# Supplementary material for: Discovery of 20 novel ribosomal leader candidates in bacteria and archaea
Source: PubMed Central journal article supplement (PMC7247131; doi:10.1186/s12866-020-01823-6), 2020-05-24
Supplement: 12866_2020_1823_MOESM2_ESM.pdf [file 12866_2020_1823_MOESM2_ESM.pdf]

# Supplementary File 1: alignments and information on downstream genes and taxonomy Discovery of 20 novel ribosomal leader candidates in bacteria and archaea

Iris Eckert & Zasha Weinberg

Note: the presentation and explanatory text of this supplementary data on novel RNA motifs follows the pattern of a presentation of previously found conserved RNA motifs (Weinberg, *et al.*, 2010).

## Contents

|          |                                       |            |
|----------|---------------------------------------|------------|
| <b>1</b> | <b>L2-Alpha</b> proteobacteria        | <b>4</b>   |
| 1.1      | Taxa . . . . .                        | 4          |
| 1.2      | Gene contexts . . . . .               | 7          |
| 1.3      | Conserved domains . . . . .           | 34         |
| 1.4      | Multiple-sequence alignment . . . . . | 35         |
| <b>2</b> | <b>L4-Archaeoglobi</b>                | <b>49</b>  |
| 2.1      | Taxa . . . . .                        | 49         |
| 2.2      | Gene contexts . . . . .               | 51         |
| 2.3      | Conserved domains . . . . .           | 116        |
| 2.4      | Multiple-sequence alignment . . . . . | 118        |
| <b>3</b> | <b>L13-Bacteroidia</b>                | <b>141</b> |
| 3.1      | Taxa . . . . .                        | 141        |
| 3.2      | Gene contexts . . . . .               | 143        |
| 3.3      | Conserved domains . . . . .           | 171        |
| 3.4      | Multiple-sequence alignment . . . . . | 171        |
| <b>4</b> | <b>eL15-Euryarchaeota</b>             | <b>199</b> |
| 4.1      | Taxa . . . . .                        | 199        |
| 4.2      | Gene contexts . . . . .               | 203        |
| 4.3      | Conserved domains . . . . .           | 235        |
| 4.4      | Multiple-sequence alignment . . . . . | 236        |

|           |                                       |            |
|-----------|---------------------------------------|------------|
| <b>5</b>  | <b>L17-Actino-Proteobacteria</b>      | <b>261</b> |
| 5.1       | Taxa . . . . .                        | 261        |
| 5.2       | Notes . . . . .                       | 268        |
| 5.3       | Gene contexts . . . . .               | 268        |
| 5.4       | Conserved domains . . . . .           | 280        |
| 5.5       | Multiple-sequence alignment . . . . . | 281        |
| <b>6</b>  | <b>L19-Flavobacteria</b>              | <b>302</b> |
| 6.1       | Taxa . . . . .                        | 302        |
| 6.2       | Gene contexts . . . . .               | 305        |
| 6.3       | Conserved domains . . . . .           | 354        |
| 6.4       | Multiple-sequence alignment . . . . . | 356        |
| <b>7</b>  | <b>L20-Deltaproteobacteria</b>        | <b>388</b> |
| 7.1       | Taxa . . . . .                        | 388        |
| 7.2       | Gene contexts . . . . .               | 388        |
| 7.3       | Conserved domains . . . . .           | 394        |
| 7.4       | Multiple-sequence alignment . . . . . | 394        |
| <b>8</b>  | <b>L25-Gammaproteobacteria</b>        | <b>399</b> |
| 8.1       | Taxa . . . . .                        | 399        |
| 8.2       | Multiple-sequence alignment . . . . . | 477        |
| <b>9</b>  | <b>L31-Actinobacteria</b>             | <b>510</b> |
| 9.1       | Taxa . . . . .                        | 510        |
| 9.2       | Gene contexts . . . . .               | 526        |
| 9.3       | Conserved domains . . . . .           | 579        |
| 9.4       | Multiple-sequence alignment . . . . . | 581        |
| <b>10</b> | <b>L31-Coriobacteria</b>              | <b>622</b> |
| 10.1      | Taxa . . . . .                        | 622        |
| 10.2      | Gene contexts . . . . .               | 622        |
| 10.3      | Conserved domains . . . . .           | 629        |
| 10.4      | Multiple-sequence alignment . . . . . | 629        |
| <b>11</b> | <b>L31-Firmicutes</b>                 | <b>631</b> |
| 11.1      | Taxa . . . . .                        | 631        |
| 11.2      | Notes . . . . .                       | 729        |
| 11.3      | Gene contexts . . . . .               | 729        |
| 11.4      | Conserved domains . . . . .           | 897        |
| 11.5      | Multiple-sequence alignment . . . . . | 901        |

|                                            |             |
|--------------------------------------------|-------------|
| <b>12 L31-Gammaproteobacteria</b>          | <b>929</b>  |
| 12.1 Taxa . . . . .                        | 929         |
| 12.2 Gene contexts . . . . .               | 1024        |
| 12.3 Conserved domains . . . . .           | 1214        |
| 12.4 Multiple-sequence alignment . . . . . | 1216        |
| <b>13 L31-Corynebacteriaceae</b>           | <b>1252</b> |
| 13.1 Taxa . . . . .                        | 1252        |
| 13.2 Gene contexts . . . . .               | 1255        |
| 13.3 Conserved domains . . . . .           | 1262        |
| 13.4 Multiple-sequence alignment . . . . . | 1263        |
| <b>14 S4-Bacteroidia</b>                   | <b>1267</b> |
| 14.1 Taxa . . . . .                        | 1267        |
| 14.2 Gene contexts . . . . .               | 1268        |
| 14.3 Conserved domains . . . . .           | 1283        |
| 14.4 Multiple-sequence alignment . . . . . | 1283        |
| <b>15 S4-Flavobacteria</b>                 | <b>1297</b> |
| 15.1 Taxa . . . . .                        | 1297        |
| 15.2 Gene contexts . . . . .               | 1299        |
| 15.3 Conserved domains . . . . .           | 1324        |
| 15.4 Multiple-sequence alignment . . . . . | 1325        |
| <b>16 S4-Clostridia</b>                    | <b>1337</b> |
| 16.1 Taxa . . . . .                        | 1337        |
| 16.2 Gene contexts . . . . .               | 1338        |
| 16.3 Conserved domains . . . . .           | 1351        |
| 16.4 Multiple-sequence alignment . . . . . | 1352        |
| <b>17 S4-Fusobacteriales</b>               | <b>1383</b> |
| 17.1 Taxa . . . . .                        | 1383        |
| 17.2 Gene contexts . . . . .               | 1385        |
| 17.3 Conserved domains . . . . .           | 1402        |
| 17.4 Multiple-sequence alignment . . . . . | 1403        |
| <b>18 S6-S18-Chlorobi</b>                  | <b>1408</b> |
| 18.1 Taxa . . . . .                        | 1408        |
| 18.2 Gene contexts . . . . .               | 1408        |
| 18.3 Conserved domains . . . . .           | 1410        |
| 18.4 Multiple-sequence alignment . . . . . | 1411        |

|                                            |             |
|--------------------------------------------|-------------|
| <b>19 S10-Clostridia</b>                   | <b>1412</b> |
| 19.1 Taxa . . . . .                        | 1412        |
| 19.2 Gene contexts . . . . .               | 1414        |
| 19.3 Conserved domains . . . . .           | 1461        |
| 19.4 Multiple-sequence alignment . . . . . | 1462        |
| <b>20 S15-Halobacteria</b>                 | <b>1499</b> |
| 20.1 Taxa . . . . .                        | 1499        |
| 20.2 Gene contexts . . . . .               | 1501        |
| 20.3 Conserved domains . . . . .           | 1508        |
| 20.4 Multiple-sequence alignment . . . . . | 1509        |
| <b>21 S15-Methanobacteria</b>              | <b>1516</b> |
| 21.1 Taxa . . . . .                        | 1516        |
| 21.2 Gene contexts . . . . .               | 1517        |
| 21.3 Conserved domains . . . . .           | 1522        |
| 21.4 Multiple-sequence alignment . . . . . | 1523        |
| <b>22 S15-Flavobacteria</b>                | <b>1531</b> |
| 22.1 Taxa . . . . .                        | 1531        |
| 22.2 Notes . . . . .                       | 1535        |
| 22.3 Gene contexts . . . . .               | 1536        |
| 22.4 Conserved domains . . . . .           | 1586        |
| 22.5 Multiple-sequence alignment . . . . . | 1586        |
| <b>23 S16-Flavobacteria</b>                | <b>1681</b> |
| 23.1 Taxa . . . . .                        | 1681        |
| 23.2 Gene contexts . . . . .               | 1682        |
| 23.3 Conserved domains . . . . .           | 1686        |
| 23.4 Multiple-sequence alignment . . . . . | 1687        |

## 1 L2-Alphaproteobacteria

### 1.1 Taxa

The taxonomy of each organism containing a putative L2-Alphaproteobacteria RNA is listed, with abbreviations identifying each hit (e.g., “Eco-1-1” and “Eco-1-2” might hypothetically represent two distinct RNAs in *E. coli*). The abbreviations will be used to identify each individual L2-Alphaproteobacteria RNA in Sections 1.2 and 1.4:

| abbrev. of hits | taxonomy of species                                                                                                  |
|-----------------|----------------------------------------------------------------------------------------------------------------------|
| Aat-1-1         | Bacteria Proteobacteria Alphaproteobacteria Rhodobacterales Rhodobacteraceae <i>Actibacterium atlanticum</i>         |
| Amu-1-1         | Bacteria Proteobacteria Alphaproteobacteria Rhodobacterales Rhodobacteraceae <i>Actibacterium mucosum</i> KCTC 23349 |
| Aat-2-1         | Bacteria Proteobacteria Alphaproteobacteria Rhodobacterales Rhodobacteraceae <i>Aestuariivita atlantica</i>          |
| Abo-1-1         | Bacteria Proteobacteria Alphaproteobacteria Rhodobacterales Rhodobacteraceae <i>Aestuariivita boseongensis</i>       |

|                    |          |                |                     |                 |                  |                                                |
|--------------------|----------|----------------|---------------------|-----------------|------------------|------------------------------------------------|
| Cba-1-1            | Bacteria | Proteobacteria | Alphaproteobacteria | Rhodobacterales | Rhodobacteraceae | <i>Celeribacter baekdomensis</i> B30           |
| Csp-1-1            | Bacteria | Proteobacteria | Alphaproteobacteria | Rhodobacterales | Rhodobacteraceae | <i>Citricella</i> sp. 357                      |
| Csp-2-1            | Bacteria | Proteobacteria | Alphaproteobacteria | Rhodobacterales | Rhodobacteraceae | <i>Citricella</i> sp. SE45                     |
| Dsp-1-1            | Bacteria | Proteobacteria | Alphaproteobacteria | Rhodobacterales | Rhodobacteraceae | <i>Defluviimonas</i> sp. 20V17                 |
| Dsh-1-1            | Bacteria | Proteobacteria | Alphaproteobacteria | Rhodobacterales | Rhodobacteraceae | <i>Dinoroseobacter shibae</i> DFL 12           |
| Gne-1-1            | Bacteria | Proteobacteria | Alphaproteobacteria | Rhodobacterales | Rhodobacteraceae | <i>Gemmobacter nectariphilus</i> DSM 15620     |
| Hma-1-1            | Bacteria | Proteobacteria | Alphaproteobacteria | Rhodobacterales | Rhodobacteraceae | <i>Haematobacter massiliensis</i>              |
| Hmi-1-1            | Bacteria | Proteobacteria | Alphaproteobacteria | Rhodobacterales | Rhodobacteraceae | <i>Haematobacter missouriensis</i>             |
| Hna-1-1            | Bacteria | Proteobacteria | Alphaproteobacteria | Rhodobacterales | Rhodobacteraceae | <i>Halocynthiibacter namhaensis</i>            |
| Hsp-1-1            | Bacteria | Proteobacteria | Alphaproteobacteria | Rhodobacterales | Rhodobacteraceae | <i>Halocynthiibacter</i> sp. PAMC 20958        |
| Jaq-1-1            | Bacteria | Proteobacteria | Alphaproteobacteria | Rhodobacterales | Rhodobacteraceae | <i>Jannaschia aquimarina</i>                   |
| Jsp-1-1            | Bacteria | Proteobacteria | Alphaproteobacteria | Rhodobacterales | Rhodobacteraceae | <i>Jannaschia</i> sp. CCS1                     |
| Kvu-1-1            | Bacteria | Proteobacteria | Alphaproteobacteria | Rhodobacterales | Rhodobacteraceae | <i>Ketogulonicigenium vulgare</i> WSH-001      |
| Kvu-2-1            | Bacteria | Proteobacteria | Alphaproteobacteria | Rhodobacterales | Rhodobacteraceae | <i>Ketogulonicigenium vulgare</i> Y25          |
| Laq-1-1            | Bacteria | Proteobacteria | Alphaproteobacteria | Rhodobacterales | Rhodobacteraceae | <i>Leisingera aquimarina</i> DSM 24565         |
| Lca-1-1            | Bacteria | Proteobacteria | Alphaproteobacteria | Rhodobacterales | Rhodobacteraceae | <i>Leisingera caerulea</i> DSM 24564           |
| Lda-1-1            | Bacteria | Proteobacteria | Alphaproteobacteria | Rhodobacterales | Rhodobacteraceae | <i>Leisingera daeponensis</i> DSM 23529        |
| Lme-1-1            | Bacteria | Proteobacteria | Alphaproteobacteria | Rhodobacterales | Rhodobacteraceae | <i>Leisingera methylolithivorans</i> DSM 14336 |
| Lsp-1-1            | Bacteria | Proteobacteria | Alphaproteobacteria | Rhodobacterales | Rhodobacteraceae | <i>Leisingera</i> sp. ANG-DT                   |
| Lsp-2-1            | Bacteria | Proteobacteria | Alphaproteobacteria | Rhodobacterales | Rhodobacteraceae | <i>Leisingera</i> sp. ANG-M1                   |
| Lsp-3-1            | Bacteria | Proteobacteria | Alphaproteobacteria | Rhodobacterales | Rhodobacteraceae | <i>Leisingera</i> sp. ANG-M6                   |
| Lsp-4-1            | Bacteria | Proteobacteria | Alphaproteobacteria | Rhodobacterales | Rhodobacteraceae | <i>Leisingera</i> sp. ANG-M7                   |
| Lsp-5-1            | Bacteria | Proteobacteria | Alphaproteobacteria | Rhodobacterales | Rhodobacteraceae | <i>Leisingera</i> sp. ANG-S                    |
| Lsp-6-1            | Bacteria | Proteobacteria | Alphaproteobacteria | Rhodobacterales | Rhodobacteraceae | <i>Leisingera</i> sp. ANG-S3                   |
| Lsp-7-1            | Bacteria | Proteobacteria | Alphaproteobacteria | Rhodobacterales | Rhodobacteraceae | <i>Leisingera</i> sp. ANG-S5                   |
| Lsp-8-1            | Bacteria | Proteobacteria | Alphaproteobacteria | Rhodobacterales | Rhodobacteraceae | <i>Leisingera</i> sp. ANG-Vp                   |
| Lsp-9-1            | Bacteria | Proteobacteria | Alphaproteobacteria | Rhodobacterales | Rhodobacteraceae | <i>Leisingera</i> sp. ANG1                     |
| Lci-1-1            | Bacteria | Proteobacteria | Alphaproteobacteria | Rhodobacterales | Rhodobacteraceae | <i>Loktanella cinnabarina</i> LL-001           |
| Lho-1-1            | Bacteria | Proteobacteria | Alphaproteobacteria | Rhodobacterales | Rhodobacteraceae | <i>Loktanella hongkongensis</i> DSM 17492      |
| Lsp-10-1           | Bacteria | Proteobacteria | Alphaproteobacteria | Rhodobacterales | Rhodobacteraceae | <i>Loktanella</i> sp. S4079                    |
| Lve-1-1            | Bacteria | Proteobacteria | Alphaproteobacteria | Rhodobacterales | Rhodobacteraceae | <i>Loktanella vestfoldensis</i> DSM 16212      |
| Lve-2-1            | Bacteria | Proteobacteria | Alphaproteobacteria | Rhodobacterales | Rhodobacteraceae | <i>Loktanella vestfoldensis</i> SKA53          |
| Mal-1-1            | Bacteria | Proteobacteria | Alphaproteobacteria | Rhodobacterales | Rhodobacteraceae | <i>Mameliella alba</i>                         |
| Msp-1-1            | Bacteria | Proteobacteria | Alphaproteobacteria | Rhodobacterales | Rhodobacteraceae | <i>Maribius</i> sp. MOLA 401                   |
| Mal-2-1            | Bacteria | Proteobacteria | Alphaproteobacteria | Rhodobacterales | Rhodobacteraceae | <i>Marinovum algicola</i> DG 898               |
| Nit-1-1 to Nit-1-2 | Bacteria | Proteobacteria | Alphaproteobacteria | Rhodobacterales | Rhodobacteraceae | <i>Nautella italica</i>                        |
| Nsp-1-1            | Bacteria | Proteobacteria | Alphaproteobacteria | Rhodobacterales | Rhodobacteraceae | <i>Nautella</i> sp. ECSMB14104                 |
| Nig-1-1            | Bacteria | Proteobacteria | Alphaproteobacteria | Rhodobacterales | Rhodobacteraceae | <i>Nereida ignava</i>                          |
| Oin-1-1            | Bacteria | Proteobacteria | Alphaproteobacteria | Rhodobacterales | Rhodobacteraceae | <i>Oceanibulbus indolifex</i> HEL-45           |
| Oba-1-1            | Bacteria | Proteobacteria | Alphaproteobacteria | Rhodobacterales | Rhodobacteraceae | <i>Oceanicola batsensis</i> HTCC2597           |
| Ogr-1-1            | Bacteria | Proteobacteria | Alphaproteobacteria | Rhodobacterales | Rhodobacteraceae | <i>Oceanicola granulatus</i> HTCC2516          |
| Osp-1-1            | Bacteria | Proteobacteria | Alphaproteobacteria | Rhodobacterales | Rhodobacteraceae | <i>Oceanicola</i> sp. HL-35                    |
| Osp-2-1            | Bacteria | Proteobacteria | Alphaproteobacteria | Rhodobacterales | Rhodobacteraceae | <i>Oceanicola</i> sp. MCTG156(1a)              |
| Osp-3-1            | Bacteria | Proteobacteria | Alphaproteobacteria | Rhodobacterales | Rhodobacteraceae | <i>Oceanicola</i> sp. S124                     |
| Ogu-1-1            | Bacteria | Proteobacteria | Alphaproteobacteria | Rhodobacterales | Rhodobacteraceae | <i>Oceaniovalibus guishaninsula</i> JLT2003    |
| Oan-1-1            | Bacteria | Proteobacteria | Alphaproteobacteria | Rhodobacterales | Rhodobacteraceae | <i>Octadecabacter antarcticus</i> 307          |
| Oar-1-1            | Bacteria | Proteobacteria | Alphaproteobacteria | Rhodobacterales | Rhodobacteraceae | <i>Octadecabacter arcticus</i> 238             |
| Ote-1-1            | Bacteria | Proteobacteria | Alphaproteobacteria | Rhodobacterales | Rhodobacteraceae | <i>Octadecabacter temperatus</i>               |
| Pde-1-1            | Bacteria | Proteobacteria | Alphaproteobacteria | Rhodobacterales | Rhodobacteraceae | <i>Paracoccus denitrificans</i> PD1222         |
| Pga-1-1            | Bacteria | Proteobacteria | Alphaproteobacteria | Rhodobacterales | Rhodobacteraceae | <i>Phaeobacter gallaeciensis</i> 2.10          |
| Pga-2-1            | Bacteria | Proteobacteria | Alphaproteobacteria | Rhodobacterales | Rhodobacteraceae | <i>Phaeobacter gallaeciensis</i> DSM 17395     |
| Pga-3-1            | Bacteria | Proteobacteria | Alphaproteobacteria | Rhodobacterales | Rhodobacteraceae | <i>Phaeobacter gallaeciensis</i> DSM 26640     |
| Pin-1-1            | Bacteria | Proteobacteria | Alphaproteobacteria | Rhodobacterales | Rhodobacteraceae | <i>Phaeobacter inhibens</i> DSM 16374          |
| Psp-1-1            | Bacteria | Proteobacteria | Alphaproteobacteria | Rhodobacterales | Rhodobacteraceae | <i>Phaeobacter</i> sp. S26                     |
| Psp-2-1            | Bacteria | Proteobacteria | Alphaproteobacteria | Rhodobacterales | Rhodobacteraceae | <i>Phaeobacter</i> sp. S60                     |
| Pte-1-1            | Bacteria | Proteobacteria | Alphaproteobacteria | Rhodobacterales | Rhodobacteraceae | <i>Planktomarina temperata</i> RCA23           |
| Pxi-1-1            | Bacteria | Proteobacteria | Alphaproteobacteria | Rhodobacterales | Rhodobacteraceae | <i>Pseudodonghicola xiamenensis</i> DSM 18339  |
| Pat-1-1            | Bacteria | Proteobacteria | Alphaproteobacteria | Rhodobacterales | Rhodobacteraceae | <i>Pseudoocenicola atlanticus</i>              |
| Pna-1-1            | Bacteria | Proteobacteria | Alphaproteobacteria | Rhodobacterales | Rhodobacteraceae | <i>Pseudoocenicola nanhaiensis</i> DSM 18065   |
| Par-1-1            | Bacteria | Proteobacteria | Alphaproteobacteria | Rhodobacterales | Rhodobacteraceae | <i>Pseudophaeobacter arcticus</i> DSM 23566    |
| Pan-1-1            | Bacteria | Proteobacteria | Alphaproteobacteria | Rhodobacterales | Rhodobacteraceae | <i>Pseudorhodobacter antarcticus</i>           |
| Paq-1-1            | Bacteria | Proteobacteria | Alphaproteobacteria | Rhodobacterales | Rhodobacteraceae | <i>Pseudorhodobacter aquimaris</i>             |
| Pfe-1-1            | Bacteria | Proteobacteria | Alphaproteobacteria | Rhodobacterales | Rhodobacteraceae | <i>Pseudorhodobacter ferrugineus</i>           |
| Pfe-2-1            | Bacteria | Proteobacteria | Alphaproteobacteria | Rhodobacterales | Rhodobacteraceae | <i>Pseudorhodobacter ferrugineus</i> DSM 5888  |
| Pwa-1-1            | Bacteria | Proteobacteria | Alphaproteobacteria | Rhodobacterales | Rhodobacteraceae | <i>Pseudorhodobacter wandonensis</i>           |

|                    |          |                |                     |                 |                  |                                                                 |
|--------------------|----------|----------------|---------------------|-----------------|------------------|-----------------------------------------------------------------|
| Psp-3-1            | Bacteria | Proteobacteria | Alphaproteobacteria | Rhodobacterales | Rhodobacteraceae | <i>Puniceibacterium</i> sp. IMCC21224                           |
| CRh-1-1            | Bacteria | Proteobacteria | Alphaproteobacteria | Rhodobacterales | Rhodobacteraceae | <i>Rhodobacter Candidatus</i> <i>Rhodobacter lobularis</i>      |
| Rca-1-1            | Bacteria | Proteobacteria | Alphaproteobacteria | Rhodobacterales | Rhodobacteraceae | <i>Rhodobacter capsulatus</i> B6                                |
| Rca-2-1            | Bacteria | Proteobacteria | Alphaproteobacteria | Rhodobacterales | Rhodobacteraceae | <i>Rhodobacter capsulatus</i> DE442                             |
| Rca-3-1            | Bacteria | Proteobacteria | Alphaproteobacteria | Rhodobacterales | Rhodobacteraceae | <i>Rhodobacter capsulatus</i> R121                              |
| Rca-4-1            | Bacteria | Proteobacteria | Alphaproteobacteria | Rhodobacterales | Rhodobacteraceae | <i>Rhodobacter capsulatus</i> SB 1003                           |
| Rca-5-1            | Bacteria | Proteobacteria | Alphaproteobacteria | Rhodobacterales | Rhodobacteraceae | <i>Rhodobacter capsulatus</i> Y262                              |
| Rca-6-1            | Bacteria | Proteobacteria | Alphaproteobacteria | Rhodobacterales | Rhodobacteraceae | <i>Rhodobacter capsulatus</i> YW1                               |
| Rca-7-1            | Bacteria | Proteobacteria | Alphaproteobacteria | Rhodobacterales | Rhodobacteraceae | <i>Rhodobacter capsulatus</i> YW2                               |
| Rsp-1-1            | Bacteria | Proteobacteria | Alphaproteobacteria | Rhodobacterales | Rhodobacteraceae | <i>Rhodobacter</i> sp. AKP1                                     |
| Rsp-2-1            | Bacteria | Proteobacteria | Alphaproteobacteria | Rhodobacterales | Rhodobacteraceae | <i>Rhodobacter</i> sp. SW2                                      |
| Rsp-3-1            | Bacteria | Proteobacteria | Alphaproteobacteria | Rhodobacterales | Rhodobacteraceae | <i>Rhodobacter sphaeroides</i> 2.4.1                            |
| Rsp-4-1            | Bacteria | Proteobacteria | Alphaproteobacteria | Rhodobacterales | Rhodobacteraceae | <i>Rhodobacter sphaeroides</i> ATCC 17025                       |
| Rsp-5-1            | Bacteria | Proteobacteria | Alphaproteobacteria | Rhodobacterales | Rhodobacteraceae | <i>Rhodobacter sphaeroides</i> ATCC 17029                       |
| Rsp-6-1            | Bacteria | Proteobacteria | Alphaproteobacteria | Rhodobacterales | Rhodobacteraceae | <i>Rhodobacter sphaeroides</i> KD131                            |
| Rsp-7-1            | Bacteria | Proteobacteria | Alphaproteobacteria | Rhodobacterales | Rhodobacteraceae | <i>Rhodobacter sphaeroides</i> WS8N                             |
| Rba-1-1            | Bacteria | Proteobacteria | Alphaproteobacteria | Rhodobacterales | Rhodobacteraceae | <i>bacterium</i> HIMB11                                         |
| Rba-2-1            | Bacteria | Proteobacteria | Alphaproteobacteria | Rhodobacterales | Rhodobacteraceae | <i>bacterium</i> KLH11                                          |
| Rba-3-1            | Bacteria | Proteobacteria | Alphaproteobacteria | Rhodobacterales | Rhodobacteraceae | <i>bacterium</i> PD-2                                           |
| Rel-1-1            | Bacteria | Proteobacteria | Alphaproteobacteria | Rhodobacterales | Rhodobacteraceae | <i>Roseibacterium elongatum</i> DSM 19469                       |
| Rat-1-1            | Bacteria | Proteobacteria | Alphaproteobacteria | Rhodobacterales | Rhodobacteraceae | <i>Roseivivax atlanticus</i>                                    |
| Rha-1-1            | Bacteria | Proteobacteria | Alphaproteobacteria | Rhodobacterales | Rhodobacteraceae | <i>Roseivivax halodurans</i> JCM 10272                          |
| Ris-1-1            | Bacteria | Proteobacteria | Alphaproteobacteria | Rhodobacterales | Rhodobacteraceae | <i>Roseivivax isoporae</i> LMG 25204                            |
| Rde-1-1            | Bacteria | Proteobacteria | Alphaproteobacteria | Rhodobacterales | Rhodobacteraceae | <i>Roseobacter denitrificans</i> Och 114                        |
| Rli-1-1            | Bacteria | Proteobacteria | Alphaproteobacteria | Rhodobacterales | Rhodobacteraceae | <i>Roseobacter litoralis</i> Och 149                            |
| Rsp-8-1            | Bacteria | Proteobacteria | Alphaproteobacteria | Rhodobacterales | Rhodobacteraceae | <i>Roseobacter</i> sp. AzwK-3b                                  |
| Rsp-9-1            | Bacteria | Proteobacteria | Alphaproteobacteria | Rhodobacterales | Rhodobacteraceae | <i>Roseobacter</i> sp. CCS2                                     |
| Rsp-10-1           | Bacteria | Proteobacteria | Alphaproteobacteria | Rhodobacterales | Rhodobacteraceae | <i>Roseobacter</i> sp. GAI101                                   |
| Rsp-11-1           | Bacteria | Proteobacteria | Alphaproteobacteria | Rhodobacterales | Rhodobacteraceae | <i>Roseobacter</i> sp. MED193                                   |
| Rsp-12-1           | Bacteria | Proteobacteria | Alphaproteobacteria | Rhodobacterales | Rhodobacteraceae | <i>Roseobacter</i> sp. SK209-2-6                                |
| Rmu-1-1            | Bacteria | Proteobacteria | Alphaproteobacteria | Rhodobacterales | Rhodobacteraceae | <i>Roseovarius mucosus</i> DSM 17069                            |
| Rnu-1-1            | Bacteria | Proteobacteria | Alphaproteobacteria | Rhodobacterales | Rhodobacteraceae | <i>Roseovarius nubinhbens</i> ISM                               |
| Rsp-13-1           | Bacteria | Proteobacteria | Alphaproteobacteria | Rhodobacterales | Rhodobacteraceae | <i>Roseovarius</i> sp. 217                                      |
| Rsp-14-1           | Bacteria | Proteobacteria | Alphaproteobacteria | Rhodobacterales | Rhodobacteraceae | <i>Roseovarius</i> sp. HTCC2601                                 |
| Rsp-15-1           | Bacteria | Proteobacteria | Alphaproteobacteria | Rhodobacterales | Rhodobacteraceae | <i>Roseovarius</i> sp. MCTG156(2b)                              |
| Rsp-16-1           | Bacteria | Proteobacteria | Alphaproteobacteria | Rhodobacterales | Rhodobacteraceae | <i>Roseovarius</i> sp. TM1035                                   |
| Rto-1-1            | Bacteria | Proteobacteria | Alphaproteobacteria | Rhodobacterales | Rhodobacteraceae | <i>Roseovarius tolerans</i>                                     |
| Rme-1-1            | Bacteria | Proteobacteria | Alphaproteobacteria | Rhodobacterales | Rhodobacteraceae | <i>Rubellimicrobium mesophilum</i> DSM 19309                    |
| Rha-2-1            | Bacteria | Proteobacteria | Alphaproteobacteria | Rhodobacterales | Rhodobacteraceae | <i>Ruegeria halocynthiae</i>                                    |
| Rmo-1-1            | Bacteria | Proteobacteria | Alphaproteobacteria | Rhodobacterales | Rhodobacteraceae | <i>Ruegeria mobilis</i>                                         |
| Rmo-2-1            | Bacteria | Proteobacteria | Alphaproteobacteria | Rhodobacterales | Rhodobacteraceae | <i>Ruegeria mobilis</i> F1926                                   |
| Rpo-1-1            | Bacteria | Proteobacteria | Alphaproteobacteria | Rhodobacterales | Rhodobacteraceae | <i>Ruegeria pomeroyi</i> DSS-3                                  |
| Rsp-17-1           | Bacteria | Proteobacteria | Alphaproteobacteria | Rhodobacterales | Rhodobacteraceae | <i>Ruegeria</i> sp. 6PALISEP08                                  |
| Rsp-18-1           | Bacteria | Proteobacteria | Alphaproteobacteria | Rhodobacterales | Rhodobacteraceae | <i>Ruegeria</i> sp. ANG-R                                       |
| Rsp-19-1           | Bacteria | Proteobacteria | Alphaproteobacteria | Rhodobacterales | Rhodobacteraceae | <i>Ruegeria</i> sp. ANG-S4                                      |
| Rsp-20-1           | Bacteria | Proteobacteria | Alphaproteobacteria | Rhodobacterales | Rhodobacteraceae | <i>Ruegeria</i> sp. R11                                         |
| Rsp-21-1           | Bacteria | Proteobacteria | Alphaproteobacteria | Rhodobacterales | Rhodobacteraceae | <i>Ruegeria</i> sp. TM1040                                      |
| Rsp-22-1           | Bacteria | Proteobacteria | Alphaproteobacteria | Rhodobacterales | Rhodobacteraceae | <i>Ruegeria</i> sp. TW15                                        |
| Sla-1-1            | Bacteria | Proteobacteria | Alphaproteobacteria | Rhodobacterales | Rhodobacteraceae | <i>Ruegeria Silicibacter lacuscaerulensis</i> ITI-1157          |
| Ssp-1-1            | Bacteria | Proteobacteria | Alphaproteobacteria | Rhodobacterales | Rhodobacteraceae | <i>Ruegeria Silicibacter</i> sp. TrichCH4B                      |
| Sst-1-1            | Bacteria | Proteobacteria | Alphaproteobacteria | Rhodobacterales | Rhodobacteraceae | <i>Sagittula stellata</i> E-37                                  |
| Smu-1-1            | Bacteria | Proteobacteria | Alphaproteobacteria | Rhodobacterales | Rhodobacteraceae | <i>Salipiger mucosus</i> DSM 16094                              |
| Sna-1-1            | Bacteria | Proteobacteria | Alphaproteobacteria | Rhodobacterales | Rhodobacteraceae | <i>Sedimentitalea nanhaiensis</i> DSM 24252                     |
| Sqi-1-1            | Bacteria | Proteobacteria | Alphaproteobacteria | Rhodobacterales | Rhodobacteraceae | <i>Sediminimonas qiaohouensis</i> DSM 21189                     |
| Sdo-1-1 to Sdo-1-2 | Bacteria | Proteobacteria | Alphaproteobacteria | Rhodobacterales | Rhodobacteraceae | <i>Sulfitobacter donghicola</i> DSW-25 = KCTC 12864 = JCM 14565 |
| Sge-1-1            | Bacteria | Proteobacteria | Alphaproteobacteria | Rhodobacterales | Rhodobacteraceae | <i>Sulfitobacter geojensis</i>                                  |
| Sgu-1-1            | Bacteria | Proteobacteria | Alphaproteobacteria | Rhodobacterales | Rhodobacteraceae | <i>Sulfitobacter guttiformis</i> KCTC 32187                     |
| Sme-1-1            | Bacteria | Proteobacteria | Alphaproteobacteria | Rhodobacterales | Rhodobacteraceae | <i>Sulfitobacter mediterraneus</i>                              |
| Sme-2-1            | Bacteria | Proteobacteria | Alphaproteobacteria | Rhodobacterales | Rhodobacteraceae | <i>Sulfitobacter mediterraneus</i> KCTC 32188                   |
| Sno-1-1            | Bacteria | Proteobacteria | Alphaproteobacteria | Rhodobacterales | Rhodobacteraceae | <i>Sulfitobacter noctilucae</i>                                 |
| Sno-2-1            | Bacteria | Proteobacteria | Alphaproteobacteria | Rhodobacterales | Rhodobacteraceae | <i>Sulfitobacter noctilucicola</i>                              |
| Spo-1-1            | Bacteria | Proteobacteria | Alphaproteobacteria | Rhodobacterales | Rhodobacteraceae | <i>Sulfitobacter pontiacus</i> 3SOLIMAR09                       |
| Sps-1-1            | Bacteria | Proteobacteria | Alphaproteobacteria | Rhodobacterales | Rhodobacteraceae | <i>Sulfitobacter pseudonitzschiae</i>                           |
| Ssp-2-1            | Bacteria | Proteobacteria | Alphaproteobacteria | Rhodobacterales | Rhodobacteraceae | <i>Sulfitobacter</i> sp. 20.GPM-1509m                           |
| Ssp-3-1            | Bacteria | Proteobacteria | Alphaproteobacteria | Rhodobacterales | Rhodobacteraceae | <i>Sulfitobacter</i> sp. CB2047                                 |

|                  |                       |                |                     |                        |                  |                                             |
|------------------|-----------------------|----------------|---------------------|------------------------|------------------|---------------------------------------------|
| Ssp-4-1          | Bacteria              | Proteobacteria | Alphaproteobacteria | Rhodobacterales        | Rhodobacteraceae | <i>Sulfitobacter</i> sp. EE-36              |
| Ssp-5-1          | Bacteria              | Proteobacteria | Alphaproteobacteria | Rhodobacterales        | Rhodobacteraceae | <i>Sulfitobacter</i> sp. NAS-14.1           |
| Tsp-1-1          | Bacteria              | Proteobacteria | Alphaproteobacteria | Rhodobacterales        | Rhodobacteraceae | <i>Tateyamaria</i> sp. ANG-S1               |
| Tar-1-1          | Bacteria              | Proteobacteria | Alphaproteobacteria | Rhodobacterales        | Rhodobacteraceae | <i>Thalassobacter arenae</i> DSM 19593      |
| Tsp-2-1          | Bacteria              | Proteobacteria | Alphaproteobacteria | Rhodobacterales        | Rhodobacteraceae | <i>Thalassobacter</i> sp. 16PALIMAR09       |
| Tst-1-1          | Bacteria              | Proteobacteria | Alphaproteobacteria | Rhodobacterales        | Rhodobacteraceae | <i>Thalassobacter stenotrophicus</i>        |
| Tsp-3-1          | Bacteria              | Proteobacteria | Alphaproteobacteria | Rhodobacterales        | Rhodobacteraceae | <i>Thalassobium Thalassiobium</i> sp. R2A62 |
| Tat-1-1          | Bacteria              | Proteobacteria | Alphaproteobacteria | Rhodobacterales        | Rhodobacteraceae | <i>Thioclava atlantica</i>                  |
| Tda-1-1          | Bacteria              | Proteobacteria | Alphaproteobacteria | Rhodobacterales        | Rhodobacteraceae | <i>Thioclava dalianensis</i>                |
| Tin-1-1          | Bacteria              | Proteobacteria | Alphaproteobacteria | Rhodobacterales        | Rhodobacteraceae | <i>Thioclava indica</i>                     |
| Tpa-1-1          | Bacteria              | Proteobacteria | Alphaproteobacteria | Rhodobacterales        | Rhodobacteraceae | <i>Thioclava pacifica</i> DSM 10166         |
| Wma-1-1          | Bacteria              | Proteobacteria | Alphaproteobacteria | Rhodobacterales        | Rhodobacteraceae | <i>Wenzinia marina</i> DSM 24838            |
| Rba-4-1          | Bacteria              | Proteobacteria | Alphaproteobacteria | <i>Rhodobacterales</i> | <i>bacterium</i> | HTCC2150                                    |
| Rba-5-1          | Bacteria              | Proteobacteria | Alphaproteobacteria | <i>Rhodobacterales</i> | <i>bacterium</i> | HTCC2255                                    |
| Rba-6-1          | Bacteria              | Proteobacteria | Alphaproteobacteria | <i>Rhodobacterales</i> | <i>bacterium</i> | HTCC2654                                    |
| Rba-7-1          | Bacteria              | Proteobacteria | Alphaproteobacteria | <i>Rhodobacterales</i> | <i>bacterium</i> | Y4I                                         |
| env-1 to env-656 | environmental samples |                |                     |                        |                  |                                             |

## 1.2 Gene contexts

Each L2-Alphaproteobacteria RNA (indicated by “RNA→”) is listed. For each hit, the downstream genes predicted to reside in a regulated operon are listed. If the nearest downstream gene is encoding in the opposite strand (and therefore presumed to not be a part of a regulated operon), then that gene is still depicted. Some environmental sequences and some RefSeq entries lack gene annotations, and so no genes are available for such sequences. The direction of each gene is indicated with an arrow (→), and each predicted conserved domain in the gene is named. Conserved domains associated with more than one L2-Alphaproteobacteria RNA are assigned a color; other domains are gray. Information about these conserved

domains is given in Section 1.3. The accession of the sequence containing each L2-Alphaproteobacteria RNA is given in the column named “Seq. accession”. Accessions beginning with “NC\_”, “NS\_”, “NW\_” or “NZ\_” are contained in RefSeq. Other accession refer to environmental samples. Nucleotide coordinates are given for the 5′ and 3′ boundaries of each L2-Alphaproteobacteria RNA. If the 5′ coordinate is greater than the 3′ coordinate, the RNA is present on the reverse-complement strand of the containing genomic DNA sequence. Each hit is denoted by an abbreviation (like “Eco-1-1”) that refers to a taxonomy given in Section 1.1.

| abbrev. | Seq. accession          |   | 5′ at  | 3′ at  | genes                                                                                                                                                                                                                                                                                                                                                        |
|---------|-------------------------|---|--------|--------|--------------------------------------------------------------------------------------------------------------------------------------------------------------------------------------------------------------------------------------------------------------------------------------------------------------------------------------------------------------|
| env-1   | SL_3KL_010_SED_10464608 | + | 263    | 326    | RNA→ RplB (COG0090)rplB (PRK09374)→                                                                                                                                                                                                                                                                                                                          |
| Dsh-1-1 | NC_009952.1             | + | 285364 | 285406 | RNA→ RplB (COG0090)rplB (PRK09374)→ rpsS (PRK00357)RpsS (COG0185)→<br>rplV (PRK00565)Ribosomal_L22 (pfam00237)→ RpsC (COG0092)rpsC (PRK00310)→<br>RplP (COG0197)rplP (PRK09203)→                                                                                                                                                                             |
| Pde-1-1 | NC_008686.1             | + | 746785 | 746857 | RNA→ RplB (COG0090)rplB (PRK09374)→ rpsS (PRK00357)RpsS (COG0185)→<br>rplV (PRK00565)Ribosomal_L22 (pfam00237)→ RpsC (COG0092)rpsC (PRK00310)→<br>RplP (COG0197)rplP (PRK09203)→                                                                                                                                                                             |
| env-2   | CEVH01071484.1          | - | 2499   | 2437   | RNA→ RplB (COG0090)rplB (PRK09374)→ rpsS (PRK00357)RpsS (COG0185)→<br>rplV (PRK00565)Ribosomal_L22 (pfam00237)→ RpsC (COG0092)rpsC (PRK00310)→<br>rplP (PRK09203)Ribosomal_L16 (pfam00252)→                                                                                                                                                                  |
| Aat-2-1 | NZ_AQQZ01000010.1       | + | 3052   | 3115   | RNA→ RplB (COG0090)rplB (PRK09374)→ rpsS (PRK00357)RpsS (COG0185)→<br>rplV (PRK00565)Ribosomal_L22 (pfam00237)→ RpsC (COG0092)rpsC (PRK00310)→<br>RplP (COG0197)rplP (PRK09203)→                                                                                                                                                                             |
| Rsp-2-1 | NZ_ACYY01000029.1       | - | 40278  | 40238  | RNA→ RplB (COG0090)rplB (PRK09374)→ RplB (COG0090)rplB (PRK09374)→<br>rpsS (PRK00357)RpsS (COG0185)→ rpsS (PRK00357)RpsS (COG0185)→<br>rplV (PRK00565)Ribosomal_L22 (pfam00237)→ rplV (PRK00565)Ribosomal_L22 (pfam00237)→<br>RpsC (COG0092)rpsC (PRK00310)→ RpsC (COG0092)rpsC (PRK00310)→ RplP (COG0197)rplP (PRK09203)→<br>RplP (COG0197)rplP (PRK09203)→ |
| env-3   | JGI20154J14316_10014726 | + | 1330   | 1394   | RNA→ RplB (COG0090)rplB (PRK09374)→ rpsS (PRK00357)RpsS (COG0185)→<br>rplV (PRK00565)Ribosomal_L22 (pfam00237)→ RpsC (COG0092)rpsC (PRK00310)→<br>RplP (COG0197)rplP (PRK09203)→ GIY-YIG_SF (cd00719)GIYc (smart00465)→                                                                                                                                      |

|         |                          |   |         |         |                                                                                                                                                                                                                      |
|---------|--------------------------|---|---------|---------|----------------------------------------------------------------------------------------------------------------------------------------------------------------------------------------------------------------------|
| Amu-1-1 | NZ_JFKE01000006.1        | - | 218957  | 218896  | RNA → RplB (COG0090)rplB (PRK09374) → rpsS (PRK00357)RpsS (COG0185) → rplV (PRK00565)Ribosomal_L22 (pfam00237) → RpsC (COG0092)rpsC (PRK00310) → RplP (COG0197)rplP (PRK09203) →                                     |
| env-4   | AglaG_F499EG101CWTC2     | - | 345     | 276     | RNA → rplB (PRK09374)Ribosomal_L2 (pfam00181) →                                                                                                                                                                      |
| env-5   | AglaG_contig17173        | - | 368     | 299     | RNA → rplB (PRK09374)Ribosomal_L2 (pfam00181) →                                                                                                                                                                      |
| Rat-1-1 | NZ_AQQW01000010.1        | + | 2615    | 2692    | RNA → RplB (COG0090)rplB (PRK09374) → rpsS (PRK00357)RpsS (COG0185) → rplV (PRK00565)Ribosomal_L22 (pfam00237) → RpsC (COG0092)rpsC (PRK00310) → RplP (COG0197)rplP (PRK09203) → hypo → 2OG-FeII_Oxy_5 (pfam13759) → |
| env-6   | JGI24724J26744_10003266  | - | 8748    | 8659    | RNA → RplB (COG0090)rplB (PRK09374) → rpsS (PRK00357)RpsS (COG0185) → rplV (PRK00565)Ribosomal_L22 (pfam00237) → RpsC (COG0092)rpsC (PRK00310) → RplP (COG0197)rplP (PRK09203) →                                     |
| env-7   | JGI24025J20009_10035938  | - | 1770    | 1681    | RNA → RplB (COG0090)rplB (PRK09374) → rpsS (PRK00357)RpsS (COG0185) → rplV (PRK00565)Ribosomal_L22 (pfam00237) → rpsC (PRK00310)30S_S3_KH (cd02412) →                                                                |
| env-8   | GX8B9KJ01CH3VN           | - | 334     | 271     | RNA → rplB (PRK09374)Ribosomal_L2 (pfam00181) →                                                                                                                                                                      |
| env-9   | JGI12109J20283_12362431  | + | 37      | 102     | RNA →                                                                                                                                                                                                                |
| Tst-1-1 | NZ_JGVS01000007.1        | + | 4252    | 4317    | RNA → RplB (COG0090)rplB (PRK09374) → rpsS (PRK00357)RpsS (COG0185) → rplV (PRK00565)Ribosomal_L22 (pfam00237) → RpsC (COG0092)rpsC (PRK00310) → RplP (COG0197)rplP (PRK09203) →                                     |
| Tsp-2-1 | NZ_JHAK01000011.1        | - | 52173   | 52108   | RNA → RplB (COG0090)rplB (PRK09374) → rpsS (PRK00357)RpsS (COG0185) → rplV (PRK00565)Ribosomal_L22 (pfam00237) → RpsC (COG0092)rpsC (PRK00310) → RplP (COG0197)rplP (PRK09203) →                                     |
| env-10  | P_2C_Liq_1_UnCty_1004676 | - | 3400    | 3335    | RNA → RplB (COG0090)rplB (PRK09374) → rpsS (PRK00357)RpsS (COG0185) → rplV (PRK00565)Ribosomal_L22 (pfam00237) → RpsC (COG0092)rpsC (PRK00310) → RplP (COG0197)rplP (PRK09203) →                                     |
| env-11  | P_2C_Liq_2_UnCty_1000207 | - | 15707   | 15642   | RNA → RplB (COG0090)rplB (PRK09374) → rpsS (PRK00357)RpsS (COG0185) → rplV (PRK00565)Ribosomal_L22 (pfam00237) → RpsC (COG0092)rpsC (PRK00310) → RplP (COG0197)rplP (PRK09203) →                                     |
| env-12  | P_2C_Liq_2_UnCty_1009999 | + | 1288    | 1353    | RNA → RplB (COG0090)rplB (PRK09374) →                                                                                                                                                                                |
| env-13  | ATLU01000110.1           | + | 1285    | 1375    | RNA → RplB (COG0090)rplB (PRK09374) → rpsS (PRK00357)RpsS (COG0185) → rplV (PRK00565)Ribosomal_L22 (pfam00237) → RpsC (COG0092)rpsC (PRK00310) → RplP (COG0197)rplP (PRK09203) →                                     |
| Rca-7-1 | NZ_AYPZ01000027.1        | + | 120952  | 121013  | RNA → RplB (COG0090)rplB (PRK09374) → rpsS (PRK00357)RpsS (COG0185) → rplV (PRK00565)Ribosomal_L22 (pfam00237) → RpsC (COG0092)rpsC (PRK00310) → RplP (COG0197)rplP (PRK09203) →                                     |
| Rca-4-1 | NC_014034.1              | + | 342742  | 342803  | RNA → RplB (COG0090)rplB (PRK09374) → rpsS (PRK00357)RpsS (COG0185) → rplV (PRK00565)Ribosomal_L22 (pfam00237) → RpsC (COG0092)rpsC (PRK00310) → RplP (COG0197)rplP (PRK09203) →                                     |
| Rca-3-1 | NZ_AYQC01000005.1        | + | 120809  | 120870  | RNA → RplB (COG0090)rplB (PRK09374) → rpsS (PRK00357)RpsS (COG0185) → rplV (PRK00565)Ribosomal_L22 (pfam00237) → RpsC (COG0092)rpsC (PRK00310) → RplP (COG0197)rplP (PRK09203) →                                     |
| Rca-5-1 | NZ_AYQB01000006.1        | + | 120842  | 120903  | RNA → RplB (COG0090)rplB (PRK09374) → rpsS (PRK00357)RpsS (COG0185) → rplV (PRK00565)Ribosomal_L22 (pfam00237) → RpsC (COG0092)rpsC (PRK00310) → RplP (COG0197)rplP (PRK09203) →                                     |
| Rca-2-1 | NZ_AYPR01000005.1        | + | 120776  | 120837  | RNA → RplB (COG0090)rplB (PRK09374) → rpsS (PRK00357)RpsS (COG0185) → rplV (PRK00565)Ribosomal_L22 (pfam00237) → RpsC (COG0092)rpsC (PRK00310) → RplP (COG0197)rplP (PRK09203) →                                     |
| Rca-1-1 | NZ_AYQA01000038.1        | + | 120869  | 120930  | RNA → RplB (COG0090)rplB (PRK09374) → rpsS (PRK00357)RpsS (COG0185) → rplV (PRK00565)Ribosomal_L22 (pfam00237) → RpsC (COG0092)rpsC (PRK00310) → RplP (COG0197)rplP (PRK09203) →                                     |
| Rsp-4-1 | NC_009428.1              | - | 2571487 | 2571448 | RNA → RplB (COG0090)rplB (PRK09374) → rpsS (PRK00357)RpsS (COG0185) → rplV (PRK00565)Ribosomal_L22 (pfam00237) → RpsC (COG0092)rpsC (PRK00310) → RplP (COG0197)rplP (PRK09203) →                                     |
| Rsp-5-1 | NC_009049.1              | + | 387361  | 387400  | RNA → RplB (COG0090)rplB (PRK09374) → rpsS (PRK00357)RpsS (COG0185) → rplV (PRK00565)Ribosomal_L22 (pfam00237) → RpsC (COG0092)rpsC (PRK00310) → RplP (COG0197)rplP (PRK09203) →                                     |



|         |                         |   |         |         |                                                                                                                                                                                                                                                                                                                                                                                                                                                                                                                                                                                                          |
|---------|-------------------------|---|---------|---------|----------------------------------------------------------------------------------------------------------------------------------------------------------------------------------------------------------------------------------------------------------------------------------------------------------------------------------------------------------------------------------------------------------------------------------------------------------------------------------------------------------------------------------------------------------------------------------------------------------|
| Rsp-6-1 | NC_011963.1             | + | 19443   | 19482   | RNA → RplB (COG0090)rplB (PRK09374) → rpsS (PRK00357)RpsS (COG0185) → rplV (PRK00565)Ribosomal_L22 (pfam00237) → RpsC (COG0092)rpsC (PRK00310) → RplP (COG0197)rplP (PRK09203) →                                                                                                                                                                                                                                                                                                                                                                                                                         |
| Rsp-7-1 | NZ_CM001161.1           | + | 2879562 | 2879601 | RNA → RplB (COG0090)rplB (PRK09374) → rpsS (PRK00357)RpsS (COG0185) → rplV (PRK00565)Ribosomal_L22 (pfam00237) → RpsC (COG0092)rpsC (PRK00310) → RplP (COG0197)rplP (PRK09203) →                                                                                                                                                                                                                                                                                                                                                                                                                         |
| Rsp-3-1 | NC_007493.2             | + | 309766  | 309805  | RNA → RplB (COG0090)rplB (PRK09374) → rpsS (PRK00357)RpsS (COG0185) → rplV (PRK00565)Ribosomal_L22 (pfam00237) → RpsC (COG0092)rpsC (PRK00310) → RplP (COG0197)rplP (PRK09203) →                                                                                                                                                                                                                                                                                                                                                                                                                         |
| env-14  | JQGR01000094.1          | + | 4628    | 4725    | RNA → RplB (COG0090)rplB (PRK09374) → rpsS (PRK00357)RpsS (COG0185) → rplV (PRK00565)Ribosomal_L22 (pfam00237) → RpsC (COG0092)rpsC (PRK00310) → RplP (COG0197)rplP (PRK09203) →                                                                                                                                                                                                                                                                                                                                                                                                                         |
| env-15  | 4455295.3.316264        | + | 69      | 130     | RNA → RplB (COG0090)rplB (PRK09374) →                                                                                                                                                                                                                                                                                                                                                                                                                                                                                                                                                                    |
| env-16  | AYRF01032015.1          | + | 99      | 189     | RNA → ←-hypo                                                                                                                                                                                                                                                                                                                                                                                                                                                                                                                                                                                             |
| env-17  | 3300000052_005679       | + | 305     | 368     | RNA → RplB (COG0090)rplB (PRK09374) → rpsS (PRK00357)RpsS (COG0185) → rplV (PRK00565)Ribosomal_L22 (pfam00237) → RpsC (COG0092)rpsC (PRK00310) → RplP (PRK09203)Ribosomal_L16 (pfam00252) →                                                                                                                                                                                                                                                                                                                                                                                                              |
| Sqi-1-1 | NZ_AUIJ01000004.1       | - | 73400   | 73337   | RNA → RplB (COG0090)rplB (PRK09374) → rpsS (PRK00357)RpsS (COG0185) → rplV (PRK00565)Ribosomal_L22 (pfam00237) → RpsC (COG0092)rpsC (PRK00310) → RplP (COG0197)rplP (PRK09203) → PRK00306 (PRK00306)Ribosomal_L29 (pfam00831) → RpsQ (COG0186)rpsQ (PRK05610) → rplN (PRK05483)Ribosomal_L14 (pfam00238) → RplX (COG0198)rplX (PRK00004) → rplE (PRK00010)RplE (COG0094) → rpsN (PRK08881)Ribosomal_S14 (pfam00253) → rpsH (PRK00136)Ribosomal_S8 (pfam00410) → RplF (COG0097)rplF (PRK05498) → RplR (COG0256)rplR (PRK05593) → RpsE (COG0098)rpsE (PRK00550) → Ribosomal_L30 (cd01658)rpmD (PRK05611) → |
| env-18  | AYRH01014365.1          | - | 242     | 152     | RNA → RplB (COG0090)rplB (PRK09374) →                                                                                                                                                                                                                                                                                                                                                                                                                                                                                                                                                                    |
| env-19  | JCVI_READ_1105499881630 | - | 824     | 763     | RNA → RplB (COG0090)rplB (PRK09374) →                                                                                                                                                                                                                                                                                                                                                                                                                                                                                                                                                                    |
| env-20  | JCVI_SCAF_1101668060777 | + | 269     | 332     | RNA → RplB (COG0090)rplB (PRK09374) → rpsS (PRK00357)RpsS (COG0185) →                                                                                                                                                                                                                                                                                                                                                                                                                                                                                                                                    |
| Hsp-1-1 | NZ_JWIE01000061.1       | + | 80663   | 80737   | RNA → RplB (COG0090)rplB (PRK09374) → rpsS (PRK00357)RpsS (COG0185) → rplV (PRK00565)Ribosomal_L22 (pfam00237) → RpsC (COG0092)rpsC (PRK00310) → RplP (COG0197)rplP (PRK09203) →                                                                                                                                                                                                                                                                                                                                                                                                                         |
| Hna-1-1 | NZ_JWIF01000023.1       | - | 41827   | 41752   | RNA → RplB (COG0090)rplB (PRK09374) → rpsS (PRK00357)RpsS (COG0185) → rplV (PRK00565)Ribosomal_L22 (pfam00237) → RpsC (COG0092)rpsC (PRK00310) → RplP (COG0197)rplP (PRK09203) →                                                                                                                                                                                                                                                                                                                                                                                                                         |
| Rba-6-1 | NZ_CH902578.1           | - | 2097076 | 2096975 | RNA → RplB (COG0090)rplB (PRK09374) → rpsS (PRK00357)RpsS (COG0185) → rplV (PRK00565)Ribosomal_L22 (pfam00237) → RpsC (COG0092)rpsC (PRK00310) → RplP (COG0197)rplP (PRK09203) →                                                                                                                                                                                                                                                                                                                                                                                                                         |
| env-21  | CENL01121776.1          | + | 1754    | 1825    | RNA → RplB (COG0090)rplB (PRK09374) → rpsS (PRK00357)RpsS (COG0185) → rplV (PRK00565)Ribosomal_L22 (pfam00237) → RpsC (COG0092)rpsC (PRK00310) → RplP (COG0197)rplP (PRK09203) →                                                                                                                                                                                                                                                                                                                                                                                                                         |
| Cba-1-1 | NZ_AMRK01000018.1       | + | 2718    | 2789    | RNA → RplB (COG0090)rplB (PRK09374) → RplB (COG0090)rplB (PRK09374) → rpsS (PRK00357)RpsS (COG0185) → rpsS (PRK00357)RpsS (COG0185) → rplV (PRK00565)Ribosomal_L22 (pfam00237) → rplV (PRK00565)Ribosomal_L22 (pfam00237) → RpsC (COG0092)rpsC (PRK00310) → RpsC (COG0092)rpsC (PRK00310) → RplP (COG0197)rplP (PRK09203) → RplP (COG0197)rplP (PRK09203) →                                                                                                                                                                                                                                              |
| Rsp-1-1 | NZ_ANFS01000015.1       | + | 2126    | 2188    | RNA → RplB (COG0090)rplB (PRK09374) → rpsS (PRK00357)RpsS (COG0185) → rplV (PRK00565)Ribosomal_L22 (pfam00237) → RpsC (COG0092)rpsC (PRK00310) → RplP (COG0197)rplP (PRK09203) →                                                                                                                                                                                                                                                                                                                                                                                                                         |
| env-22  | JGI24724J26744_10214823 | + | 124     | 189     | RNA → rplB (PRK09374)Ribosomal_L2 (pfam00181) →                                                                                                                                                                                                                                                                                                                                                                                                                                                                                                                                                          |
| env-23  | NCBI_READ_1112637934486 | + | 240     | 306     | RNA → RplB (COG0090)rplB (PRK09374) →                                                                                                                                                                                                                                                                                                                                                                                                                                                                                                                                                                    |
| env-24  | CESE01117110.1          | - | 1184    | 1118    | RNA → RplB (COG0090)rplB (PRK09374) → rpsS (PRK00357)RpsS (COG0185) →                                                                                                                                                                                                                                                                                                                                                                                                                                                                                                                                    |
| env-25  | CEST01016851.1          | + | 2161    | 2227    | RNA → RplB (COG0090)rplB (PRK09374) → rpsS (PRK00357)RpsS (COG0185) →                                                                                                                                                                                                                                                                                                                                                                                                                                                                                                                                    |
| env-26  | 2236876009_187088       | + | 204     | 270     | RNA → RplB (COG0090)rplB (PRK09374) →                                                                                                                                                                                                                                                                                                                                                                                                                                                                                                                                                                    |
| env-27  | DelMOSum2010_c10002940  | - | 12329   | 12263   | RNA → RplB (COG0090)rplB (PRK09374) → rpsS (PRK00357)RpsS (COG0185) → rplV (PRK00565)Ribosomal_L22 (pfam00237) → RpsC (COG0092)rpsC (PRK00310) → RplP (COG0197)rplP (PRK09203) →                                                                                                                                                                                                                                                                                                                                                                                                                         |

|         |                             |   |         |         |                                                                                                                                                                                                                                                                                                                                                                                       |
|---------|-----------------------------|---|---------|---------|---------------------------------------------------------------------------------------------------------------------------------------------------------------------------------------------------------------------------------------------------------------------------------------------------------------------------------------------------------------------------------------|
| env-28  | JGI20152J14361_10100075     | - | 149     | 83      | RNA → RplB (COG0090)rplB (PRK09374) →                                                                                                                                                                                                                                                                                                                                                 |
| env-29  | JGI20151J14362_10028856     | + | 2610    | 2676    | RNA → RplB (COG0090)rplB (PRK09374) →                                                                                                                                                                                                                                                                                                                                                 |
| env-30  | JGI20154J14316_10002806     | + | 4976    | 5042    | RNA → RplB (COG0090)rplB (PRK09374) → rpsS (PRK00357)RpsS (COG0185) →<br>rplV (PRK00565)Ribosomal_L22 (pfam00237) → RpsC (COG0092)rpsC (PRK00310) →<br>RplP (COG0197)rplP (PRK09203) →                                                                                                                                                                                                |
| env-31  | JGI20160J14292_10200265     | + | 405     | 471     | RNA → RplB (COG0090)rplB (PRK09374) →                                                                                                                                                                                                                                                                                                                                                 |
| env-32  | JGI20153J14295_10377309     | - | 117     | 51      | RNA → hypo →                                                                                                                                                                                                                                                                                                                                                                          |
| env-33  | JGI20153J14318_10377309     | - | 117     | 51      | RNA → hypo →                                                                                                                                                                                                                                                                                                                                                                          |
| env-34  | JGI20157J14317_10000107     | - | 35008   | 34942   | RNA → RplB (COG0090)rplB (PRK09374) → rpsS (PRK00357)RpsS (COG0185) →<br>rplV (PRK00565)Ribosomal_L22 (pfam00237) → RpsC (COG0092)rpsC (PRK00310) →<br>RplP (COG0197)rplP (PRK09203) →                                                                                                                                                                                                |
| env-35  | CEUP01061385.1              | - | 473     | 377     | RNA → rplB (PRK09374)Ribosomal_L2 (pfam00181) →                                                                                                                                                                                                                                                                                                                                       |
| Csp-1-1 | NZ_AJKJ01000048.1           | + | 3267    | 3349    | RNA → RplB (COG0090)rplB (PRK09374) → RplB (COG0090)rplB (PRK09374) →<br>rpsS (PRK00357)RpsS (COG0185) → rpsS (PRK00357)RpsS (COG0185) →<br>rplV (PRK00565)Ribosomal_L22 (pfam00237) → rplV (PRK00565)Ribosomal_L22 (pfam00237) →<br>RpsC (COG0092)rpsC (PRK00310) → RpsC (COG0092)rpsC (PRK00310) → RplP (COG0197)rplP (PRK09203) →<br>RplP (COG0197)rplP (PRK09203) → hypo → hypo → |
| Pat-1-1 | NZ_AQXQ01000010.1           | - | 63842   | 63774   | RNA → RplB (COG0090)rplB (PRK09374) → rpsS (PRK00357)RpsS (COG0185) →<br>rplV (PRK00565)Ribosomal_L22 (pfam00237) → RpsC (COG0092)rpsC (PRK00310) →<br>RplP (COG0197)rplP (PRK09203) →                                                                                                                                                                                                |
| Rba-3-1 | NZ_KN714899.1               | - | 63316   | 63257   | RNA → RplB (COG0090)rplB (PRK09374) → rpsS (PRK00357)RpsS (COG0185) →<br>rplV (PRK00565)Ribosomal_L22 (pfam00237) → RpsC (COG0092)rpsC (PRK00310) →<br>RplP (COG0197)rplP (PRK09203) →                                                                                                                                                                                                |
| env-36  | JGI24025J20009_10174089     | + | 339     | 403     | RNA → RplB (COG0090)rplB (PRK09374) →                                                                                                                                                                                                                                                                                                                                                 |
| env-37  | CEQG01114380.1              | - | 89      | 29      | RNA →                                                                                                                                                                                                                                                                                                                                                                                 |
| Rca-6-1 | NZ_AYPY01000003.1           | - | 128998  | 128937  | RNA → RplB (COG0090)rplB (PRK09374) → rpsS (PRK00357)RpsS (COG0185) →<br>rplV (PRK00565)Ribosomal_L22 (pfam00237) → RpsC (COG0092)rpsC (PRK00310) →<br>RplP (COG0197)rplP (PRK09203) →                                                                                                                                                                                                |
| env-38  | JGI24723J26617_10335773     | - | 212     | 147     | RNA → RplB (COG0090)rplB (PRK09374) →                                                                                                                                                                                                                                                                                                                                                 |
| env-39  | JGI24724J26744_10397626     | + | 94      | 159     | RNA → rplB (PRK09374)Ribosomal_L2 (pfam00181) →                                                                                                                                                                                                                                                                                                                                       |
| env-40  | JGI24723J26617_10265371     | + | 184     | 249     | RNA → RplB (COG0090)rplB (PRK09374) →                                                                                                                                                                                                                                                                                                                                                 |
| Oba-1-1 | NZ_CH724131.1               | - | 1639797 | 1639719 | RNA → RplB (COG0090)rplB (PRK09374) → rpsS (PRK00357)RpsS (COG0185) →<br>rplV (PRK00565)Ribosomal_L22 (pfam00237) → RpsC (COG0092)rpsC (PRK00310) →<br>RplP (COG0197)rplP (PRK09203) →                                                                                                                                                                                                |
| env-41  | JGI12210J13797_10911808     | - | 154     | 79      | RNA → RplB (COG0090)rplB (PRK09374) →                                                                                                                                                                                                                                                                                                                                                 |
| env-42  | SA_S1_NOR08_45m_c10088539   | - | 163     | 103     | RNA → RplB (COG0090)rplB (PRK09374) →                                                                                                                                                                                                                                                                                                                                                 |
| env-43  | SA_S1_NOR05_45m_c10012273   | + | 805     | 865     | RNA → RplB (COG0090)rplB (PRK09374) → rpsS (PRK00357)RpsS (COG0185) →<br>rplV (PRK00565)Ribosomal_L22 (pfam00237) → KH (smart00322)30S_S3_KH (cd02412) →                                                                                                                                                                                                                              |
| env-44  | SA_S2_NOR15_50m_c10022560   | - | 1787    | 1727    | RNA → RplB (COG0090)rplB (PRK09374) → rpsS (PRK00357)Ribosomal_S19 (pfam00203) →<br>rplV (PRK00565)Ribosomal_L22 (pfam00237) → rpsC (PRK00310)30S_S3_KH (cd02412) →                                                                                                                                                                                                                   |
| env-45  | KGL_S2_ANT05_2345m_c1008115 | + | 360     | 420     | RNA → RplB (COG0090)rplB (PRK09374) → rpsS (PRK00357)RpsS (COG0185) →<br>rplV (PRK00565)Ribosomal_L22 (pfam00237) → RpsC (COG0092)rpsC (PRK00310) →                                                                                                                                                                                                                                   |
| env-46  | KGL_S1_ANT02_95m_c10175114  | - | 173     | 113     | RNA → RplB (COG0090)rplB (PRK09374) →                                                                                                                                                                                                                                                                                                                                                 |
| env-47  | SA_S2_NOR13_50m_c1107468    | - | 300     | 240     | RNA → RplB (COG0090)rplB (PRK09374) →                                                                                                                                                                                                                                                                                                                                                 |
| env-48  | KGL_S1_ANT03_95m_c1050218   | + | 27      | 87      | RNA → rplB (PRK09374)Ribosomal_L2 (pfam00181) →                                                                                                                                                                                                                                                                                                                                       |
| env-49  | JGI24723J26617_10562187     | - | 219     | 156     | RNA → RplB (COG0090)rplB (PRK09374) →                                                                                                                                                                                                                                                                                                                                                 |
| env-50  | JGI24724J26744_10017014     | - | 875     | 812     | RNA → RplB (COG0090)rplB (PRK09374) →                                                                                                                                                                                                                                                                                                                                                 |
| env-51  | JGI24025J20009_10010867     | - | 4900    | 4837    | RNA → RplB (COG0090)rplB (PRK09374) → rpsS (PRK00357)RpsS (COG0185) →<br>rplV (PRK00565)Ribosomal_L22 (pfam00237) → RpsC (COG0092)rpsC (PRK00310) →<br>RplP (COG0197)rplP (PRK09203) →                                                                                                                                                                                                |
| env-52  | KGL_S1_ANT01_95m_c10003918  | + | 2539    | 2601    | RNA → RplB (COG0090)rplB (PRK09374) → rpsS (PRK00357)RpsS (COG0185) →<br>rplV (PRK00565)Ribosomal_L22 (pfam00237) → RpsC (COG0092)rpsC (PRK00310) →<br>RplP (COG0197)rplP (PRK09203) →                                                                                                                                                                                                |
| env-53  | KGL_S2_ANT05_2345m_c1031605 | - | 159     | 97      | RNA → RplB (COG0090)rplB (PRK09374) →                                                                                                                                                                                                                                                                                                                                                 |
| env-54  | KGL_S1_ANT02_95m_c10012913  | + | 2664    | 2726    | RNA → rplB (PRK09374)Ribosomal_L2 (pfam00181) →                                                                                                                                                                                                                                                                                                                                       |

|          |                           |   |         |         |                                                                                                                                                                                                                                                                                                                                      |
|----------|---------------------------|---|---------|---------|--------------------------------------------------------------------------------------------------------------------------------------------------------------------------------------------------------------------------------------------------------------------------------------------------------------------------------------|
| env-55   | AGBJ01004298.1            | - | 284     | 223     | RNA → ←-hypo                                                                                                                                                                                                                                                                                                                         |
| env-56   | JGI24025J20009_10035212   | - | 340     | 279     | RNA → rplB (PRK09374)Ribosomal_L2 (pfam00181) →                                                                                                                                                                                                                                                                                      |
| env-57   | LGVE01157751.1            | + | 1200    | 1261    | RNA → rplB (PRK09374)Ribosomal_L2 (pfam00181) →                                                                                                                                                                                                                                                                                      |
| env-58   | LGVF01211244.1            | - | 1626    | 1565    | RNA → RplB (COG0090)rplB (PRK09374) → rpsS (PRK00357)Ribosomal_S19 (pfam00203) → rplV (PRK00565) →<br>rplV (PRK00565)Ribosomal_L22 (pfam00237) → rpsC (PRK00310)30S_S3_KH (cd02412) →                                                                                                                                                |
| env-59   | LGVD01030433.1            | + | 391     | 452     | RNA → rplB (PRK09374)Ribosomal_L2 (pfam00181) →                                                                                                                                                                                                                                                                                      |
| env-60   | SA_S1_NOR08_45m_c10143553 | + | 557     | 618     | RNA → RplB (COG0090)rplB (PRK09374) →                                                                                                                                                                                                                                                                                                |
| env-61   | SA_S2_NOR15_50m_c10181039 | - | 134     | 73      | RNA → RplB (COG0090)rplB (PRK09374) →                                                                                                                                                                                                                                                                                                |
| env-62   | SA_S1_NOR02_45m_c1048433  | - | 379     | 318     | RNA → rplB (PRK09374)Ribosomal_L2 (pfam00181) →                                                                                                                                                                                                                                                                                      |
| env-63   | SA_S2_NOR18_50m_1043735   | + | 332     | 393     | RNA → rplB (PRK09374)Ribosomal_L2 (pfam00181) →                                                                                                                                                                                                                                                                                      |
| env-64   | LGOV01019582.1            | + | 657     | 718     | RNA → RplB (COG0090)rplB (PRK09374) →                                                                                                                                                                                                                                                                                                |
| Rli-1-1  | NC_015730.1               | - | 3449426 | 3449359 | RNA → RplB (COG0090)rplB (PRK09374) → rpsS (PRK00357)RpsS (COG0185) →<br>rplV (PRK00565)Ribosomal_L22 (pfam00237) → RpsC (COG0092)rpsC (PRK00310) →<br>RplP (COG0197)rplP (PRK09203) →                                                                                                                                               |
| env-65   | JGI12109J20283_10879218   | - | 201     | 135     | RNA → RplB (COG0090)rplB (PRK09374) →                                                                                                                                                                                                                                                                                                |
| Rde-1-1  | NC_008209.1               | + | 1346820 | 1346887 | RNA → RplB (COG0090)rplB (PRK09374) → rpsS (PRK00357)RpsS (COG0185) →<br>rplV (PRK00565)Ribosomal_L22 (pfam00237) → RpsC (COG0092)rpsC (PRK00310) →<br>RplP (COG0197)rplP (PRK09203) →                                                                                                                                               |
| env-66   | JGI11958J13698_1070723    | - | 120     | 52      | RNA → ←-hypo                                                                                                                                                                                                                                                                                                                         |
| env-67   | CAM_READ_0234679589       | - | 364     | 296     | RNA → rplB (PRK09374)Ribosomal_L2 (pfam00181) →                                                                                                                                                                                                                                                                                      |
| env-68   | CAM_READ_0234796905       | - | 364     | 296     | RNA → rplB (PRK09374)Ribosomal_L2 (pfam00181) →                                                                                                                                                                                                                                                                                      |
| Rsp-15-1 | NZ_JQLS01000008.1         | + | 336402  | 336479  | RNA → RplB (COG0090)rplB (PRK09374) → rpsS (PRK00357)RpsS (COG0185) →<br>rplV (PRK00565)Ribosomal_L22 (pfam00237) → RpsC (COG0092)rpsC (PRK00310) →<br>RplP (COG0197)rplP (PRK09203) →                                                                                                                                               |
| env-69   | CESQ01192690.1            | - | 546     | 470     | RNA → rplB (PRK09374)Ribosomal_L2 (pfam00181) →                                                                                                                                                                                                                                                                                      |
| Rsp-14-1 | NZ_DS022276.1             | - | 423367  | 423284  | RNA → RplB (COG0090)rplB (PRK09374) → rpsS (PRK00357)RpsS (COG0185) →<br>rplV (PRK00565)Ribosomal_L22 (pfam00237) → RpsC (COG0092)rpsC (PRK00310) →<br>RplP (COG0197)rplP (PRK09203) →                                                                                                                                               |
| env-70   | CETR01181359.1            | - | 335     | 252     | RNA → RplB (COG0090)rplB (PRK09374) →                                                                                                                                                                                                                                                                                                |
| env-71   | JGI11800J13271_1007151    | + | 1158    | 1250    | RNA →                                                                                                                                                                                                                                                                                                                                |
| Csp-2-1  | NZ_GG704599.1             | + | 399690  | 399782  | RNA → RplB (COG0090)rplB (PRK09374) → RplB (COG0090)rplB (PRK09374) →<br>rpsS (PRK00357)RpsS (COG0185) → rpsS (PRK00357)RpsS (COG0185) →<br>rplV (PRK00565)Ribosomal_L22 (pfam00237) → rplV (PRK00565)Ribosomal_L22 (pfam00237) →<br>RpsC (COG0092)rpsC (PRK00310) → RpsC (COG0092)rpsC (PRK00310) → RplP (COG0197)rplP (PRK09203) → |
| env-72   | P_2C_Liq_1_UnCty_1008935  | - | 2463    | 2386    | RNA → RplB (COG0090)rplB (PRK09374) → rpsS (PRK00357)RpsS (COG0185) →<br>rplV (PRK00565)Ribosomal_L22 (pfam00237) → RpsC (COG0092)rpsC (PRK00310) →<br>rplP (PRK09203)Ribosomal_L16 (pfam00252) →                                                                                                                                    |
| env-73   | P_2C_Liq_2_UnCty_1004597  | + | 433     | 510     | RNA → RplB (COG0090)rplB (PRK09374) → rpsS (PRK00357)RpsS (COG0185) →<br>rplV (PRK00565)Ribosomal_L22 (pfam00237) → RpsC (COG0092)rpsC (PRK00310) →<br>rplP (PRK09203)Ribosomal_L16 (pfam00252) →                                                                                                                                    |
| Nig-1-1  | NZ_CVPC01000014.1         | - | 4708    | 4631    | RNA → RplB (COG0090)rplB (PRK09374) → rpsS (PRK00357)RpsS (COG0185) →<br>rplV (PRK00565)Ribosomal_L22 (pfam00237) → RpsC (COG0092)rpsC (PRK00310) →<br>RplP (COG0197)rplP (PRK09203) →                                                                                                                                               |
| env-74   | JGI12273J12029_10524331   | + | 216     | 286     | RNA →                                                                                                                                                                                                                                                                                                                                |
| env-75   | JGI24025J20009_10000374   | - | 31294   | 31182   | RNA → RplB (COG0090)rplB (PRK09374) → rpsS (PRK00357)RpsS (COG0185) →<br>rplV (PRK00565)Ribosomal_L22 (pfam00237) → RpsC (COG0092)rpsC (PRK00310) →<br>RplP (COG0197)rplP (PRK09203) →                                                                                                                                               |
| env-76   | JGI24025J20009_10010033   | + | 1689    | 1756    | RNA → RplB (COG0090)rplB (PRK09374) → rpsS (PRK00357)RpsS (COG0185) →<br>rplV (PRK00565)Ribosomal_L22 (pfam00237) → RpsC (COG0092)rpsC (PRK00310) →<br>RplP (COG0197)rplP (PRK09203) →                                                                                                                                               |
| Tsp-1-1  | NZ_JWLL01000009.1         | - | 233099  | 233024  | RNA → RplB (COG0090)rplB (PRK09374) → rpsS (PRK00357)RpsS (COG0185) →<br>rplV (PRK00565)Ribosomal_L22 (pfam00237) → RpsC (COG0092)rpsC (PRK00310) →<br>RplP (COG0197)rplP (PRK09203) →                                                                                                                                               |
| env-77   | 2236876003_101132         | + | 388     | 448     | RNA → RplB (COG0090)rplB (PRK09374) →                                                                                                                                                                                                                                                                                                |

|          |                             |   |         |         |                                                                                                                                                                                                         |
|----------|-----------------------------|---|---------|---------|---------------------------------------------------------------------------------------------------------------------------------------------------------------------------------------------------------|
| env-78   | PML_READ_00355505           | + | 143     | 210     | RNA→                                                                                                                                                                                                    |
| env-79   | JGI20152J14361_10000074     | + | 12924   | 12991   | RNA→ RplB (COG0090)rplB (PRK09374)→ rpsS (PRK00357)RpsS (COG0185)→<br>rplV (PRK00565)Ribosomal_L22 (pfam00237)→ RpsC (COG0092)rpsC (PRK00310)→<br>RplP (COG0197)rplP (PRK09203)→ hypo→                  |
| env-80   | JGI20154J14316_10160884     | + | 228     | 295     | RNA→ rplB (PRK09374)Ribosomal_L2 (pfam00181)→                                                                                                                                                           |
| env-81   | JGI20153J14295_10001123     | + | 7148    | 7215    | RNA→ RplB (COG0090)rplB (PRK09374)→ rpsS (PRK00357)RpsS (COG0185)→<br>rplV (PRK00565)Ribosomal_L22 (pfam00237)→ RpsC (COG0092)rpsC (PRK00310)→<br>RplP (COG0197)rplP (PRK09203)→ hypo→                  |
| env-82   | JGI20153J14318_10001123     | + | 7148    | 7215    | RNA→ RplB (COG0090)rplB (PRK09374)→ rpsS (PRK00357)RpsS (COG0185)→<br>rplV (PRK00565)Ribosomal_L22 (pfam00237)→ RpsC (COG0092)rpsC (PRK00310)→<br>RplP (COG0197)rplP (PRK09203)→ hypo→                  |
| Lve-2-1  | NZ_CH672414.1               | + | 2669496 | 2669565 | RNA→ RplB (COG0090)rplB (PRK09374)→ rpsS (PRK00357)RpsS (COG0185)→<br>rplV (PRK00565)Ribosomal_L22 (pfam00237)→ RpsC (COG0092)rpsC (PRK00310)→<br>RplP (COG0197)rplP (PRK09203)→                        |
| Lve-1-1  | NZ_KB907973.1               | + | 38196   | 38265   | RNA→ RplB (COG0090)rplB (PRK09374)→ rpsS (PRK00357)RpsS (COG0185)→<br>rplV (PRK00565)Ribosomal_L22 (pfam00237)→ RpsC (COG0092)rpsC (PRK00310)→<br>RplP (COG0197)rplP (PRK09203)→                        |
| env-83   | JGI12210J13797_10455319     | + | 174     | 245     | RNA→                                                                                                                                                                                                    |
| env-84   | JGI12210J13797_10023293     | - | 122     | 51      | RNA→ ←hypo                                                                                                                                                                                              |
| Ogr-1-1  | NZ_CH724107.1               | - | 1761097 | 1761017 | RNA→ RplB (COG0090)rplB (PRK09374)→ rpsS (PRK00357)RpsS (COG0185)→<br>RplV (COG0091)rplV (PRK00565)→ RpsC (COG0092)rpsC (PRK00310)→ RplP (COG0197)rplP (PRK09203)→                                      |
| env-85   | JCVL_SCAF_1096627353865     | + | 440     | 504     | RNA→ RplB (COG0090)rplB (PRK09374)→ Zw10 (pfam06248)→ rpsS (PRK00357)RpsS (COG0185)→ hypo→<br>rplV (PRK00565)Ribosomal_L22 (pfam00237)→ RpsC (COG0092)rpsC (PRK00310)→                                  |
| env-86   | PR_CR_10.Liq_1.inCR_1002101 | + | 720     | 784     | RNA→ RplB (COG0090)rplB (PRK09374)→ rpsS (PRK00357)RpsS (COG0185)→<br>rplV (PRK00565)Ribosomal_L22 (pfam00237)→ RpsC (COG0092)rpsC (PRK00310)→<br>RplP (COG0197)rplP (PRK09203)→                        |
| env-87   | PR_CR_10.Liq_3.inCR_1034197 | - | 612     | 548     | RNA→ RplB (COG0090)rplB (PRK09374)→                                                                                                                                                                     |
| Lsp-10-1 | NZ_JXYE01000005.1           | - | 18000   | 17935   | RNA→ RplB (COG0090)rplB (PRK09374)→ rpsS (PRK00357)RpsS (COG0185)→<br>rplV (PRK00565)Ribosomal_L22 (pfam00237)→ RpsC (COG0092)rpsC (PRK00310)→<br>RplP (COG0197)rplP (PRK09203)→                        |
| env-88   | Antartic2_1216799           | + | 177     | 241     | RNA→ RplB (COG0090)rplB (PRK09374)→                                                                                                                                                                     |
| env-89   | JGI25920J50251_10282450     | - | 274     | 210     | RNA→ ←hypo                                                                                                                                                                                              |
| Aat-1-1  | NZ_AQY01000002.1            | + | 4134    | 4211    | RNA→ RplB (COG0090)rplB (PRK09374)→ rpsS (PRK00357)RpsS (COG0185)→<br>rplV (PRK00565)Ribosomal_L22 (pfam00237)→ RpsC (COG0092)rpsC (PRK00310)→<br>RplP (COG0197)rplP (PRK09203)→                        |
| env-90   | HLSNC_1002228               | - | 3054    | 2987    | RNA→ RplB (COG0090)rplB (PRK09374)→ rpsS (PRK00357)RpsS (COG0185)→<br>rplV (PRK00565)Ribosomal_L22 (pfam00237)→ RpsC (COG0092)rpsC (PRK00310)→<br>RplP (COG0197)rplP (PRK09203)→ hypo→                  |
| env-91   | KVRMV2_106490902            | + | 59      | 134     | RNA→ RplB (COG0090)rplB (PRK09374)→                                                                                                                                                                     |
| env-92   | GYQO9XB02HJOI1              | - | 85      | 21      | RNA→ ←hypo                                                                                                                                                                                              |
| env-93   | 4455295.3.416243            | + | 77      | 139     | RNA→ rplB (PRK09374)Ribosomal_L2 (pfam00181)→                                                                                                                                                           |
| env-94   | JGI20152J14361_10000792     | - | 16131   | 16066   | RNA→ RplB (COG0090)rplB (PRK09374)→ rpsS (PRK00357)RpsS (COG0185)→<br>rplV (PRK00565)Ribosomal_L22 (pfam00237)→ RpsC (COG0092)rpsC (PRK00310)→<br>RplP (COG0197)rplP (PRK09203)→                        |
| env-95   | JGI20152J14361_10021758     | + | 662     | 727     | RNA→ RplB (COG0090)rplB (PRK09374)→ rpsS (PRK00357)RpsS (COG0185)→<br>rplV (PRK00565)Ribosomal_L22 (pfam00237)→                                                                                         |
| Pna-1-1  | NZ_JHZF01000011.1           | - | 1853666 | 1853592 | RNA→ RplB (COG0090)rplB (PRK09374)→ rpsS (PRK00357)RpsS (COG0185)→<br>rplV (PRK00565)Ribosomal_L22 (pfam00237)→ RpsC (COG0092)rpsC (PRK00310)→<br>RplP (COG0197)rplP (PRK09203)→                        |
| env-96   | C687J26610_1065482          | - | 330     | 262     | RNA→ rplB (PRK09374)Ribosomal_L2 (pfam00181)→                                                                                                                                                           |
| Sna-1-1  | NZ_KI421509.1               | - | 2029881 | 2029817 | RNA→ RplB (COG0090)rplB (PRK09374)→ rpsS (PRK00357)RpsS (COG0185)→<br>rplV (PRK00565)Ribosomal_L22 (pfam00237)→ RpsC (COG0092)rpsC (PRK00310)→<br>RplP (COG0197)rplP (PRK09203)→ TIGR02466 (TIGR02466)→ |
| env-97   | GYQO9XB02GIUBI              | + | 54      | 123     | RNA→                                                                                                                                                                                                    |
| env-98   | DCrCPGB.c116271             | + | 75      | 144     | RNA→ rplB (PRK09374)Ribosomal_L2 (pfam00181)→                                                                                                                                                           |



|         |                             |   |        |        |                                                                                                                                                                                  |
|---------|-----------------------------|---|--------|--------|----------------------------------------------------------------------------------------------------------------------------------------------------------------------------------|
| env-99  | KGLS2_ANT04.2345m.c1008211  | - | 1538   | 1465   | RNA → RplB (COG0090)rplB (PRK09374) → rpsS (PRK00357)RpsS (COG0185) → rplV (PRK00565)Ribosomal_L22 (pfam00237) →                                                                 |
| env-100 | KGLS1_ANT02.95m.c10000174   | + | 24541  | 24614  | RNA → RplB (COG0090)rplB (PRK09374) → rpsS (PRK00357)RpsS (COG0185) → rplV (PRK00565)Ribosomal_L22 (pfam00237) → RpsC (COG0092)rpsC (PRK00310) → RplP (COG0197)rplP (PRK09203) → |
| env-101 | KGLS1_ANT01.95m.c10002670   | + | 4835   | 4908   | RNA → RplB (COG0090)rplB (PRK09374) → rpsS (PRK00357)RpsS (COG0185) → rplV (PRK00565)Ribosomal_L22 (pfam00237) → RpsC (COG0092)rpsC (PRK00310) → RplP (COG0197)rplP (PRK09203) → |
| env-102 | KGLS2_ANT05.2345m.c1002025  | - | 4049   | 3976   | RNA → RplB (COG0090)rplB (PRK09374) → rpsS (PRK00357)RpsS (COG0185) → rplV (PRK00565)Ribosomal_L22 (pfam00237) → RpsC (COG0092)rpsC (PRK00310) → RplP (COG0197)rplP (PRK09203) → |
| env-103 | SR_TP_S13sol.1015872        | - | 193    | 120    | RNA → RplB (COG0090)rplB (PRK09374) →                                                                                                                                            |
| env-104 | HLSNC_1000102               | + | 4292   | 4365   | RNA → RplB (COG0090)rplB (PRK09374) → rpsS (PRK00357)RpsS (COG0185) → rplV (PRK00565)Ribosomal_L22 (pfam00237) → RpsC (COG0092)rpsC (PRK00310) → RplP (COG0197)rplP (PRK09203) → |
| Jsp-1-1 | NC_007802.1                 | + | 574447 | 574519 | RNA → RplB (COG0090)rplB (PRK09374) → rpsS (PRK00357)RpsS (COG0185) → rplV (PRK00565)Ribosomal_L22 (pfam00237) → RpsC (COG0092)rpsC (PRK00310) → RplP (COG0197)rplP (PRK09203) → |
| env-105 | KVRMV2_101198589            | + | 2281   | 2349   | RNA → rplB (PRK09374)Ribosomal_L2 (pfam00181) →                                                                                                                                  |
| env-106 | PR_CR_10.Liq_1.inCR_1005216 | - | 2908   | 2842   | RNA → RplB (COG0090)rplB (PRK09374) → rpsS (PRK00357)RpsS (COG0185) → rplV (PRK00565)Ribosomal_L22 (pfam00237) → RpsC (COG0092)rpsC (PRK00310) → RplP (COG0197)rplP (PRK09203) → |
| env-107 | PR_CR_10.Liq_3.inCR_1001525 | - | 3425   | 3359   | RNA → RplB (COG0090)rplB (PRK09374) → rpsS (PRK00357)RpsS (COG0185) → rplV (PRK00565)Ribosomal_L22 (pfam00237) → RpsC (COG0092)rpsC (PRK00310) → RplP (COG0197)rplP (PRK09203) → |
| env-108 | GSLSAAL.contig03181         | + | 626    | 692    | RNA →                                                                                                                                                                            |
| env-109 | ElkS_mat_CD2A_1005801       | - | 1817   | 1752   | RNA → RplB (COG0090)rplB (PRK09374) → rpsS (PRK00357)RpsS (COG0185) → rplV (PRK00565)Ribosomal_L22 (pfam00237) → rpsC (PRK00310)30S_S3_KH (cd02412) →                            |
| env-110 | ElkS_mat_MD6A_1013394       | + | 164    | 229    | RNA → RplB (COG0090)rplB (PRK09374) → rpsS (PRK00357)RpsS (COG0185) → rplV (PRK00565)Ribosomal_L22 (pfam00237) → rpsC (PRK00310)30S_S3_KH (cd02412) →                            |
| env-111 | JGI12210J13797_11132003     | + | 2467   | 2532   | RNA → RplB (COG0090)rplB (PRK09374) → rpsS (PRK00357)RpsS (COG0185) → rplV (PRK00565)Ribosomal_L22 (pfam00237) → RpsC (COG0092)rpsC (PRK00310) → RplP (COG0197)rplP (PRK09203) → |
| env-112 | JGI12210J13797_11132005     | - | 3162   | 3097   | RNA → RplB (COG0090)rplB (PRK09374) → rpsS (PRK00357)RpsS (COG0185) → rplV (PRK00565)Ribosomal_L22 (pfam00237) → RpsC (COG0092)rpsC (PRK00310) → RplP (COG0197)rplP (PRK09203) → |
| env-113 | JGI11876J14442_10003279     | - | 3251   | 3186   | RNA → RplB (COG0090)rplB (PRK09374) → rpsS (PRK00357)RpsS (COG0185) → rplV (PRK00565)Ribosomal_L22 (pfam00237) → RpsC (COG0092)rpsC (PRK00310) → RplP (COG0197)rplP (PRK09203) → |
| env-114 | JGI12109J20283_10578297     | + | 2553   | 2618   | RNA → rplB (PRK09374)Ribosomal_L2 (pfam00181) →                                                                                                                                  |
| env-115 | JGI12109J20283_10578298     | - | 338    | 273    | RNA → rplB (PRK09374)Ribosomal_L2 (pfam00181) →                                                                                                                                  |
| env-116 | JGI12210J13797_11558909     | + | 43     | 103    | RNA → ←-hypo                                                                                                                                                                     |
| env-117 | JGI12210J13797_11938347     | - | 70     | 10     | RNA → ←-hypo                                                                                                                                                                     |
| env-118 | CENR01018324.1              | + | 1102   | 1170   | RNA → RplB (COG0090)rplB (PRK09374) →                                                                                                                                            |
| env-119 | CENV01010391.1              | - | 2234   | 2166   | RNA → RplB (COG0090)rplB (PRK09374) → rpsS (PRK00357)RpsS (COG0185) → RplV (COG0091)rplV (PRK00565) → RpsC (COG0092)rpsC (PRK00310) →                                            |
| env-120 | CERO01013343.1              | + | 295    | 363    | RNA → RplB (COG0090)rplB (PRK09374) →                                                                                                                                            |
| env-121 | JGI24724J26744_10870797     | + | 32     | 99     | RNA → RplB (COG0090)rplB (PRK09374) →                                                                                                                                            |
| env-122 | JGI12210J13797_10838428     | - | 914    | 850    | RNA → RplB (COG0090)rplB (PRK09374) →                                                                                                                                            |
| env-123 | JGI12210J13797_10838429     | + | 87     | 151    | RNA → RplB (COG0090)rplB (PRK09374) →                                                                                                                                            |
| env-124 | JGI20152J14361_10179686     | + | 269    | 339    | RNA → ←-hypo                                                                                                                                                                     |
| env-125 | SA_S1_NOR08_45m.c10004046   | + | 4200   | 4267   | RNA → RplB (COG0090)rplB (PRK09374) → rpsS (PRK00357)RpsS (COG0185) → rplV (PRK00565)Ribosomal_L22 (pfam00237) → RpsC (COG0092)rpsC (PRK00310) → RplP (COG0197)rplP (PRK09203) → |

|         |                             |   |         |         |                                                                                                                                                                                                                                                                                                                                                                                             |
|---------|-----------------------------|---|---------|---------|---------------------------------------------------------------------------------------------------------------------------------------------------------------------------------------------------------------------------------------------------------------------------------------------------------------------------------------------------------------------------------------------|
| env-126 | SA_S2_NOR15_50m_c10018770   | + | 306     | 373     | RNA → RplB (COG0090)rplB (PRK09374) → rpsS (PRK00357)RpsS (COG0185) → rplV (PRK00565)Ribosomal_L22 (pfam00237) → RpsC (COG0092)rpsC (PRK00310) → RplP (COG0197)rplP (PRK09203) →                                                                                                                                                                                                            |
| env-127 | SA_S1_NOR05_45m_c10315404   | + | 255     | 322     | RNA →                                                                                                                                                                                                                                                                                                                                                                                       |
| Ote-1-1 | NZ_CP012160.1               | + | 252086  | 252153  | RNA → RplB (COG0090)rplB (PRK09374) → rpsS (PRK00357)RpsS (COG0185) → rplV (PRK00565)Ribosomal_L22 (pfam00237) → RpsC (COG0092)rpsC (PRK00310) → RplP (COG0197)rplP (PRK09203) →                                                                                                                                                                                                            |
| Oan-1-1 | NC_020911.1                 | - | 4346201 | 4346135 | RNA → RplB (COG0090)rplB (PRK09374) → rpsS (PRK00357)RpsS (COG0185) → rplV (PRK00565)Ribosomal_L22 (pfam00237) → RpsC (COG0092)rpsC (PRK00310) → RplP (COG0197)rplP (PRK09203) →                                                                                                                                                                                                            |
| Oar-1-1 | NC_020908.1                 | + | 3931342 | 3931406 | RNA → RplB (COG0090)rplB (PRK09374) → rpsS (PRK00357)RpsS (COG0185) → rplV (PRK00565)Ribosomal_L22 (pfam00237) → RpsC (COG0092)rpsC (PRK00310) → RplP (COG0197)rplP (PRK09203) →                                                                                                                                                                                                            |
| env-128 | KGI_S1_ANT01_95m_c10350259  | - | 325     | 258     | RNA → rplB (PRK09374)Ribosomal_L2 (pfam00181) →                                                                                                                                                                                                                                                                                                                                             |
| env-129 | SA_S1_NOR08_45m_c10019190   | + | 380     | 447     | RNA → RplB (COG0090)rplB (PRK09374) → rpsS (PRK00357)RpsS (COG0185) → rplV (PRK00565)Ribosomal_L22 (pfam00237) → RpsC (COG0092)rpsC (PRK00310) → rplP (PRK09203)Ribosomal_L16 (pfam00252) →                                                                                                                                                                                                 |
| env-130 | KGI_S2_ANT04_2345m_c1106538 | - | 368     | 301     | RNA → rplB (PRK09374)Ribosomal_L2 (pfam00181) →                                                                                                                                                                                                                                                                                                                                             |
| env-131 | KGI_S2_ANT05_2345m_c1147958 | + | 34      | 101     | RNA → rplB (PRK09374)Ribosomal_L2 (pfam00181) →                                                                                                                                                                                                                                                                                                                                             |
| env-132 | KGI_S1_ANT03_95m_c1027476   | + | 53      | 120     | RNA → RplB (COG0090)rplB (PRK09374) →                                                                                                                                                                                                                                                                                                                                                       |
| env-133 | KGI_S1_ANT02_95m_c10267034  | - | 323     | 256     | RNA → RplB (COG0090)rplB (PRK09374) →                                                                                                                                                                                                                                                                                                                                                       |
| env-134 | SA_S2_NOR18_50m_1258724     | + | 183     | 250     | RNA →                                                                                                                                                                                                                                                                                                                                                                                       |
| env-135 | SA_S1_NOR05_45m_c10100002   | + | 326     | 393     | RNA → rplB (PRK09374)Ribosomal_L2 (pfam00181) →                                                                                                                                                                                                                                                                                                                                             |
| Rsp-9-1 | NZ_AAYB01000008.1           | + | 62353   | 62420   | RNA → RplB (COG0090)rplB (PRK09374) → RplB (COG0090)rplB (PRK09374) → RplB (COG0090)rplB (PRK09374) → RplB (COG0090)rplB (PRK09374) → rpsS (PRK00357)RpsS (COG0185) → rpsS (PRK00357)RpsS (COG0185) → rplV (PRK00565)Ribosomal_L22 (pfam00237) → rplV (PRK00565)Ribosomal_L22 (pfam00237) → RpsC (COG0092)rpsC (PRK00310) → RpsC (COG0092)rpsC (PRK00310) → RplP (COG0197)rplP (PRK09203) → |
| env-136 | JGI24724J26744_10208358     | + | 330     | 396     | RNA → RplB (COG0090)rplB (PRK09374) →                                                                                                                                                                                                                                                                                                                                                       |
| env-137 | JGI24723J26617_10144364     | - | 304     | 238     | RNA → RplB (COG0090)rplB (PRK09374) →                                                                                                                                                                                                                                                                                                                                                       |
| Pan-1-1 | NZ_LGHU01000123.1           | + | 98116   | 98182   | RNA → RplB (COG0090)rplB (PRK09374) → rpsS (PRK00357)RpsS (COG0185) → rplV (PRK00565)Ribosomal_L22 (pfam00237) → RpsC (COG0092)rpsC (PRK00310) → RplP (COG0197)rplP (PRK09203) →                                                                                                                                                                                                            |
| Pfe-1-1 | NZ_LGHV01000017.1           | - | 8115    | 8049    | RNA → RplB (COG0090)rplB (PRK09374) → rpsS (PRK00357)RpsS (COG0185) → rplV (PRK00565)Ribosomal_L22 (pfam00237) → RpsC (COG0092)rpsC (PRK00310) → RplP (COG0197)rplP (PRK09203) →                                                                                                                                                                                                            |
| Pfe-2-1 | NZ_ATVN01000032.1           | - | 7903    | 7837    | RNA → RplB (COG0090)rplB (PRK09374) → rpsS (PRK00357)RpsS (COG0185) → rplV (PRK00565)Ribosomal_L22 (pfam00237) → RpsC (COG0092)rpsC (PRK00310) → RplP (COG0197)rplP (PRK09203) →                                                                                                                                                                                                            |
| Lci-1-1 | NZ_BATB01000009.1           | - | 87402   | 87331   | RNA → RplB (COG0090)rplB (PRK09374) → rpsS (PRK00357)RpsS (COG0185) → rplV (PRK00565)Ribosomal_L22 (pfam00237) → RpsC (COG0092)rpsC (PRK00310) → RpsC (COG0092)rpsC (PRK00310) → hypo → RplP (COG0197)rplP (PRK09203) →                                                                                                                                                                     |
| env-138 | JGI24724J26744_10487725     | + | 233     | 347     | RNA → ← hypo                                                                                                                                                                                                                                                                                                                                                                                |
| Abo-1-1 | NZ_LJXH01000044.1           | - | 31116   | 31026   | RNA → RplB (COG0090)rplB (PRK09374) → rpsS (PRK00357)RpsS (COG0185) → rplV (PRK00565)Ribosomal_L22 (pfam00237) → RpsC (COG0092)rpsC (PRK00310) → RplP (COG0197)rplP (PRK09203) →                                                                                                                                                                                                            |
| Rha-1-1 | NZ_JALZ01000013.1           | + | 2420    | 2528    | RNA → RplB (COG0090)rplB (PRK09374) → rpsS (PRK00357)RpsS (COG0185) → rplV (PRK00565)Ribosomal_L22 (pfam00237) → RpsC (COG0092)rpsC (PRK00310) → RplP (COG0197)rplP (PRK09203) → hypo → 2OG-FelL_Oxy_5 (pfam13759) →                                                                                                                                                                        |
| Mal-1-1 | NZ_JSUQ01000002.1           | - | 319288  | 319208  | RNA → RplB (COG0090)rplB (PRK09374) → rpsS (PRK00357)RpsS (COG0185) → rplV (PRK00565)Ribosomal_L22 (pfam00237) → RpsC (COG0092)rpsC (PRK00310) → RplP (COG0197)rplP (PRK09203) →                                                                                                                                                                                                            |
| env-139 | JGI12075J13256_1001549      | + | 1682    | 1762    | RNA → RplB (COG0090)rplB (PRK09374) → rpsS (PRK00357)RpsS (COG0185) → rplV (PRK00565)Ribosomal_L22 (pfam00237) →                                                                                                                                                                                                                                                                            |
| env-140 | JGI12112J13074_1001921      | - | 771     | 691     | RNA → RplB (COG0090)rplB (PRK09374) →                                                                                                                                                                                                                                                                                                                                                       |

|         |                            |   |         |         |                                                                                                                                                                                                                                                                                                                                      |
|---------|----------------------------|---|---------|---------|--------------------------------------------------------------------------------------------------------------------------------------------------------------------------------------------------------------------------------------------------------------------------------------------------------------------------------------|
| env-141 | JGI24724J26744_10066135    | - | 1234    | 1166    | RNA → RplB (COG0090)rplB (PRK09374) → rpsS (PRK00357)RpsS (COG0185) →                                                                                                                                                                                                                                                                |
| env-142 | JGI24723J26617_10483647    | + | 129     | 197     | RNA → RplB (COG0090)rplB (PRK09374) →                                                                                                                                                                                                                                                                                                |
| env-143 | JCVL_SCAF_1101667320527    | - | 473     | 406     | RNA → rplB (PRK09374)Ribosomal_L2 (pfam00181) →                                                                                                                                                                                                                                                                                      |
| env-144 | APMI01028553.1             | - | 2484    | 2421    | RNA → RplB (COG0090)rplB (PRK09374) → rpsS (PRK00357)RpsS (COG0185) →<br>rplV (PRK00565)Ribosomal_L22 (pfam00237) → RpsC (COG0092)rpsC (PRK00310) →<br>rplP (PRK09203)Ribosomal_L16 (pfam00252) →                                                                                                                                    |
| env-145 | JGI24724J26744_10205793    | - | 600     | 536     | RNA → RplB (COG0090)rplB (PRK09374) →                                                                                                                                                                                                                                                                                                |
| env-146 | JGI25321J39296_1078939     | - | 191     | 127     | RNA → RplB (COG0090)rplB (PRK09374) →                                                                                                                                                                                                                                                                                                |
| env-147 | JGI25321J50212_10013221    | - | 2584    | 2520    | RNA → RplB (COG0090)rplB (PRK09374) → rpsS (PRK00357)RpsS (COG0185) →<br>rplV (PRK00565)Ribosomal_L22 (pfam00237) → RpsC (COG0092)rpsC (PRK00310) →<br>RplP (COG0197)rplP (PRK09203) →                                                                                                                                               |
| env-148 | JGI24025J20009_10017180    | + | 442     | 544     | RNA → RplB (COG0090)rplB (PRK09374) → rpsS (PRK00357)RpsS (COG0185) →<br>rplV (PRK00565)Ribosomal_L22 (pfam00237) → RpsC (COG0092)rpsC (PRK00310) →<br>RplP (COG0197)rplP (PRK09203) →                                                                                                                                               |
| env-149 | ATLU01001954.1             | + | 1098    | 1219    | RNA → rplB (PRK09374)Ribosomal_L2 (pfam00181) →                                                                                                                                                                                                                                                                                      |
| env-150 | JGI12210J13797_10050283    | + | 46      | 137     | RNA → RplB (COG0090)rplB (PRK09374) →                                                                                                                                                                                                                                                                                                |
| env-151 | JGI12210J13797_10199298    | - | 104     | 13      | RNA →                                                                                                                                                                                                                                                                                                                                |
| env-152 | JGI11876J14442_10101235    | - | 251     | 160     | RNA → RplB (COG0090)rplB (PRK09374) →                                                                                                                                                                                                                                                                                                |
| env-153 | JGI12109J20283_10360159    | - | 6078    | 5987    | RNA → RplB (COG0090)rplB (PRK09374) → rpsS (PRK00357)RpsS (COG0185) →<br>rplV (PRK00565)Ribosomal_L22 (pfam00237) → RpsC (COG0092)rpsC (PRK00310) →<br>RplP (COG0197)rplP (PRK09203) →                                                                                                                                               |
| env-154 | JGI12109J20283_10360162    | + | 86      | 177     | RNA → RplB (COG0090)rplB (PRK09374) → rpsS (PRK00357)RpsS (COG0185) →<br>rplV (PRK00565)Ribosomal_L22 (pfam00237) → rpsC (PRK00310)30S_S3_KH (cd02412) →                                                                                                                                                                             |
| env-155 | ElkS_mat_MD6A_1245876      | + | 17      | 108     | RNA → RplB (COG0090)rplB (PRK09374) →                                                                                                                                                                                                                                                                                                |
| env-156 | 3300001605_10196433        | + | 760     | 822     | RNA → rplB (PRK09374)Ribosomal_L2 (pfam00181) →                                                                                                                                                                                                                                                                                      |
| env-157 | JGI24723J26617_10002649    | - | 2300    | 2237    | RNA → RplB (COG0090)rplB (PRK09374) → rpsS (PRK00357)RpsS (COG0185) →<br>rplV (PRK00565)Ribosomal_L22 (pfam00237) → RpsC (COG0092)rpsC (PRK00310) →                                                                                                                                                                                  |
| env-158 | SA_S1_NOR05_45m_c10038069  | - | 1091    | 1029    | RNA → RplB (COG0090)rplB (PRK09374) → rpsS (PRK00357)Ribosomal_S19 (pfam00203) →                                                                                                                                                                                                                                                     |
| env-159 | SA_S1_NOR08_45m_c10005006  | - | 2877    | 2815    | RNA → RplB (COG0090)rplB (PRK09374) → rpsS (PRK00357)RpsS (COG0185) →<br>rplV (PRK00565)Ribosomal_L22 (pfam00237) → RpsC (COG0092)rpsC (PRK00310) →<br>RplP (COG0197)rplP (PRK09203) →                                                                                                                                               |
| env-160 | SA_S2_NOR15_50m_c10038301  | + | 1693    | 1755    | RNA → rplB (PRK09374)Ribosomal_L2 (pfam00181) →                                                                                                                                                                                                                                                                                      |
| env-161 | SA_S1_NOR02_45m_c1051392   | - | 97      | 35      | RNA →                                                                                                                                                                                                                                                                                                                                |
| env-162 | KGL_S1_ANT01_95m_c10509536 | - | 192     | 130     | RNA → RplB (COG0090)rplB (PRK09374) →                                                                                                                                                                                                                                                                                                |
| Kvu-1-1 | NC_017384.1                | - | 2210425 | 2210363 | RNA → RplB (COG0090)rplB (PRK09374) → rpsS (PRK00357)RpsS (COG0185) →<br>rplV (PRK00565)Ribosomal_L22 (pfam00237) → RpsC (COG0092)rpsC (PRK00310) →<br>RplP (COG0197)rplP (PRK09203) →                                                                                                                                               |
| Kvu-2-1 | NC_014625.1                | - | 2496662 | 2496600 | RNA → RplB (COG0090)rplB (PRK09374) → rpsS (PRK00357)RpsS (COG0185) →                                                                                                                                                                                                                                                                |
| env-163 | JGI24723J26617_10010575    | - | 238     | 176     | RNA → RplB (COG0090)rplB (PRK09374) →                                                                                                                                                                                                                                                                                                |
| Lho-1-1 | NZ_KB822996.1              | + | 454151  | 454214  | RNA → RplB (COG0090)rplB (PRK09374) → rpsS (PRK00357)RpsS (COG0185) →<br>rplV (PRK00565)Ribosomal_L22 (pfam00237) → RpsC (COG0092)rpsC (PRK00310) →<br>RplP (COG0197)rplP (PRK09203) →                                                                                                                                               |
| CRh-1-1 | NZ_LFTY01000002.1          | + | 138295  | 138372  | RNA → RplB (COG0090)rplB (PRK09374) → rpsS (PRK00357)RpsS (COG0185) →<br>rplV (PRK00565)Ribosomal_L22 (pfam00237) → RpsC (COG0092)rpsC (PRK00310) →<br>RplP (COG0197)rplP (PRK09203) →                                                                                                                                               |
| env-164 | CETY01316910.1             | + | 295     | 359     | RNA → rplB (PRK09374)Ribosomal_L2 (pfam00181) →                                                                                                                                                                                                                                                                                      |
| env-165 | SI34jun09_120m_1114364     | + | 319     | 383     | RNA →                                                                                                                                                                                                                                                                                                                                |
| Ogu-1-1 | NZ_AMGO01000054.1          | + | 2304    | 2368    | RNA → RplB (COG0090)rplB (PRK09374) → RplB (COG0090)rplB (PRK09374) →<br>rpsS (PRK00357)RpsS (COG0185) → rpsS (PRK00357)RpsS (COG0185) →<br>rplV (PRK00565)Ribosomal_L22 (pfam00237) → rplV (PRK00565)Ribosomal_L22 (pfam00237) →<br>RpsC (COG0092)rpsC (PRK00310) → RpsC (COG0092)rpsC (PRK00310) → RplP (COG0197)rplP (PRK09203) → |
| env-166 | _GX4IIKE02G7TTM            | + | 176     | 245     | RNA → RplB (COG0090)rplB (PRK09374) →                                                                                                                                                                                                                                                                                                |
| Paq-1-1 | NZ_LGHS01000007.1          | - | 43447   | 43382   | RNA → RplB (COG0090)rplB (PRK09374) → rpsS (PRK00357)RpsS (COG0185) →<br>rplV (PRK00565)Ribosomal_L22 (pfam00237) → RpsC (COG0092)rpsC (PRK00310) →<br>RplP (COG0197)rplP (PRK09203) →                                                                                                                                               |

|          |                         |   |        |        |                                                                                                                                                                                                                                                                                                                                                             |
|----------|-------------------------|---|--------|--------|-------------------------------------------------------------------------------------------------------------------------------------------------------------------------------------------------------------------------------------------------------------------------------------------------------------------------------------------------------------|
| env-167  | CERE01101430.1          | + | 2524   | 2585   | RNA → RplB (COG0090)rplB (PRK09374) → rpsS (PRK00357)RpsS (COG0185) → rplV (PRK00565)Ribosomal_L22 (pfam00237) → RpsC (COG0092)rpsC (PRK00310) →                                                                                                                                                                                                            |
| env-168  | ATLU01000020.1          | + | 4112   | 4189   | RNA → RplB (COG0090)rplB (PRK09374) → rpsS (PRK00357)RpsS (COG0185) → rplV (PRK00565)Ribosomal_L22 (pfam00237) → RpsC (COG0092)rpsC (PRK00310) → RplP (COG0197)rplP (PRK09203) →                                                                                                                                                                            |
| env-169  | CERH01017500.1          | - | 305    | 240    | RNA → RplB (COG0090)rplB (PRK09374) →                                                                                                                                                                                                                                                                                                                       |
| Rnu-1-1  | NZ_CH724156.1           | - | 347220 | 347155 | RNA → RplB (COG0090)rplB (PRK09374) → rpsS (PRK00357)RpsS (COG0185) → RplV (COG0091)rplV (PRK00565) → RpsC (COG0092)rpsC (PRK00310) →                                                                                                                                                                                                                       |
| env-170  | CEQZ01016289.1          | - | 1777   | 1712   | RNA → RplB (COG0090)rplB (PRK09374) → rpsS (PRK00357)RpsS (COG0185) → rplV (PRK00565)Ribosomal_L22 (pfam00237) → rpsC (PRK00310)30S_S3_KH (cd02412) →                                                                                                                                                                                                       |
| env-171  | KVRMV2_100592709        | + | 54     | 115    | RNA → RplB (COG0090)rplB (PRK09374) →                                                                                                                                                                                                                                                                                                                       |
| env-172  | 2236876011_238237       | + | 256    | 328    | RNA → ← hypø                                                                                                                                                                                                                                                                                                                                                |
| Rba-4-1  | NZ_AAXZ01000001.1       | + | 629695 | 629767 | RNA → RplB (COG0090)rplB (PRK09374) → RplB (COG0090)rplB (PRK09374) → rpsS (PRK00357)RpsS (COG0185) → rpsS (PRK00357)RpsS (COG0185) → rplV (PRK00565)Ribosomal_L22 (pfam00237) → rplV (PRK00565)Ribosomal_L22 (pfam00237) → RpsC (COG0092)rpsC (PRK00310) → RpsC (COG0092)rpsC (PRK00310) → RplP (COG0197)rplP (PRK09203) → RplP (COG0197)rplP (PRK09203) → |
| env-173  | JCVL_SCAF_1096628174387 | + | 532    | 596    | RNA → RplB (COG0090)rplB (PRK09374) → rpsC (PRK00310)Ribosomal_S3_C (pfam00189) → RplP (COG0197)rplP (PRK09203) →                                                                                                                                                                                                                                           |
| Sps-1-1  | NZ_JAMD01000003.1       | - | 509244 | 509179 | RNA → RplB (COG0090)rplB (PRK09374) → rpsS (PRK00357)RpsS (COG0185) → rplV (PRK00565)Ribosomal_L22 (pfam00237) → RpsC (COG0092)rpsC (PRK00310) → RplP (COG0197)rplP (PRK09203) →                                                                                                                                                                            |
| Ssp-2-1  | NZ_JIBC01000009.1       | + | 270672 | 270737 | RNA → RplB (COG0090)rplB (PRK09374) → rpsS (PRK00357)RpsS (COG0185) → rplV (PRK00565)Ribosomal_L22 (pfam00237) → RpsC (COG0092)rpsC (PRK00310) → RplP (COG0197)rplP (PRK09203) →                                                                                                                                                                            |
| env-174  | JGI24723J26617_10018613 | + | 746    | 824    | RNA → RplB (COG0090)rplB (PRK09374) → rpsS (PRK00357)RpsS (COG0185) → rplV (PRK00565)Ribosomal_L22 (pfam00237) → RpsC (COG0092)rpsC (PRK00310) → rplP (PRK09203)Ribosomal_L16 (pfam00252) →                                                                                                                                                                 |
| Osp-1-1  | NZ_JAFT01000005.1       | - | 653626 | 653563 | RNA → RplB (COG0090)rplB (PRK09374) → rpsS (PRK00357)RpsS (COG0185) → rplV (PRK00565)Ribosomal_L22 (pfam00237) → RpsC (COG0092)rpsC (PRK00310) → RplP (COG0197)rplP (PRK09203) →                                                                                                                                                                            |
| Sst-1-1  | NZ_AAYA01000001.1       | + | 200930 | 200993 | RNA → RplB (COG0090)rplB (PRK09374) → RplB (COG0090)rplB (PRK09374) → rpsS (PRK00357)RpsS (COG0185) → rpsS (PRK00357)RpsS (COG0185) → rplV (PRK00565)Ribosomal_L22 (pfam00237) → rplV (PRK00565)Ribosomal_L22 (pfam00237) → RpsC (COG0092)rpsC (PRK00310) → RplP (COG0197)rplP (PRK09203) → RplP (COG0197)rplP (PRK09203) →                                 |
| env-175  | JCVL_READ_1103242074397 | + | 704    | 765    | RNA →                                                                                                                                                                                                                                                                                                                                                       |
| env-176  | JGI24724J26744_10049941 | + | 488    | 552    | RNA → RplB (COG0090)rplB (PRK09374) → rpsS (PRK00357)RpsS (COG0185) → hypø →                                                                                                                                                                                                                                                                                |
| Rsp-16-1 | NZ_ABCL01000006.1       | + | 350229 | 350292 | RNA → RplB (COG0090)rplB (PRK09374) → RplB (COG0090)rplB (PRK09374) → rpsS (PRK00357)RpsS (COG0185) → rpsS (PRK00357)RpsS (COG0185) → rplV (PRK00565)Ribosomal_L22 (pfam00237) → rplV (PRK00565)Ribosomal_L22 (pfam00237) → RpsC (COG0092)rpsC (PRK00310) → RpsC (COG0092)rpsC (PRK00310) → RplP (COG0197)rplP (PRK09203) → RplP (COG0197)rplP (PRK09203) → |
| env-177  | JGI24724J26744_10021376 | + | 90     | 155    | RNA → RplB (COG0090)rplB (PRK09374) → rpsS (PRK00357)RpsS (COG0185) → rplV (PRK00565)Ribosomal_L22 (pfam00237) → RpsC (COG0092)rpsC (PRK00310) → RplP (COG0197)rplP (PRK09203) →                                                                                                                                                                            |
| env-178  | 3300001592_10000630     | + | 2376   | 2441   | RNA → RplB (COG0090)rplB (PRK09374) → rpsS (PRK00357)RpsS (COG0185) → rplV (PRK00565)Ribosomal_L22 (pfam00237) → KH (smart00322)30S_S3_KH (cd02412) → rpsC (PRK00310)Ribosomal_S3_C (pfam00189) → RplP (COG0197)rplP (PRK09203) →                                                                                                                           |
| env-179  | JGI25317J35169_1006515  | + | 816    | 879    | RNA → RplB (COG0090)rplB (PRK09374) → rpsS (PRK00357)RpsS (COG0185) → rplV (PRK00565)Ribosomal_L22 (pfam00237) → RpsC (COG0092)rpsC (PRK00310) → RplP (COG0197)rplP (PRK09203) →                                                                                                                                                                            |
| env-180  | JGI25319J35699_1002819  | + | 816    | 879    | RNA → RplB (COG0090)rplB (PRK09374) → rpsS (PRK00357)RpsS (COG0185) → rplV (PRK00565)Ribosomal_L22 (pfam00237) → RpsC (COG0092)rpsC (PRK00310) → RplP (COG0197)rplP (PRK09203) →                                                                                                                                                                            |



|          |                             |   |         |         |                                                                                                                                                                                       |
|----------|-----------------------------|---|---------|---------|---------------------------------------------------------------------------------------------------------------------------------------------------------------------------------------|
| env-181  | JGI25322J35698_1003836      | + | 3368    | 3431    | RNA → RplB (COG0090)rplB (PRK09374) → rpsS (PRK00357)RpsS (COG0185) → rplV (PRK00565)Ribosomal_L22 (pfam00237) → RpsC (COG0092)rpsC (PRK00310) → RplP (COG0197)rplP (PRK09203) →      |
| env-182  | JGI25318J35512_1004712      | + | 816     | 879     | RNA → RplB (COG0090)rplB (PRK09374) → rpsS (PRK00357)RpsS (COG0185) → rplV (PRK00565)Ribosomal_L22 (pfam00237) → RpsC (COG0092)rpsC (PRK00310) → RplP (COG0197)rplP (PRK09203) →      |
| env-183  | JGI25321J39296_1001477      | - | 10112   | 10049   | RNA → RplB (COG0090)rplB (PRK09374) → rpsS (PRK00357)RpsS (COG0185) → rplV (PRK00565)Ribosomal_L22 (pfam00237) → RpsC (COG0092)rpsC (PRK00310) → RplP (COG0197)rplP (PRK09203) →      |
| env-184  | JGI25320J50211_1001516      | - | 2747    | 2684    | RNA → RplB (COG0090)rplB (PRK09374) → rpsS (PRK00357)RpsS (COG0185) → rplV (PRK00565)Ribosomal_L22 (pfam00237) → RpsC (COG0092)rpsC (PRK00310) → RplP (COG0197)rplP (PRK09203) →      |
| env-185  | JGI25321J50212_10005715     | - | 4273    | 4210    | RNA → RplB (COG0090)rplB (PRK09374) → rpsS (PRK00357)RpsS (COG0185) → rplV (PRK00565)Ribosomal_L22 (pfam00237) → RpsC (COG0092)rpsC (PRK00310) → RplP (COG0197)rplP (PRK09203) →      |
| env-186  | JGI24724J26744_10053916     | + | 237     | 300     | RNA → RplB (COG0090)rplB (PRK09374) → rpsS (PRK00357)RpsS (COG0185) → rplV (PRK00565)Ribosomal_L22 (pfam00237) →                                                                      |
| Rsp-13-1 | NZ_CH902584.1               | + | 1991396 | 1991459 | RNA → RplB (COG0090)rplB (PRK09374) → rpsS (PRK00357)RpsS (COG0185) → rplV (PRK00565)Ribosomal_L22 (pfam00237) → RpsC (COG0092)rpsC (PRK00310) → RplP (COG0197)rplP (PRK09203) →      |
| env-187  | CERE01077594.1              | + | 40      | 103     | RNA → rplB (PRK09374)Ribosomal_L2 (pfam00181) →                                                                                                                                       |
| Rmu-1-1  | NZ_KN293980.1               | + | 258018  | 258081  | RNA → RplB (COG0090)rplB (PRK09374) → rpsS (PRK00357)RpsS (COG0185) → rplV (PRK00565)Ribosomal_L22 (pfam00237) → RpsC (COG0092)rpsC (PRK00310) → RplP (COG0197)rplP (PRK09203) →      |
| env-188  | GSLAS_GLMUJHB01ANH3P        | - | 111     | 36      | RNA → ←-hypo                                                                                                                                                                          |
| env-189  | PR_CR_10.Liq_1.inCR_1002975 | - | 4609    | 4543    | RNA → RplB (COG0090)rplB (PRK09374) → rpsS (PRK00357)RpsS (COG0185) → rplV (PRK00565)Ribosomal_L22 (pfam00237) → RpsC (COG0092)rpsC (PRK00310) → RplP (COG0197)rplP (PRK09203) →      |
| env-190  | GSLAS_contig20752           | + | 91      | 157     | RNA → rplB (PRK09374)Ribosomal_L2 (pfam00181) →                                                                                                                                       |
| env-191  | GSLSAALGFP0ZZ301AT1AJ       | + | 118     | 184     | RNA → RplB (COG0090)rplB (PRK09374) →                                                                                                                                                 |
| env-192  | P_2C.Liq_2.UnCty_1112442    | + | 202     | 268     | RNA → RplB (COG0090)rplB (PRK09374) →                                                                                                                                                 |
| env-193  | JCVL_SCAF_1101668363300     | - | 793     | 725     | RNA → RplB (COG0090)rplB (PRK09374) →                                                                                                                                                 |
| env-194  | CESM01031007.1              | + | 3318    | 3386    | RNA → RplB (COG0090)rplB (PRK09374) → rpsS (PRK00357)RpsS (COG0185) → rplV (PRK00565)Ribosomal_L22 (pfam00237) → rpsC (PRK00310)30S_S3_KH (cd02412) → RplP (COG0197)rplP (PRK09203) → |
| env-195  | LPaug09P1610m.c1075736      | - | 346     | 278     | RNA → rplB (PRK09374)Ribosomal_L2 (pfam00181) →                                                                                                                                       |
| env-196  | CENZ01075739.1              | - | 473     | 405     | RNA → rplB (PRK09374)Ribosomal_L2 (pfam00181) →                                                                                                                                       |
| env-197  | JCVL_SCAF_1096627291439     | + | 336     | 404     | RNA → RplB (COG0090)rplB (PRK09374) → rpsS (PRK00357)RpsS (COG0185) →                                                                                                                 |
| env-198  | CERM01028656.1              | + | 736     | 804     | RNA → RplB (COG0090)rplB (PRK09374) →                                                                                                                                                 |
| env-199  | CEWO01045537.1              | + | 245     | 313     | RNA → rplB (PRK09374)Ribosomal_L2 (pfam00181) →                                                                                                                                       |
| env-200  | CEVX01073106.1              | + | 997     | 1065    | RNA → RplB (COG0090)rplB (PRK09374) → rpsS (PRK00357)RpsS (COG0185) → rplV (PRK00565)Ribosomal_L22 (pfam00237) → RpsC (COG0092)rpsC (PRK00310) → RplP (COG0197)rplP (PRK09203) →      |
| env-201  | CEUB01117696.1              | + | 96      | 164     | RNA → rplB (PRK09374)Ribosomal_L2 (pfam00181) →                                                                                                                                       |
| env-202  | CEUG01069584.1              | - | 338     | 270     | RNA → rplB (PRK09374)Ribosomal_L2 (pfam00181) →                                                                                                                                       |
| env-203  | CEVF01073172.1              | - | 937     | 869     | RNA → RplB (COG0090)rplB (PRK09374) →                                                                                                                                                 |
| env-204  | CEQW01075709.1              | + | 117     | 185     | RNA → rplB (PRK09374)Ribosomal_L2 (pfam00181) →                                                                                                                                       |
| env-205  | CESW01144144.1              | - | 3772    | 3704    | RNA → RplB (COG0090)rplB (PRK09374) → rpsS (PRK00357)RpsS (COG0185) → rplV (PRK00565)Ribosomal_L22 (pfam00237) → RpsC (COG0092)rpsC (PRK00310) → RplP (COG0197)rplP (PRK09203) →      |
| env-206  | CERG01046692.1              | - | 1707    | 1639    | RNA → RplB (COG0090)rplB (PRK09374) → rpsS (PRK00357)RpsS (COG0185) → rplV (PRK00565)Ribosomal_L22 (pfam00237) → rpsC (PRK00310)30S_S3_KH (cd02412) →                                 |
| env-207  | CENJ01096940.1              | + | 1807    | 1875    | RNA → RplB (COG0090)rplB (PRK09374) → rpsS (PRK00357)RpsS (COG0185) → rplV (PRK00565)Ribosomal_L22 (pfam00237) → RpsC (COG0092)rpsC (PRK00310) → RplP (COG0197)rplP (PRK09203) →      |
| env-208  | CESN01179177.1              | - | 635     | 567     | RNA → RplB (COG0090)rplB (PRK09374) →                                                                                                                                                 |

|         |                         |   |      |      |                                                                                                                                                                                  |
|---------|-------------------------|---|------|------|----------------------------------------------------------------------------------------------------------------------------------------------------------------------------------|
| env-209 | CESP01157305.1          | - | 3522 | 3454 | RNA → RplB (COG0090)rplB (PRK09374) → rpsS (PRK00357)RpsS (COG0185) → rplV (PRK00565)Ribosomal_L22 (pfam00237) → RpsC (COG0092)rpsC (PRK00310) → RplP (COG0197)rplP (PRK09203) → |
| env-210 | CEVU01049360.1          | + | 90   | 158  | RNA → RplB (COG0090)rplB (PRK09374) → rpsS (PRK00357)RpsS (COG0185) → rplV (PRK00565)Ribosomal_L22 (pfam00237) → RpsC (COG0092)rpsC (PRK00310) → RplP (COG0197)rplP (PRK09203) → |
| env-211 | CEVX01093179.1          | + | 444  | 512  | RNA →                                                                                                                                                                            |
| env-212 | CEWK01264123.1          | + | 1805 | 1873 | RNA → ←-hypo                                                                                                                                                                     |
| env-213 | CENP01218092.1          | - | 190  | 122  | RNA → ←-hypo                                                                                                                                                                     |
| env-214 | CEVP01021979.1          | + | 1007 | 1075 | RNA → ←-hypo                                                                                                                                                                     |
| env-215 | JCVI_READ_1103242821391 | + | 471  | 539  | RNA → RplB (COG0090)rplB (PRK09374) →                                                                                                                                            |
| env-216 | JCVI_SCAF_1101668667046 | + | 950  | 1018 | RNA → rplB (PRK09374)Ribosomal_L2 (pfam00181) →                                                                                                                                  |
| env-217 | CETT01105554.1          | + | 279  | 347  | RNA → rplB (PRK09374)Ribosomal_L2 (pfam00181) →                                                                                                                                  |
| env-218 | CEUU01047001.1          | + | 1170 | 1238 | RNA → ←-hypo                                                                                                                                                                     |
| env-219 | CEPA01032629.1          | - | 488  | 420  | RNA → rplB (PRK09374)Ribosomal_L2 (pfam00181) →                                                                                                                                  |
| env-220 | JGI24820J26691_1001055  | - | 5955 | 5887 | RNA → RplB (COG0090)rplB (PRK09374) → rpsS (PRK00357)RpsS (COG0185) → rplV (PRK00565)Ribosomal_L22 (pfam00237) → RpsC (COG0092)rpsC (PRK00310) → RplP (COG0197)rplP (PRK09203) → |
| env-221 | CEVE01064005.1          | + | 149  | 217  | RNA → RplB (COG0090)rplB (PRK09374) → rpsS (PRK00357)RpsS (COG0185) → rplV (PRK00565)Ribosomal_L22 (pfam00237) → RpsC (PRK00310)30S_S3_KH (cd02412) →                            |
| env-222 | JCVI_SCAF_1096627794593 | - | 1348 | 1280 | RNA → rplB (PRK09374)Ribosomal_L2 (pfam00181) →                                                                                                                                  |
| env-223 | JCVI_SCAF_1096627334841 | + | 695  | 763  | RNA → RplB (COG0090)rplB (PRK09374) → rpsS (PRK00357)RpsS (COG0185) → rplV (PRK00565)Ribosomal_L22 (pfam00237) →                                                                 |
| env-224 | JCVI_SCAF_1101668673697 | + | 999  | 1067 | RNA → rplB (PRK09374)Ribosomal_L2 (pfam00181) →                                                                                                                                  |
| env-225 | CEUQ01027845.1          | - | 417  | 349  | RNA → rplB (PRK09374)Ribosomal_L2 (pfam00181) →                                                                                                                                  |
| env-226 | CEUK01022496.1          | + | 194  | 262  | RNA → rplB (PRK09374)Ribosomal_L2 (pfam00181) →                                                                                                                                  |
| env-227 | JCVI_SCAF_1101668339934 | - | 213  | 145  | RNA →                                                                                                                                                                            |
| env-228 | 2236876001_088379       | + | 363  | 434  | RNA → RplB (COG0090)rplB (PRK09374) →                                                                                                                                            |
| env-229 | JCVI_READ_1103769037343 | + | 211  | 279  | RNA → RplB (COG0090)rplB (PRK09374) →                                                                                                                                            |
| env-230 | JCVI_READ_1103769614257 | + | 956  | 1021 | RNA → ←-hypo                                                                                                                                                                     |
| env-231 | CEWK01092565.1          | + | 421  | 489  | RNA →                                                                                                                                                                            |
| env-232 | CENQ01040580.1          | + | 79   | 147  | RNA → rplB (PRK09374)Ribosomal_L2 (pfam00181) →                                                                                                                                  |
| env-233 | CEVN01064966.1          | - | 373  | 305  | RNA → rplB (PRK09374)Ribosomal_L2 (pfam00181) →                                                                                                                                  |
| env-234 | CEPL01019978.1          | + | 61   | 129  | RNA → hypo → rplB (PRK09374)Ribosomal_L2 (pfam00181) →                                                                                                                           |
| env-235 | CEPU01001285.1          | + | 124  | 192  | RNA → RplB (COG0090)rplB (PRK09374) →                                                                                                                                            |
| env-236 | JCVI_READ_1103769096640 | - | 624  | 556  | RNA → RplB (COG0090)rplB (PRK09374) →                                                                                                                                            |
| env-237 | CENO01039587.1          | - | 4337 | 4269 | RNA → RplB (COG0090)rplB (PRK09374) → rpsS (PRK00357)RpsS (COG0185) → rplV (PRK00565)Ribosomal_L22 (pfam00237) → RpsC (COG0092)rpsC (PRK00310) → RplP (COG0197)rplP (PRK09203) → |
| env-238 | CENW01212150.1          | - | 201  | 133  | RNA →                                                                                                                                                                            |
| env-239 | CEOJ01093429.1          | - | 167  | 99   | RNA →                                                                                                                                                                            |
| env-240 | CEOS01129456.1          | + | 419  | 487  | RNA → RplB (COG0090)rplB (PRK09374) →                                                                                                                                            |
| env-241 | CEOV01114312.1          | - | 112  | 44   | RNA →                                                                                                                                                                            |
| env-242 | CEOW01046858.1          | + | 2221 | 2289 | RNA → RplB (COG0090)rplB (PRK09374) → rpsS (PRK00357)RpsS (COG0185) → rplV (PRK00565)Ribosomal_L22 (pfam00237) →                                                                 |
| env-243 | CEPB01039107.1          | + | 1192 | 1260 | RNA → RplB (COG0090)rplB (PRK09374) → rpsS (PRK00357)RpsS (COG0185) → rplV (PRK00565)Ribosomal_L22 (pfam00237) → RpsC (COG0092)rpsC (PRK00310) → RplP (COG0197)rplP (PRK09203) → |
| env-244 | CEPC01014332.1          | + | 2318 | 2386 | RNA → RplB (COG0090)rplB (PRK09374) → rpsS (PRK00357)RpsS (COG0185) →                                                                                                            |
| env-245 | CEVG01269443.1          | + | 380  | 448  | RNA → rplB (PRK09374)Ribosomal_L2 (pfam00181) →                                                                                                                                  |
| env-246 | CEVY01099477.1          | + | 2626 | 2694 | RNA → RplB (COG0090)rplB (PRK09374) → rpsS (PRK00357)RpsS (COG0185) → rplV (PRK00565)Ribosomal_L22 (pfam00237) → RpsC (COG0092)rpsC (PRK00310) → RplP (COG0197)rplP (PRK09203) → |
| env-247 | CEQD01048550.1          | - | 1102 | 1034 | RNA → RplB (COG0090)rplB (PRK09374) → rpsS (PRK00357)RpsS (COG0185) →                                                                                                            |

|         |                         |   |       |       |                                                                                                                                                                                                                                                                                                                                                                         |
|---------|-------------------------|---|-------|-------|-------------------------------------------------------------------------------------------------------------------------------------------------------------------------------------------------------------------------------------------------------------------------------------------------------------------------------------------------------------------------|
| env-248 | CEOC01035558.1          | + | 378   | 446   | RNA → rplB (PRK09374)Ribosomal_L2 (pfam00181) →                                                                                                                                                                                                                                                                                                                         |
| env-249 | CEQM01116065.1          | + | 207   | 275   | RNA → rplB (PRK09374)Ribosomal_L2 (pfam00181) →                                                                                                                                                                                                                                                                                                                         |
| env-250 | CEWA01125852.1          | - | 329   | 261   | RNA → rplB (PRK09374)Ribosomal_L2 (pfam00181) →                                                                                                                                                                                                                                                                                                                         |
| env-251 | CEWO01164779.1          | - | 401   | 333   | RNA → rplB (PRK09374)Ribosomal_L2 (pfam00181) →                                                                                                                                                                                                                                                                                                                         |
| env-252 | CENG01071547.1          | - | 1142  | 1074  | RNA → RplB (COG0090)rplB (PRK09374) → rpsS (PRK00357)Ribosomal_S19 (pfam00203) →                                                                                                                                                                                                                                                                                        |
| env-253 | CENJ01189867.1          | - | 96    | 28    | RNA →                                                                                                                                                                                                                                                                                                                                                                   |
| env-254 | CENU01109952.1          | + | 428   | 496   | RNA → rplB (PRK09374)Ribosomal_L2 (pfam00181) →                                                                                                                                                                                                                                                                                                                         |
| env-255 | CEVW01291667.1          | - | 97    | 29    | RNA →                                                                                                                                                                                                                                                                                                                                                                   |
| env-256 | CAM_READ_0234711973     | + | 389   | 459   | RNA → ←-hypo                                                                                                                                                                                                                                                                                                                                                            |
| env-257 | JCVL_SCAF_1096626302357 | - | 446   | 378   | RNA → rplB (PRK09374)Ribosomal_L2 (pfam00181) →                                                                                                                                                                                                                                                                                                                         |
| env-258 | CESA01208526.1          | + | 115   | 183   | RNA → RplB (COG0090)rplB (PRK09374) →                                                                                                                                                                                                                                                                                                                                   |
| env-259 | JGI24723J26617_10000490 | - | 34468 | 34404 | RNA → RplB (COG0090)rplB (PRK09374) → rpsS (PRK00357)RpsS (COG0185) →<br>rplV (PRK00565)Ribosomal_L22 (pfam00237) → RpsC (COG0092)rpsC (PRK00310) →<br>RplP (COG0197)rplP (PRK09203) →                                                                                                                                                                                  |
| Rsp-8-1 | NZ_ABCR01000011.1       | + | 18945 | 19019 | RNA → RplB (COG0090)rplB (PRK09374) → RplB (COG0090)rplB (PRK09374) →<br>rpsS (PRK00357)RpsS (COG0185) → rpsS (PRK00357)RpsS (COG0185) →<br>rplV (PRK00565)Ribosomal_L22 (pfam00237) → rplV (PRK00565)Ribosomal_L22 (pfam00237) →<br>RpsC (COG0092)rpsC (PRK00310) → RpsC (COG0092)rpsC (PRK00310) → RplP (COG0197)rplP (PRK09203) →<br>RplP (COG0197)rplP (PRK09203) → |
| env-260 | CENP01298067.1          | - | 497   | 434   | RNA → rplB (PRK09374)Ribosomal_L2 (pfam00181) →                                                                                                                                                                                                                                                                                                                         |
| env-261 | SI34jun09_10m_1176238   | - | 203   | 140   | RNA → RplB (COG0090)rplB (PRK09374) →                                                                                                                                                                                                                                                                                                                                   |
| env-262 | CESO01033516.1          | - | 891   | 828   | RNA → RplB (COG0090)rplB (PRK09374) →                                                                                                                                                                                                                                                                                                                                   |
| env-263 | 2236876002_126045       | - | 189   | 126   | RNA → RplB (COG0090)rplB (PRK09374) →                                                                                                                                                                                                                                                                                                                                   |
| env-264 | JGI20151J14362_10250213 | - | 362   | 299   | RNA → rplB (PRK09374)Ribosomal_L2 (pfam00181) →                                                                                                                                                                                                                                                                                                                         |
| env-265 | CENZ01260479.1          | + | 344   | 407   | RNA → RplB (COG0090)rplB (PRK09374) →                                                                                                                                                                                                                                                                                                                                   |
| env-266 | 2236876002_106467       | - | 167   | 104   | RNA → RplB (COG0090)rplB (PRK09374) →                                                                                                                                                                                                                                                                                                                                   |
| env-267 | CENT01014152.1          | + | 496   | 559   | RNA → RplB (COG0090)rplB (PRK09374) → rpsS (PRK00357)RpsS (COG0185) →<br>rplV (PRK00565)Ribosomal_L22 (pfam00237) → RpsC (COG0092)rpsC (PRK00310) →<br>RplP (COG0197)rplP (PRK09203) →                                                                                                                                                                                  |
| env-268 | CERM01014689.1          | - | 2838  | 2775  | RNA → RplB (COG0090)rplB (PRK09374) → rpsS (PRK00357)RpsS (COG0185) →<br>rplV (PRK00565)Ribosomal_L22 (pfam00237) → RpsC (COG0092)rpsC (PRK00310) →<br>RplP (COG0197)rplP (PRK09203) →                                                                                                                                                                                  |
| env-269 | CENN01049021.1          | + | 1200  | 1263  | RNA → rplB (PRK09374)Ribosomal_L2 (pfam00181) →                                                                                                                                                                                                                                                                                                                         |
| env-270 | CESS01003967.1          | - | 3048  | 2985  | RNA → RplB (COG0090)rplB (PRK09374) → rpsS (PRK00357)RpsS (COG0185) →<br>rplV (PRK00565)Ribosomal_L22 (pfam00237) → RpsC (COG0092)rpsC (PRK00310) →<br>RplP (COG0197)rplP (PRK09203) →                                                                                                                                                                                  |
| env-271 | JGI20158J14315_10236147 | - | 342   | 279   | RNA → rplB (PRK09374)Ribosomal_L2 (pfam00181) →                                                                                                                                                                                                                                                                                                                         |
| env-272 | DelMOWin2010_c10431137  | + | 54    | 117   | RNA → RplB (COG0090)rplB (PRK09374) →                                                                                                                                                                                                                                                                                                                                   |
| env-273 | JCVL_SCAF_1096628356459 | - | 1073  | 1010  | RNA → rpsS (PRK00357)RpsS (COG0185) → rplV (PRK00565)Ribosomal_L22 (pfam00237) →                                                                                                                                                                                                                                                                                        |
| env-274 | JCVL_READ_1103769101289 | - | 925   | 866   | RNA → RplB (COG0090)rplB (PRK09374) →                                                                                                                                                                                                                                                                                                                                   |
| env-275 | JCVL_SCAF_1096627271074 | + | 1225  | 1289  | RNA → RplB (COG0090)rplB (PRK09374) → rpsS (PRK00357)RpsS (COG0185) →                                                                                                                                                                                                                                                                                                   |
| env-276 | JCVL_READ_1108799738541 | - | 650   | 586   | RNA → RplB (COG0090)rplB (PRK09374) →                                                                                                                                                                                                                                                                                                                                   |
| env-277 | JCVL_SCAF_1096627976978 | + | 67    | 130   | RNA → RplB (COG0090)rplB (PRK09374) →                                                                                                                                                                                                                                                                                                                                   |
| env-278 | CEWK01197169.1          | - | 120   | 57    | RNA →                                                                                                                                                                                                                                                                                                                                                                   |
| env-279 | CESM01101386.1          | - | 277   | 213   | RNA → ←-hypo                                                                                                                                                                                                                                                                                                                                                            |
| env-280 | CEUH01138205.1          | + | 837   | 901   | RNA →                                                                                                                                                                                                                                                                                                                                                                   |
| env-281 | CEWG01043024.1          | + | 1807  | 1871  | RNA → RplB (COG0090)rplB (PRK09374) →                                                                                                                                                                                                                                                                                                                                   |
| env-282 | CENF01097607.1          | + | 586   | 650   | RNA →                                                                                                                                                                                                                                                                                                                                                                   |
| env-283 | CEUG01060018.1          | - | 123   | 59    | RNA →                                                                                                                                                                                                                                                                                                                                                                   |
| env-284 | CEQW01039727.1          | - | 82    | 18    | RNA →                                                                                                                                                                                                                                                                                                                                                                   |
| env-285 | JGI24820J26691_1324391  | + | 37    | 101   | RNA → ←-hypo                                                                                                                                                                                                                                                                                                                                                            |
| env-286 | CESM01340684.1          | - | 97    | 33    | RNA →                                                                                                                                                                                                                                                                                                                                                                   |
| env-287 | JCVL_SCAF_1096627811062 | - | 972   | 908   | RNA → RplB (COG0090)rplB (PRK09374) →                                                                                                                                                                                                                                                                                                                                   |
| env-288 | JGI24820J26691_1087074  | + | 510   | 574   | RNA → hypo →                                                                                                                                                                                                                                                                                                                                                            |

|         |                         |   |      |      |                                                                                                                                                                                  |
|---------|-------------------------|---|------|------|----------------------------------------------------------------------------------------------------------------------------------------------------------------------------------|
| env-289 | JCVL_SCAF_1096627081604 | - | 1775 | 1711 | RNA → RplB (COG0090)rplB (PRK09374) → rpsS (PRK00357)RpsS (COG0185) → rplV (PRK00565)Ribosomal_L22 (pfam00237) → rpsC (PRK00310)30S_S3_KH (cd02412) →                            |
| env-290 | JCVL_SCAF_1096627977260 | + | 343  | 407  | RNA → rplB (PRK09374)Ribosomal_L2 (pfam00181) →                                                                                                                                  |
| env-291 | CEPJ01112005.1          | + | 720  | 784  | RNA → rplB (PRK09374)Ribosomal_L2 (pfam00181) →                                                                                                                                  |
| env-292 | CAM_READ_0232770725     | - | 286  | 222  | RNA → RplB (COG0090)rplB (PRK09374) →                                                                                                                                            |
| env-293 | CAM_READ_0232288387     | - | 248  | 184  | RNA → hypo →                                                                                                                                                                     |
| env-294 | JCVL_READ_1108800192449 | + | 288  | 352  | RNA → rplB (PRK09374)Ribosomal_L2 (pfam00181) →                                                                                                                                  |
| env-295 | JCVL_SCAF_1096627092934 | + | 576  | 640  | RNA → RplB (COG0090)rplB (PRK09374) →                                                                                                                                            |
| env-296 | JCVL_SCAF_1096627099260 | + | 352  | 416  | RNA → RplB (COG0090)rplB (PRK09374) → rpsS (PRK00357)RpsS (COG0185) → rplV (PRK00565)Ribosomal_L22 (pfam00237) → rpsC (PRK00310)30S_S3_KH (cd02412) →                            |
| env-297 | JGI24820J26691_1028973  | + | 1055 | 1119 | RNA →                                                                                                                                                                            |
| env-298 | CEUV01003215.1          | + | 768  | 832  | RNA →                                                                                                                                                                            |
| env-299 | CEUQ01156669.1          | - | 85   | 21   | RNA →                                                                                                                                                                            |
| env-300 | JCVL_SCAF_1101667251435 | - | 166  | 102  | RNA → hypo →                                                                                                                                                                     |
| env-301 | CENF01068770.1          | - | 88   | 24   | RNA →                                                                                                                                                                            |
| env-302 | CEOM01237289.1          | + | 465  | 529  | RNA →                                                                                                                                                                            |
| env-303 | CERW01142606.1          | + | 975  | 1039 | RNA →                                                                                                                                                                            |
| env-304 | CEVS01036929.1          | - | 88   | 24   | RNA →                                                                                                                                                                            |
| env-305 | CEVU01131676.1          | + | 1938 | 2002 | RNA →                                                                                                                                                                            |
| env-306 | CEVX01017747.1          | - | 2836 | 2772 | RNA → RplB (COG0090)rplB (PRK09374) → rpsS (PRK00357)RpsS (COG0185) → rplV (PRK00565)Ribosomal_L22 (pfam00237) → RpsC (COG0092)rpsC (PRK00310) → RplP (COG0197)rplP (PRK09203) → |
| env-307 | CEWO01083412.1          | + | 3433 | 3497 | RNA → RplB (COG0090)rplB (PRK09374) →                                                                                                                                            |
| env-308 | JCVL_SCAF_1096627863534 | - | 717  | 653  | RNA → RplB (COG0090)rplB (PRK09374) →                                                                                                                                            |
| env-309 | JCVL_SCAF_1101668429250 | + | 407  | 471  | RNA → RplB (COG0090)rplB (PRK09374) →                                                                                                                                            |
| env-310 | JCVL_SCAF_1101668671537 | - | 1477 | 1413 | RNA → rplB (PRK09374)Ribosomal_L2 (pfam00181) → rplB (PRK09374)Ribosomal_L2_C (pfam03947) → rpsS (PRK00357)RpsS (COG0185) → rplV (PRK00565)Ribosomal_L22 (pfam00237) →           |
| env-311 | CETT01040907.1          | - | 3530 | 3466 | RNA → RplB (COG0090)rplB (PRK09374) → rpsS (PRK00357)RpsS (COG0185) → rplV (PRK00565)Ribosomal_L22 (pfam00237) → RpsC (COG0092)rpsC (PRK00310) → RplP (COG0197)rplP (PRK09203) → |
| env-312 | JCVL_READ_1103242680220 | - | 329  | 265  | RNA → RplB (COG0090)rplB (PRK09374) →                                                                                                                                            |
| env-313 | JCVL_SCAF_1101668723498 | + | 490  | 554  | RNA → RplB (COG0090)rplB (PRK09374) →                                                                                                                                            |
| env-314 | JCVL_READ_1108800250675 | - | 813  | 749  | RNA → RplB (COG0090)rplB (PRK09374) →                                                                                                                                            |
| env-315 | JCVL_SCAF_1101667072466 | - | 232  | 168  | RNA →                                                                                                                                                                            |
| env-316 | JCVL_READ_1104230004824 | + | 69   | 133  | RNA → RplB (COG0090)rplB (PRK09374) →                                                                                                                                            |
| env-317 | CEPU01102359.1          | - | 315  | 251  | RNA → RplB (COG0090)rplB (PRK09374) →                                                                                                                                            |
| env-318 | JCVL_READ_1104230151507 | - | 139  | 75   | RNA →                                                                                                                                                                            |
| env-319 | JCVL_SCAF_1096626924486 | - | 857  | 793  | RNA → RplB (COG0090)rplB (PRK09374) →                                                                                                                                            |
| env-320 | CEQD01002240.1          | + | 207  | 271  | RNA → RplB (COG0090)rplB (PRK09374) →                                                                                                                                            |
| env-321 | JCVL_SCAF_1101668260309 | - | 1155 | 1091 | RNA → RplB (COG0090)rplB (PRK09374) → rpsS (PRK00357)RpsS (COG0185) →                                                                                                            |
| env-322 | CEWK01132454.1          | + | 1102 | 1166 | RNA → RplB (COG0090)rplB (PRK09374) → rpsS (PRK00357)RpsS (COG0185) → rplV (PRK00565)Ribosomal_L22 (pfam00237) → RpsC (COG0092)rpsC (PRK00310) → RplP (COG0197)rplP (PRK09203) → |
| env-323 | CETB01173647.1          | + | 105  | 169  | RNA → rplB (PRK09374)Ribosomal_L2 (pfam00181) →                                                                                                                                  |
| env-324 | CENY01053602.1          | + | 393  | 457  | RNA → rplB (PRK09374)Ribosomal_L2 (pfam00181) →                                                                                                                                  |
| env-325 | JCVL_READ_1108799747928 | + | 140  | 204  | RNA → RplB (COG0090)rplB (PRK09374) →                                                                                                                                            |
| env-326 | JCVL_SCAF_1096627704005 | - | 1325 | 1261 | RNA → RplB (COG0090)rplB (PRK09374) → RplB (COG0090)rplB (PRK09374) → rpsS (PRK00357)RpsS (COG0185) →                                                                            |
| env-327 | JCVL_SCAF_1101668170846 | - | 710  | 646  | RNA → RplB (COG0090)rplB (PRK09374) →                                                                                                                                            |
| env-328 | CEVY01136175.1          | + | 444  | 508  | RNA →                                                                                                                                                                            |
| env-329 | CAM_READ_0072915149     | + | 365  | 429  | RNA →                                                                                                                                                                            |
| env-330 | JCVL_READ_1103180852614 | - | 134  | 70   | RNA →                                                                                                                                                                            |
| env-331 | CETS01117025.1          | + | 341  | 405  | RNA →                                                                                                                                                                            |
| env-332 | CEUJ01061937.1          | - | 283  | 219  | RNA → RplB (COG0090)rplB (PRK09374) →                                                                                                                                            |



|         |                         |   |         |         |                                                                                                                                                                                                                                                                       |
|---------|-------------------------|---|---------|---------|-----------------------------------------------------------------------------------------------------------------------------------------------------------------------------------------------------------------------------------------------------------------------|
| env-333 | CEVE01027800.1          | - | 84      | 20      | RNA→                                                                                                                                                                                                                                                                  |
| env-334 | CEWJ01004911.1          | - | 89      | 25      | RNA→                                                                                                                                                                                                                                                                  |
| env-335 | CEWH01205319.1          | + | 544     | 608     | RNA→                                                                                                                                                                                                                                                                  |
| env-336 | JCVL_SCAF_1096627835679 | - | 1455    | 1391    | RNA→ RplB (COG0090)rplB (PRK09374)→ RplB (COG0090)rplB (PRK09374)→<br>rpsS (PRK00357)RpsS (COG0185)→ rplV (PRK00565)Ribosomal_L22 (pfam00237)→<br>RNA→ RplB (COG0090)rplB (PRK09374)→ rpsS (PRK00357)RpsS (COG0185)→                                                  |
| env-337 | JCVL_SCAF_1096627978139 | - | 713     | 649     | RNA→ RplB (COG0090)rplB (PRK09374)→ RplB (COG0090)rplB (PRK09374)→<br>rpsS (PRK00357)RpsS (COG0185)→ rplV (PRK00565)Ribosomal_L22 (pfam00237)→                                                                                                                        |
| env-338 | JCVL_SCAF_1096628267383 | + | 720     | 784     | RNA→ rplV (PRK00565)Ribosomal_L22 (pfam00237)→ RpsC (COG0092)rpsC (PRK00310)→                                                                                                                                                                                         |
| env-339 | JCVL_SCAF_1096627226171 | - | 356     | 292     | RNA→ rplB (PRK09374)Ribosomal_L22 (pfam00181)→                                                                                                                                                                                                                        |
| env-340 | CESB01055415.1          | + | 1248    | 1312    | RNA→ RplB (COG0090)rplB (PRK09374)→                                                                                                                                                                                                                                   |
| env-341 | JCVL_SCAF_1101668333168 | + | 132     | 196     | RNA→ RplB (COG0090)rplB (PRK09374)→ rpsS (PRK00357)RpsS (COG0185)→<br>rplV (PRK00565)Ribosomal_L22 (pfam00237)→                                                                                                                                                       |
| env-342 | CEVZ01074731.1          | + | 606     | 670     | RNA→                                                                                                                                                                                                                                                                  |
| env-343 | JCVI_READ_1108829670529 | - | 825     | 762     | RNA→ RplB (COG0090)rplB (PRK09374)→                                                                                                                                                                                                                                   |
| env-344 | JCVL_SCAF_1101668663947 | - | 95      | 31      | RNA→                                                                                                                                                                                                                                                                  |
| env-345 | JCVI_READ_1103242633429 | + | 739     | 803     | RNA→                                                                                                                                                                                                                                                                  |
| env-346 | JCVL_SCAF_1101668342543 | - | 593     | 529     | RNA→ RplB (COG0090)rplB (PRK09374)→                                                                                                                                                                                                                                   |
| env-347 | CENF01127799.1          | + | 676     | 740     | RNA→                                                                                                                                                                                                                                                                  |
| env-348 | CEQO01040664.1          | - | 501     | 437     | RNA→ rplB (PRK09374)Ribosomal_L22 (pfam00181)→                                                                                                                                                                                                                        |
| env-349 | CEQW01046424.1          | + | 1679    | 1743    | RNA→ ←-hypo                                                                                                                                                                                                                                                           |
| env-350 | CEQY01100769.1          | - | 387     | 323     | RNA→ rplB (PRK09374)Ribosomal_L22 (pfam00181)→                                                                                                                                                                                                                        |
| env-351 | CERR01085567.1          | + | 474     | 538     | RNA→                                                                                                                                                                                                                                                                  |
| env-352 | CETI01093028.1          | - | 91      | 27      | RNA→                                                                                                                                                                                                                                                                  |
| env-353 | CEVU01103598.1          | - | 85      | 21      | RNA→                                                                                                                                                                                                                                                                  |
| env-354 | CEVX01107346.1          | + | 461     | 525     | RNA→                                                                                                                                                                                                                                                                  |
| env-355 | CEWB01023124.1          | + | 120     | 184     | RNA→ rplB (PRK09374)Ribosomal_L22 (pfam00181)→                                                                                                                                                                                                                        |
| env-356 | JCVL_SCAF_1096627339121 | - | 1737    | 1673    | RNA→ RplB (COG0090)rplB (PRK09374)→ rpsS (PRK00357)RpsS (COG0185)→<br>rplV (PRK00565)Ribosomal_L22 (pfam00237)→ rpsC (PRK00310)30S_S3_KH (cd02412)→<br>RNA→ rplB (PRK09374)Ribosomal_L22 (pfam00181)→                                                                 |
| env-357 | JCVL_SCAF_1101667362029 | + | 16      | 80      | RNA→ RplB (COG0090)rplB (PRK09374)→                                                                                                                                                                                                                                   |
| env-358 | CETP01093824.1          | + | 77      | 141     | RNA→ RplB (COG0090)rplB (PRK09374)→                                                                                                                                                                                                                                   |
| env-359 | CEUU01096110.1          | - | 95      | 31      | RNA→                                                                                                                                                                                                                                                                  |
| env-360 | JCVL_SCAF_1101668661533 | - | 618     | 555     | RNA→ RplB (COG0090)rplB (PRK09374)→                                                                                                                                                                                                                                   |
| env-361 | JCVL_SCAF_1101668691223 | - | 229     | 166     | RNA→ RplB (COG0090)rplB (PRK09374)→                                                                                                                                                                                                                                   |
| Psp-3-1 | NZ_LDPY01000001.1       | + | 1628103 | 1628171 | RNA→ RplB (COG0090)rplB (PRK09374)→ rpsS (PRK00357)RpsS (COG0185)→<br>rplV (PRK00565)Ribosomal_L22 (pfam00237)→ RpsC (COG0092)rpsC (PRK00310)→<br>RplP (COG0197)rplP (PRK09203)→                                                                                      |
| Hmi-1-1 | NZ_JFGS01000025.1       | - | 34255   | 34184   | RNA→ RplB (COG0090)rplB (PRK09374)→ rpsS (PRK00357)RpsS (COG0185)→<br>rplV (PRK00565)Ribosomal_L22 (pfam00237)→ RpsC (COG0092)rpsC (PRK00310)→<br>RplP (COG0197)rplP (PRK09203)→ MhpC (COG0596)Abhydrolase_6 (pfam12697)→<br>MhpC (COG0596)Abhydrolase_6 (pfam12697)→ |
| Hma-1-1 | NZ_JGYG01000018.1       | - | 57450   | 57378   | RNA→ RplB (COG0090)rplB (PRK09374)→ rpsS (PRK00357)RpsS (COG0185)→<br>rplV (PRK00565)Ribosomal_L22 (pfam00237)→ RpsC (COG0092)rpsC (PRK00310)→<br>RplP (COG0197)rplP (PRK09203)→ MhpC (COG0596)Abhydrolase_6 (pfam12697)→                                             |
| Laq-1-1 | NZ_KI421504.1           | + | 1151633 | 1151741 | RNA→ RplB (COG0090)rplB (PRK09374)→ rpsS (PRK00357)RpsS (COG0185)→<br>rplV (PRK00565)Ribosomal_L22 (pfam00237)→ RpsC (COG0092)rpsC (PRK00310)→<br>RplP (COG0197)rplP (PRK09203)→                                                                                      |
| env-362 | JGI24723J26617_10003411 | - | 7982    | 7888    | RNA→ RplB (COG0090)rplB (PRK09374)→ rpsS (PRK00357)RpsS (COG0185)→<br>rplV (PRK00565)Ribosomal_L22 (pfam00237)→ RpsC (COG0092)rpsC (PRK00310)→<br>RplP (COG0197)rplP (PRK09203)→                                                                                      |
| Rpo-1-1 | NC_003911.12            | + | 487501  | 487565  | RNA→ RplB (COG0090)rplB (PRK09374)→ rpsS (PRK00357)RpsS (COG0185)→<br>rplV (PRK00565)Ribosomal_L22 (pfam00237)→ RpsC (COG0092)rpsC (PRK00310)→<br>RplP (COG0197)rplP (PRK09203)→                                                                                      |
| env-363 | CETY01001211.1          | - | 2221    | 2155    | RNA→ RplB (COG0090)rplB (PRK09374)→ rpsS (PRK00357)RpsS (COG0185)→<br>rplV (PRK00565)Ribosomal_L22 (pfam00237)→ RpsC (COG0092)rpsC (PRK00310)→                                                                                                                        |
| env-364 | JGI24023J19991_10525132 | - | 195     | 105     | RNA→ RplB (COG0090)rplB (PRK09374)→                                                                                                                                                                                                                                   |

|          |                             |   |         |         |                                                                                                                                                                                                                                                                                                                                                             |
|----------|-----------------------------|---|---------|---------|-------------------------------------------------------------------------------------------------------------------------------------------------------------------------------------------------------------------------------------------------------------------------------------------------------------------------------------------------------------|
| Sla-1-1  | NZ_GG704596.1               | + | 1508433 | 1508499 | RNA → RplB (COG0090)rplB (PRK09374) → RplB (COG0090)rplB (PRK09374) → rpsS (PRK00357)RpsS (COG0185) → rpsS (PRK00357)RpsS (COG0185) → rplV (PRK00565)Ribosomal_L22 (pfam00237) → rplV (PRK00565)Ribosomal_L22 (pfam00237) → RpsC (COG0092)rpsC (PRK00310) → RpsC (COG0092)rpsC (PRK00310) → RplP (COG0197)rplP (PRK09203) → RplP (COG0197)rplP (PRK09203) → |
| Rha-2-1  | NZ_JQEZO1000002.1           | - | 890631  | 890567  | RNA → RplB (COG0090)rplB (PRK09374) → rpsS (PRK00357)RpsS (COG0185) → rplV (PRK00565)Ribosomal_L22 (pfam00237) → RpsC (COG0092)rpsC (PRK00310) → RplP (COG0197)rplP (PRK09203) →                                                                                                                                                                            |
| Rsp-17-1 | NZ_LGXZ01000018.1           | - | 15524   | 15460   | RNA → RplB (COG0090)rplB (PRK09374) → rpsS (PRK00357)RpsS (COG0185) → rplV (PRK00565)Ribosomal_L22 (pfam00237) → RpsC (COG0092)rpsC (PRK00310) → RplP (COG0197)rplP (PRK09203) →                                                                                                                                                                            |
| Rsp-18-1 | NZ_JWLJ01000003.1           | + | 9098    | 9163    | RNA → RplB (COG0090)rplB (PRK09374) → rpsS (PRK00357)RpsS (COG0185) → rplV (PRK00565)Ribosomal_L22 (pfam00237) → RpsC (COG0092)rpsC (PRK00310) → RplP (COG0197)rplP (PRK09203) →                                                                                                                                                                            |
| Rsp-19-1 | NZ_JWLK01000001.1           | + | 450619  | 450684  | RNA → RplB (COG0090)rplB (PRK09374) → rpsS (PRK00357)RpsS (COG0185) → rplV (PRK00565)Ribosomal_L22 (pfam00237) → RpsC (COG0092)rpsC (PRK00310) → RplP (COG0197)rplP (PRK09203) →                                                                                                                                                                            |
| Rsp-22-1 | NZ_AEYW01000001.1           | + | 6172    | 6237    | RNA → RplB (COG0090)rplB (PRK09374) → RplB (COG0090)rplB (PRK09374) → rpsS (PRK00357)RpsS (COG0185) → rpsS (PRK00357)RpsS (COG0185) → rplV (PRK00565)Ribosomal_L22 (pfam00237) → rplV (PRK00565)Ribosomal_L22 (pfam00237) → RpsC (COG0092)rpsC (PRK00310) → RpsC (COG0092)rpsC (PRK00310) → RplP (COG0197)rplP (PRK09203) → RplP (COG0197)rplP (PRK09203) → |
| Rba-2-1  | NZ_DS999531.1               | + | 702885  | 702950  | RNA → RplB (COG0090)rplB (PRK09374) → RplB (COG0090)rplB (PRK09374) → rpsS (PRK00357)RpsS (COG0185) → rpsS (PRK00357)RpsS (COG0185) → rplV (PRK00565)Ribosomal_L22 (pfam00237) → rplV (PRK00565)Ribosomal_L22 (pfam00237) → RpsC (COG0092)rpsC (PRK00310) → RpsC (COG0092)rpsC (PRK00310) → RplP (COG0197)rplP (PRK09203) → RplP (COG0197)rplP (PRK09203) → |
| env-365  | KGL_S1_ANT01.95m.c10129328  | + | 275     | 337     | RNA → rplB (PRK09374)Ribosomal_L2 (pfam00181) →                                                                                                                                                                                                                                                                                                             |
| env-366  | KGL_S1_ANT02.95m.c10007513  | + | 664     | 726     | RNA → RplB (COG0090)rplB (PRK09374) → rpsS (PRK00357)RpsS (COG0185) → rplV (PRK00565)Ribosomal_L22 (pfam00237) → RpsC (COG0092)rpsC (PRK00310) → RplP (COG0197)rplP (PRK09203) → hypo → M20_Acy1 (cd03886)amidohydrolases (TIGR01891) →                                                                                                                     |
| env-367  | KGL_S2_ANT04.2345m.c1167548 | + | 316     | 378     | RNA → ← hypo                                                                                                                                                                                                                                                                                                                                                |
| env-368  | JGI24723J26617_10802083     | + | 118     | 180     | RNA → rplW (PRK05738) →                                                                                                                                                                                                                                                                                                                                     |
| env-369  | JGI12109J20283_10872926     | - | 175     | 77      | RNA → hypo →                                                                                                                                                                                                                                                                                                                                                |
| env-370  | JGI12109J20283_10006735     | - | 753     | 682     | RNA → RplB (COG0090)rplB (PRK09374) →                                                                                                                                                                                                                                                                                                                       |
| env-371  | JGI12109J20283_10006736     | + | 78      | 149     | RNA → rplB (PRK09374)Ribosomal_L2 (pfam00181) →                                                                                                                                                                                                                                                                                                             |
| env-372  | HLSNC_1001521               | - | 9879    | 9807    | RNA → RplB (COG0090)rplB (PRK09374) → rpsS (PRK00357)RpsS (COG0185) → rplV (PRK00565)Ribosomal_L22 (pfam00237) → RpsC (COG0092)rpsC (PRK00310) → RplP (COG0197)rplP (PRK09203) → QdoI (COG1917)DMSP_lyase (pfam16867) → 2OG-FeII_Oxy_5 (pfam13759) →                                                                                                        |
| env-373  | KGL_S2_ANT06.2345m.c1009878 | - | 2821    | 2753    | RNA → RplB (COG0090)rplB (PRK09374) → rpsS (PRK00357)RpsS (COG0185) → rplV (PRK00565)Ribosomal_L22 (pfam00237) → RpsC (COG0092)rpsC (PRK00310) → RplP (COG0197)rplP (PRK09203) →                                                                                                                                                                            |
| env-374  | KGL_S2_ANT04.2345m.c1010869 | - | 2778    | 2711    | RNA → RplB (COG0090)rplB (PRK09374) → rpsS (PRK00357)RpsS (COG0185) → rplV (PRK00565)Ribosomal_L22 (pfam00237) → RpsC (COG0092)rpsC (PRK00310) → RplP (COG0197)rplP (PRK09203) →                                                                                                                                                                            |
| env-375  | JGI20153J14295_10082023     | - | 314     | 252     | RNA → RplB (COG0090)rplB (PRK09374) →                                                                                                                                                                                                                                                                                                                       |
| env-376  | JGI20153J14318_10082023     | - | 314     | 252     | RNA → RplB (COG0090)rplB (PRK09374) →                                                                                                                                                                                                                                                                                                                       |
| env-377  | JGI20159J14440_10153261     | + | 97      | 159     | RNA → RplB (COG0090)rplB (PRK09374) →                                                                                                                                                                                                                                                                                                                       |
| env-378  | AMFJ01022780.1              | - | 134     | 67      | RNA → RplB (COG0090)rplB (PRK09374) →                                                                                                                                                                                                                                                                                                                       |
| env-379  | ACD54.3                     | - | 1770    | 1703    | RNA → RplB (COG0090)rplB (PRK09374) → rpsS (PRK00357)RpsS (COG0185) → rplV (PRK00565)Ribosomal_L22 (pfam00237) → rpsC (PRK00310)30S_S3_KH (cd02412) →                                                                                                                                                                                                       |
| env-380  | CESJ01069642.1              | - | 121     | 57      | RNA →                                                                                                                                                                                                                                                                                                                                                       |
| env-381  | JGI12109J20283_10580390     | - | 247     | 150     | RNA → RplB (COG0090)rplB (PRK09374) →                                                                                                                                                                                                                                                                                                                       |
| Osp-2-1  | NZ_JQMY01000001.1           | + | 973809  | 973875  | RNA → RplB (COG0090)rplB (PRK09374) → rpsS (PRK00357)RpsS (COG0185) → rplV (PRK00565)Ribosomal_L22 (pfam00237) → RpsC (COG0092)rpsC (PRK00310) → RplP (COG0197)rplP (PRK09203) →                                                                                                                                                                            |

|          |                         |   |         |         |                                                                                                                                                                                                                                                                                                                                                                                                                                                                                                                                             |
|----------|-------------------------|---|---------|---------|---------------------------------------------------------------------------------------------------------------------------------------------------------------------------------------------------------------------------------------------------------------------------------------------------------------------------------------------------------------------------------------------------------------------------------------------------------------------------------------------------------------------------------------------|
| env-382  | JGI12396J12026_1059309  | + | 985     | 1055    | RNA → RplB (COG0090)rplB (PRK09374) →                                                                                                                                                                                                                                                                                                                                                                                                                                                                                                       |
| env-383  | JGI12396J12026_1059311  | - | 316     | 246     | RNA → RplB (COG0090)rplB (PRK09374) →                                                                                                                                                                                                                                                                                                                                                                                                                                                                                                       |
| env-384  | JGI12467J12023_1025468  | + | 360     | 430     | RNA → RplB (COG0090)rplB (PRK09374) →                                                                                                                                                                                                                                                                                                                                                                                                                                                                                                       |
| env-385  | JGI12273J12029_10120939 | + | 462     | 532     | RNA → RplB (COG0090)rplB (PRK09374) →                                                                                                                                                                                                                                                                                                                                                                                                                                                                                                       |
| env-386  | JGI12467J12023_1167671  | + | 157     | 226     | RNA → RplB (COG0090)rplB (PRK09374) →                                                                                                                                                                                                                                                                                                                                                                                                                                                                                                       |
| env-387  | JGI12273J12029_10075303 | + | 308     | 377     | RNA → RplB (COG0090)rplB (PRK09374) →                                                                                                                                                                                                                                                                                                                                                                                                                                                                                                       |
| env-388  | JGI12273J12029_10163269 | + | 383     | 452     | RNA →                                                                                                                                                                                                                                                                                                                                                                                                                                                                                                                                       |
| Rme-1-1  | NZ_KK088521.1           | - | 243248  | 243181  | RNA → hypo → hypo → rpsS (PRK00357)RpsS (COG0185) → rplV (PRK00565)Ribosomal_L22 (pfam00237) → RpsC (COG0092)rpsC (PRK00310) → RplP (COG0197)rplP (PRK09203) → PRK00306 (PRK00306)Ribosomal_L29 (pfam00831) → rpsQ (PRK05610)Ribosomal_S17 (pfam00366) → rplN (PRK05483)Ribosomal_L14 (pfam00238) → RplX (COG0198)rplX (PRK00004) → rplE (PRK00010)RplE (COG0094) → rpsN (PRK08881)Ribosomal_S14 (pfam00253) → rpsH (PRK00136)Ribosomal_S8 (pfam00410) → RplF (COG0097)rplF (PRK05498) → hypo → rplR (PRK05593)Ribosomal_L18p (pfam00861) → |
| env-389  | JGI12467J12023_1134564  | + | 240     | 309     | RNA →                                                                                                                                                                                                                                                                                                                                                                                                                                                                                                                                       |
| env-390  | JGI12273J12029_10074910 | + | 717     | 786     | RNA → RplB (COG0090)rplB (PRK09374) →                                                                                                                                                                                                                                                                                                                                                                                                                                                                                                       |
| env-391  | JGI12273J12029_10159171 | + | 74      | 143     | RNA → RplB (COG0090)rplB (PRK09374) →                                                                                                                                                                                                                                                                                                                                                                                                                                                                                                       |
| env-392  | CESO01257586.1          | + | 654     | 720     | RNA →                                                                                                                                                                                                                                                                                                                                                                                                                                                                                                                                       |
| env-393  | CEVX01283897.1          | - | 753     | 687     | RNA → RplB (COG0090)rplB (PRK09374) →                                                                                                                                                                                                                                                                                                                                                                                                                                                                                                       |
| env-394  | CESM01223547.1          | + | 62      | 128     | RNA → RplB (COG0090)rplB (PRK09374) → rpsS (PRK00357)Ribosomal_S19 (pfam00203) →                                                                                                                                                                                                                                                                                                                                                                                                                                                            |
| env-395  | JGI26524J50256_1001720  | + | 3021    | 3111    | RNA → RplB (COG0090)rplB (PRK09374) → rpsS (PRK00357)RpsS (COG0185) → rplV (PRK00565)Ribosomal_L22 (pfam00237) → RpsC (COG0092)rpsC (PRK00310) → RplP (COG0197)rplP (PRK09203) →                                                                                                                                                                                                                                                                                                                                                            |
| env-396  | 3300001592_10003260     | + | 2614    | 2692    | RNA → RplB (COG0090)rplB (PRK09374) → rpsS (PRK00357)RpsS (COG0185) → rplV (PRK00565)Ribosomal_L22 (pfam00237) → RpsC (COG0092)rpsC (PRK00310) → RplP (COG0197)rplP (PRK09203) →                                                                                                                                                                                                                                                                                                                                                            |
| Pxi-1-1  | NZ_AUBS01000014.1       | + | 30482   | 30560   | RNA → RplB (COG0090)rplB (PRK09374) → rpsS (PRK00357)RpsS (COG0185) → rplV (PRK00565)Ribosomal_L22 (pfam00237) → RpsC (COG0092)rpsC (PRK00310) → RplP (COG0197)rplP (PRK09203) →                                                                                                                                                                                                                                                                                                                                                            |
| Rmo-1-1  | NZ_JXYG01000033.1       | - | 76643   | 76542   | RNA → RplB (COG0090)rplB (PRK09374) → rpsS (PRK00357)RpsS (COG0185) → rplV (PRK00565)Ribosomal_L22 (pfam00237) → RpsC (COG0092)rpsC (PRK00310) → RplP (COG0197)rplP (PRK09203) →                                                                                                                                                                                                                                                                                                                                                            |
| Rmo-2-1  | NZ_AQCH01000135.1       | - | 22727   | 22626   | RNA → RplB (COG0090)rplB (PRK09374) → rpsS (PRK00357)RpsS (COG0185) → rplV (PRK00565)Ribosomal_L22 (pfam00237) → RpsC (COG0092)rpsC (PRK00310) → RplP (COG0197)rplP (PRK09203) →                                                                                                                                                                                                                                                                                                                                                            |
| Rsp-21-1 | NC_008044.1             | + | 268831  | 268932  | RNA → RplB (COG0090)rplB (PRK09374) → rpsS (PRK00357)RpsS (COG0185) → rplV (PRK00565)Ribosomal_L22 (pfam00237) → RpsC (COG0092)rpsC (PRK00310) → RplP (COG0197)rplP (PRK09203) →                                                                                                                                                                                                                                                                                                                                                            |
| Ssp-1-1  | NZ_GG703517.1           | + | 54267   | 54368   | RNA → RplB (COG0090)rplB (PRK09374) → RplB (COG0090)rplB (PRK09374) → rpsS (PRK00357)RpsS (COG0185) → rpsS (PRK00357)RpsS (COG0185) → rplV (PRK00565)Ribosomal_L22 (pfam00237) → rplV (PRK00565)Ribosomal_L22 (pfam00237) → RpsC (COG0092)rpsC (PRK00310) → RpsC (COG0092)rpsC (PRK00310) → RpsC (COG0092)rpsC (PRK00310) → RplP (COG0197)rplP (PRK09203) →                                                                                                                                                                                 |
| Psp-1-1  | NZ_JSWK01000016.1       | - | 260767  | 260659  | RNA → RplB (COG0090)rplB (PRK09374) → rpsS (PRK00357)RpsS (COG0185) → rplV (PRK00565)Ribosomal_L22 (pfam00237) → RpsC (COG0092)rpsC (PRK00310) → RplP (COG0197)rplP (PRK09203) →                                                                                                                                                                                                                                                                                                                                                            |
| Pga-1-1  | NC_018286.1             | - | 3196082 | 3195974 | RNA → RplB (COG0090)rplB (PRK09374) → rpsS (PRK00357)RpsS (COG0185) → rplV (PRK00565)Ribosomal_L22 (pfam00237) → RpsC (COG0092)rpsC (PRK00310) → RplP (COG0197)rplP (PRK09203) →                                                                                                                                                                                                                                                                                                                                                            |
| Pin-1-1  | NZ_KI421498.1           | + | 3089651 | 3089759 | RNA → RplB (COG0090)rplB (PRK09374) → rpsS (PRK00357)RpsS (COG0185) → rplV (PRK00565)Ribosomal_L22 (pfam00237) → RpsC (COG0092)rpsC (PRK00310) → RplP (COG0197)rplP (PRK09203) →                                                                                                                                                                                                                                                                                                                                                            |
| Psp-2-1  | NZ_JSWJ01000014.1       | - | 97388   | 97280   | RNA → RplB (COG0090)rplB (PRK09374) → rpsS (PRK00357)RpsS (COG0185) → rplV (PRK00565)Ribosomal_L22 (pfam00237) → RpsC (COG0092)rpsC (PRK00310) → RplP (COG0197)rplP (PRK09203) →                                                                                                                                                                                                                                                                                                                                                            |

|          |                         |   |         |         |                                                                                                                                                                                                                                                                                                                                                             |
|----------|-------------------------|---|---------|---------|-------------------------------------------------------------------------------------------------------------------------------------------------------------------------------------------------------------------------------------------------------------------------------------------------------------------------------------------------------------|
| Rsp-11-1 | NZ_CH902583.1           | + | 2863415 | 2863523 | RNA → RplB (COG0090)rplB (PRK09374) → rpsS (PRK00357)RpsS (COG0185) → rplV (PRK00565)Ribosomal_L22 (pfam00237) → RpsC (COG0092)rpsC (PRK00310) → RplP (COG0197)rplP (PRK09203) →                                                                                                                                                                            |
| Par-1-1  | NZ_KI421507.1           | + | 92373   | 92482   | RNA → RplB (COG0090)rplB (PRK09374) → rpsS (PRK00357)RpsS (COG0185) → rplV (PRK00565)Ribosomal_L22 (pfam00237) → RpsC (COG0092)rpsC (PRK00310) → RplP (COG0197)rplP (PRK09203) →                                                                                                                                                                            |
| env-397  | CAM_READ_0074161329     | - | 292     | 213     | RNA → RplB (COG0090)rplB (PRK09374) →                                                                                                                                                                                                                                                                                                                       |
| env-398  | JGI24025J20009_10459630 | + | 162     | 240     | RNA →                                                                                                                                                                                                                                                                                                                                                       |
| Rsp-12-1 | NZ_AAAYC01000008.1      | - | 172899  | 172821  | RNA → RplB (COG0090)rplB (PRK09374) → RplB (COG0090)rplB (PRK09374) → rpsS (PRK00357)RpsS (COG0185) → rpsS (PRK00357)RpsS (COG0185) → rplV (PRK00565)Ribosomal_L22 (pfam00237) → rplV (PRK00565)Ribosomal_L22 (pfam00237) → RpsC (COG0092)rpsC (PRK00310) → RpsC (COG0092)rpsC (PRK00310) → RplP (COG0197)rplP (PRK09203) → RplP (COG0197)rplP (PRK09203) → |
| Lsp-7-1  | NZ_JWLH01000015.1       | - | 13431   | 13353   | RNA → RplB (COG0090)rplB (PRK09374) → rpsS (PRK00357)RpsS (COG0185) → rplV (PRK00565)Ribosomal_L22 (pfam00237) → RpsC (COG0092)rpsC (PRK00310) → RplP (COG0197)rplP (PRK09203) →                                                                                                                                                                            |
| Lsp-1-1  | NZ_JWLE01000039.1       | - | 14129   | 14051   | RNA → RplB (COG0090)rplB (PRK09374) → rpsS (PRK00357)RpsS (COG0185) → rplV (PRK00565)Ribosomal_L22 (pfam00237) → RpsC (COG0092)rpsC (PRK00310) → RplP (COG0197)rplP (PRK09203) →                                                                                                                                                                            |
| Lsp-3-1  | NZ_JWLG01000013.1       | + | 28657   | 28735   | RNA → RplB (COG0090)rplB (PRK09374) → rpsS (PRK00357)RpsS (COG0185) → rplV (PRK00565)Ribosomal_L22 (pfam00237) → RpsC (COG0092)rpsC (PRK00310) → RplP (COG0197)rplP (PRK09203) →                                                                                                                                                                            |
| Lsp-4-1  | NZ_JWLI01000007.1       | - | 341160  | 341082  | RNA → RplB (COG0090)rplB (PRK09374) → rpsS (PRK00357)RpsS (COG0185) → rplV (PRK00565)Ribosomal_L22 (pfam00237) → RpsC (COG0092)rpsC (PRK00310) → RplP (COG0197)rplP (PRK09203) →                                                                                                                                                                            |
| Lsp-6-1  | NZ_JWLF01000005.1       | - | 489868  | 489790  | RNA → RplB (COG0090)rplB (PRK09374) → rpsS (PRK00357)RpsS (COG0185) → rplV (PRK00565)Ribosomal_L22 (pfam00237) → RpsC (COG0092)rpsC (PRK00310) → RplP (COG0197)rplP (PRK09203) →                                                                                                                                                                            |
| Lsp-9-1  | NZ_AFCE02000006.1       | + | 28882   | 28960   | RNA → RplB (COG0090)rplB (PRK09374) → rpsS (PRK00357)RpsS (COG0185) → rplV (PRK00565)Ribosomal_L22 (pfam00237) → RpsC (COG0092)rpsC (PRK00310) → RplP (COG0197)rplP (PRK09203) →                                                                                                                                                                            |
| Lsp-5-1  | NZ_JWLM01000001.1       | + | 28726   | 28804   | RNA → RplB (COG0090)rplB (PRK09374) → rpsS (PRK00357)RpsS (COG0185) → rplV (PRK00565)Ribosomal_L22 (pfam00237) → RpsC (COG0092)rpsC (PRK00310) → RplP (COG0197)rplP (PRK09203) →                                                                                                                                                                            |
| Pga-2-1  | NC_018290.1             | + | 154778  | 154856  | RNA → RplB (COG0090)rplB (PRK09374) → rpsS (PRK00357)RpsS (COG0185) → rplV (PRK00565)Ribosomal_L22 (pfam00237) → RpsC (COG0092)rpsC (PRK00310) → RplP (COG0197)rplP (PRK09203) →                                                                                                                                                                            |
| Nsp-1-1  | NZ_LAUK01000016.1       | - | 42619   | 42541   | RNA → RplB (COG0090)rplB (PRK09374) → rpsS (PRK00357)RpsS (COG0185) → rplV (PRK00565)Ribosomal_L22 (pfam00237) → RpsC (COG0092)rpsC (PRK00310) → RplP (COG0197)rplP (PRK09203) →                                                                                                                                                                            |
| Nit-1-1  | NZ_CVRL01000015.1       | - | 39753   | 39675   | RNA → RplB (COG0090)rplB (PRK09374) → rpsS (PRK00357)RpsS (COG0185) → rplV (PRK00565)Ribosomal_L22 (pfam00237) → RpsC (COG0092)rpsC (PRK00310) → RplP (COG0197)rplP (PRK09203) →                                                                                                                                                                            |
| Nit-1-2  | NZ_CVRM01000022.1       | + | 261598  | 261676  | RNA → RplB (COG0090)rplB (PRK09374) → rpsS (PRK00357)RpsS (COG0185) → rplV (PRK00565)Ribosomal_L22 (pfam00237) → RpsC (COG0092)rpsC (PRK00310) → RplP (COG0197)rplP (PRK09203) →                                                                                                                                                                            |
| Rsp-20-1 | NZ_DS999054.1           | + | 3164594 | 3164672 | RNA → RplB (COG0090)rplB (PRK09374) → RplB (COG0090)rplB (PRK09374) → rpsS (PRK00357)RpsS (COG0185) → rpsS (PRK00357)RpsS (COG0185) → rplV (PRK00565)Ribosomal_L22 (pfam00237) → rplV (PRK00565)Ribosomal_L22 (pfam00237) → RpsC (COG0092)rpsC (PRK00310) → RpsC (COG0092)rpsC (PRK00310) → RplP (COG0197)rplP (PRK09203) → RplP (COG0197)rplP (PRK09203) → |
| Lsp-2-1  | NZ_JWLC01000007.1       | - | 265099  | 265021  | RNA → RplB (COG0090)rplB (PRK09374) → rpsS (PRK00357)RpsS (COG0185) → rplV (PRK00565)Ribosomal_L22 (pfam00237) → RpsC (COG0092)rpsC (PRK00310) → RplP (COG0197)rplP (PRK09203) →                                                                                                                                                                            |



|         |                           |   |         |         |                                                                                                                                                                                                                                                                                                                                                             |
|---------|---------------------------|---|---------|---------|-------------------------------------------------------------------------------------------------------------------------------------------------------------------------------------------------------------------------------------------------------------------------------------------------------------------------------------------------------------|
| Rba-7-1 | NZ_DS995281.1             | - | 3127551 | 3127473 | RNA → RplB (COG0090)rplB (PRK09374) → RplB (COG0090)rplB (PRK09374) → rpsS (PRK00357)RpsS (COG0185) → rpsS (PRK00357)RpsS (COG0185) → rplV (PRK00565)Ribosomal_L22 (pfam00237) → rplV (PRK00565)Ribosomal_L22 (pfam00237) → RpsC (COG0092)rpsC (PRK00310) → RpsC (COG0092)rpsC (PRK00310) → RplP (COG0197)rplP (PRK09203) → RplP (COG0197)rplP (PRK09203) → |
| Lca-1-1 | NZ_KI421513.1             | - | 919197  | 919119  | RNA → RplB (COG0090)rplB (PRK09374) → rpsS (PRK00357)RpsS (COG0185) → rplV (PRK00565)Ribosomal_L22 (pfam00237) → RpsC (COG0092)rpsC (PRK00310) → RplP (COG0197)rplP (PRK09203) →                                                                                                                                                                            |
| Lda-1-1 | NZ_KI421500.1             | - | 2486523 | 2486445 | RNA → RplB (COG0090)rplB (PRK09374) → rpsS (PRK00357)RpsS (COG0185) → rplV (PRK00565)Ribosomal_L22 (pfam00237) → RpsC (COG0092)rpsC (PRK00310) → RplP (COG0197)rplP (PRK09203) →                                                                                                                                                                            |
| Lsp-8-1 | NZ_JWLD01000017.1         | - | 20237   | 20159   | RNA → RplB (COG0090)rplB (PRK09374) → rpsS (PRK00357)RpsS (COG0185) → rplV (PRK00565)Ribosomal_L22 (pfam00237) → RpsC (COG0092)rpsC (PRK00310) → RplP (COG0197)rplP (PRK09203) →                                                                                                                                                                            |
| env-399 | 3300001605_10201626       | + | 440     | 500     | RNA → RplB (COG0090)rplB (PRK09374) →                                                                                                                                                                                                                                                                                                                       |
| env-400 | 3300001239_10025476       | + | 68      | 128     | RNA → rplB (PRK09374)Ribosomal_L2 (pfam00181) →                                                                                                                                                                                                                                                                                                             |
| env-401 | 3300001605_10465888       | + | 68      | 128     | RNA → RplB (COG0090)rplB (PRK09374) →                                                                                                                                                                                                                                                                                                                       |
| env-402 | 3300001605_10229328       | - | 253     | 194     | RNA → RplB (COG0090)rplB (PRK09374) →                                                                                                                                                                                                                                                                                                                       |
| env-403 | Antartic2_1036878         | - | 110     | 44      | RNA → ←-hypo                                                                                                                                                                                                                                                                                                                                                |
| env-404 | CESI01066207.1            | + | 305     | 371     | RNA → rplB (PRK09374)Ribosomal_L2 (pfam00181) →                                                                                                                                                                                                                                                                                                             |
| env-405 | JCVI_SCAF_1096627291198   | + | 567     | 632     | RNA → RplB (COG0090)rplB (PRK09374) →                                                                                                                                                                                                                                                                                                                       |
| env-406 | DelMOSum2010_c10000597    | + | 3357    | 3422    | RNA → RplB (COG0090)rplB (PRK09374) → rpsS (PRK00357)RpsS (COG0185) → rplV (PRK00565)Ribosomal_L22 (pfam00237) → RpsC (COG0092)rpsC (PRK00310) → RplP (COG0197)rplP (PRK09203) →                                                                                                                                                                            |
| env-407 | DelMOSum2011_c10059128    | + | 607     | 672     | RNA → RplB (COG0090)rplB (PRK09374) →                                                                                                                                                                                                                                                                                                                       |
| env-408 | JGI20156J14371_10007799   | - | 4716    | 4651    | RNA → RplB (COG0090)rplB (PRK09374) → rpsS (PRK00357)RpsS (COG0185) → rplV (PRK00565)Ribosomal_L22 (pfam00237) → RpsC (COG0092)rpsC (PRK00310) → RplP (COG0197)rplP (PRK09203) →                                                                                                                                                                            |
| env-409 | JGI20154J14316_10019027   | + | 1070    | 1135    | RNA → RplB (COG0090)rplB (PRK09374) → rpsS (PRK00357)RpsS (COG0185) → rplV (PRK00565)Ribosomal_L22 (pfam00237) → RpsC (COG0092)rpsC (PRK00310) → RplP (COG0197)rplP (PRK09203) →                                                                                                                                                                            |
| env-410 | JGI20160J14292_10005213   | + | 2291    | 2356    | RNA → RplB (COG0090)rplB (PRK09374) → rpsS (PRK00357)RpsS (COG0185) → rplV (PRK00565)Ribosomal_L22 (pfam00237) → RpsC (COG0092)rpsC (PRK00310) → RplP (COG0197)rplP (PRK09203) →                                                                                                                                                                            |
| env-411 | JGI20157J14317_10008243   | - | 4807    | 4742    | RNA → RplB (COG0090)rplB (PRK09374) → rpsS (PRK00357)RpsS (COG0185) → rplV (PRK00565)Ribosomal_L22 (pfam00237) → RpsC (COG0092)rpsC (PRK00310) → RplP (COG0197)rplP (PRK09203) →                                                                                                                                                                            |
| env-412 | JGI20159J14440_10014743   | - | 561     | 496     | RNA → RplB (COG0090)rplB (PRK09374) →                                                                                                                                                                                                                                                                                                                       |
| env-413 | JGI20155J14468_10115856   | + | 624     | 689     | RNA → RplB (COG0090)rplB (PRK09374) →                                                                                                                                                                                                                                                                                                                       |
| env-414 | JGI20153J14295_10306322   | - | 286     | 219     | RNA → RplB (COG0090)rplB (PRK09374) →                                                                                                                                                                                                                                                                                                                       |
| env-415 | JGI20153J14318_10306322   | - | 286     | 219     | RNA → RplB (COG0090)rplB (PRK09374) →                                                                                                                                                                                                                                                                                                                       |
| Rel-1-1 | NZ_CP004372.1             | + | 1532613 | 1532674 | RNA → RplB (COG0090)rplB (PRK09374) → rpsS (PRK00357)RpsS (COG0185) → rplV (PRK00565)Ribosomal_L22 (pfam00237) → RpsC (COG0092)rpsC (PRK00310) → RplP (COG0197)rplP (PRK09203) →                                                                                                                                                                            |
| env-416 | JGI12210J13797_11047960   | - | 109     | 48      | RNA →                                                                                                                                                                                                                                                                                                                                                       |
| env-417 | SA_S1_NOR08_45m_c10022254 | + | 16      | 83      | RNA → RplB (COG0090)rplB (PRK09374) → rpsS (PRK00357)RpsS (COG0185) → rplV (PRK00565)Ribosomal_L22 (pfam00237) → RpsC (COG0092)rpsC (PRK00310) → RplP (COG0197)rplP (PRK09203) →                                                                                                                                                                            |
| env-418 | 3300001605_10068995       | - | 547     | 488     | RNA → rplB (PRK09374)Ribosomal_L2 (pfam00181) →                                                                                                                                                                                                                                                                                                             |
| env-419 | JGI24768J34885_10007107   | + | 613     | 672     | RNA → RplB (COG0090)rplB (PRK09374) → rpsS (PRK00357)RpsS (COG0185) → rplV (PRK00565)Ribosomal_L22 (pfam00237) → RpsC (COG0092)rpsC (PRK00310) → RplP (COG0197)rplP (PRK09203) →                                                                                                                                                                            |
| env-420 | JGI25925J51416_10384036   | + | 89      | 148     | RNA → RplB (COG0090)rplB (PRK09374) →                                                                                                                                                                                                                                                                                                                       |
| env-421 | 3300001592_10004376       | - | 13045   | 12987   | RNA → RplB (COG0090)rplB (PRK09374) → rpsS (PRK00357)Ribosomal_S19 (pfam00203) → rplV (PRK00565)Ribosomal_L22 (pfam00237) → RpsC (COG0092)rpsC (PRK00310) → RplP (COG0197)rplP (PRK09203) →                                                                                                                                                                 |

|          |                         |   |         |         |                                                                                                                                                                                                                                                                                                                                                                                                                                                                                                                             |
|----------|-------------------------|---|---------|---------|-----------------------------------------------------------------------------------------------------------------------------------------------------------------------------------------------------------------------------------------------------------------------------------------------------------------------------------------------------------------------------------------------------------------------------------------------------------------------------------------------------------------------------|
| Gne-1-1  | NZ_KE386949.1           | - | 572600  | 572542  | RNA → RplB (COG0090)rplB (PRK09374) → rpsS (PRK00357)RpsS (COG0185) → rplV (PRK00565)Ribosomal_L22 (pfam00237) → RpsC (COG0092)rpsC (PRK00310) → RplP (COG0197)rplP (PRK09203) →                                                                                                                                                                                                                                                                                                                                            |
| env-422  | KVRMV2_101642803        | + | 262     | 356     | RNA → rplB (PRK09374)Ribosomal_L2 (pfam00181) →                                                                                                                                                                                                                                                                                                                                                                                                                                                                             |
| env-423  | JGI24724J26744_10668225 | - | 103     | 15      | RNA →                                                                                                                                                                                                                                                                                                                                                                                                                                                                                                                       |
| env-424  | JGI24723J26617_10025028 | + | 221     | 309     | RNA → RplB (COG0090)rplB (PRK09374) → rpsS (PRK00357)RpsS (COG0185) → rplV (PRK00565)Ribosomal_L22 (pfam00237) → RpsC (COG0092)rpsC (PRK00310) →                                                                                                                                                                                                                                                                                                                                                                            |
| env-425  | JGI24723J26617_10031254 | + | 1462    | 1550    | RNA → RplB (COG0090)rplB (PRK09374) →                                                                                                                                                                                                                                                                                                                                                                                                                                                                                       |
| env-426  | JGI24025J20009_10003199 | + | 1288    | 1376    | RNA → RplB (COG0090)rplB (PRK09374) → rpsS (PRK00357)RpsS (COG0185) → rplV (PRK00565)Ribosomal_L22 (pfam00237) → RpsC (COG0092)rpsC (PRK00310) → RplP (COG0197)rplP (PRK09203) →                                                                                                                                                                                                                                                                                                                                            |
| Msp-1-1  | NZ_JQEY01000002.1       | + | 278853  | 278919  | RNA → RplB (COG0090)rplB (PRK09374) → rpsS (PRK00357)RpsS (COG0185) → rplV (PRK00565)Ribosomal_L22 (pfam00237) → RpsC (COG0092)rpsC (PRK00310) → RplP (COG0197)rplP (PRK09203) →                                                                                                                                                                                                                                                                                                                                            |
| Sno-1-1  | NZ_JASC01000003.1       | + | 4659    | 4742    | RNA → RplB (COG0090)rplB (PRK09374) → rpsS (PRK00357)RpsS (COG0185) → rplV (PRK00565)Ribosomal_L22 (pfam00237) → RpsC (COG0092)rpsC (PRK00310) → RplP (COG0197)rplP (PRK09203) →                                                                                                                                                                                                                                                                                                                                            |
| Sno-2-1  | NZ_JASD01000008.1       | - | 392212  | 392129  | RNA → RplB (COG0090)rplB (PRK09374) → rpsS (PRK00357)RpsS (COG0185) → rplV (PRK00565)Ribosomal_L22 (pfam00237) → RpsC (COG0092)rpsC (PRK00310) → RplP (COG0197)rplP (PRK09203) →                                                                                                                                                                                                                                                                                                                                            |
| env-427  | CEWO01366965.1          | + | 1207    | 1273    | RNA → rplB (PRK09374)Ribosomal_L2 (pfam00181) →                                                                                                                                                                                                                                                                                                                                                                                                                                                                             |
| env-428  | wf2_AHAA5765_x1         | - | 329     | 263     | RNA →                                                                                                                                                                                                                                                                                                                                                                                                                                                                                                                       |
| Tin-1-1  | NZ_AUNB01000021.1       | + | 2941    | 3007    | RNA → RplB (COG0090)rplB (PRK09374) → rpsS (PRK00357)RpsS (COG0185) → rplV (PRK00565)Ribosomal_L22 (pfam00237) → RpsC (COG0092)rpsC (PRK00310) → RplP (COG0197)rplP (PRK09203) →                                                                                                                                                                                                                                                                                                                                            |
| Pwa-1-1  | NZ_LGHT01000042.1       | - | 148727  | 148661  | RNA → RplB (COG0090)rplB (PRK09374) → rpsS (PRK00357)RpsS (COG0185) → rplV (PRK00565)Ribosomal_L22 (pfam00237) → RpsC (COG0092)rpsC (PRK00310) → RplP (COG0197)rplP (PRK09203) →                                                                                                                                                                                                                                                                                                                                            |
| env-429  | 3300001605_10795549     | + | 347     | 413     | RNA → ←-hypo                                                                                                                                                                                                                                                                                                                                                                                                                                                                                                                |
| env-430  | F3OLC3J02I91T9          | - | 208     | 142     | RNA → hypo →                                                                                                                                                                                                                                                                                                                                                                                                                                                                                                                |
| env-431  | 3300001605_10634355     | - | 145     | 79      | RNA →                                                                                                                                                                                                                                                                                                                                                                                                                                                                                                                       |
| env-432  | TB_FS06.10DRAFT.1000581 | + | 16462   | 16528   | RNA → RplB (COG0090)rplB (PRK09374) → rpsS (PRK00357)RpsS (COG0185) → rplV (PRK00565)Ribosomal_L22 (pfam00237) → RpsC (COG0092)rpsC (PRK00310) →                                                                                                                                                                                                                                                                                                                                                                            |
| env-433  | 3300000052_245369       | + | 133     | 199     | RNA →                                                                                                                                                                                                                                                                                                                                                                                                                                                                                                                       |
| Osp-3-1  | NZ_AFPM01000017.1       | + | 4012    | 4166    | RNA → ←-hypo                                                                                                                                                                                                                                                                                                                                                                                                                                                                                                                |
| env-434  | JGI20160J14292_10238378 | + | 75      | 140     | RNA → hypo → rplB (PRK09374)Ribosomal_L2 (pfam00181) →                                                                                                                                                                                                                                                                                                                                                                                                                                                                      |
| env-435  | GYQO9XB02IIO19          | - | 83      | 18      | RNA →                                                                                                                                                                                                                                                                                                                                                                                                                                                                                                                       |
| env-436  | JGI24724J26744_10484319 | - | 357     | 266     | RNA → rplB (PRK09374)Ribosomal_L2 (pfam00181) →                                                                                                                                                                                                                                                                                                                                                                                                                                                                             |
| env-437  | 3300001592_10003340     | - | 10494   | 10403   | RNA → RplB (COG0090)rplB (PRK09374) → rpsS (PRK00357)RpsS (COG0185) → rplV (PRK00565)Ribosomal_L22 (pfam00237) → RpsC (COG0092)rpsC (PRK00310) → RplP (COG0197)rplP (PRK09203) →                                                                                                                                                                                                                                                                                                                                            |
| env-438  | GSLAS_GLMUJHB01D1RM5    | - | 167     | 75      | RNA → RplB (COG0090)rplB (PRK09374) →                                                                                                                                                                                                                                                                                                                                                                                                                                                                                       |
| env-439  | JGI24025J20009_10404831 | + | 123     | 211     | RNA → ←-hypo                                                                                                                                                                                                                                                                                                                                                                                                                                                                                                                |
| Rsp-10-1 | NZ_DS999213.1           | + | 3307378 | 3307453 | RNA → RplB (COG0090)rplB (PRK09374) → RplB (COG0090)rplB (PRK09374) → RplB (COG0090)rplB (PRK09374) → RplB (COG0090)rplB (PRK09374) → rpsS (PRK00357)RpsS (COG0185) → rpsS (PRK00357)RpsS (COG0185) → rpsS (PRK00357)RpsS (COG0185) → rpsS (PRK00357)RpsS (COG0185) → rplV (PRK00565)Ribosomal_L22 (pfam00237) → rplV (PRK00565)Ribosomal_L22 (pfam00237) → RpsC (COG0092)rpsC (PRK00310) → RpsC (COG0092)rpsC (PRK00310) → RpsC (COG0092)rpsC (PRK00310) → RplP (COG0197)rplP (PRK09203) → RplP (COG0197)rplP (PRK09203) → |
| Tar-1-1  | NZ_KE557314.1           | - | 63321   | 63252   | RNA → RplB (COG0090)rplB (PRK09374) → RplB (COG0090)rplB (PRK09374) → RplB (COG0090)rplB (PRK09374) → RplB (COG0090)rplB (PRK09374) → rpsS (PRK00357)RpsS (COG0185) → rpsS (PRK00357)RpsS (COG0185) → rplV (PRK00565)Ribosomal_L22 (pfam00237) → RpsC (COG0092)rpsC (PRK00310) → RplP (COG0197)rplP (PRK09203) →                                                                                                                                                                                                            |
| env-440  | JGI12109J20283_11967054 | + | 55      | 116     | RNA → hypo →                                                                                                                                                                                                                                                                                                                                                                                                                                                                                                                |

|         |                            |   |         |         |                                                                                                                                                                                                                                                                                                                                                             |
|---------|----------------------------|---|---------|---------|-------------------------------------------------------------------------------------------------------------------------------------------------------------------------------------------------------------------------------------------------------------------------------------------------------------------------------------------------------------|
| Sme-2-1 | NZ_JASH01000010.1          | - | 261103  | 261034  | RNA → RplB (COG0090)rplB (PRK09374) → rpsS (PRK00357)RpsS (COG0185) → rplV (PRK00565)Ribosomal_L22 (pfam00237) → RpsC (COG0092)rpsC (PRK00310) → RplP (COG0197)rplP (PRK09203) →                                                                                                                                                                            |
| Sme-1-1 | NZ_JEMU01000021.1          | + | 4343    | 4412    | RNA → RplB (COG0090)rplB (PRK09374) → rpsS (PRK00357)RpsS (COG0185) → rplV (PRK00565)Ribosomal_L22 (pfam00237) → RpsC (COG0092)rpsC (PRK00310) → RplP (COG0197)rplP (PRK09203) →                                                                                                                                                                            |
| Tsp-3-1 | NZ_GG697169.2              | + | 2896550 | 2896617 | RNA → RplB (COG0090)rplB (PRK09374) → RplB (COG0090)rplB (PRK09374) → RplB (COG0090)rplB (PRK09374) → rpsS (PRK00357)RpsS (COG0185) → rpsS (PRK00357)RpsS (COG0185) → rplV (PRK00565)Ribosomal_L22 (pfam00237) → rplV (PRK00565)Ribosomal_L22 (pfam00237) → RpsC (COG0092)rpsC (PRK00310) → RplP (COG0197)rplP (PRK09203) → RplP (COG0197)rplP (PRK09203) → |
| env-441 | P_1C_Liq_3_UnCty_1043905   | - | 143     | 47      | RNA →                                                                                                                                                                                                                                                                                                                                                       |
| env-442 | P_2C_Liq_1_UnCty_1002030   | + | 5317    | 5413    | RNA → RplB (COG0090)rplB (PRK09374) → rpsS (PRK00357)RpsS (COG0185) → rplV (PRK00565)Ribosomal_L22 (pfam00237) → rpsC (PRK00310)30S_S3_KH (cd02412) →                                                                                                                                                                                                       |
| env-443 | P_2C_Liq_2_UnCty_1008969   | + | 248     | 344     | RNA → RplB (COG0090)rplB (PRK09374) → rpsS (PRK00357)RpsS (COG0185) → rplV (PRK00565)Ribosomal_L22 (pfam00237) → rpsC (PRK00310)30S_S3_KH (cd02412) →                                                                                                                                                                                                       |
| env-444 | P_2C_Liq_2_UnCty_1056800   | + | 368     | 464     | RNA → RplB (COG0090)rplB (PRK09374) →                                                                                                                                                                                                                                                                                                                       |
| env-445 | JGI12210J13797_10174589    | - | 302     | 232     | RNA → RplB (COG0090)rplB (PRK09374) →                                                                                                                                                                                                                                                                                                                       |
| env-446 | JGI12210J13797_10174590    | + | 188     | 258     | RNA → RplB (COG0090)rplB (PRK09374) →                                                                                                                                                                                                                                                                                                                       |
| Rto-1-1 | NZ_LGVV01000034.1          | - | 33402   | 33310   | RNA → RplB (COG0090)rplB (PRK09374) → rpsS (PRK00357)RpsS (COG0185) → RplV (COG0091)rplV (PRK00565) → RpsC (COG0092)rpsC (PRK00310) → RplP (COG0197)rplP (PRK09203) →                                                                                                                                                                                       |
| Ris-1-1 | NZ_JAME01000033.1          | - | 54293   | 54185   | RNA → RplB (COG0090)rplB (PRK09374) → rpsS (PRK00357)RpsS (COG0185) → rplV (PRK00565)Ribosomal_L22 (pfam00237) → RpsC (COG0092)rpsC (PRK00310) → RplP (COG0197)rplP (PRK09203) →                                                                                                                                                                            |
| env-447 | KGI_S1_ANT02_95m.c10357205 | + | 47      | 140     | RNA → RplB (COG0090)rplB (PRK09374) →                                                                                                                                                                                                                                                                                                                       |
| env-448 | LADL01003569.1             | + | 6160    | 6249    | RNA → RplB (COG0090)rplB (PRK09374) → rpsS (PRK00357)RpsS (COG0185) → RplV (COG0091)rplV (PRK00565) → RpsC (COG0092)rpsC (PRK00310) → RplP (COG0197)rplP (PRK09203) →                                                                                                                                                                                       |
| env-449 | 3300001239_10287636        | - | 266     | 177     | RNA → RplB (COG0090)rplB (PRK09374) →                                                                                                                                                                                                                                                                                                                       |
| env-450 | 3300001605_10004081        | - | 3779    | 3690    | RNA → RplB (COG0090)rplB (PRK09374) → rpsS (PRK00357)RpsS (COG0185) → RplV (COG0091)rplV (PRK00565) → RpsC (COG0092)rpsC (PRK00310) → RplP (COG0197)rplP (PRK09203) →                                                                                                                                                                                       |
| env-451 | JGI25317J35169_1001357     | - | 3662    | 3573    | RNA → RplB (COG0090)rplB (PRK09374) → rpsS (PRK00357)RpsS (COG0185) → RplV (COG0091)rplV (PRK00565) → RpsC (COG0092)rpsC (PRK00310) → RplP (COG0197)rplP (PRK09203) →                                                                                                                                                                                       |
| env-452 | JGI25319J35699_1000784     | - | 3894    | 3805    | RNA → RplB (COG0090)rplB (PRK09374) → rpsS (PRK00357)RpsS (COG0185) → RplV (COG0091)rplV (PRK00565) → RpsC (COG0092)rpsC (PRK00310) → RplP (COG0197)rplP (PRK09203) →                                                                                                                                                                                       |
| env-453 | JGI25322J35698_1004507     | - | 4384    | 4295    | RNA → RplB (COG0090)rplB (PRK09374) → rpsS (PRK00357)RpsS (COG0185) → RplV (COG0091)rplV (PRK00565) → RpsC (COG0092)rpsC (PRK00310) → RplP (COG0197)rplP (PRK09203) →                                                                                                                                                                                       |
| env-454 | JGI25318J35512_1000721     | - | 3894    | 3805    | RNA → RplB (COG0090)rplB (PRK09374) → rpsS (PRK00357)RpsS (COG0185) → RplV (COG0091)rplV (PRK00565) → RpsC (COG0092)rpsC (PRK00310) → RplP (COG0197)rplP (PRK09203) →                                                                                                                                                                                       |
| env-455 | JGI25321J39296_1001405     | + | 10390   | 10479   | RNA → RplB (COG0090)rplB (PRK09374) → rpsS (PRK00357)RpsS (COG0185) → RplV (COG0091)rplV (PRK00565) → RpsC (COG0092)rpsC (PRK00310) → RplP (COG0197)rplP (PRK09203) →                                                                                                                                                                                       |
| env-456 | JGI25320J50211_1000655     | + | 15085   | 15174   | RNA → RplB (COG0090)rplB (PRK09374) → rpsS (PRK00357)RpsS (COG0185) → RplV (COG0091)rplV (PRK00565) → RpsC (COG0092)rpsC (PRK00310) → RplP (COG0197)rplP (PRK09203) →                                                                                                                                                                                       |
| env-457 | JGI25321J50212_10002409    | + | 10390   | 10479   | RNA → RplB (COG0090)rplB (PRK09374) → rpsS (PRK00357)RpsS (COG0185) → RplV (COG0091)rplV (PRK00565) → RpsC (COG0092)rpsC (PRK00310) → RplP (COG0197)rplP (PRK09203) →                                                                                                                                                                                       |
| Tpa-1-1 | NZ_AUND01000002.1          | + | 2906    | 2974    | RNA → RplB (COG0090)rplB (PRK09374) → rpsS (PRK00357)RpsS (COG0185) → rplV (PRK00565)Ribosomal_L22 (pfam00237) → RpsC (COG0092)rpsC (PRK00310) → RplP (COG0197)rplP (PRK09203) → hypo →                                                                                                                                                                     |
| env-458 | CEVN01086405.1             | - | 332     | 264     | RNA → rplB (PRK09374)Ribosomal_L2 (pfam00181) →                                                                                                                                                                                                                                                                                                             |
| Tat-1-1 | NZ_AQRC01000003.1          | - | 337439  | 337371  | RNA → RplB (COG0090)rplB (PRK09374) → rpsS (PRK00357)RpsS (COG0185) → rplV (PRK00565)Ribosomal_L22 (pfam00237) → RpsC (COG0092)rpsC (PRK00310) → RplP (COG0197)rplP (PRK09203) →                                                                                                                                                                            |
| env-459 | TFO_HY_Contig_1825         | + | 253     | 321     | RNA → RplB (COG0090)rplB (PRK09374) → rpsS (PRK00357)RpsS (COG0185) → rplV (PRK00565)Ribosomal_L22 (pfam00237) → KH (smart00322)30S_S3_KH (cd02412) →                                                                                                                                                                                                       |
| env-460 | CESE01105678.1             | + | 551     | 617     | RNA →                                                                                                                                                                                                                                                                                                                                                       |
| env-461 | CESI01080217.1             | - | 93      | 27      | RNA →                                                                                                                                                                                                                                                                                                                                                       |
| env-462 | CESU01020394.1             | - | 93      | 27      | RNA →                                                                                                                                                                                                                                                                                                                                                       |
| env-463 | CESJ01170158.1             | - | 78      | 12      | RNA →                                                                                                                                                                                                                                                                                                                                                       |



|         |                          |   |         |         |                                                                                                                                                                                                                                              |
|---------|--------------------------|---|---------|---------|----------------------------------------------------------------------------------------------------------------------------------------------------------------------------------------------------------------------------------------------|
| env-464 | CEST01002662.1           | - | 308     | 242     | RNA → RplB (COG0090)rplB (PRK09374) →                                                                                                                                                                                                        |
| env-465 | CESI01225209.1           | - | 91      | 25      | RNA →                                                                                                                                                                                                                                        |
| env-466 | CESU01161643.1           | - | 91      | 25      | RNA →                                                                                                                                                                                                                                        |
| env-467 | DelMOSum2010_c10465078   | - | 126     | 60      | RNA → RplB (COG0090)rplB (PRK09374) →                                                                                                                                                                                                        |
| env-468 | JGI20157J14317_10424860  | + | 203     | 269     | RNA → RplB (COG0090)rplB (PRK09374) →                                                                                                                                                                                                        |
| env-469 | JGI20152J14361_10060366  | + | 794     | 860     | RNA → RplB (COG0090)rplB (PRK09374) →                                                                                                                                                                                                        |
| env-470 | JGI20151J14362_10458567  | + | 170     | 236     | RNA → RplB (COG0090)rplB (PRK09374) →                                                                                                                                                                                                        |
| env-471 | JGI20157J14317_10486189  | + | 185     | 251     | RNA →                                                                                                                                                                                                                                        |
| env-472 | CERM01031828.1           | - | 1160    | 1094    | RNA → RplB (COG0090)rplB (PRK09374) → rpsS (PRK00357)Ribosomal_S19 (pfam00203) →                                                                                                                                                             |
| env-473 | JGI20152J14361_10019476  | - | 938     | 873     | RNA → rplB (PRK09374)Ribosomal_L2 (pfam00181) → rplB (PRK09374)Ribosomal.L2.C (pfam03947) →                                                                                                                                                  |
| env-474 | JGI20157J14317_10015572  | - | 3473    | 3408    | RNA → RplB (COG0090)rplB (PRK09374) → rpsS (PRK00357)RpsS (COG0185) →<br>rplV (PRK00565)Ribosomal.L22 (pfam00237) → RpsC (COG0092)rpsC (PRK00310) →<br>RplP (COG0197)rplP (PRK09203) →                                                       |
| env-475 | 2236876002_042693        | - | 416     | 351     | RNA → rplB (PRK09374)Ribosomal_L2 (pfam00181) →                                                                                                                                                                                              |
| env-476 | JGI20158J14315_10019288  | + | 625     | 691     | RNA → rplB (PRK09374)Ribosomal_L2 (pfam00181) → rplB (PRK09374)Ribosomal.L2.C (pfam03947) →<br>rpsS (PRK00357)RpsS (COG0185) → rplV (PRK00565)Ribosomal.L22 (pfam00237) →<br>RpsC (COG0092)rpsC (PRK00310) → RplP (COG0197)rplP (PRK09203) → |
| env-477 | P_2C_Liq_1_UnCty_1012554 | + | 141     | 207     | RNA → RplB (COG0090)rplB (PRK09374) → rpsS (PRK00357)RpsS (COG0185) →<br>rplV (PRK00565)Ribosomal.L22 (pfam00237) → rpsC (PRK00310)30S_S3_KH (cd02412) →                                                                                     |
| env-478 | P_2C_Liq_2_UnCty_1004631 | + | 159     | 225     | RNA → RplB (COG0090)rplB (PRK09374) → rpsS (PRK00357)RpsS (COG0185) →<br>rplV (PRK00565)Ribosomal.L22 (pfam00237) → RpsC (COG0092)rpsC (PRK00310) →<br>RplP (COG0197)rplP (PRK09203) →                                                       |
| env-479 | JGI20151J14362_10307003  | + | 248     | 314     | RNA → hypo →                                                                                                                                                                                                                                 |
| env-480 | JGI20154J14316_10012324  | + | 1879    | 1945    | RNA → RplB (COG0090)rplB (PRK09374) → rpsS (PRK00357)RpsS (COG0185) →<br>rplV (PRK00565)Ribosomal.L22 (pfam00237) → KH (smart00322)30S_S3_KH (cd02412) →<br>rpsC (PRK00310)Ribosomal_S3_C (pfam00189) → RplP (COG0197)rplP (PRK09203) →      |
| env-481 | JGI20160J14292_10120340  | - | 142     | 76      | RNA →                                                                                                                                                                                                                                        |
| env-482 | JCVL_SCAF_1101668062396  | - | 504     | 438     | RNA → rplB (PRK09374)Ribosomal_L2 (pfam00181) →                                                                                                                                                                                              |
| env-483 | JGI20156J14371_10029263  | - | 2057    | 1991    | RNA → RplB (COG0090)rplB (PRK09374) → rpsS (PRK00357)RpsS (COG0185) →<br>rplV (PRK00565)Ribosomal.L22 (pfam00237) → RpsC (COG0092)rpsC (PRK00310) →                                                                                          |
| env-484 | JCVL_SCAF_1101667021862  | + | 537     | 603     | RNA → rplB (PRK09374)Ribosomal_L2 (pfam00181) →                                                                                                                                                                                              |
| env-485 | JCVL_SCAF_1096626884361  | - | 4210    | 4144    | RNA → RplB (COG0090)rplB (PRK09374) → rpsS (PRK00357)RpsS (COG0185) →<br>rplV (PRK00565)Ribosomal.L22 (pfam00237) → RpsC (COG0092)rpsC (PRK00310) →<br>RplP (COG0197)rplP (PRK09203) →                                                       |
| env-486 | JCVL_SCAF_1096627292964  | - | 129     | 63      | RNA → RplB (COG0090)rplB (PRK09374) →                                                                                                                                                                                                        |
| env-487 | DelMOSum2010_c10287456   | - | 395     | 329     | RNA → rplB (PRK09374)Ribosomal_L2 (pfam00181) →                                                                                                                                                                                              |
| env-488 | DelMOSum2011_c10012372   | - | 3519    | 3453    | RNA → RplB (COG0090)rplB (PRK09374) → rpsS (PRK00357)RpsS (COG0185) →<br>rplV (PRK00565)Ribosomal.L22 (pfam00237) → RpsC (COG0092)rpsC (PRK00310) →<br>RplP (COG0197)rplP (PRK09203) →                                                       |
| env-489 | JGI20153J14295_10009487  | - | 3477    | 3411    | RNA → RplB (COG0090)rplB (PRK09374) → rpsS (PRK00357)RpsS (COG0185) →<br>rplV (PRK00565)Ribosomal.L22 (pfam00237) → RpsC (COG0092)rpsC (PRK00310) →<br>RplP (COG0197)rplP (PRK09203) →                                                       |
| env-490 | JGI20153J14318_10009487  | - | 3477    | 3411    | RNA → RplB (COG0090)rplB (PRK09374) → rpsS (PRK00357)RpsS (COG0185) →<br>rplV (PRK00565)Ribosomal.L22 (pfam00237) → RpsC (COG0092)rpsC (PRK00310) →<br>RplP (COG0197)rplP (PRK09203) →                                                       |
| env-491 | JGI20159J14440_10009403  | + | 2075    | 2141    | RNA → RplB (COG0090)rplB (PRK09374) → rpsS (PRK00357)RpsS (COG0185) →<br>rplV (PRK00565)Ribosomal.L22 (pfam00237) → RpsC (COG0092)rpsC (PRK00310) →<br>RplP (COG0197)rplP (PRK09203) →                                                       |
| env-492 | JGI20155J14468_10011527  | + | 2004    | 2070    | RNA → RplB (COG0090)rplB (PRK09374) → rpsS (PRK00357)RpsS (COG0185) →<br>rplV (PRK00565)Ribosomal.L22 (pfam00237) → RpsC (COG0092)rpsC (PRK00310) →<br>RplP (COG0197)rplP (PRK09203) →                                                       |
| Pte-1-1 | NZ_CP003984.1            | + | 2755361 | 2755427 | RNA → RplB (COG0090)rplB (PRK09374) → rpsS (PRK00357)RpsS (COG0185) →<br>rplV (PRK00565)Ribosomal.L22 (pfam00237) → RpsC (COG0092)rpsC (PRK00310) →<br>RplP (COG0197)rplP (PRK09203) →                                                       |
| env-493 | JCVL_SCAF_1101668090558  | + | 847     | 913     | RNA → RplB (COG0090)rplB (PRK09374) →                                                                                                                                                                                                        |
| env-494 | DelMOSum2010_c10054733   | - | 257     | 191     | RNA → RplB (COG0090)rplB (PRK09374) →                                                                                                                                                                                                        |

|         |                          |   |        |        |                                                                                                                                                                                                                                                                                                                                                                                                                                                                                                                                                                                                                                                      |
|---------|--------------------------|---|--------|--------|------------------------------------------------------------------------------------------------------------------------------------------------------------------------------------------------------------------------------------------------------------------------------------------------------------------------------------------------------------------------------------------------------------------------------------------------------------------------------------------------------------------------------------------------------------------------------------------------------------------------------------------------------|
| env-495 | JGI20151J14362_10072490  | - | 659    | 593    | RNA → RplB (COG0090)rplB (PRK09374) →                                                                                                                                                                                                                                                                                                                                                                                                                                                                                                                                                                                                                |
| env-496 | JGI20160J14292_10100804  | - | 278    | 212    | RNA → ← hypO                                                                                                                                                                                                                                                                                                                                                                                                                                                                                                                                                                                                                                         |
| env-497 | JGI24724J26744_10002738  | - | 11069  | 10947  | RNA → RplB (COG0090)rplB (PRK09374) → rpsS (PRK00357)RpsS (COG0185) →<br>rplV (PRK00565)Ribosomal_L22 (pfam00237) → RpsC (COG0092)rpsC (PRK00310) →<br>RplP (COG0197)rplP (PRK09203) →                                                                                                                                                                                                                                                                                                                                                                                                                                                               |
| env-498 | JGI24723J26617_10030085  | - | 1778   | 1656   | RNA → RplB (COG0090)rplB (PRK09374) → rpsS (PRK00357)RpsS (COG0185) →<br>rplV (PRK00565)Ribosomal_L22 (pfam00237) → rpsC (PRK00310)30S_S3_KH (cd02412) →                                                                                                                                                                                                                                                                                                                                                                                                                                                                                             |
| env-499 | JGI24723J26617_10138499  | + | 494    | 616    | RNA →                                                                                                                                                                                                                                                                                                                                                                                                                                                                                                                                                                                                                                                |
| env-500 | P_2C_Liq_1_UnCty_1025942 | + | 228    | 318    | RNA → RplB (COG0090)rplB (PRK09374) →                                                                                                                                                                                                                                                                                                                                                                                                                                                                                                                                                                                                                |
| env-501 | P_2C_Liq_2_UnCty_1020991 | + | 163    | 253    | RNA → RplB (COG0090)rplB (PRK09374) →                                                                                                                                                                                                                                                                                                                                                                                                                                                                                                                                                                                                                |
| env-502 | JCVL_SCAF_1096627363432  | - | 1000   | 917    | RNA → RplB (COG0090)rplB (PRK09374) →                                                                                                                                                                                                                                                                                                                                                                                                                                                                                                                                                                                                                |
| env-503 | P_1C_Liq_1_UnCty_1060565 | + | 89     | 180    | RNA → RplB (COG0090)rplB (PRK09374) →                                                                                                                                                                                                                                                                                                                                                                                                                                                                                                                                                                                                                |
| env-504 | P_2C_Liq_1_UnCty_1025617 | + | 238    | 329    | RNA → RplB (COG0090)rplB (PRK09374) →                                                                                                                                                                                                                                                                                                                                                                                                                                                                                                                                                                                                                |
| env-505 | P_2C_Liq_2_UnCty_1030521 | + | 237    | 327    | RNA → RplB (COG0090)rplB (PRK09374) →                                                                                                                                                                                                                                                                                                                                                                                                                                                                                                                                                                                                                |
| Smu-1-1 | NZ_KE557273.1            | + | 282336 | 282429 | RNA → RplB (COG0090)rplB (PRK09374) → rpsS (PRK00357)RpsS (COG0185) →<br>rplV (PRK00565)Ribosomal_L22 (pfam00237) → RpsC (COG0092)rpsC (PRK00310) →<br>RplP (COG0197)rplP (PRK09203) →                                                                                                                                                                                                                                                                                                                                                                                                                                                               |
| env-506 | JGI20154J14316_10000278  | - | 10091  | 10028  | RNA → RplB (COG0090)rplB (PRK09374) → rpsS (PRK00357)RpsS (COG0185) →<br>rplV (PRK00565)Ribosomal_L22 (pfam00237) → RpsC (COG0092)rpsC (PRK00310) →<br>RplP (COG0197)rplP (PRK09203) → PRK00306 (PRK00306)Ribosomal_L29 (pfam00831) →<br>rpsQ (PRK05610)Ribosomal_S17 (pfam00366) → rplN (PRK05483)Ribosomal_L14 (pfam00238) →<br>RplX (COG0198)rplX (PRK00004) → rplE (PRK00010)RplE (COG0094) →<br>rpsN (PRK08881)Ribosomal_S14 (pfam00253) → rpsH (PRK00136)Ribosomal_S8 (pfam00410) →<br>RplF (COG0097)rplF (PRK05498) → rplR (PRK05593)Ribosomal_L18p (pfam00861) →<br>RpsE (COG0098)rpsE (PRK00550) → Ribosomal_L30 (cd01658)rpmD (PRK05611) → |
| env-507 | CESJ01079969.1           | + | 363    | 426    | RNA → RplB (COG0090)rplB (PRK09374) →                                                                                                                                                                                                                                                                                                                                                                                                                                                                                                                                                                                                                |
| env-508 | DelMOSum2011_c10084907   | - | 321    | 258    | RNA → rplB (PRK09374)Ribosomal_L2 (pfam00181) →                                                                                                                                                                                                                                                                                                                                                                                                                                                                                                                                                                                                      |
| env-509 | JGI20160J14292_10062109  | + | 335    | 398    | RNA → RplB (COG0090)rplB (PRK09374) → rpsS (PRK00357)RpsS (COG0185) →                                                                                                                                                                                                                                                                                                                                                                                                                                                                                                                                                                                |
| env-510 | CESI01081701.1           | - | 1672   | 1609   | RNA → RplB (COG0090)rplB (PRK09374) → rpsS (PRK00357)RpsS (COG0185) →<br>rplV (PRK00565)Ribosomal_L22 (pfam00237) → rpsC (PRK00310)30S_S3_KH (cd02412) →                                                                                                                                                                                                                                                                                                                                                                                                                                                                                             |
| env-511 | CESU01035091.1           | - | 8481   | 8418   | RNA → RplB (COG0090)rplB (PRK09374) → rpsS (PRK00357)RpsS (COG0185) →<br>rplV (PRK00565)Ribosomal_L22 (pfam00237) → RpsC (COG0092)rpsC (PRK00310) →<br>RplP (COG0197)rplP (PRK09203) → PRK00306 (PRK00306)Ribosomal_L29 (pfam00831) →<br>rpsQ (PRK05610)Ribosomal_S17 (pfam00366) → rplN (PRK05483)Ribosomal_L14 (pfam00238) →<br>RplX (COG0198)rplX (PRK00004) → rplE (PRK00010)RplE (COG0094) →<br>rpsN (PRK08881)Ribosomal_S14 (pfam00253) → rpsH (PRK00136)Ribosomal_S8 (pfam00410) →<br>RplF (COG0097)rplF (PRK05498) → rplR (PRK05593)Ribosomal_L18p (pfam00861) →<br>RpsE (COG0098)rpsE (PRK00550) → Ribosomal_L30 (cd01658)rpmD (PRK05611) → |
| env-512 | JGI20151J14362_10229901  | + | 58     | 122    | RNA → rplB (PRK09374)Ribosomal_L2 (pfam00181) →                                                                                                                                                                                                                                                                                                                                                                                                                                                                                                                                                                                                      |
| env-513 | 2236876002_225186        | + | 183    | 247    | RNA → RplB (COG0090)rplB (PRK09374) →                                                                                                                                                                                                                                                                                                                                                                                                                                                                                                                                                                                                                |
| env-514 | 2236876010_0411961       | + | 127    | 191    | RNA →                                                                                                                                                                                                                                                                                                                                                                                                                                                                                                                                                                                                                                                |
| env-515 | CERM01014667.1           | + | 479    | 543    | RNA → RplB (COG0090)rplB (PRK09374) → rpsS (PRK00357)RpsS (COG0185) →<br>rplV (PRK00565)Ribosomal_L22 (pfam00237) → RpsC (COG0092)rpsC (PRK00310) →<br>RplP (COG0197)rplP (PRK09203) → PRK00306 (PRK00306)Ribosomal_L29 (pfam00831) →<br>rpsQ (PRK05610)Ribosomal_S17 (pfam00366) → rplN (PRK05483)Ribosomal_L14 (pfam00238) →<br>RplX (COG0198)rplX (PRK00004) → rplE (PRK00010)RplE (COG0094) →<br>rpsN (PRK08881)Ribosomal_S14 (pfam00253) → rpsH (PRK00136)Ribosomal_S8 (pfam00410) →<br>RplF (COG0097)rplF (PRK05498) → rplR (PRK05593)Ribosomal_L18p (pfam00861) →<br>RpsE (COG0098)rpsE (PRK00550) → Ribosomal_L30 (cd01658)rpmD (PRK05611) → |
| env-516 | 2236876009_129660        | + | 384    | 447    | RNA →                                                                                                                                                                                                                                                                                                                                                                                                                                                                                                                                                                                                                                                |
| env-517 | JGI20160J14292_10014797  | + | 4611   | 4675   | RNA →                                                                                                                                                                                                                                                                                                                                                                                                                                                                                                                                                                                                                                                |
| env-518 | JGI20157J14317_10244667  | + | 41     | 105    | RNA → rplB (PRK09374)Ribosomal_L2 (pfam00181) →                                                                                                                                                                                                                                                                                                                                                                                                                                                                                                                                                                                                      |
| env-519 | JCVI_READ_1105499001019  | - | 595    | 532    | RNA → rplB (PRK09374)Ribosomal_L2 (pfam00181) →                                                                                                                                                                                                                                                                                                                                                                                                                                                                                                                                                                                                      |
| env-520 | 2236876010_0225648       | + | 55     | 119    | RNA → RplB (COG0090)rplB (PRK09374) →                                                                                                                                                                                                                                                                                                                                                                                                                                                                                                                                                                                                                |
| env-521 | 2236876011_173305        | + | 341    | 406    | RNA →                                                                                                                                                                                                                                                                                                                                                                                                                                                                                                                                                                                                                                                |

|         |                               |   |         |         |                                                                                                                                                                                        |
|---------|-------------------------------|---|---------|---------|----------------------------------------------------------------------------------------------------------------------------------------------------------------------------------------|
| env-522 | P_2C_Liq_2_UnCty_1069081      | + | 299     | 389     | RNA → RplB (COG0090)rplB (PRK09374) →                                                                                                                                                  |
| env-523 | P_2C_Liq_1_UnCty_1043093      | - | 165     | 75      | RNA → RplB (COG0090)rplB (PRK09374) →                                                                                                                                                  |
| env-524 | KGI_S2_ANT04_2345m_c1261754   | + | 93      | 130     | RNA → RplB (COG0090)rplB (PRK09374) →                                                                                                                                                  |
| env-525 | JGI24723J26617_10273187       | - | 116     | 79      | RNA →                                                                                                                                                                                  |
| env-526 | CESU01002408.1                | + | 477     | 543     | RNA →                                                                                                                                                                                  |
| Tda-1-1 | NZ_JHEH01000004.1             | + | 3299    | 3366    | RNA → RplB (COG0090)rplB (PRK09374) → rpsS (PRK00357)RpsS (COG0185) →<br>rplV (PRK00565)Ribosomal_L22 (pfam00237) → RpsC (COG0092)rpsC (PRK00310) →<br>RplP (COG0197)rplP (PRK09203) → |
| Dsp-1-1 | NZ_AYXI01000047.1             | + | 2274    | 2353    | RNA → RplB (COG0090)rplB (PRK09374) → rpsS (PRK00357)RpsS (COG0185) →<br>rplV (PRK00565)Ribosomal_L22 (pfam00237) → RpsC (COG0092)rpsC (PRK00310) →<br>RplP (COG0197)rplP (PRK09203) → |
| env-527 | JGI24770J26754_10000998       | - | 16793   | 16732   | RNA → RplB (COG0090)rplB (PRK09374) → rpsS (PRK00357)RpsS (COG0185) →<br>rplV (PRK00565)Ribosomal_L22 (pfam00237) → RpsC (COG0092)rpsC (PRK00310) →<br>RplP (COG0197)rplP (PRK09203) → |
| Jaq-1-1 | NZ_JYFE01000080.1             | - | 61937   | 61870   | RNA → RplB (COG0090)rplB (PRK09374) → rpsS (PRK00357)RpsS (COG0185) →<br>rplV (PRK00565)Ribosomal_L22 (pfam00237) → RpsC (COG0092)rpsC (PRK00310) →<br>RplP (COG0197)rplP (PRK09203) → |
| Sge-1-1 | NZ_JASE01000005.1             | - | 3545549 | 3545479 | RNA → RplB (COG0090)rplB (PRK09374) → rpsS (PRK00357)RpsS (COG0185) →<br>rplV (PRK00565)Ribosomal_L22 (pfam00237) → RpsC (COG0092)rpsC (PRK00310) →<br>RplP (COG0197)rplP (PRK09203) → |
| env-528 | CESE01069575.1                | - | 1653    | 1587    | RNA → RplB (COG0090)rplB (PRK09374) → rpsS (PRK00357)RpsS (COG0185) →<br>rplV (PRK00565)Ribosomal_L22 (pfam00237) → rpsC (PRK00310)30S_S3_KH (cd02412) →                               |
| env-529 | CEST01031231.1                | - | 1873    | 1807    | RNA → RplB (COG0090)rplB (PRK09374) → rpsS (PRK00357)RpsS (COG0185) →<br>rplV (PRK00565)Ribosomal_L22 (pfam00237) → KH (smart00322)30S_S3_KH (cd02412) →                               |
| env-530 | 2236876001_338482             | - | 82      | 18      | RNA → hypo →                                                                                                                                                                           |
| env-531 | 2236876009_222696             | - | 140     | 75      | RNA → RplB (COG0090)rplB (PRK09374) →                                                                                                                                                  |
| env-532 | JGI20152J14361_10053033       | + | 949     | 1014    | RNA →                                                                                                                                                                                  |
| env-533 | 2236876001_438614             | - | 371     | 305     | RNA → rplB (PRK09374)Ribosomal_L2 (pfam00181) →                                                                                                                                        |
| env-534 | SI34jun09_10m_1003973         | - | 1624    | 1559    | RNA → RplB (COG0090)rplB (PRK09374) → rpsS (PRK00357)RpsS (COG0185) →<br>rplV (PRK00565)Ribosomal_L22 (pfam00237) →                                                                    |
| env-535 | CESU01069477.1                | - | 82      | 17      | RNA →                                                                                                                                                                                  |
| env-536 | DelMOSum2010_c10041356        | - | 259     | 194     | RNA → RplB (COG0090)rplB (PRK09374) →                                                                                                                                                  |
| env-537 | DelMOSum2011_c10032717        | - | 140     | 75      | RNA →                                                                                                                                                                                  |
| env-538 | SI60aug11_100m_c1018162       | - | 144     | 79      | RNA →                                                                                                                                                                                  |
| env-539 | SI47jul10_120m_c1099469       | + | 199     | 264     | RNA → RplB (COG0090)rplB (PRK09374) →                                                                                                                                                  |
| env-540 | SI34jun09_135m_1040685        | - | 788     | 723     | RNA → RplB (COG0090)rplB (PRK09374) →                                                                                                                                                  |
| env-541 | SI34jun09_100m_1002546        | - | 626     | 561     | RNA → RplB (COG0090)rplB (PRK09374) →                                                                                                                                                  |
| env-542 | JGI20151J14362_10030512       | + | 2508    | 2573    | RNA →                                                                                                                                                                                  |
| env-543 | CESI01072935.1                | + | 1105    | 1170    | RNA →                                                                                                                                                                                  |
| env-544 | PML_READ_01030272             | - | 197     | 132     | RNA → RplB (COG0090)rplB (PRK09374) →                                                                                                                                                  |
| env-545 | F10SI0310a_Sequence0000021673 | - | 388     | 323     | RNA → rplB (PRK09374)Ribosomal_L2 (pfam00181) →                                                                                                                                        |
| env-546 | 2236876003_146267             | + | 345     | 409     | RNA → RplB (COG0090)rplB (PRK09374) →                                                                                                                                                  |
| env-547 | 2236876010_0560637            | + | 290     | 354     | RNA → ← hypo                                                                                                                                                                           |
| env-548 | 2236876010_0169121            | - | 311     | 246     | RNA → RplB (COG0090)rplB (PRK09374) →                                                                                                                                                  |
| env-549 | 2236876009_267955             | - | 333     | 268     | RNA → rplB (PRK09374)Ribosomal_L2 (pfam00181) →                                                                                                                                        |
| env-550 | 2236876009_052156             | - | 273     | 208     | RNA → RplB (COG0090)rplB (PRK09374) →                                                                                                                                                  |
| env-551 | 2236876010_0456997            | - | 181     | 116     | RNA → RplB (COG0090)rplB (PRK09374) →                                                                                                                                                  |
| env-552 | DelMOSum2011_c10406745        | - | 105     | 40      | RNA → ← hypo                                                                                                                                                                           |
| env-553 | SI54feb11_100m_c1113376       | - | 189     | 124     | RNA → RplB (COG0090)rplB (PRK09374) →                                                                                                                                                  |
| env-554 | SI48aug10_10m_c1000222        | + | 2332    | 2397    | RNA → RplB (COG0090)rplB (PRK09374) → rpsS (PRK00357)RpsS (COG0185) →<br>rplV (PRK00565)Ribosomal_L22 (pfam00237) → RpsC (COG0092)rpsC (PRK00310) →<br>RplP (COG0197)rplP (PRK09203) → |
| env-555 | SI34jun09_120m_1016761        | - | 1571    | 1506    | RNA → RplB (COG0090)rplB (PRK09374) → rpsS (PRK00357)RpsS (COG0185) →<br>rplV (PRK00565)Ribosomal_L22 (pfam00237) →                                                                    |
| env-556 | SI48aug10_100m_1019662        | - | 473     | 408     | RNA → rplB (PRK09374)Ribosomal_L2 (pfam00181) →                                                                                                                                        |

|         |                                |   |         |         |                                                                                                                                                                                                                                                              |
|---------|--------------------------------|---|---------|---------|--------------------------------------------------------------------------------------------------------------------------------------------------------------------------------------------------------------------------------------------------------------|
| env-557 | JGI20156J14371_10036454        | - | 128     | 63      | RNA→                                                                                                                                                                                                                                                         |
| env-558 | JGI20154J14316_10048488        | + | 1717    | 1782    | RNA→                                                                                                                                                                                                                                                         |
| env-559 | JGI20160J14292_10049921        | - | 944     | 879     | RNA→ RplB (COG0090)rplB (PRK09374)→                                                                                                                                                                                                                          |
| env-560 | JGI20153J14295_10106585        | + | 637     | 702     | RNA→                                                                                                                                                                                                                                                         |
| env-561 | JGI20153J14318_10106585        | + | 637     | 702     | RNA→                                                                                                                                                                                                                                                         |
| env-562 | JGI20157J14317_10081233        | + | 1167    | 1232    | RNA→                                                                                                                                                                                                                                                         |
| env-563 | JGI20158J14315_10394374        | + | 254     | 319     | RNA→ rplW (PRK05738)Ribosomal_L23 (pfam00276)→                                                                                                                                                                                                               |
| env-564 | CERI01006995.1                 | - | 80      | 15      | RNA→                                                                                                                                                                                                                                                         |
| env-565 | CESO01025210.1                 | - | 5544    | 5479    | RNA→ RplB (COG0090)rplB (PRK09374)→ rpsS (PRK00357)RpsS (COG0185)→<br>rplV (PRK00565)Ribosomal_L22 (pfam00237)→ RpsC (COG0092)rpsC (PRK00310)→<br>RplP (COG0197)rplP (PRK09203)→                                                                             |
| env-566 | F10SI03100a_Sequence0000087588 | - | 597     | 532     | RNA→ RplB (COG0090)rplB (PRK09374)→                                                                                                                                                                                                                          |
| Rba-5-1 | NZ_DS022282.1                  | - | 1056719 | 1056654 | RNA→ RplB (COG0090)rplB (PRK09374)→ rpsS (PRK00357)RpsS (COG0185)→<br>rplV (PRK00565)Ribosomal_L22 (pfam00237)→ RpsC (COG0092)rpsC (PRK00310)→<br>RplP (COG0197)rplP (PRK09203)→                                                                             |
| env-567 | JCVI_SCAF_1101667005364        | + | 568     | 633     | RNA→ rplB (PRK09374)Ribosomal_L2 (pfam00181)→                                                                                                                                                                                                                |
| env-568 | DelMOSum2010_c10035518         | + | 2424    | 2489    | RNA→ RplB (COG0090)rplB (PRK09374)→                                                                                                                                                                                                                          |
| env-569 | DelMOSum2011_c10035518         | + | 2007    | 2072    | RNA→                                                                                                                                                                                                                                                         |
| env-570 | JGI20152J14361_10025542        | + | 1917    | 1982    | RNA→                                                                                                                                                                                                                                                         |
| env-571 | JGI20153J14295_10035283        | - | 131     | 66      | RNA→                                                                                                                                                                                                                                                         |
| env-572 | JGI20153J14318_10035283        | - | 131     | 66      | RNA→                                                                                                                                                                                                                                                         |
| env-573 | JGI20157J14317_10045573        | + | 1946    | 2011    | RNA→                                                                                                                                                                                                                                                         |
| env-574 | CESI01143925.1                 | + | 1396    | 1461    | RNA→                                                                                                                                                                                                                                                         |
| env-575 | CESU01042376.1                 | - | 78      | 13      | RNA→                                                                                                                                                                                                                                                         |
| env-576 | DelMOWin2010_c10019689         | - | 113     | 48      | RNA→ ←hypo                                                                                                                                                                                                                                                   |
| env-577 | JGI20152J14361_10025431        | - | 148     | 83      | RNA→                                                                                                                                                                                                                                                         |
| env-578 | JGI20160J14292_10037631        | - | 132     | 67      | RNA→                                                                                                                                                                                                                                                         |
| env-579 | JGI20151J14362_10009967        | - | 5544    | 5479    | RNA→ RplB (COG0090)rplB (PRK09374)→ rpsS (PRK00357)RpsS (COG0185)→<br>rplV (PRK00565)Ribosomal_L22 (pfam00237)→ RpsC (COG0092)rpsC (PRK00310)→<br>rplV (PRK00565)Ribosomal_L22 (pfam00237)→ RpsC (COG0092)rpsC (PRK00310)→<br>RplP (COG0197)rplP (PRK09203)→ |
| env-580 | JGI20157J14317_10012557        | + | 1945    | 2010    | RNA→ RplB (COG0090)rplB (PRK09374)→ rpsS (PRK00357)RpsS (COG0185)→<br>rplV (PRK00565)Ribosomal_L22 (pfam00237)→ RpsC (COG0092)rpsC (PRK00310)→<br>RplP (COG0197)rplP (PRK09203)→                                                                             |
| env-581 | CERM01019450.1                 | + | 628     | 693     | RNA→                                                                                                                                                                                                                                                         |
| env-582 | 2236876001_009312              | - | 254     | 189     | RNA→ RplB (COG0090)rplB (PRK09374)→                                                                                                                                                                                                                          |
| env-583 | JGI20156J14371_10029870        | + | 2238    | 2303    | RNA→ rplB (PRK09374)Ribosomal_L2 (pfam00181)→                                                                                                                                                                                                                |
| env-584 | JGI20154J14316_10019470        | - | 1818    | 1753    | RNA→ RplB (COG0090)rplB (PRK09374)→ rpsS (PRK00357)RpsS (COG0185)→<br>rplV (PRK00565)Ribosomal_L22 (pfam00237)→ rpsC (PRK00310)30S_S3_KH (cd02412)→                                                                                                          |
| env-585 | JGI20153J14295_10035952        | + | 1907    | 1972    | RNA→                                                                                                                                                                                                                                                         |
| env-586 | JGI20153J14318_10035952        | + | 1907    | 1972    | RNA→                                                                                                                                                                                                                                                         |
| env-587 | JGI20159J14440_10007957        | + | 3434    | 3499    | RNA→ RplB (COG0090)rplB (PRK09374)→ rpsS (PRK00357)RpsS (COG0185)→<br>rplV (PRK00565)Ribosomal_L22 (pfam00237)→ RpsC (COG0092)rpsC (PRK00310)→<br>rplP (PRK09203)Ribosomal_L16 (pfam00252)→                                                                  |
| env-588 | JGI20155J14468_10004488        | + | 2462    | 2527    | RNA→ RplB (COG0090)rplB (PRK09374)→ rpsS (PRK00357)RpsS (COG0185)→<br>rplV (PRK00565)Ribosomal_L22 (pfam00237)→ RpsC (COG0092)rpsC (PRK00310)→<br>RplP (COG0197)rplP (PRK09203)→                                                                             |
| env-589 | JGI20158J14315_10007229        | + | 2960    | 3025    | RNA→ RplB (COG0090)rplB (PRK09374)→ rpsS (PRK00357)RpsS (COG0185)→<br>rplV (PRK00565)Ribosomal_L22 (pfam00237)→ RpsC (COG0092)rpsC (PRK00310)→<br>RplP (COG0197)rplP (PRK09203)→                                                                             |
| Sgu-1-1 | NZ_JASG01000004.1              | - | 2771313 | 2771244 | RNA→ RplB (COG0090)rplB (PRK09374)→ rpsS (PRK00357)RpsS (COG0185)→<br>rplV (PRK00565)Ribosomal_L22 (pfam00237)→ RpsC (COG0092)rpsC (PRK00310)→<br>RplP (COG0197)rplP (PRK09203)→                                                                             |
| env-590 | CENJ01071080.1                 | + | 446     | 521     | RNA→ RplB (COG0090)rplB (PRK09374)→ rpsS (PRK00357)RpsS (COG0185)→                                                                                                                                                                                           |
| env-591 | CENR01032483.1                 | + | 411     | 486     | RNA→                                                                                                                                                                                                                                                         |
| env-592 | JGI12120J13076_100262          | + | 774     | 849     | RNA→ RplB (COG0090)rplB (PRK09374)→ rpsS (PRK00357)RpsS (COG0185)→<br>rplV (PRK00565)Ribosomal_L22 (pfam00237)→ rpsC (PRK00310)30S_S3_KH (cd02412)→                                                                                                          |



|         |                         |   |         |         |                                                                                                                                                                                                                                                                                                                                                                         |
|---------|-------------------------|---|---------|---------|-------------------------------------------------------------------------------------------------------------------------------------------------------------------------------------------------------------------------------------------------------------------------------------------------------------------------------------------------------------------------|
| env-593 | JGI11929J13085_109680   | + | 171     | 246     | RNA → RplB (COG0090)rplB (PRK09374) →                                                                                                                                                                                                                                                                                                                                   |
| env-594 | JGI12207J13218_1020216  | + | 89      | 164     | RNA → rplB (PRK09374)Ribosomal_L2 (pfam00181) →                                                                                                                                                                                                                                                                                                                         |
| env-595 | CEOE01076289.1          | - | 558     | 483     | RNA → rplB (PRK09374)Ribosomal_L2 (pfam00181) →                                                                                                                                                                                                                                                                                                                         |
| env-596 | LAZR01000132.1          | - | 92425   | 92350   | RNA → RplB (COG0090)rplB (PRK09374) → rpsS (PRK00357)RpsS (COG0185) →<br>rplV (PRK00565)Ribosomal_L22 (pfam00237) → RpsC (COG0092)rpsC (PRK00310) →<br>RplP (COG0197)rplP (PRK09203) →                                                                                                                                                                                  |
| env-597 | CEWQ01009550.1          | + | 346     | 421     | RNA → RplB (COG0090)rplB (PRK09374) →                                                                                                                                                                                                                                                                                                                                   |
| Ssp-3-1 | NZ_JPOY01000011.1       | - | 2334383 | 2334308 | RNA → RplB (COG0090)rplB (PRK09374) → rpsS (PRK00357)RpsS (COG0185) →<br>rplV (PRK00565)Ribosomal_L22 (pfam00237) → RpsC (COG0092)rpsC (PRK00310) →<br>RplP (COG0197)rplP (PRK09203) →                                                                                                                                                                                  |
| Ssp-4-1 | NZ_CH959310.1           | - | 345269  | 345194  | RNA → RplB (COG0090)rplB (PRK09374) → rpsS (PRK00357)RpsS (COG0185) →<br>rplV (PRK00565)Ribosomal_L22 (pfam00237) → RpsC (COG0092)rpsC (PRK00310) →<br>RplP (COG0197)rplP (PRK09203) →                                                                                                                                                                                  |
| env-598 | CEQX01294317.1          | - | 107     | 32      | RNA →                                                                                                                                                                                                                                                                                                                                                                   |
| env-599 | CESO01088717.1          | + | 87      | 162     | RNA → rplB (PRK09374)Ribosomal_L2 (pfam00181) →                                                                                                                                                                                                                                                                                                                         |
| Ssp-5-1 | NZ_CH959312.1           | - | 929126  | 929051  | RNA → RplB (COG0090)rplB (PRK09374) → rpsS (PRK00357)RpsS (COG0185) →<br>rplV (PRK00565)Ribosomal_L22 (pfam00237) → RpsC (COG0092)rpsC (PRK00310) →<br>RplP (COG0197)rplP (PRK09203) →                                                                                                                                                                                  |
| Spo-1-1 | NZ_AXZR01000005.1       | + | 3608    | 3683    | RNA → RplB (COG0090)rplB (PRK09374) → rpsS (PRK00357)RpsS (COG0185) →<br>rplV (PRK00565)Ribosomal_L22 (pfam00237) → RpsC (COG0092)rpsC (PRK00310) →<br>RplP (COG0197)rplP (PRK09203) →                                                                                                                                                                                  |
| env-600 | CEQZ01007430.1          | - | 103     | 28      | RNA →                                                                                                                                                                                                                                                                                                                                                                   |
| env-601 | CERD01103759.1          | + | 510     | 585     | RNA → RplB (COG0090)rplB (PRK09374) → rpsS (PRK00357)RpsS (COG0185) →<br>rplV (PRK00565)Ribosomal_L22 (pfam00237) → RpsC (COG0092)rpsC (PRK00310) →                                                                                                                                                                                                                     |
| env-602 | CERE01033137.1          | + | 1304    | 1379    | RNA → RplB (COG0090)rplB (PRK09374) → rpsS (PRK00357)RpsS (COG0185) →<br>rplV (PRK00565)Ribosomal_L22 (pfam00237) → RpsC (COG0092)rpsC (PRK00310) →<br>RplP (COG0197)rplP (PRK09203) →                                                                                                                                                                                  |
| env-603 | CERJ01019869.1          | - | 717     | 642     | RNA → RplB (COG0090)rplB (PRK09374) →                                                                                                                                                                                                                                                                                                                                   |
| env-604 | CESK01030715.1          | - | 2698    | 2623    | RNA → RplB (COG0090)rplB (PRK09374) → rpsS (PRK00357)RpsS (COG0185) →<br>rplV (PRK00565)Ribosomal_L22 (pfam00237) → RpsC (COG0092)rpsC (PRK00310) →<br>RplP (COG0197)rplP (PRK09203) →                                                                                                                                                                                  |
| env-605 | CEOG01072571.1          | - | 582     | 507     | RNA → RplB (COG0090)rplB (PRK09374) →                                                                                                                                                                                                                                                                                                                                   |
| env-606 | JGI11755J13075_100039   | + | 3752    | 3827    | RNA → RplB (COG0090)rplB (PRK09374) → rpsS (PRK00357)RpsS (COG0185) →<br>rplV (PRK00565)Ribosomal_L22 (pfam00237) → RpsC (COG0092)rpsC (PRK00310) →<br>RplP (COG0197)rplP (PRK09203) →                                                                                                                                                                                  |
| env-607 | JGI11949J13268_1000009  | + | 3765    | 3840    | RNA → RplB (COG0090)rplB (PRK09374) → rpsS (PRK00357)RpsS (COG0185) →<br>rplV (PRK00565)Ribosomal_L22 (pfam00237) → RpsC (COG0092)rpsC (PRK00310) →<br>RplP (COG0197)rplP (PRK09203) →                                                                                                                                                                                  |
| env-608 | CEQG01048819.1          | - | 2905    | 2830    | RNA → RplB (COG0090)rplB (PRK09374) → rpsS (PRK00357)RpsS (COG0185) →<br>rplV (PRK00565)Ribosomal_L22 (pfam00237) → RpsC (COG0092)rpsC (PRK00310) →<br>RplP (COG0197)rplP (PRK09203) →                                                                                                                                                                                  |
| env-609 | CEVJ01067098.1          | + | 321     | 396     | RNA → RplB (COG0090)rplB (PRK09374) →                                                                                                                                                                                                                                                                                                                                   |
| env-610 | CAM_READ_0079652197     | + | 1       | 76      | RNA →                                                                                                                                                                                                                                                                                                                                                                   |
| env-611 | SL_1KL_011_SED_10748645 | + | 106     | 170     | RNA → RplB (COG0090)rplB (PRK09374) →                                                                                                                                                                                                                                                                                                                                   |
| env-612 | SL_9KL_010_SED_10060232 | - | 1582    | 1518    | RNA → RplB (COG0090)rplB (PRK09374) → rpsS (PRK00357)RpsS (COG0185) →<br>rplV (PRK00565)Ribosomal_L22 (pfam00237) →                                                                                                                                                                                                                                                     |
| env-613 | JGI24025J20009_10228543 | - | 185     | 112     | RNA → RplB (COG0090)rplB (PRK09374) →                                                                                                                                                                                                                                                                                                                                   |
| env-614 | JGI24724J26744_10018762 | + | 3389    | 3462    | RNA →                                                                                                                                                                                                                                                                                                                                                                   |
| Oin-1-1 | NZ_ABID01000001.1       | + | 1417271 | 1417344 | RNA → RplB (COG0090)rplB (PRK09374) → RplB (COG0090)rplB (PRK09374) →<br>rpsS (PRK00357)RpsS (COG0185) → rpsS (PRK00357)RpsS (COG0185) →<br>rplV (PRK00565)Ribosomal_L22 (pfam00237) → rplV (PRK00565)Ribosomal_L22 (pfam00237) →<br>RpsC (COG0092)rpsC (PRK00310) → RpsC (COG0092)rpsC (PRK00310) → RplP (COG0197)rplP (PRK09203) →<br>RplP (COG0197)rplP (PRK09203) → |
| env-615 | LAZR01017474.1          | + | 457     | 530     | RNA → RplB (COG0090)rplB (PRK09374) → rpsS (PRK00357)RpsS (COG0185) →<br>rplV (PRK00565)Ribosomal_L22 (pfam00237) → RpsC (COG0092)rpsC (PRK00310) →                                                                                                                                                                                                                     |
| env-616 | JGI24724J26744_10081951 | + | 450     | 522     | RNA → RplB (COG0090)rplB (PRK09374) →                                                                                                                                                                                                                                                                                                                                   |



|         |                         |   |         |         |                                                                                                                                                                                               |
|---------|-------------------------|---|---------|---------|-----------------------------------------------------------------------------------------------------------------------------------------------------------------------------------------------|
| env-617 | ABEF01021384.1          | - | 622     | 549     | RNA → RplB (COG0090)rplB (PRK09374) →                                                                                                                                                         |
| env-618 | CEQG01019720.1          | + | 5395    | 5468    | RNA → RplB (COG0090)rplB (PRK09374) → rpsS (PRK00357)RpsS (COG0185) →<br>rplV (PRK00565)Ribosomal_L22 (pfam00237) → RpsC (COG0092)rpsC (PRK00310) →<br>RplP (COG0197)rplP (PRK09203) →        |
| env-619 | CEQZ01013875.1          | - | 101     | 28      | RNA →                                                                                                                                                                                         |
| env-620 | CESC01001606.1          | - | 1753    | 1680    | RNA → RplB (COG0090)rplB (PRK09374) → rpsS (PRK00357)RpsS (COG0185) →<br>rplV (PRK00565)Ribosomal_L22 (pfam00237) → rpsC (PRK00310)30S_S3_KH (cd02412) →                                      |
| env-621 | CEVI01215114.1          | - | 178     | 105     | RNA → RplB (COG0090)rplB (PRK09374) →                                                                                                                                                         |
| env-622 | CEWF01005413.1          | + | 2525    | 2598    | RNA → RplB (COG0090)rplB (PRK09374) → rpsS (PRK00357)RpsS (COG0185) →<br>rplV (PRK00565)Ribosomal_L22 (pfam00237) → rpsC (PRK00310)30S_S3_KH (cd02412) →                                      |
| env-623 | CERO01018958.1          | - | 2363    | 2290    | RNA → RplB (COG0090)rplB (PRK09374) → rpsS (PRK00357)RpsS (COG0185) →<br>rplV (PRK00565)Ribosomal_L22 (pfam00237) → RpsC (COG0092)rpsC (PRK00310) →                                           |
| env-624 | CEVA01074518.1          | + | 66      | 139     | RNA → rplB (PRK09374)Ribosomal_L2 (pfam00181) →                                                                                                                                               |
| env-625 | JGI24724J26744.10034861 | + | 2147    | 2220    | RNA →                                                                                                                                                                                         |
| env-626 | JGI24723J26617.10013494 | + | 1334    | 1407    | RNA → RplB (COG0090)rplB (PRK09374) → rpsS (PRK00357)RpsS (COG0185) →<br>rplV (PRK00565)Ribosomal_L22 (pfam00237) → RpsC (COG0092)rpsC (PRK00310) →<br>RplP (COG0197)rplP (PRK09203) →        |
| env-627 | LAZR01008751.1          | + | 1162    | 1237    | RNA → RplB (COG0090)rplB (PRK09374) → rpsS (PRK00357)RpsS (COG0185) →<br>rplV (PRK00565)Ribosomal_L22 (pfam00237) → RpsC (COG0092)rpsC (PRK00310) →<br>RplP (COG0197)rplP (PRK09203) →        |
| env-628 | JGI24724J26744.10022772 | + | 2527    | 2568    | RNA → RplB (COG0090)rplB (PRK09374) →                                                                                                                                                         |
| env-629 | JGI24724J26744.10281221 | + | 457     | 498     | RNA → ←hypo                                                                                                                                                                                   |
| Sdo-1-1 | NZ_JASF01000005.1       | + | 1880338 | 1880379 | RNA → RplB (COG0090)rplB (PRK09374) → rpsS (PRK00357)RpsS (COG0185) →<br>rplV (PRK00565)Ribosomal_L22 (pfam00237) → RpsC (COG0092)rpsC (PRK00310) →<br>RplP (COG0197)rplP (PRK09203) →        |
| Sdo-1-2 | NZ_JAMC01000005.1       | + | 6216    | 6257    | RNA → RplB (COG0090)rplB (PRK09374) → rpsS (PRK00357)RpsS (COG0185) →<br>rplV (PRK00565)Ribosomal_L22 (pfam00237) → RpsC (COG0092)rpsC (PRK00310) →<br>RplP (COG0197)rplP (PRK09203) →        |
| env-630 | KVRMV2_105402183        | - | 158     | 94      | RNA → RplB (COG0090)rplB (PRK09374) →                                                                                                                                                         |
| env-631 | KVRMV2_100053128        | + | 1810    | 1873    | RNA → RplB (COG0090)rplB (PRK09374) → rpsS (PRK00357)RpsS (COG0185) →<br>rplV (PRK00565)Ribosomal_L22 (pfam00237) →                                                                           |
| env-632 | KVRMV2_100511851        | + | 614     | 679     | RNA → RplB (COG0090)rplB (PRK09374) → rpsS (PRK00357)RpsS (COG0185) →                                                                                                                         |
| env-633 | 3300001592.10006696     | - | 11253   | 11192   | RNA → RplB (COG0090)rplB (PRK09374) → rpsS (PRK00357)RpsS (COG0185) →<br>rplV (PRK00565)Ribosomal_L22 (pfam00237) → RpsC (COG0092)rpsC (PRK00310) →<br>RplP (COG0197)rplP (PRK09203) →        |
| env-634 | JGI24770J26754.10633113 | - | 235     | 176     | RNA → RplB (COG0090)rplB (PRK09374) →                                                                                                                                                         |
| env-635 | JGI24770J26754.10084963 | - | 885     | 824     | RNA → RplB (COG0090)rplB (PRK09374) →                                                                                                                                                         |
| env-636 | APMI01044789.1          | + | 283     | 344     | RNA → RplB (COG0090)rplB (PRK09374) →                                                                                                                                                         |
| env-637 | JGI24770J26754.10316505 | + | 277     | 338     | RNA → RplB (COG0090)rplB (PRK09374) →                                                                                                                                                         |
| Lme-1-1 | NC_023135.1             | + | 198601  | 198709  | RNA → RplB (COG0090)rplB (PRK09374) → rpsS (PRK00357)RpsS (COG0185) →<br>rplV (PRK00565)Ribosomal_L22 (pfam00237) → hypo → RpsC (COG0092)rpsC (PRK00310) →<br>RplP (COG0197)rplP (PRK09203) → |
| env-638 | CAM_READ_0234721741     | - | 220     | 152     | RNA → RplB (COG0090)rplB (PRK09374) →                                                                                                                                                         |
| env-639 | 84546017                | - | 387     | 322     | RNA → rplB (PRK09374)Ribosomal_L2 (pfam00181) →                                                                                                                                               |
| Rba-1-1 | NZ_AVDB01000002.1       | + | 2929    | 2994    | RNA → RplB (COG0090)rplB (PRK09374) → rpsS (PRK00357)RpsS (COG0185) →<br>rplV (PRK00565)Ribosomal_L22 (pfam00237) → RpsC (COG0092)rpsC (PRK00310) →<br>RplP (COG0197)rplP (PRK09203) →        |
| env-640 | 84518656                | - | 774     | 709     | RNA → RplB (COG0090)rplB (PRK09374) →                                                                                                                                                         |
| env-641 | CAM_READ_0234724723     | + | 190     | 256     | RNA → rplB (PRK09374)Ribosomal_L2 (pfam00181) →                                                                                                                                               |
| env-642 | CAM_READ_0235767883     | + | 190     | 256     | RNA → RplB (COG0090)rplB (PRK09374) →                                                                                                                                                         |
| env-643 | JCVL_SCAF_1101667302592 | - | 664     | 599     | RNA → RplB (COG0090)rplB (PRK09374) →                                                                                                                                                         |
| env-644 | CAM_READ_0236589595     | - | 346     | 280     | RNA → rplB (PRK09374)Ribosomal_L2 (pfam00181) →                                                                                                                                               |
| env-645 | 84547844                | + | 884     | 948     | RNA →                                                                                                                                                                                         |
| env-646 | CAM_READ_0236055591     | - | 90      | 24      | RNA → hypo →                                                                                                                                                                                  |
| env-647 | CAM_READ_0236222577     | - | 217     | 152     | RNA → RplB (COG0090)rplB (PRK09374) →                                                                                                                                                         |

|         |                         |   |         |         |                                                                                                                                                                                                                                              |
|---------|-------------------------|---|---------|---------|----------------------------------------------------------------------------------------------------------------------------------------------------------------------------------------------------------------------------------------------|
| env-648 | CAM_READ_0235239301     | + | 303     | 368     | RNA →                                                                                                                                                                                                                                        |
| env-649 | JCVI_READ_1101854610991 | + | 341     | 406     | RNA → <b>rplB (PRK09374)</b> Ribosomal_L2 (pfam00181) →                                                                                                                                                                                      |
| env-650 | CAM_READ_0235244455     | + | 234     | 302     | RNA →                                                                                                                                                                                                                                        |
| Wma-1-1 | NZ_KB902287.1           | - | 74480   | 74410   | RNA → <b>RplB (COG0090)</b> <b>rplB (PRK09374)</b> → <b>rpsS (PRK00357)</b> RpsS (COG0185) →<br><b>rplV (PRK00565)</b> Ribosomal_L22 (pfam00237) → <b>RpsC (COG0092)</b> rpsC (PRK00310) →<br><b>RplP (COG0197)</b> rplP (PRK09203) →        |
| env-651 | JCVI_READ_1108839274073 | + | 792     | 857     | RNA →                                                                                                                                                                                                                                        |
| env-652 | JGI11829J13087_100089   | + | 1021    | 1083    | RNA → <b>RplB (COG0090)</b> <b>rplB (PRK09374)</b> → <b>rpsS (PRK00357)</b> RpsS (COG0185) →<br><b>rplV (PRK00565)</b> Ribosomal_L22 (pfam00237) → <b>RpsC (COG0092)</b> rpsC (PRK00310) →<br><b>RplP (COG0197)</b> rplP (PRK09203) → hypo → |
| Mal-2-1 | NZ_CP010855.1           | - | 3005866 | 3005804 | RNA → <b>RplB (COG0090)</b> <b>rplB (PRK09374)</b> → <b>rpsS (PRK00357)</b> RpsS (COG0185) →<br><b>rplV (PRK00565)</b> Ribosomal_L22 (pfam00237) → <b>RpsC (COG0092)</b> rpsC (PRK00310) →<br><b>RplP (COG0197)</b> rplP (PRK09203) →        |
| env-653 | JGI12120J13076_116087   | + | 62      | 124     | RNA → <b>RplB (COG0090)</b> <b>rplB (PRK09374)</b> →                                                                                                                                                                                         |
| env-654 | JGI11929J13085_103365   | - | 387     | 325     | RNA → <b>rplB (PRK09374)</b> Ribosomal_L2 (pfam00181) →                                                                                                                                                                                      |
| env-655 | JGI11819J13099_125412   | + | 134     | 196     | RNA →                                                                                                                                                                                                                                        |
| env-656 | JGI12210J13797_10226873 | - | 121     | 59      | RNA → hypo →                                                                                                                                                                                                                                 |
| Pga-3-1 | NC_023137.1             | + | 301203  | 301281  | RNA → <b>RplB (COG0090)</b> <b>rplB (PRK09374)</b> → <b>rpsS (PRK00357)</b> RpsS (COG0185) →<br><b>rplV (PRK00565)</b> Ribosomal_L22 (pfam00237) → <b>RpsC (COG0092)</b> rpsC (PRK00310) →<br><b>RplP (COG0197)</b> rplP (PRK09203) →        |

### 1.3 Conserved domains

Conserved domains found in protein-coding genes listed in Section 1.2 are shown below, with the first sentence in their description from the Conserved Domain Database (if any). Conserved domains associated with more than one L2-

Alphaproteobacteria RNA are assigned a color, while others are shown in gray. The number in parentheses after the colored domain name is the number of occurrences in Section 1.2.

**cd00719** (1) GIY-YIG nuclease domain superfamily.

**cd01658** (4) Ribosomal protein L30, which is found in eukaryotes and prokaryotes but not in archaea, is one of the smallest ribosomal proteins with a molecular mass of about 7kDa.

**cd02412** (29) K homology RNA-binding (KH) domain of the prokaryotic 30S small ribosomal subunit protein S3.

**cd03886** (1) M20 Peptidase Aminoacylase 1 family.

**COG0090** (567) Ribosomal protein L2 [Translation, ribosomal structure and biogenesis]

**COG0091** (13) Ribosomal protein L22 [Translation, ribosomal structure and biogenesis]

**COG0092** (310) Ribosomal protein S3 [Translation, ribosomal structure and biogenesis]

**COG0094** (5) Ribosomal protein L5 [Translation, ribosomal structure and biogenesis]

**COG0097** (5) Ribosomal protein L6P/L9E [Translation, ribosomal structure and biogenesis]

**COG0098** (4) Ribosomal protein S5 [Translation, ribosomal structure and biogenesis]

**COG0185** (365) Ribosomal protein S19 [Translation, ribosomal structure and biogenesis]

**COG0186** (1) Ribosomal protein S17 [Translation, ribosomal structure and biogenesis]

**COG0197** (289) Ribosomal protein L16/L10AE [Translation, ribosomal structure and biogenesis]

**COG0198** (5) Ribosomal protein L24 [Translation, ribosomal structure and biogenesis]

**COG0256** (1) Ribosomal protein L18 [Translation, ribosomal structure and biogenesis]

**COG0596** (3) Pimeloyl-ACP methyl ester carboxylesterase [Coenzyme transport and metabolism, General function prediction only]

**COG1917** (1) Cupin domain protein related to quercetin dioxygenase [General function prediction only]

**pfam00181** (107) Ribosomal Proteins L2, RNA binding domain.

**pfam00189** (3) Ribosomal protein S3, C-terminal domain.

**pfam00203** (7) Ribosomal protein S19.

**pfam00237** (339) Ribosomal protein L22p/L17e.

**pfam00238** (5) Ribosomal protein L14p/L23e.

**pfam00252** (8) Ribosomal protein L16p/L10e.

**pfam00253** (5) Ribosomal protein S14p/S29e.

**pfam00276** (1) Ribosomal protein L23.

**pfam00366** (4) Ribosomal protein S17.

**pfam00410** (5) Ribosomal protein S8.

**pfam00831** (5) Ribosomal L29 protein.

**pfam00861** (4) Ribosomal L18 of archaea, bacteria, mitoch.

**pfam03947** (3) Ribosomal Proteins L2, C-terminal domain.

**pfam06248** (1) Centromere/kinetochore Zw10.

**pfam12697** (3) Alpha/beta hydrolase family.

**pfam13759** (4) Putative 2OG-Fe(II) oxygenase.

**pfam16867** (1) Dimethylsulfoniopropionate lyase.

**PRK00004** (5) 50S ribosomal protein L24; Reviewed

**PRK00010** (5) 50S ribosomal protein L5; Validated

**PRK00136** (5) 30S ribosomal protein S8; Validated

**PRK00306** (5) 50S ribosomal protein L29; Reviewed

**PRK00310** (337) 30S ribosomal protein S3; Reviewed

**PRK00357** (372) 30S ribosomal protein S19; Reviewed

**PRK00550** (4) 30S ribosomal protein S5; Validated  
**PRK00565** (353) 50S ribosomal protein L22; Reviewed  
**PRK05483** (5) 50S ribosomal protein L14; Validated  
**PRK05498** (5) 50S ribosomal protein L6; Validated  
**PRK05593** (5) 50S ribosomal protein L18; Reviewed  
**PRK05610** (5) 30S ribosomal protein S17; Reviewed  
**PRK05611** (4) 50S ribosomal protein L30; Reviewed  
**PRK05738** (2) 50S ribosomal protein L23; Reviewed  
**PRK08881** (5) 30S ribosomal protein S14; Reviewed

**PRK09203** (297) 50S ribosomal protein L16; Reviewed  
**PRK09374** (677) 50S ribosomal protein L2; Validated  
**smart00322** (5) K homology RNA-binding domain.  
**smart00465** (1) GIY-YIG type nucleases (URI domain).  
**TIGR01891** (1) amidohydrolase. [Protein fate, Degradation of proteins, peptides, and glycopeptides]  
**TIGR02466** (1) conserved hypothetical protein. [Hypothetical proteins, Conserved]

## 1.4 Multiple-sequence alignment

Each L2-Alphaproteobacteria RNA is denoted by an abbreviation (like “Eco-1-1”) that refers to a taxonomy given in Section 1.1. The alignment may include sequences containing the RNA motif, as well as flanking sequence. The L2-Alphaproteobacteria RNA itself is denoted by the line underneath marked 5’ and 3’ on either end. Nucleotides in flanking sequences (i.e., not part of the motif) are written in gray letters. Stems of predicted rho-independent transcription terminators, if any, are shaded yellow. (Note: terminator predictions have not been analyzed manually, and many are likely to be false positives. Terminator predictions are those of the RNIE software.) Nucleotides predicted to function (as DNA) as transcription-factor binding sites, if any, are shaded in green. (But note: these predictions are manually annotated, so they might be under-predicted.) Annotated start codons, if any, are shaded green. (Note: start codons are frequently misannotated, especially in environmental samples.) Nucleotides proposed to basepair as part of the consensus structure are shaded in color when they comprise Watson-

Crick or G-U pairs. Otherwise they are shaded gray. Conserved stems are also indicated at the bottom of the alignment by angle brackets, where matching < and > denote base-paired columns. Below these angle brackets, the symbol “2” denotes base pairs exhibiting covariation according to the statistically well-founded R-scape method. “1” denotes base pairs exhibiting covariation according to R2R’s simplistic method. “0” denotes base pairs that are not observed to mutate and “?” denotes base pairs that have a significant frequency of non-canonical nucleotides for Watson-Crick or G-U pairs (> 5%). Below these base pair annotation is the consensus sequence: “R” = “A” or “G”, “Y” = “C” or “U”, red nucleotides: nucleotide identity conserved more than 97% of the time, black nucleotides: 90%, gray nucleotides: 75%, red circle (◉): nucleotide is present 97% of the time, black circle (◐): 90%, gray circle (◑): 75%, white circle (◒): 50%. All percentages of sequences just described (e.g. 97% conserved) assume that sequences have been weighted by the GSC algorithm implemented by the Infernal software package.

Duplicate sequences: the following putative homologs are not shown in the alignment because their sequences are identical to a homolog already shown: Cba-1-1, Gne-1-1, Kvu-2-1, Lca-1-1, Lsp-5-1, Lsp-9-1, Nig-1-1, Nit-1-1, Nit-1-2, Oin-1-1, Pfe-2-1, Rba-5-1, Rca-1-1, Rca-2-1, Rca-3-1, Rca-5-1, Rmo-2-1, Rnu-1-1, Rsp-20-1, Rsp-3-1, Rsp-6-1, Sdo-1-2, Spo-1-1, Ssp-1-1, Ssp-3-1, Tsp-2-1, env-100, env-102, env-107, env-11, env-110, env-111, env-112, env-113, env-114, env-115, env-12, env-123, env-126, env-129, env-130, env-131, env-132, env-133, env-134, env-137, env-140, env-142, env-147, env-152, env-153, env-154, env-159, env-160, env-161, env-180, env-181, env-182, env-183, env-184, env-185, env-198, env-199, env-208, env-209, env-210, env-211, env-212, env-238, env-239, env-240, env-241, env-242, env-243, env-244, env-245, env-246, env-249, env-250, env-251, env-253, env-267, env-268, env-270, env-28, env-281, env-283, env-29, env-292, env-294, env-30, env-302, env-303, env-304, env-305, env-306, env-307, env-31, env-318, env-32, env-328, env-33, env-333, env-334, env-34, env-348, env-349, env-350, env-351, env-352, env-353, env-354, env-355, env-366, env-368, env-376, env-377, env-383, env-384, env-385, env-387, env-390, env-393, env-401, env-406, env-408, env-409, env-410, env-411, env-412, env-415, env-420, env-424, env-425, env-44, env-442, env-443, env-444, env-446, env-449, env-45, env-450, env-451, env-452, env-453, env-454, env-455, env-456, env-457, env-46, env-461, env-462, env-466, env-468, env-470, env-471, env-474, env-478, env-479, env-48, env-480, env-481, env-485, env-486, env-487, env-488, env-489, env-490, env-491, env-492, env-496, env-498, env-499, env-501, env-504, env-509, env-510, env-511, env-529, env-53, env-532, env-535, env-537, env-538, env-539, env-54, env-540, env-541, env-542, env-543, env-544, env-545, env-547, env-550, env-551, env-552, env-553, env-554, env-555, env-556, env-557, env-558, env-559, env-560, env-561, env-562, env-563, env-564, env-565, env-566, env-568, env-569, env-570, env-571, env-572, env-573, env-574, env-575, env-577, env-578, env-58, env-580, env-581, env-584, env-585, env-586, env-587, env-588, env-589, env-593, env-594, env-599, env-601, env-602, env-603, env-604, env-607, env-608, env-609, env-61, env-610, env-619, env-62, env-620, env-621, env-622, env-63, env-642, env-654, env-655, env-73, env-80, env-81, env-82, env-87, env-95







































|                    |         |               |              |                 |                  |                                               |
|--------------------|---------|---------------|--------------|-----------------|------------------|-----------------------------------------------|
| Hma-1-1            | Archaea | Euryarchaeota | Halobacteria | Halobacteriales | Halobacteriaceae | <i>Haloarcula marismortui</i> ATCC 43049      |
| Hsa-2-1            | Archaea | Euryarchaeota | Halobacteria | Halobacteriales | Halobacteriaceae | <i>Haloarcula salaria</i>                     |
| Hsi-1-1            | Archaea | Euryarchaeota | Halobacteria | Halobacteriales | Halobacteriaceae | <i>Haloarcula sinaiensis</i> ATCC 33800       |
| Hva-1-1            | Archaea | Euryarchaeota | Halobacteria | Halobacteriales | Halobacteriaceae | <i>Haloarcula vallismortis</i> ATCC 29715     |
| Hsa-3-1            | Archaea | Euryarchaeota | Halobacteria | Halobacteriales | Halobacteriaceae | <i>Halobacterium salinarum</i> R1             |
| Hsp-2-1            | Archaea | Euryarchaeota | Halobacteria | Halobacteriales | Halobacteriaceae | <i>Halobacterium</i> sp. DL1                  |
| Hsp-3-1            | Archaea | Euryarchaeota | Halobacteria | Halobacteriales | Halobacteriaceae | <i>Halobacterium</i> sp. NRC-1                |
| Hla-1-1 to Hla-1-2 | Archaea | Euryarchaeota | Halobacteria | Halobacteriales | Halobacteriaceae | <i>Halobiforma lacisalsi</i> AJ5              |
| Hni-1-1            | Archaea | Euryarchaeota | Halobacteria | Halobacteriales | Halobacteriaceae | <i>Halobiforma nitratireducens</i> JCM 10879  |
| Hha-1-1 to Hha-1-2 | Archaea | Euryarchaeota | Halobacteria | Halobacteriales | Halobacteriaceae | <i>Halococcus hamelinensis</i> 100A6          |
| Hmo-1-1            | Archaea | Euryarchaeota | Halobacteria | Halobacteriales | Halobacteriaceae | <i>Halococcus morrhuae</i> DSM 1307           |
| Hsa-4-1            | Archaea | Euryarchaeota | Halobacteria | Halobacteriales | Halobacteriaceae | <i>Halococcus saccharolyticus</i> DSM 5350    |
| Hsa-5-1            | Archaea | Euryarchaeota | Halobacteria | Halobacteriales | Halobacteriaceae | <i>Halococcus salifodinae</i> DSM 8989        |
| Hth-1-1            | Archaea | Euryarchaeota | Halobacteria | Halobacteriales | Halobacteriaceae | <i>Halococcus thailandensis</i> JCM 13552     |
| Hal-1-1            | Archaea | Euryarchaeota | Halobacteria | Halobacteriales | Halobacteriaceae | <i>Haloferax alexandrinus</i> JCM 10717       |
| Hde-1-1            | Archaea | Euryarchaeota | Halobacteria | Halobacteriales | Halobacteriaceae | <i>Haloferax denitrificans</i> ATCC 35960     |
| Hel-1-1            | Archaea | Euryarchaeota | Halobacteria | Halobacteriales | Halobacteriaceae | <i>Haloferax elongans</i> ATCC BAA-1513       |
| Hgi-1-1            | Archaea | Euryarchaeota | Halobacteria | Halobacteriales | Halobacteriaceae | <i>Haloferax gibbonsii</i> ATCC 33959         |
| Hla-2-1            | Archaea | Euryarchaeota | Halobacteria | Halobacteriales | Halobacteriaceae | <i>Haloferax larsenii</i> JCM 13917           |
| Hlu-1-1            | Archaea | Euryarchaeota | Halobacteria | Halobacteriales | Halobacteriaceae | <i>Haloferax lucentense</i> DSM 14919         |
| Hme-1-1 to Hme-1-2 | Archaea | Euryarchaeota | Halobacteria | Halobacteriales | Halobacteriaceae | <i>Haloferax mediterranei</i> ATCC 33500      |
| Hmu-1-1            | Archaea | Euryarchaeota | Halobacteria | Halobacteriales | Halobacteriaceae | <i>Haloferax mucosum</i> ATCC BAA-1512        |
| Hpr-1-1            | Archaea | Euryarchaeota | Halobacteria | Halobacteriales | Halobacteriaceae | <i>Haloferax prahovense</i> DSM 18310         |
| Hsp-4-1            | Archaea | Euryarchaeota | Halobacteria | Halobacteriales | Halobacteriaceae | <i>Haloferax</i> sp. ATCC BAA-644             |
| Hsp-5-1            | Archaea | Euryarchaeota | Halobacteria | Halobacteriales | Halobacteriaceae | <i>Haloferax</i> sp. ATCC BAA-645             |
| Hsp-6-1            | Archaea | Euryarchaeota | Halobacteria | Halobacteriales | Halobacteriaceae | <i>Haloferax</i> sp. ATCC BAA-646             |
| Hsu-2-1            | Archaea | Euryarchaeota | Halobacteria | Halobacteriales | Halobacteriaceae | <i>Haloferax sulfurifontis</i> ATCC BAA-897   |
| Hvo-1-1            | Archaea | Euryarchaeota | Halobacteria | Halobacteriales | Halobacteriaceae | <i>Haloferax volcanii</i> DS2                 |
| Hbo-1-1            | Archaea | Euryarchaeota | Halobacteria | Halobacteriales | Halobacteriaceae | <i>Halogeometricum borinquense</i> DSM 11551  |
| Hsa-6-1            | Archaea | Euryarchaeota | Halobacteria | Halobacteriales | Halobacteriaceae | <i>Halogramum salarium</i> B-1                |
| Hka-1-1            | Archaea | Euryarchaeota | Halobacteria | Halobacteriales | Halobacteriaceae | <i>Halomicrobium katesii</i> DSM 19301        |
| Hmu-2-1            | Archaea | Euryarchaeota | Halobacteria | Halobacteriales | Halobacteriaceae | <i>Halomicrobium mukohataei</i> DSM 12286     |
| Hxa-1-1            | Archaea | Euryarchaeota | Halobacteria | Halobacteriales | Halobacteriaceae | <i>Halopiger xanaduensis</i> SH-6             |
| Hwa-1-1            | Archaea | Euryarchaeota | Halobacteria | Halobacteriales | Halobacteriaceae | <i>Haloquadratum walsbyi</i> C23              |
| Hwa-2-1            | Archaea | Euryarchaeota | Halobacteria | Halobacteriales | Halobacteriaceae | <i>Haloquadratum walsbyi</i> DSM 16790        |
| Hti-1-1            | Archaea | Euryarchaeota | Halobacteria | Halobacteriales | Halobacteriaceae | <i>Halorhabdus tiamatea</i> SARL4B            |
| Hut-1-1            | Archaea | Euryarchaeota | Halobacteria | Halobacteriales | Halobacteriaceae | <i>Halorhabdus utahensis</i> DSM 12940        |
| Hai-1-1            | Archaea | Euryarchaeota | Halobacteria | Halobacteriales | Halobacteriaceae | <i>Halorubrum aidingense</i> JCM 13560        |
| Har-2-1            | Archaea | Euryarchaeota | Halobacteria | Halobacteriales | Halobacteriaceae | <i>Halorubrum arcis</i> JCM 13916             |
| Hca-2-1            | Archaea | Euryarchaeota | Halobacteria | Halobacteriales | Halobacteriaceae | <i>Halorubrum californiense</i> DSM 19288     |
| Hco-1-1            | Archaea | Euryarchaeota | Halobacteria | Halobacteriales | Halobacteriaceae | <i>Halorubrum coriense</i> DSM 10284          |
| Hdi-1-1            | Archaea | Euryarchaeota | Halobacteria | Halobacteriales | Halobacteriaceae | <i>Halorubrum distributum</i> JCM 10118       |
| Hdi-2-1            | Archaea | Euryarchaeota | Halobacteria | Halobacteriales | Halobacteriaceae | <i>Halorubrum distributum</i> JCM 9100        |
| Hho-1-1            | Archaea | Euryarchaeota | Halobacteria | Halobacteriales | Halobacteriaceae | <i>Halorubrum hochstenum</i> ATCC 700873      |
| Hko-1-1            | Archaea | Euryarchaeota | Halobacteria | Halobacteriales | Halobacteriaceae | <i>Halorubrum kocurii</i> JCM 14978           |
| Hla-3-1            | Archaea | Euryarchaeota | Halobacteria | Halobacteriales | Halobacteriaceae | <i>Halorubrum lacusprofundi</i> ATCC 49239    |
| Hli-1-1            | Archaea | Euryarchaeota | Halobacteria | Halobacteriales | Halobacteriaceae | <i>Halorubrum lipolyticum</i> DSM 21995       |
| Hli-2-1            | Archaea | Euryarchaeota | Halobacteria | Halobacteriales | Halobacteriaceae | <i>Halorubrum litoreum</i> JCM 13561          |
| Hsa-7-1            | Archaea | Euryarchaeota | Halobacteria | Halobacteriales | Halobacteriaceae | <i>Halorubrum saccharovororum</i> DSM 1137    |
| Hsp-7-1            | Archaea | Euryarchaeota | Halobacteria | Halobacteriales | Halobacteriaceae | <i>Halorubrum</i> sp. T3                      |
| Hte-1-1            | Archaea | Euryarchaeota | Halobacteria | Halobacteriales | Halobacteriaceae | <i>Halorubrum tebenquichense</i> DSM 14210    |
| Hte-2-1            | Archaea | Euryarchaeota | Halobacteria | Halobacteriales | Halobacteriaceae | <i>Halorubrum terrestre</i> JCM 10247         |
| Hpa-2-1            | Archaea | Euryarchaeota | Halobacteria | Halobacteriales | Halobacteriaceae | <i>Halosarcina pallida</i> JCM 14848          |
| Hca-3-1            | Archaea | Euryarchaeota | Halobacteria | Halobacteriales | Halobacteriaceae | <i>Halosimplex carlsbadense</i> 2-9-1         |
| Hli-3-1            | Archaea | Euryarchaeota | Halobacteria | Halobacteriales | Halobacteriaceae | <i>Haloterrigena limicola</i> JCM 13563       |
| Hsa-8-1            | Archaea | Euryarchaeota | Halobacteria | Halobacteriales | Halobacteriaceae | <i>Haloterrigena salina</i> JCM 13891         |
| Hth-2-1            | Archaea | Euryarchaeota | Halobacteria | Halobacteriales | Halobacteriaceae | <i>Haloterrigena thermotolerans</i> DSM 11522 |
| Htu-1-1            | Archaea | Euryarchaeota | Halobacteria | Halobacteriales | Halobacteriaceae | <i>Haloterrigena turkmenica</i> DSM 5511      |
| Has-1-1            | Archaea | Euryarchaeota | Halobacteria | Halobacteriales | Halobacteriaceae | <i>Halovinax asiaticus</i> JCM 14624          |
| Nae-1-1            | Archaea | Euryarchaeota | Halobacteria | Halobacteriales | Halobacteriaceae | <i>Natrialba aegyptia</i> DSM 13077           |
| Nas-1-1            | Archaea | Euryarchaeota | Halobacteria | Halobacteriales | Halobacteriaceae | <i>Natrialba asiatica</i> DSM 12278           |
| Nch-1-1            | Archaea | Euryarchaeota | Halobacteria | Halobacteriales | Halobacteriaceae | <i>Natrialba chahannaensis</i> JCM 10990      |
| Nhu-1-1            | Archaea | Euryarchaeota | Halobacteria | Halobacteriales | Halobacteriaceae | <i>Natrialba hukuunbeirensis</i> JCM 10989    |
| Nma-1-1            | Archaea | Euryarchaeota | Halobacteria | Halobacteriales | Halobacteriaceae | <i>Natrialba magadii</i> ATCC 43099           |
| Nta-1-1            | Archaea | Euryarchaeota | Halobacteria | Halobacteriales | Halobacteriaceae | <i>Natrialba taiwanensis</i> DSM 12281        |

|                    |         |               |                   |                    |                      |                                                   |
|--------------------|---------|---------------|-------------------|--------------------|----------------------|---------------------------------------------------|
| Nal-1-1            | Archaea | Euryarchaeota | Halobacteria      | Halobacteriales    | Halobacteriaceae     | <i>Natrinema altunense</i> JCM 12890              |
| Nga-1-1            | Archaea | Euryarchaeota | Halobacteria      | Halobacteriales    | Halobacteriaceae     | <i>Natrinema gari</i> JCM 14663                   |
| Npa-1-1            | Archaea | Euryarchaeota | Halobacteria      | Halobacteriales    | Halobacteriaceae     | <i>Natrinema pallidum</i> DSM 3751                |
| Npe-1-1            | Archaea | Euryarchaeota | Halobacteria      | Halobacteriales    | Halobacteriaceae     | <i>Natrinema pellirubrum</i> DSM 15624            |
| Nsp-1-1            | Archaea | Euryarchaeota | Halobacteria      | Halobacteriales    | Halobacteriaceae     | <i>Natrinema sp.</i> J7-2                         |
| Nve-1-1            | Archaea | Euryarchaeota | Halobacteria      | Halobacteriales    | Halobacteriaceae     | <i>Natrinema versiforme</i> JCM 10478             |
| Ngr-1-1            | Archaea | Euryarchaeota | Halobacteria      | Halobacteriales    | Halobacteriaceae     | <i>Natronobacterium gregoryi</i> SP2              |
| Nam-1-1            | Archaea | Euryarchaeota | Halobacteria      | Halobacteriales    | Halobacteriaceae     | <i>Natronococcus amylolyticus</i> DSM 10524       |
| Nje-1-1            | Archaea | Euryarchaeota | Halobacteria      | Halobacteriales    | Halobacteriaceae     | <i>Natronococcus jeotgali</i> DSM 18795           |
| Noc-1-1            | Archaea | Euryarchaeota | Halobacteria      | Halobacteriales    | Halobacteriaceae     | <i>Natronococcus occultus</i> SP4                 |
| Nin-1-1            | Archaea | Euryarchaeota | Halobacteria      | Halobacteriales    | Halobacteriaceae     | <i>Natronolimnobius innermongolicus</i> JCM 12255 |
| Nmo-1-1            | Archaea | Euryarchaeota | Halobacteria      | Halobacteriales    | Halobacteriaceae     | <i>Natronomonas moolapensis</i> 8.8.11            |
| Nph-1-1            | Archaea | Euryarchaeota | Halobacteria      | Halobacteriales    | Halobacteriaceae     | <i>Natronomonas pharaonis</i> DSM 2160            |
| Nba-1-1            | Archaea | Euryarchaeota | Halobacteria      | Halobacteriales    | Halobacteriaceae     | <i>Natronorubrum bangense</i> JCM 10635           |
| Nsu-1-1            | Archaea | Euryarchaeota | Halobacteria      | Halobacteriales    | Halobacteriaceae     | <i>Natronorubrum sulfidifaciens</i> JCM 14089     |
| Nti-1-1            | Archaea | Euryarchaeota | Halobacteria      | Halobacteriales    | Halobacteriaceae     | <i>Natronorubrum tibetense</i> GA33               |
| Ssp-1-1            | Archaea | Euryarchaeota | Halobacteria      | Halobacteriales    | Halobacteriaceae     | <i>Salinarchaeum sp.</i> Harcht-Bsk1              |
| Hag-1-1            | Archaea | Euryarchaeota | Halobacteria      | Halobacteriales    | Halococcaceae        | <i>Halococcus agarilyticus</i>                    |
| Hse-1-1            | Archaea | Euryarchaeota | Halobacteria      | Halobacteriales    | Halococcaceae        | <i>Halococcus sediminicola</i>                    |
| Hru-1-1            | Archaea | Euryarchaeota | Halobacteria      | Haloferacales      | Haloferacaceae       | <i>Halobellus rufus</i>                           |
| Hal-2-1            | Archaea | Euryarchaeota | Halobacteria      | Haloferacales      | Haloferacaceae       | <i>Haloferax alexandrinus</i>                     |
| Hgi-2-1            | Archaea | Euryarchaeota | Halobacteria      | Haloferacales      | Haloferacaceae       | <i>Haloferax gibbonsii</i>                        |
| Hme-1-1 to Hme-1-2 | Archaea | Euryarchaeota | Halobacteria      | Haloferacales      | Haloferacaceae       | <i>Haloferax mediterranei</i> ATCC 33500          |
| Hsp-8-1            | Archaea | Euryarchaeota | Halobacteria      | Haloferacales      | Haloferacaceae       | <i>Haloferax sp.</i> ATB1                         |
| Hna-1-1            | Archaea | Euryarchaeota | Halobacteria      | Haloferacales      | Haloferacaceae       | <i>Haloplanus natans</i> DSM 17983                |
| Hru-2-1            | Archaea | Euryarchaeota | Halobacteria      | Haloferacales      | Halorubraceae        | <i>Halolamina rubra</i>                           |
| Hez-1-1            | Archaea | Euryarchaeota | Halobacteria      | Haloferacales      | Halorubraceae        | <i>Halorubrum ezzemoulense</i> DSM 17463          |
| Hha-2-1            | Archaea | Euryarchaeota | Halobacteria      | Haloferacales      | Halorubraceae        | <i>Halorubrum halophilum</i>                      |
| Hsa-9-1            | Archaea | Euryarchaeota | Halobacteria      | Haloferacales      | Halorubraceae        | <i>Halorubrum saccharovorum</i>                   |
| Hsp-9-1            | Archaea | Euryarchaeota | Halobacteria      | Haloferacales      | Halorubraceae        | <i>Halorubrum sp.</i> AJ67                        |
| Hsp-10-1           | Archaea | Euryarchaeota | Halobacteria      | Haloferacales      | Halorubraceae        | <i>Halorubrum sp.</i> BV1                         |
| Hdj-1-1            | Archaea | Euryarchaeota | Halobacteria      | Natrialbales       | Natrialbaceae        | <i>Halopiger djelfmassiliensis</i>                |
| Hgo-1-1            | Archaea | Euryarchaeota | Halobacteria      | Natrialbales       | Natrialbaceae        | <i>Halopiger goeimassiliensis</i>                 |
| Hsa-10-1           | Archaea | Euryarchaeota | Halobacteria      | Natrialbales       | Natrialbaceae        | <i>Halopiger salifodinae</i>                      |
| Hla-4-1            | Archaea | Euryarchaeota | Halobacteria      | Natrialbales       | Natrialbaceae        | <i>Halostagnicola larsenii</i> XH-48              |
| Hsp-11-1           | Archaea | Euryarchaeota | Halobacteria      | Natrialbales       | Natrialbaceae        | <i>Halostagnicola sp.</i> A56                     |
| Hje-2-1            | Archaea | Euryarchaeota | Halobacteria      | Natrialbales       | Natrialbaceae        | <i>Haloterrigena jeotgali</i> A29                 |
| Nal-2-1            | Archaea | Euryarchaeota | Halobacteria      | Natrialbales       | Natrialbaceae        | <i>Natrinema altunense</i>                        |
| Nsp-2-1            | Archaea | Euryarchaeota | Halobacteria      | Natrialbales       | Natrialbaceae        | <i>Natrinema sp.</i> J7-1                         |
| Mco-1-1            | Archaea | Euryarchaeota | Methanocellales   | Methanocellales    | Methanocellaceae     | <i>Methanocella conradii</i> HZ254                |
| CMe-1-1            | Archaea | Euryarchaeota | Methanomicrobia   | Methanomicrobiales | Generaincertae sedis | <i>Candidatus Methanoregula boonei</i> 6A8        |
| Mpa-1-1            | Archaea | Euryarchaeota | Methanomicrobia   | Methanomicrobiales | Generaincertae sedis | <i>Methanosphaerula palustris</i> E1-9c           |
| Mbo-1-1            | Archaea | Euryarchaeota | Methanomicrobia   | Methanomicrobiales | Methanomicrobiaceae  | <i>Methanoculleus bourgensis</i> MS2              |
| Mma-1-1            | Archaea | Euryarchaeota | Methanomicrobia   | Methanomicrobiales | Methanomicrobiaceae  | <i>Methanoculleus marisnigri</i> JR1              |
| Mse-1-1            | Archaea | Euryarchaeota | Methanomicrobia   | Methanomicrobiales | Methanomicrobiaceae  | <i>Methanoculleus sediminis</i>                   |
| Msp-1-1            | Archaea | Euryarchaeota | Methanomicrobia   | Methanomicrobiales | Methanomicrobiaceae  | <i>Methanoculleus sp.</i> MH98A                   |
| Mli-1-1            | Archaea | Euryarchaeota | Methanomicrobia   | Methanomicrobiales | Methanomicrobiaceae  | <i>Methanofollis liminatans</i> DSM 4140          |
| Mpa-2-1            | Archaea | Euryarchaeota | Methanomicrobia   | Methanomicrobiales | Methanomicrobiaceae  | <i>Methanolacinia paynteri</i>                    |
| Mmo-1-1            | Archaea | Euryarchaeota | Methanomicrobia   | Methanomicrobiales | Methanomicrobiaceae  | <i>Methanomicrobium mobile</i> BP                 |
| Mli-2-1            | Archaea | Euryarchaeota | Methanomicrobia   | Methanomicrobiales | Methanomicrobiaceae  | <i>Methanoplanus limicola</i> DSM 2279            |
| Mpe-1-1            | Archaea | Euryarchaeota | Methanomicrobia   | Methanomicrobiales | Methanomicrobiaceae  | <i>Methanoplanus petrolearius</i> DSM 11571       |
| Mta-1-1            | Archaea | Euryarchaeota | Methanomicrobia   | Methanomicrobiales | Methanoregulaceae    | <i>Methanolinea tarda</i> NOBI-1                  |
| Mfo-1-1            | Archaea | Euryarchaeota | Methanomicrobia   | Methanomicrobiales | Methanoregulaceae    | <i>Methanoregula formicica</i> SMSP               |
| Mhu-1-1            | Archaea | Euryarchaeota | Methanomicrobia   | Methanomicrobiales | Methanospirillaceae  | <i>Methanospirillum hungatei</i> JF-1             |
| Mco-2-1            | Archaea | Euryarchaeota | Methanosarcinales | Methanosarcinales  | Methanosarcinaceae   | <i>Methanosarcina concilii</i> GP6                |
| Mha-1-1            | Archaea | Euryarchaeota | Methanosarcinales | Methanosarcinales  | Methanosarcinaceae   | <i>Methanosarcina harundinacea</i> 6Ac            |
| Msh-1-1            | Archaea | Euryarchaeota | Methanomicrobia   | Methanosarcinales  | Methermicocccaceae   | <i>Methermicoccus shengliensis</i> DSM 18856      |
| env-1 to env-513   |         |               |                   |                    |                      | environmental samples                             |

## 2.2 Gene contexts

Each L4-Archaeoglobi RNA (indicated by “RNA→”) is listed. For each hit, the downstream genes predicted to reside in a regulated operon are listed. If the nearest downstream gene is encoding in the opposite strand (and therefore presumed to not be a part of a regulated operon), then that gene is still depicted. Some environmental sequences and some RefSeq entries lack gene annotations, and so no genes are available for such sequences. The direction of each gene is indicated with an arrow (→), and each predicted conserved domain in the gene is named. Conserved domains associated with more than one L4-Archaeoglobi RNA are assigned a color; other domains are gray. Information about these conserved

domains is given in Section 2.3. The accession of the sequence containing each L4-Archaeoglobi RNA is given in the column named “Seq. accession”. Accessions beginning with “NC-”, “NS-”, “NW-” or “NZ-” are contained in RefSeq. Other accessions refer to environmental samples. Nucleotide coordinates are given for the 5′ and 3′ boundaries of each L4-Archaeoglobi RNA. If the 5′ coordinate is greater than the 3′ coordinate, the RNA is present on the reverse-complement strand of the containing genomic DNA sequence. Each hit is denoted by an abbreviation (like “Eco-1-1”) that refers to a taxonomy given in Section 2.1.

| abbrev. | Seq. accession            |   | 5′ at  | 3′ at  | genes                                                                                                                                                                                                                                                                                                                                                                                                                                                                                                                                                                                                                                                                                                                                                                                                                                                                                                                                                                                                                                                                                                                                                                                                                                                                                                                                                                                                                                                                                                                                                                                                                                                                                                                                                                                                                                                                                                                                                                                                                                                                                                                                                                                                                                                                                                                                                                                                                                                                                                                                                                                                                                                                                                                                                                                                                                                                                                      |
|---------|---------------------------|---|--------|--------|------------------------------------------------------------------------------------------------------------------------------------------------------------------------------------------------------------------------------------------------------------------------------------------------------------------------------------------------------------------------------------------------------------------------------------------------------------------------------------------------------------------------------------------------------------------------------------------------------------------------------------------------------------------------------------------------------------------------------------------------------------------------------------------------------------------------------------------------------------------------------------------------------------------------------------------------------------------------------------------------------------------------------------------------------------------------------------------------------------------------------------------------------------------------------------------------------------------------------------------------------------------------------------------------------------------------------------------------------------------------------------------------------------------------------------------------------------------------------------------------------------------------------------------------------------------------------------------------------------------------------------------------------------------------------------------------------------------------------------------------------------------------------------------------------------------------------------------------------------------------------------------------------------------------------------------------------------------------------------------------------------------------------------------------------------------------------------------------------------------------------------------------------------------------------------------------------------------------------------------------------------------------------------------------------------------------------------------------------------------------------------------------------------------------------------------------------------------------------------------------------------------------------------------------------------------------------------------------------------------------------------------------------------------------------------------------------------------------------------------------------------------------------------------------------------------------------------------------------------------------------------------------------------|
| Mli-1-1 | NZ_CM001555.1             | + | 465849 | 465921 | <b>RNA</b> → RplC (COG0087)rpl3p (PRK04231)→ RplC (COG0087)rpl3p (PRK04231)→<br>RplD (COG0088)rpl4p (PRK04042)→ RplD (COG0088)rpl4p (PRK04042)→<br>RplW (COG0089)PRK14548 (PRK14548)→ RplW (COG0089)PRK14548 (PRK14548)→<br>RplB (COG0090)rpl2p (PRK09612)→ RplB (COG0090)rpl2p (PRK09612)→<br>RpsS (COG0185)rps19p (PRK04038)→ RpsS (COG0185)rps19p (PRK04038)→<br>rpl22p (PRK04223)RplV (COG0091)→ rpl22p (PRK04223)RplV (COG0091)→<br>RpsC (COG0092)rps3p (PRK04191)→ RpsC (COG0092)rps3p (PRK04191)→<br>PRK14549 (PRK14549)Ribosomal_L29 (pfam00831)→ PRK14549 (PRK14549)Ribosomal_L29 (pfam00831)→<br>PRK03879 (PRK03879)UPF0086 (pfam01868)→ PRK03879 (PRK03879)UPF0086 (pfam01868)→<br>RpsQ (COG0186)rps17p (PRK08572)→ RpsQ (COG0186)rps17p (PRK08572)→<br>rpl14p (PRK08571)Ribosomal_L14 (pfam00238)→ rpl14p (PRK08571)Ribosomal_L14 (pfam00238)→<br>rpl24p (PRK01191)KOW_RPL26 (cd06089)→ rpl24p (PRK01191)KOW_RPL26 (cd06089)→<br>PRK04313 (PRK04313)S4 (cd00165)KOW_RPS4 (cd06087)Ribosomal_S4e (pfam00900)→<br>PRK04313 (PRK04313)S4 (cd00165)KOW_RPS4 (cd06087)Ribosomal_S4e (pfam00900)→<br>RplE (COG0094)rpl5p (PRK04219)→ RplE (COG0094)rpl5p (PRK04219)→<br>RpsN (COG0199)rps14p (PRK05766)→ RpsN (COG0199)rps14p (PRK05766)→<br>rps8p (PRK04034)RpsH (COG0096)→ rps8p (PRK04034)RpsH (COG0096)→<br>RplF (COG0097)rpl6p (PRK05518)→ RplF (COG0097)rpl6p (PRK05518)→<br>rpl32e (PRK08562)Ribosomal_L32e (pfam01655)→ rpl32e (PRK08562)Ribosomal_L32e (pfam01655)→<br>rpl19e (PRK08570)Ribosomal_L19e (pfam01280)→ rpl19e (PRK08570)Ribosomal_L19e (pfam01280)→<br>RplR (COG0256)rpl18p (PRK08569)→ RplR (COG0256)rpl18p (PRK08569)→<br>RpsE (COG0098)rps5p (PRK04044)→ RpsE (COG0098)rps5p (PRK04044)→<br><b>RNA</b> → RplC (COG0087)rpl3p (PRK04231)→ RplD (COG0088)rpl4p (PRK04042)→<br>uL23_arch (TIGR03636)Ribosomal_L23 (pfam00276)→ RplB (COG0090)rpl2p (PRK09612)→<br>RpsS (COG0185)rps19p (PRK04038)→ rpl22p (PRK04223)RplV (COG0091)→<br>RpsC (COG0092)rps3p (PRK04191)Spore_IV_A (pfam09547)→<br>PRK14549 (PRK14549)Ribosomal_L29 (pfam00831)→ PRK03879 (PRK03879)UPF0086 (pfam01868)→<br>RpsQ (COG0186)rps17p (PRK08572)→ rpl14p (PRK08571)Ribosomal_L14 (pfam00238)→<br>rpl24p (PRK01191)KOW_RPL26 (cd06089)→<br>PRK04313 (PRK04313)KOW_RPS4 (cd06087)Ribosomal_S4e (pfam00900)→ RplE (COG0094)rpl5p (PRK04219)→<br>RpsN (COG0199)rps14p (PRK05766)→ rps8p (PRK04034)RpsH (COG0096)→<br>RplF (COG0097)rpl6p (PRK05518)→ rpl32e (PRK08562)Ribosomal_L32e (pfam01655)→<br>rpl19e (PRK08570)Ribosomal_L19e (pfam01280)→ RplR (COG0256)rpl18p (PRK08569)→<br>RpsE (COG0098)rps5p (PRK04044)→<br>RplC (COG0087)rpl3p (PRK04231)→<br>RplD (COG0088)rpl4p (PRK04042)→<br><b>RNA</b> → MTH1 (COG2106)→ RplC (COG0087)rpl3p (PRK04231)→<br>RplD (COG0088)rpl4p (PRK04042)→<br><b>RNA</b> → hypo→<br><b>RNA</b> → hypo→ rpl3p (PRK04231)Ribosomal_L3 (pfam00297)→<br><b>RNA</b> → ←hypo |
| env-1   | SakLake120mDRAFT_c0000096 | + | 22741  | 22827  | <b>RNA</b> → RplC (COG0087)rpl3p (PRK04231)→ RplD (COG0088)rpl4p (PRK04042)→<br>uL23_arch (TIGR03636)Ribosomal_L23 (pfam00276)→ RplB (COG0090)rpl2p (PRK09612)→<br>RpsS (COG0185)rps19p (PRK04038)→ rpl22p (PRK04223)RplV (COG0091)→<br>RpsC (COG0092)rps3p (PRK04191)Spore_IV_A (pfam09547)→<br>PRK14549 (PRK14549)Ribosomal_L29 (pfam00831)→ PRK03879 (PRK03879)UPF0086 (pfam01868)→<br>RpsQ (COG0186)rps17p (PRK08572)→ rpl14p (PRK08571)Ribosomal_L14 (pfam00238)→<br>rpl24p (PRK01191)KOW_RPL26 (cd06089)→<br>PRK04313 (PRK04313)KOW_RPS4 (cd06087)Ribosomal_S4e (pfam00900)→ RplE (COG0094)rpl5p (PRK04219)→<br>RpsN (COG0199)rps14p (PRK05766)→ rps8p (PRK04034)RpsH (COG0096)→<br>RplF (COG0097)rpl6p (PRK05518)→ rpl32e (PRK08562)Ribosomal_L32e (pfam01655)→<br>rpl19e (PRK08570)Ribosomal_L19e (pfam01280)→ RplR (COG0256)rpl18p (PRK08569)→<br>RpsE (COG0098)rps5p (PRK04044)→<br><b>RNA</b> → Methyltrn_RNA_3 (pfam02598)→ RplC (COG0087)rpl3p (PRK04231)→<br>RplD (COG0088)rpl4p (PRK04042)→<br><b>RNA</b> → MTH1 (COG2106)→ RplC (COG0087)rpl3p (PRK04231)→<br><b>RNA</b> → hypo→<br><b>RNA</b> → hypo→ rpl3p (PRK04231)Ribosomal_L3 (pfam00297)→<br><b>RNA</b> → ←hypo                                                                                                                                                                                                                                                                                                                                                                                                                                                                                                                                                                                                                                                                                                                                                                                                                                                                                                                                                                                                                                                                                                                                                                                                                                                                                                                                                                                                                                                                                                                                                                                                                                                                                                                     |
| env-2   | SL_8KL_010_SED_10004849   | - | 1682   | 1589   | <b>RNA</b> → Methyltrn_RNA_3 (pfam02598)→ RplC (COG0087)rpl3p (PRK04231)→<br>RplD (COG0088)rpl4p (PRK04042)→<br><b>RNA</b> → MTH1 (COG2106)→ RplC (COG0087)rpl3p (PRK04231)→<br><b>RNA</b> → hypo→<br><b>RNA</b> → hypo→ rpl3p (PRK04231)Ribosomal_L3 (pfam00297)→<br><b>RNA</b> → ←hypo                                                                                                                                                                                                                                                                                                                                                                                                                                                                                                                                                                                                                                                                                                                                                                                                                                                                                                                                                                                                                                                                                                                                                                                                                                                                                                                                                                                                                                                                                                                                                                                                                                                                                                                                                                                                                                                                                                                                                                                                                                                                                                                                                                                                                                                                                                                                                                                                                                                                                                                                                                                                                   |
| env-3   | SL_8KL_010_SED_10000147   | + | 55887  | 55980  | <b>RNA</b> → MTH1 (COG2106)→ RplC (COG0087)rpl3p (PRK04231)→<br>RplD (COG0088)rpl4p (PRK04042)→<br><b>RNA</b> → MTH1 (COG2106)→ RplC (COG0087)rpl3p (PRK04231)→<br><b>RNA</b> → hypo→<br><b>RNA</b> → hypo→ rpl3p (PRK04231)Ribosomal_L3 (pfam00297)→<br><b>RNA</b> → ←hypo                                                                                                                                                                                                                                                                                                                                                                                                                                                                                                                                                                                                                                                                                                                                                                                                                                                                                                                                                                                                                                                                                                                                                                                                                                                                                                                                                                                                                                                                                                                                                                                                                                                                                                                                                                                                                                                                                                                                                                                                                                                                                                                                                                                                                                                                                                                                                                                                                                                                                                                                                                                                                                |
| env-4   | JGI24732J26686.1113329    | + | 312    | 377    | <b>RNA</b> →                                                                                                                                                                                                                                                                                                                                                                                                                                                                                                                                                                                                                                                                                                                                                                                                                                                                                                                                                                                                                                                                                                                                                                                                                                                                                                                                                                                                                                                                                                                                                                                                                                                                                                                                                                                                                                                                                                                                                                                                                                                                                                                                                                                                                                                                                                                                                                                                                                                                                                                                                                                                                                                                                                                                                                                                                                                                                               |
| env-5   | JGI24731J21663.1001690    | + | 821    | 886    | <b>RNA</b> → hypo→                                                                                                                                                                                                                                                                                                                                                                                                                                                                                                                                                                                                                                                                                                                                                                                                                                                                                                                                                                                                                                                                                                                                                                                                                                                                                                                                                                                                                                                                                                                                                                                                                                                                                                                                                                                                                                                                                                                                                                                                                                                                                                                                                                                                                                                                                                                                                                                                                                                                                                                                                                                                                                                                                                                                                                                                                                                                                         |
| env-6   | JGI24729J20445.1012742    | - | 868    | 807    | <b>RNA</b> → hypo→ rpl3p (PRK04231)Ribosomal_L3 (pfam00297)→<br><b>RNA</b> → ←hypo                                                                                                                                                                                                                                                                                                                                                                                                                                                                                                                                                                                                                                                                                                                                                                                                                                                                                                                                                                                                                                                                                                                                                                                                                                                                                                                                                                                                                                                                                                                                                                                                                                                                                                                                                                                                                                                                                                                                                                                                                                                                                                                                                                                                                                                                                                                                                                                                                                                                                                                                                                                                                                                                                                                                                                                                                         |
| env-7   | JGI24730J26740.1315709    | + | 120    | 181    | <b>RNA</b> → ←hypo                                                                                                                                                                                                                                                                                                                                                                                                                                                                                                                                                                                                                                                                                                                                                                                                                                                                                                                                                                                                                                                                                                                                                                                                                                                                                                                                                                                                                                                                                                                                                                                                                                                                                                                                                                                                                                                                                                                                                                                                                                                                                                                                                                                                                                                                                                                                                                                                                                                                                                                                                                                                                                                                                                                                                                                                                                                                                         |



|         |                           |   |         |         |                                                                                                                                                                                                                                                                                                                                                                                                                                                                                                                                                                                                                                                                                                                                                                                                                                                                                                                                                                                                                                                                                                                                                                                  |
|---------|---------------------------|---|---------|---------|----------------------------------------------------------------------------------------------------------------------------------------------------------------------------------------------------------------------------------------------------------------------------------------------------------------------------------------------------------------------------------------------------------------------------------------------------------------------------------------------------------------------------------------------------------------------------------------------------------------------------------------------------------------------------------------------------------------------------------------------------------------------------------------------------------------------------------------------------------------------------------------------------------------------------------------------------------------------------------------------------------------------------------------------------------------------------------------------------------------------------------------------------------------------------------|
| env-8   | 2014733311                | - | 1671    | 1608    | RNA → RplC (COG0087)rpl3p (PRK04231) → RplD (COG0088)rpl4p (PRK04042) →                                                                                                                                                                                                                                                                                                                                                                                                                                                                                                                                                                                                                                                                                                                                                                                                                                                                                                                                                                                                                                                                                                          |
| env-9   | ANASMECb_4085297_C1539    | - | 1671    | 1608    | RNA → RplC (COG0087)rpl3p (PRK04231) → RplD (COG0088)rpl4p (PRK04042) →                                                                                                                                                                                                                                                                                                                                                                                                                                                                                                                                                                                                                                                                                                                                                                                                                                                                                                                                                                                                                                                                                                          |
| env-10  | PCEOT_contig04337         | + | 574     | 637     | RNA → rpl3p (PRK04231)Ribosomal_L3 (pfam00297) → RplC (COG0087)rpl3p (PRK04231) →<br>RplD (COG0088)rpl4p (PRK04042) → hypo →                                                                                                                                                                                                                                                                                                                                                                                                                                                                                                                                                                                                                                                                                                                                                                                                                                                                                                                                                                                                                                                     |
| env-11  | JGI12104J13512_1001493    | + | 1210    | 1273    | RNA → RplC (COG0087)rpl3p (PRK04231) → RplD (COG0088)rpl4p (PRK04042) →<br>RplW (COG0089)PRK14548 (PRK14548) → RplB (COG0090)rpl2p (PRK09612) →<br>RpsS (COG0185)rps19p (PRK04038) → rpl22p (PRK04223)RplV (COG0091) →<br>RpsC (COG0092)rps3p (PRK04191) → PRK14549 (PRK14549)Ribosomal_L29_HIP (cd00427) →<br>PRK03879 (PRK03879)UPF0086 (pfam01868) → RpsQ (COG0186)rps17p (PRK08572) →<br>rpl14p (PRK08571)Ribosomal_L14 (pfam00238) → rpl24p (PRK01191)KOW_RPL26 (cd06089) →<br>PRK04313 (PRK04313)KOW_RPS4 (cd06087)Ribosomal_S4e (pfam00900) →<br>rpl5p (PRK04219)Ribosomal_L5 (pfam00281)Ribosomal_L5_C (pfam00673) →<br>RpsN (COG0199)rps14p (PRK05766) → rps8p (PRK04034)RpsH (COG0096) →<br>RplF (COG0097)rpl6p (PRK05518) → rpl32e (PRK08562)Ribosomal_L32_L32e (cd00513) →<br>rpl19e (PRK08570)Ribosomal_L19e (pfam01280) → RplR (COG0256)rpl18p (PRK08569) →<br>RpsE (COG0098)rps5p (PRK04044) → Ribosomal_L7_archaeal_euk (cd01657)rpl30p (PRK06049) →<br>rpl15p (PRK06419)Ribosomal_L27A (pfam00828) → SecY (COG0201)PRK08568 (PRK08568) →<br>AdkA (COG2019)PRK04040 (PRK04040) → COG1422 (COG1422) → DUF106 (pfam01956) →<br>CmkB (COG1102)PRK04182 (PRK04182) → |
| env-12  | JGI11944J13513_1000575    | - | 22491   | 22428   | RNA → RplC (COG0087)rpl3p (PRK04231) → RplD (COG0088)rpl4p (PRK04042) →<br>RplW (COG0089)PRK14548 (PRK14548) → RplB (COG0090)rpl2p (PRK09612) →<br>RpsS (COG0185)rps19p (PRK04038) → rpl22p (PRK04223)RplV (COG0091) →<br>RpsC (COG0092)rps3p (PRK04191) → PRK14549 (PRK14549)Ribosomal_L29_HIP (cd00427) →<br>PRK03879 (PRK03879)UPF0086 (pfam01868) → RpsQ (COG0186)rps17p (PRK08572) →<br>rpl14p (PRK08571)Ribosomal_L14 (pfam00238) → rpl24p (PRK01191)KOW_RPL26 (cd06089) →<br>PRK04313 (PRK04313)KOW_RPS4 (cd06087)Ribosomal_S4e (pfam00900) →<br>rpl5p (PRK04219)Ribosomal_L5 (pfam00281)Ribosomal_L5_C (pfam00673) →<br>RpsN (COG0199)rps14p (PRK05766) → rps8p (PRK04034)RpsH (COG0096) →<br>uL6_arch (TIGR03653)Ribosomal_L6 (pfam00347) → rpl6p (PRK05518)Ribosomal_L6 (pfam00347) →<br>rpl32e (PRK08562)Ribosomal_L32_L32e (cd00513) → rpl19e (PRK08570)Ribosomal_L19e (pfam01280) →<br>RplR (COG0256)rpl18p (PRK08569) → RpsE (COG0098)rps5p (PRK04044) →                                                                                                                                                                                                           |
| Mhu-1-1 | NC_007796.1               | - | 2515622 | 2515559 | RNA → hypo → RplC (COG0087)rpl3p (PRK04231) → RplD (COG0088)rpl4p (PRK04042) →<br>RplW (COG0089)PRK14548 (PRK14548) → RplB (COG0090)rpl2p (PRK09612) →<br>RpsS (COG0185)rps19p (PRK04038) → rpl22p (PRK04223)RplV (COG0091) →<br>RpsC (COG0092)rps3p (PRK04191) → PRK14549 (PRK14549)Ribosomal_L29_HIP (cd00427) →<br>POP4 (COG1588)PRK03879 (PRK03879) → RpsQ (COG0186)rps17p (PRK08572) →<br>rpl14p (PRK08571)Ribosomal_L14 (pfam00238) → rpl24p (PRK01191)KOW_RPL26 (cd06089) →<br>PRK04313 (PRK04313)KOW_RPS4 (cd06087)Ribosomal_S4e (pfam00900) →<br>rpl5p (PRK04219)Ribosomal_L5 (pfam00281)Ribosomal_L5_C (pfam00673) →<br>RpsN (COG0199)rps14p (PRK05766) →                                                                                                                                                                                                                                                                                                                                                                                                                                                                                                              |
| env-13  | 3300001567_10007289       | + | 4411    | 4498    | RNA → hypo →                                                                                                                                                                                                                                                                                                                                                                                                                                                                                                                                                                                                                                                                                                                                                                                                                                                                                                                                                                                                                                                                                                                                                                     |
| env-14  | BDMC2_contig11431         | + | 2927    | 3013    | RNA → rpl3p (PRK04231)Ribosomal_L3 (pfam00297) → RplC (COG0087)rpl3p (PRK04231) →<br>RplD (COG0088)rpl4p (PRK04042) →                                                                                                                                                                                                                                                                                                                                                                                                                                                                                                                                                                                                                                                                                                                                                                                                                                                                                                                                                                                                                                                            |
| env-15  | APHM01006905.1            | - | 6665    | 6566    | RNA → Methyltrn_RNA_3 (pfam02598) → RplC (COG0087)rpl3p (PRK04231) →<br>RplD (COG0088)rpl4p (PRK04042) → RplW (COG0089)PRK14548 (PRK14548) →<br>RplB (COG0090)rpl2p (PRK09612) →                                                                                                                                                                                                                                                                                                                                                                                                                                                                                                                                                                                                                                                                                                                                                                                                                                                                                                                                                                                                 |
| env-16  | LTJ07As871_J07ABscf098861 | + | 1109424 | 1109523 | RNA → Methyltrn_RNA_3 (pfam02598) → RplC (COG0087)rpl3p (PRK04231) →<br>RplD (COG0088)rpl4p (PRK04042) → RplW (COG0089)PRK14548 (PRK14548) →<br>RplB (COG0090)rpl2p (PRK09612) →                                                                                                                                                                                                                                                                                                                                                                                                                                                                                                                                                                                                                                                                                                                                                                                                                                                                                                                                                                                                 |
| Hwa-1-1 | NC_017459.1               | - | 2240787 | 2240688 | RNA → Methyltrn_RNA_3 (pfam02598) → RplC (COG0087)rpl3p (PRK04231) →<br>RplD (COG0088)rpl4p (PRK04042) → RplW (COG0089)PRK14548 (PRK14548) →<br>RplB (COG0090)rpl2p (PRK09612) →                                                                                                                                                                                                                                                                                                                                                                                                                                                                                                                                                                                                                                                                                                                                                                                                                                                                                                                                                                                                 |
| env-17  | 77514049                  | - | 684     | 585     | RNA → Methyltrn_RNA_3 (pfam02598) →                                                                                                                                                                                                                                                                                                                                                                                                                                                                                                                                                                                                                                                                                                                                                                                                                                                                                                                                                                                                                                                                                                                                              |
| env-18  | FLAS_READ_83861724        | - | 684     | 585     | RNA → ←hypo                                                                                                                                                                                                                                                                                                                                                                                                                                                                                                                                                                                                                                                                                                                                                                                                                                                                                                                                                                                                                                                                                                                                                                      |

|         |                             |   |         |         |                                                                                                                                                                                                                                                                                                                                                                                                                                                                                                                                                                                                                                                                                                                                                                                                    |
|---------|-----------------------------|---|---------|---------|----------------------------------------------------------------------------------------------------------------------------------------------------------------------------------------------------------------------------------------------------------------------------------------------------------------------------------------------------------------------------------------------------------------------------------------------------------------------------------------------------------------------------------------------------------------------------------------------------------------------------------------------------------------------------------------------------------------------------------------------------------------------------------------------------|
| env-19  | P_A23_Liq_1_Fmt_1000094     | + | 5234    | 5333    | RNA → Methyltrn_RNA_3 (pfam02598) → RplC (COG0087)rpl3p (PRK04231) → RplD (COG0088)rpl4p (PRK04042) → RplW (COG0089)PRK14548 (PRK14548) → RplB (COG0090)rpl2p (PRK09612) →                                                                                                                                                                                                                                                                                                                                                                                                                                                                                                                                                                                                                         |
| env-20  | P_A23_Liq_3_Fmt_1000024     | + | 11155   | 11254   | RNA → Methyltrn_RNA_3 (pfam02598) → RplC (COG0087)rpl3p (PRK04231) → RplD (COG0088)rpl4p (PRK04042) → RplW (COG0089)PRK14548 (PRK14548) → RplB (COG0090)rpl2p (PRK09612) →                                                                                                                                                                                                                                                                                                                                                                                                                                                                                                                                                                                                                         |
| env-21  | P_A23_Liq_2_Fmt_1000003     | - | 57459   | 57360   | RNA → Methyltrn_RNA_3 (pfam02598) → RplC (COG0087)rpl3p (PRK04231) → RplD (COG0088)rpl4p (PRK04042) → RplW (COG0089)PRK14548 (PRK14548) → RplB (COG0090)rpl2p (PRK09612) →                                                                                                                                                                                                                                                                                                                                                                                                                                                                                                                                                                                                                         |
| env-22  | GSLNARP_contig28763         | + | 955     | 1054    | RNA → Methyltrn_RNA_3 (pfam02598) → RplC (COG0087)rpl3p (PRK04231) → rpl3p (PRK04231)Ribosomal_L3 (pfam00297) → RplD (COG0088)rpl4p (PRK04042) → RplW (COG0089)PRK14548 (PRK14548) → RplB (COG0090)rpl2p (PRK09612) →                                                                                                                                                                                                                                                                                                                                                                                                                                                                                                                                                                              |
| Hwa-2-1 | NC_008212.1                 | - | 2141989 | 2141890 | RNA → Methyltrn_RNA_3 (pfam02598) → RplC (COG0087)rpl3p (PRK04231) → RplD (COG0088)rpl4p (PRK04042) → RplW (COG0089)PRK14548 (PRK14548) → RplB (COG0090)rpl2p (PRK09612) →                                                                                                                                                                                                                                                                                                                                                                                                                                                                                                                                                                                                                         |
| env-23  | GSLNARP_contig23680         | + | 166     | 268     | RNA → PRK07233 (PRK07233)Methyltrn_RNA_3 (pfam02598) → rpl3p (PRK04231)Ribosomal_L3 (pfam00297) →                                                                                                                                                                                                                                                                                                                                                                                                                                                                                                                                                                                                                                                                                                  |
| env-24  | GSLNAS_F7I09SK02F1FOF       | + | 46      | 143     | RNA → MTH1 (COG2106) →                                                                                                                                                                                                                                                                                                                                                                                                                                                                                                                                                                                                                                                                                                                                                                             |
| env-25  | APHM01021632.1              | - | 3874    | 3775    | RNA → Methyltrn_RNA_3 (pfam02598) → RplC (COG0087)rpl3p (PRK04231) → RplD (COG0088)rpl4p (PRK04042) → RplW (COG0089)PRK14548 (PRK14548) → RplB (COG0090)rpl2p (PRK09612) → RpsS (COG0185)rps19p (PRK04038) → rpl22p (PRK04223)RplV (COG0091) →                                                                                                                                                                                                                                                                                                                                                                                                                                                                                                                                                     |
| env-26  | LTJ07As871_J07ABscf098869   | - | 558211  | 558112  | RNA → Methyltrn_RNA_3 (pfam02598) → RplC (COG0087)rpl3p (PRK04231) → RplD (COG0088)rpl4p (PRK04042) → RplW (COG0089)PRK14548 (PRK14548) → RplB (COG0090)rpl2p (PRK09612) → RpsS (COG0185)rps19p (PRK04038) → rpl22p (PRK04223)RplV (COG0091) → rpl22p (PRK04223)Ribosomal_L22 (pfam00237) → RpsC (COG0092)rps3p (PRK04191)Astro_capsid_p (pfam12226) → PRK14549 (PRK14549)Ribosomal_L29_HIP (cd00427) → PRK03879 (PRK03879)UPF0086 (pfam01868) → RpsQ (COG0186)rps17p (PRK08572) → rpl14p (PRK08571)Ribosomal_L14 (pfam00238) → RplX (COG0198)rpl24p (PRK01191) → PRK04313 (PRK04313)KOW_RPS4 (cd06087)Ribosomal_S4e (pfam00900) →                                                                                                                                                                 |
| env-27  | PR_CR_10_Liq_1_inCR_1027519 | - | 654     | 552     | RNA → Methyltrn_RNA_3 (pfam02598) → rpl3p (PRK04231)Ribosomal_L3 (pfam00297) →                                                                                                                                                                                                                                                                                                                                                                                                                                                                                                                                                                                                                                                                                                                     |
| env-28  | SL_4KL_010_BRINE_10026912   | - | 325     | 226     | RNA → Methyltrn_RNA_3 (pfam02598) →                                                                                                                                                                                                                                                                                                                                                                                                                                                                                                                                                                                                                                                                                                                                                                |
| env-29  | SL_5KL_010_BRINE_10001539   | - | 6337    | 6238    | RNA → Methyltrn_RNA_3 (pfam02598) → RplC (COG0087)rpl3p (PRK04231) → RplD (COG0088)rpl4p (PRK04042) → RplW (COG0089)PRK14548 (PRK14548) → RplB (COG0090)rpl2p (PRK09612) → RpsS (COG0185)rps19p (PRK04038) → rpl22p (PRK04223)RplV (COG0091) → RpsC (COG0092)rps3p (PRK04191) → RpmC (COG0255)PRK14549 (PRK14549) → PRK03879 (PRK03879)UPF0086 (pfam01868) → RpsQ (COG0186)rps17p (PRK08572) → rpl14p (PRK08571) →                                                                                                                                                                                                                                                                                                                                                                                 |
| env-30  | SL_5KL_010_BRINE_10041088   | - | 903     | 804     | RNA → Methyltrn_RNA_3 (pfam02598) → rpl3p (PRK04231)Ribosomal_L3 (pfam00297) →                                                                                                                                                                                                                                                                                                                                                                                                                                                                                                                                                                                                                                                                                                                     |
| env-31  | P_1C_Sed_2_UnCty_1050957    | - | 389     | 290     | RNA → Methyltrn_RNA_3 (pfam02598) → Methyltrn_RNA_3 (pfam02598) →                                                                                                                                                                                                                                                                                                                                                                                                                                                                                                                                                                                                                                                                                                                                  |
| Hut-1-1 | NC_013158.1                 | + | 2340327 | 2340426 | RNA → Methyltrn_RNA_3 (pfam02598) → rpl3p (PRK04231)Ribosomal_L3 (pfam00297) → RplD (COG0088)rpl4p (PRK04042) → RplW (COG0089)PRK14548 (PRK14548) → RplB (COG0090)rpl2p (PRK09612) → RpsS (COG0185)rps19p (PRK04038) → rpl22p (PRK04223)RplV (COG0091) → RpsC (COG0092)rps3p (PRK04191) → PRK14549 (PRK14549)Ribosomal_L29 (pfam00831) → PRK03879 (PRK03879)UPF0086 (pfam01868) → RpsQ (COG0186)rps17p (PRK08572) → rpl14p (PRK08571)Ribosomal_L14 (pfam00238) → RplX (COG0198)rpl24p (PRK01191) → PRK04313 (PRK04313)KOW_RPS4 (cd06087)Ribosomal_S4e (pfam00900) → RplE (COG0094)rpl5p (PRK04219) → RpsN (COG0199)rps14p (PRK05766) → rps8p (PRK04034)RpsH (COG0096) → RplF (COG0097)rpl6p (PRK05518) → NT_POLXc (cd00141)PRK12766 (PRK12766)Rpl32e (COG1717)COG2251 (COG2251)HHH_5 (pfam14520) → |
| env-32  | GSLSAAL_contig12629         | - | 3841    | 3739    | RNA → Methyltrn_RNA_3 (pfam02598) → RplC (COG0087)rpl3p (PRK04231) → rpl4p (PRK04042)Ribosomal_L4 (pfam00573) → RplW (COG0089)PRK14548 (PRK14548) → RplB (COG0090)rpl2p (PRK09612) → RpsS (COG0185)rps19p (PRK04038) → rpl22p (PRK04223)RplV (COG0091) →                                                                                                                                                                                                                                                                                                                                                                                                                                                                                                                                           |
| env-33  | GSLSAAL_contig12562         | - | 1374    | 1272    | RNA → Methyltrn_RNA_3 (pfam02598) → RplC (COG0087)rpl3p (PRK04231) →                                                                                                                                                                                                                                                                                                                                                                                                                                                                                                                                                                                                                                                                                                                               |

|        |                           |   |         |         |                                                                                                                                                                                                                                                                                                                                                                                                                                                                                                                                                                                                                                                                                                                                                                                                                                                                                                                                                                                                                                                     |
|--------|---------------------------|---|---------|---------|-----------------------------------------------------------------------------------------------------------------------------------------------------------------------------------------------------------------------------------------------------------------------------------------------------------------------------------------------------------------------------------------------------------------------------------------------------------------------------------------------------------------------------------------------------------------------------------------------------------------------------------------------------------------------------------------------------------------------------------------------------------------------------------------------------------------------------------------------------------------------------------------------------------------------------------------------------------------------------------------------------------------------------------------------------|
| env-34 | GSLSAAL_contig12554       | - | 3225    | 3123    | RNA → Methyltrn_RNA_3 (pfam02598) → RplC (COG0087)rpl3p (PRK04231) → RplD (COG0088)rpl4p (PRK04042) → RplW (COG0089)PRK14548 (PRK14548) → RplB (COG0090)rpl2p (PRK09612) →                                                                                                                                                                                                                                                                                                                                                                                                                                                                                                                                                                                                                                                                                                                                                                                                                                                                          |
| env-35 | GSLSAAL_contig12558       | - | 4430    | 4328    | RNA → Methyltrn_RNA_3 (pfam02598) → RplC (COG0087)rpl3p (PRK04231) → RplD (COG0088)rpl4p (PRK04042) → RplW (COG0089)PRK14548 (PRK14548) → RplB (COG0090)rpl2p (PRK09612) → RpsS (COG0185)rps19p (PRK04038) → rpl22p (PRK04223)RplV (COG0091) → KH (smart00322)archeal_30S_S3_KH (cd02411) →                                                                                                                                                                                                                                                                                                                                                                                                                                                                                                                                                                                                                                                                                                                                                         |
| env-36 | SL_6KL_011_BRINE_1000585  | - | 15210   | 15108   | RNA → Methyltrn_RNA_3 (pfam02598) → RplC (COG0087)rpl3p (PRK04231) → RplD (COG0088)rpl4p (PRK04042) → RplW (COG0089)uL23_arch (TIGR03636) → RplB (COG0090)rpl2p (PRK09612) → RpsS (COG0185)rps19p (PRK04038) → rpl22p (PRK04223)RplV (COG0091) → RpsC (COG0092)rps3p (PRK04191) → PRK14549 (PRK14549)Ribosomal_L29 (pfam00831) → POP4 (COG1588)PRK03879 (PRK03879) → RpsQ (COG0186)rps17p (PRK08572) → rpl14p (PRK08571)Ribosomal_L14 (pfam00238) → rpl24p (PRK01191)KOW_RPL26 (cd06089) → PRK04313 (PRK04313)KOW_RPS4 (cd06087)S4 (pfam01479)Ribosomal_S4e (pfam00900) → RplE (COG0094)rpl5p (PRK04219) → RpsN (COG0199)rps14P (PRK05766) → rps8p (PRK04034)RpsH (COG0096) → RplF (COG0097)rpl6p (PRK05518) → Rpl32e (COG1717)rpl32e (PRK08562)HHH_5 (pfam14520) →                                                                                                                                                                                                                                                                                 |
| env-37 | SL_5KL_010_BRINE_10000390 | + | 6046    | 6145    | RNA → Methyltrn_RNA_3 (pfam02598) → rpl3p (PRK04231)Ribosomal_L3 (pfam00297) → RplD (COG0088)rpl4p (PRK04042) → RplW (COG0089)PRK14548 (PRK14548) → RplB (COG0090)rpl2p (PRK09612) → RpsS (COG0185)rps19p (PRK04038) → rpl22p (PRK04223)RplV (COG0091) → RpsC (COG0092)rps3p (PRK04191) → PRK14549 (PRK14549)Ribosomal_L29 (pfam00831) → PRK03879 (PRK03879)UPF0086 (pfam01868) → RpsQ (COG0186)rps17p (PRK08572) → rpl14p (PRK08571)Ribosomal_L14 (pfam00238) → RplX (COG0198)rpl24p (PRK01191) → PRK04313 (PRK04313)KOW_RPS4 (cd06087)S4 (pfam01479)Ribosomal_S4e (pfam00900) → RplE (COG0094)rpl5p (PRK04219) → RpsN (COG0199)rps14P (PRK05766) → rps8p (PRK04034)RpsH (COG0096) → RplF (COG0097)rpl6p (PRK05518) → ComEA (COG1555)Rpl32e (COG1717)rpl32e (PRK08562)HHH_5 (pfam14520) → rpl19e (PRK08570)Ribosomal_L19e (pfam01280) → RplR (COG0256)rpl18p (PRK08569) → RpsE (COG0098)rps5p (PRK04044) → Ribosomal_L7_archeal_euk (cd01657)rpl30p (PRK06049) → rpl15p (PRK06419)Ribosomal_L27A (pfam00828) → SecY (COG0201)PRK08568 (PRK08568) → |
| env-38 | SL_4KL_010_BRINE_10108326 | + | 36      | 135     | RNA → Methyltrn_RNA_3 (pfam02598) → rpl3p (PRK04231)Ribosomal_L3 (pfam00297) →                                                                                                                                                                                                                                                                                                                                                                                                                                                                                                                                                                                                                                                                                                                                                                                                                                                                                                                                                                      |
| env-39 | SL_8KL_010_SED_10227597   | - | 345     | 246     | RNA → Methyltrn_RNA_3 (pfam02598) →                                                                                                                                                                                                                                                                                                                                                                                                                                                                                                                                                                                                                                                                                                                                                                                                                                                                                                                                                                                                                 |
| env-40 | SS_3KL_010_SOIL_10336605  | - | 246     | 147     | RNA → Methyltrn_RNA_3 (pfam02598) →                                                                                                                                                                                                                                                                                                                                                                                                                                                                                                                                                                                                                                                                                                                                                                                                                                                                                                                                                                                                                 |
| env-41 | APHM01002125.1            | + | 421     | 520     | RNA → Methyltrn_RNA_3 (pfam02598) → RplC (COG0087)rpl3p (PRK04231) → RplD (COG0088)rpl4p (PRK04042) → RplW (COG0089)PRK14548 (PRK14548) → rpl2p (PRK09612)Ribosomal_L2 (pfam00181) →                                                                                                                                                                                                                                                                                                                                                                                                                                                                                                                                                                                                                                                                                                                                                                                                                                                                |
| env-42 | LTJ07As871_J07ABscf098859 | - | 2359772 | 2359673 | RNA → Methyltrn_RNA_3 (pfam02598) → RplC (COG0087)rpl3p (PRK04231) → RplD (COG0088)rpl4p (PRK04042) → RplW (COG0089)PRK14548 (PRK14548) → rpl2p (PRK09612)Ribosomal_L2 (pfam00181) → PRK12317 (PRK12317)Translation_factor_III (cd01513)GTPBP_II (cd03694) →                                                                                                                                                                                                                                                                                                                                                                                                                                                                                                                                                                                                                                                                                                                                                                                        |
| env-43 | JXWU01069486.1            | + | 361     | 460     | RNA → Methyltrn_RNA_3 (pfam02598) →                                                                                                                                                                                                                                                                                                                                                                                                                                                                                                                                                                                                                                                                                                                                                                                                                                                                                                                                                                                                                 |
| env-44 | SS_3KL_010_SOIL_10060740  | - | 118     | 19      | RNA → Methyltrn_RNA_3 (pfam02598) →                                                                                                                                                                                                                                                                                                                                                                                                                                                                                                                                                                                                                                                                                                                                                                                                                                                                                                                                                                                                                 |
| env-45 | SL_5KL_010_BRINE_10001245 | + | 528     | 630     | RNA → Methyltrn_RNA_3 (pfam02598) → rpl3p (PRK04231)Ribosomal_L3 (pfam00297) → RplD (COG0088)rpl4p (PRK04042) → RplW (COG0089)PRK14548 (PRK14548) → RplB (COG0090)rpl2p (PRK09612) → RpsS (COG0185)rps19p (PRK04038) → rpl22p (PRK04223)RplV (COG0091) → RpsC (COG0092)rps3p (PRK04191) → PRK14549 (PRK14549)Ribosomal_L29 (pfam00831) → PRK03879 (PRK03879)UPF0086 (pfam01868) → RpsQ (COG0186)rps17p (PRK08572) → rpl14p (PRK08571)Ribosomal_L14 (pfam00238) → rpl24p (PRK01191)KOW_RPL26 (cd06089) → PRK04313 (PRK04313)KOW_RPS4 (cd06087)Ribosomal_S4e (pfam00900) → RplE (COG0094)rpl5p (PRK04219) → RpsN (COG0199)rps14P (PRK05766) → rps8p (PRK04034)RpsH (COG0096) → RplF (COG0097)rpl6p (PRK05518) → PRK12766 (PRK12766)RecA (COG0468)Rpl32e (COG1717) → rpl19e (PRK08570)Ribosomal_L19e (pfam01280) → RplR (COG0256)rpl18p (PRK08569) → RpsE (COG0098)rps5p (PRK04044) → Ribosomal_L7_archeal_euk (cd01657)rpl30p (PRK06049) →                                                                                                            |



|        |                           |   |       |       |                                                                                                                                                                                                                                                                                                                                                                                                                                                                                                                                                                                                                                                                                                                                                                                                                                                                                                                           |
|--------|---------------------------|---|-------|-------|---------------------------------------------------------------------------------------------------------------------------------------------------------------------------------------------------------------------------------------------------------------------------------------------------------------------------------------------------------------------------------------------------------------------------------------------------------------------------------------------------------------------------------------------------------------------------------------------------------------------------------------------------------------------------------------------------------------------------------------------------------------------------------------------------------------------------------------------------------------------------------------------------------------------------|
| env-46 | SL_6KL_011_BRINE.1001562  | + | 7391  | 7493  | RNA → Methyltrn_RNA_3 (pfam02598) → rpl3p (PRK04231) Ribosomal_L3 (pfam00297) → RplD (COG0088) rpl4p (PRK04042) → RplW (COG0089) PRK14548 (PRK14548) → RplB (COG0090) rpl2p (PRK09612) → RpsS (COG0185) rps19p (PRK04038) → rpl22p (PRK04223) RplV (COG0091) →                                                                                                                                                                                                                                                                                                                                                                                                                                                                                                                                                                                                                                                            |
| env-47 | SL_4KL_010_BRINE.10002586 | + | 550   | 652   | RNA → Methyltrn_RNA_3 (pfam02598) → rpl3p (PRK04231) Ribosomal_L3 (pfam00297) → RplD (COG0088) rpl4p (PRK04042) → RplW (COG0089) PRK14548 (PRK14548) → RplB (COG0090) rpl2p (PRK09612) → RpsS (COG0185) rps19p (PRK04038) → rpl22p (PRK04223) RplV (COG0091) → RpsC (COG0092) rps3p (PRK04191) → PRK14549 (PRK14549) Ribosomal_L29 (pfam00831) → PRK03879 (PRK03879) UPF0086 (pfam01868) → RpsQ (COG0186) rps17p (PRK08572) → rpl14p (PRK08571) Ribosomal_L14 (pfam00238) → rpl24p (PRK01191) KOW_RPL26 (cd06089) → PRK04313 (PRK04313) KOW_RPS4 (cd06087) Ribosomal_S4e (pfam00900) → RplE (COG0094) rpl5p (PRK04219) → RpsN (COG0199) rps14p (PRK05766) → rps8p (PRK04034) RpsH (COG0096) → RplF (COG0097) rpl6p (PRK05518) → RecA (COG0468) Rpl32e (COG1717) HHH_5 (pfam14520) →                                                                                                                                       |
| env-48 | SL_7KL_010_BRINE.10000614 | + | 5277  | 5379  | RNA → Methyltrn_RNA_3 (pfam02598) → rpl3p (PRK04231) Ribosomal_L3 (pfam00297) → RplD (COG0088) rpl4p (PRK04042) → RplW (COG0089) PRK14548 (PRK14548) → RplB (COG0090) rpl2p (PRK09612) → RpsS (COG0185) rps19p (PRK04038) → rpl22p (PRK04223) RplV (COG0091) → RpsC (COG0092) rps3p (PRK04191) → PRK14549 (PRK14549) Ribosomal_L29 (pfam00831) → PRK03879 (PRK03879) UPF0086 (pfam01868) → RpsQ (COG0186) rps17p (PRK08572) → rpl14p (PRK08571) Ribosomal_L14 (pfam00238) → rpl24p (PRK01191) KOW_RPL26 (cd06089) → PRK04313 (PRK04313) KOW_RPS4 (cd06087) Ribosomal_S4e (pfam00900) → RplE (COG0094) rpl5p (PRK04219) → RpsN (COG0199) rps14p (PRK05766) → rps8p (PRK04034) RpsH (COG0096) → RplF (COG0097) rpl6p (PRK05518) → RecA (COG0468) Rpl32e (COG1717) rpl32e (PRK08562) HHH_5 (pfam14520) → rpl19e (PRK08570) Ribosomal_L19e (pfam01280) → RplR (COG0256) rpl18p (PRK08569) → RpsE (COG0098) rps5p (PRK04044) → |
| env-49 | GSLNARP_contig28693       | + | 496   | 598   | RNA → Methyltrn_RNA_3 (pfam02598) → RplC (COG0087) rpl3p (PRK04231) → RplD (COG0088) rpl4p (PRK04042) → RplW (COG0089) PRK14548 (PRK14548) → RplB (COG0090) rpl2p (PRK09612) → RpsS (COG0185) rps19p (PRK04038) → rpl22p (PRK04223) RplV (COG0091) → RpsC (COG0092) rps3p (PRK04191) → PRK14549 (PRK14549) Ribosomal_L29 (pfam00831) → PRK03879 (PRK03879) UPF0086 (pfam01868) → RpsQ (COG0186) rps17p (PRK08572) → rpl14p (PRK08571) Ribosomal_L14 (pfam00238) → rpl24p (PRK01191) KOW_RPL26 (cd06089) →                                                                                                                                                                                                                                                                                                                                                                                                                 |
| env-50 | SL_5KL_010_BRINE.10001521 | + | 7795  | 7897  | RNA → Methyltrn_RNA_3 (pfam02598) → RplC (COG0087) rpl3p (PRK04231) → RplD (COG0088) rpl4p (PRK04042) → RplW (COG0089) PRK14548 (PRK14548) → RplB (COG0090) rpl2p (PRK09612) → rps19p (PRK04038) →                                                                                                                                                                                                                                                                                                                                                                                                                                                                                                                                                                                                                                                                                                                        |
| env-51 | SL_6KL_011_BRINE.1000203  | - | 3778  | 3676  | RNA → Methyltrn_RNA_3 (pfam02598) → RplC (COG0087) rpl3p (PRK04231) → RplD (COG0088) rpl4p (PRK04042) → RplW (COG0089) PRK14548 (PRK14548) → RplB (COG0090) rpl2p (PRK09612) → RpsS (COG0185) rps19p (PRK04038) →                                                                                                                                                                                                                                                                                                                                                                                                                                                                                                                                                                                                                                                                                                         |
| env-52 | SL_5KL_010_SED.10001876   | - | 10224 | 10122 | RNA → Methyltrn_RNA_3 (pfam02598) → RplC (COG0087) rpl3p (PRK04231) → RplD (COG0088) rpl4p (PRK04042) → RplW (COG0089) PRK14548 (PRK14548) → RplB (COG0090) rpl2p (PRK09612) → RpsS (COG0185) rps19p (PRK04038) → rpl22p (PRK04223) RplV (COG0091) → RpsC (COG0092) rps3p (PRK04191) → PRK14549 (PRK14549) Ribosomal_L29 (pfam00831) → PRK03879 (PRK03879) UPF0086 (pfam01868) → RpsQ (COG0186) rps17p (PRK08572) → rpl14p (PRK08571) Ribosomal_L14 (pfam00238) → rpl24p (PRK01191) KOW_RPL26 (cd06089) → PRK04313 (PRK04313) S4 (cd00165) KOW_RPS4 (cd06087) Ribosomal_S4e (pfam00900) → RplE (COG0094) rpl5p (PRK04219) → RpsN (COG0199) rps14p (PRK05766) → rps8p (PRK04034) RpsH (COG0096) → RplF (COG0097) rpl6p (PRK05518) → UvrC (COG0322) rpl32e (PRK08562) Ribosomal_L32e (pfam01655) HHH_5 (pfam14520) → rpl19e (PRK08570) Ribosomal_L19e (pfam01280) →                                                         |
| env-53 | SL_4KL_010_BRINE.10000708 | + | 14067 | 14169 | RNA → Methyltrn_RNA_3 (pfam02598) → RplC (COG0087) rpl3p (PRK04231) → RplD (COG0088) rpl4p (PRK04042) → RplW (COG0089) PRK14548 (PRK14548) → RplB (COG0090) rpl2p (PRK09612) → rps19p (PRK04038) →                                                                                                                                                                                                                                                                                                                                                                                                                                                                                                                                                                                                                                                                                                                        |
| env-54 | P_1C_Liq_1_UnCty_1162688  | - | 122   | 20    | RNA → MTH1 (COG2106) →                                                                                                                                                                                                                                                                                                                                                                                                                                                                                                                                                                                                                                                                                                                                                                                                                                                                                                    |



|        |                           |   |       |       |                                                                                                                                                                                                                                                                                                                                                                                                                                                                                                                                                                                                                                                                                                                                                                                                                                                                              |
|--------|---------------------------|---|-------|-------|------------------------------------------------------------------------------------------------------------------------------------------------------------------------------------------------------------------------------------------------------------------------------------------------------------------------------------------------------------------------------------------------------------------------------------------------------------------------------------------------------------------------------------------------------------------------------------------------------------------------------------------------------------------------------------------------------------------------------------------------------------------------------------------------------------------------------------------------------------------------------|
| env-55 | SL_6KL_011_BRINE_1072209  | - | 402   | 300   | RNA → Methyltrn_RNA_3 (pfam02598) →                                                                                                                                                                                                                                                                                                                                                                                                                                                                                                                                                                                                                                                                                                                                                                                                                                          |
| env-56 | SL_5KL_010_BRINE_10188769 | - | 355   | 253   | RNA → Methyltrn_RNA_3 (pfam02598) →                                                                                                                                                                                                                                                                                                                                                                                                                                                                                                                                                                                                                                                                                                                                                                                                                                          |
| env-57 | SL_4KL_010_BRINE_10162798 | + | 316   | 418   | RNA → Methyltrn_RNA_3 (pfam02598) →                                                                                                                                                                                                                                                                                                                                                                                                                                                                                                                                                                                                                                                                                                                                                                                                                                          |
| env-58 | SL_6KL_011_BRINE_1009000  | + | 854   | 956   | RNA → Methyltrn_RNA_3 (pfam02598) → RplC (COG0087)rpl3p (PRK04231) →<br>RplD (COG0088)rpl4p (PRK04042) → RplW (COG0089)PRK14548 (PRK14548) →<br>RplB (COG0090)rpl2p (PRK09612) → rps19p (PRK04038) →                                                                                                                                                                                                                                                                                                                                                                                                                                                                                                                                                                                                                                                                         |
| env-59 | ADL20m3uS_contig12843     | - | 170   | 68    | RNA → Methyltrn_RNA_3 (pfam02598) →                                                                                                                                                                                                                                                                                                                                                                                                                                                                                                                                                                                                                                                                                                                                                                                                                                          |
| env-60 | 2140918027-12578          | + | 373   | 475   | RNA →                                                                                                                                                                                                                                                                                                                                                                                                                                                                                                                                                                                                                                                                                                                                                                                                                                                                        |
| env-61 | 2140918027-03821          | + | 1792  | 1894  | RNA → Methyltrn_RNA_3 (pfam02598) →                                                                                                                                                                                                                                                                                                                                                                                                                                                                                                                                                                                                                                                                                                                                                                                                                                          |
| env-62 | ADL20m3uS_contig10848     | - | 468   | 366   | RNA → Methyltrn_RNA_3 (pfam02598) →                                                                                                                                                                                                                                                                                                                                                                                                                                                                                                                                                                                                                                                                                                                                                                                                                                          |
| env-63 | ADL5mRS1u_contig00538     | + | 967   | 1069  | RNA → Methyltrn_RNA_3 (pfam02598) → rpl3p (PRK04231)Ribosomal_L3 (pfam00297) →<br>RplC (COG0087)rpl3p (PRK04231) → RplD (COG0088)rpl4p (PRK04042) →<br>RplW (COG0089)PRK14548 (PRK14548) → RplB (COG0090)rpl2p (PRK09612) →<br>RpsS (COG0185)rps19p (PRK04038) →                                                                                                                                                                                                                                                                                                                                                                                                                                                                                                                                                                                                             |
| env-64 | GQKUMWE02JS9JS            | - | 377   | 275   | RNA → Methyltrn_RNA_3 (pfam02598) →                                                                                                                                                                                                                                                                                                                                                                                                                                                                                                                                                                                                                                                                                                                                                                                                                                          |
| env-65 | ADL20m3uS_contig10578     | - | 446   | 344   | RNA → Methyltrn_RNA_3 (pfam02598) →                                                                                                                                                                                                                                                                                                                                                                                                                                                                                                                                                                                                                                                                                                                                                                                                                                          |
| env-66 | 2140918017-36             | - | 14923 | 14821 | RNA → Methyltrn_RNA_3 (pfam02598) → rpl3p (PRK04231)Ribosomal_L3 (pfam00297) →<br>RplC (COG0087)rpl3p (PRK04231) → RplD (COG0088)rpl4p (PRK04042) →<br>RplW (COG0089)PRK14548 (PRK14548) → RplB (COG0090)rpl2p (PRK09612) →<br>RpsS (COG0185)rps19p (PRK04038) → rpl22p (PRK04223)RplV (COG0091) →<br>RpsC (COG0092)rps3p (PRK04191) → PRK14549 (PRK14549)Ribosomal_L29 (pfam00831) →<br>PRK03879 (PRK03879)UPF0086 (pfam01868) → RpsQ (COG0186)rps17p (PRK08572) →<br>rpl14p (PRK08571)Ribosomal_L14 (pfam00238) → rpl24p (PRK01191)KOW_RPL26 (cd06089) →<br>PRK04313 (PRK04313)KOW_RPS4 (cd06087)Ribosomal_S4e (pfam00900) → RplE (COG0094)rpl5p (PRK04219) →<br>RpsN (COG0199)rps14p (PRK05766) → rps8p (PRK04034)RpsH (COG0096) →<br>RplF (COG0097)rpl6p (PRK05518) → UvrC (COG0322)Rpl32e (COG1717)HHH_5 (pfam14520) →<br>rpl19e (PRK08570)Ribosomal_L19e (pfam01280) → |
| env-67 | GRCP39E01CI3EF            | - | 306   | 204   | RNA → Methyltrn_RNA_3 (pfam02598) →                                                                                                                                                                                                                                                                                                                                                                                                                                                                                                                                                                                                                                                                                                                                                                                                                                          |
| env-68 | GRCP39E01CZCI9            | + | 86    | 188   | RNA → Methyltrn_RNA_3 (pfam02598) →                                                                                                                                                                                                                                                                                                                                                                                                                                                                                                                                                                                                                                                                                                                                                                                                                                          |
| env-69 | 2140918027-00954          | + | 88    | 190   | RNA → Methyltrn_RNA_3 (pfam02598) → rpl3p (PRK04231)Ribosomal_L3 (pfam00297) →<br>RplC (COG0087)rpl3p (PRK04231) → RplD (COG0088)rpl4p (PRK04042) →<br>RplW (COG0089)PRK14548 (PRK14548) → RplB (COG0090)rpl2p (PRK09612) →<br>RpsS (COG0185)rps19p (PRK04038) → rpl22p (PRK04223)RplV (COG0091) →<br>RpsC (COG0092)rps3p (PRK04191) → PRK14549 (PRK14549)Ribosomal_L29 (pfam00831) →<br>PRK03879 (PRK03879)UPF0086 (pfam01868) →                                                                                                                                                                                                                                                                                                                                                                                                                                            |
| env-70 | GQKUMWE02F1GR6            | + | 61    | 163   | RNA → Methyltrn_RNA_3 (pfam02598) →                                                                                                                                                                                                                                                                                                                                                                                                                                                                                                                                                                                                                                                                                                                                                                                                                                          |
| env-71 | GQKUMWE02JMQQS            | + | 64    | 166   | RNA → Methyltrn_RNA_3 (pfam02598) →                                                                                                                                                                                                                                                                                                                                                                                                                                                                                                                                                                                                                                                                                                                                                                                                                                          |
| env-72 | SL_8KL_010_SED_10008943   | + | 2731  | 2830  | RNA → Methyltrn_RNA_3 (pfam02598) → RplC (COG0087)rpl3p (PRK04231) →<br>RplD (COG0088)rpl4p (PRK04042) → RplW (COG0089)PRK14548 (PRK14548) →<br>RplB (COG0090)rpl2p (PRK09612) → RpsS (COG0185)rps19p (PRK04038) →<br>rpl22p (PRK04223)RplV (COG0091) → KH (smart00322)archeal_30S_S3_KH (cd02411) →                                                                                                                                                                                                                                                                                                                                                                                                                                                                                                                                                                         |
| env-73 | SL_4KL_010_BRINE_10005953 | + | 2732  | 2831  | RNA → Methyltrn_RNA_3 (pfam02598) → RplC (COG0087)rpl3p (PRK04231) →<br>RplD (COG0088)rpl4p (PRK04042) → RplW (COG0089)PRK14548 (PRK14548) →<br>RplB (COG0090)rpl2p (PRK09612) → RpsS (COG0185)rps19p (PRK04038) →<br>rpl22p (PRK04223)RplV (COG0091) → KH (smart00322)archeal_30S_S3_KH (cd02411) →                                                                                                                                                                                                                                                                                                                                                                                                                                                                                                                                                                         |
| env-74 | SL_5KL_010_BRINE_10000601 | + | 12793 | 12892 | RNA → Methyltrn_RNA_3 (pfam02598) → RplC (COG0087)rpl3p (PRK04231) →<br>rpl4p (PRK04042)Ribosomal_L4 (pfam00573) → rpl4p (PRK04042) → RplW (COG0089)PRK14548 (PRK14548) →<br>RplB (COG0090)rpl2p (PRK09612) → RpsS (COG0185)rps19p (PRK04038) →<br>rpl22p (PRK04223)RplV (COG0091) → KH (smart00322)archeal_30S_S3_KH (cd02411) →                                                                                                                                                                                                                                                                                                                                                                                                                                                                                                                                            |
| env-75 | SL_5KL_010_SED_10018610   | - | 1058  | 959   | RNA → Methyltrn_RNA_3 (pfam02598) → rpl3p (PRK04231)Ribosomal_L3 (pfam00297) →                                                                                                                                                                                                                                                                                                                                                                                                                                                                                                                                                                                                                                                                                                                                                                                               |
| env-76 | JXWU01116399.1            | - | 162   | 60    | RNA → Methyltrn_RNA_3 (pfam02598) →                                                                                                                                                                                                                                                                                                                                                                                                                                                                                                                                                                                                                                                                                                                                                                                                                                          |
| env-77 | GSLNARP_GFPJP1N02IUPJO    | - | 257   | 155   | RNA → Methyltrn_RNA_3 (pfam02598) →                                                                                                                                                                                                                                                                                                                                                                                                                                                                                                                                                                                                                                                                                                                                                                                                                                          |
| env-78 | GSLNARP_GFPJP1N02J3NU6    | - | 222   | 120   | RNA → Methyltrn_RNA_3 (pfam02598) →                                                                                                                                                                                                                                                                                                                                                                                                                                                                                                                                                                                                                                                                                                                                                                                                                                          |



|         |                   |   |        |        |                                                                                                                                                                                                                                                                                                                                                                                                                                                                                                                                                                                                                                                                                                                                                                                                                                                                                                                                                                                                                                                                                                                                                                                                                                                                                                                                                                                                                                                                                                                                                                                                                                                                                                                                                                                       |
|---------|-------------------|---|--------|--------|---------------------------------------------------------------------------------------------------------------------------------------------------------------------------------------------------------------------------------------------------------------------------------------------------------------------------------------------------------------------------------------------------------------------------------------------------------------------------------------------------------------------------------------------------------------------------------------------------------------------------------------------------------------------------------------------------------------------------------------------------------------------------------------------------------------------------------------------------------------------------------------------------------------------------------------------------------------------------------------------------------------------------------------------------------------------------------------------------------------------------------------------------------------------------------------------------------------------------------------------------------------------------------------------------------------------------------------------------------------------------------------------------------------------------------------------------------------------------------------------------------------------------------------------------------------------------------------------------------------------------------------------------------------------------------------------------------------------------------------------------------------------------------------|
| Hsp-8-1 | NZ_JPES01000061.1 | + | 4380   | 4479   | <p>RNA → Methyltrn_RNA_3 (pfam02598) → hypo → rpl3p (PRK04231)Ribosomal_L3 (pfam00297) → RplD (COG0088)rpl4p (PRK04042) → RplW (COG0089)PRK14548 (PRK14548) → RplB (COG0090)rpl2p (PRK09612) → RpsS (COG0185)rps19p (PRK04038) → rpl22p (PRK04223)RplV (COG0091) → hypo → RpsC (COG0092)rps3p (PRK04191) → PRK14549 (PRK14549)Ribosomal_L29 (pfam00831) → PRK03879 (PRK03879)UPF0086 (pfam01868) → RpsQ (COG0186)rps17p (PRK08572) → hypo → rpl14p (PRK08571)Ribosomal_L14 (pfam00238) → RplX (COG0198)rpl24p (PRK01191) → PRK04313 (PRK04313)KOW_RPS4 (cd06087)Ribosomal_S4e (pfam00900) → RplE (COG0094)rpl5p (PRK04219) → RpsN (COG0199)rps14P (PRK05766) → rps8p (PRK04034)RpsH (COG0096) → RplF (COG0097)rpl6p (PRK05518) → PRK12766 (PRK12766)RecA (COG0468)Rpl32e (COG1717) → rpl19e (PRK08570)Ribosomal_L19e (pfam01280) → RplR (COG0256)rpl18p (PRK08569) → hypo → RpsE (COG0098)rps5p (PRK04044) → Ribosomal_L7_archaeal_euk (cd01657)rpl30p (PRK06049) → rpl15p (PRK06419)Ribosomal_L27A (pfam00828) → SecY (COG0201)PRK08568 (PRK08568) → RplD (COG0088)rpl4p (PRK04042) → RplW (COG0089)PRK14548 (PRK14548) → RplB (COG0090)rpl2p (PRK09612) → RpsS (COG0185)rps19p (PRK04038) → rpl22p (PRK04223)RplV (COG0091) → RpsC (COG0092)rps3p (PRK04191) → PRK14549 (PRK14549)Ribosomal_L29 (pfam00831) → PRK03879 (PRK03879)UPF0086 (pfam01868) → RpsQ (COG0186)rps17p (PRK08572) → rpl14p (PRK08571)Ribosomal_L14 (pfam00238) → RplX (COG0198)rpl24p (PRK01191) → PRK04313 (PRK04313)KOW_RPS4 (cd06087)Ribosomal_S4e (pfam00900) → RplE (COG0094)rpl5p (PRK04219) → RpsN (COG0199)rps14P (PRK05766) → rps8p (PRK04034)RpsH (COG0096) → RplF (COG0097)rpl6p (PRK05518) → PRK12766 (PRK12766)RecA (COG0468)Rpl32e (COG1717) → rpl19e (PRK08570)Ribosomal_L19e (pfam01280) →</p> |
| Hde-1-1 | NZ_AOLP01000011.1 | + | 331865 | 331964 | <p>RNA → Methyltrn_RNA_3 (pfam02598) → rpl3p (PRK04231)Ribosomal_L3 (pfam00297) → RplD (COG0088)rpl4p (PRK04042) → RplW (COG0089)PRK14548 (PRK14548) → RplB (COG0090)rpl2p (PRK09612) → RpsS (COG0185)rps19p (PRK04038) → rpl22p (PRK04223)RplV (COG0091) → RpsC (COG0092)rps3p (PRK04191) → PRK14549 (PRK14549)Ribosomal_L29 (pfam00831) → PRK03879 (PRK03879)UPF0086 (pfam01868) → RpsQ (COG0186)rps17p (PRK08572) → rpl14p (PRK08571)Ribosomal_L14 (pfam00238) → RplX (COG0198)rpl24p (PRK01191) → PRK04313 (PRK04313)KOW_RPS4 (cd06087)Ribosomal_S4e (pfam00900) → RplE (COG0094)rpl5p (PRK04219) → RpsN (COG0199)rps14P (PRK05766) → rps8p (PRK04034)RpsH (COG0096) → RplF (COG0097)rpl6p (PRK05518) → PRK12766 (PRK12766)RecA (COG0468)Rpl32e (COG1717) → rpl19e (PRK08570)Ribosomal_L19e (pfam01280) →</p>                                                                                                                                                                                                                                                                                                                                                                                                                                                                                                                                                                                                                                                                                                                                                                                                                                                                                                                                                                     |
| Hlu-1-1 | NZ_AOLH01000006.1 | + | 206888 | 206987 | <p>RNA → Methyltrn_RNA_3 (pfam02598) → rpl3p (PRK04231)Ribosomal_L3 (pfam00297) → RplD (COG0088)rpl4p (PRK04042) → RplW (COG0089)PRK14548 (PRK14548) → RplB (COG0090)rpl2p (PRK09612) → RpsS (COG0185)rps19p (PRK04038) → rpl22p (PRK04223)RplV (COG0091) → RpsC (COG0092)rps3p (PRK04191) → PRK14549 (PRK14549)Ribosomal_L29 (pfam00831) → PRK03879 (PRK03879)UPF0086 (pfam01868) → RpsQ (COG0186)rps17p (PRK08572) → rpl14p (PRK08571)Ribosomal_L14 (pfam00238) → RplX (COG0198)rpl24p (PRK01191) → PRK04313 (PRK04313)KOW_RPS4 (cd06087)Ribosomal_S4e (pfam00900) → RplE (COG0094)rpl5p (PRK04219) → RpsN (COG0199)rps14P (PRK05766) → rps8p (PRK04034)RpsH (COG0096) → RplF (COG0097)rpl6p (PRK05518) → PRK12766 (PRK12766)RecA (COG0468)Rpl32e (COG1717) → rpl19e (PRK08570)Ribosomal_L19e (pfam01280) →</p>                                                                                                                                                                                                                                                                                                                                                                                                                                                                                                                                                                                                                                                                                                                                                                                                                                                                                                                                                                     |
| Hal-2-1 | NZ_LK053000.1     | - | 908912 | 908813 | <p>RNA → Methyltrn_RNA_3 (pfam02598) → rpl3p (PRK04231)Ribosomal_L3 (pfam00297) → RplD (COG0088)rpl4p (PRK04042) → RplW (COG0089)PRK14548 (PRK14548) → RplB (COG0090)rpl2p (PRK09612) → RpsS (COG0185)rps19p (PRK04038) → rpl22p (PRK04223)RplV (COG0091) → RpsC (COG0092)rps3p (PRK04191) → PRK14549 (PRK14549)Ribosomal_L29 (pfam00831) → PRK03879 (PRK03879)UPF0086 (pfam01868) → RpsQ (COG0186)rps17p (PRK08572) → rpl14p (PRK08571)Ribosomal_L14 (pfam00238) → RplX (COG0198)rpl24p (PRK01191) → PRK04313 (PRK04313)KOW_RPS4 (cd06087)Ribosomal_S4e (pfam00900) → RplE (COG0094)rpl5p (PRK04219) → RpsN (COG0199)rps14P (PRK05766) → rps8p (PRK04034)RpsH (COG0096) → RplF (COG0097)rpl6p (PRK05518) → PRK12766 (PRK12766)RecA (COG0468)Rpl32e (COG1717) → rpl19e (PRK08570)Ribosomal_L19e (pfam01280) →</p>                                                                                                                                                                                                                                                                                                                                                                                                                                                                                                                                                                                                                                                                                                                                                                                                                                                                                                                                                                     |

|         |                   |   |         |         |                                                                                                                                                                                                                                                                                                                                                                                                                                                                                                                                                                                                                                                                                                                                                                                                                   |
|---------|-------------------|---|---------|---------|-------------------------------------------------------------------------------------------------------------------------------------------------------------------------------------------------------------------------------------------------------------------------------------------------------------------------------------------------------------------------------------------------------------------------------------------------------------------------------------------------------------------------------------------------------------------------------------------------------------------------------------------------------------------------------------------------------------------------------------------------------------------------------------------------------------------|
| Hsp-6-1 | NZ_AOLD01000045.1 | - | 26639   | 26540   | <p>RNA → Methyltrn_RNA_3 (pfam02598) → rpl3p (PRK04231)Ribosomal_L3 (pfam00297) → RplD (COG0088)rpl4p (PRK04042) → RplW (COG0089)PRK14548 (PRK14548) → RplB (COG0090)rpl2p (PRK09612) → RpsS (COG0185)rps19p (PRK04038) → rpl22p (PRK04223)RplV (COG0091) → RpsC (COG0092)rps3p (PRK04191) → PRK14549 (PRK14549)Ribosomal_L29 (pfam00831) → PRK03879 (PRK03879)UPF0086 (pfam01868) → RpsQ (COG0186)rps17p (PRK08572) → rpl14p (PRK08571)Ribosomal_L14 (pfam00238) → RplX (COG0198)rpl24p (PRK01191) → PRK04313 (PRK04313)KOW_RPS4 (cd06087)Ribosomal_S4e (pfam00900) → RplE (COG0094)rpl5p (PRK04219) → RpsN (COG0199)rps14P (PRK05766) → rps8p (PRK04034)RpsH (COG0096) → RplF (COG0097)rpl6p (PRK05518) → PRK12766 (PRK12766)RecA (COG0468)Rpl32e (COG1717) → rpl19e (PRK08570)Ribosomal_L19e (pfam01280) →</p> |
| Hsp-4-1 | NZ_AOLF01000024.1 | - | 14963   | 14864   | <p>RNA → Methyltrn_RNA_3 (pfam02598) → rpl3p (PRK04231)Ribosomal_L3 (pfam00297) → RplD (COG0088)rpl4p (PRK04042) → RplW (COG0089)PRK14548 (PRK14548) → RplB (COG0090)rpl2p (PRK09612) → RpsS (COG0185)rps19p (PRK04038) → rpl22p (PRK04223)RplV (COG0091) → RpsC (COG0092)rps3p (PRK04191) → PRK14549 (PRK14549)Ribosomal_L29 (pfam00831) → PRK03879 (PRK03879)UPF0086 (pfam01868) → RpsQ (COG0186)rps17p (PRK08572) → rpl14p (PRK08571)Ribosomal_L14 (pfam00238) → RplX (COG0198)rpl24p (PRK01191) → PRK04313 (PRK04313)KOW_RPS4 (cd06087)Ribosomal_S4e (pfam00900) → RplE (COG0094)rpl5p (PRK04219) → RpsN (COG0199)rps14P (PRK05766) → rps8p (PRK04034)RpsH (COG0096) → RplF (COG0097)rpl6p (PRK05518) → PRK12766 (PRK12766)RecA (COG0468)Rpl32e (COG1717) → rpl19e (PRK08570)Ribosomal_L19e (pfam01280) →</p> |
| Hsp-5-1 | NZ_AOLE01000011.1 | - | 83691   | 83592   | <p>RNA → Methyltrn_RNA_3 (pfam02598) → rpl3p (PRK04231)Ribosomal_L3 (pfam00297) → RplD (COG0088)rpl4p (PRK04042) → RplW (COG0089)PRK14548 (PRK14548) → RplB (COG0090)rpl2p (PRK09612) → RpsS (COG0185)rps19p (PRK04038) → rpl22p (PRK04223)RplV (COG0091) → RpsC (COG0092)rps3p (PRK04191) → PRK14549 (PRK14549)Ribosomal_L29 (pfam00831) → PRK03879 (PRK03879)UPF0086 (pfam01868) → RpsQ (COG0186)rps17p (PRK08572) → rpl14p (PRK08571)Ribosomal_L14 (pfam00238) → RplX (COG0198)rpl24p (PRK01191) → PRK04313 (PRK04313)KOW_RPS4 (cd06087)Ribosomal_S4e (pfam00900) → RplE (COG0094)rpl5p (PRK04219) → RpsN (COG0199)rps14P (PRK05766) → rps8p (PRK04034)RpsH (COG0096) → RplF (COG0097)rpl6p (PRK05518) → PRK12766 (PRK12766)RecA (COG0468)Rpl32e (COG1717) → rpl19e (PRK08570)Ribosomal_L19e (pfam01280) →</p> |
| Hme-1-1 | NZ_AOLO01000012.1 | - | 67999   | 67900   | <p>RNA → Methyltrn_RNA_3 (pfam02598) → rpl3p (PRK04231)Ribosomal_L3 (pfam00297) → RplD (COG0088)rpl4p (PRK04042) → RplW (COG0089)PRK14548 (PRK14548) → RplB (COG0090)rpl2p (PRK09612) → RpsS (COG0185)rps19p (PRK04038) → rpl22p (PRK04223)RplV (COG0091) → RpsC (COG0092)rps3p (PRK04191) → PRK14549 (PRK14549)Ribosomal_L29 (pfam00831) → PRK03879 (PRK03879)UPF0086 (pfam01868) → RpsQ (COG0186)rps17p (PRK08572) → rpl14p (PRK08571)Ribosomal_L14 (pfam00238) → RplX (COG0198)rpl24p (PRK01191) → PRK04313 (PRK04313)KOW_RPS4 (cd06087)Ribosomal_S4e (pfam00900) → RplE (COG0094)rpl5p (PRK04219) → RpsN (COG0199)rps14P (PRK05766) → rps8p (PRK04034)RpsH (COG0096) → RplF (COG0097)rpl6p (PRK05518) → PRK12766 (PRK12766)RecA (COG0468)Rpl32e (COG1717) → rpl19e (PRK08570)Ribosomal_L19e (pfam01280) →</p> |
| Hme-1-2 | NC_017941.2       | + | 2068879 | 2068978 | <p>RNA → Methyltrn_RNA_3 (pfam02598) → rpl3p (PRK04231)Ribosomal_L3 (pfam00297) → RplD (COG0088)rpl4p (PRK04042) → RplW (COG0089)PRK14548 (PRK14548) → RplB (COG0090)rpl2p (PRK09612) → RpsS (COG0185)rps19p (PRK04038) → rpl22p (PRK04223)RplV (COG0091) → RpsC (COG0092)rps3p (PRK04191) → PRK14549 (PRK14549)Ribosomal_L29 (pfam00831) → PRK03879 (PRK03879)UPF0086 (pfam01868) → RpsQ (COG0186)rps17p (PRK08572) → rpl14p (PRK08571)Ribosomal_L14 (pfam00238) → RplX (COG0198)rpl24p (PRK01191) → PRK04313 (PRK04313)KOW_RPS4 (cd06087)Ribosomal_S4e (pfam00900) → RplE (COG0094)rpl5p (PRK04219) → RpsN (COG0199)rps14P (PRK05766) → rps8p (PRK04034)RpsH (COG0096) → RplF (COG0097)rpl6p (PRK05518) → PRK12766 (PRK12766)RecA (COG0468)Rpl32e (COG1717) → rpl19e (PRK08570)Ribosomal_L19e (pfam01280) →</p> |



|         |                           |   |        |        |                                                                                                                                                                                                                                                                                                                                                                                                                                                                                                                                                                                                                                                                                                                                                                                                            |
|---------|---------------------------|---|--------|--------|------------------------------------------------------------------------------------------------------------------------------------------------------------------------------------------------------------------------------------------------------------------------------------------------------------------------------------------------------------------------------------------------------------------------------------------------------------------------------------------------------------------------------------------------------------------------------------------------------------------------------------------------------------------------------------------------------------------------------------------------------------------------------------------------------------|
| Hla-2-1 | NZ_AOLI01000019.1         | - | 425010 | 424911 | RNA → Methyltrn_RNA_3 (pfam02598) → rpl3p (PRK04231)Ribosomal_L3 (pfam00297) → RplD (COG0088)rpl4p (PRK04042) → RplW (COG0089)PRK14548 (PRK14548) → RplB (COG0090)rpl2p (PRK09612) → RpsS (COG0185)rps19p (PRK04038) → rpl22p (PRK04223)RplV (COG0091) → RpsC (COG0092)rps3p (PRK04191) → PRK14549 (PRK14549)Ribosomal_L29 (pfam00831) → PRK03879 (PRK03879)UPF0086 (pfam01868) → RpsQ (COG0186)rps17p (PRK08572) → rpl14p (PRK08571)Ribosomal_L14 (pfam00238) → RplX (COG0198)rpl24p (PRK01191) → PRK04313 (PRK04313)KOW_RPS4 (cd06087)Ribosomal_S4e (pfam00900) → RplE (COG0094)rpl5p (PRK04219) → RpsN (COG0199)rps14P (PRK05766) → rps8p (PRK04034)RpsH (COG0096) → RplF (COG0097)rpl6p (PRK05518) → PRK12766 (PRK12766)RecA (COG0468)Rpl32e (COG1717) → rpl19e (PRK08570)Ribosomal_L19e (pfam01280) → |
| Hel-1-1 | NZ_AOLK01000022.1         | + | 66470  | 66569  | RNA → Methyltrn_RNA_3 (pfam02598) → RplC (COG0087)rpl3p (PRK04231) → RplD (COG0088)rpl4p (PRK04042) → RplW (COG0089)PRK14548 (PRK14548) → RplB (COG0090)rpl2p (PRK09612) → RpsS (COG0185)rps19p (PRK04038) → rpl22p (PRK04223)RplV (COG0091) → RpsC (COG0092)rps3p (PRK04191) → PRK14549 (PRK14549)Ribosomal_L29 (pfam00831) → PRK03879 (PRK03879)UPF0086 (pfam01868) → RpsQ (COG0186)rps17p (PRK08572) → rpl14p (PRK08571)Ribosomal_L14 (pfam00238) → RplX (COG0198)rpl24p (PRK01191) → PRK04313 (PRK04313)KOW_RPS4 (cd06087)Ribosomal_S4e (pfam00900) → RplE (COG0094)rpl5p (PRK04219) → RpsN (COG0199)rps14P (PRK05766) → rps8p (PRK04034)RpsH (COG0096) → RplF (COG0097)rpl6p (PRK05518) → PRK12766 (PRK12766)RecA (COG0468)Rpl32e (COG1717) → rpl19e (PRK08570)Ribosomal_L19e (pfam01280) →           |
| Hmu-1-1 | NZ_AOLN01000013.1         | - | 37008  | 36909  | RNA → Methyltrn_RNA_3 (pfam02598) → rpl3p (PRK04231)Ribosomal_L3 (pfam00297) → RplD (COG0088)rpl4p (PRK04042) → RplW (COG0089)PRK14548 (PRK14548) → RplB (COG0090)rpl2p (PRK09612) → RpsS (COG0185)rps19p (PRK04038) → rpl22p (PRK04223)RplV (COG0091) → RpsC (COG0092)rps3p (PRK04191) → PRK14549 (PRK14549)Ribosomal_L29 (pfam00831) → PRK03879 (PRK03879)UPF0086 (pfam01868) → RpsQ (COG0186)rps17p (PRK08572) → rpl14p (PRK08571)Ribosomal_L14 (pfam00238) → RplX (COG0198)rpl24p (PRK01191) → PRK04313 (PRK04313)KOW_RPS4 (cd06087)Ribosomal_S4e (pfam00900) → RplE (COG0094)rpl5p (PRK04219) → RpsN (COG0199)rps14P (PRK05766) → rps8p (PRK04034)RpsH (COG0096) → RplF (COG0097)rpl6p (PRK05518) → PRK12766 (PRK12766)RecA (COG0468)Rpl32e (COG1717) → rpl19e (PRK08570)Ribosomal_L19e (pfam01280) → |
| env-79  | SL_4KL_010_BRINE_10099275 | - | 413    | 314    | RNA → Methyltrn_RNA_3 (pfam02598) →                                                                                                                                                                                                                                                                                                                                                                                                                                                                                                                                                                                                                                                                                                                                                                        |
| env-80  | SL_4KL_010_BRINE_10236927 | - | 339    | 240    | RNA → Methyltrn_RNA_3 (pfam02598) →                                                                                                                                                                                                                                                                                                                                                                                                                                                                                                                                                                                                                                                                                                                                                                        |
| env-81  | SL_4KL_010_BRINE_10017268 | + | 119    | 218    | RNA → Methyltrn_RNA_3 (pfam02598) → RplC (COG0087)rpl3p (PRK04231) → RplD (COG0088)rpl4p (PRK04042) → RplW (COG0089)PRK14548 (PRK14548) → RplB (COG0090)rpl2p (PRK09612) → RpsS (COG0185)rps19p (PRK04038) → rpl22p (PRK04223)RplV (COG0091) → RpsC (COG0092)rps3p (PRK04191) → PRK14549 (PRK14549)Ribosomal_L29 (pfam00831) → PRK03879 (PRK03879)UPF0086 (pfam01868) → RpsQ (COG0186)rps17p (PRK08572) → rpl14p (PRK08571)Ribosomal_L14 (pfam00238) → RplX (COG0198)rpl24p (PRK01191) → PRK04313 (PRK04313)KOW_RPS4 (cd06087)Ribosomal_S4e (pfam00900) → RplE (COG0094)rpl5p (PRK04219) → RpsN (COG0199)rps14P (PRK05766) → rps8p (PRK04034)RpsH (COG0096) → RplF (COG0097)rpl6p (PRK05518) → PRK12766 (PRK12766)RecA (COG0468)Rpl32e (COG1717) → rpl19e (PRK08570)Ribosomal_L19e (pfam01280) →           |
| env-82  | SL_4KL_010_BRINE_10000094 | - | 9413   | 9314   | RNA → Methyltrn_RNA_3 (pfam02598) → RplC (COG0087)rpl3p (PRK04231) → RplD (COG0088)rpl4p (PRK04042) → RplW (COG0089)PRK14548 (PRK14548) → RplB (COG0090)rpl2p (PRK09612) → RpsS (COG0185)rps19p (PRK04038) → rpl22p (PRK04223)RplV (COG0091) → RpsC (COG0092)rps3p (PRK04191) → PRK14549 (PRK14549)Ribosomal_L29_HIP (cd00427) → PRK03879 (PRK03879)UPF0086 (pfam01868) → RpsQ (COG0186)rps17p (PRK08572) → rpl14p (PRK08571)Ribosomal_L14 (pfam00238) → RplX (COG0198)rpl24p (PRK01191) → PRK04313 (PRK04313)S4 (cd00165)KOW_RPS4 (cd06087)Ribosomal_S4e (pfam00900) → RplE (COG0094)rpl5p (PRK04219) → RpsN (COG0199)rps14P (PRK05766) → rps8p (PRK04034)RpsH (COG0096) → RplF (COG0097)rpl6p (PRK05518) → COG2251 (COG2251)HHH_5 (pfam14520) →                                                          |
| env-83  | SL_4KL_010_BRINE_10065590 | + | 860    | 959    | RNA → Methyltrn_RNA_3 (pfam02598) → rpl3p (PRK04231)Ribosomal_L3 (pfam00297) →                                                                                                                                                                                                                                                                                                                                                                                                                                                                                                                                                                                                                                                                                                                             |

|          |                           |   |         |         |                                                                                                                                                                                                                                                                                                                                                                                                                                                                                                                                                                                                                                                                                                                                                                                                                                                           |
|----------|---------------------------|---|---------|---------|-----------------------------------------------------------------------------------------------------------------------------------------------------------------------------------------------------------------------------------------------------------------------------------------------------------------------------------------------------------------------------------------------------------------------------------------------------------------------------------------------------------------------------------------------------------------------------------------------------------------------------------------------------------------------------------------------------------------------------------------------------------------------------------------------------------------------------------------------------------|
| Hla-4-1  | NZ_CP007055.1             | + | 1979362 | 1979461 | RNA → <b>Methyltrn_RNA_3 (pfam02598)</b> → rpl3p (PRK04231)Ribosomal_L3 (pfam00297) → RplD (COG0088)rpl4p (PRK04042) → RplW (COG0089)PRK14548 (PRK14548) → RplB (COG0090)rpl2p (PRK09612) → RpsS (COG0185)rps19p (PRK04038) → rpl22p (PRK04223)RplV (COG0091) → RpsC (COG0092)rps3p (PRK04191) → PRK14549 (PRK14549)Ribosomal_L29 (pfam00831) → PRK03879 (PRK03879)UPF0086 (pfam01868) → RpsQ (COG0186)rps17p (PRK08572) → rpl14p (PRK08571)Ribosomal_L14 (pfam00238) → rpl24p (PRK01191)KOW_RPL26 (cd06089) → <b>PRK04313 (PRK04313)KOW_RPS4 (cd06087)Ribosomal_S4e (pfam00900)</b> → RplE (COG0094)rpl5p (PRK04219) → RpsN (COG0199)rps14p (PRK05766) → rps8p (PRK04034)RpsH (COG0096) → RplF (COG0097)rpl6p (PRK05518) → RecA (COG0468)Rpl32e (COG1717)rpl32e (PRK08562)HHH_5 (pfam14520) →                                                            |
| Ssp-1-1  | NC_021313.1               | + | 2429676 | 2429775 | RNA → <b>Methyltrn_RNA_3 (pfam02598)</b> → RplC (COG0087)rpl3p (PRK04231) → RplD (COG0088)rpl4p (PRK04042) → RplW (COG0089)PRK14548 (PRK14548) → RplB (COG0090)rpl2p (PRK09612) → RpsS (COG0185)rps19p (PRK04038) → rpl22p (PRK04223)RplV (COG0091) → RpsC (COG0092)rps3p (PRK04191) → PRK14549 (PRK14549)Ribosomal_L29 (pfam00831) → PRK03879 (PRK03879)UPF0086 (pfam01868) → hypo → RpsQ (COG0186)rps17p (PRK08572) → rpl14p (PRK08571)Ribosomal_L14 (pfam00238) → RplX (COG0198)rpl24p (PRK01191) → <b>PRK04313 (PRK04313)KOW_RPS4 (cd06087)S4 (pfam01479)Ribosomal_S4e (pfam00900)</b> → RplE (COG0094)rpl5p (PRK04219) → RpsN (COG0199)rps14p (PRK05766) → rps8p (PRK04034)RpsH (COG0096) → RplF (COG0097)rpl6p (PRK05518) → UvrC (COG0322)Rpl32e (COG1717)rpl32e (PRK08562)HHH_5 (pfam14520) → Rpl32e (COG1717)rpl32e (PRK08562)HHH_5 (pfam14520) → |
| env-84   | APHM01017236.1            | - | 204     | 105     | RNA → MTH1 (COG2106) →                                                                                                                                                                                                                                                                                                                                                                                                                                                                                                                                                                                                                                                                                                                                                                                                                                    |
| env-85   | LTJ07As871.J07ABscf096273 | - | 204     | 105     | RNA → MTH1 (COG2106) →                                                                                                                                                                                                                                                                                                                                                                                                                                                                                                                                                                                                                                                                                                                                                                                                                                    |
| env-86   | SL_4KL_010_BRINE_10002302 | + | 5048    | 5147    | RNA → <b>Methyltrn_RNA_3 (pfam02598)</b> → rpl3p (PRK04231)Ribosomal_L3 (pfam00297) → RplD (COG0088)rpl4p (PRK04042) → RplW (COG0089)PRK14548 (PRK14548) → RplB (COG0090)rpl2p (PRK09612) → RpsS (COG0185)rps19p (PRK04038) → rpl22p (PRK04223)RplV (COG0091) → RpsC (COG0092)rps3p (PRK04191) → RpmC (COG0255)PRK14549 (PRK14549) → PRK03879 (PRK03879)UPF0086 (pfam01868) →                                                                                                                                                                                                                                                                                                                                                                                                                                                                             |
| Hsp-11-1 | NZ_JMIP02000014.1         | - | 158997  | 158898  | RNA → <b>Methyltrn_RNA_3 (pfam02598)</b> → RplC (COG0087)rpl3p (PRK04231) → hypo → RplD (COG0088)rpl4p (PRK04042) → RplW (COG0089)PRK14548 (PRK14548) → hypo → hypo → RpsS (COG0185)rps19p (PRK04038) → rpl22p (PRK04223)RplV (COG0091) → RpsC (COG0092)rps3p (PRK04191) → PRK14549 (PRK14549)Ribosomal_L29 (pfam00831) → PRK03879 (PRK03879)UPF0086 (pfam01868) → RpsQ (COG0186)rps17p (PRK08572) → rpl14p (PRK08571)Ribosomal_L14 (pfam00238) → hypo → rpl24p (PRK01191)KOW_RPL26 (cd06089) → <b>PRK04313 (PRK04313)KOW_RPS4 (cd06087)Ribosomal_S4e (pfam00900)</b> → RplE (COG0094)rpl5p (PRK04219) → RpsN (COG0199)rps14p (PRK05766) → rps8p (PRK04034)RpsH (COG0096) → RplF (COG0097)rpl6p (PRK05518) → PRK12766 (PRK12766)UvrC (COG0322)Rpl32e (COG1717) →                                                                                          |
| env-87   | GSLNARP_GFPJP1N02HFKWJ    | - | 439     | 343     | RNA → PRK12442 (PRK12442) <b>Methyltrn_RNA_3 (pfam02598)</b> →                                                                                                                                                                                                                                                                                                                                                                                                                                                                                                                                                                                                                                                                                                                                                                                            |
| env-88   | SL_4KL_010_BRINE_10091194 | + | 755     | 857     | RNA → <b>Methyltrn_RNA_3 (pfam02598)</b> →                                                                                                                                                                                                                                                                                                                                                                                                                                                                                                                                                                                                                                                                                                                                                                                                                |
| env-89   | SL_4KL_010_BRINE_10095573 | - | 111     | 9       | RNA → MTH1 (COG2106) →                                                                                                                                                                                                                                                                                                                                                                                                                                                                                                                                                                                                                                                                                                                                                                                                                                    |
| Hka-1-1  | NZ_KB905379.1             | + | 273922  | 274024  | RNA → <b>Methyltrn_RNA_3 (pfam02598)</b> → rpl3p (PRK04231)Ribosomal_L3 (pfam00297) → RplD (COG0088)rpl4p (PRK04042) → RplW (COG0089)PRK14548 (PRK14548) → RplB (COG0090)rpl2p (PRK09612) → RpsS (COG0185)rps19p (PRK04038) → rpl22p (PRK04223)RplV (COG0091) → RpsC (COG0092)rps3p (PRK04191) → PRK14549 (PRK14549)Ribosomal_L29 (pfam00831) →                                                                                                                                                                                                                                                                                                                                                                                                                                                                                                           |
| Hmu-2-1  | NC_013202.1               | + | 1747213 | 1747315 | RNA → <b>Methyltrn_RNA_3 (pfam02598)</b> → rpl3p (PRK04231)Ribosomal_L3 (pfam00297) → RplD (COG0088)rpl4p (PRK04042) → RplW (COG0089)PRK14548 (PRK14548) → RplB (COG0090)rpl2p (PRK09612) → RpsS (COG0185)rps19p (PRK04038) → rpl22p (PRK04223)RplV (COG0091) → RpsC (COG0092)rps3p (PRK04191) → PRK14549 (PRK14549)Ribosomal_L29 (pfam00831) →                                                                                                                                                                                                                                                                                                                                                                                                                                                                                                           |

|         |                          |   |        |        |                                                                                                                                                                                                                                                                                                                                                                                                                                                                                                                                                                                                                                                                                                                                                                                                                                                                                                                                                                                                                                                                                                                                                                                                                                                                                                                                                                                                                                                                                                       |
|---------|--------------------------|---|--------|--------|-------------------------------------------------------------------------------------------------------------------------------------------------------------------------------------------------------------------------------------------------------------------------------------------------------------------------------------------------------------------------------------------------------------------------------------------------------------------------------------------------------------------------------------------------------------------------------------------------------------------------------------------------------------------------------------------------------------------------------------------------------------------------------------------------------------------------------------------------------------------------------------------------------------------------------------------------------------------------------------------------------------------------------------------------------------------------------------------------------------------------------------------------------------------------------------------------------------------------------------------------------------------------------------------------------------------------------------------------------------------------------------------------------------------------------------------------------------------------------------------------------|
| Hca-3-1 | NZ_AOIU01000034.1        | - | 38153  | 38054  | RNA → <b>Methyltrn_RNA_3</b> (pfam02598) → <b>rpl3p</b> (PRK04231) <b>Ribosomal_L3</b> (pfam00297) → <b>RplD</b> (COG0088) <b>rpl4p</b> (PRK04042) → <b>PRK14548</b> (PRK14548) <b>Ribosomal_L23</b> (pfam00276) → <b>RplB</b> (COG0090) <b>rpl2p</b> (PRK09612) → <b>RpsS</b> (COG0185) <b>rps19p</b> (PRK04038) → <b>rpl22p</b> (PRK04223) <b>RplV</b> (COG0091) → <b>RpsC</b> (COG0092) <b>rps3p</b> (PRK04191) → <b>PRK14549</b> (PRK14549) <b>Ribosomal_L29</b> (pfam00831) → <b>PRK03879</b> (PRK03879) <b>UPF0086</b> (pfam01868) → <b>RpsQ</b> (COG0186) <b>rps17p</b> (PRK08572) → <b>rpl14p</b> (PRK08571) <b>Ribosomal_L14</b> (pfam00238) → <b>RplX</b> (COG0198) <b>rpl24p</b> (PRK01191) → <b>PRK04313</b> (PRK04313) <b>KOW_RPS4</b> (cd06087) <b>S4</b> (pfam01479) <b>Ribosomal_S4e</b> (pfam00900) → <b>RplE</b> (COG0094) <b>rpl5p</b> (PRK04219) → <b>RpsN</b> (COG0199) <b>rps14P</b> (PRK05766) → <b>rps8p</b> (PRK04034) <b>RpsH</b> (COG0096) → <b>RplF</b> (COG0097) <b>rpl6p</b> (PRK05518) → <b>Rpl32e</b> (COG1717) <b>rpl32e</b> (PRK08562) <b>HHH_5</b> (pfam14520) → <b>rpl19e</b> (PRK08570) <b>Ribosomal_L19e</b> (pfam01280) →                                                                                                                                                                                                                                                                                                                                      |
| Hsa-5-1 | NZ_AOME01000079.1        | - | 8539   | 8440   | RNA → <b>Methyltrn_RNA_3</b> (pfam02598) → <b>RplC</b> (COG0087) <b>rpl3p</b> (PRK04231) → <b>RplD</b> (COG0088) <b>rpl4p</b> (PRK04042) → <b>RplW</b> (COG0089) <b>PRK14548</b> (PRK14548) → <b>RplB</b> (COG0090) <b>rpl2p</b> (PRK09612) → <b>RpsS</b> (COG0185) <b>rps19p</b> (PRK04038) → <b>rpl22p</b> (PRK04223) <b>RplV</b> (COG0091) → <b>RpsC</b> (COG0092) <b>rps3p</b> (PRK04191) <b>HHH_5</b> (pfam14520) → <b>PRK14549</b> (PRK14549) <b>Ribosomal_L29</b> (pfam00831) → <b>PRK03879</b> (PRK03879) <b>UPF0086</b> (pfam01868) → <b>RpsQ</b> (COG0186) <b>rps17p</b> (PRK08572) → <b>rpl14p</b> (PRK08571) <b>Ribosomal_L14</b> (pfam00238) → <b>RplX</b> (COG0198) <b>rpl24p</b> (PRK01191) → <b>PRK04313</b> (PRK04313) <b>S4</b> (cd00165) <b>KOW_RPS4</b> (cd06087) <b>Ribosomal_S4e</b> (pfam00900) → <b>RplE</b> (COG0094) <b>rpl5p</b> (PRK04219) → <b>hyp</b> → <b>hyp</b> → <b>RpsN</b> (COG0199) <b>rps14P</b> (PRK05766) →                                                                                                                                                                                                                                                                                                                                                                                                                                                                                                                                                   |
| env-90  | GQKUMWE01CQSAM           | + | 397    | 496    | RNA → <b>MTH1</b> (COG2106) →                                                                                                                                                                                                                                                                                                                                                                                                                                                                                                                                                                                                                                                                                                                                                                                                                                                                                                                                                                                                                                                                                                                                                                                                                                                                                                                                                                                                                                                                         |
| Hag-1-1 | NZ_BAFM01000007.1        | + | 1659   | 1758   | RNA → <b>Methyltrn_RNA_3</b> (pfam02598) → <b>RplC</b> (COG0087) <b>rpl3p</b> (PRK04231) → <b>RplD</b> (COG0088) <b>rpl4p</b> (PRK04042) → <b>RplW</b> (COG0089) <b>PRK14548</b> (PRK14548) → <b>RplB</b> (COG0090) <b>rpl2p</b> (PRK09612) → <b>RpsS</b> (COG0185) <b>rps19p</b> (PRK04038) → <b>rpl22p</b> (PRK04223) <b>RplV</b> (COG0091) → <b>RpsC</b> (COG0092) <b>UvrC</b> (COG0322) <b>rps3p</b> (PRK04191) <b>HHH_5</b> (pfam14520) → <b>PRK14549</b> (PRK14549) <b>Ribosomal_L29</b> (pfam00831) → <b>PRK03879</b> (PRK03879) <b>UPF0086</b> (pfam01868) → <b>RpsQ</b> (COG0186) <b>rps17p</b> (PRK08572) → <b>rpl14p</b> (PRK08571) <b>Ribosomal_L14</b> (pfam00238) → <b>RplX</b> (COG0198) <b>rpl24p</b> (PRK01191) → <b>PRK04313</b> (PRK04313) <b>S4</b> (cd00165) <b>KOW_RPS4</b> (cd06087) <b>Ribosomal_S4e</b> (pfam00900) → <b>RplE</b> (COG0094) <b>rpl5p</b> (PRK04219) → <b>RpsN</b> (COG0199) <b>rps14P</b> (PRK05766) → <b>rps8p</b> (PRK04034) <b>RpsH</b> (COG0096) → <b>RplF</b> (COG0097) <b>rpl6p</b> (PRK05518) → <b>RecA</b> (COG0468) <b>Rpl32e</b> (COG1717) <b>rpl32e</b> (PRK08562) <b>HHH_5</b> (pfam14520) → <b>rpl19e</b> (PRK08570) <b>Ribosomal_L19e</b> (pfam01280) → <b>RplR</b> (COG0256) <b>rpl18p</b> (PRK08569) → <b>RpsE</b> (COG0098) <b>rps5p</b> (PRK04044) → <b>Ribosomal_L7_archaeal_euk</b> (cd01657) <b>rpl30p</b> (PRK06049) → <b>rpl15p</b> (PRK06419) <b>Ribosomal_L27A</b> (pfam00828) → <b>SecY</b> (COG0201) <b>PRK08568</b> (PRK08568) → |
| Hsa-4-1 | NZ_AOMD01000025.1        | + | 140368 | 140467 | RNA → <b>Methyltrn_RNA_3</b> (pfam02598) → <b>RplC</b> (COG0087) <b>rpl3p</b> (PRK04231) → <b>RplD</b> (COG0088) <b>rpl4p</b> (PRK04042) → <b>RplW</b> (COG0089) <b>PRK14548</b> (PRK14548) → <b>RplB</b> (COG0090) <b>rpl2p</b> (PRK09612) → <b>RpsS</b> (COG0185) <b>rps19p</b> (PRK04038) → <b>rpl22p</b> (PRK04223) <b>RplV</b> (COG0091) → <b>RpsC</b> (COG0092) <b>rps3p</b> (PRK04191) <b>HHH_5</b> (pfam14520) → <b>PRK14549</b> (PRK14549) <b>Ribosomal_L29</b> (pfam00831) → <b>PRK03879</b> (PRK03879) <b>UPF0086</b> (pfam01868) → <b>RpsQ</b> (COG0186) <b>rps17p</b> (PRK08572) → <b>rpl14p</b> (PRK08571) <b>Ribosomal_L14</b> (pfam00238) → <b>rpl24p</b> (PRK01191) <b>KOW_RPL26</b> (cd06089) → <b>PRK04313</b> (PRK04313) <b>S4</b> (cd00165) <b>KOW_RPS4</b> (cd06087) <b>Ribosomal_S4e</b> (pfam00900) → <b>RplE</b> (COG0094) <b>rpl5p</b> (PRK04219) → <b>RpsN</b> (COG0199) <b>rps14P</b> (PRK05766) → <b>rps8p</b> (PRK04034) <b>RpsH</b> (COG0096) → <b>RplF</b> (COG0097) <b>rpl6p</b> (PRK05518) → <b>RecA</b> (COG0468) <b>Rpl32e</b> (COG1717) <b>COG2251</b> (COG2251) <b>rpl32e</b> (PRK08562) <b>HHH_5</b> (pfam14520) →                                                                                                                                                                                                                                                                                                                                             |
| env-91  | GSLNARP_contig29074      | - | 461    | 359    | RNA → <b>Methyltrn_RNA_3</b> (pfam02598) →                                                                                                                                                                                                                                                                                                                                                                                                                                                                                                                                                                                                                                                                                                                                                                                                                                                                                                                                                                                                                                                                                                                                                                                                                                                                                                                                                                                                                                                            |
| env-92  | P_1C_Liq_1_UnCty_1017446 | + | 565    | 667    | RNA → <b>MTH1</b> (COG2106) →                                                                                                                                                                                                                                                                                                                                                                                                                                                                                                                                                                                                                                                                                                                                                                                                                                                                                                                                                                                                                                                                                                                                                                                                                                                                                                                                                                                                                                                                         |
| env-93  | P_1C_Liq_3_UnCty_1022117 | - | 224    | 122    | RNA → <b>Methyltrn_RNA_3</b> (pfam02598) →                                                                                                                                                                                                                                                                                                                                                                                                                                                                                                                                                                                                                                                                                                                                                                                                                                                                                                                                                                                                                                                                                                                                                                                                                                                                                                                                                                                                                                                            |
| env-94  | P_1C_Sed_2_UnCty_1128195 | - | 252    | 150    | RNA → <b>Methyltrn_RNA_3</b> (pfam02598) →                                                                                                                                                                                                                                                                                                                                                                                                                                                                                                                                                                                                                                                                                                                                                                                                                                                                                                                                                                                                                                                                                                                                                                                                                                                                                                                                                                                                                                                            |
| env-95  | P_1C_Liq_2_UnCty_1026371 | - | 311    | 209    | RNA → <b>Methyltrn_RNA_3</b> (pfam02598) →                                                                                                                                                                                                                                                                                                                                                                                                                                                                                                                                                                                                                                                                                                                                                                                                                                                                                                                                                                                                                                                                                                                                                                                                                                                                                                                                                                                                                                                            |
| env-96  | 77515515                 | + | 477    | 579    | RNA → <b>MTH1</b> (COG2106) →                                                                                                                                                                                                                                                                                                                                                                                                                                                                                                                                                                                                                                                                                                                                                                                                                                                                                                                                                                                                                                                                                                                                                                                                                                                                                                                                                                                                                                                                         |
| env-97  | FLAS_READ_83860922       | + | 477    | 579    | RNA → <b>MTH1</b> (COG2106) →                                                                                                                                                                                                                                                                                                                                                                                                                                                                                                                                                                                                                                                                                                                                                                                                                                                                                                                                                                                                                                                                                                                                                                                                                                                                                                                                                                                                                                                                         |
| env-98  | P_A23_Liq_3_Fmt_1016381  | - | 364    | 262    | RNA → <b>MTH1</b> (COG2106) →                                                                                                                                                                                                                                                                                                                                                                                                                                                                                                                                                                                                                                                                                                                                                                                                                                                                                                                                                                                                                                                                                                                                                                                                                                                                                                                                                                                                                                                                         |

|         |                           |   |        |        |                                                                                                                                                                                                                                                                                                                                                                                                                                                                                                                                                                                                                                                                                                                                                                                                                                                                                                                                                                                          |
|---------|---------------------------|---|--------|--------|------------------------------------------------------------------------------------------------------------------------------------------------------------------------------------------------------------------------------------------------------------------------------------------------------------------------------------------------------------------------------------------------------------------------------------------------------------------------------------------------------------------------------------------------------------------------------------------------------------------------------------------------------------------------------------------------------------------------------------------------------------------------------------------------------------------------------------------------------------------------------------------------------------------------------------------------------------------------------------------|
| env-99  | APHM01021628.1            | + | 4390   | 4492   | RNA → Methyltrn_RNA_3 (pfam02598) → RplC (COG0087)rpl3p (PRK04231) → RplD (COG0088)rpl4p (PRK04042) → RplW (COG0089)PRK14548 (PRK14548) → RplB (COG0090)rpl2p (PRK09612) → RpsS (COG0185)rps19p (PRK04038) → rpl22p (PRK04223)RplV (COG0091) → RpsC (COG0092)rps3p (PRK04191) →                                                                                                                                                                                                                                                                                                                                                                                                                                                                                                                                                                                                                                                                                                          |
| env-100 | LTJ07As871_J07ABscf098869 | + | 456526 | 456628 | RNA → Methyltrn_RNA_3 (pfam02598) → RplC (COG0087)rpl3p (PRK04231) → RplD (COG0088)rpl4p (PRK04042) → RplW (COG0089)PRK14548 (PRK14548) → RplB (COG0090)rpl2p (PRK09612) → RpsS (COG0185)rps19p (PRK04038) → rpl22p (PRK04223)RplV (COG0091) → RpsC (COG0092)rps3p (PRK04191) →                                                                                                                                                                                                                                                                                                                                                                                                                                                                                                                                                                                                                                                                                                          |
| env-101 | P_1C_Sed_2_UnCty_1030622  | + | 624    | 726    | RNA → MTH1 (COG2106) →                                                                                                                                                                                                                                                                                                                                                                                                                                                                                                                                                                                                                                                                                                                                                                                                                                                                                                                                                                   |
| env-102 | SL_5KL_010_BRINE_10180849 | - | 369    | 267    | RNA → PRK10575 (PRK10575)Methyltrn_RNA_3 (pfam02598) →                                                                                                                                                                                                                                                                                                                                                                                                                                                                                                                                                                                                                                                                                                                                                                                                                                                                                                                                   |
| env-103 | SL_6KL_011_BRINE_1082566  | - | 592    | 490    | RNA → PRK10575 (PRK10575)Methyltrn_RNA_3 (pfam02598) →                                                                                                                                                                                                                                                                                                                                                                                                                                                                                                                                                                                                                                                                                                                                                                                                                                                                                                                                   |
| env-104 | SL_8KL_010_SED_10233400   | + | 212    | 314    | RNA → Methyltrn_RNA_3 (pfam02598) →                                                                                                                                                                                                                                                                                                                                                                                                                                                                                                                                                                                                                                                                                                                                                                                                                                                                                                                                                      |
| env-105 | SL_4KL_010_BRINE_10134291 | + | 227    | 329    | RNA → Methyltrn_RNA_3 (pfam02598) →                                                                                                                                                                                                                                                                                                                                                                                                                                                                                                                                                                                                                                                                                                                                                                                                                                                                                                                                                      |
| env-106 | SL_5KL_010_BRINE_10114435 | + | 29     | 131    | RNA → Methyltrn_RNA_3 (pfam02598) →                                                                                                                                                                                                                                                                                                                                                                                                                                                                                                                                                                                                                                                                                                                                                                                                                                                                                                                                                      |
| env-107 | P_1C_Sed_2_UnCty_1330058  | + | 56     | 155    | RNA → Methyltrn_RNA_3 (pfam02598) →                                                                                                                                                                                                                                                                                                                                                                                                                                                                                                                                                                                                                                                                                                                                                                                                                                                                                                                                                      |
| env-108 | SL_4KL_010_BRINE_10687755 | + | 77     | 176    | RNA → Methyltrn_RNA_3 (pfam02598) →                                                                                                                                                                                                                                                                                                                                                                                                                                                                                                                                                                                                                                                                                                                                                                                                                                                                                                                                                      |
| env-109 | JXWU01090489.1            | + | 605    | 701    | RNA → Methyltrn_RNA_3 (pfam02598) →                                                                                                                                                                                                                                                                                                                                                                                                                                                                                                                                                                                                                                                                                                                                                                                                                                                                                                                                                      |
| CHa-1-1 | NZ_ASGZ01000021.1         | + | 7594   | 7693   | RNA → Methyltrn_RNA_3 (pfam02598) → RplC (COG0087)rpl3p (PRK04231) → RplD (COG0088)rpl4p (PRK04042) → RplW (COG0089)PRK14548 (PRK14548) → RplB (COG0090)rpl2p (PRK09612) → RpsS (COG0185)rps19p (PRK04038) → rpl22p (PRK04223)RplV (COG0091) → RpsC (COG0092)rps3p (PRK04191) → PRK14549 (PRK14549)Ribosomal_L29 (pfam00831) → PRK03879 (PRK03879)UPF0086 (pfam01868) → RpsQ (COG0186)rps17p (PRK08572) → rpl14p (PRK08571)Ribosomal_L14 (pfam00238) → RplX (COG0198)rpl24p (PRK01191) → PRK04313 (PRK04313)Ribosomal_S4e (pfam00900) → RplE (COG0094)rpl5p (PRK04219) → RpsN (COG0199)rps14p (PRK05766) → rps8p (PRK04034)RpsH (COG0096) → RplF (COG0097)rpl6p (PRK05518) → PRK12766 (PRK12766)RecA (COG0468)Rpl32e (COG1717) → rpl19e (PRK08570)Ribosomal_L19e (pfam01280) → RplR (COG0256)rpl18p (PRK08569) → RpsE (COG0098)rps5p (PRK04044) → RpsE (COG0098)rps5p (PRK04044) → Ribosomal_L7_archaeal_leuk (cd01657)rpl30p (PRK06049) → rpl15p (PRK06419)Ribosomal_L27A (pfam00828) → |
| Hpa-2-1 | NZ_AOIV01000008.1         | - | 240007 | 239908 | RNA → Methyltrn_RNA_3 (pfam02598) → RplC (COG0087)rpl3p (PRK04231) → RplD (COG0088)rpl4p (PRK04042) → RplW (COG0089)PRK14548 (PRK14548) → RplB (COG0090)rpl2p (PRK09612) → RpsS (COG0185)rps19p (PRK04038) → rpl22p (PRK04223)RplV (COG0091) → RpsC (COG0092)rps3p (PRK04191) → PRK14549 (PRK14549)Ribosomal_L29 (pfam00831) → PRK03879 (PRK03879)UPF0086 (pfam01868) → RpsQ (COG0186)rps17p (PRK08572) → rpl14p (PRK08571)Ribosomal_L14 (pfam00238) → RplX (COG0198)rpl24p (PRK01191) → PRK04313 (PRK04313)KOW_RPS4 (cd06087)Ribosomal_S4e (pfam00900) → RplE (COG0094)rpl5p (PRK04219) → RpsN (COG0199)rps14p (PRK05766) → rps8p (PRK04034)RpsH (COG0096) → RplF (COG0097)rpl6p (PRK05518) → PRK12766 (PRK12766)RecA (COG0468)Rpl32e (COG1717) → rpl19e (PRK08570)Ribosomal_L19e (pfam01280) →                                                                                                                                                                                         |
| env-110 | SL_5KL_010_BRINE_10000579 | - | 6143   | 6044   | RNA → Methyltrn_RNA_3 (pfam02598) → RplC (COG0087)rpl3p (PRK04231) → RplD (COG0088)rpl4p (PRK04042) → RplW (COG0089)PRK14548 (PRK14548) → RplB (COG0090)rpl2p (PRK09612) → RpsS (COG0185)rps19p (PRK04038) → rpl22p (PRK04223)RplV (COG0091) → RpsC (COG0092)rps3p (PRK04191) → RpmC (COG0255)PRK14549 (PRK14549) → hypo → PRK03879 (PRK03879)UPF0086 (pfam01868) → RpsQ (COG0186)rps17p (PRK08572) →                                                                                                                                                                                                                                                                                                                                                                                                                                                                                                                                                                                    |
| env-111 | SL_4KL_010_BRINE_10006116 | - | 6219   | 6120   | RNA → Methyltrn_RNA_3 (pfam02598) → RplC (COG0087)rpl3p (PRK04231) → RplD (COG0088)rpl4p (PRK04042) → RplW (COG0089)PRK14548 (PRK14548) → RplB (COG0090)rpl2p (PRK09612) → RpsS (COG0185)rps19p (PRK04038) → rpl22p (PRK04223)RplV (COG0091) → RpsC (COG0092)rps3p (PRK04191) → RpmC (COG0255)PRK14549 (PRK14549) → hypo → PRK03879 (PRK03879)UPF0086 (pfam01868) → RpsQ (COG0186)rps17p (PRK08572) →                                                                                                                                                                                                                                                                                                                                                                                                                                                                                                                                                                                    |
| env-112 | SL_4KL_010_BRINE_10037372 | + | 1564   | 1663   | RNA → Methyltrn_RNA_3 (pfam02598) → rpl3p (PRK04231)Ribosomal_L3 (pfam00297) →                                                                                                                                                                                                                                                                                                                                                                                                                                                                                                                                                                                                                                                                                                                                                                                                                                                                                                           |



|         |                           |   |         |         |                                                                                                                                                                                                                                                                                                                                                                                                                                                                                                                                                                                                                                                                                                                                                                                                                                                                                                                                                                                                                                                          |
|---------|---------------------------|---|---------|---------|----------------------------------------------------------------------------------------------------------------------------------------------------------------------------------------------------------------------------------------------------------------------------------------------------------------------------------------------------------------------------------------------------------------------------------------------------------------------------------------------------------------------------------------------------------------------------------------------------------------------------------------------------------------------------------------------------------------------------------------------------------------------------------------------------------------------------------------------------------------------------------------------------------------------------------------------------------------------------------------------------------------------------------------------------------|
| Nhu-1-1 | NZ_AOIM01000008.1         | + | 9157    | 9256    | RNA → <b>Methyltrn_RNA_3 (pfam02598)</b> → <b>rpl3p (PRK04231)</b> Ribosomal_L3 (pfam00297) → <b>RplD (COG0088)</b> rpl4p (PRK04042) → <b>RplW (COG0089)</b> <b>PRK14548 (PRK14548)</b> → <b>RplB (COG0090)</b> rpl2p (PRK09612) → <b>RpsS (COG0185)</b> <b>rps19p (PRK04038)</b> → <b>rpl22p (PRK04223)</b> <b>RplV (COG0091)</b> → <b>RpsC (COG0092)</b> <b>rps3p (PRK04191)</b> → <b>RpmC (COG0255)</b> <b>PRK14549 (PRK14549)</b> → <b>PRK03879 (PRK03879)</b> UPF0086 (pfam01868) → <b>RpsQ (COG0186)</b> <b>rps17p (PRK08572)</b> → <b>rpl14p (PRK08571)</b> Ribosomal_L14 (pfam00238) → <b>rpl24p (PRK01191)</b> <b>KOW_RPL26 (cd06089)</b> → <b>PRK04313 (PRK04313)</b> S4 (pfam01479) → <b>hypo</b> →                                                                                                                                                                                                                                                                                                                                           |
| env-113 | P_A23_Liq_1_Fmt_1001862   | - | 2728    | 2626    | RNA → <b>MTH1 (COG2106)</b> → <b>RplC (COG0087)</b> rpl3p (PRK04231) → <b>RplD (COG0088)</b> rpl4p (PRK04042) → <b>RplW (COG0089)</b> <b>PRK14548 (PRK14548)</b> → <b>RplB (COG0090)</b> rpl2p (PRK09612) →                                                                                                                                                                                                                                                                                                                                                                                                                                                                                                                                                                                                                                                                                                                                                                                                                                              |
| env-114 | P_A23_Liq_1_Fmt_1006312   | - | 589     | 487     | RNA → <b>Methyltrn_RNA_3 (pfam02598)</b> →                                                                                                                                                                                                                                                                                                                                                                                                                                                                                                                                                                                                                                                                                                                                                                                                                                                                                                                                                                                                               |
| env-115 | P_A23_Liq_2_Fmt_1001778   | - | 147     | 45      | RNA → <b>MTH1 (COG2106)</b> →                                                                                                                                                                                                                                                                                                                                                                                                                                                                                                                                                                                                                                                                                                                                                                                                                                                                                                                                                                                                                            |
| env-116 | SL_5KL_010_BRINE_10182593 | - | 355     | 253     | RNA → <b>PRK10575 (PRK10575)</b> <b>Methyltrn_RNA_3 (pfam02598)</b> →                                                                                                                                                                                                                                                                                                                                                                                                                                                                                                                                                                                                                                                                                                                                                                                                                                                                                                                                                                                    |
| env-117 | SL_6KL_011_BRINE_1122878  | + | 59      | 161     | RNA → <b>Methyltrn_RNA_3 (pfam02598)</b> →                                                                                                                                                                                                                                                                                                                                                                                                                                                                                                                                                                                                                                                                                                                                                                                                                                                                                                                                                                                                               |
| env-118 | SL_5KL_010_SED_10176812   | - | 343     | 241     | RNA → <b>Methyltrn_RNA_3 (pfam02598)</b> →                                                                                                                                                                                                                                                                                                                                                                                                                                                                                                                                                                                                                                                                                                                                                                                                                                                                                                                                                                                                               |
| env-119 | GSLSAAL_GFP0ZZ301BFHUD    | + | 260     | 362     | RNA → <b>Methyltrn_RNA_3 (pfam02598)</b> →                                                                                                                                                                                                                                                                                                                                                                                                                                                                                                                                                                                                                                                                                                                                                                                                                                                                                                                                                                                                               |
| env-120 | APHM01000442.1            | + | 2818    | 2917    | RNA → <b>Methyltrn_RNA_3 (pfam02598)</b> → <b>RplC (COG0087)</b> rpl3p (PRK04231) → <b>RplD (COG0088)</b> rpl4p (PRK04042) → <b>RplW (COG0089)</b> <b>PRK14548 (PRK14548)</b> → <b>RplB (COG0090)</b> rpl2p (PRK09612) → <b>rps19p (PRK04038)</b> →                                                                                                                                                                                                                                                                                                                                                                                                                                                                                                                                                                                                                                                                                                                                                                                                      |
| env-121 | LTJ07As871_J07ABscf098878 | - | 600442  | 600343  | RNA → <b>Methyltrn_RNA_3 (pfam02598)</b> → <b>RplC (COG0087)</b> rpl3p (PRK04231) → <b>RplD (COG0088)</b> rpl4p (PRK04042) → <b>RplW (COG0089)</b> <b>PRK14548 (PRK14548)</b> → <b>RplB (COG0090)</b> rpl2p (PRK09612) →                                                                                                                                                                                                                                                                                                                                                                                                                                                                                                                                                                                                                                                                                                                                                                                                                                 |
| env-122 | JXWS01030537.1            | + | 838     | 937     | RNA → <b>Methyltrn_RNA_3 (pfam02598)</b> →                                                                                                                                                                                                                                                                                                                                                                                                                                                                                                                                                                                                                                                                                                                                                                                                                                                                                                                                                                                                               |
| env-123 | P_A23_Liq_1_Fmt_1000580   | + | 837     | 936     | RNA → <b>Methyltrn_RNA_3 (pfam02598)</b> → <b>RplC (COG0087)</b> rpl3p (PRK04231) → <b>RplD (COG0088)</b> rpl4p (PRK04042) → <b>RplW (COG0089)</b> <b>PRK14548 (PRK14548)</b> → <b>RplB (COG0090)</b> rpl2p (PRK09612) → <b>RpsS (COG0185)</b> <b>rps19p (PRK04038)</b> → <b>rpl22p (PRK04223)</b> <b>RplV (COG0091)</b> → <b>RpsC (COG0092)</b> <b>rps3p (PRK04191)</b> → <b>PRK14549 (PRK14549)</b> Ribosomal_L29 (pfam00831) → <b>PRK03879 (PRK03879)</b> UPF0086 (pfam01868) →                                                                                                                                                                                                                                                                                                                                                                                                                                                                                                                                                                       |
| env-124 | P_A23_Liq_3_Fmt_1000785   | - | 1067    | 968     | RNA → <b>Methyltrn_RNA_3 (pfam02598)</b> → <b>rpl3p (PRK04231)</b> Ribosomal_L3 (pfam00297) →                                                                                                                                                                                                                                                                                                                                                                                                                                                                                                                                                                                                                                                                                                                                                                                                                                                                                                                                                            |
| env-125 | P_A23_Liq_2_Fmt_1000789   | - | 1096    | 997     | RNA → <b>Methyltrn_RNA_3 (pfam02598)</b> → <b>rpl3p (PRK04231)</b> Ribosomal_L3 (pfam00297) →                                                                                                                                                                                                                                                                                                                                                                                                                                                                                                                                                                                                                                                                                                                                                                                                                                                                                                                                                            |
| env-126 | GSLNARP_GFPJP1N02GVYAL    | + | 71      | 170     | RNA → <b>MTH1 (COG2106)</b> →                                                                                                                                                                                                                                                                                                                                                                                                                                                                                                                                                                                                                                                                                                                                                                                                                                                                                                                                                                                                                            |
| env-127 | P_1C_Liq_2_UnCty_1129324  | + | 141     | 240     | RNA → <b>MTH1 (COG2106)</b> →                                                                                                                                                                                                                                                                                                                                                                                                                                                                                                                                                                                                                                                                                                                                                                                                                                                                                                                                                                                                                            |
| env-128 | JXWS01088076.1            | + | 222     | 321     | RNA → <b>MTH1 (COG2106)</b> →                                                                                                                                                                                                                                                                                                                                                                                                                                                                                                                                                                                                                                                                                                                                                                                                                                                                                                                                                                                                                            |
| env-129 | SS_3KL_010_SOIL_10082725  | - | 438     | 339     | RNA → <b>Methyltrn_RNA_3 (pfam02598)</b> →                                                                                                                                                                                                                                                                                                                                                                                                                                                                                                                                                                                                                                                                                                                                                                                                                                                                                                                                                                                                               |
| Hna-1-1 | NZ_KE386573.1             | - | 1301517 | 1301418 | RNA → <b>Methyltrn_RNA_3 (pfam02598)</b> → <b>rpl3p (PRK04231)</b> Ribosomal_L3 (pfam00297) → <b>RplD (COG0088)</b> rpl4p (PRK04042) → <b>RplW (COG0089)</b> <b>PRK14548 (PRK14548)</b> → <b>RplB (COG0090)</b> rpl2p (PRK09612) → <b>RpsS (COG0185)</b> <b>rps19p (PRK04038)</b> → <b>rpl22p (PRK04223)</b> <b>RplV (COG0091)</b> → <b>RpsC (COG0092)</b> <b>rps3p (PRK04191)</b> → <b>PRK14549 (PRK14549)</b> Ribosomal_L29 (pfam00831) → <b>PRK03879 (PRK03879)</b> UPF0086 (pfam01868) → <b>RpsQ (COG0186)</b> <b>rps17p (PRK08572)</b> → <b>rpl14p (PRK08571)</b> Ribosomal_L14 (pfam00238) → <b>RplX (COG0198)</b> <b>rpl24p (PRK01191)</b> → <b>PRK04313 (PRK04313)</b> <b>KOW_RPS4 (cd06087)</b> Ribosomal_S4e (pfam00900) → <b>RplE (COG0094)</b> <b>rpl5p (PRK04219)</b> → <b>RpsN (COG0199)</b> <b>rps14p (PRK05766)</b> → <b>rps8p (PRK04034)</b> RpsH (COG0096) → <b>RplF (COG0097)</b> <b>rpl6p (PRK05518)</b> → <b>PRK12766 (PRK12766)</b> RecA (COG0468) <b>Rpl32e (COG1717)</b> → <b>rpl19e (PRK08570)</b> Ribosomal_L19e (pfam01280) → |
| env-130 | P_1C_Sed_2_UnCty_1009263  | - | 1341    | 1242    | RNA → <b>Methyltrn_RNA_3 (pfam02598)</b> → <b>RplC (COG0087)</b> rpl3p (PRK04231) →                                                                                                                                                                                                                                                                                                                                                                                                                                                                                                                                                                                                                                                                                                                                                                                                                                                                                                                                                                      |
| env-131 | ADL20m3uS_contig11573     | - | 6008    | 5909    | RNA → <b>Methyltrn_RNA_3 (pfam02598)</b> → <b>rpl3p (PRK04231)</b> Ribosomal_L3 (pfam00297) → <b>RplC (COG0087)</b> rpl3p (PRK04231) → <b>RplD (COG0088)</b> rpl4p (PRK04042) → <b>RplW (COG0089)</b> <b>PRK14548 (PRK14548)</b> → <b>RplB (COG0090)</b> rpl2p (PRK09612) → <b>RpsS (COG0185)</b> <b>rps19p (PRK04038)</b> → <b>rpl22p (PRK04223)</b> <b>RplV (COG0091)</b> → <b>RpsC (COG0092)</b> <b>rps3p (PRK04191)</b> → <b>PRK14549 (PRK14549)</b> Ribosomal_L29 (pfam00831) → <b>PRK03879 (PRK03879)</b> UPF0086 (pfam01868) →                                                                                                                                                                                                                                                                                                                                                                                                                                                                                                                    |

|         |                           |   |         |         |                                                                                                                                                                                                                                                                                                                                                                                                                                                                                                                                                                                                                                                                                                                                                                                                                                                                   |
|---------|---------------------------|---|---------|---------|-------------------------------------------------------------------------------------------------------------------------------------------------------------------------------------------------------------------------------------------------------------------------------------------------------------------------------------------------------------------------------------------------------------------------------------------------------------------------------------------------------------------------------------------------------------------------------------------------------------------------------------------------------------------------------------------------------------------------------------------------------------------------------------------------------------------------------------------------------------------|
| env-132 | 2140918017-125            | - | 28013   | 27914   | RNA → <b>Methyltrn_RNA_3 (pfam02598)</b> → rpl3p (PRK04231)Ribosomal_L3 (pfam00297) → RplC (COG0087)rpl3p (PRK04231) → RplD (COG0088)rpl4p (PRK04042) → RplW (COG0089)PRK14548 (PRK14548) → RplB (COG0090)rpl2p (PRK09612) → RpsS (COG0185)rps19p (PRK04038) → rpl22p (PRK04223)RplV (COG0091) → RpsC (COG0092)rps3p (PRK04191) → PRK14549 (PRK14549)Ribosomal_L29 (pfam00831) → PRK03879 (PRK03879)UPF0086 (pfam01868) → RpsQ (COG0186)rps17p (PRK08572) → rpl14p (PRK08571)Ribosomal_L14 (pfam00238) → rpl24p (PRK01191)KOW_RPL26 (cd06089) → PRK04313 (PRK04313)KOW_RPS4 (cd06087)Ribosomal_S4e (pfam00900) → rpl5p (PRK04219)Ribosomal_L5 (pfam00281) → RpsN (COG0199)rps14P (PRK05766) → rps8p (PRK04034)RpsH (COG0096) → RplF (COG0097)rpl6p (PRK05518) → PRK12766 (PRK12766)RecA (COG0468)Rpl32e (COG1717) → rpl19e (PRK08570)Ribosomal_L19e (pfam01280) → |
| env-133 | 2140918027-00843          | + | 673     | 772     | RNA → <b>Methyltrn_RNA_3 (pfam02598)</b> → rpl3p (PRK04231)Ribosomal_L3 (pfam00297) → RplC (COG0087)rpl3p (PRK04231) → RplD (COG0088)rpl4p (PRK04042) → RplW (COG0089)PRK14548 (PRK14548) → RplB (COG0090)rpl2p (PRK09612) → RpsS (COG0185)rps19p (PRK04038) → rpl22p (PRK04223)RplV (COG0091) → RpsC (COG0092)rps3p (PRK04191) → PRK14549 (PRK14549)Ribosomal_L29 (pfam00831) → PRK03879 (PRK03879)UPF0086 (pfam01868) →                                                                                                                                                                                                                                                                                                                                                                                                                                         |
| har-1-1 | NC_015954.1               | - | 1701293 | 1701194 | RNA → <b>Methyltrn_RNA_3 (pfam02598)</b> → RplC (COG0087)rpl3p (PRK04231) → RplD (COG0088)rpl4p (PRK04042) → RplW (COG0089)PRK14548 (PRK14548) → RplB (COG0090)rpl2p (PRK09612) → RpsS (COG0185)rps19p (PRK04038) → rpl22p (PRK04223)RplV (COG0091) → RpsC (COG0092)rps3p (PRK04191) → PRK14549 (PRK14549)Ribosomal_L29 (pfam00831) → PRK03879 (PRK03879)UPF0086 (pfam01868) → RpsQ (COG0186)rps17p (PRK08572) → rpl14p (PRK08571)Ribosomal_L14 (pfam00238) → rpl24p (PRK01191)KOW_RPL26 (cd06089) → PRK04313 (PRK04313)KOW_RPS4 (cd06087)Ribosomal_S4e (pfam00900) → rpl5p (PRK04219)Ribosomal_L5 (pfam00281) → RpsN (COG0199)rps14P (PRK05766) → rps8p (PRK04034)RpsH (COG0096) → RplF (COG0097)rpl6p (PRK05518) → PRK12766 (PRK12766)RecA (COG0468)Rpl32e (COG1717) → rpl19e (PRK08570)Ribosomal_L19e (pfam01280) →                                            |
| env-134 | SS_3KL_010_SOIL_10099808  | - | 212     | 113     | RNA → <b>Methyltrn_RNA_3 (pfam02598)</b> →                                                                                                                                                                                                                                                                                                                                                                                                                                                                                                                                                                                                                                                                                                                                                                                                                        |
| env-135 | 2140918017-82247          | + | 63      | 164     | RNA →                                                                                                                                                                                                                                                                                                                                                                                                                                                                                                                                                                                                                                                                                                                                                                                                                                                             |
| Nph-1-1 | NC_007426.1               | + | 2369313 | 2369412 | RNA → <b>Methyltrn_RNA_3 (pfam02598)</b> → rpl3p (PRK04231)Ribosomal_L3 (pfam00297) → RplD (COG0088)rpl4p (PRK04042) → RplW (COG0089)PRK14548 (PRK14548) → RplB (COG0090)rpl2p (PRK09612) → RpsS (COG0185)rps19p (PRK04038) → rpl22p (PRK04223)RplV (COG0091) → RpsC (COG0092)rps3p (PRK04191) → RpmC (COG0255)PRK14549 (PRK14549) → PRK03879 (PRK03879)UPF0086 (pfam01868) → hypo → RpsQ (COG0186)rps17p (PRK08572) → rpl14p (PRK08571)Ribosomal_L14 (pfam00238) → RplX (COG0198)rpl24p (PRK01191) → PRK04313 (PRK04313)KOW_RPS4 (cd06087)Ribosomal_S4e (pfam00900) → RplE (COG0094)rpl5p (PRK04219) → RpsN (COG0199)rps14P (PRK05766) → rps8p (PRK04034)RpsH (COG0096) → RplF (COG0097)rpl6p (PRK05518) → NT_POLXc (cd00141)PRK12766 (PRK12766)Rpl32e (COG1717) → rpl19e (PRK08570)Ribosomal_L19e (pfam01280) → RplR (COG0256)rpl18p (PRK08569) →               |
| env-136 | SL_4KL_010_BRINE_10016891 | - | 2655    | 2556    | RNA → <b>Methyltrn_RNA_3 (pfam02598)</b> → RplC (COG0087)rpl3p (PRK04231) → RplD (COG0088)rpl4p (PRK04042) → RplW (COG0089)PRK14548 (PRK14548) → RplB (COG0090)rpl2p (PRK09612) →                                                                                                                                                                                                                                                                                                                                                                                                                                                                                                                                                                                                                                                                                 |

|         |                           |   |       |       |                                                                                                                                                                                                                                                                                                                                                                                                                                                                                                                                                                                                                                                                                                                                                                                                                                                                                                                                                                                                   |
|---------|---------------------------|---|-------|-------|---------------------------------------------------------------------------------------------------------------------------------------------------------------------------------------------------------------------------------------------------------------------------------------------------------------------------------------------------------------------------------------------------------------------------------------------------------------------------------------------------------------------------------------------------------------------------------------------------------------------------------------------------------------------------------------------------------------------------------------------------------------------------------------------------------------------------------------------------------------------------------------------------------------------------------------------------------------------------------------------------|
| env-137 | SL_6KL_011_BRINE_1000523  | + | 4060  | 4159  | RNA → Methyltrn_RNA_3 (pfam02598) → RplC (COG0087)rpl3p (PRK04231) → RplD (COG0088)rpl4p (PRK04042) → RplW (COG0089)PRK14548 (PRK14548) → RplB (COG0090)rpl2p (PRK09612) → RpsS (COG0185)rps19p (PRK04038) → rpl22p (PRK04223)RplV (COG0091) → RpsC (COG0092)rps3p (PRK04191) → RpmC (COG0255)PRK14549 (PRK14549) → PRK03879 (PRK03879)UPF0086 (pfam01868) → RpsQ (COG0186)rps17p (PRK08572) → rpl14p (PRK08571)Ribosomal_L14 (pfam00238) → RplX (COG0198)rpl24p (PRK01191) → PRK04313 (PRK04313)KOW_RPS4 (cd06087)Ribosomal_S4e (pfam00900) → RplE (COG0094)rpl5p (PRK04219) → RpsN (COG0199)rps14p (PRK05766) → rps8p (PRK04034)RpsH (COG0096) → RplF (COG0097)rpl6p (PRK05518) → PRK12766 (PRK12766)RecA (COG0468)Rpl32e (COG1717) → rpl19e (PRK08570)Ribosomal_L19e (pfam01280) → RplR (COG0256)rpl18p (PRK08569) → RpsE (COG0098)rps5p (PRK04044) → Ribosomal_L7_archaeal-euk (cd01657)rpl30p (PRK06049) → rpl15p (PRK06419)Ribosomal_L27A (pfam00828) → SecY (COG0201)PRK08568 (PRK08568) → |
| env-138 | P_1C_Liq_1_UnCty_1007975  | + | 1341  | 1443  | RNA → Methyltrn_RNA_3 (pfam02598) →                                                                                                                                                                                                                                                                                                                                                                                                                                                                                                                                                                                                                                                                                                                                                                                                                                                                                                                                                               |
| env-139 | SL_6KL_011_BRINE_1092333  | + | 64    | 166   | RNA → Methyltrn_RNA_3 (pfam02598) →                                                                                                                                                                                                                                                                                                                                                                                                                                                                                                                                                                                                                                                                                                                                                                                                                                                                                                                                                               |
| env-140 | SL_5KL_010_BRINE_10000145 | - | 14973 | 14871 | RNA → MTH1 (COG2106) → rpl3p (PRK04231)Ribosomal_L3 (pfam00297) → RplD (COG0088)rpl4p (PRK04042) → RplW (COG0089)PRK14548 (PRK14548) → RplB (COG0090)rpl2p (PRK09612) → RpsS (COG0185)rps19p (PRK04038) → rpl22p (PRK04223)RplV (COG0091) → RpsC (COG0092)rps3p (PRK04191) → PRK14549 (PRK14549)Ribosomal_L29_HIP (cd00427) → PRK03879 (PRK03879)UPF0086 (pfam01868) → RpsQ (COG0186)rps17p (PRK08572) → rpl14p (PRK08571)Ribosomal_L14 (pfam00238) → rpl24p (PRK01191)KOW_RPL26 (cd06089) → PRK04313 (PRK04313)KOW_RPS4 (cd06087)Ribosomal_S4e (pfam00900) → RplE (COG0094)rpl5p (PRK04219) → RpsN (COG0199)rps14p (PRK05766) → rps8p (PRK04034)RpsH (COG0096) → RplF (COG0097)rpl6p (PRK05518) → PRK12766 (PRK12766)RecA (COG0468)Rpl32e (COG1717) → rpl19e (PRK08570)Ribosomal_L19e (pfam01280) →                                                                                                                                                                                              |
| env-141 | SL_6KL_011_BRINE_1010384  | + | 87    | 189   | RNA → Methyltrn_RNA_3 (pfam02598) → rpl3p (PRK04231)Ribosomal_L3 (pfam00297) → RplD (COG0088)rpl4p (PRK04042) → RplW (COG0089)PRK14548 (PRK14548) → RplB (COG0090)rpl2p (PRK09612) → RpsS (COG0185)rps19p (PRK04038) → rpl22p (PRK04223)RplV (COG0091) →                                                                                                                                                                                                                                                                                                                                                                                                                                                                                                                                                                                                                                                                                                                                          |
| env-142 | SL_5KL_010_SED_10000993   | - | 17753 | 17651 | RNA → Methyltrn_RNA_3 (pfam02598) → rpl3p (PRK04231)Ribosomal_L3 (pfam00297) → RplD (COG0088)rpl4p (PRK04042) → RplW (COG0089)PRK14548 (PRK14548) → RplB (COG0090)rpl2p (PRK09612) → RpsS (COG0185)rps19p (PRK04038) → rpl22p (PRK04223)RplV (COG0091) → RpsC (COG0092)rps3p (PRK04191) → PRK14549 (PRK14549)Ribosomal_L29_HIP (cd00427) → PRK03879 (PRK03879)UPF0086 (pfam01868) → RpsQ (COG0186)rps17p (PRK08572) → rpl14p (PRK08571)Ribosomal_L14 (pfam00238) → rpl24p (PRK01191)KOW_RPL26 (cd06089) → PRK04313 (PRK04313)KOW_RPS4 (cd06087)Ribosomal_S4e (pfam00900) → RplE (COG0094)rpl5p (PRK04219) → RpsN (COG0199)rps14p (PRK05766) → rps8p (PRK04034)RpsH (COG0096) → RplF (COG0097)rpl6p (PRK05518) → PRK12766 (PRK12766)RecA (COG0468)Rpl32e (COG1717) → rpl19e (PRK08570)Ribosomal_L19e (pfam01280) →                                                                                                                                                                                 |
| env-143 | SL_8KL_010_SED_10049127   | - | 1844  | 1742  | RNA → Methyltrn_RNA_3 (pfam02598) → rpl3p (PRK04231)Ribosomal_L3 (pfam00297) → RplD (COG0088)rpl4p (PRK04042) →                                                                                                                                                                                                                                                                                                                                                                                                                                                                                                                                                                                                                                                                                                                                                                                                                                                                                   |
| env-144 | SL_4KL_010_BRINE_10002885 | - | 1066  | 964   | RNA → MTH1 (COG2106) → rpl3p (PRK04231)Ribosomal_L3 (pfam00297) →                                                                                                                                                                                                                                                                                                                                                                                                                                                                                                                                                                                                                                                                                                                                                                                                                                                                                                                                 |
| env-145 | SL_6KL_011_BRINE_1040731  | - | 290   | 188   | RNA → Methyltrn_RNA_3 (pfam02598) →                                                                                                                                                                                                                                                                                                                                                                                                                                                                                                                                                                                                                                                                                                                                                                                                                                                                                                                                                               |
| env-146 | SL_6KL_011_BRINE_1090778  | - | 540   | 438   | RNA → Methyltrn_RNA_3 (pfam02598) →                                                                                                                                                                                                                                                                                                                                                                                                                                                                                                                                                                                                                                                                                                                                                                                                                                                                                                                                                               |
| env-147 | SL_6KL_011_BRINE_1020969  | + | 1942  | 2044  | RNA → MTH1 (COG2106) →                                                                                                                                                                                                                                                                                                                                                                                                                                                                                                                                                                                                                                                                                                                                                                                                                                                                                                                                                                            |
| env-148 | SL_6KL_011_BRINE_1001075  | - | 545   | 443   | RNA → Methyltrn_RNA_3 (pfam02598) →                                                                                                                                                                                                                                                                                                                                                                                                                                                                                                                                                                                                                                                                                                                                                                                                                                                                                                                                                               |
| Hsp-9-1 | NZ_CBVY010000043.1        | + | 1088  | 1190  | RNA → MTH1 (COG2106) → RplC (COG0087)rpl3p (PRK04231) →                                                                                                                                                                                                                                                                                                                                                                                                                                                                                                                                                                                                                                                                                                                                                                                                                                                                                                                                           |

|          |                          |   |        |        |                                                                                                                                                                                                                                                                                                                                                                                                                                                                                                                                                                                                                                                                                                                                                                                                                                                           |
|----------|--------------------------|---|--------|--------|-----------------------------------------------------------------------------------------------------------------------------------------------------------------------------------------------------------------------------------------------------------------------------------------------------------------------------------------------------------------------------------------------------------------------------------------------------------------------------------------------------------------------------------------------------------------------------------------------------------------------------------------------------------------------------------------------------------------------------------------------------------------------------------------------------------------------------------------------------------|
| Hez-1-1  | NZ_ATXS01000002.1        | + | 57125  | 57227  | RNA → MTH1 (COG2106) → RplC (COG0087)rpl3p (PRK04231) → RplD (COG0088)rpl4p (PRK04042) → RplW (COG0089)PRK14548 (PRK14548) → RplB (COG0090)rpl2p (PRK09612) → RpsS (COG0185)rps19p (PRK04038) → rpl22p (PRK04223)RplV (COG0091) → RpsC (COG0092)rps3p (PRK04191) → RpmC (COG0255)PRK14549 (PRK14549) → PRK03879 (PRK03879)UPF0086 (pfam01868) → RpsQ (COG0186)rps17p (PRK08572) → rpl14p (PRK08571)Ribosomal_L14 (pfam00238) → rpl24p (PRK01191)KOW_RPL26 (cd06089) → PRK04313 (PRK04313)KOW_RPS4 (cd06087)Ribosomal_S4e (pfam00900) → RplE (COG0094)rpl5p (PRK04219) → RpsN (COG0199)rps14p (PRK05766) → rps8p (PRK04034)RpsH (COG0096) → RplF (COG0097)rpl6p (PRK05518) → PRK12766 (PRK12766)RecA (COG0468)Rpl32e (COG1717) → rpl19e (PRK08570)Ribosomal_L19e (pfam01280) →                                                                             |
| env-149  | P_1C_Liq_1_UnCty_1110322 | + | 40     | 142    | RNA → Methyltrn_RNA_3 (pfam02598) →                                                                                                                                                                                                                                                                                                                                                                                                                                                                                                                                                                                                                                                                                                                                                                                                                       |
| env-150  | P_1C_Liq_2_UnCty_1085242 | - | 257    | 155    | RNA → Methyltrn_RNA_3 (pfam02598) →                                                                                                                                                                                                                                                                                                                                                                                                                                                                                                                                                                                                                                                                                                                                                                                                                       |
| env-151  | P_1C_Sed_2_UnCty_1018040 | - | 1354   | 1252   | RNA → Methyltrn_RNA_3 (pfam02598) → RplC (COG0087)rpl3p (PRK04231) →                                                                                                                                                                                                                                                                                                                                                                                                                                                                                                                                                                                                                                                                                                                                                                                      |
| Hco-1-1  | NZ_AOJL01000060.1        | - | 167010 | 166908 | RNA → MTH1 (COG2106) → RplC (COG0087)rpl3p (PRK04231) → RplD (COG0088)rpl4p (PRK04042) → RplW (COG0089)PRK14548 (PRK14548) → RplB (COG0090)rpl2p (PRK09612) → RplB (COG0090)rpl2p (PRK09612) → RpsS (COG0185)rps19p (PRK04038) → rpl22p (PRK04223)RplV (COG0091) → RpsC (COG0092)rps3p (PRK04191) → RpmC (COG0255)PRK14549 (PRK14549) → PRK03879 (PRK03879)UPF0086 (pfam01868) → RpsQ (COG0186)rps17p (PRK08572) → rpl14p (PRK08571)Ribosomal_L14 (pfam00238) → rpl24p (PRK01191)KOW_RPL26 (cd06089) → PRK04313 (PRK04313)KOW_RPS4 (cd06087)Ribosomal_S4e (pfam00900) → rpl5p (PRK04219)Ribosomal_L5 (pfam00281)Ribosomal_L5_C (pfam00673) → hypo → RpsN (COG0199)rps14p (PRK05766) → rps8p (PRK04034)RpsH (COG0096) → RplF (COG0097)rpl6p (PRK05518) → PRK12766 (PRK12766)RecA (COG0468)Rpl32e (COG1717) → rpl19e (PRK08570)Ribosomal_L19e (pfam01280) → |
| env-152  | P_1C_Liq_3_UnCty_1007582 | - | 296    | 194    | RNA → MTH1 (COG2106) →                                                                                                                                                                                                                                                                                                                                                                                                                                                                                                                                                                                                                                                                                                                                                                                                                                    |
| env-153  | P_A23_Liq_1_Fmt_1009395  | - | 369    | 267    | RNA → MTH1 (COG2106) →                                                                                                                                                                                                                                                                                                                                                                                                                                                                                                                                                                                                                                                                                                                                                                                                                                    |
| env-154  | P_A23_Liq_2_Fmt_1002028  | + | 19     | 121    | RNA → Methyltrn_RNA_3 (pfam02598) → RplC (COG0087)rpl3p (PRK04231) → RplD (COG0088)rpl4p (PRK04042) → RplW (COG0089)PRK14548 (PRK14548) → RplB (COG0090)rpl2p (PRK09612) → RpsS (COG0185)rps19p (PRK04038) →                                                                                                                                                                                                                                                                                                                                                                                                                                                                                                                                                                                                                                              |
| env-155  | P_A23_Liq_2_Fmt_1023865  | + | 29     | 131    | RNA → Methyltrn_RNA_3 (pfam02598) →                                                                                                                                                                                                                                                                                                                                                                                                                                                                                                                                                                                                                                                                                                                                                                                                                       |
| env-156  | P_A23_Liq_3_Fmt_1023393  | + | 38     | 140    | RNA → Methyltrn_RNA_3 (pfam02598) →                                                                                                                                                                                                                                                                                                                                                                                                                                                                                                                                                                                                                                                                                                                                                                                                                       |
| Hsp-10-1 | NZ_JQKV01000002.1        | - | 421137 | 421035 | RNA → Methyltrn_RNA_3 (pfam02598) → RplC (COG0087)rpl3p (PRK04231) → RplD (COG0088)rpl4p (PRK04042) → RplW (COG0089)PRK14548 (PRK14548) → RplB (COG0090)rpl2p (PRK09612) → RpsS (COG0185)rps19p (PRK04038) → rpl22p (PRK04223)RplV (COG0091) → RpsC (COG0092)rps3p (PRK04191) → PRK14549 (PRK14549)Ribosomal_L29_HIP (cd00427) → PRK03879 (PRK03879)UPF0086 (pfam01868) → RpsQ (COG0186)rps17p (PRK08572) → rpl14p (PRK08571)Ribosomal_L14 (pfam00238) → RplX (COG0198)rpl24p (PRK01191) → PRK04313 (PRK04313)KOW_RPS4 (cd06087)Ribosomal_S4e (pfam00900) → RplE (COG0094)rpl5p (PRK04219) → RpsN (COG0199)rps14p (PRK05766) → rps8p (PRK04034)RpsH (COG0096) → RplF (COG0097)rpl6p (PRK05518) → PRK12766 (PRK12766)RecA (COG0468)Rpl32e (COG1717) → rpl19e (PRK08570)Ribosomal_L19e (pfam01280) →                                                        |
| Hli-1-1  | NZ_AOJG01000040.1        | - | 82466  | 82364  | RNA → MTH1 (COG2106) → rpl3p (PRK04231)Ribosomal_L3 (pfam00297) → RplD (COG0088)rpl4p (PRK04042) → RplW (COG0089)PRK14548 (PRK14548) → RplB (COG0090)rpl2p (PRK09612) → RpsS (COG0185)rps19p (PRK04038) → rpl22p (PRK04223)RplV (COG0091) → RpsC (COG0092)rps3p (PRK04191) → PRK14549 (PRK14549)Ribosomal_L29_HIP (cd00427) → PRK03879 (PRK03879)UPF0086 (pfam01868) → RpsQ (COG0186)rps17p (PRK08572) → rpl14p (PRK08571)Ribosomal_L14 (pfam00238) → rpl24p (PRK01191)KOW_RPL26 (cd06089) → PRK04313 (PRK04313)Ribosomal_S4e (pfam00900) → RplE (COG0094)rpl5p (PRK04219) → RpsN (COG0199)rps14p (PRK05766) → rps8p (PRK04034)RpsH (COG0096) → RplF (COG0097)rpl6p (PRK05518) → PRK12766 (PRK12766)RecA (COG0468)Rpl32e (COG1717) → rpl19e (PRK08570)Ribosomal_L19e (pfam01280) →                                                                        |





|         |                   |   |        |        |                                                                                                                                                                                                                                                                                                                                                                                                                                                                                                                                                                                                                                                                                                                                                                                                                                                                                                   |
|---------|-------------------|---|--------|--------|---------------------------------------------------------------------------------------------------------------------------------------------------------------------------------------------------------------------------------------------------------------------------------------------------------------------------------------------------------------------------------------------------------------------------------------------------------------------------------------------------------------------------------------------------------------------------------------------------------------------------------------------------------------------------------------------------------------------------------------------------------------------------------------------------------------------------------------------------------------------------------------------------|
| Hsp-7-1 | NZ_JH815330.1     | + | 360566 | 360668 | <p>RNA → MTH1 (COG2106) → rpl3p (PRK04231)Ribosomal_L3 (pfam00297) → RplC (COG0087)rpl3p (PRK04231) → RplC (COG0087)rpl3p (PRK04231) → RplD (COG0088)rpl4p (PRK04042) → RplW (COG0089)PRK14548 (PRK14548) → RplB (COG0090)rpl2p (PRK09612) → RplB (COG0090)rpl2p (PRK09612) → RpsS (COG0185)rps19p (PRK04038) → rpl22p (PRK04223)RplV (COG0091) → RpsC (COG0092)rps3p (PRK04191) → RpmC (COG0255)PRK14549 (PRK14549) → PRK03879 (PRK03879)UPF0086 (pfam01868) → RpsQ (COG0186)rps17p (PRK08572) → rpl14p (PRK08571)Ribosomal_L14 (pfam00238) → rpl24p (PRK01191)KOW_RPL26 (cd06089) → PRK04313 (PRK04313)KOW_RPS4 (cd06087)Ribosomal_S4e (pfam00900) → RplE (COG0094)rpl5p (PRK04219) → RpsN (COG0199)rps14p (PRK05766) → rps8p (PRK04034)RpsH (COG0096) → RplF (COG0097)rpl6p (PRK05518) → PRK12766 (PRK12766)RecA (COG0468)Rpl32e (COG1717) → rpl19e (PRK08570)Ribosomal_L19e (pfam01280) →</p> |
| Hha-2-1 | NZ_BBJP01000034.1 | + | 23045  | 23147  | <p>RNA → MTH1 (COG2106) → rpl3p (PRK04231)Ribosomal_L3 (pfam00297) → RplD (COG0088)rpl4p (PRK04042) → RplW (COG0089)PRK14548 (PRK14548) → RplB (COG0090)rpl2p (PRK09612) → RpsS (COG0185)rps19p (PRK04038) → rpl22p (PRK04223)RplV (COG0091) → RpsC (COG0092)rps3p (PRK04191) → PRK14549 (PRK14549)Ribosomal_L29_HIP (cd00427) → PRK03879 (PRK03879)UPF0086 (pfam01868) → RpsQ (COG0186)rps17p (PRK08572) → rpl14p (PRK08571)Ribosomal_L14 (pfam00238) → rpl24p (PRK01191)KOW_RPL26 (cd06089) → PRK04313 (PRK04313)Ribosomal_S4e (pfam00900) → RplE (COG0094)rpl5p (PRK04219) → RpsN (COG0199)rps14p (PRK05766) → rps8p (PRK04034)RpsH (COG0096) → RplF (COG0097)rpl6p (PRK05518) → PRK12766 (PRK12766)RecA (COG0468)Rpl32e (COG1717) → rpl19e (PRK08570)Ribosomal_L19e (pfam01280) →</p>                                                                                                         |
| Hdi-1-1 | NZ_AOJN01000013.1 | + | 82475  | 82577  | <p>RNA → MTH1 (COG2106) → RplC (COG0087)rpl3p (PRK04231) → RplD (COG0088)rpl4p (PRK04042) → RplW (COG0089)PRK14548 (PRK14548) → RplB (COG0090)rpl2p (PRK09612) → RplB (COG0090)rpl2p (PRK09612) → RpsS (COG0185)rps19p (PRK04038) → rpl22p (PRK04223)RplV (COG0091) → RpsC (COG0092)rps3p (PRK04191) → RpmC (COG0255)PRK14549 (PRK14549) → PRK03879 (PRK03879)UPF0086 (pfam01868) → RpsQ (COG0186)rps17p (PRK08572) → rpl14p (PRK08571)Ribosomal_L14 (pfam00238) → rpl24p (PRK01191)KOW_RPL26 (cd06089) → PRK04313 (PRK04313)KOW_RPS4 (cd06087)Ribosomal_S4e (pfam00900) → RplE (COG0094)rpl5p (PRK04219) → RpsN (COG0199)rps14p (PRK05766) → rps8p (PRK04034)RpsH (COG0096) → RplF (COG0097)rpl6p (PRK05518) → PRK12766 (PRK12766)RecA (COG0468)Rpl32e (COG1717) → rpl19e (PRK08570)Ribosomal_L19e (pfam01280) →</p>                                                                             |
| Hdi-2-1 | NZ_AOJM01000049.1 | - | 26024  | 25922  | <p>RNA → MTH1 (COG2106) → RplC (COG0087)rpl3p (PRK04231) → RplD (COG0088)rpl4p (PRK04042) → RplW (COG0089)PRK14548 (PRK14548) → RplB (COG0090)rpl2p (PRK09612) → RplB (COG0090)rpl2p (PRK09612) → RpsS (COG0185)rps19p (PRK04038) → rpl22p (PRK04223)RplV (COG0091) → RpsC (COG0092)rps3p (PRK04191) → RpmC (COG0255)PRK14549 (PRK14549) → PRK03879 (PRK03879)UPF0086 (pfam01868) → RpsQ (COG0186)rps17p (PRK08572) → rpl14p (PRK08571)Ribosomal_L14 (pfam00238) → rpl24p (PRK01191)KOW_RPL26 (cd06089) → PRK04313 (PRK04313)KOW_RPS4 (cd06087)Ribosomal_S4e (pfam00900) → rpl5p (PRK04219)Ribosomal_L5 (pfam00281)Ribosomal_L5_C (pfam00673) → RpsN (COG0199)rps14p (PRK05766) → rps8p (PRK04034)RpsH (COG0096) → RplF (COG0097)rpl6p (PRK05518) → PRK12766 (PRK12766)RecA (COG0468)Rpl32e (COG1717) → rpl19e (PRK08570)Ribosomal_L19e (pfam01280) →</p>                                         |

|         |                           |   |       |       |                                                                                                                                                                                                                                                                                                                                                                                                                                                                                                                                                                                                                                                                                                                                                                                                                                                                                                                                                                                                    |
|---------|---------------------------|---|-------|-------|----------------------------------------------------------------------------------------------------------------------------------------------------------------------------------------------------------------------------------------------------------------------------------------------------------------------------------------------------------------------------------------------------------------------------------------------------------------------------------------------------------------------------------------------------------------------------------------------------------------------------------------------------------------------------------------------------------------------------------------------------------------------------------------------------------------------------------------------------------------------------------------------------------------------------------------------------------------------------------------------------|
| Hsa-9-1 | NZ_JNFH02000042.1         | + | 4162  | 4264  | RNA → hypō → hypō → rpl3p (PRK04231)Ribosomal_L3 (pfam00297) → RplD (COG0088)rpl4p (PRK04042) → RplW (COG0089)PRK14548 (PRK14548) → RplB (COG0090)rpl2p (PRK09612) → RpsS (COG0185)rps19p (PRK04038) → rpl22p (PRK04223)RplV (COG0091) → hypō → RpsC (COG0092)rps3p (PRK04191) → PRK14549 (PRK14549)Ribosomal_L29_HIP (cd00427) → PRK03879 (PRK03879)UPF0086 (pfam01868) → RpsQ (COG0186)rps17p (PRK08572) → rpl14p (PRK08571)Ribosomal_L14 (pfam00238) → rpl24p (PRK01191)KOW_RPL26 (cd06089) → PRK04313 (PRK04313)Ribosomal_S4e (pfam00900) → RplE (COG0094)rpl5p (PRK04219) → RpsN (COG0199)rps14p (PRK05766) → rps8p (PRK04034)RpsH (COG0096) → RplF (COG0097)rpl6p (PRK05518) → PRK12766 (PRK12766)RecA (COG0468)Rpl32e (COG1717) → rpl19e (PRK08570)Ribosomal_L19e (pfam01280) → RplR (COG0256)rpl18p (PRK08569) → RpsE (COG0098)rps5p (PRK04044) → Ribosomal_L7_archaeal_euk (cd01657)rpl30p (PRK06049) → rpl15p (PRK06419)Ribosomal_L27A (pfam00828) → SecY (COG0201)PRK08568 (PRK08568) → |
| Har-2-1 | NZ_AOJJ01000075.1         | + | 39843 | 39945 | RNA → MTH1 (COG2106) → RplC (COG0087)rpl3p (PRK04231) → RplD (COG0088)rpl4p (PRK04042) → RplW (COG0089)PRK14548 (PRK14548) → RplB (COG0090)rpl2p (PRK09612) → RplB (COG0090)rpl2p (PRK09612) → RpsS (COG0185)rps19p (PRK04038) → rpl22p (PRK04223)RplV (COG0091) → RpsC (COG0092)rps3p (PRK04191) → RpmC (COG0255)PRK14549 (PRK14549) → PRK03879 (PRK03879)UPF0086 (pfam01868) → RpsQ (COG0186)rps17p (PRK08572) → rpl14p (PRK08571)Ribosomal_L14 (pfam00238) → rpl24p (PRK01191)KOW_RPL26 (cd06089) → PRK04313 (PRK04313)KOW_RPS4 (cd06087)Ribosomal_S4e (pfam00900) → RplE (COG0094)rpl5p (PRK04219) → RpsN (COG0199)rps14p (PRK05766) → rps8p (PRK04034)RpsH (COG0096) → RplF (COG0097)rpl6p (PRK05518) → PRK12766 (PRK12766)RecA (COG0468)Rpl32e (COG1717) → rpl19e (PRK08570)Ribosomal_L19e (pfam01280) →                                                                                                                                                                                     |
| Hte-2-1 | NZ_AOIW01000054.1         | - | 29402 | 29300 | RNA → MTH1 (COG2106) → RplC (COG0087)rpl3p (PRK04231) → RplD (COG0088)rpl4p (PRK04042) → RplW (COG0089)PRK14548 (PRK14548) → RplB (COG0090)rpl2p (PRK09612) → RplB (COG0090)rpl2p (PRK09612) → RpsS (COG0185)rps19p (PRK04038) → rpl22p (PRK04223)RplV (COG0091) → RpsC (COG0092)rps3p (PRK04191) → RpmC (COG0255)PRK14549 (PRK14549) → PRK03879 (PRK03879)UPF0086 (pfam01868) → RpsQ (COG0186)rps17p (PRK08572) → rpl14p (PRK08571)Ribosomal_L14 (pfam00238) → rpl24p (PRK01191)KOW_RPL26 (cd06089) → PRK04313 (PRK04313)KOW_RPS4 (cd06087)Ribosomal_S4e (pfam00900) → RplE (COG0094)rpl5p (PRK04219) → RpsN (COG0199)rps14p (PRK05766) → rps8p (PRK04034)RpsH (COG0096) → RplF (COG0097)rpl6p (PRK05518) → PRK12766 (PRK12766)RecA (COG0468)Rpl32e (COG1717) → rpl19e (PRK08570)Ribosomal_L19e (pfam01280) →                                                                                                                                                                                     |
| env-157 | P_1C_Liq_2_UnCty_1073497  | - | 265   | 163   | RNA → Methyltrn_RNA_3 (pfam02598) →                                                                                                                                                                                                                                                                                                                                                                                                                                                                                                                                                                                                                                                                                                                                                                                                                                                                                                                                                                |
| env-158 | SL_6KL_011_BRINE_1032700  | - | 1548  | 1446  | RNA → Methyltrn_RNA_3 (pfam02598) → RplC (COG0087)rpl3p (PRK04231) →                                                                                                                                                                                                                                                                                                                                                                                                                                                                                                                                                                                                                                                                                                                                                                                                                                                                                                                               |
| env-159 | SL_4KL_010_BRINE_10001141 | + | 89    | 191   | RNA → MTH1 (COG2106) → RplC (COG0087)rpl3p (PRK04231) → RplD (COG0088)rpl4p (PRK04042) → RplW (COG0089)PRK14548 (PRK14548) → RplB (COG0090)rpl2p (PRK09612) → RpsS (COG0185)rps19p (PRK04038) → rpl22p (PRK04223)RplV (COG0091) → RpsC (COG0092)rps3p (PRK04191) → RpmC (COG0255)PRK14549 (PRK14549) → PRK03879 (PRK03879)UPF0086 (pfam01868) → RpsQ (COG0186)rps17p (PRK08572) → rpl14p (PRK08571)Ribosomal_L14 (pfam00238) → rpl24p (PRK01191)KOW_RPL26 (cd06089) → PRK04313 (PRK04313)KOW_RPS4 (cd06087)Ribosomal_S4e (pfam00900) → RplE (COG0094)rpl5p (PRK04219) → RpsN (COG0199)rps14p (PRK05766) → rps8p (PRK04034)RpsH (COG0096) → RplF (COG0097)rpl6p (PRK05518) → PRK12766 (PRK12766)RecA (COG0468)Rpl32e (COG1717) → rpl19e (PRK08570)Ribosomal_L19e (pfam01280) → RplR (COG0256)rpl18p (PRK08569) → RpsE (COG0098)rps5p (PRK04044) → Ribosomal_L7_archaeal_euk (cd01657)rpl30p (PRK06049) → rpl15p (PRK06419)Ribosomal_L27A (pfam00828) → SecY (COG0201)PRK08568 (PRK08568) → hypō →   |
| env-160 | SL_6KL_011_BRINE_1001616  | - | 387   | 285   | RNA → MTH1 (COG2106) →                                                                                                                                                                                                                                                                                                                                                                                                                                                                                                                                                                                                                                                                                                                                                                                                                                                                                                                                                                             |

|         |                       |   |         |         |                                                                                                                                                                                                                                                                                                                                                                                                                                                                                                                                                                                                                                                                                                                                                                                                                                                |
|---------|-----------------------|---|---------|---------|------------------------------------------------------------------------------------------------------------------------------------------------------------------------------------------------------------------------------------------------------------------------------------------------------------------------------------------------------------------------------------------------------------------------------------------------------------------------------------------------------------------------------------------------------------------------------------------------------------------------------------------------------------------------------------------------------------------------------------------------------------------------------------------------------------------------------------------------|
| h3A-1-1 | NZ_KK033115.1         | + | 666108  | 666210  | <p>RNA → <b>Methyltrn_RNA_3 (pfam02598)</b> → rpl3p (PRK04231)Ribosomal_L3 (pfam00297) → RplD (COG0088)rpl4p (PRK04042) → RplW (COG0089)PRK14548 (PRK14548) → RplB (COG0090)rpl2p (PRK09612) → RpsS (COG0185)rps19p (PRK04038) → rpl22p (PRK04223)RplV (COG0091) → RpsC (COG0092)rps3p (PRK04191) → PRK14549 (PRK14549)Ribosomal_L29_HIP (cd00427) → PRK03879 (PRK03879)UPF0086 (pfam01868) → RpsQ (COG0186)rps17p (PRK08572) → rpl14p (PRK08571)Ribosomal_L14 (pfam00238) → RplX (COG0198)rpl24p (PRK01191) → PRK04313 (PRK04313)KOW_RPS4 (cd06087)Ribosomal_S4e (pfam00900) → RplE (COG0094)rpl5p (PRK04219) → RpsN (COG0199)rps14p (PRK05766) → rps8p (PRK04034)RpsH (COG0096) → RplF (COG0097)rpl6p (PRK05518) → PRK12766 (PRK12766)RecA (COG0468)Rpl32e (COG1717) → rpl19e (PRK08570)Ribosomal_L19e (pfam01280) →</p>                     |
| Hai-1-1 | NZ_AOJI01000026.1     | - | 211502  | 211400  | <p>RNA → MTH1 (COG2106) → RplC (COG0087)rpl3p (PRK04231) → RplD (COG0088)rpl4p (PRK04042) → RplW (COG0089)PRK14548 (PRK14548) → RplB (COG0090)rpl2p (PRK09612) → RpsS (COG0185)rps19p (PRK04038) → rpl22p (PRK04223)RplV (COG0091) → RpsC (COG0092)rps3p (PRK04191) → PRK14549 (PRK14549)Ribosomal_L29_HIP (cd00427) → PRK03879 (PRK03879)UPF0086 (pfam01868) → RpsQ (COG0186)rps17p (PRK08572) → rpl14p (PRK08571)Ribosomal_L14 (pfam00238) → RplX (COG0198)rpl24p (PRK01191) → PRK04313 (PRK04313)KOW_RPS4 (cd06087)Ribosomal_S4e (pfam00900) → RplE (COG0094)rpl5p (PRK04219) → RpsN (COG0199)rps14p (PRK05766) → rps8p (PRK04034)RpsH (COG0096) → RplF (COG0097)rpl6p (PRK05518) → PRK12766 (PRK12766)RecA (COG0468)Rpl32e (COG1717) → rpl19e (PRK08570)Ribosomal_L19e (pfam01280) →</p>                                                   |
| env-161 | ADL20m3uS_contig08402 | - | 1754    | 1652    | <p>RNA → <b>Methyltrn_RNA_3 (pfam02598)</b> → rpl3p (PRK04231)Ribosomal_L3 (pfam00297) → RplC (COG0087)rpl3p (PRK04231) → RplD (COG0088)rpl4p (PRK04042) →</p>                                                                                                                                                                                                                                                                                                                                                                                                                                                                                                                                                                                                                                                                                 |
| env-162 | 2140918017-4520       | - | 13975   | 13873   | <p>RNA → <b>Methyltrn_RNA_3 (pfam02598)</b> → rpl3p (PRK04231)Ribosomal_L3 (pfam00297) → RplC (COG0087)rpl3p (PRK04231) → RplD (COG0088)rpl4p (PRK04042) → RplW (COG0089)PRK14548 (PRK14548) →</p>                                                                                                                                                                                                                                                                                                                                                                                                                                                                                                                                                                                                                                             |
| env-163 | 2140918027-00057      | - | 14028   | 13926   | <p>RNA → <b>Methyltrn_RNA_3 (pfam02598)</b> → rpl3p (PRK04231)Ribosomal_L3 (pfam00297) → RplC (COG0087)rpl3p (PRK04231) → RplD (COG0088)rpl4p (PRK04042) → RplW (COG0089)PRK14548 (PRK14548) → RplB (COG0090)rpl2p (PRK09612) → RpsS (COG0185)rps19p (PRK04038) → rpl22p (PRK04223)RplV (COG0091) → RpsC (COG0092)rps3p (PRK04191) → PRK14549 (PRK14549)Ribosomal_L29_HIP (cd00427) → PRK03879 (PRK03879)UPF0086 (pfam01868) → RpsQ (COG0186)rps17p (PRK08572) → rpl14p (PRK08571)Ribosomal_L14 (pfam00238) → rpl24p (PRK01191)KOW_RPL26 (cd06089) → PRK04313 (PRK04313)Ribosomal_S4e (pfam00900) → RplE (COG0094)rpl5p (PRK04219) → RpsN (COG0199)rps14p (PRK05766) → rps8p (PRK04034)RpsH (COG0096) → RplF (COG0097)rpl6p (PRK05518) → PRK12766 (PRK12766)RecA (COG0468)Rpl32e (COG1717) → rpl19e (PRK08570)Ribosomal_L19e (pfam01280) →</p> |
| Hla-3-1 | NC_012029.1           | - | 2428716 | 2428614 | <p>RNA → <b>Methyltrn_RNA_3 (pfam02598)</b> → rpl3p (PRK04231)Ribosomal_L3 (pfam00297) → RplD (COG0088)rpl4p (PRK04042) → RplW (COG0089)PRK14548 (PRK14548) → RplB (COG0090)rpl2p (PRK09612) → RpsS (COG0185)rps19p (PRK04038) → rpl22p (PRK04223)RplV (COG0091) → RpsC (COG0092)rps3p (PRK04191) → PRK14549 (PRK14549)Ribosomal_L29_HIP (cd00427) → PRK03879 (PRK03879)UPF0086 (pfam01868) → RpsQ (COG0186)rps17p (PRK08572) → rpl14p (PRK08571)Ribosomal_L14 (pfam00238) → rpl24p (PRK01191)KOW_RPL26 (cd06089) → PRK04313 (PRK04313)Ribosomal_S4e (pfam00900) → RplE (COG0094)rpl5p (PRK04219) → RpsN (COG0199)rps14p (PRK05766) → rps8p (PRK04034)RpsH (COG0096) → RplF (COG0097)rpl6p (PRK05518) → PRK12766 (PRK12766)RecA (COG0468)Rpl32e (COG1717) → rpl19e (PRK08570)Ribosomal_L19e (pfam01280) →</p>                                  |



|         |                           |   |        |        |                                                                                                                                                                                                                                                                                                                                                                                                                                                                                                                                                                                                                                                                                                                                                                                                                         |
|---------|---------------------------|---|--------|--------|-------------------------------------------------------------------------------------------------------------------------------------------------------------------------------------------------------------------------------------------------------------------------------------------------------------------------------------------------------------------------------------------------------------------------------------------------------------------------------------------------------------------------------------------------------------------------------------------------------------------------------------------------------------------------------------------------------------------------------------------------------------------------------------------------------------------------|
| Hho-1-1 | NZ_AOJO01000045.1         | - | 129551 | 129449 | RNA → MTH1 (COG2106) → RplC (COG0087)rpl3p (PRK04231) → RplD (COG0088)rpl4p (PRK04042) → RplW (COG0089)PRK14548 (PRK14548) → RplB (COG0090)rpl2p (PRK09612) → RpsS (COG0185)rps19p (PRK04038) → rpl22p (PRK04223)RplV (COG0091) → RpsC (COG0092)rps3p (PRK04191) → PRK14549 (PRK14549)Ribosomal_L29_HIP (cd00427) → PRK03879 (PRK03879)UPF0086 (pfam01868) → RpsQ (COG0186)rps17p (PRK08572) → rpl14p (PRK08571)Ribosomal_L14 (pfam00238) → rpl24p (PRK01191)KOW_RPL26 (cd06089) → PRK04313 (PRK04313)KOW_RPS4 (cd06087)Ribosomal_S4e (pfam00900) → RplE (COG0094)rpl5p (PRK04219) → RpsN (COG0199)rps14p (PRK05766) → rps8p (PRK04034)RpsH (COG0096) → RplF (COG0097)rpl6p (PRK05518) → PRK12766 (PRK12766)RecA (COG0468)Rpl32e (COG1717) → rpl19e (PRK08570)Ribosomal_L19e (pfam01280) →                              |
| env-164 | SL_6KL_011_BRINE_1124153  | + | 36     | 138    | RNA → PHA03252 (PHA03252)Methyltrn_RNA_3 (pfam02598) →                                                                                                                                                                                                                                                                                                                                                                                                                                                                                                                                                                                                                                                                                                                                                                  |
| env-165 | P_A23_Liq_2_Fmt_1045640   | + | 57     | 159    | RNA → Methyltrn_RNA_3 (pfam02598) →                                                                                                                                                                                                                                                                                                                                                                                                                                                                                                                                                                                                                                                                                                                                                                                     |
| env-166 | P_A23_Liq_1_Fmt_1009104   | + | 715    | 817    | RNA → Methyltrn_RNA_3 (pfam02598) →                                                                                                                                                                                                                                                                                                                                                                                                                                                                                                                                                                                                                                                                                                                                                                                     |
| env-167 | P_1C_Liq_1_UnCty_1002372  | + | 283    | 385    | RNA → Methyltrn_RNA_3 (pfam02598) → RplC (COG0087)rpl3p (PRK04231) → RplD (COG0088)rpl4p (PRK04042) → RplW (COG0089)PRK14548 (PRK14548) → RplB (COG0090)rpl2p (PRK09612) → rps19p (PRK04038) →                                                                                                                                                                                                                                                                                                                                                                                                                                                                                                                                                                                                                          |
| env-168 | P_A23_Liq_3_Fmt_1018522   | - | 551    | 449    | RNA → Methyltrn_RNA_3 (pfam02598) →                                                                                                                                                                                                                                                                                                                                                                                                                                                                                                                                                                                                                                                                                                                                                                                     |
| env-169 | P_2C_Liq_1_UnCty_1117457  | - | 344    | 242    | RNA → Methyltrn_RNA_3 (pfam02598) →                                                                                                                                                                                                                                                                                                                                                                                                                                                                                                                                                                                                                                                                                                                                                                                     |
| env-170 | P_A23_Liq_1_Fmt_1046280   | - | 249    | 147    | RNA → Methyltrn_RNA_3 (pfam02598) →                                                                                                                                                                                                                                                                                                                                                                                                                                                                                                                                                                                                                                                                                                                                                                                     |
| env-171 | P_A23_Liq_2_Fmt_1063179   | - | 245    | 143    | RNA → Methyltrn_RNA_3 (pfam02598) →                                                                                                                                                                                                                                                                                                                                                                                                                                                                                                                                                                                                                                                                                                                                                                                     |
| env-172 | P_2C_Liq_1_UnCty_1157684  | - | 265    | 163    | RNA → Methyltrn_RNA_3 (pfam02598) →                                                                                                                                                                                                                                                                                                                                                                                                                                                                                                                                                                                                                                                                                                                                                                                     |
| env-173 | SL_8KL_010_SED_10202168   | - | 335    | 236    | RNA → Methyltrn_RNA_3 (pfam02598) →                                                                                                                                                                                                                                                                                                                                                                                                                                                                                                                                                                                                                                                                                                                                                                                     |
| Hru-1-1 | NZ_BBJO01000003.1         | - | 101302 | 101203 | RNA → Methyltrn_RNA_3 (pfam02598) → RplC (COG0087)rpl3p (PRK04231) → RplD (COG0088)rpl4p (PRK04042) → RplW (COG0089)PRK14548 (PRK14548) → hypo → hypo → RpsS (COG0185)rps19p (PRK04038) → rpl22p (PRK04223)RplV (COG0091) → RpsC (COG0092)rps3p (PRK04191) → PRK14549 (PRK14549)Ribosomal_L29 (pfam00831) → PRK03879 (PRK03879)UPF0086 (pfam01868) → RpsQ (COG0186)rps17p (PRK08572) → rpl14p (PRK08571)Ribosomal_L14 (pfam00238) → RplX (COG0198)rpl24p (PRK01191) → PRK04313 (PRK04313)S4 (cd00165)KOW_RPS4 (cd06087)Ribosomal_S4e (pfam00900) → RplE (COG0094)rpl5p (PRK04219) → RpsN (COG0199)rps14p (PRK05766) → rps8p (PRK04034)RpsH (COG0096) → RplF (COG0097)rpl6p (PRK05518) → PRK12766 (PRK12766)RecA (COG0468)Rpl32e (COG1717) → rpl19e (PRK08570)Ribosomal_L19e (pfam01280) →                               |
| env-174 | P_1C_Sed_2_UnCty_1300983  | + | 148    | 247    | RNA → Methyltrn_RNA_3 (pfam02598) →                                                                                                                                                                                                                                                                                                                                                                                                                                                                                                                                                                                                                                                                                                                                                                                     |
| Hru-2-1 | NZ_BBJO01000060.1         | + | 9207   | 9306   | RNA → Methyltrn_RNA_3 (pfam02598) → hypo → rpl3p (PRK04231)Ribosomal_L3 (pfam00297) →                                                                                                                                                                                                                                                                                                                                                                                                                                                                                                                                                                                                                                                                                                                                   |
| env-175 | GSLNAS_F7109SK02H8ZT2     | + | 136    | 236    | RNA → Methyltrn_RNA_3 (pfam02598) →                                                                                                                                                                                                                                                                                                                                                                                                                                                                                                                                                                                                                                                                                                                                                                                     |
| env-176 | SL_6KL_011_BRINE_1005460  | + | 5299   | 5398   | RNA → Methyltrn_RNA_3 (pfam02598) →                                                                                                                                                                                                                                                                                                                                                                                                                                                                                                                                                                                                                                                                                                                                                                                     |
| env-177 | SL_6KL_011_BRINE_1051712  | - | 689    | 590    | RNA → Methyltrn_RNA_3 (pfam02598) → rpl3p (PRK04231)Ribosomal_L3 (pfam00297) →                                                                                                                                                                                                                                                                                                                                                                                                                                                                                                                                                                                                                                                                                                                                          |
| env-178 | SL_4KL_010_BRINE_10003656 | - | 660    | 561    | RNA → Methyltrn_RNA_3 (pfam02598) → rpl3p (PRK04231)Ribosomal_L3 (pfam00297) →                                                                                                                                                                                                                                                                                                                                                                                                                                                                                                                                                                                                                                                                                                                                          |
| env-179 | JXWS01003911.1            | - | 291    | 192    | RNA → Methyltrn_RNA_3 (pfam02598) →                                                                                                                                                                                                                                                                                                                                                                                                                                                                                                                                                                                                                                                                                                                                                                                     |
| env-180 | SL_6KL_011_BRINE_1016959  | - | 122    | 23     | RNA → Methyltrn_RNA_3 (pfam02598) →                                                                                                                                                                                                                                                                                                                                                                                                                                                                                                                                                                                                                                                                                                                                                                                     |
| Nmo-1-1 | NC_020388.1               | - | 578139 | 578040 | RNA → Methyltrn_RNA_3 (pfam02598) → rpl3p (PRK04231)Ribosomal_L3 (pfam00297) → RplD (COG0088)rpl4p (PRK04042) → RplW (COG0089)PRK14548 (PRK14548) → RplB (COG0090)rpl2p (PRK09612) → RpsS (COG0185)rps19p (PRK04038) → rpl22p (PRK04223)RplV (COG0091) → RpsC (COG0092)rps3p (PRK04191) → PRK14549 (PRK14549)Ribosomal_L29 (pfam00831) → PRK03879 (PRK03879)UPF0086 (pfam01868) → RpsQ (COG0186)rps17p (PRK08572) → rpl14p (PRK08571)Ribosomal_L14 (pfam00238) → RplX (COG0198)rpl24p (PRK01191) → PRK04313 (PRK04313)KOW_RPS4 (cd06087)Ribosomal_S4e (pfam00900) → RplE (COG0094)rpl5p (PRK04219) → RpsN (COG0199)rps14p (PRK05766) → rps8p (PRK04034)RpsH (COG0096) → RplF (COG0097)rpl6p (PRK05518) → PolY_Pol_IV_kappa (cd03586)PRK12766 (PRK12766)Rpl32e (COG1717) → rpl19e (PRK08570)Ribosomal_L19e (pfam01280) → |

|         |                           |   |        |        |                                                                                                                                                                                                                                                                                                                                                                                                                                                                                                                                                                                                                                                                                                                                                                                                                                                                                                                                                                                                                                                                                                                                                                                                                                                                                                                                                                                                                                                                                                                                                                                                                                      |
|---------|---------------------------|---|--------|--------|--------------------------------------------------------------------------------------------------------------------------------------------------------------------------------------------------------------------------------------------------------------------------------------------------------------------------------------------------------------------------------------------------------------------------------------------------------------------------------------------------------------------------------------------------------------------------------------------------------------------------------------------------------------------------------------------------------------------------------------------------------------------------------------------------------------------------------------------------------------------------------------------------------------------------------------------------------------------------------------------------------------------------------------------------------------------------------------------------------------------------------------------------------------------------------------------------------------------------------------------------------------------------------------------------------------------------------------------------------------------------------------------------------------------------------------------------------------------------------------------------------------------------------------------------------------------------------------------------------------------------------------|
| Hha-1-1 | NZ_AJRK01000444.1         | - | 10548  | 10449  | <p>RNA → Methyltrn_RNA_3 (pfam02598) → Methyltrn_RNA_3 (pfam02598) → RplC (COG0087)rpl3p (PRK04231) → RplC (COG0087)rpl3p (PRK04231) → RplD (COG0088)rpl4p (PRK04042) → RplD (COG0088)rpl4p (PRK04042) → RplW (COG0089)PRK14548 (PRK14548) → RplW (COG0089)PRK14548 (PRK14548) → RplB (COG0090)rpl2p (PRK09612) → RplB (COG0090)rpl2p (PRK09612) → RpsS (COG0185)rps19p (PRK04038) → RpsS (COG0185)rps19p (PRK04038) → rpl22p (PRK04223)RplV (COG0091) → rpl22p (PRK04223)RplV (COG0091) → NT_POLXc (cd00141)RpsC (COG0092)rps3p (PRK04191)HHH_5 (pfam14520) → NT_POLXc (cd00141)RpsC (COG0092)rps3p (PRK04191)HHH_5 (pfam14520) → PRK14549 (PRK14549)Ribosomal_L29 (pfam00831) → PRK14549 (PRK14549)Ribosomal_L29 (pfam00831) → PRK03879 (PRK03879)UPF0086 (pfam01868) → PRK03879 (PRK03879)UPF0086 (pfam01868) → RpsQ (COG0186)rps17p (PRK08572) → RpsQ (COG0186)rps17p (PRK08572) → rpl14p (PRK08571)Ribosomal_L14 (pfam00238) → rpl14p (PRK08571)Ribosomal_L14 (pfam00238) → RplX (COG0198)rpl24p (PRK01191) → RplX (COG0198)rpl24p (PRK01191) → PRK04313 (PRK04313)KOW_RPS4 (cd06087)S4 (pfam01479)Ribosomal_S4e (pfam00900) → PRK04313 (PRK04313)KOW_RPS4 (cd06087)S4 (pfam01479)Ribosomal_S4e (pfam00900) → RplE (COG0094)rpl5p (PRK04219) → RplE (COG0094)rpl5p (PRK04219) → RpsN (COG0199)rps14p (PRK05766) → RpsN (COG0199)rps14p (PRK05766) → rps8p (PRK04034)RpsH (COG0096) → rps8p (PRK04034)RpsH (COG0096) → RplF (COG0097)rpl6p (PRK05518) → RplF (COG0097)rpl6p (PRK05518) → Lig (COG0272)Rpl32e (COG1717)rpl32e (PRK08562)HHH_5 (pfam14520) → Lig (COG0272)Rpl32e (COG1717)rpl32e (PRK08562)HHH_5 (pfam14520) →</p> |
| Hha-1-2 | NZ_AOMB01000043.1         | - | 108188 | 108089 | <p>RNA → Methyltrn_RNA_3 (pfam02598) → RplC (COG0087)rpl3p (PRK04231) → RplD (COG0088)rpl4p (PRK04042) → RplW (COG0089)PRK14548 (PRK14548) → RplB (COG0090)rpl2p (PRK09612) → RpsS (COG0185)rps19p (PRK04038) → rpl22p (PRK04223)RplV (COG0091) → NT_POLXc (cd00141)RpsC (COG0092)rps3p (PRK04191)HHH_5 (pfam14520) → PRK14549 (PRK14549)Ribosomal_L29 (pfam00831) → PRK03879 (PRK03879)UPF0086 (pfam01868) → RpsQ (COG0186)rps17p (PRK08572) → rpl14p (PRK08571)Ribosomal_L14 (pfam00238) → RplX (COG0198)rpl24p (PRK01191) → PRK04313 (PRK04313)KOW_RPS4 (cd06087)S4 (pfam01479)Ribosomal_S4e (pfam00900) → RplE (COG0094)rpl5p (PRK04219) → RpsN (COG0199)rps14p (PRK05766) → rps8p (PRK04034)RpsH (COG0096) → RplF (COG0097)rpl6p (PRK05518) → Lig (COG0272)Rpl32e (COG1717)rpl32e (PRK08562)HHH_5 (pfam14520) →</p>                                                                                                                                                                                                                                                                                                                                                                                                                                                                                                                                                                                                                                                                                                                                                                                                             |
| env-181 | SL_4KL_010_BRINE_10212872 | - | 267    | 168    | <p>RNA → Methyltrn_RNA_3 (pfam02598) →</p>                                                                                                                                                                                                                                                                                                                                                                                                                                                                                                                                                                                                                                                                                                                                                                                                                                                                                                                                                                                                                                                                                                                                                                                                                                                                                                                                                                                                                                                                                                                                                                                           |

|         |                           |   |         |         |                                                                                                                                                                                                                                                                                                                                                                                                                                                                                                                                                                                                                                                                                                                                                                                                                                                                                                                                                                                                                                                                                                                                                                                                                                                                                                                                                                                                                                                                                                                                                                                                                                                                                                                                                                  |
|---------|---------------------------|---|---------|---------|------------------------------------------------------------------------------------------------------------------------------------------------------------------------------------------------------------------------------------------------------------------------------------------------------------------------------------------------------------------------------------------------------------------------------------------------------------------------------------------------------------------------------------------------------------------------------------------------------------------------------------------------------------------------------------------------------------------------------------------------------------------------------------------------------------------------------------------------------------------------------------------------------------------------------------------------------------------------------------------------------------------------------------------------------------------------------------------------------------------------------------------------------------------------------------------------------------------------------------------------------------------------------------------------------------------------------------------------------------------------------------------------------------------------------------------------------------------------------------------------------------------------------------------------------------------------------------------------------------------------------------------------------------------------------------------------------------------------------------------------------------------|
| Hpa-1-1 | NZ_AEMG01000030.1         | - | 41019   | 40920   | RNA → <b>Methyltrn_RNA_3 (pfam02598)</b> → <b>Methyltrn_RNA_3 (pfam02598)</b> →<br>rpl3p (PRK04231)Ribosomal_L3 (pfam00297) → rpl3p (PRK04231)Ribosomal_L3 (pfam00297) →<br>RplD (COG0088)rpl4p (PRK04042) → RplD (COG0088)rpl4p (PRK04042) →<br>RplW (COG0089)PRK14548 (PRK14548) → RplW (COG0089)PRK14548 (PRK14548) →<br>RplB (COG0090)rpl2p (PRK09612) → RplB (COG0090)rpl2p (PRK09612) →<br>RpsS (COG0185)rps19p (PRK04038) → RpsS (COG0185)rps19p (PRK04038) →<br>rpl22p (PRK04223)RplV (COG0091) → rpl22p (PRK04223)RplV (COG0091) →<br>RpsC (COG0092)rps3p (PRK04191) → RpsC (COG0092)rps3p (PRK04191) →<br>PRK14549 (PRK14549)Ribosomal_L29 (pfam00831) → PRK14549 (PRK14549)Ribosomal_L29 (pfam00831) →<br>POP4 (COG1588)PRK03879 (PRK03879) → POP4 (COG1588)PRK03879 (PRK03879) →<br>RpsQ (COG0186)rps17p (PRK08572) → RpsQ (COG0186)rps17p (PRK08572) →<br>rpl14p (PRK08571)Ribosomal_L14 (pfam00238) → rpl14p (PRK08571)Ribosomal_L14 (pfam00238) →<br>RplX (COG0198)rpl24p (PRK01191) → RplX (COG0198)rpl24p (PRK01191) →<br>PRK04313 (PRK04313)KOW_RPS4 (cd06087)S4 (pfam01479)Ribosomal_S4e (pfam00900) →<br>PRK04313 (PRK04313)KOW_RPS4 (cd06087)S4 (pfam01479)Ribosomal_S4e (pfam00900) →<br>RplE (COG0094)rpl5p (PRK04219) → RplE (COG0094)rpl5p (PRK04219) →<br>RpsN (COG0199)rps14p (PRK05766) → RpsN (COG0199)rps14p (PRK05766) →<br>rps8p (PRK04034)RpsH (COG0096) → rps8p (PRK04034)RpsH (COG0096) →<br>RplF (COG0097)rpl6p (PRK05518) → RplF (COG0097)rpl6p (PRK05518) →<br>RecA (COG0468)rpl32e (PRK08562)Ribosomal_L32e (pfam01655)HHH_5 (pfam14520) →<br>RecA (COG0468)rpl32e (PRK08562)Ribosomal_L32e (pfam01655)HHH_5 (pfam14520) →<br>rpl19e (PRK08570)Ribosomal_L19e (pfam01280) → rpl19e (PRK08570)Ribosomal_L19e (pfam01280) → |
| Hpa-1-2 | NZ_AQXI01000001.1         | - | 1281236 | 1281137 | RNA → <b>Methyltrn_RNA_3 (pfam02598)</b> → rpl3p (PRK04231)Ribosomal_L3 (pfam00297) →<br>RplC (COG0087)rpl3p (PRK04231) → rpl3p (PRK04231)Ribosomal_L3 (pfam00297) →<br>RplD (COG0088)rpl4p (PRK04042) → RplW (COG0089)PRK14548 (PRK14548) →<br>RplB (COG0090)rpl2p (PRK09612) → RpsS (COG0185)rps19p (PRK04038) →<br>rpl22p (PRK04223)RplV (COG0091) → RpsC (COG0092)rps3p (PRK04191) →<br>PRK14549 (PRK14549)Ribosomal_L29 (pfam00831) → POP4 (COG1588)PRK03879 (PRK03879) →<br>RpsQ (COG0186)rps17p (PRK08572) → RpsQ (COG0186)rps17p (PRK08572) →<br>rpl14p (PRK08571)Ribosomal_L14 (pfam00238) → RplX (COG0198)rpl24p (PRK01191) →<br>PRK04313 (PRK04313)KOW_RPS4 (cd06087)S4 (pfam01479)Ribosomal_S4e (pfam00900) →<br>RplE (COG0094)rpl5p (PRK04219) → RpsN (COG0199)rps14p (PRK05766) →<br>rps8p (PRK04034)RpsH (COG0096) → RplF (COG0097)rpl6p (PRK05518) →<br>RecA (COG0468)rpl32e (PRK08562)Ribosomal_L32e (pfam01655)HHH_5 (pfam14520) →<br>rpl19e (PRK08570)Ribosomal_L19e (pfam01280) →                                                                                                                                                                                                                                                                                                                                                                                                                                                                                                                                                                                                                                                                                                                                                            |
| Hci-1-1 | NZ_JDTH01000001.1         | + | 807675  | 807774  | RNA → <b>Methyltrn_RNA_3 (pfam02598)</b> → rpl3p (PRK04231)Ribosomal_L3 (pfam00297) →<br>RplD (COG0088)rpl4p (PRK04042) → RplW (COG0089)PRK14548 (PRK14548) →<br>RplB (COG0090)rpl2p (PRK09612) → RpsS (COG0185)rps19p (PRK04038) →<br>rpl22p (PRK04223)RplV (COG0091) → RpsC (COG0092)rps3p (PRK04191) →<br>PRK14549 (PRK14549)Ribosomal_L29 (pfam00831) → POP4 (COG1588)PRK03879 (PRK03879) →<br>RpsQ (COG0186)rps17p (PRK08572) → rpl14p (PRK08571)Ribosomal_L14 (pfam00238) →<br>rpl24p (PRK01191)KOW_RPL26 (cd06089) →<br>PRK04313 (PRK04313)KOW_RPS4 (cd06087)Ribosomal_S4e (pfam00900) → RplE (COG0094)rpl5p (PRK04219) →<br>RpsN (COG0199)rps14p (PRK05766) → rps8p (PRK04034)RpsH (COG0096) →<br>RplF (COG0097)rpl6p (PRK05518) → UvrC (COG0322)Ribosomal_L32_L32e (cd00513)HHH_5 (pfam14520) →<br>rpl19e (PRK08570)Ribosomal_L19e (pfam01280) →                                                                                                                                                                                                                                                                                                                                                                                                                                                                                                                                                                                                                                                                                                                                                                                                                                                                                                        |
| env-182 | GRANPEH02G2JJD            | + | 188     | 287     | RNA → MTH1 (COG2106) →                                                                                                                                                                                                                                                                                                                                                                                                                                                                                                                                                                                                                                                                                                                                                                                                                                                                                                                                                                                                                                                                                                                                                                                                                                                                                                                                                                                                                                                                                                                                                                                                                                                                                                                                           |
| env-183 | GQKUMWE02FE1GX            | - | 166     | 68      | RNA → hypo →                                                                                                                                                                                                                                                                                                                                                                                                                                                                                                                                                                                                                                                                                                                                                                                                                                                                                                                                                                                                                                                                                                                                                                                                                                                                                                                                                                                                                                                                                                                                                                                                                                                                                                                                                     |
| env-184 | GSLNARP_GFPJP1N02H7ZY7    | - | 182     | 83      | RNA → <b>Methyltrn_RNA_3 (pfam02598)</b> →                                                                                                                                                                                                                                                                                                                                                                                                                                                                                                                                                                                                                                                                                                                                                                                                                                                                                                                                                                                                                                                                                                                                                                                                                                                                                                                                                                                                                                                                                                                                                                                                                                                                                                                       |
| env-185 | SL_5KL.010_BRINE.10021216 | + | 2341    | 2440    | RNA → <b>Methyltrn_RNA_3 (pfam02598)</b> →                                                                                                                                                                                                                                                                                                                                                                                                                                                                                                                                                                                                                                                                                                                                                                                                                                                                                                                                                                                                                                                                                                                                                                                                                                                                                                                                                                                                                                                                                                                                                                                                                                                                                                                       |





|         |                           |   |        |        |                                                                                                                                                                                                                                                                                                                                                                                                                                                                                                                                                                                                                                                                                                                                                                                                                                                                                                                                                                                                                                                                                                                                                                                                                                                                                                                                                                                                                                                                                                                                                                                                                                                                                                                                                                                                                                                                                                                           |
|---------|---------------------------|---|--------|--------|---------------------------------------------------------------------------------------------------------------------------------------------------------------------------------------------------------------------------------------------------------------------------------------------------------------------------------------------------------------------------------------------------------------------------------------------------------------------------------------------------------------------------------------------------------------------------------------------------------------------------------------------------------------------------------------------------------------------------------------------------------------------------------------------------------------------------------------------------------------------------------------------------------------------------------------------------------------------------------------------------------------------------------------------------------------------------------------------------------------------------------------------------------------------------------------------------------------------------------------------------------------------------------------------------------------------------------------------------------------------------------------------------------------------------------------------------------------------------------------------------------------------------------------------------------------------------------------------------------------------------------------------------------------------------------------------------------------------------------------------------------------------------------------------------------------------------------------------------------------------------------------------------------------------------|
| Nin-1-1 | NZ_AOHZ01000041.1         | - | 187314 | 187215 | RNA → <a href="#">Methyltrn_RNA_3 (pfam02598)</a> → <a href="#">rpl3p (PRK04231)</a> <a href="#">Ribosomal_L3 (pfam00297)</a> → <a href="#">RplD (COG0088)</a> <a href="#">rpl4p (PRK04042)</a> → <a href="#">RplW (COG0089)</a> <a href="#">PRK14548 (PRK14548)</a> → <a href="#">RplB (COG0090)</a> <a href="#">rpl2p (PRK09612)</a> → <a href="#">RpsS (COG0185)</a> <a href="#">rps19p (PRK04038)</a> → <a href="#">rpl22p (PRK04223)</a> <a href="#">RplV (COG0091)</a> → <a href="#">RpsC (COG0092)</a> <a href="#">rps3p (PRK04191)</a> → <a href="#">RpmC (COG0255)</a> <a href="#">PRK14549 (PRK14549)</a> → <a href="#">PRK03879 (PRK03879)</a> <a href="#">UPF0086 (pfam01868)</a> → <a href="#">RpsQ (COG0186)</a> <a href="#">rps17p (PRK08572)</a> → <a href="#">rpl14p (PRK08571)</a> <a href="#">Ribosomal_L14 (pfam00238)</a> → <a href="#">rpl24p (PRK01191)</a> <a href="#">KOW_RPL26 (cd06089)</a> → <a href="#">PRK04313 (PRK04313)</a> <a href="#">S4 (cd00165)</a> <a href="#">KOW_RPS4 (cd06087)</a> <a href="#">Ribosomal_S4e (pfam00900)</a> → <a href="#">RplE (COG0094)</a> <a href="#">rpl5p (PRK04219)</a> → <a href="#">RpsN (COG0199)</a> <a href="#">rps14P (PRK05766)</a> → <a href="#">rps8p (PRK04034)</a> <a href="#">RpsH (COG0096)</a> → <a href="#">RplF (COG0097)</a> <a href="#">rpl6p (PRK05518)</a> → <a href="#">RecA (COG0468)</a> <a href="#">Rpl32e (COG1717)</a> <a href="#">rpl32e (PRK08562)</a> <a href="#">HHH_5 (pfam14520)</a> → <a href="#">rpl19e (PRK08570)</a> <a href="#">Ribosomal_L19e (pfam01280)</a> →                                                                                                                                                                                                                                                                                                                                                    |
| env-186 | SL_4KL_010_BRINE_10024882 | - | 1898   | 1799   | RNA → <a href="#">Methyltrn_RNA_3 (pfam02598)</a> → <a href="#">rpl3p (PRK04231)</a> <a href="#">Ribosomal_L3 (pfam00297)</a> → <a href="#">RplD (COG0088)</a> <a href="#">rpl4p (PRK04042)</a> →                                                                                                                                                                                                                                                                                                                                                                                                                                                                                                                                                                                                                                                                                                                                                                                                                                                                                                                                                                                                                                                                                                                                                                                                                                                                                                                                                                                                                                                                                                                                                                                                                                                                                                                         |
| env-187 | ADL20m3uS_GFI381O02JC3VL  | + | 316    | 416    | RNA →                                                                                                                                                                                                                                                                                                                                                                                                                                                                                                                                                                                                                                                                                                                                                                                                                                                                                                                                                                                                                                                                                                                                                                                                                                                                                                                                                                                                                                                                                                                                                                                                                                                                                                                                                                                                                                                                                                                     |
| env-188 | SL_6KL_011_BRINE_1000304  | + | 9714   | 9813   | RNA → <a href="#">Methyltrn_RNA_3 (pfam02598)</a> → <a href="#">rpl3p (PRK04231)</a> <a href="#">Ribosomal_L3 (pfam00297)</a> → <a href="#">RplD (COG0088)</a> <a href="#">rpl4p (PRK04042)</a> → <a href="#">RplB (COG0090)</a> <a href="#">rpl2p (PRK09612)</a> → <a href="#">RpsS (COG0185)</a> <a href="#">rps19p (PRK04038)</a> → <a href="#">rpl22p (PRK04223)</a> <a href="#">RplV (COG0091)</a> → <a href="#">RpsC (COG0092)</a> <a href="#">rps3p (PRK04191)</a> → <a href="#">PRK14549 (PRK14549)</a> <a href="#">Ribosomal_L29 (pfam00831)</a> → <a href="#">PRK03879 (PRK03879)</a> <a href="#">UPF0086 (pfam01868)</a> → <a href="#">RpsQ (COG0186)</a> <a href="#">rps17p (PRK08572)</a> → <a href="#">rpl14p (PRK08571)</a> <a href="#">Ribosomal_L14 (pfam00238)</a> → <a href="#">rpl24p (PRK01191)</a> <a href="#">KOW_RPL26 (cd06089)</a> → <a href="#">PRK04313 (PRK04313)</a> <a href="#">KOW_RPS4 (cd06087)</a> <a href="#">S4 (pfam01479)</a> <a href="#">Ribosomal_S4e (pfam00900)</a> → <a href="#">RplE (COG0094)</a> <a href="#">rpl5p (PRK04219)</a> → <a href="#">RpsN (COG0199)</a> <a href="#">rps14P (PRK05766)</a> → <a href="#">rps8p (PRK04034)</a> <a href="#">RpsH (COG0096)</a> → <a href="#">RplF (COG0097)</a> <a href="#">rpl6p (PRK05518)</a> → <a href="#">UvrC (COG0322)</a> <a href="#">Rpl32e (COG1717)</a> <a href="#">rpl32e (PRK08562)</a> <a href="#">HHH_5 (pfam14520)</a> → <a href="#">rpl19e (PRK08570)</a> <a href="#">Ribosomal_L19e (pfam01280)</a> →                                                                                                                                                                                                                                                                                                                                                                                                            |
| env-189 | SL_8KL_010_SED_10375651   | - | 274    | 175    | RNA → <a href="#">Methyltrn_RNA_3 (pfam02598)</a> →                                                                                                                                                                                                                                                                                                                                                                                                                                                                                                                                                                                                                                                                                                                                                                                                                                                                                                                                                                                                                                                                                                                                                                                                                                                                                                                                                                                                                                                                                                                                                                                                                                                                                                                                                                                                                                                                       |
| env-190 | SL_6KL_011_BRINE_1014318  | - | 155    | 56     | RNA → <a href="#">Methyltrn_RNA_3 (pfam02598)</a> →                                                                                                                                                                                                                                                                                                                                                                                                                                                                                                                                                                                                                                                                                                                                                                                                                                                                                                                                                                                                                                                                                                                                                                                                                                                                                                                                                                                                                                                                                                                                                                                                                                                                                                                                                                                                                                                                       |
| env-191 | SL_8KL_010_SED_10000480   | + | 6111   | 6210   | RNA → <a href="#">Methyltrn_RNA_3 (pfam02598)</a> → <a href="#">rpl3p (PRK04231)</a> <a href="#">Ribosomal_L3 (pfam00297)</a> → <a href="#">RplD (COG0088)</a> <a href="#">rpl4p (PRK04042)</a> → <a href="#">RplW (COG0089)</a> <a href="#">PRK14548 (PRK14548)</a> → <a href="#">RplB (COG0090)</a> <a href="#">rpl2p (PRK09612)</a> → <a href="#">RpsS (COG0185)</a> <a href="#">rps19p (PRK04038)</a> → <a href="#">rpl22p (PRK04223)</a> <a href="#">RplV (COG0091)</a> → <a href="#">RpsC (COG0092)</a> <a href="#">rps3p (PRK04191)</a> → <a href="#">RpmC (COG0255)</a> <a href="#">PRK14549 (PRK14549)</a> → <a href="#">PRK03879 (PRK03879)</a> <a href="#">UPF0086 (pfam01868)</a> → <a href="#">RpsQ (COG0186)</a> <a href="#">rps17p (PRK08572)</a> → <a href="#">rpl14p (PRK08571)</a> <a href="#">Ribosomal_L14 (pfam00238)</a> → <a href="#">rpl24p (PRK01191)</a> <a href="#">KOW_RPL26 (cd06089)</a> → <a href="#">PRK04313 (PRK04313)</a> <a href="#">KOW_RPS4 (cd06087)</a> <a href="#">S4 (pfam01479)</a> <a href="#">Ribosomal_S4e (pfam00900)</a> → <a href="#">RplE (COG0094)</a> <a href="#">rpl5p (PRK04219)</a> → <a href="#">RpsN (COG0199)</a> <a href="#">rps14P (PRK05766)</a> → <a href="#">rps8p (PRK04034)</a> <a href="#">RpsH (COG0096)</a> → <a href="#">RplF (COG0097)</a> <a href="#">rpl6p (PRK05518)</a> → <a href="#">PRK12766 (PRK12766)</a> <a href="#">UvrC (COG0322)</a> <a href="#">Rpl32e (COG1717)</a> → <a href="#">rpl19e (PRK08570)</a> <a href="#">Ribosomal_L19e (pfam01280)</a> → <a href="#">RplR (COG0256)</a> <a href="#">rpl18p (PRK08569)</a> → <a href="#">RpsE (COG0098)</a> <a href="#">rps5p (PRK04044)</a> → <a href="#">Ribosomal_L7_archaeal_euk (cd01657)</a> <a href="#">rpl30p (PRK06049)</a> → <a href="#">rpl15p (PRK06419)</a> <a href="#">Ribosomal_L27A (pfam00828)</a> → <a href="#">SecY (COG0201)</a> <a href="#">PRK08568 (PRK08568)</a> → |
| env-192 | SL_4KL_010_BRINE_10005807 | - | 721    | 622    | RNA → <a href="#">Methyltrn_RNA_3 (pfam02598)</a> → <a href="#">rpl3p (PRK04231)</a> <a href="#">Ribosomal_L3 (pfam00297)</a> →                                                                                                                                                                                                                                                                                                                                                                                                                                                                                                                                                                                                                                                                                                                                                                                                                                                                                                                                                                                                                                                                                                                                                                                                                                                                                                                                                                                                                                                                                                                                                                                                                                                                                                                                                                                           |

|         |                           |   |        |        |                                                                                                                                                                                                                                                                                                                                                                                                                                                                                                                                                                                                                                                                                                                                                                                                                                                                                                                                                                                                                                                                                                                                                                                                                                                                                                                                                                                                                                                                                                                                                                        |
|---------|---------------------------|---|--------|--------|------------------------------------------------------------------------------------------------------------------------------------------------------------------------------------------------------------------------------------------------------------------------------------------------------------------------------------------------------------------------------------------------------------------------------------------------------------------------------------------------------------------------------------------------------------------------------------------------------------------------------------------------------------------------------------------------------------------------------------------------------------------------------------------------------------------------------------------------------------------------------------------------------------------------------------------------------------------------------------------------------------------------------------------------------------------------------------------------------------------------------------------------------------------------------------------------------------------------------------------------------------------------------------------------------------------------------------------------------------------------------------------------------------------------------------------------------------------------------------------------------------------------------------------------------------------------|
| Hla-1-1 | NZ_AGFZ01000103.1         | - | 104403 | 104304 | <p>RNA → Methyltrn_RNA_3 (pfam02598) → Methyltrn_RNA_3 (pfam02598) → RplC (COG0087)rpl3p (PRK04231) → RplC (COG0087)rpl3p (PRK04231) → RplD (COG0088)rpl4p (PRK04042) → RplD (COG0088)rpl4p (PRK04042) → RplW (COG0089)PRK14548 (PRK14548) → RplW (COG0089)PRK14548 (PRK14548) → RplB (COG0090)rpl2p (PRK09612) → RplB (COG0090)rpl2p (PRK09612) → RpsS (COG0185)rps19p (PRK04038) → RpsS (COG0185)rps19p (PRK04038) → rpl22p (PRK04223)RplV (COG0091) → rpl22p (PRK04223)RplV (COG0091) → RpsC (COG0092)rps3p (PRK04191) → RpsC (COG0092)rps3p (PRK04191) → PRK14549 (PRK14549)Ribosomal_L29 (pfam00831) → PRK14549 (PRK14549)Ribosomal_L29 (pfam00831) → PRK03879 (PRK03879)UPF0086 (pfam01868) → PRK03879 (PRK03879)UPF0086 (pfam01868) → RpsQ (COG0186)rps17p (PRK08572) → RpsQ (COG0186)rps17p (PRK08572) → rpl14p (PRK08571)Ribosomal_L14 (pfam00238) → rpl14p (PRK08571)Ribosomal_L14 (pfam00238) → rpl24p (PRK01191)KOW_RPL26 (cd06089) → rpl24p (PRK01191)KOW_RPL26 (cd06089) → PRK04313 (PRK04313)S4 (cd00165)KOW_RPS4 (cd06087)Ribosomal_S4e (pfam00900) → PRK04313 (PRK04313)S4 (cd00165)KOW_RPS4 (cd06087)Ribosomal_S4e (pfam00900) → RplE (COG0094)rpl5p (PRK04219) → RplE (COG0094)rpl5p (PRK04219) → RpsN (COG0199)rps14P (PRK05766) → RpsN (COG0199)rps14P (PRK05766) → rps8p (PRK04034)RpsH (COG0096) → rps8p (PRK04034)RpsH (COG0096) → RplF (COG0097)rpl6p (PRK05518) → RplF (COG0097)rpl6p (PRK05518) → RecA (COG0468)Rpl32e (COG1717)rpl32e (PRK08562)HHH_5 (pfam14520) → RecA (COG0468)Rpl32e (COG1717)rpl32e (PRK08562)HHH_5 (pfam14520) →</p> |
| Hla-1-2 | NZ_AOLZ01000040.1         | - | 62859  | 62760  | <p>RNA → Methyltrn_RNA_3 (pfam02598) → RplC (COG0087)rpl3p (PRK04231) → RplD (COG0088)rpl4p (PRK04042) → RplW (COG0089)PRK14548 (PRK14548) → RplD (COG0088)rpl4p (PRK04042) → RplW (COG0089)PRK14548 (PRK14548) → rpl22p (PRK04223)RplV (COG0091) → RpsC (COG0092)rps3p (PRK04191) → PRK14549 (PRK14549)Ribosomal_L29 (pfam00831) → PRK03879 (PRK03879)UPF0086 (pfam01868) → RpsQ (COG0186)rps17p (PRK08572) → RpsQ (COG0186)rps17p (PRK08572) → rpl14p (PRK08571)Ribosomal_L14 (pfam00238) → rpl24p (PRK01191)KOW_RPL26 (cd06089) → PRK04313 (PRK04313)S4 (cd00165)KOW_RPS4 (cd06087)Ribosomal_S4e (pfam00900) → RplE (COG0094)rpl5p (PRK04219) → RpsN (COG0199)rps14P (PRK05766) → rps8p (PRK04034)RpsH (COG0096) → RplF (COG0097)rpl6p (PRK05518) → RecA (COG0468)Rpl32e (COG1717)rpl32e (PRK08562)HHH_5 (pfam14520) → RecA (COG0468)Rpl32e (COG1717)rpl32e (PRK08562)HHH_5 (pfam14520) →</p>                                                                                                                                                                                                                                                                                                                                                                                                                                                                                                                                                                                                                                                                       |
| env-193 | SL_5KL_010_BRINE.10000580 | - | 14326  | 14227  | <p>RNA → Methyltrn_RNA_3 (pfam02598) → rpl3p (PRK04231)Ribosomal_L3 (pfam00297) → RplD (COG0088)rpl4p (PRK04042) → RplW (COG0089)PRK14548 (PRK14548) → RplB (COG0090)rpl2p (PRK09612) → RpsS (COG0185)rps19p (PRK04038) → rpl22p (PRK04223)RplV (COG0091) → RpsC (COG0092)rps3p (PRK04191) → RpmC (COG0255)PRK14549 (PRK14549) → PRK03879 (PRK03879)UPF0086 (pfam01868) → RpsQ (COG0186)rps17p (PRK08572) → RpsQ (COG0186)rps17p (PRK08572) → rpl14p (PRK08571)Ribosomal_L14 (pfam00238) → RplX (COG0198)rpl24p (PRK01191) → PRK04313 (PRK04313)S4 (cd00165)KOW_RPS4 (cd06087)Ribosomal_S4e (pfam00900) → RplE (COG0094)rpl5p (PRK04219) → RpsN (COG0199)rps14P (PRK05766) → rps8p (PRK04034)RpsH (COG0096) → RplF (COG0097)rpl6p (PRK05518) → PRK12766 (PRK12766)UvrC (COG0322)Rpl32e (COG1717) →</p>                                                                                                                                                                                                                                                                                                                                                                                                                                                                                                                                                                                                                                                                                                                                                                 |
| env-194 | SL_5KL_010_SED.10042598   | + | 887    | 986    | <p>RNA → Methyltrn_RNA_3 (pfam02598) →</p>                                                                                                                                                                                                                                                                                                                                                                                                                                                                                                                                                                                                                                                                                                                                                                                                                                                                                                                                                                                                                                                                                                                                                                                                                                                                                                                                                                                                                                                                                                                             |
| env-195 | SL_4KL_010_BRINE.10006165 | + | 1728   | 1827   | <p>RNA → Methyltrn_RNA_3 (pfam02598) → rpl3p (PRK04231)Ribosomal_L3 (pfam00297) → RplD (COG0088)rpl4p (PRK04042) → RplW (COG0089)PRK14548 (PRK14548) → RplB (COG0090)rpl2p (PRK09612) → RpsS (COG0185)rps19p (PRK04038) → rpl22p (PRK04223)RplV (COG0091) → RpsC (COG0092)rps3p (PRK04191) → PRK14549 (PRK14549)Ribosomal_L29_HIP (cd00427) →</p>                                                                                                                                                                                                                                                                                                                                                                                                                                                                                                                                                                                                                                                                                                                                                                                                                                                                                                                                                                                                                                                                                                                                                                                                                      |
| Hac-1-1 | NZ_BATA01000095.1         | + | 7771   | 7870   | <p>RNA → MTH1 (COG2106) → hypo → hypo →</p>                                                                                                                                                                                                                                                                                                                                                                                                                                                                                                                                                                                                                                                                                                                                                                                                                                                                                                                                                                                                                                                                                                                                                                                                                                                                                                                                                                                                                                                                                                                            |

|         |                           |   |         |         |                                                                                                                                                                                                                                                                                                                                                                                                                                                                                                                                                                                                                                                                                                                                                                                                                                                                                                                    |
|---------|---------------------------|---|---------|---------|--------------------------------------------------------------------------------------------------------------------------------------------------------------------------------------------------------------------------------------------------------------------------------------------------------------------------------------------------------------------------------------------------------------------------------------------------------------------------------------------------------------------------------------------------------------------------------------------------------------------------------------------------------------------------------------------------------------------------------------------------------------------------------------------------------------------------------------------------------------------------------------------------------------------|
| Hac-1-2 | NZ_BANO01000013.1         | - | 14331   | 14232   | RNA → <b>Methyltrn_RNA_3 (pfam02598)</b> → rpl3p (PRK04231)Ribosomal_L3 (pfam00297) → RplC (COG0087)rpl3p (PRK04231) → RplC (COG0087)rpl3p (PRK04231) → RplD (COG0088)rpl4p (PRK04042) → RplW (COG0089)PRK14548 (PRK14548) → RplB (COG0090)rpl2p (PRK09612) → RpsS (COG0185)rps19p (PRK04038) → rpl22p (PRK04223)RplV (COG0091) → RpsC (COG0092)rps3p (PRK04191) → PRK14549 (PRK14549)Ribosomal_L29 (pfam00831) → POP4 (COG1588)PRK03879 (PRK03879) → RpsQ (COG0186)rps17p (PRK08572) → rps17p (PRK08572)Ribosomal_S17 (pfam00366) → rpl14p (PRK08571)Ribosomal_L14 (pfam00238) → RplX (COG0198)rpl24p (PRK01191) → PRK04313 (PRK04313)KOW_RPS4 (cd06087)Ribosomal_S4e (pfam00900) → RplE (COG0094)rpl5p (PRK04219) → RpsN (COG0199)rps14p (PRK05766) → rps8p (PRK04034)RpsH (COG0096) → RplF (COG0097)rpl6p (PRK05518) →                                                                                          |
| env-196 | ADL20m3uS_GFI381O02IYW5A  | - | 121     | 22      | RNA → MTH1 (COG2106) →                                                                                                                                                                                                                                                                                                                                                                                                                                                                                                                                                                                                                                                                                                                                                                                                                                                                                             |
| env-197 | 2140918017-63356          | - | 193     | 94      | RNA → hypo →                                                                                                                                                                                                                                                                                                                                                                                                                                                                                                                                                                                                                                                                                                                                                                                                                                                                                                       |
| env-198 | GQKUMWE02GP8XW            | - | 475     | 376     | RNA → <b>Methyltrn_RNA_3 (pfam02598)</b> →                                                                                                                                                                                                                                                                                                                                                                                                                                                                                                                                                                                                                                                                                                                                                                                                                                                                         |
| Hsp-2-1 | NZ_CP007060.1             | + | 2200475 | 2200574 | RNA → <b>Methyltrn_RNA_3 (pfam02598)</b> → rpl3p (PRK04231)Ribosomal_L3 (pfam00297) → RplD (COG0088)rpl4p (PRK04042) → RplW (COG0089)PRK14548 (PRK14548) → RplB (COG0090)rpl2p (PRK09612) → RpsS (COG0185)rps19p (PRK04038) → rpl22p (PRK04223)RplV (COG0091) → RpsC (COG0092)rps3p (PRK04191) → PRK14549 (PRK14549)Ribosomal_L29 (pfam00831) → PRK03879 (PRK03879)UPF0086 (pfam01868) → RpsQ (COG0186)rps17p (PRK08572) → rpl14p (PRK08571)Ribosomal_L14 (pfam00238) → RplX (COG0198)rpl24p (PRK01191) → PRK04313 (PRK04313)KOW_RPS4 (cd06087)Ribosomal_S4e (pfam00900) → RplE (COG0094)rpl5p (PRK04219) → RpsN (COG0199)rps14p (PRK05766) → rps8p (PRK04034)RpsH (COG0096) → RplF (COG0097)rpl6p (PRK05518) → PRK12766 (PRK12766)RecA (COG0468)Rpl32e (COG1717) → rpl19e (PRK08570)Ribosomal_L19e (pfam01280) →                                                                                                  |
| env-199 | APHM01006302.1            | - | 1366    | 1273    | RNA → <b>Methyltrn_RNA_3 (pfam02598)</b> → RplC (COG0087)rpl3p (PRK04231) →                                                                                                                                                                                                                                                                                                                                                                                                                                                                                                                                                                                                                                                                                                                                                                                                                                        |
| env-200 | LTJ07As871.J07ABscf092781 | + | 25242   | 25335   | RNA → <b>Methyltrn_RNA_3 (pfam02598)</b> → rpl3p (PRK04231)Ribosomal_L3 (pfam00297) → hypo → PRK12766 (PRK12766)Rpl32e (COG1717) → rpl19e (PRK08570)Ribosomal_L19e (pfam01280) →                                                                                                                                                                                                                                                                                                                                                                                                                                                                                                                                                                                                                                                                                                                                   |
| Hsu-1-1 | NZ_CP008874.1             | - | 1720180 | 1720081 | RNA → <b>Methyltrn_RNA_3 (pfam02598)</b> → RplC (COG0087)rpl3p (PRK04231) → RplD (COG0088)rpl4p (PRK04042) → RplW (COG0089)PRK14548 (PRK14548) → RplB (COG0090)rpl2p (PRK09612) → RpsS (COG0185)rps19p (PRK04038) → rpl22p (PRK04223)RplV (COG0091) → RpsC (COG0092)rps3p (PRK04191) → PRK14549 (PRK14549)Ribosomal_L29 (pfam00831) → PRK03879 (PRK03879)UPF0086 (pfam01868) → RpsQ (COG0186)rps17p (PRK08572) → rpl14p (PRK08571)Ribosomal_L14 (pfam00238) → RplX (COG0198)rpl24p (PRK01191) → PRK04313 (PRK04313)KOW_RPS4 (cd06087)Ribosomal_S4e (pfam00900) → RplE (COG0094)rpl5p (PRK04219) → RpsN (COG0199)rps14p (PRK05766) → rps8p (PRK04034)RpsH (COG0096) → RplF (COG0097)rpl6p (PRK05518) → RecA (COG0468)Rpl32e (COG1717)rpl32e (PRK08562)HHH_5 (pfam14520) → rpl19e (PRK08570)Ribosomal_L19e (pfam01280) →                                                                                             |
| env-201 | P_A23_Liq_1.Fmt_1021786   | - | 270     | 171     | RNA → <b>Methyltrn_RNA_3 (pfam02598)</b> →                                                                                                                                                                                                                                                                                                                                                                                                                                                                                                                                                                                                                                                                                                                                                                                                                                                                         |
| env-202 | P_A23_Liq_2.Fmt_1024942   | - | 260     | 161     | RNA → <b>Methyltrn_RNA_3 (pfam02598)</b> →                                                                                                                                                                                                                                                                                                                                                                                                                                                                                                                                                                                                                                                                                                                                                                                                                                                                         |
| env-203 | P_A23_Liq_3.Fmt_1011772   | + | 655     | 754     | RNA → <b>Methyltrn_RNA_3 (pfam02598)</b> →                                                                                                                                                                                                                                                                                                                                                                                                                                                                                                                                                                                                                                                                                                                                                                                                                                                                         |
| Hca-1-1 | NZ_AOLS01000002.1         | - | 28213   | 28114   | RNA → <b>Methyltrn_RNA_3 (pfam02598)</b> → rpl3p (PRK04231)Ribosomal_L3 (pfam00297) → rpl4p (PRK04042)Ribosomal_L4 (pfam00573) → RplW (COG0089)PRK14548 (PRK14548) → RplB (COG0090)rpl2p (PRK09612) → RpsS (COG0185)rps19p (PRK04038) → rpl22p (PRK04223)RplV (COG0091) → RpsC (COG0092)rps3p (PRK04191) → PRK14549 (PRK14549)Ribosomal_L29 (pfam00831) → PRK03879 (PRK03879)UPF0086 (pfam01868) → RpsQ (COG0186)rps17p (PRK08572) → rpl14p (PRK08571)Ribosomal_L14 (pfam00238) → rpl24p (PRK01191)KOW_RPL26 (cd06089) → PRK04313 (PRK04313)KOW_RPS4 (cd06087)S4 (pfam01479)Ribosomal_S4e (pfam00900) → RplE (COG0094)rpl5p (PRK04219) → RpsN (COG0199)rps14p (PRK05766) → rps8p (PRK04034)RpsH (COG0096) → RplF (COG0097)rpl6p (PRK05518) → PRK12766 (PRK12766)RecA (COG0468)Rpl32e (COG1717) → rpl19e (PRK08570)Ribosomal_L19e (pfam01280) → RplR (COG0256)rpl18p (PRK08569) → RplR (COG0256)rpl18p (PRK08569) → |









|         |                           |   |         |         |                                                                                                                                                                                                                                                                                                                                                                                                                                                                                                                                                                                                                                                                                                                                                                                                                                                            |
|---------|---------------------------|---|---------|---------|------------------------------------------------------------------------------------------------------------------------------------------------------------------------------------------------------------------------------------------------------------------------------------------------------------------------------------------------------------------------------------------------------------------------------------------------------------------------------------------------------------------------------------------------------------------------------------------------------------------------------------------------------------------------------------------------------------------------------------------------------------------------------------------------------------------------------------------------------------|
| Nas-1-1 | NZ_AOIO01000023.1         | - | 59520   | 59421   | <p>RNA → <b>Methyltrn_RNA_3 (pfam02598)</b> → rpl3p (PRK04231)Ribosomal_L3 (pfam00297) → RplD (COG0088)rpl4p (PRK04042) → RplW (COG0089)PRK14548 (PRK14548) → RplB (COG0090)rpl2p (PRK09612) → RpsS (COG0185)rps19p (PRK04038) → rpl22p (PRK04223)RplV (COG0091) → RpsC (COG0092)rps3p (PRK04191) → RpmC (COG0255)PRK14549 (PRK14549) → PRK03879 (PRK03879)UPF0086 (pfam01868) → RpsQ (COG0186)rps17p (PRK08572) → rpl14p (PRK08571)Ribosomal_L14 (pfam00238) → rpl24p (PRK01191)KOW_RPL26 (cd06089) → PRK04313 (PRK04313)KOW_RPS4 (cd06087)Ribosomal_S4e (pfam00900) → RplE (COG0094)rpl5p (PRK04219) → RpsN (COG0199)rps14p (PRK05766) → rps8p (PRK04034)RpsH (COG0096) → RplF (COG0097)rpl6p (PRK05518) → Rpl32e (COG1717) →</p>                                                                                                                        |
| Noc-1-1 | NC_019974.1               | - | 3406135 | 3406036 | <p>RNA → <b>Methyltrn_RNA_3 (pfam02598)</b> → rpl3p (PRK04231)Ribosomal_L3 (pfam00297) → RplD (COG0088)rpl4p (PRK04042) → RplW (COG0089)PRK14548 (PRK14548) → RplB (COG0090)rpl2p (PRK09612) → RpsS (COG0185)rps19p (PRK04038) → rpl22p (PRK04223)RplV (COG0091) → RpsC (COG0092)rps3p (PRK04191) → PRK14549 (PRK14549)Ribosomal_L29 (pfam00831) → PRK03879 (PRK03879)UPF0086 (pfam01868) → RpsQ (COG0186)rps17p (PRK08572) → rpl14p (PRK08571)Ribosomal_L14 (pfam00238) → rpl24p (PRK01191)KOW_RPL26 (cd06089) → PRK04313 (PRK04313)KOW_RPS4 (cd06087)S4 (pfam01479)Ribosomal_S4e (pfam00900) → RplE (COG0094)rpl5p (PRK04219) → RpsN (COG0199)rps14p (PRK05766) → rps8p (PRK04034)RpsH (COG0096) → RplF (COG0097)rpl6p (PRK05518) → UvrC (COG0322)Rpl32e (COG1717)rpl32e (PRK08562)HHH_5 (pfam14520) →</p>                                               |
| Nje-1-1 | NZ_AOIA01000019.1         | + | 36830   | 36929   | <p>RNA → <b>Methyltrn_RNA_3 (pfam02598)</b> → rpl3p (PRK04231)Ribosomal_L3 (pfam00297) → RplD (COG0088)rpl4p (PRK04042) → RplW (COG0089)PRK14548 (PRK14548) → RplB (COG0090)rpl2p (PRK09612) → RpsS (COG0185)rps19p (PRK04038) → rpl22p (PRK04223)RplV (COG0091) → RpsC (COG0092)rps3p (PRK04191) → PRK14549 (PRK14549)Ribosomal_L29 (pfam00831) → PRK03879 (PRK03879)UPF0086 (pfam01868) → RpsQ (COG0186)rps17p (PRK08572) → rpl14p (PRK08571)Ribosomal_L14 (pfam00238) → rpl24p (PRK01191)KOW_RPL26 (cd06089) → PRK04313 (PRK04313)KOW_RPS4 (cd06087)S4 (pfam01479)Ribosomal_S4e (pfam00900) → RplE (COG0094)rpl5p (PRK04219) → RpsN (COG0199)rps14p (PRK05766) → rps8p (PRK04034)RpsH (COG0096) → RplF (COG0097)rpl6p (PRK05518) → RecA (COG0468)Rpl32e (COG1717)HHH_5 (pfam14520) →</p>                                                                |
| Nam-1-1 | NZ_AOIB01000037.1         | - | 63552   | 63453   | <p>RNA → <b>Methyltrn_RNA_3 (pfam02598)</b> → rpl3p (PRK04231)Ribosomal_L3 (pfam00297) → RplD (COG0088)rpl4p (PRK04042) → RplW (COG0089)PRK14548 (PRK14548) → RplB (COG0090)rpl2p (PRK09612) → RpsS (COG0185)rps19p (PRK04038) → rpl22p (PRK04223)RplV (COG0091) → RpsC (COG0092)rps3p (PRK04191) → PRK14549 (PRK14549)Ribosomal_L29 (pfam00831) → PRK03879 (PRK03879)UPF0086 (pfam01868) → RpsQ (COG0186)rps17p (PRK08572) → rpl14p (PRK08571)Ribosomal_L14 (pfam00238) → rpl24p (PRK01191)KOW_RPL26 (cd06089) → PRK04313 (PRK04313)KOW_RPS4 (cd06087)S4 (pfam01479)Ribosomal_S4e (pfam00900) → RplE (COG0094)rpl5p (PRK04219) → RpsN (COG0199)rps14p (PRK05766) → rps8p (PRK04034)RpsH (COG0096) → RplF (COG0097)rpl6p (PRK05518) → UvrC (COG0322)Rpl32e (COG1717)rpl32e (PRK08562)HHH_5 (pfam14520) → rpl19e (PRK08570)Ribosomal_L19e (pfam01280) →</p> |
| env-210 | SL_5KL_010_BRINE_10002219 | + | 679     | 778     | <p>RNA → <b>Methyltrn_RNA_3 (pfam02598)</b> → rpl3p (PRK04231)Ribosomal_L3 (pfam00297) → RplD (COG0088)rpl4p (PRK04042) → RplW (COG0089)PRK14548 (PRK14548) → RplB (COG0090)rpl2p (PRK09612) → RpsS (COG0185)rps19p (PRK04038) → rpl22p (PRK04223)RplV (COG0091) → RpsC (COG0092)rps3p (PRK04191) → PRK14549 (PRK14549)Ribosomal_L29 (pfam00831) → PRK03879 (PRK03879)UPF0086 (pfam01868) → RpsQ (COG0186)rps17p (PRK08572) → rpl14p (PRK08571)Ribosomal_L14 (pfam00238) → rpl24p (PRK01191)KOW_RPL26 (cd06089) → PRK04313 (PRK04313)S4 (cd00165)KOW_RPS4 (cd06087)Ribosomal_S4e (pfam00900) → RplE (COG0094)rpl5p (PRK04219)SDH (cd12188) → RpsN (COG0199)rps14p (PRK05766) → rps8p (PRK04034) →</p>                                                                                                                                                      |
| env-211 | SL_5KL_010_BRINE_10004382 | + | 5582    | 5681    | <p>RNA → <b>Methyltrn_RNA_3 (pfam02598)</b> → rpl3p (PRK04231)Ribosomal_L3 (pfam00297) →</p>                                                                                                                                                                                                                                                                                                                                                                                                                                                                                                                                                                                                                                                                                                                                                               |





|         |                          |   |        |        |                                                                                                                                                                                                                                                                                                                                                                                                                                                                                                                                                                                                                                                                                                                                                                                        |
|---------|--------------------------|---|--------|--------|----------------------------------------------------------------------------------------------------------------------------------------------------------------------------------------------------------------------------------------------------------------------------------------------------------------------------------------------------------------------------------------------------------------------------------------------------------------------------------------------------------------------------------------------------------------------------------------------------------------------------------------------------------------------------------------------------------------------------------------------------------------------------------------|
| Nch-1-1 | NZ_AOIN01000067.1        | + | 25511  | 25610  | RNA → <b>Methyltrn_RNA_3 (pfam02598)</b> → rpl3p (PRK04231)Ribosomal_L3 (pfam00297) → RplD (COG0088)rpl4p (PRK04042) → RplW (COG0089)PRK14548 (PRK14548) → RplB (COG0090)rpl2p (PRK09612) → RpsS (COG0185)rps19p (PRK04038) → rpl22p (PRK04223)RplV (COG0091) → RpsC (COG0092)rps3p (PRK04191) → PRK14549 (PRK14549)Ribosomal_L29 (pfam00831) → PRK03879 (PRK03879)UPF0086 (pfam01868) → RpsQ (COG0186)rps17p (PRK08572) → rpl14p (PRK08571)Ribosomal_L14 (pfam00238) → rpl24p (PRK01191)KOW_RPL26 (cd06089) → PRK04313 (PRK04313)KOW_RPS4 (cd06087)S4 (pfam01479)Ribosomal_S4e (pfam00900) → RplE (COG0094)rpl5p (PRK04219) → RpsN (COG0199)rps14P (PRK05766) → rps8p (PRK04034)RpsH (COG0096) → RplF (COG0097)rpl6p (PRK05518) → PRK12766 (PRK12766)RecA (COG0468)Rpl32e (COG1717) → |
| Nae-1-1 | NZ_AOIP01000033.1        | - | 55488  | 55389  | RNA → PRK13493 (PRK13493) <b>Methyltrn_RNA_3 (pfam02598)</b> → rpl3p (PRK04231)Ribosomal_L3 (pfam00297) → RplD (COG0088)rpl4p (PRK04042) → RplW (COG0089)PRK14548 (PRK14548) → RplB (COG0090)rpl2p (PRK09612) → RpsS (COG0185)rps19p (PRK04038) → rpl22p (PRK04223)RplV (COG0091) → RpsC (COG0092)rps3p (PRK04191) → RpmC (COG0255)PRK14549 (PRK14549) → PRK03879 (PRK03879)UPF0086 (pfam01868) → RpsQ (COG0186)rps17p (PRK08572) → rpl14p (PRK08571)Ribosomal_L14 (pfam00238) → rpl24p (PRK01191)KOW_RPL26 (cd06089) → PRK04313 (PRK04313)KOW_RPS4 (cd06087)Ribosomal_S4e (pfam00900) → RplE (COG0094)rpl5p (PRK04219) → RpsN (COG0199)rps14P (PRK05766) → rps8p (PRK04034)RpsH (COG0096) → RplF (COG0097)rpl6p (PRK05518) → PRK12766 (PRK12766)RecA (COG0468)Rpl32e (COG1717) →      |
| env-214 | SS_3KL_010_SOIL_10059833 | - | 123    | 24     | RNA → <b>Methyltrn_RNA_3 (pfam02598)</b> →                                                                                                                                                                                                                                                                                                                                                                                                                                                                                                                                                                                                                                                                                                                                             |
| env-215 | SL_3KL_010_SED_10538221  | + | 53     | 152    | RNA → MTH1 (COG2106) →                                                                                                                                                                                                                                                                                                                                                                                                                                                                                                                                                                                                                                                                                                                                                                 |
| env-216 | P_1C_Sed_2_UnCty_1120614 | - | 293    | 194    | RNA → <b>Methyltrn_RNA_3 (pfam02598)</b> →                                                                                                                                                                                                                                                                                                                                                                                                                                                                                                                                                                                                                                                                                                                                             |
| Hni-1-1 | NZ_AOMA01000004.1        | + | 593    | 692    | RNA → <b>Methyltrn_RNA_3 (pfam02598)</b> → rpl3p (PRK04231)Ribosomal_L3 (pfam00297) → RplD (COG0088)rpl4p (PRK04042) → RplW (COG0089)PRK14548 (PRK14548) → RplB (COG0090)rpl2p (PRK09612) → RpsS (COG0185)rps19p (PRK04038) → rpl22p (PRK04223)RplV (COG0091) → RpsC (COG0092)rps3p (PRK04191) → RpmC (COG0255)PRK14549 (PRK14549) → PRK03879 (PRK03879)UPF0086 (pfam01868) → RpsQ (COG0186)rps17p (PRK08572) → rpl14p (PRK08571)Ribosomal_L14 (pfam00238) → rpl24p (PRK01191)KOW_RPL26 (cd06089) → PRK04313 (PRK04313)KOW_RPS4 (cd06087)Ribosomal_S4e (pfam00900) → RplE (COG0094)rpl5p (PRK04219) → RpsN (COG0199)rps14P (PRK05766) → rps8p (PRK04034)RpsH (COG0096) → RplF (COG0097)rpl6p (PRK05518) →                                                                              |
| Has-1-1 | NZ_AOIQ01000021.1        | + | 411355 | 411454 | RNA → <b>Methyltrn_RNA_3 (pfam02598)</b> → RplC (COG0087)rpl3p (PRK04231) → RplD (COG0088)rpl4p (PRK04042) → RplW (COG0089)PRK14548 (PRK14548) → RplB (COG0090)rpl2p (PRK09612) → RpsS (COG0185)rps19p (PRK04038) → rpl22p (PRK04223)RplV (COG0091) → RpsC (COG0092)rps3p (PRK04191) → RpmC (COG0255)PRK14549 (PRK14549) → PRK03879 (PRK03879)UPF0086 (pfam01868) → RpsQ (COG0186)rps17p (PRK08572) → rpl14p (PRK08571)Ribosomal_L14 (pfam00238) → rpl24p (PRK01191)KOW_RPL26 (cd06089) → PRK04313 (PRK04313)KOW_RPS4 (cd06087)Ribosomal_S4e (pfam00900) → RplE (COG0094)rpl5p (PRK04219) → RpsN (COG0199)rps14P (PRK05766) → rps8p (PRK04034)RpsH (COG0096) → RplF (COG0097)rpl6p (PRK05518) → UvrC (COG0322)HHH_5 (pfam14520) → hyp0 →                                               |
| env-217 | 2140918027-11734         | - | 146    | 47     | RNA → <b>Methyltrn_RNA_3 (pfam02598)</b> →                                                                                                                                                                                                                                                                                                                                                                                                                                                                                                                                                                                                                                                                                                                                             |

|         |                   |   |        |        |                                                                                                                                                                                                                                                                                                                                                                                                                                                                                                                                                                                                                                                                                                                                                                                                                                   |
|---------|-------------------|---|--------|--------|-----------------------------------------------------------------------------------------------------------------------------------------------------------------------------------------------------------------------------------------------------------------------------------------------------------------------------------------------------------------------------------------------------------------------------------------------------------------------------------------------------------------------------------------------------------------------------------------------------------------------------------------------------------------------------------------------------------------------------------------------------------------------------------------------------------------------------------|
| Nal-2-1 | NZ_JNCS01000001.1 | - | 130682 | 130583 | <p>RNA → <b>Methyltrn_RNA_3 (pfam02598)</b> → rpl3p (PRK04231)Ribosomal_L3 (pfam00297) → RplD (COG0088)rpl4p (PRK04042) → RplW (COG0089)PRK14548 (PRK14548) → RplB (COG0090)rpl2p (PRK09612) → RpsS (COG0185)rps19p (PRK04038) → rpl22p (PRK04223)RplV (COG0091) → RpsC (COG0092)rps3p (PRK04191) → RpmC (COG0255)PRK14549 (PRK14549) → PRK03879 (PRK03879)UPF0086 (pfam01868) → RpsQ (COG0186)rps17p (PRK08572) → rpl14p (PRK08571)Ribosomal_L14 (pfam00238) → rpl24p (PRK01191)KOW_RPL26 (cd06089) → PRK04313 (PRK04313)KOW_RPS4 (cd06087)Ribosomal_S4e (pfam00900) → RplE (COG0094)rpl5p (PRK04219) → RpsN (COG0199)rps14P (PRK05766) → rps8p (PRK04034)RpsH (COG0096) → RplF (COG0097)rpl6p (PRK05518) → PRK12766 (PRK12766)UvrC (COG0322)Rpl32e (COG1717) →</p>                                                              |
| Nal-1-1 | NZ_AOIK01000025.1 | + | 71137  | 71236  | <p>RNA → <b>Methyltrn_RNA_3 (pfam02598)</b> → rpl3p (PRK04231)Ribosomal_L3 (pfam00297) → RplD (COG0088)rpl4p (PRK04042) → RplW (COG0089)PRK14548 (PRK14548) → RplB (COG0090)rpl2p (PRK09612) → RpsS (COG0185)rps19p (PRK04038) → rpl22p (PRK04223)RplV (COG0091) → RpsC (COG0092)rps3p (PRK04191) → RpmC (COG0255)PRK14549 (PRK14549) → PRK03879 (PRK03879)UPF0086 (pfam01868) → RpsQ (COG0186)rps17p (PRK08572) → rpl14p (PRK08571)Ribosomal_L14 (pfam00238) → rpl24p (PRK01191)KOW_RPL26 (cd06089) → PRK04313 (PRK04313)KOW_RPS4 (cd06087)Ribosomal_S4e (pfam00900) → RplE (COG0094)rpl5p (PRK04219) → RpsN (COG0199)rps14P (PRK05766) → rps8p (PRK04034)RpsH (COG0096) → RplF (COG0097)rpl6p (PRK05518) → PRK12766 (PRK12766)UvrC (COG0322)Rpl32e (COG1717) →</p>                                                              |
| Npa-1-1 | NZ_AOII01000067.1 | - | 29396  | 29297  | <p>RNA → <b>Methyltrn_RNA_3 (pfam02598)</b> → rpl3p (PRK04231)Ribosomal_L3 (pfam00297) → RplD (COG0088)rpl4p (PRK04042) → RplW (COG0089)PRK14548 (PRK14548) → RplB (COG0090)rpl2p (PRK09612) → RpsS (COG0185)rps19p (PRK04038) → rpl22p (PRK04223)RplV (COG0091) → RpsC (COG0092)rps3p (PRK04191) → RpmC (COG0255)PRK14549 (PRK14549) → PRK03879 (PRK03879)UPF0086 (pfam01868) → RpsQ (COG0186)rps17p (PRK08572) → rpl14p (PRK08571)Ribosomal_L14 (pfam00238) → rpl24p (PRK01191)KOW_RPL26 (cd06089) → PRK04313 (PRK04313)KOW_RPS4 (cd06087)Ribosomal_S4e (pfam00900) → RplE (COG0094)rpl5p (PRK04219) → RpsN (COG0199)rps14P (PRK05766) → rps8p (PRK04034)RpsH (COG0096) → RplF (COG0097)rpl6p (PRK05518) → UvrC (COG0322)Rpl32e (COG1717)rpl32e (PRK08562)HHH_5 (pfam14520) →</p>                                               |
| Nga-1-1 | NZ_AOIJ01000042.1 | - | 42266  | 42167  | <p>RNA → <b>Methyltrn_RNA_3 (pfam02598)</b> → rpl3p (PRK04231)Ribosomal_L3 (pfam00297) → RplD (COG0088)rpl4p (PRK04042) → RplW (COG0089)PRK14548 (PRK14548) → RplB (COG0090)rpl2p (PRK09612) → RpsS (COG0185)rps19p (PRK04038) → rpl22p (PRK04223)RplV (COG0091) → RpsC (COG0092)rps3p (PRK04191) → RpmC (COG0255)PRK14549 (PRK14549) → PRK03879 (PRK03879)UPF0086 (pfam01868) → RpsQ (COG0186)rps17p (PRK08572) → rpl14p (PRK08571)Ribosomal_L14 (pfam00238) → rpl24p (PRK01191)KOW_RPL26 (cd06089) → PRK04313 (PRK04313)KOW_RPS4 (cd06087)Ribosomal_S4e (pfam00900) → RplE (COG0094)rpl5p (PRK04219) → RpsN (COG0199)rps14P (PRK05766) → rps8p (PRK04034)RpsH (COG0096) → RplF (COG0097)rpl6p (PRK05518) → RecA (COG0468)Rpl32e (COG1717)rpl32e (PRK08562)HHH_5 (pfam14520) → rpl19e (PRK08570)Ribosomal_L19e (pfam01280) →</p> |
| Nsp-2-1 | NZ_AJVG01000002.1 | - | 354632 | 354533 | <p>RNA → <b>Methyltrn_RNA_3 (pfam02598)</b> → rpl3p (PRK04231)Ribosomal_L3 (pfam00297) → RplD (COG0088)rpl4p (PRK04042) → RplW (COG0089)PRK14548 (PRK14548) → RplB (COG0090)rpl2p (PRK09612) → RpsS (COG0185)rps19p (PRK04038) → rpl22p (PRK04223)RplV (COG0091) → RpsC (COG0092)rps3p (PRK04191) → RpmC (COG0255)PRK14549 (PRK14549) → PRK03879 (PRK03879)UPF0086 (pfam01868) → RpsQ (COG0186)rps17p (PRK08572) → rpl14p (PRK08571)Ribosomal_L14 (pfam00238) → rpl24p (PRK01191)KOW_RPL26 (cd06089) → PRK04313 (PRK04313)KOW_RPS4 (cd06087)Ribosomal_S4e (pfam00900) → RplE (COG0094)rpl5p (PRK04219) → RpsN (COG0199)rps14P (PRK05766) → rps8p (PRK04034)RpsH (COG0096) → RplF (COG0097)rpl6p (PRK05518) → RecA (COG0468)Rpl32e (COG1717)rpl32e (PRK08562)HHH_5 (pfam14520) → rpl19e (PRK08570)Ribosomal_L19e (pfam01280) →</p> |

|         |                   |   |         |         |                                                                                                                                                                                                                                                                                                                                                                                                                                                                                                                                                                                                                                                                                                                                                                                                                                                                                                                                                                                                                                                                                                            |
|---------|-------------------|---|---------|---------|------------------------------------------------------------------------------------------------------------------------------------------------------------------------------------------------------------------------------------------------------------------------------------------------------------------------------------------------------------------------------------------------------------------------------------------------------------------------------------------------------------------------------------------------------------------------------------------------------------------------------------------------------------------------------------------------------------------------------------------------------------------------------------------------------------------------------------------------------------------------------------------------------------------------------------------------------------------------------------------------------------------------------------------------------------------------------------------------------------|
| Nsp-1-1 | NC_018224.1       | - | 1817666 | 1817567 | <p>RNA → <b>Methyltrn_RNA_3 (pfam02598)</b> → <b>rpl3p (PRK04231)</b>Ribosomal_L3 (pfam00297) →<br/> <b>RplD (COG0088)</b>rpl4p (PRK04042) → <b>RplW (COG0089)</b><b>PRK14548 (PRK14548)</b> →<br/> <b>RplB (COG0090)</b>rpl2p (PRK09612) → <b>RpsS (COG0185)</b><b>rps19p (PRK04038)</b> →<br/> <b>rpl22p (PRK04223)</b><b>RplV (COG0091)</b> → RpsC (COG0092)<b>rps3p (PRK04191)</b> →<br/> <b>RpmC (COG0255)</b><b>PRK14549 (PRK14549)</b> → PRK03879 (PRK03879)UPF0086 (pfam01868) →<br/> <b>RpsQ (COG0186)</b>rps17p (PRK08572) → rpl14p (PRK08571)<b>Ribosomal_L14 (pfam00238)</b> →<br/> <b>rpl24p (PRK01191)</b><b>KOW_RPL26 (cd06089)</b> →<br/> <b>PRK04313 (PRK04313)</b><b>KOW_RPS4 (cd06087)</b><b>Ribosomal_S4e (pfam00900)</b> → <b>RplE (COG0094)</b><b>rpl5p (PRK04219)</b> →<br/> <b>RpsN (COG0199)</b>rps14P (PRK05766) → <b>rps8p (PRK04034)</b>RpsH (COG0096) →<br/> <b>RplF (COG0097)</b>rpl6p (PRK05518) →<br/> <b>RecA (COG0468)</b><b>Rpl32e (COG1717)</b><b>rpl32e (PRK08562)</b><b>HHH_5 (pfam14520)</b> →<br/> <b>rpl19e (PRK08570)</b><b>Ribosomal_L19e (pfam01280)</b> →</p> |
| Htu-1-1 | NC_013743.1       | + | 2295636 | 2295735 | <p>RNA → <b>Methyltrn_RNA_3 (pfam02598)</b> → rpl3p (PRK04231)Ribosomal_L3 (pfam00297) →<br/> <b>RplD (COG0088)</b>rpl4p (PRK04042) → <b>RplW (COG0089)</b><b>PRK14548 (PRK14548)</b> →<br/> <b>RplB (COG0090)</b>rpl2p (PRK09612) → <b>RpsS (COG0185)</b><b>rps19p (PRK04038)</b> →<br/> <b>rpl22p (PRK04223)</b><b>RplV (COG0091)</b> → RpsC (COG0092)<b>rps3p (PRK04191)</b> →<br/> <b>RpmC (COG0255)</b><b>PRK14549 (PRK14549)</b> → PRK03879 (PRK03879)UPF0086 (pfam01868) →<br/> <b>RpsQ (COG0186)</b>rps17p (PRK08572) → rpl14p (PRK08571)<b>Ribosomal_L14 (pfam00238)</b> →<br/> <b>rpl24p (PRK01191)</b><b>KOW_RPL26 (cd06089)</b> →<br/> <b>PRK04313 (PRK04313)</b><b>S4 (cd00165)</b><b>KOW_RPS4 (cd06087)</b><b>Ribosomal_S4e (pfam00900)</b> →<br/> <b>RplE (COG0094)</b><b>rpl5p (PRK04219)</b> → <b>RpsN (COG0199)</b>rps14P (PRK05766) →<br/> <b>rps8p (PRK04034)</b>RpsH (COG0096) → <b>RplF (COG0097)</b>rpl6p (PRK05518) →<br/> <b>PRK12766 (PRK12766)</b><b>UvrC (COG0322)</b><b>Rpl32e (COG1717)</b> → rpl19e (PRK08570)<b>Ribosomal_L19e (pfam01280)</b> →</p>                       |
| Hsa-8-1 | NZ_AOIS01000045.1 | - | 15715   | 15616   | <p>RNA → <b>Methyltrn_RNA_3 (pfam02598)</b> → rpl3p (PRK04231)Ribosomal_L3 (pfam00297) →<br/> <b>RplD (COG0088)</b>rpl4p (PRK04042) → <b>RplW (COG0089)</b><b>PRK14548 (PRK14548)</b> →<br/> <b>RplB (COG0090)</b>rpl2p (PRK09612) → <b>RpsS (COG0185)</b><b>rps19p (PRK04038)</b> →<br/> <b>rpl22p (PRK04223)</b><b>RplV (COG0091)</b> → RpsC (COG0092)<b>rps3p (PRK04191)</b> →<br/> <b>PRK14549 (PRK14549)</b><b>Ribosomal_L29 (pfam00831)</b> → PRK03879 (PRK03879)UPF0086 (pfam01868) →<br/> <b>RpsQ (COG0186)</b>rps17p (PRK08572) → rpl14p (PRK08571)<b>Ribosomal_L14 (pfam00238)</b> →<br/> <b>rpl24p (PRK01191)</b><b>KOW_RPL26 (cd06089)</b> →<br/> <b>PRK04313 (PRK04313)</b><b>S4 (cd00165)</b><b>KOW_RPS4 (cd06087)</b><b>Ribosomal_S4e (pfam00900)</b> →<br/> <b>RplE (COG0094)</b><b>rpl5p (PRK04219)</b> → <b>RpsN (COG0199)</b>rps14P (PRK05766) →<br/> <b>rps8p (PRK04034)</b>RpsH (COG0096) → <b>RplF (COG0097)</b>rpl6p (PRK05518) →<br/> <b>PRK12766 (PRK12766)</b><b>UvrC (COG0322)</b><b>Rpl32e (COG1717)</b> → rpl19e (PRK08570)<b>Ribosomal_L19e (pfam01280)</b> →</p>            |
| Hth-2-1 | NZ_AOIR01000063.1 | + | 173689  | 173788  | <p>RNA → <b>Methyltrn_RNA_3 (pfam02598)</b> → <b>RplC (COG0087)</b><b>rpl3p (PRK04231)</b> →<br/> <b>RplD (COG0088)</b>rpl4p (PRK04042) → <b>RplW (COG0089)</b><b>PRK14548 (PRK14548)</b> →<br/> <b>RplB (COG0090)</b>rpl2p (PRK09612) → <b>RpsS (COG0185)</b><b>rps19p (PRK04038)</b> →<br/> <b>rpl22p (PRK04223)</b><b>RplV (COG0091)</b> → RpsC (COG0092)<b>rps3p (PRK04191)</b> →<br/> <b>RpmC (COG0255)</b><b>PRK14549 (PRK14549)</b> → PRK03879 (PRK03879)UPF0086 (pfam01868) →<br/> <b>RpsQ (COG0186)</b>rps17p (PRK08572) → rpl14p (PRK08571)<b>Ribosomal_L14 (pfam00238)</b> →<br/> <b>rpl24p (PRK01191)</b><b>KOW_RPL26 (cd06089)</b> →<br/> <b>PRK04313 (PRK04313)</b><b>KOW_RPS4 (cd06087)</b><b>Ribosomal_S4e (pfam00900)</b> → <b>RplE (COG0094)</b><b>rpl5p (PRK04219)</b> →<br/> <b>RpsN (COG0199)</b>rps14P (PRK05766) → <b>rps8p (PRK04034)</b>RpsH (COG0096) →<br/> <b>RplF (COG0097)</b>rpl6p (PRK05518) →<br/> <b>UvrC (COG0322)</b><b>Rpl32e (COG1717)</b><b>rpl32e (PRK08562)</b><b>HHH_5 (pfam14520)</b> →<br/> <b>rpl19e (PRK08570)</b><b>Ribosomal_L19e (pfam01280)</b> →</p>    |

|         |                   |   |        |        |                                                                                                                                                                                                                                                                                                                                                                                                                                                                                                                                                                                                                                                                                                                                                                                                                                                         |
|---------|-------------------|---|--------|--------|---------------------------------------------------------------------------------------------------------------------------------------------------------------------------------------------------------------------------------------------------------------------------------------------------------------------------------------------------------------------------------------------------------------------------------------------------------------------------------------------------------------------------------------------------------------------------------------------------------------------------------------------------------------------------------------------------------------------------------------------------------------------------------------------------------------------------------------------------------|
| Hje-2-1 | NZ_JDTG01000014.1 | + | 597395 | 597494 | <p>RNA → <b>Methyltrn_RNA_3 (pfam02598)</b> → RplC (COG0087)rpl3p (PRK04231) → RplD (COG0088)rpl4p (PRK04042) → RplW (COG0089)PRK14548 (PRK14548) → RplB (COG0090)rpl2p (PRK09612) → RpsS (COG0185)rps19p (PRK04038) → rpl22p (PRK04223)RplV (COG0091) → RpsC (COG0092)rps3p (PRK04191) → RpmC (COG0255)PRK14549 (PRK14549) → PRK03879 (PRK03879)UPF0086 (pfam01868) → RpsQ (COG0186)rps17p (PRK08572) → rpl14p (PRK08571)Ribosomal_L14 (pfam00238) → rpl24p (PRK01191)KOW_RPL26 (cd06089) → PRK04313 (PRK04313)KOW_RPS4 (cd06087)Ribosomal_S4e (pfam00900) → RplE (COG0094)rpl5p (PRK04219) → RpsN (COG0199)rps14p (PRK05766) → rps8p (PRK04034)RpsH (COG0096) → RplF (COG0097)rpl6p (PRK05518) → UvrC (COG0322)Rpl32e (COG1717)rpl32e (PRK08562)HHH_5 (pfam14520) → rpl19e (PRK08570)Ribosomal_L19e (pfam01280) →</p>                                 |
| Nve-1-1 | NZ_AOID01000027.1 | + | 70079  | 70178  | <p>RNA → <b>Methyltrn_RNA_3 (pfam02598)</b> → rpl3p (PRK04231)Ribosomal_L3 (pfam00297) → RplD (COG0088)rpl4p (PRK04042) → RplW (COG0089)PRK14548 (PRK14548) → RplB (COG0090)rpl2p (PRK09612) → RpsS (COG0185)rps19p (PRK04038) → rpl22p (PRK04223)RplV (COG0091) → RpsC (COG0092)rps3p (PRK04191) → PRK14549 (PRK14549)Ribosomal_L29 (pfam00831) → PRK03879 (PRK03879)UPF0086 (pfam01868) → RpsQ (COG0186)rps17p (PRK08572) → rpl14p (PRK08571)Ribosomal_L14 (pfam00238) → rpl24p (PRK01191)KOW_RPL26 (cd06089) → PRK04313 (PRK04313)KOW_RPS4 (cd06087)Ribosomal_S4e (pfam00900) → RplE (COG0094)rpl5p (PRK04219) → RpsN (COG0199)rps14p (PRK05766) → rps8p (PRK04034)RpsH (COG0096) → RplF (COG0097)rpl6p (PRK05518) → PRK12766 (PRK12766)UvrC (COG0322)Rpl32e (COG1717) →</p>                                                                         |
| Hli-3-1 | NZ_AOIT01000030.1 | + | 41883  | 41982  | <p>RNA → <b>Methyltrn_RNA_3 (pfam02598)</b> → rpl3p (PRK04231)Ribosomal_L3 (pfam00297) → RplD (COG0088)rpl4p (PRK04042) → RplW (COG0089)PRK14548 (PRK14548) → RplB (COG0090)rpl2p (PRK09612) → RpsS (COG0185)rps19p (PRK04038) → rpl22p (PRK04223)RplV (COG0091) → RpsC (COG0092)rps3p (PRK04191) → RpmC (COG0255)PRK14549 (PRK14549) → PRK03879 (PRK03879)UPF0086 (pfam01868) → RpsQ (COG0186)rps17p (PRK08572) → rpl14p (PRK08571)Ribosomal_L14 (pfam00238) → rpl24p (PRK01191)KOW_RPL26 (cd06089) → PRK04313 (PRK04313)S4 (cd00165)KOW_RPS4 (cd06087)Ribosomal_S4e (pfam00900) → RplE (COG0094)rpl5p (PRK04219) → RpsN (COG0199)rps14p (PRK05766) → rps8p (PRK04034)RpsH (COG0096) → RplF (COG0097)rpl6p (PRK05518) → RecA (COG0468)rpl32e (PRK08562)Ribosomal_L32e (pfam01655)HHH_5 (pfam14520) → rpl19e (PRK08570)Ribosomal_L19e (pfam01280) →</p> |
| Hxa-1-1 | NC_015666.1       | - | 345106 | 345007 | <p>RNA → <b>Methyltrn_RNA_3 (pfam02598)</b> → rpl3p (PRK04231)Ribosomal_L3 (pfam00297) → RplD (COG0088)rpl4p (PRK04042) → RplW (COG0089)PRK14548 (PRK14548) → RplB (COG0090)rpl2p (PRK09612) → RpsS (COG0185)rps19p (PRK04038) → rpl22p (PRK04223)RplV (COG0091) → RpsC (COG0092)rps3p (PRK04191) → RpmC (COG0255)PRK14549 (PRK14549) → PRK03879 (PRK03879)UPF0086 (pfam01868) → RpsQ (COG0186)rps17p (PRK08572) → rpl14p (PRK08571)Ribosomal_L14 (pfam00238) → rpl24p (PRK01191)KOW_RPL26 (cd06089) → PRK04313 (PRK04313)S4 (cd00165)KOW_RPS4 (cd06087)Ribosomal_S4e (pfam00900) → RplE (COG0094)rpl5p (PRK04219) → RpsN (COG0199)rps14p (PRK05766) → rps8p (PRK04034)RpsH (COG0096) → RplF (COG0097)rpl6p (PRK05518) → RecA (COG0468)Rpl32e (COG1717)rpl32e (PRK08562)HHH_5 (pfam14520) → rpl19e (PRK08570)Ribosomal_L19e (pfam01280) →</p>           |



|         |                           |   |         |         |                                                                                                                                                                                                                                                                                                                                                                                                                                                                                                                                                                                                                                                                                                                                                                                                                                                                                                                                                                                                                                                                                                                                                                                                                                                                                                                                                                                                                                                                                                                                                                                                                                                                             |
|---------|---------------------------|---|---------|---------|-----------------------------------------------------------------------------------------------------------------------------------------------------------------------------------------------------------------------------------------------------------------------------------------------------------------------------------------------------------------------------------------------------------------------------------------------------------------------------------------------------------------------------------------------------------------------------------------------------------------------------------------------------------------------------------------------------------------------------------------------------------------------------------------------------------------------------------------------------------------------------------------------------------------------------------------------------------------------------------------------------------------------------------------------------------------------------------------------------------------------------------------------------------------------------------------------------------------------------------------------------------------------------------------------------------------------------------------------------------------------------------------------------------------------------------------------------------------------------------------------------------------------------------------------------------------------------------------------------------------------------------------------------------------------------|
| Hgo-1-1 | NZ_HG315690.1             | + | 2029000 | 2029099 | RNA → <b>Methyltrn_RNA_3</b> (pfam02598) → rpl3p (PRK04231)Ribosomal_L3 (pfam00297) → RplD (COG0088)rpl4p (PRK04042) → RplW (COG0089)PRK14548 (PRK14548) → RplB (COG0090)rpl2p (PRK09612) → RpsS (COG0185)rps19p (PRK04038) → rpl22p (PRK04223)RplV (COG0091) → RpsC (COG0092)rps3p (PRK04191) → RpmC (COG0255)PRK14549 (PRK14549) → PRK03879 (PRK03879)UPF0086 (pfam01868) → RpsQ (COG0186)rps17p (PRK08572) → rpl14p (PRK08571)Ribosomal_L14 (pfam00238) → rpl24p (PRK01191)KOW_RPL26 (cd06089) → PRK04313 (PRK04313)KOW_RPS4 (cd06087)Ribosomal_S4e (pfam00900) → RplE (COG0094)rpl5p (PRK04219) → RpsN (COG0199)rps14p (PRK05766) → rps8p (PRK04034)RpsH (COG0096) → RplF (COG0097)rpl6p (PRK05518) → UvrC (COG0322)Rpl32e (COG1717)rpl32e (PRK08562)HHH_5 (pfam14520) →                                                                                                                                                                                                                                                                                                                                                                                                                                                                                                                                                                                                                                                                                                                                                                                                                                                                                                |
| env-218 | SL_5KL_010_BRINE_10298960 | + | 132     | 231     | RNA → <b>Methyltrn_RNA_3</b> (pfam02598) →                                                                                                                                                                                                                                                                                                                                                                                                                                                                                                                                                                                                                                                                                                                                                                                                                                                                                                                                                                                                                                                                                                                                                                                                                                                                                                                                                                                                                                                                                                                                                                                                                                  |
| env-219 | SL_4KL_010_BRINE_10234182 | + | 69      | 168     | RNA → MTH1 (COG2106) →                                                                                                                                                                                                                                                                                                                                                                                                                                                                                                                                                                                                                                                                                                                                                                                                                                                                                                                                                                                                                                                                                                                                                                                                                                                                                                                                                                                                                                                                                                                                                                                                                                                      |
| env-220 | GSLNARP_GFPJP1N02GH0H6    | + | 114     | 213     | RNA → MTH1 (COG2106) →                                                                                                                                                                                                                                                                                                                                                                                                                                                                                                                                                                                                                                                                                                                                                                                                                                                                                                                                                                                                                                                                                                                                                                                                                                                                                                                                                                                                                                                                                                                                                                                                                                                      |
| env-221 | SL_5KL_010_BRINE_10027796 | + | 1534    | 1633    | RNA → <b>Methyltrn_RNA_3</b> (pfam02598) →                                                                                                                                                                                                                                                                                                                                                                                                                                                                                                                                                                                                                                                                                                                                                                                                                                                                                                                                                                                                                                                                                                                                                                                                                                                                                                                                                                                                                                                                                                                                                                                                                                  |
| Hsa-6-1 | NZ_ALJD01000008.1         | + | 211183  | 211282  | RNA → <b>Methyltrn_RNA_3</b> (pfam02598) → <b>Methyltrn_RNA_3</b> (pfam02598) → RplC (COG0087)rpl3p (PRK04231) → RplC (COG0087)rpl3p (PRK04231) → RplD (COG0088)rpl4p (PRK04042) → RplD (COG0088)rpl4p (PRK04042) → RplW (COG0089)PRK14548 (PRK14548) → RplW (COG0089)PRK14548 (PRK14548) → RplB (COG0090)rpl2p (PRK09612) → RplB (COG0090)rpl2p (PRK09612) → RpsS (COG0185)rps19p (PRK04038) → RpsS (COG0185)rps19p (PRK04038) → rpl22p (PRK04223)RplV (COG0091) → rpl22p (PRK04223)RplV (COG0091) → RpsC (COG0092)rps3p (PRK04191) → RpsC (COG0092)rps3p (PRK04191) → PRK14549 (PRK14549)Ribosomal_L29 (pfam00831) → PRK14549 (PRK14549)Ribosomal_L29 (pfam00831) → PRK03879 (PRK03879)UPF0086 (pfam01868) → PRK03879 (PRK03879)UPF0086 (pfam01868) → RpsQ (COG0186)rps17p (PRK08572) → rps17p (PRK08572)Ribosomal_S17 (pfam00366) → rps17p (PRK08572)Ribosomal_S17 (pfam00366) → rpl14p (PRK08571)Ribosomal_L14 (pfam00238) → rpl14p (PRK08571)Ribosomal_L14 (pfam00238) → rpl24p (PRK01191)KOW_RPL26 (cd06089) → rpl24p (PRK01191)KOW_RPL26 (cd06089) → PRK04313 (PRK04313)KOW_RPS4 (cd06087)Ribosomal_S4e (pfam00900) → PRK04313 (PRK04313)KOW_RPS4 (cd06087)Ribosomal_S4e (pfam00900) → RplE (COG0094)rpl5p (PRK04219) → RplE (COG0094)rpl5p (PRK04219) → RpsN (COG0199)rps14p (PRK05766) → RpsN (COG0199)rps14p (PRK05766) → rps8p (PRK04034)RpsH (COG0096) → rps8p (PRK04034)RpsH (COG0096) → RplF (COG0097)rpl6p (PRK05518) → RplF (COG0097)rpl6p (PRK05518) → PRK12766 (PRK12766)RecA (COG0468)Rpl32e (COG1717) → PRK12766 (PRK12766)RecA (COG0468)Rpl32e (COG1717) → rpl19e (PRK08570)Ribosomal_L19e (pfam01280) → rpl19e (PRK08570)Ribosomal_L19e (pfam01280) → |
| env-222 | SL_4KL_010_BRINE_10138442 | + | 547     | 646     | RNA → <b>Methyltrn_RNA_3</b> (pfam02598) →                                                                                                                                                                                                                                                                                                                                                                                                                                                                                                                                                                                                                                                                                                                                                                                                                                                                                                                                                                                                                                                                                                                                                                                                                                                                                                                                                                                                                                                                                                                                                                                                                                  |
| env-223 | GSLNARP_GFPJP1N02IH3RV    | + | 123     | 222     | RNA → MTH1 (COG2106) →                                                                                                                                                                                                                                                                                                                                                                                                                                                                                                                                                                                                                                                                                                                                                                                                                                                                                                                                                                                                                                                                                                                                                                                                                                                                                                                                                                                                                                                                                                                                                                                                                                                      |
| env-224 | GSLNARP_GFPJP1N02G85LW    | - | 148     | 49      | RNA →                                                                                                                                                                                                                                                                                                                                                                                                                                                                                                                                                                                                                                                                                                                                                                                                                                                                                                                                                                                                                                                                                                                                                                                                                                                                                                                                                                                                                                                                                                                                                                                                                                                                       |
| env-225 | CEQN01112068.1            | - | 3026    | 2927    | RNA → <b>Methyltrn_RNA_3</b> (pfam02598) → RplC (COG0087)rpl3p (PRK04231) → RplD (COG0088)rpl4p (PRK04042) → RplW (COG0089)PRK14548 (PRK14548) → rpl2p (PRK09612)Ribosomal_L2 (pfam00181)Ribosomal_L2.C (pfam03947) →                                                                                                                                                                                                                                                                                                                                                                                                                                                                                                                                                                                                                                                                                                                                                                                                                                                                                                                                                                                                                                                                                                                                                                                                                                                                                                                                                                                                                                                       |
| env-226 | CEUZ01492716.1            | + | 1180    | 1279    | RNA → MTH1 (COG2106) →                                                                                                                                                                                                                                                                                                                                                                                                                                                                                                                                                                                                                                                                                                                                                                                                                                                                                                                                                                                                                                                                                                                                                                                                                                                                                                                                                                                                                                                                                                                                                                                                                                                      |
| env-227 | CEWR01279639.1            | - | 119     | 20      | RNA → <b>Methyltrn_RNA_3</b> (pfam02598) →                                                                                                                                                                                                                                                                                                                                                                                                                                                                                                                                                                                                                                                                                                                                                                                                                                                                                                                                                                                                                                                                                                                                                                                                                                                                                                                                                                                                                                                                                                                                                                                                                                  |
| env-228 | APHM01021436.1            | - | 16571   | 16472   | RNA → <b>Methyltrn_RNA_3</b> (pfam02598) → RplC (COG0087)rpl3p (PRK04231) → RplD (COG0088)rpl4p (PRK04042) → RplW (COG0089)PRK14548 (PRK14548) → RplB (COG0090)rpl2p (PRK09612) →                                                                                                                                                                                                                                                                                                                                                                                                                                                                                                                                                                                                                                                                                                                                                                                                                                                                                                                                                                                                                                                                                                                                                                                                                                                                                                                                                                                                                                                                                           |
| env-229 | LTJ07As871_J07ABscf098859 | - | 1081824 | 1081725 | RNA → <b>Methyltrn_RNA_3</b> (pfam02598) → RplC (COG0087)rpl3p (PRK04231) → RplD (COG0088)rpl4p (PRK04042) → RplW (COG0089)PRK14548 (PRK14548) → RplB (COG0090)rpl2p (PRK09612) →                                                                                                                                                                                                                                                                                                                                                                                                                                                                                                                                                                                                                                                                                                                                                                                                                                                                                                                                                                                                                                                                                                                                                                                                                                                                                                                                                                                                                                                                                           |
| env-230 | JXWS01149363.1            | - | 957     | 858     | RNA → <b>Methyltrn_RNA_3</b> (pfam02598) → rpl3p (PRK04231)Ribosomal_L3 (pfam00297) →                                                                                                                                                                                                                                                                                                                                                                                                                                                                                                                                                                                                                                                                                                                                                                                                                                                                                                                                                                                                                                                                                                                                                                                                                                                                                                                                                                                                                                                                                                                                                                                       |
| env-231 | 3300000032_0007378        | - | 20967   | 20877   | RNA → RplC (COG0087)rpl3p (PRK04231) → rpl4p (PRK04042)Ribosomal_L4 (pfam00573) →                                                                                                                                                                                                                                                                                                                                                                                                                                                                                                                                                                                                                                                                                                                                                                                                                                                                                                                                                                                                                                                                                                                                                                                                                                                                                                                                                                                                                                                                                                                                                                                           |
| env-232 | 3300000568_10935138       | + | 219     | 307     | RNA → AF6_RA_repeat2 (cd01781) →                                                                                                                                                                                                                                                                                                                                                                                                                                                                                                                                                                                                                                                                                                                                                                                                                                                                                                                                                                                                                                                                                                                                                                                                                                                                                                                                                                                                                                                                                                                                                                                                                                            |
| env-233 | 2232068851                | - | 371     | 281     | RNA → ←-hypo                                                                                                                                                                                                                                                                                                                                                                                                                                                                                                                                                                                                                                                                                                                                                                                                                                                                                                                                                                                                                                                                                                                                                                                                                                                                                                                                                                                                                                                                                                                                                                                                                                                                |

|         |                        |   |       |       |                                                                                                                                                                                                                                                                                                                                                                                                                                                                                                                                                                                                                                                                                                                                                                                                                                                                                                                     |
|---------|------------------------|---|-------|-------|---------------------------------------------------------------------------------------------------------------------------------------------------------------------------------------------------------------------------------------------------------------------------------------------------------------------------------------------------------------------------------------------------------------------------------------------------------------------------------------------------------------------------------------------------------------------------------------------------------------------------------------------------------------------------------------------------------------------------------------------------------------------------------------------------------------------------------------------------------------------------------------------------------------------|
| env-234 | 3300000558_10378615    | + | 2773  | 2863  | RNA → RplC (COG0087)rpl3p (PRK04231) → RplD (COG0088)rpl4p (PRK04042) → RplW (COG0089)PRK14548 (PRK14548) → rpl2p (PRK09612)Ribosomal_L2 (pfam00181) →                                                                                                                                                                                                                                                                                                                                                                                                                                                                                                                                                                                                                                                                                                                                                              |
| env-235 | 3300000568_10054768    | + | 16095 | 16185 | RNA → RplC (COG0087)rpl3p (PRK04231) → RplD (COG0088)rpl4p (PRK04042) → RplW (COG0089)PRK14548 (PRK14548) → RplB (COG0090)rpl2p (PRK09612) → RpsS (COG0185)rps19p (PRK04038) → rpl22p (PRK04223)RplV (COG0091) → RpsC (COG0092)rps3p (PRK04191) → PRK14549 (PRK14549)Ribosomal_L29 (pfam00831) → PRK03879 (PRK03879)UPF0086 (pfam01868) → RpsQ (COG0186)rps17p (PRK08572) → rpl14p (PRK08571)Ribosomal_L14 (pfam00238) → rpl24p (PRK01191)KOW_RPL26 (cd06089) → PRK04313 (PRK04313)KOW_RPS4 (cd06087)Ribosomal_S4e (pfam00900) → RplE (COG0094)rpl5p (PRK04219) → RpsN (COG0199)rps14p (PRK05766) → rps8p (PRK04034)RpsH (COG0096) → RplF (COG0097)rpl6p (PRK05518) → rpl32e (PRK08562)Ribosomal_L32e (pfam01655) → rpl19e (PRK08570)Ribosomal_L19e (pfam01280) → RplR (COG0256)rpl18p (PRK08569) → RpsE (COG0098)rps5p (PRK04044) →                                                                                |
| env-236 | 3300001580_10000682    | + | 16095 | 16185 | RNA → RplC (COG0087)rpl3p (PRK04231) → RplD (COG0088)rpl4p (PRK04042) → RplW (COG0089)PRK14548 (PRK14548) → RplB (COG0090)rpl2p (PRK09612) → RpsS (COG0185)rps19p (PRK04038) → rpl22p (PRK04223)RplV (COG0091) → RpsC (COG0092)rps3p (PRK04191) → PRK14549 (PRK14549)Ribosomal_L29 (pfam00831) → PRK03879 (PRK03879)UPF0086 (pfam01868) → RpsQ (COG0186)rps17p (PRK08572) → rpl14p (PRK08571)Ribosomal_L14 (pfam00238) → rpl24p (PRK01191)KOW_RPL26 (cd06089) → PRK04313 (PRK04313)KOW_RPS4 (cd06087)Ribosomal_S4e (pfam00900) → RplE (COG0094)rpl5p (PRK04219) → RpsN (COG0199)rps14p (PRK05766) → rps8p (PRK04034)RpsH (COG0096) → RplF (COG0097)rpl6p (PRK05518) → rpl32e (PRK08562)Ribosomal_L32e (pfam01655) → rpl19e (PRK08570)Ribosomal_L19e (pfam01280) → RplR (COG0256)rpl18p (PRK08569) → RpsE (COG0098)rps5p (PRK04044) →                                                                                |
| env-237 | WSSedB2T_c028865       | - | 329   | 244   | RNA → ←-hypo                                                                                                                                                                                                                                                                                                                                                                                                                                                                                                                                                                                                                                                                                                                                                                                                                                                                                                        |
| env-238 | JGI24020J35080_1001304 | - | 6969  | 6882  | RNA → PRK05883 (PRK05883)Methyltrn_RNA_3 (pfam02598) → RplC (COG0087)rpl3p (PRK04231) → RplD (COG0088)rpl4p (PRK04042) → RplW (COG0089)PRK14548 (PRK14548) → RplB (COG0090)rpl2p (PRK09612) → RpsS (COG0185)rps19p (PRK04038) → rpl22p (PRK04223)RplV (COG0091) → RpsC (COG0092)rps3p (PRK04191) → PRK14549 (PRK14549)Ribosomal_L29 (pfam00831) → POP4 (COG1588)PRK03879 (PRK03879) → RpsQ (COG0186)rps17p (PRK08572) → rpl14p (PRK08571)Ribosomal_L14 (pfam00238) → rpl24p (PRK01191)KOW_RPL26 (cd06089) → PRK04313 (PRK04313)S4 (cd00165)KOW_RPS4 (cd06087)Ribosomal_S4e (pfam00900) →                                                                                                                                                                                                                                                                                                                            |
| env-239 | JGI24019J35510_1000070 | - | 95685 | 95598 | RNA → PRK05883 (PRK05883)Methyltrn_RNA_3 (pfam02598) → RplC (COG0087)rpl3p (PRK04231) → RplD (COG0088)rpl4p (PRK04042) → RplW (COG0089)PRK14548 (PRK14548) → RplB (COG0090)rpl2p (PRK09612) → RpsS (COG0185)rps19p (PRK04038) → rpl22p (PRK04223)RplV (COG0091) → RpsC (COG0092)rps3p (PRK04191) → PRK14549 (PRK14549)Ribosomal_L29 (pfam00831) → POP4 (COG1588)PRK03879 (PRK03879) → RpsQ (COG0186)rps17p (PRK08572) → rpl14p (PRK08571)Ribosomal_L14 (pfam00238) → rpl24p (PRK01191)KOW_RPL26 (cd06089) → PRK04313 (PRK04313)S4 (cd00165)KOW_RPS4 (cd06087)Ribosomal_S4e (pfam00900) → RplE (COG0094)rpl5p (PRK04219) → RpsN (COG0199)rps14p (PRK05766) → rps8p (PRK04034)RpsH (COG0096) → RplF (COG0097)rpl6p (PRK05518) → Rpl32e (COG1717)rpl32e (PRK08562)HHH (pfam00633)HHH_L5 (pfam14520) → rpl19e (PRK08570)Ribosomal_L19e (pfam01280) → RplR (COG0256)rpl18p (PRK08569) → RpsE (COG0098)rps5p (PRK04044) → |
| env-240 | PBDCA2_contig02310     | + | 406   | 502   | RNA → Methyltrn_RNA_3 (pfam02598) →                                                                                                                                                                                                                                                                                                                                                                                                                                                                                                                                                                                                                                                                                                                                                                                                                                                                                 |
| env-241 | LGVC01039323.1         | + | 218   | 314   | RNA → lepA (TIGR01393)Methyltrn_RNA_3 (pfam02598) →                                                                                                                                                                                                                                                                                                                                                                                                                                                                                                                                                                                                                                                                                                                                                                                                                                                                 |

|         |                         |   |       |       |                                                                                                                                                                                                                                                                                                                                                                                                                                                                                                                                                                                                                                                                                                                                                                                                                                                                        |
|---------|-------------------------|---|-------|-------|------------------------------------------------------------------------------------------------------------------------------------------------------------------------------------------------------------------------------------------------------------------------------------------------------------------------------------------------------------------------------------------------------------------------------------------------------------------------------------------------------------------------------------------------------------------------------------------------------------------------------------------------------------------------------------------------------------------------------------------------------------------------------------------------------------------------------------------------------------------------|
| env-242 | JGI24730J26740_1000024  | - | 31005 | 30928 | RNA→ RplC (COG0087)rpl3p (PRK04231)→ RplD (COG0088)rpl4p (PRK04042)→ RplW (COG0089)PRK14548 (PRK14548)→ RplB (COG0090)rpl2p (PRK09612)→ rps19p (PRK04038)Ribosomal_S19 (pfam00203)→ rpl22p (PRK04223)RplV (COG0091)→ RpsC (COG0092)rps3p (PRK04191)→ PRK14549 (PRK14549)Ribosomal_L29_HIP (cd00427)→ POP4 (COG1588)PRK03879 (PRK03879)→ RpsQ (COG0186)rps17p (PRK08572)→ rpl14p (PRK08571)Ribosomal_L14 (pfam00238)→ rpl24p (PRK01191)KOW_RPL26 (cd06089)→ PRK04313 (PRK04313)S4 (cd00165)KOW_RPS4 (cd06087)Ribosomal_S4e (pfam00900)→ rpl5p (PRK04219)Ribosomal_L5 (pfam00281)Ribosomal_L5_C (pfam00673)→ RpsN (COG0199)rps14p (PRK05766)→ rps8p (PRK04034)RpsH (COG0096)→ RplF (COG0097)rpl6p (PRK05518)→ rpl32e (PRK08562)Ribosomal_L32e (pfam01655)→ rpl19e (PRK08570)Ribosomal_L19e (pfam01280)→ RplR (COG0256)rpl18p (PRK08569)→ RpsE (COG0098)rps5p (PRK04044)→ |
| env-243 | JGI24729J20445_1009152  | + | 2242  | 2319  | RNA→                                                                                                                                                                                                                                                                                                                                                                                                                                                                                                                                                                                                                                                                                                                                                                                                                                                                   |
| env-244 | 3300001580_10004676     | + | 12012 | 12089 | RNA→ RplC (COG0087)rpl3p (PRK04231)→                                                                                                                                                                                                                                                                                                                                                                                                                                                                                                                                                                                                                                                                                                                                                                                                                                   |
| env-245 | 3300001592_10154490     | - | 853   | 774   | RNA→ ←-hypo                                                                                                                                                                                                                                                                                                                                                                                                                                                                                                                                                                                                                                                                                                                                                                                                                                                            |
| env-246 | 3300000032_0003629      | - | 1709  | 1630  | RNA→ RplC (COG0087)rpl3p (PRK04231)→ RplD (COG0088)rpl4p (PRK04042)→                                                                                                                                                                                                                                                                                                                                                                                                                                                                                                                                                                                                                                                                                                                                                                                                   |
| env-247 | 3300000568_10010498     | - | 796   | 717   | RNA→ hypo→ rpl3p (PRK04231)Ribosomal_L3 (pfam00297)→                                                                                                                                                                                                                                                                                                                                                                                                                                                                                                                                                                                                                                                                                                                                                                                                                   |
| env-248 | 3300000558_10003870     | - | 1201  | 1122  | RNA→ rpl3p (PRK04231)Ribosomal_L3 (pfam00297)→ rpl3p (PRK04231)Ribosomal_L3 (pfam00297)→                                                                                                                                                                                                                                                                                                                                                                                                                                                                                                                                                                                                                                                                                                                                                                               |
| env-249 | 3300001592_10087609     | + | 1266  | 1344  | RNA→                                                                                                                                                                                                                                                                                                                                                                                                                                                                                                                                                                                                                                                                                                                                                                                                                                                                   |
| env-250 | 3300001567_10002847     | + | 2463  | 2541  | RNA→ RplC (COG0087)rpl3p (PRK04231)→ RplD (COG0088)rpl4p (PRK04042)→ RplW (COG0089)PRK14548 (PRK14548)→ RplB (COG0090)rpl2p (PRK09612)→ RpsS (COG0185)rps19p (PRK04038)→ rpl22p (PRK04223)RplV (COG0091)→ RpsC (COG0092)rps3p (PRK04191)→ PRK14549 (PRK14549)Ribosomal_L29 (pfam00831)→ PRK03879 (PRK03879)UPF0086 (pfam01868)→ RpsQ (COG0186)rps17p (PRK08572)→ rpl14p (PRK08571)Ribosomal_L14 (pfam00238)→ rpl24p (PRK01191)KOW_RPL26 (cd06089)→ PRK04313 (PRK04313)S4 (cd00165)KOW_RPS4 (cd06087)Ribosomal_S4e (pfam00900)→ RplE (COG0094)rpl5p (PRK04219)→                                                                                                                                                                                                                                                                                                         |
| env-251 | SL_3KL_010_SED_10010201 | - | 3562  | 3491  | RNA→ RplC (COG0087)rpl3p (PRK04231)→ RplD (COG0088)rpl4p (PRK04042)→ RplW (COG0089)PRK14548 (PRK14548)→ RplB (COG0090)rpl2p (PRK09612)→ RpsS (COG0185)rps19p (PRK04038)→ hypo→                                                                                                                                                                                                                                                                                                                                                                                                                                                                                                                                                                                                                                                                                         |
| env-252 | SL_3KL_010_SED_10013818 | - | 1092  | 1021  | RNA→ rpl3p (PRK04231)Ribosomal_L3 (pfam00297)→                                                                                                                                                                                                                                                                                                                                                                                                                                                                                                                                                                                                                                                                                                                                                                                                                         |
| env-253 | SL_3KL_010_SED_10042920 | + | 1511  | 1582  | RNA→ RplC (COG0087)rpl3p (PRK04231)→ RplD (COG0088)rpl4p (PRK04042)→                                                                                                                                                                                                                                                                                                                                                                                                                                                                                                                                                                                                                                                                                                                                                                                                   |
| env-254 | BDMC2_FXAG6RB01ERNKC    | - | 187   | 100   | RNA→ hypo→                                                                                                                                                                                                                                                                                                                                                                                                                                                                                                                                                                                                                                                                                                                                                                                                                                                             |
| env-255 | JGI24730J26740_1038966  | - | 597   | 511   | RNA→ ←-hypo                                                                                                                                                                                                                                                                                                                                                                                                                                                                                                                                                                                                                                                                                                                                                                                                                                                            |
| env-256 | 3300000568_10019878     | + | 535   | 613   | RNA→ hypo→                                                                                                                                                                                                                                                                                                                                                                                                                                                                                                                                                                                                                                                                                                                                                                                                                                                             |
| env-257 | 3300001592_10003410     | - | 16086 | 16008 | RNA→ RplC (COG0087)rpl3p (PRK04231)→ RplD (COG0088)rpl4p (PRK04042)→ RplW (COG0089)PRK14548 (PRK14548)→ rpl2p (PRK09612)Ribosomal_L2_C (pfam03947)→ RpsS (COG0185)rps19p (PRK04038)→ rpl22p (PRK04223)RplV (COG0091)→ RpsC (COG0092)rps3p (PRK04191)→ PRK14549 (PRK14549)Ribosomal_L29 (pfam00831)→ PRK03879 (PRK03879)UPF0086 (pfam01868)→ RpsQ (COG0186)rps17p (PRK08572)→ rpl14p (PRK08571)Ribosomal_L14 (pfam00238)→ RplX (COG0198)rpl24p (PRK01191)→ PRK04313 (PRK04313)KOW_RPS4 (cd06087)Ribosomal_S4e (pfam00900)→ RplE (COG0094)rpl5p (PRK04219)→ RpsN (COG0199)rps14p (PRK05766)→ rps8p (PRK04034)RpsH (COG0096)→ RplF (COG0097)rpl6p (PRK05518)→ rpl32e (PRK08562)Ribosomal_L32e (pfam01655)→ rpl19e (PRK08570)Ribosomal_L19e (pfam01280)→ RplR (COG0256)rpl18p (PRK08569)→ RpsE (COG0098)rps5p (PRK04044)→                                                  |

|         |                         |   |       |       |                                                                                                                                                                                                                                                                                                                                                                                                                                                                                                                                                                                                                                                                                                                                                                                                                                                                                                                                                         |
|---------|-------------------------|---|-------|-------|---------------------------------------------------------------------------------------------------------------------------------------------------------------------------------------------------------------------------------------------------------------------------------------------------------------------------------------------------------------------------------------------------------------------------------------------------------------------------------------------------------------------------------------------------------------------------------------------------------------------------------------------------------------------------------------------------------------------------------------------------------------------------------------------------------------------------------------------------------------------------------------------------------------------------------------------------------|
| env-258 | 3300001567_10001101     | + | 23848 | 23926 | <p>RNA → RplC (COG0087)rpl3p (PRK04231) → RplD (COG0088)rpl4p (PRK04042) → RplW (COG0089)PRK14548 (PRK14548) → rpl2p (PRK09612)Ribosomal_L2.C (pfam03947) → RpsS (COG0185)rps19p (PRK04038) → rpl22p (PRK04223)RplV (COG0091) → RpsC (COG0092)rps3p (PRK04191) → PRK14549 (PRK14549)Ribosomal_L29 (pfam00831) → PRK03879 (PRK03879)UPF0086 (pfam01868) → RpsQ (COG0186)rps17p (PRK08572) → rpl14p (PRK08571)Ribosomal_L14 (pfam00238) → RplX (COG0198)rpl24p (PRK01191) → PRK04313 (PRK04313)KOW_RPS4 (cd06087)Ribosomal_S4e (pfam00900) → RplE (COG0094)rpl5p (PRK04219) → RpsN (COG0199)rps14p (PRK05766) → rps8p (PRK04034)RpsH (COG0096) → RplF (COG0097)rpl6p (PRK05518) → rpl32e (PRK08562)Ribosomal_L32e (pfam01655) → rpl19e (PRK08570)Ribosomal_L19e (pfam01280) → RplR (COG0256)rpl18p (PRK08569) → RpsE (COG0098)rps5p (PRK04044) →</p>                                                                                                      |
| env-259 | 3300000558_10195618     | + | 1540  | 1618  | <p>RNA → hypo →</p>                                                                                                                                                                                                                                                                                                                                                                                                                                                                                                                                                                                                                                                                                                                                                                                                                                                                                                                                     |
| env-260 | 3300000032_0041450      | - | 12420 | 12342 | <p>RNA → hypo →</p>                                                                                                                                                                                                                                                                                                                                                                                                                                                                                                                                                                                                                                                                                                                                                                                                                                                                                                                                     |
| env-261 | JGI24713J26584_10001748 | - | 5737  | 5659  | <p>RNA → RplC (COG0087)rpl3p (PRK04231) → RplD (COG0088)rpl4p (PRK04042) → RplW (COG0089)PRK14548 (PRK14548) → rpl2p (PRK09612)Ribosomal_L2.C (pfam03947) → RpsS (COG0185)rps19p (PRK04038) → rpl22p (PRK04223)RplV (COG0091) → RpsC (COG0092)rps3p (PRK04191) → PRK14549 (PRK14549)Ribosomal_L29 (pfam00831) → PRK03879 (PRK03879)UPF0086 (pfam01868) → RpsQ (COG0186)rps17p (PRK08572) → rpl14p (PRK08571)Ribosomal_L14 (pfam00238) →</p>                                                                                                                                                                                                                                                                                                                                                                                                                                                                                                             |
| env-262 | JGI24714J26587_10004747 | + | 2188  | 2266  | <p>RNA → RplC (COG0087)rpl3p (PRK04231) → RplD (COG0088)rpl4p (PRK04042) → RplW (COG0089)PRK14548 (PRK14548) → rpl2p (PRK09612)Ribosomal_L2.C (pfam03947) → RpsS (COG0185)rps19p (PRK04038) → rpl22p (PRK04223)RplV (COG0091) → RpsC (COG0092)rps3p (PRK04191) → PRK14549 (PRK14549)Ribosomal_L29 (pfam00831) → PRK03879 (PRK03879)UPF0086 (pfam01868) → RpsQ (COG0186)rps17p (PRK08572) → rpl14p (PRK08571)Ribosomal_L14 (pfam00238) →</p>                                                                                                                                                                                                                                                                                                                                                                                                                                                                                                             |
| env-263 | JGI24504J29685_1004785  | + | 209   | 287   | <p>RNA → RplC (COG0087)rpl3p (PRK04231) → RplD (COG0088)rpl4p (PRK04042) → RplW (COG0089)PRK14548 (PRK14548) → rpl2p (PRK09612)Ribosomal_L2.C (pfam03947) → RpsS (COG0185)rps19p (PRK04038) → rpl22p (PRK04223)RplV (COG0091) → RpsC (COG0092)rps3p (PRK04191) → PRK14549 (PRK14549)Ribosomal_L29 (pfam00831) → PRK03879 (PRK03879)UPF0086 (pfam01868) → RpsQ (COG0186)rps17p (PRK08572) → rpl14p (PRK08571)Ribosomal_L14 (pfam00238) → RplX (COG0198)rpl24p (PRK01191) → PRK04313 (PRK04313)KOW_RPS4 (cd06087)Ribosomal_S4e (pfam00900) → rpl5p (PRK04219)Ribosomal_L5 (pfam00281) →</p>                                                                                                                                                                                                                                                                                                                                                               |
| env-264 | JGI24505J29691_1002356  | + | 209   | 287   | <p>RNA → RplC (COG0087)rpl3p (PRK04231) → RplD (COG0088)rpl4p (PRK04042) → RplW (COG0089)PRK14548 (PRK14548) → rpl2p (PRK09612)Ribosomal_L2.C (pfam03947) → RpsS (COG0185)rps19p (PRK04038) → rpl22p (PRK04223)RplV (COG0091) → RpsC (COG0092)rps3p (PRK04191) → PRK14549 (PRK14549)Ribosomal_L29 (pfam00831) → PRK03879 (PRK03879)UPF0086 (pfam01868) → RpsQ (COG0186)rps17p (PRK08572) → rpl14p (PRK08571)Ribosomal_L14 (pfam00238) → RplX (COG0198)rpl24p (PRK01191) → PRK04313 (PRK04313)KOW_RPS4 (cd06087)Ribosomal_S4e (pfam00900) → RplE (COG0094)rpl5p (PRK04219) → RpsN (COG0199)rps14p (PRK05766) → rps8p (PRK04034)RpsH (COG0096) → RplF (COG0097)rpl6p (PRK05518) → rpl32e (PRK08562)Ribosomal_L32e (pfam01655) → rpl19e (PRK08570)Ribosomal_L19e (pfam01280) → RplR (COG0256)rpl18p (PRK08569) → RpsE (COG0098)rps5p (PRK04044) → Ribosomal_L7_archaeal_euk (cd01657)rpl30p (PRK06049) → rpl15p (PRK06419)Ribosomal_L27A (pfam00828) →</p> |
| env-265 | 3300000507_100004       | - | 18302 | 18224 | <p>RNA → hypo → RplC (COG0087)rpl3p (PRK04231) → RplD (COG0088)rpl4p (PRK04042) → RplW (COG0089)PRK14548 (PRK14548) → RplB (COG0090)rpl2p (PRK09612) → RpsS (COG0185)rps19p (PRK04038) → rpl22p (PRK04223)RplV (COG0091) → RpsC (COG0092)rps3p (PRK04191) → PRK14549 (PRK14549)Ribosomal_L29 (pfam00831) → PRK03879 (PRK03879)UPF0086 (pfam01868) → RpsQ (COG0186)rps17p (PRK08572) → rpl14p (PRK08571)Ribosomal_L14 (pfam00238) → RplX (COG0198)rpl24p (PRK01191) → PRK04313 (PRK04313)KOW_RPS4 (cd06087)Ribosomal_S4e (pfam00900) → RplE (COG0094)rpl5p (PRK04219) → RpsN (COG0199)rps14p (PRK05766) → rps8p (PRK04034)RpsH (COG0096) → RplF (COG0097)rpl6p (PRK05518) → rpl32e (PRK08562)Ribosomal_L32e (pfam01655) → rpl19e (PRK08570)Ribosomal_L19e (pfam01280) → RplR (COG0256)rpl18p (PRK08569) → RpsE (COG0098)rps5p (PRK04044) →</p>                                                                                                           |



|         |                         |   |       |       |                                                                                                                                                                                                                                                                                                                                                                                                                                                                                                                                                                                                                                                                                                                                                                                                                                                                                                                                                                                                                |
|---------|-------------------------|---|-------|-------|----------------------------------------------------------------------------------------------------------------------------------------------------------------------------------------------------------------------------------------------------------------------------------------------------------------------------------------------------------------------------------------------------------------------------------------------------------------------------------------------------------------------------------------------------------------------------------------------------------------------------------------------------------------------------------------------------------------------------------------------------------------------------------------------------------------------------------------------------------------------------------------------------------------------------------------------------------------------------------------------------------------|
| env-266 | 3300000558_10023046     | - | 1376  | 1297  | RNA → RplC (COG0087)rpl3p (PRK04231) →                                                                                                                                                                                                                                                                                                                                                                                                                                                                                                                                                                                                                                                                                                                                                                                                                                                                                                                                                                         |
| env-267 | 3300001592_10042930     | - | 999   | 920   | RNA → ←-hypo                                                                                                                                                                                                                                                                                                                                                                                                                                                                                                                                                                                                                                                                                                                                                                                                                                                                                                                                                                                                   |
| env-268 | 3300000568_10983650     | + | 160   | 239   | RNA → hypo →                                                                                                                                                                                                                                                                                                                                                                                                                                                                                                                                                                                                                                                                                                                                                                                                                                                                                                                                                                                                   |
| env-269 | 3300000568_10052832     | + | 512   | 591   | RNA → hypo →                                                                                                                                                                                                                                                                                                                                                                                                                                                                                                                                                                                                                                                                                                                                                                                                                                                                                                                                                                                                   |
| env-270 | 3300000032_0016008      | + | 347   | 426   | RNA → hypo →                                                                                                                                                                                                                                                                                                                                                                                                                                                                                                                                                                                                                                                                                                                                                                                                                                                                                                                                                                                                   |
| env-271 | JGI24711J26586_10020110 | - | 584   | 506   | RNA → rpl3p (PRK04231)Ribosomal_L3 (pfam00297) →                                                                                                                                                                                                                                                                                                                                                                                                                                                                                                                                                                                                                                                                                                                                                                                                                                                                                                                                                               |
| env-272 | JGI24708J26588_10012893 | + | 2107  | 2185  | RNA → RplC (COG0087)rpl3p (PRK04231) → RplD (COG0088)rpl4p (PRK04042) →<br>RplW (COG0089)PRK14548 (PRK14548) →                                                                                                                                                                                                                                                                                                                                                                                                                                                                                                                                                                                                                                                                                                                                                                                                                                                                                                 |
| env-273 | JGI24710J26742_10008143 | + | 5280  | 5358  | RNA → RplC (COG0087)rpl3p (PRK04231) → RplD (COG0088)rpl4p (PRK04042) →<br>RplW (COG0089)PRK14548 (PRK14548) →                                                                                                                                                                                                                                                                                                                                                                                                                                                                                                                                                                                                                                                                                                                                                                                                                                                                                                 |
| env-274 | JGI24707J26582_10001803 | + | 2105  | 2183  | RNA → RplC (COG0087)rpl3p (PRK04231) → RplD (COG0088)rpl4p (PRK04042) →<br>RplW (COG0089)PRK14548 (PRK14548) → RplB (COG0090)rpl2p (PRK09612) →                                                                                                                                                                                                                                                                                                                                                                                                                                                                                                                                                                                                                                                                                                                                                                                                                                                                |
| env-275 | JGI24712J26585_10006974 | - | 5713  | 5635  | RNA → RplC (COG0087)rpl3p (PRK04231) → RplD (COG0088)rpl4p (PRK04042) →<br>RplW (COG0089)PRK14548 (PRK14548) → RplB (COG0090)rpl2p (PRK09612) →<br>RpsS (COG0185)rps19p (PRK04038) → rpl22p (PRK04223)RplV (COG0091) →<br>RpsC (COG0092)rps3p (PRK04191) → PRK14549 (PRK14549)Ribosomal_L29 (pfam00831) →<br>PRK03879 (PRK03879)UPF0086 (pfam01868) → RpsQ (COG0186)rps17p (PRK08572) →<br>rpl14p (PRK08571)Ribosomal_L14 (pfam00238) →                                                                                                                                                                                                                                                                                                                                                                                                                                                                                                                                                                        |
| env-276 | JGI24709J26583_10619039 | + | 43    | 121   | RNA →                                                                                                                                                                                                                                                                                                                                                                                                                                                                                                                                                                                                                                                                                                                                                                                                                                                                                                                                                                                                          |
| env-277 | JGI24499J29688_1000702  | + | 823   | 901   | RNA → RplC (COG0087)rpl3p (PRK04231) → RplD (COG0088)rpl4p (PRK04042) →<br>RplW (COG0089)PRK14548 (PRK14548) → RplB (COG0090)rpl2p (PRK09612) →<br>RpsS (COG0185)rps19p (PRK04038) → rpl22p (PRK04223)RplV (COG0091) →<br>RpsC (COG0092)rps3p (PRK04191) → PRK14549 (PRK14549)Ribosomal_L29 (pfam00831) →<br>PRK03879 (PRK03879)UPF0086 (pfam01868) → RpsQ (COG0186)rps17p (PRK08572) →<br>rpl14p (PRK08571)Ribosomal_L14 (pfam00238) → rpl24p (PRK01191)KOW_RPL26 (cd06089) →<br>PRK04313 (PRK04313)KOW_RPS4 (cd06087)Ribosomal_S4e (pfam00900) → RplE (COG0094)rpl5p (PRK04219) →<br>RpsN (COG0199)rps14p (PRK05766) → rps8p (PRK04034)RpsH (COG0096) →<br>RplF (COG0097)rpl6p (PRK05518) → rpl32e (PRK08562)Ribosomal_L32e (pfam01655) →<br>rpl19e (PRK08570)Ribosomal_L19e (pfam01280) → RplR (COG0256)rpl18p (PRK08569) →<br>RpsE (COG0098)rps5p (PRK04044) → Ribosomal_L7_archaeal_euk (cd01657)rpl30p (PRK06049) →<br>rpl15p (PRK06419)Ribosomal_L27A (pfam00828) → SecY (COG0201)PRK08568 (PRK08568) → |
| env-278 | JGI24707J26582_10000621 | + | 14235 | 14314 | RNA → ←-hypo                                                                                                                                                                                                                                                                                                                                                                                                                                                                                                                                                                                                                                                                                                                                                                                                                                                                                                                                                                                                   |
| env-279 | JGI24708J26588_10001024 | + | 13186 | 13265 | RNA → ←-hypo                                                                                                                                                                                                                                                                                                                                                                                                                                                                                                                                                                                                                                                                                                                                                                                                                                                                                                                                                                                                   |
| env-280 | JGI24713J26584_10000622 | + | 13651 | 13730 | RNA → ←-hypo                                                                                                                                                                                                                                                                                                                                                                                                                                                                                                                                                                                                                                                                                                                                                                                                                                                                                                                                                                                                   |
| env-281 | JGI24714J26587_10000570 | + | 13186 | 13265 | RNA → ←-hypo                                                                                                                                                                                                                                                                                                                                                                                                                                                                                                                                                                                                                                                                                                                                                                                                                                                                                                                                                                                                   |
| env-282 | JGI24712J26585_10002902 | + | 13100 | 13179 | RNA → ←-hypo                                                                                                                                                                                                                                                                                                                                                                                                                                                                                                                                                                                                                                                                                                                                                                                                                                                                                                                                                                                                   |
| env-283 | JGI24711J26586_10000985 | - | 9166  | 9087  | RNA → RplC (COG0087)rpl3p (PRK04231) → RplD (COG0088)rpl4p (PRK04042) →<br>RplW (COG0089)PRK14548 (PRK14548) → RplB (COG0090)rpl2p (PRK09612) →<br>RpsS (COG0185)rps19p (PRK04038) → rpl22p (PRK04223)RplV (COG0091) →<br>RpsC (COG0092)rps3p (PRK04191) → PRK14549 (PRK14549)Ribosomal_L29 (pfam00831) →<br>PRK03879 (PRK03879)UPF0086 (pfam01868) → RpsQ (COG0186)rps17p (PRK08572) →<br>rpl14p (PRK08571)Ribosomal_L14 (pfam00238) → RplX (COG0198)rpl24p (PRK01191) →<br>PRK04313 (PRK04313)KOW_RPS4 (cd06087)Ribosomal_S4e (pfam00900) → RplE (COG0094)rpl5p (PRK04219) →<br>RpsN (COG0199)rps14p (PRK05766) → rps8p (PRK04034)RpsH (COG0096) →<br>RplF (COG0097)rpl6p (PRK05518) → rpl32e (PRK08562)Ribosomal_L32e (pfam01655) →<br>rpl19e (PRK08570)Ribosomal_L19e (pfam01280) →                                                                                                                                                                                                                        |

|         |                         |   |       |       |                                                                                                                                                                                                                                                                                                                                                                                                                                                                                                                                                                                                                                                                                                                                                                                                                                                                                                                                                                          |
|---------|-------------------------|---|-------|-------|--------------------------------------------------------------------------------------------------------------------------------------------------------------------------------------------------------------------------------------------------------------------------------------------------------------------------------------------------------------------------------------------------------------------------------------------------------------------------------------------------------------------------------------------------------------------------------------------------------------------------------------------------------------------------------------------------------------------------------------------------------------------------------------------------------------------------------------------------------------------------------------------------------------------------------------------------------------------------|
| env-284 | JGI24709J26583_10001164 | - | 9166  | 9087  | RNA → RplC (COG0087)rpl3p (PRK04231) → RplD (COG0088)rpl4p (PRK04042) → RplW (COG0089)PRK14548 (PRK14548) → RplB (COG0090)rpl2p (PRK09612) → RpsS (COG0185)rps19p (PRK04038) → rpl22p (PRK04223)RplV (COG0091) → RpsC (COG0092)rps3p (PRK04191) → PRK14549 (PRK14549)Ribosomal_L29 (pfam00831) → PRK03879 (PRK03879)UPF0086 (pfam01868) → RpsQ (COG0186)rps17p (PRK08572) → rpl14p (PRK08571)Ribosomal_L14 (pfam00238) → RplX (COG0198)rpl24p (PRK01191) → PRK04313 (PRK04313)KOW_RPS4 (cd06087)Ribosomal_S4e (pfam00900) → RplE (COG0094)rpl5p (PRK04219) → RpsN (COG0199)rps14P (PRK05766) → rps8p (PRK04034)RpsH (COG0096) → RplF (COG0097)rpl6p (PRK05518) → rpl32e (PRK08562)Ribosomal_L32e (pfam01655) → rpl19e (PRK08570)Ribosomal_L19e (pfam01280) →                                                                                                                                                                                                             |
| env-285 | JGI24710J26742_10000974 | + | 13183 | 13262 | RNA → ←-hypo                                                                                                                                                                                                                                                                                                                                                                                                                                                                                                                                                                                                                                                                                                                                                                                                                                                                                                                                                             |
| env-286 | JGI24505J29691_1015564  | + | 211   | 290   | RNA → ←-hypo                                                                                                                                                                                                                                                                                                                                                                                                                                                                                                                                                                                                                                                                                                                                                                                                                                                                                                                                                             |
| env-287 | JGI24500J29687_10001710 | + | 1224  | 1303  | RNA → RplC (COG0087)rpl3p (PRK04231) → RplD (COG0088)rpl4p (PRK04042) → RplW (COG0089)PRK14548 (PRK14548) → RplB (COG0090)rpl2p (PRK09612) → RpsS (COG0185)rps19p (PRK04038) → rpl22p (PRK04223)RplV (COG0091) → RpsC (COG0092)rps3p (PRK04191) → PRK14549 (PRK14549)Ribosomal_L29 (pfam00831) → PRK03879 (PRK03879)UPF0086 (pfam01868) → RpsQ (COG0186)rps17p (PRK08572) → rpl14p (PRK08571)Ribosomal_L14 (pfam00238) → RplX (COG0198)rpl24p (PRK01191) → PRK04313 (PRK04313)KOW_RPS4 (cd06087)Ribosomal_S4e (pfam00900) → RplE (COG0094)rpl5p (PRK04219) → RpsN (COG0199)rps14P (PRK05766) → rps8p (PRK04034)RpsH (COG0096) → RplF (COG0097)rpl6p (PRK05518) → rpl32e (PRK08562)Ribosomal_L32e (pfam01655) → rpl19e (PRK08570)Ribosomal_L19e (pfam01280) → RplR (COG0256)rpl18p (PRK08569) → RpsE (COG0098)rps5p (PRK04044) → Ribosomal_L7_archaeal_euk (cd01657)rpl30p (PRK06049) → rpl15p (PRK06419)Ribosomal_L27A (pfam00828) → SecY (COG0201)PRK08568 (PRK08568) → |
| env-288 | JGI24502J29692_10012380 | + | 876   | 955   | RNA → RplC (COG0087)rpl3p (PRK04231) → RplD (COG0088)rpl4p (PRK04042) → RplW (COG0089)PRK14548 (PRK14548) → RplB (COG0090)rpl2p (PRK09612) → RpsS (COG0185)rps19p (PRK04038) → rpl22p (PRK04223)RplV (COG0091) → RpsC (COG0092)rps3p (PRK04191) → PRK14549 (PRK14549)Ribosomal_L29 (pfam00831) → PRK03879 (PRK03879)UPF0086 (pfam01868) → RpsQ (COG0186)rps17p (PRK08572) → rpl14p (PRK08571)Ribosomal_L14 (pfam00238) → RplX (COG0198)rpl24p (PRK01191) → PRK04313 (PRK04313)KOW_RPS4 (cd06087)Ribosomal_S4e (pfam00900) → RplE (COG0094)rpl5p (PRK04219) → RpsN (COG0199)rps14P (PRK05766) → rps8p (PRK04034)RpsH (COG0096) → RplF (COG0097)rpl6p (PRK05518) → rpl32e (PRK08562)Ribosomal_L32e (pfam01655) → rpl19e (PRK08570)Ribosomal_L19e (pfam01280) → RplR (COG0256)rpl18p (PRK08569) → RpsE (COG0098)rps5p (PRK04044) → Ribosomal_L7_archaeal_euk (cd01657)rpl30p (PRK06049) → rpl15p (PRK06419)Ribosomal_L27A (pfam00828) → SecY (COG0201)PRK08568 (PRK08568) → |
| env-289 | JGI24501J29690_1003097  | + | 211   | 290   | RNA → RplC (COG0087)rpl3p (PRK04231) → RplD (COG0088)rpl4p (PRK04042) → RplW (COG0089)PRK14548 (PRK14548) → RplB (COG0090)rpl2p (PRK09612) → RpsS (COG0185)rps19p (PRK04038) → rpl22p (PRK04223)RplV (COG0091) → RpsC (COG0092)rps3p (PRK04191) → PRK14549 (PRK14549)Ribosomal_L29 (pfam00831) → PRK03879 (PRK03879)UPF0086 (pfam01868) → RpsQ (COG0186)rps17p (PRK08572) → rpl14p (PRK08571)Ribosomal_L14 (pfam00238) → RplX (COG0198)rpl24p (PRK01191) → PRK04313 (PRK04313)KOW_RPS4 (cd06087)Ribosomal_S4e (pfam00900) → RplE (COG0094)rpl5p (PRK04219) → RpsN (COG0199)rps14P (PRK05766) → rps8p (PRK04034)RpsH (COG0096) → RplF (COG0097)rpl6p (PRK05518) → rpl32e (PRK08562)Ribosomal_L32e (pfam01655) → rpl19e (PRK08570)Ribosomal_L19e (pfam01280) → RplR (COG0256)rpl18p (PRK08569) → RpsE (COG0098)rps5p (PRK04044) → Ribosomal_L7_archaeal_euk (cd01657)rpl30p (PRK06049) → rpl15p (PRK06419)Ribosomal_L27A (pfam00828) → SecY (COG0201)PRK08568 (PRK08568) → |

|         |                         |   |         |         |                                                                                                                                                                                                                                                                                                                                                                                                                                                                                                                                                                                                                                                                                                                                                                                                                                                                                                                                                                          |
|---------|-------------------------|---|---------|---------|--------------------------------------------------------------------------------------------------------------------------------------------------------------------------------------------------------------------------------------------------------------------------------------------------------------------------------------------------------------------------------------------------------------------------------------------------------------------------------------------------------------------------------------------------------------------------------------------------------------------------------------------------------------------------------------------------------------------------------------------------------------------------------------------------------------------------------------------------------------------------------------------------------------------------------------------------------------------------|
| env-290 | JGI24503J29689_10009320 | + | 876     | 955     | RNA → RplC (COG0087)rpl3p (PRK04231) → RplD (COG0088)rpl4p (PRK04042) → RplW (COG0089)PRK14548 (PRK14548) → RplB (COG0090)rpl2p (PRK09612) → RpsS (COG0185)rps19p (PRK04038) → rpl22p (PRK04223)RplV (COG0091) → RpsC (COG0092)rps3p (PRK04191) → PRK14549 (PRK14549)Ribosomal_L29 (pfam00831) → PRK03879 (PRK03879)UPF0086 (pfam01868) → RpsQ (COG0186)rps17p (PRK08572) → rpl14p (PRK08571)Ribosomal_L14 (pfam00238) → RplX (COG0198)rpl24p (PRK01191) → PRK04313 (PRK04313)KOW_RPS4 (cd06087)Ribosomal_S4e (pfam00900) → RplE (COG0094)rpl5p (PRK04219) → RpsN (COG0199)rps14P (PRK05766) → rps8p (PRK04034)RpsH (COG0096) → RplF (COG0097)rpl6p (PRK05518) → rpl32e (PRK08562)Ribosomal_L32e (pfam01655) → rpl19e (PRK08570)Ribosomal_L19e (pfam01280) → RplR (COG0256)rpl18p (PRK08569) → RpsE (COG0098)rps5p (PRK04044) → Ribosomal_L7_archaeal_euk (cd01657)rpl30p (PRK06049) → rpl15p (PRK06419)Ribosomal_L27A (pfam00828) → SecY (COG0201)PRK08568 (PRK08568) → |
| env-291 | JGI24499J29688_1000521  | + | 876     | 955     | RNA → RplC (COG0087)rpl3p (PRK04231) → RplD (COG0088)rpl4p (PRK04042) → RplW (COG0089)PRK14548 (PRK14548) → RplB (COG0090)rpl2p (PRK09612) → RpsS (COG0185)rps19p (PRK04038) → rpl22p (PRK04223)RplV (COG0091) → RpsC (COG0092)rps3p (PRK04191) → PRK14549 (PRK14549)Ribosomal_L29 (pfam00831) → PRK03879 (PRK03879)UPF0086 (pfam01868) → RpsQ (COG0186)rps17p (PRK08572) → rpl14p (PRK08571)Ribosomal_L14 (pfam00238) → RplX (COG0198)rpl24p (PRK01191) → PRK04313 (PRK04313)KOW_RPS4 (cd06087)Ribosomal_S4e (pfam00900) → RplE (COG0094)rpl5p (PRK04219) → RpsN (COG0199)rps14P (PRK05766) → rps8p (PRK04034)RpsH (COG0096) → RplF (COG0097)rpl6p (PRK05518) → rpl32e (PRK08562)Ribosomal_L32e (pfam01655) → rpl19e (PRK08570)Ribosomal_L19e (pfam01280) → RplR (COG0256)rpl18p (PRK08569) → RpsE (COG0098)rps5p (PRK04044) → Ribosomal_L7_archaeal_euk (cd01657)rpl30p (PRK06049) → rpl15p (PRK06419)Ribosomal_L27A (pfam00828) → SecY (COG0201)PRK08568 (PRK08568) → |
| env-292 | JGI24712J26585_10029187 | + | 2386    | 2464    | RNA → hypo →                                                                                                                                                                                                                                                                                                                                                                                                                                                                                                                                                                                                                                                                                                                                                                                                                                                                                                                                                             |
| env-293 | JGI24711J26586_10244524 | - | 365     | 287     | RNA → ←hypo                                                                                                                                                                                                                                                                                                                                                                                                                                                                                                                                                                                                                                                                                                                                                                                                                                                                                                                                                              |
| env-294 | JGI24710J26742_10309618 | - | 365     | 287     | RNA → ←hypo                                                                                                                                                                                                                                                                                                                                                                                                                                                                                                                                                                                                                                                                                                                                                                                                                                                                                                                                                              |
| env-295 | JGI24500J29687_10002376 | + | 168     | 246     | RNA → ←hypo                                                                                                                                                                                                                                                                                                                                                                                                                                                                                                                                                                                                                                                                                                                                                                                                                                                                                                                                                              |
| env-296 | JGI24503J29689_10006492 | + | 104     | 182     | RNA → rpl3p (PRK04231)Ribosomal_L3 (pfam00297) →                                                                                                                                                                                                                                                                                                                                                                                                                                                                                                                                                                                                                                                                                                                                                                                                                                                                                                                         |
| Mbo-1-1 | NC_018227.2             | + | 1712758 | 1712836 | RNA → RplC (COG0087)rpl3p (PRK04231) → RplD (COG0088)rpl4p (PRK04042) → RplW (COG0089)PRK14548 (PRK14548) → RplB (COG0090)rpl2p (PRK09612) → RpsS (COG0185)rps19p (PRK04038) → rpl22p (PRK04223)RplV (COG0091) → RpsC (COG0092)rps3p (PRK04191) → PRK14549 (PRK14549)Ribosomal_L29 (pfam00831) → PRK03879 (PRK03879)UPF0086 (pfam01868) → RpsQ (COG0186)rps17p (PRK08572) → rpl14p (PRK08571)Ribosomal_L14 (pfam00238) → RplX (COG0198)rpl24p (PRK01191) → PRK04313 (PRK04313)KOW_RPS4 (cd06087)Ribosomal_S4e (pfam00900) → RplE (COG0094)rpl5p (PRK04219) → RpsN (COG0199)rps14P (PRK05766) → rps8p (PRK04034)RpsH (COG0096) → RplF (COG0097)rpl6p (PRK05518) → rpl32e (PRK08562)Ribosomal_L32e (pfam01655) → rpl19e (PRK08570)Ribosomal_L19e (pfam01280) → RplR (COG0256)rpl18p (PRK08569) → RpsE (COG0098)rps5p (PRK04044) → Ribosomal_L7_archaeal_euk (cd01657)rpl30p (PRK06049) → rpl15p (PRK06419)Ribosomal_L27A (pfam00828) → SecY (COG0201)PRK08568 (PRK08568) → |
| env-297 | JGI24501J29690_1006097  | + | 749     | 827     | RNA → rpl3p (PRK04231)Ribosomal_L3 (pfam00297) →                                                                                                                                                                                                                                                                                                                                                                                                                                                                                                                                                                                                                                                                                                                                                                                                                                                                                                                         |
| env-298 | JGI24707J26582_10054179 | + | 722     | 800     | RNA → rpl3p (PRK04231)Ribosomal_L3 (pfam00297) →                                                                                                                                                                                                                                                                                                                                                                                                                                                                                                                                                                                                                                                                                                                                                                                                                                                                                                                         |
| env-299 | JGI24708J26588_10030031 | + | 1058    | 1136    | RNA → ←hypo                                                                                                                                                                                                                                                                                                                                                                                                                                                                                                                                                                                                                                                                                                                                                                                                                                                                                                                                                              |
| env-300 | JGI24709J26583_10416662 | - | 277     | 199     | RNA → hypo →                                                                                                                                                                                                                                                                                                                                                                                                                                                                                                                                                                                                                                                                                                                                                                                                                                                                                                                                                             |
| env-301 | JGI24502J29692_10003709 | + | 657     | 735     | RNA → rpl3p (PRK04231)Ribosomal_L3 (pfam00297) →                                                                                                                                                                                                                                                                                                                                                                                                                                                                                                                                                                                                                                                                                                                                                                                                                                                                                                                         |
| env-302 | JGI24503J29689_10003031 | + | 41      | 119     | RNA → ←hypo                                                                                                                                                                                                                                                                                                                                                                                                                                                                                                                                                                                                                                                                                                                                                                                                                                                                                                                                                              |
| env-303 | JGI24710J26742_10068176 | + | 372     | 450     | RNA → rpl3p (PRK04231)Ribosomal_L3 (pfam00297) →                                                                                                                                                                                                                                                                                                                                                                                                                                                                                                                                                                                                                                                                                                                                                                                                                                                                                                                         |
| env-304 | JGI24709J26583_10014213 | + | 553     | 631     | RNA → hypo → RplC (COG0087)rpl3p (PRK04231) → RplD (COG0088)rpl4p (PRK04042) → RplW (COG0089)PRK14548 (PRK14548) →                                                                                                                                                                                                                                                                                                                                                                                                                                                                                                                                                                                                                                                                                                                                                                                                                                                       |
| env-305 | JGI24502J29692_10002344 | + | 84      | 165     | RNA → RplC (COG0087)rpl3p (PRK04231) → RplD (COG0088)rpl4p (PRK04042) →                                                                                                                                                                                                                                                                                                                                                                                                                                                                                                                                                                                                                                                                                                                                                                                                                                                                                                  |
| env-306 | JGI24712J26585_10639760 | + | 51      | 132     | RNA → ←hypo                                                                                                                                                                                                                                                                                                                                                                                                                                                                                                                                                                                                                                                                                                                                                                                                                                                                                                                                                              |
| env-307 | JGI24711J26586_10552659 | + | 51      | 132     | RNA → ←hypo                                                                                                                                                                                                                                                                                                                                                                                                                                                                                                                                                                                                                                                                                                                                                                                                                                                                                                                                                              |
| env-308 | JGI24709J26583_10614246 | + | 51      | 132     | RNA → ←hypo                                                                                                                                                                                                                                                                                                                                                                                                                                                                                                                                                                                                                                                                                                                                                                                                                                                                                                                                                              |
| env-309 | JGI24710J26742_10664497 | + | 51      | 132     | RNA → ←hypo                                                                                                                                                                                                                                                                                                                                                                                                                                                                                                                                                                                                                                                                                                                                                                                                                                                                                                                                                              |

|         |                         |   |        |        |                                                                                                                                                                                                                                                                                                                                                                                                                                                                                                                                                                                                                                                                                                                                                                                                                                                                                                                                                                                             |
|---------|-------------------------|---|--------|--------|---------------------------------------------------------------------------------------------------------------------------------------------------------------------------------------------------------------------------------------------------------------------------------------------------------------------------------------------------------------------------------------------------------------------------------------------------------------------------------------------------------------------------------------------------------------------------------------------------------------------------------------------------------------------------------------------------------------------------------------------------------------------------------------------------------------------------------------------------------------------------------------------------------------------------------------------------------------------------------------------|
| Mma-1-1 | NC_009051.1             | + | 549081 | 549159 | RNA → RplC (COG0087)rpl3p (PRK04231) → RplD (COG0088)rpl4p (PRK04042) → RplW (COG0089)PRK14548 (PRK14548) → RplB (COG0090)rpl2p (PRK09612) → RpsS (COG0185)rps19p (PRK04038) → rpl22p (PRK04223)RplV (COG0091) → RpsC (COG0092)rps3p (PRK04191) → PRK14549 (PRK14549)Ribosomal_L29 (pfam00831) → PRK03879 (PRK03879)UPF0086 (pfam01868) → RpsQ (COG0186)rps17p (PRK08572) → rpl14p (PRK08571)Ribosomal_L14 (pfam00238) → RplX (COG0198)rpl24p (PRK01191) → PRK04313 (PRK04313)KOW_RPS4 (cd06087)Ribosomal_S4e (pfam00900) → RplE (COG0094)rpl5p (PRK04219) → RpsN (COG0199)rps14p (PRK05766) → rps8p (PRK04034)RpsH (COG0096) → RplF (COG0097)rpl6p (PRK05518) → rpl32e (PRK08562)Ribosomal_L32_L32e (cd00513) → rpl19e (PRK08570)Ribosomal_L19e (pfam01280) → RplR (COG0256)rpl18p (PRK08569) → RpsE (COG0098)rps5p (PRK04044) →                                                                                                                                                           |
| Mse-1-1 | NZ_JXOJ01000001.1       | + | 373962 | 374040 | RNA → RplC (COG0087)rpl3p (PRK04231) → RplD (COG0088)rpl4p (PRK04042) → RplW (COG0089)PRK14548 (PRK14548) → rpl2p (PRK09612)Ribosomal_L2_C (pfam03947) → RpsS (COG0185)rps19p (PRK04038) → rpl22p (PRK04223)RplV (COG0091) → RpsC (COG0092)rps3p (PRK04191) → PRK14549 (PRK14549)Ribosomal_L29 (pfam00831) → PRK03879 (PRK03879)UPF0086 (pfam01868) → RpsQ (COG0186)rps17p (PRK08572) → rpl14p (PRK08571)Ribosomal_L14 (pfam00238) → RplX (COG0198)rpl24p (PRK01191) → PRK04313 (PRK04313)KOW_RPS4 (cd06087)Ribosomal_S4e (pfam00900) → RplE (COG0094)rpl5p (PRK04219) → RpsN (COG0199)rps14p (PRK05766) → rps8p (PRK04034)RpsH (COG0096) → RplF (COG0097)rpl6p (PRK05518) → rpl32e (PRK08562)Ribosomal_L32e (pfam01655) → rpl19e (PRK08570)Ribosomal_L19e (pfam01280) → RplR (COG0256)rpl18p (PRK08569) → RpsE (COG0098)rps5p (PRK04044) →                                                                                                                                                 |
| Msp-1-1 | NZ_JMIO01000016.1       | + | 890    | 968    | RNA → RplC (COG0087)rpl3p (PRK04231) → RplD (COG0088)rpl4p (PRK04042) → RplW (COG0089)PRK14548 (PRK14548) → RplB (COG0090)rpl2p (PRK09612) → RpsS (COG0185)rps19p (PRK04038) → rpl22p (PRK04223)RplV (COG0091) → RpsC (COG0092)rps3p (PRK04191) → PRK14549 (PRK14549)Ribosomal_L29 (pfam00831) → PRK03879 (PRK03879)UPF0086 (pfam01868) → RpsQ (COG0186)rps17p (PRK08572) → rpl14p (PRK08571)Ribosomal_L14 (pfam00238) → RplX (COG0198)rpl24p (PRK01191) → PRK04313 (PRK04313)S4 (cd00165)KOW_RPS4 (cd06087)Ribosomal_S4e (pfam00900) → RplE (COG0094)rpl5p (PRK04219) → RpsN (COG0199)rps14p (PRK05766) → rps8p (PRK04034)RpsH (COG0096) → RplF (COG0097)rpl6p (PRK05518) → rpl32e (PRK08562)Ribosomal_L32e (pfam01655) → rpl19e (PRK08570)Ribosomal_L19e (pfam01280) → RplR (COG0256)rpl18p (PRK08569) → RpsE (COG0098)rps5p (PRK04044) → Ribosomal_L7_archaeal_euk (cd01657)rpl30p (PRK06049) → rpl15p (PRK06419)Ribosomal_L27A (pfam00828) → SecY (COG0201)PRK08568 (PRK08568) → hypo → |
| env-310 | JGI24712J26585_10057261 | - | 366    | 297    | RNA → ←hypo                                                                                                                                                                                                                                                                                                                                                                                                                                                                                                                                                                                                                                                                                                                                                                                                                                                                                                                                                                                 |
| env-311 | JGI24710J26742_10004413 | - | 10050  | 9981   | RNA → RplC (COG0087)rpl3p (PRK04231) → RplD (COG0088)rpl4p (PRK04042) → RplW (COG0089)PRK14548 (PRK14548) → RplB (COG0090)rpl2p (PRK09612) → RpsS (COG0185)rps19p (PRK04038) → rpl22p (PRK04223)RplV (COG0091) → RpsC (COG0092)rps3p (PRK04191) → PRK14549 (PRK14549)Ribosomal_L29 (pfam00831) → PRK03879 (PRK03879)UPF0086 (pfam01868) → RpsQ (COG0186)rps17p (PRK08572) → rpl14p (PRK08571)Ribosomal_L14 (pfam00238) → RplX (COG0198)rpl24p (PRK01191) → PRK04313 (PRK04313)KOW_RPS4 (cd06087)Ribosomal_S4e (pfam00900) → RplE (COG0094)rpl5p (PRK04219) → RpsN (COG0199)rps14p (PRK05766) → rps8p (PRK04034)RpsH (COG0096) → RplF (COG0097)rpl6p (PRK05518) → rpl32e (PRK08562)Ribosomal_L32e (pfam01655) → rpl19e (PRK08570)Ribosomal_L19e (pfam01280) → RplR (COG0256)rpl18p (PRK08569) → RpsE (COG0098)rps5p (PRK04044) →                                                                                                                                                             |
| env-312 | JGI24500J29687_10026414 | + | 210    | 279    | RNA → RplC (COG0087)rpl3p (PRK04231) → RplD (COG0088)rpl4p (PRK04042) → RplW (COG0089)PRK14548 (PRK14548) → RplB (COG0090)rpl2p (PRK09612) → RpsS (COG0185)rps19p (PRK04038) → rpl22p (PRK04223)RplV (COG0091) → RpsC (COG0092)rps3p (PRK04191) → PRK14549 (PRK14549)Ribosomal_L29 (pfam00831) → PRK03879 (PRK03879)UPF0086 (pfam01868) → RpsQ (COG0186)rps17p (PRK08572) → rpl14p (PRK08571)Ribosomal_L14 (pfam00238) → RplX (COG0198)rpl24p (PRK01191)KOW_RPL26 (cd06089) → PRK04313 (PRK04313)KOW_RPS4 (cd06087)Ribosomal_S4e (pfam00900) → RplE (COG0094)rpl5p (PRK04219) → RpsN (COG0199)rps14p (PRK05766) →                                                                                                                                                                                                                                                                                                                                                                           |
| env-313 | JGI24501J29690_1062315  | + | 210    | 279    | RNA → ←hypo                                                                                                                                                                                                                                                                                                                                                                                                                                                                                                                                                                                                                                                                                                                                                                                                                                                                                                                                                                                 |



|         |                         |   |        |        |                                                                                                                                                                                                                                                                                                                                                                                                                                                                                                                                                                                                                                                                                                                                                                                                                                                                                                                           |
|---------|-------------------------|---|--------|--------|---------------------------------------------------------------------------------------------------------------------------------------------------------------------------------------------------------------------------------------------------------------------------------------------------------------------------------------------------------------------------------------------------------------------------------------------------------------------------------------------------------------------------------------------------------------------------------------------------------------------------------------------------------------------------------------------------------------------------------------------------------------------------------------------------------------------------------------------------------------------------------------------------------------------------|
| env-314 | JGI24499J29688_1102173  | + | 190    | 259    | RNA → ←-hypo                                                                                                                                                                                                                                                                                                                                                                                                                                                                                                                                                                                                                                                                                                                                                                                                                                                                                                              |
| env-315 | JGI24709J26583_10005356 | - | 7831   | 7762   | RNA → RplC (COG0087)rpl3p (PRK04231) → RplD (COG0088)rpl4p (PRK04042) → RplW (COG0089)PRK14548 (PRK14548) → RplB (COG0090)rpl2p (PRK09612) → RpsS (COG0185)rps19p (PRK04038) → rpl22p (PRK04223)RplV (COG0091) → RpsC (COG0092)rps3p (PRK04191) → PRK14549 (PRK14549)Ribosomal_L29 (pfam00831) → PRK03879 (PRK03879)UPF0086 (pfam01868) → RpsQ (COG0186)rps17p (PRK08572) → rpl14p (PRK08571)Ribosomal_L14 (pfam00238) → rpl24p (PRK01191)KOW_RPL26 (cd06089) → PRK04313 (PRK04313)KOW_RPS4 (cd06087)Ribosomal_S4e (pfam00900) → RplE (COG0094)rpl5p (PRK04219) → RpsN (COG0199)rps14P (PRK05766) → rps8p (PRK04034)Ribosomal_S8 (pfam00410) →                                                                                                                                                                                                                                                                            |
| env-316 | JGI24711J26586_10160586 | + | 77     | 146    | RNA → ←-hypo                                                                                                                                                                                                                                                                                                                                                                                                                                                                                                                                                                                                                                                                                                                                                                                                                                                                                                              |
| env-317 | JGI24500J29687_10008301 | + | 42     | 123    | RNA → RplC (COG0087)rpl3p (PRK04231) → RplD (COG0088)rpl4p (PRK04042) → RplW (COG0089)PRK14548 (PRK14548) → RplB (COG0090)rpl2p (PRK09612) → RpsS (COG0185)rps19p (PRK04038) → rpl22p (PRK04223)RplV (COG0091) → RpsC (COG0092)rps3p (PRK04191) → PRK14549 (PRK14549)Ribosomal_L29 (pfam00831) → PRK03879 (PRK03879)UPF0086 (pfam01868) → RpsQ (COG0186)rps17p (PRK08572) → rpl14p (PRK08571)Ribosomal_L14 (pfam00238) → rpl24p (PRK01191)KOW_RPL26 (cd06089) → PRK04313 (PRK04313)KOW_RPS4 (cd06087)Ribosomal_S4e (pfam00900) → RplE (COG0094)rpl5p (PRK04219) → RpsN (COG0199)rps14P (PRK05766) → rps8p (PRK04034)RpsH (COG0096) → RplF (COG0097)rpl6p (PRK05518) → rpl32e (PRK08562)Ribosomal_L32e (pfam01655) → rpl19e (PRK08570)Ribosomal_L19e (pfam01280) → RplR (COG0256)rpl18p (PRK08569) →                                                                                                                       |
| env-318 | JGI24502J29692_10009873 | + | 777    | 846    | RNA → rpl3p (PRK04231)Ribosomal_L3 (pfam00297) →                                                                                                                                                                                                                                                                                                                                                                                                                                                                                                                                                                                                                                                                                                                                                                                                                                                                          |
| env-319 | JGI24503J29689_10009607 | + | 112    | 181    | RNA → rpl3p (PRK04231)Ribosomal_L3 (pfam00297) →                                                                                                                                                                                                                                                                                                                                                                                                                                                                                                                                                                                                                                                                                                                                                                                                                                                                          |
| env-320 | JGI24712J26585_10076884 | - | 494    | 425    | RNA → rpl3p (PRK04231)Ribosomal_L3 (pfam00297) →                                                                                                                                                                                                                                                                                                                                                                                                                                                                                                                                                                                                                                                                                                                                                                                                                                                                          |
| env-321 | JGI24500J29687_10085663 | + | 72     | 141    | RNA → rpl3p (PRK04231)Ribosomal_L3 (pfam00297) →                                                                                                                                                                                                                                                                                                                                                                                                                                                                                                                                                                                                                                                                                                                                                                                                                                                                          |
| env-322 | JGI24711J26586_10010708 | - | 494    | 425    | RNA → rpl3p (PRK04231)Ribosomal_L3 (pfam00297) →                                                                                                                                                                                                                                                                                                                                                                                                                                                                                                                                                                                                                                                                                                                                                                                                                                                                          |
| Mpa-1-1 | NC_011832.1             | + | 459047 | 459117 | RNA → RplC (COG0087)rpl3p (PRK04231) → RplD (COG0088)rpl4p (PRK04042) → RplW (COG0089)PRK14548 (PRK14548) → rpl2p (PRK09612)Ribosomal_L2_C (pfam03947) → RpsS (COG0185)rps19p (PRK04038) → rpl22p (PRK04223)RplV (COG0091) → RpsC (COG0092)rps3p (PRK04191) → PRK14549 (PRK14549)Ribosomal_L29 (pfam00831) → PRK03879 (PRK03879)UPF0086 (pfam01868) → RpsQ (COG0186)rps17p (PRK08572) → rpl14p (PRK08571)Ribosomal_L14 (pfam00238) → rpl24p (PRK01191)KOW_RPL26 (cd06089) → PRK04313 (PRK04313)S4 (cd00165)KOW_RPS4 (cd06087)Ribosomal_S4e (pfam00900) → RplE (COG0094)rpl5p (PRK04219) → RpsN (COG0199)rps14P (PRK05766) → rps8p (PRK04034)RpsH (COG0096) → RplF (COG0097)rpl6p (PRK05518) → rpl32e (PRK08562)Ribosomal_L32e (pfam01655) → rpl19e (PRK08570)Ribosomal_L19e (pfam01280) → RplR (COG0256)rpl18p (PRK08569) → RpsE (COG0098)rps5p (PRK04044) →                                                              |
| env-323 | DHTCA2_GJDNVXK01BZYAY   | - | 259    | 189    | RNA → hypo →                                                                                                                                                                                                                                                                                                                                                                                                                                                                                                                                                                                                                                                                                                                                                                                                                                                                                                              |
| env-324 | 3300001580_10004417     | + | 2215   | 2285   | RNA → hypo → RplC (COG0087)rpl3p (PRK04231) → RplD (COG0088)rpl4p (PRK04042) → RplW (COG0089)PRK14548 (PRK14548) → RplB (COG0090)rpl2p (PRK09612) → rps19p (PRK04038)Ribosomal_S19 (pfam00203) → rpl22p (PRK04223)RplV (COG0091) → RpsC (COG0092)rps3p (PRK04191) → PRK14549 (PRK14549)Ribosomal_L29 (pfam00831) → PRK03879 (PRK03879)UPF0086 (pfam01868) → RpsQ (COG0186)rps17p (PRK08572) → rpl14p (PRK08571)Ribosomal_L14 (pfam00238) → rpl24p (PRK01191)KOW_RPL26 (cd06089) → PRK04313 (PRK04313)S4 (cd00165)KOW_RPS4 (cd06087)Ribosomal_S4e (pfam00900) → RplE (COG0094)rpl5p (PRK04219) → RpsN (COG0199)rps14P (PRK05766) → rps8p (PRK04034)RpsH (COG0096) → RplF (COG0097)rpl6p (PRK05518) → rpl32e (PRK08562)Ribosomal_L32e (pfam01655) → rpl19e (PRK08570)Ribosomal_L19e (pfam01280) → RplR (COG0256)rpl18p (PRK08569) → RpsE (COG0098)rps5p (PRK04044) → Ribosomal_L7_archaeal_euk (cd01657)rpl30p (PRK06049) → |
| env-325 | 3300001580_10080578     | - | 953    | 870    | RNA → ←-hypo                                                                                                                                                                                                                                                                                                                                                                                                                                                                                                                                                                                                                                                                                                                                                                                                                                                                                                              |
| env-326 | 2232135516              | + | 86     | 169    | RNA →                                                                                                                                                                                                                                                                                                                                                                                                                                                                                                                                                                                                                                                                                                                                                                                                                                                                                                                     |
| env-327 | 3300000558_11733700     | - | 1392   | 1309   | RNA → ←-hypo                                                                                                                                                                                                                                                                                                                                                                                                                                                                                                                                                                                                                                                                                                                                                                                                                                                                                                              |
| env-328 | 3300000558_11835925     | - | 418    | 335    | RNA →                                                                                                                                                                                                                                                                                                                                                                                                                                                                                                                                                                                                                                                                                                                                                                                                                                                                                                                     |

|         |                        |   |         |         |                                                                                                                                                                                                                                                                                                                                                                                                                                                                                                                                                                                                                                                                                                                                                                                                                                                                                                                                                                                                                           |
|---------|------------------------|---|---------|---------|---------------------------------------------------------------------------------------------------------------------------------------------------------------------------------------------------------------------------------------------------------------------------------------------------------------------------------------------------------------------------------------------------------------------------------------------------------------------------------------------------------------------------------------------------------------------------------------------------------------------------------------------------------------------------------------------------------------------------------------------------------------------------------------------------------------------------------------------------------------------------------------------------------------------------------------------------------------------------------------------------------------------------|
| env-329 | 3300000568_10049962    | - | 21413   | 21330   | RNA → <b>hypo</b> → <b>RplC (COG0087)rpl3p (PRK04231)</b> → <b>RplD (COG0088)rpl4p (PRK04042)</b> → <b>PRK14548 (PRK14548)Ribosomal_L23 (pfam00276)</b> → <b>RplB (COG0090)rpl2p (PRK09612)</b> → <b>rps19p (PRK04038)Ribosomal_S19 (pfam00203)</b> → <b>rpl22p (PRK04223)RplV (COG0091)</b> → <b>RpsC (COG0092)rps3p (PRK04191)</b> → <b>PRK14549 (PRK14549)Ribosomal_L29 (pfam00831)</b> → <b>PRK03879 (PRK03879)UPF0086 (pfam01868)</b> → <b>RpsQ (COG0186)rps17p (PRK08572)</b> → <b>rpl14p (PRK08571)Ribosomal_L14 (pfam00238)</b> → <b>rpl24p (PRK01191)KOW_RPL26 (cd06089)</b> → <b>PRK04313 (PRK04313)KOW_RPS4 (cd06087)Ribosomal_S4e (pfam00900)</b> → <b>rpl5p (PRK04219)Ribosomal_L5 (pfam00281)Ribosomal_L5_C (pfam00673)</b> → <b>RpsN (COG0199)rps14P (PRK05766)</b> → <b>rps8p (PRK04034)RpsH (COG0096)</b> → <b>RplF (COG0097)rpl6p (PRK05518)</b> → <b>rpl32e (PRK08562)Ribosomal_L32e (pfam01655)</b> → <b>rpl19e (PRK08570)Ribosomal_L19e (pfam01280)</b> → <b>RplR (COG0256)rpl18p (PRK08569)</b> →   |
| env-330 | 3300001605_10004100    | - | 1325    | 1242    | RNA → ← <b>hypo</b>                                                                                                                                                                                                                                                                                                                                                                                                                                                                                                                                                                                                                                                                                                                                                                                                                                                                                                                                                                                                       |
| env-331 | 3300000032_0004919     | + | 16062   | 16145   | RNA → <b>RplC (COG0087)rpl3p (PRK04231)</b> → <b>RplD (COG0088)rpl4p (PRK04042)</b> → <b>PRK14548 (PRK14548)Ribosomal_L23 (pfam00276)</b> → <b>RplB (COG0090)rpl2p (PRK09612)</b> → <b>rps19p (PRK04038)Ribosomal_S19 (pfam00203)</b> → <b>rpl22p (PRK04223)RplV (COG0091)</b> → <b>RpsC (COG0092)rps3p (PRK04191)</b> → <b>PRK14549 (PRK14549)Ribosomal_L29 (pfam00831)</b> → <b>PRK03879 (PRK03879)UPF0086 (pfam01868)</b> → <b>RpsQ (COG0186)rps17p (PRK08572)</b> → <b>rpl14p (PRK08571)Ribosomal_L14 (pfam00238)</b> → <b>rpl24p (PRK01191)KOW_RPL26 (cd06089)</b> → <b>PRK04313 (PRK04313)RPS4A (COG1471)</b> → <b>KOW (smart00739)KOW_RPS4 (cd06087)</b> → <b>rpl5p (PRK04219)Ribosomal_L5 (pfam00281)Ribosomal_L5_C (pfam00673)</b> → <b>RpsN (COG0199)rps14P (PRK05766)</b> → <b>rps8p (PRK04034)RpsH (COG0096)</b> → <b>RplF (COG0097)rpl6p (PRK05518)</b> → <b>rpl32e (PRK08562)Ribosomal_L32e (pfam01655)</b> → <b>rpl19e (PRK08570)Ribosomal_L19e (pfam01280)</b> → <b>RplR (COG0256)rpl18p (PRK08569)</b> → |
| env-332 | 3300000185_104355      | - | 418     | 335     | RNA →                                                                                                                                                                                                                                                                                                                                                                                                                                                                                                                                                                                                                                                                                                                                                                                                                                                                                                                                                                                                                     |
| Mfo-1-1 | NC_019943.1            | - | 2583107 | 2583023 | RNA → <b>RplC (COG0087)rpl3p (PRK04231)</b> → <b>RplD (COG0088)rpl4p (PRK04042)</b> → <b>RplW (COG0089)PRK14548 (PRK14548)</b> → <b>RplB (COG0090)rpl2p (PRK09612)</b> → <b>rps19p (PRK04038)Ribosomal_S19 (pfam00203)</b> → <b>rpl22p (PRK04223)RplV (COG0091)</b> → <b>RpsC (COG0092)rps3p (PRK04191)</b> → <b>PRK14549 (PRK14549)Ribosomal_L29 (pfam00831)</b> → <b>PRK03879 (PRK03879)UPF0086 (pfam01868)</b> → <b>RpsQ (COG0186)rps17p (PRK08572)</b> → <b>rpl14p (PRK08571)Ribosomal_L14 (pfam00238)</b> → <b>rpl24p (PRK01191)KOW_RPL26 (cd06089)</b> → <b>PRK04313 (PRK04313)S4 (cd00165)KOW_RPS4 (cd06087)Ribosomal_S4e (pfam00900)</b> → <b>rpl5p (PRK04219)Ribosomal_L5 (pfam00281)Ribosomal_L5_C (pfam00673)</b> → <b>RpsN (COG0199)rps14P (PRK05766)</b> → <b>rps8p (PRK04034)RpsH (COG0096)</b> → <b>RplF (COG0097)rpl6p (PRK05518)</b> → <b>rpl32e (PRK08562)Ribosomal_L32e (pfam01655)</b> → <b>rpl19e (PRK08570)Ribosomal_L19e (pfam01280)</b> → <b>RplR (COG0256)rpl18p (PRK08569)</b> →                |
| env-333 | JGI20225J20221_1000316 | - | 54770   | 54691   | RNA → <b>RplC (COG0087)rpl3p (PRK04231)</b> → <b>RplD (COG0088)rpl4p (PRK04042)</b> → <b>RplW (COG0089)PRK14548 (PRK14548)</b> → <b>RplB (COG0090)rpl2p (PRK09612)</b> → <b>rps19p (PRK04038)Ribosomal_S19 (pfam00203)</b> → <b>rpl22p (PRK04223)RplV (COG0091)</b> → <b>RpsC (COG0092)rps3p (PRK04191)</b> → <b>PRK14549 (PRK14549)Ribosomal_L29 (pfam00831)</b> → <b>PRK03879 (PRK03879)UPF0086 (pfam01868)</b> → <b>RpsQ (COG0186)rps17p (PRK08572)</b> → <b>rpl14p (PRK08571)Ribosomal_L14 (pfam00238)</b> → <b>rpl24p (PRK01191)KOW_RPL26 (cd06089)</b> → <b>PRK04313 (PRK04313)S4 (cd00165)KOW_RPS4 (cd06087)Ribosomal_S4e (pfam00900)</b> → <b>RplE (COG0094)rpl5p (PRK04219)</b> → <b>RpsN (COG0199)rps14P (PRK05766)</b> → <b>rps8p (PRK04034)RpsH (COG0096)</b> → <b>RplF (COG0097)rpl6p (PRK05518)</b> → <b>rpl32e (PRK08562)Ribosomal_L32e (pfam01655)</b> → <b>rpl19e (PRK08570)Ribosomal_L19e (pfam01280)</b> → <b>RplR (COG0256)rpl18p (PRK08569)</b> →                                                    |
| env-334 | BMHB3a_c145790         | - | 1545    | 1466    | RNA → <b>RplC (COG0087)rpl3p (PRK04231)</b> → <b>RplD (COG0088)rpl4p (PRK04042)</b> →                                                                                                                                                                                                                                                                                                                                                                                                                                                                                                                                                                                                                                                                                                                                                                                                                                                                                                                                     |
| env-335 | JGI24730J26740_1000194 | - | 6399    | 6320    | RNA → <b>RplC (COG0087)rpl3p (PRK04231)</b> → <b>RplD (COG0088)rpl4p (PRK04042)</b> → <b>RplW (COG0089)PRK14548 (PRK14548)</b> → <b>RplB (COG0090)rpl2p (PRK09612)</b> → <b>rps19p (PRK04038)Ribosomal_S19 (pfam00203)</b> → <b>rpl22p (PRK04223)RplV (COG0091)</b> → <b>RpsC (COG0092)rps3p (PRK04191)</b> → <b>PRK14549 (PRK14549)Ribosomal_L29 (pfam00831)</b> → <b>PRK03879 (PRK03879)UPF0086 (pfam01868)</b> → <b>RpsQ (COG0186)rps17p (PRK08572)</b> → <b>rpl14p (PRK08571)Ribosomal_L14 (pfam00238)</b> → <b>rpl24p (PRK01191)KOW_RPL26 (cd06089)</b> → <b>PRK04313 (PRK04313)RPS4A (COG1471)</b> →                                                                                                                                                                                                                                                                                                                                                                                                                |

|         |                             |   |        |        |                                                                                                                                                                                                                                                                                                                                                                                                                                                                                                                                                                                                                                                                                                                                                                                                                              |
|---------|-----------------------------|---|--------|--------|------------------------------------------------------------------------------------------------------------------------------------------------------------------------------------------------------------------------------------------------------------------------------------------------------------------------------------------------------------------------------------------------------------------------------------------------------------------------------------------------------------------------------------------------------------------------------------------------------------------------------------------------------------------------------------------------------------------------------------------------------------------------------------------------------------------------------|
| env-336 | JGI24730J26740_1000273      | - | 21541  | 21462  | RNA → RplC (COG0087)rpl3p (PRK04231) → RplD (COG0088)rpl4p (PRK04042) → RplW (COG0089)PRK14548 (PRK14548) → RplB (COG0090)rpl2p (PRK09612) → rps19p (PRK04038)Ribosomal_S19 (pfam00203) → rpl22p (PRK04223)RplV (COG0091) → RpsC (COG0092)rps3p (PRK04191) → PRK14549 (PRK14549)Ribosomal_L29 (pfam00831) → PRK03879 (PRK03879)UPF0086 (pfam01868) → RpsQ (COG0186)rps17p (PRK08572) → rpl14p (PRK08571)Ribosomal_L14 (pfam00238) → rpl24p (PRK01191)KOW_RPL26 (cd06089) → PRK04313 (PRK04313)S4 (cd00165)KOW_RPS4 (cd06087)Ribosomal_S4e (pfam00900) → RplE (COG0094)rpl5p (PRK04219) → RpsN (COG0199)rps14P (PRK05766) → rps8p (PRK04034)RpsH (COG0096) → RplF (COG0097)rpl6p (PRK05518) → rpl32e (PRK08562)Ribosomal_L32e (pfam01655) → rpl19e (PRK08570)Ribosomal_L19e (pfam01280) → RplR (COG0256)rpl18p (PRK08569) →   |
| env-337 | 2013874846                  | + | 4629   | 4707   | RNA → RplC (COG0087)rpl3p (PRK04231) → RplD (COG0088)rpl4p (PRK04042) → RplW (COG0089)PRK14548 (PRK14548) →                                                                                                                                                                                                                                                                                                                                                                                                                                                                                                                                                                                                                                                                                                                  |
| env-338 | PRSSGFe2_Sequence0000003268 | + | 541    | 620    | RNA → hypo →                                                                                                                                                                                                                                                                                                                                                                                                                                                                                                                                                                                                                                                                                                                                                                                                                 |
| env-339 | WSSedL1Cam_c0014            | - | 25929  | 25851  | RNA → RplC (COG0087)rpl3p (PRK04231) → RplD (COG0088)rpl4p (PRK04042) → RplW (COG0089)PRK14548 (PRK14548) → RplB (COG0090)rpl2p (PRK09612) → rps19p (PRK04038)Ribosomal_S19 (pfam00203) → rpl22p (PRK04223)RplV (COG0091) → RpsC (COG0092)rps3p (PRK04191) → PRK14549 (PRK14549)Ribosomal_L29 (pfam00831) → PRK03879 (PRK03879)UPF0086 (pfam01868) → RpsQ (COG0186)rps17p (PRK08572) → rpl14p (PRK08571)Ribosomal_L14 (pfam00238) → rpl24p (PRK01191)KOW_RPL26 (cd06089) → PRK04313 (PRK04313)S4 (cd00165)KOW_RPS4 (cd06087)Ribosomal_S4e (pfam00900) → RplE (COG0094)rpl5p (PRK04219) → RpsN (COG0199)rps14P (PRK05766) → rps8p (PRK04034)RpsH (COG0096) → RplF (COG0097)rpl6p (PRK05518) → rpl32e (PRK08562)Ribosomal_L32_L32e (cd00513) → rpl19e (PRK08570)Ribosomal_L19e (pfam01280) → RplR (COG0256)rpl18p (PRK08569) → |
| CMe-1-1 | NC_009712.1                 | + | 517727 | 517802 | RNA → RplC (COG0087)rpl3p (PRK04231) → RplD (COG0088)rpl4p (PRK04042) → RplW (COG0089)PRK14548 (PRK14548) → RplB (COG0090)rpl2p (PRK09612) → rps19p (PRK04038)Ribosomal_S19 (pfam00203) → rpl22p (PRK04223)RplV (COG0091) → RpsC (COG0092)rps3p (PRK04191) → PRK14549 (PRK14549)Ribosomal_L29 (pfam00831) → PRK03879 (PRK03879)UPF0086 (pfam01868) → RpsQ (COG0186)rps17p (PRK08572) → rpl14p (PRK08571)Ribosomal_L14 (pfam00238) → rpl24p (PRK01191)KOW_RPL26 (cd06089) → PRK04313 (PRK04313)S4 (cd00165)KOW_RPS4 (cd06087)Ribosomal_S4e (pfam00900) → RplE (COG0094)rpl5p (PRK04219) → RpsN (COG0199)rps14P (PRK05766) → rps8p (PRK04034)RpsH (COG0096) → RplF (COG0097)rpl6p (PRK05518) → rpl32e (PRK08562)Ribosomal_L32_L32e (cd00513) → rpl19e (PRK08570)Ribosomal_L19e (pfam01280) → RplR (COG0256)rpl18p (PRK08569) → |
| env-340 | 3300001567_10001587         | + | 11347  | 11431  | RNA → rpl3p (PRK04231)Ribosomal_L3 (pfam00297) →                                                                                                                                                                                                                                                                                                                                                                                                                                                                                                                                                                                                                                                                                                                                                                             |
| env-341 | WSSedA2C_c003915            | - | 773    | 689    | RNA → rpl3p (PRK04231)Ribosomal_L3 (pfam00297) →                                                                                                                                                                                                                                                                                                                                                                                                                                                                                                                                                                                                                                                                                                                                                                             |
| env-342 | WSSedA1TJGI_c001789         | - | 1725   | 1641   | RNA → RplC (COG0087)rpl3p (PRK04231) → RplD (COG0088)rpl4p (PRK04042) →                                                                                                                                                                                                                                                                                                                                                                                                                                                                                                                                                                                                                                                                                                                                                      |
| env-343 | WSSedB1B2_c003929           | - | 407    | 323    | RNA →                                                                                                                                                                                                                                                                                                                                                                                                                                                                                                                                                                                                                                                                                                                                                                                                                        |
| env-344 | WSSedA1Ba_1001899           | - | 3122   | 3038   | RNA → ←hypo                                                                                                                                                                                                                                                                                                                                                                                                                                                                                                                                                                                                                                                                                                                                                                                                                  |
| env-345 | WSSedA1Ba2_1001418          | - | 2992   | 2908   | RNA → ←hypo                                                                                                                                                                                                                                                                                                                                                                                                                                                                                                                                                                                                                                                                                                                                                                                                                  |
| env-346 | WSSedA1Ba3_1004880          | - | 2426   | 2342   | RNA → ←hypo                                                                                                                                                                                                                                                                                                                                                                                                                                                                                                                                                                                                                                                                                                                                                                                                                  |
| env-347 | WSSedA2Ca3_1003915          | - | 773    | 689    | RNA → ←hypo                                                                                                                                                                                                                                                                                                                                                                                                                                                                                                                                                                                                                                                                                                                                                                                                                  |
| env-348 | JGI20214J14112_1009109      | + | 1012   | 1096   | RNA → rpl3p (PRK04231)Ribosomal_L3 (pfam00297) →                                                                                                                                                                                                                                                                                                                                                                                                                                                                                                                                                                                                                                                                                                                                                                             |
| env-349 | JGI20213J14113_1038457      | - | 635    | 551    | RNA → ←hypo                                                                                                                                                                                                                                                                                                                                                                                                                                                                                                                                                                                                                                                                                                                                                                                                                  |
| env-350 | B3_all.c_Convs72656         | + | 183    | 267    | RNA → RplC (COG0087)rpl3p (PRK04231) → RplD (COG0088)rpl4p (PRK04042) →                                                                                                                                                                                                                                                                                                                                                                                                                                                                                                                                                                                                                                                                                                                                                      |
| env-351 | 3300000568_10104459         | - | 1600   | 1514   | RNA → RplC (COG0087)rpl3p (PRK04231) → RplD (COG0088)rpl4p (PRK04042) →                                                                                                                                                                                                                                                                                                                                                                                                                                                                                                                                                                                                                                                                                                                                                      |
| env-352 | SakLake120mDRAFT_c0023947   | - | 758    | 684    | RNA → rpl3p (PRK04231)Ribosomal_L3 (pfam00297) →                                                                                                                                                                                                                                                                                                                                                                                                                                                                                                                                                                                                                                                                                                                                                                             |
| env-353 | 3300000032_0022845          | - | 6964   | 6878   | RNA → RplC (COG0087)rpl3p (PRK04231) → RplD (COG0088)rpl4p (PRK04042) →                                                                                                                                                                                                                                                                                                                                                                                                                                                                                                                                                                                                                                                                                                                                                      |
| env-354 | 3300000568_10039005         | - | 399    | 313    | RNA → ←hypo                                                                                                                                                                                                                                                                                                                                                                                                                                                                                                                                                                                                                                                                                                                                                                                                                  |
| env-355 | 3300001567_10000694         | + | 33701  | 33787  | RNA → ←hypo                                                                                                                                                                                                                                                                                                                                                                                                                                                                                                                                                                                                                                                                                                                                                                                                                  |
| env-356 | 3300000558_11950893         | - | 214    | 128    | RNA → ←hypo                                                                                                                                                                                                                                                                                                                                                                                                                                                                                                                                                                                                                                                                                                                                                                                                                  |
| env-357 | JGI26437J51864_10016855     | + | 1418   | 1504   | RNA →                                                                                                                                                                                                                                                                                                                                                                                                                                                                                                                                                                                                                                                                                                                                                                                                                        |



|         |                         |   |      |      |                                                                                                                                                                                                                                                                                                                                                                                                                                                                                                                                                                                                                                                                                                                                                                                                                                      |
|---------|-------------------------|---|------|------|--------------------------------------------------------------------------------------------------------------------------------------------------------------------------------------------------------------------------------------------------------------------------------------------------------------------------------------------------------------------------------------------------------------------------------------------------------------------------------------------------------------------------------------------------------------------------------------------------------------------------------------------------------------------------------------------------------------------------------------------------------------------------------------------------------------------------------------|
| env-358 | WSSedA1Ba_1000820       | - | 2896 | 2810 | RNA → RplC (COG0087)rpl3p (PRK04231) → RplD (COG0088)rpl4p (PRK04042) → RplW (COG0089)PRK14548 (PRK14548) → RplB (COG0090)rpl2p (PRK09612) →                                                                                                                                                                                                                                                                                                                                                                                                                                                                                                                                                                                                                                                                                         |
| env-359 | JGI20214J14112_1000181  | - | 5712 | 5626 | RNA → RplC (COG0087)rpl3p (PRK04231) → RplD (COG0088)rpl4p (PRK04042) → RplW (COG0089)PRK14548 (PRK14548) → RplB (COG0090)rpl2p (PRK09612) → rps19p (PRK04038)Ribosomal_S19 (pfam00203) → rpl22p (PRK04223)RplV (COG0091) → RpsC (COG0092)rps3p (PRK04191) → PRK14549 (PRK14549)Ribosomal_L29 (pfam00831) → PRK03879 (PRK03879)UPF0086 (pfam01868) → RpsQ (COG0186)rps17p (PRK08572) → rpl14p (PRK08571)Ribosomal_L14 (pfam00238) →                                                                                                                                                                                                                                                                                                                                                                                                  |
| env-360 | WSSedB2Ca_1001724       | - | 887  | 801  | RNA → rpl3p (PRK04231)Ribosomal_L3 (pfam00297) →                                                                                                                                                                                                                                                                                                                                                                                                                                                                                                                                                                                                                                                                                                                                                                                     |
| env-361 | WSSedA2C_c001213        | + | 2849 | 2935 | RNA → rpl3p (PRK04231)Ribosomal_L3 (pfam00297) →                                                                                                                                                                                                                                                                                                                                                                                                                                                                                                                                                                                                                                                                                                                                                                                     |
| env-362 | WSSedA1TJGL_c002576     | + | 889  | 975  | RNA → RplC (COG0087)rpl3p (PRK04231) → RplD (COG0088)rpl4p (PRK04042) → RplW (COG0089)PRK14548 (PRK14548) → RplB (COG0090)rpl2p (PRK09612) →                                                                                                                                                                                                                                                                                                                                                                                                                                                                                                                                                                                                                                                                                         |
| env-363 | WSSedB1B2_c000733       | - | 1648 | 1562 | RNA → rpl3p (PRK04231)Ribosomal_L3 (pfam00297) →                                                                                                                                                                                                                                                                                                                                                                                                                                                                                                                                                                                                                                                                                                                                                                                     |
| env-364 | WSSedB2T_c003532        | + | 434  | 520  | RNA → rpl3p (PRK04231)Ribosomal_L3 (pfam00297) →                                                                                                                                                                                                                                                                                                                                                                                                                                                                                                                                                                                                                                                                                                                                                                                     |
| env-365 | WSSedA1Ba2_1000822      | - | 2885 | 2799 | RNA → RplC (COG0087)rpl3p (PRK04231) → RplD (COG0088)rpl4p (PRK04042) → RplW (COG0089)PRK14548 (PRK14548) → RplB (COG0090)rpl2p (PRK09612) →                                                                                                                                                                                                                                                                                                                                                                                                                                                                                                                                                                                                                                                                                         |
| env-366 | WSSedA1Ba3_1000489      | + | 1543 | 1629 | RNA → RplC (COG0087)rpl3p (PRK04231) → RplD (COG0088)rpl4p (PRK04042) → RplW (COG0089)PRK14548 (PRK14548) → RplB (COG0090)rpl2p (PRK09612) → rps19p (PRK04038)Ribosomal_S19 (pfam00203) → rpl22p (PRK04223)RplV (COG0091) → RpsC (COG0092)rps3p (PRK04191) → PRK14549 (PRK14549)Ribosomal_L29 (pfam00831) → PRK03879 (PRK03879)UPF0086 (pfam01868) → RpsQ (COG0186)rps17p (PRK08572) → rpl14p (PRK08571)Ribosomal_L14 (pfam00238) → rpl24p (PRK01191)KOW_RPL26 (cd06089) → PRK04313 (PRK04313)KOW_RPS4 (cd06087)Ribosomal_S4e (pfam00900) → rpl5p (PRK04219)Ribosomal_L5 (pfam00281)Ribosomal_L5_C (pfam00673) → RpsN (COG0199)rps14p (PRK05766) → rps8p (PRK04034)RpsH (COG0096) → RplF (COG0097)rpl6p (PRK05518) → rpl32e (PRK08562)Ribosomal_L32e (pfam01655) → rpl19e (PRK08570)Ribosomal_L19e (pfam01280) → rpl18p (PRK08569) → |
| env-367 | WSSedB2Ba_1001051       | - | 1502 | 1416 | RNA → RplC (COG0087)rpl3p (PRK04231) → RplD (COG0088)rpl4p (PRK04042) →                                                                                                                                                                                                                                                                                                                                                                                                                                                                                                                                                                                                                                                                                                                                                              |
| env-368 | WSSedA2Ca3_1001213      | + | 2849 | 2935 | RNA → rpl3p (PRK04231)Ribosomal_L3 (pfam00297) →                                                                                                                                                                                                                                                                                                                                                                                                                                                                                                                                                                                                                                                                                                                                                                                     |
| env-369 | JGI20213J14113_1000441  | - | 1013 | 927  | RNA → rpl3p (PRK04231)Ribosomal_L3 (pfam00297) →                                                                                                                                                                                                                                                                                                                                                                                                                                                                                                                                                                                                                                                                                                                                                                                     |
| env-370 | JGI26437J51864_10613048 | + | 135  | 220  | RNA → hypo →                                                                                                                                                                                                                                                                                                                                                                                                                                                                                                                                                                                                                                                                                                                                                                                                                         |
| env-371 | 3300000568_10163768     | + | 37   | 123  | RNA → hypo →                                                                                                                                                                                                                                                                                                                                                                                                                                                                                                                                                                                                                                                                                                                                                                                                                         |
| env-372 | JGI20213J14113_1352303  | + | 18   | 105  | RNA → ←hypo                                                                                                                                                                                                                                                                                                                                                                                                                                                                                                                                                                                                                                                                                                                                                                                                                          |
| env-373 | WSSedB1B2_c001061       | - | 813  | 728  | RNA → hypo →                                                                                                                                                                                                                                                                                                                                                                                                                                                                                                                                                                                                                                                                                                                                                                                                                         |
| env-374 | JGI26437J51864_10024878 | + | 905  | 990  | RNA →                                                                                                                                                                                                                                                                                                                                                                                                                                                                                                                                                                                                                                                                                                                                                                                                                                |
| env-375 | LWFCAn_GLQU6AQ01CDIKX   | - | 257  | 171  | RNA → hypo →                                                                                                                                                                                                                                                                                                                                                                                                                                                                                                                                                                                                                                                                                                                                                                                                                         |
| env-376 | JGI24732J26686_1167705  | - | 325  | 240  | RNA → hypo →                                                                                                                                                                                                                                                                                                                                                                                                                                                                                                                                                                                                                                                                                                                                                                                                                         |
| env-377 | JGI24732J26686_1058151  | - | 388  | 303  | RNA → hypo →                                                                                                                                                                                                                                                                                                                                                                                                                                                                                                                                                                                                                                                                                                                                                                                                                         |
| env-378 | GYO3UBL02HBW2K          | - | 172  | 86   | RNA → hypo →                                                                                                                                                                                                                                                                                                                                                                                                                                                                                                                                                                                                                                                                                                                                                                                                                         |
| env-379 | LWFCAn_GLO1YSU01C0WMX   | + | 42   | 125  | RNA → ←hypo                                                                                                                                                                                                                                                                                                                                                                                                                                                                                                                                                                                                                                                                                                                                                                                                                          |
| env-380 | 3300000558_10014112     | + | 936  | 1015 | RNA → RplC (COG0087)rpl3p (PRK04231) → RplD (COG0088)rpl4p (PRK04042) → RplW (COG0089)PRK14548 (PRK14548) → RplB (COG0090)rpl2p (PRK09612) → rps19p (PRK04038)Ribosomal_S19 (pfam00203) → rpl22p (PRK04223)RplV (COG0091) → RpsC (COG0092)rps3p (PRK04191) → PRK14549 (PRK14549)Ribosomal_L29 (pfam00831) → PRK03879 (PRK03879)UPF0086 (pfam01868) → RpsQ (COG0186)rps17p (PRK08572) → rpl14p (PRK08571)Ribosomal_L14 (pfam00238) → rpl24p (PRK01191)KOW_RPL26 (cd06089) → PRK04313 (PRK04313)KOW_RPS4 (cd06087)Ribosomal_S4e (pfam00900) → rpl5p (PRK04219)Ribosomal_L5 (pfam00281)Ribosomal_L5_C (pfam00673) → RpsN (COG0199)rps14p (PRK05766) → rps8p (PRK04034)RpsH (COG0096) → rpl6p (PRK05518)Ribosomal_L6 (pfam00347) →                                                                                                       |
| env-381 | 3300001580_10840377     | - | 216  | 137  | RNA → ←hypo                                                                                                                                                                                                                                                                                                                                                                                                                                                                                                                                                                                                                                                                                                                                                                                                                          |
| env-382 | JGI20214J14112_1015362  | + | 514  | 593  | RNA → rpl3p (PRK04231)Ribosomal_L3 (pfam00297) →                                                                                                                                                                                                                                                                                                                                                                                                                                                                                                                                                                                                                                                                                                                                                                                     |
| env-383 | 3300001605_10335424     | - | 366  | 287  | RNA →                                                                                                                                                                                                                                                                                                                                                                                                                                                                                                                                                                                                                                                                                                                                                                                                                                |
| env-384 | JGI26437J51864_10189827 | + | 91   | 170  | RNA → ←hypo                                                                                                                                                                                                                                                                                                                                                                                                                                                                                                                                                                                                                                                                                                                                                                                                                          |
| env-385 | JGI26437J51864_10656079 | - | 220  | 141  | RNA → ←hypo                                                                                                                                                                                                                                                                                                                                                                                                                                                                                                                                                                                                                                                                                                                                                                                                                          |



|         |                          |   |       |       |                                                                                                                                                                                                                                                                                                                                                                                                                                                                                                                                                                                                                                                                                                                                                                                                                                                                    |
|---------|--------------------------|---|-------|-------|--------------------------------------------------------------------------------------------------------------------------------------------------------------------------------------------------------------------------------------------------------------------------------------------------------------------------------------------------------------------------------------------------------------------------------------------------------------------------------------------------------------------------------------------------------------------------------------------------------------------------------------------------------------------------------------------------------------------------------------------------------------------------------------------------------------------------------------------------------------------|
| env-386 | 3300001580_10004519      | - | 9169  | 9090  | RNA → RplC (COG0087)rpl3p (PRK04231) → RplD (COG0088)rpl4p (PRK04042) → RplW (COG0089)PRK14548 (PRK14548) → RplB (COG0090)rpl2p (PRK09612) → rps19p (PRK04038)Ribosomal_S19 (pfam00203) → rpl22p (PRK04223)RplV (COG0091) → RpsC (COG0092)rps3p (PRK04191) → PRK14549 (PRK14549)Ribosomal_L29 (pfam00831) → PRK03879 (PRK03879)UPF0086 (pfam01868) → RpsQ (COG0186)rps17p (PRK08572) → rpl14p (PRK08571)Ribosomal_L14 (pfam00238) → rpl24p (PRK01191)KOW_RPL26 (cd06089) → PRK04313 (PRK04313)KOW_RPS4 (cd06087)Ribosomal_S4e (pfam00900) → rpl5p (PRK04219)Ribosomal_L5 (pfam00281)Ribosomal_L5_C (pfam00673) → RpsN (COG0199)rps14p (PRK05766) → rps8p (PRK04034)RpsH (COG0096) → RplF (COG0097)rpl6p (PRK05518) → rpl32e (PRK08562)Ribosomal_L32e (pfam01655) →                                                                                                 |
| env-387 | 3300000032_0388072       | - | 284   | 205   | RNA →                                                                                                                                                                                                                                                                                                                                                                                                                                                                                                                                                                                                                                                                                                                                                                                                                                                              |
| env-388 | 3300001605_10952026      | + | 300   | 379   | RNA → ←-hypo                                                                                                                                                                                                                                                                                                                                                                                                                                                                                                                                                                                                                                                                                                                                                                                                                                                       |
| env-389 | B3_all.c.Cons98067       | + | 267   | 345   | RNA → rpl3p (PRK04231)Ribosomal_L3 (pfam00297) →                                                                                                                                                                                                                                                                                                                                                                                                                                                                                                                                                                                                                                                                                                                                                                                                                   |
| env-390 | LWAnNiSIP_F624WLL02IC2DN | - | 276   | 191   | RNA → hypo →                                                                                                                                                                                                                                                                                                                                                                                                                                                                                                                                                                                                                                                                                                                                                                                                                                                       |
| env-391 | LWAnN_F624WLL02IC2DN     | - | 276   | 191   | RNA → hypo →                                                                                                                                                                                                                                                                                                                                                                                                                                                                                                                                                                                                                                                                                                                                                                                                                                                       |
| env-392 | JGI24728J21555_1000024   | + | 55297 | 55372 | RNA → RplC (COG0087)rpl3p (PRK04231) → RplD (COG0088)rpl4p (PRK04042) → RplW (COG0089)PRK14548 (PRK14548) → RplB (COG0090)rpl2p (PRK09612) → rps19p (PRK04038)Ribosomal_S19 (pfam00203) → rpl22p (PRK04223)RplV (COG0091) → RpsC (COG0092)rps3p (PRK04191) → PRK14549 (PRK14549)Ribosomal_L29 (pfam00831) → PRK03879 (PRK03879)UPF0086 (pfam01868) → RpsQ (COG0186)rps17p (PRK08572) → rpl14p (PRK08571)Ribosomal_L14 (pfam00238) → rpl24p (PRK01191)KOW_RPL26 (cd06089) → PRK04313 (PRK04313)KOW_RPS4 (cd06087)Ribosomal_S4e (pfam00900) → rpl5p (PRK04219)Ribosomal_L5 (pfam00281)Ribosomal_L5_C (pfam00673) → RpsN (COG0199)rps14p (PRK05766) → rps8p (PRK04034)RpsH (COG0096) → RplF (COG0097)rpl6p (PRK05518) → rpl32e (PRK08562)Ribosomal_L32_L32e (cd00513) → hypo → hypo → rpl19e (PRK08570)Ribosomal_L19e (pfam01280) → RplR (COG0256)rpl18p (PRK08569) → |
| env-393 | JGI24731J21663_1041451   | + | 763   | 838   | RNA →                                                                                                                                                                                                                                                                                                                                                                                                                                                                                                                                                                                                                                                                                                                                                                                                                                                              |
| env-394 | JGI24732J26686_1000141   | + | 22138 | 22213 | RNA → RplC (COG0087)rpl3p (PRK04231) → RplD (COG0088)rpl4p (PRK04042) → RplW (COG0089)PRK14548 (PRK14548) → RplB (COG0090)rpl2p (PRK09612) → rps19p (PRK04038)Ribosomal_S19 (pfam00203) → rpl22p (PRK04223)RplV (COG0091) → RpsC (COG0092)rps3p (PRK04191) → PRK14549 (PRK14549)Ribosomal_L29 (pfam00831) → PRK03879 (PRK03879)UPF0086 (pfam01868) → RpsQ (COG0186)rps17p (PRK08572) → rpl14p (PRK08571)Ribosomal_L14 (pfam00238) → rpl24p (PRK01191)KOW_RPL26 (cd06089) → PRK04313 (PRK04313)KOW_RPS4 (cd06087)Ribosomal_S4e (pfam00900) → rpl5p (PRK04219)Ribosomal_L5 (pfam00281)Ribosomal_L5_C (pfam00673) → RpsN (COG0199)rps14p (PRK05766) → rps8p (PRK04034)RpsH (COG0096) → RplF (COG0097)rpl6p (PRK05518) → rpl32e (PRK08562)Ribosomal_L32_L32e (cd00513) → hypo → hypo → rpl19e (PRK08570)Ribosomal_L19e (pfam01280) → RplR (COG0256)rpl18p (PRK08569) → |
| env-395 | JGI24729J20445_1000265   | - | 14288 | 14211 | RNA → RplC (COG0087)rpl3p (PRK04231) → RplD (COG0088)rpl4p (PRK04042) → RplW (COG0089)PRK14548 (PRK14548) → RplB (COG0090)rpl2p (PRK09612) → rps19p (PRK04038)Ribosomal_S19 (pfam00203) → rpl22p (PRK04223)RplV (COG0091) → RpsC (COG0092)rps3p (PRK04191) → PRK14549 (PRK14549)Ribosomal_L29 (pfam00831) → PRK03879 (PRK03879)UPF0086 (pfam01868) → RpsQ (COG0186)rps17p (PRK08572) → rpl14p (PRK08571)Ribosomal_L14 (pfam00238) → rpl24p (PRK01191)KOW_RPL26 (cd06089) → PRK04313 (PRK04313)S4 (cd00165)KOW_RPS4 (cd06087)Ribosomal_S4e (pfam00900) → RplE (COG0094)rpl5p (PRK04219) → RpsN (COG0199)rps14p (PRK05766) → rps8p (PRK04034)RpsH (COG0096) → RplF (COG0097)rpl6p (PRK05518) → rpl32e (PRK08562)Ribosomal_L32e (pfam01655) → rpl19e (PRK08570)Ribosomal_L19e (pfam01280) → RplR (COG0256)rpl18p (PRK08569) →                                         |

|         |                        |   |       |       |                                                                                                                                                                                                                                                                                                                                                                                                                                                                                                                                                                                                                                                                                                                                                                                                                            |
|---------|------------------------|---|-------|-------|----------------------------------------------------------------------------------------------------------------------------------------------------------------------------------------------------------------------------------------------------------------------------------------------------------------------------------------------------------------------------------------------------------------------------------------------------------------------------------------------------------------------------------------------------------------------------------------------------------------------------------------------------------------------------------------------------------------------------------------------------------------------------------------------------------------------------|
| env-396 | JGI24729J20445_1000376 | - | 22541 | 22464 | RNA → RplC (COG0087)rpl3p (PRK04231) → RplD (COG0088)rpl4p (PRK04042) → RplW (COG0089)PRK14548 (PRK14548) → RplB (COG0090)rpl2p (PRK09612) → rps19p (PRK04038)Ribosomal_S19 (pfam00203) → rpl22p (PRK04223)RplV (COG0091) → RpsC (COG0092)rps3p (PRK04191) → PRK14549 (PRK14549)Ribosomal_L29 (pfam00831) → PRK03879 (PRK03879)UPF0086 (pfam01868) → RpsQ (COG0186)rps17p (PRK08572) → rpl14p (PRK08571)Ribosomal_L14 (pfam00238) → rpl24p (PRK01191)KOW_RPL26 (cd06089) → PRK04313 (PRK04313)S4 (cd00165)KOW_RPS4 (cd06087)Ribosomal_S4e (pfam00900) → RplE (COG0094)rpl5p (PRK04219) → RpsN (COG0199)rps14P (PRK05766) → rps8p (PRK04034)RpsH (COG0096) → RplF (COG0097)rpl6p (PRK05518) → rpl32e (PRK08562)Ribosomal_L32e (pfam01655) → rpl19e (PRK08570)Ribosomal_L19e (pfam01280) → RplR (COG0256)rpl18p (PRK08569) → |
| env-397 | JGI24732J26686_1000166 | - | 22911 | 22834 | RNA → RplC (COG0087)rpl3p (PRK04231) → RplD (COG0088)rpl4p (PRK04042) → RplW (COG0089)PRK14548 (PRK14548) → RplB (COG0090)rpl2p (PRK09612) → rps19p (PRK04038)Ribosomal_S19 (pfam00203) → rpl22p (PRK04223)RplV (COG0091) → RpsC (COG0092)rps3p (PRK04191) → PRK14549 (PRK14549)Ribosomal_L29 (pfam00831) → PRK03879 (PRK03879)UPF0086 (pfam01868) → RpsQ (COG0186)rps17p (PRK08572) → rpl14p (PRK08571)Ribosomal_L14 (pfam00238) → rpl24p (PRK01191)KOW_RPL26 (cd06089) → PRK04313 (PRK04313)S4 (cd00165)KOW_RPS4 (cd06087)Ribosomal_S4e (pfam00900) → RplE (COG0094)rpl5p (PRK04219) → RpsN (COG0199)rps14P (PRK05766) → rps8p (PRK04034)RpsH (COG0096) → RplF (COG0097)rpl6p (PRK05518) → rpl32e (PRK08562)Ribosomal_L32e (pfam01655) → rpl19e (PRK08570)Ribosomal_L19e (pfam01280) → RplR (COG0256)rpl18p (PRK08569) → |
| env-398 | JGI24730J26740_1278979 | + | 62    | 139   | RNA → ←-hypo                                                                                                                                                                                                                                                                                                                                                                                                                                                                                                                                                                                                                                                                                                                                                                                                               |
| env-399 | JGI20214J14112_1005972 | + | 608   | 694   | RNA → hypo → RplC (COG0087)rpl3p (PRK04231) →                                                                                                                                                                                                                                                                                                                                                                                                                                                                                                                                                                                                                                                                                                                                                                              |
| env-400 | 3300000558_10001908    | - | 3593  | 3508  | RNA → hypo →                                                                                                                                                                                                                                                                                                                                                                                                                                                                                                                                                                                                                                                                                                                                                                                                               |
| env-401 | 3300001605_12127170    | + | 26    | 111   | RNA → hypo →                                                                                                                                                                                                                                                                                                                                                                                                                                                                                                                                                                                                                                                                                                                                                                                                               |
| env-402 | JGI24732J26686_1168257 | - | 324   | 239   | RNA → hypo →                                                                                                                                                                                                                                                                                                                                                                                                                                                                                                                                                                                                                                                                                                                                                                                                               |
| env-403 | JGI24729J20445_1001367 | - | 9125  | 9040  | RNA → RplC (COG0087)rpl3p (PRK04231) → RplD (COG0088)rpl4p (PRK04042) → RplW (COG0089)PRK14548 (PRK14548) → RplB (COG0090)rpl2p (PRK09612) → rps19p (PRK04038)Ribosomal_S19 (pfam00203) → rpl22p (PRK04223)RplV (COG0091) → RpsC (COG0092)rps3p (PRK04191) → PRK14549 (PRK14549)Ribosomal_L29 (pfam00831) → PRK03879 (PRK03879)UPF0086 (pfam01868) → RpsQ (COG0186)rps17p (PRK08572) → rpl14p (PRK08571)Ribosomal_L14 (pfam00238) → rpl24p (PRK01191)KOW_RPL26 (cd06089) → PRK04313 (PRK04313)S4 (cd00165)KOW_RPS4 (cd06087)Ribosomal_S4e (pfam00900) → rpl5p (PRK04219)Ribosomal_L5 (pfam00281)Ribosomal_L5_C (pfam00673) → RpsN (COG0199)rps14P (PRK05766) → rps8p (PRK04034)RpsH (COG0096) → RplF (COG0097)rpl6p (PRK05518) → rpl32e (PRK08562)Ribosomal_L32e (pfam01655) →                                             |
| env-404 | JGI24730J26740_1168855 | + | 233   | 318   | RNA → hypo →                                                                                                                                                                                                                                                                                                                                                                                                                                                                                                                                                                                                                                                                                                                                                                                                               |
| env-405 | JGI24728J21555_1218516 | - | 187   | 102   | RNA → ←-hypo                                                                                                                                                                                                                                                                                                                                                                                                                                                                                                                                                                                                                                                                                                                                                                                                               |
| env-406 | JGI24729J20445_1004575 | + | 4026  | 4111  | RNA →                                                                                                                                                                                                                                                                                                                                                                                                                                                                                                                                                                                                                                                                                                                                                                                                                      |
| env-407 | WSSedA1Ba3_1333478     | - | 172   | 89    | RNA → hypo →                                                                                                                                                                                                                                                                                                                                                                                                                                                                                                                                                                                                                                                                                                                                                                                                               |

|         |                         |   |         |         |                                                                                                                                                                                                                                                                                                                                                                                                                                                                                                                                                                                                                                                                                                                                                                                                                                                                                                                                                                                                                                                                                                                                                                                                                                                                                                                                                                                                                                                                                                                                                                                                                                                                                                          |
|---------|-------------------------|---|---------|---------|----------------------------------------------------------------------------------------------------------------------------------------------------------------------------------------------------------------------------------------------------------------------------------------------------------------------------------------------------------------------------------------------------------------------------------------------------------------------------------------------------------------------------------------------------------------------------------------------------------------------------------------------------------------------------------------------------------------------------------------------------------------------------------------------------------------------------------------------------------------------------------------------------------------------------------------------------------------------------------------------------------------------------------------------------------------------------------------------------------------------------------------------------------------------------------------------------------------------------------------------------------------------------------------------------------------------------------------------------------------------------------------------------------------------------------------------------------------------------------------------------------------------------------------------------------------------------------------------------------------------------------------------------------------------------------------------------------|
| Mli-2-1 | NZ_CM001436.1           | - | 2884644 | 2884571 | <p>RNA → RplC (COG0087)rpl3p (PRK04231) → RplD (COG0087)rpl3p (PRK04231) → RplD (COG0088)rpl4p (PRK04042) → RplD (COG0088)rpl4p (PRK04042) → RplW (COG0089)PRK14548 (PRK14548) → RplW (COG0089)PRK14548 (PRK14548) → RplB (COG0090)rpl2p (PRK09612) → RplB (COG0090)rpl2p (PRK09612) → rps19p (PRK04038)Ribosomal_S19 (pfam00203) → rps19p (PRK04038)Ribosomal_S19 (pfam00203) → rpl22p (PRK04223)RplV (COG0091) → rpl22p (PRK04223)RplV (COG0091) → RpsC (COG0092)rps3p (PRK04191) → RpsC (COG0092)rps3p (PRK04191) → PRK14549 (PRK14549)Ribosomal_L29 (pfam00831) → PRK14549 (PRK14549)Ribosomal_L29 (pfam00831) → PRK03879 (PRK03879)UPF0086 (pfam01868) → PRK03879 (PRK03879)UPF0086 (pfam01868) → RpsQ (COG0186)rps17p (PRK08572) → RpsQ (COG0186)rps17p (PRK08572) → rpl14p (PRK08571)Ribosomal_L14 (pfam00238) → rpl14p (PRK08571)Ribosomal_L14 (pfam00238) → rpl24p (PRK01191)KOW_RPL26 (cd06089) → rpl24p (PRK01191)KOW_RPL26 (cd06089) → PRK04313 (PRK04313)KOW_RPS4 (cd06087)Ribosomal_S4e (pfam00900) → PRK04313 (PRK04313)KOW_RPS4 (cd06087)Ribosomal_S4e (pfam00900) → RplE (COG0094)rpl5p (PRK04219) → RplE (COG0094)rpl5p (PRK04219) → RpsN (COG0199)rps14p (PRK05766) → RpsN (COG0199)rps14p (PRK05766) → rps8p (PRK04034)RpsH (COG0096) → rps8p (PRK04034)RpsH (COG0096) → RplF (COG0097)uL6_arch (TIGR03653) → RplF (COG0097)uL6_arch (TIGR03653) → rpl32e (PRK08562)Ribosomal_L32e (pfam01655) → rpl32e (PRK08562)Ribosomal_L32e (pfam01655) → rpl19e (PRK08570)Ribosomal_L19e (pfam01280) → rpl19e (PRK08570)Ribosomal_L19e (pfam01280) → RplR (COG0256)rpl18p (PRK08569) → RplR (COG0256)rpl18p (PRK08569) → RpsE (COG0098)rps5p (PRK04044) → RpsE (COG0098)rps5p (PRK04044) →</p> |
| Mpe-1-1 | NC_014507.1             | + | 2206565 | 2206637 | <p>RNA → RplC (COG0087)rpl3p (PRK04231) → RplD (COG0088)rpl4p (PRK04042) → RplW (COG0089)PRK14548 (PRK14548) → RplB (COG0090)rpl2p (PRK09612) → RpsS (COG0185)rps19p (PRK04038) → rpl22p (PRK04223)RplV (COG0091) → RpsC (COG0092)rps3p (PRK04191) → PRK14549 (PRK14549)Ribosomal_L29 (pfam00831) → PRK03879 (PRK03879)UPF0086 (pfam01868) → RpsQ (COG0186)rps17p (PRK08572) → rpl14p (PRK08571)Ribosomal_L14 (pfam00238) → rpl24p (PRK01191)KOW_RPL26 (cd06089) → RplE (COG0094)rpl5p (PRK04219) → RpsN (COG0199)rps14p (PRK05766) → rps8p (PRK04034)RpsH (COG0096) → RplF (COG0097)rpl6p (PRK05518) → hypo → rpl32e (PRK08562)Ribosomal_L32e (pfam01655) → rpl19e (PRK08570)Ribosomal_L19e (pfam01280) → RplR (COG0256)rpl18p (PRK08569) → RpsE (COG0098)rps5p (PRK04044) →</p>                                                                                                                                                                                                                                                                                                                                                                                                                                                                                                                                                                                                                                                                                                                                                                                                                                                                                                                        |
| Mpa-2-1 | NZ_KN360930.1           | - | 82807   | 82734   | RNA → ←-hypo                                                                                                                                                                                                                                                                                                                                                                                                                                                                                                                                                                                                                                                                                                                                                                                                                                                                                                                                                                                                                                                                                                                                                                                                                                                                                                                                                                                                                                                                                                                                                                                                                                                                                             |
| env-408 | M940CN_1020281          | + | 3372    | 3442    | RNA → rpl3p (PRK04231)Ribosomal_L3 (pfam00297) →                                                                                                                                                                                                                                                                                                                                                                                                                                                                                                                                                                                                                                                                                                                                                                                                                                                                                                                                                                                                                                                                                                                                                                                                                                                                                                                                                                                                                                                                                                                                                                                                                                                         |
| Mmo-1-1 | NZ_JOMF01000007.1       | + | 9542    | 9636    | <p>RNA → RplC (COG0087)rpl3p (PRK04231) → RplD (COG0088)rpl4p (PRK04042) → RplW (COG0089)PRK14548 (PRK14548) → RplB (COG0090)rpl2p (PRK09612) → RpsS (COG0185)rps19p (PRK04038) → rpl22p (PRK04223)RplV (COG0091) → RpsC (COG0092)rps3p (PRK04191) → PRK14549 (PRK14549)Ribosomal_L29 (pfam00831) → POP4 (COG1588)PRK03879 (PRK03879) → RpsQ (COG0186)rps17p (PRK08572) → rpl14p (PRK08571)Ribosomal_L14 (pfam00238) → RplX (COG0198)rpl24p (PRK01191) → PRK04313 (PRK04313)KOW_RPS4 (cd06087)Ribosomal_S4e (pfam00900) → RplE (COG0094)rpl5p (PRK04219) → RpsN (COG0199)rps14p (PRK05766) → rps8p (PRK04034)RpsH (COG0096) → RplF (COG0097)rpl6p (PRK05518) → rpl32e (PRK08562)Ribosomal_L32e (pfam01655) → rpl19e (PRK08570)Ribosomal_L19e (pfam01280) → RplR (COG0256)rpl18p (PRK08569) → RpsE (COG0098)rps5p (PRK04044) →</p>                                                                                                                                                                                                                                                                                                                                                                                                                                                                                                                                                                                                                                                                                                                                                                                                                                                                        |
| env-409 | RUMENNODE.4185760_38501 | - | 73103   | 73009   | <p>RNA → RplC (COG0087)rpl3p (PRK04231) → RplD (COG0088)rpl4p (PRK04042) → RplW (COG0089)PRK14548 (PRK14548) → RplB (COG0090)rpl2p (PRK09612) → rpl2p (PRK09612) → RpsS (COG0185)rps19p (PRK04038) → rpl22p (PRK04223)RplV (COG0091) → KH (smart00322)archeal_30S_S3_KH (cd02411) → rps3p (PRK04191)Ribosomal_S3_C (pfam00189) → PRK14549 (PRK14549)Ribosomal_L29 (pfam00831) → POP4 (COG1588)PRK03879 (PRK03879) → RpsQ (COG0186)rps17p (PRK08572) → rpl14p (PRK08571)Ribosomal_L14 (pfam00238) → RplX (COG0198)rpl24p (PRK01191) → PRK04313 (PRK04313)Ribosomal_S4e (pfam00900) → PRK04313 (PRK04313)KOW_RPS4 (cd06087) → RplE (COG0094)rpl5p (PRK04219) → RpsN (COG0199)rps14p (PRK05766) → rps8p (PRK04034)RpsH (COG0096) → RplF (COG0097)rpl6p (PRK05518) →</p>                                                                                                                                                                                                                                                                                                                                                                                                                                                                                                                                                                                                                                                                                                                                                                                                                                                                                                                                     |

|         |                         |   |         |         |                                                                                                                                                                                                                                                                                                                                                                                                                                                                                                                                                                                                                                                                                                                                                                                                                                                                                                                                                                                                                                                                                                                                                                                                                                                       |
|---------|-------------------------|---|---------|---------|-------------------------------------------------------------------------------------------------------------------------------------------------------------------------------------------------------------------------------------------------------------------------------------------------------------------------------------------------------------------------------------------------------------------------------------------------------------------------------------------------------------------------------------------------------------------------------------------------------------------------------------------------------------------------------------------------------------------------------------------------------------------------------------------------------------------------------------------------------------------------------------------------------------------------------------------------------------------------------------------------------------------------------------------------------------------------------------------------------------------------------------------------------------------------------------------------------------------------------------------------------|
| env-410 | SL_5KL_010_SED_10008304 | + | 2725    | 2796    | RNA → RplC (COG0087)rpl3p (PRK04231) → RplD (COG0088)rpl4p (PRK04042) →                                                                                                                                                                                                                                                                                                                                                                                                                                                                                                                                                                                                                                                                                                                                                                                                                                                                                                                                                                                                                                                                                                                                                                               |
| env-411 | LCWY01003686.1          | + | 978     | 1049    | RNA → hypo →                                                                                                                                                                                                                                                                                                                                                                                                                                                                                                                                                                                                                                                                                                                                                                                                                                                                                                                                                                                                                                                                                                                                                                                                                                          |
| env-412 | LCWZ01000078.1          | + | 773     | 844     | RNA → RplC (COG0087)rpl3p (PRK04231) → RplD (COG0088)rpl4p (PRK04042) →<br>RplW (COG0089)PRK14548 (PRK14548) → RplB (COG0090)rpl2p (PRK09612) →<br>RpsS (COG0185)rps19p (PRK04038) → rpl22p (PRK04223)RplV (COG0091) →<br>RpsC (COG0092)rps3p (PRK04191) → PRK14549 (PRK14549)Ribosomal_L29 (pfam00831) →<br>PRK03879 (PRK03879)UPF0086 (pfam01868) → RpsQ (COG0186)rps17p (PRK08572) →<br>rpl14p (PRK08571)Ribosomal_L14 (pfam00238) → rpl24p (PRK01191)KOW_RPL26 (cd06089) →<br>PRK04313 (PRK04313)KOW_RPS4 (cd06087)S4 (pfam01479)Ribosomal_S4e (pfam00900) →<br>rpl5p (PRK04219)Ribosomal_L5 (pfam00281)Ribosomal_L5_C (pfam00673) →<br>RpsN (COG0199)rps14p (PRK05766) → rps8p (PRK04034) → rps8p (PRK04034)Ribosomal_S8 (pfam00410) →<br>RplF (COG0097)rpl6p (PRK05518) → hypo → Rpl32e (COG1717)rpl32e (PRK08562) →<br>rpl19e (PRK08570)Ribosomal_L19e (pfam01280) → RplR (COG0256)rpl18p (PRK08569) →<br>RpsE (COG0098)rps5p (PRK04044) → Ribosomal_L30_like (cd00355)rpl30p (PRK06049) →<br>Ribosomal_L7_archeal_euk (cd01657)rpl30p (PRK06049) → RplO (COG0200)rpl15p (PRK06419) →                                                                                                                                                          |
| Mco-1-1 | NC_017034.1             | + | 1276328 | 1276418 | RNA → MTH1 (COG2106) →                                                                                                                                                                                                                                                                                                                                                                                                                                                                                                                                                                                                                                                                                                                                                                                                                                                                                                                                                                                                                                                                                                                                                                                                                                |
| env-413 | JGI24024J18818_10045249 | + | 1393    | 1489    | RNA → Methyltrn_RNA_3 (pfam02598) →                                                                                                                                                                                                                                                                                                                                                                                                                                                                                                                                                                                                                                                                                                                                                                                                                                                                                                                                                                                                                                                                                                                                                                                                                   |
| env-414 | LGVD01025758.1          | - | 1753    | 1657    | RNA → Methyltrn_RNA_3 (pfam02598) →                                                                                                                                                                                                                                                                                                                                                                                                                                                                                                                                                                                                                                                                                                                                                                                                                                                                                                                                                                                                                                                                                                                                                                                                                   |
| env-415 | ASHM260b_GM9OZ8V02GZRNU | + | 167     | 263     | RNA → hypo →                                                                                                                                                                                                                                                                                                                                                                                                                                                                                                                                                                                                                                                                                                                                                                                                                                                                                                                                                                                                                                                                                                                                                                                                                                          |
| env-416 | LGVE01111852.1          | - | 441     | 345     | RNA → Methyltrn_RNA_3 (pfam02598) →                                                                                                                                                                                                                                                                                                                                                                                                                                                                                                                                                                                                                                                                                                                                                                                                                                                                                                                                                                                                                                                                                                                                                                                                                   |
| env-417 | LGVF01232254.1          | - | 138     | 42      | RNA → Methyltrn_RNA_3 (pfam02598) →                                                                                                                                                                                                                                                                                                                                                                                                                                                                                                                                                                                                                                                                                                                                                                                                                                                                                                                                                                                                                                                                                                                                                                                                                   |
| env-418 | LG0V01013195.1          | + | 3349    | 3445    | RNA → Methyltrn_RNA_3 (pfam02598) → RplC (COG0087)rpl3p (PRK04231) →<br>RplD (COG0088)rpl4p (PRK04042) → RplW (COG0089)PRK14548 (PRK14548) →<br>RplB (COG0090)rpl2p (PRK09612) → RpsS (COG0185)rps19p (PRK04038) →<br>rpl22p (PRK04223)Ribosomal_L22 (pfam00237) → rps3p (PRK04191)Ribosomal_S3_C (pfam00189) →<br>PRK14549 (PRK14549)Ribosomal_L29 (pfam00831) → PRK03879 (PRK03879)UPF0086 (pfam01868) →<br>RpsQ (COG0186)rps17p (PRK08572) → rpl14p (PRK08571)Ribosomal_L14 (pfam00238) →<br>rpl24p (PRK01191)KOW_RPL26 (cd06089) →<br>PRK04313 (PRK04313)KOW_RPS4 (cd06087)Ribosomal_S4e (pfam00900) →<br>rpl5p (PRK04219)Ribosomal_L5_C (pfam00673) → RpsN (COG0199)rps14p (PRK05766) →<br>rps8p (PRK04034)RpsH (COG0096) → RplF (COG0097)rpl6p (PRK05518) →<br>Rpl32e (COG1717)rpl32e (PRK08562) →                                                                                                                                                                                                                                                                                                                                                                                                                                              |
| env-419 | LGVC01002321.1          | + | 1612    | 1708    | RNA → Methyltrn_RNA_3 (pfam02598) → RplC (COG0087)rpl3p (PRK04231) →<br>RplD (COG0088)rpl4p (PRK04042) → RplW (COG0089)PRK14548 (PRK14548) →<br>RplB (COG0090)rpl2p (PRK09612) → RpsS (COG0185)rps19p (PRK04038) →<br>rpl22p (PRK04223)RplV (COG0091) → RpsC (COG0092)rps3p (PRK04191) →<br>PRK14549 (PRK14549)Ribosomal_L29 (pfam00831) → PRK03879 (PRK03879)UPF0086 (pfam01868) →<br>RpsQ (COG0186)rps17p (PRK08572) → rpl14p (PRK08571)Ribosomal_L14 (pfam00238) →<br>rpl24p (PRK01191)KOW_RPL26 (cd06089) →<br>PRK04313 (PRK04313)KOW_RPS4 (cd06087)Ribosomal_S4e (pfam00900) → RplE (COG0094)rpl5p (PRK04219) →<br>RpsN (COG0199)rps14p (PRK05766) → rps8p (PRK04034)RpsH (COG0096) →<br>RplF (COG0097)rpl6p (PRK05518) → rpl32e (PRK08562)Ribosomal_L32_L32e (cd00513) →<br>rpl19e (PRK08570)Ribosomal_L19e (pfam01280) → RplR (COG0256)rpl18p (PRK08569) →<br>RpsE (COG0098)rps5p (PRK04044) → Ribosomal_L7_archeal_euk (cd01657)rpl30p (PRK06049) →<br>RplO (COG0200)rpl15p (PRK06419) → SecY (COG0201)PRK08568 (PRK08568) →<br>adk (PRK00279)ADK (cd01428) → COG1422 (COG1422)spore_lon_C (TIGR02903) →<br>CmkB (COG1102)PRK04182 (PRK04182) →<br>PRK04270 (PRK04270)PseudoU_synth_hDyskerin (cd02572)PUA (pfam01472) → hypo → hypo → hypo → |



|         |                        |   |        |        |                                                                                                                                                                                                                                                                                                                                                                                                                                                                                                                                                                                                                                                                                                                                                                                                                                                                                                                              |
|---------|------------------------|---|--------|--------|------------------------------------------------------------------------------------------------------------------------------------------------------------------------------------------------------------------------------------------------------------------------------------------------------------------------------------------------------------------------------------------------------------------------------------------------------------------------------------------------------------------------------------------------------------------------------------------------------------------------------------------------------------------------------------------------------------------------------------------------------------------------------------------------------------------------------------------------------------------------------------------------------------------------------|
| env-420 | LGVD01004949.1         | + | 1392   | 1488   | RNA → <b>Methyltrn_RNA_3 (pfam02598)</b> → RplC (COG0087)rpl3p (PRK04231) → rpl4p (PRK04042)Ribosomal_L4 (pfam00573) → RplW (COG0089)PRK14548 (PRK14548) → rpl2p (PRK09612)Ribosomal_L2_C (pfam03947) → RpsS (COG0185)rps19p (PRK04038) → rpl22p (PRK04223)RplV (COG0091) → rps3p (PRK04191)Ribosomal_S3_C (pfam00189) → PRK14549 (PRK14549)Ribosomal_L29 (pfam00831) → PRK03879 (PRK03879)UPF0086 (pfam01868) → RpsQ (COG0186)rps17p (PRK08572) → rpl14p (PRK08571)Ribosomal_L14 (pfam00238) → rpl24p (PRK01191) → PRK04313 (PRK04313)KOW_RPS4 (cd06087)Ribosomal_S4e (pfam00900) → RplE (COG0094)rpl5p (PRK04219) → RpsN (COG0199)rps14P (PRK05766) → rps8p (PRK04034)RpsH (COG0096) → RplF (COG0097)rpl6p (PRK05518) → rpl32e (PRK08562)Ribosomal_L32_L32e (cd00513) → rpl19e (PRK08570)Ribosomal_L19e (pfam01280) → RplR (COG0256)rpl18p (PRK08569) → RpsE (COG0098)rps5p (PRK04044) → RpmD (COG1841)rpl30p (PRK06049) → |
| env-421 | LGVE01002492.1         | - | 11696  | 11600  | RNA → <b>Methyltrn_RNA_3 (pfam02598)</b> → RplC (COG0087)rpl3p (PRK04231) → RplD (COG0088)rpl4p (PRK04042) → RplW (COG0089)PRK14548 (PRK14548) → RplB (COG0090)rpl2p (PRK09612) → rpl2p (PRK09612)Ribosomal_L2_C (pfam03947) → RpsS (COG0185)rps19p (PRK04038) → rpl22p (PRK04223)RplV (COG0091) → rps3p (PRK04191)archeal_30S_S3_KH (cd02411) → RpsC (COG0092)rps3p (PRK04191) → RpmC (COG0255)PRK14549 (PRK14549) → PRK03879 (PRK03879)UPF0086 (pfam01868) → rps17p (PRK08572) → rpl14p (PRK08571)Ribosomal_L14 (pfam00238) → rpl24p (PRK01191)KOW_RPL26 (cd06089) → PRK04313 (PRK04313)rpl5p (PRK04219)KOW_RPS4 (cd06087)Ribosomal_L5_C (pfam00673)Ribosomal_S4e (pfam00900) → rps8p (PRK04034)RpsH (COG0096) → RplF (COG0097)rpl6p (PRK05518) → RplE (COG0094)rpl5p (PRK04219) → Rpl32e (COG1717)rpl32e (PRK08562) →                                                                                                     |
| env-422 | LGVF01002618.1         | + | 131    | 227    | RNA → <b>Methyltrn_RNA_3 (pfam02598)</b> → rpl3p (PRK04231)Ribosomal_L3 (pfam00297) → RplC (COG0087)rpl3p (PRK04231) →                                                                                                                                                                                                                                                                                                                                                                                                                                                                                                                                                                                                                                                                                                                                                                                                       |
| env-423 | LGVE01240744.1         | - | 496    | 400    | RNA → <b>Methyltrn_RNA_3 (pfam02598)</b> →                                                                                                                                                                                                                                                                                                                                                                                                                                                                                                                                                                                                                                                                                                                                                                                                                                                                                   |
| env-424 | LGVF01231129.1         | - | 567    | 471    | RNA → <b>Methyltrn_RNA_3 (pfam02598)</b> →                                                                                                                                                                                                                                                                                                                                                                                                                                                                                                                                                                                                                                                                                                                                                                                                                                                                                   |
| env-425 | LGOV01087460.1         | + | 959    | 1055   | RNA → <b>Methyltrn_RNA_3 (pfam02598)</b> →                                                                                                                                                                                                                                                                                                                                                                                                                                                                                                                                                                                                                                                                                                                                                                                                                                                                                   |
| env-426 | LGVE01063670.1         | + | 1228   | 1324   | RNA → <b>Methyltrn_RNA_3 (pfam02598)</b> → RplC (COG0087)rpl3p (PRK04231) →                                                                                                                                                                                                                                                                                                                                                                                                                                                                                                                                                                                                                                                                                                                                                                                                                                                  |
| env-427 | LGVF01061963.1         | + | 239    | 335    | RNA → <b>Methyltrn_RNA_3 (pfam02598)</b> → rpl3p (PRK04231)Ribosomal_L3 (pfam00297) →                                                                                                                                                                                                                                                                                                                                                                                                                                                                                                                                                                                                                                                                                                                                                                                                                                        |
| env-428 | WSSedA1Ba3_1023920     | + | 778    | 871    | RNA → <b>Methyltrn_RNA_3 (pfam02598)</b> →                                                                                                                                                                                                                                                                                                                                                                                                                                                                                                                                                                                                                                                                                                                                                                                                                                                                                   |
| env-429 | WSSedA1Ba_1038552      | + | 407    | 500    | RNA → MTH1 (COG2106) →                                                                                                                                                                                                                                                                                                                                                                                                                                                                                                                                                                                                                                                                                                                                                                                                                                                                                                       |
| Msh-1-1 | NZ_JONQ01000008.1      | - | 165643 | 165550 | RNA → <b>Methyltrn_RNA_3 (pfam02598)</b> → RplC (COG0087)rpl3p (PRK04231) → RplD (COG0088)rpl4p (PRK04042) → RplW (COG0089)PRK14548 (PRK14548) → RplB (COG0090)rpl2p (PRK09612) → RpsS (COG0185)rps19p (PRK04038) → rpl22p (PRK04223)RplV (COG0091) → RpsC (COG0092)rps3p (PRK04191) → PRK14549 (PRK14549)Ribosomal_L29_HIP (cd00427) → PRK03879 (PRK03879)UPF0086 (pfam01868) → RpsQ (COG0186)rps17p (PRK08572) → rpl14p (PRK08571)Ribosomal_L14 (pfam00238) → RplX (COG0198)rpl24p (PRK01191) → PRK04313 (PRK04313)S4 (cd00165)Ribosomal_S4e (pfam00900) → RplE (COG0094)rpl5p (PRK04219) → RpsN (COG0199)rps14P (PRK05766) → rps8p (PRK04034)RpsH (COG0096) → RplF (COG0097)rpl6p (PRK05518) → rpl32e (PRK08562)Ribosomal_L32e (pfam01655) → rpl19e (PRK08570)Ribosomal_L19e (pfam01280) → RplR (COG0256)rpl18p (PRK08569) →                                                                                              |
| env-430 | taComm3_C1244          | - | 4081   | 3988   | RNA → <b>Methyltrn_RNA_3 (pfam02598)</b> → RplC (COG0087)rpl3p (PRK04231) → RplD (COG0088)rpl4p (PRK04042) → RplW (COG0089)PRK14548 (PRK14548) → RplB (COG0090)rpl2p (PRK09612) → RpsS (COG0185)rps19p (PRK04038) → rpl22p (PRK04223)RplV (COG0091) →                                                                                                                                                                                                                                                                                                                                                                                                                                                                                                                                                                                                                                                                        |
| env-431 | JGI12104J13512_1002612 | - | 3904   | 3811   | RNA → <b>Methyltrn_RNA_3 (pfam02598)</b> → RplC (COG0087)rpl3p (PRK04231) → RplD (COG0088)rpl4p (PRK04042) → RplW (COG0089)PRK14548 (PRK14548) → RplB (COG0090)rpl2p (PRK09612) → RpsS (COG0185)rps19p (PRK04038) → rpl22p (PRK04223)Ribosomal_L22 (pfam00237) →                                                                                                                                                                                                                                                                                                                                                                                                                                                                                                                                                                                                                                                             |

|         |                        |   |         |         |                                                                                                                                                                                                                                                                                                                                                                                                                                                                                                                                                                                                                                                                                                                                                                                                                                                                                                                                                                                                                                                                   |
|---------|------------------------|---|---------|---------|-------------------------------------------------------------------------------------------------------------------------------------------------------------------------------------------------------------------------------------------------------------------------------------------------------------------------------------------------------------------------------------------------------------------------------------------------------------------------------------------------------------------------------------------------------------------------------------------------------------------------------------------------------------------------------------------------------------------------------------------------------------------------------------------------------------------------------------------------------------------------------------------------------------------------------------------------------------------------------------------------------------------------------------------------------------------|
| env-432 | JGI11944J13513_1000082 | - | 41802   | 41709   | RNA → <b>Methyltrn_RNA_3 (pfam02598)</b> → RplC (COG0087)rpl3p (PRK04231) → RplD (COG0088)rpl4p (PRK04042) → RplW (COG0089)PRK14548 (PRK14548) → RplB (COG0090)rpl2p (PRK09612) → RpsS (COG0185)rps19p (PRK04038) → rpl22p (PRK04223)RplV (COG0091) → RpsC (COG0092)rps3p (PRK04191) → PRK14549 (PRK14549)Ribosomal_L29 (pfam00831) → PRK03879 (PRK03879)UPF0086 (pfam01868) → RpsQ (COG0186)rps17p (PRK08572) → rpl14p (PRK08571)Ribosomal_L14 (pfam00238) → rpl24p (PRK01191)KOW_RPL26 (cd06089) → PRK04313 (PRK04313)KOW_RPS4 (cd06087)S4 (pfam01479)Ribosomal_S4e (pfam00900) → rpl5p (PRK04219)Ribosomal_L5 (pfam00281)Ribosomal_L5_C (pfam00673) → RpsN (COG0199)rps14P (PRK05766) → rps8p (PRK04034)RpsH (COG0096) → RplF (COG0097)rpl6p (PRK05518) → rpl32e (PRK08562)Ribosomal_L32e (pfam01655) → rpl19e (PRK08570)Ribosomal_L19e (pfam01280) → RplR (COG0256)rpl18p (PRK08569) → RNA → <b>Methyltrn_RNA_3 (pfam02598)</b> → RplC (COG0087)rpl3p (PRK04231) →                                                                                            |
| env-433 | JGI20179J14886_1000343 | - | 1356    | 1263    | RNA → <b>Methyltrn_RNA_3 (pfam02598)</b> → RplC (COG0087)rpl3p (PRK04231) →                                                                                                                                                                                                                                                                                                                                                                                                                                                                                                                                                                                                                                                                                                                                                                                                                                                                                                                                                                                       |
| env-434 | 3300001580_10791145    | - | 337     | 244     | RNA → MTH1 (COG2106) →                                                                                                                                                                                                                                                                                                                                                                                                                                                                                                                                                                                                                                                                                                                                                                                                                                                                                                                                                                                                                                            |
| env-435 | 3300000568_10023551    | - | 5356    | 5263    | RNA → <b>Methyltrn_RNA_3 (pfam02598)</b> → RplC (COG0087)rpl3p (PRK04231) → RplD (COG0088)rpl4p (PRK04042) → RplW (COG0089)PRK14548 (PRK14548) → RplB (COG0090)rpl2p (PRK09612) → RpsS (COG0185)rps19p (PRK04038) → rpl22p (PRK04223)RplV (COG0091) → RpsC (COG0092)rps3p (PRK04191) → PRK14549 (PRK14549)Ribosomal_L29 (pfam00831) → PRK03879 (PRK03879)UPF0086 (pfam01868) → RNA → MTH1 (COG2106)PRK10611 (PRK10611) → rpl3p (PRK04231)Ribosomal_L3 (pfam00297) →                                                                                                                                                                                                                                                                                                                                                                                                                                                                                                                                                                                               |
| env-436 | 3300001592_10171977    | + | 123     | 216     | RNA → MTH1 (COG2106) →                                                                                                                                                                                                                                                                                                                                                                                                                                                                                                                                                                                                                                                                                                                                                                                                                                                                                                                                                                                                                                            |
| env-437 | 3300000032_0536775     | - | 94      | 1       | RNA →                                                                                                                                                                                                                                                                                                                                                                                                                                                                                                                                                                                                                                                                                                                                                                                                                                                                                                                                                                                                                                                             |
| env-438 | 3300001605_11573450    | - | 95      | 2       | RNA → MTH1 (COG2106) →                                                                                                                                                                                                                                                                                                                                                                                                                                                                                                                                                                                                                                                                                                                                                                                                                                                                                                                                                                                                                                            |
| env-439 | 3300001567_10002499    | - | 7097    | 7004    | RNA → <b>Methyltrn_RNA_3 (pfam02598)</b> → RplC (COG0087)rpl3p (PRK04231) → RplD (COG0088)rpl4p (PRK04042) → RplW (COG0089)PRK14548 (PRK14548) → RplB (COG0090)rpl2p (PRK09612) → RpsS (COG0185)rps19p (PRK04038) → rpl22p (PRK04223)RplV (COG0091) → RpsC (COG0092)rps3p (PRK04191) → PRK14549 (PRK14549)Ribosomal_L29 (pfam00831) → PRK03879 (PRK03879)UPF0086 (pfam01868) → RpsQ (COG0186)rps17p (PRK08572) → rpl14p (PRK08571)Ribosomal_L14 (pfam00238) → KOW (smart00739)KOW_RPL26 (cd06089) → PRK04313 (PRK04313)Ribosomal_S4e (pfam00900) → RNA → MTH1 (COG2106) →                                                                                                                                                                                                                                                                                                                                                                                                                                                                                         |
| env-440 | 3300000558_10031507    | - | 264     | 171     | RNA → MTH1 (COG2106) →                                                                                                                                                                                                                                                                                                                                                                                                                                                                                                                                                                                                                                                                                                                                                                                                                                                                                                                                                                                                                                            |
| env-441 | PCEOT_contig04628      | + | 1388    | 1481    | RNA → <b>Methyltrn_RNA_3 (pfam02598)</b> → RplC (COG0087)rpl3p (PRK04231) → RplD (COG0088)rpl4p (PRK04042) → RplW (COG0089)PRK14548 (PRK14548) → RplB (COG0090)rpl2p (PRK09612) → RpsS (COG0185)rps19p (PRK04038) → rpl22p (PRK04223)RplV (COG0091) → RpsC (COG0092)rps3p (PRK04191) → PRK14549 (PRK14549)Ribosomal_L29 (pfam00831) → PRK03879 (PRK03879)UPF0086 (pfam01868) → RNA → MTH1 (COG2106) →                                                                                                                                                                                                                                                                                                                                                                                                                                                                                                                                                                                                                                                             |
| env-442 | JGI12104J13512_1100715 | + | 77      | 170     | RNA → MTH1 (COG2106) →                                                                                                                                                                                                                                                                                                                                                                                                                                                                                                                                                                                                                                                                                                                                                                                                                                                                                                                                                                                                                                            |
| Mco-2-1 | NC_015416.1            | - | 2306426 | 2306333 | RNA → <b>Methyltrn_RNA_3 (pfam02598)</b> → RplC (COG0087)rpl3p (PRK04231) → RplD (COG0088)rpl4p (PRK04042) → RplW (COG0089)PRK14548 (PRK14548) → RplB (COG0090)rpl2p (PRK09612) → RpsS (COG0185)rps19p (PRK04038) → rpl22p (PRK04223)RplV (COG0091) → RpsC (COG0092)rps3p (PRK04191) → PRK14549 (PRK14549)Ribosomal_L29 (pfam00831) → PRK03879 (PRK03879)UPF0086 (pfam01868) → RpsQ (COG0186)rps17p (PRK08572) → rpl14p (PRK08571)Ribosomal_L14 (pfam00238) → rpl24p (PRK01191)KOW_RPL26 (cd06089) → rpl24p (PRK01191)KOW_RPL26 (cd06089) → PRK04313 (PRK04313)KOW_RPS4 (cd06087)Ribosomal_S4e (pfam00900) → RplE (COG0094)rpl5p (PRK04219) → RpsN (COG0199)rps14P (PRK05766) → rps8p (PRK04034)RpsH (COG0096) → RplF (COG0097)rpl6p (PRK05518) → rpl32e (PRK08562)Ribosomal_L32e (pfam01655) → rpl19e (PRK08570)Ribosomal_L19e (pfam01280) → RplR (COG0256)rpl18p (PRK08569) → RNA → <b>Methyltrn_RNA_3 (pfam02598)</b> → RplC (COG0087)rpl3p (PRK04231) → RplD (COG0088)rpl4p (PRK04042) → RplW (COG0089)PRK14548 (PRK14548) → RplB (COG0090)rpl2p (PRK09612) → |
| env-443 | JGI24730J26740_1002326 | - | 3281    | 3188    | RNA → <b>Methyltrn_RNA_3 (pfam02598)</b> → RplC (COG0087)rpl3p (PRK04231) → RplD (COG0088)rpl4p (PRK04042) → RplW (COG0089)PRK14548 (PRK14548) →                                                                                                                                                                                                                                                                                                                                                                                                                                                                                                                                                                                                                                                                                                                                                                                                                                                                                                                  |

|         |                           |   |       |       |                                                                                                                                                                                                                                                                                                                                                                                                                                                                                                                                                                                                                                                                                                                                                                                                                                                                                                                                                                                                                                                                                                                                                                                                                                                                                                                                                                                                                                                                                                                                                                                                                                                                                                                                                                                                                                                                                                                  |
|---------|---------------------------|---|-------|-------|------------------------------------------------------------------------------------------------------------------------------------------------------------------------------------------------------------------------------------------------------------------------------------------------------------------------------------------------------------------------------------------------------------------------------------------------------------------------------------------------------------------------------------------------------------------------------------------------------------------------------------------------------------------------------------------------------------------------------------------------------------------------------------------------------------------------------------------------------------------------------------------------------------------------------------------------------------------------------------------------------------------------------------------------------------------------------------------------------------------------------------------------------------------------------------------------------------------------------------------------------------------------------------------------------------------------------------------------------------------------------------------------------------------------------------------------------------------------------------------------------------------------------------------------------------------------------------------------------------------------------------------------------------------------------------------------------------------------------------------------------------------------------------------------------------------------------------------------------------------------------------------------------------------|
| env-444 | JGI24732J26686_1000856    | + | 2537  | 2630  | RNA → <a href="#">Methyltrn_RNA_3 (pfam02598)</a> → <a href="#">rpl3p (PRK04231)</a> <a href="#">Ribosomal_L3 (pfam00297)</a> → <a href="#">rpl3p (PRK04231)</a> <a href="#">Ribosomal_L3 (pfam00297)</a> → <a href="#">RplD (COG0088)</a> <a href="#">rpl4p (PRK04042)</a> → <a href="#">RplW (COG0089)</a> <a href="#">PRK14548 (PRK14548)</a> → <a href="#">RplB (COG0090)</a> <a href="#">rpl2p (PRK09612)</a> → <a href="#">RpsS (COG0185)</a> <a href="#">rps19p (PRK04038)</a> → <a href="#">rpl22p (PRK04223)</a> <a href="#">RplV (COG0091)</a> → <a href="#">RpsC (COG0092)</a> <a href="#">rps3p (PRK04191)</a> → <a href="#">RpmC (COG0255)</a> <a href="#">PRK14549 (PRK14549)</a> → <a href="#">POP4 (COG1588)</a> <a href="#">PRK03879 (PRK03879)</a> → <a href="#">RpsQ (COG0186)</a> <a href="#">rps17p (PRK08572)</a> → <a href="#">rpl14p (PRK08571)</a> <a href="#">Ribosomal_L14 (pfam00238)</a> → <a href="#">rpl24p (PRK01191)</a> <a href="#">KOW_RPL26 (cd06089)</a> → <a href="#">PRK04313 (PRK04313)</a> <a href="#">KOW_RPS4 (cd06087)</a> <a href="#">S4 (pfam01479)</a> <a href="#">Ribosomal_S4e (pfam00900)</a> → <a href="#">rpl5p (PRK04219)</a> <a href="#">Ribosomal_L5 (pfam00281)</a> <a href="#">Ribosomal_L5_C (pfam00673)</a> → <a href="#">RpsN (COG0199)</a> <a href="#">rps14p (PRK05766)</a> → <a href="#">rps8p (PRK04034)</a> <a href="#">RpsH (COG0096)</a> → <a href="#">RplF (COG0097)</a> <a href="#">rpl6p (PRK05518)</a> → <a href="#">rpl32e (PRK08562)</a> <a href="#">Ribosomal_L32_L32e (cd00513)</a> → <a href="#">rpl19e (PRK08570)</a> <a href="#">Ribosomal_L19e (pfam01280)</a> → <a href="#">RplR (COG0256)</a> <a href="#">rpl18p (PRK08569)</a> → <a href="#">RpsE (COG0098)</a> <a href="#">rps5p (PRK04044)</a> → <a href="#">Ribosomal_L7_archaeal_euk (cd01657)</a> <a href="#">rpl30p (PRK06049)</a> → <a href="#">rpl15p (PRK06419)</a> → |
| env-445 | JGI24730J26740_1077952    | - | 136   | 43    | RNA → <a href="#">MTH1 (COG2106)</a> →                                                                                                                                                                                                                                                                                                                                                                                                                                                                                                                                                                                                                                                                                                                                                                                                                                                                                                                                                                                                                                                                                                                                                                                                                                                                                                                                                                                                                                                                                                                                                                                                                                                                                                                                                                                                                                                                           |
| env-446 | JGI24729J20445_1000277    | + | 15893 | 15986 | RNA → <a href="#">Methyltrn_RNA_3 (pfam02598)</a> → <a href="#">RplC (COG0087)</a> <a href="#">rpl3p (PRK04231)</a> → <a href="#">RplD (COG0088)</a> <a href="#">rpl4p (PRK04042)</a> → <a href="#">RplW (COG0089)</a> <a href="#">PRK14548 (PRK14548)</a> → <a href="#">RplB (COG0090)</a> <a href="#">rpl2p (PRK09612)</a> → <a href="#">RpsS (COG0185)</a> <a href="#">rps19p (PRK04038)</a> → <a href="#">rpl22p (PRK04223)</a> <a href="#">RplV (COG0091)</a> → <a href="#">RpsC (COG0092)</a> <a href="#">rps3p (PRK04191)</a> → <a href="#">PRK14549 (PRK14549)</a> <a href="#">Ribosomal_L29 (pfam00831)</a> → <a href="#">PRK03879 (PRK03879)</a> <a href="#">UPF0086 (pfam01868)</a> → <a href="#">RpsQ (COG0186)</a> <a href="#">rps17p (PRK08572)</a> → <a href="#">rpl14p (PRK08571)</a> <a href="#">Ribosomal_L14 (pfam00238)</a> → <a href="#">rpl24p (PRK01191)</a> <a href="#">KOW_RPL26 (cd06089)</a> → <a href="#">PRK04313 (PRK04313)</a> <a href="#">S4 (cd00165)</a> <a href="#">KOW_RPS4 (cd06087)</a> → <a href="#">RplE (COG0094)</a> <a href="#">rpl5p (PRK04219)</a> → <a href="#">RpsN (COG0199)</a> <a href="#">rps14p (PRK05766)</a> → <a href="#">rps8p (PRK04034)</a> <a href="#">RpsH (COG0096)</a> → <a href="#">RplF (COG0097)</a> <a href="#">rpl6p (PRK05518)</a> → <a href="#">rpl32e (PRK08562)</a> <a href="#">Ribosomal_L32e (pfam01655)</a> → <a href="#">rpl19e (PRK08570)</a> <a href="#">Ribosomal_L19e (pfam01280)</a> → <a href="#">RplR (COG0256)</a> <a href="#">rpl18p (PRK08569)</a> →                                                                                                                                                                                                                                                                                                                                                                        |
| env-447 | JGI24732J26686_1234070    | + | 153   | 246   | RNA → <a href="#">MTH1 (COG2106)</a> →                                                                                                                                                                                                                                                                                                                                                                                                                                                                                                                                                                                                                                                                                                                                                                                                                                                                                                                                                                                                                                                                                                                                                                                                                                                                                                                                                                                                                                                                                                                                                                                                                                                                                                                                                                                                                                                                           |
| env-448 | SakLake120mDRAFT_c0020500 | - | 1276  | 1183  | RNA → <a href="#">Methyltrn_RNA_3 (pfam02598)</a> →                                                                                                                                                                                                                                                                                                                                                                                                                                                                                                                                                                                                                                                                                                                                                                                                                                                                                                                                                                                                                                                                                                                                                                                                                                                                                                                                                                                                                                                                                                                                                                                                                                                                                                                                                                                                                                                              |
| env-449 | JGI24730J26740_1097811    | - | 201   | 108   | RNA → <a href="#">Methyltrn_RNA_3 (pfam02598)</a> →                                                                                                                                                                                                                                                                                                                                                                                                                                                                                                                                                                                                                                                                                                                                                                                                                                                                                                                                                                                                                                                                                                                                                                                                                                                                                                                                                                                                                                                                                                                                                                                                                                                                                                                                                                                                                                                              |
| env-450 | JGI20198J14950_1052355    | + | 64    | 157   | RNA → <a href="#">MTH1 (COG2106)</a> →                                                                                                                                                                                                                                                                                                                                                                                                                                                                                                                                                                                                                                                                                                                                                                                                                                                                                                                                                                                                                                                                                                                                                                                                                                                                                                                                                                                                                                                                                                                                                                                                                                                                                                                                                                                                                                                                           |
| env-451 | JGI24729J20445_1001989    | - | 4749  | 4656  | RNA → <a href="#">Methyltrn_RNA_3 (pfam02598)</a> → <a href="#">RplC (COG0087)</a> <a href="#">rpl3p (PRK04231)</a> → <a href="#">RplD (COG0088)</a> <a href="#">rpl4p (PRK04042)</a> → <a href="#">RplW (COG0089)</a> <a href="#">PRK14548 (PRK14548)</a> → <a href="#">RplB (COG0090)</a> <a href="#">rpl2p (PRK09612)</a> → <a href="#">RpsS (COG0185)</a> <a href="#">rps19p (PRK04038)</a> → <a href="#">rpl22p (PRK04223)</a> <a href="#">RplV (COG0091)</a> → <a href="#">RpsC (COG0092)</a> <a href="#">rps3p (PRK04191)</a> →                                                                                                                                                                                                                                                                                                                                                                                                                                                                                                                                                                                                                                                                                                                                                                                                                                                                                                                                                                                                                                                                                                                                                                                                                                                                                                                                                                           |
| env-452 | JGI20214J14112_1145042    | + | 137   | 230   | RNA → <a href="#">MTH1 (COG2106)</a> →                                                                                                                                                                                                                                                                                                                                                                                                                                                                                                                                                                                                                                                                                                                                                                                                                                                                                                                                                                                                                                                                                                                                                                                                                                                                                                                                                                                                                                                                                                                                                                                                                                                                                                                                                                                                                                                                           |
| env-453 | JGI24732J26686_1001287    | - | 3712  | 3619  | RNA → <a href="#">Methyltrn_RNA_3 (pfam02598)</a> → <a href="#">RplC (COG0087)</a> <a href="#">rpl3p (PRK04231)</a> → <a href="#">RplD (COG0088)</a> <a href="#">rpl4p (PRK04042)</a> → <a href="#">RplW (COG0089)</a> <a href="#">PRK14548 (PRK14548)</a> → <a href="#">rpl2p (PRK09612)</a> <a href="#">Ribosomal_L2 (pfam00181)</a> → <a href="#">rpl2p (PRK09612)</a> <a href="#">Ribosomal_L2_C (pfam03947)</a> → <a href="#">RpsS (COG0185)</a> <a href="#">rps19p (PRK04038)</a> →                                                                                                                                                                                                                                                                                                                                                                                                                                                                                                                                                                                                                                                                                                                                                                                                                                                                                                                                                                                                                                                                                                                                                                                                                                                                                                                                                                                                                        |
| env-454 | JGI24730J26740_1003612    | - | 4510  | 4417  | RNA → <a href="#">Methyltrn_RNA_3 (pfam02598)</a> → <a href="#">RplC (COG0087)</a> <a href="#">rpl3p (PRK04231)</a> → <a href="#">RplD (COG0088)</a> <a href="#">rpl4p (PRK04042)</a> → <a href="#">RplW (COG0089)</a> <a href="#">PRK14548 (PRK14548)</a> → <a href="#">RplB (COG0090)</a> <a href="#">rpl2p (PRK09612)</a> → <a href="#">RpsS (COG0185)</a> <a href="#">rps19p (PRK04038)</a> → <a href="#">rpl22p (PRK04223)</a> <a href="#">RplV (COG0091)</a> → <a href="#">KH (smart00322)</a> <a href="#">archaeal_30S_S3_KH (cd02411)</a> →                                                                                                                                                                                                                                                                                                                                                                                                                                                                                                                                                                                                                                                                                                                                                                                                                                                                                                                                                                                                                                                                                                                                                                                                                                                                                                                                                              |
| env-455 | JGI24732J26686_1002014    | + | 4931  | 5024  | RNA → <a href="#">Methyltrn_RNA_3 (pfam02598)</a> → <a href="#">RplC (COG0087)</a> <a href="#">rpl3p (PRK04231)</a> → <a href="#">RplD (COG0088)</a> <a href="#">rpl4p (PRK04042)</a> → <a href="#">RplW (COG0089)</a> <a href="#">PRK14548 (PRK14548)</a> →                                                                                                                                                                                                                                                                                                                                                                                                                                                                                                                                                                                                                                                                                                                                                                                                                                                                                                                                                                                                                                                                                                                                                                                                                                                                                                                                                                                                                                                                                                                                                                                                                                                     |
| env-456 | taComm3_C551              | - | 847   | 754   | RNA → <a href="#">Methyltrn_RNA_3 (pfam02598)</a> → <a href="#">rpl3p (PRK04231)</a> <a href="#">Ribosomal_L3 (pfam00297)</a> →                                                                                                                                                                                                                                                                                                                                                                                                                                                                                                                                                                                                                                                                                                                                                                                                                                                                                                                                                                                                                                                                                                                                                                                                                                                                                                                                                                                                                                                                                                                                                                                                                                                                                                                                                                                  |

|         |                        |   |       |       |                                                                                                                                                                                                                                                                                                                                                                                                                                                                                                                                                                                                                                                                                                                                                                                                                                                                                                                                          |
|---------|------------------------|---|-------|-------|------------------------------------------------------------------------------------------------------------------------------------------------------------------------------------------------------------------------------------------------------------------------------------------------------------------------------------------------------------------------------------------------------------------------------------------------------------------------------------------------------------------------------------------------------------------------------------------------------------------------------------------------------------------------------------------------------------------------------------------------------------------------------------------------------------------------------------------------------------------------------------------------------------------------------------------|
| env-457 | JGI12104J13512_1000496 | - | 35195 | 35102 | RNA → MTH1 (COG2106) → RplC (COG0087)rpl3p (PRK04231) → RplD (COG0088)rpl4p (PRK04042) → RplW (COG0089)PRK14548 (PRK14548) → RplB (COG0090)rpl2p (PRK09612) → RpsS (COG0185)rps19p (PRK04038) → rpl22p (PRK04223)RplV (COG0091) → RpsC (COG0092)rps3p (PRK04191) → PRK14549 (PRK14549)Ribosomal_L29 (pfam00831) → PRK03879 (PRK03879)UPF0086 (pfam01868) → RpsQ (COG0186)rps17p (PRK08572) → rpl14p (PRK08571)Ribosomal_L14 (pfam00238) → rpl24p (PRK01191)KOW_RPL26 (cd06089) → PRK04313 (PRK04313)KOW_RPS4 (cd06087)S4 (pfam01479) → RplE (COG0094)rpl5p (PRK04219) → RpsN (COG0199)rps14P (PRK05766) → rps8p (PRK04034)RpsH (COG0096) → RplF (COG0097)rpl6p (PRK05518) → rpl32e (PRK08562)Ribosomal_L32e (pfam01655) → rpl19e (PRK08570)Ribosomal_L19e (pfam01280) → RplR (COG0256)rpl18p (PRK08569) → RpsE (COG0098)rps5p (PRK04044) →                                                                                               |
| env-458 | JGI12104J13512_1006964 | - | 3599  | 3506  | RNA → Methyltrn_RNA_3 (pfam02598) → RplC (COG0087)rpl3p (PRK04231) → RplD (COG0088)rpl4p (PRK04042) → RplW (COG0089)PRK14548 (PRK14548) → RplB (COG0090)rpl2p (PRK09612) → rps19p (PRK04038)Ribosomal_S19 (pfam00203) →                                                                                                                                                                                                                                                                                                                                                                                                                                                                                                                                                                                                                                                                                                                  |
| env-459 | JGI11944J13513_1000282 | + | 18417 | 18510 | RNA → Methyltrn_RNA_3 (pfam02598) → RplC (COG0087)rpl3p (PRK04231) → RplD (COG0088)rpl4p (PRK04042) → RplW (COG0089)PRK14548 (PRK14548) → RplB (COG0090)rpl2p (PRK09612) → RpsS (COG0185)rps19p (PRK04038) → rpl22p (PRK04223)RplV (COG0091) → RpsC (COG0092)rps3p (PRK04191) → PRK14549 (PRK14549)Ribosomal_L29 (pfam00831) → PRK03879 (PRK03879)UPF0086 (pfam01868) → RpsQ (COG0186)rps17p (PRK08572) → rpl14p (PRK08571)Ribosomal_L14 (pfam00238) → rpl24p (PRK01191)KOW_RPL26 (cd06089) → PRK04313 (PRK04313)KOW_RPS4 (cd06087)S4 (pfam01479) → RplE (COG0094)rpl5p (PRK04219) → RpsN (COG0199)rps14P (PRK05766) → rps8p (PRK04034)RpsH (COG0096) → RplF (COG0097)rpl6p (PRK05518) → rpl32e (PRK08562)Ribosomal_L32e (pfam01655) → rpl19e (PRK08570)Ribosomal_L19e (pfam01280) → RplR (COG0256)rpl18p (PRK08569) → RpsE (COG0098)rps5p (PRK04044) →                                                                                  |
| env-460 | WSSedA2C_c029104       | + | 89    | 182   | RNA → MTH1 (COG2106) → rpl3p (PRK04231)Ribosomal_L3 (pfam00297) →                                                                                                                                                                                                                                                                                                                                                                                                                                                                                                                                                                                                                                                                                                                                                                                                                                                                        |
| env-461 | WSSedA2Ca3_1029104     | + | 89    | 182   | RNA → MTH1 (COG2106) → rpl3p (PRK04231)Ribosomal_L3 (pfam00297) →                                                                                                                                                                                                                                                                                                                                                                                                                                                                                                                                                                                                                                                                                                                                                                                                                                                                        |
| env-462 | WSSedA1TJGI_c020031    | - | 764   | 671   | RNA → MTH1 (COG2106) → rpl3p (PRK04231)Ribosomal_L3 (pfam00297) →                                                                                                                                                                                                                                                                                                                                                                                                                                                                                                                                                                                                                                                                                                                                                                                                                                                                        |
| env-463 | WSSedA1Ba3_1007453     | + | 836   | 929   | RNA → Methyltrn_RNA_3 (pfam02598) → RplC (COG0087)rpl3p (PRK04231) → rpl4p (PRK04042)Ribosomal_L4 (pfam00573) →                                                                                                                                                                                                                                                                                                                                                                                                                                                                                                                                                                                                                                                                                                                                                                                                                          |
| env-464 | JGI20213J14113_1028243 | - | 729   | 636   | RNA → MTH1 (COG2106) → rpl3p (PRK04231)Ribosomal_L3 (pfam00297) →                                                                                                                                                                                                                                                                                                                                                                                                                                                                                                                                                                                                                                                                                                                                                                                                                                                                        |
| env-465 | JGI20214J14112_1082845 | - | 335   | 242   | RNA → MTH1 (COG2106) →                                                                                                                                                                                                                                                                                                                                                                                                                                                                                                                                                                                                                                                                                                                                                                                                                                                                                                                   |
| env-466 | JGI20214J14112_1065024 | - | 197   | 104   | RNA → MTH1 (COG2106) →                                                                                                                                                                                                                                                                                                                                                                                                                                                                                                                                                                                                                                                                                                                                                                                                                                                                                                                   |
| env-467 | 3300000558_11706232    | - | 175   | 82    | RNA → Methyltrn_RNA_3 (pfam02598) →                                                                                                                                                                                                                                                                                                                                                                                                                                                                                                                                                                                                                                                                                                                                                                                                                                                                                                      |
| env-468 | 3300001605_10001574    | + | 12383 | 12476 | RNA → Methyltrn_RNA_3 (pfam02598) → rpl3p (PRK04231)Ribosomal_L3 (pfam00297) → rpl3p (PRK04231)Ribosomal_L3 (pfam00297) → RplD (COG0088)rpl4p (PRK04042) → RplW (COG0089)PRK14548 (PRK14548) → RplB (COG0090)rpl2p (PRK09612) → RpsS (COG0185)rps19p (PRK04038) → rpl22p (PRK04223)RplV (COG0091) → RpsC (COG0092)rps3p (PRK04191) → PRK14549 (PRK14549)Ribosomal_L29 (pfam00831) → PRK03879 (PRK03879)UPF0086 (pfam01868) → RpsQ (COG0186)rps17p (PRK08572) → rpl14p (PRK08571)Ribosomal_L14 (pfam00238) → rpl24p (PRK01191)KOW_RPL26 (cd06089) → PRK04313 (PRK04313)KOW_RPS4 (cd06087)S4 (pfam01479)Ribosomal_S4e (pfam00900) → rpl5p (PRK04219)Ribosomal_L5 (pfam00281)Ribosomal_L5_C (pfam00673) → RpsN (COG0199)rps14P (PRK05766) → rps8p (PRK04034)RpsH (COG0096) → RplF (COG0097)rpl6p (PRK05518) → rpl32e (PRK08562)Ribosomal_L32e (pfam01655) → rpl19e (PRK08570)Ribosomal_L19e (pfam01280) → RplR (COG0256)rpl18p (PRK08569) → |
| env-469 | 2232004817             | + | 121   | 214   | RNA → MTH1 (COG2106) →                                                                                                                                                                                                                                                                                                                                                                                                                                                                                                                                                                                                                                                                                                                                                                                                                                                                                                                   |
| env-470 | 3300000558_10046922    | - | 175   | 82    | RNA → Methyltrn_RNA_3 (pfam02598) →                                                                                                                                                                                                                                                                                                                                                                                                                                                                                                                                                                                                                                                                                                                                                                                                                                                                                                      |
| env-471 | 3300000032_0025728     | - | 2226  | 2133  | RNA → Methyltrn_RNA_3 (pfam02598) → RplC (COG0087)rpl3p (PRK04231) → RplD (COG0088)rpl4p (PRK04042) →                                                                                                                                                                                                                                                                                                                                                                                                                                                                                                                                                                                                                                                                                                                                                                                                                                    |
| env-472 | 3300000568_10127450    | - | 4713  | 4620  | RNA → Methyltrn_RNA_3 (pfam02598) → RplC (COG0087)rpl3p (PRK04231) → RplD (COG0088)rpl4p (PRK04042) → RplW (COG0089)PRK14548 (PRK14548) → RplB (COG0090)rpl2p (PRK09612) → RpsS (COG0185)rps19p (PRK04038) → rpl22p (PRK04223)RplV (COG0091) → RpsC (COG0092)rps3p (PRK04191) →                                                                                                                                                                                                                                                                                                                                                                                                                                                                                                                                                                                                                                                          |



|         |                           |   |        |        |                                                                                                                                                                                                                                                                                                                                                                                                                                                                                                                                                                                                                                                                                                                                                                                                                                                                                                                                                                                                                                                                                                                                                                                                                                   |
|---------|---------------------------|---|--------|--------|-----------------------------------------------------------------------------------------------------------------------------------------------------------------------------------------------------------------------------------------------------------------------------------------------------------------------------------------------------------------------------------------------------------------------------------------------------------------------------------------------------------------------------------------------------------------------------------------------------------------------------------------------------------------------------------------------------------------------------------------------------------------------------------------------------------------------------------------------------------------------------------------------------------------------------------------------------------------------------------------------------------------------------------------------------------------------------------------------------------------------------------------------------------------------------------------------------------------------------------|
| env-473 | 3300001580_10000904       | + | 13878  | 13971  | RNA → <b>Methyltrn_RNA_3 (pfam02598)</b> → RplC (COG0087)rpl3p (PRK04231) → RplD (COG0088)rpl4p (PRK04042) → RplW (COG0089)PRK14548 (PRK14548) → RplB (COG0090)rpl2p (PRK09612) → RpsS (COG0185)rps19p (PRK04038) → rpl22p (PRK04223)RplV (COG0091) → RpsC (COG0092)rps3p (PRK04191) → PRK14549 (PRK14549)Ribosomal_L29 (pfam00831) → PRK03879 (PRK03879)UPF0086 (pfam01868) → RpsQ (COG0186)rps17p (PRK08572) → rpl14p (PRK08571)Ribosomal_L14 (pfam00238) → rpl24p (PRK01191)KOW_RPL26 (cd06089) → PRK04313 (PRK04313)KOW_RPS4 (cd06087)S4 (pfam01479)Ribosomal_S4e (pfam00900) → rpl5p (PRK04219)Ribosomal_L5 (pfam00281)Ribosomal_L5_C (pfam00673) → RpsN (COG0199)rps14p (PRK05766) → rps8p (PRK04034)RpsH (COG0096) → RplF (COG0097)rpl6p (PRK05518) → rpl32e (PRK08562)Ribosomal_L32e (pfam01655) → rpl19e (PRK08570)Ribosomal_L19e (pfam01280) → RplR (COG0256)rpl18p (PRK08569) →                                                                                                                                                                                                                                                                                                                                        |
| env-474 | 3300001592_10239960       | + | 303    | 396    | RNA → MTH1 (COG2106) →                                                                                                                                                                                                                                                                                                                                                                                                                                                                                                                                                                                                                                                                                                                                                                                                                                                                                                                                                                                                                                                                                                                                                                                                            |
| env-475 | 3300001580_10151383       | - | 980    | 887    | RNA → MTH1 (COG2106) →                                                                                                                                                                                                                                                                                                                                                                                                                                                                                                                                                                                                                                                                                                                                                                                                                                                                                                                                                                                                                                                                                                                                                                                                            |
| Mha-1-1 | NC_0117527.1              | - | 484979 | 484886 | RNA → <b>Methyltrn_RNA_3 (pfam02598)</b> →                                                                                                                                                                                                                                                                                                                                                                                                                                                                                                                                                                                                                                                                                                                                                                                                                                                                                                                                                                                                                                                                                                                                                                                        |
| env-476 | JGI12104J13512_1010054    | + | 871    | 964    | RNA → <b>Methyltrn_RNA_3 (pfam02598)</b> → RplC (COG0087)rpl3p (PRK04231) → RplD (COG0088)rpl4p (PRK04042) →                                                                                                                                                                                                                                                                                                                                                                                                                                                                                                                                                                                                                                                                                                                                                                                                                                                                                                                                                                                                                                                                                                                      |
| env-477 | SakLake120mDRAFT_c0004292 | + | 2569   | 2662   | RNA → <b>Methyltrn_RNA_3 (pfam02598)</b> → RplC (COG0087)rpl3p (PRK04231) → RplD (COG0088)rpl4p (PRK04042) → PRK14548 (PRK14548) → RplB (COG0090)rpl2p (PRK09612) → RpsS (COG0185)rps19p (PRK04038) → rpl22p (PRK04223)RplV (COG0091) → RpsC (COG0092)rps3p (PRK04191) →                                                                                                                                                                                                                                                                                                                                                                                                                                                                                                                                                                                                                                                                                                                                                                                                                                                                                                                                                          |
| env-478 | JXWW01104647.1            | - | 233    | 140    | RNA → <b>Methyltrn_RNA_3 (pfam02598)</b> →                                                                                                                                                                                                                                                                                                                                                                                                                                                                                                                                                                                                                                                                                                                                                                                                                                                                                                                                                                                                                                                                                                                                                                                        |
| env-479 | JGI24025J20009_10001050   | - | 20258  | 20165  | RNA → <b>Methyltrn_RNA_3 (pfam02598)</b> → RplC (COG0087)rpl3p (PRK04231) → RplD (COG0088)rpl4p (PRK04042) → RplW (COG0089)PRK14548 (PRK14548) → RplB (COG0090)rpl2p (PRK09612) → RpsS (COG0185)rps19p (PRK04038) → rpl22p (PRK04223)RplV (COG0091) → RpsC (COG0092)rps3p (PRK04191)rne (PRK10811) → PRK14549 (PRK14549)Ribosomal_L29 (pfam00831) → PRK03879 (PRK03879)UPF0086 (pfam01868) → RpsQ (COG0186)rps17p (PRK08572)RING-CH-C4HC3_FANCL (cd16490) → rpl14p (PRK08571)Ribosomal_L14 (pfam00238) → RplX (COG0198)rpl24p (PRK01191) → PRK04313 (PRK04313)KOW_RPS4 (cd06087)S4 (pfam01479)Ribosomal_S4e (pfam00900) → RplE (COG0094)rpl5p (PRK04219) →                                                                                                                                                                                                                                                                                                                                                                                                                                                                                                                                                                        |
| env-480 | ASA129_contig07056        | - | 867    | 774    | RNA → MTH1 (COG2106) →                                                                                                                                                                                                                                                                                                                                                                                                                                                                                                                                                                                                                                                                                                                                                                                                                                                                                                                                                                                                                                                                                                                                                                                                            |
| env-481 | JGI24020J35080_1000033    | + | 3315   | 3408   | RNA → MTH1 (COG2106) → RplC (COG0087)rpl3p (PRK04231) → RplD (COG0088)rpl4p (PRK04042) → RplW (COG0089)PRK14548 (PRK14548) → RplB (COG0090)rpl2p (PRK09612) → RpsS (COG0185)rps19p (PRK04038) → rpl22p (PRK04223)RplV (COG0091) → RpsC (COG0092)rps3p (PRK04191) → PRK14549 (PRK14549)Ribosomal_L29 (pfam00831) → POP4 (COG1588)PRK03879 (PRK03879) → RpsQ (COG0186)rps17p (PRK08572) → rpl14p (PRK08571)Ribosomal_L14 (pfam00238) → rpl24p (PRK01191)KOW_RPL26 (cd06089) → PRK04313 (PRK04313)KOW_RPS4 (cd06087)S4 (pfam01479)Ribosomal_S4e (pfam00900) → RplE (COG0094)rpl5p (PRK04219) → hypo → rps8p (PRK04034)RpsH (COG0096) → RplF (COG0097)rpl6p (PRK05518) → rpl32e (PRK08562)Ribosomal_L32e (pfam01655) → rpl19e (PRK08570)Ribosomal_L19e (pfam01280) → RplR (COG0256)rpl18p (PRK08569) → RpsE (COG0098)rps5p (PRK04044) → Ribosomal_L7_archaeal_euk (cd01657)rpl30p (PRK06049) → rpl15p (PRK06419)Ribosomal_L27A (pfam00828) → SecY (COG0201)PRK08568 (PRK08568) → adk (PRK00279)ADK (cd01428) → COG1422 (COG1422)PRK02201 (PRK02201) → CmkB (COG1102)PRK04182 (PRK04182) → PRK04270 (PRK04270)PseudoU_synth_hDyskerin (cd02572)PUA (pfam01472) → hypo → hypo → AAA (smart00382)CooC (cd02034)GTPase_EngA (TIGR03594) → |

|         |                           |   |       |       |                                                                                                                                                                                                                                                                                                                                                                                                                                                                                                                                                                                                                                                                                                                                                                                                                                                                                                            |
|---------|---------------------------|---|-------|-------|------------------------------------------------------------------------------------------------------------------------------------------------------------------------------------------------------------------------------------------------------------------------------------------------------------------------------------------------------------------------------------------------------------------------------------------------------------------------------------------------------------------------------------------------------------------------------------------------------------------------------------------------------------------------------------------------------------------------------------------------------------------------------------------------------------------------------------------------------------------------------------------------------------|
| env-482 | JGI24020J35080_1000258    | + | 14429 | 14513 | RNA → MTH1 (COG2106)Raftlin (pfam15250) → RplC (COG0087)rpl3p (PRK04231) → RplD (COG0088)rpl4p (PRK04042) → RplW (COG0089)PRK14548 (PRK14548) → RplB (COG0090)rpl2p (PRK09612) → RpsS (COG0185)rps19p (PRK04038) → rpl22p (PRK04223)RplV (COG0091) → RpsC (COG0092)rps3p (PRK04191) → PRK14549 (PRK14549)Ribosomal_L29 (pfam00831) → POP4 (COG1588)PRK03879 (PRK03879) → RpsQ (COG0186)rps17p (PRK08572) → rpl14p (PRK08571)Ribosomal_L14 (pfam00238) → rpl24p (PRK01191)KOW_RPL26 (cd06089) → PRK04313 (PRK04313)KOW_RPS4 (cd06087)S4 (pfam01479)Ribosomal_S4e (pfam00900) → rpl5p (PRK04219)Ribosomal_L5 (pfam00281)Ribosomal_L5_C (pfam00673) → RpsN (COG0199)rps14p (PRK05766) → rps8p (PRK04034)RpsH (COG0096) → RplF (COG0097)rpl6p (PRK05518) → Rpl32e (COG1717)rpl32e (PRK08562)HHH (pfam00633)HHH_5 (pfam14520) → rpl19e (PRK08570)Ribosomal_L19e (pfam01280) → RplR (COG0256)rpl18p (PRK08569) → |
| env-483 | JGI20177J14857_1074829    | - | 299   | 212   | RNA → MTH1 (COG2106) →                                                                                                                                                                                                                                                                                                                                                                                                                                                                                                                                                                                                                                                                                                                                                                                                                                                                                     |
| env-484 | JGI20193J14888_1132815    | - | 101   | 14    | RNA → Methyltrn_RNA_3 (pfam02598) →                                                                                                                                                                                                                                                                                                                                                                                                                                                                                                                                                                                                                                                                                                                                                                                                                                                                        |
| env-485 | JGI20191J14862_1083948    | + | 194   | 281   | RNA → MTH1 (COG2106) →                                                                                                                                                                                                                                                                                                                                                                                                                                                                                                                                                                                                                                                                                                                                                                                                                                                                                     |
| env-486 | JGI20195J14853_1011539    | - | 972   | 885   | RNA → MTH1 (COG2106) → rpl3p (PRK04231)Ribosomal_L3 (pfam00297) →                                                                                                                                                                                                                                                                                                                                                                                                                                                                                                                                                                                                                                                                                                                                                                                                                                          |
| env-487 | JGI20179J14886_1000011    | - | 26349 | 26262 | RNA → MTH1 (COG2106) → RplC (COG0087)rpl3p (PRK04231) → RplD (COG0088)rpl4p (PRK04042) → RplW (COG0089)PRK14548 (PRK14548) → RplB (COG0090)rpl2p (PRK09612) → RpsS (COG0185)rps19p (PRK04038) → rpl22p (PRK04223)RplV (COG0091) → RpsC (COG0092)rps3p (PRK04191) → RpmC (COG0255)PRK14549 (PRK14549) → POP4 (COG1588)PRK03879 (PRK03879) → RpsQ (COG0186)rps17p (PRK08572) → rpl14p (PRK08571)Ribosomal_L14 (pfam00238) → rpl24p (PRK01191)KOW_RPL26 (cd06089) → PRK04313 (PRK04313)KOW_RPS4 (cd06087)S4 (pfam01479)Ribosomal_S4e (pfam00900) → rpl5p (PRK04219)Ribosomal_L5 (pfam00281)Ribosomal_L5_C (pfam00673) →                                                                                                                                                                                                                                                                                       |
| env-488 | JGI20199J14953_1000018    | + | 6725  | 6812  | RNA → Methyltrn_RNA_3 (pfam02598) → RplC (COG0087)rpl3p (PRK04231) → RplD (COG0088)rpl4p (PRK04042) → RplW (COG0089)PRK14548 (PRK14548) → RplB (COG0090)rpl2p (PRK09612) → RpsS (COG0185)rps19p (PRK04038) → rpl22p (PRK04223)RplV (COG0091) → RpsC (COG0092)rps3p (PRK04191) → RpmC (COG0255)PRK14549 (PRK14549) → POP4 (COG1588)PRK03879 (PRK03879) → RpsQ (COG0186)rps17p (PRK08572) →                                                                                                                                                                                                                                                                                                                                                                                                                                                                                                                  |
| env-489 | JGI20201J14949_1002905    | - | 1578  | 1491  | RNA → MTH1 (COG2106) → RplC (COG0087)rpl3p (PRK04231) → rpl4p (PRK04042) →                                                                                                                                                                                                                                                                                                                                                                                                                                                                                                                                                                                                                                                                                                                                                                                                                                 |
| env-490 | JGI20197J15001_1000199    | - | 8178  | 8091  | RNA → MTH1 (COG2106) → RplC (COG0087)rpl3p (PRK04231) → RplD (COG0088)rpl4p (PRK04042) → RplW (COG0089)PRK14548 (PRK14548) → RplB (COG0090)rpl2p (PRK09612) → RpsS (COG0185)rps19p (PRK04038) → rpl22p (PRK04223)RplV (COG0091) → RpsC (COG0092)rps3p (PRK04191) → RpmC (COG0255)PRK14549 (PRK14549) → POP4 (COG1588)PRK03879 (PRK03879) → RpsQ (COG0186)rps17p (PRK08572) → rpl14p (PRK08571)Ribosomal_L14 (pfam00238) → rpl24p (PRK01191)KOW_RPL26 (cd06089) → PRK04313 (PRK04313)KOW_RPS4 (cd06087)S4 (pfam01479)Ribosomal_S4e (pfam00900) → rpl5p (PRK04219)Ribosomal_L5 (pfam00281)Ribosomal_L5_C (pfam00673) →                                                                                                                                                                                                                                                                                       |
| env-491 | JGI20197J15136_1000199    | - | 8178  | 8091  | RNA → MTH1 (COG2106) → RplC (COG0087)rpl3p (PRK04231) → RplD (COG0088)rpl4p (PRK04042) → RplW (COG0089)PRK14548 (PRK14548) → RplB (COG0090)rpl2p (PRK09612) → RpsS (COG0185)rps19p (PRK04038) → rpl22p (PRK04223)RplV (COG0091) → RpsC (COG0092)rps3p (PRK04191) → RpmC (COG0255)PRK14549 (PRK14549) → POP4 (COG1588)PRK03879 (PRK03879) → RpsQ (COG0186)rps17p (PRK08572) → rpl14p (PRK08571)Ribosomal_L14 (pfam00238) → rpl24p (PRK01191)KOW_RPL26 (cd06089) → PRK04313 (PRK04313)KOW_RPS4 (cd06087)S4 (pfam01479)Ribosomal_S4e (pfam00900) → rpl5p (PRK04219)Ribosomal_L5 (pfam00281)Ribosomal_L5_C (pfam00673) →                                                                                                                                                                                                                                                                                       |
| env-492 | AGCH01000237.1            | - | 413   | 326   | RNA → MTH1 (COG2106) →                                                                                                                                                                                                                                                                                                                                                                                                                                                                                                                                                                                                                                                                                                                                                                                                                                                                                     |
| env-493 | PermFrostAlaska.NODE_9622 | - | 413   | 326   | RNA → MTH1 (COG2106) →                                                                                                                                                                                                                                                                                                                                                                                                                                                                                                                                                                                                                                                                                                                                                                                                                                                                                     |

|         |                        |   |       |       |                                                                                                                                                                                                                                                                                                                                                                                                                                                                                                                                                                                                                                                                                   |
|---------|------------------------|---|-------|-------|-----------------------------------------------------------------------------------------------------------------------------------------------------------------------------------------------------------------------------------------------------------------------------------------------------------------------------------------------------------------------------------------------------------------------------------------------------------------------------------------------------------------------------------------------------------------------------------------------------------------------------------------------------------------------------------|
| env-494 | B3_all.c.Cons150562    | - | 21306 | 21219 | RNA → MTH1 (COG2106) → rpl3p (PRK04231) Ribosomal_L3 (pfam00297) → RplC (COG0087) rpl3p (PRK04231) → RplD (COG0088) rpl4p (PRK04042) → RplW (COG0089) PRK14548 (PRK14548) → RplB (COG0090) rpl2p (PRK09612) → RpsS (COG0185) rps19p (PRK04038) → rpl22p (PRK04223) RplV (COG0091) → RpsC (COG0092) rps3p (PRK04191) → RpmC (COG0255) PRK14549 (PRK14549) → POP4 (COG1588) PRK03879 (PRK03879) → RpsQ (COG0186) rps17p (PRK08572) → rpl14p (PRK08571) Ribosomal_L14 (pfam00238) → rpl24p (PRK01191) KOW_RPL26 (cd06089) → PRK04313 (PRK04313) KOW_RPS4 (cd06087) S4 (pfam01479) Ribosomal_S4e (pfam00900) → rpl5p (PRK04219) Ribosomal_L5 (pfam00281) Ribosomal_L5_C (pfam00673) → |
| env-495 | JGI20199J14953_1000162 | + | 190   | 277   | RNA → MTH1 (COG2106) → RplC (COG0087) rpl3p (PRK04231) → RplD (COG0088) rpl4p (PRK04042) → RplW (COG0089) PRK14548 (PRK14548) → RplB (COG0090) rpl2p (PRK09612) → RpsS (COG0185) rps19p (PRK04038) → rpl22p (PRK04223) RplV (COG0091) → RpsC (COG0092) rps3p (PRK04191) → RpmC (COG0255) PRK14549 (PRK14549) → POP4 (COG1588) PRK03879 (PRK03879) → RpsQ (COG0186) rps17p (PRK08572) → rpl14p (PRK08571) Ribosomal_L14 (pfam00238) → rpl24p (PRK01191) →                                                                                                                                                                                                                          |
| env-496 | JGI20198J14950_1000001 | + | 50351 | 50438 | RNA → Methyltrn_RNA_3 (pfam02598) → RplC (COG0087) rpl3p (PRK04231) → RplD (COG0088) rpl4p (PRK04042) → RplW (COG0089) PRK14548 (PRK14548) → RplB (COG0090) rpl2p (PRK09612) → RpsS (COG0185) rps19p (PRK04038) → rpl22p (PRK04223) RplV (COG0091) → RpsC (COG0092) rps3p (PRK04191) → RpmC (COG0255) PRK14549 (PRK14549) → POP4 (COG1588) PRK03879 (PRK03879) → RpsQ (COG0186) rps17p (PRK08572) → rpl14p (PRK08571) Ribosomal_L14 (pfam00238) → RplX (COG0198) rpl24p (PRK01191) → PRK04313 (PRK04313) KOW_RPS4 (cd06087) Ribosomal_S4e (pfam00900) → rpl5p (PRK04219) Ribosomal_L5 (pfam00281) Ribosomal_L5_C (pfam00673) →                                                    |
| env-497 | JGI20200J14955_1011738 | + | 613   | 700   | RNA → MTH1 (COG2106) →                                                                                                                                                                                                                                                                                                                                                                                                                                                                                                                                                                                                                                                            |
| env-498 | JGI20201J14949_1007869 | + | 187   | 274   | RNA → MTH1 (COG2106) → rpl3p (PRK04231) Ribosomal_L3 (pfam00297) →                                                                                                                                                                                                                                                                                                                                                                                                                                                                                                                                                                                                                |
| env-499 | JGI20197J15001_1000002 | - | 33762 | 33675 | RNA → MTH1 (COG2106) → RplC (COG0087) rpl3p (PRK04231) → RplD (COG0088) rpl4p (PRK04042) → RplW (COG0089) PRK14548 (PRK14548) → RplB (COG0090) rpl2p (PRK09612) → RpsS (COG0185) rps19p (PRK04038) → rpl22p (PRK04223) RplV (COG0091) → RpsC (COG0092) rps3p (PRK04191) → RpmC (COG0255) PRK14549 (PRK14549) → POP4 (COG1588) PRK03879 (PRK03879) → RpsQ (COG0186) rps17p (PRK08572) → rpl14p (PRK08571) Ribosomal_L14 (pfam00238) → RplX (COG0198) rpl24p (PRK01191) → PRK04313 (PRK04313) KOW_RPS4 (cd06087) Ribosomal_S4e (pfam00900) → rpl5p (PRK04219) Ribosomal_L5 (pfam00281) Ribosomal_L5_C (pfam00673) →                                                                 |
| env-500 | JGI20197J15136_1000002 | - | 33762 | 33675 | RNA → MTH1 (COG2106) → RplC (COG0087) rpl3p (PRK04231) → RplD (COG0088) rpl4p (PRK04042) → RplW (COG0089) PRK14548 (PRK14548) → RplB (COG0090) rpl2p (PRK09612) → RpsS (COG0185) rps19p (PRK04038) → rpl22p (PRK04223) RplV (COG0091) → RpsC (COG0092) rps3p (PRK04191) → RpmC (COG0255) PRK14549 (PRK14549) → POP4 (COG1588) PRK03879 (PRK03879) → RpsQ (COG0186) rps17p (PRK08572) → rpl14p (PRK08571) Ribosomal_L14 (pfam00238) → RplX (COG0198) rpl24p (PRK01191) → PRK04313 (PRK04313) KOW_RPS4 (cd06087) Ribosomal_S4e (pfam00900) → rpl5p (PRK04219) Ribosomal_L5 (pfam00281) Ribosomal_L5_C (pfam00673) →                                                                 |
| env-501 | AGCH01000005.1         | - | 11078 | 10991 | RNA → Methyltrn_RNA_3 (pfam02598) → rpl3p (PRK04231) Ribosomal_L3 (pfam00297) → RplC (COG0087) rpl3p (PRK04231) → RplD (COG0088) rpl4p (PRK04042) → RplW (COG0089) PRK14548 (PRK14548) → RplB (COG0090) rpl2p (PRK09612) → RpsS (COG0185) rps19p (PRK04038) → rpl22p (PRK04223) RplV (COG0091) → RpsC (COG0092) rps3p (PRK04191) → RpmC (COG0255) PRK14549 (PRK14549) → POP4 (COG1588) PRK03879 (PRK03879) → RpsQ (COG0186) rps17p (PRK08572) → rpl14p (PRK08571) Ribosomal_L14 (pfam00238) → rpl24p (PRK01191) KOW_RPL26 (cd06089) → PRK04313 (PRK04313) KOW_RPS4 (cd06087) S4 (pfam01479) Ribosomal_S4e (pfam00900) →                                                           |

|         |                           |   |       |       |                                                                                                                                                                                                                                                                                                                                                                                                                                                                                                                                                                                                                                                                                                                                                                                                                                                                                                                                                                                                                                   |
|---------|---------------------------|---|-------|-------|-----------------------------------------------------------------------------------------------------------------------------------------------------------------------------------------------------------------------------------------------------------------------------------------------------------------------------------------------------------------------------------------------------------------------------------------------------------------------------------------------------------------------------------------------------------------------------------------------------------------------------------------------------------------------------------------------------------------------------------------------------------------------------------------------------------------------------------------------------------------------------------------------------------------------------------------------------------------------------------------------------------------------------------|
| env-502 | PermFrostAlaska_NODE_6124 | - | 23466 | 23379 | RNA → <b>Methyltrn_RNA_3 (pfam02598)</b> → <b>rpl3p (PRK04231)</b> Ribosomal_L3 (pfam00297) → <b>RplC (COG0087)</b> rpl3p (PRK04231) → <b>RplD (COG0088)</b> rpl4lp (PRK04042) → <b>RplW (COG0089)</b> <b>PRK14548 (PRK14548)</b> → <b>RplB (COG0090)</b> rpl2p (PRK09612) → <b>RpsS (COG0185)</b> <b>rps19p (PRK04038)</b> → <b>rpl22p (PRK04223)</b> <b>RplV (COG0091)</b> → <b>RpsC (COG0092)</b> <b>rps3p (PRK04191)</b> → <b>RpmC (COG0255)</b> <b>PRK14549 (PRK14549)</b> → <b>POP4 (COG1588)</b> <b>PRK03879 (PRK03879)</b> → <b>RpsQ (COG0186)</b> <b>rps17p (PRK08572)</b> → <b>rpl14p (PRK08571)</b> <b>Ribosomal_L14 (pfam00238)</b> → <b>rpl24p (PRK01191)</b> <b>KOW_RPL26 (cd06089)</b> → <b>PRK04313 (PRK04313)</b> <b>KOW_RPS4 (cd06087)</b> <b>S4 (pfam01479)</b> <b>Ribosomal_S4e (pfam00900)</b> →                                                                                                                                                                                                             |
| env-503 | B3_all_c.Cons68376        | - | 6993  | 6906  | RNA → <b>Methyltrn_RNA_3 (pfam02598)</b> → <b>RplC (COG0087)</b> rpl3p (PRK04231) → <b>RplD (COG0088)</b> rpl4lp (PRK04042) → <b>RplW (COG0089)</b> <b>PRK14548 (PRK14548)</b> → <b>RplB (COG0090)</b> rpl2p (PRK09612) → <b>RpsS (COG0185)</b> <b>rps19p (PRK04038)</b> → <b>rpl22p (PRK04223)</b> <b>RplV (COG0091)</b> → <b>RpsC (COG0092)</b> <b>rps3p (PRK04191)</b> → <b>RpmC (COG0255)</b> <b>PRK14549 (PRK14549)</b> → <b>POP4 (COG1588)</b> <b>PRK03879 (PRK03879)</b> →                                                                                                                                                                                                                                                                                                                                                                                                                                                                                                                                                 |
| env-504 | JGI20179J14886_1002439    | - | 264   | 177   | RNA → <b>Methyltrn_RNA_3 (pfam02598)</b> →                                                                                                                                                                                                                                                                                                                                                                                                                                                                                                                                                                                                                                                                                                                                                                                                                                                                                                                                                                                        |
| env-505 | JGI24728J21555_1000539    | + | 10047 | 10116 | RNA → <b>RplC (COG0087)</b> rpl3p (PRK04231) → <b>RplD (COG0088)</b> rpl4lp (PRK04042) → <b>RplW (COG0089)</b> <b>PRK14548 (PRK14548)</b> → <b>RplB (COG0090)</b> rpl2p (PRK09612) → <b>RpsS (COG0185)</b> <b>rps19p (PRK04038)</b> → <b>rpl22p (PRK04223)</b> <b>RplV (COG0091)</b> → <b>RpsC (COG0092)</b> <b>rps3p (PRK04191)</b> → <b>PRK14549 (PRK14549)</b> <b>Ribosomal_L29 (pfam00831)</b> → <b>PRK03879 (PRK03879)</b> <b>UPF0086 (pfam01868)</b> → <b>RpsQ (COG0186)</b> <b>rps17p (PRK08572)</b> → <b>rpl14p (PRK08571)</b> <b>Ribosomal_L14 (pfam00238)</b> → <b>rpl24p (PRK01191)</b> <b>KOW_RPL26 (cd06089)</b> → <b>PRK04313 (PRK04313)</b> <b>KOW_RPS4 (cd06087)</b> <b>Ribosomal_S4e (pfam00900)</b> → <b>rpl5p (PRK04219)</b> <b>Ribosomal_L5 (pfam00281)</b> <b>Ribosomal_L5_C (pfam00673)</b> → <b>RpsN (COG0199)</b> <b>rps14p (PRK05766)</b> → <b>rps8p (PRK04034)</b> <b>RpsH (COG0096)</b> → <b>RplF (COG0097)</b> <b>rpl6p (PRK05518)</b> → <b>rpl32e (PRK08562)</b> <b>Ribosomal_L32e (pfam01655)</b> → |
| env-506 | JGI24728J21555_1000541    | - | 9030  | 8961  | RNA → <b>RplC (COG0087)</b> rpl3p (PRK04231) → <b>RplD (COG0088)</b> rpl4lp (PRK04042) → <b>RplW (COG0089)</b> <b>PRK14548 (PRK14548)</b> → <b>RplB (COG0090)</b> rpl2p (PRK09612) → <b>RpsS (COG0185)</b> <b>rps19p (PRK04038)</b> → <b>rpl22p (PRK04223)</b> <b>RplV (COG0091)</b> → <b>RpsC (COG0092)</b> <b>rps3p (PRK04191)</b> → <b>PRK14549 (PRK14549)</b> <b>Ribosomal_L29 (pfam00831)</b> → <b>PRK03879 (PRK03879)</b> <b>UPF0086 (pfam01868)</b> → <b>RpsQ (COG0186)</b> <b>rps17p (PRK08572)</b> → <b>rpl14p (PRK08571)</b> <b>Ribosomal_L14 (pfam00238)</b> → <b>rpl24p (PRK01191)</b> <b>KOW_RPL26 (cd06089)</b> → <b>PRK04313 (PRK04313)</b> <b>KOW_RPS4 (cd06087)</b> <b>Ribosomal_S4e (pfam00900)</b> → <b>rpl5p (PRK04219)</b> <b>Ribosomal_L5 (pfam00281)</b> <b>Ribosomal_L5_C (pfam00673)</b> → <b>RpsN (COG0199)</b> <b>rps14p (PRK05766)</b> → <b>rps8p (PRK04034)</b> <b>RpsH (COG0096)</b> → <b>RplF (COG0097)</b> <b>rpl6p (PRK05518)</b> → <b>rpl32e (PRK08562)</b> <b>Ribosomal_L32e (pfam01655)</b> → |
| env-507 | JGI24728J21555_1000542    | - | 9049  | 8980  | RNA → <b>RplC (COG0087)</b> rpl3p (PRK04231) → <b>RplD (COG0088)</b> rpl4lp (PRK04042) → <b>RplW (COG0089)</b> <b>PRK14548 (PRK14548)</b> → <b>RplB (COG0090)</b> rpl2p (PRK09612) → <b>RpsS (COG0185)</b> <b>rps19p (PRK04038)</b> → <b>rpl22p (PRK04223)</b> <b>RplV (COG0091)</b> → <b>RpsC (COG0092)</b> <b>rps3p (PRK04191)</b> → <b>PRK14549 (PRK14549)</b> <b>Ribosomal_L29 (pfam00831)</b> → <b>PRK03879 (PRK03879)</b> <b>UPF0086 (pfam01868)</b> → <b>RpsQ (COG0186)</b> <b>rps17p (PRK08572)</b> → <b>rpl14p (PRK08571)</b> <b>Ribosomal_L14 (pfam00238)</b> → <b>rpl24p (PRK01191)</b> <b>KOW_RPL26 (cd06089)</b> → <b>PRK04313 (PRK04313)</b> <b>KOW_RPS4 (cd06087)</b> <b>Ribosomal_S4e (pfam00900)</b> → <b>rpl5p (PRK04219)</b> <b>Ribosomal_L5 (pfam00281)</b> <b>Ribosomal_L5_C (pfam00673)</b> → <b>RpsN (COG0199)</b> <b>rps14p (PRK05766)</b> → <b>rps8p (PRK04034)</b> <b>RpsH (COG0096)</b> → <b>RplF (COG0097)</b> <b>rpl6p (PRK05518)</b> → <b>rpl32e (PRK08562)</b> <b>Ribosomal_L32e (pfam01655)</b> → |
| env-508 | taComm3_C12988            | + | 619   | 703   | RNA → <b>rpl3p (PRK04231)</b> Ribosomal_L3 (pfam00297) →                                                                                                                                                                                                                                                                                                                                                                                                                                                                                                                                                                                                                                                                                                                                                                                                                                                                                                                                                                          |



|         |                        |   |         |         |                                                                                                                                                                                                                                                                                                                                                                                                                                                                                                                                                                                                                                                                                                                                                                                                                                                                                                                                                                                                                                                                                                                                                                                                                                                                                                                                                                                                                                                                                                                                                                                                                                                                                                                                                                                                                                                                                                                                                                                                       |
|---------|------------------------|---|---------|---------|-------------------------------------------------------------------------------------------------------------------------------------------------------------------------------------------------------------------------------------------------------------------------------------------------------------------------------------------------------------------------------------------------------------------------------------------------------------------------------------------------------------------------------------------------------------------------------------------------------------------------------------------------------------------------------------------------------------------------------------------------------------------------------------------------------------------------------------------------------------------------------------------------------------------------------------------------------------------------------------------------------------------------------------------------------------------------------------------------------------------------------------------------------------------------------------------------------------------------------------------------------------------------------------------------------------------------------------------------------------------------------------------------------------------------------------------------------------------------------------------------------------------------------------------------------------------------------------------------------------------------------------------------------------------------------------------------------------------------------------------------------------------------------------------------------------------------------------------------------------------------------------------------------------------------------------------------------------------------------------------------------|
| env-509 | JGI12104J13512_1000732 | + | 3737    | 3822    | <p>RNA → RplC (COG0087)rpl3p (PRK04231) → RplD (COG0088)rpl4p (PRK04042) → RplW (COG0089)PRK14548 (PRK14548) → RplB (COG0090)rpl2p (PRK09612) → RpsS (COG0185)rps19p (PRK04038) → rpl22p (PRK04223)RplV (COG0091) → RpsC (COG0092)rps3p (PRK04191) → PRK14549 (PRK14549)Ribosomal_L29 (pfam00831) → PRK03879 (PRK03879)UPF0086 (pfam01868) → RpsQ (COG0186)rps17p (PRK08572) → rpl14p (PRK08571)Ribosomal_L14 (pfam00238) → rpl24p (PRK01191)KOW_RPL26 (cd06089) → PRK04313 (PRK04313)S4 (cd00165)KOW_RPS4 (cd06087)Ribosomal_S4e (pfam00900) → RplE (COG0094)rpl5p (PRK04219) → RpsN (COG0199)rps14P (PRK05766) → rps8p (PRK04034)RpsH (COG0096) → RplF (COG0097)rpl6p (PRK05518) → rpl32e (PRK08562)Ribosomal_L32e (pfam01655) → rpl19e (PRK08570)Ribosomal_L19e (pfam01280) → RplR (COG0256)rpl18p (PRK08569) → RpsE (COG0098)rps5p (PRK04044) → Ribosomal_L7_archaeal_euk (cd01657)rpl30p (PRK06049) → rpl15p (PRK06419)Ribosomal_L27A (pfam00828) → SecY (COG0201)PRK08568 (PRK08568) → AdkA (COG2019)PRK04040 (PRK04040) → DUF106 (pfam01956) → CmkB (COG1102)PRK04182 (PRK04182) → Lactamase_B (smart00849)DHPS-like_MBL-fold (cd07713) → RNA → RplC (COG0087)rpl3p (PRK04231) → RplD (COG0088)rpl4p (PRK04042) → RplW (COG0089)PRK14548 (PRK14548) → RplB (COG0090)rpl2p (PRK09612) → RpsS (COG0185)rps19p (PRK04038) → rpl22p (PRK04223)RplV (COG0091) → RpsC (COG0092)rps3p (PRK04191) → PRK14549 (PRK14549)Ribosomal_L29 (pfam00831) → PRK03879 (PRK03879)UPF0086 (pfam01868) → RpsQ (COG0186)rps17p (PRK08572) → rpl14p (PRK08571)Ribosomal_L14 (pfam00238) → rpl24p (PRK01191)KOW_RPL26 (cd06089) → PRK04313 (PRK04313)S4 (cd00165)KOW_RPS4 (cd06087)Ribosomal_S4e (pfam00900) → RplE (COG0094)rpl5p (PRK04219) → RpsN (COG0199)rps14P (PRK05766) → rps8p (PRK04034)RpsH (COG0096) → RplF (COG0097)rpl6p (PRK05518) → rpl32e (PRK08562)Ribosomal_L32e (pfam01655) → rpl19e (PRK08570)Ribosomal_L19e (pfam01280) → RplR (COG0256)rpl18p (PRK08569) → RpsE (COG0098)rps5p (PRK04044) →</p> |
| env-510 | JGI11944J13513_1000175 | + | 47191   | 47276   | <p>RNA → hypo → RplC (COG0087)rpl3p (PRK04231) → RplD (COG0088)rpl4p (PRK04042) → RplW (COG0089)PRK14548 (PRK14548) → RplB (COG0090)rpl2p (PRK09612) → RpsS (COG0185)rps19p (PRK04038) → rpl22p (PRK04223)RplV (COG0091) → RpsC (COG0092)rps3p (PRK04191) → PRK14549 (PRK14549)Ribosomal_L29 (pfam00831) → PRK03879 (PRK03879)UPF0086 (pfam01868) → RpsQ (COG0186)rps17p (PRK08572) → rpl14p (PRK08571)Ribosomal_L14 (pfam00238) → rpl24p (PRK01191)KOW_RPL26 (cd06089) → PRK04313 (PRK04313)S4 (cd00165)KOW_RPS4 (cd06087)Ribosomal_S4e (pfam00900) → RplE (COG0094)rpl5p (PRK04219) → RpsN (COG0199)rps14P (PRK05766) → rps8p (PRK04034)RpsH (COG0096) → RplF (COG0097)rpl6p (PRK05518) → rpl32e (PRK08562)Ribosomal_L32e (pfam01655) → rpl19e (PRK08570)Ribosomal_L19e (pfam01280) → RplR (COG0256)rpl18p (PRK08569) → RpsE (COG0098)rps5p (PRK04044) →</p>                                                                                                                                                                                                                                                                                                                                                                                                                                                                                                                                                                                                                                                                                                                                                                                                                                                                                                                                                                                                                                                                                                                                        |
| Mta-1-1 | NZ_AG1Y02000001.1      | - | 1752945 | 1752858 | <p>RNA → hypo → RplC (COG0087)rpl3p (PRK04231) → RplD (COG0088)rpl4p (PRK04042) → RplW (COG0089)PRK14548 (PRK14548) → RplB (COG0090)rpl2p (PRK09612) → RpsS (COG0185)rps19p (PRK04038) → rpl22p (PRK04223)RplV (COG0091) → RpsC (COG0092)rps3p (PRK04191) → PRK14549 (PRK14549)Ribosomal_L29 (pfam00831) → PRK03879 (PRK03879)UPF0086 (pfam01868) → RpsQ (COG0186)rps17p (PRK08572) → rpl14p (PRK08571)Ribosomal_L14 (pfam00238) → rpl24p (PRK01191)KOW_RPL26 (cd06089) → PRK04313 (PRK04313)S4 (cd00165)KOW_RPS4 (cd06087)Ribosomal_S4e (pfam00900) → RplE (COG0094)rpl5p (PRK04219) → RpsN (COG0199)rps14P (PRK05766) → rps8p (PRK04034)RpsH (COG0096) → RplF (COG0097)rpl6p (PRK05518) → rpl32e (PRK08562)Ribosomal_L32e (pfam01655) → rpl19e (PRK08570)Ribosomal_L19e (pfam01280) → RplR (COG0256)rpl18p (PRK08569) → RpsE (COG0098)rps5p (PRK04044) →</p>                                                                                                                                                                                                                                                                                                                                                                                                                                                                                                                                                                                                                                                                                                                                                                                                                                                                                                                                                                                                                                                                                                                                        |
| env-511 | taComm3_C1003          | - | 71292   | 71205   | <p>RNA → hypo → RplC (COG0087)rpl3p (PRK04231) → RplD (COG0088)rpl4p (PRK04042) → RplW (COG0089)PRK14548 (PRK14548) → RplB (COG0090)rpl2p (PRK09612) → RpsS (COG0185)rps19p (PRK04038) → rpl22p (PRK04223)RplV (COG0091) → RpsC (COG0092)rps3p (PRK04191) → PRK14549 (PRK14549)Ribosomal_L29 (pfam00831) → PRK03879 (PRK03879)UPF0086 (pfam01868) → RpsQ (COG0186)rps17p (PRK08572) → rpl14p (PRK08571)Ribosomal_L14 (pfam00238) → rpl24p (PRK01191)KOW_RPL26 (cd06089) → PRK04313 (PRK04313)S4 (cd00165)KOW_RPS4 (cd06087)Ribosomal_S4e (pfam00900) → RplE (COG0094)rpl5p (PRK04219) → RpsN (COG0199)rps14P (PRK05766) → rps8p (PRK04034)RpsH (COG0096) → RplF (COG0097)rpl6p (PRK05518) → rpl32e (PRK08562)Ribosomal_L32e (pfam01655) → rpl19e (PRK08570)Ribosomal_L19e (pfam01280) → RplR (COG0256)rpl18p (PRK08569) → RpsE (COG0098)rps5p (PRK04044) →</p>                                                                                                                                                                                                                                                                                                                                                                                                                                                                                                                                                                                                                                                                                                                                                                                                                                                                                                                                                                                                                                                                                                                                        |

|         |                        |   |        |        |                                                                                                                                                                                                                                                                                                                                                                                                                                                                                                                                                                                                                                                                                                                                                                                                                                                         |
|---------|------------------------|---|--------|--------|---------------------------------------------------------------------------------------------------------------------------------------------------------------------------------------------------------------------------------------------------------------------------------------------------------------------------------------------------------------------------------------------------------------------------------------------------------------------------------------------------------------------------------------------------------------------------------------------------------------------------------------------------------------------------------------------------------------------------------------------------------------------------------------------------------------------------------------------------------|
| env-512 | JGI12104J13512_1000711 | - | 24857  | 24770  | RNA → hypo → RplC (COG0087)rpl3p (PRK04231) → RplD (COG0088)rpl4p (PRK04042) → RplW (COG0089)PRK14548 (PRK14548) → RplB (COG0090)rpl2p (PRK09612) → RpsS (COG0185)rps19p (PRK04038) → rpl22p (PRK04223)RplV (COG0091) → RpsC (COG0092)rps3p (PRK04191) → PRK14549 (PRK14549)Ribosomal_L29 (pfam00831) → PRK03879 (PRK03879)UPF0086 (pfam01868) → RpsQ (COG0186)rps17p (PRK08572) → rpl14p (PRK08571)Ribosomal_L14 (pfam00238) → rpl24p (PRK01191)KOW_RPL26 (cd06089) → PRK04313 (PRK04313)S4 (cd00165)KOW_RPS4 (cd06087)Ribosomal_S4e (pfam00900) → RplE (COG0094)rpl5p (PRK04219) → RpsN (COG0199)rps14P (PRK05766) → rps8p (PRK04034)RpsH (COG0096) → RplF (COG0097)rpl6p (PRK05518) → rpl32e (PRK08562)Ribosomal_L32e (pfam01655) → rpl19e (PRK08570)Ribosomal_L19e (pfam01280) → RplR (COG0256)rpl18p (PRK08569) → RpsE (COG0098)rps5p (PRK04044) → |
| env-513 | JGI11944J13513_1000170 | - | 24861  | 24774  | RNA → hypo → RplC (COG0087)rpl3p (PRK04231) → RplD (COG0088)rpl4p (PRK04042) → RplW (COG0089)PRK14548 (PRK14548) → RplB (COG0090)rpl2p (PRK09612) → RpsS (COG0185)rps19p (PRK04038) → rpl22p (PRK04223)RplV (COG0091) → RpsC (COG0092)rps3p (PRK04191) → PRK14549 (PRK14549)Ribosomal_L29 (pfam00831) → PRK03879 (PRK03879)UPF0086 (pfam01868) → RpsQ (COG0186)rps17p (PRK08572) → rpl14p (PRK08571)Ribosomal_L14 (pfam00238) → rpl24p (PRK01191)KOW_RPL26 (cd06089) → PRK04313 (PRK04313)S4 (cd00165)KOW_RPS4 (cd06087)Ribosomal_S4e (pfam00900) → RplE (COG0094)rpl5p (PRK04219) → RpsN (COG0199)rps14P (PRK05766) → rps8p (PRK04034)RpsH (COG0096) → RplF (COG0097)rpl6p (PRK05518) → rpl32e (PRK08562)Ribosomal_L32e (pfam01655) → rpl19e (PRK08570)Ribosomal_L19e (pfam01280) → RplR (COG0256)rpl18p (PRK08569) → RpsE (COG0098)rps5p (PRK04044) → |
| Hbo-1-1 | NC_014729.1            | + | 955608 | 955707 | RNA → MethyItrn_RNA_3 (pfam02598) → rpl3p (PRK04231)Ribosomal_L3 (pfam00297) → RplD (COG0088)rpl4p (PRK04042) → RplW (COG0089)PRK14548 (PRK14548) → RplB (COG0090)rpl2p (PRK09612) → RpsS (COG0185)rps19p (PRK04038) → rpl22p (PRK04223)RplV (COG0091) → RpsC (COG0092)rps3p (PRK04191) → PRK14549 (PRK14549)Ribosomal_L29 (pfam00831) → PRK03879 (PRK03879)UPF0086 (pfam01868) → RpsQ (COG0186)rps17p (PRK08572) → rpl14p (PRK08571)Ribosomal_L14 (pfam00238) → RplX (COG0198)rpl24p (PRK01191) → PRK04313 (PRK04313)KOW_RPS4 (cd06087)Ribosomal_S4e (pfam00900) → RplE (COG0094)rpl5p (PRK04219) → RpsN (COG0199)rps14P (PRK05766) → rps8p (PRK04034)RpsH (COG0096) → RplF (COG0097)rpl6p (PRK05518) → PRK12766 (PRK12766)RecA (COG0468)Rpl32e (COG1717) → rpl19e (PRK08570)Ribosomal_L19e (pfam01280) →                                              |
| Ngr-1-1 | NC_019792.1            | - | 316138 | 316039 | RNA → MethyItrn_RNA_3 (pfam02598) → rpl3p (PRK04231)Ribosomal_L3 (pfam00297) → RplD (COG0088)rpl4p (PRK04042) → RplW (COG0089)PRK14548 (PRK14548) → RplB (COG0090)rpl2p (PRK09612) → RpsS (COG0185)rps19p (PRK04038) → rpl22p (PRK04223)RplV (COG0091) → RpsC (COG0092)rps3p (PRK04191) → PRK14549 (PRK14549) → PRK03879 (PRK03879)UPF0086 (pfam01868) → RpsQ (COG0186)rps17p (PRK08572) → rpl14p (PRK08571)Ribosomal_L14 (pfam00238) → rpl24p (PRK01191)KOW_RPL26 (cd06089) → PRK04313 (PRK04313)S4 (cd00165)KOW_RPS4 (cd06087)Ribosomal_S4e (pfam00900) → RplE (COG0094)rpl5p (PRK04219) → RpsN (COG0199)rps14P (PRK05766) → rps8p (PRK04034)RpsH (COG0096) → RplF (COG0097)rpl6p (PRK05518) → PRK12766 (PRK12766)RecA (COG0468)Rpl32e (COG1717) → rpl19e (PRK08570)Ribosomal_L19e (pfam01280) →                                                      |
| Hje-1-1 | NC_014297.1            | + | 971638 | 971737 | RNA → MethyItrn_RNA_3 (pfam02598) → RplC (COG0087)rpl3p (PRK04231) → RplD (COG0088)rpl4p (PRK04042) → RplW (COG0089)PRK14548 (PRK14548) → RplB (COG0090)rpl2p (PRK09612) → RpsS (COG0185)rps19p (PRK04038) → rpl22p (PRK04223)RplV (COG0091) → RpsC (COG0092)rps3p (PRK04191) → PRK14549 (PRK14549)Ribosomal_L29 (pfam00831) → PRK03879 (PRK03879)UPF0086 (pfam01868) → RpsQ (COG0186)rps17p (PRK08572) → rpl14p (PRK08571)Ribosomal_L14 (pfam00238) → rpl24p (PRK01191)KOW_RPL26 (cd06089) → PRK04313 (PRK04313)KOW_RPS4 (cd06087)Ribosomal_S4e (pfam00900) → RplE (COG0094)rpl5p (PRK04219) → RpsN (COG0199)rps14P (PRK05766) → rps8p (PRK04034)RpsH (COG0096) → RplF (COG0097)rpl6p (PRK05518) → PRK12766 (PRK12766)RecA (COG0468)Rpl32e (COG1717) → rpl19e (PRK08570)Ribosomal_L19e (pfam01280) →                                                   |

|         |                   |   |         |         |                                                                                                                                                                                                                                                                                                                                                                                                                                                                                                                                                                                                                                                                                                                                                                                                                                                                                                              |
|---------|-------------------|---|---------|---------|--------------------------------------------------------------------------------------------------------------------------------------------------------------------------------------------------------------------------------------------------------------------------------------------------------------------------------------------------------------------------------------------------------------------------------------------------------------------------------------------------------------------------------------------------------------------------------------------------------------------------------------------------------------------------------------------------------------------------------------------------------------------------------------------------------------------------------------------------------------------------------------------------------------|
| Nma-1-1 | NC_013922.1       | + | 222997  | 223096  | <p>RNA → <b>Methyltrn_RNA_3 (pfam02598)</b> → rpl3p (PRK04231)Ribosomal_L3 (pfam00297) → RplD (COG0088)rpl4p (PRK04042) → RplW (COG0089)PRK14548 (PRK14548) → RplB (COG0090)rpl2p (PRK09612) → RpsS (COG0185)rps19p (PRK04038) → rpl22p (PRK04223)RplV (COG0091) → RpsC (COG0092)rps3p (PRK04191) → RpmC (COG0255)PRK14549 (PRK14549) → PRK03879 (PRK03879)UPF0086 (pfam01868) → RpsQ (COG0186)rps17p (PRK08572) → rpl14p (PRK08571)Ribosomal_L14 (pfam00238) → rpl24p (PRK01191)KOW_RPL26 (cd06089) → PRK04313 (PRK04313)S4 (cd00165)KOW_RPS4 (cd06087)Ribosomal_S4e (pfam00900) → RplE (COG0094)rpl5p (PRK04219) → RpsN (COG0199)rps14P (PRK05766) → rps8p (PRK04034)RpsH (COG0096) → RplF (COG0097)rpl6p (PRK05518) → PRK12766 (PRK12766)RecA (COG0468)Rpl32e (COG1717) →</p>                                                                                                                             |
| Hal-1-1 | NZ_AOLL01000031.1 | - | 14961   | 14862   | <p>RNA → <b>Methyltrn_RNA_3 (pfam02598)</b> → rpl3p (PRK04231)Ribosomal_L3 (pfam00297) → RplD (COG0088)rpl4p (PRK04042) → RplW (COG0089)PRK14548 (PRK14548) → RplB (COG0090)rpl2p (PRK09612) → RpsS (COG0185)rps19p (PRK04038) → rpl22p (PRK04223)RplV (COG0091) → RpsC (COG0092)rps3p (PRK04191) → PRK14549 (PRK14549)Ribosomal_L29 (pfam00831) → PRK03879 (PRK03879)UPF0086 (pfam01868) → RpsQ (COG0186)rps17p (PRK08572) → rpl14p (PRK08571)Ribosomal_L14 (pfam00238) → RplX (COG0198)rpl24p (PRK01191) → PRK04313 (PRK04313)KOW_RPS4 (cd06087)Ribosomal_S4e (pfam00900) → RplE (COG0094)rpl5p (PRK04219) → RpsN (COG0199)rps14P (PRK05766) → rps8p (PRK04034)RpsH (COG0096) → RplF (COG0097)rpl6p (PRK05518) → PRK12766 (PRK12766)RecA (COG0468)Rpl32e (COG1717) → rpl19e (PRK08570)Ribosomal_L19e (pfam01280) →</p>                                                                                     |
| Hvo-1-1 | NC_013967.1       | - | 2419949 | 2419850 | <p>RNA → <b>Methyltrn_RNA_3 (pfam02598)</b> → rpl3p (PRK04231)Ribosomal_L3 (pfam00297) → RplD (COG0088)rpl4p (PRK04042) → RplW (COG0089)PRK14548 (PRK14548) → RplB (COG0090)rpl2p (PRK09612) → RpsS (COG0185)rps19p (PRK04038) → rpl22p (PRK04223)RplV (COG0091) → RpsC (COG0092)rps3p (PRK04191) → PRK14549 (PRK14549)Ribosomal_L29 (pfam00831) → PRK03879 (PRK03879)UPF0086 (pfam01868) → RpsQ (COG0186)rps17p (PRK08572) → rpl14p (PRK08571)Ribosomal_L14 (pfam00238) → RplX (COG0198)rpl24p (PRK01191) → PRK04313 (PRK04313)KOW_RPS4 (cd06087)Ribosomal_S4e (pfam00900) → RplE (COG0094)rpl5p (PRK04219) → RpsN (COG0199)rps14P (PRK05766) → rps8p (PRK04034)RpsH (COG0096) → RplF (COG0097)rpl6p (PRK05518) → PRK12766 (PRK12766)RecA (COG0468)Rpl32e (COG1717) → rpl19e (PRK08570)Ribosomal_L19e (pfam01280) →</p>                                                                                     |
| Nti-1-1 | NZ_KB913017.1     | - | 3677377 | 3677278 | <p>RNA → <b>Methyltrn_RNA_3 (pfam02598)</b> → rpl3p (PRK04231)Ribosomal_L3 (pfam00297) → RplC (COG0087)rpl3p (PRK04231) → rpl3p (PRK04231)Ribosomal_L3 (pfam00297) → RplD (COG0088)rpl4p (PRK04042) → RplW (COG0089)PRK14548 (PRK14548) → RplB (COG0090)rpl2p (PRK09612) → RpsS (COG0185)rps19p (PRK04038) → rpl22p (PRK04223)RplV (COG0091) → RpsC (COG0092)rps3p (PRK04191) → RpmC (COG0255)PRK14549 (PRK14549) → PRK03879 (PRK03879)UPF0086 (pfam01868) → RpsQ (COG0186)rps17p (PRK08572) → rpl14p (PRK08571)Ribosomal_L14 (pfam00238) → rpl24p (PRK01191)KOW_RPL26 (cd06089) → PRK04313 (PRK04313)KOW_RPS4 (cd06087)S4 (pfam01479)Ribosomal_S4e (pfam00900) → RplE (COG0094)rpl5p (PRK04219) → RpsN (COG0199)rps14P (PRK05766) → rps8p (PRK04034)RpsH (COG0096) → RplF (COG0097)rpl6p (PRK05518) → PRK12766 (PRK12766)RecA (COG0468)Rpl32e (COG1717) → rpl19e (PRK08570)Ribosomal_L19e (pfam01280) →</p> |

|         |             |   |         |         |                                                                                                                                                                                                                                                                                                                                                                                                                                                                                                                                                                                                                                                                                                                                                                                                                         |
|---------|-------------|---|---------|---------|-------------------------------------------------------------------------------------------------------------------------------------------------------------------------------------------------------------------------------------------------------------------------------------------------------------------------------------------------------------------------------------------------------------------------------------------------------------------------------------------------------------------------------------------------------------------------------------------------------------------------------------------------------------------------------------------------------------------------------------------------------------------------------------------------------------------------|
| Npe-1-1 | NC_019962.1 | + | 854999  | 855098  | RNA → <b>Methyltrn_RNA_3 (pfam02598)</b> → RplC (COG0087)rpl3p (PRK04231) → RplD (COG0088)rpl4p (PRK04042) → RplW (COG0089)PRK14548 (PRK14548) → RplB (COG0090)rpl2p (PRK09612) → RpsS (COG0185)rps19p (PRK04038) → rpl22p (PRK04223)RplV (COG0091) → RpsC (COG0092)rps3p (PRK04191) → RpmC (COG0255)PRK14549 (PRK14549) → PRK03879 (PRK03879)UPF0086 (pfam01868) → RpsQ (COG0186)rps17p (PRK08572) → rpl14p (PRK08571)Ribosomal_L14 (pfam00238) → rpl24p (PRK01191)KOW_RPL26 (cd06089) → <b>PRK04313 (PRK04313)KOW_RPS4 (cd06087)Ribosomal_S4e (pfam00900)</b> → RplE (COG0094)rpl5p (PRK04219) → RpsN (COG0199)rps14p (PRK05766) → rps8p (PRK04034)RpsH (COG0096) → RplF (COG0097)rpl6p (PRK05518) → UvrC (COG0322)Rpl32e (COG1717)rpl32e (PRK08562)HHH_5 (pfam14520) → rpl19e (PRK08570)Ribosomal_L19e (pfam01280) → |
| Hti-1-1 | NC_021921.1 | - | 1979794 | 1979695 | RNA → <b>Methyltrn_RNA_3 (pfam02598)</b> → RplC (COG0087)rpl3p (PRK04231) → RplD (COG0088)rpl4p (PRK04042) → RplW (COG0089)PRK14548 (PRK14548) → RplB (COG0090)rpl2p (PRK09612) → RpsS (COG0185)rps19p (PRK04038) → rpl22p (PRK04223)RplV (COG0091) → RpsC (COG0092)rps3p (PRK04191) → PRK14549 (PRK14549)Ribosomal_L29 (pfam00831) → PRK03879 (PRK03879)UPF0086 (pfam01868) → RpsQ (COG0186)rps17p (PRK08572) → rpl14p (PRK08571)Ribosomal_L14 (pfam00238) → RplX (COG0198)rpl24p (PRK01191) → <b>PRK04313 (PRK04313)KOW_RPS4 (cd06087)Ribosomal_S4e (pfam00900)</b> → RplE (COG0094)rpl5p (PRK04219) → RpsN (COG0199)rps14p (PRK05766) → rps8p (PRK04034)RpsH (COG0096) → RplF (COG0097)rpl6p (PRK05518) →                                                                                                            |

## 2.3 Conserved domains

Conserved domains found in protein-coding genes listed in Section 2.2 are shown below, with the first sentence in their description from the Conserved Domain Database (if any). Conserved domains associated with more than one

**cd00141** (6) Nucleotidyltransferase (NT) domain of family X DNA Polymerases. [D/E]  
**cd00165** (46) S4/Hsp/ tRNA synthetase RNA-binding domain; The domain surface is populated by conserved, charged residues that define a likely RNA-binding site; Found in stress proteins, ribosomal proteins and tRNA synthetases; This may imply a hitherto unrecognized functional similarity between these three protein classes.  
**cd00355** (1) Ribosomal protein L30, which is found in eukaryotes and prokaryotes but not in archaea, is one of the smallest ribosomal proteins with a molecular mass of about 7kDa.  
**cd00497** (22) Ribosomal L29 protein/HIP.  
**cd00513** (12) Ribosomal.L32.L32e: L32 is a protein from the large subunit that contains a surface-exposed globular domain and a finger-like projection that extends into the RNA core to stabilize the tertiary structure.  
**cd01428** (2) Adenylate kinase (ADK) catalyzes the reversible phosphoryl transfer from adenosine triphosphates (ATP) to adenosine monophosphates (AMP) and to yield adenosine diphosphates (ADP).  
**cd01513** (1) Domain III of Elongation factor (EF) Tu (EF-TU) and related proteins.  
**cd01657** (30) Ribosomal protein L7, which is found in archaea and eukaryotes but not in prokaryotes, binds domain II of the 23S rRNA as well as the 5S rRNA and is one of five ribosomal proteins that mediate the interactions 5S rRNA makes with the ribosome.  
**cd01781** (1) Ubiquitin domain of AT-6, second repeat.  
**cd02034** (1) The accessory protein CooC, which contains a nucleotide-binding domain (P-loop)

L4-Archaeoglobi RNA are assigned a color, while others are shown in gray. The number in parentheses after the colored domain name is the number of occurrences in Section 2.2.

near the N-terminus, participates in the maturation of the nickel center of carbon monoxide dehydrogenase (CODH).  
**cd02411** (7) K homology RNA-binding domain (KH) of the archaeal 30S small ribosomal subunit S3 protein.  
**cd02572** (2) Pseudouridine synthase, human dyskerin like.  
**cd03586** (1) DNA Polymerase IV/Kappa.  
**cd03694** (1) Domain II of the GTPBP family of GTP binding proteins.  
**cd06087** (219) KOW motif of Ribosomal Protein S4 (RPS4).  
**cd06089** (159) KOW motif of Ribosomal Protein L26.  
**cd07713** (1) Methanocaldococcus jannaschii dihydropteroate synthase, Thermoanaerobacter tengcongensis Tflp, and related proteins; MBL-fold metallo hydrolase domain.  
**cd12183** (4) Saccharopine Dehydrogenase NAD-binding and catalytic domains.  
**cd16490** (1) RING-CH finger, H2 subclass (C4HC3-type), found in Fanconi anemia group L protein (FANCL) and similar proteins.  
**COG0087** (255) Ribosomal protein L3 [Translation, ribosomal structure and biogenesis]  
**COG0088** (321) Ribosomal protein L4 [Translation, ribosomal structure and biogenesis]  
**COG0089** (310) Ribosomal protein L23 [Translation, ribosomal structure and biogenesis]  
**COG0090** (299) Ribosomal protein L2 [Translation, ribosomal structure and biogenesis]  
**COG0091** (269) Ribosomal protein L22 [Translation, ribosomal structure and biogenesis]  
**COG0092** (256) Ribosomal protein S3 [Translation, ribosomal structure and biogenesis]  
**COG0094** (188) Ribosomal protein L5 [Translation, ribosomal structure and biogenesis]



- COG0096** (210) Ribosomal protein S8 [Translation, ribosomal structure and biogenesis]  
**COG0097** (208) Ribosomal protein L6P/L9E [Translation, ribosomal structure and biogenesis]  
**COG0098** (59) Ribosomal protein S5 [Translation, ribosomal structure and biogenesis]  
**COG0185** (256) Ribosomal protein S19 [Translation, ribosomal structure and biogenesis]  
**COG0186** (242) Ribosomal protein S17 [Translation, ribosomal structure and biogenesis]  
**COG0198** (75) Ribosomal protein L24 [Translation, ribosomal structure and biogenesis]  
**COG0199** (213) Ribosomal protein S14 [Translation, ribosomal structure and biogenesis]  
**COG0200** (2) Ribosomal protein L15 [Translation, ribosomal structure and biogenesis]  
**COG0201** (25) Preprotein translocase subunit SecY [Intracellular trafficking, secretion, and vesicular transport]  
**COG0255** (60) Ribosomal protein L29 [Translation, ribosomal structure and biogenesis]  
**COG0256** (85) Ribosomal protein L18 [Translation, ribosomal structure and biogenesis]  
**COG0272** (4) NAD-dependent DNA ligase [Replication, recombination and repair]  
**COG0322** (25) Excinuclease UvrABC, nuclease subunit [Replication, recombination and repair]  
**COG0468** (99) RecA/RadA recombinase [Replication, recombination and repair]  
**COG1102** (4) Cytidylate kinase [Nucleotide transport and metabolism]  
**COG1222** (3) Uncharacterized archaeal membrane protein, DUF106 family, distantly related to YidC/Oxa1 [Function unknown]  
**COG1271** (2) Ribosomal protein S4E [Translation, ribosomal structure and biogenesis]  
**COG1555** (1) DNA uptake protein ComE and related DNA-binding proteins [Replication, recombination and repair]  
**COG1588** (34) RNase P/RNase MRP subunit p29 [Translation, ribosomal structure and biogenesis]  
**COG1717** (131) Ribosomal protein L32E [Translation, ribosomal structure and biogenesis]  
**COG1841** (1) Ribosomal protein L30/L7E [Translation, ribosomal structure and biogenesis]  
**COG2019** (2) Archaeal adenylate kinase [Nucleotide transport and metabolism]  
**COG2106** (89) Predicted RNA methylase MTH1, SPOUT superfamily [General function prediction only]  
**COG2251** (4) Predicted nuclease, RecB family [General function prediction only]  
**COG5271** (1) Midasin, AAA ATPase with vWA domain, involved in ribosome maturation [Translation, ribosomal structure and biogenesis]  
**pfam00181** (5) Ribosomal Proteins L2, RNA binding domain.  
**pfam00189** (3) Ribosomal protein S3, C-terminal domain.  
**pfam00203** (23) Ribosomal protein S19.  
**pfam00237** (3) Ribosomal protein L22p/L17e.  
**pfam00238** (239) Ribosomal protein L14p/L23e.  
**pfam00276** (4) Ribosomal protein L23.  
**pfam00281** (36) Ribosomal protein L5.  
**pfam00297** (180) Ribosomal protein L3.  
**pfam00347** (4) Ribosomal protein L6.  
**pfam00366** (3) Ribosomal protein S17.  
**pfam00410** (2) Ribosomal protein S8.  
**pfam00573** (16) Ribosomal protein L4/L1 family.  
**pfam00633** (2) Helix-hairpin-helix motif.  
**pfam00673** (35) ribosomal L5P family C-terminus.  
**pfam00828** (25) Ribosomal proteins 50S-L15, 50S-L18e, 60S-L27A.  
**pfam00831** (172) Ribosomal L29 protein.  
**pfam00900** (227) Ribosomal family S4e.  
**pfam01280** (169) Ribosomal protein L19e.  
**pfam01472** (2) PUA domain.  
**pfam01479** (47) S4 domain.  
**pfam01655** (63) Ribosomal protein L32.  
**pfam01868** (219) Domain of unknown function UPF0086.  
**pfam01956** (2) Integral membrane protein DUF106.  
**pfam02598** (347) Putative RNA methyltransferase.  
**pfam03947** (12) Ribosomal Proteins L2, C-terminal domain.  
**pfam04147** (1) Nop14-like family.  
**pfam09547** (1) Stage IV sporulation protein A (spore\_IV\_A).  
**pfam10559** (1) Plug domain of Sec61p.  
**pfam12226** (1) Turkey astrovirus capsid protein.  
**pfam14520** (61) Helix-hairpin-helix domain.  
**pfam15250** (1) Raftlin.  
**PHA03252** (1) DNA packaging tegument protein UL25; Provisional  
**PRK00279** (2) adenylate kinase; Reviewed  
**PRK01191** (235) 50S ribosomal protein L24P; Validated  
**PRK02201** (1) putative inner membrane protein translocase component YidC; Provisional  
**PRK03879** (253) ribonuclease P protein component 1; Validated  
**PRK04034** (214) 30S ribosomal protein S8P; Reviewed  
**PRK04038** (284) 30S ribosomal protein S19P; Provisional  
**PRK04040** (2) adenylate kinase; Provisional  
**PRK04042** (341) 50S ribosomal protein L4P; Provisional  
**PRK04044** (59) 30S ribosomal protein S5P; Reviewed  
**PRK04182** (4) cytidylate kinase; Provisional  
**PRK04191** (260) 30S ribosomal protein S3P; Reviewed  
**PRK04219** (226) 50S ribosomal protein L5P; Reviewed  
**PRK04223** (272) 50S ribosomal protein L22P; Reviewed  
**PRK04231** (435) 50S ribosomal protein L3P; Reviewed  
**PRK04270** (2) H/ACA RNA-protein complex component Cbf5p; Reviewed  
**PRK04313** (234) 30S ribosomal protein S4e; Validated  
**PRK05518** (209) 50S ribosomal protein L6P; Reviewed  
**PRK05766** (213) 30S ribosomal protein S14P; Reviewed  
**PRK05883** (2) acyl carrier protein; Validated  
**PRK06079** (32) 50S ribosomal protein L30P; Reviewed  
**PRK06419** (28) 50S ribosomal protein L15P; Reviewed  
**PRK07233** (1) hypothetical protein; Provisional  
**PRK08562** (116) 50S ribosomal protein L32e; Validated  
**PRK08568** (25) preprotein translocase subunit SecY; Reviewed  
**PRK08569** (86) 50S ribosomal protein L18P; Reviewed  
**PRK08570** (169) 50S ribosomal protein L19e; Reviewed  
**PRK08571** (240) 50S ribosomal protein L14P; Reviewed  
**PRK08572** (246) 30S ribosomal protein S17P; Reviewed  
**PRK09612** (316) 50S ribosomal protein L2P; Validated  
**PRK10575** (3) iron-hydroxamate transporter ATP-binding subunit; Provisional  
**PRK10611** (1) chemotaxis methyltransferase CheR; Provisional  
**PRK10811** (1) ribonuclease E; Reviewed  
**PRK12317** (1) elongation factor 1-alpha; Reviewed  
**PRK12442** (1) translation initiation factor IF-1; Reviewed  
**PRK12766** (86) 50S ribosomal protein L32e; Provisional  
**PRK13493** (1) chemoreceptor glutamine deamidase CheD; Provisional  
**PRK14548** (313) 50S ribosomal protein L23P; Provisional  
**PRK15749** (254) 50S ribosomal protein L29P; Provisional  
**smart00322** (6) K homology RNA-binding domain.  
**smart00382** (1) ATPases associated with a variety of cellular activities.

**smart00739** (2) KOW (Kyprides, Ouzounis, Woese) motif.  
**smart00849** (1) Metallo-beta-lactamase superfamily.  
**TIGR01393** (1) elongation factor 4. [Unknown function, General]  
**TIGR02903** (1) ATP-dependent protease, Lon family. [Protein fate, Degradation of proteins, peptides, and glycopeptides, Cellular processes, Sporulation and germination]  
**TIGR03594** (1) ribosome-associated GTPase EngA. [Protein synthesis, Other]

**TIGR03636** (2) ribosomal protein uL23, archaeal form. [Protein synthesis, Ribosomal proteins: synthesis and modification]  
**TIGR03653** (3) ribosomal protein uL6, archaeal form. [Protein synthesis, Ribosomal proteins: synthesis and modification]

## 2.4 Multiple-sequence alignment

Each L4-Archaeoglobi RNA is denoted by an abbreviation (like “Eco-1-1”) that refers to a taxonomy given in Section 2.1. The alignment may include sequences containing the RNA motif, as well as flanking sequence. The L4-Archaeoglobi RNA itself is denoted by the line underneath marked 5’ and 3’ on either end. Nucleotides in flanking sequences (i.e., not part of the motif) are written in gray letters. Stems of predicted rho-independent transcription terminators, if any, are shaded yellow. (Note: terminator predictions have not been analyzed manually, and many are likely to be false positives. Terminator predictions are those of the RNIE software.) Nucleotides predicted to function (as DNA) as transcription-factor binding sites, if any, are shaded in green. (But note: these predictions are manually annotated, so they might be under-predicted.) Annotated start codons, if any, are shaded green. (Note: start codons are frequently misannotated, especially in environmental samples.) Nucleotides proposed to basepair as part of the consensus structure are shaded in color when they comprise Watson-Crick or G-U

pairs. Otherwise they are shaded gray. Conserved stems are also indicated at the bottom of the alignment by angle brackets, where matching < and > denote base-paired columns. Below these angle brackets, the symbol “2” denotes base pairs exhibiting covariation according to the statistically well-founded R-scape method. “1” denotes base pairs exhibiting covariation according to R2R’s simplistic method. “0” denotes base pairs that are not observed to mutate and “?” denotes base pairs that have a significant frequency of non-canonical nucleotides for Watson-Crick or G-U pairs (> 5%). Below these base pair annotation is the consensus sequence: “R” = “A” or “G”, “Y” = “C” or “U”, red nucleotides: nucleotide identity conserved more than 97% of the time, black nucleotides: 90%, gray nucleotides: 75%, red circle (◉): nucleotide is present 97% of the time, black circle (◐): 90%, gray circle (◑): 75%, white circle (○): 50%. All percentages of sequences just described (e.g. 97% conserved) assume that sequences have been weighted by the GSC algorithm implemented by the Infernal software package.

Duplicate sequences: the following putative homologs are not shown in the alignment because their sequences are identical to a homolog already shown: Hdi-2-1, Hgi-2-1, Hha-1-2, Hhi-1-1, Hje-2-1, Hla-1-2, Hla-3-1, Hma-1-1, Hme-1-2, Hpa-1-2, Hsa-3-1, Hsi-1-1, Hsp-1-1, Hsp-4-1, Hsp-5-1, Hte-2-1, Hvo-1-1, Hwa-2-1, Mco-2-1, Mhu-1-1, Nal-1-1, Nsp-1-1, env-100, env-111, env-112, env-12, env-121, env-124, env-125, env-132, env-133, env-141, env-142, env-143, env-144, env-16, env-162, env-163, env-168, env-171, env-177, env-18, env-19, env-192, env-194, env-195, env-20, env-200, env-202, env-205, env-208, env-21, env-211, env-212, env-213, env-22, env-229, env-230, env-234, env-235, env-236, env-239, env-26, env-262, env-263, env-264, env-267, env-273, env-276, env-279, env-280, env-281, env-282, env-283, env-284, env-285, env-286, env-287, env-288, env-289, env-290, env-291, env-294, env-299, env-300, env-301, env-302, env-307, env-308, env-309, env-311, env-312, env-313, env-314, env-319, env-327, env-328, env-329, env-330, env-336, env-342, env-343, env-344, env-345, env-346, env-347, env-348, env-362, env-363, env-364, env-365, env-366, env-367, env-368, env-369, env-388, env-391, env-393, env-394, env-396, env-397, env-398, env-401, env-404, env-411, env-412, env-417, env-419, env-42, env-420, env-421, env-422, env-424, env-426, env-427, env-431, env-432, env-438, env-447, env-453, env-454, env-457, env-458, env-459, env-46, env-461, env-463, env-47, env-470, env-473, env-48, env-487, env-488, env-489, env-490, env-491, env-493, env-494, env-496, env-497, env-498, env-499, env-500, env-501, env-502, env-503, env-506, env-507, env-51, env-510, env-513, env-52, env-53, env-60, env-61, env-66, env-67, env-68, env-69, env-7, env-73, env-75, env-85, env-9, env-97, har-1-1

alignment positions 1...79

```
Mli-1-1 GUGAUGCCCCGGCUGCCCCUUAUGGGGGGCACAACCGAGAAGGACUCUAAUCCAGUCCCAAGGAGCUGACAGACGCUGGA
env-1 UUCCAGAUCCGUUCUCAUUCGUAUACGAAUAGAGACCAGAAAGGAGUUGUACAAACAACAGGGCUGAAUUAUGUGGA
env-2 CAAUGUCACGAAAGGAUAUACGGUUGGAGAAUUAAGAGAGGGAAUAGUACUCGAAAGGUCUAGCGAAGAGAAAGUAGGU
env-3 UAAUCUCGAUAAAACAACGGAAGUCGGGAAUUAAGAGAGGGGUUUGUUGUAGAGAAAGUUGGUGAUGAGAGAGUAGGU
env-4 AUCGGGGACGGAUCCCGUGCCCGGCAUGGUUAUGGGAACGAAUCCCGUCUUCGACCGGUGGCUGAUAAGACGCUGGG
env-5 AUCGGGGCGGAUCGCGGUGCCCGGCAUGGUUAUGGGAACGAAUCCCGUCUUCGACCGGUGGCUGAUAAGACGCUGGG
env-6 GAAUGUCCAUUAAGAGCCAUUUAAGCCUUGAAAUAAGAGCAUAAUUGCAUAAUUAAGCAUUGGGCUGAAAGAGUGGGA
env-8 UAAUUGAACCUAAUUCUGACUUUUUUCGGUCAAGACCGGGUCAUAAAUUGCUUUAUUGCAAUUGGGCUGAAAGAGUGGGA
```

```
.....
.....
.....RR.....RRR.....RRR.....RRR.....GY.....RRR.....GG
.....
```



env-94 CCCGUUGCGGCUCUCGUCGACAGCCAGCCGAAUUCGUCGAGUCGGCUGUCAACACAGGAAUCGUGACCGAGGUCGGA  
env-95 CCCGUUGCGGCUCUCGUCGACAGCCAGCCGAAUUCGUCGAGUCGGCUGUCAACACAGGAAUCGUGACCGAGGUCGGA  
env-96 GCCCUUGCGGCUCUCGUCGACAGCCAGCCGAAUUCGUCGAGUCGGCUGUCAACACAGGAAUCGUGACCGAGGUCGGA  
env-98 GCCCUUGCGGCUCUCGUCGACAGCCAGCCGAAUUCGUCGAGUCGGCUGUCAACACAGGAAUCGUGACCGAGGUCGGA  
env-99 CCCAUUGCGGGUCUCGUCGACAGCCAGCCGAAUUCGUCGAGUCGGCUGUCAACACAGGAAUCGUGACCGAGGUCGGA  
env-101 GCCGUCUCGCGUUUCGUCACAGAGGUGACCGACCCAGCGGACGGCUACACACCAAGGAAUCGUGACCAAGGUCGGA  
env-102 .....GCUACACACCAAGGAAUCGUGACCAAGGUCGGA  
env-103 .....GUAACGACCAAGGAAUCGUGACCAAGGUCGGA  
env-104 GCUCGGGUUUUCGUCACAGACCGUAGCCGACCGGACGACCGGCUACACACCAAGGAAUCGUGACCAAGGUCGGA  
env-105 CCGGUCUCGUCGACAGACCGUAGCCGUAUCAGACGACGACCGGCUACACCAAGGAAUCGUGACCAAGGUCGGA  
env-106 .....CAAGGAAUCGUGACCAAGGUCGGA  
env-107 .....GAGACCGUACCGGGGUCGUUACAAGAGGAAUCGUGACCGAGGUCGGA  
env-108 .....CGCGCGUCUCGUCGACCGGACCGGUUCGAGUCAUCGGAACUGCGAAGGAAUCGUGACCGAGGUCGGA  
env-109 GCUCGCGUCUCGUCGACAGCCGUCGCGGACCGGUAUCGAGGUCGUAAGACAGGAAUCGUGACCGAGGUCGGA  
CHa-1-1 CGUGCUCGCGCGAGUUGGCGGACUCACCGGCCCCGACGGGCGGAGCGACGACCGGAAUCGUGACCGAGGUCGGA  
Hpa-2-1 CCUCGUCGUCGUCUACGACCGGUCGCAUUCGAAACGAAUUCGGGUCGUUACAAGGAAUCGUGACCGAGGUCGGA  
env-110 GCUUCGCGCGGUCACAGACCGGUCGCAUUCGAAACGAAUUCGGGUCGUUACAAGGAAUCGUGACCGAGGUCGGA  
Nhu-1-1 GCUCGCGCGCAGUCACAGACCGGUCGCAUUCGAAACGAAUUCGGGUCGUUACAAGGAAUCGUGACCGAGGUCGGA  
env-113 GCUCGCGGUCGUGGCGGACCGGUCGACCCCUAGCGGGAAAGAGUCGAAACACAGGAAUCGUGACCGAGGUCGGA  
env-114 CCCGUUGCGGGUCUCGUCGACAGCCAGCCGAAUUCGUCGAGUCGGCUGUCAACACAGGAAUCGUGACCGAGGUCGGA  
env-115 CCGGUUGCGGGUCUCGUCGACAGCCAGCCGAAUUCGUCGAGUCGGCUGUUAACACAGGAAUCGUGACCGAGGUCGGA  
env-116 .....CGGACGACCGGCUACACACCAAGGAAUCGUGACCAAGGUCGGA  
env-117 .....GAUCCAGGCGAUCGACCGGCUACACACCAAGGAAUCGUGACCAAGGUCGGA  
env-118 .....GACCGGCUACACACCAAGGAAUCGUGACCAAGGUCGGA  
env-119 GCGCUCGCGGUUUUCGUCACAGACCGUAGCCGACCCAGCGGGCGGCUACACACCAAGGAAUCGUGACCAAGGUCGGA  
env-120 UGUGCUCGCGCGUUGGUCAGACACCUCCGGCCAGACGGGCGGAGCUCGAGACGGAUCGUGACCGAGGUCGGA  
env-122 CGUGCUCGCGCGUUGGUCAGACACCUCCGGCCAGACGGGCGGAGCUCGAGACGGAUCGUGACCGAGGUCGGA  
env-123 CGUGCUCGCGCGUUGGUCAGACACCUCCGGCCAGACGGGCGGAGCUCGAGACGGAUCGUGACCGAGGUCGGA  
env-126 .....GCUACGACCGGUCGCAUUCGAAACGAAUUCGGGUCGUUACAAGGAAUCGUGACCGAGGUCGGA  
env-127 CCUCGCGUCGCGUCUACGACCGGUCGCAUUCGAAACGAAUUCGGGUCGUUACAAGGAAUCGUGACCGAGGUCGGA  
env-128 CCUCGCGUCGCGUCUACGACCGGUCGCAUUCGAAACGAAUUCGGGUCGUUACAAGGAAUCGUGACCGAGGUCGGA  
env-129 GCUUCGCGCGUCUCACGACCGGUCGCAUUCGAAACGAAUUCGGGUCGUUACAAGGAAUCGUGACCGAGGUCGGA  
Hna-1-1 CCUUCGCGUCUCACGACCGGUCGCAUUCGAAACGAAUUCGGGUCGUUACAAGGAAUCGUGACCGAGGUCGGA  
env-130 CCUUCGCGUCUCACGACCGGUCGCAUUCGAAACGAAUUCGGGUCGUUACAAGGAAUCGUGACCGAGGUCGGA  
env-131 CCGCUCGCGGUCUCCCGACCGGUCGCGGUCGAAACGCGGAGUCGAGAAAGGAAUCGUGACCGAGGUCGGA  
env-134 GCUCCGCGUCGUCACAGACCGGUCGCAUUCGAAACGAAUUCGGGUCGUUACAAGGAAUCGUGACCGAGGUCGGA  
env-135 .....GACGGGUCGAAUCUACCGGUCGCGGGUCGUUACAAGGAAUCGUGACCGAGGUCGGA  
Nph-1-1 GCUCGCGGUCGUCUACAGACCGGUCGCAUUCGAAACGAAUUCGGGUCGUUACAAGGAAUCGUGACCGAGGUCGGA  
env-136 GCUCUCGUCGUCGUCGACAGCCGUCGCAUUCGAAACGAAUUCGGGUCGUUACAAGGAAUCGUGACCGAGGUCGGA  
env-137 GCUCGCGUUCGUCUACAGACCGGUCGCAUUCGAAACGAAUUCGGGUCGUUACAAGGAAUCGUGACCGAGGUCGGA  
env-138 GCUCGCGUACCAUGGCGGACCGGUCGCGCCCGACGCGGAGCGAGUCGACAAACACAGGAAUCGUGACCGAGGUCGGA  
env-139 .....GCGCGCUCGCGGACGGGAGGAGUCGACAAACACAGGAAUCGUGACCGAGGUCGGA  
env-140 GCUUCGCGGUCUUGGCGGACCGGUCGCGCCCGACGGGCGGAGUCGACAAACACAGGAAUCGUGACCGAGGUCGGA  
env-145 GCUCCGCGUUCGUGGCGGACCGGUCGCGCCCGACGGGCGGAGUCGAAACACAGGAAUCGUGACCGAGGUCGGA  
env-146 .....ACACAGGAAUCGUGACCGAGGUCGGA  
env-147 GCUCGCGGUCGUCGUGGCGGACCGGUCGUCUCCUCGACGGGAGGAGUCGACAAACACAGGAAUCGUGACCGAGGUCGGA  
env-148 GCUCGCGGUCGUGGCGGACCGGUCGUCUCCCGACGGGAGGAGUCGAAACACAGGAAUCGUGACCGAGGUCGGA  
Hsp-9-1 GCUCGCGGUCGUGGCGGACCGGUCGCAUUCGAAACGAAUUCGGGUCGUUACAAGGAAUCGUGACCGAGGUCGGA  
Hez-1-1 GCUCGCGGUCGUGGCGGACCGGUCGCAUUCGAAACGAAUUCGGGUCGUUACAAGGAAUCGUGACCGAGGUCGGA  
env-149 .....AAGAGUCGAAACACAGGAAUCGUGACCGAGGUCGGA  
env-150 .....AAUCGAAACACAGGAAUCGUGACCGAGGUCGGA  
env-151 .....CAAGGAAUCGUGACCGAGGUCGGA  
Hco-1-1 GCUCGCGGUCGUGGCGGACCGGUCGCAUUCGAAACGAAUUCGGGUCGUUACAAGGAAUCGUGACCGAGGUCGGA  
env-152 GCUCGCGGUCGUGGCGGACCGGUCGCAUUCGAAACGAAUUCGGGUCGUUACAAGGAAUCGUGACCGAGGUCGGA  
env-153 GCUCGCGGUCGUGGCGGACCGGUCGCAUUCGAAACGAAUUCGGGUCGUUACAAGGAAUCGUGACCGAGGUCGGA  
env-154 .....UCAGGAAUCGUGACCGAGGUCGGA  
env-155 .....CAGGAAUCGUGACCGAGGUCGGA  
env-156 GAGUCGAAACACAGGAAUCGUGACCGAGGUCGGA  
Hsp-10-1 GCUCGCGGUCGUGGCGGACCGGUCGCAUUCGAAACGAAUUCGGGUCGUUACAAGGAAUCGUGACCGAGGUCGGA  
Hli-1-1 GCUCGCGGUCGUGGCGGACCGGUCGCAUUCGAAACGAAUUCGGGUCGUUACAAGGAAUCGUGACCGAGGUCGGA  
Hte-1-1 GCUCGCGGUCGUGGCGGACCGGUCGCAUUCGAAACGAAUUCGGGUCGUUACAAGGAAUCGUGACCGAGGUCGGA  
Hko-1-1 GCUCGCGGUCGUGGCGGACCGGUCGCAUUCGAAACGAAUUCGGGUCGUUACAAGGAAUCGUGACCGAGGUCGGA  
Hli-2-1 GCUCGCGGUCGUGGCGGACCGGUCGCAUUCGAAACGAAUUCGGGUCGUUACAAGGAAUCGUGACCGAGGUCGGA  
Hsa-7-1 GCUCGCGGUCGUGGCGGACCGGUCGCAUUCGAAACGAAUUCGGGUCGUUACAAGGAAUCGUGACCGAGGUCGGA  
Hca-2-1 GCUCGCGGUCGUGGCGGACCGGUCGCAUUCGAAACGAAUUCGGGUCGUUACAAGGAAUCGUGACCGAGGUCGGA  
Hsp-7-1 GCUCGCGGUCGUGGCGGACCGGUCGCAUUCGAAACGAAUUCGGGUCGUUACAAGGAAUCGUGACCGAGGUCGGA  
Hha-2-1 GCUCGCGGUCGUGGCGGACCGGUCGCAUUCGAAACGAAUUCGGGUCGUUACAAGGAAUCGUGACCGAGGUCGGA  
Hdi-1-1 GCUCGCGGUCGUGGCGGACCGGUCGCAUUCGAAACGAAUUCGGGUCGUUACAAGGAAUCGUGACCGAGGUCGGA  
Hsa-9-1 CGCUCGCGGUCGUGGCGGACCGGUCGCAUUCGAAACGAAUUCGGGUCGUUACAAGGAAUCGUGACCGAGGUCGGA  
Har-2-1 GCUCGCGGUCGUGGCGGACCGGUCGCAUUCGAAACGAAUUCGGGUCGUUACAAGGAAUCGUGACCGAGGUCGGA  
env-157 .....CCAGCGGGNAGAGUCGAAACACAGGAAUCGUGACCGAGGUCGGA  
env-158 .....GUGACCGAGGUCGGA  
env-159 GCUCGCGGUCGUGGCGGACCGGUCGCAUUCGAAACGAAUUCGGGUCGUUACAAGGAAUCGUGACCGAGGUCGGA  
env-160 GCUCGCGGUCUACGUGGCGGACCGGUCGUCUCCCGACGGGAGGAGUCGACAAACACAGGAAUCGUGACCGAGGUCGGA  
h3A-1-1 GCUUCGUGUCCGUCACGACCGGUCGCGCCCGACGGGAGCGAGUCGUAACACAGGAAUCGUGACCGAGGUCGGA  
Hai-1-1 GCUCGCGGUCGUGGCGGACCGGUCGCAUUCGAAACGAAUUCGGGUCGUUACAAGGAAUCGUGACCGAGGUCGGA  
env-161 GCUCCGCGUUCGUGGCGGACCGGUCGCAUUCGAAACGAAUUCGGGUCGUUACAAGGAAUCGUGACCGAGGUCGGA  
Hho-1-1 GCUCGCGGUCGUGGCGGACCGGUCGCAUUCGAAACGAAUUCGGGUCGUUACAAGGAAUCGUGACCGAGGUCGGA  
env-164 .....GUGAAACACAGGAAUCGUGACCGAGGUCGGA  
env-165 .....CAGGAAUCGUGACCGAGGUCGGA  
env-166 GCUCGCGUACCAUGGCGGACCGGUCGCGCCCGACGGGAGCGAGUCGACAAACACAGGAAUCGUGACCGAGGUCGGA  
env-167 .....GGCGGACCGGUCGCGCCCGACGGGAGCGAGUCGACAAACACAGGAAUCGUGACCGAGGUCGGA  
env-169 .....CGGUGGCGGACCGGUCGCAUUCGAAACGAAUUCGGGUCGUUACAAGGAAUCGUGACCGAGGUCGGA  
env-170 .....GUGACCGAGGUCGGA

.....  
.....RRR•••RRR•••RRR•••GY•R••RRGY•GGA





env-220 GCUUCGGCAGAGCCACAGACCGGCCUCGGGAUCCAGCGAUUCGGGGUCGUCAACACAGGGAUUCGUGACCGAGGUCGGA  
 env-221 GCUCGGCCGCAUGUCACAGACCGGCCUCGAAUCGACGCGUUCGGGGUCGUCAAGCAAGGGAUUCGUGACCGAGGUCGGA  
 Hsa-6-1 CCUGCCGGUCUCCCCACAGACCGGCCUCGAAUCAGACGCGUUCGGGGUCGUUAAACAGGGAUUCGUGACCGAGGUCGGA  
 env-222 GCUCUUCGUCGCGACAGACCGGCCUCGGGAUCCAGCGUUCGGGGUCGUUAAAGCAGGGAUUCGUGACCGAGGUCGGA  
 env-223 GCUCGGGGUAGGCAUAGAGCGGUCAACCGGCCUCGGGAUCCAGCGAUUCGGGGUCGUUAAAGCAGGGAUUCGUGACCGAGGUCGGA  
 env-224 UCUUAGAUCUUUACCACAGGCCGGCUCUGGUAUCAGAAUUCAGAGUCGUUAAAGCAAGGAUUCGUGACCGAGGUCGGA  
 env-225 UCUUAGAUCUUUACCACAGGCCGGCUCUGGUAUCAGAAUUCAGAGUCGUUAAAGCAAGGAUUCGUGACCGAGGUCGGA  
 env-226 UCUUAGAUCUUUACCACAGGCCGGCUCUGGUAUCAGAAUUCAGAGUCGUUAAAGCAAGGAUUCGUGACCGAGGUCGGA  
 env-227 UCUUAGAUCUUUACCACAGGCCGGCUCUGGUAUCAGAAUUCAGAGUCGUUAAAGCAAGGAUUCGUGACCGAGGUCGGA  
 env-228 CCUCGGCGUUCGUCUACAGACCGGCCUCGAGUCAAUCGUAUUCGGGGUCGUUAAACAGGGAUUCGUGACCGAGGUCGGA  
 env-231 GUCGGGGUAGGCAUAGAGCGGUCAUACCUUUGCAUGAGUCGUGGUGAGCAUUAUCAACAGCUGACCGAGGUCGGA  
 env-232 UCGGGGGUAGGCAUAGAGCGGUCAUACCUUUGCAUGAGUCGUGGUGAGCAUUAUCAACAGCUGACCGAGGUCGGA  
 env-233 GUCGGGGUAGGCAUAGAGCGGUCAUACCUUUGCAUGAGUCGUGGUGAGCAUUAUCAACAGCUGACCGAGGUCGGA  
 env-237 CUCUAUAGGUGAGUCACUCCCGGAGGGAGUUAACCGGAAAGGAGUUGGGAUUAUCAACAGCGGUGACUAGUCGGA  
 env-238 CCCUCCACUCAGAAUUCUCAUACUCCGUGAAAAGCGAGUGGAGGAGUUCGAGAGGAGUAGUCGUAAGGUCGGA  
 env-240 CAUCCACCGUUCGCAUACCCUCUCAUACAGUUUGAAAAGAAUCGGAUUAACCGGAGGUAUUGUGACCAUAGUCGGG  
 env-241 AUCAUUCGACCCUCACUGAUGGAGAUAUCCGGUUGGGGUCGUGGUCGCAAGACCAAAAGAGCGAGACAAAGUCGGA  
 env-242 CAUGCCUGGUGUUUCUGAGCCUGCAGGGGAAAACUCACAUUGGAGUUGUAGUCCGUCACAAACGGGAAGACAGAGUUGGA  
 env-243 CAUGCCUGGUGUUUCUGAGCCUGCAGGGGAAAACUCACAUUGGAGUUGUAGUCCGUCACAAACGGGAAGACAGAGUUGGA  
 env-244 AUGGGUGGGGUGCGCCCCGUGUACGGGGCCGAGCCGAGAAAGGAGUUGUAGUUAUCAACAGGGGUGACACGGUGGA  
 env-245 AUUUGGGCGGGGCGCCGUAUCCGGGGGCAACAGCCGAGAAAGGAGUUGUUAUCAACAGGGGUGACACGGUGGA  
 env-246 AUUUGGGCGGGGCGCCGUAUCCGGGGGCAACAGCCGAGAAAGGAGUUGUUAUCAACAGGGGUGACACGGUGGA  
 env-247 AUUUGGGCGGGGCGCCGUAUCCGGGGGCAACAGCCGAGAAAGGAGUUGUUAUCAACAGGGGUGACACGGUGGA  
 env-248 AUUUGGGCGGGGCGCCGUAUCCGGGGGCAACAGCCGAGAAAGGAGUUGUUAUCAACAGGGGUGACACGGUGGA  
 env-249 CAGGUAUGUCAUCCGGGAAUCCGGGUGGUAACCGGAGCGAGUUGUUAUCAACAGGGGUGACUUAUAGA  
 env-250 CAGGUAAGCGCAUCCGGGAAUCCGGGUGGUAACCGGAGCGAGUUGUUAUCAACAGGGGUGACACAGUAGA  
 env-251 AAGAGUAUACAUUCUGGUCACGUGGGGCGAGCCGAGAAAGGAGUUGUUAUCAACAGGGGUGACACAGUAGA  
 env-252 AAGAGUAUACAUUCUGGUCACGUGGGGCGAGCCGAGAAAGGAGUUGUUAUCAACAGGGGUGACACAGUAGA  
 env-253 AAGAUAGCAUACAUUCGUAACCAUCCGGGUGCAGGAGUUGUUAUCAACAGGGGUGACACAGUAGA  
 env-254 CAUCAUAGGUAUACAUUCGUAACCAUCCGGGUGGAAACAAAGAGGAGUUCGUGACACCAACAGGGGUGACAGAGUAGU  
 env-255 UUGGGGAUCCCGUCUCAUACUAGAGGGGGUUAUCCGAGAAAGGAGUUGUUAUCAACAGGGGUGACAGAGUAGG  
 env-256 GAAGGUGCAACCCUCCACAUUGGAGGGCCGAGUGUGUAUUGGAGUUGGUGUCUGACAAACGGGUGACAGGAGCUGGA  
 env-257 GCGAAGGUCGAAACCCUCCACAUUGGAGGGCCGAGUGUGUAUUGGAGUUGGUGUCUGACAAACGGGUGACAGGAGCUGGA  
 env-258 GCGAAGGUCGAAACCCUCCACAUUGGAGGGCCGAGUGUGUAUUGGAGUUGGUGUCUGACAAACGGGUGACAGGAGCUGGA  
 env-259 GCGAAGGUCGAAACCCUCCACAUUGGAGGGCCGAGUGUGUAUUGGAGUUGGUGUCUGACAAACGGGUGACAGGAGCUGGA  
 env-260 GCGAAGGUCGAAACCCUCCACAUUGGAGGGCCGAGUGUGUAUUGGAGUUGGUGUCUGACAAACGGGUGACAGGAGCUGGA  
 env-261 GCGAAGGUCGAAACCCUCCACAUUGGAGGGCCGAGUGUGUAUUGGAGUUGGUGUCUGACAAACGGGUGACAGGAGCUGGA  
 env-265 CACAAGGUCGAAACCCUCCACGAGGGCCGAGUGUGUAUUGGAGUUGGUGUCUGACAAACGGGUGACAGGAGCUGGA  
 env-266 GUGGAGUUGAAACCCUCCUACCGAGGGCAGGUGUGUAUUGGAGUUGGUGUCUGACAAACGGGUGACAGGAGCUGGA  
 env-268 UGGAGAUUGAAACCCUCCUACCGAGGGCAGGUGUGUAUUGGAGUUGGUGUCUGACAAACGGGUGACAGGAGCUGGA  
 env-269 GUGGAGUUGAAACCCUCCUACCGAGGGCAGGUGUGUAUUGGAGUUGGUGUCUGACAAACGGGUGACAGGAGCUGGA  
 env-270 UGGAGAUUGAAACCCUCCUACCGAGGGCAGGUGUGUAUUGGAGUUGGUGUCUGACAAACGGGUGACAGGAGCUGGA  
 env-271 UCGAAGGUCGAAACCCUCCAGAUUGGAGGGGUAUCGUAUUGGAGUUGGUGUCUGACAAACGGGUGACAGGAGCUGGA  
 env-272 UCGAAGGUCGAAACCCUCCAGAUUGGAGGGGUAUCGUAUUGGAGUUGGUGUCUGACAAACGGGUGACAGGAGCUGGA  
 env-274 UCGAAGGUCGAAACCCUCCAGAUUGGAGGGGUAUCGUAUUGGAGUUGGUGUCUGACAAACGGGUGACAGGAGCUGGA  
 env-275 UCGAAGGUCGAAACCCUCCAGAUUGGAGGGGUAUCGUAUUGGAGUUGGUGUCUGACAAACGGGUGACAGGAGCUGGA  
 env-277 UCGAAGGUCGAAACCCUCCAGAUUGGAGGGGUAUCGUAUUGGAGUUGGUGUCUGACAAACGGGUGACAGGAGCUGGA  
 env-278 GCGAAGGUCGAAACCCUCCAGAUUGGAGGGGUAUCGUAUUGGAGUUGGUGUCUGACAAACGGGUGACAGGAGCUGGA  
 env-292 CAAAGGUCGAAACCCUCCACAUUGGAGGGCCGAGUGUGUAUUGGAGUUGGUGUCUGACAAACGGGUGACAGGAGCUGGA  
 env-293 CAAAGGUCGAAACCCUCCAGAUUGGAGGGCCGAGUGUGUAUUGGAGUUGGUGUCUGACAAACGGGUGACAGGAGCUGGA  
 env-295 CACAAGGUCGAAACCCUCCACAUUGGAGGGCCGAGUGUGUAUUGGAGUUGGUGUCUGACAAACGGGUGACAGGAGCUGGA  
 env-296 CACAAGGUCGAAACCCUCCACAUUGGAGGGCCGAGUGUGUAUUGGAGUUGGUGUCUGACAAACGGGUGACAGGAGCUGGA  
 Mbo-1-1 CGCAAAGGUCGAAACCCUCCACAUUGGAGGGCCGAGUGUGUAUUGGAGUUGGUGUCUGACAAACGGGUGACAGGAGCUGGA  
 env-297 CACAAGGUCGAAACCCUCCACAUUGGAGGGCCGAGUGUGUAUUGGAGUUGGUGUCUGACAAACGGGUGACAGGAGCUGGA  
 env-298 CACAAGGUCGAAACCCUCCACAUUGGAGGGCCGAGUGUGUAUUGGAGUUGGUGUCUGACAAACGGGUGACAGGAGCUGGA  
 env-303 CAAAGGUCGAAACCCUCCACAUUGGAGGGCCGAGUGUGUAUUGGAGUUGGUGUCUGACAAACGGGUGACAGGAGCUGGA  
 env-304 CGCAAAGGUCGAAACCCUCCACAUUGGAGGGCCGAGUGUGUAUUGGAGUUGGUGUCUGACAAACGGGUGACAGGAGCUGGA  
 env-305 UCGAAGGUCGAAACCCUCCAGAUUGGAGGGGUAUCGUAUUGGAGUUGGUGUCUGACAAACGGGUGACAGGAGCUGGA  
 env-306 UCGAAGGUCGAAACCCUCCAGAUUGGAGGGGUAUCGUAUUGGAGUUGGUGUCUGACAAACGGGUGACAGGAGCUGGA  
 Mma-1-1 GACAAGGUCGAAACCCUCCACGAGGGCCGAGUGUGUAUUGGAGUUGGUGUCUGACAAACGGGUGACAGGAGCUGGA  
 Mse-1-1 CACAAGGUCGAAACCCUCCACGAGGGCCGAGUGUGUAUUGGAGUUGGUGUCUGACAAACGGGUGACAGGAGCUGGA  
 Msp-1-1 GACAAGGUCGAAACCCUCCACGAGGGCCGAGUGUGUAUUGGAGUUGGUGUCUGACAAACGGGUGACAGGAGCUGGA  
 env-310 AGCAGGUCGAAACCCUCCUUGCGGAGGGGGCAGUGUGUAUUGGAGUUGGUGUCUGACAAACGGGUGACAGGAGCUGGA  
 env-315 AGCAGGUCGAAACCCUCCUUGCGGAGGGGGCAGUGUGUAUUGGAGUUGGUGUCUGACAAACGGGUGACAGGAGCUGGA  
 env-316 . . . GGUCGAAACCCUCCUUGCGGAGGGGGCAGUGUGUAUUGGAGUUGGUGUCUGACAAACGGGUGACAGGAGCUGGA  
 env-317 . . . GAGGAGUUGGUCUGACAAACGGGUGACAGGAGCUGGA  
 env-318 AGCAGGUCGAAACCCUCCUUGCGGAGGGGGCAGUGUGUAUUGGAGUUGGUGUCUGACAAACGGGUGACAGGAGCUGGA  
 env-320 AGCAGGUCGAAACCCUCCUUGCGGAGGGGGCAGUGUGUAUUGGAGUUGGUGUCUGACAAACGGGUGACAGGAGCUGGA  
 env-321 . . . AACCCUCCUUGCGGAGGGGGCAGUGUGUAUUGGAGUUGGUGUCUGACAAACGGGUGACAGGAGCUGGA  
 env-322 AGCAGGUCGAAACCCUCCUUGCGGAGGGGGCAGUGUGUAUUGGAGUUGGUGUCUGACAAACGGGUGACAGGAGCUGGA  
 Mpa-1-1 AUACGGUCGACCCCGACCCUGAUGGUCGGGAUCCGAGAGGAGUUGGAGGUAUCAACAGGGGUGACAGAAAGCUGGA  
 env-323 . . . AAUGCCGAGGAGUUGGAGGUAUCAACAGGGGUGACAGAAAGCUGGA  
 env-324 UUGAUUGGUGAAUCUCAUCAGAAACCCUGAUGGUAUCCGAGAAAGGAGUUGGUAUUCGUAUCAACAGGGGUGACAGAGUUGG  
 env-325 CUCGAUUGGUGAAACCCUCCUUGCAGGAGGGGUAUCCGAGAAAGGAGUUGGUAUUCGUAUCAACAGGGGUGACAGAGUAGGA  
 env-326 CUCGAUUGGUGAAACCCUCCUUGCAGGAGGGGUAUCCGAGAAAGGAGUUGGUAUUCGUAUCAACAGGGGUGACAGAGUAGGA  
 env-331 CUCGAUUGGUGAAACCCUCCUUGCAGGAGGGGUAUCCGAGAAAGGAGUUGGUAUUCGUAUCAACAGGGGUGACAGAGUAGGA  
 env-332 CUCGAUUGGUGAAACCCUCCUUGCAGGAGGGGUAUCCGAGAAAGGAGUUGGUAUUCGUAUCAACAGGGGUGACAGAGUAGGA  
 Mfo-1-1 CGAUUGGUGAAUCCCGUAUAACAGGGGGUAUCCGAGAAAGGAGUUGGUAUUCGUAUCAACAGGGGUGACAGAGUUGG  
 env-333 CGAUUGGUGAAACCCCGCAGACAGUCGGGGGAUCCGAGAAAGGAGUUGGUAUUCGUAUCAACAGGGGUGACAGAGUUGGA  
 env-334 GAUUGGUGAACCCUCCAGAAUUCGGGGGAUCCGAGAAAGGAGUUGGUAUUCGUAUCAACAGGGGUGACAAAGUUGGA  
 env-335 GAUUGGUGAACCCUCCAGAAUUCGGGGGAUCCGAGAAAGGAGUUGGUAUUCGUAUCAACAGGGGUGACAAAGUUGGA  
 env-337 GAUUGGUGAACCCCGCAGAAUUCGGGGGAUCCGAGAAAGGAGUUGGUAUUCGUAUCAACAGGGGUGACAAAGUUGGA  
 env-338 CGAUUGGUGAAACCCCGCAGACAUUGGGGGGAUCCGAGAAAGGAGUUCGUAUCAACAGGGGUGACAGAGUUGGA  
 env-339 CGAUUGGUGAAACCCCGCAGACAUUGGGGGGAUCCGAGAAAGGAGUUCGUAUCAACAGGGGUGACAGAGUUGGA

.....  
 .....RR.....RRR.....RRR.....GY.....RRGY.....GGA















env-247 AUCGAU...CAGCGC.AG...GGGUGGAC...GUGC...UCU...GCAC.GAGCCCGC...GUGUA...UCAGCA...UCA...UACUGG...U.ACAUCC...GGCGAUA...GUCAGGU  
env-248 AUCGAU...CAGCGC.AG...GGGUGGAC...GUGC...UCU...GCAC.GAGCCCGC...GUGUA...UCAGCA...UCA...UACUGG...U.ACAUCC...GGCGAUA...GUCAGGU  
env-249 UUGAU...AUCACGCAAA...GGGUGGAC...GUCUU...CCC...GGAAG.GAGCCCGU...UUCUG...CCA...UGG...C.AGAAAAC...GGGUAAC...GUCAGGA  
env-250 UUGAU...AUCACGCAAA...GGGUGGAC...GUCUU...CCC...GGAAG.GAGCCCGU...UUUUG...CC...AUACA...GG...C.AGAAAAC...GGGUAAC...AUCAGGA  
env-251 UUGAUUGAAGCGCC.C...GGGGAAAC...GU...GAAA...AG.GAGCCAC...UUUCU...G...AUA...GG...CG.GAAA...GGCGUCCGG...GUCAGGA  
env-252 UUGAUUGAAGCGCC.C...GGGGAAAC...GU...GAAA...AG.GAGCCAC...UUUCU...G...AAUACA...UC...A.GAAA...GGCGUCCGG...GUCAGGA  
env-253 UUGAUUGAAGCGCC.C...GGGGAAAC...GU...GAAA...AG.GAGCCAC...UUUCU...G...ACUA...C...A.GAAA...GGCGUCCAGG...GUCAGGA  
env-254 AUCGAU.CAAGCGCCU...GGGUGGAC...GUUG...GUG...CAAG.GAGCCCGU...UUUCU...AUGGCGG...UGCCAU...A.GGAG...GUGGAUCAGG...GUCAGGA  
env-255 UUGAU...CAGCGCAUU...GGGGAAAC...GUU...CGUGC...AAC.GAGCCUU...UUUCA...UACAGC...CAUUAU...GAUGUG...AU.GAAGAU...GGCGAUU...GUCAGGA  
env-256 UUGAU.CGAGACGA.U...GGGGAAAC...GC...CAGUGCA...GC.GCGCCGG...UUCGG...GGAA...CACUC...C.GGAA...ACGUUGGAGA...AUCAGGA  
env-257 UUGAU.CGAGACGA.U...GGGGAAAC...GC...CAGUGCA...GC.GCGCCGG...UUCGG...GGAA...CACUC...C.GGAA...ACGUUGGAGA...AUCAGGA  
env-258 UUGAU.CGAGACGA.U...GGGGAAAC...GC...CAGUGCA...GC.GCGCCGG...UUCGG...GGAA...CACUC...C.GGAA...ACGUUGGAGA...AUCAGGA  
env-259 UUGAU.CGAGACGA.U...GGGGAAAC...GC...CAGUGCA...GC.GCGCCGG...UUCGG...GGAA...CACUC...C.GGAA...ACGUUGGAGA...AUCAGGA  
env-260 UUGAU.CGAGACGA.U...GGGGAAAC...GC...CAGUGCA...GC.GCGCCGG...UUCGG...GGAA...CACUC...C.GGAA...ACGUUGGAGA...AUCAGGA  
env-261 UUGAU.CGAGACGA.U...GGGGAAAC...GC...CAGUGCA...GC.GCGCCGG...UUCCA...GGGA...CACUC...C.GGAA...ACGUUGGAGA...AUCAGGA  
env-265 UUGAU.CGAGACGA.U...GGGGAAAC...GC...CAGUGCA...GC.GCGCCGG...UUCC...GGGA...GAAUG...U.GGGA...GGAA...GGGUUGAAG...GUCAGGA  
env-266 UUGAU.CGAGACGA.U...GGGGAAAC...GC...CAGUGCA...GC.GCGCCGG...UUUC...CGGA...UAAAUC...UGCC...GGGA...GGGUUGAAG...GUCAGGA  
env-268 UUGAU.CGAGACGA.U...GGGGAAAC...GC...CAGUGCA...GC.GCGCCGG...UUUC...CGGA...UAAAUC...UGCC...GGGA...GGGUUGAAG...GUCAGGA  
env-269 UUGAU.CGAGACGA.U...GGGGAAAC...GC...CAGUGCA...GC.GCGCCGG...UUUC...CGGA...UAAAUC...UGCC...GGGA...GGGUUGAAG...GUCAGGA  
env-270 UUGAU.CGAGACGA.U...GGGGAAAC...GC...CAGUGCA...GC.GCGCCGG...UUUC...CGGA...UAAAUC...UGCC...GGGA...GGGUUGAAG...GUCAGGA  
env-271 UUGAU.CGAGACGA.U...GGGGAAAC...GC...CAGUGCA...GC.GCGCCGG...UUUC...CGGA...UAAAUC...UGCC...GGGA...GGGUUGAAG...GUCAGGA  
env-272 UUGAU.CGAGACGA.U...GGGGAAAC...GC...CAGUGCA...GC.GCGCCGG...UUCC...AGAGA...ACA...UCUCU...CC.GGAA...ACGUUGAAG...GUCAGGA  
env-274 UUGAU.CGAGACGA.U...GGGGAAAC...GU...CAGUGCA...GC.GCGCCGG...UUCC...AGAGA...ACA...UCUCU...CC.GGAA...ACGUUGAAG...GUCAGGA  
env-275 UUGAU.CGAGACGA.U...GGGGAAAC...GC...CAGUGCA...GC.GCGCCGG...UUCC...AGAGA...ACA...UCUCU...CC.GGAA...ACGUUGAAG...GUCAGGA  
env-277 UUGAU.CGAGACGA.U...GGGGAAAC...GC...CAGUGCA...GC.GCGCCGG...UUCC...AGAGA...ACA...UCUCU...CC.GGAA...ACGUUGAAG...GUCAGGA  
env-278 UUGAU.CGAGACGA.U...GGGGAAAC...GC...CGUGCA...GC.GCGCCGG...UUCC...GGGA...CAGGCU...UGCC...GGAA...ACGUUGAAG...AUCAGGA  
env-292 UUGAU.CGAGACGA.U...GGGGAAAC...GC...CGUGCA...GC.GAGCCCGU...UUCGG...GGAA...CAAGU...UUCC...C.GAAA...GGGUUGAAG...GUCAGGA  
env-293 UUGAU.CGAGACGA.U...GGGGAAAC...GC...CGUGCA...GC.GAGCCCGU...UUCGG...GGAA...CAAGU...UUCC...C.GAAA...GGGUUGAAG...GUCAGGA  
env-295 UUGAU.CGAGACGA.U...GGGGAAAC...GC...CGUGCA...GC.GAGCCCGU...UUCGG...GGAA...CAAGU...UUCC...C.GAAA...GGGUUGAAG...GUCAGGA  
env-296 UUGAU.CGAGACGA.U...GGGGAAAC...GC...CGUGCA...GC.GAGCCCGU...UUCGG...GGAA...CAAGU...UUCC...C.GAAA...GGGUUGAAG...GUCAGGA  
Mbo-1-1 UUGAU.CGAGACGA.U...GGGGAAAC...GC...CGUGCA...GC.GAGCCCGU...UUCGG...GGAA...CAAGU...UUCC...C.GAAA...GGGUUGAAG...GUCAGGA  
env-297 UUGAU.CGAGACGA.U...GGGGAAAC...GC...CGUGCA...GC.GAGCCCGU...UUCC...GGGA...CAGGU...UGCC...GAAA...GGGUUGAAG...GUCAGGA  
env-298 UUGAU.CGAGACGA.U...GGGGAAAC...GC...CGUGCA...GC.GAGCCCGU...UUCC...GGGA...CAGGU...UGCC...GAAA...GGGUUGAAG...GUCAGGA  
env-303 UUGAU.CGAGACGA.U...GGGGAAAC...GC...CGUGCA...GC.GAGCCCGU...UUCC...GGGA...CAGGU...UGCC...GAAA...GGGUUGAAG...GUCAGGA  
env-304 UUGAU.CGAGACGA.U...GGGGAAAC...GC...CGUGCA...GC.GAGCCCGU...UUCC...GGGA...CAGGU...UGCC...GAAA...GGGUUGAAG...GUCAGGA  
env-305 UUGAU.CGAGACGA.U...GGGGAAAC...GC...CAGUGCA...GC.GCGCCGG...UUCC...AGAGA...ACA...UCUCU...CC.GGAA...ACGUUGAAG...GUCAGGA  
env-306 UUGAU.CGAGACGA.U...GGGGAAAC...GC...CAGUGCA...GC.GCGCCGG...UUCC...AGAGA...ACA...UCUCU...CC.GGAA...ACGUUGAAG...GUCAGGA  
Mma-1-1 UUGAU.CGAGACGA.U...GGGGAAAC...GC...CAGUGCA...GC.GCGCCGG...UUCC...AGAGA...ACA...UCUCU...CC.GGAA...ACGUUGAAG...GUCAGGA  
Mse-1-1 UUGAU.CGAGACGA.U...GGGGAAAC...GC...CAGUGCA...GC.GCGCCGG...UUCC...AGAGA...ACA...UCUCU...CC.GGAA...ACGUUGAAG...GUCAGGA  
Msp-1-1 UUGAU.CGAGACGA.U...GGGGAAAC...GC...CAGUGCA...GC.GCGCCGG...UUCC...AGAGA...ACA...UCUCU...CC.GGAA...ACGUUGAAG...GUCAGGA  
env-310 UUGAU.CGAGACGA.C...GGGGAAAC...GC...CAGUGCA...GC.GAGCCCGU...UUCUU...GGGA...GAGU...UGCC...C.GGGA...GGGUUGAAG...GUCAGGA  
env-315 UUGAU.CGAGACGA.C...GGGGAAAC...GC...CAGUGCA...GC.GAGCCCGU...UUCUU...GGGA...GAGU...UGCC...C.GGGA...GGGUUGAAG...GUCAGGA  
env-316 UUGAU.CGAGACGA.C...GGGGAAAC...GC...CAGUGCA...GC.GAGCCCGU...UUCUU...GGGA...GAGU...UGCC...C.GGGA...GGGUUGAAG...GUCAGGA  
env-317 UUGAU.CGAGACGA.U...GGGGAAAC...GC...CAGUGCA...GC.GCGCCGG...UUCC...AGAGA...ACA...UCUCU...CC.GGAA...ACGUUGAAG...GUCAGGA  
env-318 UUGAU.CGAGGGCC.A...GGGGAAAC...GC...CAGUGCA...GC.GAGCCCGU...UUUCU...GGGA...GAGU...UGCC...C.GGGA...GGGUUGAAG...GUCAGGA  
env-320 UUGAU.CGAGGGCC.A...GGGGAAAC...GC...CAGUGCA...GC.GAGCCCGU...UUUCU...GGGA...GAGU...UGCC...C.GGGA...GGGUUGAAG...GUCAGGA  
env-321 UUGAU.CGAGGGCC.A...GGGGAAAC...GC...CAGUGCA...GC.GAGCCCGU...UUUCU...GGGA...GAGU...UGCC...C.GGGA...GGGUUGAAG...GUCAGGA  
env-322 UUGAU.CGAGGGCC.A...GGGGAAAC...GC...CAGUGCA...GC.GAGCCCGU...UUUCU...GGGA...GAGU...UGCC...C.GGGA...GGGUUGAAG...GUCAGGA  
Mpa-1-1 UUGAA...GGACAG.U...GGGUGGAC...GUU...CGUGC...AAC.GAGCCCGU...UCCUG...CA...UG...C.AGGAGAU...UGUCUG...UUAGGA  
env-323 UUGAA...GGACAG.U...GGGUGGAC...GUU...CGUGC...AAC.GAGCCCGU...UCCUG...CA...UG...C.AGGAGAU...UGUCUG...UUAGGA  
env-324 UUGAU...ACCGCGCAU...GGGUGGAC...GUU...CGUGC...AAC.GAGCCCGU...UCCUG...A...U...C.AGGAGA...UUGUCUG...UUAGGA  
env-325 UUGAC.CAGGACGCAU...GGGUGGAC...GUU...CGUGC...AAC.GAGCCCGU...UCCUUCU...GUGCA...UGUAGC...A.GGGAU...GGCCAUU...GUCAGGA  
env-326 UUGAC.CAGGACGCAU...GGGUGGAC...GUU...CGUGC...AAC.GAGCCCGU...UCCUUCU...GUGCA...UGUAGC...A.GGGAU...GGCCAUU...GUCAGGA  
env-331 UUGAC.CAGGACGCAU...GGGUGGAC...GUU...CGUGC...AAC.GAGCCCGU...UCCUUCU...GUGCA...UGUAGC...A.GGGAU...GGCCAUU...GUCAGGA  
env-332 UUGAC.CAGGACGCAU...GGGUGGAC...GUU...CGUGC...AAC.GAGCCCGU...UCCUUCU...GUGCA...UGUAGC...A.GGGAU...GGCCAUU...GUCAGGA  
Mfo-1-1 UUGAU...CAGGCGCAU...GGGGAAAC...GUU...CGUGC...AAC.GAGCCCGU...UCCUUCU...GGGAC...GUGCCG...GUG...AAGAU...GGCCAUU...GUCAGGA  
env-333 UUGAC.CGUGACGCAU...GGGUGGAC...GUUU...CCAUAAA...AAAC.GAGCCCGU...UCCCC...GG...AAUUAU...GGGAU...GGCCAUU...GUCAGGA  
env-334 UUGAC.CGUGACGCAU...GGGUGGAC...GUUUU...CAUAAA...AAAC.GAGCCCGU...UCCCC...GG...AAUUAU...GGGAU...GGCCAUU...GUCAGGA  
env-335 UUGAC.CGUGACGCAU...GGGUGGAC...GUUUU...CAUAAA...AAAC.GAGCCCGU...UCCCC...GG...AAUUAU...GGGAU...GGCCAUU...GUCAGGA  
env-337 UUGAC.CGUGACGCAU...GGGUGGAC...GUUUU...CAUAAA...AAAC.GAGCCCGU...UCCCC...GG...AAUUAU...GGGAU...GGCCAUU...GUCAGGA  
env-338 UUGAC.CGUGACGCAU...GGGUGGAC...GUUUU...CAUAAA...AAAC.GAGCCCGU...UCCCC...GG...AAUUAU...GGGAU...GGCCAUU...GUCAGGA  
env-339 UUGAC.CGUGACGCAU...GGGUGGAC...GUUUU...CAUAAA...AAAC.GAGCCCGU...UCCCC...GG...AAUUAU...GGGAU...GGCCAUU...GUCAGGA  
CMe-1-1 UUGAC.CGUGACGCAU...GGGUGGAC...GUUUU...CAUAAA...AAAC.GAGCCCGU...UCCCC...GG...AAUUAU...GGGAU...GGCCAUU...GUCAGGA  
env-340 AUCGAC.AGGUACGCAU...GGGUGGAC...GUU...CGUGC...AAC.GAGCCCGU...UCCCA...GG...CAAUAAU...GGGAU...GGCCAUU...GUCAGGA  
env-341 UUGAC.CGUGACGCAU...GGGUGGAC...GUUU...GAAC...AAAC.GAGCCCGU...UCCCA...GG...AAAUAAU...GGGAU...GGCCAUU...GUCAGGA  
env-349 UUGAC.CGUGACGCAU...GGGUGGAC...GUUU...GAAC...AAAC.GAGCCCGU...UCCCA...GG...AAAUAAU...GGGAU...GGCCAUU...GUCAGGA  
env-350 UUGAC.CGUGACGCAU...GGGUGGAC...GUU...CGUGC...AAC.GAGCCCGU...UCCCG...GUGUUU...GAGUAG...A.GGGAU...GGCCAUU...GUCAGGA  
env-351 UUGAC.CGUGACGCAU...GGGUGGAC...GUU...CGUGC...AAC.GAGCCCGU...UCCCG...GUGUUU...GAGUAG...A.GGGAU...GGCCAUU...GUCAGGA  
env-352 UUGAU.UACCGCGCAU...GGGUGGAC...GUU...CGUGC...AAC.GAGCCCGU...UCCCG...G...CAAUAAUU...GGGCG...A.GGGAU...GGCCAUU...GUCAGGA  
env-353 UUGAU.AAGACGCAU...GGGUGGAC...GUUU...GAAC...AAAC.GAGCCCGU...UCCAA...UUGCUC...A.UGGAU...GGCCAUU...GUCAGGA  
env-354 UUGAU.AAGACGCAU...GGGUGGAC...GUUU...GAAC...AAAC.GAGCCCGU...UCCAA...UUGCUC...A.UGGAU...GGCCAUU...GUCAGGA  
env-355 UUGAU.AAGACGCAU...GGGUGGAC...GUUU...GAAC...AAAC.GAGCCCGU...UCCAA...UUGCUC...A.UGGAU...GGCCAUU...GUCAGGA  
env-356 UUGAU.AAGACGCAU...GGGUGGAC...GUUU...GAAC...AAAC.GAGCCCGU...UCCAA...UUGCUC...A.UGGAU...GGCCAUU...GUCAGGA  
env-357 UUGAC.CAGACGCAU...GGGUGGAC...GUUU...AAAC...AAAC.GAGCCCGU...UCCAC...GUGUUU...A.UGGAU...GGCCAUU...GUCAGGA  
env-358 UUGAC.CAGACGCAU...GGGUGGAC...GUUU...GAAC...AAAC.GAGCCCGU...UCCAC...GUGUUU...A.UGGAU...GGCCAUU...GUCAGGA  
env-359 UUGAC.CAGACGCAU...GGGUGGAC...GUUU...GAAC...AAAC.GAGCCCGU...UCCAC...GUGUUU...A.UGGAU...GGCCAUU...GUCAGGA  
env-360 UUGAC.CAGACGCAU...GGGUGGAC...GUUU...GAAC...AAAC.GAGCCCGU...UCCAC...GUGUUU...A.UGGAU...GGCCAUU...GUCAGGA  
env-361 UUGAC.CAGACGCAU...GGGUGGAC...GUUU...GAAC...AAAC.GAGCCCGU...UCCAC...GUGUUU...A.UGGAU...GGCCAUU...GUCAGGA  
env-370 UUGAC.CAGACGCAU...GGGUGGAC...GUUU...GAAC...AAAC.GAGCCCGU...UCCAA...UUGCCCA...U.UGGAU...GGCCAUU...GUCAGGA  
env-371 UUGAC.CAGACGCAU...GGGUGGAC...GUUU...GAAC...AAAC.GAGCCCGU...UCCAA...UUGCCUG...A.UGGAU...GGCCAUU...GUCAGGA  
env-372 UUGAC.CGUAACGCAU...GGGUGGAC...GUUU...GAAC...AAAC.GAGCCCGU...UCCAA...AUGCUC...C.UGGAU...GGCCAUU...GUCAGGA  
env-373 UUGAC.CGUAACGCAU...GGGUGGAC...GUUU...GAU...AGAC.GAGCCCGU...UCCAA...AUGCUCUA...C.UGGAU...GGCCAUU...GUCAGGA  
env-374 UUGAC.CAGACGCAU...GGGUGGAC...GUU...AAAA...AAC.GAGCCCGU...UCCAU...CCGCUC...A.UGGAU...GGCCAUU...GUCAGGA

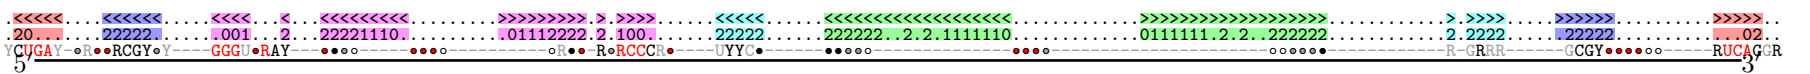

































```

env-443 CCAACAUGGGACACACCGGCUAUCAGCGGAUCUUGCGGUGUCUUCGGUCUCCGCCUCACGGGGCGUAGAUCAUUCUUGAGCAAAGAGUCAUUGGAAAGAUUAGAAUACAACAC
env-444 GCAGAUCCAGUCAGAAAGCGGAUCUUGCAGUGGUAUUCGGUCUCCUUCGCAAGGGCGUUGAUGCGUUCUUGAGCGAUGAAGCAAGGACAGGUUAUUGCAUGAUUAAACCAUUCGCA
env-445
env-446
env-448 AGCGAUCCAGCAAGCGAGGCCUUGCGGUGUCUUUGGCCUCCCAUCAAGAGGGCGUUGAUGCGUUCUUGAGUCGAGAUUUGUUGGAGAGAUUGUUAUGAUAACACCAUUCGCAUCA
env-449
env-450
env-451 UGGGUCAUUGGGCCAGAAGCGCGAUCUUGUGGUGGUAUUCGGUCACCCGCACGAGGGCGUAGAUUGCGUUCUUGAGUUGUAGAAAGCAAUUGGCAGAUUAGCAUGAUUAAACCAUUC
env-452
env-455 UAGGUCAUUGGACCGAGAAGCGCGAUCUUGCGGUGGUAUUCGGUCACCCAGCAGAGGGCGUAGAUUGCGUUCUUGAGUAAGAAAGCUUUGGCAGGUUAGCAUGAUUAAACCAUUC
env-456 UAGGUCAUUGGGCCAGAAGCGCGAUCUUGCGGUGGUAUUCGGUCACCCGCACGAGGGCGUAGAUUGCGUUCUUGAGUUGUAGCAAGAAAGCAAGGACAGCAUGAUUAAACCAUUC
env-460 UGGGUCAUUCUAGGCCAGAAGCGGUAUCUUGCGGUGGUAUUCGGUCACCCUCACGAGGGCGUAGAUUGCGUUCUUGAGCAAGAAACAAUGGACAGGUUAGCAUGAUUAAACCAUUC
env-462 UGGGUCAUUCUAGGCCAGAAGCGGUAUCUUGCGGUGGUAUUCGGUCACCCUCACGAGGGCGUAGAUUGCGUUCUUGAGCAAGAAACAAUGGACAGGUUAGCAUGAUUAAACCAUUC
env-464 UGGGUCAUUCUAGGCCAGAAGCGGUAUCUUGCGGUGGUAUUCGGUCACCCUCACGAGGGCGUAGAUUGCGUUCUUGAGCAAGAAACAAUGGACAGGUUAGCAUGAUUAAACCAUUC
env-465 UAGGUCAUUCUAGGCCAGAAGCGGUAUCUUGCGGUGGUAUUCGGUCACCCUCACGAGGGC
env-466
env-467
env-468 UCCAUAGGGCCGAAGGAGAAGGGGCUUGAGGUGGUCUUCGGUCUGCCCGCACGCGGGCGUUGAUGCGUUCUUGAGCAGCGAAACGAUGGAAAGAUUGCAUGAUUAAACCAUAC
env-469
env-471 UCCAUAGGGCCGANGGAGANGGGGCUUGAGGUGGUCUUCGGUCUGCCCGCACGCGGGCGUUGAUGCGUUCUUGAGCAGCGAAACGAUGGAAAGAUUGCAUGAUUAAACCAUAC
env-472 UCCAUAGGGCCGAAGGAGAAGGGGCUUGAGGUGGUCUUCGGUCUGCCCGCACGCGGGCGUUGAUGCGUUCUUGAGCAGCGAAACGAUGGAAAGAUUGCAUGAUUAAACCAUAC
env-474 UGGGUCAAGGGCCAAAGCGGUGGUCUGAGGUGGUCUUCGGUCUCCCGCACGCGGGCGUUGAUGCGUUCUUGAGCAGCGAAACGAUGGAAAGAUUGCGUUAUAAAC
env-475 UCCGCCAGGGCCAAAGGGGAGGUCUGGAAACUGGUCUACGGUAUUCGGUCUGCCCGCACGCGGGCGUUGAUGCGUUCUUGAGCAGCGAAACGAUGGAAAGAUUGCGUUAUAAAC
Mha-1-1 UCCGCCAGGGCCAAAGGGGAGGUCUGGAAACUGGUCUACGGUAUUCGGUCUGCCCGCACGCGGGCGUUGAUGCGUUCUUGAGCAGCGAAACGAUGGAAAGAUUGCGUUAUAAAC
env-476 UCCGCCAGGGCCAAAGGAGAGGUCUGGAAACUGGUCUACGGUCUCCCGCACGCGGGCGUUGAUGCGUUCUUGAGCAGCGAAACGAUGGAAAGAUUGCGUUAUAAACCAUUCGCA
env-477 UACGUCAAGGGCCAAAGCAUGGUCUGAGGUGGUCUUCGGUCUCCCGCACGCGGGCGUUGAUGCAUUCUUGAGCAGCGAAACGAUGGAAAGAUUGCGUUAUAAACCAUUCGCA
env-478
env-479 CCGUACACUGCAACCCUGGUGGGAUUAUUGGUUCAACAGCUGGGGGGUCGACCGGUUCUUGAGCGAAUUGAUGGAUAGAUUGCGUUAUACAACAUAUUCGCAUCAGGGAAC
env-480 CCGUACACCGCAACCUUGUGGCGAUAUUCGUUCAACAGCUGGGGGGUCGACCGGUUCUUGAGCGAAGAAUUGAUGGAUAGAUUGCGUUAUCAACAUAUUCGCAUCAGGGAAC
env-481 UGUCUUUAAGGACAGGGGAGACCGUGUAUAGUGUUCGGUUCACCAAGAAAGGACUAUCUGGAAUUGUGGAGAGAAUUGUUCGACGAGUGGUAACAUAUACCAUAUCAAAG
env-482 GUGUAUUAUUGGUCUGCCGAAAAGGAGUAUUGAUAUUGGAAAAGCAGGAAAAGUCGAUCUGAUGGAAUUGGAAUUCGUUCUGAACAGGGGACAGAAAGUGAGAAAC
env-483 GCUUGACAACCUUCGCUUUGGCCUCA
env-484
env-485
env-486 GCUUGACAACCUUCGCUUUGGCCUCAACACCGCGGAGUAGAAGCGCUUUAACCGAAGCGGGGCUUCGUAUCGAGGAAGCGUCAGACUUGUCGUUAUACAUAUUCGACCAAGG
env-492 GCUUGACAACCUUUGCUUUGGCCUCAACACCGCGGAGUAGAAGCGCUUUAACCGAAGCGGGGCUUCGUAUCGAGGAAGCGUCAGACUUGUCGUUAUACAUAUUCGACCAAGG
env-495 GCUUGA
env-504
env-505 AUAAGGUAUACUCUGGUCUCUGAUCUGGCAUCGACUAUCUAUUCUGGCGAAGCCGCUUUAUGAUCUGUAUCAGACAGAAGGACUGAUUGAAAACCCCAACGUAACAGACCCCGC
env-508 ACUCUAUACCGGUGUAACAACCGCGGAUAUAGGCGAGUUAACCGAUUAGUUCGCUUCGGCCAAAAGAAUUGGCCAACGUUCAGUCAUUGAGCAGGAUUGAUAUAGAACCC
env-509 UCACUAUCUCCGGUAUACUCUGGCCAAAGAGUAGGCGAAUUGACCCGGAUCGCGGAAAGGCCACCGCAGGUGGCUCCAGUGAACCGCACGUAAGGAUUGAUAUAGAAACCCCAA
Mta-1-1 CACAUCUCCGGUAUUGCUCUGGCCAAGAUAGGCGAAAAACCGGAAUACCGGUAUAGGGCCACAAGGAGUGGCCUGCGACACAUGCAAGUGCAGGAUUGAUAUAGAACCCCAAAGA
env-511 CACAUCUCCGGUAUUGCUCUGGCCAAGAUAGGCGAAAAACCGGAAUACCGGUAUAGGGCCACAAGGAGUGGCCUGCGACACAUGCAAGUGCAGGAUUGAUAUAGAACCCCAAAGA
env-512 CACAUCUCCGGUAUUGCUCUGGCCAAGAUAGGCGAAAAACCGGAAUACCGGUAUAGGGCCACAAGGAGUGGCCUGCGACACAUGCAAGUGCAGGAUUGAUAUAGAACCCCAAAGA
Hbo-1-1 AGCGGAAAGGGGCGACCGUCGUCUUCGGUUCACCCGUCGUGGGUUCACGACAUUCGCGGACUUCGCGGACUAGCAGCGGAAAGUCACAGUCAAACCCUCCGACCGUCCGGGUUCGACCUUG
Ngr-1-1 AGGGGACGGGAUGACCGUCGCUUCGCGGCGCCGAGAGAGGGCUGCCGACAUUCUUCGGAUUCGAGGGCGUUCGCAUCUUCGAGCGAGGAGGGGGGCGACGACGGAGUGGAAC
Hje-1-1 CCGACGGAACCGUCGCUUCGCGGUCGCGGGCGCGGAGACUAUCUGGACGUGAACCGCGAGGCGGUCGCGGACCAAGCGGGCGGAGGUGUCGAAACCGGCUUCGGACGG
Nma-1-1 AACCGGAUACUACCGCGACGGAUUCACAACGCGUUCGUGCGCCGAGAGAGGGCUGCCUUCGGAACUCGGAACUCGAGGAUACCCGUCGAGUCGUGUUCGCGGCAUUGCCAUUCG
Hal-1-1 CCGAUGCCGGCGCAUGACCGUCGUCUUCGGGUGCCGGCGGUGGCUUCGCGGACUUCGCGGACUUCGCGGGAUGCCUCCGAGGAUUGUUGCAGACGUCGAAACCUUCGUUGGCGGGGUUCGA
Nti-1-1 AACGGGACGGGAUGACCGUCGCUUCGCGGCGCCGCAACAGAGGGCUGCCGACAUUCUUCGACAUUCGAGGCUUCGCGUUCGCGCCCGCGGAUGAACGGGGCAGCGGACGAGGGAU
Npe-1-1 AGGGGGAUGGGAUGACCGUCGCUUCGCGGCGCCGCAACAGAGGGCUGCCGACAUUCUUCGACAUUCGAGGCAUUCGCGGUCGCGGGGCGCCGAAAGGACGCGGGCGGAGGAGCGG
Hti-1-1 CGUCGCGUGGCAUGAUCAGUCCGUUUGGCGCGCGGAGCGCGGUGCCGCUUUCUUCGCGGUCGAAACCGGGUGUCGUGCAACCGGUCACCGGUGACGAGUUGGCGGACGGCGU

```

### 3 L13-Bacteroidia

#### 3.1 Taxa

The taxonomy of each organism containing a putative L13-Bacteroidia RNA is listed, with abbreviations identifying each hit (e.g., “Eco-1-1” and “Eco-1-2” might hypothetically represent two distinct RNAs in *E. coli*). The abbreviations will be used to identify each individual L13-Bacteroidia RNA in Sections 3.2 and 3.4:

| abbrev. of hits | taxonomy of species                                                                                                                   |
|-----------------|---------------------------------------------------------------------------------------------------------------------------------------|
| Bsp-1-1         | Bacteria Bacteroidetes Bacteroidia Bacteroidales Bacteroidaceae <i>Bacteroides</i> sp. Ga6A1                                          |
| Bsp-2-1         | Bacteria Bacteroidetes Bacteroidia Bacteroidales Bacteroidaceae <i>Bacteroides</i> sp. Ga6A2                                          |
| Psp-1-1         | Bacteria Bacteroidetes Bacteroidia Bacteroidales Prevotellaceae <i>Alloprevotella</i> <i>Prevotella</i> sp. oral taxon 473 str. F0040 |
| Pcl-1-1         | Bacteria Bacteroidetes Bacteroidia Bacteroidales Prevotellaceae <i>Paraprevotella clara</i> YIT 11840                                 |
| Pxy-1-1         | Bacteria Bacteroidetes Bacteroidia Bacteroidales Prevotellaceae <i>Paraprevotella xylaniphila</i> YIT 11841                           |
| Hse-1-1         | Bacteria Bacteroidetes Bacteroidia Bacteroidales Prevotellaceae <i>Prevotella Hallelia seregens</i> ATCC 51272                        |

|                    |          |               |             |               |                |                                                                |
|--------------------|----------|---------------|-------------|---------------|----------------|----------------------------------------------------------------|
| Pal-1-1 to Pal-1-2 | Bacteria | Bacteroidetes | Bacteroidia | Bacteroidales | Prevotellaceae | <i>Prevotella albensis</i> DSM 11370 = JCM 12258               |
| Pam-1-1            | Bacteria | Bacteroidetes | Bacteroidia | Bacteroidales | Prevotellaceae | <i>Prevotella amnii</i> CRIS 21A-A                             |
| Pam-2-1            | Bacteria | Bacteroidetes | Bacteroidia | Bacteroidales | Prevotellaceae | <i>Prevotella amnii</i> DNF00058                               |
| Pam-3-1            | Bacteria | Bacteroidetes | Bacteroidia | Bacteroidales | Prevotellaceae | <i>Prevotella amnii</i> DSM 23384                              |
| Pam-4-1            | Bacteria | Bacteroidetes | Bacteroidia | Bacteroidales | Prevotellaceae | <i>Prevotella amnii</i> DSM 23384 = JCM 14753                  |
| Pau-1-1            | Bacteria | Bacteroidetes | Bacteroidia | Bacteroidales | Prevotellaceae | <i>Prevotella aurantiaca</i> JCM 15754                         |
| Pba-1-1 to Pba-1-2 | Bacteria | Bacteroidetes | Bacteroidia | Bacteroidales | Prevotellaceae | <i>Prevotella baroniae</i> DSM 16972 = JCM 13447               |
| Pba-2-1            | Bacteria | Bacteroidetes | Bacteroidia | Bacteroidales | Prevotellaceae | <i>Prevotella baroniae</i> F0067                               |
| Pbe-1-1            | Bacteria | Bacteroidetes | Bacteroidia | Bacteroidales | Prevotellaceae | <i>Prevotella bergensis</i> DSM 17361                          |
| Pbi-1-1            | Bacteria | Bacteroidetes | Bacteroidia | Bacteroidales | Prevotellaceae | <i>Prevotella bivia</i>                                        |
| Pbi-2-1            | Bacteria | Bacteroidetes | Bacteroidia | Bacteroidales | Prevotellaceae | <i>Prevotella bivia</i> DNF00188                               |
| Pbi-3-1            | Bacteria | Bacteroidetes | Bacteroidia | Bacteroidales | Prevotellaceae | <i>Prevotella bivia</i> DNF00320                               |
| Pbi-4-1            | Bacteria | Bacteroidetes | Bacteroidia | Bacteroidales | Prevotellaceae | <i>Prevotella bivia</i> DNF00650                               |
| Pbi-5-1            | Bacteria | Bacteroidetes | Bacteroidia | Bacteroidales | Prevotellaceae | <i>Prevotella bivia</i> DSM 20514                              |
| Pbi-6-1            | Bacteria | Bacteroidetes | Bacteroidia | Bacteroidales | Prevotellaceae | <i>Prevotella bivia</i> JCVIHMP010                             |
| Pbr-1-1            | Bacteria | Bacteroidetes | Bacteroidia | Bacteroidales | Prevotellaceae | <i>Prevotella brevis</i> ATCC 19188                            |
| Pbr-2-1            | Bacteria | Bacteroidetes | Bacteroidia | Bacteroidales | Prevotellaceae | <i>Prevotella brevis</i> P6B11                                 |
| Pbr-3-1            | Bacteria | Bacteroidetes | Bacteroidia | Bacteroidales | Prevotellaceae | <i>Prevotella bryantii</i> B14                                 |
| Pbr-4-1            | Bacteria | Bacteroidetes | Bacteroidia | Bacteroidales | Prevotellaceae | <i>Prevotella bryantii</i> C21a                                |
| Pbu-1-1            | Bacteria | Bacteroidetes | Bacteroidia | Bacteroidales | Prevotellaceae | <i>Prevotella buccae</i>                                       |
| Pbu-2-1            | Bacteria | Bacteroidetes | Bacteroidia | Bacteroidales | Prevotellaceae | <i>Prevotella buccae</i> ATCC 33574                            |
| Pbu-3-1            | Bacteria | Bacteroidetes | Bacteroidia | Bacteroidales | Prevotellaceae | <i>Prevotella buccae</i> D17                                   |
| Pbu-4-1            | Bacteria | Bacteroidetes | Bacteroidia | Bacteroidales | Prevotellaceae | <i>Prevotella buccalis</i> ATCC 35310                          |
| Pbu-5-1            | Bacteria | Bacteroidetes | Bacteroidia | Bacteroidales | Prevotellaceae | <i>Prevotella buccalis</i> DNF00853                            |
| Pbu-6-1            | Bacteria | Bacteroidetes | Bacteroidia | Bacteroidales | Prevotellaceae | <i>Prevotella buccalis</i> DNF00985                            |
| Pco-1-1            | Bacteria | Bacteroidetes | Bacteroidia | Bacteroidales | Prevotellaceae | <i>Prevotella conceptionensis</i> 9403948                      |
| Pco-2-1            | Bacteria | Bacteroidetes | Bacteroidia | Bacteroidales | Prevotellaceae | <i>Prevotella copri</i> DSM 18205                              |
| Pco-3-1 to Pco-3-2 | Bacteria | Bacteroidetes | Bacteroidia | Bacteroidales | Prevotellaceae | <i>Prevotella corporis</i> DSM 18810 = JCM 8529                |
| Pde-1-1            | Bacteria | Bacteroidetes | Bacteroidia | Bacteroidales | Prevotellaceae | <i>Prevotella dentalis</i> DSM 3688                            |
| Pde-2-1            | Bacteria | Bacteroidetes | Bacteroidia | Bacteroidales | Prevotellaceae | <i>Prevotella dantasini</i> JCM 15908                          |
| Pde-3-1            | Bacteria | Bacteroidetes | Bacteroidia | Bacteroidales | Prevotellaceae | <i>Prevotella denticola</i> CRIS 18C-A                         |
| Pde-4-1            | Bacteria | Bacteroidetes | Bacteroidia | Bacteroidales | Prevotellaceae | <i>Prevotella denticola</i> DNF00960                           |
| Pde-5-1 to Pde-5-2 | Bacteria | Bacteroidetes | Bacteroidia | Bacteroidales | Prevotellaceae | <i>Prevotella denticola</i> DSM 20614 = JCM 13449              |
| Pde-6-1            | Bacteria | Bacteroidetes | Bacteroidia | Bacteroidales | Prevotellaceae | <i>Prevotella denticola</i> F0289                              |
| Pdi-1-1            | Bacteria | Bacteroidetes | Bacteroidia | Bacteroidales | Prevotellaceae | <i>Prevotella disiens</i> DNF00882                             |
| Pdi-2-1            | Bacteria | Bacteroidetes | Bacteroidia | Bacteroidales | Prevotellaceae | <i>Prevotella disiens</i> FB035-09AN                           |
| Pdi-3-1            | Bacteria | Bacteroidetes | Bacteroidia | Bacteroidales | Prevotellaceae | <i>Prevotella disiens</i> JCM 6334 = ATCC 29426                |
| Pen-1-1            | Bacteria | Bacteroidetes | Bacteroidia | Bacteroidales | Prevotellaceae | <i>Prevotella enoeca</i> JCM 12259                             |
| Pfa-1-1            | Bacteria | Bacteroidetes | Bacteroidia | Bacteroidales | Prevotellaceae | <i>Prevotella falsenii</i> DSM 22864 = JCM 15124               |
| Pfu-1-1            | Bacteria | Bacteroidetes | Bacteroidia | Bacteroidales | Prevotellaceae | <i>Prevotella fusca</i> JCM 17724                              |
| Phi-1-1            | Bacteria | Bacteroidetes | Bacteroidia | Bacteroidales | Prevotellaceae | <i>Prevotella histicola</i> F0411                              |
| Phi-2-1 to Phi-2-2 | Bacteria | Bacteroidetes | Bacteroidia | Bacteroidales | Prevotellaceae | <i>Prevotella histicola</i> JCM 15637 = DNF00424               |
| Pin-1-1            | Bacteria | Bacteroidetes | Bacteroidia | Bacteroidales | Prevotellaceae | <i>Prevotella intermedia</i> 17                                |
| Pin-2-1            | Bacteria | Bacteroidetes | Bacteroidia | Bacteroidales | Prevotellaceae | <i>Prevotella intermedia</i> ATCC 25611 = DSM 20706            |
| Pin-3-1            | Bacteria | Bacteroidetes | Bacteroidia | Bacteroidales | Prevotellaceae | <i>Prevotella intermedia</i> ZT                                |
| Plo-1-1            | Bacteria | Bacteroidetes | Bacteroidia | Bacteroidales | Prevotellaceae | <i>Prevotella loescheii</i> DSM 19665 = JCM 12249 = ATCC 15930 |
| Pma-1-1            | Bacteria | Bacteroidetes | Bacteroidia | Bacteroidales | Prevotellaceae | <i>Prevotella maculosa</i> DSM 19339                           |
| Pma-2-1            | Bacteria | Bacteroidetes | Bacteroidia | Bacteroidales | Prevotellaceae | <i>Prevotella maculosa</i> DSM 19339 = JCM 15638               |
| Pma-3-1            | Bacteria | Bacteroidetes | Bacteroidia | Bacteroidales | Prevotellaceae | <i>Prevotella maculosa</i> OT 289                              |
| Pma-4-1            | Bacteria | Bacteroidetes | Bacteroidia | Bacteroidales | Prevotellaceae | <i>Prevotella marshii</i> DSM 16973                            |
| Pma-5-1            | Bacteria | Bacteroidetes | Bacteroidia | Bacteroidales | Prevotellaceae | <i>Prevotella marshii</i> DSM 16973 = JCM 13450                |
| Pme-1-1            | Bacteria | Bacteroidetes | Bacteroidia | Bacteroidales | Prevotellaceae | <i>Prevotella melaninogenica</i> ATCC 25845                    |
| Pme-2-1            | Bacteria | Bacteroidetes | Bacteroidia | Bacteroidales | Prevotellaceae | <i>Prevotella melaninogenica</i> D18                           |
| Pme-3-1            | Bacteria | Bacteroidetes | Bacteroidia | Bacteroidales | Prevotellaceae | <i>Prevotella melaninogenica</i> DNF00666                      |
| Pmi-1-1            | Bacteria | Bacteroidetes | Bacteroidia | Bacteroidales | Prevotellaceae | <i>Prevotella micans</i> DSM 21469                             |
| Pmi-2-1            | Bacteria | Bacteroidetes | Bacteroidia | Bacteroidales | Prevotellaceae | <i>Prevotella micans</i> DSM 21469 = JCM 16134                 |
| Pmi-3-1            | Bacteria | Bacteroidetes | Bacteroidia | Bacteroidales | Prevotellaceae | <i>Prevotella micans</i> F0438                                 |
| Pmu-1-1            | Bacteria | Bacteroidetes | Bacteroidia | Bacteroidales | Prevotellaceae | <i>Prevotella multififormis</i> DSM 16608                      |
| Pmu-2-1            | Bacteria | Bacteroidetes | Bacteroidia | Bacteroidales | Prevotellaceae | <i>Prevotella multisaccharivorax</i> DSM 17128                 |
| Pna-1-1            | Bacteria | Bacteroidetes | Bacteroidia | Bacteroidales | Prevotellaceae | <i>Prevotella nanceiensis</i> DSM 19126                        |
| Pna-2-1            | Bacteria | Bacteroidetes | Bacteroidia | Bacteroidales | Prevotellaceae | <i>Prevotella nanceiensis</i> DSM 19126 = JCM 15639            |
| Pni-1-1            | Bacteria | Bacteroidetes | Bacteroidia | Bacteroidales | Prevotellaceae | <i>Prevotella nigrescens</i> ATCC 33563                        |
| Pni-2-1            | Bacteria | Bacteroidetes | Bacteroidia | Bacteroidales | Prevotellaceae | <i>Prevotella nigrescens</i> CC14M                             |
| Pni-3-1            | Bacteria | Bacteroidetes | Bacteroidia | Bacteroidales | Prevotellaceae | <i>Prevotella nigrescens</i> F0103                             |
| Por-1-1            | Bacteria | Bacteroidetes | Bacteroidia | Bacteroidales | Prevotellaceae | <i>Prevotella oralis</i> ATCC 33269                            |

|                   |                       |               |             |               |                |                                                              |
|-------------------|-----------------------|---------------|-------------|---------------|----------------|--------------------------------------------------------------|
| Por-2-1           | Bacteria              | Bacteroidetes | Bacteroidia | Bacteroidales | Prevotellaceae | <i>Prevotella oralis</i> CC98A                               |
| Por-3-1           | Bacteria              | Bacteroidetes | Bacteroidia | Bacteroidales | Prevotellaceae | <i>Prevotella oralis</i> HGA0225                             |
| Por-4-1           | Bacteria              | Bacteroidetes | Bacteroidia | Bacteroidales | Prevotellaceae | <i>Prevotella oris</i> C735                                  |
| Por-5-1           | Bacteria              | Bacteroidetes | Bacteroidia | Bacteroidales | Prevotellaceae | <i>Prevotella oris</i> DSM 18711                             |
| Por-6-1           | Bacteria              | Bacteroidetes | Bacteroidia | Bacteroidales | Prevotellaceae | <i>Prevotella oris</i> DSM 18711 = JCM 12252                 |
| Por-7-1           | Bacteria              | Bacteroidetes | Bacteroidia | Bacteroidales | Prevotellaceae | <i>Prevotella oris</i> F0302                                 |
| Por-8-1           | Bacteria              | Bacteroidetes | Bacteroidia | Bacteroidales | Prevotellaceae | <i>Prevotella oryzae</i> DSM 17970                           |
| Pou-1-1           | Bacteria              | Bacteroidetes | Bacteroidia | Bacteroidales | Prevotellaceae | <i>Prevotella oulorum</i> F0390                              |
| Pou-2-1           | Bacteria              | Bacteroidetes | Bacteroidia | Bacteroidales | Prevotellaceae | <i>Prevotella oulorum</i> JCM 14966                          |
| Ppa-1-1           | Bacteria              | Bacteroidetes | Bacteroidia | Bacteroidales | Prevotellaceae | <i>Prevotella pallens</i> ATCC 700821                        |
| Ppa-2-1           | Bacteria              | Bacteroidetes | Bacteroidia | Bacteroidales | Prevotellaceae | <i>Prevotella paludivivens</i> DSM 17968                     |
| Ppa-3-1           | Bacteria              | Bacteroidetes | Bacteroidia | Bacteroidales | Prevotellaceae | <i>Prevotella paludivivens</i> DSM 17968 = JCM 13650         |
| Ppl-1-1           | Bacteria              | Bacteroidetes | Bacteroidia | Bacteroidales | Prevotellaceae | <i>Prevotella pleuritidis</i> F0068                          |
| Ppl-2-1           | Bacteria              | Bacteroidetes | Bacteroidia | Bacteroidales | Prevotellaceae | <i>Prevotella pleuritidis</i> JCM 14110                      |
| Pru-1-1           | Bacteria              | Bacteroidetes | Bacteroidia | Bacteroidales | Prevotellaceae | <i>Prevotella ruminicola</i> 23                              |
| Pru-2-1           | Bacteria              | Bacteroidetes | Bacteroidia | Bacteroidales | Prevotellaceae | <i>Prevotella ruminicola</i> Ga6B6                           |
| Psa-1-1           | Bacteria              | Bacteroidetes | Bacteroidia | Bacteroidales | Prevotellaceae | <i>Prevotella saccharolytica</i> F0055                       |
| Psa-2-1           | Bacteria              | Bacteroidetes | Bacteroidia | Bacteroidales | Prevotellaceae | <i>Prevotella salivae</i> DSM 15606                          |
| Psa-3-1           | Bacteria              | Bacteroidetes | Bacteroidia | Bacteroidales | Prevotellaceae | <i>Prevotella salivae</i> F0493                              |
| Psc-1-1           | Bacteria              | Bacteroidetes | Bacteroidia | Bacteroidales | Prevotellaceae | <i>Prevotella scopos</i> JCM 17725                           |
| Psh-1-1           | Bacteria              | Bacteroidetes | Bacteroidia | Bacteroidales | Prevotellaceae | <i>Prevotella shahii</i> DSM 15611 = JCM 12083               |
| Psp-2-1           | Bacteria              | Bacteroidetes | Bacteroidia | Bacteroidales | Prevotellaceae | <i>Prevotella sp.</i> 109                                    |
| Psp-3-1           | Bacteria              | Bacteroidetes | Bacteroidia | Bacteroidales | Prevotellaceae | <i>Prevotella sp.</i> AGR2160                                |
| Psp-4-1           | Bacteria              | Bacteroidetes | Bacteroidia | Bacteroidales | Prevotellaceae | <i>Prevotella sp.</i> BV3P1                                  |
| Psp-5-1           | Bacteria              | Bacteroidetes | Bacteroidia | Bacteroidales | Prevotellaceae | <i>Prevotella sp.</i> C561                                   |
| Psp-6-1           | Bacteria              | Bacteroidetes | Bacteroidia | Bacteroidales | Prevotellaceae | <i>Prevotella sp.</i> F0091                                  |
| Psp-7-1           | Bacteria              | Bacteroidetes | Bacteroidia | Bacteroidales | Prevotellaceae | <i>Prevotella sp.</i> FD3004                                 |
| Psp-8-1           | Bacteria              | Bacteroidetes | Bacteroidia | Bacteroidales | Prevotellaceae | <i>Prevotella sp.</i> HJM029                                 |
| Psp-9-1           | Bacteria              | Bacteroidetes | Bacteroidia | Bacteroidales | Prevotellaceae | <i>Prevotella sp.</i> HUN102                                 |
| Psp-10-1          | Bacteria              | Bacteroidetes | Bacteroidia | Bacteroidales | Prevotellaceae | <i>Prevotella sp.</i> ICM33                                  |
| Psp-11-1          | Bacteria              | Bacteroidetes | Bacteroidia | Bacteroidales | Prevotellaceae | <i>Prevotella sp.</i> MA2016                                 |
| Psp-12-1          | Bacteria              | Bacteroidetes | Bacteroidia | Bacteroidales | Prevotellaceae | <i>Prevotella sp.</i> MSX73                                  |
| Psp-23-1          | Bacteria              | Bacteroidetes | Bacteroidia | Bacteroidales | Prevotellaceae | <i>Prevotella sp. oral taxon</i> 299 str. F0039              |
| Psp-24-1          | Bacteria              | Bacteroidetes | Bacteroidia | Bacteroidales | Prevotellaceae | <i>Prevotella sp. oral taxon</i> 306 str. F0472              |
| Psp-25-1          | Bacteria              | Bacteroidetes | Bacteroidia | Bacteroidales | Prevotellaceae | <i>Prevotella sp. oral taxon</i> 317 str. F0108              |
| Psp-26-1          | Bacteria              | Bacteroidetes | Bacteroidia | Bacteroidales | Prevotellaceae | <i>Prevotella sp. oral taxon</i> 472 str. F0295              |
| Psp-13-1          | Bacteria              | Bacteroidetes | Bacteroidia | Bacteroidales | Prevotellaceae | <i>Prevotella sp.</i> P4-65                                  |
| Psp-14-1          | Bacteria              | Bacteroidetes | Bacteroidia | Bacteroidales | Prevotellaceae | <i>Prevotella sp.</i> P4-76                                  |
| Psp-15-1          | Bacteria              | Bacteroidetes | Bacteroidia | Bacteroidales | Prevotellaceae | <i>Prevotella sp.</i> P5-119                                 |
| Psp-16-1          | Bacteria              | Bacteroidetes | Bacteroidia | Bacteroidales | Prevotellaceae | <i>Prevotella sp.</i> P5-125                                 |
| Psp-17-1          | Bacteria              | Bacteroidetes | Bacteroidia | Bacteroidales | Prevotellaceae | <i>Prevotella sp.</i> P5-60                                  |
| Psp-18-1          | Bacteria              | Bacteroidetes | Bacteroidia | Bacteroidales | Prevotellaceae | <i>Prevotella sp.</i> P6B1                                   |
| Psp-19-1          | Bacteria              | Bacteroidetes | Bacteroidia | Bacteroidales | Prevotellaceae | <i>Prevotella sp.</i> P6B4                                   |
| Psp-20-1          | Bacteria              | Bacteroidetes | Bacteroidia | Bacteroidales | Prevotellaceae | <i>Prevotella sp.</i> RM4                                    |
| Psp-21-1          | Bacteria              | Bacteroidetes | Bacteroidia | Bacteroidales | Prevotellaceae | <i>Prevotella sp.</i> S7 MS 2                                |
| Psp-22-1          | Bacteria              | Bacteroidetes | Bacteroidia | Bacteroidales | Prevotellaceae | <i>Prevotella sp.</i> S7-1-8                                 |
| Pst-1-1           | Bacteria              | Bacteroidetes | Bacteroidia | Bacteroidales | Prevotellaceae | <i>Prevotella stercorea</i> DSM 18206                        |
| Pti-1-1           | Bacteria              | Bacteroidetes | Bacteroidia | Bacteroidales | Prevotellaceae | <i>Prevotella timonensis</i> 4401737 = DSM 22865 = JCM 15640 |
| Pti-2-1           | Bacteria              | Bacteroidetes | Bacteroidia | Bacteroidales | Prevotellaceae | <i>Prevotella timonensis</i> CRIS 5C-B1                      |
| Pti-3-1           | Bacteria              | Bacteroidetes | Bacteroidia | Bacteroidales | Prevotellaceae | <i>Prevotella timonensis</i> S9-PR14                         |
| Pve-1-1           | Bacteria              | Bacteroidetes | Bacteroidia | Bacteroidales | Prevotellaceae | <i>Prevotella veroralis</i> DSM 19559                        |
| Pve-2-1           | Bacteria              | Bacteroidetes | Bacteroidia | Bacteroidales | Prevotellaceae | <i>Prevotella veroralis</i> DSM 19559 = JCM 6290             |
| Pve-3-1           | Bacteria              | Bacteroidetes | Bacteroidia | Bacteroidales | Prevotellaceae | <i>Prevotella veroralis</i> F0319                            |
| env-1 to env-1259 | environmental samples |               |             |               |                |                                                              |

### 3.2 Gene contexts

Each L13-Bacteroidia RNA (indicated by “RNA→”) is listed. For each hit, the downstream genes predicted to reside in a regulated operon are listed. If the nearest downstream gene is encoding in the opposite strand (and therefore presumed to not be a part of a regulated operon), then that gene is still depicted. Some environmental sequences and some RefSeq entries lack gene annotations, and so no genes are available for such sequences. The direction of each gene is

indicated with an arrow (→), and each predicted conserved domain in the gene is named. Conserved domains associated with more than one L13-Bacteroidia RNA are assigned a color; other domains are gray. Information about these conserved domains is given in Section 3.3. The accession of the sequence containing each L13-Bacteroidia RNA is given in the column named “Seq. accession”. Accessions beginning with “NC\_”, “NS\_”, “NW\_” or “NZ\_” are contained in RefSeq. Other

accession refer to environmental samples. Nucleotide coordinates are given for the 5′ and 3′ boundaries of each L13-Bacteroidia RNA. If the 5′ coordinate is greater than the 3′ coordinate, the RNA is present on the reverse-complement strand of the containing genomic DNA sequence. Each hit is denoted by an abbreviation (like “Eco-1-1”) that refers to a taxonomy given in Section 3.1.

| abbrev. | Seq. accession                      |   | 5′ at  | 3′ at  | genes                                                                                                                                 |
|---------|-------------------------------------|---|--------|--------|---------------------------------------------------------------------------------------------------------------------------------------|
| env-1   | AMCI01008330.1                      | - | 1066   | 991    | RNA → rplM (PRK09216)Ribosomal_L13 (pfam00572) → rpsI (PRK00132)Ribosomal_S9 (pfam00380) →                                            |
| env-2   | AUXO012860029.1                     | - | 1571   | 1495   | RNA → rplM (PRK09216)Ribosomal_L13 (pfam00572) → rpsI (PRK00132)Ribosomal_S9 (pfam00380) →                                            |
| env-3   | SRS011529_WUGC_scaffold.27015       | - | 1315   | 1235   | RNA → rplM (PRK09216)Ribosomal_L13 (pfam00572) → rpsI (PRK00132)Ribosomal_S9 (pfam00380) →                                            |
| env-4   | RUMENNODE.4362630_1                 | + | 14588  | 14659  | RNA → rplM (PRK09216)Ribosomal_L13 (pfam00572) → rplM (PRK09216)Ribosomal_L13 (pfam00572) → rpsI (PRK00132)Ribosomal_S9 (pfam00380) → |
| env-5   | scaffold15734_5_MH0046              | + | 243    | 321    | RNA → rplM (PRK09216)Ribosomal_L13 (pfam00572) → rpsI (PRK00132)Ribosomal_S9 (pfam00380) →                                            |
| env-6   | SRMUA_GNVGR9Q01D7VOE                | - | 237    | 168    | RNA → rplM (PRK09216)RplM (COG0102) →                                                                                                 |
| env-7   | AUXO010978888.1                     | + | 545    | 616    | RNA → rplM (PRK09216)Ribosomal_L13 (pfam00572) → rpsI (PRK00132)Ribosomal_S9 (pfam00380) →                                            |
| env-8   | SRS048164_C2255498                  | + | 534    | 617    | RNA →                                                                                                                                 |
| env-9   | scaffold6072_39_MH0053              | + | 450    | 533    | RNA →                                                                                                                                 |
| env-10  | SRS019910_WUGC_scaffold.74502       | + | 208    | 291    | RNA → rplM (PRK09216)Ribosomal_L13 (pfam00572) → rpsI (PRK00132)Ribosomal_S9 (pfam00380) →                                            |
| env-11  | scaffold204458_1_MH0006             | - | 1372   | 1304   | RNA → rplM (PRK09216)Ribosomal_L13 (pfam00572) → rpsI (PRK00132)Ribosomal_S9 (pfam00380) →                                            |
| env-12  | UnmappedStool_Broad_scaffold.711238 | - | 140    | 72     | RNA → hypo →                                                                                                                          |
| env-13  | 4491686.3.479386                    | - | 127    | 205    | RNA →                                                                                                                                 |
| env-14  | scaffold15346_2_O2.UC-24            | + | 302    | 371    | RNA → rplM (PRK09216)Ribosomal_L13 (pfam00572) →                                                                                      |
| env-15  | HCF12C_103092                       | - | 189    | 116    | RNA →                                                                                                                                 |
| env-16  | AUXO015828536.1                     | + | 340    | 412    | RNA → rplM (PRK09216)Ribosomal_L13 (pfam00572) →                                                                                      |
| env-17  | DOM022_scaffold34730_2              | - | 1753   | 1684   | RNA → rplM (PRK09216)Ribosomal_L13 (pfam00572) → rpsI (PRK00132)Ribosomal_S9 (pfam00380) →                                            |
| env-18  | scaffold19504_1_MH0036              | - | 69802  | 69732  | RNA → rplM (PRK09216)Ribosomal_L13 (pfam00572) → rpsI (PRK00132)Ribosomal_S9 (pfam00380) →                                            |
| env-19  | scaffold4731_12_MH0057              | - | 597    | 527    | RNA → rplM (PRK09216)Ribosomal_L13 (pfam00572) →                                                                                      |
| env-20  | DLM014_scaffold3130_5               | - | 5881   | 5811   | RNA → rplM (PRK09216)Ribosomal_L13 (pfam00572) → rpsI (PRK00132)Ribosomal_S9 (pfam00380) →                                            |
| Pxy-1-1 | NZ_GL883827.1                       | - | 169388 | 169318 | RNA → rplM (PRK09216)Ribosomal_L13 (pfam00572) → rpsI (PRK00132)Ribosomal_S9 (pfam00380) →                                            |
| env-21  | SRS048164_WUGC_scaffold.29212       | + | 2023   | 2093   | RNA → rplM (PRK09216)Ribosomal_L13 (pfam00572) →                                                                                      |
| env-22  | scaffold5875_2_MH0020               | + | 21461  | 21531  | RNA → rplM (PRK09216)Ribosomal_L13 (pfam00572) → rpsI (PRK00132)Ribosomal_S9 (pfam00380) →                                            |
| env-23  | scaffold18015_8_MH0044              | + | 3289   | 3359   | RNA → rplM (PRK09216)Ribosomal_L13 (pfam00572) → rpsI (PRK00132)Ribosomal_S9 (pfam00380) →                                            |
| env-24  | scaffold39182_1_MH0047              | - | 395    | 325    | RNA → rplM (PRK09216)Ribosomal_L13 (pfam00572) →                                                                                      |
| env-25  | scaffold33768_3_MH0073              | + | 2463   | 2533   | RNA → rplM (PRK09216)Ribosomal_L13 (pfam00572) →                                                                                      |
| env-26  | scaffold6160_1_V1.UC-19             | + | 273    | 343    | RNA → rplM (PRK09216)Ribosomal_L13 (pfam00572) →                                                                                      |
| env-27  | scaffold2340_6_MH0035               | + | 477    | 547    | RNA → rplM (PRK09216)Ribosomal_L13 (pfam00572) →                                                                                      |
| env-28  | scaffold54231_2_MH0050              | + | 1169   | 1239   | RNA → rplM (PRK09216)Ribosomal_L13 (pfam00572) →                                                                                      |
| env-29  | scaffold58113_4_MH0056              | - | 1209   | 1139   | RNA → rplM (PRK09216)Ribosomal_L13 (pfam00572) → rpsI (PRK00132)Ribosomal_S9 (pfam00380) →                                            |
| env-30  | scaffold2091_1_MH0058               | - | 156    | 86     | RNA →                                                                                                                                 |
| env-31  | scaffold16985_10_MH0059             | - | 522    | 452    | RNA → rplM (PRK09216)Ribosomal_L13 (pfam00572) →                                                                                      |
| env-32  | scaffold41222_2_MH0070              | - | 522    | 452    | RNA → rplM (PRK09216)Ribosomal_L13 (pfam00572) →                                                                                      |
| env-33  | scaffold1773_9_MH0082               | + | 1494   | 1564   | RNA → rplM (PRK09216)Ribosomal_L13 (pfam00572) → rpsI (PRK00132)Ribosomal_S9 (pfam00380) →                                            |
| env-34  | scaffold14401_2_O2.UC-12            | + | 160    | 230    | rpsB (PRK05299)Ribosomal_S2 (pfam00318) →                                                                                             |
| env-35  | 4491401.3_NODE.125                  | + | 6382   | 6452   | RNA → rplM (PRK09216)Ribosomal_L13 (pfam00572) → rpsI (PRK00132)Ribosomal_S9 (pfam00380) →                                            |
| env-36  | 4491414.3_NODE.4995                 | + | 3654   | 3724   | RNA → rplM (PRK09216)Ribosomal_L13 (pfam00572) → rpsI (PRK00132)Ribosomal_S9 (pfam00380) →                                            |
| env-37  | 4491415.3_NODE.16304                | - | 35739  | 35669  | RNA → rplM (PRK09216)Ribosomal_L13 (pfam00572) → rpsI (PRK00132)Ribosomal_S9 (pfam00380) →                                            |
| env-38  | 4491417.3_NODE.72813                | + | 28708  | 28778  | RNA → rplM (PRK09216)Ribosomal_L13 (pfam00572) → rpsI (PRK00132)Ribosomal_S9 (pfam00380) →                                            |
| env-39  | 4491419.3_NODE.42377                | - | 198572 | 198502 | RNA → rplM (PRK09216)Ribosomal_L13 (pfam00572) → rpsI (PRK00132)Ribosomal_S9 (pfam00380) →                                            |
| env-40  | 4491477.3_NODE.70256                | - | 8117   | 8047   | RNA → rplM (PRK09216)Ribosomal_L13 (pfam00572) →                                                                                      |



|         |                                 |   |        |        |       |                                                                                                                                                                           |
|---------|---------------------------------|---|--------|--------|-------|---------------------------------------------------------------------------------------------------------------------------------------------------------------------------|
| env-41  | DLM006_scaffold552.72           | - | 772    | 702    | RNA → | rplM (PRK09216)Ribosomal.L13 (pfam00572) → rpsI (PRK00132)Ribosomal.S9 (pfam00380) →                                                                                      |
| env-42  | DLM028_scaffold52693.6          | + | 193    | 263    | RNA → | rplM (PRK09216)Ribosomal.L13 (pfam00572) → rpsI (PRK00132)Ribosomal.S9 (pfam00380) →                                                                                      |
| env-43  | DOM010_scaffold9237.5           | + | 12401  | 12471  | RNA → | rplM (PRK09216)Ribosomal.L13 (pfam00572) → rpsI (PRK00132)Ribosomal.S9 (pfam00380) →                                                                                      |
| env-44  | NLM008_scaffold4989.13          | + | 788    | 858    | RNA → | rplM (PRK09216)Ribosomal.L13 (pfam00572) →                                                                                                                                |
| env-45  | SRS011529_WUGC_scaffold_21913   | + | 1369   | 1439   | RNA → | rplM (PRK09216)Ribosomal.L13 (pfam00572) → rpsI (PRK00132)Ribosomal.S9 (pfam00380) →                                                                                      |
| env-46  | SRS013521_LANL_scaffold_6003    | - | 8813   | 8743   | RNA → | rplM (PRK09216)Ribosomal.L13 (pfam00572) → rpsI (PRK00132)Ribosomal.S9 (pfam00380) →                                                                                      |
| env-47  | SRS013687_C2637478              | - | 685    | 615    | RNA → | rplM (PRK09216)Ribosomal.L13 (pfam00572) →                                                                                                                                |
| env-48  | SRS013800_Baylor_scaffold_15627 | + | 1409   | 1479   | RNA → | rplM (PRK09216)Ribosomal.L13 (pfam00572) →                                                                                                                                |
| env-49  | SRS015133_WUGC_scaffold_36455   | - | 685    | 615    | RNA → | rplM (PRK09216)Ribosomal.L13 (pfam00572) →                                                                                                                                |
| env-50  | SRS015782_WUGC_scaffold_38346   | + | 1363   | 1433   | RNA → | rplM (PRK09216)Ribosomal.L13 (pfam00572) →                                                                                                                                |
| env-51  | SRS017307_Baylor_scaffold_15330 | - | 1112   | 1042   | RNA → | rplM (PRK09216)Ribosomal.L13 (pfam00572) → rpsI (PRK00132)Ribosomal.S9 (pfam00380) →                                                                                      |
| env-52  | SRS017433_Baylor_scaffold_19937 | - | 547    | 477    | RNA → | rplM (PRK09216)Ribosomal.L13 (pfam00572) →                                                                                                                                |
| env-53  | SRS017701_Baylor_scaffold_13140 | - | 970    | 900    | RNA → | rplM (PRK09216)Ribosomal.L13 (pfam00572) → rpsI (PRK00132)Ribosomal.S9 (pfam00380) →                                                                                      |
| env-54  | SRS023914_C2116633              | - | 685    | 615    | RNA → | rplM (PRK09216)Ribosomal.L13 (pfam00572) →                                                                                                                                |
| env-55  | SRS024435_LANL_scaffold_1171    | - | 1412   | 1342   | RNA → | rplM (PRK09216)Ribosomal.L13 (pfam00572) → rpsI (PRK00132)Ribosomal.S9 (pfam00380) →                                                                                      |
| env-56  | SRS045004_LANL_scaffold_14319   | + | 1359   | 1429   | RNA → | rplM (PRK09216)Ribosomal.L13 (pfam00572) → rpsI (PRK00132)Ribosomal.S9 (pfam00380) →                                                                                      |
| env-57  | SRS045645_C2019336              | + | 871    | 941    | RNA → |                                                                                                                                                                           |
| env-58  | SRS047044_C1551280              | - | 547    | 477    | RNA → | rplM (PRK09216)Ribosomal.L13 (pfam00572) →                                                                                                                                |
| env-59  | SRS049712_C15572285             | + | 896    | 966    | RNA → | rplM (PRK09216)Ribosomal.L13 (pfam00572) →                                                                                                                                |
| env-60  | SRS049995_LANL_scaffold_2946    | - | 33940  | 33870  | RNA → | rplM (PRK09216)Ribosomal.L13 (pfam00572) → rpsI (PRK00132)Ribosomal.S9 (pfam00380) →                                                                                      |
| env-61  | SRS063985_LANL_scaffold_39061   | - | 685    | 615    | RNA → | rplM (PRK09216)Ribosomal.L13 (pfam00572) →                                                                                                                                |
| env-62  | SRS078176_C2299272              | - | 333    | 263    | RNA → | rplM (PRK09216)Ribosomal.L13 (pfam00572) →                                                                                                                                |
| Pcl-1-1 | NZ_JH376625.1                   | + | 66716  | 66786  | RNA → | rplM (PRK09216)Ribosomal.L13 (pfam00572) → rpsI (PRK00132)Ribosomal.S9 (pfam00380) →                                                                                      |
| env-63  | scaffold5721_2.MH0077           | - | 792    | 722    | RNA → | rplM (PRK09216)Ribosomal.L13 (pfam00572) → rpsI (PRK00132)Ribosomal.S9 (pfam00380) →                                                                                      |
| env-64  | scaffold32997_1.MH0002          | - | 109    | 39     | RNA → |                                                                                                                                                                           |
| env-65  | scaffold77706_1.MH0069          | - | 138    | 68     | RNA → |                                                                                                                                                                           |
| env-66  | NLM006_scaffold34944.6          | + | 1503   | 1573   | RNA → | rplM (PRK09216)Ribosomal.L13 (pfam00572) → rpsI (PRK00132)Ribosomal.S9 (pfam00380) →                                                                                      |
| env-67  | NOF008_scaffold67812.2          | - | 140    | 70     | RNA → |                                                                                                                                                                           |
| env-68  | NOF010_scaffold32157.6          | + | 458    | 528    | RNA → | rplM (PRK09216)Ribosomal.L13 (pfam00572) → rpsI (PRK00132)Ribosomal.S9 (pfam00380) →                                                                                      |
| env-69  | SRS017821_Baylor_scaffold_12585 | + | 5448   | 5518   | RNA → | rplM (PRK09216)Ribosomal.L13 (pfam00572) → rpsI (PRK00132)Ribosomal.S9 (pfam00380) →                                                                                      |
| env-70  | AUXO011504091.1                 | - | 895    | 820    | RNA → | rplM (PRK09216)Ribosomal.L13 (pfam00572) →                                                                                                                                |
| env-71  | AUXO012576065.1                 | + | 558    | 627    | RNA → | rplM (PRK09216)Ribosomal.L13 (pfam00572) → rpsI (PRK00132)Ribosomal.S9 (pfam00380) →                                                                                      |
| env-72  | AUXO017805936.1                 | + | 175    | 245    | RNA → | rplM (PRK09216)Ribosomal.L13 (pfam00572) →                                                                                                                                |
| env-73  | AUXO015702136.1                 | - | 1049   | 974    | RNA → | rplM (PRK09216)Ribosomal.L13 (pfam00572) → rpsI (PRK00132)Ribosomal.S9 (pfam00380) →                                                                                      |
| env-74  | AUXO010123457.1                 | + | 71     | 143    | RNA → | rplM (PRK09216)Ribosomal.L13 (pfam00572) → rpsI (PRK00132)Ribosomal.S9 (pfam00380) →                                                                                      |
| env-75  | CAM_READ_0099979911             | + | 161    | 230    | RNA → | rplM (PRK09216)Ribosomal.L13 (pfam00572) →                                                                                                                                |
| env-76  | NOM008_scaffold29131.6          | - | 3871   | 3801   | RNA → | rplM (PRK09216)Ribosomal.L13 (pfam00572) → rpsI (PRK00132)Ribosomal.S9 (pfam00380) →                                                                                      |
| env-77  | AUXO013980254.1                 | - | 161    | 92     | RNA → | hypo →                                                                                                                                                                    |
| env-78  | AUXO014577836.1                 | - | 989    | 916    | RNA → | rplM (PRK09216)Ribosomal.L13 (pfam00572) → rpsI (PRK00132)Ribosomal.S9 (pfam00380) →                                                                                      |
| env-79  | 2013414608                      | - | 600    | 529    | RNA → | rplM (PRK09216)Ribosomal.L13 (pfam00572) → rplM (PRK09216)Ribosomal.L13 (pfam00572) →                                                                                     |
| env-80  | pre-rum113-01766                | + | 19308  | 19380  | RNA → | rplM (PRK09216)Ribosomal.L13 (pfam00572) → rpsI (PRK00132)Ribosomal.S9 (pfam00380) →                                                                                      |
| Pbr-3-1 | NZ_ADWO01000013.1               | - | 1784   | 1707   | RNA → | rplM (PRK09216)Ribosomal.L13 (pfam00572) → rplM (PRK09216)Ribosomal.L13 (pfam00572) → rpsI (PRK00132)Ribosomal.S9 (pfam00380) → rpsI (PRK00132)Ribosomal.S9 (pfam00380) → |
| Pbr-4-1 | NZ_AUKF01000007.1               | - | 102040 | 101963 | RNA → | rplM (PRK09216)Ribosomal.L13 (pfam00572) → rpsI (PRK00132)Ribosomal.S9 (pfam00380) →                                                                                      |
| env-81  | AUXO013781889.1                 | + | 110    | 187    | RNA → | rplM (PRK09216)Ribosomal.L13 (pfam00572) → rpsI (PRK00132)Ribosomal.S9 (pfam00380) →                                                                                      |
| env-82  | AUXO016535493.1                 | + | 268    | 342    | RNA → | rplM (PRK09216)Ribosomal.L13 (pfam00572) → rpsI (PRK00132)Ribosomal.S9 (pfam00380) →                                                                                      |
| env-83  | AUXO012398056.1                 | + | 1683   | 1756   | RNA → | rplM (PRK09216)Ribosomal.L13 (pfam00572) → rpsI (PRK00132)Ribosomal.S9 (pfam00380) →                                                                                      |
| env-84  | scaffold11907_5.MH0040          | - | 2845   | 2774   | RNA → | rplM (PRK09216)Ribosomal.L13 (pfam00572) → rpsI (PRK00132)Ribosomal.S9 (pfam00380) →                                                                                      |
| env-85  | 4491405.3.NODE_26186            | + | 3884   | 3955   | RNA → | rplM (PRK09216)Ribosomal.L13 (pfam00572) → rpsI (PRK00132)Ribosomal.S9 (pfam00380) →                                                                                      |
| env-86  | scaffold25515_12.MH0059         | + | 284    | 355    | RNA → | rplM (PRK09216)Ribosomal.L13 (pfam00572) → rpsI (PRK00132)Ribosomal.S9 (pfam00380) →                                                                                      |
| env-87  | AUXO015466288.1                 | + | 1512   | 1584   | RNA → | rplM (PRK09216)Ribosomal.L13 (pfam00572) → rpsI (PRK00132)Ribosomal.S9 (pfam00380) →                                                                                      |
| Pal-1-1 | NZ_AUFP01000001.1               | - | 13559  | 13481  | RNA → | rplM (PRK09216)Ribosomal.L13 (pfam00572) → rpsI (PRK00132)Ribosomal.S9 (pfam00380) →                                                                                      |

|         |                                           |   |       |       |                                                                                                   |
|---------|-------------------------------------------|---|-------|-------|---------------------------------------------------------------------------------------------------|
| Pal-1-2 | NZ_BAJD01000011.1                         | + | 60623 | 60701 | RNA → rplM (PRK09216)Ribosomal_L13 (pfam00572) → rpsI (PRK00132)Ribosomal_S9 (pfam00380) →        |
| env-88  | SRS062878_C3036997                        | - | 256   | 183   | RNA → hypo → rplM (PRK09216)RplM (COG0102) →                                                      |
| env-89  | Tongue_dor_WUGI_scaffold.10412            | + | 328   | 401   | RNA → rplM (PRK09216)Ribosomal_L13 (pfam00572) → rpsI (PRK00132)Ribosomal_S9 (pfam00380) →        |
| env-90  | SRS014470_WUGC_scaffold.46671             | - | 1515  | 1442  | RNA → rplM (PRK09216)Ribosomal_L13 (pfam00572) → rpsI (PRK00132)Ribosomal_S9 (pfam00380) →        |
| env-91  | SRS018439_C2372430                        | + | 460   | 533   | RNA → rplM (PRK09216)Ribosomal_L13 (pfam00572) →                                                  |
| env-92  | SRS019607_WUGC_scaffold.53821             | - | 2535  | 2462  | RNA → rplM (PRK09216)Ribosomal_L13 (pfam00572) → rpsI (PRK00132)Ribosomal_S9 (pfam00380) →        |
| env-93  | SRS019894_C3844330                        | - | 310   | 237   | RNA → rplM (PRK09216)Ribosomal_L13 (cd00392) →                                                    |
| env-94  | SRS047219_C2319273                        | + | 489   | 562   | RNA → rplM (PRK09216)Ribosomal_L13 (pfam00572) → rpsI (PRK00132)Ribosomal_S9 (pfam00380) →        |
| env-95  | SRS057539_LANL_scaffold.61402             | - | 1835  | 1762  | RNA → rplM (PRK09216)Ribosomal_L13 (pfam00572) → rpsI (PRK00132)Ribosomal_S9 (pfam00380) →        |
| env-96  | SRS057791_C3471145                        | + | 135   | 208   | RNA →                                                                                             |
| env-97  | SRS062544_LANL_scaffold.41679             | - | 1006  | 933   | RNA → rplM (PRK09216)Ribosomal_L13 (pfam00572) → rpsI (PRK00132)Ribosomal_S9 (pfam00380) →        |
| env-98  | Throat_LANL_C5730482                      | + | 257   | 330   | RNA →                                                                                             |
| env-99  | SRS011306_Baylor_scaffold.83447           | + | 6688  | 6761  | RNA → rplM (PRK09216)Ribosomal_L13 (pfam00572) → rpsI (PRK00132)Ribosomal_S9 (pfam00380) →        |
| env-100 | SRS015038_C1882965                        | - | 403   | 330   | RNA → rplM (PRK09216)Ribosomal_L13 (pfam00572) →                                                  |
| env-101 | SRS015762_C3563104                        | - | 158   | 85    | RNA →                                                                                             |
| env-102 | SRS015893_WUGC_scaffold.41335             | - | 2217  | 2144  | RNA → rplM (PRK09216)Ribosomal_L13 (pfam00572) → rpsI (PRK00132)Ribosomal_S9 (pfam00380) →        |
| env-103 | SRS015941_C3475421                        | + | 479   | 552   | RNA → rplM (PRK09216) →                                                                           |
| env-104 | SRS016002_WUGC_scaffold.14080             | - | 451   | 378   | RNA → rplM (PRK09216)Ribosomal_L13 (pfam00572) →                                                  |
| env-105 | SRS018357_Baylor_scaffold.26234           | + | 880   | 953   | RNA → hypo →                                                                                      |
| env-106 | SRS018591_WUGC_scaffold.33810             | - | 202   | 129   | RNA → hypo →                                                                                      |
| env-107 | SRS018739_C3556239                        | + | 325   | 398   | RNA →                                                                                             |
| env-108 | SRS019022_C2654036                        | - | 1005  | 932   | RNA → rplM (PRK09216)Ribosomal_L13 (pfam00572) → rpsI (PRK00132)Ribosomal_S9 (pfam00380) →        |
| env-109 | SRS019026_C1997533                        | - | 401   | 328   | RNA → rplM (PRK09216)Ribosomal_L13 (pfam00572) →                                                  |
| env-110 | SRS019027_WUGC_scaffold.18825             | + | 340   | 413   | RNA → rplM (PRK09216)Ribosomal_L13 (pfam00572) →                                                  |
| env-111 | SRS019045_WUGC_scaffold.59681             | - | 2127  | 2054  | RNA → rplM (PRK09216)Ribosomal_L13 (pfam00572) → rpsI (PRK00132)Ribosomal_S9 (pfam00380) →        |
| env-112 | SRS019974_Baylor_scaffold.58098           | + | 480   | 553   | RNA → rplM (PRK09216)Ribosomal_L13 (pfam00572) → rpsI (PRK00132)Ribosomal_S9 (pfam00380) →        |
| env-113 | SRS020856_C2589008                        | + | 484   | 557   | RNA →                                                                                             |
| env-114 | SRS022621_C4094963                        | - | 158   | 85    | RNA → hypo →                                                                                      |
| env-115 | SRS023352_C4653467                        | - | 740   | 667   | RNA → rplM (PRK09216)Ribosomal_L13 (pfam00572) → rpsI (PRK00132)Ribosomal_S9 (pfam00380) →        |
| env-116 | SRS024138_C2697359                        | + | 474   | 547   | RNA →                                                                                             |
| env-117 | SRS024277_LANL_scaffold.45644             | + | 325   | 398   | RNA → rplM (PRK09216)Ribosomal_L13 (pfam00572) → rpsI (PRK00132)Ribosomal_S9 (pfam00380) →        |
| env-118 | SRS024580_C3091241                        | - | 952   | 879   | RNA → rplM (PRK09216)Ribosomal_L13 (pfam00572) → rpsI (PRK00132)Ribosomal_S9 (pfam00380) →        |
| env-119 | SRS047824_WUGC_scaffold.40341             | - | 1220  | 1147  | RNA → rplM (PRK09216)Ribosomal_L13 (pfam00572) → rpsI (PRK00132)Ribosomal_S9 (pfam00380) →        |
| env-120 | SRS048411_C6958491                        | - | 407   | 334   | RNA → rplM (PRK09216)Ribosomal_L13 (pfam00572) →                                                  |
| env-121 | SRS048791_C3141610                        | + | 191   | 264   | RNA → rplM (PRK09216)RplM (COG0102) →                                                             |
| env-122 | SRS053603_LANL_scaffold.55573             | + | 1162  | 1235  | RNA → rplM (PRK09216)Ribosomal_L13 (pfam00572) → rpsI (PRK00132)Ribosomal_S9 (pfam00380) →        |
| env-123 | SRS058336_C2151893                        | + | 935   | 1008  | RNA →                                                                                             |
| env-124 | SRS064423_LANL_scaffold.69482             | - | 3254  | 3181  | RNA → rplM (PRK09216)Ribosomal_L13 (pfam00572) → rpsI (PRK00132)Ribosomal_S9 (pfam00380) →        |
| env-125 | SRS065278_C2565433                        | - | 3238  | 3165  | RNA → rplM (PRK09216)Ribosomal_L13 (pfam00572) → rpsI (PRK00132)Ribosomal_S9 (pfam00380) →        |
| env-126 | SRS016740_C2737901                        | - | 1286  | 1213  | RNA → hypo → rplM (PRK09216)Ribosomal_L13 (pfam00572) → rpsI (PRK00132)Ribosomal_S9 (pfam00380) → |
| env-127 | SRS047210_C3305333                        | - | 1003  | 930   | RNA → rplM (PRK09216)Ribosomal_L13 (pfam00572) → rpsI (PRK00132)Ribosomal_S9 (pfam00380) →        |
| env-128 | SRS064774_C2715190                        | + | 51    | 124   | RNA → hypo → rplM (PRK09216)Ribosomal_L13 (pfam00572) →                                           |
| env-129 | SRS014692_C1518495                        | - | 385   | 312   | RNA → rplM (PRK09216)Ribosomal_L13 (pfam00572) →                                                  |
| env-130 | SRS014684_WUGC_scaffold.43074             | + | 2486  | 2559  | RNA → rplM (PRK09216)Ribosomal_L13 (pfam00572) → rpsI (PRK00132)Ribosomal_S9 (pfam00380) →        |
| env-131 | SRS014689_WUGC_scaffold.12190             | + | 2627  | 2700  | RNA → rplM (PRK09216)Ribosomal_L13 (pfam00572) → rpsI (PRK00132)Ribosomal_S9 (pfam00380) →        |
| env-132 | Supragingival_plaque_LANL_scaffold.252697 | - | 158   | 85    | RNA →                                                                                             |
| env-133 | SRS013705_Baylor_scaffold.2470            | - | 1400  | 1327  | RNA → rplM (PRK09216)Ribosomal_L13 (pfam00572) → rpsI (PRK00132)Ribosomal_S9 (pfam00380) →        |
| env-134 | SRS014271_C2964309                        | + | 4142  | 4215  | RNA →                                                                                             |
| env-135 | SRS015215_WUGC_scaffold.38570             | + | 157   | 230   | RNA → rplM (PRK09216)Ribosomal_L13 (pfam00572) →                                                  |
| env-136 | SRS016342_C2855557                        | - | 402   | 329   | RNA → rplM (PRK09216)Ribosomal_L13 (pfam00572) →                                                  |
| env-137 | SRS017808_Baylor_scaffold.55041           | - | 1325  | 1252  | RNA → rplM (PRK09216)Ribosomal_L13 (pfam00572) → rpsI (PRK00132)Ribosomal_S9 (pfam00380) →        |
| env-138 | SRS018791_C2310859                        | + | 489   | 562   | RNA → rplM (PRK09216)Ribosomal_L13 (pfam00572) → rpsI (PRK00132)Ribosomal_S9 (pfam00380) →        |

|          |                                         |   |         |         |      |                                           |                                          |
|----------|-----------------------------------------|---|---------|---------|------|-------------------------------------------|------------------------------------------|
| env-139  | SRS020220_Baylor_scaffold_52325         | - | 173     | 100     | RNA→ |                                           |                                          |
| env-140  | SRS021954_Baylor_scaffold_48638         | + | 2555    | 2628    | RNA→ | rplM (PRK09216)Ribosomal_L13 (pfam00572)→ | rpsI (PRK00132)Ribosomal_S9 (pfam00380)→ |
| env-141  | SRS023617_Baylor_scaffold_62383         | + | 2343    | 2416    | RNA→ | rplM (PRK09216)Ribosomal_L13 (pfam00572)→ | rpsI (PRK00132)Ribosomal_S9 (pfam00380)→ |
| env-142  | SRS023926_Baylor_scaffold_35364         | + | 6413    | 6486    | RNA→ | rplM (PRK09216)Ribosomal_L13 (pfam00572)→ | rpsI (PRK00132)Ribosomal_S9 (pfam00380)→ |
| env-143  | SRS024081_C2596496                      | - | 158     | 85      | RNA→ |                                           |                                          |
| env-144  | SRS044373_C2896605                      | - | 144     | 217     | RNA→ | rplM (PRK09216)Ribosomal_L13 (pfam00572)→ | rpsI (PRK00132)Ribosomal_S9 (pfam00380)→ |
| env-145  | SRS044486_C2263445                      | - | 551     | 478     | RNA→ | rplM (PRK09216)Ribosomal_L13 (pfam00572)→ |                                          |
| env-146  | SRS050244_C4466451                      | - | 293     | 220     | RNA→ | rplM (PRK09216)Ribosomal_L13 (pfam00572)→ |                                          |
| env-147  | SRS056892_C1498053                      | - | 740     | 667     | RNA→ | rplM (PRK09216)Ribosomal_L13 (pfam00572)→ | rpsI (PRK00132)Ribosomal_S9 (pfam00380)→ |
| env-148  | SRS015797_C2641570                      | + | 936     | 1009    | RNA→ |                                           |                                          |
| env-149  | SRS019219_C2933673                      | + | 150     | 223     | RNA→ | rplM (PRK09216)Ribosomal_L13 (pfam00572)→ | rpsI (PRK00132)Ribosomal_S9 (pfam00380)→ |
| env-150  | SRS024318_LANL_scaffold_22081           | - | 1688    | 1615    | RNA→ | rplM (PRK09216)Ribosomal_L13 (pfam00572)→ | rpsI (PRK00132)Ribosomal_S9 (pfam00380)→ |
| env-151  | SRS042643_WUGC_scaffold_65245           | - | 159     | 86      | RNA→ |                                           |                                          |
| env-152  | SRS043663_LANL_scaffold_40074           | - | 6366    | 6293    | RNA→ | rplM (PRK09216)Ribosomal_L13 (pfam00572)→ | rpsI (PRK00132)Ribosomal_S9 (pfam00380)→ |
| env-153  | SRS053854_LANL_scaffold_53869           | + | 18601   | 18674   | RNA→ | rplM (PRK09216)Ribosomal_L13 (pfam00572)→ | rpsI (PRK00132)Ribosomal_S9 (pfam00380)→ |
| env-154  | SRS062761_LANL_scaffold_7973            | + | 6020    | 6093    | RNA→ | rplM (PRK09216)Ribosomal_L13 (pfam00572)→ | rpsI (PRK00132)Ribosomal_S9 (pfam00380)→ |
| env-155  | SRS075404_C3410168                      | + | 150     | 223     | RNA→ |                                           |                                          |
| env-156  | SRS023835_Baylor_scaffold_45883         | - | 172     | 99      | RNA→ |                                           |                                          |
| env-157  | SRS049147_LANL_scaffold_19223           | - | 1397    | 1324    | RNA→ | rplM (PRK09216)Ribosomal_L13 (pfam00572)→ | rpsI (PRK00132)Ribosomal_S9 (pfam00380)→ |
| env-158  | SRS020856_Baylor_scaffold_43228         | + | 1090    | 1165    | RNA→ |                                           |                                          |
| env-159  | SRS023557_C1740022                      | + | 539     | 614     | RNA→ |                                           |                                          |
| env-160  | SRS023930_Baylor_scaffold_1355          | + | 765     | 840     | RNA→ | rplM (PRK09216)Ribosomal_L13 (pfam00572)→ | rpsI (PRK00132)Ribosomal_S9 (pfam00380)→ |
| env-161  | SRS013946_WUGC_scaffold_1088            | + | 79348   | 79423   | RNA→ | rplM (PRK09216)Ribosomal_L13 (pfam00572)→ | rpsI (PRK00132)Ribosomal_S9 (pfam00380)→ |
| env-162  | SRS019124_C1404027                      | - | 844     | 769     | RNA→ | rplM (PRK09216)Ribosomal_L13 (pfam00572)→ | rpsI (PRK00132)Ribosomal_S9 (pfam00380)→ |
| Psp-23-1 | NC_022111.1                             | - | 1426745 | 1426670 | RNA→ | rplM (PRK09216)Ribosomal_L13 (pfam00572)→ | rpsI (PRK00132)Ribosomal_S9 (pfam00380)→ |
| env-163  | Keratinized_gingiva_LANL_scaffold_26598 | - | 469     | 394     | RNA→ | rplM (PRK09216)Ribosomal_L13 (pfam00572)→ |                                          |
| env-164  | SRS045127_LANL_scaffold_9552            | - | 310     | 235     | RNA→ | rplM (PRK09216)Ribosomal_L13 (pfam00572)→ |                                          |
| env-165  | SRS057539_LANL_scaffold_47289           | + | 1537    | 1612    | RNA→ | rplM (PRK09216)Ribosomal_L13 (pfam00572)→ | rpsI (PRK00132)Ribosomal_S9 (pfam00380)→ |
| env-166  | SRS064774_LANL_scaffold_66778           | - | 205     | 130     | RNA→ | rplM (PRK09216)→                          |                                          |
| env-167  | SRS024375_LANL_scaffold_43091           | - | 2175    | 2100    | RNA→ | rplM (PRK09216)Ribosomal_L13 (pfam00572)→ | rpsI (PRK00132)Ribosomal_S9 (pfam00380)→ |
| env-168  | SRS045715_LANL_scaffold_76474           | + | 674     | 749     | RNA→ | rplM (PRK09216)Ribosomal_L13 (pfam00572)→ | rpsI (PRK00132)Ribosomal_S9 (pfam00380)→ |
| env-169  | SRS013818_Baylor_scaffold_58539         | - | 3474    | 3399    | RNA→ | rplM (PRK09216)Ribosomal_L13 (pfam00572)→ | rpsI (PRK00132)Ribosomal_S9 (pfam00380)→ |
| env-170  | SRS018439_Baylor_scaffold_27830         | + | 14827   | 14902   | RNA→ | rplM (PRK09216)Ribosomal_L13 (pfam00572)→ | rpsI (PRK00132)Ribosomal_S9 (pfam00380)→ |
| env-171  | Palatine_Tonsils_LANL_C6199093          | - | 206     | 131     | RNA→ | rplM (PRK09216)→                          |                                          |
| env-172  | SRS016740_Baylor_scaffold_45058         | - | 3466    | 3391    | RNA→ | rplM (PRK09216)Ribosomal_L13 (pfam00572)→ | rpsI (PRK00132)Ribosomal_S9 (pfam00380)→ |
| env-173  | SRS011306_Baylor_scaffold_30322         | - | 1178    | 1103    | RNA→ | rplM (PRK09216)Ribosomal_L13 (pfam00572)→ | rpsI (PRK00132)Ribosomal_S9 (pfam00380)→ |
| env-174  | SRS013164_Baylor_scaffold_48360         | - | 1235    | 1160    | RNA→ | rplM (PRK09216)Ribosomal_L13 (pfam00572)→ | rpsI (PRK00132)Ribosomal_S9 (pfam00380)→ |
| env-175  | SRS013942_C1226381                      | + | 56      | 131     | RNA→ | rplM (PRK09216)Ribosomal_L13 (pfam00572)→ |                                          |
| env-176  | SRS013947_WUGC_scaffold_26275           | + | 3554    | 3629    | RNA→ | rplM (PRK09216)Ribosomal_L13 (pfam00572)→ | rpsI (PRK00132)Ribosomal_S9 (pfam00380)→ |
| env-177  | SRS013948_C1540062                      | - | 1341    | 1266    | RNA→ | rplM (PRK09216)Ribosomal_L13 (pfam00572)→ | rpsI (PRK00132)Ribosomal_S9 (pfam00380)→ |
| env-178  | SRS014888_C2952726                      | - | 278     | 203     | RNA→ | rplM (PRK09216)RplM (COG0102)→            |                                          |
| env-179  | SRS015762_WUGC_scaffold_24890           | - | 155     | 80      | RNA→ |                                           |                                          |
| env-180  | SRS016002_WUGC_scaffold_61027           | + | 308     | 383     | RNA→ | rplM (PRK09216)Ribosomal_L13 (pfam00572)→ | rpsI (PRK00132)Ribosomal_S9 (pfam00380)→ |
| env-181  | SRS016086_WUGC_scaffold_26845           | - | 1575    | 1500    | RNA→ | rplM (PRK09216)Ribosomal_L13 (pfam00572)→ | rpsI (PRK00132)Ribosomal_S9 (pfam00380)→ |
| env-182  | SRS016225_C2845363                      | + | 174     | 249     | RNA→ |                                           |                                          |
| env-183  | SRS016569_Baylor_scaffold_56398         | - | 14475   | 14400   | RNA→ | rplM (PRK09216)Ribosomal_L13 (pfam00572)→ | rpsI (PRK00132)Ribosomal_S9 (pfam00380)→ |
| env-184  | SRS017808_C3912739                      | + | 987     | 1062    | RNA→ | rplM (PRK09216)Ribosomal_L13 (pfam00572)→ | rpsI (PRK00132)Ribosomal_S9 (pfam00380)→ |
| env-185  | SRS018145_Baylor_scaffold_43542         | - | 203     | 128     | RNA→ | rplM (PRK09216)→                          |                                          |
| env-186  | SRS019022_WUGC_scaffold_45455           | + | 194     | 269     | RNA→ | rplM (PRK09216)Ribosomal_L13 (pfam00572)→ | rpsI (PRK00132)Ribosomal_S9 (pfam00380)→ |
| env-187  | SRS019045_C2719629                      | + | 63      | 138     | RNA→ | rplM (PRK09216)Ribosomal_L13 (pfam00572)→ | rpsI (PRK00132)Ribosomal_S9 (pfam00380)→ |
| env-188  | SRS019126_WUGC_scaffold_13188           | + | 379     | 454     | RNA→ | rplM (PRK09216)Ribosomal_L13 (pfam00572)→ | rpsI (PRK00132)Ribosomal_S9 (pfam00380)→ |
| env-189  | SRS019894_C3913439                      | - | 664     | 589     | RNA→ | rplM (PRK09216)Ribosomal_L13 (pfam00572)→ | rpsI (PRK00132)rps9 (CHL00079)→          |



|         |                                   |   |        |        |                                                                                                   |
|---------|-----------------------------------|---|--------|--------|---------------------------------------------------------------------------------------------------|
| env-190 | SRS019974_Baylor_scaffold.2117    | + | 182    | 257    | RNA → rplM (PRK09216)Ribosomal_L13 (pfam00572) → rpsI (PRK00132)Ribosomal_S9 (pfam00380) →        |
| env-191 | SRS021954_C3044878                | + | 70     | 145    | RNA → rplM (PRK09216)Ribosomal_L13 (pfam00572) → rpsI (PRK00132)Ribosomal_S9 (pfam00380) →        |
| env-192 | SRS023958_C1974288                | + | 58     | 133    | RNA → rplM (PRK09216)Ribosomal_L13 (pfam00572) →                                                  |
| env-193 | SRS024015_Baylor_scaffold.54415   | + | 4601   | 4676   | RNA → rplM (PRK09216)Ribosomal_L13 (pfam00572) → rpsI (PRK00132)Ribosomal_S9 (pfam00380) →        |
| env-194 | SRS024277_C2835398                | + | 56     | 131    | RNA → rplM (PRK09216)Ribosomal_L13 (pfam00572) → rpsI (PRK00132)Ribosomal_S9 (pfam00380) →        |
| env-195 | SRS048411_C6973885                | + | 102    | 177    | RNA → rplM (PRK09216)Ribosomal_L13 (pfam00572) → rpsI (PRK00132)Ribosomal_S9 (pfam00380) →        |
| env-196 | SRS048791_C3265861                | - | 1162   | 1087   | RNA → rplM (PRK09216)Ribosomal_L13 (pfam00572) → rpsI (PRK00132)Ribosomal_S9 (pfam00380) →        |
| env-197 | SRS052227_C2916121                | - | 1045   | 970    | RNA → rplM (PRK09216)Ribosomal_L13 (pfam00572) → rpsI (PRK00132)Ribosomal_S9 (pfam00380) →        |
| env-198 | SRS053603_LANL_scaffold.51146     | - | 1182   | 1107   | RNA → rplM (PRK09216)Ribosomal_L13 (pfam00572) → rpsI (PRK00132)Ribosomal_S9 (pfam00380) →        |
| env-199 | SRS054687_C3493368                | + | 1536   | 1611   | RNA → rplM (PRK09216)Ribosomal_L13 (pfam00572) →                                                  |
| env-200 | SRS056323_C2562669                | - | 459    | 384    | RNA → rplM (PRK09216)Ribosomal_L13 (pfam00572) →                                                  |
| env-201 | SRS057355_C2358048                | - | 1102   | 1027   | RNA → rplM (PRK09216)Ribosomal_L13 (pfam00572) → rpsI (PRK00132)Ribosomal_S9 (pfam00380) →        |
| env-202 | SRS063193_LANL_scaffold.66856     | - | 3099   | 3024   | RNA → rplM (PRK09216)Ribosomal_L13 (pfam00572) → rpsI (PRK00132)Ribosomal_S9 (pfam00380) →        |
| env-203 | SRS064423_LANL_scaffold.47969     | - | 3499   | 3424   | RNA → rplM (PRK09216)Ribosomal_L13 (pfam00572) → rpsI (PRK00132)Ribosomal_S9 (pfam00380) →        |
| env-204 | SRS077736_LANL_scaffold.38236     | + | 42461  | 42536  | RNA → rplM (PRK09216)Ribosomal_L13 (pfam00572) → rpsI (PRK00132)Ribosomal_S9 (pfam00380) →        |
| env-205 | Tongue_dor_WUGI_scaffold.8501     | + | 269    | 344    | RNA → rplM (PRK09216)Ribosomal_L13 (pfam00572) → rpsI (PRK00132)Ribosomal_S9 (pfam00380) →        |
| env-206 | SRS014470_C3713445                | + | 547    | 622    | RNA → rplM (PRK09216)RplM (COG0102) →                                                             |
| env-207 | SRS018300_C3341863                | + | 280    | 205    | RNA → rplM (PRK09216)RplM (COG0102) →                                                             |
| env-208 | SRS024441_LANL_scaffold.48252     | - | 856    | 931    | RNA →                                                                                             |
| env-209 | SRS075404_C3567588                | + | 297    | 372    | RNA → rplM (PRK09216)RplM (COG0102) →                                                             |
| env-210 | SRS011086_WUGC_scaffold.15953     | - | 4147   | 4072   | RNA → rplM (PRK09216)Ribosomal_L13 (pfam00572) → rpsI (PRK00132)Ribosomal_S9 (pfam00380) →        |
| env-211 | SRS013879_WUGC_scaffold.7871      | + | 156    | 231    | RNA → rplM (PRK09216)Ribosomal_L13 (pfam00572) → rpsI (PRK00132)Ribosomal_S9 (pfam00380) →        |
| env-212 | SRS011243_Baylor_scaffold.40702   | - | 1370   | 1295   | RNA → rplM (PRK09216)Ribosomal_L13 (pfam00572) → rpsI (PRK00132)Ribosomal_S9 (pfam00380) →        |
| env-213 | SRS014573_WUGC_scaffold.49775     | - | 908    | 833    | RNA → rplM (PRK09216)Ribosomal_L13 (pfam00572) → rpsI (PRK00132)Ribosomal_S9 (pfam00380) →        |
| env-214 | SRS015797_WUGC_scaffold.1453      | - | 1656   | 1581   | RNA → rplM (PRK09216)Ribosomal_L13 (pfam00572) → rpsI (PRK00132)Ribosomal_S9 (pfam00380) →        |
| env-215 | SRS016037_WUGC_scaffold.35398     | + | 102    | 177    | RNA → rplM (PRK09216)Ribosomal_L13 (pfam00572) →                                                  |
| env-216 | SRS021496_Baylor_scaffold.24398   | - | 5055   | 4980   | RNA → rplM (PRK09216)Ribosomal_L13 (pfam00572) → rpsI (PRK00132)Ribosomal_S9 (pfam00380) →        |
| env-217 | SRS024138_Baylor_scaffold.896     | + | 1270   | 1345   | RNA → rplM (PRK09216)Ribosomal_L13 (pfam00572) → rpsI (PRK00132)Ribosomal_S9 (pfam00380) →        |
| env-218 | SRS042643_WUGC_scaffold.46473     | + | 11248  | 11323  | RNA → rplM (PRK09216)Ribosomal_L13 (pfam00572) → rpsI (PRK00132)Ribosomal_S9 (pfam00380) →        |
| env-219 | SRS047219_C2146198                | + | 105    | 180    | RNA → rplM (PRK09216)RplM (COG0102) →                                                             |
| env-220 | SRS049147_LANL_scaffold.18610     | + | 946    | 1021   | RNA → rplM (PRK09216)Ribosomal_L13 (pfam00572) → rpsI (PRK00132)Ribosomal_S9 (pfam00380) →        |
| env-221 | SRS055426_LANL_scaffold.19831     | - | 3585   | 3510   | RNA → rplM (PRK09216)Ribosomal_L13 (pfam00572) → rpsI (PRK00132)Ribosomal_S9 (pfam00380) → hypo → |
| env-222 | Buccal_mucosa_LANL_scaffold.78460 | - | 760    | 685    | RNA → rplM (PRK09216)Ribosomal_L13 (pfam00572) → rpsI (PRK00132)Ribosomal_S9 (pfam00380) →        |
| env-223 | SRS014271_WUGC_scaffold.629       | + | 43     | 118    | RNA → rplM (PRK09216)Ribosomal_L13 (pfam00572) → rpsI (PRK00132)Ribosomal_S9 (pfam00380) →        |
| env-224 | SRS062544_LANL_scaffold.4602      | - | 1246   | 1171   | RNA → rplM (PRK09216)Ribosomal_L13 (pfam00572) → rpsI (PRK00132)Ribosomal_S9 (pfam00380) →        |
| env-225 | SRS065278_LANL_scaffold.63970     | - | 3725   | 3650   | RNA → rplM (PRK09216)Ribosomal_L13 (pfam00572) → rpsI (PRK00132)Ribosomal_S9 (pfam00380) →        |
| env-226 | SRS024081_LANL_scaffold.32043     | + | 406    | 481    | RNA → rplM (PRK09216)Ribosomal_L13 (pfam00572) → rpsI (PRK00132)Ribosomal_S9 (pfam00380) →        |
| env-227 | SRS022719_LANL_scaffold.53966     | + | 5202   | 5277   | RNA → rplM (PRK09216)Ribosomal_L13 (pfam00572) → rpsI (PRK00132)Ribosomal_S9 (pfam00380) →        |
| env-228 | SRS044662_LANL_scaffold.14148     | - | 15885  | 15810  | RNA → rplM (PRK09216)Ribosomal_L13 (pfam00572) → rpsI (PRK00132)Ribosomal_S9 (pfam00380) →        |
| env-229 | SRS050669_LANL_scaffold.25595     | + | 601    | 676    | RNA → rplM (PRK09216)Ribosomal_L13 (pfam00572) → rpsI (PRK00132)Ribosomal_S9 (pfam00380) →        |
| env-230 | SRS058336_LANL_scaffold.14781     | - | 102    | 27     | RNA → hypo →                                                                                      |
| env-231 | SRS016342_Baylor_scaffold.48981   | + | 82     | 157    | RNA → rplM (PRK09216)Ribosomal_L13 (pfam00572) → rpsI (PRK00132)Ribosomal_S9 (pfam00380) →        |
| env-232 | SRS018739_WUGC_scaffold.60144     | - | 1366   | 1291   | RNA → rplM (PRK09216)Ribosomal_L13 (pfam00572) → rpsI (PRK00132)Ribosomal_S9 (pfam00380) →        |
| env-233 | SRS019126_C2043960                | + | 254    | 329    | RNA →                                                                                             |
| Pna-2-1 | NZ_BAKD01000002.1                 | - | 398642 | 398567 | RNA → rplM (PRK09216)Ribosomal_L13 (pfam00572) → rpsI (PRK00132)Ribosomal_S9 (pfam00380) →        |
| Pna-1-1 | NZ_KB904328.1                     | + | 132132 | 132207 | RNA → rplM (PRK09216)Ribosomal_L13 (pfam00572) → rpsI (PRK00132)Ribosomal_S9 (pfam00380) →        |
| env-234 | SRS011140_Baylor_scaffold.53572   | + | 2158   | 2083   | RNA → rplM (PRK09216)Ribosomal_L13 (pfam00572) → rpsI (PRK00132)Ribosomal_S9 (pfam00380) →        |
| env-235 | SRS015434_C5898829                | + | 238    | 313    | RNA → rplM (PRK09216)Ribosomal_L13 (pfam00572) →                                                  |
| env-236 | SRS015644_WUGC_scaffold.48566     | + | 1536   | 1611   | RNA → rplM (PRK09216)Ribosomal_L13 (pfam00572) → rpsI (PRK00132)Ribosomal_S9 (pfam00380) →        |
| env-237 | SRS019077_WUGC_scaffold.47444     | - | 372    | 297    | RNA → rplM (PRK09216)Ribosomal_L13 (pfam00572) →                                                  |
| env-238 | SRS019127_C1659470                | + | 56     | 131    | RNA → rplM (PRK09216)Ribosomal_L13 (pfam00572) → rpsI (PRK00132)Ribosomal_S9 (pfam00380) →        |
| env-239 | SRS020856_Baylor_scaffold.12760   | - | 1113   | 1038   | RNA → rplM (PRK09216)Ribosomal_L13 (pfam00572) → rpsI (PRK00132)Ribosomal_S9 (pfam00380) →        |



|         |                                           |   |       |       |       |                                            |                                           |
|---------|-------------------------------------------|---|-------|-------|-------|--------------------------------------------|-------------------------------------------|
| env-240 | SRS022077_Baylor_scaffold_47573           | + | 56    | 131   | RNA → | rplM (PRK09216)Ribosomal_L13 (pfam00572) → | rpsI (PRK00132)Ribosomal_S9 (pfam00380) → |
| env-241 | SRS022621_Baylor_scaffold_3806            | - | 26534 | 26459 | RNA → | rplM (PRK09216)Ribosomal_L13 (pfam00572) → | rpsI (PRK00132)Ribosomal_S9 (pfam00380) → |
| env-242 | SRS023617_Baylor_scaffold_52938           | - | 36529 | 36454 | RNA → | rplM (PRK09216)Ribosomal_L13 (pfam00572) → | rpsI (PRK00132)Ribosomal_S9 (pfam00380) → |
| env-243 | SRS024580_C3074526                        | - | 620   | 545   | RNA → | rplM (PRK09216)Ribosomal_L13 (pfam00572) → |                                           |
| env-244 | SRS042131_WUGC_scaffold_8821              | + | 37335 | 37260 | RNA → | rplM (PRK09216)Ribosomal_L13 (pfam00572) → | rpsI (PRK00132)Ribosomal_S9 (pfam00380) → |
| env-245 | SRS050244_LANL_scaffold_95985             | + | 1714  | 1789  | RNA → | rplM (PRK09216)Ribosomal_L13 (pfam00572) → | rpsI (PRK00132)Ribosomal_S9 (pfam00380) → |
| env-246 | SRS019607_C2757825                        | - | 1575  | 1500  | RNA → | rplM (PRK09216)Ribosomal_L13 (pfam00572) → | rpsI (PRK00132)Ribosomal_S9 (pfam00380) → |
| env-247 | SRS023835_Baylor_scaffold_30646           | - | 382   | 307   | RNA → | rplM (PRK09216)Ribosomal_L13 (pfam00572) → |                                           |
| env-248 | SRS057205_LANL_scaffold_32691             | + | 1114  | 1189  | RNA → |                                            |                                           |
| env-249 | SRS012279_C2758674                        | + | 3094  | 3169  | RNA → | rplM (PRK09216)Ribosomal_L13 (pfam00572) → | rpsI (PRK00132)Ribosomal_S9 (pfam00380) → |
| env-250 | SRS014692_C1492733                        | + | 63    | 138   | RNA → | rplM (PRK09216)Ribosomal_L13 (pfam00572) → |                                           |
| env-251 | SRS019026_C1981803                        | + | 132   | 207   | RNA → | rplM (PRK09216)Ribosomal_L13 (pfam00572) → | rpsI (PRK00132)Ribosomal_S9 (pfam00380) → |
| env-252 | SRS019027_C1968276                        | + | 63    | 138   | RNA → | rplM (PRK09216)Ribosomal_L13 (pfam00572) → | rpsI (PRK00132)Ribosomal_S9 (pfam00380) → |
| env-253 | SRS019327_WUGC_scaffold_24766             | - | 2945  | 2870  | RNA → | rplM (PRK09216)Ribosomal_L13 (pfam00572) → | rpsI (PRK00132)Ribosomal_S9 (pfam00380) → |
| env-254 | SRS019389_C2252888                        | + | 2434  | 2509  | RNA → |                                            |                                           |
| env-255 | SRS023352_C4687326                        | - | 1370  | 1295  | RNA → | rplM (PRK09216)Ribosomal_L13 (pfam00572) → | rpsI (PRK00132)Ribosomal_S9 (pfam00380) → |
| env-256 | SRS047210_C3287465                        | - | 670   | 595   | RNA → | rplM (PRK09216)Ribosomal_L13 (pfam00572) → | rpsI (PRK00132)rps9 (CHL00079) →          |
| env-257 | SRS057791_LANL_scaffold_82241             | + | 477   | 552   | RNA → | rplM (PRK09216)Ribosomal_L13 (pfam00572) → | rpsI (PRK00132)Ribosomal_S9 (pfam00380) → |
| env-258 | SRS014684_WUGC_scaffold_44011             | + | 3280  | 3355  | RNA → | rplM (PRK09216)Ribosomal_L13 (pfam00572) → | rpsI (PRK00132)Ribosomal_S9 (pfam00380) → |
| env-259 | SRS017533_Baylor_scaffold_27038           | - | 80    | 5     | RNA → |                                            |                                           |
| env-260 | SRS043663_LANL_scaffold_17693             | + | 210   | 285   | RNA → | rplM (PRK09216)Ribosomal_L13 (pfam00572) → |                                           |
| env-261 | SRS062761_C4207862                        | - | 374   | 299   | RNA → | rplM (PRK09216)Ribosomal_L13 (pfam00572) → |                                           |
| env-262 | SRS013946_WUGC_scaffold_14040             | + | 788   | 863   | RNA → | rplM (PRK09216)Ribosomal_L13 (cd00392) →   |                                           |
| env-263 | SRS019125_WUGC_scaffold_9864              | - | 274   | 199   | RNA → | rplM (PRK09216)RplM (COG0102) →            |                                           |
| env-264 | SRS013506_Baylor_scaffold_8126            | - | 301   | 226   | RNA → | rplM (PRK09216)Ribosomal_L13 (cd00392) →   |                                           |
| env-265 | SRS014473_C1126965                        | + | 422   | 497   | RNA → | rplM (PRK09216)Ribosomal_L13 (pfam00572) → | rpsI (PRK00132)Ribosomal_S9 (pfam00380) → |
| env-266 | AUX0014368639.1                           | - | 674   | 600   | RNA → | rplM (PRK09216)Ribosomal_L13 (pfam00572) → |                                           |
| env-267 | AUX0015562770.1                           | + | 235   | 303   | RNA → | rplM (PRK09216)Ribosomal_L13 (pfam00572) → | rpsI (PRK00132)Ribosomal_S9 (pfam00380) → |
| Bsp-2-1 | NZ_JNXX01000045.1                         | - | 3997  | 3929  | RNA → | rplM (PRK09216)Ribosomal_L13 (pfam00572) → | rpsI (PRK00132)Ribosomal_S9 (pfam00380) → |
| Bsp-1-1 | NZ_JNLA01000048.1                         | + | 27849 | 27917 | RNA → | rplM (PRK09216)Ribosomal_L13 (pfam00572) → | rpsI (PRK00132)Ribosomal_S9 (pfam00380) → |
| env-268 | SRS023352_C4496944                        | - | 123   | 46    | RNA → | hypo →                                     |                                           |
| env-269 | SRS062544_C2920745                        | + | 463   | 540   | RNA → |                                            |                                           |
| env-270 | SRS019219_WUGC_scaffold_426               | - | 214   | 137   | RNA → | hypo →                                     |                                           |
| env-271 | SRS051791_LANL_scaffold_54765             | - | 217   | 140   | RNA → |                                            |                                           |
| env-272 | SRS015057_WUGC_scaffold_61382             | + | 542   | 619   | RNA → |                                            |                                           |
| env-273 | SRS048411_C6924690                        | + | 505   | 582   | RNA → |                                            |                                           |
| env-274 | SRS057791_C3531782                        | + | 268   | 345   | RNA → |                                            |                                           |
| env-275 | SRS045715_LANL_scaffold_76924             | + | 360   | 437   | RNA → |                                            |                                           |
| env-276 | SRS015272_C3500034                        | - | 214   | 137   | RNA → |                                            |                                           |
| env-277 | SRS018791_C2278485                        | + | 773   | 850   | RNA → |                                            |                                           |
| env-278 | SRS011255_C2362793                        | - | 117   | 40    | RNA → |                                            |                                           |
| env-279 | SRS013950_WUGC_scaffold_2138              | - | 220   | 143   | RNA → |                                            |                                           |
| env-280 | SRS013836_C4630228                        | + | 244   | 321   | RNA → |                                            |                                           |
| env-281 | SRS023841_C1489733                        | - | 221   | 144   | RNA → | hypo →                                     |                                           |
| env-282 | Supragingival_plaque_LANL_scaffold_194841 | - | 474   | 397   | RNA → | rplM (PRK09216)Ribosomal_L13 (pfam00572) → |                                           |
| env-283 | SRS017691_C5410429                        | + | 2077  | 2154  | RNA → |                                            |                                           |
| env-284 | SRS024561_C2727733                        | + | 380   | 457   | RNA → |                                            |                                           |
| env-285 | SRS024277_C2727216                        | - | 173   | 96    | RNA → | hypo →                                     |                                           |
| env-286 | SRS016319_C3957492                        | - | 123   | 46    | RNA → | hypo →                                     |                                           |
| env-287 | SRS042131_C2217398                        | + | 340   | 417   | RNA → |                                            |                                           |
| env-288 | SRS043663_C4080713                        | + | 808   | 885   | RNA → |                                            |                                           |
| env-289 | SRS062761_C4201374                        | + | 277   | 354   | RNA → |                                            |                                           |

|         |                                      |   |       |       |      |                                                                                     |
|---------|--------------------------------------|---|-------|-------|------|-------------------------------------------------------------------------------------|
| env-290 | SRS015797_C2619071                   | - | 219   | 142   | RNA→ |                                                                                     |
| env-291 | SRS019607_C2703769                   | - | 184   | 107   | RNA→ | ←-hypo                                                                              |
| env-292 | SRS021496_Baylor_scaffold_55246      | + | 49    | 126   | RNA→ | rplM (PRK09216)Ribosomal_L13 (pfam00572)→                                           |
| env-293 | SRS024081_C2601354                   | + | 658   | 735   | RNA→ |                                                                                     |
| env-294 | SRS049389_C4506064                   | + | 176   | 253   | RNA→ |                                                                                     |
| env-295 | SRS075404_C3622013                   | + | 648   | 725   | RNA→ |                                                                                     |
| env-296 | SRS018739_C3603893                   | + | 489   | 566   | RNA→ |                                                                                     |
| env-297 | SRS020220_C3576851                   | - | 115   | 38    | RNA→ | hypo→                                                                               |
| env-298 | SRS011306_C3387646                   | + | 94    | 171   | RNA→ |                                                                                     |
| env-299 | SRS019071_C5065527                   | - | 138   | 61    | RNA→ | hypo→                                                                               |
| env-300 | SRS019327_WUGC_scaffold_20822        | + | 376   | 453   | RNA→ |                                                                                     |
| env-301 | Supragingival_plaque_LANL_C182575899 | - | 117   | 40    | RNA→ | hypo→                                                                               |
| env-302 | SRS016002_C2496321                   | - | 179   | 102   | RNA→ | hypo→                                                                               |
| env-303 | SRS019126_C2138744                   | + | 361   | 438   | RNA→ |                                                                                     |
| env-304 | SRS019127_C1661984                   | + | 1415  | 1492  | RNA→ |                                                                                     |
| env-305 | SRS017209_Baylor_scaffold_64433      | - | 214   | 137   | RNA→ |                                                                                     |
| env-306 | SRS024318_LANL_scaffold_131          | - | 214   | 137   | RNA→ |                                                                                     |
| env-307 | SRS057205_LANL_scaffold_46232        | - | 410   | 333   | RNA→ | rplM (PRK09216)Ribosomal_L13 (pfam00572)→                                           |
| env-308 | SRS018357_C3783001                   | - | 179   | 102   | RNA→ | hypo→                                                                               |
| env-309 | SRS020856_C2544654                   | + | 239   | 316   | RNA→ |                                                                                     |
| env-310 | SRS044373_WUGC_scaffold_63614        | - | 123   | 46    | RNA→ |                                                                                     |
| env-311 | SRS014271_C2955858                   | + | 2330  | 2407  | RNA→ |                                                                                     |
| env-312 | SRS050244_C4442009                   | + | 418   | 495   | RNA→ |                                                                                     |
| env-313 | SRS062544_C3030084                   | + | 2332  | 2409  | RNA→ |                                                                                     |
| env-314 | SRS013164_C2312325                   | - | 119   | 42    | RNA→ | hypo→                                                                               |
| env-315 | SRS016225_C2929058                   | + | 310   | 388   | RNA→ |                                                                                     |
| env-316 | 4491686.3.521687                     | + | 140   | 220   | RNA→ | ←-hypo                                                                              |
| env-317 | scaffold7222.1_MH0052                | - | 220   | 140   | RNA→ |                                                                                     |
| env-318 | 4491686.3.475604                     | - | 103   | 23    | RNA→ | ←-hypo                                                                              |
| env-319 | 2013397958                           | - | 676   | 600   | RNA→ | rplM (PRK09216)Ribosomal_L13 (pfam00572)→ rplM (PRK09216)Ribosomal_L13 (pfam00572)→ |
| Psp-3-1 | NZ_AUJK01000003.1                    | + | 63931 | 64008 | RNA→ | rplM (PRK09216)Ribosomal_L13 (pfam00572)→ rpsI (PRK00132)Ribosomal_S9 (pfam00380)→  |
| env-320 | scaffold26454.4_MH0084               | + | 5212  | 5288  | RNA→ | rplM (PRK09216)Ribosomal_L13 (pfam00572)→ rpsI (PRK00132)Ribosomal_S9 (pfam00380)→  |
| env-321 | scaffold66021.2_MH0081               | + | 3270  | 3346  | RNA→ | rplM (PRK09216)Ribosomal_L13 (pfam00572)→ rpsI (PRK00132)Ribosomal_S9 (pfam00380)→  |
| env-322 | scaffold25402.2_MH0054               | + | 2416  | 2492  | RNA→ | rplM (PRK09216)Ribosomal_L13 (pfam00572)→ rpsI (PRK00132)Ribosomal_S9 (pfam00380)→  |
| env-323 | scaffold8724.1_O2_UC-16              | - | 106   | 30    | RNA→ |                                                                                     |
| env-324 | SRS015782_WUGC_scaffold_20008        | - | 24364 | 24288 | RNA→ | rplM (PRK09216)Ribosomal_L13 (pfam00572)→ rpsI (PRK00132)Ribosomal_S9 (pfam00380)→  |
| env-325 | SRS047044_WUGC_scaffold_15995        | - | 1654  | 1578  | RNA→ | rplM (PRK09216)Ribosomal_L13 (pfam00572)→ rpsI (PRK00132)Ribosomal_S9 (pfam00380)→  |
| env-326 | scaffold34413.1_V1_CD-13             | + | 111   | 187   | RNA→ | rplM (PRK09216)Ribosomal_L13 (pfam00572)→ rpsI (PRK00132)Ribosomal_S9 (pfam00380)→  |
| env-327 | scaffold69522.1_MH0044               | + | 6237  | 6313  | RNA→ | rplM (PRK09216)Ribosomal_L13 (pfam00572)→ rpsI (PRK00132)Ribosomal_S9 (pfam00380)→  |
| env-328 | scaffold59624.1_MH0052               | + | 3663  | 3739  | RNA→ | ←-hypo                                                                              |
| env-329 | scaffold15726.3_MH0032               | - | 12257 | 12181 | RNA→ | rplM (PRK09216)Ribosomal_L13 (pfam00572)→ rpsI (PRK00132)Ribosomal_S9 (pfam00380)→  |
| env-330 | scaffold58986.1_MH0033               | - | 3162  | 3086  | RNA→ | rplM (PRK09216)Ribosomal_L13 (pfam00572)→ rpsI (PRK00132)Ribosomal_S9 (pfam00380)→  |
| env-331 | scaffold11675.1_MH0026               | + | 12207 | 12283 | RNA→ | rplM (PRK09216)Ribosomal_L13 (pfam00572)→ rpsI (PRK00132)Ribosomal_S9 (pfam00380)→  |
| env-332 | NLM025_scaffold6375_35               | - | 965   | 889   | RNA→ | rplM (PRK09216)Ribosomal_L13 (pfam00572)→ rpsI (PRK00132)Ribosomal_S9 (pfam00380)→  |
| env-333 | SRS013951_WUGC_scaffold_10163        | - | 35684 | 35608 | RNA→ | rplM (PRK09216)Ribosomal_L13 (pfam00572)→ rpsI (PRK00132)Ribosomal_S9 (pfam00380)→  |
| env-334 | SRS019161_WUGC_scaffold_63747        | + | 921   | 997   | RNA→ | rplM (PRK09216)Ribosomal_L13 (pfam00572)→ rpsI (PRK00132)Ribosomal_S9 (pfam00380)→  |
| env-335 | SRS050422_LANL_scaffold_39679        | - | 16737 | 16661 | RNA→ | rplM (PRK09216)Ribosomal_L13 (pfam00572)→ rpsI (PRK00132)Ribosomal_S9 (pfam00380)→  |
| env-336 | scaffold3922.2_MH0001                | - | 532   | 456   | RNA→ | rplM (PRK09216)Ribosomal_L13 (pfam00572)→                                           |
| env-337 | scaffold12670.1_MH0041               | + | 6023  | 6099  | RNA→ | rplM (PRK09216)Ribosomal_L13 (pfam00572)→ rpsI (PRK00132)Ribosomal_S9 (pfam00380)→  |
| env-338 | 4491401.3_NODE_59631                 | + | 440   | 516   | RNA→ | rplM (PRK09216)Ribosomal_L13 (pfam00572)→                                           |
| env-339 | scaffold24499.3_MH0018               | - | 199   | 123   | RNA→ |                                                                                     |
| env-340 | SRS048164_WUGC_scaffold_7139         | - | 11028 | 10952 | RNA→ | rplM (PRK09216)Ribosomal_L13 (pfam00572)→ rpsI (PRK00132)Ribosomal_S9 (pfam00380)→  |

|         |                                   |   |        |        |       |                                            |                                           |
|---------|-----------------------------------|---|--------|--------|-------|--------------------------------------------|-------------------------------------------|
| env-341 | scaffold13081_6.MH0009            | - | 3032   | 2956   | RNA → | rplM (PRK09216)Ribosomal_L13 (pfam00572) → | rpsI (PRK00132)Ribosomal_S9 (pfam00380) → |
| env-342 | scaffold29722_3.MH0034            | + | 2377   | 2453   | RNA → | rplM (PRK09216)Ribosomal_L13 (pfam00572) → | rpsI (PRK00132)Ribosomal_S9 (pfam00380) → |
| env-343 | scaffold19923_2.O2.UC-12          | - | 430    | 354    | RNA → | rplM (PRK09216)Ribosomal_L13 (pfam00572) → |                                           |
| env-344 | SRS015794_Baylor_scaffold.29113   | - | 896    | 820    | RNA → | rplM (PRK09216)Ribosomal_L13 (pfam00572) → | rpsI (PRK00132)Ribosomal_S9 (pfam00380) → |
| env-345 | scaffold988_4.MH0046              | - | 10774  | 10698  | RNA → | rplM (PRK09216)Ribosomal_L13 (pfam00572) → | rpsI (PRK00132)Ribosomal_S9 (pfam00380) → |
| env-346 | scaffold60646_3.MH0076            | - | 3034   | 2958   | RNA → | rplM (PRK09216)Ribosomal_L13 (pfam00572) → | rpsI (PRK00132)Ribosomal_S9 (pfam00380) → |
| env-347 | scaffold60041_3.MH0056            | - | 523    | 447    | RNA → | rplM (PRK09216)Ribosomal_L13 (pfam00572) → |                                           |
| env-348 | scaffold62900_7.O2.UC-19          | + | 1505   | 1581   | RNA → | rplM (PRK09216)Ribosomal_L13 (pfam00572) → | rpsI (PRK00132)Ribosomal_S9 (pfam00380) → |
| env-349 | Subgingival_plaque.LANL.C11191810 | + | 401    | 479    | RNA → |                                            |                                           |
| Pma-3-1 | NZ_JH594503.1                     | - | 275251 | 275173 | RNA → | rplM (PRK09216)Ribosomal_L13 (pfam00572) → | rpsI (PRK00132)Ribosomal_S9 (pfam00380) → |
| env-350 | SRS024087_C3572528                | - | 219    | 141    | RNA → |                                            |                                           |
| env-351 | SRS024289_LANL_scaffold.69854     | - | 837    | 759    | RNA → | rplM (PRK09216)Ribosomal_L13 (pfam00572) → | rpsI (PRK00132)Ribosomal_S9 (pfam00380) → |
| env-352 | SRS047634_LANL_scaffold.34142     | - | 1677   | 1599   | RNA → | rplM (PRK09216)Ribosomal_L13 (pfam00572) → | rpsI (PRK00132)Ribosomal_S9 (pfam00380) → |
| Pma-1-1 | NZ_KB908319.1                     | + | 316856 | 316934 | RNA → | rplM (PRK09216)Ribosomal_L13 (pfam00572) → | rpsI (PRK00132)Ribosomal_S9 (pfam00380) → |
| Pma-2-1 | NZ_BAJZ01000003.1                 | + | 9704   | 9782   | RNA → | rplM (PRK09216)Ribosomal_L13 (pfam00572) → | rpsI (PRK00132)Ribosomal_S9 (pfam00380) → |
| env-353 | SRS018443_Baylor_scaffold.42450   | + | 2749   | 2827   | RNA → |                                            |                                           |
| env-354 | SRS019980_C3029122                | + | 888    | 966    | RNA → |                                            |                                           |
| env-355 | SRS017227_Baylor_scaffold.86068   | - | 121    | 43     | RNA → |                                            |                                           |
| env-356 | SRS049268_LANL_scaffold.27761     | + | 405    | 483    | RNA → |                                            |                                           |
| env-357 | SRS017120_Baylor_scaffold.16174   | + | 172    | 250    | RNA → | rplM (PRK09216)Ribosomal_L13 (pfam00572) → | rpsI (PRK00132)Ribosomal_S9 (pfam00380) → |
| env-358 | SRS024318_LANL_scaffold.13466     | - | 227    | 149    | RNA → | hypo →                                     |                                           |
| env-359 | SRS018791_WUGC_scaffold.24827     | + | 398    | 476    | RNA → | rplM (PRK09216)Ribosomal_L13 (pfam00572) → | rpsI (PRK00132)Ribosomal_S9 (pfam00380) → |
| env-360 | SRS075404_C3518551                | + | 334    | 412    | RNA → |                                            |                                           |
| env-361 | SRS015395_C2316301                | + | 133    | 211    | RNA → |                                            |                                           |
| env-362 | SRS019122_C5835162                | + | 454    | 532    | RNA → |                                            |                                           |
| env-363 | SRS011086_WUGC_scaffold.41294     | + | 17651  | 17729  | RNA → | rplM (PRK09216)Ribosomal_L13 (pfam00572) → | rpsI (PRK00132)Ribosomal_S9 (pfam00380) → |
| env-364 | SRS020334_Baylor_scaffold.26466   | - | 656    | 578    | RNA → | rplM (PRK09216)Ribosomal_L13 (pfam00572) → |                                           |
| env-365 | SRS023617_Baylor_scaffold.72410   | + | 1232   | 1310   | RNA → |                                            |                                           |
| env-366 | SRS047210_C3259279                | - | 125    | 47     | RNA → |                                            |                                           |
| env-367 | SRS050244_LANL_scaffold.47339     | - | 253    | 175    | RNA → |                                            |                                           |
| env-368 | SRS014689_C1337541                | - | 253    | 175    | RNA → |                                            |                                           |
| env-369 | SRS016225_C2877068                | + | 184    | 262    | RNA → |                                            |                                           |
| env-370 | SRS018591_WUGC_scaffold.20233     | + | 10037  | 10115  | RNA → | rplM (PRK09216)Ribosomal_L13 (pfam00572) → | rpsI (PRK00132)Ribosomal_S9 (pfam00380) → |
| env-371 | SRS013705_C3658225                | + | 116    | 194    | RNA → |                                            |                                           |
| env-372 | SRS019607_WUGC_scaffold.9276      | + | 440    | 362    | RNA → | rplM (PRK09216)Ribosomal_L13 (pfam00572) → |                                           |
| env-373 | SRS014684_C3202863                | - | 288    | 366    | RNA → |                                            |                                           |
| env-374 | SRS047824_WUGC_scaffold.43430     | + | 1021   | 1099   | RNA → | rplM (PRK09216)Ribosomal_L13 (pfam00572) → | rpsI (PRK00132)Ribosomal_S9 (pfam00380) → |
| env-375 | SRS014573_WUGC_scaffold.51555     | - | 550    | 472    | RNA → | rplM (PRK09216)Ribosomal_L13 (pfam00572) → |                                           |
| env-376 | SRS015209_WUGC_scaffold.7145      | - | 1222   | 1144   | RNA → | rplM (PRK09216)Ribosomal_L13 (pfam00572) → | rpsI (PRK00132)Ribosomal_S9 (pfam00380) → |
| env-377 | SRS021496_Baylor_scaffold.21245   | + | 106    | 184    | RNA → | rplM (PRK09216)Ribosomal_L13 (pfam00572) → | rpsI (PRK00132)Ribosomal_S9 (pfam00380) → |
| env-378 | SRS023835_Baylor_scaffold.21120   | + | 440    | 362    | RNA → | rplM (PRK09216)Ribosomal_L13 (pfam00572) → |                                           |
| env-379 | SRS047219_WUGC_scaffold.3870      | - | 3309   | 3387   | RNA → | rplM (PRK09216)Ribosomal_L13 (pfam00572) → | rpsI (PRK00132)Ribosomal_S9 (pfam00380) → |
| env-380 | SRS048791_LANL_scaffold.13616     | + | 156    | 234    | RNA → |                                            |                                           |
| env-381 | SRS051791_LANL_scaffold.6037      | + | 5220   | 5298   | RNA → | rplM (PRK09216)Ribosomal_L13 (pfam00572) → | rpsI (PRK00132)Ribosomal_S9 (pfam00380) → |
| env-382 | SRS062544_LANL_scaffold.33552     | + | 2985   | 3063   | RNA → | rplM (PRK09216)Ribosomal_L13 (pfam00572) → | rpsI (PRK00132)Ribosomal_S9 (pfam00380) → |
| env-383 | SRS063193_LANL_scaffold.17717     | - | 550    | 472    | RNA → | rplM (PRK09216)Ribosomal_L13 (pfam00572) → |                                           |
| env-384 | SRS023926_Baylor_scaffold.61302   | - | 446    | 368    | RNA → | rplM (PRK09216)Ribosomal_L13 (pfam00572) → |                                           |
| env-385 | SRS019126_C2050939                | + | 106    | 184    | RNA → |                                            |                                           |
| env-386 | SRS014692_C1429530                | + | 228    | 306    | RNA → |                                            |                                           |
| env-387 | SRS023352_LANL_scaffold.12203     | + | 574    | 652    | RNA → | rplM (PRK09216)Ribosomal_L13 (pfam00572) → | rpsI (PRK00132)Ribosomal_S9 (pfam00380) → |
| env-388 | SRS053603_LANL_scaffold.56678     | - | 125    | 47     | RNA → | hypo →                                     |                                           |
| env-389 | SRS075404_LANL_scaffold.32190     | + | 334    | 412    | RNA → | rplM (PRK09216)Ribosomal_L13 (pfam00572) → |                                           |



|         |                                   |   |         |         |                                                                                                                                                                                                               |
|---------|-----------------------------------|---|---------|---------|---------------------------------------------------------------------------------------------------------------------------------------------------------------------------------------------------------------|
| env-390 | SRS019026_C1988327                | + | 1161    | 1239    | RNA→                                                                                                                                                                                                          |
| env-391 | SRS042131_WUGC_scaffold_38955     | - | 396     | 318     | RNA→ <b>rplM (PRK09216)</b> Ribosomal_L13 (pfam00572)→                                                                                                                                                        |
| env-392 | SRS015038_WUGC_scaffold_15341     | - | 253     | 175     | RNA→                                                                                                                                                                                                          |
| env-393 | SRS016002_WUGC_scaffold_10716     | + | 1413    | 1491    | RNA→ <b>rplM (PRK09216)</b> Ribosomal_L13 (pfam00572)→ <b>rplM (PRK09216)</b> Ribosomal_L13 (pfam00572)→<br><b>rpsI (PRK00132)</b> Ribosomal_S9 (pfam00380)→                                                  |
| env-394 | SRS056323_C2617078                | - | 253     | 175     | RNA→                                                                                                                                                                                                          |
| env-395 | SRS065278_C2566571                | - | 253     | 175     | RNA→                                                                                                                                                                                                          |
| env-396 | SRS019974_C3363040                | + | 862     | 940     | RNA→                                                                                                                                                                                                          |
| Psa-2-1 | NZ_GL629647.1                     | + | 2253698 | 2253776 | RNA→ <b>rplM (PRK09216)</b> Ribosomal_L13 (pfam00572)→ <b>rpsI (PRK00132)</b> Ribosomal_S9 (pfam00380)→                                                                                                       |
| env-397 | SRS016086_C2389321                | - | 101     | 23      | RNA→ hypo→                                                                                                                                                                                                    |
| env-398 | SRS020856_Baylor_scaffold_13408   | + | 234     | 312     | RNA→ <b>rplM (PRK09216)</b> Ribosomal_L13 (pfam00572)→ <b>rpsI (PRK00132)</b> Ribosomal_S9 (pfam00380)→                                                                                                       |
| env-399 | SRS014271_WUGC_scaffold_18759     | + | 466     | 544     | RNA→ <b>rplM (PRK09216)</b> Ribosomal_L13 (pfam00572)→                                                                                                                                                        |
| env-400 | SRS015057_WUGC_scaffold_34905     | + | 1097    | 1175    | RNA→ <b>rplM (PRK09216)</b> Ribosomal_L13 (pfam00572)→                                                                                                                                                        |
| Psa-3-1 | NZ_AWG01000017.1                  | + | 92405   | 92483   | RNA→ <b>rplM (PRK09216)</b> Ribosomal_L13 (pfam00572)→ <b>rpsI (PRK00132)</b> Ribosomal_S9 (pfam00380)→                                                                                                       |
| env-401 | SRS012279_C2722110                | + | 914     | 992     | RNA→                                                                                                                                                                                                          |
| env-402 | SRS024015_Baylor_scaffold_12438   | + | 2443    | 2521    | RNA→ <b>rplM (PRK09216)</b> Ribosomal_L13 (pfam00572)→ <b>rpsI (PRK00132)</b> Ribosomal_S9 (pfam00380)→                                                                                                       |
| env-403 | SRS013234_C2993348                | - | 253     | 175     | RNA→                                                                                                                                                                                                          |
| env-404 | SRS024081_LANL_scaffold_75049     | + | 9042    | 9120    | RNA→                                                                                                                                                                                                          |
| env-405 | SRS057205_C3268011                | + | 63      | 141     | RNA→                                                                                                                                                                                                          |
| env-406 | Tongue_dor_WUGI_scaffold_48438    | - | 373     | 295     | RNA→ <b>rplM (PRK09216)</b> Ribosomal_L13 (pfam00572)→                                                                                                                                                        |
| env-407 | SRS022143_WUGC_scaffold_32861     | + | 47      | 125     | RNA→ <b>rplM (PRK09216)</b> Ribosomal_L13 (pfam00572)→                                                                                                                                                        |
| env-408 | SRS016541_Baylor_scaffold_9219    | - | 350     | 274     | RNA→ <b>rplM (PRK09216)</b> Ribosomal_L13 (pfam00572)→                                                                                                                                                        |
| env-409 | SRS016575_C3620180                | + | 304     | 380     | RNA→                                                                                                                                                                                                          |
| env-410 | SRS017691_Baylor_scaffold_1218    | - | 223     | 147     | RNA→                                                                                                                                                                                                          |
| env-411 | SRS049318_C6476930                | + | 709     | 785     | RNA→                                                                                                                                                                                                          |
| env-412 | SRS016569_Baylor_scaffold_25639   | - | 252     | 175     | RNA→                                                                                                                                                                                                          |
| Por-6-1 | NZ_BA_JC01000029.1                | + | 9652    | 9728    | RNA→ hypo→ <b>rplM (PRK09216)</b> Ribosomal_L13 (pfam00572)→ <b>rpsI (PRK00132)</b> Ribosomal_S9 (pfam00380)→                                                                                                 |
| Por-5-1 | NZ_KB898581.1                     | - | 166045  | 165968  | RNA→ <b>rplM (PRK09216)</b> Ribosomal_L13 (pfam00572)→ <b>rpsI (PRK00132)</b> Ribosomal_S9 (pfam00380)→                                                                                                       |
| env-413 | SRS013723_C3447116                | - | 123     | 46      | RNA→                                                                                                                                                                                                          |
| env-414 | SRS013170_Baylor_scaffold_49654   | - | 224     | 147     | RNA→ hypo→                                                                                                                                                                                                    |
| env-415 | SRS015055_C1639257                | - | 224     | 147     | RNA→ hypo→                                                                                                                                                                                                    |
| env-416 | SRS015062_C160810                 | - | 234     | 157     | RNA→ hypo→                                                                                                                                                                                                    |
| env-417 | SRS023964_C2594004                | - | 224     | 147     | RNA→                                                                                                                                                                                                          |
| Por-4-1 | NZ_GL349571.1                     | + | 7135    | 7212    | RNA→ <b>rplM (PRK09216)</b> Ribosomal_L13 (pfam00572)→ <b>rplM (PRK09216)</b> Ribosomal_L13 (pfam00572)→<br><b>rpsI (PRK00132)</b> Ribosomal_S9 (pfam00380)→ <b>rpsI (PRK00132)</b> Ribosomal_S9 (pfam00380)→ |
| Por-7-1 | NZ_GG703883.1                     | + | 239161  | 239238  | RNA→ <b>rplM (PRK09216)</b> Ribosomal_L13 (pfam00572)→ <b>rpsI (PRK00132)</b> Ribosomal_S9 (pfam00380)→                                                                                                       |
| env-418 | Buccal_mucosa_LANL_C65077335      | + | 342     | 419     | RNA→ hypo→                                                                                                                                                                                                    |
| env-419 | SRS019980_C3064054                | - | 118     | 41      | RNA→ hypo→                                                                                                                                                                                                    |
| env-420 | SRS019029_C3217778                | + | 42      | 119     | RNA→ hypo→ <b>rplM (PRK09216)</b> Ribosomal_L13 (pfam00572)→                                                                                                                                                  |
| env-421 | SRS024087_C3239609                | + | 108     | 185     | RNA→                                                                                                                                                                                                          |
| env-422 | SRS014476_C3433381                | + | 868     | 945     | RNA→                                                                                                                                                                                                          |
| env-423 | Subgingival_plaque_LANL_C11098963 | - | 118     | 41      | RNA→ hypo→                                                                                                                                                                                                    |
| env-424 | SRS024649_LANL_scaffold_18754     | + | 580     | 657     | RNA→                                                                                                                                                                                                          |
| Psp-8-1 | NZ_AZHT01000177.1                 | + | 6805    | 6883    | RNA→ <b>rplM (PRK09216)</b> Ribosomal_L13 (pfam00572)→ <b>rpsI (PRK00132)</b> Ribosomal_S9 (pfam00380)→                                                                                                       |
| env-425 | SRS019219_WUGC_scaffold_64631     | - | 18808   | 18730   | RNA→ <b>rplM (PRK09216)</b> Ribosomal_L13 (pfam00572)→ <b>rpsI (PRK00132)</b> Ribosomal_S9 (pfam00380)→                                                                                                       |
| env-426 | SRS014271_C2786805                | - | 121     | 43      | RNA→ hypo→                                                                                                                                                                                                    |
| env-427 | SRS024318_LANL_scaffold_76469     | + | 3580    | 3658    | RNA→                                                                                                                                                                                                          |
| env-428 | SRS062544_C2827308                | - | 121     | 43      | RNA→ hypo→                                                                                                                                                                                                    |
| env-429 | SRS017120_Baylor_scaffold_66317   | - | 655     | 577     | RNA→ <b>rplM (PRK09216)</b> Ribosomal_L13 (pfam00572)→                                                                                                                                                        |
| env-430 | SRS042643_WUGC_scaffold_1740      | - | 1427    | 1349    | RNA→ <b>rplM (PRK09216)</b> Ribosomal_L13 (pfam00572)→ <b>rpsI (PRK00132)</b> Ribosomal_S9 (pfam00380)→                                                                                                       |
| env-431 | SRS018739_WUGC_scaffold_55643     | + | 229     | 307     | RNA→ <b>rplM (PRK09216)</b> Ribosomal_L13 (pfam00572)→                                                                                                                                                        |
| env-432 | SRS050244_LANL_scaffold_95751     | + | 228     | 306     | RNA→ <b>rplM (PRK09216)</b> Ribosomal_L13 (pfam00572)→ <b>rpsI (PRK00132)</b> Ribosomal_S9 (pfam00380)→                                                                                                       |
| env-433 | SRS019026_C1859658                | + | 229     | 307     | RNA→                                                                                                                                                                                                          |



|         |                                 |   |        |        |     |   |                                                                                    |   |
|---------|---------------------------------|---|--------|--------|-----|---|------------------------------------------------------------------------------------|---|
| env-434 | SRS044373_C2740995              | - | 121    | 43     | RNA | → | hypo                                                                               | → |
| env-435 | SRS021496_Baylor_scaffold.66287 | + | 228    | 306    | RNA | → | rplM (PRK09216)Ribosomal_L13 (pfam00572) → rpsI (PRK00132)Ribosomal_S9 (pfam00380) | → |
| env-436 | SRS023352_LANL_scaffold.79269   | - | 463    | 385    | RNA | → | rplM (PRK09216)Ribosomal_L13 (pfam00572) →                                         |   |
| env-437 | SRS022143_WUGC_scaffold.73957   | + | 77     | 155    | RNA | → | rplM (PRK09216)Ribosomal_L13 (pfam00572) → rpsI (PRK00132)Ribosomal_S9 (pfam00380) | → |
| env-438 | SRS015893_C2357989              | - | 655    | 577    | RNA | → | rplM (PRK09216)Ribosomal_L13 (pfam00572) →                                         |   |
| env-439 | SRS015057_WUGC_scaffold.71704   | + | 230    | 308    | RNA | → | rplM (PRK09216)Ribosomal_L13 (pfam00572) →                                         |   |
| env-440 | SRS024355_LANL_scaffold.106705  | - | 2853   | 2775   | RNA | → | rplM (PRK09216)Ribosomal_L13 (pfam00572) → rpsI (PRK00132)Ribosomal_S9 (pfam00380) | → |
| env-441 | SRS058053_C5276896              | - | 119    | 41     | RNA | → |                                                                                    |   |
| env-442 | SRS023595_C6791388              | - | 141    | 63     | RNA | → | hypo                                                                               | → |
| env-443 | SRS047219_C2204013              | + | 361    | 439    | RNA | → |                                                                                    |   |
| Pou-1-1 | NZ_JH114217.1                   | + | 161819 | 161897 | RNA | → | rplM (PRK09216)Ribosomal_L13 (pfam00572) → rpsI (PRK00132)Ribosomal_S9 (pfam00380) | → |
| env-444 | SRS019980_C2940732              | + | 377    | 455    | RNA | → |                                                                                    |   |
| env-445 | SRS022536_LANL_scaffold.97402   | - | 1401   | 1323   | RNA | → | rplM (PRK09216)Ribosomal_L13 (pfam00572) → rpsI (PRK00132)Ribosomal_S9 (pfam00380) | → |
| env-446 | SRS018591_C1244473              | - | 270    | 192    | RNA | → | rplM (PRK09216) →                                                                  |   |
| env-447 | SRS063999_LANL_scaffold.89325   | + | 324    | 402    | RNA | → | rplM (PRK09216)Ribosomal_L13 (pfam00572) → rpsI (PRK00132)Ribosomal_S9 (pfam00380) | → |
| Pou-2-1 | NZ_BAJQ01000079.1               | - | 3607   | 3529   | RNA | → | rplM (PRK09216)Ribosomal_L13 (pfam00572) → rpsI (PRK00132)Ribosomal_S9 (pfam00380) | → |
| env-448 | AUXO010375897.1                 | + | 341    | 415    | RNA | → | rplM (PRK09216)Ribosomal_L13 (pfam00572) → rpsI (PRK00132)Ribosomal_S9 (pfam00380) | → |
| env-449 | SRS063603_C4098342              | + | 290    | 366    | RNA | → |                                                                                    |   |
| Pba-2-1 | NZ_AWEY01000020.1               | - | 92342  | 92266  | RNA | → | rplM (PRK09216)Ribosomal_L13 (pfam00572) → rpsI (PRK00132)Ribosomal_S9 (pfam00380) | → |
| Pba-1-1 | NZ_AUFQ01000002.1               | - | 90788  | 90712  | RNA | → | rplM (PRK09216)Ribosomal_L13 (pfam00572) → rpsI (PRK00132)Ribosomal_S9 (pfam00380) | → |
| Pba-1-2 | NZ_BAJF01000002.1               | + | 155272 | 155348 | RNA | → | rplM (PRK09216)Ribosomal_L13 (pfam00572) → rpsI (PRK00132)Ribosomal_S9 (pfam00380) | → |
| env-450 | SRS049389_C4455900              | + | 102    | 178    | RNA | → |                                                                                    |   |
| Pde-2-1 | NZ_BAKG01000016.1               | + | 37012  | 37087  | RNA | → | rplM (PRK09216)Ribosomal_L13 (pfam00572) → rpsI (PRK00132)Ribosomal_S9 (pfam00380) | → |
| Pbe-1-1 | NZ_GG704782.1                   | + | 371273 | 371346 | RNA | → | rplM (PRK09216)Ribosomal_L13 (pfam00572) → rpsI (PRK00132)Ribosomal_S9 (pfam00380) | → |
| env-451 | AUXO016035411.1                 | - | 430    | 357    | RNA | → | rplM (PRK09216)Ribosomal_L13 (pfam00572) →                                         |   |
| env-452 | AUXO017177372.1                 | + | 741    | 814    | RNA | → | rplM (PRK09216)Ribosomal_L13 (pfam00572) → rpsI (PRK00132)Ribosomal_S9 (pfam00380) | → |
| env-453 | AUXO011185619.1                 | + | 157    | 231    | RNA | → | rplM (PRK09216)Ribosomal_L13 (pfam00572) → rpsI (PRK00132)Ribosomal_S9 (pfam00380) | → |
| env-454 | SRS022725_LANL_scaffold.110518  | - | 1243   | 1167   | RNA | → | rplM (PRK09216)Ribosomal_L13 (pfam00572) → rpsI (PRK00132)Ribosomal_S9 (pfam00380) | → |
| env-455 | SRS047634_LANL_scaffold.138961  | - | 948    | 872    | RNA | → | rplM (PRK09216)Ribosomal_L13 (pfam00572) → rpsI (PRK00132)Ribosomal_S9 (pfam00380) | → |
| env-456 | SRS063603_LANL_scaffold.20726   | + | 2347   | 2423   | RNA | → | rplM (PRK09216)Ribosomal_L13 (pfam00572) → rpsI (PRK00132)Ribosomal_S9 (pfam00380) | → |
| env-457 | SRS058808_LANL_scaffold.70845   | - | 2078   | 2005   | RNA | → | rplM (PRK09216)Ribosomal_L13 (pfam00572) → rpsI (PRK00132)Ribosomal_S9 (pfam00380) | → |
| env-458 | SRS022602_Baylor_scaffold.3137  | + | 97     | 171    | RNA | → | rplM (PRK09216)Ribosomal_L13 (pfam00572) →                                         |   |
| env-459 | SRS013252_Baylor_scaffold.54444 | - | 7007   | 6933   | RNA | → | rplM (PRK09216)Ribosomal_L13 (pfam00572) → rpsI (PRK00132)Ribosomal_S9 (pfam00380) | → |
| env-460 | SRS017511_C3369784              | - | 87     | 13     | RNA | → | hypo                                                                               | → |
| env-461 | SRS063603_LANL_scaffold.102327  | + | 763    | 837    | RNA | → |                                                                                    |   |
| Psa-1-1 | NZ_KB290984.1                   | - | 62870  | 62796  | RNA | → | rplM (PRK09216)Ribosomal_L13 (pfam00572) → rpsI (PRK00132)Ribosomal_S9 (pfam00380) | → |
| env-462 | SRS049268_C4307889              | - | 590    | 516    | RNA | → | rplM (PRK09216)Ribosomal_L13 (pfam00572) →                                         |   |
| env-463 | SRS017227_C5254572              | - | 533    | 459    | RNA | → | rplM (PRK09216)Ribosomal_L13 (pfam00572) →                                         |   |
| env-464 | SRS018665_C3785311              | + | 95     | 169    | RNA | → | rplM (PRK09216)Ribosomal_L13 (pfam00572) → rpsI (PRK00132)Ribosomal_S9 (pfam00380) | → |
| env-465 | SRS051941_C3920117              | - | 311    | 237    | RNA | → | rplM (PRK09216)Ribosomal_L13 (pfam00572) →                                         |   |
| env-466 | HCF12C.28379                    | - | 230    | 155    | RNA | → | hypo                                                                               | → |
| env-467 | 08.07_GOS_DNA_C8001741.1        | + | 143    | 218    | RNA | → | rplM (PRK09216)Ribosomal_L13 (pfam00572) →                                         |   |
| env-468 | AUXO013741021.1                 | + | 250    | 324    | RNA | → | hypo                                                                               | → |
| env-469 | AUXO016321942.1                 | + | 109    | 183    | RNA | → | rplM (PRK09216)Ribosomal_L13 (pfam00572) → rpsI (PRK00132)Ribosomal_S9 (pfam00380) | → |
| env-470 | AUXO016352636.1                 | + | 21     | 94     | RNA | → | rplM (PRK09216)Ribosomal_L13 (pfam00572) → rpsI (PRK00132)Ribosomal_S9 (pfam00380) | → |
| Ppa-3-1 | NZ_BAJH01000014.1               | + | 85099  | 85176  | RNA | → | rplM (PRK09216)Ribosomal_L13 (pfam00572) → rpsI (PRK00132)Ribosomal_S9 (pfam00380) | → |
| Ppa-2-1 | NZ_KB890632.1                   | + | 85379  | 85456  | RNA | → | rplM (PRK09216)Ribosomal_L13 (pfam00572) → rpsI (PRK00132)Ribosomal_S9 (pfam00380) | → |
| env-471 | 2205195008                      | + | 38     | 115    | RNA | → |                                                                                    |   |
| env-472 | 2157459302                      | + | 38     | 115    | RNA | → |                                                                                    |   |
| env-473 | JGI20225J20221_1004075          | + | 804    | 881    | RNA | → | rplM (PRK09216)Ribosomal_L13 (pfam00572) → rpsI (PRK00132)Ribosomal_S9 (pfam00380) | → |
| env-474 | BMHB3a_c149604                  | - | 2595   | 2518   | RNA | → | rplM (PRK09216)Ribosomal_L13 (pfam00572) → rpsI (PRK00132)Ribosomal_S9 (pfam00380) | → |
| env-475 | JGI20225J20221_1000003          | - | 388531 | 388454 | RNA | → | rplM (PRK09216)Ribosomal_L13 (pfam00572) → rpsI (PRK00132)Ribosomal_S9 (pfam00380) | → |

|         |                                 |   |        |        |       |                                                                                                                                                                              |
|---------|---------------------------------|---|--------|--------|-------|------------------------------------------------------------------------------------------------------------------------------------------------------------------------------|
| env-476 | BMHBC.68715                     | + | 149    | 226    | RNA → | rplM (PRK09216)Ribosomal_L13 (pfam00572) → rpsI (PRK00132)Ribosomal_S9 (pfam00380) →                                                                                         |
| env-477 | BMHBC.2.1802482                 | + | 57     | 134    | RNA → |                                                                                                                                                                              |
| env-478 | BMHBC.2.3001399                 | + | 57     | 134    | RNA → |                                                                                                                                                                              |
| env-479 | BMHBC.2.2370598                 | + | 57     | 134    | RNA → |                                                                                                                                                                              |
| env-480 | BMHBC.2.1178038                 | + | 57     | 134    | RNA → |                                                                                                                                                                              |
| env-481 | BMHBC.2.612469                  | + | 57     | 134    | RNA → |                                                                                                                                                                              |
| env-482 | BMHBC.2.3578336                 | + | 57     | 134    | RNA → |                                                                                                                                                                              |
| env-483 | HCE12Call500_c0056283           | + | 177    | 251    | RNA → | rplM (PRK09216)Ribosomal_L13 (pfam00572) → rpsI (PRK00132)Ribosomal_S9 (pfam00380) →                                                                                         |
| env-484 | HCF12C.221933                   | - | 28484  | 28410  | RNA → | rplM (PRK09216)Ribosomal_L13 (pfam00572) → rpsI (PRK00132)Ribosomal_S9 (pfam00380) →                                                                                         |
| env-485 | HCF14C.11080                    | - | 2194   | 2120   | RNA → | rplM (PRK09216)Ribosomal_L13 (pfam00572) → rpsI (PRK00132)Ribosomal_S9 (pfam00380) →                                                                                         |
| env-486 | AUXO012434654.1                 | + | 366    | 290    | RNA → | rplM (PRK09216)RplM (COG0102)Ribosomal_L13 (cd00392) →                                                                                                                       |
| env-487 | AUXO011866134.1                 | + | 7      | 83     | RNA → | ← hypo                                                                                                                                                                       |
| env-488 | AUXO017757733.1                 | - | 1325   | 1250   | RNA → | rplM (PRK09216)Ribosomal_L13 (pfam00572) → rpsI (PRK00132)Ribosomal_S9 (pfam00380) →                                                                                         |
| env-489 | AUXO011774349.1                 | - | 771    | 700    | RNA → | rplM (PRK09216)Ribosomal_L13 (pfam00572) → rpsI (PRK00132)Ribosomal_S9 (pfam00380) →                                                                                         |
| env-490 | SRS013542_LANL_scaffold_1766    | - | 69128  | 69055  | RNA → | rplM (PRK09216)Ribosomal_L13 (pfam00572) → rpsI (PRK00132)Ribosomal_S9 (pfam00380) →                                                                                         |
| env-491 | SRS023604_Baylor_scaffold_50    | + | 320    | 393    | RNA → | rplM (PRK09216)Ribosomal_L13 (pfam00572) → rpsI (PRK00132)Ribosomal_S9 (pfam00380) →                                                                                         |
| env-492 | SRS017497_Baylor_scaffold_193   | + | 91994  | 91921  | RNA → | rplM (PRK09216)Ribosomal_L13 (pfam00572) → rpsI (PRK00132)Ribosomal_S9 (pfam00380) →                                                                                         |
| env-493 | SRS023468_LANL_scaffold_8569    | - | 176    | 249    | RNA → | rplM (PRK09216)Ribosomal_L13 (pfam00572) → rpsI (PRK00132)Ribosomal_S9 (pfam00380) →                                                                                         |
| Pam-1-1 | NZ_ADFQ01000027.1               | + | 26891  | 26964  | RNA → | rplM (PRK09216)Ribosomal_L13 (pfam00572) → rplM (PRK09216)Ribosomal_L13 (pfam00572) →<br>rpsI (PRK00132)Ribosomal_S9 (pfam00380) → rpsI (PRK00132)Ribosomal_S9 (pfam00380) → |
| Pam-2-1 | NZ_JRNU01000014.1               | - | 45509  | 45436  | RNA → | rplM (PRK09216)Ribosomal_L13 (pfam00572) → rpsI (PRK00132)Ribosomal_S9 (pfam00380) →                                                                                         |
| Pam-3-1 | NZ_KB905270.1                   | + | 27167  | 27240  | RNA → | rplM (PRK09216)Ribosomal_L13 (pfam00572) → rpsI (PRK00132)Ribosomal_S9 (pfam00380) →                                                                                         |
| Pam-4-1 | NZ_BAJP01000004.1               | - | 90359  | 90286  | RNA → | rplM (PRK09216)Ribosomal_L13 (pfam00572) → rpsI (PRK00132)Ribosomal_S9 (pfam00380) →                                                                                         |
| Pbi-1-1 | NZ_JUWN01000307.1               | + | 2136   | 2209   | RNA → | rplM (PRK09216)Ribosomal_L13 (pfam00572) → rpsI (PRK00132)Ribosomal_S9 (pfam00380) →                                                                                         |
| Pbi-6-1 | NZ_ADFO01000036.1               | - | 4358   | 4285   | RNA → | rplM (PRK09216)Ribosomal_L13 (pfam00572) → rplM (PRK09216)Ribosomal_L13 (pfam00572) →<br>rpsI (PRK00132)Ribosomal_S9 (pfam00380) → rpsI (PRK00132)Ribosomal_S9 (pfam00380) → |
| Pbi-5-1 | NZ_JH660660.1                   | + | 893597 | 893670 | RNA → | rplM (PRK09216)Ribosomal_L13 (pfam00572) → rpsI (PRK00132)Ribosomal_S9 (pfam00380) →                                                                                         |
| Pbi-2-1 | NZ_JRNF01000004.1               | + | 30225  | 30298  | RNA → | rplM (PRK09216)Ribosomal_L13 (pfam00572) → rpsI (PRK00132)Ribosomal_S9 (pfam00380) →                                                                                         |
| Pbi-4-1 | NZ_JRNM01000029.1               | + | 14173  | 14246  | RNA → | rplM (PRK09216)Ribosomal_L13 (pfam00572) → rpsI (PRK00132)Ribosomal_S9 (pfam00380) →                                                                                         |
| Pbi-3-1 | NZ_JRNQ01000001.1               | - | 38223  | 38150  | RNA → | rplM (PRK09216)Ribosomal_L13 (pfam00572) → rpsI (PRK00132)Ribosomal_S9 (pfam00380) →                                                                                         |
| Pve-1-1 | NZ_KB898330.1                   | + | 50120  | 50193  | RNA → | rplM (PRK09216)Ribosomal_L13 (pfam00572) → rpsI (PRK00132)Ribosomal_S9 (pfam00380) →                                                                                         |
| Pve-2-1 | NZ_BAIP01000005.1               | + | 49830  | 49903  | RNA → | rplM (PRK09216)Ribosomal_L13 (pfam00572) → rpsI (PRK00132)Ribosomal_S9 (pfam00380) →                                                                                         |
| Pve-3-1 | NZ_GG698713.1                   | - | 155542 | 155469 | RNA → | rplM (PRK09216)Ribosomal_L13 (pfam00572) → rpsI (PRK00132)Ribosomal_S9 (pfam00380) →                                                                                         |
| env-494 | SRS013836_C4770317              | - | 112    | 39     | RNA → | hypo →                                                                                                                                                                       |
| env-495 | SRS014689_WUGC_scaffold_10524   | - | 158    | 84     | RNA → | hypo →                                                                                                                                                                       |
| env-496 | SRS019045_WUGC_scaffold_55373   | + | 7079   | 7153   | RNA → |                                                                                                                                                                              |
| env-497 | SRS064329_LANL_scaffold_12626   | + | 135    | 209    | RNA → | rplM (PRK09216)Ribosomal_L13 (pfam00572) →                                                                                                                                   |
| Psc-1-1 | NZ_BAKP01000004.1               | + | 58256  | 58330  | RNA → | rplM (PRK09216)Ribosomal_L13 (pfam00572) → rpsI (PRK00132)Ribosomal_S9 (pfam00380) →                                                                                         |
| env-498 | SRS017808_Baylor_scaffold_59118 | + | 835    | 909    | RNA → |                                                                                                                                                                              |
| env-499 | SRS044373_WUGC_scaffold_55808   | + | 931    | 1005   | RNA → |                                                                                                                                                                              |
| env-500 | SRS053603_LANL_scaffold_86116   | + | 1113   | 1187   | RNA → |                                                                                                                                                                              |
| Psp-6-1 | NZ_KI259601.1                   | + | 30175  | 30249  | RNA → | rplM (PRK09216)Ribosomal_L13 (pfam00572) → rpsI (PRK00132)Ribosomal_S9 (pfam00380) →                                                                                         |
| Pme-3-1 | NZ_JRNS01000294.1               | + | 180    | 255    | RNA → | rplM (PRK09216)Ribosomal_L13 (pfam00572) → rpsI (PRK00132)Ribosomal_S9 (pfam00380) →                                                                                         |
| env-501 | SRS024318_LANL_scaffold_11533   | - | 620    | 547    | RNA → | rplM (PRK09216)Ribosomal_L13 (pfam00572) → rpsI (PRK00132)Ribosomal_S9 (pfam00380) →                                                                                         |
| env-502 | SRS017439_Baylor_scaffold_50412 | - | 108    | 36     | RNA → |                                                                                                                                                                              |
| env-503 | SRS011086_WUGC_scaffold_40282   | - | 108    | 36     | RNA → | hypo →                                                                                                                                                                       |
| env-504 | SRS014124_WUGC_scaffold_14407   | - | 802    | 730    | RNA → | rplM (PRK09216)Ribosomal_L13 (pfam00572) → rplM (PRK09216)Ribosomal_L13 (pfam00572) →<br>rpsI (PRK00132)Ribosomal_S9 (pfam00380) →                                           |
| env-505 | SRS017533_Baylor_scaffold_7923  | + | 285    | 357    | RNA → | rplM (PRK09216)Ribosomal_L13 (pfam00572) →                                                                                                                                   |
| env-506 | SRS049147_LANL_scaffold_62005   | + | 1217   | 1289   | RNA → |                                                                                                                                                                              |
| Phi-1-1 | NZ_JH376764.1                   | + | 326001 | 326073 | RNA → | hypo → rplM (PRK09216)Ribosomal_L13 (pfam00572) → rpsI (PRK00132)Ribosomal_S9 (pfam00380) →                                                                                  |
| env-507 | SRS017076_C2635852              | + | 287    | 359    | RNA → | hypo →                                                                                                                                                                       |
| Phi-2-1 | NZ_BA_JX01000005.1              | - | 144658 | 144586 | RNA → | rplM (PRK09216)Ribosomal_L13 (pfam00572) → rpsI (PRK00132)Ribosomal_S9 (pfam00380) →                                                                                         |

|          |                                 |   |        |        |                                                                                                                                                                                                               |
|----------|---------------------------------|---|--------|--------|---------------------------------------------------------------------------------------------------------------------------------------------------------------------------------------------------------------|
| env-508  | SRS013234_Baylor_scaffold_28796 | - | 148    | 76     | RNA→                                                                                                                                                                                                          |
| env-509  | SRS024637_LANL_scaffold_306     | + | 443    | 515    | RNA→ <b>rplM (PRK09216)</b> Ribosomal_L13 (pfam00572)→ <b>rpsI (PRK00132)</b> Ribosomal_S9 (pfam00380)→                                                                                                       |
| Phi-2-2  | NZ_JRNJ01000036.1               | - | 45722  | 45650  | RNA→ <b>rplM (PRK09216)</b> Ribosomal_L13 (pfam00572)→ <b>rpsI (PRK00132)</b> Ribosomal_S9 (pfam00380)→                                                                                                       |
| env-510  | SRS014573_WUGC_scaffold_34708   | - | 1134   | 1060   | RNA→ <b>rplM (PRK09216)</b> Ribosomal_L13 (pfam00572)→ <b>rpsI (PRK00132)</b> Ribosomal_S9 (pfam00380)→                                                                                                       |
| env-511  | SRS021496_Baylor_scaffold_22917 | + | 96     | 170    | RNA→ <b>rplM (PRK09216)</b> Ribosomal_L13 (pfam00572)→                                                                                                                                                        |
| env-512  | SRS015644_WUGC_scaffold_31522   | - | 876    | 802    | RNA→ <b>rplM (PRK09216)</b> Ribosomal_L13 (pfam00572)→ <b>rpsI (PRK00132)</b> Ribosomal_S9 (pfam00380)→                                                                                                       |
| env-513  | SRS042131_C2183549              | + | 266    | 340    | RNA→                                                                                                                                                                                                          |
| env-514  | SRS022719_LANL_scaffold_14486   | + | 176535 | 176609 | RNA→ <b>rplM (PRK09216)</b> Ribosomal_L13 (pfam00572)→ <b>rpsI (PRK00132)</b> Ribosomal_S9 (pfam00380)→                                                                                                       |
| env-515  | SRS044662_LANL_scaffold_9271    | + | 199524 | 199598 | RNA→ <b>rplM (PRK09216)</b> Ribosomal_L13 (pfam00572)→ <b>rpsI (PRK00132)</b> Ribosomal_S9 (pfam00380)→                                                                                                       |
| env-516  | SRS013879_C2814589              | - | 110    | 36     | RNA→                                                                                                                                                                                                          |
| env-517  | SRS018145_Baylor_scaffold_16176 | - | 11602  | 11528  | RNA→ <b>rplM (PRK09216)</b> Ribosomal_L13 (pfam00572)→ <b>rpsI (PRK00132)</b> Ribosomal_S9 (pfam00380)→                                                                                                       |
| env-518  | SRS057692_LANL_scaffold_51493   | + | 229    | 303    | RNA→                                                                                                                                                                                                          |
| env-519  | SRS016002_WUGC_scaffold_30040   | + | 6147   | 6221   | RNA→                                                                                                                                                                                                          |
| Psp-5-1  | NZ_JH114141.1                   | + | 226443 | 226517 | RNA→ <b>rplM (PRK09216)</b> Ribosomal_L13 (pfam00572)→ <b>rpsI (PRK00132)</b> Ribosomal_S9 (pfam00380)→                                                                                                       |
| env-520  | SRS017713_Baylor_scaffold_12488 | - | 158    | 84     | RNA→ hypo→                                                                                                                                                                                                    |
| env-521  | SRS056622_LANL_scaffold_17923   | - | 158    | 84     | RNA→ hypo→                                                                                                                                                                                                    |
| env-522  | SRS022625_Baylor_scaffold_4609  | - | 158    | 84     | RNA→ hypo→                                                                                                                                                                                                    |
| env-523  | SRS016037_WUGC_scaffold_34392   | + | 1842   | 1916   | RNA→ <b>rplM (PRK09216)</b> Ribosomal_L13 (pfam00572)→ <b>rpsI (PRK00132)</b> Ribosomal_S9 (pfam00380)→                                                                                                       |
| env-524  | SRS054687_LANL_scaffold_40466   | - | 149    | 75     | RNA→ hypo→                                                                                                                                                                                                    |
| env-525  | SRS016569_Baylor_scaffold_12365 | + | 198    | 272    | RNA→ <b>rplM (PRK09216)</b> Ribosomal_L13 (pfam00572)→ <b>rplM (PRK09216)</b> Ribosomal_L13 (pfam00572)→<br><b>rpsI (PRK00132)</b> Ribosomal_S9 (pfam00380)→                                                  |
| env-526  | SRS043663_LANL_scaffold_8456    | + | 196    | 270    | RNA→ <b>rplM (PRK09216)</b> Ribosomal_L13 (pfam00572)→                                                                                                                                                        |
| env-527  | SRS011086_WUGC_scaffold_9083    | - | 2222   | 2148   | RNA→ <b>rplM (PRK09216)</b> Ribosomal_L13 (pfam00572)→ <b>rpsI (PRK00132)</b> Ribosomal_S9 (pfam00380)→                                                                                                       |
| env-528  | SRS024441_LANL_scaffold_8252    | - | 965    | 891    | RNA→ <b>rplM (PRK09216)</b> Ribosomal_L13 (pfam00572)→ <b>rpsI (PRK00132)</b> Ribosomal_S9 (pfam00380)→                                                                                                       |
| env-529  | SRS045127_LANL_scaffold_25864   | + | 4      | 78     | RNA→ <b>rplM (PRK09216)</b> Ribosomal_L13 (pfam00572)→                                                                                                                                                        |
| env-530  | SRS052227_C2913848              | - | 999    | 925    | RNA→ <b>rplM (PRK09216)</b> Ribosomal_L13 (pfam00572)→ <b>rpsI (PRK00132)</b> Ribosomal_S9 (pfam00380)→                                                                                                       |
| Psp-10-1 | NZ_JACD01000007.1               | + | 195948 | 196022 | RNA→ <b>rplM (PRK09216)</b> Ribosomal_L13 (pfam00572)→ <b>rpsI (PRK00132)</b> Ribosomal_S9 (pfam00380)→                                                                                                       |
| env-531  | SRS018591_WUGC_scaffold_24424   | + | 1589   | 1663   | RNA→                                                                                                                                                                                                          |
| env-532  | SRS013947_C1601091              | - | 178    | 104    | RNA→ hypo→                                                                                                                                                                                                    |
| env-533  | SRS019120_C1333688              | + | 439    | 513    | RNA→                                                                                                                                                                                                          |
| env-534  | SRS017209_Baylor_scaffold_33086 | + | 1225   | 1299   | RNA→                                                                                                                                                                                                          |
| env-535  | SRS018394_C4052969              | + | 130    | 204    | RNA→ <b>rplM (PRK09216)</b> Ribosomal_L13 (pfam00572)→ <b>rpsI (PRK00132)</b> Ribosomal_S9 (pfam00380)→                                                                                                       |
| env-536  | SRS055378_LANL_scaffold_77236   | - | 397    | 323    | RNA→ <b>rplM (PRK09216)</b> Ribosomal_L13 (pfam00572)→                                                                                                                                                        |
| env-537  | SRS013164_Baylor_scaffold_24536 | - | 1111   | 1037   | RNA→ <b>rplM (PRK09216)</b> Ribosomal_L13 (pfam00572)→ <b>rpsI (PRK00132)</b> Ribosomal_S9 (pfam00380)→                                                                                                       |
| env-538  | SRS011243_Baylor_scaffold_14041 | + | 7051   | 7125   | RNA→ <b>rplM (PRK09216)</b> Ribosomal_L13 (pfam00572)→ <b>rpsI (PRK00132)</b> Ribosomal_S9 (pfam00380)→                                                                                                       |
| env-539  | SRS011247_C1360241              | + | 440    | 514    | RNA→ <b>rplM (PRK09216)</b> Ribosomal_L13 (pfam00572)→                                                                                                                                                        |
| env-540  | SRS013502_Baylor_scaffold_7651  | - | 3320   | 3246   | RNA→ <b>rplM (PRK09216)</b> Ribosomal_L13 (pfam00572)→ <b>rpsI (PRK00132)</b> Ribosomal_S9 (pfam00380)→                                                                                                       |
| env-541  | SRS013879_WUGC_scaffold_9024    | - | 172    | 98     | RNA→                                                                                                                                                                                                          |
| env-542  | SRS014124_WUGC_scaffold_11710   | - | 948    | 874    | RNA→ <b>rplM (PRK09216)</b> Ribosomal_L13 (pfam00572)→ <b>rplM (PRK09216)</b> Ribosomal_L13 (pfam00572)→<br><b>rpsI (PRK00132)</b> Ribosomal_S9 (pfam00380)→ <b>rpsI (PRK00132)</b> Ribosomal_S9 (pfam00380)→ |
| env-543  | SRS014689_WUGC_scaffold_10523   | - | 158    | 84     | RNA→                                                                                                                                                                                                          |
| env-544  | SRS016501_C1543222              | + | 266    | 340    | RNA→ <b>rplM (PRK09216)</b> <b>RplM (COG0102)</b> →                                                                                                                                                           |
| env-545  | SRS019022_WUGC_scaffold_10171   | - | 190    | 116    | RNA→                                                                                                                                                                                                          |
| env-546  | SRS019045_WUGC_scaffold_18044   | + | 6417   | 6491   | RNA→                                                                                                                                                                                                          |
| env-547  | SRS023557_Baylor_scaffold_343   | - | 20477  | 20403  | RNA→ <b>rplM (PRK09216)</b> Ribosomal_L13 (pfam00572)→ <b>rpsI (PRK00132)</b> Ribosomal_S9 (pfam00380)→                                                                                                       |
| env-548  | SRS024580_LANL_scaffold_5027    | + | 1876   | 1950   | RNA→ <b>rplM (PRK09216)</b> Ribosomal_L13 (pfam00572)→ <b>rpsI (PRK00132)</b> Ribosomal_S9 (pfam00380)→                                                                                                       |
| env-549  | SRS057355_LANL_scaffold_16577   | - | 735    | 661    | RNA→ <b>rplM (PRK09216)</b> Ribosomal_L13 (pfam00572)→ <b>rpsI (PRK00132)</b> Ribosomal_S9 (pfam00380)→                                                                                                       |
| env-550  | SRS063288_LANL_scaffold_61854   | + | 267    | 341    | RNA→ <b>rplM (PRK09216)</b> Ribosomal_L13 (pfam00572)→ <b>rpsI (PRK00132)</b> Ribosomal_S9 (pfam00380)→                                                                                                       |
| env-551  | SRS077736_LANL_scaffold_11170   | - | 5468   | 5394   | RNA→ <b>rplM (PRK09216)</b> Ribosomal_L13 (pfam00572)→ <b>rpsI (PRK00132)</b> Ribosomal_S9 (pfam00380)→                                                                                                       |
| Pme-2-1  | NZ_GG740010.1                   | + | 211066 | 211140 | RNA→ <b>rplM (PRK09216)</b> Ribosomal_L13 (pfam00572)→ <b>rplM (PRK09216)</b> Ribosomal_L13 (pfam00572)→<br><b>rpsI (PRK00132)</b> Ribosomal_S9 (pfam00380)→ <b>rpsI (PRK00132)</b> Ribosomal_S9 (pfam00380)→ |
| Pme-1-1  | NC_014370.1                     | - | 173052 | 172978 | RNA→ <b>rplM (PRK09216)</b> Ribosomal_L13 (pfam00572)→ <b>rpsI (PRK00132)</b> Ribosomal_S9 (pfam00380)→                                                                                                       |
| env-552  | SRS024447_LANL_scaffold_5458    | - | 189    | 115    | RNA→ hypo→                                                                                                                                                                                                    |



|          |                                      |   |        |        |                                                                                                                                                                                 |
|----------|--------------------------------------|---|--------|--------|---------------------------------------------------------------------------------------------------------------------------------------------------------------------------------|
| env-553  | SRS018739_WUGC_scaffold_1229         | - | 110    | 36     | RNA → hypo →                                                                                                                                                                    |
| env-554  | SRS021954_Baylor_scaffold_773        | + | 402    | 476    | RNA → rplM (PRK09216)Ribosomal_L13 (pfam00572) →                                                                                                                                |
| env-555  | SRS020858_C742461                    | + | 146    | 220    | RNA →                                                                                                                                                                           |
| env-556  | SRS055426_LANL_scaffold_45579        | - | 373    | 299    | RNA → rplM (PRK09216)Ribosomal_L13 (pfam00572) →                                                                                                                                |
| env-557  | SRS013818_Baylor_scaffold_15170      | + | 1030   | 1104   | RNA → rplM (PRK09216)Ribosomal_L13 (pfam00572) →                                                                                                                                |
| env-558  | SRS022530_LANL_scaffold_8517         | - | 2577   | 2503   | RNA → rplM (PRK09216)Ribosomal_L13 (pfam00572) → rpsI (PRK00132)Ribosomal_S9 (pfam00380) →                                                                                      |
| env-559  | SRS018969_WUGC_scaffold_48352        | - | 1834   | 1760   | RNA → rplM (PRK09216)Ribosomal_L13 (pfam00572) → rpsI (PRK00132)Ribosomal_S9 (pfam00380) →                                                                                      |
| env-560  | SRS019029_C3094948                   | + | 207    | 281    | RNA →                                                                                                                                                                           |
| env-561  | SRS057539_LANL_scaffold_11258        | + | 1634   | 1708   | RNA → rplM (PRK09216)Ribosomal_L13 (pfam00572) →                                                                                                                                |
| Pfu-1-1  | NZ_CP012074.1                        | - | 335584 | 335511 | RNA → rplM (PRK09216)Ribosomal_L13 (pfam00572) → rpsI (PRK00132)Ribosomal_S9 (pfam00380) →                                                                                      |
| Psp-24-1 | NZ_AJIN01000058.1                    | + | 75456  | 75530  | RNA → rplM (PRK09216)Ribosomal_L13 (pfam00572) → rplM (PRK09216)Ribosomal_L13 (pfam00572) → rpsI (PRK00132)Ribosomal_S9 (pfam00380) → rpsI (PRK00132)Ribosomal_S9 (pfam00380) → |
| env-562  | SRS018357_Baylor_scaffold_53049      | + | 659    | 733    | RNA →                                                                                                                                                                           |
| env-563  | SRS044486_WUGC_scaffold_29347        | + | 207    | 281    | RNA →                                                                                                                                                                           |
| env-564  | SRS042643_WUGC_scaffold_65829        | + | 2043   | 2117   | RNA →                                                                                                                                                                           |
| Pde-3-1  | NZ_AEXO01000095.1                    | + | 287046 | 287120 | RNA → rplM (PRK09216)Ribosomal_L13 (pfam00572) → rplM (PRK09216)Ribosomal_L13 (pfam00572) → rpsI (PRK00132)Ribosomal_S9 (pfam00380) → rpsI (PRK00132)Ribosomal_S9 (pfam00380) → |
| env-565  | SRS017691_C5408377                   | + | 1907   | 1981   | RNA →                                                                                                                                                                           |
| Pde-4-1  | NZ_JRNO01000001.1                    | - | 3358   | 3284   | RNA → rplM (PRK09216)Ribosomal_L13 (pfam00572) → rpsI (PRK00132)Ribosomal_S9 (pfam00380) →                                                                                      |
| Pde-5-1  | NZ_ATWK01000001.1                    | + | 151366 | 151440 | RNA → rplM (PRK09216)Ribosomal_L13 (pfam00572) → rpsI (PRK00132)Ribosomal_S9 (pfam00380) →                                                                                      |
| Pde-5-2  | NZ_BAJG01000001.1                    | + | 303181 | 303255 | RNA → rplM (PRK09216)Ribosomal_L13 (pfam00572) → rpsI (PRK00132)Ribosomal_S9 (pfam00380) →                                                                                      |
| env-566  | SRS013836_Baylor_scaffold_11239      | + | 579    | 653    | RNA →                                                                                                                                                                           |
| env-567  | SRS011255_Baylor_scaffold_46592      | + | 1416   | 1490   | RNA →                                                                                                                                                                           |
| Pde-6-1  | NC_015311.1                          | + | 832827 | 832901 | RNA → rplM (PRK09216)Ribosomal_L13 (pfam00572) → rpsI (PRK00132)Ribosomal_S9 (pfam00380) →                                                                                      |
| env-568  | SRS013836_C4811161                   | - | 112    | 38     | RNA →                                                                                                                                                                           |
| env-569  | SRS019029_WUGC_scaffold_26302        | + | 226    | 300    | RNA →                                                                                                                                                                           |
| Pmu-1-1  | NZ_GL872283.1                        | + | 37707  | 37781  | RNA → rplM (PRK09216)Ribosomal_L13 (pfam00572) → rpsI (PRK00132)Ribosomal_S9 (pfam00380) →                                                                                      |
| env-570  | AUXO010614209.1                      | + | 217    | 289    | RNA →                                                                                                                                                                           |
| env-571  | Supragingival_plaque_LANL_C181911197 | - | 124    | 49     | RNA → hypo →                                                                                                                                                                    |
| env-572  | SRS018739_C3456198                   | - | 221    | 146    | RNA → hypo →                                                                                                                                                                    |
| env-573  | Supragingival_plaque_LANL_C182733701 | + | 533    | 608    | RNA →                                                                                                                                                                           |
| env-574  | MA40A_contig28992                    | - | 33539  | 33466  | RNA → rplM (PRK09216)Ribosomal_L13 (pfam00572) → rpsI (PRK00132)Ribosomal_S9 (pfam00380) →                                                                                      |
| env-575  | SRS023604_C759437                    | + | 77     | 149    | RNA → rplM (PRK09216)Ribosomal_L13 (pfam00572) →                                                                                                                                |
| env-576  | SRS023468_LANL_scaffold_9905         | + | 61199  | 61271  | RNA → rplM (PRK09216)Ribosomal_L13 (pfam00572) → rpsI (PRK00132)Ribosomal_S9 (pfam00380) →                                                                                      |
| Psp-22-1 | NZ_JRNC01000011.1                    | + | 61278  | 61350  | RNA → rplM (PRK09216)Ribosomal_L13 (pfam00572) → rpsI (PRK00132)Ribosomal_S9 (pfam00380) →                                                                                      |
| env-577  | RUMENNODE_143372.1                   | - | 3480   | 3407   | RNA → rplM (PRK09216)Ribosomal_L13 (pfam00572) → rpsI (PRK00132)Ribosomal_S9 (pfam00380) →                                                                                      |
| env-578  | SRS049318_LANL_scaffold_15105        | - | 3354   | 3278   | RNA → rplM (PRK09216)Ribosomal_L13 (pfam00572) → rpsI (PRK00132)Ribosomal_S9 (pfam00380) →                                                                                      |
| env-579  | SRS017691_C5027809                   | - | 118    | 42     | RNA → hypo →                                                                                                                                                                    |
| Pmi-3-1  | NZ_JH594521.1                        | - | 42001  | 41925  | RNA → rplM (PRK09216)Ribosomal_L13 (pfam00572) → rpsI (PRK00132)Ribosomal_S9 (pfam00380) →                                                                                      |
| Pmi-1-1  | NZ_KB892256.1                        | - | 41862  | 41786  | RNA → rplM (PRK09216)Ribosomal_L13 (pfam00572) → rpsI (PRK00132)Ribosomal_S9 (pfam00380) →                                                                                      |
| Pmi-2-1  | NZ_BAKH01000001.1                    | + | 67606  | 67682  | RNA → rplM (PRK09216)Ribosomal_L13 (pfam00572) → rpsI (PRK00132)Ribosomal_S9 (pfam00380) →                                                                                      |
| env-580  | SRS047634_LANL_scaffold_139898       | + | 902    | 978    | RNA → rplM (PRK09216)Ribosomal_L13 (pfam00572) → rpsI (PRK00132)Ribosomal_S9 (pfam00380) →                                                                                      |
| env-581  | SRS055378_C3881430                   | - | 175    | 99     | RNA → hypo →                                                                                                                                                                    |
| env-582  | SRS022602_Baylor_scaffold_67890      | - | 3320   | 3244   | RNA → rplM (PRK09216)Ribosomal_L13 (pfam00572) → rpsI (PRK00132)Ribosomal_S9 (pfam00380) →                                                                                      |
| Pin-1-1  | NC_017861.1                          | - | 192856 | 192781 | RNA → rplM (PRK09216)Ribosomal_L13 (pfam00572) → rpsI (PRK00132)Ribosomal_S9 (pfam00380) →                                                                                      |
| env-583  | SRS014692_WUGC_scaffold_15999        | + | 4242   | 4316   | RNA → rplM (PRK09216)Ribosomal_L13 (pfam00572) → rpsI (PRK00132)Ribosomal_S9 (pfam00380) →                                                                                      |
| env-584  | SRS014684_WUGC_scaffold_44181        | + | 3215   | 3289   | RNA →                                                                                                                                                                           |
| env-585  | SRS014689_WUGC_scaffold_31060        | + | 16578  | 16652  | RNA →                                                                                                                                                                           |
| env-586  | SRS019026_WUGC_scaffold_25915        | - | 1526   | 1452   | RNA → rplM (PRK09216)Ribosomal_L13 (pfam00572) → rpsI (PRK00132)Ribosomal_S9 (pfam00380) →                                                                                      |
| env-587  | SRS019027_C1975919                   | + | 1325   | 1399   | RNA →                                                                                                                                                                           |
| env-588  | SRS022530_LANL_scaffold_21668        | - | 23768  | 23694  | RNA → rplM (PRK09216)Ribosomal_L13 (pfam00572) → rpsI (PRK00132)Ribosomal_S9 (pfam00380) →                                                                                      |
| env-589  | SRS043663_C4103193                   | + | 3216   | 3290   | RNA →                                                                                                                                                                           |
| env-590  | SRS044373_WUGC_scaffold_63271        | + | 16814  | 16888  | RNA → rplM (PRK09216)Ribosomal_L13 (pfam00572) → rpsI (PRK00132)Ribosomal_S9 (pfam00380) →                                                                                      |



|         |                                   |   |       |       |       |                                            |                                           |
|---------|-----------------------------------|---|-------|-------|-------|--------------------------------------------|-------------------------------------------|
| env-591 | SRS048791.LANL_scaffold_39630     | - | 1512  | 1438  | RNA → | rplM (PRK09216)Ribosomal_L13 (pfam00572) → | rpsI (PRK00132)Ribosomal_S9 (pfam00380) → |
| env-592 | SRS047824.WUGC_scaffold_53533     | - | 614   | 540   | RNA → | rplM (PRK09216)Ribosomal_L13 (pfam00572) → |                                           |
| env-593 | SRS057205.LANL_scaffold_58665     | + | 670   | 744   | RNA → | rplM (PRK09216)RplM (COG0102) →            |                                           |
| env-594 | SRS012279.Baylor_scaffold_56590   | - | 3134  | 3060  | RNA → | rplM (PRK09216)Ribosomal_L13 (pfam00572) → | rpsI (PRK00132)Ribosomal_S9 (pfam00380) → |
| env-595 | SRS011306.Baylor_scaffold_89003   | - | 10148 | 10074 | RNA → | rplM (PRK09216)Ribosomal_L13 (pfam00572) → | rpsI (PRK00132)Ribosomal_S9 (pfam00380) → |
| env-596 | SRS075404.LANL_scaffold_64891     | + | 238   | 312   | RNA → |                                            |                                           |
| env-597 | SRS023352.LANL_scaffold_62464     | - | 47439 | 47365 | RNA → | rplM (PRK09216)Ribosomal_L13 (pfam00572) → | rpsI (PRK00132)Ribosomal_S9 (pfam00380) → |
| env-598 | SRS063603.C4102126                | + | 332   | 406   | RNA → |                                            |                                           |
| env-599 | SRS064329.C2725335                | + | 3215  | 3289  | RNA → |                                            |                                           |
| env-600 | SRS062878.LANL_scaffold_70775     | - | 8062  | 7988  | RNA → | rplM (PRK09216)Ribosomal_L13 (pfam00572) → | rpsI (PRK00132)Ribosomal_S9 (pfam00380) → |
| env-601 | Subgingival_plaque.LANL_C11028051 | + | 219   | 293   | RNA → |                                            |                                           |
| env-602 | SRS014691.C2755366                | + | 2883  | 2957  | RNA → |                                            |                                           |
| env-603 | SRS015272.C3490354                | + | 339   | 413   | RNA → |                                            |                                           |
| env-604 | SRS015644.WUGC_scaffold_48472     | + | 933   | 1007  | RNA → | rplM (PRK09216)Ribosomal_L13 (pfam00572) → | rpsI (PRK00132)Ribosomal_S9 (pfam00380) → |
| env-605 | SRS018357.Baylor_scaffold_17708   | - | 24023 | 23949 | RNA → | rplM (PRK09216)Ribosomal_L13 (pfam00572) → | rpsI (PRK00132)Ribosomal_S9 (pfam00380) → |
| env-606 | SRS019974.Baylor_scaffold_54950   | + | 3215  | 3289  | RNA → | rplM (PRK09216)Ribosomal_L13 (pfam00572) → | rpsI (PRK00132)Ribosomal_S9 (pfam00380) → |
| env-607 | SRS023617.Baylor_scaffold_30918   | + | 5850  | 5924  | RNA → | rplM (PRK09216)Ribosomal_L13 (pfam00572) → | rpsI (PRK00132)Ribosomal_S9 (pfam00380) → |
| env-608 | SRS024375.C2325854                | + | 138   | 212   | RNA → |                                            |                                           |
| env-609 | SRS042131.WUGC_scaffold_50435     | + | 3411  | 3485  | RNA → |                                            |                                           |
| env-610 | SRS047210.WUGC_scaffold_57327     | + | 9864  | 9938  | RNA → | rplM (PRK09216)Ribosomal_L13 (pfam00572) → | rpsI (PRK00132)Ribosomal_S9 (pfam00380) → |
| env-611 | SRS050244.LANL_scaffold_37949     | - | 1334  | 1260  | RNA → | rplM (PRK09216)Ribosomal_L13 (pfam00572) → | rpsI (PRK00132)Ribosomal_S9 (pfam00380) → |
| env-612 | SRS053603.LANL_scaffold_49200     | + | 16206 | 16280 | RNA → | rplM (PRK09216)Ribosomal_L13 (pfam00572) → | rpsI (PRK00132)Ribosomal_S9 (pfam00380) → |
| env-613 | SRS017076.C2680416                | + | 454   | 528   | RNA → |                                            |                                           |
| env-614 | SRS013946.C747973                 | - | 1186  | 1112  | RNA → | rplM (PRK09216)Ribosomal_L13 (pfam00572) → | rpsI (PRK00132)Ribosomal_S9 (pfam00380) → |
| env-615 | SRS014470.WUGC_scaffold_48816     | - | 9526  | 9452  | RNA → | rplM (PRK09216)Ribosomal_L13 (pfam00572) → | rpsI (PRK00132)Ribosomal_S9 (pfam00380) → |
| env-616 | SRS014573.C3755401                | + | 2926  | 3000  | RNA → |                                            |                                           |
| env-617 | SRS015038.WUGC_scaffold_38040     | + | 3215  | 3289  | RNA → |                                            |                                           |
| env-618 | SRS015057.WUGC_scaffold_8828      | + | 2155  | 2229  | RNA → | rplM (PRK09216)Ribosomal_L13 (pfam00572) → | rpsI (PRK00132)Ribosomal_S9 (pfam00380) → |
| env-619 | SRS015209.WUGC_scaffold_49105     | + | 45106 | 45180 | RNA → | rplM (PRK09216)Ribosomal_L13 (pfam00572) → | rpsI (PRK00132)Ribosomal_S9 (pfam00380) → |
| env-620 | SRS015893.WUGC_scaffold_32763     | + | 3119  | 3193  | RNA → | rplM (PRK09216)Ribosomal_L13 (pfam00572) → | rpsI (PRK00132)Ribosomal_S9 (pfam00380) → |
| env-621 | SRS016002.WUGC_scaffold_17242     | + | 35903 | 35977 | RNA → | rplM (PRK09216)Ribosomal_L13 (pfam00572) → | rpsI (PRK00132)Ribosomal_S9 (pfam00380) → |
| env-622 | SRS017120.Baylor_scaffold_72849   | + | 96    | 170   | RNA → | rplM (PRK09216)Ribosomal_L13 (pfam00572) → | rpsI (PRK00132)Ribosomal_S9 (pfam00380) → |
| env-623 | SRS017439.Baylor_scaffold_52553   | - | 1177  | 1103  | RNA → | rplM (PRK09216)Ribosomal_L13 (pfam00572) → | rpsI (PRK00132)Ribosomal_S9 (pfam00380) → |
| env-624 | SRS018300.Baylor_scaffold_51866   | + | 3216  | 3290  | RNA → | rplM (PRK09216)Ribosomal_L13 (pfam00572) → | rpsI (PRK00132)Ribosomal_S9 (pfam00380) → |
| env-625 | SRS018439.Baylor_scaffold_51883   | - | 3196  | 3122  | RNA → | rplM (PRK09216)Ribosomal_L13 (pfam00572) → | rpsI (PRK00132)Ribosomal_S9 (pfam00380) → |
| env-626 | SRS018739.WUGC_scaffold_60459     | - | 1177  | 1103  | RNA → | rplM (PRK09216)Ribosomal_L13 (pfam00572) → | rpsI (PRK00132)Ribosomal_S9 (pfam00380) → |
| env-627 | SRS019126.WUGC_scaffold_41627     | - | 1177  | 1103  | RNA → | rplM (PRK09216)Ribosomal_L13 (pfam00572) → | rpsI (PRK00132)Ribosomal_S9 (pfam00380) → |
| env-628 | SRS019127.C1673699                | + | 3216  | 3290  | RNA → |                                            |                                           |
| env-629 | SRS019219.WUGC_scaffold_22098     | - | 3099  | 3025  | RNA → | rplM (PRK09216)Ribosomal_L13 (pfam00572) → | rpsI (PRK00132)Ribosomal_S9 (pfam00380) → |
| env-630 | SRS020220.Baylor_scaffold_52465   | - | 1526  | 1452  | RNA → | rplM (PRK09216)Ribosomal_L13 (pfam00572) → | rpsI (PRK00132)Ribosomal_S9 (pfam00380) → |
| env-631 | SRS020856.Baylor_scaffold_35690   | - | 3199  | 3125  | RNA → | rplM (PRK09216)Ribosomal_L13 (pfam00572) → | rpsI (PRK00132)Ribosomal_S9 (pfam00380) → |
| env-632 | SRS022143.WUGC_scaffold_32909     | - | 9534  | 9460  | RNA → | rplM (PRK09216)Ribosomal_L13 (pfam00572) → | rpsI (PRK00132)Ribosomal_S9 (pfam00380) → |
| env-633 | SRS022621.C4119557                | + | 2940  | 3014  | RNA → |                                            |                                           |
| env-634 | SRS024318.LANL_scaffold_74074     | - | 11441 | 11367 | RNA → | rplM (PRK09216)Ribosomal_L13 (pfam00572) → | rpsI (PRK00132)Ribosomal_S9 (pfam00380) → |
| env-635 | SRS024580.C3038766                | - | 171   | 97    | RNA → |                                            |                                           |
| env-636 | SRS024637.LANL_scaffold_30251     | + | 233   | 307   | RNA → |                                            |                                           |
| env-637 | SRS042910.C5625461                | + | 3216  | 3290  | RNA → |                                            |                                           |
| env-638 | SRS045715.LANL_scaffold_89135     | + | 3431  | 3505  | RNA → | rplM (PRK09216)Ribosomal_L13 (pfam00572) → |                                           |
| env-639 | SRS049147.LANL_scaffold_58601     | + | 95    | 169   | RNA → | rplM (PRK09216)Ribosomal_L13 (pfam00572) → | rpsI (PRK00132)Ribosomal_S9 (pfam00380) → |
| env-640 | SRS053854.C1915023                | + | 140   | 214   | RNA → |                                            |                                           |
| env-641 | SRS054687.C3415499                | - | 171   | 97    | RNA → | hypo →                                     |                                           |
| env-642 | SRS055426.LANL_scaffold_56878     | + | 12351 | 12425 | RNA → | rplM (PRK09216)Ribosomal_L13 (pfam00572) → |                                           |

|         |                                   |   |         |         |       |                                                                                                                                 |
|---------|-----------------------------------|---|---------|---------|-------|---------------------------------------------------------------------------------------------------------------------------------|
| env-643 | SRS056622.LANL_scaffold_38514     | - | 47437   | 47363   | RNA → | rplM (PRK09216)Ribosomal_L13 (pfam00572) → rpsI (PRK00132)Ribosomal_S9 (pfam00380) →                                            |
| env-644 | SRS058336_C2178143                | + | 3215    | 3289    | RNA → |                                                                                                                                 |
| env-645 | SRS063193.LANL_scaffold_53070     | + | 2926    | 3000    | RNA → | rplM (PRK09216)Ribosomal_L13 (pfam00572) → rpsI (PRK00132)Ribosomal_S9 (pfam00380) →                                            |
| env-646 | SRS064423.LANL_scaffold_66525     | - | 11227   | 11153   | RNA → | rplM (PRK09216)Ribosomal_L13 (pfam00572) → rpsI (PRK00132)Ribosomal_S9 (pfam00380) →                                            |
| env-647 | SRS065278_C2564619                | + | 3215    | 3289    | RNA → |                                                                                                                                 |
| Ppa-1-1 | NZ_GL982513.1                     | + | 723490  | 723564  | RNA → | rplM (PRK09216)Ribosomal_L13 (pfam00572) → rpsI (PRK00132)Ribosomal_S9 (pfam00380) →                                            |
| env-648 | SRS018791.WUGC_scaffold_38475     | - | 1334    | 1260    | RNA → | rplM (PRK09216)Ribosomal_L13 (pfam00572) → rpsI (PRK00132)Ribosomal_S9 (pfam00380) →                                            |
| env-649 | SRS022077_Baylor_scaffold_52460   | - | 1526    | 1452    | RNA → | rplM (PRK09216)Ribosomal_L13 (pfam00572) → rpsI (PRK00132)Ribosomal_S9 (pfam00380) →                                            |
| env-650 | SRS024015_Baylor_scaffold_54468   | - | 5401    | 5327    | RNA → | rplM (PRK09216)Ribosomal_L13 (pfam00572) → rpsI (PRK00132)Ribosomal_S9 (pfam00380) →                                            |
| env-651 | SRS016319.WUGC_scaffold_54116     | + | 3215    | 3289    | RNA → | rplM (PRK09216)Ribosomal_L13 (pfam00572) → rpsI (PRK00132)Ribosomal_S9 (pfam00380) →                                            |
| env-652 | SRS047219.WUGC_scaffold_57943     | + | 16790   | 16864   | RNA → | rplM (PRK09216)Ribosomal_L13 (pfam00572) → rpsI (PRK00132)Ribosomal_S9 (pfam00380) →                                            |
| env-653 | Buccal_mucosa.LANL_C64807355      | - | 110     | 36      | RNA → | hypo →                                                                                                                          |
| env-654 | Contig7238817.1                   | - | 110     | 36      | RNA → |                                                                                                                                 |
| env-655 | SRS015434_C5938921                | - | 110     | 36      | RNA → |                                                                                                                                 |
| env-656 | SRS017808_Baylor_scaffold_37180   | + | 3883    | 3957    | RNA → |                                                                                                                                 |
| env-657 | SRS016740_C2751815                | - | 117     | 43      | RNA → |                                                                                                                                 |
| env-658 | SRS023930_C2173199                | - | 90      | 16      | RNA → |                                                                                                                                 |
| env-659 | SRS013705_Baylor_scaffold_102904  | + | 23297   | 23371   | RNA → |                                                                                                                                 |
| env-660 | SRS013879_C2856030                | + | 1392    | 1466    | RNA → |                                                                                                                                 |
| env-661 | SRS015762.WUGC_scaffold_41259     | + | 774     | 848     | RNA → | rplM (PRK09216)Ribosomal_L13 (pfam00572) → rpsI (PRK00132)Ribosomal_S9 (pfam00380) →                                            |
| env-662 | SRS015797.WUGC_scaffold_34883     | - | 23901   | 23827   | RNA → | rplM (PRK09216)Ribosomal_L13 (pfam00572) → rpsI (PRK00132)Ribosomal_S9 (pfam00380) →                                            |
| env-663 | SRS015941.WUGC_scaffold_78227     | + | 3216    | 3290    | RNA → | rplM (PRK09216)Ribosomal_L13 (pfam00572) → rpsI (PRK00132)Ribosomal_S9 (pfam00380) →                                            |
| env-664 | SRS016086.WUGC_scaffold_26855     | - | 171     | 97      | RNA → |                                                                                                                                 |
| env-665 | SRS016225_C2803421                | - | 171     | 97      | RNA → | hypo →                                                                                                                          |
| env-666 | SRS016569_Baylor_scaffold_56485   | + | 16533   | 16607   | RNA → | rplM (PRK09216)Ribosomal_L13 (pfam00572) → rpsI (PRK00132)Ribosomal_S9 (pfam00380) →                                            |
| env-667 | SRS021496_Baylor_scaffold_85386   | - | 12316   | 12242   | RNA → | rplM (PRK09216)Ribosomal_L13 (pfam00572) → rpsI (PRK00132)Ribosomal_S9 (pfam00380) →                                            |
| env-668 | SRS021954_C2960878                | + | 284     | 358     | RNA → |                                                                                                                                 |
| env-669 | SRS023926_C2818602                | + | 2890    | 2964    | RNA → |                                                                                                                                 |
| env-670 | SRS024081.LANL_scaffold_39378     | + | 40034   | 40108   | RNA → | rplM (PRK09216)Ribosomal_L13 (pfam00572) → rpsI (PRK00132)Ribosomal_S9 (pfam00380) →                                            |
| env-671 | SRS042643.WUGC_scaffold_26426     | - | 1334    | 1260    | RNA → | rplM (PRK09216)Ribosomal_L13 (pfam00572) → rpsI (PRK00132)Ribosomal_S9 (pfam00380) →                                            |
| env-672 | SRS051791.LANL_scaffold_12138     | - | 47738   | 47664   | RNA → | rplM (PRK09216)Ribosomal_L13 (pfam00572) → rpsI (PRK00132)Ribosomal_S9 (pfam00380) →                                            |
| env-673 | SRS057539.LANL_scaffold_35057     | + | 49731   | 49805   | RNA → | rplM (PRK09216)Ribosomal_L13 (pfam00572) → rpsI (PRK00132)Ribosomal_S9 (pfam00380) →                                            |
| env-674 | SRS063288_C2542184                | + | 84      | 158     | RNA → | rplM (PRK09216)Ribosomal_L13 (pfam00572) →                                                                                      |
| env-675 | SRS064774.LANL_scaffold_17002     | - | 16294   | 16220   | RNA → | rplM (PRK09216)Ribosomal_L13 (pfam00572) → rpsI (PRK00132)Ribosomal_S9 (pfam00380) →                                            |
| env-676 | UnmappedStool_Broad_C252508257    | - | 155     | 79      | RNA → | hypo →                                                                                                                          |
| Pco-3-1 | NZ_AUME01000007.1                 | - | 36087   | 36011   | RNA → | rplM (PRK09216)Ribosomal_L13 (pfam00572) → rpsI (PRK00132)Ribosomal_S9 (pfam00380) →                                            |
| Pco-3-2 | NZ_BAIT01000003.1                 | + | 74722   | 74798   | RNA → | rplM (PRK09216)Ribosomal_L13 (pfam00572) → rpsI (PRK00132)Ribosomal_S9 (pfam00380) →                                            |
| Pni-1-1 | NZ_GL982464.1                     | + | 2020144 | 2020219 | RNA → | rplM (PRK09216)Ribosomal_L13 (pfam00572) → rplM (PRK09216)Ribosomal_L13 (pfam00572) → rpsI (PRK00132)Ribosomal_S9 (pfam00380) → |
| env-677 | SRS012285_Baylor_scaffold_36585   | + | 18214   | 18289   | RNA → | rplM (PRK09216)Ribosomal_L13 (pfam00572) → rpsI (PRK00132)Ribosomal_S9 (pfam00380) →                                            |
| env-678 | SRS022083_C1814115                | - | 190     | 115     | RNA → | hypo →                                                                                                                          |
| env-679 | SRS024144_C1709965                | - | 224     | 149     | RNA → | rplM (PRK09216)RplM (COG0102)Ribosomal_L13 (cd00392)Ribosomal_L13 (pfam00572) →                                                 |
| env-680 | SRS063932.LANL_scaffold_105725    | + | 15855   | 15930   | RNA → |                                                                                                                                 |
| env-681 | Subgingival_plaque.LANL_C10982129 | - | 147     | 72      | RNA → | hypo →                                                                                                                          |
| env-682 | SRS022725.LANL_scaffold_18998     | - | 20108   | 20033   | RNA → | rplM (PRK09216)Ribosomal_L13 (pfam00572) → rpsI (PRK00132)Ribosomal_S9 (pfam00380) →                                            |
| env-683 | SRS063215_C2206217                | + | 314     | 389     | RNA → | hypo →                                                                                                                          |
| env-684 | SRS045313.LANL_scaffold_12927     | + | 11427   | 11502   | RNA → |                                                                                                                                 |
| env-685 | SRS058053.LANL_scaffold_46648     | + | 2496    | 2571    | RNA → | rplM (PRK09216)Ribosomal_L13 (pfam00572) → rpsI (PRK00132)Ribosomal_S9 (pfam00380) →                                            |
| env-686 | SRS015215.WUGC_scaffold_60845     | + | 31443   | 31518   | RNA → |                                                                                                                                 |
| env-687 | SRS016575_C3771021                | - | 171     | 96      | RNA → | hypo →                                                                                                                          |
| env-688 | SRS017227_Baylor_scaffold_128981  | - | 4583    | 4508    | RNA → | rplM (PRK09216)Ribosomal_L13 (pfam00572) → rpsI (PRK00132)Ribosomal_S9 (pfam00380) →                                            |
| env-689 | SRS018573_C2468474                | - | 171     | 96      | RNA → | hypo →                                                                                                                          |

|         |                                 |   |        |        |      |                                                                                    |
|---------|---------------------------------|---|--------|--------|------|------------------------------------------------------------------------------------|
| env-690 | SRS045197_C3607732              | + | 2688   | 2763   | RNA→ |                                                                                    |
| env-691 | SRS047113_C5438044              | + | 4885   | 4960   | RNA→ |                                                                                    |
| env-692 | SRS049318_LANL_scaffold_180129  | + | 334    | 409    | RNA→ | rplM (PRK09216)Ribosomal_L13 (pfam00572)→                                          |
| env-693 | SRS051930_C3291029              | + | 3901   | 3976   | RNA→ |                                                                                    |
| env-694 | SRS057022_LANL_scaffold_21753   | + | 985    | 1060   | RNA→ | rplM (PRK09216)Ribosomal_L13 (pfam00572)→                                          |
| env-695 | SRS064449_C4104329              | + | 731    | 806    | RNA→ |                                                                                    |
| env-696 | SRS014691_C2755332              | - | 159    | 84     | RNA→ | hypo→                                                                              |
| env-697 | SRS019029_WUGC_scaffold_30607   | - | 318    | 243    | RNA→ | rplM (PRK09216)Ribosomal_L13 (pfam00572)→                                          |
| env-698 | SRS011255_Baylor_scaffold_75811 | - | 105    | 30     | RNA→ |                                                                                    |
| env-699 | SRS023938_C2346941              | - | 137    | 62     | RNA→ |                                                                                    |
| Pni-3-1 | NZ_ADGJ01000034.1               | + | 4034   | 4109   | RNA→ | rplM (PRK09216)Ribosomal_L13 (pfam00572)→ rpsI (PRK00132)Ribosomal_S9 (pfam00380)→ |
| env-700 | SRS013533_PGA_scaffold_55845    | + | 31911  | 31986  | RNA→ | ←hypo                                                                              |
| env-701 | SRS013950_WUGC_scaffold_19463   | + | 6777   | 6852   | RNA→ | rplM (PRK09216)Ribosomal_L13 (pfam00572)→ rpsI (PRK00132)Ribosomal_S9 (pfam00380)→ |
| env-702 | SRS015574_C3429056              | + | 765    | 840    | RNA→ |                                                                                    |
| env-703 | SRS019980_Baylor_scaffold_52314 | - | 426    | 351    | RNA→ | rplM (PRK09216)Ribosomal_L13 (pfam00572)→                                          |
| env-704 | SRS022536_LANL_scaffold_126332  | + | 32859  | 32934  | RNA→ | rplM (PRK09216)Ribosomal_L13 (pfam00572)→ rpsI (PRK00132)Ribosomal_S9 (pfam00380)→ |
| env-705 | SRS023595_C7191239              | - | 113    | 38     | RNA→ |                                                                                    |
| env-706 | SRS024087_LANL_scaffold_6797    | - | 49193  | 49118  | RNA→ | rplM (PRK09216)Ribosomal_L13 (pfam00572)→ rpsI (PRK00132)Ribosomal_S9 (pfam00380)→ |
| env-707 | SRS058808_C2875695              | - | 162    | 87     | RNA→ |                                                                                    |
| env-708 | SRS065099_LANL_scaffold_67594   | - | 171    | 96     | RNA→ | hypo→                                                                              |
| Pni-2-1 | NZ_KI669452.1                   | - | 66638  | 66563  | RNA→ | rplM (PRK09216)Ribosomal_L13 (pfam00572)→ rpsI (PRK00132)Ribosomal_S9 (pfam00380)→ |
| env-709 | SRS057355_C2357028              | + | 1923   | 1998   | RNA→ |                                                                                    |
| env-710 | SRS014573_C3689837              | + | 580    | 655    | RNA→ |                                                                                    |
| env-711 | SRS013164_Baylor_scaffold_6044  | + | 24960  | 25035  | RNA→ | rplM (PRK09216)Ribosomal_L13 (pfam00572)→ rpsI (PRK00132)Ribosomal_S9 (pfam00380)→ |
| env-712 | SRS015434_C5939871              | + | 1383   | 1458   | RNA→ | hypo→                                                                              |
| env-713 | SRS016037_WUGC_scaffold_40495   | - | 1517   | 1442   | RNA→ | rplM (PRK09216)Ribosomal_L13 (pfam00572)→ rpsI (PRK00132)Ribosomal_S9 (pfam00380)→ |
| env-714 | SRS017209_C2612132              | - | 171    | 96     | RNA→ | hypo→                                                                              |
| env-715 | SRS018145_Baylor_scaffold_45351 | + | 15741  | 15816  | RNA→ | rplM (PRK09216)Ribosomal_L13 (pfam00572)→ rpsI (PRK00132)Ribosomal_S9 (pfam00380)→ |
| env-716 | SRS019071_WUGC_scaffold_1653    | - | 393    | 318    | RNA→ | rplM (PRK09216)Ribosomal_L13 (pfam00572)→                                          |
| env-717 | SRS019327_WUGC_scaffold_7031    | - | 9945   | 9870   | RNA→ | rplM (PRK09216)Ribosomal_L13 (pfam00572)→ rpsI (PRK00132)Ribosomal_S9 (pfam00380)→ |
| env-718 | SRS022719_LANL_scaffold_29884   | - | 15205  | 15130  | RNA→ | rplM (PRK09216)Ribosomal_L13 (pfam00572)→ rpsI (PRK00132)Ribosomal_S9 (pfam00380)→ |
| env-719 | SRS023958_Baylor_scaffold_35671 | + | 24960  | 25035  | RNA→ | rplM (PRK09216)Ribosomal_L13 (pfam00572)→ rpsI (PRK00132)Ribosomal_S9 (pfam00380)→ |
| env-720 | SRS044662_LANL_scaffold_26917   | - | 15127  | 15052  | RNA→ | rplM (PRK09216)Ribosomal_L13 (pfam00572)→ rpsI (PRK00132)Ribosomal_S9 (pfam00380)→ |
| env-721 | SRS049389_C4741864              | + | 3211   | 3286   | RNA→ | hypo→                                                                              |
| env-722 | SRS050669_C2732573              | - | 171    | 96     | RNA→ | hypo→                                                                              |
| env-723 | SRS057692_LANL_scaffold_59063   | + | 15741  | 15816  | RNA→ | rplM (PRK09216)Ribosomal_L13 (pfam00572)→ rpsI (PRK00132)Ribosomal_S9 (pfam00380)→ |
| env-724 | SRS043422_C2606710              | - | 418    | 343    | RNA→ | rplM (PRK09216)Ribosomal_L13 (pfam00572)→                                          |
| Pau-1-1 | NZ_BAKF01000067.1               | - | 163    | 88     | RNA→ |                                                                                    |
| Psp-9-1 | NZ_JIAF01000004.1               | - | 988952 | 988877 | RNA→ | rplM (PRK09216)Ribosomal_L13 (pfam00572)→ rpsI (PRK00132)Ribosomal_S9 (pfam00380)→ |
| env-725 | SRS055401_C2262988              | - | 171    | 96     | RNA→ | hypo→                                                                              |
| env-726 | SRS016746_C3112314              | - | 171    | 96     | RNA→ | hypo→                                                                              |
| env-727 | Contig7208859.1                 | - | 113    | 38     | RNA→ |                                                                                    |
| env-728 | SRS048411_C6994262              | + | 2390   | 2465   | RNA→ |                                                                                    |
| env-729 | SRS013723_C3473767              | + | 936    | 1011   | RNA→ | hypo→                                                                              |
| env-730 | SRS020226_C3504182              | + | 3062   | 3137   | RNA→ | hypo→                                                                              |
| env-731 | SRS022149_C2844760              | - | 185    | 110    | RNA→ | hypo→                                                                              |
| env-732 | SRS023595_Baylor_scaffold_12538 | - | 315    | 240    | RNA→ | rplM (PRK09216)Ribosomal_L13 (pfam00572)→                                          |
| env-733 | SRS017511_Baylor_scaffold_37568 | - | 3386   | 3311   | RNA→ | rplM (PRK09216)Ribosomal_L13 (pfam00572)→ rpsI (PRK00132)Ribosomal_S9 (pfam00380)→ |
| env-734 | SRS062761_C4185168              | - | 157    | 82     | RNA→ | hypo→                                                                              |
| env-735 | SRS063603_LANL_scaffold_16033   | + | 3063   | 3138   | RNA→ | rplM (PRK09216)Ribosomal_L13 (pfam00572)→ rpsI (PRK00132)Ribosomal_S9 (pfam00380)→ |
| env-736 | SRS049268_C4330408              | + | 785    | 860    | RNA→ | hypo→                                                                              |
| Pin-3-1 | NZ_ATMK01000012.1               | - | 3560   | 3485   | RNA→ | rplM (PRK09216)Ribosomal_L13 (pfam00572)→ rpsI (PRK00132)Ribosomal_S9 (pfam00380)→ |



|         |                                 |   |       |       |       |                                                                                                                                                                           |
|---------|---------------------------------|---|-------|-------|-------|---------------------------------------------------------------------------------------------------------------------------------------------------------------------------|
| Pfa-1-1 | NZ_BAJY01000023.1               | + | 18148 | 18223 | RNA → | rplM (PRK09216)Ribosomal_L13 (pfam00572) → rpsI (PRK00132)Ribosomal_S9 (pfam00380) →                                                                                      |
| env-737 | SRS049318_LANL_scaffold_111644  | + | 3483  | 3558  | RNA → | rplM (PRK09216)Ribosomal_L13 (pfam00572) → rpsI (PRK00132)Ribosomal_S9 (pfam00380) →                                                                                      |
| Pin-2-1 | NZ_KE392224.1                   | + | 52909 | 52984 | RNA → | rplM (PRK09216)Ribosomal_L13 (pfam00572) → rpsI (PRK00132)Ribosomal_S9 (pfam00380) →                                                                                      |
| env-738 | SRS014474_C725551               | + | 364   | 439   | RNA → |                                                                                                                                                                           |
| env-739 | SRS014477_C1641189              | + | 1209  | 1284  | RNA → |                                                                                                                                                                           |
| env-740 | SRS015061_C521155               | - | 3425  | 3350  | RNA → | rplM (PRK09216)Ribosomal_L13 (pfam00572) → rpsI (PRK00132)Ribosomal_S9 (pfam00380) →                                                                                      |
| env-741 | SRS015062_WUGC_scaffold_566     | - | 3425  | 3350  | RNA → | rplM (PRK09216)Ribosomal_L13 (pfam00572) → rpsI (PRK00132)Ribosomal_S9 (pfam00380) →                                                                                      |
| env-742 | SRS047634_C4505245              | + | 2722  | 2797  | RNA → |                                                                                                                                                                           |
| Pdi-3-1 | NZ_KI259320.1                   | - | 18576 | 18501 | RNA → | rplM (PRK09216)Ribosomal_L13 (pfam00572) → rpsI (PRK00132)Ribosomal_S9 (pfam00380) →                                                                                      |
| env-743 | SRS017521_Baylor_scaffold_47871 | - | 90    | 15    | RNA → |                                                                                                                                                                           |
| Pdi-2-1 | NZ_AEDO01000037.1               | + | 25023 | 25098 | RNA → | rplM (PRK09216)Ribosomal_L13 (pfam00572) → rplM (PRK09216)Ribosomal_L13 (pfam00572) → rpsI (PRK00132)Ribosomal_S9 (pfam00380) → rpsI (PRK00132)Ribosomal_S9 (pfam00380) → |
| Pdi-1-1 | NZ_JRNR01000099.1               | - | 3529  | 3454  | RNA → | rplM (PRK09216)Ribosomal_L13 (pfam00572) → rpsI (PRK00132)Ribosomal_S9 (pfam00380) →                                                                                      |
| env-744 | NOM017_scaffold152_1            | + | 2821  | 2896  | RNA → |                                                                                                                                                                           |
| env-745 | 4448812.3_Contig1872            | + | 367   | 442   | RNA → | rplM (PRK09216)Ribosomal_L13 (pfam00572) → rpsI (PRK00132)Ribosomal_S9 (pfam00380) →                                                                                      |
| env-746 | DLM003_scaffold159_2            | + | 2840  | 2915  | RNA → | rplM (PRK09216)Ribosomal_L13 (pfam00572) → rpsI (PRK00132)Ribosomal_S9 (pfam00380) →                                                                                      |
| env-747 | NOM022_scaffold34272_1          | + | 2699  | 2774  | RNA → | rplM (PRK09216)Ribosomal_L13 (pfam00572) → rpsI (PRK00132)Ribosomal_S9 (pfam00380) →                                                                                      |
| env-748 | contig104641                    | + | 10740 | 10815 | RNA → | rplM (PRK09216)Ribosomal_L13 (pfam00572) →                                                                                                                                |
| env-749 | DLM001_scaffold46771_1          | - | 555   | 480   | RNA → | rplM (PRK09216)Ribosomal_L13 (pfam00572) →                                                                                                                                |
| env-750 | DOM003_scaffold20629_2          | + | 164   | 239   | RNA → | rplM (PRK09216)Ribosomal_L13 (pfam00572) →                                                                                                                                |
| env-751 | NLM001_scaffold44488_1          | + | 2699  | 2774  | RNA → | rplM (PRK09216)Ribosomal_L13 (pfam00572) → rpsI (PRK00132)Ribosomal_S9 (pfam00380) →                                                                                      |
| env-752 | SRS011271_WUGC_scaffold_12531   | + | 603   | 678   | RNA → |                                                                                                                                                                           |
| env-753 | 4448818.3_Contig13931           | - | 222   | 147   | RNA → | rplM (PRK09216) →                                                                                                                                                         |
| env-754 | NLM006_scaffold2689_1           | - | 559   | 484   | RNA → | rplM (PRK09216)Ribosomal_L13 (pfam00572) →                                                                                                                                |
| env-755 | SRS015794_Baylor_scaffold_8969  | + | 743   | 818   | RNA → | rplM (PRK09216)Ribosomal_L13 (pfam00572) →                                                                                                                                |
| env-756 | DOF011_scaffold4575_1           | + | 2870  | 2945  | RNA → | rplM (PRK09216)Ribosomal_L13 (pfam00572) → rpsI (PRK00132)Ribosomal_S9 (pfam00380) →                                                                                      |
| env-757 | NLM004_scaffold39342_1          | - | 326   | 250   | RNA → | rplM (PRK09216)Ribosomal_L13 (pfam00572) →                                                                                                                                |
| env-758 | DLF003_scaffold48930_1          | + | 25126 | 25201 | RNA → | rplM (PRK09216)Ribosomal_L13 (pfam00572) →                                                                                                                                |
| env-759 | NLM004_scaffold4959_1           | - | 319   | 244   | RNA → | rplM (PRK09216)Ribosomal_L13 (pfam00572) →                                                                                                                                |
| env-760 | NOM012_scaffold33926_2          | - | 272   | 197   | RNA → | rplM (PRK09216)Ribosomal_L13 (pfam00572) →                                                                                                                                |
| env-761 | scaffold3211.3_V1_CD-2          | + | 538   | 613   | RNA → |                                                                                                                                                                           |
| env-762 | SRS019910_WUGC_scaffold_54703   | + | 204   | 279   | RNA → |                                                                                                                                                                           |
| env-763 | DLM001_scaffold46772_1          | - | 551   | 476   | RNA → | rplM (PRK09216)Ribosomal_L13 (pfam00572) →                                                                                                                                |
| env-764 | DOM016_scaffold20994_2          | + | 58303 | 58378 | RNA → | rplM (PRK09216)Ribosomal_L13 (pfam00572) → rpsI (PRK00132)Ribosomal_S9 (pfam00380) →                                                                                      |
| env-765 | SRS013521_LANL_scaffold_8254    | - | 121   | 46    | RNA → |                                                                                                                                                                           |
| env-766 | NLM016_scaffold16524_1          | - | 542   | 467   | RNA → | rplM (PRK09216)Ribosomal_L13 (pfam00572) →                                                                                                                                |
| env-767 | 4491403.3_NODE_17602            | - | 322   | 247   | RNA → | rplM (PRK09216)Ribosomal_L13 (pfam00572) →                                                                                                                                |
| env-768 | SRS049959_WUGC_scaffold_5722    | - | 414   | 338   | RNA → | rplM (PRK09216)Ribosomal_L13 (pfam00572) →                                                                                                                                |
| env-769 | scaffold28598_1_V1_UC-17        | - | 126   | 50    | RNA → |                                                                                                                                                                           |
| env-770 | scaffold2660_2_MH0049           | + | 139   | 215   | RNA → | rplM (PRK09216)Ribosomal_L13 (pfam00572) →                                                                                                                                |
| env-771 | 4491403.3_NODE_60160            | - | 980   | 904   | RNA → | rplM (PRK09216)Ribosomal_L13 (pfam00572) → rpsI (PRK00132)Ribosomal_S9 (pfam00380) →                                                                                      |
| env-772 | SRS013521_LANL_scaffold_15414   | - | 158   | 82    | RNA → | hypō →                                                                                                                                                                    |
| env-773 | SRS049995_LANL_scaffold_36980   | + | 752   | 828   | RNA → |                                                                                                                                                                           |
| env-774 | BAAX01002455.1                  | + | 95    | 171   | RNA → | rplM (PRK09216)Ribosomal_L13 (pfam00572) → rpsI (PRK00132)Ribosomal_S9 (pfam00380) → rpsI (PRK00132)Ribosomal_S9 (pfam00380) →                                            |
| env-775 | SRS015794_C2240237              | + | 338   | 414   | RNA → |                                                                                                                                                                           |
| env-776 | DLM006_scaffold20724_1          | + | 4613  | 4689  | RNA → | rplM (PRK09216)Ribosomal_L13 (pfam00572) → rpsI (PRK00132)Ribosomal_S9 (pfam00380) →                                                                                      |
| env-777 | NLF006_scaffold9001_1           | - | 11920 | 11844 | RNA → | rplM (PRK09216)Ribosomal_L13 (pfam00572) → rpsI (PRK00132)Ribosomal_S9 (pfam00380) →                                                                                      |
| env-778 | NLM002_scaffold28362_1          | + | 827   | 903   | RNA → | rplM (PRK09216)Ribosomal_L13 (pfam00572) → rpsI (PRK00132)Ribosomal_S9 (pfam00380) →                                                                                      |
| env-779 | NLM004_scaffold34280_1          | + | 818   | 894   | RNA → | rplM (PRK09216)Ribosomal_L13 (pfam00572) →                                                                                                                                |
| env-780 | NLM006_scaffold7359_1           | + | 197   | 273   | RNA → | rplM (PRK09216)Ribosomal_L13 (pfam00572) →                                                                                                                                |
| env-781 | DLM002_scaffold24298_1          | + | 12011 | 12086 | RNA → | rplM (PRK09216)Ribosomal_L13 (pfam00572) → rpsI (PRK00132)Ribosomal_S9 (pfam00380) →                                                                                      |
| env-782 | NOF010_scaffold54121_1          | + | 59215 | 59290 | RNA → | rplM (PRK09216)Ribosomal_L13 (pfam00572) → rpsI (PRK00132)Ribosomal_S9 (pfam00380) →                                                                                      |



|         |                                 |   |        |        |       |                                            |                                            |
|---------|---------------------------------|---|--------|--------|-------|--------------------------------------------|--------------------------------------------|
| env-783 | NOM009_scaffold53764_1          | + | 59215  | 59290  | RNA → | rplM (PRK09216)Ribosomal_L13 (pfam00572) → | rpsI (PRK00132)Ribosomal_S9 (pfam00380) →  |
| env-784 | NOM017_scaffold40285_1          | + | 1439   | 1514   | RNA → | rplM (PRK09216)Ribosomal_L13 (pfam00572) → |                                            |
| env-785 | NLM004_scaffold29467_1          | + | 19562  | 19637  | RNA → | rplM (PRK09216)Ribosomal_L13 (pfam00572) → |                                            |
| env-786 | SRS022609_Baylor_scaffold_13243 | + | 21067  | 21142  | RNA → | rplM (PRK09216)Ribosomal_L13 (pfam00572) → | rpsI (PRK00132)Ribosomal_S9 (pfam00380) →  |
| env-787 | 4491403.3_NODE_11716            | + | 384    | 459    | RNA → |                                            |                                            |
| env-788 | DLM027_scaffold23115_4          | + | 11864  | 11939  | RNA → | rplM (PRK09216)Ribosomal_L13 (pfam00572) → | rpsI (PRK00132)Ribosomal_S9 (pfam00380) →  |
| env-789 | 4448819.3_Contig631             | - | 7314   | 7239   | RNA → | rplM (PRK09216)Ribosomal_L13 (pfam00572) → | rpsI (PRK00132)Ribosomal_S9 (pfam00380) →  |
| env-790 | 4448812.3_Contig639             | + | 2967   | 3042   | RNA → | rplM (PRK09216)Ribosomal_L13 (pfam00572) → | rpsI (PRK00132)Ribosomal_S9 (pfam00380) →  |
| env-791 | scaffold18566_1_MH0009          | - | 109    | 34     | RNA → |                                            |                                            |
| env-792 | NLM016_scaffold16376_1          | - | 143    | 68     | RNA → |                                            |                                            |
| env-793 | scaffold58558_1_MH0065          | + | 213    | 288    | RNA → | rplM (PRK09216)Ribosomal_L13 (pfam00572) → | rpsI (PRK00132)Ribosomal_S9 (pfam00380) →  |
| env-794 | 4491477.3_NODE_2169             | - | 8743   | 8668   | RNA → | rplM (PRK09216)Ribosomal_L13 (pfam00572) → | rpsI (PRK00132)Ribosomal_S9 (pfam00380) →  |
| env-795 | SRS015782_WUGC_scaffold_26114   | - | 11843  | 11768  | RNA → | rplM (PRK09216)Ribosomal_L13 (pfam00572) → | rpsI (PRK00132)Ribosomal_S9 (pfam00380) →  |
| env-796 | SRS024132_Baylor_scaffold_32360 | - | 11900  | 11825  | RNA → | rplM (PRK09216)Ribosomal_L13 (pfam00572) → | rpsI (PRK00132)Ribosomal_S9 (pfam00380) →  |
| env-797 | scaffold43386_1_MH0050          | + | 966    | 1041   | RNA → |                                            |                                            |
| env-798 | 4448813.3_Contig493             | - | 5921   | 5846   | RNA → | rplM (PRK09216)Ribosomal_L13 (pfam00572) → | rpsI (PRK00132)Ribosomal_S9 (pfam00380) →  |
| env-799 | NOF001_scaffold377_4            | - | 5305   | 5230   | RNA → | rplM (PRK09216)Ribosomal_L13 (pfam00572) → | rpsI (PRK00132)Ribosomal_S9 (pfam00380) →  |
| env-800 | CAM_READ_0099651871             | - | 384    | 309    | RNA → | rplM (PRK09216)Ribosomal_L13 (pfam00572) → |                                            |
| env-801 | SRS047044_WUGC_scaffold_16328   | + | 257    | 332    | RNA → | rplM (PRK09216)Ribosomal_L13 (pfam00572) → |                                            |
| env-802 | 4444165.3_02693                 | + | 265    | 340    | RNA → | rplM (PRK09216)Ribosomal_L13 (pfam00572) → |                                            |
| env-803 | 4448807.3_Contig1253            | - | 1893   | 1817   | RNA → | rplM (PRK09216)Ribosomal_L13 (pfam00572) → | rpsI (PRK00132)Ribosomal_S9 (pfam00380) →  |
| env-804 | NLM008_scaffold29501_1          | - | 12251  | 12176  | RNA → | rplM (PRK09216)Ribosomal_L13 (pfam00572) → | rpsI (PRK00132)Ribosomal_S9 (pfam00380) →  |
| env-805 | NLM024_scaffold18343_2          | + | 16425  | 16500  | RNA → | rplM (PRK09216)Ribosomal_L13 (pfam00572) → | rpsI (PRK00132)Ribosomal_S9 (pfam00380) →  |
| env-806 | NOM013_scaffold52528_1          | - | 10498  | 10423  | RNA → | rplM (PRK09216)Ribosomal_L13 (pfam00572) → | rpsI (PRK00132)Ribosomal_S9 (pfam00380) →  |
| env-807 | SRS017849_C4402944              | - | 468    | 393    | RNA → | rplM (PRK09216)Ribosomal_L13 (pfam00572) → |                                            |
| env-808 | C4444188_1_MH0077               | + | 224    | 299    | RNA → | rplM (PRK09216)Ribosomal_L13 (pfam00572) → |                                            |
| env-809 | 4448817.3_Contig838             | - | 764    | 689    | RNA → | rplM (PRK09216)Ribosomal_L13 (pfam00572) → | rpsI (PRK00132)Ribosomal_S9 (pfam00380) →  |
| env-810 | 4491404.3_NODE_16218            | + | 95     | 170    | RNA → | rplM (PRK09216)Ribosomal_L13 (pfam00572) → | rpsI (PRK00132)Ribosomal_S9 (pfam00380) →  |
| env-811 | 4491414.3_NODE_1809             | + | 43317  | 43392  | RNA → | rplM (PRK09216)Ribosomal_L13 (pfam00572) → | rpsI (PRK00132)Ribosomal_S9 (pfam00380) →  |
| env-812 | 4491421.3_NODE_2987             | + | 40037  | 40112  | RNA → | rplM (PRK09216)Ribosomal_L13 (pfam00572) → | rpsI (PRK00132)Ribosomal_S9 (pfam00380) →  |
| env-813 | DLF006_scaffold45333_1          | + | 259    | 334    | RNA → | rplM (PRK09216)Ribosomal_L13 (pfam00572) → |                                            |
| env-814 | DLM005_scaffold13338_1          | + | 240    | 315    | RNA → | rplM (PRK09216)Ribosomal_L13 (pfam00572) → | rpsI (PRK00132)Ribosomal_S9 (pfam00380) →  |
| env-815 | DLM017_scaffold38149_2          | - | 11964  | 11889  | RNA → | rplM (PRK09216)Ribosomal_L13 (pfam00572) → | rpsI (PRK00132)Ribosomal_S9 (pfam00380) →  |
| env-816 | DOM001_scaffold19626_3          | + | 109863 | 109938 | RNA → | rplM (PRK09216)Ribosomal_L13 (pfam00572) → | rpsI (PRK00132)Ribosomal_S9 (pfam00380) →  |
| env-817 | DOM003_scaffold20232_1          | + | 1899   | 1974   | RNA → | rplM (PRK09216)Ribosomal_L13 (pfam00572) → |                                            |
| env-818 | NOM019_scaffold53163_1          | + | 23837  | 23912  | RNA → | rplM (PRK09216)Ribosomal_L13 (pfam00572) → | rpsI (PRK00132)Ribosomal_S9 (pfam00380) →  |
| env-819 | SRS019910_WUGC_scaffold_10772   | + | 132    | 207    | RNA → | rplM (PRK09216)Ribosomal_L13 (pfam00572) → |                                            |
| env-820 | SRS053398_LANL_scaffold_37336   | + | 287    | 362    | RNA → | rplM (PRK09216)Ribosomal_L13 (pfam00572) → | rpsI (PRK00132)Ribosomal_S9 (pfam00380) →  |
| env-821 | 4448820.3_Contig_1858           | - | 2732   | 2657   | RNA → | rplM (PRK09216)Ribosomal_L13 (pfam00572) → | rpsI (PRK00132)Ribosomal_S9 (pfam00380) →  |
| env-822 | DLF003_scaffold47495_1          | + | 445    | 520    | RNA → | rplM (PRK09216)Ribosomal_L13 (pfam00572) → |                                            |
| env-823 | DOM023_scaffold26204_1          | - | 12481  | 12406  | RNA → | rplM (PRK09216)Ribosomal_L13 (pfam00572) → | rpsI (PRK00132)Ribosomal_S9 (pfam00380) →  |
| env-824 | 4448818.3_Contig459             | - | 19229  | 19154  | RNA → | rplM (PRK09216)Ribosomal_L13 (pfam00572) → | rpsI (PRK00132)Ribosomal_S9 (pfam00380) →  |
| env-825 | 4448811.3_Contig642             | - | 2634   | 2559   | RNA → | rplM (PRK09216)RplM (COG0102) →            | rplM (PRK09216)Ribosomal_L13 (pfam00572) → |
| env-826 | 4448814.3_Contig2119            | + | 771    | 846    | RNA → | rplM (PRK09216)Ribosomal_L13 (pfam00572) → | rpsI (PRK00132)Ribosomal_S9 (pfam00380) →  |
| env-827 | scaffold12317_1_MH0026          | - | 272    | 197    | RNA → | rplM (PRK09216)Ribosomal_L13 (pfam00572) → |                                            |
| env-828 | scaffold30210_1_MH0049          | - | 536    | 461    | RNA → | rplM (PRK09216)Ribosomal_L13 (pfam00572) → |                                            |
| env-829 | 4448810.3.47000                 | - | 13461  | 13386  | RNA → | rplM (PRK09216)Ribosomal_L13 (pfam00572) → | rpsI (PRK00132)Ribosomal_S9 (pfam00380) →  |
| env-830 | 4448816.3_Contig1564            | - | 700    | 625    | RNA → | rplM (PRK09216)Ribosomal_L13 (pfam00572) → | rplM (PRK09216)Ribosomal_L13 (pfam00572) → |
| env-831 | NOM001_scaffold36808_1          | - | 12342  | 12267  | RNA → | rplM (PRK09216)Ribosomal_L13 (pfam00572) → | rpsI (PRK00132)Ribosomal_S9 (pfam00380) →  |
| env-832 | CAM_READ_0099565819             | + | 27     | 102    | RNA → | rplM (PRK09216)Ribosomal_L13 (pfam00572) → |                                            |
| env-833 | 4448808.3_Contig33004           | - | 288    | 214    | RNA → | rplM (PRK09216)RplM (COG0102) →            |                                            |

|          |                                  |   |         |         |     |                                            |                                            |
|----------|----------------------------------|---|---------|---------|-----|--------------------------------------------|--------------------------------------------|
| env-834  | NLM016_scaffold13879_1           | - | 134     | 59      | RNA | → hypo                                     | →                                          |
| env-835  | scaffold9468_1.O2.UC-12          | + | 3921    | 3996    | RNA | → rplM (PRK09216)Ribosomal_L13 (pfam00572) | →                                          |
| env-836  | NLM006_scaffold9242_1            | + | 439     | 514     | RNA | → rplM (PRK09216)RplM (COG0102)            | →                                          |
| env-837  | NLM009_scaffold10030_1           | + | 15733   | 15808   | RNA | → rplM (PRK09216)Ribosomal_L13 (pfam00572) | → rpsI (PRK00132)Ribosomal_S9 (pfam00380)  |
| Pco-2-1  | NZ_GG703855.1                    | - | 96347   | 96272   | RNA | → rplM (PRK09216)Ribosomal_L13 (pfam00572) | → rpsI (PRK00132)Ribosomal_S9 (pfam00380)  |
| env-838  | contig13883                      | - | 85      | 10      | RNA | → hypo                                     | →                                          |
| env-839  | DLF004_scaffold32113_1           | - | 12265   | 12190   | RNA | → rplM (PRK09216)Ribosomal_L13 (pfam00572) | → rpsI (PRK00132)Ribosomal_S9 (pfam00380)  |
| env-840  | SRS013687_Baylor_scaffold_46077  | - | 545     | 470     | RNA | → rplM (PRK09216)Ribosomal_L13 (pfam00572) | →                                          |
| env-841  | SRS023914_Baylor_scaffold_16462  | + | 15313   | 15388   | RNA | → rplM (PRK09216)Ribosomal_L13 (pfam00572) | → rpsI (PRK00132)Ribosomal_S9 (pfam00380)  |
| env-842  | SRS049959_WUGC_scaffold_10211    | - | 449     | 374     | RNA | → rplM (PRK09216)Ribosomal_L13 (pfam00572) | →                                          |
| env-843  | scaffold2008_3.V1.UC-21          | + | 224     | 299     | RNA | → rplM (PRK09216)Ribosomal_L13 (pfam00572) | → rpsI (PRK00132)Ribosomal_S9 (pfam00380)  |
| env-844  | NOM020_scaffold12283_2           | - | 11931   | 11856   | RNA | → rplM (PRK09216)Ribosomal_L13 (pfam00572) | → rpsI (PRK00132)Ribosomal_S9 (pfam00380)  |
| Por-8-1  | NZ_KK073873.1                    | + | 3030252 | 3030326 | RNA | → rplM (PRK09216)Ribosomal_L13 (pfam00572) | → rpsI (PRK00132)Ribosomal_S9 (pfam00380)  |
| Psp-21-1 | NZ_JRPT01000012.1                | - | 33492   | 33419   | RNA | → rplM (PRK09216)Ribosomal_L13 (pfam00572) | → rpsI (PRK00132)Ribosomal_S9 (pfam00380)  |
| env-845  | RUMENNODE_2697187_1              | - | 3085    | 3011    | RNA | → rplM (PRK09216)Ribosomal_L13 (pfam00572) | → rpsI (PRK00132)Ribosomal_S9 (pfam00380)  |
| env-846  | AUXO015280558.1                  | - | 453     | 379     | RNA | → rplM (PRK09216)Ribosomal_L13 (pfam00572) | →                                          |
| env-847  | AUXO011297008.1                  | - | 1734    | 1660    | RNA | → rplM (PRK09216)Ribosomal_L13 (pfam00572) | → rpsI (PRK00132)Ribosomal_S9 (pfam00380)  |
| env-848  | SRS013723_Baylor_scaffold_19570  | + | 4339    | 4413    | RNA | → rplM (PRK09216)Ribosomal_L13 (pfam00572) | → rpsI (PRK00132)Ribosomal_S9 (pfam00380)  |
| env-849  | SRS012285_C2809459               | - | 149     | 75      | RNA | → hypo                                     | →                                          |
| env-850  | SRS019980_C2790887               | - | 135     | 61      | RNA | → hypo                                     | →                                          |
| env-851  | SRS016043_WUGC_scaffold_31124    | + | 1754    | 1828    | RNA | → rplM (PRK09216)Ribosomal_L13 (pfam00572) | →                                          |
| env-852  | SRS011152_Baylor_scaffold_57690  | - | 154     | 80      | RNA | →                                          |                                            |
| env-853  | SRS013836_C4801934               | + | 838     | 912     | RNA | →                                          |                                            |
| env-854  | SRS045313_C1296217               | - | 154     | 80      | RNA | → hypo                                     | →                                          |
| env-855  | SRS022725_LANL_scaffold_20670    | - | 412     | 338     | RNA | → rplM (PRK09216)Ribosomal_L13 (pfam00572) | →                                          |
| env-856  | SRS022149_C2846288               | + | 4393    | 4467    | RNA | →                                          |                                            |
| env-857  | SRS051930_C3273277               | + | 1215    | 1289    | RNA | →                                          |                                            |
| env-858  | SRS042984_LANL_scaffold_16758    | + | 9998    | 10072   | RNA | → rplM (PRK09216)Ribosomal_L13 (pfam00572) | → rpsI (PRK00132)Ribosomal_S9 (pfam00380)  |
| env-859  | SRS052876_LANL_scaffold_54535    | + | 954     | 1028    | RNA | →                                          |                                            |
| Pco-1-1  | NZ_HE999443.1                    | - | 281229  | 281155  | RNA | → rplM (PRK09216)Ribosomal_L13 (pfam00572) | → rpsI (PRK00132)Ribosomal_S9 (pfam00380)  |
| env-860  | SRS014578_WUGC_scaffold_18370    | - | 7328    | 7254    | RNA | → rplM (PRK09216)Ribosomal_L13 (pfam00572) | → rpsI (PRK00132)Ribosomal_S9 (pfam00380)  |
| env-861  | SRS013170_Baylor_scaffold_112597 | + | 2727    | 2801    | RNA | →                                          |                                            |
| env-862  | SRS043239_C1976103               | - | 186     | 112     | RNA | → hypo                                     | →                                          |
| env-863  | SRS063999_LANL_scaffold_2422     | - | 7865    | 7791    | RNA | → rplM (PRK09216)Ribosomal_L13 (pfam00572) | → rpsI (PRK00132)Ribosomal_S9 (pfam00380)  |
| env-864  | SRS016360_Baylor_scaffold_11199  | - | 720     | 646     | RNA | → rplM (PRK09216)Ribosomal_L13 (pfam00572) | → rpsI (PRK00132)Ribosomal_S9 (pfam00380)  |
| env-865  | SRS019128_C4357049               | - | 303     | 229     | RNA | → rplM (PRK09216)Ribosomal_L13 (pfam00572) | →                                          |
| env-866  | SRS024087_LANL_scaffold_47659    | - | 135     | 61      | RNA | →                                          |                                            |
| env-867  | SRS063932_LANL_scaffold_92613    | + | 4336    | 4410    | RNA | →                                          |                                            |
| env-868  | SRS024289_LANL_scaffold_70016    | - | 135     | 61      | RNA | →                                          |                                            |
| env-869  | SRS018443_Baylor_scaffold_65820  | + | 8016    | 8090    | RNA | → rplM (PRK09216)Ribosomal_L13 (pfam00572) | → rpsI (PRK00132)Ribosomal_S9 (pfam00380)  |
| env-870  | SRS018337_C2365684               | + | 512     | 586     | RNA | →                                          |                                            |
| env-871  | SRS063215_LANL_scaffold_21409    | - | 945     | 871     | RNA | → rplM (PRK09216)Ribosomal_L13 (pfam00572) | → rpsI (PRK00132)Ribosomal_S9 (pfam00380)  |
| env-872  | SRS014107_WUGC_scaffold_50706    | - | 134     | 60      | RNA | →                                          |                                            |
| env-873  | SRS015044_WUGC_scaffold_67840    | - | 135     | 61      | RNA | →                                          |                                            |
| env-874  | SRS016331_C4131247               | - | 156     | 82      | RNA | →                                          |                                            |
| env-875  | SRS017139_C3804675               | - | 135     | 61      | RNA | →                                          |                                            |
| env-876  | SRS024355_LANL_scaffold_42842    | - | 1441    | 1367    | RNA | → rplM (PRK09216)Ribosomal_L13 (pfam00572) | → rpsI (PRK00132)Ribosomal_S9 (pfam00380)  |
| Psp-25-1 | NZ_GG740073.1                    | - | 461425  | 461351  | RNA | → rplM (PRK09216)Ribosomal_L13 (pfam00572) | → rplM (PRK09216)Ribosomal_L13 (pfam00572) |
|          |                                  |   |         |         |     |                                            | → rpsI (PRK00132)Ribosomal_S9 (pfam00380)  |
|          |                                  |   |         |         |     |                                            | → rpsI (PRK00132)Ribosomal_S9 (pfam00380)  |
| env-877  | SRS011343_C2242542               | + | 1051    | 1125    | RNA | →                                          |                                            |
| env-878  | SRS014691_C2503925               | - | 145     | 71      | RNA | → hypo                                     | →                                          |
| env-879  | SRS019028_WUGC_scaffold_45064    | - | 145     | 71      | RNA | → hypo                                     | →                                          |

|          |                                 |   |        |        |       |                                                                                                                                                                                            |
|----------|---------------------------------|---|--------|--------|-------|--------------------------------------------------------------------------------------------------------------------------------------------------------------------------------------------|
| env-880  | SRS015574_WUGC_scaffold_63161   | + | 871    | 945    | RNA → | rplM (PRK09216)Ribosomal_L13 (pfam00572) →                                                                                                                                                 |
| env-881  | SRS016746_Baylor_scaffold_73191 | + | 1882   | 1956   | RNA → |                                                                                                                                                                                            |
| env-882  | SRS017511_Baylor_scaffold_92834 | - | 135    | 61     | RNA → |                                                                                                                                                                                            |
| env-883  | SRS023358_C3462583              | + | 482    | 556    | RNA → |                                                                                                                                                                                            |
| env-884  | SRS049318_LANL_scaffold_32648   | + | 9208   | 9282   | RNA → |                                                                                                                                                                                            |
| env-885  | SRS050628_LANL_scaffold_20687   | - | 978    | 904    | RNA → | rplM (PRK09216)Ribosomal_L13 (pfam00572) → rpsI (PRK00132)Ribosomal_S9 (pfam00380) →                                                                                                       |
| env-886  | SRS022719_LANL_scaffold_45285   | - | 804    | 729    | RNA → | rplM (PRK09216)Ribosomal_L13 (pfam00572) → rpsI (PRK00132)Ribosomal_S9 (pfam00380) →                                                                                                       |
| env-887  | SRS019129_WUGC_scaffold_43257   | - | 338    | 263    | RNA → | rplM (PRK09216)Ribosomal_L13 (pfam00572) →                                                                                                                                                 |
| env-888  | SRS016043_C2115867              | - | 218    | 143    | RNA → | rplM (PRK09216)RplM (COG0102) →                                                                                                                                                            |
| env-889  | SRS013533_PGA_scaffold_117699   | + | 3103   | 3178   | RNA → |                                                                                                                                                                                            |
| env-890  | SRS017511_Baylor_scaffold_92627 | + | 951    | 1026   | RNA → |                                                                                                                                                                                            |
| env-891  | SRS021477_C2588523              | - | 323    | 248    | RNA → | rplM (PRK09216)Ribosomal_L13 (pfam00572) →                                                                                                                                                 |
| env-892  | SRS013170_Baylor_scaffold_67347 | - | 307    | 232    | RNA → | rplM (PRK09216)Ribosomal_L13 (pfam00572) →                                                                                                                                                 |
| env-893  | SRS064449_C4126558              | - | 118    | 43     | RNA → |                                                                                                                                                                                            |
| env-894  | SRS053917_LANL_scaffold_88433   | + | 607    | 682    | RNA → | rplM (PRK09216)Ribosomal_L13 (pfam00572) →                                                                                                                                                 |
| env-895  | SRS013252_C3525919              | - | 153    | 78     | RNA → | hypo →                                                                                                                                                                                     |
| env-896  | SRS015803_C2675896              | + | 3433   | 3508   | RNA → | rplM (PRK09216)Ribosomal_L13 (pfam00572) → rpsI (PRK00132)Ribosomal_S9 (pfam00380) →                                                                                                       |
| env-897  | SRS018394_C4057209              | - | 982    | 907    | RNA → | rplM (PRK09216)Ribosomal_L13 (pfam00572) → rpsI (PRK00132)Ribosomal_S9 (pfam00380) →                                                                                                       |
| env-898  | SRS024649_LANL_scaffold_51754   | - | 635    | 560    | RNA → | rplM (PRK09216)Ribosomal_L13 (pfam00572) →                                                                                                                                                 |
| env-899  | SRS054430_LANL_scaffold_20956   | - | 988    | 913    | RNA → | rplM (PRK09216)Ribosomal_L13 (pfam00572) → rpsI (PRK00132)Ribosomal_S9 (pfam00380) →                                                                                                       |
| Plo-1-1  | NZ_KB899213.1                   | + | 249357 | 249432 | RNA → | rplM (PRK09216)Ribosomal_L13 (pfam00572) → rpsI (PRK00132)Ribosomal_S9 (pfam00380) →                                                                                                       |
| env-900  | SRS017445_Baylor_scaffold_83464 | + | 1528   | 1603   | RNA → | rplM (PRK09216)Ribosomal_L13 (pfam00572) →                                                                                                                                                 |
| env-901  | SRS018573_C2480980              | - | 139    | 64     | RNA → |                                                                                                                                                                                            |
| env-902  | SRS045197_WUGC_scaffold_65903   | + | 7998   | 8073   | RNA → | rplM (PRK09216)Ribosomal_L13 (pfam00572) → rpsI (PRK00132)Ribosomal_S9 (pfam00380) →                                                                                                       |
| Psp-26-1 | NZ_GG704825.1                   | - | 516881 | 516806 | RNA → | rplM (PRK09216)Ribosomal_L13 (pfam00572) → rpsI (PRK00132)Ribosomal_S9 (pfam00380) → hypo → rpsB (PRK05299)Ribosomal_S2 (pfam00318) → tsf (PRK09377)UBA_EF-Ts (cd14275)EF_TS (pfam00889) → |
| env-903  | SRS023841_Baylor_scaffold_21872 | - | 947    | 872    | RNA → | rplM (PRK09216)Ribosomal_L13 (pfam00572) → rpsI (PRK00132)Ribosomal_S9 (pfam00380) →                                                                                                       |
| env-904  | SRS011098_C1871947              | - | 560    | 485    | RNA → | rplM (PRK09216)Ribosomal_L13 (pfam00572) →                                                                                                                                                 |
| env-905  | SRS011255_C2493253              | - | 151    | 76     | RNA → |                                                                                                                                                                                            |
| env-906  | SRS016746_C2995254              | + | 311    | 386    | RNA → |                                                                                                                                                                                            |
| env-907  | SRS017227_C5088817              | + | 278    | 353    | RNA → |                                                                                                                                                                                            |
| env-908  | SRS018157_Baylor_scaffold_33504 | + | 7670   | 7745   | RNA → | rplM (PRK09216)Ribosomal_L13 (pfam00572) → rpsI (PRK00132)Ribosomal_S9 (pfam00380) →                                                                                                       |
| env-909  | SRS018665_C3707955              | + | 500    | 575    | RNA → |                                                                                                                                                                                            |
| env-910  | SRS019906_C2276695              | + | 7839   | 7914   | RNA → |                                                                                                                                                                                            |
| env-911  | SRS023595_C6887425              | - | 139    | 64     | RNA → | hypo →                                                                                                                                                                                     |
| env-912  | SRS023938_C2241954              | - | 119    | 44     | RNA → | hypo →                                                                                                                                                                                     |
| env-913  | SRS024087_LANL_scaffold_42583   | - | 139    | 64     | RNA → |                                                                                                                                                                                            |
| env-914  | SRS051378_C1873917              | - | 1295   | 1220   | RNA → | rplM (PRK09216)Ribosomal_L13 (pfam00572) → rpsI (PRK00132)Ribosomal_S9 (pfam00380) →                                                                                                       |
| env-915  | SRS051941_LANL_scaffold_77484   | - | 153    | 78     | RNA → |                                                                                                                                                                                            |
| env-916  | SRS052604_LANL_scaffold_13013   | + | 539    | 614    | RNA → | rplM (PRK09216)Ribosomal_L13 (pfam00572) → rpsI (PRK00132)Ribosomal_S9 (pfam00380) →                                                                                                       |
| env-917  | SRS055401_C2209469              | + | 195    | 270    | RNA → |                                                                                                                                                                                            |
| env-918  | SRS058053_LANL_scaffold_60299   | + | 304    | 379    | RNA → |                                                                                                                                                                                            |
| env-919  | SRS063603_C4249750              | - | 118    | 43     | RNA → |                                                                                                                                                                                            |
| env-920  | SRS063932_LANL_scaffold_98774   | - | 139    | 64     | RNA → |                                                                                                                                                                                            |
| env-921  | SRS017808_C3874880              | - | 146    | 71     | RNA → |                                                                                                                                                                                            |
| env-922  | SRS017439_Baylor_scaffold_51404 | - | 632    | 557    | RNA → | rplM (PRK09216)Ribosomal_L13 (pfam00572) →                                                                                                                                                 |
| env-923  | SRS075404_LANL_scaffold_60611   | + | 3391   | 3466   | RNA → |                                                                                                                                                                                            |
| env-924  | SRS012279_Baylor_scaffold_46820 | + | 3560   | 3635   | RNA → | rplM (PRK09216)Ribosomal_L13 (pfam00572) → rpsI (PRK00132)Ribosomal_S9 (pfam00380) →                                                                                                       |
| env-925  | SRS013705_Baylor_scaffold_63054 | + | 3114   | 3189   | RNA → | rplM (PRK09216)Ribosomal_L13 (pfam00572) → rpsI (PRK00132)Ribosomal_S9 (pfam00380) →                                                                                                       |
| env-926  | SRS013879_C2765042              | + | 277    | 352    | RNA → |                                                                                                                                                                                            |
| env-927  | SRS017209_Baylor_scaffold_40939 | + | 72651  | 72726  | RNA → | rplM (PRK09216)Ribosomal_L13 (pfam00572) → rpsI (PRK00132)Ribosomal_S9 (pfam00380) →                                                                                                       |
| env-928  | SRS018357_Baylor_scaffold_46794 | + | 98     | 173    | RNA → | rplM (PRK09216)Ribosomal_L13 (pfam00572) →                                                                                                                                                 |



|         |                                 |   |       |       |                                                                                                                                                                                 |
|---------|---------------------------------|---|-------|-------|---------------------------------------------------------------------------------------------------------------------------------------------------------------------------------|
| env-929 | SRS022077_Baylor_scaffold_41018 | + | 3560  | 3635  | RNA → rplM (PRK09216)Ribosomal_L13 (pfam00572) → rpsI (PRK00132)Ribosomal_S9 (pfam00380) →                                                                                      |
| env-930 | SRS023926_Baylor_scaffold_55027 | + | 3644  | 3719  | RNA → rplM (PRK09216)Ribosomal_L13 (pfam00572) → rpsI (PRK00132)Ribosomal_S9 (pfam00380) →                                                                                      |
| env-931 | SRS050669_LANL_scaffold_50571   | + | 3562  | 3637  | RNA → rplM (PRK09216)Ribosomal_L13 (pfam00572) → rpsI (PRK00132)Ribosomal_S9 (pfam00380) →                                                                                      |
| env-932 | SRS064329_LANL_scaffold_50907   | - | 985   | 910   | RNA → rplM (PRK09216)Ribosomal_L13 (pfam00572) → rpsI (PRK00132)Ribosomal_S9 (pfam00380) →                                                                                      |
| env-933 | Tongue_dor_WUGI_scaffold_12918  | + | 1043  | 1118  | RNA →                                                                                                                                                                           |
| env-934 | SRS011306_Baylor_scaffold_62841 | - | 35842 | 35767 | RNA → rplM (PRK09216)Ribosomal_L13 (pfam00572) → rpsI (PRK00132)Ribosomal_S9 (pfam00380) →                                                                                      |
| env-935 | SRS014573_WUGC_scaffold_21848   | + | 3270  | 3345  | RNA → rplM (PRK09216)Ribosomal_L13 (pfam00572) →                                                                                                                                |
| env-936 | SRS015762_C3664821              | + | 2929  | 3004  | RNA →                                                                                                                                                                           |
| env-937 | SRS016002_C2493893              | - | 135   | 60    | RNA → hypo →                                                                                                                                                                    |
| env-938 | SRS018300_Baylor_scaffold_10118 | + | 3538  | 3613  | RNA → rplM (PRK09216)Ribosomal_L13 (pfam00572) → rpsI (PRK00132)Ribosomal_S9 (pfam00380) →                                                                                      |
| env-939 | SRS018739_WUGC_scaffold_27638   | + | 3156  | 3231  | RNA → rplM (PRK09216)Ribosomal_L13 (pfam00572) → rpsI (PRK00132)Ribosomal_S9 (pfam00380) →                                                                                      |
| env-940 | SRS019389_C2124919              | - | 146   | 71    | RNA → hypo →                                                                                                                                                                    |
| env-941 | SRS024081_LANL_scaffold_17499   | + | 2653  | 2728  | RNA → rplM (PRK09216)Ribosomal_L13 (pfam00572) → rpsI (PRK00132)Ribosomal_S9 (pfam00380) →                                                                                      |
| env-942 | SRS024441_LANL_scaffold_33890   | + | 6153  | 6228  | RNA → rplM (PRK09216)Ribosomal_L13 (pfam00572) → rpsI (PRK00132)Ribosomal_S9 (pfam00380) →                                                                                      |
| env-943 | SRS049389_WUGC_scaffold_44708   | - | 146   | 71    | RNA →                                                                                                                                                                           |
| env-944 | SRS053603_LANL_scaffold_56769   | + | 3538  | 3613  | RNA →                                                                                                                                                                           |
| env-945 | SRS057205_LANL_scaffold_36133   | - | 1438  | 1363  | RNA → rplM (PRK09216)Ribosomal_L13 (pfam00572) → rpsI (PRK00132)Ribosomal_S9 (pfam00380) →                                                                                      |
| env-946 | SRS063193_LANL_scaffold_48783   | + | 3570  | 3645  | RNA → rplM (PRK09216)Ribosomal_L13 (pfam00572) →                                                                                                                                |
| env-947 | SRS064774_C2783916              | - | 146   | 71    | RNA → hypo →                                                                                                                                                                    |
| Psh-1-1 | NZ_BAI01000030.1                | - | 35483 | 35408 | RNA → rplM (PRK09216)Ribosomal_L13 (pfam00572) → rpsI (PRK00132)Ribosomal_S9 (pfam00380) →                                                                                      |
| env-948 | SRS022143_WUGC_scaffold_91746   | - | 632   | 557   | RNA → rplM (PRK09216)Ribosomal_L13 (pfam00572) →                                                                                                                                |
| env-949 | SRS019327_WUGC_scaffold_70870   | - | 10558 | 10483 | RNA → rplM (PRK09216)Ribosomal_L13 (pfam00572) → rpsI (PRK00132)Ribosomal_S9 (pfam00380) →                                                                                      |
| env-950 | SRS015434_C5949372              | - | 146   | 71    | RNA →                                                                                                                                                                           |
| env-951 | SRS018439_Baylor_scaffold_22146 | - | 17449 | 17374 | RNA → rplM (PRK09216)Ribosomal_L13 (pfam00572) → rpsI (PRK00132)Ribosomal_S9 (pfam00380) →                                                                                      |
| env-952 | SRS019071_C5217890              | + | 1981  | 2056  | RNA →                                                                                                                                                                           |
| env-953 | SRS013164_Baylor_scaffold_59130 | - | 979   | 904   | RNA → rplM (PRK09216)Ribosomal_L13 (pfam00572) → rpsI (PRK00132)Ribosomal_S9 (pfam00380) →                                                                                      |
| env-954 | SRS014888_C3104655              | - | 146   | 71    | RNA →                                                                                                                                                                           |
| env-955 | SRS023958_Baylor_scaffold_31813 | + | 3560  | 3635  | RNA → rplM (PRK09216)Ribosomal_L13 (pfam00572) →                                                                                                                                |
| env-956 | SRS057355_C2359830              | - | 146   | 71    | RNA →                                                                                                                                                                           |
| env-957 | SRS021496_C2846806              | - | 146   | 71    | RNA →                                                                                                                                                                           |
| env-958 | SRS022530_LANL_scaffold_60444   | - | 7595  | 7520  | RNA → rplM (PRK09216)Ribosomal_L13 (pfam00572) → rpsI (PRK00132)Ribosomal_S9 (pfam00380) →                                                                                      |
| env-959 | SRS063288_C2558656              | + | 371   | 446   | RNA →                                                                                                                                                                           |
| env-960 | scaffold15263_2_MH0055          | - | 943   | 868   | RNA → rplM (PRK09216)Ribosomal_L13 (pfam00572) → rpsI (PRK00132)Ribosomal_S9 (pfam00380) →                                                                                      |
| env-961 | scaffold18695_5_MH0014          | + | 2193  | 2268  | RNA → rplM (PRK09216)Ribosomal_L13 (pfam00572) → rpsI (PRK00132)Ribosomal_S9 (pfam00380) →                                                                                      |
| env-962 | scaffold58703_4_MH0042          | + | 509   | 584   | RNA → rplM (PRK09216)Ribosomal_L13 (pfam00572) →                                                                                                                                |
| env-963 | scaffold410_3_MH0063            | - | 5281  | 5206  | RNA → rplM (PRK09216)Ribosomal_L13 (pfam00572) → rpsI (PRK00132)Ribosomal_S9 (pfam00380) →                                                                                      |
| env-964 | scaffold1879_1_O2.UC-24         | + | 1299  | 1374  | RNA → rplM (PRK09216)Ribosomal_L13 (pfam00572) → rpsI (PRK00132)Ribosomal_S9 (pfam00380) →                                                                                      |
| env-965 | scaffold6667_6_V1.UC-14         | - | 958   | 883   | RNA → rplM (PRK09216)Ribosomal_L13 (pfam00572) → rpsI (PRK00132)Ribosomal_S9 (pfam00380) →                                                                                      |
| env-966 | 4491482.3_NODE.74973            | - | 6204  | 6129  | RNA → rplM (PRK09216)Ribosomal_L13 (pfam00572) → rpsI (PRK00132)Ribosomal_S9 (pfam00380) →                                                                                      |
| env-967 | BAAX01036178.1                  | - | 165   | 88    | RNA →                                                                                                                                                                           |
| env-968 | 4491403.3_NODE_60304            | - | 979   | 902   | RNA → rplM (PRK09216)Ribosomal_L13 (pfam00572) → rplM (PRK09216)Ribosomal_L13 (pfam00572) → rpsI (PRK00132)Ribosomal_S9 (pfam00380) → rpsI (PRK00132)Ribosomal_S9 (pfam00380) → |
| env-969 | DLF003_scaffold24849.4          | - | 8212  | 8135  | RNA → rplM (PRK09216)Ribosomal_L13 (pfam00572) → rpsI (PRK00132)Ribosomal_S9 (pfam00380) →                                                                                      |
| env-970 | NLM016_scaffold8572.3           | - | 1028  | 951   | RNA → rplM (PRK09216)Ribosomal_L13 (pfam00572) → rpsI (PRK00132)Ribosomal_S9 (pfam00380) →                                                                                      |
| env-971 | 4491404.3_NODE_3637             | + | 6552  | 6629  | RNA → rplM (PRK09216)Ribosomal_L13 (pfam00572) →                                                                                                                                |
| env-972 | DLM006_scaffold334.9            | + | 10545 | 10622 | RNA → rplM (PRK09216)Ribosomal_L13 (pfam00572) → rpsI (PRK00132)Ribosomal_S9 (pfam00380) →                                                                                      |
| env-973 | scaffold78050_1_O2.UC-19        | + | 162   | 239   | RNA → rplM (PRK09216)Ribosomal_L13 (pfam00572) → rpsI (PRK00132)Ribosomal_S9 (pfam00380) →                                                                                      |
| env-974 | DOM016_scaffold1189_4           | + | 9750  | 9827  | RNA → rplM (PRK09216)Ribosomal_L13 (pfam00572) → rpsI (PRK00132)Ribosomal_S9 (pfam00380) →                                                                                      |
| env-975 | DOM022_scaffold19179_2          | + | 11637 | 11714 | RNA → rplM (PRK09216)Ribosomal_L13 (pfam00572) → rpsI (PRK00132)Ribosomal_S9 (pfam00380) →                                                                                      |
| env-976 | SRS011529_WUGC_scaffold_9481    | + | 35    | 112   | RNA → rplM (PRK09216)Ribosomal_L13 (pfam00572) → rpsI (PRK00132)Ribosomal_S9 (pfam00380) →                                                                                      |
| Pst-1-1 | NZ_JH379462.1                   | - | 10330 | 10253 | RNA → rplM (PRK09216)Ribosomal_L13 (pfam00572) → rpsI (PRK00132)Ribosomal_S9 (pfam00380) →                                                                                      |
| env-977 | NLF006_scaffold10643.1          | - | 1262  | 1185  | RNA → rplM (PRK09216)Ribosomal_L13 (pfam00572) → rpsI (PRK00132)Ribosomal_S9 (pfam00380) →                                                                                      |



|          |                                     |   |         |         |       |                                                                                                                                                                           |
|----------|-------------------------------------|---|---------|---------|-------|---------------------------------------------------------------------------------------------------------------------------------------------------------------------------|
| env-978  | NLM029_scaffold46472_1              | - | 9492    | 9415    | RNA → | rplM (PRK09216)Ribosomal_L13 (pfam00572) → rpsI (PRK00132)Ribosomal_S9 (pfam00380) →                                                                                      |
| env-979  | NLF005_scaffold222_5                | + | 9773    | 9850    | RNA → | rplM (PRK09216)Ribosomal_L13 (pfam00572) → rpsI (PRK00132)Ribosomal_S9 (pfam00380) →                                                                                      |
| env-980  | NOM007_scaffold112_4                | + | 15977   | 16054   | RNA → | rplM (PRK09216)Ribosomal_L13 (pfam00572) → rpsI (PRK00132)Ribosomal_S9 (pfam00380) →                                                                                      |
| env-981  | NLM025_scaffold10432_10             | - | 8972    | 8895    | RNA → | rplM (PRK09216)Ribosomal_L13 (pfam00572) → rpsI (PRK00132)Ribosomal_S9 (pfam00380) →                                                                                      |
| env-982  | DLM002_scaffold10936_3              | + | 5488    | 5565    | RNA → | rplM (PRK09216)Ribosomal_L13 (pfam00572) → rpsI (PRK00132)Ribosomal_S9 (pfam00380) →                                                                                      |
| env-983  | NLM009_scaffold4804_2               | + | 26579   | 26656   | RNA → | rplM (PRK09216)Ribosomal_L13 (pfam00572) → rpsI (PRK00132)Ribosomal_S9 (pfam00380) →                                                                                      |
| env-984  | NLM002_scaffold27297_2              | - | 9435    | 9358    | RNA → | rplM (PRK09216)Ribosomal_L13 (pfam00572) → rpsI (PRK00132)Ribosomal_S9 (pfam00380) →                                                                                      |
| env-985  | UnmappedStool_Broad_scaffold_727222 | - | 162     | 82      | RNA → | hypo →                                                                                                                                                                    |
| env-986  | 4491404.3_NODE_8492                 | + | 545     | 625     | RNA → | rplM (PRK09216)Ribosomal_L13 (pfam00572) →                                                                                                                                |
| env-987  | SRS016541_C1524265                  | + | 279     | 359     | RNA → |                                                                                                                                                                           |
| env-988  | SRS013687_Baylor_scaffold_57705     | + | 279     | 359     | RNA → | rplM (PRK09216)Ribosomal_L13 (pfam00572) →                                                                                                                                |
| env-989  | SRS023914_Baylor_scaffold_14686     | + | 279     | 359     | RNA → | rplM (PRK09216)Ribosomal_L13 (pfam00572) → rpsI (PRK00132)Ribosomal_S9 (pfam00380) →                                                                                      |
| env-990  | BAAx01006449.1                      | - | 273     | 193     | RNA → | rplM (PRK09216)Ribosomal_L13 (pfam00572) →                                                                                                                                |
| env-991  | NLF006_scaffold165_1                | - | 402     | 322     | RNA → | rplM (PRK09216)Ribosomal_L13 (pfam00572) →                                                                                                                                |
| env-992  | 4491403.3_NODE_60304                | - | 780     | 700     | RNA → | rplM (PRK09216)Ribosomal_L13 (pfam00572) → rplM (PRK09216)Ribosomal_L13 (pfam00572) → rpsI (PRK00132)Ribosomal_S9 (pfam00380) → rpsI (PRK00132)Ribosomal_S9 (pfam00380) → |
| env-993  | SRS049959_C3758114                  | - | 124     | 44      | RNA → | hypo →                                                                                                                                                                    |
| env-994  | scaffold29644_4_O2_UC-13            | - | 6421    | 6346    | RNA → | rplM (PRK09216)Ribosomal_L13 (pfam00572) → rpsI (PRK00132)Ribosomal_S9 (pfam00380) →                                                                                      |
| Pbu-3-1  | NZ_GG739928.1                       | - | 179846  | 179770  | RNA → | rplM (PRK09216)Ribosomal_L13 (pfam00572) → rplM (PRK09216)Ribosomal_L13 (pfam00572) → rpsI (PRK00132)Ribosomal_S9 (pfam00380) → rpsI (PRK00132)Ribosomal_S9 (pfam00380) → |
| Pbu-1-1  | NZ_JVYX01000008.1                   | - | 5815    | 5739    | RNA → | rplM (PRK09216)Ribosomal_L13 (pfam00572) → rpsI (PRK00132)Ribosomal_S9 (pfam00380) →                                                                                      |
| Pbu-2-1  | NZ_GL586311.1                       | + | 1240091 | 1240167 | RNA → | rplM (PRK09216)Ribosomal_L13 (pfam00572) → rpsI (PRK00132)Ribosomal_S9 (pfam00380) →                                                                                      |
| Psp-12-1 | NZ_ALJQ01000010.1                   | - | 159165  | 159089  | RNA → | rplM (PRK09216)Ribosomal_L13 (pfam00572) → rplM (PRK09216)Ribosomal_L13 (pfam00572) → rpsI (PRK00132)Ribosomal_S9 (pfam00380) → rpsI (PRK00132)Ribosomal_S9 (pfam00380) → |
| env-995  | AUXO015968780.1                     | + | 216     | 290     | RNA → |                                                                                                                                                                           |
| env-996  | AUXO017534585.1                     | - | 968     | 894     | RNA → | rplM (PRK09216)Ribosomal_L13 (pfam00572) → rpsI (PRK00132)Ribosomal_S9 (pfam00380) →                                                                                      |
| env-997  | pre-rum113-00662                    | - | 3481    | 3406    | RNA → | rplM (PRK09216)Ribosomal_L13 (pfam00572) → rpsI (PRK00132)Ribosomal_S9 (pfam00380) →                                                                                      |
| env-998  | pre-rum114-03875                    | + | 2977    | 3052    | RNA → | rplM (PRK09216)Ribosomal_L13 (pfam00572) → rpsI (PRK00132)Ribosomal_S9 (pfam00380) →                                                                                      |
| env-999  | HCE12Call500_c0260910               | + | 4902    | 4978    | RNA → | rplM (PRK09216)Ribosomal_L13 (pfam00572) →                                                                                                                                |
| env-1000 | HCF12C_329458                       | - | 179     | 103     | RNA → | ← hypo                                                                                                                                                                    |
| Por-1-1  | NZ_GL833119.1                       | - | 125193  | 125119  | RNA → | rplM (PRK09216)Ribosomal_L13 (pfam00572) → rpsI (PRK00132)Ribosomal_S9 (pfam00380) →                                                                                      |
| Por-3-1  | NZ_KE340302.1                       | - | 130474  | 130400  | RNA → | rplM (PRK09216)Ribosomal_L13 (pfam00572) → rpsI (PRK00132)Ribosomal_S9 (pfam00380) →                                                                                      |
| env-1001 | SRS013836_C4829201                  | - | 117     | 43      | RNA → |                                                                                                                                                                           |
| Por-2-1  | NZ_KI669542.1                       | - | 130434  | 130360  | RNA → | rplM (PRK09216)Ribosomal_L13 (pfam00572) → rpsI (PRK00132)Ribosomal_S9 (pfam00380) →                                                                                      |
| env-1002 | SRS023604_Baylor_scaffold_3034      | + | 34418   | 34492   | RNA → | rplM (PRK09216)Ribosomal_L13 (pfam00572) → rpsI (PRK00132)Ribosomal_S9 (pfam00380) →                                                                                      |
| env-1003 | SRS013542_C165903                   | - | 485     | 411     | RNA → | rplM (PRK09216)Ribosomal_L13 (pfam00572) →                                                                                                                                |
| Pti-3-1  | NZ_JRPQ01000080.1                   | + | 19409   | 19483   | RNA → | rplM (PRK09216)Ribosomal_L13 (pfam00572) → rpsI (PRK00132)Ribosomal_S9 (pfam00380) →                                                                                      |
| env-1004 | SRS011111_Baylor_scaffold_4265      | + | 5684    | 5758    | RNA → | rplM (PRK09216)Ribosomal_L13 (pfam00572) →                                                                                                                                |
| Pti-1-1  | NZ_HG417093.1                       | - | 162971  | 162897  | RNA → | rplM (PRK09216)Ribosomal_L13 (pfam00572) → rpsI (PRK00132)Ribosomal_S9 (pfam00380) →                                                                                      |
| Pti-2-1  | NZ_ADEF01000048.1                   | + | 153828  | 153902  | RNA → | rplM (PRK09216)Ribosomal_L13 (pfam00572) → rplM (PRK09216)Ribosomal_L13 (pfam00572) → rpsI (PRK00132)Ribosomal_S9 (pfam00380) → rpsI (PRK00132)Ribosomal_S9 (pfam00380) → |
| env-1005 | SRS023468_LANL_scaffold_1144        | - | 3752    | 3678    | RNA → | rplM (PRK09216)Ribosomal_L13 (pfam00572) → rpsI (PRK00132)Ribosomal_S9 (pfam00380) →                                                                                      |
| env-1006 | SRS023604_Baylor_scaffold_2736      | - | 116     | 42      | RNA → | hypo →                                                                                                                                                                    |
| Psp-4-1  | NZ_AWXC01000037.1                   | - | 65697   | 65623   | RNA → | rplM (PRK09216)Ribosomal_L13 (pfam00572) → rpsI (PRK00132)Ribosomal_S9 (pfam00380) →                                                                                      |
| Pbu-6-1  | NZ_JRNP01000028.1                   | + | 52030   | 52104   | RNA → | rplM (PRK09216)Ribosomal_L13 (pfam00572) → rpsI (PRK00132)Ribosomal_S9 (pfam00380) →                                                                                      |
| env-1007 | SRS011111_Baylor_scaffold_12781     | - | 1177    | 1103    | RNA → | rplM (PRK09216)Ribosomal_L13 (pfam00572) → rpsI (PRK00132)Ribosomal_S9 (pfam00380) →                                                                                      |
| Pbu-5-1  | NZ_JRNN01000034.1                   | + | 33581   | 33655   | RNA → | rplM (PRK09216)Ribosomal_L13 (pfam00572) → rpsI (PRK00132)Ribosomal_S9 (pfam00380) →                                                                                      |
| Pbu-4-1  | NZ_ADEG01000023.1                   | - | 35564   | 35490   | RNA → | rplM (PRK09216)Ribosomal_L13 (pfam00572) → rplM (PRK09216)Ribosomal_L13 (pfam00572) → rpsI (PRK00132)Ribosomal_S9 (pfam00380) → rpsI (PRK00132)Ribosomal_S9 (pfam00380) → |
| env-1008 | SRS017511_Baylor_scaffold_48340     | - | 333     | 258     | RNA → | hypo → rplM (PRK09216)Ribosomal_L13 (pfam00572) →                                                                                                                         |
| Pen-1-1  | NZ_BAIX01000001.1                   | + | 113639  | 113714  | RNA → | rplM (PRK09216)Ribosomal_L13 (pfam00572) → rpsI (PRK00132)Ribosomal_S9 (pfam00380) →                                                                                      |
| env-1009 | SRS013950_C2181444                  | - | 1427    | 1352    | RNA → | rplM (PRK09216)Ribosomal_L13 (pfam00572) → rpsI (PRK00132)Ribosomal_S9 (pfam00380) →                                                                                      |
| env-1010 | SRS014107_WUGC_scaffold_54517       | - | 223     | 148     | RNA → | rplM (PRK09216)RplM (COG0102) →                                                                                                                                           |

|          |                                  |   |         |         |       |                                                                                             |
|----------|----------------------------------|---|---------|---------|-------|---------------------------------------------------------------------------------------------|
| env-1011 | SRS014476_C3414245               | + | 514     | 589     | RNA → | rplM (PRK09216)RplM (COG0102) →                                                             |
| env-1012 | SRS014691_C2727318               | + | 851     | 926     | RNA → |                                                                                             |
| env-1013 | SRS016746_Baylor_scaffold_78063  | + | 1074    | 1149    | RNA → | rplM (PRK09216)Ribosomal_L13 (pfam00572) →                                                  |
| env-1014 | SRS017227_Baylor_scaffold_162432 | - | 14350   | 14275   | RNA → | rplM (PRK09216)Ribosomal_L13 (pfam00572) → rpsI (PRK00132)Ribosomal_S9 (pfam00380) →        |
| env-1015 | SRS019029_WUGC_scaffold_53097    | + | 1214    | 1289    | RNA → | rplM (PRK09216)Ribosomal_L13 (pfam00572) →                                                  |
| env-1016 | SRS047634_LANL_scaffold_137848   | + | 8745    | 8820    | RNA → |                                                                                             |
| Ppl-1-1  | NZ_AWET01000036.1                | + | 123358  | 123433  | RNA → | rplM (PRK09216)Ribosomal_L13 (pfam00572) → rpsI (PRK00132)Ribosomal_S9 (pfam00380) →        |
| env-1017 | Buccal_mucosa_LANL_C64865474     | + | 28      | 103     | RNA → | rplM (PRK09216)Ribosomal_L13 (pfam00572) →                                                  |
| env-1018 | SRS011255_C2371241               | - | 446     | 371     | RNA → | rplM (PRK09216)Ribosomal_L13 (pfam00572) →                                                  |
| env-1019 | SRS047113_LANL_scaffold_81006    | + | 28      | 103     | RNA → | hypo → rplM (PRK09216)Ribosomal_L13 (pfam00572) → rpsI (PRK00132)Ribosomal_S9 (pfam00380) → |
| env-1020 | SRS058808_C2744514               | + | 90      | 165     | RNA → | hypo → rplM (PRK09216)Ribosomal_L13 (pfam00572) →                                           |
| Ppl-2-1  | NZ_BAJN01000002.1                | - | 253813  | 253738  | RNA → | rplM (PRK09216)Ribosomal_L13 (pfam00572) → rpsI (PRK00132)Ribosomal_S9 (pfam00380) →        |
| env-1021 | scaffold29515_4.MH0046           | - | 478     | 404     | RNA → | rplM (PRK09216)Ribosomal_L13 (pfam00572) →                                                  |
| env-1022 | scaffold6118_1.MH0049            | + | 1778    | 1852    | RNA → | rplM (PRK09216)Ribosomal_L13 (pfam00572) → rpsI (PRK00132)Ribosomal_S9 (pfam00380) →        |
| env-1023 | scaffold121376_1.MH0056          | - | 1807    | 1733    | RNA → | rplM (PRK09216)Ribosomal_L13 (pfam00572) → rpsI (PRK00132)Ribosomal_S9 (pfam00380) →        |
| env-1024 | 4448812.3.Contig33336            | + | 223     | 300     | RNA → |                                                                                             |
| env-1025 | DLF003_scaffold46021.1           | - | 4697    | 4623    | RNA → | rplM (PRK09216)Ribosomal_L13 (pfam00572) → rpsI (PRK00132)Ribosomal_S9 (pfam00380) →        |
| env-1026 | NOF001_scaffold14758.1           | - | 4682    | 4608    | RNA → | rplM (PRK09216)Ribosomal_L13 (pfam00572) → rpsI (PRK00132)Ribosomal_S9 (pfam00380) →        |
| env-1027 | SRS017227_C4992648               | - | 155     | 81      | RNA → | hypo →                                                                                      |
| Pma-4-1  | NZ_GL397214.1                    | - | 1714297 | 1714223 | RNA → | rplM (PRK09216)Ribosomal_L13 (pfam00572) → rpsI (PRK00132)Ribosomal_S9 (pfam00380) →        |
| env-1028 | SRS023595_Baylor_scaffold_66299  | + | 21      | 95      | RNA → | rplM (PRK09216)Ribosomal_L13 (pfam00572) → rpsI (PRK00132)Ribosomal_S9 (pfam00380) →        |
| Pma-5-1  | NZ_BA_JI01000002.1               | - | 152336  | 152262  | RNA → | rplM (PRK09216)Ribosomal_L13 (pfam00572) → hypo → rpsI (PRK00132)Ribosomal_S9 (pfam00380) → |
| env-1029 | AUXO014575475.1                  | + | 800     | 874     | RNA → | rplM (PRK09216)Ribosomal_L13 (pfam00572) → rpsI (PRK00132)Ribosomal_S9 (pfam00380) →        |
| env-1030 | RUMENNODE.3847963.1              | + | 42999   | 43073   | RNA → | rplM (PRK09216)Ribosomal_L13 (pfam00572) → rplM (PRK09216)Ribosomal_L13 (pfam00572) →       |
| env-1031 | AUXO014586155.1                  | + | 7411    | 7485    | RNA → | rplM (PRK09216)Ribosomal_L13 (pfam00572) → rpsI (PRK00132)Ribosomal_S9 (pfam00380) →        |
| env-1032 | HCF12C_125474                    | - | 35705   | 35631   | RNA → | rplM (PRK09216)Ribosomal_L13 (pfam00572) → rpsI (PRK00132)Ribosomal_S9 (pfam00380) →        |
| env-1033 | HCE12Call500_c0173985            | + | 472     | 546     | RNA → | rplM (PRK09216)Ribosomal_L13 (pfam00572) → rpsI (PRK00132)Ribosomal_S9 (pfam00380) →        |
| env-1034 | NLF006_scaffold31027_2           | - | 1626    | 1552    | RNA → | rplM (PRK09216)Ribosomal_L13 (pfam00572) → rpsI (PRK00132)Ribosomal_S9 (pfam00380) →        |
| env-1035 | AUXO013075926.1                  | + | 551     | 625     | RNA → | rplM (PRK09216)Ribosomal_L13 (pfam00572) → rpsI (PRK00132)Ribosomal_S9 (pfam00380) →        |
| env-1036 | RUMENNODE.4167426_1              | + | 15701   | 15775   | RNA → | rplM (PRK09216)Ribosomal_L13 (pfam00572) → rpsI (PRK00132)Ribosomal_S9 (pfam00380) →        |
| env-1037 | AUXO014456099.1                  | - | 1496    | 1422    | RNA → | rplM (PRK09216)Ribosomal_L13 (pfam00572) → rpsI (PRK00132)Ribosomal_S9 (pfam00380) →        |
| env-1038 | scaffold2367_2.V1.UC-14          | - | 1330    | 1257    | RNA → | rplM (PRK09216)Ribosomal_L13 (pfam00572) → rpsI (PRK00132)Ribosomal_S9 (pfam00380) →        |
| env-1039 | 4491414.3.NODE_1526              | - | 5046    | 4973    | RNA → | rplM (PRK09216)Ribosomal_L13 (pfam00572) → rpsI (PRK00132)Ribosomal_S9 (pfam00380) →        |
| env-1040 | DLF003_scaffold16038_8           | - | 1088    | 1015    | RNA → | rplM (PRK09216)Ribosomal_L13 (pfam00572) → rpsI (PRK00132)Ribosomal_S9 (pfam00380) →        |
| env-1041 | DLF005_scaffold3173_4            | - | 4285    | 4212    | RNA → | rplM (PRK09216)Ribosomal_L13 (pfam00572) → rpsI (PRK00132)Ribosomal_S9 (pfam00380) →        |
| env-1042 | NOM012_scaffold23711_5           | + | 2538    | 2611    | RNA → | rplM (PRK09216)Ribosomal_L13 (pfam00572) → rpsI (PRK00132)Ribosomal_S9 (pfam00380) →        |
| env-1043 | scaffold1280_4.V1.UC-13          | - | 11294   | 11221   | RNA → | rplM (PRK09216)Ribosomal_L13 (pfam00572) → rpsI (PRK00132)Ribosomal_S9 (pfam00380) →        |
| env-1044 | SRS015663_WUGC_scaffold_11548    | + | 5547    | 5620    | RNA → | rplM (PRK09216)Ribosomal_L13 (pfam00572) → rpsI (PRK00132)Ribosomal_S9 (pfam00380) →        |
| env-1045 | SRS051031_LANL_scaffold_24636    | - | 16175   | 16102   | RNA → | rplM (PRK09216)Ribosomal_L13 (pfam00572) → rpsI (PRK00132)Ribosomal_S9 (pfam00380) →        |
| env-1046 | scaffold8699_1.MH0021            | + | 371     | 444     | RNA → | rplM (PRK09216)Ribosomal_L13 (pfam00572) →                                                  |
| env-1047 | C1729250_1.MH0022                | - | 754     | 681     | RNA → | rplM (PRK09216)Ribosomal_L13 (pfam00572) → rpsI (PRK00132)Ribosomal_S9 (pfam00380) →        |
| env-1048 | scaffold49_1.MH0057              | + | 5529    | 5602    | RNA → | rplM (PRK09216)Ribosomal_L13 (pfam00572) → rpsI (PRK00132)Ribosomal_S9 (pfam00380) →        |
| env-1049 | scaffold98913_1.O2.UC-19         | - | 593     | 520     | RNA → | rplM (PRK09216)Ribosomal_L13 (pfam00572) →                                                  |
| env-1050 | scaffold80421_1.O2.UC-1          | + | 180     | 253     | RNA → | rplM (PRK09216)Ribosomal_L13 (pfam00572) →                                                  |
| env-1051 | DLM018_scaffold38383_1           | + | 191     | 264     | RNA → | rplM (PRK09216)Ribosomal_L13 (pfam00572) → rpsI (PRK00132)Ribosomal_S9 (pfam00380) →        |
| env-1052 | 4491401.3.NODE_2070              | - | 1171    | 1098    | RNA → | rplM (PRK09216)Ribosomal_L13 (pfam00572) → rpsI (PRK00132)Ribosomal_S9 (pfam00380) →        |
| env-1053 | 4491477.3.NODE_12413             | + | 2389    | 2462    | RNA → | rplM (PRK09216)Ribosomal_L13 (pfam00572) → rpsI (PRK00132)Ribosomal_S9 (pfam00380) →        |
| Psp-2-1  | NZ_LFQU01000025.1                | + | 6048    | 6121    | RNA → | rplM (PRK09216)Ribosomal_L13 (pfam00572) → rpsI (PRK00132)Ribosomal_S9 (pfam00380) →        |
| env-1054 | 4491405.3.NODE_34345             | + | 86865   | 86938   | RNA → | rplM (PRK09216)Ribosomal_L13 (pfam00572) → rpsI (PRK00132)Ribosomal_S9 (pfam00380) →        |
| env-1055 | scaffold4912_4.MH0034            | - | 2299    | 2226    | RNA → | rplM (PRK09216)Ribosomal_L13 (pfam00572) → rpsI (PRK00132)Ribosomal_S9 (pfam00380) →        |
| env-1056 | C1986582_1.MH0079                | + | 198     | 271     | RNA → | rplM (PRK09216)Ribosomal_L13 (pfam00572) →                                                  |
| env-1057 | scaffold47598_1.O2.UC-11         | + | 2719    | 2792    | RNA → | rplM (PRK09216)Ribosomal_L13 (pfam00572) → rpsI (PRK00132)Ribosomal_S9 (pfam00380) →        |

|          |                                 |   |        |        |       |                                            |                                                                                         |
|----------|---------------------------------|---|--------|--------|-------|--------------------------------------------|-----------------------------------------------------------------------------------------|
| env-1058 | AUXO010723907.1                 | - | 1439   | 1366   | RNA → | rplM (PRK09216)Ribosomal_L13 (pfam00572) → | rpsI (PRK00132)Ribosomal_S9 (pfam00380) →                                               |
| env-1059 | SRM_contig03116                 | + | 29     | 103    | RNA → | rplM (PRK09216)Ribosomal_L13 (pfam00572) → |                                                                                         |
| env-1060 | AUXO013680712.1                 | + | 1792   | 1865   | RNA → | rplM (PRK09216)Ribosomal_L13 (pfam00572) → | rpsI (PRK00132)Ribosomal_S9 (pfam00380) →                                               |
| env-1061 | SRS049959_WUGC_scaffold_56943   | - | 909    | 836    | RNA → | rplM (PRK09216)Ribosomal_L13 (pfam00572) → | rpsI (PRK00132)Ribosomal_S9 (pfam00380) →                                               |
| Psp-13-1 | NZ_JXQH01000086.1               | + | 71385  | 71458  | RNA → | rplM (PRK09216)Ribosomal_L13 (pfam00572) → | rpsI (PRK00132)Ribosomal_S9 (pfam00380) →                                               |
| Psp-14-1 | NZ_JXQI01000060.1               | + | 39882  | 39955  | RNA → | rplM (PRK09216)Ribosomal_L13 (pfam00572) → | rpsI (PRK00132)Ribosomal_S9 (pfam00380) →                                               |
| env-1062 | scaffold253617_1_MH0006         | + | 404    | 477    | RNA → |                                            |                                                                                         |
| Psp-17-1 | NZ_JXQJ01000163.1               | + | 35397  | 35470  | RNA → | rplM (PRK09216)Ribosomal_L13 (pfam00572) → | rpsI (PRK00132)Ribosomal_S9 (pfam00380) →                                               |
| env-1063 | NOM022_scaffold35257_3          | + | 8385   | 8458   | RNA → | rplM (PRK09216)Ribosomal_L13 (pfam00572) → |                                                                                         |
| Psp-15-1 | NZ_JXQK01000088.1               | + | 79922  | 79995  | RNA → | rplM (PRK09216)Ribosomal_L13 (pfam00572) → | rpsI (PRK00132)Ribosomal_S9 (pfam00380) →                                               |
| Psp-16-1 | NZ_JXQL01000086.1               | - | 112978 | 112905 | RNA → | rplM (PRK09216)Ribosomal_L13 (pfam00572) → | rpsI (PRK00132)Ribosomal_S9 (pfam00380) →                                               |
| env-1064 | BAAX01026741.1                  | - | 768    | 695    | RNA → | rplM (PRK09216)Ribosomal_L13 (pfam00572) → |                                                                                         |
| env-1065 | scaffold15697_4_MH0030          | - | 142    | 69     | RNA → |                                            |                                                                                         |
| env-1066 | NOM022_scaffold26603_2          | - | 448    | 375    | RNA → | rplM (PRK09216)Ribosomal_L13 (pfam00572) → |                                                                                         |
| env-1067 | AUXO015787294.1                 | - | 1451   | 1378   | RNA → | rplM (PRK09216)Ribosomal_L13 (pfam00572) → | rpsI (PRK00132)Ribosomal_S9 (pfam00380) →                                               |
| Hse-1-1  | NZ_JADU01000007.1               | + | 92405  | 92478  | RNA → | rplM (PRK09216)Ribosomal_L13 (pfam00572) → | rpsI (PRK00132)Ribosomal_S9 (pfam00380) →                                               |
| env-1068 | scaffold4605_11_MH0050          | - | 3079   | 3003   | RNA → | rplM (PRK09216)Ribosomal_L13 (pfam00572) → | rpsI (PRK00132)Ribosomal_S9 (pfam00380) →                                               |
| env-1069 | HCE12Call500_c0256376           | - | 434    | 359    | RNA → | rplM (PRK09216)Ribosomal_L13 (pfam00572) → |                                                                                         |
| env-1070 | HCF14C_2.1_1_newblercontig23395 | + | 452    | 527    | RNA → | rplM (PRK09216)Ribosomal_L13 (pfam00572) → |                                                                                         |
| env-1071 | AUXO017008710.1                 | + | 176    | 252    | RNA → | hypo →                                     |                                                                                         |
| env-1072 | HCF14C_3223                     | - | 3241   | 3167   | RNA → | rplM (PRK09216)Ribosomal_L13 (pfam00572) → | rpsI (PRK00132)Ribosomal_S9 (pfam00380) →                                               |
| env-1073 | HCF12C_138759                   | - | 454    | 380    | RNA → | rplM (PRK09216)Ribosomal_L13 (pfam00572) → |                                                                                         |
| env-1074 | HCF14C_3378                     | + | 16846  | 16920  | RNA → |                                            |                                                                                         |
| env-1075 | HCF12C_432612                   | + | 209    | 283    | RNA → | rplM (PRK09216)Ribosomal_L13 (pfam00572) → | rpsI (PRK00132)Ribosomal_S9 (pfam00380) →                                               |
| env-1076 | AUXO011672201.1                 | - | 118    | 44     | RNA → |                                            |                                                                                         |
| env-1077 | AUXO010615907.1                 | - | 963    | 889    | RNA → | rplM (PRK09216)Ribosomal_L13 (pfam00572) → | rpsI (PRK00132)Ribosomal_S9 (pfam00380) →                                               |
| env-1078 | RUMENNODE.3874741_74000         | + | 4185   | 4261   | RNA → | rplM (PRK09216)Ribosomal_L13 (pfam00572) → |                                                                                         |
| env-1079 | AUXO013969103.1                 | + | 2307   | 2382   | RNA → |                                            |                                                                                         |
| env-1080 | AUXO015357845.1                 | + | 1768   | 1843   | RNA → | rplM (PRK09216)Ribosomal_L13 (pfam00572) → | rpsI (PRK00132)Ribosomal_S9 (pfam00380) →                                               |
| env-1081 | SRM_contig10604                 | + | 931    | 1006   | RNA → |                                            |                                                                                         |
| env-1082 | SRMUA_GNVGR9Q01BHOFT            | - | 77     | 2      | RNA → |                                            |                                                                                         |
| env-1083 | SRMUA_GNVGR9Q01BGO0O            | - | 154    | 79     | RNA → |                                            |                                                                                         |
| env-1084 | AUXO010497420.1                 | + | 284    | 358    | RNA → | rplM (PRK09216)Ribosomal_L13 (pfam00572) → | rpsI (PRK00132)Ribosomal_S9 (pfam00380) →                                               |
| env-1085 | AUXO018287067.1                 | - | 792    | 718    | RNA → | rplM (PRK09216)Ribosomal_L13 (pfam00572) → | rpsI (PRK00132)Ribosomal_S9 (pfam00380) →                                               |
| env-1086 | AUXO015587525.1                 | + | 974    | 1048   | RNA → |                                            |                                                                                         |
| env-1087 | AUXO011220652.1                 | + | 3323   | 3399   | RNA → |                                            |                                                                                         |
| env-1088 | AUXO012321124.1                 | - | 85     | 11     | RNA → |                                            |                                                                                         |
| env-1089 | AUXO014609123.1                 | - | 80     | 6      | RNA → |                                            |                                                                                         |
| env-1090 | AUXO018327041.1                 | + | 2387   | 2463   | RNA → |                                            |                                                                                         |
| env-1091 | AUXO018475375.1                 | - | 90     | 14     | RNA → | ← hypo                                     |                                                                                         |
| env-1092 | SRMUA_GMSDS1U03GX2P3            | + | 122    | 197    | RNA → | rplM (PRK09216)Ribosomal_L13 (pfam00572) → |                                                                                         |
| env-1093 | AUXO015617850.1                 | + | 121    | 196    | RNA → | rplM (PRK09216)Ribosomal_L13 (pfam00572) → | rpsI (PRK00132)Ribosomal_S9 (pfam00380) →                                               |
| env-1094 | AUXO010064957.1                 | - | 160    | 84     | RNA → | hypo →                                     |                                                                                         |
| env-1095 | AUXO012890930.1                 | - | 277    | 202    | RNA → |                                            |                                                                                         |
| env-1096 | RUMENNODE.1622158_1             | + | 23986  | 24061  | RNA → | rplM (PRK09216)Ribosomal_L13 (pfam00572) → | rpsI (PRK00132)Ribosomal_S9 (pfam00380) →                                               |
| env-1097 | AUXO012504799.1                 | + | 349    | 424    | RNA → |                                            |                                                                                         |
| env-1098 | RUMENNODE.4144373_1             | - | 20587  | 20512  | RNA → | rplM (PRK09216)Ribosomal_L13 (pfam00572) → | rplM (PRK09216)Ribosomal_L13 (pfam00572) →<br>rpsI (PRK00132)Ribosomal_S9 (pfam00380) → |
| Psp-7-1  | NZ_KN050820.1                   | - | 266447 | 266372 | RNA → | rplM (PRK09216)Ribosomal_L13 (pfam00572) → | rpsI (PRK00132)Ribosomal_S9 (pfam00380) →                                               |
| env-1099 | 4491686.3.305921                | - | 489    | 414    | RNA → | rplM (PRK09216)Ribosomal_L13 (pfam00572) → |                                                                                         |
| env-1100 | 4491686.3.312252                | + | 219    | 294    | RNA → | rplM (PRK09216)Ribosomal_L13 (pfam00572) → |                                                                                         |
| Psp-11-1 | NZ_JHUW01000006.1               | + | 275505 | 275580 | RNA → | rplM (PRK09216)Ribosomal_L13 (pfam00572) → | rpsI (PRK00132)Ribosomal_S9 (pfam00380) →                                               |



|          |                                 |   |         |         |       |                                            |                                           |
|----------|---------------------------------|---|---------|---------|-------|--------------------------------------------|-------------------------------------------|
| Psp-19-1 | NZ_JHVE01000005.1               | + | 85620   | 85695   | RNA → | rplM (PRK09216)Ribosomal_L13 (pfam00572) → | rpsI (PRK00132)Ribosomal_S9 (pfam00380) → |
| Psp-18-1 | NZ_JNKF01000010.1               | + | 588125  | 588200  | RNA → | rplM (PRK09216)Ribosomal_L13 (pfam00572) → | rpsI (PRK00132)Ribosomal_S9 (pfam00380) → |
| env-1101 | 4491686.3.93290                 | - | 116     | 41      | RNA → |                                            |                                           |
| Pru-1-1  | NC_014033.1                     | + | 3193901 | 3193976 | RNA → | rplM (PRK09216)Ribosomal_L13 (pfam00572) → | rpsI (PRK00132)Ribosomal_S9 (pfam00380) → |
| Pru-2-1  | NZ_JHXD01000002.1               | + | 95378   | 95453   | RNA → | rplM (PRK09216)Ribosomal_L13 (pfam00572) → | rpsI (PRK00132)Ribosomal_S9 (pfam00380) → |
| Psp-20-1 | NZ_JNKG01000008.1               | + | 135579  | 135654  | RNA → | rplM (PRK09216)Ribosomal_L13 (pfam00572) → | rpsI (PRK00132)Ribosomal_S9 (pfam00380) → |
| env-1102 | AUXO018400480.1                 | - | 139     | 64      | RNA → |                                            |                                           |
| env-1103 | AUXO015757529.1                 | - | 664     | 588     | RNA → | rplM (PRK09216)Ribosomal_L13 (pfam00572) → |                                           |
| env-1104 | AUXO015472756.1                 | - | 170     | 95      | RNA → |                                            |                                           |
| Pbr-1-1  | NZ_JHXM01000009.1               | - | 128416  | 128341  | RNA → | rplM (PRK09216)Ribosomal_L13 (pfam00572) → | rpsI (PRK00132)Ribosomal_S9 (pfam00380) → |
| Pbr-2-1  | NZ_KK211353.1                   | - | 323686  | 323611  | RNA → | rplM (PRK09216)Ribosomal_L13 (pfam00572) → | rpsI (PRK00132)Ribosomal_S9 (pfam00380) → |
| env-1105 | AUXO010774619.1                 | - | 135     | 60      | RNA → |                                            |                                           |
| env-1106 | AUXO016205324.1                 | + | 977     | 1053    | RNA → |                                            |                                           |
| env-1107 | AUXO018699643.1                 | - | 84      | 9       | RNA → |                                            |                                           |
| env-1108 | AUXO010272107.1                 | + | 282     | 357     | RNA → | ← hypo                                     |                                           |
| env-1109 | AUXO014911040.1                 | + | 6911    | 6987    | RNA → | rplM (PRK09216)Ribosomal_L13 (pfam00572) → | rpsI (PRK00132)Ribosomal_S9 (pfam00380) → |
| env-1110 | AUXO018573799.1                 | - | 2207    | 2131    | RNA → | rplM (PRK09216)Ribosomal_L13 (pfam00572) → | rpsI (PRK00132)Ribosomal_S9 (pfam00380) → |
| env-1111 | AUXO016034740.1                 | - | 861     | 785     | RNA → | rplM (PRK09216)Ribosomal_L13 (pfam00572) → | rpsI (PRK00132)Ribosomal_S9 (pfam00380) → |
| env-1112 | AUXO013985143.1                 | + | 1048    | 1123    | RNA → | rplM (PRK09216)Ribosomal_L13 (pfam00572) → |                                           |
| env-1113 | AUXO012106665.1                 | + | 1076    | 1151    | RNA → | rplM (PRK09216)Ribosomal_L13 (pfam00572) → | rpsI (PRK00132)Ribosomal_S9 (pfam00380) → |
| env-1114 | AUXO010611192.1                 | + | 2306    | 2381    | RNA → | rplM (PRK09216)Ribosomal_L13 (pfam00572) → | rpsI (PRK00132)Ribosomal_S9 (pfam00380) → |
| env-1115 | AUXO017780793.1                 | + | 2412    | 2486    | RNA → | rplM (PRK09216)Ribosomal_L13 (pfam00572) → |                                           |
| env-1116 | AUXO016964339.1                 | - | 2517    | 2443    | RNA → | ← hypo                                     |                                           |
| env-1117 | DLM014_scaffold29163_3          | - | 749     | 677     | RNA → | rplM (PRK09216)Ribosomal_L13 (pfam00572) → | rpsI (PRK00132)Ribosomal_S9 (pfam00380) → |
| env-1118 | AUXO012501382.1                 | + | 1300    | 1372    | RNA → | rplM (PRK09216)Ribosomal_L13 (pfam00572) → |                                           |
| env-1119 | RUMENNODE_4186824_1             | - | 20452   | 20380   | RNA → | rplM (PRK09216)Ribosomal_L13 (pfam00572) → | rpsI (PRK00132)Ribosomal_S9 (pfam00380) → |
| env-1120 | HCE12Call500_c0163880           | - | 1019    | 945     | RNA → | rplM (PRK09216)Ribosomal_L13 (pfam00572) → | rpsI (PRK00132)Ribosomal_S9 (pfam00380) → |
| env-1121 | HCF14C_7730                     | + | 2022    | 2096    | RNA → | rplM (PRK09216)Ribosomal_L13 (pfam00572) → | rpsI (PRK00132)Ribosomal_S9 (pfam00380) → |
| env-1122 | HCF12C_211171                   | + | 370     | 445     | RNA → | rplM (PRK09216)Ribosomal_L13 (pfam00572) → |                                           |
| env-1123 | 4491686.3.18377                 | - | 3185    | 3110    | RNA → | rplM (PRK09216)Ribosomal_L13 (pfam00572) → | rpsI (PRK00132)Ribosomal_S9 (pfam00380) → |
| env-1124 | 4491686.3.998042                | + | 30719   | 30794   | RNA → | rplM (PRK09216)Ribosomal_L13 (pfam00572) → | rpsI (PRK00132)Ribosomal_S9 (pfam00380) → |
| env-1125 | HCF12C_268453                   | + | 254     | 328     | RNA → |                                            |                                           |
| env-1126 | HCF12C_148665                   | + | 852     | 926     | RNA → | hypo →                                     |                                           |
| env-1127 | HCE12Call500_c0204626           | - | 679     | 605     | RNA → | rplM (PRK09216)Ribosomal_L13 (pfam00572) → | rpsI (PRK00132)rps9 (CHL00079) →          |
| env-1128 | HCF12C_185472                   | + | 268     | 342     | RNA → | rplM (PRK09216)RplM (COG0102) →            |                                           |
| env-1129 | 4491421.3_NODE.9264             | + | 154     | 230     | RNA → | rplM (PRK09216)Ribosomal_L13 (pfam00572) → |                                           |
| env-1130 | AUXO015981657.1                 | - | 1275    | 1203    | RNA → | rplM (PRK09216)Ribosomal_L13 (pfam00572) → | rpsI (PRK00132)Ribosomal_S9 (pfam00380) → |
| env-1131 | AUXO010201767.1                 | + | 271     | 345     | RNA → | rplM (PRK09216)Ribosomal_L13 (pfam00572) → |                                           |
| env-1132 | AUXO014390899.1                 | - | 563     | 489     | RNA → | rplM (PRK09216)Ribosomal_L13 (pfam00572) → |                                           |
| env-1133 | AUXO015967901.1                 | + | 641     | 712     | RNA → | rplM (PRK09216)Ribosomal_L13 (pfam00572) → | rpsI (PRK00132)Ribosomal_S9 (pfam00380) → |
| env-1134 | AUXO015633410.1                 | + | 206     | 279     | RNA → | rplM (PRK09216)Ribosomal_L13 (pfam00572) → | rpsI (PRK00132)Ribosomal_S9 (pfam00380) → |
| env-1135 | AUXO017839357.1                 | + | 144     | 211     | RNA → | rplM (PRK09216)Ribosomal_L13 (pfam00572) → |                                           |
| env-1136 | AUXO016134445.1                 | + | 192     | 259     | RNA → | rplM (PRK09216)Ribosomal_L13 (pfam00572) → | rpsI (PRK00132)Ribosomal_S9 (pfam00380) → |
| env-1137 | SRS064449_C3977517              | + | 160     | 232     | RNA → | rplM (PRK09216)RplM (COG0102) →            |                                           |
| env-1138 | SRS013170_C4245439              | - | 179     | 107     | RNA → |                                            |                                           |
| env-1139 | SRS019071_C4979592              | + | 177     | 249     | RNA → |                                            |                                           |
| env-1140 | SRS063999_C3760459              | + | 1331    | 1403    | RNA → | rplM (PRK09216)Ribosomal_L13 (pfam00572) → | rpsI (PRK00132)Ribosomal_S9 (pfam00380) → |
| env-1141 | SRS053917_LANL_scaffold_97956   | + | 384     | 456     | RNA → | rplM (PRK09216)Ribosomal_L13 (pfam00572) → |                                           |
| env-1142 | SRS049318_LANL_scaffold_147506  | + | 27      | 99      | RNA → | rplM (PRK09216)Ribosomal_L13 (pfam00572) → |                                           |
| env-1143 | SRS047634_C4471531              | - | 1001    | 929     | RNA → | rplM (PRK09216)Ribosomal_L13 (pfam00572) → | rpsI (PRK00132)Ribosomal_S9 (pfam00380) → |
| env-1144 | SRS022602_Baylor_scaffold_89900 | - | 465     | 393     | RNA → | rplM (PRK09216)Ribosomal_L13 (pfam00572) → |                                           |
| env-1145 | SRS019028_C2913254              | - | 170     | 98      | RNA → |                                            |                                           |



|          |                                    |   |        |        |       |                                                                                      |
|----------|------------------------------------|---|--------|--------|-------|--------------------------------------------------------------------------------------|
| env-1146 | SRS063603.LANL_scaffold_35578      | + | 6849   | 6921   | RNA → | rplM (PRK09216)Ribosomal_L13 (pfam00572) → rpsI (PRK00132)Ribosomal_S9 (pfam00380) → |
| env-1147 | SRS016225.WUGC_scaffold_29763      | + | 2155   | 2226   | RNA → |                                                                                      |
| env-1148 | SRS022621.Baylor_scaffold_78299    | + | 1192   | 1263   | RNA → | rplM (PRK09216)Ribosomal_L13 (pfam00572) →                                           |
| env-1149 | SRS022719.LANL_scaffold_24264      | - | 1070   | 999    | RNA → | rplM (PRK09216)Ribosomal_L13 (pfam00572) → rpsI (PRK00132)Ribosomal_S9 (pfam00380) → |
| env-1150 | SRS023926.C2746934                 | + | 199    | 270    | RNA → | rplM (PRK09216)Ribosomal_L13 (pfam00572) →                                           |
| env-1151 | SRS014888.C3094079                 | - | 1005   | 933    | RNA → | rplM (PRK09216)Ribosomal_L13 (pfam00572) → rpsI (PRK00132)Ribosomal_S9 (pfam00380) → |
| env-1152 | SRS057355.LANL_scaffold_38534      | + | 74     | 146    | RNA → | rplM (PRK09216)Ribosomal_L13 (pfam00572) →                                           |
| env-1153 | SRS018739.C3681903                 | - | 158    | 86     | RNA → |                                                                                      |
| env-1154 | SRS013164.Baylor_scaffold_53891    | - | 1272   | 1200   | RNA → | rplM (PRK09216)Ribosomal_L13 (pfam00572) → rpsI (PRK00132)Ribosomal_S9 (pfam00380) → |
| env-1155 | SRS015797.WUGC_scaffold_34484      | - | 665    | 593    | RNA → | rplM (PRK09216)Ribosomal_L13 (pfam00572) → rpsI (PRK00132)Ribosomal_S9 (pfam00380) → |
| env-1156 | SRS042131.WUGC_scaffold_59323      | - | 801    | 729    | RNA → | rplM (PRK09216)Ribosomal_L13 (pfam00572) → rpsI (PRK00132)Ribosomal_S9 (pfam00380) → |
| env-1157 | SRS024441.LANL_scaffold_55878      | - | 1004   | 932    | RNA → | rplM (PRK09216)Ribosomal_L13 (pfam00572) → rpsI (PRK00132)Ribosomal_S9 (pfam00380) → |
| env-1158 | SRS016037.WUGC_scaffold_44051      | - | 27077  | 27005  | RNA → | rplM (PRK09216)Ribosomal_L13 (pfam00572) → rpsI (PRK00132)Ribosomal_S9 (pfam00380) → |
| env-1159 | SRS018357.Baylor_scaffold_49795    | + | 563    | 635    | RNA → |                                                                                      |
| env-1160 | SRS044662.LANL_scaffold_9532       | + | 25254  | 25326  | RNA → | rplM (PRK09216)Ribosomal_L13 (pfam00572) → rpsI (PRK00132)Ribosomal_S9 (pfam00380) → |
| env-1161 | SRS045127.LANL_scaffold_15711      | - | 3179   | 3107   | RNA → | rplM (PRK09216)Ribosomal_L13 (pfam00572) → rpsI (PRK00132)Ribosomal_S9 (pfam00380) → |
| env-1162 | SRS049147.C4127564                 | + | 678    | 750    | RNA → |                                                                                      |
| env-1163 | Palatine_Tonsils.LANL_C6209475     | + | 331    | 403    | RNA → | rplM (PRK09216)Ribosomal_L13 (pfam00572) →                                           |
| env-1164 | SRS015434.C5847974                 | - | 383    | 311    | RNA → | rplM (PRK09216)Ribosomal_L13 (pfam00572) →                                           |
| env-1165 | SRS017533.Baylor_scaffold_51088    | + | 1318   | 1390   | RNA → |                                                                                      |
| env-1166 | SRS019327.C2789739                 | + | 1129   | 1201   | RNA → | rplM (PRK09216)Ribosomal_L13 (pfam00572) →                                           |
| env-1167 | Buccal_mucosa.LANL_scaffold_123568 | - | 308    | 236    | RNA → | rplM (PRK09216)Ribosomal_L13 (cd00392) →                                             |
| env-1168 | SRS015985.C1563967                 | + | 138    | 210    | RNA → | rplM (PRK09216)Ribosomal_L13 (pfam00572) →                                           |
| env-1169 | SRS062878.LANL_scaffold_81556      | + | 2146   | 2218   | RNA → | rplM (PRK09216)RplM (COG0102) →                                                      |
| env-1170 | SRS075404.C3564214                 | - | 158    | 86     | RNA → | hypo →                                                                               |
| env-1171 | Throat.LANL_C5768501               | + | 142    | 214    | RNA → | rplM (PRK09216)Ribosomal_L13 (pfam00572) →                                           |
| env-1172 | SRS011306.Baylor_scaffold_57099    | + | 475    | 547    | RNA → | rplM (PRK09216)RplM (COG0102) →                                                      |
| env-1173 | SRS013879.WUGC_scaffold_12081      | + | 2721   | 2793   | RNA → | rplM (PRK09216)Ribosomal_L13 (pfam00572) → rpsI (PRK00132)Ribosomal_S9 (pfam00380) → |
| env-1174 | SRS013947.C1628089                 | - | 350    | 278    | RNA → | rplM (PRK09216)Ribosomal_L13 (pfam00572) →                                           |
| env-1175 | SRS013948.WUGC_scaffold_13434      | + | 25402  | 25474  | RNA → | rplM (PRK09216)Ribosomal_L13 (pfam00572) →                                           |
| env-1176 | SRS014271.C2902322                 | - | 158    | 86     | RNA → |                                                                                      |
| env-1177 | SRS015762.WUGC_scaffold_30677      | - | 1005   | 933    | RNA → | rplM (PRK09216)Ribosomal_L13 (pfam00572) → rpsI (PRK00132)Ribosomal_S9 (pfam00380) → |
| env-1178 | SRS016002.C2530304                 | + | 27     | 99     | RNA → | rplM (PRK09216)Ribosomal_L13 (pfam00572) →                                           |
| env-1179 | SRS016569.C2383578                 | + | 27     | 99     | RNA → | rplM (PRK09216)Ribosomal_L13 (pfam00572) →                                           |
| env-1180 | SRS017209.Baylor_scaffold_3818     | + | 25398  | 25470  | RNA → | rplM (PRK09216)Ribosomal_L13 (pfam00572) → rpsI (PRK00132)Ribosomal_S9 (pfam00380) → |
| env-1181 | SRS018145.Baylor_scaffold_64       | + | 25195  | 25267  | RNA → | rplM (PRK09216)Ribosomal_L13 (pfam00572) → rpsI (PRK00132)Ribosomal_S9 (pfam00380) → |
| env-1182 | SRS018439.Baylor_scaffold_41344    | - | 879    | 807    | RNA → | rplM (PRK09216)Ribosomal_L13 (pfam00572) → rpsI (PRK00132)Ribosomal_S9 (pfam00380) → |
| env-1183 | SRS019071.C4950970                 | - | 163    | 91     | RNA → | hypo →                                                                               |
| env-1184 | SRS019120.C1301558                 | + | 33     | 105    | RNA → | rplM (PRK09216)Ribosomal_L13 (pfam00572) →                                           |
| env-1185 | SRS019126.WUGC_scaffold_35353      | + | 161    | 233    | RNA → | rplM (PRK09216)Ribosomal_L13 (pfam00572) → rpsI (PRK00132)Ribosomal_S9 (pfam00380) → |
| env-1186 | SRS023958.Baylor_scaffold_34017    | + | 4806   | 4878   | RNA → | rplM (PRK09216)Ribosomal_L13 (pfam00572) → rpsI (PRK00132)Ribosomal_S9 (pfam00380) → |
| env-1187 | SRS024081.C2561546                 | + | 437    | 509    | RNA → |                                                                                      |
| env-1188 | SRS050669.LANL_scaffold_65278      | - | 28287  | 28215  | RNA → | rplM (PRK09216)Ribosomal_L13 (pfam00572) → rpsI (PRK00132)Ribosomal_S9 (pfam00380) → |
| env-1189 | SRS057205.LANL_scaffold_2683       | - | 1005   | 933    | RNA → | rplM (PRK09216)Ribosomal_L13 (pfam00572) → rpsI (PRK00132)Ribosomal_S9 (pfam00380) → |
| env-1190 | SRS057692.C2560902                 | + | 134    | 206    | RNA → |                                                                                      |
| env-1191 | SRS058336.LANL_scaffold_19337      | - | 5666   | 5594   | RNA → | rplM (PRK09216)Ribosomal_L13 (pfam00572) → rpsI (PRK00132)Ribosomal_S9 (pfam00380) → |
| env-1192 | SRS015057.WUGC_scaffold_40957      | - | 277    | 205    | RNA → | rplM (PRK09216)Ribosomal_L13 (pfam00572) →                                           |
| env-1193 | SRS063603.LANL_scaffold_3918       | - | 1001   | 931    | RNA → | rplM (PRK09216)Ribosomal_L13 (pfam00572) → rpsI (PRK00132)Ribosomal_S9 (pfam00380) → |
| env-1194 | SRS016746.Baylor_scaffold_3854     | + | 350    | 421    | RNA → |                                                                                      |
| Psp-1-1  | NZ_KB290717.1                      | - | 518225 | 518153 | RNA → | rplM (PRK09216)Ribosomal_L13 (pfam00572) → rpsI (PRK00132)Ribosomal_S9 (pfam00380) → |
| env-1195 | SRS013949.C3355882                 | - | 134    | 64     | RNA → | hypo →                                                                               |

|          |                                  |   |      |      |                                                                                            |
|----------|----------------------------------|---|------|------|--------------------------------------------------------------------------------------------|
| env-1196 | SRS024087_C3225267               | - | 91   | 21   | RNA → hypo →                                                                               |
| env-1197 | SRS013950_C2065648               | - | 258  | 188  | RNA → rplM (PRK09216)RplM (COG0102) →                                                      |
| env-1198 | SRS018157_C4805273               | - | 576  | 506  | RNA → rplM (PRK09216)Ribosomal_L13 (pfam00572) →                                           |
| env-1199 | SRS019128_C4141267               | + | 154  | 224  | RNA →                                                                                      |
| env-1200 | SRS047634_LANL_scaffold_18390    | + | 479  | 549  | RNA → rplM (PRK09216)Ribosomal_L13 (pfam00572) → rpsI (PRK00132)Ribosomal_S9 (pfam00380) → |
| env-1201 | SRS055401_C2292367               | - | 364  | 294  | RNA → rplM (PRK09216)Ribosomal_L13 (pfam00572) →                                           |
| env-1202 | SRS063932_LANL_scaffold_79042    | + | 232  | 302  | RNA → rplM (PRK09216)Ribosomal_L13 (pfam00572) → rpsI (PRK00132)Ribosomal_S9 (pfam00380) → |
| env-1203 | SRS015803_WUGC_scaffold_2190     | + | 350  | 420  | RNA → rplM (PRK09216)Ribosomal_L13 (pfam00572) → rpsI (PRK00132)Ribosomal_S9 (pfam00380) → |
| env-1204 | SRS024289_LANL_scaffold_56240    | + | 232  | 302  | RNA → rplM (PRK09216)Ribosomal_L13 (pfam00572) → rpsI (PRK00132)Ribosomal_S9 (pfam00380) → |
| env-1205 | SRS023938_C2238754               | - | 301  | 231  | RNA → rplM (PRK09216)Ribosomal_L13 (pfam00572) →                                           |
| env-1206 | SRS012285_C2904644               | - | 382  | 310  | RNA → rplM (PRK09216)Ribosomal_L13 (pfam00572) →                                           |
| env-1207 | SRS017227_Baylor_scaffold_121114 | + | 26   | 98   | RNA → rplM (PRK09216)Ribosomal_L13 (pfam00572) → rpsI (PRK00132)Ribosomal_S9 (pfam00380) → |
| env-1208 | SRS023595_Baylor_scaffold_24496  | + | 230  | 302  | RNA → rplM (PRK09216)Ribosomal_L13 (pfam00572) → rpsI (PRK00132)Ribosomal_S9 (pfam00380) → |
| env-1209 | SRS047113_C5260445               | - | 272  | 200  | RNA → rplM (PRK09216)RplM (COG0102) →                                                      |
| env-1210 | SRS050628_C1880365               | + | 114  | 186  | RNA → rplM (PRK09216)Ribosomal_L13 (pfam00572) →                                           |
| env-1211 | SRS019028_C3034176               | - | 899  | 827  | RNA → rplM (PRK09216)Ribosomal_L13 (pfam00572) → rpsI (PRK00132)Ribosomal_S9 (pfam00380) → |
| env-1212 | SRS019029_C3106614               | + | 230  | 302  | RNA →                                                                                      |
| env-1213 | SRS016037_C2055413               | - | 3265 | 3192 | RNA → rplM (PRK09216)Ribosomal_L13 (pfam00572) → rpsI (PRK00132)Ribosomal_S9 (pfam00380) → |
| env-1214 | SRS022719_LANL_scaffold_71174    | - | 5214 | 5141 | RNA → rplM (PRK09216)Ribosomal_L13 (pfam00572) → rpsI (PRK00132)Ribosomal_S9 (pfam00380) → |
| env-1215 | SRS044662_LANL_scaffold_46735    | - | 2254 | 2181 | RNA → rplM (PRK09216)Ribosomal_L13 (pfam00572) → rpsI (PRK00132)Ribosomal_S9 (pfam00380) → |
| env-1216 | SRS013164_Baylor_scaffold_32078  | + | 335  | 407  | RNA → rplM (PRK09216)Ribosomal_L13 (pfam00572) → rpsI (PRK00132)Ribosomal_S9 (pfam00380) → |
| env-1217 | SRS013879_WUGC_scaffold_46467    | - | 1318 | 1246 | RNA → rplM (PRK09216)Ribosomal_L13 (pfam00572) → rpsI (PRK00132)Ribosomal_S9 (pfam00380) → |
| env-1218 | SRS015434_C5929714               | - | 1009 | 937  | RNA → rplM (PRK09216)Ribosomal_L13 (pfam00572) → rpsI (PRK00132)Ribosomal_S9 (pfam00380) → |
| env-1219 | SRS019071_C5025454               | - | 172  | 100  | RNA → hypo →                                                                               |
| env-1220 | SRS023958_Baylor_scaffold_23657  | + | 335  | 407  | RNA → rplM (PRK09216)Ribosomal_L13 (pfam00572) → rpsI (PRK00132)Ribosomal_S9 (pfam00380) → |
| env-1221 | SRS049389_WUGC_scaffold_42978    | - | 343  | 271  | RNA → rplM (PRK09216)Ribosomal_L13 (pfam00572) →                                           |
| env-1222 | SRS052227_LANL_scaffold_7065     | - | 172  | 100  | RNA →                                                                                      |
| env-1223 | SRS011140_C5077184               | + | 62   | 134  | RNA → rplM (PRK09216)Ribosomal_L13 (pfam00572) →                                           |
| env-1224 | SRS016225_WUGC_scaffold_16679    | - | 161  | 89   | RNA →                                                                                      |
| env-1225 | SRS017439_C3816727               | + | 159  | 231  | RNA → rplM (PRK09216)Ribosomal_L13 (pfam00572) → rpsI (PRK00132)Ribosomal_S9 (pfam00380) → |
| env-1226 | SRS018357_Baylor_scaffold_50190  | - | 1318 | 1246 | RNA → rplM (PRK09216)Ribosomal_L13 (pfam00572) → rpsI (PRK00132)Ribosomal_S9 (pfam00380) → |
| env-1227 | SRS019327_WUGC_scaffold_31       | + | 300  | 372  | RNA → rplM (PRK09216)Ribosomal_L13 (pfam00572) → rpsI (PRK00132)Ribosomal_S9 (pfam00380) → |
| env-1228 | SRS013239_Baylor_scaffold_8550   | + | 223  | 295  | RNA → rplM (PRK09216)Ribosomal_L13 (pfam00572) → rpsI (PRK00132)Ribosomal_S9 (pfam00380) → |
| env-1229 | SRS013252_C3407129               | + | 146  | 218  | RNA →                                                                                      |
| env-1230 | SRS019329_C822464                | - | 1070 | 998  | RNA → rplM (PRK09216)Ribosomal_L13 (pfam00572) → rpsI (PRK00132)Ribosomal_S9 (pfam00380) → |
| env-1231 | SRS045049_C1487558               | - | 103  | 31   | RNA →                                                                                      |
| env-1232 | SRS046686_C923094                | + | 169  | 241  | RNA → rplM (PRK09216)Ribosomal_L13 (pfam00572) → rpsI (PRK00132)Ribosomal_S9 (pfam00380) → |
| env-1233 | SRS012279_C2693900               | - | 583  | 511  | RNA → rplM (PRK09216)Ribosomal_L13 (pfam00572) →                                           |
| env-1234 | SRS014573_WUGC_scaffold_5954     | + | 353  | 425  | RNA → rplM (PRK09216)Ribosomal_L13 (pfam00572) → rpsI (PRK00132)Ribosomal_S9 (pfam00380) → |
| env-1235 | SRS014888_C3088705               | - | 1002 | 930  | RNA → rplM (PRK09216)Ribosomal_L13 (pfam00572) → rpsI (PRK00132)Ribosomal_S9 (pfam00380) → |
| env-1236 | SRS018145_Baylor_scaffold_49105  | - | 1318 | 1246 | RNA → rplM (PRK09216)Ribosomal_L13 (pfam00572) → rpsI (PRK00132)Ribosomal_S9 (pfam00380) → |
| env-1237 | SRS019122_C5893890               | + | 223  | 295  | RNA → rplM (PRK09216)Ribosomal_L13 (pfam00572) → rpsI (PRK00132)Ribosomal_S9 (pfam00380) → |
| env-1238 | SRS019126_C2101879               | - | 343  | 271  | RNA → rplM (PRK09216)Ribosomal_L13 (pfam00572) →                                           |
| env-1239 | SRS021496_Baylor_scaffold_82682  | + | 222  | 294  | RNA → rplM (PRK09216)Ribosomal_L13 (pfam00572) → rpsI (PRK00132)Ribosomal_S9 (pfam00380) → |
| env-1240 | SRS054569_C1464969               | - | 199  | 127  | RNA → hypo →                                                                               |
| env-1241 | SRS057205_LANL_scaffold_57883    | + | 1002 | 930  | RNA → rplM (PRK09216)Ribosomal_L13 (pfam00572) → rpsI (PRK00132)Ribosomal_S9 (pfam00380) → |
| env-1242 | SRS057692_LANL_scaffold_10341    | + | 335  | 407  | RNA → rplM (PRK09216)Ribosomal_L13 (pfam00572) → rpsI (PRK00132)Ribosomal_S9 (pfam00380) → |
| env-1243 | SRS018739_C3498499               | - | 172  | 100  | RNA → hypo →                                                                               |
| env-1244 | SRS013946_WUGC_scaffold_9812     | + | 797  | 869  | RNA →                                                                                      |
| env-1245 | SRS017127_Baylor_scaffold_10764  | - | 3240 | 3168 | RNA → rplM (PRK09216)Ribosomal_L13 (pfam00572) → rpsI (PRK00132)Ribosomal_S9 (pfam00380) → |
| env-1246 | SRS019120_C1331431               | + | 223  | 295  | RNA → rplM (PRK09216)Ribosomal_L13 (pfam00572) →                                           |
| env-1247 | SRS019124_WUGC_scaffold_15768    | + | 336  | 408  | RNA → rplM (PRK09216)Ribosomal_L13 (pfam00572) → rpsI (PRK00132)Ribosomal_S9 (pfam00380) → |

|          |                                |   |         |         |       |                                                                                                                                                                              |
|----------|--------------------------------|---|---------|---------|-------|------------------------------------------------------------------------------------------------------------------------------------------------------------------------------|
| env-1248 | SRS019125_WUGC_scaffold_5306   | + | 336     | 408     | RNA → | rplM (PRK09216)Ribosomal_L13 (pfam00572) → rpsI (PRK00132)Ribosomal_S9 (pfam00380) →                                                                                         |
| env-1249 | SRS019128_C4205376             | + | 199     | 271     | RNA → |                                                                                                                                                                              |
| env-1250 | SRS047113_C5255867             | - | 272     | 200     | RNA → | rplM (PRK09216)RplM (COG0102) →                                                                                                                                              |
| env-1251 | SRS014473_WUGC_scaffold_265    | - | 32420   | 32348   | RNA → | rplM (PRK09216)Ribosomal_L13 (pfam00572) → rpsI (PRK00132)Ribosomal_S9 (pfam00380) →                                                                                         |
| env-1252 | SRS015060_WUGC_scaffold_459    | + | 456     | 528     | RNA → | rplM (PRK09216)Ribosomal_L13 (pfam00572) → rpsI (PRK00132)Ribosomal_S9 (pfam00380) →                                                                                         |
| env-1253 | SRS063272_LANL_scaffold_10757  | - | 7611    | 7539    | RNA → | rplM (PRK09216)Ribosomal_L13 (pfam00572) → rpsI (PRK00132)Ribosomal_S9 (pfam00380) →                                                                                         |
| env-1254 | SRS017215_C2622978             | + | 37      | 109     | RNA → | rplM (PRK09216)Ribosomal_L13 (pfam00572) → rpsI (PRK00132)Ribosomal_S9 (pfam00380) →                                                                                         |
| env-1255 | SRS049318_C6258073             | - | 173     | 101     | RNA → | hypo →                                                                                                                                                                       |
| env-1256 | SRS016225_WUGC_scaffold_16862  | - | 163     | 90      | RNA → | hypo →                                                                                                                                                                       |
| env-1257 | SRS018300_C3300755             | - | 410     | 337     | RNA → | rplM (PRK09216)Ribosomal_L13 (pfam00572) →                                                                                                                                   |
| env-1258 | SRS013506_Baylor_scaffold_6896 | + | 328     | 400     | RNA → | rplM (PRK09216)Ribosomal_L13 (pfam00572) → rpsI (PRK00132)Ribosomal_S9 (pfam00380) →                                                                                         |
| env-1259 | SRS049147_C4035837             | + | 173     | 101     | RNA → | hypo →                                                                                                                                                                       |
| Pmu-2-1  | NZ_GL945017.1                  | + | 791406  | 791482  | RNA → | rplM (PRK09216)Ribosomal_L13 (pfam00572) → rplM (PRK09216)Ribosomal_L13 (pfam00572) →<br>rpsI (PRK00132)Ribosomal_S9 (pfam00380) → rpsI (PRK00132)Ribosomal_S9 (pfam00380) → |
| Pde-1-1  | NC_019960.1                    | - | 1444430 | 1444357 | RNA → | rplM (PRK09216)Ribosomal_L13 (pfam00572) → rpsI (PRK00132)Ribosomal_S9 (pfam00380) →                                                                                         |

### 3.3 Conserved domains

Conserved domains found in protein-coding genes listed in Section 3.2 are shown below, with the first sentence in their description from the Conserved Domain Database (if any). Conserved domains associated with more than one

**cd00392** (6) Ribosomal protein L13.  
**cd14275** (1) UBA domain found in elongation factor Ts (EF-Ts) from bacteria, chloroplasts and mitochondria of eukaryotes.  
**CHL00079** (3) ribosomal protein S9  
**COG0102** (26) Ribosomal protein L13 [Translation, ribosomal structure and biogenesis]  
**pfam00318** (2) Ribosomal protein S2.  
**pfam00380** (712) Ribosomal protein S9/S16.

### 3.4 Multiple-sequence alignment

Each L13-Bacteroidia RNA is denoted by an abbreviation (like “Eco-1-1”) that refers to a taxonomy given in Section 3.1. The alignment may include sequences containing the RNA motif, as well as flanking sequence. The L13-Bacteroidia RNA itself is denoted by the line underneath marked 5’ and 3’ on either end. Nucleotides in flanking sequences (i.e., not part of the motif) are written in gray letters. Stems of predicted rho-independent transcription terminators, if any, are shaded yellow. (Note: terminator predictions have not been analyzed manually, and many are likely to be false positives. Terminator predictions are those of the RNIE software.) Nucleotides predicted to function (as DNA) as transcription-factor binding sites, if any, are shaded in green. (But note: these predictions are manually annotated, so they might be under-predicted.) Annotated start codons, if any, are shaded green. (Note: start codons are frequently misannotated, especially in environmental samples.) Nucleotides proposed to basepair as part of the consensus structure are shaded in color when they comprise Watson-Crick or G-U pairs. Oth-

L13-Bacteroidia RNA are assigned a color, while others are shown in gray. The number in parentheses after the colored domain name is the number of occurrences in Section 3.2.

**pfam00572** (955) Ribosomal protein L13.  
**pfam00889** (1) Elongation factor TS.  
**PRK00132** (715) 30S ribosomal protein S9; Reviewed  
**PRK05299** (2) 30S ribosomal protein S2; Provisional  
**PRK09216** (990) 50S ribosomal protein L13; Reviewed  
**PRK09377** (1) elongation factor Ts; Provisional

erwise they are shaded gray. Conserved stems are also indicated at the bottom of the alignment by angle brackets, where matching < and > denote base-paired columns. Below these angle brackets, the symbol “2” denotes base pairs exhibiting covariation according to the statistically well-founded R-scape method. “1” denotes base pairs exhibiting covariation according to R2R’s simplistic method. “0” denotes base pairs that are not observed to mutate and “?” denotes base pairs that have a significant frequency of non-canonical nucleotides for Watson-Crick or G-U pairs (> 5%). Below these base pair annotation is the consensus sequence: “R” = “A” or “G”, “Y” = “C” or “U”, red nucleotides: nucleotide identity conserved more than 97% of the time, black nucleotides: 90%, gray nucleotides: 75%, red circle (◐): nucleotide is present 97% of the time, black circle (◑): 90%, gray circle (◒): 75%, white circle (◓): 50%. All percentages of sequences just described (e.g. 97% conserved) assume that sequences have been weighted by the GSC algorithm implemented by the Infernal software package.

Duplicate sequences: the following putative homologs are not shown in the alignment because their sequences are identical to a homolog already shown: Bsp-1-1, Pal-1-2, Pam-2-1, Pam-4-1, Pba-1-2, Pbi-2-1, Pbi-3-1, Pbi-4-1, Pbi-5-1, Pbi-6-1, Pbr-4-1, Pbu-6-1, Pcl-1-1, Pco-1-1, Pco-3-2, Pde-5-2, Phi-1-1, Pin-2-1, Plo-1-1, Pma-2-1, Pma-5-1, Pme-1-1, Pme-2-1, Pmi-1-1, Pmi-2-1, Pmi-3-1, Pna-1-1, Pna-2-1, Pni-2-1, Por-3-1, Por-4-1, Por-7-1, Ppa-1-1, Ppa-2-1, Ppl-1-1, Pru-2-1, Psa-1-1, Psa-2-1, Psa-3-1, Psh-1-1, Psp-10-1, Psp-14-1, Psp-18-1, Psp-20-1, Psp-22-1, Psp-23-1, Pst-1-1, Pve-2-1, Pxy-1-1, env-100, env-1000, env-101, env-1010, env-1011, env-1012, env-1013, env-1014, env-1015, env-1016, env-1018, env-1019, env-102, env-1026, env-103, env-1030, env-1036, env-104, env-1041, env-1042, env-1045, env-1047, env-1048, env-1049, env-105, env-1050, env-1051, env-1057, env-106, env-107, env-1070, env-1073, env-108, env-1082, env-109, env-110, env-111, env-112, env-1121, env-1124, env-1128, env-113, env-114, env-1142, env-1146, env-115, env-1150, env-1152, env-116, env-1160, env-1161, env-1162, env-1168, env-1169, env-117, env-1170, env-1171, env-1172, env-1173, env-1174, env-1175, env-1176, env-1177, env-1178, env-1179, env-118, env-1180, env-1181, env-1182, env-1183, env-1184, env-1185, env-1186, env-1187, env-1188, env-1189, env-119, env-1190, env-1191, env-1196, env-1198, env-1199, env-120, env-1200, env-1201, env-1202, env-1204, env-1207, env-1208, env-1209, env-121, env-1210, env-1212, env-1214, env-1215, env-1217, env-1218, env-1219, env-122, env-1220, env-1221, env-1222, env-1225, env-1226, env-1227, env-1229, env-123, env-1230, env-1231, env-1232, env-1234, env-1235, env-1236, env-1237, env-1238, env-1239, env-124, env-1240, env-1241, env-1242, env-1246, env-1247, env-1248, env-1249, env-125, env-1252, env-1253, env-1255, env-1257, env-127, env-128, env-130, env-131, env-133, env-134, env-135, env-136, env-137, env-138, env-139, env-140, env-141, env-142, env-143, env-144, env-145, env-146, env-147, env-149, env-150, env-151, env-152, env-153, env-154, env-156, env-161, env-162, env-172, env-173, env-174, env-175, env-176, env-177, env-178, env-179, env-180, env-181, env-182, env-183, env-184, env-185, env-186, env-187, env-188, env-189, env-19, env-190, env-191, env-192, env-193, env-194, env-195, env-196, env-197, env-198, env-199, env-20, env-200, env-201, env-202, env-203, env-204, env-214, env-215, env-216, env-217, env-218, env-219, env-220, env-221, env-223, env-224, env-225, env-228, env-23, env-235, env-236, env-237, env-238, env-239, env-24, env-240, env-241, env-242, env-243, env-244, env-245, env-247, env-25, env-251, env-252, env-253, env-254, env-255, env-256, env-261, env-263, env-271, env-274, env-277, env-28, env-282, env-283, env-284, env-289, env-29, env-294, env-296, env-30, env-300, env-303, env-304, env-306, env-31, env-312, env-313, env-32, env-325, env-33, env-332, env-333, env-334, env-335, env-34, env-340, env-342, env-343, env-344, env-346, env-35, env-352, env-356, env-358, env-36, env-364, env-365, env-366, env-367, env-37, env-372, env-374, env-376, env-377, env-378, env-379, env-38, env-380, env-381, env-382, env-383, env-39, env-391, env-393, env-394, env-395, env-40, env-404, env-405, env-407, env-409, env-41, env-415, env-416, env-417, env-42, env-424, env-427, env-428, env-43, env-430, env-44, env-45, env-456, env-459, env-46, env-460, env-461, env-465, env-47, env-472, env-475, env-478, env-479, env-48, env-480, env-481, env-482, env-484, env-49, env-496, env-499, env-50, env-500, env-505, env-506, env-51, env-513, env-515, env-518, env-52, env-524, env-528, env-529, env-53, env-530, env-533, env-536, env-539, env-54, env-540, env-541, env-542, env-543, env-544, env-545, env-546, env-547, env-548, env-549, env-55, env-550, env-551, env-556, env-56, env-57, env-58, env-581, env-584, env-585, env-586, env-587, env-588, env-59, env-590, env-591, env-60, env-601, env-602, env-603, env-604, env-605, env-606, env-607, env-608, env-609, env-61, env-610, env-611, env-612, env-614, env-615, env-616, env-617, env-618, env-619, env-62, env-620, env-621, env-622, env-623, env-624, env-625, env-626, env-627, env-628, env-629, env-630, env-631, env-632, env-633, env-634, env-635, env-636, env-637, env-638, env-639, env-640, env-641, env-642, env-643, env-644, env-645, env-646, env-647, env-649, env-65, env-650, env-654, env-655, env-656, env-658, env-659, env-66, env-660, env-661, env-662, env-663, env-664, env-665, env-666, env-667, env-668, env-669, env-67, env-670, env-671, env-672, env-673, env-674, env-675, env-678, env-68, env-685, env-687, env-688, env-689, env-69, env-690, env-691, env-692, env-693, env-694, env-695, env-697, env-701, env-702, env-703, env-704, env-705, env-706, env-707, env-708, env-712, env-713, env-714, env-715, env-716, env-717, env-718, env-719, env-720, env-721, env-722, env-723, env-728, env-730, env-731, env-732, env-739, env-740, env-741, env-750, env-764, env-773, env-777, env-778, env-779, env-782, env-783, env-784, env-786, env-792, env-794, env-795, env-796, env-805, env-806, env-807, env-809, env-810, env-811, env-812, env-813, env-814, env-815, env-816, env-817, env-818, env-819, env-820, env-823, env-841, env-844, env-85, env-850, env-853, env-854, env-863, env-867, env-871, env-879, env-884, env-89, env-895, env-896, env-897, env-898, env-899, env-90, env-904, env-905, env-906, env-907, env-908, env-909, env-91, env-910, env-911, env-912, env-913, env-914, env-915, env-916, env-917, env-918, env-919, env-92, env-920, env-925, env-926, env-927, env-928, env-929, env-93, env-930, env-931, env-933, env-934, env-935, env-936, env-937, env-938, env-939, env-94, env-940, env-941, env-942, env-943, env-944, env-945, env-946, env-947, env-95, env-951, env-952, env-954, env-955, env-956, env-959, env-96, env-962, env-963, env-964, env-965, env-966, env-969, env-97, env-974, env-975, env-976, env-980, env-987, env-988, env-989, env-99, env-991, env-998

alignment positions 1...79

```

env-1  CACCGGUUUCAACAGGAAACUUACAGCGGAAGACCUUGGCCAAUAAAUAUAAAUAAGUUGUACUUUUUGCGCGCCGGAUUUUUU
env-2  CGUUCAGAUACACAAAAGUUUGCAAAAAGUUUUUGCGGUUCACAGAAAAGUUUGUACUUUUUGCGCGCCGGAUUUUUU
env-3  ACGCGGAAAUAUCACGAAAAAAGACAAAGUAGAUUUUGCCAUAGAAUAAAAAAUAAGUACUUUUUGCGCGCCGGAUUUU
env-4  CCAAAGAGUAGCAAAAUAAGUAAAAAGUUUUUGCGAGUUUGCGUAAAAAGCCGUAUUUGCGCGCCGGAUUUUUU
env-5  AUAUUUUUAACAAACAUAAACAACAGCCUCACAGCAUAAAGAAUUCUCAUUUAUUUAUUGUAACUUUGCAACUGGAAU
env-6  AAUGAAAGUGCGAAAAACUUAAAAAUUUUUUGUAGUGGGGAAAAGUGCUAACUUUGCAAGCCGGAUUUUUU

```

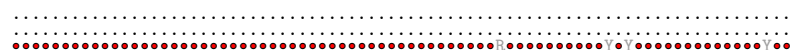















env-774 AAUUUAAA...  
 env-775 UCUUAAA...  
 env-776 UCUUAAA...  
 env-780 UUUUAAA...  
 env-781 AUUUAAA...  
 env-785 AUUCAAA...  
 env-787 AUUCAAA...  
 env-788 AUUUAAA...  
 env-789 AUUCAAA...  
 env-790 AUUYAAA...  
 env-791 AUUCAAA...  
 env-793 AUUUAAA...  
 env-797 AUUUAAA...  
 env-798 AUUUAAA...  
 env-799 AUUCAAA...  
 env-800 .CAUAAA...  
 env-801 NNNNNN...  
 env-802 UUUUAAA...  
 env-803 AUUUAAA...  
 env-804 AUUCAAA...  
 env-808 AUUCAAA...  
 env-821 UUYUAAA...  
 env-822 AUUUAAA...  
 env-824 AUUUAAA...  
 env-825 AUUUAAA...  
 env-826 AUUCAAA...  
 env-827 AUUCAAA...  
 env-828 .ACUAAA...  
 env-829 AUUCAAA...  
 env-830 UCUAAA...  
 env-831 AUUCAAA...  
 env-832 .GUGUAA...  
 env-833 AAUUUU...  
 env-834 AUUUU...  
 env-835 AUUCU...  
 env-836 UUUCA...  
 env-837 UUUU...  
 Pco-2-1 UUUU...  
 env-838 UUUU...  
 env-839 AUUU...  
 env-840 AUUC...  
 env-842 AUUC...  
 env-843 AUUU...  
 Por-8-1 AUCU...  
 Psp-21-1 AAUA...  
 env-845 NNNNN...  
 env-846 AAUA...  
 env-847 GUUAA...  
 env-848 ACGUA...  
 env-849 ACGUA...  
 env-851 GCGUA...  
 env-852 ACGUA...  
 env-855 ACGUA...  
 env-856 ACUA...  
 env-857 ACUA...  
 env-858 ACUA...  
 env-859 ACGUA...  
 env-860 ACUA...  
 env-861 GCGUA...  
 env-862 ACUA...  
 env-864 ACGUA...  
 env-865 ACGUA...  
 env-866 ACUA...  
 env-868 ACGUA...  
 env-869 ACUA...  
 env-870 ACUA...  
 env-872 AUUU...  
 env-873 ACUA...  
 env-874 AUUA...  
 env-875 ACUA...  
 env-876 ACUA...  
 Psp-25-1 ACGUA...  
 env-877 ACUA...  
 env-878 ACUA...  
 env-880 ACUA...  
 env-881 ACGU...  
 env-882 ACUA...  
 env-883 ACGU...  
 env-885 ACUA...  
 env-886 AGCGU...  
 env-887 UAUUA...  
 env-888 UAUUA...  
 env-889 UAUUA...  
 env-890 UAUUA...

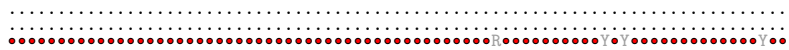



































env-7 UUUCAAGA  
 env-8 .....  
 env-9 CAAGCCUA  
 env-10 GCCUAAUG  
 env-11 ACAAGACC  
 env-12 AU.....  
 env-13 .....  
 env-14 ACCAUUUC  
 env-15 UAAACGAU  
 env-16 UAACAAAA  
 env-17 AAGUUACA  
 env-18 AAGUUACA  
 env-21 AGUUACAA  
 env-22 AAGUUACA  
 env-26 AGUUACAA  
 env-27 AAGUUACA  
 env-63 AAGUUACA  
 env-64 .....  
 env-70 AACAGAAG  
 env-71 UAUUAACA  
 env-72 UAAGAAAC  
 env-73 ACAGAAAGU  
 env-74 AAAAAAAA  
 env-75 ACAAGACC  
 env-76 UUACAAGA  
 env-77 AGUAAAAA  
 env-78 GCUACAAG  
 env-79 CAAGACCA  
 env-80 CAAGACCA  
 Pbr-3-1 UUCAAUAG  
 env-81 UUCAAUAG  
 env-82 UAAGA.....  
 env-83 AUUAAAAAG  
 env-84 UCAUGAAU  
 env-86 UCAUGAAU  
 env-87 UGAGCUAC  
 Pal-1-1 GAUUCGAC  
 env-88 GACACUU  
 env-98 GGACACUU  
 env-126 GACACUU  
 env-129 GGACACUU  
 env-132 GGACACUU  
 env-148 GGACACUU  
 env-155 GGACACUU  
 env-157 UGGACACU  
 env-158 .....  
 env-159 AAAAAACC  
 env-160 AAAAAACC  
 env-163 AAAAAACC  
 env-164 AAAAAACC  
 env-165 AAAAAACC  
 env-166 AAAAAACC  
 env-167 AAAAAACC  
 env-168 AAAAAACC  
 env-169 AAAAAACC  
 env-170 AAAAAACC  
 env-171 AAAAAACC  
 env-205 AAAAAACC  
 env-206 AAAAAACC  
 env-207 AAAAAACC  
 env-208 AAAAAACC  
 env-209 AAAAAACC  
 env-210 AAAAAACC  
 env-211 AAAAAACC  
 env-212 AAAAAACC  
 env-213 AAAAAACC  
 env-222 AAAAAACC  
 env-226 AAAAAACC  
 env-227 AAAAAACC  
 env-229 AAAAAACC  
 env-230 .....  
 env-231 AAAAAACC  
 env-232 AAAAAACC  
 env-233 .....  
 env-234 AAAAAACC  
 env-246 AAAAAACC  
 env-248 .....  
 env-249 AAAAAACC  
 env-250 AAAAAACC  
 env-257 AAAAAACC  
 env-258 AAAAAACC  
 env-259 .....  
 env-260 AAAAAACC  
 env-262 AAAAAACC

.....  
 .....  
 ●●●R●●●

env-264 AAAAAACC  
 env-265 AAAAAACC  
 env-266 AUAUGACA  
 env-267 CAUUUCCG  
 Bsp-2-1 CAUUUCCG  
 env-268 .....  
 env-269 .....  
 env-270 UUCAAAACC  
 env-272 .....  
 env-273 .....  
 env-275 .....  
 env-276 .....  
 env-278 .....  
 env-279 UUCAGACA  
 env-280 .....  
 env-281 .....  
 env-285 CAUUGAAU  
 env-286 .....  
 env-287 UUCAGGUA  
 env-288 UUCAGGUA  
 env-290 UUCAAGUA  
 env-291 UUCAAAACC  
 env-292 NNNNNNNN  
 env-293 UUCAGGUA  
 env-295 .....  
 env-297 .....  
 env-298 UUCAGGUA  
 env-299 .....  
 env-301 .....  
 env-302 .....  
 env-305 UUCAGGUA  
 env-307 UUCAGGUA  
 env-308 UUCAGGUA  
 env-309 UUCAGGUA  
 env-310 .....  
 env-311 .....  
 env-314 .....  
 env-315 UUCAAGUA  
 env-316 .....  
 env-317 UCACAAAG  
 env-318 .....  
 env-319 UUCAAUAC  
 Psp-3-1 CAUGUGUU  
 env-320 CUAUAUCA  
 env-321 CUAUAUCA  
 env-322 CUAUAUCA  
 env-323 .....  
 env-324 CUAUAUCA  
 env-326 CUAUAUCA  
 env-327 CUAUAUCA  
 env-328 .....  
 env-329 CUAUAUCA  
 env-330 CUAUAUCA  
 env-331 CUAUAUCA  
 env-336 CUAUAUCA  
 env-337 CUAUAUCA  
 env-338 CUAUAUCA  
 env-339 CUAUAUCA  
 env-341 CUAUAUCA  
 env-345 CUAUAUCA  
 env-347 CUAUAACA  
 env-348 CUAUAUCA  
 env-349 .....  
 Pma-3-1 CAAAGCAU  
 env-350 CAAAGCAU  
 env-351 CAAAGCAU  
 Pma-1-1 CAAAGCAU  
 env-353 .....  
 env-354 .....  
 env-355 .....  
 env-357 UCAUUGAU  
 env-359 UCAUUGAU  
 env-360 .....  
 env-361 UCAUUGAU  
 env-362 .....  
 env-363 .....  
 env-368 UCAUUGAU  
 env-369 UCAUUGAU  
 env-370 UCAUUGAU  
 env-371 UCAUUGAU  
 env-373 .....  
 env-375 UCAUUGAU  
 env-384 UCAUUGAU  
 env-385 UCAUUGAU

.....  
 .....  
 ●●●R●●●



env-386 .....  
 env-387 UCAUUGAU  
 env-388 .....  
 env-389 UCAUUGAU  
 env-390 UCAUUGAU  
 env-392 UCAUUGAU  
 env-396 UCAUUGAU  
 env-397 .....  
 env-398 UCAUUGAU  
 env-399 UCAUUGAU  
 env-400 UCAUUGAU  
 env-401 UCAUUGAU  
 env-402 UCAUUGAU  
 env-403 UCAUUGAU  
 env-406 UCAUUGAU  
 env-408 CGAAAAGU  
 env-410 CGAAAAGU  
 env-411 CGAAAAGU  
 env-412 UCAUUGAU  
 Por-6-1 CGAAAAGU  
 Por-5-1 CGAAAAGU  
 env-413 .....  
 env-414 CGAAAAGU  
 env-418 .....  
 env-419 .....  
 env-420 CGAAGGUA  
 env-421 CGAAAAGU  
 env-422 .....  
 env-423 .....  
 Psp-8-1 CGAAGGUA  
 env-425 CGAAGGUA  
 env-426 .....  
 env-429 CGAAGGUA  
 env-431 CGAAGGUA  
 env-432 CGAAGGUA  
 env-433 .....  
 env-434 .....  
 env-435 CGAAGGUA  
 env-436 CGAAGGUA  
 env-437 CGAAGGUA  
 env-438 CGAAGGUA  
 env-439 CGAAGGUA  
 env-440 CGAAGGUA  
 env-441 .....  
 env-442 .....  
 env-443 .....  
 Pou-1-1 CGAAGGUA  
 env-444 .....  
 env-445 CGAAGGUA  
 env-446 CGAAGGUA  
 env-447 CGAAGGUA  
 Pou-2-1 CGAAGGUA  
 env-448 GUUACAAG  
 env-449 .....  
 Pba-2-1 UCGAAUAC  
 Pba-1-1 UCGAAUAC  
 env-450 UCGAAUGU  
 Pde-2-1 UACAAGAC  
 Pbe-1-1 AAUAAGGU  
 env-451 ACUAAUUC  
 env-452 GCACAAGC  
 env-453 CAAGACUG  
 env-454 AAGACUUA  
 env-455 AAGACUUA  
 env-457 UUAUAAAA  
 env-458 .....  
 env-462 UAUAAAAAC  
 env-463 UAUAAAAAC  
 env-464 UUAUAAAA  
 env-466 AAUGAGUU  
 env-467 UGGCGGUA  
 env-468 .....  
 env-469 GACAAUUU  
 env-470 ACAAGACA  
 Ppa-3-1 AACAAUGU  
 env-471 AAUAAUGU  
 env-473 AAUAAUGU  
 env-474 AAUAAUGU  
 env-476 AAUAAUGU  
 env-477 AAUAAUGU  
 env-483 UAAGGAAC  
 env-485 UAAUAGGA  
 env-486 AGCAAUAC  
 env-487 AGUUAGAC

.....  
 .....  
 ●●●R●●●

env-488 AACAAAUU  
 env-489 ACAAGACU  
 env-490 AAGACUAA  
 env-491 AAGACUAA  
 env-492 AAGACUAA  
 env-493 AAGACUAA  
 Pam-1-1 AAGACUAA  
 Pam-3-1 AAGACUAA  
 Pbi-1-1 CAAGACUA  
 Pve-1-1 CAAGACUA  
 Pve-3-1 ACAAGACU  
 env-494 .....  
 env-495 UACAAGAC  
 env-497 UACAAGAC  
 Psc-1-1 ACAAGACU  
 env-498 .....  
 Psp-6-1 UACAAGAC  
 Pme-3-1 UACAAGAC  
 env-501 UACAAGAC  
 env-502 .....  
 env-503 .....  
 env-504 UUCAAGA  
 env-507 .....  
 Phi-2-1 UUCAAGA  
 env-508 UUACAA..  
 env-509 AACUUUCA  
 Phi-2-2 UUCAAGA  
 env-510 UACAAGAC  
 env-511 UACAANNN  
 env-512 UACAAGAC  
 env-514 UACAAGAC  
 env-516 .....  
 env-517 .....  
 env-519 UACAAGAC  
 Psp-5-1 UACAAGAC  
 env-520 UACAAGAC  
 env-521 UACAAGAC  
 env-522 UACAAGAC  
 env-523 UACAA...  
 env-525 UGCUC  
 env-526 ACAAGACU  
 env-527 UACAAGAC  
 env-531 UACAAGAC  
 env-532 ACAAGACU  
 env-534 UACA...  
 env-535 UACAAGAC  
 env-537 UACAAGAC  
 env-538 UACAAGAC  
 env-552 ACAAGACU  
 env-553 .....  
 env-554 UACAAGAC  
 env-555 UACAAGAC  
 env-557 UACAAGAC  
 env-558 NNNNNNN  
 env-559 UACAAGAC  
 env-560 .....  
 env-561 UACUAC  
 Pfu-1-1 ACAAGACU  
 Psp-24-1 ACAAGACU  
 env-562 .....  
 env-563 .....  
 env-564 ACA...  
 Pde-3-1 ACAAGACU  
 env-565 .....  
 Pde-4-1 ACAAGACU  
 Pde-5-1 CAAGACUA  
 env-566 CAAGA...  
 env-567 ACAAGA..  
 Pde-6-1 CAAGACUA  
 env-568 .....  
 env-569 CAA...  
 Pmu-1-1 CAAGACUA  
 env-570 .....  
 env-571 .....  
 env-572 AAUUAUA  
 env-573 .....  
 env-574 UAACAGGU  
 env-575 AUCAGGUA  
 env-576 AUCAGGUA  
 env-577 UAAGUUAC  
 env-578 UUAUAAGA  
 env-579 .....  
 env-580 UUAUAAGA  
 env-582 UUAUAAGA

.....  
 .....  
 ●●●R●●●

Pin-1-1 UAAGACUA  
 env-583 AU.....  
 env-589 AUAAGACU  
 env-592 GGUAGUAG  
 env-593 AUAAGACU  
 env-594 AGACCAGA  
 env-595 AUAAGACU  
 env-596 AU.....  
 env-597 GGUCGCCU  
 env-598 .....  
 env-599 AUAAGAC.  
 env-600 AUAAGACU  
 env-613 AUAAGACU  
 env-648 AUAAGACU  
 env-651 AUAAGACU  
 env-652 CCUCUGCU  
 env-653 .....  
 env-657 .....  
 env-676 UACAAGAC  
 Pco-3-1 UACAAGAC  
 Pni-1-1 UAAGACUA  
 env-677 UAAGACUA  
 env-679 UAAGACUA  
 env-680 CAAGACU.  
 env-681 CA.....  
 env-682 UAAGACUA  
 env-683 UAAGACUA  
 env-684 UAAGACUA  
 env-686 UAAGACUA  
 env-696 UAAGACUA  
 env-698 .....  
 env-699 .....  
 Pni-3-1 UAAGACUA  
 env-700 .....  
 env-709 .....  
 env-710 UAAGACUA  
 env-711 UAAGACUA  
 env-724 UAAGACUA  
 Pau-1-1 AGUUUUUA  
 Psp-9-1 AAGACUUA  
 env-725 UAAGACUA  
 env-726 UAAGACUA  
 env-727 .....  
 env-729 UAAGACUA  
 env-733 UAAGACUA  
 env-734 UAAGACUA  
 env-735 UAAGACUA  
 env-736 UAAGACUA  
 Pin-3-1 UAAGACUA  
 Pfa-1-1 AAGACUUA  
 env-737 UAAGACUA  
 env-738 UAAGACUA  
 env-742 UAAGACUA  
 Pdi-3-1 AAGACUUA  
 env-743 .....  
 Pdi-2-1 AAGACUUA  
 Pdi-1-1 AAGACUUA  
 env-744 GGACACA.  
 env-745 GACACAUU  
 env-746 GACACACA  
 env-747 GACACACA  
 env-748 GGACACAU  
 env-749 GACACACAU  
 env-751 GACACACAU  
 env-752 .....  
 env-753 CACAUUAA  
 env-754 GACACACAU  
 env-755 GUAAUCGA  
 env-756 GACACACA  
 env-757 CAUUUAGU  
 env-758 AAGACACA  
 env-759 AAAGAC  
 env-760 GACACACAU  
 env-761 .....  
 env-762 ACAUUUAG  
 env-763 ACAUUUAG  
 env-765 .....  
 env-766 ACAUUUAG  
 env-767 ACAUUUAG  
 env-768 CAUUUAGU  
 env-769 .....  
 env-770 CAUUUAGU  
 env-771 CAUUUAGU  
 env-772 CAUUUAGU

.....  
 .....  
 ●●●R●●●

env-774 UUUCAAGA  
 env-775 CAUUAAGU  
 env-776 CAUUAAGU  
 env-780 UUUCAAGA  
 env-781 CACAUUAA  
 env-785 ACAUUAAG  
 env-787 .....  
 env-788 CACAUUAA  
 env-789 CAUUAAGU  
 env-790 CAUUAAGU  
 env-791 .....  
 env-793 CACAUUAA  
 env-797 .....  
 env-798 AUUAAGUU  
 env-799 CACAUUAA  
 env-800 ACAUUAAG  
 env-801 CACAUUAA  
 env-802 CACAUUAA  
 env-803 ACAUUAAG  
 env-804 CACAUUAA  
 env-808 CACAUUAA  
 env-821 UAAGUUAC  
 env-822 ACACAUUA  
 env-824 CAUUAAGU  
 env-825 ■GACACA  
 env-826 CACAUUAA  
 env-827 CACAUUAA  
 env-828 CACAUUAA  
 env-829 AAGUUACA  
 env-830 ■GACACAU  
 env-831 ACAUUAAG  
 env-832 ACAUUAAG  
 env-833 AGUUAACA  
 env-834 .....  
 env-835 CAUUAAGU  
 env-836 CACAUUAA  
 env-837 CACAUUAA  
 Pco-2-1 CACAUUAA  
 env-838 .....  
 env-839 CACAUUAA  
 env-840 ACAUUAAG  
 env-842 ACAUUAAG  
 env-843 ACAUUAAG  
 Por-8-1 AGACCAUU  
 Psp-21-1 AUCAAAUC  
 env-845 ■GAUACUU  
 env-846 ■GAUACUU  
 env-847 AGGUGGAA  
 env-848 AGACUAUU  
 env-849 .....  
 env-851 AGACUAUU  
 env-852 A.....  
 env-855 AGACUAUU  
 env-856 AGACUGUU  
 env-857 A.....  
 env-858 AGACUAUU  
 env-859 AGACUAUU  
 env-860 AGACUAUU  
 env-861 .....  
 env-862 AGACUAUU  
 env-864 AGACUAUU  
 env-865 AGACUAUU  
 env-866 .....  
 env-868 .....  
 env-869 AGACUAUU  
 env-870 AGACUAUU  
 env-872 .....  
 env-873 .....  
 env-874 AGACUAUU  
 env-875 .....  
 env-876 AGACUAUU  
 Psp-25-1 AGACUAUU  
 env-877 AGACUAUU  
 env-878 A.....  
 env-880 AGACUAUU  
 env-881 .....  
 env-882 .....  
 env-883 .....  
 env-885 AGACUAUU  
 env-886 AAGACUUA  
 env-887 ACAAGACU  
 env-888 ACAAGACU  
 env-889 .....  
 env-890 .....

.....  
 .....  
 ●●●R●●●



env-891 ACAAGACU  
 env-892 ACAAGACU  
 env-893 .....  
 env-894 ACAAGACU  
 env-900 ACAAGACU  
 env-901 .....  
 env-902 ACAAGACU  
 Psp-26-1 ACAAGACU  
 env-903 .....  
 env-921 A.....  
 env-922 AGACUAUU  
 env-923 A.....  
 env-924 AGACUAUU  
 env-932 .....  
 env-948 AGACUAUU  
 env-949 AGACUAUU  
 env-950 A.....  
 env-953 A.....  
 env-957 A.....  
 env-958 AGACUAUU  
 env-960 GACUGUUU  
 env-961 GACUGUUU  
 env-967 AGCCUAGA  
 env-968 ACAAGACU  
 env-970 ACAAGACU  
 env-971 ACAAGACU  
 env-972 CAAGACUA  
 env-973 CAAGACUA  
 env-977 CAAGACUA  
 env-978 CAAGACUA  
 env-979 CAAGACUA  
 env-981 CAAGACUA  
 env-982 CAAGACUA  
 env-983 CAAGACUA  
 env-984 CAAGACUA  
 env-985 CAAGACUA  
 env-986 CAAGACUA  
 env-990 CAAGACUA  
 env-992 CAAGACUA  
 env-993 .....  
 env-994 GACUGUUU  
 Pbu-3-1 UGUAAUUA  
 Pbu-1-1 UGUAAUUA  
 Pbu-2-1 UGUAAUUA  
 Psp-12-1 UGUAAUUA  
 env-995 .....  
 env-996 GAAAGUAA  
 env-997 UGUCGAAA  
 env-999 UAUAUUU  
 Por-1-1 UUUCAAAA  
 .....  
 env-1001 UUUCAAAA  
 Por-2-1 AUAAGACU  
 env-1002 AUAAGACU  
 env-1003 AUAAGACU  
 Pti-3-1 AUAAGACU  
 env-1004 UAUAAGAC  
 Pti-1-1 AUAAGACU  
 Pti-2-1 AUAAGACU  
 env-1005 AUAAGACU  
 env-1006 .....  
 Psp-4-1 UACAAGAC  
 env-1007 UACAAGAC  
 Pbu-5-1 UACAAGAC  
 Pbu-4-1 UACAAGAC  
 env-1008 NNNNNNNN  
 Pen-1-1 CAAAACUA  
 env-1009 CAAAACUA  
 env-1017 CAAAACUA  
 env-1020 CAAAACUA  
 Ppl-2-1 CAAAACUA  
 env-1021 GUUACAAG  
 env-1022 GUUACAAG  
 env-1023 GUUACAAG  
 env-1024 .....  
 env-1025 UACAAGAC  
 env-1027 UUACAAGA  
 Pma-4-1 UUACAAGA  
 env-1028 UUACAAGA  
 env-1029 UUUUAGUU  
 env-1031 UUUUAGUU  
 env-1032 UAUUGAAG  
 env-1033 UAUUGAAG  
 env-1034 AGUUACAA  
 env-1035 CAAGACUA

.....  
 .....  
 ●●●R●●●

env-1037 UAGUAAAU  
 env-1038 AAGUUACA  
 env-1039 AAGUUACA  
 env-1040 AAGUUACA  
 env-1043 AAGUUACA  
 env-1044 AAGUUACA  
 env-1046 AAGUUACA  
 env-1052 UUACAAAA  
 env-1053 AAGUUACA  
 Psp-2-1 AAGUUACA  
 env-1054 AAGUUACA  
 env-1055 AAGUUACA  
 env-1056 AAGUUACA  
 env-1058 UUACAAGA  
 env-1059 AGUUACAA  
 env-1060 AGUUACAA  
 env-1061 UCAAGAAA  
 Psp-13-1 UCAAGAAA  
 env-1062 UCAAGAAA  
 Psp-17-1 GUGAAGAA  
 env-1063 GUGAAGAA  
 Psp-15-1 UCAAGAAA  
 Psp-16-1 GUGAAGAA  
 env-1064 UGGAAGAA  
 env-1065 .....  
 env-1066 UGGAAAGA  
 env-1067 ACAAGACU  
 Hse-1-1 CAUCAAGG  
 env-1068 UAAAUUA  
 env-1069 AACAAUUC  
 env-1071 AUAUUUAA  
 env-1072 UCGGAUGC  
 env-1074 UCGGAUGC  
 env-1075 UCGGAUGC  
 env-1076 .....  
 env-1077 GAUUUUUU  
 env-1078 GUUAGACC  
 env-1079 GACCUCGG  
 env-1080 GUUAGACC  
 env-1081 .....  
 env-1083 AGUUAGAC  
 env-1084 AAGAGUAU  
 env-1085 AGAGAGUA  
 env-1086 .....  
 env-1087 .....  
 env-1088 .....  
 env-1089 .....  
 env-1090 .....  
 env-1091 .....  
 env-1092 AUUUUUUU  
 env-1093 GAGAGAAA  
 env-1094 AGACCCUG  
 env-1095 GAGUUAGA  
 env-1096 GCCUGGGA  
 env-1097 AGAACAAA  
 env-1098 AUGUGGGU  
 Psp-7-1 UGUGAGUU  
 env-1099 UUUUUUUU  
 env-1100 UUUUUUUU  
 Psp-11-1 GACCCUGG  
 Psp-19-1 AGACCCUG  
 env-1101 .....  
 Pru-1-1 UUUUUUUU  
 env-1102 .....  
 env-1103 UUGAAUUU  
 env-1104 CUUUUAGU  
 Pbr-1-1 UUAAGUUA  
 Pbr-2-1 UUAAGUUA  
 env-1105 .....  
 env-1106 .....  
 env-1107 .....  
 env-1108 .....  
 env-1109 GUGGGUGG  
 env-1110 UGCGGGUG  
 env-1111 GCGGGUGG  
 env-1112 UAAGUUAC  
 env-1113 AAUUUUCG  
 env-1114 UGAUAAAA  
 env-1115 UGAUAAAA  
 env-1116 UUUUAGUU  
 env-1117 AUGUUUUU  
 env-1118 UUACAAGA  
 env-1119 UUACAAGA  
 env-1120 UAAGAAUU

.....  
 .....  
 ●●●R●●●

```

env-1122 AAGAAUUA
env-1123 CGAAAUAA
env-1125 UAAGUUAC
env-1126 ACAAGACU
env-1127 ACAAGACU
env-1129 ACAUUAAG
env-1130 ACUUUUGU
env-1131 UAAUGUGA
env-1132 AGAAGACC
env-1133 UACAAGAC
env-1134 CCACAAAC
env-1135 AAAUGUGA
env-1136 CAAGACCA
env-1137 UUAGA●●●
env-1138 UUAGAAUG
env-1139 CUUAGAAU
env-1140 CUUAGAAU
env-1141 CUUAGAAU
env-1143 CUUAGAAU
env-1144 CUUAGAAU
env-1145 CUUAGAAU
env-1147 UGGACACU
env-1148 ●●GACACU
env-1149 ●●GACACU
env-1151 UGGACACU
env-1153 UGGACACU
env-1154 ●●GACACU
env-1155 AUCGUUGA
env-1156 ●●GACACU
env-1157 ●●GACACU
env-1158 ●●GACACU
env-1159 UGGACACU
env-1163 ●●GACACU
env-1164 UGGACACU
env-1165 UGGACACU
env-1166 ●●●●GACAC
env-1167 ●●GACACU
env-1192 CCAUUUCU
env-1193 ●●●●GAUAC
env-1194 AUGGAUAC
Psp-1-1 ●●●●GAUAC
env-1195 .....
env-1197 ●●●●GAUAC
env-1203 ●●●●GAUAC
env-1205 ●●●●GAUAC
env-1206 ●●●●GAUAC
env-1211 .....
env-1213 ●●●●GAUAC
env-1216 UGGAUACU
env-1223 UGGAUACU
env-1224 UGGAUACU
env-1228 .....
env-1233 UGGAUACU
env-1243 UGGAUACU
env-1244 .....
env-1245 ●●●●GAUAC
env-1250 AUGGAUAC
env-1251 ●●●●GAUAC
env-1254 ●●●●GAUAC
env-1256 AUGGAUAC
env-1258 ●●●●GAUAC
env-1259 AUGGAUAC
Pmu-2-1 GUCAACAG
Pde-1-1 GUAUCAAG
.....
.....
.....
●●●●R●●●

```

## 4 eL15-Euryarchaeota

### 4.1 Taxa

The taxonomy of each organism containing a putative eL15-Euryarchaeota RNA is listed, with abbreviations identifying each hit (e.g., “Eco-1-1” and “Eco-1-2” might hypothetically represent two distinct RNAs in *E. coli*). The abbreviations will be used to identify each individual eL15-Euryarchaeota RNA in Sections 4.2 and 4.4:.

## abbrev. of hits

## taxonomy of species

|                    |                          |                                                                                            |
|--------------------|--------------------------|--------------------------------------------------------------------------------------------|
| har-1-1            | halophilic archaeon DL31 | Archaea                                                                                    |
| ume-1-1            | Archaea Euryarchaeota    | environmental samples uncultured methanogenic archaeon RC-I                                |
| h3A-1-1            | Archaea Euryarchaeota    | Halobacteria Halobacteriales haloarchaeon 3A1_DGR                                          |
| Hsa-1-1            | Archaea Euryarchaeota    | Halobacteria Halobacteriales Haloarculaceae <i>Halapricum salinum</i>                      |
| Hsp-1-1            | Archaea Euryarchaeota    | Halobacteria Halobacteriales Haloarculaceae <i>Haloarcula sp.</i> CBA1115                  |
| CHa-1-1            | Archaea Euryarchaeota    | Halobacteria Halobacteriales Halobacteriaceae <i>Candidatus Halobonum tyrrellensis</i> G22 |
| Hci-1-1            | Archaea Euryarchaeota    | Halobacteria Halobacteriales Halobacteriaceae <i>Haladaptatus cibarius</i> D43             |
| Hpa-1-1 to Hpa-1-2 | Archaea Euryarchaeota    | Halobacteria Halobacteriales Halobacteriaceae <i>Haladaptatus paucihalophilus</i> DX253    |
| Hje-1-1            | Archaea Euryarchaeota    | Halobacteria Halobacteriales Halobacteriaceae <i>Halalkalicoccus jeotgali</i> B3           |
| Hsu-1-1            | Archaea Euryarchaeota    | Halobacteria Halobacteriales Halobacteriaceae <i>Halanaeroarchaeum sulfurreducens</i>      |
| Hac-1-1 to Hac-1-2 | Archaea Euryarchaeota    | Halobacteria Halobacteriales Halobacteriaceae <i>Halarchaeum acidiphilum</i> MH1-52-1      |
| Ham-1-1            | Archaea Euryarchaeota    | Halobacteria Halobacteriales Halobacteriaceae <i>Haloarcula amylolytica</i> JCM 13557      |
| Har-1-1            | Archaea Euryarchaeota    | Halobacteria Halobacteriales Halobacteriaceae <i>Haloarcula argentinensis</i> DSM 12282    |
| Hca-1-1            | Archaea Euryarchaeota    | Halobacteria Halobacteriales Halobacteriaceae <i>Haloarcula californiae</i> ATCC 33799     |
| Hhi-1-1            | Archaea Euryarchaeota    | Halobacteria Halobacteriales Halobacteriaceae <i>Haloarcula hispanica</i> ATCC 33960       |
| Hhi-2-1            | Archaea Euryarchaeota    | Halobacteria Halobacteriales Halobacteriaceae <i>Haloarcula hispanica</i> N601             |
| Hja-1-1            | Archaea Euryarchaeota    | Halobacteria Halobacteriales Halobacteriaceae <i>Haloarcula japonica</i> DSM 6131          |
| Hma-1-1            | Archaea Euryarchaeota    | Halobacteria Halobacteriales Halobacteriaceae <i>Haloarcula marismortui</i> ATCC 43049     |
| Hsa-2-1            | Archaea Euryarchaeota    | Halobacteria Halobacteriales Halobacteriaceae <i>Haloarcula salaria</i>                    |
| Hsi-1-1            | Archaea Euryarchaeota    | Halobacteria Halobacteriales Halobacteriaceae <i>Haloarcula sinaiensis</i> ATCC 33800      |
| Hva-1-1            | Archaea Euryarchaeota    | Halobacteria Halobacteriales Halobacteriaceae <i>Haloarcula vallismortui</i> ATCC 29715    |
| Hsa-3-1            | Archaea Euryarchaeota    | Halobacteria Halobacteriales Halobacteriaceae <i>Halobacterium salinarum</i> R1            |
| Hsp-2-1            | Archaea Euryarchaeota    | Halobacteria Halobacteriales Halobacteriaceae <i>Halobacterium sp.</i> DL1                 |
| Hsp-3-1            | Archaea Euryarchaeota    | Halobacteria Halobacteriales Halobacteriaceae <i>Halobacterium sp.</i> NRC-1               |
| Hla-1-1 to Hla-1-2 | Archaea Euryarchaeota    | Halobacteria Halobacteriales Halobacteriaceae <i>Halobiforma lacisalsi</i> AJ5             |
| Hni-1-1            | Archaea Euryarchaeota    | Halobacteria Halobacteriales Halobacteriaceae <i>Halobiforma nitratireducens</i> JCM 10879 |
| Hha-1-1 to Hha-1-2 | Archaea Euryarchaeota    | Halobacteria Halobacteriales Halobacteriaceae <i>Halococcus hamelinensis</i> 100A6         |
| Hmo-1-1            | Archaea Euryarchaeota    | Halobacteria Halobacteriales Halobacteriaceae <i>Halococcus morrhuae</i> DSM 1307          |
| Hsa-4-1            | Archaea Euryarchaeota    | Halobacteria Halobacteriales Halobacteriaceae <i>Halococcus saccharolyticus</i> DSM 5350   |
| Hsa-5-1            | Archaea Euryarchaeota    | Halobacteria Halobacteriales Halobacteriaceae <i>Halococcus salifodinae</i> DSM 8989       |
| Hth-1-1            | Archaea Euryarchaeota    | Halobacteria Halobacteriales Halobacteriaceae <i>Halococcus thailandensis</i> JCM 13552    |
| Hal-1-1            | Archaea Euryarchaeota    | Halobacteria Halobacteriales Halobacteriaceae <i>Haloferax alexandrinus</i> JCM 10717      |
| Hde-1-1            | Archaea Euryarchaeota    | Halobacteria Halobacteriales Halobacteriaceae <i>Haloferax denitrificans</i> ATCC 35960    |
| Hel-1-1            | Archaea Euryarchaeota    | Halobacteria Halobacteriales Halobacteriaceae <i>Haloferax elongans</i> ATCC BAA-1513      |
| Hgi-1-1            | Archaea Euryarchaeota    | Halobacteria Halobacteriales Halobacteriaceae <i>Haloferax gibbonsii</i> ATCC 33959        |
| Hla-2-1            | Archaea Euryarchaeota    | Halobacteria Halobacteriales Halobacteriaceae <i>Haloferax larsenii</i> JCM 13917          |
| Hlu-1-1            | Archaea Euryarchaeota    | Halobacteria Halobacteriales Halobacteriaceae <i>Haloferax lucentense</i> DSM 14919        |
| Hme-1-1 to Hme-1-2 | Archaea Euryarchaeota    | Halobacteria Halobacteriales Halobacteriaceae <i>Haloferax mediterranei</i> ATCC 33500     |
| Hmu-1-1            | Archaea Euryarchaeota    | Halobacteria Halobacteriales Halobacteriaceae <i>Haloferax mucosum</i> ATCC BAA-1512       |
| Hpr-1-1            | Archaea Euryarchaeota    | Halobacteria Halobacteriales Halobacteriaceae <i>Haloferax prahovense</i> DSM 18310        |
| Hsp-4-1            | Archaea Euryarchaeota    | Halobacteria Halobacteriales Halobacteriaceae <i>Haloferax sp.</i> ATCC BAA-644            |
| Hsp-5-1            | Archaea Euryarchaeota    | Halobacteria Halobacteriales Halobacteriaceae <i>Haloferax sp.</i> ATCC BAA-645            |
| Hsp-6-1            | Archaea Euryarchaeota    | Halobacteria Halobacteriales Halobacteriaceae <i>Haloferax sp.</i> ATCC BAA-646            |
| Hsp-7-1            | Archaea Euryarchaeota    | Halobacteria Halobacteriales Halobacteriaceae <i>Haloferax sp.</i> BAB2207                 |
| Hsu-2-1            | Archaea Euryarchaeota    | Halobacteria Halobacteriales Halobacteriaceae <i>Haloferax sulfurifontis</i> ATCC BAA-897  |
| Hvo-1-1            | Archaea Euryarchaeota    | Halobacteria Halobacteriales Halobacteriaceae <i>Haloferax volcanii</i> DS2                |
| Hbo-1-1            | Archaea Euryarchaeota    | Halobacteria Halobacteriales Halobacteriaceae <i>Halogeometricum borinquense</i> DSM 11551 |
| Hsa-6-1            | Archaea Euryarchaeota    | Halobacteria Halobacteriales Halobacteriaceae <i>Halogranum salarium</i> B-1               |
| Hka-1-1            | Archaea Euryarchaeota    | Halobacteria Halobacteriales Halobacteriaceae <i>Halomicrobium katesii</i> DSM 19301       |
| Hmu-2-1            | Archaea Euryarchaeota    | Halobacteria Halobacteriales Halobacteriaceae <i>Halomicrobium mukohataei</i> DSM 12286    |
| Hxa-1-1            | Archaea Euryarchaeota    | Halobacteria Halobacteriales Halobacteriaceae <i>Halopiger xanaduensis</i> SH-6            |
| Hwa-1-1            | Archaea Euryarchaeota    | Halobacteria Halobacteriales Halobacteriaceae <i>Haloquadratum walsbyi</i> C23             |
| Hwa-2-1            | Archaea Euryarchaeota    | Halobacteria Halobacteriales Halobacteriaceae <i>Haloquadratum walsbyi</i> DSM 16790       |
| Hti-1-1            | Archaea Euryarchaeota    | Halobacteria Halobacteriales Halobacteriaceae <i>Halorhabdus tiamatea</i> SARL4B           |
| Hut-1-1            | Archaea Euryarchaeota    | Halobacteria Halobacteriales Halobacteriaceae <i>Halorhabdus utahensis</i> DSM 12940       |
| Hai-1-1            | Archaea Euryarchaeota    | Halobacteria Halobacteriales Halobacteriaceae <i>Halorubrum aidingense</i> JCM 13560       |
| Har-2-1            | Archaea Euryarchaeota    | Halobacteria Halobacteriales Halobacteriaceae <i>Halorubrum arcis</i> JCM 13916            |
| Hca-2-1            | Archaea Euryarchaeota    | Halobacteria Halobacteriales Halobacteriaceae <i>Halorubrum californiense</i> DSM 19288    |
| Hco-1-1            | Archaea Euryarchaeota    | Halobacteria Halobacteriales Halobacteriaceae <i>Halorubrum coriense</i> DSM 10284         |
| Hdi-1-1            | Archaea Euryarchaeota    | Halobacteria Halobacteriales Halobacteriaceae <i>Halorubrum distributum</i> JCM 10118      |
| Hdi-2-1            | Archaea Euryarchaeota    | Halobacteria Halobacteriales Halobacteriaceae <i>Halorubrum distributum</i> JCM 9100       |
| Hho-1-1            | Archaea Euryarchaeota    | Halobacteria Halobacteriales Halobacteriaceae <i>Halorubrum hochstenium</i> ATCC 700873    |
| Hko-1-1            | Archaea Euryarchaeota    | Halobacteria Halobacteriales Halobacteriaceae <i>Halorubrum kocurii</i> JCM 14978          |
| Hla-3-1            | Archaea Euryarchaeota    | Halobacteria Halobacteriales Halobacteriaceae <i>Halorubrum lacusprofundi</i> ATCC 49239   |



|                    |         |               |                 |                    |                     |                                                   |
|--------------------|---------|---------------|-----------------|--------------------|---------------------|---------------------------------------------------|
| Hli-1-1            | Archaea | Euryarchaeota | Halobacteria    | Halobacteriales    | Halobacteriaceae    | <i>Halorubrum lipolyticum</i> DSM 21995           |
| Hli-2-1            | Archaea | Euryarchaeota | Halobacteria    | Halobacteriales    | Halobacteriaceae    | <i>Halorubrum litoreum</i> JCM 13561              |
| Hsa-7-1            | Archaea | Euryarchaeota | Halobacteria    | Halobacteriales    | Halobacteriaceae    | <i>Halorubrum saccharovororum</i> DSM 1137        |
| Hsp-8-1            | Archaea | Euryarchaeota | Halobacteria    | Halobacteriales    | Halobacteriaceae    | <i>Halorubrum</i> sp. T3                          |
| Hte-1-1            | Archaea | Euryarchaeota | Halobacteria    | Halobacteriales    | Halobacteriaceae    | <i>Halorubrum tebenquichense</i> DSM 14210        |
| Hte-2-1            | Archaea | Euryarchaeota | Halobacteria    | Halobacteriales    | Halobacteriaceae    | <i>Halorubrum terrestre</i> JCM 10247             |
| Hpa-2-1            | Archaea | Euryarchaeota | Halobacteria    | Halobacteriales    | Halobacteriaceae    | <i>Halosarcina pallida</i> JCM 14848              |
| Hca-3-1            | Archaea | Euryarchaeota | Halobacteria    | Halobacteriales    | Halobacteriaceae    | <i>Halosimplex carlsbadense</i> 2-9-1             |
| Hli-3-1            | Archaea | Euryarchaeota | Halobacteria    | Halobacteriales    | Halobacteriaceae    | <i>Haloterrigena limicola</i> JCM 13563           |
| Hsa-8-1            | Archaea | Euryarchaeota | Halobacteria    | Halobacteriales    | Halobacteriaceae    | <i>Haloterrigena salina</i> JCM 13891             |
| Hth-2-1            | Archaea | Euryarchaeota | Halobacteria    | Halobacteriales    | Halobacteriaceae    | <i>Haloterrigena thermotolerans</i> DSM 11522     |
| Htu-1-1            | Archaea | Euryarchaeota | Halobacteria    | Halobacteriales    | Halobacteriaceae    | <i>Haloterrigena turkmenica</i> DSM 5511          |
| Has-1-1            | Archaea | Euryarchaeota | Halobacteria    | Halobacteriales    | Halobacteriaceae    | <i>Halovivax asiaticus</i> JCM 14624              |
| Nae-1-1            | Archaea | Euryarchaeota | Halobacteria    | Halobacteriales    | Halobacteriaceae    | <i>Natrialba aegyptia</i> DSM 13077               |
| Nas-1-1            | Archaea | Euryarchaeota | Halobacteria    | Halobacteriales    | Halobacteriaceae    | <i>Natrialba asiatica</i> DSM 12278               |
| Nch-1-1            | Archaea | Euryarchaeota | Halobacteria    | Halobacteriales    | Halobacteriaceae    | <i>Natrialba chahannaensis</i> JCM 10990          |
| Nhu-1-1            | Archaea | Euryarchaeota | Halobacteria    | Halobacteriales    | Halobacteriaceae    | <i>Natrialba hulunbeirensis</i> JCM 10989         |
| Nma-1-1            | Archaea | Euryarchaeota | Halobacteria    | Halobacteriales    | Halobacteriaceae    | <i>Natrialba magadii</i> ATCC 43099               |
| Nta-1-1            | Archaea | Euryarchaeota | Halobacteria    | Halobacteriales    | Halobacteriaceae    | <i>Natrialba taiwanensis</i> DSM 12281            |
| Nal-1-1            | Archaea | Euryarchaeota | Halobacteria    | Halobacteriales    | Halobacteriaceae    | <i>Natrinema altunense</i> JCM 12890              |
| Nga-1-1            | Archaea | Euryarchaeota | Halobacteria    | Halobacteriales    | Halobacteriaceae    | <i>Natrinema gari</i> JCM 14663                   |
| Npa-1-1            | Archaea | Euryarchaeota | Halobacteria    | Halobacteriales    | Halobacteriaceae    | <i>Natrinema pallidum</i> DSM 3751                |
| Npe-1-1            | Archaea | Euryarchaeota | Halobacteria    | Halobacteriales    | Halobacteriaceae    | <i>Natrinema pellirubrum</i> DSM 15624            |
| Nsp-1-1            | Archaea | Euryarchaeota | Halobacteria    | Halobacteriales    | Halobacteriaceae    | <i>Natrinema</i> sp. J7-2                         |
| Nve-1-1            | Archaea | Euryarchaeota | Halobacteria    | Halobacteriales    | Halobacteriaceae    | <i>Natrinema versiforme</i> JCM 10478             |
| Ngr-1-1            | Archaea | Euryarchaeota | Halobacteria    | Halobacteriales    | Halobacteriaceae    | <i>Natronobacterium gregoryi</i> SP2              |
| Nam-1-1            | Archaea | Euryarchaeota | Halobacteria    | Halobacteriales    | Halobacteriaceae    | <i>Natronococcus amylolyticus</i> DSM 10524       |
| Nje-1-1            | Archaea | Euryarchaeota | Halobacteria    | Halobacteriales    | Halobacteriaceae    | <i>Natronococcus jeotgali</i> DSM 18795           |
| Noc-1-1            | Archaea | Euryarchaeota | Halobacteria    | Halobacteriales    | Halobacteriaceae    | <i>Natronococcus occultus</i> SP4                 |
| Nin-1-1            | Archaea | Euryarchaeota | Halobacteria    | Halobacteriales    | Halobacteriaceae    | <i>Natronolimnobius innermongolicus</i> JCM 12255 |
| Nmo-1-1            | Archaea | Euryarchaeota | Halobacteria    | Halobacteriales    | Halobacteriaceae    | <i>Natronomonas moolapensis</i> 8.8.11            |
| Nph-1-1            | Archaea | Euryarchaeota | Halobacteria    | Halobacteriales    | Halobacteriaceae    | <i>Natronomonas pharaonis</i> DSM 2160            |
| Nba-1-1            | Archaea | Euryarchaeota | Halobacteria    | Halobacteriales    | Halobacteriaceae    | <i>Natronorubrum bangense</i> JCM 10635           |
| Nsu-1-1            | Archaea | Euryarchaeota | Halobacteria    | Halobacteriales    | Halobacteriaceae    | <i>Natronorubrum sulfidifaciens</i> JCM 14089     |
| Nti-1-1            | Archaea | Euryarchaeota | Halobacteria    | Halobacteriales    | Halobacteriaceae    | <i>Natronorubrum tibetense</i> GA33               |
| Ssp-1-1            | Archaea | Euryarchaeota | Halobacteria    | Halobacteriales    | Halobacteriaceae    | <i>Salinarchaeum</i> sp. Harcht-Bsk1              |
| Hag-1-1            | Archaea | Euryarchaeota | Halobacteria    | Halobacteriales    | Halococcaceae       | <i>Halococcus agarilyticus</i>                    |
| Hse-1-1            | Archaea | Euryarchaeota | Halobacteria    | Halobacteriales    | Halococcaceae       | <i>Halococcus sediminicola</i>                    |
| Hru-1-1            | Archaea | Euryarchaeota | Halobacteria    | Haloferacales      | Haloferacaceae      | <i>Halobellus rufus</i>                           |
| Hal-2-1            | Archaea | Euryarchaeota | Halobacteria    | Haloferacales      | Haloferacaceae      | <i>Haloferax alexandrinus</i>                     |
| Hgi-2-1            | Archaea | Euryarchaeota | Halobacteria    | Haloferacales      | Haloferacaceae      | <i>Haloferax gibbonsii</i>                        |
| Hme-1-1 to Hme-1-2 | Archaea | Euryarchaeota | Halobacteria    | Haloferacales      | Haloferacaceae      | <i>Haloferax mediterranei</i> ATCC 33500          |
| Hsp-9-1            | Archaea | Euryarchaeota | Halobacteria    | Haloferacales      | Haloferacaceae      | <i>Haloferax</i> sp. ATB1                         |
| Hna-1-1            | Archaea | Euryarchaeota | Halobacteria    | Haloferacales      | Haloferacaceae      | <i>Haloplanus natans</i> DSM 17983                |
| Hru-2-1            | Archaea | Euryarchaeota | Halobacteria    | Haloferacales      | Halorubraceae       | <i>Halolamina rubra</i>                           |
| Hez-1-1            | Archaea | Euryarchaeota | Halobacteria    | Haloferacales      | Halorubraceae       | <i>Halorubrum ezzemoulense</i> DSM 17463          |
| Hha-2-1            | Archaea | Euryarchaeota | Halobacteria    | Haloferacales      | Halorubraceae       | <i>Halorubrum halophilum</i>                      |
| Hsa-9-1            | Archaea | Euryarchaeota | Halobacteria    | Haloferacales      | Halorubraceae       | <i>Halorubrum saccharovororum</i>                 |
| Hsp-10-1           | Archaea | Euryarchaeota | Halobacteria    | Haloferacales      | Halorubraceae       | <i>Halorubrum</i> sp. BV1                         |
| Hdj-1-1            | Archaea | Euryarchaeota | Halobacteria    | Natrialbales       | Natrialbaceae       | <i>Halopiger djelfmassiliensis</i>                |
| Hgo-1-1            | Archaea | Euryarchaeota | Halobacteria    | Natrialbales       | Natrialbaceae       | <i>Halopiger golemassiliensis</i>                 |
| Hsa-10-1           | Archaea | Euryarchaeota | Halobacteria    | Natrialbales       | Natrialbaceae       | <i>Halopiger salifodinae</i>                      |
| Hla-4-1            | Archaea | Euryarchaeota | Halobacteria    | Natrialbales       | Natrialbaceae       | <i>Halostagnicola larsenii</i> XH-48              |
| Hsp-11-1           | Archaea | Euryarchaeota | Halobacteria    | Natrialbales       | Natrialbaceae       | <i>Halostagnicola</i> sp. A56                     |
| Hje-2-1            | Archaea | Euryarchaeota | Halobacteria    | Natrialbales       | Natrialbaceae       | <i>Haloterrigena jeotgali</i> A29                 |
| Nal-2-1            | Archaea | Euryarchaeota | Halobacteria    | Natrialbales       | Natrialbaceae       | <i>Natrinema altunense</i>                        |
| Nsp-2-1            | Archaea | Euryarchaeota | Halobacteria    | Natrialbales       | Natrialbaceae       | <i>Natrinema</i> sp. J7-1                         |
| Mar-1-1            | Archaea | Euryarchaeota | Methanobacteria | Methanobacteriales | Methanobacteriaceae | <i>Methanobacterium arcticum</i>                  |
| Mfo-1-1            | Archaea | Euryarchaeota | Methanobacteria | Methanobacteriales | Methanobacteriaceae | <i>Methanobacterium formicicum</i>                |
| Mfo-2-1            | Archaea | Euryarchaeota | Methanobacteria | Methanobacteriales | Methanobacteriaceae | <i>Methanobacterium formicicum</i> DSM 3637       |
| Msp-1-1            | Archaea | Euryarchaeota | Methanobacteria | Methanobacteriales | Methanobacteriaceae | <i>Methanobacterium</i> sp. AL-21                 |
| Msp-2-1            | Archaea | Euryarchaeota | Methanobacteria | Methanobacteriales | Methanobacteriaceae | <i>Methanobacterium</i> sp. MB1                   |
| Msp-3-1            | Archaea | Euryarchaeota | Methanobacteria | Methanobacteriales | Methanobacteriaceae | <i>Methanobacterium</i> sp. SMA-27                |
| Msp-4-1            | Archaea | Euryarchaeota | Methanobacteria | Methanobacteriales | Methanobacteriaceae | <i>Methanobacterium</i> sp. SWAN-1                |
| Mve-1-1            | Archaea | Euryarchaeota | Methanobacteria | Methanobacteriales | Methanobacteriaceae | <i>Methanobacterium veterum</i>                   |

|                     |         |               |                 |                    |                                |                                                     |
|---------------------|---------|---------------|-----------------|--------------------|--------------------------------|-----------------------------------------------------|
| Mor-1-1             | Archaea | Euryarchaeota | Methanobacteria | Methanobacteriales | Methanobacteriaceae            | <i>Methanobrevibacter oralis</i> JMR01              |
| Msm-1-1             | Archaea | Euryarchaeota | Methanobacteria | Methanobacteriales | Methanobacteriaceae            | <i>Methanobrevibacter smithii</i>                   |
| Msm-2-1             | Archaea | Euryarchaeota | Methanobacteria | Methanobacteriales | Methanobacteriaceae            | <i>Methanobrevibacter smithii</i> ATCC 35061        |
| Msm-3-1             | Archaea | Euryarchaeota | Methanobacteria | Methanobacteriales | Methanobacteriaceae            | <i>Methanobrevibacter smithii</i> DSM 2374          |
| Msm-4-1             | Archaea | Euryarchaeota | Methanobacteria | Methanobacteriales | Methanobacteriaceae            | <i>Methanobrevibacter smithii</i> DSM 2375          |
| Msm-5-1             | Archaea | Euryarchaeota | Methanobacteria | Methanobacteriales | Methanobacteriaceae            | <i>Methanobrevibacter smithii</i> TS145A            |
| Msm-6-1             | Archaea | Euryarchaeota | Methanobacteria | Methanobacteriales | Methanobacteriaceae            | <i>Methanobrevibacter smithii</i> TS145B            |
| Msm-7-1             | Archaea | Euryarchaeota | Methanobacteria | Methanobacteriales | Methanobacteriaceae            | <i>Methanobrevibacter smithii</i> TS146A            |
| Msm-8-1             | Archaea | Euryarchaeota | Methanobacteria | Methanobacteriales | Methanobacteriaceae            | <i>Methanobrevibacter smithii</i> TS146B            |
| Msm-9-1             | Archaea | Euryarchaeota | Methanobacteria | Methanobacteriales | Methanobacteriaceae            | <i>Methanobrevibacter smithii</i> TS146C            |
| Msm-10-1            | Archaea | Euryarchaeota | Methanobacteria | Methanobacteriales | Methanobacteriaceae            | <i>Methanobrevibacter smithii</i> TS146E            |
| Msm-11-1            | Archaea | Euryarchaeota | Methanobacteria | Methanobacteriales | Methanobacteriaceae            | <i>Methanobrevibacter smithii</i> TS147A            |
| Msm-12-1            | Archaea | Euryarchaeota | Methanobacteria | Methanobacteriales | Methanobacteriaceae            | <i>Methanobrevibacter smithii</i> TS147B            |
| Msm-13-1            | Archaea | Euryarchaeota | Methanobacteria | Methanobacteriales | Methanobacteriaceae            | <i>Methanobrevibacter smithii</i> TS147C            |
| Msm-14-1            | Archaea | Euryarchaeota | Methanobacteria | Methanobacteriales | Methanobacteriaceae            | <i>Methanobrevibacter smithii</i> TS94A             |
| Msm-15-1            | Archaea | Euryarchaeota | Methanobacteria | Methanobacteriales | Methanobacteriaceae            | <i>Methanobrevibacter smithii</i> TS94B             |
| Msm-16-1            | Archaea | Euryarchaeota | Methanobacteria | Methanobacteriales | Methanobacteriaceae            | <i>Methanobrevibacter smithii</i> TS94C             |
| Msm-17-1            | Archaea | Euryarchaeota | Methanobacteria | Methanobacteriales | Methanobacteriaceae            | <i>Methanobrevibacter smithii</i> TS95A             |
| Msm-18-1            | Archaea | Euryarchaeota | Methanobacteria | Methanobacteriales | Methanobacteriaceae            | <i>Methanobrevibacter smithii</i> TS95B             |
| Msm-19-1            | Archaea | Euryarchaeota | Methanobacteria | Methanobacteriales | Methanobacteriaceae            | <i>Methanobrevibacter smithii</i> TS95C             |
| Msm-20-1            | Archaea | Euryarchaeota | Methanobacteria | Methanobacteriales | Methanobacteriaceae            | <i>Methanobrevibacter smithii</i> TS95D             |
| Msm-21-1            | Archaea | Euryarchaeota | Methanobacteria | Methanobacteriales | Methanobacteriaceae            | <i>Methanobrevibacter smithii</i> TS96A             |
| Msm-22-1            | Archaea | Euryarchaeota | Methanobacteria | Methanobacteriales | Methanobacteriaceae            | <i>Methanobrevibacter smithii</i> TS96B             |
| Msm-23-1            | Archaea | Euryarchaeota | Methanobacteria | Methanobacteriales | Methanobacteriaceae            | <i>Methanobrevibacter smithii</i> TS96C             |
| Mae-1-1             | Archaea | Euryarchaeota | Methanococci    | Methanococcales    | Methanococcaceae               | <i>Methanococcus aeolicus</i> Nankai-3              |
| Mvo-1-1             | Archaea | Euryarchaeota | Methanococci    | Methanococcales    | Methanococcaceae               | <i>Methanococcus voltae</i> A3                      |
| Mco-1-1             | Archaea | Euryarchaeota | Methanomicrobia | Methanocellales    | Methanocellaceae               | <i>Methanocella conradii</i> HZ254                  |
| CMe-1-1             | Archaea | Euryarchaeota | Methanomicrobia | Methanomicrobiales | Generaincertae sedis           | <i>Candidatus Methanoregula boonei</i> 6A8          |
| Mpa-1-1             | Archaea | Euryarchaeota | Methanomicrobia | Methanomicrobiales | Generaincertae sedis           | <i>Methanosphaerula palustris</i> E1-9c             |
| Mma-1-1             | Archaea | Euryarchaeota | Methanomicrobia | Methanomicrobiales | Methanomicrobiaceae            | <i>Methanoculleus marisnigri</i> JR1                |
| Mse-1-1             | Archaea | Euryarchaeota | Methanomicrobia | Methanomicrobiales | Methanomicrobiaceae            | <i>Methanoculleus sediminis</i>                     |
| Msp-5-1             | Archaea | Euryarchaeota | Methanomicrobia | Methanomicrobiales | Methanomicrobiaceae            | <i>Methanoculleus</i> sp. MH98A                     |
| Mli-1-1             | Archaea | Euryarchaeota | Methanomicrobia | Methanomicrobiales | Methanomicrobiaceae            | <i>Methanofollis liminatans</i> DSM 4140            |
| Mta-1-1             | Archaea | Euryarchaeota | Methanomicrobia | Methanomicrobiales | Methanoregulaceae              | <i>Methanolinea tarda</i> NOBI-1                    |
| Mhu-1-1             | Archaea | Euryarchaeota | Methanomicrobia | Methanomicrobiales | Methanospirillaceae            | <i>Methanospirillum hungatei</i> JF-1               |
| CMe-2-1             | Archaea | Euryarchaeota | Methanomicrobia | Methanosarcinales  | Candidatus Methanoperedenaceae | <i>Candidatus Methanoperedens nitroreducens</i>     |
| Mbu-1-1             | Archaea | Euryarchaeota | Methanomicrobia | Methanosarcinales  | Methanosarcinaceae             | <i>Methanococcoides burtonii</i> DSM 6242           |
| Mme-1-1             | Archaea | Euryarchaeota | Methanomicrobia | Methanosarcinales  | Methanosarcinaceae             | <i>Methanococcoides methylutens</i>                 |
| Mme-2-1             | Archaea | Euryarchaeota | Methanomicrobia | Methanosarcinales  | Methanosarcinaceae             | <i>Methanococcoides methylutens</i> MM1             |
| Mev-1-1             | Archaea | Euryarchaeota | Methanomicrobia | Methanosarcinales  | Methanosarcinaceae             | <i>Methanolobium evestigatum</i> Z-7303             |
| Mma-2-1             | Archaea | Euryarchaeota | Methanomicrobia | Methanosarcinales  | Methanosarcinaceae             | <i>Methanolobium mahii</i> DSM 5219                 |
| Mps-1-1             | Archaea | Euryarchaeota | Methanomicrobia | Methanosarcinales  | Methanosarcinaceae             | <i>Methanolobium psychrophilum</i> R15              |
| Mti-1-1             | Archaea | Euryarchaeota | Methanomicrobia | Methanosarcinales  | Methanosarcinaceae             | <i>Methanolobium tindarius</i> DSM 2278             |
| Mho-1-1             | Archaea | Euryarchaeota | Methanomicrobia | Methanosarcinales  | Methanosarcinaceae             | <i>Methanomethylovorans hollandica</i> DSM 15978    |
| Mzh-1-1             | Archaea | Euryarchaeota | Methanomicrobia | Methanosarcinales  | Methanosarcinaceae             | <i>Methanosalsum zhilinae</i> DSM 4017              |
| Mac-1-1             | Archaea | Euryarchaeota | Methanomicrobia | Methanosarcinales  | Methanosarcinaceae             | <i>Methanosarcina acetivorans</i> C2A               |
| Mba-1-1             | Archaea | Euryarchaeota | Methanomicrobia | Methanosarcinales  | Methanosarcinaceae             | <i>Methanosarcina barkeri</i> 227                   |
| Mba-2-1             | Archaea | Euryarchaeota | Methanomicrobia | Methanosarcinales  | Methanosarcinaceae             | <i>Methanosarcina barkeri</i> 3                     |
| Mba-3-1             | Archaea | Euryarchaeota | Methanomicrobia | Methanosarcinales  | Methanosarcinaceae             | <i>Methanosarcina barkeri</i> CM1                   |
| Mba-4-1             | Archaea | Euryarchaeota | Methanomicrobia | Methanosarcinales  | Methanosarcinaceae             | <i>Methanosarcina barkeri</i> MS                    |
| Mba-5-1             | Archaea | Euryarchaeota | Methanomicrobia | Methanosarcinales  | Methanosarcinaceae             | <i>Methanosarcina barkeri</i> str. Fusaro           |
| Mba-6-1             | Archaea | Euryarchaeota | Methanomicrobia | Methanosarcinales  | Methanosarcinaceae             | <i>Methanosarcina barkeri</i> str. Wiesmoor         |
| Mho-2-1             | Archaea | Euryarchaeota | Methanomicrobia | Methanosarcinales  | Methanosarcinaceae             | <i>Methanosarcina horonobensis</i> HB-1 = JCM 15518 |
| Mla-1-1             | Archaea | Euryarchaeota | Methanomicrobia | Methanosarcinales  | Methanosarcinaceae             | <i>Methanosarcina lacustris</i> Z-7289              |
| Mma-3-1 to Mma-3-56 | Archaea | Euryarchaeota | Methanomicrobia | Methanosarcinales  | Methanosarcinaceae             | <i>Methanosarcina mazei</i>                         |
| Mma-4-1             | Archaea | Euryarchaeota | Methanomicrobia | Methanosarcinales  | Methanosarcinaceae             | <i>Methanosarcina mazei</i> C16                     |
| Mma-5-1             | Archaea | Euryarchaeota | Methanomicrobia | Methanosarcinales  | Methanosarcinaceae             | <i>Methanosarcina mazei</i> Go1                     |
| Mma-6-1             | Archaea | Euryarchaeota | Methanomicrobia | Methanosarcinales  | Methanosarcinaceae             | <i>Methanosarcina mazei</i> LYC                     |
| Mma-7-1             | Archaea | Euryarchaeota | Methanomicrobia | Methanosarcinales  | Methanosarcinaceae             | <i>Methanosarcina mazei</i> S-6                     |
| Mma-8-1             | Archaea | Euryarchaeota | Methanomicrobia | Methanosarcinales  | Methanosarcinaceae             | <i>Methanosarcina mazei</i> SarPi                   |
| Mma-9-1             | Archaea | Euryarchaeota | Methanomicrobia | Methanosarcinales  | Methanosarcinaceae             | <i>Methanosarcina mazei</i> WWM610                  |
| Msi-1-1             | Archaea | Euryarchaeota | Methanomicrobia | Methanosarcinales  | Methanosarcinaceae             | <i>Methanosarcina siciliae</i> C2J                  |
| Msi-2-1             | Archaea | Euryarchaeota | Methanomicrobia | Methanosarcinales  | Methanosarcinaceae             | <i>Methanosarcina siciliae</i> T4/M                 |
| Mso-1-1             | Archaea | Euryarchaeota | Methanomicrobia | Methanosarcinales  | Methanosarcinaceae             | <i>Methanosarcina soligelidi</i>                    |
| Msp-6-1             | Archaea | Euryarchaeota | Methanomicrobia | Methanosarcinales  | Methanosarcinaceae             | <i>Methanosarcina</i> sp. 1.H.A.2.2                 |







|         |                             |   |        |        |                                                                                                                                                                                                                                                                                                      |
|---------|-----------------------------|---|--------|--------|------------------------------------------------------------------------------------------------------------------------------------------------------------------------------------------------------------------------------------------------------------------------------------------------------|
| Hwa-1-1 | NC_017459.1                 | + | 520849 | 520904 | RNA → PRK04243 (PRK04243)Ribosomal_L15e (pfam00827) →<br>ThiF_MoeB_HesA_family (cd00757)adenylthiF (TIGR02356) →<br>PRK08762 (PRK08762)ThiF_MoeB_HesA_family (cd00757) →                                                                                                                             |
| env-23  | APHM01021410.1              | + | 37065  | 37122  | RNA → PRK04243 (PRK04243)Ribosomal_L15e (pfam00827) →<br>PRK08762 (PRK08762)ThiF_MoeB_HesA_family (cd00757) →                                                                                                                                                                                        |
| env-24  | LTJ07As871_J07ABscf098855   | + | 941476 | 941533 | RNA → PRK04243 (PRK04243)Ribosomal_L15e (pfam00827) →                                                                                                                                                                                                                                                |
| env-25  | APHM01021802.1              | + | 241797 | 241852 | RNA → PRK04243 (PRK04243)Ribosomal_L15e (pfam00827) →<br>ThiF_MoeB_HesA_family (cd00757)adenylthiF (TIGR02356) →                                                                                                                                                                                     |
| env-26  | LTJ07As871_J07ABscf098874   | + | 856037 | 856092 | RNA → PRK04243 (PRK04243)Ribosomal_L15e (pfam00827) →<br>ThiF_MoeB_HesA_family (cd00757)adenylthiF (TIGR02356) →                                                                                                                                                                                     |
| env-27  | JXWS01023088.1              | - | 1497   | 1442   | RNA → PRK04243 (PRK04243)Ribosomal_L15e (pfam00827) →<br>ThiF_MoeB_HesA_family (cd00757)adenylthiF (TIGR02356) →                                                                                                                                                                                     |
| env-28  | P_A23_Liq_2_Fmt_1049687     | + | 77     | 131    | RNA → PRK04243 (PRK04243)Ribosomal_L15e (pfam00827) →                                                                                                                                                                                                                                                |
| env-29  | P_A23_Liq_1_Fmt_1040915     | - | 222    | 168    | RNA → PRK04243 (PRK04243)Ribosomal_L15e (pfam00827) →                                                                                                                                                                                                                                                |
| env-30  | P_A23_Liq_3_Fmt_1034622     | + | 56     | 110    | RNA → RPL15A (COG1632)PRK04243 (PRK04243) →                                                                                                                                                                                                                                                          |
| env-31  | GSLNARP_GFPJP1N02JOWUN      | + | 62     | 117    | RNA → RPL15A (COG1632)PRK04243 (PRK04243) →                                                                                                                                                                                                                                                          |
| Hru-1-1 | NZ_BBJO01000020.1           | + | 43857  | 43911  | RNA → PRK04243 (PRK04243)Ribosomal_L15e (pfam00827) →                                                                                                                                                                                                                                                |
| env-32  | JXWS01113690.1              | + | 469    | 523    | RNA → RPL15A (COG1632)PRK04243 (PRK04243) →                                                                                                                                                                                                                                                          |
| env-33  | GSLNARP_GGGT6729_b1         | + | 216    | 270    | RNA → RPL15A (COG1632)PRK04243 (PRK04243) →                                                                                                                                                                                                                                                          |
| Hpa-2-1 | NZ_AOIV01000027.1           | - | 154749 | 154689 | RNA → PRK04243 (PRK04243)Ribosomal_L15e (pfam00827) →                                                                                                                                                                                                                                                |
| env-34  | GSLNAS_contig09763          | + | 194    | 284    | RNA → RPL15A (COG1632)PRK04243 (PRK04243) →                                                                                                                                                                                                                                                          |
| env-35  | SL_5KL_010_BRINE_10000873   | + | 7980   | 8030   | RNA → PRK04243 (PRK04243)Ribosomal_L15e (pfam00827) →                                                                                                                                                                                                                                                |
| env-36  | SL_6KL_011_BRINE_1000559    | + | 8034   | 8084   | RNA → PRK04243 (PRK04243)Ribosomal_L15e (pfam00827) →                                                                                                                                                                                                                                                |
| env-37  | SL_4KL_010_BRINE_10001420   | - | 8559   | 8509   | RNA → PRK04243 (PRK04243)Ribosomal_L15e (pfam00827) →                                                                                                                                                                                                                                                |
| env-38  | SL_7KL_010_BRINE_10000923   | - | 9479   | 9429   | RNA → PRK04243 (PRK04243)Ribosomal_L15e (pfam00827) →                                                                                                                                                                                                                                                |
| env-39  | GSLNARP_contig11045         | + | 688    | 814    | RNA → PRK04243 (PRK04243)Ribosomal_L15e (pfam00827) →                                                                                                                                                                                                                                                |
| env-40  | APHM01004060.1              | - | 1754   | 1627   | RNA → PRK04243 (PRK04243)Ribosomal_L15e (pfam00827) →                                                                                                                                                                                                                                                |
| env-41  | LTJ07As871_J07ABscf087768   | + | 8333   | 8460   | RNA → PRK04243 (PRK04243)Ribosomal_L15e (pfam00827) →                                                                                                                                                                                                                                                |
| Hac-1-1 | NZ_BATA01000010.1           | - | 40529  | 40466  | RNA → PRK04243 (PRK04243)Ribosomal_L15e (pfam00827) →                                                                                                                                                                                                                                                |
| Hac-1-2 | NZ_BANO01000201.1           | + | 3030   | 3093   | RNA → PRK04243 (PRK04243)Ribosomal_L15e (pfam00827) →                                                                                                                                                                                                                                                |
| env-42  | JXWS01007612.1              | + | 354    | 427    | RNA → PRK04243 (PRK04243)Ribosomal_L15e (pfam00827) →                                                                                                                                                                                                                                                |
| env-43  | P_A23_Liq_1_Fmt_1012496     | + | 495    | 568    | RNA → PRK04243 (PRK04243)Ribosomal_L15e (pfam00827) →                                                                                                                                                                                                                                                |
| env-44  | P_A23_Liq_3_Fmt_1032483     | - | 283    | 210    | RNA → RPL15A (COG1632)PRK04243 (PRK04243) →                                                                                                                                                                                                                                                          |
| env-45  | P_1C_Liq_3_UnCty_1034822    | + | 91     | 164    | RNA → RPL15A (COG1632)PRK04243 (PRK04243) →                                                                                                                                                                                                                                                          |
| env-46  | P_1C_Liq_1_UnCty_1087024    | - | 228    | 155    | RNA → PRK04243 (PRK04243)Ribosomal_L15e (pfam00827) →                                                                                                                                                                                                                                                |
| Hna-1-1 | NZ_KE386573.1               | + | 519442 | 519497 | RNA → PRK04243 (PRK04243)Ribosomal_L15e (pfam00827) →                                                                                                                                                                                                                                                |
| env-47  | P_1C_Sed_2_UnCty_1011141    | + | 185    | 240    | RNA → PRK04243 (PRK04243)Ribosomal_L15e (pfam00827) →                                                                                                                                                                                                                                                |
| env-48  | GSLSAAL_contig05270         | + | 171    | 218    | RNA → PRK04243 (PRK04243)Ribosomal_L15e (pfam00827) →<br>PRK08762 (PRK08762)ThiF_MoeB_HesA_family (cd00757) →                                                                                                                                                                                        |
| env-49  | GSLSAAL_contig13583         | - | 272    | 225    | RNA → PRK04243 (PRK04243)Ribosomal_L15e (pfam00827) →                                                                                                                                                                                                                                                |
| env-50  | GSLSAAL_contig05339         | - | 621    | 574    | RNA → PRK04243 (PRK04243)Ribosomal_L15e (pfam00827) →                                                                                                                                                                                                                                                |
| env-51  | GSLSAAL_contig11105         | + | 1628   | 1675   | RNA → PRK04243 (PRK04243)Ribosomal_L15e (pfam00827) →<br>PRK08762 (PRK08762)ThiF_MoeB_HesA_family (cd00757) →                                                                                                                                                                                        |
| env-52  | GSLSAAL_contig11811         | - | 21562  | 21515  | RNA → PRK04243 (PRK04243)Ribosomal_L15e (pfam00827) →<br>PRK08762 (PRK08762)ThiF_MoeB_HesA_family (cd00757) →<br>PRK05399 (PRK05399)MutS_I (pfam01624) →<br>MUTSd (smart00533)MutS (COG0249) → MUTSac (smart00534)MutS (COG0249) →                                                                   |
| env-53  | PR_CR_10_Liq_1.inCR_1003279 | - | 5806   | 5759   | HATPase_c (smart00387)HATPase_c (cd00075) → DNA_mis_repair (pfam01119)MutL_C (pfam08676) →<br>RNA → PRK04243 (PRK04243)Ribosomal_L15e (pfam00827) →<br>PRK08762 (PRK08762)ThiF_MoeB_HesA_family (cd00757) →<br>MUTSac (smart00534)MUTSd (smart00533)MutS (COG0249) → MutL (COG0323)mutL (PRK00095) → |
| env-54  | PR_CR_10_Liq_3.inCR_1104247 | - | 209    | 162    | RNA → RPL15A (COG1632)PRK04243 (PRK04243) →                                                                                                                                                                                                                                                          |
| env-55  | SL_6KL_011_BRINE_1017367    | + | 1682   | 1774   | RNA → PRK04243 (PRK04243)Ribosomal_L15e (pfam00827) →                                                                                                                                                                                                                                                |
| env-56  | SL_4KL_010_BRINE_10011168   | - | 1073   | 981    | RNA → PRK04243 (PRK04243)Ribosomal_L15e (pfam00827) →                                                                                                                                                                                                                                                |
| env-57  | SL_6KL_011_BRINE_1001181    | - | 10407  | 10313  | RNA → PRK04243 (PRK04243)Ribosomal_L15e (pfam00827) →                                                                                                                                                                                                                                                |

|         |                           |   |        |        |                                                       |
|---------|---------------------------|---|--------|--------|-------------------------------------------------------|
| env-58  | SL_5KL_010_SED_10002058   | - | 10404  | 10310  | RNA → PRK04243 (PRK04243)Ribosomal_L15e (pfam00827) → |
| env-59  | SL_8KL_010_SED_10019608   | + | 2296   | 2390   | RNA → PRK04243 (PRK04243)Ribosomal_L15e (pfam00827) → |
| env-60  | SL_4KL_010_BRINE_10010798 | - | 3106   | 3012   | RNA → PRK04243 (PRK04243)Ribosomal_L15e (pfam00827) → |
| env-61  | SL_6KL_011_BRINE_10003334 | + | 4498   | 4594   | RNA → PRK04243 (PRK04243)Ribosomal_L15e (pfam00827) → |
| env-62  | SL_8KL_010_SED_10044433   | - | 1782   | 1686   | RNA → PRK04243 (PRK04243)Ribosomal_L15e (pfam00827) → |
| env-63  | SL_6KL_011_BRINE_1254331  | + | 116    | 210    | RNA →                                                 |
| env-64  | SL_5KL_010_BRINE_10001910 | - | 7669   | 7575   | RNA → PRK04243 (PRK04243)Ribosomal_L15e (pfam00827) → |
| env-65  | SL_4KL_010_BRINE_10067600 | - | 209    | 106    | RNA → RPL15A (COG1632)PRK04243 (PRK04243) →           |
| env-66  | SL_6KL_011_BRINE_1036440  | - | 1105   | 1005   | RNA → PRK04243 (PRK04243)Ribosomal_L15e (pfam00827) → |
| Hai-1-1 | NZ_AOJI01000011.1         | + | 21092  | 21169  | RNA → PRK04243 (PRK04243)Ribosomal_L15e (pfam00827) → |
| Hco-1-1 | NZ_AOJL01000012.1         | + | 32123  | 32204  | RNA → PRK04243 (PRK04243)Ribosomal_L15e (pfam00827) → |
| Hsp-8-1 | NZ_JH815329.1             | + | 137323 | 137405 | RNA → PRK04243 (PRK04243)Ribosomal_L15e (pfam00827) → |
| Hte-1-1 | NZ_AOJD01000051.1         | + | 33749  | 33831  | RNA → PRK04243 (PRK04243)Ribosomal_L15e (pfam00827) → |
| Hho-1-1 | NZ_AOJO01000019.1         | - | 62900  | 62818  | RNA → PRK04243 (PRK04243)Ribosomal_L15e (pfam00827) → |
| env-67  | P_1C_Liq_3_UnCty_1013660  | - | 413    | 331    | RNA → RPL15A (COG1632)PRK04243 (PRK04243) →           |
| env-68  | P_1C_Liq_1_UnCty_1013722  | - | 796    | 714    | RNA → PRK04243 (PRK04243)Ribosomal_L15e (pfam00827) → |
| env-69  | P_1C_Liq_2_UnCty_1006954  | - | 774    | 692    | RNA → PRK04243 (PRK04243)Ribosomal_L15e (pfam00827) → |
| Hca-2-1 | NZ_AOJK01000041.1         | + | 102530 | 102612 | RNA → PRK04243 (PRK04243)Ribosomal_L15e (pfam00827) → |
| env-70  | P_A23_Liq_1_Fmt_1003600   | - | 1435   | 1353   | RNA → PRK04243 (PRK04243)Ribosomal_L15e (pfam00827) → |
| env-71  | P_A23_Liq_3_Fmt_1003343   | + | 1237   | 1319   | RNA → PRK04243 (PRK04243)Ribosomal_L15e (pfam00827) → |
| env-72  | P_A23_Liq_2_Fmt_1003882   | - | 1692   | 1610   | RNA → PRK04243 (PRK04243)Ribosomal_L15e (pfam00827) → |
| Hez-1-1 | NZ_ATXS01000005.1         | + | 87176  | 87258  | RNA → PRK04243 (PRK04243)Ribosomal_L15e (pfam00827) → |
| Hli-2-1 | NZ_AOJF01000031.1         | - | 113040 | 112960 | RNA → PRK04243 (PRK04243)Ribosomal_L15e (pfam00827) → |
| Har-2-1 | NZ_AOJJ01000054.1         | - | 111488 | 111408 | RNA → PRK04243 (PRK04243)Ribosomal_L15e (pfam00827) → |
| Hdi-1-1 | NZ_AOJN01000039.1         | - | 113054 | 112974 | RNA → PRK04243 (PRK04243)Ribosomal_L15e (pfam00827) → |
| Hte-2-1 | NZ_AOIW01000042.1         | - | 36897  | 36817  | RNA → PRK04243 (PRK04243)Ribosomal_L15e (pfam00827) → |
| Hdi-2-1 | NZ_AOJM01000058.1         | - | 27117  | 27037  | RNA → PRK04243 (PRK04243)Ribosomal_L15e (pfam00827) → |
| env-73  | P_1C_Liq_1_UnCty_1078077  | - | 117    | 36     | RNA → hypo →                                          |
| Hli-1-1 | NZ_AOJG01000017.1         | - | 108989 | 108896 | RNA → PRK04243 (PRK04243)Ribosomal_L15e (pfam00827) → |
| Hha-2-1 | NZ_BBJP01000018.1         | + | 13726  | 13819  | RNA → PRK04243 (PRK04243)Ribosomal_L15e (pfam00827) → |
| Hsa-9-1 | NZ_JNFH02000023.1         | + | 21503  | 21596  | RNA → PRK04243 (PRK04243)Ribosomal_L15e (pfam00827) → |
| env-74  | ADL20m3uS_contig07384     | + | 1833   | 1926   | RNA → PRK04243 (PRK04243)Ribosomal_L15e (pfam00827) → |
| env-75  | 2140918017-2486           | + | 2582   | 2675   | RNA → PRK04243 (PRK04243)Ribosomal_L15e (pfam00827) → |
| env-76  | 2140918027-05980          | - | 1029   | 936    | RNA → PRK04243 (PRK04243)Ribosomal_L15e (pfam00827) → |
| Hla-3-1 | NC_012029.1               | + | 432908 | 433001 | RNA → PRK04243 (PRK04243)Ribosomal_L15e (pfam00827) → |
| Hko-1-1 | NZ_AOJH01000069.1         | + | 3726   | 3819   | RNA → PRK04243 (PRK04243)Ribosomal_L15e (pfam00827) → |
| env-77  | GQKUMWE01AOE6H            | - | 136    | 43     | RNA → hypo →                                          |
| env-78  | GQKUMWE02FUCCT            | + | 205    | 298    | RNA → hypo →                                          |
| Hsa-7-1 | NZ_AOJE01000060.1         | + | 111633 | 111732 | RNA → PRK04243 (PRK04243)Ribosomal_L15e (pfam00827) → |
| env-79  | P_1C_Liq_2_UnCty_1069180  | - | 260    | 182    | RNA → PRK04243 (PRK04243)Ribosomal_L15e (pfam00827) → |
| env-80  | P_A23_Liq_1_Fmt_1002719   | - | 2388   | 2327   | RNA → PRK04243 (PRK04243)Ribosomal_L15e (pfam00827) → |
| env-81  | P_A23_Liq_3_Fmt_1003378   | - | 2423   | 2362   | RNA → PRK04243 (PRK04243)Ribosomal_L15e (pfam00827) → |
| env-82  | P_A23_Liq_2_Fmt_1009559   | - | 879    | 818    | RNA → PRK04243 (PRK04243)Ribosomal_L15e (pfam00827) → |
| env-83  | P_1C_Sed_2_UnCty_1017312  | + | 398    | 479    | RNA → PRK04243 (PRK04243)Ribosomal_L15e (pfam00827) → |
| env-84  | P_1C_Liq_1_UnCty_1034993  | + | 194    | 275    | RNA → RPL15A (COG1632)PRK04243 (PRK04243) →           |
| env-85  | P_1C_Liq_2_UnCty_1023529  | - | 401    | 320    | RNA → RPL15A (COG1632)PRK04243 (PRK04243) →           |
| env-86  | P_1C_Liq_3_UnCty_1021498  | - | 346    | 265    | RNA → RPL15A (COG1632)PRK04243 (PRK04243) →           |
| env-87  | P_1C_Sed_2_UnCty_1004595  | + | 1788   | 1869   | RNA → PRK04243 (PRK04243)Ribosomal_L15e (pfam00827) → |
| env-88  | P_1C_Sed_2_UnCty_1006549  | + | 274    | 355    | RNA → PRK04243 (PRK04243)Ribosomal_L15e (pfam00827) → |
| env-89  | SL_6KL_011_BRINE_1064466  | - | 575    | 484    | RNA → PRK04243 (PRK04243)Ribosomal_L15e (pfam00827) → |
| env-90  | SL_6KL_011_BRINE_1008323  | - | 510    | 419    | RNA → RPL15A (COG1632)PRK04243 (PRK04243) →           |
| env-91  | SL_6KL_011_BRINE_1063445  | + | 299    | 393    | RNA → RPL15A (COG1632)PRK04243 (PRK04243) →           |

|         |                           |   |         |         |                                                                                                                                                      |
|---------|---------------------------|---|---------|---------|------------------------------------------------------------------------------------------------------------------------------------------------------|
| env-92  | SL_6KL.011_BRINE_1001542  | - | 7921    | 7827    | RNA → PRK04243 (PRK04243)Ribosomal_L15e (pfam00827) →                                                                                                |
| env-93  | SL_6KL.011_BRINE_1006605  | + | 4992    | 5093    | RNA → RPL15A (COG1632)PRK04243 (PRK04243) →                                                                                                          |
| env-94  | SL_6KL.011_BRINE_1010435  | - | 890     | 821     | RNA → PRK04243 (PRK04243)Ribosomal_L15e (pfam00827) →                                                                                                |
| Hmu-1-1 | NZ_AOLN01000018.1         | + | 760151  | 760214  | RNA → PRK04243 (PRK04243)Ribosomal_L15e (pfam00827) →                                                                                                |
| Hel-1-1 | NZ_AOLK01000011.1         | - | 499306  | 499243  | RNA → PRK04243 (PRK04243)Ribosomal_L15e (pfam00827) →                                                                                                |
| Hla-2-1 | NZ_AOLI01000030.1         | - | 9206    | 9143    | RNA → PRK04243 (PRK04243)Ribosomal_L15e (pfam00827) →                                                                                                |
| Hde-1-1 | NZ_AOLP01000017.1         | + | 194706  | 194766  | RNA → PRK04243 (PRK04243)Ribosomal_L15e (pfam00827) →                                                                                                |
| Hal-2-1 | NZ_LK053000.1             | - | 1797714 | 1797654 | RNA → PRK04243 (PRK04243)Ribosomal_L15e (pfam00827) →                                                                                                |
| Hpr-1-1 | NZ_AOLG01000009.1         | - | 95328   | 95268   | RNA → PRK04243 (PRK04243)Ribosomal_L15e (pfam00827) →                                                                                                |
| Hgi-1-1 | NZ_AOLJ01000011.1         | + | 406353  | 406413  | RNA → PRK04243 (PRK04243)Ribosomal_L15e (pfam00827) →                                                                                                |
| Hgi-2-1 | NZ_CP011947.1             | - | 470623  | 470563  | RNA → PRK04243 (PRK04243)Ribosomal_L15e (pfam00827) →                                                                                                |
| Hsp-9-1 | NZ_JPES01000007.1         | - | 10173   | 10113   | RNA → PRK04243 (PRK04243)Ribosomal_L15e (pfam00827) →                                                                                                |
| Hsu-2-1 | NZ_AOLM01000018.1         | + | 49470   | 49530   | RNA → PRK04243 (PRK04243)Ribosomal_L15e (pfam00827) →                                                                                                |
| Hsp-6-1 | NZ_AOLD01000031.1         | + | 8987    | 9047    | RNA → PRK04243 (PRK04243)Ribosomal_L15e (pfam00827) →                                                                                                |
| Hsp-4-1 | NZ_AOLF01000036.1         | - | 67323   | 67263   | RNA → PRK04243 (PRK04243)Ribosomal_L15e (pfam00827) →                                                                                                |
| Hsp-5-1 | NZ_AOLE01000023.1         | + | 9123    | 9183    | RNA → PRK04243 (PRK04243)Ribosomal_L15e (pfam00827) →                                                                                                |
| Hme-1-1 | NZ_AOLO01000007.1         | + | 387185  | 387264  | RNA → PRK04243 (PRK04243)Ribosomal_L15e (pfam00827) →                                                                                                |
| Hme-1-2 | NC_017941.2               | - | 494773  | 494694  | RNA → PRK04243 (PRK04243)Ribosomal_L15e (pfam00827) →                                                                                                |
| Hru-2-1 | NZ_BBJN01000010.1         | - | 27162   | 27075   | RNA → PRK04243 (PRK04243)Ribosomal_L15e (pfam00827) →                                                                                                |
| env-95  | P_A23.Liq_1.Fmt_1000360   | + | 2899    | 2970    | RNA → PRK04243 (PRK04243)Ribosomal_L15e (pfam00827) →                                                                                                |
| env-96  | P_A23.Liq_3.Fmt_1000054   | + | 17691   | 17762   | RNA → PRK04243 (PRK04243)Ribosomal_L15e (pfam00827) →                                                                                                |
| env-97  | P_A23.Liq_2.Fmt_1000005   | + | 59053   | 59124   | RNA → PRK04243 (PRK04243)Ribosomal_L15e (pfam00827) →                                                                                                |
| env-98  | JXWS01130832.1            | - | 481     | 414     | RNA → RPL15A (COG1632)PRK04243 (PRK04243) →                                                                                                          |
| env-99  | APHM01022051.1            | + | 3638    | 3699    | RNA → PRK04243 (PRK04243)Ribosomal_L15e (pfam00827) →                                                                                                |
| env-100 | LTJ07As871_J07ABscf098878 | + | 1502510 | 1502571 | RNA → PRK04243 (PRK04243)Ribosomal_L15e (pfam00827) →                                                                                                |
| CHa-1-1 | NZ_ASGZ01000052.1         | + | 24839   | 24927   | RNA → PRK04243 (PRK04243)Ribosomal_L15e (pfam00827) → GlcE (TIGR03520)DUF21 (pfam01595) →                                                            |
| env-101 | SL_4KL.010_BRINE_10493865 | - | 158     | 111     | RNA → RPL15A (COG1632)PRK04243 (PRK04243) →                                                                                                          |
| env-102 | SL_6KL.011_BRINE_1000129  | + | 15997   | 16046   | RNA → PRK04243 (PRK04243)Ribosomal_L15e (pfam00827) →                                                                                                |
| env-103 | SL_4KL.010_BRINE_10001303 | + | 2439    | 2488    | PRK08762 (PRK08762)ThiF_MoeB_HesA_family (cd00757) → NikR (COG0864)NikR_C (pfam08753) →<br>RNA → PRK04243 (PRK04243)Ribosomal_L15e (pfam00827) →     |
| env-104 | SL_4KL.010_BRINE_10001201 | + | 2902    | 2951    | PRK08762 (PRK08762)ThiF_MoeB_HesA_family (cd00757) → NikR (COG0864)NikR_C (pfam08753) →<br>RNA → PRK04243 (PRK04243)Ribosomal_L15e (pfam00827) →     |
| env-105 | SL_5KL.010_BRINE_10000041 | + | 10173   | 10222   | ThiF_MoeB_HesA_family (cd00757)adenyl_thiF (TIGR02356) → NikR (COG0864)NikR_C (pfam08753) →<br>RNA → PRK04243 (PRK04243)Ribosomal_L15e (pfam00827) → |
| env-106 | SL_6KL.011_BRINE_1002627  | - | 6475    | 6426    | RNA → PRK04243 (PRK04243)Ribosomal_L15e (pfam00827) →                                                                                                |
| env-107 | SL_5KL.010_SED_10011446   | + | 130     | 179     | RNA → PRK04243 (PRK04243)Ribosomal_L15e (pfam00827) →                                                                                                |
| env-108 | SL_8KL.010_SED_10489198   | - | 248     | 199     | RNA → PRK04243 (PRK04243)Ribosomal_L15e (pfam00827) →                                                                                                |
| env-109 | SL_4KL.010_BRINE_10000898 | + | 3047    | 3096    | RNA → PRK04243 (PRK04243)Ribosomal_L15e (pfam00827) →                                                                                                |
| env-110 | SL_6KL.011_BRINE_1001896  | - | 92      | 43      | RNA → ← hypo                                                                                                                                         |
| env-111 | SL_4KL.010_BRINE_10030276 | + | 2918    | 2967    | RNA → hypo →                                                                                                                                         |
| env-112 | P_1C.Liq_3.UnCty_1038130  | - | 250     | 201     | RNA → PRK04243 (PRK04243)Ribosomal_L15e (pfam00827) →                                                                                                |
| env-113 | P_1C.Liq_2.UnCty_1042794  | + | 154     | 203     | RNA → PRK04243 (PRK04243)Ribosomal_L15e (pfam00827) →                                                                                                |
| env-114 | P_1C.Liq_1.UnCty_1078870  | + | 144     | 193     | RNA → PRK04243 (PRK04243)Ribosomal_L15e (pfam00827) →                                                                                                |
| env-115 | P_A23.Liq_3.Fmt_1006374   | - | 68      | 19      | RNA →                                                                                                                                                |
| env-116 | JXWS01040251.1            | + | 738     | 787     | RNA →                                                                                                                                                |
| env-117 | P_A23.Liq_3.Fmt_1005856   | + | 1663    | 1712    | RNA →                                                                                                                                                |
| env-118 | P_A23.Liq_2.Fmt_1003095   | - | 2041    | 1992    | RNA → PRK04243 (PRK04243)Ribosomal_L15e (pfam00827) →                                                                                                |
| env-119 | APHM01020319.1            | - | 3958    | 3909    | RNA → PRK04243 (PRK04243)Ribosomal_L15e (pfam00827) →                                                                                                |
| env-120 | LTJ07As871_J07ABscf098871 | + | 227603  | 227652  | RNA → PRK04243 (PRK04243)Ribosomal_L15e (pfam00827) →                                                                                                |
| env-121 | P_A23.Liq_1.Fmt_1002579   | - | 586     | 537     | RNA → PRK04243 (PRK04243)Ribosomal_L15e (pfam00827) →                                                                                                |
| env-122 | P_A23.Liq_1.Fmt_1006552   | - | 756     | 707     | RNA → PRK04243 (PRK04243)Ribosomal_L15e (pfam00827) →                                                                                                |
| env-123 | P_A23.Liq_2.Fmt_1001062   | + | 420     | 469     | RNA → PRK04243 (PRK04243)Ribosomal_L15e (pfam00827) →                                                                                                |
| env-124 | GSLNARP_contig28426       | + | 697     | 746     | RNA → PRK04243 (PRK04243)Ribosomal_L15e (pfam00827) →                                                                                                |



|          |                           |   |        |        |                                                                                                                                                                                                                                                                                         |
|----------|---------------------------|---|--------|--------|-----------------------------------------------------------------------------------------------------------------------------------------------------------------------------------------------------------------------------------------------------------------------------------------|
| env-125  | P_A23.Liq_3.Fmt_1000673   | - | 2025   | 1976   | RNA → PRK04243 (PRK04243)Ribosomal_L15e (pfam00827) →                                                                                                                                                                                                                                   |
| env-126  | ADL20m3uS_contig11627     | + | 9912   | 9962   | RNA → PRK04243 (PRK04243)Ribosomal_L15e (pfam00827) →                                                                                                                                                                                                                                   |
| env-127  | ADL5mRS1u_contig00042     | - | 12742  | 12692  | RNA → PRK04243 (PRK04243)Ribosomal_L15e (pfam00827) →                                                                                                                                                                                                                                   |
| env-128  | 2140918027-00046          | - | 29012  | 28962  | RNA → PRK04243 (PRK04243)Ribosomal_L15e (pfam00827) →                                                                                                                                                                                                                                   |
| env-129  | P_1C_Sed_2_UnCty_1108461  | + | 263    | 312    | RNA → PRK04243 (PRK04243)Ribosomal_L15e (pfam00827) →                                                                                                                                                                                                                                   |
| env-130  | ADL20m3uS_contig09914     | + | 12790  | 12839  | RNA → PRK04243 (PRK04243)Ribosomal_L15e (pfam00827) →                                                                                                                                                                                                                                   |
| env-131  | ADL5mRS1u_contig00058     | - | 5253   | 5204   | RNA → PRK04243 (PRK04243)Ribosomal_L15e (pfam00827) →                                                                                                                                                                                                                                   |
| env-132  | 2140918017-271            | - | 51697  | 51648  | RNA → PRK04243 (PRK04243)Ribosomal_L15e (pfam00827) →                                                                                                                                                                                                                                   |
| env-133  | 2140918017-8071           | - | 5288   | 5239   | RNA → PRK04243 (PRK04243)Ribosomal_L15e (pfam00827) →                                                                                                                                                                                                                                   |
| env-134  | 2140918027-00195          | - | 5210   | 5161   | RNA → PRK04243 (PRK04243)Ribosomal_L15e (pfam00827) →                                                                                                                                                                                                                                   |
| env-135  | SL_4KL_010_BRINE_10074326 | - | 160    | 113    | RNA → PRK04243 (PRK04243)Ribosomal_L15e (pfam00827) →                                                                                                                                                                                                                                   |
| env-136  | SL_6KL_011_BRINE_1020994  | - | 164    | 117    | RNA → PRK04243 (PRK04243)Ribosomal_L15e (pfam00827) →                                                                                                                                                                                                                                   |
| env-137  | SL_6KL_011_BRINE_1123850  | + | 243    | 291    | RNA → PRK04243 (PRK04243)Ribosomal_L15e (pfam00827) →                                                                                                                                                                                                                                   |
| env-138  | SL_8KL_010_SED_10020664   | - | 519    | 471    | RNA → PRK04243 (PRK04243)Ribosomal_L15e (pfam00827) →                                                                                                                                                                                                                                   |
| env-139  | SL_8KL_010_SED_10132433   | - | 343    | 294    | RNA → RPL15A (COG1632)PRK04243 (PRK04243) →                                                                                                                                                                                                                                             |
| env-140  | SL_5KL_010_SED_10120051   | + | 387    | 435    | RNA →                                                                                                                                                                                                                                                                                   |
| env-141  | SL_5KL_010_BRINE_10075440 | - | 64     | 16     | RNA → hypo →                                                                                                                                                                                                                                                                            |
| env-142  | SL_5KL_010_SED_10001678   | - | 13040  | 12992  | RNA → PRK04243 (PRK04243)Ribosomal_L15e (pfam00827) →<br>MCP_signal (cd11386)MA (smart00283)PRK10935 (PRK10935)HAMP (pfam00672) →<br>ThiF_MoeB_HesA_family (cd00757)adenyl_thiF (TIGR02356) → PRK04460 (PRK04460)ParD (COG3609) →<br>TIGR00697 (TIGR00697)Vut_1 (pfam02592) →           |
| env-143  | SL_7KL_010_BRINE_10383585 | + | 15     | 63     | RNA → RPL15A (COG1632)PRK04243 (PRK04243) →                                                                                                                                                                                                                                             |
| env-144  | SL_5KL_010_SED_10002997   | - | 7066   | 7018   | RNA → PRK04243 (PRK04243)Ribosomal_L15e (pfam00827) →<br>MA (smart00283)Tar (COG0840)PRK10935 (PRK10935)HAMP (pfam00672) →<br>ThiF_MoeB_HesA_family (cd00757)adenyl_thiF (TIGR02356) → PRK04460 (PRK04460)ParD (COG3609) →<br>TIGR00697 (TIGR00697)Vut_1 (pfam02592) → YhaK (COG1741) → |
| env-145  | SL_5KL_010_BRINE_10088461 | + | 207    | 254    | RNA → PRK04243 (PRK04243)Ribosomal_L15e (pfam00827) →                                                                                                                                                                                                                                   |
| env-146  | SL_6KL_011_BRINE_1001921  | - | 5758   | 5709   | RNA → PRK04243 (PRK04243)Ribosomal_L15e (pfam00827) →<br>MA (smart00283)Tar (COG0840)HAMP (pfam00672) →<br>ThiF_MoeB_HesA_family (cd00757)adenyl_thiF (TIGR02356) → PRK04460 (PRK04460)ParD (COG3609) →<br>TIGR00697 (TIGR00697)Vut_1 (pfam02592) → YhaK (COG1741) →                    |
| env-147  | SL_6KL_011_BRINE_1002375  | - | 67     | 20     | RNA →                                                                                                                                                                                                                                                                                   |
| env-148  | SL_4KL_010_BRINE_10002475 | + | 10303  | 10350  | RNA → RPL15A (COG1632)PRK04243 (PRK04243) →                                                                                                                                                                                                                                             |
| env-149  | SL_5KL_010_BRINE_10000147 | - | 15060  | 15012  | RNA → PRK04243 (PRK04243)Ribosomal_L15e (pfam00827) →<br>MA (smart00283)Tar (COG0840)HAMP (pfam00672) →<br>ThiF_MoeB_HesA_family (cd00757)adenyl_thiF (TIGR02356) → PRK04460 (PRK04460)ParD (COG3609) →<br>TIGR00697 (TIGR00697)Vut_1 (pfam02592) →                                     |
| env-150  | SL_6KL_011_BRINE_1000125  | + | 13899  | 13947  | RNA → PRK04243 (PRK04243)Ribosomal_L15e (pfam00827) →<br>MA (smart00283)Tar (COG0840)HAMP (pfam00672) →<br>ThiF_MoeB_HesA_family (cd00757)adenyl_thiF (TIGR02356) → PRK04460 (PRK04460)ParD (COG3609) →<br>TIGR00697 (TIGR00697)Vut_1 (pfam02592) →                                     |
| env-151  | SL_4KL_010_BRINE_10000557 | + | 10772  | 10820  | RNA → PRK04243 (PRK04243)Ribosomal_L15e (pfam00827) →<br>MA (smart00283)Tar (COG0840)HAMP (pfam00672) →<br>ThiF_MoeB_HesA_family (cd00757)adenyl_thiF (TIGR02356) → PRK04460 (PRK04460)ParD (COG3609) →<br>TIGR00697 (TIGR00697)Vut_1 (pfam02592) →                                     |
| env-152  | SL_4KL_010_BRINE_10273491 | - | 277    | 229    | RNA → ← hypo                                                                                                                                                                                                                                                                            |
| env-153  | P_A23.Liq_1.Fmt_1052201   | - | 109    | 60     | RNA → hypo →                                                                                                                                                                                                                                                                            |
| env-154  | P_A23.Liq_3.Fmt_1050467   | + | 211    | 260    | RNA → hypo →                                                                                                                                                                                                                                                                            |
| env-155  | P_A23.Liq_2.Fmt_1033762   | + | 198    | 247    | RNA → PRK04243 (PRK04243)Ribosomal_L15e (pfam00827) →                                                                                                                                                                                                                                   |
| env-156  | APHM01021601.1            | - | 2022   | 1973   | RNA → PRK04243 (PRK04243)Ribosomal_L15e (pfam00827) →                                                                                                                                                                                                                                   |
| env-157  | LTJ07As871_J07ABscf098869 | - | 39692  | 39643  | RNA → PRK04243 (PRK04243)Ribosomal_L15e (pfam00827) →                                                                                                                                                                                                                                   |
| env-158  | JXWU01132649.1            | - | 361    | 312    | RNA → RPL15A (COG1632)PRK04243 (PRK04243) →                                                                                                                                                                                                                                             |
| env-159  | SL_4KL_010_BRINE_10652442 | - | 116    | 67     | RNA →                                                                                                                                                                                                                                                                                   |
| Hsp-10-1 | NZ_KN050825.1             | + | 204974 | 205055 | RNA → PRK04243 (PRK04243)Ribosomal_L15e (pfam00827) →                                                                                                                                                                                                                                   |



|          |                           |   |         |         |                                                                                                                                              |
|----------|---------------------------|---|---------|---------|----------------------------------------------------------------------------------------------------------------------------------------------|
| Hse-1-1  | NZ_BBMP01000007.1         | - | 359177  | 359090  | RNA → PRK04243 (PRK04243)Ribosomal_L15e (pfam00827) → DsbA_FrnE (cd03024)Thioredoxin_4 (pfam13462) →                                         |
| Hmo-1-1  | NZ_AOMC01000142.1         | - | 76777   | 76718   | RNA → PRK04243 (PRK04243)Ribosomal_L15e (pfam00827) → DsbA_FrnE (cd03024)Thioredoxin_4 (pfam13462) →                                         |
| Hth-1-1  | NZ_AOMF01000174.1         | - | 199637  | 199578  | RNA → PRK04243 (PRK04243)Ribosomal_L15e (pfam00827) →                                                                                        |
| Nae-1-1  | NZ_AOIP01000031.1         | + | 430123  | 430196  | RNA → PRK04243 (PRK04243)Ribosomal_L15e (pfam00827) →                                                                                        |
| Nta-1-1  | NZ_AOIL01000013.1         | + | 203216  | 203289  | RNA → PRK04243 (PRK04243)Ribosomal_L15e (pfam00827) →                                                                                        |
| Nas-1-1  | NZ_AOIO01000020.1         | - | 6198    | 6125    | RNA → PRK04243 (PRK04243)Ribosomal_L15e (pfam00827) →                                                                                        |
| env-160  | GSLNAS_F7I09SK02JROTM     | - | 174     | 92      | RNA → ←-hypo                                                                                                                                 |
| env-161  | GSLNARP_GFPJP1N02H548U    | + | 202     | 278     | RNA → RPL15A (COG1632)PRK04243 (PRK04243) →                                                                                                  |
| env-162  | SL_8KL_010_SED_10010026   | + | 6182    | 6238    | RNA → RPL15A (COG1632)PRK04243 (PRK04243) →                                                                                                  |
| env-163  | SL_4KL_010_BRINE_10000926 | + | 6176    | 6232    | RNA → PRK04243 (PRK04243)Ribosomal_L15e (pfam00827) →                                                                                        |
| env-164  | SL_5KL_010_BRINE_10000029 | + | 1081    | 1137    | RNA → PRK04243 (PRK04243)Ribosomal_L15e (pfam00827) →                                                                                        |
| env-165  | SL_6KL_011_BRINE_1183487  | + | 36      | 92      | RNA → RPL15A (COG1632)PRK04243 (PRK04243) →                                                                                                  |
| env-166  | SL_5KL_010_SED_10001187   | - | 8518    | 8462    | RNA → PRK04243 (PRK04243)Ribosomal_L15e (pfam00827) →                                                                                        |
| env-167  | SL_4KL_010_BRINE_10007163 | + | 5927    | 5983    | RNA → PRK04243 (PRK04243)Ribosomal_L15e (pfam00827) →                                                                                        |
| env-168  | SL_4KL_010_BRINE_10050687 | - | 1683    | 1627    | RNA → PRK04243 (PRK04243)Ribosomal_L15e (pfam00827) →                                                                                        |
| env-169  | SL_8KL_010_SED_10059739   | - | 1479    | 1423    | RNA → PRK04243 (PRK04243)Ribosomal_L15e (pfam00827) →                                                                                        |
| env-170  | SL_5KL_010_BRINE_10000179 | + | 3935    | 3995    | RNA → PRK04243 (PRK04243)Ribosomal_L15e (pfam00827) →                                                                                        |
| env-171  | SL_6KL_011_BRINE_1206958  | - | 208     | 148     | RNA → RPL15A (COG1632)PRK04243 (PRK04243) →                                                                                                  |
| Hla-4-1  | NZ_CP007055.1             | - | 515819  | 515738  | RNA → PRK04243 (PRK04243)Ribosomal_L15e (pfam00827) →                                                                                        |
| Hsp-11-1 | NZ_JMIP02000020.1         | + | 43217   | 43284   | RNA → PRK04243 (PRK04243)Ribosomal_L15e (pfam00827) →                                                                                        |
| Hsp-3-1  | NC_002607.1               | - | 153435  | 153378  | RNA → PRK04243 (PRK04243)Ribosomal_L15e (pfam00827) →                                                                                        |
| Hsa-3-1  | NC_010364.1               | - | 153597  | 153540  | RNA → PRK04243 (PRK04243)Ribosomal_L15e (pfam00827) →                                                                                        |
| env-172  | SL_4KL_010_BRINE_10049878 | + | 1656    | 1711    | RNA → RPL15A (COG1632)PRK04243 (PRK04243) →                                                                                                  |
| Hsa-1-1  | NZ_BBMO01000001.1         | - | 1407520 | 1407456 | RNA → PRK04243 (PRK04243)Ribosomal_L15e (pfam00827) →                                                                                        |
| env-173  | ADL20m3uS_GLR497S01AM9VW  | - | 353     | 303     | RNA → RPL15A (COG1632)PRK04243 (PRK04243) →                                                                                                  |
| env-174  | 2140918017-22757          | - | 213     | 163     | RNA → PRK04243 (PRK04243)Ribosomal_L15e (pfam00827) →                                                                                        |
| env-175  | GSLNAS_F7I09SK02IM9H7     | + | 19      | 70      | RNA → PRK04243 (PRK04243)Ribosomal_L15e (pfam00827) →                                                                                        |
| env-176  | P_1C_Sed_2_UnCty_1039923  | - | 750     | 700     | RNA → PRK04243 (PRK04243)Ribosomal_L15e (pfam00827) →                                                                                        |
| Hpa-1-1  | NZ_AEMG01000025.1         | - | 56166   | 56103   | RNA → PRK04243 (PRK04243)Ribosomal_L15e (pfam00827) →                                                                                        |
| Hpa-1-2  | NZ_AQXI01000001.1         | - | 2637650 | 2637587 | PRK04243 (PRK04243)Ribosomal_L15e (pfam00827) → DUF1211 (pfam06736) → DUF1211 (pfam06736) →                                                  |
| env-177  | SL_4KL_010_BRINE_10364003 | - | 267     | 151     | RNA → RPL15A (COG1632)PRK04243 (PRK04243) →                                                                                                  |
| env-178  | SL_4KL_010_BRINE_10015962 | - | 1055    | 974     | RNA → PRK04243 (PRK04243)Ribosomal_L15e (pfam00827) →                                                                                        |
| env-179  | SL_4KL_010_BRINE_10475926 | + | 13      | 62      | RNA → RPL15A (COG1632)PRK04243 (PRK04243) →                                                                                                  |
| env-180  | SL_4KL_010_BRINE_10013350 | - | 4649    | 4598    | RNA → PRK04243 (PRK04243)Ribosomal_L15e (pfam00827) →                                                                                        |
| env-181  | SL_4KL_010_BRINE_10006798 | - | 2037    | 1873    | RNA → PRK04243 (PRK04243)Ribosomal_L15e (pfam00827) →                                                                                        |
| env-182  | SL_4KL_010_BRINE_10145615 | + | 98      | 148     | RNA → PRK04243 (PRK04243)Ribosomal_L15e (pfam00827) →                                                                                        |
| Ssp-1-1  | NC_021313.1               | + | 780000  | 780118  | RNA → PRK04243 (PRK04243)Ribosomal_L15e (pfam00827) →                                                                                        |
| env-183  | JXWU01070236.1            | - | 388     | 249     | RNA → PRK04243 (PRK04243)Ribosomal_L15e (pfam00827) →                                                                                        |
| Nph-1-1  | NC_007426.1               | - | 125427  | 125378  | RNA → PRK04243 (PRK04243)Ribosomal_L15e (pfam00827) →                                                                                        |
| env-184  | SL_4KL_010_BRINE_10509292 | + | 104     | 196     | RNA → RPL15A (COG1632)PRK04243 (PRK04243) →                                                                                                  |
| Hgo-1-1  | NZ_HG315690.1             | - | 2398586 | 2398507 | RNA → PRK04243 (PRK04243)Ribosomal_L15e (pfam00827) → PRK15005 (PRK15005)USP_Like (cd00293) → ars_reduc_gluta (TIGR02689)LMWpC (pfam01451) → |
| Hxa-1-1  | NC_015666.1               | + | 1583029 | 1583107 | RNA → PRK04243 (PRK04243)Ribosomal_L15e (pfam00827) →                                                                                        |
| env-185  | SL_4KL_010_BRINE_10004067 | + | 1089    | 1146    | RNA → PRK04243 (PRK04243)Ribosomal_L15e (pfam00827) → PRK15005 (PRK15005)USP_Like (cd00293) →                                                |
| env-186  | SL_5KL_010_BRINE_10021750 | + | 302     | 359     | RNA → PRK04243 (PRK04243)Ribosomal_L15e (pfam00827) → PRK15005 (PRK15005)USP_Like (cd00293) →                                                |
| env-187  | SL_8KL_010_SED_10621895   | - | 164     | 104     | RNA → RPL15A (COG1632)PRK04243 (PRK04243) →                                                                                                  |
| Nin-1-1  | NZ_AOHZ01000075.1         | - | 121628  | 121567  | RNA → PRK04243 (PRK04243)Ribosomal_L15e (pfam00827) →                                                                                        |
| env-188  | SL_5KL_010_BRINE_10005738 | - | 1188    | 1131    | RNA → PRK04243 (PRK04243)Ribosomal_L15e (pfam00827) →                                                                                        |
| env-189  | SL_6KL_011_BRINE_1053602  | + | 271     | 328     | RNA → PRK04243 (PRK04243)Ribosomal_L15e (pfam00827) →                                                                                        |
| env-190  | SL_8KL_010_SED_10028257   | - | 828     | 771     | RNA → PRK04243 (PRK04243)Ribosomal_L15e (pfam00827) →                                                                                        |

|         |                           |   |         |         |                                                                                                                        |
|---------|---------------------------|---|---------|---------|------------------------------------------------------------------------------------------------------------------------|
| env-191 | SL_4KL_010_BRINE_10066144 | - | 810     | 753     | RNA → PRK04243 (PRK04243)Ribosomal_L15e (pfam00827) →                                                                  |
| env-192 | SS_3KL_010_SOIL_10028172  | - | 1924    | 1854    | RNA → ←-hypo                                                                                                           |
| env-193 | SL_3KL_010_SED_10125154   | + | 137     | 207     | RNA → PRK04243 (PRK04243)Ribosomal_L15e (pfam00827) →                                                                  |
| Nje-1-1 | NZ_AOIA01000114.1         | + | 146675  | 146744  | RNA → PRK04243 (PRK04243)Ribosomal_L15e (pfam00827) →                                                                  |
| Nam-1-1 | NZ_AOIB01000026.1         | + | 119391  | 119460  | RNA → PRK04243 (PRK04243)Ribosomal_L15e (pfam00827) →                                                                  |
| Noc-1-1 | NC_019974.1               | - | 1797311 | 1797242 | RNA → PRK04243 (PRK04243)Ribosomal_L15e (pfam00827) →                                                                  |
| env-194 | GSLNARP_GFPJP1N02GQ822    | + | 449     | 495     | RNA →                                                                                                                  |
| env-195 | SL_4KL_010_BRINE_10350018 | - | 232     | 148     | RNA → RPL15A (COG1632)PRK04243 (PRK04243) →                                                                            |
| env-196 | SL_4KL_010_BRINE_10097165 | - | 841     | 785     | RNA → PRK04243 (PRK04243)Ribosomal_L15e (pfam00827) →                                                                  |
| env-197 | SL_5KL_010_BRINE_10001159 | - | 6520    | 6463    | RNA → PRK04243 (PRK04243)Ribosomal_L15e (pfam00827) →                                                                  |
| env-198 | SL_5KL_010_SED_10028357   | + | 365     | 422     | RNA → PRK04243 (PRK04243)Ribosomal_L15e (pfam00827) →                                                                  |
| env-199 | SL_6KL_011_BRINE_1084724  | - | 464     | 407     | RNA → RPL15A (COG1632)PRK04243 (PRK04243) →                                                                            |
| env-200 | SL_8KL_010_SED_10260913   | + | 164     | 221     | RNA → RPL15A (COG1632)PRK04243 (PRK04243) →                                                                            |
| env-201 | SL_4KL_010_BRINE_10003303 | + | 1476    | 1533    | RNA → PRK04243 (PRK04243)Ribosomal_L15e (pfam00827) →                                                                  |
| env-202 | GSLNAS_F7I09SK02F8ECV     | - | 271     | 209     | RNA → RPL15A (COG1632)PRK04243 (PRK04243) →                                                                            |
| Hla-1-1 | NZ_AGFZ01000059.1         | - | 22715   | 22654   | RNA → hypo → hypo → PRK04243 (PRK04243)Ribosomal_L15e (pfam00827) →<br>PRK04243 (PRK04243)Ribosomal_L15e (pfam00827) → |
| Hla-1-2 | NZ_AOLZ01000073.1         | - | 22804   | 22743   | RNA → hypo → PRK04243 (PRK04243)Ribosomal_L15e (pfam00827) →                                                           |
| Hva-1-1 | NZ_AOLQ01000004.1         | - | 73870   | 73819   | RNA → PRK04243 (PRK04243)Ribosomal_L15e (pfam00827) →                                                                  |
| Hsi-1-1 | NZ_AOLR01000005.1         | + | 181787  | 181840  | RNA → PRK04243 (PRK04243)Ribosomal_L15e (pfam00827) →                                                                  |
| Hma-1-1 | NC_006396.1               | + | 1849657 | 1849710 | RNA → PRK04243 (PRK04243)Ribosomal_L15e (pfam00827) →                                                                  |
| Ham-1-1 | NZ_AOLW01000010.1         | - | 93451   | 93398   | RNA → PRK04243 (PRK04243)Ribosomal_L15e (pfam00827) →                                                                  |
| env-203 | P_A23_Liq_1_Fmt_1025305   | + | 182     | 235     | RNA → PRK04243 (PRK04243)Ribosomal_L15e (pfam00827) →                                                                  |
| env-204 | P_A23_Liq_3_Fmt_1015036   | - | 204     | 151     | RNA → PRK04243 (PRK04243)Ribosomal_L15e (pfam00827) →                                                                  |
| env-205 | P_A23_Liq_2_Fmt_1015236   | + | 488     | 541     | RNA → PRK04243 (PRK04243)Ribosomal_L15e (pfam00827) →                                                                  |
| Hca-1-1 | NZ_AOLS01000038.1         | - | 57729   | 57676   | RNA → PRK04243 (PRK04243)Ribosomal_L15e (pfam00827) →                                                                  |
| Hsa-2-1 | NZ_JXAO01000004.1         | + | 115750  | 115803  | RNA → hypo →                                                                                                           |
| Hhi-2-1 | NC_023013.1               | + | 2490914 | 2490967 | RNA → PRK04243 (PRK04243)Ribosomal_L15e (pfam00827) →                                                                  |
| Hhi-1-1 | NC_015948.1               | + | 2479481 | 2479534 | RNA → PRK04243 (PRK04243)Ribosomal_L15e (pfam00827) →                                                                  |
| Hsp-1-1 | NZ_CP010529.1             | + | 1092738 | 1092791 | RNA → PRK04243 (PRK04243)Ribosomal_L15e (pfam00827) →                                                                  |
| Hja-1-1 | NZ_AOLY01000007.1         | - | 129303  | 129250  | RNA → PRK04243 (PRK04243)Ribosomal_L15e (pfam00827) →                                                                  |
| Har-1-1 | NZ_AOLX01000025.1         | - | 30531   | 30480   | RNA → PRK04243 (PRK04243)Ribosomal_L15e (pfam00827) →                                                                  |
| env-206 | GSLNAS_F7I09SK02I6FWL     | + | 298     | 351     | RNA → PRK04243 (PRK04243)Ribosomal_L15e (pfam00827) →                                                                  |
| Hmu-2-1 | NC_013202.1               | - | 272589  | 272518  | RNA → PRK04243 (PRK04243)Ribosomal_L15e (pfam00827) →                                                                  |
| Hka-1-1 | NZ_KB905378.1             | + | 614167  | 614238  | RNA → PRK04243 (PRK04243)Ribosomal_L15e (pfam00827) →                                                                  |
| env-207 | SL_6KL_011_BRINE_1037538  | - | 695     | 635     | RNA → ←-hypo                                                                                                           |
| env-208 | SL_6KL_011_BRINE_1012586  | - | 1128    | 1038    | RNA → PRK04243 (PRK04243)Ribosomal_L15e (pfam00827) →                                                                  |
| env-209 | SL_4KL_010_BRINE_10018197 | + | 2238    | 2328    | RNA → PRK04243 (PRK04243)Ribosomal_L15e (pfam00827) →                                                                  |
| env-210 | SL_6KL_011_BRINE_1090145  | + | 342     | 402     | RNA → PRK04243 (PRK04243)Ribosomal_L15e (pfam00827) →                                                                  |
| env-211 | SL_4KL_010_BRINE_10055587 | - | 1221    | 1161    | RNA → PRK04243 (PRK04243)Ribosomal_L15e (pfam00827) →                                                                  |
| env-212 | SL_6KL_011_BRINE_1018015  | - | 1651    | 1591    | RNA → PRK04243 (PRK04243)Ribosomal_L15e (pfam00827) →                                                                  |
| env-213 | SL_4KL_010_BRINE_10006569 | + | 5039    | 5099    | RNA → PRK04243 (PRK04243)Ribosomal_L15e (pfam00827) →                                                                  |
| env-214 | SL_6KL_011_BRINE_1094071  | - | 230     | 150     | RNA → RPL15A (COG1632)PRK04243 (PRK04243) →                                                                            |
| env-215 | GSLSAALGFP0ZZ301EUXSI     | + | 466     | 528     | RNA → ←-hypo                                                                                                           |
| env-216 | SL_4KL_010_BRINE_10104860 | + | 909     | 969     | RNA → RPL15A (COG1632)PRK04243 (PRK04243) →                                                                            |
| env-217 | GSLNARP_contig03416       | - | 112     | 53      | RNA →                                                                                                                  |
| env-218 | GSLNAS_F7I09SK02HZKWC     | - | 504     | 445     | RNA → RPL15A (COG1632)PRK04243 (PRK04243) →                                                                            |
| env-219 | GSLNAS_F7I09SK02GL76P     | - | 421     | 362     | RNA → RPL15A (COG1632)PRK04243 (PRK04243) →                                                                            |
| env-220 | P_A23_Liq_1_Fmt_1037775   | + | 87      | 146     | RNA → PRK04243 (PRK04243)Ribosomal_L15e (pfam00827) →                                                                  |
| Nmo-1-1 | NC_020388.1               | + | 780497  | 780546  | RNA → PRK04243 (PRK04243)Ribosomal_L15e (pfam00827) →                                                                  |
| env-221 | APHM01007304.1            | + | 2549    | 2595    | RNA → PRK04243 (PRK04243)Ribosomal_L15e (pfam00827) → PRK08671 (PRK08671)MetAP2 (cd01088) →                            |
| env-222 | LTJ07As871_J07ABscf089578 | - | 54536   | 54490   | RNA → PRK04243 (PRK04243)Ribosomal_L15e (pfam00827) →                                                                  |

|          |                           |   |         |         |                                                                                               |
|----------|---------------------------|---|---------|---------|-----------------------------------------------------------------------------------------------|
| env-223  | GSLNARP_contig28880       | + | 3300    | 3346    | RNA → PRK04243 (PRK04243)Ribosomal_L15e (pfam00827) → PRK08671 (PRK08671)APP_MetAP (cd01060)  |
| env-224  | APHM01013436.1            | + | 115     | 161     | RNA → PRK04243 (PRK04243)Ribosomal_L15e (pfam00827) →                                         |
| env-225  | LTJ07As871_J07ABscf098875 | + | 1708553 | 1708599 | RNA → PRK04243 (PRK04243)Ribosomal_L15e (pfam00827) →                                         |
| env-226  | SL_4KL_010_BRINE_10204549 | + | 36      | 97      | RNA → RPL15A (COG1632)PRK04243 (PRK04243) →                                                   |
| env-227  | JXWU01037046.1            | - | 538     | 484     | RNA → RPL15A (COG1632)PRK04243 (PRK04243) →                                                   |
| env-228  | SS_3KL_010_SOIL_10003299  | + | 3588    | 3637    | RNA → PRK04243 (PRK04243)Ribosomal_L15e (pfam00827) →                                         |
| env-229  | SS_3KL_010_SOIL_10003445  | + | 3378    | 3426    | RNA → PRK04243 (PRK04243)Ribosomal_L15e (pfam00827) →                                         |
| Hci-1-1  | NZ_JDTH01000002.1         | - | 1455055 | 1454992 | RNA → PRK04243 (PRK04243)Ribosomal_L15e (pfam00827) →                                         |
| Hut-1-1  | NC_013158.1               | - | 2429098 | 2429049 | RNA → PRK04243 (PRK04243)Ribosomal_L15e (pfam00827) →                                         |
| env-230  | GSLNARP_GFPJP1N02FZ9S5    | + | 70      | 153     | RNA → PRK04243 (PRK04243)Ribosomal_L15e (pfam00827) →                                         |
| env-231  | SL_8KL_010_SED_10278449   | - | 167     | 118     | RNA → RPL15A (COG1632)PRK04243 (PRK04243) →                                                   |
| env-232  | SL_4KL_010_BRINE_10001615 | - | 5266    | 5217    | RNA → PRK04243 (PRK04243)Ribosomal_L15e (pfam00827) →                                         |
| env-233  | SL_6KL_011_BRINE_1000077  | - | 3468    | 3419    | RNA → PRK04243 (PRK04243)Ribosomal_L15e (pfam00827) → hypo → hypo →                           |
| env-234  | SL_6KL_011_BRINE_1009755  | - | 3271    | 3210    | RNA → PRK04243 (PRK04243)Ribosomal_L15e (pfam00827) →                                         |
| env-235  | SL_8KL_010_SED_10678060   | - | 174     | 125     | RNA → RPL15A (COG1632)PRK04243 (PRK04243) →                                                   |
| env-236  | SL_4KL_010_BRINE_10654803 | + | 125     | 172     | RNA → RPL15A (COG1632)PRK04243 (PRK04243) →                                                   |
| Nba-1-1  | NZ_AOBY01000007.1         | + | 209062  | 209133  | RNA → PRK04243 (PRK04243)Ribosomal_L15e (pfam00827) →                                         |
| env-237  | SL_3KL_010_SED_11113557   | - | 168     | 97      | RNA → RPL15A (COG1632)PRK04243 (PRK04243) →                                                   |
| Nsu-1-1  | NZ_AOHX01000026.1         | + | 190456  | 190532  | RNA → PRK04243 (PRK04243)Ribosomal_L15e (pfam00827) →                                         |
| Npa-1-1  | NZ_AOII01000068.1         | + | 9874    | 9946    | RNA → PRK04243 (PRK04243)Ribosomal_L15e (pfam00827) →                                         |
| Nal-2-1  | NZ_JNCS01000001.1         | + | 188067  | 188139  | RNA → PRK04243 (PRK04243)Ribosomal_L15e (pfam00827) →                                         |
| Nal-1-1  | NZ_AOIK01000025.1         | - | 13704   | 13632   | RNA → PRK04243 (PRK04243)Ribosomal_L15e (pfam00827) →                                         |
| Nga-1-1  | NZ_AOIJ01000043.1         | + | 26494   | 26566   | RNA → PRK04243 (PRK04243)Ribosomal_L15e (pfam00827) →                                         |
| Nsp-2-1  | NZ_AJVJ01000013.1         | + | 23678   | 23750   | RNA → PRK04243 (PRK04243)Ribosomal_L15e (pfam00827) →                                         |
| Nsp-1-1  | NC_018224.1               | + | 1880458 | 1880530 | RNA → PRK04243 (PRK04243)Ribosomal_L15e (pfam00827) →                                         |
| Hdj-1-1  | NZ_HG315684.1             | - | 683477  | 683408  | RNA → PRK04243 (PRK04243)Ribosomal_L15e (pfam00827) →                                         |
| Hli-3-1  | NZ_AOIT01000029.1         | - | 228185  | 228113  | RNA → PRK04243 (PRK04243)Ribosomal_L15e (pfam00827) →                                         |
| Hje-2-1  | NZ_JDTG01000014.1         | - | 528274  | 528203  | RNA → PRK04243 (PRK04243)Ribosomal_L15e (pfam00827) →                                         |
| Hth-2-1  | NZ_AOIR01000063.1         | - | 74675   | 74604   | RNA → PRK04243 (PRK04243)Ribosomal_L15e (pfam00827) →                                         |
| Hsa-10-1 | NZ_JROF01000002.1         | + | 114940  | 115012  | RNA → PRK04243 (PRK04243)Ribosomal_L15e (pfam00827) →                                         |
| env-238  | SL_5KL_010_BRINE_10014771 | + | 1979    | 2040    | RNA → PRK04243 (PRK04243)Ribosomal_L15e (pfam00827) →                                         |
| env-239  | SL_5KL_010_BRINE_10003441 | + | 1496    | 1557    | RNA → PRK04243 (PRK04243)Ribosomal_L15e (pfam00827) →                                         |
| env-240  | SL_6KL_011_BRINE_1002462  | - | 7480    | 7419    | RNA → PRK04243 (PRK04243)Ribosomal_L15e (pfam00827) →                                         |
| env-241  | SL_8KL_010_SED_10108063   | - | 214     | 153     | RNA → PRK04243 (PRK04243)Ribosomal_L15e (pfam00827) →                                         |
| env-242  | SL_4KL_010_BRINE_10000366 | + | 1598    | 1659    | RNA → PRK04243 (PRK04243)Ribosomal_L15e (pfam00827) →                                         |
| Hni-1-1  | NZ_AOMA01000119.1         | + | 3513    | 3588    | RNA → PRK04243 (PRK04243)Ribosomal_L15e (pfam00827) →                                         |
| Nch-1-1  | NZ_AOIN01000080.1         | + | 5529    | 5592    | RNA → PRK04243 (PRK04243)Ribosomal_L15e (pfam00827) →                                         |
| Nhu-1-1  | NZ_AOIM01000013.1         | + | 217184  | 217247  | RNA → PRK04243 (PRK04243)Ribosomal_L15e (pfam00827) →                                         |
| Nve-1-1  | NZ_AOID01000026.1         | - | 208079  | 208007  | RNA → PRK04243 (PRK04243)Ribosomal_L15e (pfam00827) →                                         |
| Hsa-8-1  | NZ_AOIS01000035.1         | + | 13267   | 13339   | RNA → PRK04243 (PRK04243)Ribosomal_L15e (pfam00827) →                                         |
| Htu-1-1  | NC_013743.1               | - | 2869593 | 2869521 | RNA → PRK04243 (PRK04243)Ribosomal_L15e (pfam00827) →                                         |
| env-243  | SL_8KL_010_SED_10556862   | - | 191     | 117     | RNA → RPL15A (COG1632)PRK04243 (PRK04243) →                                                   |
| Hca-3-1  | NZ_AOIU01000004.1         | + | 46196   | 46248   | RNA → PRK04243 (PRK04243)Ribosomal_L15e (pfam00827) →                                         |
| env-244  | JXWS01111537.1            | - | 180     | 72      | RNA → ← Form_Nir_trans (pfam01226)                                                            |
| env-245  | SL_4KL_010_BRINE_10017818 | - | 3866    | 3781    | RNA → PRK04243 (PRK04243)Ribosomal_L15e (pfam00827) → PRK15005 (PRK15005)USP_Like (cd00293) → |
| env-246  | GSLNAS_F7I09SK02G2VWW     | + | 218     | 297     | RNA → PRK04243 (PRK04243)Ribosomal_L15e (pfam00827) →                                         |
| env-247  | SL_5KL_010_BRINE_10003121 | + | 300     | 385     | RNA → PRK04243 (PRK04243)Ribosomal_L15e (pfam00827) →                                         |
| env-248  | SL_5KL_010_BRINE_10044475 | - | 707     | 612     | RNA → PRK04243 (PRK04243)Ribosomal_L15e (pfam00827) →                                         |
| env-249  | SL_4KL_010_BRINE_10064659 | + | 812     | 918     | RNA → RPL15A (COG1632)PRK04243 (PRK04243) → RPL15A (COG1632)PRK04243 (PRK04243) →             |
| env-250  | GSLNARP_GFPJP1N02IRMJO    | + | 320     | 372     | RNA → PRK04243 (PRK04243)Ribosomal_L15e (pfam00827) →                                         |
| env-251  | APHM01020421.1            | + | 442     | 499     | RNA → PRK04243 (PRK04243)Ribosomal_L15e (pfam00827) →                                         |
| env-252  | LTJ07As871_J07ABscf098852 | - | 1211893 | 1211836 | RNA → PRK04243 (PRK04243)Ribosomal_L15e (pfam00827) →                                         |



|         |                          |   |         |         |                                                                                                                                                                                                                                   |
|---------|--------------------------|---|---------|---------|-----------------------------------------------------------------------------------------------------------------------------------------------------------------------------------------------------------------------------------|
| env-253 | GSLNARP_GFPJP1N02H78XW   | + | 40      | 86      | RNA → RPL15A (COG1632)PRK04243 (PRK04243) →                                                                                                                                                                                       |
| Hsu-1-1 | NZ_CP008874.1            | - | 516965  | 516913  | RNA → PRK04243 (PRK04243)Ribosomal_L15e (pfam00827) →                                                                                                                                                                             |
| Hsp-2-1 | NZ_CP007060.1            | - | 692145  | 692080  | RNA → PRK04243 (PRK04243)Ribosomal_L15e (pfam00827) →                                                                                                                                                                             |
| Has-1-1 | NZ_AOIQ01000019.1        | + | 72263   | 72320   | RNA → PRK04243 (PRK04243)Ribosomal_L15e (pfam00827) →                                                                                                                                                                             |
| env-254 | SS_3KL_010_SOIL_10043763 | - | 169     | 95      | RNA → RPL15A (COG1632)PRK04243 (PRK04243) →                                                                                                                                                                                       |
| Hag-1-1 | NZ_BAFM01000013.1        | + | 96977   | 97051   | RNA → PRK04243 (PRK04243)Ribosomal_L15e (pfam00827) → FrnE (COG2761)Thioredoxin_4 (pfam13462) →                                                                                                                                   |
| Hsa-4-1 | NZ_AOMD01000030.1        | + | 286601  | 286667  | RNA → PRK04243 (PRK04243)Ribosomal_L15e (pfam00827) → hypo → hypo → FrnE (COG2761)Thioredoxin_4 (pfam13462) →                                                                                                                     |
| Hsa-5-1 | NZ_AOME01000076.1        | + | 93813   | 93880   | RNA → PRK04243 (PRK04243)Ribosomal_L15e (pfam00827) → FrnE (COG2761)Thioredoxin_4 (pfam13462) →                                                                                                                                   |
| env-255 | CERQ01166877.1           | - | 487     | 436     | RNA → RPL15A (COG1632)PRK04243 (PRK04243) →                                                                                                                                                                                       |
| env-256 | CETH01173410.1           | + | 12810   | 12860   | RNA → PRK04243 (PRK04243)Ribosomal_L15e (pfam00827) → PreA (COG1146)Fer4_7 (pfam12838) →                                                                                                                                          |
| env-257 | CETM01021463.1           | - | 36859   | 36809   | RNA → PRK04243 (PRK04243)Ribosomal_L15e (pfam00827) → PreA (COG1146)Fer4_7 (pfam12838) →                                                                                                                                          |
| env-258 | CEUQ01031760.1           | + | 6382    | 6432    | RNA → PRK04243 (PRK04243)Ribosomal_L15e (pfam00827) → PreA (COG1146)Fer4_7 (pfam12838) →                                                                                                                                          |
| env-259 | CEUS01376465.1           | + | 263     | 313     | RNA → RPL15A (COG1632)PRK04243 (PRK04243) →                                                                                                                                                                                       |
| env-260 | CEUY01138208.1           | - | 851     | 801     | RNA → PRK04243 (PRK04243)Ribosomal_L15e (pfam00827) → hypo →                                                                                                                                                                      |
| env-261 | CEUZ01171605.1           | + | 1156    | 1206    | RNA → RPL15A (COG1632)PRK04243 (PRK04243) →                                                                                                                                                                                       |
| env-262 | JCVL_SCAF_1096628214146  | - | 161     | 111     | RNA →                                                                                                                                                                                                                             |
| env-263 | CENY01171985.1           | - | 10152   | 10102   | RNA → PRK04243 (PRK04243)Ribosomal_L15e (pfam00827) → PreA (COG1146)Fer4_13 (pfam13370) →                                                                                                                                         |
| env-264 | CEOQ01117861.1           | + | 720     | 770     | RNA → RPL15A (COG1632)PRK04243 (PRK04243) →                                                                                                                                                                                       |
| env-265 | CEUL01353856.1           | + | 7       | 57      | RNA → PRK04243 (PRK04243)Ribosomal_L15e (pfam00827) → PreA (COG1146)Fer4_7 (pfam12838) →                                                                                                                                          |
| env-266 | CENY01152858.1           | + | 14934   | 14985   | RNA → PRK04243 (PRK04243)Ribosomal_L15e (pfam00827) → PreA (COG1146)Fer4_9 (pfam13187) →                                                                                                                                          |
| Mae-1-1 | NC_009635.1              | - | 1562691 | 1562646 | RNA → PRK04243 (PRK04243)Ribosomal_L15e (pfam00827) →                                                                                                                                                                             |
| env-267 | PBDCA2_FIDWTPW02QZKOZ    | + | 178     | 232     | RNA → hypo → RPL15A (COG1632)PRK04243 (PRK04243) →                                                                                                                                                                                |
| env-268 | JGI24422J19971_10000787  | - | 11928   | 11884   | RNA → PRK04243 (PRK04243)Ribosomal_L15e (pfam00827) →                                                                                                                                                                             |
| env-269 | JGI2172J19969_10313737   | - | 395     | 351     | RNA → RPL15A (COG1632)PRK04243 (PRK04243) →                                                                                                                                                                                       |
| env-270 | LGVF01069618.1           | - | 525     | 473     | RNA → PRK04243 (PRK04243)Ribosomal_L15e (pfam00827) →                                                                                                                                                                             |
| env-271 | LGVE01065530.1           | - | 193     | 142     | RNA → PRK04243 (PRK04243)Ribosomal_L15e (pfam00827) →                                                                                                                                                                             |
| env-272 | LGVF01108952.1           | + | 1406    | 1457    | RNA → PRK04243 (PRK04243)Ribosomal_L15e (pfam00827) →                                                                                                                                                                             |
| env-273 | LGVF01076430.1           | - | 3041    | 2990    | RNA → PRK04243 (PRK04243)Ribosomal_L15e (pfam00827) →                                                                                                                                                                             |
| env-274 | JGI24721J26819_10009006  | + | 6561    | 6611    | RNA → PRK04243 (PRK04243)Ribosomal_L15e (pfam00827) → PRK12277 (PRK12277)RPL13 (COG4352) → PRK14555 (PRK14555)RNA_binding (pfam01877) → RPP1 (COG1603)PRK00912 (PRK00912) → PRK03717 (PRK03717)RNase_P_Rpp14 (pfam01900) →        |
| env-275 | JGI24721J44947_10030901  | - | 78      | 28      | RNA →                                                                                                                                                                                                                             |
| env-276 | JGI24721J44947_10028419  | + | 536     | 586     | RNA → PRK04243 (PRK04243)Ribosomal_L15e (pfam00827) → PRK12277 (PRK12277)RPL13 (COG4352) → PRK14555 (PRK14555)RNA_binding (pfam01877) → RPP1 (COG1603)PRK00912 (PRK00912) → PRK03717 (PRK03717)RNase_P_Rpp14 (pfam01900) →        |
| env-277 | JGI24721J44947_10022851  | + | 2001    | 2047    | RNA → PRK04243 (PRK04243)Ribosomal_L15e (pfam00827) → PRK12277 (PRK12277)RPL13 (COG4352) → PRK14555 (PRK14555)RNA_binding (pfam01877) → hypo → RPP1 (COG1603)PRK00912 (PRK00912) → PRK03717 (PRK03717)RNase_P_Rpp14 (pfam01900) → |
| env-278 | JGI20130J15003_1001487   | + | 10993   | 11039   | RNA → PRK04243 (PRK04243)Ribosomal_L15e (pfam00827) → PRK12277 (PRK12277)RPL13 (COG4352) → PRK14555 (PRK14555)RNA_binding (pfam01877) → RPP1 (COG1603)PRK00912 (PRK00912) → PRK03717 (PRK03717)RNase_P_Rpp14 (pfam01900) →        |
| env-279 | JGI20130J15133_1001487   | + | 10993   | 11039   | RNA → PRK04243 (PRK04243)Ribosomal_L15e (pfam00827) → PRK12277 (PRK12277)RPL13 (COG4352) → PRK14555 (PRK14555)RNA_binding (pfam01877) → RPP1 (COG1603)PRK00912 (PRK00912) → PRK03717 (PRK03717)RNase_P_Rpp14 (pfam01900) →        |
| env-280 | JGI24721J26819_10027382  | - | 1728    | 1682    | RNA → PRK04243 (PRK04243)Ribosomal_L15e (pfam00827) → PRK12277 (PRK12277)RPL13 (COG4352) → PRK14555 (PRK14555)RNA_binding (pfam01877) → PRK00912 (PRK00912)RNase_P_p30 (pfam01876) →                                              |
| env-281 | JGI2172J19969_10022280   | + | 1906    | 1952    | RNA → RPL15A (COG1632)PRK04243 (PRK04243) →                                                                                                                                                                                       |
| env-282 | SMTZ1_10021852           | + | 5904    | 5950    | RNA → RPL15A (COG1632)PRK04243 (PRK04243) →                                                                                                                                                                                       |
| env-283 | JGI20214J14112_1187723   | + | 274     | 322     | RNA →                                                                                                                                                                                                                             |
| env-284 | WSSedA2C_c189965         | + | 176     | 224     | RNA → RPL15A (COG1632)PRK04243 (PRK04243) →                                                                                                                                                                                       |
| env-285 | WSSedA2Ca3_1189965       | + | 176     | 224     | RNA → RPL15A (COG1632)PRK04243 (PRK04243) →                                                                                                                                                                                       |
| env-286 | WSSedB1B2_c027137        | - | 242     | 194     | RNA → PRK04243 (PRK04243)Ribosomal_L15e (pfam00827) →                                                                                                                                                                             |
| env-287 | JGI24721J26819_10037939  | + | 1348    | 1398    | RNA → PRK04243 (PRK04243)Ribosomal_L15e (pfam00827) → PRK12277 (PRK12277)RPL13 (COG4352) →                                                                                                                                        |



|         |                         |   |       |       |                                                                                                                                                                                                                                  |
|---------|-------------------------|---|-------|-------|----------------------------------------------------------------------------------------------------------------------------------------------------------------------------------------------------------------------------------|
| env-288 | JGI24721J44947_10000270 | - | 47013 | 46963 | RNA → PRK04243 (PRK04243)Ribosomal_L15e (pfam00827) → PRK12277 (PRK12277)RPL13 (COG4352) →                                                                                                                                       |
| env-289 | JGI2160J19893_10105365  | - | 280   | 230   | RNA → RPL15A (COG1632)PRK04243 (PRK04243) →                                                                                                                                                                                      |
| env-290 | JGI2171J19970_10224488  | + | 281   | 331   | RNA → RPL15A (COG1632)PRK04243 (PRK04243) →                                                                                                                                                                                      |
| env-291 | JGI2173J19968_10055779  | + | 876   | 926   | RNA → RPL15A (COG1632)PRK04243 (PRK04243) →                                                                                                                                                                                      |
| env-292 | SMTZ1_10000331          | - | 33118 | 33068 | RNA → PRK04243 (PRK04243)Ribosomal_L15e (pfam00827) → PRK12277 (PRK12277)RPL13 (COG4352) →<br>PRK14555 (PRK14555)RNA_binding (pfam01877) → RPP1 (COG1603)PRK00912 (PRK00912) →<br>PRK03717 (PRK03717)RNase_P_Rpp14 (pfam01900) → |
| env-293 | JGI2171J19970_10312620  | + | 332   | 382   | RNA → RPL15A (COG1632)PRK04243 (PRK04243) →                                                                                                                                                                                      |
| env-294 | SMTZ1_10014562          | - | 4684  | 4634  | RNA → PRK04243 (PRK04243)Ribosomal_L15e (pfam00827) → PRK12277 (PRK12277)RPL13 (COG4352) →<br>PRK14555 (PRK14555)RNA_binding (pfam01877) → RPP1 (COG1603)PRK00912 (PRK00912) →<br>PRK03717 (PRK03717)RNase_P_Rpp14 (pfam01900) → |
| env-295 | WSSedA1TJGL_c051973     | + | 58    | 106   | RNA → RPL15A (COG1632)PRK04243 (PRK04243) →                                                                                                                                                                                      |
| env-296 | WSSedA1Ba3_1047821      | - | 762   | 714   | RNA → PRK04243 (PRK04243)Ribosomal_L15e (pfam00827) → hypo →                                                                                                                                                                     |
| env-297 | JGI20171J14444_1002001  | + | 1726  | 1771  | RNA → PRK04243 (PRK04243)Ribosomal_L15e (pfam00827) →                                                                                                                                                                            |
| env-298 | JGI20165J15291_1047466  | - | 228   | 183   | RNA → PRK04243 (PRK04243)Ribosomal_L15e (pfam00827) →                                                                                                                                                                            |
| env-299 | JGI20164J15296_1001389  | + | 654   | 699   | RNA → PRK04243 (PRK04243)Ribosomal_L15e (pfam00827) →                                                                                                                                                                            |
| env-300 | JGI20163J15578_10000609 | - | 5418  | 5373  | RNA → PRK04243 (PRK04243)Ribosomal_L15e (pfam00827) →                                                                                                                                                                            |
| env-301 | JGI20164J15296_1023034  | - | 338   | 292   | RNA → RPL15A (COG1632)PRK04243 (PRK04243) →                                                                                                                                                                                      |
| env-302 | JGI20164J15296_1001061  | + | 1474  | 1520  | RNA → PRK04243 (PRK04243)Ribosomal_L15e (pfam00827) →                                                                                                                                                                            |
| env-303 | JGI20164J15296_1003383  | - | 130   | 84    | RNA →                                                                                                                                                                                                                            |
| env-304 | WSSedA2C_c120722        | - | 217   | 169   | RNA → PRK04243 (PRK04243)Ribosomal_L15e (pfam00827) →                                                                                                                                                                            |
| env-305 | WSSedA1Ba2_1101229      | - | 82    | 34    | RNA → hypo →                                                                                                                                                                                                                     |
| env-306 | WSSedA1Ba3_1039983      | - | 339   | 291   | RNA → RPL15A (COG1632)PRK04243 (PRK04243) →                                                                                                                                                                                      |
| env-307 | WSSedA2Ca3_1120722      | - | 217   | 169   | RNA → PRK04243 (PRK04243)Ribosomal_L15e (pfam00827) →                                                                                                                                                                            |
| env-308 | JREQ01002797.1          | + | 594   | 639   | RNA → RPL15A (COG1632)PRK04243 (PRK04243) →                                                                                                                                                                                      |
| env-309 | JREQ01001068.1          | + | 594   | 639   | RNA → RPL15A (COG1632)PRK04243 (PRK04243) → RPL15A (COG1632)PRK04243 (PRK04243) →                                                                                                                                                |
| env-310 | JREQ01004635.1          | - | 265   | 221   | RNA → PRK04243 (PRK04243)Ribosomal_L15e (pfam00827) →                                                                                                                                                                            |
| env-311 | JGI24422J19971_10442158 | + | 33    | 79    | RNA → RPL15A (COG1632)PRK04243 (PRK04243) →                                                                                                                                                                                      |
| env-312 | JGI2172J19969_10165153  | + | 155   | 200   | RNA → RPL15A (COG1632)PRK04243 (PRK04243) →                                                                                                                                                                                      |
| env-313 | JGI2173J19968_10019714  | - | 204   | 159   | RNA → PRK04243 (PRK04243)Ribosomal_L15e (pfam00827) →                                                                                                                                                                            |
| env-314 | JGI2171J19970_10593475  | + | 159   | 204   | RNA → PRK04243 (PRK04243)Ribosomal_L15e (pfam00827) →                                                                                                                                                                            |
| env-315 | JGI24422J19971_10429142 | - | 262   | 217   | RNA → PRK04243 (PRK04243)Ribosomal_L15e (pfam00827) →                                                                                                                                                                            |
| env-316 | SMTZ1_10013484          | - | 9454  | 9409  | RNA → PRK04243 (PRK04243)Ribosomal_L15e (pfam00827) →<br>PRK14555 (PRK14555)RNA_binding (pfam01877) → RPP1 (COG1603)PRK00912 (PRK00912) →<br>PRK03717 (PRK03717)RNase_P_Rpp14 (pfam01900) →                                      |
| env-317 | JGI2172J19969_10374243  | - | 221   | 175   | RNA → PRK04243 (PRK04243)Ribosomal_L15e (pfam00827) →                                                                                                                                                                            |
| env-318 | JGI2173J19968_10119450  | - | 690   | 644   | RNA → hypo → PRK04243 (PRK04243)Ribosomal_L15e (pfam00827) →                                                                                                                                                                     |
| env-319 | JGI2171J19970_10117997  | - | 822   | 776   | RNA → hypo → PRK04243 (PRK04243)Ribosomal_L15e (pfam00827) → RNA_binding (pfam01877) →                                                                                                                                           |
| env-320 | SMTZ1_10010538          | - | 5263  | 5217  | RNA → PRK04243 (PRK04243)Ribosomal_L15e (pfam00827) →<br>PRK14555 (PRK14555)RNA_binding (pfam01877) → RPP1 (COG1603)PRK00912 (PRK00912) →<br>PRK03717 (PRK03717)RNase_P_Rpp14 (pfam01900) →                                      |
| env-321 | TB.LI09_3_1376570       | + | 4     | 50    | RNA → PRK04243 (PRK04243)Ribosomal_L15e (pfam00827) →                                                                                                                                                                            |
| env-322 | LGVD01087542.1          | - | 817   | 771   | RNA → RPL15A (COG1632)PRK04243 (PRK04243) → RPL15A (COG1632)PRK04243 (PRK04243) →<br>RNA_binding (pfam01877) →                                                                                                                   |
| env-323 | JGI24024J18818_10296176 | - | 207   | 161   | RNA → hypo →                                                                                                                                                                                                                     |
| env-324 | SMTZ1_10000031          | + | 24101 | 24147 | RNA → PRK04243 (PRK04243)Ribosomal_L15e (pfam00827) →<br>PRK14555 (PRK14555)RNA_binding (pfam01877) → PRK00912 (PRK00912)RNase_P_p30 (pfam01876) →<br>PRK03717 (PRK03717)RNase_P_Rpp14 (pfam01900) →                             |
| env-325 | JGI2173J19968_10468069  | - | 221   | 175   | RNA → PRK04243 (PRK04243)Ribosomal_L15e (pfam00827) →                                                                                                                                                                            |
| env-326 | LGVF01282102.1          | - | 355   | 309   | RNA → RPL15A (COG1632)PRK04243 (PRK04243) →                                                                                                                                                                                      |
| env-327 | LGVE01222292.1          | - | 389   | 343   | RNA → RPL15A (COG1632)PRK04243 (PRK04243) →                                                                                                                                                                                      |
| env-328 | LGOV01067113.1          | + | 3689  | 3735  | RNA → PRK04243 (PRK04243)Ribosomal_L15e (pfam00827) →<br>PRK14555 (PRK14555)RNA_binding (pfam01877) → PRK00912 (PRK00912)RNase_P_p30 (pfam01876) →<br>POP5 (COG1369) →                                                           |

|         |                         |   |         |         |                                                                                                                                                                                                                            |
|---------|-------------------------|---|---------|---------|----------------------------------------------------------------------------------------------------------------------------------------------------------------------------------------------------------------------------|
| Pab-1-1 | NC.000868.1             | + | 818641  | 818684  | RNA → PRK04243 (PRK04243)Ribosomal_L15e (pfam00827) → hydrog_prot (TIGR00072)H2MP_MemB-H2evol (cd06067) →                                                                                                                  |
| Psp-2-1 | NC.017946.1             | - | 888644  | 888600  | RNA → PRK04243 (PRK04243)Ribosomal_L15e (pfam00827) →                                                                                                                                                                      |
| Tga-1-1 | NC.012804.1             | + | 1735891 | 1735934 | RNA → PRK04243 (PRK04243)Ribosomal_L15e (pfam00827) →                                                                                                                                                                      |
| Tsp-3-1 | NC.018015.1             | - | 513605  | 513561  | RNA → PRK04243 (PRK04243)Ribosomal_L15e (pfam00827) →                                                                                                                                                                      |
| Tsp-2-1 | NC.016051.1             | - | 1259118 | 1259075 | RNA → PRK04243 (PRK04243)Ribosomal_L15e (pfam00827) →                                                                                                                                                                      |
| Tna-1-1 | NZ_CP007264.1           | + | 1944164 | 1944207 | RNA → PRK04243 (PRK04243)Ribosomal_L15e (pfam00827) →                                                                                                                                                                      |
| Teu-1-1 | NZ_CP008887.1           | + | 1002663 | 1002706 | RNA → PRK04243 (PRK04243)Ribosomal_L15e (pfam00827) →                                                                                                                                                                      |
| env-329 | 3300001592.11448690     | + | 60      | 103     | RNA → PRK04243 (PRK04243)Ribosomal_L15e (pfam00827) →                                                                                                                                                                      |
| Tsp-4-1 | NZ_KE387149.1           | + | 630216  | 630259  | RNA → PRK04243 (PRK04243)Ribosomal_L15e (pfam00827) →                                                                                                                                                                      |
| Tsi-1-1 | NC.012883.1             | + | 1077704 | 1077747 | RNA → PRK04243 (PRK04243)Ribosomal_L15e (pfam00827) →                                                                                                                                                                      |
| Tli-1-1 | NC.022084.1             | + | 51943   | 51986   | RNA → PRK04243 (PRK04243)Ribosomal_L15e (pfam00827) →                                                                                                                                                                      |
| env-330 | JGI24019J35510.1000020  | - | 119249  | 119205  | RNA → PRK04243 (PRK04243)Ribosomal_L15e (pfam00827) →                                                                                                                                                                      |
| Tba-1-1 | NC.014804.1             | + | 122047  | 122091  | RNA → PRK04243 (PRK04243)Ribosomal_L15e (pfam00827) →                                                                                                                                                                      |
| Tpa-1-1 | NZ_CP006965.1           | + | 229409  | 229452  | RNA → PRK04243 (PRK04243)Ribosomal_L15e (pfam00827) →                                                                                                                                                                      |
| Ppa-1-1 | NZ_CP006019.1           | + | 356037  | 356081  | RNA → PRK04243 (PRK04243)Ribosomal_L15e (pfam00827) → COG1325 (COG1325)PRK14555 (PRK14555) PRK03892 (PRK03892)RPP1 (COG1603) → PRK03717 (PRK03717)POP5 (COG1369) → TIGR00341 (TIGR00341)DUF389 (pfam04087) →               |
| Pfu-2-1 | NC.003413.1             | - | 849639  | 849596  | RNA → PRK04243 (PRK04243)Ribosomal_L15e (pfam00827) →                                                                                                                                                                      |
| Pfu-1-1 | NC.018092.1             | - | 651734  | 651691  | RNA → PRK04243 (PRK04243)Ribosomal_L15e (pfam00827) →                                                                                                                                                                      |
| Pho-1-1 | NC.000961.1             | + | 891553  | 891596  | RNA → PRK04243 (PRK04243)Ribosomal_L15e (pfam00827) → PRK04243 (PRK04243)Ribosomal_L15e (pfam00827) → hydrog_prot (TIGR00072)H2MP_MemB-H2evol (cd06067) →                                                                  |
| Psp-1-1 | NC.015474.1             | + | 1545307 | 1545351 | RNA → PRK04243 (PRK04243)Ribosomal_L15e (pfam00827) → hydrog_prot (TIGR00072)H2MP_MemB-H2evol (cd06067) →                                                                                                                  |
| Pya-1-1 | NC.015680.1             | + | 224726  | 224769  | RNA → PRK04243 (PRK04243)Ribosomal_L15e (pfam00827) →                                                                                                                                                                      |
| Tko-1-1 | NC.006624.1             | - | 1280545 | 1280502 | RNA → PRK04243 (PRK04243)Ribosomal_L15e (pfam00827) →                                                                                                                                                                      |
| Tsp-1-1 | NC.015865.1             | - | 869933  | 869890  | RNA → PRK04243 (PRK04243)Ribosomal_L15e (pfam00827) →                                                                                                                                                                      |
| Pfe-1-1 | NZ_LANF01000010.1       | - | 104355  | 104312  | RNA → PRK04243 (PRK04243)Ribosomal_L15e (pfam00827) →                                                                                                                                                                      |
| Ton-1-1 | NC.011529.1             | + | 120097  | 120140  | RNA → PRK04243 (PRK04243)Ribosomal_L15e (pfam00827) → COG1325 (COG1325)PRK14555 (PRK14555) PRK03892 (PRK03892)RPP1 (COG1603) →                                                                                             |
| Tzi-1-1 | NZ_AJLF01000001.1       | - | 197475  | 197432  | RNA → PRK04243 (PRK04243)Ribosomal_L15e (pfam00827) → PRK04243 (PRK04243)Ribosomal_L15e (pfam00827) →                                                                                                                      |
| env-331 | JGI24721J44947.10092924 | + | 379     | 432     | RNA → PRK04243 (PRK04243)Ribosomal_L15e (pfam00827) → PRK12277 (PRK12277)RPL13 (COG4352) → PRK14555 (PRK14555)RNA_binding (pfam01877) → PRK00912 (PRK00912)RNase_P_p30 (pfam01876) →                                       |
| env-332 | JGI24721J26819.10019109 | + | 3371    | 3424    | RNA → PRK04243 (PRK04243)Ribosomal_L15e (pfam00827) → PRK12277 (PRK12277)RPL13 (COG4352) → PRK14555 (PRK14555)RNA_binding (pfam01877) → PRK00912 (PRK00912)RNase_P_p30 (pfam01876) →                                       |
| env-333 | JGI24422J19971.10125801 | - | 282     | 234     | RNA → RPL15A (COG1632)PRK04243 (PRK04243) →                                                                                                                                                                                |
| env-334 | JGI24721J26819.10947299 | + | 173     | 218     | RNA →                                                                                                                                                                                                                      |
| env-335 | JGI24721J44947.10473589 | - | 321     | 276     | RNA → PRK04243 (PRK04243)Ribosomal_L15e (pfam00827) →                                                                                                                                                                      |
| env-336 | JGI24721J26819.10001491 | + | 21482   | 21529   | RNA → PRK04243 (PRK04243)Ribosomal_L15e (pfam00827) → PRK12277 (PRK12277)RPL13 (COG4352) → PRK14555 (PRK14555)RNA_binding (pfam01877) → RPP1 (COG1603)PRK00912 (PRK00912) → PRK03717 (PRK03717)RNase_P_Rpp14 (pfam01900) → |
| env-337 | JGI24721J44947.10032959 | - | 4920    | 4873    | RNA → PRK04243 (PRK04243)Ribosomal_L15e (pfam00827) → PRK12277 (PRK12277)RPL13 (COG4352) → PRK14555 (PRK14555)RNA_binding (pfam01877) → RPP1 (COG1603)PRK00912 (PRK00912) → PRK03717 (PRK03717)RNase_P_Rpp14 (pfam01900) → |
| env-338 | TB_LI09_3.1044718       | + | 801     | 846     | RNA → PRK04243 (PRK04243)Ribosomal_L15e (pfam00827) →                                                                                                                                                                      |
| env-339 | JGI24721J26819.10004799 | - | 3984    | 3939    | RNA → PRK04243 (PRK04243)Ribosomal_L15e (pfam00827) → PRK12277 (PRK12277)RPL13 (COG4352) → PRK14555 (PRK14555)RNA_binding (pfam01877) → RPP1 (COG1603)PRK00912 (PRK00912) → PRK03717 (PRK03717)RNase_P_Rpp14 (pfam01900) → |
| env-340 | JGI24721J44947.10004827 | - | 9632    | 9587    | RNA → PRK04243 (PRK04243)Ribosomal_L15e (pfam00827) → PRK12277 (PRK12277)RPL13 (COG4352) → PRK14555 (PRK14555)RNA_binding (pfam01877) → RPP1 (COG1603)PRK00912 (PRK00912) → PRK03717 (PRK03717)RNase_P_Rpp14 (pfam01900) → |
| env-341 | JGI20130J15003.1091000  | + | 354     | 398     | RNA → PRK04243 (PRK04243)Ribosomal_L15e (pfam00827) →                                                                                                                                                                      |
| env-342 | JGI20130J15133.1091000  | + | 354     | 398     | RNA → PRK04243 (PRK04243)Ribosomal_L15e (pfam00827) →                                                                                                                                                                      |

|         |                         |   |       |       |                                                                                                                                                                                                                                                                         |
|---------|-------------------------|---|-------|-------|-------------------------------------------------------------------------------------------------------------------------------------------------------------------------------------------------------------------------------------------------------------------------|
| env-343 | JGI24721J44947_10014353 | - | 2950  | 2906  | RNA → PRK04243 (PRK04243)Ribosomal_L15e (pfam00827) → PRK12277 (PRK12277)RPL13 (COG4352) → PRK14555 (PRK14555)RNA_binding (pfam01877) → RPP1 (COG1603)PRK00912 (PRK00912) → PRK03717 (PRK03717)RNase_P_Rpp14 (pfam01900) →                                              |
| env-344 | JGI20130J15003_1005034  | + | 5585  | 5630  | RNA → PRK04243 (PRK04243)Ribosomal_L15e (pfam00827) → PRK12277 (PRK12277)RPL13 (COG4352) → PRK14555 (PRK14555)RNA_binding (pfam01877) → PRK00912 (PRK00912)RNase_P_p30 (pfam01876) → RPP1 (COG1603)PRK00912 (PRK00912) → PRK03717 (PRK03717)RNase_P_Rpp14 (pfam01900) → |
| env-345 | JGI20130J15133_1005034  | + | 5585  | 5630  | RNA → PRK04243 (PRK04243)Ribosomal_L15e (pfam00827) → PRK12277 (PRK12277)RPL13 (COG4352) → PRK14555 (PRK14555)RNA_binding (pfam01877) → PRK00912 (PRK00912)RNase_P_p30 (pfam01876) → RPP1 (COG1603)PRK00912 (PRK00912) → PRK03717 (PRK03717)RNase_P_Rpp14 (pfam01900) → |
| env-346 | JGI24721J26819_10047889 | - | 1496  | 1451  | RNA → PRK04243 (PRK04243)Ribosomal_L15e (pfam00827) → PRK12277 (PRK12277)RPL13 (COG4352) → PRK14555 (PRK14555)RNA_binding (pfam01877) → Acyl-CoA_dh_N (pfam02771) →                                                                                                     |
| env-347 | JGI24721J44947_10203480 | + | 445   | 490   | RNA → PRK04243 (PRK04243)Ribosomal_L15e (pfam00827) →                                                                                                                                                                                                                   |
| env-348 | JREQ01006527.1          | - | 305   | 258   | RNA → PRK04243 (PRK04243)Ribosomal_L15e (pfam00827) →                                                                                                                                                                                                                   |
| env-349 | JGI2172J19969_10000042  | - | 4265  | 4219  | RNA → RPL15A (COG1632)PRK04243 (PRK04243) → PRK12277 (PRK12277)RPL13 (COG4352) → PRK14555 (PRK14555)RNA_binding (pfam01877) → RPP1 (COG1603)PRK00912 (PRK00912) → PRK03717 (PRK03717)RNase_P_Rpp14 (pfam01900) →                                                        |
| env-350 | JGI2173J19968_10000091  | + | 26877 | 26923 | RNA → RPL15A (COG1632)PRK04243 (PRK04243) → PRK12277 (PRK12277)RPL13 (COG4352) → PRK14555 (PRK14555)RNA_binding (pfam01877) → PRK00912 (PRK00912)RNase_P_p30 (pfam01876) →                                                                                              |
| env-351 | JGI2171J19970_10013243  | - | 1906  | 1860  | RNA → RPL15A (COG1632)PRK04243 (PRK04243) → PRK12277 (PRK12277)RPL13 (COG4352) → PRK14555 (PRK14555)RNA_binding (pfam01877) → PRK00912 (PRK00912)RNase_P_p30 (pfam01876) →                                                                                              |
| env-352 | JGI24422J19971_10240577 | + | 294   | 340   | RNA → RPL15A (COG1632)PRK04243 (PRK04243) →                                                                                                                                                                                                                             |
| env-353 | JGI24422J19971_10004830 | + | 6226  | 6272  | RNA → PRK04243 (PRK04243)Ribosomal_L15e (pfam00827) → PRK12277 (PRK12277)RPL13 (COG4352) → PRK14555 (PRK14555)RNA_binding (pfam01877) → PRK00912 (PRK00912)RNase_P_p30 (pfam01876) → PRK03717 (PRK03717)POP5 (COG1369) →                                                |
| env-354 | JGI2172J19969_10181609  | - | 256   | 210   | RNA → PRK04243 (PRK04243)Ribosomal_L15e (pfam00827) →                                                                                                                                                                                                                   |
| env-355 | JGI24422J19971_10009670 | - | 3736  | 3690  | RNA → PRK04243 (PRK04243)Ribosomal_L15e (pfam00827) → PRK12277 (PRK12277)RPL13 (COG4352) → PRK14555 (PRK14555)RNA_binding (pfam01877) → RPP1 (COG1603)PRK00912 (PRK00912) → PRK03717 (PRK03717)RNase_P_Rpp14 (pfam01900) →                                              |
| env-356 | JGI2172J19969_10028492  | + | 394   | 440   | RNA → PRK04243 (PRK04243)Ribosomal_L15e (pfam00827) → PRK12277 (PRK12277)RPL13 (COG4352) → PRK14555 (PRK14555)RNA_binding (pfam01877) → PRK00912 (PRK00912) →                                                                                                           |
| env-357 | JGI24422J19971_10492128 | - | 124   | 78    | RNA → ← hypo                                                                                                                                                                                                                                                            |
| env-358 | JGI24422J19971_10371442 | + | 38    | 84    | RNA → RPL15A (COG1632)PRK04243 (PRK04243) →                                                                                                                                                                                                                             |
| env-359 | JGI24019J35510_1000149  | + | 57719 | 57764 | RNA → PRK04243 (PRK04243)Ribosomal_L15e (pfam00827) → PRK12277 (PRK12277)RPL13 (COG4352) → PRK14555 (PRK14555)RNA_binding (pfam01877) → PRK00912 (PRK00912)RNase_P_p30 (pfam01876) →                                                                                    |
| env-360 | JGI24020J35080_1000786  | + | 20256 | 20301 | RNA →                                                                                                                                                                                                                                                                   |
| env-361 | JGI24020J35080_1002222  | - | 8791  | 8746  | RNA → PRK04243 (PRK04243)Ribosomal_L15e (pfam00827) → PRK12277 (PRK12277)RPL13 (COG4352) → PRK14555 (PRK14555)RNA_binding (pfam01877) → PRK00912 (PRK00912)RNase_P_p30 (pfam01876) → PRK03717 (PRK03717)RNase_P_Rpp14 (pfam01900) →                                     |
| env-362 | JGI24422J19971_10000253 | - | 1868  | 1822  | RNA → PRK04243 (PRK04243)Ribosomal_L15e (pfam00827) → PRK12277 (PRK12277)RPL13 (COG4352) → PRK14555 (PRK14555)RNA_binding (pfam01877) → PRK00912 (PRK00912)RNase_P_p30 (pfam01876) →                                                                                    |
| env-363 | JGI26339J46600_10000361 | + | 3851  | 3897  | RNA → PRK04243 (PRK04243)Ribosomal_L15e (pfam00827) → PRK12277 (PRK12277)RPL13 (COG4352) → PRK14555 (PRK14555)RNA_binding (pfam01877) → RPP1 (COG1603)PRK00912 (PRK00912) → PRK03717 (PRK03717)RNase_P_Rpp14 (pfam01900) →                                              |
| env-364 | JGI24025J20009_10035112 | - | 1739  | 1692  | RNA → PRK04243 (PRK04243)Ribosomal_L15e (pfam00827) →                                                                                                                                                                                                                   |
| env-365 | JGI24422J19971_10447265 | - | 312   | 266   | RNA → RPL15A (COG1632)PRK04243 (PRK04243) →                                                                                                                                                                                                                             |
| env-366 | JGI24422J19971_10005604 | - | 2467  | 2422  | RNA → hypo → PRK04243 (PRK04243)Ribosomal_L15e (pfam00827) → PRK12277 (PRK12277)RPL13 (COG4352) → PRK14555 (PRK14555)RNA_binding (pfam01877) → RPP1 (COG1603)PRK00912 (PRK00912) → PRK03717 (PRK03717)RNase_P_Rpp14 (pfam01900) →                                       |
| env-367 | JGI2171J19970_10311510  | + | 423   | 468   | RNA → hypo →                                                                                                                                                                                                                                                            |
| env-368 | JGI24422J19971_10296037 | - | 379   | 334   | RNA → hypo → RPL15A (COG1632)PRK04243 (PRK04243) →                                                                                                                                                                                                                      |
| env-369 | JGI24422J19971_10083467 | + | 1365  | 1411  | RNA → RPL15A (COG1632)PRK04243 (PRK04243) →                                                                                                                                                                                                                             |
| env-370 | JGI24422J19971_10004103 | - | 1823  | 1778  | RNA → hypo → PRK04243 (PRK04243)Ribosomal_L15e (pfam00827) → PRK12277 (PRK12277)RPL13 (COG4352) → PRK14555 (PRK14555)RNA_binding (pfam01877) → PRK00912 (PRK00912)RNase_P_p30 (pfam01876) →                                                                             |
| env-371 | JGI2172J19969_10042350  | + | 1081  | 1126  | RNA → hypo → RPL15A (COG1632)PRK04243 (PRK04243) →                                                                                                                                                                                                                      |
| env-372 | JGI2173J19968_10455679  | - | 124   | 79    | RNA → hypo →                                                                                                                                                                                                                                                            |



|         |                         |   |      |      |                                                                                                                                                                                                                                            |
|---------|-------------------------|---|------|------|--------------------------------------------------------------------------------------------------------------------------------------------------------------------------------------------------------------------------------------------|
| env-373 | JGI2171J19970_10583661  | + | 269  | 314  | RNA → hypo →                                                                                                                                                                                                                               |
| env-374 | SMTZ1_10006093          | + | 9757 | 9802 | RNA → hypo → PRK04243 (PRK04243)Ribosomal_L15e (pfam00827) → PRK12277 (PRK12277)RPL13 (COG4352) → PRK14555 (PRK14555)RNA_binding (pfam01877) → PRK00912 (PRK00912)RNase_P_p30 (pfam01876) → PRK03717 (PRK03717)RNase_P_Rpp14 (pfam01900) → |
| env-375 | JGI24025J20009_10133169 | - | 100  | 54   | RNA → ← hypo                                                                                                                                                                                                                               |
| env-376 | JGI24422J19971_10019282 | - | 678  | 632  | RNA → PRK04243 (PRK04243)Ribosomal_L15e (pfam00827) →                                                                                                                                                                                      |
| env-377 | JGI24025J20009_10005934 | - | 75   | 29   | RNA →                                                                                                                                                                                                                                      |
| env-378 | JGI24025J20009_10025887 | + | 2637 | 2683 | RNA →                                                                                                                                                                                                                                      |
| env-379 | JGI24025J20009_10011070 | + | 4857 | 4903 | RNA →                                                                                                                                                                                                                                      |
| env-380 | JGI24025J20009_10053632 | + | 1424 | 1470 | RNA → ← hypo                                                                                                                                                                                                                               |
| env-381 | JGI24422J19971_10774031 | - | 188  | 142  | RNA → PRK04243 (PRK04243)Ribosomal_L15e (pfam00827) →                                                                                                                                                                                      |
| env-382 | JGI2171J19970_10721007  | - | 71   | 25   | RNA →                                                                                                                                                                                                                                      |
| env-383 | JGI24025J20009_10067810 | - | 1101 | 1055 | RNA → PRK04243 (PRK04243)Ribosomal_L15e (pfam00827) → PRK12277 (PRK12277)RPL13 (COG4352) → COG1325 (COG1325)PRK14555 (PRK14555) →                                                                                                          |
| env-384 | JGI24025J20009_10468419 | - | 121  | 75   | RNA →                                                                                                                                                                                                                                      |
| env-385 | JGI2172J19969_10020584  | - | 1314 | 1266 | RNA → hypo → PRK04243 (PRK04243)Ribosomal_L15e (pfam00827) → PRK12277 (PRK12277)RPL13 (COG4352) → PRK14555 (PRK14555)RNA_binding (pfam01877) →                                                                                             |
| env-386 | JGI24422J19971_10090327 | - | 1116 | 1068 | RNA → PRK04243 (PRK04243)Ribosomal_L15e (pfam00827) → PRK12277 (PRK12277)RPL13 (COG4352) → COG1325 (COG1325)PRK14555 (PRK14555) →                                                                                                          |
| env-387 | JGI24422J19971_10132992 | - | 55   | 7    | RNA → hypo →                                                                                                                                                                                                                               |
| env-388 | JGI24721J26819_10042702 | + | 773  | 820  | RNA → PRK04243 (PRK04243)Ribosomal_L15e (pfam00827) → PRK12277 (PRK12277)RPL13 (COG4352) → PRK14555 (PRK14555)RNA_binding (pfam01877) → RPP1 (COG1603)PRK00912 (PRK00912) →                                                                |
| env-389 | JGI24721J44947_10035793 | + | 3282 | 3329 | RNA → PRK04243 (PRK04243)Ribosomal_L15e (pfam00827) → PRK12277 (PRK12277)RPL13 (COG4352) → PRK14555 (PRK14555)RNA_binding (pfam01877) →                                                                                                    |
| env-390 | JGI24721J26819_10782576 | - | 189  | 142  | RNA → PRK04243 (PRK04243)Ribosomal_L15e (pfam00827) →                                                                                                                                                                                      |
| env-391 | JGI24721J44947_11017790 | - | 189  | 142  | RNA → PRK04243 (PRK04243)Ribosomal_L15e (pfam00827) →                                                                                                                                                                                      |
| env-392 | GBSCES77_Contig_41123   | - | 1948 | 1904 | RNA → PRK04243 (PRK04243)Ribosomal_L15e (pfam00827) → PRK12277 (PRK12277)RPL13 (COG4352) → PRK14555 (PRK14555)RNA_binding (pfam01877) → RPP1 (COG1603)PRK00912 (PRK00912) →                                                                |
| env-393 | GBSCES77_Contig_16200   | - | 2430 | 2386 | RNA → PRK04243 (PRK04243)Ribosomal_L15e (pfam00827) → PRK12277 (PRK12277)RPL13 (COG4352) → PRK14555 (PRK14555)RNA_binding (pfam01877) → RPP1 (COG1603)PRK00912 (PRK00912) → PRK03717 (PRK03717)RNase_P_Rpp14 (pfam01900) →                 |
| env-394 | GBSCES77_Contig_3030    | + | 791  | 835  | RNA → PRK04243 (PRK04243)Ribosomal_L15e (pfam00827) → PRK12277 (PRK12277)RPL13 (COG4352) → PRK14555 (PRK14555)RNA_binding (pfam01877) → RPP1 (COG1603)PRK00912 (PRK00912) → PRK03717 (PRK03717)RNase_P_Rpp14 (pfam01900) →                 |
| env-395 | GBSCES77_Contig_34313   | + | 671  | 715  | RNA → PRK04243 (PRK04243)Ribosomal_L15e (pfam00827) → PRK12277 (PRK12277)RPL13 (COG4352) → PRK14555 (PRK14555)RNA_binding (pfam01877) → RPP1 (COG1603)PRK00912 (PRK00912) → PRK03717 (PRK03717)RNase_P_Rpp14 (pfam01900) →                 |
| env-396 | GBSCES77_Contig_24520   | - | 2097 | 2053 | RNA → PRK04243 (PRK04243)Ribosomal_L15e (pfam00827) → PRK12277 (PRK12277)RPL13 (COG4352) → PRK14555 (PRK14555)RNA_binding (pfam01877) → RPP1 (COG1603)PRK00912 (PRK00912) →                                                                |
| env-397 | GBSCES77_Contig_45658   | + | 559  | 603  | RNA → PRK04243 (PRK04243)Ribosomal_L15e (pfam00827) → PRK12277 (PRK12277)RPL13 (COG4352) → PRK14555 (PRK14555)RNA_binding (pfam01877) → RPP1 (COG1603)PRK00912 (PRK00912) → PRK03717 (PRK03717)RNase_P_Rpp14 (pfam01900) →                 |
| env-398 | GBSCES77_Contig_11719   | - | 2430 | 2386 | RNA → PRK04243 (PRK04243)Ribosomal_L15e (pfam00827) → PRK12277 (PRK12277)RPL13 (COG4352) → PRK14555 (PRK14555)RNA_binding (pfam01877) → RPP1 (COG1603)PRK00912 (PRK00912) → PRK03717 (PRK03717)RNase_P_Rpp14 (pfam01900) →                 |
| env-399 | GBSCES77_Contig_6779    | + | 671  | 715  | RNA → PRK04243 (PRK04243)Ribosomal_L15e (pfam00827) → PRK12277 (PRK12277)RPL13 (COG4352) → PRK14555 (PRK14555)RNA_binding (pfam01877) → RPP1 (COG1603)PRK00912 (PRK00912) →                                                                |
| env-400 | GBSCES77_Contig_20802   | - | 2430 | 2386 | RNA → PRK04243 (PRK04243)Ribosomal_L15e (pfam00827) → PRK12277 (PRK12277)RPL13 (COG4352) → PRK14555 (PRK14555)RNA_binding (pfam01877) → RPP1 (COG1603)PRK00912 (PRK00912) → PRK03717 (PRK03717)RNase_P_Rpp14 (pfam01900) →                 |
| env-401 | GBSCES77_Contig_29831   | - | 2430 | 2386 | RNA → PRK04243 (PRK04243)Ribosomal_L15e (pfam00827) → PRK12277 (PRK12277)RPL13 (COG4352) → PRK14555 (PRK14555)RNA_binding (pfam01877) → RPP1 (COG1603)PRK00912 (PRK00912) → PRK03717 (PRK03717)RNase_P_Rpp14 (pfam01900) →                 |
| env-402 | JGI20130J15003_1003712  | - | 4413 | 4369 | RNA → PRK04243 (PRK04243)Ribosomal_L15e (pfam00827) → PRK12277 (PRK12277)RPL13 (COG4352) → PRK14555 (PRK14555)RNA_binding (pfam01877) → RPP1 (COG1603)PRK00912 (PRK00912) → PRK03717 (PRK03717)RNase_P_Rpp14 (pfam01900) →                 |



|         |                         |   |       |       |                                                                                                                                                                                                                                                                 |
|---------|-------------------------|---|-------|-------|-----------------------------------------------------------------------------------------------------------------------------------------------------------------------------------------------------------------------------------------------------------------|
| env-403 | JGI20130J15133_1003712  | - | 4413  | 4369  | RNA → PRK04243 (PRK04243)Ribosomal_L15e (pfam00827) → PRK12277 (PRK12277)RPL13 (COG4352) → PRK14555 (PRK14555)RNA_binding (pfam01877) → RPP1 (COG1603)PRK00912 (PRK00912) → PRK03717 (PRK03717)RNase_P_Rpp14 (pfam01900) →                                      |
| env-404 | JGI24721J26819_10021412 | - | 955   | 911   | RNA → PRK04243 (PRK04243)Ribosomal_L15e (pfam00827) → PRK12277 (PRK12277)RPL13 (COG4352) →                                                                                                                                                                      |
| env-405 | JGI24721J44947_10036157 | + | 3704  | 3748  | RNA → PRK04243 (PRK04243)Ribosomal_L15e (pfam00827) → PRK12277 (PRK12277)RPL13 (COG4352) →                                                                                                                                                                      |
| env-406 | JGI20130J15003_1001502  | + | 15316 | 15361 | RNA → PRK04243 (PRK04243)Ribosomal_L15e (pfam00827) → PRK12277 (PRK12277)RPL13 (COG4352) → PRK14555 (PRK14555)RNA_binding (pfam01877) → RPP1 (COG1603)PRK00912 (PRK00912) → PRK03717 (PRK03717)RNase_P_Rpp14 (pfam01900) →                                      |
| env-407 | JGI20130J15133_1001502  | + | 15316 | 15361 | RNA → PRK04243 (PRK04243)Ribosomal_L15e (pfam00827) → PRK12277 (PRK12277)RPL13 (COG4352) → PRK14555 (PRK14555)RNA_binding (pfam01877) → RPP1 (COG1603)PRK00912 (PRK00912) → PRK03717 (PRK03717)RNase_P_Rpp14 (pfam01900) →                                      |
| env-408 | JGI24721J26819_10470799 | + | 270   | 315   | RNA →                                                                                                                                                                                                                                                           |
| env-409 | JGI24721J44947_10040429 | + | 409   | 454   | RNA → PRK04243 (PRK04243)Ribosomal_L15e (pfam00827) → PRK12277 (PRK12277)RPL13 (COG4352) → PRK14555 (PRK14555)RNA_binding (pfam01877) → RPP1 (COG1603)PRK00912 (PRK00912) → PRK03717 (PRK03717)RNase_P_Rpp14 (pfam01900) →                                      |
| env-410 | JGI20130J15003_1014452  | - | 2679  | 2634  | RNA → PRK04243 (PRK04243)Ribosomal_L15e (pfam00827) → PRK12277 (PRK12277)RPL13 (COG4352) → PRK14555 (PRK14555)RNA_binding (pfam01877) → PRK00912 (PRK00912)RNase_P_p30 (pfam01876) → PRK03717 (PRK03717)RNase_P_Rpp14 (pfam01900) →                             |
| env-411 | JGI20130J15133_1014452  | - | 2679  | 2634  | RNA → PRK04243 (PRK04243)Ribosomal_L15e (pfam00827) → PRK12277 (PRK12277)RPL13 (COG4352) → PRK14555 (PRK14555)RNA_binding (pfam01877) → PRK00912 (PRK00912)RNase_P_p30 (pfam01876) → PRK03717 (PRK03717)RNase_P_Rpp14 (pfam01900) →                             |
| env-412 | JGI24721J26819_10066975 | - | 1900  | 1855  | RNA → PRK04243 (PRK04243)Ribosomal_L15e (pfam00827) → PRK12277 (PRK12277)RPL13 (COG4352) → PRK14555 (PRK14555)RNA_binding (pfam01877) → PRK00912 (PRK00912)RNase_P_p30 (pfam01876) →                                                                            |
| env-413 | JGI24721J44947_10053920 | - | 3312  | 3267  | RNA → RPL15A (COG1632)PRK04243 (PRK04243) → RPL15A (COG1632)PRK04243 (PRK04243) → PRK12277 (PRK12277)RPL13 (COG4352) → PRK14555 (PRK14555)RNA_binding (pfam01877) → PRK00912 (PRK00912)RNase_P_p30 (pfam01876) → PRK03717 (PRK03717)RNase_P_Rpp14 (pfam01900) → |
| env-414 | JGI24721J26819_10007452 | + | 1045  | 1090  | RNA → PRK04243 (PRK04243)Ribosomal_L15e (pfam00827) → PRK12277 (PRK12277)RPL13 (COG4352) → PRK14555 (PRK14555)RNA_binding (pfam01877) → RPP1 (COG1603)PRK00912 (PRK00912) → PRK03717 (PRK03717)RNase_P_Rpp14 (pfam01900) →                                      |
| env-415 | JGI24721J44947_10012689 | + | 1045  | 1091  | RNA → PRK04243 (PRK04243)Ribosomal_L15e (pfam00827) → PRK12277 (PRK12277)RPL13 (COG4352) → PRK14555 (PRK14555)RNA_binding (pfam01877) → RPP1 (COG1603)PRK00912 (PRK00912) → PRK03717 (PRK03717)RNase_P_Rpp14 (pfam01900) →                                      |
| env-416 | JGI24721J26819_10000566 | + | 1047  | 1092  | RNA → PRK04243 (PRK04243)Ribosomal_L15e (pfam00827) → PRK12277 (PRK12277)RPL13 (COG4352) → PRK14555 (PRK14555)RNA_binding (pfam01877) → RPP1 (COG1603)PRK00912 (PRK00912) → PRK03717 (PRK03717)RNase_P_Rpp14 (pfam01900) →                                      |
| env-417 | JGI24721J44947_10000929 | - | 39531 | 39486 | RNA → PRK04243 (PRK04243)Ribosomal_L15e (pfam00827) → PRK12277 (PRK12277)RPL13 (COG4352) → PRK14555 (PRK14555)RNA_binding (pfam01877) → RPP1 (COG1603)PRK00912 (PRK00912) → PRK03717 (PRK03717)RNase_P_Rpp14 (pfam01900) →                                      |
| env-418 | JGI20130J15003_1040014  | + | 320   | 364   | RNA → PRK04243 (PRK04243)Ribosomal_L15e (pfam00827) → PRK12277 (PRK12277)RPL13 (COG4352) →                                                                                                                                                                      |
| env-419 | JGI20130J15133_1040014  | + | 320   | 364   | RNA → PRK04243 (PRK04243)Ribosomal_L15e (pfam00827) → PRK12277 (PRK12277)RPL13 (COG4352) →                                                                                                                                                                      |
| env-420 | JGI24721J26819_10008710 | - | 5175  | 5131  | RNA → PRK04243 (PRK04243)Ribosomal_L15e (pfam00827) → PRK12277 (PRK12277)RPL13 (COG4352) → PRK14555 (PRK14555)RNA_binding (pfam01877) → RPP1 (COG1603)PRK00912 (PRK00912) → PRK03717 (PRK03717)RNase_P_Rpp14 (pfam01900) →                                      |
| env-421 | JGI24721J44947_10014925 | - | 5175  | 5131  | RNA → PRK04243 (PRK04243)Ribosomal_L15e (pfam00827) → PRK12277 (PRK12277)RPL13 (COG4352) → PRK14555 (PRK14555)RNA_binding (pfam01877) → RPP1 (COG1603)PRK00912 (PRK00912) → PRK03717 (PRK03717)RNase_P_Rpp14 (pfam01900) →                                      |
| env-422 | JGI20130J15003_1006708  | + | 320   | 364   | RNA → PRK04243 (PRK04243)Ribosomal_L15e (pfam00827) → PRK12277 (PRK12277)RPL13 (COG4352) → PRK14555 (PRK14555)RNA_binding (pfam01877) → RPP1 (COG1603)PRK00912 (PRK00912) → PRK03717 (PRK03717)RNase_P_Rpp14 (pfam01900) →                                      |
| env-423 | JGI20130J15133_1006708  | + | 320   | 364   | RNA → PRK04243 (PRK04243)Ribosomal_L15e (pfam00827) → PRK12277 (PRK12277)RPL13 (COG4352) → PRK14555 (PRK14555)RNA_binding (pfam01877) → RPP1 (COG1603)PRK00912 (PRK00912) → PRK03717 (PRK03717)RNase_P_Rpp14 (pfam01900) →                                      |
| env-424 | JGI24422J19971_10000261 | - | 3582  | 3531  | RNA → PRK04243 (PRK04243)Ribosomal_L15e (pfam00827) → PRK12277 (PRK12277)RPL13 (COG4352) → PRK14555 (PRK14555)RNA_binding (pfam01877) → RPP1 (COG1603)PRK00912 (PRK00912) → PRK03717 (PRK03717)RNase_P_Rpp14 (pfam01900) →                                      |
| env-425 | JGI2173J19968_10016998  | + | 1834  | 1885  | RNA → PRK04243 (PRK04243)Ribosomal_L15e (pfam00827) → PRK12277 (PRK12277)RPL13 (COG4352) →                                                                                                                                                                      |

|         |                           |   |         |         |                                                                                                                                                                                                                                                         |
|---------|---------------------------|---|---------|---------|---------------------------------------------------------------------------------------------------------------------------------------------------------------------------------------------------------------------------------------------------------|
| env-426 | SMTZ1_10000482            | + | 8104    | 8155    | RNA → PRK04243 (PRK04243)Ribosomal_L15e (pfam00827) → PRK12277 (PRK12277)RPL13 (COG4352) → PRK14555 (PRK14555)RNA_binding (pfam01877) → RPP1 (COG1603)PRK00912 (PRK00912) → PRK03717 (PRK03717)RNase_P_Rpp14 (pfam01900) →                              |
| env-427 | JGI2171J19970_10271144    | - | 353     | 302     | RNA → RPL15A (COG1632)PRK04243 (PRK04243) →                                                                                                                                                                                                             |
| env-428 | SMTZ1_10032630            | - | 6487    | 6436    | RNA → ←-hypo                                                                                                                                                                                                                                            |
| env-429 | JGI2172J19969_10033071    | + | 406     | 457     | RNA → ←-hypo                                                                                                                                                                                                                                            |
| env-430 | JGI2171J19970_10083154    | - | 519     | 468     | RNA → ←-hypo                                                                                                                                                                                                                                            |
| env-431 | JGI24422J19971_10005257   | + | 6290    | 6341    | RNA → PRK04243 (PRK04243)Ribosomal_L15e (pfam00827) → PRK12277 (PRK12277)RPL13 (COG4352) → PRK14555 (PRK14555)RNA_binding (pfam01877) → PRK00912 (PRK00912)RNase_P_p30 (pfam01876) →                                                                    |
| env-432 | JGI24422J19971_10022574   | + | 1413    | 1464    | RNA → PRK04243 (PRK04243)Ribosomal_L15e (pfam00827) → PRK12277 (PRK12277)Ribosomal_L13e (pfam01294) → PRK14555 (PRK14555)RNA_binding (pfam01877) → RPP1 (COG1603)PRK00912 (PRK00912) → PRK03717 (PRK03717)RNase_P_Rpp14 (pfam01900) →                   |
| env-433 | JGI2172J19969_10002202    | - | 186     | 135     | RNA → PRK04243 (PRK04243)Ribosomal_L15e (pfam00827) →                                                                                                                                                                                                   |
| env-434 | JGI2172J19969_10005325    | + | 99      | 150     | RNA → PRK04243 (PRK04243)Ribosomal_L15e (pfam00827) → PRK12277 (PRK12277)RPL13 (COG4352) → PRK14555 (PRK14555)RNA_binding (pfam01877) → RPP1 (COG1603)PRK00912 (PRK00912) → PRK03717 (PRK03717)RNase_P_Rpp14 (pfam01900) →                              |
| env-435 | JGI2173J19968_10000262    | + | 3449    | 3500    | RNA → PRK04243 (PRK04243)Ribosomal_L15e (pfam00827) → PRK12277 (PRK12277)RPL13 (COG4352) → PRK14555 (PRK14555)RNA_binding (pfam01877) → RPP1 (COG1603)PRK00912 (PRK00912) → PRK03717 (PRK03717)RNase_P_Rpp14 (pfam01900) →                              |
| env-436 | JGI2171J19970_10002036    | + | 2023    | 2074    | RNA → PRK04243 (PRK04243)Ribosomal_L15e (pfam00827) → PRK12277 (PRK12277)RPL13 (COG4352) → PRK14555 (PRK14555)RNA_binding (pfam01877) → RPP1 (COG1603)PRK00912 (PRK00912) → PRK03717 (PRK03717)RNase_P_Rpp14 (pfam01900) →                              |
| env-437 | JGI24422J19971_10243708   | + | 627     | 678     | RNA →                                                                                                                                                                                                                                                   |
| env-438 | JGI24721J44947_10007540   | - | 2578    | 2525    | RNA → PRK04243 (PRK04243)Ribosomal_L15e (pfam00827) → PRK12277 (PRK12277)RPL13 (COG4352) → PRK14555 (PRK14555)RNA_binding (pfam01877) → RPP1 (COG1603)PRK00912 (PRK00912) → PRK03717 (PRK03717)RNase_P_Rpp14 (pfam01900) →                              |
| env-439 | JGI24721J26819_10005385   | + | 10350   | 10403   | RNA → PRK04243 (PRK04243)Ribosomal_L15e (pfam00827) → PRK12277 (PRK12277)RPL13 (COG4352) → PRK14555 (PRK14555)RNA_binding (pfam01877) → RPP1 (COG1603)PRK00912 (PRK00912) → PRK03717 (PRK03717)RNase_P_Rpp14 (pfam01900) →                              |
| env-440 | JGI2172J19969_10330441    | + | 133     | 180     | RNA → RPL15A (COG1632)PRK04243 (PRK04243) →                                                                                                                                                                                                             |
| env-441 | JGI24422J19971_10230678   | - | 541     | 494     | RNA → PRK04243 (PRK04243)Ribosomal_L15e (pfam00827) →                                                                                                                                                                                                   |
| env-442 | JGI24422J19971_10330695   | - | 518     | 473     | RNA → PRK04243 (PRK04243)Ribosomal_L15e (pfam00827) →                                                                                                                                                                                                   |
| env-443 | JGI2171J19970_10787211    | - | 272     | 227     | RNA → RPL15A (COG1632)PRK04243 (PRK04243) →                                                                                                                                                                                                             |
| env-444 | JGI2172J19969_10018448    | + | 977     | 1022    | RNA → PRK04243 (PRK04243)Ribosomal_L15e (pfam00827) →                                                                                                                                                                                                   |
| env-445 | SMTZ1_10005895            | - | 12232   | 12187   | RNA → hypo → PRK04243 (PRK04243)Ribosomal_L15e (pfam00827) →                                                                                                                                                                                            |
| env-446 | JGI2171J19970_10523375    | - | 233     | 185     | RNA → PRK04243 (PRK04243)Ribosomal_L15e (pfam00827) →                                                                                                                                                                                                   |
| env-447 | JGI24721J26819_10011755   | + | 847     | 896     | RNA → PRK04243 (PRK04243)Ribosomal_L15e (pfam00827) → PRK12277 (PRK12277)RPL13 (COG4352) → PRK14555 (PRK14555)RNA_binding (pfam01877) → RPP1 (COG1603)PRK00912 (PRK00912) → PRK03717 (PRK03717)RNase_P_Rpp14 (pfam01900) →                              |
| env-448 | JGI24721J44947_10000482   | - | 52170   | 52121   | RNA → PRK04243 (PRK04243)Ribosomal_L15e (pfam00827) → PRK12277 (PRK12277)RPL13 (COG4352) → PRK14555 (PRK14555)RNA_binding (pfam01877) → RPP1 (COG1603)PRK00912 (PRK00912) → PRK03717 (PRK03717)RNase_P_Rpp14 (pfam01900) →                              |
| env-449 | JGI2173J19968_10000733    | + | 4783    | 4829    | RNA → PRK04243 (PRK04243)Ribosomal_L15e (pfam00827) →                                                                                                                                                                                                   |
| env-450 | JGI2172J19969_10000762    | - | 8526    | 8480    | RNA → PRK04243 (PRK04243)Ribosomal_L15e (pfam00827) →                                                                                                                                                                                                   |
| env-451 | JGI2171J19970_10187156    | - | 317     | 271     | RNA → RPL15A (COG1632)PRK04243 (PRK04243) →                                                                                                                                                                                                             |
| env-452 | JGI24422J19971_10000606   | + | 10914   | 10960   | RNA → PRK04243 (PRK04243)Ribosomal_L15e (pfam00827) →                                                                                                                                                                                                   |
| env-453 | NCBI_PBSM_READ_68102390   | + | 1020    | 1063    | RNA →                                                                                                                                                                                                                                                   |
| Mvo-1-1 | NC_014222.1               | - | 1392579 | 1392536 | RNA → PRK04243 (PRK04243)Ribosomal_L15e (pfam00827) →                                                                                                                                                                                                   |
| env-454 | SakLake120mDRAFT_c0000339 | + | 19224   | 19273   | RNA → RPL15A (COG1632)PRK04243 (PRK04243) → RPP1 (COG1603)PRK00912 (PRK00912) → RNase_P_Rpp14 (pfam01900) → PRK03996 (PRK03996)proteasome_alpha_archeal (cd03756) → SdoI (COG1500)PRK13760 (PRK13760) → fpl37ae (PRK03976)Ribosomal_L37ae (pfam01780) → |

|         |                         |   |         |         |                                                                                                                                                                                                                                                                                                                                                                                                                                                                                                                                                                                                                                                                                                               |
|---------|-------------------------|---|---------|---------|---------------------------------------------------------------------------------------------------------------------------------------------------------------------------------------------------------------------------------------------------------------------------------------------------------------------------------------------------------------------------------------------------------------------------------------------------------------------------------------------------------------------------------------------------------------------------------------------------------------------------------------------------------------------------------------------------------------|
| ume-1-1 | NC_009464.1             | - | 994905  | 994839  | RNA → PRK04243 (PRK04243)Ribosomal_L15e (pfam00827) → COG1325 (COG1325)PRK14555 (PRK14555) → PRK00912 (PRK00912)RNase_P_p30 (pfam01876) → PRK03717 (PRK03717)RNase_P_Rpp14 (pfam01900) → PRK03996 (PRK03996)proteasome_alpha_archeal (cd03756) → Sdo1 (COG1500)PRK13760 (PRK13760) → Rrp4 (COG1097)PRK04163 (PRK04163) → RNase_PH_archRRP41 (cd11366)PRK03983 (PRK03983) → RNase_PH_archRRP42 (cd11365)PRK04282 (PRK04282) → rpl37ae (PRK03976)Ribosomal_L37ae (pfam01780) → RPC10 (COG1996)rpoP (PRK00398) → Pcc1 (COG2892)Pcc1 (pfam09341) → gimC_beta (TIGR02338)Prefoldin_2 (pfam01920) → hypo → hypo → hypo →                                                                                            |
| CMe-2-1 | NZ_JMIY01000003.1       | + | 337389  | 337437  | RNA → PRK04243 (PRK04243)Ribosomal_L15e (pfam00827) → PRK14555 (PRK14555)RNA_binding (pfam01877) →                                                                                                                                                                                                                                                                                                                                                                                                                                                                                                                                                                                                            |
| Mev-1-1 | NC_014253.1             | - | 592639  | 592588  | RNA → PRK04243 (PRK04243)Ribosomal_L15e (pfam00827) → PRK14555 (PRK14555)RNA_binding (pfam01877) → PRK00912 (PRK00912)RNase_P_p30 (pfam01876) → PRK03717 (PRK03717)POP5 (COG1369) → PRK03996 (PRK03996)proteasome_alpha_archeal (cd03756) → Sdo1 (COG1500)PRK13760 (PRK13760) → hypo → hypo → hypo →                                                                                                                                                                                                                                                                                                                                                                                                          |
| env-455 | WSSedA2C_c207490        | + | 72      | 126     | RNA → PRK04243 (PRK04243)Ribosomal_L15e (pfam00827) →                                                                                                                                                                                                                                                                                                                                                                                                                                                                                                                                                                                                                                                         |
| env-456 | WSSedA2Ca3_1207490      | + | 72      | 126     | RNA → PRK04243 (PRK04243)Ribosomal_L15e (pfam00827) →                                                                                                                                                                                                                                                                                                                                                                                                                                                                                                                                                                                                                                                         |
| env-457 | WSSedA1TJGL_c024695     | + | 624     | 678     | RNA → PRK04243 (PRK04243)Ribosomal_L15e (pfam00827) →                                                                                                                                                                                                                                                                                                                                                                                                                                                                                                                                                                                                                                                         |
| env-458 | WSSedA1Ba2_1000622      | + | 1087    | 1141    | RNA → PRK04243 (PRK04243)Ribosomal_L15e (pfam00827) → RPP1 (COG1603)PRK00912 (PRK00912) → PRK03717 (PRK03717)RNase_P_Rpp14 (pfam01900) → PRK03996 (PRK03996)proteasome_alpha_archeal (cd03756) → Sdo1 (COG1500)PRK13760 (PRK13760) → rpl37ae (PRK03976)Ribosomal_L37ae (pfam01780) →                                                                                                                                                                                                                                                                                                                                                                                                                          |
| env-459 | WSSedA1Ba3_1003811      | + | 2343    | 2397    | RNA → PRK04243 (PRK04243)Ribosomal_L15e (pfam00827) → RPP1 (COG1603)PRK00912 (PRK00912) → PRK03717 (PRK03717)RNase_P_Rpp14 (pfam01900) →                                                                                                                                                                                                                                                                                                                                                                                                                                                                                                                                                                      |
| env-460 | JGI26437J51864_10646690 | + | 117     | 172     | RNA →                                                                                                                                                                                                                                                                                                                                                                                                                                                                                                                                                                                                                                                                                                         |
| env-461 | WSSedB1B2_c010830       | + | 452     | 507     | RNA → RPL15A (COG1632)PRK04243 (PRK04243) →                                                                                                                                                                                                                                                                                                                                                                                                                                                                                                                                                                                                                                                                   |
| env-462 | JGI20214J14112_1483376  | + | 5       | 54      | RNA → PRK04243 (PRK04243)Ribosomal_L15e (pfam00827) →                                                                                                                                                                                                                                                                                                                                                                                                                                                                                                                                                                                                                                                         |
| Mzh-1-1 | NC_015676.1             | - | 1281814 | 1281760 | RNA → PRK04243 (PRK04243)Ribosomal_L15e (pfam00827) → PRK14555 (PRK14555)RNA_binding (pfam01877) → RPP1 (COG1603)PRK00912 (PRK00912) → PRK03717 (PRK03717)RNase_P_Rpp14 (pfam01900) → PRK03996 (PRK03996)proteasome_alpha_archeal (cd03756) → Sdo1 (COG1500)PRK13760 (PRK13760) → Rrp4 (COG1097)PRK04163 (PRK04163) → RNase_PH_archRRP41 (cd11366)PRK03983 (PRK03983) → RNase_PH_archRRP42 (cd11365)PRK04282 (PRK04282) → rpl37ae (PRK03976)Ribosomal_L37ae (pfam01780) → RPC10 (COG1996)rpoP (PRK00398) → Brix (smart00879)IMP4 (COG2136) → Pcc1 (COG2892)Pcc1 (pfam09341) → gimC_beta (TIGR02338)Prefoldin_2 (pfam01920) → PRK14538 (PRK14538)DHH (pfam01368) → PaaK (COG1541)AMP-binding_C_2 (pfam14535) → |
| env-463 | JGI24020J35080_1007792  | + | 2787    | 2832    | RNA → RPL15A (COG1632)PRK04243 (PRK04243) →                                                                                                                                                                                                                                                                                                                                                                                                                                                                                                                                                                                                                                                                   |
| env-464 | JGI24019J35510_1000013  | + | 160353  | 160398  | RNA → PRK04243 (PRK04243)Ribosomal_L15e (pfam00827) → PRK14555 (PRK14555)RNA_binding (pfam01877) → RPP1 (COG1603)PRK00912 (PRK00912) → PRK03717 (PRK03717)RNase_P_Rpp14 (pfam01900) → PRK03996 (PRK03996)proteasome_alpha_archeal (cd03756) → Sdo1 (COG1500)PRK13760 (PRK13760) → Rrp4 (COG1097)PRK04163 (PRK04163) → RNase_PH_archRRP41 (cd11366)PRK03983 (PRK03983) → RNase_PH_archRRP42 (cd11365)PRK04282 (PRK04282) → rpl37ae (PRK03976)Ribosomal_L37ae (pfam01780) → Pcc1 (COG2892)Pcc1 (pfam09341) → gimC_beta (TIGR02338)GimC (COG1382) →                                                                                                                                                              |
| env-465 | JGI24724J26744_10037895 | - | 1732    | 1679    | RNA → PRK04243 (PRK04243)Ribosomal_L15e (pfam00827) → ABC_ATPase (cd00267)AAA (smart00382)NapF (COG1145)Fer4.7 (pfam12838) →                                                                                                                                                                                                                                                                                                                                                                                                                                                                                                                                                                                  |
| env-466 | LWFCAn_GLQU6AQ01BL2KP   | - | 265     | 213     | RNA → PRK04243 (PRK04243)Ribosomal_L15e (pfam00827) →                                                                                                                                                                                                                                                                                                                                                                                                                                                                                                                                                                                                                                                         |
| env-467 | JGI24730J26740_1001090  | + | 9520    | 9567    | RNA → PRK04243 (PRK04243)Ribosomal_L15e (pfam00827) → PRK14555 (PRK14555)RNA_binding (pfam01877) →                                                                                                                                                                                                                                                                                                                                                                                                                                                                                                                                                                                                            |
| env-468 | JGI24730J26740_1002557  | - | 5350    | 5303    | RNA → PRK04243 (PRK04243)Ribosomal_L15e (pfam00827) → PRK14555 (PRK14555)RNA_binding (pfam01877) →                                                                                                                                                                                                                                                                                                                                                                                                                                                                                                                                                                                                            |
| env-469 | taComm3_C6796           | + | 6853    | 6906    | RNA → PRK04243 (PRK04243)Ribosomal_L15e (pfam00827) → PRK00912 (PRK00912)RNase_P_p30 (pfam01876) → PRK03717 (PRK03717)RNase_P_Rpp14 (pfam01900) → PRK03996 (PRK03996)proteasome_alpha_archeal (cd03756) → Sdo1 (COG1500)PRK13760 (PRK13760) → rpl37ae (PRK03976)Ribosomal_L37ae (pfam01780) → RPC10 (COG1996)rpoP (PRK00398) →                                                                                                                                                                                                                                                                                                                                                                                |



|         |                        |   |         |         |                                                                                                                                                                                                                                                                                                                                                                                                                                          |
|---------|------------------------|---|---------|---------|------------------------------------------------------------------------------------------------------------------------------------------------------------------------------------------------------------------------------------------------------------------------------------------------------------------------------------------------------------------------------------------------------------------------------------------|
| env-470 | JGI12104J13512.1001091 | + | 6473    | 6526    | RNA → PRK04243 (PRK04243)Ribosomal_L15e (pfam00827) → PRK00912 (PRK00912)RNase_P_p30 (pfam01876) → PRK03717 (PRK03717)RNase_P_Rpp14 (pfam01900) → PRK03996 (PRK03996)proteasome_alpha_archeal (cd03756) → Sdo1 (COG1500)PRK13760 (PRK13760) → rpl37ae (PRK03976)Ribosomal_L37ae (pfam01780) → RPC10 (COG1996)rpoP (PRK00398) →                                                                                                           |
| env-471 | JGI11944J13513.1001226 | + | 6477    | 6530    | RNA → PRK04243 (PRK04243)Ribosomal_L15e (pfam00827) → PRK00912 (PRK00912)RNase_P_p30 (pfam01876) → PRK03717 (PRK03717)RNase_P_Rpp14 (pfam01900) → PRK03996 (PRK03996)proteasome_alpha_archeal (cd03756) → Sdo1 (COG1500)PRK13760 (PRK13760) → rpl37ae (PRK03976)Ribosomal_L37ae (pfam01780) → RPC10 (COG1996)rpoP (PRK00398) →                                                                                                           |
| Mta-1-1 | NZ_AG1Y02000001.1      | + | 329402  | 329455  | RNA → PRK04243 (PRK04243)Ribosomal_L15e (pfam00827) → PRK00912 (PRK00912)RNase_P_p30 (pfam01876) → PRK03717 (PRK03717)RNase_P_Rpp14 (pfam01900) → PRK03996 (PRK03996)proteasome_alpha_archeal (cd03756) → Sdo1 (COG1500)PRK13760 (PRK13760) → rpl37ae (PRK03976)Ribosomal_L37ae (pfam01780) → RPC10 (COG1996)rpoP (PRK00398) →                                                                                                           |
| env-472 | TB_LI09_4.10122878     | + | 413     | 459     | RNA → RPL15A (COG1632)PRK04243 (PRK04243) →                                                                                                                                                                                                                                                                                                                                                                                              |
| env-473 | TB_LI09_4.10800703     | + | 157     | 203     | RNA → hypo →                                                                                                                                                                                                                                                                                                                                                                                                                             |
| env-474 | BDMC2_contig02027      | - | 540     | 492     | RNA → RPL15A (COG1632)PRK04243 (PRK04243) → PRK04243 (PRK04243)Ribosomal_L15e (pfam00827) →                                                                                                                                                                                                                                                                                                                                              |
| Mpa-1-1 | NC_011832.1            | - | 2661123 | 2661072 | RNA → PRK04243 (PRK04243)Ribosomal_L15e (pfam00827) → RPP1 (COG1603)PRK00912 (PRK00912) → PRK03717 (PRK03717)RNase_P_Rpp14 (pfam01900) → PRK03996 (PRK03996)proteasome_alpha_archeal (cd03756) → Sdo1 (COG1500)PRK13760 (PRK13760) → rpl37ae (PRK03976)Ribosomal_L37ae (pfam01780) → RPC10 (COG1996)rpoP (PRK00398) → IMP4 (COG2136)PRK00933 (PRK00933) → Pcc1 (COG2892)PRK14887 (PRK14887) → yhbS (COG3153)Acetyltransf.7 (pfam13508) → |
| env-475 | JGI20225J20221.1000037 | + | 100793  | 100845  | RNA → PRK04243 (PRK04243)Ribosomal_L15e (pfam00827) → PRK00912 (PRK00912)RNase_P_p30 (pfam01876) → PRK03717 (PRK03717)RNase_P_Rpp14 (pfam01900) → PRK03996 (PRK03996)proteasome_alpha_archeal (cd03756) → Sdo1 (COG1500)PRK13760 (PRK13760) → rpl37ae (PRK03976)Ribosomal_L37ae (pfam01780) → RPC10 (COG1996)rpoP (PRK00398) → Pcc1 (COG2892)Pcc1 (pfam09341) → gimC_beta (TIGR02338)Prefoldin_2 (pfam01920) →                           |
| env-476 | WSSedL1Cam.c0003       | - | 103534  | 103482  | RNA → PRK04243 (PRK04243)Ribosomal_L15e (pfam00827) → PRK00912 (PRK00912)RNase_P_p30 (pfam01876) → PRK03717 (PRK03717)RNase_P_Rpp14 (pfam01900) → PRK03996 (PRK03996)proteasome_alpha_archeal (cd03756) → Sdo1 (COG1500)PRK13760 (PRK13760) → rpl37ae (PRK03976)Ribosomal_L37ae (pfam01780) → RPC10 (COG1996)rpoP (PRK00398) → Pcc1 (COG2892)Pcc1 (pfam09341) → gimC_beta (TIGR02338)Prefoldin_2 (pfam01920) →                           |
| env-477 | JGI24729J20445.1007040 | + | 2798    | 2848    | RNA → ←hypo                                                                                                                                                                                                                                                                                                                                                                                                                              |
| env-478 | JGI24730J26740.1000148 | - | 22730   | 22680   | RNA → PRK04243 (PRK04243)Ribosomal_L15e (pfam00827) → RPP1 (COG1603)PRK00912 (PRK00912) → PRK03717 (PRK03717)RNase_P_Rpp14 (pfam01900) → PRK03996 (PRK03996)proteasome_alpha_archeal (cd03756) → Sdo1 (COG1500)PRK13760 (PRK13760) → rpl37ae (PRK03976)Ribosomal_L37ae (pfam01780) → RPC10 (COG1996)rpoP (PRK00398) → PRK00933 (PRK00933) → Pcc1 (COG2892)Pcc1 (pfam09341) →                                                             |
| env-479 | 3300000558.10037240    | - | 1302    | 1247    | RNA → PRK04243 (PRK04243)Ribosomal_L15e (pfam00827) → PRK00912 (PRK00912)RNase_P_p30 (pfam01876) →                                                                                                                                                                                                                                                                                                                                       |
| env-480 | 3300000568.10759524    | - | 62      | 6       | RNA →                                                                                                                                                                                                                                                                                                                                                                                                                                    |
| env-481 | 3300000032.0445971     | - | 908     | 852     | RNA → PRK04243 (PRK04243)Ribosomal_L15e (pfam00827) → PRK00912 (PRK00912) →                                                                                                                                                                                                                                                                                                                                                              |
| env-482 | 3300000568.10762646    | - | 251     | 195     | RNA → PRK04243 (PRK04243)Ribosomal_L15e (pfam00827) →                                                                                                                                                                                                                                                                                                                                                                                    |
| env-483 | 3300000568.10812672    | + | 106     | 162     | RNA → PRK04243 (PRK04243)Ribosomal_L15e (pfam00827) →                                                                                                                                                                                                                                                                                                                                                                                    |
| env-484 | 3300000568.10718528    | + | 26      | 82      | RNA → PRK04243 (PRK04243)Ribosomal_L15e (pfam00827) →                                                                                                                                                                                                                                                                                                                                                                                    |
| env-485 | 3300001567.10000590    | + | 50837   | 50893   | RNA → PRK04243 (PRK04243)Ribosomal_L15e (pfam00827) → PRK00912 (PRK00912)RNase_P_p30 (pfam01876) → PRK03717 (PRK03717)RNase_P_Rpp14 (pfam01900) → PRK03996 (PRK03996)proteasome_alpha_archeal (cd03756) → Sdo1 (COG1500)PRK13760 (PRK13760) → rpl37ae (PRK03976)Ribosomal_L37ae (pfam01780) → RPC10 (COG1996)rpoP (PRK00398) → Pcc1 (COG2892)Pcc1 (pfam09341) →                                                                          |
| env-486 | 3300000568.10082522    | + | 368     | 421     | RNA → PRK04243 (PRK04243)Ribosomal_L15e (pfam00827) →                                                                                                                                                                                                                                                                                                                                                                                    |
| env-487 | 3300001567.10000995    | - | 27743   | 27691   | RNA → PRK04243 (PRK04243)Ribosomal_L15e (pfam00827) → PRK00912 (PRK00912)RNase_P_p30 (pfam01876) → PRK03717 (PRK03717)RNase_P_Rpp14 (pfam01900) → PRK03996 (PRK03996)proteasome_alpha_archeal (cd03756) → Sdo1 (COG1500)PRK13760 (PRK13760) → rpl37ae (PRK03976)Ribosomal_L37ae (pfam01780) → RPC10 (COG1996)rpoP (PRK00398) → Pcc1 (COG2892)Pcc1 (pfam09341) →                                                                          |



|         |                           |   |       |       |                                                                                                                                                                                                                                                                                                                                                                                                                                             |
|---------|---------------------------|---|-------|-------|---------------------------------------------------------------------------------------------------------------------------------------------------------------------------------------------------------------------------------------------------------------------------------------------------------------------------------------------------------------------------------------------------------------------------------------------|
| env-488 | JGI26437J51864_10005597   | - | 1881  | 1829  | RNA → PRK04243 (PRK04243)Ribosomal_L15e (pfam00827) → RPP1 (COG1603)PRK00912 (PRK00912) → PRK03717 (PRK03717)RNase_P_Rpp14 (pfam01900) →                                                                                                                                                                                                                                                                                                    |
| env-489 | lwComb_BCIB16813_x1       | + | 697   | 749   | RNA →                                                                                                                                                                                                                                                                                                                                                                                                                                       |
| env-490 | WSSedA1Ba3_1028801        | + | 186   | 238   | RNA → PRK04243 (PRK04243)Ribosomal_L15e (pfam00827) → PRK00912 (PRK00912)RNase_P_p30 (pfam01876) →                                                                                                                                                                                                                                                                                                                                          |
| env-491 | WSSedA1Ba3_1008109        | + | 557   | 609   | RNA → PRK04243 (PRK04243)Ribosomal_L15e (pfam00827) → PRK00912 (PRK00912)RNase_P_p30 (pfam01876) → PRK03717 (PRK03717)RNase_P_Rpp14 (pfam01900) → Proteasome_A_N (smart00948)PRE1 (COG0638) →                                                                                                                                                                                                                                               |
| env-492 | WSSedA1TJGL_c023358       | - | 396   | 344   | RNA → RPL15A (COG1632)PRK04243 (PRK04243) →                                                                                                                                                                                                                                                                                                                                                                                                 |
| env-493 | WSSedA1Ba_1000153         | - | 7580  | 7528  | RNA → PRK04243 (PRK04243)Ribosomal_L15e (pfam00827) → PRK00912 (PRK00912)RNase_P_p30 (pfam01876) → PRK03717 (PRK03717)RNase_P_Rpp14 (pfam01900) → PRK03996 (PRK03996)proteasome_alpha_archeal (cd03756) → Sdo1 (COG1500)PRK13760 (PRK13760) → rpl37ae (PRK03976)Ribosomal_L37ae (pfam01780) → RPC10 (COG1996)rpoP (PRK00398) → Pcc1 (COG2892)Pcc1 (pfam09341) →                                                                             |
| env-494 | WSSedA1Ba2_1001361        | - | 527   | 475   | RNA → RPL15A (COG1632)PRK04243 (PRK04243) →                                                                                                                                                                                                                                                                                                                                                                                                 |
| env-495 | JGI26437J51864_10016078   | - | 877   | 823   | RNA → PRK04243 (PRK04243)Ribosomal_L15e (pfam00827) → PRK00912 (PRK00912) →                                                                                                                                                                                                                                                                                                                                                                 |
| env-496 | LWFCAn_GLQU6AQ01EP314     | - | 386   | 333   | RNA → RPL15A (COG1632)PRK04243 (PRK04243) →                                                                                                                                                                                                                                                                                                                                                                                                 |
| env-497 | JGI24729J20445_1011542    | + | 712   | 765   | RNA → PRK04243 (PRK04243)Ribosomal_L15e (pfam00827) → PRK00912 (PRK00912)RNase_P_p30 (pfam01876) →                                                                                                                                                                                                                                                                                                                                          |
| env-498 | JGI24728J21555_1031680    | - | 431   | 378   | RNA → RPL15A (COG1632)PRK04243 (PRK04243) →                                                                                                                                                                                                                                                                                                                                                                                                 |
| env-499 | 3300001580_10004398       | - | 7500  | 7446  | RNA → PRK04243 (PRK04243)Ribosomal_L15e (pfam00827) → RPP1 (COG1603)PRK00912 (PRK00912) → PRK03717 (PRK03717)RNase_P_Rpp14 (pfam01900) → PRK03996 (PRK03996)proteasome_alpha_archeal (cd03756) → Sdo1 (COG1500)PRK13760 (PRK13760) → rpl37ae (PRK03976)Ribosomal_L37ae (pfam01780) → RPC10 (COG1996)rpoP (PRK00398) → Pcc1 (COG2892)Pcc1 (pfam09341) → gimC_beta (TIGR02338)Prefoldin_2 (pfam01920) → spoT_relA (TIGR00691)SpoT (COG0317) → |
| env-500 | JGI24729J20445_1004823    | - | 1184  | 1131  | RNA → PRK04243 (PRK04243)Ribosomal_L15e (pfam00827) → RPP1 (COG1603)PRK00912 (PRK00912) →                                                                                                                                                                                                                                                                                                                                                   |
| env-501 | JGI24732J26686_1002952    | - | 3151  | 3098  | RNA → PRK04243 (PRK04243)Ribosomal_L15e (pfam00827) → RPP1 (COG1603)PRK00912 (PRK00912) → PRK03717 (PRK03717)RNase_P_Rpp14 (pfam01900) → PRK03996 (PRK03996)proteasome_alpha_archeal (cd03756) → Sdo1 (COG1500)PRK13760 (PRK13760) →                                                                                                                                                                                                        |
| env-502 | JGI24732J26686_1094881    | - | 48    | 1     | RNA →                                                                                                                                                                                                                                                                                                                                                                                                                                       |
| env-503 | JGI24729J20445_1001141    | + | 9710  | 9763  | RNA → PRK04243 (PRK04243)Ribosomal_L15e (pfam00827) → RPP1 (COG1603)PRK00912 (PRK00912) →                                                                                                                                                                                                                                                                                                                                                   |
| env-504 | JGI24732J26686_1139212    | - | 359   | 306   | RNA → RPL15A (COG1632)PRK04243 (PRK04243) →                                                                                                                                                                                                                                                                                                                                                                                                 |
| env-505 | TB_GS10_10_10036752       | + | 1072  | 1125  | RNA → PRK04243 (PRK04243)Ribosomal_L15e (pfam00827) → RPP1 (COG1603)PRK00912 (PRK00912) →                                                                                                                                                                                                                                                                                                                                                   |
| env-506 | JGI24730J26740_1018719    | + | 53    | 106   | RNA → PRK04243 (PRK04243)Ribosomal_L15e (pfam00827) → RPP1 (COG1603)PRK00912 (PRK00912) → RNase_P_Rpp14 (pfam01900) →                                                                                                                                                                                                                                                                                                                       |
| env-507 | SakLake120mDRAFT_c0042489 | - | 330   | 276   | RNA → ←hypo →                                                                                                                                                                                                                                                                                                                                                                                                                               |
| env-508 | 3300001605_10380848       | + | 193   | 245   | RNA → PRK04243 (PRK04243)Ribosomal_L15e (pfam00827) →                                                                                                                                                                                                                                                                                                                                                                                       |
| env-509 | 3300000032_0318192        | - | 212   | 159   | RNA → PRK04243 (PRK04243)Ribosomal_L15e (pfam00827) →                                                                                                                                                                                                                                                                                                                                                                                       |
| env-510 | 3300001580_10019781       | - | 923   | 870   | RNA → PRK04243 (PRK04243)Ribosomal_L15e (pfam00827) → hypo →                                                                                                                                                                                                                                                                                                                                                                                |
| env-511 | 3300000558_10012475       | + | 6222  | 6275  | RNA → RPL15A (COG1632)PRK04243 (PRK04243) →                                                                                                                                                                                                                                                                                                                                                                                                 |
| env-512 | 3300001567_10108382       | + | 569   | 622   | RNA → PRK04243 (PRK04243)Ribosomal_L15e (pfam00827) →                                                                                                                                                                                                                                                                                                                                                                                       |
| env-513 | 3300001580_10224100       | + | 558   | 611   | RNA → RPL15A (COG1632)PRK04243 (PRK04243) →                                                                                                                                                                                                                                                                                                                                                                                                 |
| env-514 | JGI26437J51864_10657425   | - | 97    | 44    | RNA → hypo →                                                                                                                                                                                                                                                                                                                                                                                                                                |
| env-515 | 3300001580_10162759       | + | 554   | 608   | RNA → RPL15A (COG1632)PRK04243 (PRK04243) →                                                                                                                                                                                                                                                                                                                                                                                                 |
| env-516 | 3300001567_10107871       | + | 571   | 625   | RNA → PRK04243 (PRK04243)Ribosomal_L15e (pfam00827) →                                                                                                                                                                                                                                                                                                                                                                                       |
| env-517 | JGI24728J21555_1000054    | - | 38560 | 38510 | RNA → PRK04243 (PRK04243)Ribosomal_L15e (pfam00827) → RPP1 (COG1603)PRK00912 (PRK00912) → PRK03717 (PRK03717)RNase_P_Rpp14 (pfam01900) → PRK03996 (PRK03996)proteasome_alpha_archeal (cd03756) → Sdo1 (COG1500)PRK13760 (PRK13760) → rpl37ae (PRK03976)Ribosomal_L37ae (pfam01780) →                                                                                                                                                        |
| env-518 | JGI24728J21555_1000137    | - | 38579 | 38529 | RNA → PRK04243 (PRK04243)Ribosomal_L15e (pfam00827) → RPP1 (COG1603)PRK00912 (PRK00912) → PRK03717 (PRK03717)RNase_P_Rpp14 (pfam01900) → PRK03996 (PRK03996)proteasome_alpha_archeal (cd03756) → Sdo1 (COG1500)PRK13760 (PRK13760) → rpl37ae (PRK03976)Ribosomal_L37ae (pfam01780) →                                                                                                                                                        |

|         |                             |   |         |         |                                                                                                                                                                                                                                                                                                                                                                                                                                |
|---------|-----------------------------|---|---------|---------|--------------------------------------------------------------------------------------------------------------------------------------------------------------------------------------------------------------------------------------------------------------------------------------------------------------------------------------------------------------------------------------------------------------------------------|
| env-519 | JGI24728J21555.1000138      | + | 5955    | 6005    | RNA → PRK04243 (PRK04243)Ribosomal_L15e (pfam00827) → RPP1 (COG1603)PRK00912 (PRK00912) → PRK03717 (PRK03717)RNase_P_Rpp14 (pfam01900) → PRK03996 (PRK03996)proteasome_alpha_archeal (cd03756) → Sdo1 (COG1500)PRK13760 (PRK13760) → rpl37ae (PRK03976)Ribosomal_L37ae (pfam01780) →                                                                                                                                           |
| env-520 | JGI24728J21555.1000139      | + | 5947    | 5997    | RNA → PRK04243 (PRK04243)Ribosomal_L15e (pfam00827) → RPP1 (COG1603)PRK00912 (PRK00912) → PRK03717 (PRK03717)RNase_P_Rpp14 (pfam01900) → PRK03996 (PRK03996)proteasome_alpha_archeal (cd03756) → Sdo1 (COG1500)PRK13760 (PRK13760) → rpl37ae (PRK03976)Ribosomal_L37ae (pfam01780) →                                                                                                                                           |
| env-521 | JGI24728J21555.1000140      | - | 38568   | 38518   | RNA → PRK04243 (PRK04243)Ribosomal_L15e (pfam00827) → RPP1 (COG1603)PRK00912 (PRK00912) → PRK03717 (PRK03717)RNase_P_Rpp14 (pfam01900) → PRK03996 (PRK03996)proteasome_alpha_archeal (cd03756) → Sdo1 (COG1500)PRK13760 (PRK13760) → rpl37ae (PRK03976)Ribosomal_L37ae (pfam01780) →                                                                                                                                           |
| env-522 | SL_5KL.010_SED_10012660     | - | 440     | 389     | RNA → RPL15A (COG1632)PRK04243 (PRK04243) →                                                                                                                                                                                                                                                                                                                                                                                    |
| env-523 | LCWY01000735.1              | - | 1783    | 1732    | RNA → PRK04243 (PRK04243)Ribosomal_L15e (pfam00827) → PRK00912 (PRK00912)RNase_P_p30 (pfam01876) → PRK03717 (PRK03717)RNase_P_Rpp14 (pfam01900) →                                                                                                                                                                                                                                                                              |
| env-524 | LCWZ01000388.1              | - | 3340    | 3289    | RNA → PRK04243 (PRK04243)Ribosomal_L15e (pfam00827) → PRK00912 (PRK00912)RNase_P_p30 (pfam01876) → PRK03717 (PRK03717)RNase_P_Rpp14 (pfam01900) → PRK03996 (PRK03996)proteasome_alpha_archeal (cd03756) → PRK13760 (PRK13760)SBDS (pfam01172) → Sdo1 (COG1500)SBDS_C (pfam09377) → hypo →                                                                                                                                      |
| env-525 | SL_5KL.010_SED_10011794     | + | 2661    | 2714    | RNA → PRK04243 (PRK04243)Ribosomal_L15e (pfam00827) →                                                                                                                                                                                                                                                                                                                                                                          |
| env-526 | SL_3KL.010_SED_10302459     | + | 187     | 240     | RNA → RPL15A (COG1632)PRK04243 (PRK04243) →                                                                                                                                                                                                                                                                                                                                                                                    |
| env-527 | LCWZ01004261.1              | - | 1068    | 1015    | RNA → RPL15A (COG1632)PRK04243 (PRK04243) → PRK00912 (PRK00912)RNase_P_p30 (pfam01876) →                                                                                                                                                                                                                                                                                                                                       |
| env-528 | JGI2065J20421.1127642       | + | 79      | 128     | RNA → PRK04243 (PRK04243)Ribosomal_L15e (pfam00827) →                                                                                                                                                                                                                                                                                                                                                                          |
| env-529 | 2013877062                  | + | 961     | 1010    | RNA → PRK04243 (PRK04243)Ribosomal_L15e (pfam00827) → PRK00912 (PRK00912)RNase_P_p30 (pfam01876) →                                                                                                                                                                                                                                                                                                                             |
| env-530 | BMHB3a.c117030              | + | 389     | 438     | RNA → PRK04243 (PRK04243)Ribosomal_L15e (pfam00827) →                                                                                                                                                                                                                                                                                                                                                                          |
| env-531 | BMHB3a.c11385               | - | 71      | 22      | RNA → hypo →                                                                                                                                                                                                                                                                                                                                                                                                                   |
| env-532 | JGI24730J26740.1000056      | + | 41101   | 41154   | RNA → PRK04243 (PRK04243)Ribosomal_L15e (pfam00827) → PRK00912 (PRK00912)RNase_P_p30 (pfam01876) → PRK03717 (PRK03717)RNase_P_Rpp14 (pfam01900) → PRK03996 (PRK03996)proteasome_alpha_archeal (cd03756) → Sdo1 (COG1500)PRK13760 (PRK13760) → rpl37ae (PRK03976)Ribosomal_L37ae (pfam01780) → RPC10 (COG1996)rpoP (PRK00398) → Pcc1 (COG2892)Pcc1 (pfam09341) → gimC_beta (TIGR02338)GimC (COG1382) →                          |
| env-533 | JGI24730J26740.1000097      | - | 49515   | 49462   | RNA → PRK04243 (PRK04243)Ribosomal_L15e (pfam00827) → PRK00912 (PRK00912)RNase_P_p30 (pfam01876) → PRK03717 (PRK03717)RNase_P_Rpp14 (pfam01900) → PRK03996 (PRK03996)proteasome_alpha_archeal (cd03756) → Sdo1 (COG1500)PRK13760 (PRK13760) → rpl37ae (PRK03976)Ribosomal_L37ae (pfam01780) → RPC10 (COG1996)rpoP (PRK00398) → Pcc1 (COG2892)Pcc1 (pfam09341) → gimC_beta (TIGR02338)GimC (COG1382) →                          |
| CMe-1-1 | NC_009712.1                 | - | 1906137 | 1906085 | RNA → PRK04243 (PRK04243)Ribosomal_L15e (pfam00827) → PRK00912 (PRK00912)RNase_P_p30 (pfam01876) → PRK03717 (PRK03717)RNase_P_Rpp14 (pfam01900) → PRK03996 (PRK03996)proteasome_alpha_archeal (cd03756) → Sdo1 (COG1500)PRK13760 (PRK13760) → rpl37ae (PRK03976)Ribosomal_L37ae (pfam01780) → RPC10 (COG1996)rpoP (PRK00398) → Pcc1 (COG2892)Pcc1 (pfam09341) → PRK09343 (PRK09343)GimC (COG1382) →                            |
| env-534 | PRSSGFe2_Sequence0000007570 | - | 3311    | 3258    | RNA → PRK04243 (PRK04243)Ribosomal_L15e (pfam00827) → PRK00912 (PRK00912)RNase_P_p30 (pfam01876) → PRK03717 (PRK03717)RNase_P_Rpp14 (pfam01900) → PRK03996 (PRK03996)proteasome_alpha_archeal (cd03756) → Sdo1 (COG1500)PRK13760 (PRK13760) →                                                                                                                                                                                  |
| env-535 | JGI26339J46600.10050974     | + | 104     | 156     | RNA → RPL15A (COG1632)PRK04243 (PRK04243) → PRK00912 (PRK00912) →                                                                                                                                                                                                                                                                                                                                                              |
| env-536 | SL_3KL.010_SED_10003966     | - | 9606    | 9558    | RNA → PRK04243 (PRK04243)Ribosomal_L15e (pfam00827) → RPP1 (COG1603)PRK00912 (PRK00912) → PRK03717 (PRK03717)RNase_P_Rpp14 (pfam01900) → PRK03996 (PRK03996)proteasome_alpha_archeal (cd03756) → Sdo1 (COG1500)PRK13760 (PRK13760) → rpl37ae (PRK03976)Ribosomal_L37ae (pfam01780) → RPC10 (COG1996)rpoP (PRK00398) → IMP4 (COG2136)PRK00933 (PRK00933) → Pcc1 (COG2892)Pcc1 (pfam09341) → PRK09343 (PRK09343)GimC (COG1382) → |
| env-537 | SL_3KL.010_SED_10034542     | + | 3130    | 3178    | RNA → RPL15A (COG1632)PRK04243 (PRK04243) →                                                                                                                                                                                                                                                                                                                                                                                    |

|         |                         |   |         |         |                                                                                                                                                                                                                                                                                                                                                                                                                                                                                                                                                                                                                                                                                                                                                                                                                                                                                                                |
|---------|-------------------------|---|---------|---------|----------------------------------------------------------------------------------------------------------------------------------------------------------------------------------------------------------------------------------------------------------------------------------------------------------------------------------------------------------------------------------------------------------------------------------------------------------------------------------------------------------------------------------------------------------------------------------------------------------------------------------------------------------------------------------------------------------------------------------------------------------------------------------------------------------------------------------------------------------------------------------------------------------------|
| env-538 | JGI12104J13512_1003036  | - | 8013    | 7965    | RNA → PRK04243 (PRK04243)Ribosomal_L15e (pfam00827) →<br>PRK00912 (PRK00912)RNase_P_p30 (pfam01876) → PRK03717 (PRK03717)RNase_P_Rpp14 (pfam01900) →<br>PRK03996 (PRK03996)proteasome_alpha_archeal (cd03756) → Sdo1 (COG1500)PRK13760 (PRK13760) →<br>rpl37ae (PRK03976)Ribosomal_L37ae (pfam01780) →                                                                                                                                                                                                                                                                                                                                                                                                                                                                                                                                                                                                         |
| env-539 | JGI11944J13513_1000334  | + | 17500   | 17548   | RNA → PRK04243 (PRK04243)Ribosomal_L15e (pfam00827) →<br>PRK00912 (PRK00912)RNase_P_p30 (pfam01876) → PRK03717 (PRK03717)RNase_P_Rpp14 (pfam01900) →<br>PRK03996 (PRK03996)proteasome_alpha_archeal (cd03756) → Sdo1 (COG1500)PRK13760 (PRK13760) →<br>rpl37ae (PRK03976)Ribosomal_L37ae (pfam01780) →                                                                                                                                                                                                                                                                                                                                                                                                                                                                                                                                                                                                         |
| env-540 | PCEOT_contig21575       | - | 446     | 398     | RNA → RPL15A (COG1632)PRK04243 (PRK04243) →                                                                                                                                                                                                                                                                                                                                                                                                                                                                                                                                                                                                                                                                                                                                                                                                                                                                    |
| Mhu-1-1 | NC_007796.1             | + | 2543565 | 2543613 | RNA → PRK04243 (PRK04243)Ribosomal_L15e (pfam00827) → RPPI (COG1603)PRK00912 (PRK00912) →<br>PRK03717 (PRK03717)RNase_P_Rpp14 (pfam01900) →<br>PRK03996 (PRK03996)proteasome_alpha_archeal (cd03756) → Sdo1 (COG1500)PRK13760 (PRK13760) →<br>rpl37ae (PRK03976)Ribosomal_L37ae (pfam01780) → RPC10 (COG1996)rpoP (PRK00398) →<br>PRK00933 (PRK00933) → Pcc1 (COG2892)Pcc1 (pfam09341) → PRK09343 (PRK09343)Prefoldin_2 (pfam0192<br>hypo → hypo → hypo →<br>PRK14960 (PRK14960)CARDB (pfam07705)NosD (pfam05048)Beta_helix (pfam13229)DUF4832 (pfam16116)<br>PRK14960 (PRK14960)CARDB (pfam07705)NosD (pfam05048)Beta_helix (pfam13229)DUF4832 (pfam16116)<br>PRK14960 (PRK14960)CARDB (pfam07705)NosD (pfam05048)Beta_helix (pfam13229)DUF4832 (pfam16116)                                                                                                                                                   |
| env-541 | JGI24730J26740_1152247  | - | 310     | 262     | RNA → PRK04243 (PRK04243)Ribosomal_L15e (pfam00827) →                                                                                                                                                                                                                                                                                                                                                                                                                                                                                                                                                                                                                                                                                                                                                                                                                                                          |
| env-542 | 3300001580_10002056     | + | 12087   | 12136   | RNA → PRK04243 (PRK04243)Ribosomal_L15e (pfam00827) →<br>PRK00912 (PRK00912)RNase_P_p30 (pfam01876) → PRK03717 (PRK03717)RNase_P_Rpp14 (pfam01900) →<br>PRK03996 (PRK03996)proteasome_alpha_archeal (cd03756) → Sdo1 (COG1500)PRK13760 (PRK13760) →<br>rpl37ae (PRK03976)Ribosomal_L37ae (pfam01780) →                                                                                                                                                                                                                                                                                                                                                                                                                                                                                                                                                                                                         |
| env-543 | JGI26437J51864_10233459 | - | 229     | 178     | RNA → PRK04243 (PRK04243)Ribosomal_L15e (pfam00827) →                                                                                                                                                                                                                                                                                                                                                                                                                                                                                                                                                                                                                                                                                                                                                                                                                                                          |
| env-544 | JGI24730J26740_1087991  | - | 503     | 453     | RNA → RPL15A (COG1632)PRK04243 (PRK04243) →                                                                                                                                                                                                                                                                                                                                                                                                                                                                                                                                                                                                                                                                                                                                                                                                                                                                    |
| env-545 | JGI24731J21663_1016982  | - | 1473    | 1423    | RNA → PRK04243 (PRK04243)Ribosomal_L15e (pfam00827) → RPPI (COG1603)PRK00912 (PRK00912) →<br>hypo →                                                                                                                                                                                                                                                                                                                                                                                                                                                                                                                                                                                                                                                                                                                                                                                                            |
| env-546 | JGI24732J26686_1102613  | - | 402     | 352     | RNA → RPL15A (COG1632)PRK04243 (PRK04243) →                                                                                                                                                                                                                                                                                                                                                                                                                                                                                                                                                                                                                                                                                                                                                                                                                                                                    |
| Mli-1-1 | NZ_CM001555.1           | + | 718118  | 718169  | RNA → PRK04243 (PRK04243)Ribosomal_L15e (pfam00827) →<br>PRK04243 (PRK04243)Ribosomal_L15e (pfam00827) → PRK00912 (PRK00912)RNase_P_p30 (pfam01876) →<br>PRK00912 (PRK00912)RNase_P_p30 (pfam01876) → PRK03717 (PRK03717)RNase_P_Rpp14 (pfam01900) →<br>PRK03717 (PRK03717)RNase_P_Rpp14 (pfam01900) →<br>PRK03996 (PRK03996)proteasome_alpha_archeal (cd03756) →<br>PRK03996 (PRK03996)proteasome_alpha_archeal (cd03756) → Sdo1 (COG1500)PRK13760 (PRK13760) →<br>Sdo1 (COG1500)PRK13760 (PRK13760) → rpl37ae (PRK03976)Ribosomal_L37ae (pfam01780) →<br>rpl37ae (PRK03976)Ribosomal_L37ae (pfam01780) → RPC10 (COG1996)rpoP (PRK00398) →<br>RPC10 (COG1996)rpoP (PRK00398) → IMP4 (COG2136)PRK00933 (PRK00933) →<br>IMP4 (COG2136)PRK00933 (PRK00933) → Pcc1 (COG2892)Pcc1 (pfam09341) →<br>Pcc1 (COG2892)Pcc1 (pfam09341) → gimC_beta (TIGR02338)GimC (COG1382) →<br>gimC_beta (TIGR02338)GimC (COG1382) → |
| env-547 | JGI24712J26585_10534437 | + | 165     | 211     | RNA →                                                                                                                                                                                                                                                                                                                                                                                                                                                                                                                                                                                                                                                                                                                                                                                                                                                                                                          |
| env-548 | JGI24711J26586_10063235 | + | 193     | 239     | RNA → PRK04243 (PRK04243)Ribosomal_L15e (pfam00827) →<br>PRK00912 (PRK00912)RNase_P_p30 (pfam01876) →                                                                                                                                                                                                                                                                                                                                                                                                                                                                                                                                                                                                                                                                                                                                                                                                          |
| env-549 | JGI24709J26583_10002362 | + | 11095   | 11141   | RNA → RPL15A (COG1632)PRK04243 (PRK04243) → PRK00912 (PRK00912)RNase_P_p30 (pfam01876) →<br>PRK03717 (PRK03717)RNase_P_Rpp14 (pfam01900) →<br>PRK03996 (PRK03996)proteasome_alpha_archeal (cd03756) → Sdo1 (COG1500)PRK13760 (PRK13760) →<br>rpl37ae (PRK03976)Ribosomal_L37ae (pfam01780) →                                                                                                                                                                                                                                                                                                                                                                                                                                                                                                                                                                                                                   |
| env-550 | JGI24710J26742_10002715 | - | 4756    | 4710    | RNA → RPL15A (COG1632)PRK04243 (PRK04243) → PRK00912 (PRK00912)RNase_P_p30 (pfam01876) →<br>PRK03717 (PRK03717)RNase_P_Rpp14 (pfam01900) →<br>PRK03996 (PRK03996)proteasome_alpha_archeal (cd03756) → Sdo1 (COG1500)PRK13760 (PRK13760) →<br>rpl37ae (PRK03976)Ribosomal_L37ae (pfam01780) →                                                                                                                                                                                                                                                                                                                                                                                                                                                                                                                                                                                                                   |
| env-551 | JGI24500J29687_10032170 | + | 390     | 436     | RNA → RPL15A (COG1632)PRK04243 (PRK04243) → PRK00912 (PRK00912)RNase_P_p30 (pfam01876) →<br>PRK03717 (PRK03717)RNase_P_Rpp14 (pfam01900) →<br>PRK03996 (PRK03996)proteasome_alpha_archeal (cd03756) → Sdo1 (COG1500)PRK13760 (PRK13760) →                                                                                                                                                                                                                                                                                                                                                                                                                                                                                                                                                                                                                                                                      |



|         |                         |   |         |         |                                                                                                                                                                                                                                                                                                                                                                                                            |
|---------|-------------------------|---|---------|---------|------------------------------------------------------------------------------------------------------------------------------------------------------------------------------------------------------------------------------------------------------------------------------------------------------------------------------------------------------------------------------------------------------------|
| Mse-1-1 | NZ_JXOJ01000004.1       | + | 7876    | 7922    | RNA → hypo → PRK04243 (PRK04243)Ribosomal_L15e (pfam00827) → PRK00912 (PRK00912)RNase_P_p30 (pfam01876) → PRK03717 (PRK03717)RNase_P_Rpp14 (pfam01900) → PRK03996 (PRK03996)proteasome_alpha_archeal (cd03756) → Sdo1 (COG1500)PRK13760 (PRK13760) → rpl37ae (PRK03976)Ribosomal_L37ae (pfam01780) → RPC10 (COG1996)rpoP (PRK00398) → IMP4 (COG2136)PRK00933 (PRK00933) → Pcc1 (COG2892)Pcc1 (pfam09341) → |
| Mma-1-1 | NC_009051.1             | - | 1680920 | 1680874 | RNA → PRK04243 (PRK04243)Ribosomal_L15e (pfam00827) → PRK00912 (PRK00912)RNase_P_p30 (pfam01876) → PRK03717 (PRK03717)RNase_P_Rpp14 (pfam01900) → PRK03996 (PRK03996)proteasome_alpha_archeal (cd03756) → Sdo1 (COG1500)PRK13760 (PRK13760) → rpl37ae (PRK03976)Ribosomal_L37ae (pfam01780) → RPC10 (COG1996)rpoP (PRK00398) → IMP4 (COG2136)PRK00933 (PRK00933) → Pcc1 (COG2892)Pcc1 (pfam09341) →        |
| Msp-5-1 | NZ_JMIO01000049.1       | + | 18527   | 18573   | RNA → PRK04243 (PRK04243)Ribosomal_L15e (pfam00827) → RPP1 (COG1603)PRK00912 (PRK00912) → PRK03717 (PRK03717)RNase_P_Rpp14 (pfam01900) → PRK03996 (PRK03996)proteasome_alpha_archeal (cd03756) → Sdo1 (COG1500)PRK13760 (PRK13760) → rpl37ae (PRK03976)Ribosomal_L37ae (pfam01780) → RPC10 (COG1996)rpoP (PRK00398) → IMP4 (COG2136)PRK00933 (PRK00933) → hypo → Pcc1 (COG2892)Pcc1 (pfam09341) →          |
| env-552 | JGI24712J26585_10228661 | + | 308     | 354     | RNA → PRK04243 (PRK04243)Ribosomal_L15e (pfam00827) →                                                                                                                                                                                                                                                                                                                                                      |
| env-553 | JGI24707J26582_10055176 | - | 84      | 39      | RNA → ← hypo                                                                                                                                                                                                                                                                                                                                                                                               |
| env-554 | JGI24708J26588_10022103 | - | 1842    | 1797    | RNA → PRK04243 (PRK04243)Ribosomal_L15e (pfam00827) → RPP1 (COG1603)PRK00912 (PRK00912) → PRK03717 (PRK03717)RNase_P_Rpp14 (pfam01900) →                                                                                                                                                                                                                                                                   |
| env-555 | JGI24712J26585_10005651 | + | 1497    | 1542    | RNA → PRK04243 (PRK04243)Ribosomal_L15e (pfam00827) → RPP1 (COG1603)PRK00912 (PRK00912) → PRK03717 (PRK03717)RNase_P_Rpp14 (pfam01900) → PRK03996 (PRK03996)proteasome_alpha_archeal (cd03756) → Sdo1 (COG1500)PRK13760 (PRK13760) → Sdo1 (COG1500)PRK13760 (PRK13760) → rpl37ae (PRK03976)Ribosomal_L37ae (pfam01780) →                                                                                   |
| env-556 | JGI24710J26742_10007141 | + | 2776    | 2821    | RNA → PRK04243 (PRK04243)Ribosomal_L15e (pfam00827) → RPP1 (COG1603)PRK00912 (PRK00912) → PRK03717 (PRK03717)RNase_P_Rpp14 (pfam01900) → PRK03996 (PRK03996)proteasome_alpha_archeal (cd03756) → Sdo1 (COG1500)PRK13760 (PRK13760) → rpl37ae (PRK03976)Ribosomal_L37ae (pfam01780) →                                                                                                                       |
| env-557 | JGI24502J29692_10004908 | + | 2312    | 2357    | RNA → PRK04243 (PRK04243)Ribosomal_L15e (pfam00827) → RPP1 (COG1603)PRK00912 (PRK00912) → PRK03717 (PRK03717)RNase_P_Rpp14 (pfam01900) → PRK03996 (PRK03996)proteasome_alpha_archeal (cd03756) → Sdo1 (COG1500)PRK13760 (PRK13760) → rpl37ae (PRK03976)Ribosomal_L37ae (pfam01780) →                                                                                                                       |
| env-558 | JGI24503J29689_10004405 | + | 2321    | 2366    | RNA → PRK04243 (PRK04243)Ribosomal_L15e (pfam00827) → RPP1 (COG1603)PRK00912 (PRK00912) → PRK03717 (PRK03717)RNase_P_Rpp14 (pfam01900) → PRK03996 (PRK03996)proteasome_alpha_archeal (cd03756) → Sdo1 (COG1500)PRK13760 (PRK13760) → rpl37ae (PRK03976)Ribosomal_L37ae (pfam01780) →                                                                                                                       |
| env-559 | JGI24707J26582_10007021 | + | 73      | 118     | RNA → PRK04243 (PRK04243)Ribosomal_L15e (pfam00827) → RPP1 (COG1603)PRK00912 (PRK00912) → PRK03717 (PRK03717)RNase_P_Rpp14 (pfam01900) → PRK03996 (PRK03996)proteasome_alpha_archeal (cd03756) → Sdo1 (COG1500)PRK13760 (PRK13760) → rpl37ae (PRK03976)Ribosomal_L37ae (pfam01780) →                                                                                                                       |
| env-560 | JGI24708J26588_10445994 | - | 46      | 1       | RNA →                                                                                                                                                                                                                                                                                                                                                                                                      |
| env-561 | JGI24711J26586_10009933 | - | 1842    | 1797    | RNA → PRK04243 (PRK04243)Ribosomal_L15e (pfam00827) → RPP1 (COG1603)PRK00912 (PRK00912) → PRK03717 (PRK03717)RNase_P_Rpp14 (pfam01900) →                                                                                                                                                                                                                                                                   |
| env-562 | JGI24709J26583_10016669 | + | 2203    | 2248    | RNA → PRK04243 (PRK04243)Ribosomal_L15e (pfam00827) → PRK00912 (PRK00912)RNase_P_p30 (pfam01876) → RPP1 (COG1603)PRK00912 (PRK00912) → PRK03717 (PRK03717)RNase_P_Rpp14 (pfam01900) →                                                                                                                                                                                                                      |
| env-563 | JGI24500J29687_10006466 | + | 556     | 601     | RNA → PRK04243 (PRK04243)Ribosomal_L15e (pfam00827) → RPP1 (COG1603)PRK00912 (PRK00912) → PRK03717 (PRK03717)RNase_P_Rpp14 (pfam01900) → Proteasome_A_N (smart00948)PRE1 (COG0638) →                                                                                                                                                                                                                       |
| env-564 | 3300000568_10010387     | + | 293     | 339     | RNA → PRK04243 (PRK04243)Ribosomal_L15e (pfam00827) →                                                                                                                                                                                                                                                                                                                                                      |
| env-565 | 3300000032_0492979      | + | 132     | 178     | RNA →                                                                                                                                                                                                                                                                                                                                                                                                      |
| env-566 | 3300000558_10049236     | + | 193     | 239     | RNA → PRK04243 (PRK04243)Ribosomal_L15e (pfam00827) → PRK00912 (PRK00912)RNase_P_p30 (pfam01876) → PRK03717 (PRK03717)RNase_P_Rpp14 (pfam01900) → PRK03996 (PRK03996)proteasome_alpha_archeal (cd03756) → Sdo1 (COG1500)PRK13760 (PRK13760) → rpl37ae (PRK03976)Ribosomal_L37ae (pfam01780) →                                                                                                              |
| env-567 | 3300000032_0511128      | + | 210     | 256     | RNA →                                                                                                                                                                                                                                                                                                                                                                                                      |
| env-568 | 3300000032_0037457      | - | 630     | 584     | RNA → PRK04243 (PRK04243)Ribosomal_L15e (pfam00827) →                                                                                                                                                                                                                                                                                                                                                      |
| env-569 | 3300001592_10229257     | + | 50      | 96      | RNA → PRK04243 (PRK04243)Ribosomal_L15e (pfam00827) →                                                                                                                                                                                                                                                                                                                                                      |



|         |                         |   |       |       |                                                                                                                                                                                                                                                                                                                                                                                                                                |
|---------|-------------------------|---|-------|-------|--------------------------------------------------------------------------------------------------------------------------------------------------------------------------------------------------------------------------------------------------------------------------------------------------------------------------------------------------------------------------------------------------------------------------------|
| env-570 | 3300000507_100942       | + | 577   | 624   | RNA → PRK04243 (PRK04243)Ribosomal_L15e (pfam00827) → PRK00912 (PRK00912)RNase_P_p30 (pfam01876) → PRK03717 (PRK03717)RNase_P_Rpp14 (pfam01900) → PRK03996 (PRK03996)proteasome_alpha_archeal (cd03756) → Sdo1 (COG1500)PRK13760 (PRK13760) → rpl37ae (PRK03976)Ribosomal_L37ae (pfam01780) →                                                                                                                                  |
| env-571 | JGI24713J26584_10001369 | + | 2226  | 2272  | RNA → RPL15A (COG1632)PRK04243 (PRK04243) → RPP1 (COG1603)PRK00912 (PRK00912) → PRK03717 (PRK03717)RNase_P_Rpp14 (pfam01900) → PRK03996 (PRK03996)proteasome_alpha_archeal (cd03756) → Sdo1 (COG1500)PRK13760 (PRK13760) → rpl37ae (PRK03976)Ribosomal_L37ae (pfam01780) →                                                                                                                                                     |
| env-572 | JGI24714J26587_10001520 | - | 13960 | 13913 | RNA → RPL15A (COG1632)PRK04243 (PRK04243) → RPP1 (COG1603)PRK00912 (PRK00912) → PRK03717 (PRK03717)RNase_P_Rpp14 (pfam01900) → PRK03996 (PRK03996)proteasome_alpha_archeal (cd03756) → Sdo1 (COG1500)PRK13760 (PRK13760) → rpl37ae (PRK03976)Ribosomal_L37ae (pfam01780) →                                                                                                                                                     |
| env-573 | JGI24504J29685_1025823  | + | 107   | 154   | RNA → RPL15A (COG1632)PRK04243 (PRK04243) →                                                                                                                                                                                                                                                                                                                                                                                    |
| env-574 | 3300001592_10015540     | - | 752   | 702   | RNA → PRK04243 (PRK04243)Ribosomal_L15e (pfam00827) →                                                                                                                                                                                                                                                                                                                                                                          |
| env-575 | 3300000032_0000829      | + | 1108  | 1158  | RNA → PRK04243 (PRK04243)Ribosomal_L15e (pfam00827) → PRK00912 (PRK00912)RNase_P_p30 (pfam01876) → PRK03717 (PRK03717)RNase_P_Rpp14 (pfam01900) → PRK03996 (PRK03996)proteasome_alpha_archeal (cd03756) → Sdo1 (COG1500)PRK13760 (PRK13760) → rpl37ae (PRK03976)Ribosomal_L37ae (pfam01780) → RPC10 (COG1996)rpoP (PRK00398) → PRK00933 (PRK00933) → Pcc1 (COG2892)PRK14887 (PRK14887) → gimC_beta (TIGR02338)GimC (COG1375) → |
| env-576 | 3300000558_12043292     | + | 53    | 104   | RNA → PRK04243 (PRK04243)Ribosomal_L15e (pfam00827) →                                                                                                                                                                                                                                                                                                                                                                          |
| env-577 | 3300000568_10821221     | - | 73    | 23    | RNA → hypo →                                                                                                                                                                                                                                                                                                                                                                                                                   |
| env-578 | 3300001567_10009047     | + | 577   | 629   | RNA → PRK04243 (PRK04243)Ribosomal_L15e (pfam00827) → RPP1 (COG1603)PRK00912 (PRK00912) → PRK03717 (PRK03717)RNase_P_Rpp14 (pfam01900) → PRK03996 (PRK03996)proteasome_alpha_archeal (cd03756) → Sdo1 (COG1500)PRK13760 (PRK13760) → rpl37ae (PRK03976)Ribosomal_L37ae (pfam01780) →                                                                                                                                           |
| env-579 | 3300001592_10165112     | + | 124   | 175   | RNA → PRK04243 (PRK04243)Ribosomal_L15e (pfam00827) → PRK00912 (PRK00912)RNase_P_p30 (pfam01876) →                                                                                                                                                                                                                                                                                                                             |
| env-580 | 3300001567_10003826     | + | 5679  | 5730  | RNA → PRK04243 (PRK04243)Ribosomal_L15e (pfam00827) → RPP1 (COG1603)PRK00912 (PRK00912) → PRK03717 (PRK03717)RNase_P_Rpp14 (pfam01900) → PRK03996 (PRK03996)proteasome_alpha_archeal (cd03756) → Sdo1 (COG1500)PRK13760 (PRK13760) → rpl37ae (PRK03976)Ribosomal_L37ae (pfam01780) →                                                                                                                                           |
| env-581 | 3300000032_0010281      | - | 14322 | 14272 | RNA → PRK04243 (PRK04243)Ribosomal_L15e (pfam00827) → RPP1 (COG1603)PRK00912 (PRK00912) → PRK03717 (PRK03717)RNase_P_Rpp14 (pfam01900) → PRK03996 (PRK03996)proteasome_alpha_archeal (cd03756) → Sdo1 (COG1500)PRK13760 (PRK13760) → rpl37ae (PRK03976)Ribosomal_L37ae (pfam01780) → RPC10 (COG1996)rpoP (PRK00398) →                                                                                                          |
| env-582 | 3300000558_11443494     | - | 245   | 195   | RNA → PRK04243 (PRK04243)Ribosomal_L15e (pfam00827) →                                                                                                                                                                                                                                                                                                                                                                          |
| env-583 | 3300000568_10668294     | - | 19377 | 19327 | RNA → PRK04243 (PRK04243)Ribosomal_L15e (pfam00827) → RPP1 (COG1603)PRK00912 (PRK00912) → PRK03717 (PRK03717)RNase_P_Rpp14 (pfam01900) → PRK03996 (PRK03996)proteasome_alpha_archeal (cd03756) → Sdo1 (COG1500)PRK13760 (PRK13760) → rpl37ae (PRK03976)Ribosomal_L37ae (pfam01780) → RPC10 (COG1996)rpoP (PRK00398) →                                                                                                          |
| env-584 | 3300001580_10001349     | - | 19377 | 19327 | RNA → PRK04243 (PRK04243)Ribosomal_L15e (pfam00827) → RPP1 (COG1603)PRK00912 (PRK00912) → PRK03717 (PRK03717)RNase_P_Rpp14 (pfam01900) → PRK03996 (PRK03996)proteasome_alpha_archeal (cd03756) → Sdo1 (COG1500)PRK13760 (PRK13760) → rpl37ae (PRK03976)Ribosomal_L37ae (pfam01780) → RPC10 (COG1996)rpoP (PRK00398) →                                                                                                          |
| env-585 | JGI12104J13512_1001025  | + | 6838  | 6890  | RNA → RPL15A (COG1632)PRK04243 (PRK04243) → PRK00912 (PRK00912)RNase_P_p30 (pfam01876) → PRK03717 (PRK03717)RNase_P_Rpp14 (pfam01900) → PRK03996 (PRK03996)proteasome_alpha_archeal (cd03756) → Sdo1 (COG1500)PRK13760 (PRK13760) → rpl37ae (PRK03976)Ribosomal_L37ae (pfam01780) → RPC10 (COG1996)rpoP (PRK00398) →                                                                                                           |
| env-586 | JGI11944J13513_1001244  | + | 5853  | 5905  | RNA → RPL15A (COG1632)PRK04243 (PRK04243) → PRK00912 (PRK00912)RNase_P_p30 (pfam01876) → PRK03717 (PRK03717)RNase_P_Rpp14 (pfam01900) → PRK03996 (PRK03996)proteasome_alpha_archeal (cd03756) → Sdo1 (COG1500)PRK13760 (PRK13760) → rpl37ae (PRK03976)Ribosomal_L37ae (pfam01780) → RPC10 (COG1996)rpoP (PRK00398) →                                                                                                           |
| env-587 | taComm3_C10759          | - | 580   | 529   | RNA → PRK04243 (PRK04243)Ribosomal_L15e (pfam00827) →                                                                                                                                                                                                                                                                                                                                                                          |
| env-588 | 3300001592_10896941     | - | 243   | 192   | RNA → PRK04243 (PRK04243)Ribosomal_L15e (pfam00827) →                                                                                                                                                                                                                                                                                                                                                                          |
| env-589 | 2227094145              | - | 323   | 269   | RNA → ← hypo →                                                                                                                                                                                                                                                                                                                                                                                                                 |
| env-590 | 2227164185              | + | 1201  | 1252  | RNA → ← hypo →                                                                                                                                                                                                                                                                                                                                                                                                                 |

|         |                         |   |         |         |                                                                                                                                                                                                                                                                                                                                                                                                                                                                                                                                   |
|---------|-------------------------|---|---------|---------|-----------------------------------------------------------------------------------------------------------------------------------------------------------------------------------------------------------------------------------------------------------------------------------------------------------------------------------------------------------------------------------------------------------------------------------------------------------------------------------------------------------------------------------|
| env-591 | 2226969280              | + | 1286    | 1337    | RNA → RPL15A (COG1632)PRK04243 (PRK04243) →                                                                                                                                                                                                                                                                                                                                                                                                                                                                                       |
| env-592 | 2227071043              | + | 381     | 432     | RNA → PRK04243 (PRK04243)Ribosomal_L15e (pfam00827) →                                                                                                                                                                                                                                                                                                                                                                                                                                                                             |
| env-593 | IMNBL1_c0001816         | - | 461     | 410     | RNA → RPL15A (COG1632)PRK04243 (PRK04243) →                                                                                                                                                                                                                                                                                                                                                                                                                                                                                       |
| env-594 | JGI20163J15578_10187233 | - | 825     | 772     | RNA → PRK04243 (PRK04243)Ribosomal_L15e (pfam00827) →                                                                                                                                                                                                                                                                                                                                                                                                                                                                             |
| env-595 | JGI996J12353_1000527    | - | 5644    | 5593    | RNA → PRK04243 (PRK04243)Ribosomal_L15e (pfam00827) →<br>PRK14555 (PRK14555)RNA_binding (pfam01877) → RPP1 (COG1603)PRK00912 (PRK00912) →                                                                                                                                                                                                                                                                                                                                                                                         |
| env-596 | 2227035939              | + | 2727    | 2778    | RNA → RPL15A (COG1632)PRK04243 (PRK04243) →                                                                                                                                                                                                                                                                                                                                                                                                                                                                                       |
| env-597 | 2227538537              | - | 5296    | 5245    | RNA → PRK04243 (PRK04243)Ribosomal_L15e (pfam00827) →<br>PRK14555 (PRK14555)RNA_binding (pfam01877) → RPP1 (COG1603)PRK00912 (PRK00912) →                                                                                                                                                                                                                                                                                                                                                                                         |
| env-598 | IMNBL1_c0047771         | - | 55      | 4       | RNA →                                                                                                                                                                                                                                                                                                                                                                                                                                                                                                                             |
| env-599 | 2226957925              | - | 288     | 237     | RNA → RPL15A (COG1632)PRK04243 (PRK04243) →                                                                                                                                                                                                                                                                                                                                                                                                                                                                                       |
| env-600 | IMNBL1_c0018460         | - | 1848    | 1797    | RNA → PRK04243 (PRK04243)Ribosomal_L15e (pfam00827) →<br>PRK14555 (PRK14555)RNA_binding (pfam01877) → RPP1 (COG1603)PRK00912 (PRK00912) →                                                                                                                                                                                                                                                                                                                                                                                         |
| env-601 | JGI994J12354_10008059   | + | 6285    | 6336    | RNA → PRK04243 (PRK04243)Ribosomal_L15e (pfam00827) →<br>PRK14555 (PRK14555)RNA_binding (pfam01877) → RPP1 (COG1603)PRK00912 (PRK00912) →                                                                                                                                                                                                                                                                                                                                                                                         |
| env-602 | 2227477430              | - | 52      | 1       | RNA →                                                                                                                                                                                                                                                                                                                                                                                                                                                                                                                             |
| env-603 | 2227211080              | - | 136     | 82      | RNA →                                                                                                                                                                                                                                                                                                                                                                                                                                                                                                                             |
| env-604 | 2227517699              | + | 3271    | 3325    | RNA → hypo →                                                                                                                                                                                                                                                                                                                                                                                                                                                                                                                      |
| env-605 | IMNBL1_c0279633         | + | 244     | 298     | RNA → PRK04243 (PRK04243)Ribosomal_L15e (pfam00827) →                                                                                                                                                                                                                                                                                                                                                                                                                                                                             |
| env-606 | JGI994J12354_10081286   | - | 57      | 3       | RNA → ← hypo                                                                                                                                                                                                                                                                                                                                                                                                                                                                                                                      |
| env-607 | 2227618780              | - | 56      | 2       | RNA →                                                                                                                                                                                                                                                                                                                                                                                                                                                                                                                             |
| env-608 | IMNBL1_c0051091         | + | 1242    | 1296    | RNA → hypo →                                                                                                                                                                                                                                                                                                                                                                                                                                                                                                                      |
| env-609 | JGI994J12354_10078750   | - | 57      | 3       | RNA →                                                                                                                                                                                                                                                                                                                                                                                                                                                                                                                             |
| env-610 | IMNBL1_c0049435         | + | 1175    | 1227    | RNA → PRK04243 (PRK04243)Ribosomal_L15e (pfam00827) →                                                                                                                                                                                                                                                                                                                                                                                                                                                                             |
| env-611 | 2227139717              | - | 365     | 311     | RNA → ← hypo                                                                                                                                                                                                                                                                                                                                                                                                                                                                                                                      |
| env-612 | JGI994J12354_10115912   | - | 1015    | 961     | RNA → PRK04243 (PRK04243)Ribosomal_L15e (pfam00827) →<br>PRK14555 (PRK14555)RNA_binding (pfam01877) →                                                                                                                                                                                                                                                                                                                                                                                                                             |
| env-613 | IMNBL1_c0291723         | + | 33      | 87      | RNA → RPL15A (COG1632)PRK04243 (PRK04243) →                                                                                                                                                                                                                                                                                                                                                                                                                                                                                       |
| env-614 | IMNBL1_c0045419         | + | 1265    | 1319    | RNA → PRK04243 (PRK04243)Ribosomal_L15e (pfam00827) →                                                                                                                                                                                                                                                                                                                                                                                                                                                                             |
| env-615 | JGI994J12354_10079817   | - | 170     | 116     | RNA → PRK04243 (PRK04243)Ribosomal_L15e (pfam00827) →                                                                                                                                                                                                                                                                                                                                                                                                                                                                             |
| env-616 | 3300000594_10398        | + | 31      | 76      | RNA → PRK04243 (PRK04243)Ribosomal_L15e (pfam00827) →<br>PRK14555 (PRK14555)RNA_binding (pfam01877) → PRK00912 (PRK00912)RNase_P_p30 (pfam01876) →                                                                                                                                                                                                                                                                                                                                                                                |
| Mco-1-1 | NC_017034.1             | + | 356660  | 356705  | RNA → PRK04243 (PRK04243)Ribosomal_L15e (pfam00827) →<br>PRK14555 (PRK14555)RNA_binding (pfam01877) → RPP1 (COG1603)PRK00912 (PRK00912) →<br>BcsA (COG1215)glyco_like_mftF (TIGR04283) →                                                                                                                                                                                                                                                                                                                                          |
| env-617 | SL_5KL_010_SED_10351708 | + | 176     | 228     | RNA →                                                                                                                                                                                                                                                                                                                                                                                                                                                                                                                             |
| env-618 | SL_8KL_010_SED_10426921 | + | 67      | 119     | RNA → PRK04243 (PRK04243)Ribosomal_L15e (pfam00827) →                                                                                                                                                                                                                                                                                                                                                                                                                                                                             |
| Mps-1-1 | NC_018876.1             | + | 2608031 | 2608076 | RNA → PRK04243 (PRK04243)Ribosomal_L15e (pfam00827) → COG1325 (COG1325)PRK14555 (PRK14555)<br>RPP1 (COG1603)PRK00912 (PRK00912) → PRK03717 (PRK03717)RNase_P_Rpp14 (pfam01900) →<br>PRK03996 (PRK03996)proteasome_alpha_archeal (cd03756) → Sdo1 (COG1500)PRK13760 (PRK13760) →<br>Rrp4 (COG1097)PRK04163 (PRK04163)Pup (pfam05639) →<br>RNase_PH_archRRP41 (cd11366)PRK03983 (PRK03983) →<br>RNase_PH_archRRP42 (cd11365)PRK04282 (PRK04282) → rpl37ae (PRK03976)Ribosomal_L37ae (pfam01780)<br>RPC10 (COG1996)rpoP (PRK00398) → |
| env-619 | JGI25321J50212_10071092 | - | 517     | 472     | RNA → RPL15A (COG1632)PRK04243 (PRK04243) →                                                                                                                                                                                                                                                                                                                                                                                                                                                                                       |
| env-620 | 3300001567_10059738     | + | 145     | 190     | RNA → PRK04243 (PRK04243)Ribosomal_L15e (pfam00827) → COG1325 (COG1325)PRK14555 (PRK14555)                                                                                                                                                                                                                                                                                                                                                                                                                                        |
| Mti-1-1 | NZ_AZAJ01000001.1       | - | 571920  | 571858  | RNA → PRK04243 (PRK04243)Ribosomal_L15e (pfam00827) →<br>PRK14555 (PRK14555)RNA_binding (pfam01877) → PRK00912 (PRK00912)RNase_P_p30 (pfam01876) →<br>PRK03717 (PRK03717)POP5 (COG1369) → PRK03996 (PRK03996)proteasome_alpha_archeal (cd03756) →<br>Sdo1 (COG1500)PRK13760 (PRK13760) → Rrp4 (COG1097)PRK04163 (PRK04163) →<br>RNase_PH_archRRP41 (cd11366)PRK03983 (PRK03983) →<br>RNase_PH_archRRP42 (cd11365)PRK04282 (PRK04282) → rpl37ae (PRK03976)Ribosomal_L37ae (pfam01780)<br>RPC10 (COG1996)rpoP (PRK00398) →          |
| env-621 | 2231757710              | + | 31      | 79      | RNA → PRK04243 (PRK04243)Ribosomal_L15e (pfam00827) →                                                                                                                                                                                                                                                                                                                                                                                                                                                                             |

|          |                         |   |         |         |                                                                                                                                                                                                |
|----------|-------------------------|---|---------|---------|------------------------------------------------------------------------------------------------------------------------------------------------------------------------------------------------|
| Mba-2-1  | NZ_CP009517.1           | - | 1228703 | 1228652 | RNA → PRK04243 (PRK04243)Ribosomal_L15e (pfam00827) → COG1325 (COG1325)PRK14555 (PRK14555)<br>RPP1 (COG1603)PRK00912 (PRK00912) → PRK03717 (PRK03717)POP5 (COG1369) →                          |
| env-622  | B4_c.Cons7318           | + | 381     | 432     | RNA → PRK04243 (PRK04243)Ribosomal_L15e (pfam00827) →                                                                                                                                          |
| env-623  | JGI20225J20221_1000854  | - | 92739   | 92688   | RNA → PRK04243 (PRK04243)Ribosomal_L15e (pfam00827) → COG1325 (COG1325)PRK14555 (PRK14555)<br>RPP1 (COG1603)PRK00912 (PRK00912) → PRK03717 (PRK03717)POP5 (COG1369) →                          |
| env-624  | 3300000507_111820       | - | 641     | 590     | RNA → PRK04243 (PRK04243)Ribosomal_L15e (pfam00827) →                                                                                                                                          |
| env-625  | JGI24714J26587_10012885 | - | 2658    | 2606    | RNA → PRK04243 (PRK04243)Ribosomal_L15e (pfam00827) → COG1325 (COG1325)PRK14555 (PRK14555)<br>RPP1 (COG1603)PRK00912 (PRK00912) → PRK03717 (PRK03717)POP5 (COG1369) →                          |
| env-626  | JGI24712J26585_10034019 | - | 1360    | 1308    | RNA → PRK04243 (PRK04243)Ribosomal_L15e (pfam00827) → COG1325 (COG1325)PRK14555 (PRK14555)<br>RPP1 (COG1603)PRK00912 (PRK00912) →                                                              |
| env-627  | JGI24711J26586_10062120 | + | 435     | 487     | RNA → PRK04243 (PRK04243)Ribosomal_L15e (pfam00827) →                                                                                                                                          |
| Mho-2-1  | NZ_CP009516.1           | - | 3291833 | 3291782 | RNA → PRK04243 (PRK04243)Ribosomal_L15e (pfam00827) → COG1325 (COG1325)PRK14555 (PRK14555)<br>RPP1 (COG1603)PRK00912 (PRK00912) → PRK03717 (PRK03717)POP5 (COG1369) →                          |
| env-628  | JGI24731J21663_1002020  | - | 12930   | 12879   | RNA → PRK04243 (PRK04243)Ribosomal_L15e (pfam00827) → COG1325 (COG1325)PRK14555 (PRK14555)<br>RPP1 (COG1603)PRK00912 (PRK00912) → PRK03717 (PRK03717)POP5 (COG1369) →                          |
| env-629  | JGI24731J21663_1031455  | - | 306     | 255     | RNA → RPL15A (COG1632)PRK04243 (PRK04243) →                                                                                                                                                    |
| env-630  | JGI12419J13241_1124316  | + | 56      | 108     | RNA → RPL15A (COG1632)PRK04243 (PRK04243) →                                                                                                                                                    |
| Mth-1-1  | NZ_CP009501.1           | - | 381745  | 381693  | RNA → PRK04243 (PRK04243)Ribosomal_L15e (pfam00827) → COG1325 (COG1325)PRK14555 (PRK14555)<br>RPP1 (COG1603)PRK00912 (PRK00912) → PRK03717 (PRK03717)POP5 (COG1369) →                          |
| Msp-13-1 | NZ_CP009524.1           | - | 1406720 | 1406669 | RNA → PRK04243 (PRK04243)Ribosomal_L15e (pfam00827) → COG1325 (COG1325)PRK14555 (PRK14555)<br>RPP1 (COG1603)PRK00912 (PRK00912) → PRK03717 (PRK03717)POP5 (COG1369) →                          |
| Mva-1-1  | NZ_CP009520.1           | - | 1438747 | 1438696 | RNA → COG4585 (COG4585) → PRK04243 (PRK04243)Ribosomal_L15e (pfam00827) →<br>COG1325 (COG1325)PRK14555 (PRK14555) → RPP1 (COG1603)PRK00912 (PRK00912) →<br>PRK03717 (PRK03717)POP5 (COG1369) → |
| Mba-4-1  | NZ_CP009528.1           | - | 2670750 | 2670699 | RNA → PRK04243 (PRK04243)Ribosomal_L15e (pfam00827) → COG1325 (COG1325)PRK14555 (PRK14555)<br>RPP1 (COG1603)PRK00912 (PRK00912) → PRK03717 (PRK03717)POP5 (COG1369) →                          |
| Mba-1-1  | NZ_CP009530.1           | + | 476717  | 476768  | RNA → PRK04243 (PRK04243)Ribosomal_L15e (pfam00827) → COG1325 (COG1325)PRK14555 (PRK14555)<br>RPP1 (COG1603)PRK00912 (PRK00912) → PRK03717 (PRK03717)POP5 (COG1369) →                          |
| Mba-3-1  | NZ_CP008746.1           | + | 468339  | 468390  | RNA → PRK04243 (PRK04243)Ribosomal_L15e (pfam00827) → COG1325 (COG1325)PRK14555 (PRK14555)<br>RPP1 (COG1603)PRK00912 (PRK00912) → PRK03717 (PRK03717)POP5 (COG1369) →                          |
| env-631  | BMHB3a_c34562           | + | 135     | 186     | RNA →                                                                                                                                                                                          |
| env-632  | JGI2065J20421_1016166   | + | 872     | 923     | RNA → PRK04243 (PRK04243)Ribosomal_L15e (pfam00827) →<br>PRK14555 (PRK14555)RNA_binding (pfam01877) →                                                                                          |
| env-633  | B3_all_c.Cons125890     | + | 461     | 512     | RNA → PRK04243 (PRK04243)Ribosomal_L15e (pfam00827) →                                                                                                                                          |
| Mla-1-1  | NZ_CP009515.1           | + | 2312125 | 2312176 | RNA → PRK04243 (PRK04243)Ribosomal_L15e (pfam00827) → COG1325 (COG1325)PRK14555 (PRK14555)<br>RPP1 (COG1603)PRK00912 (PRK00912) → PRK03717 (PRK03717)POP5 (COG1369) →                          |
| Mba-5-1  | NC_007355.1             | + | 3156160 | 3156211 | RNA → PRK04243 (PRK04243)Ribosomal_L15e (pfam00827) → COG1325 (COG1325)PRK14555 (PRK14555)<br>RPP1 (COG1603)PRK00912 (PRK00912) → PRK03717 (PRK03717)POP5 (COG1369) →                          |
| Mba-6-1  | NZ_CP009526.1           | - | 2909575 | 2909524 | RNA → PRK04243 (PRK04243)Ribosomal_L15e (pfam00827) → COG1325 (COG1325)PRK14555 (PRK14555)<br>RPP1 (COG1603)PRK00912 (PRK00912) → PRK03717 (PRK03717)POP5 (COG1369) →                          |
| Msp-7-1  | NZ_JJQY01000019.1       | - | 28722   | 28671   | RNA → PRK04243 (PRK04243)Ribosomal_L15e (pfam00827) → COG1325 (COG1325)PRK14555 (PRK14555)<br>RPP1 (COG1603)PRK00912 (PRK00912) → PRK03717 (PRK03717)POP5 (COG1369) →                          |
| Msp-8-1  | NZ_JJOV01000053.1       | - | 61527   | 61476   | RNA → PRK04243 (PRK04243)Ribosomal_L15e (pfam00827) → COG1325 (COG1325)PRK14555 (PRK14555)<br>RPP1 (COG1603)PRK00912 (PRK00912) → PRK03717 (PRK03717)POP5 (COG1369) →                          |
| Msp-10-1 | NZ_JJOX01000057.1       | - | 29319   | 29268   | RNA → PRK04243 (PRK04243)Ribosomal_L15e (pfam00827) → COG1325 (COG1325)PRK14555 (PRK14555)<br>RPP1 (COG1603)PRK00912 (PRK00912) → PRK03717 (PRK03717)POP5 (COG1369) →                          |
| Msp-11-1 | NZ_JJOY01000041.1       | - | 29252   | 29201   | RNA → PRK04243 (PRK04243)Ribosomal_L15e (pfam00827) → COG1325 (COG1325)PRK14555 (PRK14555)<br>RPP1 (COG1603)PRK00912 (PRK00912) → PRK03717 (PRK03717)POP5 (COG1369) →                          |
| Msp-6-1  | NZ_JJQL01000038.1       | - | 47137   | 47086   | RNA → PRK04243 (PRK04243)Ribosomal_L15e (pfam00827) → COG1325 (COG1325)PRK14555 (PRK14555)<br>RPP1 (COG1603)PRK00912 (PRK00912) → PRK03717 (PRK03717)POP5 (COG1369) →                          |
| Msp-12-1 | NZ_JJOZ01000046.1       | - | 28637   | 28586   | RNA → PRK04243 (PRK04243)Ribosomal_L15e (pfam00827) → COG1325 (COG1325)PRK14555 (PRK14555)<br>RPP1 (COG1603)PRK00912 (PRK00912) → PRK03717 (PRK03717)POP5 (COG1369) →                          |
| Msp-9-1  | NZ_JJOW01000294.1       | - | 20540   | 20489   | RNA → PRK04243 (PRK04243)Ribosomal_L15e (pfam00827) → COG1325 (COG1325)PRK14555 (PRK14555)<br>RPP1 (COG1603)PRK00912 (PRK00912) → PRK03717 (PRK03717)POP5 (COG1369) →                          |
| Msp-16-1 | NZ_CP009503.1           | + | 3735833 | 3735884 | RNA → PRK04243 (PRK04243)Ribosomal_L15e (pfam00827) → COG1325 (COG1325)PRK14555 (PRK14555)<br>RPP1 (COG1603)PRK00912 (PRK00912) → PRK03717 (PRK03717)POP5 (COG1369) →                          |
| Msp-15-1 | NZ_CP009504.1           | - | 2456027 | 2455976 | RNA → PRK04243 (PRK04243)Ribosomal_L15e (pfam00827) → COG1325 (COG1325)PRK14555 (PRK14555)<br>RPP1 (COG1603)PRK00912 (PRK00912) → PRK03717 (PRK03717)POP5 (COG1369) →                          |



|          |                        |   |         |         |                                                                                                                                                                       |
|----------|------------------------|---|---------|---------|-----------------------------------------------------------------------------------------------------------------------------------------------------------------------|
| env-634  | JGI24731J21663_1041287 | + | 802     | 854     | RNA → ← <b>hypo</b>                                                                                                                                                   |
| Mso-1-1  | NZ_JQLR01000001.1      | + | 2442416 | 2442467 | RNA → PRK04243 (PRK04243)Ribosomal_L15e (pfam00827) → COG1325 (COG1325)PRK14555 (PRK14555)<br>RPP1 (COG1603)PRK00912 (PRK00912) → PRK03717 (PRK03717)POP5 (COG1369) → |
| Mma-5-1  | NC_003901.1            | + | 3119311 | 3119362 | RNA → PRK04243 (PRK04243)Ribosomal_L15e (pfam00827) → COG1325 (COG1325)PRK14555 (PRK14555)<br>RPP1 (COG1603)PRK00912 (PRK00912) → PRK03717 (PRK03717)POP5 (COG1369) → |
| Mma-6-1  | NZ_CP009513.1          | + | 3747266 | 3747317 | RNA → PRK04243 (PRK04243)Ribosomal_L15e (pfam00827) → COG1325 (COG1325)PRK14555 (PRK14555)<br>RPP1 (COG1603)PRK00912 (PRK00912) → PRK03717 (PRK03717)POP5 (COG1369) → |
| Mma-8-1  | NZ_CP009511.1          | - | 2504533 | 2504482 | RNA → PRK04243 (PRK04243)Ribosomal_L15e (pfam00827) → COG1325 (COG1325)PRK14555 (PRK14555)<br>RPP1 (COG1603)PRK00912 (PRK00912) → PRK03717 (PRK03717)POP5 (COG1369) → |
| Mma-7-1  | NZ_CP009512.1          | - | 2625933 | 2625882 | RNA → PRK04243 (PRK04243)Ribosomal_L15e (pfam00827) → COG1325 (COG1325)PRK14555 (PRK14555)<br>RPP1 (COG1603)PRK00912 (PRK00912) → PRK03717 (PRK03717)POP5 (COG1369) → |
| Mma-3-1  | NZ_JJPB01000050.1      | + | 11936   | 11987   | RNA → PRK04243 (PRK04243)Ribosomal_L15e (pfam00827) → COG1325 (COG1325)PRK14555 (PRK14555)<br>RPP1 (COG1603)PRK00912 (PRK00912) → PRK03717 (PRK03717)POP5 (COG1369) → |
| Mma-3-2  | NZ_JJQI01000092.1      | - | 16421   | 16370   | RNA → PRK04243 (PRK04243)Ribosomal_L15e (pfam00827) → COG1325 (COG1325)PRK14555 (PRK14555)<br>RPP1 (COG1603)PRK00912 (PRK00912) → PRK03717 (PRK03717)POP5 (COG1369) → |
| Mma-3-3  | NZ_JJQC01000141.1      | - | 42369   | 42318   | RNA → PRK04243 (PRK04243)Ribosomal_L15e (pfam00827) → COG1325 (COG1325)PRK14555 (PRK14555)<br>RPP1 (COG1603)PRK00912 (PRK00912) → PRK03717 (PRK03717)POP5 (COG1369) → |
| Mma-3-4  | NZ_JJPX01000042.1      | + | 11441   | 11492   | RNA → PRK04243 (PRK04243)Ribosomal_L15e (pfam00827) → COG1325 (COG1325)PRK14555 (PRK14555)<br>RPP1 (COG1603)PRK00912 (PRK00912) → PRK03717 (PRK03717)POP5 (COG1369) → |
| Mma-3-5  | NZ_JJQA01000093.1      | - | 42369   | 42318   | RNA → PRK04243 (PRK04243)Ribosomal_L15e (pfam00827) → COG1325 (COG1325)PRK14555 (PRK14555)<br>RPP1 (COG1603)PRK00912 (PRK00912) → PRK03717 (PRK03717)POP5 (COG1369) → |
| Mma-3-6  | NZ_JJPN01000151.1      | + | 11194   | 11245   | RNA → PRK04243 (PRK04243)Ribosomal_L15e (pfam00827) → COG1325 (COG1325)PRK14555 (PRK14555)<br>RPP1 (COG1603)PRK00912 (PRK00912) → PRK03717 (PRK03717)POP5 (COG1369) → |
| Mma-3-7  | NZ_JJOS01000070.1      | + | 20296   | 20347   | RNA → PRK04243 (PRK04243)Ribosomal_L15e (pfam00827) → COG1325 (COG1325)PRK14555 (PRK14555)<br>RPP1 (COG1603)PRK00912 (PRK00912) → PRK03717 (PRK03717)POP5 (COG1369) → |
| Mma-3-8  | NZ_JJPG01000087.1      | + | 11936   | 11987   | RNA → PRK04243 (PRK04243)Ribosomal_L15e (pfam00827) → COG1325 (COG1325)PRK14555 (PRK14555)<br>RPP1 (COG1603)PRK00912 (PRK00912) → PRK03717 (PRK03717)POP5 (COG1369) → |
| Mma-3-9  | NZ_JJPP01000085.1      | + | 31236   | 31287   | RNA → PRK04243 (PRK04243)Ribosomal_L15e (pfam00827) → COG1325 (COG1325)PRK14555 (PRK14555)<br>RPP1 (COG1603)PRK00912 (PRK00912) → PRK03717 (PRK03717)POP5 (COG1369) → |
| Mma-3-10 | NZ_JJQB01000132.1      | - | 42369   | 42318   | RNA → PRK04243 (PRK04243)Ribosomal_L15e (pfam00827) → COG1325 (COG1325)PRK14555 (PRK14555)<br>RPP1 (COG1603)PRK00912 (PRK00912) → PRK03717 (PRK03717)POP5 (COG1369) → |
| Mma-3-11 | NZ_JJQG01000125.1      | + | 110287  | 110338  | RNA → PRK04243 (PRK04243)Ribosomal_L15e (pfam00827) → COG1325 (COG1325)PRK14555 (PRK14555)<br>RPP1 (COG1603)PRK00912 (PRK00912) → PRK03717 (PRK03717)POP5 (COG1369) → |
| Mma-3-12 | NZ_JJPF01000029.1      | - | 32163   | 32112   | RNA → PRK04243 (PRK04243)Ribosomal_L15e (pfam00827) → COG1325 (COG1325)PRK14555 (PRK14555)<br>RPP1 (COG1603)PRK00912 (PRK00912) → PRK03717 (PRK03717)POP5 (COG1369) → |
| Mma-3-13 | NZ_JJQR01000115.1      | + | 47927   | 47978   | RNA → PRK04243 (PRK04243)Ribosomal_L15e (pfam00827) → COG1325 (COG1325)PRK14555 (PRK14555)<br>RPP1 (COG1603)PRK00912 (PRK00912) → PRK03717 (PRK03717)POP5 (COG1369) → |
| Mma-3-14 | NZ_JJQW01000009.1      | - | 43611   | 43560   | RNA → PRK04243 (PRK04243)Ribosomal_L15e (pfam00827) → COG1325 (COG1325)PRK14555 (PRK14555)<br>RPP1 (COG1603)PRK00912 (PRK00912) → PRK03717 (PRK03717)POP5 (COG1369) → |
| Mma-3-15 | NZ_JJPO01000048.1      | + | 11937   | 11988   | RNA → PRK04243 (PRK04243)Ribosomal_L15e (pfam00827) → COG1325 (COG1325)PRK14555 (PRK14555)<br>RPP1 (COG1603)PRK00912 (PRK00912) → PRK03717 (PRK03717)POP5 (COG1369) → |
| Mma-3-16 | NZ_JJQX01000051.1      | + | 8135    | 8186    | RNA → PRK04243 (PRK04243)Ribosomal_L15e (pfam00827) → COG1325 (COG1325)PRK14555 (PRK14555)<br>RPP1 (COG1603)PRK00912 (PRK00912) → PRK03717 (PRK03717)POP5 (COG1369) → |
| Mma-3-17 | NZ_JJQE01000025.1      | - | 33596   | 33545   | RNA → PRK04243 (PRK04243)Ribosomal_L15e (pfam00827) → COG1325 (COG1325)PRK14555 (PRK14555)<br>RPP1 (COG1603)PRK00912 (PRK00912) → PRK03717 (PRK03717)POP5 (COG1369) → |
| Mma-3-18 | NZ_JJRA01000090.1      | - | 35290   | 35239   | RNA → PRK04243 (PRK04243)Ribosomal_L15e (pfam00827) → COG1325 (COG1325)PRK14555 (PRK14555)<br>RPP1 (COG1603)PRK00912 (PRK00912) → PRK03717 (PRK03717)POP5 (COG1369) → |
| Mma-3-19 | NZ_JJRB01000023.1      | - | 35592   | 35541   | RNA → PRK04243 (PRK04243)Ribosomal_L15e (pfam00827) → COG1325 (COG1325)PRK14555 (PRK14555)<br>RPP1 (COG1603)PRK00912 (PRK00912) → PRK03717 (PRK03717)POP5 (COG1369) → |
| Mma-3-20 | NZ_JJOT01000028.1      | + | 142723  | 142774  | RNA → PRK04243 (PRK04243)Ribosomal_L15e (pfam00827) → COG1325 (COG1325)PRK14555 (PRK14555)<br>RPP1 (COG1603)PRK00912 (PRK00912) → PRK03717 (PRK03717)POP5 (COG1369) → |
| Mma-3-21 | NZ_JJQS01000135.1      | - | 34925   | 34874   | RNA → PRK04243 (PRK04243)Ribosomal_L15e (pfam00827) → COG1325 (COG1325)PRK14555 (PRK14555)<br>RPP1 (COG1603)PRK00912 (PRK00912) → PRK03717 (PRK03717)POP5 (COG1369) → |
| Mma-3-22 | NZ_JJPC01000138.1      | + | 16225   | 16276   | RNA → PRK04243 (PRK04243)Ribosomal_L15e (pfam00827) → COG1325 (COG1325)PRK14555 (PRK14555)<br>RPP1 (COG1603)PRK00912 (PRK00912) → PRK03717 (PRK03717)POP5 (COG1369) → |
| Mma-3-23 | NZ_JJOU01000016.1      | - | 43691   | 43640   | RNA → PRK04243 (PRK04243)Ribosomal_L15e (pfam00827) → COG1325 (COG1325)PRK14555 (PRK14555)<br>RPP1 (COG1603)PRK00912 (PRK00912) → PRK03717 (PRK03717)POP5 (COG1369) → |





|          |                        |   |         |         |                                                                                                                                                                                                                                                                                                                                                                                                                                                                                                                                                                                                                                                                                                                                       |
|----------|------------------------|---|---------|---------|---------------------------------------------------------------------------------------------------------------------------------------------------------------------------------------------------------------------------------------------------------------------------------------------------------------------------------------------------------------------------------------------------------------------------------------------------------------------------------------------------------------------------------------------------------------------------------------------------------------------------------------------------------------------------------------------------------------------------------------|
| Mma-3-53 | NZ_JJQP01000172.1      | + | 39888   | 39939   | RNA → PRK04243 (PRK04243)Ribosomal_L15e (pfam00827) → COG1325 (COG1325)PRK14555 (PRK14555)<br>RPP1 (COG1603)PRK00912 (PRK00912) → PRK03717 (PRK03717)POP5 (COG1369) →                                                                                                                                                                                                                                                                                                                                                                                                                                                                                                                                                                 |
| Mma-3-54 | NZ_JJQN01000109.1      | + | 11937   | 11988   | RNA → PRK04243 (PRK04243)Ribosomal_L15e (pfam00827) → COG1325 (COG1325)PRK14555 (PRK14555)<br>RPP1 (COG1603)PRK00912 (PRK00912) → PRK03717 (PRK03717)POP5 (COG1369) →                                                                                                                                                                                                                                                                                                                                                                                                                                                                                                                                                                 |
| Mma-3-55 | NZ_JJQT01000136.1      | - | 6188    | 6137    | RNA → PRK04243 (PRK04243)Ribosomal_L15e (pfam00827) → COG1325 (COG1325)PRK14555 (PRK14555)<br>RPP1 (COG1603)PRK00912 (PRK00912) → PRK03717 (PRK03717)POP5 (COG1369) →                                                                                                                                                                                                                                                                                                                                                                                                                                                                                                                                                                 |
| Mma-3-56 | NZ_JJQV01000102.1      | - | 35394   | 35343   | RNA → PRK04243 (PRK04243)Ribosomal_L15e (pfam00827) → COG1325 (COG1325)PRK14555 (PRK14555)<br>RPP1 (COG1603)PRK00912 (PRK00912) → PRK03717 (PRK03717)POP5 (COG1369) →                                                                                                                                                                                                                                                                                                                                                                                                                                                                                                                                                                 |
| Mma-9-1  | NZ_CP009509.1          | + | 2909485 | 2909536 | RNA → PRK04243 (PRK04243)Ribosomal_L15e (pfam00827) → COG1325 (COG1325)PRK14555 (PRK14555)<br>RPP1 (COG1603)PRK00912 (PRK00912) → PRK03717 (PRK03717)POP5 (COG1369) →                                                                                                                                                                                                                                                                                                                                                                                                                                                                                                                                                                 |
| Mma-4-1  | NZ_CP009514.1          | + | 1235377 | 1235428 | RNA → PRK04243 (PRK04243)Ribosomal_L15e (pfam00827) → COG1325 (COG1325)PRK14555 (PRK14555)<br>RPP1 (COG1603)PRK00912 (PRK00912) → PRK03717 (PRK03717)POP5 (COG1369) →                                                                                                                                                                                                                                                                                                                                                                                                                                                                                                                                                                 |
| Mac-1-1  | NC_003552.1            | - | 2189802 | 2189751 | RNA → PRK04243 (PRK04243)Ribosomal_L15e (pfam00827) → COG1325 (COG1325)PRK14555 (PRK14555)<br>RPP1 (COG1603)PRK00912 (PRK00912) → PRK03717 (PRK03717)POP5 (COG1369) →                                                                                                                                                                                                                                                                                                                                                                                                                                                                                                                                                                 |
| Msi-2-1  | NZ_CP009506.1          | - | 3147028 | 3146977 | RNA → PRK04243 (PRK04243)Ribosomal_L15e (pfam00827) → COG1325 (COG1325)PRK14555 (PRK14555)<br>RPP1 (COG1603)PRK00912 (PRK00912) → PRK03717 (PRK03717)POP5 (COG1369) →                                                                                                                                                                                                                                                                                                                                                                                                                                                                                                                                                                 |
| env-635  | WSSedB2T_c104918       | + | 74      | 125     | RNA → RPL15A (COG1632)PRK04243 (PRK04243) →                                                                                                                                                                                                                                                                                                                                                                                                                                                                                                                                                                                                                                                                                           |
| Msi-1-1  | NZ_CP009508.1          | - | 2149794 | 2149743 | RNA → PRK04243 (PRK04243)Ribosomal_L15e (pfam00827) → COG1325 (COG1325)PRK14555 (PRK14555)<br>RPP1 (COG1603)PRK00912 (PRK00912) → PRK03717 (PRK03717)POP5 (COG1369) →                                                                                                                                                                                                                                                                                                                                                                                                                                                                                                                                                                 |
| env-636  | M940CN_1003840         | - | 2106    | 2055    | RNA → PRK04243 (PRK04243)Ribosomal_L15e (pfam00827) → COG1325 (COG1325)PRK14555 (PRK14555)<br>RPP1 (COG1603)PRK00912 (PRK00912) → PRK03717 (PRK03717)RNase_P_Rpp14 (pfam01900) →                                                                                                                                                                                                                                                                                                                                                                                                                                                                                                                                                      |
| Msp-14-1 | NZ_CP009505.1          | - | 2602304 | 2602254 | RNA → ←-hypo                                                                                                                                                                                                                                                                                                                                                                                                                                                                                                                                                                                                                                                                                                                          |
| env-637  | 3300001567_10002926    | - | 2776    | 2730    | RNA → PRK04243 (PRK04243)Ribosomal_L15e (pfam00827) → COG1325 (COG1325)PRK14555 (PRK14555)<br>RPP1 (COG1603)PRK00912 (PRK00912) → PRK03717 (PRK03717)POP5 (COG1369) →<br>PRK03996 (PRK03996)proteasome_alpha (cd01911) →                                                                                                                                                                                                                                                                                                                                                                                                                                                                                                              |
| env-638  | DHTCA2_contig15787     | + | 370     | 416     | RNA →                                                                                                                                                                                                                                                                                                                                                                                                                                                                                                                                                                                                                                                                                                                                 |
| env-639  | AMWB01080572.1         | + | 1326    | 1372    | RNA → PRK04243 (PRK04243)Ribosomal_L15e (pfam00827) →                                                                                                                                                                                                                                                                                                                                                                                                                                                                                                                                                                                                                                                                                 |
| env-640  | 3300001580_10062933    | + | 412     | 459     | RNA → PRK04243 (PRK04243)Ribosomal_L15e (pfam00827) →                                                                                                                                                                                                                                                                                                                                                                                                                                                                                                                                                                                                                                                                                 |
| Mho-1-1  | NC_019977.1            | + | 1869779 | 1869826 | PRK14555 (PRK14555)RNA_binding (pfam01877) → RPP1 (COG1603)PRK00912 (PRK00912) →<br>RNA → PRK04243 (PRK04243)Ribosomal_L15e (pfam00827) →<br>PRK14555 (PRK14555)RNA_binding (pfam01877) → RPP1 (COG1603)PRK00912 (PRK00912) →<br>PRK03717 (PRK03717)POP5 (COG1369) → PRK03996 (PRK03996)proteasome_alpha_archaeal (cd03756) →<br>Sdo1 (COG1500)PRK13760 (PRK13760) → Rrp4 (COG1097)PRK04163 (PRK04163) →<br>RNase_PH_archRRP41 (cd11366)PRK03983 (PRK03983)PRK05658 (PRK05658) →<br>RNase_PH_archRRP42 (cd11365)PRK04282 (PRK04282) → tp137ae (PRK03976)Ribosomal_L37ae (pfam01780) →<br>RPC10 (COG1996)rpoP (PRK00398) → Brix (smart00879)IMP4 (COG2136) →<br>Pcc1 (COG2892)Pcc1 (pfam09341) → gimC_beta (TIGR02338)GimC (COG1382) → |
| env-641  | AMWB01126899.1         | + | 489     | 536     | PRK05427 (PRK05427)DHH (pfam01368) → PaaK (COG1541)AMP-binding_C_2 (pfam14535) →<br>RNA → PRK04243 (PRK04243)Ribosomal_L15e (pfam00827) →<br>PRK14555 (PRK14555)RNA_binding (pfam01877) → PRK00912 (PRK00912)RNase_P_p30 (pfam01876) →<br>PRK03717 (PRK03717)POP5 (COG1369) → PRK03996 (PRK03996)proteasome_alpha_archaeal (cd03756) →                                                                                                                                                                                                                                                                                                                                                                                                |
| Mbu-1-1  | NC_007955.1            | + | 176502  | 176552  | RNA → PRK04243 (PRK04243)Ribosomal_L15e (pfam00827) →<br>PRK14555 (PRK14555)RNA_binding (pfam01877) → PRK00912 (PRK00912)RNase_P_p30 (pfam01876) →<br>PRK03717 (PRK03717)RNase_P_Rpp14 (pfam01900) →                                                                                                                                                                                                                                                                                                                                                                                                                                                                                                                                  |
| env-642  | AZIB01003834.1         | + | 91      | 141     | RNA → PRK04243 (PRK04243)Ribosomal_L15e (pfam00827) →<br>PRK14555 (PRK14555)RNA_binding (pfam01877) →                                                                                                                                                                                                                                                                                                                                                                                                                                                                                                                                                                                                                                 |
| Mme-2-1  | NZ_CP009518.1          | + | 794999  | 795052  | RNA → PRK04243 (PRK04243)Ribosomal_L15e (pfam00827) → COG1325 (COG1325)PRK14555 (PRK14555) →<br>RPP1 (COG1603)PRK00912 (PRK00912) → PRK03717 (PRK03717)RNase_P_Rpp14 (pfam01900) →                                                                                                                                                                                                                                                                                                                                                                                                                                                                                                                                                    |
| Mme-1-1  | NZ_JRHO01000010.1      | + | 86627   | 86680   | RNA → PRK04243 (PRK04243)Ribosomal_L15e (pfam00827) → COG1325 (COG1325)PRK14555 (PRK14555) →<br>PRK00912 (PRK00912)RNase_P_p30 (pfam01876) → PRK03717 (PRK03717)POP5 (COG1369) →                                                                                                                                                                                                                                                                                                                                                                                                                                                                                                                                                      |
| Msh-1-1  | NZ_JONQ01000008.1      | + | 45804   | 45849   | RNA → RPL15A (COG1632)PRK04243 (PRK04243) → PRK14555 (PRK14555)RNA_binding (pfam01877) →<br>RPP1 (COG1603)PRK00912 (PRK00912) →                                                                                                                                                                                                                                                                                                                                                                                                                                                                                                                                                                                                       |
| env-643  | HCF12C_96986           | - | 646     | 605     | RNA → PRK04243 (PRK04243)Ribosomal_L15e (pfam00827) →                                                                                                                                                                                                                                                                                                                                                                                                                                                                                                                                                                                                                                                                                 |
| env-644  | AUXO016695324.1        | - | 1274    | 1233    | RNA → PRK04243 (PRK04243)Ribosomal_L15e (pfam00827) →                                                                                                                                                                                                                                                                                                                                                                                                                                                                                                                                                                                                                                                                                 |
| env-645  | JGI12104J13512_1011404 | - | 2541    | 2501    | RNA → PRK04243 (PRK04243)Ribosomal_L15e (pfam00827) →<br>PRK14555 (PRK14555)RNA_binding (pfam01877) → RPP1 (COG1603)PRK00912 (PRK00912) →<br>PRK03717 (PRK03717)POP5 (COG1369) →                                                                                                                                                                                                                                                                                                                                                                                                                                                                                                                                                      |

|         |                                    |   |        |        |                                                                                                                                                                                                                                                                                                                                                                                                                               |
|---------|------------------------------------|---|--------|--------|-------------------------------------------------------------------------------------------------------------------------------------------------------------------------------------------------------------------------------------------------------------------------------------------------------------------------------------------------------------------------------------------------------------------------------|
| env-646 | 3300001580_10676249                | + | 109    | 149    | RNA → PRK04243 (PRK04243) Ribosomal_L15e (pfam00827) →                                                                                                                                                                                                                                                                                                                                                                        |
| env-647 | 08_07_CONTROL_DNA_scaffold24236_7  | - | 6049   | 6007   | RNA → PRK04243 (PRK04243) Ribosomal_L15e (pfam00827) →<br>PRK14555 (PRK14555) RNA_binding (pfam01877) →                                                                                                                                                                                                                                                                                                                       |
| env-648 | 08_07_XOS_DNA_scaffold878_1        | + | 2078   | 2120   | RNA → PRK04243 (PRK04243) Ribosomal_L15e (pfam00827) →                                                                                                                                                                                                                                                                                                                                                                        |
| env-649 | O8_19_POLYDEXT_DNA_scaffold34267_3 | - | 167    | 125    | RNA → PRK04243 (PRK04243) Ribosomal_L15e (pfam00827) →                                                                                                                                                                                                                                                                                                                                                                        |
| env-650 | JGI1994J12354_10354549             | - | 293    | 251    | RNA → PRK04243 (PRK04243) Ribosomal_L15e (pfam00827) →                                                                                                                                                                                                                                                                                                                                                                        |
| env-651 | JGI24713J26584_10000181            | - | 19302  | 19259  | RNA → PRK04243 (PRK04243) Ribosomal_L15e (pfam00827) → COG1325 (COG1325) PRK14555 (PRK14555) →<br>RPP1 (COG1603) PRK00912 (PRK00912) → PRK03717 (PRK03717) POP5 (COG1369) →<br>PRK03996 (PRK03996) proteasome_alpha_archeal (cd03756) → Sdo1 (COG1500) PRK13760 (PRK13760) →<br>Rrp4 (COG1097) PRK04163 (PRK04163) → RNase_PH_archRRP41 (cd11366) PRK03983 (PRK03983) →<br>RNase_PH_archRRP42 (cd11365) PRK04282 (PRK04282) → |
| env-652 | JGI24714J26587_10000218            | + | 19819  | 19862  | RNA → PRK04243 (PRK04243) Ribosomal_L15e (pfam00827) → COG1325 (COG1325) PRK14555 (PRK14555) →<br>RPP1 (COG1603) PRK00912 (PRK00912) → PRK03717 (PRK03717) POP5 (COG1369) →<br>PRK03996 (PRK03996) proteasome_alpha_archeal (cd03756) → Sdo1 (COG1500) PRK13760 (PRK13760) →<br>Rrp4 (COG1097) PRK04163 (PRK04163) → RNase_PH_archRRP41 (cd11366) PRK03983 (PRK03983) →<br>RNase_PH_archRRP42 (cd11365) PRK04282 (PRK04282) → |
| env-653 | JGI24504J29685_1000272             | - | 114106 | 114063 | RNA → PRK04243 (PRK04243) Ribosomal_L15e (pfam00827) → COG1325 (COG1325) PRK14555 (PRK14555) →<br>RPP1 (COG1603) PRK00912 (PRK00912) → PRK03717 (PRK03717) POP5 (COG1369) →<br>PRK03996 (PRK03996) proteasome_alpha_archeal (cd03756) → Sdo1 (COG1500) PRK13760 (PRK13760) →<br>Rrp4 (COG1097) PRK04163 (PRK04163) → RNase_PH_archRRP41 (cd11366) PRK03983 (PRK03983) →<br>RNase_PH_archRRP42 (cd11365) PRK04282 (PRK04282) → |
| env-654 | JGI24504J29685_1000273             | + | 20634  | 20677  | RNA → PRK04243 (PRK04243) Ribosomal_L15e (pfam00827) → COG1325 (COG1325) PRK14555 (PRK14555) →<br>RPP1 (COG1603) PRK00912 (PRK00912) → PRK03717 (PRK03717) POP5 (COG1369) →<br>PRK03996 (PRK03996) proteasome_alpha_archeal (cd03756) → Sdo1 (COG1500) PRK13760 (PRK13760) →<br>Rrp4 (COG1097) PRK04163 (PRK04163) → RNase_PH_archRRP41 (cd11366) PRK03983 (PRK03983) →<br>RNase_PH_archRRP42 (cd11365) PRK04282 (PRK04282) → |
| env-655 | JGI24505J29691_1005987             | + | 2006   | 2049   | RNA → PRK04243 (PRK04243) Ribosomal_L15e (pfam00827) → COG1325 (COG1325) PRK14555 (PRK14555) →<br>RPP1 (COG1603) PRK00912 (PRK00912) → PRK03717 (PRK03717) POP5 (COG1369) →<br>PRK03996 (PRK03996) proteasome_alpha_archeal (cd03756) → Sdo1 (COG1500) PRK13760 (PRK13760) →<br>Rrp4 (COG1097) PRK04163 (PRK04163) → RNase_PH_archRRP41 (cd11366) PRK03983 (PRK03983) →<br>RNase_PH_archRRP42 (cd11365) PRK04282 (PRK04282) → |
| env-656 | RUMENNODE_3862964_1                | + | 19057  | 19104  | RNA → hypo → PRK04243 (PRK04243) Ribosomal_L15e (pfam00827) →<br>PRK14555 (PRK14555) RNA_binding (pfam01877) → hypo →                                                                                                                                                                                                                                                                                                         |
| env-657 | AUXO010246320.1                    | + | 2947   | 2993   | RNA →                                                                                                                                                                                                                                                                                                                                                                                                                         |
| env-658 | RUMENNODE_3957055_1                | + | 1849   | 1895   | RNA → PRK04243 (PRK04243) Ribosomal_L15e (pfam00827) →<br>PRK14555 (PRK14555) RNA_binding (pfam01877) →                                                                                                                                                                                                                                                                                                                       |
| Mve-1-1 | NZ_JQJK01000008.1                  | + | 40819  | 40860  | RNA → PRK04243 (PRK04243) Ribosomal_L15e (pfam00827) →<br>PRK14555 (PRK14555) RNA_binding (pfam01877) → RPP1 (COG1603) PRK00912 (PRK00912) →<br>PRK03717 (PRK03717) RNase_P_Rpp14 (pfam01900) →                                                                                                                                                                                                                               |
| Mar-1-1 | NZ_JQKN01000001.1                  | + | 40819  | 40860  | RNA → PRK04243 (PRK04243) Ribosomal_L15e (pfam00827) →<br>PRK14555 (PRK14555) RNA_binding (pfam01877) → RPP1 (COG1603) PRK00912 (PRK00912) →<br>PRK03717 (PRK03717) RNase_P_Rpp14 (pfam01900) →                                                                                                                                                                                                                               |
| env-659 | JGI24731J21663_1049964             | - | 360    | 319    | RNA → RPL15A (COG1632) PRK04243 (PRK04243) →                                                                                                                                                                                                                                                                                                                                                                                  |
| env-660 | B3_allc.Cons195859                 | + | 487    | 528    | RNA → RPL15A (COG1632) PRK04243 (PRK04243) →                                                                                                                                                                                                                                                                                                                                                                                  |
| Msp-4-1 | NC_015574.1                        | + | 503676 | 503718 | RNA → PRK04243 (PRK04243) Ribosomal_L15e (pfam00827) →<br>PRK14555 (PRK14555) RNA_binding (pfam01877) → RPP1 (COG1603) PRK00912 (PRK00912) →                                                                                                                                                                                                                                                                                  |
| env-661 | 2014734625                         | + | 11972  | 12018  | RNA → PRK04243 (PRK04243) Ribosomal_L15e (pfam00827) →<br>PRK14555 (PRK14555) RNA_binding (pfam01877) → RPP1 (COG1603) PRK00912 (PRK00912) →                                                                                                                                                                                                                                                                                  |
| env-662 | ANASMECb_4085297_C2853             | + | 11972  | 12018  | RNA → PRK04243 (PRK04243) Ribosomal_L15e (pfam00827) →<br>PRK14555 (PRK14555) RNA_binding (pfam01877) → RPP1 (COG1603) PRK00912 (PRK00912) →                                                                                                                                                                                                                                                                                  |
| env-663 | 3300001580_10131017                | - | 51     | 5      | RNA →                                                                                                                                                                                                                                                                                                                                                                                                                         |
| env-664 | 3300001592_10138106                | - | 985    | 939    | RNA → PRK04243 (PRK04243) Ribosomal_L15e (pfam00827) →<br>PRK14555 (PRK14555) RNA_binding (pfam01877) →                                                                                                                                                                                                                                                                                                                       |
| env-665 | JGI24712J26585_10348213            | - | 47     | 4      | RNA → hypo →                                                                                                                                                                                                                                                                                                                                                                                                                  |



|         |                             |   |         |         |                                                                                                                                                                                                                                                                                                                                                                                                                                  |
|---------|-----------------------------|---|---------|---------|----------------------------------------------------------------------------------------------------------------------------------------------------------------------------------------------------------------------------------------------------------------------------------------------------------------------------------------------------------------------------------------------------------------------------------|
| env-666 | JGI24709J26583_10002022     | - | 8087    | 8044    | RNA → PRK04243 (PRK04243)Ribosomal_L15e (pfam00827) → PRK14555 (PRK14555)RNA_binding (pfam01877) → RPP1 (COG1603)PRK00912 (PRK00912) → PRK03717 (PRK03717)RNase_P_Rpp14 (pfam01900) → PRK03996 (PRK03996)proteasome_alpha_archeal (cd03756) → Sdo1 (COG1500)PRK13760 (PRK13760) → Rrp4 (COG1097)PRK04163 (PRK04163) → RNase_PH_archRRP41 (cd11366)PRK03983 (PRK03983) → RNase_PH_archRRP42 (cd11365)PRK04282 (PRK04282) →        |
| env-667 | JGI24710J26742_10000204     | + | 18022   | 18065   | RNA → PRK04243 (PRK04243)Ribosomal_L15e (pfam00827) → PRK14555 (PRK14555)RNA_binding (pfam01877) → RPP1 (COG1603)PRK00912 (PRK00912) → PRK03717 (PRK03717)RNase_P_Rpp14 (pfam01900) → PRK03996 (PRK03996)proteasome_alpha_archeal (cd03756) → Sdo1 (COG1500)PRK13760 (PRK13760) → Rrp4 (COG1097)PRK04163 (PRK04163) → RNase_PH_archRRP41 (cd11366)PRK03983 (PRK03983) → RNase_PH_archRRP42 (cd11365)PRK04282 (PRK04282) →        |
| env-668 | JGI24500J29687_10014623     | + | 1789    | 1832    | RNA → hypo → PRK04243 (PRK04243)Ribosomal_L15e (pfam00827) → PRK14555 (PRK14555)RNA_binding (pfam01877) → RPP1 (COG1603)PRK00912 (PRK00912) → PRK03717 (PRK03717)RNase_P_Rpp14 (pfam01900) → PRK03996 (PRK03996)proteasome_alpha_archeal (cd03756) → Sdo1 (COG1500)PRK13760 (PRK13760) → Rrp4 (COG1097)PRK04163 (PRK04163) → RNase_PH_archRRP41 (cd11366)PRK03983 (PRK03983) → RNase_PH_archRRP42 (cd11365)PRK04282 (PRK04282) → |
| env-669 | JGI24501J29690_1010023      | + | 224     | 267     | RNA → hypo → PRK04243 (PRK04243)Ribosomal_L15e (pfam00827) → PRK14555 (PRK14555)RNA_binding (pfam01877) → RPP1 (COG1603)PRK00912 (PRK00912) → PRK03717 (PRK03717)RNase_P_Rpp14 (pfam01900) → PRK03996 (PRK03996)proteasome_alpha_archeal (cd03756) → Sdo1 (COG1500)PRK13760 (PRK13760) → Rrp4 (COG1097)PRK04163 (PRK04163) → RNase_PH_archRRP41 (cd11366)PRK03983 (PRK03983) → RNase_PH_archRRP42 (cd11365)PRK04282 (PRK04282) → |
| env-670 | JGI24711J26586_10150374     | - | 270     | 227     | RNA → PRK04243 (PRK04243)Ribosomal_L15e (pfam00827) →                                                                                                                                                                                                                                                                                                                                                                            |
| env-671 | JGI24731J21663_1027378      | - | 1115    | 1069    | RNA → PRK04243 (PRK04243)Ribosomal_L15e (pfam00827) → PRK14555 (PRK14555)RNA_binding (pfam01877) →                                                                                                                                                                                                                                                                                                                               |
| env-672 | JGI24729J20445_1009801      | + | 789     | 835     | RNA → PRK04243 (PRK04243)Ribosomal_L15e (pfam00827) → PRK14555 (PRK14555)RNA_binding (pfam01877) → RPP1 (COG1603)PRK00912 (PRK00912) →                                                                                                                                                                                                                                                                                           |
| Mfo-2-1 | NZ_AMPO01000006.1           | + | 4040    | 4086    | RNA → PRK04243 (PRK04243)Ribosomal_L15e (pfam00827) → PRK04243 (PRK04243)Ribosomal_L15e (pfam00827) → PRK14555 (PRK14555)RNA_binding (pfam01877) → RPP1 (COG1603)PRK00912 (PRK00912) → RPP1 (COG1603)PRK00912 (PRK00912) →                                                                                                                                                                                                       |
| env-673 | JGI20214J14112_1380804      | - | 244     | 198     | RNA → RPL15A (COG1632)PRK04243 (PRK04243) →                                                                                                                                                                                                                                                                                                                                                                                      |
| env-674 | JGI24731J21663_1005210      | + | 4307    | 4353    | RNA → PRK04243 (PRK04243)Ribosomal_L15e (pfam00827) → PRK14555 (PRK14555)RNA_binding (pfam01877) → RPP1 (COG1603)PRK00912 (PRK00912) →                                                                                                                                                                                                                                                                                           |
| Msp-2-1 | NC_023044.1                 | + | 529281  | 529327  | RNA → PRK04243 (PRK04243)Ribosomal_L15e (pfam00827) → PRK14555 (PRK14555)RNA_binding (pfam01877) → RPP1 (COG1603)PRK00912 (PRK00912) → PRK03717 (PRK03717)RNase_P_Rpp14 (pfam01900) → PRK03996 (PRK03996)proteasome_alpha_archeal (cd03756) → Sdo1 (COG1500)PRK13760 (PRK13760) → Rrp4 (COG1097)PRK04163 (PRK04163) → RNase_PH_archRRP41 (cd11366)PRK03983 (PRK03983) → RNase_PH_archRRP42 (cd11365)PRK04282 (PRK04282) →        |
| Mfo-1-1 | NZ_CP006933.1               | - | 1785014 | 1784968 | RNA → PRK04243 (PRK04243)Ribosomal_L15e (pfam00827) → PRK14555 (PRK14555)RNA_binding (pfam01877) → RPP1 (COG1603)PRK00912 (PRK00912) → PRK03717 (PRK03717)POP5 (COG1369) → PRK03996 (PRK03996)proteasome_alpha_archeal (cd03756) → Sdo1 (COG1500)PRK13760 (PRK13760) → Rrp4 (COG1097)PRK04163 (PRK04163) → RNase_PH_archRRP41 (cd11366)PRK03983 (PRK03983) → RNase_PH_archRRP42 (cd11365)PRK04282 (PRK04282) →                   |
| env-675 | PRSSGFe2_Sequence0000019669 | + | 951     | 992     | RNA → PRK04243 (PRK04243)Ribosomal_L15e (pfam00827) → PRK14555 (PRK14555)RNA_binding (pfam01877) →                                                                                                                                                                                                                                                                                                                               |
| env-676 | JGI12104J13512_1023983      | - | 1071    | 1030    | RNA → PRK04243 (PRK04243)Ribosomal_L15e (pfam00827) → PRK14555 (PRK14555)RNA_binding (pfam01877) →                                                                                                                                                                                                                                                                                                                               |
| env-677 | JGI11944J13513_1001397      | - | 15451   | 15410   | RNA → PRK04243 (PRK04243)Ribosomal_L15e (pfam00827) → PRK14555 (PRK14555)RNA_binding (pfam01877) → PRK00912 (PRK00912)RNase_P_p30 (pfam01876) → PRK03717 (PRK03717)POP5 (COG1369) →                                                                                                                                                                                                                                              |
| env-678 | 3300001592_10385652         | - | 169     | 128     | RNA → PRK04243 (PRK04243)Ribosomal_L15e (pfam00827) →                                                                                                                                                                                                                                                                                                                                                                            |



|          |                                      |   |         |         |                                                                                                                                                                                                                                |
|----------|--------------------------------------|---|---------|---------|--------------------------------------------------------------------------------------------------------------------------------------------------------------------------------------------------------------------------------|
| Msp-1-1  | NC_015216.1                          | - | 2225955 | 2225907 | RNA → PRK04243 (PRK04243) Ribosomal_L15e (pfam00827) → PRK14555 (PRK14555) RNA_binding (pfam01877) → RPP1 (COG1603) PRK00912 (PRK00912) → RPP1 (COG1603) PRK00912 (PRK00912) → PRK03717 (PRK03717) RNase_P_Rpp14 (pfam01900) → |
| env-679  | JGI2065J20421_1000005                | + | 287784  | 287832  | RNA → PRK04243 (PRK04243) Ribosomal_L15e (pfam00827) → PRK14555 (PRK14555) RNA_binding (pfam01877) → RPP1 (COG1603) PRK00912 (PRK00912) →                                                                                      |
| env-680  | WSSedB2Ca_1123116                    | - | 192     | 151     | RNA → PRK04243 (PRK04243) Ribosomal_L15e (pfam00827) →                                                                                                                                                                         |
| Msp-3-1  | NZ_JQLY01000001.1                    | + | 314798  | 314839  | RNA → PRK04243 (PRK04243) Ribosomal_L15e (pfam00827) → PRK14555 (PRK14555) RNA_binding (pfam01877) → RPP1 (COG1603) PRK00912 (PRK00912) → PRK03717 (PRK03717) POP5 (COG1369) →                                                 |
| env-681  | B3_all.c.Cons30296                   | + | 231     | 272     | RNA → PRK04243 (PRK04243) Ribosomal_L15e (pfam00827) →                                                                                                                                                                         |
| env-682  | B3_all.c.Cons42794                   | + | 295     | 336     | RNA → RPL15A (COG1632) PRK04243 (PRK04243) →                                                                                                                                                                                   |
| env-683  | SL_5KL_010_SED_10126917              | - | 228     | 187     | RNA → PRK04243 (PRK04243) Ribosomal_L15e (pfam00827) →                                                                                                                                                                         |
| Mor-1-1  | NZ_HG796200.1                        | - | 398447  | 398403  | RNA → PRK04243 (PRK04243) Ribosomal_L15e (pfam00827) → PRK14555 (PRK14555) RNA_binding (pfam01877) →                                                                                                                           |
| Msm-14-1 | NZ_AELU01000003.1                    | - | 71106   | 71058   | RNA → PRK04243 (PRK04243) Ribosomal_L15e (pfam00827) → PRK14555 (PRK14555) RNA_binding (pfam01877) → YurZ (COG0599) →                                                                                                          |
| Msm-4-1  | NZ_DS996911.1                        | + | 39506   | 39554   | RNA → PRK04243 (PRK04243) Ribosomal_L15e (pfam00827) → PRK14555 (PRK14555) RNA_binding (pfam01877) →                                                                                                                           |
| env-684  | scaffold116291_3_V1.CD-8             | - | 666     | 618     | RNA → PRK04243 (PRK04243) Ribosomal_L15e (pfam00827) →                                                                                                                                                                         |
| env-685  | 4491416.3_NODE_1031                  | + | 40283   | 40331   | RNA → PRK04243 (PRK04243) Ribosomal_L15e (pfam00827) → PRK14555 (PRK14555) RNA_binding (pfam01877) → YurZ (COG0599) →                                                                                                          |
| env-686  | scaffold101749_2_MH0011              | + | 6770    | 6818    | RNA → PRK04243 (PRK04243) Ribosomal_L15e (pfam00827) → PRK14555 (PRK14555) RNA_binding (pfam01877) → YurZ (COG0599) →                                                                                                          |
| env-687  | scaffold45427_5_O2.UC-12             | + | 989     | 1037    | RNA → PRK04243 (PRK04243) Ribosomal_L15e (pfam00827) →                                                                                                                                                                         |
| env-688  | scaffold45612_1_V1.CD-9              | - | 1221    | 1173    | RNA → PRK04243 (PRK04243) Ribosomal_L15e (pfam00827) → PRK14555 (PRK14555) RNA_binding (pfam01877) →                                                                                                                           |
| env-689  | scaffold99220_1_V1.UC-8              | - | 16733   | 16685   | RNA → PRK04243 (PRK04243) Ribosomal_L15e (pfam00827) → PRK14555 (PRK14555) RNA_binding (pfam01877) →                                                                                                                           |
| env-690  | UnmappedStool_Broad_scaffold_1133206 | + | 660     | 708     | RNA → PRK04243 (PRK04243) Ribosomal_L15e (pfam00827) → PRK14555 (PRK14555) RNA_binding (pfam01877) →                                                                                                                           |
| env-691  | DLM022_scaffold90350.1               | + | 654     | 702     | RNA → PRK04243 (PRK04243) Ribosomal_L15e (pfam00827) → PRK14555 (PRK14555) RNA_binding (pfam01877) → YurZ (COG0599) →                                                                                                          |
| env-692  | ADJS01014849.1                       | - | 6089    | 6041    | RNA → PRK04243 (PRK04243) Ribosomal_L15e (pfam00827) → PRK14555 (PRK14555) RNA_binding (pfam01877) →                                                                                                                           |
| env-693  | SRS014235_C3325073                   | + | 168     | 216     | RNA → PRK04243 (PRK04243) Ribosomal_L15e (pfam00827) →                                                                                                                                                                         |
| env-694  | SRS014979_C3300304                   | - | 2323    | 2275    | RNA → PRK04243 (PRK04243) Ribosomal_L15e (pfam00827) → PRK14555 (PRK14555) RNA_binding (pfam01877) →                                                                                                                           |
| Msm-1-1  | NZ_CCXV01000062.1                    | - | 3684    | 3636    | RNA → PRK04243 (PRK04243) Ribosomal_L15e (pfam00827) → PRK14555 (PRK14555) RNA_binding (pfam01877) →                                                                                                                           |
| Msm-19-1 | NZ_AELZ01000004.1                    | - | 93410   | 93362   | RNA → PRK04243 (PRK04243) Ribosomal_L15e (pfam00827) → PRK14555 (PRK14555) RNA_binding (pfam01877) →                                                                                                                           |
| Msm-11-1 | NZ_AELR01000006.1                    | - | 74375   | 74327   | RNA → PRK04243 (PRK04243) Ribosomal_L15e (pfam00827) → PRK14555 (PRK14555) RNA_binding (pfam01877) →                                                                                                                           |
| Msm-23-1 | NZ_AEMD01000013.1                    | - | 30363   | 30315   | RNA → PRK04243 (PRK04243) Ribosomal_L15e (pfam00827) → PRK14555 (PRK14555) RNA_binding (pfam01877) →                                                                                                                           |
| Msm-12-1 | NZ_AELS01000005.1                    | - | 55986   | 55938   | RNA → PRK04243 (PRK04243) Ribosomal_L15e (pfam00827) → PRK14555 (PRK14555) RNA_binding (pfam01877) →                                                                                                                           |
| Msm-13-1 | NZ_AELT01000005.1                    | - | 60811   | 60763   | RNA → PRK04243 (PRK04243) Ribosomal_L15e (pfam00827) → PRK14555 (PRK14555) RNA_binding (pfam01877) →                                                                                                                           |
| Msm-22-1 | NZ_AEMC01000004.1                    | - | 93153   | 93105   | RNA → PRK04243 (PRK04243) Ribosomal_L15e (pfam00827) → PRK14555 (PRK14555) RNA_binding (pfam01877) →                                                                                                                           |
| Msm-21-1 | NZ_AEMB01000003.1                    | - | 93149   | 93101   | RNA → PRK04243 (PRK04243) Ribosomal_L15e (pfam00827) → PRK14555 (PRK14555) RNA_binding (pfam01877) →                                                                                                                           |
| Msm-20-1 | NZ_AEMA01000007.1                    | - | 93143   | 93095   | RNA → PRK04243 (PRK04243) Ribosomal_L15e (pfam00827) → PRK14555 (PRK14555) RNA_binding (pfam01877) →                                                                                                                           |
| Msm-10-1 | NZ_AELQ01000008.1                    | - | 55971   | 55923   | RNA → PRK04243 (PRK04243) Ribosomal_L15e (pfam00827) → PRK14555 (PRK14555) RNA_binding (pfam01877) →                                                                                                                           |

|          |                          |   |         |         |                                                                                                                                                 |
|----------|--------------------------|---|---------|---------|-------------------------------------------------------------------------------------------------------------------------------------------------|
| Msm-18-1 | NZ_AELY01000006.1        | - | 93416   | 93368   | RNA → PRK04243 (PRK04243)Ribosomal_L15e (pfam00827) → PRK14555 (PRK14555)RNA_binding (pfam01877) →                                              |
| Msm-9-1  | NZ_AELO01000021.1        | - | 3502    | 3454    | RNA → PRK04243 (PRK04243)Ribosomal_L15e (pfam00827) → PRK14555 (PRK14555)RNA_binding (pfam01877) →                                              |
| Msm-5-1  | NZ_AEKU01000009.1        | - | 30411   | 30363   | RNA → PRK04243 (PRK04243)Ribosomal_L15e (pfam00827) → PRK14555 (PRK14555)RNA_binding (pfam01877) →                                              |
| Msm-17-1 | NZ_AELX01000007.1        | - | 93439   | 93391   | RNA → RPL15A (COG1632)PRK04243 (PRK04243) → hypo → hypo → PRK14555 (PRK14555)RNA_binding (pfam01877) →                                          |
| Msm-8-1  | NZ_AELN01000005.1        | - | 30375   | 30327   | RNA → PRK04243 (PRK04243)Ribosomal_L15e (pfam00827) → PRK14555 (PRK14555)RNA_binding (pfam01877) →                                              |
| Msm-2-1  | NC_009515.1              | - | 288824  | 288776  | RNA → PRK04243 (PRK04243)Ribosomal_L15e (pfam00827) → PRK14555 (PRK14555)RNA_binding (pfam01877) → YurZ (COG0599) →                             |
| Msm-3-1  | NZ_GG704759.1            | - | 1679032 | 1678984 | RNA → PRK04243 (PRK04243)Ribosomal_L15e (pfam00827) → PRK14555 (PRK14555)RNA_binding (pfam01877) →                                              |
| env-695  | scaffold43629_1_V1.CD-14 | + | 589     | 637     | RNA → RPL15A (COG1632)PRK04243 (PRK04243) →                                                                                                     |
| Msm-16-1 | NZ_AELW01000005.1        | - | 70811   | 70763   | RNA → PRK04243 (PRK04243)Ribosomal_L15e (pfam00827) → PRK14555 (PRK14555)RNA_binding (pfam01877) → YurZ (COG0599) →                             |
| Msm-15-1 | NZ_AELV01000008.1        | - | 55039   | 54991   | RNA → PRK04243 (PRK04243)Ribosomal_L15e (pfam00827) → PRK14555 (PRK14555)RNA_binding (pfam01877) → YurZ (COG0599) →                             |
| Msm-6-1  | NZ_AELL01000010.1        | - | 30405   | 30357   | RNA → PRK04243 (PRK04243)Ribosomal_L15e (pfam00827) → PRK14555 (PRK14555)RNA_binding (pfam01877) →                                              |
| Msm-7-1  | NZ_AELM01000013.1        | - | 30412   | 30364   | RNA → PRK04243 (PRK04243)Ribosomal_L15e (pfam00827) → PRK14555 (PRK14555)RNA_binding (pfam01877) →                                              |
| env-696  | JGI26339J46600_10088026  | - | 219     | 169     | RNA → PRK04243 (PRK04243)Ribosomal_L15e (pfam00827) →                                                                                           |
| env-697  | JGI24730J26740_1120805   | + | 4       | 51      | RNA → RPL15A (COG1632)PRK04243 (PRK04243) →                                                                                                     |
| env-698  | LGVF01127568.1           | + | 648     | 697     | RNA →                                                                                                                                           |
| env-699  | LGOV01033634.1           | - | 1312    | 1261    | RNA → PRK04243 (PRK04243)Ribosomal_L15e (pfam00827) → PRK14555 (PRK14555)RNA_binding (pfam01877) → PRK00912 (PRK00912)RNase_P_p30 (pfam01876) → |
| env-700  | LGVE01048678.1           | - | 619     | 570     | RNA → PRK04243 (PRK04243)Ribosomal_L15e (pfam00827) →                                                                                           |
| env-701  | LGVF01407700.1           | + | 445     | 496     | RNA → RPL15A (COG1632)PRK04243 (PRK04243) →                                                                                                     |
| env-702  | LGVE01104961.1           | - | 973     | 923     | RNA → PRK04243 (PRK04243)Ribosomal_L15e (pfam00827) →                                                                                           |
| env-703  | LGVF01373635.1           | - | 2320    | 2270    | RNA → PRK04243 (PRK04243)Ribosomal_L15e (pfam00827) →                                                                                           |
| env-704  | LGVE01091035.1           | + | 101     | 150     | RNA → PRK04243 (PRK04243)Ribosomal_L15e (pfam00827) →                                                                                           |
| env-705  | LGVF01174437.1           | - | 990     | 941     | RNA → PRK04243 (PRK04243)Ribosomal_L15e (pfam00827) →                                                                                           |
| env-706  | LGVE01094124.1           | + | 632     | 681     | RNA → PRK04243 (PRK04243)Ribosomal_L15e (pfam00827) →                                                                                           |
| env-707  | JGI24024J18818_10368636  | + | 225     | 274     | RNA →                                                                                                                                           |
| env-708  | LGVF01194351.1           | - | 1341    | 1292    | RNA → PRK04243 (PRK04243)Ribosomal_L15e (pfam00827) →                                                                                           |
| env-709  | PBDCA2_contig12847       | - | 760     | 713     | RNA → PRK04243 (PRK04243)Ribosomal_L15e (pfam00827) → PRK14555 (PRK14555)RNA_binding (pfam01877) →                                              |
| env-710  | JGI2161J19892_1008470    | - | 767     | 717     | RNA → RPL15A (COG1632)PRK04243 (PRK04243) →                                                                                                     |
| env-711  | JGI2172J19969_10002521   | + | 546     | 596     | RNA → RPL15A (COG1632)PRK04243 (PRK04243) →                                                                                                     |
| env-712  | JGI24422J19971_10970220  | + | 95      | 145     | RNA → RPL15A (COG1632)PRK04243 (PRK04243) →                                                                                                     |
| env-713  | JGI2160J19893_10000003   | - | 51272   | 51222   | RNA → RPL15A (COG1632)PRK04243 (PRK04243) →                                                                                                     |
| Ngr-1-1  | NC_019792.1              | - | 2417457 | 2417388 | RNA → PRK04243 (PRK04243)Ribosomal_L15e (pfam00827) →                                                                                           |
| Hti-1-1  | NC_021921.1              | - | 2128296 | 2128249 | RNA → PRK04243 (PRK04243)Ribosomal_L15e (pfam00827) →                                                                                           |
| Npe-1-1  | NC_019962.1              | - | 782478  | 782407  | RNA → PRK04243 (PRK04243)Ribosomal_L15e (pfam00827) →                                                                                           |
| Hsp-7-1  | NZ_ANPG01000166.1        | - | 1829    | 1769    | RNA → PRK04243 (PRK04243)Ribosomal_L15e (pfam00827) →                                                                                           |
| Hlu-1-1  | NZ_AOLH01000025.1        | + | 31699   | 31759   | RNA → PRK04243 (PRK04243)Ribosomal_L15e (pfam00827) →                                                                                           |
| Hal-1-1  | NZ_AOLL01000011.1        | + | 546240  | 546300  | RNA → PRK04243 (PRK04243)Ribosomal_L15e (pfam00827) →                                                                                           |
| Hvo-1-1  | NC_013967.1              | - | 495895  | 495835  | RNA → PRK04243 (PRK04243)Ribosomal_L15e (pfam00827) →                                                                                           |
| Hje-1-1  | NC_014297.1              | + | 2507160 | 2507224 | RNA → PRK04243 (PRK04243)Ribosomal_L15e (pfam00827) → ThiF_MoeB_HesA_family (cd00757)adenyl_thiF (TIGR02356) →                                  |
| Hbo-1-1  | NC_014729.1              | + | 2535983 | 2536036 | RNA → PRK04243 (PRK04243)Ribosomal_L15e (pfam00827) →                                                                                           |
| Nma-1-1  | NC_013922.1              | - | 988031  | 987966  | RNA → PRK04243 (PRK04243)Ribosomal_L15e (pfam00827) →                                                                                           |
| Nti-1-1  | NZ_KB913017.1            | + | 2799470 | 2799545 | RNA → PRK04243 (PRK04243)Ribosomal_L15e (pfam00827) →                                                                                           |

### 4.3 Conserved domains

Conserved domains found in protein-coding genes listed in Section 4.2 are shown below, with the first sentence in their description from the Conserved Domain Database (if any). Conserved domains associated with more than one eL15-

- cd00075 (1) Histidine kinase-like ATPases; This family includes several ATP-binding proteins for example: histidine kinase, DNA gyrase B, topoisomerases, heat shock protein HSP90, phytochrome-like ATPases and DNA mismatch repair proteins
- cd00267 (1) ATP-binding cassette transporter nucleotide-binding domain.
- cd00293 (4) Usp: Universal stress protein family.
- cd00757 (26) ThiF\_MoeB\_HesA.
- cd01066 (1) A family including aminopeptidase P, aminopeptidase M, and prolidase.
- cd01088 (1) Methionine Aminopeptidase 2.
- cd01911 (1) proteasome alpha subunit.
- cd02153 (2) The tRNA binding domain is also known as the Myf domain in literature.
- cd03024 (2) DsbA family, FrnE subfamily; FrnE is a DsbA-like protein containing a CXXX motif.
- cd03756 (76) proteasome\_alpha\_archaeal.
- cd06067 (3) Endopeptidases belonging to membrane-bound hydrogen evolving hydrogenase group. [NiFe]
- cd11365 (19) RRP42 subunit of archaeal exosome.
- cd11366 (19) RRP41 subunit of archaeal exosome.
- cd11386 (1) Methyl-accepting chemotaxis protein (MCP), signaling domain.
- COG0249 (3) DNA mismatch repair ATPase MutS [Replication, recombination and repair]
- COG0317 (1) (p)ppGpp synthase/hydrolase, HD superfamily [Signal transduction mechanisms, Transcription]
- COG0323 (1) DNA mismatch repair ATPase MutL [Replication, recombination and repair]
- COG0599 (7) Uncharacterized conserved protein YurZ, alkylhydroperoxidase/carboxymuconolactone decarboxylase family [General function prediction only]
- COG0638 (2) 20S proteasome, alpha and beta subunits [Posttranslational modification, protein turnover, chaperones]
- COG0840 (5) Methyl-accepting chemotaxis protein [Cell motility, Signal transduction mechanisms]
- COG0864 (3) Metal-responsive transcriptional regulator, contains CopG/Arc/MetJ DNA-binding domain [Transcription]
- COG1097 (19) Exosome complex RNA-binding protein Rrp4, contains S1 and KH domains [Translation, ribosomal structure and biogenesis]
- COG1145 (1) Ferredoxin [Energy production and conversion]
- COG1146 (6) NAD-dependent dihydropyrimidine dehydrogenase, PreA subunit [Nucleotide transport and metabolism]
- COG1215 (1) Glycosyltransferase, catalytic subunit of cellulose synthase and poly-beta-1,6-N-acetylglucosamine synthase [Cell motility]
- COG1325 (106) Exosome subunit, RNA binding protein with dsRBD fold [Translation, ribosomal structure and biogenesis]
- COG1369 (108) RNase P/RNase MRP subunit POP5 [Translation, ribosomal structure and biogenesis]
- COG1382 (10) Prefoldin, chaperonin cofactor [Posttranslational modification, protein turnover, chaperones]
- COG1500 (76) Ribosome maturation protein Sdo1 [Translation, ribosomal structure and biogenesis]
- COG1541 (2) Phenylacetate-coenzyme A ligase PaaK, adenylate-forming domain family [Coenzyme transport and metabolism]
- COG1603 (223) RNase P/RNase MRP subunit p30 [Translation, ribosomal structure and biogenesis]
- COG1632 (147) Ribosomal protein L15E [Translation, ribosomal structure and biogenesis]
- COG1721 (2) Redox-sensitive bicupin YhaK, pirin superfamily [General function prediction only]
- COG1996 (35) DNA-directed RNA polymerase, subunit RPC12/RpoP, contains C4-type Zn-finger [Transcription]
- COG1997 (1) Ribosomal protein L37AE/L43A [Translation, ribosomal structure and biogenesis]
- COG2456 (11) rRNA maturation protein Rpf1, contains Brix/IMP4 (anticodon-binding) domain [Translation, ribosomal structure and biogenesis]
- COG2761 (6) Predicted dithiol-disulfide isomerase, DsbA family [Posttranslational modification, protein turnover, chaperones]
- COG2892 (25) tRNA threonylcarbamoyladenosine modification (KEOPS) complex, Pcc1 subunit [Translation, ribosomal structure and biogenesis]
- COG3153 (1) Predicted N-acetyltransferase YhbS [General function prediction only]
- COG3609 (6) Transcriptional regulator, contains Arc/MetJ-type RHH (ribbon-helix-helix) DNA-binding domain [Transcription]
- COG4352 (80) Ribosomal protein L13E [Translation, ribosomal structure and biogenesis]
- COG4585 (1) Signal transduction histidine kinase [Signal transduction mechanisms]
- pfam00672 (6) HAMP domain.
- pfam00827 (780) Ribosomal L15.
- pfam01119 (1) DNA mismatch repair protein, C-terminal domain.
- pfam01172 (1) Shwachman-Bodian-Diamond syndrome (SBDS) protein.
- pfam01226 (1) Formate/nitrite transporter.
- pfam01294 (1) Ribosomal protein L13e.
- pfam01368 (2) DHH family.
- pfam01451 (1) Low molecular weight phosphotyrosine protein phosphatase.
- pfam01595 (1) Domain of unknown function DUF21.
- pfam01624 (1) MutS domain I.
- pfam01780 (58) Ribosomal L37ae protein family.
- pfam01876 (70) RNase P subunit p30.
- pfam01877 (163) RNA binding.
- pfam01900 (136) Rpp14/Pop5 family.
- pfam01920 (6) Prefoldin subunit.
- pfam02592 (6) Putative vitamin uptake transporter.
- pfam02771 (1) Acyl-CoA dehydrogenase, N-terminal domain.
- pfam04087 (1) Domain of unknown function (DUF389).
- pfam05048 (3) Periplasmic copper-binding protein (NosD).

- pfam05639** (1) Pup-like protein. [EQ]  
**pfam06736** (3) Protein of unknown function (DUF1211).  
**pfam07705** (3) CARDB.  
**pfam08676** (1) MutL C terminal dimerisation domain.  
**pfam08753** (3) NikR C terminal nickel binding domain.  
**pfam09341** (23) Transcription factor Pcc1.  
**pfam09377** (1) SBDS protein C-terminal domain.  
**pfam12838** (5) 4Fe-4S dicluster domain.  
**pfam13187** (1) 4Fe-4S dicluster domain.  
**pfam13229** (3) Right handed beta helix region.  
**pfam13370** (1) 4Fe-4S single cluster domain of Ferredoxin I. [4Fe-4S]  
**pfam13462** (8) Thioredoxin.  
**pfam13508** (1) Acetyltransferase (GNAT) domain.  
**pfam14535** (2) AMP-binding enzyme C-terminal domain.  
**pfam16116** (3) Domain of unknown function (DUF4832).  
**PRK00095** (1) DNA mismatch repair protein; Reviewed  
**PRK00398** (35) DNA-directed RNA polymerase subunit P; Provisional  
**PRK00912** (296) ribonuclease P protein component 3; Provisional  
**PRK00933** (11) ribosomal biogenesis protein; Validated  
**PRK03717** (241) ribonuclease P protein component 2; Provisional  
**PRK03892** (2) ribonuclease P protein component 3; Provisional  
**PRK03973** (59) 50S ribosomal protein L37Ae; Reviewed  
**PRK03983** (19) exosome complex exonuclease Rrp41; Provisional  
**PRK03996** (77) proteasome subunit alpha; Provisional  
**PRK04163** (19) exosome complex RNA-binding protein Rrp4; Provisional  
**PRK04243** (927) 50S ribosomal protein L15e; Validated  
**PRK04282** (19) exosome complex RNA-binding protein Rrp42; Provisional  
**PRK04460** (6) nickel responsive regulator; Provisional  
**PRK05399** (1) DNA mismatch repair protein MutS; Provisional  
**PRK05427** (1) putative manganese-dependent inorganic pyrophosphatase; Provisional  
**PRK05658** (1) RNA polymerase sigma factor RpoD; Validated  
**PRK08671** (2) methionine aminopeptidase; Provisional  
**PRK08762** (10) molybdopterin biosynthesis protein MoeB; Validated  
**PRK09343** (3) prefoldin subunit beta; Provisional  
**PRK10089** (2) tRNA-binding protein; Provisional  
**PRK10935** (2) nitrate/nitrite sensor protein NarQ; Provisional  
**PRK12277** (81) 50S ribosomal protein L13e; Provisional  
**PRK13760** (76) putative RNA-associated protein; Provisional  
**PRK14538** (1) putative bifunctional signaling protein/50S ribosomal protein L9; Provisional  
**PRK14555** (267) hypothetical protein; Provisional  
**PRK14887** (2) KEOPS complex Pcc1-like subunit; Provisional  
**PRK14960** (3) DNA polymerase III subunits gamma and tau; Provisional  
**PRK15005** (4) universal stress protein F; Provisional  
**smart00283** (6) Methyl-accepting chemotaxis-like domains (chemotaxis sensory transducer).  
**smart00382** (1) ATPases associated with a variety of cellular activities.  
**smart00387** (1) Histidine kinase-like ATPases.  
**smart00533** (2) DNA-binding domain of DNA mismatch repair MUTS family.  
**smart00534** (2) ATPase domain of DNA mismatch repair MUTS family.  
**smart00579** (3) The Brix domain is found in a number of eukaryotic proteins.  
**smart00948** (2) Proteasome subunit A N-terminal signature Add an annotation.  
**TIGR00072** (3) hydrogenase maturation protease.  
**TIGR00341** (1) TIGR00341 family protein. [Hypothetical proteins, Conserved]  
**TIGR00691** (1) (p)ppGpp synthetase, RelA/SpoT family. [Cellular processes, Adaptations to atypical conditions]  
**TIGR00697** (6) conserved hypothetical integral membrane protein. [Hypothetical proteins, Conserved]  
**TIGR02338** (13) prefoldin, beta subunit, archaeal.  
**TIGR02356** (16) thiazole biosynthesis adenylyltransferase ThiF, E. [Biosynthesis of cofactors, prosthetic groups, and carriers, Thiamine]  
**TIGR02689** (1) arsenate reductase, glutathione/glutaredoxin type. [Cellular processes, Detoxification]  
**TIGR03520** (1) gliding motility-associated protein GldE.  
**TIGR04283** (1) transferase 2, rSAM/selenodomain-associated. [Unknown function, Enzymes of unknown specificity]

#### 4.4 Multiple-sequence alignment

Each eL15-Euryarchaeota RNA is denoted by an abbreviation (like “Eco-1-1”) that refers to a taxonomy given in Section 4.1. The alignment may include sequences containing the RNA motif, as well as flanking sequence. The eL15-Euryarchaeota RNA itself is denoted by the line underneath marked 5' and 3' on either end. Nucleotides in flanking sequences (i.e., not part of the motif) are written in gray letters. Stems of predicted rho-independent transcription terminators, if any, are shaded yellow. (Note: terminator predictions have not been analyzed manually, and many are likely to be false positives. Terminator predictions are those of the RNIE software.) Nucleotides predicted to function (as DNA) as transcription-factor binding sites, if any, are shaded in green. (But note: these predictions are manually annotated, so they might be under-predicted.) Annotated start codons, if any, are shaded green. (Note: start codons are frequently misannotated, espe-

cially in environmental samples.) Nucleotides proposed to basepair as part of the consensus structure are shaded in color when they comprise Watson-Crick or G-U pairs. Otherwise they are shaded gray. Conserved stems are also indicated at the bottom of the alignment by angle brackets, where matching < and > denote base-paired columns. Below these angle brackets, the symbol “2” denotes base pairs exhibiting covariation according to the statistically well-founded R-scape method. “1” denotes base pairs exhibiting covariation according to R2R’s simplistic method. “0” denotes base pairs that are not observed to mutate and “?” denotes base pairs that have a significant frequency of non-canonical nucleotides for Watson-Crick or G-U pairs (> 5%). Below these base pair annotation is the consensus sequence: “R” = “A” or “G”, “Y” = “C” or “U”, red nucleotides: nucleotide identity conserved more than 97% of the time, black nucleotides: 90%, gray nucleotides: 75%,



red circle (◉): nucleotide is present 97% of the time, black circle (◐): 90%, gray circle (◑): 97% conserved) assume that sequences have been weighted by the GSC algorithm (◉): 75%, white circle (○): 50%. All percentages of sequences just described (e.g. implemented by the Infernal software package.

Duplicate sequences: the following putative homologs are not shown in the alignment because their sequences are identical to a homolog already shown: Hac-1-2, Hal-1-1, Hdi-1-1, Hdi-2-1, Hez-1-1, Hha-1-2, Hhi-1-1, Hhi-2-1, Hla-1-2, Hla-3-1, Hlu-1-1, Hme-1-2, Hpa-1-2, Hsa-3-1, Hsp-1-1, Hsp-4-1, Hsp-5-1, Hte-2-1, Hvo-1-1, Hwa-2-1, Mar-1-1, Mba-1-1, Mba-3-1, Mba-6-1, Mho-1-1, Mhu-1-1, Mma-3-10, Mma-3-11, Mma-3-12, Mma-3-13, Mma-3-14, Mma-3-15, Mma-3-16, Mma-3-17, Mma-3-18, Mma-3-19, Mma-3-2, Mma-3-20, Mma-3-21, Mma-3-22, Mma-3-23, Mma-3-24, Mma-3-25, Mma-3-26, Mma-3-27, Mma-3-28, Mma-3-29, Mma-3-3, Mma-3-30, Mma-3-31, Mma-3-32, Mma-3-33, Mma-3-34, Mma-3-35, Mma-3-36, Mma-3-37, Mma-3-38, Mma-3-39, Mma-3-4, Mma-3-40, Mma-3-41, Mma-3-42, Mma-3-43, Mma-3-44, Mma-3-45, Mma-3-46, Mma-3-47, Mma-3-48, Mma-3-49, Mma-3-5, Mma-3-50, Mma-3-51, Mma-3-52, Mma-3-53, Mma-3-54, Mma-3-55, Mma-3-56, Mma-3-6, Mma-3-7, Mma-3-8, Mma-3-9, Mma-4-1, Mma-5-1, Mma-6-1, Mma-7-1, Mma-8-1, Mma-9-1, Msm-1-1, Msm-10-1, Msm-11-1, Msm-12-1, Msm-13-1, Msm-15-1, Msm-17-1, Msm-18-1, Msm-19-1, Msm-2-1, Msm-20-1, Msm-21-1, Msm-22-1, Msm-23-1, Msm-3-1, Msm-5-1, Msm-7-1, Msm-8-1, Msm-9-1, Msp-10-1, Msp-11-1, Msp-12-1, Msp-15-1, Msp-6-1, Msp-8-1, Msp-9-1, Nal-1-1, Nsp-1-1, Nsp-2-1, Pfu-1-1, env-100, env-103, env-106, env-107, env-108, env-109, env-111, env-113, env-118, env-120, env-123, env-124, env-127, env-128, env-13, env-131, env-132, env-133, env-134, env-143, env-150, env-151, env-154, env-155, env-157, env-163, env-165, env-166, env-167, env-168, env-17, env-171, env-18, env-190, env-191, env-198, env-20, env-200, env-204, env-205, env-209, env-21, env-211, env-222, env-225, env-24, env-240, env-241, env-242, env-252, env-257, env-258, env-259, env-26, env-260, env-261, env-263, env-264, env-265, env-272, env-275, env-279, env-280, env-282, env-285, env-288, env-292, env-294, env-300, env-303, env-305, env-306, env-307, env-313, env-314, env-315, env-316, env-320, env-335, env-337, env-340, env-342, env-343, env-345, env-346, env-347, env-350, env-351, env-352, env-355, env-357, env-36, env-361, env-368, env-37, env-372, env-373, env-374, env-38, env-389, env-391, env-393, env-394, env-395, env-396, env-397, env-398, env-399, env-4, env-400, env-401, env-403, env-404, env-405, env-407, env-409, env-41, env-411, env-415, env-417, env-419, env-421, env-423, env-426, env-430, env-431, env-434, env-435, env-436, env-437, env-44, env-445, env-448, env-451, env-452, env-456, env-458, env-459, env-46, env-464, env-468, env-470, env-471, env-478, env-482, env-483, env-493, env-494, env-498, env-501, env-504, env-510, env-518, env-519, env-520, env-521, env-523, env-524, env-526, env-527, env-533, env-54, env-548, env-549, env-550, env-551, env-554, env-555, env-556, env-557, env-558, env-56, env-562, env-566, env-569, env-572, env-573, env-58, env-582, env-583, env-584, env-586, env-59, env-592, env-593, env-60, env-600, env-601, env-614, env-615, env-618, env-62, env-626, env-627, env-632, env-648, env-649, env-652, env-653, env-654, env-655, env-662, env-666, env-667, env-668, env-669, env-677, env-678, env-68, env-687, env-688, env-689, env-69, env-690, env-691, env-692, env-693, env-694, env-703, env-705, env-71, env-711, env-712, env-713, env-72, env-75, env-76, env-8, env-81, env-82, env-85, env-88, env-96, env-97, har-1-1

alignment positions 1 ... 180

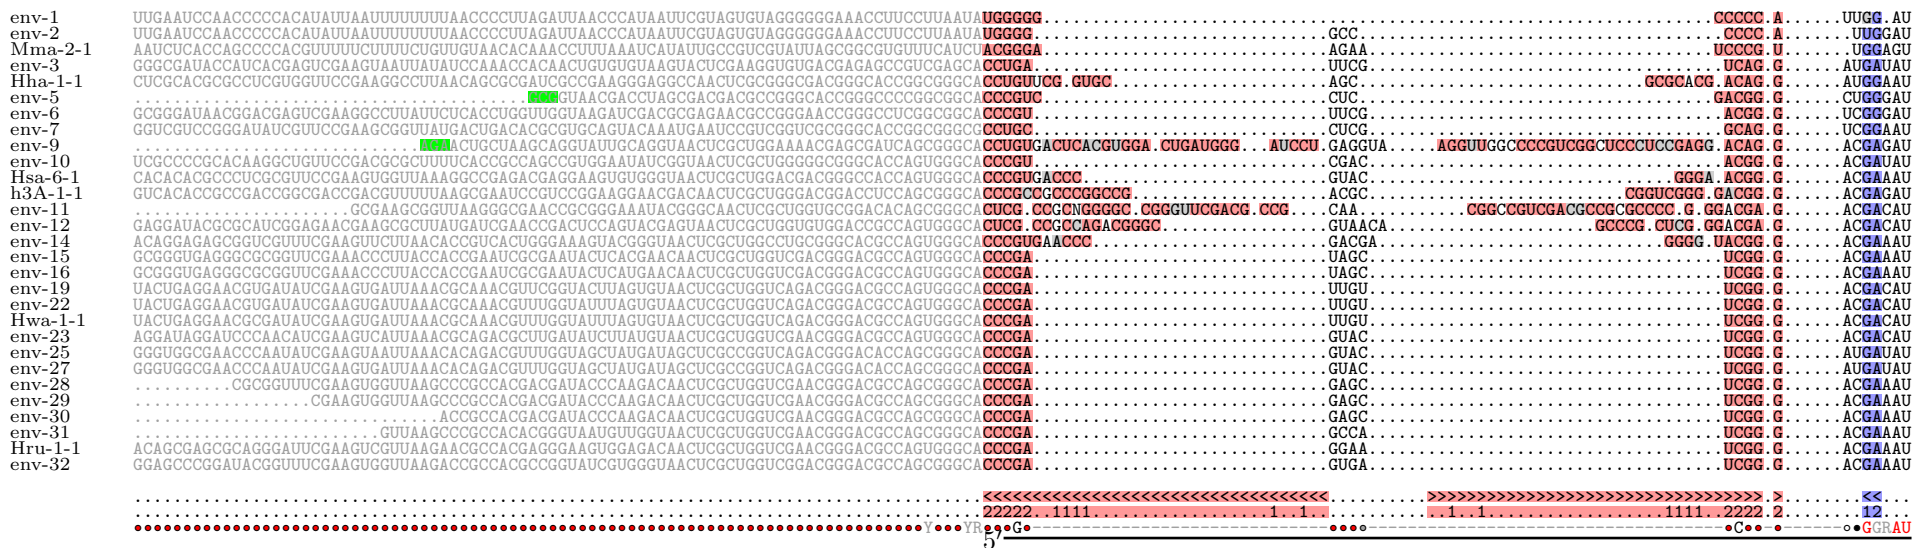



























































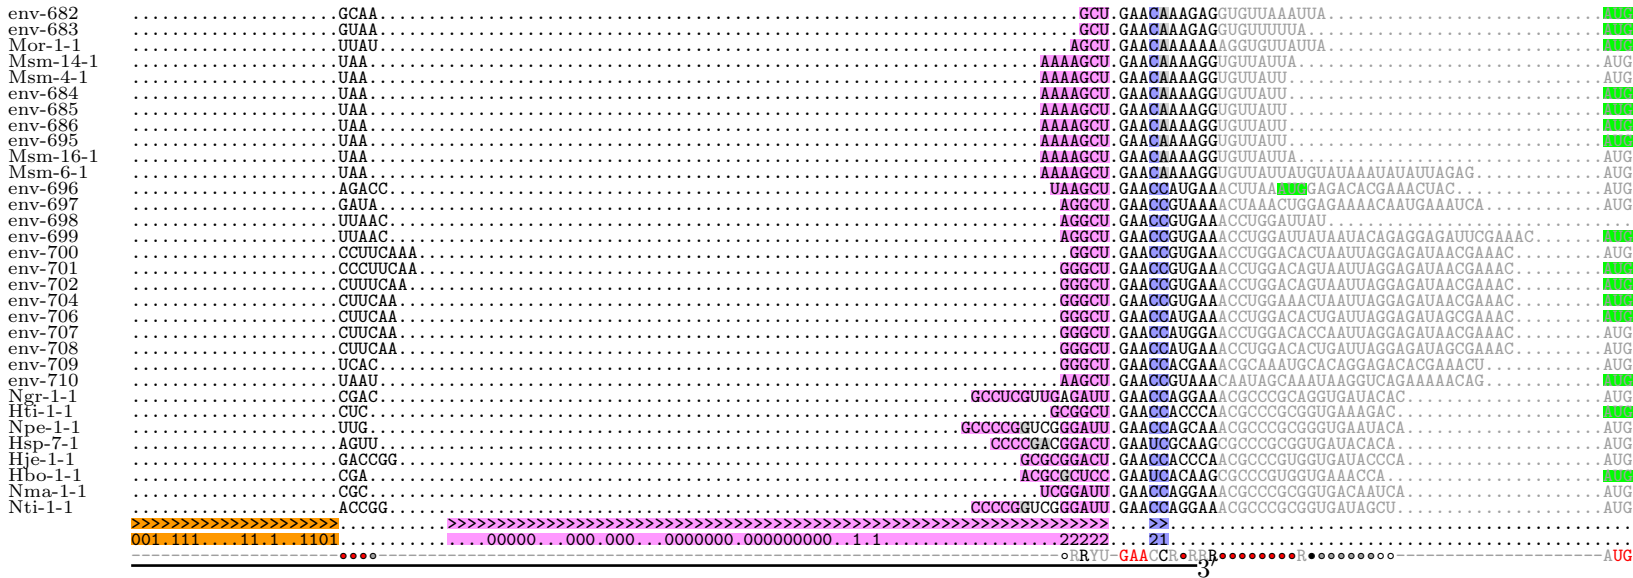

## 5 L17-Actino-Proteobacteria

### 5.1 Taxa

The taxonomy of each organism containing a putative L17-Actino-Proteobacteria RNA is listed, with abbreviations identifying each hit (e.g., “Eco-1-1” and “Eco-1-2” might hypothetically represent two distinct RNAs in *E.*

*coli*). The abbreviations will be used to identify each individual L17-Actino-Proteobacteria RNA in Sections 5.3 and 5.5.

#### abbrev. of hits

#### taxonomy of species

|                    |                                                                                                                                               |
|--------------------|-----------------------------------------------------------------------------------------------------------------------------------------------|
| Aal-1-1            | Bacteria Actinobacteria Actinobacteridae Actinomycetales Propionibacterineae Nocardioideaceae <i>Actinopolymorpha alba</i> DSM 45243          |
| Tbi-1-1            | Bacteria Actinobacteria Actinobacteridae Actinomycetales Pseudonocardineae Pseudonocardiaceae <i>Thermobispora bispora</i> DSM 43833          |
| Sac-1-1            | Bacteria Actinobacteria Actinobacteridae Actinomycetales Streptomycineae Streptomycetaceae <i>Streptomyces acidiscabies</i> 84-104            |
| Saf-1-1            | Bacteria Actinobacteria Actinobacteridae Actinomycetales Streptomycineae Streptomycetaceae <i>Streptomyces afghaniensis</i> 772               |
| Sal-1-1            | Bacteria Actinobacteria Actinobacteridae Actinomycetales Streptomycineae Streptomycetaceae <i>Streptomyces albulus</i> CCRC 11814             |
| Sal-2-1            | Bacteria Actinobacteria Actinobacteridae Actinomycetales Streptomycineae Streptomycetaceae <i>Streptomyces albus</i> J1074                    |
| Sau-1-1            | Bacteria Actinobacteria Actinobacteridae Actinomycetales Streptomycineae Streptomycetaceae <i>Streptomyces aurantiacus</i> JA 4570            |
| Sau-2-1            | Bacteria Actinobacteria Actinobacteridae Actinomycetales Streptomycineae Streptomycetaceae <i>Streptomyces auratus</i> AGR0001                |
| Sav-1-1            | Bacteria Actinobacteria Actinobacteridae Actinomycetales Streptomycineae Streptomycetaceae <i>Streptomyces avermitilis</i> MA-4680            |
| Sbi-1-1            | Bacteria Actinobacteria Actinobacteridae Actinomycetales Streptomycineae Streptomycetaceae <i>Streptomyces bingchenggensis</i> BCW-1          |
| Sbo-1-1 to Sbo-1-2 | Bacteria Actinobacteria Actinobacteridae Actinomycetales Streptomycineae Streptomycetaceae <i>Streptomyces bottropensis</i> ATCC 25435        |
| Sca-1-1            | Bacteria Actinobacteria Actinobacteridae Actinomycetales Streptomycineae Streptomycetaceae <i>Streptomyces canus</i> 299MFChir4.1             |
| Sca-2-1 to Sca-2-2 | Bacteria Actinobacteria Actinobacteridae Actinomycetales Streptomycineae Streptomycetaceae <i>Streptomyces cattleya</i> NRRL 8057 = DSM 46488 |
| Sch-1-1            | Bacteria Actinobacteria Actinobacteridae Actinomycetales Streptomycineae Streptomycetaceae <i>Streptomyces chartreusis</i> NRRL 12338         |
| Scl-1-1 to Scl-1-2 | Bacteria Actinobacteria Actinobacteridae Actinomycetales Streptomycineae Streptomycetaceae <i>Streptomyces clavuligerus</i> ATCC 27064        |
| Sco-1-1            | Bacteria Actinobacteria Actinobacteridae Actinomycetales Streptomycineae Streptomycetaceae <i>Streptomyces coelicoflavus</i> ZG0656           |
| Sco-2-1            | Bacteria Actinobacteria Actinobacteridae Actinomycetales Streptomycineae Streptomycetaceae <i>Streptomyces coelicolor</i> A3(2)               |
| Sco-3-1            | Bacteria Actinobacteria Actinobacteridae Actinomycetales Streptomycineae Streptomycetaceae <i>Streptomyces collinus</i> Tu 365                |
| Sda-1-1            | Bacteria Actinobacteria Actinobacteridae Actinomycetales Streptomycineae Streptomycetaceae <i>Streptomyces davawensis</i> JCM 4913            |
| Sfi-1-1            | Bacteria Actinobacteria Actinobacteridae Actinomycetales Streptomycineae Streptomycetaceae <i>Streptomyces flavogriseus</i> ATCC 33331        |
| Sfu-1-1            | Bacteria Actinobacteria Actinobacteridae Actinomycetales Streptomycineae Streptomycetaceae <i>Streptomyces fulvissimus</i> DSM 40593          |

|                      |          |                |                  |                 |                 |                   |                                                                       |
|----------------------|----------|----------------|------------------|-----------------|-----------------|-------------------|-----------------------------------------------------------------------|
| Sga-1-1              | Bacteria | Actinobacteria | Actinobacteridae | Actinomycetales | Streptomycineae | Streptomycetaceae | <i>Streptomyces gancidicus</i> BKS 13-15                              |
| Sgh-1-1              | Bacteria | Actinobacteria | Actinobacteridae | Actinomycetales | Streptomycineae | Streptomycetaceae | <i>Streptomyces ghanaensis</i> ATCC 14672                             |
| Sgl-1-1              | Bacteria | Actinobacteria | Actinobacteridae | Actinomycetales | Streptomycineae | Streptomycetaceae | <i>Streptomyces globisporus</i> C-1027                                |
| Sgr-1-1              | Bacteria | Actinobacteria | Actinobacteridae | Actinomycetales | Streptomycineae | Streptomycetaceae | <i>Streptomyces griseoaurantiacus</i> M045                            |
| Sgr-2-1              | Bacteria | Actinobacteria | Actinobacteridae | Actinomycetales | Streptomycineae | Streptomycetaceae | <i>Streptomyces griseoflavus</i> Tu4000                               |
| Sgr-4-1              | Bacteria | Actinobacteria | Actinobacteridae | Actinomycetales | Streptomycineae | Streptomycetaceae | <i>Streptomyces griseus</i> subsp. <i>griseus</i> NBRC 13350          |
| Sgr-3-1              | Bacteria | Actinobacteria | Actinobacteridae | Actinomycetales | Streptomycineae | Streptomycetaceae | <i>Streptomyces griseus</i> XylebKG-1                                 |
| Shy-1-1              | Bacteria | Actinobacteria | Actinobacteridae | Actinomycetales | Streptomycineae | Streptomycetaceae | <i>Streptomyces hygrosopicus</i> ATCC 53653                           |
| Shy-2-1              | Bacteria | Actinobacteria | Actinobacteridae | Actinomycetales | Streptomycineae | Streptomycetaceae | <i>Streptomyces hygrosopicus</i> subsp. <i>jinggangensis</i> 5008     |
| Shy-3-1              | Bacteria | Actinobacteria | Actinobacteridae | Actinomycetales | Streptomycineae | Streptomycetaceae | <i>Streptomyces hygrosopicus</i> subsp. <i>jinggangensis</i> TL01     |
| Sip-1-1              | Bacteria | Actinobacteria | Actinobacteridae | Actinomycetales | Streptomycineae | Streptomycetaceae | <i>Streptomyces ipomoeae</i> 91-03                                    |
| Sli-1-1              | Bacteria | Actinobacteria | Actinobacteridae | Actinomycetales | Streptomycineae | Streptomycetaceae | <i>Streptomyces lividans</i> 1326                                     |
| Sli-2-1 to Sli-2-2   | Bacteria | Actinobacteria | Actinobacteridae | Actinomycetales | Streptomycineae | Streptomycetaceae | <i>Streptomyces lividans</i> TK24                                     |
| Smo-1-1              | Bacteria | Actinobacteria | Actinobacteridae | Actinomycetales | Streptomycineae | Streptomycetaceae | <i>Streptomyces mobaraensis</i> NBRC 13819 = DSM 40847                |
| Sni-1-1              | Bacteria | Actinobacteria | Actinobacteridae | Actinomycetales | Streptomycineae | Streptomycetaceae | <i>Streptomyces niveus</i> NCIMB 11891                                |
| Spr-1-1              | Bacteria | Actinobacteria | Actinobacteridae | Actinomycetales | Streptomycineae | Streptomycetaceae | <i>Streptomyces pristinaespiralis</i> ATCC 25486                      |
| Spr-2-1              | Bacteria | Actinobacteria | Actinobacteridae | Actinomycetales | Streptomycineae | Streptomycetaceae | <i>Streptomyces prunicolor</i> NBRC 13075                             |
| Spu-1-1              | Bacteria | Actinobacteria | Actinobacteridae | Actinomycetales | Streptomycineae | Streptomycetaceae | <i>Streptomyces purpureus</i> KA281                                   |
| Sri-1-1              | Bacteria | Actinobacteria | Actinobacteridae | Actinomycetales | Streptomycineae | Streptomycetaceae | <i>Streptomyces rimosus</i> subsp. <i>rimosus</i> ATCC 10970          |
| Sro-1-1              | Bacteria | Actinobacteria | Actinobacteridae | Actinomycetales | Streptomycineae | Streptomycetaceae | <i>Streptomyces roseochromogenes</i> subsp. <i>oscitans</i> DS 12.976 |
| Sro-2-1              | Bacteria | Actinobacteria | Actinobacteridae | Actinomycetales | Streptomycineae | Streptomycetaceae | <i>Streptomyces roseosporus</i> NRRL 15998                            |
| Ssc-1-1              | Bacteria | Actinobacteria | Actinobacteridae | Actinomycetales | Streptomycineae | Streptomycetaceae | <i>Streptomyces scabiei</i> 87.22                                     |
| Ssc-2-1              | Bacteria | Actinobacteria | Actinobacteridae | Actinomycetales | Streptomycineae | Streptomycetaceae | <i>Streptomyces scabrisporus</i> DSM 41855                            |
| Sso-1-1              | Bacteria | Actinobacteria | Actinobacteridae | Actinomycetales | Streptomycineae | Streptomycetaceae | <i>Streptomyces somaliensis</i> DSM 40738                             |
| Ssp-1-1              | Bacteria | Actinobacteria | Actinobacteridae | Actinomycetales | Streptomycineae | Streptomycetaceae | <i>Streptomyces</i> sp. 303MFC05.2                                    |
| Ssp-2-1              | Bacteria | Actinobacteria | Actinobacteridae | Actinomycetales | Streptomycineae | Streptomycetaceae | <i>Streptomyces</i> sp. 351MFTsu5.1                                   |
| Ssp-3-1              | Bacteria | Actinobacteria | Actinobacteridae | Actinomycetales | Streptomycineae | Streptomycetaceae | <i>Streptomyces</i> sp. AA0539                                        |
| Ssp-4-1              | Bacteria | Actinobacteria | Actinobacteridae | Actinomycetales | Streptomycineae | Streptomycetaceae | <i>Streptomyces</i> sp. AA1529                                        |
| Ssp-6-1              | Bacteria | Actinobacteria | Actinobacteridae | Actinomycetales | Streptomycineae | Streptomycetaceae | <i>Streptomyces</i> sp. Amel2xE9                                      |
| Ssp-5-1              | Bacteria | Actinobacteria | Actinobacteridae | Actinomycetales | Streptomycineae | Streptomycetaceae | <i>Streptomyces</i> sp. ATexAB-D23                                    |
| Ssp-7-1              | Bacteria | Actinobacteria | Actinobacteridae | Actinomycetales | Streptomycineae | Streptomycetaceae | <i>Streptomyces</i> sp. BoleA5                                        |
| Ssp-8-1              | Bacteria | Actinobacteria | Actinobacteridae | Actinomycetales | Streptomycineae | Streptomycetaceae | <i>Streptomyces</i> sp. C                                             |
| Ssp-17-1             | Bacteria | Actinobacteria | Actinobacteridae | Actinomycetales | Streptomycineae | Streptomycetaceae | <i>Streptomyces</i> sp. CcalMP-8W                                     |
| Ssp-9-1              | Bacteria | Actinobacteria | Actinobacteridae | Actinomycetales | Streptomycineae | Streptomycetaceae | <i>Streptomyces</i> sp. CNB091                                        |
| Ssp-10-1             | Bacteria | Actinobacteria | Actinobacteridae | Actinomycetales | Streptomycineae | Streptomycetaceae | <i>Streptomyces</i> sp. CNQ766                                        |
| Ssp-11-1             | Bacteria | Actinobacteria | Actinobacteridae | Actinomycetales | Streptomycineae | Streptomycetaceae | <i>Streptomyces</i> sp. CNS335                                        |
| Ssp-12-1             | Bacteria | Actinobacteria | Actinobacteridae | Actinomycetales | Streptomycineae | Streptomycetaceae | <i>Streptomyces</i> sp. CNS615                                        |
| Ssp-13-1             | Bacteria | Actinobacteria | Actinobacteridae | Actinomycetales | Streptomycineae | Streptomycetaceae | <i>Streptomyces</i> sp. CNT302                                        |
| Ssp-14-1             | Bacteria | Actinobacteria | Actinobacteridae | Actinomycetales | Streptomycineae | Streptomycetaceae | <i>Streptomyces</i> sp. CNT372                                        |
| Ssp-15-1             | Bacteria | Actinobacteria | Actinobacteridae | Actinomycetales | Streptomycineae | Streptomycetaceae | <i>Streptomyces</i> sp. CNY228                                        |
| Ssp-16-1             | Bacteria | Actinobacteria | Actinobacteridae | Actinomycetales | Streptomycineae | Streptomycetaceae | <i>Streptomyces</i> sp. CNY243                                        |
| Ssp-18-1             | Bacteria | Actinobacteria | Actinobacteridae | Actinomycetales | Streptomycineae | Streptomycetaceae | <i>Streptomyces</i> sp. DvalAA-83                                     |
| Ssp-49-1             | Bacteria | Actinobacteria | Actinobacteridae | Actinomycetales | Streptomycineae | Streptomycetaceae | <i>Streptomyces</i> sp. e14                                           |
| Ssp-19-1             | Bacteria | Actinobacteria | Actinobacteridae | Actinomycetales | Streptomycineae | Streptomycetaceae | <i>Streptomyces</i> sp. FxanaC1                                       |
| Ssp-20-1             | Bacteria | Actinobacteria | Actinobacteridae | Actinomycetales | Streptomycineae | Streptomycetaceae | <i>Streptomyces</i> sp. FxanaD5                                       |
| Ssp-21-1             | Bacteria | Actinobacteria | Actinobacteridae | Actinomycetales | Streptomycineae | Streptomycetaceae | <i>Streptomyces</i> sp. GBA 94-10                                     |
| Ssp-22-1             | Bacteria | Actinobacteria | Actinobacteridae | Actinomycetales | Streptomycineae | Streptomycetaceae | <i>Streptomyces</i> sp. HCCB10043                                     |
| Ssp-23-1             | Bacteria | Actinobacteria | Actinobacteridae | Actinomycetales | Streptomycineae | Streptomycetaceae | <i>Streptomyces</i> sp. HGB0020                                       |
| Ssp-25-1             | Bacteria | Actinobacteria | Actinobacteridae | Actinomycetales | Streptomycineae | Streptomycetaceae | <i>Streptomyces</i> sp. HmicA12                                       |
| Ssp-24-1             | Bacteria | Actinobacteria | Actinobacteridae | Actinomycetales | Streptomycineae | Streptomycetaceae | <i>Streptomyces</i> sp. HPH0547                                       |
| Ssp-26-1             | Bacteria | Actinobacteria | Actinobacteridae | Actinomycetales | Streptomycineae | Streptomycetaceae | <i>Streptomyces</i> sp. KhCrAH-244                                    |
| Ssp-27-1             | Bacteria | Actinobacteria | Actinobacteridae | Actinomycetales | Streptomycineae | Streptomycetaceae | <i>Streptomyces</i> sp. KhCrAH-340                                    |
| Ssp-28-1             | Bacteria | Actinobacteria | Actinobacteridae | Actinomycetales | Streptomycineae | Streptomycetaceae | <i>Streptomyces</i> sp. LaPpAH-108                                    |
| Ssp-29-1             | Bacteria | Actinobacteria | Actinobacteridae | Actinomycetales | Streptomycineae | Streptomycetaceae | <i>Streptomyces</i> sp. LaPpAH-165                                    |
| Ssp-30-1             | Bacteria | Actinobacteria | Actinobacteridae | Actinomycetales | Streptomycineae | Streptomycetaceae | <i>Streptomyces</i> sp. LaPpAH-202                                    |
| Ssp-31-1             | Bacteria | Actinobacteria | Actinobacteridae | Actinomycetales | Streptomycineae | Streptomycetaceae | <i>Streptomyces</i> sp. LaPpAH-95                                     |
| Ssp-32-1 to Ssp-32-2 | Bacteria | Actinobacteria | Actinobacteridae | Actinomycetales | Streptomycineae | Streptomycetaceae | <i>Streptomyces</i> sp. Mg1                                           |
| Ssp-33-1             | Bacteria | Actinobacteria | Actinobacteridae | Actinomycetales | Streptomycineae | Streptomycetaceae | <i>Streptomyces</i> sp. MspMP-M5                                      |
| Ssp-34-1             | Bacteria | Actinobacteria | Actinobacteridae | Actinomycetales | Streptomycineae | Streptomycetaceae | <i>Streptomyces</i> sp. PAMC26508                                     |
| Ssp-36-1             | Bacteria | Actinobacteria | Actinobacteridae | Actinomycetales | Streptomycineae | Streptomycetaceae | <i>Streptomyces</i> sp. PsTaAH-124                                    |
| Ssp-35-1             | Bacteria | Actinobacteria | Actinobacteridae | Actinomycetales | Streptomycineae | Streptomycetaceae | <i>Streptomyces</i> sp. PVA 94-07                                     |
| Ssp-37-1             | Bacteria | Actinobacteria | Actinobacteridae | Actinomycetales | Streptomycineae | Streptomycetaceae | <i>Streptomyces</i> sp. R1-NS-10                                      |
| Ssp-38-1             | Bacteria | Actinobacteria | Actinobacteridae | Actinomycetales | Streptomycineae | Streptomycetaceae | <i>Streptomyces</i> sp. S4                                            |
| Ssp-39-1             | Bacteria | Actinobacteria | Actinobacteridae | Actinomycetales | Streptomycineae | Streptomycetaceae | <i>Streptomyces</i> sp. SA3_actF                                      |
| Ssp-40-1             | Bacteria | Actinobacteria | Actinobacteridae | Actinomycetales | Streptomycineae | Streptomycetaceae | <i>Streptomyces</i> sp. SA3_actG                                      |

|                      |          |                   |                   |                   |                                                                                             |                      |                                                 |
|----------------------|----------|-------------------|-------------------|-------------------|---------------------------------------------------------------------------------------------|----------------------|-------------------------------------------------|
| Ssp-44-1             | Bacteria | Actinobacteria    | Actinobacteridae  | Actinomycetales   | Streptomycineae                                                                             | Streptomycetaceae    | <i>Streptomyces</i> sp. ScaeMP-e10              |
| Ssp-45-1             | Bacteria | Actinobacteria    | Actinobacteridae  | Actinomycetales   | Streptomycineae                                                                             | Streptomycetaceae    | <i>Streptomyces</i> sp. SirexAA-E               |
| Ssp-41-1             | Bacteria | Actinobacteria    | Actinobacteridae  | Actinomycetales   | Streptomycineae                                                                             | Streptomycetaceae    | <i>Streptomyces</i> sp. SPB74                   |
| Ssp-42-1             | Bacteria | Actinobacteria    | Actinobacteridae  | Actinomycetales   | Streptomycineae                                                                             | Streptomycetaceae    | <i>Streptomyces</i> sp. SPB78                   |
| Ssp-43-1             | Bacteria | Actinobacteria    | Actinobacteridae  | Actinomycetales   | Streptomycineae                                                                             | Streptomycetaceae    | <i>Streptomyces</i> sp. SS                      |
| Ssp-46-1             | Bacteria | Actinobacteria    | Actinobacteridae  | Actinomycetales   | Streptomycineae                                                                             | Streptomycetaceae    | <i>Streptomyces</i> sp. TOR3209                 |
| Ssp-47-1             | Bacteria | Actinobacteria    | Actinobacteridae  | Actinomycetales   | Streptomycineae                                                                             | Streptomycetaceae    | <i>Streptomyces</i> sp. Tu6071                  |
| Ssp-48-1             | Bacteria | Actinobacteria    | Actinobacteridae  | Actinomycetales   | Streptomycineae                                                                             | Streptomycetaceae    | <i>Streptomyces</i> sp. W007                    |
| Ssu-1-1              | Bacteria | Actinobacteria    | Actinobacteridae  | Actinomycetales   | Streptomycineae                                                                             | Streptomycetaceae    | <i>Streptomyces sulphureus</i> DSM 40104        |
| Ssu-2-1              | Bacteria | Actinobacteria    | Actinobacteridae  | Actinomycetales   | Streptomycineae                                                                             | Streptomycetaceae    | <i>Streptomyces sulphureus</i> L180             |
| Ssv-1-1              | Bacteria | Actinobacteria    | Actinobacteridae  | Actinomycetales   | Streptomycineae                                                                             | Streptomycetaceae    | <i>Streptomyces sviceus</i> ATCC 29083          |
| Sts-1-1              | Bacteria | Actinobacteria    | Actinobacteridae  | Actinomycetales   | Streptomycineae                                                                             | Streptomycetaceae    | <i>Streptomyces tsukubaensis</i> NRRL18488      |
| Stu-1-1              | Bacteria | Actinobacteria    | Actinobacteridae  | Actinomycetales   | Streptomycineae                                                                             | Streptomycetaceae    | <i>Streptomyces turgidiscabies</i> Car8         |
| Sve-1-1              | Bacteria | Actinobacteria    | Actinobacteridae  | Actinomycetales   | Streptomycineae                                                                             | Streptomycetaceae    | <i>Streptomyces venezuelae</i> ATCC 10712       |
| Svi-1-1              | Bacteria | Actinobacteria    | Actinobacteridae  | Actinomycetales   | Streptomycineae                                                                             | Streptomycetaceae    | <i>Streptomyces violaceusniger</i> SPC6         |
| Svi-2-1              | Bacteria | Actinobacteria    | Actinobacteridae  | Actinomycetales   | Streptomycineae                                                                             | Streptomycetaceae    | <i>Streptomyces violaceusniger</i> Tu 4113      |
| Svi-3-1              | Bacteria | Actinobacteria    | Actinobacteridae  | Actinomycetales   | Streptomycineae                                                                             | Streptomycetaceae    | <i>Streptomyces viridochromogenes</i> DSM 40736 |
| Svi-4-1              | Bacteria | Actinobacteria    | Actinobacteridae  | Actinomycetales   | Streptomycineae                                                                             | Streptomycetaceae    | <i>Streptomyces viridochromogenes</i> Tue57     |
| Svi-5-1              | Bacteria | Actinobacteria    | Actinobacteridae  | Actinomycetales   | Streptomycineae                                                                             | Streptomycetaceae    | <i>Streptomyces viridosporus</i> T7A            |
| Svi-6-1              | Bacteria | Actinobacteria    | Actinobacteridae  | Actinomycetales   | Streptomycineae                                                                             | Streptomycetaceae    | <i>Streptomyces vitaminophilus</i> DSM 41686    |
| Szi-1-1              | Bacteria | Actinobacteria    | Actinobacteridae  | Actinomycetales   | Streptomycineae                                                                             | Streptomycetaceae    | <i>Streptomyces zinciresistens</i> K42          |
| Sba-1-1              | Bacteria | Actinobacteria    | Actinobacteridae  | Actinomycetales   | Streptomycineae                                                                             | Streptomycetaceae    | <i>Streptomyces bacterium</i> MP113-05          |
| Nco-1-1              | Bacteria | Actinobacteria    | Actinobacteridae  | Actinomycetales   | Streptosporangineae                                                                         | Streptosporangiaceae | <i>Nonomuraea coxensis</i> DSM 45129            |
| Sro-3-1              | Bacteria | Actinobacteria    | Actinobacteridae  | Actinomycetales   | Streptosporangineae                                                                         | Streptosporangiaceae | <i>Streptosporangium roseum</i> DSM 43021       |
| Aat-1-1              | Bacteria | Actinobacteria    | Actinobacteridae  | Actinomycetales   | Streptosporangineae                                                                         | Thermomonosporaceae  | <i>Actinomadura atramentaria</i> DSM 43919      |
| Afl-1-1              | Bacteria | Actinobacteria    | Actinobacteridae  | Actinomycetales   | Streptosporangineae                                                                         | Thermomonosporaceae  | <i>Actinomadura flavalba</i> DSM 45200          |
| Aac-1-1              | Bacteria | Actinobacteria    | Catenulisporales  | Actinospicaceae   | <i>Actinospica acidiphila</i>                                                               |                      |                                                 |
| Nal-1-1              | Bacteria | Actinobacteriales | Nocardioideae     | Nocardioideae     | <i>Nocardioides alkalitolerans</i>                                                          | DSM 16699            |                                                 |
| Nha-1-1              | Bacteria | Actinobacteriales | Nocardioideae     | Nocardioideae     | <i>Nocardioides halotolerans</i>                                                            | DSM 19273            |                                                 |
| Nin-1-1              | Bacteria | Actinobacteriales | Nocardioideae     | Nocardioideae     | <i>Nocardioides insulae</i>                                                                 | DSM 17944            |                                                 |
| Nlu-1-1              | Bacteria | Actinobacteriales | Nocardioideae     | Nocardioideae     | <i>Nocardioides luteus</i>                                                                  |                      |                                                 |
| Nsp-1-1              | Bacteria | Actinobacteriales | Nocardioideae     | Nocardioideae     | <i>Nocardioides</i> sp. J54                                                                 |                      |                                                 |
| Nsp-2-1              | Bacteria | Actinobacteriales | Nocardioideae     | Nocardioideae     | <i>Nocardioides</i> sp. URHA0020                                                            |                      |                                                 |
| Nsp-3-1              | Bacteria | Actinobacteriales | Nocardioideae     | Nocardioideae     | <i>Nocardioides</i> sp. URHA0032                                                            |                      |                                                 |
| Psi-1-1              | Bacteria | Actinobacteriales | Nocardioideae     | Nocardioideae     | <i>Pimelobacter simplex</i>                                                                 |                      |                                                 |
| Ssp-50-1             | Bacteria | Actinobacteria    | Pseudonocardiales | Pseudonocardiaeae | <i>Saccharothrix</i> sp. ST-888                                                             |                      |                                                 |
| Kau-1-1 to Kau-1-2   | Bacteria | Actinobacteria    | Streptomycetales  | Streptomycetaceae | <i>Kitasatospora aureofaciens</i>                                                           |                      |                                                 |
| Kaz-1-1              | Bacteria | Actinobacteria    | Streptomycetales  | Streptomycetaceae | <i>Kitasatospora azatica</i>                                                                | KCTC 9699            |                                                 |
| Kme-1-1              | Bacteria | Actinobacteria    | Streptomycetales  | Streptomycetaceae | <i>Kitasatospora mediocidica</i>                                                            | KCTC 9733            |                                                 |
| Kph-1-1 to Kph-1-2   | Bacteria | Actinobacteria    | Streptomycetales  | Streptomycetaceae | <i>Kitasatospora phosalacinea</i>                                                           |                      |                                                 |
| Kpu-1-1              | Bacteria | Actinobacteria    | Streptomycetales  | Streptomycetaceae | <i>Kitasatospora purpeofusca</i>                                                            |                      |                                                 |
| Ksp-1-1              | Bacteria | Actinobacteria    | Streptomycetales  | Streptomycetaceae | <i>Kitasatospora</i> sp. MBT63                                                              |                      |                                                 |
| Ksp-2-1              | Bacteria | Actinobacteria    | Streptomycetales  | Streptomycetaceae | <i>Kitasatospora</i> sp. MBT66                                                              |                      |                                                 |
| Ksp-3-1              | Bacteria | Actinobacteria    | Streptomycetales  | Streptomycetaceae | <i>Kitasatospora</i> sp. MY 5-36                                                            |                      |                                                 |
| Ksp-4-1              | Bacteria | Actinobacteria    | Streptomycetales  | Streptomycetaceae | <i>Kitasatospora</i> sp. NRRL B-11411                                                       |                      |                                                 |
| Sal-3-1              | Bacteria | Actinobacteria    | Streptomycetales  | Streptomycetaceae | <i>Streptacidiphilus albus</i>                                                              |                      |                                                 |
| Sal-4-1              | Bacteria | Actinobacteria    | Streptomycetales  | Streptomycetaceae | <i>Streptacidiphilus albus</i>                                                              | JL83                 |                                                 |
| Sca-3-1              | Bacteria | Actinobacteria    | Streptomycetales  | Streptomycetaceae | <i>Streptacidiphilus carbonis</i>                                                           |                      |                                                 |
| Sje-1-1              | Bacteria | Actinobacteria    | Streptomycetales  | Streptomycetaceae | <i>Streptacidiphilus jeojiense</i>                                                          |                      |                                                 |
| Sor-1-1              | Bacteria | Actinobacteria    | Streptomycetales  | Streptomycetaceae | <i>Streptacidiphilus oryzae</i>                                                             | TH49                 |                                                 |
| [pa-1-1              | Bacteria | Actinobacteria    | Streptomycetales  | Streptomycetaceae | <i>Streptomyces</i> [Kitasatospora] papulosa                                                |                      |                                                 |
| Asp-1-1              | Bacteria | Actinobacteria    | Streptomycetales  | Streptomycetaceae | <i>Streptomyces Actinosporangium</i> sp. NRRL B-3428                                        |                      |                                                 |
| Sac-2-1              | Bacteria | Actinobacteria    | Streptomycetales  | Streptomycetaceae | <i>Streptomyces achromogenes</i> subsp. <i>achromogenes</i>                                 |                      |                                                 |
| Sac-3-1              | Bacteria | Actinobacteria    | Streptomycetales  | Streptomycetaceae | <i>Streptomyces acidiscabies</i>                                                            |                      |                                                 |
| Sah-1-1              | Bacteria | Actinobacteria    | Streptomycetales  | Streptomycetaceae | <i>Streptomyces ahyyroscopicus</i> subsp. <i>wuyiensis</i>                                  |                      |                                                 |
| Sal-5-1              | Bacteria | Actinobacteria    | Streptomycetales  | Streptomycetaceae | <i>Streptomyces</i> <i>Streptomyces</i> albidoflavus group <i>Streptomyces albidoflavus</i> |                      |                                                 |
| Sal-6-1              | Bacteria | Actinobacteria    | Streptomycetales  | Streptomycetaceae | <i>Streptomyces alboflavus</i>                                                              |                      |                                                 |
| Sal-7-1              | Bacteria | Actinobacteria    | Streptomycetales  | Streptomycetaceae | <i>Streptomyces albovidis</i>                                                               |                      |                                                 |
| Sal-8-1              | Bacteria | Actinobacteria    | Streptomycetales  | Streptomycetaceae | <i>Streptomyces albulus</i>                                                                 |                      |                                                 |
| Sal-9-1              | Bacteria | Actinobacteria    | Streptomycetales  | Streptomycetaceae | <i>Streptomyces albulus</i> PD-1                                                            |                      |                                                 |
| Sal-10-1             | Bacteria | Actinobacteria    | Streptomycetales  | Streptomycetaceae | <i>Streptomyces albulus</i> ZPM                                                             |                      |                                                 |
| Sal-11-1             | Bacteria | Actinobacteria    | Streptomycetales  | Streptomycetaceae | <i>Streptomyces albus</i>                                                                   |                      |                                                 |
| Sal-12-1 to Sal-12-5 | Bacteria | Actinobacteria    | Streptomycetales  | Streptomycetaceae | <i>Streptomyces albus</i> subsp. <i>albus</i>                                               |                      |                                                 |
| Sam-1-1              | Bacteria | Actinobacteria    | Streptomycetales  | Streptomycetaceae | <i>Streptomyces ambofaciens</i>                                                             | ATCC 23877           |                                                 |
| San-1-1              | Bacteria | Actinobacteria    | Streptomycetales  | Streptomycetaceae | <i>Streptomyces antibioticus</i>                                                            |                      |                                                 |

|                      |                                                          |                                                               |
|----------------------|----------------------------------------------------------|---------------------------------------------------------------|
| San-2-1 to San-2-2   | Bacteria Actinobacteria Streptomyetales Streptomyetaceae | <i>Streptomyces anulatus</i>                                  |
| Sat-1-1              | Bacteria Actinobacteria Streptomyetales Streptomyetaceae | <i>Streptomyces atratus</i>                                   |
| Sat-2-1              | Bacteria Actinobacteria Streptomyetales Streptomyetaceae | <i>Streptomyces atroolivaceus</i>                             |
| Sau-3-1 to Sau-3-2   | Bacteria Actinobacteria Streptomyetales Streptomyetaceae | <i>Streptomyces aureocirculatus</i>                           |
| Sau-4-1              | Bacteria Actinobacteria Streptomyetales Streptomyetaceae | <i>Streptomyces aureus</i>                                    |
| Sav-2-1 to Sav-2-2   | Bacteria Actinobacteria Streptomyetales Streptomyetaceae | <i>Streptomyces avermitilis</i> MA-4680 = NBRC 14893          |
| Sav-3-1              | Bacteria Actinobacteria Streptomyetales Streptomyetaceae | <i>Streptomyces avicenniae</i>                                |
| Sba-2-1              | Bacteria Actinobacteria Streptomyetales Streptomyetaceae | <i>Streptomyces baarnensis</i>                                |
| Sbi-2-1 to Sbi-2-2   | Bacteria Actinobacteria Streptomyetales Streptomyetaceae | <i>Streptomyces bicolor</i>                                   |
| Sbi-3-1 to Sbi-3-3   | Bacteria Actinobacteria Streptomyetales Streptomyetaceae | <i>Streptomyces bikiniensis</i>                               |
| Sbr-1-1              | Bacteria Actinobacteria Streptomyetales Streptomyetaceae | <i>Streptomyces brasiliensis</i>                              |
| Sca-4-1              | Bacteria Actinobacteria Streptomyetales Streptomyetaceae | <i>Streptomyces caatingaensis</i>                             |
| Sca-5-1 to Sca-5-2   | Bacteria Actinobacteria Streptomyetales Streptomyetaceae | <i>Streptomyces californicus</i>                              |
| Sca-6-1 to Sca-6-2   | Bacteria Actinobacteria Streptomyetales Streptomyetaceae | <i>Streptomyces capuensis</i>                                 |
| Sca-7-1              | Bacteria Actinobacteria Streptomyetales Streptomyetaceae | <i>Streptomyces catenulae</i>                                 |
| Sce-1-1              | Bacteria Actinobacteria Streptomyetales Streptomyetaceae | <i>Streptomyces celluloflavus</i>                             |
| Sce-2-1              | Bacteria Actinobacteria Streptomyetales Streptomyetaceae | <i>Streptomyces cellulosa</i>                                 |
| Scy-1-1              | Bacteria Actinobacteria Streptomyetales Streptomyetaceae | <i>Streptomyces cyaneofuscatus</i>                            |
| Scy-2-1              | Bacteria Actinobacteria Streptomyetales Streptomyetaceae | <i>Streptomyces cyaneogriseus</i> subsp. <i>noncyanogenus</i> |
| Sde-1-1              | Bacteria Actinobacteria Streptomyetales Streptomyetaceae | <i>Streptomyces decoyicus</i>                                 |
| Sdu-1-1              | Bacteria Actinobacteria Streptomyetales Streptomyetaceae | <i>Streptomyces durhamensis</i>                               |
| Ser-1-1              | Bacteria Actinobacteria Streptomyetales Streptomyetaceae | <i>Streptomyces erythrochromogenes</i>                        |
| Seu-1-1              | Bacteria Actinobacteria Streptomyetales Streptomyetaceae | <i>Streptomyces europaeiscabiei</i>                           |
| Sex-1-1              | Bacteria Actinobacteria Streptomyetales Streptomyetaceae | <i>Streptomyces exfoliatus</i>                                |
| Sex-2-1              | Bacteria Actinobacteria Streptomyetales Streptomyetaceae | <i>Streptomyces exfoliatus</i> DSM 41693                      |
| Sfl-2-1              | Bacteria Actinobacteria Streptomyetales Streptomyetaceae | <i>Streptomyces flaveolus</i>                                 |
| Sfl-3-1              | Bacteria Actinobacteria Streptomyetales Streptomyetaceae | <i>Streptomyces flaveus</i>                                   |
| Sfl-4-1              | Bacteria Actinobacteria Streptomyetales Streptomyetaceae | <i>Streptomyces flavidovirens</i> DSM 40150                   |
| Sfl-5-1              | Bacteria Actinobacteria Streptomyetales Streptomyetaceae | <i>Streptomyces flavochromogenes</i>                          |
| Sfl-6-1              | Bacteria Actinobacteria Streptomyetales Streptomyetaceae | <i>Streptomyces flavotricini</i>                              |
| Sfl-7-1              | Bacteria Actinobacteria Streptomyetales Streptomyetaceae | <i>Streptomyces flavovariabilis</i>                           |
| Sfl-8-1              | Bacteria Actinobacteria Streptomyetales Streptomyetaceae | <i>Streptomyces flavovirens</i>                               |
| Sfl-9-1              | Bacteria Actinobacteria Streptomyetales Streptomyetaceae | <i>Streptomyces floridae</i>                                  |
| Sfr-1-1 to Sfr-1-2   | Bacteria Actinobacteria Streptomyetales Streptomyetaceae | <i>Streptomyces fradiae</i>                                   |
| Sfu-2-1              | Bacteria Actinobacteria Streptomyetales Streptomyetaceae | <i>Streptomyces fulvoviolaceus</i>                            |
| Sfu-3-1              | Bacteria Actinobacteria Streptomyetales Streptomyetaceae | <i>Streptomyces fulvoviridis</i>                              |
| Sga-2-1              | Bacteria Actinobacteria Streptomyetales Streptomyetaceae | <i>Streptomyces galbus</i>                                    |
| Sgl-2-1              | Bacteria Actinobacteria Streptomyetales Streptomyetaceae | <i>Streptomyces glaucescens</i>                               |
| Sgl-3-1 to Sgl-3-2   | Bacteria Actinobacteria Streptomyetales Streptomyetaceae | <i>Streptomyces globisporus</i> subsp. <i>globisporus</i>     |
| Sgr-5-1              | Bacteria Actinobacteria Streptomyetales Streptomyetaceae | <i>Streptomyces graminis</i>                                  |
| Sgr-6-1              | Bacteria Actinobacteria Streptomyetales Streptomyetaceae | <i>Streptomyces griseoflavus</i>                              |
| Sgr-7-1              | Bacteria Actinobacteria Streptomyetales Streptomyetaceae | <i>Streptomyces griseofuscus</i>                              |
| Sgr-8-1              | Bacteria Actinobacteria Streptomyetales Streptomyetaceae | <i>Streptomyces griseolus</i>                                 |
| Sgr-9-1              | Bacteria Actinobacteria Streptomyetales Streptomyetaceae | <i>Streptomyces griseoluteus</i>                              |
| Sgr-10-1             | Bacteria Actinobacteria Streptomyetales Streptomyetaceae | <i>Streptomyces griseorubens</i>                              |
| Sgr-11-1             | Bacteria Actinobacteria Streptomyetales Streptomyetaceae | <i>Streptomyces griseus</i>                                   |
| Sgr-12-1 to Sgr-12-9 | Bacteria Actinobacteria Streptomyetales Streptomyetaceae | <i>Streptomyces griseus</i> subsp. <i>griseus</i>             |
| Sgr-13-1 to Sgr-13-5 | Bacteria Actinobacteria Streptomyetales Streptomyetaceae | <i>Streptomyces griseus</i> subsp. <i>rhodochrous</i>         |
| Sha-1-1              | Bacteria Actinobacteria Streptomyetales Streptomyetaceae | <i>Streptomyces halstedii</i>                                 |
| Shy-4-1              | Bacteria Actinobacteria Streptomyetales Streptomyetaceae | <i>Streptomyces hygrosopicus</i> subsp. <i>hygrosopicus</i>   |
| Sia-1-1              | Bacteria Actinobacteria Streptomyetales Streptomyetaceae | <i>Streptomyces iakyrus</i>                                   |
| Sir-1-1              | Bacteria Actinobacteria Streptomyetales Streptomyetaceae | <i>Streptomyces iranensis</i>                                 |
| Ska-1-1 to Ska-1-2   | Bacteria Actinobacteria Streptomyetales Streptomyetaceae | <i>Streptomyces katrae</i>                                    |
| Sla-1-1              | Bacteria Actinobacteria Streptomyetales Streptomyetaceae | <i>Streptomyces lavendulae</i>                                |
| Sla-2-1 to Sla-2-4   | Bacteria Actinobacteria Streptomyetales Streptomyetaceae | <i>Streptomyces lavendulae</i> subsp. <i>lavendulae</i>       |
| Sla-3-1              | Bacteria Actinobacteria Streptomyetales Streptomyetaceae | <i>Streptomyces lavenduligriseus</i>                          |
| Sle-1-1              | Bacteria Actinobacteria Streptomyetales Streptomyetaceae | <i>Streptomyces leeuwenhoekii</i>                             |
| Sli-2-1 to Sli-2-2   | Bacteria Actinobacteria Streptomyetales Streptomyetaceae | <i>Streptomyces lividans</i> TK24                             |
| Slu-1-1              | Bacteria Actinobacteria Streptomyetales Streptomyetaceae | <i>Streptomyces luteus</i>                                    |
| Sly-1-1              | Bacteria Actinobacteria Streptomyetales Streptomyetaceae | <i>Streptomyces lydicus</i>                                   |
| Sly-2-1              | Bacteria Actinobacteria Streptomyetales Streptomyetaceae | <i>Streptomyces lydicus</i> A02                               |
| Sme-1-1              | Bacteria Actinobacteria Streptomyetales Streptomyetaceae | <i>Streptomyces mediolani</i>                                 |
| Sme-2-1              | Bacteria Actinobacteria Streptomyetales Streptomyetaceae | <i>Streptomyces megasporus</i>                                |
| Smi-1-1              | Bacteria Actinobacteria Streptomyetales Streptomyetaceae | <i>Streptomyces mirabilis</i>                                 |
| Smo-2-1              | Bacteria Actinobacteria Streptomyetales Streptomyetaceae | <i>Streptomyces monomycini</i>                                |



|                      |                                                          |                                            |
|----------------------|----------------------------------------------------------|--------------------------------------------|
| Sna-1-1              | Bacteria Actinobacteria Streptomyetales Streptomyetaceae | <i>Streptomyces natalensis</i>             |
| Sna-2-1              | Bacteria Actinobacteria Streptomyetales Streptomyetaceae | <i>Streptomyces natalensis</i> ATCC 27448  |
| Sni-2-1              | Bacteria Actinobacteria Streptomyetales Streptomyetaceae | <i>Streptomyces niger</i>                  |
| Sno-1-1              | Bacteria Actinobacteria Streptomyetales Streptomyetaceae | <i>Streptomyces nodosus</i>                |
| Sno-2-1              | Bacteria Actinobacteria Streptomyetales Streptomyetaceae | <i>Streptomyces novaecaesareae</i>         |
| Soc-1-1              | Bacteria Actinobacteria Streptomyetales Streptomyetaceae | <i>Streptomyces ochraceiscleroticus</i>    |
| Sod-1-1              | Bacteria Actinobacteria Streptomyetales Streptomyetaceae | <i>Streptomyces odonnellii</i>             |
| Sol-1-1              | Bacteria Actinobacteria Streptomyetales Streptomyetaceae | <i>Streptomyces olindensis</i>             |
| Sol-2-1 to Sol-2-2   | Bacteria Actinobacteria Streptomyetales Streptomyetaceae | <i>Streptomyces olivaceus</i>              |
| Spe-1-1              | Bacteria Actinobacteria Streptomyetales Streptomyetaceae | <i>Streptomyces peruviansis</i>            |
| Spe-2-1              | Bacteria Actinobacteria Streptomyetales Streptomyetaceae | <i>Streptomyces peucetius</i>              |
| Spl-1-1 to Spl-1-2   | Bacteria Actinobacteria Streptomyetales Streptomyetaceae | <i>Streptomyces pluripotens</i>            |
| Spu-2-1 to Spu-2-2   | Bacteria Actinobacteria Streptomyetales Streptomyetaceae | <i>Streptomyces puniceus</i>               |
| Spu-3-1 to Spu-3-2   | Bacteria Actinobacteria Streptomyetales Streptomyetaceae | <i>Streptomyces purpeochromogenes</i>      |
| Spy-1-1              | Bacteria Actinobacteria Streptomyetales Streptomyetaceae | <i>Streptomyces pyridomyceticus</i>        |
| Sre-1-1              | Bacteria Actinobacteria Streptomyetales Streptomyetaceae | <i>Streptomyces resistomycificus</i>       |
| Sri-2-1 to Sri-2-2   | Bacteria Actinobacteria Streptomyetales Streptomyetaceae | <i>Streptomyces rimosus</i>                |
| Sri-3-1              | Bacteria Actinobacteria Streptomyetales Streptomyetaceae | <i>Streptomyces rimosus</i> R6-500         |
| Sri-4-1 to Sri-4-20  | Bacteria Actinobacteria Streptomyetales Streptomyetaceae | <i>Streptomyces rimosus subsp. rimosus</i> |
| Sro-4-1              | Bacteria Actinobacteria Streptomyetales Streptomyetaceae | <i>Streptomyces roseosporus</i> NRRL 11379 |
| Sro-5-1              | Bacteria Actinobacteria Streptomyetales Streptomyetaceae | <i>Streptomyces roseovorticillatus</i>     |
| Sro-6-1              | Bacteria Actinobacteria Streptomyetales Streptomyetaceae | <i>Streptomyces roseus</i>                 |
| Sru-1-1 to Sru-1-2   | Bacteria Actinobacteria Streptomyetales Streptomyetaceae | <i>Streptomyces ruber</i>                  |
| Ssc-3-1 to Ssc-3-2   | Bacteria Actinobacteria Streptomyetales Streptomyetaceae | <i>Streptomyces scabiei</i>                |
| Ssc-4-1 to Ssc-4-2   | Bacteria Actinobacteria Streptomyetales Streptomyetaceae | <i>Streptomyces sclerotialis</i>           |
| Ssc-5-1              | Bacteria Actinobacteria Streptomyetales Streptomyetaceae | <i>Streptomyces scopuliridis</i> RB72      |
| Sse-1-1              | Bacteria Actinobacteria Streptomyetales Streptomyetaceae | <i>Streptomyces seoulensis</i>             |
| Ssp-51-1             | Bacteria Actinobacteria Streptomyetales Streptomyetaceae | <i>Streptomyces sp.</i> 142MFCol3.1        |
| Ssp-52-1             | Bacteria Actinobacteria Streptomyetales Streptomyetaceae | <i>Streptomyces sp.</i> 150FB              |
| Ssp-53-1             | Bacteria Actinobacteria Streptomyetales Streptomyetaceae | <i>Streptomyces sp.</i> 769                |
| Ssp-55-1             | Bacteria Actinobacteria Streptomyetales Streptomyetaceae | <i>Streptomyces sp.</i> AcH 505            |
| Ssp-54-1             | Bacteria Actinobacteria Streptomyetales Streptomyetaceae | <i>Streptomyces sp.</i> AW19M42            |
| Ssp-56-1             | Bacteria Actinobacteria Streptomyetales Streptomyetaceae | <i>Streptomyces sp.</i> CNH099             |
| Ssp-57-1             | Bacteria Actinobacteria Streptomyetales Streptomyetaceae | <i>Streptomyces sp.</i> CNH189             |
| Ssp-58-1             | Bacteria Actinobacteria Streptomyetales Streptomyetaceae | <i>Streptomyces sp.</i> CNH287             |
| Ssp-59-1             | Bacteria Actinobacteria Streptomyetales Streptomyetaceae | <i>Streptomyces sp.</i> CNQ-509            |
| Ssp-60-1             | Bacteria Actinobacteria Streptomyetales Streptomyetaceae | <i>Streptomyces sp.</i> CNQ-525            |
| Ssp-61-1             | Bacteria Actinobacteria Streptomyetales Streptomyetaceae | <i>Streptomyces sp.</i> CNQ329             |
| Ssp-62-1             | Bacteria Actinobacteria Streptomyetales Streptomyetaceae | <i>Streptomyces sp.</i> CNQ431             |
| Ssp-63-1             | Bacteria Actinobacteria Streptomyetales Streptomyetaceae | <i>Streptomyces sp.</i> CNQ865             |
| Ssp-64-1             | Bacteria Actinobacteria Streptomyetales Streptomyetaceae | <i>Streptomyces sp.</i> CNR698             |
| Ssp-65-1             | Bacteria Actinobacteria Streptomyetales Streptomyetaceae | <i>Streptomyces sp.</i> CNS606             |
| Ssp-66-1             | Bacteria Actinobacteria Streptomyetales Streptomyetaceae | <i>Streptomyces sp.</i> CNS654             |
| Ssp-67-1             | Bacteria Actinobacteria Streptomyetales Streptomyetaceae | <i>Streptomyces sp.</i> CNT318             |
| Ssp-68-1             | Bacteria Actinobacteria Streptomyetales Streptomyetaceae | <i>Streptomyces sp.</i> CNT360             |
| Ssp-69-1             | Bacteria Actinobacteria Streptomyetales Streptomyetaceae | <i>Streptomyces sp.</i> CNT371             |
| Ssp-70-1             | Bacteria Actinobacteria Streptomyetales Streptomyetaceae | <i>Streptomyces sp.</i> CT34               |
| Ssp-71-1             | Bacteria Actinobacteria Streptomyetales Streptomyetaceae | <i>Streptomyces sp.</i> DpondAA-B6         |
| Ssp-73-1             | Bacteria Actinobacteria Streptomyetales Streptomyetaceae | <i>Streptomyces sp.</i> FxanaA7            |
| Ssp-72-1             | Bacteria Actinobacteria Streptomyetales Streptomyetaceae | <i>Streptomyces sp.</i> FXJ7.023           |
| Ssp-74-1             | Bacteria Actinobacteria Streptomyetales Streptomyetaceae | <i>Streptomyces sp.</i> GXT6               |
| Ssp-75-1             | Bacteria Actinobacteria Streptomyetales Streptomyetaceae | <i>Streptomyces sp.</i> HNS054             |
| Ssp-76-1             | Bacteria Actinobacteria Streptomyetales Streptomyetaceae | <i>Streptomyces sp.</i> JS01               |
| Ssp-77-1             | Bacteria Actinobacteria Streptomyetales Streptomyetaceae | <i>Streptomyces sp.</i> KE1                |
| Ssp-78-1             | Bacteria Actinobacteria Streptomyetales Streptomyetaceae | <i>Streptomyces sp.</i> KhCrAH-337         |
| Ssp-79-1             | Bacteria Actinobacteria Streptomyetales Streptomyetaceae | <i>Streptomyces sp.</i> KhCrAH-40          |
| Ssp-80-1             | Bacteria Actinobacteria Streptomyetales Streptomyetaceae | <i>Streptomyces sp.</i> M10                |
| Ssp-81-1             | Bacteria Actinobacteria Streptomyetales Streptomyetaceae | <i>Streptomyces sp.</i> MBT28              |
| Ssp-32-1 to Ssp-32-2 | Bacteria Actinobacteria Streptomyetales Streptomyetaceae | <i>Streptomyces sp.</i> Mg1                |
| Ssp-82-1             | Bacteria Actinobacteria Streptomyetales Streptomyetaceae | <i>Streptomyces sp.</i> MNU77              |
| Ssp-83-1             | Bacteria Actinobacteria Streptomyetales Streptomyetaceae | <i>Streptomyces sp.</i> MUSC 125           |
| Ssp-84-1             | Bacteria Actinobacteria Streptomyetales Streptomyetaceae | <i>Streptomyces sp.</i> MUSC119T           |
| Ssp-85-1             | Bacteria Actinobacteria Streptomyetales Streptomyetaceae | <i>Streptomyces sp.</i> MUSC136T           |
| Ssp-86-1             | Bacteria Actinobacteria Streptomyetales Streptomyetaceae | <i>Streptomyces sp.</i> MUSC149T           |
| Ssp-87-1             | Bacteria Actinobacteria Streptomyetales Streptomyetaceae | <i>Streptomyces sp.</i> MUSC164            |



|                        |                                                           |                                       |                 |
|------------------------|-----------------------------------------------------------|---------------------------------------|-----------------|
| Ssp-153-1              | Bacteria Actinobacteria Streptomyetales Streptomycetaceae | <i>Streptomyces</i> sp.               | NRRL S-31       |
| Ssp-154-1              | Bacteria Actinobacteria Streptomyetales Streptomycetaceae | <i>Streptomyces</i> sp.               | NRRL S-325      |
| Ssp-155-1              | Bacteria Actinobacteria Streptomyetales Streptomycetaceae | <i>Streptomyces</i> sp.               | NRRL S-337      |
| Ssp-156-1              | Bacteria Actinobacteria Streptomyetales Streptomycetaceae | <i>Streptomyces</i> sp.               | NRRL S-340      |
| Ssp-157-1              | Bacteria Actinobacteria Streptomyetales Streptomycetaceae | <i>Streptomyces</i> sp.               | NRRL S-350      |
| Ssp-158-1              | Bacteria Actinobacteria Streptomyetales Streptomycetaceae | <i>Streptomyces</i> sp.               | NRRL S-37       |
| Ssp-159-1              | Bacteria Actinobacteria Streptomyetales Streptomycetaceae | <i>Streptomyces</i> sp.               | NRRL S-378      |
| Ssp-160-1              | Bacteria Actinobacteria Streptomyetales Streptomycetaceae | <i>Streptomyces</i> sp.               | NRRL S-384      |
| Ssp-161-1              | Bacteria Actinobacteria Streptomyetales Streptomycetaceae | <i>Streptomyces</i> sp.               | NRRL S-455      |
| Ssp-162-1              | Bacteria Actinobacteria Streptomyetales Streptomycetaceae | <i>Streptomyces</i> sp.               | NRRL S-474      |
| Ssp-163-1              | Bacteria Actinobacteria Streptomyetales Streptomycetaceae | <i>Streptomyces</i> sp.               | NRRL S-475      |
| Ssp-164-1              | Bacteria Actinobacteria Streptomyetales Streptomycetaceae | <i>Streptomyces</i> sp.               | NRRL S-481      |
| Ssp-165-1              | Bacteria Actinobacteria Streptomyetales Streptomycetaceae | <i>Streptomyces</i> sp.               | NRRL S-495      |
| Ssp-166-1              | Bacteria Actinobacteria Streptomyetales Streptomycetaceae | <i>Streptomyces</i> sp.               | NRRL S-515      |
| Ssp-167-1              | Bacteria Actinobacteria Streptomyetales Streptomycetaceae | <i>Streptomyces</i> sp.               | NRRL S-575      |
| Ssp-168-1              | Bacteria Actinobacteria Streptomyetales Streptomycetaceae | <i>Streptomyces</i> sp.               | NRRL S-623      |
| Ssp-169-1              | Bacteria Actinobacteria Streptomyetales Streptomycetaceae | <i>Streptomyces</i> sp.               | NRRL S-646      |
| Ssp-170-1              | Bacteria Actinobacteria Streptomyetales Streptomycetaceae | <i>Streptomyces</i> sp.               | NRRL S-813      |
| Ssp-171-1              | Bacteria Actinobacteria Streptomyetales Streptomycetaceae | <i>Streptomyces</i> sp.               | NRRL S-87       |
| Ssp-172-1              | Bacteria Actinobacteria Streptomyetales Streptomycetaceae | <i>Streptomyces</i> sp.               | NRRL S-920      |
| Ssp-173-1              | Bacteria Actinobacteria Streptomyetales Streptomycetaceae | <i>Streptomyces</i> sp.               | NRRL S-98       |
| Ssp-174-1              | Bacteria Actinobacteria Streptomyetales Streptomycetaceae | <i>Streptomyces</i> sp.               | NRRL WC-3540    |
| Ssp-175-1              | Bacteria Actinobacteria Streptomyetales Streptomycetaceae | <i>Streptomyces</i> sp.               | NRRL WC-3549    |
| Ssp-176-1              | Bacteria Actinobacteria Streptomyetales Streptomycetaceae | <i>Streptomyces</i> sp.               | NRRL WC-3626    |
| Ssp-177-1              | Bacteria Actinobacteria Streptomyetales Streptomycetaceae | <i>Streptomyces</i> sp.               | NRRL WC-3641    |
| Ssp-178-1              | Bacteria Actinobacteria Streptomyetales Streptomycetaceae | <i>Streptomyces</i> sp.               | NRRL WC-3683    |
| Ssp-179-1              | Bacteria Actinobacteria Streptomyetales Streptomycetaceae | <i>Streptomyces</i> sp.               | NRRL WC-3702    |
| Ssp-180-1              | Bacteria Actinobacteria Streptomyetales Streptomycetaceae | <i>Streptomyces</i> sp.               | NRRL WC-3703    |
| Ssp-181-1              | Bacteria Actinobacteria Streptomyetales Streptomycetaceae | <i>Streptomyces</i> sp.               | NRRL WC-3719    |
| Ssp-182-1              | Bacteria Actinobacteria Streptomyetales Streptomycetaceae | <i>Streptomyces</i> sp.               | NRRL WC-3725    |
| Ssp-183-1              | Bacteria Actinobacteria Streptomyetales Streptomycetaceae | <i>Streptomyces</i> sp.               | NRRL WC-3742    |
| Ssp-184-1 to Ssp-184-2 | Bacteria Actinobacteria Streptomyetales Streptomycetaceae | <i>Streptomyces</i> sp.               | NRRL WC-3744    |
| Ssp-185-1              | Bacteria Actinobacteria Streptomyetales Streptomycetaceae | <i>Streptomyces</i> sp.               | NRRL WC-3773    |
| Ssp-186-1              | Bacteria Actinobacteria Streptomyetales Streptomycetaceae | <i>Streptomyces</i> sp.               | NRRL WC-3774    |
| Ssp-187-1              | Bacteria Actinobacteria Streptomyetales Streptomycetaceae | <i>Streptomyces</i> sp.               | NRRL WC-3795    |
| Ssp-188-1              | Bacteria Actinobacteria Streptomyetales Streptomycetaceae | <i>Streptomyces</i> sp.               | NTK 937         |
| Ssp-189-1              | Bacteria Actinobacteria Streptomyetales Streptomycetaceae | <i>Streptomyces</i> sp.               | PCS3-D2         |
| Ssp-190-1              | Bacteria Actinobacteria Streptomyetales Streptomycetaceae | <i>Streptomyces</i> sp.               | PRh5            |
| Ssp-191-1              | Bacteria Actinobacteria Streptomyetales Streptomycetaceae | <i>Streptomyces</i> sp.               | RSD-27          |
| Ssp-192-1              | Bacteria Actinobacteria Streptomyetales Streptomycetaceae | <i>Streptomyces</i> sp.               | SBT349          |
| Ssp-193-1              | Bacteria Actinobacteria Streptomyetales Streptomycetaceae | <i>Streptomyces</i> sp.               | SolWspMP-sol2th |
| Ssp-194-1              | Bacteria Actinobacteria Streptomyetales Streptomycetaceae | <i>Streptomyces</i> sp.               | TAA040          |
| Ssp-195-1              | Bacteria Actinobacteria Streptomyetales Streptomycetaceae | <i>Streptomyces</i> sp.               | TAA204          |
| Ssp-196-1              | Bacteria Actinobacteria Streptomyetales Streptomycetaceae | <i>Streptomyces</i> sp.               | Tu 6176         |
| Ssp-197-1              | Bacteria Actinobacteria Streptomyetales Streptomycetaceae | <i>Streptomyces</i> sp.               | UNC401CLCol     |
| Ssp-198-1              | Bacteria Actinobacteria Streptomyetales Streptomycetaceae | <i>Streptomyces</i> sp.               | URHA0041        |
| Ssp-199-1              | Bacteria Actinobacteria Streptomyetales Streptomycetaceae | <i>Streptomyces</i> sp.               | WM6386          |
| Ssp-200-1              | Bacteria Actinobacteria Streptomyetales Streptomycetaceae | <i>Streptomyces</i> sp.               | WM6391          |
| Ssp-201-1              | Bacteria Actinobacteria Streptomyetales Streptomycetaceae | <i>Streptomyces</i> sp.               | WM6391          |
| Sst-1-1                | Bacteria Actinobacteria Streptomyetales Streptomycetaceae | <i>Streptomyces stelliscabiei</i>     |                 |
| Sto-1-1                | Bacteria Actinobacteria Streptomyetales Streptomycetaceae | <i>Streptomyces toyocaensis</i>       |                 |
| Sva-1-1                | Bacteria Actinobacteria Streptomyetales Streptomycetaceae | <i>Streptomyces variegatus</i>        |                 |
| Sva-2-1 to Sva-2-2     | Bacteria Actinobacteria Streptomyetales Streptomycetaceae | <i>Streptomyces varsoviensis</i>      |                 |
| Svi-7-1                | Bacteria Actinobacteria Streptomyetales Streptomycetaceae | <i>Streptomyces vietnamensis</i>      |                 |
| Svi-8-1                | Bacteria Actinobacteria Streptomyetales Streptomycetaceae | <i>Streptomyces vinaceus</i>          |                 |
| Svi-9-1 to Svi-9-2     | Bacteria Actinobacteria Streptomyetales Streptomycetaceae | <i>Streptomyces violaceoruber</i>     |                 |
| Svi-10-1               | Bacteria Actinobacteria Streptomyetales Streptomycetaceae | <i>Streptomyces violaceorubidus</i>   |                 |
| Svi-11-1               | Bacteria Actinobacteria Streptomyetales Streptomycetaceae | <i>Streptomyces violens</i>           |                 |
| Svi-12-1 to Svi-12-3   | Bacteria Actinobacteria Streptomyetales Streptomycetaceae | <i>Streptomyces virginiae</i>         |                 |
| Svi-13-1 to Svi-13-4   | Bacteria Actinobacteria Streptomyetales Streptomycetaceae | <i>Streptomyces viridochromogenes</i> |                 |
| Swa-1-1                | Bacteria Actinobacteria Streptomyetales Streptomycetaceae | <i>Streptomyces wadayamensis</i>      |                 |
| Swe-1-1                | Bacteria Actinobacteria Streptomyetales Streptomycetaceae | <i>Streptomyces wedmorensis</i>       |                 |
| Sxa-1-1 to Sxa-1-2     | Bacteria Actinobacteria Streptomyetales Streptomycetaceae | <i>Streptomyces xanthophaeus</i>      |                 |
| Sxi-1-1                | Bacteria Actinobacteria Streptomyetales Streptomycetaceae | <i>Streptomyces xiamenensis</i>       |                 |
| Sxi-2-1                | Bacteria Actinobacteria Streptomyetales Streptomycetaceae | <i>Streptomyces xinghaiensis</i>      | S187            |

|                 |                                                                  |                                                                               |
|-----------------|------------------------------------------------------------------|-------------------------------------------------------------------------------|
| Sxy-1-1         | Bacteria Actinobacteria Streptomycetales Streptomycetaceae       | <i>Streptomyces xylophagus</i>                                                |
| Sya-1-1         | Bacteria Actinobacteria Streptomycetales Streptomycetaceae       | <i>Streptomyces yangpuensis</i>                                               |
| Sye-1-1         | Bacteria Actinobacteria Streptomycetales Streptomycetaceae       | <i>Streptomyces yeochonensis</i> CN732                                        |
| Sye-2-1         | Bacteria Actinobacteria Streptomycetales Streptomycetaceae       | <i>Streptomyces yerevanensis</i>                                              |
| Hcr-1-1         | Bacteria Actinobacteria Streptosporangiales Streptosporangiaceae | <i>Herbidospora cretacea</i>                                                  |
| Mro-1-1         | Bacteria Actinobacteria Streptosporangiales Streptosporangiaceae | <i>Microbispora rosea</i> subsp. <i>nonnitritogenes</i>                       |
| Msp-1-1         | Bacteria Actinobacteria Streptosporangiales Streptosporangiaceae | <i>Microbispora</i> sp. ATCC PTA-5024                                         |
| Mgl-1-1         | Bacteria Actinobacteria Streptosporangiales Streptosporangiaceae | <i>Microtetraspora glauca</i>                                                 |
| Nca-1-1         | Bacteria Actinobacteria Streptosporangiales Streptosporangiaceae | <i>Nonomuraea candida</i>                                                     |
| Nsp-4-1         | Bacteria Actinobacteria Streptosporangiales Streptosporangiaceae | <i>Nonomuraea</i> sp. SBT364                                                  |
| Sam-2-1         | Bacteria Actinobacteria Streptosporangiales Streptosporangiaceae | <i>Streptosporangium amethystogenes</i>                                       |
| Sro-7-1         | Bacteria Actinobacteria Streptosporangiales Streptosporangiaceae | <i>Streptosporangium roseum</i>                                               |
| Ama-1-1         | Bacteria Actinobacteria Streptosporangiales Thermomonosporaceae  | <i>Actinomadura madurae</i> LIID-AJ290                                        |
| Ari-1-1         | Bacteria Actinobacteria Streptosporangiales Thermomonosporaceae  | <i>Actinomadura rifamycini</i> DSM 43936                                      |
| Sal-13-1        | Bacteria Actinobacteria Streptosporangiales Thermomonosporaceae  | <i>Spirillospora albida</i>                                                   |
| [br-1-1         | Bacteria Proteobacteria Betaproteobacteria Burkholderiales       | [Polyangium] <i>brachysporum</i>                                              |
| Rge-1-1         | Bacteria Proteobacteria Betaproteobacteria Burkholderiales       | <i>Rubrivivax gelatinosus</i> CBS                                             |
| Age-1-1         | Bacteria Proteobacteria Deltaproteobacteria Myxococcales         | Cystobacterineae Archangiaceae <i>Archangium gephyra</i>                      |
| Avi-1-1         | Bacteria Proteobacteria Deltaproteobacteria Myxococcales         | Cystobacterineae Archangiaceae <i>Archangium violaceum</i> Cb vi76            |
| Hmi-1-1         | Bacteria Proteobacteria Deltaproteobacteria Myxococcales         | Cystobacterineae Archangiaceae <i>Hyalangium minutum</i>                      |
| Cfu-1-1         | Bacteria Proteobacteria Deltaproteobacteria Myxococcales         | Cystobacterineae Cystobacteraceae <i>Cystobacter fuscus</i> DSM 2262          |
| Sau-5-1         | Bacteria Proteobacteria Deltaproteobacteria Myxococcales         | Cystobacterineae Cystobacteraceae <i>Stigmatella aurantiaca</i> DW4/3-1       |
| Cco-1-1         | Bacteria Proteobacteria Deltaproteobacteria Myxococcales         | Cystobacterineae Myxococcaceae <i>Corallocooccus coralloides</i> DSM 2259     |
| Mfu-1-1         | Bacteria Proteobacteria Deltaproteobacteria Myxococcales         | Cystobacterineae Myxococcaceae <i>Myxococcus fulvus</i> 124B02                |
| Mfu-2-1         | Bacteria Proteobacteria Deltaproteobacteria Myxococcales         | Cystobacterineae Myxococcaceae <i>Myxococcus fulvus</i> HW-1                  |
| Mha-1-1         | Bacteria Proteobacteria Deltaproteobacteria Myxococcales         | Cystobacterineae Myxococcaceae <i>Myxococcus hansupus</i>                     |
| Msp-2-1         | Bacteria Proteobacteria Deltaproteobacteria Myxococcales         | Cystobacterineae Myxococcaceae <i>Myxococcus</i> sp. (contaminant ex DSM 436) |
| Mst-1-1         | Bacteria Proteobacteria Deltaproteobacteria Myxococcales         | Cystobacterineae Myxococcaceae <i>Myxococcus stipitatus</i> DSM 14675         |
| Mxa-1-1         | Bacteria Proteobacteria Deltaproteobacteria Myxococcales         | Cystobacterineae Myxococcaceae <i>Myxococcus xanthus</i> DK 1622              |
| Mxa-2-1         | Bacteria Proteobacteria Deltaproteobacteria Myxococcales         | Cystobacterineae Myxococcaceae <i>Myxococcus xanthus</i> DZ2                  |
| Mxa-3-1         | Bacteria Proteobacteria Deltaproteobacteria Myxococcales         | Cystobacterineae Myxococcaceae <i>Myxococcus xanthus</i> DZF1                 |
| env-1 to env-41 | environmental samples                                            |                                                                               |

## 5.2 Notes

Superscript numbers are used to annotate any L17-Actino-Proteobacteria RNA that has special characteristics (described below). These numeric annotations will

<sup>1</sup> Left hairpin does not conform well to the characteristics of those in most other

## 5.3 Gene contexts

Each L17-Actino-Proteobacteria RNA (indicated by “RNA→”) is listed. For each hit, the downstream genes predicted to reside in a regulated operon are listed. If the nearest downstream gene is encoding in the opposite strand (and therefore presumed to not be a part of a regulated operon), then that gene is still depicted. Some environmental sequences and some RefSeq entries lack gene annotations, and so no genes are available for such sequences. The direction of each gene is indicated with an arrow (→), and each predicted conserved domain in the gene is named. Conserved domains associated with more than one L17-Actino-Proteobacteria RNA are assigned a color; other domains are gray. Information about these conserved domains is given in Section 5.4. The accession of the se-

quences will be used in Sections 5.3 and 5.5. The meaning of the numbers are as follows.

sequences.

quence containing each L17-Actino-Proteobacteria RNA is given in the column named “Seq. accession”. Accessions beginning with “NC\_”, “NS\_”, “NW\_” or “NZ\_” are contained in RefSeq. Other accession refer to environmental samples. Nucleotide coordinates are given for the 5’ and 3’ boundaries of each L17-Actino-Proteobacteria RNA. If the 5’ coordinate is greater than the 3’ coordinate, the RNA is present on the reverse-complement strand of the containing genomic DNA sequence. Each hit is denoted by an abbreviation (like “Eco-1-1”) that refers to a taxonomy given in Section 5.1. (Superscript numbers refer to annotations listed in Section 5.2)



| abbrev.                | Seq. accession          | 5' at | 3' at   | genes                                                                                                                                                                                                             |
|------------------------|-------------------------|-------|---------|-------------------------------------------------------------------------------------------------------------------------------------------------------------------------------------------------------------------|
| env-1                  | C687J26621_10007310     | -     | 562     | 514 RNA→ RplQ (COG0203)rplQ (PRK05591)→ hypo→                                                                                                                                                                     |
| env-2                  | C687J26621_10071554     | -     | 1140    | 1092 RNA→ hypo→ RplQ (COG0203)rplQ (PRK05591)→ hypo→ hypo→                                                                                                                                                        |
| [br-1-1                | NZ_CP011371.1           | -     | 5726771 | 5726711 RNA→ RplQ (COG0203)rplQ (PRK05591)→                                                                                                                                                                       |
| env-3                  | soil_Contig5330         | +     | 734     | 782 RNA→ RplQ (COG0203)rplQ (PRK05591)→ hypo→ hypo→ hypo→                                                                                                                                                         |
| Nal-1-1                | NZ_AUFN01000013.1       | -     | 290198  | 290141 RNA→ RplQ (COG0203)rplQ (PRK05591)→ hypo→                                                                                                                                                                  |
| Nsp-1-1                | NZ_JAER01000028.1       | +     | 47081   | 47133 RNA→ RplQ (COG0203)rplQ (PRK05591)→                                                                                                                                                                         |
| Mxa-1-1                | NC_008095.1             | +     | 3870176 | 3870231 RNA→ RplQ (COG0203)rplQ (PRK05591)→                                                                                                                                                                       |
| Mxa-2-1                | NZ_AKYI02000032.1       | +     | 15862   | 15917 RNA→ RplQ (COG0203)rplQ (PRK05591)→                                                                                                                                                                         |
| Mxa-3-1                | NZ_AOBT01000010.1       | -     | 325703  | 325648 RNA→ RplQ (COG0203)rplQ (PRK05591)→                                                                                                                                                                        |
| env-4                  | G312J29652_10012153     | -     | 190     | 133 RNA→ RplQ (COG0203)rplQ (PRK05591)→                                                                                                                                                                           |
| Cfu-1-1                | NZ_ANAH02000033.1       | -     | 26146   | 26089 RNA→ RplQ (COG0203)rplQ (PRK05591)→                                                                                                                                                                         |
| Avi-1-1                | NZ_JPMI01000295.1       | +     | 16333   | 16389 RNA→ RplQ (COG0203)rplQ (PRK05591)→                                                                                                                                                                         |
| Age-1-1                | NZ_CP011509.1           | +     | 5915327 | 5915383 RNA→ RplQ (COG0203)rplQ (PRK05591)→                                                                                                                                                                       |
| Hmi-1-1                | NZ_JMCB01000003.1       | +     | 16437   | 16494 RNA→ RplQ (COG0203)rplQ (PRK05591)→                                                                                                                                                                         |
| env-5                  | JGI12467J12023_1013060  | +     | 231     | 287 RNA→ RplQ (COG0203)rplQ (PRK05591)→                                                                                                                                                                           |
| Sau-5-1                | NC_014623.1             | +     | 4510803 | 4510859 RNA→ RplQ (COG0203)rplQ (PRK05591)→                                                                                                                                                                       |
| Mfu-1-1                | NZ_CP006003.1           | -     | 6488472 | 6488416 RNA→ RplQ (COG0203)rplQ (PRK05591)→                                                                                                                                                                       |
| Mst-1-1                | NC_020126.1             | -     | 5952427 | 5952371 RNA→ RplQ (COG0203)rplQ (PRK05591)→                                                                                                                                                                       |
| Msp-2-1                | NZ_AKXT02000011.1       | -     | 416054  | 415998 RNA→ RplQ (COG0203)rplQ (PRK05591)→                                                                                                                                                                        |
| Mha-1-1                | NZ_CP012109.1           | -     | 4586241 | 4586185 RNA→ RplQ (COG0203)rplQ (PRK05591)→                                                                                                                                                                       |
| Mfu-2-1                | NC_015711.1             | +     | 5782024 | 5782080 RNA→ RplQ (COG0203)rplQ (PRK05591)→                                                                                                                                                                       |
| env-6                  | JGI12467J12023_1015101  | +     | 1120    | 1177 RNA→ RplQ (COG0203)rplQ (PRK05591)→                                                                                                                                                                          |
| Cco-1-1                | NC_017030.1             | +     | 3764344 | 3764400 RNA→ RplQ (COG0203)rplQ (PRK05591)→                                                                                                                                                                       |
| env-7                  | SRB_FXPBX6M01ETLHE      | -     | 521     | 467 RNA→ RplQ (COG0203)rplQ (PRK05591)→                                                                                                                                                                           |
| env-8                  | LWAnN_GIDYKCY01AF5CK    | -     | 393     | 338 RNA→ RplQ (COG0203)rplQ (PRK05591)→                                                                                                                                                                           |
| Ama-1-1                | NZ_AWOO02000003.1       | -     | 173008  | 172954 RNA→ rplQ (PRK05591)Ribosomal_L17 (pfam01196)→                                                                                                                                                             |
| env-9                  | topACOD_F95O9CU02FUYYO  | +     | 189     | 240 RNA→ rplQ (PRK05591)Ribosomal_L17 (pfam01196)→                                                                                                                                                                |
| env-10                 | botACOD_contig00616     | +     | 47      | 98 RNA→ rplQ (PRK05591)Ribosomal_L17 (pfam01196)→ PseudoU_synth_EcTruA (cd02570)truA (PRK00021)→<br>AdoMet_MTases (cd02440)Methyltransf_25 (pfam13649)→<br>AAA (smart00382)Uup (COG0488)ABC_tran_Xtn (pfam12848)→ |
| Ssp-68-1               | NZ_AUKO01000030.1       | +     | 121030  | 121087 RNA→ rplQ (PRK05591)Ribosomal_L17 (pfam01196)→                                                                                                                                                             |
| <sup>1</sup> env-11    | topACOD_F95O9CU01C589N  | -     | 233     | 171 RNA→ rplQ (PRK05591)Ribosomal_L17 (pfam01196)→                                                                                                                                                                |
| env-12                 | DCrCPGB_c521527         | +     | 223     | 278 RNA→ RplQ (COG0203)rplQ (PRK05591)→                                                                                                                                                                           |
| Ssp-96-1               | NZ_JOAI01000002.1       | -     | 176853  | 176802 RNA→ rplQ (PRK05591)Ribosomal_L17 (pfam01196)→ PseudoU_synth_EcTruA (cd02570)truA (PRK00021)→                                                                                                              |
| Ksp-1-1                | NZ_JAIZ01000648.1       | -     | 13562   | 13510 RNA→ rplQ (PRK05591)Ribosomal_L17 (pfam01196)→ PseudoU_synth_EcTruA (cd02570)truA (PRK00021)→<br>AAA (smart00382)Uup (COG0488)→                                                                             |
| Kme-1-1                | NZ_JQLN01000005.1       | +     | 2502927 | 2502979 RNA→ rplQ (PRK05591)Ribosomal_L17 (pfam01196)→ PseudoU_synth_EcTruA (cd02570)truA (PRK00021)→<br>AAA (smart00382)Uup (COG0488)AAA_21 (pfam13304)→                                                         |
| Rge-1-1                | NZ_AJFF01000004.1       | +     | 16232   | 16281 RNA→ RplQ (COG0203)rplQ (PRK05591)→                                                                                                                                                                         |
| Sca-3-1                | NZ_BBPM01000018.1       | -     | 109868  | 109813 RNA→ rplQ (PRK05591)Ribosomal_L17 (pfam01196)→ PseudoU_synth_EcTruA (cd02570)truA (PRK00021)→                                                                                                              |
| Sal-3-1                | NZ_BBPL01000005.1       | +     | 86334   | 86389 RNA→ rplQ (PRK05591)Ribosomal_L17 (pfam01196)→                                                                                                                                                              |
| Sal-4-1                | NZ_JQML01000001.1       | +     | 5666634 | 5666689 RNA→ rplQ (PRK05591)Ribosomal_L17 (pfam01196)→                                                                                                                                                            |
| env-13                 | JGI24770J26754_10005505 | -     | 4344    | 4287 RNA→ RplQ (COG0203)rplQ (PRK05591)PRK11855 (PRK11855)→<br>PRK09434 (PRK09434)bac_FRK (cd01167)→ CarboxypepD_reg (pfam13620)→                                                                                 |
| Sav-3-1                | NZ_JOEK01000005.1       | -     | 58397   | 58339 RNA→ RplQ (COG0203)rplQ (PRK05591)→                                                                                                                                                                         |
| <sup>1</sup> Ssp-195-1 | NZ_AUKW01000004.1       | -     | 554930  | 554861 RNA→ PRK13428 (PRK13428)rplQ (PRK05591)Ribosomal_L17 (pfam01196)→<br>PseudoU_synth_EcTruA (cd02570)truA (PRK00021)→                                                                                        |
| Nsp-4-1                | NZ_LAVL01000256.1       | -     | 2722    | 2668 RNA→ rplQ (PRK05591)Ribosomal_L17 (pfam01196)→ PseudoU_synth_EcTruA (cd02570)truA (PRK00021)→                                                                                                                |
| env-14                 | botACOD_F64RS5002G1132  | +     | 29      | 84 RNA→ rplQ (PRK05591)Ribosomal_L17 (pfam01196)→                                                                                                                                                                 |
| Nco-1-1                | NZ_KB903951.1           | -     | 119743  | 119681 RNA→ rplQ (PRK05591)Ribosomal_L17 (pfam01196)→ PseudoU_synth_EcTruA (cd02570)truA (PRK00021)→                                                                                                              |
| Sje-1-1                | NZ_JOEH01000005.1       | -     | 70730   | 70674 RNA→ rplQ (PRK05591)Ribosomal_L17 (pfam01196)→ PseudoU_synth_EcTruA (cd02570)truA (PRK00021)→                                                                                                               |
| Kaz-1-1                | NZ_JQMO01000003.1       | +     | 3548080 | 3548135 RNA→ rplQ (PRK05591)Ribosomal_L17 (pfam01196)→                                                                                                                                                            |

|                        |                        |   |         |         |                                                                                                                                                                                                                                                                        |
|------------------------|------------------------|---|---------|---------|------------------------------------------------------------------------------------------------------------------------------------------------------------------------------------------------------------------------------------------------------------------------|
| Kph-1-1                | NZ_JNWZ01000014.1      | - | 38553   | 38499   | RNA → <a href="#">rplQ (PRK05591)</a> <a href="#">Ribosomal_L17 (pfam01196)</a> → <a href="#">PseudoU_synth_EcTruA (cd02570)</a> <a href="#">truA (PRK00021)</a> → <a href="#">AAA (smart00382)</a> <a href="#">Uup (COG0488)</a> →                                    |
| Kph-1-2                | NZ_JNYE01000006.1      | + | 139183  | 139237  | RNA → <a href="#">rplQ (PRK05591)</a> <a href="#">Ribosomal_L17 (pfam01196)</a> →                                                                                                                                                                                      |
| Sno-2-1                | NZ_JNWQ01000041.1      | - | 6189    | 6134    | RNA → <a href="#">rplQ (PRK05591)</a> <a href="#">Ribosomal_L17 (pfam01196)</a> →                                                                                                                                                                                      |
| Ksp-3-1                | NZ_LFVW01000009.1      | + | 42129   | 42184   | RNA → <a href="#">rplQ (PRK05591)</a> <a href="#">Ribosomal_L17 (pfam01196)</a> → <a href="#">PseudoU_synth_EcTruA (cd02570)</a> <a href="#">truA (PRK00021)</a> → <a href="#">AAA (smart00382)</a> <a href="#">Uup (COG0488)</a> <a href="#">AAA_21 (pfam13304)</a> → |
| Spy-1-1                | NZ_KL573373.1          | + | 195480  | 195535  | RNA → <a href="#">rplQ (PRK05591)</a> <a href="#">Ribosomal_L17 (pfam01196)</a> →                                                                                                                                                                                      |
| Ksp-4-1                | NZ_JOGH01000001.1      | - | 191862  | 191808  | RNA → <a href="#">rplQ (PRK05591)</a> <a href="#">Ribosomal_L17 (pfam01196)</a> → <a href="#">PseudoU_synth_EcTruA (cd02570)</a> <a href="#">truA (PRK00021)</a> → <a href="#">AAA (smart00382)</a> <a href="#">Uup (COG0488)</a> →                                    |
| Ssp-165-1              | NZ_JZWY01000017.1      | - | 18645   | 18591   | RNA → <a href="#">rplQ (PRK05591)</a> <a href="#">Ribosomal_L17 (pfam01196)</a> →                                                                                                                                                                                      |
| Ssp-133-1              | NZ_JOHN01000002.1      | + | 49938   | 49992   | RNA → <a href="#">rplQ (PRK05591)</a> <a href="#">Ribosomal_L17 (pfam01196)</a> → <a href="#">PseudoU_synth_EcTruA (cd02570)</a> <a href="#">truA (PRK00021)</a> → <a href="#">AAA (smart00382)</a> <a href="#">Uup (COG0488)</a> →                                    |
| Ssp-50-1               | NZ_JYJF01000115.1      | - | 10192   | 10138   | RNA → <a href="#">rplQ (PRK05591)</a> <a href="#">Ribosomal_L17 (pfam01196)</a> → <a href="#">PseudoU_synth_EcTruA (cd02570)</a> <a href="#">truA (PRK00021)</a> →                                                                                                     |
| Ssp-157-1              | NZ_JOHO01000003.1      | + | 268650  | 268704  | RNA → <a href="#">rplQ (PRK05591)</a> <a href="#">Ribosomal_L17 (pfam01196)</a> → <a href="#">PseudoU_synth_EcTruA (cd02570)</a> <a href="#">truA (PRK00021)</a> → <a href="#">AAA (smart00382)</a> <a href="#">Uup (COG0488)</a> <a href="#">AAA_21 (pfam13304)</a> → |
| Ssp-160-1              | NZ_JOJA01000001.1      | + | 115341  | 115395  | RNA → <a href="#">rplQ (PRK05591)</a> <a href="#">Ribosomal_L17 (pfam01196)</a> → <a href="#">PseudoU_synth_EcTruA (cd02570)</a> <a href="#">truA (PRK00021)</a> →                                                                                                     |
| Ksp-2-1                | NZ_JAIY01000008.1      | - | 87931   | 87877   | RNA → <a href="#">rplQ (PRK05591)</a> <a href="#">Ribosomal_L17 (pfam01196)</a> → <a href="#">PseudoU_synth_EcTruA (cd02570)</a> <a href="#">truA (PRK00021)</a> → <a href="#">AAA (smart00382)</a> <a href="#">Uup (COG0488)</a> →                                    |
| Kpu-1-1                | NZ_JODS01000006.1      | + | 94156   | 94210   | RNA → <a href="#">rplQ (PRK05591)</a> <a href="#">Ribosomal_L17 (pfam01196)</a> →                                                                                                                                                                                      |
| Ssp-183-1              | NZ_JOCF01000001.1      | - | 67177   | 67123   | RNA → <a href="#">rplQ (PRK05591)</a> <a href="#">Ribosomal_L17 (pfam01196)</a> → <a href="#">PseudoU_synth_EcTruA (cd02570)</a> <a href="#">truA (PRK00021)</a> → <a href="#">AAA (smart00382)</a> <a href="#">Uup (COG0488)</a> <a href="#">AAA_21 (pfam13304)</a> → |
| Sam-2-1                | NZ_JOEQ01000010.1      | - | 266003  | 265948  | RNA → <a href="#">rplQ (PRK05591)</a> <a href="#">Ribosomal_L17 (pfam01196)</a> → <a href="#">PseudoU_synth_EcTruA (cd02570)</a> <a href="#">truA (PRK00021)</a> →                                                                                                     |
| Sro-7-1                | NZ_JOEP01000065.1      | + | 28073   | 28126   | RNA → <a href="#">rplQ (PRK05591)</a> <a href="#">Ribosomal_L17 (pfam01196)</a> → <a href="#">PseudoU_synth_EcTruA (cd02570)</a> <a href="#">truA (PRK00021)</a> →                                                                                                     |
| Ssp-87-1               | NZ_LAKD01000081.1      | + | 62702   | 62751   | RNA → <a href="#">rplQ (PRK05591)</a> <a href="#">Ribosomal_L17 (pfam01196)</a> → <a href="#">PseudoU_synth_EcTruA (cd02570)</a> <a href="#">truA (PRK00021)</a> →                                                                                                     |
| Ssp-190-1              | NZ_JABQ01000020.1      | + | 41705   | 41754   | RNA → <a href="#">rplQ (PRK05591)</a> <a href="#">Ribosomal_L17 (pfam01196)</a> → <a href="#">PseudoU_synth_EcTruA (cd02570)</a> <a href="#">truA (PRK00021)</a> →                                                                                                     |
| Sir-1-1                | NZ_LK022848.1          | - | 5397417 | 5397368 | RNA → <a href="#">rplQ (PRK05591)</a> <a href="#">Ribosomal_L17 (pfam01196)</a> → <a href="#">PseudoU_synth_EcTruA (cd02570)</a> <a href="#">truA (PRK00021)</a> →                                                                                                     |
| Shy-4-1                | NZ_JOIK01000025.1      | + | 178719  | 178768  | RNA → <a href="#">rplQ (PRK05591)</a> <a href="#">Ribosomal_L17 (pfam01196)</a> → <a href="#">PseudoU_synth_EcTruA (cd02570)</a> <a href="#">truA (PRK00021)</a> →                                                                                                     |
| Sro-3-1                | NC_013595.1            | + | 1131580 | 1131634 | RNA → <a href="#">rplQ (PRK05591)</a> <a href="#">Ribosomal_L17 (pfam01196)</a> → <a href="#">PseudoU_synth_EcTruA (cd02570)</a> <a href="#">truA (PRK00021)</a> →                                                                                                     |
| Nin-1-1                | NZ_KE383928.1          | + | 830235  | 830308  | RNA → <a href="#">rplQ (PRK05591)</a> <a href="#">Ribosomal_L17 (pfam01196)</a> →                                                                                                                                                                                      |
| Nca-1-1                | NZ_JOAG01000016.1      | + | 29392   | 29446   | RNA → <a href="#">rplQ (PRK05591)</a> <a href="#">Ribosomal_L17 (pfam01196)</a> →                                                                                                                                                                                      |
| <sup>1</sup> Ssp-192-1 | NZ_LAVK01000035.1      | + | 24842   | 24902   | RNA → <a href="#">rplQ (PRK05591)</a> <a href="#">Ribosomal_L17 (pfam01196)</a> → <a href="#">PseudoU_synth_EcTruA (cd02570)</a> <a href="#">truA (PRK00021)</a> →                                                                                                     |
| Ssp-172-1              | NZ_JODF01000016.1      | - | 82667   | 82612   | RNA → <a href="#">rplQ (PRK05591)</a> <a href="#">Ribosomal_L17 (pfam01196)</a> → <a href="#">PseudoU_synth_EcTruA (cd02570)</a> <a href="#">truA (PRK00021)</a> →                                                                                                     |
| Ssp-93-1               | NZ_JOJM01000060.1      | - | 2808    | 2751    | RNA → <a href="#">rplQ (PRK05591)</a> <a href="#">Ribosomal_L17 (pfam01196)</a> →                                                                                                                                                                                      |
| Sau-3-1                | NZ_JOAP01000029.1      | + | 78987   | 79043   | RNA → <a href="#">rplQ (PRK05591)</a> <a href="#">Ribosomal_L17 (pfam01196)</a> →                                                                                                                                                                                      |
| Sau-3-2                | NZ_JOAR01000028.1      | + | 78983   | 79039   | RNA → <a href="#">rplQ (PRK05591)</a> <a href="#">Ribosomal_L17 (pfam01196)</a> →                                                                                                                                                                                      |
| Sal-6-1                | NZ_JNXT01000010.1      | - | 3945    | 3889    | RNA → <a href="#">rplQ (PRK05591)</a> <a href="#">Ribosomal_L17 (pfam01196)</a> → <a href="#">PseudoU_synth_EcTruA (cd02570)</a> <a href="#">truA (PRK00021)</a> →                                                                                                     |
| Sru-1-1                | NZ_JODN01000016.1      | - | 4008    | 3952    | RNA → <a href="#">rplQ (PRK05591)</a> <a href="#">Ribosomal_L17 (pfam01196)</a> → <a href="#">PseudoU_synth_EcTruA (cd02570)</a> <a href="#">truA (PRK00021)</a> →                                                                                                     |
| Sru-1-2                | NZ_JOAQ01000016.1      | - | 4052    | 3996    | RNA → <a href="#">rplQ (PRK05591)</a> <a href="#">Ribosomal_L17 (pfam01196)</a> → <a href="#">PseudoU_synth_EcTruA (cd02570)</a> <a href="#">truA (PRK00021)</a> →                                                                                                     |
| Sau-1-1                | NZ_AOPZ01000478.1      | - | 3734    | 3676    | RNA → ←-hypo                                                                                                                                                                                                                                                           |
| Ssp-106-1              | NZ_JOIG01000009.1      | - | 261110  | 261058  | RNA → <a href="#">rplQ (PRK05591)</a> <a href="#">Ribosomal_L17 (pfam01196)</a> → <a href="#">PseudoU_synth_EcTruA (cd02570)</a> <a href="#">truA (PRK00021)</a> →                                                                                                     |
| Sxi-1-1                | NZ_CP009922.2          | - | 2234636 | 2234584 | RNA → <a href="#">rplQ (PRK05591)</a> <a href="#">Ribosomal_L17 (pfam01196)</a> → <a href="#">PseudoU_synth_EcTruA (cd02570)</a> <a href="#">truA (PRK00021)</a> →                                                                                                     |
| Ssp-3-1                | NZ_ALNP01000008.1      | + | 75229   | 75281   | RNA → <a href="#">rplQ (PRK05591)</a> <a href="#">Ribosomal_L17 (pfam01196)</a> → <a href="#">PseudoU_synth_EcTruA (cd02570)</a> <a href="#">truA (PRK00021)</a> →                                                                                                     |
| env-15                 | JGI12419J13241_1048700 | + | 807     | 860     | RNA →                                                                                                                                                                                                                                                                  |
| env-16                 | JGI12341J12878_1001749 | + | 4790    | 4843    | RNA → <a href="#">rplQ (PRK05591)</a> <a href="#">Ribosomal_L17 (pfam01196)</a> →                                                                                                                                                                                      |
| env-17                 | JGI12298J13902_1000008 | - | 41137   | 41084   | RNA → <a href="#">rplQ (PRK05591)</a> <a href="#">Ribosomal_L17 (pfam01196)</a> →                                                                                                                                                                                      |
| Tbi-1-1                | NC_014165.1            | + | 644331  | 644384  | RNA → <a href="#">rplQ (PRK05591)</a> <a href="#">Ribosomal_L17 (pfam01196)</a> →                                                                                                                                                                                      |
| env-18                 | JGI12419J13241_1045219 | - | 901     | 848     | RNA → <a href="#">rplQ (PRK05591)</a> <a href="#">Ribosomal_L17 (pfam01196)</a> →                                                                                                                                                                                      |
| Ssp-118-1              | NZ_JOFZ01000006.1      | - | 529759  | 529704  | RNA → <a href="#">rplQ (PRK05591)</a> <a href="#">Ribosomal_L17 (pfam01196)</a> →                                                                                                                                                                                      |
| env-19                 | 2200133452             | + | 1231    | 1291    | RNA → <a href="#">rplQ (PRK05591)</a> <a href="#">Ribosomal_L17 (pfam01196)</a> →                                                                                                                                                                                      |
| env-20                 | 2200130945             | - | 4098    | 4038    | RNA → <a href="#">rplQ (PRK05591)</a> <a href="#">Ribosomal_L17 (pfam01196)</a> →                                                                                                                                                                                      |
| env-21                 | JGI12419J13241_1059560 | - | 305     | 245     | RNA → <a href="#">rplQ (PRK05591)</a> <a href="#">Ribosomal_L17 (pfam01196)</a> →                                                                                                                                                                                      |
| Sor-1-1                | NZ_JQM01000005.1       | + | 4289657 | 4289704 | RNA → <a href="#">rplQ (PRK05591)</a> <a href="#">Ribosomal_L17 (pfam01196)</a> → <a href="#">PseudoU_synth_EcTruA (cd02570)</a> <a href="#">truA (PRK00021)</a> →                                                                                                     |
| Ssp-64-1               | NZ_AZXC01000006.1      | - | 241043  | 240986  | RNA → <a href="#">rplQ (PRK05591)</a> <a href="#">rpsP (PRK14521)</a> <a href="#">Ribosomal_L17 (pfam01196)</a> → <a href="#">PseudoU_synth_EcTruA (cd02570)</a> <a href="#">truA (PRK00021)</a> →                                                                     |

|           |                   |   |         |         |       |                                                       |                                                                                                                            |
|-----------|-------------------|---|---------|---------|-------|-------------------------------------------------------|----------------------------------------------------------------------------------------------------------------------------|
| Ssp-12-1  | NZ_KB846744.1     | - | 49103   | 49046   | RNA→  | rplQ (PRK05591)Ribosomal.L17 (pfam01196)→             | PseudoU_synth_EcTruA (cd02570)truA (PRK00021)→                                                                             |
| Ssp-13-1  | NZ_KB898271.1     | - | 505841  | 505784  | RNA→  | rplQ (PRK05591)Ribosomal.L17 (pfam01196)→             | PseudoU_synth_EcTruA (cd02570)truA (PRK00021)→                                                                             |
| Ssp-61-1  | NZ_AXVU01000018.1 | - | 122599  | 122542  | RNA→  | rplQ (PRK05591)Ribosomal.L17 (pfam01196)→             | PseudoU_synth_EcTruA (cd02570)truA (PRK00021)→                                                                             |
| Ssp-59-1  | NZ_CP011492.1     | + | 4931209 | 4931266 | RNA→  | rplQ (PRK05591)Ribosomal.L17 (pfam01196)→             | PseudoU_synth_EcTruA (cd02570)truA (PRK00021)→                                                                             |
| Ssp-16-1  | NZ_KB897717.1     | - | 411625  | 411568  | RNA→  | rplQ (PRK05591)Ribosomal.L17 (pfam01196)→             | PseudoU_synth_EcTruA (cd02570)truA (PRK00021)→                                                                             |
| Ssp-10-1  | NZ_KB897364.1     | - | 373832  | 373775  | RNA→  | rplQ (PRK05591)Ribosomal.L17 (pfam01196)→             | PseudoU_synth_EcTruA (cd02570)truA (PRK00021)→                                                                             |
| Ssp-11-1  | NZ_KB897623.1     | + | 230842  | 230899  | RNA→  | rplQ (PRK05591)Ribosomal.L17 (pfam01196)→             | PseudoU_synth_EcTruA (cd02570)truA (PRK00021)→                                                                             |
| Ssp-63-1  | NZ_AUKP01000008.1 | + | 18089   | 18146   | RNA→  | rplQ (PRK05591)Ribosomal.L17 (pfam01196)→             | PseudoU_synth_EcTruA (cd02570)truA (PRK00021)→                                                                             |
| Ssp-60-1  | NZ_JNID01000001.1 | + | 69239   | 69296   | RNA→  | rplQ (PRK05591)Ribosomal.L17 (pfam01196)→             | PseudoU_synth_EcTruA (cd02570)truA (PRK00021)→                                                                             |
| Ssp-69-1  | NZ_AZWW01000009.1 | - | 266579  | 266522  | RNA→  | rplQ (PRK05591)Ribosomal.L17 (pfam01196)→             | PseudoU_synth_EcTruA (cd02570)truA (PRK00021)→                                                                             |
| Ssp-56-1  | NZ_AZWL01000015.1 | - | 17420   | 17364   | hypo→ | rplQ (PRK05591)Ribosomal.L17 (pfam01196)→             | PseudoU_synth_EcTruA (cd02570)truA (PRK00021)→                                                                             |
| Hcr-1-1   | NZ_JODQ01000002.1 | - | 560025  | 559979  | RNA→  | rplQ (PRK05591)Ribosomal.L17 (pfam01196)→             | PseudoU_synth_EcTruA (cd02570)truA (PRK00021)→                                                                             |
| Msp-1-1   | NZ_KI866524.1     | - | 954571  | 954521  | RNA→  | rplQ (PRK05591)Ribosomal.L17 (pfam01196)→             | PseudoU_synth_EcTruA (cd02570)truA (PRK00021)→                                                                             |
| Mro-1-1   | NZ_JNZQ01000013.1 | + | 26247   | 26297   | RNA→  | rplQ (PRK05591)Ribosomal.L17 (pfam01196)→             | PseudoU_synth_EcTruA (cd02570)truA (PRK00021)→                                                                             |
| Ssp-171-1 | NZ_JOGB01000027.1 | - | 2040    | 1986    | RNA→  | rplQ (PRK05591)Ribosomal.L17 (pfam01196)→             | PseudoU_synth_EcTruA (cd02570)truA (PRK00021)→                                                                             |
| Ssp-43-1  | NZ_JH941042.1     | + | 296021  | 296076  | RNA→  | rplQ (PRK05591)Ribosomal.L17 (pfam01196)→             | PseudoU_synth_EcTruA (cd02570)truA (PRK00021)→                                                                             |
| Svi-13-1  | NZ_LGUP01000370.1 | - | 89952   | 89897   | RNA→  | rplQ (PRK05591)Ribosomal.L17 (pfam01196)→             | PseudoU_synth_EcTruA (cd02570)truA (PRK00021)→                                                                             |
| Swe-1-1   | NZ_JNWK01000006.1 | - | 89924   | 89869   | RNA→  | rplQ (PRK05591)Ribosomal.L17 (pfam01196)→             | PseudoU_synth_EcTruA (cd02570)truA (PRK00021)→                                                                             |
| Ssp-73-1  | NZ_LACL01000017.1 | + | 268699  | 268754  | RNA→  | rplQ (PRK05591)Ribosomal.L17 (pfam01196)→             |                                                                                                                            |
| Ssc-3-1   | NZ_KL997422.1     | + | 626325  | 626380  | RNA→  | rplQ (PRK05591)Ribosomal.L17 (pfam01196)→             |                                                                                                                            |
| Kau-1-1   | NZ_JODU01000011.1 | - | 303136  | 303081  | RNA→  | rplQ (PRK05591)Ribosomal.L17 (pfam01196)→             |                                                                                                                            |
| Sgr-1-1   | NZ_AEYX01000036.1 | - | 159801  | 159746  | RNA→  | rplQ (PRK05591)Ribosomal.L17 (pfam01196)→             | rplQ (PRK05591)Ribosomal.L17 (pfam01196)→<br>PseudoU_synth_EcTruA (cd02570)truA (PRK00021)→                                |
| Sto-1-1   | NZ_JFCB01000003.1 | + | 275848  | 275903  | RNA→  | rplQ (PRK05591)Ribosomal.L17 (pfam01196)→             |                                                                                                                            |
| Ssp-114-1 | NZ_JOHW01000009.1 | - | 153796  | 153741  | RNA→  | rplQ (PRK05591)Ribosomal.L17 (pfam01196)→             | PseudoU_synth_EcTruA (cd02570)truA (PRK00021)→                                                                             |
| Ssc-4-1   | NZ_JODX01000002.1 | + | 54572   | 54627   | RNA→  | rplQ (PRK05591)Ribosomal.L17 (pfam01196)→             | PseudoU_synth_EcTruA (cd02570)truA (PRK00021)→                                                                             |
| Ssp-1-1   | NZ_KB911732.1     | - | 106280  | 106225  | RNA→  | rplQ (PRK05591)Ribosomal.L17 (pfam01196)→             |                                                                                                                            |
| Sau-4-1   | NZ_KL647039.1     | - | 228013  | 227958  | RNA→  | rplQ (PRK05591)Ribosomal.L17 (pfam01196)→             | PseudoU_synth_EcTruA (cd02570)truA (PRK00021)→                                                                             |
| Spr-1-1   | NZ_CM000950.1     | - | 3302692 | 3302637 | RNA→  | hypo→ rplQ (PRK05591)Ribosomal.L17 (pfam01196)→ hypo→ |                                                                                                                            |
| Ssp-189-1 | NZ_JDUZ01000002.1 | + | 233594  | 233648  | RNA→  | rplQ (PRK05591)Ribosomal.L17 (pfam01196)→             | PseudoU_synth_EcTruA (cd02570)truA (PRK00021)→<br>AAA (smart00382)Uup (COG0488)AAA_21 (pfam13304)→<br>DUF2029 (pfam09594)→ |
| Sfl-6-1   | NZ_JNXV01000034.1 | + | 16887   | 16941   | RNA→  | rplQ (PRK05591)Ribosomal.L17 (pfam01196)→             |                                                                                                                            |
| Ssp-103-1 | NZ_JOFX01000039.1 | + | 152601  | 152655  | RNA→  | rplQ (PRK05591)Ribosomal.L17 (pfam01196)→             |                                                                                                                            |
| Ssp-111-1 | NZ_JYJI01000223.1 | + | 17460   | 17514   | RNA→  | rplQ (PRK05591)Ribosomal.L17 (pfam01196)→             |                                                                                                                            |
| Ssp-159-1 | NZ_JOBX01000009.1 | + | 138190  | 138244  | RNA→  | rplQ (PRK05591)Ribosomal.L17 (pfam01196)→             |                                                                                                                            |
| Ser-1-1   | NZ_JNZG01000024.1 | + | 137960  | 138014  | RNA→  | rplQ (PRK05591)Ribosomal.L17 (pfam01196)→             | PseudoU_synth_EcTruA (cd02570)truA (PRK00021)→<br>AAA (smart00382)Uup (COG0488)AAA_21 (pfam13304)→<br>DUF2029 (pfam09594)→ |
| Sya-1-1   | NZ_LBMK01000005.1 | - | 318921  | 318867  | RNA→  | rplQ (PRK05591)Ribosomal.L17 (pfam01196)→             |                                                                                                                            |
| Svi-12-1  | NZ_LGUV01000155.1 | - | 24360   | 24306   | RNA→  | rplQ (PRK05591)Ribosomal.L17 (pfam01196)→             | PseudoU_synth_EcTruA (cd02570)truA (PRK00021)→<br>AAA (smart00382)Uup (COG0488)AAA_21 (pfam13304)→<br>DUF2029 (pfam09594)→ |
| Ssp-151-1 | NZ_JOCY01000032.1 | - | 24441   | 24387   | RNA→  | rplQ (PRK05591)Ribosomal.L17 (pfam01196)→             | PseudoU_synth_EcTruA (cd02570)truA (PRK00021)→<br>AAA (smart00382)Uup (COG0488)AAA_21 (pfam13304)→<br>DUF2029 (pfam09594)→ |
| Ssp-110-1 | NZ_JOFY01000047.1 | - | 27927   | 27873   | RNA→  | rplQ (PRK05591)Ribosomal.L17 (pfam01196)→             | PseudoU_synth_EcTruA (cd02570)truA (PRK00021)→<br>AAA (smart00382)Uup (COG0488)AAA_21 (pfam13304)→<br>DUF2029 (pfam09594)→ |
| Ssp-112-1 | NZ_JOIB01000007.1 | + | 127472  | 127526  | RNA→  | rplQ (PRK05591)Ribosomal.L17 (pfam01196)→             | PseudoU_synth_EcTruA (cd02570)truA (PRK00021)→<br>AAA (smart00382)Uup (COG0488)AAA_21 (pfam13304)→<br>DUF2029 (pfam09594)→ |
| Ssp-102-1 | NZ_JOIR01000010.1 | + | 206080  | 206134  | RNA→  | rplQ (PRK05591)Ribosomal.L17 (pfam01196)→             | PseudoU_synth_EcTruA (cd02570)truA (PRK00021)→<br>AAA (smart00382)Uup (COG0488)AAA_21 (pfam13304)→<br>DUF2029 (pfam09594)→ |
| Sla-2-1   | NZ_JOB01000029.1  | + | 79242   | 79296   | RNA→  | rplQ (PRK05591)Ribosomal.L17 (pfam01196)→             |                                                                                                                            |
| Ssp-92-1  | NZ_JOHF01000013.1 | + | 131540  | 131594  | RNA→  | rplQ (PRK05591)Ribosomal.L17 (pfam01196)→             |                                                                                                                            |
| Ssp-139-1 | NZ_JZWW01000181.1 | - | 23883   | 23829   | RNA→  | rplQ (PRK05591)Ribosomal.L17 (pfam01196)→             |                                                                                                                            |
| Ssp-173-1 | NZ_JOJD01000018.1 | - | 24958   | 24904   | RNA→  | rplQ (PRK05591)Ribosomal.L17 (pfam01196)→             |                                                                                                                            |



|           |                   |   |         |         |      |                                                |                                                |
|-----------|-------------------|---|---------|---------|------|------------------------------------------------|------------------------------------------------|
| Svi-12-2  | NZ_JOAK01000021.1 | - | 24986   | 24932   | RNA→ | rplQ (PRK05591)Ribosomal.L17 (pfam01196)→      |                                                |
| Ssp-8-1   | NZ_GG657750.1     | + | 4667597 | 4667651 | RNA→ | rplQ (PRK05591)Ribosomal.L17 (pfam01196)→      | rplQ (PRK05591)Ribosomal.L17 (pfam01196)→      |
| Svi-7-1   | NZ_CP010407.1     | + | 5084066 | 5084122 | RNA→ | rplQ (PRK05591)Ribosomal.L17 (pfam01196)→      | PseudoU_synth_EcTruA (cd02570)truA (PRK00021)→ |
| Sgr-12-1  | NZ_JNZT01000074.1 | - | 4616    | 4560    | RNA→ | rplQ (PRK05591)Ribosomal.L17 (pfam01196)→      | PseudoU_synth_EcTruA (cd02570)truA (PRK00021)→ |
| Sgr-12-2  | NZ_JOEN01000002.1 | - | 181210  | 181154  | RNA→ | rplQ (PRK05591)Ribosomal.L17 (pfam01196)→      | PseudoU_synth_EcTruA (cd02570)truA (PRK00021)→ |
| Sfl-5-1   | NZ_JNZO01000012.1 | - | 190895  | 190839  | RNA→ | rplQ (PRK05591)Ribosomal.L17 (pfam01196)→      | PseudoU_synth_EcTruA (cd02570)truA (PRK00021)→ |
| Sbi-3-1   | NZ_JNWL01000008.1 | + | 233987  | 234043  | RNA→ | rplQ (PRK05591)Ribosomal.L17 (pfam01196)→      | PseudoU_synth_EcTruA (cd02570)truA (PRK00021)→ |
| Sbi-3-2   | NZ_JOAU01000005.1 | + | 321503  | 321559  | RNA→ | rplQ (PRK05591)Ribosomal.L17 (pfam01196)→      | PseudoU_synth_EcTruA (cd02570)truA (PRK00021)→ |
| Sbi-3-3   | NZ_JNXJ01000008.1 | + | 234102  | 234158  | RNA→ | rplQ (PRK05591)Ribosomal.L17 (pfam01196)→      | PseudoU_synth_EcTruA (cd02570)truA (PRK00021)→ |
| Sex-1-1   | NZ_KL647056.1     | + | 327108  | 327164  | RNA→ | rplQ (PRK05591)Ribosomal.L17 (pfam01196)→      | PseudoU_synth_EcTruA (cd02570)truA (PRK00021)→ |
| Sgl-3-1   | NZ_JODW01000006.1 | - | 235779  | 235723  | RNA→ | rplQ (PRK05591)Ribosomal.L17 (pfam01196)→      | PseudoU_synth_EcTruA (cd02570)truA (PRK00021)→ |
| Sgr-9-1   | NZ_JOBE01000026.1 | + | 78758   | 78814   | RNA→ | rplQ (PRK05591)Ribosomal.L17 (pfam01196)→      | PseudoU_synth_EcTruA (cd02570)truA (PRK00021)→ |
| Ssp-121-1 | NZ_JOGW01000078.1 | + | 27510   | 27566   | RNA→ | rplQ (PRK05591)Ribosomal.L17 (pfam01196)→      | PseudoU_synth_EcTruA (cd02570)truA (PRK00021)→ |
| Sve-1-1   | NC_018750.1       | + | 4750596 | 4750652 | RNA→ | rplQ (PRK05591)Ribosomal.L17 (pfam01196)→      | PseudoU_synth_EcTruA (cd02570)truA (PRK00021)→ |
| Sav-2-1   | NZ_JZJK01000077.1 | - | 121007  | 120951  | RNA→ | rplQ (PRK05591)Ribosomal.L17 (pfam01196)→      | PseudoU_synth_EcTruA (cd02570)truA (PRK00021)→ |
| Sav-1-1   | NC_003155.4       | + | 6003039 | 6003095 | RNA→ | rplQ (PRK05591)Ribosomal.L17 (pfam01196)→      | PseudoU_synth_EcTruA (cd02570)truA (PRK00021)→ |
| Sav-2-2   | NZ_BAVY01000021.1 | - | 121478  | 121422  | RNA→ | rplQ (PRK05591)Ribosomal.L17 (pfam01196)→      | PseudoU_synth_EcTruA (cd02570)truA (PRK00021)→ |
| Mgl-1-1   | NZ_JOFO01000009.1 | + | 79442   | 79498   | RNA→ | rplQ (PRK05591)Ribosomal.L17 (pfam01196)→      | PseudoU_synth_EcTruA (cd02570)truA (PRK00021)→ |
| Asp-1-1   | NZ_JOGW01000014.1 | - | 37012   | 36956   | RNA→ | rplQ (PRK05591)Ribosomal.L17 (pfam01196)→      |                                                |
| Stu-1-1   | NZ_AEJB01000201.1 | - | 20150   | 20094   | RNA→ | rplQ (PRK05591)Ribosomal.L17 (pfam01196)→      | PseudoU_synth_EcTruA (cd02570)truA (PRK00021)→ |
| Sye-2-1   | NZ_JNWJ01000097.1 | + | 561     | 617     | RNA→ | rplQ (PRK05591)Ribosomal.L17 (pfam01196)→      | PseudoU_synth_EcTruA (cd02570)truA (PRK00021)→ |
| Sdu-1-1   | NZ_JNXR01000027.1 | + | 434     | 490     | RNA→ | rplQ (PRK05591)Ribosomal.L17 (pfam01196)→      | PseudoU_synth_EcTruA (cd02570)truA (PRK00021)→ |
| Sgh-1-1   | NZ_DS999641.1     | - | 3242980 | 3242924 | RNA→ | rplQ (PRK05591)Ribosomal.L17 (pfam01196)→      | rplQ (PRK05591)Ribosomal.L17 (pfam01196)→      |
|           |                   |   |         |         |      | PseudoU_synth_EcTruA (cd02570)truA (PRK00021)→ | PseudoU_synth_EcTruA (cd02570)truA (PRK00021)→ |
| Svi-5-1   | NZ_JH993790.1     | - | 1541255 | 1541199 | RNA→ | rplQ (PRK05591)Ribosomal.L17 (pfam01196)→      | PseudoU_synth_EcTruA (cd02570)truA (PRK00021)→ |
| Ssp-153-1 | NZ_JOCB01000058.1 | + | 23941   | 23997   | RNA→ | rplQ (PRK05591)Ribosomal.L17 (pfam01196)→      | PseudoU_synth_EcTruA (cd02570)truA (PRK00021)→ |
| Ssp-86-1  | NZ_LAVA01000018.1 | + | 78943   | 78999   | RNA→ | rplQ (PRK05591)Ribosomal.L17 (pfam01196)→      | PseudoU_synth_EcTruA (cd02570)truA (PRK00021)→ |
| Sro-1-1   | NZ_CM002285.1     | - | 3697722 | 3697666 | RNA→ | rplQ (PRK05591)Ribosomal.L17 (pfam01196)→      | PseudoU_synth_EcTruA (cd02570)truA (PRK00021)→ |
| Sgr-7-1   | NZ_JOFU01000024.1 | + | 46860   | 46916   | RNA→ | rplQ (PRK05591)Ribosomal.L17 (pfam01196)→      |                                                |
| Ssp-28-1  | NZ_KB891987.1     | + | 241284  | 241340  | RNA→ | rplQ (PRK05591)Ribosomal.L17 (pfam01196)→      | PseudoU_synth_EcTruA (cd02570)truA (PRK00021)→ |
| Ssp-176-1 | NZ_JOCA01000010.1 | + | 82614   | 82670   | RNA→ | rplQ (PRK05591)Ribosomal.L17 (pfam01196)→      |                                                |
| Ssp-14-1  | NZ_KB897780.1     | - | 288156  | 288100  | RNA→ | rplQ (PRK05591)Ribosomal.L17 (pfam01196)→      |                                                |
| Sac-2-1   | NZ_JODT01000001.1 | - | 203810  | 203754  | RNA→ | rplQ (PRK05591)Ribosomal.L17 (pfam01196)→      | PseudoU_synth_EcTruA (cd02570)truA (PRK00021)→ |
| Sbo-1-1   | NZ_KB405078.1     | - | 1073332 | 1073276 | RNA→ | rplQ (PRK05591)Ribosomal.L17 (pfam01196)→      |                                                |
| Sbo-1-2   | NZ_KB911581.1     | + | 1052469 | 1052525 | RNA→ | rplQ (PRK05591)Ribosomal.L17 (pfam01196)→      |                                                |
| Ssp-2-1   | NZ_KB911779.1     | - | 228049  | 227993  | RNA→ | rplQ (PRK05591)Ribosomal.L17 (pfam01196)→      | PseudoU_synth_EcTruA (cd02570)truA (PRK00021)→ |
| Ssp-98-1  | NZ_JOGP01000006.1 | - | 287417  | 287361  | RNA→ | rplQ (PRK05591)Ribosomal.L17 (pfam01196)→      |                                                |
| Sac-3-1   | NZ_KQ257828.1     | + | 111389  | 111445  | RNA→ | rplQ (PRK05591)Ribosomal.L17 (pfam01196)→      | PseudoU_synth_EcTruA (cd02570)truA (PRK00021)→ |
| Sac-1-1   | NZ_AHBF01000045.1 | - | 10486   | 10430   | RNA→ | rplQ (PRK05591)Ribosomal.L17 (pfam01196)→      | rplQ (PRK05591)Ribosomal.L17 (pfam01196)→      |
|           |                   |   |         |         |      | PseudoU_synth_EcTruA (cd02570)truA (PRK00021)→ | PseudoU_synth_EcTruA (cd02570)truA (PRK00021)→ |
| Sca-7-1   | NZ_JODY01000013.1 | - | 8155    | 8099    | RNA→ | rplQ (PRK05591)Ribosomal.L17 (pfam01196)→      | PseudoU_synth_EcTruA (cd02570)truA (PRK00021)→ |
| Sgr-2-1   | NZ_GG657758.1     | - | 3229434 | 3229378 | RNA→ | rplQ (PRK05591)Ribosomal.L17 (pfam01196)→      | rplQ (PRK05591)Ribosomal.L17 (pfam01196)→      |
| Ssp-105-1 | NZ_JOIF01000015.1 | + | 61537   | 61593   | RNA→ | rplQ (PRK05591)Ribosomal.L17 (pfam01196)→      | PseudoU_synth_EcTruA (cd02570)truA (PRK00021)→ |
| Ssp-85-1  | NZ_LBDA01000016.1 | + | 39978   | 40034   | RNA→ | rplQ (PRK05591)Ribosomal.L17 (pfam01196)→      | PseudoU_synth_EcTruA (cd02570)truA (PRK00021)→ |
| Sco-3-1   | NC_021985.1       | + | 5098374 | 5098430 | RNA→ | rplQ (PRK05591)Ribosomal.L17 (pfam01196)→      | PseudoU_synth_EcTruA (cd02570)truA (PRK00021)→ |
| Sse-1-1   | NZ_JNXP01000008.1 | - | 210569  | 210513  | RNA→ | rplQ (PRK05591)Ribosomal.L17 (pfam01196)→      | PseudoU_synth_EcTruA (cd02570)truA (PRK00021)→ |
| Sre-1-1   | NZ_KL575664.1     | - | 76522   | 76466   | RNA→ | RplQ (COG0203)rplQ (PRK05591)→                 |                                                |
| Spe-1-1   | NZ_KL575016.1     | + | 244282  | 244340  | RNA→ | rplQ (PRK05591)Ribosomal.L17 (pfam01196)→      |                                                |
| Sbi-2-1   | NZ_JOFS01000017.1 | - | 10150   | 10092   | RNA→ | rplQ (PRK05591)Ribosomal.L17 (pfam01196)→      |                                                |
| Sbi-2-2   | NZ_JOFR01000006.1 | - | 10415   | 10357   | RNA→ | rplQ (PRK05591)Ribosomal.L17 (pfam01196)→      |                                                |
| Ssp-83-1  | NZ_JUIG01000050.1 | - | 40198   | 40142   | RNA→ | rplQ (PRK05591)Ribosomal.L17 (pfam01196)→      | PseudoU_synth_EcTruA (cd02570)truA (PRK00021)→ |
| Spl-1-1   | NZ_JTDH01000075.1 | - | 3887    | 3831    | RNA→ | rplQ (PRK05591)Ribosomal.L17 (pfam01196)→      | PseudoU_synth_EcTruA (cd02570)truA (PRK00021)→ |
| Spl-1-2   | NZ_JUIF01000014.1 | - | 27221   | 27165   | RNA→ | rplQ (PRK05591)Ribosomal.L17 (pfam01196)→      | PseudoU_synth_EcTruA (cd02570)truA (PRK00021)→ |



|           |                   |   |         |         |      |                                                                                                                                                                                      |
|-----------|-------------------|---|---------|---------|------|--------------------------------------------------------------------------------------------------------------------------------------------------------------------------------------|
| Sno-1-1   | NZ_CP009313.1     | + | 4387573 | 4387629 | RNA→ | rplQ (PRK05591)Ribosomal.L17 (pfam01196)→                                                                                                                                            |
| San-1-1   | NZ_LGUX01000327.1 | + | 17957   | 18013   | RNA→ | rplQ (PRK05591)Ribosomal.L17 (pfam01196)→ PseudoU_synth_EcTruA (cd02570)truA (PRK00021)→                                                                                             |
| Sfl-3-1   | NZ_JOCU01000004.1 | + | 188839  | 188895  | RNA→ | rplQ (PRK05591)Ribosomal.L17 (pfam01196)→ PseudoU_synth_EcTruA (cd02570)truA (PRK00021)→                                                                                             |
| Ssp-109-1 | NZ_JOIC01000006.1 | + | 63381   | 63437   | RNA→ | rplQ (PRK05591)Ribosomal.L17 (pfam01196)→ PseudoU_synth_EcTruA (cd02570)truA (PRK00021)→                                                                                             |
| Sfl-2-1   | NZ_JNVV01000004.1 | + | 188944  | 189000  | RNA→ | rplQ (PRK05591)Ribosomal.L17 (pfam01196)→ PseudoU_synth_EcTruA (cd02570)truA (PRK00021)→                                                                                             |
| Sla-3-1   | NZ_JOB01000005.1  | + | 187241  | 187297  | RNA→ | rplQ (PRK05591)Ribosomal.L17 (pfam01196)→ PseudoU_synth_EcTruA (cd02570)truA (PRK00021)→                                                                                             |
| Ssp-74-1  | NZ_KI601353.1     | - | 672230  | 672174  | RNA→ | rplQ (PRK05591)Ribosomal.L17 (pfam01196)→ PseudoU_synth_EcTruA (cd02570)truA (PRK00021)→                                                                                             |
| Ssp-162-1 | NZ_KL585947.1     | + | 251029  | 251085  | RNA→ | rplQ (PRK05591)Ribosomal.L17 (pfam01196)→                                                                                                                                            |
| Ssp-164-1 | NZ_KL585169.1     | - | 174791  | 174735  | RNA→ | rplQ (PRK05591)Ribosomal.L17 (pfam01196)→                                                                                                                                            |
| Ssp-161-1 | NZ_JOCT01000004.1 | - | 557487  | 557431  | RNA→ | rplQ (PRK05591)Ribosomal.L17 (pfam01196)→                                                                                                                                            |
| Sgl-2-1   | NZ_CP009438.1     | + | 4600285 | 4600341 | RNA→ | rplQ (PRK05591)Ribosomal.L17 (pfam01196)→                                                                                                                                            |
| Ssp-143-1 | NZ_JOAW01000083.1 | + | 21714   | 21772   | RNA→ | rplQ (PRK05591)Ribosomal.L17 (pfam01196)→                                                                                                                                            |
| Ssp-36-1  | NZ_KB892158.1     | + | 80443   | 80499   | RNA→ | rplQ (PRK05591)Ribosomal.L17 (pfam01196)→                                                                                                                                            |
| Ssp-196-1 | NZ_KK106988.1     | + | 235730  | 235786  | RNA→ | rplQ (PRK05591)Ribosomal.L17 (pfam01196)→                                                                                                                                            |
| Ssp-200-1 | NZ_JXWX01000073.1 | - | 12207   | 12151   | RNA→ | rplQ (PRK05591)Ribosomal.L17 (pfam01196)→                                                                                                                                            |
| Sli-2-1   | NZ_GG657756.1     | - | 3314931 | 3314875 | RNA→ | rplQ (PRK05591)Ribosomal.L17 (pfam01196)→ rplQ (PRK05591)Ribosomal.L17 (pfam01196)→                                                                                                  |
| Sli-1-1   | NZ_CM001889.1     | + | 5192600 | 5192656 | RNA→ | rplQ (PRK05591)Ribosomal.L17 (pfam01196)→                                                                                                                                            |
| Sli-2-2   | NZ_CP009124.1     | - | 3347250 | 3347194 | RNA→ | rplQ (PRK05591)Ribosomal.L17 (pfam01196)→                                                                                                                                            |
| Sco-2-1   | NC_003888.3       | + | 5143469 | 5143525 | RNA→ | rplQ (PRK05591)Ribosomal.L17 (pfam01196)→                                                                                                                                            |
| Svi-9-1   | NZ_JOCE01000019.1 | - | 83006   | 82950   | RNA→ | rplQ (PRK05591)Ribosomal.L17 (pfam01196)→                                                                                                                                            |
| Sco-1-1   | NZ_AHGS01001102.1 | + | 34290   | 34346   | RNA→ | rplQ (PRK05591)Ribosomal.L17 (pfam01196)→                                                                                                                                            |
| Ssp-128-1 | NZ_JOGV01000002.1 | + | 114246  | 114302  | RNA→ | rplQ (PRK05591)Ribosomal.L17 (pfam01196)→                                                                                                                                            |
| Sol-2-1   | NZ_JOFH01000023.1 | - | 178524  | 178468  | RNA→ | rplQ (PRK05591)Ribosomal.L17 (pfam01196)→ PseudoU_synth_EcTruA (cd02570)truA (PRK00021)→                                                                                             |
| Ssp-72-1  | NZ_APIV01000001.1 | - | 622171  | 622115  | RNA→ | rplQ (PRK05591)Ribosomal.L17 (pfam01196)→ PseudoU_synth_EcTruA (cd02570)truA (PRK00021)→                                                                                             |
| Ssp-124-1 | NZ_JOHJ01000006.1 | + | 93024   | 93080   | RNA→ | rplQ (PRK05591)Ribosomal.L17 (pfam01196)→                                                                                                                                            |
| Ssp-147-1 | NZ_JOGT01000009.1 | - | 100768  | 100712  | RNA→ | rplQ (PRK05591)Ribosomal.L17 (pfam01196)→                                                                                                                                            |
| Ssp-126-1 | NZ_JOGJ01000017.1 | + | 292846  | 292902  | RNA→ | rplQ (PRK05591)Ribosomal.L17 (pfam01196)→                                                                                                                                            |
| Sce-2-1   | NZ_JOEV01000018.1 | - | 142923  | 142867  | RNA→ | rplQ (PRK05591)Ribosomal.L17 (pfam01196)→ PseudoU_synth_EcTruA (cd02570)truA (PRK00021)→                                                                                             |
| Smo-1-1   | NZ_AORZ01000051.1 | - | 35230   | 35174   | RNA→ | rplQ (PRK05591)Ribosomal.L17 (pfam01196)→ PseudoU_synth_EcTruA (cd02570)truA (PRK00021)→                                                                                             |
| Svi-9-2   | NZ_JODI01000022.1 | + | 100216  | 100272  | RNA→ | rplQ (PRK05591)Ribosomal.L17 (pfam01196)→ PseudoU_synth_EcTruA (cd02570)truA (PRK00021)→                                                                                             |
| Sso-1-1   | NZ_AJJM01000095.1 | - | 4025    | 3969    | RNA→ | rplQ (PRK05591)Ribosomal.L17 (pfam01196)→ rplQ (PRK05591)Ribosomal.L17 (pfam01196)→                                                                                                  |
| Soc-1-1   | NZ_JOAX01000002.1 | + | 178274  | 178330  | RNA→ | rplQ (PRK05591)Ribosomal.L17 (pfam01196)→ PseudoU_synth_EcTruA (cd02570)truA (PRK00021)→                                                                                             |
| Sni-2-1   | NZ_JOFQ01000004.1 | - | 303573  | 303517  | RNA→ | rplQ (PRK05591)Ribosomal.L17 (pfam01196)→ PseudoU_synth_EcTruA (cd02570)truA (PRK00021)→                                                                                             |
| Svi-11-1  | NZ_JOBH01000014.1 | + | 179111  | 179167  | RNA→ | rplQ (PRK05591)Ribosomal.L17 (pfam01196)→ PseudoU_synth_EcTruA (cd02570)truA (PRK00021)→                                                                                             |
| Sex-2-1   | NZ_AZSS01000011.1 | + | 62972   | 63028   | RNA→ | rplQ (PRK05591)Ribosomal.L17 (pfam01196)→ PseudoU_synth_EcTruA (cd02570)truA (PRK00021)→                                                                                             |
| Ssp-6-1   | NZ_KB912947.1     | - | 14396   | 14340   | RNA→ | rplQ (PRK05591)Ribosomal.L17 (pfam01196)→ PseudoU_synth_EcTruA (cd02570)truA (PRK00021)→                                                                                             |
| Ssp-101-1 | NZ_JOFW01000029.1 | - | 52272   | 52216   | RNA→ | rplQ (PRK05591)Ribosomal.L17 (pfam01196)→                                                                                                                                            |
| Ssp-49-1  | NZ_GG753626.1     | + | 3590861 | 3590917 | RNA→ | rplQ (PRK05591)Ribosomal.L17 (pfam01196)→ rplQ (PRK05591)Ribosomal.L17 (pfam01196)→<br>PseudoU_synth_EcTruA (cd02570)truA (PRK00021)→ PseudoU_synth_EcTruA (cd02570)truA (PRK00021)→ |
| Sal-11-1  | NZ_CP010519.1     | + | 5393200 | 5393256 | RNA→ | rplQ (PRK05591)Ribosomal.L17 (pfam01196)→                                                                                                                                            |
| Shy-2-1   | NC_017765.1       | + | 6630461 | 6630517 | RNA→ | rplQ (PRK05591)Ribosomal.L17 (pfam01196)→ PseudoU_synth_EcTruA (cd02570)truA (PRK00021)→                                                                                             |
| Shy-3-1   | NC_020895.1       | + | 6324153 | 6324209 | RNA→ | rplQ (PRK05591)Ribosomal.L17 (pfam01196)→ PseudoU_synth_EcTruA (cd02570)truA (PRK00021)→                                                                                             |
| Ssp-46-1  | NZ_AGNH01000472.1 | - | 11085   | 11029   | RNA→ | rplQ (PRK05591)Ribosomal.L17 (pfam01196)→                                                                                                                                            |
| Ssp-187-1 | NZ_JOCG01000011.1 | + | 26447   | 26503   | RNA→ | rplQ (PRK05591)Ribosomal.L17 (pfam01196)→                                                                                                                                            |
| Ssp-156-1 | NZ_JOIY01000026.1 | + | 57550   | 57606   | RNA→ | rplQ (PRK05591)Ribosomal.L17 (pfam01196)→                                                                                                                                            |
| Sgr-10-1  | NZ_KL503830.1     | + | 4506022 | 4506078 | RNA→ | rplQ (PRK05591)Ribosomal.L17 (pfam01196)→                                                                                                                                            |
| Aac-1-1   | NZ_JNYX01000001.1 | - | 551094  | 551038  | RNA→ | rplQ (PRK05591)Ribosomal.L17 (pfam01196)→                                                                                                                                            |
| Ssp-197-1 | NZ_JMLN01000037.1 | + | 22969   | 23025   | RNA→ | rplQ (PRK05591)Ribosomal.L17 (pfam01196)→                                                                                                                                            |
| Ssp-20-1  | NZ_KB891532.1     | + | 21043   | 21099   | RNA→ | rplQ (PRK05591)Ribosomal.L17 (pfam01196)→                                                                                                                                            |
| Ssp-123-1 | NZ_JOHL01000062.1 | - | 14420   | 14364   | RNA→ | rplQ (PRK05591)Ribosomal.L17 (pfam01196)→                                                                                                                                            |
| Ssp-141-1 | NZ_JOHU01000049.1 | - | 16428   | 16372   | RNA→ | rplQ (PRK05591)Ribosomal.L17 (pfam01196)→                                                                                                                                            |
| Sga-1-1   | NZ_AOHP01000041.1 | - | 49677   | 49621   | RNA→ | rplQ (PRK05591)Ribosomal.L17 (pfam01196)→                                                                                                                                            |

|           |                         |   |         |         |      |                                                                                          |
|-----------|-------------------------|---|---------|---------|------|------------------------------------------------------------------------------------------|
| Ssp-81-1  | NZ_LARV01000087.1       | + | 36996   | 37052   | RNA→ | rplQ (PRK05591)Ribosomal.L17 (pfam01196)→                                                |
| Ssp-113-1 | NZ_KL591910.1           | + | 68579   | 68635   | RNA→ | rplQ (PRK05591)Ribosomal.L17 (pfam01196)→                                                |
| Ssp-57-1  | NZ_AZUS01000002.1       | + | 290899  | 290955  | RNA→ | rplQ (PRK05591)Ribosomal.L17 (pfam01196)→                                                |
| Ssp-149-1 | NZ_JOIV01000008.1       | + | 53324   | 53380   | RNA→ | rplQ (PRK05591)Ribosomal.L17 (pfam01196)→ PseudoU_synth_EcTruA (cd02570)truA (PRK00021)→ |
| Ssp-178-1 | NZ_JOJG01000009.1       | - | 357423  | 357367  | RNA→ | rplQ (PRK05591)Ribosomal.L17 (pfam01196)→ PseudoU_synth_EcTruA (cd02570)truA (PRK00021)→ |
| Sah-1-1   | NZ_JXYI02000085.1       | + | 175249  | 175305  | RNA→ | rplQ (PRK05591)Ribosomal.L17 (pfam01196)→ PseudoU_synth_EcTruA (cd02570)truA (PRK00021)→ |
| Sal-8-1   | NZ_CP007574.1           | - | 4322438 | 4322382 | RNA→ | rplQ (PRK05591)Ribosomal.L17 (pfam01196)→ PseudoU_synth_EcTruA (cd02570)truA (PRK00021)→ |
| Sal-10-1  | NZ_CP006871.1           | - | 4620900 | 4620844 | RNA→ | rplQ (PRK05591)Ribosomal.L17 (pfam01196)→ PseudoU_synth_EcTruA (cd02570)truA (PRK00021)→ |
| Sal-1-1   | NZ_AROY02000047.1       | + | 56170   | 56226   | RNA→ | rplQ (PRK05591)Ribosomal.L17 (pfam01196)→ PseudoU_synth_EcTruA (cd02570)truA (PRK00021)→ |
| Sal-9-1   | NZ_AXDB02000042.1       | - | 10629   | 10573   | RNA→ | rplQ (PRK05591)Ribosomal.L17 (pfam01196)→ PseudoU_synth_EcTruA (cd02570)truA (PRK00021)→ |
| Svi-10-1  | NZ_JODM01000001.1       | + | 289559  | 289615  | RNA→ | rplQ (PRK05591)Ribosomal.L17 (pfam01196)→                                                |
| Sch-1-1   | NZ_JH164842.1           | - | 142738  | 142680  | RNA→ | rplQ (PRK05591)Ribosomal.L17 (pfam01196)→                                                |
| Sia-1-1   | NZ_JNXI01000009.1       | - | 19967   | 19909   | RNA→ | rplQ (PRK05591)Ribosomal.L17 (pfam01196)→                                                |
| Saf-1-1   | NZ_KE354180.1           | - | 5829    | 5771    | RNA→ | rplQ (PRK05591)Ribosomal.L17 (pfam01196)→                                                |
| Ssp-89-1  | NZ_BBNN01000017.1       | + | 134818  | 134874  | RNA→ | rplQ (PRK05591)Ribosomal.L17 (pfam01196)→                                                |
| Sva-1-1   | NZ_JYJH01000002.1       | + | 426     | 482     | RNA→ | rplQ (PRK05591)Ribosomal.L17 (pfam01196)→                                                |
| Sfl-7-1   | NZ_JNXD01000002.1       | - | 531073  | 531017  | RNA→ | rplQ (PRK05591)Ribosomal.L17 (pfam01196)→                                                |
| Ssp-158-1 | NZ_JOIZ01000007.1       | + | 222840  | 222896  | RNA→ | rplQ (PRK05591)Ribosomal.L17 (pfam01196)→                                                |
| Sro-5-1   | NZ_JOFL01000019.1       | - | 115762  | 115706  | RNA→ | rplQ (PRK05591)Ribosomal.L17 (pfam01196)→                                                |
| Ssp-116-1 | NZ_JOHV01000022.1       | - | 72383   | 72327   | RNA→ | rplQ (PRK05591)Ribosomal.L17 (pfam01196)→ PseudoU_synth_EcTruA (cd02570)truA (PRK00021)→ |
| env-22    | JGI25153J46596_10079674 | + | 416     | 472     | RNA→ | rplQ (PRK05591)Ribosomal.L17 (pfam01196)→                                                |
| Sam-1-1   | NZ_CP012382.1           | + | 4777985 | 4778041 | RNA→ | rplQ (PRK05591)Ribosomal.L17 (pfam01196)→ PseudoU_synth_EcTruA (cd02570)truA (PRK00021)→ |
| Ssp-51-1  | NZ_AUKV01000055.1       | + | 421     | 477     | RNA→ | rplQ (PRK05591)Ribosomal.L17 (pfam01196)→ PseudoU_synth_EcTruA (cd02570)truA (PRK00021)→ |
| Slu-1-1   | NZ_KN039947.1           | - | 2174179 | 2174123 | RNA→ | rplQ (PRK05591)Ribosomal.L17 (pfam01196)→ PseudoU_synth_EcTruA (cd02570)truA (PRK00021)→ |
| Sna-2-1   | NZ_JRKI01000063.1       | + | 196029  | 196085  | RNA→ | rplQ (PRK05591)Ribosomal.L17 (pfam01196)→                                                |
| Sna-1-1   | NZ_KL570007.1           | - | 55047   | 54991   | RNA→ | rplQ (PRK05591)Ribosomal.L17 (pfam01196)→                                                |
| Ssp-75-1  | NZ_LDZX01000014.1       | - | 12861   | 12805   | RNA→ | rplQ (PRK05591)Ribosomal.L17 (pfam01196)→                                                |
| env-23    | JGI12419J13241_1019540  | - | 599     | 543     | RNA→ | rplQ (PRK05591)Ribosomal.L17 (pfam01196)→                                                |
| Ssp-182-1 | NZ_JOJH01000005.1       | - | 21931   | 219875  | RNA→ | rplQ (PRK05591)Ribosomal.L17 (pfam01196)→ PseudoU_synth_EcTruA (cd02570)truA (PRK00021)→ |
| Scy-2-1   | NZ_CP010849.1           | + | 4633351 | 4633407 | RNA→ | rplQ (PRK05591)Ribosomal.L17 (pfam01196)→ PseudoU_synth_EcTruA (cd02570)truA (PRK00021)→ |
| Ssp-184-1 | NZ_JNXK01000001.1       | + | 184828  | 184884  | RNA→ | rplQ (PRK05591)Ribosomal.L17 (pfam01196)→ PseudoU_synth_EcTruA (cd02570)truA (PRK00021)→ |
| Ssp-184-2 | NZ_JOCJ01000007.1       | + | 53530   | 53586   | RNA→ | rplQ (PRK05591)Ribosomal.L17 (pfam01196)→ PseudoU_synth_EcTruA (cd02570)truA (PRK00021)→ |
| Svi-4-1   | NZ_AMLP01000111.1       | - | 27781   | 27725   | RNA→ | rplQ (PRK05591)Ribosomal.L17 (pfam01196)→                                                |
| Ssp-163-1 | NZ_JOJB01000037.1       | + | 425     | 481     | RNA→ | rplQ (PRK05591)Ribosomal.L17 (pfam01196)→ PseudoU_synth_EcTruA (cd02570)truA (PRK00021)→ |
| Ssp-177-1 | NZ_KL579031.1           | - | 16656   | 16600   | RNA→ | rplQ (PRK05591)Ribosomal.L17 (pfam01196)→                                                |
| Sol-1-1   | NZ_JJOH01000017.1       | + | 251041  | 251097  | RNA→ | rplQ (PRK05591)Ribosomal.L17 (pfam01196)→                                                |
| Svi-3-1   | NZ_GG657757.1           | + | 5367559 | 5367615 | RNA→ | rplQ (PRK05591)Ribosomal.L17 (pfam01196)→ rplQ (PRK05591)Ribosomal.L17 (pfam01196)→      |
| Szi-1-1   | NZ_AGBF01000029.1       | - | 28163   | 28107   | RNA→ | rplQ (PRK05591)Ribosomal.L17 (pfam01196)→ rplQ (PRK05591)Ribosomal.L17 (pfam01196)→      |
| Svi-13-2  | NZ_LFNT01000154.1       | + | 521     | 577     | RNA→ | rplQ (PRK05591)Ribosomal.L17 (pfam01196)→                                                |
| Svi-13-3  | NZ_LGUR01000037.1       | + | 521     | 577     | RNA→ | rplQ (PRK05591)Ribosomal.L17 (pfam01196)→                                                |
| Svi-13-4  | NZ_LGUQ01000054.1       | - | 6858    | 6802    | RNA→ | rplQ (PRK05591)Ribosomal.L17 (pfam01196)→                                                |
| Ssp-120-1 | NZ_JOIA01001474.1       | + | 156     | 212     | RNA→ | rplQ (PRK05591)Ribosomal.L17 (pfam01196)→                                                |
| Ssp-131-1 | NZ_JOGX01000044.1       | + | 26042   | 26098   | RNA→ | rplQ (PRK05591)Ribosomal.L17 (pfam01196)→ PseudoU_synth_EcTruA (cd02570)truA (PRK00021)→ |
| Sca-4-1   | NZ_LFXA01000017.1       | + | 733261  | 733317  | RNA→ | rplQ (PRK05591)Ribosomal.L17 (pfam01196)→ PseudoU_synth_EcTruA (cd02570)truA (PRK00021)→ |
| Sba-1-1   | NZ_KI547048.1           | + | 192269  | 192328  | RNA→ | rplQ (PRK05591)Ribosomal.L17 (pfam01196)→                                                |
| Ssp-65-1  | NZ_AUFD01000010.1       | - | 185036  | 184977  | RNA→ | rplQ (PRK05591)Ribosomal.L17 (pfam01196)→                                                |
| Sme-2-1   | NZ_JODL01000029.1       | - | 20518   | 20462   | RNA→ | rplQ (PRK05591)Ribosomal.L17 (pfam01196)→ PseudoU_synth_EcTruA (cd02570)truA (PRK00021)→ |
| Sgr-12-3  | NZ_JNZI01000001.1       | - | 441683  | 441627  | RNA→ | rplQ (PRK05591)Ribosomal.L17 (pfam01196)→ PseudoU_synth_EcTruA (cd02570)truA (PRK00021)→ |
| Sgr-12-4  | NZ_JOGN01000053.1       | - | 20537   | 20481   | RNA→ | rplQ (PRK05591)Ribosomal.L17 (pfam01196)→ PseudoU_synth_EcTruA (cd02570)truA (PRK00021)→ |
| Ssp-15-1  | NZ_KB898225.1           | + | 40192   | 40248   | RNA→ | rplQ (PRK05591)Ribosomal.L17 (pfam01196)→ PseudoU_synth_EcTruA (cd02570)truA (PRK00021)→ |
| Ssp-38-1  | NZ_FR873697.1           | - | 1509259 | 1509203 | RNA→ | rplQ (PRK05591)Ribosomal.L17 (pfam01196)→ PseudoU_synth_EcTruA (cd02570)truA (PRK00021)→ |
| Sal-5-1   | NZ_JOII01000001.1       | - | 312744  | 312688  | RNA→ | rplQ (PRK05591)Ribosomal.L17 (pfam01196)→ PseudoU_synth_EcTruA (cd02570)truA (PRK00021)→ |

|           |                         |   |         |         |      |                                                |                                                |
|-----------|-------------------------|---|---------|---------|------|------------------------------------------------|------------------------------------------------|
| Ssp-99-1  | NZ_JOGQ01000003.1       | + | 125525  | 125581  | RNA→ | rplQ (PRK05591)Ribosomal.L17 (pfam01196)→      | PseudoU_synth_EcTruA (cd02570)truA (PRK00021)→ |
| Ssp-77-1  | NZ_LAYX01000002.1       | - | 159453  | 159397  | RNA→ | rplQ (PRK05591)Ribosomal.L17 (pfam01196)→      | PseudoU_synth_EcTruA (cd02570)truA (PRK00021)→ |
| Swa-1-1   | NZ_JHDU01000025.1       | - | 87726   | 87670   | RNA→ | rplQ (PRK05591)Ribosomal.L17 (pfam01196)→      | PseudoU_synth_EcTruA (cd02570)truA (PRK00021)→ |
| Ssp-30-1  | NZ_KB890704.1           | - | 981330  | 981274  | RNA→ | rplQ (PRK05591)Ribosomal.L17 (pfam01196)→      | PseudoU_synth_EcTruA (cd02570)truA (PRK00021)→ |
| Ssp-134-1 | NZ_JOHX01000007.1       | - | 127009  | 126953  | RNA→ | rplQ (PRK05591)Ribosomal.L17 (pfam01196)→      | PseudoU_synth_EcTruA (cd02570)truA (PRK00021)→ |
| Ssp-62-1  | NZ_JTCK01000085.1       | + | 32179   | 32235   | RNA→ | rplQ (PRK05591)Ribosomal.L17 (pfam01196)→      | PseudoU_synth_EcTruA (cd02570)truA (PRK00021)→ |
| Ssp-21-1  | NZ_CM002271.1           | + | 4349395 | 4349451 | RNA→ | rplQ (PRK05591)Ribosomal.L17 (pfam01196)→      | PseudoU_synth_EcTruA (cd02570)truA (PRK00021)→ |
| Ssp-35-1  | NZ_CM002273.1           | + | 4354309 | 4354365 | RNA→ | rplQ (PRK05591)Ribosomal.L17 (pfam01196)→      | PseudoU_synth_EcTruA (cd02570)truA (PRK00021)→ |
| Ssp-80-1  | NZ_KN549146.1           | + | 250775  | 250831  | RNA→ | rplQ (PRK05591)Ribosomal.L17 (pfam01196)→      | PseudoU_synth_EcTruA (cd02570)truA (PRK00021)→ |
| Sgr-12-5  | NZ_JOGU01000007.1       | - | 148467  | 148411  | RNA→ | rplQ (PRK05591)Ribosomal.L17 (pfam01196)→      | PseudoU_synth_EcTruA (cd02570)truA (PRK00021)→ |
| Sva-2-1   | NZ_JOBFO1000008.1       | - | 20052   | 19996   | RNA→ | rplQ (PRK05591)Ribosomal.L17 (pfam01196)→      |                                                |
| Sva-2-2   | NZ_JOFN01000040.1       | - | 18282   | 18226   | RNA→ | rplQ (PRK05591)Ribosomal.L17 (pfam01196)→      |                                                |
| Ssp-58-1  | NZ_AUKQ01000015.1       | + | 52320   | 52377   | RNA→ | rplQ (PRK05591)Ribosomal.L17 (pfam01196)→      |                                                |
| Sal-12-1  | NZ_JOID01000003.1       | + | 68800   | 68856   | RNA→ | rplQ (PRK05591)Ribosomal.L17 (pfam01196)→      |                                                |
| Sfr-1-1   | NZ_LGSP01000027.1       | - | 10382   | 10326   | RNA→ | rplQ (PRK05591)Ribosomal.L17 (pfam01196)→      |                                                |
| Sfr-1-2   | NZ_JNAD01000026.1       | - | 10369   | 10313   | RNA→ | rplQ (PRK05591)Ribosomal.L17 (pfam01196)→      |                                                |
| Sxi-2-1   | NZ_AFRP01001524.1       | + | 40341   | 40397   | RNA→ | rplQ (PRK05591)Ribosomal.L17 (pfam01196)→      |                                                |
| Ssp-119-1 | NZ_JOHR01000002.1       | + | 230095  | 230151  | RNA→ | rplQ (PRK05591)Ribosomal.L17 (pfam01196)→      |                                                |
| Ssp-33-1  | NZ_KB891885.1           | - | 239596  | 239541  | RNA→ | rplQ (PRK05591)Ribosomal.L17 (pfam01196)→      | PseudoU_synth_EcTruA (cd02570)truA (PRK00021)→ |
| Ssp-37-1  | NZ_BARG01000058.1       | - | 624     | 569     | RNA→ | rplQ (PRK05591)Ribosomal.L17 (pfam01196)→      |                                                |
| Ssp-170-1 | NZ_JODG01000026.1       | + | 329     | 385     | RNA→ | rplQ (PRK05591)Ribosomal.L17 (pfam01196)→      | PseudoU_synth_EcTruA (cd02570)truA (PRK00021)→ |
|           |                         |   |         |         |      | Ugd (COG1004)NDP-sugDHase (TIGR03026)→         |                                                |
| Smi-1-1   | NZ_KN050740.1           | - | 288662  | 288606  | RNA→ | rplQ (PRK05591)Ribosomal.L17 (pfam01196)→      | PseudoU_synth_EcTruA (cd02570)truA (PRK00021)→ |
| Ssp-138-1 | NZ_JOIU01000016.1       | + | 88730   | 88786   | RNA→ | rplQ (PRK05591)Ribosomal.L17 (pfam01196)→      | PseudoU_synth_EcTruA (cd02570)truA (PRK00021)→ |
| Sga-2-1   | NZ_JRHJ01000054.1       | + | 156382  | 156438  | RNA→ | rplQ (PRK05591)Ribosomal.L17 (pfam01196)→      |                                                |
| env-24    | JGI24740J21852_10018017 | - | 980     | 924     | RNA→ | rplQ (PRK05591)Ribosomal.L17 (pfam01196)→      |                                                |
| env-25    | JGI24739J22299_10011386 | - | 2321    | 2265    | RNA→ | rplQ (PRK05591)Ribosomal.L17 (pfam01196)→      |                                                |
| env-26    | JGI24737J22298_10030274 | - | 711     | 655     | RNA→ | rplQ (PRK05591)Ribosomal.L17 (pfam01196)→      | hypo→                                          |
| env-27    | JGI24735J21928_10022680 | + | 1260    | 1316    | RNA→ | rplQ (PRK05591)Ribosomal.L17 (pfam01196)→      |                                                |
| env-28    | JGI24738J21930_10016389 | + | 901     | 957     | RNA→ | rplQ (PRK05591)Ribosomal.L17 (pfam01196)→      |                                                |
| env-29    | JGI24738J21930_10017841 | - | 666     | 610     | RNA→ | rplQ (PRK05591)Ribosomal.L17 (pfam01196)→      |                                                |
| Sca-1-1   | NZ_KB911586.1           | + | 111863  | 111919  | RNA→ | rplQ (PRK05591)Ribosomal.L17 (pfam01196)→      | PseudoU_synth_EcTruA (cd02570)truA (PRK00021)→ |
| Ssp-23-1  | NZ_KE150428.1           | + | 48833   | 48889   | RNA→ | rplQ (PRK05591)Ribosomal.L17 (pfam01196)→      | PseudoU_synth_EcTruA (cd02570)truA (PRK00021)→ |
| Ssp-135-1 | NZ_JNXF01000033.1       | - | 14094   | 14038   | RNA→ | rplQ (PRK05591)Ribosomal.L17 (pfam01196)→      |                                                |
| Ssp-137-1 | NZ_JOHP01000033.1       | - | 14040   | 13984   | RNA→ | rplQ (PRK05591)Ribosomal.L17 (pfam01196)→      |                                                |
| Ssp-91-1  | NZ_JNZW01000034.1       | - | 14086   | 14030   | RNA→ | rplQ (PRK05591)Ribosomal.L17 (pfam01196)→      |                                                |
| Ssp-136-1 | NZ_JOHS01000031.1       | - | 14033   | 13977   | RNA→ | rplQ (PRK05591)Ribosomal.L17 (pfam01196)→      |                                                |
| Ssp-169-1 | NZ_JODC01000003.1       | - | 760731  | 760675  | RNA→ | rplQ (PRK05591)Ribosomal.L17 (pfam01196)→      |                                                |
| env-30    | JGI24736J21556_1066001  | + | 409     | 465     | RNA→ |                                                |                                                |
| Ssv-1-1   | NZ_CM000951.1           | + | 5617327 | 5617383 | RNA→ | rplQ (PRK05591)Ribosomal.L17 (pfam01196)→      | hypo→                                          |
|           |                         |   |         |         |      | PseudoU_synth_EcTruA (cd02570)truA (PRK00021)→ | hypo→                                          |
| Ssp-186-1 | NZ_JOBZ01000048.1       | + | 11344   | 11400   | RNA→ | rplQ (PRK05591)Ribosomal.L17 (pfam01196)→      |                                                |
| Sda-1-1   | NC_020504.1             | - | 4173417 | 4173361 | RNA→ | rplQ (PRK05591)Ribosomal.L17 (pfam01196)→      | PseudoU_synth_EcTruA (cd02570)truA (PRK00021)→ |
| Sgr-12-6  | NZ_JOJE01000032.1       | - | 42148   | 42092   | RNA→ | rplQ (PRK05591)Ribosomal.L17 (pfam01196)→      |                                                |
| Ssp-199-1 | NZ_JXTE01000103.1       | - | 19424   | 19368   | RNA→ | rplQ (PRK05591)Ribosomal.L17 (pfam01196)→      |                                                |
| env-31    | JGI25160J50197_1027159  | - | 1290    | 1235    | RNA→ | rplQ (PRK05591)Ribosomal.L17 (pfam01196)→      |                                                |
| Ssp-88-1  | NZ_BBNO01000005.1       | + | 169561  | 169616  | RNA→ | rplQ (PRK05591)Ribosomal.L17 (pfam01196)→      | PseudoU_synth_EcTruA (cd02570)truA (PRK00021)→ |
| Ssp-19-1  | NZ_AQWO01000012.1       | - | 42118   | 42063   | RNA→ | rplQ (PRK05591)Ribosomal.L17 (pfam01196)→      | PseudoU_synth_EcTruA (cd02570)truA (PRK00021)→ |
| Sfu-2-1   | NZ_JOEY01000005.1       | - | 283078  | 283023  | RNA→ | rplQ (PRK05591)Ribosomal.L17 (pfam01196)→      | PseudoU_synth_EcTruA (cd02570)truA (PRK00021)→ |
|           |                         |   |         |         |      | Glyco_hydro_26 (pfam02156)→                    |                                                |
| Sau-2-1   | NZ_JH725387.1           | + | 3734051 | 3734106 | RNA→ | rplQ (PRK05591)Ribosomal.L17 (pfam01196)→      |                                                |
| Sxy-1-1   | NZ_JNWO01000013.1       | + | 27275   | 27330   | RNA→ | rplQ (PRK05591)Ribosomal.L17 (pfam01196)→      |                                                |
| Ssp-122-1 | NZ_JNXE01000005.1       | + | 80283   | 80338   | RNA→ | rplQ (PRK05591)Ribosomal.L17 (pfam01196)→      |                                                |



|           |                        |   |         |         |                                                                                                                                                                                                                                                                                                                                                                                                                                                                                |
|-----------|------------------------|---|---------|---------|--------------------------------------------------------------------------------------------------------------------------------------------------------------------------------------------------------------------------------------------------------------------------------------------------------------------------------------------------------------------------------------------------------------------------------------------------------------------------------|
| Spr-2-1   | NZ_BARF01000005.1      | + | 85303   | 85358   | RNA→ <a href="#">rplQ (PRK05591)</a> <a href="#">Ribosomal_L17 (pfam01196)</a> →                                                                                                                                                                                                                                                                                                                                                                                               |
| Ssp-84-1  | NZ_LBMU01000061.1      | - | 29957   | 29901   | RNA→ <a href="#">rplQ (PRK05591)</a> <a href="#">Ribosomal_L17 (pfam01196)</a> →                                                                                                                                                                                                                                                                                                                                                                                               |
| Sip-1-1   | NZ_AEJC01000092.1      | + | 9205    | 9260    | RNA→ <a href="#">rplQ (PRK05591)</a> <a href="#">Ribosomal_L17 (pfam01196)</a> → <a href="#">PseudoU_synth_EcTruA (cd02570)</a> <a href="#">truA (PRK00021)</a> →                                                                                                                                                                                                                                                                                                              |
| Sly-2-1   | NZ_CP007699.1          | + | 4988677 | 4988732 | RNA→ <a href="#">rplQ (PRK05591)</a> <a href="#">Ribosomal_L17 (pfam01196)</a> → <a href="#">PseudoU_synth_EcTruA (cd02570)</a> <a href="#">truA (PRK00021)</a> →                                                                                                                                                                                                                                                                                                              |
| Ssc-2-1   | NZ_KB889574.1          | - | 55636   | 55581   | RNA→ <a href="#">rplQ (PRK05591)</a> <a href="#">Ribosomal_L17 (pfam01196)</a> →                                                                                                                                                                                                                                                                                                                                                                                               |
| Sye-1-1   | NZ_JQNR01000005.1      | + | 1956765 | 1956820 | RNA→ <a href="#">rplQ (PRK05591)</a> <a href="#">Ribosomal_L17 (pfam01196)</a> →                                                                                                                                                                                                                                                                                                                                                                                               |
| Svi-6-1   | NZ_KB904651.1          | - | 121812  | 121756  | RNA→ <a href="#">rplQ (PRK05591)</a> <a href="#">Ribosomal_L17 (pfam01196)</a> →                                                                                                                                                                                                                                                                                                                                                                                               |
| Sni-1-1   | NZ_CM002280.1          | - | 3417483 | 3417429 | RNA→ <a href="#">rplQ (PRK05591)</a> <a href="#">Ribosomal_L17 (pfam01196)</a> → <a href="#">PseudoU_synth_EcTruA (cd02570)</a> <a href="#">truA (PRK00021)</a> →                                                                                                                                                                                                                                                                                                              |
| Ssu-2-1   | NZ_AJTQ01000307.1      | + | 13549   | 13604   | RNA→ <a href="#">RplQ (COG0203)</a> <a href="#">rplQ (PRK05591)</a> →                                                                                                                                                                                                                                                                                                                                                                                                          |
| Ssu-1-1   | NZ_KB905817.1          | - | 189202  | 189147  | RNA→ <a href="#">RplQ (COG0203)</a> <a href="#">rplQ (PRK05591)</a> → <a href="#">PseudoU_synth_EcTruA (cd02570)</a> <a href="#">truA (PRK00021)</a> →                                                                                                                                                                                                                                                                                                                         |
| Svi-2-1   | NC_015957.1            | + | 705115  | 705170  | RNA→ <a href="#">rplQ (PRK05591)</a> <a href="#">Ribosomal_L17 (pfam01196)</a> → <a href="#">PseudoU_synth_EcTruA (cd02570)</a> <a href="#">truA (PRK00021)</a> →                                                                                                                                                                                                                                                                                                              |
| Sfl-4-1   | NZ_AUBE01000006.1      | - | 238624  | 238569  | RNA→ <a href="#">rplQ (PRK05591)</a> <a href="#">Ribosomal_L17 (pfam01196)</a> → <a href="#">PseudoU_synth_EcTruA (cd02570)</a> <a href="#">truA (PRK00021)</a> →                                                                                                                                                                                                                                                                                                              |
| Spu-1-1   | NZ_KB913030.1          | + | 4401513 | 4401568 | RNA→ <a href="#">rplQ (PRK05591)</a> <a href="#">Ribosomal_L17 (pfam01196)</a> → <a href="#">PseudoU_synth_EcTruA (cd02570)</a> <a href="#">truA (PRK00021)</a> →                                                                                                                                                                                                                                                                                                              |
| Ssc-4-2   | NZ_JOBC01000019.1      | - | 77220   | 77165   | RNA→ <a href="#">rplQ (PRK05591)</a> <a href="#">Ribosomal_L17 (pfam01196)</a> → <a href="#">PseudoU_synth_EcTruA (cd02570)</a> <a href="#">truA (PRK00021)</a> →                                                                                                                                                                                                                                                                                                              |
| Shy-1-1   | NZ_GG657754.1          | - | 4571299 | 4571244 | RNA→ <a href="#">rplQ (PRK05591)</a> <a href="#">Ribosomal_L17 (pfam01196)</a> → <a href="#">rplQ (PRK05591)</a> <a href="#">Ribosomal_L17 (pfam01196)</a> →                                                                                                                                                                                                                                                                                                                   |
| env-32    | JGI25160J50197_1040719 | - | 1000    | 945     | RNA→ <a href="#">rplQ (PRK05591)</a> <a href="#">Ribosomal_L17 (pfam01196)</a> → <a href="#">truA (PRK00021)</a> <a href="#">PseudoU_synth_1 (pfam01416)</a> →                                                                                                                                                                                                                                                                                                                 |
| Sbi-1-1   | NC_016582.1            | + | 7517266 | 7517321 | RNA→ <a href="#">rplQ (PRK05591)</a> <a href="#">Ribosomal_L17 (pfam01196)</a> →                                                                                                                                                                                                                                                                                                                                                                                               |
| Afl-1-1   | NZ_KB894099.1          | - | 208768  | 208711  | RNA→ <a href="#">rplQ (PRK05591)</a> <a href="#">Ribosomal_L17 (pfam01196)</a> →                                                                                                                                                                                                                                                                                                                                                                                               |
| Ssp-55-1  | NZ_JTIY01000001.1      | - | 1514095 | 1514041 | RNA→ <a href="#">rplQ (PRK05591)</a> <a href="#">Ribosomal_L17 (pfam01196)</a> →                                                                                                                                                                                                                                                                                                                                                                                               |
| Ssp-152-1 | NZ_JOCX01000005.1      | + | 52944   | 52998   | RNA→ <a href="#">rplQ (PRK05591)</a> <a href="#">Ribosomal_L17 (pfam01196)</a> →                                                                                                                                                                                                                                                                                                                                                                                               |
| Ssp-104-1 | NZ_JOIS01000020.1      | - | 101942  | 101888  | RNA→ <a href="#">rplQ (PRK05591)</a> <a href="#">Ribosomal_L17 (pfam01196)</a> →                                                                                                                                                                                                                                                                                                                                                                                               |
| Ssp-166-1 | NZ_JODE01000005.1      | + | 46633   | 46687   | RNA→ <a href="#">rplQ (PRK05591)</a> <a href="#">Ribosomal_L17 (pfam01196)</a> → <a href="#">PseudoU_synth_EcTruA (cd02570)</a> <a href="#">truA (PRK00021)</a> →                                                                                                                                                                                                                                                                                                              |
| Ssp-167-1 | NZ_JODJ01000029.1      | + | 46652   | 46706   | <a href="#">AAA (smart00382)</a> <a href="#">Uup (COG0488)</a> <a href="#">AAA_21 (pfam13304)</a> → <a href="#">DUF2029 (pfam09594)</a> → <a href="#">DUF2029 (pfam09594)</a> →<br>RNA→ <a href="#">rplQ (PRK05591)</a> <a href="#">Ribosomal_L17 (pfam01196)</a> → <a href="#">PseudoU_synth_EcTruA (cd02570)</a> <a href="#">truA (PRK00021)</a> →                                                                                                                           |
| Ssp-191-1 | NZ_JWZS01000804.1      | + | 24884   | 24938   | <a href="#">AAA (smart00382)</a> <a href="#">Uup (COG0488)</a> <a href="#">AAA_21 (pfam13304)</a> → <a href="#">DUF2029 (pfam09594)</a> → <a href="#">DUF2029 (pfam09594)</a> →<br>RNA→ <a href="#">rplQ (PRK05591)</a> <a href="#">Ribosomal_L17 (pfam01196)</a> → <a href="#">PseudoU_synth_EcTruA (cd02570)</a> <a href="#">truA (PRK00021)</a> →                                                                                                                           |
| Sxa-1-1   | NZ_JNZH01000037.1      | - | 123110  | 123056  | <a href="#">AAA (smart00382)</a> <a href="#">Uup (COG0488)</a> <a href="#">AAA_21 (pfam13304)</a> → <a href="#">hypo</a> →<br>RNA→ <a href="#">rplQ (PRK05591)</a> <a href="#">Ribosomal_L17 (pfam01196)</a> → <a href="#">PseudoU_synth_EcTruA (cd02570)</a> <a href="#">truA (PRK00021)</a> →                                                                                                                                                                                |
| Sxa-1-2   | NZ_JOFT01000047.1      | + | 32685   | 32739   | <a href="#">AAA (smart00382)</a> <a href="#">Uup (COG0488)</a> → <a href="#">DUF2029 (pfam09594)</a> →<br>RNA→ <a href="#">rplQ (PRK05591)</a> <a href="#">Ribosomal_L17 (pfam01196)</a> → <a href="#">PseudoU_synth_EcTruA (cd02570)</a> <a href="#">truA (PRK00021)</a> →                                                                                                                                                                                                    |
| Sla-1-1   | NZ_JNXL01000004.1      | + | 16844   | 16898   | <a href="#">AAA (smart00382)</a> <a href="#">Uup (COG0488)</a> → <a href="#">DUF2029 (pfam09594)</a> →<br>RNA→ <a href="#">rplQ (PRK05591)</a> <a href="#">Ribosomal_L17 (pfam01196)</a> →                                                                                                                                                                                                                                                                                     |
| Svi-12-3  | NZ_JNYC01000038.1      | + | 47873   | 47927   | RNA→ <a href="#">rplQ (PRK05591)</a> <a href="#">Ribosomal_L17 (pfam01196)</a> → <a href="#">PseudoU_synth_EcTruA (cd02570)</a> <a href="#">truA (PRK00021)</a> →                                                                                                                                                                                                                                                                                                              |
| Sla-2-2   | NZ_JOEW01000015.1      | + | 48662   | 48716   | <a href="#">AAA (smart00382)</a> <a href="#">Uup (COG0488)</a> <a href="#">AAA_21 (pfam13304)</a> →<br>RNA→ <a href="#">rplQ (PRK05591)</a> <a href="#">Ribosomal_L17 (pfam01196)</a> → <a href="#">PseudoU_synth_EcTruA (cd02570)</a> <a href="#">truA (PRK00021)</a> →                                                                                                                                                                                                       |
| Ssp-150-1 | NZ_JODA01000027.1      | - | 24120   | 24066   | <a href="#">AAA (smart00382)</a> <a href="#">Uup (COG0488)</a> <a href="#">AAA_21 (pfam13304)</a> → <a href="#">DUF2029 (pfam09594)</a> →<br>RNA→ <a href="#">rplQ (PRK05591)</a> <a href="#">Ribosomal_L17 (pfam01196)</a> → <a href="#">PseudoU_synth_EcTruA (cd02570)</a> <a href="#">truA (PRK00021)</a> →                                                                                                                                                                 |
| Ssp-32-1  | NZ_DS570396.1          | - | 78156   | 78102   | <a href="#">AAA (smart00382)</a> <a href="#">Uup (COG0488)</a> <a href="#">AAA_21 (pfam13304)</a> → <a href="#">DUF2029 (pfam09594)</a> →<br>RNA→ <a href="#">rplQ (PRK05591)</a> <a href="#">Ribosomal_L17 (pfam01196)</a> → <a href="#">rplQ (PRK05591)</a> <a href="#">Ribosomal_L17 (pfam01196)</a> →<br><a href="#">PseudoU_synth_EcTruA (cd02570)</a> <a href="#">truA (PRK00021)</a> → <a href="#">PseudoU_synth_EcTruA (cd02570)</a> <a href="#">truA (PRK00021)</a> → |
| Ssp-32-2  | NZ_CP011664.1          | + | 4787937 | 4787991 | <a href="#">AAA (smart00382)</a> <a href="#">Uup (COG0488)</a> <a href="#">AAA_21 (pfam13304)</a> →<br><a href="#">AAA (smart00382)</a> <a href="#">Uup (COG0488)</a> <a href="#">AAA_21 (pfam13304)</a> → <a href="#">DUF2029 (pfam09594)</a> → <a href="#">DUF2029 (pfam09594)</a> →<br>RNA→ <a href="#">rplQ (PRK05591)</a> <a href="#">Ribosomal_L17 (pfam01196)</a> → <a href="#">PseudoU_synth_EcTruA (cd02570)</a> <a href="#">truA (PRK00021)</a> →                    |
| Ska-1-1   | NZ_JNZY01000017.1      | + | 138776  | 138830  | <a href="#">AAA (smart00382)</a> <a href="#">Uup (COG0488)</a> <a href="#">AAA_21 (pfam13304)</a> → <a href="#">DUF2029 (pfam09594)</a> →<br>RNA→ <a href="#">rplQ (PRK05591)</a> <a href="#">Ribosomal_L17 (pfam01196)</a> →                                                                                                                                                                                                                                                  |
| Sro-6-1   | NZ_LFML01000045.1      | + | 17342   | 17396   | RNA→ <a href="#">rplQ (PRK05591)</a> <a href="#">Ribosomal_L17 (pfam01196)</a> →                                                                                                                                                                                                                                                                                                                                                                                               |
| Ssp-194-1 | NZ_AUKR01000012.1      | + | 193841  | 193895  | RNA→ <a href="#">rplQ (PRK05591)</a> <a href="#">Ribosomal_L17 (pfam01196)</a> → <a href="#">PseudoU_synth_EcTruA (cd02570)</a> <a href="#">truA (PRK00021)</a> →                                                                                                                                                                                                                                                                                                              |
| env-33    | LWSO_NODE.580          | + | 2805    | 2860    | RNA→ <a href="#">rplQ (PRK05591)</a> <a href="#">Ribosomal_L17 (pfam01196)</a> → <a href="#">PseudoU_synth_EcTruA (cd02570)</a> <a href="#">truA (PRK00021)</a> →                                                                                                                                                                                                                                                                                                              |
| Ssp-181-1 | NZ_JOCD01000044.1      | - | 26202   | 26147   | RNA→ <a href="#">rplQ (PRK05591)</a> <a href="#">Ribosomal_L17 (pfam01196)</a> →                                                                                                                                                                                                                                                                                                                                                                                               |
| Ssp-7-1   | NZ_KB892128.1          | + | 655     | 710     | RNA→ <a href="#">rplQ (PRK05591)</a> <a href="#">Ribosomal_L17 (pfam01196)</a> → <a href="#">PseudoU_synth_EcTruA (cd02570)</a> <a href="#">truA (PRK00021)</a> →                                                                                                                                                                                                                                                                                                              |
| Ssp-140-1 | NZ_KL591014.1          | + | 86235   | 86290   | RNA→ <a href="#">rplQ (PRK05591)</a> <a href="#">Ribosomal_L17 (pfam01196)</a> → <a href="#">PseudoU_synth_EcTruA (cd02570)</a> <a href="#">truA (PRK00021)</a> →                                                                                                                                                                                                                                                                                                              |
| Svi-1-1   | NZ_ASHX01000001.1      | - | 1241638 | 1241583 | RNA→ <a href="#">rplQ (PRK05591)</a> <a href="#">Ribosomal_L17 (pfam01196)</a> →                                                                                                                                                                                                                                                                                                                                                                                               |
| Sca-2-1   | NC_016111.1            | + | 3889184 | 3889239 | RNA→ <a href="#">rplQ (PRK05591)</a> <a href="#">Ribosomal_L17 (pfam01196)</a> → <a href="#">PseudoU_synth_EcTruA (cd02570)</a> <a href="#">truA (PRK00021)</a> →                                                                                                                                                                                                                                                                                                              |
| Sca-2-2   | NC_017586.1            | + | 3888995 | 3889050 | RNA→ <a href="#">rplQ (PRK05591)</a> <a href="#">Ribosomal_L17 (pfam01196)</a> → <a href="#">PseudoU_synth_EcTruA (cd02570)</a> <a href="#">truA (PRK00021)</a> →                                                                                                                                                                                                                                                                                                              |



|           |                        |   |         |         |      |                                                  |                                                |
|-----------|------------------------|---|---------|---------|------|--------------------------------------------------|------------------------------------------------|
| Sts-1-1   | NZ_AJSZ01000399.1      | - | 24785   | 24730   | RNA→ | rplQ (PRK05591)Ribosomal.L17 (pfam01196)→        | rplQ (PRK05591)Ribosomal.L17 (pfam01196)→      |
| Ssp-25-1  | NZ_KB891797.1          | + | 527129  | 527185  | RNA→ | rplQ (PRK05591)Ribosomal.L17 (pfam01196)→        | PseudoU_synth_EcTruA (cd02570)truA (PRK00021)→ |
| Ska-1-2   | NZ_JZWW01000003.1      | + | 52624   | 52679   | RNA→ | rplQ (PRK05591)Ribosomal.L17 (pfam01196)→        | PseudoU_synth_EcTruA (cd02570)truA (PRK00021)→ |
|           |                        |   |         |         |      | AAA (smart00382)Uup (COG0488)AAA_21 (pfam13304)→ | DUF2029 (pfam09594)→                           |
| Smo-2-1   | NZ_JNYL01000032.1      | - | 28345   | 28290   | RNA→ | rplQ (PRK05591)Ribosomal.L17 (pfam01196)→        |                                                |
| Ssp-70-1  | NZ_KN708638.1          | - | 3669055 | 3669000 | RNA→ | rplQ (PRK05591)Ribosomal.L17 (pfam01196)→        |                                                |
| Sba-2-1   | NZ_KL573554.1          | + | 64146   | 64201   | RNA→ | rplQ (PRK05591)Ribosomal.L17 (pfam01196)→        | PseudoU_synth_EcTruA (cd02570)truA (PRK00021)→ |
| Sme-1-1   | NZ_JOJK01000001.1      | - | 178778  | 178723  | RNA→ | rplQ (PRK05591)Ribosomal.L17 (pfam01196)→        | PseudoU_synth_EcTruA (cd02570)truA (PRK00021)→ |
| Sgr-11-1  | NZ_JYBE01000004.1      | - | 64041   | 63986   | RNA→ | rplQ (PRK05591)Ribosomal.L17 (pfam01196)→        | PseudoU_synth_EcTruA (cd02570)truA (PRK00021)→ |
| Sgl-1-1   | NZ_JH689267.1          | - | 288602  | 288547  | RNA→ | rplQ (PRK05591)Ribosomal.L17 (pfam01196)→        | PseudoU_synth_EcTruA (cd02570)truA (PRK00021)→ |
| Ssp-76-1  | NZ_JPWW01000002.1      | + | 1014580 | 1014635 | RNA→ | rplQ (PRK05591)Ribosomal.L17 (pfam01196)→        | PseudoU_synth_EcTruA (cd02570)truA (PRK00021)→ |
| Sgr-12-7  | NZ_JOGA01000004.1      | - | 151218  | 151163  | RNA→ | rplQ (PRK05591)Ribosomal.L17 (pfam01196)→        | PseudoU_synth_EcTruA (cd02570)truA (PRK00021)→ |
| Sgl-3-2   | NZ_JNZK01000003.1      | - | 116076  | 116021  | RNA→ | rplQ (PRK05591)Ribosomal.L17 (pfam01196)→        | PseudoU_synth_EcTruA (cd02570)truA (PRK00021)→ |
| Sgr-4-1   | NC_010572.1            | - | 3318808 | 3318753 | RNA→ | rplQ (PRK05591)Ribosomal.L17 (pfam01196)→        | PseudoU_synth_EcTruA (cd02570)truA (PRK00021)→ |
| San-2-1   | NZ_JNXS01000008.1      | + | 26146   | 26201   | RNA→ | rplQ (PRK05591)Ribosomal.L17 (pfam01196)→        | PseudoU_synth_EcTruA (cd02570)truA (PRK00021)→ |
| San-2-2   | NZ_JOEZ01000006.1      | - | 175251  | 175196  | RNA→ | rplQ (PRK05591)Ribosomal.L17 (pfam01196)→        | PseudoU_synth_EcTruA (cd02570)truA (PRK00021)→ |
| Sgr-3-1   | NZ_GL877172.1          | - | 3511493 | 3511438 | RNA→ | rplQ (PRK05591)Ribosomal.L17 (pfam01196)→        | rplQ (PRK05591)Ribosomal.L17 (pfam01196)→      |
|           |                        |   |         |         |      | PseudoU_synth_EcTruA (cd02570)truA (PRK00021)→   | PseudoU_synth_EcTruA (cd02570)truA (PRK00021)→ |
| Sgr-12-8  | NZ_JOBR01000006.1      | + | 349597  | 349652  | RNA→ | rplQ (PRK05591)Ribosomal.L17 (pfam01196)→        | PseudoU_synth_EcTruA (cd02570)truA (PRK00021)→ |
| Ssp-9-1   | NZ_KB899005.1          | + | 126861  | 126916  | RNA→ | rplQ (PRK05591)Ribosomal.L17 (pfam01196)→        | PseudoU_synth_EcTruA (cd02570)truA (PRK00021)→ |
| Seu-1-1   | NZ_KQ257782.1          | - | 24925   | 24870   | RNA→ | rplQ (PRK05591)Ribosomal.L17 (pfam01196)→        | PseudoU_synth_EcTruA (cd02570)truA (PRK00021)→ |
| Ssp-82-1  | NZ_JXUQ01000001.1      | + | 4992228 | 4992283 | RNA→ | rplQ (PRK05591)Ribosomal.L17 (pfam01196)→        | PseudoU_synth_EcTruA (cd02570)truA (PRK00021)→ |
| Sal-12-2  | NZ_JOED01000012.1      | + | 368027  | 368082  | RNA→ | rplQ (PRK05591)Ribosomal.L17 (pfam01196)→        | PseudoU_synth_EcTruA (cd02570)truA (PRK00021)→ |
| Ssp-48-1  | NZ_AGSW01000026.1      | - | 4221    | 4166    | RNA→ | rplQ (PRK05591)Ribosomal.L17 (pfam01196)→        | rplQ (PRK05591)Ribosomal.L17 (pfam01196)→      |
|           |                        |   |         |         |      | PseudoU_synth_EcTruA (cd02570)truA (PRK00021)→   | PseudoU_synth_EcTruA (cd02570)truA (PRK00021)→ |
| Sha-1-1   | NZ_JOAZ01000028.1      | - | 8990    | 8935    | RNA→ | rplQ (PRK05591)Ribosomal.L17 (pfam01196)→        | PseudoU_synth_EcTruA (cd02570)truA (PRK00021)→ |
| Sgr-8-1   | NZ_JOFC01000040.1      | - | 9004    | 8949    | RNA→ | rplQ (PRK05591)Ribosomal.L17 (pfam01196)→        | PseudoU_synth_EcTruA (cd02570)truA (PRK00021)→ |
| Ssp-45-1  | NC_015953.1            | + | 4421046 | 4421101 | RNA→ | rplQ (PRK05591)Ribosomal.L17 (pfam01196)→        | PseudoU_synth_EcTruA (cd02570)truA (PRK00021)→ |
| Ssp-18-1  | NZ_ARPI01000009.1      | + | 69587   | 69642   | RNA→ | rplQ (PRK05591)Ribosomal.L17 (pfam01196)→        | PseudoU_synth_EcTruA (cd02570)truA (PRK00021)→ |
| Ssp-71-1  | NZ_AZVE01000001.1      | - | 707671  | 707616  | RNA→ | rplQ (PRK05591)Ribosomal.L17 (pfam01196)→        | PseudoU_synth_EcTruA (cd02570)truA (PRK00021)→ |
| Ssp-175-1 | NZ_KL585382.1          | + | 76745   | 76800   | RNA→ | rplQ (PRK05591)Ribosomal.L17 (pfam01196)→        | PseudoU_synth_EcTruA (cd02570)truA (PRK00021)→ |
| Ssp-188-1 | NZ_JJOB01000001.1      | + | 3882743 | 3882798 | RNA→ | rplQ (PRK05591)Ribosomal.L17 (pfam01196)→        | PseudoU_synth_EcTruA (cd02570)truA (PRK00021)→ |
| Ssp-52-1  | NZ_JTHL01000001.1      | + | 5725538 | 5725593 | RNA→ | rplQ (PRK05591)Ribosomal.L17 (pfam01196)→        |                                                |
| Sri-4-1   | NZ_JOCQ01000089.1      | - | 23248   | 23193   | RNA→ | rplQ (PRK05591)Ribosomal.L17 (pfam01196)→        |                                                |
| Ssp-145-1 | NZ_JOHB01000009.1      | + | 199860  | 199915  | RNA→ | rplQ (PRK05591)Ribosomal.L17 (pfam01196)→        |                                                |
| env-34    | JGI25160J50197_1029655 | - | 174     | 119     | RNA→ |                                                  |                                                |
| Sly-1-1   | NZ_JNZA01000027.1      | - | 104738  | 104683  | RNA→ | rplQ (PRK05591)Ribosomal.L17 (pfam01196)→        |                                                |
| Ssp-142-1 | NZ_JOGE01000029.1      | + | 58699   | 58754   | RNA→ | rplQ (PRK05591)Ribosomal.L17 (pfam01196)→        |                                                |
| Ssp-155-1 | NZ_JOIX01000020.1      | + | 81701   | 81756   | RNA→ | rplQ (PRK05591)Ribosomal.L17 (pfam01196)→        | PseudoU_synth_EcTruA (cd02570)truA (PRK00021)→ |
| Ssp-53-1  | NZ_CP003987.1          | + | 5490097 | 5490152 | RNA→ | rplQ (PRK05591)Ribosomal.L17 (pfam01196)→        | PseudoU_synth_EcTruA (cd02570)truA (PRK00021)→ |
| Sat-2-1   | NZ_JNXG01000002.1      | + | 464448  | 464503  | RNA→ | rplQ (PRK05591)Ribosomal.L17 (pfam01196)→        | PseudoU_synth_EcTruA (cd02570)truA (PRK00021)→ |
| Ssp-95-1  | NZ_JOAE01000005.1      | - | 277533  | 277478  | RNA→ | rplQ (PRK05591)Ribosomal.L17 (pfam01196)→        | PseudoU_synth_EcTruA (cd02570)truA (PRK00021)→ |
| Sfl-1-1   | NC_016114.1            | - | 2965273 | 2965218 | RNA→ | rplQ (PRK05591)Ribosomal.L17 (pfam01196)→        | PseudoU_synth_EcTruA (cd02570)truA (PRK00021)→ |
| Ssp-34-1  | NC_021055.1            | + | 4462927 | 4462982 | RNA→ | rplQ (PRK05591)Ribosomal.L17 (pfam01196)→        | PseudoU_synth_EcTruA (cd02570)truA (PRK00021)→ |
| [pa-1-1   | NZ_JNYQ01000004.1      | - | 851086  | 851031  | RNA→ | rplQ (PRK05591)Ribosomal.L17 (pfam01196)→        | PseudoU_synth_EcTruA (cd02570)truA (PRK00021)→ |
| Sol-2-2   | NZ_JNWM01000003.1      | + | 440846  | 440901  | RNA→ | rplQ (PRK05591)Ribosomal.L17 (pfam01196)→        | PseudoU_synth_EcTruA (cd02570)truA (PRK00021)→ |
| Sfu-3-1   | NZ_JNXH01000004.1      | - | 821119  | 821064  | RNA→ | rplQ (PRK05591)Ribosomal.L17 (pfam01196)→        | PseudoU_synth_EcTruA (cd02570)truA (PRK00021)→ |
| Sfl-8-1   | NZ_JOAB01000003.1      | - | 795932  | 795877  | RNA→ | rplQ (PRK05591)Ribosomal.L17 (pfam01196)→        | PseudoU_synth_EcTruA (cd02570)truA (PRK00021)→ |
| Ssp-154-1 | NZ_JOIW01000004.1      | - | 790730  | 790675  | RNA→ | rplQ (PRK05591)Ribosomal.L17 (pfam01196)→        | PseudoU_synth_EcTruA (cd02570)truA (PRK00021)→ |
| Sce-1-1   | NZ_JOEL01000031.1      | + | 46103   | 46158   | RNA→ | rplQ (PRK05591)Ribosomal.L17 (pfam01196)→        |                                                |
| Ssc-5-1   | NZ_JOEI01000008.1      | + | 148665  | 148720  | RNA→ | rplQ (PRK05591)Ribosomal.L17 (pfam01196)→        | PseudoU_synth_EcTruA (cd02570)truA (PRK00021)→ |
| Ssp-144-1 | NZ_KL589850.1          | + | 71321   | 71376   | RNA→ | rplQ (PRK05591)Ribosomal.L17 (pfam01196)→        | PseudoU_synth_EcTruA (cd02570)truA (PRK00021)→ |
| Ssp-54-1  | NZ_CBRG010000181.1     | + | 9589    | 9644    | RNA→ | rplQ (PRK05591)Ribosomal.L17 (pfam01196)→        | PseudoU_synth_EcTruA (cd02570)truA (PRK00021)→ |

|           |                    |   |         |         |                                                |                                                |                                                |
|-----------|--------------------|---|---------|---------|------------------------------------------------|------------------------------------------------|------------------------------------------------|
| Sgr-13-1  | NZ_JOFF01000044.1  | - | 4277    | 4222    | RNA→                                           | rplQ (PRK05591)Ribosomal.L17 (pfam01196)→      | PseudoU_synth_EcTruA (cd02570)truA (PRK00021)→ |
| Sfl-9-1   | NZ_JOAC01000001.1  | + | 308726  | 308781  | RNA→                                           | rplQ (PRK05591)Ribosomal.L17 (pfam01196)→      | PseudoU_synth_EcTruA (cd02570)truA (PRK00021)→ |
| Sro-4-1   | NZ_ABYX02000001.1  | + | 4766062 | 4766117 | RNA→                                           | rplQ (PRK05591)Ribosomal.L17 (pfam01196)→      | PseudoU_synth_EcTruA (cd02570)truA (PRK00021)→ |
| Ssp-22-1  | NZ_AWOQ01000620.1  | + | 11739   | 11794   | RNA→                                           | rplQ (PRK05591)Ribosomal.L17 (pfam01196)→      |                                                |
| Sro-2-1   | NZ_DS999644.1      | + | 4713512 | 4713567 | RNA→                                           | rplQ (PRK05591)Ribosomal.L17 (pfam01196)→      | rplQ (PRK05591)Ribosomal.L17 (pfam01196)→      |
| Sal-12-3  | NZ_JNWW01000015.1  | - | 121666  | 121611  | PseudoU_synth_EcTruA (cd02570)truA (PRK00021)→ | PseudoU_synth_EcTruA (cd02570)truA (PRK00021)→ | PseudoU_synth_EcTruA (cd02570)truA (PRK00021)→ |
| Ssp-174-1 | NZ_JOCW01000027.1  | + | 95259   | 95314   | RNA→                                           | rplQ (PRK05591)Ribosomal.L17 (pfam01196)→      | PseudoU_synth_EcTruA (cd02570)truA (PRK00021)→ |
| Ssp-107-1 | NZ_JOIP01000001.1  | + | 298835  | 298890  | RNA→                                           | rplQ (PRK05591)Ribosomal.L17 (pfam01196)→      | PseudoU_synth_EcTruA (cd02570)truA (PRK00021)→ |
| Ssp-108-1 | NZ_JOIO01000005.1  | + | 89666   | 89721   | RNA→                                           | rplQ (PRK05591)Ribosomal.L17 (pfam01196)→      | PseudoU_synth_EcTruA (cd02570)truA (PRK00021)→ |
| Sgr-13-2  | NZ_LGUZ01000023.1  | - | 4252    | 4197    | RNA→                                           | rplQ (PRK05591)Ribosomal.L17 (pfam01196)→      | PseudoU_synth_EcTruA (cd02570)truA (PRK00021)→ |
| Spu-3-1   | NZ_JOBG01000005.1  | - | 224288  | 224233  | RNA→                                           | rplQ (PRK05591)Ribosomal.L17 (pfam01196)→      | PseudoU_synth_EcTruA (cd02570)truA (PRK00021)→ |
| Sgr-13-3  | NZ_JOFE01000006.1  | + | 95269   | 95324   | RNA→                                           | rplQ (PRK05591)Ribosomal.L17 (pfam01196)→      | PseudoU_synth_EcTruA (cd02570)truA (PRK00021)→ |
| Sgr-13-4  | NZ_JOFD01000016.1  | - | 125262  | 125207  | RNA→                                           | rplQ (PRK05591)Ribosomal.L17 (pfam01196)→      | PseudoU_synth_EcTruA (cd02570)truA (PRK00021)→ |
| Spu-3-2   | NZ_JODK01000012.1  | + | 27097   | 27152   | RNA→                                           | rplQ (PRK05591)Ribosomal.L17 (pfam01196)→      | PseudoU_synth_EcTruA (cd02570)truA (PRK00021)→ |
| Sbr-1-1   | NZ_JNXB01000005.1  | + | 80235   | 80290   | RNA→                                           | rplQ (PRK05591)Ribosomal.L17 (pfam01196)→      | PseudoU_synth_EcTruA (cd02570)truA (PRK00021)→ |
| Sca-5-1   | NZ_KL573598.1      | - | 234310  | 234255  | RNA→                                           | rplQ (PRK05591)Ribosomal.L17 (pfam01196)→      | PseudoU_synth_EcTruA (cd02570)truA (PRK00021)→ |
| Sca-5-2   | NZ_KL569913.1      | + | 82305   | 82360   | RNA→                                           | rplQ (PRK05591)Ribosomal.L17 (pfam01196)→      | PseudoU_synth_EcTruA (cd02570)truA (PRK00021)→ |
| Sgr-13-5  | NZ_JODO01000006.1  | + | 95248   | 95303   | RNA→                                           | rplQ (PRK05591)Ribosomal.L17 (pfam01196)→      | PseudoU_synth_EcTruA (cd02570)truA (PRK00021)→ |
| Ssp-129-1 | NZ_JOHA01000009.1  | + | 79533   | 79588   | RNA→                                           | rplQ (PRK05591)Ribosomal.L17 (pfam01196)→      | PseudoU_synth_EcTruA (cd02570)truA (PRK00021)→ |
| Ssp-130-1 | NZ_JOHD01000004.1  | + | 34514   | 34569   | RNA→                                           | rplQ (PRK05591)Ribosomal.L17 (pfam01196)→      | PseudoU_synth_EcTruA (cd02570)truA (PRK00021)→ |
| Ssp-100-1 | NZ_JOIH01000008.1  | - | 104878  | 104823  | RNA→                                           | rplQ (PRK05591)Ribosomal.L17 (pfam01196)→      | PseudoU_synth_EcTruA (cd02570)truA (PRK00021)→ |
| Spu-2-1   | NZ_JOFA01000009.1  | + | 27215   | 27270   | RNA→                                           | rplQ (PRK05591)Ribosomal.L17 (pfam01196)→      | PseudoU_synth_EcTruA (cd02570)truA (PRK00021)→ |
| Sgr-12-9  | NZ_JOIT01000002.1  | + | 49057   | 49112   | RNA→                                           | rplQ (PRK05591)Ribosomal.L17 (pfam01196)→      | PseudoU_synth_EcTruA (cd02570)truA (PRK00021)→ |
| Spu-2-2   | NZ_JOBQ01000009.1  | + | 27228   | 27283   | RNA→                                           | rplQ (PRK05591)Ribosomal.L17 (pfam01196)→      | PseudoU_synth_EcTruA (cd02570)truA (PRK00021)→ |
| Svi-8-1   | NZ_JNYP01000002.1  | + | 382717  | 382772  | RNA→                                           | rplQ (PRK05591)Ribosomal.L17 (pfam01196)→      |                                                |
| Ssp-66-1  | NZ_JNLT01000004.1  | - | 111420  | 111365  | RNA→                                           | rplQ (PRK05591)Ribosomal.L17 (pfam01196)→      | PseudoU_synth_EcTruA (cd02570)truA (PRK00021)→ |
| Ssp-94-1  | NZ_JOHG01000019.1  | - | 96015   | 95960   | RNA→                                           | rplQ (PRK05591)Ribosomal.L17 (pfam01196)→      | PseudoU_synth_EcTruA (cd02570)truA (PRK00021)→ |
| Ssp-17-1  | NZ_KB890938.1      | + | 398321  | 398376  | RNA→                                           | rplQ (PRK05591)Ribosomal.L17 (pfam01196)→      | PseudoU_synth_EcTruA (cd02570)truA (PRK00021)→ |
| Ssp-193-1 | NZ_ARPF01000004.1  | - | 200548  | 200493  | RNA→                                           | rplQ (PRK05591)Ribosomal.L17 (pfam01196)→      | PseudoU_synth_EcTruA (cd02570)truA (PRK00021)→ |
| Sat-1-1   | NZ_JQJU01000001.1  | + | 70024   | 70079   | RNA→                                           | rplQ (PRK05591)Ribosomal.L17 (pfam01196)→      | PseudoU_synth_EcTruA (cd02570)truA (PRK00021)→ |
| Ssp-44-1  | NZ_KB891296.1      | - | 1243298 | 1243243 | RNA→                                           | rplQ (PRK05591)Ribosomal.L17 (pfam01196)→      | PseudoU_synth_EcTruA (cd02570)truA (PRK00021)→ |
| Scy-1-1   | NZ_JOEM01000001.1  | - | 651664  | 651609  | RNA→                                           | rplQ (PRK05591)Ribosomal.L17 (pfam01196)→      | PseudoU_synth_EcTruA (cd02570)truA (PRK00021)→ |
| Sfu-1-1   | NC_021177.1        | + | 4972092 | 4972147 | RNA→                                           | rplQ (PRK05591)Ribosomal.L17 (pfam01196)→      | PseudoU_synth_EcTruA (cd02570)truA (PRK00021)→ |
| Sal-7-1   | NZ_JNWF01000006.1  | - | 157973  | 157918  | RNA→                                           | rplQ (PRK05591)Ribosomal.L17 (pfam01196)→      | PseudoU_synth_EcTruA (cd02570)truA (PRK00021)→ |
| Ssp-168-1 | NZ_KL647092.1      | - | 163335  | 163280  | RNA→                                           | rplQ (PRK05591)Ribosomal.L17 (pfam01196)→      | PseudoU_synth_EcTruA (cd02570)truA (PRK00021)→ |
| Ssp-97-1  | NZ_JOJO01000001.1  | + | 71929   | 71984   | RNA→                                           | rplQ (PRK05591)Ribosomal.L17 (pfam01196)→      | PseudoU_synth_EcTruA (cd02570)truA (PRK00021)→ |
| Ssp-146-1 | NZ_JOGZ01000044.1  | - | 52593   | 52538   | RNA→                                           | rplQ (PRK05591)Ribosomal.L17 (pfam01196)→      | PseudoU_synth_EcTruA (cd02570)truA (PRK00021)→ |
| Sod-1-1   | NZ_LATD01000297.1  | + | 18268   | 18323   | RNA→                                           | rplQ (PRK05591)Ribosomal.L17 (pfam01196)→      | PseudoU_synth_EcTruA (cd02570)truA (PRK00021)→ |
| Sri-4-2   | NZ_JOBO01000012.1  | + | 88122   | 88177   | RNA→                                           | rplQ (PRK05591)Ribosomal.L17 (pfam01196)→      | PseudoU_synth_EcTruA (cd02570)truA (PRK00021)→ |
| Sgr-6-1   | NZ_LGUW01000024.1  | + | 68205   | 68259   | RNA→                                           | rplQ (PRK05591)Ribosomal.L17 (pfam01196)→      | PseudoU_synth_EcTruA (cd02570)truA (PRK00021)→ |
| Sri-4-3   | NZ_JOBV01000009.1  | + | 106610  | 106664  | RNA→                                           | rplQ (PRK05591)Ribosomal.L17 (pfam01196)→      | PseudoU_synth_EcTruA (cd02570)truA (PRK00021)→ |
| Sri-4-4   | NZ_JOES01000007.1  | + | 106606  | 106660  | RNA→                                           | rplQ (PRK05591)Ribosomal.L17 (pfam01196)→      | PseudoU_synth_EcTruA (cd02570)truA (PRK00021)→ |
| Sri-4-5   | NZ_JNWX01000006.1  | + | 69237   | 69291   | RNA→                                           | rplQ (PRK05591)Ribosomal.L17 (pfam01196)→      | PseudoU_synth_EcTruA (cd02570)truA (PRK00021)→ |
| Sri-2-1   | NZ_JMGX01000035.1  | + | 49554   | 49609   | RNA→                                           | rplQ (PRK05591)Ribosomal.L17 (pfam01196)→      | PseudoU_synth_EcTruA (cd02570)truA (PRK00021)→ |
| Kau-1-2   | NZ_LGUY01000192.1  | + | 63444   | 63499   | RNA→                                           | rplQ (PRK05591)Ribosomal.L17 (pfam01196)→      | PseudoU_synth_EcTruA (cd02570)truA (PRK00021)→ |
| Ssp-179-1 | NZ_JOCC01000033.1  | + | 69292   | 69347   | RNA→                                           | rplQ (PRK05591)Ribosomal.L17 (pfam01196)→      | PseudoU_synth_EcTruA (cd02570)truA (PRK00021)→ |
| Sri-4-6   | NZ_JOEO01000033.1  | - | 28104   | 28049   | RNA→                                           | rplQ (PRK05591)Ribosomal.L17 (pfam01196)→      | PseudoU_synth_EcTruA (cd02570)truA (PRK00021)→ |
| Sri-4-7   | NZ_JJNYK01000036.1 | - | 28104   | 28049   | RNA→                                           | rplQ (PRK05591)Ribosomal.L17 (pfam01196)→      | PseudoU_synth_EcTruA (cd02570)truA (PRK00021)→ |
| Sri-4-8   | NZ_JOBN01000012.1  | + | 209341  | 209396  | RNA→                                           | rplQ (PRK05591)Ribosomal.L17 (pfam01196)→      | PseudoU_synth_EcTruA (cd02570)truA (PRK00021)→ |
| Sri-4-9   | NZ_JOCL01000017.1  | + | 107763  | 107818  | RNA→                                           | rplQ (PRK05591)Ribosomal.L17 (pfam01196)→      | PseudoU_synth_EcTruA (cd02570)truA (PRK00021)→ |
| Sri-4-10  | NZ_JOCR01000028.1  | + | 69299   | 69354   | RNA→                                           | rplQ (PRK05591)Ribosomal.L17 (pfam01196)→      | PseudoU_synth_EcTruA (cd02570)truA (PRK00021)→ |



|           |                   |   |         |         |                                                                                                                                                                                             |
|-----------|-------------------|---|---------|---------|---------------------------------------------------------------------------------------------------------------------------------------------------------------------------------------------|
| Sri-4-11  | NZ_JOCO01000017.1 | + | 107815  | 107870  | RNA→ rplQ (PRK05591)Ribosomal.L17 (pfam01196)→ PseudoU_synth_EcTruA (cd02570)truA (PRK00021)→                                                                                               |
| Sri-4-12  | NZ_JOBS01000018.1 | + | 107803  | 107858  | RNA→ rplQ (PRK05591)Ribosomal.L17 (pfam01196)→ PseudoU_synth_EcTruA (cd02570)truA (PRK00021)→                                                                                               |
| Ssp-180-1 | NZ_JOCH01000032.1 | + | 69299   | 69354   | RNA→ rplQ (PRK05591)Ribosomal.L17 (pfam01196)→ PseudoU_synth_EcTruA (cd02570)truA (PRK00021)→                                                                                               |
| Sca-6-1   | NZ_JNWP01000055.1 | + | 21186   | 21241   | RNA→ rplQ (PRK05591)Ribosomal.L17 (pfam01196)→ PseudoU_synth_EcTruA (cd02570)truA (PRK00021)→                                                                                               |
| Sca-6-2   | NZ_JOFM01000031.1 | + | 69322   | 69377   | RNA→ rplQ (PRK05591)Ribosomal.L17 (pfam01196)→ PseudoU_synth_EcTruA (cd02570)truA (PRK00021)→                                                                                               |
| Sri-4-13  | NZ_JOB01000154.1  | - | 8051    | 7996    | RNA→ rplQ (PRK05591)Ribosomal.L17 (pfam01196)→ PseudoU_synth_EcTruA (cd02570)truA (PRK00021)→                                                                                               |
| Sri-4-14  | NZ_JOCM01000018.1 | + | 107761  | 107816  | RNA→ rplQ (PRK05591)Ribosomal.L17 (pfam01196)→ PseudoU_synth_EcTruA (cd02570)truA (PRK00021)→                                                                                               |
| Sri-4-15  | NZ_JOCP01000018.1 | - | 28099   | 28044   | RNA→ rplQ (PRK05591)Ribosomal.L17 (pfam01196)→ PseudoU_synth_EcTruA (cd02570)truA (PRK00021)→                                                                                               |
| Sri-4-16  | NZ_JNYR01000006.1 | + | 209435  | 209490  | RNA→ rplQ (PRK05591)Ribosomal.L17 (pfam01196)→ PseudoU_synth_EcTruA (cd02570)truA (PRK00021)→                                                                                               |
| Sla-2-3   | NZ_JOEX01000032.1 | + | 107616  | 107671  | RNA→ rplQ (PRK05591)Ribosomal.L17 (pfam01196)→ PseudoU_synth_EcTruA (cd02570)truA (PRK00021)→                                                                                               |
| Sla-2-4   | NZ_JOCN01000020.1 | + | 107890  | 107945  | RNA→ rplQ (PRK05591)Ribosomal.L17 (pfam01196)→ PseudoU_synth_EcTruA (cd02570)truA (PRK00021)→                                                                                               |
| Sri-1-1   | NZ_ANSJ01000031.1 | + | 47278   | 47333   | RNA→ rplQ (PRK05591)Ribosomal.L17 (pfam01196)→ PseudoU_synth_EcTruA (cd02570)truA (PRK00021)→                                                                                               |
| Sri-3-1   | NZ_JJNO01000013.1 | + | 209385  | 209440  | RNA→ rplQ (PRK05591)Ribosomal.L17 (pfam01196)→ PseudoU_synth_EcTruA (cd02570)truA (PRK00021)→                                                                                               |
| Sri-2-2   | NZ_JMGY01000011.1 | + | 209215  | 209270  | RNA→ rplQ (PRK05591)Ribosomal.L17 (pfam01196)→ PseudoU_synth_EcTruA (cd02570)truA (PRK00021)→                                                                                               |
| Sri-4-17  | NZ_JOET01000019.1 | + | 107682  | 107737  | RNA→ rplQ (PRK05591)Ribosomal.L17 (pfam01196)→ PseudoU_synth_EcTruA (cd02570)truA (PRK00021)→                                                                                               |
| Ssp-90-1  | NZ_JNWN01000026.1 | - | 28254   | 28199   | RNA→ rplQ (PRK05591)Ribosomal.L17 (pfam01196)→                                                                                                                                              |
| Spe-2-1   | NZ_JOCK01000016.1 | + | 107552  | 107607  | RNA→ rplQ (PRK05591)Ribosomal.L17 (pfam01196)→                                                                                                                                              |
| Sri-4-18  | NZ_JOBW01000066.1 | + | 21254   | 21309   | RNA→ rplQ (PRK05591)Ribosomal.L17 (pfam01196)→ PseudoU_synth_EcTruA (cd02570)truA (PRK00021)→                                                                                               |
| Ssp-185-1 | NZ_JOJI01000014.1 | + | 111307  | 111361  | RNA→ rplQ (PRK05591)Ribosomal.L17 (pfam01196)→ PseudoU_synth_EcTruA (cd02570)truA (PRK00021)→                                                                                               |
| Sri-4-19  | NZ_JOB01000017.1  | - | 140212  | 140157  | RNA→ rplQ (PRK05591)Ribosomal.L17 (pfam01196)→ PseudoU_synth_EcTruA (cd02570)truA (PRK00021)→                                                                                               |
| Sri-4-20  | NZ_JOJJ01000026.1 | + | 70453   | 70508   | RNA→ rplQ (PRK05591)Ribosomal.L17 (pfam01196)→ PseudoU_synth_EcTruA (cd02570)truA (PRK00021)→                                                                                               |
| Ssp-5-1   | NZ_KB892002.1     | - | 454475  | 454420  | RNA→ rplQ (PRK05591)Ribosomal.L17 (pfam01196)→ PseudoU_synth_EcTruA (cd02570)truA (PRK00021)→                                                                                               |
| Ssp-29-1  | NZ_KB891785.1     | - | 425407  | 425352  | RNA→ rplQ (PRK05591)Ribosomal.L17 (pfam01196)→ PseudoU_synth_EcTruA (cd02570)truA (PRK00021)→                                                                                               |
| Ssp-31-1  | NZ_AQWQ01000002.1 | - | 425407  | 425352  | RNA→ rplQ (PRK05591)Ribosomal.L17 (pfam01196)→ PseudoU_synth_EcTruA (cd02570)truA (PRK00021)→                                                                                               |
| Ssp-26-1  | NZ_KB891594.1     | - | 382830  | 382775  | RNA→ rplQ (PRK05591)Ribosomal.L17 (pfam01196)→ PseudoU_synth_EcTruA (cd02570)truA (PRK00021)→                                                                                               |
| Ssp-27-1  | NZ_KB891406.1     | - | 1044742 | 1044687 | RNA→ rplQ (PRK05591)Ribosomal.L17 (pfam01196)→ PseudoU_synth_EcTruA (cd02570)truA (PRK00021)→                                                                                               |
| Ssp-79-1  | NZ_KI911349.1     | + | 472182  | 472237  | RNA→ rplQ (PRK05591)Ribosomal.L17 (pfam01196)→ PseudoU_synth_EcTruA (cd02570)truA (PRK00021)→                                                                                               |
| Ssp-78-1  | NZ_AZVF01000001.1 | - | 1050889 | 1050834 | RNA→ rplQ (PRK05591)Ribosomal.L17 (pfam01196)→ PseudoU_synth_EcTruA (cd02570)truA (PRK00021)→                                                                                               |
| Aat-1-1   | NZ_KB907214.1     | - | 233058  | 233000  | RNA→ rplQ (PRK05591)Ribosomal.L17 (pfam01196)→                                                                                                                                              |
| Ssp-117-1 | NZ_JOHY01000071.1 | - | 9294    | 9239    | RNA→ rplQ (PRK05591)Ribosomal.L17 (pfam01196)→ PseudoU_synth_EcTruA (cd02570)truA (PRK00021)→                                                                                               |
| Ssp-198-1 | NZ_KL370770.1     | + | 196586  | 196640  | RNA→ rplQ (PRK05591)Ribosomal.L17 (pfam01196)→ PseudoU_synth_EcTruA (cd02570)truA (PRK00021)→                                                                                               |
| Ssp-115-1 | NZ_JOHT01000007.1 | + | 90429   | 90475   | RNA→ rplQ (PRK05591)Ribosomal.L17 (pfam01196)→ PseudoU_synth_EcTruA (cd02570)truA (PRK00021)→                                                                                               |
| Ssp-148-1 | NZ_JOGD01000029.1 | + | 57793   | 57839   | RNA→ rplQ (PRK05591)Ribosomal.L17 (pfam01196)→ PseudoU_synth_EcTruA (cd02570)truA (PRK00021)→                                                                                               |
| Psi-1-1   | NZ_CP009896.1     | - | 4283040 | 4282985 | RNA→ rplQ (PRK05591)Ribosomal.L17 (pfam01196)→ IspH (COG0761)ispH (PRK01045)→                                                                                                               |
| Ssp-4-1   | NZ_ALAP01000018.1 | - | 152336  | 152283  | PRK11630 (PRK11630)SUA5 (COG0009)→                                                                                                                                                          |
| Ssp-67-1  | NZ_AUKN01000012.1 | + | 38678   | 38731   | RNA→ rplQ (PRK05591)Ribosomal.L17 (pfam01196)→ PseudoU_synth_EcTruA (cd02570)truA (PRK00021)→                                                                                               |
| Ssp-201-1 | NZ_LAND01000020.1 | + | 47240   | 47292   | RNA→ rplQ (PRK05591)Ribosomal.L17 (pfam01196)→ PseudoU_synth_EcTruA (cd02570)truA (PRK00021)→                                                                                               |
| Aal-1-1   | NZ_KB892746.1     | + | 281585  | 281636  | RNA→ rplQ (PRK05591)Ribosomal.L17 (pfam01196)→ rplQ (PRK05591)Ribosomal.L17 (pfam01196)→ PseudoU_synth_EcTruA (cd02570)truA (PRK00021)→ AdoMet_MTases (cd02440)Methyltransf_25 (pfam13649)→ |
| Sal-13-1  | NZ_JOFJ01000024.1 | - | 50986   | 50914   | hypo→ hypo→ RNA→ RplQ (COG0203)rplQ (PRK05591)→                                                                                                                                             |
| Ari-1-1   | NZ_AULB01000026.1 | + | 70386   | 70458   | RNA→ rplQ (PRK05591)Ribosomal.L17 (pfam01196)→                                                                                                                                              |
| Ssp-40-1  | NZ_ADXA01000020.1 | - | 61314   | 61258   | RNA→ rplQ (PRK05591)Ribosomal.L17 (pfam01196)→ rplQ (PRK05591)Ribosomal.L17 (pfam01196)→ PseudoU_synth_EcTruA (cd02570)truA (PRK00021)→ PseudoU_synth_EcTruA (cd02570)truA (PRK00021)→      |
| Ssp-39-1  | NZ_ADXB01001219.1 | + | 56      | 112     | RNA→ rplQ (PRK05591)Ribosomal.L17 (pfam01196)→ rplQ (PRK05591)Ribosomal.L17 (pfam01196)→                                                                                                    |
| Ssp-42-1  | NZ_GG657742.1     | - | 2775010 | 2774954 | RNA→ rplQ (PRK05591)Ribosomal.L17 (pfam01196)→ rplQ (PRK05591)Ribosomal.L17 (pfam01196)→ PseudoU_synth_EcTruA (cd02570)truA (PRK00021)→ PseudoU_synth_EcTruA (cd02570)truA (PRK00021)→      |
| Ssp-47-1  | NZ_CM001165.1     | + | 4663630 | 4663686 | RNA→ ←hypo                                                                                                                                                                                  |
| Ssp-41-1  | NZ_GG770539.1     | + | 4279054 | 4279112 | RNA→ hypo→ rplQ (PRK05591)Ribosomal.L17 (pfam01196)→ PseudoU_synth_EcTruA (cd02570)truA (PRK00021)→ hypo→                                                                                   |
| Ssp-125-1 | NZ_JOGO01000002.1 | - | 47335   | 47279   | RNA→ rplQ (PRK05591)Ribosomal.L17 (pfam01196)→ PseudoU_synth_EcTruA (cd02570)truA (PRK00021)→                                                                                               |
| Nsp-3-1   | NZ_JIAV01000015.1 | - | 114208  | 114159  | RNA→ RplQ (COG0203)rplQ (PRK05591)rne (PRK10811)→                                                                                                                                           |

|           |                        |   |         |         |                                                                                               |
|-----------|------------------------|---|---------|---------|-----------------------------------------------------------------------------------------------|
| Nsp-2-1   | NZ_KK211169.1          | + | 269460  | 269509  | RNA→ RplQ (COG0203)rplQ (PRK05591)→                                                           |
| env-35    | JGI12075J13256_1000799 | - | 577     | 527     | RNA→ rplQ (PRK05591)Ribosomal.L17 (pfam01196)→                                                |
| env-36    | JGI12112J13074_1005592 | - | 506     | 456     | RNA→ RplQ (COG0203)rplQ (PRK05591)→                                                           |
| env-37    | JGI12271J12027_1176655 | + | 141     | 191     | RNA→                                                                                          |
| env-38    | JGI12396J12026_1276148 | + | 100     | 150     | RNA→ hypo→                                                                                    |
| env-39    | JGI12397J12024_1184993 | + | 151     | 201     | RNA→                                                                                          |
| env-40    | JGI12271J12027_1236889 | + | 33      | 83      | RNA→ rplQ (PRK05591)Ribosomal.L17 (pfam01196)→                                                |
| Nlu-1-1   | NZ_JZDQ01000118.1      | + | 6491    | 6537    | RNA→ rplQ (PRK05591)Ribosomal.L17 (pfam01196)→                                                |
| env-41    | JXWU01108663.1         | + | 303     | 347     | RNA→ rplQ (PRK05591)Ribosomal.L17 (pfam01196)→                                                |
| Nha-1-1   | NZ_AUGT01000009.1      | + | 577134  | 577185  | RNA→ RplQ (COG0203)rplQ (PRK05591)→                                                           |
| Sst-1-1   | NZ_KQ257875.1          | + | 79579   | 79635   | RNA→ rplQ (PRK05591)Ribosomal.L17 (pfam01196)→                                                |
| Sle-1-1   | NZ_LN831790.1          | - | 3535110 | 3535054 | RNA→ rplQ (PRK05591)Ribosomal.L17 (pfam01196)→ PseudoU_synth_EcTruA (cd02570)truA (PRK00021)→ |
| Sal-2-1   | NC_020990.1            | + | 4279609 | 4279665 | RNA→ rplQ (PRK05591)Ribosomal.L17 (pfam01196)→ PseudoU_synth_EcTruA (cd02570)truA (PRK00021)→ |
| Ssp-24-1  | NZ_KE150476.1          | - | 126365  | 126312  | RNA→ ←hypo                                                                                    |
| Ssp-132-1 | NZ_JOHQ01000016.1      | + | 22026   | 22079   | RNA→ ←hypo                                                                                    |
| Ssp-127-1 | NZ_JOGK01000040.1      | + | 21913   | 21966   | RNA→ ←hypo                                                                                    |
| Sgr-5-1   | NZ_JNWT01000058.1      | + | 21899   | 21952   | RNA→ ←hypo                                                                                    |
| Sal-12-4  | NZ_JODZ01000010.1      | + | 169503  | 169556  | RNA→ ←hypo                                                                                    |
| Sal-12-5  | NZ_JODR01000016.1      | + | 224011  | 224064  | RNA→ ←hypo                                                                                    |
| ScI-1-1   | NZ_CM001015.1          | + | 4251346 | 4251401 | RNA→ rplQ (PRK05591)Ribosomal.L17 (pfam01196)→                                                |
| ScI-1-2   | NZ_CM000913.1          | + | 4257377 | 4257432 | RNA→ rplQ (PRK05591)Ribosomal.L17 (pfam01196)→ rplQ (PRK05591)Ribosomal.L17 (pfam01196)→      |
| Ssc-1-1   | NC_013929.1            | - | 4144210 | 4144152 | RNA→ rplQ (PRK05591)Ribosomal.L17 (pfam01196)→                                                |
| Ssc-3-2   | NZ_KL997514.1          | + | 21465   | 21523   | RNA→ rplQ (PRK05591)Ribosomal.L17 (pfam01196)→                                                |
| Sde-1-1   | NZ_KL570245.1          | + | 195754  | 195809  | RNA→ rplQ (PRK05591)Ribosomal.L17 (pfam01196)→                                                |

## 5.4 Conserved domains

Conserved domains found in protein-coding genes listed in Section 5.3 are shown below, with the first sentence in their description from the Conserved Domain Database (if any). Conserved domains associated with more than one L17-Actino-Proteobacteria RNA are assigned a color, while others are shown in gray. The symbols ‘d’ and ‘u’ (if any) to the left of the colored domain name indicate whether the domain occurs upstream or downstream of the RNA motif. Domains marked with lower-case ‘d’ occur (at least once) present downstream

**cd01167** (1) Fructokinases (FRKs) mainly from bacteria and plants are enzymes with high specificity for fructose, as are all FRKs, but they catalyzes the conversion of fructose to fructose-6-phosphate, which is an entry point into glycolysis via conversion into glucose-6-phosphate. [or ketohexokinases (KHKs)]

**cd02440** (2) S-adenosylmethionine-dependent methyltransferases (SAM or AdoMet-MTase), class I; AdoMet-MTases are enzymes that use S-adenosyl-L-methionine (SAM or AdoMet) as a substrate for methyltransfer, creating the product S-adenosyl-L-homocysteine (AdoHcy).

**cd02570** (329) Eukaryotic and bacterial pseudouridine synthases similar to E.

**COG0009** (1) tRNA A37 threonylcarbamoyladenosine synthetase subunit TsaC/SUA5/YrdC [Translation, ribosomal structure and biogenesis]

**COG0203** (37) Ribosomal protein L17 [Translation, ribosomal structure and biogenesis]

**COG0488** (29) ATPase components of ABC transporters with duplicated ATPase domains

of some L17-Actino-Proteobacteria RNA in the opposite orientation. Domains marked with capital ‘D’ occur downstream and in the same orientation (i.e., a potential *cis*-regulatory arrangement). Domains marked with a ‘u’ occur upstream of the RNA in either orientation. If the ‘d’/‘u’ symbols are missing, then the domain is downstream and in the same strand. (This mode is used for motifs predicted as *cis*-regulatory.) The number in parentheses after the colored domain name is the number of occurrences in Section 5.3.

[General function prediction only]

**COG0761** (1) 4-Hydroxy-3-methylbut-2-enyl diphosphate reductase IspH [Lipid transport and metabolism]

**COG1004** (1) UDP-glucose 6-dehydrogenase [Cell wall/membrane/envelope biogenesis]

**pfam01196** (524) Ribosomal protein L17.

**pfam01416** (1) tRNA pseudouridine synthase.

**pfam02156** (1) Glycosyl hydrolase family 26.

**pfam09594** (19) Protein of unknown function (DUF2029).

**pfam12848** (1) ABC transporter.

**pfam13304** (21) AAA domain, putative AbiEii toxin, Type IV TA system.

**pfam13620** (1) Carboxypeptidase regulatory-like domain.

**pfam13649** (2) Methyltransferase domain.

**PRK00021** (330) tRNA pseudouridine synthase A; Validated





env-5 UCUGAAGCACCCUGUCUCGCGCCGACACAGCCGAGGCGGCGAGGGGAGGGGGCCCGUAAAGCCCAACAAGGCAA  
Sau-5-1 UGUCGUAACCCACGCCUCCGCGCCGACACCGGUUACACCGCGGGGAGUGAGGGGGCCCGUAAAAGGCCUCCUUGGCAA  
Mfu-1-1 CCCCAGCGCCCGGACAUUGGCGGCAAGCGCGCGGAGGGAAAGGACCCCGUGAAGUCCUCCGGUUCGACGAGCAG  
Mst-1-1 UUUCCUCCGUGCCCGGACAUUGUUGAGCGGCGCGGAGGGAAAGGACCCUUGUGAGACCCACCGGUUCAAUAGCAG  
Msp-2-1 ACCUCCUCAACCGUCCGCGGCGACGCGGUCAGCGGCGGAGGGGAGGGGGCUGGAGCUUCCCGGCCGAUAGCAG  
Mfu-2-1 GCCUCCCCAGCGGCGCGGGCAGCGGUCAGCGGCGGAGGGGAGGGGGCCGGAGCUUCCAGCCCGAUGACAG  
env-6 CUGGGUCCACCGCGUGACACCGGUUACGCGCGCGGGCAGAGGGGGCCUCCUCAAUAACCGGAGGCCAAGGCAA  
Cco-1-1 CACCUGCCUUGGCGGCCACCGACACCGGUUACGUGGCGGAGGCGAGGGGGCCCGUACACAGGGCCCGAUUCAA  
env-7 . . . . . GCCGAGGCAACGUCAGCAA  
env-8 AGAACUGGCCCGCAGAACCCUGGACAAAGCCUAGAGCUCUGACAAUACGAAAGGCGGCCAACAGUCCCGUCCAGCGUG  
Ama-1-1 GGACAAUACCGCGACGACGACGACGAGCUACGCCGAGACCGAGCAGUACUAGACCCGUAUCCCGCGCGGGGGCAC  
env-9 CGGAGUGCGCAUAGAGUACCGAGCAGAAAGCGAGCGCGACCGGUCAGUGCAGAGUCCGAGCGGCGCGGUAUCCAGAC  
env-10 . . . . . GCGGACCGUCAGUCGAGUCCGAGCGGCGCGGUAUCCAGAC  
1 Ssp-68-1 CUGCGGGCCCGGCGCGCCUCCGCGGCCACCGCGGAAAGCGCAUGGGAGCACAGCCCGCGCCCGUCCGGGGGCGCA  
env-11 AGACCGAGCAGUACUGACCGGACCGCGGCGCGGGGCGCGUCCCGCGCGUCCGGGACAGCAGGCGCGCGGGCGU  
env-12 GCAGUUGGCGCGUACAAUACAGUUGAUGGCGGCGCGGGCCGAAACUUCGUGUUCGGGUUCGCUCCGACAC  
Ssp-96-1 CUACCGGAGACCGAGCAGUACUAAAGAUUCCGGACCGGGGCGGCCUUCGCGGCGCGCCCGCCACCGUGCAAGUCG  
Ksp-1-1 GCGGAGACCGAGCAGUACUAGAGUUGGACCGGGGCGGCCUUCGCGGACCGCCCGCGUUCUAGCACAAGCCG  
Kme-1-1 UUAACCGGAGACCGAGCAGUACUAGAUUUGGUCGGGACCGUCCACCGGAGCCCGGUAUGAAGGAAAGUCG  
Rge-1-1 AGCGUUGAGAUCCGGGCGCGUCGCGGUCGUCGUAAGAACCGUCGCGGUCUCCGAGCGGAGCCCGGUGUCGAGU  
Sca-3-1 UGAUCCAGCAGUACACCGUUCAGGUGUACGGGACCGUCUCCGCGGUCUCCGUAUCUUGAUGGCUUGAUGACAAAG  
Sal-3-1 AGACCGAGCAGUACUGAAGAACCCUGGUCAGGACCGCCUCCGCGGUCUCCGUAUCUUGAAGGCGUGGACAAAGU  
env-13 GACGACGACGACGCGGUCGUGGAGGACGAGCAGUACUAGUCCGCGGAGGCGCGCCUCCGGACACCCCGGA  
1 Sav-3-1 GACGGUUCGCGGAGGACGAGCGGCGCGCGGUCGUGGAGACCGAGCAGUACUAGCCUCCGGGGUCCGCAAC  
Ssp-195-1 AGACCGAGCAGUACUGAUCGACCGGCGGGGCGGCGACCGCGCGGCGGGCCCGCGCCCGUCCCGUCCGGCGAUCG  
Nsp-4-1 ACCGCGGUGCGCGCGCGGCUACGACGACGACGACGCGGUCAGUCGAGACCGAGCAGUACUAGUUUCCCGUAAGC  
env-14 . . . . . GGAGAGGGGCCCGCGGGGUGAACGUA  
Nco-1-1 CGCGGUGGCCCGCGGGCCUACGACGACGACGACGCGGUCAGUCGAGACCGAGCAGUACUACACACUGAUAGC  
Sje-1-1 GACCGAGCAGUACUGAGCCGUAUCGAGUGGUAACGGGACCGCCCGCGGUCUCCGUAACCUUAGGUCGCAACCAAG  
Kaz-1-1 GGACCGGGCGCGCCUCCGUGCGCCUUGUUCGAGUACACAGGGUCUGCGGGGACAAACCCCGAGACCCCAUAAAG  
Kph-1-1 GGCUAACGCGGAGACCGAGCAGUACUGAGUUCGACACCGGGGGCGGUCUCCGCGGACCGCCCGGUGGCGUGAAG  
Kph-1-2 GCUACGCGGAGACCGAGCAGUACUGAGUUCGACACCGGGGGCAGCCUUCGCGGGCGCGCCCGGUGGCGUGAAG  
Sno-2-1 GGUUACGCGGAGACCGAGCAGUACUAAAGAUUUGGCGCGGGGGCGGUUCCAGCGGACCGCCCGGUCGACGGAAG  
Ksp-3-1 GCACUUCGCGGAGACCGAGCAGUACUGAGAAUUGGCGCGGGGGCGGUUCCAGAAACCGCCCGCGUCCGUGAAG  
Spy-1-1 GGUUACGCGGAGACCGAGCAGUACUAAAGAUUUGGCGCGGGGGCGGUUCCAGGAGCGCCCGCGUACGGAAG  
Ksp-4-1 AGACCGAGCAGUACUGAUUCCUGAAGUCUAGCGCGGGGGCGGUUCCAGGUGAUCGCCCGGGGCAUGAAAAAG  
Ssp-165-1 GGUUACGCGGAGACCGAGCAGUACUGAGAGACUAGACCGGGGGCGGUUCCCGGAAACCGCCCGGUCGUGGAAAG  
Ssp-133-1 CGGGUUCGCGGAGACCGAGCAGUACUGAGAGACUAGACCGGGGGCGGUUCCCGGAAACCGCCCGGUCGUGAAG  
Ssp-50-1 AGGGUUCGCGGAGACCGAGCAGUACUAAAGAUUUGGCGCGGGGGCGUCCAGCGGACCGCCCGGUAUCCGAAAG  
Ssp-157-1 GGUUACGCGGAGACCGAGCAGUACUAAAGAUUUGGCGCGGGGGCGGUUCCCGGAAACCGCCCGGUCGUGAAG  
Ssp-160-1 GCUACGCGGAGACCGAGCAGUACUGAGUUCGACACCGGGGGCGGUUCCCGGAGCGCCCGGUGGCGUGAAG  
Ksp-2-1 GGUUACGCGGAGACCGAGCAGUACUGAGAGACUAGACCGGGGGCGGUUCCAGGAAACCGCCCGGUCGUGAAG  
Ssp-183-1 CGGGUUCGCGGAGACCGAGCAGUACUGAGAGACUAGACCGGGGGCGGUUCCCGGAAACCGCCCGGUCGUGAAG  
Sam-2-1 CCGAGCGGUGGCGCGGGCGGCUACGACGACGACGACGAGCGCCUACGUCGAGACCGAGCAGUACUAGUUUCAAUA  
Sro-7-1 CCGAGCGGUGGCGCGGGCGGCUACGACGACGACGACGAGCGCGUACGUCGAGACCGAGCAGUACUAGUUUUCUGA  
Ssp-87-1 CGGACCGCGUUCGUCGAGACCGAGCAGUACUAGAACUCCCGGUCGCGUGGUGGUGGUGGUCUACUCCGACCGCG  
Ssp-190-1 CGGAGCGCGGUCUUCGUCGAGACCGAGCAGUACUAGAACCGCGGUCGCGUGGUGGUGGUGGUGGUCUACUCCGCG  
Sir-1-1 CGGACCGCGUUCGUCGAGACCGAGCAGUACUAGAACUCCCGGUCGCGUGGUGGUGGUGGUGGUCUACUCCGCG  
Shy-4-1 CGGACCGCGUUCGUCGAGACCGAGCAGUACUAGAACCGCGGUCGCGUGGUGGUGGUGGUGGUGGUCUACUCCGCG  
Sro-3-1 CCCCAGCGGUGGCGCGGGCGGCGGCUACGACGACGACGACGCGGUCAGUCGAGACCGAGCAGUACUAGUUUUCUGU  
Nin-1-1 GUUCGUCGAGCCCGGGCGGUAUGCAAGCGGCAUCGUUCCACCGCGUCGCGCGGCAACUGAAGAUCCGUGGCGGAG  
1 Nca-1-1 ACAGAGCGGUAUCGUCGAGACCGAGCAGUACUAGAACCGCGGUCGCGUGGUGGUGGUGGUGGUGGUCUACUCCG  
Ssp-192-1 UCGCGCCCGACCGGUAACUGAUACCGCGGUGGCGGUCGCGUCCGUGGGGAAAGCGGUGGUGGUGGUGGUGGUGG  
Ssp-172-1 GAGCAGCGCGACCGCGGUGUUCGUGAGACCGAGCAGUACUAAAUUCUGCGGACCGCGUCGCGGCGGUCGCGAGUUC  
Ssp-93-1 CGAGACCGAGCAGUACUAAAGAGCUCGGGACCGCGCGUAGUUUUGGUGGUGGUGGUGGUGGUGGUGGUGGUGG  
Sau-3-1 CGAGACCGAGCAGUACUGAGAGCUCGGGCGCGGUCGUGGUGGUGGUGGUGGUGGUGGUGGUGGUGGUGGUGG  
Sal-6-1 CGAGACCGAGCAGUACUAGAGCUCGGGACGCGGGAUAGUUUUGGUGGUGGUGGUGGUGGUGGUGGUGGUGGUGG  
Sau-1-1 UCGAGACCGAGCAGUACUAGAGCUCGGGACGAGCGGUCGUGUUGGUGGUGGUGGUGGUGGUGGUGGUGGUGG  
Ssp-106-1 AGGACGACGGGGACACGGGCUUCGCGGAGACCGAGCAGUACUGACGAAAGCGGUAUCGAGCGGCGCCCGCGGACAGU  
Ssp-3-1 GAGCCUUCGCGGCGGAGGACGAGCGGGACACGGGCUUCGCGGAGACCGAGCAGUACUGAGCGUCCGUGGUCACAGU  
env-15 GCGGCCUUCGCGACCGGUGACCGCCCGCGCGCGGGCGGACCGCGCGACCGGUGUCGUGGCAAGCCAUGAAGGU  
env-16 GCGGCCUUCGCGACCGGUGACCGCCCGCGCGCGGGCGGACCGCGCGACCGGUGUCGUGGCAAGCCAUGAAGGU  
env-18 . . . . . AAGCCAUGAAGGU  
Ssp-118-1 GCGCGCGGACCGCGGUGUCGCGGGGCUACGGGGCGGCGUGCUGAACCGCGCACCGCGUACCGCGCACACGAAAGC  
env-19 CACCGGGCGCGGACUGUCGCGGGAUGAGGCGCCUCCGUAUCGCGGCGCACCGGCCCGUUCGCGGAGAUUGUAAGAG  
env-20 CACCGGGCGCGGACUGUCGCGGGAUGAGGCGCCUCCGUAUCGCGGCGCACCGGCCCGUUCGCGGAGAUUGUAAGAG  
env-21 ACCGGACCGCGGACUGUCGCGGGAUGAGGCGCCUCCGUAUCGCGGGAUGAGCGCGGACCGCGGAGAUUGUAAGAG  
Sor-1-1 ACCGAGCAGUACUGAAGACAUUCGUCGCGGUCGCGGUCGCGCGCGGUGAUGCGGUAAGUUCGUAACGCGGUGCGCGGAC  
Ssp-64-1 GUGGUGGUCUCCGCGGCGCACGGCCCGGGGCUCCGGGCGGAGAGCGCGGACAGAUUCCCGGUAACCGCGGGGGGUG  
Ssp-12-1 GGGUGGUGGUCUCCGCGGCGCACGGCCCGGGGCUCCGGGCGGAGAGCGCGGACAGAUUCCCGGUAACCGCGGGGGGUG  
Ssp-13-1 GGGUGGUGGUCUCCGCGGCGCACGGCCCGGGGCUCCGGGCGGAGCGCGGACAGAUUCCCGGUAACCGCGGGGGGUG  
Ssp-61-1 CCGGACCUCCGCGCGGACACCUUCGCGCGGACGACGACGCGCGACGCGGGGCUUCGUGGAGACCGAGCAGUACUGAAGU  
Ssp-59-1 CCCCACCUCCGCGCGGACACCUUCGCGCGGACGACGACGCGCGACGCGGGGCUUCGUGGAGACCGAGCAGUACUGAAGU  
Ssp-16-1 CCCCACCUCCGCGCGGACACCUUCGCGCGGACGACGACGCGCGACGCGGGGCUUCGUGGAGACCGAGCAGUACUGAAGU  
Ssp-69-1 CCCCACCUCCGCGCGGACACCUUCGCGCGGACGACGACGCGCGACGCGGGGCUUCGUGGAGACCGAGCAGUACUGAAGU  
Ssp-56-1 GCGCGGACACCUUCGCGCGGAGGACGACGCGCGACGCGGGGCUUCGUGGAGACCGAGCAGUACUGAAGU  
Hcr-1-1 CGUUCGCGGGGCGGCGGACGACGACGAGGACGCGGCGUUCGUGGAGACCGAGCAGUACUGAAGU  
Msp-1-1 CGUACCGGAGUCGUGCGGAGGACACACCGUACACCGCGCGCCCGCGGUCGUAACCGGUGGGGGCGGAGUACAGCC  
Mro-1-1 CUGAUCGCGGUCUCCGAGCAGCGGACACCGUUCGUGGCGCGGCGGUCGCGGAGUUCGCGGCGGUAAGGCGGCGAUGACAGUC  
Ssp-171-1 CCGAGCGCGGUCUUCGUCGAGACCGAGCAGUACUGAUCCAGUUCGCGGGAGGCGCGGACUGCCGGGGCCCGCGUAC  
Ssp-43-1 GAGCAGUACUAGUAGUUCGUGCGGGCGGCUUCGCGCGGUCGCGGAGUUCGCGGCGCCUUCGCGGCGGCGGUGUCU  
Svi-13-1 GAGCAGUACUAGUAGUUCGUGCGGGCGGCUUCGCGCGGUCGCGGAGUUCGCGGCGCCUUCGCGGCGGCGGUGUCU  
Ssp-73-1 CGUGGUCGUGGCGCGGAGUUCGCGGCGCCUUCGCGGCGGCGGUCUCCGAGGCGUUCGAAAGGAGAACCCGGAUCU  
Ssc-3-1 GGUGCGGUGGCGGUGGUGGUCGCGGAGUUCGCGGCGGCGGUCUCCGAGGCGUCCUUCGCGGAGUUCGCGGAGUUC

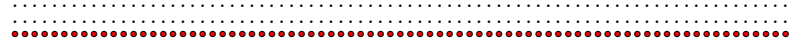











|           |   |             |       |                       |       |               |       |                         |                       |                        |          |                       |             |                                 |                               |                               |
|-----------|---|-------------|-------|-----------------------|-------|---------------|-------|-------------------------|-----------------------|------------------------|----------|-----------------------|-------------|---------------------------------|-------------------------------|-------------------------------|
| env-1     | C | GUGG        | ..... | AUCAAA                | ..... | CGUCUGA       | ..    | CGAACCCUCCAGUACCGUAGGAG | ..                    | GCAAAACAUGA            | .....    | AAGGAAAUACC           | .....       | AUCCGUCACGGACCGGACUAGUAAACU     |                               |                               |
| env-2     | C | GUGG        | ..... | AUCAAA                | ..... | CGUCUGA       | ..    | CGAACCCUCCAGUACCGUAGGAG | ..                    | GCAAAACAUGA            | .....    | AAGGAAAUACC           | .....       | AUCCGUCACGGACCGGACUAGUAAACU     |                               |                               |
| [br-1-1   | C | UGCGCCGGC   | ..... | CACCGA                | ..... | GCGCGGGUGAUG  | ..    | CAA                     | CCCCGGUACCGUACGCGCGGG | ..                     | UUAUAAGA | .....                 | AAGGAAAGACC | .....                           | AUCCGUCACCGGUCACGGCCUUGCAAACU |                               |
| env-3     | A | CAAGCCUCG   | ..... | GGUC                  | ..... | GGAGCCUGAAG   | ..    | CCUC                    | .....                 | GGUACCGUACCGGCA        | .....    | CGGGAUUAUAAAGGA       | .....       | AAGGAAAGACC                     | .....                         | AUCCGUCACCGGUCACGGCCUUGCAAACU |
| Nal-1-1   | C | UGCGCCUGG   | ..... | UCACC                 | ..... | CGACCCUGAAC   | ..    | CCUA                    | .....                 | CCGCGUACCGGUCACGGCCGAG | ..       | AGA                   | .....       | GAGAGAAGCACG                    | .....                         | AUCCGUCACCGGUCACGGCCUUGCAAACU |
| Nsp-1-1   | A | GGACCGGGC   | ..... | AUUC                  | ..... | GCGCGGUUC     | ..    | CAC                     | .....                 | CUCCGGUACCGUACGCGCGGAC | ..       | CUA                   | .....       | CGACCCGGUACCGUACGGCCGGG         | .....                         | AUCCGUCACCGGUCACGGCCUUGCAAACU |
| Mxa-1-1   | A | GGCGCCU     | ..... | CGUCGC                | ..... | GGUCGCGCAUC   | ..    | CCAC                    | .....                 | CCGGUACCGUACGCGCGGAG   | ..       | CUA                   | .....       | CGACCCGGUACCGUACGGCCGGG         | .....                         | AUCCGUCACCGGUCACGGCCUUGCAAACU |
| env-4     | U | GGUGCCCGG   | ..... | UGC                   | ..... | GGUCCUAUCUUC  | ..    | CCAC                    | .....                 | CCGGUACCGUACGCGCGGAG   | ..       | UUG                   | .....       | GGCGCCUCCGAAAGGGCC              | .....                         | AUCCGUCACCGGUCACGGCCUUGCAAACU |
| Cfu-1-1   | C | GGUGGAGCC   | ..... | GGUC                  | ..... | GGUCCUAUCUUC  | ..    | CCAC                    | .....                 | CCGGUACCGUACGCGCGGAG   | ..       | UUG                   | .....       | GGCGCCUCCGAAAGGGCC              | .....                         | AUCCGUCACCGGUCACGGCCUUGCAAACU |
| Avi-1-1   | C | GGUGGAGCC   | ..... | CGUCGC                | ..... | GGUCCUAUCUUC  | ..    | CCAC                    | .....                 | CCGGUACCGUACGCGCGGAG   | ..       | UUG                   | .....       | GGCGCCUCCGAAAGGGCC              | .....                         | AUCCGUCACCGGUCACGGCCUUGCAAACU |
| Age-1-1   | C | GGUGGAGCC   | ..... | CGUCGC                | ..... | GGUCCUAUCUUC  | ..    | CCAC                    | .....                 | CCGGUACCGUACGCGCGGAG   | ..       | UUG                   | .....       | GGCGCCUCCGAAAGGGCC              | .....                         | AUCCGUCACCGGUCACGGCCUUGCAAACU |
| Hmi-1-1   | U | AGCGGACCUC  | ..... | GGUUC                 | ..... | GAGUCCGUUCUUC | ..    | CCAC                    | .....                 | CCGGUACCGUACGCGCGGAG   | ..       | UUG                   | .....       | GGCGCCUCCGAAAGGGCC              | .....                         | AUCCGUCACCGGUCACGGCCUUGCAAACU |
| env-5     | U | GGCGAGCC    | ..... | CGUCGC                | ..... | GGUCCUAUCUUC  | ..    | CCAC                    | .....                 | CCGGUACCGUACGCGCGGAG   | ..       | UUG                   | .....       | GGCGCCUCCGAAAGGGCC              | .....                         | AUCCGUCACCGGUCACGGCCUUGCAAACU |
| Sau-5-1   | U | GGCGGCCCC   | ..... | UGUCG                 | ..... | GGUCCUAUCUUC  | ..    | CCAC                    | .....                 | CCGGUACCGUACGCGCGGAG   | ..       | UUG                   | .....       | GGCGCCUCCGAAAGGGCC              | .....                         | AUCCGUCACCGGUCACGGCCUUGCAAACU |
| Mfu-1-1   | U | GGUGGGCC    | ..... | CGUCGC                | ..... | GGUCCUAUCUUC  | ..    | CCAC                    | .....                 | CCGGUACCGUACGCGCGGAG   | ..       | UUG                   | .....       | GGCGCCUCCGAAAGGGCC              | .....                         | AUCCGUCACCGGUCACGGCCUUGCAAACU |
| Mst-1-1   | U | GGCGGCCCC   | ..... | CGUCGC                | ..... | GGUCCUAUCUUC  | ..    | CCAC                    | .....                 | CCGGUACCGUACGCGCGGAG   | ..       | UUG                   | .....       | GGCGCCUCCGAAAGGGCC              | .....                         | AUCCGUCACCGGUCACGGCCUUGCAAACU |
| Msp-2-1   | U | GGCGGCCCC   | ..... | CGUCGC                | ..... | GGUCCUAUCUUC  | ..    | CCAC                    | .....                 | CCGGUACCGUACGCGCGGAG   | ..       | UUG                   | .....       | GGCGCCUCCGAAAGGGCC              | .....                         | AUCCGUCACCGGUCACGGCCUUGCAAACU |
| Mfu-2-1   | U | GGCGGCCCC   | ..... | CGUCGC                | ..... | GGUCCUAUCUUC  | ..    | CCAC                    | .....                 | CCGGUACCGUACGCGCGGAG   | ..       | UUG                   | .....       | GGCGCCUCCGAAAGGGCC              | .....                         | AUCCGUCACCGGUCACGGCCUUGCAAACU |
| env-6     | U | AGCGACC     | ..... | CGUGUC                | ..... | GGUCCUAUCUUC  | ..    | CCAC                    | .....                 | CCGGUACCGUACGCGCGGAG   | ..       | UUG                   | .....       | GGCGCCUCCGAAAGGGCC              | .....                         | AUCCGUCACCGGUCACGGCCUUGCAAACU |
| Cco-1-1   | C | GGCGCCCGU   | ..... | GUGU                  | ..... | GCGCGCGUUCUUC | ..    | CCAC                    | .....                 | CCGGUACCGUACGCGCGGAG   | ..       | UUG                   | .....       | GGCGCCUCCGAAAGGGCC              | .....                         | AUCCGUCACCGGUCACGGCCUUGCAAACU |
| env-7     | A | AGACCGCC    | ..... | UCAG                  | ..... | GGGCGCGUGG    | ..    | CACG                    | .....                 | CUCGGUACCGUACGCGCGGAG  | ..       | UUA                   | .....       | AGAAUAAG                        | .....                         | AUCCGUCACCGGUCACGGCCUUGCAAACU |
| env-8     | A | GGCCUCG     | ..... | GAAG                  | ..... | CGAGGUUGAUGG  | ..    | CACC                    | .....                 | CCCGGUACCGUACGCGCGGAG  | ..       | UUA                   | .....       | AGAAUAAG                        | .....                         | AUCCGUCACCGGUCACGGCCUUGCAAACU |
| Ama-1-1   | C | GUUCCCGG    | ..... | CGU                   | ..... | CCU           | ..... | GGAAOCAG                | .....                 | CUGA                   | .....    | CGCGGUACCGUACGCGCGGAG | ..          | CAGG                            | .....                         | AUCCGUCACCGGUCACGGCCUUGCAAACU |
| env-9     | C | GGGGUAC     | ..... | GAGUG                 | ..... | GUGGCCCC      | ..... | CUGA                    | .....                 | CGCGGUACCGUACGCGCGGAG  | ..       | CAGA                  | .....       | AAGGAGAACCGCACC                 | .....                         | AUCCGUCACCGGUCACGGCCUUGCAAACU |
| env-10    | C | GGGGUAC     | ..... | GAGUG                 | ..... | GUGGCCCC      | ..... | CUGA                    | .....                 | CGCGGUACCGUACGCGCGGAG  | ..       | CAGA                  | .....       | AAGGAGAACCGCACC                 | .....                         | AUCCGUCACCGGUCACGGCCUUGCAAACU |
| Ssp-68-1  | C | CGCGGUCC    | ..... | UCUC                  | ..... | GGGGCGGGGUC   | ..    | CGUA                    | .....                 | CCCGGUACCGUACGCGCGGAG  | ..       | A                     | .....       | CGGUCGGGUCCGACAGCGGCGGAGGAAACAC | .....                         | AUCCGUCACCGGUCACGGCCUUGCAAACU |
| env-11    | C | UGGAC       | ..... | ACGGAAACAAGUGCA       | ..... | GUUACAACAGG   | ..... | CUGA                    | .....                 | CGCGGUACCGUACGCGCGGAG  | ..       | CAGG                  | .....       | AAGGAGAACCGCACC                 | .....                         | AUCCGUCACCGGUCACGGCCUUGCAAACU |
| env-12    | G | GGUCGGGGC   | ..... | GGCU                  | ..... | GCCCGGGUCCA   | ..... | CUGA                    | .....                 | CGCGGUACCGUACGCGCGGAG  | ..       | AGAAAU                | .....       | GAGAGACAGC                      | .....                         | AUCCGUCACCGGUCACGGCCUUGCAAACU |
| Ssp-96-1  | U | ACGGGCA     | ..... | CAG                   | ..... | CGCCGUGGCG    | ..... | CGG                     | .....                 | CUGCGGUACCGUACGCGCGGAG | ..       | CGGAGAUAC             | .....       | GAGGAGUUAUCC                    | .....                         | AUCCGUCACCGGUCACGGCCUUGCAAACU |
| Ksp-1-1   | U | CGGGGCA     | ..... | ACAG                  | ..... | UGCCCGGCGC    | ..... | CGG                     | .....                 | CUGCGGUACCGUACGCGCGGAG | ..       | CGGAGAUCC             | .....       | AAGGAGUUAUCC                    | .....                         | AUCCGUCACCGGUCACGGCCUUGCAAACU |
| Kme-1-1   | U | CGGGGCA     | ..... | ACAG                  | ..... | UGCCCGGCGC    | ..... | CGG                     | .....                 | CUGCGGUACCGUACGCGCGGAG | ..       | CGGAGAUAC             | .....       | AAGGAGUUAUCC                    | .....                         | AUCCGUCACCGGUCACGGCCUUGCAAACU |
| Rge-1-1   | A | GGGGC       | ..... | CCAGU                 | ..... | GCCCGGUC      | ..... | CGG                     | .....                 | CUCGGUACCGUACGCGCGGAG  | ..       | CAGAAUACA             | .....       | AAGGAGUUAUCC                    | .....                         | AUCCGUCACCGGUCACGGCCUUGCAAACU |
| SCa-3-1   | C | GUAGGGCA    | ..... | ACAG                  | ..... | UGCCCGGUGC    | ..... | CGG                     | .....                 | CUCGGUACCGUACGCGCGGAG  | ..       | CGGAGAUCC             | .....       | AAGGAGUUAUCC                    | .....                         | AUCCGUCACCGGUCACGGCCUUGCAAACU |
| Sal-3-1   | C | GUAGGGCA    | ..... | ACAG                  | ..... | UGCCCGGUGC    | ..... | CGG                     | .....                 | CUCGGUACCGUACGCGCGGAG  | ..       | CGGAGAUCC             | .....       | AAGGAGUUAUCC                    | .....                         | AUCCGUCACCGGUCACGGCCUUGCAAACU |
| env-13    | C | CGCGGUCC    | ..... | GGCU                  | ..... | GCCCGGUGGCGCA | ..... | CGUA                    | .....                 | CCCGGUACCGUACGCGCGGAG  | ..       | CGGAGAUCC             | .....       | AAGGAGUUAUCC                    | .....                         | AUCCGUCACCGGUCACGGCCUUGCAAACU |
| Sav-3-1   | C | CGCGGGG     | ..... | GUCU                  | ..... | CGCCGGGCGCGCA | ..... | CUGA                    | .....                 | CGCGGUACCGUACGCGCGGAG  | ..       | CAGGAUA               | .....       | CAGGAGACAGC                     | .....                         | AUCCGUCACCGGUCACGGCCUUGCAAACU |
| Ssp-195-1 | C | CGCGGGC     | ..... | GGACACCCUCCGGUACCGUAU | ..... | GGCGCGAG      | ..... | CUCG                    | .....                 | CACCGGUACCGUACGCGCGGAG | ..       | CGGAGCAACG            | .....       | AAGGAGAACCGCACC                 | .....                         | AUCCGUCACCGGUCACGGCCUUGCAAACU |
| Nsp-4-1   | C | CGGACC      | ..... | GUCCC                 | ..... | GGUUCGGCGG    | ..... | CGGA                    | .....                 | CCCGGUACCGUACGCGCGGAG  | ..       | CGGUGAACUCAC          | .....       | AAGGAGAACCGCACC                 | .....                         | AUCCGUCACCGGUCACGGCCUUGCAAACU |
| env-14    | A | CGCGCGCGG   | ..... | CGA                   | ..... | CGCGCGCGCGG   | ..... | CGG                     | .....                 | CUCGGUACCGUACGCGCGGAG  | ..       | CGGUGAACUCAC          | .....       | AAGGAGAACCGCACC                 | .....                         | AUCCGUCACCGGUCACGGCCUUGCAAACU |
| Nco-1-1   | C | CGCGCCCGCGG | ..... | CGA                   | ..... | CGCGCGCGCGG   | ..... | CGG                     | .....                 | CUCGGUACCGUACGCGCGGAG  | ..       | CGGUGAACUCAC          | .....       | AAGGAGAACCGCACC                 | .....                         | AUCCGUCACCGGUCACGGCCUUGCAAACU |
| Sje-1-1   | U | CGUCGGGCA   | ..... | ACAG                  | ..... | UGCCCGUAGC    | ..... | CGG                     | .....                 | CUCGGUACCGUACGCGCGGAG  | ..       | CGGAGAUCC             | .....       | AAGGAGUUAUCC                    | .....                         | AUCCGUCACCGGUCACGGCCUUGCAAACU |
| Kaz-1-1   | C | CGUCGGGCA   | ..... | ACCG                  | ..... | UGCCCGUAGC    | ..... | CGG                     | .....                 | CUCGGUACCGUACGCGCGGAG  | ..       | CGGAGAUCC             | .....       | AAGGAGUUAUCC                    | .....                         | AUCCGUCACCGGUCACGGCCUUGCAAACU |
| Kph-1-1   | U | CGUCGGGAC   | ..... | GGGU                  | ..... | GUCCGACGC     | ..... | CGG                     | .....                 | CUCGGUACCGUACGCGCGGAG  | ..       | CGGAGAUCC             | .....       | AAGGAGUUAUCC                    | .....                         | AUCCGUCACCGGUCACGGCCUUGCAAACU |
| Kph-1-2   | U | CGUCGGGAC   | ..... | GGGU                  | ..... | GUCCGACGC     | ..... | CGG                     | .....                 | CUCGGUACCGUACGCGCGGAG  | ..       | CGGAGAUCC             | .....       | AAGGAGUUAUCC                    | .....                         | AUCCGUCACCGGUCACGGCCUUGCAAACU |
| Sno-2-1   | U | CGUAGGGCA   | ..... | ACAG                  | ..... | UGCCCGUAGC    | ..... | CGG                     | .....                 | CUCGGUACCGUACGCGCGGAG  | ..       | CGGAGAUCC             | .....       | AAGGAGUUAUCC                    | .....                         | AUCCGUCACCGGUCACGGCCUUGCAAACU |
| Ksp-3-1   | U | CGUAGGGCA   | ..... | ACAG                  | ..... | UGCCCGUAGC    | ..... | CGG                     | .....                 | CUCGGUACCGUACGCGCGGAG  | ..       | CGGAGAUCC             | .....       | AAGGAGUUAUCC                    | .....                         | AUCCGUCACCGGUCACGGCCUUGCAAACU |
| Spy-1-1   | U | CGUAGGGCA   | ..... | ACAG                  | ..... | UGCCCGUAGC    | ..... | CGG                     | .....                 | CUCGGUACCGUACGCGCGGAG  | ..       | CGGAGAUCC             | .....       | AAGGAGUUAUCC                    | .....                         | AUCCGUCACCGGUCACGGCCUUGCAAACU |
| Ksp-4-1   | U | CGUAGGGCA   | ..... | CAG                   | ..... | UGUCCGACGC    | ..... | CGG                     | .....                 | CUCGGUACCGUACGCGCGGAG  | ..       | CGGAGAUCC             | .....       | AAGGAGUUAUCC                    | .....                         | AUCCGUCACCGGUCACGGCCUUGCAAACU |
| Ssp-165-1 | U | CGUAGGGCA   | ..... | CAG                   | ..... | UGUCCGACGC    | ..... | CGG                     | .....                 | CUCGGUACCGUACGCGCGGAG  | ..       | CGGAGAUCC             | .....       | AAGGAGUUAUCC                    | .....                         | AUCCGUCACCGGUCACGGCCUUGCAAACU |
| Ssp-133-1 | U | CGUAGGGCA   | ..... | CGG                   | ..... | UGUCCGACGC    | ..... | CGG                     | .....                 | CUCGGUACCGUACGCGCGGAG  | ..       | CGGAGAUCC             | .....       | AAGGAGUUAUCC                    | .....                         | AUCCGUCACCGGUCACGGCCUUGCAAACU |
| Ssp-50-1  | U | CGUAGGGCA   | ..... | CGG                   | ..... | UGUCCGACGC    | ..... | CGG                     | .....                 | CUCGGUACCGUACGCGCGGAG  | ..       | CGGAGAUCC             | .....       | AAGGAGUUAUCC                    | .....                         | AUCCGUCACCGGUCACGGCCUUGCAAACU |
| Ssp-157-1 | U | CGUAGGGCA   | ..... | CAG                   | ..... | UGUCCGACGC    | ..... | CGG                     | .....                 | CUCGGUACCGUACGCGCGGAG  | ..       | CGGAGAUCC             | .....       | AAGGAGUUAUCC                    | .....                         | AUCCGUCACCGGUCACGGCCUUGCAAACU |
| Ssp-160-1 | U | CGUAGGGCA   | ..... | CGAGU                 | ..... | GUCCGUAGC     | ..... | CGG                     | .....                 | CUCGGUACCGUACGCGCGGAG  | ..       | CGGAGAUCC             | .....       | AAGGAGUUAUCC                    | .....                         | AUCCGUCACCGGUCACGGCCUUGCAAACU |
| Ksp-2-1   | U | CGUAGGGCA   | ..... | ACAGU                 | ..... | GCCCGUAGC     | ..... | CGG                     | .....                 | CUCGGUACCGUACGCGCGGAG  | ..       | CGGAGAUCC             | .....       | AAGGAGUUAUCC                    | .....                         | AUCCGUCACCGGUCACGGCCUUGCAAACU |
| Ssp-183-1 | U | CGUAGGGCA   | ..... | ACAGU                 | ..... | GCCCGUAGC     | ..... | CGG                     | .....                 | CUCGGUACCGUACGCGCGGAG  | ..       | CGGAGAUCC             | .....       | AAGGAGUUAUCC                    | .....                         | AUCCGUCACCGGUCACGGCCUUGCAAACU |
| Sam-2-1   | A | CGGGGA      | ..... | UGG                   | ..... | CGACUCCCGG    | ..... | CGGA                    | .....                 | CCCGGUACCGUACGCGCGGAG  | ..       | CGGUGAACUC            | .....       | AAGGAGAACCGCACC                 | .....                         | AUCCGUCACCGGUCACGGCCUUGCAAACU |
| Sro-7-1   | A | CGGGGA      | ..... | UCC                   | ..... | GAUCCCGG      | ..... | CUGA                    | .....                 | CCCGGUACCGUACGCGCGGAG  | ..       | CGGUGAACUC            | .....       | AAGGAGAACCGCACC                 | .....                         | AUCCGUCACCGGUCACGGCCUUGCAAACU |
| Ssp-87-1  | C | ACAG        | ..... | CGUGGAU               | ..... | UUGUCA        | ..... | CUGA                    | .....                 | CACCGGUACCGUACGCGCGGAG | ..       | CAGACACC              | .....       | UAGGAGAACCGCACC                 | .....                         | AUCCGUCACCGGUCACGGCCUUGCAAACU |
| Ssp-190-1 | C | ACGG        | ..... | CGUGGAU               | ..... | UUGUCA        | ..... | CUGA                    | .....                 | CACCGGUACCGUACGCGCGGAG | ..       | CAGACACC              | .....       | UAGGAGAACCGCACC                 | .....                         | AUCCGUCACCGGUCACGGCCUUGCAAACU |
| Sir-1-1   | C | ACGG        | ..... | CGUGGAU               | ..... | UUGUCA        | ..... | CUGA                    | .....                 | CACCGGUACCGUACGCGCGGAG | ..       | CAGACACC              | .....       | UAGGAGAACCGCACC                 | .....                         | AUCCGUCACCGGUCACGGCCUUGCAAACU |
| Shy-4-1   | A | CGGGG       | ..... | CUGAU                 | ..... | UCCGUA        | ..... | CUGA                    | .....                 | CACCGGUACCGUACGCGCGGAG | ..       | CAGACAUCC             | .....       | UAGGAGAACCGCACC                 | .....                         | AUCCGUCACCGGUCACGGCCUUGCAAACU |
| Sro-3-1   | A | ACGGGGA     | ..... | UCC                   | ..... | GAUCCCGG      | ..... | CUGA                    | .....                 | CACCGGUACCGUACGCGCGGAG | ..       | CGGUGAACUC            | .....       | AAGGAGAACCGCACC                 | .....                         | AUCCGUCACCGGUCACGGCCUUGCAAACU |
| Nin-1-1   | C | CGUCGGAGG   | ..... | CCACCUCCUCCAAAUCGCU   | ..... | CCUCGACGCG    | ..... | UUA                     | .....                 | CCCGGUACCGUACGCGCGGAG  | ..       | AGA                   | .....       | AAGGAGAACCGCACC                 | .....                         | AUCCGUCACCGGUCACGGCCUUGCAAACU |
| Nca-1-1   | A | CGCGCCUGG   | ..... | GACC                  | ..... | GC            | ..... | CGUC                    | .....                 | CGCGGUACCGUACGCGCGGAG  | ..       | CGGUGAACUC            | .....       | AAGGAGAACCGCACC                 | .....                         | AUCCGUCACCGGUCACGGCCUUGCAAACU |
| Ssp-192-1 | C | GUUCCGAGG   | ..... | GUG                   | ..... | UCCUGGACGUUUG | ..... | CUGA                    | .....                 | CACCGGUACCGUACGCGCGGAG | ..       | CAGACCG               | .....       | AAGGAGAACCGCACC                 | .....                         | AUCCGUCACCGGUCACGGCCUUGCAAACU |
| Ssp-172-1 | C | CGCGGCC     | ..... | UGUC                  | ..... | GGGCGGCGCA    | ..... | CUGA                    | .....                 | CCCGGUACCGUACGCGCGGAG  | ..       | CAGACAUCC             | .....       | AAGGAGAACCGCACC                 | .....                         | AUCCGUCACCGGUCACGGCCUUGCAAACU |
| Ssp-93-1  | C | CGCGGCC     | ..... | UIAC                  | ..... | GGGCGGCGGCGG  | ..... | CUGA                    | .....                 | CCCGGUACCGUACGCGCGGAG  | ..       | CAGACAUCC             | .....       | AAGGAGAACCGCACC                 | .....                         | AUCCGUCACCGGUCACGGCCUUGCAAACU |
| Sau-3-1   | C | CGCGGCC     | ..... | UIAC                  | ..... | GGGCGGCGGCGG  | ..... | CUGA                    | .....                 | CCCGGUACCGUACGCGCGGAG  | ..       | CAGACAUCC             | .....       | AAGGAGAACCGCACC                 | .....                         | AUCCGUCACCGGUCACGGCCUUGCAAACU |
| Sal-6-1   | C | CGCGGCC     | ..... | UIAC                  | ..... | GGGCGGCGGCGG  | ..... | CUGA                    | .....                 | CCCGGUACCGUACGCGCGGAG  | ..       | CAGACAUCC             | .....       | AAGGAGAACCGCACC                 | .....                         | AUCCGUCACCGGUCACGGCCUUGCAAACU |
| Sau-1-1   | C | CGCGGCC     | ..... | UIAC                  | ..... | GGGCGGCGGCGG  | ..... | CUGA                    | .....                 | CCCGGUACCGUACGCGCGGAG  | ..       | CAGACACC              | .....       | UAGGAGAACCGCACC                 | .....                         | AUCCGUCACCGGUCACGGCCUUGCAAACU |
| Ssp-106-1 | C | CGCACUG     | ..... | CUGAC                 | ..... | CAGUCCGCGC    | ..... | CUGA                    | .....                 | CACCGGUACCGUACGCGCGGAG | ..       | CAGACAGU              | .....       | AAGGAGAACCGCACC                 | .....                         | AUCCGUCACCGGUCACGGCCUUGCAAACU |
| Ssp-3-1   | C | CGCACUG     | ..... | CUGAC                 | ..... | CAGUCCGCGC    | ..... | CUGA                    | .....                 | CACCGGUACCGUACGCGCGGAG | ..       | CAGACAGU              | .....       | AAGGAGAACCGCACC                 | .....                         | AUCCGUCACCGGUCACGGCCUUGCAAACU |
| env-15    | A | CGGACCGGC   | ..... | GCAU                  | ..... | GCGGUCGC      | ..... | CGGA                    | .....                 | CCCGGUACCGUACGCGCGGAG  | ..       | CGGUGAACUC            | .....       | AAGGAGAACCGCACC                 | .....                         | AUCCGUCACCGGUCACGGCCUUGCAAACU |
| env-16    | A | CGGACCGGC   | ..... | GCAU                  | ..... | GCGGUCGC      | ..... | CGGA                    | .....                 | CCCGGUACCGUACGCGCGGAG  | ..       | CGGUGAACUC            | .....       | AAGGAGAACCGCACC                 | .....                         | AUCCGUCACCGGUCACGGCCUUGCAAACU |
| env-18    | A | CGGACCGGC   | ..... | GCAU                  | ..... | GCGGUCGC      | ..... | CGGA                    | .....                 | CCCGGUACCGUACGCGCGGAG  | ..       | CGGUGAACUC            | .....       | AAGGAGAACCGCACC                 | .....                         | AUCCGUCACCGGUCACGGCCUUGCAAACU |
| Ssp-118-1 | A | UCGGCGGGC   | ..... | GACC                  | ..... | GUCCCGCGGAC   | ..... | CUGA                    | .....                 | CACCGGUACCGUACGCGCGGAG | ..       | CAGACAUCC             | .....       | AAGGAGAACCGCACC                 | .....                         | AUCCGUCACCGGUCACGGCCUUGCAAACU |
| env-19    | A | CGAGGGCGCGC | ..... | CCCG                  | ..... | GCGGCGGCGGCGG | ..... | CGGA                    | .....                 | CCCGGUACCGUACGCGCGGAG  | ..       | CGGUGAACUC            | .....       | AAGGAGAACCGCACC                 | .....                         | AUCCGUCACCGGUCACGGCCUUGCAAACU |
| env-20    | A | CGAGGGCGCGC | ..... | CCCG                  | ..... | GCGGCGGCGGCGG | ..... | CGGA                    | .....                 | CCCGGUACCGUACGCGCGGAG  |          |                       |             |                                 |                               |                               |









































|                    |          |               |                |                  |                   |                                                               |
|--------------------|----------|---------------|----------------|------------------|-------------------|---------------------------------------------------------------|
| Ala-1-1            | Bacteria | Bacteroidetes | Flavobacteriia | Flavobacteriales | Flavobacteriaceae | <i>Aquimarina latercula</i> DSM 2041                          |
| Ama-1-1            | Bacteria | Bacteroidetes | Flavobacteriia | Flavobacteriales | Flavobacteriaceae | <i>Aquimarina macrocephali</i> JAMB N27                       |
| Ame-1-1            | Bacteria | Bacteroidetes | Flavobacteriia | Flavobacteriales | Flavobacteriaceae | <i>Aquimarina megaterium</i> XH134                            |
| Amu-1-1            | Bacteria | Bacteroidetes | Flavobacteriia | Flavobacteriales | Flavobacteriaceae | <i>Aquimarina muelleri</i> DSM 19832                          |
| Apa-1-1            | Bacteria | Bacteroidetes | Flavobacteriia | Flavobacteriales | Flavobacteriaceae | <i>Aquimarina pacifica</i>                                    |
| Aal-1-1            | Bacteria | Bacteroidetes | Flavobacteriia | Flavobacteriales | Flavobacteriaceae | <i>Arenibacter algicola</i>                                   |
| Ace-1-1            | Bacteria | Bacteroidetes | Flavobacteriia | Flavobacteriales | Flavobacteriaceae | <i>Arenibacter certesi</i> DSM 19833                          |
| Ala-2-1            | Bacteria | Bacteroidetes | Flavobacteriia | Flavobacteriales | Flavobacteriaceae | <i>Arenibacter latericius</i> DSM 15913                       |
| Bar-1-1            | Bacteria | Bacteroidetes | Flavobacteriia | Flavobacteriales | Flavobacteriaceae | <i>Bizionia argentinensis</i> JUB59                           |
| Cca-1-1 to Cca-1-3 | Bacteria | Bacteroidetes | Flavobacteriia | Flavobacteriales | Flavobacteriaceae | <i>Capnocytophaga canis</i>                                   |
| Cgr-1-1            | Bacteria | Bacteroidetes | Flavobacteriia | Flavobacteriales | Flavobacteriaceae | <i>Capnocytophaga granulosa</i> ATCC 51502                    |
| Coc-2-1            | Bacteria | Bacteroidetes | Flavobacteriia | Flavobacteriales | Flavobacteriaceae | <i>Capnocytophaga ochracea</i>                                |
| Coc-3-1            | Bacteria | Bacteroidetes | Flavobacteriia | Flavobacteriales | Flavobacteriaceae | <i>Capnocytophaga ochracea</i> F0287                          |
| Coc-4-1            | Bacteria | Bacteroidetes | Flavobacteriia | Flavobacteriales | Flavobacteriaceae | <i>Capnocytophaga ochracea str.</i> Holt 25                   |
| Csp-2-1            | Bacteria | Bacteroidetes | Flavobacteriia | Flavobacteriales | Flavobacteriaceae | <i>Capnocytophaga sp.</i> CM59                                |
| Csp-3-1            | Bacteria | Bacteroidetes | Flavobacteriia | Flavobacteriales | Flavobacteriaceae | <i>Capnocytophaga sp. oral taxon</i> 324 str. F0483           |
| Csp-4-1            | Bacteria | Bacteroidetes | Flavobacteriia | Flavobacteriales | Flavobacteriaceae | <i>Capnocytophaga sp. oral taxon</i> 326 str. F0382           |
| Csp-5-1            | Bacteria | Bacteroidetes | Flavobacteriia | Flavobacteriales | Flavobacteriaceae | <i>Capnocytophaga sp. oral taxon</i> 329 str. F0087           |
| Csp-6-1            | Bacteria | Bacteroidetes | Flavobacteriia | Flavobacteriales | Flavobacteriaceae | <i>Capnocytophaga sp. oral taxon</i> 332 str. F0381           |
| Csp-7-1            | Bacteria | Bacteroidetes | Flavobacteriia | Flavobacteriales | Flavobacteriaceae | <i>Capnocytophaga sp. oral taxon</i> 335 str. F0486           |
| Csp-8-1            | Bacteria | Bacteroidetes | Flavobacteriia | Flavobacteriales | Flavobacteriaceae | <i>Capnocytophaga sp. oral taxon</i> 336 str. F0502           |
| Csp-9-1            | Bacteria | Bacteroidetes | Flavobacteriia | Flavobacteriales | Flavobacteriaceae | <i>Capnocytophaga sp. oral taxon</i> 380 str. F0488           |
| Csp-10-1           | Bacteria | Bacteroidetes | Flavobacteriia | Flavobacteriales | Flavobacteriaceae | <i>Capnocytophaga sp. oral taxon</i> 412 str. F0487           |
| Csp-11-1           | Bacteria | Bacteroidetes | Flavobacteriia | Flavobacteriales | Flavobacteriaceae | <i>Capnocytophaga sp. oral taxon</i> 863 str. F0517           |
| Cal-1-1            | Bacteria | Bacteroidetes | Flavobacteriia | Flavobacteriales | Flavobacteriaceae | <i>Cellulophaga algicola</i> DSM 14237                        |
| Cba-1-1            | Bacteria | Bacteroidetes | Flavobacteriia | Flavobacteriales | Flavobacteriaceae | <i>Cellulophaga baltica</i> 13                                |
| Cba-2-1            | Bacteria | Bacteroidetes | Flavobacteriia | Flavobacteriales | Flavobacteriaceae | <i>Cellulophaga baltica</i> 18                                |
| Cba-3-1            | Bacteria | Bacteroidetes | Flavobacteriia | Flavobacteriales | Flavobacteriaceae | <i>Cellulophaga baltica</i> 4                                 |
| Cba-4-1            | Bacteria | Bacteroidetes | Flavobacteriia | Flavobacteriales | Flavobacteriaceae | <i>Cellulophaga baltica</i> NN016038                          |
| Csp-12-1           | Bacteria | Bacteroidetes | Flavobacteriia | Flavobacteriales | Flavobacteriaceae | <i>Cellulophaga sp.</i> E6(2014)                              |
| Csp-13-1           | Bacteria | Bacteroidetes | Flavobacteriia | Flavobacteriales | Flavobacteriaceae | <i>Cellulophaga sp.</i> Hel.L.12                              |
| Cca-2-1            | Bacteria | Bacteroidetes | Flavobacteriia | Flavobacteriales | Flavobacteriaceae | <i>Chryseobacterium caeni</i> DSM 17710                       |
| Cgr-2-1            | Bacteria | Bacteroidetes | Flavobacteriia | Flavobacteriales | Flavobacteriaceae | <i>Chryseobacterium gregarium</i> DSM 19109                   |
| Cha-1-1            | Bacteria | Bacteroidetes | Flavobacteriia | Flavobacteriales | Flavobacteriaceae | <i>Chryseobacterium halperniae</i>                            |
| Chi-1-1            | Bacteria | Bacteroidetes | Flavobacteriia | Flavobacteriales | Flavobacteriaceae | <i>Chryseobacterium hispalense</i> DSM 25574                  |
| Cko-1-1            | Bacteria | Bacteroidetes | Flavobacteriia | Flavobacteriales | Flavobacteriaceae | <i>Chryseobacterium koreense</i> CCUG 49689                   |
| Cpa-1-1            | Bacteria | Bacteroidetes | Flavobacteriia | Flavobacteriales | Flavobacteriaceae | <i>Chryseobacterium palustre</i> DSM 21579                    |
| Csp-14-1           | Bacteria | Bacteroidetes | Flavobacteriia | Flavobacteriales | Flavobacteriaceae | <i>Chryseobacterium sp.</i> FH1                               |
| Csp-15-1           | Bacteria | Bacteroidetes | Flavobacteriia | Flavobacteriales | Flavobacteriaceae | <i>Chryseobacterium sp.</i> FH2                               |
| Csp-16-1           | Bacteria | Bacteroidetes | Flavobacteriia | Flavobacteriales | Flavobacteriaceae | <i>Chryseobacterium sp.</i> OV259                             |
| Csp-17-1           | Bacteria | Bacteroidetes | Flavobacteriia | Flavobacteriales | Flavobacteriaceae | <i>Chryseobacterium sp.</i> YR005                             |
| Csp-18-1           | Bacteria | Bacteroidetes | Flavobacteriia | Flavobacteriales | Flavobacteriaceae | <i>Chryseobacterium sp.</i> YR460                             |
| Cte-1-1            | Bacteria | Bacteroidetes | Flavobacteriia | Flavobacteriales | Flavobacteriaceae | <i>Chryseobacterium tenax</i> DSM 16811                       |
| Ddo-1-1            | Bacteria | Bacteroidetes | Flavobacteriia | Flavobacteriales | Flavobacteriaceae | <i>Dokdonia donghaensis</i> DSW-1                             |
| Dsp-1-1            | Bacteria | Bacteroidetes | Flavobacteriia | Flavobacteriales | Flavobacteriaceae | <i>Dokdonia sp.</i> MED134                                    |
| Dsp-2-1            | Bacteria | Bacteroidetes | Flavobacteriia | Flavobacteriales | Flavobacteriaceae | <i>Dokdonia sp.</i> PRO95                                     |
| Ean-1-1 to Ean-1-4 | Bacteria | Bacteroidetes | Flavobacteriia | Flavobacteriales | Flavobacteriaceae | <i>Elizabethkingia anophelis</i>                              |
| Ean-2-1            | Bacteria | Bacteroidetes | Flavobacteriia | Flavobacteriales | Flavobacteriaceae | <i>Elizabethkingia anophelis</i> Ag1                          |
| Ean-3-1            | Bacteria | Bacteroidetes | Flavobacteriia | Flavobacteriales | Flavobacteriaceae | <i>Elizabethkingia anophelis</i> FMS-007                      |
| Ean-4-1            | Bacteria | Bacteroidetes | Flavobacteriia | Flavobacteriales | Flavobacteriaceae | <i>Elizabethkingia anophelis</i> NUH1                         |
| Ean-5-1            | Bacteria | Bacteroidetes | Flavobacteriia | Flavobacteriales | Flavobacteriaceae | <i>Elizabethkingia anophelis</i> NUH11                        |
| Ean-6-1            | Bacteria | Bacteroidetes | Flavobacteriia | Flavobacteriales | Flavobacteriaceae | <i>Elizabethkingia anophelis</i> NUH4                         |
| Ean-7-1            | Bacteria | Bacteroidetes | Flavobacteriia | Flavobacteriales | Flavobacteriaceae | <i>Elizabethkingia anophelis</i> NUH6                         |
| Ean-8-1            | Bacteria | Bacteroidetes | Flavobacteriia | Flavobacteriales | Flavobacteriaceae | <i>Elizabethkingia anophelis</i> NUHP1                        |
| Ean-9-1            | Bacteria | Bacteroidetes | Flavobacteriia | Flavobacteriales | Flavobacteriaceae | <i>Elizabethkingia anophelis</i> NUHP2                        |
| Ean-10-1           | Bacteria | Bacteroidetes | Flavobacteriia | Flavobacteriales | Flavobacteriaceae | <i>Elizabethkingia anophelis</i> NUHP3                        |
| Ean-11-1           | Bacteria | Bacteroidetes | Flavobacteriia | Flavobacteriales | Flavobacteriaceae | <i>Elizabethkingia anophelis</i> PW2809                       |
| Ean-12-1           | Bacteria | Bacteroidetes | Flavobacteriia | Flavobacteriales | Flavobacteriaceae | <i>Elizabethkingia anophelis</i> R26                          |
| Eme-1-1            | Bacteria | Bacteroidetes | Flavobacteriia | Flavobacteriales | Flavobacteriaceae | <i>Elizabethkingia meningoseptica</i> 502                     |
| Eme-2-1 to Eme-2-2 | Bacteria | Bacteroidetes | Flavobacteriia | Flavobacteriales | Flavobacteriaceae | <i>Elizabethkingia meningoseptica</i> ATCC 13253 = NBRC 12535 |
| Emi-1-1            | Bacteria | Bacteroidetes | Flavobacteriia | Flavobacteriales | Flavobacteriaceae | <i>Elizabethkingia miricola</i>                               |
| Ead-1-1            | Bacteria | Bacteroidetes | Flavobacteriia | Flavobacteriales | Flavobacteriaceae | <i>Eudoraea adriatica</i> DSM 19308                           |
| Fic-1-1            | Bacteria | Bacteroidetes | Flavobacteriia | Flavobacteriales | Flavobacteriaceae | <i>Flaviramulus ichthyenteri</i> Th78                         |
| Fba-6-1            | Bacteria | Bacteroidetes | Flavobacteriia | Flavobacteriales | Flavobacteriaceae | <i>bacterium</i> HQM9                                         |
| Fba-7-1            | Bacteria | Bacteroidetes | Flavobacteriia | Flavobacteriales | Flavobacteriaceae | <i>bacterium</i> P7-3-5                                       |

|                     |          |               |                |                  |                   |                                                       |
|---------------------|----------|---------------|----------------|------------------|-------------------|-------------------------------------------------------|
| Fba-8-1             | Bacteria | Bacteroidetes | Flavobacteriia | Flavobacteriales | Flavobacteriaceae | <i>bacterium</i> S85                                  |
| Fan-1-1             | Bacteria | Bacteroidetes | Flavobacteriia | Flavobacteriales | Flavobacteriaceae | <i>Flavobacterium antarcticum</i> DSM 19726           |
| Faq-1-1             | Bacteria | Bacteroidetes | Flavobacteriia | Flavobacteriales | Flavobacteriaceae | <i>Flavobacterium aquatile</i> LMG 4008 = ATCC 11947  |
| Fbr-1-1             | Bacteria | Bacteroidetes | Flavobacteriia | Flavobacteriales | Flavobacteriaceae | <i>Flavobacterium branchiophilum</i> FL-15            |
| Fca-1-1 to Fca-1-2  | Bacteria | Bacteroidetes | Flavobacteriia | Flavobacteriales | Flavobacteriaceae | <i>Flavobacterium cauense</i> R2A-7                   |
| Fch-1-1             | Bacteria | Bacteroidetes | Flavobacteriia | Flavobacteriales | Flavobacteriaceae | <i>Flavobacterium chungangense</i> LMG 26729          |
| Fco-1-1             | Bacteria | Bacteroidetes | Flavobacteriia | Flavobacteriales | Flavobacteriaceae | <i>Flavobacterium columnare</i> ATCC 49512            |
| Fda-1-1             | Bacteria | Bacteroidetes | Flavobacteriia | Flavobacteriales | Flavobacteriaceae | <i>Flavobacterium daejeonense</i> DSM 17708           |
| Fde-1-1             | Bacteria | Bacteroidetes | Flavobacteriia | Flavobacteriales | Flavobacteriaceae | <i>Flavobacterium denitrificans</i> DSM 15936         |
| Fen-1-1 to Fen-1-2  | Bacteria | Bacteroidetes | Flavobacteriia | Flavobacteriales | Flavobacteriaceae | <i>Flavobacterium enshiense</i> DK69                  |
| Ffi-1-1             | Bacteria | Bacteroidetes | Flavobacteriia | Flavobacteriales | Flavobacteriaceae | <i>Flavobacterium filum</i> DSM 17961                 |
| Ffr-1-1             | Bacteria | Bacteroidetes | Flavobacteriia | Flavobacteriales | Flavobacteriaceae | <i>Flavobacterium frigidarium</i> DSM 17623           |
| Ffr-2-1             | Bacteria | Bacteroidetes | Flavobacteriia | Flavobacteriales | Flavobacteriaceae | <i>Flavobacterium frigoris</i> PS1                    |
| Fge-1-1             | Bacteria | Bacteroidetes | Flavobacteriia | Flavobacteriales | Flavobacteriaceae | <i>Flavobacterium gelidilacus</i> DSM 15343           |
| Fgi-1-1             | Bacteria | Bacteroidetes | Flavobacteriia | Flavobacteriales | Flavobacteriaceae | <i>Flavobacterium gilvum</i>                          |
| Fhi-1-1             | Bacteria | Bacteroidetes | Flavobacteriia | Flavobacteriales | Flavobacteriaceae | <i>Flavobacterium hibernum</i>                        |
| Fin-1-1             | Bacteria | Bacteroidetes | Flavobacteriia | Flavobacteriales | Flavobacteriaceae | <i>Flavobacterium indicum</i> GPTSA100-9              |
| Fli-1-1             | Bacteria | Bacteroidetes | Flavobacteriia | Flavobacteriales | Flavobacteriaceae | <i>Flavobacterium limnosediminis</i> JC2902           |
| Fps-1-1 to Fps-1-10 | Bacteria | Bacteroidetes | Flavobacteriia | Flavobacteriales | Flavobacteriaceae | <i>Flavobacterium psychrophilum</i>                   |
| Fps-2-1             | Bacteria | Bacteroidetes | Flavobacteriia | Flavobacteriales | Flavobacteriaceae | <i>Flavobacterium psychrophilum</i> FPG101            |
| Fps-3-1             | Bacteria | Bacteroidetes | Flavobacteriia | Flavobacteriales | Flavobacteriaceae | <i>Flavobacterium psychrophilum</i> FPG3              |
| Fps-4-1             | Bacteria | Bacteroidetes | Flavobacteriia | Flavobacteriales | Flavobacteriaceae | <i>Flavobacterium psychrophilum</i> JIP02/86          |
| Fre-1-1             | Bacteria | Bacteroidetes | Flavobacteriia | Flavobacteriales | Flavobacteriaceae | <i>Flavobacterium reichenbachii</i>                   |
| Fsa-1-1             | Bacteria | Bacteroidetes | Flavobacteriia | Flavobacteriales | Flavobacteriaceae | <i>Flavobacterium saliperosum</i> S13                 |
| Fsa-2-1             | Bacteria | Bacteroidetes | Flavobacteriia | Flavobacteriales | Flavobacteriaceae | <i>Flavobacterium sasangense</i> DSM 21067            |
| Fse-1-1             | Bacteria | Bacteroidetes | Flavobacteriia | Flavobacteriales | Flavobacteriaceae | <i>Flavobacterium seoulense</i>                       |
| Fso-1-1             | Bacteria | Bacteroidetes | Flavobacteriia | Flavobacteriales | Flavobacteriaceae | <i>Flavobacterium soli</i> DSM 19725                  |
| Fsp-1-1             | Bacteria | Bacteroidetes | Flavobacteriia | Flavobacteriales | Flavobacteriaceae | <i>Flavobacterium</i> sp. 83                          |
| Fsp-2-1             | Bacteria | Bacteroidetes | Flavobacteriia | Flavobacteriales | Flavobacteriaceae | <i>Flavobacterium</i> sp. ABG                         |
| Fsp-3-1             | Bacteria | Bacteroidetes | Flavobacteriia | Flavobacteriales | Flavobacteriaceae | <i>Flavobacterium</i> sp. ACAM 123                    |
| Fsp-4-1             | Bacteria | Bacteroidetes | Flavobacteriia | Flavobacteriales | Flavobacteriaceae | <i>Flavobacterium</i> sp. AED                         |
| Fsp-5-1             | Bacteria | Bacteroidetes | Flavobacteriia | Flavobacteriales | Flavobacteriaceae | <i>Flavobacterium</i> sp. B17                         |
| Fsp-6-1             | Bacteria | Bacteroidetes | Flavobacteriia | Flavobacteriales | Flavobacteriaceae | <i>Flavobacterium</i> sp. CF136                       |
| Fsp-7-1             | Bacteria | Bacteroidetes | Flavobacteriia | Flavobacteriales | Flavobacteriaceae | <i>Flavobacterium</i> sp. F52                         |
| Fsp-8-1             | Bacteria | Bacteroidetes | Flavobacteriia | Flavobacteriales | Flavobacteriaceae | <i>Flavobacterium</i> sp. F1                          |
| Fsp-9-1             | Bacteria | Bacteroidetes | Flavobacteriia | Flavobacteriales | Flavobacteriaceae | <i>Flavobacterium</i> sp. KJJ                         |
| Fsp-10-1            | Bacteria | Bacteroidetes | Flavobacteriia | Flavobacteriales | Flavobacteriaceae | <i>Flavobacterium</i> sp. MEB061                      |
| Fsp-11-1            | Bacteria | Bacteroidetes | Flavobacteriia | Flavobacteriales | Flavobacteriaceae | <i>Flavobacterium</i> sp. URHB0058                    |
| Fsp-12-1            | Bacteria | Bacteroidetes | Flavobacteriia | Flavobacteriales | Flavobacteriaceae | <i>Flavobacterium</i> sp. WG21                        |
| Fsu-1-1             | Bacteria | Bacteroidetes | Flavobacteriia | Flavobacteriales | Flavobacteriaceae | <i>Flavobacterium succinicans</i> LMG 10402           |
| Fsu-2-1 to Fsu-2-2  | Bacteria | Bacteroidetes | Flavobacteriia | Flavobacteriales | Flavobacteriaceae | <i>Flavobacterium suncheonense</i> GH29-5 = DSM 17707 |
| Fte-1-1             | Bacteria | Bacteroidetes | Flavobacteriia | Flavobacteriales | Flavobacteriaceae | <i>Flavobacterium tegetincola</i> DSM 22377           |
| Fag-1-1             | Bacteria | Bacteroidetes | Flavobacteriia | Flavobacteriales | Flavobacteriaceae | <i>Formosa agariphila</i> KMM 3901                    |
| Fsp-13-1            | Bacteria | Bacteroidetes | Flavobacteriia | Flavobacteriales | Flavobacteriaceae | <i>Formosa</i> sp. AK20                               |
| Gsa-1-1             | Bacteria | Bacteroidetes | Flavobacteriia | Flavobacteriales | Flavobacteriaceae | <i>Gaetbulibacter saemankumensis</i> DSM 17032        |
| Gsp-1-1             | Bacteria | Bacteroidetes | Flavobacteriia | Flavobacteriales | Flavobacteriaceae | <i>Galbibacter</i> sp. ck-12-15                       |
| Gme-1-1             | Bacteria | Bacteroidetes | Flavobacteriia | Flavobacteriales | Flavobacteriaceae | <i>Gelidibacter mesophilus</i> DSM 14095              |
| Gli-1-1             | Bacteria | Bacteroidetes | Flavobacteriia | Flavobacteriales | Flavobacteriaceae | <i>Gillisia limnaea</i> DSM 15749                     |
| Gsp-2-1             | Bacteria | Bacteroidetes | Flavobacteriia | Flavobacteriales | Flavobacteriaceae | <i>Gillisia</i> sp. CAL575                            |
| Gsp-3-1             | Bacteria | Bacteroidetes | Flavobacteriia | Flavobacteriales | Flavobacteriaceae | <i>Gillisia</i> sp. CBA3202                           |
| Gsp-4-1             | Bacteria | Bacteroidetes | Flavobacteriia | Flavobacteriales | Flavobacteriaceae | <i>Gillisia</i> sp. Hel.I-29                          |
| Gsp-5-1             | Bacteria | Bacteroidetes | Flavobacteriia | Flavobacteriales | Flavobacteriaceae | <i>Gillisia</i> sp. JM1                               |
| Gec-1-1             | Bacteria | Bacteroidetes | Flavobacteriia | Flavobacteriales | Flavobacteriaceae | <i>Gramella echinicola</i> DSM 19838                  |
| Gpo-1-1             | Bacteria | Bacteroidetes | Flavobacteriia | Flavobacteriales | Flavobacteriaceae | <i>Gramella portivictoriae</i> DSM 23547              |
| Iha-1-1             | Bacteria | Bacteroidetes | Flavobacteriia | Flavobacteriales | Flavobacteriaceae | <i>Imtechella halotolerans</i> K1                     |
| Jpa-1-1 to Jpa-1-3  | Bacteria | Bacteroidetes | Flavobacteriia | Flavobacteriales | Flavobacteriaceae | <i>Jejuia pallidilutea</i>                            |
| Jma-1-1             | Bacteria | Bacteroidetes | Flavobacteriia | Flavobacteriales | Flavobacteriaceae | <i>Joostella marina</i> DSM 19592                     |
| Kje-1-1             | Bacteria | Bacteroidetes | Flavobacteriia | Flavobacteriales | Flavobacteriaceae | <i>Kordia jejudonensis</i>                            |
| Kzh-1-1             | Bacteria | Bacteroidetes | Flavobacteriia | Flavobacteriales | Flavobacteriaceae | <i>Kordia zhangzhouensis</i>                          |
| Ksp-1-1             | Bacteria | Bacteroidetes | Flavobacteriia | Flavobacteriales | Flavobacteriaceae | <i>Krokinobacter</i> sp. 4H-3-7-5                     |
| Lja-1-1             | Bacteria | Bacteroidetes | Flavobacteriia | Flavobacteriales | Flavobacteriaceae | <i>Lacinutrix jangbogonensis</i>                      |
| Lsp-1-1             | Bacteria | Bacteroidetes | Flavobacteriia | Flavobacteriales | Flavobacteriaceae | <i>Lacinutrix</i> sp. 5H-3-7-4                        |
| Lsp-2-1             | Bacteria | Bacteroidetes | Flavobacteriia | Flavobacteriales | Flavobacteriaceae | <i>Lacinutrix</i> sp. Hel.I-90                        |
| Lsp-3-1             | Bacteria | Bacteroidetes | Flavobacteriia | Flavobacteriales | Flavobacteriaceae | <i>Leeuwenhoekella</i> sp. Hel.I-48                   |
| Lsp-4-1             | Bacteria | Bacteroidetes | Flavobacteriia | Flavobacteriales | Flavobacteriaceae | <i>Leeuwenhoekella</i> sp. MAR_2009_132               |



|                    |                       |               |                |                  |                   |                                                        |
|--------------------|-----------------------|---------------|----------------|------------------|-------------------|--------------------------------------------------------|
| Myu-1-1            | Bacteria              | Bacteroidetes | Flavobacteriia | Flavobacteriales | Flavobacteriaceae | <i>Mangrovimonas yunxiaonensis</i>                     |
| Man-1-1            | Bacteria              | Bacteroidetes | Flavobacteriia | Flavobacteriales | Flavobacteriaceae | <i>Maribacter antarcticus</i> DSM 21422                |
| Mfo-1-1            | Bacteria              | Bacteroidetes | Flavobacteriia | Flavobacteriales | Flavobacteriaceae | <i>Maribacter forsetii</i> DSM 18668                   |
| Msp-1-1            | Bacteria              | Bacteroidetes | Flavobacteriia | Flavobacteriales | Flavobacteriaceae | <i>Maribacter sp.</i> Hel.I.7                          |
| Mth-1-1            | Bacteria              | Bacteroidetes | Flavobacteriia | Flavobacteriales | Flavobacteriaceae | <i>Maribacter thermophilus</i>                         |
| Mze-1-1            | Bacteria              | Bacteroidetes | Flavobacteriia | Flavobacteriales | Flavobacteriaceae | <i>Mesoflavibacter zeaxanthinifaciens</i> DSM 18436    |
| Mze-2-1            | Bacteria              | Bacteroidetes | Flavobacteriia | Flavobacteriales | Flavobacteriaceae | <i>Mesoflavibacter zeaxanthinifaciens</i> S86          |
| Mmo-1-1            | Bacteria              | Bacteroidetes | Flavobacteriia | Flavobacteriales | Flavobacteriaceae | <i>Mesonia mobilis</i> DSM 19841                       |
| Mlu-1-1            | Bacteria              | Bacteroidetes | Flavobacteriia | Flavobacteriales | Flavobacteriaceae | <i>Muricauda lutaonensis</i>                           |
| Msp-2-1            | Bacteria              | Bacteroidetes | Flavobacteriia | Flavobacteriales | Flavobacteriaceae | <i>Muricauda sp.</i> MAR.2010.75                       |
| Min-1-1            | Bacteria              | Bacteroidetes | Flavobacteriia | Flavobacteriales | Flavobacteriaceae | <i>Myroides injenensis</i> M09-0166                    |
| Ndo-1-1            | Bacteria              | Bacteroidetes | Flavobacteriia | Flavobacteriales | Flavobacteriaceae | <i>Nonlabens dokdonensis</i> DSW-6                     |
| Nma-1-1            | Bacteria              | Bacteroidetes | Flavobacteriia | Flavobacteriales | Flavobacteriaceae | <i>Nonlabens marinus</i> S1-08                         |
| Nse-1-1            | Bacteria              | Bacteroidetes | Flavobacteriia | Flavobacteriales | Flavobacteriaceae | <i>Nonlabens sediminis</i>                             |
| Nul-1-1 to Nul-1-6 | Bacteria              | Bacteroidetes | Flavobacteriia | Flavobacteriales | Flavobacteriaceae | <i>Nonlabens ulvanivorans</i>                          |
| Oma-1-1            | Bacteria              | Bacteroidetes | Flavobacteriia | Flavobacteriales | Flavobacteriaceae | <i>Olleya marilimosa</i> CAM030                        |
| Osp-1-1            | Bacteria              | Bacteroidetes | Flavobacteriia | Flavobacteriales | Flavobacteriaceae | <i>Olleya sp.</i> VCSA23                               |
| Osp-2-1            | Bacteria              | Bacteroidetes | Flavobacteriia | Flavobacteriales | Flavobacteriaceae | <i>Olleya sp.</i> VCSM12                               |
| Orh-1-1            | Bacteria              | Bacteroidetes | Flavobacteriia | Flavobacteriales | Flavobacteriaceae | <i>Ornithobacterium rhinotracheale</i> DSM 15997       |
| Orh-2-1            | Bacteria              | Bacteroidetes | Flavobacteriia | Flavobacteriales | Flavobacteriaceae | <i>Ornithobacterium rhinotracheale</i> H06-030791      |
| Orh-3-1            | Bacteria              | Bacteroidetes | Flavobacteriia | Flavobacteriales | Flavobacteriaceae | <i>Ornithobacterium rhinotracheale</i> ORT-UMN 88      |
| Psp-1-1            | Bacteria              | Bacteroidetes | Flavobacteriia | Flavobacteriales | Flavobacteriaceae | <i>Polaribacter sp.</i> Hel1.33_49                     |
| Psp-2-1            | Bacteria              | Bacteroidetes | Flavobacteriia | Flavobacteriales | Flavobacteriaceae | <i>Polaribacter sp.</i> Hel.I.88                       |
| Psp-3-1            | Bacteria              | Bacteroidetes | Flavobacteriia | Flavobacteriales | Flavobacteriaceae | <i>Polaribacter sp.</i> MED152                         |
| Pgo-1-1            | Bacteria              | Bacteroidetes | Flavobacteriia | Flavobacteriales | Flavobacteriaceae | <i>Psychroflexus gondwanensis</i> ACAM 44              |
| Pto-1-1            | Bacteria              | Bacteroidetes | Flavobacteriia | Flavobacteriales | Flavobacteriaceae | <i>Psychroflexus torquis</i> ATCC 700755               |
| Ptr-1-1            | Bacteria              | Bacteroidetes | Flavobacteriia | Flavobacteriales | Flavobacteriaceae | <i>Psychroflexus tropicus</i> DSM 15496                |
| Pbu-1-1            | Bacteria              | Bacteroidetes | Flavobacteriia | Flavobacteriales | Flavobacteriaceae | <i>Psychroserpens burtonensis</i> DSM 12212            |
| Pda-1-1            | Bacteria              | Bacteroidetes | Flavobacteriia | Flavobacteriales | Flavobacteriaceae | <i>Psychroserpens damuponensis</i>                     |
| Pja-1-1            | Bacteria              | Bacteroidetes | Flavobacteriia | Flavobacteriales | Flavobacteriaceae | <i>Psychroserpens jangbogonensis</i>                   |
| Pme-1-1            | Bacteria              | Bacteroidetes | Flavobacteriia | Flavobacteriales | Flavobacteriaceae | <i>Psychroserpens mesophilus</i>                       |
| Psp-4-1            | Bacteria              | Bacteroidetes | Flavobacteriia | Flavobacteriales | Flavobacteriaceae | <i>Psychroserpens sp.</i> Hel.I.66                     |
| Ran-1-1 to Ran-1-2 | Bacteria              | Bacteroidetes | Flavobacteriia | Flavobacteriales | Flavobacteriaceae | <i>Riemerella anatipestifer</i>                        |
| Ran-2-1 to Ran-2-2 | Bacteria              | Bacteroidetes | Flavobacteriia | Flavobacteriales | Flavobacteriaceae | <i>Riemerella anatipestifer</i> ATCC 11845 = DSM 15868 |
| Ran-3-1            | Bacteria              | Bacteroidetes | Flavobacteriia | Flavobacteriales | Flavobacteriaceae | <i>Riemerella anatipestifer</i> CH3                    |
| Ran-4-1            | Bacteria              | Bacteroidetes | Flavobacteriia | Flavobacteriales | Flavobacteriaceae | <i>Riemerella anatipestifer</i> RA-CH-1                |
| Ran-5-1            | Bacteria              | Bacteroidetes | Flavobacteriia | Flavobacteriales | Flavobacteriaceae | <i>Riemerella anatipestifer</i> RA-CH-2                |
| Ran-6-1            | Bacteria              | Bacteroidetes | Flavobacteriia | Flavobacteriales | Flavobacteriaceae | <i>Riemerella anatipestifer</i> RA-GD                  |
| Ran-7-1            | Bacteria              | Bacteroidetes | Flavobacteriia | Flavobacteriales | Flavobacteriaceae | <i>Riemerella anatipestifer</i> RA-SG                  |
| Ran-8-1            | Bacteria              | Bacteroidetes | Flavobacteriia | Flavobacteriales | Flavobacteriaceae | <i>Riemerella anatipestifer</i> RA-YM                  |
| Ran-9-1            | Bacteria              | Bacteroidetes | Flavobacteriia | Flavobacteriales | Flavobacteriaceae | <i>Riemerella anatipestifer</i> Yb2                    |
| Rco-1-1            | Bacteria              | Bacteroidetes | Flavobacteriia | Flavobacteriales | Flavobacteriaceae | <i>Riemerella columbina</i> DSM 16469                  |
| Ssp-1-1            | Bacteria              | Bacteroidetes | Flavobacteriia | Flavobacteriales | Flavobacteriaceae | <i>Salegentibacter sp.</i> Hel.I.6                     |
| Sxi-1-1            | Bacteria              | Bacteroidetes | Flavobacteriia | Flavobacteriales | Flavobacteriaceae | <i>Salinimicrobium xinjiangense</i> DSM 19287          |
| Ssp-2-1            | Bacteria              | Bacteroidetes | Flavobacteriia | Flavobacteriales | Flavobacteriaceae | <i>Sediminibacter sp.</i> Hel.I.10                     |
| Sze-1-1            | Bacteria              | Bacteroidetes | Flavobacteriia | Flavobacteriales | Flavobacteriaceae | <i>Siansivirga zeaxanthinifaciens</i> CC-SAMT-1        |
| Tna-1-1            | Bacteria              | Bacteroidetes | Flavobacteriia | Flavobacteriales | Flavobacteriaceae | <i>Tamlana nanhaiensis</i>                             |
| Tse-1-1            | Bacteria              | Bacteroidetes | Flavobacteriia | Flavobacteriales | Flavobacteriaceae | <i>Tamlana sedimentorum</i>                            |
| Tma-1-1            | Bacteria              | Bacteroidetes | Flavobacteriia | Flavobacteriales | Flavobacteriaceae | <i>Tenacibaculum maritimum</i> NCIMB 2154              |
| Tme-1-1            | Bacteria              | Bacteroidetes | Flavobacteriia | Flavobacteriales | Flavobacteriaceae | <i>Tenacibaculum mesophilum</i>                        |
| Tov-1-1            | Bacteria              | Bacteroidetes | Flavobacteriia | Flavobacteriales | Flavobacteriaceae | <i>Tenacibaculum ovolyticum</i> DSM 18103              |
| Wma-1-1            | Bacteria              | Bacteroidetes | Flavobacteriia | Flavobacteriales | Flavobacteriaceae | <i>Weeksella massiliensis</i>                          |
| Wvi-1-1            | Bacteria              | Bacteroidetes | Flavobacteriia | Flavobacteriales | Flavobacteriaceae | <i>Weeksella virosa</i> DSM 16922                      |
| Wps-1-1            | Bacteria              | Bacteroidetes | Flavobacteriia | Flavobacteriales | Flavobacteriaceae | <i>Winogradskyella psychrotolerans</i> RS-3            |
| Wsp-1-1            | Bacteria              | Bacteroidetes | Flavobacteriia | Flavobacteriales | Flavobacteriaceae | <i>Winogradskyella sp.</i> PG-2                        |
| Zam-1-1            | Bacteria              | Bacteroidetes | Flavobacteriia | Flavobacteriales | Flavobacteriaceae | <i>Zhouia amylyolytica</i> AD3                         |
| Zga-1-1            | Bacteria              | Bacteroidetes | Flavobacteriia | Flavobacteriales | Flavobacteriaceae | <i>Zobellia galactanivorans</i>                        |
| Zul-1-1            | Bacteria              | Bacteroidetes | Flavobacteriia | Flavobacteriales | Flavobacteriaceae | <i>Zobellia uliginosa</i>                              |
| env-1 to env-2123  | environmental samples |               |                |                  |                   |                                                        |

## 6.2 Gene contexts

Each L19-Flavobacteria RNA (indicated by “RNA→”) is listed. For each hit, the downstream genes predicted to reside in a regulated operon are listed. If the nearest downstream gene is encoding in the opposite strand (and therefore presumed to not be a part of a regulated operon), then that gene is still depicted. Some environmental sequences and some RefSeq entries lack gene annotations, and so no genes are available for such sequences. The direction of each gene is indicated with an arrow (→), and each predicted conserved domain in the gene is named. Conserved domains associated with more than one L19-Flavobacteria RNA are assigned a color; other domains are gray. Information about these con-

served domains is given in Section 6.3. The accession of the sequence containing each L19-Flavobacteria RNA is given in the column named “Seq. accession”. Accessions beginning with “NC\_”, “NS\_”, “NW\_” or “NZ\_” are contained in RefSeq. Other accession refer to environmental samples. Nucleotide coordinates are given for the 5′ and 3′ boundaries of each L19-Flavobacteria RNA. If the 5′ coordinate is greater than the 3′ coordinate, the RNA is present on the reverse-complement strand of the containing genomic DNA sequence. Each hit is denoted by an abbreviation (like “Eco-1-1”) that refers to a taxonomy given in Section 6.1.

| abbrev. | Seq. accession                 |   | 5′ at | 3′ at | genes                                                               |
|---------|--------------------------------|---|-------|-------|---------------------------------------------------------------------|
| env-1   | DelMOWin2010.c10054634         | + | 824   | 851   | RNA→ rplS (PRK05338)Ribosomal_L19 (pfam01245)→                      |
| env-2   | JCVL_SCAF_1101668113425        | - | 1241  | 1214  | RNA→ rplS (PRK05338)Ribosomal_L19 (pfam01245)→                      |
| env-3   | scaffold96896_1.MH0080         | + | 1611  | 1645  | RNA→ rplS (PRK05338)Ribosomal_L19 (pfam01245)→                      |
| env-4   | JCVL_SCAF_1101668324204        | + | 356   | 380   | RNA→ rplS (PRK05338)Ribosomal_L19 (pfam01245)→ PRK08299 (PRK08299)→ |
| env-5   | CEVX01024844.1                 | + | 3189  | 3216  | RNA→ rplS (PRK05338)Ribosomal_L19 (pfam01245)→                      |
| env-6   | JCVL_SCAF_1101668025146        | + | 75    | 102   | RNA→ rplS (PRK05338)Ribosomal_L19 (pfam01245)→                      |
| env-7   | scaffold46008_4.MH0055         | + | 3799  | 3835  | RNA→ rplS (PRK05338)Ribosomal_L19 (pfam01245)→                      |
| env-8   | 2236876009_110915              | - | 51    | 24    | RNA→                                                                |
| env-9   | 2236876011_102929              | - | 302   | 275   | RNA→ rplS (PRK05338)Ribosomal_L19 (pfam01245)→                      |
| env-10  | 2236876009_236522              | + | 137   | 164   | RNA→ rplS (PRK05338)Ribosomal_L19 (pfam01245)→                      |
| env-11  | 2236876010_0006057             | - | 121   | 94    | RNA→ hypo→                                                          |
| env-12  | SI47jul10_100m.c1059181        | + | 191   | 218   | RNA→ rplS (PRK05338)Ribosomal_L19 (pfam01245)→                      |
| env-13  | SI39nov09_120m.c1230431        | - | 223   | 196   | RNA→ rplS (PRK05338)Ribosomal_L19 (pfam01245)→                      |
| env-14  | SI36aug09_135m.c1030014        | + | 671   | 698   | RNA→ rplS (PRK05338)Ribosomal_L19 (pfam01245)→                      |
| env-15  | SI53jan11_100m.c1051597        | + | 314   | 341   | RNA→ rplS (PRK05338)Ribosomal_L19 (pfam01245)→                      |
| env-16  | SI60aug11_100m.c1037386        | - | 486   | 459   | RNA→ rplS (PRK05338)Ribosomal_L19 (pfam01245)→                      |
| env-17  | SI47jul10_120m.c1000746        | + | 8693  | 8720  | RNA→ rplS (PRK05338)Ribosomal_L19 (pfam01245)→                      |
| env-18  | SI53jan11_150m.c1118125        | - | 192   | 165   | RNA→ rplS (PRK05338)Ribosomal_L19 (pfam01245)→                      |
| env-19  | SI34jun09_120m_1000436         | + | 12936 | 12963 | RNA→ rplS (PRK05338)Ribosomal_L19 (pfam01245)→                      |
| env-20  | SI34jun09_135m_1001026         | + | 8736  | 8763  | RNA→ rplS (PRK05338)Ribosomal_L19 (pfam01245)→                      |
| env-21  | SI36aug09_100m_1040962         | - | 274   | 247   | RNA→ rplS (PRK05338)Ribosomal_L19 (pfam01245)→                      |
| env-22  | SI36aug09_120m_1000931         | - | 2702  | 2675  | RNA→ rplS (PRK05338)Ribosomal_L19 (pfam01245)→                      |
| env-23  | SI34jun09_100m_1000067         | - | 31230 | 31203 | RNA→ rplS (PRK05338)Ribosomal_L19 (pfam01245)→                      |
| env-24  | F10SI0310a_Sequence0000020675  | + | 300   | 327   | RNA→ rplS (PRK05338)Ribosomal_L19 (pfam01245)→                      |
| env-25  | F10SI03100a_Sequence0000002003 | - | 449   | 422   | RNA→ rplS (PRK05338)Ribosomal_L19 (pfam01245)→                      |
| env-26  | F10SI03120a_Sequence0000009017 | - | 632   | 605   | RNA→ rplS (PRK05338)Ribosomal_L19 (pfam01245)→                      |
| env-27  | JCVL_SCAF_1096627066532        | - | 2055  | 2028  | RNA→ rplS (PRK05338)Ribosomal_L19 (pfam01245)→                      |
| env-28  | CEWGO1100961.1                 | + | 836   | 863   | RNA→ rplS (PRK05338)Ribosomal_L19 (pfam01245)→                      |
| env-29  | A09P0410a_Sequence0000049938   | - | 828   | 801   | RNA→ rplS (PRK05338)Ribosomal_L19 (pfam01245)→                      |
| env-30  | JCVL_SCAF_1096627807607        | - | 1865  | 1838  | RNA→ rplS (PRK05338)Ribosomal_L19 (pfam01245)→                      |
| env-31  | CENP01449906.1                 | + | 6989  | 7016  | RNA→ rplS (PRK05338)Ribosomal_L19 (pfam01245)→                      |
| env-32  | CEOK01161594.1                 | - | 675   | 648   | RNA→ rplS (PRK05338)Ribosomal_L19 (pfam01245)→                      |
| env-33  | CESO1045118.1                  | - | 1107  | 1080  | RNA→ rplS (PRK05338)Ribosomal_L19 (pfam01245)→                      |
| env-34  | LPaug08P2610m.c1001156         | + | 4888  | 4915  | RNA→ rplS (PRK05338)Ribosomal_L19 (pfam01245)→                      |
| env-35  | CESF01045010.1                 | + | 37    | 64    | RNA→ rplS (PRK05338)Ribosomal_L19 (pfam01245)→                      |
| env-36  | CESI01106464.1                 | - | 2060  | 2033  | RNA→ rplS (PRK05338)Ribosomal_L19 (pfam01245)→                      |
| env-37  | CESU01171607.1                 | - | 76    | 49    | RNA→                                                                |
| env-38  | DelMOSum2011.c10436309         | - | 43    | 16    | RNA→ ←hypo                                                          |
| env-39  | CEWOO1376889.1                 | - | 537   | 510   | RNA→ rplS (PRK05338)Ribosomal_L19 (pfam01245)→                      |

|          |                                   |   |         |         |                                                                                                                                                                              |
|----------|-----------------------------------|---|---------|---------|------------------------------------------------------------------------------------------------------------------------------------------------------------------------------|
| env-40   | JGI20156J14371_10000063           | - | 46374   | 46347   | RNA → rplS (PRK05338)Ribosomal_L19 (pfam01245) →                                                                                                                             |
| env-41   | CENG01060425.1                    | - | 1443    | 1416    | RNA → hypo → rplS (PRK05338)Ribosomal_L19 (pfam01245) →                                                                                                                      |
| env-42   | CEOM01373684.1                    | + | 885     | 912     | RNA → rplS (PRK05338)Ribosomal_L19 (pfam01245) →                                                                                                                             |
| env-43   | CENJ01127951.1                    | + | 724     | 751     | RNA → rplS (PRK05338)Ribosomal_L19 (pfam01245) →                                                                                                                             |
| env-44   | JCVL_SCAF_1096627276236           | + | 31293   | 31320   | RNA → rplS (PRK05338)Ribosomal_L19 (pfam01245) →                                                                                                                             |
| env-45   | P_2C_Liq_1_UnCty_1015735          | - | 1527    | 1500    | RNA → rplS (PRK05338)Ribosomal_L19 (pfam01245) →                                                                                                                             |
| env-46   | SRS022609_C3248272                | - | 149     | 114     | RNA → rplS (PRK05338) →                                                                                                                                                      |
| env-47   | NLM026_scaffold33221_1            | - | 492     | 457     | RNA → hypo → rplS (PRK05338)Ribosomal_L19 (pfam01245) →                                                                                                                      |
| env-48   | SRS013476_C3069736                | + | 704     | 739     | RNA → rplS (PRK05338)Ribosomal_L19 (pfam01245) →                                                                                                                             |
| env-49   | NOF004_scaffold34062_6            | + | 254     | 289     | RNA → rplS (PRK05338)Ribosomal_L19 (pfam01245) →                                                                                                                             |
| env-50   | SRS020233_C4251492                | - | 197     | 162     | RNA → rplS (PRK05338)Ribosomal_L19 (pfam01245) →                                                                                                                             |
| env-51   | JGI20154J14316_10000121           | + | 19996   | 20023   | RNA → rplS (PRK05338)Ribosomal_L19 (pfam01245) → DUF1015 (pfam06245) →<br>TIGR00044 (TIGR00044)PLPDE_III_YBL036c_like (cd00635) → ValS (COG0525)valS (PRK05729) →            |
| env-52   | JGI20153J14295_10000586           | + | 20619   | 20646   | RNA → rplS (PRK05338)Ribosomal_L19 (pfam01245) → DUF1015 (pfam06245) →<br>TIGR00044 (TIGR00044)PLPDE_III_YBL036c_like (cd00635) → ValS (COG0525)valS (PRK05729) →            |
| env-53   | JGI20153J14318_10000586           | + | 20619   | 20646   | RNA → rplS (PRK05338)Ribosomal_L19 (pfam01245) → DUF1015 (pfam06245) →<br>TIGR00044 (TIGR00044)PLPDE_III_YBL036c_like (cd00635) → ValS (COG0525)valS (PRK05729) →            |
| env-54   | JGI20154J14316_10009206           | - | 959     | 931     | RNA → rplS (PRK05338)Ribosomal_L19 (pfam01245) → DUF1015 (pfam06245) →                                                                                                       |
| env-55   | DelMOSum2011_c10004732            | - | 2425    | 2397    | RNA → rplS (PRK05338)Ribosomal_L19 (pfam01245) → DUF1015 (pfam06245) →<br>SDR_c (cd05233)fabG (PRK05653) →                                                                   |
| env-56   | 2236876010_0079494                | - | 132     | 104     | RNA → hypo →                                                                                                                                                                 |
| env-57   | CEWG01003263.1                    | - | 1195    | 1167    | RNA → rplS (PRK05338)Ribosomal_L19 (pfam01245) → DUF1015 (pfam06245) →                                                                                                       |
| env-58   | 2236876009_196101                 | - | 440     | 412     | RNA → rplS (PRK05338)Ribosomal_L19 (pfam01245) →                                                                                                                             |
| env-59   | JGI20154J14316_10002796           | - | 4419    | 4392    | RNA → rplS (PRK05338)Ribosomal_L19 (pfam01245) → DUF1015 (pfam06245) →<br>PRK07825 (PRK07825)adh_short (pfam00106) → TIGR00044 (TIGR00044)PLPDE_III_YBL036c_like (cd00635) → |
| env-60   | CGULGFCP3IQ02J1ARS                | + | 207     | 234     | RNA → rplS (PRK05338)Ribosomal_L19 (pfam01245) →                                                                                                                             |
| env-61   | 2236876001_386712                 | + | 198     | 225     | RNA → rplS (PRK05338)Ribosomal_L19 (pfam01245) →                                                                                                                             |
| env-62   | 2236876001_178730                 | + | 31      | 58      | RNA → rplS (PRK05338)Ribosomal_L19 (pfam01245) →                                                                                                                             |
| env-63   | SI34jun09_10m_1002607             | - | 5144    | 5117    | RNA → rplS (PRK05338)Ribosomal_L19 (pfam01245) →                                                                                                                             |
| env-64   | JGI1221J11331_1002397             | - | 3466    | 3439    | RNA → rplS (PRK05338)Ribosomal_L19 (pfam01245) →                                                                                                                             |
| env-65   | BS_KBB_SWE26_205m_c1114174        | - | 142     | 115     | RNA → rplS (PRK05338)Ribosomal_L19 (pfam01245) →                                                                                                                             |
| env-66   | BS_KBA_SWE21_205m_10293102        | + | 80      | 107     | RNA → ←hypo                                                                                                                                                                  |
| env-67   | CEQG01051930.1                    | + | 175     | 202     | RNA → hypo → rplS (PRK05338)Ribosomal_L19 (pfam01245) →                                                                                                                      |
| Nul-1-1  | NZ_BBMK01000006.1                 | + | 140006  | 140033  | RNA → rplS (PRK05338)Ribosomal_L19 (pfam01245) →                                                                                                                             |
| Fba-1-1  | NZ_CH672374.1                     | + | 838999  | 839026  | RNA → rplS (PRK05338)Ribosomal_L19 (pfam01245) →                                                                                                                             |
| Nul-1-2  | NZ_BBLG01000002.1                 | - | 286727  | 286700  | RNA → rplS (PRK05338)Ribosomal_L19 (pfam01245) →                                                                                                                             |
| Nul-1-3  | NZ_BBMJ01000007.1                 | + | 150921  | 150948  | RNA → rplS (PRK05338)Ribosomal_L19 (pfam01245) →                                                                                                                             |
| Nul-1-4  | NZ_BBNT01000005.1                 | - | 74527   | 74500   | RNA → rplS (PRK05338)Ribosomal_L19 (pfam01245) →                                                                                                                             |
| Nul-1-5  | NZ_JPJI01000032.1                 | - | 1150068 | 1150041 | RNA → rplS (PRK05338)Ribosomal_L19 (pfam01245) →                                                                                                                             |
| Nul-1-6  | NZ_BBMM01000005.1                 | + | 148362  | 148389  | RNA → rplS (PRK05338)Ribosomal_L19 (pfam01245) →                                                                                                                             |
| env-68   | TDF_OR_ARG04_113m_c1026478        | + | 123     | 150     | RNA → rplS (PRK05338)Ribosomal_L19 (pfam01245) →                                                                                                                             |
| Csp-18-1 | NZ_JUGG01000008.1                 | - | 653525  | 653498  | RNA → rplS (PRK05338)Ribosomal_L19 (pfam01245) →                                                                                                                             |
| Csp-15-1 | NZ_LFNE01000002.1                 | - | 475215  | 475188  | RNA → rplS (PRK05338)Ribosomal_L19 (pfam01245) →                                                                                                                             |
| Csp-16-1 | NZ_KN050755.1                     | - | 362647  | 362620  | RNA → rplS (PRK05338)Ribosomal_L19 (pfam01245) →                                                                                                                             |
| Chi-1-1  | NZ_JARQ01000007.1                 | - | 271126  | 271099  | RNA → rplS (PRK05338)Ribosomal_L19 (pfam01245) →                                                                                                                             |
| env-69   | APMI01120637.1                    | - | 2839    | 2812    | RNA → rplS (PRK05338)Ribosomal_L19 (pfam01245) →                                                                                                                             |
| Cgr-2-1  | NZ_AUMU01000006.1                 | - | 52910   | 52883   | RNA → rplS (PRK05338)Ribosomal_L19 (pfam01245) →                                                                                                                             |
| Csp-17-1 | NZ_JUGK01000011.1                 | - | 424788  | 424761  | RNA → rplS (PRK05338)Ribosomal_L19 (pfam01245) →                                                                                                                             |
| Fsp-5-1  | NZ_BACY01000298.1                 | - | 3551    | 3524    | RNA → rplS (PRK05338)Ribosomal_L19 (pfam01245) →                                                                                                                             |
| env-70   | 07_22_INULIN_DNA_scaffold76662_14 | - | 670     | 643     | RNA → rplS (PRK05338)Ribosomal_L19 (pfam01245) →                                                                                                                             |
| env-71   | JGI20153J14295_10392805           | + | 60      | 87      | RNA → rplS (PRK05338)Ribosomal_L19 (pfam01245) →                                                                                                                             |
| env-72   | JGI20153J14318_10392805           | + | 60      | 87      | RNA → rplS (PRK05338)Ribosomal_L19 (pfam01245) →                                                                                                                             |
| env-73   | JCVL_SCAF_1096627352169           | - | 5043    | 5016    | RNA → rplS (PRK05338)Ribosomal_L19 (pfam01245) →                                                                                                                             |

|         |                               |   |       |       |       |                                            |
|---------|-------------------------------|---|-------|-------|-------|--------------------------------------------|
| env-74  | JCVL_SCAF_1096626620328       | - | 745   | 718   | RNA → | rplS (PRK05338)Ribosomal_L19 (pfam01245) → |
| env-75  | CEWG01401482.1                | - | 206   | 179   | RNA → | rplS (PRK05338)Ribosomal_L19 (pfam01245) → |
| env-76  | 84538774                      | + | 290   | 317   | RNA → | rplS (PRK05338)Ribosomal_L19 (pfam01245) → |
| env-77  | JCVL_READ_1106515117443       | + | 381   | 408   | RNA → | rplS (PRK05338)Ribosomal_L19 (pfam01245) → |
| env-78  | 84539387                      | - | 983   | 956   | RNA → | rplS (PRK05338)Ribosomal_L19 (pfam01245) → |
| env-79  | JCVL_READ_1101854579158       | + | 714   | 741   | RNA → |                                            |
| env-80  | JCVL_READ_1101754002299       | + | 718   | 745   | RNA → |                                            |
| env-81  | CESE01025856.1                | + | 5377  | 5404  | RNA → | rplS (PRK05338)Ribosomal_L19 (pfam01245) → |
| env-82  | CESI01208183.1                | + | 540   | 567   | RNA → |                                            |
| env-83  | CESJ01033644.1                | - | 458   | 431   | RNA → | rplS (PRK05338)Ribosomal_L19 (pfam01245) → |
| env-84  | CEST01017140.1                | + | 5896  | 5923  | RNA → | rplS (PRK05338)Ribosomal_L19 (pfam01245) → |
| env-85  | CESU01147895.1                | - | 55    | 28    | RNA → |                                            |
| env-86  | JCVL_SCAF_1096627480095       | - | 1803  | 1776  | RNA → | rplS (PRK05338)Ribosomal_L19 (pfam01245) → |
| env-87  | DelMOSum2010_c10678701        | + | 177   | 204   | RNA → |                                            |
| env-88  | CAM_READ_0235983637           | + | 371   | 398   | RNA → |                                            |
| env-89  | JCVL_SCAF_1101668031618       | + | 670   | 697   | RNA → | rplS (PRK05338)Ribosomal_L19 (pfam01245) → |
| env-90  | CERM01141528.1                | + | 522   | 549   | RNA → |                                            |
| env-91  | JGI20157J14317_10131042       | + | 360   | 387   | RNA → | rplS (PRK05338)Ribosomal_L19 (pfam01245) → |
| env-92  | 2236876002_127420             | + | 329   | 356   | RNA → |                                            |
| env-93  | JCVL_SCAF_1096626613738       | - | 310   | 283   | RNA → | rplS (PRK05338)Ribosomal_L19 (pfam01245) → |
| env-94  | 2236876006_283195             | - | 34    | 7     | RNA → |                                            |
| env-95  | DelMOSum2010_c10002012        | + | 12245 | 12272 | RNA → | rplS (PRK05338)Ribosomal_L19 (pfam01245) → |
| env-96  | DelMOSum2011_c10031706        | - | 525   | 498   | RNA → | rplS (PRK05338)Ribosomal_L19 (pfam01245) → |
| env-97  | DelMOWin2010_c10001229        | + | 4276  | 4303  | RNA → | rplS (PRK05338)Ribosomal_L19 (pfam01245) → |
| env-98  | JGI20152J14361_10056501       | - | 442   | 415   | RNA → | rplS (PRK05338)Ribosomal_L19 (pfam01245) → |
| env-99  | JGI20156J14371_10026599       | + | 782   | 809   | RNA → | rplS (PRK05338)Ribosomal_L19 (pfam01245) → |
| env-100 | JGI20154J14316_10083694       | + | 359   | 386   | RNA → | rplS (PRK05338)Ribosomal_L19 (pfam01245) → |
| env-101 | JGI20160J14292_10012380       | - | 2489  | 2462  | RNA → | rplS (PRK05338)Ribosomal_L19 (pfam01245) → |
| env-102 | JGI20159J14440_10010596       | + | 2893  | 2920  | RNA → | rplS (PRK05338)Ribosomal_L19 (pfam01245) → |
| env-103 | JGI20155J14468_10002089       | - | 1100  | 1073  | RNA → | rplS (PRK05338)Ribosomal_L19 (pfam01245) → |
| env-104 | JGI20158J14315_10029275       | + | 515   | 542   | RNA → | rplS (PRK05338)Ribosomal_L19 (pfam01245) → |
| env-105 | A09P0410a_Sequence0000056231  | + | 784   | 811   | RNA → |                                            |
| env-106 | F10SI0310a_Sequence0000007596 | - | 1376  | 1349  | RNA → | rplS (PRK05338)Ribosomal_L19 (pfam01245) → |
| env-107 | JCVL_SCAF_1096626854527       | + | 2612  | 2639  | RNA → | rplS (PRK05338)Ribosomal_L19 (pfam01245) → |
| env-108 | DelMOWin2010_c10025809        | + | 1404  | 1431  | RNA → | rplS (PRK05338)Ribosomal_L19 (pfam01245) → |
| env-109 | JGI20152J14361_10004558       | + | 2419  | 2446  | RNA → | rplS (PRK05338)Ribosomal_L19 (pfam01245) → |
| env-110 | JGI20151J14362_10005809       | + | 2820  | 2847  | RNA → | rplS (PRK05338)Ribosomal_L19 (pfam01245) → |
| env-111 | JGI20153J14295_10006540       | - | 5010  | 4983  | RNA → | rplS (PRK05338)Ribosomal_L19 (pfam01245) → |
| env-112 | JGI20153J14318_10006540       | - | 5010  | 4983  | RNA → | rplS (PRK05338)Ribosomal_L19 (pfam01245) → |
| env-113 | JGI20159J14440_10023770       | - | 1237  | 1210  | RNA → | rplS (PRK05338)Ribosomal_L19 (pfam01245) → |
| env-114 | JGI20155J14468_10003739       | + | 1801  | 1828  | RNA → | rplS (PRK05338)Ribosomal_L19 (pfam01245) → |
| env-115 | JGI20158J14315_10006321       | + | 2255  | 2282  | RNA → | rplS (PRK05338)Ribosomal_L19 (pfam01245) → |
| env-116 | CESS01145451.1                | - | 462   | 435   | RNA → | rplS (PRK05338)Ribosomal_L19 (pfam01245) → |
| env-117 | JGI20156J14371_10212006       | + | 469   | 496   | RNA → |                                            |
| env-118 | JGI20154J14316_10004022       | + | 6496  | 6523  | RNA → | rplS (PRK05338)Ribosomal_L19 (pfam01245) → |
| env-119 | JGI20160J14292_10007636       | + | 2383  | 2410  | RNA → | rplS (PRK05338)Ribosomal_L19 (pfam01245) → |
| env-120 | P_2C_Liq_3_UnCty_100387       | + | 12092 | 12119 | RNA → | rplS (PRK05338)Ribosomal_L19 (pfam01245) → |
| env-121 | P_2C_Liq_1_UnCty_1000156      | + | 13091 | 13118 | RNA → | rplS (PRK05338)Ribosomal_L19 (pfam01245) → |
| env-122 | P_2C_Liq_2_UnCty_1000768      | + | 4871  | 4898  | RNA → | rplS (PRK05338)Ribosomal_L19 (pfam01245) → |
| env-123 | JGI20151J14362_10005693       | + | 5310  | 5337  | RNA → | rplS (PRK05338)Ribosomal_L19 (pfam01245) → |
| env-124 | JGI20153J14295_10091054       | + | 386   | 413   | RNA → | rplS (PRK05338)Ribosomal_L19 (pfam01245) → |
| env-125 | JGI20153J14318_10091054       | + | 386   | 413   | RNA → | rplS (PRK05338)Ribosomal_L19 (pfam01245) → |



|         |                             |   |        |        |       |                                            |                       |
|---------|-----------------------------|---|--------|--------|-------|--------------------------------------------|-----------------------|
| env-126 | JGI11876J14442.10491868     | - | 201    | 174    | RNA → | rplS (PRK05338)Ribosomal.L19 (pfam01245) → |                       |
| env-127 | JGI11876J14442.10523508     | + | 238    | 265    | RNA → | rplS (PRK05338)Ribosomal.L19 (pfam01245) → |                       |
| env-128 | CEOS01057510.1              | + | 637    | 664    | RNA → | rplS (PRK05338)Ribosomal.L19 (pfam01245) → |                       |
| env-129 | CETR01239150.1              | + | 650    | 677    | RNA → | rplS (PRK05338)Ribosomal.L19 (pfam01245) → |                       |
| env-130 | CETS01121663.1              | - | 506    | 479    | RNA → | rplS (PRK05338)Ribosomal.L19 (pfam01245) → |                       |
| env-131 | CETZ01264369.1              | + | 15462  | 15489  | RNA → | rplS (PRK05338)Ribosomal.L19 (pfam01245) → |                       |
| env-132 | CEUA01417981.1              | - | 740    | 713    | RNA → | rplS (PRK05338)Ribosomal.L19 (pfam01245) → |                       |
| env-133 | CEVA01411844.1              | - | 180    | 153    | RNA → | rplS (PRK05338)Ribosomal.L19 (pfam01245) → |                       |
| Oho-1-1 | NC_016599.1                 | - | 405639 | 405612 | RNA → | rplS (PRK05338)Ribosomal.L19 (pfam01245) → | hypo →                |
| env-134 | PR_CR_10.Liq_1.inCR_1003339 | + | 5067   | 5094   | RNA → | rplS (PRK05338)Ribosomal.L19 (pfam01245) → | hypo →                |
| env-135 | PR_CR_10.Liq_3.inCR_1015616 | + | 986    | 1013   | RNA → | rplS (PRK05338)Ribosomal.L19 (pfam01245) → |                       |
| env-136 | JCVL_SCAF_1101668700438     | + | 1308   | 1335   | RNA → |                                            |                       |
| env-137 | CETE01027368.1              | + | 993    | 1020   | RNA → | rplS (PRK05338)Ribosomal.L19 (pfam01245) → |                       |
| env-138 | CEWH01269799.1              | + | 175    | 202    | RNA → | rplS (PRK05338)Ribosomal.L19 (pfam01245) → |                       |
| env-139 | CEUH01076195.1              | - | 529    | 502    | RNA → | rplS (PRK05338)Ribosomal.L19 (pfam01245) → |                       |
| env-140 | CEVG01157966.1              | + | 2615   | 2642   | RNA → | rplS (PRK05338)Ribosomal.L19 (pfam01245) → |                       |
| env-141 | CEUU01157968.1              | - | 568    | 541    | RNA → | rplS (PRK05338)Ribosomal.L19 (pfam01245) → |                       |
| env-142 | CEVA01228795.1              | - | 1304   | 1277   | RNA → | rplS (PRK05338)Ribosomal.L19 (pfam01245) → |                       |
| env-143 | CEUW01090977.1              | - | 185    | 158    | RNA → | rplS (PRK05338)Ribosomal.L19 (pfam01245) → |                       |
| env-144 | CENG01005083.1              | + | 2607   | 2634   | RNA → | rplS (PRK05338)Ribosomal.L19 (pfam01245) → |                       |
| env-145 | CENU01397455.1              | - | 1003   | 976    | RNA → | rplS (PRK05338)Ribosomal.L19 (pfam01245) → | PRK08299 (PRK08299) → |
| env-146 | CENJ01029369.1              | - | 130    | 103    | RNA → | rplS (PRK05338)Ribosomal.L19 (pfam01245) → |                       |
| Nse-1-1 | NZ_BBML01000004.1           | - | 136788 | 136761 | RNA → | rplS (PRK05338)Ribosomal.L19 (pfam01245) → |                       |
| env-147 | CENG01172060.1              | - | 288    | 261    | RNA → | rplS (PRK05338)Ribosomal.L19 (pfam01245) → |                       |
| env-148 | CENJ01036011.1              | - | 1206   | 1179   | RNA → | rplS (PRK05338)Ribosomal.L19 (pfam01245) → | PRK08299 (PRK08299) → |
| env-149 | CENJ01107579.1              | - | 484    | 457    | RNA → | rplS (PRK05338)Ribosomal.L19 (pfam01245) → |                       |
| env-150 | JGI20151J14362.10016516     | - | 3534   | 3507   | RNA → | rplS (PRK05338)Ribosomal.L19 (pfam01245) → | PRK08299 (PRK08299) → |
| env-151 | JGI20156J14371.10021029     | + | 1321   | 1348   | RNA → | rplS (PRK05338)Ribosomal.L19 (pfam01245) → | PRK08299 (PRK08299) → |
| env-152 | JGI20160J14292.10169914     | + | 210    | 237    | RNA → | rplS (PRK05338)Ribosomal.L19 (pfam01245) → |                       |
| env-153 | JGI20159J14440.10065380     | + | 387    | 414    | RNA → | rplS (PRK05338)Ribosomal.L19 (pfam01245) → | PRK08299 (PRK08299) → |
| env-154 | JGI20155J14468.10022096     | - | 399    | 372    | RNA → | rplS (PRK05338)Ribosomal.L19 (pfam01245) → |                       |
| env-155 | JGI20158J14315.10073378     | - | 1006   | 979    | RNA → | rplS (PRK05338)Ribosomal.L19 (pfam01245) → | PRK08299 (PRK08299) → |
| env-156 | CEOS01040381.1              | - | 4293   | 4266   | RNA → | rplS (PRK05338)Ribosomal.L19 (pfam01245) → |                       |
| env-157 | CEOX01212680.1              | + | 1004   | 1031   | RNA → |                                            |                       |
| env-158 | CEPD01030902.1              | - | 4264   | 4237   | RNA → | rplS (PRK05338)Ribosomal.L19 (pfam01245) → |                       |
| env-159 | CERQ01076022.1              | - | 4315   | 4288   | RNA → | rplS (PRK05338)Ribosomal.L19 (pfam01245) → |                       |
| env-160 | CESL01149743.1              | - | 4963   | 4936   | RNA → | rplS (PRK05338)Ribosomal.L19 (pfam01245) → |                       |
| env-161 | CETA01027592.1              | - | 4529   | 4502   | RNA → | rplS (PRK05338)Ribosomal.L19 (pfam01245) → |                       |
| env-162 | CETB01172258.1              | + | 5225   | 5252   | RNA → | rplS (PRK05338)Ribosomal.L19 (pfam01245) → |                       |
| env-163 | CETG01164098.1              | - | 4952   | 4925   | RNA → | rplS (PRK05338)Ribosomal.L19 (pfam01245) → |                       |
| env-164 | CETM01103031.1              | - | 1792   | 1765   | RNA → | rplS (PRK05338)Ribosomal.L19 (pfam01245) → |                       |
| env-165 | CET001013763.1              | + | 6548   | 6575   | RNA → | rplS (PRK05338)Ribosomal.L19 (pfam01245) → |                       |
| env-166 | CETR01123512.1              | - | 2833   | 2806   | RNA → | rplS (PRK05338)Ribosomal.L19 (pfam01245) → |                       |
| env-167 | CETS01046135.1              | + | 8383   | 8410   | RNA → | rplS (PRK05338)Ribosomal.L19 (pfam01245) → |                       |
| env-168 | CETT01303147.1              | + | 949    | 976    | RNA → | rplS (PRK05338)Ribosomal.L19 (pfam01245) → |                       |
| env-169 | CETU01309689.1              | - | 765    | 738    | RNA → | rplS (PRK05338)Ribosomal.L19 (pfam01245) → |                       |
| env-170 | CEUN01257627.1              | + | 429    | 456    | RNA → | rplS (PRK05338)Ribosomal.L19 (pfam01245) → |                       |
| env-171 | CEUX01208011.1              | - | 370    | 343    | RNA → | rplS (PRK05338)Ribosomal.L19 (pfam01245) → |                       |
| env-172 | CEUY01486419.1              | - | 3370   | 3343   | RNA → | rplS (PRK05338)Ribosomal.L19 (pfam01245) → |                       |
| env-173 | CEVI01034447.1              | - | 284    | 257    | RNA → | rplS (PRK05338)Ribosomal.L19 (pfam01245) → |                       |
| env-174 | CEVJ01148327.1              | - | 504    | 477    | RNA → | rplS (PRK05338)Ribosomal.L19 (pfam01245) → |                       |
| env-175 | CEVK01192335.1              | + | 325    | 352    | RNA → | rplS (PRK05338)Ribosomal.L19 (pfam01245) → |                       |

|         |                                   |   |         |         |                                                                                                                                                                                                                                                                                |
|---------|-----------------------------------|---|---------|---------|--------------------------------------------------------------------------------------------------------------------------------------------------------------------------------------------------------------------------------------------------------------------------------|
| env-176 | CEVM01083244.1                    | - | 265     | 238     | RNA → rplS (PRK05338)Ribosomal_L19 (pfam01245) →                                                                                                                                                                                                                               |
| env-177 | CEWI01140434.1                    | - | 2409    | 2382    | RNA → rplS (PRK05338)Ribosomal_L19 (pfam01245) →                                                                                                                                                                                                                               |
| Zpr-1-1 | NC_014041.1                       | + | 3889655 | 3889682 | RNA → rplS (PRK05338)Ribosomal_L19 (pfam01245) →                                                                                                                                                                                                                               |
| env-178 | CEVA01498907.1                    | + | 662     | 689     | RNA → rplS (PRK05338)Ribosomal_L19 (pfam01245) →                                                                                                                                                                                                                               |
| env-179 | Buccal_mucosa_LANL_scaffold_37880 | + | 293     | 320     | RNA → rplS (PRK05338)Ribosomal_L19 (pfam01245) →                                                                                                                                                                                                                               |
| env-180 | SRS018149_Baylor_scaffold_24394   | + | 14431   | 14458   | RNA → rplS (PRK05338)Ribosomal_L19 (pfam01245) →                                                                                                                                                                                                                               |
| env-181 | SRS054569_C1505048                | - | 440     | 413     | RNA → rplS (PRK05338)Ribosomal_L19 (pfam01245) →                                                                                                                                                                                                                               |
| env-182 | SRS024140_C1177031                | - | 285     | 258     | RNA → rplS (PRK05338)Ribosomal_L19 (pfam01245) →                                                                                                                                                                                                                               |
| env-183 | SRS052668_LANL_scaffold_1943      | - | 64691   | 64664   | RNA → rplS (PRK05338)Ribosomal_L19 (pfam01245) →                                                                                                                                                                                                                               |
| env-184 | SRS024347_C1548200                | - | 195     | 168     | RNA → rplS (PRK05338)Ribosomal_L19 (pfam01245) →                                                                                                                                                                                                                               |
| env-185 | SRS017127_Baylor_scaffold_3172    | - | 838     | 811     | RNA → PLN02820 (PLN02820)MmdA (COG4799) → rplS (PRK05338)Ribosomal_L19 (pfam01245) →                                                                                                                                                                                           |
| env-186 | LGVO01048772.1                    | + | 5860    | 5887    | RNA → rplS (PRK05338)Ribosomal_L19 (pfam01245) →                                                                                                                                                                                                                               |
| env-187 | LGVF01504154.1                    | - | 463     | 436     | RNA → rplS (PRK05338)Ribosomal_L19 (pfam01245) →                                                                                                                                                                                                                               |
| env-188 | JCVL_SCAF_1096627098231           | + | 761     | 788     | RNA → rplS (PRK05338)Ribosomal_L19 (pfam01245) → monomer_idh (TIGR00178)IDH (pfam03971) →                                                                                                                                                                                      |
| env-189 | CESM01261374.1                    | - | 289     | 262     | RNA → rplS (PRK05338)Ribosomal_L19 (pfam01245) →                                                                                                                                                                                                                               |
| env-190 | CETE01135469.1                    | - | 628     | 601     | RNA → rplS (PRK05338)Ribosomal_L19 (pfam01245) → monomer_idh (TIGR00178)IDH (pfam03971) →                                                                                                                                                                                      |
| env-191 | CETQ01070376.1                    | - | 697     | 670     | RNA → rplS (PRK05338)Ribosomal_L19 (pfam01245) → monomer_idh (TIGR00178)IDH (pfam03971) →                                                                                                                                                                                      |
| env-192 | CEUH01016525.1                    | + | 7232    | 7259    | RNA → rplS (PRK05338)Ribosomal_L19 (pfam01245) → monomer_idh (TIGR00178)IDH (pfam03971) →<br>PRK13484 (PRK13484)TonB_dep_Rec (pfam00593)Plug (pfam07715)CarbopepD_reg.2 (pfam13715)OMP_b-brl.3 (pfam13715)DUF4249 (pfam14054) → murQ (PRK05441)SIS_Etherase (cd05007) → hypo → |
| env-193 | CEWG01371477.1                    | - | 849     | 822     | RNA → rplS (PRK05338)Ribosomal_L19 (pfam01245) → monomer_idh (TIGR00178)IDH (pfam03971) →                                                                                                                                                                                      |
| env-194 | TahiMoana_1003731                 | - | 598     | 571     | RNA → rplS (PRK05338)Ribosomal_L19 (pfam01245) →                                                                                                                                                                                                                               |
| env-195 | ElkS_mat_CD6A_1022331             | + | 121     | 148     | RNA → rplS (PRK05338)Ribosomal_L19 (pfam01245) →                                                                                                                                                                                                                               |
| env-196 | JGI11876J14442_10027587           | + | 312     | 339     | RNA → rplS (PRK05338)Ribosomal_L19 (pfam01245) →                                                                                                                                                                                                                               |
| env-197 | CEVK01107798.1                    | - | 6100    | 6073    | RNA → rplS (PRK05338)Ribosomal_L19 (pfam01245) →                                                                                                                                                                                                                               |
| env-198 | CEVM01261662.1                    | + | 6748    | 6775    | RNA → rplS (PRK05338)Ribosomal_L19 (pfam01245) →                                                                                                                                                                                                                               |
| env-199 | CEVO01248002.1                    | - | 144     | 117     | RNA → rplS (PRK05338)Ribosomal_L19 (pfam01245) →                                                                                                                                                                                                                               |
| env-200 | LPaug08P2610m.c1119498            | + | 167     | 194     | RNA →                                                                                                                                                                                                                                                                          |
| env-201 | LPjun09P1210m.c1035922            | + | 137     | 164     | RNA → rplS (PRK05338)Ribosomal_L19 (pfam01245) →                                                                                                                                                                                                                               |
| env-202 | G312J29652_10010132               | + | 1022    | 1049    | RNA → rplS (PRK05338)Ribosomal_L19 (pfam01245) →                                                                                                                                                                                                                               |
| Rbi-1-1 | NC_013222.1                       | + | 2791912 | 2791939 | RNA → rplS (PRK05338)Ribosomal_L19 (pfam01245) →                                                                                                                                                                                                                               |
| env-203 | JGI24024J18818_10269885           | - | 332     | 305     | RNA → rplS (PRK05338)Ribosomal_L19 (pfam01245) →                                                                                                                                                                                                                               |
| env-204 | P_1C_Liq_3_UnCty_1004041          | + | 444     | 471     | RNA → rplS (PRK05338)Ribosomal_L19 (pfam01245) →                                                                                                                                                                                                                               |
| env-205 | P_1C_Liq_1_UnCty_1002842          | - | 2900    | 2873    | RNA → rplS (PRK05338)Ribosomal_L19 (pfam01245) →                                                                                                                                                                                                                               |
| env-206 | P_2C_Liq_1_UnCty_1206961          | + | 13      | 40      | RNA → rplS (PRK05338)Ribosomal_L19 (pfam01245) →                                                                                                                                                                                                                               |
| env-207 | JGI20156J14371_10587087           | - | 192     | 165     | RNA → rplS (PRK05338)Ribosomal_L19 (pfam01245) →                                                                                                                                                                                                                               |
| env-208 | ElkS_mat_MD6A_1140673             | + | 80      | 107     | RNA → rplS (PRK05338)Ribosomal_L19 (pfam01245) →                                                                                                                                                                                                                               |
| env-209 | JGI11876J14442_10684723           | - | 250     | 223     | RNA → rplS (PRK05338)Ribosomal_L19 (pfam01245) →                                                                                                                                                                                                                               |
| env-210 | LM29OCT2010E.c89422               | + | 70      | 97      | RNA → rplS (PRK05338)Ribosomal_L19 (pfam01245) →                                                                                                                                                                                                                               |
| env-211 | JGI11876J14442_10078056           | - | 328     | 301     | RNA → rplS (PRK05338)Ribosomal_L19 (pfam01245) →                                                                                                                                                                                                                               |
| Gsp-1-1 | NZ_AMSG01000008.1                 | + | 129752  | 129779  | RNA → rplS (PRK05338)Ribosomal_L19 (pfam01245) → rplS (PRK05338)Ribosomal_L19 (pfam01245) →                                                                                                                                                                                    |
| env-212 | PR_CR_10_Liq_1_inCR_1041635       | - | 595     | 568     | RNA → rplS (PRK05338)Ribosomal_L19 (pfam01245) →                                                                                                                                                                                                                               |
| env-213 | PR_CR_10_Liq_3_inCR_1112054       | - | 41      | 14      | RNA →                                                                                                                                                                                                                                                                          |
| env-214 | ATED1026_F5B15RW02FGXY8           | - | 36      | 9       | RNA →                                                                                                                                                                                                                                                                          |
| env-215 | JGI24023J19991_10000222           | - | 18096   | 18069   | RNA → rplS (PRK05338)Ribosomal_L19 (pfam01245) →                                                                                                                                                                                                                               |
| env-216 | JGI24023J19991_10496689           | - | 276     | 249     | RNA → hypo → rplS (PRK05338)Ribosomal_L19 (pfam01245) →                                                                                                                                                                                                                        |
| Man-1-1 | NZ_JHZC01000004.1                 | - | 677641  | 677614  | RNA → rplS (PRK05338)Ribosomal_L19 (pfam01245) →                                                                                                                                                                                                                               |
| env-217 | NCBI_READ_1112493462061           | + | 858     | 885     | RNA →                                                                                                                                                                                                                                                                          |
| env-218 | JGI24723J26617_10000035           | - | 19920   | 19893   | RNA → rplS (PRK05338)Ribosomal_L19 (pfam01245) →                                                                                                                                                                                                                               |
| env-219 | UnmappedStool_Broad_C253267521    | + | 390     | 417     | RNA → rplS (PRK05338)Ribosomal_L19 (pfam01245) →                                                                                                                                                                                                                               |
| env-220 | SRS016095_C2602647                | + | 2397    | 2424    | RNA → rplS (PRK05338)Ribosomal_L19 (pfam01245) → hypo →                                                                                                                                                                                                                        |
| env-221 | SRS019968_C2032833                | + | 279     | 306     | RNA → rplS (PRK05338)Ribosomal_L19 (pfam01245) →                                                                                                                                                                                                                               |
| env-222 | 4491417.3_NODE.24004              | + | 1215    | 1242    | RNA → rplS (PRK05338)Ribosomal_L19 (pfam01245) →                                                                                                                                                                                                                               |

|         |                                   |   |       |       |                                                                                                                                                                                                                                                                                                                                                                       |
|---------|-----------------------------------|---|-------|-------|-----------------------------------------------------------------------------------------------------------------------------------------------------------------------------------------------------------------------------------------------------------------------------------------------------------------------------------------------------------------------|
| env-223 | UnmappedStool_Broad_C252323657    | + | 165   | 192   | RNA → rplS (PRK05338)Ribosomal_L19 (pfam01245) →                                                                                                                                                                                                                                                                                                                      |
| env-224 | SRS053917_LANL_scaffold_85389     | + | 54783 | 54810 | RNA → rplS (PRK05338)Ribosomal_L19 (pfam01245) → KAS_II (cd00834)Ketoacyl-synt_2 (pfam13723) → PRK10925 (PRK10925)SodA (COG0605) →                                                                                                                                                                                                                                    |
| env-225 | SRS022725_LANL_scaffold_115907    | - | 16699 | 16672 | RNA → rplS (PRK05338)Ribosomal_L19 (pfam01245) → KAS_II (cd00834)Ketoacyl-synt_2 (pfam13723) → PRK10925 (PRK10925)SodA (COG0605) →                                                                                                                                                                                                                                    |
| env-226 | SRS075410_LANL_scaffold_18149     | - | 1834  | 1807  | RNA → rplS (PRK05338)Ribosomal_L19 (pfam01245) →                                                                                                                                                                                                                                                                                                                      |
| env-227 | SRS023841_C1664739                | + | 283   | 310   | RNA → rplS (PRK05338)Ribosomal_L19 (pfam01245) → KAS_II (cd00834)fabF (TIGR03150) → PRK10925 (PRK10925)SodA (COG0605) → tonB_Cterm (TIGR01352)TonB_C (pfam03544) → SCO (cd02968) → DUF4325 (pfam14213) → PIN (pfam01850) → RsmA (COG0030)ksgA (PRK00274) →                                                                                                            |
| env-228 | Subgingival_plaque_LANL_C11225722 | - | 66    | 39    | RNA →                                                                                                                                                                                                                                                                                                                                                                 |
| env-229 | SRS011126_Baylor_scaffold_19796   | - | 15490 | 15463 | RNA → rplS (PRK05338)Ribosomal_L19 (pfam01245) → KAS_II (cd00834)fabF (TIGR03150) → PRK10925 (PRK10925)SodA (COG0605) → tonB_Cterm (TIGR01352)TonB_C (pfam03544) → SCO (cd02968) → DUF4325 (pfam14213) → PIN (pfam01850) → RsmA (COG0030)ksgA (PRK00274) →                                                                                                            |
| env-230 | SRS013949_C3491244                | + | 478   | 505   | RNA →                                                                                                                                                                                                                                                                                                                                                                 |
| env-231 | SRS015899_WUGC_scaffold_40977     | + | 29485 | 29512 | RNA → rplS (PRK05338)Ribosomal_L19 (pfam01245) → KAS_II (cd00834)fabF (TIGR03150) → PRK10925 (PRK10925)SodA (COG0605) → tonB_Cterm (TIGR01352)TonB_C (pfam03544) → SCO (cd02968) → DUF4325 (pfam14213) → PIN (pfam01850) → RsmA (COG0030)ksgA (PRK00274) →                                                                                                            |
| env-232 | SRS016297_C532705                 | - | 142   | 115   | RNA →                                                                                                                                                                                                                                                                                                                                                                 |
| env-233 | SRS022083_C1794273                | + | 126   | 153   | RNA → rplS (PRK05338)Ribosomal_L19 (pfam01245) →                                                                                                                                                                                                                                                                                                                      |
| env-234 | SRS022536_LANL_scaffold_110861    | - | 15742 | 15715 | RNA → rplS (PRK05338)Ribosomal_L19 (pfam01245) → KAS_II (cd00834)fabF (TIGR03150) → PRK10925 (PRK10925)SodA (COG0605) → tonB_Cterm (TIGR01352)TonB_C (pfam03544) → SCO (cd02968) → DUF4325 (pfam14213) → PIN (pfam01850) → RsmA (COG0030)ksgA (PRK00274) →                                                                                                            |
| env-235 | SRS023938_C2099915                | + | 111   | 138   | RNA → rplS (PRK05338)Ribosomal_L19 (pfam01245) →                                                                                                                                                                                                                                                                                                                      |
| env-236 | SRS024381_C2283100                | + | 338   | 365   | RNA →                                                                                                                                                                                                                                                                                                                                                                 |
| env-237 | SRS042984_LANL_scaffold_49763     | - | 3257  | 3230  | RNA → rplS (PRK05338)Ribosomal_L19 (pfam01245) → KAS_II (cd00834)fabF (TIGR03150) → PRK10925 (PRK10925)SodA (COG0605) → tonB_Cterm (TIGR01352)TonB_C (pfam03544) → hypo →                                                                                                                                                                                             |
| env-238 | SRS049318_LANL_scaffold_97896     | + | 617   | 644   | RNA →                                                                                                                                                                                                                                                                                                                                                                 |
| env-239 | SRS065099_LANL_scaffold_36643     | - | 202   | 175   | RNA → rplS (PRK05338)Ribosomal_L19 (pfam01245) →                                                                                                                                                                                                                                                                                                                      |
| env-240 | SRS065310_C1333489                | + | 502   | 529   | RNA →                                                                                                                                                                                                                                                                                                                                                                 |
| env-241 | SRS075410_C3068469                | + | 2319  | 2346  | RNA →                                                                                                                                                                                                                                                                                                                                                                 |
| env-242 | SRS015803_C2605009                | + | 372   | 399   | RNA → rplS (PRK05338)Ribosomal_L19 (pfam01245) →                                                                                                                                                                                                                                                                                                                      |
| env-243 | SRS047634_LANL_scaffold_52163     | + | 1818  | 1845  | RNA →                                                                                                                                                                                                                                                                                                                                                                 |
| env-244 | SRS017691_Baylor_scaffold_41406   | + | 1771  | 1798  | RNA →                                                                                                                                                                                                                                                                                                                                                                 |
| env-245 | SRS055450_LANL_scaffold_77438     | + | 1416  | 1443  | RNA →                                                                                                                                                                                                                                                                                                                                                                 |
| Csp-2-1 | NZ_ALNN01000014.1                 | - | 9694  | 9667  | RNA → rplS (PRK05338)Ribosomal_L19 (pfam01245) → rplS (PRK05338)Ribosomal_L19 (pfam01245) → KAS_II (cd00834)Ketoacyl-synt_2 (pfam13723) → KAS_II (cd00834)Ketoacyl-synt_2 (pfam13723) → PRK10925 (PRK10925)SodA (COG0605) → PRK10925 (PRK10925)SodA (COG0605) → tonB_Cterm (TIGR01352)TonB_C (pfam03544) → tonB_Cterm (TIGR01352)TonB_C (pfam03544) → SCO (cd02968) → |
| env-246 | SRS050244_C4263116                | - | 66    | 39    | RNA →                                                                                                                                                                                                                                                                                                                                                                 |
| Cgr-1-1 | NZ_KE150260.1                     | + | 63374 | 63401 | RNA → rplS (PRK05338)Ribosomal_L19 (pfam01245) → KAS_II (cd00834)Ketoacyl-synt_2 (pfam13723) → PRK10925 (PRK10925)SodA (COG0605) → tonB_Cterm (TIGR01352)TonB_C (pfam03544) → SCO (cd02968) → DUF4325 (pfam14213) → PIN (pfam01850) → RsmA (COG0030)ksgA (PRK00274) →                                                                                                 |
| env-247 | SRS019980_C3055592                | - | 63    | 36    | RNA →                                                                                                                                                                                                                                                                                                                                                                 |
| env-248 | SRS063603_LANL_scaffold_70638     | - | 72    | 45    | RNA →                                                                                                                                                                                                                                                                                                                                                                 |
| env-249 | SRS011255_C2494079                | - | 69    | 42    | RNA →                                                                                                                                                                                                                                                                                                                                                                 |
| env-250 | SRS014578_WUGC_scaffold_19186     | + | 5221  | 5248  | RNA → rplS (PRK05338)Ribosomal_L19 (pfam01245) → KAS_II (cd00834)fabF (TIGR03150) → PRK10925 (PRK10925)SodA (COG0605) →                                                                                                                                                                                                                                               |
| env-251 | SRS017445_Baylor_scaffold_33849   | + | 184   | 211   | RNA → rplS (PRK05338)Ribosomal_L19 (pfam01245) →                                                                                                                                                                                                                                                                                                                      |
| env-252 | SRS017691_C5080407                | - | 78    | 51    | RNA → hypo →                                                                                                                                                                                                                                                                                                                                                          |
| env-253 | SRS018573_WUGC_scaffold_28515     | + | 3449  | 3476  | RNA → rplS (PRK05338)Ribosomal_L19 (pfam01245) → KAS_II (cd00834)fabF (TIGR03150) → PRK10925 (PRK10925)SodA (COG0605) →                                                                                                                                                                                                                                               |
| env-254 | SRS045197_WUGC_scaffold_27322     | - | 194   | 167   | RNA → rplS (PRK05338)Ribosomal_L19 (pfam01245) →                                                                                                                                                                                                                                                                                                                      |
| env-255 | SRS063932_LANL_scaffold_8547      | + | 316   | 343   | RNA → rplS (PRK05338)Ribosomal_L19 (pfam01245) →                                                                                                                                                                                                                                                                                                                      |
| env-256 | SRS022602_Baylor_scaffold_17361   | - | 665   | 638   | RNA → rplS (PRK05338)Ribosomal_L19 (pfam01245) → hypo →                                                                                                                                                                                                                                                                                                               |



|          |                                 |   |        |        |                                                                                                                                                                                 |
|----------|---------------------------------|---|--------|--------|---------------------------------------------------------------------------------------------------------------------------------------------------------------------------------|
| env-257  | SRS013252_C3528677              | + | 307    | 334    | RNA → rplS (PRK05338)Ribosomal_L19 (pfam01245) →                                                                                                                                |
| env-258  | SRS013705_C3926261              | + | 2029   | 2056   | RNA → rplS (PRK05338)Ribosomal_L19 (pfam01245) →                                                                                                                                |
| env-259  | SRS015434_C5837920              | + | 260    | 287    | RNA → rplS (PRK05338)Ribosomal_L19 (pfam01245) →                                                                                                                                |
| env-260  | SRS017139_Baylor_scaffold_77500 | + | 898    | 925    | RNA → KAS.I.II (cd00834)fabF (TIGR03150) → hypo → PRK10925 (PRK10925)SodA (COG0605) →                                                                                           |
| env-261  | SRS018157_Baylor_scaffold_33010 | + | 2985   | 3012   | RNA → rplS (PRK05338)Ribosomal_L19 (pfam01245) →                                                                                                                                |
| env-262  | SRS018300_Baylor_scaffold_56055 | + | 6669   | 6696   | RNA → rplS (PRK05338)Ribosomal_L19 (pfam01245) →                                                                                                                                |
| env-263  | SRS019028_WUGC_scaffold_24330   | + | 43055  | 43082  | RNA → rplS (PRK05338)Ribosomal_L19 (pfam01245) →                                                                                                                                |
| env-264  | SRS019029_WUGC_scaffold_43710   | + | 5639   | 5666   | RNA → rplS (PRK05338)Ribosomal_L19 (pfam01245) →                                                                                                                                |
| env-265  | SRS019071_C5218564              | + | 2113   | 2140   | RNA →                                                                                                                                                                           |
| env-266  | SRS023926_C2716754              | - | 232    | 205    | RNA → rplS (PRK05338)Ribosomal_L19 (pfam01245) →                                                                                                                                |
| env-267  | SRS024355_LANL_scaffold_16886   | - | 95     | 68     | RNA →                                                                                                                                                                           |
| env-268  | SRS024649_LANL_scaffold_7780    | - | 430    | 403    | RNA → rplS (PRK05338)Ribosomal_L19 (pfam01245) →                                                                                                                                |
| env-269  | SRS049318_LANL_scaffold_73392   | + | 507    | 534    | RNA →                                                                                                                                                                           |
| env-270  | SRS051941_LANL_scaffold_75018   | - | 1329   | 1302   | RNA → rplS (PRK05338)Ribosomal_L19 (pfam01245) →                                                                                                                                |
| env-271  | SRS052604_C1778119              | + | 204    | 231    | RNA → rplS (PRK05338)Ribosomal_L19 (pfam01245) →                                                                                                                                |
| env-272  | SRS055378_LANL_scaffold_12682   | + | 3851   | 3878   | RNA → rplS (PRK05338)Ribosomal_L19 (pfam01245) →                                                                                                                                |
| env-273  | SRS014477_C1574933              | + | 316    | 343    | RNA →                                                                                                                                                                           |
| env-274  | SRS017304_C1915201              | + | 220    | 247    | RNA → rplS (PRK05338)Ribosomal_L19 (pfam01245) →                                                                                                                                |
| env-275  | SRS045197_WUGC_scaffold_24835   | + | 1618   | 1645   | RNA →                                                                                                                                                                           |
| env-276  | SRS047113_C5057443              | - | 72     | 45     | RNA →                                                                                                                                                                           |
| Csp-11-1 | NZ_KE992168.1                   | + | 41060  | 41087  | RNA → rplS (PRK05338)Ribosomal_L19 (pfam01245) →                                                                                                                                |
| env-277  | SRS015762_C3669651              | - | 1738   | 1711   | RNA → rplS (PRK05338)Ribosomal_L19 (pfam01245) → KAS.I.II (cd00834)Ketoacyl-synt_2 (pfam13723) → PRK10925 (PRK10925)SodA (COG0605) →                                            |
| env-278  | SRS015989_C2177835              | - | 199    | 172    | RNA → rplS (PRK05338)Ribosomal_L19 (pfam01245) →                                                                                                                                |
| env-279  | SRS016746_Baylor_scaffold_79161 | - | 4503   | 4476   | RNA → rplS (PRK05338)Ribosomal_L19 (pfam01245) →                                                                                                                                |
| env-280  | SRS043772_WUGC_scaffold_6381    | + | 547    | 574    | RNA → rplS (PRK05338)Ribosomal_L19 (pfam01245) →                                                                                                                                |
| env-281  | SRS064449_LANL_scaffold_70561   | + | 3228   | 3255   | RNA →                                                                                                                                                                           |
| env-282  | SRS011098_C1795866              | + | 278    | 305    | RNA →                                                                                                                                                                           |
| env-283  | SRS012279_C2574426              | + | 101    | 128    | RNA → rplS (PRK05338)Ribosomal_L19 (pfam01245) →                                                                                                                                |
| env-284  | SRS013723_Baylor_scaffold_90380 | - | 302    | 275    | RNA → rplS (PRK05338)Ribosomal_L19 (pfam01245) →                                                                                                                                |
| env-285  | SRS013836_C4642922              | + | 91     | 118    | RNA → rplS (PRK05338)Ribosomal_L19 (pfam01245) →                                                                                                                                |
| env-286  | SRS014578_WUGC_scaffold_47009   | - | 8623   | 8596   | RNA → rplS (PRK05338)Ribosomal_L19 (pfam01245) →                                                                                                                                |
| env-287  | SRS014690_WUGC_scaffold_15252   | + | 1864   | 1891   | RNA → rplS (PRK05338)Ribosomal_L19 (pfam01245) →                                                                                                                                |
| env-288  | SRS014888_C3106699              | + | 96     | 123    | RNA → rplS (PRK05338)Ribosomal_L19 (pfam01245) →                                                                                                                                |
| env-289  | SRS015755_WUGC_scaffold_39561   | + | 2225   | 2252   | RNA →                                                                                                                                                                           |
| env-290  | SRS015762_WUGC_scaffold_50704   | + | 8795   | 8822   | RNA → rplS (PRK05338)Ribosomal_L19 (pfam01245) →                                                                                                                                |
| env-291  | SRS015797_WUGC_scaffold_33578   | + | 7661   | 7688   | RNA → rplS (PRK05338)Ribosomal_L19 (pfam01245) →                                                                                                                                |
| env-292  | SRS016319_C3872782              | + | 96     | 123    | RNA → rplS (PRK05338)Ribosomal_L19 (pfam01245) →                                                                                                                                |
| env-293  | SRS017511_Baylor_scaffold_29232 | + | 1941   | 1968   | RNA → rplS (PRK05338)Ribosomal_L19 (pfam01245) →                                                                                                                                |
| env-294  | SRS018300_Baylor_scaffold_56130 | + | 96     | 123    | RNA → rplS (PRK05338)Ribosomal_L19 (pfam01245) →                                                                                                                                |
| env-295  | SRS019028_WUGC_scaffold_30630   | - | 13299  | 13272  | RNA → rplS (PRK05338)Ribosomal_L19 (pfam01245) →                                                                                                                                |
| env-296  | SRS019029_WUGC_scaffold_51290   | - | 216    | 189    | RNA → rplS (PRK05338)Ribosomal_L19 (pfam01245) →                                                                                                                                |
| env-297  | SRS019122_C5922434              | + | 96     | 123    | RNA → rplS (PRK05338)Ribosomal_L19 (pfam01245) →                                                                                                                                |
| env-298  | SRS019127_WUGC_scaffold_19698   | - | 2353   | 2326   | RNA → rplS (PRK05338)Ribosomal_L19 (pfam01245) → KAS.I.II (cd00834)Ketoacyl-synt_2 (pfam13723) → PRK10925 (PRK10925)SodA (COG0605) →                                            |
| env-299  | SRS019906_WUGC_scaffold_11203   | - | 334    | 307    | RNA →                                                                                                                                                                           |
| env-300  | SRS019980_Baylor_scaffold_24077 | + | 36052  | 36079  | RNA → rplS (PRK05338)Ribosomal_L19 (pfam01245) →                                                                                                                                |
| env-301  | SRS021496_Baylor_scaffold_80652 | - | 8962   | 8935   | RNA → rplS (PRK05338)Ribosomal_L19 (pfam01245) → KAS.I.II (cd00834)Ketoacyl-synt_2 (pfam13723) → PRK10925 (PRK10925)SodA (COG0605) → tonB_Cterm (TIGR01352)TonB_C (pfam03544) → |
| env-302  | SRS022077_C2503359              | + | 101    | 128    | RNA → rplS (PRK05338)Ribosomal_L19 (pfam01245) →                                                                                                                                |
| env-303  | SRS022530_LANL_scaffold_60953   | + | 128871 | 128898 | RNA → rplS (PRK05338)Ribosomal_L19 (pfam01245) → KAS.I.II (cd00834)Ketoacyl-synt_2 (pfam13723) → PRK10925 (PRK10925)SodA (COG0605) → tonB_Cterm (TIGR01352)TonB_C (pfam03544) → |
| env-304  | SRS023938_Baylor_scaffold_64946 | + | 867    | 894    | RNA → rplS (PRK05338)Ribosomal_L19 (pfam01245) → rplS (PRK05338)Ribosomal_L19 (pfam01245) →                                                                                     |



|         |                                  |   |       |       |                                                                                                                                                                                                                                                                                                                                                       |
|---------|----------------------------------|---|-------|-------|-------------------------------------------------------------------------------------------------------------------------------------------------------------------------------------------------------------------------------------------------------------------------------------------------------------------------------------------------------|
| env-305 | SRS051378_LANL_scaffold_26894    | - | 581   | 554   | RNA → rplS (PRK05338)Ribosomal_L19 (pfam01245) →                                                                                                                                                                                                                                                                                                      |
| env-306 | SRS052876_LANL_scaffold_30038    | + | 1896  | 1923  | RNA → rplS (PRK05338)Ribosomal_L19 (pfam01245) →                                                                                                                                                                                                                                                                                                      |
| env-307 | SRS055378_LANL_scaffold_27817    | - | 196   | 169   | RNA → rplS (PRK05338)Ribosomal_L19 (pfam01245) →                                                                                                                                                                                                                                                                                                      |
| env-308 | SRS063288_LANL_scaffold_21438    | - | 2311  | 2284  | RNA → rplS (PRK05338)Ribosomal_L19 (pfam01245) → KAS_II (cd00834)Ketoacyl-synt_2 (pfam13723) → PRK10925 (PRK10925)SodA (COG0605) →                                                                                                                                                                                                                    |
| env-309 | SRS063999_LANL_scaffold_36605    | + | 103   | 130   | RNA → rplS (PRK05338)Ribosomal_L19 (pfam01245) →                                                                                                                                                                                                                                                                                                      |
| Cgi-1-1 | NZ_ACLQ01000031.1                | + | 74550 | 74577 | RNA → rplS (PRK05338)Ribosomal_L19 (pfam01245) → rplS (PRK05338)Ribosomal_L19 (pfam01245) → KAS_II (cd00834)Ketoacyl-synt_2 (pfam13723) → KAS_II (cd00834)Ketoacyl-synt_2 (pfam13723) → PRK10925 (PRK10925)SodA (COG0605) → PRK10925 (PRK10925)SodA (COG0605) → tonB_Cterm (TIGR01352)TonB_C (pfam03544) → tonB_Cterm (TIGR01352)TonB_C (pfam03544) → |
| env-310 | SRS015158_WUGC_scaffold_7291     | - | 289   | 262   | rplS (PRK05338)Ribosomal_L19 (pfam01245) →                                                                                                                                                                                                                                                                                                            |
| env-311 | SRS065310_C1342652               | - | 237   | 210   | RNA → rplS (PRK05338)Ribosomal_L19 (pfam01245) →                                                                                                                                                                                                                                                                                                      |
| env-312 | SRS016200_WUGC_scaffold_37401    | + | 138   | 165   | RNA → rplS (PRK05338)Ribosomal_L19 (pfam01245) →                                                                                                                                                                                                                                                                                                      |
| env-313 | SRS013705_C3910892               | - | 51    | 24    | RNA →                                                                                                                                                                                                                                                                                                                                                 |
| env-314 | SRS017209_Baylor_scaffold_54331  | - | 82    | 55    | RNA →                                                                                                                                                                                                                                                                                                                                                 |
| env-315 | SRS018439_C2415034               | + | 2567  | 2594  | RNA →                                                                                                                                                                                                                                                                                                                                                 |
| env-316 | SRS018739_C3517180               | - | 170   | 143   | RNA → rplS (PRK05338)Ribosomal_L19 (pfam01245) →                                                                                                                                                                                                                                                                                                      |
| env-317 | SRS019077_WUGC_scaffold_45325    | + | 94    | 121   | RNA → rplS (PRK05338)Ribosomal_L19 (pfam01245) →                                                                                                                                                                                                                                                                                                      |
| env-318 | SRS023926_Baylor_scaffold_72969  | + | 206   | 233   | RNA → rplS (PRK05338)Ribosomal_L19 (pfam01245) → KAS_II (cd00834)Ketoacyl-synt_2 (pfam13723) → PRK10925 (PRK10925)SodA (COG0605) → hypo →                                                                                                                                                                                                             |
| env-319 | SRS024441_C2947315               | + | 96    | 123   | RNA → rplS (PRK05338)Ribosomal_L19 (pfam01245) →                                                                                                                                                                                                                                                                                                      |
| env-320 | SRS050244_LANL_scaffold_54867    | + | 23174 | 23201 | RNA → rplS (PRK05338)Ribosomal_L19 (pfam01245) →                                                                                                                                                                                                                                                                                                      |
| env-321 | SRS050669_LANL_scaffold_708      | + | 7741  | 7768  | RNA → rplS (PRK05338)Ribosomal_L19 (pfam01245) → KAS_II (cd00834)Ketoacyl-synt_2 (pfam13723) → PRK10925 (PRK10925)SodA (COG0605) → tonB_Cterm (TIGR01352)TonB_C (pfam03544) →                                                                                                                                                                         |
| env-322 | SRS062544_C3036364               | + | 1599  | 1626  | RNA → rplS (PRK05338)Ribosomal_L19 (pfam01245) → KAS_II (cd00834)Ketoacyl-synt_2 (pfam13723) → PRK10925 (PRK10925)SodA (COG0605) →                                                                                                                                                                                                                    |
| env-323 | SRS023964_Baylor_scaffold_63915  | - | 289   | 262   | RNA → rplS (PRK05338)Ribosomal_L19 (pfam01245) →                                                                                                                                                                                                                                                                                                      |
| env-324 | SRS024355_LANL_scaffold_68198    | - | 289   | 262   | RNA → rplS (PRK05338)Ribosomal_L19 (pfam01245) →                                                                                                                                                                                                                                                                                                      |
| env-325 | SRS042131_WUGC_scaffold_62340    | + | 1868  | 1895  | RNA → rplS (PRK05338)Ribosomal_L19 (pfam01245) →                                                                                                                                                                                                                                                                                                      |
| env-326 | SRS075410_LANL_scaffold_45971    | - | 82    | 55    | RNA →                                                                                                                                                                                                                                                                                                                                                 |
| env-327 | SRS022602_Baylor_scaffold_115301 | - | 611   | 584   | RNA → rplS (PRK05338)Ribosomal_L19 (pfam01245) → hypo →                                                                                                                                                                                                                                                                                               |
| env-328 | SRS017445_Baylor_scaffold_77384  | + | 73    | 100   | RNA → rplS (PRK05338)Ribosomal_L19 (pfam01245) →                                                                                                                                                                                                                                                                                                      |
| env-329 | SRS058336_C2180371               | - | 2178  | 2151  | RNA → rplS (PRK05338)Ribosomal_L19 (pfam01245) → KAS_II (cd00834)Ketoacyl-synt_2 (pfam13723) → PRK10925 (PRK10925)SodA (COG0605) →                                                                                                                                                                                                                    |
| env-330 | SRS016002_C2622796               | + | 98    | 125   | RNA → rplS (PRK05338)Ribosomal_L19 (pfam01245) → KAS_II (cd00834)Ketoacyl-synt_2 (pfam13723) →                                                                                                                                                                                                                                                        |
| env-331 | SRS018394_Baylor_scaffold_70182  | + | 834   | 861   | RNA → rplS (PRK05338)Ribosomal_L19 (pfam01245) →                                                                                                                                                                                                                                                                                                      |
| env-332 | SRS023841_Baylor_scaffold_23089  | - | 5503  | 5476  | RNA → rplS (PRK05338)Ribosomal_L19 (pfam01245) → KAS_II (cd00834)Ketoacyl-synt_2 (pfam13723) → PRK10925 (PRK10925)SodA (COG0605) → tonB_Cterm (TIGR01352)TonB_C (pfam03544) →                                                                                                                                                                         |
| env-333 | SRS013252_C3501854               | + | 222   | 249   | RNA → rplS (PRK05338)Ribosomal_L19 (pfam01245) →                                                                                                                                                                                                                                                                                                      |
| env-334 | SRS013949_WUGC_scaffold_26347    | - | 289   | 262   | RNA → rplS (PRK05338)Ribosomal_L19 (pfam01245) →                                                                                                                                                                                                                                                                                                      |
| env-335 | SRS013950_C2064126               | + | 253   | 280   | RNA → rplS (PRK05338)Ribosomal_L19 (pfam01245) →                                                                                                                                                                                                                                                                                                      |
| env-336 | SRS015215_WUGC_scaffold_59667    | - | 1128  | 1101  | RNA → rplS (PRK05338)Ribosomal_L19 (pfam01245) →                                                                                                                                                                                                                                                                                                      |
| env-337 | SRS015278_C1853906               | + | 1366  | 1393  | RNA → rplS (PRK05338)Ribosomal_L19 (pfam01245) →                                                                                                                                                                                                                                                                                                      |
| env-338 | SRS015989_WUGC_scaffold_22267    | + | 1178  | 1205  | RNA → rplS (PRK05338)Ribosomal_L19 (pfam01245) →                                                                                                                                                                                                                                                                                                      |
| env-339 | SRS016331_WUGC_scaffold_4458     | - | 4432  | 4405  | RNA → rplS (PRK05338)Ribosomal_L19 (pfam01245) →                                                                                                                                                                                                                                                                                                      |
| env-340 | SRS016746_Baylor_scaffold_49712  | + | 3708  | 3735  | RNA → rplS (PRK05338)Ribosomal_L19 (pfam01245) →                                                                                                                                                                                                                                                                                                      |
| env-341 | SRS018157_Baylor_scaffold_36967  | + | 16031 | 16058 | RNA → rplS (PRK05338)Ribosomal_L19 (pfam01245) →                                                                                                                                                                                                                                                                                                      |
| env-342 | SRS018975_WUGC_scaffold_5756     | + | 23754 | 23781 | RNA → rplS (PRK05338)Ribosomal_L19 (pfam01245) →                                                                                                                                                                                                                                                                                                      |
| env-343 | SRS019071_WUGC_scaffold_32884    | - | 289   | 262   | RNA → rplS (PRK05338)Ribosomal_L19 (pfam01245) →                                                                                                                                                                                                                                                                                                      |
| env-344 | SRS020340_C2977594               | - | 289   | 262   | RNA → rplS (PRK05338)Ribosomal_L19 (pfam01245) →                                                                                                                                                                                                                                                                                                      |
| env-345 | SRS024021_Baylor_scaffold_35803  | + | 10911 | 10938 | RNA → rplS (PRK05338)Ribosomal_L19 (pfam01245) →                                                                                                                                                                                                                                                                                                      |
| env-346 | SRS024144_C1810569               | + | 1730  | 1757  | RNA → rplS (PRK05338)Ribosomal_L19 (pfam01245) →                                                                                                                                                                                                                                                                                                      |
| env-347 | SRS024561_LANL_scaffold_19935    | + | 3850  | 3877  | RNA → rplS (PRK05338)Ribosomal_L19 (pfam01245) →                                                                                                                                                                                                                                                                                                      |
| env-348 | SRS024649_C3635117               | + | 578   | 605   | RNA →                                                                                                                                                                                                                                                                                                                                                 |

|         |                                  |   |       |       |                                                                                                                                                                                                                                                                                                                        |
|---------|----------------------------------|---|-------|-------|------------------------------------------------------------------------------------------------------------------------------------------------------------------------------------------------------------------------------------------------------------------------------------------------------------------------|
| env-349 | SRS042984.LANL_scaffold_17949    | - | 524   | 497   | RNA → <a href="#">rplS (PRK05338)</a> <a href="#">Ribosomal_L19 (pfam01245)</a> →                                                                                                                                                                                                                                      |
| env-350 | SRS043755.C2384479               | - | 289   | 262   | RNA → <a href="#">rplS (PRK05338)</a> <a href="#">Ribosomal_L19 (pfam01245)</a> →                                                                                                                                                                                                                                      |
| env-351 | SRS043772.WUGC_scaffold_25088    | + | 1877  | 1904  | RNA → <a href="#">rplS (PRK05338)</a> <a href="#">Ribosomal_L19 (pfam01245)</a> →                                                                                                                                                                                                                                      |
| env-352 | SRS047265.WUGC_scaffold_21571    | + | 10737 | 10764 | RNA → <a href="#">rplS (PRK05338)</a> <a href="#">Ribosomal_L19 (pfam01245)</a> → <a href="#">KAS.I.II (cd00834)</a> <a href="#">Ketoacyl-synt_2 (pfam13723)</a> →<br><a href="#">PRK10925 (PRK10925)</a> <a href="#">SodA (COG0605)</a> → <a href="#">tonB_Cterm (TIGR01352)</a> <a href="#">TonB_C (pfam03544)</a> → |
| env-353 | SRS047634.LANL_scaffold_65807    | - | 82    | 55    | RNA →                                                                                                                                                                                                                                                                                                                  |
| env-354 | SRS051930.LANL_scaffold_29394    | - | 1258  | 1231  | RNA → <a href="#">rplS (PRK05338)</a> <a href="#">Ribosomal_L19 (pfam01245)</a> →                                                                                                                                                                                                                                      |
| env-355 | SRS075406.C837804                | + | 4602  | 4629  | RNA → <a href="#">rplS (PRK05338)</a> <a href="#">Ribosomal_L19 (pfam01245)</a> →                                                                                                                                                                                                                                      |
| env-356 | SRS016541.Baylor_scaffold_34066  | + | 23526 | 23553 | RNA → <a href="#">rplS (PRK05338)</a> <a href="#">Ribosomal_L19 (pfam01245)</a> → <a href="#">KAS.I.II (cd00834)</a> <a href="#">Ketoacyl-synt_2 (pfam13723)</a> →<br><a href="#">PRK10925 (PRK10925)</a> <a href="#">SodA (COG0605)</a> → <a href="#">tonB_Cterm (TIGR01352)</a> <a href="#">TonB_C (pfam03544)</a> → |
| env-357 | SRS053630.LANL_scaffold_23956    | - | 14901 | 14874 | RNA → <a href="#">rplS (PRK05338)</a> <a href="#">Ribosomal_L19 (pfam01245)</a> → <a href="#">KAS.I.II (cd00834)</a> <a href="#">Ketoacyl-synt_2 (pfam13723)</a> →<br><a href="#">PRK10925 (PRK10925)</a> <a href="#">SodA (COG0605)</a> → <a href="#">tonB_Cterm (TIGR01352)</a> <a href="#">TonB_C (pfam03544)</a> → |
| env-358 | SRS064329.C2710786               | - | 237   | 210   | RNA → <a href="#">rplS (PRK05338)</a> <a href="#">Ribosomal_L19 (pfam01245)</a> →                                                                                                                                                                                                                                      |
| env-359 | SRS011126.Baylor_scaffold_64408  | + | 519   | 546   | RNA → <a href="#">rplS (PRK05338)</a> <a href="#">Ribosomal_L19 (pfam01245)</a> →                                                                                                                                                                                                                                      |
| env-360 | SRS011343.Baylor_scaffold_21101  | + | 3877  | 3904  | RNA → <a href="#">rplS (PRK05338)</a> <a href="#">Ribosomal_L19 (pfam01245)</a> →                                                                                                                                                                                                                                      |
| env-361 | SRS012285.Baylor_scaffold_35900  | - | 433   | 406   | RNA → <a href="#">rplS (PRK05338)</a> <a href="#">Ribosomal_L19 (pfam01245)</a> →                                                                                                                                                                                                                                      |
| env-362 | SRS013533.C5373250               | + | 215   | 242   | RNA → <a href="#">rplS (PRK05338)</a> <a href="#">Ribosomal_L19 (pfam01245)</a> →                                                                                                                                                                                                                                      |
| env-363 | SRS015899.WUGC_scaffold_32404    | + | 5473  | 5500  | RNA → <a href="#">rplS (PRK05338)</a> <a href="#">Ribosomal_L19 (pfam01245)</a> →                                                                                                                                                                                                                                      |
| env-364 | SRS016043.WUGC_scaffold_15886    | - | 289   | 262   | RNA → <a href="#">rplS (PRK05338)</a> <a href="#">Ribosomal_L19 (pfam01245)</a> →                                                                                                                                                                                                                                      |
| env-365 | SRS017227.Baylor_scaffold_5549   | + | 3292  | 3319  | RNA →                                                                                                                                                                                                                                                                                                                  |
| env-366 | SRS018573.WUGC_scaffold_23933    | + | 4746  | 4773  | RNA → <a href="#">rplS (PRK05338)</a> <a href="#">Ribosomal_L19 (pfam01245)</a> →                                                                                                                                                                                                                                      |
| env-367 | SRS019333.C1276128               | + | 649   | 676   | RNA →                                                                                                                                                                                                                                                                                                                  |
| env-368 | SRS021477.Baylor_scaffold_72269  | + | 2598  | 2625  | RNA → <a href="#">rplS (PRK05338)</a> <a href="#">Ribosomal_L19 (pfam01245)</a> →                                                                                                                                                                                                                                      |
| env-369 | SRS023538.Baylor_scaffold_41620  | + | 7749  | 7776  | RNA → <a href="#">rplS (PRK05338)</a> <a href="#">Ribosomal_L19 (pfam01245)</a> → <a href="#">KAS.I.II (cd00834)</a> <a href="#">Ketoacyl-synt_2 (pfam13723)</a> →<br><a href="#">PRK10925 (PRK10925)</a> <a href="#">SodA (COG0605)</a> → <a href="#">tonB_Cterm (TIGR01352)</a> <a href="#">TonB_C (pfam03544)</a> → |
| env-370 | SRS024081.LANL_scaffold_74647    | - | 14542 | 14515 | RNA → <a href="#">rplS (PRK05338)</a> <a href="#">Ribosomal_L19 (pfam01245)</a> → <a href="#">KAS.I.II (cd00834)</a> <a href="#">Ketoacyl-synt_2 (pfam13723)</a> →<br><a href="#">PRK10925 (PRK10925)</a> <a href="#">SodA (COG0605)</a> → <a href="#">tonB_Cterm (TIGR01352)</a> <a href="#">TonB_C (pfam03544)</a> → |
| env-371 | SRS024138.Baylor_scaffold_45959  | + | 4204  | 4231  | RNA → <a href="#">rplS (PRK05338)</a> <a href="#">Ribosomal_L19 (pfam01245)</a> → <a href="#">KAS.I.II (cd00834)</a> <a href="#">Ketoacyl-synt_2 (pfam13723)</a> →<br><a href="#">PRK10925 (PRK10925)</a> <a href="#">SodA (COG0605)</a> → <a href="#">tonB_Cterm (TIGR01352)</a> <a href="#">TonB_C (pfam03544)</a> → |
| env-372 | SRS045197.WUGC_scaffold_31928    | - | 203   | 176   | RNA → <a href="#">rplS (PRK05338)</a> <a href="#">Ribosomal_L19 (pfam01245)</a> →                                                                                                                                                                                                                                      |
| env-373 | SRS047113.LANL_scaffold_42767    | - | 289   | 262   | RNA → <a href="#">rplS (PRK05338)</a> <a href="#">Ribosomal_L19 (pfam01245)</a> →                                                                                                                                                                                                                                      |
| env-374 | SRS049268.C4056582               | - | 82    | 55    | RNA → hypo →                                                                                                                                                                                                                                                                                                           |
| env-375 | SRS049318.LANL_scaffold_162736   | - | 82    | 55    | RNA →                                                                                                                                                                                                                                                                                                                  |
| env-376 | SRS053584.LANL_scaffold_34108    | + | 3382  | 3409  | RNA → <a href="#">rplS (PRK05338)</a> <a href="#">Ribosomal_L19 (pfam01245)</a> →                                                                                                                                                                                                                                      |
| env-377 | SRS058053.LANL_scaffold_42593    | + | 127   | 154   | RNA → <a href="#">rplS (PRK05338)</a> <a href="#">Ribosomal_L19 (pfam01245)</a> →                                                                                                                                                                                                                                      |
| env-378 | SRS063215.LANL_scaffold_9737     | - | 206   | 179   | RNA → <a href="#">rplS (PRK05338)</a> <a href="#">Ribosomal_L19 (pfam01245)</a> →                                                                                                                                                                                                                                      |
| env-379 | SRS065099.LANL_scaffold_38497    | + | 1419  | 1446  | RNA → <a href="#">rplS (PRK05338)</a> <a href="#">Ribosomal_L19 (pfam01245)</a> →                                                                                                                                                                                                                                      |
| env-380 | SRS015044.WUGC_scaffold_40958    | - | 82    | 55    | RNA →                                                                                                                                                                                                                                                                                                                  |
| env-381 | SRS015470.WUGC_scaffold_48518    | + | 881   | 908   | RNA →                                                                                                                                                                                                                                                                                                                  |
| env-382 | SRS015947.C1406781               | - | 1120  | 1093  | RNA → <a href="#">rplS (PRK05338)</a> <a href="#">Ribosomal_L19 (pfam01245)</a> →                                                                                                                                                                                                                                      |
| env-383 | SRS052604.C1832355               | - | 290   | 263   | RNA → <a href="#">rplS (PRK05338)</a> <a href="#">Ribosomal_L19 (pfam01245)</a> →                                                                                                                                                                                                                                      |
| env-384 | SRS055401.LANL_scaffold_4017     | + | 3753  | 3780  | RNA → <a href="#">rplS (PRK05338)</a> <a href="#">Ribosomal_L19 (pfam01245)</a> → <a href="#">KAS.I.II (cd00834)</a> <a href="#">Ketoacyl-synt_2 (pfam13723)</a> →<br><a href="#">PRK10925 (PRK10925)</a> <a href="#">SodA (COG0605)</a> → <a href="#">tonB_Cterm (TIGR01352)</a> <a href="#">TonB_C (pfam03544)</a> → |
| env-385 | SRS016360.Baylor_scaffold_25143  | + | 778   | 805   | RNA → <a href="#">rplS (PRK05338)</a> <a href="#">Ribosomal_L19 (pfam01245)</a> →                                                                                                                                                                                                                                      |
| env-386 | SRS017025.C1733308               | - | 289   | 262   | RNA → <a href="#">rplS (PRK05338)</a> <a href="#">Ribosomal_L19 (pfam01245)</a> →                                                                                                                                                                                                                                      |
| env-387 | SRS019591.C1897347               | - | 576   | 549   | RNA → <a href="#">rplS (PRK05338)</a> <a href="#">Ribosomal_L19 (pfam01245)</a> →                                                                                                                                                                                                                                      |
| env-388 | SRS050628.LANL_scaffold_19974    | + | 122   | 149   | RNA → <a href="#">rplS (PRK05338)</a> <a href="#">Ribosomal_L19 (pfam01245)</a> → <a href="#">KAS.I.II (cd00834)</a> <a href="#">Ketoacyl-synt_2 (pfam13723)</a> →                                                                                                                                                     |
| env-389 | SRS058808.LANL_scaffold_17722    | - | 1470  | 1443  | RNA → <a href="#">rplS (PRK05338)</a> <a href="#">Ribosomal_L19 (pfam01245)</a> →                                                                                                                                                                                                                                      |
| env-390 | SRS019225.WUGC_scaffold_3159     | - | 14652 | 14625 | RNA → <a href="#">rplS (PRK05338)</a> <a href="#">Ribosomal_L19 (pfam01245)</a> → <a href="#">KAS.I.II (cd00834)</a> <a href="#">Ketoacyl-synt_2 (pfam13723)</a> →<br><a href="#">PRK10925 (PRK10925)</a> <a href="#">SodA (COG0605)</a> → <a href="#">tonB_Cterm (TIGR01352)</a> <a href="#">TonB_C (pfam03544)</a> → |
| env-391 | SRS014573.C3736643               | - | 387   | 360   | RNA → <a href="#">rplS (PRK05338)</a> <a href="#">Ribosomal_L19 (pfam01245)</a> →                                                                                                                                                                                                                                      |
| env-392 | SRS045715.C4787013               | + | 279   | 306   | RNA → <a href="#">rplS (PRK05338)</a> <a href="#">Ribosomal_L19 (pfam01245)</a> →                                                                                                                                                                                                                                      |
| env-393 | SRS015064.C1649023               | - | 315   | 288   | RNA → <a href="#">rplS (PRK05338)</a> <a href="#">Ribosomal_L19 (pfam01245)</a> →                                                                                                                                                                                                                                      |
| env-394 | SRS013170.Baylor_scaffold_118831 | - | 45    | 18    | RNA →                                                                                                                                                                                                                                                                                                                  |

|          |                                 |   |         |         |                                                                        |
|----------|---------------------------------|---|---------|---------|------------------------------------------------------------------------|
| env-395  | SRS016575_Baylor_scaffold_24948 | + | 13      | 40      | RNA → rplS (PRK05338)Ribosomal_L19 (pfam01245) →                       |
| env-396  | SRS011098_Baylor_scaffold_7568  | + | 1143    | 1170    | RNA → rplS (PRK05338)Ribosomal_L19 (pfam01245) →                       |
| env-397  | SRS011255_Baylor_scaffold_19128 | + | 7753    | 7780    | RNA →                                                                  |
| env-398  | SRS016092_C1080935              | + | 130     | 157     | RNA → rplS (PRK05338)Ribosomal_L19 (pfam01245) →                       |
| env-399  | SRS063603_LANL_scaffold_85471   | + | 432     | 459     | RNA → rplS (PRK05338)Ribosomal_L19 (pfam01245) →                       |
| env-400  | JGI24723J26617_10169939         | + | 159     | 186     | RNA → rplS (PRK05338)Ribosomal_L19 (pfam01245) →                       |
| Aal-1-1  | NZ_JPOO01000003.1               | + | 1020008 | 1020035 | RNA → rplS (PRK05338)Ribosomal_L19 (pfam01245) →                       |
| env-401  | CENR01047393.1                  | + | 64      | 91      | RNA → rplS (PRK05338)Ribosomal_L19 (pfam01245) →                       |
| env-402  | JGI24723J26617_10002127         | + | 8185    | 8212    | RNA → rplS (PRK05338)Ribosomal_L19 (pfam01245) →                       |
| env-403  | JGI24723J26617_10400028         | - | 167     | 140     | RNA → rplS (PRK05338)Ribosomal_L19 (pfam01245) →                       |
| env-404  | JGI11876J14442_10842250         | - | 169     | 142     | RNA → rplS (PRK05338)Ribosomal_L19 (pfam01245) →                       |
| env-405  | 3300001197_1009609              | + | 200     | 227     | RNA → rplS (PRK05338)Ribosomal_L19 (pfam01245) →                       |
| Cpa-1-1  | NZ_KE383813.1                   | + | 351899  | 351926  | RNA → rplS (PRK05338)Ribosomal_L19 (pfam01245) →                       |
| env-406  | JGI20160J14292_10276556         | + | 252     | 281     | RNA → rplS (PRK05338)Ribosomal_L19 (pfam01245) →                       |
| env-407  | JGI26524J50256_1027228          | - | 1038    | 1011    | RNA → rplS (PRK05338)Ribosomal_L19 (pfam01245) →                       |
| env-408  | JGI26523J50269_1011208          | - | 1852    | 1825    | RNA → rplS (PRK05338)Ribosomal_L19 (pfam01245) →                       |
| env-409  | JGI26527J51213_1021506          | + | 117     | 144     | RNA → rplS (PRK05338)Ribosomal_L19 (pfam01245) →                       |
| env-410  | JGI26531J51214_10040747         | - | 1247    | 1220    | RNA → rplS (PRK05338)Ribosomal_L19 (pfam01245) →                       |
| env-411  | SwRhRL2b_contig_430118          | + | 1429    | 1456    | RNA → rplS (PRK05338)Ribosomal_L19 (pfam01245) →                       |
| Cte-1-1  | NZ_AUAA01000036.1               | + | 28922   | 28949   | RNA → rplS (PRK05338)Ribosomal_L19 (pfam01245) →                       |
| env-412  | APMI01002267.1                  | - | 4164    | 4137    | RNA → rplS (PRK05338)Ribosomal_L19 (pfam01245) →                       |
| env-413  | JGI26530J50255_1090020          | + | 26      | 53      | RNA → rplS (PRK05338)Ribosomal_L19 (pfam01245) →                       |
| Cca-2-1  | NZ_AUAFK01000009.1              | + | 927162  | 927189  | RNA → rplS (PRK05338)Ribosomal_L19 (pfam01245) →                       |
| env-414  | 2204596394                      | - | 335     | 308     | RNA → rplS (PRK05338)Ribosomal_L19 (pfam01245) →                       |
| env-415  | 2158507912                      | - | 335     | 308     | RNA → rplS (PRK05338)Ribosomal_L19 (pfam01245) →                       |
| env-416  | 3300001196_1012603              | - | 263     | 236     | RNA → hypo → rplS (PRK05338)Ribosomal_L19 (pfam01245) →                |
| env-417  | 3300001197_1004711              | - | 1007    | 980     | RNA → rplS (PRK05338)Ribosomal_L19 (pfam01245) →                       |
| env-418  | JGI26538J50259_1000010          | + | 108285  | 108312  | RNA → hypo → rplS (PRK05338)Ribosomal_L19 (pfam01245) →                |
| Fba-3-1  | NC_013062.1                     | - | 907127  | 907100  | RNA → rplS (PRK05338)Ribosomal_L19 (pfam01245) →                       |
| Cha-1-1  | NZ_JPLY01000004.1               | - | 726335  | 726308  | RNA → rplS (PRK05338)Ribosomal_L19 (pfam01245) →                       |
| env-419  | 3300001592_10000850             | + | 8847    | 8874    | RNA → hypo → rplS (PRK05338)Ribosomal_L19 (pfam01245) →                |
| Cko-1-1  | NZ_LFNG01000001.1               | + | 195794  | 195821  | RNA → rplS (PRK05338)Ribosomal_L19 (pfam01245) →                       |
| Csp-14-1 | NZ_JPLZ01000003.1               | - | 97674   | 97647   | RNA → rplS (PRK05338)Ribosomal_L19 (pfam01245) →                       |
| env-420  | G312J29652_10118847             | + | 270     | 297     | RNA → rplS (PRK05338)Ribosomal_L19 (pfam01245) →                       |
| env-421  | KVRMV2_101465984                | + | 447     | 474     | RNA → rplS (PRK05338)Ribosomal_L19 (pfam01245) →                       |
| env-422  | JGI26530J50255_1091746          | - | 216     | 189     | RNA → rplS (PRK05338)Ribosomal_L19 (pfam01245) →                       |
| env-423  | JGI26529J51215_1001451          | + | 7912    | 7939    | RNA → rplS (PRK05338)Ribosomal_L19 (pfam01245) →                       |
| env-424  | CESG01229099.1                  | + | 720     | 747     | RNA → rplS (PRK05338)Ribosomal_L19 (pfam01245) →                       |
| env-425  | CEQS01103232.1                  | + | 83      | 110     | RNA → rplS (PRK05338)Ribosomal_L19 (pfam01245) →                       |
| env-426  | CEOF01031608.1                  | - | 756     | 729     | RNA → rplS (PRK05338)Ribosomal_L19 (pfam01245) → PRK08299 (PRK08299) → |
| env-427  | CENX01416069.1                  | + | 1028    | 1055    | RNA → rplS (PRK05338)Ribosomal_L19 (pfam01245) → PRK08299 (PRK08299) → |
| env-428  | CESI01090854.1                  | + | 6360    | 6387    | RNA → rplS (PRK05338)Ribosomal_L19 (pfam01245) →                       |
| env-429  | CESU01215068.1                  | - | 134     | 107     | RNA → rplS (PRK05338)Ribosomal_L19 (pfam01245) →                       |
| env-430  | CESI01241033.1                  | - | 576     | 549     | RNA → hypo → rplS (PRK05338)Ribosomal_L19 (pfam01245) →                |
| Sze-1-1  | NZ_CP007202.1                   | + | 3148679 | 3148706 | RNA → rplS (PRK05338)Ribosomal_L19 (pfam01245) →                       |
| env-431  | NCBI_READ_1112533034697         | + | 726     | 753     | RNA →                                                                  |
| env-432  | CEVX01297991.1                  | - | 487     | 460     | RNA → rplS (PRK05338)Ribosomal_L19 (pfam01245) →                       |
| env-433  | CENF01074325.1                  | - | 280     | 253     | RNA → rplS (PRK05338)Ribosomal_L19 (pfam01245) →                       |
| env-434  | CEVU01029800.1                  | - | 121     | 94      | RNA → hypo →                                                           |
| env-435  | CESM01056441.1                  | - | 321     | 294     | RNA → rplS (PRK05338)Ribosomal_L19 (pfam01245) →                       |
| env-436  | CEQN01349805.1                  | - | 798     | 771     | RNA → rplS (PRK05338)Ribosomal_L19 (pfam01245) → PRK08299 (PRK08299) → |
| env-437  | CEUA01051077.1                  | + | 1051    | 1078    | RNA → hypo →                                                           |



|         |                             |   |       |       |       |                                            |                                    |
|---------|-----------------------------|---|-------|-------|-------|--------------------------------------------|------------------------------------|
| env-438 | CEOX01208336.1              | - | 960   | 933   | RNA → | rplS (PRK05338)Ribosomal_L19 (pfam01245) → | PRK08299 (PRK08299) →              |
| env-439 | CEPK01106220.1              | - | 708   | 681   | RNA → | rplS (PRK05338)Ribosomal_L19 (pfam01245) → | PRK08299 (PRK08299) →              |
| env-440 | CEQX01336274.1              | - | 961   | 934   | RNA → | rplS (PRK05338)Ribosomal_L19 (pfam01245) → | PRK08299 (PRK08299) →              |
| env-441 | CEVS01105966.1              | + | 832   | 859   | RNA → | rplS (PRK05338)Ribosomal_L19 (pfam01245) → | PRK08299 (PRK08299) →              |
| env-442 | CEOW01119178.1              | - | 642   | 615   | RNA → | rplS (PRK05338)Ribosomal_L19 (pfam01245) → | PRK08299 (PRK08299) →              |
| env-443 | CEPW01076239.1              | + | 1420  | 1447  | RNA → | rplS (PRK05338)Ribosomal_L19 (pfam01245) → | PRK08299 (PRK08299) →              |
| env-444 | CETU01284987.1              | + | 291   | 318   | RNA → | rplS (PRK05338)Ribosomal_L19 (pfam01245) → |                                    |
| env-445 | CEVL01112834.1              | - | 1317  | 1290  | RNA → | rplS (PRK05338)Ribosomal_L19 (pfam01245) → | PRK08299 (PRK08299) →              |
| env-446 | CEVR01040825.1              | - | 1071  | 1044  | RNA → | rplS (PRK05338)Ribosomal_L19 (pfam01245) → | PRK08299 (PRK08299) →              |
| env-447 | CEVW01007019.1              | - | 234   | 207   | RNA → | rplS (PRK05338)Ribosomal_L19 (pfam01245) → |                                    |
| env-448 | CEVY01168308.1              | + | 338   | 365   | RNA → | rplS (PRK05338)Ribosomal_L19 (pfam01245) → |                                    |
| env-449 | CEVZ01408390.1              | - | 747   | 720   | RNA → | rplS (PRK05338)Ribosomal_L19 (pfam01245) → | PRK08299 (PRK08299) →              |
| env-450 | CEWO01314421.1              | - | 167   | 140   | RNA → | rplS (PRK05338)Ribosomal_L19 (pfam01245) → |                                    |
| env-451 | CEVG01047150.1              | + | 617   | 644   | RNA → |                                            |                                    |
| env-452 | CEWH01127616.1              | - | 502   | 475   | RNA → | rplS (PRK05338)Ribosomal_L19 (pfam01245) → |                                    |
| env-453 | CETE01195508.1              | - | 433   | 406   | RNA → | rplS (PRK05338)Ribosomal_L19 (pfam01245) → |                                    |
| env-454 | CESB01079027.1              | - | 492   | 465   | RNA → | rplS (PRK05338)Ribosomal_L19 (pfam01245) → |                                    |
| env-455 | CEWH01141888.1              | + | 60    | 87    | RNA → | rplS (PRK05338)Ribosomal_L19 (pfam01245) → |                                    |
| env-456 | JCVL_SCAF_1096627080784     | - | 1550  | 1523  | RNA → | rplS (PRK05338)Ribosomal_L19 (pfam01245) → |                                    |
| env-457 | JCVL_SCAF_1096627154527     | - | 948   | 921   | RNA → | rplS (PRK05338)Ribosomal_L19 (pfam01245) → |                                    |
| env-458 | 2236876001_368620           | + | 5     | 32    | RNA → | rplS (PRK05338)Ribosomal_L19 (pfam01245) → |                                    |
| env-459 | CEVE01148832.1              | + | 48    | 75    | RNA → | rplS (PRK05338)Ribosomal_L19 (pfam01245) → |                                    |
| env-460 | CEUF01225509.1              | - | 494   | 467   | RNA → | rplS (PRK05338)Ribosomal_L19 (pfam01245) → |                                    |
| env-461 | CEVH01093382.1              | + | 145   | 172   | RNA → | rplS (PRK05338)Ribosomal_L19 (pfam01245) → |                                    |
| env-462 | CENG01146222.1              | + | 169   | 196   | RNA → | rplS (PRK05338)Ribosomal_L19 (pfam01245) → |                                    |
| env-463 | CEOM01318431.1              | - | 353   | 326   | RNA → | rplS (PRK05338)Ribosomal_L19 (pfam01245) → |                                    |
| env-464 | CENO01076922.1              | - | 362   | 335   | RNA → | rplS (PRK05338)Ribosomal_L19 (pfam01245) → |                                    |
| env-465 | CEOC01161351.1              | + | 852   | 879   | RNA → | rplS (PRK05338)Ribosomal_L19 (pfam01245) → |                                    |
| env-466 | CEUQ01033343.1              | - | 386   | 359   | RNA → | rplS (PRK05338)Ribosomal_L19 (pfam01245) → |                                    |
| env-467 | CEUV01047175.1              | + | 3626  | 3653  | RNA → | rplS (PRK05338)Ribosomal_L19 (pfam01245) → |                                    |
| env-468 | CEVH01118179.1              | + | 204   | 231   | RNA → | rplS (PRK05338)Ribosomal_L19 (pfam01245) → |                                    |
| env-469 | JCVL_READ_1108799335411     | - | 468   | 441   | RNA → | rplS (PRK05338)Ribosomal_L19 (pfam01245) → |                                    |
| env-470 | JCVL_READ_1105333524717     | - | 686   | 659   | RNA → | rplS (PRK05338)Ribosomal_L19 (pfam01245) → |                                    |
| env-471 | JCVL_SCAF_1096627165370     | - | 2607  | 2580  | RNA → | rplS (PRK05338)Ribosomal_L19 (pfam01245) → |                                    |
| env-472 | CEOM01332252.1              | + | 48    | 75    | RNA → | rplS (PRK05338)Ribosomal_L19 (pfam01245) → |                                    |
| env-473 | CEUR01223384.1              | + | 46    | 19    | RNA → |                                            |                                    |
| env-474 | CEWK01258637.1              | - | 133   | 106   | RNA → | hypo →                                     |                                    |
| env-475 | JCVL_SCAF_1096627377686     | - | 4544  | 4517  | RNA → | rplS (PRK05338)Ribosomal_L19 (pfam01245) → | lcd (COG0538)PRK08299 (PRK08299) → |
| env-476 | SI34jun09_10m_1057978       | - | 369   | 342   | RNA → | rplS (PRK05338)Ribosomal_L19 (pfam01245) → |                                    |
| env-477 | CENG01034942.1              | - | 1486  | 1459  | RNA → | rplS (PRK05338)Ribosomal_L19 (pfam01245) → |                                    |
| env-478 | CEOM01098376.1              | - | 235   | 208   | RNA → | rplS (PRK05338)Ribosomal_L19 (pfam01245) → |                                    |
| env-479 | CEVS01030948.1              | + | 1746  | 1773  | RNA → | rplS (PRK05338)Ribosomal_L19 (pfam01245) → |                                    |
| env-480 | CEWR01159377.1              | + | 50034 | 50061 | RNA → | rplS (PRK05338)Ribosomal_L19 (pfam01245) → |                                    |
| env-481 | CESF01020515.1              | + | 988   | 1015  | RNA → | rplS (PRK05338)Ribosomal_L19 (pfam01245) → |                                    |
| env-482 | CESO01050146.1              | + | 1060  | 1087  | RNA → | rplS (PRK05338)Ribosomal_L19 (pfam01245) → |                                    |
| env-483 | KVRMV2_100000088            | - | 5600  | 5573  | RNA → | rplS (PRK05338)Ribosomal_L19 (pfam01245) → |                                    |
| env-484 | KVRMV2_100034891            | - | 6394  | 6367  | RNA → | rplS (PRK05338)Ribosomal_L19 (pfam01245) → |                                    |
| env-485 | CERW01158022.1              | + | 442   | 469   | RNA → |                                            |                                    |
| env-486 | LPaug08P2610m_c1078019      | + | 6     | 33    | RNA → | rplS (PRK05338)Ribosomal_L19 (pfam01245) → |                                    |
| env-487 | KGL_S1_ANT01_95m_c10010320  | + | 2206  | 2233  | RNA → | rplS (PRK05338)Ribosomal_L19 (pfam01245) → |                                    |
| env-488 | KGL_S2_ANT04_2345m_c1008589 | - | 3087  | 3060  | RNA → | rplS (PRK05338)Ribosomal_L19 (pfam01245) → |                                    |
| env-489 | KGL_S2_ANT05_2345m_c1137067 | - | 164   | 137   | RNA → | rplS (PRK05338)Ribosomal_L19 (pfam01245) → |                                    |



|         |                             |   |      |      |                                                                                                                                                |
|---------|-----------------------------|---|------|------|------------------------------------------------------------------------------------------------------------------------------------------------|
| env-490 | KGL_S1_ANT03.95m.c1048383   | + | 153  | 180  | RNA → rplS (PRK05338)Ribosomal_L19 (pfam01245) →                                                                                               |
| env-491 | KGL_S1_ANT02.95m.c10003481  | - | 1313 | 1286 | RNA → rplS (PRK05338)Ribosomal_L19 (pfam01245) →                                                                                               |
| env-492 | KGL_S1_ANT02.95m.c10032222  | + | 261  | 288  | RNA → rplS (PRK05338)Ribosomal_L19 (pfam01245) →                                                                                               |
| env-493 | KGL_S1_ANT01.95m.c10010675  | + | 3983 | 4010 | RNA → rplS (PRK05338)Ribosomal_L19 (pfam01245) →                                                                                               |
| env-494 | KGL_S2_ANT05.2345m.c1144219 | + | 109  | 136  | RNA → rplS (PRK05338)Ribosomal_L19 (pfam01245) →                                                                                               |
| env-495 | KGL_S1_ANT02.95m.c10086448  | - | 710  | 683  | RNA → rplS (PRK05338)Ribosomal_L19 (pfam01245) →                                                                                               |
| env-496 | SI34jun09.10m.1080363       | + | 219  | 246  | RNA → rplS (PRK05338)Ribosomal_L19 (pfam01245) →                                                                                               |
| env-497 | JGI20157J14317_10015639     | + | 4166 | 4193 | RNA → rplS (PRK05338)Ribosomal_L19 (pfam01245) →                                                                                               |
| env-498 | CEPW01210536.1              | + | 127  | 154  | RNA → rplS (PRK05338)Ribosomal_L19 (pfam01245) →                                                                                               |
| env-499 | CEUA01108642.1              | + | 6252 | 6279 | RNA → rplS (PRK05338)Ribosomal_L19 (pfam01245) → PRK08299 (PRK08299) →                                                                         |
| env-500 | CEWA01174457.1              | + | 746  | 773  | RNA → ←hypo                                                                                                                                    |
| env-501 | JGI24023J19991_10003771     | - | 406  | 379  | RNA → rplS (PRK05338)Ribosomal_L19 (pfam01245) →                                                                                               |
| env-502 | JCVI_READ_1104230194226     | + | 528  | 555  | RNA → rplS (PRK05338)Ribosomal_L19 (pfam01245) →                                                                                               |
| env-503 | wf3_AHAI437_g1              | + | 799  | 826  | RNA →                                                                                                                                          |
| env-504 | 2236876001_449510           | + | 47   | 74   | RNA → rplS (PRK05338)Ribosomal_L19 (pfam01245) →                                                                                               |
| env-505 | TDF_MC_ARG01_113m.c1099489  | - | 124  | 97   | RNA → hypo →                                                                                                                                   |
| env-506 | JGI20153J14295_10005629     | - | 2919 | 2892 | RNA → rplS (PRK05338)Ribosomal_L19 (pfam01245) → PRK08299 (PRK08299) → PRK08299 (PRK08299) →<br>murQ (PRK05441)SIS_Etherase (cd05007) → hypo → |
| env-507 | JGI20153J14318_10005629     | - | 2919 | 2892 | RNA → rplS (PRK05338)Ribosomal_L19 (pfam01245) → PRK08299 (PRK08299) → PRK08299 (PRK08299) →<br>murQ (PRK05441)SIS_Etherase (cd05007) → hypo → |
| env-508 | CEPT01227262.1              | - | 57   | 30   | RNA →                                                                                                                                          |
| env-509 | CESU01040866.1              | - | 1275 | 1248 | RNA → rplS (PRK05338)Ribosomal_L19 (pfam01245) → PRK08299 (PRK08299) →                                                                         |
| env-510 | JCVI_SCAF_1096627031829     | - | 1224 | 1197 | RNA → rplS (PRK05338)Ribosomal_L19 (pfam01245) → PRK08299 (PRK08299) →                                                                         |
| env-511 | CEVH01254860.1              | - | 217  | 190  | RNA → rplS (PRK05338)Ribosomal_L19 (pfam01245) →                                                                                               |
| env-512 | JGI24023J19991_10003593     | + | 2712 | 2739 | RNA → rplS (PRK05338)Ribosomal_L19 (pfam01245) →                                                                                               |
| env-513 | ASA120_GJFD58A02F7OV7       | + | 101  | 128  | RNA → rplS (PRK05338)Ribosomal_L19 (pfam01245) →                                                                                               |
| env-514 | 2236876001_074437           | + | 323  | 350  | RNA →                                                                                                                                          |
| env-515 | KGL_S1_ANT01.95m.c10456706  | - | 66   | 39   | RNA →                                                                                                                                          |
| env-516 | KGL_S1_ANT03.95m.c1008295   | - | 214  | 187  | RNA → rplS (PRK05338)Ribosomal_L19 (pfam01245) →                                                                                               |
| env-517 | SA_S1_NOR08_45m.c10345472   | - | 298  | 271  | RNA → rplS (PRK05338)Ribosomal_L19 (pfam01245) →                                                                                               |
| env-518 | KGL_S1_ANT03.95m.c1006880   | + | 307  | 334  | RNA → rplS (PRK05338)Ribosomal_L19 (pfam01245) →                                                                                               |
| env-519 | JGI20154J14316_10012696     | + | 4846 | 4873 | RNA → rplS (PRK05338)Ribosomal_L19 (pfam01245) →                                                                                               |
| env-520 | CEO001015956.1              | + | 214  | 241  | RNA → rplS (PRK05338)Ribosomal_L19 (pfam01245) → PRK08299 (PRK08299) →<br>murQ (PRK05441)SIS_Etherase (cd05007) → hypo →                       |
| env-521 | CESR01281926.1              | + | 492  | 519  | RNA → rplS (PRK05338)Ribosomal_L19 (pfam01245) →                                                                                               |
| env-522 | CEVG01003056.1              | + | 390  | 417  | RNA → hypo →                                                                                                                                   |
| env-523 | JGI24025J20009_10088571     | - | 715  | 688  | RNA → rplS (PRK05338)Ribosomal_L19 (pfam01245) →                                                                                               |
| env-524 | JCVI_READ_1108800202219     | - | 163  | 136  | RNA →                                                                                                                                          |
| Tma-1-1 | NZ_BAUG01000055.1           | + | 4233 | 4260 | RNA → rplS (PRK05338)Ribosomal_L19 (pfam01245) →                                                                                               |
| env-525 | 2236876001_552703           | - | 123  | 96   | RNA → hypo →                                                                                                                                   |
| env-526 | KGL_S1_ANT01.95m.c10209358  | + | 393  | 420  | RNA →                                                                                                                                          |
| env-527 | P_2C_Liq_1_UnCty_1013314    | + | 1523 | 1550 | RNA → rplS (PRK05338)Ribosomal_L19 (pfam01245) →                                                                                               |
| env-528 | P_2C_Liq_1_UnCty_1013450    | - | 874  | 847  | RNA → rplS (PRK05338)Ribosomal_L19 (pfam01245) →                                                                                               |
| env-529 | JGI24024J18818_10000452     | - | 6510 | 6483 | RNA → rplS (PRK05338)Ribosomal_L19 (pfam01245) →                                                                                               |
| env-530 | CERI01232405.1              | - | 69   | 42   | RNA →                                                                                                                                          |
| env-531 | CEUB01095771.1              | - | 744  | 717  | RNA → rplS (PRK05338)Ribosomal_L19 (pfam01245) → PRK08299 (PRK08299) →                                                                         |
| env-532 | LGVF01272697.1              | + | 220  | 247  | RNA → rplS (PRK05338)Ribosomal_L19 (pfam01245) →                                                                                               |
| env-533 | JCVI_READ_1103242157104     | - | 160  | 133  | RNA →                                                                                                                                          |
| env-534 | JCVI_READ_1108800189128     | + | 253  | 280  | RNA → rplS (PRK05338)Ribosomal_L19 (pfam01245) → PRK08299 (PRK08299) →                                                                         |
| env-535 | 2236876001_291567           | - | 86   | 59   | RNA →                                                                                                                                          |
| env-536 | JGI20152J14361_10348201     | - | 184  | 157  | RNA → rplS (PRK05338)Ribosomal_L19 (pfam01245) →                                                                                               |
| env-537 | 2006938804                  | + | 246  | 273  | RNA → hypo →                                                                                                                                   |
| env-538 | JGI20156J14371_10009645     | + | 545  | 572  | RNA → rplS (PRK05338)Ribosomal_L19 (pfam01245) →                                                                                               |

|         |                               |   |         |         |       |                                                   |
|---------|-------------------------------|---|---------|---------|-------|---------------------------------------------------|
| env-539 | JGI20157J14317_10000094       | + | 89205   | 89232   | RNA → | rplS (PRK05338)Ribosomal_L19 (pfam01245) →        |
| env-540 | DelMOSum2010_c10046964        | + | 738     | 765     | RNA → | rplS (PRK05338)Ribosomal_L19 (pfam01245) →        |
| env-541 | JGI20152J14361_10050080       | - | 464     | 437     | RNA → | rplS (PRK05338)Ribosomal_L19 (pfam01245) →        |
| env-542 | JGI20154J14316_10114600       | + | 178     | 205     | RNA → | rplS (PRK05338)Ribosomal_L19 (pfam01245) →        |
| env-543 | JGI20160J14292_10167608       | + | 546     | 573     | RNA → |                                                   |
| env-544 | JGI20159J14440_10045553       | - | 1068    | 1041    | RNA → | rplS (PRK05338)Ribosomal_L19 (pfam01245) →        |
| env-545 | JGI20155J14468_10052104       | - | 1080    | 1053    | RNA → | rplS (PRK05338)Ribosomal_L19 (pfam01245) →        |
| env-546 | JGI20158J14315_10097952       | - | 470     | 443     | RNA → | rplS (PRK05338)Ribosomal_L19 (pfam01245) →        |
| env-547 | F10SI0310a_Sequence0000013889 | - | 1032    | 1005    | RNA → | rplS (PRK05338)Ribosomal_L19 (pfam01245) →        |
| env-548 | DelMOSum2011_c10479874        | + | 149     | 176     | RNA → | rplS (PRK05338)Ribosomal_L19 (pfam01245) →        |
| env-549 | JGI20152J14361_10049778       | - | 470     | 443     | RNA → | rplS (PRK05338)Ribosomal_L19 (pfam01245) →        |
| env-550 | JGI20153J14295_10000026       | - | 1056    | 1029    | RNA → | rplS (PRK05338)Ribosomal_L19 (pfam01245) →        |
| env-551 | JGI20153J14318_10000026       | - | 1056    | 1029    | RNA → | rplS (PRK05338)Ribosomal_L19 (pfam01245) →        |
| env-552 | JGI20159J14440_10045424       | - | 1068    | 1041    | RNA → | rplS (PRK05338)Ribosomal_L19 (pfam01245) →        |
| env-553 | JGI20155J14468_10052697       | - | 1064    | 1037    | RNA → | rplS (PRK05338)Ribosomal_L19 (pfam01245) →        |
| env-554 | JGI20158J14315_10000044       | - | 470     | 443     | RNA → | rplS (PRK05338)Ribosomal_L19 (pfam01245) →        |
| env-555 | P_2C_Liq_1_UnCty_1031250      | - | 753     | 726     | RNA → | rplS (PRK05338)Ribosomal_L19 (pfam01245) →        |
| env-556 | P_2C_Liq_2_UnCty_1144299      | - | 190     | 163     | RNA → | rplS (PRK05338)Ribosomal_L19 (pfam01245) →        |
| env-557 | DelMOWin2010_c10191725        | + | 109     | 136     | RNA → | rplS (PRK05338)Ribosomal_L19 (pfam01245) →        |
| env-558 | PML_READ_00935591             | - | 131     | 104     | RNA → | ← hypo                                            |
| env-559 | BS_KBA_SWE12_21m_c10032736    | + | 594     | 621     | RNA → | rplS (PRK05338)Ribosomal_L19 (pfam01245) →        |
| env-560 | BS_KBA_SWE21_205m_10115428    | - | 372     | 345     | RNA → | rplS (PRK05338)Ribosomal_L19 (pfam01245) →        |
| env-561 | BS_KBA_SWE02_21m_10146188     | + | 256     | 283     | RNA → | rplS (PRK05338)Ribosomal_L19 (pfam01245) →        |
| env-562 | SA_S1_NOR08_45m_c10057602     | - | 805     | 778     | RNA → | rplS (PRK05338)Ribosomal_L19 (pfam01245) →        |
| env-563 | SA_S2_NOR15_50m_c10029395     | + | 1634    | 1661    | RNA → | rplS (PRK05338)Ribosomal_L19 (pfam01245) →        |
| env-564 | SA_S1_NOR02_45m_c1073127      | - | 170     | 143     | RNA → | rplS (PRK05338)Ribosomal_L19 (pfam01245) →        |
| env-565 | SA_S2_NOR15_50m_c10237660     | - | 437     | 410     | RNA → | rplS (PRK05338)Ribosomal_L19 (pfam01245) →        |
| env-566 | SA_S1_NOR05_45m_c10015507     | + | 313     | 340     | RNA → | rplS (PRK05338)Ribosomal_L19 (pfam01245) →        |
| env-567 | SA_S1_NOR08_45m_c10002712     | + | 1145    | 1172    | RNA → | rplS (PRK05338)Ribosomal_L19 (pfam01245) →        |
| env-568 | SA_S2_NOR15_50m_c10347322     | - | 312     | 285     | RNA → | rplS (PRK05338)Ribosomal_L19 (pfam01245) →        |
| env-569 | SA_S1_NOR02_45m_c1174369      | + | 156     | 183     | RNA → | hypo →                                            |
| env-570 | KGL_S1_ANT01_95m_c10003353    | - | 6873    | 6846    | RNA → | rplS (PRK05338)Ribosomal_L19 (pfam01245) →        |
| env-571 | KGL_S1_ANT02_95m_c10361752    | - | 97      | 70      | RNA → |                                                   |
| env-572 | JGI1221J11331_1000054         | - | 29154   | 29127   | RNA → | rplS (PRK05338)Ribosomal_L19 (pfam01245) →        |
| env-573 | ASLM20b_GM71RDO02HMAJ4        | - | 59      | 32      | RNA → | hypo →                                            |
| Fba-5-1 | NC_014472.1                   | + | 3298444 | 3298471 | RNA → | rplS (PRK05338)Ribosomal_L19 (pfam01245) →        |
| env-574 | KGL_S1_ANT01_95m_c10282318    | - | 277     | 250     | RNA → | hypo → rplS (PRK05338)Ribosomal_L19 (pfam01245) → |
| env-575 | SA_S1_NOR05_45m_c10063021     | + | 354     | 381     | RNA → | rplS (PRK05338)Ribosomal_L19 (pfam01245) →        |
| env-576 | SA_S1_NOR02_45m_c1006420      | + | 323     | 350     | RNA → | rplS (PRK05338)Ribosomal_L19 (pfam01245) →        |
| env-577 | KGL_S1_ANT02_95m_c10152699    | + | 34      | 61      | RNA → | hypo → rplS (PRK05338)Ribosomal_L19 (pfam01245) → |
| env-578 | CESI01056244.1                | + | 1354    | 1381    | RNA → |                                                   |
| Tme-1-1 | NZ_LDOD01000007.1             | - | 131191  | 131164  | RNA → | rplS (PRK05338)Ribosomal_L19 (pfam01245) →        |
| Zul-1-1 | NZ_JQMD01000002.1             | - | 686490  | 686463  | RNA → | rplS (PRK05338)Ribosomal_L19 (pfam01245) →        |
| env-579 | KGL_S1_ANT01_95m_c10220709    | - | 418     | 391     | RNA → | hypo → rplS (PRK05338)Ribosomal_L19 (pfam01245) → |
| env-580 | SA_S2_NOR13_50m_c1009519      | + | 390     | 417     | RNA → | rplS (PRK05338)Ribosomal_L19 (pfam01245) →        |
| env-581 | SA_S1_NOR05_45m_c10030739     | + | 81      | 108     | RNA → | rplS (PRK05338)Ribosomal_L19 (pfam01245) →        |
| env-582 | SA_S1_NOR08_45m_c10078726     | - | 177     | 150     | RNA → | rplS (PRK05338)Ribosomal_L19 (pfam01245) →        |
| env-583 | SA_S2_NOR15_50m_c10004324     | + | 2414    | 2441    | RNA → | rplS (PRK05338)Ribosomal_L19 (pfam01245) →        |
| env-584 | SA_S2_NOR18_50m_1017234       | + | 451     | 478     | RNA → | rplS (PRK05338)Ribosomal_L19 (pfam01245) →        |
| env-585 | SA_S1_NOR08_45m_c10100170     | + | 733     | 760     | RNA → | rplS (PRK05338)Ribosomal_L19 (pfam01245) →        |
| env-586 | SA_S2_NOR15_50m_c10049348     | + | 877     | 904     | RNA → | rplS (PRK05338)Ribosomal_L19 (pfam01245) →        |
| env-587 | TDF_MC_ARG02_113m_c1036547    | + | 146     | 173     | RNA → | rplS (PRK05338)Ribosomal_L19 (pfam01245) →        |

|         |                               |   |        |        |                                                                                                                                                                                                                 |
|---------|-------------------------------|---|--------|--------|-----------------------------------------------------------------------------------------------------------------------------------------------------------------------------------------------------------------|
| env-588 | KGL_S1_ANT01_95m.c10011644    | - | 2952   | 2925   | RNA → rplS (PRK05338)Ribosomal_L19 (pfam01245) →                                                                                                                                                                |
| env-589 | KGL_S1_ANT03_95m.c1001414     | + | 244    | 271    | RNA → rplS (PRK05338)Ribosomal_L19 (pfam01245) →                                                                                                                                                                |
| env-590 | BS_KBA_SWE21_205m.10096012    | - | 541    | 514    | RNA → rplS (PRK05338)Ribosomal_L19 (pfam01245) →                                                                                                                                                                |
| env-591 | LGVF01642023.1                | + | 527    | 554    | RNA → rplS (PRK05338)Ribosomal_L19 (pfam01245) →                                                                                                                                                                |
| env-592 | DelMOSum2010_c10000064        | + | 13406  | 13433  | RNA → rplS (PRK05338)Ribosomal_L19 (pfam01245) →                                                                                                                                                                |
| env-593 | DelMOSum2011_c10042862        | + | 72     | 99     | RNA → rplS (PRK05338)Ribosomal_L19 (pfam01245) →                                                                                                                                                                |
| env-594 | SI34jun09_10m.1001399         | + | 1917   | 1944   | RNA → rplS (PRK05338)Ribosomal_L19 (pfam01245) →                                                                                                                                                                |
| env-595 | JGI20152J14361_10000209       | + | 40144  | 40171  | RNA → rplS (PRK05338)Ribosomal_L19 (pfam01245) →                                                                                                                                                                |
| env-596 | JGI20151J14362_10000555       | - | 1411   | 1384   | RNA → rplS (PRK05338)Ribosomal_L19 (pfam01245) →                                                                                                                                                                |
| env-597 | JGI20156J14371_10000042       | + | 40239  | 40266  | RNA → rplS (PRK05338)Ribosomal_L19 (pfam01245) →                                                                                                                                                                |
| env-598 | JGI20154J14316_10000040       | + | 40642  | 40669  | RNA → rplS (PRK05338)Ribosomal_L19 (pfam01245) →                                                                                                                                                                |
| env-599 | JGI20160J14292_10000074       | + | 5141   | 5168   | RNA → rplS (PRK05338)Ribosomal_L19 (pfam01245) →                                                                                                                                                                |
| env-600 | JGI20153J14295_10000199       | + | 26032  | 26059  | RNA → rplS (PRK05338)Ribosomal_L19 (pfam01245) →                                                                                                                                                                |
| env-601 | JGI20153J14318_10000199       | + | 26032  | 26059  | RNA → rplS (PRK05338)Ribosomal_L19 (pfam01245) →                                                                                                                                                                |
| env-602 | JGI20157J14317_10000069       | - | 62313  | 62286  | RNA → rplS (PRK05338)Ribosomal_L19 (pfam01245) →                                                                                                                                                                |
| env-603 | JGI20159J14440_10000007       | + | 39982  | 40009  | RNA → rplS (PRK05338)Ribosomal_L19 (pfam01245) →                                                                                                                                                                |
| env-604 | JGI20155J14468_10000017       | - | 82695  | 82668  | RNA → rplS (PRK05338)Ribosomal_L19 (pfam01245) →                                                                                                                                                                |
| env-605 | JGI20158J14315_10000602       | - | 6255   | 6228   | RNA → rplS (PRK05338)Ribosomal_L19 (pfam01245) →                                                                                                                                                                |
| env-606 | F10SI0310a_Sequence0000031405 | + | 45     | 72     | RNA → rplS (PRK05338)Ribosomal_L19 (pfam01245) →                                                                                                                                                                |
| Zga-1-1 | NC_015844.1                   | + | 11699  | 11726  | RNA → rplS (PRK05338)Ribosomal_L19 (pfam01245) →                                                                                                                                                                |
| env-607 | TDF_OR_ARG04_113m.c1009311    | + | 312    | 339    | RNA → rplS (PRK05338)Ribosomal_L19 (pfam01245) →                                                                                                                                                                |
| env-608 | KGI_S2_ANT04_2345m.c1075036   | - | 569    | 542    | RNA → rplS (PRK05338)Ribosomal_L19 (pfam01245) →                                                                                                                                                                |
| env-609 | KGI_S1_ANT02_95m.c10135656    | - | 480    | 453    | RNA → rplS (PRK05338)Ribosomal_L19 (pfam01245) →                                                                                                                                                                |
| env-610 | KGI_S1_ANT02_95m.c10219286    | - | 147    | 120    | RNA → rplS (PRK05338)Ribosomal_L19 (pfam01245) →                                                                                                                                                                |
| env-611 | JGI24023J19991_10008759       | + | 3422   | 3449   | RNA → rplS (PRK05338)Ribosomal_L19 (pfam01245) →                                                                                                                                                                |
| Tov-1-1 | NZ_KE387163.1                 | + | 593630 | 593657 | RNA → rplS (PRK05338)Ribosomal_L19 (pfam01245) →                                                                                                                                                                |
| env-612 | KGI_S1_ANT01_95m.c10030583    | + | 914    | 941    | RNA → rplS (PRK05338)Ribosomal_L19 (pfam01245) →                                                                                                                                                                |
| env-613 | KGI_S1_ANT02_95m.c10406104    | + | 132    | 159    | RNA → rplS (PRK05338)Ribosomal_L19 (pfam01245) →                                                                                                                                                                |
| env-614 | KGI_S1_ANT02_95m.c10445002    | + | 31     | 58     | RNA → rplS (PRK05338)Ribosomal_L19 (pfam01245) →                                                                                                                                                                |
| Ace-1-1 | NZ_KE386915.1                 | - | 8797   | 8770   | RNA → rplS (PRK05338)Ribosomal_L19 (pfam01245) →                                                                                                                                                                |
| env-615 | DelMOSum2011_c10154912        | + | 8      | 35     | RNA → rplS (PRK05338)Ribosomal_L19 (pfam01245) → PRK08299 (PRK08299) →                                                                                                                                          |
| env-616 | CERS01121503.1                | + | 479    | 506    | RNA →                                                                                                                                                                                                           |
| env-617 | JGI20152J14361_10000298       | - | 36606  | 36579  | RNA → rplS (PRK05338)Ribosomal_L19 (pfam01245) → Icd (COG0538)PRK08299 (PRK08299) →<br>murQ (PRK05441)SIS_Etherase (cd05007) → COX15-CtaA (pfam02628) →<br>TGS_ThrRS_N (cd01667)ThrS (COG0441)thrS (PRK00413) → |
| env-618 | JGI20154J14316_10019853       | - | 413    | 386    | RNA → rplS (PRK05338)Ribosomal_L19 (pfam01245) →                                                                                                                                                                |
| env-619 | JGI20160J14292_10056708       | + | 610    | 637    | RNA → rplS (PRK05338)Ribosomal_L19 (pfam01245) → PRK08299 (PRK08299) →                                                                                                                                          |
| env-620 | JGI20153J14295_10004656       | + | 5844   | 5871   | RNA → rplS (PRK05338)Ribosomal_L19 (pfam01245) → Icd (COG0538)PRK08299 (PRK08299) →<br>murQ (PRK05441)SIS_Etherase (cd05007) → COX15-CtaA (pfam02628) →                                                         |
| env-621 | JGI20153J14318_10004656       | + | 5844   | 5871   | RNA → rplS (PRK05338)Ribosomal_L19 (pfam01245) → Icd (COG0538)PRK08299 (PRK08299) →<br>murQ (PRK05441)SIS_Etherase (cd05007) → COX15-CtaA (pfam02628) →                                                         |
| env-622 | JGI20157J14317_10171026       | - | 182    | 155    | RNA → rplS (PRK05338)Ribosomal_L19 (pfam01245) →                                                                                                                                                                |
| env-623 | JGI20153J14295_10241690       | + | 224    | 251    | RNA → rplS (PRK05338)Ribosomal_L19 (pfam01245) →                                                                                                                                                                |
| env-624 | JGI20153J14318_10241690       | + | 224    | 251    | RNA → rplS (PRK05338)Ribosomal_L19 (pfam01245) →                                                                                                                                                                |
| env-625 | JGI20156J14371_10014241       | - | 1035   | 1008   | RNA → rplS (PRK05338)Ribosomal_L19 (pfam01245) → PRK08299 (PRK08299) →                                                                                                                                          |
| env-626 | NCBI_READ_1112614356934       | + | 470    | 497    | RNA → rplS (PRK05338)Ribosomal_L19 (pfam01245) →                                                                                                                                                                |
| env-627 | JGI20152J14361_10011154       | - | 64     | 37     | RNA →                                                                                                                                                                                                           |
| env-628 | JGI20152J14361_10002150       | + | 8757   | 8784   | RNA → rplS (PRK05338)Ribosomal_L19 (pfam01245) →                                                                                                                                                                |
| env-629 | CESU01163506.1                | - | 117    | 90     | RNA → hypo →                                                                                                                                                                                                    |
| env-630 | JGI20154J14316_10029844       | + | 675    | 702    | RNA → rplS (PRK05338)Ribosomal_L19 (pfam01245) →                                                                                                                                                                |
| env-631 | DelMOSum2011_c10007301        | - | 1729   | 1702   | RNA → rplS (PRK05338)Ribosomal_L19 (pfam01245) →                                                                                                                                                                |
| env-632 | JGI20156J14371_10057408       | + | 984    | 1011   | RNA → rplS (PRK05338)Ribosomal_L19 (pfam01245) →                                                                                                                                                                |
| env-633 | JGI20153J14295_10093405       | - | 123    | 96     | RNA →                                                                                                                                                                                                           |

|          |                                |   |       |       |      |                                                                             |
|----------|--------------------------------|---|-------|-------|------|-----------------------------------------------------------------------------|
| env-634  | JGI20153J14318_10093405        | - | 123   | 96    | RNA→ |                                                                             |
| env-635  | JGI20157J14317_10007733        | + | 5168  | 5195  | RNA→ | rplS (PRK05338)Ribosomal_L19 (pfam01245)→                                   |
| env-636  | 2236876009_261411              | - | 77    | 50    | RNA→ | hypo→                                                                       |
| env-637  | DelMOSum2010_c10004838         | - | 7637  | 7610  | RNA→ | rplS (PRK05338)Ribosomal_L19 (pfam01245)→                                   |
| env-638  | JGI20152J14361_10046914        | + | 1115  | 1142  | RNA→ |                                                                             |
| env-639  | 2236876010_0651014             | + | 319   | 346   | RNA→ | rplS (PRK05338)Ribosomal_L19 (pfam01245)→                                   |
| Fsp-12-1 | NZ_AMYW01000004.1              | + | 95479 | 95506 | RNA→ | rplS (PRK05338)Ribosomal_L19 (pfam01245)→                                   |
| env-640  | JGI20152J14361_10056262        | + | 870   | 897   | RNA→ |                                                                             |
| env-641  | CESE01016993.1                 | - | 115   | 88    | RNA→ |                                                                             |
| env-642  | CESI01086171.1                 | + | 110   | 137   | RNA→ | rplS (PRK05338)Ribosomal_L19 (pfam01245)→                                   |
| env-643  | CESJ01062511.1                 | - | 5384  | 5357  | RNA→ | rplS (PRK05338)Ribosomal_L19 (pfam01245)→                                   |
| env-644  | CESU01102979.1                 | - | 419   | 392   | RNA→ | rplS (PRK05338)Ribosomal_L19 (pfam01245)→                                   |
| env-645  | JGI20152J14361_10002317        | + | 11082 | 11109 | RNA→ | rplS (PRK05338)Ribosomal_L19 (pfam01245)→                                   |
| env-646  | JGI20153J14295_10001978        | + | 15013 | 15040 | RNA→ |                                                                             |
| env-647  | JGI20153J14295_10015022        | + | 1046  | 1073  | RNA→ | rplS (PRK05338)Ribosomal_L19 (pfam01245)→                                   |
| env-648  | JGI20153J14318_10001978        | + | 15013 | 15040 | RNA→ |                                                                             |
| env-649  | JGI20153J14318_10015022        | + | 1046  | 1073  | RNA→ | rplS (PRK05338)Ribosomal_L19 (pfam01245)→                                   |
| env-650  | CERM01075739.1                 | + | 5107  | 5134  | RNA→ | rplS (PRK05338)Ribosomal_L19 (pfam01245)→                                   |
| env-651  | sludgePhrap_Contig8207         | - | 493   | 466   | RNA→ | rplS (PRK05338)Ribosomal_L19 (pfam01245)→                                   |
| env-652  | 2156199154                     | - | 535   | 508   | RNA→ | rplS (PRK05338)Ribosomal_L19 (pfam01245)→                                   |
| env-653  | 2210285019                     | + | 294   | 321   | RNA→ | rplS (PRK05338)Ribosomal_L19 (pfam01245)→                                   |
| env-654  | JGI20160J14292_10046497        | + | 690   | 717   | RNA→ | rplS (PRK05338)Ribosomal_L19 (pfam01245)→                                   |
| env-655  | CESE01253289.1                 | - | 285   | 258   | RNA→ | rplS (PRK05338)Ribosomal_L19 (pfam01245)→                                   |
| env-656  | CESJ01016245.1                 | + | 3196  | 3223  | RNA→ | Ribosomal_L19 (pfam01245)→                                                  |
| env-657  | JGI20152J14361_10000482        | + | 17691 | 17718 | RNA→ | rplS (PRK05338)Ribosomal_L19 (pfam01245)→                                   |
| env-658  | JGI20154J14316_10002680        | + | 12374 | 12401 | RNA→ | rplS (PRK05338)Ribosomal_L19 (pfam01245)→                                   |
| env-659  | JGI20160J14292_10003989        | - | 962   | 935   | RNA→ | rplS (PRK05338)Ribosomal_L19 (pfam01245)→                                   |
| env-660  | JGI20153J14295_10000826        | - | 7449  | 7422  | RNA→ | rplS (PRK05338)Ribosomal_L19 (pfam01245)→                                   |
| env-661  | JGI20153J14318_10000826        | - | 7449  | 7422  | RNA→ | rplS (PRK05338)Ribosomal_L19 (pfam01245)→                                   |
| env-662  | A09P04_1300_Sequence0000003336 | - | 2306  | 2279  | RNA→ | rplS (PRK05338)Ribosomal_L19 (pfam01245)→                                   |
| env-663  | NCBI_BBAY_READ_1106073089325   | - | 898   | 871   | RNA→ | rplS (PRK05338)Ribosomal_L19 (pfam01245)→ PRK08299 (PRK08299)→              |
| env-664  | P_1C_Liq_3_UnCty_1009162       | - | 198   | 171   | RNA→ | rplS (PRK05338)Ribosomal_L19 (pfam01245)→                                   |
| env-665  | P_1C_Liq_1_UnCty_1001883       | - | 3248  | 3221  | RNA→ | rplS (PRK05338)Ribosomal_L19 (pfam01245)→                                   |
| env-666  | P_1C_Liq_2_UnCty_1016458       | + | 549   | 576   | RNA→ |                                                                             |
| env-667  | NCBI_BBAY_READ_1106105074739   | + | 204   | 231   | RNA→ | rplS (PRK05338)Ribosomal_L19 (pfam01245)→ PRK08299 (PRK08299)→              |
| env-668  | CENJ01092743.1                 | - | 137   | 110   | RNA→ | rplS (PRK05338)Ribosomal_L19 (pfam01245)→                                   |
| env-669  | NCBI_BBAY_READ_1106073037205   | + | 277   | 304   | RNA→ | rplS (PRK05338)Ribosomal_L19 (pfam01245)→ PRK08299 (PRK08299)→              |
| env-670  | CERS01174496.1                 | - | 38    | 11    | RNA→ |                                                                             |
| env-671  | CEVW01141574.1                 | + | 1150  | 1177  | RNA→ | rplS (PRK05338)Ribosomal_L19 (pfam01245)→                                   |
| env-672  | CEUA01411516.1                 | + | 349   | 376   | RNA→ | rplS (PRK05338)Ribosomal_L19 (pfam01245)→                                   |
| env-673  | CEQM01197603.1                 | + | 392   | 419   | RNA→ | rplS (PRK05338)Ribosomal_L19 (pfam01245)→                                   |
| env-674  | CEQN01023522.1                 | + | 8459  | 8486  | RNA→ | rplS (PRK05338)Ribosomal_L19 (pfam01245)→                                   |
| env-675  | CEQO01070212.1                 | + | 1934  | 1961  | RNA→ | rplS (PRK05338)Ribosomal_L19 (pfam01245)→                                   |
| env-676  | CEVS01116577.1                 | - | 1094  | 1067  | RNA→ | rplS (PRK05338)Ribosomal_L19 (pfam01245)→                                   |
| env-677  | CEVP01261667.1                 | + | 2     | 29    | RNA→ | rplS (PRK05338)Ribosomal_L19 (pfam01245)→                                   |
| env-678  | JCVI_READ_1104230344964        | - | 901   | 874   | RNA→ | rplS (PRK05338)Ribosomal_L19 (pfam01245)→                                   |
| env-679  | CERW01179445.1                 | + | 13    | 40    | RNA→ | rplS (PRK05338)Ribosomal_L19 (pfam01245)→                                   |
| env-680  | DelMOWin2010_c10013017         | + | 4133  | 4160  | RNA→ | rplS (PRK05338)Ribosomal_L19 (pfam01245)→ PRK08299 (PRK08299)→              |
| env-681  | JGI20157J14317_10033833        | + | 996   | 1023  | RNA→ | rplS (PRK05338)Ribosomal_L19 (pfam01245)→ lcd (COG0538)PRK08299 (PRK08299)→ |
| env-682  | CEWH01233956.1                 | - | 272   | 245   | RNA→ | rplS (PRK05338)Ribosomal_L19 (pfam01245)→                                   |
| env-683  | JCVI_SCAF_1101668058877        | - | 1488  | 1461  | RNA→ | rplS (PRK05338)Ribosomal_L19 (pfam01245)→ PRK08299 (PRK08299)→              |
| env-684  | CENT01032076.1                 | - | 7307  | 7280  | RNA→ | rplS (PRK05338)Ribosomal_L19 (pfam01245)→                                   |



|          |                         |   |         |         |       |                                            |                                                   |
|----------|-------------------------|---|---------|---------|-------|--------------------------------------------|---------------------------------------------------|
| env-685  | CENG01052807.1          | + | 215     | 242     | RNA → | rplS (PRK05338)Ribosomal_L19 (pfam01245) → |                                                   |
| env-686  | CESE01258788.1          | + | 699     | 726     | RNA → | rplS (PRK05338)Ribosomal_L19 (pfam01245) → |                                                   |
| env-687  | CESJ01025343.1          | + | 3507    | 3534    | RNA → | rplS (PRK05338)Ribosomal_L19 (pfam01245) → |                                                   |
| Ean-11-1 | NZ_CBYE01000026.1       | - | 462809  | 462782  | RNA → | rplS (PRK05338)Ribosomal_L19 (pfam01245) → | PRK10546 (PRK10546)Nudix_Hydrolase_31 (cd04690) → |
| Eme-1-1  | NZ_AVCQ01000015.1       | + | 91308   | 91335   | RNA → | rplS (PRK05338)Ribosomal_L19 (pfam01245) → | PRK08999 (PRK08999)Nudix_Hydrolase_31 (cd04690) → |
| Ean-1-1  | NZ_JNCG01000035.1       | + | 11502   | 11529   | RNA → | rplS (PRK05338)Ribosomal_L19 (pfam01245) → | PRK08999 (PRK08999)Nudix_Hydrolase_31 (cd04690) → |
| Ean-1-2  | NZ_LFKT01000011.1       | - | 207966  | 207939  | RNA → | rplS (PRK05338)Ribosomal_L19 (pfam01245) → | PRK08999 (PRK08999)Nudix_Hydrolase_31 (cd04690) → |
| Ean-2-1  | NZ_AHHG01000005.1       | - | 82828   | 82801   | RNA → | rplS (PRK05338)Ribosomal_L19 (pfam01245) → | rplS (PRK05338)Ribosomal_L19 (pfam01245) →        |
| Ean-8-1  | NZ_CP007547.1           | + | 2704094 | 2704121 | RNA → | rplS (PRK05338)Ribosomal_L19 (pfam01245) → | PRK08999 (PRK08999)Nudix_Hydrolase_31 (cd04690) → |
| Ean-3-1  | NZ_CP006576.1           | + | 2075235 | 2075262 | RNA → | rplS (PRK05338)Ribosomal_L19 (pfam01245) → | PRK08999 (PRK08999)Nudix_Hydrolase_31 (cd04690) → |
| Ean-6-1  | NZ_ASYI01000012.1       | - | 167353  | 167326  | RNA → | rplS (PRK05338)Ribosomal_L19 (pfam01245) → | PRK08999 (PRK08999)Nudix_Hydrolase_31 (cd04690) → |
| Ean-5-1  | NZ_ASYK01000009.1       | + | 92547   | 92574   | RNA → | rplS (PRK05338)Ribosomal_L19 (pfam01245) → | PRK08999 (PRK08999)Nudix_Hydrolase_31 (cd04690) → |
| Ean-7-1  | NZ_ASYJ01000045.1       | - | 40079   | 40052   | RNA → | rplS (PRK05338)Ribosomal_L19 (pfam01245) → | PRK08999 (PRK08999)Nudix_Hydrolase_31 (cd04690) → |
| Ean-10-1 | NZ_ASYG01000013.1       | - | 186964  | 186937  | RNA → | rplS (PRK05338)Ribosomal_L19 (pfam01245) → | PRK08999 (PRK08999)Nudix_Hydrolase_31 (cd04690) → |
| Ean-9-1  | NZ_ASYF01000003.1       | + | 87715   | 87742   | RNA → | rplS (PRK05338)Ribosomal_L19 (pfam01245) → | PRK08999 (PRK08999)Nudix_Hydrolase_31 (cd04690) → |
| Ean-4-1  | NZ_ASYH01000003.1       | + | 87833   | 87860   | RNA → | rplS (PRK05338)Ribosomal_L19 (pfam01245) → | PRK08999 (PRK08999)Nudix_Hydrolase_31 (cd04690) → |
| Ean-1-3  | NZ_CCAC010000045.1      | + | 65940   | 65967   | RNA → | rplS (PRK05338)Ribosomal_L19 (pfam01245) → | PRK08999 (PRK08999)Nudix_Hydrolase_31 (cd04690) → |
| Ean-1-4  | NZ_CCAB010000079.1      | + | 65942   | 65969   | RNA → | rplS (PRK05338)Ribosomal_L19 (pfam01245) → | PRK08999 (PRK08999)Nudix_Hydrolase_31 (cd04690) → |
| Ean-12-1 | NZ_ANIW01000063.1       | - | 189045  | 189018  | RNA → | rplS (PRK05338)Ribosomal_L19 (pfam01245) → | PRK08999 (PRK08999)Nudix_Hydrolase_31 (cd04690) → |
| Eme-2-1  | NZ_BARD01000013.1       | - | 28567   | 28540   | RNA → | rplS (PRK05338)Ribosomal_L19 (pfam01245) → |                                                   |
| Eme-2-2  | NZ_ASAN01000023.1       | - | 28545   | 28518   | RNA → | rplS (PRK05338)Ribosomal_L19 (pfam01245) → |                                                   |
| env-688  | LPaug09P1610m.c1098533  | + | 95      | 122     | RNA → | rplS (PRK05338)Ribosomal_L19 (pfam01245) → |                                                   |
| env-689  | JGI20157J14317_10000212 | - | 34865   | 34838   | RNA → | rplS (PRK05338)Ribosomal_L19 (pfam01245) → | lcd (COG0538)PRK08299 (PRK08299) →                |
| env-690  | LPaug08P2610m.c1056069  | + | 194     | 221     | RNA → | rplS (PRK05338)Ribosomal_L19 (pfam01245) → |                                                   |
| env-691  | CESU01106244.1          | - | 3668    | 3641    | RNA → | rplS (PRK05338)Ribosomal_L19 (pfam01245) → | lcd (COG0538)PRK08299 (PRK08299) →                |
| env-692  | wf3_Contig2666          | + | 306     | 333     | RNA → | rplS (PRK05338)Ribosomal_L19 (pfam01245) → |                                                   |
| env-693  | JGI11876J14442_10791786 | - | 254     | 227     | RNA → | rplS (PRK05338)Ribosomal_L19 (pfam01245) → |                                                   |
| env-694  | DelMOSum2011.c10050897  | - | 758     | 731     | RNA → | rplS (PRK05338)Ribosomal_L19 (pfam01245) → |                                                   |
| env-695  | JGI20153J14295_10078886 | + | 823     | 850     | RNA → | rplS (PRK05338)Ribosomal_L19 (pfam01245) → |                                                   |
| env-696  | JGI20153J14318_10078886 | + | 823     | 850     | RNA → | rplS (PRK05338)Ribosomal_L19 (pfam01245) → |                                                   |
| env-697  | JGI20153J14295_10079231 | - | 179     | 152     | RNA → | rplS (PRK05338)Ribosomal_L19 (pfam01245) → |                                                   |
| env-698  | JGI20153J14318_10079231 | - | 179     | 152     | RNA → | rplS (PRK05338)Ribosomal_L19 (pfam01245) → |                                                   |
| env-699  | SRS043422_C2637862      | - | 319     | 292     | RNA → | rplS (PRK05338)Ribosomal_L19 (pfam01245) → |                                                   |
| env-700  | SRS013506_C1070803      | - | 155     | 128     | RNA → | rplS (PRK05338)Ribosomal_L19 (pfam01245) → |                                                   |
| env-701  | SRS058105_C1803295      | + | 211     | 238     | RNA → | rplS (PRK05338)Ribosomal_L19 (pfam01245) → |                                                   |
| env-702  | CEQS01154894.1          | - | 496     | 469     | RNA → | rplS (PRK05338)Ribosomal_L19 (pfam01245) → |                                                   |
| env-703  | CETA01127273.1          | + | 1082    | 1109    | RNA → | rplS (PRK05338)Ribosomal_L19 (pfam01245) → |                                                   |
| env-704  | 2236876010_0239681      | + | 214     | 241     | RNA → | rplS (PRK05338)Ribosomal_L19 (pfam01245) → |                                                   |
| env-705  | 2236876010_0451387      | + | 219     | 246     | RNA → | rplS (PRK05338)Ribosomal_L19 (pfam01245) → |                                                   |
| env-706  | JGI20154J14316_10000655 | + | 31048   | 31075   | RNA → | rplS (PRK05338)Ribosomal_L19 (pfam01245) → |                                                   |
| env-707  | JGI20157J14317_10157594 | + | 564     | 591     | RNA → |                                            |                                                   |
| env-708  | CESI01155210.1          | - | 333     | 306     | RNA → | rplS (PRK05338)Ribosomal_L19 (pfam01245) → |                                                   |
| env-709  | CESU01106790.1          | - | 246     | 219     | RNA → | rplS (PRK05338)Ribosomal_L19 (pfam01245) → |                                                   |
| Gfo-1-1  | NC_008571.1             | - | 690781  | 690754  | RNA → | rplS (PRK05338)Ribosomal_L19 (pfam01245) → |                                                   |
| env-710  | DelMOSum2010.c10261886  | - | 392     | 365     | RNA → | rplS (PRK05338)Ribosomal_L19 (pfam01245) → |                                                   |
| env-711  | JGI20154J14316_10114945 | - | 324     | 297     | RNA → | rplS (PRK05338)Ribosomal_L19 (pfam01245) → |                                                   |
| env-712  | JGI24025J20009_10008959 | - | 4721    | 4694    | RNA → | rplS (PRK05338)Ribosomal_L19 (pfam01245) → |                                                   |
| env-713  | JGI20154J14316_10088205 | + | 421     | 448     | RNA → | rplS (PRK05338)Ribosomal_L19 (pfam01245) → |                                                   |
| env-714  | JGI20156J14371_10005271 | - | 8543    | 8516    | RNA → | rplS (PRK05338)Ribosomal_L19 (pfam01245) → |                                                   |
| env-715  | CETR01024806.1          | + | 447     | 474     | RNA → | rplS (PRK05338)Ribosomal_L19 (pfam01245) → |                                                   |
| env-716  | CXWF01011805.1          | - | 863     | 836     | RNA → | rplS (PRK05338)Ribosomal_L19 (pfam01245) → | hypo →                                            |

|         |                             |   |         |         |      |                                                 |
|---------|-----------------------------|---|---------|---------|------|-------------------------------------------------|
| Cat-1-1 | NC_014230.1                 | - | 1512168 | 1512141 | RNA→ | rplS (PRK05338)Ribosomal_L19 (pfam01245)→       |
| env-717 | KGL_S1_ANT02.95m.c10343606  | + | 218     | 245     | RNA→ | rplS (PRK05338)Ribosomal_L19 (pfam01245)→       |
| env-718 | CEWR01292008.1              | - | 1347    | 1320    | RNA→ | rplS (PRK05338)Ribosomal_L19 (pfam01245)→       |
| env-719 | JGI24723J26617.10003020     | + | 3244    | 3271    | RNA→ | rplS (PRK05338)Ribosomal_L19 (pfam01245)→       |
| env-720 | SA_S1_NOR05.45m.c10349549   | + | 1       | 28      | RNA→ | rplS (PRK05338)Ribosomal_L19 (pfam01245)→       |
| env-721 | SA_S2_NOR15.50m.c10137904   | + | 11      | 38      | RNA→ | rplS (PRK05338)Ribosomal_L19 (pfam01245)→       |
| env-722 | SA_S1_NOR08.45m.c10597501   | - | 252     | 225     | RNA→ | hypo→ rplS (PRK05338)Ribosomal_L19 (pfam01245)→ |
| env-723 | KGL_S2_ANT04.2345m.c1082035 | + | 110     | 137     | RNA→ | rplS (PRK05338)Ribosomal_L19 (pfam01245)→       |
| env-724 | SA_S1_NOR08.45m.c10030363   | - | 789     | 762     | RNA→ | rplS (PRK05338)Ribosomal_L19 (pfam01245)→       |
| env-725 | KGL_S1_ANT02.95m.c10228337  | - | 406     | 379     | RNA→ | rplS (PRK05338)Ribosomal_L19 (pfam01245)→       |
| env-726 | JGI24024J18818.10002320     | + | 5869    | 5896    | RNA→ | rplS (PRK05338)Ribosomal_L19 (pfam01245)→       |
| env-727 | KVRMV2.100472114            | - | 249     | 222     | RNA→ | rplS (PRK05338)Ribosomal_L19 (pfam01245)→       |
| Tna-1-1 | NZ_JTDFV01000005.1          | + | 417562  | 417589  | RNA→ | rplS (PRK05338)Ribosomal_L19 (pfam01245)→       |
| Pbu-1-1 | NZ_AUDE01000014.1           | + | 155495  | 155522  | RNA→ | rplS (PRK05338)Ribosomal_L19 (pfam01245)→       |
| env-728 | KGL_S1_ANT01.95m.c10008907  | - | 926     | 899     | RNA→ | rplS (PRK05338)Ribosomal_L19 (pfam01245)→       |
| env-729 | KGL_S2_ANT06.2345m.c1016060 | - | 116     | 89      | RNA→ |                                                 |
| env-730 | KGL_S2_ANT04.2345m.c1006248 | - | 1101    | 1074    | RNA→ | rplS (PRK05338)Ribosomal_L19 (pfam01245)→       |
| env-731 | KGL_S1_ANT02.95m.c10014716  | - | 776     | 749     | RNA→ | rplS (PRK05338)Ribosomal_L19 (pfam01245)→       |
| env-732 | SA_S1_NOR05.45m.c10011330   | + | 878     | 905     | RNA→ | rplS (PRK05338)Ribosomal_L19 (pfam01245)→       |
| env-733 | SA_S2_NOR15.50m.c10030572   | + | 1601    | 1628    | RNA→ | rplS (PRK05338)Ribosomal_L19 (pfam01245)→       |
| env-734 | SA_S1_NOR08.45m.c10005809   | + | 1419    | 1446    | RNA→ | rplS (PRK05338)Ribosomal_L19 (pfam01245)→       |
| env-735 | KGL_S2_ANT04.2345m.c1312501 | - | 63      | 36      | RNA→ |                                                 |
| env-736 | SA_S2_NOR18.50m.1150586     | - | 220     | 193     | RNA→ | rplS (PRK05338)Ribosomal_L19 (pfam01245)→       |
| env-737 | KGL_S2_ANT04.2345m.c1135335 | + | 346     | 373     | RNA→ |                                                 |
| env-738 | KGL_S1_ANT02.95m.c10003498  | - | 1873    | 1846    | RNA→ | rplS (PRK05338)Ribosomal_L19 (pfam01245)→       |
| env-739 | TDF_MC_ARG02.113m.c1071523  | + | 280     | 307     | RNA→ | ←hypo                                           |
| env-740 | JGI24723J26617.10000135     | + | 62418   | 62445   | RNA→ | rplS (PRK05338)Ribosomal_L19 (pfam01245)→       |
| Ale-1-1 | NZ_BBNQ01000002.1           | + | 52311   | 52338   | RNA→ | rplS (PRK05338)Ribosomal_L19 (pfam01245)→       |
| Fic-1-1 | NZ_KN525716.1               | + | 641421  | 641448  | RNA→ | rplS (PRK05338)Ribosomal_L19 (pfam01245)→       |
| env-741 | KGL_S1_ANT01.95m.c10145689  | + | 78      | 105     | RNA→ | rplS (PRK05338)Ribosomal_L19 (pfam01245)→       |
| env-742 | KGL_S1_ANT01.95m.c10094256  | + | 98      | 125     | RNA→ | rplS (PRK05338)Ribosomal_L19 (pfam01245)→       |
| env-743 | BS_KBA_SWE12.21m.c10430184  | - | 261     | 234     | RNA→ | rplS (PRK05338)Ribosomal_L19 (pfam01245)→       |
| env-744 | SA_S1_NOR08.45m.c10000775   | + | 7919    | 7946    | RNA→ | rplS (PRK05338)Ribosomal_L19 (pfam01245)→       |
| env-745 | SA_S2_NOR15.50m.c10050530   | + | 950     | 977     | RNA→ | rplS (PRK05338)Ribosomal_L19 (pfam01245)→       |
| env-746 | SA_S1_NOR08.45m.c10816085   | + | 12      | 39      | RNA→ | hypo→ rplS (PRK05338)Ribosomal_L19 (pfam01245)→ |
| env-747 | SA_S2_NOR15.50m.c10122310   | + | 573     | 546     | RNA→ | rplS (PRK05338)Ribosomal_L19 (pfam01245)→       |
| env-748 | KGL_S1_ANT01.95m.c10075767  | + | 706     | 733     | RNA→ | rplS (PRK05338)Ribosomal_L19 (pfam01245)→       |
| env-749 | KGL_S1_ANT02.95m.c10035975  | - | 1547    | 1520    | RNA→ | rplS (PRK05338)Ribosomal_L19 (pfam01245)→       |
| env-750 | ElkS_mat_MD6A.1000445       | - | 13256   | 13229   | RNA→ | rplS (PRK05338)Ribosomal_L19 (pfam01245)→       |
| env-751 | JGI11876J14442.10004783     | - | 7288    | 7261    | RNA→ | rplS (PRK05338)Ribosomal_L19 (pfam01245)→       |
| env-752 | JGI24025J20009.10002662     | + | 3106    | 3133    | RNA→ | rplS (PRK05338)Ribosomal_L19 (pfam01245)→       |
| env-753 | JGI24724J26744.10000817     | - | 7312    | 7285    | RNA→ | rplS (PRK05338)Ribosomal_L19 (pfam01245)→       |
| env-754 | JGI24723J26617.10075658     | + | 845     | 872     | RNA→ | rplS (PRK05338)Ribosomal_L19 (pfam01245)→       |
| Ale-1-2 | NZ_BBN01000009.1            | - | 60878   | 60851   | RNA→ | hypo→ hypo→                                     |
| Wsp-1-1 | NZ_AP014583.1               | + | 217643  | 217670  | RNA→ | rplS (PRK05338)Ribosomal_L19 (pfam01245)→       |
| env-755 | DelMOSum2011.c10001390      | + | 13601   | 13628   | RNA→ | rplS (PRK05338)Ribosomal_L19 (pfam01245)→       |
| env-756 | BS_KBA_SWE12.21m.c10000778  | - | 8562    | 8535    | RNA→ | rplS (PRK05338)Ribosomal_L19 (pfam01245)→       |
| env-757 | BS_KBB_SWE26.205m.c1007554  | + | 1145    | 1172    | RNA→ | rplS (PRK05338)Ribosomal_L19 (pfam01245)→       |
| env-758 | BS_KBA_SWE07.21m.c1035024   | - | 470     | 443     | RNA→ | rplS (PRK05338)Ribosomal_L19 (pfam01245)→       |
| env-759 | BS_KBA_SWE21.205m.10000389  | - | 3010    | 2983    | RNA→ | rplS (PRK05338)Ribosomal_L19 (pfam01245)→       |
| env-760 | BS_KBA_SWE02.21m.10003979   | + | 3505    | 3532    | RNA→ | rplS (PRK05338)Ribosomal_L19 (pfam01245)→       |
| env-761 | SA_S1_NOR05.45m.c10404754   | - | 237     | 210     | RNA→ | rplS (PRK05338)Ribosomal_L19 (pfam01245)→       |

|          |                            |   |         |         |      |                                                 |
|----------|----------------------------|---|---------|---------|------|-------------------------------------------------|
| env-762  | SA_S1_NOR08_45m.c10035522  | + | 438     | 465     | RNA→ | rplS (PRK05338)Ribosomal_L19 (pfam01245)→       |
| env-763  | SA_S2_NOR15_50m.c10123094  | + | 331     | 358     | RNA→ | rplS (PRK05338)Ribosomal_L19 (pfam01245)→       |
| env-764  | SA_S2_NOR15_50m.c10622339  | - | 159     | 132     | RNA→ | rplS (PRK05338)Ribosomal_L19 (pfam01245)→       |
| env-765  | BS_KBA_SWE02_21m.10429781  | + | 153     | 180     | RNA→ | rplS (PRK05338)Ribosomal_L19 (pfam01245)→       |
| env-766  | JGI24723J26617_10219199    | + | 387     | 414     | RNA→ | hypo→                                           |
| Pda-1-1  | NZ_LXJO1000016.1           | - | 240145  | 240118  | RNA→ | rplS (PRK05338)Ribosomal_L19 (pfam01245)→       |
| Fba-7-1  | NZ_ALIH01000012.1          | + | 102806  | 102833  | RNA→ | rplS (PRK05338)Ribosomal_L19 (pfam01245)→       |
| env-767  | SA_S2_NOR13_50m.c1039248   | + | 208     | 235     | RNA→ | rplS (PRK05338)Ribosomal_L19 (pfam01245)→       |
| env-768  | SA_S1_NOR05_45m.c10021836  | - | 1574    | 1547    | RNA→ | rplS (PRK05338)Ribosomal_L19 (pfam01245)→       |
| env-769  | SA_S1_NOR08_45m.c10009016  | - | 4028    | 4001    | RNA→ | rplS (PRK05338)Ribosomal_L19 (pfam01245)→       |
| env-770  | SA_S2_NOR15_50m.c10078015  | - | 652     | 625     | RNA→ | rplS (PRK05338)Ribosomal_L19 (pfam01245)→       |
| env-771  | TB_PC08_66_10107273        | + | 586     | 613     | RNA→ | rplS (PRK05338)Ribosomal_L19 (pfam01245)→       |
| env-772  | BS_KBA_SWE12_21m.c10659546 | + | 51      | 78      | RNA→ | hypo→ rplS (PRK05338)Ribosomal_L19 (pfam01245)→ |
| env-773  | TB_PC08_64_1001738         | + | 2654    | 2681    | RNA→ | rplS (PRK05338)Ribosomal_L19 (pfam01245)→       |
| env-774  | TB_FS06_10DRAFT_1005018    | + | 3980    | 4007    | RNA→ | rplS (PRK05338)Ribosomal_L19 (pfam01245)→       |
| env-775  | TB_PC08_66_10001095        | + | 2574    | 2601    | RNA→ | rplS (PRK05338)Ribosomal_L19 (pfam01245)→       |
| env-776  | TB_GS10_10_10000237        | + | 23689   | 23716   | RNA→ | rplS (PRK05338)Ribosomal_L19 (pfam01245)→       |
| env-777  | TB_GS10_10_10014454        | - | 4102    | 4075    | RNA→ | rplS (PRK05338)Ribosomal_L19 (pfam01245)→       |
| env-778  | TB_GS09_5_10009762         | + | 4122    | 4149    | RNA→ | rplS (PRK05338)Ribosomal_L19 (pfam01245)→       |
| env-779  | TB_PC08_3_1001100          | - | 12933   | 12906   | RNA→ | rplS (PRK05338)Ribosomal_L19 (pfam01245)→       |
| env-780  | JGI24723J26617_10196616    | + | 45      | 72      | RNA→ | rplS (PRK05338)Ribosomal_L19 (pfam01245)→       |
| env-781  | JGI20151J14362_10404994    | + | 205     | 232     | RNA→ |                                                 |
| env-782  | JGI20155J14468_10372448    | + | 233     | 260     | RNA→ | rplS (PRK05338)Ribosomal_L19 (pfam01245)→       |
| env-783  | 3300001592_10000620        | - | 7266    | 7239    | RNA→ | rplS (PRK05338)Ribosomal_L19 (pfam01245)→       |
| env-784  | GBANfinal_contig20918      | + | 428     | 455     | RNA→ |                                                 |
| Tse-1-1  | NZ_JTDW01000005.1          | + | 217195  | 217222  | RNA→ | rplS (PRK05338)Ribosomal_L19 (pfam01245)→       |
| env-785  | SA_S1_NOR05_45m.c10008190  | - | 2600    | 2573    | RNA→ | rplS (PRK05338)Ribosomal_L19 (pfam01245)→       |
| env-786  | SA_S1_NOR08_45m.c10005913  | - | 109     | 82      | RNA→ | ←hypo                                           |
| env-787  | SA_S2_NOR15_50m.c10028300  | - | 1363    | 1336    | RNA→ | rplS (PRK05338)Ribosomal_L19 (pfam01245)→       |
| env-788  | CEQZ01051997.1             | - | 539     | 512     | RNA→ | rplS (PRK05338)Ribosomal_L19 (pfam01245)→       |
| env-789  | CERU01034551.1             | - | 2620    | 2593    | RNA→ | rplS (PRK05338)Ribosomal_L19 (pfam01245)→       |
| env-790  | JGI24025J20009_10046633    | + | 1505    | 1532    | RNA→ | rplS (PRK05338)Ribosomal_L19 (pfam01245)→       |
| Psp-4-1  | NZ_JUGU01000001.1          | + | 1535967 | 1535994 | RNA→ | rplS (PRK05338)Ribosomal_L19 (pfam01245)→       |
| Fsp-13-1 | NZ_ANLA01000019.1          | - | 4070    | 4043    | RNA→ | rplS (PRK05338)Ribosomal_L19 (pfam01245)→       |
| env-791  | CEQG01218791.1             | + | 295     | 322     | RNA→ | rplS (PRK05338)Ribosomal_L19 (pfam01245)→       |
| env-792  | CERD01073987.1             | + | 168     | 195     | RNA→ | rplS (PRK05338)Ribosomal_L19 (pfam01245)→       |
| env-793  | JGI11876J14442_10006999    | + | 7283    | 7310    | RNA→ | rplS (PRK05338)Ribosomal_L19 (pfam01245)→       |
| env-794  | JGI24723J26617_10011294    | + | 1041    | 1068    | RNA→ | rplS (PRK05338)Ribosomal_L19 (pfam01245)→       |
| Jpa-1-1  | NZ_BBNS01000022.1          | + | 50201   | 50228   | RNA→ | rplS (PRK05338)Ribosomal_L19 (pfam01245)→       |
| Pja-1-1  | NZ_JSWG01000016.1          | + | 19956   | 19983   | RNA→ | rplS (PRK05338)Ribosomal_L19 (pfam01245)→       |
| env-795  | BS_KBA_SWE02_21m.10588502  | + | 82      | 109     | RNA→ | rplS (PRK05338)Ribosomal_L19 (pfam01245)→       |
| env-796  | JGI11876J14442_10024983    | + | 2546    | 2573    | RNA→ | rplS (PRK05338)Ribosomal_L19 (pfam01245)→       |
| env-797  | KVRMV2_101767380           | + | 513     | 540     | RNA→ |                                                 |
| Pme-1-1  | NZ_JXJP01000027.1          | - | 9100    | 9073    | RNA→ | rplS (PRK05338)Ribosomal_L19 (pfam01245)→       |
| env-798  | SA_S1_NOR08_45m.c10161364  | - | 92      | 65      | RNA→ | ←hypo                                           |
| env-799  | ElkS_mat_MD6A_1031343      | - | 868     | 841     | RNA→ | rplS (PRK05338)Ribosomal_L19 (pfam01245)→       |
| Jpa-1-2  | NZ_BBNR01000023.1          | - | 12164   | 12137   | RNA→ | rplS (PRK05338)Ribosomal_L19 (pfam01245)→       |
| Jpa-1-3  | NZ_BBNY01000007.1          | + | 50312   | 50339   | RNA→ | rplS (PRK05338)Ribosomal_L19 (pfam01245)→       |
| env-800  | DelMOSum2010_c10067390     | - | 753     | 726     | RNA→ | rplS (PRK05338)Ribosomal_L19 (pfam01245)→       |
| env-801  | JGI20154J14316_10000408    | + | 38586   | 38613   | RNA→ | rplS (PRK05338)Ribosomal_L19 (pfam01245)→       |
| env-802  | JGI20160J14292_10000275    | + | 38583   | 38610   | RNA→ | rplS (PRK05338)Ribosomal_L19 (pfam01245)→       |
| env-803  | JGI20157J14317_10000632    | + | 26198   | 26225   | RNA→ | rplS (PRK05338)Ribosomal_L19 (pfam01245)→       |



|         |                             |   |         |         |                                                                                              |
|---------|-----------------------------|---|---------|---------|----------------------------------------------------------------------------------------------|
| env-804 | JGI24724J26744_10000045     | - | 14321   | 14294   | RNA → rplS (PRK05338)Ribosomal_L19 (pfam01245) →                                             |
| env-805 | JGI20157J14317_10002549     | + | 15190   | 15217   | RNA → rplS (PRK05338)Ribosomal_L19 (pfam01245) →                                             |
| env-806 | JGI24724J26744_10018347     | - | 3457    | 3430    | RNA → rplS (PRK05338)Ribosomal_L19 (pfam01245) →                                             |
| env-807 | JGI20153J14295_10046331     | - | 387     | 360     | RNA → rplS (PRK05338)Ribosomal_L19 (pfam01245) →                                             |
| env-808 | JGI20153J14318_10046331     | - | 387     | 360     | RNA → rplS (PRK05338)Ribosomal_L19 (pfam01245) →                                             |
| env-809 | SA_S1_NOR08_45m_c10278240   | - | 201     | 174     | RNA → rplS (PRK05338)Ribosomal_L19 (pfam01245) →                                             |
| env-810 | JGI20154J14316_10043409     | + | 1626    | 1653    | RNA → rplS (PRK05338)Ribosomal_L19 (pfam01245) →                                             |
| env-811 | JGI20157J14317_10008721     | - | 382     | 355     | RNA → rplS (PRK05338)Ribosomal_L19 (pfam01245) →                                             |
| env-812 | 2236876003_126260           | - | 373     | 346     | RNA → rplS (PRK05338)Ribosomal_L19 (pfam01245) → rplS (PRK05338)Ribosomal_L19 (pfam01245) →  |
| env-813 | JGI20151J14362_10005078     | - | 176     | 149     | RNA → rplS (PRK05338)Ribosomal_L19 (pfam01245) →                                             |
| env-814 | JGI20156J14371_10014418     | + | 4045    | 4072    | RNA → rplS (PRK05338)Ribosomal_L19 (pfam01245) →                                             |
| env-815 | JGI20160J14292_10615073     | - | 221     | 194     | RNA → rplS (PRK05338)Ribosomal_L19 (pfam01245) →                                             |
| env-816 | JGI20158J14315_10346697     | + | 250     | 277     | RNA → rplS (PRK05338)Ribosomal_L19 (pfam01245) →                                             |
| env-817 | CERM01179909.1              | - | 111     | 84      | RNA →                                                                                        |
| env-818 | JGI24025J20009_10452841     | - | 33      | 6       | RNA →                                                                                        |
| env-819 | LAZR01000052.1              | + | 53070   | 53097   | RNA → rplS (PRK05338)Ribosomal_L19 (pfam01245) →                                             |
| env-820 | JGI24723J26617_10040665     | + | 256     | 283     | RNA → rplS (PRK05338)Ribosomal_L19 (pfam01245) →                                             |
| env-821 | KGI_S2_ANT06_2345m_c1000032 | - | 27425   | 27398   | RNA → rplS (PRK05338)Ribosomal_L19 (pfam01245) →                                             |
| env-822 | KGI_S2_ANT04_2345m_c1056173 | + | 342     | 369     | RNA → rplS (PRK05338)Ribosomal_L19 (pfam01245) →                                             |
| env-823 | JGI24723J26617_10586359     | + | 61      | 88      | RNA → hypo → rplS (PRK05338)Ribosomal_L19 (pfam01245) →                                      |
| Msp-1-1 | NZ_JHZW01000003.1           | + | 1124580 | 1124607 | RNA → rplS (PRK05338)Ribosomal_L19 (pfam01245) →                                             |
| env-824 | JCVI_SCAF_1101668691466     | - | 995     | 968     | RNA → rplS (PRK05338)Ribosomal_L19 (pfam01245) → PRK08299 (PRK08299) →                       |
| Ksp-1-1 | NC_015496.1                 | - | 2413193 | 2413166 | RNA → rplS (PRK05338)Ribosomal_L19 (pfam01245) →                                             |
| env-825 | JCVI_SCAF_1096627091268     | - | 3048    | 3021    | RNA → rplS (PRK05338)Ribosomal_L19 (pfam01245) → PRK08299 (PRK08299) →                       |
| env-826 | CENF01107965.1              | + | 887     | 914     | RNA → rplS (PRK05338)Ribosomal_L19 (pfam01245) →                                             |
| env-827 | CENT01102842.1              | - | 285     | 258     | RNA → rplS (PRK05338)Ribosomal_L19 (pfam01245) →                                             |
| env-828 | CEOF01364937.1              | + | 159     | 186     | RNA → rplS (PRK05338)Ribosomal_L19 (pfam01245) → PRK08299 (PRK08299) →                       |
| env-829 | CESM01052670.1              | + | 1148    | 1175    | RNA → rplS (PRK05338)Ribosomal_L19 (pfam01245) → PRK08299 (PRK08299) →                       |
| env-830 | CETQ01129049.1              | - | 6191    | 6164    | RNA → rplS (PRK05338)Ribosomal_L19 (pfam01245) → PRK08299 (PRK08299) →                       |
| env-831 | CEVP01064703.1              | + | 384     | 411     | RNA → rplS (PRK05338)Ribosomal_L19 (pfam01245) → PRK08299 (PRK08299) →                       |
| env-832 | CEWG01096248.1              | - | 610     | 583     | RNA → rplS (PRK05338)Ribosomal_L19 (pfam01245) → PRK08299 (PRK08299) →                       |
| Ddo-1-1 | NZ_JSAQ01000001.1           | - | 3054937 | 3054910 | RNA → rplS (PRK05338)Ribosomal_L19 (pfam01245) →                                             |
| Dsp-1-1 | NZ_CP009301.1               | - | 3150857 | 3150830 | RNA → rplS (PRK05338)Ribosomal_L19 (pfam01245) →                                             |
| env-833 | JGI20152J14361_10000826     | - | 19357   | 19330   | RNA → rplS (PRK05338)Ribosomal_L19 (pfam01245) → Icd (COG0538)PRK08299 (PRK08299) →          |
| env-834 | JGI20151J14362_10000089     | + | 3724    | 3751    | RNA → rplS (PRK05338)Ribosomal_L19 (pfam01245) → Icd (COG0538)PRK08299 (PRK08299) →          |
| env-835 | JGI20156J14371_10084791     | - | 1014    | 987     | RNA → rplS (PRK05338)Ribosomal_L19 (pfam01245) → PRK08299 (PRK08299) →                       |
| env-836 | JGI20160J14292_10018282     | + | 2194    | 2221    | RNA → rplS (PRK05338)Ribosomal_L19 (pfam01245) → Icd (COG0538)PRK08299 (PRK08299) →          |
| env-837 | JGI20153J14295_10086476     | + | 211     | 238     | RNA → rplS (PRK05338)Ribosomal_L19 (pfam01245) → PRK08299 (PRK08299) →                       |
| env-838 | JGI20153J14318_10086476     | + | 211     | 238     | RNA → rplS (PRK05338)Ribosomal_L19 (pfam01245) → PRK08299 (PRK08299) →                       |
| env-839 | JGI20159J14440_10043604     | - | 1010    | 983     | RNA → rplS (PRK05338)Ribosomal_L19 (pfam01245) → PRK08299 (PRK08299) → PTZ00435 (PTZ00435) → |
| env-840 | JGI20154J14316_10041093     | + | 2028    | 2055    | RNA → ← hypo                                                                                 |
| env-841 | CERK01035414.1              | + | 22      | 49      | RNA → rplS (PRK05338)Ribosomal_L19 (pfam01245) → Icd (COG0538)PRK08299 (PRK08299) →          |
| env-842 | JGI20156J14371_10216168     | - | 35      | 8       | CarbopepD_reg_2 (pfam13715) →                                                                |
| env-843 | JGI20157J14317_10031126     | + | 717     | 744     | RNA → rplS (PRK05338)Ribosomal_L19 (pfam01245) → Icd (COG0538)PRK08299 (PRK08299) →          |
| env-844 | JGI20155J14468_10062223     | - | 1029    | 1002    | RNA → rplS (PRK05338)Ribosomal_L19 (pfam01245) → PRK08299 (PRK08299) →                       |
| env-845 | JGI20158J14315_10013594     | + | 3165    | 3192    | RNA → rplS (PRK05338)Ribosomal_L19 (pfam01245) → PRK08299 (PRK08299) →                       |
| env-846 | CESO01100995.1              | + | 886     | 913     | RNA →                                                                                        |
| env-847 | JGI20156J14371_10185819     | - | 95      | 68      | RNA →                                                                                        |
| env-848 | JGI20157J14317_10068544     | + | 454     | 481     | RNA → rplS (PRK05338)Ribosomal_L19 (pfam01245) → PRK08299 (PRK08299) →                       |
| env-849 | JGI20155J14468_10063464     | - | 1018    | 991     | RNA → rplS (PRK05338)Ribosomal_L19 (pfam01245) → PRK08299 (PRK08299) →                       |
| env-850 | 2236876010_0174543          | - | 309     | 282     | RNA → rplS (PRK05338)Ribosomal_L19 (pfam01245) → rplS (PRK05338)Ribosomal_L19 (pfam01245) →  |



|         |                                |   |       |       |                                                                                                                                                                                                                                                                                                                                                                                                           |
|---------|--------------------------------|---|-------|-------|-----------------------------------------------------------------------------------------------------------------------------------------------------------------------------------------------------------------------------------------------------------------------------------------------------------------------------------------------------------------------------------------------------------|
| env-851 | SI47jul10_100m.c1048908        | - | 444   | 417   | RNA → rplS (PRK05338)Ribosomal_L19 (pfam01245) →                                                                                                                                                                                                                                                                                                                                                          |
| env-852 | SI60aug11_100m.c1000269        | - | 14900 | 14873 | RNA → rplS (PRK05338)Ribosomal_L19 (pfam01245) → lcd (COG0538)PRK08299 (PRK08299) →<br>CirA (COG1629)PRK10064 (PRK10064)CarbopepD_reg_2 (pfam13715) → DUF4249 (pfam14054) →<br>murQ (PRK05441)SIS_Etherase (cd05007) → hypo → ThrS (COG0441)thrS (PRK00413)TGS (pfam02824) →<br>InfC (COG0290)InfC (PRK00028) → rpmI (PRK00172)Ribosomal_L35p (pfam01632) →<br>rplT (PRK05185)Ribosomal_L20 (pfam00453) → |
| env-853 | SI60aug11_100m.c1000276        | + | 16471 | 16498 | RNA → rplS (PRK05338)Ribosomal_L19 (pfam01245) → PRK08299 (PRK08299) →                                                                                                                                                                                                                                                                                                                                    |
| env-854 | SI34jun09_10m_1000015          | - | 14900 | 14873 | RNA → rplS (PRK05338)Ribosomal_L19 (pfam01245) → lcd (COG0538)PRK08299 (PRK08299) →<br>CirA (COG1629)PRK10064 (PRK10064)CarbopepD_reg_2 (pfam13715) → DUF4249 (pfam14054) →<br>murQ (PRK05441)SIS_Etherase (cd05007) → hypo → ThrS (COG0441)thrS (PRK00413)TGS (pfam02824) →<br>InfC (COG0290)InfC (PRK00028) → rpmI (PRK00172)Ribosomal_L35p (pfam01632) →<br>rplT (PRK05185)Ribosomal_L20 (pfam00453) → |
| env-855 | SI34jun09_120m_1001069         | + | 4978  | 5005  | RNA → rplS (PRK05338)Ribosomal_L19 (pfam01245) → lcd (COG0538)PRK08299 (PRK08299) →<br>CirA (COG1629)PRK10064 (PRK10064)CarbopepD_reg_2 (pfam13715) → DUF4249 (pfam14054) →<br>murQ (PRK05441)SIS_Etherase (cd05007) → hypo → tRNA_SAD (smart00863)ThrS (COG0441)TGS (pfam02824) →                                                                                                                        |
| env-856 | SI34jun09_135m_1006065         | - | 2206  | 2179  | RNA → rplS (PRK05338)Ribosomal_L19 (pfam01245) → lcd (COG0538)PRK08299 (PRK08299) →<br>CarbopepD_reg_2 (pfam13715) →                                                                                                                                                                                                                                                                                      |
| env-857 | SI36aug09_100m_1042710         | + | 81    | 108   | RNA → rplS (PRK05338)Ribosomal_L19 (pfam01245) →                                                                                                                                                                                                                                                                                                                                                          |
| env-858 | SI34jun09_100m_1000078         | + | 35369 | 35396 | RNA → rplS (PRK05338)Ribosomal_L19 (pfam01245) → lcd (COG0538)PRK08299 (PRK08299) →<br>PRK10064 (PRK10064)Plug (pfam07715)CarbopepD_reg_2 (pfam13715) →                                                                                                                                                                                                                                                   |
| env-859 | SI48aug10_100m_1000414         | - | 12190 | 12163 | RNA → rplS (PRK05338)Ribosomal_L19 (pfam01245) → lcd (COG0538)PRK08299 (PRK08299) →<br>CirA (COG1629)PRK10064 (PRK10064)CarbopepD_reg_2 (pfam13715) → DUF4249 (pfam14054) →<br>murQ (PRK05441)SIS_Etherase (cd05007) → hypo → ThrS (COG0441)thrS (PRK00413)TGS (pfam02824) →<br>InfC (COG0290)InfC (PRK00028) → rpmI (PRK00172)Ribosomal_L35p (pfam01632) →<br>rplT (PRK05185)Ribosomal_L20 (pfam00453) → |
| env-860 | CERW01115635.1                 | - | 4803  | 4776  | RNA → hypo → rplS (PRK05338)Ribosomal_L19 (pfam01245) → lcd (COG0538)PRK08299 (PRK08299) →<br>CirA (COG1629)Plug (pfam07715)CarbopepD_reg_2 (pfam13715)OMP_b-brl.3 (pfam14905) →<br>DUF4249 (pfam14054) →                                                                                                                                                                                                 |
| env-861 | JCVI_READ_1105430340115        | + | 255   | 282   | RNA → rplS (PRK05338)Ribosomal_L19 (pfam01245) → PRK08299 (PRK08299) →                                                                                                                                                                                                                                                                                                                                    |
| env-862 | DelMOSum2010_c10759857         | - | 116   | 89    | RNA → hypo →                                                                                                                                                                                                                                                                                                                                                                                              |
| env-863 | DelMOSum2011_c10081878         | + | 954   | 981   | RNA → rplS (PRK05338)Ribosomal_L19 (pfam01245) →                                                                                                                                                                                                                                                                                                                                                          |
| env-864 | SI48aug10_10m.c1014029         | + | 16    | 43    | RNA → rplS (PRK05338)Ribosomal_L19 (pfam01245) → PRK08299 (PRK08299) →                                                                                                                                                                                                                                                                                                                                    |
| env-865 | PML_READ_01299143              | + | 134   | 161   | RNA →                                                                                                                                                                                                                                                                                                                                                                                                     |
| env-866 | 2236876010_0240919             | + | 325   | 352   | RNA →                                                                                                                                                                                                                                                                                                                                                                                                     |
| env-867 | JGI20157J14317_10001218        | - | 14738 | 14711 | RNA → rplS (PRK05338)Ribosomal_L19 (pfam01245) → lcd (COG0538)PRK08299 (PRK08299) →<br>CirA (COG1629)PRK10064 (PRK10064)CarbopepD_reg_2 (pfam13715) → DUF4249 (pfam14054) →<br>murQ (PRK05441)SIS_Etherase (cd05007) → hypo → ThrS (COG0441)thrS (PRK00413)TGS (pfam02824) →<br>InfC (COG0290)InfC (PRK00028) → rpmI (PRK00172)Ribosomal_L35p (pfam01632) →<br>rplT (PRK05185)Ribosomal_L20 (pfam00453) → |
| env-868 | NCBI_BBAY_READ_1106105285287   | + | 249   | 276   | RNA → rplS (PRK05338)Ribosomal_L19 (pfam01245) → PRK08299 (PRK08299) →                                                                                                                                                                                                                                                                                                                                    |
| env-869 | DelMOSum2010_c10181064         | - | 71    | 44    | RNA →                                                                                                                                                                                                                                                                                                                                                                                                     |
| env-870 | DelMOSum2010_c10631757         | - | 229   | 202   | RNA → hypo → rplS (PRK05338)Ribosomal_L19 (pfam01245) →                                                                                                                                                                                                                                                                                                                                                   |
| env-871 | SI36aug09_100m_1082667         | - | 291   | 264   | RNA → rplS (PRK05338)Ribosomal_L19 (pfam01245) →                                                                                                                                                                                                                                                                                                                                                          |
| env-872 | SI34jun09_100m_1043923         | - | 717   | 690   | RNA → rplS (PRK05338)Ribosomal_L19 (pfam01245) → PRK08299 (PRK08299) →                                                                                                                                                                                                                                                                                                                                    |
| env-873 | JGI20156J14371_10000105        | - | 20092 | 20065 | RNA → rplS (PRK05338)Ribosomal_L19 (pfam01245) → lcd (COG0538)PRK08299 (PRK08299) →                                                                                                                                                                                                                                                                                                                       |
| env-874 | JGI20160J14292_10261268        | - | 452   | 425   | RNA → rplS (PRK05338)Ribosomal_L19 (pfam01245) →                                                                                                                                                                                                                                                                                                                                                          |
| env-875 | JGI20155J14468_10000942        | - | 20092 | 20065 | RNA → rplS (PRK05338)Ribosomal_L19 (pfam01245) → lcd (COG0538)PRK08299 (PRK08299) →                                                                                                                                                                                                                                                                                                                       |
| env-876 | CERI01041892.1                 | - | 67    | 40    | RNA →                                                                                                                                                                                                                                                                                                                                                                                                     |
| env-877 | CETY01197871.1                 | + | 10782 | 10809 | RNA → rplS (PRK05338)Ribosomal_L19 (pfam01245) → lcd (COG0538)PRK08299 (PRK08299) →                                                                                                                                                                                                                                                                                                                       |
| env-878 | CEWO01125901.1                 | - | 186   | 159   | RNA → rplS (PRK05338)Ribosomal_L19 (pfam01245) →                                                                                                                                                                                                                                                                                                                                                          |
| env-879 | F10SI0310a_Sequence0000036835  | - | 83    | 56    | RNA →                                                                                                                                                                                                                                                                                                                                                                                                     |
| env-880 | F10SI03100a_Sequence0000055496 | + | 990   | 1017  | RNA →                                                                                                                                                                                                                                                                                                                                                                                                     |
| env-881 | CETY01434901.1                 | + | 139   | 166   | RNA → rplS (PRK05338)Ribosomal_L19 (pfam01245) → PRK08299 (PRK08299) →                                                                                                                                                                                                                                                                                                                                    |
| env-882 | JGI20154J14316_10005236        | + | 6892  | 6919  | RNA → rplS (PRK05338)Ribosomal_L19 (pfam01245) → lcd (COG0538)PRK08299 (PRK08299) →                                                                                                                                                                                                                                                                                                                       |
| env-883 | JGI20155J14468_10106440        | + | 886   | 913   | RNA →                                                                                                                                                                                                                                                                                                                                                                                                     |

|         |                              |   |       |       |                                                                                                                                                                                                                                                                                                                                           |
|---------|------------------------------|---|-------|-------|-------------------------------------------------------------------------------------------------------------------------------------------------------------------------------------------------------------------------------------------------------------------------------------------------------------------------------------------|
| env-884 | SI60aug11_100m_c1103194      | + | 244   | 271   | RNA → rplS (PRK05338)Ribosomal_L19 (pfam01245) →                                                                                                                                                                                                                                                                                          |
| env-885 | SI48aug10_10m_c1005211       | - | 1208  | 1181  | RNA → rplS (PRK05338)Ribosomal_L19 (pfam01245) → PRK08299 (PRK08299) →                                                                                                                                                                                                                                                                    |
| env-886 | SI34jun09_10m_1014940        | + | 226   | 253   | RNA → rplS (PRK05338)Ribosomal_L19 (pfam01245) → PRK08299 (PRK08299) →                                                                                                                                                                                                                                                                    |
| env-887 | SI34jun09_120m_1058221       | - | 543   | 516   | RNA → rplS (PRK05338)Ribosomal_L19 (pfam01245) → PRK08299 (PRK08299) →                                                                                                                                                                                                                                                                    |
| env-888 | SI34jun09_135m_1193559       | + | 232   | 259   | RNA →                                                                                                                                                                                                                                                                                                                                     |
| env-889 | JGI20151J14362_10577636      | - | 201   | 174   | RNA → rplS (PRK05338)Ribosomal_L19 (pfam01245) →                                                                                                                                                                                                                                                                                          |
| env-890 | JGI20157J14317_10006145      | - | 8612  | 8585  | RNA → rplS (PRK05338)Ribosomal_L19 (pfam01245) → lcd (COG0538)PRK08299 (PRK08299) →                                                                                                                                                                                                                                                       |
| env-891 | SI48aug10_100m_1000052       | + | 30997 | 31024 | RNA → rplS (PRK05338)Ribosomal_L19 (pfam01245) → lcd (COG0538)PRK08299 (PRK08299) →                                                                                                                                                                                                                                                       |
| env-892 | JGI20157J14317_10006052      | - | 4424  | 4397  | RNA → rplS (PRK05338)Ribosomal_L19 (pfam01245) → lcd (COG0538)PRK08299 (PRK08299) →                                                                                                                                                                                                                                                       |
| env-893 | 2236876001_145660            | - | 390   | 363   | RNA → rplS (PRK05338)Ribosomal_L19 (pfam01245) →                                                                                                                                                                                                                                                                                          |
| env-894 | JCVI_SCAF_1096627080844      | + | 1234  | 1261  | RNA → rplS (PRK05338)Ribosomal_L19 (pfam01245) → lcd (COG0538)PRK08299 (PRK08299) →<br>PRK10064 (PRK10064) Plug (pfam07715)CarbopepD_reg.2 (pfam13715) →                                                                                                                                                                                  |
| env-895 | DelMOWin2010_c10059332       | + | 366   | 393   | RNA → rplS (PRK05338)Ribosomal_L19 (pfam01245) → PRK08299 (PRK08299) →                                                                                                                                                                                                                                                                    |
| env-896 | CENF01410679.1               | + | 457   | 484   | RNA → rplS (PRK05338)Ribosomal_L19 (pfam01245) → PRK08299 (PRK08299) →                                                                                                                                                                                                                                                                    |
| env-897 | CENT01071942.1               | + | 440   | 467   | RNA → rplS (PRK05338)Ribosomal_L19 (pfam01245) → lcd (COG0538)PRK08299 (PRK08299) →<br>PRK10064 (PRK10064) TonB_dep_Rec (pfam00593) Plug (pfam07715)CarbopepD_reg.2 (pfam13715) OMP_b-brl_3 (pfam13715) →<br>DUF4249 (pfam14054) → murQ (PRK05441)SIS_Etherase (cd05007) → hypo →                                                         |
| env-898 | CEOP01008385.1               | - | 7910  | 7883  | RNA → rplS (PRK05338)Ribosomal_L19 (pfam01245) → lcd (COG0538)PRK08299 (PRK08299) →<br>PRK10064 (PRK10064) TonB_dep_Rec (pfam00593) Plug (pfam07715)CarbopepD_reg.2 (pfam13715) OMP_b-brl_3 (pfam13715) →<br>DUF4249 (pfam14054) → murQ (PRK05441)SIS_Etherase (cd05007) → hypo →<br>TGS_ThrRS_N (cd01667)ThrS (COG0441)thrS (PRK00413) → |
| env-899 | CERW01135648.1               | + | 187   | 214   | RNA → rplS (PRK05338)Ribosomal_L19 (pfam01245) → PRK08299 (PRK08299) →                                                                                                                                                                                                                                                                    |
| env-900 | CESF01017371.1               | - | 1161  | 1134  | RNA → rplS (PRK05338)Ribosomal_L19 (pfam01245) → PRK08299 (PRK08299) →                                                                                                                                                                                                                                                                    |
| env-901 | CESM01027070.1               | + | 3699  | 3726  | RNA → rplS (PRK05338)Ribosomal_L19 (pfam01245) → lcd (COG0538)PRK08299 (PRK08299) →<br>PRK10064 (PRK10064) TonB_dep_Rec (pfam00593) Plug (pfam07715)CarbopepD_reg.2 (pfam13715) OMP_b-brl_3 (pfam13715) →<br>DUF4249 (pfam14054) →                                                                                                        |
| env-902 | CESO01004564.1               | + | 1551  | 1578  | RNA → rplS (PRK05338)Ribosomal_L19 (pfam01245) → lcd (COG0538)PRK08299 (PRK08299) →<br>PRK10064 (PRK10064) TonB_dep_Rec (pfam00593) Plug (pfam07715)CarbopepD_reg.2 (pfam13715) OMP_b-brl_3 (pfam13715) →<br>DUF4249 (pfam14054) → murQ (PRK05441)SIS_Etherase (cd05007) →                                                                |
| env-903 | CEVS01180975.1               | - | 1250  | 1223  | RNA → rplS (PRK05338)Ribosomal_L19 (pfam01245) → PRK08299 (PRK08299) →                                                                                                                                                                                                                                                                    |
| env-904 | CEVU01367992.1               | - | 1403  | 1376  | RNA → rplS (PRK05338)Ribosomal_L19 (pfam01245) → PRK08299 (PRK08299) →                                                                                                                                                                                                                                                                    |
| env-905 | CEWG01218791.1               | - | 8217  | 8190  | RNA → rplS (PRK05338)Ribosomal_L19 (pfam01245) → lcd (COG0538)PRK08299 (PRK08299) →<br>PRK10064 (PRK10064) TonB_dep_Rec (pfam00593) Plug (pfam07715)CarbopepD_reg.2 (pfam13715) OMP_b-brl_3 (pfam13715) →<br>DUF4249 (pfam14054) → murQ (PRK05441)SIS_Etherase (cd05007) → hypo →<br>TGS_ThrRS_N (cd01667)ThrS (COG0441)thrS (PRK00413) → |
| env-906 | NCBI_READ_1112493833240      | + | 25    | 52    | RNA → rplS (PRK05338)Ribosomal_L19 (pfam01245) → PRK08299 (PRK08299) →                                                                                                                                                                                                                                                                    |
| env-907 | CESE01052974.1               | + | 1100  | 1127  | RNA → rplS (PRK05338)Ribosomal_L19 (pfam01245) → PRK08299 (PRK08299) →                                                                                                                                                                                                                                                                    |
| env-908 | CESJ01033277.1               | + | 1112  | 1139  | RNA → rplS (PRK05338)Ribosomal_L19 (pfam01245) → PRK08299 (PRK08299) →                                                                                                                                                                                                                                                                    |
| env-909 | CEST01137492.1               | + | 594   | 621   | RNA → hypo →                                                                                                                                                                                                                                                                                                                              |
| env-910 | DelMOSum2011_c10014222       | + | 400   | 427   | RNA → rplS (PRK05338)Ribosomal_L19 (pfam01245) → lcd (COG0538)PRK08299 (PRK08299) →<br>PRK10064 (PRK10064) TonB_dep_Rec (pfam00593) Plug (pfam07715)CarbopepD_reg.2 (pfam13715) →                                                                                                                                                         |
| env-911 | DelMOSum2011_c10064936       | + | 400   | 427   | RNA → rplS (PRK05338)Ribosomal_L19 (pfam01245) → PRK08299 (PRK08299) →                                                                                                                                                                                                                                                                    |
| env-912 | CESU01016977.1               | - | 4567  | 4540  | RNA → rplS (PRK05338)Ribosomal_L19 (pfam01245) → lcd (COG0538)PRK08299 (PRK08299) →<br>PRK10064 (PRK10064) TonB_dep_Rec (pfam00593) Plug (pfam07715)CarbopepD_reg.2 (pfam13715) →<br>DUF4249 (pfam14054) →                                                                                                                                |
| env-913 | LPjun09P1210m_c1060279       | - | 297   | 270   | RNA → rplS (PRK05338)Ribosomal_L19 (pfam01245) →                                                                                                                                                                                                                                                                                          |
| env-914 | DelMOSum2010_c10056893       | - | 591   | 564   | RNA → rplS (PRK05338)Ribosomal_L19 (pfam01245) → PRK08299 (PRK08299) →                                                                                                                                                                                                                                                                    |
| env-915 | PML_READ_00864574            | + | 212   | 239   | RNA →                                                                                                                                                                                                                                                                                                                                     |
| env-916 | CEPZ01008967.1               | - | 10616 | 10589 | RNA → rplS (PRK05338)Ribosomal_L19 (pfam01245) →                                                                                                                                                                                                                                                                                          |
| env-917 | SRS015278_C1831448           | + | 482   | 509   | RNA → rplS (PRK05338)Ribosomal_L19 (pfam01245) →                                                                                                                                                                                                                                                                                          |
| env-918 | SRS024649_C3604464           | + | 494   | 521   | RNA →                                                                                                                                                                                                                                                                                                                                     |
| Fba-4-1 | NZ_ABH101000004.1            | + | 89845 | 89872 | RNA → rplS (PRK05338)Ribosomal_L19 (pfam01245) → rplS (PRK05338)Ribosomal_L19 (pfam01245) →                                                                                                                                                                                                                                               |
| env-919 | NCBI_BBAY_READ_1105731251167 | - | 848   | 821   | RNA → rplS (PRK05338)Ribosomal_L19 (pfam01245) → PRK08299 (PRK08299) →                                                                                                                                                                                                                                                                    |

|         |                             |   |        |        |      |                                                                                            |
|---------|-----------------------------|---|--------|--------|------|--------------------------------------------------------------------------------------------|
| env-920 | CESI01073316.1              | - | 585    | 558    | RNA→ | rplS (PRK05338)Ribosomal_L19 (pfam01245)→                                                  |
| env-921 | CESU01070521.1              | - | 784    | 757    | RNA→ | rplS (PRK05338)Ribosomal_L19 (pfam01245)→                                                  |
| env-922 | Antartic2_1088051           | - | 150    | 123    | RNA→ | hypo→                                                                                      |
| env-923 | 2236876011_158566           | + | 32     | 59     | RNA→ | rplS (PRK05338)Ribosomal_L19 (pfam01245)→                                                  |
| env-924 | 2236876009_152251           | - | 387    | 360    | RNA→ | rplS (PRK05338)Ribosomal_L19 (pfam01245)→                                                  |
| env-925 | JGI24723J26617_10000165     | - | 51447  | 51420  | RNA→ | rplS (PRK05338)Ribosomal_L19 (pfam01245)→                                                  |
| env-926 | JGI24024J18818_10020607     | - | 2387   | 2360   | RNA→ | rplS (PRK05338)Ribosomal_L19 (pfam01245)→                                                  |
| env-927 | LGVF01309355.1              | + | 1747   | 1774   | RNA→ | rplS (PRK05338)Ribosomal_L19 (pfam01245)→                                                  |
| env-928 | TDF_MC_ARG01_113m_c1056626  | - | 258    | 231    | RNA→ | hypo→ rplS (PRK05338)Ribosomal_L19 (pfam01245)→                                            |
| Ffi-1-1 | NZ_AUDM01000017.1           | - | 30024  | 29997  | RNA→ | rplS (PRK05338)Ribosomal_L19 (pfam01245)→                                                  |
| env-929 | KGL_S1_ANT01_95m_c10018333  | - | 2431   | 2404   | RNA→ | rplS (PRK05338)Ribosomal_L19 (pfam01245)→ hypo→                                            |
| env-930 | KGI_S2_ANT04_2345m_c1018541 | + | 769    | 796    | RNA→ | rplS (PRK05338)Ribosomal_L19 (pfam01245)→                                                  |
| env-931 | KGI_S1_ANT02_95m_c10051843  | - | 1116   | 1089   | RNA→ | rplS (PRK05338)Ribosomal_L19 (pfam01245)→                                                  |
| Fba-8-1 | NZ_AFPK01000067.1           | + | 24608  | 24635  | RNA→ | rplS (PRK05338)Ribosomal_L19 (pfam01245)→ rplS (PRK05338)Ribosomal_L19 (pfam01245)→        |
| env-932 | SA_S2_NOR18_50m_1003007     | + | 2084   | 2111   | RNA→ | rplS (PRK05338)Ribosomal_L19 (pfam01245)→                                                  |
| env-933 | SA_S2_NOR13_50m_c1000705    | + | 3191   | 3218   | RNA→ | rplS (PRK05338)Ribosomal_L19 (pfam01245)→                                                  |
| env-934 | SA_S1_NOR05_45m_c10004569   | - | 1775   | 1748   | RNA→ | rplS (PRK05338)Ribosomal_L19 (pfam01245)→ hypo→                                            |
| env-935 | SA_S1_NOR08_45m_c10000086   | + | 11623  | 11650  | RNA→ | rplS (PRK05338)Ribosomal_L19 (pfam01245)→                                                  |
| env-936 | SA_S2_NOR15_50m_c10001702   | + | 8902   | 8929   | RNA→ | rplS (PRK05338)Ribosomal_L19 (pfam01245)→                                                  |
| env-937 | SA_S1_NOR02_45m_c1057368    | + | 341    | 368    | RNA→ | ←hypo                                                                                      |
| env-938 | JGI20157J14317_10496092     | + | 266    | 293    | RNA→ |                                                                                            |
| Cca-1-1 | NZ_CDO01000142.1            | + | 52361  | 52388  | RNA→ | rplS (PRK05338)Ribosomal_L19 (pfam01245)→                                                  |
| Cca-1-2 | NZ_CDOH01000131.1           | - | 1703   | 1676   | RNA→ | rplS (PRK05338)Ribosomal_L19 (pfam01245)→                                                  |
| Cca-1-3 | NZ_CDOL01000061.1           | + | 11126  | 11153  | RNA→ | rplS (PRK05338)Ribosomal_L19 (pfam01245)→                                                  |
| env-939 | JGI25913J50563_1214264      | - | 110    | 83     | RNA→ | hypo→                                                                                      |
| env-940 | KVRMV2_100094982            | + | 521    | 548    | RNA→ |                                                                                            |
| env-941 | KVRMV2_100096620            | + | 400    | 427    | RNA→ | rplS (PRK05338)Ribosomal_L19 (pfam01245)→                                                  |
| env-942 | KVRMV2_102215955            | + | 253    | 280    | RNA→ | rplS (PRK05338)Ribosomal_L19 (pfam01245)→                                                  |
| Emi-1-1 | NZ_CP011059.1               | - | 192039 | 192012 | RNA→ | rplS (PRK05338)Ribosomal_L19 (pfam01245)→ Nudix_Hydrolase_31 (cd04690)NUDIX_4 (pfam14815)→ |
| Wma-1-1 | NZ_CCMH01000053.1           | - | 16198  | 16171  | RNA→ | rplS (PRK05338)Ribosomal_L19 (pfam01245)→                                                  |
| env-943 | P_2C_Liq_1_UnCty_1237069    | + | 47     | 74     | RNA→ | rplS (PRK05338)Ribosomal_L19 (pfam01245)→                                                  |
| env-944 | P_1C_Liq_1_UnCty_1029662    | + | 212    | 239    | RNA→ | rplS (PRK05338)Ribosomal_L19 (pfam01245)→                                                  |
| env-945 | CESF01128812.1              | - | 1808   | 1781   | RNA→ | rplS (PRK05338)Ribosomal_L19 (pfam01245)→ PRK08299 (PRK08299)→                             |
| env-946 | CES001022412.1              | + | 665    | 692    | RNA→ | rplS (PRK05338)Ribosomal_L19 (pfam01245)→ PRK08299 (PRK08299)→                             |
| env-947 | CEOP01454573.1              | + | 1970   | 1997   | RNA→ | rplS (PRK05338)Ribosomal_L19 (pfam01245)→                                                  |
| env-948 | CEWO01198114.1              | + | 1577   | 1604   | RNA→ | rplS (PRK05338)Ribosomal_L19 (pfam01245)→ PRK08299 (PRK08299)→                             |
| env-949 | CERI01052802.1              | + | 1424   | 1451   | RNA→ | rplS (PRK05338)Ribosomal_L19 (pfam01245)→                                                  |
| env-950 | CETY01032138.1              | + | 785    | 812    | RNA→ |                                                                                            |
| env-951 | JGI20152J14361_10010744     | - | 1575   | 1548   | RNA→ | rplS (PRK05338)Ribosomal_L19 (pfam01245)→                                                  |
| env-952 | JGI20151J14362_10033063     | + | 947    | 974    | RNA→ | rplS (PRK05338)Ribosomal_L19 (pfam01245)→                                                  |
| env-953 | JGI20157J14317_10018646     | + | 2505   | 2532   | RNA→ | rplS (PRK05338)Ribosomal_L19 (pfam01245)→                                                  |
| env-954 | 2236876010_0376568          | + | 129    | 156    | RNA→ | rplS (PRK05338)Ribosomal_L19 (pfam01245)→                                                  |
| env-955 | 2236876010_0173724          | + | 243    | 270    | RNA→ | hypo→                                                                                      |
| env-956 | JGI20156J14371_10012147     | + | 2603   | 2630   | RNA→ | rplS (PRK05338)Ribosomal_L19 (pfam01245)→                                                  |
| env-957 | 2236876010_0038631          | + | 246    | 273    | RNA→ | rplS (PRK05338)Ribosomal_L19 (pfam01245)→ hypo→                                            |
| env-958 | 2236876010_0065632          | - | 228    | 201    | RNA→ | rplS (PRK05338)Ribosomal_L19 (pfam01245)→                                                  |
| env-959 | DelMOWin2010_c10348025      | - | 98     | 71     | RNA→ |                                                                                            |
| env-960 | JGI20154J14316_10016038     | + | 2890   | 2917   | RNA→ | rplS (PRK05338)Ribosomal_L19 (pfam01245)→                                                  |
| env-961 | JGI20160J14292_10020040     | + | 2336   | 2363   | RNA→ | rplS (PRK05338)Ribosomal_L19 (pfam01245)→                                                  |
| env-962 | JGI20153J14295_10012810     | + | 2889   | 2916   | RNA→ | rplS (PRK05338)Ribosomal_L19 (pfam01245)→                                                  |
| env-963 | JGI20153J14318_10012810     | + | 2889   | 2916   | RNA→ | rplS (PRK05338)Ribosomal_L19 (pfam01245)→                                                  |
| env-964 | JGI20159J14440_10003663     | - | 8129   | 8102   | RNA→ | rplS (PRK05338)Ribosomal_L19 (pfam01245)→                                                  |



|          |                            |   |         |         |     |   |                                          |   |
|----------|----------------------------|---|---------|---------|-----|---|------------------------------------------|---|
| env-965  | JGI20159J14440.10003889    | + | 6429    | 6456    | RNA | → | rplS (PRK05338)Ribosomal_L19 (pfam01245) | → |
| env-966  | JGI20155J14468.10099882    | - | 830     | 803     | RNA | → | rplS (PRK05338)Ribosomal_L19 (pfam01245) | → |
| env-967  | JGI20158J14315.10032857    | - | 673     | 646     | RNA | → | rplS (PRK05338)Ribosomal_L19 (pfam01245) | → |
| env-968  | 2236876010.0093675         | + | 11      | 38      | RNA | → | rplS (PRK05338)Ribosomal_L19 (pfam01245) | → |
| env-969  | 2236876010.0167969         | + | 65      | 92      | RNA | → | rplS (PRK05338)Ribosomal_L19 (pfam01245) | → |
| env-970  | DelMOSum2011_c10093048     | - | 801     | 774     | RNA | → | rplS (PRK05338)Ribosomal_L19 (pfam01245) | → |
| env-971  | DelMOSum2011_c10001686     | - | 6899    | 6872    | RNA | → | rplS (PRK05338)Ribosomal_L19 (pfam01245) | → |
| env-972  | SI34jun09_10m_1096433      | - | 156     | 129     | RNA | → | rplS (PRK05338)Ribosomal_L19 (pfam01245) | → |
| env-973  | CERM01034613.1             | - | 664     | 637     | RNA | → | rplS (PRK05338)Ribosomal_L19 (pfam01245) | → |
| env-974  | 2236876009.179996          | - | 147     | 120     | RNA | → | rplS (PRK05338)Ribosomal_L19 (pfam01245) | → |
| env-975  | 2236876010.0260662         | + | 145     | 172     | RNA | → |                                          |   |
| env-976  | NCBI_READ_1112749174365    | + | 12      | 39      | RNA | → | rplS (PRK05338)Ribosomal_L19 (pfam01245) | → |
| env-977  | P_2C_Liq_3_UnCty_100987    | + | 228     | 257     | RNA | → | rplS (PRK05338)Ribosomal_L19 (pfam01245) | → |
| env-978  | P_2C_Liq_1_UnCty_1005821   | + | 3392    | 3421    | RNA | → | hypo                                     | → |
| env-979  | P_2C_Liq_2_UnCty_1021870   | + | 790     | 819     | RNA | → | rplS (PRK05338)Ribosomal_L19 (pfam01245) | → |
| env-980  | JGI20154J14316.10003986    | - | 1590    | 1561    | RNA | → | rplS (PRK05338)Ribosomal_L19 (pfam01245) | → |
| env-981  | JGI20153J14295.10004614    | + | 8389    | 8418    | RNA | → | rplS (PRK05338)Ribosomal_L19 (pfam01245) | → |
| env-982  | JGI20153J14318.10004614    | + | 8389    | 8418    | RNA | → | rplS (PRK05338)Ribosomal_L19 (pfam01245) | → |
| env-983  | JGI20152J14361.10000338    | + | 14595   | 14624   | RNA | → | rplS (PRK05338)Ribosomal_L19 (pfam01245) | → |
| env-984  | JGI20156J14371.10003171    | + | 2644    | 2673    | RNA | → | rplS (PRK05338)Ribosomal_L19 (pfam01245) | → |
| env-985  | JGI20154J14316.10025201    | - | 1474    | 1445    | RNA | → | rplS (PRK05338)Ribosomal_L19 (pfam01245) | → |
| env-986  | JGI20153J14295.10003738    | + | 9965    | 9994    | RNA | → |                                          |   |
| env-987  | JGI20153J14318.10003738    | + | 9965    | 9994    | RNA | → |                                          |   |
| env-988  | P_2C_Liq_1_UnCty_1000289   | - | 21098   | 21069   | RNA | → | rplS (PRK05338)Ribosomal_L19 (pfam01245) | → |
| Psp-2-1  | NZ_JHZZ01000001.1          | - | 2913763 | 2913734 | RNA | → | rplS (PRK05338)Ribosomal_L19 (pfam01245) | → |
| env-989  | CESI01065175.1             | + | 1901    | 1930    | RNA | → | rplS (PRK05338)Ribosomal_L19 (pfam01245) | → |
| env-990  | CESU01059413.1             | + | 594     | 623     | RNA | → | rplS (PRK05338)Ribosomal_L19 (pfam01245) | → |
| env-991  | JGI20152J14361.10000044    | - | 80594   | 80565   | RNA | → | rplS (PRK05338)Ribosomal_L19 (pfam01245) | → |
| env-992  | JGI20153J14295.10523871    | - | 70      | 41      | RNA | → | ←hypo                                    |   |
| env-993  | JGI20153J14318.10523871    | - | 70      | 41      | RNA | → | ←hypo                                    |   |
| env-994  | DelMOWin2010_c10731323     | + | 65      | 94      | RNA | → | ←hypo                                    |   |
| env-995  | JGI20156J14371.10483843    | + | 180     | 209     | RNA | → | ←hypo                                    |   |
| env-996  | JGI20159J14440.10053546    | + | 607     | 636     | RNA | → | rplS (PRK05338)Ribosomal_L19 (pfam01245) | → |
| env-997  | NCBI_READ_1112777322026    | - | 870     | 841     | RNA | → | rplS (PRK05338)Ribosomal_L19 (pfam01245) | → |
| env-998  | NCBI_READ_1112637402410    | + | 418     | 447     | RNA | → | rplS (PRK05338)Ribosomal_L19 (pfam01245) | → |
| env-999  | NCBI_READ_1112614318228    | - | 194     | 165     | RNA | → | rplS (PRK05338)Ribosomal_L19 (pfam01245) | → |
| env-1000 | CESE01039129.1             | + | 14427   | 14456   | RNA | → |                                          |   |
| env-1001 | CESJ01285814.1             | - | 2842    | 2813    | RNA | → | rplS (PRK05338)Ribosomal_L19 (pfam01245) | → |
| env-1002 | CEST01030576.1             | - | 89      | 60      | RNA | → |                                          |   |
| Pir-1-1  | NZ_CH724148.1              | + | 36399   | 36428   | RNA | → | rplS (PRK05338)Ribosomal_L19 (pfam01245) | → |
| env-1003 | BS_KBA_SWE12.21m_c10085874 | + | 203     | 230     | RNA | → | rplS (PRK05338)Ribosomal_L19 (pfam01245) | → |
| env-1004 | BS_KBB_SWE26.205m_c1058109 | + | 165     | 192     | RNA | → | rplS (PRK05338)Ribosomal_L19 (pfam01245) | → |
| env-1005 | BS_KBA_SWE21.205m_10102186 | + | 146     | 173     | RNA | → | rplS (PRK05338)Ribosomal_L19 (pfam01245) | → |
| env-1006 | BS_KBA_SWE02.21m_10115347  | - | 438     | 411     | RNA | → | rplS (PRK05338)Ribosomal_L19 (pfam01245) | → |
| env-1007 | NCBI_READ_1112494184882    | - | 125     | 96      | RNA | → |                                          |   |
| env-1008 | NCBI_READ_1112637830883    | + | 552     | 581     | RNA | → | rplS (PRK05338)Ribosomal_L19 (pfam01245) | → |
| env-1009 | DelMOSum2010_c10000424     | - | 11560   | 11531   | RNA | → | rplS (PRK05338)Ribosomal_L19 (pfam01245) | → |
| env-1010 | JGI20157J14317.10004444    | - | 857     | 828     | RNA | → | rplS (PRK05338)Ribosomal_L19 (pfam01245) | → |
| env-1011 | NCBI_READ_1112493603404    | + | 47      | 76      | RNA | → | rplS (PRK05338)Ribosomal_L19 (pfam01245) | → |
| env-1012 | NCBI_READ_1112493503141    | + | 144     | 173     | RNA | → | rplS (PRK05338)Ribosomal_L19 (pfam01245) | → |
| env-1013 | NCBI_READ_1112788476902    | + | 509     | 538     | RNA | → | rplS (PRK05338)Ribosomal_L19 (pfam01245) | → |
| env-1014 | CEWR01020717.1             | - | 6341    | 6312    | RNA | → | rplS (PRK05338)Ribosomal_L19 (pfam01245) | → |



|          |                              |   |         |         |                                                                                                                                                                                         |
|----------|------------------------------|---|---------|---------|-----------------------------------------------------------------------------------------------------------------------------------------------------------------------------------------|
| env-1015 | CESJ01043971.1               | + | 1219    | 1246    | RNA → rplS (PRK05338)Ribosomal_L19 (pfam01245) → PRK08299 (PRK08299) → murQ (PRK05441)SIS_Etherase (cd05007) → hypo → TGS_ThrRS_N (cd01667)ThrS (COG0441)thrS (PRK00413) →              |
| env-1016 | 2236876002.177911            | - | 239     | 210     | RNA → hypo → rplS (PRK05338)Ribosomal_L19 (pfam01245) →                                                                                                                                 |
| env-1017 | DelMOSum2010_c10001649       | - | 15644   | 15615   | RNA → rplS (PRK05338)Ribosomal_L19 (pfam01245) →                                                                                                                                        |
| env-1018 | JGI20154J14316_10032387      | + | 2473    | 2502    | RNA → ← hypo                                                                                                                                                                            |
| env-1019 | JGI20153J14295_10012199      | + | 4050    | 4079    | RNA → rplS (PRK05338)Ribosomal_L19 (pfam01245) →                                                                                                                                        |
| env-1020 | JGI20153J14318_10012199      | + | 4050    | 4079    | RNA → rplS (PRK05338)Ribosomal_L19 (pfam01245) →                                                                                                                                        |
| env-1021 | SI34jun09_10m_1071064        | + | 169     | 198     | RNA → rplS (PRK05338)Ribosomal_L19 (pfam01245) →                                                                                                                                        |
| env-1022 | A09P0410a_Sequence0000002007 | - | 383     | 354     | RNA → rplS (PRK05338)Ribosomal_L19 (pfam01245) →                                                                                                                                        |
| env-1023 | JGI20154J14316_10036828      | + | 484     | 513     | RNA → rplS (PRK05338)Ribosomal_L19 (pfam01245) →                                                                                                                                        |
| env-1024 | JGI20160J14292_10414066      | + | 250     | 221     | RNA → rplS (PRK05338)Ribosomal_L19 (pfam01245) →                                                                                                                                        |
| env-1025 | CESI01082352.1               | + | 317     | 346     | RNA → rplS (PRK05338)Ribosomal_L19 (pfam01245) →                                                                                                                                        |
| env-1026 | JGI20160J14292_10063069      | + | 592     | 621     | RNA → rplS (PRK05338)Ribosomal_L19 (pfam01245) →                                                                                                                                        |
| env-1027 | CESD01219058.1               | + | 576     | 603     | RNA → rplS (PRK05338)Ribosomal_L19 (pfam01245) →                                                                                                                                        |
| env-1028 | CETB01155201.1               | + | 708     | 735     | RNA → rplS (PRK05338)Ribosomal_L19 (pfam01245) →                                                                                                                                        |
| env-1029 | CETH01045262.1               | + | 30526   | 30553   | RNA → rplS (PRK05338)Ribosomal_L19 (pfam01245) → lcd (COG0538)PRK08299 (PRK08299) → murQ (PRK05441)SIS_Etherase (cd05007) → hypo → TGS_ThrRS_N (cd01667)ThrS (COG0441)thrS (PRK00413) → |
| env-1030 | CETM01203845.1               | + | 3063    | 3090    | RNA → rplS (PRK05338)Ribosomal_L19 (pfam01245) → lcd (COG0538)PRK08299 (PRK08299) → murQ (PRK05441)SIS_Etherase (cd05007) → hypo → TGS_ThrRS_N (cd01667)ThrS (COG0441)thrS (PRK00413) → |
| env-1031 | CETT01281088.1               | + | 569     | 596     | RNA → rplS (PRK05338)Ribosomal_L19 (pfam01245) →                                                                                                                                        |
| env-1032 | CEUL01311114.1               | - | 456     | 429     | RNA → rplS (PRK05338)Ribosomal_L19 (pfam01245) →                                                                                                                                        |
| env-1033 | CEUZ01290455.1               | + | 1300    | 1327    | RNA → rplS (PRK05338)Ribosomal_L19 (pfam01245) → lcd (COG0538)PRK08299 (PRK08299) → murQ (PRK05441)SIS_Etherase (cd05007) → hypo → TGS_ThrRS_N (cd01667)ThrS (COG0441)thrS (PRK00413) → |
| env-1034 | SI60aug11_100m_c1007508      | - | 2548    | 2519    | RNA → rplS (PRK05338)Ribosomal_L19 (pfam01245) →                                                                                                                                        |
| env-1035 | JGI20152J14361_10003189      | + | 8383    | 8354    | RNA → rplS (PRK05338)Ribosomal_L19 (pfam01245) →                                                                                                                                        |
| env-1036 | JGI20153J14295_10000489      | + | 27052   | 27081   | RNA → rplS (PRK05338)Ribosomal_L19 (pfam01245) →                                                                                                                                        |
| env-1037 | JGI20153J14318_10000489      | + | 27052   | 27081   | RNA → rplS (PRK05338)Ribosomal_L19 (pfam01245) →                                                                                                                                        |
| Psp-1-1  | NZ_JPDI01000001.1            | - | 2860067 | 2860038 | RNA → rplS (PRK05338)Ribosomal_L19 (pfam01245) →                                                                                                                                        |
| env-1038 | CEOP01247711.1               | - | 5731    | 5704    | RNA → rplS (PRK05338)Ribosomal_L19 (pfam01245) → lcd (COG0538)PRK08299 (PRK08299) → murQ (PRK05441)SIS_Etherase (cd05007) → hypo → TGS_ThrRS_N (cd01667)ThrS (COG0441)thrS (PRK00413) → |
| env-1039 | 2236876001_262712            | - | 39      | 11      | RNA → hypo →                                                                                                                                                                            |
| env-1040 | CERB01093551.1               | + | 315     | 342     | RNA → rplS (PRK05338)Ribosomal_L19 (pfam01245) →                                                                                                                                        |
| env-1041 | CERS01312156.1               | + | 272     | 299     | RNA → rplS (PRK05338)Ribosomal_L19 (pfam01245) → PRK08299 (PRK08299) →                                                                                                                  |
| env-1042 | NCBI_READ_1112290446392      | + | 322     | 351     | RNA → rplS (PRK05338)Ribosomal_L19 (pfam01245) →                                                                                                                                        |
| env-1043 | NCBI_READ_1112493493141      | + | 227     | 256     | RNA →                                                                                                                                                                                   |
| env-1044 | CESE01277103.1               | - | 107     | 78      | RNA →                                                                                                                                                                                   |
| env-1045 | CEST01047642.1               | + | 9823    | 9852    | RNA →                                                                                                                                                                                   |
| env-1046 | CEWR01079815.1               | + | 9821    | 9850    | RNA →                                                                                                                                                                                   |
| env-1047 | NCBI_READ_1112777250419      | - | 310     | 281     | RNA → rplS (PRK05338)Ribosomal_L19 (pfam01245) →                                                                                                                                        |
| env-1048 | KGI_S2_ANT05_2345m_c1212107  | - | 177     | 148     | RNA → rplS (PRK05338)Ribosomal_L19 (pfam01245) →                                                                                                                                        |
| env-1049 | P_2C_Liq_3_UnCty_100705      | - | 3459    | 3430    | RNA → rplS (PRK05338)Ribosomal_L19 (pfam01245) →                                                                                                                                        |
| env-1050 | P_2C_Liq_1_UnCty_1002384     | - | 5606    | 5577    | RNA → rplS (PRK05338)Ribosomal_L19 (pfam01245) →                                                                                                                                        |
| env-1051 | P_2C_Liq_2_UnCty_1024292     | - | 447     | 418     | RNA → rplS (PRK05338)Ribosomal_L19 (pfam01245) →                                                                                                                                        |
| env-1052 | NCBI_READ_1112788537198      | - | 239     | 210     | RNA → rplS (PRK05338)Ribosomal_L19 (pfam01245) →                                                                                                                                        |
| env-1053 | NCBI_READ_1112493844367      | - | 655     | 626     | RNA → rplS (PRK05338)Ribosomal_L19 (pfam01245) →                                                                                                                                        |
| env-1054 | NCBI_READ_1112679247542      | + | 278     | 307     | RNA → rplS (PRK05338)Ribosomal_L19 (pfam01245) →                                                                                                                                        |
| env-1055 | CESI01042215.1               | + | 703     | 732     | RNA →                                                                                                                                                                                   |
| env-1056 | CESJ01095310.1               | - | 463     | 434     | RNA → rplS (PRK05338)Ribosomal_L19 (pfam01245) →                                                                                                                                        |
| env-1057 | NCBI_READ_1112493752993      | - | 840     | 812     | RNA → rplS (PRK05338)Ribosomal_L19 (pfam01245) →                                                                                                                                        |
| env-1058 | NCBI_READ_1112777271421      | + | 338     | 367     | RNA → rplS (PRK05338)Ribosomal_L19 (pfam01245) →                                                                                                                                        |
| Wvi-1-1  | NC_015144.1                  | + | 358414  | 358441  | RNA → rplS (PRK05338)Ribosomal_L19 (pfam01245) →                                                                                                                                        |
| env-1059 | BGMT1_NODE_590531            | - | 606     | 579     | RNA → rplS (PRK05338)Ribosomal_L19 (pfam01245) →                                                                                                                                        |
| env-1060 | HBC_scaff_10036577           | + | 20118   | 20145   | RNA → rplS (PRK05338)Ribosomal_L19 (pfam01245) →                                                                                                                                        |

|          |                             |   |         |         |      |                                                                                     |
|----------|-----------------------------|---|---------|---------|------|-------------------------------------------------------------------------------------|
| env-1061 | HBC_ctgs_1000111            | - | 333     | 306     | RNA→ | rplS (PRK05338)Ribosomal_L19 (pfam01245)→                                           |
| Fbr-1-1  | NC_016001.1                 | - | 3443259 | 3443232 | RNA→ | rplS (PRK05338)Ribosomal_L19 (pfam01245)→                                           |
| env-1062 | BS_KBA_SWE02_21m_10304347   | + | 145     | 172     | RNA→ | rplS (PRK05338)Ribosomal_L19 (pfam01245)→                                           |
| env-1063 | P_1C_Liq_1_UnCty_1096570    | - | 282     | 255     | RNA→ | rplS (PRK05338)Ribosomal_L19 (pfam01245)→                                           |
| env-1064 | JGI25910J50241_10412907     | - | 135     | 108     | RNA→ | hyppo→                                                                              |
| env-1065 | JGI25920J50251_10025281     | + | 980     | 1007    | RNA→ | rplS (PRK05338)Ribosomal_L19 (pfam01245)→                                           |
| env-1066 | GXP7IEG01AS1FF              | - | 340     | 313     | RNA→ | rplS (PRK05338)Ribosomal_L19 (pfam01245)→                                           |
| env-1067 | GXP7IEG01AL3G3              | + | 149     | 176     | RNA→ |                                                                                     |
| env-1068 | ElkS_mat_MD6A_1173344       | + | 220     | 247     | RNA→ |                                                                                     |
| env-1069 | JGI11876J14442_10000405     | - | 30539   | 30512   | RNA→ | rplS (PRK05338)Ribosomal_L19 (pfam01245)→                                           |
| Iha-1-1  | NZ_AJJU01000006.1           | - | 7932    | 7905    | RNA→ | rplS (PRK05338)Ribosomal_L19 (pfam01245)→ rplS (PRK05338)Ribosomal_L19 (pfam01245)→ |
| env-1070 | CEQG01145189.1              | + | 73521   | 73548   | RNA→ | rplS (PRK05338)Ribosomal_L19 (pfam01245)→                                           |
| env-1071 | CETR01067878.1              | + | 322     | 349     | RNA→ | rplS (PRK05338)Ribosomal_L19 (pfam01245)→                                           |
| env-1072 | CERQ01241836.1              | + | 41      | 68      | RNA→ | rplS (PRK05338)Ribosomal_L19 (pfam01245)→                                           |
| env-1073 | SA_S1_NOR08_45m_c10570168   | + | 216     | 243     | RNA→ |                                                                                     |
| env-1074 | SA_S1_NOR08_45m_c10657421   | - | 214     | 187     | RNA→ | rplS (PRK05338)Ribosomal_L19 (pfam01245)→                                           |
| Fjo-1-1  | NC_009441.1                 | - | 2640521 | 2640494 | RNA→ | rplS (PRK05338)Ribosomal_L19 (pfam01245)→                                           |
| env-1075 | KGI_S2_ANT06_2345m_c1002444 | + | 3037    | 3064    | RNA→ | rplS (PRK05338)Ribosomal_L19 (pfam01245)→                                           |
| env-1076 | BS_KBA_SWE12_21m_c10001565  | - | 7677    | 7650    | RNA→ | rplS (PRK05338)Ribosomal_L19 (pfam01245)→                                           |
| env-1077 | BS_KBB_SWE26_205m_c1000550  | - | 7615    | 7588    | RNA→ | rplS (PRK05338)Ribosomal_L19 (pfam01245)→                                           |
| env-1078 | BS_KBA_SWE21_205m_10000090  | + | 19045   | 19072   | RNA→ | rplS (PRK05338)Ribosomal_L19 (pfam01245)→                                           |
| env-1079 | BS_KBA_SWE02_21m_10000113   | - | 8549    | 8522    | RNA→ | rplS (PRK05338)Ribosomal_L19 (pfam01245)→                                           |
| env-1080 | SL_9KL_010_SED_10011059     | + | 964     | 991     | RNA→ | rplS (PRK05338)Ribosomal_L19 (pfam01245)→                                           |
| env-1081 | BS_KBA_SWE12_21m_c10000952  | + | 3392    | 3419    | RNA→ | ←-hyppo                                                                             |
| env-1082 | BS_KBB_SWE26_205m_c1003233  | - | 1828    | 1801    | RNA→ | rplS (PRK05338)Ribosomal_L19 (pfam01245)→                                           |
| env-1083 | BS_KBA_SWE02_21m_10008514   | + | 1890    | 1917    | RNA→ | ←-hyppo                                                                             |
| env-1084 | LWSO_GLQAYWI01D9JTG         | + | 68      | 95      | RNA→ | rplS (PRK05338)Ribosomal_L19 (pfam01245)→                                           |
| Sxi-1-1  | NZ_AUIG01000022.1           | - | 52581   | 52554   | RNA→ | rplS (PRK05338)Ribosomal_L19 (pfam01245)→                                           |
| env-1085 | JGI25910J50241_10309536     | - | 48      | 21      | RNA→ |                                                                                     |
| env-1086 | JGI25920J50251_10000309     | - | 8552    | 8525    | RNA→ | rplS (PRK05338)Ribosomal_L19 (pfam01245)→                                           |
| env-1087 | JGI25914J50564_10400042     | + | 203     | 230     | RNA→ | ←-hyppo                                                                             |
| env-1088 | JGI24770J26754_10001491     | + | 8389    | 8416    | RNA→ | rplS (PRK05338)Ribosomal_L19 (pfam01245)→                                           |
| env-1089 | JGI25917J50250_1002458      | + | 3566    | 3593    | RNA→ | rplS (PRK05338)Ribosomal_L19 (pfam01245)→                                           |
| env-1090 | JGI25914J50564_10000033     | - | 2824    | 2797    | RNA→ | rplS (PRK05338)Ribosomal_L19 (pfam01245)→                                           |
| Gli-1-1  | NZ_JH594606.1               | + | 1012580 | 1012607 | RNA→ | rplS (PRK05338)Ribosomal_L19 (pfam01245)→ rplS (PRK05338)Ribosomal_L19 (pfam01245)→ |
| env-1091 | SL_7KL_010_BRINE_10005701   | - | 3752    | 3725    | RNA→ | rplS (PRK05338)Ribosomal_L19 (pfam01245)→                                           |
| env-1092 | JGI25920J50251_10215690     | - | 222     | 195     | RNA→ | rplS (PRK05338)Ribosomal_L19 (pfam01245)→                                           |
| env-1093 | JGI25914J50564_10165301     | - | 359     | 332     | RNA→ | rplS (PRK05338)Ribosomal_L19 (pfam01245)→                                           |
| env-1094 | JGI25914J50564_10198338     | - | 73      | 46      | RNA→ |                                                                                     |
| env-1095 | JGI25913J50563_1230681      | - | 286     | 259     | RNA→ | rplS (PRK05338)Ribosomal_L19 (pfam01245)→                                           |
| env-1096 | BS_KBA_SWE21_205m_10014821  | - | 1943    | 1916    | RNA→ | rplS (PRK05338)Ribosomal_L19 (pfam01245)→                                           |
| env-1097 | JGI25912J50252_10330425     | - | 38      | 11      | RNA→ |                                                                                     |
| env-1098 | CENH01045038.1              | + | 3       | 30      | RNA→ | rplS (PRK05338)Ribosomal_L19 (pfam01245)→                                           |
| env-1099 | CETA01060825.1              | - | 2104    | 2077    | RNA→ | rplS (PRK05338)Ribosomal_L19 (pfam01245)→                                           |
| env-1100 | CETB01301347.1              | + | 490     | 517     | RNA→ | rplS (PRK05338)Ribosomal_L19 (pfam01245)→                                           |
| env-1101 | CETT01089007.1              | - | 2908    | 2881    | RNA→ | rplS (PRK05338)Ribosomal_L19 (pfam01245)→                                           |
| env-1102 | CEVJ01064547.1              | + | 730     | 757     | RNA→ | rplS (PRK05338)Ribosomal_L19 (pfam01245)→                                           |
| env-1103 | CEWI01163115.1              | + | 358     | 385     | RNA→ | rplS (PRK05338)Ribosomal_L19 (pfam01245)→                                           |
| env-1104 | KGI_S1_ANT01_95m_c10228781  | - | 190     | 163     | RNA→ | rplS (PRK05338)Ribosomal_L19 (pfam01245)→                                           |
| env-1105 | KGI_S1_ANT02_95m_c10005113  | + | 4522    | 4549    | RNA→ | rplS (PRK05338)Ribosomal_L19 (pfam01245)→                                           |
| env-1106 | CERE01034022.1              | + | 347     | 374     | RNA→ | rplS (PRK05338)Ribosomal_L19 (pfam01245)→                                           |
| env-1107 | CENS01098701.1              | - | 541     | 514     | RNA→ | rplS (PRK05338)Ribosomal_L19 (pfam01245)→                                           |

|          |                            |   |         |         |                                                                       |
|----------|----------------------------|---|---------|---------|-----------------------------------------------------------------------|
| env-1108 | CEPZ01082641.1             | - | 112     | 85      | RNA→                                                                  |
| env-1109 | CEQY01232939.1             | - | 234     | 207     | RNA→ <a href="#">rplS (PRK05338)</a> Ribosomal_L19 (pfam01245)→       |
| env-1110 | CERQ01070756.1             | - | 1060    | 1033    | RNA→ <a href="#">rplS (PRK05338)</a> Ribosomal_L19 (pfam01245)→       |
| env-1111 | CERU01112183.1             | - | 9021    | 8994    | RNA→ <a href="#">rplS (PRK05338)</a> Ribosomal_L19 (pfam01245)→       |
| env-1112 | CESC01027484.1             | + | 19541   | 19568   | RNA→ <a href="#">rplS (PRK05338)</a> Ribosomal_L19 (pfam01245)→       |
| env-1113 | CEUN01369745.1             | + | 390     | 417     | RNA→ <a href="#">rplS (PRK05338)</a> Ribosomal_L19 (pfam01245)→       |
| Lbl-1-1  | NZ_CH672395.1              | - | 1844571 | 1844544 | RNA→ <a href="#">rplS (PRK05338)</a> Ribosomal_L19 (pfam01245)→       |
| Aag-1-1  | NZ_JH621256.1              | - | 89135   | 89108   | RNA→ <a href="#">rplS (PRK05338)</a> Ribosomal_L19 (pfam01245)→       |
| Ead-1-1  | NZ_KB907548.1              | - | 10231   | 10204   | RNA→ <a href="#">rplS (PRK05338)</a> Ribosomal_L19 (pfam01245)→       |
| env-1114 | TahiMoana_1000007          | - | 24341   | 24314   | RNA→ ←-hypo                                                           |
| env-1115 | topACOD_FV90NF401A1PKH     | - | 248     | 221     | RNA→ <a href="#">rplS (PRK05338)</a> Ribosomal_L19 (pfam01245)→       |
| Lsp-2-1  | NZ_JYNQ01000001.1          | + | 1019925 | 1019952 | RNA→ <a href="#">rplS (PRK05338)</a> Ribosomal_L19 (pfam01245)→       |
| env-1116 | CESE01078901.1             | + | 29392   | 29419   | RNA→ <a href="#">rplS (PRK05338)</a> Ribosomal_L19 (pfam01245)→       |
| env-1117 | CEST01016161.1             | + | 29395   | 29422   | RNA→ <a href="#">rplS (PRK05338)</a> Ribosomal_L19 (pfam01245)→       |
| Lsp-3-1  | NZ_JHZY01000002.1          | + | 1633784 | 1633811 | RNA→ <a href="#">rplS (PRK05338)</a> Ribosomal_L19 (pfam01245)→       |
| env-1118 | CEQG01152154.1             | + | 3057    | 3084    | RNA→ <a href="#">rplS (PRK05338)</a> Ribosomal_L19 (pfam01245)→       |
| env-1119 | CEVJ01105358.1             | - | 124     | 97      | RNA→ hypo→                                                            |
| env-1120 | CEVO01225740.1             | - | 100     | 73      | RNA→                                                                  |
| env-1121 | JGI12097J13213.1000092     | + | 32172   | 32199   | RNA→ <a href="#">rplS (PRK05338)</a> Ribosomal_L19 (pfam01245)→       |
| env-1122 | JGI11800J13271.1071213     | - | 166     | 139     | RNA→ <a href="#">rplS (PRK05338)</a> Ribosomal_L19 (pfam01245)→       |
| env-1123 | CESO01260573.1             | + | 553     | 580     | RNA→ <a href="#">rplS (PRK05338)</a> Ribosomal_L19 (pfam01245)→       |
| Lja-1-1  | NZ_JSWF01000016.1          | - | 442     | 415     | RNA→ <a href="#">rplS (PRK05338)</a> Ribosomal_L19 (pfam01245)→       |
| Lsp-1-1  | NC_015638.1                | + | 16178   | 16205   | RNA→ <a href="#">rplS (PRK05338)</a> Ribosomal_L19 (pfam01245)→       |
| env-1124 | CEPG01053707.1             | + | 643     | 670     | RNA→                                                                  |
| Pto-1-1  | NC_018721.1                | - | 3532395 | 3532368 | RNA→ <a href="#">rplS (PRK05338)</a> Ribosomal_L19 (pfam01245)→       |
| Pgo-1-1  | NZ_APLF01000012.1          | - | 7252    | 7225    | RNA→ <a href="#">rplS (PRK05338)</a> Ribosomal_L19 (pfam01245)→       |
| env-1125 | LV_Brine.h2.0102.1076663   | - | 420     | 393     | RNA→ <a href="#">rplS (PRK05338)</a> Ribosomal_L19 (pfam01245)→       |
| env-1126 | JGI1221J11331.1011062      | - | 813     | 786     | RNA→ <a href="#">rplS (PRK05338)</a> Ribosomal_L19 (pfam01245)→       |
| env-1127 | P_1C_Liq_1_UnCty_1029884   | - | 249     | 222     | RNA→ <a href="#">rplS (PRK05338)</a> Ribosomal_L19 (pfam01245)→       |
| env-1128 | P_2C_Liq_2_UnCty_1118043   | + | 295     | 322     | RNA→ ←-hypo                                                           |
| Ptr-1-1  | NZ_KB905345.1              | + | 151414  | 151441  | RNA→ <a href="#">rplS (PRK05338)</a> Ribosomal_L19 (pfam01245)→       |
| env-1129 | SL_9KL_010_SED.10069806    | + | 146     | 173     | RNA→ <a href="#">rplS (PRK05338)</a> Ribosomal_L19 (pfam01245)→       |
| env-1130 | P_2C_Liq_1_UnCty_1186584   | - | 277     | 250     | RNA→ <a href="#">rplS (PRK05338)</a> Ribosomal_L19 (pfam01245)→       |
| env-1131 | P_1C_Liq_2_UnCty_1015821   | + | 305     | 332     | RNA→ <a href="#">rplS (PRK05338)</a> Ribosomal_L19 (pfam01245)→       |
| env-1132 | JGI25910J50241.10010778    | - | 306     | 279     | RNA→ <a href="#">rplS (PRK05338)</a> Ribosomal_L19 (pfam01245)→       |
| env-1133 | JGI25920J50251.10125176    | + | 96      | 123     | RNA→ <a href="#">rplS (PRK05338)</a> Ribosomal_L19 (pfam01245)→       |
| env-1134 | CEPR01006195.1             | + | 270508  | 270535  | RNA→ <a href="#">rplS (PRK05338)</a> Ribosomal_L19 (pfam01245)→       |
| env-1135 | CERJ01067812.1             | + | 321     | 348     | RNA→ <a href="#">rplS (PRK05338)</a> Ribosomal_L19 (pfam01245)→       |
| env-1136 | JGI25911J50253.10012314    | + | 1397    | 1424    | RNA→ <a href="#">rplS (PRK05338)</a> Ribosomal_L19 (pfam01245)→       |
| Gsp-4-1  | NZ_JQLP01000003.1          | - | 9409    | 9382    | RNA→ <a href="#">rplS (PRK05338)</a> Ribosomal_L19 (pfam01245)→       |
| env-1137 | JGI24770J26754.10341917    | - | 46      | 19      | RNA→ ←-hypo                                                           |
| env-1138 | JGI24770J26754.10005581    | + | 5539    | 5566    | RNA→ <a href="#">rplS (PRK05338)</a> Ribosomal_L19 (pfam01245)→       |
| env-1139 | JGI24723J26617.10022857    | + | 2227    | 2254    | RNA→ <a href="#">rplS (PRK05338)</a> Ribosomal_L19 (pfam01245)→       |
| env-1140 | M3P_c10140209              | - | 55      | 28      | RNA→ ←-hypo                                                           |
| env-1141 | JGI1221J11331.1121684      | - | 169     | 142     | RNA→ <a href="#">rplS (PRK05338)</a> Ribosomal_L19 (pfam01245)→       |
| env-1142 | JFJP01038398.1             | + | 17693   | 17720   | RNA→ <a href="#">rplS (PRK05338)</a> Ribosomal_L19 (pfam01245)→       |
| env-1143 | JGI26054J46599.1167877     | + | 72      | 99      | RNA→ <a href="#">rplS (PRK05338)</a> Ribosomal_L19 (pfam01245)→       |
| env-1144 | LWFCAN_N_GO09JKT02FQCFO    | + | 32      | 59      | RNA→ hypo→ <a href="#">rplS (PRK05338)</a> Ribosomal_L19 (pfam01245)→ |
| env-1145 | LM20APR2010E_c18959        | - | 172     | 145     | RNA→ <a href="#">rplS (PRK05338)</a> Ribosomal_L19 (pfam01245)→       |
| env-1146 | KGL_S1_ANT02.95m_c10072419 | - | 199     | 172     | RNA→ <a href="#">rplS (PRK05338)</a> Ribosomal_L19 (pfam01245)→       |
| env-1147 | JGI1221J11331.1000410      | + | 13452   | 13479   | RNA→ <a href="#">rplS (PRK05338)</a> Ribosomal_L19 (pfam01245)→       |
| env-1148 | JGI24770J26754.10209365    | + | 67      | 94      | RNA→ <a href="#">rplS (PRK05338)</a> Ribosomal_L19 (pfam01245)→       |

|          |                            |   |        |        |                                                            |
|----------|----------------------------|---|--------|--------|------------------------------------------------------------|
| env-1149 | LWAEeNNiAF_GBUVFP102GIQM4  | - | 107    | 80     | RNA→ ←-hypo                                                |
| env-1150 | GXP7IEG01DK1RD             | + | 62     | 89     | RNA→ rplS (PRK05338)Ribosomal_L19 (pfam01245)→             |
| env-1151 | TB_FS08_3DRAFT_1076085     | - | 419    | 392    | RNA→ rplS (PRK05338)Ribosomal_L19 (pfam01245)→             |
| env-1152 | KGI_S1_ANT02_95m_c10077220 | + | 767    | 794    | RNA→ rplS (PRK05338)Ribosomal_L19 (pfam01245)→             |
| env-1153 | SR_TTP_S3_1011262          | - | 257    | 230    | RNA→ rplS (PRK05338)Ribosomal_L19 (pfam01245)→             |
| env-1154 | SR_TP_S1sol_1004373        | + | 1564   | 1591   | RNA→ rplS (PRK05338)Ribosomal_L19 (pfam01245)→             |
| env-1155 | CETR01086737.1             | - | 288    | 261    | RNA→ rplS (PRK05338)Ribosomal_L19 (pfam01245)→             |
| env-1156 | CEVJ01064574.1             | - | 35932  | 35905  | RNA→ rplS (PRK05338)Ribosomal_L19 (pfam01245)→             |
| env-1157 | CEVK01071768.1             | - | 2531   | 2504   | RNA→ rplS (PRK05338)Ribosomal_L19 (pfam01245)→             |
| env-1158 | CEVM01085059.1             | - | 146813 | 146786 | RNA→ rplS (PRK05338)Ribosomal_L19 (pfam01245)→             |
| env-1159 | CEVO01080562.1             | - | 4295   | 4268   | RNA→ rplS (PRK05338)Ribosomal_L19 (pfam01245)→             |
| env-1160 | CEVQ01352678.1             | + | 1996   | 2023   | RNA→                                                       |
| env-1161 | JGI12421J11937_10000023    | - | 29464  | 29437  | RNA→ ←-hypo                                                |
| env-1162 | JGI25911J50253_10733752    | - | 166    | 139    | RNA→ hypo→                                                 |
| env-1163 | _GVICOHK01DYU3D            | - | 65     | 38     | RNA→ hypo→                                                 |
| env-1164 | KGI_S1_ANT02_95m_c10073298 | + | 760    | 787    | RNA→ rplS (PRK05338)Ribosomal_L19 (pfam01245)→             |
| env-1165 | LV_Brine_h2_0102_1044952   | + | 61     | 88     | RNA→ rplS (PRK05338)Ribosomal_L19 (pfam01245)→             |
| env-1166 | PBR_1111292                | + | 3885   | 3912   | RNA→ rplS (PRK05338)Ribosomal_L19 (pfam01245)→ hypo→ hypo→ |
| env-1167 | JGI25910J50241_10023455    | + | 23     | 50     | RNA→ rplS (PRK05338)Ribosomal_L19 (pfam01245)→             |
| env-1168 | LWFCAn_GLO1YSU01DQOFC      | - | 166    | 139    | RNA→ hypo→                                                 |
| Fso-1-1  | NZ_AUGO01000009.1          | + | 122444 | 122471 | RNA→ rplS (PRK05338)Ribosomal_L19 (pfam01245)→             |
| env-1169 | TB_PC08_66_10000538        | + | 14971  | 14998  | RNA→ rplS (PRK05338)Ribosomal_L19 (pfam01245)→             |
| env-1170 | TB_GS10_10_10217433        | + | 384    | 411    | RNA→ rplS (PRK05338)Ribosomal_L19 (pfam01245)→             |
| env-1171 | TB_PC08_64_1080822         | - | 480    | 453    | RNA→ rplS (PRK05338)Ribosomal_L19 (pfam01245)→             |
| env-1172 | CESI01032264.1             | + | 1988   | 2015   | RNA→ rplS (PRK05338)Ribosomal_L19 (pfam01245)→             |
| env-1173 | CESU01010912.1             | + | 7776   | 7803   | RNA→ rplS (PRK05338)Ribosomal_L19 (pfam01245)→             |
| env-1174 | Antartic2_1044867          | - | 57     | 30     | RNA→ hypo→                                                 |
| env-1175 | JGI20156J14371_10138076    | - | 258    | 231    | RNA→ rplS (PRK05338)Ribosomal_L19 (pfam01245)→             |
| env-1176 | JGI20154J14316_10002203    | - | 374    | 347    | RNA→ rplS (PRK05338)Ribosomal_L19 (pfam01245)→             |
| env-1177 | JGI20160J14292_10013217    | + | 567    | 594    | RNA→ rplS (PRK05338)Ribosomal_L19 (pfam01245)→             |
| env-1178 | JGI20153J14295_10047621    | - | 358    | 331    | RNA→ rplS (PRK05338)Ribosomal_L19 (pfam01245)→             |
| env-1179 | JGI20153J14318_10047621    | - | 358    | 331    | RNA→ rplS (PRK05338)Ribosomal_L19 (pfam01245)→             |
| env-1180 | JGI20157J14317_10000793    | - | 151    | 124    | RNA→ rplS (PRK05338)Ribosomal_L19 (pfam01245)→             |
| env-1181 | CERM01033640.1             | + | 3672   | 3699   | RNA→                                                       |
| env-1182 | CESO01224126.1             | + | 67     | 40     | RNA→                                                       |
| env-1183 | CERM01182019.1             | + | 636    | 663    | RNA→ rplS (PRK05338)Ribosomal_L19 (pfam01245)→             |
| env-1184 | CESO01277244.1             | - | 422    | 395    | RNA→ rplS (PRK05338)Ribosomal_L19 (pfam01245)→             |
| env-1185 | DelMOSum2010_c10004802     | + | 3737   | 3764   | RNA→ rplS (PRK05338)Ribosomal_L19 (pfam01245)→             |
| env-1186 | LPaug08P2610m_c1071471     | - | 214    | 187    | RNA→ rplS (PRK05338)Ribosomal_L19 (pfam01245)→             |
| env-1187 | JGI20154J14316_10001372    | - | 183    | 156    | RNA→ rplS (PRK05338)Ribosomal_L19 (pfam01245)→             |
| env-1188 | JGI20153J14295_10000027    | - | 965    | 938    | RNA→ rplS (PRK05338)Ribosomal_L19 (pfam01245)→             |
| env-1189 | JGI20153J14318_10000027    | - | 965    | 938    | RNA→ rplS (PRK05338)Ribosomal_L19 (pfam01245)→             |
| env-1190 | JGI20160J14292_10003823    | + | 1395   | 1422   | RNA→ rplS (PRK05338)Ribosomal_L19 (pfam01245)→             |
| env-1191 | DelMOSum2010_c10005021     | - | 5906   | 5879   | RNA→ rplS (PRK05338)Ribosomal_L19 (pfam01245)→             |
| env-1192 | LPaug09P1610m_c1163453     | - | 115    | 88     | RNA→ hypo→                                                 |
| env-1193 | JGI20154J14316_10016259    | - | 2513   | 2486   | RNA→ rplS (PRK05338)Ribosomal_L19 (pfam01245)→             |
| env-1194 | JGI20153J14295_10112779    | - | 627    | 600    | RNA→ rplS (PRK05338)Ribosomal_L19 (pfam01245)→             |
| env-1195 | JGI20153J14318_10112779    | - | 627    | 600    | RNA→ rplS (PRK05338)Ribosomal_L19 (pfam01245)→             |
| env-1196 | JGI20157J14317_10641510    | - | 167    | 140    | RNA→ rplS (PRK05338)Ribosomal_L19 (pfam01245)→             |
| env-1197 | JGI20154J14316_10003287    | + | 9143   | 9170   | RNA→ rplS (PRK05338)Ribosomal_L19 (pfam01245)→             |
| env-1198 | JGI20157J14317_10237281    | - | 352    | 325    | RNA→ rplS (PRK05338)Ribosomal_L19 (pfam01245)→             |
| env-1199 | CESF01069914.1             | + | 3709   | 3736   | RNA→ rplS (PRK05338)Ribosomal_L19 (pfam01245)→             |



|          |                                 |   |         |         |      |                                                                                                                  |
|----------|---------------------------------|---|---------|---------|------|------------------------------------------------------------------------------------------------------------------|
| env-1200 | 3300001197_1005977              | + | 3403    | 3430    | RNA→ | rplS (PRK05338)Ribosomal_L19 (pfam01245)→                                                                        |
| env-1201 | 3300001197_1015663              | + | 4060    | 4087    | RNA→ | ← monomer_idh (TIGR00178)IDH (pfam03971)                                                                         |
| env-1202 | JGI24723J26617_10020059         | - | 30      | 3       | RNA→ |                                                                                                                  |
| env-1203 | DelMOSum2011_c10017080          | + | 3029    | 3056    | RNA→ | rplS (PRK05338)Ribosomal_L19 (pfam01245)→                                                                        |
| env-1204 | A09P04_1300_Sequence0000012002  | + | 1343    | 1370    | RNA→ | hypo→                                                                                                            |
| Apa-1-1  | NZ_JACC01000002.1               | + | 197695  | 197722  | RNA→ | rplS (PRK05338)Ribosomal_L19 (pfam01245)→                                                                        |
| env-1205 | SI39nov09_120m_c1067562         | + | 410     | 437     | RNA→ | rplS (PRK05338)Ribosomal_L19 (pfam01245)→                                                                        |
| env-1206 | CESI01135903.1                  | - | 37      | 10      | RNA→ |                                                                                                                  |
| env-1207 | CETR01240919.1                  | + | 43      | 70      | RNA→ | rplS (PRK05338)Ribosomal_L19 (pfam01245)→ hypo→                                                                  |
| env-1208 | JGI24723J26617_10024281         | - | 2550    | 2523    | RNA→ | rplS (PRK05338)Ribosomal_L19 (pfam01245)→                                                                        |
| Fba-6-1  | NZ_AFPB01000181.1               | - | 41364   | 41337   | RNA→ | rplS (PRK05338)Ribosomal_L19 (pfam01245)→ rplS (PRK05338)Ribosomal_L19 (pfam01245)→                              |
| Aat-1-1  | NZ_AQRA01000009.1               | - | 19513   | 19486   | RNA→ | rplS (PRK05338)Ribosomal_L19 (pfam01245)→                                                                        |
| env-1209 | SA_S1_NOR08_45m_c10624926       | - | 92      | 65      | RNA→ | hypo→                                                                                                            |
| env-1210 | DelMOSum2010_c10001221          | + | 15564   | 15591   | RNA→ | rplS (PRK05338)Ribosomal_L19 (pfam01245)→                                                                        |
| env-1211 | SI34jun09_10m_1058447           | + | 104     | 131     | RNA→ | rplS (PRK05338)Ribosomal_L19 (pfam01245)→                                                                        |
| env-1212 | SI34jun09_100m_1143518          | + | 11      | 38      | RNA→ | rplS (PRK05338)Ribosomal_L19 (pfam01245)→                                                                        |
| env-1213 | CERM01031204.1                  | - | 3510    | 3483    | RNA→ | rplS (PRK05338)Ribosomal_L19 (pfam01245)→                                                                        |
| env-1214 | CESO01003542.1                  | - | 1110    | 1083    | RNA→ | rplS (PRK05338)Ribosomal_L19 (pfam01245)→                                                                        |
| env-1215 | CEVO01049684.1                  | - | 87      | 60      | RNA→ |                                                                                                                  |
| env-1216 | 3300001197_1020214              | - | 102     | 75      | RNA→ | ← hypo                                                                                                           |
| env-1217 | JGI24724J26744_10266378         | - | 318     | 291     | RNA→ | rplS (PRK05338)Ribosomal_L19 (pfam01245)→                                                                        |
| env-1218 | JGI24723J26617_10417056         | - | 210     | 183     | RNA→ | rplS (PRK05338)Ribosomal_L19 (pfam01245)→                                                                        |
| Fag-1-1  | NZ_HG315671.1                   | + | 2869946 | 2869973 | RNA→ | rplS (PRK05338)Ribosomal_L19 (pfam01245)→                                                                        |
| env-1219 | SA_S1_NOR08_45m_c10036615       | - | 52      | 25      | RNA→ |                                                                                                                  |
| env-1220 | CERM01065147.1                  | - | 4841    | 4814    | RNA→ | rplS (PRK05338)Ribosomal_L19 (pfam01245)→                                                                        |
| env-1221 | CESU01000186.1                  | - | 4638    | 4611    | RNA→ | rplS (PRK05338)Ribosomal_L19 (pfam01245)→                                                                        |
| env-1222 | CEWR01293092.1                  | - | 4692    | 4665    | RNA→ | rplS (PRK05338)Ribosomal_L19 (pfam01245)→                                                                        |
| env-1223 | JGI24723J26617_10804348         | - | 30      | 3       | RNA→ |                                                                                                                  |
| Ame-1-1  | NZ_JACB01000004.1               | - | 19600   | 19573   | RNA→ | rplS (PRK05338)Ribosomal_L19 (pfam01245)→                                                                        |
| env-1224 | DelMOSum2010_c10203686          | + | 55      | 82      | RNA→ | rplS (PRK05338)Ribosomal_L19 (pfam01245)→                                                                        |
| env-1225 | DelMOWin2010_c10009783          | - | 4961    | 4934    | RNA→ | rplS (PRK05338)Ribosomal_L19 (pfam01245)→                                                                        |
| env-1226 | JGI20158J14315_10383416         | + | 217     | 244     | RNA→ | rplS (PRK05338)Ribosomal_L19 (pfam01245)→                                                                        |
| Fsp-3-1  | NZ_AJXL01000094.1               | - | 14222   | 14195   | RNA→ | rplS (PRK05338)Ribosomal_L19 (pfam01245)→                                                                        |
| env-1227 | KGI_S1_ANT01_95m_c10053628      | + | 1010    | 1037    | RNA→ | rplS (PRK05338)Ribosomal_L19 (pfam01245)→                                                                        |
| env-1228 | KGI_S2_ANT04_2345m_c1008646     | + | 1380    | 1353    | RNA→ | rplS (PRK05338)Ribosomal_L19 (pfam01245)→                                                                        |
| env-1229 | KGI_S1_ANT02_95m_c10015121      | - | 1911    | 1938    | RNA→ | rplS (PRK05338)Ribosomal_L19 (pfam01245)→                                                                        |
| env-1230 | KGI_S1_ANT01_95m_c10161490      | + | 312     | 339     | RNA→ | rplS (PRK05338)Ribosomal_L19 (pfam01245)→                                                                        |
| env-1231 | JGI20157J14317_10035387         | + | 911     | 938     | RNA→ | rplS (PRK05338)Ribosomal_L19 (pfam01245)→ PRK08299 (PRK08299)→                                                   |
| env-1232 | JGI20157J14317_10082171         | + | 919     | 946     | RNA→ | rplS (PRK05338)Ribosomal_L19 (pfam01245)→                                                                        |
| env-1233 | SRS018157_Baylor_scaffold_84048 | - | 8172    | 8145    | RNA→ | rplS (PRK05338)Ribosomal_L19 (pfam01245)→<br>DEDDh (cd06127)GIY-YIG-UvrC_Cho (cd10434)EXOIII (smart00479)→ hypo→ |
| env-1234 | SRS051941_LANL_scaffold_40129   | + | 359     | 386     | RNA→ | rplS (PRK05338)Ribosomal_L19 (pfam01245)→                                                                        |
| env-1235 | Buccal_mucosa_LANL_C64921346    | + | 256     | 283     | RNA→ |                                                                                                                  |
| env-1236 | SRS052876_LANL_scaffold_53214   | - | 5451    | 5424    | RNA→ | rplS (PRK05338)Ribosomal_L19 (pfam01245)→<br>DEDDh (cd06127)GIY-YIG-UvrC_Cho (cd10434)EXOIII (smart00479)→ hypo→ |
| env-1237 | SRS015044_WUGC_scaffold_8201    | + | 78      | 105     | RNA→ | rplS (PRK05338)Ribosomal_L19 (pfam01245)→                                                                        |
| env-1238 | SRS063603_LANL_scaffold_47458   | + | 2882    | 2909    | RNA→ | rplS (PRK05338)Ribosomal_L19 (pfam01245)→<br>DEDDh (cd06127)GIY-YIG-UvrC_Cho (cd10434)EXOIII (smart00479)→ hypo→ |
| env-1239 | SRS024087_C3545532              | + | 415     | 442     | RNA→ | rplS (PRK05338)Ribosomal_L19 (pfam01245)→ DEDDh (cd06127)EXOIII (smart00479)→                                    |
| env-1240 | SRS063932_LANL_scaffold_104549  | + | 686     | 713     | RNA→ | rplS (PRK05338)Ribosomal_L19 (pfam01245)→<br>DEDDh (cd06127)GIY-YIG-UvrC_Cho (cd10434)EXOIII (smart00479)→ hypo→ |
| env-1241 | SRS011126_Baylor_scaffold_17978 | + | 2727    | 2754    | RNA→ | rplS (PRK05338)Ribosomal_L19 (pfam01245)→<br>DEDDh (cd06127)GIY-YIG-UvrC_Cho (cd10434)EXOIII (smart00479)→ hypo→ |

|          |                                 |   |         |         |                                                                                                                       |
|----------|---------------------------------|---|---------|---------|-----------------------------------------------------------------------------------------------------------------------|
| env-1242 | SRS013252_C3667205              | + | 686     | 713     | RNA→ rplS (PRK05338)Ribosomal_L19 (pfam01245)→<br>DEDDh (cd06127)GIY-YIG_UvrC_Cho (cd10434)EXOIII (smart00479)→       |
| env-1243 | SRS013533_PGA_scaffold_50908    | + | 1008    | 1035    | RNA→ rplS (PRK05338)Ribosomal_L19 (pfam01245)→                                                                        |
| env-1244 | SRS015803_C2641419              | - | 493     | 466     | RNA→ rplS (PRK05338)Ribosomal_L19 (pfam01245)→                                                                        |
| env-1245 | SRS016360_Baylor_scaffold_62601 | + | 2151    | 2178    | RNA→ rplS (PRK05338)Ribosomal_L19 (pfam01245)→<br>DEDDh (cd06127)GIY-YIG_UvrC_Cho (cd10434)EXOIII (smart00479)→ hypo→ |
| env-1246 | SRS018665_WUGC_scaffold_58455   | + | 2151    | 2178    | RNA→ rplS (PRK05338)Ribosomal_L19 (pfam01245)→<br>DEDDh (cd06127)GIY-YIG_UvrC_Cho (cd10434)EXOIII (smart00479)→ hypo→ |
| env-1247 | SRS019128_WUGC_scaffold_49488   | + | 686     | 713     | RNA→ rplS (PRK05338)Ribosomal_L19 (pfam01245)→                                                                        |
| env-1248 | SRS024561_LANL_scaffold_36518   | - | 14316   | 14289   | RNA→ rplS (PRK05338)Ribosomal_L19 (pfam01245)→<br>DEDDh (cd06127)GIY-YIG_UvrC_Cho (cd10434)EXOIII (smart00479)→ hypo→ |
| env-1249 | SRS045197_C3607834              | - | 1029    | 1002    | RNA→ rplS (PRK05338)Ribosomal_L19 (pfam01245)→ DEDDh (cd06127)EXOIII (smart00479)→                                    |
| env-1250 | SRS047113_C5335430              | - | 293     | 266     | RNA→ rplS (PRK05338)Ribosomal_L19 (pfam01245)→                                                                        |
| env-1251 | SRS063999_C3543586              | + | 260     | 287     | RNA→ rplS (PRK05338)Ribosomal_L19 (pfam01245)→                                                                        |
| Csp-6-1  | NZ_KB291246.1                   | + | 15364   | 15391   | RNA→ rplS (PRK05338)Ribosomal_L19 (pfam01245)→<br>DEDDh (cd06127)GIY-YIG_UvrC_Cho (cd10434)EXOIII (smart00479)→ hypo→ |
| env-1252 | SRS018157_Baylor_scaffold_18962 | + | 6563    | 6590    | RNA→ rplS (PRK05338)Ribosomal_L19 (pfam01245)→                                                                        |
| env-1253 | JGI24768J34885_10247260         | + | 433     | 460     | RNA→                                                                                                                  |
| env-1254 | JCVI_SCAF_1101668160045         | + | 894     | 921     | RNA→ rplS (PRK05338)Ribosomal_L19 (pfam01245)→                                                                        |
| env-1255 | SwRhRL2b_contig_2171902         | + | 1146    | 1173    | RNA→ rplS (PRK05338)Ribosomal_L19 (pfam01245)→                                                                        |
| env-1256 | PBDCA2_GBB5CE401BK0D1_left      | + | 27      | 54      | RNA→                                                                                                                  |
| Fsu-1-1  | NZ_JATV01000027.1               | + | 3805    | 3832    | RNA→ rplS (PRK05338)Ribosomal_L19 (pfam01245)→                                                                        |
| env-1257 | JGI25913J50563_1001466          | + | 819     | 846     | RNA→ rplS (PRK05338)Ribosomal_L19 (pfam01245)→                                                                        |
| env-1258 | 3300000052_140975               | - | 3211    | 3184    | RNA→ rplS (PRK05338)Ribosomal_L19 (pfam01245)→                                                                        |
| env-1259 | G312J29652_10012531             | - | 1124    | 1097    | RNA→ rplS (PRK05338)Ribosomal_L19 (pfam01245)→                                                                        |
| env-1260 | KGLS1_ANT02_95m_c10000047       | - | 11017   | 10990   | RNA→ rplS (PRK05338)Ribosomal_L19 (pfam01245)→                                                                        |
| env-1261 | JGI24770J26754_10206717         | + | 89      | 116     | RNA→ rplS (PRK05338)Ribosomal_L19 (pfam01245)→                                                                        |
| env-1262 | TFO_HY_Contig_1126              | + | 12214   | 12241   | RNA→ rplS (PRK05338)Ribosomal_L19 (pfam01245)→                                                                        |
| Msp-2-1  | NZ_JQNJ01000001.1               | + | 4092805 | 4092832 | RNA→ rplS (PRK05338)Ribosomal_L19 (pfam01245)→                                                                        |
| env-1263 | P_1C_Sed_3_UnCty_1133928        | - | 236     | 209     | RNA→ rplS (PRK05338)Ribosomal_L19 (pfam01245)→                                                                        |
| Fco-1-1  | NC_016510.2                     | + | 2920503 | 2920530 | RNA→ rplS (PRK05338)Ribosomal_L19 (pfam01245)→                                                                        |
| Ala-1-1  | NZ_AUMK01000014.1               | - | 41792   | 41765   | RNA→ rplS (PRK05338)Ribosomal_L19 (pfam01245)→                                                                        |
| env-1264 | JGI24023J19991_10023870         | - | 1433    | 1406    | RNA→ rplS (PRK05338)Ribosomal_L19 (pfam01245)→                                                                        |
| env-1265 | JGI24724J26744_10048212         | + | 212     | 239     | RNA→ rplS (PRK05338)Ribosomal_L19 (pfam01245)→                                                                        |
| env-1266 | JGI24723J26617_10001125         | - | 19348   | 19321   | RNA→ rplS (PRK05338)Ribosomal_L19 (pfam01245)→                                                                        |
| env-1267 | TrichMG_c100001                 | - | 14774   | 14747   | RNA→ rplS (PRK05338)Ribosomal_L19 (pfam01245)→                                                                        |
| Wps-1-1  | NZ_ATMR01000180.1               | + | 83347   | 83374   | RNA→ rplS (PRK05338)Ribosomal_L19 (pfam01245)→                                                                        |
| env-1268 | AglaG_GBVDVLI01B3NQO            | - | 163     | 136     | RNA→ rplS (PRK05338)Ribosomal_L19 (pfam01245)→                                                                        |
| env-1269 | ElkS_mat_MD6A_1003775           | - | 3249    | 3222    | RNA→ ←hypo                                                                                                            |
| env-1270 | JGI11876J14442_10004776         | - | 3630    | 3603    | RNA→ ←hypo                                                                                                            |
| env-1271 | CERE01152256.1                  | + | 629     | 656     | RNA→                                                                                                                  |
| Mze-1-1  | NZ_AULQ01000006.1               | - | 14032   | 14005   | RNA→ rplS (PRK05338)Ribosomal_L19 (pfam01245)→                                                                        |
| env-1272 | JGI24723J26617_10002074         | - | 4096    | 4069    | RNA→ rplS (PRK05338)Ribosomal_L19 (pfam01245)→                                                                        |
| Gpo-1-1  | NZ_AUHF01000008.1               | + | 262596  | 262623  | RNA→ rplS (PRK05338)Ribosomal_L19 (pfam01245)→                                                                        |
| Oma-1-1  | NZ_JADR01000006.1               | - | 9045    | 9018    | RNA→ rplS (PRK05338)Ribosomal_L19 (pfam01245)→                                                                        |
| env-1273 | wf3_AHAI14839_x1                | + | 659     | 686     | RNA→ rplS (PRK05338)Ribosomal_L19 (pfam01245)→                                                                        |
| env-1274 | CEGD01004528.1                  | - | 427     | 400     | RNA→ rplS (PRK05338)Ribosomal_L19 (pfam01245)→                                                                        |
| env-1275 | BS_KBA_SWE21_205m_10562486      | - | 229     | 202     | RNA→ rplS (PRK05338)Ribosomal_L19 (pfam01245)→                                                                        |
| env-1276 | wf3_Contig6796                  | + | 1463    | 1490    | RNA→ rplS (PRK05338)Ribosomal_L19 (pfam01245)→                                                                        |
| env-1277 | CESF01053946.1                  | - | 9020    | 8993    | RNA→ rplS (PRK05338)Ribosomal_L19 (pfam01245)→                                                                        |
| env-1278 | CESO01316884.1                  | + | 263     | 290     | RNA→ rplS (PRK05338)Ribosomal_L19 (pfam01245)→                                                                        |
| env-1279 | JGI24724J26744_10002545         | + | 3020    | 3047    | RNA→ rplS (PRK05338)Ribosomal_L19 (pfam01245)→                                                                        |
| Fgi-1-1  | NZ_JNCP01000011.1               | + | 2791    | 2818    | RNA→ rplS (PRK05338)Ribosomal_L19 (pfam01245)→                                                                        |

|          |                             |   |         |         |                                                                                                                                                               |
|----------|-----------------------------|---|---------|---------|---------------------------------------------------------------------------------------------------------------------------------------------------------------|
| env-1280 | KGI_S1_ANT01.95m.c10010682  | + | 3821    | 3848    | RNA → <a href="#">rplS (PRK05338)</a> <a href="#">Ribosomal_L19 (pfam01245)</a> →                                                                             |
| Fde-1-1  | NZ_KE384377.1               | - | 10971   | 10944   | RNA → <a href="#">rplS (PRK05338)</a> <a href="#">Ribosomal_L19 (pfam01245)</a> →                                                                             |
| Fsp-8-1  | NZ_JQJY01000004.1           | + | 576152  | 576179  | RNA → <a href="#">rplS (PRK05338)</a> <a href="#">Ribosomal_L19 (pfam01245)</a> →                                                                             |
| Ffr-2-1  | NZ_AHKF01000018.1           | - | 29890   | 29863   | RNA → <a href="#">rplS (PRK05338)</a> <a href="#">Ribosomal_L19 (pfam01245)</a> → <a href="#">rplS (PRK05338)</a> <a href="#">Ribosomal_L19 (pfam01245)</a> → |
| Fsp-7-1  | NZ_AKZQ01000002.1           | - | 95707   | 95680   | RNA → <a href="#">rplS (PRK05338)</a> <a href="#">Ribosomal_L19 (pfam01245)</a> → <a href="#">rplS (PRK05338)</a> <a href="#">Ribosomal_L19 (pfam01245)</a> → |
| Fch-1-1  | NZ_JASY01000001.1           | + | 715110  | 715137  | RNA → <a href="#">rplS (PRK05338)</a> <a href="#">Ribosomal_L19 (pfam01245)</a> →                                                                             |
| Fsp-2-1  | NZ_LEKS01000006.1           | - | 39097   | 39070   | RNA → <a href="#">rplS (PRK05338)</a> <a href="#">Ribosomal_L19 (pfam01245)</a> →                                                                             |
| Ffr-1-1  | NZ_AUDO01000011.1           | - | 15707   | 15680   | RNA → <a href="#">rplS (PRK05338)</a> <a href="#">Ribosomal_L19 (pfam01245)</a> →                                                                             |
| Fre-1-1  | NZ_JPRL01000001.1           | + | 2564906 | 2564933 | RNA → <a href="#">rplS (PRK05338)</a> <a href="#">Ribosomal_L19 (pfam01245)</a> →                                                                             |
| env-1281 | SA_S1_NOR08_45m.c10539000   | - | 115     | 88      | RNA → <a href="#">hypo</a> →                                                                                                                                  |
| Osp-1-1  | NZ_KI912445.1               | - | 8860    | 8833    | RNA → <a href="#">rplS (PRK05338)</a> <a href="#">Ribosomal_L19 (pfam01245)</a> →                                                                             |
| Osp-2-1  | NZ_JADT01000012.1           | - | 9076    | 9049    | RNA → <a href="#">rplS (PRK05338)</a> <a href="#">Ribosomal_L19 (pfam01245)</a> →                                                                             |
| env-1282 | BS_KBA_SWE12_21m.c10000785  | - | 8390    | 8363    | RNA → <a href="#">←hypo</a>                                                                                                                                   |
| env-1283 | BS_KBB_SWE26_205m.c1003525  | + | 489     | 516     | RNA → <a href="#">←hypo</a>                                                                                                                                   |
| env-1284 | BS_KBA_SWE21_205m.10009165  | + | 1230    | 1257    | RNA → <a href="#">←hypo</a>                                                                                                                                   |
| env-1285 | BS_KBA_SWE02_21m.10000834   | - | 8439    | 8412    | RNA → <a href="#">←hypo</a>                                                                                                                                   |
| Ssp-2-1  | NZ_JHZX01000001.1           | - | 3745903 | 3745876 | RNA → <a href="#">rplS (PRK05338)</a> <a href="#">Ribosomal_L19 (pfam01245)</a> →                                                                             |
| env-1286 | CEUX01158018.1              | - | 198     | 171     | RNA → <a href="#">rplS (PRK05338)</a> <a href="#">Ribosomal_L19 (pfam01245)</a> →                                                                             |
| Fsp-4-1  | NZ_JSYM01000007.1           | + | 139958  | 139985  | RNA → <a href="#">rplS (PRK05338)</a> <a href="#">Ribosomal_L19 (pfam01245)</a> →                                                                             |
| Fsp-10-1 | NZ_JXQR01000051.1           | + | 159915  | 159942  | RNA → <a href="#">rplS (PRK05338)</a> <a href="#">Ribosomal_L19 (pfam01245)</a> →                                                                             |
| env-1287 | KGI_S1_ANT01.95m.c10011075  | + | 3112    | 3139    | RNA → <a href="#">rplS (PRK05338)</a> <a href="#">Ribosomal_L19 (pfam01245)</a> →                                                                             |
| env-1288 | KGI_S2_ANT04_2345m.c1004935 | - | 4516    | 4489    | RNA → <a href="#">rplS (PRK05338)</a> <a href="#">Ribosomal_L19 (pfam01245)</a> →                                                                             |
| env-1289 | KGI_S1_ANT01.95m.c10002779  | - | 5614    | 5587    | RNA → <a href="#">rplS (PRK05338)</a> <a href="#">Ribosomal_L19 (pfam01245)</a> →                                                                             |
| env-1290 | KGI_S2_ANT04_2345m.c1005141 | - | 4576    | 4549    | RNA → <a href="#">rplS (PRK05338)</a> <a href="#">Ribosomal_L19 (pfam01245)</a> →                                                                             |
| Gsp-2-1  | NZ_APHJ01000024.1           | + | 94820   | 94847   | RNA → <a href="#">rplS (PRK05338)</a> <a href="#">Ribosomal_L19 (pfam01245)</a> →                                                                             |
| Fsp-9-1  | NZ_JARP01000001.1           | - | 168990  | 168963  | RNA → <a href="#">rplS (PRK05338)</a> <a href="#">Ribosomal_L19 (pfam01245)</a> →                                                                             |
| env-1291 | KGI_S1_ANT01.95m.c10032372  | + | 345     | 372     | RNA → <a href="#">rplS (PRK05338)</a> <a href="#">Ribosomal_L19 (pfam01245)</a> →                                                                             |
| env-1292 | KGI_S2_ANT04_2345m.c1037950 | + | 215     | 242     | RNA → <a href="#">rplS (PRK05338)</a> <a href="#">Ribosomal_L19 (pfam01245)</a> →                                                                             |
| env-1293 | ElkS_mat_MD6A_1029448       | - | 765     | 738     | RNA → <a href="#">rplS (PRK05338)</a> <a href="#">Ribosomal_L19 (pfam01245)</a> →                                                                             |
| env-1294 | JGI11876J14442_10227469     | - | 312     | 285     | RNA → <a href="#">rplS (PRK05338)</a> <a href="#">Ribosomal_L19 (pfam01245)</a> →                                                                             |
| env-1295 | JGI11876J14442_10329633     | - | 316     | 289     | RNA → <a href="#">rplS (PRK05338)</a> <a href="#">Ribosomal_L19 (pfam01245)</a> →                                                                             |
| env-1296 | JGI24770J26754_10195704     | - | 676     | 649     | RNA → <a href="#">rplS (PRK05338)</a> <a href="#">Ribosomal_L19 (pfam01245)</a> →                                                                             |
| env-1297 | KGI_S1_ANT01.95m.c10062448  | + | 418     | 445     | RNA → <a href="#">rplS (PRK05338)</a> <a href="#">Ribosomal_L19 (pfam01245)</a> →                                                                             |
| env-1298 | KGI_S1_ANT01.95m.c10003247  | + | 7447    | 7474    | RNA → <a href="#">rplS (PRK05338)</a> <a href="#">Ribosomal_L19 (pfam01245)</a> →                                                                             |
| env-1299 | KGI_S2_ANT04_2345m.c1001347 | + | 8040    | 8067    | RNA → <a href="#">rplS (PRK05338)</a> <a href="#">Ribosomal_L19 (pfam01245)</a> →                                                                             |
| env-1300 | KGI_S1_ANT01.95m.c10708988  | + | 201     | 228     | RNA →                                                                                                                                                         |
| env-1301 | KGI_S1_ANT01.95m.c10208214  | - | 419     | 392     | RNA → <a href="#">rplS (PRK05338)</a> <a href="#">Ribosomal_L19 (pfam01245)</a> →                                                                             |
| env-1302 | JGI24770J26754_10790136     | - | 258     | 231     | RNA → <a href="#">rplS (PRK05338)</a> <a href="#">Ribosomal_L19 (pfam01245)</a> →                                                                             |
| env-1303 | LWAnN_GIDYKCY01DFNMC        | + | 24      | 51      | RNA → <a href="#">rplS (PRK05338)</a> <a href="#">Ribosomal_L19 (pfam01245)</a> →                                                                             |
| Fhi-1-1  | NZ_JPRK01000017.1           | - | 43000   | 42973   | RNA → <a href="#">rplS (PRK05338)</a> <a href="#">Ribosomal_L19 (pfam01245)</a> →                                                                             |
| Gsp-3-1  | NZ_AJLT01000006.1           | - | 8930    | 8903    | RNA → <a href="#">rplS (PRK05338)</a> <a href="#">Ribosomal_L19 (pfam01245)</a> → <a href="#">rplS (PRK05338)</a> <a href="#">Ribosomal_L19 (pfam01245)</a> → |
| env-1304 | ARMCC.Contig_357991         | + | 153     | 180     | RNA → <a href="#">rplS (PRK05338)</a> <a href="#">Ribosomal_L19 (pfam01245)</a> →                                                                             |
| Fsp-6-1  | NZ_AKJZ01000008.1           | + | 64241   | 64268   | RNA → <a href="#">rplS (PRK05338)</a> <a href="#">Ribosomal_L19 (pfam01245)</a> → <a href="#">rplS (PRK05338)</a> <a href="#">Ribosomal_L19 (pfam01245)</a> → |
| env-1305 | JGI24770J26754_10441296     | + | 303     | 330     | RNA →                                                                                                                                                         |
| env-1306 | JGI25920J50251_10022691     | + | 1368    | 1395    | RNA → <a href="#">rplS (PRK05338)</a> <a href="#">Ribosomal_L19 (pfam01245)</a> →                                                                             |
| Gsp-5-1  | NZ_KE384218.1               | - | 1128381 | 1128354 | RNA → <a href="#">rplS (PRK05338)</a> <a href="#">Ribosomal_L19 (pfam01245)</a> →                                                                             |
| Fsp-11-1 | NZ_AUEU01000005.1           | - | 10099   | 10072   | RNA → <a href="#">rplS (PRK05338)</a> <a href="#">Ribosomal_L19 (pfam01245)</a> →                                                                             |
| Fsp-1-1  | NZ_JQMS01000001.1           | + | 3749524 | 3749551 | RNA → <a href="#">rplS (PRK05338)</a> <a href="#">Ribosomal_L19 (pfam01245)</a> →                                                                             |
| env-1307 | KVRMV2_102036113            | - | 475     | 448     | RNA → <a href="#">rplS (PRK05338)</a> <a href="#">Ribosomal_L19 (pfam01245)</a> →                                                                             |
| Psp-3-1  | NC_020830.1                 | + | 933043  | 933070  | RNA → <a href="#">rplS (PRK05338)</a> <a href="#">Ribosomal_L19 (pfam01245)</a> →                                                                             |
| env-1308 | CEOF01395880.1              | - | 44      | 17      | RNA →                                                                                                                                                         |
| env-1309 | SI60aug11_200m.c1101747     | - | 140     | 113     | RNA → <a href="#">hypo</a> →                                                                                                                                  |

|          |                          |   |         |         |       |                                                                                            |
|----------|--------------------------|---|---------|---------|-------|--------------------------------------------------------------------------------------------|
| env-1310 | P_1C_Liq_1_UnCty_1069070 | + | 219     | 246     | RNA → | rplS (PRK05338)Ribosomal_L19 (pfam01245) →                                                 |
| Gme-1-1  | NZ_AUHD01000012.1        | - | 8795    | 8768    | RNA → | rplS (PRK05338)Ribosomal_L19 (pfam01245) →                                                 |
| env-1311 | KVRMV2_102150733         | + | 448     | 475     | RNA → |                                                                                            |
| env-1312 | ElkS_mat_CD2A_1245275    | - | 90      | 63      | RNA → | ←hypo                                                                                      |
| env-1313 | JGI11876J14442_10000066  | - | 15974   | 15947   | RNA → | rplS (PRK05338)Ribosomal_L19 (pfam01245) →                                                 |
| env-1314 | JGI25317J35169_1088507   | - | 268     | 241     | RNA → | rplS (PRK05338)Ribosomal_L19 (pfam01245) →                                                 |
| env-1315 | JGI25321J39296_1089961   | + | 165     | 192     | RNA → | rplS (PRK05338)Ribosomal_L19 (pfam01245) →                                                 |
| env-1316 | JGI25321J50212_10001726  | - | 4881    | 4854    | RNA → | rplS (PRK05338)Ribosomal_L19 (pfam01245) →                                                 |
| Min-1-1  | NZ_BAEX01000008.1        | - | 31090   | 31063   | RNA → | rplS (PRK05338)Ribosomal_L19 (pfam01245) → rplS (PRK05338)Ribosomal_L19 (pfam01245) →      |
| env-1317 | CEVI01222985.1           | + | 1040    | 1067    | RNA → | rplS (PRK05338)Ribosomal_L19 (pfam01245) →                                                 |
| env-1318 | JGI11876J14442_10220788  | + | 165     | 192     | RNA → | rplS (PRK05338)Ribosomal_L19 (pfam01245) →                                                 |
| env-1319 | ElkS_mat_MD6A_1191826    | + | 14      | 41      | RNA → | rplS (PRK05338)Ribosomal_L19 (pfam01245) →                                                 |
| env-1320 | CENM01024442.1           | - | 460     | 433     | RNA → | rplS (PRK05338)Ribosomal_L19 (pfam01245) →                                                 |
| Ssp-1-1  | NZ_JQNQ01000001.1        | - | 3054097 | 3054070 | RNA → | rplS (PRK05338)Ribosomal_L19 (pfam01245) →                                                 |
| env-1321 | 3300001605_10299261      | + | 678     | 705     | RNA → | rplS (PRK05338)Ribosomal_L19 (pfam01245) →                                                 |
| Fsu-2-1  | NZ_AUCZ01000004.1        | - | 149796  | 149769  | RNA → | rplS (PRK05338)Ribosomal_L19 (pfam01245) → hypo → monomer_idh (TIGR00178)IDH (pfam03971) → |
| Fsu-2-2  | NZ_JRLW01000001.1        | - | 149690  | 149663  | RNA → | rplS (PRK05338)Ribosomal_L19 (pfam01245) → hypo → monomer_idh (TIGR00178)IDH (pfam03971) → |
| env-1322 | PBR_1002168              | + | 6973    | 7000    | RNA → | rplS (PRK05338)Ribosomal_L19 (pfam01245) →                                                 |
| env-1323 | ElkS_mat_CD2A_1001393    | - | 6905    | 6878    | RNA → | rplS (PRK05338)Ribosomal_L19 (pfam01245) →                                                 |
| env-1324 | ElkS_mat_CD2A_1002187    | - | 557     | 530     | RNA → | rplS (PRK05338)Ribosomal_L19 (pfam01245) →                                                 |
| env-1325 | JGI11876J14442_10004185  | - | 6445    | 6418    | RNA → | rplS (PRK05338)Ribosomal_L19 (pfam01245) →                                                 |
| env-1326 | CENR01035721.1           | + | 297     | 324     | RNA → | rplS (PRK05338)Ribosomal_L19 (pfam01245) →                                                 |
| env-1327 | 2200738958               | - | 695     | 668     | RNA → | rplS (PRK05338)Ribosomal_L19 (pfam01245) →                                                 |
| Mze-2-1  | NZ_AFOE01000017.1        | - | 24032   | 24005   | RNA → | rplS (PRK05338)Ribosomal_L19 (pfam01245) → rplS (PRK05338)Ribosomal_L19 (pfam01245) →      |
| env-1328 | P_2C_Liq_1_UnCty_1043821 | - | 45      | 18      | RNA → |                                                                                            |
| Myu-1-1  | NZ_JPFK01000002.1        | + | 125744  | 125771  | RNA → | rplS (PRK05338)Ribosomal_L19 (pfam01245) →                                                 |
| Gsa-1-1  | NZ_AUDV01000007.1        | - | 8102    | 8075    | RNA → | rplS (PRK05338)Ribosomal_L19 (pfam01245) →                                                 |
| Amu-1-1  | NZ_AUML01000029.1        | + | 59901   | 59928   | RNA → | rplS (PRK05338)Ribosomal_L19 (pfam01245) →                                                 |
| Fen-1-1  | NZ_AVCS01000013.1        | + | 115329  | 115356  | RNA → | rplS (PRK05338)Ribosomal_L19 (pfam01245) →                                                 |
| Fen-1-2  | NZ_JRLZ01000009.1        | - | 140934  | 140907  | RNA → | rplS (PRK05338)Ribosomal_L19 (pfam01245) →                                                 |
| Fli-1-1  | NZ_AVGG01000005.1        | + | 168606  | 168633  | RNA → | rplS (PRK05338)Ribosomal_L19 (pfam01245) →                                                 |
| Fca-1-1  | NZ_AVBI01000004.1        | + | 53904   | 53931   | RNA → | rplS (PRK05338)Ribosomal_L19 (pfam01245) →                                                 |
| Fca-1-2  | NZ_JRLU01000011.1        | - | 41550   | 41523   | RNA → | rplS (PRK05338)Ribosomal_L19 (pfam01245) →                                                 |
| Fsa-1-1  | NZ_AVFO01000024.1        | - | 41542   | 41515   | RNA → | rplS (PRK05338)Ribosomal_L19 (pfam01245) →                                                 |
| Fse-1-1  | NZ_JNCA01000006.1        | - | 95236   | 95209   | RNA → | rplS (PRK05338)Ribosomal_L19 (pfam01245) →                                                 |
| Fda-1-1  | NZ_AUDK01000004.1        | - | 79117   | 79090   | RNA → | rplS (PRK05338)Ribosomal_L19 (pfam01245) →                                                 |
| Dsp-2-1  | NZ_CM001837.1            | - | 2216219 | 2216192 | RNA → | rplS (PRK05338)Ribosomal_L19 (pfam01245) →                                                 |
| env-1329 | P_1C_Liq_1_UnCty_1060928 | + | 197     | 224     | RNA → | rplS (PRK05338)Ribosomal_L19 (pfam01245) →                                                 |
| env-1330 | P_2C_Liq_1_UnCty_1114980 | - | 96      | 69      | RNA → | hypo →                                                                                     |
| env-1331 | P_2C_Liq_2_UnCty_1069521 | - | 266     | 239     | RNA → | rplS (PRK05338)Ribosomal_L19 (pfam01245) →                                                 |
| env-1332 | JGI26524J50256_1000640   | + | 40528   | 40555   | RNA → | rplS (PRK05338)Ribosomal_L19 (pfam01245) →                                                 |
| env-1333 | JGI26523J50269_1000212   | + | 2723    | 2696    | RNA → | rplS (PRK05338)Ribosomal_L19 (pfam01245) →                                                 |
| env-1334 | JGI26534J51046_1001256   | + | 19707   | 19734   | RNA → | rplS (PRK05338)Ribosomal_L19 (pfam01245) →                                                 |
| env-1335 | NCBI_READ_1112777305773  | - | 253     | 226     | RNA → | rplS (PRK05338)Ribosomal_L19 (pfam01245) →                                                 |
| env-1336 | PBR_1158914              | + | 213     | 240     | RNA → |                                                                                            |
| env-1337 | JGI24768J34885_10254432  | + | 396     | 423     | RNA → | rplS (PRK05338)Ribosomal_L19 (pfam01245) →                                                 |
| env-1338 | JGI25913J50563_1000388   | + | 6034    | 6007    | RNA → | rplS (PRK05338)Ribosomal_L19 (pfam01245) →                                                 |
| Faq-1-1  | NZ_JRHH01000003.1        | - | 440802  | 440775  | RNA → | rplS (PRK05338)Ribosomal_L19 (pfam01245) →                                                 |
| env-1339 | CEUK01343367.1           | - | 1065    | 1038    | RNA → | rplS (PRK05338)Ribosomal_L19 (pfam01245) →                                                 |
| env-1340 | JGI24770J26754_10099893  | + | 564     | 591     | RNA → | rplS (PRK05338)Ribosomal_L19 (pfam01245) →                                                 |
| env-1341 | JGI25910J50241_10080562  | + | 57      | 84      | RNA → | rplS (PRK05338)Ribosomal_L19 (pfam01245) →                                                 |
| env-1342 | CESF01139250.1           | - | 371     | 344     | RNA → | rplS (PRK05338)Ribosomal_L19 (pfam01245) →                                                 |



|          |                                 |   |         |         |                                                                                                                                                                                                                                                                                                                        |
|----------|---------------------------------|---|---------|---------|------------------------------------------------------------------------------------------------------------------------------------------------------------------------------------------------------------------------------------------------------------------------------------------------------------------------|
| Zam-1-1  | NZ_AYXY01000014.1               | - | 3873    | 3846    | RNA → rplS (PRK05338)Ribosomal_L19 (pfam01245) →                                                                                                                                                                                                                                                                       |
| Gec-1-1  | NZ_AUHG01000016.1               | - | 9590    | 9563    | RNA → rplS (PRK05338)Ribosomal_L19 (pfam01245) →                                                                                                                                                                                                                                                                       |
| env-1343 | CEOS01230303.1                  | - | 1375    | 1348    | RNA → rplS (PRK05338)Ribosomal_L19 (pfam01245) →                                                                                                                                                                                                                                                                       |
| env-1344 | 2227004913                      | + | 161     | 197     | RNA → rplS (PRK05338)Ribosomal_L19 (pfam01245) →                                                                                                                                                                                                                                                                       |
| env-1345 | IMNBL1_c0000763                 | - | 5212    | 5176    | RNA → rplS (PRK05338)Ribosomal_L19 (pfam01245) →                                                                                                                                                                                                                                                                       |
| env-1346 | JGI996J12353_1000635            | - | 5278    | 5242    | RNA → rplS (PRK05338)Ribosomal_L19 (pfam01245) →                                                                                                                                                                                                                                                                       |
| env-1347 | TB03JUN2009E_Contig_140630      | - | 66      | 39      | RNA →                                                                                                                                                                                                                                                                                                                  |
| env-1348 | JGI24770J26754_10070249         | + | 144     | 171     | RNA → rplS (PRK05338)Ribosomal_L19 (pfam01245) →                                                                                                                                                                                                                                                                       |
| env-1349 | JGI24025J20009_10007707         | - | 2829    | 2802    | RNA → rplS (PRK05338)Ribosomal_L19 (pfam01245) →                                                                                                                                                                                                                                                                       |
| env-1350 | JGI24724J26744_10044739         | - | 1715    | 1688    | RNA → rplS (PRK05338)Ribosomal_L19 (pfam01245) →                                                                                                                                                                                                                                                                       |
| env-1351 | TB_GS09_5_10015365              | - | 2511    | 2484    | RNA → rplS (PRK05338)Ribosomal_L19 (pfam01245) →                                                                                                                                                                                                                                                                       |
| env-1352 | KGL_S1_ANT01_95m_c10107932      | + | 100     | 127     | RNA → rplS (PRK05338)Ribosomal_L19 (pfam01245) →                                                                                                                                                                                                                                                                       |
| env-1353 | SA_S1_NOR08_45m_c10041987       | + | 169     | 196     | RNA → rplS (PRK05338)Ribosomal_L19 (pfam01245) →                                                                                                                                                                                                                                                                       |
| env-1354 | KGL_S2_ANT04_2345m_c1369759     | - | 184     | 157     | RNA → rplS (PRK05338)Ribosomal_L19 (pfam01245) →                                                                                                                                                                                                                                                                       |
| env-1355 | KGL_S2_ANT05_2345m_c1099771     | + | 146     | 173     | RNA → rplS (PRK05338)Ribosomal_L19 (pfam01245) →                                                                                                                                                                                                                                                                       |
| env-1356 | KGL_S1_ANT02_95m_c10047434      | - | 1222    | 1195    | RNA → hypo → rplS (PRK05338)Ribosomal_L19 (pfam01245) →                                                                                                                                                                                                                                                                |
| env-1357 | SA_S1_NOR05_45m_c10449740       | - | 163     | 136     | RNA → hypo → rplS (PRK05338)Ribosomal_L19 (pfam01245) →                                                                                                                                                                                                                                                                |
| env-1358 | SA_S2_NOR15_50m_c10770364       | + | 118     | 145     | RNA → rplS (PRK05338)Ribosomal_L19 (pfam01245) →                                                                                                                                                                                                                                                                       |
| env-1359 | JGI20156J14371_10179980         | + | 85      | 112     | RNA → rplS (PRK05338)Ribosomal_L19 (pfam01245) →                                                                                                                                                                                                                                                                       |
| env-1360 | TDF_MC_ARG01_113m_c1038862      | - | 280     | 253     | RNA → rplS (PRK05338)Ribosomal_L19 (pfam01245) →                                                                                                                                                                                                                                                                       |
| env-1361 | CESO01105902.1                  | + | 2141    | 2168    | RNA → rplS (PRK05338)Ribosomal_L19 (pfam01245) → <b>lcd (COG0538)PRK08299 (PRK08299) →</b>                                                                                                                                                                                                                             |
| env-1362 | CETY01197370.1                  | + | 892     | 919     | <b>murQ (PRK05441)SIS_Etherase (cd05007) → hypo → TGS_ThrRS_N (cd01667)ThrS (COG0441)thrS (PRK00413) →</b><br>RNA → rplS (PRK05338)Ribosomal_L19 (pfam01245) → <b>lcd (COG0538)PRK08299 (PRK08299) →</b><br><b>murQ (PRK05441)SIS_Etherase (cd05007) → hypo → TGS_ThrRS_N (cd01667)ThrS (COG0441)thrS (PRK00413) →</b> |
| env-1363 | CEVX01010802.1                  | + | 2158    | 2185    | RNA →                                                                                                                                                                                                                                                                                                                  |
| env-1364 | DelMOWin2010_c10186470          | + | 427     | 454     | RNA → rplS (PRK05338)Ribosomal_L19 (pfam01245) →                                                                                                                                                                                                                                                                       |
| env-1365 | CEWO01359685.1                  | + | 828     | 855     | RNA → rplS (PRK05338)Ribosomal_L19 (pfam01245) →                                                                                                                                                                                                                                                                       |
| env-1366 | DelMOSum2010_c10245447          | - | 220     | 193     | RNA → rplS (PRK05338)Ribosomal_L19 (pfam01245) →                                                                                                                                                                                                                                                                       |
| env-1367 | JCVL_SCAF_1101668030402         | + | 742     | 769     | RNA → rplS (PRK05338)Ribosomal_L19 (pfam01245) → <b>PRK08299 (PRK08299) →</b>                                                                                                                                                                                                                                          |
| env-1368 | JCVL_SCAF_1096627111654         | + | 201     | 228     | RNA → rplS (PRK05338)Ribosomal_L19 (pfam01245) → <b>PRK08299 (PRK08299) →</b>                                                                                                                                                                                                                                          |
| env-1369 | SA_S1_NOR08_45m_c10116776       | - | 500     | 473     | RNA → rplS (PRK05338)Ribosomal_L19 (pfam01245) →                                                                                                                                                                                                                                                                       |
| env-1370 | CENP01239202.1                  | - | 14739   | 14712   | RNA → rplS (PRK05338)Ribosomal_L19 (pfam01245) → <b>PRK08299 (PRK08299) →</b>                                                                                                                                                                                                                                          |
| env-1371 | CENX01155294.1                  | - | 392     | 365     | RNA → rplS (PRK05338)Ribosomal_L19 (pfam01245) →                                                                                                                                                                                                                                                                       |
| env-1372 | CEOF01367002.1                  | - | 392     | 365     | RNA → rplS (PRK05338)Ribosomal_L19 (pfam01245) →                                                                                                                                                                                                                                                                       |
| env-1373 | CEOK01333021.1                  | + | 503     | 530     | RNA → rplS (PRK05338)Ribosomal_L19 (pfam01245) →                                                                                                                                                                                                                                                                       |
| Jma-1-1  | NZ_JH651379.1                   | - | 2994278 | 2994251 | RNA → rplS (PRK05338)Ribosomal_L19 (pfam01245) → <b>rplS (PRK05338)Ribosomal_L19 (pfam01245) →</b>                                                                                                                                                                                                                     |
| env-1374 | SRS043422_LANL_scaffold_17386   | - | 316     | 289     | RNA → rplS (PRK05338)Ribosomal_L19 (pfam01245) →                                                                                                                                                                                                                                                                       |
| env-1375 | SRS015947_WUGC_scaffold_22634   | + | 8860    | 8887    | RNA → rplS (PRK05338)Ribosomal_L19 (pfam01245) →                                                                                                                                                                                                                                                                       |
| env-1376 | SRS055450_LANL_scaffold_26813   | - | 98      | 71      | RNA →                                                                                                                                                                                                                                                                                                                  |
| Csp-1-1  | NZ_ABZV01000006.1               | - | 117415  | 117388  | RNA → rplS (PRK05338)Ribosomal_L19 (pfam01245) → <b>rplS (PRK05338)Ribosomal_L19 (pfam01245) →</b>                                                                                                                                                                                                                     |
| env-1377 | KGL_S1_ANT01_95m_c10119168      | - | 553     | 526     | RNA → rplS (PRK05338)Ribosomal_L19 (pfam01245) →                                                                                                                                                                                                                                                                       |
| env-1378 | KGL_S2_ANT04_2345m_c1039681     | - | 468     | 441     | RNA → rplS (PRK05338)Ribosomal_L19 (pfam01245) →                                                                                                                                                                                                                                                                       |
| env-1379 | KGL_S1_ANT02_95m_c10037526      | + | 1078    | 1105    | RNA → rplS (PRK05338)Ribosomal_L19 (pfam01245) →                                                                                                                                                                                                                                                                       |
| env-1380 | KVRMV2_100600626                | + | 510     | 537     | RNA → rplS (PRK05338)Ribosomal_L19 (pfam01245) →                                                                                                                                                                                                                                                                       |
| env-1381 | KGL_S2_ANT05_2345m_c1283145     | + | 206     | 179     | RNA → rplS (PRK05338)Ribosomal_L19 (pfam01245) →                                                                                                                                                                                                                                                                       |
| env-1382 | KGL_S1_ANT01_95m_c10241621      | - | 446     | 419     | RNA → hypo → rplS (PRK05338)Ribosomal_L19 (pfam01245) →                                                                                                                                                                                                                                                                |
| env-1383 | SRS015440_WUGC_scaffold_57079   | - | 459     | 432     | RNA → rplS (PRK05338)Ribosomal_L19 (pfam01245) → <b>rplS (PRK05338)Ribosomal_L19 (pfam01245) →</b>                                                                                                                                                                                                                     |
| env-1384 | SRS043018_WUGC_scaffold_66496   | + | 2705    | 2732    | RNA → rplS (PRK05338)Ribosomal_L19 (pfam01245) →                                                                                                                                                                                                                                                                       |
| env-1385 | Buccal_mucosa_LANL_C64861354    | + | 291     | 318     | RNA →                                                                                                                                                                                                                                                                                                                  |
| env-1386 | SRS015470_WUGC_scaffold_44437   | + | 4765    | 4792    | RNA → rplS (PRK05338)Ribosomal_L19 (pfam01245) →                                                                                                                                                                                                                                                                       |
| env-1387 | SRS015803_WUGC_scaffold_24800   | - | 3059    | 3032    | RNA → rplS (PRK05338)Ribosomal_L19 (pfam01245) →                                                                                                                                                                                                                                                                       |
| env-1388 | SRS018157_Baylor_scaffold_69033 | - | 304     | 277     | RNA → rplS (PRK05338)Ribosomal_L19 (pfam01245) →                                                                                                                                                                                                                                                                       |
| env-1389 | SRS019077_WUGC_scaffold_14658   | - | 3232    | 3205    | RNA → rplS (PRK05338)Ribosomal_L19 (pfam01245) →                                                                                                                                                                                                                                                                       |

|          |                                  |   |        |        |                                                                                                                                                                                                                                                |
|----------|----------------------------------|---|--------|--------|------------------------------------------------------------------------------------------------------------------------------------------------------------------------------------------------------------------------------------------------|
| env-1390 | SRS045197_C3591711               | + | 1253   | 1280   | RNA → <a href="#">rplS (PRK05338)</a> <a href="#">Ribosomal_L19 (pfam01245)</a> →                                                                                                                                                              |
| env-1391 | SRS047113_LANL_scaffold_83219    | + | 1884   | 1911   | RNA → <a href="#">rplS (PRK05338)</a> <a href="#">Ribosomal_L19 (pfam01245)</a> →                                                                                                                                                              |
| env-1392 | SRS053584_LANL_scaffold_18794    | + | 28521  | 28548  | RNA → <a href="#">rplS (PRK05338)</a> <a href="#">Ribosomal_L19 (pfam01245)</a> →                                                                                                                                                              |
| env-1393 | SRS049318_LANL_scaffold_16971    | + | 18008  | 18035  | RNA → ← <a href="#">MnmE (COG0486)</a> <a href="#">trmE (PRK05291)</a>                                                                                                                                                                         |
| env-1394 | SRS053917_LANL_scaffold_21642    | - | 195    | 168    | RNA → <a href="#">rplS (PRK05338)</a> <a href="#">Ribosomal_L19 (pfam01245)</a> →                                                                                                                                                              |
| env-1395 | SRS016541_C1605707               | + | 1495   | 1522   | RNA →                                                                                                                                                                                                                                          |
| env-1396 | SRS064329_C2650028               | - | 160    | 133    | RNA → <a href="#">rplS (PRK05338)</a> <a href="#">Ribosomal_L19 (pfam01245)</a> →                                                                                                                                                              |
| env-1397 | SRS013705_Baylor_scaffold_103146 | + | 2218   | 2245   | RNA →                                                                                                                                                                                                                                          |
| env-1398 | SRS014691_C2508076               | + | 212    | 239    | RNA →                                                                                                                                                                                                                                          |
| env-1399 | SRS015899_WUGC_scaffold_20745    | - | 1016   | 989    | RNA → <a href="#">rplS (PRK05338)</a> <a href="#">Ribosomal_L19 (pfam01245)</a> → <a href="#">DEDDh (cd06127)</a> <a href="#">EXOIII (smart00479)</a> →                                                                                        |
| env-1400 | SRS016600_C792137                | + | 109    | 136    | RNA → <a href="#">rplS (PRK05338)</a> <a href="#">Ribosomal_L19 (pfam01245)</a> →                                                                                                                                                              |
| env-1401 | SRS018300_Baylor_scaffold_9343   | - | 19627  | 19600  | RNA → <a href="#">rplS (PRK05338)</a> <a href="#">Ribosomal_L19 (pfam01245)</a> →<br><a href="#">DEDDh (cd06127)</a> <a href="#">GIY-YIG_UvrC_Cho (cd10434)</a> <a href="#">GIYc (smart00465)</a> <a href="#">EXOIII (smart00479)</a> → hypo → |
| env-1402 | SRS018394_Baylor_scaffold_38060  | + | 100    | 127    | RNA → <a href="#">DEDDh (cd06127)</a> <a href="#">GIY-YIG_UvrC_Cho (cd10434)</a> <a href="#">GIYc (smart00465)</a> <a href="#">EXOIII (smart00479)</a> →                                                                                       |
| env-1403 | SRS019077_WUGC_scaffold_36089    | + | 316    | 343    | RNA → <a href="#">rplS (PRK05338)</a> <a href="#">Ribosomal_L19 (pfam01245)</a> →                                                                                                                                                              |
| env-1404 | SRS019591_WUGC_scaffold_29923    | + | 8636   | 8663   | RNA → <a href="#">rplS (PRK05338)</a> <a href="#">Ribosomal_L19 (pfam01245)</a> →<br><a href="#">DEDDh (cd06127)</a> <a href="#">GIY-YIG_UvrC_Cho (cd10434)</a> <a href="#">GIYc (smart00465)</a> <a href="#">EXOIII (smart00479)</a> → hypo → |
| env-1405 | SRS020226_Baylor_scaffold_9915   | - | 98     | 71     | RNA →                                                                                                                                                                                                                                          |
| env-1406 | SRS045197_WUGC_scaffold_16333    | + | 97     | 124    | RNA → <a href="#">rplS (PRK05338)</a> <a href="#">Ribosomal_L19 (pfam01245)</a> →                                                                                                                                                              |
| env-1407 | SRS045715_LANL_scaffold_96337    | - | 197    | 170    | RNA → <a href="#">rplS (PRK05338)</a> <a href="#">Ribosomal_L19 (pfam01245)</a> →                                                                                                                                                              |
| env-1408 | SRS047634_LANL_scaffold_48423    | + | 258    | 285    | RNA → <a href="#">rplS (PRK05338)</a> <a href="#">Ribosomal_L19 (pfam01245)</a> →<br><a href="#">DEDDh (cd06127)</a> <a href="#">GIY-YIG_UvrC_Cho (cd10434)</a> <a href="#">GIYc (smart00465)</a> <a href="#">EXOIII (smart00479)</a> →        |
| env-1409 | SRS049389_C4597964               | + | 336    | 363    | RNA → <a href="#">rplS (PRK05338)</a> <a href="#">Ribosomal_L19 (pfam01245)</a> →                                                                                                                                                              |
| env-1410 | SRS051378_C1803515               | + | 93     | 120    | RNA → <a href="#">rplS (PRK05338)</a> <a href="#">Ribosomal_L19 (pfam01245)</a> →                                                                                                                                                              |
| env-1411 | SRS052876_LANL_scaffold_22433    | - | 95     | 68     | RNA →                                                                                                                                                                                                                                          |
| env-1412 | SRS054430_C1931853               | - | 145    | 118    | RNA → <a href="#">rplS (PRK05338)</a> <a href="#">Ribosomal_L19 (pfam01245)</a> →                                                                                                                                                              |
| env-1413 | SRS063215_LANL_scaffold_23111    | + | 338    | 365    | RNA → <a href="#">rplS (PRK05338)</a> <a href="#">Ribosomal_L19 (pfam01245)</a> →<br><a href="#">DEDDh (cd06127)</a> <a href="#">GIY-YIG_UvrC_Cho (cd10434)</a> <a href="#">GIYc (smart00465)</a> <a href="#">EXOIII (smart00479)</a> → hypo → |
| Csp-5-1  | NZ_KN390023.1                    | + | 11801  | 11828  | RNA → <a href="#">rplS (PRK05338)</a> <a href="#">Ribosomal_L19 (pfam01245)</a> →<br><a href="#">DEDDh (cd06127)</a> <a href="#">GIY-YIG_UvrC_Cho (cd10434)</a> <a href="#">GIYc (smart00465)</a> <a href="#">EXOIII (smart00479)</a> → hypo → |
| env-1414 | SRS014888_C3105885               | + | 94     | 121    | RNA → <a href="#">rplS (PRK05338)</a> <a href="#">Ribosomal_L19 (pfam01245)</a> →                                                                                                                                                              |
| env-1415 | SRS014894_WUGC_scaffold_7097     | - | 2195   | 2168   | RNA → <a href="#">rplS (PRK05338)</a> <a href="#">Ribosomal_L19 (pfam01245)</a> →                                                                                                                                                              |
| env-1416 | SRS015755_WUGC_scaffold_30815    | + | 386    | 413    | RNA →                                                                                                                                                                                                                                          |
| env-1417 | SRS015989_WUGC_scaffold_19659    | - | 95     | 68     | RNA →                                                                                                                                                                                                                                          |
| env-1418 | SRS016575_Baylor_scaffold_9392   | - | 196    | 169    | RNA → <a href="#">rplS (PRK05338)</a> <a href="#">Ribosomal_L19 (pfam01245)</a> →                                                                                                                                                              |
| env-1419 | SRS015762_C3674485               | - | 8573   | 8546   | RNA → <a href="#">rplS (PRK05338)</a> <a href="#">Ribosomal_L19 (pfam01245)</a> →<br><a href="#">DEDDh (cd06127)</a> <a href="#">GIY-YIG_UvrC_Cho (cd10434)</a> <a href="#">GIYc (smart00465)</a> <a href="#">EXOIII (smart00479)</a> → hypo → |
| env-1420 | SRS019122_C5792698               | + | 337    | 364    | RNA →                                                                                                                                                                                                                                          |
| env-1421 | SRS019127_C1676711               | + | 5492   | 5519   | RNA → <a href="#">rplS (PRK05338)</a> <a href="#">Ribosomal_L19 (pfam01245)</a> →                                                                                                                                                              |
| env-1422 | SRS057205_LANL_scaffold_59131    | - | 8746   | 8719   | RNA → <a href="#">rplS (PRK05338)</a> <a href="#">Ribosomal_L19 (pfam01245)</a> →<br><a href="#">DEDDh (cd06127)</a> <a href="#">GIY-YIG_UvrC_Cho (cd10434)</a> <a href="#">GIYc (smart00465)</a> <a href="#">EXOIII (smart00479)</a> → hypo → |
| env-1423 | SRS020862_C943009                | - | 41     | 14     | RNA →                                                                                                                                                                                                                                          |
| env-1424 | SRS023358_LANL_scaffold_6552     | + | 284    | 311    | RNA →                                                                                                                                                                                                                                          |
| Csp-3-1  | NZ_KB291508.1                    | - | 173545 | 173518 | RNA → <a href="#">rplS (PRK05338)</a> <a href="#">Ribosomal_L19 (pfam01245)</a> →<br><a href="#">DEDDh (cd06127)</a> <a href="#">GIY-YIG_UvrC_Cho (cd10434)</a> <a href="#">GIYc (smart00465)</a> <a href="#">EXOIII (smart00479)</a> → hypo → |
| env-1425 | SRS050244_LANL_scaffold_96048    | - | 316    | 289    | RNA → <a href="#">rplS (PRK05338)</a> <a href="#">Ribosomal_L19 (pfam01245)</a> →                                                                                                                                                              |
| env-1426 | SRS058336_C2049026               | + | 171    | 198    | RNA → <a href="#">rplS (PRK05338)</a> <a href="#">Ribosomal_L19 (pfam01245)</a> →                                                                                                                                                              |
| Csp-7-1  | NZ_AKFR01000031.1                | - | 313220 | 313193 | RNA → <a href="#">rplS (PRK05338)</a> <a href="#">Ribosomal_L19 (pfam01245)</a> →<br><a href="#">DEDDh (cd06127)</a> <a href="#">GIY-YIG_UvrC_Cho (cd10434)</a> <a href="#">EXOIII (smart00479)</a> → hypo →                                   |
| env-1427 | SRS023930_C2193178               | + | 1147   | 1174   | RNA → <a href="#">rplS (PRK05338)</a> <a href="#">Ribosomal_L19 (pfam01245)</a> →<br><a href="#">DEDDh (cd06127)</a> <a href="#">GIY-YIG_UvrC_Cho (cd10434)</a> <a href="#">GIYc (smart00465)</a> <a href="#">EXOIII (smart00479)</a> →        |
| env-1428 | SRS013723_Baylor_scaffold_18285  | - | 2329   | 2302   | RNA → <a href="#">rplS (PRK05338)</a> <a href="#">Ribosomal_L19 (pfam01245)</a> →<br><a href="#">DEDDh (cd06127)</a> <a href="#">GIY-YIG_UvrC_Cho (cd10434)</a> <a href="#">GIYc (smart00465)</a> <a href="#">EXOIII (smart00479)</a> → hypo → |
| env-1429 | SRS014888_C3086477               | + | 650    | 677    | RNA → <a href="#">rplS (PRK05338)</a> <a href="#">Ribosomal_L19 (pfam01245)</a> →                                                                                                                                                              |

|          |                                 |   |         |         |                                                                                                                                        |
|----------|---------------------------------|---|---------|---------|----------------------------------------------------------------------------------------------------------------------------------------|
| env-1430 | SRS050669_LANL_scaffold.18681   | + | 4293    | 4320    | RNA→ rplS (PRK05338)Ribosomal_L19 (pfam01245)→<br>DEDDh (cd06127)GIY-YIG_UvrC_Cho (cd10434)GIYc (smart00465)EXOIII (smart00479)→ hypo→ |
| env-1431 | SRS016200_C2186320              | + | 683     | 710     | RNA→                                                                                                                                   |
| env-1432 | SRS019128_WUGC_scaffold.9518    | - | 98      | 71      | RNA→                                                                                                                                   |
| env-1433 | SRS022536_LANL_scaffold.19907   | + | 4308    | 4335    | RNA→ rplS (PRK05338)Ribosomal_L19 (pfam01245)→<br>DEDDh (cd06127)GIY-YIG_UvrC_Cho (cd10434)EXOIII (smart00479)→ hypo→                  |
| env-1434 | SRS047265_WUGC_scaffold.12298   | + | 1403    | 1430    | RNA→ rplS (PRK05338)Ribosomal_L19 (pfam01245)→                                                                                         |
| Coc-3-1  | NZ_GL573160.1                   | + | 1092618 | 1092645 | RNA→ rplS (PRK05338)Ribosomal_L19 (pfam01245)→<br>DEDDh (cd06127)GIY-YIG_UvrC_Cho (cd10434)EXOIII (smart00479)→ hypo→                  |
| Coc-4-1  | NZ_AKFV01000020.1               | - | 85462   | 85435   | RNA→ rplS (PRK05338)Ribosomal_L19 (pfam01245)→<br>DEDDh (cd06127)GIY-YIG_UvrC_Cho (cd10434)EXOIII (smart00479)→ hypo→                  |
| env-1435 | SRS015064_C1629213              | - | 175     | 148     | RNA→ rplS (PRK05338)Ribosomal_L19 (pfam01245)→                                                                                         |
| env-1436 | SRS015985_C1503945              | - | 334     | 307     | RNA→ rplS (PRK05338)Ribosomal_L19 (pfam01245)→                                                                                         |
| env-1437 | SRS023841_Baylor_scaffold.1736  | + | 704     | 731     | RNA→                                                                                                                                   |
| env-1438 | SRS011098_Baylor_scaffold.6943  | - | 17288   | 17261   | RNA→ rplS (PRK05338)Ribosomal_L19 (pfam01245)→                                                                                         |
| env-1439 | SRS013836_C4761312              | + | 346     | 373     | RNA→ rplS (PRK05338)Ribosomal_L19 (pfam01245)→                                                                                         |
| env-1440 | SRS013949_WUGC_scaffold.10235   | - | 196     | 169     | RNA→ rplS (PRK05338)Ribosomal_L19 (pfam01245)→                                                                                         |
| env-1441 | SRS013950_WUGC_scaffold.18124   | - | 73      | 46      | RNA→                                                                                                                                   |
| env-1442 | SRS015278_WUGC_scaffold.6560    | + | 2113    | 2140    | RNA→ rplS (PRK05338)Ribosomal_L19 (pfam01245)→                                                                                         |
| env-1443 | SRS015899_WUGC_scaffold.28433   | - | 886     | 859     | RNA→ rplS (PRK05338)Ribosomal_L19 (pfam01245)→                                                                                         |
| env-1444 | SRS019073_C2522155              | - | 95      | 68      | RNA→                                                                                                                                   |
| env-1445 | SRS019077_WUGC_scaffold.58916   | - | 190     | 163     | RNA→ rplS (PRK05338)Ribosomal_L19 (pfam01245)→                                                                                         |
| env-1446 | SRS019225_WUGC_scaffold.9244    | - | 22742   | 22715   | RNA→ rplS (PRK05338)Ribosomal_L19 (pfam01245)→                                                                                         |
| env-1447 | SRS024289_LANL_scaffold.9371    | - | 98      | 71      | RNA→                                                                                                                                   |
| Csp-4-1  | NZ_KB291464.1                   | - | 78968   | 78941   | RNA→ rplS (PRK05338)Ribosomal_L19 (pfam01245)→                                                                                         |
| env-1448 | SRS011243_Baylor_scaffold.38886 | - | 160     | 133     | RNA→ rplS (PRK05338)Ribosomal_L19 (pfam01245)→                                                                                         |
| env-1449 | SRS013723_Baylor_scaffold.75255 | - | 295     | 268     | RNA→ rplS (PRK05338)Ribosomal_L19 (pfam01245)→                                                                                         |
| env-1450 | SRS015215_WUGC_scaffold.9005    | - | 288     | 261     | RNA→ rplS (PRK05338)Ribosomal_L19 (pfam01245)→                                                                                         |
| env-1451 | SRS015797_WUGC_scaffold.26726   | + | 97      | 124     | RNA→ rplS (PRK05338)Ribosomal_L19 (pfam01245)→                                                                                         |
| env-1452 | SRS016037_WUGC_scaffold.44282   | + | 97      | 124     | RNA→ rplS (PRK05338)Ribosomal_L19 (pfam01245)→                                                                                         |
| env-1453 | SRS019127_WUGC_scaffold.18778   | - | 8687    | 8660    | RNA→ rplS (PRK05338)Ribosomal_L19 (pfam01245)→                                                                                         |
| env-1454 | SRS023926_Baylor_scaffold.61121 | - | 10271   | 10244   | RNA→ rplS (PRK05338)Ribosomal_L19 (pfam01245)→                                                                                         |
| env-1455 | SRS016092_WUGC_scaffold.23364   | + | 5266    | 5293    | RNA→ rplS (PRK05338)Ribosomal_L19 (pfam01245)→                                                                                         |
| env-1456 | SRS013950_C2181950              | - | 72      | 45      | RNA→                                                                                                                                   |
| env-1457 | SRS017304_Baylor_scaffold.31444 | - | 97      | 70      | RNA→                                                                                                                                   |
| env-1458 | SRS055378_LANL_scaffold.18208   | - | 294     | 267     | RNA→ rplS (PRK05338)Ribosomal_L19 (pfam01245)→                                                                                         |
| Coc-2-1  | NZ_JVFB01000050.1               | + | 35837   | 35864   | RNA→ rplS (PRK05338)Ribosomal_L19 (pfam01245)→<br>DEDDh (cd06127)GIY-YIG_UvrC_Cho (cd10434)GIYc (smart00465)EXOIII (smart00479)→ hypo→ |
| Coc-1-1  | NC_013162.1                     | + | 98683   | 98710   | RNA→ rplS (PRK05338)Ribosomal_L19 (pfam01245)→<br>DEDDh (cd06127)GIY-YIG_UvrC_Cho (cd10434)EXOIII (smart00479)→ hypo→                  |
| env-1459 | SRS022602_Baylor_scaffold.10139 | - | 838     | 811     | RNA→ rplS (PRK05338)Ribosomal_L19 (pfam01245)→ DEDDh (cd06127)EXOIII (smart00479)→                                                     |
| env-1460 | SRS019129_C1939915              | + | 361     | 388     | RNA→                                                                                                                                   |
| env-1461 | SRS019225_C1595905              | + | 1474    | 1501    | RNA→ rplS (PRK05338)Ribosomal_L19 (pfam01245)→                                                                                         |
| env-1462 | SRS022530_LANL_scaffold.63608   | - | 33016   | 32989   | RNA→ rplS (PRK05338)Ribosomal_L19 (pfam01245)→                                                                                         |
| env-1463 | SRS063288_LANL_scaffold.25513   | + | 95      | 122     | RNA→ rplS (PRK05338)Ribosomal_L19 (pfam01245)→                                                                                         |
| env-1464 | SRS023595_Baylor_scaffold.90932 | + | 332     | 359     | RNA→                                                                                                                                   |
| env-1465 | SRS063215_C2182525              | + | 130     | 157     | RNA→ rplS (PRK05338)Ribosomal_L19 (pfam01245)→                                                                                         |
| env-1466 | SRS015540_C1108360              | + | 184     | 211     | RNA→ rplS (PRK05338)Ribosomal_L19 (pfam01245)→                                                                                         |
| env-1467 | SRS011098_Baylor_scaffold.10766 | + | 140     | 167     | RNA→ rplS (PRK05338)Ribosomal_L19 (pfam01245)→                                                                                         |
| env-1468 | SRS013836_Baylor_scaffold.6509  | - | 524     | 497     | RNA→ rplS (PRK05338)Ribosomal_L19 (pfam01245)→                                                                                         |
| Csp-9-1  | NZ_KB291222.1                   | + | 54393   | 54420   | RNA→ rplS (PRK05338)Ribosomal_L19 (pfam01245)→<br>DEDDh (cd06127)GIY-YIG_UvrC_Cho (cd10434)GIYc (smart00465)EXOIII (smart00479)→ hypo→ |
| env-1469 | SRS015989_WUGC_scaffold.4470    | + | 307     | 334     | RNA→ rplS (PRK05338)Ribosomal_L19 (pfam01245)→<br>DEDDh (cd06127)GIY-YIG_UvrC_Cho (cd10434)GIYc (smart00465)EXOIII (smart00479)→ hypo→ |



|          |                                   |   |        |        |      |                                                                                                                                                                                                                                                                                                                                                             |
|----------|-----------------------------------|---|--------|--------|------|-------------------------------------------------------------------------------------------------------------------------------------------------------------------------------------------------------------------------------------------------------------------------------------------------------------------------------------------------------------|
| env-1470 | SRS018145_Baylor_scaffold_33633   | + | 64     | 91     | RNA→ | rplS (PRK05338)Ribosomal_L19 (pfam01245)→                                                                                                                                                                                                                                                                                                                   |
| env-1471 | SRS057692_LANL_scaffold_49475     | + | 78     | 105    | RNA→ | rplS (PRK05338)Ribosomal_L19 (pfam01245)→                                                                                                                                                                                                                                                                                                                   |
| env-1472 | SRS021960_C2154761                | + | 379    | 406    | RNA→ |                                                                                                                                                                                                                                                                                                                                                             |
| env-1473 | SRS024441_LANL_scaffold_52434     | + | 78     | 105    | RNA→ | rplS (PRK05338)Ribosomal_L19 (pfam01245)→                                                                                                                                                                                                                                                                                                                   |
| env-1474 | SRS050628_C1898890                | - | 986    | 959    | RNA→ | rplS (PRK05338)Ribosomal_L19 (pfam01245)→ DEDDh (cd06127)EXOIII (smart00479)→                                                                                                                                                                                                                                                                               |
| Csp-8-1  | NZ_KE150490.1                     | - | 376575 | 376548 | RNA→ | rplS (PRK05338)Ribosomal_L19 (pfam01245)→                                                                                                                                                                                                                                                                                                                   |
| Csp-10-1 | NZ_AJZR01000006.1                 | + | 50848  | 50875  | RNA→ | DEDDh (cd06127)GIY-YIG_UvrC_Cho (cd10434)GIYc (smart00465)EXOIII (smart00479)→ hypo→<br>rplS (PRK05338)Ribosomal_L19 (pfam01245)→ rplS (PRK05338)Ribosomal_L19 (pfam01245)→<br>DEDDh (cd06127)GIY-YIG_UvrC_Cho (cd10434)GIYc (smart00465)EXOIII (smart00479)→<br>DEDDh (cd06127)GIY-YIG_UvrC_Cho (cd10434)GIYc (smart00465)EXOIII (smart00479)→ hypo→ hypo→ |
| env-1475 | Buccal_mucosa_LANL_scaffold_29579 | + | 329    | 356    | RNA→ | rplS (PRK05338)Ribosomal_L19 (pfam01245)→                                                                                                                                                                                                                                                                                                                   |
| env-1476 | SRS020222_C1009936                | + | 264    | 291    | RNA→ | rplS (PRK05338)Ribosomal_L19 (pfam01245)→                                                                                                                                                                                                                                                                                                                   |
| env-1477 | SRS014578_WUGC_scaffold_11003     | - | 214    | 187    | RNA→ | rplS (PRK05338)Ribosomal_L19 (pfam01245)→                                                                                                                                                                                                                                                                                                                   |
| env-1478 | SRS016043_WUGC_scaffold_8966      | - | 256    | 229    | RNA→ | rplS (PRK05338)Ribosomal_L19 (pfam01245)→                                                                                                                                                                                                                                                                                                                   |
| env-1479 | SRS018573_WUGC_scaffold_5605      | - | 2301   | 2274   | RNA→ | rplS (PRK05338)Ribosomal_L19 (pfam01245)→                                                                                                                                                                                                                                                                                                                   |
| env-1480 | SRS019591_WUGC_scaffold_18990     | + | 16688  | 16715  | RNA→ | rplS (PRK05338)Ribosomal_L19 (pfam01245)→                                                                                                                                                                                                                                                                                                                   |
| env-1481 | SRS020340_Baylor_scaffold_33924   | - | 288    | 261    | RNA→ | rplS (PRK05338)Ribosomal_L19 (pfam01245)→                                                                                                                                                                                                                                                                                                                   |
| env-1482 | SRS021477_Baylor_scaffold_1231    | + | 5953   | 5980   | RNA→ | rplS (PRK05338)Ribosomal_L19 (pfam01245)→                                                                                                                                                                                                                                                                                                                   |
| env-1483 | SRS023358_LANL_scaffold_44043     | + | 179    | 206    | RNA→ | rplS (PRK05338)Ribosomal_L19 (pfam01245)→                                                                                                                                                                                                                                                                                                                   |
| env-1484 | SRS024021_Baylor_scaffold_8187    | - | 288    | 261    | RNA→ | rplS (PRK05338)Ribosomal_L19 (pfam01245)→                                                                                                                                                                                                                                                                                                                   |
| env-1485 | SRS047100_C2080290                | - | 301    | 274    | RNA→ | rplS (PRK05338)Ribosomal_L19 (pfam01245)→                                                                                                                                                                                                                                                                                                                   |
| Fan-1-1  | NZ_ATT01000004.1                  | + | 10713  | 10740  | RNA→ | rplS (PRK05338)Ribosomal_L19 (pfam01245)→                                                                                                                                                                                                                                                                                                                   |
| Fte-1-1  | NZ_AUDN01000020.1                 | - | 101805 | 101778 | RNA→ | rplS (PRK05338)Ribosomal_L19 (pfam01245)→                                                                                                                                                                                                                                                                                                                   |
| env-1486 | SRS017227_Baylor_scaffold_48001   | - | 401    | 374    | RNA→ | rplS (PRK05338)Ribosomal_L19 (pfam01245)→                                                                                                                                                                                                                                                                                                                   |
| env-1487 | SRS055401_LANL_scaffold_34300     | - | 163    | 136    | RNA→ | rplS (PRK05338)Ribosomal_L19 (pfam01245)→                                                                                                                                                                                                                                                                                                                   |
| env-1488 | SRS013949_C3524448                | + | 60     | 87     | RNA→ | rplS (PRK05338)Ribosomal_L19 (pfam01245)→                                                                                                                                                                                                                                                                                                                   |
| env-1489 | SRS063932_LANL_scaffold_105541    | + | 28523  | 28550  | RNA→ | rplS (PRK05338)Ribosomal_L19 (pfam01245)→ COG4389 (COG4389)SpecificRecomb (pfam10136)→                                                                                                                                                                                                                                                                      |
| env-1490 | CEOS01042827.1                    | - | 20258  | 20231  | RNA→ | rplS (PRK05338)Ribosomal_L19 (pfam01245)→                                                                                                                                                                                                                                                                                                                   |
| env-1491 | CERQ01126197.1                    | + | 4556   | 4583   | RNA→ | rplS (PRK05338)Ribosomal_L19 (pfam01245)→                                                                                                                                                                                                                                                                                                                   |
| env-1492 | CETA01045631.1                    | - | 13014  | 12987  | RNA→ | rplS (PRK05338)Ribosomal_L19 (pfam01245)→                                                                                                                                                                                                                                                                                                                   |
| env-1493 | CETB01056197.1                    | + | 21881  | 21908  | RNA→ | rplS (PRK05338)Ribosomal_L19 (pfam01245)→                                                                                                                                                                                                                                                                                                                   |
| env-1494 | CETG01362727.1                    | - | 665    | 638    | RNA→ | rplS (PRK05338)Ribosomal_L19 (pfam01245)→                                                                                                                                                                                                                                                                                                                   |
| env-1495 | CETR01036094.1                    | + | 21881  | 21908  | RNA→ | rplS (PRK05338)Ribosomal_L19 (pfam01245)→                                                                                                                                                                                                                                                                                                                   |
| env-1496 | CETS01044312.1                    | + | 9368   | 9395   | RNA→ | rplS (PRK05338)Ribosomal_L19 (pfam01245)→                                                                                                                                                                                                                                                                                                                   |
| env-1497 | CETT01258458.1                    | - | 563    | 536    | RNA→ | rplS (PRK05338)Ribosomal_L19 (pfam01245)→                                                                                                                                                                                                                                                                                                                   |
| env-1498 | CEUY01396649.1                    | + | 431    | 458    | RNA→ | rplS (PRK05338)Ribosomal_L19 (pfam01245)→                                                                                                                                                                                                                                                                                                                   |
| env-1499 | CEVJ01196187.1                    | - | 671    | 644    | RNA→ | rplS (PRK05338)Ribosomal_L19 (pfam01245)→                                                                                                                                                                                                                                                                                                                   |
| env-1500 | CEVK01214642.1                    | - | 308    | 281    | RNA→ | rplS (PRK05338)Ribosomal_L19 (pfam01245)→                                                                                                                                                                                                                                                                                                                   |
| env-1501 | CEVM01174021.1                    | + | 444    | 471    | RNA→ | rplS (PRK05338)Ribosomal_L19 (pfam01245)→                                                                                                                                                                                                                                                                                                                   |
| env-1502 | CEVO01132965.1                    | - | 263    | 236    | RNA→ | rplS (PRK05338)Ribosomal_L19 (pfam01245)→                                                                                                                                                                                                                                                                                                                   |
| env-1503 | CEVQ01096279.1                    | - | 594    | 567    | RNA→ | rplS (PRK05338)Ribosomal_L19 (pfam01245)→                                                                                                                                                                                                                                                                                                                   |
| env-1504 | CEWI01238921.1                    | - | 396    | 369    | RNA→ | rplS (PRK05338)Ribosomal_L19 (pfam01245)→                                                                                                                                                                                                                                                                                                                   |
| env-1505 | CENM01019596.1                    | - | 258    | 231    | RNA→ | rplS (PRK05338)Ribosomal_L19 (pfam01245)→                                                                                                                                                                                                                                                                                                                   |
| env-1506 | JGI24723J26617_10000093           | + | 49411  | 49438  | RNA→ | rplS (PRK05338)Ribosomal_L19 (pfam01245)→                                                                                                                                                                                                                                                                                                                   |
| env-1507 | LGVF01495366.1                    | + | 36     | 63     | RNA→ | rplS (PRK05338)Ribosomal_L19 (pfam01245)→                                                                                                                                                                                                                                                                                                                   |
| Mmo-1-1  | NZ_AUHX01000001.1                 | - | 133740 | 133713 | RNA→ | rplS (PRK05338)Ribosomal_L19 (pfam01245)→                                                                                                                                                                                                                                                                                                                   |
| env-1508 | CEOS01168860.1                    | + | 192    | 219    | RNA→ | rplS (PRK05338)Ribosomal_L19 (pfam01245)→                                                                                                                                                                                                                                                                                                                   |
| env-1509 | CEQE01154469.1                    | + | 4      | 31     | RNA→ | rplS (PRK05338)Ribosomal_L19 (pfam01245)→                                                                                                                                                                                                                                                                                                                   |
| env-1510 | CEVM01223312.1                    | - | 386    | 359    | RNA→ | rplS (PRK05338)Ribosomal_L19 (pfam01245)→                                                                                                                                                                                                                                                                                                                   |
| env-1511 | CEVF01118313.1                    | - | 339    | 312    | RNA→ | rplS (PRK05338)Ribosomal_L19 (pfam01245)→                                                                                                                                                                                                                                                                                                                   |
| env-1512 | TahiMoana_1030440                 | - | 764    | 737    | RNA→ | rplS (PRK05338)Ribosomal_L19 (pfam01245)→                                                                                                                                                                                                                                                                                                                   |
| env-1513 | JGI11881J13070_1029301            | + | 172    | 199    | RNA→ | rplS (PRK05338)Ribosomal_L19 (pfam01245)→                                                                                                                                                                                                                                                                                                                   |
| env-1514 | JGI12218J13221_1034272            | - | 80     | 53     | RNA→ |                                                                                                                                                                                                                                                                                                                                                             |



|          |                           |   |         |         |       |                                                                                                                                                                                                                                                             |
|----------|---------------------------|---|---------|---------|-------|-------------------------------------------------------------------------------------------------------------------------------------------------------------------------------------------------------------------------------------------------------------|
| env-1515 | JGI11931J13222_1024356    | - | 246     | 219     | RNA → | rplS (PRK05338)Ribosomal_L19 (pfam01245) →                                                                                                                                                                                                                  |
| env-1516 | CETA01220460.1            | + | 285     | 312     | RNA → | rplS (PRK05338)Ribosomal_L19 (pfam01245) →                                                                                                                                                                                                                  |
| env-1517 | CETS01220756.1            | + | 255     | 282     | RNA → | rplS (PRK05338)Ribosomal_L19 (pfam01245) →                                                                                                                                                                                                                  |
| env-1518 | CEVIO1118676.1            | - | 855     | 828     | RNA → | rplS (PRK05338)Ribosomal_L19 (pfam01245) →                                                                                                                                                                                                                  |
| Lsp-4-1  | NZ_JPOL01000003.1         | + | 201753  | 201780  | RNA → | rplS (PRK05338)Ribosomal_L19 (pfam01245) →                                                                                                                                                                                                                  |
| env-1519 | JGI1221J11331_1178417     | + | 266     | 293     | RNA → | rplS (PRK05338)Ribosomal_L19 (pfam01245) →                                                                                                                                                                                                                  |
| env-1520 | SA_S1_NOR08_45m_c10151176 | - | 451     | 424     | RNA → | rplS (PRK05338)Ribosomal_L19 (pfam01245) →                                                                                                                                                                                                                  |
| env-1521 | SA_S1_NOR08_45m_c10000441 | + | 12622   | 12649   | RNA → | rplS (PRK05338)Ribosomal_L19 (pfam01245) →                                                                                                                                                                                                                  |
| env-1522 | SA_S2_NOR15_50m_c10000385 | + | 13396   | 13423   | RNA → | rplS (PRK05338)Ribosomal_L19 (pfam01245) →                                                                                                                                                                                                                  |
| env-1523 | SA_S1_NOR02_45m_c1172796  | - | 185     | 158     | RNA → | rplS (PRK05338)Ribosomal_L19 (pfam01245) →                                                                                                                                                                                                                  |
| env-1524 | SA_S2_NOR18_50m_1098208   | + | 227     | 254     | RNA → | rplS (PRK05338)Ribosomal_L19 (pfam01245) →                                                                                                                                                                                                                  |
| env-1525 | SA_S1_NOR05_45m_c10040916 | - | 1024    | 997     | RNA → | rplS (PRK05338)Ribosomal_L19 (pfam01245) →                                                                                                                                                                                                                  |
| Ama-1-1  | NZ_JACA01000020.1         | + | 179901  | 179928  | RNA → | rplS (PRK05338)Ribosomal_L19 (pfam01245) →                                                                                                                                                                                                                  |
| env-1526 | JGI25920J50251_10000870   | - | 9504    | 9477    | RNA → | rplS (PRK05338)Ribosomal_L19 (pfam01245) →                                                                                                                                                                                                                  |
| env-1527 | JGI25909J50240_1100786    | + | 75      | 102     | RNA → | rplS (PRK05338)Ribosomal_L19 (pfam01245) →                                                                                                                                                                                                                  |
| env-1528 | JGI25911J50253_10030107   | + | 69      | 96      | RNA → | rplS (PRK05338)Ribosomal_L19 (pfam01245) →                                                                                                                                                                                                                  |
| env-1529 | JGI25912J50252_10144474   | + | 133     | 160     | RNA → | rplS (PRK05338)Ribosomal_L19 (pfam01245) →                                                                                                                                                                                                                  |
| env-1530 | JGI25908J49247_10036170   | - | 1268    | 1241    | RNA → | rplS (PRK05338)Ribosomal_L19 (pfam01245) →                                                                                                                                                                                                                  |
| env-1531 | JGI25907J50239_1087629    | + | 148     | 175     | RNA → | rplS (PRK05338)Ribosomal_L19 (pfam01245) →                                                                                                                                                                                                                  |
| Aca-1-1  | NZ_AUBG01000016.1         | + | 27656   | 27683   | RNA → | rplS (PRK05338)Ribosomal_L19 (pfam01245) →                                                                                                                                                                                                                  |
| env-1532 | CETR01021789.1            | - | 7980    | 7953    | RNA → | rplS (PRK05338)Ribosomal_L19 (pfam01245) →                                                                                                                                                                                                                  |
| env-1533 | JGI24723J26617_10120000   | + | 312     | 339     | RNA → | rplS (PRK05338)Ribosomal_L19 (pfam01245) →                                                                                                                                                                                                                  |
| env-1534 | JGI24724J26744_10003103   | - | 7169    | 7142    | RNA → | rplS (PRK05338)Ribosomal_L19 (pfam01245) →                                                                                                                                                                                                                  |
| Fsa-2-1  | NZ_JMLU01000004.1         | + | 158055  | 158082  | RNA → | rplS (PRK05338)Ribosomal_L19 (pfam01245) →                                                                                                                                                                                                                  |
| env-1535 | 3300001592_10082624       | - | 375     | 348     | RNA → | rplS (PRK05338)Ribosomal_L19 (pfam01245) →                                                                                                                                                                                                                  |
| env-1536 | 3300001605_10000472       | - | 597     | 570     | RNA → | rplS (PRK05338)Ribosomal_L19 (pfam01245) →                                                                                                                                                                                                                  |
| env-1537 | 3300001592_10006511       | + | 11374   | 11401   | RNA → | rplS (PRK05338)Ribosomal_L19 (pfam01245) →                                                                                                                                                                                                                  |
| Fba-2-1  | NZ_AAXX01000003.1         | - | 173796  | 173769  | RNA → | rplS (PRK05338)Ribosomal_L19 (pfam01245) → rplS (PRK05338)Ribosomal_L19 (pfam01245) →                                                                                                                                                                       |
| Kje-1-1  | NZ_LBMG01000057.1         | + | 26887   | 26914   | RNA → | rplS (PRK05338)Ribosomal_L19 (pfam01245) →                                                                                                                                                                                                                  |
| Kal-1-1  | NZ_DS544873.1             | + | 1877186 | 1877213 | RNA → | rplS (PRK05338)Ribosomal_L19 (pfam01245) →                                                                                                                                                                                                                  |
| Kzh-1-1  | NZ_LBMH01000008.1         | - | 5300    | 5273    | RNA → | rplS (PRK05338)Ribosomal_L19 (pfam01245) →                                                                                                                                                                                                                  |
| env-1538 | TB_FS06_10DRAFT_1000005   | + | 81339   | 81366   | RNA → | rplS (PRK05338)Ribosomal_L19 (pfam01245) →                                                                                                                                                                                                                  |
| env-1539 | JGI20151J14362_10264229   | - | 319     | 292     | RNA → | rplS (PRK05338)Ribosomal_L19 (pfam01245) →                                                                                                                                                                                                                  |
| env-1540 | JGI20156J14371_10338308   | - | 271     | 244     | RNA → | rplS (PRK05338)Ribosomal_L19 (pfam01245) →                                                                                                                                                                                                                  |
| env-1541 | JGI25920J50251_10088380   | + | 139     | 166     | RNA → | rplS (PRK05338)Ribosomal_L19 (pfam01245) →                                                                                                                                                                                                                  |
| Fin-1-1  | NC_017025.1               | - | 992421  | 992394  | RNA → | rplS (PRK05338)Ribosomal_L19 (pfam01245) →                                                                                                                                                                                                                  |
| env-1542 | CESJ01019018.1            | - | 182     | 155     | RNA → | rplS (PRK05338)Ribosomal_L19 (pfam01245) →                                                                                                                                                                                                                  |
| env-1543 | CEWG01277609.1            | - | 481     | 454     | RNA → | rplS (PRK05338)Ribosomal_L19 (pfam01245) → PRK08299 (PRK08299) →                                                                                                                                                                                            |
| env-1544 | CESM01468209.1            | - | 344     | 317     | RNA → | rplS (PRK05338)Ribosomal_L19 (pfam01245) →                                                                                                                                                                                                                  |
| env-1545 | 2236876007_0430719        | + | 198     | 225     | RNA → | hypo →                                                                                                                                                                                                                                                      |
| env-1546 | CETY01043148.1            | - | 6005    | 5978    | RNA → | rplS (PRK05338)Ribosomal_L19 (pfam01245) → lcd (COG0538)PRK08299 (PRK08299) →<br>Peptidase_M14NE-CP-C like (cd11308)CirA (COG1629)TonB-hemlactrns (TIGR01786)CarbopepD_reg_2 (pfam13715) →<br>DUF4249 (pfam14054) → murQ (PRK05441)SIS_Etherase (cd05007) → |
| env-1547 | DelMOSum2010_c10221712    | + | 321     | 348     | RNA → | rplS (PRK05338)Ribosomal_L19 (pfam01245) →                                                                                                                                                                                                                  |
| env-1548 | CEWO01314910.1            | + | 580     | 607     | RNA → | rplS (PRK05338)Ribosomal_L19 (pfam01245) →                                                                                                                                                                                                                  |
| env-1549 | JGI20156J14371_10001449   | + | 17641   | 17668   | RNA → | rplS (PRK05338)Ribosomal_L19 (pfam01245) → lcd (COG0538)PRK08299 (PRK08299) →                                                                                                                                                                               |
| env-1550 | JGI20155J14468_10020639   | - | 210     | 183     | RNA → | rplS (PRK05338)Ribosomal_L19 (pfam01245) →                                                                                                                                                                                                                  |
| env-1551 | JGI20160J14292_10134963   | - | 298     | 271     | RNA → | rplS (PRK05338)Ribosomal_L19 (pfam01245) →                                                                                                                                                                                                                  |
| env-1552 | CERIO1264885.1            | + | 831     | 858     | RNA → | rplS (PRK05338)Ribosomal_L19 (pfam01245) →                                                                                                                                                                                                                  |
| env-1553 | CERM01228874.1            | + | 1239    | 1266    | RNA → | rplS (PRK05338)Ribosomal_L19 (pfam01245) →                                                                                                                                                                                                                  |
| env-1554 | JGI20156J14371_10182376   | - | 65      | 38      | RNA → | rplS (PRK05338)Ribosomal_L19 (pfam01245) →                                                                                                                                                                                                                  |
| env-1555 | 2236876001_539343         | + | 237     | 264     | RNA → | rplS (PRK05338)Ribosomal_L19 (pfam01245) →                                                                                                                                                                                                                  |
| env-1556 | CESU01013805.1            | + | 6882    | 6909    | RNA → | rplS (PRK05338)Ribosomal_L19 (pfam01245) →                                                                                                                                                                                                                  |

|          |                                |   |        |        |                                                                                                                                                                                                                                                                                            |
|----------|--------------------------------|---|--------|--------|--------------------------------------------------------------------------------------------------------------------------------------------------------------------------------------------------------------------------------------------------------------------------------------------|
| env-1557 | CESI01075687.1                 | - | 1194   | 1167   | RNA → rplS (PRK05338)Ribosomal_L19 (pfam01245) → PRK08299 (PRK08299) →                                                                                                                                                                                                                     |
| env-1558 | CEVG01321748.1                 | + | 522    | 549    | RNA → rplS (PRK05338)Ribosomal_L19 (pfam01245) → PRK08299 (PRK08299) →                                                                                                                                                                                                                     |
| env-1559 | A09P04_1300_Sequence0000000262 | + | 5688   | 5715   | RNA → rplS (PRK05338)Ribosomal_L19 (pfam01245) → PRK08299 (PRK08299) →                                                                                                                                                                                                                     |
| env-1560 | A09P041000a_Sequence0000000037 | - | 206    | 179    | RNA → rplS (PRK05338)Ribosomal_L19 (pfam01245) →                                                                                                                                                                                                                                           |
| env-1561 | CENF01216542.1                 | + | 866    | 893    | RNA → rplS (PRK05338)Ribosomal_L19 (pfam01245) → lcd (COG0538)PRK08299 (PRK08299) →<br>PRK10064 (PRK10064)TonB_dep_Rec (pfam00593)Plug (pfam07715)CarbopepD_reg_2 (pfam13715)OMP_b-brl_3 (pfam13715) →                                                                                     |
| env-1562 | CETV01076215.1                 | + | 63     | 90     | DUF4249 (pfam14054) → murQ (PRK05441)SIS_Etherase (cd05007) →<br>RNA → rplS (PRK05338)Ribosomal_L19 (pfam01245) → lcd (COG0538)PRK08299 (PRK08299) →<br>murQ (PRK05441)SIS_Etherase (cd05007) → hypo → TGS_ThrRS_N (cd01667)thrS (PRK00413) →                                              |
| env-1563 | JCVL_SCAF_1096627109417        | + | 201    | 228    | RNA → rplS (PRK05338)Ribosomal_L19 (pfam01245) → lcd (COG0538)PRK08299 (PRK08299) →                                                                                                                                                                                                        |
| env-1564 | SI60aug11_100m.c1000185        | + | 69     | 96     | RNA → rplS (PRK05338)Ribosomal_L19 (pfam01245) → lcd (COG0538)PRK08299 (PRK08299) →                                                                                                                                                                                                        |
| env-1565 | CESI01023758.1                 | - | 17726  | 17699  | RNA → rplS (PRK05338)Ribosomal_L19 (pfam01245) → lcd (COG0538)PRK08299 (PRK08299) →<br>CirA (COG1629)TonB-hemlactrns (TIGR01786)CarbopepD_reg_2 (pfam13715) → DUF4249 (pfam14054) →<br>murQ (PRK05441)SIS_Etherase (cd05007) → hypo → TGS_ThrRS_N (cd01667)ThrS (COG0441)thrS (PRK00413) → |
| env-1566 | CESU01036743.1                 | + | 15859  | 15886  | RNA → rplS (PRK05338)Ribosomal_L19 (pfam01245) → PRK08299 (PRK08299) →                                                                                                                                                                                                                     |
| env-1567 | CERR01132098.1                 | + | 302    | 329    | RNA → rplS (PRK05338)Ribosomal_L19 (pfam01245) →                                                                                                                                                                                                                                           |
| env-1568 | CEVX01177957.1                 | + | 418    | 445    | RNA → ←hypo                                                                                                                                                                                                                                                                                |
| env-1569 | SI47jul10_100m.c1001824        | - | 4900   | 4873   | RNA → rplS (PRK05338)Ribosomal_L19 (pfam01245) → lcd (COG0538)PRK08299 (PRK08299) →                                                                                                                                                                                                        |
| env-1570 | SI54feb11_100m.c1021428        | - | 825    | 798    | RNA → rplS (PRK05338)Ribosomal_L19 (pfam01245) → PRK08299 (PRK08299) →                                                                                                                                                                                                                     |
| env-1571 | SI36aug09_135m.c1033193        | + | 185    | 212    | RNA → rplS (PRK05338)Ribosomal_L19 (pfam01245) → PRK08299 (PRK08299) →                                                                                                                                                                                                                     |
| env-1572 | SI47jul10_120m.c1035424        | - | 591    | 564    | RNA → rplS (PRK05338)Ribosomal_L19 (pfam01245) → PRK08299 (PRK08299) →                                                                                                                                                                                                                     |
| env-1573 | SI34jun09_120m_1000013         | + | 68976  | 69003  | RNA → rplS (PRK05338)Ribosomal_L19 (pfam01245) → lcd (COG0538)PRK08299 (PRK08299) →                                                                                                                                                                                                        |
| env-1574 | SI34jun09_135m_1000008         | - | 90123  | 90096  | RNA → rplS (PRK05338)Ribosomal_L19 (pfam01245) → lcd (COG0538)PRK08299 (PRK08299) →                                                                                                                                                                                                        |
| env-1575 | SI36aug09_100m_1005555         | - | 1309   | 1282   | RNA → rplS (PRK05338)Ribosomal_L19 (pfam01245) → PRK08299 (PRK08299) →                                                                                                                                                                                                                     |
| env-1576 | SI36aug09_120m_1000042         | + | 41474  | 41501  | RNA → rplS (PRK05338)Ribosomal_L19 (pfam01245) → lcd (COG0538)PRK08299 (PRK08299) →                                                                                                                                                                                                        |
| env-1577 | SI36aug09_120m_1006408         | + | 625    | 598    | RNA → rplS (PRK05338)Ribosomal_L19 (pfam01245) →                                                                                                                                                                                                                                           |
| env-1578 | SI34jun09_100m_1013853         | - | 1182   | 1209   | RNA → rplS (PRK05338)Ribosomal_L19 (pfam01245) → PRK08299 (PRK08299) →                                                                                                                                                                                                                     |
| env-1579 | F10SI03120a_Sequence0000008470 | - | 1292   | 1265   | RNA → rplS (PRK05338)Ribosomal_L19 (pfam01245) → PRK08299 (PRK08299) →                                                                                                                                                                                                                     |
| env-1580 | F10SI03135a_Sequence0000028256 | - | 1234   | 1207   | RNA → rplS (PRK05338)Ribosomal_L19 (pfam01245) → PRK08299 (PRK08299) →                                                                                                                                                                                                                     |
| env-1581 | CESE01030659.1                 | + | 2760   | 2787   | RNA → rplS (PRK05338)Ribosomal_L19 (pfam01245) → PRK08299 (PRK08299) →                                                                                                                                                                                                                     |
| env-1582 | CEWR01159442.1                 | + | 4928   | 4955   | RNA → rplS (PRK05338)Ribosomal_L19 (pfam01245) → PRK08299 (PRK08299) →                                                                                                                                                                                                                     |
| env-1583 | CEOP01456443.1                 | - | 1734   | 1707   | RNA → rplS (PRK05338)Ribosomal_L19 (pfam01245) → lcd (COG0538)PRK08299 (PRK08299) →                                                                                                                                                                                                        |
| env-1584 | CERW011247538.1                | - | 744    | 717    | RNA → rplS (PRK05338)Ribosomal_L19 (pfam01245) → PRK08299 (PRK08299) →                                                                                                                                                                                                                     |
| env-1585 | CEVX01084310.1                 | + | 8526   | 8553   | RNA → rplS (PRK05338)Ribosomal_L19 (pfam01245) → lcd (COG0538)PRK08299 (PRK08299) →<br>PRK10064 (PRK10064)Plug (pfam07715)CarbopepD_reg_2 (pfam13715) →                                                                                                                                    |
| env-1586 | CEWO01028333.1                 | + | 4814   | 4841   | RNA → rplS (PRK05338)Ribosomal_L19 (pfam01245) → lcd (COG0538)PRK08299 (PRK08299) →<br>PRK10064 (PRK10064)Plug (pfam07715)CarbopepD_reg_2 (pfam13715) →                                                                                                                                    |
| env-1587 | CETQ01273970.1                 | - | 129    | 102    | RNA → hypo →                                                                                                                                                                                                                                                                               |
| env-1588 | CETK01030187.1                 | + | 60     | 87     | RNA → rplS (PRK05338)Ribosomal_L19 (pfam01245) → lcd (COG0538)PRK08299 (PRK08299) →<br>CarbopepD_reg_2 (pfam13715) →                                                                                                                                                                       |
| env-1589 | CETA01078260.1                 | + | 1931   | 1958   | RNA → rplS (PRK05338)Ribosomal_L19 (pfam01245) → PRK08299 (PRK08299) →                                                                                                                                                                                                                     |
| env-1590 | CESM01008740.1                 | + | 6469   | 6496   | RNA → rplS (PRK05338)Ribosomal_L19 (pfam01245) →                                                                                                                                                                                                                                           |
| env-1591 | CEUA01047049.1                 | - | 77     | 50     | RNA →                                                                                                                                                                                                                                                                                      |
| env-1592 | CEUB01108690.1                 | - | 4211   | 4184   | RNA → rplS (PRK05338)Ribosomal_L19 (pfam01245) → lcd (COG0538)PRK08299 (PRK08299) →<br>TonB-hemin (TIGR01785)TonB_dep_Rec (pfam00593)Plug (pfam07715)CarbopepD_reg_2 (pfam13715) → hypo →                                                                                                  |
| env-1593 | CENZ01369401.1                 | - | 254    | 227    | RNA → rplS (PRK05338)Ribosomal_L19 (pfam01245) →                                                                                                                                                                                                                                           |
| env-1594 | CEQF01051053.1                 | + | 1217   | 1244   | RNA → rplS (PRK05338)Ribosomal_L19 (pfam01245) → PRK08299 (PRK08299) →                                                                                                                                                                                                                     |
| env-1595 | CERL01234262.1                 | + | 134    | 161    | RNA → rplS (PRK05338)Ribosomal_L19 (pfam01245) → PRK08299 (PRK08299) →                                                                                                                                                                                                                     |
| env-1596 | CEQY01193862.1                 | - | 1759   | 1732   | RNA → rplS (PRK05338)Ribosomal_L19 (pfam01245) → lcd (COG0538)PRK08299 (PRK08299) →                                                                                                                                                                                                        |
| env-1597 | CERR01235002.1                 | + | 163    | 190    | RNA → rplS (PRK05338)Ribosomal_L19 (pfam01245) → PRK08299 (PRK08299) →                                                                                                                                                                                                                     |
| env-1598 | CESQ01389779.1                 | + | 211    | 238    | RNA → rplS (PRK05338)Ribosomal_L19 (pfam01245) → PRK08299 (PRK08299) →                                                                                                                                                                                                                     |
| env-1599 | CETI01152875.1                 | + | 187    | 214    | RNA → rplS (PRK05338)Ribosomal_L19 (pfam01245) → PRK08299 (PRK08299) →                                                                                                                                                                                                                     |
| Mth-1-1  | NZ_LDAS01000001.1              | - | 695657 | 695630 | RNA → rplS (PRK05338)Ribosomal_L19 (pfam01245) →                                                                                                                                                                                                                                           |
| env-1600 | JGI24723J26617_10397431        | + | 150    | 177    | RNA → rplS (PRK05338)Ribosomal_L19 (pfam01245) →                                                                                                                                                                                                                                           |

|          |                              |   |       |       |                                                                                                                                                                                                                              |
|----------|------------------------------|---|-------|-------|------------------------------------------------------------------------------------------------------------------------------------------------------------------------------------------------------------------------------|
| env-1601 | JGI24724J26744.10000071      | - | 8106  | 8079  | RNA → rplS (PRK05338)Ribosomal_L19 (pfam01245) →                                                                                                                                                                             |
| env-1602 | BS_KBA_SWE12.21m.c10564765   | + | 114   | 141   | RNA → rplS (PRK05338)Ribosomal_L19 (pfam01245) →                                                                                                                                                                             |
| env-1603 | BS_KBA_SWE02.21m.10243122    | - | 247   | 220   | RNA → rplS (PRK05338)Ribosomal_L19 (pfam01245) →                                                                                                                                                                             |
| Bar-1-1  | NZ_AFXZ01000061.1            | - | 9495  | 9468  | RNA → rplS (PRK05338)Ribosomal_L19 (pfam01245) → rplS (PRK05338)Ribosomal_L19 (pfam01245) →                                                                                                                                  |
| env-1604 | CESI01155152.1               | - | 1312  | 1285  | RNA → rplS (PRK05338)Ribosomal_L19 (pfam01245) → PRK08299 (PRK08299) →                                                                                                                                                       |
| env-1605 | JCVI_SCAF_1096627904983      | + | 1367  | 1394  | RNA → rplS (PRK05338)Ribosomal_L19 (pfam01245) →                                                                                                                                                                             |
| env-1606 | JGI20152J14361.10239717      | + | 202   | 229   | RNA →                                                                                                                                                                                                                        |
| env-1607 | CESI01144570.1               | + | 19660 | 19687 | RNA → rplS (PRK05338)Ribosomal_L19 (pfam01245) → PRK08299 (PRK08299) →                                                                                                                                                       |
| env-1608 | JGI20156J14371.10001677      | + | 8441  | 8468  | RNA → rplS (PRK05338)Ribosomal_L19 (pfam01245) → lcd (COG0538)PRK08299 (PRK08299) →<br>murQ (PRK05441)SIS (cd04795) → murQ (PRK05441)SIS_Etherase (cd05007) → hypo →<br>TGS_ThrRS_N (cd01667)ThrS (COG0441)thrS (PRK00413) → |
| env-1609 | JGI20160J14292.10002169      | + | 6253  | 6280  | RNA → rplS (PRK05338)Ribosomal_L19 (pfam01245) → lcd (COG0538)PRK08299 (PRK08299) →<br>murQ (PRK05441)SIS_Etherase (cd05007) → hypo → TGS_ThrRS_N (cd01667)ThrS (COG0441)thrS (PRK00413) →                                   |
| env-1610 | JGI20159J14440.10295666      | + | 144   | 171   | RNA → rplS (PRK05338)Ribosomal_L19 (pfam01245) →                                                                                                                                                                             |
| env-1611 | CERI01069492.1               | + | 3368  | 3395  | RNA → rplS (PRK05338)Ribosomal_L19 (pfam01245) →                                                                                                                                                                             |
| env-1612 | CESI01307738.1               | - | 4623  | 4596  | RNA → rplS (PRK05338)Ribosomal_L19 (pfam01245) → lcd (COG0538)PRK08299 (PRK08299) →<br>murQ (PRK05441)SIS_Etherase (cd05007) → hypo → TGS_ThrRS_N (cd01667)ThrS (COG0441)thrS (PRK00413) →                                   |
| env-1613 | CESU01111611.1               | + | 322   | 349   | RNA → rplS (PRK05338)Ribosomal_L19 (pfam01245) →                                                                                                                                                                             |
| env-1614 | DelMO_Sum2010.c10000810      | - | 24769 | 24742 | RNA → rplS (PRK05338)Ribosomal_L19 (pfam01245) → lcd (COG0538)PRK08299 (PRK08299) →<br>murQ (PRK05441)SIS_Etherase (cd05007) → hypo → TGS_ThrRS_N (cd01667)ThrS (COG0441)thrS (PRK00413) →                                   |
| env-1615 | JGI20160J14292.10000029      | + | 74902 | 74929 | RNA → rplS (PRK05338)Ribosomal_L19 (pfam01245) → lcd (COG0538)PRK08299 (PRK08299) →<br>murQ (PRK05441)SIS_Etherase (cd05007) → hypo → TGS_ThrRS_N (cd01667)ThrS (COG0441)thrS (PRK00413) →                                   |
| env-1616 | NCBI_BBAY_READ_1105898016080 | - | 698   | 671   | RNA → rplS (PRK05338)Ribosomal_L19 (pfam01245) → PRK08299 (PRK08299) →                                                                                                                                                       |
| env-1617 | KGI_S1_ANT03.95m.c1092068    | + | 85    | 112   | RNA → rplS (PRK05338)Ribosomal_L19 (pfam01245) →                                                                                                                                                                             |
| env-1618 | CENF01157472.1               | + | 115   | 142   | RNA → rplS (PRK05338)Ribosomal_L19 (pfam01245) → PRK08299 (PRK08299) →                                                                                                                                                       |
| env-1619 | CEOM01030827.1               | - | 7675  | 7648  | RNA → rplS (PRK05338)Ribosomal_L19 (pfam01245) → lcd (COG0538)PRK08299 (PRK08299) →                                                                                                                                          |
| env-1620 | CERW01220270.1               | + | 272   | 299   | RNA → rplS (PRK05338)Ribosomal_L19 (pfam01245) →                                                                                                                                                                             |
| env-1621 | CESP01276117.1               | - | 1053  | 1026  | RNA → rplS (PRK05338)Ribosomal_L19 (pfam01245) → PRK08299 (PRK08299) →                                                                                                                                                       |
| env-1622 | CEVP01353816.1               | - | 945   | 918   | RNA → rplS (PRK05338)Ribosomal_L19 (pfam01245) → PRK08299 (PRK08299) →                                                                                                                                                       |
| env-1623 | CEVS01278067.1               | - | 151   | 124   | RNA → rplS (PRK05338)Ribosomal_L19 (pfam01245) →                                                                                                                                                                             |
| env-1624 | TB_GS09.5.10001116           | + | 8952  | 8979  | RNA → ← hypo →                                                                                                                                                                                                               |
| env-1625 | LGVF01492896.1               | - | 734   | 707   | RNA → rplS (PRK05338)Ribosomal_L19 (pfam01245) →                                                                                                                                                                             |
| env-1626 | LGVC01057912.1               | - | 723   | 696   | RNA → rplS (PRK05338)Ribosomal_L19 (pfam01245) →                                                                                                                                                                             |
| env-1627 | LGVF01075961.1               | - | 4858  | 4831  | RNA → rplS (PRK05338)Ribosomal_L19 (pfam01245) →                                                                                                                                                                             |
| env-1628 | LGVD01061935.1               | + | 3177  | 3204  | RNA → rplS (PRK05338)Ribosomal_L19 (pfam01245) →                                                                                                                                                                             |
| env-1629 | JGI24023J19991.10018257      | - | 2685  | 2658  | RNA → rplS (PRK05338)Ribosomal_L19 (pfam01245) →                                                                                                                                                                             |
| env-1630 | SA_S1_NOR08.45m.c10644258    | + | 115   | 142   | RNA → rplS (PRK05338)Ribosomal_L19 (pfam01245) →                                                                                                                                                                             |
| env-1631 | BS_KBA_SWE12.21m.c10053575   | - | 952   | 925   | RNA → rplS (PRK05338)Ribosomal_L19 (pfam01245) →                                                                                                                                                                             |
| env-1632 | BS_KBA_SWE12.21m.c10014505   | - | 2364  | 2337  | RNA → rplS (PRK05338)Ribosomal_L19 (pfam01245) →                                                                                                                                                                             |
| env-1633 | BS_KBA_SWE21.205m.10014880   | - | 290   | 263   | RNA → rplS (PRK05338)Ribosomal_L19 (pfam01245) →                                                                                                                                                                             |
| env-1634 | BS_KBA_SWE02.21m.10009640    | - | 1361  | 1334  | RNA → rplS (PRK05338)Ribosomal_L19 (pfam01245) →                                                                                                                                                                             |
| env-1635 | BS_KBA_SWE12.21m.c10000793   | + | 3415  | 3442  | RNA → rplS (PRK05338)Ribosomal_L19 (pfam01245) →                                                                                                                                                                             |
| env-1636 | BS_KBB_SWE26.205m.c1001614   | - | 974   | 947   | RNA → rplS (PRK05338)Ribosomal_L19 (pfam01245) →                                                                                                                                                                             |
| env-1637 | BS_KBA_SWE07.21m.c1003990    | - | 996   | 969   | RNA → rplS (PRK05338)Ribosomal_L19 (pfam01245) →                                                                                                                                                                             |
| env-1638 | BS_KBA_SWE21.205m.10000010   | + | 4468  | 4495  | RNA → rplS (PRK05338)Ribosomal_L19 (pfam01245) →                                                                                                                                                                             |
| env-1639 | BS_KBA_SWE02.21m.10000410    | - | 12530 | 12503 | RNA → rplS (PRK05338)Ribosomal_L19 (pfam01245) →                                                                                                                                                                             |
| env-1640 | SA_S1_NOR05.45m.c10006399    | - | 2424  | 2397  | RNA → rplS (PRK05338)Ribosomal_L19 (pfam01245) →                                                                                                                                                                             |
| env-1641 | SA_S1_NOR08.45m.c10019755    | - | 2638  | 2611  | RNA → rplS (PRK05338)Ribosomal_L19 (pfam01245) →                                                                                                                                                                             |
| env-1642 | SA_S2_NOR15.50m.c10428401    | - | 127   | 100   | RNA → hypo →                                                                                                                                                                                                                 |
| env-1643 | SA_S1_NOR02.45m.c1030347     | - | 406   | 379   | RNA → rplS (PRK05338)Ribosomal_L19 (pfam01245) →                                                                                                                                                                             |
| env-1644 | SA_S1_NOR05.45m.c10357957    | + | 172   | 199   | RNA → rplS (PRK05338)Ribosomal_L19 (pfam01245) →                                                                                                                                                                             |
| env-1645 | SA_S1_NOR08.45m.c10002181    | - | 7235  | 7208  | RNA → rplS (PRK05338)Ribosomal_L19 (pfam01245) →                                                                                                                                                                             |
| env-1646 | SA_S2_NOR15.50m.c10098518    | + | 631   | 658   | RNA → rplS (PRK05338)Ribosomal_L19 (pfam01245) →                                                                                                                                                                             |



|          |                             |   |        |        |                                                                       |
|----------|-----------------------------|---|--------|--------|-----------------------------------------------------------------------|
| env-1647 | SA_S1_NOR02_45m.c1091868    | + | 275    | 302    | RNA→                                                                  |
| env-1648 | SA_S1_NOR08_45m.c10420270   | + | 193    | 220    | RNA→ <a href="#">rplS (PRK05338)</a> Ribosomal_L19 (pfam01245)→       |
| env-1649 | SA_S2_NOR15_50m.c10316835   | - | 257    | 230    | RNA→ <a href="#">rplS (PRK05338)</a> Ribosomal_L19 (pfam01245)→       |
| env-1650 | TDF_OR_ARG04_113m.c1012125  | + | 552    | 579    | RNA→ <a href="#">rplS (PRK05338)</a> Ribosomal_L19 (pfam01245)→       |
| env-1651 | TDF_MC_ARG01_113m.c1022147  | + | 240    | 267    | RNA→ <a href="#">rplS (PRK05338)</a> Ribosomal_L19 (pfam01245)→       |
| env-1652 | TDF_MC_ARG02_113m.c1008450  | - | 506    | 479    | RNA→ <a href="#">rplS (PRK05338)</a> Ribosomal_L19 (pfam01245)→       |
| env-1653 | BS_KBA_SWE02_21m.10037748   | - | 1195   | 1168   | RNA→ <a href="#">rplS (PRK05338)</a> Ribosomal_L19 (pfam01245)→       |
| env-1654 | 3300000558_10149016         | - | 188    | 161    | RNA→ <a href="#">rplS (PRK05338)</a> Ribosomal_L19 (pfam01245)→       |
| env-1655 | 3300001580_10557157         | - | 129    | 102    | RNA→ hypo→                                                            |
| env-1656 | JGI24025J20009_10008154     | + | 4607   | 4634   | RNA→ <a href="#">rplS (PRK05338)</a> Ribosomal_L19 (pfam01245)→       |
| env-1657 | JGI24023J19991_10004490     | + | 7709   | 7736   | RNA→ <a href="#">rplS (PRK05338)</a> Ribosomal_L19 (pfam01245)→       |
| env-1658 | JGI24023J19991_10080503     | - | 958    | 931    | RNA→ <a href="#">rplS (PRK05338)</a> Ribosomal_L19 (pfam01245)→       |
| env-1659 | JGI24723J26617_10180956     | + | 346    | 373    | RNA→ <a href="#">rplS (PRK05338)</a> Ribosomal_L19 (pfam01245)→       |
| env-1660 | KGL_S1_ANT01_95m.c10580845  | + | 177    | 204    | RNA→                                                                  |
| env-1661 | SA_S1_NOR05_45m.c10210261   | - | 309    | 282    | RNA→ <a href="#">rplS (PRK05338)</a> Ribosomal_L19 (pfam01245)→       |
| env-1662 | SA_S1_NOR08_45m.c10537755   | - | 218    | 191    | RNA→ <a href="#">rplS (PRK05338)</a> Ribosomal_L19 (pfam01245)→       |
| env-1663 | BS_KBA_SWE02_21m.10201411   | - | 197    | 170    | RNA→ <a href="#">rplS (PRK05338)</a> Ribosomal_L19 (pfam01245)→       |
| env-1664 | JGI24023J19991_10000890     | + | 13567  | 13594  | RNA→ <a href="#">rplS (PRK05338)</a> Ribosomal_L19 (pfam01245)→       |
| env-1665 | JGI24023J19991_10066851     | - | 58     | 31     | RNA→                                                                  |
| env-1666 | JGI24723J26617_10016062     | - | 2589   | 2562   | RNA→ <a href="#">rplS (PRK05338)</a> Ribosomal_L19 (pfam01245)→       |
| env-1667 | SA_S2_NOR13_50m.c1002773    | + | 505    | 532    | RNA→ <a href="#">rplS (PRK05338)</a> Ribosomal_L19 (pfam01245)→       |
| env-1668 | SA_S1_NOR08_45m.c10050681   | - | 1008   | 981    | RNA→ <a href="#">rplS (PRK05338)</a> Ribosomal_L19 (pfam01245)→       |
| env-1669 | SA_S2_NOR18_50m.1016505     | + | 743    | 770    | RNA→ <a href="#">rplS (PRK05338)</a> Ribosomal_L19 (pfam01245)→       |
| env-1670 | BS_KBA_SWE12_21m.c10023034  | + | 75     | 102    | RNA→ hypo→ <a href="#">rplS (PRK05338)</a> Ribosomal_L19 (pfam01245)→ |
| env-1671 | TDF_MC_ARG01_113m.c1073913  | - | 277    | 250    | RNA→ <a href="#">rplS (PRK05338)</a> Ribosomal_L19 (pfam01245)→       |
| env-1672 | SA_S1_NOR05_45m.c10164455   | - | 247    | 220    | RNA→ <a href="#">rplS (PRK05338)</a> Ribosomal_L19 (pfam01245)→       |
| env-1673 | SA_S1_NOR08_45m.c10222535   | + | 399    | 426    | RNA→ hypo→                                                            |
| env-1674 | KGI_S2_ANT04_2345m.c1080213 | - | 311    | 284    | RNA→ <a href="#">rplS (PRK05338)</a> Ribosomal_L19 (pfam01245)→       |
| env-1675 | KGI_S2_ANT05_2345m.c1048372 | + | 258    | 285    | RNA→ <a href="#">rplS (PRK05338)</a> Ribosomal_L19 (pfam01245)→       |
| env-1676 | KGL_S1_ANT02_95m.c10148848  | + | 250    | 277    | RNA→ <a href="#">rplS (PRK05338)</a> Ribosomal_L19 (pfam01245)→       |
| env-1677 | SA_S1_NOR05_45m.c10033322   | - | 654    | 627    | RNA→ <a href="#">rplS (PRK05338)</a> Ribosomal_L19 (pfam01245)→       |
| env-1678 | SA_S2_NOR15_50m.c10038594   | - | 1024   | 997    | RNA→ <a href="#">rplS (PRK05338)</a> Ribosomal_L19 (pfam01245)→       |
| env-1679 | SA_S1_NOR02_45m.c1001276    | + | 495    | 522    | RNA→ <a href="#">rplS (PRK05338)</a> Ribosomal_L19 (pfam01245)→       |
| env-1680 | DelMOSum2010.c10000022      | + | 68552  | 68579  | RNA→ <a href="#">rplS (PRK05338)</a> Ribosomal_L19 (pfam01245)→       |
| env-1681 | JGI20152J14361_10000425     | + | 29939  | 29966  | RNA→ <a href="#">rplS (PRK05338)</a> Ribosomal_L19 (pfam01245)→       |
| env-1682 | JGI20156J14371_10000267     | - | 17345  | 17318  | RNA→ <a href="#">rplS (PRK05338)</a> Ribosomal_L19 (pfam01245)→       |
| env-1683 | JGI20160J14292_10003446     | - | 6169   | 6142   | RNA→ <a href="#">rplS (PRK05338)</a> Ribosomal_L19 (pfam01245)→       |
| env-1684 | JGI20157J14317_10000008     | - | 112600 | 112573 | RNA→ <a href="#">rplS (PRK05338)</a> Ribosomal_L19 (pfam01245)→       |
| env-1685 | JGI20159J14440_10247722     | - | 454    | 427    | RNA→ <a href="#">rplS (PRK05338)</a> Ribosomal_L19 (pfam01245)→       |
| env-1686 | JGI20155J14468_10011132     | - | 1438   | 1411   | RNA→ <a href="#">rplS (PRK05338)</a> Ribosomal_L19 (pfam01245)→       |
| env-1687 | JGI24024J18818_10003851     | - | 4397   | 4370   | RNA→ <a href="#">rplS (PRK05338)</a> Ribosomal_L19 (pfam01245)→       |
| env-1688 | JGI24025J20009_10171329     | - | 268    | 241    | RNA→ <a href="#">rplS (PRK05338)</a> Ribosomal_L19 (pfam01245)→       |
| env-1689 | JGI24023J19991_10009898     | - | 4045   | 4018   | RNA→ <a href="#">rplS (PRK05338)</a> Ribosomal_L19 (pfam01245)→       |
| env-1690 | AMQJ01014829.1              | + | 152    | 179    | RNA→ <a href="#">rplS (PRK05338)</a> Ribosomal_L19 (pfam01245)→       |
| env-1691 | BS_KBB_SWE26_205m.c1063562  | - | 562    | 535    | RNA→ <a href="#">rplS (PRK05338)</a> Ribosomal_L19 (pfam01245)→       |
| env-1692 | LADL01001103.1              | - | 19831  | 19804  | RNA→ <a href="#">rplS (PRK05338)</a> Ribosomal_L19 (pfam01245)→       |
| env-1693 | 3300001605_10098760         | + | 18     | 45     | RNA→ <a href="#">rplS (PRK05338)</a> Ribosomal_L19 (pfam01245)→       |
| env-1694 | 3300001605_10728906         | + | 37     | 64     | RNA→ <a href="#">rplS (PRK05338)</a> Ribosomal_L19 (pfam01245)→       |
| env-1695 | JGI25319J35699_1005705      | - | 2536   | 2509   | RNA→ <a href="#">rplS (PRK05338)</a> Ribosomal_L19 (pfam01245)→       |
| env-1696 | JGI25322J35698_1044001      | + | 313    | 340    | RNA→ <a href="#">rplS (PRK05338)</a> Ribosomal_L19 (pfam01245)→       |
| env-1697 | JGI25322J35698_1082485      | - | 304    | 277    | RNA→ <a href="#">rplS (PRK05338)</a> Ribosomal_L19 (pfam01245)→       |
| env-1698 | JGI25321J50212_10001262     | + | 10258  | 10285  | RNA→ <a href="#">rplS (PRK05338)</a> Ribosomal_L19 (pfam01245)→       |



|          |                               |   |       |       |     |   |                                          |   |
|----------|-------------------------------|---|-------|-------|-----|---|------------------------------------------|---|
| env-1699 | JGI24023J19991_10000724       | - | 16241 | 16214 | RNA | → | rplS (PRK05338)Ribosomal_L19 (pfam01245) | → |
| env-1700 | JGI24023J19991_10020737       | - | 942   | 915   | RNA | → | rplS (PRK05338)Ribosomal_L19 (pfam01245) | → |
| env-1701 | JGI24724J26744_10238812       | + | 132   | 159   | RNA | → | rplS (PRK05338)Ribosomal_L19 (pfam01245) | → |
| env-1702 | GYQO9XB02HASQ4                | + | 72    | 99    | RNA | → | rplS (PRK05338)Ribosomal_L19 (pfam01245) | → |
| env-1703 | SA_S2_NOR13_50m_c1000423      | - | 7317  | 7290  | RNA | → | rplS (PRK05338)Ribosomal_L19 (pfam01245) | → |
| env-1704 | SA_S1_NOR05_45m_c10000647     | + | 6814  | 6841  | RNA | → | rplS (PRK05338)Ribosomal_L19 (pfam01245) | → |
| env-1705 | SA_S1_NOR08_45m_c10010910     | + | 1079  | 1106  | RNA | → | rplS (PRK05338)Ribosomal_L19 (pfam01245) | → |
| env-1706 | SA_S2_NOR15_50m_c10000830     | - | 7224  | 7197  | RNA | → | rplS (PRK05338)Ribosomal_L19 (pfam01245) | → |
| env-1707 | SA_S1_NOR02_45m_c1000223      | + | 5930  | 5957  | RNA | → | rplS (PRK05338)Ribosomal_L19 (pfam01245) | → |
| env-1708 | SA_S2_NOR18_50m_1000296       | + | 7034  | 7061  | RNA | → | rplS (PRK05338)Ribosomal_L19 (pfam01245) | → |
| env-1709 | SA_S1_NOR08_45m_c10776056     | + | 93    | 120   | RNA | → | rplS (PRK05338)Ribosomal_L19 (pfam01245) | → |
| env-1710 | SA_S2_NOR15_50m_c10819626     | + | 139   | 166   | RNA | → | rplS (PRK05338)Ribosomal_L19 (pfam01245) | → |
| env-1711 | KGI_S2_ANT04_2345m_c1093702   | - | 353   | 326   | RNA | → | rplS (PRK05338)Ribosomal_L19 (pfam01245) | → |
| env-1712 | JGI24024J18818_10091357       | + | 178   | 205   | RNA | → | rplS (PRK05338)Ribosomal_L19 (pfam01245) | → |
| env-1713 | JGI24023J19991_10004817       | + | 8687  | 8714  | RNA | → | rplS (PRK05338)Ribosomal_L19 (pfam01245) | → |
| env-1714 | JGI24724J26744_10028319       | + | 646   | 673   | RNA | → | rplS (PRK05338)Ribosomal_L19 (pfam01245) | → |
| env-1715 | JGI25321J39296_1005427        | - | 539   | 512   | RNA | → | rplS (PRK05338)Ribosomal_L19 (pfam01245) | → |
| env-1716 | KGI_S1_ANT01_95m_c10099108    | - | 675   | 648   | RNA | → | rplS (PRK05338)Ribosomal_L19 (pfam01245) | → |
| env-1717 | JGI20152J14361_10116815       | - | 44    | 17    | RNA | → |                                          |   |
| env-1718 | CESJ01024341.1                | - | 209   | 182   | RNA | → | rplS (PRK05338)Ribosomal_L19 (pfam01245) | → |
| env-1719 | CESU01225158.1                | - | 101   | 74    | RNA | → | ←hypo                                    |   |
| env-1720 | 2236876010_0042617            | - | 400   | 373   | RNA | → | ←hypo                                    |   |
| env-1721 | CESE01142542.1                | - | 615   | 588   | RNA | → | rplS (PRK05338)Ribosomal_L19 (pfam01245) | → |
| env-1722 | CEST01023914.1                | + | 29031 | 29058 | RNA | → | rplS (PRK05338)Ribosomal_L19 (pfam01245) | → |
| env-1723 | SI47jul10_100m_c1098063       | + | 194   | 221   | RNA | → | rplS (PRK05338)Ribosomal_L19 (pfam01245) | → |
| env-1724 | SI60aug11_100m_c1028962       | + | 97    | 124   | RNA | → | rplS (PRK05338)Ribosomal_L19 (pfam01245) | → |
| env-1725 | SI34jun09_10m_1003941         | - | 2294  | 2267  | RNA | → | rplS (PRK05338)Ribosomal_L19 (pfam01245) | → |
| env-1726 | SI34jun09_120m_1016406        | + | 1739  | 1766  | RNA | → | rplS (PRK05338)Ribosomal_L19 (pfam01245) | → |
| env-1727 | SI34jun09_135m_1017351        | + | 105   | 132   | RNA | → | rplS (PRK05338)Ribosomal_L19 (pfam01245) | → |
| env-1728 | SI34jun09_100m_1011215        | + | 2334  | 2361  | RNA | → | ←hypo                                    |   |
| env-1729 | JGI20152J14361_10052984       | - | 284   | 257   | RNA | → | rplS (PRK05338)Ribosomal_L19 (pfam01245) | → |
| env-1730 | JGI20154J14316_10033520       | - | 1618  | 1591  | RNA | → | rplS (PRK05338)Ribosomal_L19 (pfam01245) | → |
| env-1731 | JGI20153J14295_10031874       | + | 864   | 891   | RNA | → | rplS (PRK05338)Ribosomal_L19 (pfam01245) | → |
| env-1732 | JGI20153J14318_10031874       | + | 864   | 891   | RNA | → | rplS (PRK05338)Ribosomal_L19 (pfam01245) | → |
| env-1733 | SI34jun09_100m_1117558        | - | 60    | 33    | RNA | → |                                          |   |
| env-1734 | JGI20154J14316_10134296       | - | 50    | 23    | RNA | → | ←hypo                                    |   |
| env-1735 | A09P04500a_Sequence0000006337 | - | 1219  | 1192  | RNA | → | rplS (PRK05338)Ribosomal_L19 (pfam01245) | → |
| env-1736 | 2236876010_0103866            | - | 296   | 269   | RNA | → | rplS (PRK05338)Ribosomal_L19 (pfam01245) | → |
| env-1737 | 2236876010_0516017            | - | 121   | 94    | RNA | → | hypo→                                    |   |
| env-1738 | SI48aug10_10m_c1005499        | - | 1214  | 1187  | RNA | → | rplS (PRK05338)Ribosomal_L19 (pfam01245) | → |
| env-1739 | SI34jun09_100m_1006670        | - | 3438  | 3411  | RNA | → | rplS (PRK05338)Ribosomal_L19 (pfam01245) | → |
| env-1740 | SI48aug10_100m_1215338        | - | 233   | 206   | RNA | → | rplS (PRK05338)Ribosomal_L19 (pfam01245) | → |
| env-1741 | JGI20152J14361_10035731       | - | 36    | 9     | RNA | → |                                          |   |
| env-1742 | JGI20154J14316_10050212       | + | 864   | 891   | RNA | → | rplS (PRK05338)Ribosomal_L19 (pfam01245) | → |
| env-1743 | DeMOSum2010_c10404944         | + | 225   | 252   | RNA | → | rplS (PRK05338)Ribosomal_L19 (pfam01245) | → |
| env-1744 | JGI20152J14361_10057660       | + | 53    | 80    | RNA | → | rplS (PRK05338)Ribosomal_L19 (pfam01245) | → |
| env-1745 | JGI20160J14292_10015472       | - | 917   | 890   | RNA | → | rplS (PRK05338)Ribosomal_L19 (pfam01245) | → |
| env-1746 | JGI20153J14295_10017977       | - | 917   | 890   | RNA | → | rplS (PRK05338)Ribosomal_L19 (pfam01245) | → |
| env-1747 | JGI20153J14318_10017977       | - | 917   | 890   | RNA | → | rplS (PRK05338)Ribosomal_L19 (pfam01245) | → |
| env-1748 | CESI01016430.1                | - | 9287  | 9260  | RNA | → | rplS (PRK05338)Ribosomal_L19 (pfam01245) | → |
| env-1749 | CESU01088699.1                | - | 907   | 880   | RNA | → | rplS (PRK05338)Ribosomal_L19 (pfam01245) | → |
| env-1750 | JGI20160J14292_10015444       | - | 915   | 888   | RNA | → | rplS (PRK05338)Ribosomal_L19 (pfam01245) | → |

|          |                                |   |        |        |                                                         |
|----------|--------------------------------|---|--------|--------|---------------------------------------------------------|
| env-1751 | JGI20152J14361_10058556        | - | 907    | 880    | RNA → rplS (PRK05338)Ribosomal_L19 (pfam01245) →        |
| env-1752 | JGI20151J14362_10017387        | - | 622    | 595    | RNA → rplS (PRK05338)Ribosomal_L19 (pfam01245) →        |
| env-1753 | JGI20156J14371_10018698        | - | 1553   | 1526   | RNA → rplS (PRK05338)Ribosomal_L19 (pfam01245) →        |
| env-1754 | JGI20153J14295_10043016        | - | 915    | 888    | RNA → rplS (PRK05338)Ribosomal_L19 (pfam01245) →        |
| env-1755 | JGI20153J14318_10043016        | - | 915    | 888    | RNA → rplS (PRK05338)Ribosomal_L19 (pfam01245) →        |
| env-1756 | JGI20157J14317_10051617        | - | 1574   | 1547   | RNA → rplS (PRK05338)Ribosomal_L19 (pfam01245) →        |
| env-1757 | JGI20155J14468_10700974        | - | 81     | 54     | RNA →                                                   |
| env-1758 | SA_S1_NOR05_45m_c10078427      | - | 539    | 512    | RNA → rplS (PRK05338)Ribosomal_L19 (pfam01245) →        |
| env-1759 | SA_S1_NOR08_45m_c10045004      | + | 838    | 865    | RNA → rplS (PRK05338)Ribosomal_L19 (pfam01245) →        |
| env-1760 | KGI_S2_ANT05_2345m_c1126697    | + | 69     | 96     | RNA → hypo → rplS (PRK05338)Ribosomal_L19 (pfam01245) → |
| env-1761 | DelMOWin2010_c10293423         | - | 119    | 92     | RNA → hypo →                                            |
| env-1762 | SA_S1_NOR05_45m_c10023438      | + | 31     | 58     | RNA → hypo → rplS (PRK05338)Ribosomal_L19 (pfam01245) → |
| env-1763 | SA_S2_NOR15_50m_c10177335      | + | 332    | 359    | RNA → rplS (PRK05338)Ribosomal_L19 (pfam01245) →        |
| env-1764 | wf3_Contig6924                 | + | 1855   | 1882   | RNA → rplS (PRK05338)Ribosomal_L19 (pfam01245) →        |
| env-1765 | SA_S2_NOR13_50m_c1013867       | + | 488    | 515    | RNA → rplS (PRK05338)Ribosomal_L19 (pfam01245) →        |
| env-1766 | SA_S1_NOR05_45m_c10010432      | - | 1796   | 1769   | RNA → rplS (PRK05338)Ribosomal_L19 (pfam01245) →        |
| env-1767 | SA_S1_NOR08_45m_c10037082      | - | 634    | 607    | RNA → rplS (PRK05338)Ribosomal_L19 (pfam01245) →        |
| env-1768 | SA_S2_NOR15_50m_c10017076      | - | 2062   | 2035   | RNA → rplS (PRK05338)Ribosomal_L19 (pfam01245) →        |
| env-1769 | SA_S2_NOR15_50m_c10038947      | + | 1097   | 1124   | RNA → rplS (PRK05338)Ribosomal_L19 (pfam01245) →        |
| env-1770 | SA_S2_NOR18_50m_1060527        | - | 230    | 203    | RNA → rplS (PRK05338)Ribosomal_L19 (pfam01245) →        |
| env-1771 | SA_S1_NOR05_45m_c10402627      | + | 248    | 275    | RNA →                                                   |
| env-1772 | SA_S1_NOR05_45m_c10000045      | - | 1209   | 1182   | RNA → rplS (PRK05338)Ribosomal_L19 (pfam01245) →        |
| env-1773 | SA_S1_NOR08_45m_c10003536      | - | 7347   | 7320   | RNA → rplS (PRK05338)Ribosomal_L19 (pfam01245) →        |
| env-1774 | SA_S1_NOR08_45m_c10000343      | - | 1310   | 1283   | RNA → rplS (PRK05338)Ribosomal_L19 (pfam01245) →        |
| env-1775 | SA_S2_NOR15_50m_c10001574      | + | 6336   | 6363   | RNA → rplS (PRK05338)Ribosomal_L19 (pfam01245) →        |
| env-1776 | SA_S1_NOR02_45m_c1000618       | - | 359    | 332    | RNA → rplS (PRK05338)Ribosomal_L19 (pfam01245) →        |
| env-1777 | JGI20153J14295_10002993        | + | 9139   | 9166   | RNA → rplS (PRK05338)Ribosomal_L19 (pfam01245) → hypo → |
| env-1778 | JGI20153J14318_10002993        | + | 9139   | 9166   | RNA → rplS (PRK05338)Ribosomal_L19 (pfam01245) → hypo → |
| env-1779 | TDF_OR_ARG04_113m_c1085059     | + | 254    | 281    | RNA → rplS (PRK05338)Ribosomal_L19 (pfam01245) →        |
| env-1780 | TDF_MC_ARG01_113m_c1019942     | + | 199    | 226    | RNA → rplS (PRK05338)Ribosomal_L19 (pfam01245) →        |
| env-1781 | SA_S1_NOR08_45m_c10002903      | + | 2910   | 2937   | RNA → rplS (PRK05338)Ribosomal_L19 (pfam01245) →        |
| env-1782 | A09P04_1300_Sequence0000007657 | + | 1676   | 1703   | RNA → ←hypo                                             |
| env-1783 | KGI_S1_ANT01_95m_c10287783     | + | 183    | 210    | RNA → rplS (PRK05338)Ribosomal_L19 (pfam01245) →        |
| env-1784 | KGI_S2_ANT06_2345m_c1008730    | + | 1837   | 1864   | RNA → rplS (PRK05338)Ribosomal_L19 (pfam01245) →        |
| env-1785 | KGI_S2_ANT04_2345m_c1006171    | + | 550    | 577    | RNA → rplS (PRK05338)Ribosomal_L19 (pfam01245) →        |
| env-1786 | KGI_S1_ANT03_95m_c1134508      | - | 63     | 36     | RNA →                                                   |
| env-1787 | JGI20157J14317_10111054        | - | 633    | 606    | RNA → rplS (PRK05338)Ribosomal_L19 (pfam01245) →        |
| env-1788 | SA_S1_NOR08_45m_c10034502      | - | 1734   | 1707   | RNA → rplS (PRK05338)Ribosomal_L19 (pfam01245) →        |
| env-1789 | SA_S2_NOR15_50m_c10791456      | - | 35     | 8      | RNA → hypo →                                            |
| env-1790 | SA_S1_NOR05_45m_c10068256      | - | 784    | 757    | RNA → rplS (PRK05338)Ribosomal_L19 (pfam01245) →        |
| env-1791 | SA_S1_NOR02_45m_c1126975       | + | 134    | 161    | RNA → rplS (PRK05338)Ribosomal_L19 (pfam01245) →        |
| env-1792 | JGI24023J19991_10001462        | - | 645    | 618    | RNA → rplS (PRK05338)Ribosomal_L19 (pfam01245) →        |
| env-1793 | TB_FS06_10DRAFT_1000012        | - | 81337  | 81310  | RNA → rplS (PRK05338)Ribosomal_L19 (pfam01245) →        |
| env-1794 | CEQG01202036.1                 | - | 389    | 362    | RNA → rplS (PRK05338)Ribosomal_L19 (pfam01245) →        |
| env-1795 | CETB01163705.1                 | - | 1198   | 1171   | RNA → rplS (PRK05338)Ribosomal_L19 (pfam01245) →        |
| env-1796 | CETR01130265.1                 | - | 4705   | 4678   | RNA → rplS (PRK05338)Ribosomal_L19 (pfam01245) →        |
| env-1797 | CEVI01205692.1                 | - | 792    | 765    | RNA → rplS (PRK05338)Ribosomal_L19 (pfam01245) →        |
| env-1798 | CEVK01214383.1                 | + | 636    | 663    | RNA → rplS (PRK05338)Ribosomal_L19 (pfam01245) →        |
| env-1799 | CEVM01258184.1                 | + | 830    | 857    | RNA → rplS (PRK05338)Ribosomal_L19 (pfam01245) →        |
| env-1800 | CEVO01247352.1                 | + | 698    | 725    | RNA → rplS (PRK05338)Ribosomal_L19 (pfam01245) →        |
| env-1801 | CEVQ01122451.1                 | - | 320926 | 320899 | RNA → rplS (PRK05338)Ribosomal_L19 (pfam01245) →        |
| env-1802 | KVRMV2_102248759               | - | 166    | 139    | RNA → rplS (PRK05338)Ribosomal_L19 (pfam01245) →        |

|          |                             |   |       |       |      |                                                 |
|----------|-----------------------------|---|-------|-------|------|-------------------------------------------------|
| env-1803 | SA_S1_NOR05_45m.c10338159   | - | 197   | 170   | RNA→ | rplS (PRK05338)Ribosomal_L19 (pfam01245)→       |
| env-1804 | TB_PC08_66_10120445         | + | 167   | 194   | RNA→ | rplS (PRK05338)Ribosomal_L19 (pfam01245)→       |
| env-1805 | TB_PC08_3_1025062           | - | 907   | 880   | RNA→ | rplS (PRK05338)Ribosomal_L19 (pfam01245)→       |
| env-1806 | JGI20156J14371_10038484     | + | 575   | 602   | RNA→ | rplS (PRK05338)Ribosomal_L19 (pfam01245)→       |
| env-1807 | TB_FS06_10DRAFT_1028770     | + | 1020  | 1047  | RNA→ | rplS (PRK05338)Ribosomal_L19 (pfam01245)→       |
| env-1808 | TB_FS08_3DRAFT_1011355      | + | 1346  | 1373  | RNA→ | rplS (PRK05338)Ribosomal_L19 (pfam01245)→       |
| env-1809 | TB_GS10_10_10046912         | - | 1239  | 1212  | RNA→ | rplS (PRK05338)Ribosomal_L19 (pfam01245)→       |
| env-1810 | TB_PC08_64_1001821          | - | 694   | 667   | RNA→ | rplS (PRK05338)Ribosomal_L19 (pfam01245)→       |
| env-1811 | TB_GS09_5_10120216          | + | 181   | 208   | RNA→ | rplS (PRK05338)Ribosomal_L19 (pfam01245)→       |
| env-1812 | SA_S2_NOR13_50m.c1168462    | - | 250   | 223   | RNA→ | rplS (PRK05338)Ribosomal_L19 (pfam01245)→       |
| env-1813 | F3OLC3J02IOFD0              | + | 181   | 208   | RNA→ | rplS (PRK05338)Ribosomal_L19 (pfam01245)→       |
| env-1814 | DelMOSum2010_c10132439      | + | 587   | 614   | RNA→ | rplS (PRK05338)Ribosomal_L19 (pfam01245)→       |
| env-1815 | JGI20154J14316_10553810     | + | 41    | 68    | RNA→ | rplS (PRK05338)Ribosomal_L19 (pfam01245)→       |
| env-1816 | Y607_1006251                | + | 85823 | 85850 | RNA→ | rplS (PRK05338)Ribosomal_L19 (pfam01245)→       |
| env-1817 | P_2C_Liq_1_UnCty_1000596    | - | 3980  | 3953  | RNA→ | rplS (PRK05338)Ribosomal_L19 (pfam01245)→       |
| env-1818 | P_2C_Liq_2_UnCty_1018319    | - | 663   | 636   | RNA→ | rplS (PRK05338)Ribosomal_L19 (pfam01245)→       |
| env-1819 | CESM01027170.1              | - | 1718  | 1691  | RNA→ | rplS (PRK05338)Ribosomal_L19 (pfam01245)→       |
| env-1820 | CESO01163408.1              | - | 81    | 54    | RNA→ |                                                 |
| env-1821 | 2236876010_0590763          | + | 140   | 167   | RNA→ | rplS (PRK05338)Ribosomal_L19 (pfam01245)→       |
| env-1822 | CERM01240744.1              | - | 96    | 69    | RNA→ |                                                 |
| env-1823 | CESO01076655.1              | + | 584   | 611   | RNA→ | rplS (PRK05338)Ribosomal_L19 (pfam01245)→       |
| env-1824 | S134jun09_10m_1037670       | - | 665   | 638   | RNA→ | hypo→ rplS (PRK05338)Ribosomal_L19 (pfam01245)→ |
| env-1825 | JCVL_SCAF_1096627114274     | - | 579   | 552   | RNA→ | rplS (PRK05338)Ribosomal_L19 (pfam01245)→       |
| env-1826 | KGL_S1_ANT01_95m.c10055806  | - | 1138  | 1111  | RNA→ | rplS (PRK05338)Ribosomal_L19 (pfam01245)→       |
| env-1827 | KGI_S2_ANT04_2345m.c1015516 | + | 2067  | 2094  | RNA→ |                                                 |
| env-1828 | KGI_S2_ANT05_2345m.c1137445 | - | 257   | 230   | RNA→ | rplS (PRK05338)Ribosomal_L19 (pfam01245)→       |
| env-1829 | KGL_S1_ANT02_95m.c10013777  | - | 1526  | 1499  | RNA→ | rplS (PRK05338)Ribosomal_L19 (pfam01245)→       |
| env-1830 | SA_S2_NOR18_50m_1001412     | + | 399   | 426   | RNA→ | rplS (PRK05338)Ribosomal_L19 (pfam01245)→       |
| env-1831 | JGI24723J26617_10068646     | + | 585   | 612   | RNA→ | rplS (PRK05338)Ribosomal_L19 (pfam01245)→       |
| env-1832 | SA_S2_NOR13_50m.c1001448    | - | 4743  | 4716  | RNA→ | rplS (PRK05338)Ribosomal_L19 (pfam01245)→       |
| env-1833 | SA_S1_NOR05_45m.c10001450   | + | 3917  | 3944  | RNA→ | rplS (PRK05338)Ribosomal_L19 (pfam01245)→       |
| env-1834 | SA_S1_NOR08_45m.c10000307   | + | 15014 | 15041 | RNA→ | rplS (PRK05338)Ribosomal_L19 (pfam01245)→       |
| env-1835 | SA_S2_NOR15_50m.c10010164   | - | 3285  | 3258  | RNA→ | rplS (PRK05338)Ribosomal_L19 (pfam01245)→       |
| env-1836 | SA_S1_NOR02_45m.c1019106    | - | 530   | 503   | RNA→ | rplS (PRK05338)Ribosomal_L19 (pfam01245)→       |
| env-1837 | SA_S1_NOR08_45m.c10000615   | - | 6292  | 6265  | RNA→ | rplS (PRK05338)Ribosomal_L19 (pfam01245)→       |
| env-1838 | SA_S2_NOR15_50m.c10000097   | + | 10972 | 10999 | RNA→ | rplS (PRK05338)Ribosomal_L19 (pfam01245)→       |
| env-1839 | SA_S2_NOR15_50m.c10469518   | - | 217   | 190   | RNA→ | rplS (PRK05338)Ribosomal_L19 (pfam01245)→       |
| env-1840 | JGI24724J26744_11008656     | + | 37    | 64    | RNA→ | rplS (PRK05338)Ribosomal_L19 (pfam01245)→       |
| env-1841 | TDF_MC_ARG01_113m.c1006717  | + | 93    | 120   | RNA→ | rplS (PRK05338)Ribosomal_L19 (pfam01245)→       |
| env-1842 | SA_S1_NOR05_45m.c10106893   | + | 70    | 97    | RNA→ | rplS (PRK05338)Ribosomal_L19 (pfam01245)→       |
| env-1843 | KGL_S1_ANT03_95m.c1004957   | + | 964   | 991   | RNA→ | rplS (PRK05338)Ribosomal_L19 (pfam01245)→       |
| env-1844 | CESI01143241.1              | - | 582   | 555   | RNA→ | rplS (PRK05338)Ribosomal_L19 (pfam01245)→       |
| env-1845 | KGL_S1_ANT01_95m.c10121130  | - | 48    | 21    | RNA→ |                                                 |
| env-1846 | TDF_OR_ARG04_113m.c1009977  | - | 584   | 557   | RNA→ | rplS (PRK05338)Ribosomal_L19 (pfam01245)→       |
| env-1847 | TDF_MC_ARG01_113m.c1004441  | - | 665   | 638   | RNA→ | rplS (PRK05338)Ribosomal_L19 (pfam01245)→       |
| env-1848 | KGI_S2_ANT04_2345m.c1086413 | + | 531   | 558   | RNA→ | ←hypo                                           |
| env-1849 | JGI24024J18818_10700231     | + | 18    | 45    | RNA→ | rplS (PRK05338)Ribosomal_L19 (pfam01245)→       |
| env-1850 | JGI24723J26617_10589038     | + | 80    | 107   | RNA→ | rplS (PRK05338)Ribosomal_L19 (pfam01245)→       |
| env-1851 | TDF_OR_ARG04_113m.c1145284  | - | 81    | 54    | RNA→ | ←hypo                                           |
| env-1852 | TDF_MC_ARG01_113m.c1013236  | - | 275   | 248   | RNA→ | ←hypo                                           |
| env-1853 | CEVE01269246.1              | + | 219   | 246   | RNA→ | rplS (PRK05338)Ribosomal_L19 (pfam01245)→       |
| env-1854 | CEVF01060294.1              | + | 1089  | 1116  | RNA→ | rplS (PRK05338)Ribosomal_L19 (pfam01245)→       |

|          |                              |   |         |         |                                                                                                                                                                                            |
|----------|------------------------------|---|---------|---------|--------------------------------------------------------------------------------------------------------------------------------------------------------------------------------------------|
| Mlu-1-1  | NZ_CP011071.1                | + | 10994   | 11021   | RNA → rplS (PRK05338)Ribosomal_L19 (pfam01245) →                                                                                                                                           |
| env-1855 | 2236876010_0651002           | - | 265     | 238     | RNA → rplS (PRK05338)Ribosomal_L19 (pfam01245) →                                                                                                                                           |
| env-1856 | 2236876010_0559523           | + | 257     | 284     | RNA →                                                                                                                                                                                      |
| env-1857 | JGI20154J14316_10006430      | + | 537     | 564     | RNA → rplS (PRK05338)Ribosomal_L19 (pfam01245) →                                                                                                                                           |
| env-1858 | JGI20153J14295_10000108      | - | 47780   | 47753   | RNA → rplS (PRK05338)Ribosomal_L19 (pfam01245) →                                                                                                                                           |
| env-1859 | JGI20153J14318_10000108      | - | 47780   | 47753   | RNA → rplS (PRK05338)Ribosomal_L19 (pfam01245) →                                                                                                                                           |
| env-1860 | JCVL_SCAF_1096627739007      | - | 830     | 803     | RNA → rplS (PRK05338)Ribosomal_L19 (pfam01245) → PRK08299 (PRK08299) →                                                                                                                     |
| env-1861 | CETK01280519.1               | + | 89      | 116     | RNA → rplS (PRK05338)Ribosomal_L19 (pfam01245) → PRK08299 (PRK08299) →                                                                                                                     |
| Ala-2-1  | NZ_AUKX01000041.1            | + | 37352   | 37379   | RNA → rplS (PRK05338)Ribosomal_L19 (pfam01245) →                                                                                                                                           |
| env-1862 | JGI24723J26617_10101877      | - | 728     | 701     | RNA → rplS (PRK05338)Ribosomal_L19 (pfam01245) →                                                                                                                                           |
| Ndo-1-1  | NC_020156.1                  | + | 117213  | 117240  | RNA → rplS (PRK05338)Ribosomal_L19 (pfam01245) →                                                                                                                                           |
| env-1863 | DelMOSum2011_c10602551       | - | 154     | 127     | RNA → rplS (PRK05338)Ribosomal_L19 (pfam01245) →                                                                                                                                           |
| env-1864 | A09P0410a_Sequence0000028955 | + | 1010    | 1037    | RNA →                                                                                                                                                                                      |
| Cal-1-1  | NC_014934.1                  | + | 10579   | 10606   | RNA → rplS (PRK05338)Ribosomal_L19 (pfam01245) →                                                                                                                                           |
| env-1865 | 2236876009_020497            | + | 88      | 115     | RNA →                                                                                                                                                                                      |
| Csp-13-1 | NZ_JUHB01000001.1            | + | 1008351 | 1008378 | RNA → rplS (PRK05338)Ribosomal_L19 (pfam01245) →                                                                                                                                           |
| Mfo-1-1  | NZ_JQLH01000001.1            | + | 2737717 | 2737744 | RNA → rplS (PRK05338)Ribosomal_L19 (pfam01245) →                                                                                                                                           |
| Cba-4-1  | NZ_CP009887.1                | + | 4088266 | 4088293 | RNA → rplS (PRK05338)Ribosomal_L19 (pfam01245) →                                                                                                                                           |
| Cba-2-1  | NZ_CP009976.1                | + | 4128380 | 4128407 | RNA → rplS (PRK05338)Ribosomal_L19 (pfam01245) →                                                                                                                                           |
| Cba-1-1  | NZ_ATLH01000022.1            | + | 273938  | 273965  | RNA → rplS (PRK05338)Ribosomal_L19 (pfam01245) →                                                                                                                                           |
| Cba-3-1  | NZ_ATLG01000021.1            | + | 275945  | 275972  | RNA → rplS (PRK05338)Ribosomal_L19 (pfam01245) →                                                                                                                                           |
| Csp-12-1 | NZ_JQCT01000003.1            | - | 7091    | 7064    | RNA → rplS (PRK05338)Ribosomal_L19 (pfam01245) →                                                                                                                                           |
| env-1866 | CEQL01331727.1               | - | 1140    | 1113    | RNA → rplS (PRK05338)Ribosomal_L19 (pfam01245) → PRK08299 (PRK08299) →                                                                                                                     |
| env-1867 | BS_KBA_SWE12_21m_c10696970   | + | 162     | 189     | RNA →                                                                                                                                                                                      |
| env-1868 | BS_KBA_SWE02_21m_10122283    | + | 143     | 170     | RNA → rplS (PRK05338)Ribosomal_L19 (pfam01245) →                                                                                                                                           |
| env-1869 | 3300001605_10642224          | + | 131     | 158     | RNA → rplS (PRK05338)Ribosomal_L19 (pfam01245) →                                                                                                                                           |
| env-1870 | 3300000558_11705956          | - | 186     | 159     | RNA → rplS (PRK05338)Ribosomal_L19 (pfam01245) →                                                                                                                                           |
| env-1871 | 3300001605_11328178          | - | 116     | 89      | RNA → hypo →                                                                                                                                                                               |
| env-1872 | CENX01111910.1               | + | 8377    | 8404    | RNA → rplS (PRK05338)Ribosomal_L19 (pfam01245) → lcd (COG0538)PRK08299 (PRK08299) →<br>murQ (PRK05441)SIS_Etherase (cd05007) → hypo →                                                      |
| env-1873 | CENP01126039.1               | + | 1259    | 1286    | RNA →                                                                                                                                                                                      |
| env-1874 | CEOF01188357.1               | - | 3192    | 3165    | RNA → rplS (PRK05338)Ribosomal_L19 (pfam01245) → lcd (COG0538)PRK08299 (PRK08299) →<br>murQ (PRK05441)SIS_Etherase (cd05007) → hypo → TGS_ThrRS_N (cd01667)ThrS (COG0441)thrS (PRK00413) → |
| env-1875 | JGI20154J14316_10007303      | - | 5508    | 5481    | RNA → rplS (PRK05338)Ribosomal_L19 (pfam01245) →                                                                                                                                           |
| env-1876 | JGI20160J14292_10005573      | - | 5508    | 5481    | RNA → rplS (PRK05338)Ribosomal_L19 (pfam01245) →                                                                                                                                           |
| env-1877 | JGI20153J14295_10005409      | - | 5688    | 5661    | RNA → rplS (PRK05338)Ribosomal_L19 (pfam01245) →                                                                                                                                           |
| env-1878 | JGI20153J14318_10005409      | - | 5688    | 5661    | RNA → rplS (PRK05338)Ribosomal_L19 (pfam01245) →                                                                                                                                           |
| env-1879 | JGI20157J14317_10006339      | - | 4204    | 4177    | RNA → rplS (PRK05338)Ribosomal_L19 (pfam01245) →                                                                                                                                           |
| env-1880 | KGI_S1_ANT01_95m_c10030633   | + | 858     | 885     | RNA → rplS (PRK05338)Ribosomal_L19 (pfam01245) →                                                                                                                                           |
| env-1881 | SA_S1_NOR08_45m_c10000592    | - | 9103    | 9076    | RNA → rplS (PRK05338)Ribosomal_L19 (pfam01245) →                                                                                                                                           |
| env-1882 | KGI_S2_ANT04_2345m_c1033268  | + | 162     | 189     | RNA → rplS (PRK05338)Ribosomal_L19 (pfam01245) →                                                                                                                                           |
| env-1883 | SA_S2_NOR15_50m_c10000395    | - | 9786    | 9759    | RNA → rplS (PRK05338)Ribosomal_L19 (pfam01245) →                                                                                                                                           |
| env-1884 | KGI_S2_ANT05_2345m_c1037235  | + | 96      | 123     | RNA → rplS (PRK05338)Ribosomal_L19 (pfam01245) →                                                                                                                                           |
| env-1885 | KGI_S1_ANT02_95m_c10039728   | + | 412     | 439     | RNA → rplS (PRK05338)Ribosomal_L19 (pfam01245) →                                                                                                                                           |
| env-1886 | JGI24023J19991_10000015      | - | 6676    | 6649    | RNA → rplS (PRK05338)Ribosomal_L19 (pfam01245) →                                                                                                                                           |
| Orh-1-1  | NC_018016.1                  | - | 563396  | 563369  | RNA → rplS (PRK05338)Ribosomal_L19 (pfam01245) →                                                                                                                                           |
| Orh-3-1  | NZ_CP006828.1                | + | 1411724 | 1411751 | RNA → rplS (PRK05338)Ribosomal_L19 (pfam01245) →                                                                                                                                           |
| Orh-2-1  | NZ_AXDE01000005.1            | + | 164490  | 164517  | RNA → rplS (PRK05338)Ribosomal_L19 (pfam01245) →                                                                                                                                           |
| env-1887 | TB_FS06_10DRAFT_1002658      | + | 1277    | 1304    | RNA → rplS (PRK05338)Ribosomal_L19 (pfam01245) →                                                                                                                                           |
| env-1888 | LG0V01058696.1               | + | 3884    | 3911    | RNA → rplS (PRK05338)Ribosomal_L19 (pfam01245) →                                                                                                                                           |
| env-1889 | LGVE01220578.1               | - | 1243    | 1216    | RNA → rplS (PRK05338)Ribosomal_L19 (pfam01245) →                                                                                                                                           |
| env-1890 | LGVF01377133.1               | + | 233     | 260     | RNA → rplS (PRK05338)Ribosomal_L19 (pfam01245) →                                                                                                                                           |
| env-1891 | topACOD_F95O9CU01CV6MI       | + | 310     | 337     | RNA → ←hypo                                                                                                                                                                                |



|          |                                 |   |         |         |       |                                            |
|----------|---------------------------------|---|---------|---------|-------|--------------------------------------------|
| env-1892 | SRS011243_C2014617              | + | 132     | 159     | RNA → | rplS (PRK05338)Ribosomal_L19 (pfam01245) → |
| env-1893 | SRS013533_PGA_scaffold_14677    | + | 406     | 433     | RNA → | rplS (PRK05338)Ribosomal_L19 (pfam01245) → |
| env-1894 | SRS014888_C3069310              | - | 488     | 461     | RNA → | rplS (PRK05338)Ribosomal_L19 (pfam01245) → |
| env-1895 | SRS015762_C3674271              | - | 5976    | 5949    | RNA → | rplS (PRK05338)Ribosomal_L19 (pfam01245) → |
| env-1896 | SRS019028_C2956184              | + | 301     | 328     | RNA → | rplS (PRK05338)Ribosomal_L19 (pfam01245) → |
| env-1897 | SRS057355_C2324181              | - | 410     | 383     | RNA → | rplS (PRK05338)Ribosomal_L19 (pfam01245) → |
| env-1898 | SRS015893_C2350217              | - | 265     | 238     | RNA → | rplS (PRK05338)Ribosomal_L19 (pfam01245) → |
| env-1899 | SRS016575_Baylor_scaffold_56189 | - | 634     | 607     | RNA → | rplS (PRK05338)Ribosomal_L19 (pfam01245) → |
| env-1900 | SRS015985_WUGC_scaffold_37008   | + | 406     | 433     | RNA → | rplS (PRK05338)Ribosomal_L19 (pfam01245) → |
| env-1901 | SRS013949_WUGC_scaffold_26331   | + | 33      | 60      | RNA → | rplS (PRK05338)Ribosomal_L19 (pfam01245) → |
| env-1902 | SRS015755_WUGC_scaffold_23418   | + | 50      | 77      | RNA → | rplS (PRK05338)Ribosomal_L19 (pfam01245) → |
| env-1903 | SRS015989_WUGC_scaffold_7779    | + | 1237    | 1264    | RNA → | rplS (PRK05338)Ribosomal_L19 (pfam01245) → |
| env-1904 | SRS018665_WUGC_scaffold_42984   | - | 394     | 367     | RNA → | rplS (PRK05338)Ribosomal_L19 (pfam01245) → |
| env-1905 | SRS019077_C2600640              | - | 510     | 483     | RNA → | rplS (PRK05338)Ribosomal_L19 (pfam01245) → |
| env-1906 | SRS019980_Baylor_scaffold_35308 | - | 329     | 302     | RNA → | rplS (PRK05338)Ribosomal_L19 (pfam01245) → |
| env-1907 | SRS021960_Baylor_scaffold_16219 | - | 926     | 899     | RNA → | rplS (PRK05338)Ribosomal_L19 (pfam01245) → |
| env-1908 | SRS022725_C5693545              | + | 21      | 48      | RNA → | rplS (PRK05338)Ribosomal_L19 (pfam01245) → |
| env-1909 | SRS024144_C1769633              | - | 629     | 602     | RNA → | rplS (PRK05338)Ribosomal_L19 (pfam01245) → |
| env-1910 | SRS024447_LANL_scaffold_57217   | + | 716     | 743     | RNA → | rplS (PRK05338)Ribosomal_L19 (pfam01245) → |
| env-1911 | SRS042984_LANL_scaffold_57938   | + | 113     | 140     | RNA → | rplS (PRK05338)Ribosomal_L19 (pfam01245) → |
| env-1912 | SRS043018_WUGC_scaffold_57339   | - | 1047    | 1020    | RNA → | rplS (PRK05338)Ribosomal_L19 (pfam01245) → |
| env-1913 | SRS045197_WUGC_scaffold_67272   | - | 636     | 609     | RNA → | rplS (PRK05338)Ribosomal_L19 (pfam01245) → |
| env-1914 | SRS047100_C2003956              | + | 65      | 92      | RNA → | rplS (PRK05338)Ribosomal_L19 (pfam01245) → |
| env-1915 | SRS047113_LANL_scaffold_55438   | + | 262     | 289     | RNA → | rplS (PRK05338)Ribosomal_L19 (pfam01245) → |
| env-1916 | SRS051378_C1867511              | + | 419     | 446     | RNA → | rplS (PRK05338)Ribosomal_L19 (pfam01245) → |
| env-1917 | SRS053584_LANL_scaffold_44116   | - | 1012    | 985     | RNA → | rplS (PRK05338)Ribosomal_L19 (pfam01245) → |
| env-1918 | SRS019387_C1763302              | + | 725     | 752     | RNA → | rplS (PRK05338)Ribosomal_L19 (pfam01245) → |
| env-1919 | SRS022719_LANL_scaffold_27291   | - | 206354  | 206327  | RNA → | rplS (PRK05338)Ribosomal_L19 (pfam01245) → |
| env-1920 | SRS044662_LANL_scaffold_16481   | + | 271     | 298     | RNA → | rplS (PRK05338)Ribosomal_L19 (pfam01245) → |
| env-1921 | SRS024081_LANL_scaffold_75020   | + | 4020    | 4047    | RNA → | rplS (PRK05338)Ribosomal_L19 (pfam01245) → |
| env-1922 | SRS043663_C4071478              | + | 98      | 125     | RNA → | rplS (PRK05338)Ribosomal_L19 (pfam01245) → |
| env-1923 | SRS058808_LANL_scaffold_27436   | - | 1152    | 1125    | RNA → | rplS (PRK05338)Ribosomal_L19 (pfam01245) → |
| Ran-1-1  | NZ_CP007503.1                   | - | 224334  | 224307  | RNA → | rplS (PRK05338)Ribosomal_L19 (pfam01245) → |
| env-1924 | Throat_LANL_C5692256            | - | 55      | 28      | RNA → |                                            |
| env-1925 | SRS013945_C1211939              | - | 282     | 255     | RNA → | rplS (PRK05338)Ribosomal_L19 (pfam01245) → |
| env-1926 | SRS014124_WUGC_scaffold_20088   | + | 433     | 460     | RNA → | rplS (PRK05338)Ribosomal_L19 (pfam01245) → |
| env-1927 | SRS050244_C4542361              | + | 282     | 309     | RNA → | rplS (PRK05338)Ribosomal_L19 (pfam01245) → |
| env-1928 | SRS077736_C1862773              | - | 6973    | 6946    | RNA → | rplS (PRK05338)Ribosomal_L19 (pfam01245) → |
| env-1929 | SRS015574_C3403721              | - | 626     | 599     | RNA → | rplS (PRK05338)Ribosomal_L19 (pfam01245) → |
| env-1930 | SRS018394_Baylor_scaffold_2340  | - | 289     | 262     | RNA → | rplS (PRK05338)Ribosomal_L19 (pfam01245) → |
| env-1931 | SRS020226_Baylor_scaffold_48915 | + | 185     | 212     | RNA → | rplS (PRK05338)Ribosomal_L19 (pfam01245) → |
| env-1932 | SRS024580_C3050280              | + | 109     | 136     | RNA → | rplS (PRK05338)Ribosomal_L19 (pfam01245) → |
| Ran-6-1  | NC_017569.1                     | + | 2072327 | 2072354 | RNA → | rplS (PRK05338)Ribosomal_L19 (pfam01245) → |
| Ran-8-1  | NZ_AENH01000023.1               | + | 154146  | 154173  | RNA → | rplS (PRK05338)Ribosomal_L19 (pfam01245) → |
| Ran-5-1  | NC_020125.1                     | + | 1496908 | 1496935 | RNA → | rplS (PRK05338)Ribosomal_L19 (pfam01245) → |
| Ran-1-2  | NZ_CP007504.1                   | - | 234152  | 234125  | RNA → | rplS (PRK05338)Ribosomal_L19 (pfam01245) → |
| Ran-9-1  | NZ_CP007204.1                   | - | 224442  | 224415  | RNA → | rplS (PRK05338)Ribosomal_L19 (pfam01245) → |
| env-1933 | SRS064329_C2693709              | + | 819     | 846     | RNA → |                                            |
| env-1934 | Contig7224538.1                 | + | 301     | 328     | RNA → | rplS (PRK05338)Ribosomal_L19 (pfam01245) → |
| env-1935 | SRS011306_C3614405              | + | 617     | 644     | RNA → | rplS (PRK05338)Ribosomal_L19 (pfam01245) → |
| env-1936 | SRS012279_C2754684              | + | 588     | 615     | RNA → | rplS (PRK05338)Ribosomal_L19 (pfam01245) → |
| env-1937 | SRS014573_C3689455              | - | 453     | 426     | RNA → | rplS (PRK05338)Ribosomal_L19 (pfam01245) → |

|          |                                 |   |       |       |     |   |                                          |   |
|----------|---------------------------------|---|-------|-------|-----|---|------------------------------------------|---|
| env-1938 | SRS015434_C5917170              | + | 248   | 275   | RNA | → | rplS (PRK05338)Ribosomal_L19 (pfam01245) | → |
| env-1939 | SRS015644_C1854550              | + | 125   | 152   | RNA | → | rplS (PRK05338)Ribosomal_L19 (pfam01245) | → |
| env-1940 | SRS016002_WUGC_scaffold_45788   | + | 233   | 260   | RNA | → | rplS (PRK05338)Ribosomal_L19 (pfam01245) | → |
| env-1941 | SRS016086_C2526098              | - | 7008  | 6981  | RNA | → | rplS (PRK05338)Ribosomal_L19 (pfam01245) | → |
| env-1942 | SRS016225_C3019675              | - | 16261 | 16234 | RNA | → | rplS (PRK05338)Ribosomal_L19 (pfam01245) | → |
| env-1943 | SRS017209_Baylor_scaffold_70466 | - | 6318  | 6291  | RNA | → | rplS (PRK05338)Ribosomal_L19 (pfam01245) | → |
| env-1944 | SRS018157_Baylor_scaffold_33211 | - | 449   | 422   | RNA | → | rplS (PRK05338)Ribosomal_L19 (pfam01245) | → |
| env-1945 | SRS018300_C3337187              | + | 271   | 298   | RNA | → | rplS (PRK05338)Ribosomal_L19 (pfam01245) | → |
| env-1946 | SRS018357_C3935552              | - | 973   | 946   | RNA | → | rplS (PRK05338)Ribosomal_L19 (pfam01245) | → |
| env-1947 | SRS019071_C5219198              | + | 750   | 777   | RNA | → | rplS (PRK05338)Ribosomal_L19 (pfam01245) | → |
| env-1948 | SRS019327_C2809319              | - | 4490  | 4463  | RNA | → | rplS (PRK05338)Ribosomal_L19 (pfam01245) | → |
| env-1949 | SRS019591_WUGC_scaffold_40451   | - | 587   | 560   | RNA | → | rplS (PRK05338)Ribosomal_L19 (pfam01245) | → |
| env-1950 | SRS022077_Baylor_scaffold_57695 | + | 692   | 719   | RNA | → | rplS (PRK05338)Ribosomal_L19 (pfam01245) | → |
| env-1951 | SRS022530_LANL_scaffold_35836   | - | 15939 | 15912 | RNA | → | rplS (PRK05338)Ribosomal_L19 (pfam01245) | → |
| env-1952 | SRS023557_C1767643              | + | 685   | 712   | RNA | → | rplS (PRK05338)Ribosomal_L19 (pfam01245) | → |
| env-1953 | SRS024015_C2912470              | + | 143   | 170   | RNA | → | rplS (PRK05338)Ribosomal_L19 (pfam01245) | → |
| env-1954 | SRS024138_C2702299              | + | 249   | 276   | RNA | → | rplS (PRK05338)Ribosomal_L19 (pfam01245) | → |
| env-1955 | SRS024277_C2782780              | + | 132   | 159   | RNA | → | rplS (PRK05338)Ribosomal_L19 (pfam01245) | → |
| env-1956 | SRS024441_C3047628              | - | 532   | 505   | RNA | → | rplS (PRK05338)Ribosomal_L19 (pfam01245) | → |
| env-1957 | SRS042131_C2195835              | - | 173   | 146   | RNA | → | rplS (PRK05338)Ribosomal_L19 (pfam01245) | → |
| env-1958 | SRS042910_C5619617              | - | 593   | 566   | RNA | → | rplS (PRK05338)Ribosomal_L19 (pfam01245) | → |
| env-1959 | SRS044373_C2908610              | + | 898   | 925   | RNA | → | rplS (PRK05338)Ribosomal_L19 (pfam01245) | → |
| env-1960 | SRS049389_WUGC_scaffold_41106   | - | 1464  | 1437  | RNA | → | rplS (PRK05338)Ribosomal_L19 (pfam01245) | → |
| env-1961 | SRS050669_LANL_scaffold_26170   | - | 6321  | 6294  | RNA | → | rplS (PRK05338)Ribosomal_L19 (pfam01245) | → |
| env-1962 | SRS054687_C3492060              | - | 1063  | 1036  | RNA | → | rplS (PRK05338)Ribosomal_L19 (pfam01245) | → |
| env-1963 | SRS056622_C2465234              | - | 126   | 99    | RNA | → | hypo→                                    |   |
| env-1964 | SRS057791_LANL_scaffold_38618   | - | 378   | 351   | RNA | → | rplS (PRK05338)Ribosomal_L19 (pfam01245) | → |
| env-1965 | SRS058336_LANL_scaffold_49913   | - | 1206  | 1179  | RNA | → | rplS (PRK05338)Ribosomal_L19 (pfam01245) | → |
| env-1966 | SRS063288_LANL_scaffold_40195   | - | 1268  | 1241  | RNA | → | rplS (PRK05338)Ribosomal_L19 (pfam01245) | → |
| env-1967 | SRS064423_C2493432              | + | 93    | 120   | RNA | → | rplS (PRK05338)Ribosomal_L19 (pfam01245) | → |
| env-1968 | SRS011152_Baylor_scaffold_32757 | + | 171   | 198   | RNA | → | rplS (PRK05338)Ribosomal_L19 (pfam01245) | → |
| env-1969 | SRS011343_C2194933              | + | 209   | 236   | RNA | → | rplS (PRK05338)Ribosomal_L19 (pfam01245) | → |
| env-1970 | SRS013170_Baylor_scaffold_51649 | + | 154   | 181   | RNA | → | rplS (PRK05338)Ribosomal_L19 (pfam01245) | → |
| env-1971 | SRS015278_WUGC_scaffold_59883   | + | 397   | 424   | RNA | → | rplS (PRK05338)Ribosomal_L19 (pfam01245) | → |
| env-1972 | SRS018971_C758067               | - | 179   | 206   | RNA | → | rplS (PRK05338)Ribosomal_L19 (pfam01245) | → |
| env-1973 | SRS018975_WUGC_scaffold_37778   | + | 742   | 715   | RNA | → | rplS (PRK05338)Ribosomal_L19 (pfam01245) | → |
| env-1974 | SRS022536_LANL_scaffold_73925   | + | 387   | 414   | RNA | → | rplS (PRK05338)Ribosomal_L19 (pfam01245) | → |
| env-1975 | SRS023964_C2589681              | - | 1401  | 1374  | RNA | → | rplS (PRK05338)Ribosomal_L19 (pfam01245) | → |
| env-1976 | SRS051941_C3866993              | - | 218   | 191   | RNA | → | rplS (PRK05338)Ribosomal_L19 (pfam01245) | → |
| env-1977 | SRS013947_WUGC_scaffold_25354   | - | 1008  | 981   | RNA | → | rplS (PRK05338)Ribosomal_L19 (pfam01245) | → |
| env-1978 | SRS023930_Baylor_scaffold_9769  | - | 192   | 165   | RNA | → | rplS (PRK05338)Ribosomal_L19 (pfam01245) | → |
| env-1979 | SRS013723_C3240076              | - | 198   | 171   | RNA | → | rplS (PRK05338)Ribosomal_L19 (pfam01245) | → |
| env-1980 | SRS015440_WUGC_scaffold_82221   | + | 2031  | 2058  | RNA | → | rplS (PRK05338)Ribosomal_L19 (pfam01245) | → |
| env-1981 | SRS015470_WUGC_scaffold_52571   | + | 10203 | 10230 | RNA | → | rplS (PRK05338)Ribosomal_L19 (pfam01245) | → |
| env-1982 | SRS016043_WUGC_scaffold_35871   | - | 521   | 494   | RNA | → | rplS (PRK05338)Ribosomal_L19 (pfam01245) | → |
| env-1983 | SRS019073_C2517672              | - | 733   | 706   | RNA | → | rplS (PRK05338)Ribosomal_L19 (pfam01245) | → |
| env-1984 | SRS016200_WUGC_scaffold_14444   | - | 1066  | 1039  | RNA | → | rplS (PRK05338)Ribosomal_L19 (pfam01245) | → |
| env-1985 | SRS051244_C3506325              | + | 2611  | 2638  | RNA | → | rplS (PRK05338)Ribosomal_L19 (pfam01245) | → |
| env-1986 | SRS055450_C2078447              | - | 643   | 616   | RNA | → | rplS (PRK05338)Ribosomal_L19 (pfam01245) | → |
| env-1987 | SRS017439_C3808563              | + | 80    | 107   | RNA | → | rplS (PRK05338)Ribosomal_L19 (pfam01245) | → |
| env-1988 | SRS019591_C1935122              | + | 1741  | 1768  | RNA | → | rplS (PRK05338)Ribosomal_L19 (pfam01245) | → |
| env-1989 | SRS020340_Baylor_scaffold_39528 | + | 113   | 140   | RNA | → | rplS (PRK05338)Ribosomal_L19 (pfam01245) | → |

|          |                                 |   |        |        |                                                                                                                                                                                                                                            |
|----------|---------------------------------|---|--------|--------|--------------------------------------------------------------------------------------------------------------------------------------------------------------------------------------------------------------------------------------------|
| env-1990 | SRS023595_C7179369              | + | 182    | 209    | RNA → rplS (PRK05338)Ribosomal_L19 (pfam01245) →                                                                                                                                                                                           |
| env-1991 | SRS042643_C2995340              | + | 43     | 70     | RNA → rplS (PRK05338)Ribosomal_L19 (pfam01245) →                                                                                                                                                                                           |
| env-1992 | SRS057539_C2749897              | + | 2475   | 2502   | RNA → rplS (PRK05338)Ribosomal_L19 (pfam01245) →                                                                                                                                                                                           |
| env-1993 | SRS014894_WUGC_scaffold_69889   | - | 1011   | 984    | RNA → rplS (PRK05338)Ribosomal_L19 (pfam01245) →                                                                                                                                                                                           |
| Ran-2-1  | NC_014738.1                     | - | 235938 | 235911 | RNA → rplS (PRK05338)Ribosomal_L19 (pfam01245) →                                                                                                                                                                                           |
| Ran-7-1  | NZ_KB206037.1                   | + | 651066 | 651093 | RNA → rplS (PRK05338)Ribosomal_L19 (pfam01245) →                                                                                                                                                                                           |
| Ran-2-2  | NZ_017045.1                     | - | 396304 | 396277 | RNA → rplS (PRK05338)Ribosomal_L19 (pfam01245) →                                                                                                                                                                                           |
| Rco-1-1  | NZ_KB894217.1                   | + | 70188  | 70215  | RNA → rplS (PRK05338)Ribosomal_L19 (pfam01245) → Era (COG1159)era (PRK00089) → ABC_YhbG (cd03218)AAA (smart00382)BCA_ABC_TP_C (pfam12399) → PduO_Nterm (TIGR00636)Cob_adeno_trans (pfam01923) → TPK (cd07995)TPK_B1_binding (smart00983) → |
| env-1994 | Palatine_Tonsils_LANL_C6201686  | - | 597    | 570    | RNA → rplS (PRK05338)Ribosomal_L19 (pfam01245) →                                                                                                                                                                                           |
| env-1995 | SRS013252_C3650314              | + | 625    | 652    | RNA → rplS (PRK05338)Ribosomal_L19 (pfam01245) →                                                                                                                                                                                           |
| env-1996 | SRS015158_WUGC_scaffold_8442    | + | 3252   | 3279   | RNA → rplS (PRK05338)Ribosomal_L19 (pfam01245) →                                                                                                                                                                                           |
| env-1997 | SRS015797_C2637654              | + | 603    | 630    | RNA → rplS (PRK05338)Ribosomal_L19 (pfam01245) →                                                                                                                                                                                           |
| env-1998 | SRS019906_C2274015              | + | 1640   | 1667   | RNA → rplS (PRK05338)Ribosomal_L19 (pfam01245) →                                                                                                                                                                                           |
| env-1999 | SRS022149_LANL_scaffold_18048   | + | 563    | 590    | RNA →                                                                                                                                                                                                                                      |
| env-2000 | SRS047634_LANL_scaffold_86898   | + | 255    | 282    | RNA → rplS (PRK05338)Ribosomal_L19 (pfam01245) →                                                                                                                                                                                           |
| Ran-3-1  | NZ_CP006649.1                   | + | 63395  | 63422  | RNA → rplS (PRK05338)Ribosomal_L19 (pfam01245) →                                                                                                                                                                                           |
| env-2001 | SRS016541_C1584168              | - | 612    | 585    | RNA → rplS (PRK05338)Ribosomal_L19 (pfam01245) →                                                                                                                                                                                           |
| env-2002 | SRS023841_C1590187              | + | 410    | 437    | RNA → rplS (PRK05338)Ribosomal_L19 (pfam01245) →                                                                                                                                                                                           |
| env-2003 | SRS043422_C2629820              | + | 251    | 278    | RNA → rplS (PRK05338)Ribosomal_L19 (pfam01245) →                                                                                                                                                                                           |
| env-2004 | SRS053917_C3736582              | + | 117    | 144    | RNA → rplS (PRK05338)Ribosomal_L19 (pfam01245) →                                                                                                                                                                                           |
| env-2005 | SRS012285_Baylor_scaffold_55554 | + | 199    | 226    | RNA → rplS (PRK05338)Ribosomal_L19 (pfam01245) →                                                                                                                                                                                           |
| env-2006 | SRS013945_C1168989              | - | 161    | 134    | RNA → rplS (PRK05338)Ribosomal_L19 (pfam01245) →                                                                                                                                                                                           |
| env-2007 | SRS013950_C2108425              | + | 189    | 216    | RNA → rplS (PRK05338)Ribosomal_L19 (pfam01245) →                                                                                                                                                                                           |
| env-2008 | SRS014473_C1123279              | + | 540    | 567    | RNA → rplS (PRK05338)Ribosomal_L19 (pfam01245) →                                                                                                                                                                                           |
| env-2009 | SRS014578_WUGC_scaffold_6706    | + | 428    | 455    | RNA → rplS (PRK05338)Ribosomal_L19 (pfam01245) →                                                                                                                                                                                           |
| env-2010 | SRS015044_WUGC_scaffold_69863   | - | 685    | 658    | RNA → rplS (PRK05338)Ribosomal_L19 (pfam01245) →                                                                                                                                                                                           |
| env-2011 | SRS015899_C1768151              | - | 210    | 183    | RNA → rplS (PRK05338)Ribosomal_L19 (pfam01245) →                                                                                                                                                                                           |
| env-2012 | SRS016331_C4139213              | - | 394    | 367    | RNA → rplS (PRK05338)Ribosomal_L19 (pfam01245) →                                                                                                                                                                                           |
| env-2013 | SRS017227_Baylor_scaffold_32942 | - | 562    | 535    | RNA → rplS (PRK05338)Ribosomal_L19 (pfam01245) →                                                                                                                                                                                           |
| env-2014 | SRS017691_C5166596              | - | 303    | 276    | RNA → rplS (PRK05338)Ribosomal_L19 (pfam01245) →                                                                                                                                                                                           |
| env-2015 | SRS019125_C626092               | - | 1070   | 1043   | RNA → rplS (PRK05338)Ribosomal_L19 (pfam01245) →                                                                                                                                                                                           |
| env-2016 | SRS019129_WUGC_scaffold_11480   | - | 802    | 775    | RNA → rplS (PRK05338)Ribosomal_L19 (pfam01245) →                                                                                                                                                                                           |
| env-2017 | SRS022083_C1917930              | + | 717    | 744    | RNA →                                                                                                                                                                                                                                      |
| env-2018 | SRS024087_C3403049              | - | 384    | 357    | RNA → rplS (PRK05338)Ribosomal_L19 (pfam01245) →                                                                                                                                                                                           |
| env-2019 | SRS024649_C3480943              | + | 159    | 186    | RNA → rplS (PRK05338)Ribosomal_L19 (pfam01245) →                                                                                                                                                                                           |
| env-2020 | SRS043755_WUGC_scaffold_2404    | + | 403    | 430    | RNA → rplS (PRK05338)Ribosomal_L19 (pfam01245) →                                                                                                                                                                                           |
| env-2021 | SRS047265_C1089128              | + | 277    | 304    | RNA → rplS (PRK05338)Ribosomal_L19 (pfam01245) →                                                                                                                                                                                           |
| env-2022 | SRS049318_C6415734              | + | 418    | 445    | RNA → rplS (PRK05338)Ribosomal_L19 (pfam01245) →                                                                                                                                                                                           |
| env-2023 | SRS051930_C3222104              | + | 135    | 162    | RNA → rplS (PRK05338)Ribosomal_L19 (pfam01245) →                                                                                                                                                                                           |
| env-2024 | SRS052876_LANL_scaffold_28233   | - | 514    | 487    | RNA → rplS (PRK05338)Ribosomal_L19 (pfam01245) →                                                                                                                                                                                           |
| env-2025 | SRS054430_LANL_scaffold_17686   | - | 3792   | 3765   | RNA → rplS (PRK05338)Ribosomal_L19 (pfam01245) →                                                                                                                                                                                           |
| env-2026 | SRS055378_C4102388              | - | 904    | 877    | RNA → rplS (PRK05338)Ribosomal_L19 (pfam01245) →                                                                                                                                                                                           |
| env-2027 | SRS063603_C4216775              | + | 204    | 231    | RNA → rplS (PRK05338)Ribosomal_L19 (pfam01245) →                                                                                                                                                                                           |
| env-2028 | SRS063932_LANL_scaffold_98887   | - | 303    | 276    | RNA → rplS (PRK05338)Ribosomal_L19 (pfam01245) →                                                                                                                                                                                           |
| env-2029 | SRS063999_LANL_scaffold_36577   | + | 83     | 110    | RNA → rplS (PRK05338)Ribosomal_L19 (pfam01245) →                                                                                                                                                                                           |
| env-2030 | SRS064449_C3931012              | + | 199    | 226    | RNA → rplS (PRK05338)Ribosomal_L19 (pfam01245) →                                                                                                                                                                                           |
| env-2031 | SRS075410_LANL_scaffold_45208   | + | 279    | 306    | RNA → rplS (PRK05338)Ribosomal_L19 (pfam01245) →                                                                                                                                                                                           |
| env-2032 | SRS021496_C2863013              | + | 18     | 45     | RNA → rplS (PRK05338)Ribosomal_L19 (pfam01245) →                                                                                                                                                                                           |
| env-2033 | SRS017445_Baylor_scaffold_27071 | - | 1986   | 1959   | RNA → rplS (PRK05338)Ribosomal_L19 (pfam01245) →                                                                                                                                                                                           |
| env-2034 | CENR01002311.1                  | - | 10635  | 10608  | RNA → rplS (PRK05338)Ribosomal_L19 (pfam01245) →                                                                                                                                                                                           |
| env-2035 | JCVI_SCAF_1096626906398         | - | 1635   | 1608   | RNA → rplS (PRK05338)Ribosomal_L19 (pfam01245) →                                                                                                                                                                                           |



|          |                              |   |        |        |                                                                                                                                                                                                                                                      |
|----------|------------------------------|---|--------|--------|------------------------------------------------------------------------------------------------------------------------------------------------------------------------------------------------------------------------------------------------------|
| Fge-1-1  | NZ_AUGN01000001.1            | + | 377756 | 377783 | RNA → rplS (PRK05338)Ribosomal_L19 (pfam01245) →                                                                                                                                                                                                     |
| Nma-1-1  | NZ_AP014548.1                | + | 46175  | 46202  | RNA → rplS (PRK05338)Ribosomal_L19 (pfam01245) →                                                                                                                                                                                                     |
| env-2036 | CENJ01235641.1               | - | 101    | 74     | RNA →                                                                                                                                                                                                                                                |
| env-2037 | CEQC01079196.1               | + | 513    | 540    | RNA → rplS (PRK05338)Ribosomal_L19 (pfam01245) →                                                                                                                                                                                                     |
| env-2038 | CEQG01233746.1               | - | 746    | 719    | RNA → rplS (PRK05338)Ribosomal_L19 (pfam01245) →                                                                                                                                                                                                     |
| env-2039 | CEQH01174899.1               | + | 314    | 341    | RNA → rplS (PRK05338)Ribosomal_L19 (pfam01245) →                                                                                                                                                                                                     |
| env-2040 | CEQR01110413.1               | - | 5165   | 5138   | RNA → rplS (PRK05338)Ribosomal_L19 (pfam01245) →                                                                                                                                                                                                     |
| env-2041 | CEQT01267208.1               | - | 212    | 185    | RNA → rplS (PRK05338)Ribosomal_L19 (pfam01245) →                                                                                                                                                                                                     |
| env-2042 | CEQZ01055080.1               | - | 2498   | 2471   | RNA → rplS (PRK05338)Ribosomal_L19 (pfam01245) →                                                                                                                                                                                                     |
| env-2043 | CERB01343087.1               | + | 510    | 537    | RNA → rplS (PRK05338)Ribosomal_L19 (pfam01245) →                                                                                                                                                                                                     |
| env-2044 | CERC01066855.1               | + | 170716 | 170743 | RNA → rplS (PRK05338)Ribosomal_L19 (pfam01245) →                                                                                                                                                                                                     |
| env-2045 | CERD01039641.1               | + | 170722 | 170749 | RNA → rplS (PRK05338)Ribosomal_L19 (pfam01245) →                                                                                                                                                                                                     |
| env-2046 | CERX01145001.1               | + | 1529   | 1556   | RNA → rplS (PRK05338)Ribosomal_L19 (pfam01245) →                                                                                                                                                                                                     |
| env-2047 | JGI20157J14317_10303049      | - | 277    | 250    | RNA → rplS (PRK05338)Ribosomal_L19 (pfam01245) →                                                                                                                                                                                                     |
| env-2048 | DelMOSum2010_c10000073       | - | 56849  | 56822  | RNA → rplS (PRK05338)Ribosomal_L19 (pfam01245) →                                                                                                                                                                                                     |
| env-2049 | A09P0410a_Sequence0000004289 | - | 1199   | 1172   | RNA → rplS (PRK05338)Ribosomal_L19 (pfam01245) →                                                                                                                                                                                                     |
| env-2050 | CESP01013401.1               | + | 29497  | 29523  | RNA → rplS (PRK05338)Ribosomal_L19 (pfam01245) → Icd (COG0538)PRK08299 (PRK08299) →<br>TonB_dep_Rec (pfam00593)Plug (pfam07715)CarbopepD_reg_2 (pfam13715)OMP_b-brl_3 (pfam14905) →<br>DUF4249 (pfam14054) → murQ (PRK05441)SIS_Etherase (cd05007) → |
| env-2051 | CEUM01057183.1               | + | 1335   | 1361   | RNA → rplS (PRK05338)Ribosomal_L19 (pfam01245) →                                                                                                                                                                                                     |
| env-2052 | CESB01235038.1               | + | 467    | 493    | RNA → rplS (PRK05338)Ribosomal_L19 (pfam01245) →                                                                                                                                                                                                     |
| env-2053 | CESZ01095135.1               | - | 719    | 693    | RNA → rplS (PRK05338)Ribosomal_L19 (pfam01245) → PRK08299 (PRK08299) →                                                                                                                                                                               |
| env-2054 | CEOC01268308.1               | - | 738    | 712    | RNA → rplS (PRK05338)Ribosomal_L19 (pfam01245) → PRK08299 (PRK08299) →                                                                                                                                                                               |
| env-2055 | CEQL01119221.1               | - | 829    | 803    | RNA → rplS (PRK05338)Ribosomal_L19 (pfam01245) → PRK08299 (PRK08299) →                                                                                                                                                                               |
| env-2056 | CETL01074928.1               | - | 1402   | 1376   | RNA → rplS (PRK05338)Ribosomal_L19 (pfam01245) → PRK08299 (PRK08299) →                                                                                                                                                                               |
| env-2057 | JCVL_SCAF_1096627050705      | + | 985    | 1011   | RNA → rplS (PRK05338)Ribosomal_L19 (pfam01245) → Icd (COG0538)PRK08299 (PRK08299) →<br>Peptidase_M14NE-CP-C_like (cd11308)Plug (pfam07715)CarbopepD_reg_2 (pfam13715) →                                                                              |
| env-2058 | 85084776                     | + | 656    | 682    | RNA →                                                                                                                                                                                                                                                |
| env-2059 | JCVL_READ_1103180508165      | + | 656    | 682    | RNA →                                                                                                                                                                                                                                                |
| env-2060 | CENO01049189.1               | - | 4161   | 4135   | RNA → rplS (PRK05338)Ribosomal_L19 (pfam01245) → Icd (COG0538)PRK08299 (PRK08299) →<br>Peptidase_M14NE-CP-C_like (cd11308)TonB-hemlactrns (TIGR01786)TonB_dep_Rec (pfam00593)Plug (pfam07715)Carb<br>DUF4249 (pfam14054) →                           |
| env-2061 | CENQ01101034.1               | + | 138    | 164    | RNA → rplS (PRK05338)Ribosomal_L19 (pfam01245) → PRK08299 (PRK08299) →                                                                                                                                                                               |
| env-2062 | CEOV01119354.1               | + | 225    | 251    | RNA → rplS (PRK05338)Ribosomal_L19 (pfam01245) → PRK08299 (PRK08299) →                                                                                                                                                                               |
| env-2063 | CEPB01008934.1               | + | 225    | 251    | RNA → rplS (PRK05338)Ribosomal_L19 (pfam01245) → PRK08299 (PRK08299) →                                                                                                                                                                               |
| env-2064 | CEQD01038409.1               | + | 1170   | 1196   | RNA → rplS (PRK05338)Ribosomal_L19 (pfam01245) → Icd (COG0538)PRK08299 (PRK08299) →<br>Peptidase_M14NE-CP-C_like (cd11308)Plug (pfam07715)CarbopepD_reg_2 (pfam13715) →                                                                              |
| env-2065 | CETP01090435.1               | - | 265    | 239    | RNA → rplS (PRK05338)Ribosomal_L19 (pfam01245) →                                                                                                                                                                                                     |
| env-2066 | CEUW01136624.1               | + | 327    | 353    | RNA → rplS (PRK05338)Ribosomal_L19 (pfam01245) →                                                                                                                                                                                                     |
| env-2067 | JCVL_SCAF_1096627827830      | - | 1339   | 1315   | RNA → rplS (PRK05338)Ribosomal_L19 (pfam01245) →                                                                                                                                                                                                     |
| env-2068 | CERK01129111.1               | - | 488    | 464    | RNA → rplS (PRK05338)Ribosomal_L19 (pfam01245) →                                                                                                                                                                                                     |
| env-2069 | CEOY01052385.1               | - | 1246   | 1222   | RNA → rplS (PRK05338)Ribosomal_L19 (pfam01245) → PRK08299 (PRK08299) →                                                                                                                                                                               |
| env-2070 | CEWA01020377.1               | - | 206    | 182    | RNA → rplS (PRK05338)Ribosomal_L19 (pfam01245) →                                                                                                                                                                                                     |
| env-2071 | JCVL_SCAF_1101668434874      | - | 68     | 44     | RNA →                                                                                                                                                                                                                                                |
| env-2072 | CEPA01251295.1               | + | 591    | 615    | RNA →                                                                                                                                                                                                                                                |
| env-2073 | CEUM01025643.1               | - | 3227   | 3203   | RNA → rplS (PRK05338)Ribosomal_L19 (pfam01245) → Icd (COG0538)PRK08299 (PRK08299) →<br>PRK10064 (PRK10064)Plug (pfam07715)CarbopepD_reg_2 (pfam13715) →                                                                                              |
| env-2074 | CEUR01331033.1               | + | 1016   | 1040   | RNA → rplS (PRK05338)Ribosomal_L19 (pfam01245) → PRK08299 (PRK08299) →                                                                                                                                                                               |
| env-2075 | CEWJ01138850.1               | + | 1316   | 1340   | RNA → rplS (PRK05338)Ribosomal_L19 (pfam01245) → PRK08299 (PRK08299) →                                                                                                                                                                               |
| env-2076 | CEVY01039090.1               | + | 1019   | 1043   | RNA → rplS (PRK05338)Ribosomal_L19 (pfam01245) → PRK08299 (PRK08299) →                                                                                                                                                                               |
| env-2077 | JCVL_SCAF_1101667338675      | - | 229    | 205    | RNA →                                                                                                                                                                                                                                                |
| env-2078 | CEQN01304455.1               | + | 639    | 663    | RNA →                                                                                                                                                                                                                                                |
| env-2079 | CEWH01064632.1               | - | 607    | 583    | RNA → rplS (PRK05338)Ribosomal_L19 (pfam01245) → PRK08299 (PRK08299) →                                                                                                                                                                               |



|          |                         |   |         |         |       |                                                                                                                                                                                                                                       |
|----------|-------------------------|---|---------|---------|-------|---------------------------------------------------------------------------------------------------------------------------------------------------------------------------------------------------------------------------------------|
| env-2080 | JCVL_SCAF_1096627518681 | - | 1299    | 1275    | RNA → | rplS (PRK05338)Ribosomal_L19 (pfam01245) →                                                                                                                                                                                            |
| env-2081 | JCVL_SCAF_1096628156800 | + | 1484    | 1508    | RNA → | rplS (PRK05338)Ribosomal_L19 (pfam01245) →                                                                                                                                                                                            |
| env-2082 | JCVL_SCAF_1096626505381 | - | 660     | 636     | RNA → | rplS (PRK05338)Ribosomal_L19 (pfam01245) → PRK08299 (PRK08299) →                                                                                                                                                                      |
| env-2083 | CEOC01044408.1          | - | 1075    | 1051    | RNA → | rplS (PRK05338)Ribosomal_L19 (pfam01245) → PRK08299 (PRK08299) →                                                                                                                                                                      |
| env-2084 | CEOO01047216.1          | - | 229     | 205     | RNA → | rplS (PRK05338)Ribosomal_L19 (pfam01245) →                                                                                                                                                                                            |
| env-2085 | CEOV01066520.1          | + | 633     | 657     | RNA → | rplS (PRK05338)Ribosomal_L19 (pfam01245) → PRK08299 (PRK08299) →                                                                                                                                                                      |
| env-2086 | CEOW01181946.1          | - | 83      | 59      | RNA → |                                                                                                                                                                                                                                       |
| env-2087 | CEOX01007014.1          | - | 822     | 798     | RNA → | rplS (PRK05338)Ribosomal_L19 (pfam01245) → PRK08299 (PRK08299) →                                                                                                                                                                      |
| env-2088 | CEPC01000822.1          | + | 908     | 932     | RNA → | rplS (PRK05338)Ribosomal_L19 (pfam01245) → PRK08299 (PRK08299) →                                                                                                                                                                      |
| env-2089 | CEPK01174470.1          | + | 625     | 649     | RNA → | rplS (PRK05338)Ribosomal_L19 (pfam01245) → PRK08299 (PRK08299) →                                                                                                                                                                      |
| env-2090 | CEPT01287638.1          | - | 874     | 850     | RNA → | rplS (PRK05338)Ribosomal_L19 (pfam01245) → PRK08299 (PRK08299) →                                                                                                                                                                      |
| env-2091 | CEPW01050466.1          | + | 751     | 775     | RNA → |                                                                                                                                                                                                                                       |
| env-2092 | CEQM01235848.1          | + | 92      | 116     | RNA → | rplS (PRK05338)Ribosomal_L19 (pfam01245) → PRK08299 (PRK08299) →                                                                                                                                                                      |
| env-2093 | CERW01124879.1          | + | 537     | 561     | RNA → | rplS (PRK05338)Ribosomal_L19 (pfam01245) → PRK08299 (PRK08299) →                                                                                                                                                                      |
| env-2094 | CETW01029624.1          | + | 2015    | 2039    | RNA → | rplS (PRK05338)Ribosomal_L19 (pfam01245) → PRK08299 (PRK08299) →                                                                                                                                                                      |
| env-2095 | CEVL01092845.1          | + | 120     | 144     | RNA → | rplS (PRK05338)Ribosomal_L19 (pfam01245) → PRK08299 (PRK08299) →                                                                                                                                                                      |
| env-2096 | CEVZ01428942.1          | - | 1474    | 1450    | RNA → | rplS (PRK05338)Ribosomal_L19 (pfam01245) → PRK08299 (PRK08299) →                                                                                                                                                                      |
| env-2097 | JCVI_READ_1108839666479 | + | 178     | 202     | RNA → | rplS (PRK05338)Ribosomal_L19 (pfam01245) → PRK08299 (PRK08299) →                                                                                                                                                                      |
| env-2098 | CEQO01202726.1          | + | 82      | 106     | RNA → | rplS (PRK05338)Ribosomal_L19 (pfam01245) → PRK08299 (PRK08299) →                                                                                                                                                                      |
| env-2099 | CERB01095802.1          | - | 746     | 722     | RNA → | rplS (PRK05338)Ribosomal_L19 (pfam01245) → PRK08299 (PRK08299) →                                                                                                                                                                      |
| env-2100 | CEVN01023152.1          | + | 744     | 768     | RNA → |                                                                                                                                                                                                                                       |
| env-2101 | JCVI_READ_1103242406987 | + | 651     | 675     | RNA → | rplS (PRK05338)Ribosomal_L19 (pfam01245) → hypo →                                                                                                                                                                                     |
| env-2102 | JCVL_SCAF_1096626678284 | - | 913     | 889     | RNA → | rplS (PRK05338)Ribosomal_L19 (pfam01245) → PRK08299 (PRK08299) →                                                                                                                                                                      |
| env-2103 | CEVR01021723.1          | - | 210     | 186     | RNA → | rplS (PRK05338)Ribosomal_L19 (pfam01245) →                                                                                                                                                                                            |
| env-2104 | JCVL_SCAF_1096627874827 | + | 442     | 466     | RNA → | rplS (PRK05338)Ribosomal_L19 (pfam01245) → rplS (PRK05338)Ribosomal_L19 (pfam01245) →                                                                                                                                                 |
| env-2105 | JCVL_SCAF_1096627874827 | + | 1299    | 1323    | RNA → | rplS (PRK05338)Ribosomal_L19 (pfam01245) → rplS (PRK05338)Ribosomal_L19 (pfam01245) →                                                                                                                                                 |
| env-2106 | JCVL_SCAF_1101668523738 | - | 116     | 92      | RNA → |                                                                                                                                                                                                                                       |
| env-2107 | JCVL_SCAF_1096628400995 | - | 1440    | 1416    | RNA → | rplS (PRK05338)Ribosomal_L19 (pfam01245) → rplS (PRK05338)Ribosomal_L19 (pfam01245) → PRK08299 (PRK08299) → PRK08299 (PRK08299) → TrmD (COG0336)trmD (PRK00026) → TrmD (COG0336)trmD (PRK00026) →                                     |
| env-2108 | JCVL_SCAF_1096628400995 | - | 527     | 503     | RNA → | rplS (PRK05338)Ribosomal_L19 (pfam01245) → rplS (PRK05338)Ribosomal_L19 (pfam01245) →                                                                                                                                                 |
| env-2109 | CEPB01125895.1          | - | 825     | 801     | RNA → | rplS (PRK05338)Ribosomal_L19 (pfam01245) → PRK08299 (PRK08299) →                                                                                                                                                                      |
| env-2110 | CETE01078549.1          | - | 790     | 766     | RNA → | rplS (PRK05338)Ribosomal_L19 (pfam01245) → PRK08299 (PRK08299) →                                                                                                                                                                      |
| env-2111 | CETH01012318.1          | + | 755     | 779     | RNA → | rplS (PRK05338)Ribosomal_L19 (pfam01245) → lcd (COG0538)PRK08299 (PRK08299) →                                                                                                                                                         |
| env-2112 | CETM01404675.1          | + | 166     | 190     | RNA → | rplS (PRK05338)Ribosomal_L19 (pfam01245) → PRK08299 (PRK08299) →                                                                                                                                                                      |
| env-2113 | CETQ01016873.1          | - | 562     | 538     | RNA → | rplS (PRK05338)Ribosomal_L19 (pfam01245) → PRK08299 (PRK08299) →                                                                                                                                                                      |
| env-2114 | CEUF01066100.1          | - | 3392    | 3368    | RNA → | rplS (PRK05338)Ribosomal_L19 (pfam01245) → lcd (COG0538)PRK08299 (PRK08299) → PRK10064 (PRK10064)Plug (pfam07715)CarbopepD_reg_2 (pfam13715)OMP_b-brL3 (pfam14905) → PRK10064 (PRK10064)Plug (pfam07715)CarbopepD_reg_2 (pfam13715) → |
| env-2115 | CEUG01002262.1          | + | 1316    | 1340    | RNA → | rplS (PRK05338)Ribosomal_L19 (pfam01245) → lcd (COG0538)PRK08299 (PRK08299) → PRK10064 (PRK10064)Plug (pfam07715)CarbopepD_reg_2 (pfam13715) →                                                                                        |
| env-2116 | CEVE01132406.1          | - | 1971    | 1947    | RNA → | rplS (PRK05338)Ribosomal_L19 (pfam01245) → lcd (COG0538)PRK08299 (PRK08299) → Peptidase_M14NE-CP-C like (cd11308)CarbopepD_reg_2 (pfam13715) →                                                                                        |
| env-2117 | CEWG01029302.1          | + | 660     | 684     | RNA → | rplS (PRK05338)Ribosomal_L19 (pfam01245) → PRK08299 (PRK08299) →                                                                                                                                                                      |
| env-2118 | JGI24820J26691_1003156  | + | 3260    | 3284    | RNA → | rplS (PRK05338)Ribosomal_L19 (pfam01245) → lcd (COG0538)PRK08299 (PRK08299) →                                                                                                                                                         |
| env-2119 | JCVI_READ_1108800196652 | + | 341     | 365     | RNA → | rplS (PRK05338)Ribosomal_L19 (pfam01245) →                                                                                                                                                                                            |
| env-2120 | JCVI_READ_1105333388420 | - | 189     | 165     | RNA → | rplS (PRK05338)Ribosomal_L19 (pfam01245) →                                                                                                                                                                                            |
| env-2121 | CETK01326476.1          | - | 589     | 565     | RNA → | rplS (PRK05338)Ribosomal_L19 (pfam01245) → PRK08299 (PRK08299) →                                                                                                                                                                      |
| env-2122 | JCVL_SCAF_1096628212569 | - | 1326    | 1302    | RNA → | rplS (PRK05338)Ribosomal_L19 (pfam01245) →                                                                                                                                                                                            |
| env-2123 | CENO01004142.1          | - | 481     | 457     | RNA → | rplS (PRK05338)Ribosomal_L19 (pfam01245) →                                                                                                                                                                                            |
| Fps-4-1  | NC_009613.3             | - | 1709481 | 1709454 | RNA → | rplS (PRK05338)Ribosomal_L19 (pfam01245) →                                                                                                                                                                                            |
| Fps-1-1  | NZ_CP008878.1           | - | 1965790 | 1965763 | RNA → | rplS (PRK05338)Ribosomal_L19 (pfam01245) →                                                                                                                                                                                            |
| Fps-1-2  | NZ_CP008883.1           | - | 1959068 | 1959041 | RNA → | rplS (PRK05338)Ribosomal_L19 (pfam01245) →                                                                                                                                                                                            |
| Fps-1-3  | NZ_CP008881.1           | - | 1956157 | 1956130 | RNA → | rplS (PRK05338)Ribosomal_L19 (pfam01245) →                                                                                                                                                                                            |

|          |               |   |         |         |              |                                           |
|----------|---------------|---|---------|---------|--------------|-------------------------------------------|
| Fps-1-4  | NZ_CP007627.1 | + | 1042967 | 1042994 | <b>RNA</b> → | rplS (PRK05338)Ribosomal_L19 (pfam01245)→ |
| Fps-2-1  | NZ_CP007206.1 | + | 992155  | 992182  | <b>RNA</b> → | rplS (PRK05338)Ribosomal_L19 (pfam01245)→ |
| Fps-3-1  | NZ_CP007207.1 | + | 1881558 | 1881585 | <b>RNA</b> → | rplS (PRK05338)Ribosomal_L19 (pfam01245)→ |
| Fps-1-5  | NZ_CP008902.1 | - | 2002522 | 2002495 | <b>RNA</b> → | rplS (PRK05338)Ribosomal_L19 (pfam01245)→ |
| Fps-1-6  | NZ_CP010278.1 | - | 2065590 | 2065563 | <b>RNA</b> → | rplS (PRK05338)Ribosomal_L19 (pfam01245)→ |
| Fps-1-7  | NZ_CP010275.1 | - | 2106998 | 2106971 | <b>RNA</b> → | rplS (PRK05338)Ribosomal_L19 (pfam01245)→ |
| Fps-1-8  | NZ_CP010276.1 | - | 2110820 | 2110793 | <b>RNA</b> → | rplS (PRK05338)Ribosomal_L19 (pfam01245)→ |
| Fps-1-9  | NZ_CP010277.1 | - | 2068780 | 2068753 | <b>RNA</b> → | rplS (PRK05338)Ribosomal_L19 (pfam01245)→ |
| Fps-1-10 | NZ_CP010274.1 | - | 2108381 | 2108354 | <b>RNA</b> → | rplS (PRK05338)Ribosomal_L19 (pfam01245)→ |
| Ran-4-1  | NC_018609.1   | + | 1957039 | 1957066 | <b>RNA</b> → | rplS (PRK05338)Ribosomal_L19 (pfam01245)→ |

### 6.3 Conserved domains

Conserved domains found in protein-coding genes listed in Section 6.2 are shown below, with the first sentence in their description from the Conserved Domain Database (if any). Conserved domains associated with more than one

L19-Flavobacteria RNA are assigned a color, while others are shown in gray. The number in parentheses after the colored domain name is the number of occurrences in Section 6.2.

**cd00635** (4) Type III Pyridoxal 5-phosphate (PLP)-Dependent Enzymes, YBL036c-like proteins.  
**cd00834** (35) Beta-ketoacyl-acyl carrier protein (ACP) synthase (KAS), type I and II.  
**cd01667** (19) TGS\_ThrRS.N: ThrRS (threonyl-tRNA Synthetase) is a class II tRNA synthetase that couples threonine to its cognate tRNA.  
**cd02968** (7) SCO (an acronym for Synthesis of Cytochrome c Oxidase) family; composed of proteins similar to Sco1, a membrane-anchored protein possessing a soluble domain with a TRX fold.  
**cd03218** (1) ATP-binding cassette component of YhbG transport system.  
**cd04690** (18) Members of the Nudix hydrolase superfamily catalyze the hydrolysis of Nucleoside Diphosphates linked to other moieties, X.  
**cd04795** (1) SIS domain.  
**cd05007** (36) N-acetylmuramic acid 6-phosphate etherase.  
**cd05233** (1) classical (c) SDRs. [AG]  
**cd06127** (38) DEDDh 3'-5' exonuclease domain family.  
**cd07995** (1) Thiamine pyrophosphokinase.  
**cd10254** (33) Catalytic GIY-YIG domain of nucleotide excision repair endonucleases UvrC, Cho, and similar proteins.  
**cd11308** (5) Peptidase associated domain: C-terminal domain of M14 N/E carboxypeptidase; putative folding, regulation, or interaction domain.  
**COG0030** (5) 16S rRNA A1518 and A1519 N6-dimethyltransferase RsmA/KsgA/DIM1 (may also have DNA glycosylase/AP lyase activity) [Translation, ribosomal structure and biogenesis]  
**COG0290** (4) Translation initiation factor IF-3 [Translation, ribosomal structure and biogenesis]  
**COG0336** (2) tRNA G37 N-methylase TrmD [Translation, ribosomal structure and biogenesis]  
**COG0441** (23) Threonyl-tRNA synthetase [Translation, ribosomal structure and biogenesis]  
**COG0486** (1) tRNA U34 5-carboxymethylaminomethyl modifying GTPase MnmE/TrmE [Translation, ribosomal structure and biogenesis]  
**COG0525** (3) Valyl-tRNA synthetase [Translation, ribosomal structure and biogenesis]  
**COG0538** (76) Isocitrate dehydrogenase [Energy production and conversion]  
**COG0605** (32) Superoxide dismutase [Inorganic ion transport and metabolism]  
**COG1159** (1) GTPase Era, involved in 16S rRNA processing [Translation, ribosomal structure and biogenesis]

**COG1629** (8) Outer membrane receptor proteins, mostly Fe transport [Inorganic ion transport and metabolism]  
**COG4389** (1) Site-specific recombinase [Replication, recombination and repair]  
**COG4799** (1) Acetyl-CoA carboxylase, carboxyltransferase component [Lipid transport and metabolism]  
**pfam00081** (1) Iron/manganese superoxide dismutases, alpha-hairpin domain.  
**pfam00106** (1) short chain dehydrogenase.  
**pfam00453** (4) Ribosomal protein L20.  
**pfam00593** (12) TonB dependent receptor.  
**pfam01245** (2085) Ribosomal protein L19.  
**pfam01632** (4) Ribosomal protein L35.  
**pfam01850** (5) PIN domain.  
**pfam01923** (1) Cobalamin adenosyltransferase.  
**pfam02628** (3) Cytochrome oxidase assembly protein.  
**pfam02824** (5) TGS domain.  
**pfam03544** (22) Gram-negative bacterial TonB protein C-terminal.  
**pfam03971** (8) Monomeric isocitrate dehydrogenase.  
**pfam06245** (7) Protein of unknown function (DUF1015).  
**pfam07715** (22) TonB-dependent Receptor Plug Domain.  
**pfam10136** (1) Site-specific recombinase.  
**pfam12399** (1) Branched-chain amino acid ATP-binding cassette transporter.  
**pfam13715** (33) CarboxypepD\_reg-like domain.  
**pfam13723** (27) Beta-ketoacyl synthase, N-terminal domain.  
**pfam14054** (18) Domain of unknown function (DUF4249).  
**pfam14213** (5) Domain of unknown function (DUF4325).  
**pfam14815** (1) NUDIX domain.  
**pfam14905** (10) Outer membrane protein beta-barrel family.  
**PLN02820** (1) 3-methylcrotonyl-CoA carboxylase, beta chain  
**PRK00026** (2) tRNA (guanine-N(1)-methyltransferase; Reviewed  
**PRK00028** (4) translation initiation factor IF-3; Reviewed  
**PRK00089** (1) GTPase Era; Reviewed  
**PRK00172** (4) 50S ribosomal protein L35; Reviewed

**PRK00274** (5) 16S ribosomal RNA methyltransferase KsgA/Dim1 family protein; Reviewed  
**PRK00413** (23) threonyl-tRNA synthetase; Reviewed  
**PRK05185** (4) 50S ribosomal protein L20; Provisional  
**PRK05291** (1) tRNA modification GTPase TrmE; Reviewed  
**PRK05338** (2085) 50S ribosomal protein L19; Provisional  
**PRK05491** (37) N-acetylmuramic acid-6-phosphate etherase; Reviewed  
**PRK05653** (1) 3-ketoacyl-(acyl-carrier-protein) reductase; Validated  
**PRK05729** (3) valyl-tRNA synthetase; Reviewed  
**PRK07825** (1) short chain dehydrogenase; Provisional  
**PRK08299** (224) isocitrate dehydrogenase; Validated  
**PRK08999** (16) hypothetical protein; Provisional  
**PRK10064** (20) catechol siderophore receptor CirA; Provisional  
**PRK10546** (1) pyrimidine (deoxy)nucleoside triphosphate pyrophosphohydrolase; Provisional  
**PRK10925** (33) superoxide dismutase; Provisional  
**PRK13484** (1) putative iron-regulated outer membrane virulence protein; Provisional  
**PTZ00435** (1) isocitrate dehydrogenase; Provisional  
**smart00382** (1) ATPases associated with a variety of cellular activities.  
**smart00465** (18) GIY-YIG type nucleases (URI domain).  
**smart00479** (38) exonuclease domain in DNA-polymerase alpha and epsilon chain, ribonuclease T and other exonucleases.  
**smart00863** (1) Threonyl and Alanyl tRNA synthetase second additional domain.  
**smart00983** (1) Thiamin pyrophosphokinase, vitamin B1 binding domain.  
**TIGR00044** (4) pyridoxal phosphate enzyme, YggS family. [Unknown function, Enzymes of unknown specificity]  
**TIGR00178** (8) isocitrate dehydrogenase, NADP-dependent, monomeric type. [Energy metabolism, TCA cycle]  
**TIGR00636** (1) ATP:cob(I)alamin adenosyltransferase. [Biosynthesis of cofactors, prosthetic

groups, and carriers, Heme, porphyrin, and cobalamin]  
**TIGR01859** (22) TonB family C-terminal domain. [Transport and binding proteins, Cations and iron carrying compounds]  
**TIGR01785** (1) TonB-dependent heme/hemoglobin receptor family protein. [Transport and binding proteins, Cations and iron carrying compounds, Transport and binding proteins, Porins]  
**TIGR01786** (3) TonB-dependent hemoglobin/transferrin/lactoferrin receptor family protein. [Transport and binding proteins, Cations and iron carrying compounds, Transport and binding proteins, Porins]  
**TIGR03150** (8) beta-ketoacyl-acyl-carrier-protein synthase II. [acyl-carrier-protein] synthase 2 (KAS-II, FabF) is involved in the condensation step of fatty acid biosynthesis in which the malonyl donor group is decarboxylated and the resulting carbanion used to attack and extend the acyl group attached to the acyl carrier protein. Most genomes encoding fatty acid biosynthesis contain a number of condensing enzymes, often of all three types: 1, 2 and 3. Synthase 2 is mechanistically related to synthase 1 (KAS-I, FabB) containing a number of absolutely conserved catalytic residues in common. This model is based primarily on genes which are found in apparent operons with other essential genes of fatty acid biosynthesis (GenProp0681). The large gap between the trusted cutoff and the noise cutoff contains many genes which are not found adjacent to genes of the fatty acid pathway in genomes that often also contain a better hit to this model. These genes may be involved in other processes such as polyketide biosyntheses. Some genomes contain more than one above-trusted hit to this model which may result from recent paralogous expansions. Second hits to this model which are not next to other fatty acid biosynthesis genes may be involved in other processes. FabB sequences should fall well below the noise cutoff of this model. [Fatty acid and phospholipid metabolism, Biosynthesis]

## 6.4 Multiple-sequence alignment

Each L19-Flavobacteria RNA is denoted by an abbreviation (like “Eco-1-1”) that refers to a taxonomy given in Section 6.1. The alignment may include sequences containing the RNA motif, as well as flanking sequence. The L19-Flavobacteria RNA itself is denoted by the line underneath marked 5' and 3' on either end. Nucleotides in flanking sequences (i.e., not part of the motif) are written in gray letters. Stems of predicted rho-independent transcription terminators, if any, are shaded yellow. (Note: terminator predictions have not been analyzed manually, and many are likely to be false positives. Terminator predictions are those of the RNIE software.) Nucleotides predicted to function (as DNA) as transcription-factor binding sites, if any, are shaded in green. (But note: these predictions are manually annotated, so they might be under-predicted.) Annotated start codons, if any, are shaded green. (Note: start codons are frequently misannotated, especially in environmental samples.) Nucleotides proposed to basepair as part of the consensus structure are shaded in color when they comprise Watson-Crick or G-U

pairs. Otherwise they are shaded gray. Conserved stems are also indicated at the bottom of the alignment by angle brackets, where matching < and > denote base-paired columns. Below these angle brackets, the symbol “2” denotes base pairs exhibiting covariation according to the statistically well-founded R-scape method. “1” denotes base pairs exhibiting covariation according to R2R’s simplistic method. “0” denotes base pairs that are not observed to mutate and “?” denotes base pairs that have a significant frequency of non-canonical nucleotides for Watson-Crick or G-U pairs (> 5%). Below these base pair annotation is the consensus sequence: “R” = “A” or “G”, “Y” = “C” or “U”, red nucleotides: nucleotide identity conserved more than 97% of the time, black nucleotides: 90%, gray nucleotides: 75%, red circle (◉): nucleotide is present 97% of the time, black circle (◐): 90%, gray circle (◑): 75%, white circle (◒): 50%. All percentages of sequences just described (e.g. 97% conserved) assume that sequences have been weighted by the GSC algorithm implemented by the Infernal software package.

Duplicate sequences: the following putative homologs are not shown in the alignment because their sequences are identical to a homolog already shown: Cat-1-1, Cba-1-1, Cba-2-1, Cba-3-1, Cca-1-2, Cca-1-3, Cgi-1-1, Cgr-1-1, Coc-1-1, Coc-2-1, Coc-4-1, Csp-1-1, Csp-10-1, Csp-11-1, Csp-12-1, Csp-2-1, Csp-3-1, Csp-4-1, Csp-5-1,

Csp-6-1, Csp-9-1, Ean-1-3, Ean-1-4, Ean-10-1, Ean-12-1, Ean-2-1, Ean-3-1, Ean-4-1, Ean-5-1, Ean-6-1, Ean-7-1, Ean-8-1, Ean-9-1, Eme-2-2, Fca-1-2, Fen-1-2, Fps-1-1, Fps-1-10, Fps-1-2, Fps-1-3, Fps-1-4, Fps-1-5, Fps-1-6, Fps-1-7, Fps-1-8, Fps-1-9, Fps-2-1, Fps-3-1, Fsp-6-1, Fsu-2-2, Gsp-2-1, Jpa-1-2, Jpa-1-3, Lbl-1-1, Mlu-1-1, Nul-1-5, Orh-2-1, Orh-3-1, Psp-1-1, Ran-1-2, Ran-2-2, Ran-5-1, Ran-7-1, Ran-8-1, Ran-9-1, Zpr-1-1, env-100, env-1000, env-1001, env-1002, env-1004, env-1005, env-1006, env-1008, env-101, env-1013, env-1014, env-1018, env-102, env-1020, env-1022, env-1024, env-1028, env-103, env-1030, env-1031, env-1032, env-1033, env-1035, env-1036, env-1037, env-104, env-1041, env-1043, env-1044, env-1045, env-1046, env-105, env-1050, env-1051, env-1054, env-1055, env-1056, env-106, env-1061, env-1065, env-1071, env-1077, env-1078, env-1079, env-108, env-1082, env-1083, env-1087, env-109, env-1090, env-1093, env-1094, env-11, env-110, env-1100, env-1101, env-1102, env-1103, env-1105, env-1108, env-1109, env-111, env-1110, env-1111, env-1112, env-1113, env-1117, env-1119, env-112, env-1120, env-1122, env-1123, env-1126, env-113, env-1133, env-114, env-115, env-1154, env-1156, env-1157, env-1158, env-1159, env-116, env-1160, env-1170, env-1171, env-1173, env-1176, env-1177, env-1178, env-1179, env-1180, env-1184, env-1186, env-1187, env-1188, env-1189, env-119, env-1192, env-1193, env-1194, env-1195, env-1198, env-12, env-1201, env-1204, env-121, env-1211, env-1212, env-1214, env-1218, env-122, env-1226, env-1229, env-1236, env-1238, env-1240, env-1242, env-1243, env-1244, env-1245, env-1246, env-1247, env-1248, env-1249, env-125, env-1250, env-1251, env-1266, env-1270, env-1277, env-1278, env-1279, env-1283, env-1284, env-1285, env-1288, env-129, env-1290, env-1292, env-1294, env-1295, env-1298, env-1299, env-13, env-130, env-131, env-1313, env-1315, env-1316, env-132, env-1324, env-1325, env-133, env-1330, env-1331, env-1333, env-1334, env-1345, env-1346, env-135, env-1350, env-1353, env-1354, env-1355, env-1356, env-1358, env-1362, env-1363, env-1365, env-1371, env-1372, env-1373, env-1376, env-1378, env-1379, env-1386, env-1387, env-1388, env-1389, env-1390, env-1391, env-1392, env-1396, env-1397, env-1398, env-1399, env-14, env-1400, env-1401, env-1402, env-1403, env-1404, env-1405, env-1406, env-1407, env-1408, env-1409, env-1410, env-1411, env-1412, env-1413, env-1415, env-142, env-1420, env-1421, env-1422, env-1426, env-1430, env-1438, env-1439, env-1440, env-1441, env-1442, env-1443, env-1444, env-1445, env-1446, env-1447, env-145, env-1452, env-1453, env-1454, env-1457, env-1458, env-1460, env-1461, env-1463, env-1471, env-1476, env-1477, env-1478, env-1479, env-148, env-1480, env-1481, env-1482, env-1483, env-1484, env-1485, env-1491, env-1492, env-1493, env-1494, env-1495, env-1496, env-1497, env-1498, env-1499, env-15, env-1500, env-1501, env-1502, env-1503, env-1504, env-1506, env-1509, env-151, env-1510, env-1514, env-1515, env-1516, env-1517, env-1518, env-152, env-1522, env-1523, env-1524, env-153, env-1531, env-154, env-1540, env-1548, env-155, env-1550, env-1552, env-1553, env-1560, env-1566, env-1568, env-157, env-1570, env-1571, env-1572, env-1573, env-1574, env-1575, env-1576, env-1577, env-1578, env-1579, env-158, env-1580, env-1584, env-1585, env-1586, env-159, env-1591, env-1592, env-1595, env-1598, env-1599, env-16, env-160, env-1609, env-161, env-1610, env-1613, env-1619, env-162, env-1620, env-1621, env-1622, env-1623, env-1627, env-163, env-1632, env-1633, env-1634, env-1636, env-1637, env-1638, env-1639, env-164, env-1641, env-1642, env-1643, env-1645, env-1646, env-1647, env-1649, env-165, env-1651, env-1652, env-1655, env-166, env-1668, env-1669, env-167, env-1675, env-1676, env-1678, env-1679, env-168, env-1681, env-1682, env-1683, env-1684, env-1685, env-1686, env-1688, env-1689, env-169, env-1691, env-1692, env-1693, env-1694, env-1695, env-1696, env-1697, env-1698, env-17, env-170, env-1704, env-1705, env-1706, env-1707, env-1708, env-171, env-1710, env-1719, env-172, env-1722, env-1724, env-1725, env-1726, env-1727, env-1728, env-1729, env-173, env-1730, env-1731, env-1732, env-1738, env-1739, env-174, env-1740, env-1744, env-1745, env-1746, env-1747, env-1748, env-1749, env-175, env-1753, env-1754, env-1755, env-1756, env-1757, env-1759, env-176, env-1766, env-1767, env-1768, env-1769, env-177, env-1770, env-1773, env-1774, env-1775, env-1776, env-1778, env-1780, env-1784, env-1785, env-1786, env-1795, env-1796, env-1797, env-1798, env-1799, env-18, env-1800, env-1801, env-1808, env-1809, env-181, env-1810, env-1811, env-1827, env-1828, env-1829, env-1833, env-1834, env-1835, env-1836, env-1838, env-1847, env-1852, env-1854, env-1858, env-1859, env-1868, env-187, env-1871, env-1874, env-1876, env-1877, env-1878, env-1879, env-1882, env-1883, env-1884, env-1885, env-1889, env-189, env-1890, env-1895, env-1896, env-1897, env-19, env-190, env-1901, env-1902, env-1903, env-1904, env-1905, env-1906, env-1907, env-1908, env-1909, env-191, env-1910, env-1911, env-1912, env-1913, env-1914, env-1915, env-1916, env-1917, env-192, env-1920, env-1926, env-1927, env-1928, env-193, env-1935, env-1936, env-1937, env-1938, env-1939, env-1940, env-1941, env-1942, env-1943, env-1944, env-1945, env-1946, env-1947, env-1948, env-1949, env-1950, env-1951, env-1952, env-1953, env-1954, env-1955, env-1956, env-1957, env-1958, env-1959, env-196, env-1960, env-1961, env-1962, env-1963, env-1964, env-1965, env-1966, env-1967, env-1969, env-1970, env-1971, env-1972, env-1973, env-1974, env-1975, env-1976, env-1979, env-198, env-1980, env-1981, env-1982, env-1983, env-1985, env-1986, env-199, env-1992, env-20, env-2002, env-2003, env-2004, env-2005, env-2006, env-2007, env-2008, env-2009, env-201, env-2010, env-2011, env-2012, env-2013, env-2014, env-2015, env-2016, env-2017, env-2018, env-2019, env-2020, env-2021, env-2022, env-2023, env-2024, env-2025, env-2026, env-2027, env-2028, env-2029, env-2030, env-2031, env-2037, env-2038, env-2039, env-2040, env-2041, env-2042, env-2043, env-2044, env-2045, env-2046, env-2049, env-205, env-2053, env-2058, env-2059, env-206, env-2060, env-2061, env-2062, env-2063, env-2064, env-2070, env-2072, env-2073, env-2074, env-2075, env-2081, env-2082, env-2083, env-2084, env-2085, env-2086, env-2087, env-2088, env-2089, env-209, env-2090, env-2091, env-2092, env-2093, env-2094, env-2095, env-2096, env-2097, env-2099, env-21, env-2105, env-2106, env-2107, env-2108, env-2109, env-2110, env-2111, env-2112, env-2113, env-2114, env-2115, env-2116, env-2117, env-2118, env-2119, env-2120, env-213, env-22, env-221, env-225, env-228, env-229, env-23, env-230, env-231, env-232, env-233, env-234, env-235, env-236, env-237, env-238, env-239, env-24, env-240, env-241, env-243, env-245, env-25, env-250, env-251, env-252, env-253, env-254, env-255, env-257, env-258, env-259, env-26, env-260, env-261, env-262, env-263, env-264, env-265, env-266, env-267, env-268, env-269, env-270, env-271, env-272, env-276, env-278, env-279, env-28, env-284, env-285, env-286, env-287, env-288,













































```

env-59 ..... AUG
env-60 ..... AUG
env-61 ..... AUG
env-63 ..... AUG
env-64 ..... AUG
env-65 ..... AUG
env-67 ..... AUG
Nul-1-1 ..... AUG
Fba-1-1 ..... AUG
Nul-1-2 ..... AUG
Nul-1-3 ..... AUG
Nul-1-4 ..... AUG
Nul-1-6 ..... AUG
env-68 ..... AUG
Csp-18-1 ..... AUG
Csp-15-1 ..... AUG
Csp-16-1 ..... AUG
Chi-1-1 ..... AUG
env-69 ..... AUG
Cgr-2-1 ..... AUG
Csp-17-1 ..... AUG
Fsp-5-1 ..... AAU
env-70 ..... AUG
env-71 ..... AUG
env-73 ..... AUG
env-74 ..... AUG
env-75 ..... AUG
env-76 ..... AUG
env-78 ..... AUG
env-79 ..... AUG
env-81 ..... AUG
env-86 ..... AUG
env-87 ..... AUG
env-88 ..... AUG
env-89 ..... AUG
env-90 ..... AUG
env-91 ..... AUG
env-92 .....
env-93 .....
env-107 ..... AUG
env-117 .....
env-118 ..... AUG
env-120 ..... AUG
env-123 ..... AUG
env-124 ..... AUG
env-126 ..... AUG
env-127 ..... AUG
env-128 ..... AUG
Oho-1-1 ..... AUG
env-134 ..... AUG
env-136 ..... AUG
env-137 ..... AUG
env-138 ..... AUG
env-139 ..... AUG
env-140 ..... AUG
env-141 ..... AUG
env-143 ..... AUG
env-144 ..... AUG
env-146 ..... AUG
Nse-1-1 ..... AUG
env-147 ..... AUG
env-149 ..... AUG
env-150 ..... AUG
env-156 ..... AUG
env-178 ..... AUG
env-179 ..... AUG
env-180 ..... AUG
env-182 ..... AUG
env-183 ..... AUG
env-184 ..... AUG
env-185 ..... AUG
env-186 ..... AUG
env-188 ..... AUG
env-194 ..... AUG
env-195 ..... AUG
env-197 ..... AUG
env-200 ..... AUG
env-202 ..... AUG
Rbi-1-1 ..... AUG
env-203 ..... AUG
env-204 ..... AUG
env-207 ..... AUG
env-208 ..... AUG
env-210 ..... AUG

```

```

.....
.....
----- AUG

```

env-211 ..... AUG  
 Gsp-1-1 ..... AUG  
 env-212 .....  
 env-214 .....  
 env-215 ..... AUG  
 env-216 ..... AUG  
 Man-1-1 ..... AUG  
 env-217 ..... AUG  
 env-218 ..... AUG  
 env-219 ..... AUG  
 env-220 ..... AUG  
 env-222 ..... AUG  
 env-223 ..... AUG  
 env-224 ..... AUG  
 env-226 ..... AUG  
 env-227 ..... AUG  
 env-242 ..... AUG  
 env-244 ..... AUG  
 env-246 ..... AUG  
 env-247 ..... AUG  
 env-248 ..... AUG  
 env-249 ..... AUG  
 env-256 ..... AUG  
 env-273 ..... AUG  
 env-274 ..... AUG  
 env-275 ..... AUG  
 env-277 ..... AUG  
 env-280 ..... AUG  
 env-281 ..... AUG  
 env-282 ..... AUG  
 env-283 ..... AUG  
 env-310 ..... AUG  
 env-312 ..... AUG  
 env-313 .....  
 env-323 ..... AUG  
 env-325 ..... AUG  
 env-326 ..... AUG  
 env-327 ..... AUG  
 env-330 ..... AUG  
 env-331 ..... AUG  
 env-332 ..... AUG  
 env-356 ..... AUG  
 env-380 ..... AUG  
 env-381 ..... AUG  
 env-385 ..... AUG  
 env-390 ..... AUG  
 env-391 ..... AUG  
 env-392 ..... AUG  
 env-393 ..... AUG  
 env-394 .....  
 env-395 ..... AUG  
 env-396 ..... AUG  
 env-400 ..... AUG  
 Aal-1-1 ..... AUG  
 env-401 ..... AUG  
 env-402 ..... AUG  
 env-403 ..... AUG  
 env-404 ..... AUG  
 env-405 ..... AUG  
 Cpa-1-1 ..... AUG  
 env-406 ..... AUG  
 env-407 ..... AUG  
 env-411 ..... AUG  
 Cte-1-1 ..... AUG  
 env-412 ..... AUG  
 env-413 ..... AUG  
 Cca-2-1 ..... AUG  
 env-414 ..... AUG  
 env-416 ..... AUG  
 env-418 ..... AUG  
 Fba-3-1 ..... AUG  
 Cha-1-1 ..... AUG  
 env-419 ..... AUG  
 Cko-1-1 ..... AUG  
 Csp-14-1 ..... AUG  
 env-420 ..... AUG  
 env-421 ..... AUG  
 env-422 ..... A..  
 env-424 ..... AUG  
 env-425 ..... AUG  
 env-426 ..... AUG  
 env-427 ..... AUG  
 env-428 ..... AUG  
 env-430 ..... AUG

.....  
 .....  
 ----- AUG

Sze-1-1 ..... AUG  
env-431 ..... AUG  
env-432 ..... AUG  
env-433 ..... AUG  
env-434 ..... AUG  
env-435 ..... AUG  
env-436 ..... AUG  
env-437 ..... AUG  
env-438 ..... AUG  
env-439 ..... AUG  
env-440 ..... AUG  
env-441 ..... AUG  
env-442 ..... AUG  
env-451 .....  
env-452 ..... AUG  
env-453 ..... AUG  
env-454 ..... AUG  
env-455 ..... AUG  
env-456 ..... AUG  
env-457 ..... AUG  
env-460 ..... AUG  
env-461 ..... AUG  
env-462 ..... AUG  
env-463 ..... AUG  
env-464 ..... AUG  
env-470 ..... AUG  
env-471 ..... AUG  
env-472 ..... AUG  
env-473 .....  
env-474 ..... AUG  
env-475 ..... AUG  
env-476 ..... AUG  
env-477 ..... AUG  
env-479 ..... AUG  
env-480 ..... AUG  
env-481 ..... AUG  
env-483 ..... AUG  
env-485 ..... AUG  
env-486 ..... AUG  
env-487 ..... AUG  
env-493 ..... AUG  
env-496 ..... AUG  
env-497 ..... AUG  
env-498 ..... AUG  
env-499 ..... AUG  
env-500 .....  
env-501 ..... AUG  
env-502 ..... AUG  
env-503 ..... AUG  
env-504 ..... AUG  
env-505 ..... AUG  
env-506 ..... AUG  
env-508 ..... AUG  
env-509 ..... AUG  
env-510 ..... AUG  
env-512 ..... AUG  
env-513 ..... AUG  
env-514 ..... AUG  
env-515 ..... AUG  
env-517 ..... AUG  
env-518 ..... AUG  
env-519 ..... AUG  
env-520 ..... AUG  
env-521 ..... AUG  
env-522 ..... AUG  
env-523 ..... AUG  
env-524 ..... AUG  
Tma-1-1 ..... AUG  
env-525 ..... AUG  
env-526 ..... AUG  
env-527 ..... AUG  
env-529 ..... AUG  
env-530 ..... AUG  
env-531 ..... AUG  
env-532 ..... AUG  
env-533 ..... AUG  
env-535 ..... AUG  
env-536 ..... AUG  
env-537 ..... AUG  
env-538 ..... AUG  
env-540 ..... AUG  
env-548 ..... AUG  
env-555 ..... AUG  
env-557 ..... AUG

.....  
.....  
-----AUG

env-558 .....AUG  
env-559 .....AUG  
env-562 .....AUG  
env-565 .....AUG  
env-566 .....AUG  
env-570 .....AUG  
env-572 .....AUG  
env-573 .....  
Fba-5-1 .....AUG  
env-574 .....AUG  
env-575 .....AUG  
env-577 .....AUG  
env-578 .....AUG  
Tme-1-1 .....AUG  
Zul-1-1 .....AUG  
env-579 .....AUG  
env-580 .....AUG  
env-581 .....AUG  
env-585 .....AUG  
env-587 .....AUG  
env-588 .....AUG  
env-590 .....AUG  
env-591 .....AUG  
env-592 .....AUG  
Zga-1-1 .....AUG  
env-607 .....AUG  
env-608 .....AUG  
env-610 .....AUG  
env-611 .....AUG  
Tov-1-1 .....AUG  
env-612 .....AUG  
env-614 .....AUG  
Ace-1-1 .....AUG  
env-615 .....AUG  
env-616 .....  
env-617 .....AUG  
env-623 .....AUG  
env-625 .....AUG  
env-626 .....AUG  
env-627 .....AUG  
env-628 .....AUG  
env-629 .....AUG  
env-630 .....AUG  
env-631 .....AUG  
env-636 .....AUG  
env-639 .....AUG  
Fsp-12-1 .....AUG  
env-640 .....AUG  
env-645 .....AUG  
env-651 .....AUG  
env-652 .....AUG  
env-653 .....AUG  
env-654 .....AUG  
env-655 .....AUG  
env-656 .....AUG  
env-657 .....AUG  
env-663 .....AUG  
env-664 .....AUG  
env-667 .....AUA  
env-668 .....AUG  
env-669 .....AUG  
env-670 .....  
env-671 .....AUG  
env-672 .....AUG  
env-673 .....AUG  
env-677 .....AUG  
env-678 .....AUG  
env-679 .....AUG  
env-680 .....AUG  
env-682 .....AUG  
env-683 .....AUG  
env-684 .....AUG  
env-685 .....AUG  
env-686 .....AUG  
Ean-11-1 .....AUG  
Eme-1-1 .....AUG  
Ean-1-1 .....AUG  
Ean-1-2 .....AUG  
Eme-2-1 .....AUG  
env-688 .....AUG  
env-689 .....AUG  
env-690 .....AUG  
env-692 .....AUG  
env-693 .....AUG

.....  
.....  
-----AUG



env-694 ..... AUG  
 env-695 ..... AUG  
 env-697 ..... AUG  
 env-699 ..... AUG  
 env-700 ..... AUG  
 env-702 ..... AUG  
 env-703 ..... AUG  
 env-704 ..... AUG  
 env-707 ..... AUG  
 Gfo-1-1 ..... AAU  
 env-710 ..... AUG  
 env-711 ..... AUG  
 env-712 ..... AUG  
 env-713 ..... AUG  
 env-714 ..... AUG  
 env-715 ..... AUG  
 env-717 ..... AUG  
 env-718 ..... AUG  
 env-719 ..... AUG  
 env-720 ..... AUG  
 env-722 ..... AUG  
 env-723 ..... AUG  
 env-724 ..... AUG  
 env-725 ..... AUG  
 env-726 ..... AUG  
 env-727 ..... AUG  
 Tna-1-1 ..... AUG  
 Pbu-1-1 ..... AUG  
 env-728 ..... AUG  
 env-732 ..... AUG  
 env-734 ..... AUG  
 env-737 ..... AUG  
 env-739 .....  
 env-740 ..... AUG  
 Ale-1-1 ..... AUG  
 Fic-1-1 ..... AUG  
 env-741 ..... AUG  
 env-742 ..... AUG  
 env-743 ..... AUG  
 env-744 ..... AUG  
 env-746 ..... AUG  
 env-747 ..... AUG  
 env-748 ..... AUG  
 env-750 ..... AUG  
 env-752 ..... AUG  
 Ale-1-2 ..... AUG  
 Wsp-1-1 ..... AUG  
 env-755 ..... AUG  
 env-756 ..... AUG  
 env-761 ..... AUG  
 env-762 ..... AUG  
 env-764 ..... AUG  
 env-765 ..... AUG  
 env-766 ..... AUG  
 Pda-1-1 ..... AUG  
 Fba-7-1 ..... AUG  
 env-767 ..... AUG  
 env-771 ..... AUG  
 env-772 ..... AUG  
 env-773 ..... AUG  
 env-774 ..... AUG  
 env-779 ..... AUG  
 env-780 ..... AUG  
 env-781 ..... AUG  
 env-783 ..... AUG  
 env-784 ..... AUG  
 Tse-1-1 ..... AUG  
 env-785 ..... AUG  
 env-788 ..... AUG  
 env-790 ..... AUG  
 Psp-4-1 ..... AUG  
 Fsp-13-1 ..... AUG  
 env-791 ..... AUG  
 env-793 ..... AUG  
 env-794 ..... AUG  
 Jpa-1-1 ..... AUG  
 Pja-1-1 ..... UGA  
 env-795 ..... AUG  
 env-796 ..... AUG  
 env-797 ..... AUG  
 Pme-1-1 ..... AUG  
 env-798 ..... AUG  
 env-799 ..... AUG  
 env-800 ..... AUG

.....  
 .....  
 ----- AUG

env-804 ..... AUG  
env-805 ..... AUG  
env-806 ..... AUG  
env-807 ..... AUG  
env-809 ..... AUG  
env-810 ..... AUG  
env-811 ..... AUG  
env-812 ..... AUG  
env-813 ..... AUG  
env-818 .....  
env-819 ..... AUG  
env-820 ..... AUG  
env-821 ..... AUG  
env-823 ..... AUG  
Msp-1-1 ..... AUG  
env-824 ..... AUG  
Ksp-1-1 ..... AUG  
env-825 ..... AUG  
env-826 ..... AUG  
Ddo-1-1 ..... AUG  
Dsp-1-1 ..... AUG  
env-833 ..... AUG  
env-839 ..... AUG  
env-840 ..... AUG  
env-841 ..... AUG  
env-842 .....  
env-843 ..... AUG  
env-847 ..... AUG  
env-850 ..... AUG  
env-851 ..... AUG  
env-860 ..... AUG  
env-862 ..... AUG  
env-864 ..... AUG  
env-865 ..... AUG  
env-866 ..... AUG  
env-867 ..... AUG  
env-868 ..... AUG  
env-869 ..... AUG  
env-870 ..... AUG  
env-881 ..... AUG  
env-882 ..... AUG  
env-883 ..... AUG  
env-884 ..... AUG  
env-889 ..... AUG  
env-890 ..... AUG  
env-891 ..... AUG  
env-892 ..... AUG  
env-893 ..... AUG  
env-894 ..... AUG  
env-906 ..... AUG  
env-907 ..... AUG  
env-910 ..... AUG  
env-913 ..... AUG  
env-914 ..... AUG  
env-915 ..... AUG  
env-916 ..... AUG  
env-917 ..... AUG  
env-918 .....  
Fba-4-1 ..... AUG  
env-919 ..... AUG  
env-920 ..... AUG  
env-923 ..... AUG  
env-924 ..... AUG  
env-925 ..... AUG  
env-926 ..... AUG  
env-927 ..... AUG  
env-928 ..... AUG  
Ffi-1-1 ..... AUG  
env-929 ..... AUG  
Fba-8-1 ..... AUG  
env-932 ..... AUG  
env-933 ..... AUG  
env-938 .....  
Cca-1-1 ..... AUG  
env-939 ..... AUG  
env-940 .....  
env-941 ..... AUG  
env-942 ..... AUG  
Emi-1-1 ..... AUG  
Wma-1-1 ..... AUG  
env-943 ..... AUG  
env-944 ..... AUG  
env-945 ..... AUG  
env-947 ..... AUG

.....  
.....  
----- AUG

env-948 ..... AUG  
 env-949 ..... AUG  
 env-950 ..... AUG  
 env-951 ..... AUG  
 env-954 ..... AUG  
 env-955 ..... AUG  
 env-956 ..... AUG  
 env-957 ..... AUG  
 env-959 ..... AUG  
 env-968 ..... AUG  
 env-969 ..... AUG  
 env-970 ..... AUG  
 env-974 ..... AUG  
 env-975 AACAAAGAAUG  
 env-976 ..... AUG  
 env-977 ..... AUG  
 env-980 ..... AUG  
 env-983 ..... AUG  
 env-988 ..... AUG  
 Psp-2-1 ..... AUG  
 env-989 ..... AUG  
 env-991 ..... AUG  
 env-992 ..... AUG  
 env-994 ..... AUG  
 env-997 ..... AUG  
 env-998 ..... AUG  
 env-999 ..... AUG  
 Pir-1-1 ..... AUG  
 env-1003 ..... AUG  
 env-1007 ..... AUG  
 env-1009 ..... AUG  
 env-1010 ..... AUG  
 env-1011 ..... AUG  
 env-1012 ..... AUG  
 env-1015 ..... AUG  
 env-1016 ..... AUG  
 env-1017 ..... AUG  
 env-1019 ..... AUG  
 env-1021 ..... AUG  
 env-1023 ..... AUG  
 env-1025 ..... AUG  
 env-1026 ..... AUG  
 env-1027 ..... AUG  
 env-1029 ..... AUG  
 env-1034 ..... AUG  
 env-1038 ..... AUG  
 env-1039 .....  
 env-1040 ..... AUG  
 env-1042 ..... AUG  
 env-1047 ..... AUG  
 env-1048 ..... AUG  
 env-1049 ..... AUG  
 env-1052 ..... AUG  
 env-1053 ..... AUG  
 env-1057 ..... AUG  
 env-1058 ..... AUG  
 Wvi-1-1 ..... AUG  
 env-1059 ..... AUG  
 env-1060 ..... AUG  
 Fbr-1-1 ..... AUG  
 env-1062 ..... AUG  
 env-1063 ..... AUG  
 env-1064 ..... AUG  
 env-1066 ..... AUG  
 env-1067 .....  
 env-1068 ..... AUG  
 env-1069 ..... AUG  
 Iha-1-1 ..... AUG  
 env-1070 ..... AUG  
 env-1072 ..... AUG  
 env-1073 ..... AUG  
 env-1074 ..... AUG  
 Fjo-1-1 ..... AUG  
 env-1075 ..... AUG  
 env-1076 ..... AUG  
 env-1080 ..... AUG  
 env-1081 ..... AUG  
 env-1084 ..... AUG  
 Sxi-1-1 ..... AUG  
 env-1085 .....  
 env-1086 ..... AUG  
 env-1088 ..... AUG  
 env-1089 ..... AUG  
 Gli-1-1 ..... AUG

.....  
 .....  
 ----- AUG

env-1091 ..... AUG  
env-1092 ..... AUG  
env-1095 ..... AUG  
env-1096 ..... AUG  
env-1097 .....  
env-1098 ..... AUG  
env-1099 ..... AUG  
env-1104 ..... AUG  
env-1106 ..... AUG  
env-1107 ..... AUG  
Aag-1-1 ..... AUG  
Ead-1-1 ..... AUG  
env-1114 ..... AUG  
env-1115 ..... AUG  
Lsp-2-1 ..... AUG  
env-1116 ..... AUG  
Lsp-3-1 ..... AUG  
env-1118 ..... AUG  
env-1121 ..... AUG  
Lja-1-1 ..... AUG  
Lsp-1-1 ..... AUG  
env-1124 .....  
Pto-1-1 ..... AUG  
Pgo-1-1 ..... AUG  
env-1125 ..... AUG  
env-1127 ..... AUG  
env-1128 .....  
Ptr-1-1 ..... AUG  
env-1129 ..... AUG  
env-1130 ..... AUG  
env-1131 ..... AUG  
env-1132 ..... AUG  
env-1134 ..... AUG  
env-1135 ..... AUG  
env-1136 ..... AUG  
Gsp-4-1 ..... AUG  
env-1137 .....  
env-1138 ..... AUG  
env-1139 ..... AUG  
env-1140 .....  
env-1141 ..... AUG  
env-1142 ..... AUG  
env-1143 ..... AUG  
env-1144 ..... AUG  
env-1145 ..... AUG  
env-1146 ..... AUG  
env-1147 ..... AUG  
env-1148 ..... AUG  
env-1149 ..... AUG  
env-1150 ..... AUG  
env-1151 ..... AUG  
env-1152 ..... AUG  
env-1153 ..... AUG  
env-1155 ..... AUG  
env-1161 ..... AUG  
env-1162 ..... AUG  
env-1163 ..... AUG  
env-1164 ..... AUG  
env-1165 ..... AUG  
env-1166 ..... AUG  
env-1167 ..... AUG  
env-1168 ..... AUG  
Fso-1-1 ..... AUG  
env-1169 ..... AUG  
env-1172 ..... AUG  
env-1174 .....  
env-1175 ..... AUG  
env-1181 .....  
env-1182 ..... AUG  
env-1183 ..... AUG  
env-1185 ..... AUG  
env-1190 ..... AUG  
env-1191 ..... AUG  
env-1196 ..... AUG  
env-1197 ..... AUG  
env-1199 ..... AUG  
env-1200 ..... AUG  
env-1202 .....  
env-1203 ..... AUG  
Apa-1-1 ..... AUG  
env-1205 ..... AUG  
env-1206 .....  
env-1207 ..... AUG  
env-1208 ..... AUG

.....  
.....  
----- AUG



Fba-6-1 ..... AUG  
 Aat-1-1 ..... AUG  
 env-1209 ..... AUG  
 env-1210 ..... AUG  
 env-1213 ..... AUG  
 env-1215 ..... AUG  
 env-1216 ..... AUG  
 env-1217 ..... AUG  
 Fag-1-1 ..... AUG  
 env-1219 .....  
 env-1220 ..... AUG  
 env-1221 ..... AUG  
 env-1222 ..... AUG  
 env-1223 .....  
 Ame-1-1 ..... AUG  
 env-1224 ..... AUG  
 env-1225 ..... AUG  
 Fsp-3-1 ..... AUG  
 env-1227 ..... AUG  
 env-1228 ..... AUG  
 env-1230 ..... AUG  
 env-1231 ..... AUG  
 env-1232 ..... AUG  
 env-1233 ..... AUG  
 env-1234 ..... AUG  
 env-1235 ..... AUG  
 env-1237 ..... AUG  
 env-1239 ..... AUG  
 env-1241 ..... AUG  
 env-1252 ..... AUG  
 env-1253 ..... AUG  
 env-1254 ..... AUG  
 env-1255 ..... AUG  
 env-1256 ..... AUG  
 Fsu-1-1 ..... AUG  
 env-1257 ..... AUG  
 env-1258 ..... AUG  
 env-1259 ..... AUG  
 env-1260 ..... AUG  
 env-1261 ..... AUG  
 env-1262 ..... AUG  
 Msp-2-1 ..... AUG  
 env-1263 ..... AUG  
 Fco-1-1 ..... AUG  
 Ala-1-1 ..... AUG  
 env-1264 ..... AUG  
 env-1265 ..... AUG  
 env-1267 ..... AUG  
 Wps-1-1 ..... AUG  
 env-1268 ..... AUG  
 env-1269 ..... UGA  
 env-1271 ..... AUG  
 Mze-1-1 ..... AUG  
 env-1272 ..... AUG  
 Gpo-1-1 ..... AUG  
 Oma-1-1 ..... AUG  
 env-1273 ..... AUG  
 env-1274 ..... AUG  
 env-1275 ..... AUG  
 env-1276 ..... AUG  
 Fgi-1-1 ..... AUG  
 env-1280 ..... UGG  
 Fde-1-1 ..... AUG  
 Fsp-8-1 ..... AUG  
 Ffr-2-1 ..... AUG  
 Fsp-7-1 ..... AUG  
 Fch-1-1 ..... AUG  
 Fsp-2-1 ..... AUG  
 Ffr-1-1 ..... AUG  
 Fre-1-1 ..... AUG  
 env-1281 ..... AUG  
 Osp-1-1 ..... AUG  
 Osp-2-1 ..... AUG  
 env-1282 ..... AUG  
 Ssp-2-1 ..... AUG  
 env-1286 ..... AUG  
 Fsp-4-1 ..... AUG  
 Fsp-10-1 ..... AUG  
 env-1287 ..... AUG  
 env-1289 ..... AUG  
 Fsp-9-1 ..... AUG  
 env-1291 ..... AUG  
 env-1293 ..... AUG  
 env-1296 ..... AUG

.....  
 .....  
 ----- AUG

env-1297 .....AUG  
env-1300 .....  
env-1301 .....  
env-1302 .....AUG  
env-1303 .....AUG  
Phi-1-1 .....AUG  
Gsp-3-1 .....  
env-1304 .....  
env-1305 .....AUG  
env-1306 .....  
Gsp-5-1 .....  
Fsp-11-1 .....  
Fsp-1-1 .....AUG  
env-1307 .....  
Psp-3-1 .....  
env-1308 .....  
env-1309 .....AUG  
env-1310 .....  
Gme-1-1 .....  
env-1311 .....  
env-1312 .....AUG  
env-1314 .....  
Min-1-1 .....  
env-1317 .....  
env-1318 .....  
env-1319 .....  
env-1320 .....  
Ssp-1-1 .....  
env-1321 .....  
Fsu-2-1 .....  
env-1322 .....  
env-1323 .....  
env-1326 .....  
env-1327 .....  
Mze-2-1 .....  
env-1328 .....  
Myu-1-1 .....  
Gsa-1-1 .....  
Amu-1-1 .....  
Fen-1-1 .....AUG  
Fli-1-1 .....  
Fca-1-1 .....AUG  
Fsa-1-1 .....  
Fse-1-1 .....  
Fda-1-1 .....  
Dsp-2-1 .....  
env-1329 .....AUG  
env-1332 .....  
env-1335 .....AUG  
env-1336 .....AUG  
env-1337 .....  
env-1338 .....  
Faq-1-1 .....  
env-1339 .....  
env-1340 .....  
env-1341 .....  
env-1342 .....  
Zam-1-1 .....  
Gec-1-1 .....  
env-1343 .....  
env-1344 .....  
env-1347 .....AUG  
env-1348 .....AUG  
env-1349 .....  
env-1351 .....  
env-1352 .....  
env-1357 .....  
env-1359 .....AUG  
env-1360 .....  
env-1361 .....  
env-1364 .....  
env-1366 .....AUG  
env-1367 .....AUG  
env-1368 .....AUG  
env-1369 .....  
env-1370 .....  
Jma-1-1 .....  
env-1374 .....AUG  
env-1375 .....  
env-1377 .....  
env-1380 .....  
env-1381 .....AUG  
env-1382 .....AUG  
env-1383 .....  
  
.....  
.....  
-----AUG

env-1384 ..... AUG  
 env-1385 .....  
 env-1393 ..... AUG  
 env-1394 ..... AUG  
 env-1395 .....  
 env-1414 ..... AUG  
 env-1416 .....  
 env-1417 ..... AUG  
 env-1418 ..... AUG  
 env-1419 ..... AUG  
 env-1423 .....  
 env-1424 ..... AUG  
 env-1425 ..... AUG  
 Csp-7-1 ..... AUG  
 env-1427 ..... AUG  
 env-1428 ..... AUG  
 env-1429 ..... AUG  
 env-1431 .....  
 env-1432 ..... AUG  
 env-1433 ..... AUG  
 env-1434 ..... AUG  
 Coc-3-1 ..... AUG  
 env-1435 ..... AUG  
 env-1436 ..... AUG  
 env-1437 ..... AUG  
 env-1448 ..... AUG  
 env-1449 ..... AUG  
 env-1450 ..... AUG  
 env-1451 ..... AUG  
 env-1455 ..... AUG  
 env-1456 ..... AUG  
 env-1459 ..... AUG  
 env-1462 ..... AUG  
 env-1464 .....  
 env-1465 ..... AUG  
 env-1466 ..... AUG  
 env-1467 ..... AUG  
 env-1468 ..... AUG  
 env-1469 ..... AUG  
 env-1470 ..... AUG  
 env-1472 ..... AUG  
 env-1473 ..... AUG  
 env-1474 ..... AUG  
 Csp-8-1 ..... AUG  
 env-1475 ..... AUG  
 Fan-1-1 ..... AUG  
 Fte-1-1 ..... AUG  
 env-1486 ..... AUG  
 env-1487 ..... AUG  
 env-1488 ..... AUG  
 env-1489 ..... AUG  
 env-1490 ..... AUG  
 env-1505 ..... AUG  
 env-1507 ..... AUG  
 Mmo-1-1 ..... AUG  
 env-1508 ..... AUG  
 env-1511 ..... AUG  
 env-1512 ..... AUG  
 env-1513 ..... AUG  
 Lsp-4-1 ..... AUG  
 env-1519 .....  
 env-1520 ..... AUG  
 env-1521 ..... AUG  
 env-1525 ..... AUG  
 Ama-1-1 ..... AUG  
 env-1526 ..... AUG  
 env-1527 ..... AUG  
 env-1528 ..... AUG  
 env-1529 ..... AUG  
 env-1530 ..... AUG  
 Aca-1-1 ..... AUG  
 env-1532 ..... AUG  
 env-1533 ..... AUG  
 env-1534 ..... AUG  
 Fsa-2-1 ..... AUG  
 env-1535 ..... AUG  
 env-1536 ..... AUG  
 env-1537 ..... AUG  
 Fba-2-1 ..... AUG  
 Kje-1-1 ..... AUG  
 Kal-1-1 ..... AUG  
 Kzh-1-1 ..... AUG  
 env-1538 ..... AUG  
 env-1539 ..... AUG

.....  
 .....  
 ----- AUG

env-1541 ..... AUG  
Fin-1-1 ..... AUG  
env-1542 ..... AUG  
env-1543 ..... AUG  
env-1544 ..... AUG  
env-1545 ..... AUG  
env-1546 ..... AUG  
env-1547 ..... AUG  
env-1549 ..... AUG  
env-1551 ..... AUG  
env-1554 ..... AUG  
env-1555 ..... AUG  
env-1556 ..... AUG  
env-1557 ..... AUG  
env-1558 ..... AUG  
env-1559 ..... AUG  
env-1561 ..... AUG  
env-1562 ..... AUG  
env-1563 ..... AUG  
env-1564 ..... AUG  
env-1565 ..... AUG  
env-1567 ..... AUG  
env-1569 ..... AUG  
env-1581 ..... AUG  
env-1582 ..... AUG  
env-1583 ..... AUG  
env-1587 ..... AUG  
env-1588 ..... AUG  
env-1589 ..... AUG  
env-1590 ..... AUG  
env-1593 ..... AUG  
env-1594 ..... AUG  
env-1596 ..... AUG  
env-1597 ..... AUG  
Mth-1-1 ..... AUG  
env-1600 ..... AUG  
env-1601 ..... AUG  
env-1602 ..... AUG  
env-1603 ..... AUG  
Bar-1-1 ..... AUG  
env-1604 ..... AUG  
env-1605 ..... AUG  
env-1606 ..... AUG  
env-1607 ..... AUG  
env-1608 ..... AUG  
env-1611 ..... AUG  
env-1612 ..... AUG  
env-1614 ..... AUG  
env-1615 ..... AUG  
env-1616 ..... AUG  
env-1617 ..... AUG  
env-1618 ..... AUG  
env-1624 ..... AUG  
env-1625 ..... AUG  
env-1626 ..... AUG  
env-1628 ..... AUG  
env-1629 ..... AUG  
env-1630 ..... AUG  
env-1631 ..... AUG  
env-1635 ..... AUG  
env-1640 ..... AUG  
env-1644 ..... AUG  
env-1648 ..... AUG  
env-1650 ..... AUG  
env-1653 ..... AUG  
env-1654 ..... AUG  
env-1656 ..... AUG  
env-1657 ..... AUG  
env-1658 ..... AUG  
env-1659 ..... AUG  
env-1660 ..... AUG  
env-1661 ..... AUG  
env-1662 ..... AUG  
env-1663 ..... AUG  
env-1664 ..... AUG  
env-1665 ..... AUG  
env-1666 ..... AUG  
env-1667 ..... AUG  
env-1670 ..... AUG  
env-1671 ..... AUG  
env-1672 ..... AUG  
env-1673 ..... AUG  
env-1674 ..... AUG  
env-1677 ..... AUG

.....  
.....  
----- AUG



env-1680 ..... AUG  
env-1687 ..... AUG  
env-1690 ..... AUG  
env-1699 ..... AUG  
env-1700 ..... AUG  
env-1701 ..... AUG  
env-1702 ..... AUG  
env-1703 ..... AUG  
env-1709 ..... AUG  
env-1711 ..... AUG  
env-1712 ..... AUG  
env-1713 ..... AUG  
env-1714 ..... AUG  
env-1715 ..... AUG  
env-1716 ..... AUG  
env-1717 .....  
env-1718 ..... AUG  
env-1720 ..... AUG  
env-1721 ..... AUG  
env-1723 ..... AUG  
env-1733 ..... AUG  
env-1734 .....  
env-1735 ..... AUG  
env-1736 ..... AUG  
env-1737 ..... AUG  
env-1741 .....  
env-1742 ..... AUG  
env-1743 ..... AUG  
env-1750 ..... AUG  
env-1751 ..... AUG  
env-1752 ..... AUG  
env-1758 ..... AUG  
env-1760 ..... AUG  
env-1761 ..... AUG  
env-1762 ..... AUG  
env-1763 ..... AUG  
env-1764 ..... AUG  
env-1765 ..... AUG  
env-1771 .....  
env-1772 ..... AUG  
env-1777 ..... AUG  
env-1779 ..... AUG  
env-1781 ..... AUG  
env-1782 ..... AUG  
env-1783 ..... AUG  
env-1787 ..... AUG  
env-1788 ..... AUG  
env-1789 .....  
env-1790 ..... AUG  
env-1791 ..... AUG  
env-1792 ..... GAU  
env-1793 ..... AUG  
env-1794 ..... AUG  
env-1802 ..... AUG  
env-1803 ..... AUG  
env-1804 ..... AUG  
env-1805 ..... AUG  
env-1806 ..... AUG  
env-1807 ..... AUG  
env-1812 ..... AUG  
env-1813 ..... AUG  
env-1814 ..... AUG  
env-1815 ..... AUG  
env-1816 ..... AUG  
env-1817 ..... AUG  
env-1818 ..... AUG  
env-1819 ..... AUG  
env-1820 ..... AUG  
env-1821 ..... AUG  
env-1822 ..... AUG  
env-1823 ..... AUG  
env-1824 ..... AUG  
env-1825 ..... AUG  
env-1826 ..... AUG  
env-1830 ..... AUG  
env-1831 ..... AUG  
env-1832 ..... AUG  
env-1837 ..... AUG  
env-1839 ..... AUG  
env-1840 ..... AUG  
env-1841 ..... AUG  
env-1842 ..... AUG  
env-1843 ..... AUG  
env-1844 ..... AUG

.....  
.....  
----- AUG

env-1845 .....  
env-1846 ..... AUG  
env-1848 ..... AUG  
env-1849 ..... AUG  
env-1850 ..... AUG  
env-1851 ..... AUG  
env-1853 ..... AUG  
env-1855 ..... AUG  
env-1856 ..... AUG  
env-1857 ..... AUG  
env-1860 ..... AUG  
env-1861 ..... AUG  
Ala-2-1 ..... AUG  
env-1862 ..... AUG  
Ndo-1-1 ..... AUG  
env-1863 ..... AUG  
env-1864 ..... AUG  
Cal-1-1 ..... AUG  
env-1865 ..... AUG  
Csp-13-1 ..... AUG  
Mfo-1-1 ..... AUG  
Cba-4-1 ..... AUG  
env-1866 ..... AUG  
env-1867 ..... AUG  
env-1869 ..... AUG  
env-1870 ..... AUG  
env-1872 ..... AUG  
env-1873 .....  
env-1875 ..... AUG  
env-1880 ..... AUG  
env-1881 ..... AUG  
env-1886 ..... AUG  
Orh-1-1 ..... AUG  
env-1887 ..... AUG  
env-1888 ..... AUG  
env-1891 .....  
env-1892 ..... AUG  
env-1893 ..... AUG  
env-1894 ..... AUG  
env-1898 ..... AUG  
env-1899 ..... AUG  
env-1900 ..... AUG  
env-1918 ..... AUG  
env-1919 ..... AUG  
env-1921 ..... AUG  
env-1922 ..... AUG  
env-1923 ..... AUG  
Ran-1-1 ..... AUG  
env-1924 .....  
env-1925 ..... AUG  
env-1929 ..... AUG  
env-1930 ..... AUG  
env-1931 ..... AUG  
env-1932 ..... AUG  
Ran-6-1 ..... AUG  
env-1933 .....  
env-1934 ..... AUG  
env-1968 ..... AUG  
env-1977 ..... AUG  
env-1978 ..... AUG  
env-1984 ..... AUG  
env-1987 ..... AUG  
env-1988 ..... AUG  
env-1989 ..... AUG  
env-1990 ..... AUG  
env-1991 ..... AUG  
env-1993 ..... AUG  
Ran-2-1 ..... AUG  
Rco-1-1 ..... AUG  
env-1994 ..... AUG  
env-1995 ..... AUG  
env-1996 ..... AUG  
env-1997 ..... AUG  
env-1998 ..... AUG  
env-1999 ..... AUG  
env-2000 ..... AUG  
Ran-3-1 ..... AUG  
env-2001 ..... AUG  
env-2032 ..... AUG  
env-2033 ..... AUG  
env-2034 ..... AUG  
env-2035 ..... AUG  
Fge-1-1 ..... AUG  
Nma-1-1 ..... AUG

.....  
.....  
----- AUG

```

env-2036 ..... AUG
env-2047 ..... AUG
env-2048 ..... AUG
env-2050 ..... AUG
env-2051 ..... AUG
env-2052 ..... AUG
env-2054 ..... AUG
env-2055 ..... AUG
env-2056 ..... AUG
env-2057 ..... AUG
env-2065 ..... AUG
env-2066 ..... AUG
env-2067 ..... AUG
env-2068 ..... AUG
env-2069 ..... AUG
env-2071 ..... AUG
env-2076 ..... AUG
env-2077 ..... AUG
env-2078 .....
env-2079 ..... AUG
env-2080 ..... AUG
env-2098 ..... AUG
env-2100 ..... AUG
env-2101 ..... AUG
env-2102 ..... AUG
env-2103 ..... AUG
env-2104 ..... AUG
env-2121 ..... AUG
env-2122 ..... AUG
env-2123 ..... AUG
Fps-4-1 ..... AUG
Ran-4-1 ..... AUG
.....
----- AUG

```

## 7 L20-Deltaproteobacteria

### 7.1 Taxa

The taxonomy of each organism containing a putative L20-Deltaproteobacteria RNA is listed, with abbreviations identifying each hit (e.g., “Eco-1-1” and “Eco-1-2” might hypothetically represent two distinct RNAs in *E. coli*). The abbreviations will be used to identify each individual L20-Deltaproteobacteria RNA in Sections 7.2 and 7.4:.

| abbrev. of hits | taxonomy of species                                                                                                            |
|-----------------|--------------------------------------------------------------------------------------------------------------------------------|
| Dac-1-1         | Bacteria Proteobacteria Deltaproteobacteria Desulfuromonadales Desulfuromonadaceae <i>Desulfuromonas acetoxidans</i> DSM 684   |
| Dsp-1-1         | Bacteria Proteobacteria Deltaproteobacteria Desulfuromonadales Desulfuromonadaceae <i>Desulfuromonas</i> sp. TF                |
| Pse-1-1         | Bacteria Proteobacteria Deltaproteobacteria Desulfuromonadales Desulfuromonadaceae <i>Pelobacter seleniigenes</i> DSM 18267    |
| Gfe-1-1         | Bacteria Proteobacteria Deltaproteobacteria Desulfuromonadales Geobacteraceae <i>Geoalkalibacter ferrihydriticus</i> DSM 17813 |
| Gsu-1-1         | Bacteria Proteobacteria Deltaproteobacteria Desulfuromonadales Geobacteraceae <i>Geoalkalibacter subterraneus</i>              |
| Gbe-1-1         | Bacteria Proteobacteria Deltaproteobacteria Desulfuromonadales Geobacteraceae <i>Geobacter bemidjensis</i> Bem                 |
| Gbr-1-1         | Bacteria Proteobacteria Deltaproteobacteria Desulfuromonadales Geobacteraceae <i>Geobacter bremensis</i> R1                    |
| Glo-1-1         | Bacteria Proteobacteria Deltaproteobacteria Desulfuromonadales Geobacteraceae <i>Geobacter lovleyi</i> SZ                      |
| Gme-1-1         | Bacteria Proteobacteria Deltaproteobacteria Desulfuromonadales Geobacteraceae <i>Geobacter metallireducens</i> GS-15           |
| Gme-2-1         | Bacteria Proteobacteria Deltaproteobacteria Desulfuromonadales Geobacteraceae <i>Geobacter metallireducens</i> RCH3            |
| Gpi-1-1         | Bacteria Proteobacteria Deltaproteobacteria Desulfuromonadales Geobacteraceae <i>Geobacter pickeringii</i>                     |
| Gso-1-1         | Bacteria Proteobacteria Deltaproteobacteria Desulfuromonadales Geobacteraceae <i>Geobacter soli</i>                            |
| Gsp-1-1         | Bacteria Proteobacteria Deltaproteobacteria Desulfuromonadales Geobacteraceae <i>Geobacter</i> sp. FRC-32                      |
| Gsp-2-1         | Bacteria Proteobacteria Deltaproteobacteria Desulfuromonadales Geobacteraceae <i>Geobacter</i> sp. M18                         |
| Gsp-3-1         | Bacteria Proteobacteria Deltaproteobacteria Desulfuromonadales Geobacteraceae <i>Geobacter</i> sp. M21                         |
| Gsp-4-1         | Bacteria Proteobacteria Deltaproteobacteria Desulfuromonadales Geobacteraceae <i>Geobacter</i> sp. OR-1                        |
| Gsu-2-1         | Bacteria Proteobacteria Deltaproteobacteria Desulfuromonadales Geobacteraceae <i>Geobacter sulfurreducens</i>                  |
| Gsu-3-1         | Bacteria Proteobacteria Deltaproteobacteria Desulfuromonadales Geobacteraceae <i>Geobacter sulfurreducens</i> KN400            |
| Gsu-4-1         | Bacteria Proteobacteria Deltaproteobacteria Desulfuromonadales Geobacteraceae <i>Geobacter sulfurreducens</i> PCA              |
| Gur-1-1         | Bacteria Proteobacteria Deltaproteobacteria Desulfuromonadales Geobacteraceae <i>Geobacter uraniireducens</i> Rf4              |
| Gel-1-1         | Bacteria Proteobacteria Deltaproteobacteria Desulfuromonadales Geobacteraceae <i>Geopsychrobacter electrophilus</i> DSM 16401  |

Pca-1-1 Bacteria Proteobacteria Deltaproteobacteria Desulfuromonadales Pelobacteraceae *Pelobacter carbinolicus* DSM 2380  
 Ppr-1-1 Bacteria Proteobacteria Deltaproteobacteria Desulfuromonadales Pelobacteraceae *Pelobacter propionicus* DSM 2379  
 env-1 to env-179 environmental samples

## 7.2 Gene contexts

Each L20-Deltaproteobacteria RNA (indicated by “RNA→”) is listed. For each hit, the downstream genes predicted to reside in a regulated operon are listed. If the nearest downstream gene is encoding in the opposite strand (and therefore presumed to not be a part of a regulated operon), then that gene is still depicted. Some environmental sequences and some RefSeq entries lack gene annotations, and so no genes are available for such sequences. The direction of each gene is indicated with an arrow (→), and each predicted conserved domain in the gene is named. Conserved domains associated with more than one L20-Deltaproteobacteria RNA are assigned a color; other domains are gray. Information about these conserved

domains is given in Section 7.3. The accession of the sequence containing each L20-Deltaproteobacteria RNA is given in the column named “Seq. accession”. Accessions beginning with “NC\_”, “NS\_”, “NW\_” or “NZ\_” are contained in RefSeq. Other accession refer to environmental samples. Nucleotide coordinates are given for the 5′ and 3′ boundaries of each L20-Deltaproteobacteria RNA. If the 5′ coordinate is greater than the 3′ coordinate, the RNA is present on the reverse-complement strand of the containing genomic DNA sequence. Each hit is denoted by an abbreviation (like “Eco-1-1”) that refers to a taxonomy given in Section 7.1.

| abbrev. | Seq. accession            |   | 5′ at   | 3′ at   | genes                                                                                                                                                                                                                                                        |
|---------|---------------------------|---|---------|---------|--------------------------------------------------------------------------------------------------------------------------------------------------------------------------------------------------------------------------------------------------------------|
| env-1   | 3300000558_10042364       | - | 210     | 132     | RNA→ rpIT (PRK05185)Ribosomal_L20 (pfam00453)→                                                                                                                                                                                                               |
| env-2   | KVRMV2_101537624          | - | 193     | 105     | RNA→ rpIT (PRK05185)rpl20 (CHL00068)→                                                                                                                                                                                                                        |
| env-3   | LGVD01016786.1            | + | 10188   | 10263   | RNA→ rpIT (PRK05185)Ribosomal_L20 (pfam00453)→                                                                                                                                                                                                               |
| env-4   | LGVE01096777.1            | + | 810     | 885     | RNA→ rpIT (PRK05185)Ribosomal_L20 (pfam00453)→                                                                                                                                                                                                               |
| env-5   | LGVF011151704.1           | - | 2284    | 2209    | RNA→ rpIT (PRK05185)Ribosomal_L20 (pfam00453)→                                                                                                                                                                                                               |
| env-6   | LGVF01446591.1            | - | 671     | 594     | RNA→ rpIT (PRK05185)Ribosomal_L20 (pfam00453)→                                                                                                                                                                                                               |
| env-7   | JGI24023J19991_10001126   | + | 6175    | 6251    | RNA→ rpIT (PRK05185)Ribosomal_L20 (pfam00453)→                                                                                                                                                                                                               |
| Pse-1-1 | NZ_JOMG01000004.1         | + | 547284  | 547360  | RNA→ rpIT (PRK05185)Ribosomal_L20 (pfam00453)→                                                                                                                                                                                                               |
| env-8   | M940M_1000089             | - | 2577    | 2501    | RNA→ rpIT (PRK05185)Ribosomal_L20 (pfam00453)→                                                                                                                                                                                                               |
| env-9   | M590M1_1000913            | - | 8384    | 8460    | RNA→ rpIT (PRK05185)Ribosomal_L20 (pfam00453)→                                                                                                                                                                                                               |
| env-10  | M590M2_1001691            | - | 8449    | 8373    | RNA→ rpIT (PRK05185)Ribosomal_L20 (pfam00453)→                                                                                                                                                                                                               |
| env-11  | SA_S1_NOR05_45m_c10229484 | - | 170     | 92      | RNA→ rpIT (PRK05185)rpl20 (CHL00068)→                                                                                                                                                                                                                        |
| Gel-1-1 | NZ_ARWE01000001.1         | + | 1492573 | 1492658 | RNA→ rpIT (PRK05185)Ribosomal_L20 (pfam00453)→                                                                                                                                                                                                               |
| env-12  | KVRMV2_100037767          | - | 14415   | 14351   | RNA→ rpIT (PRK05185)Ribosomal_L20 (pfam00453)→ PheS (COG0016)pheS (PRK00488)→<br>PheT (COG0072)pheT (PRK00629)tRNA_bind_bactPheRS (cd02796)→                                                                                                                 |
| env-13  | 3300001605_10126988       | + | 58      | 114     | RNA→ rpIT (PRK05185)Ribosomal_L20 (pfam00453)→ PheS (COG0016)pheS (PRK00488)→<br>syfB (CHL00192)pheT (PRK00629)→                                                                                                                                             |
| env-14  | 3300001605_10740178       | + | 188     | 244     | RNA→ rpIT (PRK05185)Ribosomal_L20 (pfam00453)→                                                                                                                                                                                                               |
| env-15  | 3300001605_10006506       | + | 12971   | 13027   | RNA→                                                                                                                                                                                                                                                         |
| env-16  | 3300001605_10708600       | + | 200     | 256     | RNA→ rpIT (PRK05185)Ribosomal_L20 (pfam00453)→                                                                                                                                                                                                               |
| env-17  | LWFCAn_GLO1YSU01EBI9B     | + | 3       | 64      | RNA→ hypo→ rpIT (PRK05185)Ribosomal_L20 (pfam00453)→                                                                                                                                                                                                         |
| env-18  | lwComb_BHFI11626_g1       | + | 746     | 807     | RNA→                                                                                                                                                                                                                                                         |
| env-19  | 2034067870                | + | 177     | 238     | RNA→ rpIT (PRK05185)Ribosomal_L20 (cd07026)→                                                                                                                                                                                                                 |
| env-20  | LWFCAn_GLO1YSU01D9AZM     | - | 414     | 353     | RNA→ hypo→ rpIT (PRK05185)Ribosomal_L20 (pfam00453)→                                                                                                                                                                                                         |
| env-21  | LWFCAn_GLZZ6Z001ECB4G     | - | 114     | 53      | RNA→ ←hypo                                                                                                                                                                                                                                                   |
| env-22  | LWFCAnN_GO09JKT02GDB9I    | + | 274     | 335     | RNA→ rpIT (PRK05185)Ribosomal_L20 (pfam00453)→                                                                                                                                                                                                               |
| Ppr-1-1 | NC_008609.1               | - | 2488533 | 2488474 | RNA→ rpIT (PRK05185)Ribosomal_L20 (pfam00453)→ PheS (COG0016)pheS (PRK00488)→<br>PheT (COG0072)pheT (PRK00629)tRNA_bind_bactPheRS (cd02796)→ ihfA (PRK00285)IHF_A (cd13835)→<br>HTH_MlrA-like_sg2 (cd04765)MerR_1 (pfam13411)→ hypo→ hypo→ hypo→ hypo→ hypo→ |
| env-23  | JGI11944J13513_1245443    | - | 94      | 39      | RNA→                                                                                                                                                                                                                                                         |
| env-24  | 3300000032_0015669        | - | 35340   | 35277   | RNA→ rpIT (PRK05185)Ribosomal_L20 (pfam00453)→                                                                                                                                                                                                               |
| env-25  | 3300000568_10008200       | + | 165385  | 165448  | RNA→ rpIT (PRK05185)Ribosomal_L20 (pfam00453)→                                                                                                                                                                                                               |





|         |                        |   |         |         |                                                                                                                                                                                                                                                                                                                                        |
|---------|------------------------|---|---------|---------|----------------------------------------------------------------------------------------------------------------------------------------------------------------------------------------------------------------------------------------------------------------------------------------------------------------------------------------|
| env-59  | 3300001580_11172117    | - | 105     | 50      | RNA→                                                                                                                                                                                                                                                                                                                                   |
| env-60  | 3300000032_0024462     | - | 15336   | 15280   | RNA→ rplT (PRK05185)Ribosomal_L20 (pfam00453)→ PheS (COG0016)pheS (PRK00488)→ PheT (COG0072)pheT (PRK00629)tRNA_bind_bactPheRS (cd02796)→                                                                                                                                                                                              |
| env-61  | JGI24728J21555_1009694 | - | 2660    | 2605    | RNA→ rplT (PRK05185)Ribosomal_L20 (pfam00453)→ PheS (COG0016)pheS (PRK00488)→ pheT (PRK00629)tRNA_bind_bactPheRS (cd02796)B3_4 (pfam03483)→                                                                                                                                                                                            |
| env-62  | JGI24728J21555_1023465 | + | 254     | 309     | RNA→ rplT (PRK05185)Ribosomal_L20 (pfam00453)→ PheS (COG0016)pheS (PRK00488)→                                                                                                                                                                                                                                                          |
| env-63  | JGI24730J26740_1004602 | - | 3221    | 3166    | RNA→ rplT (PRK05185)Ribosomal_L20 (pfam00453)→ PheS (COG0016)pheS (PRK00488)→ PheT (COG0072)pheT (PRK00629)tRNA_bind_bactPheRS (cd02796)→                                                                                                                                                                                              |
| env-64  | JGI24730J26740_1000449 | - | 28604   | 28549   | RNA→ rplT (PRK05185)Ribosomal_L20 (pfam00453)→                                                                                                                                                                                                                                                                                         |
| Glo-1-1 | NC_010814.1            | + | 1993020 | 1993075 | RNA→ rplT (PRK05185)Ribosomal_L20 (pfam00453)→ PheS (COG0016)pheS (PRK00488)→ PheT (COG0072)pheT (PRK00629)tRNA_bind_bactPheRS (cd02796)→ DUF3373 (pfam11853)→                                                                                                                                                                         |
| env-65  | JGI24728J21555_1018455 | + | 1325    | 1380    | RNA→ rplT (PRK05185)Ribosomal_L20 (pfam00453)→ pheS (PRK00488)Phe.tRNA-synt_N (pfam02912)→                                                                                                                                                                                                                                             |
| env-66  | PCEOT_F164E7T01BG9SK   | + | 218     | 273     | RNA→ rplT (PRK05185)Ribosomal_L20 (pfam00453)→                                                                                                                                                                                                                                                                                         |
| env-67  | IMNBL1_c0232076        | + | 282     | 341     | RNA→ rplT (PRK05185)rpl20 (CHL00068)→                                                                                                                                                                                                                                                                                                  |
| env-68  | JGI994J12354_10020529  | - | 91      | 32      | RNA→ ←hypo                                                                                                                                                                                                                                                                                                                             |
| env-69  | JGI994J12354_10102055  | - | 91      | 32      | RNA→                                                                                                                                                                                                                                                                                                                                   |
| env-70  | JGI24728J21555_1023893 | - | 695     | 633     | RNA→ rplT (PRK05185)Ribosomal_L20 (pfam00453)→ pheS (PRK00488)Phe.tRNA-synt_N (pfam02912)→                                                                                                                                                                                                                                             |
| env-71  | 3300000568_10095751    | - | 3182    | 3123    | RNA→ rplT (PRK05185)Ribosomal_L20 (pfam00453)→                                                                                                                                                                                                                                                                                         |
| env-72  | 3300000568_10166208    | + | 543     | 602     | RNA→ rplT (PRK05185)Ribosomal_L20 (pfam00453)→                                                                                                                                                                                                                                                                                         |
| env-73  | 3300000568_10910092    | - | 126     | 67      | RNA→ hypo→                                                                                                                                                                                                                                                                                                                             |
| env-74  | 3300001580_10542033    | - | 192     | 133     | RNA→ rplT (PRK05185)Ribosomal_L20 (pfam00453)→                                                                                                                                                                                                                                                                                         |
| env-75  | 3300001567_10003592    | + | 12408   | 12467   | RNA→ rplT (PRK05185)Ribosomal_L20 (pfam00453)→                                                                                                                                                                                                                                                                                         |
| env-76  | 3300000558_10376168    | - | 3122    | 3060    | RNA→ rplT (PRK05185)Ribosomal_L20 (pfam00453)→ PheS (COG0016)pheS (PRK00488)→                                                                                                                                                                                                                                                          |
| env-77  | 3300000032_0032030     | - | 654     | 593     | RNA→ rplT (PRK05185)Ribosomal_L20 (pfam00453)→ pheS (PRK00488)Phe.tRNA-synt_N (pfam02912)→                                                                                                                                                                                                                                             |
| env-78  | 3300000568_10567303    | - | 669     | 608     | RNA→ rplT (PRK05185)Ribosomal_L20 (pfam00453)→ pheS (PRK00488)Phe.tRNA-synt_N (pfam02912)→                                                                                                                                                                                                                                             |
| Gso-1-1 | NZ_JXBL01000001.1      | - | 1713733 | 1713668 | RNA→ rplT (PRK05185)Ribosomal_L20 (pfam00453)→ PheS (COG0016)pheS (PRK00488)→ PheT (COG0072)pheT (PRK00629)tRNA_bind_bactPheRS (cd02796)→ ihfA (PRK00285)IHF_A (cd13835)→ HTH_MlrA-like_sg2 (cd04765)MerR_1 (pfam13411)→ hypo→                                                                                                         |
| Gsu-2-1 | NZ_CP010430.1          | - | 4273106 | 4273044 | RNA→ rplT (PRK05185)Ribosomal_L20 (pfam00453)→ PheS (COG0016)pheS (PRK00488)→ PheT (COG0072)pheT (PRK00629)tRNA_bind_bactPheRS (cd02796)→ ihfA (PRK00285)IHF_A (cd13835)→ HTH_MlrA-like_sg2 (cd04765)MerR_1 (pfam13411)→ hypo→                                                                                                         |
| env-79  | ACD53_150              | - | 7941    | 7879    | RNA→ rplT (PRK05185)Ribosomal_L20 (pfam00453)→ PheS (COG0016)pheS (PRK00488)→ pheT (PRK00629)tRNA_bind_bactPheRS (cd02796)B3_4 (pfam03483)→ PheT (COG0072)pheT (PRK00629)→ ihfA (PRK00285)IHF_A (cd13835)→ HTH_MlrA-like_sg2 (cd04765)MerR_1 (pfam13411)→ hypo→                                                                        |
| Gsu-4-1 | NC_002939.5            | + | 1664846 | 1664908 | RNA→ rplT (PRK05185)Ribosomal_L20 (pfam00453)→ PheS (COG0016)pheS (PRK00488)→ PheT (COG0072)pheT (PRK00629)tRNA_bind_bactPheRS (cd02796)→ ihfA (PRK00285)IHF_A (cd13835)→ HTH_MlrA-like_sg2 (cd04765)MerR_1 (pfam13411)→ hypo→ hypo→ hypo→ hypo→                                                                                       |
| Gsu-3-1 | NC_017454.1            | + | 1634500 | 1634562 | RNA→ rplT (PRK05185)Ribosomal_L20 (pfam00453)→ PheS (COG0016)pheS (PRK00488)→ PheT (COG0072)pheT (PRK00629)tRNA_bind_bactPheRS (cd02796)→ ihfA (PRK00285)IHF_A (cd13835)→ HTH_MlrA-like_sg2 (cd04765)MerR_1 (pfam13411)→ hypo→ hypo→ hypo→ hypo→                                                                                       |
| Gpi-1-1 | NZ_CP009788.1          | - | 1887990 | 1887929 | RNA→ rplT (PRK05185)Ribosomal_L20 (pfam00453)→ PheS (COG0016)pheS (PRK00488)→ PheT (COG0072)pheT (PRK00629)tRNA_bind_bactPheRS (cd02796)→ ihfA (PRK00285)IHF_A (cd13835)→ HTH_MlrA-like_sg2 (cd04765)MerR_1 (pfam13411)→ hypo→ SurE (COG0496)surE (PRK00346)→ RpoD (COG0568)sigma70-ECF (TIGR02937)→ Apt (COG0503)PRK02304 (PRK02304)→ |
| env-80  | JXWW01164903.1         | - | 235     | 172     | RNA→ rplT (PRK05185)Ribosomal_L20 (pfam00453)→                                                                                                                                                                                                                                                                                         |
| Gsp-4-1 | NZ_BAZF01000009.1      | + | 8601    | 8663    | RNA→ rplT (PRK05185)Ribosomal_L20 (pfam00453)→ PheS (COG0016)pheS (PRK00488)→ PheT (COG0072)pheT (PRK00629)tRNA_bind_bactPheRS (cd02796)→ ihfA (PRK00285)IHF_A (cd13835)→ HTH_MlrA-like_sg2 (cd04765)MerR_1 (pfam13411)→ hypo→                                                                                                         |
| env-81  | 3300001567_10543765    | + | 112     | 171     | RNA→ ←hypo                                                                                                                                                                                                                                                                                                                             |
| env-82  | 3300001567_10545448    | - | 129     | 70      | RNA→ ←hypo                                                                                                                                                                                                                                                                                                                             |
| env-83  | 3300000568_10531113    | + | 84      | 144     | RNA→ rplT (PRK05185)Ribosomal_L20 (pfam00453)→                                                                                                                                                                                                                                                                                         |
| env-84  | 3300000032_0125795     | - | 2173    | 2113    | RNA→ rplT (PRK05185)Ribosomal_L20 (pfam00453)→ PheS (COG0016)pheS (PRK00488)→ PheT (COG0072)pheT (PRK00629)tRNA_bind_bactPheRS (cd02796)→                                                                                                                                                                                              |





|         |                            |   |         |         |                                                                                                                                                  |
|---------|----------------------------|---|---------|---------|--------------------------------------------------------------------------------------------------------------------------------------------------|
| env-110 | 2232073740                 | - | 430     | 354     | RNA → rplT (PRK05185)Ribosomal_L20 (pfam00453) →                                                                                                 |
| env-111 | 3300000558_10134028        | + | 138     | 216     | RNA → rplT (PRK05185)Ribosomal_L20 (pfam00453) →                                                                                                 |
| env-112 | 3300000558_11394841        | - | 255     | 177     | RNA → rplT (PRK05185)Ribosomal_L20 (pfam00453) →                                                                                                 |
| env-113 | 3300000568_10011739        | - | 718     | 640     | RNA → rplT (PRK05185)Ribosomal_L20 (pfam00453) →                                                                                                 |
| env-114 | 3300001567_10107199        | - | 546     | 468     | RNA → rplT (PRK05185)Ribosomal_L20 (pfam00453) →                                                                                                 |
| Dsp-1-1 | NZ_KI421413.1              | - | 228136  | 228058  | RNA → rplT (PRK05185)Ribosomal_L20 (pfam00453) →                                                                                                 |
| env-115 | 3300001580_10000645        | + | 14984   | 15060   | RNA → rplT (PRK05185)Ribosomal_L20 (pfam00453) →                                                                                                 |
| env-116 | 3300000558_11481507        | - | 595     | 519     | RNA → rplT (PRK05185)Ribosomal_L20 (pfam00453) →                                                                                                 |
| env-117 | 3300000558_11690408        | + | 653     | 728     | RNA → rplT (PRK05185)Ribosomal_L20 (pfam00453) →                                                                                                 |
| Pca-1-1 | NC_007498.2                | + | 1669010 | 1669085 | RNA → rplT (PRK05185)Ribosomal_L20 (pfam00453) → rplT (PRK05185)Ribosomal_L20 (pfam00453) →                                                      |
| env-118 | 3300001567_10001919        | + | 18381   | 18456   | RNA → rplT (PRK05185)Ribosomal_L20 (pfam00453) → PheS (COG0016)pheS (PRK00488) →<br>PheT (COG0072)pheT (PRK00629)tRNA_bind_bactPheRS (cd02796) → |
| env-119 | 3300000558_10022538        | - | 6809    | 6737    | RNA → rplT (PRK05185)Ribosomal_L20 (pfam00453) → PheS (COG0016)pheS (PRK00488) →<br>PheT (COG0072)pheT (PRK00629)tRNA_bind_bactPheRS (cd02796) → |
| env-120 | 3300000558_10299282        | + | 347     | 425     | RNA →                                                                                                                                            |
| env-121 | SA_S1_NOR05_45m_c10345692  | - | 276     | 199     | RNA → rplT (PRK05185)Ribosomal_L20 (pfam00453) →                                                                                                 |
| env-122 | SA_S1_NOR05_45m_c10511679  | - | 159     | 82      | RNA → rplT (PRK05185)rpl20 (CHL00068) →                                                                                                          |
| env-123 | SA_S2_NOR18_50m_1106132    | - | 249     | 173     | RNA → rplT (PRK05185)Ribosomal_L20 (pfam00453) →                                                                                                 |
| env-124 | SA_S2_NOR13_50m_c1176942   | + | 189     | 265     | RNA →                                                                                                                                            |
| env-125 | SA_S1_NOR05_45m_c10000719  | + | 2825    | 2901    | RNA → rplT (PRK05185)Ribosomal_L20 (pfam00453) →                                                                                                 |
| env-126 | SA_S1_NOR08_45m_c10011655  | + | 1979    | 2055    | RNA → rplT (PRK05185)Ribosomal_L20 (pfam00453) →                                                                                                 |
| env-127 | SA_S1_NOR08_45m_c10015541  | + | 2845    | 2921    | RNA → rplT (PRK05185)Ribosomal_L20 (pfam00453) →                                                                                                 |
| env-128 | SA_S2_NOR15_50m_c10016791  | + | 1291    | 1367    | RNA → rplT (PRK05185)Ribosomal_L20 (pfam00453) →                                                                                                 |
| env-129 | SA_S1_NOR02_45m_c1003376   | - | 909     | 833     | RNA → rplT (PRK05185)Ribosomal_L20 (pfam00453) →                                                                                                 |
| env-130 | SA_S2_NOR15_50m_c10152710  | - | 153     | 77      | RNA → rplT (PRK05185)rpl20 (CHL00068) →                                                                                                          |
| env-131 | SA_S1_NOR05_45m_c10069212  | + | 630     | 706     | RNA → rplT (PRK05185)Ribosomal_L20 (pfam00453) →                                                                                                 |
| env-132 | SA_S1_NOR02_45m_c1134354   | - | 100     | 24      | RNA → ← hypo                                                                                                                                     |
| env-133 | SA_S1_NOR08_45m_c10008401  | - | 164     | 88      | RNA → rplT (PRK05185)rpl20 (CHL00068) →                                                                                                          |
| env-134 | SA_S2_NOR13_50m_c1190193   | + | 137     | 213     | RNA →                                                                                                                                            |
| env-135 | SA_S1_NOR05_45m_c10026777  | - | 566     | 490     | RNA → rplT (PRK05185)Ribosomal_L20 (pfam00453) → hypo →                                                                                          |
| env-136 | SA_S1_NOR08_45m_c10014299  | + | 2144    | 2220    | RNA → rplT (PRK05185)Ribosomal_L20 (pfam00453) →                                                                                                 |
| env-137 | SA_S2_NOR15_50m_c10136720  | + | 639     | 715     | RNA → rplT (PRK05185)rpl20 (CHL00068) →                                                                                                          |
| env-138 | SA_S1_NOR02_45m_c1067657   | + | 160     | 236     | RNA → rplT (PRK05185)Ribosomal_L20 (pfam00453) →                                                                                                 |
| env-139 | SA_S2_NOR13_50m_c1078169   | - | 216     | 139     | RNA → rplT (PRK05185)Ribosomal_L20 (pfam00453) →                                                                                                 |
| env-140 | SA_S1_NOR05_45m_c10009856  | + | 2006    | 2083    | RNA → rplT (PRK05185)Ribosomal_L20 (pfam00453) →                                                                                                 |
| env-141 | SA_S1_NOR08_45m_c10000806  | + | 2877    | 2954    | RNA → rplT (PRK05185)Ribosomal_L20 (pfam00453) →                                                                                                 |
| env-142 | SA_S2_NOR15_50m_c10001918  | + | 2889    | 2966    | RNA → rplT (PRK05185)Ribosomal_L20 (pfam00453) →                                                                                                 |
| env-143 | SA_S1_NOR02_45m_c1117957   | + | 138     | 215     | RNA → rplT (PRK05185)rpl20 (CHL00068) →                                                                                                          |
| env-144 | SA_S2_NOR18_50m_1236664    | + | 180     | 257     | RNA →                                                                                                                                            |
| env-145 | SA_S1_NOR05_45m_c10219562  | + | 174     | 251     | RNA → rplT (PRK05185)Ribosomal_L20 (pfam00453) →                                                                                                 |
| env-146 | SA_S2_NOR15_50m_c10184235  | + | 79      | 156     | RNA → rplT (PRK05185)Ribosomal_L20 (pfam00453) → rplT (PRK05185)Ribosomal_L20 (pfam00453) →                                                      |
| env-147 | SA_S2_NOR15_50m_c10184235  | + | 392     | 469     | RNA → rplT (PRK05185)Ribosomal_L20 (pfam00453) → rplT (PRK05185)Ribosomal_L20 (pfam00453) →                                                      |
| env-148 | SA_S1_NOR05_45m_c10004739  | + | 2326    | 2403    | RNA → rplT (PRK05185)Ribosomal_L20 (pfam00453) →                                                                                                 |
| env-149 | SA_S1_NOR08_45m_c10004622  | - | 3588    | 3511    | RNA → rplT (PRK05185)Ribosomal_L20 (pfam00453) →                                                                                                 |
| env-150 | SA_S2_NOR15_50m_c10019150  | + | 2898    | 2975    | RNA → rplT (PRK05185)Ribosomal_L20 (pfam00453) →                                                                                                 |
| env-151 | SA_S2_NOR15_50m_c10106824  | - | 231     | 154     | RNA → rplT (PRK05185)Ribosomal_L20 (pfam00453) →                                                                                                 |
| env-152 | SA_S1_NOR02_45m_c1126557   | + | 164     | 241     | RNA → rplT (PRK05185)rpl20 (CHL00068) →                                                                                                          |
| env-153 | ASA120_GJFD58A02GB27U      | - | 120     | 43      | RNA →                                                                                                                                            |
| env-154 | BS_KBA_SWE12_21m_c10210524 | + | 169     | 246     | RNA → rplT (PRK05185)Ribosomal_L20 (pfam00453) →                                                                                                 |
| env-155 | BS_KBA_SWE21_205m_10288133 | + | 106     | 183     | RNA → rplT (PRK05185)Ribosomal_L20 (pfam00453) →                                                                                                 |
| env-156 | BS_KBA_SWE02_21m_10654080  | - | 133     | 56      | RNA →                                                                                                                                            |
| env-157 | BS_KBA_SWE12_21m_c10693372 | - | 146     | 69      | RNA → rplT (PRK05185)rpl20 (CHL00068) →                                                                                                          |
| env-158 | BS_KBA_SWE21_205m_10269672 | + | 184     | 261     | RNA → rplT (PRK05185)rpl20 (CHL00068) →                                                                                                          |



|         |                            |   |       |       |      |                                                                                                                                                                                                                                                                                                                                                                                                                                                                              |
|---------|----------------------------|---|-------|-------|------|------------------------------------------------------------------------------------------------------------------------------------------------------------------------------------------------------------------------------------------------------------------------------------------------------------------------------------------------------------------------------------------------------------------------------------------------------------------------------|
| env-159 | BS_KBA_SWE12_21m.c10454375 | - | 178   | 101   | RNA→ | rplT (PRK05185)rpl20 (CHL00068)→                                                                                                                                                                                                                                                                                                                                                                                                                                             |
| env-160 | KGL_S1_ANT01_95m.c10080207 | - | 841   | 763   | RNA→ | rplT (PRK05185)Ribosomal_L20 (pfam00453)→ pheS (PRK00488)Phe_tRNA-synt_N (pfam02912)→                                                                                                                                                                                                                                                                                                                                                                                        |
| env-161 | ASLM20b_GM71RDO02F8O89     | + | 134   | 212   | RNA→ | rplT (PRK05185)Ribosomal_L20 (pfam00453)→                                                                                                                                                                                                                                                                                                                                                                                                                                    |
| env-162 | ASA120_GJFD58A02J09L8      | - | 396   | 318   | RNA→ | rplT (PRK05185)Ribosomal_L20 (pfam00453)→                                                                                                                                                                                                                                                                                                                                                                                                                                    |
| env-163 | SA_S1_NOR08_45m.c10161630  | - | 206   | 128   | RNA→ | rplT (PRK05185)rpl20 (CHL00068)→                                                                                                                                                                                                                                                                                                                                                                                                                                             |
| env-164 | SA_S2_NOR15_50m.c10056163  | + | 270   | 348   | RNA→ | rplT (PRK05185)Ribosomal_L20 (pfam00453)→ hypo→ PheS (COG0016)pheS (PRK00488)→                                                                                                                                                                                                                                                                                                                                                                                               |
| env-165 | SA_S2_NOR13_50m.c1030706   | - | 679   | 601   | RNA→ | rplT (PRK05185)Ribosomal_L20 (pfam00453)→ hypo→ pheS (PRK00488)Phe_tRNA-synt_N (pfam02912)→                                                                                                                                                                                                                                                                                                                                                                                  |
| env-166 | SA_S1_NOR08_45m.c10303771  | - | 125   | 47    | RNA→ |                                                                                                                                                                                                                                                                                                                                                                                                                                                                              |
| env-167 | SA_S1_NOR05_45m.c10043877  | + | 802   | 880   | RNA→ |                                                                                                                                                                                                                                                                                                                                                                                                                                                                              |
| env-168 | SA_S2_NOR15_50m.c10070834  | - | 112   | 34    | RNA→ |                                                                                                                                                                                                                                                                                                                                                                                                                                                                              |
| env-169 | SA_S1_NOR05_45m.c10169234  | + | 253   | 331   | RNA→ | rplT (PRK05185)Ribosomal_L20 (pfam00453)→                                                                                                                                                                                                                                                                                                                                                                                                                                    |
| env-170 | SA_S1_NOR08_45m.c10013077  | + | 3405  | 3483  | RNA→ | rplT (PRK05185)Ribosomal_L20 (pfam00453)→                                                                                                                                                                                                                                                                                                                                                                                                                                    |
| env-171 | SA_S1_NOR08_45m.c10110821  | - | 352   | 274   | RNA→ | rplT (PRK05185)Ribosomal_L20 (pfam00453)→                                                                                                                                                                                                                                                                                                                                                                                                                                    |
| env-172 | SA_S2_NOR15_50m.c10446830  | + | 267   | 345   | RNA→ |                                                                                                                                                                                                                                                                                                                                                                                                                                                                              |
| env-173 | SA_S2_NOR18_50m.1021448    | + | 190   | 268   | RNA→ | rplT (PRK05185)Ribosomal_L20 (pfam00453)→ hypo→ pheS (PRK00488)Phe_tRNA-synt_N (pfam02912)→                                                                                                                                                                                                                                                                                                                                                                                  |
| env-174 | LGOV01008591.1             | + | 13588 | 13681 | RNA→ | rplT (PRK05185)Ribosomal_L20 (pfam00453)→                                                                                                                                                                                                                                                                                                                                                                                                                                    |
| env-175 | LGVE01183011.1             | + | 6160  | 6253  | RNA→ | rplT (PRK05185)Ribosomal_L20 (pfam00453)→                                                                                                                                                                                                                                                                                                                                                                                                                                    |
| env-176 | LGVF01312494.1             | + | 20148 | 20241 | RNA→ | rplT (PRK05185)Ribosomal_L20 (pfam00453)→                                                                                                                                                                                                                                                                                                                                                                                                                                    |
| env-177 | 3300001580_10002513        | - | 10447 | 10365 | RNA→ | rplT (PRK05185)Ribosomal_L20 (pfam00453)→ PheS (COG0016)pheS (PRK00488)→ PheT (COG0072)pheT (PRK00629)tRNA_bind_bactPheRS (cd02796)→ ihfA (PRK00285)IHF_A (cd13835)→ HTH_MlrA-like_sg2 (cd04765)MerR_1 (pfam13411)→ SurE (COG0496)surE (PRK00346)→ Pcm (COG2518)Methyltransf_25 (pfam13649)→ YgaA (COG1238)SNARE_assoc (pfam09335)→ LysM (smart00257)LysM (cd00118)Peptidase_M23 (pfam01551)→ RpoD (COG0568)sigma70-ECF (TIGR02937)→ Apt (COG0503)PRK02304 (PRK02304)→ hypo→ |
| env-178 | 3300000558_10371857        | - | 2112  | 2038  | RNA→ | rplT (PRK05185)Ribosomal_L20 (pfam00453)→ PheS (COG0016)pheS (PRK00488)→                                                                                                                                                                                                                                                                                                                                                                                                     |
| env-179 | 3300001580_10030616        | - | 3653  | 3579  | RNA→ | rplT (PRK05185)Ribosomal_L20 (pfam00453)→ PheS (COG0016)pheS (PRK00488)→                                                                                                                                                                                                                                                                                                                                                                                                     |

### 7.3 Conserved domains

Conserved domains found in protein-coding genes listed in Section 7.2 are shown below, with the first sentence in their description from the Conserved Domain Database (if any). Conserved domains associated with more than one L20-

**cd00118** (1) Lysine Motif is a small domain involved in binding peptidoglycan.  
**cd02796** (35) tRNA-binding-domain-containing prokaryotic phenylalanly tRNA synthetase (PheRS) beta chain.  
**cd04765** (18) Helix-Turn-Helix DNA binding domain of putative MlrA-like transcription regulators.  
**cd06158** (1) Uncharacterized homologs of Site-2 protease (S2P), zinc metalloproteases (MEROPS family M50) which cleave transmembrane domains of substrate proteins, regulating intramembrane proteolysis (RIP) of diverse signal transduction mechanisms.  
**cd07026** (1) Ribosomal protein L20.  
**cd13835** (18) Alpha subunit of integration host factor (IHFA).  
**CHL00068** (15) ribosomal protein L20  
**CHL00192** (1) phenylalanyl-tRNA synthetase beta chain; Provisional  
**COG0016** (48) Phenylalanyl-tRNA synthetase alpha subunit [Translation, ribosomal structure and biogenesis]

Deltaproteobacteria RNA are assigned a color, while others are shown in gray. The number in parentheses after the colored domain name is the number of occurrences in Section 7.2.

**COG0072** (35) Phenylalanyl-tRNA synthetase beta subunit [Translation, ribosomal structure and biogenesis]  
**COG0180** (1) Tryptophanyl-tRNA synthetase [Translation, ribosomal structure and biogenesis]  
**COG0496** (8) Broad specificity polyphosphatase and 5'/3'-nucleotidase SurE [Replication, recombination and repair]  
**COG0508** (4) Adenine/guanine phosphoribosyltransferase or related PRPP-binding protein [Nucleotide transport and metabolism]  
**COG0568** (4) DNA-directed RNA polymerase, sigma subunit (sigma70/sigma32) [Transcription]  
**COG0739** (2) Murein DD-endopeptidase MepM and murein hydrolase activator NlpD, contain LysM domain [Cell wall/membrane/envelope biogenesis]  
**COG0789** (1) DNA-binding transcriptional regulator, MerR family [Transcription]  
**COG1238** (3) Uncharacterized membrane protein YqaA, SNARE-associated domain [Function unknown]  
**COG1354** (1) Chromatin segregation and condensation protein Rec8/ScpA/Sccl, kleisin family





env-104 CACAAUUGUCGAGUCGCGGAUCAUAAAAUACAGUUGCCUGAUUCCUUAACAAGGGAACCGCAACUCGGCUUA  
env-106 GUGCACAAGGCGGAUCGCGCAAACAUACAGUCGCCUUAUCCUUAUCUGUAACCGGUAACGGAACCCAGUUUCGGCUUA  
env-107 .....

alignment positions 78 .. 216

```

env-1 ACCCCGUAACUGGGGGG . . . AUACGGUCCCCUCUCAGAUCGG . . . CGAGCGCU . . . UUU . . . GGCCUUG . . . . . ACAAAUUAACCUAAGGAGAAAGAG . . . AUG
env-2 UUUUCGUAACUGGGGG . . . ACCAUUCCCCUCGAGAUCGGCAAGCGCGCAUUGUGCGAG . . . AAGAUG . . . UAUU . . . CAUUUU . . . . . AAAGAUAGAAGGAAGGAAGAG . . . AUG
env-3 CGCUGCAAUCUGGGGG . . . ACGAUUCCCCUCGAGAUCGGCCA . . . CGGC . . . AAAU . . . GCGG . . . . . AAACCAUUUAGAGAGAAAGGCAAGUGAG . . . AUG
env-6 CGGUUGGAAUCUGGGGG . . . ACAUUCCCUCGAGAUCGGCCA . . . CGGC . . . AGUU . . . GCGG . . . . . AAAAAUAUUCAUUGAGAAGGAGCAAGCGAG . . . AUG
env-7 AGUUGGAAUCUGGGGG . . . ACAUUCCCUCGAGAUCGGCCA . . . CGGC . . . AGAU . . . GCGG . . . . . AAAAAUAUUUAGAGAAGGCAAGUGAG . . . AUG
Pse-1 UGUUGGAAUCUGGGGG . . . ACA UCCCUCGAGAUCGGCCG . . . CGGC . . . AUA . . . GCGG . . . . . AAACAUAUUUAGAGAAGGAGCAAGUGAG . . . AUG
env-8 UGUUGGAAUCUGGGGG . . . AUA UCCCUCGAGAUCGGCCG . . . CGGC . . . AUAU . . . GCGG . . . . . AAACAUAUUUAGAGAAGGCAAGUGAG . . . AUG
env-9 UGUUGGAAUCUGGGGG . . . AUA UCCCUCGAGAUCGGCCG . . . CGGC . . . AUA . . . GCGG . . . . . AAACAUAUUUAGAGAAGGAGCAAGUGAG . . . AUG
env-11 UGCUGGAAUCUGGGGG . . . ACAUUCCCUCGAGAUCGGCCG . . . CGGC . . . UUAU . . . GCGG . . . . . AAAAAUAUAUUUAGAGAAGGCAAGAGAG . . . AUG
Gel-1-1 ACCUUGGAAUCUGGGGG . . . ACCAUCCCCUCGAGAUCGGCA . . . CGGU . . . CUUA . . . ACCGAAUCUUUAAAUAUUUACCCAAAGGAGGCAAGAGAG . . . AUG
env-12 UAGUCGAAUCUGGGGGACAUUUUCAGUCCCCUCAGAUCGGCGAAUACACAGA . . . . . UUA . . . AAAC . . . UGA . . . . . AGGAGGAGAU . . . AUG
env-13 CAUCCCGAAUCUGGAGG . . . AACGG . . . CCCUUGCGAUCGGCAAA . . . . . UUA . . . AAAC . . . UGA . . . . . AGGAGUCAAAG . . . AUG
env-14 CAUCCCGAAUCUGGAGG . . . AACGG . . . CCCUUGCGAUCGGCAAA . . . . . UUA . . . AAAC . . . UGA . . . . . AGGAGUCAAAG . . . AUG
env-15 CAUCCCGAAUCUGGAGG . . . AACGG . . . CCCUUGCGAUCGGCAAA . . . . . UUA . . . AAAC . . . UGA . . . . . AGGAGUCAAAG . . . AUG
env-16 CAUCCCGAAUCUGGAGG . . . AACGG . . . CCCUUGCGAUCGGCAAA . . . . . UUA . . . AAAC . . . UGA . . . . . AGGAGUCAAAG . . . AUG
env-17 CCCAAAGAACCUAGG . . . AAAUUGUCCCCUUAGGAUCGGUAAUUAACCAAUA . . . . . UUA . . . AAAC . . . UGA . . . . . AGGAGUCAAAG . . . AUG
env-18 AUGCAAAGAACCUAGG . . . AAAUUGUCCCCUUAGGAUCGGUAAUUAACCAAUA . . . . . UUA . . . AAAC . . . UGA . . . . . AGGAGUCAAAG . . . AUG
env-19 AUGCAAAGAACCUAGG . . . AAAUUGUCCCCUUAGGAUCGGUAAUUAACCAAUA . . . . . UUA . . . AAAC . . . UGA . . . . . AGGAGUCAAAG . . . AUG
env-20 AUGCAAAGAACCUAGG . . . AAAUUGUCCCCUUAGGAUCGGUAAUUAACCAAUA . . . . . UUA . . . AAAC . . . UGA . . . . . AGGAGUCAAAG . . . AUG
env-21 AUGCAAAGAACCUAGG . . . AAAUUGUCCCCUUAGGAUCGGUAAUUAACCAAUA . . . . . UUA . . . AAAC . . . UGA . . . . . AGGAGUCAAAG . . . AUG
Ppr-1-1 ACCCCAAAGAACCAGG . . . ACAGUCCCCCUUAGGAUCGGCAAA . . . . . AUU . . . CAU . . . GAU . . . . . CAAGGAGUAGAA . . . AUG
env-23 CAGCCAAAGAACCUAGG . . . AACGG . . . CCCUUGCGAUCGGUAAUUAACCAAUA . . . . . AUU . . . CAU . . . GAU . . . . . CAAAGGAGUAGAA . . . AUG
env-24 GAGCCAAAGAACCUAGG . . . AAAUUGUCCCCUUAGGAUCGGUAAUUAACCAAUA . . . . . AUU . . . CAU . . . GAU . . . . . CAAAGGAGUAGAA . . . AUG
env-25 GAGCCAAAGAACCUAGG . . . AACGG . . . CCCUUGCGAUCGGUAAUUAACCAAUA . . . . . AUU . . . CAU . . . GAU . . . . . CAAAGGAGUAGAA . . . AUG
env-26 GAGCCAAAGAACCUAGG . . . AACGG . . . CCCUUGCGAUCGGUAAUUAACCAAUA . . . . . AUU . . . CAU . . . GAU . . . . . CAAAGGAGUAGAA . . . AUG
env-27 GAGCCAAAGAACCUAGG . . . AACGG . . . CCCUUGCGAUCGGUAAUUAACCAAUA . . . . . AUU . . . CAU . . . GAU . . . . . CAAAGGAGUAGAA . . . AUG
env-28 GAGCCAAAGAACCUAGG . . . AACGG . . . CCCUUGCGAUCGGUAAUUAACCAAUA . . . . . AUU . . . CAU . . . GAU . . . . . CAAAGGAGUAGAA . . . AUG

```

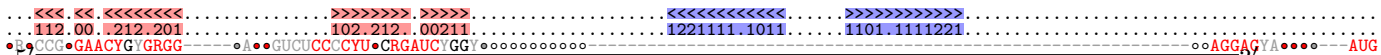





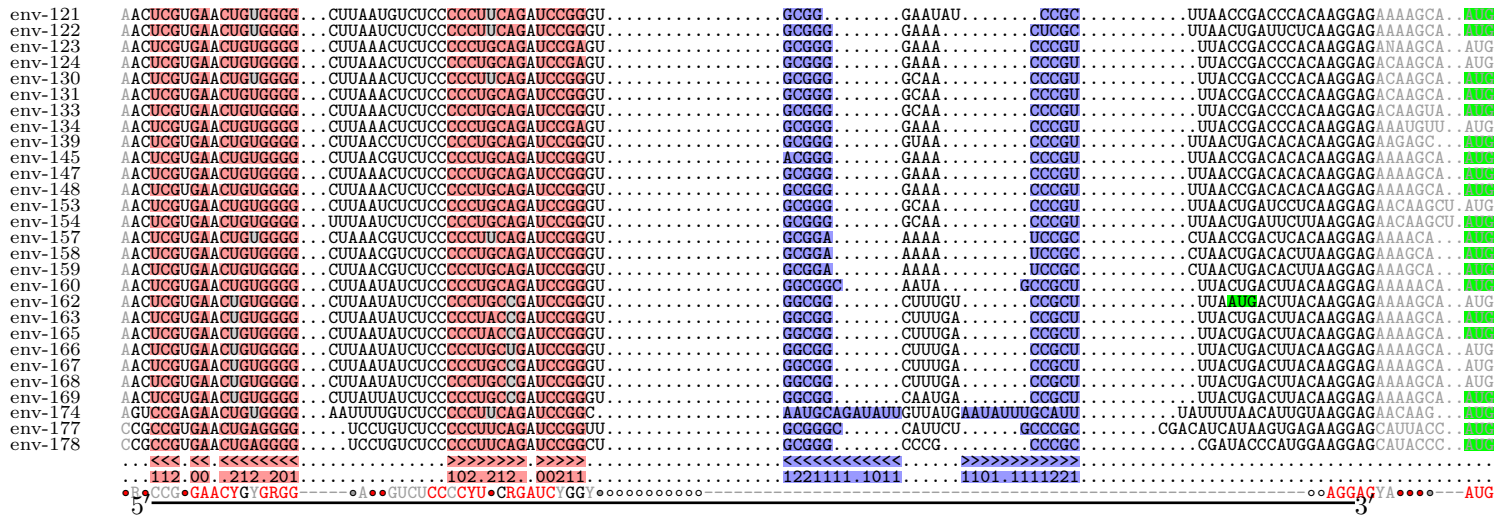

## 8 L25-Gammaproteobacteria

### 8.1 Taxa

The taxonomy of each organism containing a putative L25-Gammaproteobacteria RNA is listed, with abbreviations identifying each hit (e.g., “Eco-1-1” and “Eco-1-2” might hypothetically represent two distinct RNAs in *E. coli*). The abbreviations will be used to identify each individual L25-Gammaproteobacteria RNA in Sections ?? and 8.2:.

| abbrev. of hits    | taxonomy of species                                                                                                                                                                |
|--------------------|------------------------------------------------------------------------------------------------------------------------------------------------------------------------------------|
| Sen-1-1            | AKU_12601Bacteria Proteobacteria Gammaproteobacteria Enterobacteriales Enterobacteriaceae <i>Salmonella enterica subsp. enterica serovar Paratyphi A</i>                           |
| bsy-1-1            | str Bacteria bacteria symbiont BFo1 of <i>Frankliniella occidentalis</i>                                                                                                           |
| bsy-2-1            | Bacteria bacteria symbiont BFo2 of <i>Frankliniella occidentalis</i>                                                                                                               |
| Baq-1-1            | Bacteria Proteobacteria Gammaproteobacteria Enterobacteriales Budviciaceae <i>Budvicia aquatica</i> DSM 5075 = ATCC 35567                                                          |
| Lgr-1-1 to Lgr-1-2 | Bacteria Proteobacteria Gammaproteobacteria Enterobacteriales Budviciaceae <i>Leminorella grimontii</i> ATCC 33999 = DSM 5078                                                      |
| Pfo-1-1            | Bacteria Proteobacteria Gammaproteobacteria Enterobacteriales Budviciaceae <i>Pragia fontium</i>                                                                                   |
| Bag-1-1            | Bacteria Proteobacteria Gammaproteobacteria Enterobacteriales Enterobacteriaceae <i>Buttiauxella agrestis</i>                                                                      |
| Bag-2-1            | Bacteria Proteobacteria Gammaproteobacteria Enterobacteriales Enterobacteriaceae <i>Buttiauxella agrestis</i> ATCC 33320                                                           |
| Cne-1-1 to Cne-1-3 | Bacteria Proteobacteria Gammaproteobacteria Enterobacteriales Enterobacteriaceae <i>Cedecea neteri</i>                                                                             |
| Cam-1-1 to Cam-1-3 | Bacteria Proteobacteria Gammaproteobacteria Enterobacteriales Enterobacteriaceae <i>Citrobacter amalonaticus</i>                                                                   |
| Cam-2-1            | Bacteria Proteobacteria Gammaproteobacteria Enterobacteriales Enterobacteriaceae <i>Citrobacter amalonaticus</i> Y19                                                               |
| Cfa-1-1            | Bacteria Proteobacteria Gammaproteobacteria Enterobacteriales Enterobacteriaceae <i>Citrobacter farmeri</i> GTC 1319                                                               |
| Cbr-1-1 to Cbr-1-6 | Bacteria Proteobacteria Gammaproteobacteria Enterobacteriales Enterobacteriaceae <i>Citrobacter Citrobacter freundii</i> complex <i>Citrobacter braakii</i>                        |
| Cfr-1-1 to Cfr-1-4 | Bacteria Proteobacteria Gammaproteobacteria Enterobacteriales Enterobacteriaceae <i>Citrobacter Citrobacter freundii</i> complex <i>Citrobacter freundii</i>                       |
| Cfr-2-1 to Cfr-2-2 | Bacteria Proteobacteria Gammaproteobacteria Enterobacteriales Enterobacteriaceae <i>Citrobacter Citrobacter freundii</i> complex <i>Citrobacter freundii</i> ATCC 8090 = MTCC 1658 |
| Cfr-3-1            | Bacteria Proteobacteria Gammaproteobacteria Enterobacteriales Enterobacteriaceae <i>Citrobacter Citrobacter freundii</i> complex <i>Citrobacter freundii</i> CFNIH1                |
| Cfr-4-1            | Bacteria Proteobacteria Gammaproteobacteria Enterobacteriales Enterobacteriaceae <i>Citrobacter Citrobacter freundii</i> complex <i>Citrobacter freundii</i> MGH 56                |
| Cfr-5-1            | Bacteria Proteobacteria Gammaproteobacteria Enterobacteriales Enterobacteriaceae <i>Citrobacter Citrobacter freundii</i> complex <i>Citrobacter freundii</i> NBRC 12681            |
| Cfr-6-1            | Bacteria Proteobacteria Gammaproteobacteria Enterobacteriales Enterobacteriaceae <i>Citrobacter Citrobacter freundii</i> complex <i>Citrobacter freundii</i> RLS1                  |

|                     |          |                |                     |                  |                    |              |                                                              |                                                           |
|---------------------|----------|----------------|---------------------|------------------|--------------------|--------------|--------------------------------------------------------------|-----------------------------------------------------------|
| Cfr-7-1             | Bacteria | Proteobacteria | Gammaproteobacteria | Enterobacterales | Enterobacteriaceae | Citrobacter  | Citrobacter freundii complex                                 | <i>Citrobacter freundii</i> UCI 31                        |
| Cfr-8-1             | Bacteria | Proteobacteria | Gammaproteobacteria | Enterobacterales | Enterobacteriaceae | Citrobacter  | Citrobacter freundii complex                                 | <i>Citrobacter freundii</i> UCI 32                        |
| Cse-1-1             | Bacteria | Proteobacteria | Gammaproteobacteria | Enterobacterales | Enterobacteriaceae | Citrobacter  | Citrobacter freundii complex                                 | <i>Citrobacter sedlakii</i> NBRC 105722                   |
| Csp-1-1             | Bacteria | Proteobacteria | Gammaproteobacteria | Enterobacterales | Enterobacteriaceae | Citrobacter  | Citrobacter freundii complex                                 | <i>Citrobacter sp.</i> BIDMC107                           |
| Csp-2-1             | Bacteria | Proteobacteria | Gammaproteobacteria | Enterobacterales | Enterobacteriaceae | Citrobacter  | Citrobacter freundii complex                                 | <i>Citrobacter sp.</i> BIDMC108                           |
| Csp-3-1             | Bacteria | Proteobacteria | Gammaproteobacteria | Enterobacterales | Enterobacteriaceae | Citrobacter  | Citrobacter freundii complex                                 | <i>Citrobacter sp.</i> MGH100                             |
| Csp-4-1             | Bacteria | Proteobacteria | Gammaproteobacteria | Enterobacterales | Enterobacteriaceae | Citrobacter  | Citrobacter freundii complex                                 | <i>Citrobacter sp.</i> MGH103                             |
| Csp-5-1             | Bacteria | Proteobacteria | Gammaproteobacteria | Enterobacterales | Enterobacteriaceae | Citrobacter  | Citrobacter freundii complex                                 | <i>Citrobacter sp.</i> MGH104                             |
| Csp-6-1             | Bacteria | Proteobacteria | Gammaproteobacteria | Enterobacterales | Enterobacteriaceae | Citrobacter  | Citrobacter freundii complex                                 | <i>Citrobacter sp.</i> MGH105                             |
| Csp-7-1             | Bacteria | Proteobacteria | Gammaproteobacteria | Enterobacterales | Enterobacteriaceae | Citrobacter  | Citrobacter freundii complex                                 | <i>Citrobacter sp.</i> MGH106                             |
| Csp-8-1             | Bacteria | Proteobacteria | Gammaproteobacteria | Enterobacterales | Enterobacteriaceae | Citrobacter  | Citrobacter freundii complex                                 | <i>Citrobacter sp.</i> MGH109                             |
| Csp-9-1             | Bacteria | Proteobacteria | Gammaproteobacteria | Enterobacterales | Enterobacteriaceae | Citrobacter  | Citrobacter freundii complex                                 | <i>Citrobacter sp.</i> MGH110                             |
| Csp-10-1            | Bacteria | Proteobacteria | Gammaproteobacteria | Enterobacterales | Enterobacteriaceae | Citrobacter  | Citrobacter freundii complex                                 | <i>Citrobacter sp.</i> MGH99                              |
| Cwe-1-1             | Bacteria | Proteobacteria | Gammaproteobacteria | Enterobacterales | Enterobacteriaceae | Citrobacter  | Citrobacter freundii complex                                 | <i>Citrobacter werkmanii</i> NBRC 105721                  |
| Cko-1-1 to Cko-1-2  | Bacteria | Proteobacteria | Gammaproteobacteria | Enterobacterales | Enterobacteriaceae |              | <i>Citrobacter koseri</i>                                    |                                                           |
| Cpa-1-1             | Bacteria | Proteobacteria | Gammaproteobacteria | Enterobacterales | Enterobacteriaceae |              | <i>Citrobacter pasteurii</i>                                 |                                                           |
| Cro-1-1             | Bacteria | Proteobacteria | Gammaproteobacteria | Enterobacterales | Enterobacteriaceae |              | <i>Citrobacter rodentium</i>                                 |                                                           |
| Cro-2-1             | Bacteria | Proteobacteria | Gammaproteobacteria | Enterobacterales | Enterobacteriaceae |              | <i>Citrobacter rodentium</i> NBRC 105723                     |                                                           |
| Csp-11-1            | Bacteria | Proteobacteria | Gammaproteobacteria | Enterobacterales | Enterobacteriaceae |              | <i>Citrobacter sp.</i> JT3                                   |                                                           |
| Csp-12-1            | Bacteria | Proteobacteria | Gammaproteobacteria | Enterobacterales | Enterobacteriaceae |              | <i>Citrobacter sp.</i> MGH 55                                |                                                           |
| Csp-13-1            | Bacteria | Proteobacteria | Gammaproteobacteria | Enterobacterales | Enterobacteriaceae |              | <i>Citrobacter sp.</i> S-77                                  |                                                           |
| Cdu-1-1             | Bacteria | Proteobacteria | Gammaproteobacteria | Enterobacterales | Enterobacteriaceae |              | <i>Cronobacter dublinensis subsp. dublinensis</i> LMG 23823  |                                                           |
| Cdu-2-1             | Bacteria | Proteobacteria | Gammaproteobacteria | Enterobacterales | Enterobacteriaceae |              | <i>Cronobacter dublinensis subsp. lactaridi</i> LMG 23825    |                                                           |
| Cdu-3-1             | Bacteria | Proteobacteria | Gammaproteobacteria | Enterobacterales | Enterobacteriaceae |              | <i>Cronobacter dublinensis subsp. lausannensis</i> LMG 23824 |                                                           |
| Cma-1-1 to Cma-1-5  | Bacteria | Proteobacteria | Gammaproteobacteria | Enterobacterales | Enterobacteriaceae |              | <i>Cronobacter malonaticus</i>                               |                                                           |
| Cma-2-1             | Bacteria | Proteobacteria | Gammaproteobacteria | Enterobacterales | Enterobacteriaceae |              | <i>Cronobacter malonaticus</i> ENBT0334                      |                                                           |
| Cma-3-1             | Bacteria | Proteobacteria | Gammaproteobacteria | Enterobacterales | Enterobacteriaceae |              | <i>Cronobacter malonaticus</i> LMG 23826                     |                                                           |
| Cmu-1-1             | Bacteria | Proteobacteria | Gammaproteobacteria | Enterobacterales | Enterobacteriaceae |              | <i>Cronobacter muytjensii</i> ATCC 51329                     |                                                           |
| Csa-1-1             | Bacteria | Proteobacteria | Gammaproteobacteria | Enterobacterales | Enterobacteriaceae |              | <i>Cronobacter sakazakii</i>                                 |                                                           |
| Csa-2-1             | Bacteria | Proteobacteria | Gammaproteobacteria | Enterobacterales | Enterobacteriaceae |              | <i>Cronobacter sakazakii</i> 2151                            |                                                           |
| Csa-3-1             | Bacteria | Proteobacteria | Gammaproteobacteria | Enterobacterales | Enterobacteriaceae |              | <i>Cronobacter sakazakii</i> 8399                            |                                                           |
| Csa-4-1             | Bacteria | Proteobacteria | Gammaproteobacteria | Enterobacterales | Enterobacteriaceae |              | <i>Cronobacter sakazakii</i> E764                            |                                                           |
| Csa-5-1             | Bacteria | Proteobacteria | Gammaproteobacteria | Enterobacterales | Enterobacteriaceae |              | <i>Cronobacter sakazakii</i> ES35                            |                                                           |
| Csa-6-1             | Bacteria | Proteobacteria | Gammaproteobacteria | Enterobacterales | Enterobacteriaceae |              | <i>Cronobacter sakazakii</i> ES713                           |                                                           |
| Csa-7-1             | Bacteria | Proteobacteria | Gammaproteobacteria | Enterobacterales | Enterobacteriaceae |              | <i>Cronobacter sakazakii</i> NBRC 102416                     |                                                           |
| Csa-8-1             | Bacteria | Proteobacteria | Gammaproteobacteria | Enterobacterales | Enterobacteriaceae |              | <i>Cronobacter sakazakii</i> NCIMB 8272                      |                                                           |
| Ctu-1-1             | Bacteria | Proteobacteria | Gammaproteobacteria | Enterobacterales | Enterobacteriaceae |              | <i>Cronobacter turicensis</i> z508                           |                                                           |
| Ctu-2-1             | Bacteria | Proteobacteria | Gammaproteobacteria | Enterobacterales | Enterobacteriaceae |              | <i>Cronobacter turicensis</i> z610                           |                                                           |
| Cun-1-1 to Cun-1-2  | Bacteria | Proteobacteria | Gammaproteobacteria | Enterobacterales | Enterobacteriaceae |              | <i>Cronobacter universalis</i> NCTC 9529                     |                                                           |
| Eas-1-1 to Eas-1-2  | Bacteria | Proteobacteria | Gammaproteobacteria | Enterobacterales | Enterobacteriaceae | Enterobacter | Enterobacter cloacae complex                                 | <i>Enterobacter asburiae</i>                              |
| Eas-2-1             | Bacteria | Proteobacteria | Gammaproteobacteria | Enterobacterales | Enterobacteriaceae | Enterobacter | Enterobacter cloacae complex                                 | <i>Enterobacter asburiae</i> C1                           |
| Eas-3-1             | Bacteria | Proteobacteria | Gammaproteobacteria | Enterobacterales | Enterobacteriaceae | Enterobacter | Enterobacter cloacae complex                                 | <i>Enterobacter asburiae</i> L1                           |
| Eca-1-1             | Bacteria | Proteobacteria | Gammaproteobacteria | Enterobacterales | Enterobacteriaceae | Enterobacter | Enterobacter cloacae complex                                 | <i>Enterobacter cancerogenus</i>                          |
| Eca-2-1             | Bacteria | Proteobacteria | Gammaproteobacteria | Enterobacterales | Enterobacteriaceae | Enterobacter | Enterobacter cloacae complex                                 | <i>Enterobacter cancerogenus</i>                          |
| Ecl-1-1 to Ecl-1-12 |          |                |                     |                  |                    |              |                                                              | YZ1                                                       |
| Ecl-2-1             | Bacteria | Proteobacteria | Gammaproteobacteria | Enterobacterales | Enterobacteriaceae | Enterobacter | Enterobacter cloacae complex                                 | <i>Enterobacter cloacae</i>                               |
|                     | Bacteria | Proteobacteria | Gammaproteobacteria | Enterobacterales | Enterobacteriaceae | Enterobacter | Enterobacter cloacae complex                                 | <i>Enterobacter cloacae</i> 'Hoffmann cluster III' MGH 13 |
| Ecl-3-1             | Bacteria | Proteobacteria | Gammaproteobacteria | Enterobacterales | Enterobacteriaceae | Enterobacter | Enterobacter cloacae complex                                 | <i>Enterobacter cloacae</i> BIDMC 33A                     |
| Ecl-4-1             | Bacteria | Proteobacteria | Gammaproteobacteria | Enterobacterales | Enterobacteriaceae | Enterobacter | Enterobacter cloacae complex                                 | <i>Enterobacter cloacae</i> BIDMC 66                      |
| Ecl-5-1             | Bacteria | Proteobacteria | Gammaproteobacteria | Enterobacterales | Enterobacteriaceae | Enterobacter | Enterobacter cloacae complex                                 | <i>Enterobacter cloacae</i> BIDMC 67                      |
| Ecl-6-1             | Bacteria | Proteobacteria | Gammaproteobacteria | Enterobacterales | Enterobacteriaceae | Enterobacter | Enterobacter cloacae complex                                 | <i>Enterobacter cloacae</i> BIDMC 8                       |
| Ecl-7-1             | Bacteria | Proteobacteria | Gammaproteobacteria | Enterobacterales | Enterobacteriaceae | Enterobacter | Enterobacter cloacae complex                                 | <i>Enterobacter cloacae</i> BWH 43                        |















































|                      |          |                |                     |                   |                    |                                                    |                            |
|----------------------|----------|----------------|---------------------|-------------------|--------------------|----------------------------------------------------|----------------------------|
| Ksp-3-1              | Bacteria | Proteobacteria | Gammaproteobacteria | Enterobacteriales | Enterobacteriaceae | <i>Klebsiella sp.</i>                              | RIT-PI-d                   |
| Kva-1-1 to Kva-1-7   | Bacteria | Proteobacteria | Gammaproteobacteria | Enterobacteriales | Enterobacteriaceae | <i>Klebsiella variicola</i>                        |                            |
| Kas-1-1              | Bacteria | Proteobacteria | Gammaproteobacteria | Enterobacteriales | Enterobacteriaceae | <i>Kluyvera ascorbata</i>                          | ATCC 33433                 |
| Kcr-1-1              | Bacteria | Proteobacteria | Gammaproteobacteria | Enterobacteriales | Enterobacteriaceae | <i>Kluyvera cryocrescens</i>                       |                            |
| Kor-1-1              | Bacteria | Proteobacteria | Gammaproteobacteria | Enterobacteriales | Enterobacteriaceae | <i>Kosakonia oryzae</i>                            |                            |
| Kra-1-1              | Bacteria | Proteobacteria | Gammaproteobacteria | Enterobacteriales | Enterobacteriaceae | <i>Kosakonia radicumcicans</i>                     | UMEnt01/12                 |
| Kra-2-1              | Bacteria | Proteobacteria | Gammaproteobacteria | Enterobacteriales | Enterobacteriaceae | <i>Kosakonia radicumcicans</i>                     | YD4                        |
| Lad-1-1 to Lad-1-2   | Bacteria | Proteobacteria | Gammaproteobacteria | Enterobacteriales | Enterobacteriaceae | <i>Leclercia adecarboxylata</i>                    |                            |
| Lad-2-1              | Bacteria | Proteobacteria | Gammaproteobacteria | Enterobacteriales | Enterobacteriaceae | <i>Leclercia adecarboxylata</i>                    | ATCC 23216 = NBRC 102595   |
| Lsp-1-1              | Bacteria | Proteobacteria | Gammaproteobacteria | Enterobacteriales | Enterobacteriaceae | <i>Leclercia sp.</i>                               | LK8                        |
| Lam-1-1              | Bacteria | Proteobacteria | Gammaproteobacteria | Enterobacteriales | Enterobacteriaceae | <i>Lelliottia amnigena</i>                         | CHS 78                     |
| Msp-1-1              | Bacteria | Proteobacteria | Gammaproteobacteria | Enterobacteriales | Enterobacteriaceae | <i>Mangrovibacter sp.</i>                          | MFB070                     |
| Mma-1-1              | Bacteria | Proteobacteria | Gammaproteobacteria | Enterobacteriales | Enterobacteriaceae | <i>Metakosakonia massiliensis</i>                  | JC163                      |
| Pge-1-1              | Bacteria | Proteobacteria | Gammaproteobacteria | Enterobacteriales | Enterobacteriaceae | <i>Pluralibacter gergoviae</i>                     |                            |
| Pvu-1-1              | Bacteria | Proteobacteria | Gammaproteobacteria | Enterobacteriales | Enterobacteriaceae | <i>Pseudeschherichia vulneris</i>                  | NBRC 102420                |
| Ror-1-1              | Bacteria | Proteobacteria | Gammaproteobacteria | Enterobacteriales | Enterobacteriaceae | <i>Raoultella ornithinolytica</i>                  |                            |
| Ror-2-1              | Bacteria | Proteobacteria | Gammaproteobacteria | Enterobacteriales | Enterobacteriaceae | <i>Raoultella ornithinolytica</i>                  | 2-156-04.S1.C1             |
| Ror-3-1              | Bacteria | Proteobacteria | Gammaproteobacteria | Enterobacteriales | Enterobacteriaceae | <i>Raoultella ornithinolytica</i>                  | 2-156-04.S1.C2             |
| Ror-4-1 to Ror-4-2   | Bacteria | Proteobacteria | Gammaproteobacteria | Enterobacteriales | Enterobacteriaceae | <i>Raoultella ornithinolytica</i>                  | B6                         |
| Rpl-1-1 to Rpl-1-3   | Bacteria | Proteobacteria | Gammaproteobacteria | Enterobacteriales | Enterobacteriaceae | <i>Raoultella planticola</i>                       |                            |
| Rpl-2-1              | Bacteria | Proteobacteria | Gammaproteobacteria | Enterobacteriales | Enterobacteriaceae | <i>Raoultella planticola</i>                       | ATCC 33531                 |
| Rte-1-1              | Bacteria | Proteobacteria | Gammaproteobacteria | Enterobacteriales | Enterobacteriaceae | <i>Raoultella terrigena</i>                        |                            |
| Sbo-1-1              | Bacteria | Proteobacteria | Gammaproteobacteria | Enterobacteriales | Enterobacteriaceae | <i>Salmonella bongori serovar</i>                  | 48:z41:- str. RKS3044      |
| Sen-2-1 to Sen-2-2   | Bacteria | Proteobacteria | Gammaproteobacteria | Enterobacteriales | Enterobacteriaceae | <i>Salmonella enterica</i>                         |                            |
| Sen-3-1              | Bacteria | Proteobacteria | Gammaproteobacteria | Enterobacteriales | Enterobacteriaceae | <i>Salmonella enterica subsp. arizonae serovar</i> | 62:z36:- str. RKS2983      |
| Sen-4-1              | Bacteria | Proteobacteria | Gammaproteobacteria | Enterobacteriales | Enterobacteriaceae | <i>Salmonella enterica subsp. enterica</i>         |                            |
| Sen-5-1 to Sen-5-6   | Bacteria | Proteobacteria | Gammaproteobacteria | Enterobacteriales | Enterobacteriaceae | <i>Salmonella enterica subsp. enterica serovar</i> | 4,12:i:-                   |
| Sen-6-1 to Sen-6-5   | Bacteria | Proteobacteria | Gammaproteobacteria | Enterobacteriales | Enterobacteriaceae | <i>Salmonella enterica subsp. enterica serovar</i> | 4,5,12:i:-                 |
| Sen-7-1 to Sen-7-3   | Bacteria | Proteobacteria | Gammaproteobacteria | Enterobacteriales | Enterobacteriaceae | <i>Salmonella enterica subsp. enterica serovar</i> | 4,[5],12:i:-               |
| Sen-8-1              | Bacteria | Proteobacteria | Gammaproteobacteria | Enterobacteriales | Enterobacteriaceae | <i>Salmonella enterica subsp. enterica serovar</i> | 8,(20):-:z6                |
| Sen-9-1              | Bacteria | Proteobacteria | Gammaproteobacteria | Enterobacteriales | Enterobacteriaceae | <i>Salmonella enterica subsp. enterica serovar</i> | 9,12:l,v:- str. 94293      |
| Sen-10-1             | Bacteria | Proteobacteria | Gammaproteobacteria | Enterobacteriales | Enterobacteriaceae | <i>Salmonella enterica subsp. enterica serovar</i> | Abaetetuba str. ATCC 35640 |
| Sen-11-1             | Bacteria | Proteobacteria | Gammaproteobacteria | Enterobacteriales | Enterobacteriaceae | <i>Salmonella enterica subsp. enterica serovar</i> | Abony str. 0014            |
| Sen-12-1 to Sen-12-3 | Bacteria | Proteobacteria | Gammaproteobacteria | Enterobacteriales | Enterobacteriaceae | <i>Salmonella enterica subsp. enterica serovar</i> | Agona                      |
| Sen-13-1             | Bacteria | Proteobacteria | Gammaproteobacteria | Enterobacteriales | Enterobacteriaceae | <i>Salmonella enterica subsp. enterica serovar</i> | Agona str. 460004 2-1      |
| Sen-14-1 to Sen-14-4 | Bacteria | Proteobacteria | Gammaproteobacteria | Enterobacteriales | Enterobacteriaceae | <i>Salmonella enterica subsp. enterica serovar</i> | Albany                     |
| Sen-15-1 to Sen-15-3 | Bacteria | Proteobacteria | Gammaproteobacteria | Enterobacteriales | Enterobacteriaceae | <i>Salmonella enterica subsp. enterica serovar</i> | Anatum                     |
| Sen-16-1             | Bacteria | Proteobacteria | Gammaproteobacteria | Enterobacteriales | Enterobacteriaceae | <i>Salmonella enterica subsp. enterica serovar</i> | Anatum str. 06-0532        |
| Sen-17-1             | Bacteria | Proteobacteria | Gammaproteobacteria | Enterobacteriales | Enterobacteriaceae | <i>Salmonella enterica subsp. enterica serovar</i> | Anatum str. ATCC BAA-1592  |
| Sen-18-1             | Bacteria | Proteobacteria | Gammaproteobacteria | Enterobacteriales | Enterobacteriaceae | <i>Salmonella enterica subsp. enterica serovar</i> | Aqua str. NVSL2001         |
| Sen-19-1             | Bacteria | Proteobacteria | Gammaproteobacteria | Enterobacteriales | Enterobacteriaceae | <i>Salmonella enterica subsp. enterica serovar</i> | Bareilly str. 07-0873      |
| Sen-20-1             | Bacteria | Proteobacteria | Gammaproteobacteria | Enterobacteriales | Enterobacteriaceae | <i>Salmonella enterica subsp. enterica serovar</i> | Bareilly str. CFSAN000178  |
| Sen-21-1             | Bacteria | Proteobacteria | Gammaproteobacteria | Enterobacteriales | Enterobacteriaceae | <i>Salmonella enterica subsp. enterica serovar</i> | Bareilly str. CFSAN000179  |
| Sen-22-1             | Bacteria | Proteobacteria | Gammaproteobacteria | Enterobacteriales | Enterobacteriaceae | <i>Salmonella enterica subsp. enterica serovar</i> | Bareilly str. CFSAN000180  |
| Sen-23-1             | Bacteria | Proteobacteria | Gammaproteobacteria | Enterobacteriales | Enterobacteriaceae | <i>Salmonella enterica subsp. enterica serovar</i> | Bareilly str. CFSAN000181  |
| Sen-24-1             | Bacteria | Proteobacteria | Gammaproteobacteria | Enterobacteriales | Enterobacteriaceae | <i>Salmonella enterica subsp. enterica serovar</i> | Bareilly str. CFSAN000182  |
| Sen-25-1             | Bacteria | Proteobacteria | Gammaproteobacteria | Enterobacteriales | Enterobacteriaceae | <i>Salmonella enterica subsp. enterica serovar</i> | Bareilly str. CFSAN000184  |
| Sen-26-1             | Bacteria | Proteobacteria | Gammaproteobacteria | Enterobacteriales | Enterobacteriaceae | <i>Salmonella enterica subsp. enterica serovar</i> | Bareilly str. CFSAN000185  |
| Sen-27-1             | Bacteria | Proteobacteria | Gammaproteobacteria | Enterobacteriales | Enterobacteriaceae | <i>Salmonella enterica subsp. enterica serovar</i> | Bareilly str. CFSAN000186  |
| Sen-28-1             | Bacteria | Proteobacteria | Gammaproteobacteria | Enterobacteriales | Enterobacteriaceae | <i>Salmonella enterica subsp. enterica serovar</i> | Bareilly str. CFSAN000187  |
| Sen-29-1             | Bacteria | Proteobacteria | Gammaproteobacteria | Enterobacteriales | Enterobacteriaceae | <i>Salmonella enterica subsp. enterica serovar</i> | Bareilly str. CFSAN000188  |
| Sen-30-1             | Bacteria | Proteobacteria | Gammaproteobacteria | Enterobacteriales | Enterobacteriaceae | <i>Salmonella enterica subsp. enterica serovar</i> | Bareilly str. CFSAN000190  |
| Sen-31-1             | Bacteria | Proteobacteria | Gammaproteobacteria | Enterobacteriales | Enterobacteriaceae | <i>Salmonella enterica subsp. enterica serovar</i> | Bareilly str. CFSAN000191  |
| Sen-32-1             | Bacteria | Proteobacteria | Gammaproteobacteria | Enterobacteriales | Enterobacteriaceae | <i>Salmonella enterica subsp. enterica serovar</i> | Bareilly str. CFSAN000192  |
| Sen-33-1             | Bacteria | Proteobacteria | Gammaproteobacteria | Enterobacteriales | Enterobacteriaceae | <i>Salmonella enterica subsp. enterica serovar</i> | Bareilly str. CFSAN000193  |
| Sen-34-1             | Bacteria | Proteobacteria | Gammaproteobacteria | Enterobacteriales | Enterobacteriaceae | <i>Salmonella enterica subsp. enterica serovar</i> | Bareilly str. CFSAN000194  |
| Sen-35-1             | Bacteria | Proteobacteria | Gammaproteobacteria | Enterobacteriales | Enterobacteriaceae | <i>Salmonella enterica subsp. enterica serovar</i> | Bareilly str. CFSAN000195  |
| Sen-36-1             | Bacteria | Proteobacteria | Gammaproteobacteria | Enterobacteriales | Enterobacteriaceae | <i>Salmonella enterica subsp. enterica serovar</i> | Bareilly str. CFSAN000196  |
| Sen-37-1             | Bacteria | Proteobacteria | Gammaproteobacteria | Enterobacteriales | Enterobacteriaceae | <i>Salmonella enterica subsp. enterica serovar</i> | Bareilly str. CFSAN000198  |
| Sen-38-1             | Bacteria | Proteobacteria | Gammaproteobacteria | Enterobacteriales | Enterobacteriaceae | <i>Salmonella enterica subsp. enterica serovar</i> | Bareilly str. CFSAN000199  |
| Sen-39-1             | Bacteria | Proteobacteria | Gammaproteobacteria | Enterobacteriales | Enterobacteriaceae | <i>Salmonella enterica subsp. enterica serovar</i> | Bareilly str. CFSAN000201  |
| Sen-40-1             | Bacteria | Proteobacteria | Gammaproteobacteria | Enterobacteriales | Enterobacteriaceae | <i>Salmonella enterica subsp. enterica serovar</i> | Bareilly str. CFSAN000202  |













|                       |          |                |                     |                   |                    |                                    |                                                                   |
|-----------------------|----------|----------------|---------------------|-------------------|--------------------|------------------------------------|-------------------------------------------------------------------|
| Sfl-24-1              | Bacteria | Proteobacteria | Gammaproteobacteria | Enterobacteriales | Enterobacteriaceae | <i>Shigella flexneri</i>           | 2005GS061                                                         |
| Sfl-25-1 to Sfl-25-14 | Bacteria | Proteobacteria | Gammaproteobacteria | Enterobacteriales | Enterobacteriaceae | <i>Shigella flexneri</i>           | 2a                                                                |
| Sfl-26-1              | Bacteria | Proteobacteria | Gammaproteobacteria | Enterobacteriales | Enterobacteriaceae | <i>Shigella flexneri</i>           | 51575                                                             |
| Sfl-27-1              | Bacteria | Proteobacteria | Gammaproteobacteria | Enterobacteriales | Enterobacteriaceae | <i>Shigella flexneri</i>           | 51576                                                             |
| Sfl-28-1              | Bacteria | Proteobacteria | Gammaproteobacteria | Enterobacteriales | Enterobacteriaceae | <i>Shigella flexneri</i>           | 51577                                                             |
| Sfl-29-1              | Bacteria | Proteobacteria | Gammaproteobacteria | Enterobacteriales | Enterobacteriaceae | <i>Shigella flexneri</i>           | Shi05SX04                                                         |
| Sfl-30-1              | Bacteria | Proteobacteria | Gammaproteobacteria | Enterobacteriales | Enterobacteriaceae | <i>Shigella flexneri</i>           | Shi06AH028                                                        |
| Sfl-31-1              | Bacteria | Proteobacteria | Gammaproteobacteria | Enterobacteriales | Enterobacteriaceae | <i>Shigella flexneri</i>           | Shi06AH091                                                        |
| Sfl-32-1              | Bacteria | Proteobacteria | Gammaproteobacteria | Enterobacteriales | Enterobacteriaceae | <i>Shigella flexneri</i>           | Shi06AH116                                                        |
| Sfl-33-1              | Bacteria | Proteobacteria | Gammaproteobacteria | Enterobacteriales | Enterobacteriaceae | <i>Shigella flexneri</i>           | Shi06AH130                                                        |
| Sfl-34-1              | Bacteria | Proteobacteria | Gammaproteobacteria | Enterobacteriales | Enterobacteriaceae | <i>Shigella flexneri</i>           | Shi06AH135                                                        |
| Sfl-35-1              | Bacteria | Proteobacteria | Gammaproteobacteria | Enterobacteriales | Enterobacteriaceae | <i>Shigella flexneri</i>           | Shi06AH66                                                         |
| Sfl-36-1              | Bacteria | Proteobacteria | Gammaproteobacteria | Enterobacteriales | Enterobacteriaceae | <i>Shigella flexneri</i>           | Shi06GS07                                                         |
| Sfl-37-1              | Bacteria | Proteobacteria | Gammaproteobacteria | Enterobacteriales | Enterobacteriaceae | <i>Shigella flexneri</i>           | Shi06GS37                                                         |
| Sfl-38-1              | Bacteria | Proteobacteria | Gammaproteobacteria | Enterobacteriales | Enterobacteriaceae | <i>Shigella flexneri</i>           | Shi06GS43                                                         |
| Sfl-39-1              | Bacteria | Proteobacteria | Gammaproteobacteria | Enterobacteriales | Enterobacteriaceae | <i>Shigella flexneri</i>           | Shi06GS48                                                         |
| Sfl-40-1              | Bacteria | Proteobacteria | Gammaproteobacteria | Enterobacteriales | Enterobacteriaceae | <i>Shigella flexneri</i>           | Shi06GS55                                                         |
| Sfl-41-1              | Bacteria | Proteobacteria | Gammaproteobacteria | Enterobacteriales | Enterobacteriaceae | <i>Shigella flexneri</i>           | Shi06HN016                                                        |
| Sfl-42-1              | Bacteria | Proteobacteria | Gammaproteobacteria | Enterobacteriales | Enterobacteriaceae | <i>Shigella flexneri</i>           | Shi06HN023                                                        |
| Sfl-43-1              | Bacteria | Proteobacteria | Gammaproteobacteria | Enterobacteriales | Enterobacteriaceae | <i>Shigella flexneri</i>           | Shi06HN091                                                        |
| Sfl-44-1              | Bacteria | Proteobacteria | Gammaproteobacteria | Enterobacteriales | Enterobacteriaceae | <i>Shigella flexneri</i>           | Shi06HN118                                                        |
| Sfl-45-1              | Bacteria | Proteobacteria | Gammaproteobacteria | Enterobacteriales | Enterobacteriaceae | <i>Shigella flexneri</i>           | Shi06HN159                                                        |
| Sfl-46-1              | Bacteria | Proteobacteria | Gammaproteobacteria | Enterobacteriales | Enterobacteriaceae | <i>Shigella flexneri</i>           | Shi06HN244                                                        |
| Sfl-47-1              | Bacteria | Proteobacteria | Gammaproteobacteria | Enterobacteriales | Enterobacteriaceae | <i>Shigella flexneri</i>           | Shi06HN250                                                        |
| Sfl-48-1              | Bacteria | Proteobacteria | Gammaproteobacteria | Enterobacteriales | Enterobacteriaceae | <i>Shigella flexneri</i>           | Shi06HN378                                                        |
| Sfl-49-1              | Bacteria | Proteobacteria | Gammaproteobacteria | Enterobacteriales | Enterobacteriaceae | <i>Shigella flexneri</i>           | Shi06SX36                                                         |
| Sfl-50-1              | Bacteria | Proteobacteria | Gammaproteobacteria | Enterobacteriales | Enterobacteriaceae | <i>Shigella flexneri</i>           | Shi06SX53                                                         |
| Sfl-51-1 to Sfl-51-2  | Bacteria | Proteobacteria | Gammaproteobacteria | Enterobacteriales | Enterobacteriaceae | <i>Shigella flexneri</i>           | Y                                                                 |
| Sso-1-1 to Sso-1-540  | Bacteria | Proteobacteria | Gammaproteobacteria | Enterobacteriales | Enterobacteriaceae | <i>Shigella sonnei</i>             |                                                                   |
| Sso-2-1               | Bacteria | Proteobacteria | Gammaproteobacteria | Enterobacteriales | Enterobacteriaceae | <i>Shigella sonnei</i>             | 1DT-1                                                             |
| Sco-1-1               | Bacteria | Proteobacteria | Gammaproteobacteria | Enterobacteriales | Enterobacteriaceae | <i>Siccibacter colletis</i>        |                                                                   |
| Stu-1-1               | Bacteria | Proteobacteria | Gammaproteobacteria | Enterobacteriales | Enterobacteriaceae | <i>Siccibacter turicensis</i>      | LMG 23730                                                         |
| Tgu-1-1               | Bacteria | Proteobacteria | Gammaproteobacteria | Enterobacteriales | Enterobacteriaceae | <i>Trabulsiella guamensis</i>      | ATCC 49490                                                        |
| Tod-1-1               | Bacteria | Proteobacteria | Gammaproteobacteria | Enterobacteriales | Enterobacteriaceae | <i>Trabulsiella odontotermitis</i> |                                                                   |
| Yre-1-1               | Bacteria | Proteobacteria | Gammaproteobacteria | Enterobacteriales | Enterobacteriaceae | <i>Yokenella regensburgei</i>      | ATCC 49455                                                        |
| Eam-1-1               | Bacteria | Proteobacteria | Gammaproteobacteria | Enterobacteriales | Erwiniaceae        | <i>Erwinia amylovora</i>           | NBRC 12687                                                        |
| Ebi-1-1               | Bacteria | Proteobacteria | Gammaproteobacteria | Enterobacteriales | Erwiniaceae        | <i>Erwinia billingiae</i>          |                                                                   |
| Ein-1-1 to Ein-1-2    | Bacteria | Proteobacteria | Gammaproteobacteria | Enterobacteriales | Erwiniaceae        | <i>Erwinia iniecta</i>             |                                                                   |
| Ema-2-1               | Bacteria | Proteobacteria | Gammaproteobacteria | Enterobacteriales | Erwiniaceae        | <i>Erwinia mallotivora</i>         |                                                                   |
| Eol-1-1               | Bacteria | Proteobacteria | Gammaproteobacteria | Enterobacteriales | Erwiniaceae        | <i>Erwinia oleae</i>               |                                                                   |
| Esp-55-1              | Bacteria | Proteobacteria | Gammaproteobacteria | Enterobacteriales | Erwiniaceae        | <i>Erwinia</i>                     | sp. 9145                                                          |
| Etr-1-1               | Bacteria | Proteobacteria | Gammaproteobacteria | Enterobacteriales | Erwiniaceae        | <i>Erwinia tracheiphila</i>        |                                                                   |
| Ety-1-1               | Bacteria | Proteobacteria | Gammaproteobacteria | Enterobacteriales | Erwiniaceae        | <i>Erwinia typographi</i>          |                                                                   |
| Pag-1-1 to Pag-1-6    | Bacteria | Proteobacteria | Gammaproteobacteria | Enterobacteriales | Erwiniaceae        | <i>Pantoea</i>                     | <i>Pantoea agglomerans</i> group <i>Pantoea agglomerans</i>       |
| Pag-2-1               | Bacteria | Proteobacteria | Gammaproteobacteria | Enterobacteriales | Erwiniaceae        | <i>Pantoea</i>                     | <i>Pantoea agglomerans</i> group <i>Pantoea agglomerans</i> Eh318 |
| Pan-1-1 to Pan-1-5    | Bacteria | Proteobacteria | Gammaproteobacteria | Enterobacteriales | Erwiniaceae        | <i>Pantoea ananatis</i>            |                                                                   |
| Pan-2-1               | Bacteria | Proteobacteria | Gammaproteobacteria | Enterobacteriales | Erwiniaceae        | <i>Pantoea ananatis</i>            | BD442                                                             |
| Pan-3-1 to Pan-3-2    | Bacteria | Proteobacteria | Gammaproteobacteria | Enterobacteriales | Erwiniaceae        | <i>Pantoea ananatis</i>            | LMG 2665                                                          |
| Pan-4-1               | Bacteria | Proteobacteria | Gammaproteobacteria | Enterobacteriales | Erwiniaceae        | <i>Pantoea ananatis</i>            | Sd-1                                                              |
| Pan-5-1               | Bacteria | Proteobacteria | Gammaproteobacteria | Enterobacteriales | Erwiniaceae        | <i>Pantoea anthophila</i>          |                                                                   |
| Pro-1-1               | Bacteria | Proteobacteria | Gammaproteobacteria | Enterobacteriales | Erwiniaceae        | <i>Pantoea rodasii</i>             |                                                                   |
| Prw-1-1               | Bacteria | Proteobacteria | Gammaproteobacteria | Enterobacteriales | Erwiniaceae        | <i>Pantoea ruandensis</i>          |                                                                   |
| Pse-1-1               | Bacteria | Proteobacteria | Gammaproteobacteria | Enterobacteriales | Erwiniaceae        | <i>Pantoea septica</i>             |                                                                   |
| Psp-1-1               | Bacteria | Proteobacteria | Gammaproteobacteria | Enterobacteriales | Erwiniaceae        | <i>Pantoea</i>                     | sp. 3.5.1                                                         |
| Psp-2-1               | Bacteria | Proteobacteria | Gammaproteobacteria | Enterobacteriales | Erwiniaceae        | <i>Pantoea</i>                     | sp. 9140                                                          |
| Psp-3-1               | Bacteria | Proteobacteria | Gammaproteobacteria | Enterobacteriales | Erwiniaceae        | <i>Pantoea</i>                     | sp. BL1                                                           |
| Psp-4-1               | Bacteria | Proteobacteria | Gammaproteobacteria | Enterobacteriales | Erwiniaceae        | <i>Pantoea</i>                     | sp. CFSAN033090                                                   |
| Psp-5-1               | Bacteria | Proteobacteria | Gammaproteobacteria | Enterobacteriales | Erwiniaceae        | <i>Pantoea</i>                     | sp. IMH                                                           |
| Psp-6-1               | Bacteria | Proteobacteria | Gammaproteobacteria | Enterobacteriales | Erwiniaceae        | <i>Pantoea</i>                     | sp. MBLJ3                                                         |
| Psp-7-1               | Bacteria | Proteobacteria | Gammaproteobacteria | Enterobacteriales | Erwiniaceae        | <i>Pantoea</i>                     | sp. NGS-ED-1003                                                   |
| Psp-8-1               | Bacteria | Proteobacteria | Gammaproteobacteria | Enterobacteriales | Erwiniaceae        | <i>Pantoea</i>                     | sp. PSNIH1                                                        |
| Psp-9-1               | Bacteria | Proteobacteria | Gammaproteobacteria | Enterobacteriales | Erwiniaceae        | <i>Pantoea</i>                     | sp. PSNIH2                                                        |
| Psp-10-1              | Bacteria | Proteobacteria | Gammaproteobacteria | Enterobacteriales | Erwiniaceae        | <i>Pantoea</i>                     | sp. RIT-PI-b                                                      |
| Psp-11-1              | Bacteria | Proteobacteria | Gammaproteobacteria | Enterobacteriales | Erwiniaceae        | <i>Pantoea</i>                     | sp. SM3                                                           |
| Pst-1-1 to Pst-1-2    | Bacteria | Proteobacteria | Gammaproteobacteria | Enterobacteriales | Erwiniaceae        | <i>Pantoea stewartii</i>           |                                                                   |



|                    |          |                |                     |                   |                |                                                                             |
|--------------------|----------|----------------|---------------------|-------------------|----------------|-----------------------------------------------------------------------------|
| Pva-1-1 to Pva-1-3 | Bacteria | Proteobacteria | Gammaproteobacteria | Enterobacteriales | Erwiniaceae    | <i>Pantoea vagans</i>                                                       |
| Pfl-1-1            | Bacteria | Proteobacteria | Gammaproteobacteria | Enterobacteriales | Erwiniaceae    | <i>Phaseolibacter flectens</i> ATCC 12775                                   |
| Tmo-1-1            | Bacteria | Proteobacteria | Gammaproteobacteria | Enterobacteriales | Erwiniaceae    | <i>Tatumella morbirosei</i>                                                 |
| Tpt-1-1 to Tpt-1-2 | Bacteria | Proteobacteria | Gammaproteobacteria | Enterobacteriales | Erwiniaceae    | <i>Tatumella ptyseos</i> ATCC 33301                                         |
| Tsa-1-1            | Bacteria | Proteobacteria | Gammaproteobacteria | Enterobacteriales | Erwiniaceae    | <i>Tatumella saanichensis</i>                                               |
| Tsp-1-1            | Bacteria | Proteobacteria | Gammaproteobacteria | Enterobacteriales | Erwiniaceae    | <i>Tatumella</i> sp. UCD-D_suzukii                                          |
| Ean-1-1            | Bacteria | Proteobacteria | Gammaproteobacteria | Enterobacteriales | Hafniaceae     | <i>Edwardsiella anguillarum</i> ET070829                                    |
| Ean-2-1            | Bacteria | Proteobacteria | Gammaproteobacteria | Enterobacteriales | Hafniaceae     | <i>Edwardsiella anguillarum</i> ET080729                                    |
| Ean-3-1            | Bacteria | Proteobacteria | Gammaproteobacteria | Enterobacteriales | Hafniaceae     | <i>Edwardsiella anguillarum</i> ET080813                                    |
| Ean-4-1            | Bacteria | Proteobacteria | Gammaproteobacteria | Enterobacteriales | Hafniaceae     | <i>Edwardsiella anguillarum</i> ET081126R                                   |
| Eho-5-1            | Bacteria | Proteobacteria | Gammaproteobacteria | Enterobacteriales | Hafniaceae     | <i>Edwardsiella hoshinae</i> NBRC 105699 = ATCC 33379                       |
| Eic-1-1            | Bacteria | Proteobacteria | Gammaproteobacteria | Enterobacteriales | Hafniaceae     | <i>Edwardsiella ictaluri</i> ATCC 33202                                     |
| Epi-1-1 to Epi-1-2 | Bacteria | Proteobacteria | Gammaproteobacteria | Enterobacteriales | Hafniaceae     | <i>Edwardsiella piscicida</i>                                               |
| Esp-56-1           | Bacteria | Proteobacteria | Gammaproteobacteria | Enterobacteriales | Hafniaceae     | <i>Edwardsiella</i> sp. EA181011                                            |
| Eta-1-1            | Bacteria | Proteobacteria | Gammaproteobacteria | Enterobacteriales | Hafniaceae     | <i>Edwardsiella tarda</i>                                                   |
| Eta-2-1            | Bacteria | Proteobacteria | Gammaproteobacteria | Enterobacteriales | Hafniaceae     | <i>Edwardsiella tarda</i> ATCC 15947 = NBRC 105688                          |
| Eta-3-1            | Bacteria | Proteobacteria | Gammaproteobacteria | Enterobacteriales | Hafniaceae     | <i>Edwardsiella tarda</i> DT                                                |
| Hal-1-1 to Hal-1-4 | Bacteria | Proteobacteria | Gammaproteobacteria | Enterobacteriales | Hafniaceae     | <i>Hafnia alvei</i>                                                         |
| Hal-2-1            | Bacteria | Proteobacteria | Gammaproteobacteria | Enterobacteriales | Hafniaceae     | <i>Hafnia alvei</i> ATCC 13337                                              |
| Hal-3-1            | Bacteria | Proteobacteria | Gammaproteobacteria | Enterobacteriales | Hafniaceae     | <i>Hafnia alvei</i> FB1                                                     |
| Hpa-1-1 to Hpa-1-2 | Bacteria | Proteobacteria | Gammaproteobacteria | Enterobacteriales | Hafniaceae     | <i>Hafnia paralvei</i>                                                      |
| Aen-1-1            | Bacteria | Proteobacteria | Gammaproteobacteria | Enterobacteriales | Morganellaceae | <i>Arsenophonus endosymbiont</i> str. Hangzhou of <i>Nilaparvata lugens</i> |
| Ana-1-1            | Bacteria | Proteobacteria | Gammaproteobacteria | Enterobacteriales | Morganellaceae | <i>Arsenophonus nasoniae</i> DSM 15247                                      |
| Mwi-1-1            | Bacteria | Proteobacteria | Gammaproteobacteria | Enterobacteriales | Morganellaceae | <i>Moellerella wisconsensis</i>                                             |
| Mmo-1-1 to Mmo-1-8 | Bacteria | Proteobacteria | Gammaproteobacteria | Enterobacteriales | Morganellaceae | <i>Morganella morgani</i>                                                   |
| Mmo-2-1            | Bacteria | Proteobacteria | Gammaproteobacteria | Enterobacteriales | Morganellaceae | <i>Morganella morgani</i> F675                                              |
| Mmo-3-1            | Bacteria | Proteobacteria | Gammaproteobacteria | Enterobacteriales | Morganellaceae | <i>Morganella morgani</i> H1r                                               |
| Mmo-4-1            | Bacteria | Proteobacteria | Gammaproteobacteria | Enterobacteriales | Morganellaceae | <i>Morganella morgani</i> IS15                                              |
| Msp-2-1            | Bacteria | Proteobacteria | Gammaproteobacteria | Enterobacteriales | Morganellaceae | <i>Morganella</i> sp. EGD-HP17                                              |
| Pas-1-1            | Bacteria | Proteobacteria | Gammaproteobacteria | Enterobacteriales | Morganellaceae | <i>Photorhabdus asymbiotica</i> subsp. <i>australis</i> DSM 17609           |
| Plu-1-1 to Plu-1-2 | Bacteria | Proteobacteria | Gammaproteobacteria | Enterobacteriales | Morganellaceae | <i>Photorhabdus luminescens</i>                                             |
| Plu-2-1            | Bacteria | Proteobacteria | Gammaproteobacteria | Enterobacteriales | Morganellaceae | <i>Photorhabdus luminescens</i> BA1                                         |
| Plu-3-1            | Bacteria | Proteobacteria | Gammaproteobacteria | Enterobacteriales | Morganellaceae | <i>Photorhabdus luminescens</i> NBII H75HRPL105                             |
| Plu-4-1            | Bacteria | Proteobacteria | Gammaproteobacteria | Enterobacteriales | Morganellaceae | <i>Photorhabdus luminescens</i> NBII HiPL101                                |
| Plu-5-1            | Bacteria | Proteobacteria | Gammaproteobacteria | Enterobacteriales | Morganellaceae | <i>Photorhabdus luminescens</i> subsp. <i>luminescens</i>                   |
| Pte-1-1            | Bacteria | Proteobacteria | Gammaproteobacteria | Enterobacteriales | Morganellaceae | <i>Photorhabdus temperata</i> subsp. <i>khanii</i> NC19                     |
| Pte-2-1            | Bacteria | Proteobacteria | Gammaproteobacteria | Enterobacteriales | Morganellaceae | <i>Photorhabdus temperata</i> subsp. <i>temperata</i> Meg1                  |
| Pte-3-1            | Bacteria | Proteobacteria | Gammaproteobacteria | Enterobacteriales | Morganellaceae | <i>Photorhabdus temperata</i> subsp. <i>thracensis</i>                      |
| Pmi-1-1 to Pmi-1-6 | Bacteria | Proteobacteria | Gammaproteobacteria | Enterobacteriales | Morganellaceae | <i>Proteus mirabilis</i>                                                    |
| Pvu-2-1            | Bacteria | Proteobacteria | Gammaproteobacteria | Enterobacteriales | Morganellaceae | <i>Proteus vulgaris</i>                                                     |
| Pal-1-1            | Bacteria | Proteobacteria | Gammaproteobacteria | Enterobacteriales | Morganellaceae | <i>Providencia alcalifaciens</i> 205/92                                     |
| Pal-2-1            | Bacteria | Proteobacteria | Gammaproteobacteria | Enterobacteriales | Morganellaceae | <i>Providencia alcalifaciens</i> F90-2004                                   |
| Pal-3-1            | Bacteria | Proteobacteria | Gammaproteobacteria | Enterobacteriales | Morganellaceae | <i>Providencia alcalifaciens</i> PAL-1                                      |
| Pal-4-1            | Bacteria | Proteobacteria | Gammaproteobacteria | Enterobacteriales | Morganellaceae | <i>Providencia alcalifaciens</i> PAL-2                                      |
| Pal-5-1            | Bacteria | Proteobacteria | Gammaproteobacteria | Enterobacteriales | Morganellaceae | <i>Providencia alcalifaciens</i> PAL-3                                      |
| Pal-6-1            | Bacteria | Proteobacteria | Gammaproteobacteria | Enterobacteriales | Morganellaceae | <i>Providencia alcalifaciens</i> R90-1475                                   |
| Pal-7-1            | Bacteria | Proteobacteria | Gammaproteobacteria | Enterobacteriales | Morganellaceae | <i>Providencia alcalifaciens</i> RIMD 1656011                               |
| Pre-1-1 to Pre-1-2 | Bacteria | Proteobacteria | Gammaproteobacteria | Enterobacteriales | Morganellaceae | <i>Providencia rettgeri</i>                                                 |
| Pst-2-1            | Bacteria | Proteobacteria | Gammaproteobacteria | Enterobacteriales | Morganellaceae | <i>Providencia stuartii</i>                                                 |
| Xbo-1-1            | Bacteria | Proteobacteria | Gammaproteobacteria | Enterobacteriales | Morganellaceae | <i>Xenorhabdus bovienii</i>                                                 |
| Xbo-4-1            | Bacteria | Proteobacteria | Gammaproteobacteria | Enterobacteriales | Morganellaceae | <i>Xenorhabdus bovienii</i> str. <i>feltiae</i> Florida                     |
| Xbo-5-1            | Bacteria | Proteobacteria | Gammaproteobacteria | Enterobacteriales | Morganellaceae | <i>Xenorhabdus bovienii</i> str. <i>feltiae</i> France                      |
| Xbo-6-1            | Bacteria | Proteobacteria | Gammaproteobacteria | Enterobacteriales | Morganellaceae | <i>Xenorhabdus bovienii</i> str. <i>feltiae</i> Moldova                     |
| Xbo-2-1            | Bacteria | Proteobacteria | Gammaproteobacteria | Enterobacteriales | Morganellaceae | <i>Xenorhabdus bovienii</i> str. Intermedium                                |
| Xbo-3-1            | Bacteria | Proteobacteria | Gammaproteobacteria | Enterobacteriales | Morganellaceae | <i>Xenorhabdus bovienii</i> str. Jollieti                                   |
| Xbo-7-1            | Bacteria | Proteobacteria | Gammaproteobacteria | Enterobacteriales | Morganellaceae | <i>Xenorhabdus bovienii</i> str. <i>kraussei</i> Becker Underwood           |
| Xbo-8-1            | Bacteria | Proteobacteria | Gammaproteobacteria | Enterobacteriales | Morganellaceae | <i>Xenorhabdus bovienii</i> str. <i>kraussei</i> Quebec                     |
| Xbo-9-1            | Bacteria | Proteobacteria | Gammaproteobacteria | Enterobacteriales | Morganellaceae | <i>Xenorhabdus bovienii</i> str. <i>oregonense</i>                          |
| Xbo-10-1           | Bacteria | Proteobacteria | Gammaproteobacteria | Enterobacteriales | Morganellaceae | <i>Xenorhabdus bovienii</i> str. <i>puntauvense</i>                         |
| Xca-1-1            | Bacteria | Proteobacteria | Gammaproteobacteria | Enterobacteriales | Morganellaceae | <i>Xenorhabdus cabanillasii</i> JM26                                        |
| Xdo-1-1            | Bacteria | Proteobacteria | Gammaproteobacteria | Enterobacteriales | Morganellaceae | <i>Xenorhabdus doucetiae</i>                                                |
| Xgr-1-1            | Bacteria | Proteobacteria | Gammaproteobacteria | Enterobacteriales | Morganellaceae | <i>Xenorhabdus griffiniae</i>                                               |
| Xkh-1-1            | Bacteria | Proteobacteria | Gammaproteobacteria | Enterobacteriales | Morganellaceae | <i>Xenorhabdus khoisanae</i>                                                |
| Xne-1-1            | Bacteria | Proteobacteria | Gammaproteobacteria | Enterobacteriales | Morganellaceae | <i>Xenorhabdus nematophila</i>                                              |
| Xne-2-1            | Bacteria | Proteobacteria | Gammaproteobacteria | Enterobacteriales | Morganellaceae | <i>Xenorhabdus nematophila</i> AN6/1                                        |

|                     |          |                |                     |                   |                   |                                                                         |
|---------------------|----------|----------------|---------------------|-------------------|-------------------|-------------------------------------------------------------------------|
| Xpo-1-1             | Bacteria | Proteobacteria | Gammaproteobacteria | Enterobacteriales | Morganellaceae    | <i>Xenorhabdus poinarii</i> G6                                          |
| Xsp-1-1             | Bacteria | Proteobacteria | Gammaproteobacteria | Enterobacteriales | Morganellaceae    | <i>Xenorhabdus</i> sp. NBAII XenSa04                                    |
| Xsz-1-1             | Bacteria | Proteobacteria | Gammaproteobacteria | Enterobacteriales | Morganellaceae    | <i>Xenorhabdus szentirmaii</i> DSM 16338                                |
| Bgo-1-1             | Bacteria | Proteobacteria | Gammaproteobacteria | Enterobacteriales | Pectobacteriaceae | <i>Brenneria goodwinii</i>                                              |
| Dch-1-1 to Dch-1-2  | Bacteria | Proteobacteria | Gammaproteobacteria | Enterobacteriales | Pectobacteriaceae | <i>Dickeya chrysanthemi</i>                                             |
| Dch-2-1             | Bacteria | Proteobacteria | Gammaproteobacteria | Enterobacteriales | Pectobacteriaceae | <i>Dickeya chrysanthemi</i> NCPPB 3533                                  |
| Dch-3-1             | Bacteria | Proteobacteria | Gammaproteobacteria | Enterobacteriales | Pectobacteriaceae | <i>Dickeya chrysanthemi</i> NCPPB 402                                   |
| Dch-4-1             | Bacteria | Proteobacteria | Gammaproteobacteria | Enterobacteriales | Pectobacteriaceae | <i>Dickeya chrysanthemi</i> NCPPB 516                                   |
| Dda-1-1             | Bacteria | Proteobacteria | Gammaproteobacteria | Enterobacteriales | Pectobacteriaceae | <i>Dickeya dadantii</i> NCPPB 3537                                      |
| Dda-2-1             | Bacteria | Proteobacteria | Gammaproteobacteria | Enterobacteriales | Pectobacteriaceae | <i>Dickeya dadantii</i> NCPPB 898                                       |
| Dda-3-1             | Bacteria | Proteobacteria | Gammaproteobacteria | Enterobacteriales | Pectobacteriaceae | <i>Dickeya dadantii</i> subsp. <i>dieffenbachiae</i> NCPPB 2976         |
| Ddi-1-1             | Bacteria | Proteobacteria | Gammaproteobacteria | Enterobacteriales | Pectobacteriaceae | <i>Dickeya dianthicola</i> IPO 980                                      |
| Ddi-2-1             | Bacteria | Proteobacteria | Gammaproteobacteria | Enterobacteriales | Pectobacteriaceae | <i>Dickeya dianthicola</i> RNS04.9                                      |
| Dso-1-1             | Bacteria | Proteobacteria | Gammaproteobacteria | Enterobacteriales | Pectobacteriaceae | <i>Dickeya solani</i>                                                   |
| Dsp-1-1             | Bacteria | Proteobacteria | Gammaproteobacteria | Enterobacteriales | Pectobacteriaceae | <i>Dickeya</i> sp. 2B12                                                 |
| Dsp-2-1             | Bacteria | Proteobacteria | Gammaproteobacteria | Enterobacteriales | Pectobacteriaceae | <i>Dickeya</i> sp. B16                                                  |
| Dsp-3-1             | Bacteria | Proteobacteria | Gammaproteobacteria | Enterobacteriales | Pectobacteriaceae | <i>Dickeya</i> sp. DW 0440                                              |
| Dsp-4-1             | Bacteria | Proteobacteria | Gammaproteobacteria | Enterobacteriales | Pectobacteriaceae | <i>Dickeya</i> sp. MK7                                                  |
| Dsp-5-1             | Bacteria | Proteobacteria | Gammaproteobacteria | Enterobacteriales | Pectobacteriaceae | <i>Dickeya</i> sp. NCPPB 3274                                           |
| Dsp-6-1             | Bacteria | Proteobacteria | Gammaproteobacteria | Enterobacteriales | Pectobacteriaceae | <i>Dickeya</i> sp. S1                                                   |
| Dze-1-1             | Bacteria | Proteobacteria | Gammaproteobacteria | Enterobacteriales | Pectobacteriaceae | <i>Dickeya zeae</i> CSL RW192                                           |
| Dze-2-1             | Bacteria | Proteobacteria | Gammaproteobacteria | Enterobacteriales | Pectobacteriaceae | <i>Dickeya zeae</i> DZ2Q                                                |
| Dze-3-1             | Bacteria | Proteobacteria | Gammaproteobacteria | Enterobacteriales | Pectobacteriaceae | <i>Dickeya zeae</i> EC1                                                 |
| Dze-4-1             | Bacteria | Proteobacteria | Gammaproteobacteria | Enterobacteriales | Pectobacteriaceae | <i>Dickeya zeae</i> MK19                                                |
| Dze-5-1             | Bacteria | Proteobacteria | Gammaproteobacteria | Enterobacteriales | Pectobacteriaceae | <i>Dickeya zeae</i> NCPPB 2538                                          |
| Dze-6-1             | Bacteria | Proteobacteria | Gammaproteobacteria | Enterobacteriales | Pectobacteriaceae | <i>Dickeya zeae</i> NCPPB 3531                                          |
| Lqu-1-1 to Lqu-1-3  | Bacteria | Proteobacteria | Gammaproteobacteria | Enterobacteriales | Pectobacteriaceae | <i>Lonsdalea quercina</i> subsp. <i>quercina</i>                        |
| Pat-1-1 to Pat-1-2  | Bacteria | Proteobacteria | Gammaproteobacteria | Enterobacteriales | Pectobacteriaceae | <i>Pectobacterium atrosepticum</i>                                      |
| Pat-2-1             | Bacteria | Proteobacteria | Gammaproteobacteria | Enterobacteriales | Pectobacteriaceae | <i>Pectobacterium atrosepticum</i> CFBP 6276                            |
| Pat-3-1             | Bacteria | Proteobacteria | Gammaproteobacteria | Enterobacteriales | Pectobacteriaceae | <i>Pectobacterium atrosepticum</i> ICMP 1526                            |
| Pbe-1-1 to Pbe-1-2  | Bacteria | Proteobacteria | Gammaproteobacteria | Enterobacteriales | Pectobacteriaceae | <i>Pectobacterium betavasculorum</i>                                    |
| Pca-1-1             | Bacteria | Proteobacteria | Gammaproteobacteria | Enterobacteriales | Pectobacteriaceae | <i>Pectobacterium carotovorum</i>                                       |
| Pca-2-1             | Bacteria | Proteobacteria | Gammaproteobacteria | Enterobacteriales | Pectobacteriaceae | <i>Pectobacterium carotovorum</i> subsp. <i>actinidiae</i>              |
| Pca-3-1 to Pca-3-15 | Bacteria | Proteobacteria | Gammaproteobacteria | Enterobacteriales | Pectobacteriaceae | <i>Pectobacterium carotovorum</i> subsp. <i>brasiliense</i>             |
| Pca-4-1             | Bacteria | Proteobacteria | Gammaproteobacteria | Enterobacteriales | Pectobacteriaceae | <i>Pectobacterium carotovorum</i> subsp. <i>brasiliensis</i> ICMP 19477 |
| Pca-5-1 to Pca-5-10 | Bacteria | Proteobacteria | Gammaproteobacteria | Enterobacteriales | Pectobacteriaceae | <i>Pectobacterium carotovorum</i> subsp. <i>carotovorum</i>             |
| Pca-6-1             | Bacteria | Proteobacteria | Gammaproteobacteria | Enterobacteriales | Pectobacteriaceae | <i>Pectobacterium carotovorum</i> subsp. <i>carotovorum</i> ICMP 5702   |
| Pca-7-1             | Bacteria | Proteobacteria | Gammaproteobacteria | Enterobacteriales | Pectobacteriaceae | <i>Pectobacterium carotovorum</i> subsp. <i>carotovorum</i> UGC32       |
| Pca-8-1 to Pca-8-2  | Bacteria | Proteobacteria | Gammaproteobacteria | Enterobacteriales | Pectobacteriaceae | <i>Pectobacterium carotovorum</i> subsp. <i>odoriferum</i>              |
| Ppa-1-1             | Bacteria | Proteobacteria | Gammaproteobacteria | Enterobacteriales | Pectobacteriaceae | <i>Pectobacterium parmentieri</i>                                       |
| Ppa-2-1             | Bacteria | Proteobacteria | Gammaproteobacteria | Enterobacteriales | Pectobacteriaceae | <i>Pectobacterium parmentieri</i> CFIA1002                              |
| Ppo-1-1             | Bacteria | Proteobacteria | Gammaproteobacteria | Enterobacteriales | Pectobacteriaceae | <i>Pectobacterium polaris</i>                                           |
| Pwa-1-1 to Pwa-1-2  | Bacteria | Proteobacteria | Gammaproteobacteria | Enterobacteriales | Pectobacteriaceae | <i>Pectobacterium wasabiae</i>                                          |
| CSo-1-1             | Bacteria | Proteobacteria | Gammaproteobacteria | Enterobacteriales | Pectobacteriaceae | <i>Sodalis Candidatus</i> Sodalis pierantonius str. SOPE                |
| Spr-1-1             | Bacteria | Proteobacteria | Gammaproteobacteria | Enterobacteriales | Pectobacteriaceae | <i>Sodalis praecaptivus</i>                                             |
| Pur-1-1             | Bacteria | Proteobacteria | Gammaproteobacteria | Enterobacteriales | unclassified      | Enterobacteriales <i>Phytobacter ursingii</i>                           |
| Cmu-2-1             | Bacteria | Proteobacteria | Gammaproteobacteria | Enterobacteriales | Yersiniaceae      | <i>Chania multitudinisentens</i> RB-25                                  |
| Rch-1-1             | Bacteria | Proteobacteria | Gammaproteobacteria | Enterobacteriales | Yersiniaceae      | <i>Rouxiiella chamberiensis</i>                                         |
| Sfo-1-1             | Bacteria | Proteobacteria | Gammaproteobacteria | Enterobacteriales | Yersiniaceae      | <i>Serratia fonticola</i>                                               |
| Sfo-2-1             | Bacteria | Proteobacteria | Gammaproteobacteria | Enterobacteriales | Yersiniaceae      | <i>Serratia fonticola</i> LMG 7882                                      |
| Sfo-3-1             | Bacteria | Proteobacteria | Gammaproteobacteria | Enterobacteriales | Yersiniaceae      | <i>Serratia fonticola</i> UTAD54                                        |
| Sgr-1-1             | Bacteria | Proteobacteria | Gammaproteobacteria | Enterobacteriales | Yersiniaceae      | <i>Serratia grimesii</i>                                                |
| Sli-1-1             | Bacteria | Proteobacteria | Gammaproteobacteria | Enterobacteriales | Yersiniaceae      | <i>Serratia liquefaciens</i>                                            |
| Sli-2-1             | Bacteria | Proteobacteria | Gammaproteobacteria | Enterobacteriales | Yersiniaceae      | <i>Serratia liquefaciens</i> FK01                                       |
| Sma-1-1 to Sma-1-4  | Bacteria | Proteobacteria | Gammaproteobacteria | Enterobacteriales | Yersiniaceae      | <i>Serratia marcescens</i>                                              |
| Sma-2-1             | Bacteria | Proteobacteria | Gammaproteobacteria | Enterobacteriales | Yersiniaceae      | <i>Serratia marcescens</i> AB42556419-isolate1                          |
| Sma-3-1             | Bacteria | Proteobacteria | Gammaproteobacteria | Enterobacteriales | Yersiniaceae      | <i>Serratia marcescens</i> BIDMC 44                                     |
| Sma-4-1             | Bacteria | Proteobacteria | Gammaproteobacteria | Enterobacteriales | Yersiniaceae      | <i>Serratia marcescens</i> BIDMC 50                                     |
| Sma-5-1             | Bacteria | Proteobacteria | Gammaproteobacteria | Enterobacteriales | Yersiniaceae      | <i>Serratia marcescens</i> BIDMC 80                                     |
| Sma-6-1             | Bacteria | Proteobacteria | Gammaproteobacteria | Enterobacteriales | Yersiniaceae      | <i>Serratia marcescens</i> BIDMC 81                                     |
| Sma-7-1             | Bacteria | Proteobacteria | Gammaproteobacteria | Enterobacteriales | Yersiniaceae      | <i>Serratia marcescens</i> H1q                                          |
| Sma-8-1             | Bacteria | Proteobacteria | Gammaproteobacteria | Enterobacteriales | Yersiniaceae      | <i>Serratia marcescens</i> LCT-SM166                                    |
| Sma-9-1             | Bacteria | Proteobacteria | Gammaproteobacteria | Enterobacteriales | Yersiniaceae      | <i>Serratia marcescens</i> LCT-SM262                                    |
| Sma-10-1            | Bacteria | Proteobacteria | Gammaproteobacteria | Enterobacteriales | Yersiniaceae      | <i>Serratia marcescens</i> MC458                                        |
| Sma-11-1            | Bacteria | Proteobacteria | Gammaproteobacteria | Enterobacteriales | Yersiniaceae      | <i>Serratia marcescens</i> MC459                                        |

|                      |          |                |                     |                   |              |                                                                    |
|----------------------|----------|----------------|---------------------|-------------------|--------------|--------------------------------------------------------------------|
| Sma-12-1             | Bacteria | Proteobacteria | Gammaproteobacteria | Enterobacteriales | Yersiniaceae | <i>Serratia marcescens</i> MC460                                   |
| Sma-13-1             | Bacteria | Proteobacteria | Gammaproteobacteria | Enterobacteriales | Yersiniaceae | <i>Serratia marcescens</i> MC6000                                  |
| Sma-14-1             | Bacteria | Proteobacteria | Gammaproteobacteria | Enterobacteriales | Yersiniaceae | <i>Serratia marcescens</i> MC6001                                  |
| Sma-15-1             | Bacteria | Proteobacteria | Gammaproteobacteria | Enterobacteriales | Yersiniaceae | <i>Serratia marcescens</i> MC620                                   |
| Sma-16-1             | Bacteria | Proteobacteria | Gammaproteobacteria | Enterobacteriales | Yersiniaceae | <i>Serratia marcescens</i> PH1a                                    |
| Sma-17-1             | Bacteria | Proteobacteria | Gammaproteobacteria | Enterobacteriales | Yersiniaceae | <i>Serratia marcescens</i> SM39                                    |
| Sma-18-1 to Sma-18-2 | Bacteria | Proteobacteria | Gammaproteobacteria | Enterobacteriales | Yersiniaceae | <i>Serratia marcescens</i> subsp. <i>marcescens</i>                |
| Sma-19-1             | Bacteria | Proteobacteria | Gammaproteobacteria | Enterobacteriales | Yersiniaceae | <i>Serratia marcescens</i> subsp. <i>marcescens</i> ATCC 13880     |
| Sma-20-1             | Bacteria | Proteobacteria | Gammaproteobacteria | Enterobacteriales | Yersiniaceae | <i>Serratia marcescens</i> subsp. <i>marcescens</i> Db11           |
| Sne-1-1              | Bacteria | Proteobacteria | Gammaproteobacteria | Enterobacteriales | Yersiniaceae | <i>Serratia nematodiphila</i> DZ0503SBS1                           |
| Spl-1-1              | Bacteria | Proteobacteria | Gammaproteobacteria | Enterobacteriales | Yersiniaceae | <i>Serratia plymuthica</i> RVH1                                    |
| Ssp-1-1              | Bacteria | Proteobacteria | Gammaproteobacteria | Enterobacteriales | Yersiniaceae | <i>Serratia</i> sp. 506_PEND                                       |
| Ssp-2-1              | Bacteria | Proteobacteria | Gammaproteobacteria | Enterobacteriales | Yersiniaceae | <i>Serratia</i> sp. Ag1                                            |
| Ssp-3-1              | Bacteria | Proteobacteria | Gammaproteobacteria | Enterobacteriales | Yersiniaceae | <i>Serratia</i> sp. Ag2                                            |
| Ssp-4-1              | Bacteria | Proteobacteria | Gammaproteobacteria | Enterobacteriales | Yersiniaceae | <i>Serratia</i> sp. DD3                                            |
| Ssp-5-1              | Bacteria | Proteobacteria | Gammaproteobacteria | Enterobacteriales | Yersiniaceae | <i>Serratia</i> sp. FS14                                           |
| Ssp-6-1              | Bacteria | Proteobacteria | Gammaproteobacteria | Enterobacteriales | Yersiniaceae | <i>Serratia</i> sp. H1n                                            |
| Ssp-7-1              | Bacteria | Proteobacteria | Gammaproteobacteria | Enterobacteriales | Yersiniaceae | <i>Serratia</i> sp. H1w                                            |
| Ssp-8-1              | Bacteria | Proteobacteria | Gammaproteobacteria | Enterobacteriales | Yersiniaceae | <i>Serratia</i> sp. SCBI                                           |
| Ssp-9-1              | Bacteria | Proteobacteria | Gammaproteobacteria | Enterobacteriales | Yersiniaceae | <i>Serratia</i> sp. TEL                                            |
| Ssy-1-1              | Bacteria | Proteobacteria | Gammaproteobacteria | Enterobacteriales | Yersiniaceae | <i>Serratia symbiotica</i>                                         |
| Sur-1-1              | Bacteria | Proteobacteria | Gammaproteobacteria | Enterobacteriales | Yersiniaceae | <i>Serratia urelytica</i>                                          |
| Yal-1-1 to Yal-1-4   | Bacteria | Proteobacteria | Gammaproteobacteria | Enterobacteriales | Yersiniaceae | <i>Yersinia aldovae</i>                                            |
| Yal-2-1              | Bacteria | Proteobacteria | Gammaproteobacteria | Enterobacteriales | Yersiniaceae | <i>Yersinia aldovae</i> 670-83                                     |
| Yal-3-1              | Bacteria | Proteobacteria | Gammaproteobacteria | Enterobacteriales | Yersiniaceae | <i>Yersinia aleksiciae</i>                                         |
| Ybe-1-1              | Bacteria | Proteobacteria | Gammaproteobacteria | Enterobacteriales | Yersiniaceae | <i>Yersinia bercovieri</i>                                         |
| Yen-1-1 to Yen-1-4   | Bacteria | Proteobacteria | Gammaproteobacteria | Enterobacteriales | Yersiniaceae | <i>Yersinia enterocolitica</i>                                     |
| Yen-2-1              | Bacteria | Proteobacteria | Gammaproteobacteria | Enterobacteriales | Yersiniaceae | <i>Yersinia enterocolitica</i> (type O:2) str. YE3094/96           |
| Yen-3-1              | Bacteria | Proteobacteria | Gammaproteobacteria | Enterobacteriales | Yersiniaceae | <i>Yersinia enterocolitica</i> (type O:5) str. YE53/03             |
| Yen-4-1              | Bacteria | Proteobacteria | Gammaproteobacteria | Enterobacteriales | Yersiniaceae | <i>Yersinia enterocolitica</i> (type O:9) str. YE56/03             |
| Yen-5-1              | Bacteria | Proteobacteria | Gammaproteobacteria | Enterobacteriales | Yersiniaceae | <i>Yersinia enterocolitica</i> subsp. <i>palaearctica</i> 556/8265 |
| Yen-6-1              | Bacteria | Proteobacteria | Gammaproteobacteria | Enterobacteriales | Yersiniaceae | <i>Yersinia enterocolitica</i> subsp. <i>palaearctica</i> 647/5307 |
| Yen-7-1              | Bacteria | Proteobacteria | Gammaproteobacteria | Enterobacteriales | Yersiniaceae | <i>Yersinia enterocolitica</i> subsp. <i>palaearctica</i> YO527    |
| Yfr-1-1 to Yfr-1-17  | Bacteria | Proteobacteria | Gammaproteobacteria | Enterobacteriales | Yersiniaceae | <i>Yersinia frederiksenii</i>                                      |
| Yfr-2-1 to Yfr-2-2   | Bacteria | Proteobacteria | Gammaproteobacteria | Enterobacteriales | Yersiniaceae | <i>Yersinia frederiksenii</i> ATCC 33641                           |
| Yfr-3-1              | Bacteria | Proteobacteria | Gammaproteobacteria | Enterobacteriales | Yersiniaceae | <i>Yersinia frederiksenii</i> Y225                                 |
| Yin-1-1              | Bacteria | Proteobacteria | Gammaproteobacteria | Enterobacteriales | Yersiniaceae | <i>Yersinia intermedia</i>                                         |
| Ykr-1-1 to Ykr-1-2   | Bacteria | Proteobacteria | Gammaproteobacteria | Enterobacteriales | Yersiniaceae | <i>Yersinia kristensenii</i>                                       |
| Yma-1-1              | Bacteria | Proteobacteria | Gammaproteobacteria | Enterobacteriales | Yersiniaceae | <i>Yersinia massiliensis</i>                                       |
| Yma-2-1              | Bacteria | Proteobacteria | Gammaproteobacteria | Enterobacteriales | Yersiniaceae | <i>Yersinia massiliensis</i> CCUG 53443                            |
| Ymo-1-1 to Ymo-1-7   | Bacteria | Proteobacteria | Gammaproteobacteria | Enterobacteriales | Yersiniaceae | <i>Yersinia mollaretii</i>                                         |
| Ynu-1-1              | Bacteria | Proteobacteria | Gammaproteobacteria | Enterobacteriales | Yersiniaceae | <i>Yersinia nurmii</i>                                             |
| Ype-1-1 to Ype-1-2   | Bacteria | Proteobacteria | Gammaproteobacteria | Enterobacteriales | Yersiniaceae | <i>Yersinia pekkanenii</i>                                         |
| Ype-2-1 to Ype-2-9   | Bacteria | Proteobacteria | Gammaproteobacteria | Enterobacteriales | Yersiniaceae | <i>Yersinia pestis</i>                                             |
| Ype-3-1              | Bacteria | Proteobacteria | Gammaproteobacteria | Enterobacteriales | Yersiniaceae | <i>Yersinia pestis</i> 1045                                        |
| Ype-4-1              | Bacteria | Proteobacteria | Gammaproteobacteria | Enterobacteriales | Yersiniaceae | <i>Yersinia pestis</i> 12                                          |
| Ype-5-1              | Bacteria | Proteobacteria | Gammaproteobacteria | Enterobacteriales | Yersiniaceae | <i>Yersinia pestis</i> 1412                                        |
| Ype-6-1              | Bacteria | Proteobacteria | Gammaproteobacteria | Enterobacteriales | Yersiniaceae | <i>Yersinia pestis</i> 1413                                        |
| Ype-7-1              | Bacteria | Proteobacteria | Gammaproteobacteria | Enterobacteriales | Yersiniaceae | <i>Yersinia pestis</i> 14735                                       |
| Ype-8-1              | Bacteria | Proteobacteria | Gammaproteobacteria | Enterobacteriales | Yersiniaceae | <i>Yersinia pestis</i> 1522                                        |
| Ype-9-1              | Bacteria | Proteobacteria | Gammaproteobacteria | Enterobacteriales | Yersiniaceae | <i>Yersinia pestis</i> 164                                         |
| Ype-10-1             | Bacteria | Proteobacteria | Gammaproteobacteria | Enterobacteriales | Yersiniaceae | <i>Yersinia pestis</i> 1670                                        |
| Ype-11-1             | Bacteria | Proteobacteria | Gammaproteobacteria | Enterobacteriales | Yersiniaceae | <i>Yersinia pestis</i> 2                                           |
| Ype-12-1             | Bacteria | Proteobacteria | Gammaproteobacteria | Enterobacteriales | Yersiniaceae | <i>Yersinia pestis</i> 2944                                        |
| Ype-13-1             | Bacteria | Proteobacteria | Gammaproteobacteria | Enterobacteriales | Yersiniaceae | <i>Yersinia pestis</i> 3067                                        |
| Ype-14-1             | Bacteria | Proteobacteria | Gammaproteobacteria | Enterobacteriales | Yersiniaceae | <i>Yersinia pestis</i> 34008                                       |
| Ype-15-1             | Bacteria | Proteobacteria | Gammaproteobacteria | Enterobacteriales | Yersiniaceae | <i>Yersinia pestis</i> 34202                                       |
| Ype-16-1             | Bacteria | Proteobacteria | Gammaproteobacteria | Enterobacteriales | Yersiniaceae | <i>Yersinia pestis</i> 351001                                      |
| Ype-17-1             | Bacteria | Proteobacteria | Gammaproteobacteria | Enterobacteriales | Yersiniaceae | <i>Yersinia pestis</i> 3770                                        |
| Ype-18-1             | Bacteria | Proteobacteria | Gammaproteobacteria | Enterobacteriales | Yersiniaceae | <i>Yersinia pestis</i> 42095                                       |
| Ype-19-1             | Bacteria | Proteobacteria | Gammaproteobacteria | Enterobacteriales | Yersiniaceae | <i>Yersinia pestis</i> 5                                           |
| Ype-20-1             | Bacteria | Proteobacteria | Gammaproteobacteria | Enterobacteriales | Yersiniaceae | <i>Yersinia pestis</i> 620024                                      |
| Ype-21-1             | Bacteria | Proteobacteria | Gammaproteobacteria | Enterobacteriales | Yersiniaceae | <i>Yersinia pestis</i> 71021                                       |
| Ype-22-1             | Bacteria | Proteobacteria | Gammaproteobacteria | Enterobacteriales | Yersiniaceae | <i>Yersinia pestis</i> 710317                                      |
| Ype-23-1             | Bacteria | Proteobacteria | Gammaproteobacteria | Enterobacteriales | Yersiniaceae | <i>Yersinia pestis</i> 7338                                        |





|                        |          |                |                     |                   |                    |                                    |                                                               |
|------------------------|----------|----------------|---------------------|-------------------|--------------------|------------------------------------|---------------------------------------------------------------|
| Ype-80-1               | Bacteria | Proteobacteria | Gammaproteobacteria | Enterobacteriales | Yersiniaceae       | <i>Yersinia pestis</i>             | I1969003                                                      |
| Ype-81-1               | Bacteria | Proteobacteria | Gammaproteobacteria | Enterobacteriales | Yersiniaceae       | <i>Yersinia pestis</i>             | I1970005                                                      |
| Ype-82-1               | Bacteria | Proteobacteria | Gammaproteobacteria | Enterobacteriales | Yersiniaceae       | <i>Yersinia pestis</i>             | I1991001                                                      |
| Ype-83-1               | Bacteria | Proteobacteria | Gammaproteobacteria | Enterobacteriales | Yersiniaceae       | <i>Yersinia pestis</i>             | I1994006                                                      |
| Ype-84-1               | Bacteria | Proteobacteria | Gammaproteobacteria | Enterobacteriales | Yersiniaceae       | <i>Yersinia pestis</i>             | I2001001                                                      |
| Ype-85-1               | Bacteria | Proteobacteria | Gammaproteobacteria | Enterobacteriales | Yersiniaceae       | <i>Yersinia pestis</i>             | J1963002                                                      |
| Ype-86-1               | Bacteria | Proteobacteria | Gammaproteobacteria | Enterobacteriales | Yersiniaceae       | <i>Yersinia pestis</i>             | J1978002                                                      |
| Ype-87-1               | Bacteria | Proteobacteria | Gammaproteobacteria | Enterobacteriales | Yersiniaceae       | <i>Yersinia pestis</i>             | K21985002                                                     |
| Ype-88-1               | Bacteria | Proteobacteria | Gammaproteobacteria | Enterobacteriales | Yersiniaceae       | <i>Yersinia pestis</i>             | M0000002                                                      |
| Ype-89-1               | Bacteria | Proteobacteria | Gammaproteobacteria | Enterobacteriales | Yersiniaceae       | <i>Yersinia pestis</i>             | MGJZ12                                                        |
| Ype-90-1               | Bacteria | Proteobacteria | Gammaproteobacteria | Enterobacteriales | Yersiniaceae       | <i>Yersinia pestis</i>             | MGJZ3                                                         |
| Ype-91-1               | Bacteria | Proteobacteria | Gammaproteobacteria | Enterobacteriales | Yersiniaceae       | <i>Yersinia pestis</i>             | MGJZ6                                                         |
| Ype-92-1               | Bacteria | Proteobacteria | Gammaproteobacteria | Enterobacteriales | Yersiniaceae       | <i>Yersinia pestis</i>             | MGJZ7                                                         |
| Ype-93-1               | Bacteria | Proteobacteria | Gammaproteobacteria | Enterobacteriales | Yersiniaceae       | <i>Yersinia pestis</i>             | MGJZ9                                                         |
| Ype-94-1 to Ype-94-2   | Bacteria | Proteobacteria | Gammaproteobacteria | Enterobacteriales | Yersiniaceae       | <i>Yersinia pestis</i>             | Pestoides F                                                   |
| Ype-95-1               | Bacteria | Proteobacteria | Gammaproteobacteria | Enterobacteriales | Yersiniaceae       | <i>Yersinia pestis</i>             | Pestoides G                                                   |
| Ype-96-1               | Bacteria | Proteobacteria | Gammaproteobacteria | Enterobacteriales | Yersiniaceae       | <i>Yersinia pestis</i>             | SHAN11                                                        |
| Ype-97-1               | Bacteria | Proteobacteria | Gammaproteobacteria | Enterobacteriales | Yersiniaceae       | <i>Yersinia pestis</i>             | SHAN12                                                        |
| Ype-113-1              | Bacteria | Proteobacteria | Gammaproteobacteria | Enterobacteriales | Yersiniaceae       | <i>Yersinia pestis</i>             | str. Pestoides B                                              |
| Ype-114-1 to Ype-114-2 | Bacteria | Proteobacteria | Gammaproteobacteria | Enterobacteriales | Yersiniaceae       | <i>Yersinia pestis</i>             | subsp. <i>microtus</i> bv. Ulegeica                           |
| Ype-115-1              | Bacteria | Proteobacteria | Gammaproteobacteria | Enterobacteriales | Yersiniaceae       | <i>Yersinia pestis</i>             | subsp. <i>pestis</i> bv. Orientalis                           |
| Ype-98-1               | Bacteria | Proteobacteria | Gammaproteobacteria | Enterobacteriales | Yersiniaceae       | <i>Yersinia pestis</i>             | YN1065                                                        |
| Ype-99-1               | Bacteria | Proteobacteria | Gammaproteobacteria | Enterobacteriales | Yersiniaceae       | <i>Yersinia pestis</i>             | YN1683                                                        |
| Ype-100-1              | Bacteria | Proteobacteria | Gammaproteobacteria | Enterobacteriales | Yersiniaceae       | <i>Yersinia pestis</i>             | YN2179                                                        |
| Ype-101-1              | Bacteria | Proteobacteria | Gammaproteobacteria | Enterobacteriales | Yersiniaceae       | <i>Yersinia pestis</i>             | YN2588                                                        |
| Ype-102-1              | Bacteria | Proteobacteria | Gammaproteobacteria | Enterobacteriales | Yersiniaceae       | <i>Yersinia pestis</i>             | YN472                                                         |
| Ype-103-1              | Bacteria | Proteobacteria | Gammaproteobacteria | Enterobacteriales | Yersiniaceae       | <i>Yersinia pestis</i>             | YN663                                                         |
| Yps-1-1 to Yps-1-4     | Bacteria | Proteobacteria | Gammaproteobacteria | Enterobacteriales | Yersiniaceae       | <i>Yersinia pseudotuberculosis</i> |                                                               |
| Yps-2-1                | Bacteria | Proteobacteria | Gammaproteobacteria | Enterobacteriales | Yersiniaceae       | <i>Yersinia pseudotuberculosis</i> | B-6796                                                        |
| Yps-3-1                | Bacteria | Proteobacteria | Gammaproteobacteria | Enterobacteriales | Yersiniaceae       | <i>Yersinia pseudotuberculosis</i> | B-6862                                                        |
| Yps-4-1                | Bacteria | Proteobacteria | Gammaproteobacteria | Enterobacteriales | Yersiniaceae       | <i>Yersinia pseudotuberculosis</i> | B-6863                                                        |
| Yps-5-1                | Bacteria | Proteobacteria | Gammaproteobacteria | Enterobacteriales | Yersiniaceae       | <i>Yersinia pseudotuberculosis</i> | B-6864                                                        |
| Yps-6-1                | Bacteria | Proteobacteria | Gammaproteobacteria | Enterobacteriales | Yersiniaceae       | <i>Yersinia pseudotuberculosis</i> | B-6865                                                        |
| Yps-7-1                | Bacteria | Proteobacteria | Gammaproteobacteria | Enterobacteriales | Yersiniaceae       | <i>Yersinia pseudotuberculosis</i> | B-6866                                                        |
| Yps-8-1                | Bacteria | Proteobacteria | Gammaproteobacteria | Enterobacteriales | Yersiniaceae       | <i>Yersinia pseudotuberculosis</i> | B-7194                                                        |
| Yps-9-1                | Bacteria | Proteobacteria | Gammaproteobacteria | Enterobacteriales | Yersiniaceae       | <i>Yersinia pseudotuberculosis</i> | B-7195                                                        |
| Yps-10-1 to Yps-10-2   | Bacteria | Proteobacteria | Gammaproteobacteria | Enterobacteriales | Yersiniaceae       | <i>Yersinia pseudotuberculosis</i> | IP 32953                                                      |
| Yps-11-1 to Yps-11-2   | Bacteria | Proteobacteria | Gammaproteobacteria | Enterobacteriales | Yersiniaceae       | <i>Yersinia pseudotuberculosis</i> | PB1/+                                                         |
| Yps-13-1               | Bacteria | Proteobacteria | Gammaproteobacteria | Enterobacteriales | Yersiniaceae       | <i>Yersinia pseudotuberculosis</i> | str. PA3606                                                   |
| Yps-12-1 to Yps-12-2   | Bacteria | Proteobacteria | Gammaproteobacteria | Enterobacteriales | Yersiniaceae       | <i>Yersinia pseudotuberculosis</i> | YPIII                                                         |
| Yro-1-1                | Bacteria | Proteobacteria | Gammaproteobacteria | Enterobacteriales | Yersiniaceae       | <i>Yersinia rohdei</i>             |                                                               |
| Yru-1-1 to Yru-1-3     | Bacteria | Proteobacteria | Gammaproteobacteria | Enterobacteriales | Yersiniaceae       | <i>Yersinia ruckeri</i>            |                                                               |
| Yru-2-1 to Yru-2-2     | Bacteria | Proteobacteria | Gammaproteobacteria | Enterobacteriales | Yersiniaceae       | <i>Yersinia ruckeri</i>            | ATCC 29473                                                    |
| Ysi-1-1                | Bacteria | Proteobacteria | Gammaproteobacteria | Enterobacteriales | Yersiniaceae       | <i>Yersinia similis</i>            |                                                               |
| Ywa-1-1 to Ywa-1-2     | Bacteria | Proteobacteria | Gammaproteobacteria | Enterobacteriales | Yersiniaceae       | <i>Yersinia wautersii</i>          |                                                               |
| CRe-1-1                | Bacteria | Proteobacteria | Gammaproteobacteria | Enterobacteriales | Enterobacteriaceae | aphid secondary symbionts          | <i>Candidatus</i> Regiella insecticola LSR1                   |
| CRe-2-1                | Bacteria | Proteobacteria | Gammaproteobacteria | Enterobacteriales | Enterobacteriaceae | aphid secondary symbionts          | <i>Candidatus</i> Regiella insecticola R5.15                  |
| Bsp-1-1                | Bacteria | Proteobacteria | Gammaproteobacteria | Enterobacteriales | Enterobacteriaceae | <i>Brenneria</i> sp.               | EniD312                                                       |
| Cda-1-1                | Bacteria | Proteobacteria | Gammaproteobacteria | Enterobacteriales | Enterobacteriaceae | <i>Cedecea davisae</i>             | DSM 4568                                                      |
| Cfr-1-1 to Cfr-1-4     | Bacteria | Proteobacteria | Gammaproteobacteria | Enterobacteriales | Enterobacteriaceae | Citrobacter                        | Citrobacter freundii complex <i>Citrobacter freundii</i>      |
| Cfr-9-1                | Bacteria | Proteobacteria | Gammaproteobacteria | Enterobacteriales | Enterobacteriaceae | Citrobacter                        | Citrobacter freundii complex <i>Citrobacter freundii</i>      |
|                        |          |                |                     |                   |                    |                                    | 4.7.47CFAA                                                    |
| Cfr-2-1 to Cfr-2-2     | Bacteria | Proteobacteria | Gammaproteobacteria | Enterobacteriales | Enterobacteriaceae | Citrobacter                        | Citrobacter freundii complex <i>Citrobacter freundii</i> ATCC |
|                        |          |                |                     |                   |                    |                                    | 8090 = MTCC 1658                                              |
| Cfr-10-1               | Bacteria | Proteobacteria | Gammaproteobacteria | Enterobacteriales | Enterobacteriaceae | Citrobacter                        | Citrobacter freundii complex <i>Citrobacter freundii</i> GTC  |
|                        |          |                |                     |                   |                    |                                    | 09479                                                         |
| Cfr-11-1               | Bacteria | Proteobacteria | Gammaproteobacteria | Enterobacteriales | Enterobacteriaceae | Citrobacter                        | Citrobacter freundii complex <i>Citrobacter freundii</i> GTC  |
|                        |          |                |                     |                   |                    |                                    | 09629                                                         |
| Cko-1-1 to Cko-1-2     | Bacteria | Proteobacteria | Gammaproteobacteria | Enterobacteriales | Enterobacteriaceae | <i>Citrobacter koseri</i>          |                                                               |
| Cko-2-1                | Bacteria | Proteobacteria | Gammaproteobacteria | Enterobacteriales | Enterobacteriaceae | <i>Citrobacter koseri</i>          | ATCC BAA-895                                                  |
| Cro-3-1                | Bacteria | Proteobacteria | Gammaproteobacteria | Enterobacteriales | Enterobacteriaceae | <i>Citrobacter rodentium</i>       | ICC168                                                        |
| Csp-14-1               | Bacteria | Proteobacteria | Gammaproteobacteria | Enterobacteriales | Enterobacteriaceae | <i>Citrobacter</i> sp.             | 30.2                                                          |
| Csp-15-1               | Bacteria | Proteobacteria | Gammaproteobacteria | Enterobacteriales | Enterobacteriaceae | <i>Citrobacter</i> sp.             | A1                                                            |

|                     |          |                |                     |                   |                    |                                                                       |
|---------------------|----------|----------------|---------------------|-------------------|--------------------|-----------------------------------------------------------------------|
| Csp-16-1            | Bacteria | Proteobacteria | Gammaproteobacteria | Enterobacteriales | Enterobacteriaceae | <i>Citrobacter sp.</i> KTE151                                         |
| Csp-17-1            | Bacteria | Proteobacteria | Gammaproteobacteria | Enterobacteriales | Enterobacteriaceae | <i>Citrobacter sp.</i> KTE30                                          |
| Csp-18-1            | Bacteria | Proteobacteria | Gammaproteobacteria | Enterobacteriales | Enterobacteriaceae | <i>Citrobacter sp.</i> KTE32                                          |
| Csp-19-1            | Bacteria | Proteobacteria | Gammaproteobacteria | Enterobacteriales | Enterobacteriaceae | <i>Citrobacter sp.</i> L17                                            |
| Cyo-1-1             | Bacteria | Proteobacteria | Gammaproteobacteria | Enterobacteriales | Enterobacteriaceae | <i>Citrobacter youngae</i> ATCC 29220                                 |
| Cco-1-1             | Bacteria | Proteobacteria | Gammaproteobacteria | Enterobacteriales | Enterobacteriaceae | <i>Cronobacter condimenti</i> 1330                                    |
| Cdu-4-1             | Bacteria | Proteobacteria | Gammaproteobacteria | Enterobacteriales | Enterobacteriaceae | <i>Cronobacter dublinensis</i> 1210                                   |
| Cdu-5-1             | Bacteria | Proteobacteria | Gammaproteobacteria | Enterobacteriales | Enterobacteriaceae | <i>Cronobacter dublinensis</i> 582                                    |
| Cma-4-1             | Bacteria | Proteobacteria | Gammaproteobacteria | Enterobacteriales | Enterobacteriaceae | <i>Cronobacter malonaticus</i> 507                                    |
| Cma-5-1             | Bacteria | Proteobacteria | Gammaproteobacteria | Enterobacteriales | Enterobacteriaceae | <i>Cronobacter malonaticus</i> 681                                    |
| Csa-9-1             | Bacteria | Proteobacteria | Gammaproteobacteria | Enterobacteriales | Enterobacteriaceae | <i>Cronobacter sakazakii</i> 680                                      |
| Csa-10-1            | Bacteria | Proteobacteria | Gammaproteobacteria | Enterobacteriales | Enterobacteriaceae | <i>Cronobacter sakazakii</i> 696                                      |
| Csa-11-1            | Bacteria | Proteobacteria | Gammaproteobacteria | Enterobacteriales | Enterobacteriaceae | <i>Cronobacter sakazakii</i> 701                                      |
| Csa-12-1            | Bacteria | Proteobacteria | Gammaproteobacteria | Enterobacteriales | Enterobacteriaceae | <i>Cronobacter sakazakii</i> ATCC BAA-894                             |
| Csa-13-1            | Bacteria | Proteobacteria | Gammaproteobacteria | Enterobacteriales | Enterobacteriaceae | <i>Cronobacter sakazakii</i> CMCC 45402                               |
| Csa-14-1            | Bacteria | Proteobacteria | Gammaproteobacteria | Enterobacteriales | Enterobacteriaceae | <i>Cronobacter sakazakii</i> E899                                     |
| Csa-15-1            | Bacteria | Proteobacteria | Gammaproteobacteria | Enterobacteriales | Enterobacteriaceae | <i>Cronobacter sakazakii</i> ES15                                     |
| Csa-16-1            | Bacteria | Proteobacteria | Gammaproteobacteria | Enterobacteriales | Enterobacteriaceae | <i>Cronobacter sakazakii</i> SP291                                    |
| Ctu-3-1             | Bacteria | Proteobacteria | Gammaproteobacteria | Enterobacteriales | Enterobacteriaceae | <i>Cronobacter turicensis</i> 564                                     |
| Ctu-4-1             | Bacteria | Proteobacteria | Gammaproteobacteria | Enterobacteriales | Enterobacteriaceae | <i>Cronobacter turicensis</i> z3032                                   |
| Cun-1-1 to Cun-1-2  | Bacteria | Proteobacteria | Gammaproteobacteria | Enterobacteriales | Enterobacteriaceae | <i>Cronobacter universalis</i> NCTC 9529                              |
| Dda-4-1             | Bacteria | Proteobacteria | Gammaproteobacteria | Enterobacteriales | Enterobacteriaceae | <i>Dickeya dadantii</i> 3937                                          |
| Dda-5-1             | Bacteria | Proteobacteria | Gammaproteobacteria | Enterobacteriales | Enterobacteriaceae | <i>Dickeya dadantii</i> Ech586                                        |
| Ddi-3-1             | Bacteria | Proteobacteria | Gammaproteobacteria | Enterobacteriales | Enterobacteriaceae | <i>Dickeya dianthicola</i> GBBC 2039                                  |
| DDi-4-1             | Bacteria | Proteobacteria | Gammaproteobacteria | Enterobacteriales | Enterobacteriaceae | <i>Dickeya dianthicola</i> NCPPB 3534                                 |
| Ddi-5-1             | Bacteria | Proteobacteria | Gammaproteobacteria | Enterobacteriales | Enterobacteriaceae | <i>Dickeya dianthicola</i> NCPPB 453                                  |
| Dpa-1-1             | Bacteria | Proteobacteria | Gammaproteobacteria | Enterobacteriales | Enterobacteriaceae | <i>Dickeya paradisiaca</i> NCPPB 2511                                 |
| Dso-2-1             | Bacteria | Proteobacteria | Gammaproteobacteria | Enterobacteriales | Enterobacteriaceae | <i>Dickeya solani</i> GBBC 2040                                       |
| Dso-3-1             | Bacteria | Proteobacteria | Gammaproteobacteria | Enterobacteriales | Enterobacteriaceae | <i>Dickeya solani</i> IPO 2222                                        |
| Dso-4-1             | Bacteria | Proteobacteria | Gammaproteobacteria | Enterobacteriales | Enterobacteriaceae | <i>Dickeya solani</i> MK10                                            |
| Dso-5-1             | Bacteria | Proteobacteria | Gammaproteobacteria | Enterobacteriales | Enterobacteriaceae | <i>Dickeya solani</i> MK16                                            |
| Dso-6-1             | Bacteria | Proteobacteria | Gammaproteobacteria | Enterobacteriales | Enterobacteriaceae | <i>Dickeya solani</i> RNS 08.23.3.1.A                                 |
| Dsp-7-1             | Bacteria | Proteobacteria | Gammaproteobacteria | Enterobacteriales | Enterobacteriaceae | <i>Dickeya sp.</i> CSL RW240                                          |
| Dsp-8-1             | Bacteria | Proteobacteria | Gammaproteobacteria | Enterobacteriales | Enterobacteriaceae | <i>Dickeya sp.</i> D s0432-1                                          |
| Dsp-9-1             | Bacteria | Proteobacteria | Gammaproteobacteria | Enterobacteriales | Enterobacteriaceae | <i>Dickeya sp.</i> NCPPB 569                                          |
| Dze-7-1             | Bacteria | Proteobacteria | Gammaproteobacteria | Enterobacteriales | Enterobacteriaceae | <i>Dickeya zeae</i> MS1                                               |
| Dze-8-1             | Bacteria | Proteobacteria | Gammaproteobacteria | Enterobacteriales | Enterobacteriaceae | <i>Dickeya zeae</i> NCPPB 3532                                        |
| Dze-9-1             | Bacteria | Proteobacteria | Gammaproteobacteria | Enterobacteriales | Enterobacteriaceae | <i>Dickeya zeae</i> ZJU1202                                           |
| Eic-2-1             | Bacteria | Proteobacteria | Gammaproteobacteria | Enterobacteriales | Enterobacteriaceae | <i>Edwardsiella ictaluri</i> 93-146                                   |
| Eta-4-1             | Bacteria | Proteobacteria | Gammaproteobacteria | Enterobacteriales | Enterobacteriaceae | <i>Edwardsiella tarda</i> ATCC 23685                                  |
| Eta-5-1             | Bacteria | Proteobacteria | Gammaproteobacteria | Enterobacteriales | Enterobacteriaceae | <i>Edwardsiella tarda</i> C07-087                                     |
| Eta-6-1             | Bacteria | Proteobacteria | Gammaproteobacteria | Enterobacteriales | Enterobacteriaceae | <i>Edwardsiella tarda</i> EIB202                                      |
| Eta-7-1             | Bacteria | Proteobacteria | Gammaproteobacteria | Enterobacteriales | Enterobacteriaceae | <i>Edwardsiella tarda</i> FL6-60                                      |
| Eta-8-1             | Bacteria | Proteobacteria | Gammaproteobacteria | Enterobacteriales | Enterobacteriaceae | <i>Edwardsiella tarda</i> NBRC 105688                                 |
| Eae-1-1             | Bacteria | Proteobacteria | Gammaproteobacteria | Enterobacteriales | Enterobacteriaceae | <i>Enterobacter aerogenes</i> EA1509E                                 |
| Eae-2-1             | Bacteria | Proteobacteria | Gammaproteobacteria | Enterobacteriales | Enterobacteriaceae | <i>Enterobacter aerogenes</i> FGI35                                   |
| Eae-3-1             | Bacteria | Proteobacteria | Gammaproteobacteria | Enterobacteriales | Enterobacteriaceae | <i>Enterobacter aerogenes</i> KCTC 2190                               |
| Eca-3-1             | Bacteria | Proteobacteria | Gammaproteobacteria | Enterobacteriales | Enterobacteriaceae | <i>Enterobacter cancerogenus</i> ATCC 35316                           |
| Eas-1-1 to Eas-1-2  | Bacteria | Proteobacteria | Gammaproteobacteria | Enterobacteriales | Enterobacteriaceae | <i>Enterobacter cloacae</i> complex <i>Enterobacter asburiae</i>      |
| Eas-4-1             | Bacteria | Proteobacteria | Gammaproteobacteria | Enterobacteriales | Enterobacteriaceae | <i>Enterobacter cloacae</i> complex <i>Enterobacter asburiae</i> LF7a |
| Ecl-1-1 to Ecl-1-12 | Bacteria | Proteobacteria | Gammaproteobacteria | Enterobacteriales | Enterobacteriaceae | <i>Enterobacter cloacae</i> complex <i>Enterobacter cloacae</i>       |
| Ecl-55-1            | Bacteria | Proteobacteria | Gammaproteobacteria | Enterobacteriales | Enterobacteriaceae | <i>Enterobacter cloacae</i> complex <i>Enterobacter cloacae</i> BWH   |
| Ecl-56-1            | Bacteria | Proteobacteria | Gammaproteobacteria | Enterobacteriales | Enterobacteriaceae | <i>Enterobacter cloacae</i> complex <i>Enterobacter cloacae</i> BWH   |
| Ecl-57-1            | Bacteria | Proteobacteria | Gammaproteobacteria | Enterobacteriales | Enterobacteriaceae | <i>Enterobacter cloacae</i> complex <i>Enterobacter cloacae</i>       |
| Ecl-58-1            | Bacteria | Proteobacteria | Gammaproteobacteria | Enterobacteriales | Enterobacteriaceae | <i>Enterobacter cloacae</i> complex <i>Enterobacter cloacae</i>       |
| Ecl-59-1            | Bacteria | Proteobacteria | Gammaproteobacteria | Enterobacteriales | Enterobacteriaceae | <i>Enterobacter cloacae</i> complex <i>Enterobacter cloacae</i> S611  |
| Ecl-60-1            | Bacteria | Proteobacteria | Gammaproteobacteria | Enterobacteriales | Enterobacteriaceae | <i>Enterobacter cloacae</i> complex <i>Enterobacter cloacae</i> SCF1  |
| Ecl-66-1            | Bacteria | Proteobacteria | Gammaproteobacteria | Enterobacteriales | Enterobacteriaceae | <i>Enterobacter cloacae</i> complex <i>Enterobacter cloacae str.</i>  |

Hanford



































































|                    |          |                |                     |                   |                    |                                                                            |
|--------------------|----------|----------------|---------------------|-------------------|--------------------|----------------------------------------------------------------------------|
| Ksp-7-1            | Bacteria | Proteobacteria | Gammaproteobacteria | Enterobacteriales | Enterobacteriaceae | <i>Klebsiella sp.</i> MS 92-3                                              |
| Ksp-8-1            | Bacteria | Proteobacteria | Gammaproteobacteria | Enterobacteriales | Enterobacteriaceae | <i>Klebsiella sp.</i> OBRC7                                                |
| Kva-1-1 to Kva-1-7 | Bacteria | Proteobacteria | Gammaproteobacteria | Enterobacteriales | Enterobacteriaceae | <i>Klebsiella variicola</i>                                                |
| Kva-2-1            | Bacteria | Proteobacteria | Gammaproteobacteria | Enterobacteriales | Enterobacteriaceae | <i>Klebsiella variicola</i> At-22                                          |
| Era-1-1            | Bacteria | Proteobacteria | Gammaproteobacteria | Enterobacteriales | Enterobacteriaceae | Kosakonia <i>Enterobacter radicincitans</i> DSM 16656                      |
| Ksa-1-1            | Bacteria | Proteobacteria | Gammaproteobacteria | Enterobacteriales | Enterobacteriaceae | <i>Kosakonia sacchari</i> SP1                                              |
| Mmo-1-1 to Mmo-1-8 | Bacteria | Proteobacteria | Gammaproteobacteria | Enterobacteriales | Enterobacteriaceae | <i>Morganella morganii</i>                                                 |
| Mmo-5-1            | Bacteria | Proteobacteria | Gammaproteobacteria | Enterobacteriales | Enterobacteriaceae | <i>Morganella morganii</i> SC01                                            |
| Mmo-6-1            | Bacteria | Proteobacteria | Gammaproteobacteria | Enterobacteriales | Enterobacteriaceae | <i>Morganella morganii subsp. morganii</i> KT                              |
| Pag-3-1            | Bacteria | Proteobacteria | Gammaproteobacteria | Enterobacteriales | Enterobacteriaceae | <i>Pantoea agglomerans</i> 299R                                            |
| Pag-1-1 to Pag-1-6 | Bacteria | Proteobacteria | Gammaproteobacteria | Enterobacteriales | Enterobacteriaceae | <i>Pantoea</i> <i>Pantoea agglomerans</i> group <i>Pantoea agglomerans</i> |
| Pag-4-1            | Bacteria | Proteobacteria | Gammaproteobacteria | Enterobacteriales | Enterobacteriaceae | <i>Pantoea agglomerans</i> IG1                                             |
| Pag-5-1            | Bacteria | Proteobacteria | Gammaproteobacteria | Enterobacteriales | Enterobacteriaceae | <i>Pantoea agglomerans</i> Tx10                                            |
| Pan-1-1 to Pan-1-5 | Bacteria | Proteobacteria | Gammaproteobacteria | Enterobacteriales | Enterobacteriaceae | <i>Pantoea ananatis</i>                                                    |
| Pan-6-1            | Bacteria | Proteobacteria | Gammaproteobacteria | Enterobacteriales | Enterobacteriaceae | <i>Pantoea ananatis</i> AJ13355                                            |
| Pan-7-1            | Bacteria | Proteobacteria | Gammaproteobacteria | Enterobacteriales | Enterobacteriaceae | <i>Pantoea ananatis</i> BRT175                                             |
| Pan-8-1            | Bacteria | Proteobacteria | Gammaproteobacteria | Enterobacteriales | Enterobacteriaceae | <i>Pantoea ananatis</i> LMG 20103                                          |
| Pan-9-1            | Bacteria | Proteobacteria | Gammaproteobacteria | Enterobacteriales | Enterobacteriaceae | <i>Pantoea ananatis</i> LMG 5342                                           |
| Pan-10-1           | Bacteria | Proteobacteria | Gammaproteobacteria | Enterobacteriales | Enterobacteriaceae | <i>Pantoea ananatis</i> PA13                                               |
| Pdi-1-1            | Bacteria | Proteobacteria | Gammaproteobacteria | Enterobacteriales | Enterobacteriaceae | <i>Pantoea dispersa</i> EGD-AAK13                                          |
| Psp-12-1           | Bacteria | Proteobacteria | Gammaproteobacteria | Enterobacteriales | Enterobacteriaceae | <i>Pantoea sp.</i> A4                                                      |
| Psp-19-1           | Bacteria | Proteobacteria | Gammaproteobacteria | Enterobacteriales | Enterobacteriaceae | <i>Pantoea sp.</i> aB                                                      |
| Psp-13-1           | Bacteria | Proteobacteria | Gammaproteobacteria | Enterobacteriales | Enterobacteriaceae | <i>Pantoea sp.</i> AS-PWVM4                                                |
| Psp-14-1           | Bacteria | Proteobacteria | Gammaproteobacteria | Enterobacteriales | Enterobacteriaceae | <i>Pantoea sp.</i> At-9b                                                   |
| Psp-15-1           | Bacteria | Proteobacteria | Gammaproteobacteria | Enterobacteriales | Enterobacteriaceae | <i>Pantoea sp.</i> GM01                                                    |
| Psp-17-1           | Bacteria | Proteobacteria | Gammaproteobacteria | Enterobacteriales | Enterobacteriaceae | <i>Pantoea sp.</i> Sc1                                                     |
| Psp-16-1           | Bacteria | Proteobacteria | Gammaproteobacteria | Enterobacteriales | Enterobacteriaceae | <i>Pantoea sp.</i> SL1.M5                                                  |
| Psp-18-1           | Bacteria | Proteobacteria | Gammaproteobacteria | Enterobacteriales | Enterobacteriaceae | <i>Pantoea sp.</i> YR343                                                   |
| Pst-3-1            | Bacteria | Proteobacteria | Gammaproteobacteria | Enterobacteriales | Enterobacteriaceae | <i>Pantoea stewartii subsp. indologenes</i>                                |
| Pst-4-1            | Bacteria | Proteobacteria | Gammaproteobacteria | Enterobacteriales | Enterobacteriaceae | <i>Pantoea stewartii subsp. stewartii</i> DC283                            |
| Pva-2-1            | Bacteria | Proteobacteria | Gammaproteobacteria | Enterobacteriales | Enterobacteriaceae | <i>Pantoea vagans</i> C9-1                                                 |
| Pat-4-1            | Bacteria | Proteobacteria | Gammaproteobacteria | Enterobacteriales | Enterobacteriaceae | <i>Pectobacterium atrosepticum</i> SCRI1043                                |
| Pca-9-1            | Bacteria | Proteobacteria | Gammaproteobacteria | Enterobacteriales | Enterobacteriaceae | <i>Pectobacterium carotovorum subsp. brasiliensis</i> PBR1692              |
| Pca-10-1           | Bacteria | Proteobacteria | Gammaproteobacteria | Enterobacteriales | Enterobacteriaceae | <i>Pectobacterium carotovorum subsp. carotovorum</i> PC1                   |
| Pca-11-1           | Bacteria | Proteobacteria | Gammaproteobacteria | Enterobacteriales | Enterobacteriaceae | <i>Pectobacterium carotovorum subsp. carotovorum</i> PCC21                 |
| Pca-12-1           | Bacteria | Proteobacteria | Gammaproteobacteria | Enterobacteriales | Enterobacteriaceae | <i>Pectobacterium carotovorum subsp. carotovorum</i> WPP14                 |
| Psp-20-1           | Bacteria | Proteobacteria | Gammaproteobacteria | Enterobacteriales | Enterobacteriaceae | <i>Pectobacterium sp.</i> SCC3193                                          |
| Pwa-2-1            | Bacteria | Proteobacteria | Gammaproteobacteria | Enterobacteriales | Enterobacteriaceae | <i>Pectobacterium wasabiae</i> CFBP 3304                                   |
| Pwa-3-1            | Bacteria | Proteobacteria | Gammaproteobacteria | Enterobacteriales | Enterobacteriaceae | <i>Pectobacterium wasabiae</i> WPP163                                      |
| Pas-2-1            | Bacteria | Proteobacteria | Gammaproteobacteria | Enterobacteriales | Enterobacteriaceae | <i>Photorhabdus asymbiotica</i>                                            |
| Plu-6-1            | Bacteria | Proteobacteria | Gammaproteobacteria | Enterobacteriales | Enterobacteriaceae | <i>Photorhabdus luminescens subsp. laumondii</i> TTO1                      |
| Pte-4-1            | Bacteria | Proteobacteria | Gammaproteobacteria | Enterobacteriales | Enterobacteriaceae | <i>Photorhabdus temperata</i> J3                                           |
| Pte-5-1            | Bacteria | Proteobacteria | Gammaproteobacteria | Enterobacteriales | Enterobacteriaceae | <i>Photorhabdus temperata subsp. temperata</i> M1021                       |
| Pst-5-1            | Bacteria | Proteobacteria | Gammaproteobacteria | Enterobacteriales | Enterobacteriaceae | <i>Plautia stali symbiont</i>                                              |
| Pha-1-1            | Bacteria | Proteobacteria | Gammaproteobacteria | Enterobacteriales | Enterobacteriaceae | <i>Proteus hauseri</i> Zmd44                                               |
| Pmi-1-1 to Pmi-1-6 | Bacteria | Proteobacteria | Gammaproteobacteria | Enterobacteriales | Enterobacteriaceae | <i>Proteus mirabilis</i>                                                   |
| Pmi-2-1            | Bacteria | Proteobacteria | Gammaproteobacteria | Enterobacteriales | Enterobacteriaceae | <i>Proteus mirabilis</i> ATCC 29906                                        |
| Pmi-3-1            | Bacteria | Proteobacteria | Gammaproteobacteria | Enterobacteriales | Enterobacteriaceae | <i>Proteus mirabilis</i> BB2000                                            |
| Pmi-4-1            | Bacteria | Proteobacteria | Gammaproteobacteria | Enterobacteriales | Enterobacteriaceae | <i>Proteus mirabilis</i> C05028                                            |
| Pmi-5-1            | Bacteria | Proteobacteria | Gammaproteobacteria | Enterobacteriales | Enterobacteriaceae | <i>Proteus mirabilis</i> HI4320                                            |
| Pmi-6-1            | Bacteria | Proteobacteria | Gammaproteobacteria | Enterobacteriales | Enterobacteriaceae | <i>Proteus mirabilis</i> PR03                                              |
| Pmi-7-1            | Bacteria | Proteobacteria | Gammaproteobacteria | Enterobacteriales | Enterobacteriaceae | <i>Proteus mirabilis</i> WGLW4                                             |
| Pmi-8-1            | Bacteria | Proteobacteria | Gammaproteobacteria | Enterobacteriales | Enterobacteriaceae | <i>Proteus mirabilis</i> WGLW6                                             |
| Pal-9-1            | Bacteria | Proteobacteria | Gammaproteobacteria | Enterobacteriales | Enterobacteriaceae | <i>Providencia alcalifaciens</i> Dmel2                                     |
| Pal-8-1            | Bacteria | Proteobacteria | Gammaproteobacteria | Enterobacteriales | Enterobacteriaceae | <i>Providencia alcalifaciens</i> DSM 30120                                 |
| Pbu-1-1            | Bacteria | Proteobacteria | Gammaproteobacteria | Enterobacteriales | Enterobacteriaceae | <i>Providencia burhodogranariae</i> DSM 19968                              |
| Pre-2-1            | Bacteria | Proteobacteria | Gammaproteobacteria | Enterobacteriales | Enterobacteriaceae | <i>Providencia rettgeri</i> Dmel1                                          |
| Pru-1-1            | Bacteria | Proteobacteria | Gammaproteobacteria | Enterobacteriales | Enterobacteriaceae | <i>Providencia rustigianii</i> DSM 4541                                    |
| Pst-6-1            | Bacteria | Proteobacteria | Gammaproteobacteria | Enterobacteriales | Enterobacteriaceae | <i>Providencia stuartii</i> ATCC 25827                                     |
| Pst-7-1            | Bacteria | Proteobacteria | Gammaproteobacteria | Enterobacteriales | Enterobacteriaceae | <i>Providencia stuartii</i> MRSN 2154                                      |
| Ror-4-1 to Ror-4-2 | Bacteria | Proteobacteria | Gammaproteobacteria | Enterobacteriales | Enterobacteriaceae | <i>Raoultella ormithinolytica</i> B6                                       |
| Rpl-1-1 to Rpl-1-3 | Bacteria | Proteobacteria | Gammaproteobacteria | Enterobacteriales | Enterobacteriaceae | <i>Raoultella planticola</i>                                               |
| Sbo-3-1            | Bacteria | Proteobacteria | Gammaproteobacteria | Enterobacteriales | Enterobacteriaceae | <i>Salmonella bongori</i> N268-08                                          |
| Sbo-4-1            | Bacteria | Proteobacteria | Gammaproteobacteria | Enterobacteriales | Enterobacteriaceae | <i>Salmonella bongori</i> NCTC 12419                                       |
| Sen-2-1 to Sen-2-2 | Bacteria | Proteobacteria | Gammaproteobacteria | Enterobacteriales | Enterobacteriaceae | <i>Salmonella enterica</i>                                                 |

































|                        |                                                                                                                                                                                                               |
|------------------------|---------------------------------------------------------------------------------------------------------------------------------------------------------------------------------------------------------------|
| Sen-975-1              | Bacteria Proteobacteria Gammaproteobacteria Enterobacteriales Enterobacteriaceae <i>Salmonella enterica subsp. enterica serovar</i> Typhimurium str. STM11                                                    |
| Sen-976-1              | Bacteria Proteobacteria Gammaproteobacteria Enterobacteriales Enterobacteriaceae <i>Salmonella enterica subsp. enterica serovar</i> Typhimurium str. STM12                                                    |
| Sen-977-1              | Bacteria Proteobacteria Gammaproteobacteria Enterobacteriales Enterobacteriaceae <i>Salmonella enterica subsp. enterica serovar</i> Typhimurium str. STM2                                                     |
| Sen-978-1              | Bacteria Proteobacteria Gammaproteobacteria Enterobacteriales Enterobacteriaceae <i>Salmonella enterica subsp. enterica serovar</i> Typhimurium str. STM3                                                     |
| Sen-979-1              | Bacteria Proteobacteria Gammaproteobacteria Enterobacteriales Enterobacteriaceae <i>Salmonella enterica subsp. enterica serovar</i> Typhimurium str. STM4                                                     |
| Sen-980-1              | Bacteria Proteobacteria Gammaproteobacteria Enterobacteriales Enterobacteriaceae <i>Salmonella enterica subsp. enterica serovar</i> Typhimurium str. STM5                                                     |
| Sen-981-1              | Bacteria Proteobacteria Gammaproteobacteria Enterobacteriales Enterobacteriaceae <i>Salmonella enterica subsp. enterica serovar</i> Typhimurium str. STM6                                                     |
| Sen-982-1              | Bacteria Proteobacteria Gammaproteobacteria Enterobacteriales Enterobacteriaceae <i>Salmonella enterica subsp. enterica serovar</i> Typhimurium str. STM7                                                     |
| Sen-983-1              | Bacteria Proteobacteria Gammaproteobacteria Enterobacteriales Enterobacteriaceae <i>Salmonella enterica subsp. enterica serovar</i> Typhimurium str. STM8                                                     |
| Sen-984-1              | Bacteria Proteobacteria Gammaproteobacteria Enterobacteriales Enterobacteriaceae <i>Salmonella enterica subsp. enterica serovar</i> Typhimurium str. STM9                                                     |
| Sen-985-1              | Bacteria Proteobacteria Gammaproteobacteria Enterobacteriales Enterobacteriaceae <i>Salmonella enterica subsp. enterica serovar</i> Typhimurium str. T000240                                                  |
| Sen-986-1              | Bacteria Proteobacteria Gammaproteobacteria Enterobacteriales Enterobacteriaceae <i>Salmonella enterica subsp. enterica serovar</i> Typhimurium str. TN061786                                                 |
| Sen-987-1              | Bacteria Proteobacteria Gammaproteobacteria Enterobacteriales Enterobacteriaceae <i>Salmonella enterica subsp. enterica serovar</i> Typhimurium str. U288                                                     |
| Sen-988-1              | Bacteria Proteobacteria Gammaproteobacteria Enterobacteriales Enterobacteriaceae <i>Salmonella enterica subsp. enterica serovar</i> Typhimurium str. UK-1                                                     |
| Sen-989-1              | Bacteria Proteobacteria Gammaproteobacteria Enterobacteriales Enterobacteriaceae <i>Salmonella enterica subsp. enterica serovar</i> Typhimurium str. USDA-ARS-USMARC-1899                                     |
| Sen-990-1              | Bacteria Proteobacteria Gammaproteobacteria Enterobacteriales Enterobacteriaceae <i>Salmonella enterica subsp. enterica serovar</i> Typhimurium var. 5- str. CFSAN001921                                      |
| Sen-991-1              | Bacteria Proteobacteria Gammaproteobacteria Enterobacteriales Enterobacteriaceae <i>Salmonella enterica subsp. enterica serovar</i> Typhimurium var. 5- str. CFSAN004345                                      |
| Sen-992-1              | Bacteria Proteobacteria Gammaproteobacteria Enterobacteriales Enterobacteriaceae <i>Salmonella enterica subsp. enterica serovar</i> Typhimurium var. Copenhagen str. 0084                                     |
| Sen-993-1              | Bacteria Proteobacteria Gammaproteobacteria Enterobacteriales Enterobacteriaceae <i>Salmonella enterica subsp. enterica serovar</i> Uganda str. R8-3404                                                       |
| Sen-994-1              | Bacteria Proteobacteria Gammaproteobacteria Enterobacteriales Enterobacteriaceae <i>Salmonella enterica subsp. enterica serovar</i> Urbana str. ATCC 9261                                                     |
| Sen-995-1              | Bacteria Proteobacteria Gammaproteobacteria Enterobacteriales Enterobacteriaceae <i>Salmonella enterica subsp. enterica serovar</i> Worthington str. ATCC 9607                                                |
| Sen-996-1              | Bacteria Proteobacteria Gammaproteobacteria Enterobacteriales Enterobacteriaceae <i>Salmonella enterica subsp. enterica serovar</i> Agona <i>Salmonella enterica subsp. enterica serovar</i> Agona str. SL483 |
| Sen-997-1              | Bacteria Proteobacteria Gammaproteobacteria Enterobacteriales Enterobacteriaceae <i>Salmonella enterica subsp. enterica serovar</i> Choleraesuis str. SCSA50                                                  |
| Sen-998-1              | Bacteria Proteobacteria Gammaproteobacteria Enterobacteriales Enterobacteriaceae <i>Salmonella enterica subsp. enterica serovar</i> Choleraesuis str. SCSA50                                                  |
| Sen-999-1              | Bacteria Proteobacteria Gammaproteobacteria Enterobacteriales Enterobacteriaceae <i>Salmonella enterica subsp. enterica serovar</i> Dublin str. CT_02021853                                                   |
| Sen-1000-1             | Bacteria Proteobacteria Gammaproteobacteria Enterobacteriales Enterobacteriaceae <i>Salmonella enterica subsp. enterica serovar</i> Gallinarum/pullorum str. RKS5078                                          |
| Sen-1001-1             | Bacteria Proteobacteria Gammaproteobacteria Enterobacteriales Enterobacteriaceae <i>Salmonella enterica subsp. enterica serovar</i> Gallinarum/pullorum str. RKS5078                                          |
| Sen-1001-1             | Bacteria Proteobacteria Gammaproteobacteria Enterobacteriales Enterobacteriaceae <i>Salmonella enterica subsp. enterica serovar</i> Gallinarum str. 287/91                                                    |
| Sen-1002-1             | Bacteria Proteobacteria Gammaproteobacteria Enterobacteriales Enterobacteriaceae <i>Salmonella enterica subsp. enterica serovar</i> Hadar str. RI_05P066                                                      |
| Sen-1003-1             | Bacteria Proteobacteria Gammaproteobacteria Enterobacteriales Enterobacteriaceae <i>Salmonella enterica subsp. enterica serovar</i> Heidelberg str. B182                                                      |
| Sen-1004-1             | Bacteria Proteobacteria Gammaproteobacteria Enterobacteriales Enterobacteriaceae <i>Salmonella enterica subsp. enterica serovar</i> Heidelberg str. SL476                                                     |
| Sen-1005-1             | Bacteria Proteobacteria Gammaproteobacteria Enterobacteriales Enterobacteriaceae <i>Salmonella enterica subsp. enterica serovar</i> Heidelberg str. SL486                                                     |
| Sen-1006-1             | Bacteria Proteobacteria Gammaproteobacteria Enterobacteriales Enterobacteriaceae <i>Salmonella enterica subsp. enterica serovar</i> Kentucky str. CDC 191                                                     |
| Sen-265-1 to Sen-265-2 | Bacteria Proteobacteria Gammaproteobacteria Enterobacteriales Enterobacteriaceae <i>Salmonella enterica subsp. enterica serovar</i> Kentucky str. CVM29188                                                    |
| Sen-1007-1             | Bacteria Proteobacteria Gammaproteobacteria Enterobacteriales Enterobacteriaceae <i>Salmonella enterica subsp. enterica serovar</i> Newport str. SL254                                                        |
| Sen-1008-1             | Bacteria Proteobacteria Gammaproteobacteria Enterobacteriales Enterobacteriaceae <i>Salmonella enterica subsp. enterica serovar</i> Newport str. SL317                                                        |
|                        | Bacteria Proteobacteria Gammaproteobacteria Enterobacteriales Enterobacteriaceae <i>Salmonella enterica subsp. enterica serovar</i> Paratyphi B str. SPB7                                                     |

|                          |                                                                                                                                                                                                                               |
|--------------------------|-------------------------------------------------------------------------------------------------------------------------------------------------------------------------------------------------------------------------------|
| Sen-1009-1               | Bacteria Proteobacteria Gammaproteobacteria Enterobacteriales Enterobacteriaceae Salmonella Salmonella enterica subsp. entericaserovar Saintpaul<br><i>Salmonella enterica subsp. enterica serovar Saintpaul str. SARA23</i>  |
| Sen-1010-1               | Bacteria Proteobacteria Gammaproteobacteria Enterobacteriales Enterobacteriaceae Salmonella Salmonella enterica subsp. entericaserovar Saintpaul<br><i>Salmonella enterica subsp. enterica serovar Saintpaul str. SARA29</i>  |
| Sen-1011-1               | Bacteria Proteobacteria Gammaproteobacteria Enterobacteriales Enterobacteriaceae Salmonella Salmonella enterica subsp. entericaserovar Typhi <i>Salmonella enterica subsp. enterica serovar Typhi str. CT18</i>               |
| Sen-1012-1               | Bacteria Proteobacteria Gammaproteobacteria Enterobacteriales Enterobacteriaceae Salmonella Salmonella enterica subsp. entericaserovar Typhi <i>Salmonella enterica subsp. enterica serovar Typhi str. E00-7866</i>           |
| Sen-1013-1               | Bacteria Proteobacteria Gammaproteobacteria Enterobacteriales Enterobacteriaceae Salmonella Salmonella enterica subsp. entericaserovar Typhi <i>Salmonella enterica subsp. enterica serovar Typhi str. Ty2</i>                |
| Sen-1014-1               | Bacteria Proteobacteria Gammaproteobacteria Enterobacteriales Enterobacteriaceae Salmonella Salmonella enterica subsp. entericaserovar Typhimurium<br><i>Salmonella enterica subsp. enterica serovar Typhimurium str. LT2</i> |
| Sen-1015-1               | Bacteria Proteobacteria Gammaproteobacteria Enterobacteriales Enterobacteriaceae Salmonella Salmonella enterica subsp. entericaserovar Virchow<br><i>Salmonella enterica subsp. enterica serovar Virchow str. SL491</i>       |
| Sen-1016-1 to Sen-1016-3 | Bacteria Proteobacteria Gammaproteobacteria Enterobacteriales Enterobacteriaceae <i>Salmonella enterica subsp. houtenae</i>                                                                                                   |
| Sen-1017-1               | Bacteria Proteobacteria Gammaproteobacteria Enterobacteriales Enterobacteriaceae <i>Salmonella enterica subsp. houtenae serovar 16:z4,z32:- str. RKS3027</i>                                                                  |
| Sen-1018-1               | Bacteria Proteobacteria Gammaproteobacteria Enterobacteriales Enterobacteriaceae <i>Salmonella enterica subsp. houtenae serovar 50:g,z51:- str. 01-0133</i>                                                                   |
| Sen-1019-1               | Bacteria Proteobacteria Gammaproteobacteria Enterobacteriales Enterobacteriaceae <i>Salmonella enterica subsp. houtenae str. ATCC BAA-1581</i>                                                                                |
| Sen-1020-1               | Bacteria Proteobacteria Gammaproteobacteria Enterobacteriales Enterobacteriaceae <i>Salmonella enterica subsp. indica serovar 6,14,25:z10:1,(2),7 str. 1121</i>                                                               |
| Sen-1021-1               | Bacteria Proteobacteria Gammaproteobacteria Enterobacteriales Enterobacteriaceae <i>Salmonella enterica subsp. salamae serovar 58:l,z13,z28:z6 str. 00-0163</i>                                                               |
| Sen-1022-1               | Bacteria Proteobacteria Gammaproteobacteria Enterobacteriales Enterobacteriaceae <i>Salmonella enterica subsp. salamae str. 3588/07</i>                                                                                       |
| Sfo-4-1                  | Bacteria Proteobacteria Gammaproteobacteria Enterobacteriales Enterobacteriaceae <i>Serratia fonticola AU-AP2C</i>                                                                                                            |
| Sli-3-1                  | Bacteria Proteobacteria Gammaproteobacteria Enterobacteriales Enterobacteriaceae <i>Serratia liquefaciens ATCC 27592</i>                                                                                                      |
| Sma-1-1 to Sma-1-4       | Bacteria Proteobacteria Gammaproteobacteria Enterobacteriales Enterobacteriaceae <i>Serratia marcescens</i>                                                                                                                   |
| Sma-21-1                 | Bacteria Proteobacteria Gammaproteobacteria Enterobacteriales Enterobacteriaceae <i>Serratia marcescens EGD-HP20</i>                                                                                                          |
| Sma-22-1                 | Bacteria Proteobacteria Gammaproteobacteria Enterobacteriales Enterobacteriaceae <i>Serratia marcescens FGI94</i>                                                                                                             |
| Sma-23-1                 | Bacteria Proteobacteria Gammaproteobacteria Enterobacteriales Enterobacteriaceae <i>Serratia marcescens LCT-SM213</i>                                                                                                         |
| Sma-24-1                 | Bacteria Proteobacteria Gammaproteobacteria Enterobacteriales Enterobacteriaceae <i>Serratia marcescens VGH107</i>                                                                                                            |
| Sma-25-1                 | Bacteria Proteobacteria Gammaproteobacteria Enterobacteriales Enterobacteriaceae <i>Serratia marcescens W2.3</i>                                                                                                              |
| Sma-26-1                 | Bacteria Proteobacteria Gammaproteobacteria Enterobacteriales Enterobacteriaceae <i>Serratia marcescens WW4</i>                                                                                                               |
| Sod-1-1                  | Bacteria Proteobacteria Gammaproteobacteria Enterobacteriales Enterobacteriaceae <i>Serratia odorifera DSM 4582</i>                                                                                                           |
| Spl-2-1                  | Bacteria Proteobacteria Gammaproteobacteria Enterobacteriales Enterobacteriaceae <i>Serratia plymuthica 4Rx13</i>                                                                                                             |
| Spl-3-1                  | Bacteria Proteobacteria Gammaproteobacteria Enterobacteriales Enterobacteriaceae <i>Serratia plymuthica A30</i>                                                                                                               |
| Spl-4-1                  | Bacteria Proteobacteria Gammaproteobacteria Enterobacteriales Enterobacteriaceae <i>Serratia plymuthica AS9</i>                                                                                                               |
| Spl-5-1                  | Bacteria Proteobacteria Gammaproteobacteria Enterobacteriales Enterobacteriaceae <i>Serratia plymuthica PRI-2C</i>                                                                                                            |
| Spl-6-1                  | Bacteria Proteobacteria Gammaproteobacteria Enterobacteriales Enterobacteriaceae <i>Serratia plymuthica S13</i>                                                                                                               |
| Spr-2-1                  | Bacteria Proteobacteria Gammaproteobacteria Enterobacteriales Enterobacteriaceae <i>Serratia proteamaculans 568</i>                                                                                                           |
| Ssp-10-1                 | Bacteria Proteobacteria Gammaproteobacteria Enterobacteriales Enterobacteriaceae <i>Serratia sp. AS12</i>                                                                                                                     |
| Ssp-11-1                 | Bacteria Proteobacteria Gammaproteobacteria Enterobacteriales Enterobacteriaceae <i>Serratia sp. AS13</i>                                                                                                                     |
| Ssp-12-1                 | Bacteria Proteobacteria Gammaproteobacteria Enterobacteriales Enterobacteriaceae <i>Serratia sp. ATCC 39006</i>                                                                                                               |
| Ssp-13-1                 | Bacteria Proteobacteria Gammaproteobacteria Enterobacteriales Enterobacteriaceae <i>Serratia sp. M24T3</i>                                                                                                                    |
| Ssp-14-1                 | Bacteria Proteobacteria Gammaproteobacteria Enterobacteriales Enterobacteriaceae <i>Serratia sp. S4</i>                                                                                                                       |
| Ssy-2-1                  | Bacteria Proteobacteria Gammaproteobacteria Enterobacteriales Enterobacteriaceae <i>Serratia Serratia symbiotica str. Tucson</i>                                                                                              |
| Sbo-2-1 to Sbo-2-10      | Bacteria Proteobacteria Gammaproteobacteria Enterobacteriales Enterobacteriaceae <i>Shigella boydii</i>                                                                                                                       |
| Sbo-5-1                  | Bacteria Proteobacteria Gammaproteobacteria Enterobacteriales Enterobacteriaceae <i>Shigella boydii 08-0009</i>                                                                                                               |
| Sbo-6-1                  | Bacteria Proteobacteria Gammaproteobacteria Enterobacteriales Enterobacteriaceae <i>Shigella boydii 08-0280</i>                                                                                                               |
| Sbo-7-1                  | Bacteria Proteobacteria Gammaproteobacteria Enterobacteriales Enterobacteriaceae <i>Shigella boydii 08-2671</i>                                                                                                               |
| Sbo-8-1                  | Bacteria Proteobacteria Gammaproteobacteria Enterobacteriales Enterobacteriaceae <i>Shigella boydii 08-2675</i>                                                                                                               |
| Sbo-9-1                  | Bacteria Proteobacteria Gammaproteobacteria Enterobacteriales Enterobacteriaceae <i>Shigella boydii 08-6341</i>                                                                                                               |
| Sbo-10-1                 | Bacteria Proteobacteria Gammaproteobacteria Enterobacteriales Enterobacteriaceae <i>Shigella boydii 09-0344</i>                                                                                                               |
| Sbo-11-1                 | Bacteria Proteobacteria Gammaproteobacteria Enterobacteriales Enterobacteriaceae <i>Shigella boydii 248-1B</i>                                                                                                                |
| Sbo-12-1                 | Bacteria Proteobacteria Gammaproteobacteria Enterobacteriales Enterobacteriaceae <i>Shigella boydii 4444-74</i>                                                                                                               |
| Sbo-13-1                 | Bacteria Proteobacteria Gammaproteobacteria Enterobacteriales Enterobacteriaceae <i>Shigella boydii 5216-82</i>                                                                                                               |
| Sbo-14-1                 | Bacteria Proteobacteria Gammaproteobacteria Enterobacteriales Enterobacteriaceae <i>Shigella boydii ATCC 9905</i>                                                                                                             |
| Sbo-15-1                 | Bacteria Proteobacteria Gammaproteobacteria Enterobacteriales Enterobacteriaceae <i>Shigella boydii CDC 3083-94</i>                                                                                                           |
| Sbo-16-1                 | Bacteria Proteobacteria Gammaproteobacteria Enterobacteriales Enterobacteriaceae <i>Shigella boydii S6614</i>                                                                                                                 |
| Sbo-17-1                 | Bacteria Proteobacteria Gammaproteobacteria Enterobacteriales Enterobacteriaceae <i>Shigella boydii S7334</i>                                                                                                                 |
| Sbo-18-1                 | Bacteria Proteobacteria Gammaproteobacteria Enterobacteriales Enterobacteriaceae <i>Shigella boydii Sb227</i>                                                                                                                 |
| Sdy-3-1                  | Bacteria Proteobacteria Gammaproteobacteria Enterobacteriales Enterobacteriaceae <i>Shigella dysenteriae 1012</i>                                                                                                             |
| Sdy-4-1                  | Bacteria Proteobacteria Gammaproteobacteria Enterobacteriales Enterobacteriaceae <i>Shigella dysenteriae 225-75</i>                                                                                                           |
| Sdy-5-1                  | Bacteria Proteobacteria Gammaproteobacteria Enterobacteriales Enterobacteriaceae <i>Shigella dysenteriae 4</i>                                                                                                                |
| Sdy-6-1                  | Bacteria Proteobacteria Gammaproteobacteria Enterobacteriales Enterobacteriaceae <i>Shigella dysenteriae CDC 74-1112</i>                                                                                                      |



|                       |          |                |                     |                   |                    |                                                            |
|-----------------------|----------|----------------|---------------------|-------------------|--------------------|------------------------------------------------------------|
| Sdy-7-1               | Bacteria | Proteobacteria | Gammaproteobacteria | Enterobacteriales | Enterobacteriaceae | <i>Shigella dysenteriae</i> S6554                          |
| Sdy-8-1               | Bacteria | Proteobacteria | Gammaproteobacteria | Enterobacteriales | Enterobacteriaceae | <i>Shigella dysenteriae</i> Sd197                          |
| Sdy-9-1               | Bacteria | Proteobacteria | Gammaproteobacteria | Enterobacteriales | Enterobacteriaceae | <i>Shigella dysenteriae</i> WRSd3                          |
| Sdy-10-1              | Bacteria | Proteobacteria | Gammaproteobacteria | Enterobacteriales | Enterobacteriaceae | <i>Shigella dysenteriae</i> WRSd5                          |
| Sfl-1-1 to Sfl-1-2    | Bacteria | Proteobacteria | Gammaproteobacteria | Enterobacteriales | Enterobacteriaceae | <i>Shigella flexneri</i>                                   |
| Sfl-52-1              | Bacteria | Proteobacteria | Gammaproteobacteria | Enterobacteriales | Enterobacteriaceae | <i>Shigella flexneri</i> 2001020                           |
| Sfl-53-1              | Bacteria | Proteobacteria | Gammaproteobacteria | Enterobacteriales | Enterobacteriaceae | <i>Shigella flexneri</i> 2002017                           |
| Sfl-54-1              | Bacteria | Proteobacteria | Gammaproteobacteria | Enterobacteriales | Enterobacteriaceae | <i>Shigella flexneri</i> 2002028                           |
| Sfl-55-1              | Bacteria | Proteobacteria | Gammaproteobacteria | Enterobacteriales | Enterobacteriaceae | <i>Shigella flexneri</i> 2002106                           |
| Sfl-56-1              | Bacteria | Proteobacteria | Gammaproteobacteria | Enterobacteriales | Enterobacteriaceae | <i>Shigella flexneri</i> 2003035                           |
| Sfl-57-1              | Bacteria | Proteobacteria | Gammaproteobacteria | Enterobacteriales | Enterobacteriaceae | <i>Shigella flexneri</i> 2003036                           |
| Sfl-58-1              | Bacteria | Proteobacteria | Gammaproteobacteria | Enterobacteriales | Enterobacteriaceae | <i>Shigella flexneri</i> 2005002                           |
| Sfl-59-1              | Bacteria | Proteobacteria | Gammaproteobacteria | Enterobacteriales | Enterobacteriaceae | <i>Shigella flexneri</i> 2005025                           |
| Sfl-60-1              | Bacteria | Proteobacteria | Gammaproteobacteria | Enterobacteriales | Enterobacteriaceae | <i>Shigella flexneri</i> 2005184                           |
| Sfl-61-1              | Bacteria | Proteobacteria | Gammaproteobacteria | Enterobacteriales | Enterobacteriaceae | <i>Shigella flexneri</i> 2930-71                           |
| Sfl-25-1 to Sfl-25-14 | Bacteria | Proteobacteria | Gammaproteobacteria | Enterobacteriales | Enterobacteriaceae | <i>Shigella flexneri</i> 2a                                |
| Sfl-62-1              | Bacteria | Proteobacteria | Gammaproteobacteria | Enterobacteriales | Enterobacteriaceae | <i>Shigella flexneri</i> 2a str. 2457T                     |
| Sfl-63-1              | Bacteria | Proteobacteria | Gammaproteobacteria | Enterobacteriales | Enterobacteriaceae | <i>Shigella flexneri</i> 2a str. 301                       |
| Sfl-64-1 to Sfl-64-2  | Bacteria | Proteobacteria | Gammaproteobacteria | Enterobacteriales | Enterobacteriaceae | <i>Shigella flexneri</i> 3a                                |
| Sfl-65-1              | Bacteria | Proteobacteria | Gammaproteobacteria | Enterobacteriales | Enterobacteriaceae | <i>Shigella flexneri</i> 4343-70                           |
| Sfl-66-1              | Bacteria | Proteobacteria | Gammaproteobacteria | Enterobacteriales | Enterobacteriaceae | <i>Shigella flexneri</i> 5 str. 8401                       |
| Sfl-67-1              | Bacteria | Proteobacteria | Gammaproteobacteria | Enterobacteriales | Enterobacteriaceae | <i>Shigella flexneri</i> 51581                             |
| Sfl-68-1              | Bacteria | Proteobacteria | Gammaproteobacteria | Enterobacteriales | Enterobacteriaceae | <i>Shigella flexneri</i> 5a str. M90T                      |
| Sfl-69-1              | Bacteria | Proteobacteria | Gammaproteobacteria | Enterobacteriales | Enterobacteriaceae | <i>Shigella flexneri</i> 6                                 |
| Sfl-70-1              | Bacteria | Proteobacteria | Gammaproteobacteria | Enterobacteriales | Enterobacteriaceae | <i>Shigella flexneri</i> CCH060                            |
| Sfl-71-1              | Bacteria | Proteobacteria | Gammaproteobacteria | Enterobacteriales | Enterobacteriaceae | <i>Shigella flexneri</i> CDC 796-83                        |
| Sfl-72-1              | Bacteria | Proteobacteria | Gammaproteobacteria | Enterobacteriales | Enterobacteriaceae | <i>Shigella flexneri</i> G1663                             |
| Sfl-73-1              | Bacteria | Proteobacteria | Gammaproteobacteria | Enterobacteriales | Enterobacteriaceae | <i>Shigella flexneri</i> MT1457                            |
| Sfl-74-1              | Bacteria | Proteobacteria | Gammaproteobacteria | Enterobacteriales | Enterobacteriaceae | <i>Shigella flexneri</i> S5644                             |
| Sfl-75-1              | Bacteria | Proteobacteria | Gammaproteobacteria | Enterobacteriales | Enterobacteriaceae | <i>Shigella flexneri</i> S5717                             |
| Sfl-76-1              | Bacteria | Proteobacteria | Gammaproteobacteria | Enterobacteriales | Enterobacteriaceae | <i>Shigella flexneri</i> S6162                             |
| Sfl-77-1              | Bacteria | Proteobacteria | Gammaproteobacteria | Enterobacteriales | Enterobacteriaceae | <i>Shigella flexneri</i> S6585                             |
| Sfl-78-1              | Bacteria | Proteobacteria | Gammaproteobacteria | Enterobacteriales | Enterobacteriaceae | <i>Shigella flexneri</i> S6678                             |
| Sfl-79-1              | Bacteria | Proteobacteria | Gammaproteobacteria | Enterobacteriales | Enterobacteriaceae | <i>Shigella flexneri</i> S6764                             |
| Sfl-80-1              | Bacteria | Proteobacteria | Gammaproteobacteria | Enterobacteriales | Enterobacteriaceae | <i>Shigella flexneri</i> S7737                             |
| Sfl-81-1              | Bacteria | Proteobacteria | Gammaproteobacteria | Enterobacteriales | Enterobacteriaceae | <i>Shigella flexneri</i> Shi06GS02                         |
| Sfl-82-1              | Bacteria | Proteobacteria | Gammaproteobacteria | Enterobacteriales | Enterobacteriaceae | <i>Shigella flexneri</i> Shi06HNO06                        |
| Sfl-83-1              | Bacteria | Proteobacteria | Gammaproteobacteria | Enterobacteriales | Enterobacteriaceae | <i>Shigella flexneri</i> Shi06HN344                        |
| Sfl-84-1              | Bacteria | Proteobacteria | Gammaproteobacteria | Enterobacteriales | Enterobacteriaceae | <i>Shigella flexneri</i> Shi06HN347                        |
| Sfl-85-1              | Bacteria | Proteobacteria | Gammaproteobacteria | Enterobacteriales | Enterobacteriaceae | <i>Shigella flexneri</i> VA-6                              |
| Sfl-51-1 to Sfl-51-2  | Bacteria | Proteobacteria | Gammaproteobacteria | Enterobacteriales | Enterobacteriaceae | <i>Shigella flexneri</i> Y                                 |
| Sso-1-1 to Sso-1-540  | Bacteria | Proteobacteria | Gammaproteobacteria | Enterobacteriales | Enterobacteriaceae | <i>Shigella sonnei</i>                                     |
| Sso-3-1               | Bacteria | Proteobacteria | Gammaproteobacteria | Enterobacteriales | Enterobacteriaceae | <i>Shigella sonnei</i> 08-7761                             |
| Sso-4-1               | Bacteria | Proteobacteria | Gammaproteobacteria | Enterobacteriales | Enterobacteriaceae | <i>Shigella sonnei</i> 08-7765                             |
| Sso-5-1               | Bacteria | Proteobacteria | Gammaproteobacteria | Enterobacteriales | Enterobacteriaceae | <i>Shigella sonnei</i> 09-1032                             |
| Sso-6-1               | Bacteria | Proteobacteria | Gammaproteobacteria | Enterobacteriales | Enterobacteriaceae | <i>Shigella sonnei</i> 09-2245                             |
| Sso-7-1               | Bacteria | Proteobacteria | Gammaproteobacteria | Enterobacteriales | Enterobacteriaceae | <i>Shigella sonnei</i> 09-4962                             |
| Sso-8-1               | Bacteria | Proteobacteria | Gammaproteobacteria | Enterobacteriales | Enterobacteriaceae | <i>Shigella sonnei</i> 3233-85                             |
| Sso-9-1               | Bacteria | Proteobacteria | Gammaproteobacteria | Enterobacteriales | Enterobacteriaceae | <i>Shigella sonnei</i> 4822-66                             |
| Sso-10-1              | Bacteria | Proteobacteria | Gammaproteobacteria | Enterobacteriales | Enterobacteriaceae | <i>Shigella sonnei</i> 53G                                 |
| Sso-11-1              | Bacteria | Proteobacteria | Gammaproteobacteria | Enterobacteriales | Enterobacteriaceae | <i>Shigella sonnei</i> S6513                               |
| Sso-12-1              | Bacteria | Proteobacteria | Gammaproteobacteria | Enterobacteriales | Enterobacteriaceae | <i>Shigella sonnei</i> Ss046                               |
| Sso-13-1              | Bacteria | Proteobacteria | Gammaproteobacteria | Enterobacteriales | Enterobacteriaceae | <i>Shigella sonnei</i> str. Moseley                        |
| Ssp-15-1              | Bacteria | Proteobacteria | Gammaproteobacteria | Enterobacteriales | Enterobacteriaceae | <i>Shigella</i> sp. D9                                     |
| Sbl-1-1               | Bacteria | Proteobacteria | Gammaproteobacteria | Enterobacteriales | Enterobacteriaceae | <i>Shimwellia blattae</i> DSM 4481 = NBRC 105725           |
| Sgl-1-1               | Bacteria | Proteobacteria | Gammaproteobacteria | Enterobacteriales | Enterobacteriaceae | <i>Sodalis glossinidius</i> str. 'morsitans'               |
| Xbo-11-1              | Bacteria | Proteobacteria | Gammaproteobacteria | Enterobacteriales | Enterobacteriaceae | <i>Xenorhabdus bovienii</i> SS-2004                        |
| Xne-3-1               | Bacteria | Proteobacteria | Gammaproteobacteria | Enterobacteriales | Enterobacteriaceae | <i>Xenorhabdus nematophila</i> ATCC 19061                  |
| Xne-4-1               | Bacteria | Proteobacteria | Gammaproteobacteria | Enterobacteriales | Enterobacteriaceae | <i>Xenorhabdus nematophila</i> F1                          |
| Xne-5-1 to Xne-5-2    | Bacteria | Proteobacteria | Gammaproteobacteria | Enterobacteriales | Enterobacteriaceae | <i>Xenorhabdus nematophila</i> str. Anatoliense            |
| Xne-6-1 to Xne-6-2    | Bacteria | Proteobacteria | Gammaproteobacteria | Enterobacteriales | Enterobacteriaceae | <i>Xenorhabdus nematophila</i> str. Websteri               |
| Yal-4-1               | Bacteria | Proteobacteria | Gammaproteobacteria | Enterobacteriales | Enterobacteriaceae | <i>Yersinia aldovae</i> ATCC 35236                         |
| Ybe-2-1               | Bacteria | Proteobacteria | Gammaproteobacteria | Enterobacteriales | Enterobacteriaceae | <i>Yersinia bercovieri</i> ATCC 43970                      |
| Yen-8-1               | Bacteria | Proteobacteria | Gammaproteobacteria | Enterobacteriales | Enterobacteriaceae | <i>Yersinia enterocolitica</i> (type O:3) str. YE12/03     |
| Yen-9-1               | Bacteria | Proteobacteria | Gammaproteobacteria | Enterobacteriales | Enterobacteriaceae | <i>Yersinia enterocolitica</i> (type O:5,27) str. YE149/02 |

|                        |          |                |                     |                   |                    |                                                                     |
|------------------------|----------|----------------|---------------------|-------------------|--------------------|---------------------------------------------------------------------|
| Yen-10-1               | Bacteria | Proteobacteria | Gammaproteobacteria | Enterobacteriales | Enterobacteriaceae | <i>Yersinia enterocolitica</i> (type O:9) str. YE212/02             |
| Yen-11-1               | Bacteria | Proteobacteria | Gammaproteobacteria | Enterobacteriales | Enterobacteriaceae | <i>Yersinia enterocolitica</i> IP 10393                             |
| Yen-12-1               | Bacteria | Proteobacteria | Gammaproteobacteria | Enterobacteriales | Enterobacteriaceae | <i>Yersinia enterocolitica</i> IP2222                               |
| Yen-13-1               | Bacteria | Proteobacteria | Gammaproteobacteria | Enterobacteriales | Enterobacteriaceae | <i>Yersinia enterocolitica</i> NFO                                  |
| Yen-14-1               | Bacteria | Proteobacteria | Gammaproteobacteria | Enterobacteriales | Enterobacteriaceae | <i>Yersinia enterocolitica</i> subsp. <i>enterocolitica</i> 8081    |
| Yen-15-1               | Bacteria | Proteobacteria | Gammaproteobacteria | Enterobacteriales | Enterobacteriaceae | <i>Yersinia enterocolitica</i> subsp. <i>enterocolitica</i> WA-314  |
| Yen-16-1               | Bacteria | Proteobacteria | Gammaproteobacteria | Enterobacteriales | Enterobacteriaceae | <i>Yersinia enterocolitica</i> subsp. <i>palaearctica</i> 105.5R(r) |
| Yen-17-1               | Bacteria | Proteobacteria | Gammaproteobacteria | Enterobacteriales | Enterobacteriaceae | <i>Yersinia enterocolitica</i> subsp. <i>palaearctica</i> PhRBD_Ye1 |
| Yen-18-1               | Bacteria | Proteobacteria | Gammaproteobacteria | Enterobacteriales | Enterobacteriaceae | <i>Yersinia enterocolitica</i> subsp. <i>palaearctica</i> Y11       |
| Yen-19-1               | Bacteria | Proteobacteria | Gammaproteobacteria | Enterobacteriales | Enterobacteriaceae | <i>Yersinia enterocolitica</i> subsp. <i>palaearctica</i> YE-149    |
| Yen-20-1               | Bacteria | Proteobacteria | Gammaproteobacteria | Enterobacteriales | Enterobacteriaceae | <i>Yersinia enterocolitica</i> subsp. <i>palaearctica</i> YE-150    |
| Yen-21-1               | Bacteria | Proteobacteria | Gammaproteobacteria | Enterobacteriales | Enterobacteriaceae | <i>Yersinia enterocolitica</i> subsp. <i>palaearctica</i> YE-P1     |
| Yen-22-1               | Bacteria | Proteobacteria | Gammaproteobacteria | Enterobacteriales | Enterobacteriaceae | <i>Yersinia enterocolitica</i> subsp. <i>palaearctica</i> YE-P4     |
| Yfr-2-1 to Yfr-2-2     | Bacteria | Proteobacteria | Gammaproteobacteria | Enterobacteriales | Enterobacteriaceae | <i>Yersinia frederiksenii</i> ATCC 33641                            |
| Yin-2-1                | Bacteria | Proteobacteria | Gammaproteobacteria | Enterobacteriales | Enterobacteriaceae | <i>Yersinia intermedia</i> ATCC 29909                               |
| Ykr-2-1                | Bacteria | Proteobacteria | Gammaproteobacteria | Enterobacteriales | Enterobacteriaceae | <i>Yersinia kristensenii</i> ATCC 33638                             |
| Ymo-2-1                | Bacteria | Proteobacteria | Gammaproteobacteria | Enterobacteriales | Enterobacteriaceae | <i>Yersinia mollaretii</i> ATCC 43969                               |
| Ype-116-1              | Bacteria | Proteobacteria | Gammaproteobacteria | Enterobacteriales | Enterobacteriaceae | <i>Yersinia pestis</i> 113                                          |
| Ype-117-1              | Bacteria | Proteobacteria | Gammaproteobacteria | Enterobacteriales | Enterobacteriaceae | <i>Yersinia pestis</i> 2330                                         |
| Ype-118-1              | Bacteria | Proteobacteria | Gammaproteobacteria | Enterobacteriales | Enterobacteriaceae | <i>Yersinia pestis</i> 2501                                         |
| Ype-119-1              | Bacteria | Proteobacteria | Gammaproteobacteria | Enterobacteriales | Enterobacteriaceae | <i>Yersinia pestis</i> 2504                                         |
| Ype-120-1              | Bacteria | Proteobacteria | Gammaproteobacteria | Enterobacteriales | Enterobacteriaceae | <i>Yersinia pestis</i> 2506                                         |
| Ype-121-1              | Bacteria | Proteobacteria | Gammaproteobacteria | Enterobacteriales | Enterobacteriaceae | <i>Yersinia pestis</i> 30017                                        |
| Ype-122-1              | Bacteria | Proteobacteria | Gammaproteobacteria | Enterobacteriales | Enterobacteriaceae | <i>Yersinia pestis</i> 42013                                        |
| Ype-123-1              | Bacteria | Proteobacteria | Gammaproteobacteria | Enterobacteriales | Enterobacteriaceae | <i>Yersinia pestis</i> 42091                                        |
| Ype-124-1              | Bacteria | Proteobacteria | Gammaproteobacteria | Enterobacteriales | Enterobacteriaceae | <i>Yersinia pestis</i> 5761                                         |
| Ype-125-1              | Bacteria | Proteobacteria | Gammaproteobacteria | Enterobacteriales | Enterobacteriaceae | <i>Yersinia pestis</i> 7                                            |
| Ype-126-1              | Bacteria | Proteobacteria | Gammaproteobacteria | Enterobacteriales | Enterobacteriaceae | <i>Yersinia pestis</i> 735                                          |
| Ype-127-1              | Bacteria | Proteobacteria | Gammaproteobacteria | Enterobacteriales | Enterobacteriaceae | <i>Yersinia pestis</i> 780441                                       |
| Ype-128-1              | Bacteria | Proteobacteria | Gammaproteobacteria | Enterobacteriales | Enterobacteriaceae | <i>Yersinia pestis</i> 91                                           |
| Ype-29-1 to Ype-29-2   | Bacteria | Proteobacteria | Gammaproteobacteria | Enterobacteriales | Enterobacteriaceae | <i>Yersinia pestis</i> A1122                                        |
| Ype-129-1              | Bacteria | Proteobacteria | Gammaproteobacteria | Enterobacteriales | Enterobacteriaceae | <i>Yersinia pestis</i> A1956001                                     |
| Ype-31-1 to Ype-31-2   | Bacteria | Proteobacteria | Gammaproteobacteria | Enterobacteriales | Enterobacteriaceae | <i>Yersinia pestis</i> Angola                                       |
| Ype-32-1 to Ype-32-2   | Bacteria | Proteobacteria | Gammaproteobacteria | Enterobacteriales | Enterobacteriaceae | <i>Yersinia pestis</i> Antiqua                                      |
| Ype-217-1              | Bacteria | Proteobacteria | Gammaproteobacteria | Enterobacteriales | Enterobacteriaceae | <i>Yersinia pestis</i> biovar Antiqua str. B42003004                |
| Ype-218-1 to Ype-218-2 | Bacteria | Proteobacteria | Gammaproteobacteria | Enterobacteriales | Enterobacteriaceae | <i>Yersinia pestis</i> biovar Antiqua str. E1979001                 |
| Ype-219-1              | Bacteria | Proteobacteria | Gammaproteobacteria | Enterobacteriales | Enterobacteriaceae | <i>Yersinia pestis</i> biovar Antiqua str. UG05-0454                |
| Ype-220-1              | Bacteria | Proteobacteria | Gammaproteobacteria | Enterobacteriales | Enterobacteriaceae | <i>Yersinia pestis</i> biovar Mediaevalis str. K1973002             |
| Ype-221-1              | Bacteria | Proteobacteria | Gammaproteobacteria | Enterobacteriales | Enterobacteriaceae | <i>Yersinia pestis</i> biovar Mediaevalis str. Harbin 35            |
| Ype-222-1              | Bacteria | Proteobacteria | Gammaproteobacteria | Enterobacteriales | Enterobacteriaceae | <i>Yersinia pestis</i> biovar Microtus str. 91001                   |
| Ype-223-1              | Bacteria | Proteobacteria | Gammaproteobacteria | Enterobacteriales | Enterobacteriaceae | <i>Yersinia pestis</i> biovar Orientalis str. F1991016              |
| Ype-225-1              | Bacteria | Proteobacteria | Gammaproteobacteria | Enterobacteriales | Enterobacteriaceae | <i>Yersinia pestis</i> biovar Orientalis str. India 195             |
| Ype-224-1              | Bacteria | Proteobacteria | Gammaproteobacteria | Enterobacteriales | Enterobacteriaceae | <i>Yersinia pestis</i> biovar Orientalis str. IP275                 |
| Ype-226-1              | Bacteria | Proteobacteria | Gammaproteobacteria | Enterobacteriales | Enterobacteriaceae | <i>Yersinia pestis</i> biovar Orientalis str. MG05-1020             |
| Ype-227-1              | Bacteria | Proteobacteria | Gammaproteobacteria | Enterobacteriales | Enterobacteriaceae | <i>Yersinia pestis</i> biovar Orientalis str. PEXU2                 |
| Ype-130-1              | Bacteria | Proteobacteria | Gammaproteobacteria | Enterobacteriales | Enterobacteriaceae | <i>Yersinia pestis</i> C1976001                                     |
| Ype-131-1              | Bacteria | Proteobacteria | Gammaproteobacteria | Enterobacteriales | Enterobacteriaceae | <i>Yersinia pestis</i> C1989001                                     |
| Ype-132-1              | Bacteria | Proteobacteria | Gammaproteobacteria | Enterobacteriales | Enterobacteriaceae | <i>Yersinia pestis</i> CA88-4125                                    |
| Ype-133-1              | Bacteria | Proteobacteria | Gammaproteobacteria | Enterobacteriales | Enterobacteriaceae | <i>Yersinia pestis</i> CMCC125002                                   |
| Ype-134-1              | Bacteria | Proteobacteria | Gammaproteobacteria | Enterobacteriales | Enterobacteriaceae | <i>Yersinia pestis</i> CMCC348002                                   |
| Ype-135-1              | Bacteria | Proteobacteria | Gammaproteobacteria | Enterobacteriales | Enterobacteriaceae | <i>Yersinia pestis</i> CMCC49003                                    |
| Ype-136-1              | Bacteria | Proteobacteria | Gammaproteobacteria | Enterobacteriales | Enterobacteriaceae | <i>Yersinia pestis</i> CMCC64001                                    |
| Ype-137-1              | Bacteria | Proteobacteria | Gammaproteobacteria | Enterobacteriales | Enterobacteriaceae | <i>Yersinia pestis</i> CMCC8211                                     |
| Ype-138-1              | Bacteria | Proteobacteria | Gammaproteobacteria | Enterobacteriales | Enterobacteriaceae | <i>Yersinia pestis</i> CMCC87001                                    |
| Ype-139-1              | Bacteria | Proteobacteria | Gammaproteobacteria | Enterobacteriales | Enterobacteriaceae | <i>Yersinia pestis</i> CMCC91090                                    |
| Ype-140-1              | Bacteria | Proteobacteria | Gammaproteobacteria | Enterobacteriales | Enterobacteriaceae | <i>Yersinia pestis</i> CMCC93014                                    |
| Ype-141-1              | Bacteria | Proteobacteria | Gammaproteobacteria | Enterobacteriales | Enterobacteriaceae | <i>Yersinia pestis</i> CMCC96001                                    |
| Ype-142-1              | Bacteria | Proteobacteria | Gammaproteobacteria | Enterobacteriales | Enterobacteriaceae | <i>Yersinia pestis</i> CO92                                         |
| Ype-143-1              | Bacteria | Proteobacteria | Gammaproteobacteria | Enterobacteriales | Enterobacteriaceae | <i>Yersinia pestis</i> D106004                                      |
| Ype-144-1              | Bacteria | Proteobacteria | Gammaproteobacteria | Enterobacteriales | Enterobacteriaceae | <i>Yersinia pestis</i> D182038                                      |
| Ype-145-1              | Bacteria | Proteobacteria | Gammaproteobacteria | Enterobacteriales | Enterobacteriaceae | <i>Yersinia pestis</i> D1982001                                     |
| Ype-146-1              | Bacteria | Proteobacteria | Gammaproteobacteria | Enterobacteriales | Enterobacteriaceae | <i>Yersinia pestis</i> G1996006                                     |
| Ype-147-1              | Bacteria | Proteobacteria | Gammaproteobacteria | Enterobacteriales | Enterobacteriaceae | <i>Yersinia pestis</i> G1996010                                     |
| Ype-148-1              | Bacteria | Proteobacteria | Gammaproteobacteria | Enterobacteriales | Enterobacteriaceae | <i>Yersinia pestis</i> G8786                                        |
| Ype-149-1              | Bacteria | Proteobacteria | Gammaproteobacteria | Enterobacteriales | Enterobacteriaceae | <i>Yersinia pestis</i> H1959004                                     |



|                          |               |                |                     |                     |                    |                                                                                                                                  |                                                                                                                                         |
|--------------------------|---------------|----------------|---------------------|---------------------|--------------------|----------------------------------------------------------------------------------------------------------------------------------|-----------------------------------------------------------------------------------------------------------------------------------------|
| Ype-213-1                | Bacteria      | Proteobacteria | Gammaproteobacteria | Enterobacteriales   | Enterobacteriaceae | <i>Yersinia pestis</i> PY-99                                                                                                     |                                                                                                                                         |
| Ype-215-1                | Bacteria      | Proteobacteria | Gammaproteobacteria | Enterobacteriales   | Enterobacteriaceae | <i>Yersinia pestis</i> YN2551                                                                                                    |                                                                                                                                         |
| Ype-216-1                | Bacteria      | Proteobacteria | Gammaproteobacteria | Enterobacteriales   | Enterobacteriaceae | <i>Yersinia pestis</i> Z176003                                                                                                   |                                                                                                                                         |
| Yps-14-1                 | Bacteria      | Proteobacteria | Gammaproteobacteria | Enterobacteriales   | Enterobacteriaceae | <i>Yersinia pseudotuberculosis</i> IP 31758                                                                                      |                                                                                                                                         |
| Yps-10-1 to Yps-10-2     | Bacteria      | Proteobacteria | Gammaproteobacteria | Enterobacteriales   | Enterobacteriaceae | <i>Yersinia pseudotuberculosis</i> IP 32953                                                                                      |                                                                                                                                         |
| Yps-15-1                 | Bacteria      | Proteobacteria | Gammaproteobacteria | Enterobacteriales   | Enterobacteriaceae | <i>Yersinia pseudotuberculosis</i> NBRC 105692                                                                                   |                                                                                                                                         |
| Yps-11-1 to Yps-11-2     | Bacteria      | Proteobacteria | Gammaproteobacteria | Enterobacteriales   | Enterobacteriaceae | <i>Yersinia pseudotuberculosis</i> PB1/+                                                                                         |                                                                                                                                         |
| Yps-12-1 to Yps-12-2     | Bacteria      | Proteobacteria | Gammaproteobacteria | Enterobacteriales   | Enterobacteriaceae | <i>Yersinia pseudotuberculosis</i> YPIII                                                                                         |                                                                                                                                         |
| Yro-2-1                  | Bacteria      | Proteobacteria | Gammaproteobacteria | Enterobacteriales   | Enterobacteriaceae | <i>Yersinia rohdei</i> ATCC 43380                                                                                                |                                                                                                                                         |
| Yru-1-1 to Yru-1-3       | Bacteria      | Proteobacteria | Gammaproteobacteria | Enterobacteriales   | Enterobacteriaceae | <i>Yersinia ruckeri</i>                                                                                                          |                                                                                                                                         |
| Yru-2-1 to Yru-2-2       | Bacteria      | Proteobacteria | Gammaproteobacteria | Enterobacteriales   | Enterobacteriaceae | <i>Yersinia ruckeri</i> ATCC 29473                                                                                               |                                                                                                                                         |
| Yre-2-1                  | Bacteria      | Proteobacteria | Gammaproteobacteria | Enterobacteriales   | Enterobacteriaceae | <i>Yokenella regensburgi</i> ATCC 43003                                                                                          |                                                                                                                                         |
| gpr-1-1                  | Bacteria      | Proteobacteria | Gammaproteobacteria | gamma               | proteobacterium    | WG36                                                                                                                             |                                                                                                                                         |
| CSc-1-1                  | Bacteria      | Proteobacteria | Gammaproteobacteria | Orbales             | Orbaceae           | <i>Candidatus Schmidhempelia bombi</i> str. Bimp                                                                                 |                                                                                                                                         |
| Fpe-1-1                  | Bacteria      | Proteobacteria | Gammaproteobacteria | Orbales             | Orbaceae           | <i>Frischella perrara</i>                                                                                                        |                                                                                                                                         |
| Gap-1-1                  | Bacteria      | Proteobacteria | Gammaproteobacteria | Orbales             | Orbaceae           | <i>Gilliamella apicola</i>                                                                                                       |                                                                                                                                         |
| Asu-1-1                  | Bacteria      | Proteobacteria | Gammaproteobacteria | Pasteurellales      | Pasteurellaceae    | <i>Actinobacillus succinogenes</i> 130Z                                                                                          |                                                                                                                                         |
| Aap-1-1                  | Bacteria      | Proteobacteria | Gammaproteobacteria | Pasteurellales      | Pasteurellaceae    | <i>Aggregatibacter aphrophilus</i>                                                                                               |                                                                                                                                         |
| Aap-2-1                  | Bacteria      | Proteobacteria | Gammaproteobacteria | Pasteurellales      | Pasteurellaceae    | <i>Aggregatibacter aphrophilus</i> ATCC 33389                                                                                    |                                                                                                                                         |
| Aap-3-1                  | Bacteria      | Proteobacteria | Gammaproteobacteria | Pasteurellales      | Pasteurellaceae    | <i>Aggregatibacter aphrophilus</i> F0387                                                                                         |                                                                                                                                         |
| Aap-4-1                  | Bacteria      | Proteobacteria | Gammaproteobacteria | Pasteurellales      | Pasteurellaceae    | <i>Aggregatibacter aphrophilus</i> NJ8700                                                                                        |                                                                                                                                         |
| Ase-1-1                  | Bacteria      | Proteobacteria | Gammaproteobacteria | Pasteurellales      | Pasteurellaceae    | <i>Aggregatibacter segnis</i> ATCC 33393                                                                                         |                                                                                                                                         |
| Gan-1-1 to Gan-1-12      | Bacteria      | Proteobacteria | Gammaproteobacteria | Pasteurellales      | Pasteurellaceae    | <i>Gallibacterium anatis</i>                                                                                                     |                                                                                                                                         |
| Gan-2-1                  | Bacteria      | Proteobacteria | Gammaproteobacteria | Pasteurellales      | Pasteurellaceae    | <i>Gallibacterium anatis</i> 10672-6                                                                                             |                                                                                                                                         |
| Gan-3-1                  | Bacteria      | Proteobacteria | Gammaproteobacteria | Pasteurellales      | Pasteurellaceae    | <i>Gallibacterium anatis</i> 12656/12                                                                                            |                                                                                                                                         |
| Gan-4-1                  | Bacteria      | Proteobacteria | Gammaproteobacteria | Pasteurellales      | Pasteurellaceae    | <i>Gallibacterium anatis</i> 4895                                                                                                |                                                                                                                                         |
| Gan-5-1                  | Bacteria      | Proteobacteria | Gammaproteobacteria | Pasteurellales      | Pasteurellaceae    | <i>Gallibacterium anatis</i> 7990                                                                                                |                                                                                                                                         |
| Gan-6-1                  | Bacteria      | Proteobacteria | Gammaproteobacteria | Pasteurellales      | Pasteurellaceae    | <i>Gallibacterium anatis</i> CCM5995                                                                                             |                                                                                                                                         |
| Gan-7-1                  | Bacteria      | Proteobacteria | Gammaproteobacteria | Pasteurellales      | Pasteurellaceae    | <i>Gallibacterium anatis</i> DSM 16844 = F 149                                                                                   |                                                                                                                                         |
| Gan-8-1                  | Bacteria      | Proteobacteria | Gammaproteobacteria | Pasteurellales      | Pasteurellaceae    | <i>Gallibacterium anatis</i> IPDH697-78                                                                                          |                                                                                                                                         |
| Gan-10-1                 | Bacteria      | Proteobacteria | Gammaproteobacteria | Pasteurellales      | Pasteurellaceae    | <i>Gallibacterium anatis</i> str. Avicor                                                                                         |                                                                                                                                         |
| Gan-9-1                  | Bacteria      | Proteobacteria | Gammaproteobacteria | Pasteurellales      | Pasteurellaceae    | <i>Gallibacterium anatis</i> UMN179                                                                                              |                                                                                                                                         |
| Gge-1-1                  | Bacteria      | Proteobacteria | Gammaproteobacteria | Pasteurellales      | Pasteurellaceae    | <i>Gallibacterium genomosp.</i> 1                                                                                                |                                                                                                                                         |
| Gge-2-1                  | Bacteria      | Proteobacteria | Gammaproteobacteria | Pasteurellales      | Pasteurellaceae    | <i>Gallibacterium genomosp.</i> 2                                                                                                |                                                                                                                                         |
| Hha-1-1 to Hha-1-2       | Bacteria      | Proteobacteria | Gammaproteobacteria | Pasteurellales      | Pasteurellaceae    | <i>Haemophilus haemolyticus</i>                                                                                                  |                                                                                                                                         |
| Hha-2-1                  | Bacteria      | Proteobacteria | Gammaproteobacteria | Pasteurellales      | Pasteurellaceae    | <i>Haemophilus haemolyticus</i> M21127                                                                                           |                                                                                                                                         |
| Hha-3-1                  | Bacteria      | Proteobacteria | Gammaproteobacteria | Pasteurellales      | Pasteurellaceae    | <i>Haemophilus haemolyticus</i> M21621                                                                                           |                                                                                                                                         |
| Hin-1-1 to Hin-1-6       | Bacteria      | Proteobacteria | Gammaproteobacteria | Pasteurellales      | Pasteurellaceae    | <i>Haemophilus influenzae</i>                                                                                                    |                                                                                                                                         |
| Hin-2-1                  | Bacteria      | Proteobacteria | Gammaproteobacteria | Pasteurellales      | Pasteurellaceae    | <i>Haemophilus influenzae</i> 2019                                                                                               |                                                                                                                                         |
| Hin-3-1                  | Bacteria      | Proteobacteria | Gammaproteobacteria | Pasteurellales      | Pasteurellaceae    | <i>Haemophilus influenzae</i> 3655                                                                                               |                                                                                                                                         |
| Hin-4-1                  | Bacteria      | Proteobacteria | Gammaproteobacteria | Pasteurellales      | Pasteurellaceae    | <i>Haemophilus influenzae</i> 60294N1                                                                                            |                                                                                                                                         |
| Hin-5-1                  | Bacteria      | Proteobacteria | Gammaproteobacteria | Pasteurellales      | Pasteurellaceae    | <i>Haemophilus influenzae</i> 7P49H1                                                                                             |                                                                                                                                         |
| Hin-6-1                  | Bacteria      | Proteobacteria | Gammaproteobacteria | Pasteurellales      | Pasteurellaceae    | <i>Haemophilus influenzae</i> PittII                                                                                             |                                                                                                                                         |
| Hin-7-1                  | Bacteria      | Proteobacteria | Gammaproteobacteria | Pasteurellales      | Pasteurellaceae    | <i>Haemophilus influenzae</i> R2866                                                                                              |                                                                                                                                         |
| Hpa-2-1                  | Bacteria      | Proteobacteria | Gammaproteobacteria | Pasteurellales      | Pasteurellaceae    | <i>Haemophilus parainfluenzae</i> ATCC 33392                                                                                     |                                                                                                                                         |
| Hsp-1-1                  | Bacteria      | Proteobacteria | Gammaproteobacteria | Pasteurellales      | Pasteurellaceae    | <i>Haemophilus sp. oral taxon</i> 851 str. F0397                                                                                 |                                                                                                                                         |
| Mma-2-1                  | Bacteria      | Proteobacteria | Gammaproteobacteria | Pasteurellales      | Pasteurellaceae    | <i>Mannheimia massilioguelmaensis</i>                                                                                            |                                                                                                                                         |
| Vpa-1-1 to Vpa-1-2       | Bacteria      | Proteobacteria | Gammaproteobacteria | Vibrionales         | Vibrionaceae       | <i>Vibrio parahaemolyticus</i>                                                                                                   |                                                                                                                                         |
| Sen-1023-1               | Bacteria      | Proteobacteria | Gammaproteobacteria | Enterobacteriales   | Enterobacteriaceae | Salmonella Salmonella enterica subsp. entericaserovar Tennessee <i>Salmonella enterica subsp. enterica serovar</i> Tennessee str |                                                                                                                                         |
| Sen-1024-1 to Sen-1024-2 | CVM19633      | Bacteria       | Proteobacteria      | Gammaproteobacteria | Enterobacteriales  | Enterobacteriaceae                                                                                                               | <i>Salmonella enterica subsp. enterica serovar</i> Schwarzengrund str                                                                   |
| Sen-1025-1               | CVM23701      | Bacteria       | Proteobacteria      | Gammaproteobacteria | Enterobacteriales  | Enterobacteriaceae                                                                                                               | Salmonella Salmonella enterica subsp. entericaserovar 4,[5],12:i:- <i>Salmonella enterica subsp. enterica serovar</i> 4,[5],12:i:- str  |
| Sen-1026-1               | GA_MM04042433 | Bacteria       | Proteobacteria      | Gammaproteobacteria | Enterobacteriales  | Enterobacteriaceae                                                                                                               | <i>Salmonella enterica subsp. enterica serovar</i> Javiana str                                                                          |
| Sen-1027-1               | HLN05-537     | Bacteria       | Proteobacteria      | Gammaproteobacteria | Enterobacteriales  | Enterobacteriaceae                                                                                                               | Salmonella Salmonella enterica subsp. entericaserovar Weltevreden <i>Salmonella enterica subsp. enterica serovar</i> Weltevreden str    |
| Sen-1028-1               | P125109       | Bacteria       | Proteobacteria      | Gammaproteobacteria | Enterobacteriales  | Enterobacteriaceae                                                                                                               | Salmonella Salmonella enterica subsp. entericaserovar Enteritidis <i>Salmonella enterica subsp. enterica serovar</i> Enteritidis str    |
| Sen-1029-1               | RKS4594       | Bacteria       | Proteobacteria      | Gammaproteobacteria | Enterobacteriales  | Enterobacteriaceae                                                                                                               | Salmonella Salmonella enterica subsp. entericaserovar Paratyphi C <i>Salmonella enterica subsp. enterica serovar</i> Paratyphi C strain |



|                                              |                                                                                                                                                                                                                               |
|----------------------------------------------|-------------------------------------------------------------------------------------------------------------------------------------------------------------------------------------------------------------------------------|
| Sen-1030-1                                   | SC-B67Bacteria Proteobacteria Gammaproteobacteria Enterobacteriales Enterobacteriaceae Salmonella Salmonella enterica subsp. entericaserovar Choleraesuis <i>Salmonella enterica subsp. enterica serovar Choleraesuis</i> str |
| Sen-1024-1 to Sen-1024-2<br>env-1 to env-370 | SL480Bacteria Proteobacteria Gammaproteobacteria Enterobacteriales Enterobacteriaceae <i>Salmonella enterica subsp. enterica serovar Schwarzengrund</i> str environmental samples                                             |

## 8.2 Multiple-sequence alignment

Each L25-Gammaproteobacteria RNA is denoted by an abbreviation (like “Eco-1-1”) that refers to a taxonomy given in Section 8.1. The alignment may include sequences containing the RNA motif, as well as flanking sequence. The L25-Gammaproteobacteria RNA itself is denoted by the line underneath marked 5’ and 3’ on either end. Nucleotides in flanking sequences (i.e., not part of the motif) are written in gray letters. Stems of predicted rho-independent transcription terminators, if any, are shaded yellow. (Note: terminator predictions have not been analyzed manually, and many are likely to be false positives. Terminator predictions are those of the RNIE software.) Nucleotides predicted to function (as DNA) as transcription-factor binding sites, if any, are shaded in green. (But note: these predictions are manually annotated, so they might be under-predicted.) Annotated start codons, if any, are shaded green. (Note: start codons are frequently misannotated, especially in environmental samples.) Nucleotides proposed to basepair as part of the consensus structure are shaded in color when they comprise Watson-

Crick or G-U pairs. Otherwise they are shaded gray. Conserved stems are also indicated at the bottom of the alignment by angle brackets, where matching < and > denote base-paired columns. Below these angle brackets, the symbol “2” denotes base pairs exhibiting covariation according to the statistically well-founded R-scape method. “1” denotes base pairs exhibiting covariation according to R2R’s simplistic method. “0” denotes base pairs that are not observed to mutate and “?” denotes base pairs that have a significant frequency of non-canonical nucleotides for Watson-Crick or G-U pairs (> 5%). Below these base pair annotation is the consensus sequence: “R” = “A” or “G”, “Y” = “C” or “U”, red nucleotides: nucleotide identity conserved more than 97% of the time, black nucleotides: 90%, gray nucleotides: 75%, red circle (◉): nucleotide is present 97% of the time, black circle (◐): 90%, gray circle (◑): 75%, white circle (◒): 50%. All percentages of sequences just described (e.g. 97% conserved) assume that sequences have been weighted by the GSC algorithm implemented by the Infernal software package.

Duplicate sequences: the following putative homologs are not shown in the alignment because their sequences are identical to a homolog already shown: Aap-1-1, Aap-2-1, Aap-3-1, Aap-4-1, Ase-1-1, CRe-1-1, Cam-1-1, Cam-1-2, Cam-1-3, Cbr-1-1, Cbr-1-2, Cbr-1-3, Cbr-1-4, Cbr-1-6, Cdu-1-1, Cdu-4-1, Cdu-5-1, Cfr-1-1, Cfr-1-2, Cfr-1-3, Cfr-10-1, Cfr-11-1, Cfr-2-1, Cfr-2-2, Cfr-3-1, Cfr-5-1, Cfr-6-1, Cfr-7-1, Cfr-8-1, Cfr-9-1, Cko-1-1, Cko-2-1, Cma-1-2, Cma-1-3, Cma-1-4, Cma-2-1, Cma-3-1, Cma-5-1, Cro-1-1, Cro-3-1, Csa-1-1, Csa-11-1, Csa-13-1, Csa-14-1, Csa-16-1, Csa-2-1, Csa-3-1, Csa-4-1, Csa-5-1, Csa-6-1, Csa-8-1, Csa-9-1, Csp-1-1, Csp-10-1, Csp-12-1, Csp-14-1, Csp-15-1, Csp-16-1, Csp-19-1, Csp-2-1, Csp-3-1, Csp-4-1, Csp-5-1, Csp-6-1, Csp-7-1, Csp-8-1, Csp-9-1, Ctu-1-1, Ctu-2-1, Ctu-4-1, Cun-1-2, Cyo-1-1, Dch-1-2, Dch-2-1, Dda-4-1, Ddi-1-1, Ddi-2-1, Ddi-4-1, Dso-1-1, Dso-2-1, Dso-3-1, Dso-5-1, Dso-6-1, Dsp-4-1, Dsp-6-1, Dsp-7-1, Dsp-8-1, Dze-3-1, Eae-1-1, Eae-2-1, Eae-3-1, Eal-1-1, Eal-3-1, Eal-4-1, Eal-5-1, Eam-11-1, Eam-12-1, Eam-13-1, Eam-14-1, Eam-2-1, Eam-3-1, Eam-4-1, Eam-5-1, Eam-6-1, Eam-7-1, Eam-8-1, Eam-9-1, Ean-1-1, Ean-2-1, Ean-3-1, Ean-4-1, Eas-1-1, Eas-1-2, Eas-2-1, Eas-3-1, Eba-1-1, Eba-3-1, Eba-5-1, Eca-2-1, Eca-3-1, Ecl-1-1, Ecl-1-10, Ecl-1-11, Ecl-1-12, Ecl-1-2, Ecl-1-3, Ecl-1-4, Ecl-1-5, Ecl-1-6, Ecl-1-7, Ecl-1-8, Ecl-1-9, Ecl-10-1, Ecl-11-1, Ecl-12-1, Ecl-13-1, Ecl-15-1, Ecl-17-1, Ecl-18-1, Ecl-19-1, Ecl-2-1, Ecl-20-1, Ecl-21-1, Ecl-22-1, Ecl-23-1, Ecl-24-1, Ecl-25-1, Ecl-26-1, Ecl-27-1, Ecl-28-1, Ecl-28-2, Ecl-28-3, Ecl-28-4, Ecl-28-5, Ecl-28-6, Ecl-3-1, Ecl-30-1, Ecl-31-1, Ecl-32-1, Ecl-35-1, Ecl-36-1, Ecl-38-1, Ecl-4-1, Ecl-40-1, Ecl-41-1, Ecl-43-1, Ecl-44-1, Ecl-46-1, Ecl-47-1, Ecl-48-1, Ecl-49-1, Ecl-5-1, Ecl-50-1, Ecl-52-2, Ecl-52-4, Ecl-52-5, Ecl-53-1, Ecl-55-1, Ecl-56-1, Ecl-57-1, Ecl-6-1, Ecl-61-1, Ecl-62-1, Ecl-63-1, Ecl-64-1, Ecl-65-1, Ecl-66-1, Ecl-67-1, Ecl-68-1, Ecl-69-1, Ecl-7-1, Ecl-70-1, Ecl-8-1, Ecl-9-1, Eco-1-1, Eco-1-2, Eco-1-3, Eco-1-4, Eco-10-1, Eco-100-1, Eco-1000-1, Eco-1001-1, Eco-1002-1, Eco-1003-1, Eco-1004-1, Eco-1005-1, Eco-1006-1, Eco-1007-1, Eco-1008-1, Eco-1009-1, Eco-101-1, Eco-1010-1, Eco-1011-1, Eco-1012-1, Eco-1013-1, Eco-1014-1, Eco-1015-1, Eco-1016-1, Eco-1017-1, Eco-1018-1, Eco-1019-1, Eco-102-1, Eco-1020-1, Eco-1021-1, Eco-1021-2, Eco-1021-3, Eco-1022-1, Eco-1023-1, Eco-1024-1, Eco-1025-1, Eco-1026-1, Eco-1027-1, Eco-1028-1, Eco-1029-1, Eco-103-1, Eco-1030-1, Eco-1031-1, Eco-1032-1, Eco-1033-1, Eco-1034-1, Eco-1035-1, Eco-1036-1, Eco-1037-1, Eco-1038-1, Eco-1039-1, Eco-104-1, Eco-1040-1, Eco-1041-1, Eco-1042-1, Eco-1043-1, Eco-1044-1, Eco-1045-1, Eco-1046-1, Eco-1047-1, Eco-1048-1, Eco-1049-1, Eco-105-1, Eco-1050-1, Eco-1051-1, Eco-1052-1, Eco-1053-1, Eco-1054-1, Eco-1055-1, Eco-1056-1, Eco-1057-1, Eco-1058-1, Eco-1059-1, Eco-106-1, Eco-1060-1, Eco-1061-1, Eco-1062-1, Eco-1063-1, Eco-1064-1, Eco-1065-1, Eco-1066-1, Eco-1067-1, Eco-1068-1, Eco-1069-1, Eco-107-1, Eco-1070-1, Eco-1071-1, Eco-1072-1, Eco-1073-1, Eco-1074-1, Eco-1075-1, Eco-1076-1, Eco-1077-1, Eco-1078-1, Eco-1079-1, Eco-108-1, Eco-1080-1, Eco-1081-1, Eco-1082-1, Eco-1083-1, Eco-1085-1, Eco-1086-1, Eco-1087-1, Eco-1088-1, Eco-1089-1, Eco-109-1, Eco-1090-1, Eco-1091-1, Eco-1092-1, Eco-1093-1, Eco-1094-1, Eco-1095-1, Eco-1096-1, Eco-1097-1, Eco-1098-1, Eco-1099-1, Eco-11-1, Eco-110-1, Eco-1100-1, Eco-1101-1, Eco-1102-1, Eco-1103-1, Eco-1103-2, Eco-1104-1, Eco-1105-1,









Eco-792-1, Eco-793-1, Eco-794-1, Eco-795-1, Eco-796-1, Eco-797-1, Eco-798-1, Eco-799-1, Eco-8-1, Eco-80-1, Eco-800-1, Eco-801-1, Eco-802-1, Eco-803-1, Eco-804-1, Eco-805-1, Eco-806-1, Eco-807-1, Eco-808-1, Eco-809-1, Eco-81-1, Eco-810-1, Eco-811-1, Eco-812-1, Eco-813-1, Eco-814-1, Eco-815-1, Eco-816-1, Eco-817-1, Eco-818-1, Eco-819-1, Eco-82-1, Eco-820-1, Eco-821-1, Eco-822-1, Eco-823-1, Eco-824-1, Eco-825-1, Eco-826-1, Eco-827-1, Eco-828-1, Eco-829-1, Eco-83-1, Eco-830-1, Eco-831-1, Eco-832-1, Eco-833-1, Eco-834-1, Eco-835-1, Eco-836-1, Eco-837-1, Eco-838-1, Eco-839-1, Eco-840-1, Eco-841-1, Eco-842-1, Eco-843-1, Eco-844-1, Eco-845-1, Eco-846-1, Eco-847-1, Eco-848-1, Eco-849-1, Eco-85-1, Eco-850-1, Eco-851-1, Eco-852-1, Eco-853-1, Eco-854-1, Eco-855-1, Eco-856-1, Eco-857-1, Eco-858-1, Eco-859-1, Eco-86-1, Eco-860-1, Eco-861-1, Eco-862-1, Eco-863-1, Eco-864-1, Eco-865-1, Eco-866-1, Eco-867-1, Eco-868-1, Eco-869-1, Eco-87-1, Eco-870-1, Eco-871-1, Eco-872-1, Eco-873-1, Eco-874-1, Eco-875-1, Eco-876-1, Eco-877-1, Eco-878-1, Eco-879-1, Eco-88-1, Eco-880-1, Eco-881-1, Eco-882-1, Eco-883-1, Eco-884-1, Eco-885-1, Eco-886-1, Eco-887-1, Eco-888-1, Eco-889-1, Eco-89-1, Eco-890-1, Eco-891-1, Eco-892-1, Eco-893-1, Eco-894-1, Eco-895-1, Eco-896-1, Eco-897-1, Eco-898-1, Eco-899-1, Eco-9-1, Eco-90-1, Eco-900-1, Eco-901-1, Eco-902-1, Eco-903-1, Eco-904-1, Eco-905-1, Eco-906-1, Eco-907-1, Eco-908-1, Eco-909-1, Eco-91-1, Eco-910-1, Eco-911-1, Eco-912-1, Eco-913-1, Eco-914-1, Eco-915-1, Eco-916-1, Eco-917-1, Eco-918-1, Eco-919-1, Eco-92-1, Eco-920-1, Eco-921-1, Eco-922-1, Eco-923-1, Eco-924-1, Eco-925-1, Eco-926-1, Eco-927-1, Eco-928-1, Eco-929-1, Eco-93-1, Eco-930-1, Eco-931-1, Eco-932-1, Eco-933-1, Eco-934-1, Eco-935-1, Eco-936-1, Eco-937-1, Eco-938-1, Eco-939-1, Eco-94-1, Eco-940-1, Eco-941-1, Eco-942-1, Eco-943-1, Eco-944-1, Eco-945-1, Eco-946-1, Eco-947-1, Eco-948-1, Eco-949-1, Eco-95-1, Eco-950-1, Eco-951-1, Eco-952-1, Eco-953-1, Eco-954-1, Eco-955-1, Eco-956-1, Eco-957-1, Eco-958-1, Eco-959-1, Eco-96-1, Eco-960-1, Eco-961-1, Eco-962-1, Eco-963-1, Eco-964-1, Eco-965-1, Eco-966-1, Eco-967-1, Eco-968-1, Eco-969-1, Eco-97-1, Eco-970-1, Eco-971-1, Eco-972-1, Eco-973-1, Eco-974-1, Eco-975-1, Eco-976-1, Eco-977-1, Eco-978-1, Eco-979-1, Eco-98-1, Eco-980-1, Eco-981-1, Eco-982-1, Eco-983-1, Eco-984-1, Eco-985-1, Eco-986-1, Eco-987-1, Eco-988-1, Eco-989-1, Eco-99-1, Eco-990-1, Eco-991-1, Eco-992-1, Eco-993-1, Eco-994-1, Eco-995-1, Eco-996-1, Eco-997-1, Eco-998-1, Eco-999-1, Efe-1-2, Efe-1-3, Efe-2-1, Efe-3-1, Efe-4-1, Eho-1-1, Eho-1-2, Eho-1-3, Eho-1-4, Eho-1-5, Eho-1-6, Eho-1-7, Eho-1-8, Eho-1-9, Eho-2-1, Eho-3-1, Eho-3-2, Eho-4-1, Eho-4-2, Eho-6-1, Eho-7-1, Eho-8-1, Eic-1-1, Ein-1-2, Eko-1-10, Eko-1-11, Eko-1-2, Eko-1-3, Eko-1-4, Eko-1-5, Eko-1-6, Eko-1-7, Eko-1-9, Elu-1-1, Elu-1-2, Elu-1-3, Elu-1-4, Ema-1-1, Emo-1-1, Epy-1-1, Esp-1-1, Esp-10-1, Esp-11-1, Esp-12-1, Esp-13-1, Esp-15-1, Esp-16-1, Esp-17-1, Esp-2-1, Esp-20-1, Esp-21-1, Esp-22-1, Esp-23-1, Esp-24-1, Esp-25-1, Esp-26-1, Esp-27-1, Esp-28-1, Esp-29-1, Esp-3-1, Esp-30-1, Esp-31-1, Esp-32-1, Esp-33-1, Esp-34-1, Esp-35-1, Esp-36-1, Esp-38-1, Esp-39-1, Esp-4-1, Esp-40-1, Esp-41-1, Esp-44-1, Esp-45-1, Esp-46-1, Esp-47-1, Esp-48-1, Esp-49-1, Esp-5-1, Esp-50-1, Esp-52-1, Esp-54-1, Esp-56-1, Esp-57-1, Esp-58-1, Esp-59-1, Esp-6-1, Esp-60-1, Esp-61-1, Esp-62-1, Esp-63-1, Esp-64-1, Esp-66-1, Esp-67-1, Esp-69-1, Esp-7-1, Esp-70-1, Esp-71-1, Esp-72-1, Esp-73-1, Esp-75-1, Esp-76-1, Esp-8-1, Esp-80-1, Esp-9-1, Eta-2-1, Eta-3-1, Eta-6-1, Eta-7-1, Eta-8-1, Etr-2-1, Fhe-2-1, Fhe-3-1, Fpu-2-1, Fpu-3-1, Fpu-4-1, Gan-1-1, Gan-1-11, Gan-1-12, Gan-1-3, Gan-1-4, Gan-1-7, Gan-1-8, Gan-10-1, Gan-2-1, Gan-4-1, Gan-8-1, Gge-1-1, Gge-2-1, Hal-1-3, Hal-1-4, Hal-2-1, Hal-3-1, Hha-2-1, Hin-1-2, Hin-1-3, Hin-1-4, Hin-1-5, Hin-1-6, Hin-2-1, Hin-3-1, Hin-5-1, Hin-6-1, Hin-7-1, Hpa-1-2, Kae-1-1, Kae-10-1, Kae-11-1, Kae-12-1, Kae-13-1, Kae-4-1, Kae-5-1, Kae-6-1, Kae-7-1, Kae-8-1, Kae-9-1, Kcf-1-1, Kmi-1-1, Kmi-2-1, Kmi-3-1, Kox-1-2, Kox-1-3, Kox-1-4, Kox-10-1, Kox-11-1, Kox-12-1, Kox-13-1, Kox-14-1, Kox-16-1, Kox-17-1, Kox-19-1, Kox-2-1, Kox-20-1, Kox-3-1, Kox-4-1, Kox-5-1, Kox-7-1, Kox-8-1, Kox-9-1, Kpn-1-1, Kpn-1-2, Kpn-1-3, Kpn-1-4, Kpn-1-5, Kpn-1-6, Kpn-1-7, Kpn-1-8, Kpn-1-9, Kpn-10-1, Kpn-100-1, Kpn-101-1, Kpn-102-1, Kpn-103-1, Kpn-104-1, Kpn-105-1, Kpn-106-1, Kpn-107-1, Kpn-108-1, Kpn-109-1, Kpn-11-1, Kpn-110-1, Kpn-111-1, Kpn-112-1, Kpn-113-1, Kpn-114-1, Kpn-115-1, Kpn-116-1, Kpn-117-1, Kpn-118-1, Kpn-119-1, Kpn-12-1, Kpn-120-1, Kpn-121-1, Kpn-122-1, Kpn-123-1, Kpn-124-1, Kpn-125-1, Kpn-126-1, Kpn-127-1, Kpn-128-1, Kpn-129-1, Kpn-13-1, Kpn-130-1, Kpn-131-1, Kpn-132-1, Kpn-133-1, Kpn-134-1, Kpn-135-1, Kpn-136-1, Kpn-137-1, Kpn-138-1, Kpn-139-1, Kpn-14-1, Kpn-140-1, Kpn-141-1, Kpn-142-1, Kpn-143-1, Kpn-144-1, Kpn-145-1, Kpn-146-1, Kpn-147-1, Kpn-148-1, Kpn-149-1, Kpn-15-1, Kpn-150-1, Kpn-151-1, Kpn-152-1, Kpn-153-1, Kpn-154-1, Kpn-155-1, Kpn-156-1, Kpn-157-1, Kpn-158-1, Kpn-159-1, Kpn-16-1, Kpn-160-1, Kpn-161-1, Kpn-162-1, Kpn-163-1, Kpn-164-1, Kpn-165-1, Kpn-166-1, Kpn-167-1, Kpn-168-1, Kpn-17-1, Kpn-170-1, Kpn-171-1, Kpn-172-1, Kpn-173-1, Kpn-174-1, Kpn-175-1, Kpn-176-1, Kpn-177-1, Kpn-178-1, Kpn-179-1, Kpn-18-1, Kpn-180-1, Kpn-181-1, Kpn-182-1, Kpn-183-1, Kpn-184-1, Kpn-185-1, Kpn-186-1, Kpn-187-1, Kpn-188-1, Kpn-189-1, Kpn-19-1, Kpn-190-1, Kpn-191-1, Kpn-192-1, Kpn-193-1, Kpn-195-1, Kpn-196-1, Kpn-197-1, Kpn-198-1, Kpn-199-1, Kpn-199-2, Kpn-2-1, Kpn-20-1, Kpn-200-1, Kpn-200-2, Kpn-201-1, Kpn-202-1, Kpn-203-1, Kpn-203-2, Kpn-204-1, Kpn-204-2, Kpn-205-1, Kpn-205-2, Kpn-205-3, Kpn-205-4, Kpn-206-1, Kpn-206-2, Kpn-206-3, Kpn-206-4, Kpn-206-5, Kpn-206-6, Kpn-206-7, Kpn-207-1, Kpn-208-1, Kpn-209-1, Kpn-21-1, Kpn-210-1, Kpn-211-1, Kpn-212-1, Kpn-213-1, Kpn-214-1, Kpn-215-1, Kpn-216-1, Kpn-217-1, Kpn-218-1, Kpn-22-1, Kpn-220-1, Kpn-221-1, Kpn-222-1, Kpn-223-1, Kpn-224-1, Kpn-225-1, Kpn-227-1, Kpn-228-1, Kpn-229-1, Kpn-23-1, Kpn-230-1, Kpn-231-1, Kpn-232-1, Kpn-233-1, Kpn-234-1, Kpn-235-1, Kpn-236-1, Kpn-237-1, Kpn-238-1, Kpn-239-1, Kpn-24-1, Kpn-240-1, Kpn-241-1, Kpn-242-1, Kpn-243-1, Kpn-244-1, Kpn-245-1, Kpn-246-1, Kpn-247-1, Kpn-248-1, Kpn-249-1, Kpn-25-1, Kpn-250-1, Kpn-251-1, Kpn-252-1, Kpn-253-1, Kpn-254-1, Kpn-255-1, Kpn-256-1, Kpn-257-1, Kpn-258-1, Kpn-259-1, Kpn-26-1, Kpn-260-1, Kpn-261-1, Kpn-262-1, Kpn-263-1, Kpn-264-1, Kpn-265-1, Kpn-266-1, Kpn-267-1, Kpn-268-1, Kpn-269-1, Kpn-27-1, Kpn-270-1, Kpn-271-1, Kpn-272-1, Kpn-273-1, Kpn-274-1, Kpn-275-1, Kpn-276-1, Kpn-277-1, Kpn-278-1, Kpn-279-1, Kpn-28-1, Kpn-280-1, Kpn-282-1, Kpn-283-1, Kpn-284-1, Kpn-285-1, Kpn-286-1, Kpn-287-1, Kpn-288-1, Kpn-289-1, Kpn-29-1, Kpn-290-1, Kpn-291-1, Kpn-292-1, Kpn-293-1, Kpn-294-1, Kpn-295-1, Kpn-296-1, Kpn-297-1, Kpn-298-1, Kpn-299-1, Kpn-3-1, Kpn-3-2, Kpn-30-1, Kpn-300-1, Kpn-301-1, Kpn-302-1, Kpn-303-1, Kpn-304-1, Kpn-305-1, Kpn-306-1, Kpn-307-1, Kpn-308-1, Kpn-309-1, Kpn-31-1, Kpn-310-1, Kpn-311-1, Kpn-312-1, Kpn-313-1, Kpn-314-1,

Kpn-315-1, Kpn-316-1, Kpn-317-1, Kpn-318-1, Kpn-319-1, Kpn-32-1, Kpn-320-1, Kpn-321-1, Kpn-322-1, Kpn-323-1, Kpn-324-1, Kpn-325-1, Kpn-326-1, Kpn-327-1, Kpn-328-1, Kpn-329-1, Kpn-33-1, Kpn-330-1, Kpn-331-1, Kpn-332-1, Kpn-333-1, Kpn-334-1, Kpn-335-1, Kpn-336-1, Kpn-337-1, Kpn-338-1, Kpn-339-1, Kpn-34-1, Kpn-340-1, Kpn-341-1, Kpn-342-1, Kpn-343-1, Kpn-344-1, Kpn-345-1, Kpn-346-1, Kpn-347-1, Kpn-348-1, Kpn-349-1, Kpn-35-1, Kpn-350-1, Kpn-351-1, Kpn-352-1, Kpn-353-1, Kpn-354-1, Kpn-355-1, Kpn-356-1, Kpn-357-1, Kpn-358-1, Kpn-359-1, Kpn-36-1, Kpn-360-1, Kpn-361-1, Kpn-362-1, Kpn-37-1, Kpn-38-1, Kpn-39-1, Kpn-4-1, Kpn-40-1, Kpn-41-1, Kpn-42-1, Kpn-43-1, Kpn-44-1, Kpn-45-1, Kpn-46-1, Kpn-47-1, Kpn-48-1, Kpn-49-1, Kpn-5-1, Kpn-50-1, Kpn-51-1, Kpn-52-1, Kpn-53-1, Kpn-54-1, Kpn-55-1, Kpn-56-1, Kpn-57-1, Kpn-58-1, Kpn-59-1, Kpn-6-1, Kpn-60-1, Kpn-61-1, Kpn-62-1, Kpn-63-1, Kpn-64-1, Kpn-65-1, Kpn-66-1, Kpn-67-1, Kpn-68-1, Kpn-69-1, Kpn-7-1, Kpn-70-1, Kpn-71-1, Kpn-72-1, Kpn-73-1, Kpn-74-1, Kpn-75-1, Kpn-76-1, Kpn-77-1, Kpn-78-1, Kpn-79-1, Kpn-8-1, Kpn-80-1, Kpn-81-1, Kpn-82-1, Kpn-83-1, Kpn-84-1, Kpn-85-1, Kpn-86-1, Kpn-87-1, Kpn-88-1, Kpn-89-1, Kpn-9-1, Kpn-90-1, Kpn-91-1, Kpn-92-1, Kpn-93-1, Kpn-94-1, Kpn-95-1, Kpn-96-1, Kpn-97-1, Kpn-98-1, Kpn-99-1, Kqu-2-1, Kqu-2-2, Kqu-2-3, Kqu-2-4, Kra-1-1, Ksp-4-1, Ksp-5-1, Ksp-6-1, Ksp-7-1, Kva-1-1, Kva-1-2, Kva-1-3, Kva-1-4, Kva-1-6, Kva-1-7, Kva-2-1, Lad-1-2, Lad-2-1, Lam-1-1, Lgr-1-2, Lqu-1-3, Lsp-1-1, Mmo-1-2, Mmo-1-4, Mmo-1-5, Mmo-1-6, Mmo-1-8, Mmo-4-1, Mmo-6-1, Msp-2-1, Pag-1-2, Pag-1-3, Pag-1-4, Pag-2-1, Pal-1-1, Pal-3-1, Pal-4-1, Pal-6-1, Pal-7-1, Pan-1-1, Pan-1-2, Pan-1-4, Pan-1-5, Pan-10-1, Pan-2-1, Pan-3-1, Pan-3-2, Pan-4-1, Pan-6-1, Pan-7-1, Pan-8-1, Pan-9-1, Pat-1-1, Pat-1-2, Pat-2-1, Pat-4-1, Pca-11-1, Pca-12-1, Pca-3-10, Pca-3-11, Pca-3-12, Pca-3-13, Pca-3-14, Pca-3-3, Pca-3-4, Pca-3-5, Pca-3-6, Pca-3-7, Pca-3-8, Pca-3-9, Pca-4-1, Pca-5-4, Pca-5-5, Pca-5-6, Pca-5-8, Pca-8-2, Pdi-1-1, Plu-1-1, Pmi-1-1, Pmi-1-3, Pmi-1-4, Pmi-1-5, Pmi-1-6, Pmi-3-1, Pmi-4-1, Pmi-5-1, Pmi-6-1, Pmi-7-1, Pmi-8-1, Ppa-1-1, Pre-1-2, Prw-1-1, Psp-11-1, Psp-15-1, Psp-16-1, Psp-17-1, Psp-19-1, Psp-2-1, Psp-20-1, Psp-4-1, Psp-6-1, Psp-8-1, Pst-1-2, Pst-2-1, Pst-3-1, Pte-4-1, Pte-5-1, Pva-1-3, Pva-2-1, Pvu-1-1, Pwa-1-1, Pwa-1-2, Ror-2-1, Ror-3-1, Ror-4-1, Ror-4-2, Rpl-1-1, Rpl-1-2, Rpl-1-3, Rpl-2-1, Sbl-1-1, Sbo-1-1, Sbo-10-1, Sbo-11-1, Sbo-12-1, Sbo-14-1, Sbo-15-1, Sbo-16-1, Sbo-17-1, Sbo-18-1, Sbo-2-1, Sbo-2-10, Sbo-2-2, Sbo-2-3, Sbo-2-4, Sbo-2-5, Sbo-2-6, Sbo-2-8, Sbo-2-9, Sbo-4-1, Sbo-5-1, Sbo-6-1, Sbo-7-1, Sbo-8-1, Sbo-9-1, Sdy-1-1, Sdy-10-1, Sdy-2-1, Sdy-3-1, Sdy-4-1, Sdy-5-1, Sdy-6-1, Sdy-7-1, Sdy-9-1, Sen-1-1, Sen-10-1, Sen-100-1, Sen-1000-1, Sen-1001-1, Sen-1002-1, Sen-1003-1, Sen-1004-1, Sen-1005-1, Sen-1006-1, Sen-1008-1, Sen-1009-1, Sen-101-1, Sen-1010-1, Sen-1011-1, Sen-1012-1, Sen-1013-1, Sen-1014-1, Sen-1015-1, Sen-1016-1, Sen-1016-2, Sen-1017-1, Sen-1019-1, Sen-102-1, Sen-1021-1, Sen-1022-1, Sen-1023-1, Sen-1024-1, Sen-1024-2, Sen-1025-1, Sen-1026-1, Sen-1027-1, Sen-1028-1, Sen-1029-1, Sen-103-1, Sen-1030-1, Sen-104-1, Sen-105-1, Sen-106-1, Sen-107-1, Sen-108-1, Sen-109-1, Sen-11-1, Sen-110-1, Sen-111-1, Sen-111-2, Sen-111-3, Sen-112-1, Sen-112-2, Sen-113-1, Sen-114-1, Sen-115-1, Sen-116-1, Sen-117-1, Sen-118-1, Sen-119-1, Sen-12-1, Sen-12-2, Sen-12-3, Sen-120-1, Sen-121-1, Sen-122-1, Sen-123-1, Sen-124-1, Sen-125-1, Sen-126-1, Sen-127-1, Sen-128-1, Sen-128-2, Sen-129-1, Sen-129-2, Sen-129-3, Sen-13-1, Sen-130-1, Sen-131-1, Sen-132-1, Sen-133-1, Sen-134-1, Sen-135-1, Sen-135-2, Sen-136-1, Sen-136-2, Sen-136-3, Sen-136-4, Sen-136-5, Sen-136-6, Sen-137-1, Sen-137-2, Sen-137-3, Sen-137-4, Sen-137-5, Sen-138-1, Sen-138-10, Sen-138-11, Sen-138-12, Sen-138-13, Sen-138-14, Sen-138-15, Sen-138-2, Sen-138-3, Sen-138-4, Sen-138-5, Sen-138-6, Sen-138-7, Sen-138-8, Sen-138-9, Sen-139-1, Sen-14-1, Sen-14-2, Sen-14-3, Sen-14-4, Sen-140-1, Sen-141-1, Sen-142-1, Sen-143-1, Sen-144-1, Sen-145-1, Sen-146-1, Sen-147-1, Sen-148-1, Sen-149-1, Sen-15-1, Sen-15-2, Sen-15-3, Sen-150-1, Sen-151-1, Sen-152-1, Sen-153-1, Sen-154-1, Sen-155-1, Sen-156-1, Sen-157-1, Sen-158-1, Sen-159-1, Sen-16-1, Sen-160-1, Sen-161-1, Sen-162-1, Sen-163-1, Sen-164-1, Sen-165-1, Sen-166-1, Sen-166-10, Sen-166-11, Sen-166-12, Sen-166-13, Sen-166-14, Sen-166-15, Sen-166-16, Sen-166-17, Sen-166-18, Sen-166-2, Sen-166-3, Sen-166-4, Sen-166-5, Sen-166-6, Sen-166-7, Sen-166-8, Sen-166-9, Sen-167-1, Sen-168-1, Sen-169-1, Sen-169-10, Sen-169-11, Sen-169-12, Sen-169-13, Sen-169-14, Sen-169-15, Sen-169-16, Sen-169-17, Sen-169-18, Sen-169-19, Sen-169-2, Sen-169-20, Sen-169-21, Sen-169-22, Sen-169-23, Sen-169-24, Sen-169-25, Sen-169-26, Sen-169-27, Sen-169-28, Sen-169-29, Sen-169-3, Sen-169-30, Sen-169-31, Sen-169-32, Sen-169-33, Sen-169-34, Sen-169-35, Sen-169-36, Sen-169-37, Sen-169-38, Sen-169-39, Sen-169-4, Sen-169-40, Sen-169-41, Sen-169-42, Sen-169-43, Sen-169-44, Sen-169-45, Sen-169-46, Sen-169-47, Sen-169-48, Sen-169-49, Sen-169-5, Sen-169-50, Sen-169-51, Sen-169-52, Sen-169-6, Sen-169-7, Sen-169-8, Sen-169-9, Sen-17-1, Sen-170-1, Sen-171-1, Sen-172-1, Sen-173-1, Sen-174-1, Sen-175-1, Sen-176-1, Sen-177-1, Sen-178-1, Sen-179-1, Sen-18-1, Sen-180-1, Sen-181-1, Sen-182-1, Sen-183-1, Sen-184-1, Sen-185-1, Sen-186-1, Sen-187-1, Sen-188-1, Sen-189-1, Sen-19-1, Sen-190-1, Sen-191-1, Sen-192-1, Sen-193-1, Sen-194-1, Sen-195-1, Sen-196-1, Sen-197-1, Sen-198-1, Sen-199-1, Sen-2-1, Sen-2-2, Sen-20-1, Sen-200-1, Sen-201-1, Sen-202-1, Sen-203-1, Sen-204-1, Sen-205-1, Sen-206-1, Sen-207-1, Sen-208-1, Sen-209-1, Sen-21-1, Sen-210-1, Sen-211-1, Sen-212-1, Sen-213-1, Sen-214-1, Sen-215-1, Sen-216-1, Sen-217-1, Sen-218-1, Sen-219-1, Sen-22-1, Sen-220-1, Sen-221-1, Sen-222-1, Sen-223-2, Sen-223-3, Sen-224-1, Sen-224-10, Sen-224-11, Sen-224-12, Sen-224-13, Sen-224-14, Sen-224-15, Sen-224-16, Sen-224-17, Sen-224-18, Sen-224-19, Sen-224-2, Sen-224-20, Sen-224-21, Sen-224-22, Sen-224-23, Sen-224-24, Sen-224-25, Sen-224-26, Sen-224-27, Sen-224-28, Sen-224-29, Sen-224-3, Sen-224-30, Sen-224-31, Sen-224-32, Sen-224-33, Sen-224-34, Sen-224-35, Sen-224-36, Sen-224-37, Sen-224-38, Sen-224-39, Sen-224-4, Sen-224-40, Sen-224-41, Sen-224-42, Sen-224-43, Sen-224-44, Sen-224-45, Sen-224-46, Sen-224-47, Sen-224-48, Sen-224-49, Sen-224-5, Sen-224-50, Sen-224-51, Sen-224-52, Sen-224-6, Sen-224-7, Sen-224-8, Sen-224-9, Sen-225-2, Sen-225-3, Sen-225-4, Sen-226-2, Sen-227-1, Sen-227-2, Sen-228-1, Sen-229-1, Sen-229-2, Sen-229-3, Sen-229-4, Sen-230-1, Sen-231-1, Sen-232-1, Sen-232-2, Sen-232-3, Sen-232-4, Sen-232-5, Sen-233-1, Sen-234-1, Sen-235-1, Sen-236-1, Sen-236-10, Sen-236-11, Sen-236-12, Sen-236-13, Sen-236-14, Sen-236-15, Sen-236-16, Sen-236-2, Sen-236-3, Sen-236-4, Sen-236-5, Sen-236-6, Sen-236-7, Sen-236-8, Sen-236-9, Sen-237-1, Sen-238-1, Sen-24-1, Sen-240-1, Sen-241-1, Sen-242-1, Sen-242-2, Sen-243-1, Sen-244-1, Sen-245-1, Sen-246-1, Sen-247-1, Sen-248-1, Sen-249-1, Sen-25-1, Sen-250-1, Sen-251-1, Sen-252-1, Sen-253-1, Sen-254-1, Sen-255-1, Sen-256-1, Sen-257-1,





































Pca-5-9  
Pca-9-1  
Pca-8-1  
Pca-5-10  
Pca-3-15  
Pca-7-1  
Pca-1-1  
Pca-2-1  
Pat-3-1  
Pte-1-1  
Xbo-9-1  
Plu-6-1  
Plu-2-1  
Xne-3-1  
Xkh-1-1  
Xne-5-1  
Xgr-1-1  
Xdo-1-1  
Xbo-2-1  
Xbo-11-1  
Xbo-8-1  
Pas-1-1  
Xpo-1-1  
Plu-1-2  
Plu-5-1  
Plu-3-1  
Pte-2-1  
Pte-3-1  
Xsp-1-1  
Xca-1-1  
Xsz-1-1  
Spl-2-1  
Sfo-4-1  
Sfo-3-1  
Sfo-1-1  
env-157  
Sma-1-2  
Sgr-1-1  
Sma-1-3  
Sur-1-1  
env-158  
Sma-14-1  
Ssp-8-1  
Ssp-9-1  
Sne-1-1  
Sma-18-1  
Sma-25-1  
Sma-1-1  
env-159  
env-160  
Sli-2-1  
env-161  
Ssp-6-1  
Ssp-2-1  
Ssy-2-1  
Ssy-1-1  
env-162  
env-163  
Ssp-14-1  
Cmu-2-1  
Spr-2-1  
Ssp-4-1  
Spl-1-1  
Ssp-10-1  
Sod-1-1  
Spl-5-1  
Ype-132-1  
Yfr-1-1  
Yfr-1-4  
Ymo-1-1  
Ymo-1-3  
Yfr-1-6  
Yfr-1-7  
Yen-21-1  
Yal-1-1  
Yfr-1-9  
Ype-1-1  
Yfr-1-10  
Yfr-2-2  
Yfr-1-12  
Yal-1-3  
Ymo-1-5  
Yma-2-1  
Yma-1-1

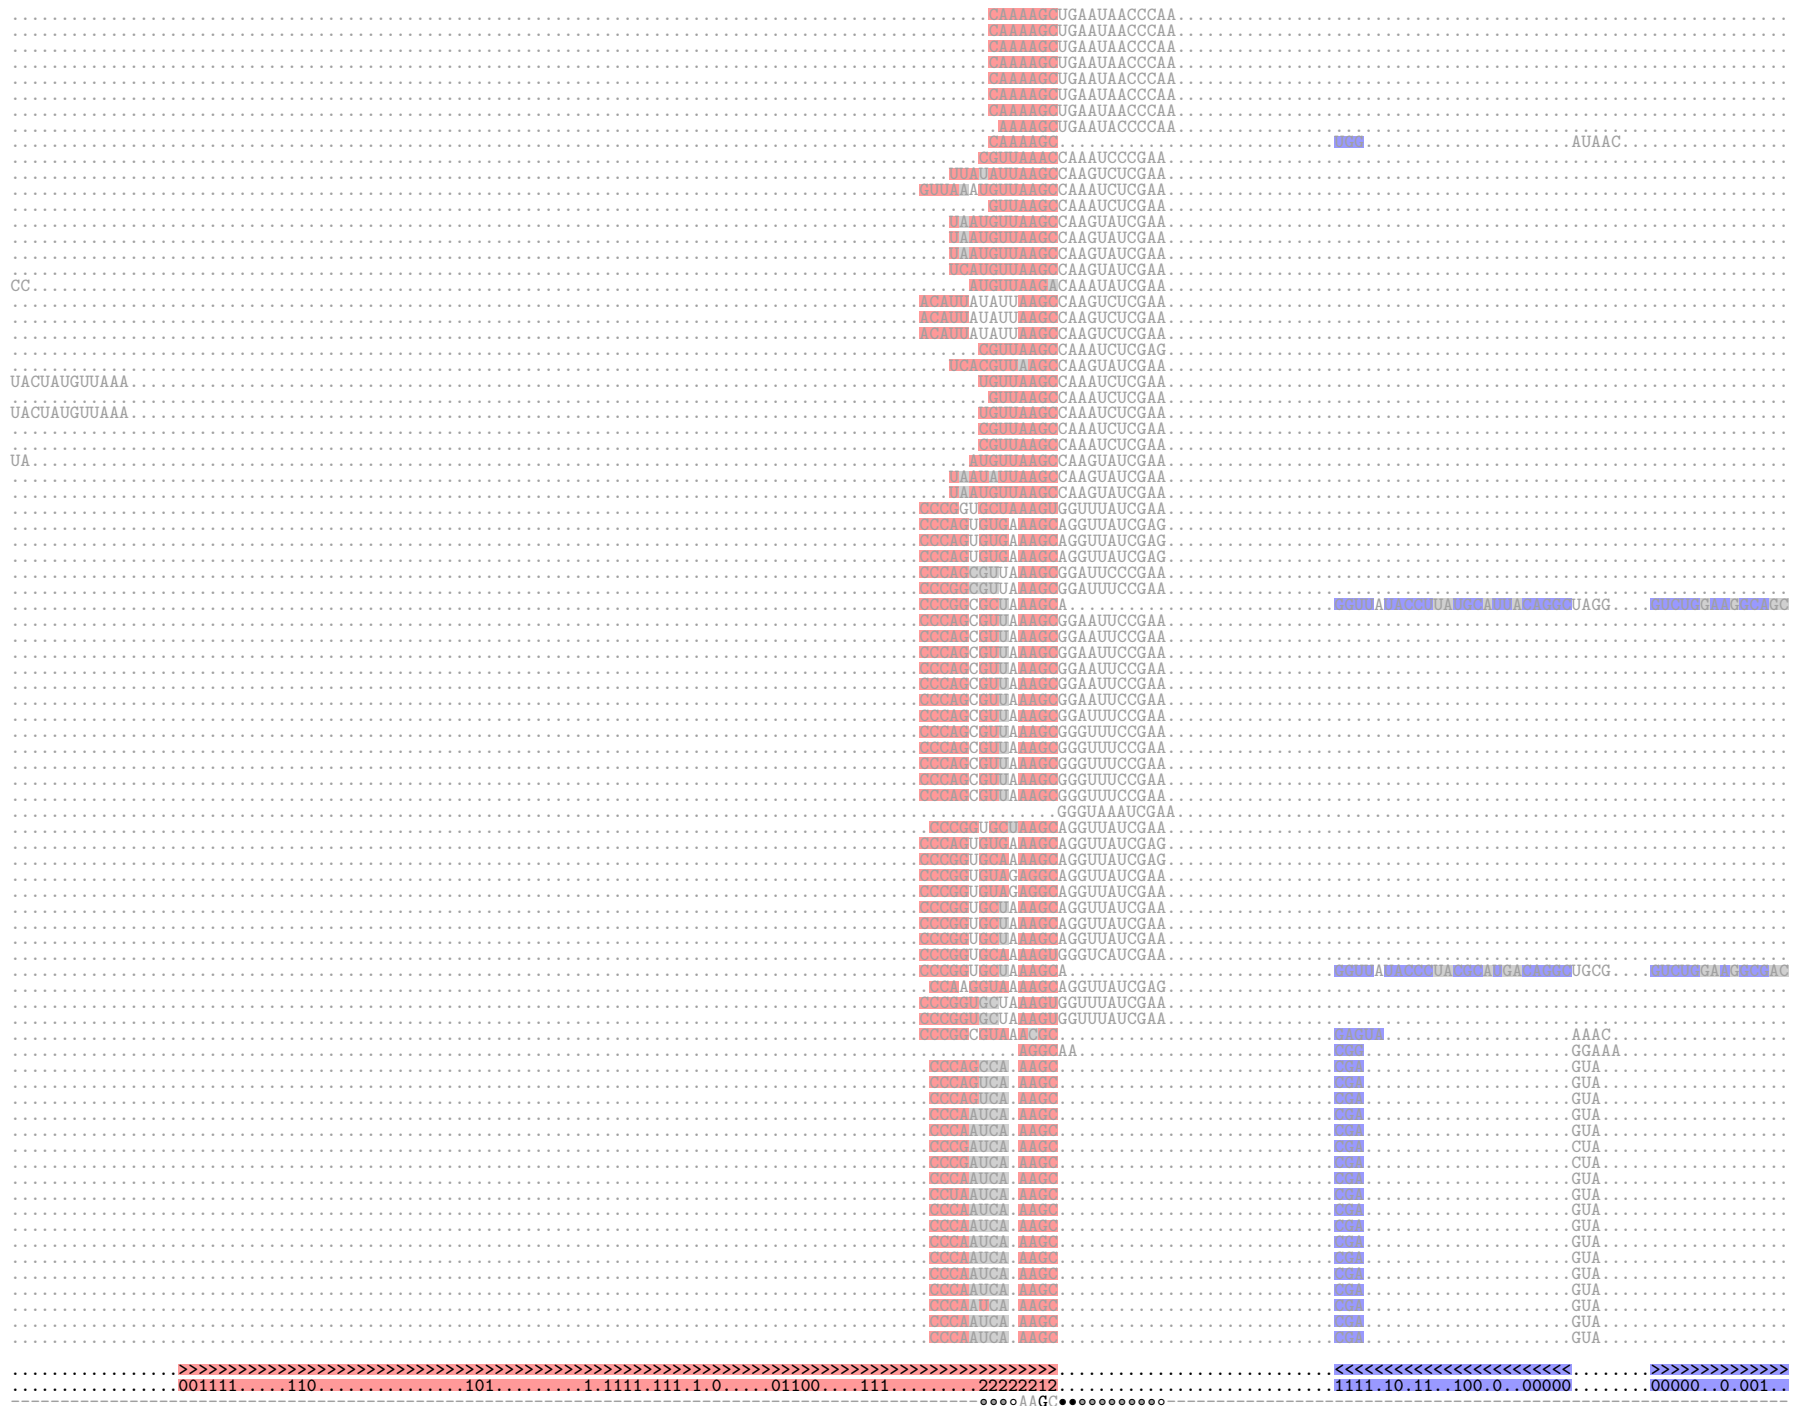































|                      |          |                |                  |                 |                     |                     |                                                                         |
|----------------------|----------|----------------|------------------|-----------------|---------------------|---------------------|-------------------------------------------------------------------------|
| Ama-2-1              | Bacteria | Actinobacteria | Actinobacteridae | Actinomycetales | Actinomycineae      | Actinomycetaceae    | <i>Actinomyces massiliensis</i> F0489                                   |
| Ane-1-1              | Bacteria | Actinobacteria | Actinobacteridae | Actinomycetales | Actinomycineae      | Actinomycetaceae    | <i>Actinomyces neuii</i> BVS029A5                                       |
| Vca-1-1              | Bacteria | Actinobacteria | Actinobacteridae | Actinomycetales | Actinomycineae      | Actinomycetaceae    | <i>Varibaculum cambriense</i> DSM 15806                                 |
| Aha-1-1              | Bacteria | Actinobacteria | Actinobacteridae | Actinomycetales | Actinopolysporineae | Actinopolysporaceae | <i>Actinopolyspora halophila</i> DSM 43834                              |
| Cac-1-1              | Bacteria | Actinobacteria | Actinobacteridae | Actinomycetales | Catenulisporineae   | Catenulisporaceae   | <i>Catenulispora acidiphila</i> DSM 44928                               |
| Gai-1-1              | Bacteria | Actinobacteria | Actinobacteridae | Actinomycetales | Corynebacterineae   | Gordoniaceae        | <i>Gordonia aichiensis</i> NBRC 108223                                  |
| Gal-1-1              | Bacteria | Actinobacteria | Actinobacteridae | Actinomycetales | Corynebacterineae   | Gordoniaceae        | <i>Gordonia alkanivorans</i> NBRC 16433                                 |
| Gam-1-1              | Bacteria | Actinobacteria | Actinobacteridae | Actinomycetales | Corynebacterineae   | Gordoniaceae        | <i>Gordonia amarae</i> NBRC 15530                                       |
| Gam-2-1              | Bacteria | Actinobacteria | Actinobacteridae | Actinomycetales | Corynebacterineae   | Gordoniaceae        | <i>Gordonia amicalis</i> NBRC 100051 = JCM 11271                        |
| Gar-1-1              | Bacteria | Actinobacteria | Actinobacteridae | Actinomycetales | Corynebacterineae   | Gordoniaceae        | <i>Gordonia araii</i> NBRC 100433                                       |
| Gbr-1-1              | Bacteria | Actinobacteria | Actinobacteridae | Actinomycetales | Corynebacterineae   | Gordoniaceae        | <i>Gordonia bronchialis</i> DSM 43247                                   |
| Gef-1-1              | Bacteria | Actinobacteria | Actinobacteridae | Actinomycetales | Corynebacterineae   | Gordoniaceae        | <i>Gordonia effusa</i> NBRC 100432                                      |
| Ghi-1-1 to Ghi-1-2   | Bacteria | Actinobacteria | Actinobacteridae | Actinomycetales | Corynebacterineae   | Gordoniaceae        | <i>Gordonia hirsuta</i> DSM 44140 = NBRC 16056                          |
| Gkr-1-1              | Bacteria | Actinobacteria | Actinobacteridae | Actinomycetales | Corynebacterineae   | Gordoniaceae        | <i>Gordonia kroppenstedtii</i> DSM 45133                                |
| Gma-1-1              | Bacteria | Actinobacteria | Actinobacteridae | Actinomycetales | Corynebacterineae   | Gordoniaceae        | <i>Gordonia malaquae</i> NBRC 108250                                    |
| Gna-1-1              | Bacteria | Actinobacteria | Actinobacteridae | Actinomycetales | Corynebacterineae   | Gordoniaceae        | <i>Gordonia namibiensis</i> NBRC 108229                                 |
| Gne-1-1              | Bacteria | Actinobacteria | Actinobacteridae | Actinomycetales | Corynebacterineae   | Gordoniaceae        | <i>Gordonia neofelifaecis</i> NRRL B-59395                              |
| Got-1-1              | Bacteria | Actinobacteria | Actinobacteridae | Actinomycetales | Corynebacterineae   | Gordoniaceae        | <i>Gordonia otitidis</i> NBRC 100426                                    |
| Gpa-1-1              | Bacteria | Actinobacteria | Actinobacteridae | Actinomycetales | Corynebacterineae   | Gordoniaceae        | <i>Gordonia paraffinivorans</i> NBRC 108238                             |
| Gpo-1-1              | Bacteria | Actinobacteria | Actinobacteridae | Actinomycetales | Corynebacterineae   | Gordoniaceae        | <i>Gordonia polyisoprenivorans</i> HW436                                |
| Gpo-2-1              | Bacteria | Actinobacteria | Actinobacteridae | Actinomycetales | Corynebacterineae   | Gordoniaceae        | <i>Gordonia polyisoprenivorans</i> NBRC 16320                           |
| Gpo-3-1              | Bacteria | Actinobacteria | Actinobacteridae | Actinomycetales | Corynebacterineae   | Gordoniaceae        | <i>Gordonia polyisoprenivorans</i> VH2                                  |
| Grh-1-1              | Bacteria | Actinobacteria | Actinobacteridae | Actinomycetales | Corynebacterineae   | Gordoniaceae        | <i>Gordonia rhizosphaera</i> NBRC 16068                                 |
| Gru-1-1              | Bacteria | Actinobacteria | Actinobacteridae | Actinomycetales | Corynebacterineae   | Gordoniaceae        | <i>Gordonia rubripertincta</i> NBRC 101908                              |
| Gsi-1-1              | Bacteria | Actinobacteria | Actinobacteridae | Actinomycetales | Corynebacterineae   | Gordoniaceae        | <i>Gordonia sihwensis</i> NBRC 108236                                   |
| Gso-1-1              | Bacteria | Actinobacteria | Actinobacteridae | Actinomycetales | Corynebacterineae   | Gordoniaceae        | <i>Gordonia soli</i> NBRC 108243                                        |
| Gsp-1-1              | Bacteria | Actinobacteria | Actinobacteridae | Actinomycetales | Corynebacterineae   | Gordoniaceae        | <i>Gordonia sp.</i> KTR9                                                |
| Gsp-2-1              | Bacteria | Actinobacteria | Actinobacteridae | Actinomycetales | Corynebacterineae   | Gordoniaceae        | <i>Gordonia sputi</i> NBRC 100414                                       |
| Gte-1-1              | Bacteria | Actinobacteria | Actinobacteridae | Actinomycetales | Corynebacterineae   | Gordoniaceae        | <i>Gordonia terrae</i> C-6                                              |
| Gte-2-1              | Bacteria | Actinobacteria | Actinobacteridae | Actinomycetales | Corynebacterineae   | Gordoniaceae        | <i>Gordonia terrae</i> NBRC 100016                                      |
| Asu-1-1              | Bacteria | Actinobacteria | Actinobacteridae | Actinomycetales | Corynebacterineae   | Mycobacteriaceae    | <i>Amycolicococcus subflavus</i> DQS3-9A1                               |
| Mab-1-1 to Mab-1-166 | Bacteria | Actinobacteria | Actinobacteridae | Actinomycetales | Corynebacterineae   | Mycobacteriaceae    | <i>Mycobacterium abscessus</i>                                          |
| Mch-1-1              | Bacteria | Actinobacteria | Actinobacteridae | Actinomycetales | Corynebacterineae   | Mycobacteriaceae    | <i>Mycobacterium chubuense</i> NBB4                                     |
| Mfo-1-1              | Bacteria | Actinobacteria | Actinobacteridae | Actinomycetales | Corynebacterineae   | Mycobacteriaceae    | <i>Mycobacterium fortuitum subsp. fortuitum</i> DSM 46621               |
| Mgi-1-1              | Bacteria | Actinobacteria | Actinobacteridae | Actinomycetales | Corynebacterineae   | Mycobacteriaceae    | <i>Mycobacterium gilvum</i> PYR-GCK                                     |
| Mgi-2-1              | Bacteria | Actinobacteria | Actinobacteridae | Actinomycetales | Corynebacterineae   | Mycobacteriaceae    | <i>Mycobacterium gilvum</i> Spyr1                                       |
| Mha-1-1              | Bacteria | Actinobacteria | Actinobacteridae | Actinomycetales | Corynebacterineae   | Mycobacteriaceae    | <i>Mycobacterium hassiacum</i> DSM 44199                                |
| Mma-1-1              | Bacteria | Actinobacteria | Actinobacteridae | Actinomycetales | Corynebacterineae   | Mycobacteriaceae    | <i>Mycobacterium massiliense</i> CCUG 48898                             |
| Mph-1-1              | Bacteria | Actinobacteria | Actinobacteridae | Actinomycetales | Corynebacterineae   | Mycobacteriaceae    | <i>Mycobacterium phlei</i> RIVM601174                                   |
| Mrh-1-1              | Bacteria | Actinobacteria | Actinobacteridae | Actinomycetales | Corynebacterineae   | Mycobacteriaceae    | <i>Mycobacterium rhodesiae</i> JS60                                     |
| Mrh-2-1              | Bacteria | Actinobacteria | Actinobacteridae | Actinomycetales | Corynebacterineae   | Mycobacteriaceae    | <i>Mycobacterium rhodesiae</i> NBB3                                     |
| Msp-1-1              | Bacteria | Actinobacteria | Actinobacteridae | Actinomycetales | Corynebacterineae   | Mycobacteriaceae    | <i>Mycobacterium sp.</i> 141                                            |
| Msp-2-1              | Bacteria | Actinobacteria | Actinobacteridae | Actinomycetales | Corynebacterineae   | Mycobacteriaceae    | <i>Mycobacterium sp.</i> 155                                            |
| Msp-3-1              | Bacteria | Actinobacteria | Actinobacteridae | Actinomycetales | Corynebacterineae   | Mycobacteriaceae    | <i>Mycobacterium sp.</i> 360MFTsu5.1                                    |
| Msp-4-1              | Bacteria | Actinobacteria | Actinobacteridae | Actinomycetales | Corynebacterineae   | Mycobacteriaceae    | <i>Mycobacterium sp.</i> JDM601                                         |
| Msp-5-1              | Bacteria | Actinobacteria | Actinobacteridae | Actinomycetales | Corynebacterineae   | Mycobacteriaceae    | <i>Mycobacterium sp.</i> JLS                                            |
| Msp-6-1              | Bacteria | Actinobacteria | Actinobacteridae | Actinomycetales | Corynebacterineae   | Mycobacteriaceae    | <i>Mycobacterium sp.</i> KMS                                            |
| Msp-7-1              | Bacteria | Actinobacteria | Actinobacteridae | Actinomycetales | Corynebacterineae   | Mycobacteriaceae    | <i>Mycobacterium sp.</i> MCS                                            |
| Mth-1-1              | Bacteria | Actinobacteria | Actinobacteridae | Actinomycetales | Corynebacterineae   | Mycobacteriaceae    | <i>Mycobacterium thermoresistibile</i> ATCC 19527                       |
| Mva-1-1              | Bacteria | Actinobacteria | Actinobacteridae | Actinomycetales | Corynebacterineae   | Mycobacteriaceae    | <i>Mycobacterium vaccae</i> ATCC 25954                                  |
| Mva-2-1              | Bacteria | Actinobacteria | Actinobacteridae | Actinomycetales | Corynebacterineae   | Mycobacteriaceae    | <i>Mycobacterium vanbaalenii</i> PYR-1                                  |
| Mab-2-1              | Bacteria | Actinobacteria | Actinobacteridae | Actinomycetales | Corynebacterineae   | Mycobacteriaceae    | <i>Mycobacterium abscessus</i> <i>Mycobacterium abscessus</i> 3A-0119-R |
| Mab-3-1              | Bacteria | Actinobacteria | Actinobacteridae | Actinomycetales | Corynebacterineae   | Mycobacteriaceae    | <i>Mycobacterium abscessus</i> 3A-0122-R                                |
| Mab-4-1              | Bacteria | Actinobacteria | Actinobacteridae | Actinomycetales | Corynebacterineae   | Mycobacteriaceae    | <i>Mycobacterium abscessus</i> 3A-0122-S                                |
| Mab-5-1              | Bacteria | Actinobacteria | Actinobacteridae | Actinomycetales | Corynebacterineae   | Mycobacteriaceae    | <i>Mycobacterium abscessus</i> 3A-0731                                  |
| Mab-6-1              | Bacteria | Actinobacteria | Actinobacteridae | Actinomycetales | Corynebacterineae   | Mycobacteriaceae    | <i>Mycobacterium abscessus</i> 3A-0810-R                                |





|                    |                                                                                                                                                                                           |
|--------------------|-------------------------------------------------------------------------------------------------------------------------------------------------------------------------------------------|
| Mav-1-1            | Bacteria Actinobacteria Actinobacteridae Actinomycetales Corynebacterineae Mycobacteriaceae Mycobacterium Mycobacteriumavium complex (MAC) <i>Mycobacterium avium subsp. avium</i> Env 77 |
| Nas-1-1            | Bacteria Actinobacteria Actinobacteridae Actinomycetales Corynebacterineae Nocardiaceae <i>Nocardia asteroides</i> NBRC 15531                                                             |
| Nbr-1-1            | Bacteria Actinobacteria Actinobacteridae Actinomycetales Corynebacterineae Nocardiaceae <i>Nocardia brasiliensis</i> ATCC 700358                                                          |
| Ncy-1-1            | Bacteria Actinobacteria Actinobacteridae Actinomycetales Corynebacterineae Nocardiaceae <i>Nocardia cyriacigeorgica</i> GUH-2                                                             |
| Nfa-1-1            | Bacteria Actinobacteria Actinobacteridae Actinomycetales Corynebacterineae Nocardiaceae <i>Nocardia farcinica</i> IFM 10152                                                               |
| Nsp-1-1            | Bacteria Actinobacteria Actinobacteridae Actinomycetales Corynebacterineae Nocardiaceae <i>Nocardia sp.</i> 348MFTsu5.1                                                                   |
| Nsp-2-1            | Bacteria Actinobacteria Actinobacteridae Actinomycetales Corynebacterineae Nocardiaceae <i>Nocardia sp.</i> BMG111209                                                                     |
| Req-1-1            | Bacteria Actinobacteria Actinobacteridae Actinomycetales Corynebacterineae Nocardiaceae <i>Rhodococcus equi</i> 103S                                                                      |
| Req-2-1            | Bacteria Actinobacteria Actinobacteridae Actinomycetales Corynebacterineae Nocardiaceae <i>Rhodococcus equi</i> ATCC 33707                                                                |
| Req-3-1            | Bacteria Actinobacteria Actinobacteridae Actinomycetales Corynebacterineae Nocardiaceae <i>Rhodococcus equi</i> NBRC 101255 = C 7                                                         |
| Rer-1-1            | Bacteria Actinobacteria Actinobacteridae Actinomycetales Corynebacterineae Nocardiaceae <i>Rhodococcus erythropolis</i> CCM2595                                                           |
| Rer-2-1            | Bacteria Actinobacteria Actinobacteridae Actinomycetales Corynebacterineae Nocardiaceae <i>Rhodococcus erythropolis</i> DN1                                                               |
| Rer-3-1            | Bacteria Actinobacteria Actinobacteridae Actinomycetales Corynebacterineae Nocardiaceae <i>Rhodococcus erythropolis</i> PR4                                                               |
| Rer-4-1            | Bacteria Actinobacteria Actinobacteridae Actinomycetales Corynebacterineae Nocardiaceae <i>Rhodococcus erythropolis</i> SK121                                                             |
| Rer-5-1            | Bacteria Actinobacteria Actinobacteridae Actinomycetales Corynebacterineae Nocardiaceae <i>Rhodococcus erythropolis</i> XP                                                                |
| Rim-1-1            | Bacteria Actinobacteria Actinobacteridae Actinomycetales Corynebacterineae Nocardiaceae <i>Rhodococcus imtechensis</i> RKJ300                                                             |
| Rjo-1-1            | Bacteria Actinobacteria Actinobacteridae Actinomycetales Corynebacterineae Nocardiaceae <i>Rhodococcus jostii</i> RHA1                                                                    |
| Rop-1-1            | Bacteria Actinobacteria Actinobacteridae Actinomycetales Corynebacterineae Nocardiaceae <i>Rhodococcus opacus</i> B4                                                                      |
| Rop-2-1            | Bacteria Actinobacteria Actinobacteridae Actinomycetales Corynebacterineae Nocardiaceae <i>Rhodococcus opacus</i> M213                                                                    |
| Rop-3-1 to Rop-3-2 | Bacteria Actinobacteria Actinobacteridae Actinomycetales Corynebacterineae Nocardiaceae <i>Rhodococcus opacus</i> PD630                                                                   |
| Rpy-1-1            | Bacteria Actinobacteria Actinobacteridae Actinomycetales Corynebacterineae Nocardiaceae <i>Rhodococcus pyridinivorans</i> AK37                                                            |
| Rpy-2-1            | Bacteria Actinobacteria Actinobacteridae Actinomycetales Corynebacterineae Nocardiaceae <i>Rhodococcus pyridinivorans</i> SB3094                                                          |
| Rqi-1-1            | Bacteria Actinobacteria Actinobacteridae Actinomycetales Corynebacterineae Nocardiaceae <i>Rhodococcus qingshengii</i> BKS 20-40                                                          |
| Rrh-1-1            | Bacteria Actinobacteria Actinobacteridae Actinomycetales Corynebacterineae Nocardiaceae <i>Rhodococcus rhodnii</i> LMG 5362                                                               |
| Rrh-2-1            | Bacteria Actinobacteria Actinobacteridae Actinomycetales Corynebacterineae Nocardiaceae <i>Rhodococcus rhodochrous</i> BKS6-46                                                            |
| Rru-1-1            | Bacteria Actinobacteria Actinobacteridae Actinomycetales Corynebacterineae Nocardiaceae <i>Rhodococcus ruber</i> BKS 20-38                                                                |
| Rru-2-1            | Bacteria Actinobacteria Actinobacteridae Actinomycetales Corynebacterineae Nocardiaceae <i>Rhodococcus ruber</i> Chol-4                                                                   |
| Rsp-1-1            | Bacteria Actinobacteria Actinobacteridae Actinomycetales Corynebacterineae Nocardiaceae <i>Rhodococcus sp.</i> 114MFTsu3.1                                                                |
| Rsp-2-1            | Bacteria Actinobacteria Actinobacteridae Actinomycetales Corynebacterineae Nocardiaceae <i>Rhodococcus sp.</i> 29MFTsu3.1                                                                 |
| Rsp-3-1            | Bacteria Actinobacteria Actinobacteridae Actinomycetales Corynebacterineae Nocardiaceae <i>Rhodococcus sp.</i> AW25M09                                                                    |
| Rsp-4-1            | Bacteria Actinobacteria Actinobacteridae Actinomycetales Corynebacterineae Nocardiaceae <i>Rhodococcus sp.</i> DK17                                                                       |
| Rsp-5-1            | Bacteria Actinobacteria Actinobacteridae Actinomycetales Corynebacterineae Nocardiaceae <i>Rhodococcus sp.</i> EsD8                                                                       |
| Rsp-6-1            | Bacteria Actinobacteria Actinobacteridae Actinomycetales Corynebacterineae Nocardiaceae <i>Rhodococcus sp.</i> JVH1                                                                       |
| Rsp-7-1            | Bacteria Actinobacteria Actinobacteridae Actinomycetales Corynebacterineae Nocardiaceae <i>Rhodococcus sp.</i> P14                                                                        |
| Rsp-8-1            | Bacteria Actinobacteria Actinobacteridae Actinomycetales Corynebacterineae Nocardiaceae <i>Rhodococcus sp.</i> P27                                                                        |
| Rsp-9-1            | Bacteria Actinobacteria Actinobacteridae Actinomycetales Corynebacterineae Nocardiaceae <i>Rhodococcus sp.</i> R1101                                                                      |
| Rtr-1-1            | Bacteria Actinobacteria Actinobacteridae Actinomycetales Corynebacterineae Nocardiaceae <i>Rhodococcus triatomae</i> BKS 15-14                                                            |
| Rwr-1-1            | Bacteria Actinobacteria Actinobacteridae Actinomycetales Corynebacterineae Nocardiaceae <i>Rhodococcus uratislaviensis</i> IFP 2016                                                       |
| Sni-1-1            | Bacteria Actinobacteria Actinobacteridae Actinomycetales Corynebacterineae Nocardiaceae <i>Smaragdicoccus niigatensis</i> DSM 44881                                                       |
| Tpa-1-1            | Bacteria Actinobacteria Actinobacteridae Actinomycetales Corynebacterineae Tsukamurellaceae <i>Tsukamurella paurometabola</i> DSM 20162                                                   |
| Wsp-1-1            | Bacteria Actinobacteria Actinobacteridae Actinomycetales Corynebacterineae Williamsiaceae <i>Williamsia sp.</i> D3                                                                        |
| Ace-1-1            | Bacteria Actinobacteria Actinobacteridae Actinomycetales Frankineae Acidothermaceae <i>Acidothermus cellulolyticus</i> 11B                                                                |
| Fal-1-1            | Bacteria Actinobacteria Actinobacteridae Actinomycetales Frankineae Frankiaceae <i>Frankia alni</i> ACN14a                                                                                |
| Fsp-1-1            | Bacteria Actinobacteria Actinobacteridae Actinomycetales Frankineae Frankiaceae <i>Frankia sp.</i> BCU110501                                                                              |
| Fsp-2-1            | Bacteria Actinobacteria Actinobacteridae Actinomycetales Frankineae Frankiaceae <i>Frankia sp.</i> BMG5.12                                                                                |
| Fsp-3-1            | Bacteria Actinobacteria Actinobacteridae Actinomycetales Frankineae Frankiaceae <i>Frankia sp.</i> Cc13                                                                                   |
| Fsp-4-1            | Bacteria Actinobacteria Actinobacteridae Actinomycetales Frankineae Frankiaceae <i>Frankia sp.</i> Cc16                                                                                   |
| Fsp-5-1            | Bacteria Actinobacteria Actinobacteridae Actinomycetales Frankineae Frankiaceae <i>Frankia sp.</i> EAN1pec                                                                                |
| Fsp-7-1            | Bacteria Actinobacteria Actinobacteridae Actinomycetales Frankineae Frankiaceae <i>Frankia sp.</i> Eu1c                                                                                   |
| Fsp-6-1            | Bacteria Actinobacteria Actinobacteridae Actinomycetales Frankineae Frankiaceae <i>Frankia sp.</i> EUN1f                                                                                  |
| Fsp-8-1            | Bacteria Actinobacteria Actinobacteridae Actinomycetales Frankineae Frankiaceae <i>Frankia sp.</i> Iso899                                                                                 |
| Fsp-9-1            | Bacteria Actinobacteria Actinobacteridae Actinomycetales Frankineae Frankiaceae <i>Frankia sp.</i> QA3                                                                                    |
| Fsy-1-1            | Bacteria Actinobacteria Actinobacteridae Actinomycetales Frankineae Frankiaceae <i>Frankia symbiont of Datisca glomerata</i>                                                              |
| Nmu-1-1            | Bacteria Actinobacteria Actinobacteridae Actinomycetales Frankineae Nakamurellaceae <i>Nakamurella multipartita</i> DSM 44233                                                             |
| Spo-1-1            | Bacteria Actinobacteria Actinobacteridae Actinomycetales Frankineae Sporichthyaceae <i>Sporichthya polymorpha</i> DSM 43042                                                               |
| Sna-1-1            | Bacteria Actinobacteria Actinobacteridae Actinomycetales Glycomycineae Glycomycetaceae <i>Stackebrandtia nassauensis</i> DSM 44728                                                        |
| Bfa-1-1            | Bacteria Actinobacteria Actinobacteridae Actinomycetales Micrococcineae Dermabacteraceae <i>Brachybacterium faecium</i> DSM 4810                                                          |
| Bmu-1-1            | Bacteria Actinobacteria Actinobacteridae Actinomycetales Micrococcineae Dermabacteraceae <i>Brachybacterium muris</i> UCD-AY4                                                             |
| Bpa-1-1            | Bacteria Actinobacteria Actinobacteridae Actinomycetales Micrococcineae Dermabacteraceae <i>Brachybacterium paraconglomeratum</i> LC44                                                    |
| Bsq-1-1            | Bacteria Actinobacteria Actinobacteridae Actinomycetales Micrococcineae Dermabacteraceae <i>Brachybacterium squillarum</i> M-6-3                                                          |
| Dsp-1-1            | Bacteria Actinobacteria Actinobacteridae Actinomycetales Micrococcineae Dermabacteraceae <i>Dermabacter sp.</i> HFH0086                                                                   |
| Afr-1-1            | Bacteria Actinobacteria Actinobacteridae Actinomycetales Micromonosporineae Micromonosporaceae <i>Actinoplanes friuliensis</i> DSM 7358                                                   |
| Agl-1-1            | Bacteria Actinobacteria Actinobacteridae Actinomycetales Micromonosporineae Micromonosporaceae <i>Actinoplanes globisporus</i> DSM 43857                                                  |
| Ami-1-1            | Bacteria Actinobacteria Actinobacteridae Actinomycetales Micromonosporineae Micromonosporaceae <i>Actinoplanes missouriensis</i> 431                                                      |

|          |          |                |                  |                 |                     |                      |                                                      |
|----------|----------|----------------|------------------|-----------------|---------------------|----------------------|------------------------------------------------------|
| Asp-1-1  | Bacteria | Actinobacteria | Actinobacteridae | Actinomycetales | Micromonosporineae  | Micromonosporaceae   | <i>Actinoplanes</i> sp. N902-109                     |
| Asp-2-1  | Bacteria | Actinobacteria | Actinobacteridae | Actinomycetales | Micromonosporineae  | Micromonosporaceae   | <i>Actinoplanes</i> sp. SE50/110                     |
| Cko-1-1  | Bacteria | Actinobacteria | Actinobacteridae | Actinomycetales | Micromonosporineae  | Micromonosporaceae   | <i>Catelliglobospora koreensis</i> DSM 44566         |
| Lal-1-1  | Bacteria | Actinobacteria | Actinobacteridae | Actinomycetales | Micromonosporineae  | Micromonosporaceae   | <i>Longispora albida</i> DSM 44784                   |
| Mau-1-1  | Bacteria | Actinobacteria | Actinobacteridae | Actinomycetales | Micromonosporineae  | Micromonosporaceae   | <i>Micromonospora aurantiaca</i> ATCC 27029          |
| Mlu-1-1  | Bacteria | Actinobacteria | Actinobacteridae | Actinomycetales | Micromonosporineae  | Micromonosporaceae   | <i>Micromonospora lupini</i> str. Lupac 08           |
| Msp-8-1  | Bacteria | Actinobacteria | Actinobacteridae | Actinomycetales | Micromonosporineae  | Micromonosporaceae   | <i>Micromonospora</i> sp. ATCC 39149                 |
| Msp-9-1  | Bacteria | Actinobacteria | Actinobacteridae | Actinomycetales | Micromonosporineae  | Micromonosporaceae   | <i>Micromonospora</i> sp. CNB394                     |
| Msp-10-1 | Bacteria | Actinobacteria | Actinobacteridae | Actinomycetales | Micromonosporineae  | Micromonosporaceae   | <i>Micromonospora</i> sp. L5                         |
| Sar-1-1  | Bacteria | Actinobacteria | Actinobacteridae | Actinomycetales | Micromonosporineae  | Micromonosporaceae   | <i>Salinispora arenicola</i> CNH877                  |
| Sar-2-1  | Bacteria | Actinobacteria | Actinobacteridae | Actinomycetales | Micromonosporineae  | Micromonosporaceae   | <i>Salinispora arenicola</i> CNH962                  |
| Sar-3-1  | Bacteria | Actinobacteria | Actinobacteridae | Actinomycetales | Micromonosporineae  | Micromonosporaceae   | <i>Salinispora arenicola</i> CNP105                  |
| Sar-4-1  | Bacteria | Actinobacteria | Actinobacteridae | Actinomycetales | Micromonosporineae  | Micromonosporaceae   | <i>Salinispora arenicola</i> CNP193                  |
| Sar-5-1  | Bacteria | Actinobacteria | Actinobacteridae | Actinomycetales | Micromonosporineae  | Micromonosporaceae   | <i>Salinispora arenicola</i> CNR107                  |
| Sar-6-1  | Bacteria | Actinobacteria | Actinobacteridae | Actinomycetales | Micromonosporineae  | Micromonosporaceae   | <i>Salinispora arenicola</i> CNS-205                 |
| Sar-7-1  | Bacteria | Actinobacteria | Actinobacteridae | Actinomycetales | Micromonosporineae  | Micromonosporaceae   | <i>Salinispora arenicola</i> CNS051                  |
| Sar-8-1  | Bacteria | Actinobacteria | Actinobacteridae | Actinomycetales | Micromonosporineae  | Micromonosporaceae   | <i>Salinispora arenicola</i> CNS673                  |
| Sar-9-1  | Bacteria | Actinobacteria | Actinobacteridae | Actinomycetales | Micromonosporineae  | Micromonosporaceae   | <i>Salinispora arenicola</i> CNT859                  |
| Sar-10-1 | Bacteria | Actinobacteria | Actinobacteridae | Actinomycetales | Micromonosporineae  | Micromonosporaceae   | <i>Salinispora arenicola</i> CNX481                  |
| Sar-11-1 | Bacteria | Actinobacteria | Actinobacteridae | Actinomycetales | Micromonosporineae  | Micromonosporaceae   | <i>Salinispora arenicola</i> CNX814                  |
| Sar-12-1 | Bacteria | Actinobacteria | Actinobacteridae | Actinomycetales | Micromonosporineae  | Micromonosporaceae   | <i>Salinispora arenicola</i> CNY011                  |
| Sar-13-1 | Bacteria | Actinobacteria | Actinobacteridae | Actinomycetales | Micromonosporineae  | Micromonosporaceae   | <i>Salinispora arenicola</i> CNY231                  |
| Sar-14-1 | Bacteria | Actinobacteria | Actinobacteridae | Actinomycetales | Micromonosporineae  | Micromonosporaceae   | <i>Salinispora arenicola</i> CNY234                  |
| Sar-15-1 | Bacteria | Actinobacteria | Actinobacteridae | Actinomycetales | Micromonosporineae  | Micromonosporaceae   | <i>Salinispora arenicola</i> CNY256                  |
| Sar-16-1 | Bacteria | Actinobacteria | Actinobacteridae | Actinomycetales | Micromonosporineae  | Micromonosporaceae   | <i>Salinispora arenicola</i> CNY260                  |
| Sar-17-1 | Bacteria | Actinobacteria | Actinobacteridae | Actinomycetales | Micromonosporineae  | Micromonosporaceae   | <i>Salinispora arenicola</i> CNY280                  |
| Sar-18-1 | Bacteria | Actinobacteria | Actinobacteridae | Actinomycetales | Micromonosporineae  | Micromonosporaceae   | <i>Salinispora arenicola</i> CNY282                  |
| Sar-19-1 | Bacteria | Actinobacteria | Actinobacteridae | Actinomycetales | Micromonosporineae  | Micromonosporaceae   | <i>Salinispora arenicola</i> DSM 45545               |
| Spa-1-1  | Bacteria | Actinobacteria | Actinobacteridae | Actinomycetales | Micromonosporineae  | Micromonosporaceae   | <i>Salinispora pacifica</i> CNQ768                   |
| Spa-2-1  | Bacteria | Actinobacteria | Actinobacteridae | Actinomycetales | Micromonosporineae  | Micromonosporaceae   | <i>Salinispora pacifica</i> CNR942                   |
| Spa-3-1  | Bacteria | Actinobacteria | Actinobacteridae | Actinomycetales | Micromonosporineae  | Micromonosporaceae   | <i>Salinispora pacifica</i> CNS055                   |
| Spa-4-1  | Bacteria | Actinobacteria | Actinobacteridae | Actinomycetales | Micromonosporineae  | Micromonosporaceae   | <i>Salinispora pacifica</i> CNS860                   |
| Spa-5-1  | Bacteria | Actinobacteria | Actinobacteridae | Actinomycetales | Micromonosporineae  | Micromonosporaceae   | <i>Salinispora pacifica</i> CNS863                   |
| Spa-6-1  | Bacteria | Actinobacteria | Actinobacteridae | Actinomycetales | Micromonosporineae  | Micromonosporaceae   | <i>Salinispora pacifica</i> CNS996                   |
| Spa-7-1  | Bacteria | Actinobacteria | Actinobacteridae | Actinomycetales | Micromonosporineae  | Micromonosporaceae   | <i>Salinispora pacifica</i> CNT045                   |
| Spa-8-1  | Bacteria | Actinobacteria | Actinobacteridae | Actinomycetales | Micromonosporineae  | Micromonosporaceae   | <i>Salinispora pacifica</i> CNT124                   |
| Spa-9-1  | Bacteria | Actinobacteria | Actinobacteridae | Actinomycetales | Micromonosporineae  | Micromonosporaceae   | <i>Salinispora pacifica</i> CNT584                   |
| Spa-10-1 | Bacteria | Actinobacteria | Actinobacteridae | Actinomycetales | Micromonosporineae  | Micromonosporaceae   | <i>Salinispora pacifica</i> CNT609                   |
| Spa-11-1 | Bacteria | Actinobacteria | Actinobacteridae | Actinomycetales | Micromonosporineae  | Micromonosporaceae   | <i>Salinispora pacifica</i> CNT849                   |
| Spa-12-1 | Bacteria | Actinobacteria | Actinobacteridae | Actinomycetales | Micromonosporineae  | Micromonosporaceae   | <i>Salinispora pacifica</i> CNT851                   |
| Spa-13-1 | Bacteria | Actinobacteria | Actinobacteridae | Actinomycetales | Micromonosporineae  | Micromonosporaceae   | <i>Salinispora pacifica</i> CNY237                   |
| Spa-14-1 | Bacteria | Actinobacteria | Actinobacteridae | Actinomycetales | Micromonosporineae  | Micromonosporaceae   | <i>Salinispora pacifica</i> CNY330                   |
| Spa-15-1 | Bacteria | Actinobacteria | Actinobacteridae | Actinomycetales | Micromonosporineae  | Micromonosporaceae   | <i>Salinispora pacifica</i> DSM 45543                |
| Spa-16-1 | Bacteria | Actinobacteria | Actinobacteridae | Actinomycetales | Micromonosporineae  | Micromonosporaceae   | <i>Salinispora pacifica</i> DSM 45544                |
| Spa-17-1 | Bacteria | Actinobacteria | Actinobacteridae | Actinomycetales | Micromonosporineae  | Micromonosporaceae   | <i>Salinispora pacifica</i> DSM 45546                |
| Spa-18-1 | Bacteria | Actinobacteria | Actinobacteridae | Actinomycetales | Micromonosporineae  | Micromonosporaceae   | <i>Salinispora pacifica</i> DSM 45547                |
| Spa-19-1 | Bacteria | Actinobacteria | Actinobacteridae | Actinomycetales | Micromonosporineae  | Micromonosporaceae   | <i>Salinispora pacifica</i> DSM 45548                |
| Spa-20-1 | Bacteria | Actinobacteria | Actinobacteridae | Actinomycetales | Micromonosporineae  | Micromonosporaceae   | <i>Salinispora pacifica</i> DSM 45549                |
| Str-1-1  | Bacteria | Actinobacteria | Actinobacteridae | Actinomycetales | Micromonosporineae  | Micromonosporaceae   | <i>Salinispora tropica</i> CNB-440                   |
| Str-2-1  | Bacteria | Actinobacteria | Actinobacteridae | Actinomycetales | Micromonosporineae  | Micromonosporaceae   | <i>Salinispora tropica</i> CNR699                    |
| Str-3-1  | Bacteria | Actinobacteria | Actinobacteridae | Actinomycetales | Micromonosporineae  | Micromonosporaceae   | <i>Salinispora tropica</i> CNS416                    |
| Vma-1-1  | Bacteria | Actinobacteria | Actinobacteridae | Actinomycetales | Micromonosporineae  | Micromonosporaceae   | <i>Verrucosipora maris</i> AB-18-032                 |
| Aal-1-1  | Bacteria | Actinobacteria | Actinobacteridae | Actinomycetales | Propionibacterineae | Nocardiodaceae       | <i>Actinopolymorpha alba</i> DSM 45243               |
| Ama-3-1  | Bacteria | Actinobacteria | Actinobacteridae | Actinomycetales | Propionibacterineae | Nocardiodaceae       | <i>Aeromicrobium marinum</i> DSM 15272               |
| Nba-1-1  | Bacteria | Actinobacteria | Actinobacteridae | Actinomycetales | Propionibacterineae | Nocardiodaceae       | <i>Nocardiodaceae bacterium</i> Broad-1              |
| Nsp-3-1  | Bacteria | Actinobacteria | Actinobacteridae | Actinomycetales | Propionibacterineae | Nocardiodaceae       | <i>Nocardioides</i> sp. Iso805N                      |
| Nsp-4-1  | Bacteria | Actinobacteria | Actinobacteridae | Actinomycetales | Propionibacterineae | Nocardiodaceae       | <i>Nocardioides</i> sp. JS614                        |
| Pav-1-1  | Bacteria | Actinobacteria | Actinobacteridae | Actinomycetales | Propionibacterineae | Propionibacteriaceae | <i>Propionibacterium avidum</i> 44067                |
| Pav-2-1  | Bacteria | Actinobacteria | Actinobacteridae | Actinomycetales | Propionibacterineae | Propionibacteriaceae | <i>Propionibacterium avidum</i> TM16                 |
| Psp-1-1  | Bacteria | Actinobacteria | Actinobacteridae | Actinomycetales | Propionibacterineae | Propionibacteriaceae | <i>Propionibacterium</i> sp. HGH0353                 |
| Psp-2-1  | Bacteria | Actinobacteria | Actinobacteridae | Actinomycetales | Propionibacterineae | Propionibacteriaceae | <i>Propionibacterium</i> sp. KPL1838                 |
| Psp-3-1  | Bacteria | Actinobacteria | Actinobacteridae | Actinomycetales | Propionibacterineae | Propionibacteriaceae | <i>Propionibacterium</i> sp. KPL1852                 |
| Psp-4-1  | Bacteria | Actinobacteria | Actinobacteridae | Actinomycetales | Propionibacterineae | Propionibacteriaceae | <i>Propionibacterium</i> sp. KPL2000                 |
| Psp-5-1  | Bacteria | Actinobacteria | Actinobacteridae | Actinomycetales | Propionibacterineae | Propionibacteriaceae | <i>Propionibacterium</i> sp. KPL2005                 |
| Ply-1-1  | Bacteria | Actinobacteria | Actinobacteridae | Actinomycetales | Propionibacterineae | Propionibacteriaceae | <i>Propionimicrobium lymphophilum</i> ACS-093-V-SCH5 |



|                    |          |                |                  |                 |                   |                     |                                                                       |
|--------------------|----------|----------------|------------------|-----------------|-------------------|---------------------|-----------------------------------------------------------------------|
| Ami-2-1            | Bacteria | Actinobacteria | Actinobacteridae | Actinomycetales | Pseudonocardineae | Actinosynnemataceae | <i>Actinosynnema mirum</i> DSM 43827                                  |
| Asp-3-1            | Bacteria | Actinobacteria | Actinobacteridae | Actinomycetales | Pseudonocardineae | Pseudonocardiaaceae | <i>Actinoalloteichus spitiensis</i> RMV-1378                          |
| Aen-1-1            | Bacteria | Actinobacteria | Actinobacteridae | Actinomycetales | Pseudonocardineae | Pseudonocardiaaceae | <i>Actinokinetoospora enzanensis</i> DSM 44649                        |
| Aaz-1-1            | Bacteria | Actinobacteria | Actinobacteridae | Actinomycetales | Pseudonocardineae | Pseudonocardiaaceae | <i>Amycolatopsis azurea</i> DSM 43854                                 |
| Aba-1-1            | Bacteria | Actinobacteria | Actinobacteridae | Actinomycetales | Pseudonocardineae | Pseudonocardiaaceae | <i>Amycolatopsis balhimycina</i> FH 1894                              |
| Abe-1-1            | Bacteria | Actinobacteria | Actinobacteridae | Actinomycetales | Pseudonocardineae | Pseudonocardiaaceae | <i>Amycolatopsis benzoatilytica</i> AK 16/65                          |
| Ade-1-1            | Bacteria | Actinobacteria | Actinobacteridae | Actinomycetales | Pseudonocardineae | Pseudonocardiaaceae | <i>Amycolatopsis decaplanina</i> DSM 44594                            |
| Ame-1-1            | Bacteria | Actinobacteria | Actinobacteridae | Actinomycetales | Pseudonocardineae | Pseudonocardiaaceae | <i>Amycolatopsis mediterranei</i> RB                                  |
| Ame-2-1 to Ame-2-2 | Bacteria | Actinobacteria | Actinobacteridae | Actinomycetales | Pseudonocardineae | Pseudonocardiaaceae | <i>Amycolatopsis mediterranei</i> S699                                |
| Ame-3-1            | Bacteria | Actinobacteria | Actinobacteridae | Actinomycetales | Pseudonocardineae | Pseudonocardiaaceae | <i>Amycolatopsis mediterranei</i> U32                                 |
| Ame-4-1 to Ame-4-2 | Bacteria | Actinobacteria | Actinobacteridae | Actinomycetales | Pseudonocardineae | Pseudonocardiaaceae | <i>Amycolatopsis methanolica</i> 239                                  |
| Ani-1-1            | Bacteria | Actinobacteria | Actinobacteridae | Actinomycetales | Pseudonocardineae | Pseudonocardiaaceae | <i>Amycolatopsis nigrescens</i> CSC17Ta-90                            |
| Asp-4-1            | Bacteria | Actinobacteria | Actinobacteridae | Actinomycetales | Pseudonocardineae | Pseudonocardiaaceae | <i>Amycolatopsis</i> sp. ATCC 39116                                   |
| Ava-1-1            | Bacteria | Actinobacteria | Actinobacteridae | Actinomycetales | Pseudonocardineae | Pseudonocardiaaceae | <i>Amycolatopsis vancoresmycina</i> DSM 44592                         |
| Pdi-1-1            | Bacteria | Actinobacteria | Actinobacteridae | Actinomycetales | Pseudonocardineae | Pseudonocardiaaceae | <i>Pseudonocardia diozanivorans</i> CB1190                            |
| Psp-6-1            | Bacteria | Actinobacteria | Actinobacteridae | Actinomycetales | Pseudonocardineae | Pseudonocardiaaceae | <i>Pseudonocardia</i> sp. P1                                          |
| Saz-1-1            | Bacteria | Actinobacteria | Actinobacteridae | Actinomycetales | Pseudonocardineae | Pseudonocardiaaceae | <i>Saccharomonospora azurea</i> NA-128                                |
| Saz-2-1            | Bacteria | Actinobacteria | Actinobacteridae | Actinomycetales | Pseudonocardineae | Pseudonocardiaaceae | <i>Saccharomonospora azurea</i> SZMC 14600                            |
| Scy-1-1            | Bacteria | Actinobacteria | Actinobacteridae | Actinomycetales | Pseudonocardineae | Pseudonocardiaaceae | <i>Saccharomonospora cyanea</i> NA-134                                |
| Sgl-1-1            | Bacteria | Actinobacteria | Actinobacteridae | Actinomycetales | Pseudonocardineae | Pseudonocardiaaceae | <i>Saccharomonospora glauca</i> K62                                   |
| Sha-1-1            | Bacteria | Actinobacteria | Actinobacteridae | Actinomycetales | Pseudonocardineae | Pseudonocardiaaceae | <i>Saccharomonospora halophila</i> 8                                  |
| Sma-1-1            | Bacteria | Actinobacteria | Actinobacteridae | Actinomycetales | Pseudonocardineae | Pseudonocardiaaceae | <i>Saccharomonospora marina</i> XMU15                                 |
| Ssa-1-1            | Bacteria | Actinobacteria | Actinobacteridae | Actinomycetales | Pseudonocardineae | Pseudonocardiaaceae | <i>Saccharomonospora saliphila</i> YIM 90502                          |
| Svi-1-1            | Bacteria | Actinobacteria | Actinobacteridae | Actinomycetales | Pseudonocardineae | Pseudonocardiaaceae | <i>Saccharomonospora viridis</i> DSM 43017                            |
| Sxi-1-1            | Bacteria | Actinobacteria | Actinobacteridae | Actinomycetales | Pseudonocardineae | Pseudonocardiaaceae | <i>Saccharomonospora xinjiangensis</i> XJ-54                          |
| Ser-1-1            | Bacteria | Actinobacteria | Actinobacteridae | Actinomycetales | Pseudonocardineae | Pseudonocardiaaceae | <i>Saccharopolyspora erythraea</i> D                                  |
| Ser-2-1            | Bacteria | Actinobacteria | Actinobacteridae | Actinomycetales | Pseudonocardineae | Pseudonocardiaaceae | <i>Saccharopolyspora erythraea</i> NRRL 2338                          |
| Ssp-1-1            | Bacteria | Actinobacteria | Actinobacteridae | Actinomycetales | Pseudonocardineae | Pseudonocardiaaceae | <i>Saccharopolyspora spinosa</i> NRRL 18395                           |
| Ses-1-1            | Bacteria | Actinobacteria | Actinobacteridae | Actinomycetales | Pseudonocardineae | Pseudonocardiaaceae | <i>Saccharothrix espanaensis</i> DSM 44229                            |
| Sma-2-1            | Bacteria | Actinobacteria | Actinobacteridae | Actinomycetales | Pseudonocardineae | Pseudonocardiaaceae | <i>Sciscionella marina</i> DSM 45152                                  |
| Saf-1-1            | Bacteria | Actinobacteria | Actinobacteridae | Actinomycetales | Streptomycineae   | Streptomycetaceae   | <i>Streptomyces afghaniensis</i> 772                                  |
| Sal-1-1            | Bacteria | Actinobacteria | Actinobacteridae | Actinomycetales | Streptomycineae   | Streptomycetaceae   | <i>Streptomyces albus</i> J1074                                       |
| Sav-1-1            | Bacteria | Actinobacteria | Actinobacteridae | Actinomycetales | Streptomycineae   | Streptomycetaceae   | <i>Streptomyces avermitilis</i> MA-4680                               |
| Sbi-1-1            | Bacteria | Actinobacteria | Actinobacteridae | Actinomycetales | Streptomycineae   | Streptomycetaceae   | <i>Streptomyces bingchenggensis</i> BCW-1                             |
| Sbo-1-1 to Sbo-1-2 | Bacteria | Actinobacteria | Actinobacteridae | Actinomycetales | Streptomycineae   | Streptomycetaceae   | <i>Streptomyces bottropensis</i> ATCC 25435                           |
| Sca-1-1            | Bacteria | Actinobacteria | Actinobacteridae | Actinomycetales | Streptomycineae   | Streptomycetaceae   | <i>Streptomyces canus</i> 299MFChir4.1                                |
| Sca-2-1 to Sca-2-2 | Bacteria | Actinobacteria | Actinobacteridae | Actinomycetales | Streptomycineae   | Streptomycetaceae   | <i>Streptomyces cattleya</i> NRRL 8057 = DSM 46488                    |
| Sch-1-1            | Bacteria | Actinobacteria | Actinobacteridae | Actinomycetales | Streptomycineae   | Streptomycetaceae   | <i>Streptomyces chartreusis</i> NRRL 12338                            |
| Scl-1-1 to Scl-1-2 | Bacteria | Actinobacteria | Actinobacteridae | Actinomycetales | Streptomycineae   | Streptomycetaceae   | <i>Streptomyces clavuligerus</i> ATCC 27064                           |
| Sco-1-1            | Bacteria | Actinobacteria | Actinobacteridae | Actinomycetales | Streptomycineae   | Streptomycetaceae   | <i>Streptomyces coelicoflavus</i> ZG0656                              |
| Sco-2-1            | Bacteria | Actinobacteria | Actinobacteridae | Actinomycetales | Streptomycineae   | Streptomycetaceae   | <i>Streptomyces coelicolor</i> A3(2)                                  |
| Sco-3-1            | Bacteria | Actinobacteria | Actinobacteridae | Actinomycetales | Streptomycineae   | Streptomycetaceae   | <i>Streptomyces collinus</i> Tu 365                                   |
| Sda-1-1            | Bacteria | Actinobacteria | Actinobacteridae | Actinomycetales | Streptomycineae   | Streptomycetaceae   | <i>Streptomyces davawensis</i> JCM 4913                               |
| Sfl-1-1            | Bacteria | Actinobacteria | Actinobacteridae | Actinomycetales | Streptomycineae   | Streptomycetaceae   | <i>Streptomyces flavogriseus</i> ATCC 33331                           |
| Sfu-1-1            | Bacteria | Actinobacteria | Actinobacteridae | Actinomycetales | Streptomycineae   | Streptomycetaceae   | <i>Streptomyces fulvissimus</i> DSM 40593                             |
| Sga-1-1            | Bacteria | Actinobacteria | Actinobacteridae | Actinomycetales | Streptomycineae   | Streptomycetaceae   | <i>Streptomyces gancidicus</i> BKS 13-15                              |
| Sgh-1-1            | Bacteria | Actinobacteria | Actinobacteridae | Actinomycetales | Streptomycineae   | Streptomycetaceae   | <i>Streptomyces ghanaensis</i> ATCC 14672                             |
| Sgl-2-1            | Bacteria | Actinobacteria | Actinobacteridae | Actinomycetales | Streptomycineae   | Streptomycetaceae   | <i>Streptomyces globisporus</i> C-1027                                |
| Sgr-1-1            | Bacteria | Actinobacteria | Actinobacteridae | Actinomycetales | Streptomycineae   | Streptomycetaceae   | <i>Streptomyces griseoaurantiacus</i> M045                            |
| Sgr-2-1            | Bacteria | Actinobacteria | Actinobacteridae | Actinomycetales | Streptomycineae   | Streptomycetaceae   | <i>Streptomyces griseoflavus</i> Tu4000                               |
| Sgr-4-1            | Bacteria | Actinobacteria | Actinobacteridae | Actinomycetales | Streptomycineae   | Streptomycetaceae   | <i>Streptomyces griseus</i> subsp. <i>griseus</i> NBRC 13350          |
| Sgr-3-1            | Bacteria | Actinobacteria | Actinobacteridae | Actinomycetales | Streptomycineae   | Streptomycetaceae   | <i>Streptomyces griseus</i> XylebKG-1                                 |
| Shy-1-1            | Bacteria | Actinobacteria | Actinobacteridae | Actinomycetales | Streptomycineae   | Streptomycetaceae   | <i>Streptomyces hygrosopicus</i> ATCC 53653                           |
| Shy-2-1            | Bacteria | Actinobacteria | Actinobacteridae | Actinomycetales | Streptomycineae   | Streptomycetaceae   | <i>Streptomyces hygrosopicus</i> subsp. <i>jinggangensis</i> 5008     |
| Shy-3-1            | Bacteria | Actinobacteria | Actinobacteridae | Actinomycetales | Streptomycineae   | Streptomycetaceae   | <i>Streptomyces hygrosopicus</i> subsp. <i>jinggangensis</i> TL01     |
| Sip-1-1            | Bacteria | Actinobacteria | Actinobacteridae | Actinomycetales | Streptomycineae   | Streptomycetaceae   | <i>Streptomyces ipomoeae</i> 91-03                                    |
| Sli-1-1            | Bacteria | Actinobacteria | Actinobacteridae | Actinomycetales | Streptomycineae   | Streptomycetaceae   | <i>Streptomyces lividans</i> 1326                                     |
| Sli-2-1 to Sli-2-2 | Bacteria | Actinobacteria | Actinobacteridae | Actinomycetales | Streptomycineae   | Streptomycetaceae   | <i>Streptomyces lividans</i> TK24                                     |
| Smo-1-1            | Bacteria | Actinobacteria | Actinobacteridae | Actinomycetales | Streptomycineae   | Streptomycetaceae   | <i>Streptomyces mobaraensis</i> NBRC 13819 = DSM 40847                |
| Sni-2-1            | Bacteria | Actinobacteria | Actinobacteridae | Actinomycetales | Streptomycineae   | Streptomycetaceae   | <i>Streptomyces niveus</i> NCIMB 11891                                |
| Spr-1-1            | Bacteria | Actinobacteria | Actinobacteridae | Actinomycetales | Streptomycineae   | Streptomycetaceae   | <i>Streptomyces pristinaespiralis</i> ATCC 25486                      |
| Spr-2-1            | Bacteria | Actinobacteria | Actinobacteridae | Actinomycetales | Streptomycineae   | Streptomycetaceae   | <i>Streptomyces prunicolor</i> NBRC 13075                             |
| Spu-1-1            | Bacteria | Actinobacteria | Actinobacteridae | Actinomycetales | Streptomycineae   | Streptomycetaceae   | <i>Streptomyces purpureus</i> KA281                                   |
| Sri-1-1            | Bacteria | Actinobacteria | Actinobacteridae | Actinomycetales | Streptomycineae   | Streptomycetaceae   | <i>Streptomyces rimosus</i> subsp. <i>rimosus</i> ATCC 10970          |
| Sro-1-1            | Bacteria | Actinobacteria | Actinobacteridae | Actinomycetales | Streptomycineae   | Streptomycetaceae   | <i>Streptomyces roseochromogenes</i> subsp. <i>oscitans</i> DS 12.976 |

|                      |          |                |                  |                   |                     |                                           |                                                 |
|----------------------|----------|----------------|------------------|-------------------|---------------------|-------------------------------------------|-------------------------------------------------|
| Sro-2-1              | Bacteria | Actinobacteria | Actinobacteridae | Actinomycetales   | Streptomycineae     | Streptomycetaceae                         | <i>Streptomyces roseosporus</i> NRRL 15998      |
| Ssc-1-1              | Bacteria | Actinobacteria | Actinobacteridae | Actinomycetales   | Streptomycineae     | Streptomycetaceae                         | <i>Streptomyces scabiei</i> 87.22               |
| Ssc-2-1              | Bacteria | Actinobacteria | Actinobacteridae | Actinomycetales   | Streptomycineae     | Streptomycetaceae                         | <i>Streptomyces scabrisporus</i> DSM 41855      |
| Sso-1-1              | Bacteria | Actinobacteria | Actinobacteridae | Actinomycetales   | Streptomycineae     | Streptomycetaceae                         | <i>Streptomyces somaliensis</i> DSM 40738       |
| Ssp-2-1              | Bacteria | Actinobacteria | Actinobacteridae | Actinomycetales   | Streptomycineae     | Streptomycetaceae                         | <i>Streptomyces</i> sp. 303MFC05.2              |
| Ssp-3-1              | Bacteria | Actinobacteria | Actinobacteridae | Actinomycetales   | Streptomycineae     | Streptomycetaceae                         | <i>Streptomyces</i> sp. 351MFTsu.5.1            |
| Ssp-4-1              | Bacteria | Actinobacteria | Actinobacteridae | Actinomycetales   | Streptomycineae     | Streptomycetaceae                         | <i>Streptomyces</i> sp. AA0539                  |
| Ssp-5-1              | Bacteria | Actinobacteria | Actinobacteridae | Actinomycetales   | Streptomycineae     | Streptomycetaceae                         | <i>Streptomyces</i> sp. AA4                     |
| Ssp-7-1              | Bacteria | Actinobacteria | Actinobacteridae | Actinomycetales   | Streptomycineae     | Streptomycetaceae                         | <i>Streptomyces</i> sp. Amel2xE9                |
| Ssp-6-1              | Bacteria | Actinobacteria | Actinobacteridae | Actinomycetales   | Streptomycineae     | Streptomycetaceae                         | <i>Streptomyces</i> sp. ATeXAB-D23              |
| Ssp-8-1              | Bacteria | Actinobacteria | Actinobacteridae | Actinomycetales   | Streptomycineae     | Streptomycetaceae                         | <i>Streptomyces</i> sp. C                       |
| Ssp-14-1             | Bacteria | Actinobacteria | Actinobacteridae | Actinomycetales   | Streptomycineae     | Streptomycetaceae                         | <i>Streptomyces</i> sp. CcalMP-8W               |
| Ssp-9-1              | Bacteria | Actinobacteria | Actinobacteridae | Actinomycetales   | Streptomycineae     | Streptomycetaceae                         | <i>Streptomyces</i> sp. CNB091                  |
| Ssp-10-1             | Bacteria | Actinobacteria | Actinobacteridae | Actinomycetales   | Streptomycineae     | Streptomycetaceae                         | <i>Streptomyces</i> sp. CNS615                  |
| Ssp-11-1             | Bacteria | Actinobacteria | Actinobacteridae | Actinomycetales   | Streptomycineae     | Streptomycetaceae                         | <i>Streptomyces</i> sp. CNT302                  |
| Ssp-12-1             | Bacteria | Actinobacteria | Actinobacteridae | Actinomycetales   | Streptomycineae     | Streptomycetaceae                         | <i>Streptomyces</i> sp. CNT372                  |
| Ssp-13-1             | Bacteria | Actinobacteria | Actinobacteridae | Actinomycetales   | Streptomycineae     | Streptomycetaceae                         | <i>Streptomyces</i> sp. CNY228                  |
| Ssp-15-1             | Bacteria | Actinobacteria | Actinobacteridae | Actinomycetales   | Streptomycineae     | Streptomycetaceae                         | <i>Streptomyces</i> sp. DvalAA-83               |
| Ssp-44-1             | Bacteria | Actinobacteria | Actinobacteridae | Actinomycetales   | Streptomycineae     | Streptomycetaceae                         | <i>Streptomyces</i> sp. e14                     |
| Ssp-16-1             | Bacteria | Actinobacteria | Actinobacteridae | Actinomycetales   | Streptomycineae     | Streptomycetaceae                         | <i>Streptomyces</i> sp. FxanaD5                 |
| Ssp-17-1             | Bacteria | Actinobacteria | Actinobacteridae | Actinomycetales   | Streptomycineae     | Streptomycetaceae                         | <i>Streptomyces</i> sp. GBA 94-10               |
| Ssp-18-1             | Bacteria | Actinobacteria | Actinobacteridae | Actinomycetales   | Streptomycineae     | Streptomycetaceae                         | <i>Streptomyces</i> sp. HCCB10043               |
| Ssp-19-1             | Bacteria | Actinobacteria | Actinobacteridae | Actinomycetales   | Streptomycineae     | Streptomycetaceae                         | <i>Streptomyces</i> sp. HGB0020                 |
| Ssp-21-1             | Bacteria | Actinobacteria | Actinobacteridae | Actinomycetales   | Streptomycineae     | Streptomycetaceae                         | <i>Streptomyces</i> sp. HmicA12                 |
| Ssp-20-1             | Bacteria | Actinobacteria | Actinobacteridae | Actinomycetales   | Streptomycineae     | Streptomycetaceae                         | <i>Streptomyces</i> sp. HPH0547                 |
| Ssp-22-1             | Bacteria | Actinobacteria | Actinobacteridae | Actinomycetales   | Streptomycineae     | Streptomycetaceae                         | <i>Streptomyces</i> sp. KhCrAH-244              |
| Ssp-23-1             | Bacteria | Actinobacteria | Actinobacteridae | Actinomycetales   | Streptomycineae     | Streptomycetaceae                         | <i>Streptomyces</i> sp. KhCrAH-340              |
| Ssp-24-1             | Bacteria | Actinobacteria | Actinobacteridae | Actinomycetales   | Streptomycineae     | Streptomycetaceae                         | <i>Streptomyces</i> sp. LaPpAH-108              |
| Ssp-25-1             | Bacteria | Actinobacteria | Actinobacteridae | Actinomycetales   | Streptomycineae     | Streptomycetaceae                         | <i>Streptomyces</i> sp. LaPpAH-165              |
| Ssp-26-1             | Bacteria | Actinobacteria | Actinobacteridae | Actinomycetales   | Streptomycineae     | Streptomycetaceae                         | <i>Streptomyces</i> sp. LaPpAH-202              |
| Ssp-27-1             | Bacteria | Actinobacteria | Actinobacteridae | Actinomycetales   | Streptomycineae     | Streptomycetaceae                         | <i>Streptomyces</i> sp. LaPpAH-95               |
| Ssp-28-1 to Ssp-28-2 | Bacteria | Actinobacteria | Actinobacteridae | Actinomycetales   | Streptomycineae     | Streptomycetaceae                         | <i>Streptomyces</i> sp. Mg1                     |
| Ssp-29-1             | Bacteria | Actinobacteria | Actinobacteridae | Actinomycetales   | Streptomycineae     | Streptomycetaceae                         | <i>Streptomyces</i> sp. PAMC26508               |
| Ssp-31-1             | Bacteria | Actinobacteria | Actinobacteridae | Actinomycetales   | Streptomycineae     | Streptomycetaceae                         | <i>Streptomyces</i> sp. PsTaAH-124              |
| Ssp-30-1             | Bacteria | Actinobacteria | Actinobacteridae | Actinomycetales   | Streptomycineae     | Streptomycetaceae                         | <i>Streptomyces</i> sp. PVA 94-07               |
| Ssp-32-1             | Bacteria | Actinobacteria | Actinobacteridae | Actinomycetales   | Streptomycineae     | Streptomycetaceae                         | <i>Streptomyces</i> sp. R1-NS-10                |
| Ssp-33-1             | Bacteria | Actinobacteria | Actinobacteridae | Actinomycetales   | Streptomycineae     | Streptomycetaceae                         | <i>Streptomyces</i> sp. S4                      |
| Ssp-34-1             | Bacteria | Actinobacteria | Actinobacteridae | Actinomycetales   | Streptomycineae     | Streptomycetaceae                         | <i>Streptomyces</i> sp. SA3_actF                |
| Ssp-35-1             | Bacteria | Actinobacteria | Actinobacteridae | Actinomycetales   | Streptomycineae     | Streptomycetaceae                         | <i>Streptomyces</i> sp. SA3_actG                |
| Ssp-39-1             | Bacteria | Actinobacteria | Actinobacteridae | Actinomycetales   | Streptomycineae     | Streptomycetaceae                         | <i>Streptomyces</i> sp. ScaeMP-e10              |
| Ssp-40-1             | Bacteria | Actinobacteria | Actinobacteridae | Actinomycetales   | Streptomycineae     | Streptomycetaceae                         | <i>Streptomyces</i> sp. SirexAA-E               |
| Ssp-36-1             | Bacteria | Actinobacteria | Actinobacteridae | Actinomycetales   | Streptomycineae     | Streptomycetaceae                         | <i>Streptomyces</i> sp. SPB74                   |
| Ssp-37-1             | Bacteria | Actinobacteria | Actinobacteridae | Actinomycetales   | Streptomycineae     | Streptomycetaceae                         | <i>Streptomyces</i> sp. SPB78                   |
| Ssp-38-1             | Bacteria | Actinobacteria | Actinobacteridae | Actinomycetales   | Streptomycineae     | Streptomycetaceae                         | <i>Streptomyces</i> sp. SS                      |
| Ssp-41-1             | Bacteria | Actinobacteria | Actinobacteridae | Actinomycetales   | Streptomycineae     | Streptomycetaceae                         | <i>Streptomyces</i> sp. TOR3209                 |
| Ssp-42-1             | Bacteria | Actinobacteria | Actinobacteridae | Actinomycetales   | Streptomycineae     | Streptomycetaceae                         | <i>Streptomyces</i> sp. Tu6071                  |
| Ssp-43-1             | Bacteria | Actinobacteria | Actinobacteridae | Actinomycetales   | Streptomycineae     | Streptomycetaceae                         | <i>Streptomyces</i> sp. W007                    |
| Ssu-1-1              | Bacteria | Actinobacteria | Actinobacteridae | Actinomycetales   | Streptomycineae     | Streptomycetaceae                         | <i>Streptomyces sulphureus</i> DSM 40104        |
| Ssu-2-1              | Bacteria | Actinobacteria | Actinobacteridae | Actinomycetales   | Streptomycineae     | Streptomycetaceae                         | <i>Streptomyces sulphureus</i> L180             |
| Ssv-1-1              | Bacteria | Actinobacteria | Actinobacteridae | Actinomycetales   | Streptomycineae     | Streptomycetaceae                         | <i>Streptomyces sviveus</i> ATCC 29083          |
| Sts-1-1              | Bacteria | Actinobacteria | Actinobacteridae | Actinomycetales   | Streptomycineae     | Streptomycetaceae                         | <i>Streptomyces tsukubaensis</i> NRRL18488      |
| Stu-1-1              | Bacteria | Actinobacteria | Actinobacteridae | Actinomycetales   | Streptomycineae     | Streptomycetaceae                         | <i>Streptomyces turgidiscabies</i> Car8         |
| Sve-1-1              | Bacteria | Actinobacteria | Actinobacteridae | Actinomycetales   | Streptomycineae     | Streptomycetaceae                         | <i>Streptomyces venezuelae</i> ATCC 10712       |
| Svi-2-1              | Bacteria | Actinobacteria | Actinobacteridae | Actinomycetales   | Streptomycineae     | Streptomycetaceae                         | <i>Streptomyces violaceusniger</i> SPC6         |
| Svi-3-1              | Bacteria | Actinobacteria | Actinobacteridae | Actinomycetales   | Streptomycineae     | Streptomycetaceae                         | <i>Streptomyces violaceusniger</i> Tu 4113      |
| Svi-4-1              | Bacteria | Actinobacteria | Actinobacteridae | Actinomycetales   | Streptomycineae     | Streptomycetaceae                         | <i>Streptomyces viridochromogenes</i> DSM 40736 |
| Svi-5-1              | Bacteria | Actinobacteria | Actinobacteridae | Actinomycetales   | Streptomycineae     | Streptomycetaceae                         | <i>Streptomyces viridochromogenes</i> Tue57     |
| Svi-6-1              | Bacteria | Actinobacteria | Actinobacteridae | Actinomycetales   | Streptomycineae     | Streptomycetaceae                         | <i>Streptomyces viridosporus</i> T7A            |
| Svi-7-1              | Bacteria | Actinobacteria | Actinobacteridae | Actinomycetales   | Streptomycineae     | Streptomycetaceae                         | <i>Streptomyces vitaminophilus</i> DSM 41686    |
| Szi-1-1              | Bacteria | Actinobacteria | Actinobacteridae | Actinomycetales   | Streptomycineae     | Streptomycetaceae                         | <i>Streptomyces zinciresistens</i> K42          |
| Sba-1-1              | Bacteria | Actinobacteria | Actinobacteridae | Actinomycetales   | Streptomycineae     | Streptomycetaceae                         | <i>Streptomyces bacterium</i> MP113-05          |
| Nco-1-1              | Bacteria | Actinobacteria | Actinobacteridae | Actinomycetales   | Streptosporangineae | Streptosporangiaceae                      | <i>Nomomuraea cozensis</i> DSM 45129            |
| Sro-3-1              | Bacteria | Actinobacteria | Actinobacteridae | Actinomycetales   | Streptosporangineae | Streptosporangiaceae                      | <i>Streptosporangium roseum</i> DSM 43021       |
| Tcu-1-1              | Bacteria | Actinobacteria | Actinobacteridae | Actinomycetales   | Streptosporangineae | Thermomonosporaceae                       | <i>Thermomonospora curvata</i> DSM 43183        |
| Bas-1-1              | Bacteria | Actinobacteria | Actinobacteridae | Bifidobacteriales | Bifidobacteriaceae  | <i>Bifidobacterium asteroides</i> PRL2011 |                                                 |

|                      |                                                                               |                                                                                        |
|----------------------|-------------------------------------------------------------------------------|----------------------------------------------------------------------------------------|
| Blo-1-1              | Bacteria Actinobacteria Actinobacteridae Bifidobacteriales Bifidobacteriaceae | <i>Bifidobacterium longum</i> D2957                                                    |
| Blo-2-1              | Bacteria Actinobacteria Actinobacteridae Bifidobacteriales Bifidobacteriaceae | <i>Bifidobacterium longum</i> DJO10A                                                   |
| Blo-3-1              | Bacteria Actinobacteria Actinobacteridae Bifidobacteriales Bifidobacteriaceae | <i>Bifidobacterium longum</i> E18                                                      |
| Blo-4-1              | Bacteria Actinobacteria Actinobacteridae Bifidobacteriales Bifidobacteriaceae | <i>Bifidobacterium longum</i> NCC2705                                                  |
| Blo-5-1              | Bacteria Actinobacteria Actinobacteridae Bifidobacteriales Bifidobacteriaceae | <i>Bifidobacterium longum</i> subsp. <i>infantis</i> 157F                              |
| Blo-6-1              | Bacteria Actinobacteria Actinobacteridae Bifidobacteriales Bifidobacteriaceae | <i>Bifidobacterium longum</i> subsp. <i>infantis</i> ATCC 15697                        |
| Blo-7-1              | Bacteria Actinobacteria Actinobacteridae Bifidobacteriales Bifidobacteriaceae | <i>Bifidobacterium longum</i> subsp. <i>infantis</i> ATCC 15697 = JCM 1222             |
| Blo-8-1              | Bacteria Actinobacteria Actinobacteridae Bifidobacteriales Bifidobacteriaceae | <i>Bifidobacterium longum</i> subsp. <i>infantis</i> ATCC 55813                        |
| Blo-9-1              | Bacteria Actinobacteria Actinobacteridae Bifidobacteriales Bifidobacteriaceae | <i>Bifidobacterium longum</i> subsp. <i>infantis</i> CCUG 52486                        |
| Blo-10-1             | Bacteria Actinobacteria Actinobacteridae Bifidobacteriales Bifidobacteriaceae | <i>Bifidobacterium longum</i> subsp. <i>longum</i> 1-6B                                |
| Blo-11-1             | Bacteria Actinobacteria Actinobacteridae Bifidobacteriales Bifidobacteriaceae | <i>Bifidobacterium longum</i> subsp. <i>longum</i> 2-2B                                |
| Blo-12-1             | Bacteria Actinobacteria Actinobacteridae Bifidobacteriales Bifidobacteriaceae | <i>Bifidobacterium longum</i> subsp. <i>longum</i> 35B                                 |
| Blo-13-1             | Bacteria Actinobacteria Actinobacteridae Bifidobacteriales Bifidobacteriaceae | <i>Bifidobacterium longum</i> subsp. <i>longum</i> 44B                                 |
| Blo-14-1             | Bacteria Actinobacteria Actinobacteridae Bifidobacteriales Bifidobacteriaceae | <i>Bifidobacterium longum</i> subsp. <i>longum</i> BBMN68                              |
| Blo-15-1             | Bacteria Actinobacteria Actinobacteridae Bifidobacteriales Bifidobacteriaceae | <i>Bifidobacterium longum</i> subsp. <i>longum</i> CECT 7347                           |
| Blo-16-1             | Bacteria Actinobacteria Actinobacteridae Bifidobacteriales Bifidobacteriaceae | <i>Bifidobacterium longum</i> subsp. <i>longum</i> F8                                  |
| Blo-17-1             | Bacteria Actinobacteria Actinobacteridae Bifidobacteriales Bifidobacteriaceae | <i>Bifidobacterium longum</i> subsp. <i>longum</i> JCM 1217                            |
| Blo-18-1             | Bacteria Actinobacteria Actinobacteridae Bifidobacteriales Bifidobacteriaceae | <i>Bifidobacterium longum</i> subsp. <i>longum</i> JDM301                              |
| Blo-19-1             | Bacteria Actinobacteria Actinobacteridae Bifidobacteriales Bifidobacteriaceae | <i>Bifidobacterium longum</i> subsp. <i>longum</i> KACC 91563                          |
| Bsp-1-1              | Bacteria Actinobacteria Actinobacteridae Bifidobacteriales Bifidobacteriaceae | <i>Bifidobacterium</i> sp. 12.1.47BFAA                                                 |
| Bth-1-1              | Bacteria Actinobacteria Actinobacteridae Bifidobacteriales Bifidobacteriaceae | <i>Bifidobacterium thermophilum</i> RBL67                                              |
| aLL-1-1              | Bacteria Actinobacteria actinobacterium LLX17                                 |                                                                                        |
| Ade-2-1              | Bacteria Actinobacteria Actinomycetales Actinomycetaceae                      | <i>Actinomyces dentalis</i> DSM 19115                                                  |
| Age-1-1              | Bacteria Actinobacteria Actinomycetales Actinomycetaceae                      | <i>Actinomyces gerencseriae</i> DSM 6844                                               |
| Apo-1-1              | Bacteria Actinobacteria Actinomycetales Actinomycetaceae                      | <i>Actinomyces polymesiensis</i>                                                       |
| Asu-2-1              | Bacteria Actinobacteria Actinomycetales Actinomycetaceae                      | <i>Actinomyces suimastitidis</i> DSM 15538                                             |
| Aha-2-1              | Bacteria Actinobacteria Actinomycetales Actinomycetaceae                      | <i>Arcanobacterium haemolyticum</i>                                                    |
| Bas-2-1 to Bas-2-3   | Bacteria Actinobacteria Bifidobacteriales Bifidobacteriaceae                  | <i>Bifidobacterium asteroides</i>                                                      |
| Bas-3-1              | Bacteria Actinobacteria Bifidobacteriales Bifidobacteriaceae                  | <i>Bifidobacterium asteroides</i> DSM 20089                                            |
| Bbo-1-1              | Bacteria Actinobacteria Bifidobacteriales Bifidobacteriaceae                  | <i>Bifidobacterium boum</i>                                                            |
| Bbo-2-1 to Bbo-2-2   | Bacteria Actinobacteria Bifidobacteriales Bifidobacteriaceae                  | <i>Bifidobacterium boum</i> DSM 20432                                                  |
| Bco-1-1              | Bacteria Actinobacteria Bifidobacteriales Bifidobacteriaceae                  | <i>Bifidobacterium coryneforme</i>                                                     |
| Bco-2-1              | Bacteria Actinobacteria Bifidobacteriales Bifidobacteriaceae                  | <i>Bifidobacterium coryneforme</i> DSM 20216                                           |
| Bin-1-1              | Bacteria Actinobacteria Bifidobacteriales Bifidobacteriaceae                  | <i>Bifidobacterium indicum</i> LMG 11587 = DSM 20214                                   |
| Blo-20-1             | Bacteria Actinobacteria Bifidobacteriales Bifidobacteriaceae                  | <i>Bifidobacterium longum</i>                                                          |
| Blo-21-1             | Bacteria Actinobacteria Bifidobacteriales Bifidobacteriaceae                  | <i>Bifidobacterium longum</i> AGR2137                                                  |
| Blo-22-1 to Blo-22-9 | Bacteria Actinobacteria Bifidobacteriales Bifidobacteriaceae                  | <i>Bifidobacterium longum</i> subsp. <i>infantis</i>                                   |
| Blo-23-1             | Bacteria Actinobacteria Bifidobacteriales Bifidobacteriaceae                  | <i>Bifidobacterium longum</i> subsp. <i>infantis</i> ATCC 15697 = JCM 1222 = DSM 20088 |
| Blo-24-1             | Bacteria Actinobacteria Bifidobacteriales Bifidobacteriaceae                  | <i>Bifidobacterium longum</i> subsp. <i>infantis</i> EK3                               |
| Blo-25-1 to Blo-25-2 | Bacteria Actinobacteria Bifidobacteriales Bifidobacteriaceae                  | <i>Bifidobacterium longum</i> subsp. <i>longum</i>                                     |
| Blo-26-1             | Bacteria Actinobacteria Bifidobacteriales Bifidobacteriaceae                  | <i>Bifidobacterium longum</i> subsp. <i>longum</i> 1-5B                                |
| Blo-27-1             | Bacteria Actinobacteria Bifidobacteriales Bifidobacteriaceae                  | <i>Bifidobacterium longum</i> subsp. <i>longum</i> 17-1B                               |
| Blo-28-1             | Bacteria Actinobacteria Bifidobacteriales Bifidobacteriaceae                  | <i>Bifidobacterium longum</i> subsp. <i>longum</i> 7-1B                                |
| Blo-29-1             | Bacteria Actinobacteria Bifidobacteriales Bifidobacteriaceae                  | <i>Bifidobacterium longum</i> subsp. <i>longum</i> 72B                                 |
| Blo-30-1             | Bacteria Actinobacteria Bifidobacteriales Bifidobacteriaceae                  | <i>Bifidobacterium longum</i> subsp. <i>longum</i> CMCC P0001                          |
| Blo-31-1             | Bacteria Actinobacteria Bifidobacteriales Bifidobacteriaceae                  | <i>Bifidobacterium longum</i> subsp. <i>longum</i> EK13                                |
| Blo-32-1             | Bacteria Actinobacteria Bifidobacteriales Bifidobacteriaceae                  | <i>Bifidobacterium longum</i> subsp. <i>longum</i> EK5                                 |
| Blo-33-1             | Bacteria Actinobacteria Bifidobacteriales Bifidobacteriaceae                  | <i>Bifidobacterium longum</i> subsp. <i>longum</i> GT15                                |
| Blo-34-1             | Bacteria Actinobacteria Bifidobacteriales Bifidobacteriaceae                  | <i>Bifidobacterium longum</i> subsp. <i>suis</i>                                       |
| Blo-35-1             | Bacteria Actinobacteria Bifidobacteriales Bifidobacteriaceae                  | <i>Bifidobacterium longum</i> subsp. <i>suis</i> DSM 20211                             |
| Bme-1-1              | Bacteria Actinobacteria Bifidobacteriales Bifidobacteriaceae                  | <i>Bifidobacterium merycicum</i>                                                       |
| Bme-2-1              | Bacteria Actinobacteria Bifidobacteriales Bifidobacteriaceae                  | <i>Bifidobacterium merycicum</i> DSM 6492                                              |
| Bre-1-1 to Bre-1-2   | Bacteria Actinobacteria Bifidobacteriales Bifidobacteriaceae                  | <i>Bifidobacterium reuteri</i> DSM 23975                                               |
| Bsc-1-1 to Bsc-1-2   | Bacteria Actinobacteria Bifidobacteriales Bifidobacteriaceae                  | <i>Bifidobacterium scardovii</i>                                                       |
| Bsc-2-1              | Bacteria Actinobacteria Bifidobacteriales Bifidobacteriaceae                  | <i>Bifidobacterium scardovii</i> JCM 12489 = DSM 13734                                 |
| Bsp-2-1              | Bacteria Actinobacteria Bifidobacteriales Bifidobacteriaceae                  | <i>Bifidobacterium</i> sp. 7101                                                        |
| Bsp-3-1              | Bacteria Actinobacteria Bifidobacteriales Bifidobacteriaceae                  | <i>Bifidobacterium</i> sp. A11                                                         |
| Bsu-1-1              | Bacteria Actinobacteria Bifidobacteriales Bifidobacteriaceae                  | <i>Bifidobacterium subtile</i>                                                         |
| Bsu-2-1 to Bsu-2-2   | Bacteria Actinobacteria Bifidobacteriales Bifidobacteriaceae                  | <i>Bifidobacterium subtile</i> DSM 20096                                               |
| Bth-2-1              | Bacteria Actinobacteria Bifidobacteriales Bifidobacteriaceae                  | <i>Bifidobacterium thermacidophilum</i> subsp. <i>porcinum</i>                         |
| Bth-3-1              | Bacteria Actinobacteria Bifidobacteriales Bifidobacteriaceae                  | <i>Bifidobacterium thermacidophilum</i> subsp. <i>porcinum</i> DSM 17755               |
| Bth-4-1              | Bacteria Actinobacteria Bifidobacteriales Bifidobacteriaceae                  | <i>Bifidobacterium thermacidophilum</i> subsp. <i>thermacidophilum</i>                 |
| Bth-5-1 to Bth-5-2   | Bacteria Actinobacteria Bifidobacteriales Bifidobacteriaceae                  | <i>Bifidobacterium thermacidophilum</i> subsp. <i>thermacidophilum</i> DSM 15837       |
| Bth-6-1              | Bacteria Actinobacteria Bifidobacteriales Bifidobacteriaceae                  | <i>Bifidobacterium thermophilum</i>                                                    |
| Bth-7-1              | Bacteria Actinobacteria Bifidobacteriales Bifidobacteriaceae                  | <i>Bifidobacterium thermophilum</i> DSM 20210                                          |

|                      |                                                              |                                                                                 |
|----------------------|--------------------------------------------------------------|---------------------------------------------------------------------------------|
| Bth-8-1              | Bacteria Actinobacteria Bifidobacteriales Bifidobacteriaceae | <i>Bifidobacterium thermophilum</i> DSM 20212                                   |
| Bts-1-1              | Bacteria Actinobacteria Bifidobacteriales Bifidobacteriaceae | <i>Bifidobacterium tsurumiense</i>                                              |
| Bts-2-1 to Bts-2-2   | Bacteria Actinobacteria Bifidobacteriales Bifidobacteriaceae | <i>Bifidobacterium tsurumiense</i> DSM 17777                                    |
| Aac-1-1              | Bacteria Actinobacteria Catenulesporales Actinospicaceae     | <i>Actinospica acidiphila</i>                                                   |
| Aro-1-1              | Bacteria Actinobacteria Catenulesporales Actinospicaceae     | <i>Actinospica robiniae</i> DSM 44927                                           |
| Gal-2-1              | Bacteria Actinobacteria Corynebacteriales Gordoniaceae       | <i>Gordonia alkanivorans</i> CGMCC 6845                                         |
| Gal-3-1              | Bacteria Actinobacteria Corynebacteriales Gordoniaceae       | <i>Gordonia alkanivorans</i> s104                                               |
| Gam-3-1              | Bacteria Actinobacteria Corynebacteriales Gordoniaceae       | <i>Gordonia amicalis</i> CCMA-559                                               |
| Ghi-1-1 to Ghi-1-2   | Bacteria Actinobacteria Corynebacteriales Gordoniaceae       | <i>Gordonia hirsuta</i> DSM 44140 = NBRC 16056                                  |
| Gja-1-1              | Bacteria Actinobacteria Corynebacteriales Gordoniaceae       | <i>Gordonia jacobaea</i>                                                        |
| Gsh-1-1              | Bacteria Actinobacteria Corynebacteriales Gordoniaceae       | <i>Gordonia shandongensis</i> DSM 45094                                         |
| Gsi-2-1              | Bacteria Actinobacteria Corynebacteriales Gordoniaceae       | <i>Gordonia sihwensis</i>                                                       |
| Gte-3-1              | Bacteria Actinobacteria Corynebacteriales Gordoniaceae       | <i>Gordonia terrae</i>                                                          |
| Mab-1-1 to Mab-1-166 | Bacteria Actinobacteria Corynebacteriales Mycobacteriaceae   | <i>Mycobacterium abscessus</i>                                                  |
| Mab-59-1             | Bacteria Actinobacteria Corynebacteriales Mycobacteriaceae   | <i>Mycobacterium abscessus</i> 21                                               |
| Mab-60-1             | Bacteria Actinobacteria Corynebacteriales Mycobacteriaceae   | <i>Mycobacterium abscessus</i> CF                                               |
| Mab-61-1             | Bacteria Actinobacteria Corynebacteriales Mycobacteriaceae   | <i>Mycobacterium abscessus</i> M24                                              |
| Mab-62-1             | Bacteria Actinobacteria Corynebacteriales Mycobacteriaceae   | <i>Mycobacterium abscessus</i> MAB_030201_1061                                  |
| Mab-63-1             | Bacteria Actinobacteria Corynebacteriales Mycobacteriaceae   | <i>Mycobacterium abscessus</i> MAB_030201_1075                                  |
| Mab-64-1             | Bacteria Actinobacteria Corynebacteriales Mycobacteriaceae   | <i>Mycobacterium abscessus</i> MAB_082312_2272                                  |
| Mab-65-1             | Bacteria Actinobacteria Corynebacteriales Mycobacteriaceae   | <i>Mycobacterium abscessus</i> MAB_082312_2273                                  |
| Mab-66-1             | Bacteria Actinobacteria Corynebacteriales Mycobacteriaceae   | <i>Mycobacterium abscessus</i> MAB_091912_2455                                  |
| Mab-67-1             | Bacteria Actinobacteria Corynebacteriales Mycobacteriaceae   | <i>Mycobacterium abscessus</i> MAB_110811_1470                                  |
| Mab-68-1             | Bacteria Actinobacteria Corynebacteriales Mycobacteriaceae   | <i>Mycobacterium abscessus</i> MAB_110811_2726                                  |
| Mab-70-1 to Mab-70-2 | Bacteria Actinobacteria Corynebacteriales Mycobacteriaceae   | <i>Mycobacterium abscessus</i> subsp. <i>abscessus</i>                          |
| Mab-71-1 to Mab-71-3 | Bacteria Actinobacteria Corynebacteriales Mycobacteriaceae   | <i>Mycobacterium abscessus</i> subsp. <i>bolletii</i>                           |
| Mab-72-1             | Bacteria Actinobacteria Corynebacteriales Mycobacteriaceae   | <i>Mycobacterium abscessus</i> subsp. <i>bolletii</i> 103                       |
| Mab-73-1             | Bacteria Actinobacteria Corynebacteriales Mycobacteriaceae   | <i>Mycobacterium abscessus</i> subsp. <i>bolletii</i> INCQS 00594               |
| Mab-74-1             | Bacteria Actinobacteria Corynebacteriales Mycobacteriaceae   | <i>Mycobacterium abscessus</i> subsp. <i>massiliense</i> CCUG 48898 = JCM 15300 |
| Mab-75-1             | Bacteria Actinobacteria Corynebacteriales Mycobacteriaceae   | <i>Mycobacterium abscessus</i> subsp. <i>massiliense</i> str. GO 06             |
| Mab-69-1             | Bacteria Actinobacteria Corynebacteriales Mycobacteriaceae   | <i>Mycobacterium abscessus</i> UC22                                             |
| Mar-1-1              | Bacteria Actinobacteria Corynebacteriales Mycobacteriaceae   | <i>Mycobacterium aromaticivorans</i> JS19b1 = JCM 16368                         |
| Mau-2-1              | Bacteria Actinobacteria Corynebacteriales Mycobacteriaceae   | <i>Mycobacterium aurum</i>                                                      |
| Mau-3-1              | Bacteria Actinobacteria Corynebacteriales Mycobacteriaceae   | <i>Mycobacterium austroafricanum</i>                                            |
| Mvu-1-1              | Bacteria Actinobacteria Corynebacteriales Mycobacteriaceae   | <i>Mycobacterium avium</i> complex (MAC) <i>Mycobacterium vulneris</i>          |
| Mch-2-1              | Bacteria Actinobacteria Corynebacteriales Mycobacteriaceae   | <i>Mycobacterium chelonae</i>                                                   |
| Mch-3-1              | Bacteria Actinobacteria Corynebacteriales Mycobacteriaceae   | <i>Mycobacterium chelonae</i> 1518                                              |
| Mch-4-1              | Bacteria Actinobacteria Corynebacteriales Mycobacteriaceae   | <i>Mycobacterium chlorophenicum</i>                                             |
| Mch-5-1              | Bacteria Actinobacteria Corynebacteriales Mycobacteriaceae   | <i>Mycobacterium chubuense</i>                                                  |
| Mco-1-1              | Bacteria Actinobacteria Corynebacteriales Mycobacteriaceae   | <i>Mycobacterium conceptionense</i>                                             |
| Mco-2-1              | Bacteria Actinobacteria Corynebacteriales Mycobacteriaceae   | <i>Mycobacterium cosmeticum</i>                                                 |
| Mel-1-1              | Bacteria Actinobacteria Corynebacteriales Mycobacteriaceae   | <i>Mycobacterium elephantis</i>                                                 |
| Mfa-1-1              | Bacteria Actinobacteria Corynebacteriales Mycobacteriaceae   | <i>Mycobacterium farcinogenes</i>                                               |
| Mfo-2-1              | Bacteria Actinobacteria Corynebacteriales Mycobacteriaceae   | <i>Mycobacterium fortuitum</i> complex <i>Mycobacterium fortuitum</i> Z58       |
| Mhe-1-1              | Bacteria Actinobacteria Corynebacteriales Mycobacteriaceae   | <i>Mycobacterium heraklionense</i>                                              |
| Mim-1-1              | Bacteria Actinobacteria Corynebacteriales Mycobacteriaceae   | <i>Mycobacterium immunogenum</i>                                                |
| Mka-1-1              | Bacteria Actinobacteria Corynebacteriales Mycobacteriaceae   | <i>Mycobacterium kansaii</i> Z61                                                |
| Mky-1-1              | Bacteria Actinobacteria Corynebacteriales Mycobacteriaceae   | <i>Mycobacterium kyorinense</i>                                                 |
| Mll-1-1              | Bacteria Actinobacteria Corynebacteriales Mycobacteriaceae   | <i>Mycobacterium llutzerense</i>                                                |
| Mma-2-1              | Bacteria Actinobacteria Corynebacteriales Mycobacteriaceae   | <i>Mycobacterium mageritense</i> DSM 44476 = CIP 104973                         |
| Mne-1-1              | Bacteria Actinobacteria Corynebacteriales Mycobacteriaceae   | <i>Mycobacterium neoaurum</i>                                                   |
| Mne-2-1              | Bacteria Actinobacteria Corynebacteriales Mycobacteriaceae   | <i>Mycobacterium neoaurum</i> ATCC 25795                                        |
| Mne-3-1              | Bacteria Actinobacteria Corynebacteriales Mycobacteriaceae   | <i>Mycobacterium neoaurum</i> VKM Ac-1815D                                      |
| Mob-1-1 to Mob-1-2   | Bacteria Actinobacteria Corynebacteriales Mycobacteriaceae   | <i>Mycobacterium obuense</i>                                                    |
| Mru-1-1              | Bacteria Actinobacteria Corynebacteriales Mycobacteriaceae   | <i>Mycobacterium rufum</i>                                                      |
| Mse-1-1 to Mse-1-2   | Bacteria Actinobacteria Corynebacteriales Mycobacteriaceae   | <i>Mycobacterium senegalense</i>                                                |
| Mse-2-1              | Bacteria Actinobacteria Corynebacteriales Mycobacteriaceae   | <i>Mycobacterium septicum</i> DSM 44393                                         |
| Mse-3-1 to Mse-3-2   | Bacteria Actinobacteria Corynebacteriales Mycobacteriaceae   | <i>Mycobacterium setense</i>                                                    |
| Msp-11-1             | Bacteria Actinobacteria Corynebacteriales Mycobacteriaceae   | <i>Mycobacterium</i> sp. EPa45                                                  |
| Msp-12-1             | Bacteria Actinobacteria Corynebacteriales Mycobacteriaceae   | <i>Mycobacterium</i> sp. UM_Kg1                                                 |
| Msp-13-1             | Bacteria Actinobacteria Corynebacteriales Mycobacteriaceae   | <i>Mycobacterium</i> sp. UM_Kg17                                                |
| Msp-14-1             | Bacteria Actinobacteria Corynebacteriales Mycobacteriaceae   | <i>Mycobacterium</i> sp. UM_Kg27                                                |
| Msp-15-1             | Bacteria Actinobacteria Corynebacteriales Mycobacteriaceae   | <i>Mycobacterium</i> sp. UM_NYF                                                 |
| Msp-16-1             | Bacteria Actinobacteria Corynebacteriales Mycobacteriaceae   | <i>Mycobacterium</i> sp. UM_NZ2                                                 |
| Msp-17-1             | Bacteria Actinobacteria Corynebacteriales Mycobacteriaceae   | <i>Mycobacterium</i> sp. UM_WGJ                                                 |

|                    |                                                                                                                                     |
|--------------------|-------------------------------------------------------------------------------------------------------------------------------------|
| Msp-18-1           | Bacteria Actinobacteria Corynebacteriales Mycobacteriaceae <i>Mycobacterium sp.</i> UM_WWY                                          |
| Msp-19-1           | Bacteria Actinobacteria Corynebacteriales Mycobacteriaceae <i>Mycobacterium sp.</i> UNC280MFTsu5.1                                  |
| Msp-20-1           | Bacteria Actinobacteria Corynebacteriales Mycobacteriaceae <i>Mycobacterium sp.</i> UNC410CL29Cvi84                                 |
| Msp-21-1           | Bacteria Actinobacteria Corynebacteriales Mycobacteriaceae <i>Mycobacterium sp.</i> UNCL9                                           |
| Msp-22-1           | Bacteria Actinobacteria Corynebacteriales Mycobacteriaceae <i>Mycobacterium sp.</i> URHB0044                                        |
| Msp-23-1           | Bacteria Actinobacteria Corynebacteriales Mycobacteriaceae <i>Mycobacterium sp.</i> URHD0025                                        |
| Msp-24-1           | Bacteria Actinobacteria Corynebacteriales Mycobacteriaceae <i>Mycobacterium sp.</i> VKM Ac-1816D                                    |
| Msp-25-1           | Bacteria Actinobacteria Corynebacteriales Mycobacteriaceae <i>Mycobacterium sp.</i> VKM Ac-1817D                                    |
| Mar-2-1            | Bacteria Actinobacteria Corynebacteriales Mycobacteriaceae Mycobacterium Mycobacterium terrae complex <i>Mycobacterium arupense</i> |
| Mtu-1-1            | Bacteria Actinobacteria Corynebacteriales Mycobacteriaceae <i>Mycobacterium tusciae</i> JS617                                       |
| Nab-1-1            | Bacteria Actinobacteria Corynebacteriales Nocardiaceae <i>Nocardia abscessus</i> NBRC 100374                                        |
| Nao-1-1            | Bacteria Actinobacteria Corynebacteriales Nocardiaceae <i>Nocardia aobensis</i> NBRC 100429                                         |
| Nar-1-1            | Bacteria Actinobacteria Corynebacteriales Nocardiaceae <i>Nocardia araoensis</i> NBRC 100135                                        |
| Nas-2-1            | Bacteria Actinobacteria Corynebacteriales Nocardiaceae <i>Nocardia asiatica</i> NBRC 100129                                         |
| Nbr-2-1            | Bacteria Actinobacteria Corynebacteriales Nocardiaceae <i>Nocardia brasiliensis</i> IFM 10847                                       |
| Nbr-3-1            | Bacteria Actinobacteria Corynebacteriales Nocardiaceae <i>Nocardia brasiliensis</i> NBRC 14402                                      |
| Nbr-4-1            | Bacteria Actinobacteria Corynebacteriales Nocardiaceae <i>Nocardia brevicatena</i> NBRC 12119                                       |
| Nca-1-1            | Bacteria Actinobacteria Corynebacteriales Nocardiaceae <i>Nocardia carnea</i>                                                       |
| Nca-2-1            | Bacteria Actinobacteria Corynebacteriales Nocardiaceae <i>Nocardia carnea</i> NBRC 14403                                            |
| Nce-1-1            | Bacteria Actinobacteria Corynebacteriales Nocardiaceae <i>Nocardia cerradoensis</i> NBRC 101014                                     |
| Ncy-2-1            | Bacteria Actinobacteria Corynebacteriales Nocardiaceae <i>Nocardia cyriacigeorgica</i> NBRC 100375                                  |
| Nex-1-1            | Bacteria Actinobacteria Corynebacteriales Nocardiaceae <i>Nocardia exalbida</i> NBRC 100660                                         |
| Nhi-1-1            | Bacteria Actinobacteria Corynebacteriales Nocardiaceae <i>Nocardia higoensis</i> NBRC 100133                                        |
| Nji-1-1            | Bacteria Actinobacteria Corynebacteriales Nocardiaceae <i>Nocardia jiangxiensis</i> NBRC 101359                                     |
| Nni-1-1            | Bacteria Actinobacteria Corynebacteriales Nocardiaceae <i>Nocardia niigatensis</i> NBRC 100131                                      |
| Nno-1-1            | Bacteria Actinobacteria Corynebacteriales Nocardiaceae <i>Nocardia nova</i> SH22a                                                   |
| Not-1-1            | Bacteria Actinobacteria Corynebacteriales Nocardiaceae <i>Nocardia otitidiscaviarum</i> IFM 11049                                   |
| Not-2-1            | Bacteria Actinobacteria Corynebacteriales Nocardiaceae <i>Nocardia otitidiscaviarum</i> NBRC 14405                                  |
| Npa-1-1            | Bacteria Actinobacteria Corynebacteriales Nocardiaceae <i>Nocardia paucivorans</i> NBRC 100373                                      |
| Npn-1-1            | Bacteria Actinobacteria Corynebacteriales Nocardiaceae <i>Nocardia pneumoniae</i> NBRC 100136                                       |
| Nrh-1-1 to Nrh-1-2 | Bacteria Actinobacteria Corynebacteriales Nocardiaceae <i>Nocardia rhamnosiphila</i> NBRC 108938                                    |
| Nsp-5-1            | Bacteria Actinobacteria Corynebacteriales Nocardiaceae <i>Nocardia sp.</i> BMG51109                                                 |
| Nsp-6-1            | Bacteria Actinobacteria Corynebacteriales Nocardiaceae <i>Nocardia sp.</i> CNY236                                                   |
| Nsp-7-1            | Bacteria Actinobacteria Corynebacteriales Nocardiaceae <i>Nocardia sp.</i> NRRL WC-3656                                             |
| Nta-1-1            | Bacteria Actinobacteria Corynebacteriales Nocardiaceae <i>Nocardia takedensis</i> NBRC 100417                                       |
| Nte-1-1            | Bacteria Actinobacteria Corynebacteriales Nocardiaceae <i>Nocardia tenerifensis</i> NBRC 101015                                     |
| Nte-2-1            | Bacteria Actinobacteria Corynebacteriales Nocardiaceae <i>Nocardia testacea</i> NBRC 100365                                         |
| Nth-1-1            | Bacteria Actinobacteria Corynebacteriales Nocardiaceae <i>Nocardia thailandica</i> NBRC 100428                                      |
| Ntr-1-1            | Bacteria Actinobacteria Corynebacteriales Nocardiaceae <i>Nocardia transvalensis</i> NBRC 15921                                     |
| Nve-1-1            | Bacteria Actinobacteria Corynebacteriales Nocardiaceae <i>Nocardia veterana</i> NBRC 100344                                         |
| Nvi-1-1            | Bacteria Actinobacteria Corynebacteriales Nocardiaceae <i>Nocardia vinacea</i> NBRC 16497                                           |
| Nvu-1-1            | Bacteria Actinobacteria Corynebacteriales Nocardiaceae <i>Nocardia vulneris</i>                                                     |
| Rae-1-1            | Bacteria Actinobacteria Corynebacteriales Nocardiaceae <i>Rhodococcus aetherivorans</i>                                             |
| Rde-1-1            | Bacteria Actinobacteria Corynebacteriales Nocardiaceae <i>Rhodococcus defluvi</i>                                                   |
| Rer-6-1            | Bacteria Actinobacteria Corynebacteriales Nocardiaceae <i>Rhodococcus erythropolis</i>                                              |
| Rer-7-1            | Bacteria Actinobacteria Corynebacteriales Nocardiaceae <i>Rhodococcus erythropolis</i> R138                                         |
| Rfa-1-1 to Rfa-1-2 | Bacteria Actinobacteria Corynebacteriales Nocardiaceae <i>Rhodococcus fascians</i>                                                  |
| Rfa-2-1            | Bacteria Actinobacteria Corynebacteriales Nocardiaceae <i>Rhodococcus fascians</i> 02-815                                           |
| Rfa-3-1            | Bacteria Actinobacteria Corynebacteriales Nocardiaceae <i>Rhodococcus fascians</i> 02-816c                                          |
| Rfa-4-1            | Bacteria Actinobacteria Corynebacteriales Nocardiaceae <i>Rhodococcus fascians</i> 04-516                                           |
| Rfa-5-1            | Bacteria Actinobacteria Corynebacteriales Nocardiaceae <i>Rhodococcus fascians</i> 05-339-1                                         |
| Rfa-6-1            | Bacteria Actinobacteria Corynebacteriales Nocardiaceae <i>Rhodococcus fascians</i> 05-561-1                                         |
| Rfa-7-1            | Bacteria Actinobacteria Corynebacteriales Nocardiaceae <i>Rhodococcus fascians</i> A21d2                                            |
| Rfa-8-1            | Bacteria Actinobacteria Corynebacteriales Nocardiaceae <i>Rhodococcus fascians</i> A25f                                             |
| Rfa-9-1            | Bacteria Actinobacteria Corynebacteriales Nocardiaceae <i>Rhodococcus fascians</i> A3b                                              |
| Rfa-10-1           | Bacteria Actinobacteria Corynebacteriales Nocardiaceae <i>Rhodococcus fascians</i> A44A                                             |
| Rfa-11-1           | Bacteria Actinobacteria Corynebacteriales Nocardiaceae <i>Rhodococcus fascians</i> A73a                                             |
| Rfa-12-1           | Bacteria Actinobacteria Corynebacteriales Nocardiaceae <i>Rhodococcus fascians</i> A76                                              |
| Rfa-13-1           | Bacteria Actinobacteria Corynebacteriales Nocardiaceae <i>Rhodococcus fascians</i> A78                                              |
| Rfa-14-1           | Bacteria Actinobacteria Corynebacteriales Nocardiaceae <i>Rhodococcus fascians</i> D188                                             |
| Rfa-15-1           | Bacteria Actinobacteria Corynebacteriales Nocardiaceae <i>Rhodococcus fascians</i> G1C26                                            |
| Rfa-16-1           | Bacteria Actinobacteria Corynebacteriales Nocardiaceae <i>Rhodococcus fascians</i> G1C36                                            |
| Rfa-17-1           | Bacteria Actinobacteria Corynebacteriales Nocardiaceae <i>Rhodococcus fascians</i> LMG 3602                                         |
| Rfa-18-1           | Bacteria Actinobacteria Corynebacteriales Nocardiaceae <i>Rhodococcus fascians</i> LMG 3605                                         |
| Rfa-19-1           | Bacteria Actinobacteria Corynebacteriales Nocardiaceae <i>Rhodococcus fascians</i> LMG 3616                                         |



|                    |                                                                                                          |
|--------------------|----------------------------------------------------------------------------------------------------------|
| Rfa-20-1           | Bacteria Actinobacteria Corynebacteriales Nocardiaceae <i>Rhodococcus fascians</i> LMG 3625              |
| Rfa-21-1           | Bacteria Actinobacteria Corynebacteriales Nocardiaceae <i>Rhodococcus fascians</i> NBRC 12155 = LMG 3623 |
| Rop-4-1            | Bacteria Actinobacteria Corynebacteriales Nocardiaceae <i>Rhodococcus opacus</i>                         |
| Rop-3-1 to Rop-3-2 | Bacteria Actinobacteria Corynebacteriales Nocardiaceae <i>Rhodococcus opacus</i> PD630                   |
| Rqi-2-1            | Bacteria Actinobacteria Corynebacteriales Nocardiaceae <i>Rhodococcus qingshengii</i>                    |
| Rrh-3-1            | Bacteria Actinobacteria Corynebacteriales Nocardiaceae <i>Rhodococcus rhodnii</i>                        |
| Rrh-4-1            | Bacteria Actinobacteria Corynebacteriales Nocardiaceae <i>Rhodococcus rhodochrous</i>                    |
| Rrh-5-1            | Bacteria Actinobacteria Corynebacteriales Nocardiaceae <i>Rhodococcus rhodochrous</i> ATCC 17895         |
| Rrh-6-1            | Bacteria Actinobacteria Corynebacteriales Nocardiaceae <i>Rhodococcus rhodochrous</i> ATCC 21198         |
| Rru-3-1 to Rru-3-2 | Bacteria Actinobacteria Corynebacteriales Nocardiaceae <i>Rhodococcus ruber</i>                          |
| Rsp-10-1           | Bacteria Actinobacteria Corynebacteriales Nocardiaceae <i>Rhodococcus</i> sp. 311R                       |
| Rsp-11-1           | Bacteria Actinobacteria Corynebacteriales Nocardiaceae <i>Rhodococcus</i> sp. AD45                       |
| Rsp-12-1           | Bacteria Actinobacteria Corynebacteriales Nocardiaceae <i>Rhodococcus</i> sp. ARP2                       |
| Rsp-13-1           | Bacteria Actinobacteria Corynebacteriales Nocardiaceae <i>Rhodococcus</i> sp. B7740                      |
| Rsp-14-1           | Bacteria Actinobacteria Corynebacteriales Nocardiaceae <i>Rhodococcus</i> sp. Chr-9                      |
| Rsp-15-1           | Bacteria Actinobacteria Corynebacteriales Nocardiaceae <i>Rhodococcus</i> sp. JG-3                       |
| Rsp-16-1           | Bacteria Actinobacteria Corynebacteriales Nocardiaceae <i>Rhodococcus</i> sp. MEB064                     |
| Rsp-22-1           | Bacteria Actinobacteria Corynebacteriales Nocardiaceae <i>Rhodococcus</i> sp. p52                        |
| Rsp-17-1           | Bacteria Actinobacteria Corynebacteriales Nocardiaceae <i>Rhodococcus</i> sp. PML026                     |
| Rsp-18-1           | Bacteria Actinobacteria Corynebacteriales Nocardiaceae <i>Rhodococcus</i> sp. R04                        |
| Rsp-19-1           | Bacteria Actinobacteria Corynebacteriales Nocardiaceae <i>Rhodococcus</i> sp. RD6.2                      |
| Rsp-20-1           | Bacteria Actinobacteria Corynebacteriales Nocardiaceae <i>Rhodococcus</i> sp. UNC23MFCrub1.1             |
| Rsp-21-1           | Bacteria Actinobacteria Corynebacteriales Nocardiaceae <i>Rhodococcus</i> sp. UNC363MFTsu5.1             |
| Rwr-2-1            | Bacteria Actinobacteria Corynebacteriales Nocardiaceae <i>Rhodococcus wratislaviensis</i> NBRC 100605    |
| Tbi-1-1            | Bacteria Actinobacteria Corynebacteriales <i>Tomitella biformata</i> AHU 1821                            |
| Tsp-1-1            | Bacteria Actinobacteria Corynebacteriales Tsukamurellaceae <i>Tsukamurella</i> sp. 1534                  |
| Whe-1-1            | Bacteria Actinobacteria Corynebacteriales Williamsiaceae <i>Williamsia herbipolensis</i>                 |
| Car-1-1            | Bacteria Actinobacteria Frankiales Cryptosporangiaceae <i>Cryptosporangium arvum</i> DSM 44712           |
| Fco-1-1            | Bacteria Actinobacteria Frankiales Frankiaceae <i>Frankia coriariae</i>                                  |
| Fsa-1-1            | Bacteria Actinobacteria Frankiales Frankiaceae <i>Frankia saprophytica</i>                               |
| Fsp-10-1           | Bacteria Actinobacteria Frankiales Frankiaceae <i>Frankia</i> sp. Allo2                                  |
| Fsp-11-1           | Bacteria Actinobacteria Frankiales Frankiaceae <i>Frankia</i> sp. BMG5.23                                |
| Fsp-12-1           | Bacteria Actinobacteria Frankiales Frankiaceae <i>Frankia</i> sp. CeD                                    |
| Fsp-13-1           | Bacteria Actinobacteria Frankiales Frankiaceae <i>Frankia</i> sp. Cp11-S                                 |
| Fsp-14-1           | Bacteria Actinobacteria Frankiales Frankiaceae <i>Frankia</i> sp. DC12                                   |
| Fsp-15-1           | Bacteria Actinobacteria Frankiales Frankiaceae <i>Frankia</i> sp. Thr                                    |
| Gar-2-1            | Bacteria Actinobacteria Glycomycetales Glycomycetaceae <i>Glycomyces arizonensis</i> DSM 44726           |
| Gsp-3-1            | Bacteria Actinobacteria Glycomycetales Glycomycetaceae <i>Glycomyces</i> sp. NRRRL B-16210               |
| Gte-4-1            | Bacteria Actinobacteria Glycomycetales Glycomycetaceae <i>Glycomyces tenuis</i>                          |
| Gte-5-1            | Bacteria Actinobacteria Glycomycetales Glycomycetaceae <i>Glycomyces tenuis</i> DSM 44171                |
| Hal-1-1            | Bacteria Actinobacteria Glycomycetales Glycomycetaceae <i>Haloglycomyces albus</i> DSM 45210             |
| Jal-1-1            | Bacteria Actinobacteria Jiangellales Jiangellaceae <i>Jiangella alkaliphila</i>                          |
| Jga-1-1            | Bacteria Actinobacteria Jiangellales Jiangellaceae <i>Jiangella gansuensis</i> DSM 44835                 |
| Jmu-1-1            | Bacteria Actinobacteria Jiangellales Jiangellaceae <i>Jiangella muralis</i>                              |
| Cbo-1-1            | Bacteria Actinobacteria Micrococcales Cellulomonadaceae <i>Cellulomonas bogoriensis</i> 69B4 = DSM 16987 |
| Bph-1-1            | Bacteria Actinobacteria Micrococcales Dermabacteraceae <i>Brachybacterium phenoliresistens</i>           |
| Dho-1-1            | Bacteria Actinobacteria Micrococcales Dermabacteraceae <i>Dermabacter hominis</i> 1368                   |
| Ase-1-1            | Bacteria Actinobacteria Micromonosporales Micromonosporaceae <i>Actinocatenispora sera</i>               |
| Are-1-1            | Bacteria Actinobacteria Micromonosporales Micromonosporaceae <i>Actinoplanes rectilineatus</i>           |
| Asu-3-1            | Bacteria Actinobacteria Micromonosporales Micromonosporaceae <i>Actinoplanes subtropicus</i>             |
| Aut-1-1            | Bacteria Actinobacteria Micromonosporales Micromonosporaceae <i>Actinoplanes utahensis</i>               |
| Cja-1-1            | Bacteria Actinobacteria Micromonosporales Micromonosporaceae <i>Catenuloplanes japonicus</i>             |
| Dau-1-1            | Bacteria Actinobacteria Micromonosporales Micromonosporaceae <i>Dactylosporangium aurantiacum</i>        |
| Mca-1-1            | Bacteria Actinobacteria Micromonosporales Micromonosporaceae <i>Micromonospora carbonacea</i>            |
| Mch-6-1            | Bacteria Actinobacteria Micromonosporales Micromonosporaceae <i>Micromonospora chokoriensis</i>          |
| Mgl-1-1            | Bacteria Actinobacteria Micromonosporales Micromonosporaceae <i>Micromonospora globosa</i>               |
| Mpa-1-1            | Bacteria Actinobacteria Micromonosporales Micromonosporaceae <i>Micromonospora parva</i>                 |
| Mpu-1-1            | Bacteria Actinobacteria Micromonosporales Micromonosporaceae <i>Micromonospora purpureochromogenes</i>   |
| Msp-26-1           | Bacteria Actinobacteria Micromonosporales Micromonosporaceae <i>Micromonospora</i> sp. HK10              |
| Msp-27-1           | Bacteria Actinobacteria Micromonosporales Micromonosporaceae <i>Micromonospora</i> sp. M42               |
| Msp-28-1           | Bacteria Actinobacteria Micromonosporales Micromonosporaceae <i>Micromonospora</i> sp. RV43              |
| Pan-1-1            | Bacteria Actinobacteria Micromonosporales Micromonosporaceae <i>Pilimelia anulata</i>                    |
| Sar-20-1           | Bacteria Actinobacteria Micromonosporales Micromonosporaceae <i>Salinispora arenicola</i>                |
| Sar-21-1           | Bacteria Actinobacteria Micromonosporales Micromonosporaceae <i>Salinispora arenicola</i> CNB458         |
| Sar-22-1           | Bacteria Actinobacteria Micromonosporales Micromonosporaceae <i>Salinispora arenicola</i> CNB527         |

|                    |                                                                  |                                                 |
|--------------------|------------------------------------------------------------------|-------------------------------------------------|
| Sar-23-1           | Bacteria Actinobacteria Micromonosporales Micromonosporaceae     | <i>Salinispora arenicola</i> CNH646             |
| Sar-24-1           | Bacteria Actinobacteria Micromonosporales Micromonosporaceae     | <i>Salinispora arenicola</i> CNH905             |
| Sar-25-1           | Bacteria Actinobacteria Micromonosporales Micromonosporaceae     | <i>Salinispora arenicola</i> CNH941             |
| Sar-26-1           | Bacteria Actinobacteria Micromonosporales Micromonosporaceae     | <i>Salinispora arenicola</i> CNH963             |
| Sar-27-1           | Bacteria Actinobacteria Micromonosporales Micromonosporaceae     | <i>Salinispora arenicola</i> CNH964             |
| Sar-28-1           | Bacteria Actinobacteria Micromonosporales Micromonosporaceae     | <i>Salinispora arenicola</i> CNQ748             |
| Sar-29-1           | Bacteria Actinobacteria Micromonosporales Micromonosporaceae     | <i>Salinispora arenicola</i> CNR416             |
| Sar-30-1           | Bacteria Actinobacteria Micromonosporales Micromonosporaceae     | <i>Salinispora arenicola</i> CNR425             |
| Sar-31-1           | Bacteria Actinobacteria Micromonosporales Micromonosporaceae     | <i>Salinispora arenicola</i> CNR921             |
| Sar-32-1           | Bacteria Actinobacteria Micromonosporales Micromonosporaceae     | <i>Salinispora arenicola</i> CNS243             |
| Sar-33-1           | Bacteria Actinobacteria Micromonosporales Micromonosporaceae     | <i>Salinispora arenicola</i> CNS299             |
| Sar-34-1           | Bacteria Actinobacteria Micromonosporales Micromonosporaceae     | <i>Salinispora arenicola</i> CNS744             |
| Sar-35-1           | Bacteria Actinobacteria Micromonosporales Micromonosporaceae     | <i>Salinispora arenicola</i> CNT005             |
| Sar-36-1           | Bacteria Actinobacteria Micromonosporales Micromonosporaceae     | <i>Salinispora arenicola</i> CNT798             |
| Sar-37-1           | Bacteria Actinobacteria Micromonosporales Micromonosporaceae     | <i>Salinispora arenicola</i> CNT799             |
| Sar-38-1           | Bacteria Actinobacteria Micromonosporales Micromonosporaceae     | <i>Salinispora arenicola</i> CNT800             |
| Sar-39-1           | Bacteria Actinobacteria Micromonosporales Micromonosporaceae     | <i>Salinispora arenicola</i> CNT850             |
| Sar-40-1           | Bacteria Actinobacteria Micromonosporales Micromonosporaceae     | <i>Salinispora arenicola</i> CNT857             |
| Sar-41-1           | Bacteria Actinobacteria Micromonosporales Micromonosporaceae     | <i>Salinispora arenicola</i> CNX482             |
| Sar-42-1           | Bacteria Actinobacteria Micromonosporales Micromonosporaceae     | <i>Salinispora arenicola</i> CNX508             |
| Sar-43-1           | Bacteria Actinobacteria Micromonosporales Micromonosporaceae     | <i>Salinispora arenicola</i> CNX891             |
| Spa-21-1           | Bacteria Actinobacteria Micromonosporales Micromonosporaceae     | <i>Salinispora pacifica</i> CNR114              |
| Spa-22-1           | Bacteria Actinobacteria Micromonosporales Micromonosporaceae     | <i>Salinispora pacifica</i> CNR894              |
| Spa-23-1           | Bacteria Actinobacteria Micromonosporales Micromonosporaceae     | <i>Salinispora pacifica</i> CNS103              |
| Spa-24-1           | Bacteria Actinobacteria Micromonosporales Micromonosporaceae     | <i>Salinispora pacifica</i> CNS237              |
| Spa-25-1           | Bacteria Actinobacteria Micromonosporales Micromonosporaceae     | <i>Salinispora pacifica</i> CNT001              |
| Spa-26-1           | Bacteria Actinobacteria Micromonosporales Micromonosporaceae     | <i>Salinispora pacifica</i> CNT003              |
| Spa-27-1           | Bacteria Actinobacteria Micromonosporales Micromonosporaceae     | <i>Salinispora pacifica</i> CNT029              |
| Spa-28-1           | Bacteria Actinobacteria Micromonosporales Micromonosporaceae     | <i>Salinispora pacifica</i> CNT084              |
| Spa-29-1           | Bacteria Actinobacteria Micromonosporales Micromonosporaceae     | <i>Salinispora pacifica</i> CNT131              |
| Spa-30-1           | Bacteria Actinobacteria Micromonosporales Micromonosporaceae     | <i>Salinispora pacifica</i> CNT138              |
| Spa-31-1           | Bacteria Actinobacteria Micromonosporales Micromonosporaceae     | <i>Salinispora pacifica</i> CNT148              |
| Spa-32-1           | Bacteria Actinobacteria Micromonosporales Micromonosporaceae     | <i>Salinispora pacifica</i> CNT150              |
| Spa-33-1           | Bacteria Actinobacteria Micromonosporales Micromonosporaceae     | <i>Salinispora pacifica</i> CNT569              |
| Spa-34-1           | Bacteria Actinobacteria Micromonosporales Micromonosporaceae     | <i>Salinispora pacifica</i> CNT603              |
| Spa-35-1           | Bacteria Actinobacteria Micromonosporales Micromonosporaceae     | <i>Salinispora pacifica</i> CNT796              |
| Spa-36-1           | Bacteria Actinobacteria Micromonosporales Micromonosporaceae     | <i>Salinispora pacifica</i> CNT854              |
| Spa-37-1           | Bacteria Actinobacteria Micromonosporales Micromonosporaceae     | <i>Salinispora pacifica</i> CNT855              |
| Spa-38-1           | Bacteria Actinobacteria Micromonosporales Micromonosporaceae     | <i>Salinispora pacifica</i> CNY202              |
| Spa-39-1           | Bacteria Actinobacteria Micromonosporales Micromonosporaceae     | <i>Salinispora pacifica</i> CNY239              |
| Spa-40-1           | Bacteria Actinobacteria Micromonosporales Micromonosporaceae     | <i>Salinispora pacifica</i> CNY331              |
| Str-4-1            | Bacteria Actinobacteria Micromonosporales Micromonosporaceae     | <i>Salinispora tropica</i> CNB476               |
| Str-5-1            | Bacteria Actinobacteria Micromonosporales Micromonosporaceae     | <i>Salinispora tropica</i> CNB536               |
| Str-6-1            | Bacteria Actinobacteria Micromonosporales Micromonosporaceae     | <i>Salinispora tropica</i> CNH898               |
| Str-7-1            | Bacteria Actinobacteria Micromonosporales Micromonosporaceae     | <i>Salinispora tropica</i> CNS197               |
| Str-8-1            | Bacteria Actinobacteria Micromonosporales Micromonosporaceae     | <i>Salinispora tropica</i> CNT250               |
| Str-9-1            | Bacteria Actinobacteria Micromonosporales Micromonosporaceae     | <i>Salinispora tropica</i> CNT261               |
| Str-10-1           | Bacteria Actinobacteria Micromonosporales Micromonosporaceae     | <i>Salinispora tropica</i> CNY012               |
| Nla-1-1            | Bacteria Actinobacteria Nakamurellales Nakamurellaceae           | <i>Nakamurella lactea</i> DSM 19367             |
| Ama-4-1            | Bacteria Actinobacteria Propionibacteriales Nocardiodaceae       | <i>Aeromicrobium massiliense</i> JC14           |
| Msp-29-1           | Bacteria Actinobacteria Propionibacteriales Nocardiodaceae       | <i>Marmoricola</i> sp. URHB0036                 |
| Nal-1-1            | Bacteria Actinobacteria Propionibacteriales Nocardiodaceae       | <i>Nocardioides alkalitolerans</i> DSM 16699    |
| Nin-1-1            | Bacteria Actinobacteria Propionibacteriales Nocardiodaceae       | <i>Nocardioides insulae</i> DSM 17944           |
| Nlu-1-1            | Bacteria Actinobacteria Propionibacteriales Nocardiodaceae       | <i>Nocardioides luteus</i>                      |
| Nsp-8-1            | Bacteria Actinobacteria Propionibacteriales Nocardiodaceae       | <i>Nocardioides</i> sp. UNC345MFTsu5.1          |
| Nsp-9-1            | Bacteria Actinobacteria Propionibacteriales Nocardiodaceae       | <i>Nocardioides</i> sp. URHA0020                |
| Nsp-10-1           | Bacteria Actinobacteria Propionibacteriales Nocardiodaceae       | <i>Nocardioides</i> sp. URHA0032                |
| Psu-1-1            | Bacteria Actinobacteria Propionibacteriales Nocardiodaceae       | <i>Propioniceella superfundia</i> DSM 22317     |
| Ply-2-1            | Bacteria Actinobacteria Propionibacteriales Propionibacteriaceae | <i>Propionimicrobium lymphophilum</i> DSM 4903  |
| Psp-7-1            | Bacteria Actinobacteria Propionibacteriales Propionibacteriaceae | <i>Propionimicrobium</i> sp. BV2F7              |
| Acy-1-1            | Bacteria Actinobacteria Pseudonocardiales Pseudonocardiaceae     | <i>Actinoalloteichus cyanogriseus</i>           |
| Acy-2-1            | Bacteria Actinobacteria Pseudonocardiales Pseudonocardiaceae     | <i>Actinoalloteichus cyanogriseus</i> DSM 43889 |
| Ain-1-1            | Bacteria Actinobacteria Pseudonocardiales Pseudonocardiaceae     | <i>Actinokineospora inagensis</i> DSM 44258     |
| Asp-5-1 to Asp-5-2 | Bacteria Actinobacteria Pseudonocardiales Pseudonocardiaceae     | <i>Actinokineospora sphericospongiae</i>        |
| Aal-2-1            | Bacteria Actinobacteria Pseudonocardiales Pseudonocardiaceae     | <i>Allokutzneria alata</i>                      |

|                    |                                                              |                                                                                      |
|--------------------|--------------------------------------------------------------|--------------------------------------------------------------------------------------|
| Aha-3-1            | Bacteria Actinobacteria Pseudonocardiales Pseudonocardiaceae | <i>Amycolatopsis halophila</i> YIM 93223                                             |
| Aja-1-1            | Bacteria Actinobacteria Pseudonocardiales Pseudonocardiaceae | <i>Amycolatopsis japonica</i>                                                        |
| Aje-1-1            | Bacteria Actinobacteria Pseudonocardiales Pseudonocardiaceae | <i>Amycolatopsis jejuensis</i>                                                       |
| Ame-5-1 to Ame-5-2 | Bacteria Actinobacteria Pseudonocardiales Pseudonocardiaceae | <i>Amycolatopsis mediterranei</i>                                                    |
| Ame-4-1 to Ame-4-2 | Bacteria Actinobacteria Pseudonocardiales Pseudonocardiaceae | <i>Amycolatopsis methanolica</i> 239                                                 |
| Aor-1-1            | Bacteria Actinobacteria Pseudonocardiales Pseudonocardiaceae | <i>Amycolatopsis orientalis</i>                                                      |
| Aor-2-1            | Bacteria Actinobacteria Pseudonocardiales Pseudonocardiaceae | <i>Amycolatopsis orientalis</i> DSM 40040 = KCTC 9412                                |
| Aor-3-1            | Bacteria Actinobacteria Pseudonocardiales Pseudonocardiaceae | <i>Amycolatopsis orientalis</i> DSM 43388                                            |
| Aor-4-1            | Bacteria Actinobacteria Pseudonocardiales Pseudonocardiaceae | <i>Amycolatopsis orientalis</i> DSM 46075                                            |
| Ari-1-1            | Bacteria Actinobacteria Pseudonocardiales Pseudonocardiaceae | <i>Amycolatopsis rifamycinica</i>                                                    |
| Asp-6-1            | Bacteria Actinobacteria Pseudonocardiales Pseudonocardiaceae | <i>Amycolatopsis</i> sp. MJM2582                                                     |
| Ata-1-1            | Bacteria Actinobacteria Pseudonocardiales Pseudonocardiaceae | <i>Amycolatopsis taiwanensis</i> DSM 45107                                           |
| Ath-1-1            | Bacteria Actinobacteria Pseudonocardiales Pseudonocardiaceae | <i>Amycolatopsis thermoflava</i> N1165                                               |
| Ava-2-1            | Bacteria Actinobacteria Pseudonocardiales Pseudonocardiaceae | <i>Amycolatopsis vancoresmycina</i>                                                  |
| Kar-1-1            | Bacteria Actinobacteria Pseudonocardiales Pseudonocardiaceae | <i>Kibdelosporangium aridum</i> subsp. <i>largum</i>                                 |
| Ksp-1-1            | Bacteria Actinobacteria Pseudonocardiales Pseudonocardiaceae | <i>Kibdelosporangium</i> sp. MJ126-NF4                                               |
| Kal-1-1            | Bacteria Actinobacteria Pseudonocardiales Pseudonocardiaceae | <i>Kutzneria albida</i>                                                              |
| Kal-2-1            | Bacteria Actinobacteria Pseudonocardiales Pseudonocardiaceae | <i>Kutzneria albida</i> DSM 43870                                                    |
| Ksp-2-1            | Bacteria Actinobacteria Pseudonocardiales Pseudonocardiaceae | <i>Kutzneria</i> sp. 744                                                             |
| Lae-1-1 to Lae-1-2 | Bacteria Actinobacteria Pseudonocardiales Pseudonocardiaceae | <i>Lechevalieria aerocolonigenes</i>                                                 |
| Lal-2-1            | Bacteria Actinobacteria Pseudonocardiales Pseudonocardiaceae | <i>Lentzea albidocapillata</i>                                                       |
| Pru-1-1            | Bacteria Actinobacteria Pseudonocardiales Pseudonocardiaceae | <i>Prauserella rugosa</i>                                                            |
| Psp-8-1            | Bacteria Actinobacteria Pseudonocardiales Pseudonocardiaceae | <i>Prauserella</i> sp. Am3                                                           |
| Pac-1-1            | Bacteria Actinobacteria Pseudonocardiales Pseudonocardiaceae | <i>Pseudonocardia acaciae</i> DSM 45401                                              |
| Pas-1-1            | Bacteria Actinobacteria Pseudonocardiales Pseudonocardiaceae | <i>Pseudonocardia asaccharolytica</i> DSM 44247 = NBRC 16224                         |
| Pau-1-1            | Bacteria Actinobacteria Pseudonocardiales Pseudonocardiaceae | <i>Pseudonocardia autotrophica</i>                                                   |
| Psp-9-1            | Bacteria Actinobacteria Pseudonocardiales Pseudonocardiaceae | <i>Pseudonocardia</i> sp. P2                                                         |
| Psp-10-1           | Bacteria Actinobacteria Pseudonocardiales Pseudonocardiaceae | <i>Pseudonocardia spinosisporea</i> DSM 44797                                        |
| [ir-1-1            | Bacteria Actinobacteria Pseudonocardiales Pseudonocardiaceae | Saccharomonospora [Actinopolyspora] <i>iraqiensis</i> IQ-H1                          |
| Spa-41-1           | Bacteria Actinobacteria Pseudonocardiales Pseudonocardiaceae | <i>Saccharomonospora paurometabolica</i> YIM 90007                                   |
| Ssp-45-1           | Bacteria Actinobacteria Pseudonocardiales Pseudonocardiaceae | <i>Saccharomonospora</i> sp. CNQ490                                                  |
| Svi-8-1            | Bacteria Actinobacteria Pseudonocardiales Pseudonocardiaceae | <i>Saccharomonospora viridis</i>                                                     |
| Sre-1-1            | Bacteria Actinobacteria Pseudonocardiales Pseudonocardiaceae | <i>Saccharopolyspora rectivirgula</i>                                                |
| Sre-2-1            | Bacteria Actinobacteria Pseudonocardiales Pseudonocardiaceae | <i>Saccharopolyspora rectivirgula</i> DSM 43747                                      |
| Ssp-46-1           | Bacteria Actinobacteria Pseudonocardiales Pseudonocardiaceae | <i>Saccharothrix</i> sp. NRRL B-16314                                                |
| Ssy-1-1            | Bacteria Actinobacteria Pseudonocardiales Pseudonocardiaceae | <i>Saccharothrix syringae</i>                                                        |
| Ssp-47-1           | Bacteria Actinobacteria Pseudonocardiales Pseudonocardiaceae | <i>Sciscionella</i> sp. SE31                                                         |
| Kar-2-1            | Bacteria Actinobacteria Streptomycetales Streptomycetaceae   | <i>Kitasatospora arboriphila</i>                                                     |
| Kau-1-1 to Kau-1-2 | Bacteria Actinobacteria Streptomycetales Streptomycetaceae   | <i>Kitasatospora aureofaciens</i>                                                    |
| Kaz-1-1            | Bacteria Actinobacteria Streptomycetales Streptomycetaceae   | <i>Kitasatospora azatica</i> KCTC 9699                                               |
| Sal-2-1            | Bacteria Actinobacteria Streptomycetales Streptomycetaceae   | <i>Streptacidiphilus albus</i>                                                       |
| Sal-3-1            | Bacteria Actinobacteria Streptomycetales Streptomycetaceae   | <i>Streptacidiphilus albus</i> JL83                                                  |
| Sje-1-1            | Bacteria Actinobacteria Streptomycetales Streptomycetaceae   | <i>Streptacidiphilus jeojiense</i>                                                   |
| Sji-1-1            | Bacteria Actinobacteria Streptomycetales Streptomycetaceae   | <i>Streptacidiphilus jiangxiensis</i>                                                |
| Sru-1-1            | Bacteria Actinobacteria Streptomycetales Streptomycetaceae   | <i>Streptacidiphilus rugosus</i> AM-16                                               |
| [pa-1-1            | Bacteria Actinobacteria Streptomycetales Streptomycetaceae   | Streptomyces [Kitasatospora] <i>papulosa</i>                                         |
| Asp-7-1            | Bacteria Actinobacteria Streptomycetales Streptomycetaceae   | Streptomyces <i>Actinosporangium</i> sp. NRRL B-3428                                 |
| Sac-1-1            | Bacteria Actinobacteria Streptomycetales Streptomycetaceae   | <i>Streptomyces achromogenes</i> subsp. <i>achromogenes</i>                          |
| Sal-4-1            | Bacteria Actinobacteria Streptomycetales Streptomycetaceae   | Streptomyces <i>Streptomyces albidoflavus</i> group <i>Streptomyces albidoflavus</i> |
| Sal-5-1            | Bacteria Actinobacteria Streptomycetales Streptomycetaceae   | <i>Streptomyces alboflavus</i>                                                       |
| Sal-6-1            | Bacteria Actinobacteria Streptomycetales Streptomycetaceae   | <i>Streptomyces alboviridis</i>                                                      |
| Sal-7-1            | Bacteria Actinobacteria Streptomycetales Streptomycetaceae   | <i>Streptomyces albus</i>                                                            |
| Sal-8-1 to Sal-8-4 | Bacteria Actinobacteria Streptomycetales Streptomycetaceae   | <i>Streptomyces albus</i> subsp. <i>albus</i>                                        |
| Sam-1-1            | Bacteria Actinobacteria Streptomycetales Streptomycetaceae   | <i>Streptomyces ambofaciens</i> ATCC 23877                                           |
| San-1-1            | Bacteria Actinobacteria Streptomycetales Streptomycetaceae   | <i>Streptomyces antibioticus</i>                                                     |
| San-2-1            | Bacteria Actinobacteria Streptomycetales Streptomycetaceae   | <i>Streptomyces anulatus</i>                                                         |
| Sat-1-1            | Bacteria Actinobacteria Streptomycetales Streptomycetaceae   | <i>Streptomyces atratus</i>                                                          |
| Sat-2-1            | Bacteria Actinobacteria Streptomycetales Streptomycetaceae   | <i>Streptomyces atroolivaceus</i>                                                    |
| Sau-1-1 to Sau-1-2 | Bacteria Actinobacteria Streptomycetales Streptomycetaceae   | <i>Streptomyces aureocirculatus</i>                                                  |
| Sau-2-1            | Bacteria Actinobacteria Streptomycetales Streptomycetaceae   | <i>Streptomyces aureus</i>                                                           |
| Sav-2-1 to Sav-2-2 | Bacteria Actinobacteria Streptomycetales Streptomycetaceae   | <i>Streptomyces avermitilis</i> MA-4680 = NBRC 14893                                 |
| Sav-3-1            | Bacteria Actinobacteria Streptomycetales Streptomycetaceae   | <i>Streptomyces avicenniae</i>                                                       |
| Sba-2-1            | Bacteria Actinobacteria Streptomycetales Streptomycetaceae   | <i>Streptomyces baarnensis</i>                                                       |
| Sbi-2-1 to Sbi-2-2 | Bacteria Actinobacteria Streptomycetales Streptomycetaceae   | <i>Streptomyces bicolor</i>                                                          |
| Sbi-3-1 to Sbi-3-3 | Bacteria Actinobacteria Streptomycetales Streptomycetaceae   | <i>Streptomyces bikiniensis</i>                                                      |

|                      |                                                          |                                                        |
|----------------------|----------------------------------------------------------|--------------------------------------------------------|
| Sbr-1-1              | Bacteria Actinobacteria Streptomyetales Streptomyetaceae | <i>Streptomyces brasiliensis</i>                       |
| Sca-3-1              | Bacteria Actinobacteria Streptomyetales Streptomyetaceae | <i>Streptomyces caatingaensis</i>                      |
| Sca-4-1 to Sca-4-2   | Bacteria Actinobacteria Streptomyetales Streptomyetaceae | <i>Streptomyces californicus</i>                       |
| Sca-5-1 to Sca-5-2   | Bacteria Actinobacteria Streptomyetales Streptomyetaceae | <i>Streptomyces capuensis</i>                          |
| Sce-1-1              | Bacteria Actinobacteria Streptomyetales Streptomyetaceae | <i>Streptomyces cellulosa</i>                          |
| Scy-2-1              | Bacteria Actinobacteria Streptomyetales Streptomyetaceae | <i>Streptomyces cyaneofuscatus</i>                     |
| Scy-3-1              | Bacteria Actinobacteria Streptomyetales Streptomyetaceae | <i>Streptomyces cyaneogriseus subsp. noncyanogenus</i> |
| Sdu-1-1              | Bacteria Actinobacteria Streptomyetales Streptomyetaceae | <i>Streptomyces durhamensis</i>                        |
| Ser-3-1              | Bacteria Actinobacteria Streptomyetales Streptomyetaceae | <i>Streptomyces erythrochromogenes</i>                 |
| Seu-1-1              | Bacteria Actinobacteria Streptomyetales Streptomyetaceae | <i>Streptomyces europaeiscabiei</i>                    |
| Sex-1-1 to Sex-1-2   | Bacteria Actinobacteria Streptomyetales Streptomyetaceae | <i>Streptomyces exfoliatus</i>                         |
| Sex-2-1              | Bacteria Actinobacteria Streptomyetales Streptomyetaceae | <i>Streptomyces exfoliatus</i> DSM 41693               |
| Sfl-2-1              | Bacteria Actinobacteria Streptomyetales Streptomyetaceae | <i>Streptomyces flaveolus</i>                          |
| Sfl-3-1              | Bacteria Actinobacteria Streptomyetales Streptomyetaceae | <i>Streptomyces flaveus</i>                            |
| Sfl-4-1              | Bacteria Actinobacteria Streptomyetales Streptomyetaceae | <i>Streptomyces flavidovirens</i> DSM 40150            |
| Sfl-5-1              | Bacteria Actinobacteria Streptomyetales Streptomyetaceae | <i>Streptomyces flavochromogenes</i>                   |
| Sfl-6-1              | Bacteria Actinobacteria Streptomyetales Streptomyetaceae | <i>Streptomyces flavotricini</i>                       |
| Sfl-7-1              | Bacteria Actinobacteria Streptomyetales Streptomyetaceae | <i>Streptomyces flavovariabilis</i>                    |
| Sfl-8-1              | Bacteria Actinobacteria Streptomyetales Streptomyetaceae | <i>Streptomyces flavovirens</i>                        |
| Sfl-9-1              | Bacteria Actinobacteria Streptomyetales Streptomyetaceae | <i>Streptomyces floridae</i>                           |
| Sfu-2-1              | Bacteria Actinobacteria Streptomyetales Streptomyetaceae | <i>Streptomyces fulvoviolaceus</i>                     |
| Sfu-3-1              | Bacteria Actinobacteria Streptomyetales Streptomyetaceae | <i>Streptomyces fulvoviridis</i>                       |
| Sga-2-1              | Bacteria Actinobacteria Streptomyetales Streptomyetaceae | <i>Streptomyces galbus</i>                             |
| Sgl-3-1              | Bacteria Actinobacteria Streptomyetales Streptomyetaceae | <i>Streptomyces glaucescens</i>                        |
| Sgl-4-1 to Sgl-4-2   | Bacteria Actinobacteria Streptomyetales Streptomyetaceae | <i>Streptomyces globisporus subsp. globisporus</i>     |
| Sgr-5-1              | Bacteria Actinobacteria Streptomyetales Streptomyetaceae | <i>Streptomyces graminis</i>                           |
| Sgr-6-1              | Bacteria Actinobacteria Streptomyetales Streptomyetaceae | <i>Streptomyces griseoflavus</i>                       |
| Sgr-7-1              | Bacteria Actinobacteria Streptomyetales Streptomyetaceae | <i>Streptomyces griseofuscus</i>                       |
| Sgr-8-1              | Bacteria Actinobacteria Streptomyetales Streptomyetaceae | <i>Streptomyces griseolus</i>                          |
| Sgr-9-1              | Bacteria Actinobacteria Streptomyetales Streptomyetaceae | <i>Streptomyces griseoluteus</i>                       |
| Sgr-10-1             | Bacteria Actinobacteria Streptomyetales Streptomyetaceae | <i>Streptomyces griseorubens</i>                       |
| Sgr-11-1             | Bacteria Actinobacteria Streptomyetales Streptomyetaceae | <i>Streptomyces griseus</i>                            |
| Sgr-12-1 to Sgr-12-9 | Bacteria Actinobacteria Streptomyetales Streptomyetaceae | <i>Streptomyces griseus subsp. griseus</i>             |
| Sgr-13-1 to Sgr-13-5 | Bacteria Actinobacteria Streptomyetales Streptomyetaceae | <i>Streptomyces griseus subsp. rhodochrous</i>         |
| Sha-2-1              | Bacteria Actinobacteria Streptomyetales Streptomyetaceae | <i>Streptomyces halstedii</i>                          |
| Shy-4-1              | Bacteria Actinobacteria Streptomyetales Streptomyetaceae | <i>Streptomyces hygrosopicus subsp. hygrosopicus</i>   |
| Sia-1-1              | Bacteria Actinobacteria Streptomyetales Streptomyetaceae | <i>Streptomyces iakyrus</i>                            |
| Sir-1-1              | Bacteria Actinobacteria Streptomyetales Streptomyetaceae | <i>Streptomyces iranensis</i>                          |
| Ska-1-1 to Ska-1-2   | Bacteria Actinobacteria Streptomyetales Streptomyetaceae | <i>Streptomyces katrae</i>                             |
| Sla-1-1              | Bacteria Actinobacteria Streptomyetales Streptomyetaceae | <i>Streptomyces lavendulae</i>                         |
| Sla-2-1 to Sla-2-4   | Bacteria Actinobacteria Streptomyetales Streptomyetaceae | <i>Streptomyces lavendulae subsp. lavendulae</i>       |
| Sla-3-1              | Bacteria Actinobacteria Streptomyetales Streptomyetaceae | <i>Streptomyces lavenduligriseus</i>                   |
| Sle-1-1              | Bacteria Actinobacteria Streptomyetales Streptomyetaceae | <i>Streptomyces leeuwenhoekii</i>                      |
| Sli-2-1 to Sli-2-2   | Bacteria Actinobacteria Streptomyetales Streptomyetaceae | <i>Streptomyces lividans</i> TK24                      |
| Slu-1-1              | Bacteria Actinobacteria Streptomyetales Streptomyetaceae | <i>Streptomyces luteus</i>                             |
| Sme-1-1              | Bacteria Actinobacteria Streptomyetales Streptomyetaceae | <i>Streptomyces mediolani</i>                          |
| Smi-1-1              | Bacteria Actinobacteria Streptomyetales Streptomyetaceae | <i>Streptomyces mirabilis</i>                          |
| Sno-1-1              | Bacteria Actinobacteria Streptomyetales Streptomyetaceae | <i>Streptomyces nodosus</i>                            |
| Sod-1-1              | Bacteria Actinobacteria Streptomyetales Streptomyetaceae | <i>Streptomyces odonnellii</i>                         |
| Sol-1-1              | Bacteria Actinobacteria Streptomyetales Streptomyetaceae | <i>Streptomyces olindensis</i>                         |
| Sol-2-1 to Sol-2-2   | Bacteria Actinobacteria Streptomyetales Streptomyetaceae | <i>Streptomyces olivaceus</i>                          |
| Spe-1-1              | Bacteria Actinobacteria Streptomyetales Streptomyetaceae | <i>Streptomyces peruviansis</i>                        |
| Spe-2-1              | Bacteria Actinobacteria Streptomyetales Streptomyetaceae | <i>Streptomyces peucetius</i>                          |
| Spl-1-1 to Spl-1-2   | Bacteria Actinobacteria Streptomyetales Streptomyetaceae | <i>Streptomyces pluripotens</i>                        |
| Spu-2-1 to Spu-2-2   | Bacteria Actinobacteria Streptomyetales Streptomyetaceae | <i>Streptomyces puniceus</i>                           |
| Spu-3-1 to Spu-3-2   | Bacteria Actinobacteria Streptomyetales Streptomyetaceae | <i>Streptomyces purpeochromogenes</i>                  |
| Sre-3-1              | Bacteria Actinobacteria Streptomyetales Streptomyetaceae | <i>Streptomyces resistomyeticus</i>                    |
| Sri-2-1 to Sri-2-2   | Bacteria Actinobacteria Streptomyetales Streptomyetaceae | <i>Streptomyces rimosus</i>                            |
| Sri-3-1              | Bacteria Actinobacteria Streptomyetales Streptomyetaceae | <i>Streptomyces rimosus</i> R6-500                     |
| Sri-4-1 to Sri-4-20  | Bacteria Actinobacteria Streptomyetales Streptomyetaceae | <i>Streptomyces rimosus subsp. rimosus</i>             |
| Sro-4-1              | Bacteria Actinobacteria Streptomyetales Streptomyetaceae | <i>Streptomyces roseosporus</i> NRRL 11379             |
| Sro-5-1              | Bacteria Actinobacteria Streptomyetales Streptomyetaceae | <i>Streptomyces roseovorticillatus</i>                 |
| Sro-6-1              | Bacteria Actinobacteria Streptomyetales Streptomyetaceae | <i>Streptomyces roseus</i>                             |
| Sru-2-1 to Sru-2-2   | Bacteria Actinobacteria Streptomyetales Streptomyetaceae | <i>Streptomyces ruber</i>                              |
| Ssc-3-1 to Ssc-3-2   | Bacteria Actinobacteria Streptomyetales Streptomyetaceae | <i>Streptomyces scabiei</i>                            |

|                      |                                                          |                                       |
|----------------------|----------------------------------------------------------|---------------------------------------|
| Ssc-4-1              | Bacteria Actinobacteria Streptomyetales Streptomyetaceae | <i>Streptomyces sclerotialis</i>      |
| Ssc-5-1              | Bacteria Actinobacteria Streptomyetales Streptomyetaceae | <i>Streptomyces scopuliridis</i> RB72 |
| Sse-1-1              | Bacteria Actinobacteria Streptomyetales Streptomyetaceae | <i>Streptomyces seoulensis</i>        |
| Ssp-48-1             | Bacteria Actinobacteria Streptomyetales Streptomyetaceae | <i>Streptomyces sp.</i> 142MFCol3.1   |
| Ssp-50-1             | Bacteria Actinobacteria Streptomyetales Streptomyetaceae | <i>Streptomyces sp.</i> Ach 505       |
| Ssp-49-1             | Bacteria Actinobacteria Streptomyetales Streptomyetaceae | <i>Streptomyces sp.</i> AW19M42       |
| Ssp-51-1             | Bacteria Actinobacteria Streptomyetales Streptomyetaceae | <i>Streptomyces sp.</i> CNH287        |
| Ssp-52-1             | Bacteria Actinobacteria Streptomyetales Streptomyetaceae | <i>Streptomyces sp.</i> CNQ431        |
| Ssp-53-1             | Bacteria Actinobacteria Streptomyetales Streptomyetaceae | <i>Streptomyces sp.</i> CNR698        |
| Ssp-54-1             | Bacteria Actinobacteria Streptomyetales Streptomyetaceae | <i>Streptomyces sp.</i> CNS606        |
| Ssp-55-1             | Bacteria Actinobacteria Streptomyetales Streptomyetaceae | <i>Streptomyces sp.</i> CNS654        |
| Ssp-56-1             | Bacteria Actinobacteria Streptomyetales Streptomyetaceae | <i>Streptomyces sp.</i> CNT360        |
| Ssp-57-1             | Bacteria Actinobacteria Streptomyetales Streptomyetaceae | <i>Streptomyces sp.</i> DpondAA-B6    |
| Ssp-59-1             | Bacteria Actinobacteria Streptomyetales Streptomyetaceae | <i>Streptomyces sp.</i> FxanaA7       |
| Ssp-58-1             | Bacteria Actinobacteria Streptomyetales Streptomyetaceae | <i>Streptomyces sp.</i> FXJ7.023      |
| Ssp-60-1             | Bacteria Actinobacteria Streptomyetales Streptomyetaceae | <i>Streptomyces sp.</i> GXT6          |
| Ssp-61-1             | Bacteria Actinobacteria Streptomyetales Streptomyetaceae | <i>Streptomyces sp.</i> HNS054        |
| Ssp-62-1             | Bacteria Actinobacteria Streptomyetales Streptomyetaceae | <i>Streptomyces sp.</i> JS01          |
| Ssp-63-1             | Bacteria Actinobacteria Streptomyetales Streptomyetaceae | <i>Streptomyces sp.</i> KE1           |
| Ssp-64-1             | Bacteria Actinobacteria Streptomyetales Streptomyetaceae | <i>Streptomyces sp.</i> KhCrAH-337    |
| Ssp-65-1             | Bacteria Actinobacteria Streptomyetales Streptomyetaceae | <i>Streptomyces sp.</i> KhCrAH-40     |
| Ssp-66-1             | Bacteria Actinobacteria Streptomyetales Streptomyetaceae | <i>Streptomyces sp.</i> M10           |
| Ssp-67-1             | Bacteria Actinobacteria Streptomyetales Streptomyetaceae | <i>Streptomyces sp.</i> MBT28         |
| Ssp-28-1 to Ssp-28-2 | Bacteria Actinobacteria Streptomyetales Streptomyetaceae | <i>Streptomyces sp.</i> Mg1           |
| Ssp-68-1             | Bacteria Actinobacteria Streptomyetales Streptomyetaceae | <i>Streptomyces sp.</i> MNU77         |
| Ssp-69-1             | Bacteria Actinobacteria Streptomyetales Streptomyetaceae | <i>Streptomyces sp.</i> MUSC 125      |
| Ssp-70-1             | Bacteria Actinobacteria Streptomyetales Streptomyetaceae | <i>Streptomyces sp.</i> MUSC119T      |
| Ssp-71-1             | Bacteria Actinobacteria Streptomyetales Streptomyetaceae | <i>Streptomyces sp.</i> MUSC136T      |
| Ssp-72-1             | Bacteria Actinobacteria Streptomyetales Streptomyetaceae | <i>Streptomyces sp.</i> MUSC149T      |
| Ssp-73-1             | Bacteria Actinobacteria Streptomyetales Streptomyetaceae | <i>Streptomyces sp.</i> MUSC164       |
| Ssp-74-1             | Bacteria Actinobacteria Streptomyetales Streptomyetaceae | <i>Streptomyces sp.</i> NBRC 110035   |
| Ssp-75-1             | Bacteria Actinobacteria Streptomyetales Streptomyetaceae | <i>Streptomyces sp.</i> NRRL B-11253  |
| Ssp-76-1             | Bacteria Actinobacteria Streptomyetales Streptomyetaceae | <i>Streptomyces sp.</i> NRRL B-12105  |
| Ssp-77-1             | Bacteria Actinobacteria Streptomyetales Streptomyetaceae | <i>Streptomyces sp.</i> NRRL B-1322   |
| Ssp-78-1             | Bacteria Actinobacteria Streptomyetales Streptomyetaceae | <i>Streptomyces sp.</i> NRRL B-1347   |
| Ssp-79-1             | Bacteria Actinobacteria Streptomyetales Streptomyetaceae | <i>Streptomyces sp.</i> NRRL B-1381   |
| Ssp-80-1             | Bacteria Actinobacteria Streptomyetales Streptomyetaceae | <i>Streptomyces sp.</i> NRRL B-24051  |
| Ssp-81-1             | Bacteria Actinobacteria Streptomyetales Streptomyetaceae | <i>Streptomyces sp.</i> NRRL B-24720  |
| Ssp-82-1             | Bacteria Actinobacteria Streptomyetales Streptomyetaceae | <i>Streptomyces sp.</i> NRRL B-3229   |
| Ssp-83-1             | Bacteria Actinobacteria Streptomyetales Streptomyetaceae | <i>Streptomyces sp.</i> NRRL B-3253   |
| Ssp-84-1             | Bacteria Actinobacteria Streptomyetales Streptomyetaceae | <i>Streptomyces sp.</i> NRRL F-2202   |
| Ssp-85-1             | Bacteria Actinobacteria Streptomyetales Streptomyetaceae | <i>Streptomyces sp.</i> NRRL F-2305   |
| Ssp-86-1             | Bacteria Actinobacteria Streptomyetales Streptomyetaceae | <i>Streptomyces sp.</i> NRRL F-2580   |
| Ssp-87-1             | Bacteria Actinobacteria Streptomyetales Streptomyetaceae | <i>Streptomyces sp.</i> NRRL F-2664   |
| Ssp-88-1             | Bacteria Actinobacteria Streptomyetales Streptomyetaceae | <i>Streptomyces sp.</i> NRRL F-2747   |
| Ssp-89-1             | Bacteria Actinobacteria Streptomyetales Streptomyetaceae | <i>Streptomyces sp.</i> NRRL F-2799   |
| Ssp-90-1             | Bacteria Actinobacteria Streptomyetales Streptomyetaceae | <i>Streptomyces sp.</i> NRRL F-2890   |
| Ssp-91-1             | Bacteria Actinobacteria Streptomyetales Streptomyetaceae | <i>Streptomyces sp.</i> NRRL F-3213   |
| Ssp-92-1             | Bacteria Actinobacteria Streptomyetales Streptomyetaceae | <i>Streptomyces sp.</i> NRRL F-3218   |
| Ssp-93-1             | Bacteria Actinobacteria Streptomyetales Streptomyetaceae | <i>Streptomyces sp.</i> NRRL F-3273   |
| Ssp-94-1             | Bacteria Actinobacteria Streptomyetales Streptomyetaceae | <i>Streptomyces sp.</i> NRRL F-3307   |
| Ssp-95-1             | Bacteria Actinobacteria Streptomyetales Streptomyetaceae | <i>Streptomyces sp.</i> NRRL F-4335   |
| Ssp-96-1             | Bacteria Actinobacteria Streptomyetales Streptomyetaceae | <i>Streptomyces sp.</i> NRRL F-4428   |
| Ssp-97-1             | Bacteria Actinobacteria Streptomyetales Streptomyetaceae | <i>Streptomyces sp.</i> NRRL F-4474   |
| Ssp-98-1             | Bacteria Actinobacteria Streptomyetales Streptomyetaceae | <i>Streptomyces sp.</i> NRRL F-4835   |
| Ssp-99-1             | Bacteria Actinobacteria Streptomyetales Streptomyetaceae | <i>Streptomyces sp.</i> NRRL F-5008   |
| Ssp-100-1            | Bacteria Actinobacteria Streptomyetales Streptomyetaceae | <i>Streptomyces sp.</i> NRRL F-5053   |
| Ssp-101-1            | Bacteria Actinobacteria Streptomyetales Streptomyetaceae | <i>Streptomyces sp.</i> NRRL F-5065   |
| Ssp-102-1            | Bacteria Actinobacteria Streptomyetales Streptomyetaceae | <i>Streptomyces sp.</i> NRRL F-5126   |
| Ssp-103-1            | Bacteria Actinobacteria Streptomyetales Streptomyetaceae | <i>Streptomyces sp.</i> NRRL F-5135   |
| Ssp-104-1            | Bacteria Actinobacteria Streptomyetales Streptomyetaceae | <i>Streptomyces sp.</i> NRRL F-5140   |
| Ssp-105-1            | Bacteria Actinobacteria Streptomyetales Streptomyetaceae | <i>Streptomyces sp.</i> NRRL F-5193   |
| Ssp-106-1            | Bacteria Actinobacteria Streptomyetales Streptomyetaceae | <i>Streptomyces sp.</i> NRRL F-525    |
| Ssp-107-1            | Bacteria Actinobacteria Streptomyetales Streptomyetaceae | <i>Streptomyces sp.</i> NRRL F-5527   |
| Ssp-108-1            | Bacteria Actinobacteria Streptomyetales Streptomyetaceae | <i>Streptomyces sp.</i> NRRL F-5555   |





|                      |                                                                  |                                                  |
|----------------------|------------------------------------------------------------------|--------------------------------------------------|
| Ssp-174-1            | Bacteria Actinobacteria Streptomycetales Streptomycetaceae       | <i>Streptomyces sp.</i> URHA0041                 |
| Ssp-175-1            | Bacteria Actinobacteria Streptomycetales Streptomycetaceae       | <i>Streptomyces sp.</i> WM6386                   |
| Ssp-176-1            | Bacteria Actinobacteria Streptomycetales Streptomycetaceae       | <i>Streptomyces sp.</i> WM6391                   |
| Ssp-177-1            | Bacteria Actinobacteria Streptomycetales Streptomycetaceae       | <i>Streptomyces sp.</i> WMMB 714                 |
| Sst-1-1              | Bacteria Actinobacteria Streptomycetales Streptomycetaceae       | <i>Streptomyces stelliscabiei</i>                |
| Sto-1-1              | Bacteria Actinobacteria Streptomycetales Streptomycetaceae       | <i>Streptomyces toyocaensis</i>                  |
| Sva-1-1              | Bacteria Actinobacteria Streptomycetales Streptomycetaceae       | <i>Streptomyces variegatus</i>                   |
| Sva-2-1 to Sva-2-2   | Bacteria Actinobacteria Streptomycetales Streptomycetaceae       | <i>Streptomyces varsoviensis</i>                 |
| Svi-9-1              | Bacteria Actinobacteria Streptomycetales Streptomycetaceae       | <i>Streptomyces vietnamensis</i>                 |
| Svi-10-1             | Bacteria Actinobacteria Streptomycetales Streptomycetaceae       | <i>Streptomyces vinaceus</i>                     |
| Svi-11-1 to Svi-11-2 | Bacteria Actinobacteria Streptomycetales Streptomycetaceae       | <i>Streptomyces violaceoruber</i>                |
| Svi-12-1             | Bacteria Actinobacteria Streptomycetales Streptomycetaceae       | <i>Streptomyces violaceorubidus</i>              |
| Svi-13-1 to Svi-13-3 | Bacteria Actinobacteria Streptomycetales Streptomycetaceae       | <i>Streptomyces virginiae</i>                    |
| Svi-14-1 to Svi-14-4 | Bacteria Actinobacteria Streptomycetales Streptomycetaceae       | <i>Streptomyces viridochromogenes</i>            |
| Swa-1-1              | Bacteria Actinobacteria Streptomycetales Streptomycetaceae       | <i>Streptomyces wadayamensis</i>                 |
| Swe-1-1              | Bacteria Actinobacteria Streptomycetales Streptomycetaceae       | <i>Streptomyces wedmorensis</i>                  |
| Sxa-1-1              | Bacteria Actinobacteria Streptomycetales Streptomycetaceae       | <i>Streptomyces xanthophaeus</i>                 |
| Sxi-2-1              | Bacteria Actinobacteria Streptomycetales Streptomycetaceae       | <i>Streptomyces xiamenensis</i>                  |
| Sxy-1-1              | Bacteria Actinobacteria Streptomycetales Streptomycetaceae       | <i>Streptomyces xylophagus</i>                   |
| Sya-1-1              | Bacteria Actinobacteria Streptomycetales Streptomycetaceae       | <i>Streptomyces yangpuensis</i>                  |
| Sye-1-1              | Bacteria Actinobacteria Streptomycetales Streptomycetaceae       | <i>Streptomyces yeochonensis</i> CN732           |
| Sye-2-1              | Bacteria Actinobacteria Streptomycetales Streptomycetaceae       | <i>Streptomyces yerevanensis</i>                 |
| Hcr-1-1              | Bacteria Actinobacteria Streptosporangiales Streptosporangiaceae | <i>Herbidospora cretacea</i>                     |
| Mro-1-1              | Bacteria Actinobacteria Streptosporangiales Streptosporangiaceae | <i>Microbispora rosea subsp. nonnitritogenes</i> |
| Msp-30-1             | Bacteria Actinobacteria Streptosporangiales Streptosporangiaceae | <i>Microbispora sp.</i> NRRL B-24597             |
| Mgl-2-1              | Bacteria Actinobacteria Streptosporangiales Streptosporangiaceae | <i>Microtetraspora glauca</i>                    |
| Nca-3-1              | Bacteria Actinobacteria Streptosporangiales Streptosporangiaceae | <i>Nonomuraea candida</i>                        |
| Nsp-11-1             | Bacteria Actinobacteria Streptosporangiales Streptosporangiaceae | <i>Nonomuraea sp.</i> SBT364                     |
| Sam-2-1              | Bacteria Actinobacteria Streptosporangiales Streptosporangiaceae | <i>Streptosporangium amethystogenes</i>          |
| Sro-7-1              | Bacteria Actinobacteria Streptosporangiales Streptosporangiaceae | <i>Streptosporangium roseum</i>                  |
| Ama-5-1              | Bacteria Actinobacteria Streptosporangiales Thermomonosporaceae  | <i>Actinomadura madurae</i> LIID-AJ290           |
| Ari-2-1              | Bacteria Actinobacteria Streptosporangiales Thermomonosporaceae  | <i>Actinomadura rifamycini</i> DSM 43936         |
| Dsp-2-1              | Bacteria Firmicutes Clostridia Clostridiales Peptococcaceae      | <i>Dehalobacter sp.</i> FTH1                     |
| env-1 to env-666     | environmental samples                                            |                                                  |

## 9.2 Gene contexts

Each L31-Actinobacteria RNA (indicated by “RNA→”) is listed. For each hit, the downstream genes predicted to reside in a regulated operon are listed. If the nearest downstream gene is encoding in the opposite strand (and therefore presumed to not be a part of a regulated operon), then that gene is still depicted. Some environmental sequences and some RefSeq entries lack gene annotations, and so no genes are available for such sequences. The direction of each gene is indicated with an arrow (→), and each predicted conserved domain in the gene is named. Conserved domains associated with more than one L31-Actinobacteria RNA are assigned a color; other domains are gray. Information about these con-

served domains is given in Section 9.3. The accession of the sequence containing each L31-Actinobacteria RNA is given in the column named “Seq. accession”. Accessions beginning with “NC\_”, “NS\_”, “NW\_” or “NZ\_” are contained in RefSeq. Other accession refer to environmental samples. Nucleotide coordinates are given for the 5′ and 3′ boundaries of each L31-Actinobacteria RNA. If the 5′ coordinate is greater than the 3′ coordinate, the RNA is present on the reverse-complement strand of the containing genomic DNA sequence. Each hit is denoted by an abbreviation (like “Eco-1-1”) that refers to a taxonomy given in Section 9.1.

| abbrev. | Seq. accession          | 5′ at | 3′ at  | genes                                                                                 |
|---------|-------------------------|-------|--------|---------------------------------------------------------------------------------------|
| env-1   | 3300001239_10346507     | -     | 863    | 813 RNA→ rpmE (PRK00019)Ribosomal_L31 (pfam01197)→ PCRf (smart00937)PCRf (pfam03462)→ |
| env-2   | topACOD_FV90NF401DDBWP  | -     | 101    | 65 RNA→                                                                               |
| Vca-1-1 | NZ_ATUF01000002.1       | -     | 402422 | 402378 RNA→ rpmE (PRK00019)Ribosomal_L31 (pfam01197)→ hypo→                           |
| env-3   | JGI12397J12024_1050070  | +     | 67     | 116 RNA→ rpmE (PRK00019)Ribosomal_L31 (pfam01197)→                                    |
| env-4   | JGI24736J21556_1099768  | +     | 224    | 283 RNA→ rpmE (PRK00019)Ribosomal_L31 (pfam01197)→                                    |
| env-5   | JGI24739J22299_10173028 | -     | 428    | 369 RNA→ rpmE (PRK00019)Ribosomal_L31 (pfam01197)→                                    |
| env-6   | JGI24737J22298_10039126 | -     | 417    | 358 RNA→ rpmE (PRK00019)Ribosomal_L31 (pfam01197)→                                    |

|          |                           |   |         |         |                                                                                                                                                                                                                                                                                                                                                                                                                                                                                             |
|----------|---------------------------|---|---------|---------|---------------------------------------------------------------------------------------------------------------------------------------------------------------------------------------------------------------------------------------------------------------------------------------------------------------------------------------------------------------------------------------------------------------------------------------------------------------------------------------------|
| Cac-1-1  | NC_013131.1               | + | 1360258 | 1360298 | RNA → rpmE (PRK00019)Ribosomal_L31 (pfam01197) →                                                                                                                                                                                                                                                                                                                                                                                                                                            |
| env-7    | JGI12397J12024_1339528    | + | 56      | 114     | RNA → hypo →                                                                                                                                                                                                                                                                                                                                                                                                                                                                                |
| env-8    | LWAnNNiSIP_GDN60OX01COTOZ | + | 264     | 310     | RNA →                                                                                                                                                                                                                                                                                                                                                                                                                                                                                       |
| env-9    | JGI12396J12026_1108615    | + | 2       | 43      | RNA → rpmE (PRK00019)Ribosomal_L31 (pfam01197) →                                                                                                                                                                                                                                                                                                                                                                                                                                            |
| env-10   | JGI12467J12023_1043457    | + | 377     | 418     | RNA → rpmE (PRK00019)Ribosomal_L31 (pfam01197) → prfA (PRK00591)PCRF (pfam03462) →                                                                                                                                                                                                                                                                                                                                                                                                          |
| env-11   | JGI12396J12026_1011438    | + | 24      | 84      | RNA → ← hypo                                                                                                                                                                                                                                                                                                                                                                                                                                                                                |
| env-12   | JGI12273J12029_10084767   | + | 24      | 84      | RNA → rpmE (PRK00019)Ribosomal_L31 (pfam01197) →                                                                                                                                                                                                                                                                                                                                                                                                                                            |
| env-13   | JGI2065J20421_1025414     | + | 78      | 138     | RNA → rpmE (PRK00019)Ribosomal_L31 (pfam01197) → PCRF (smart00937)PCRF (pfam03462) →                                                                                                                                                                                                                                                                                                                                                                                                        |
| env-14   | JGI24770J26754_10678085   | + | 122     | 174     | RNA → rpmE (PRK00019)Ribosomal_L31 (pfam01197) →                                                                                                                                                                                                                                                                                                                                                                                                                                            |
| Apo-1-1  | NZ_CCXH01000177.1         | + | 1390    | 1448    | RNA → rpmE (PRK00019)Ribosomal_L31 (pfam01197) →                                                                                                                                                                                                                                                                                                                                                                                                                                            |
| env-15   | botACOD_GAKN62C01CC25B    | + | 172     | 219     | RNA → rpmE (PRK00019)Ribosomal_L31 (pfam01197) →                                                                                                                                                                                                                                                                                                                                                                                                                                            |
| env-16   | AglaG_GDN60OX02G4DXO      | - | 301     | 242     | RNA → rpmE (PRK00019)Ribosomal_L31 (pfam01197) →                                                                                                                                                                                                                                                                                                                                                                                                                                            |
| env-17   | JGI12396J12026_1002764    | + | 4       | 65      | RNA → ← hypo                                                                                                                                                                                                                                                                                                                                                                                                                                                                                |
| env-18   | JGI12396J12026_1094345    | + | 9       | 87      | RNA → rpmE (PRK00019)Ribosomal_L31 (pfam01197) →                                                                                                                                                                                                                                                                                                                                                                                                                                            |
| Ama-3-1  | NZ_CM001024.1             | + | 677475  | 677520  | RNA → rpmE (PRK00019)Ribosomal_L31 (pfam01197) → PrfA (COG0216)prfA (PRK00591) → HemK (COG2890)PRK09328 (PRK09328) → HTH_LUXR (smart00421)CitB (COG2197) →                                                                                                                                                                                                                                                                                                                                  |
| Nin-1-1  | NZ_KE383929.1             | - | 680299  | 680255  | RNA → rpmE (PRK00019)Ribosomal_L31 (pfam01197) →                                                                                                                                                                                                                                                                                                                                                                                                                                            |
| env-19   | JGI11800J13271_1023285    | - | 253     | 187     | RNA → rpmE (PRK00019)Ribosomal_L31 (pfam01197) →                                                                                                                                                                                                                                                                                                                                                                                                                                            |
| env-20   | CEUF01060573.1            | - | 405     | 339     | RNA → rpmE (PRK00019)Ribosomal_L31 (pfam01197) →                                                                                                                                                                                                                                                                                                                                                                                                                                            |
| Jga-1-1  | NZ_KI911782.1             | + | 1567026 | 1567073 | RNA → rpmE (PRK00019)Ribosomal_L31 (pfam01197) →                                                                                                                                                                                                                                                                                                                                                                                                                                            |
| Hcr-1-1  | NZ_JODQ01000002.1         | - | 16089   | 16035   | RNA → rpmE (PRK00019)Ribosomal_L31 (pfam01197) →                                                                                                                                                                                                                                                                                                                                                                                                                                            |
| env-21   | JGI24735J21928_10338363   | - | 327     | 278     | RNA → rpmE (PRK00019)Ribosomal_L31 (pfam01197) →                                                                                                                                                                                                                                                                                                                                                                                                                                            |
| Asu-2-1  | NZ_KE386848.1             | + | 67014   | 67059   | RNA → rpmE (PRK00019)Ribosomal_L31 (pfam01197) → prfA (PRK00591)RF-1 (pfam00472)PCRF (pfam03462) → HemK (COG2890)PRK09328 (PRK09328) →                                                                                                                                                                                                                                                                                                                                                      |
| Psp-8-1  | NZ_JTJI01000005.1         | + | 27456   | 27507   | RNA → rpmE (PRK00019)Ribosomal_L31 (pfam01197) →                                                                                                                                                                                                                                                                                                                                                                                                                                            |
| Pru-1-1  | NZ_JOIJ01000022.1         | + | 44825   | 44876   | RNA → rpmE (PRK00019)Ribosomal_L31 (pfam01197) →                                                                                                                                                                                                                                                                                                                                                                                                                                            |
| env-22   | JGI25321J39296_1051856    | - | 129     | 78      | RNA → rpmE (PRK00019)rpmE (PRK00019)Ribosomal_L31 (pfam01197) →                                                                                                                                                                                                                                                                                                                                                                                                                             |
| env-23   | JGI25321J50212_10048695   | - | 336     | 285     | RNA → rpmE (PRK00019)Ribosomal_L31 (pfam01197) →                                                                                                                                                                                                                                                                                                                                                                                                                                            |
| env-24   | JGI25317J35169_1083333    | + | 5       | 56      | RNA → rpmE (PRK00019)Ribosomal_L31 (pfam01197) →                                                                                                                                                                                                                                                                                                                                                                                                                                            |
| env-25   | C688J13580_1096905        | + | 58      | 98      | RNA → hypo → rpmE (PRK00019)Ribosomal_L31 (pfam01197) →                                                                                                                                                                                                                                                                                                                                                                                                                                     |
| Sfl-5-1  | NZ_JNZO01000018.1         | + | 362423  | 362470  | RNA → rpmE (PRK00019)Ribosomal_L31 (pfam01197) → PrfA (COG0216)prfA (PRK00591) → HemK (COG2890)PRK09328 (PRK09328) → SUA5 (COG0009)TIGR00057 (TIGR00057) → hypo → hypo → hypo → hypo →                                                                                                                                                                                                                                                                                                      |
| Jmu-1-1  | NZ_KQ434753.1             | - | 67929   | 67882   | RNA → rpmE (PRK00019)Ribosomal_L31 (pfam01197) → PrfA (COG0216)prfA (PRK00591) → HemK (COG2890)PRK09328 (PRK09328) → SUA5 (COG0009)TIGR00057 (TIGR00057) → GT_WecA_like (cd06853)mraY (PRK00108) → hypo → AtpI2 (COG5336)ATPase_gene1 (pfam09527) → PRK05815 (PRK05815)ATP-synt_A (pfam00119) → PRK06876 (PRK06876)AtpE (COG0636) → PRK05759 (PRK05759)AtpF (COG0711) → PRK13430 (PRK13430)OSCP (pfam00213) → AtpA (COG0056)PRK09281 (PRK09281) → PRK05621 (PRK05621)ATP-synt (pfam00231) → |
| env-26   | JGI12397J12024_1025645    | + | 23      | 68      | RNA → rpmE (PRK00019)Ribosomal_L31 (pfam01197) →                                                                                                                                                                                                                                                                                                                                                                                                                                            |
| Ssp-2-1  | NZ_KB911723.1             | - | 80543   | 80496   | RNA → rpmE (PRK00019)Ribosomal_L31 (pfam01197) →                                                                                                                                                                                                                                                                                                                                                                                                                                            |
| env-27   | FWIROz_GKA24FP02JUPYD     | + | 39      | 96      | RNA → rpmE (PRK00019)Ribosomal_L31 (pfam01197) →                                                                                                                                                                                                                                                                                                                                                                                                                                            |
| env-28   | 3300001592_10007801       | - | 2906    | 2841    | RNA → rpmE (PRK00019)Ribosomal_L31 (pfam01197) → PrfA (COG0216)prfA (PRK00591) → HemK (COG2890)PRK09328 (PRK09328) → SUA5 (COG0009)TIGR00057 (TIGR00057) →                                                                                                                                                                                                                                                                                                                                  |
| Cbo-1-1  | NZ_AXCZ01000025.1         | - | 21537   | 21491   | RNA → rpmE (PRK00019)Ribosomal_L31 (pfam01197) → prfA (PRK00591)RF-1 (pfam00472)PCRF (pfam03462) → HemK (COG2890)PRK09328 (PRK09328) → SUA5 (COG0009)TIGR00057 (TIGR00057) → GT_WecA_like (cd06853)mraY (PRK00108) → hypo →                                                                                                                                                                                                                                                                 |
| aLL-1-1  | NZ_KI301992.1             | - | 1665648 | 1665606 | RNA → rpmE (PRK00019)Ribosomal_L31 (pfam01197) → PrfA (COG0216)prfA (PRK00591) → HemK (COG2890)PRK09328 (PRK09328) →                                                                                                                                                                                                                                                                                                                                                                        |
| Msp-29-1 | NZ_KE384490.1             | + | 243863  | 243905  | RNA → rpmE (PRK00019)Ribosomal_L31 (pfam01197) →                                                                                                                                                                                                                                                                                                                                                                                                                                            |
| Mch-5-1  | NZ_JYNX01000034.1         | - | 42359   | 42308   | RNA → rpmE (PRK00019)Ribosomal_L31 (pfam01197) → PrfA (COG0216)prfA (PRK00591) → HemK (COG2890)PRK09328 (PRK09328) → SUA5 (COG0009)TIGR00057 (TIGR00057) → GT_WecA_like (cd06853)mraY (PRK00108) →                                                                                                                                                                                                                                                                                          |

|           |                             |   |         |         |                                                                                                                                                                                                                                                                                                                                                                                                                                                                                                                                                                                                |
|-----------|-----------------------------|---|---------|---------|------------------------------------------------------------------------------------------------------------------------------------------------------------------------------------------------------------------------------------------------------------------------------------------------------------------------------------------------------------------------------------------------------------------------------------------------------------------------------------------------------------------------------------------------------------------------------------------------|
| Mch-4-1   | NZ_JYNL01000069.1           | - | 3786    | 3735    | RNA → rpmE (PRK00019)Ribosomal_L31 (pfam01197) → PrfA (COG0216)prfA (PRK00591) → HemK (COG2890)PRK09328 (PRK09328) → SUA5 (COG0009)TIGR00057 (TIGR00057) → hypo → hypo →                                                                                                                                                                                                                                                                                                                                                                                                                       |
| Aha-2-1   | NZ_JUZA01000019.1           | + | 44897   | 44933   | RNA → rpmE (PRK00019)Ribosomal_L31 (pfam01197) → prfA (PRK00591)RF-1 (pfam00472)PCRF (pfam03462) → hypo → hypo → SUA5 (COG0009)TIGR00057 (TIGR00057) → SUA5 (COG0009)TIGR00057 (TIGR00057) → GT_WecA_like (cd06853)mraY (PRK00108) → hypo → PRK05815 (PRK05815)ATP-synt_A (pfam00119) → PRK06876 (PRK06876)AtpE (COG0636) → PRK05759 (PRK05759)AtpF (COG0711) → PRK13430 (PRK13430)OSCP (pfam00213) → AtpA (COG0056)PRK09281 (PRK09281) → PRK05621 (PRK05621)ATP-synt (pfam00231) → AtpD (COG0055)PRK09280 (PRK09280) →                                                                        |
| Ane-1-1   | NZ_JH815214.1               | + | 304462  | 304498  | RNA → rpmE (PRK00019)Ribosomal_L31 (pfam01197) → prfA (PRK00591)RF-1 (pfam00472)PCRF (pfam03462) → hypo → hypo → SUA5 (COG0009)HemK (COG2890)PRK09328 (PRK09328)TIGR00057 (TIGR00057) → SUA5 (COG0009)TIGR00057 (TIGR00057) → SUA5 (COG0009)TIGR00057 (TIGR00057) → GT_WecA_like (cd06853)mraY (PRK00108) → hypo → PRK05815 (PRK05815)ATP-synt_A (pfam00119) → PRK06876 (PRK06876)AtpE (COG0636) → PRK05759 (PRK05759)AtpF (COG0711) → PRK13430 (PRK13430)OSCP (pfam00213) → AtpA (COG0056)PRK09281 (PRK09281) → PRK05621 (PRK05621)ATP-synt (pfam00231) → AtpD (COG0055)PRK09280 (PRK09280) → |
| env-29    | PRSSGFe2_Sequence0000001542 | - | 7752    | 7691    | RNA → rpmE (PRK00019)Ribosomal_L31 (pfam01197) → HemK (COG2890)PRK09328 (PRK09328) → SUA5 (COG0009)TIGR00057 (TIGR00057) → ECA_wecA (TIGR02380)GT_WecA_like (cd06853) → hypo → AtpI2 (COG5336)ATPase_gene1 (pfam09527) → PRK05815 (PRK05815)ATP-synt_A (pfam00119) → PRK07874 (PRK07874)AtpE (COG0636) → PRK05759 (PRK05759)AtpF (COG0711) → PRK13430 (PRK13430)OSCP (pfam00213) → PRK09281 (PRK09281)ATP-synt_ab_N (pfam02874) →                                                                                                                                                              |
| Sni-1-1   | NZ_AQXZ01000013.1           | - | 17062   | 17017   | RNA → rpmE (PRK00019)Ribosomal_L31 (pfam01197) →                                                                                                                                                                                                                                                                                                                                                                                                                                                                                                                                               |
| env-30    | JGI24770J26754_10040473     | + | 643     | 688     | RNA → rpmE (PRK00019)Ribosomal_L31 (pfam01197) → PrfA (COG0216)prfA (PRK00591) →                                                                                                                                                                                                                                                                                                                                                                                                                                                                                                               |
| Asp-2-1   | NC_017803.1                 | - | 8255931 | 8255885 | RNA → rpmE (PRK00019)Ribosomal_L31 (pfam01197) → PrfA (COG0216)prfA (PRK00591) →                                                                                                                                                                                                                                                                                                                                                                                                                                                                                                               |
| env-31    | DCrCPGB_c279856             | - | 114     | 45      | RNA → hypo →                                                                                                                                                                                                                                                                                                                                                                                                                                                                                                                                                                                   |
| Hal-1-1   | NZ_AZUQ01000001.1           | + | 2107349 | 2107408 | RNA → rpmE (PRK00019)Ribosomal_L31 (pfam01197) → PrfA (COG0216)prfA (PRK00591) → HemK (COG2890)PRK09328 (PRK09328) →                                                                                                                                                                                                                                                                                                                                                                                                                                                                           |
| env-32    | 4491734.3.12108778          | + | 329     | 367     | RNA → rpmE (PRK00019)Ribosomal_L31 (pfam01197) →                                                                                                                                                                                                                                                                                                                                                                                                                                                                                                                                               |
| Ssp-169-1 | NZ_AUKR01000002.1           | - | 319811  | 319766  | RNA → rpmE (PRK00019)Ribosomal_L31 (pfam01197) →                                                                                                                                                                                                                                                                                                                                                                                                                                                                                                                                               |
| Dsp-2-1   | NZ_AQYY01000001.1           | + | 1361355 | 1361413 | RNA → rpmE (PRK00019)Ribosomal_L31 (pfam01197) → PrfA (COG0216)prfA (PRK00591) → HemK (COG2890)PRK09328 (PRK09328) → SUA5 (COG0009)TIGR00057 (TIGR00057) → GT_WecA_like (cd06853)mraY (PRK00108) → hypo → AtpI2 (COG5336)SH3_and_anchor (TIGR04211) → PRK05815 (PRK05815)ATP-synt_A (pfam00119) → PRK05815 (PRK05815)ATP-synt_A (pfam00119) → PRK07874 (PRK07874)AtpE (COG0636) → PRK05759 (PRK05759)AtpF (COG0711) → PRK13430 (PRK13430)OSCP (pfam00213) → AtpA (COG0056)PRK09281 (PRK09281) → PRK05621 (PRK05621)ATP-synt (pfam00231) → AtpD (COG0055)PRK09280 (PRK09280) →                  |
| Mel-1-1   | NZ_LBNO01000049.1           | - | 15168   | 15110   | RNA → rpmE (PRK00019)Ribosomal_L31 (pfam01197) → PrfA (COG0216)prfA (PRK00591) → HemK (COG2890)PRK09328 (PRK09328) → SUA5 (COG0009)TIGR00057 (TIGR00057) → GT_WecA_like (cd06853)mraY (PRK00108) →                                                                                                                                                                                                                                                                                                                                                                                             |
| env-33    | FNTS067_GJ87FRN01EXCYZ      | - | 173     | 120     | RNA → hypo →                                                                                                                                                                                                                                                                                                                                                                                                                                                                                                                                                                                   |
| Car-1-1   | NZ_KK073874.1               | - | 7435021 | 7434972 | RNA → rpmE (PRK00019)Ribosomal_L31 (pfam01197) → PrfA (COG0216)prfA (PRK00591) →                                                                                                                                                                                                                                                                                                                                                                                                                                                                                                               |
| env-34    | ATED_F4WRAXD01CHLUA         | - | 225     | 176     | RNA → rpmE (PRK00019)Ribosomal_L31 (pfam01197) →                                                                                                                                                                                                                                                                                                                                                                                                                                                                                                                                               |
| Asp-3-1   | NZ_AGVX02000017.1           | - | 538     | 468     | RNA → rpmE (PRK00019)Ribosomal_L31 (pfam01197) →                                                                                                                                                                                                                                                                                                                                                                                                                                                                                                                                               |
| env-35    | FNTS_GKKEVUV01AVOLL         | - | 130     | 92      | RNA → rpmE (PRK00019)Ribosomal_L31 (pfam01197) →                                                                                                                                                                                                                                                                                                                                                                                                                                                                                                                                               |
| env-36    | FNTS_GKKEVUV01BHC90         | + | 147     | 184     | RNA →                                                                                                                                                                                                                                                                                                                                                                                                                                                                                                                                                                                          |
| Mth-1-1   | NZ_AGVE01000042.1           | - | 531859  | 531799  | RNA → rpmE (PRK00019)Ribosomal_L31 (pfam01197) → rpmE (PRK00019)Ribosomal_L31 (pfam01197) →                                                                                                                                                                                                                                                                                                                                                                                                                                                                                                    |
| env-37    | JGI24740J21852_10021611     | + | 341     | 395     | RNA → rpmE (PRK00019)Ribosomal_L31 (pfam01197) → PrfA (COG0216)prfA (PRK00591) → HemK (COG2890)PRK09328 (PRK09328) →                                                                                                                                                                                                                                                                                                                                                                                                                                                                           |
| env-38    | JGI24735J21928_10010623     | + | 1057    | 1111    | RNA → rpmE (PRK00019)Ribosomal_L31 (pfam01197) → PrfA (COG0216)prfA (PRK00591) → HemK (COG2890)PRK09328 (PRK09328) →                                                                                                                                                                                                                                                                                                                                                                                                                                                                           |
| env-39    | APMI01059580.1              | - | 1604    | 1551    | RNA → rpmE (PRK00019)Ribosomal_L31 (pfam01197) →                                                                                                                                                                                                                                                                                                                                                                                                                                                                                                                                               |
| env-40    | JGI12397J12024_1172898      | + | 68      | 120     | RNA → rpmE (PRK00019)Ribosomal_L31 (pfam01197) →                                                                                                                                                                                                                                                                                                                                                                                                                                                                                                                                               |
| env-41    | JGI12396J12026_1047907      | + | 22      | 72      | RNA → rpmE (PRK00019)Ribosomal_L31 (pfam01197) →                                                                                                                                                                                                                                                                                                                                                                                                                                                                                                                                               |



|           |                        |   |         |         |                                                                                                                                                                                                                                                         |
|-----------|------------------------|---|---------|---------|---------------------------------------------------------------------------------------------------------------------------------------------------------------------------------------------------------------------------------------------------------|
| env-42    | JGI12397J12024_1022031 | + | 22      | 72      | RNA → rpmE (PRK00019)Ribosomal_L31 (pfam01197) →                                                                                                                                                                                                        |
| Ssp-96-1  | NZ_JYJI01000122.1      | - | 1881    | 1833    | RNA → rpmE (PRK00019)Ribosomal_L31 (pfam01197) →                                                                                                                                                                                                        |
| Sfl-6-1   | NZ_JNXV01000514.1      | + | 1188    | 1236    | RNA → rpmE (PRK00019)Ribosomal_L31 (pfam01197) →                                                                                                                                                                                                        |
| Sya-1-1   | NZ_LBMK01000002.1      | + | 777882  | 777930  | RNA → rpmE (PRK00019)Ribosomal_L31 (pfam01197) →                                                                                                                                                                                                        |
| Ssp-87-1  | NZ_JOFX01000020.1      | + | 50692   | 50740   | RNA → rpmE (PRK00019)Ribosomal_L31 (pfam01197) →                                                                                                                                                                                                        |
| Ssp-122-1 | NZ_JZWW01000282.1      | - | 1731    | 1683    | RNA → rpmE (PRK00019)Ribosomal_L31 (pfam01197) →                                                                                                                                                                                                        |
| Ssp-150-1 | NZ_JOJD01000020.1      | - | 213028  | 212980  | RNA → rpmE (PRK00019)Ribosomal_L31 (pfam01197) →                                                                                                                                                                                                        |
| Svi-13-1  | NZ_JOAK01000005.1      | - | 213389  | 213341  | RNA → rpmE (PRK00019)Ribosomal_L31 (pfam01197) →                                                                                                                                                                                                        |
| Ssp-97-1  | NZ_JOIB01000042.1      | + | 22450   | 22498   | RNA → rpmE (PRK00019)Ribosomal_L31 (pfam01197) →                                                                                                                                                                                                        |
| Ssp-148-1 | NZ_JOGB01000028.1      | - | 45090   | 45041   | RNA → rpmE (PRK00019)Ribosomal_L31 (pfam01197) →                                                                                                                                                                                                        |
| Ssp-88-1  | NZ_JOIS01000002.1      | + | 34345   | 34393   | RNA → rpmE (PRK00019)Ribosomal_L31 (pfam01197) →                                                                                                                                                                                                        |
| Ssp-164-1 | NZ_JDUZ01000009.1      | + | 57343   | 57391   | RNA → rpmE (PRK00019)Ribosomal_L31 (pfam01197) →                                                                                                                                                                                                        |
| Svi-13-2  | NZ_LGUV01000348.1      | + | 15469   | 15517   | RNA → rpmE (PRK00019)Ribosomal_L31 (pfam01197) →                                                                                                                                                                                                        |
| Ssp-95-1  | NZ_JOFY01000017.1      | - | 211039  | 210991  | RNA → rpmE (PRK00019)Ribosomal_L31 (pfam01197) →                                                                                                                                                                                                        |
| Ssp-132-1 | NZ_JOCY01000015.1      | - | 213281  | 213233  | RNA → rpmE (PRK00019)Ribosomal_L31 (pfam01197) →                                                                                                                                                                                                        |
| Ssp-28-1  | NZ_DS570390.1          | + | 37435   | 37483   | RNA → rpmE (PRK00019)Ribosomal_L31 (pfam01197) → rpmE (PRK00019)Ribosomal_L31 (pfam01197) →                                                                                                                                                             |
| Ssp-28-2  | NZ_CP011664.1          | + | 5363260 | 5363308 | RNA → rpmE (PRK00019)Ribosomal_L31 (pfam01197) →                                                                                                                                                                                                        |
| Ssp-8-1   | NZ_GG657750.1          | + | 5365177 | 5365225 | RNA → rpmE (PRK00019)Ribosomal_L31 (pfam01197) → rpmE (PRK00019)Ribosomal_L31 (pfam01197) →                                                                                                                                                             |
| Ssp-143-1 | NZ_JODE01000026.1      | - | 95012   | 94964   | RNA → rpmE (PRK00019)Ribosomal_L31 (pfam01197) →                                                                                                                                                                                                        |
| Ssp-144-1 | NZ_JODJ01000019.1      | - | 95012   | 94964   | RNA → rpmE (PRK00019)Ribosomal_L31 (pfam01197) →                                                                                                                                                                                                        |
| Sla-2-1   | NZ_JOEW01000030.1      | + | 23758   | 23806   | RNA → rpmE (PRK00019)Ribosomal_L31 (pfam01197) →                                                                                                                                                                                                        |
| Ska-1-1   | NZ_JZVV01000546.1      | + | 4574    | 4622    | RNA → rpmE (PRK00019)Ribosomal_L31 (pfam01197) →                                                                                                                                                                                                        |
| Sro-6-1   | NZ_LFML01000043.1      | - | 44786   | 44738   | RNA → rpmE (PRK00019)Ribosomal_L31 (pfam01197) →                                                                                                                                                                                                        |
| Ssp-133-1 | NZ_JOCX01000002.1      | + | 316404  | 316452  | RNA → rpmE (PRK00019)Ribosomal_L31 (pfam01197) →                                                                                                                                                                                                        |
| Sxa-1-1   | NZ_KL647135.1          | - | 194665  | 194617  | RNA → rpmE (PRK00019)Ribosomal_L31 (pfam01197) →                                                                                                                                                                                                        |
| Ska-1-2   | NZ_JNZY01000009.1      | - | 192103  | 192055  | RNA → rpmE (PRK00019)Ribosomal_L31 (pfam01197) →                                                                                                                                                                                                        |
| Ssp-138-1 | NZ_JOBX01000049.1      | - | 61013   | 60965   | RNA → rpmE (PRK00019)Ribosomal_L31 (pfam01197) →                                                                                                                                                                                                        |
| Ser-3-1   | NZ_JNZG01000011.1      | + | 30135   | 30183   | RNA → rpmE (PRK00019)Ribosomal_L31 (pfam01197) →                                                                                                                                                                                                        |
| Sla-2-2   | NZ_JOBH01000032.1      | + | 31087   | 31135   | RNA → rpmE (PRK00019)Ribosomal_L31 (pfam01197) →                                                                                                                                                                                                        |
| Ssp-77-1  | NZ_JOHF01000038.1      | + | 31053   | 31101   | RNA → rpmE (PRK00019)Ribosomal_L31 (pfam01197) →                                                                                                                                                                                                        |
| Ssp-131-1 | NZ_JODA01000013.1      | - | 129059  | 129011  | RNA → rpmE (PRK00019)Ribosomal_L31 (pfam01197) →                                                                                                                                                                                                        |
| Ssp-86-1  | NZ_JOIR01000005.1      | + | 53139   | 53187   | RNA → rpmE (PRK00019)Ribosomal_L31 (pfam01197) →                                                                                                                                                                                                        |
| Sla-1-1   | NZ_JNXL01000021.1      | + | 3212    | 3260    | RNA → rpmE (PRK00019)Ribosomal_L31 (pfam01197) →                                                                                                                                                                                                        |
| Ssp-166-1 | NZ_JWZS01001028.1      | - | 3788    | 3740    | RNA → rpmE (PRK00019)Ribosomal_L31 (pfam01197) →                                                                                                                                                                                                        |
| Svi-13-3  | NZ_JNYC01000007.1      | + | 377227  | 377275  | RNA → rpmE (PRK00019)Ribosomal_L31 (pfam01197) →                                                                                                                                                                                                        |
| Dsp-1-1   | NZ_KE340308.1          | - | 2146886 | 2146842 | RNA → rpmE (PRK00019)Ribosomal_L31 (pfam01197) →                                                                                                                                                                                                        |
| Dho-1-1   | NZ_KN323183.1          | - | 2148108 | 2148064 | RNA → rpmE (PRK00019)Ribosomal_L31 (pfam01197) →                                                                                                                                                                                                        |
| Bpa-1-1   | NZ_AGSO01000002.1      | - | 39806   | 39767   | RNA → rpmE (PRK00019)Ribosomal_L31 (pfam01197) → rpmE (PRK00019)Ribosomal_L31 (pfam01197) →                                                                                                                                                             |
| Bph-1-1   | NZ_KK069988.1          | + | 25747   | 25790   | RNA → rpmE (PRK00019)Ribosomal_L31 (pfam01197) → PrfB (COG1186)prfA (PRK00591) → HemK (COG2890)PRK09328 (PRK09328) → hypo → SUA5 (COG0009)TIGR00057 (TIGR00057) → GT_WecA_like (cd06853)mraY (PRK00108) → hypo →                                        |
| Bfa-1-1   | NC_013172.1            | - | 2159943 | 2159900 | RNA → rpmE (PRK00019)Ribosomal_L31 (pfam01197) →                                                                                                                                                                                                        |
| env-43    | 2204806299             | + | 97      | 140     | RNA → rpmE (PRK00019)Ribosomal_L31 (pfam01197) →                                                                                                                                                                                                        |
| env-44    | 2158018103             | + | 97      | 140     | RNA → rpmE (PRK00019)Ribosomal_L31 (pfam01197) →                                                                                                                                                                                                        |
| env-45    | 2157611060             | - | 212     | 169     | RNA → rpmE (PRK00019)Ribosomal_L31 (pfam01197) →                                                                                                                                                                                                        |
| env-46    | 2204808654             | - | 212     | 169     | RNA → rpmE (PRK00019)Ribosomal_L31 (pfam01197) →                                                                                                                                                                                                        |
| Bmu-1-1   | NZ_AORC01000017.1      | + | 14987   | 15030   | RNA → rpmE (PRK00019)Ribosomal_L31 (pfam01197) → PCRf (smart00937)RF-1 (pfam00472)PCRf (pfam03462) → HemK (COG2890)PRK09328 (PRK09328) → PHA03169 (PHA03169)SUA5 (COG0009)TIGR00057 (TIGR00057) → GT_WecA_like (cd06853)mraY (PRK00108) → hypo → hypo → |
| Bsq-1-1   | NZ_AGBX01000007.1      | - | 600878  | 600835  | RNA → rpmE (PRK00019)Ribosomal_L31 (pfam01197) → rpmE (PRK00019)Ribosomal_L31 (pfam01197) →                                                                                                                                                             |
| Sba-1-1   | NZ_KI547049.1          | + | 42821   | 42866   | RNA → rpmE (PRK00019)Ribosomal_L31 (pfam01197) →                                                                                                                                                                                                        |
| env-47    | P3_CLC_Cons55403       | - | 298     | 252     | RNA → rpmE (PRK00019)Ribosomal_L31 (pfam01197) →                                                                                                                                                                                                        |



|          |                         |   |         |         |                                                                                                                                                                                                                |
|----------|-------------------------|---|---------|---------|----------------------------------------------------------------------------------------------------------------------------------------------------------------------------------------------------------------|
| env-48   | JGI24770J26754_10015274 | + | 2104    | 2148    | RNA → rpmE (PRK00019)Ribosomal_L31 (pfam01197) → PrfA (COG0216)prfA (PRK00591) → HemK (COG2890)PRK09328 (PRK09328) →                                                                                           |
| env-49   | JGI12467J12023_1082663  | + | 17      | 88      | RNA → hypo → rpmE (PRK00019)Ribosomal_L31 (pfam01197) →                                                                                                                                                        |
| env-50   | 3300001592_10976328     | + | 61      | 104     | RNA → rpmE (PRK00019)Ribosomal_L31 (pfam01197) →                                                                                                                                                               |
| env-51   | 3300001592_10499386     | + | 49      | 92      | RNA → rpmE (PRK00019)Ribosomal_L31 (pfam01197) →                                                                                                                                                               |
| env-52   | JGI12273J12029_10089888 | + | 7       | 85      | RNA → rpmE (PRK00019)Ribosomal_L31 (pfam01197) →                                                                                                                                                               |
| env-53   | JGI12712J15308_10920105 | - | 124     | 57      | RNA → ←hypo                                                                                                                                                                                                    |
| env-54   | JGI20163J15578_10158293 | + | 1046    | 1091    | RNA → rpmE (PRK00019)rho (PRK09376)rho_factor (cd01128)Ribosomal_L31 (pfam01197) →                                                                                                                             |
| env-55   | JGI12396J12026_1117834  | + | 20      | 67      | RNA → hypo →                                                                                                                                                                                                   |
| env-56   | JGI12630J15595_10565893 | + | 41      | 109     | RNA → rpmE (PRK00019)Ribosomal_L31 (pfam01197) →                                                                                                                                                               |
| env-57   | JGI12396J12026_1055065  | + | 42      | 89      | RNA → rpmE (PRK00019)Ribosomal_L31 (pfam01197) → prfA (PRK00591)RF-1 (pfam00472)PCRF (pfam03462) →                                                                                                             |
| env-58   | JGI12273J12029_10130660 | + | 34      | 81      | RNA → rpmE (PRK00019)Ribosomal_L31 (pfam01197) →                                                                                                                                                               |
| env-59   | JGI12397J12024_1064796  | + | 44      | 91      | RNA → rpmE (PRK00019)Ribosomal_L31 (pfam01197) → PCRF (smart00937)PCRF (pfam03462) →                                                                                                                           |
| Spo-1-1  | NZ_KB913029.1           | + | 3641099 | 3641144 | RNA → rpmE (PRK00019)Ribosomal_L31 (pfam01197) → PrfA (COG0216)prfA (PRK00591) → HemK (COG2890)PRK09328 (PRK09328) →                                                                                           |
| env-60   | JGI24739J22299_10966797 | + | 95      | 143     | RNA → ←hypo                                                                                                                                                                                                    |
| env-61   | JGI26538J50259_1004293  | - | 1226    | 1180    | RNA → rpmE (PRK00019)Ribosomal_L31 (pfam01197) → PCRF (smart00937)RF-1 (pfam00472)PCRF (pfam03462) →                                                                                                           |
| Ssp-51-1 | NZ_AUKQ01000005.1       | + | 616357  | 616402  | RNA → rpmE (PRK00019)Ribosomal_L31 (pfam01197) →                                                                                                                                                               |
| Sji-1-1  | NZ_BBPN01000044.1       | + | 2914    | 2959    | RNA → rpmE (PRK00019)Ribosomal_L31 (pfam01197) →                                                                                                                                                               |
| Aut-1-1  | NZ_JRTT01000013.1       | + | 144414  | 144459  | RNA → rpmE (PRK00019)Ribosomal_L31 (pfam01197) → PrfA (COG0216)prfA (PRK00591) →                                                                                                                               |
| Mtu-1-1  | NZ_KI912270.1           | - | 156001  | 155939  | RNA → rpmE (PRK00019)Ribosomal_L31 (pfam01197) →                                                                                                                                                               |
| Cko-1-1  | NZ_KB903272.1           | + | 26084   | 26123   | RNA → rpmE (PRK00019)Ribosomal_L31 (pfam01197) → PrfA (COG0216)prfA (PRK00591) →                                                                                                                               |
| Nla-1-1  | NZ_AUFT01000001.1       | - | 90372   | 90294   | RNA → rpmE (PRK00019)Ribosomal_L31 (pfam01197) →                                                                                                                                                               |
| Nsp-9-1  | NZ_JIAR01000025.1       | - | 305751  | 305704  | RNA → rpmE (PRK00019)Ribosomal_L31 (pfam01197) → PrfA (COG0216)prfA (PRK00591) → HemK (COG2890)PRK09328 (PRK09328) → SUA5 (COG0009)TIGR00057 (TIGR00057) → hypo → ECA_wecA (TIGR02380)GT_WecA_like (cd06853) → |
| env-62   | JGI24738J21930_10349179 | - | 206     | 158     | RNA → rpmE (PRK00019)Ribosomal_L31 (pfam01197) →                                                                                                                                                               |
| Afr-1-1  | NC_022657.1             | - | 8170022 | 8169953 | RNA → rpmE (PRK00019)Ribosomal_L31 (pfam01197) → PrfA (COG0216)prfA (PRK00591) →                                                                                                                               |
| env-63   | JGI12397J12024_1210963  | + | 55      | 124     | RNA → ←hypo                                                                                                                                                                                                    |
| env-64   | JGI12397J12024_1099088  | + | 55      | 124     | RNA → ←hypo                                                                                                                                                                                                    |
| Asu-3-1  | NZ_JOJL01000007.1       | - | 354095  | 354026  | RNA → rpmE (PRK00019)Ribosomal_L31 (pfam01197) → PrfA (COG0216)prfA (PRK00591) →                                                                                                                               |
| env-65   | JGI12397J12024_1237113  | + | 36      | 80      | RNA → ←hypo                                                                                                                                                                                                    |
| env-66   | JGI12397J12024_1148967  | + | 11      | 80      | RNA → ←hypo                                                                                                                                                                                                    |
| env-67   | JGI12273J12029_10092990 | + | 57      | 97      | RNA → ←hypo                                                                                                                                                                                                    |
| env-68   | JGI12272J11983_1168523  | + | 58      | 98      | RNA → rpmE (PRK00019)Ribosomal_L31 (pfam01197) →                                                                                                                                                               |
| env-69   | JGI12271J12027_1090360  | + | 56      | 96      | RNA → ←hypo                                                                                                                                                                                                    |
| env-70   | JGI12396J12026_1102605  | + | 43      | 84      | RNA → rpmE (PRK00019)Ribosomal_L31 (pfam01197) → PCRF (smart00937)RF-1 (pfam00472)PCRF (pfam03462)ABC_tran_CTD (pfam16326) →                                                                                   |
| env-71   | JGI12396J12026_1237335  | - | 118     | 77      | RNA → ←hypo                                                                                                                                                                                                    |
| env-72   | JGI12273J12029_10179347 | + | 43      | 84      | RNA → ←hypo                                                                                                                                                                                                    |
| env-73   | JGI12397J12024_1046578  | + | 44      | 85      | RNA → ←hypo                                                                                                                                                                                                    |
| env-74   | JGI12273J12029_10030651 | + | 419     | 460     | RNA → rpmE (PRK00019)Ribosomal_L31 (pfam01197) → PrfA (COG0216)prfA (PRK00591) → HemK (COG2890)PRK09328 (PRK09328) →                                                                                           |
| env-75   | JGI12272J11983_1113393  | + | 87      | 128     | RNA → ←hypo                                                                                                                                                                                                    |
| env-76   | JGI12467J12023_1025401  | + | 18      | 59      | RNA → ←hypo                                                                                                                                                                                                    |
| env-77   | JGI12271J12027_1039259  | + | 18      | 59      | RNA → ←hypo                                                                                                                                                                                                    |
| env-78   | JGI12396J12026_1083332  | + | 54      | 95      | RNA → hypo → rpmE (PRK00019)Ribosomal_L31 (pfam01197) →                                                                                                                                                        |
| env-79   | JGI12397J12024_1046859  | + | 54      | 95      | RNA → hypo → rpmE (PRK00019)Ribosomal_L31 (pfam01197) → prfA (PRK00591)PCRF (pfam03462) →                                                                                                                      |
| env-80   | JGI12397J12024_1016153  | + | 50      | 91      | RNA → PRK08279 (PRK08279) → rpmE (PRK00019)Ribosomal_L31 (pfam01197) → prfA (PRK00591)PCRF (pfam03462) →                                                                                                       |
| Ncy-1-1  | NC_016887.1             | + | 1254812 | 1254859 | RNA → rpmE (PRK00019)Ribosomal_L31 (pfam01197) → PrfA (COG0216)prfA (PRK00591) →                                                                                                                               |
| Ncy-2-1  | NZ_BAFY01000056.1       | + | 16681   | 16728   | RNA → rpmE (PRK00019)Ribosomal_L31 (pfam01197) → PrfA (COG0216)prfA (PRK00591) →                                                                                                                               |

|         |                                 |   |         |         |                                                                                                                                                                                                    |
|---------|---------------------------------|---|---------|---------|----------------------------------------------------------------------------------------------------------------------------------------------------------------------------------------------------|
| Npn-1-1 | NZ_BAGF01000020.1               | + | 89242   | 89291   | RNA → rpmE (PRK00019)Ribosomal_L31 (pfam01197) → PrfA (COG0216)prfA (PRK00591) → HemK (COG2890)PRK09328 (PRK09328) →                                                                               |
| env-81  | JGI12271J12027_1026620          | + | 102     | 144     | RNA → ←hypo                                                                                                                                                                                        |
| env-82  | JGI12273J12029_10010121         | + | 4       | 46      | RNA → rpmE (PRK00019)Ribosomal_L31 (pfam01197) → PCRf (smart00937)PCRf (pfam03462) →                                                                                                               |
| env-83  | JGI12397J12024_1000989          | + | 11      | 53      | RNA → ←hypo                                                                                                                                                                                        |
| env-84  | DCrCPGB.c187296                 | - | 360     | 318     | RNA → rpmE (PRK00019)Ribosomal_L31 (pfam01197) →                                                                                                                                                   |
| env-85  | JGI12467J12023_1052535          | + | 9       | 51      | RNA → ←hypo                                                                                                                                                                                        |
| env-86  | FNTS_GKKEVUV02H38F2             | - | 160     | 118     | RNA → ←hypo                                                                                                                                                                                        |
| env-87  | JGI12397J12024_1145631          | + | 15      | 60      | RNA → rpmE (PRK00019)Ribosomal_L31 (pfam01197) →                                                                                                                                                   |
| env-88  | JGI24737J22298_10298947         | - | 195     | 153     | RNA → rpmE (PRK00019)Ribosomal_L31 (pfam01197) →                                                                                                                                                   |
| env-89  | JGI24735J21928_10416994         | - | 88      | 46      | RNA → hypo →                                                                                                                                                                                       |
| Sre-2-1 | NZ_AYJW01000043.1               | - | 1191    | 1142    | RNA → rpmE (PRK00019)Ribosomal_L31 (pfam01197) → PCRf (smart00937)RF-1 (pfam00472)PCRf (pfam03462)ABC_tran_CTD (pfam16326) → PrfA (COG0216)prfA (PRK00591) → HemK (COG2890)PRK09328 (PRK09328) →   |
| Sre-1-1 | NZ_JNVU01000048.1               | - | 201384  | 201335  | RNA → rpmE (PRK00019)Ribosomal_L31 (pfam01197) → PrfA (COG0216)prfA (PRK00591) → HemK (COG2890)PRK09328 (PRK09328) →                                                                               |
| Acy-1-1 | NZ_KL573951.1                   | - | 441934  | 441863  | RNA → rpmE (PRK00019)Ribosomal_L31 (pfam01197) →                                                                                                                                                   |
| Acy-2-1 | NZ_AUBJ01000013.1               | - | 277214  | 277143  | RNA → rpmE (PRK00019)Ribosomal_L31 (pfam01197) →                                                                                                                                                   |
| Mrh-2-1 | NC_016604.1                     | + | 3820183 | 3820236 | RNA → rpmE (PRK00019)Ribosomal_L31 (pfam01197) → PrfA (COG0216)prfA (PRK00591) → HemK (COG2890)PRK09328 (PRK09328) → SUA5 (COG0009)TIGR00057 (TIGR00057) → GT_WecA_like (cd06853)mraY (PRK00108) → |
| env-90  | JGI11758J13082_115022           | + | 103     | 146     | RNA → rpmE (PRK00019)Ribosomal_L31 (pfam01197) →                                                                                                                                                   |
| env-91  | JGI12112J13074_1001942          | - | 1400    | 1357    | RNA → rpmE (PRK00019)Ribosomal_L31 (pfam01197) → prfA (PRK00591)RF-1 (pfam00472)PCRf (pfam03462) → RNA → ←hypo                                                                                     |
| env-92  | JGI12060J13090_109431           | - | 402     | 359     | RNA → rpmE (PRK00019)Ribosomal_L31 (pfam01197) →                                                                                                                                                   |
| env-93  | CEQG01140696.1                  | + | 747     | 790     | RNA → rpmE (PRK00019)Ribosomal_L31 (pfam01197) →                                                                                                                                                   |
| env-94  | JGI12075J13256_1000493          | - | 2999    | 2956    | RNA → rpmE (PRK00019)Ribosomal_L31 (pfam01197) → PrfA (COG0216)prfA (PRK00591) → HemK (COG2890)PRK09328 (PRK09328) → SUA5 (COG0009)TIGR00057 (TIGR00057) →                                         |
| env-95  | JGI11800J13271_1002272          | - | 358     | 315     | RNA → rpmE (PRK00019)Ribosomal_L31 (pfam01197) →                                                                                                                                                   |
| env-96  | CETS01058554.1                  | + | 353     | 396     | RNA → rpmE (PRK00019)Ribosomal_L31 (pfam01197) →                                                                                                                                                   |
| env-97  | SRS016575_C3611077              | + | 309     | 354     | RNA → ←hypo                                                                                                                                                                                        |
| env-98  | SRS020340_Baylor_scaffold_41668 | + | 245     | 290     | RNA → rpmE (PRK00019)Ribosomal_L31 (pfam01197) →                                                                                                                                                   |
| Ade-2-1 | NZ_AUBL01000029.1               | + | 17719   | 17764   | RNA → rpmE (PRK00019)Ribosomal_L31 (pfam01197) →                                                                                                                                                   |
| env-99  | SRS022536_C4437610              | - | 232     | 187     | RNA → rpmE (PRK00019)Ribosomal_L31 (pfam01197) →                                                                                                                                                   |
| env-100 | SRS024144_LANL_scaffold_22347   | + | 53      | 98      | RNA → rpmE (PRK00019)Ribosomal_L31 (pfam01197) →                                                                                                                                                   |
| env-101 | SRS042984_C3945655              | + | 291     | 336     | RNA → rpmE (PRK00019)Ribosomal_L31 (pfam01197) →                                                                                                                                                   |
| env-102 | SRS065099_LANL_scaffold_83872   | - | 432     | 387     | RNA → hypo →                                                                                                                                                                                       |
| env-103 | SRS017139_Baylor_scaffold_27719 | + | 210     | 255     | RNA → rpmE (PRK00019)Ribosomal_L31 (pfam01197) →                                                                                                                                                   |
| env-104 | SRS024355_LANL_scaffold_54831   | - | 212     | 167     | RNA → rpmE (PRK00019)Ribosomal_L31 (pfam01197) →                                                                                                                                                   |
| env-105 | SRS018443_Baylor_scaffold_61370 | + | 276     | 321     | RNA → rpmE (PRK00019)Ribosomal_L31 (pfam01197) →                                                                                                                                                   |
| env-106 | SRS013252_Baylor_scaffold_60598 | + | 250     | 295     | RNA → rpmE (PRK00019)Ribosomal_L31 (pfam01197) →                                                                                                                                                   |
| env-107 | SRS017691_C5148150              | - | 133     | 88      | RNA → rpmE (PRK00019)rpmE2 (PRK01678)Ribosomal_L31 (pfam01197) →                                                                                                                                   |
| env-108 | SRS021477_Baylor_scaffold_9272  | + | 137     | 182     | RNA → rpmE (PRK00019)Ribosomal_L31 (pfam01197) → prfA (PRK00591)PCRf (pfam03462) →                                                                                                                 |
| env-109 | SRS024087_C3541330              | - | 796     | 751     | RNA → rpmE (PRK00019)Ribosomal_L31 (pfam01197) → hypo → prfA (PRK00591)PCRf (pfam03462) →                                                                                                          |
| env-110 | SRS063932_LANL_scaffold_97365   | + | 249     | 294     | RNA → rpmE (PRK00019)Ribosomal_L31 (pfam01197) → hypo → PrfA (COG0216)prfA (PRK00591) →                                                                                                            |
| env-111 | SRS019128_C4186243              | + | 134     | 179     | RNA → rpmE (PRK00019)Ribosomal_L31 (pfam01197) →                                                                                                                                                   |
| Bin-1-1 | NZ_CP006018.1                   | - | 1292657 | 1292613 | RNA → rpmE (PRK00019)Ribosomal_L31 (pfam01197) → prfA (PRK00591)RF-1 (pfam00472)PCRf (pfam03462) → HemK (COG2890)PRK09328 (PRK09328) →                                                             |
| env-112 | HBC_scaff_10011399              | - | 3944    | 3900    | RNA → rpmE (PRK00019)Ribosomal_L31 (pfam01197) → prfA (PRK00591)PCRf (pfam03462) →                                                                                                                 |
| env-113 | HBC_ctgs_1009601                | + | 1655    | 1699    | RNA → rpmE (PRK00019)Ribosomal_L31 (pfam01197) → prfA (PRK00591)PCRf (pfam03462) → PRK05567 (PRK05567)CBS_pair_IMP DH (cd04601) →                                                                  |
| Bco-1-1 | NZ_CP007287.1                   | - | 1328201 | 1328157 | RNA → rpmE (PRK00019)Ribosomal_L31 (pfam01197) → prfA (PRK00591)RF-1 (pfam00472)PCRf (pfam03462) → HemK (COG2890)PRK09328 (PRK09328) →                                                             |
| Bco-2-1 | NZ_JDUF01000003.1               | + | 212969  | 213013  | RNA → rpmE (PRK00019)Ribosomal_L31 (pfam01197) → prfA (PRK00591)RF-1 (pfam00472)PCRf (pfam03462) → HemK (COG2890)PRK09328 (PRK09328) →                                                             |

|           |                                 |   |         |         |                                                                                                                                                                                                                                                                                                                                                                                                                                                                            |
|-----------|---------------------------------|---|---------|---------|----------------------------------------------------------------------------------------------------------------------------------------------------------------------------------------------------------------------------------------------------------------------------------------------------------------------------------------------------------------------------------------------------------------------------------------------------------------------------|
| env-114   | AF_2010_repIIA01.1248365        | - | 214     | 164     | RNA → ←-hypo                                                                                                                                                                                                                                                                                                                                                                                                                                                               |
| env-115   | AF_2010_repIIA1.10264337        | - | 138     | 88      | RNA → rpmE (PRK00019)Ribosomal_L31 (pfam01197)→                                                                                                                                                                                                                                                                                                                                                                                                                            |
| env-116   | _GX4IIKE02HM9I2                 | - | 308     | 260     | RNA → rpmE (PRK00019)Ribosomal_L31 (pfam01197)→                                                                                                                                                                                                                                                                                                                                                                                                                            |
| Sro-4-1   | NZ_ABYX02000001.1               | + | 5513786 | 5513833 | RNA → rpmE (PRK00019)Ribosomal_L31 (pfam01197)→                                                                                                                                                                                                                                                                                                                                                                                                                            |
| Ssp-18-1  | NZ_AWOQ01000221.1               | + | 3075    | 3122    | RNA → rpmE (PRK00019)Ribosomal_L31 (pfam01197)→                                                                                                                                                                                                                                                                                                                                                                                                                            |
| Sro-2-1   | NZ_DS999644.1                   | + | 5470394 | 5470441 | RNA → rpmE (PRK00019)Ribosomal_L31 (pfam01197)→ rpmE (PRK00019)Ribosomal_L31 (pfam01197)→                                                                                                                                                                                                                                                                                                                                                                                  |
| Sgl-4-1   | NZ_JNZK01000005.1               | + | 91932   | 91979   | RNA → rpmE (PRK00019)Ribosomal_L31 (pfam01197)→                                                                                                                                                                                                                                                                                                                                                                                                                            |
| Sal-8-1   | NZ_JNWW01000013.1               | + | 257612  | 257659  | RNA → rpmE (PRK00019)Ribosomal_L31 (pfam01197)→                                                                                                                                                                                                                                                                                                                                                                                                                            |
| Sgl-2-1   | NZ_JH689271.1                   | - | 192859  | 192812  | RNA → rpmE (PRK00019)Ribosomal_L31 (pfam01197)→                                                                                                                                                                                                                                                                                                                                                                                                                            |
| Sgr-12-1  | NZ_JOGA01000014.1               | - | 269813  | 269766  | RNA → rpmE (PRK00019)Ribosomal_L31 (pfam01197)→                                                                                                                                                                                                                                                                                                                                                                                                                            |
| Ssp-55-1  | NZ_JNLT01000003.1               | - | 25808   | 25761   | RNA → rpmE (PRK00019)Ribosomal_L31 (pfam01197)→                                                                                                                                                                                                                                                                                                                                                                                                                            |
| Ssp-62-1  | NZ_JPWVW01000002.1              | + | 1728736 | 1728783 | RNA → rpmE (PRK00019)Ribosomal_L31 (pfam01197)→                                                                                                                                                                                                                                                                                                                                                                                                                            |
| Ssp-167-1 | NZ_LAVK01000634.1               | - | 420     | 376     | RNA → rpmE (PRK00019)Ribosomal_L31 (pfam01197)→                                                                                                                                                                                                                                                                                                                                                                                                                            |
| Sav-3-1   | NZ_JOEK01000002.1               | - | 249434  | 249391  | RNA → rpmE (PRK00019)Ribosomal_L31 (pfam01197)→                                                                                                                                                                                                                                                                                                                                                                                                                            |
| Ssp-4-1   | NZ_ALNP01000028.1               | + | 19225   | 19269   | RNA → rpmE (PRK00019)Ribosomal_L31 (pfam01197)→                                                                                                                                                                                                                                                                                                                                                                                                                            |
| Sxi-2-1   | NZ_CP009922.2                   | + | 4411426 | 4411470 | RNA → rpmE (PRK00019)Ribosomal_L31 (pfam01197)→                                                                                                                                                                                                                                                                                                                                                                                                                            |
| Ssp-90-1  | NZ_JOIG01000006.1               | + | 162280  | 162324  | RNA → rpmE (PRK00019)Ribosomal_L31 (pfam01197)→                                                                                                                                                                                                                                                                                                                                                                                                                            |
| Jal-1-1   | NZ_LBMC01000041.1               | + | 84087   | 84134   | RNA → rpmE (PRK00019)Ribosomal_L31 (pfam01197)→ PrfA (COG0216)prfA (PRK00591)→<br>HemK (COG2890)PRK09328 (PRK09328)→ SUA5 (COG0009)TIGR00057 (TIGR00057)→<br>ECA_wecA (TIGR02380)GT_WecA_like (cd06853)→ hypo→ Atp12 (COG5336)→<br>PRK05815 (PRK05815)ATP-synt_A (pfam00119)→ PRK06876 (PRK06876)AtpE (COG0636)→<br>PRK05759 (PRK05759)AtpF (COG0711)→ PRK13430 (PRK13430)OSCP (pfam00213)→<br>AtpA (COG0056)PRK09281 (PRK09281)→ PRK05621 (PRK05621)ATP-synt (pfam00231)→ |
| env-117   | JGI20183J14883_110497           | + | 278     | 327     | RNA → ←-hypo                                                                                                                                                                                                                                                                                                                                                                                                                                                               |
| env-118   | JGI20181J14860_1000476          | + | 1897    | 1946    | RNA → rpmE (PRK00019)Ribosomal_L31 (pfam01197)→                                                                                                                                                                                                                                                                                                                                                                                                                            |
| env-119   | JGI20198J14950_1000651          | - | 1554    | 1505    | RNA → rpmE (PRK00019)Ribosomal_L31 (pfam01197)→                                                                                                                                                                                                                                                                                                                                                                                                                            |
| env-120   | JGI20200J14955_1000024          | + | 14466   | 14515   | RNA → rpmE (PRK00019)Ribosomal_L31 (pfam01197)→                                                                                                                                                                                                                                                                                                                                                                                                                            |
| env-121   | JGI20201J14949_1011227          | + | 406     | 455     | RNA → rpmE (PRK00019)Ribosomal_L31 (pfam01197)→                                                                                                                                                                                                                                                                                                                                                                                                                            |
| env-122   | JGI20202J14951_1000077          | + | 2663    | 2712    | RNA → rpmE (PRK00019)Ribosomal_L31 (pfam01197)→                                                                                                                                                                                                                                                                                                                                                                                                                            |
| env-123   | JGI20197J15001_1017583          | + | 314     | 363     | RNA → rpmE (PRK00019)Ribosomal_L31 (pfam01197)→                                                                                                                                                                                                                                                                                                                                                                                                                            |
| env-124   | JGI20197J15136_1017583          | + | 314     | 363     | RNA → rpmE (PRK00019)Ribosomal_L31 (pfam01197)→                                                                                                                                                                                                                                                                                                                                                                                                                            |
| env-125   | R_ear_cream-WUGI_scaffold_53252 | - | 122     | 77      | RNA →                                                                                                                                                                                                                                                                                                                                                                                                                                                                      |
| Pav-2-1   | NZ_AOUA01000299.1               | + | 6067    | 6112    | RNA → rpmE (PRK00019)Ribosomal_L31 (pfam01197)→                                                                                                                                                                                                                                                                                                                                                                                                                            |
| Pav-1-1   | NC_021064.1                     | + | 1037423 | 1037468 | RNA → rpmE (PRK00019)Ribosomal_L31 (pfam01197)→                                                                                                                                                                                                                                                                                                                                                                                                                            |
| Psp-5-1   | NZ_KI515688.1                   | - | 2409959 | 2409914 | RNA → rpmE (PRK00019)Ribosomal_L31 (pfam01197)→                                                                                                                                                                                                                                                                                                                                                                                                                            |
| Psp-3-1   | NZ_KI515696.1                   | - | 178310  | 178265  | RNA → rpmE (PRK00019)Ribosomal_L31 (pfam01197)→                                                                                                                                                                                                                                                                                                                                                                                                                            |
| Psp-2-1   | NZ_KI518468.1                   | + | 147059  | 147104  | RNA → rpmE (PRK00019)Ribosomal_L31 (pfam01197)→                                                                                                                                                                                                                                                                                                                                                                                                                            |
| Psp-4-1   | NZ_AXMH01000003.1               | - | 663366  | 663321  | RNA → rpmE (PRK00019)Ribosomal_L31 (pfam01197)→                                                                                                                                                                                                                                                                                                                                                                                                                            |
| Psp-1-1   | NZ_KE340299.1                   | - | 2592352 | 2592307 | RNA → rpmE (PRK00019)Ribosomal_L31 (pfam01197)→                                                                                                                                                                                                                                                                                                                                                                                                                            |
| env-126   | JGI12397J12024_1115564          | + | 10      | 52      | RNA → rpmE (PRK00019)Ribosomal_L31 (pfam01197)→                                                                                                                                                                                                                                                                                                                                                                                                                            |
| Pac-1-1   | NZ_JIAI01000013.1               | - | 168551  | 168505  | RNA → rpmE (PRK00019)Ribosomal_L31 (pfam01197)→                                                                                                                                                                                                                                                                                                                                                                                                                            |
| env-127   | JGI24736J21556_1166172          | + | 166     | 205     | RNA → rpmE (PRK00019)Ribosomal_L31 (pfam01197)→                                                                                                                                                                                                                                                                                                                                                                                                                            |
| env-128   | JGI12467J12023_1013674          | + | 485     | 531     | RNA → rpmE (PRK00019)Ribosomal_L31 (pfam01197)→                                                                                                                                                                                                                                                                                                                                                                                                                            |
| env-129   | JGI12271J12027_1096703          | + | 1       | 47      | RNA → rpmE (PRK00019)Ribosomal_L31 (pfam01197)→                                                                                                                                                                                                                                                                                                                                                                                                                            |
| env-130   | JGI12397J12024_1040638          | + | 77      | 125     | RNA → rpmE (PRK00019)Ribosomal_L31 (pfam01197)→                                                                                                                                                                                                                                                                                                                                                                                                                            |
| env-131   | JGI12273J12029_10103667         | + | 517     | 565     | RNA →                                                                                                                                                                                                                                                                                                                                                                                                                                                                      |
| env-132   | JGI24770J26754_10130366         | - | 170     | 134     | RNA → rpmE (PRK00019)Ribosomal_L31 (pfam01197)→                                                                                                                                                                                                                                                                                                                                                                                                                            |
| env-133   | JGI20200J14955_1003644          | + | 1490    | 1528    | RNA → rpmE (PRK00019)Ribosomal_L31 (pfam01197)→                                                                                                                                                                                                                                                                                                                                                                                                                            |
| env-134   | JGI20201J14949_1077705          | + | 89      | 127     | RNA → hypo→ rpmE (PRK00019)Ribosomal_L31 (pfam01197)→                                                                                                                                                                                                                                                                                                                                                                                                                      |
| env-135   | JGI20202J14951_1033931          | + | 287     | 325     | RNA → ←-hypo                                                                                                                                                                                                                                                                                                                                                                                                                                                               |
| Bth-2-1   | NZ_JGZS01000003.1               | + | 338005  | 338048  | RNA → rpmE (PRK00019)Ribosomal_L31 (pfam01197)→                                                                                                                                                                                                                                                                                                                                                                                                                            |
| Bsc-1-1   | NZ_JULC01000081.1               | + | 2980    | 3024    | RNA → rpmE (PRK00019)Ribosomal_L31 (pfam01197)→                                                                                                                                                                                                                                                                                                                                                                                                                            |
| Bth-7-1   | NZ_JDUB01000001.1               | + | 171828  | 171872  | RNA → rpmE (PRK00019)Ribosomal_L31 (pfam01197)→                                                                                                                                                                                                                                                                                                                                                                                                                            |



|          |                            |   |         |         |                                                                                                                                                                                                                                                                                                                                                                                                                                                                                                                               |
|----------|----------------------------|---|---------|---------|-------------------------------------------------------------------------------------------------------------------------------------------------------------------------------------------------------------------------------------------------------------------------------------------------------------------------------------------------------------------------------------------------------------------------------------------------------------------------------------------------------------------------------|
| Bth-8-1  | NZ_JHWM01000001.1          | - | 74179   | 74133   | RNA → rpmE (PRK00019)Ribosomal_L31 (pfam01197) →                                                                                                                                                                                                                                                                                                                                                                                                                                                                              |
| Bth-1-1  | NC_020546.1                | - | 1607274 | 1607228 | RNA → rpmE (PRK00019)Ribosomal_L31 (pfam01197) →                                                                                                                                                                                                                                                                                                                                                                                                                                                                              |
| Bth-5-1  | NZ_AUF101000006.1          | + | 346383  | 346427  | RNA → rpmE (PRK00019)Ribosomal_L31 (pfam01197) →                                                                                                                                                                                                                                                                                                                                                                                                                                                                              |
| Bth-4-1  | NZ_JGZT01000005.1          | + | 346830  | 346874  | RNA → rpmE (PRK00019)Ribosomal_L31 (pfam01197) →                                                                                                                                                                                                                                                                                                                                                                                                                                                                              |
| Bth-5-2  | NZ_JDFO01000003.1          | + | 250962  | 251006  | RNA → rpmE (PRK00019)Ribosomal_L31 (pfam01197) →                                                                                                                                                                                                                                                                                                                                                                                                                                                                              |
| Bth-3-1  | NZ_JDTQ01000009.1          | + | 58022   | 58066   | RNA → rpmE (PRK00019)Ribosomal_L31 (pfam01197) →                                                                                                                                                                                                                                                                                                                                                                                                                                                                              |
| Bth-6-1  | NZ_JGZV01000001.1          | - | 350252  | 350208  | RNA → rpmE (PRK00019)Ribosomal_L31 (pfam01197) →                                                                                                                                                                                                                                                                                                                                                                                                                                                                              |
| Bbo-2-1  | NZ_JHWO01000001.1          | - | 219911  | 219867  | RNA → rpmE (PRK00019)Ribosomal_L31 (pfam01197) →                                                                                                                                                                                                                                                                                                                                                                                                                                                                              |
| Bbo-2-2  | NZ_JDUH01000006.1          | - | 219494  | 219450  | RNA → rpmE (PRK00019)Ribosomal_L31 (pfam01197) →                                                                                                                                                                                                                                                                                                                                                                                                                                                                              |
| Bbo-1-1  | NZ_JGYQ01000016.1          | - | 219470  | 219426  | RNA → rpmE (PRK00019)Ribosomal_L31 (pfam01197) →                                                                                                                                                                                                                                                                                                                                                                                                                                                                              |
| env-136  | 3300001592_10065837        | - | 1863    | 1818    | RNA → hypo → rpmE (PRK00019)Ribosomal_L31 (pfam01197) →                                                                                                                                                                                                                                                                                                                                                                                                                                                                       |
| Nsp-4-1  | NC_008699.1                | + | 1862060 | 1862105 | RNA → rpmE (PRK00019)Ribosomal_L31 (pfam01197) → PrfA (COG0216)prfA (PRK00591) → HemK (COG2890)PRK09328 (PRK09328) → SUA5 (COG0009)TIGR00057 (TIGR00057) → GT_WecA_like (cd06853)mraY (PRK00108) →                                                                                                                                                                                                                                                                                                                            |
| env-137  | AP72_2010_repI_A10_1095182 | - | 366     | 312     | RNA → rpmE (PRK00019)Ribosomal_L31 (pfam01197) →                                                                                                                                                                                                                                                                                                                                                                                                                                                                              |
| env-138  | JGI12075J13256_1008725     | - | 141     | 76      | RNA →                                                                                                                                                                                                                                                                                                                                                                                                                                                                                                                         |
| env-139  | CEOS01170558.1             | - | 194     | 129     | RNA → rpmE (PRK00019)Ribosomal_L31 (pfam01197) →                                                                                                                                                                                                                                                                                                                                                                                                                                                                              |
| env-140  | JGI12064J13199_110746      | - | 352     | 287     | RNA → rpmE (PRK00019)Ribosomal_L31 (pfam01197) →                                                                                                                                                                                                                                                                                                                                                                                                                                                                              |
| env-141  | P3_CLC_Con13751            | - | 1150    | 1079    | RNA → ←PRK15098 (PRK15098)BglX (COG1472)                                                                                                                                                                                                                                                                                                                                                                                                                                                                                      |
| env-142  | Cons65214                  | + | 22      | 93      | RNA → ←PRK15098 (PRK15098)BglX (COG1472)                                                                                                                                                                                                                                                                                                                                                                                                                                                                                      |
| Fsp-8-1  | NZ_ATXA01000002.1          | + | 22334   | 22383   | RNA → rpmE (PRK00019)Ribosomal_L31 (pfam01197) →                                                                                                                                                                                                                                                                                                                                                                                                                                                                              |
| env-143  | JGI12635J15846_10174018    | + | 8       | 48      | RNA → hypo → DUF4387 (pfam14330) → MhpC (COG0596)menH_SHCHC (TIGR03695) →                                                                                                                                                                                                                                                                                                                                                                                                                                                     |
| Nsp-10-1 | NZ_JIAV01000021.1          | + | 30441   | 30487   | RNA → rpmE (PRK00019)Ribosomal_L31 (pfam01197) → PrfA (COG0216)prfA (PRK00591) → HemK (COG2890)PRK09328 (PRK09328) → SUA5 (COG0009)TIGR00057 (TIGR00057) → ECA_wecA (TIGR02380)GT_WecA_like (cd06853) →                                                                                                                                                                                                                                                                                                                       |
| env-144  | JGI12273J12029_10078345    | + | 11      | 81      | RNA → rpmE (PRK00019)Ribosomal_L31 (pfam01197) →                                                                                                                                                                                                                                                                                                                                                                                                                                                                              |
| Cja-1-1  | NZ_JNXY01000008.1          | + | 8604    | 8652    | RNA → rpmE (PRK00019)Ribosomal_L31 (pfam01197) →                                                                                                                                                                                                                                                                                                                                                                                                                                                                              |
| Fsy-1-1  | NC_015656.1                | - | 4523128 | 4523080 | RNA → rpmE (PRK00019)Ribosomal_L31 (pfam01197) →                                                                                                                                                                                                                                                                                                                                                                                                                                                                              |
| Fco-1-1  | NZ_JWIO01000003.1          | + | 248178  | 248226  | RNA → rpmE (PRK00019)Ribosomal_L31 (pfam01197) →                                                                                                                                                                                                                                                                                                                                                                                                                                                                              |
| env-145  | JGI24770J26754_10245837    | + | 73      | 125     | RNA → rpmE (PRK00019)Ribosomal_L31 (pfam01197) → prfA (PRK00591)PCRF (pfam03462) →                                                                                                                                                                                                                                                                                                                                                                                                                                            |
| Ply-1-1  | NZ_KE150269.1              | - | 1488609 | 1488566 | RNA → rpmE (PRK00019)Ribosomal_L31 (pfam01197) → PrfA (COG0216)prfA (PRK00591) → HemK (COG2890)PRK09328 (PRK09328) → SUA5 (COG0009)TIGR00057 (TIGR00057) → GT_WecA_like (cd06853)mraY (PRK00108) → hypo → AtpI2 (COG5336)ATPase_gene1 (pfam09527) → PRK05815 (PRK05815)ATP-synt_A (pfam00119) → PRK07874 (PRK07874)AtpE (COG0636) → PRK05759 (PRK05759)AtpF (COG0711) → AtpH (COG0712)PRK13430 (PRK13430) → AtpA (COG0056)PRK09281 (PRK09281) → PRK05621 (PRK05621)ATP-synt (pfam00231) → AtpD (COG0055)PRK09280 (PRK09280) → |
| Psp-7-1  | NZ_AZIS01000003.1          | + | 159103  | 159146  | RNA → rpmE (PRK00019)Ribosomal_L31 (pfam01197) → PrfA (COG0216)prfA (PRK00591) → HemK (COG2890)PRK09328 (PRK09328) → SUA5 (COG0009)TIGR00057 (TIGR00057) → GT_WecA_like (cd06853)mraY (PRK00108) → hypo → AtpI2 (COG5336)ATPase_gene1 (pfam09527) → PRK05815 (PRK05815)ATP-synt_A (pfam00119) → PRK07874 (PRK07874)AtpE (COG0636) → PRK05759 (PRK05759)AtpF (COG0711) → AtpH (COG0712)PRK13430 (PRK13430) → AtpA (COG0056)PRK09281 (PRK09281) → PRK05621 (PRK05621)ATP-synt (pfam00231) → AtpD (COG0055)PRK09280 (PRK09280) → |
| Ply-2-1  | NZ_KE384026.1              | - | 390464  | 390421  | RNA → rpmE (PRK00019)Ribosomal_L31 (pfam01197) → PrfA (COG0216)prfA (PRK00591) → HemK (COG2890)PRK09328 (PRK09328) → SUA5 (COG0009)TIGR00057 (TIGR00057) → GT_WecA_like (cd06853)mraY (PRK00108) → hypo → AtpI2 (COG5336)ATPase_gene1 (pfam09527) → PRK05815 (PRK05815)ATP-synt_A (pfam00119) → PRK07874 (PRK07874)AtpE (COG0636) → PRK05759 (PRK05759)AtpF (COG0711) → AtpH (COG0712)PRK13430 (PRK13430) → AtpA (COG0056)PRK09281 (PRK09281) → PRK05621 (PRK05621)ATP-synt (pfam00231) → AtpD (COG0055)PRK09280 (PRK09280) → |
| Ssc-2-1  | NZ_KB889571.1              | + | 220     | 266     | RNA → rpmE (PRK00019)Ribosomal_L31 (pfam01197) →                                                                                                                                                                                                                                                                                                                                                                                                                                                                              |
| Sri-4-1  | NZ_JNWX01000074.1          | + | 10628   | 10672   | RNA → rpmE (PRK00019)Ribosomal_L31 (pfam01197) →                                                                                                                                                                                                                                                                                                                                                                                                                                                                              |
| Sri-2-1  | NZ_JMGX01000008.1          | + | 10567   | 10611   | RNA → rpmE (PRK00019)Ribosomal_L31 (pfam01197) →                                                                                                                                                                                                                                                                                                                                                                                                                                                                              |

|           |                         |   |         |         |      |                      |                           |                            |
|-----------|-------------------------|---|---------|---------|------|----------------------|---------------------------|----------------------------|
| Kau-1-1   | NZ_LGUY01000019.1       | - | 4086    | 4042    | RNA→ | rpmE (PRK00019)      | Ribosomal_L31 (pfam01197) | →                          |
| Ssp-156-1 | NZ_JOCC01000117.1       | - | 4095    | 4051    | RNA→ | rpmE (PRK00019)      | Ribosomal_L31 (pfam01197) | →                          |
| Sri-4-2   | NZ_JOEO01000027.1       | - | 93461   | 93417   | RNA→ | rpmE (PRK00019)      | Ribosomal_L31 (pfam01197) | →                          |
| Sri-4-3   | NZ_JNYK01000063.1       | - | 4106    | 4062    | RNA→ | rpmE (PRK00019)      | Ribosomal_L31 (pfam01197) | →                          |
| Sri-4-4   | NZ_JOBN01000051.1       | - | 4141    | 4097    | RNA→ | rpmE (PRK00019)      | Ribosomal_L31 (pfam01197) | →                          |
| Sri-4-5   | NZ_JOCL01000019.1       | - | 93576   | 93532   | RNA→ | rpmE (PRK00019)      | Ribosomal_L31 (pfam01197) | →                          |
| Sri-4-6   | NZ_JOCR01000115.1       | - | 4074    | 4030    | RNA→ | rpmE (PRK00019)      | Ribosomal_L31 (pfam01197) | →                          |
| Sri-4-7   | NZ_JOCO01000065.1       | + | 10588   | 10632   | RNA→ | rpmE (PRK00019)      | Ribosomal_L31 (pfam01197) | →                          |
| Sri-4-8   | NZ_JOBS01000027.1       | - | 93497   | 93453   | RNA→ | rpmE (PRK00019)      | Ribosomal_L31 (pfam01197) | →                          |
| Ssp-157-1 | NZ_JOCH01000101.1       | - | 4120    | 4076    | RNA→ | rpmE (PRK00019)      | Ribosomal_L31 (pfam01197) | →                          |
| Sca-5-1   | NZ_JNWP01000078.1       | - | 4108    | 4064    | RNA→ | rpmE (PRK00019)      | Ribosomal_L31 (pfam01197) | →                          |
| Sca-5-2   | NZ_JOFM01000099.1       | - | 4116    | 4072    | RNA→ | rpmE (PRK00019)      | Ribosomal_L31 (pfam01197) | →                          |
| Sri-4-9   | NZ_JOBT01000405.1       | + | 10576   | 10620   | RNA→ | rpmE (PRK00019)      | Ribosomal_L31 (pfam01197) | →                          |
| Sri-4-10  | NZ_JOCM01000066.1       | - | 4088    | 4044    | RNA→ | rpmE (PRK00019)      | Ribosomal_L31 (pfam01197) | →                          |
| Sri-4-11  | NZ_JOCP01000071.1       | - | 4099    | 4055    | RNA→ | rpmE (PRK00019)      | Ribosomal_L31 (pfam01197) | →                          |
| Sri-4-12  | NZ_JNYR01000048.1       | - | 4090    | 4046    | RNA→ | rpmE (PRK00019)      | Ribosomal_L31 (pfam01197) | →                          |
| Sla-2-3   | NZ_JOEX01000083.1       | - | 4150    | 4106    | RNA→ | rpmE (PRK00019)      | Ribosomal_L31 (pfam01197) | →                          |
| Sla-2-4   | NZ_JOCN01000068.1       | + | 10603   | 10647   | RNA→ | rpmE (PRK00019)      | Ribosomal_L31 (pfam01197) | →                          |
| Sri-1-1   | NZ_ANSJ01000029.1       | - | 26110   | 26066   | RNA→ | rpmE (PRK00019)      | Ribosomal_L31 (pfam01197) | →                          |
| Sri-3-1   | NZ_JJNO01000011.1       | + | 11204   | 11248   | RNA→ | rpmE (PRK00019)      | Ribosomal_L31 (pfam01197) | →                          |
| Sri-2-2   | NZ_JMGY01000002.1       | + | 188935  | 188979  | RNA→ | rpmE (PRK00019)      | Ribosomal_L31 (pfam01197) | →                          |
| Sri-4-13  | NZ_JOET01000092.1       | - | 4083    | 4039    | RNA→ | rpmE (PRK00019)      | Ribosomal_L31 (pfam01197) | →                          |
| Sgr-6-1   | NZ_LGUW01000086.1       | - | 3993    | 3949    | RNA→ | rpmE (PRK00019)      | Ribosomal_L31 (pfam01197) | →                          |
| Sri-4-14  | NZ_JOBV01000024.1       | + | 10595   | 10639   | RNA→ | rpmE (PRK00019)      | Ribosomal_L31 (pfam01197) | →                          |
| Sri-4-15  | NZ_JOES01000028.1       | - | 85329   | 85285   | RNA→ | rpmE (PRK00019)      | Ribosomal_L31 (pfam01197) | →                          |
| Sri-4-16  | NZ_JOBP01000025.1       | - | 87385   | 87341   | RNA→ | rpmE (PRK00019)      | Ribosomal_L31 (pfam01197) | →                          |
| Sri-4-17  | NZ_JOJJ01000030.1       | + | 10597   | 10641   | RNA→ | rpmE (PRK00019)      | Ribosomal_L31 (pfam01197) | →                          |
| Ssp-75-1  | NZ_JNWN01000030.1       | + | 10583   | 10627   | RNA→ | rpmE (PRK00019)      | Ribosomal_L31 (pfam01197) | →                          |
| Spe-2-1   | NZ_JOCK01000033.1       | + | 10581   | 10625   | RNA→ | rpmE (PRK00019)      | Ribosomal_L31 (pfam01197) | →                          |
| Sri-4-18  | NZ_JOCQ01000154.1       | - | 4106    | 4062    | RNA→ | rpmE (PRK00019)      | Ribosomal_L31 (pfam01197) | →                          |
| Sri-4-19  | NZ_JOBW01000113.1       | + | 10576   | 10620   | RNA→ | rpmE (PRK00019)      | Ribosomal_L31 (pfam01197) | →                          |
| Sri-4-20  | NZ_JOBO01000026.1       | + | 10605   | 10649   | RNA→ | rpmE (PRK00019)      | Ribosomal_L31 (pfam01197) | →                          |
| env-146   | JGI24739J22299_10113857 | + | 487     | 535     | RNA→ | PRK10959 (PRK10959)→ | rpmE (PRK00019)           | Ribosomal_L31 (pfam01197)→ |
| env-147   | JGI24738J21930_10012013 | - | 456     | 408     | RNA→ | hypo→                | rpmE (PRK00019)           | Ribosomal_L31 (pfam01197)→ |
| env-148   | JGI24737J22298_10573430 | + | 283     | 331     | RNA→ | hypo→                |                           |                            |
| Nal-1-1   | NZ_AUFN01000010.1       | - | 437447  | 437399  | RNA→ | rpmE (PRK00019)      | Ribosomal_L31 (pfam01197) | →                          |
| env-149   | JGI25160J50197_1029009  | - | 1165    | 1120    | RNA→ | rpmE (PRK00019)      | Ribosomal_L31 (pfam01197) | →                          |
| Shy-1-1   | NZ_GG657754.1           | - | 3705640 | 3705595 | RNA→ | rpmE (PRK00019)      | Ribosomal_L31 (pfam01197) | → rpmE (PRK00019)          |
| Ssp-36-1  | NZ_GG770539.1           | - | 1908349 | 1908302 | RNA→ | hypo→                | rpmE (PRK00019)           | Ribosomal_L31 (pfam01197)→ |
| Ssp-109-1 | NZ_JOG001000006.1       | - | 20265   | 20218   | RNA→ | rpmE (PRK00019)      | Ribosomal_L31 (pfam01197) | →                          |
| Ssp-35-1  | NZ_ADXA01000073.1       | - | 20808   | 20761   | RNA→ | rpmE (PRK00019)      | Ribosomal_L31 (pfam01197) | → rpmE (PRK00019)          |
| Ssp-37-1  | NZ_GG657742.1           | + | 5431603 | 5431650 | RNA→ | rpmE (PRK00019)      | Ribosomal_L31 (pfam01197) | → rpmE (PRK00019)          |
| Ssp-34-1  | NZ_ADXB01000013.1       | - | 18515   | 18468   | RNA→ | rpmE (PRK00019)      | Ribosomal_L31 (pfam01197) | → rpmE (PRK00019)          |
| Ssp-42-1  | NZ_CM001165.1           | - | 2277919 | 2277872 | RNA→ | rpmE (PRK00019)      | Ribosomal_L31 (pfam01197) | → rpmE (PRK00019)          |
| env-150   | FWIREIOz_GKZ9IRQ02HYXXR | + | 135     | 179     | RNA→ | rpmE (PRK00019)      | Ribosomal_L31 (pfam01197) | →                          |
| Mau-2-1   | NZ_CVQQ01000029.1       | + | 46091   | 46143   | RNA→ | rpmE (PRK00019)      | Ribosomal_L31 (pfam01197) | →                          |
| env-151   | JGI26341J46601_10001885 | - | 1722    | 1672    | RNA→ | rpmE (PRK00019)      | Ribosomal_L31 (pfam01197) | →                          |
| env-152   | JGI26340J50214_10000427 | - | 14824   | 14774   | RNA→ | rpmE (PRK00019)      | Ribosomal_L31 (pfam01197) | →                          |
| env-153   | JGI12397J12024_1078638  | + | 4       | 59      | RNA→ | ← hypo               |                           |                            |
| Psp-10-1  | NZ_KE386835.1           | - | 170013  | 169972  | RNA→ | rpmE (PRK00019)      | Ribosomal_L31 (pfam01197) | →                          |
| env-154   | JGI24739J22299_10349184 | - | 302     | 261     | RNA→ | rpmE (PRK00019)      | Ribosomal_L31 (pfam01197) | →                          |
| env-155   | JGI24737J22298_10666825 | - | 244     | 203     | RNA→ | rpmE (PRK00019)      | Ribosomal_L31 (pfam01197) | →                          |



|           |                          |   |         |         |                                                                                                                                                                                                          |
|-----------|--------------------------|---|---------|---------|----------------------------------------------------------------------------------------------------------------------------------------------------------------------------------------------------------|
| env-156   | FIHLEPW02SY4CH           | - | 297     | 256     | RNA → rpmE (PRK00019)Ribosomal_L31 (pfam01197) →                                                                                                                                                         |
| env-157   | JGI20208J14878_1015464   | - | 754     | 701     | RNA → rpmE (PRK00019)Ribosomal_L31 (pfam01197) →                                                                                                                                                         |
| env-158   | JGI20207J14881_1024728   | - | 493     | 439     | RNA → rpmE (PRK00019)Ribosomal_L31 (pfam01197) →                                                                                                                                                         |
| env-159   | JGI20206J14855_1162051   | - | 92      | 38      | RNA → ← hypō                                                                                                                                                                                             |
| env-160   | JGI20208J14878_1000138   | + | 14241   | 14295   | RNA → rpmE (PRK00019)Ribosomal_L31 (pfam01197) → PrfA (COG0216)prfA (PRK00591) →<br>HemK (COG2890)PRK09328 (PRK09328) → SUA5 (COG0009)TIGR00057 (TIGR00057) →<br>GT_WecA_like (cd06853)mraY (PRK00108) → |
| Mha-1-1   | NZ_KB903880.1            | - | 18836   | 18779   | RNA → rpmE (PRK00019)Ribosomal_L31 (pfam01197) → PrfA (COG0216)prfA (PRK00591) →<br>HemK (COG2890)PRK09328 (PRK09328) → SUA5 (COG0009)TIGR00057 (TIGR00057) →<br>GT_WecA_like (cd06853)mraY (PRK00108) → |
| env-161   | JGI12635J15846_10811506  | + | 158     | 208     | RNA → rpmE (PRK00019)Ribosomal_L31 (pfam01197) →                                                                                                                                                         |
| env-162   | JGI12712J15308_10934693  | - | 161     | 94      | RNA → hypō →                                                                                                                                                                                             |
| env-163   | JGI12271J12027_1083783   | + | 20      | 68      | RNA → hypō → rpmE (PRK00019)Ribosomal_L31 (pfam01197) →                                                                                                                                                  |
| env-164   | JGI12397J12024_1053925   | + | 25      | 70      | RNA → rpmE (PRK00019)Ribosomal_L31 (pfam01197) →                                                                                                                                                         |
| Asp-5-1   | NZ_AYXG01000169.1        | + | 21786   | 21823   | RNA → efflux_EmrB (TIGR00711)MFS_1 (pfam07690) → rpmE (PRK00019)Ribosomal_L31 (pfam01197) →                                                                                                              |
| env-165   | JGI24740J21852_10368802  | + | 100     | 168     | RNA → rpmE (PRK00019)Ribosomal_L31 (pfam01197) →                                                                                                                                                         |
| Nlu-1-1   | NZ_JZDQ01000313.1        | + | 1229    | 1274    | RNA → rpmE (PRK00019)Ribosomal_L31 (pfam01197) →                                                                                                                                                         |
| Nba-1-1   | NZ_GL873266.1            | + | 198527  | 198572  | RNA → rpmE (PRK00019)Ribosomal_L31 (pfam01197) → PrfA (COG0216)prfA (PRK00591) →                                                                                                                         |
| Ssp-177-1 | NZ_LAND01000002.1        | - | 44421   | 44376   | RNA → rpmE (PRK00019)Ribosomal_L31 (pfam01197) →                                                                                                                                                         |
| Lal-1-1   | NZ_KB903833.1            | - | 501554  | 501506  | RNA → rpmE (PRK00019)Ribosomal_L31 (pfam01197) →                                                                                                                                                         |
| Gma-1-1   | NZ_BAOP01000039.1        | - | 23950   | 23903   | RNA → rpmE (PRK00019)Ribosomal_L31 (pfam01197) →                                                                                                                                                         |
| Bme-1-1   | NZ_JGZC01000003.1        | + | 96433   | 96480   | RNA → rpmE (PRK00019)Ribosomal_L31 (pfam01197) →                                                                                                                                                         |
| Bme-2-1   | NZ_JDTL01000009.1        | - | 12355   | 12308   | RNA → rpmE (PRK00019)Ribosomal_L31 (pfam01197) →                                                                                                                                                         |
| Bsu-2-1   | NZ_AUFH01000003.1        | - | 180572  | 180527  | RNA → rpmE (PRK00019)Ribosomal_L31 (pfam01197) →                                                                                                                                                         |
| Bsu-1-1   | NZ_JGZR01000005.1        | - | 181538  | 181493  | RNA → rpmE (PRK00019)Ribosomal_L31 (pfam01197) →                                                                                                                                                         |
| Bsu-2-2   | NZ_JDXT01000010.1        | + | 15308   | 15353   | RNA → rpmE (PRK00019)Ribosomal_L31 (pfam01197) →                                                                                                                                                         |
| Bre-1-1   | NZ_JGZK01000017.1        | + | 179460  | 179506  | RNA → rpmE (PRK00019)Ribosomal_L31 (pfam01197) →                                                                                                                                                         |
| Bre-1-2   | NZ_JDUW01000013.1        | + | 107     | 153     | RNA → rpmE (PRK00019)Ribosomal_L31 (pfam01197) →                                                                                                                                                         |
| Blo-34-1  | NZ_JGZA01000001.1        | + | 95476   | 95522   | RNA → rpmE (PRK00019)Ribosomal_L31 (pfam01197) →                                                                                                                                                         |
| Blo-35-1  | NZ_JDUC01000003.1        | + | 20722   | 20768   | RNA → rpmE (PRK00019)Ribosomal_L31 (pfam01197) →                                                                                                                                                         |
| Blo-30-1  | NZ_KE145398.1            | - | 59671   | 59625   | RNA → rpmE (PRK00019)Ribosomal_L31 (pfam01197) →                                                                                                                                                         |
| Blo-18-1  | NC_014169.1              | - | 1896650 | 1896604 | RNA → rpmE (PRK00019)Ribosomal_L31 (pfam01197) →                                                                                                                                                         |
| Blo-20-1  | NZ_CP008885.1            | - | 1899429 | 1899383 | RNA → rpmE (PRK00019)Ribosomal_L31 (pfam01197) →                                                                                                                                                         |
| Blo-21-1  | NZ_ATWX01000002.1        | - | 62575   | 62529   | RNA → rpmE (PRK00019)Ribosomal_L31 (pfam01197) →                                                                                                                                                         |
| env-166   | SRS020869_C3365636       | - | 215     | 169     | RNA → rpmE (PRK00019)Ribosomal_L31 (pfam01197) →                                                                                                                                                         |
| Blo-22-1  | NZ_CCWR01000010.1        | + | 9996    | 10042   | RNA → rpmE (PRK00019)Ribosomal_L31 (pfam01197) →                                                                                                                                                         |
| Blo-22-2  | NZ_CCWS01000010.1        | + | 10024   | 10070   | RNA → rpmE (PRK00019)Ribosomal_L31 (pfam01197) →                                                                                                                                                         |
| Blo-22-3  | NZ_CCWU01000013.1        | + | 9992    | 10038   | RNA → rpmE (PRK00019)Ribosomal_L31 (pfam01197) →                                                                                                                                                         |
| Blo-22-4  | NZ_CCWP01000016.1        | + | 10004   | 10050   | RNA → rpmE (PRK00019)Ribosomal_L31 (pfam01197) →                                                                                                                                                         |
| Blo-22-5  | NZ_CCWO01000014.1        | + | 10001   | 10047   | RNA → rpmE (PRK00019)Ribosomal_L31 (pfam01197) →                                                                                                                                                         |
| Blo-22-6  | NZ_CCWQ01000012.1        | + | 10020   | 10066   | RNA → rpmE (PRK00019)Ribosomal_L31 (pfam01197) →                                                                                                                                                         |
| Blo-22-7  | NZ_CCWN01000013.1        | + | 10016   | 10062   | RNA → rpmE (PRK00019)Ribosomal_L31 (pfam01197) →                                                                                                                                                         |
| Blo-22-8  | NZ_CCWT01000014.1        | + | 10021   | 10067   | RNA → rpmE (PRK00019)Ribosomal_L31 (pfam01197) →                                                                                                                                                         |
| Blo-23-1  | NZ_JDTT01000014.1        | - | 70968   | 70922   | RNA → rpmE (PRK00019)Ribosomal_L31 (pfam01197) →                                                                                                                                                         |
| Blo-6-1   | NC_011593.1              | + | 649451  | 649497  | RNA → rpmE (PRK00019)Ribosomal_L31 (pfam01197) →                                                                                                                                                         |
| Blo-7-1   | NC_0117219.1             | + | 649243  | 649289  | RNA → rpmE (PRK00019)Ribosomal_L31 (pfam01197) →                                                                                                                                                         |
| env-167   | BABF01008774.1           | - | 974     | 928     | RNA → rpmE (PRK00019)Ribosomal_L31 (pfam01197) →                                                                                                                                                         |
| env-168   | scaffold29315_2_MH0086   | - | 681     | 635     | RNA → rpmE (PRK00019)Ribosomal_L31 (pfam01197) →                                                                                                                                                         |
| env-169   | SRS018133_C4548354       | - | 305     | 259     | RNA → rpmE (PRK00019)Ribosomal_L31 (pfam01197) →                                                                                                                                                         |
| env-170   | scaffold19704_2_O2.UC-23 | - | 9273    | 9227    | RNA → rpmE (PRK00019)Ribosomal_L31 (pfam01197) →                                                                                                                                                         |
| env-171   | scaffold19269_2_V1.UC-14 | - | 1535    | 1489    | RNA → rpmE (PRK00019)Ribosomal_L31 (pfam01197) →                                                                                                                                                         |
| env-172   | scaffold21097_2_V1.UC-15 | - | 760     | 714     | RNA → rpmE (PRK00019)Ribosomal_L31 (pfam01197) →                                                                                                                                                         |
| env-173   | scaffold17503_1_V1.UC-18 | + | 2099    | 2145    | RNA → rpmE (PRK00019)Ribosomal_L31 (pfam01197) →                                                                                                                                                         |

|          |                         |   |         |         |      |                                                                                     |
|----------|-------------------------|---|---------|---------|------|-------------------------------------------------------------------------------------|
| env-174  | scaffold52336_3.V1.UC-6 | + | 189     | 235     | RNA→ | rpmE (PRK00019)Ribosomal_L31 (pfam01197)→                                           |
| env-175  | 4491422.3_NODE.2100     | + | 169     | 215     | RNA→ | rpmE (PRK00019)Ribosomal_L31 (pfam01197)→                                           |
| env-176  | DLF009_scaffold9111.2   | + | 197     | 243     | RNA→ | rpmE (PRK00019)Ribosomal_L31 (pfam01197)→                                           |
| env-177  | DLM001_scaffold39319.11 | - | 1511    | 1465    | RNA→ | rpmE (PRK00019)Ribosomal_L31 (pfam01197)→                                           |
| env-178  | longitudinal_276_85     | - | 13590   | 13544   | RNA→ | rpmE (PRK00019)Ribosomal_L31 (pfam01197)→                                           |
| env-179  | longitudinal_277_74     | - | 54531   | 54485   | RNA→ | rpmE (PRK00019)Ribosomal_L31 (pfam01197)→                                           |
| env-180  | longitudinal_455_238    | + | 17104   | 17150   | RNA→ | rpmE (PRK00019)Ribosomal_L31 (pfam01197)→                                           |
| env-181  | longitudinal_456_166    | + | 17071   | 17117   | RNA→ | rpmE (PRK00019)Ribosomal_L31 (pfam01197)→                                           |
| env-182  | longitudinal_457_211    | + | 244972  | 245018  | RNA→ | rpmE (PRK00019)Ribosomal_L31 (pfam01197)→                                           |
| env-183  | longitudinal_458_181    | + | 17074   | 17120   | RNA→ | rpmE (PRK00019)Ribosomal_L31 (pfam01197)→                                           |
| env-184  | longitudinal_459_243    | + | 17138   | 17184   | RNA→ | rpmE (PRK00019)Ribosomal_L31 (pfam01197)→                                           |
| env-185  | longitudinal_512_194    | - | 163136  | 163090  | RNA→ | rpmE (PRK00019)Ribosomal_L31 (pfam01197)→                                           |
| env-186  | longitudinal_513_220    | + | 245449  | 245495  | RNA→ | rpmE (PRK00019)Ribosomal_L31 (pfam01197)→                                           |
| env-187  | longitudinal_514_219    | + | 245293  | 245339  | RNA→ | rpmE (PRK00019)Ribosomal_L31 (pfam01197)→                                           |
| env-188  | longitudinal_515_8      | + | 17141   | 17187   | RNA→ | rpmE (PRK00019)Ribosomal_L31 (pfam01197)→                                           |
| env-189  | longitudinal_516_182    | - | 163739  | 163693  | RNA→ | rpmE (PRK00019)Ribosomal_L31 (pfam01197)→                                           |
| env-190  | longitudinal_517_226    | - | 112586  | 112540  | RNA→ | rpmE (PRK00019)Ribosomal_L31 (pfam01197)→                                           |
| env-191  | longitudinal_518_210    | - | 116768  | 116722  | RNA→ | rpmE (PRK00019)Ribosomal_L31 (pfam01197)→                                           |
| env-192  | ADJS01003337.1          | - | 8514    | 8468    | RNA→ | rpmE (PRK00019)Ribosomal_L31 (pfam01197)→                                           |
| env-193  | ADJT01002401.1          | + | 120384  | 120430  | RNA→ | rpmE (PRK00019)Ribosomal_L31 (pfam01197)→                                           |
| env-194  | SRS018656_C1658316      | + | 203     | 249     | RNA→ | rpmE (PRK00019)Ribosomal_L31 (pfam01197)→                                           |
| env-195  | SRS020328_C2846861      | - | 160     | 114     | RNA→ | rpmE (PRK00019)Ribosomal_L31 (pfam01197)→                                           |
| Blo-1-1  | NZ_AQGL01000009.1       | - | 343420  | 343374  | RNA→ | rpmE (PRK00019)Ribosomal_L31 (pfam01197)→                                           |
| Blo-22-9 | NZ_CDPT01000001.1       | - | 1421625 | 1421579 | RNA→ | rpmE (PRK00019)Ribosomal_L31 (pfam01197)→                                           |
| Blo-15-1 | NZ_CALH01000107.1       | - | 4653    | 4607    | RNA→ | rpmE (PRK00019)Ribosomal_L31 (pfam01197)→                                           |
| Blo-31-1 | NZ_JNWD01000001.1       | + | 233485  | 233531  | RNA→ | rpmE (PRK00019)Ribosomal_L31 (pfam01197)→                                           |
| Blo-28-1 | NZ_JNVY01000019.1       | + | 152362  | 152408  | RNA→ | rpmE (PRK00019)Ribosomal_L31 (pfam01197)→                                           |
| Blo-24-1 | NZ_JNWB01000013.1       | - | 17648   | 17602   | RNA→ | rpmE (PRK00019)Ribosomal_L31 (pfam01197)→                                           |
| Blo-29-1 | NZ_JNWA01000011.1       | + | 218140  | 218186  | RNA→ | rpmE (PRK00019)Ribosomal_L31 (pfam01197)→                                           |
| Blo-11-1 | NZ_AJTJ01000037.1       | - | 10590   | 10544   | RNA→ | rpmE (PRK00019)Ribosomal_L31 (pfam01197)→                                           |
| Blo-12-1 | NZ_AJTI01000029.1       | + | 4915    | 4961    | RNA→ | rpmE (PRK00019)Ribosomal_L31 (pfam01197)→                                           |
| Blo-26-1 | NZ_JNVX01000017.1       | - | 233903  | 233857  | RNA→ | rpmE (PRK00019)Ribosomal_L31 (pfam01197)→                                           |
| Blo-25-1 | NZ_JGYZ01000008.1       | - | 522649  | 522603  | RNA→ | rpmE (PRK00019)Ribosomal_L31 (pfam01197)→                                           |
| Blo-9-1  | NZ_DS990240.1           | + | 132343  | 132389  | RNA→ | rpmE (PRK00019)Ribosomal_L31 (pfam01197)→ rpmE (PRK00019)Ribosomal_L31 (pfam01197)→ |
| Bsp-1-1  | NZ_GL622628.1           | - | 22265   | 22219   | RNA→ | rpmE (PRK00019)Ribosomal_L31 (pfam01197)→                                           |
| Blo-3-1  | NZ_CM002287.1           | - | 1828371 | 1828325 | RNA→ | rpmE (PRK00019)Ribosomal_L31 (pfam01197)→                                           |
| Blo-14-1 | NC_014656.1             | + | 2156860 | 2156906 | RNA→ | rpmE (PRK00019)Ribosomal_L31 (pfam01197)→                                           |
| Blo-17-1 | NC_015067.1             | - | 1854923 | 1854877 | RNA→ | rpmE (PRK00019)Ribosomal_L31 (pfam01197)→                                           |
| Blo-33-1 | NZ_CP006741.1           | - | 1917232 | 1917186 | RNA→ | rpmE (PRK00019)Ribosomal_L31 (pfam01197)→                                           |
| Blo-16-1 | NC_021008.1             | - | 314812  | 314766  | RNA→ | rpmE (PRK00019)Ribosomal_L31 (pfam01197)→                                           |
| Blo-25-2 | NZ_JRWN01000004.1       | + | 171999  | 172045  | RNA→ | rpmE (PRK00019)Ribosomal_L31 (pfam01197)→                                           |
| env-196  | BABC01009804.1          | - | 850     | 804     | RNA→ | rpmE (PRK00019)Ribosomal_L31 (pfam01197)→                                           |
| Blo-19-1 | NC_017221.1             | + | 433187  | 433233  | RNA→ | rpmE (PRK00019)Ribosomal_L31 (pfam01197)→                                           |
| env-197  | hgutS8_s8_172738        | - | 762     | 716     | RNA→ | rpmE (PRK00019)Ribosomal_L31 (pfam01197)→                                           |
| env-198  | BABE01000068.1          | - | 9777    | 9731    | RNA→ | rpmE (PRK00019)Ribosomal_L31 (pfam01197)→                                           |
| env-199  | scaffold8513_5_MH0012   | + | 1213    | 1259    | RNA→ | rpmE (PRK00019)Ribosomal_L31 (pfam01197)→                                           |
| env-200  | DLF013_scaffold22032.2  | - | 754     | 708     | RNA→ | rpmE (PRK00019)Ribosomal_L31 (pfam01197)→                                           |
| env-201  | DLM012_scaffold9385.5   | + | 30093   | 30139   | RNA→ | rpmE (PRK00019)Ribosomal_L31 (pfam01197)→                                           |
| env-202  | DLM018_scaffold48944.2  | - | 1497    | 1451    | RNA→ | rpmE (PRK00019)Ribosomal_L31 (pfam01197)→                                           |
| env-203  | DOF008_scaffold17675.1  | - | 57046   | 57000   | RNA→ | rpmE (PRK00019)Ribosomal_L31 (pfam01197)→                                           |
| env-204  | longitudinal_33_209     | + | 102094  | 102140  | RNA→ | rpmE (PRK00019)Ribosomal_L31 (pfam01197)→                                           |
| env-205  | longitudinal_34_64      | + | 102147  | 102193  | RNA→ | rpmE (PRK00019)Ribosomal_L31 (pfam01197)→                                           |

|          |                               |   |         |         |                                                                                                                                                                               |
|----------|-------------------------------|---|---------|---------|-------------------------------------------------------------------------------------------------------------------------------------------------------------------------------|
| env-206  | longitudinal_35_67            | - | 79278   | 79232   | RNA → rpmE (PRK00019)Ribosomal_L31 (pfam01197) →                                                                                                                              |
| env-207  | longitudinal_36_6             | - | 79301   | 79255   | RNA → rpmE (PRK00019)Ribosomal_L31 (pfam01197) →                                                                                                                              |
| env-208  | longitudinal_37_110           | - | 139321  | 139275  | RNA → rpmE (PRK00019)Ribosomal_L31 (pfam01197) →                                                                                                                              |
| env-209  | longitudinal_59_157           | + | 17124   | 17170   | RNA → rpmE (PRK00019)Ribosomal_L31 (pfam01197) → PrfA (COG0216)prfA (PRK00591) → HemK (COG2890)PRK09328 (PRK09328) →                                                          |
| env-210  | longitudinal_60_167           | + | 21344   | 21390   | RNA → rpmE (PRK00019)Ribosomal_L31 (pfam01197) →                                                                                                                              |
| env-211  | longitudinal_94_39            | - | 19572   | 19526   | RNA → rpmE (PRK00019)Ribosomal_L31 (pfam01197) →                                                                                                                              |
| env-212  | longitudinal_95_34            | + | 21350   | 21396   | RNA → rpmE (PRK00019)Ribosomal_L31 (pfam01197) →                                                                                                                              |
| env-213  | longitudinal_96_7             | + | 102094  | 102140  | RNA → rpmE (PRK00019)Ribosomal_L31 (pfam01197) →                                                                                                                              |
| env-214  | SRS017103_C2706015            | - | 215     | 169     | RNA → rpmE (PRK00019)Ribosomal_L31 (pfam01197) →                                                                                                                              |
| env-215  | SRS052697_LANL_scaffold_51199 | + | 934     | 980     | RNA → rpmE (PRK00019)Ribosomal_L31 (pfam01197) →                                                                                                                              |
| Blo-13-1 | NZ_AJTM01000062.1             | - | 86722   | 86676   | RNA → rpmE (PRK00019)Ribosomal_L31 (pfam01197) →                                                                                                                              |
| Blo-27-1 | NZ_JNVZ01000015.1             | + | 229769  | 229815  | RNA → rpmE (PRK00019)Ribosomal_L31 (pfam01197) →                                                                                                                              |
| Blo-32-1 | NZ_JNWC01000023.1             | - | 297292  | 297246  | RNA → rpmE (PRK00019)Ribosomal_L31 (pfam01197) →                                                                                                                              |
| Blo-10-1 | NZ_AJTF01000083.1             | + | 25032   | 25078   | RNA → rpmE (PRK00019)Ribosomal_L31 (pfam01197) →                                                                                                                              |
| Blo-4-1  | NC_004307.2                   | + | 2130767 | 2130813 | RNA → rpmE (PRK00019)Ribosomal_L31 (pfam01197) →                                                                                                                              |
| Blo-8-1  | NZ_GG666850.1                 | + | 218460  | 218506  | RNA → rpmE (PRK00019)Ribosomal_L31 (pfam01197) →                                                                                                                              |
| Blo-5-1  | NC_015052.1                   | - | 1885479 | 1885433 | RNA → rpmE (PRK00019)Ribosomal_L31 (pfam01197) →                                                                                                                              |
| env-216  | BABF01010041.1                | + | 452     | 498     | RNA → rpmE (PRK00019)Ribosomal_L31 (pfam01197) →                                                                                                                              |
| env-217  | SRS016517_C20400143           | - | 363     | 317     | RNA → rpmE (PRK00019)Ribosomal_L31 (pfam01197) →                                                                                                                              |
| env-218  | SRS016495_LANL_scaffold_979   | + | 781     | 827     | RNA →                                                                                                                                                                         |
| Blo-2-1  | NC_010816.1                   | + | 2243300 | 2243346 | RNA → rpmE (PRK00019)Ribosomal_L31 (pfam01197) →                                                                                                                              |
| env-219  | JGI24738J21930_10111851       | + | 341     | 398     | RNA → rpmE (PRK00019)Ribosomal_L31 (pfam01197) →                                                                                                                              |
| Ssp-47-1 | NZ_JALM01000005.1             | + | 11373   | 11411   | RNA → rpmE (PRK00019)Ribosomal_L31 (pfam01197) → PrfA (COG0216)prfA (PRK00591) → HemK (COG2890)PRK09328 (PRK09328) → CpdA (COG1409) → hypo → HicB (COG1598)HicB (pfam05534) → |
| Sma-2-1  | NZ_KB905458.1                 | - | 174655  | 174617  | RNA → rpmE (PRK00019)Ribosomal_L31 (pfam01197) → PrfA (COG0216)prfA (PRK00591) →                                                                                              |
| Nrh-1-1  | NZ_JOAJ01000005.1             | + | 675604  | 675651  | RNA → rpmE (PRK00019)Ribosomal_L31 (pfam01197) → PrfA (COG0216)prfA (PRK00591) →                                                                                              |
| Nrh-1-2  | NZ_JOEJ01000005.1             | - | 16032   | 15985   | RNA → rpmE (PRK00019)Ribosomal_L31 (pfam01197) → PrfA (COG0216)prfA (PRK00591) →                                                                                              |
| Nte-2-1  | NZ_BAGJ01000039.1             | + | 21259   | 21306   | RNA → rpmE (PRK00019)Ribosomal_L31 (pfam01197) → PrfA (COG0216)prfA (PRK00591) → HemK (COG2890)PRK09328 (PRK09328) → HemK (COG2890)PRK09328 (PRK09328) →                      |
| Nsp-2-1  | NZ_KB907310.1                 | + | 750500  | 750547  | RNA → rpmE (PRK00019)Ribosomal_L31 (pfam01197) → PrfA (COG0216)prfA (PRK00591) →                                                                                              |
| env-220  | JGI12635J15846_10443042       | + | 326     | 380     | RNA → ← hypo                                                                                                                                                                  |
| env-221  | JGI12467J12023_1172356        | + | 9       | 51      | RNA → rpmE (PRK00019)Ribosomal_L31 (pfam01197) →                                                                                                                              |
| env-222  | JGI12397J12024_1008566        | + | 21      | 63      | RNA → rpmE (PRK00019)Ribosomal_L31 (pfam01197) → PCRf (smart00937)RF-1 (pfam00472)PCRf (pfam03462) →                                                                          |
| env-223  | JGI24741J21665_1049030        | + | 81      | 179     | RNA → rpmE (PRK00019)Ribosomal_L31 (pfam01197) → prfA (PRK00591)PCRf (pfam03462) →                                                                                            |
| env-224  | JGI24740J21852_10229407       | + | 87      | 185     | RNA → hypo → rpmE (PRK00019)Ribosomal_L31 (pfam01197) →                                                                                                                       |
| env-225  | JGI12397J12024_1078760        | + | 13      | 60      | RNA → rpmE (PRK00019)Ribosomal_L31 (pfam01197) →                                                                                                                              |
| env-226  | JGI12396J12026_1036873        | + | 11      | 61      | RNA → rpmE (PRK00019)Ribosomal_L31 (pfam01197) →                                                                                                                              |
| env-227  | FNTS_GKKEVUV01A6HR7           | + | 259     | 297     | RNA → rpmE (PRK00019)Ribosomal_L31 (pfam01197) →                                                                                                                              |
| env-228  | JGI12396J12026_1167238        | + | 15      | 53      | RNA → rpmE (PRK00019)Ribosomal_L31 (pfam01197) →                                                                                                                              |
| env-229  | JGI12396J12026_1310149        | + | 19      | 57      | RNA → hypo → rpmE (PRK00019)Ribosomal_L31 (pfam01197) →                                                                                                                       |
| env-230  | Incfw_1020660                 | + | 204     | 250     | RNA → rpmE (PRK00019)Ribosomal_L31 (pfam01197) →                                                                                                                              |
| env-231  | JGI12273J12029_10368297       | + | 4       | 44      | RNA → rpmE (PRK00019)Ribosomal_L31 (pfam01197) →                                                                                                                              |
| env-232  | JGI24735J21928_10783078       | + | 165     | 212     | RNA → hypo →                                                                                                                                                                  |
| env-233  | JGI12272J11983_1065882        | + | 43      | 88      | RNA → ← hypo                                                                                                                                                                  |
| env-234  | JGI12397J12024_1021578        | + | 17      | 62      | RNA → rpmE (PRK00019)Ribosomal_L31 (pfam01197) →                                                                                                                              |
| env-235  | JGI12271J12027_1090917        | + | 17      | 62      | RNA → rpmE (PRK00019)Ribosomal_L31 (pfam01197) →                                                                                                                              |
| env-236  | JGI12273J12029_10052257       | + | 17      | 62      | RNA → ← hypo                                                                                                                                                                  |
| Fsp-3-1  | NC_007777.1                   | - | 4454117 | 4454072 | RNA → rpmE (PRK00019)Ribosomal_L31 (pfam01197) →                                                                                                                              |
| Fsp-15-1 | NZ_JENI01000016.1             | + | 11880   | 11925   | RNA → rpmE (PRK00019)Ribosomal_L31 (pfam01197) →                                                                                                                              |
| Fsp-11-1 | NZ_JDWE01000027.1             | + | 11908   | 11953   | RNA → rpmE (PRK00019)Ribosomal_L31 (pfam01197) →                                                                                                                              |
| Fsp-12-1 | NZ_JPGU01000036.1             | - | 33938   | 33893   | RNA → rpmE (PRK00019)Ribosomal_L31 (pfam01197) →                                                                                                                              |



|           |                         |   |         |         |                                                                                                                                                                                                                                                          |
|-----------|-------------------------|---|---------|---------|----------------------------------------------------------------------------------------------------------------------------------------------------------------------------------------------------------------------------------------------------------|
| Fsp-10-1  | NZ_JPHT01000022.1       | - | 73950   | 73905   | RNA → rpmE (PRK00019)Ribosomal_L31 (pfam01197) →                                                                                                                                                                                                         |
| Fsp-4-1   | NZ_AYTZ01000024.1       | + | 10131   | 10176   | RNA → rpmE (PRK00019)Ribosomal_L31 (pfam01197) →                                                                                                                                                                                                         |
| Ssy-1-1   | NZ_JNYO01000029.1       | - | 44929   | 44889   | RNA → rpmE (PRK00019)Ribosomal_L31 (pfam01197) →                                                                                                                                                                                                         |
| Ssp-54-1  | NZ_KE384522.1           | - | 215499  | 215455  | RNA → rpmE (PRK00019)Ribosomal_L31 (pfam01197) →                                                                                                                                                                                                         |
| Ssp-174-1 | NZ_JNIH01000045.1       | + | 12803   | 12848   | RNA → rpmE (PRK00019)Ribosomal_L31 (pfam01197) →                                                                                                                                                                                                         |
| Ssp-32-1  | NZ_BARG01000069.1       | - | 93141   | 93096   | RNA → rpmE (PRK00019)Ribosomal_L31 (pfam01197) →                                                                                                                                                                                                         |
| Sxy-1-1   | NZ_JNWO01000024.1       | - | 100532  | 100487  | RNA → rpmE (PRK00019)Ribosomal_L31 (pfam01197) →                                                                                                                                                                                                         |
| env-237   | JGI12396J12026_1094817  | + | 15      | 73      | RNA → rpmE (PRK00019)Ribosomal_L31 (pfam01197) →                                                                                                                                                                                                         |
| env-238   | JGI12467J12023_1044130  | + | 19      | 77      | RNA → rpmE (PRK00019)Ribosomal_L31 (pfam01197) →                                                                                                                                                                                                         |
| env-239   | JGI12273J12029_10045587 | + | 359     | 415     | RNA → rpmE (PRK00019)Ribosomal_L31 (pfam01197) →                                                                                                                                                                                                         |
| env-240   | JGI24740J21852_10734288 | - | 137     | 91      | RNA → ←-hypo                                                                                                                                                                                                                                             |
| Ssp-102-1 | NZ_JOFZ01000002.1       | + | 291142  | 291188  | RNA → rpmE (PRK00019)Ribosomal_L31 (pfam01197) →                                                                                                                                                                                                         |
| Sca-3-1   | NZ_LFXA01000015.1       | + | 32879   | 32925   | RNA → rpmE (PRK00019)Ribosomal_L31 (pfam01197) →                                                                                                                                                                                                         |
| Ghi-1-2   | NZ_ATVK01000007.1       | + | 35312   | 35358   | RNA → rpmE (PRK00019)Ribosomal_L31 (pfam01197) →                                                                                                                                                                                                         |
| Ghi-1-1   | NZ_BANT01000013.1       | + | 35312   | 35358   | RNA → rpmE (PRK00019)Ribosomal_L31 (pfam01197) →                                                                                                                                                                                                         |
| Ssc-5-1   | NZ_JOEI01000009.1       | - | 442082  | 442036  | RNA → rpmE (PRK00019)Ribosomal_L31 (pfam01197) →                                                                                                                                                                                                         |
| Sro-5-1   | NZ_JOFL01000017.1       | + | 10548   | 10594   | RNA → rpmE (PRK00019)Ribosomal_L31 (pfam01197) →                                                                                                                                                                                                         |
| Sva-2-1   | NZ_JOBFO1000022.1       | + | 129517  | 129563  | RNA → rpmE (PRK00019)Ribosomal_L31 (pfam01197) →                                                                                                                                                                                                         |
| Sva-2-2   | NZ_JOFN01000033.1       | + | 33993   | 34039   | RNA → rpmE (PRK00019)Ribosomal_L31 (pfam01197) →                                                                                                                                                                                                         |
| Sye-1-1   | NZ_JQNR01000005.1       | + | 2828881 | 2828928 | RNA → rpmE (PRK00019)Ribosomal_L31 (pfam01197) →                                                                                                                                                                                                         |
| env-241   | JGI12397J12024_1054783  | + | 54      | 105     | RNA → rpmE (PRK00019)Ribosomal_L31 (pfam01197) → PrfA (COG0216)prfA (PRK00591) →                                                                                                                                                                         |
| env-242   | JGI12272J11983_1231162  | + | 43      | 94      | RNA → rpmE (PRK00019)Ribosomal_L31 (pfam01197) →                                                                                                                                                                                                         |
| Nex-1-1   | NZ_BAFZ01000027.1       | + | 22758   | 22807   | RNA → rpmE (PRK00019)Ribosomal_L31 (pfam01197) → PrfA (COG0216)prfA (PRK00591) →                                                                                                                                                                         |
| Nar-1-1   | NZ_BAFR01000040.1       | + | 1958    | 2005    | HemK (COG2890)PRK09328 (PRK09328) →<br>RNA → rpmE (PRK00019)Ribosomal_L31 (pfam01197) → PrfA (COG0216)prfA (PRK00591) →                                                                                                                                  |
| Nab-1-1   | NZ_BAFP01000034.1       | + | 43181   | 43230   | HemK (COG2890)PRK09328 (PRK09328) →<br>RNA → rpmE (PRK00019)Ribosomal_L31 (pfam01197) → PrfA (COG0216)prfA (PRK00591) →                                                                                                                                  |
| Mar-1-1   | NZ_JALN02000001.1       | + | 4095907 | 4095961 | HemK (COG2890)PRK09328 (PRK09328) →<br>RNA → rpmE (PRK00019)Ribosomal_L31 (pfam01197) → PrfA (COG0216)prfA (PRK00591) →<br>HemK (COG2890)PRK09328 (PRK09328) → SUA5 (COG0009)TIGR00057 (TIGR00057) →                                                     |
| env-243   | JGI24770J26754_10202382 | + | 361     | 403     | GT_WecA_like (cd06853)mraY (PRK00108) →<br>RNA → rpmE (PRK00019)Ribosomal_L31 (pfam01197) →                                                                                                                                                              |
| env-244   | FWIRElOz_GKZ9IRQ02H6XIE | - | 268     | 216     | RNA → rpmE (PRK00019)Ribosomal_L31 (pfam01197) →                                                                                                                                                                                                         |
| env-245   | JGI26342J46808_1002686  | - | 1270    | 1220    | RNA → rpmE (PRK00019)Ribosomal_L31 (pfam01197) →                                                                                                                                                                                                         |
| env-246   | JGI26344J46810_1010675  | - | 505     | 455     | RNA → rpmE (PRK00019)Ribosomal_L31 (pfam01197) →                                                                                                                                                                                                         |
| env-247   | JGI26347J50199_1039997  | - | 278     | 228     | RNA → rpmE (PRK00019)Ribosomal_L31 (pfam01197) →                                                                                                                                                                                                         |
| Agl-1-1   | NZ_KB903307.1           | - | 53455   | 53386   | RNA → rpmE (PRK00019)Ribosomal_L31 (pfam01197) → PrfA (COG0216)prfA (PRK00591) →                                                                                                                                                                         |
| Msp-15-1  | NZ_LBEW01000064.1       | - | 15115   | 15060   | RNA → rpmE (PRK00019)Ribosomal_L31 (pfam01197) → PrfA (COG0216)prfA (PRK00591) →<br>HemK (COG2890)PRK09328 (PRK09328) → SUA5 (COG0009)TIGR00057 (TIGR00057) →<br>GT_WecA_like (cd06853)PRK15119 (PRK15119) → GT_WecA_like (cd06853)PRK15119 (PRK15119) → |
| Mco-2-1   | NZ_CCBB010000001.1      | - | 249287  | 249232  | RNA → rpmE (PRK00019)Ribosomal_L31 (pfam01197) → PrfA (COG0216)prfA (PRK00591) →<br>HemK (COG2890)PRK09328 (PRK09328) → SUA5 (COG0009)TIGR00057 (TIGR00057) →<br>GT_WecA_like (cd06853)PRK15119 (PRK15119) →                                             |
| env-248   | JGI12688J13320_109532   | - | 138     | 89      | RNA → rpmE (PRK00019)Ribosomal_L31 (pfam01197) →                                                                                                                                                                                                         |
| env-249   | JGI24735J21928_10093269 | + | 384     | 441     | RNA → rpmE (PRK00019)Ribosomal_L31 (pfam01197) → prfA (PRK00591)PCRF (pfam03462) →                                                                                                                                                                       |
| Nmu-1-1   | NC_013235.1             | + | 2318949 | 2318997 | RNA → rpmE (PRK00019)Ribosomal_L31 (pfam01197) →                                                                                                                                                                                                         |
| env-250   | JGI12635J15846_13193507 | - | 158     | 97      | RNA → hypo →                                                                                                                                                                                                                                             |
| env-251   | JGI20241J16302_100838   | + | 402     | 463     | RNA → rpmE (PRK00019)Ribosomal_L31 (pfam01197) →                                                                                                                                                                                                         |
| env-252   | JGI20235J16296_1030653  | - | 332     | 271     | RNA → rpmE (PRK00019)Ribosomal_L31 (pfam01197) →                                                                                                                                                                                                         |
| env-253   | C688J13580_1073401      | + | 297     | 353     | RNA → rpmE (PRK00019)rpmE2 (PRK01678)Ribosomal_L31 (pfam01197) →                                                                                                                                                                                         |
| env-254   | JGI12397J12024_1051954  | + | 41      | 127     | RNA → rpmE (PRK00019)Ribosomal_L31 (pfam01197) → hypo →                                                                                                                                                                                                  |
| env-255   | C688J13580_1242542      | - | 139     | 84      | RNA → rpmE (PRK00019)Ribosomal_L31 (pfam01197) →                                                                                                                                                                                                         |
| env-256   | JGI12397J12024_1036663  | + | 40      | 82      | RNA → rpmE (PRK00019)Ribosomal_L31 (pfam01197) →                                                                                                                                                                                                         |

|           |                                 |   |         |         |                                                                                                                                                                                                    |
|-----------|---------------------------------|---|---------|---------|----------------------------------------------------------------------------------------------------------------------------------------------------------------------------------------------------|
| env-257   | JGI12396J12026_1028942          | + | 39      | 125     | RNA → rpmE (PRK00019)Ribosomal_L31 (pfam01197) → prfA (PRK00591)RF-1 (pfam00472)PCRF (pfam03462) →                                                                                                 |
| env-258   | JGI12397J12024_1014281          | + | 48      | 131     | RNA → rpmE (PRK00019)Ribosomal_L31 (pfam01197) → prfA (PRK00591)PCRF (pfam03462) →                                                                                                                 |
| env-259   | JGI24735J21928_10543660         | - | 202     | 156     | RNA → ←hypo                                                                                                                                                                                        |
| env-260   | _GVICOHK01AHWYS                 | - | 222     | 178     | RNA → rpmE (PRK00019)Ribosomal_L31 (pfam01197) →                                                                                                                                                   |
| env-261   | CTBMPR_c14314                   | + | 184     | 228     | RNA → rpmE (PRK00019)Ribosomal_L31 (pfam01197) →                                                                                                                                                   |
| env-262   | JGI12420J12819_1024840          | + | 306     | 350     | RNA → rpmE (PRK00019)Ribosomal_L31 (pfam01197) →                                                                                                                                                   |
| env-263   | JGI12397J12024_1056172          | + | 36      | 78      | RNA → rpmE (PRK00019)Ribosomal_L31 (pfam01197) →                                                                                                                                                   |
| env-264   | JGI24739J22299_10632192         | - | 277     | 228     | RNA → rpmE (PRK00019)Ribosomal_L31 (pfam01197) →                                                                                                                                                   |
| env-265   | topACOD_FV90NF401CWY9R          | + | 385     | 428     | RNA →                                                                                                                                                                                              |
| env-266   | JGI24735J21928_10186907         | + | 96      | 140     | RNA → rpmE (PRK00019)Ribosomal_L31 (pfam01197) → prfA (PRK00591)PCRF (pfam03462) →                                                                                                                 |
| Nth-1-1   | NZ_BAGK01000052.1               | + | 1741    | 1791    | RNA → rpmE (PRK00019)Ribosomal_L31 (pfam01197) →                                                                                                                                                   |
| Pan-1-1   | NZ_JOFP01000001.1               | - | 15114   | 15064   | RNA → rpmE (PRK00019)Ribosomal_L31 (pfam01197) → PrfA (COG0216)prfA (PRK00591) → HemK (COG2890)PRK09328 (PRK09328) →                                                                               |
| Nas-1-1   | NZ_BAFO02000037.1               | + | 210935  | 210985  | RNA → rpmE (PRK00019)Ribosomal_L31 (pfam01197) → PrfA (COG0216)prfA (PRK00591) → HemK (COG2890)PRK09328 (PRK09328) →                                                                               |
| Sxi-1-1   | NZ_JH636049.1                   | + | 3421640 | 3421684 | RNA → rpmE (PRK00019)Ribosomal_L31 (pfam01197) → rpmE (PRK00019)Ribosomal_L31 (pfam01197) → PrfA (COG0216)prfA (PRK00591) → PrfA (COG0216)prfA (PRK00591) → hypo →                                 |
| Ssa-1-1   | NZ_KB912602.1                   | - | 65465   | 65418   | RNA → rpmE (PRK00019)Ribosomal_L31 (pfam01197) →                                                                                                                                                   |
| Mch-1-1   | NC_018027.1                     | - | 3984376 | 3984325 | RNA → rpmE (PRK00019)Ribosomal_L31 (pfam01197) → PrfA (COG0216)prfA (PRK00591) → HemK (COG2890)PRK09328 (PRK09328) → SUA5 (COG0009)TIGR00057 (TIGR00057) → GT_WecA_like (cd06853)mraY (PRK00108) → |
| env-267   | SRS015947_C1328584              | - | 203     | 156     | RNA → rpmE (PRK00019)Ribosomal_L31 (pfam01197) →                                                                                                                                                   |
| env-268   | SRS013170_Baylor_scaffold_89712 | + | 115     | 162     | RNA → rpmE (PRK00019)Ribosomal_L31 (pfam01197) →                                                                                                                                                   |
| env-269   | SRS015574_WUGC_scaffold_15753   | + | 130     | 177     | RNA → rpmE (PRK00019)Ribosomal_L31 (pfam01197) →                                                                                                                                                   |
| env-270   | SRS017227_Baylor_scaffold_82921 | + | 846     | 893     | RNA →                                                                                                                                                                                              |
| env-271   | SRS022149_LANL_scaffold_16970   | + | 119     | 166     | RNA → rpmE (PRK00019)Ribosomal_L31 (pfam01197) →                                                                                                                                                   |
| env-272   | SRS023964_C2397974              | - | 196     | 149     | RNA → ←hypo                                                                                                                                                                                        |
| env-273   | SRS055378_LANL_scaffold_81766   | + | 131     | 178     | RNA → rpmE (PRK00019)Ribosomal_L31 (pfam01197) →                                                                                                                                                   |
| env-274   | SRS044366_WUGC_scaffold_3585    | + | 105     | 152     | RNA → rpmE (PRK00019)Ribosomal_L31 (pfam01197) →                                                                                                                                                   |
| env-275   | SRS017304_C1861044              | - | 118     | 71      | RNA → rpmE (PRK00528)rpmE (PRK00019)rpmE2 (PRK01678)Ribosomal_L31 (pfam01197) →                                                                                                                    |
| env-276   | SRS024289_C1901398              | + | 126     | 173     | RNA → rpmE (PRK00019)Ribosomal_L31 (pfam01197) →                                                                                                                                                   |
| env-277   | SRS024649_C3463797              | - | 196     | 149     | RNA → ←hypo                                                                                                                                                                                        |
| env-278   | SRS058053_C5176642              | - | 196     | 149     | RNA → ←hypo                                                                                                                                                                                        |
| Age-1-1   | NZ_KE386871.1                   | - | 110335  | 110288  | RNA → rpmE (PRK00019)Ribosomal_L31 (pfam01197) →                                                                                                                                                   |
| Pas-1-1   | NZ_AUII01000018.1               | - | 64638   | 64580   | RNA → rpmE (PRK00019)Ribosomal_L31 (pfam01197) → prfA (PRK00591)RF-1 (pfam00472)PCRF (pfam03462) → HemK (COG2890)PRK09328 (PRK09328) → SUA5 (COG0009)TIGR00057 (TIGR00057) →                       |
| Pdi-1-1   | NC_015312.1                     | + | 1759317 | 1759374 | RNA → rpmE (PRK00019)Ribosomal_L31 (pfam01197) → PrfA (COG0216)prfA (PRK00591) → HemK (COG2890)PRK09328 (PRK09328) → SUA5 (COG0009)TIGR00057 (TIGR00057) →                                         |
| env-279   | FNTS067_GKA24FP01DWQJ8          | - | 109     | 66      | RNA → ←hypo                                                                                                                                                                                        |
| env-280   | _GX4IIKE01BKU07                 | + | 30      | 75      | RNA → rpmE (PRK00019)Ribosomal_L31 (pfam01197) → hypo →                                                                                                                                            |
| Ame-4-2   | NZ_CP009110.1                   | + | 1382283 | 1382334 | RNA → rpmE (PRK00019)Ribosomal_L31 (pfam01197) → prfA (PRK00591)RF-1 (pfam00472)PCRF (pfam03462) →                                                                                                 |
| Ame-4-1   | NZ_AQUL01000001.1               | + | 6275366 | 6275417 | RNA → rpmE (PRK00019)Ribosomal_L31 (pfam01197) → prfA (PRK00591)RF-1 (pfam00472)PCRF (pfam03462) →                                                                                                 |
| Asp-4-1   | NZ_AFWY03000007.1               | + | 215866  | 215917  | RNA → rpmE (PRK00019)Ribosomal_L31 (pfam01197) → prfA (PRK00591)RF-1 (pfam00472)PCRF (pfam03462) →                                                                                                 |
| Ath-1-1   | NZ_KI421511.1                   | - | 4345617 | 4345566 | RNA → rpmE (PRK00019)Ribosomal_L31 (pfam01197) → prfA (PRK00591)RF-1 (pfam00472)PCRF (pfam03462) →                                                                                                 |
| Sbi-1-1   | NC_016582.1                     | - | 4870714 | 4870670 | RNA → rpmE (PRK00019)Ribosomal_L31 (pfam01197) →                                                                                                                                                   |
| Shy-4-1   | NZ_JOIK01000001.1               | + | 665887  | 665931  | RNA → rpmE (PRK00019)Ribosomal_L31 (pfam01197) →                                                                                                                                                   |
| Ssp-73-1  | NZ_LAKD01000061.1               | + | 86684   | 86728   | RNA → rpmE (PRK00019)Ribosomal_L31 (pfam01197) →                                                                                                                                                   |
| Sir-1-1   | NZ_LK022848.1                   | - | 4236123 | 4236079 | RNA → rpmE (PRK00019)Ribosomal_L31 (pfam01197) →                                                                                                                                                   |
| Ssp-165-1 | NZ_JABQ01000013.1               | - | 32688   | 32644   | RNA → rpmE (PRK00019)Ribosomal_L31 (pfam01197) →                                                                                                                                                   |



|         |                         |   |         |         |                                                                                                                                                                                                                                                                                                                                                                                                                                                                                                                                    |
|---------|-------------------------|---|---------|---------|------------------------------------------------------------------------------------------------------------------------------------------------------------------------------------------------------------------------------------------------------------------------------------------------------------------------------------------------------------------------------------------------------------------------------------------------------------------------------------------------------------------------------------|
| Svi-3-1 | NC_015957.1             | + | 1549091 | 1549136 | RNA → rpmE (PRK00019)Ribosomal_L31 (pfam01197) →                                                                                                                                                                                                                                                                                                                                                                                                                                                                                   |
| env-281 | FNTS_GKKEVUV01CU0U2     | - | 207     | 156     | RNA → rpmE (PRK00019)Ribosomal_L31 (pfam01197) →                                                                                                                                                                                                                                                                                                                                                                                                                                                                                   |
| env-282 | JGI24736J21556_1245205  | + | 19      | 73      | RNA → hypo → rpmE (PRK00019)Ribosomal_L31 (pfam01197) →                                                                                                                                                                                                                                                                                                                                                                                                                                                                            |
| env-283 | JGI20205J14842_1000519  | + | 3917    | 3979    | RNA → rpmE (PRK00019)Ribosomal_L31 (pfam01197) →                                                                                                                                                                                                                                                                                                                                                                                                                                                                                   |
| env-284 | JGI20206J14855_1026724  | + | 110     | 172     | RNA → rpmE (PRK00019)Ribosomal_L31 (pfam01197) →                                                                                                                                                                                                                                                                                                                                                                                                                                                                                   |
| env-285 | JGI20188J14859_1000358  | + | 3928    | 3990    | RNA → rpmE (PRK00019)Ribosomal_L31 (pfam01197) →                                                                                                                                                                                                                                                                                                                                                                                                                                                                                   |
| env-286 | JGI20204J15000_1155101  | + | 129     | 191     | RNA →                                                                                                                                                                                                                                                                                                                                                                                                                                                                                                                              |
| env-287 | JGI20204J15135_1155101  | + | 129     | 191     | RNA →                                                                                                                                                                                                                                                                                                                                                                                                                                                                                                                              |
| env-288 | JGI12396J12026_1106282  | + | 35      | 77      | RNA → rpmE (PRK00019)Ribosomal_L31 (pfam01197) →                                                                                                                                                                                                                                                                                                                                                                                                                                                                                   |
| env-289 | 4491734.3.10488814      | - | 168     | 123     | RNA → rpmE (PRK00019)Ribosomal_L31 (pfam01197) →                                                                                                                                                                                                                                                                                                                                                                                                                                                                                   |
| env-290 | JGI20163J15578_11401153 | + | 94      | 155     | RNA → rpmE (PRK00019)Ribosomal_L31 (pfam01197) →                                                                                                                                                                                                                                                                                                                                                                                                                                                                                   |
| Gar-1-1 | NZ_BAEE01000076.1       | + | 38199   | 38249   | RNA → rpmE (PRK00019)Ribosomal_L31 (pfam01197) → rpmE (PRK00019)Ribosomal_L31 (pfam01197) →<br>PrfA (COG0216)prfA (PRK00591) → PrfA (COG0216)prfA (PRK00591) →<br>HemK (COG2890)PRK09328 (PRK09328) → HemK (COG2890)PRK09328 (PRK09328) →<br>SUA5 (COG0009)TIGR00057 (TIGR00057) → SUA5 (COG0009)TIGR00057 (TIGR00057) →<br>GlyA (COG0112)glyA (PRK00011) → GlyA (COG0112)glyA (PRK00011) →<br>GT_WecA_like (cd06853)mraY (PRK00108) → GT_WecA_like (cd06853)mraY (PRK00108) → hypo → hypo →                                       |
| Mro-1-1 | NZ_JNZQ01000027.1       | - | 31420   | 31342   | RNA → rpmE (PRK00019)Ribosomal_L31 (pfam01197) →                                                                                                                                                                                                                                                                                                                                                                                                                                                                                   |
| env-291 | JGI12271J12027_1030093  | + | 10      | 56      | RNA → ←hypo                                                                                                                                                                                                                                                                                                                                                                                                                                                                                                                        |
| env-292 | JGI12273J12029_10015673 | + | 375     | 422     | RNA → rpmE (PRK00019)Ribosomal_L31 (pfam01197) →                                                                                                                                                                                                                                                                                                                                                                                                                                                                                   |
| Psu-1-1 | NZ_KE384020.1           | - | 789516  | 789467  | RNA → rpmE (PRK00019)Ribosomal_L31 (pfam01197) → PrfA (COG0216)prfA (PRK00591) →<br>HemK (COG2890)PRK09328 (PRK09328) → hypo → SUA5 (COG0009)TIGR00057 (TIGR00057) →<br>GT_WecA_like (cd06853)PRK15119 (PRK15119) → hypo → AtpI2 (COG5336) →<br>PRK05815 (PRK05815)ATP-synt_A (pfam00119) → PRK07874 (PRK07874)AtpE (COG0636) →<br>PRK05759 (PRK05759)AtpF (COG0711) → AtpH (COG0712)PRK13430 (PRK13430) →<br>AtpA (COG0056)PRK09281 (PRK09281) → PRK05621 (PRK05621)ATP-synt (pfam00231) →<br>AtpD (COG0055)PRK09280 (PRK09280) → |
| Gne-1-1 | NZ_AEUD01000002.1       | + | 368326  | 368371  | RNA → rpmE (PRK00019)Ribosomal_L31 (pfam01197) → rpmE (PRK00019)Ribosomal_L31 (pfam01197) →                                                                                                                                                                                                                                                                                                                                                                                                                                        |
| Gsi-1-1 | NZ_BANU01000014.1       | - | 24449   | 24403   | RNA → rpmE (PRK00019)Ribosomal_L31 (pfam01197) →                                                                                                                                                                                                                                                                                                                                                                                                                                                                                   |
| Gsi-2-1 | NZ_JZDP01000041.1       | - | 24646   | 24600   | RNA → rpmE (PRK00019)Ribosomal_L31 (pfam01197) →                                                                                                                                                                                                                                                                                                                                                                                                                                                                                   |
| Nta-1-1 | NZ_BAGG01000023.1       | + | 33157   | 33212   | RNA → rpmE (PRK00019)Ribosomal_L31 (pfam01197) →                                                                                                                                                                                                                                                                                                                                                                                                                                                                                   |
| env-293 | JGI24737J22298_11161458 | + | 91      | 139     | RNA → ←hypo                                                                                                                                                                                                                                                                                                                                                                                                                                                                                                                        |
| env-294 | JGI12419J13241_1001214  | - | 1703    | 1660    | RNA → rpmE (PRK00019)Ribosomal_L31 (pfam01197) →                                                                                                                                                                                                                                                                                                                                                                                                                                                                                   |
| env-295 | JGI24739J22299_10027406 | + | 1671    | 1722    | RNA → rpmE (PRK00019)Ribosomal_L31 (pfam01197) →                                                                                                                                                                                                                                                                                                                                                                                                                                                                                   |
| env-296 | JGI24735J21928_10050545 | - | 1004    | 953     | RNA → rpmE (PRK00019)Ribosomal_L31 (pfam01197) → PCRf (smart00937)PCRf (pfam03462) →                                                                                                                                                                                                                                                                                                                                                                                                                                               |
| env-297 | JGI24738J21930_10034417 | - | 910     | 859     | RNA → rpmE (PRK00019)Ribosomal_L31 (pfam01197) → PCRf (smart00937)PCRf (pfam03462) →                                                                                                                                                                                                                                                                                                                                                                                                                                               |
| env-298 | 2044439917              | - | 59      | 9       | RNA → hypo →                                                                                                                                                                                                                                                                                                                                                                                                                                                                                                                       |
| Mob-1-1 | NZ_LAUZ02000011.1       | + | 54331   | 54383   | RNA → rpmE (PRK00019)Ribosomal_L31 (pfam01197) →                                                                                                                                                                                                                                                                                                                                                                                                                                                                                   |
| Mob-1-2 | NZ_JYNU01000003.1       | + | 194583  | 194635  | RNA → rpmE (PRK00019)Ribosomal_L31 (pfam01197) →                                                                                                                                                                                                                                                                                                                                                                                                                                                                                   |
| env-299 | DCrCPGB_c366807         | + | 142     | 208     | RNA → rpmE (PRK00019)Ribosomal_L31 (pfam01197) →                                                                                                                                                                                                                                                                                                                                                                                                                                                                                   |
| Asp-1-1 | NC_021191.1             | - | 8063566 | 8063525 | RNA → rpmE (PRK00019)Ribosomal_L31 (pfam01197) → PrfA (COG0216)prfA (PRK00591) →                                                                                                                                                                                                                                                                                                                                                                                                                                                   |
| env-300 | JGI12397J12024_1258028  | + | 36      | 84      | RNA → rpmE (PRK00019)Ribosomal_L31 (pfam01197) →                                                                                                                                                                                                                                                                                                                                                                                                                                                                                   |
| env-301 | JGI12396J12026_1152696  | + | 33      | 81      | RNA → rpmE (PRK00019)Ribosomal_L31 (pfam01197) →                                                                                                                                                                                                                                                                                                                                                                                                                                                                                   |
| env-302 | JGI12397J12024_1022450  | + | 5       | 53      | RNA → rpmE (PRK00019)Ribosomal_L31 (pfam01197) →                                                                                                                                                                                                                                                                                                                                                                                                                                                                                   |
| env-303 | JGI12396J12026_1048802  | + | 4       | 52      | RNA → rpmE (PRK00019)Ribosomal_L31 (pfam01197) → hypo →                                                                                                                                                                                                                                                                                                                                                                                                                                                                            |
| Nsp-6-1 | NZ_KI519393.1           | - | 15320   | 15272   | RNA → rpmE (PRK00019)Ribosomal_L31 (pfam01197) → PrfA (COG0216)prfA (PRK00591) →<br>HemK (COG2890)PRK09328 (PRK09328) → HemK (COG2890)PRK09328 (PRK09328) →<br>SUA5 (COG0009)TIGR00057 (TIGR00057) → ECA_wecA (TIGR02380)GT_WecA_like (cd06853) → hypo →                                                                                                                                                                                                                                                                           |
| env-304 | JGI12662J13196_1036374  | + | 59      | 111     | RNA → rpmE (PRK00019)Ribosomal_L31 (pfam01197) →                                                                                                                                                                                                                                                                                                                                                                                                                                                                                   |
| env-305 | JGI12630J15595_10065573 | - | 185     | 133     | RNA → rpmE (PRK00019)Ribosomal_L31 (pfam01197) →                                                                                                                                                                                                                                                                                                                                                                                                                                                                                   |
| env-306 | JGI12701J14581_1053699  | - | 204     | 152     | RNA → ←hypo                                                                                                                                                                                                                                                                                                                                                                                                                                                                                                                        |
| env-307 | JGI12635J15846_10023607 | + | 2592    | 2644    | RNA → rpmE (PRK00019)Ribosomal_L31 (pfam01197) →                                                                                                                                                                                                                                                                                                                                                                                                                                                                                   |
| env-308 | JGI24739J22299_10989154 | + | 71      | 123     | RNA → ←hypo                                                                                                                                                                                                                                                                                                                                                                                                                                                                                                                        |

|          |                         |   |         |         |      |                                                                                                                                                                                                    |
|----------|-------------------------|---|---------|---------|------|----------------------------------------------------------------------------------------------------------------------------------------------------------------------------------------------------|
| env-309  | JGI24737J22298_10504981 | - | 264     | 212     | RNA→ | rpmE (PRK00019)Ribosomal_L31 (pfam01197)→                                                                                                                                                          |
| env-310  | JGI24735J21928_10176247 | + | 442     | 488     | RNA→ | rpmE (PRK00019)Ribosomal_L31 (pfam01197)→                                                                                                                                                          |
| env-311  | JGI24738J21930_10548350 | + | 122     | 176     | RNA→ | ←hypo                                                                                                                                                                                              |
| env-312  | JGI12654J13325_1015162  | - | 201     | 152     | RNA→ | rpmE (PRK00019)Ribosomal_L31 (pfam01197)→                                                                                                                                                          |
| env-313  | JGI12630J15595_10385291 | + | 47      | 96      | RNA→ | rpmE (PRK00019)Ribosomal_L31 (pfam01197)→                                                                                                                                                          |
| env-314  | JGI20163J15578_11533527 | + | 79      | 130     | RNA→ | rpmE (PRK00019)Ribosomal_L31 (pfam01197)→                                                                                                                                                          |
| Ami-1-1  | NC_017093.1             | - | 7818806 | 7818758 | RNA→ | rpmE (PRK00019)Ribosomal_L31 (pfam01197)→ PrfA (COG0216)prfA (PRK00591)→                                                                                                                           |
| env-315  | JGI12397J12024_1010539  | + | 13      | 58      | RNA→ | rpmE (PRK00019)Ribosomal_L31 (pfam01197)→                                                                                                                                                          |
| env-316  | JGI12271J12027_1149268  | + | 10      | 55      | RNA→ | rpmE (PRK00019)Ribosomal_L31 (pfam01197)→                                                                                                                                                          |
| env-317  | JGI12273J12029_10077712 | + | 13      | 58      | RNA→ | rpmE (PRK00019)Ribosomal_L31 (pfam01197)→ hypo→                                                                                                                                                    |
| env-318  | DCrCPGB_c531990         | - | 129     | 85      | RNA→ | rpmE (PRK00019)Ribosomal_L31 (pfam01197)→                                                                                                                                                          |
| env-319  | JGI12273J12029_10731265 | + | 11      | 55      | RNA→ | rpmE (PRK00019)Ribosomal_L31 (pfam01197)→                                                                                                                                                          |
| env-320  | JGI12272J11983_1298237  | + | 5       | 49      | RNA→ | rpmE (PRK00019)Ribosomal_L31 (pfam01197)→                                                                                                                                                          |
| env-321  | JGI12397J12024_1066331  | + | 11      | 55      | RNA→ | rpmE (PRK00019)Ribosomal_L31 (pfam01197)→ prfA (PRK00591)PCRF (pfam03462)→                                                                                                                         |
| Nni-1-1  | NZ_BAGC01000013.1       | + | 24797   | 24839   | RNA→ | rpmE (PRK00019)Ribosomal_L31 (pfam01197)→                                                                                                                                                          |
| Nsp-8-1  | NZ_JQJL01000005.1       | + | 229229  | 229271  | RNA→ | rpmE (PRK00019)Ribosomal_L31 (pfam01197)→                                                                                                                                                          |
| env-322  | JGI26055J44792_1072012  | + | 221     | 266     | RNA→ | rpmE (PRK00019)Ribosomal_L31 (pfam01197)→                                                                                                                                                          |
| Rsp-20-1 | NZ_JMLQ01000015.1       | - | 17505   | 17461   | RNA→ | rpmE (PRK00019)Ribosomal_L31 (pfam01197)→                                                                                                                                                          |
| Rsp-16-1 | NZ_JXQS01000036.1       | - | 17102   | 17058   | RNA→ | rpmE (PRK00019)Ribosomal_L31 (pfam01197)→                                                                                                                                                          |
| Mpu-1-1  | NZ_JOEU01000058.1       | - | 20946   | 20882   | RNA→ | rpmE (PRK00019)Ribosomal_L31 (pfam01197)→ PrfA (COG0216)prfA (PRK00591)→                                                                                                                           |
| Msp-27-1 | NZ_KK037233.1           | + | 5461529 | 5461593 | RNA→ | rpmE (PRK00019)Ribosomal_L31 (pfam01197)→ PrfA (COG0216)prfA (PRK00591)→                                                                                                                           |
| env-323  | JGI24735J21928_10524408 | - | 73      | 31      | RNA→ |                                                                                                                                                                                                    |
| env-324  | ARMCC_Contig_460253     | + | 48      | 90      | RNA→ | rpmE (PRK00019)Ribosomal_L31 (pfam01197)→                                                                                                                                                          |
| Aal-1-1  | NZ_KB892745.1           | + | 20751   | 20792   | RNA→ | rpmE (PRK00019)Ribosomal_L31 (pfam01197)→ PrfA (COG0216)prfA (PRK00591)→<br>HemK (COG2890)PRK09328 (PRK09328)→                                                                                     |
| env-325  | JGI20200J14955_1003645  | - | 246     | 200     | RNA→ | rpmE (PRK00019)Ribosomal_L31 (pfam01197)→                                                                                                                                                          |
| env-326  | JGI20200J14955_1019771  | + | 167     | 213     | RNA→ | ←hypo                                                                                                                                                                                              |
| env-327  | JGI20200J14955_1023045  | - | 263     | 217     | RNA→ | rpmE (PRK00019)Ribosomal_L31 (pfam01197)→                                                                                                                                                          |
| env-328  | JGI20202J14951_1002967  | - | 251     | 205     | RNA→ | rpmE (PRK00019)Ribosomal_L31 (pfam01197)→                                                                                                                                                          |
| env-329  | JGI20198J14950_1057835  | + | 78      | 124     | RNA→ | ←hypo                                                                                                                                                                                              |
| env-330  | JGI24735J21928_10184830 | - | 549     | 503     | RNA→ | rpmE (PRK00019)Ribosomal_L31 (pfam01197)→                                                                                                                                                          |
| env-331  | JGI24739J22299_10397894 | + | 86      | 132     | RNA→ | ←hypo                                                                                                                                                                                              |
| env-332  | JGI24737J22298_10271796 | - | 450     | 404     | RNA→ | ←hypo                                                                                                                                                                                              |
| env-333  | JGI12467J12023_1177552  | + | 17      | 100     | RNA→ | ←hypo                                                                                                                                                                                              |
| env-334  | JGI12272J11983_1096727  | + | 28      | 109     | RNA→ | rpmE (PRK00019)Ribosomal_L31 (pfam01197)→                                                                                                                                                          |
| env-335  | JGI24735J21928_10002808 | + | 5639    | 5690    | RNA→ | rpmE (PRK00019)Ribosomal_L31 (pfam01197)→                                                                                                                                                          |
| env-336  | JGI24737J22298_10862154 | - | 237     | 199     | RNA→ | rpmE (PRK00019)Ribosomal_L31 (pfam01197)→                                                                                                                                                          |
| env-337  | JGI25321J50212_10143090 | + | 305     | 354     | RNA→ | rpmE (PRK00019)Ribosomal_L31 (pfam01197)→                                                                                                                                                          |
| env-338  | 4491734.3.365955        | - | 183     | 127     | RNA→ | rpmE (PRK00019)Ribosomal_L31 (pfam01197)→                                                                                                                                                          |
| Bts-1-1  | NZ_JGZU01000002.1       | + | 80841   | 80886   | RNA→ | ←hypo                                                                                                                                                                                              |
| Bts-2-1  | NZ_JDTR01000003.1       | + | 80645   | 80690   | RNA→ | ←hypo                                                                                                                                                                                              |
| Bts-2-2  | NZ_AUCL01000004.1       | + | 80936   | 80981   | RNA→ | ←hypo                                                                                                                                                                                              |
| Ama-5-1  | NZ_AWOO02000022.1       | + | 110008  | 110077  | RNA→ | rpmE (PRK00019)Ribosomal_L31 (pfam01197)→                                                                                                                                                          |
| env-339  | JGI20163J15578_11194518 | + | 309     | 354     | RNA→ |                                                                                                                                                                                                    |
| env-340  | JGI12712J15308_10985252 | + | 184     | 237     | RNA→ | ←hypo                                                                                                                                                                                              |
| env-341  | botACOD_GAKN62C01DMNDD  | + | 189     | 242     | RNA→ | rpmE (PRK00019)Ribosomal_L31 (pfam01197)→                                                                                                                                                          |
| env-342  | JGI12420J12819_1025726  | + | 200     | 254     | RNA→ | rpmE (PRK00019)Ribosomal_L31 (pfam01197)→                                                                                                                                                          |
| env-343  | JGI12273J12029_10026616 | + | 9       | 57      | RNA→ | rpmE (PRK00019)Ribosomal_L31 (pfam01197)→                                                                                                                                                          |
| env-344  | FNTS_GKKEVUV02IK9X6     | - | 344     | 296     | RNA→ | rpmE (PRK00019)Ribosomal_L31 (pfam01197)→                                                                                                                                                          |
| env-345  | JGI12397J12024_1004279  | + | 17      | 65      | RNA→ | rpmE (PRK00019)Ribosomal_L31 (pfam01197)→ hypo→                                                                                                                                                    |
| Mva-1-1  | NZ_JH814692.1           | + | 273119  | 273170  | RNA→ | rpmE (PRK00019)Ribosomal_L31 (pfam01197)→ PrfA (COG0216)prfA (PRK00591)→<br>HemK (COG2890)PRK09328 (PRK09328)→ SUA5 (COG0009)TIGR00057 (TIGR00057)→<br>ECA_wecA (TIGR02380)GT_WecA_like (cd06853)→ |

|          |                         |   |         |         |                                                                                                                                                                                                         |
|----------|-------------------------|---|---------|---------|---------------------------------------------------------------------------------------------------------------------------------------------------------------------------------------------------------|
| Mru-1-1  | NZ_JROA01000001.1       | - | 4191975 | 4191924 | RNA → rpmE (PRK00019)Ribosomal_L31 (pfam01197) → PrfA (COG0216)prfA (PRK00591) → HemK (COG2890)PRK09328 (PRK09328) → SUA5 (COG0009)TIGR00057 (TIGR00057) → GT_WecA_like (cd06853)mraY (PRK00108) →      |
| Mva-2-1  | NC_008726.1             | - | 4654670 | 4654618 | RNA → rpmE (PRK00019)Ribosomal_L31 (pfam01197) → PrfA (COG0216)prfA (PRK00591) → HemK (COG2890)PRK09328 (PRK09328) → SUA5 (COG0009)TIGR00057 (TIGR00057) → GT_WecA_like (cd06853)mraY (PRK00108) →      |
| Mau-3-1  | NZ_HG964453.1           | + | 57934   | 57986   | RNA → rpmE (PRK00019)Ribosomal_L31 (pfam01197) → PrfA (COG0216)prfA (PRK00591) → HemK (COG2890)PRK09328 (PRK09328) → SUA5 (COG0009)TIGR00057 (TIGR00057) → GT_WecA_like (cd06853)mraY (PRK00108) →      |
| Mgi-1-1  | NC_009338.1             | + | 2399433 | 2399484 | RNA → rpmE (PRK00019)Ribosomal_L31 (pfam01197) → PrfA (COG0216)prfA (PRK00591) → HemK (COG2890)PRK09328 (PRK09328) → SUA5 (COG0009)TIGR00057 (TIGR00057) → GT_WecA_like (cd06853)mraY (PRK00108) →      |
| Mgi-2-1  | NC_014814.1             | + | 1769516 | 1769567 | RNA → rpmE (PRK00019)Ribosomal_L31 (pfam01197) → PrfA (COG0216)prfA (PRK00591) → HemK (COG2890)PRK09328 (PRK09328) → SUA5 (COG0009)TIGR00057 (TIGR00057) → GT_WecA_like (cd06853)mraY (PRK00108) →      |
| env-346  | 2200268977              | - | 11805   | 11751   | RNA → rpmE (PRK00019)Ribosomal_L31 (pfam01197) →                                                                                                                                                        |
| env-347  | 2200159822              | - | 2727    | 2673    | RNA → rpmE (PRK00019)Ribosomal_L31 (pfam01197) →                                                                                                                                                        |
| env-348  | JGI1358J11329_10025592  | + | 1331    | 1398    | RNA → rpmE (PRK00019)Ribosomal_L31 (pfam01197) →                                                                                                                                                        |
| Nas-2-1  | NZ_BAFS01000060.1       | + | 2797    | 2847    | RNA → rpmE (PRK00019)Ribosomal_L31 (pfam01197) → PrfA (COG0216)prfA (PRK00591) →                                                                                                                        |
| Mab-65-1 | NZ_JMIA01000002.1       | + | 750325  | 750361  | RNA → rpmE (PRK00019)Ribosomal_L31 (pfam01197) → PrfA (COG0216)prfA (PRK00591) → HemK (COG2890)PRK09328 (PRK09328) → SUA5 (COG0009)TIGR00057 (TIGR00057) → ECA_wecA (TIGR02380)GT_WecA_like (cd06853) → |
| Mch-2-1  | NZ_CP010946.1           | + | 1349878 | 1349914 | RNA → rpmE (PRK00019)Ribosomal_L31 (pfam01197) → PrfA (COG0216)prfA (PRK00591) → HemK (COG2890)PRK09328 (PRK09328) → SUA5 (COG0009)TIGR00057 (TIGR00057) → ECA_wecA (TIGR02380)GT_WecA_like (cd06853) → |
| env-349  | JGI26345J50200_1206263  | + | 102     | 156     | RNA → rpmE (PRK00019)Ribosomal_L31 (pfam01197) →                                                                                                                                                        |
| env-350  | JGI12396J12026_1038988  | + | 59      | 128     | RNA → ←-hypo                                                                                                                                                                                            |
| Fsp-7-1  | NC_014666.1             | + | 1161289 | 1161336 | RNA → rpmE (PRK00019)Ribosomal_L31 (pfam01197) → PrfA (COG0216)prfA (PRK00591) → HemK (COG2890)PRK09328 (PRK09328) →                                                                                    |
| Sca-1-1  | NZ_KB911608.1           | - | 87758   | 87712   | RNA → rpmE (PRK00019)Ribosomal_L31 (pfam01197) →                                                                                                                                                        |
| Ssv-1-1  | NZ_CM000951.1           | + | 6314528 | 6314574 | RNA → rpmE (PRK00019)Ribosomal_L31 (pfam01197) → hypo →                                                                                                                                                 |
| Ssp-50-1 | NZ_JTIY01000001.1       | - | 828848  | 828802  | RNA → rpmE (PRK00019)Ribosomal_L31 (pfam01197) →                                                                                                                                                        |
| Ssp-19-1 | NZ_KE150433.1           | - | 83516   | 83470   | RNA → rpmE (PRK00019)Ribosomal_L31 (pfam01197) →                                                                                                                                                        |
| Aro-1-1  | NZ_KI632511.1           | - | 5249323 | 5249275 | RNA → rpmE (PRK00019)Ribosomal_L31 (pfam01197) →                                                                                                                                                        |
| Sca-2-1  | NC_016111.1             | + | 4478364 | 4478410 | RNA → rpmE (PRK00019)Ribosomal_L31 (pfam01197) →                                                                                                                                                        |
| Sca-2-2  | NC_017586.1             | + | 4478172 | 4478218 | RNA → rpmE (PRK00019)Ribosomal_L31 (pfam01197) →                                                                                                                                                        |
| Nvi-1-1  | NZ_BAGN01000056.1       | + | 32207   | 32254   | RNA → rpmE (PRK00019)Ribosomal_L31 (pfam01197) → PrfA (COG0216)prfA (PRK00591) → HemK (COG2890)PRK09328 (PRK09328) →                                                                                    |
| env-351  | BICA1_1000552           | + | 2686    | 2734    | RNA → rpmE (PRK00019)Ribosomal_L31 (pfam01197) →                                                                                                                                                        |
| env-352  | JGI12675J13321_109048   | + | 170     | 222     | RNA → rpmE (PRK00019)Ribosomal_L31 (pfam01197) →                                                                                                                                                        |
| env-353  | JGI26342J46808_1016646  | + | 241     | 293     | RNA → rpmE (PRK00019)Ribosomal_L31 (pfam01197) →                                                                                                                                                        |
| env-354  | JGI26345J50200_1290574  | + | 128     | 180     | RNA →                                                                                                                                                                                                   |
| env-355  | JGI12713J13577_1075251  | + | 94      | 146     | RNA → rpmE (PRK00019)Ribosomal_L31 (pfam01197) →                                                                                                                                                        |
| env-356  | JGI12669J13542_130180   | - | 221     | 169     | RNA → rpmE (PRK00019)Ribosomal_L31 (pfam01197) →                                                                                                                                                        |
| env-357  | JGI12712J15308_10002766 | - | 597     | 545     | RNA → rpmE (PRK00019)Ribosomal_L31 (pfam01197) →                                                                                                                                                        |
| env-358  | JGI12659J15293_10130778 | - | 420     | 368     | RNA → rpmE (PRK00019)Ribosomal_L31 (pfam01197) →                                                                                                                                                        |
| env-359  | JGI12635J15846_10434338 | + | 340     | 392     | RNA → rpmE (PRK00019)Ribosomal_L31 (pfam01197) →                                                                                                                                                        |
| env-360  | JGI26347J50199_1038113  | - | 440     | 388     | RNA → rpmE (PRK00019)Ribosomal_L31 (pfam01197) →                                                                                                                                                        |
| env-361  | JGI12668J13544_1081006  | - | 183     | 131     | RNA → rpmE (PRK00019)Ribosomal_L31 (pfam01197) →                                                                                                                                                        |
| env-362  | JGI26337J50220_1123253  | + | 72      | 124     | RNA → rpmE (PRK00019)Ribosomal_L31 (pfam01197) →                                                                                                                                                        |
| env-363  | JGI12712J15308_10042764 | + | 278     | 330     | RNA → rpmE (PRK00019)Ribosomal_L31 (pfam01197) →                                                                                                                                                        |
| env-364  | JGI12699J13341_100212   | - | 1510    | 1458    | RNA → rpmE (PRK00019)Ribosomal_L31 (pfam01197) →                                                                                                                                                        |
| env-365  | JGI26338J50219_1041585  | - | 309     | 257     | RNA → rpmE (PRK00019)Ribosomal_L31 (pfam01197) →                                                                                                                                                        |



|          |                   |   |        |        |                                                                                                                                                                                                         |
|----------|-------------------|---|--------|--------|---------------------------------------------------------------------------------------------------------------------------------------------------------------------------------------------------------|
| Mim-1-1  | NZ_JXUU01000007.1 | - | 15102  | 15062  | RNA → rpmE (PRK00019)Ribosomal_L31 (pfam01197) → PrfA (COG0216)prfA (PRK00591) → HemK (COG2890)PRK09328 (PRK09328) → SUA5 (COG0009)TIGR00057 (TIGR00057) → ECA_wecA (TIGR02380)GT_WecA_like (cd06853) → |
| Mab-73-1 | NZ_AUVF01000002.1 | + | 521591 | 521631 | RNA → rpmE (PRK00019)Ribosomal_L31 (pfam01197) → PrfA (COG0216)prfA (PRK00591) → HemK (COG2890)PRK09328 (PRK09328) → SUA5 (COG0009)TIGR00057 (TIGR00057) → ECA_wecA (TIGR02380)GT_WecA_like (cd06853) → |
| Mab-1-2  | NZ_CSZN01000002.1 | - | 459458 | 459418 | RNA → rpmE (PRK00019)Ribosomal_L31 (pfam01197) → PrfA (COG0216)prfA (PRK00591) → HemK (COG2890)PRK09328 (PRK09328) → SUA5 (COG0009)TIGR00057 (TIGR00057) → ECA_wecA (TIGR02380)GT_WecA_like (cd06853) → |
| Mab-1-3  | NZ_CSYW01000003.1 | - | 506431 | 506391 | RNA → rpmE (PRK00019)Ribosomal_L31 (pfam01197) → PrfA (COG0216)prfA (PRK00591) → HemK (COG2890)PRK09328 (PRK09328) → SUA5 (COG0009)TIGR00057 (TIGR00057) → ECA_wecA (TIGR02380)GT_WecA_like (cd06853) → |
| Mab-1-4  | NZ_CSXQ01000001.1 | - | 309290 | 309250 | RNA → rpmE (PRK00019)Ribosomal_L31 (pfam01197) → PrfA (COG0216)prfA (PRK00591) → HemK (COG2890)PRK09328 (PRK09328) → SUA5 (COG0009)TIGR00057 (TIGR00057) → ECA_wecA (TIGR02380)GT_WecA_like (cd06853) → |
| Mab-1-5  | NZ_CSWA01000004.1 | - | 506374 | 506334 | RNA → rpmE (PRK00019)Ribosomal_L31 (pfam01197) → PrfA (COG0216)prfA (PRK00591) → HemK (COG2890)PRK09328 (PRK09328) → SUA5 (COG0009)TIGR00057 (TIGR00057) → ECA_wecA (TIGR02380)GT_WecA_like (cd06853) → |
| Mab-1-6  | NZ_CSYH01000003.1 | - | 506327 | 506287 | RNA → rpmE (PRK00019)Ribosomal_L31 (pfam01197) → PrfA (COG0216)prfA (PRK00591) → HemK (COG2890)PRK09328 (PRK09328) → SUA5 (COG0009)TIGR00057 (TIGR00057) → ECA_wecA (TIGR02380)GT_WecA_like (cd06853) → |
| Mab-1-7  | NZ_CSZC01000001.1 | - | 742902 | 742862 | RNA → rpmE (PRK00019)Ribosomal_L31 (pfam01197) → PrfA (COG0216)prfA (PRK00591) → HemK (COG2890)PRK09328 (PRK09328) → SUA5 (COG0009)TIGR00057 (TIGR00057) → ECA_wecA (TIGR02380)GT_WecA_like (cd06853) → |
| Mab-1-8  | NZ_CSXA01000001.1 | + | 162315 | 162355 | RNA → rpmE (PRK00019)Ribosomal_L31 (pfam01197) → PrfA (COG0216)prfA (PRK00591) → HemK (COG2890)PRK09328 (PRK09328) → SUA5 (COG0009)TIGR00057 (TIGR00057) → ECA_wecA (TIGR02380)GT_WecA_like (cd06853) → |
| Mab-1-9  | NZ_CSXG01000001.1 | + | 162314 | 162354 | RNA → rpmE (PRK00019)Ribosomal_L31 (pfam01197) → PrfA (COG0216)prfA (PRK00591) → HemK (COG2890)PRK09328 (PRK09328) → SUA5 (COG0009)TIGR00057 (TIGR00057) → ECA_wecA (TIGR02380)GT_WecA_like (cd06853) → |
| Mab-1-10 | NZ_CSWO01000003.1 | - | 506432 | 506392 | RNA → rpmE (PRK00019)Ribosomal_L31 (pfam01197) → PrfA (COG0216)prfA (PRK00591) → HemK (COG2890)PRK09328 (PRK09328) → SUA5 (COG0009)TIGR00057 (TIGR00057) → ECA_wecA (TIGR02380)GT_WecA_like (cd06853) → |
| Mab-1-11 | NZ_CSXV01000002.1 | - | 197279 | 197239 | RNA → rpmE (PRK00019)Ribosomal_L31 (pfam01197) → PrfA (COG0216)prfA (PRK00591) → HemK (COG2890)PRK09328 (PRK09328) → SUA5 (COG0009)TIGR00057 (TIGR00057) → ECA_wecA (TIGR02380)GT_WecA_like (cd06853) → |
| Mab-1-12 | NZ_CSYY01000002.1 | - | 459141 | 459101 | RNA → rpmE (PRK00019)Ribosomal_L31 (pfam01197) → PrfA (COG0216)prfA (PRK00591) → HemK (COG2890)PRK09328 (PRK09328) → SUA5 (COG0009)TIGR00057 (TIGR00057) → ECA_wecA (TIGR02380)GT_WecA_like (cd06853) → |
| Mab-1-13 | NZ_CSXN01000003.1 | - | 506492 | 506452 | RNA → rpmE (PRK00019)Ribosomal_L31 (pfam01197) → PrfA (COG0216)prfA (PRK00591) → HemK (COG2890)PRK09328 (PRK09328) → SUA5 (COG0009)TIGR00057 (TIGR00057) → ECA_wecA (TIGR02380)GT_WecA_like (cd06853) → |
| Mab-1-14 | NZ_CSXO01000001.1 | - | 506300 | 506260 | RNA → rpmE (PRK00019)Ribosomal_L31 (pfam01197) → PrfA (COG0216)prfA (PRK00591) → HemK (COG2890)PRK09328 (PRK09328) → SUA5 (COG0009)TIGR00057 (TIGR00057) → ECA_wecA (TIGR02380)GT_WecA_like (cd06853) → |
| Mab-1-15 | NZ_CSZL01000002.1 | - | 506309 | 506269 | RNA → rpmE (PRK00019)Ribosomal_L31 (pfam01197) → PrfA (COG0216)prfA (PRK00591) → HemK (COG2890)PRK09328 (PRK09328) → SUA5 (COG0009)TIGR00057 (TIGR00057) → ECA_wecA (TIGR02380)GT_WecA_like (cd06853) → |
| Mab-1-16 | NZ_CSXB01000001.1 | - | 309269 | 309229 | RNA → rpmE (PRK00019)Ribosomal_L31 (pfam01197) → PrfA (COG0216)prfA (PRK00591) → HemK (COG2890)PRK09328 (PRK09328) → SUA5 (COG0009)TIGR00057 (TIGR00057) → ECA_wecA (TIGR02380)GT_WecA_like (cd06853) → |
| Mab-1-17 | NZ_CSXU01000001.1 | - | 742819 | 742779 | RNA → rpmE (PRK00019)Ribosomal_L31 (pfam01197) → PrfA (COG0216)prfA (PRK00591) → HemK (COG2890)PRK09328 (PRK09328) → SUA5 (COG0009)TIGR00057 (TIGR00057) → ECA_wecA (TIGR02380)GT_WecA_like (cd06853) → |
| Mab-1-18 | NZ_CSZA01000001.1 | - | 742884 | 742844 | RNA → rpmE (PRK00019)Ribosomal_L31 (pfam01197) → PrfA (COG0216)prfA (PRK00591) → HemK (COG2890)PRK09328 (PRK09328) → SUA5 (COG0009)TIGR00057 (TIGR00057) → ECA_wecA (TIGR02380)GT_WecA_like (cd06853) → |

|          |                   |   |         |         |                                                                                                                                                                                                         |
|----------|-------------------|---|---------|---------|---------------------------------------------------------------------------------------------------------------------------------------------------------------------------------------------------------|
| Mab-1-19 | NZ_CSJY01000002.1 | - | 698905  | 698865  | RNA → rpmE (PRK00019)Ribosomal_L31 (pfam01197) → PrfA (COG0216)prfA (PRK00591) → HemK (COG2890)PRK09328 (PRK09328) → SUA5 (COG0009)TIGR00057 (TIGR00057) → ECA_wecA (TIGR02380)GT_WecA_like (cd06853) → |
| Mab-1-20 | NZ_CSU01000004.1  | + | 10612   | 10652   | RNA → rpmE (PRK00019)Ribosomal_L31 (pfam01197) → PrfA (COG0216)prfA (PRK00591) → HemK (COG2890)PRK09328 (PRK09328) → SUA5 (COG0009)TIGR00057 (TIGR00057) → ECA_wecA (TIGR02380)GT_WecA_like (cd06853) → |
| Mab-1-21 | NZ_CSUQ01000003.1 | + | 10596   | 10636   | RNA → rpmE (PRK00019)Ribosomal_L31 (pfam01197) → PrfA (COG0216)prfA (PRK00591) → HemK (COG2890)PRK09328 (PRK09328) → SUA5 (COG0009)TIGR00057 (TIGR00057) → ECA_wecA (TIGR02380)GT_WecA_like (cd06853) → |
| Mab-1-22 | NZ_CSUX01000003.1 | + | 475932  | 475972  | RNA → rpmE (PRK00019)Ribosomal_L31 (pfam01197) → PrfA (COG0216)prfA (PRK00591) → HemK (COG2890)PRK09328 (PRK09328) → SUA5 (COG0009)TIGR00057 (TIGR00057) → ECA_wecA (TIGR02380)GT_WecA_like (cd06853) → |
| Mab-1-23 | NZ_CSUD01000003.1 | - | 309291  | 309251  | RNA → rpmE (PRK00019)Ribosomal_L31 (pfam01197) → PrfA (COG0216)prfA (PRK00591) → HemK (COG2890)PRK09328 (PRK09328) → SUA5 (COG0009)TIGR00057 (TIGR00057) → ECA_wecA (TIGR02380)GT_WecA_like (cd06853) → |
| Mab-1-24 | NZ_CSVO01000002.1 | - | 459138  | 459098  | RNA → rpmE (PRK00019)Ribosomal_L31 (pfam01197) → PrfA (COG0216)prfA (PRK00591) → HemK (COG2890)PRK09328 (PRK09328) → SUA5 (COG0009)TIGR00057 (TIGR00057) → ECA_wecA (TIGR02380)GT_WecA_like (cd06853) → |
| Mab-1-25 | NZ_CSVF01000001.1 | - | 459123  | 459083  | RNA → rpmE (PRK00019)Ribosomal_L31 (pfam01197) → PrfA (COG0216)prfA (PRK00591) → HemK (COG2890)PRK09328 (PRK09328) → SUA5 (COG0009)TIGR00057 (TIGR00057) → ECA_wecA (TIGR02380)GT_WecA_like (cd06853) → |
| Mab-1-26 | NZ_CSVJ01000002.1 | - | 506338  | 506298  | RNA → rpmE (PRK00019)Ribosomal_L31 (pfam01197) → PrfA (COG0216)prfA (PRK00591) → HemK (COG2890)PRK09328 (PRK09328) → SUA5 (COG0009)TIGR00057 (TIGR00057) → ECA_wecA (TIGR02380)GT_WecA_like (cd06853) → |
| Mab-1-27 | NZ_CSXF01000002.1 | - | 506190  | 506150  | RNA → rpmE (PRK00019)Ribosomal_L31 (pfam01197) → PrfA (COG0216)prfA (PRK00591) → HemK (COG2890)PRK09328 (PRK09328) → SUA5 (COG0009)TIGR00057 (TIGR00057) → ECA_wecA (TIGR02380)GT_WecA_like (cd06853) → |
| Mab-1-28 | NZ_CSWJ01000002.1 | - | 506432  | 506392  | RNA → rpmE (PRK00019)Ribosomal_L31 (pfam01197) → PrfA (COG0216)prfA (PRK00591) → HemK (COG2890)PRK09328 (PRK09328) → SUA5 (COG0009)TIGR00057 (TIGR00057) → ECA_wecA (TIGR02380)GT_WecA_like (cd06853) → |
| Mab-1-29 | NZ_CSWG01000004.1 | - | 309142  | 309102  | RNA → rpmE (PRK00019)Ribosomal_L31 (pfam01197) → PrfA (COG0216)prfA (PRK00591) → HemK (COG2890)PRK09328 (PRK09328) → SUA5 (COG0009)TIGR00057 (TIGR00057) → ECA_wecA (TIGR02380)GT_WecA_like (cd06853) → |
| Mab-1-30 | NZ_CSXC01000001.1 | - | 310020  | 309980  | RNA → rpmE (PRK00019)Ribosomal_L31 (pfam01197) → PrfA (COG0216)prfA (PRK00591) → HemK (COG2890)PRK09328 (PRK09328) → SUA5 (COG0009)TIGR00057 (TIGR00057) → ECA_wecA (TIGR02380)GT_WecA_like (cd06853) → |
| Mab-1-31 | NZ_CSXT01000001.1 | - | 445981  | 445941  | RNA → rpmE (PRK00019)Ribosomal_L31 (pfam01197) → PrfA (COG0216)prfA (PRK00591) → HemK (COG2890)PRK09328 (PRK09328) → SUA5 (COG0009)TIGR00057 (TIGR00057) → ECA_wecA (TIGR02380)GT_WecA_like (cd06853) → |
| Mab-1-32 | NZ_CSXP01000001.1 | - | 1200434 | 1200394 | RNA → rpmE (PRK00019)Ribosomal_L31 (pfam01197) → PrfA (COG0216)prfA (PRK00591) → HemK (COG2890)PRK09328 (PRK09328) → SUA5 (COG0009)TIGR00057 (TIGR00057) → ECA_wecA (TIGR02380)GT_WecA_like (cd06853) → |
| Mab-1-33 | NZ_CSXI01000001.1 | + | 244753  | 244793  | RNA → rpmE (PRK00019)Ribosomal_L31 (pfam01197) → PrfA (COG0216)prfA (PRK00591) → HemK (COG2890)PRK09328 (PRK09328) → SUA5 (COG0009)TIGR00057 (TIGR00057) → ECA_wecA (TIGR02380)GT_WecA_like (cd06853) → |
| Mab-1-34 | NZ_CSXR01000001.1 | - | 818533  | 818493  | RNA → rpmE (PRK00019)Ribosomal_L31 (pfam01197) → PrfA (COG0216)prfA (PRK00591) → HemK (COG2890)PRK09328 (PRK09328) → SUA5 (COG0009)TIGR00057 (TIGR00057) → ECA_wecA (TIGR02380)GT_WecA_like (cd06853) → |
| Mab-1-35 | NZ_CSVD01000002.1 | - | 699015  | 698975  | RNA → rpmE (PRK00019)Ribosomal_L31 (pfam01197) → PrfA (COG0216)prfA (PRK00591) → HemK (COG2890)PRK09328 (PRK09328) → SUA5 (COG0009)TIGR00057 (TIGR00057) → ECA_wecA (TIGR02380)GT_WecA_like (cd06853) → |
| Mab-1-36 | NZ_CSVE01000001.1 | + | 148660  | 148700  | RNA → rpmE (PRK00019)Ribosomal_L31 (pfam01197) → PrfA (COG0216)prfA (PRK00591) → HemK (COG2890)PRK09328 (PRK09328) → SUA5 (COG0009)TIGR00057 (TIGR00057) → ECA_wecA (TIGR02380)GT_WecA_like (cd06853) → |
| Mab-1-37 | NZ_CSXC01000001.1 | - | 786146  | 786106  | RNA → rpmE (PRK00019)Ribosomal_L31 (pfam01197) → PrfA (COG0216)prfA (PRK00591) → HemK (COG2890)PRK09328 (PRK09328) → SUA5 (COG0009)TIGR00057 (TIGR00057) → ECA_wecA (TIGR02380)GT_WecA_like (cd06853) → |



|          |                   |   |        |        |                                                                                                                                                                                                         |
|----------|-------------------|---|--------|--------|---------------------------------------------------------------------------------------------------------------------------------------------------------------------------------------------------------|
| Mab-1-38 | NZ_CSUB01000002.1 | - | 622023 | 621983 | RNA → rpmE (PRK00019)Ribosomal_L31 (pfam01197) → PrfA (COG0216)prfA (PRK00591) → HemK (COG2890)PRK09328 (PRK09328) → SUA5 (COG0009)TIGR00057 (TIGR00057) → ECA_wecA (TIGR02380)GT_WecA_like (cd06853) → |
| Mab-1-39 | NZ_CSVC01000026.1 | - | 62798  | 62758  | RNA → rpmE (PRK00019)Ribosomal_L31 (pfam01197) → PrfA (COG0216)prfA (PRK00591) → HemK (COG2890)PRK09328 (PRK09328) → SUA5 (COG0009)TIGR00057 (TIGR00057) → ECA_wecA (TIGR02380)GT_WecA_like (cd06853) → |
| Mab-1-40 | NZ_CSUE01000001.1 | - | 309387 | 309347 | RNA → rpmE (PRK00019)Ribosomal_L31 (pfam01197) → PrfA (COG0216)prfA (PRK00591) → HemK (COG2890)PRK09328 (PRK09328) → SUA5 (COG0009)TIGR00057 (TIGR00057) → ECA_wecA (TIGR02380)GT_WecA_like (cd06853) → |
| Mab-1-41 | NZ_CSUK01000001.1 | + | 382760 | 382800 | RNA → rpmE (PRK00019)Ribosomal_L31 (pfam01197) → PrfA (COG0216)prfA (PRK00591) → HemK (COG2890)PRK09328 (PRK09328) → SUA5 (COG0009)TIGR00057 (TIGR00057) → ECA_wecA (TIGR02380)GT_WecA_like (cd06853) → |
| Mab-1-42 | NZ_CSVI01000002.1 | + | 162256 | 162296 | RNA → rpmE (PRK00019)Ribosomal_L31 (pfam01197) → PrfA (COG0216)prfA (PRK00591) → HemK (COG2890)PRK09328 (PRK09328) → SUA5 (COG0009)TIGR00057 (TIGR00057) → ECA_wecA (TIGR02380)GT_WecA_like (cd06853) → |
| Mab-1-43 | NZ_CSVH01000001.1 | - | 786306 | 786266 | RNA → rpmE (PRK00019)Ribosomal_L31 (pfam01197) → PrfA (COG0216)prfA (PRK00591) → HemK (COG2890)PRK09328 (PRK09328) → SUA5 (COG0009)TIGR00057 (TIGR00057) → ECA_wecA (TIGR02380)GT_WecA_like (cd06853) → |
| Mab-1-44 | NZ_CSTR01000001.1 | + | 245392 | 245432 | RNA → rpmE (PRK00019)Ribosomal_L31 (pfam01197) → PrfA (COG0216)prfA (PRK00591) → HemK (COG2890)PRK09328 (PRK09328) → SUA5 (COG0009)TIGR00057 (TIGR00057) → ECA_wecA (TIGR02380)GT_WecA_like (cd06853) → |
| Mab-1-45 | NZ_CSUL01000001.1 | - | 309282 | 309242 | RNA → rpmE (PRK00019)Ribosomal_L31 (pfam01197) → PrfA (COG0216)prfA (PRK00591) → HemK (COG2890)PRK09328 (PRK09328) → SUA5 (COG0009)TIGR00057 (TIGR00057) → ECA_wecA (TIGR02380)GT_WecA_like (cd06853) → |
| Mab-1-46 | NZ_CSVW01000021.1 | - | 62685  | 62645  | RNA → rpmE (PRK00019)Ribosomal_L31 (pfam01197) → PrfA (COG0216)prfA (PRK00591) → HemK (COG2890)PRK09328 (PRK09328) → SUA5 (COG0009)TIGR00057 (TIGR00057) → ECA_wecA (TIGR02380)GT_WecA_like (cd06853) → |
| Mab-1-47 | NZ_CSUJ01000001.1 | - | 506352 | 506312 | RNA → rpmE (PRK00019)Ribosomal_L31 (pfam01197) → PrfA (COG0216)prfA (PRK00591) → HemK (COG2890)PRK09328 (PRK09328) → SUA5 (COG0009)TIGR00057 (TIGR00057) → ECA_wecA (TIGR02380)GT_WecA_like (cd06853) → |
| Mab-1-48 | NZ_CSZY01000003.1 | - | 506245 | 506205 | RNA → rpmE (PRK00019)Ribosomal_L31 (pfam01197) → PrfA (COG0216)prfA (PRK00591) → HemK (COG2890)PRK09328 (PRK09328) → SUA5 (COG0009)TIGR00057 (TIGR00057) → ECA_wecA (TIGR02380)GT_WecA_like (cd06853) → |
| Mab-1-49 | NZ_CSTV01000001.1 | - | 309289 | 309249 | RNA → rpmE (PRK00019)Ribosomal_L31 (pfam01197) → PrfA (COG0216)prfA (PRK00591) → HemK (COG2890)PRK09328 (PRK09328) → SUA5 (COG0009)TIGR00057 (TIGR00057) → ECA_wecA (TIGR02380)GT_WecA_like (cd06853) → |
| Mab-1-50 | NZ_CSZE01000002.1 | - | 506271 | 506231 | RNA → rpmE (PRK00019)Ribosomal_L31 (pfam01197) → PrfA (COG0216)prfA (PRK00591) → HemK (COG2890)PRK09328 (PRK09328) → SUA5 (COG0009)TIGR00057 (TIGR00057) → ECA_wecA (TIGR02380)GT_WecA_like (cd06853) → |
| Mab-1-51 | NZ_CSTG01000003.1 | + | 162313 | 162353 | RNA → rpmE (PRK00019)Ribosomal_L31 (pfam01197) → PrfA (COG0216)prfA (PRK00591) → HemK (COG2890)PRK09328 (PRK09328) → SUA5 (COG0009)TIGR00057 (TIGR00057) → ECA_wecA (TIGR02380)GT_WecA_like (cd06853) → |
| Mab-1-52 | NZ_CSVT01000001.1 | - | 685006 | 684966 | RNA → rpmE (PRK00019)Ribosomal_L31 (pfam01197) → PrfA (COG0216)prfA (PRK00591) → HemK (COG2890)PRK09328 (PRK09328) → SUA5 (COG0009)TIGR00057 (TIGR00057) → ECA_wecA (TIGR02380)GT_WecA_like (cd06853) → |
| Mab-1-53 | NZ_CSYN01000001.1 | - | 310020 | 309980 | RNA → rpmE (PRK00019)Ribosomal_L31 (pfam01197) → PrfA (COG0216)prfA (PRK00591) → HemK (COG2890)PRK09328 (PRK09328) → SUA5 (COG0009)TIGR00057 (TIGR00057) → ECA_wecA (TIGR02380)GT_WecA_like (cd06853) → |
| Mab-1-54 | NZ_CSUV01000003.1 | - | 309253 | 309213 | RNA → rpmE (PRK00019)Ribosomal_L31 (pfam01197) → PrfA (COG0216)prfA (PRK00591) → HemK (COG2890)PRK09328 (PRK09328) → SUA5 (COG0009)TIGR00057 (TIGR00057) → ECA_wecA (TIGR02380)GT_WecA_like (cd06853) → |
| Mab-1-55 | NZ_CSYG01000003.1 | - | 415344 | 415304 | RNA → rpmE (PRK00019)Ribosomal_L31 (pfam01197) → PrfA (COG0216)prfA (PRK00591) → HemK (COG2890)PRK09328 (PRK09328) → SUA5 (COG0009)TIGR00057 (TIGR00057) → ECA_wecA (TIGR02380)GT_WecA_like (cd06853) → |
| Mab-1-56 | NZ_CSYZ01000001.1 | - | 506610 | 506570 | RNA → rpmE (PRK00019)Ribosomal_L31 (pfam01197) → PrfA (COG0216)prfA (PRK00591) → HemK (COG2890)PRK09328 (PRK09328) → SUA5 (COG0009)TIGR00057 (TIGR00057) → ECA_wecA (TIGR02380)GT_WecA_like (cd06853) → |

|          |                   |   |         |         |                                                                                                                                                                                                         |
|----------|-------------------|---|---------|---------|---------------------------------------------------------------------------------------------------------------------------------------------------------------------------------------------------------|
| Mab-1-57 | NZ_CSUT01000001.1 | - | 621986  | 621946  | RNA → rpmE (PRK00019)Ribosomal_L31 (pfam01197) → PrfA (COG0216)prfA (PRK00591) → HemK (COG2890)PRK09328 (PRK09328) → SUA5 (COG0009)TIGR00057 (TIGR00057) → ECA_wecA (TIGR02380)GT_WecA_like (cd06853) → |
| Mab-1-58 | NZ_CSZI01000001.1 | - | 309973  | 309933  | RNA → rpmE (PRK00019)Ribosomal_L31 (pfam01197) → PrfA (COG0216)prfA (PRK00591) → HemK (COG2890)PRK09328 (PRK09328) → SUA5 (COG0009)TIGR00057 (TIGR00057) → hypo → hypo →                                |
| Mab-1-59 | NZ_CSUS01000001.1 | - | 353814  | 353774  | RNA → rpmE (PRK00019)Ribosomal_L31 (pfam01197) → PrfA (COG0216)prfA (PRK00591) → HemK (COG2890)PRK09328 (PRK09328) → SUA5 (COG0009)TIGR00057 (TIGR00057) → ECA_wecA (TIGR02380)GT_WecA_like (cd06853) → |
| Mab-1-60 | NZ_CSWU01000006.1 | - | 248462  | 248422  | RNA → rpmE (PRK00019)Ribosomal_L31 (pfam01197) → PrfA (COG0216)prfA (PRK00591) → HemK (COG2890)PRK09328 (PRK09328) → SUA5 (COG0009)TIGR00057 (TIGR00057) → ECA_wecA (TIGR02380)GT_WecA_like (cd06853) → |
| Mab-1-61 | NZ_CSZU01000001.1 | + | 162316  | 162356  | RNA → rpmE (PRK00019)Ribosomal_L31 (pfam01197) → PrfA (COG0216)prfA (PRK00591) → HemK (COG2890)PRK09328 (PRK09328) → SUA5 (COG0009)TIGR00057 (TIGR00057) → ECA_wecA (TIGR02380)GT_WecA_like (cd06853) → |
| Mab-1-62 | NZ_CSXW01000004.1 | - | 506373  | 506333  | RNA → rpmE (PRK00019)Ribosomal_L31 (pfam01197) → PrfA (COG0216)prfA (PRK00591) → HemK (COG2890)PRK09328 (PRK09328) → SUA5 (COG0009)TIGR00057 (TIGR00057) → ECA_wecA (TIGR02380)GT_WecA_like (cd06853) → |
| Mab-1-63 | NZ_CSYT01000002.1 | - | 506484  | 506444  | RNA → rpmE (PRK00019)Ribosomal_L31 (pfam01197) → PrfA (COG0216)prfA (PRK00591) → HemK (COG2890)PRK09328 (PRK09328) → SUA5 (COG0009)TIGR00057 (TIGR00057) → ECA_wecA (TIGR02380)GT_WecA_like (cd06853) → |
| Mab-1-64 | NZ_CSWQ01000004.1 | - | 506673  | 506633  | RNA → rpmE (PRK00019)Ribosomal_L31 (pfam01197) → PrfA (COG0216)prfA (PRK00591) → HemK (COG2890)PRK09328 (PRK09328) → SUA5 (COG0009)TIGR00057 (TIGR00057) → ECA_wecA (TIGR02380)GT_WecA_like (cd06853) → |
| Mab-1-65 | NZ_CSYY01000003.1 | - | 506329  | 506289  | RNA → rpmE (PRK00019)Ribosomal_L31 (pfam01197) → PrfA (COG0216)prfA (PRK00591) → HemK (COG2890)PRK09328 (PRK09328) → SUA5 (COG0009)TIGR00057 (TIGR00057) → ECA_wecA (TIGR02380)GT_WecA_like (cd06853) → |
| Mab-1-66 | NZ_CSTZ01000001.1 | + | 476370  | 476410  | RNA → rpmE (PRK00019)Ribosomal_L31 (pfam01197) → PrfA (COG0216)prfA (PRK00591) → HemK (COG2890)PRK09328 (PRK09328) → SUA5 (COG0009)TIGR00057 (TIGR00057) → ECA_wecA (TIGR02380)GT_WecA_like (cd06853) → |
| Mab-1-67 | NZ_CSZF01000003.1 | + | 162311  | 162351  | RNA → rpmE (PRK00019)Ribosomal_L31 (pfam01197) → PrfA (COG0216)prfA (PRK00591) → HemK (COG2890)PRK09328 (PRK09328) → SUA5 (COG0009)TIGR00057 (TIGR00057) → hypo →                                       |
| Mab-1-68 | NZ_CSXJ01000004.1 | - | 506351  | 506311  | RNA → rpmE (PRK00019)Ribosomal_L31 (pfam01197) → PrfA (COG0216)prfA (PRK00591) → HemK (COG2890)PRK09328 (PRK09328) → SUA5 (COG0009)TIGR00057 (TIGR00057) → ECA_wecA (TIGR02380)GT_WecA_like (cd06853) → |
| Mab-1-69 | NZ_CSZV01000002.1 | + | 162295  | 162335  | RNA → rpmE (PRK00019)Ribosomal_L31 (pfam01197) → PrfA (COG0216)prfA (PRK00591) → HemK (COG2890)PRK09328 (PRK09328) → SUA5 (COG0009)TIGR00057 (TIGR00057) → ECA_wecA (TIGR02380)GT_WecA_like (cd06853) → |
| Mab-1-70 | NZ_CSTT01000001.1 | + | 930033  | 930073  | RNA → rpmE (PRK00019)Ribosomal_L31 (pfam01197) → PrfA (COG0216)prfA (PRK00591) → HemK (COG2890)PRK09328 (PRK09328) → SUA5 (COG0009)TIGR00057 (TIGR00057) → ECA_wecA (TIGR02380)GT_WecA_like (cd06853) → |
| Mab-1-71 | NZ_CSZQ01000006.1 | - | 248596  | 248556  | RNA → rpmE (PRK00019)Ribosomal_L31 (pfam01197) → PrfA (COG0216)prfA (PRK00591) → HemK (COG2890)PRK09328 (PRK09328) → SUA5 (COG0009)TIGR00057 (TIGR00057) → ECA_wecA (TIGR02380)GT_WecA_like (cd06853) → |
| Mab-1-72 | NZ_CSXM01000002.1 | - | 501635  | 501595  | RNA → rpmE (PRK00019)Ribosomal_L31 (pfam01197) → PrfA (COG0216)prfA (PRK00591) → HemK (COG2890)PRK09328 (PRK09328) → SUA5 (COG0009)TIGR00057 (TIGR00057) → ECA_wecA (TIGR02380)GT_WecA_like (cd06853) → |
| Mab-1-73 | NZ_CSUC01000001.1 | - | 1714344 | 1714304 | RNA → rpmE (PRK00019)Ribosomal_L31 (pfam01197) → PrfA (COG0216)prfA (PRK00591) → HemK (COG2890)PRK09328 (PRK09328) → SUA5 (COG0009)TIGR00057 (TIGR00057) → ECA_wecA (TIGR02380)GT_WecA_like (cd06853) → |
| Mab-1-74 | NZ_CSXZ01000001.1 | - | 893217  | 893177  | RNA → rpmE (PRK00019)Ribosomal_L31 (pfam01197) → PrfA (COG0216)prfA (PRK00591) → HemK (COG2890)PRK09328 (PRK09328) → SUA5 (COG0009)TIGR00057 (TIGR00057) → ECA_wecA (TIGR02380)GT_WecA_like (cd06853) → |
| Mab-1-75 | NZ_CSXV01000002.1 | - | 786397  | 786357  | RNA → rpmE (PRK00019)Ribosomal_L31 (pfam01197) → PrfA (COG0216)prfA (PRK00591) → HemK (COG2890)PRK09328 (PRK09328) → SUA5 (COG0009)TIGR00057 (TIGR00057) → ECA_wecA (TIGR02380)GT_WecA_like (cd06853) → |

|          |                   |   |         |         |                                                                                                                                                                                                         |
|----------|-------------------|---|---------|---------|---------------------------------------------------------------------------------------------------------------------------------------------------------------------------------------------------------|
| Mab-1-76 | NZ_CSUZ01000001.1 | - | 506435  | 506395  | RNA → rpmE (PRK00019)Ribosomal_L31 (pfam01197) → PrfA (COG0216)prfA (PRK00591) → HemK (COG2890)PRK09328 (PRK09328) → SUA5 (COG0009)TIGR00057 (TIGR00057) → ECA_wecA (TIGR02380)GT_WecA_like (cd06853) → |
| Mab-1-77 | NZ_CSWM01000002.1 | - | 506367  | 506327  | RNA → rpmE (PRK00019)Ribosomal_L31 (pfam01197) → PrfA (COG0216)prfA (PRK00591) → HemK (COG2890)PRK09328 (PRK09328) → SUA5 (COG0009)TIGR00057 (TIGR00057) → ECA_wecA (TIGR02380)GT_WecA_like (cd06853) → |
| Mab-1-78 | NZ_CSXI01000001.1 | - | 248627  | 248587  | RNA → rpmE (PRK00019)Ribosomal_L31 (pfam01197) → PrfA (COG0216)prfA (PRK00591) → HemK (COG2890)PRK09328 (PRK09328) → SUA5 (COG0009)TIGR00057 (TIGR00057) → ECA_wecA (TIGR02380)GT_WecA_like (cd06853) → |
| Mab-1-79 | NZ_CSUM01000001.1 | + | 245392  | 245432  | RNA → rpmE (PRK00019)Ribosomal_L31 (pfam01197) → PrfA (COG0216)prfA (PRK00591) → HemK (COG2890)PRK09328 (PRK09328) → SUA5 (COG0009)TIGR00057 (TIGR00057) → ECA_wecA (TIGR02380)GT_WecA_like (cd06853) → |
| Mab-1-80 | NZ_CSWP01000004.1 | - | 313093  | 313053  | RNA → rpmE (PRK00019)Ribosomal_L31 (pfam01197) → PrfA (COG0216)prfA (PRK00591) → HemK (COG2890)PRK09328 (PRK09328) → SUA5 (COG0009)TIGR00057 (TIGR00057) → ECA_wecA (TIGR02380)GT_WecA_like (cd06853) → |
| Mab-1-81 | NZ_CSXD01000003.1 | - | 506396  | 506356  | RNA → rpmE (PRK00019)Ribosomal_L31 (pfam01197) → PrfA (COG0216)prfA (PRK00591) → HemK (COG2890)PRK09328 (PRK09328) → SUA5 (COG0009)TIGR00057 (TIGR00057) → ECA_wecA (TIGR02380)GT_WecA_like (cd06853) → |
| Mab-1-82 | NZ_CSVQ01000001.1 | - | 459269  | 459229  | RNA → rpmE (PRK00019)Ribosomal_L31 (pfam01197) → PrfA (COG0216)prfA (PRK00591) → HemK (COG2890)PRK09328 (PRK09328) → SUA5 (COG0009)TIGR00057 (TIGR00057) → ECA_wecA (TIGR02380)GT_WecA_like (cd06853) → |
| Mab-1-83 | NZ_CSZJ01000001.1 | - | 385149  | 385109  | RNA → rpmE (PRK00019)Ribosomal_L31 (pfam01197) → PrfA (COG0216)prfA (PRK00591) → HemK (COG2890)PRK09328 (PRK09328) → SUA5 (COG0009)TIGR00057 (TIGR00057) → ECA_wecA (TIGR02380)GT_WecA_like (cd06853) → |
| Mab-1-84 | NZ_CSZB01000001.1 | + | 163125  | 163165  | RNA → rpmE (PRK00019)Ribosomal_L31 (pfam01197) → PrfA (COG0216)prfA (PRK00591) → HemK (COG2890)PRK09328 (PRK09328) → SUA5 (COG0009)TIGR00057 (TIGR00057) → ECA_wecA (TIGR02380)GT_WecA_like (cd06853) → |
| Mab-1-85 | NZ_CSZR01000001.1 | + | 244744  | 244784  | RNA → rpmE (PRK00019)Ribosomal_L31 (pfam01197) → PrfA (COG0216)prfA (PRK00591) → HemK (COG2890)PRK09328 (PRK09328) → SUA5 (COG0009)TIGR00057 (TIGR00057) → ECA_wecA (TIGR02380)GT_WecA_like (cd06853) → |
| Mab-1-86 | NZ_CSXI01000003.1 | - | 506355  | 506315  | RNA → rpmE (PRK00019)Ribosomal_L31 (pfam01197) → PrfA (COG0216)prfA (PRK00591) → HemK (COG2890)PRK09328 (PRK09328) → SUA5 (COG0009)TIGR00057 (TIGR00057) → ECA_wecA (TIGR02380)GT_WecA_like (cd06853) → |
| Mab-1-87 | NZ_CSXV01000002.1 | - | 1045594 | 1045554 | RNA → rpmE (PRK00019)Ribosomal_L31 (pfam01197) → PrfA (COG0216)prfA (PRK00591) → HemK (COG2890)PRK09328 (PRK09328) → SUA5 (COG0009)TIGR00057 (TIGR00057) → ECA_wecA (TIGR02380)GT_WecA_like (cd06853) → |
| Mab-1-88 | NZ_CSXW01000002.1 | + | 309303  | 309343  | RNA → rpmE (PRK00019)Ribosomal_L31 (pfam01197) → PrfA (COG0216)prfA (PRK00591) → HemK (COG2890)PRK09328 (PRK09328) → SUA5 (COG0009)TIGR00057 (TIGR00057) → ECA_wecA (TIGR02380)GT_WecA_like (cd06853) → |
| Mab-1-89 | NZ_CSXZ01000001.1 | - | 445930  | 445890  | RNA → rpmE (PRK00019)Ribosomal_L31 (pfam01197) → PrfA (COG0216)prfA (PRK00591) → HemK (COG2890)PRK09328 (PRK09328) → SUA5 (COG0009)TIGR00057 (TIGR00057) → ECA_wecA (TIGR02380)GT_WecA_like (cd06853) → |
| Mab-1-90 | NZ_CSXE01000001.1 | - | 786209  | 786169  | RNA → rpmE (PRK00019)Ribosomal_L31 (pfam01197) → PrfA (COG0216)prfA (PRK00591) → HemK (COG2890)PRK09328 (PRK09328) → SUA5 (COG0009)TIGR00057 (TIGR00057) → ECA_wecA (TIGR02380)GT_WecA_like (cd06853) → |
| Mab-1-91 | NZ_CSXW01000003.1 | - | 742881  | 742841  | RNA → rpmE (PRK00019)Ribosomal_L31 (pfam01197) → PrfA (COG0216)prfA (PRK00591) → HemK (COG2890)PRK09328 (PRK09328) → SUA5 (COG0009)TIGR00057 (TIGR00057) → ECA_wecA (TIGR02380)GT_WecA_like (cd06853) → |
| Mab-1-92 | NZ_CSXW01000002.1 | - | 506308  | 506268  | RNA → rpmE (PRK00019)Ribosomal_L31 (pfam01197) → PrfA (COG0216)prfA (PRK00591) → HemK (COG2890)PRK09328 (PRK09328) → SUA5 (COG0009)TIGR00057 (TIGR00057) → ECA_wecA (TIGR02380)GT_WecA_like (cd06853) → |
| Mab-1-93 | NZ_CSZY01000004.1 | - | 21804   | 21764   | RNA → rpmE (PRK00019)Ribosomal_L31 (pfam01197) → PrfA (COG0216)prfA (PRK00591) → HemK (COG2890)PRK09328 (PRK09328) → SUA5 (COG0009)TIGR00057 (TIGR00057) → ECA_wecA (TIGR02380)GT_WecA_like (cd06853) → |
| Mab-1-94 | NZ_CSYP01000001.1 | + | 941699  | 941739  | RNA → rpmE (PRK00019)Ribosomal_L31 (pfam01197) → PrfA (COG0216)prfA (PRK00591) → HemK (COG2890)PRK09328 (PRK09328) → SUA5 (COG0009)TIGR00057 (TIGR00057) → ECA_wecA (TIGR02380)GT_WecA_like (cd06853) → |



|           |                   |   |        |        |                                                                                                                                                                                                         |
|-----------|-------------------|---|--------|--------|---------------------------------------------------------------------------------------------------------------------------------------------------------------------------------------------------------|
| Mab-1-95  | NZ_CSWF01000002.1 | - | 506495 | 506455 | RNA → rpmE (PRK00019)Ribosomal_L31 (pfam01197) → PrfA (COG0216)prfA (PRK00591) → HemK (COG2890)PRK09328 (PRK09328) → SUA5 (COG0009)TIGR00057 (TIGR00057) → ECA_wecA (TIGR02380)GT_WecA_like (cd06853) → |
| Mab-1-96  | NZ_CSXY01000002.1 | + | 162311 | 162351 | RNA → rpmE (PRK00019)Ribosomal_L31 (pfam01197) → PrfA (COG0216)prfA (PRK00591) → HemK (COG2890)PRK09328 (PRK09328) → SUA5 (COG0009)TIGR00057 (TIGR00057) → ECA_wecA (TIGR02380)GT_WecA_like (cd06853) → |
| Mab-1-97  | NZ_CSZD01000002.1 | + | 162313 | 162353 | RNA → rpmE (PRK00019)Ribosomal_L31 (pfam01197) → PrfA (COG0216)prfA (PRK00591) → HemK (COG2890)PRK09328 (PRK09328) → SUA5 (COG0009)TIGR00057 (TIGR00057) → ECA_wecA (TIGR02380)GT_WecA_like (cd06853) → |
| Mab-1-98  | NZ_CSUO01000001.1 | - | 308185 | 308145 | RNA → rpmE (PRK00019)Ribosomal_L31 (pfam01197) → PrfA (COG0216)prfA (PRK00591) → HemK (COG2890)PRK09328 (PRK09328) → SUA5 (COG0009)TIGR00057 (TIGR00057) → ECA_wecA (TIGR02380)GT_WecA_like (cd06853) → |
| Mab-1-99  | NZ_CSVK01000004.1 | - | 506337 | 506297 | RNA → rpmE (PRK00019)Ribosomal_L31 (pfam01197) → PrfA (COG0216)prfA (PRK00591) → HemK (COG2890)PRK09328 (PRK09328) → SUA5 (COG0009)TIGR00057 (TIGR00057) → ECA_wecA (TIGR02380)GT_WecA_like (cd06853) → |
| Mab-1-100 | NZ_CSQY01000001.1 | + | 422078 | 422118 | RNA → rpmE (PRK00019)Ribosomal_L31 (pfam01197) → PrfA (COG0216)prfA (PRK00591) → HemK (COG2890)PRK09328 (PRK09328) → SUA5 (COG0009)TIGR00057 (TIGR00057) → ECA_wecA (TIGR02380)GT_WecA_like (cd06853) → |
| Mab-1-101 | NZ_CSXQ01000001.1 | - | 896926 | 896886 | RNA → rpmE (PRK00019)Ribosomal_L31 (pfam01197) → PrfA (COG0216)prfA (PRK00591) → HemK (COG2890)PRK09328 (PRK09328) → SUA5 (COG0009)TIGR00057 (TIGR00057) → ECA_wecA (TIGR02380)GT_WecA_like (cd06853) → |
| Mab-1-102 | NZ_CSXK01000002.1 | - | 506652 | 506612 | RNA → rpmE (PRK00019)Ribosomal_L31 (pfam01197) → PrfA (COG0216)prfA (PRK00591) → HemK (COG2890)PRK09328 (PRK09328) → SUA5 (COG0009)TIGR00057 (TIGR00057) → ECA_wecA (TIGR02380)GT_WecA_like (cd06853) → |
| Mab-1-103 | NZ_CSXS01000003.1 | - | 506296 | 506256 | RNA → rpmE (PRK00019)Ribosomal_L31 (pfam01197) → PrfA (COG0216)prfA (PRK00591) → HemK (COG2890)PRK09328 (PRK09328) → SUA5 (COG0009)TIGR00057 (TIGR00057) → ECA_wecA (TIGR02380)GT_WecA_like (cd06853) → |
| Mab-1-104 | NZ_CSYA01000001.1 | + | 244753 | 244793 | RNA → rpmE (PRK00019)Ribosomal_L31 (pfam01197) → PrfA (COG0216)prfA (PRK00591) → HemK (COG2890)PRK09328 (PRK09328) → SUA5 (COG0009)TIGR00057 (TIGR00057) → ECA_wecA (TIGR02380)GT_WecA_like (cd06853) → |
| Mab-1-105 | NZ_CSXB01000001.1 | - | 506499 | 506459 | RNA → rpmE (PRK00019)Ribosomal_L31 (pfam01197) → PrfA (COG0216)prfA (PRK00591) → HemK (COG2890)PRK09328 (PRK09328) → SUA5 (COG0009)TIGR00057 (TIGR00057) → ECA_wecA (TIGR02380)GT_WecA_like (cd06853) → |
| Mab-1-106 | NZ_CSZH01000001.1 | - | 625398 | 625358 | RNA → rpmE (PRK00019)Ribosomal_L31 (pfam01197) → PrfA (COG0216)prfA (PRK00591) → HemK (COG2890)PRK09328 (PRK09328) → SUA5 (COG0009)TIGR00057 (TIGR00057) → ECA_wecA (TIGR02380)GT_WecA_like (cd06853) → |
| Mab-1-107 | NZ_CSXE01000001.1 | + | 244753 | 244793 | RNA → rpmE (PRK00019)Ribosomal_L31 (pfam01197) → PrfA (COG0216)prfA (PRK00591) → HemK (COG2890)PRK09328 (PRK09328) → SUA5 (COG0009)TIGR00057 (TIGR00057) → ECA_wecA (TIGR02380)GT_WecA_like (cd06853) → |
| Mab-1-108 | NZ_CSYO01000001.1 | - | 309254 | 309214 | RNA → rpmE (PRK00019)Ribosomal_L31 (pfam01197) → PrfA (COG0216)prfA (PRK00591) → HemK (COG2890)PRK09328 (PRK09328) → SUA5 (COG0009)TIGR00057 (TIGR00057) → ECA_wecA (TIGR02380)GT_WecA_like (cd06853) → |
| Mab-1-109 | NZ_CSZG01000009.1 | - | 21110  | 21070  | RNA → rpmE (PRK00019)Ribosomal_L31 (pfam01197) → PrfA (COG0216)prfA (PRK00591) → HemK (COG2890)PRK09328 (PRK09328) → SUA5 (COG0009)TIGR00057 (TIGR00057) → ECA_wecA (TIGR02380)GT_WecA_like (cd06853) → |
| Mab-1-110 | NZ_CSZR01000003.1 | - | 459464 | 459424 | RNA → rpmE (PRK00019)Ribosomal_L31 (pfam01197) → PrfA (COG0216)prfA (PRK00591) → HemK (COG2890)PRK09328 (PRK09328) → SUA5 (COG0009)TIGR00057 (TIGR00057) → ECA_wecA (TIGR02380)GT_WecA_like (cd06853) → |
| Mab-1-111 | NZ_CSZM01000004.1 | - | 132560 | 132520 | RNA → rpmE (PRK00019)Ribosomal_L31 (pfam01197) → PrfA (COG0216)prfA (PRK00591) → HemK (COG2890)PRK09328 (PRK09328) → SUA5 (COG0009)TIGR00057 (TIGR00057) → ECA_wecA (TIGR02380)GT_WecA_like (cd06853) → |
| Mab-1-112 | NZ_CSUF01000001.1 | - | 445936 | 445896 | RNA → rpmE (PRK00019)Ribosomal_L31 (pfam01197) → PrfA (COG0216)prfA (PRK00591) → HemK (COG2890)PRK09328 (PRK09328) → SUA5 (COG0009)TIGR00057 (TIGR00057) → ECA_wecA (TIGR02380)GT_WecA_like (cd06853) → |
| Mab-1-113 | NZ_CSTF01000001.1 | - | 309258 | 309218 | RNA → rpmE (PRK00019)Ribosomal_L31 (pfam01197) → PrfA (COG0216)prfA (PRK00591) → HemK (COG2890)PRK09328 (PRK09328) → SUA5 (COG0009)TIGR00057 (TIGR00057) → ECA_wecA (TIGR02380)GT_WecA_like (cd06853) → |

|          |                   |   |        |        |                                                                                                                                                                                                         |
|----------|-------------------|---|--------|--------|---------------------------------------------------------------------------------------------------------------------------------------------------------------------------------------------------------|
| Mab-57-1 | NZ_ATFQ01000015.1 | + | 135878 | 135918 | RNA → rpmE (PRK00019)Ribosomal_L31 (pfam01197) → PrfA (COG0216)prfA (PRK00591) → HemK (COG2890)PRK09328 (PRK09328) → SUA5 (COG0009)TIGR00057 (TIGR00057) → ECA_wecA (TIGR02380)GT_WecA_like (cd06853) → |
| Mab-9-1  | NZ_AGQU01000002.1 | + | 364967 | 365007 | RNA → rpmE (PRK00019)Ribosomal_L31 (pfam01197) → PrfA (COG0216)prfA (PRK00591) → HemK (COG2890)PRK09328 (PRK09328) → SUA5 (COG0009)TIGR00057 (TIGR00057) → ECA_wecA (TIGR02380)GT_WecA_like (cd06853) → |
| Mab-17-1 | NZ_AKTY01000002.1 | + | 656984 | 657024 | RNA → rpmE (PRK00019)Ribosomal_L31 (pfam01197) → PrfA (COG0216)prfA (PRK00591) → HemK (COG2890)PRK09328 (PRK09328) → SUA5 (COG0009)TIGR00057 (TIGR00057) → ECA_wecA (TIGR02380)GT_WecA_like (cd06853) → |
| Mab-38-1 | NZ_AJSE01000006.1 | - | 848090 | 848050 | RNA → rpmE (PRK00019)Ribosomal_L31 (pfam01197) → PrfA (COG0216)prfA (PRK00591) → HemK (COG2890)PRK09328 (PRK09328) → SUA5 (COG0009)TIGR00057 (TIGR00057) → ECA_wecA (TIGR02380)GT_WecA_like (cd06853) → |
| Mab-37-1 | NZ_AJSD01000001.1 | + | 321157 | 321197 | RNA → rpmE (PRK00019)Ribosomal_L31 (pfam01197) → PrfA (COG0216)prfA (PRK00591) → HemK (COG2890)PRK09328 (PRK09328) → SUA5 (COG0009)TIGR00057 (TIGR00057) → ECA_wecA (TIGR02380)GT_WecA_like (cd06853) → |
| Mab-49-1 | NZ_AKUU01000002.1 | + | 437326 | 437366 | RNA → rpmE (PRK00019)Ribosomal_L31 (pfam01197) → PrfA (COG0216)prfA (PRK00591) → HemK (COG2890)PRK09328 (PRK09328) → SUA5 (COG0009)TIGR00057 (TIGR00057) → ECA_wecA (TIGR02380)GT_WecA_like (cd06853) → |
| Mab-45-1 | NZ_AKUJ01000002.1 | + | 812189 | 812229 | RNA → rpmE (PRK00019)Ribosomal_L31 (pfam01197) → PrfA (COG0216)prfA (PRK00591) → HemK (COG2890)PRK09328 (PRK09328) → SUA5 (COG0009)TIGR00057 (TIGR00057) → ECA_wecA (TIGR02380)GT_WecA_like (cd06853) → |
| Mab-16-1 | NZ_AKTX01000002.1 | + | 136662 | 136702 | RNA → rpmE (PRK00019)Ribosomal_L31 (pfam01197) → PrfA (COG0216)prfA (PRK00591) → HemK (COG2890)PRK09328 (PRK09328) → SUA5 (COG0009)TIGR00057 (TIGR00057) → ECA_wecA (TIGR02380)GT_WecA_like (cd06853) → |
| Mab-52-1 | NZ_AKUW01000004.1 | + | 53562  | 53602  | RNA → rpmE (PRK00019)Ribosomal_L31 (pfam01197) → PrfA (COG0216)prfA (PRK00591) → HemK (COG2890)PRK09328 (PRK09328) → SUA5 (COG0009)TIGR00057 (TIGR00057) → ECA_wecA (TIGR02380)GT_WecA_like (cd06853) → |
| Mab-32-1 | NZ_AKVR01000005.1 | - | 756739 | 756699 | RNA → rpmE (PRK00019)Ribosomal_L31 (pfam01197) → PrfA (COG0216)prfA (PRK00591) → HemK (COG2890)PRK09328 (PRK09328) → SUA5 (COG0009)TIGR00057 (TIGR00057) → ECA_wecA (TIGR02380)GT_WecA_like (cd06853) → |
| Mab-31-1 | NZ_AJLZ01000010.1 | + | 127082 | 127122 | RNA → rpmE (PRK00019)Ribosomal_L31 (pfam01197) → PrfA (COG0216)prfA (PRK00591) → HemK (COG2890)PRK09328 (PRK09328) → SUA5 (COG0009)TIGR00057 (TIGR00057) → ECA_wecA (TIGR02380)GT_WecA_like (cd06853) → |
| Mab-23-1 | NZ_AKUD01000004.1 | - | 490418 | 490378 | RNA → rpmE (PRK00019)Ribosomal_L31 (pfam01197) → PrfA (COG0216)prfA (PRK00591) → HemK (COG2890)PRK09328 (PRK09328) → SUA5 (COG0009)TIGR00057 (TIGR00057) → ECA_wecA (TIGR02380)GT_WecA_like (cd06853) → |
| Mab-47-1 | NZ_AKUL01000001.1 | + | 920827 | 920867 | RNA → rpmE (PRK00019)Ribosomal_L31 (pfam01197) → PrfA (COG0216)prfA (PRK00591) → HemK (COG2890)PRK09328 (PRK09328) → SUA5 (COG0009)TIGR00057 (TIGR00057) → ECA_wecA (TIGR02380)GT_WecA_like (cd06853) → |
| Mab-22-1 | NZ_AKUC01000004.1 | + | 136640 | 136680 | RNA → rpmE (PRK00019)Ribosomal_L31 (pfam01197) → PrfA (COG0216)prfA (PRK00591) → HemK (COG2890)PRK09328 (PRK09328) → SUA5 (COG0009)TIGR00057 (TIGR00057) → ECA_wecA (TIGR02380)GT_WecA_like (cd06853) → |
| Mab-20-1 | NZ_AKUB01000002.1 | + | 136706 | 136746 | RNA → rpmE (PRK00019)Ribosomal_L31 (pfam01197) → PrfA (COG0216)prfA (PRK00591) → HemK (COG2890)PRK09328 (PRK09328) → SUA5 (COG0009)TIGR00057 (TIGR00057) → ECA_wecA (TIGR02380)GT_WecA_like (cd06853) → |
| Mab-19-1 | NZ_AKUA01000003.1 | + | 136653 | 136693 | RNA → rpmE (PRK00019)Ribosomal_L31 (pfam01197) → PrfA (COG0216)prfA (PRK00591) → HemK (COG2890)PRK09328 (PRK09328) → SUA5 (COG0009)TIGR00057 (TIGR00057) → ECA_wecA (TIGR02380)GT_WecA_like (cd06853) → |
| Mab-48-1 | NZ_AKUN01000002.1 | + | 437379 | 437419 | RNA → rpmE (PRK00019)Ribosomal_L31 (pfam01197) → PrfA (COG0216)prfA (PRK00591) → HemK (COG2890)PRK09328 (PRK09328) → SUA5 (COG0009)TIGR00057 (TIGR00057) → ECA_wecA (TIGR02380)GT_WecA_like (cd06853) → |
| Mab-35-1 | NZ_AJMA01000004.1 | - | 313058 | 313018 | RNA → rpmE (PRK00019)Ribosomal_L31 (pfam01197) → PrfA (COG0216)prfA (PRK00591) → HemK (COG2890)PRK09328 (PRK09328) → SUA5 (COG0009)TIGR00057 (TIGR00057) → ECA_wecA (TIGR02380)GT_WecA_like (cd06853) → |
| Mab-50-1 | NZ_AKUM01000002.1 | + | 611330 | 611370 | RNA → rpmE (PRK00019)Ribosomal_L31 (pfam01197) → PrfA (COG0216)prfA (PRK00591) → HemK (COG2890)PRK09328 (PRK09328) → SUA5 (COG0009)TIGR00057 (TIGR00057) → ECA_wecA (TIGR02380)GT_WecA_like (cd06853) → |



|          |                   |   |         |         |                                                                                                                                                                                                                                                                                       |
|----------|-------------------|---|---------|---------|---------------------------------------------------------------------------------------------------------------------------------------------------------------------------------------------------------------------------------------------------------------------------------------|
| Mab-51-1 | NZ_AKUV01000004.1 | + | 437347  | 437387  | RNA → rpmE (PRK00019)Ribosomal_L31 (pfam01197) → PrfA (COG0216)prfA (PRK00591) → HemK (COG2890)PRK09328 (PRK09328) → SUA5 (COG0009)TIGR00057 (TIGR00057) → ECA_wecA (TIGR02380)GT_WecA_like (cd06853) →                                                                               |
| Mab-53-1 | NZ_AKUO01000005.1 | + | 53563   | 53603   | RNA → rpmE (PRK00019)Ribosomal_L31 (pfam01197) → PrfA (COG0216)prfA (PRK00591) → HemK (COG2890)PRK09328 (PRK09328) → SUA5 (COG0009)TIGR00057 (TIGR00057) → ECA_wecA (TIGR02380)GT_WecA_like (cd06853) →                                                                               |
| Mab-44-1 | NZ_AKUI01000002.1 | + | 376605  | 376645  | RNA → rpmE (PRK00019)Ribosomal_L31 (pfam01197) → PrfA (COG0216)prfA (PRK00591) → HemK (COG2890)PRK09328 (PRK09328) → SUA5 (COG0009)TIGR00057 (TIGR00057) → ECA_wecA (TIGR02380)GT_WecA_like (cd06853) →                                                                               |
| Mab-18-1 | NZ_AKTZ01000005.1 | + | 437892  | 437932  | RNA → rpmE (PRK00019)Ribosomal_L31 (pfam01197) → PrfA (COG0216)prfA (PRK00591) → HemK (COG2890)PRK09328 (PRK09328) → SUA5 (COG0009)TIGR00057 (TIGR00057) → ECA_wecA (TIGR02380)GT_WecA_like (cd06853) →                                                                               |
| Mab-36-1 | NZ_AKVU01000008.1 | - | 313101  | 313061  | RNA → rpmE (PRK00019)Ribosomal_L31 (pfam01197) → PrfA (COG0216)prfA (PRK00591) → HemK (COG2890)PRK09328 (PRK09328) → SUA5 (COG0009)TIGR00057 (TIGR00057) → ECA_wecA (TIGR02380)GT_WecA_like (cd06853) →                                                                               |
| Mab-46-1 | NZ_AKUK01000006.1 | + | 53546   | 53586   | RNA → rpmE (PRK00019)Ribosomal_L31 (pfam01197) → PrfA (COG0216)prfA (PRK00591) → HemK (COG2890)PRK09328 (PRK09328) → SUA5 (COG0009)TIGR00057 (TIGR00057) → ECA_wecA (TIGR02380)GT_WecA_like (cd06853) →                                                                               |
| Mab-21-1 | NZ_AKUQ01000005.1 | + | 54178   | 54218   | RNA → rpmE (PRK00019)Ribosomal_L31 (pfam01197) → PrfA (COG0216)prfA (PRK00591) → HemK (COG2890)PRK09328 (PRK09328) → SUA5 (COG0009)TIGR00057 (TIGR00057) → ECA_wecA (TIGR02380)GT_WecA_like (cd06853) →                                                                               |
| Mab-58-1 | NZ_AJSC01000002.1 | - | 671044  | 671004  | RNA → rpmE (PRK00019)Ribosomal_L31 (pfam01197) → PrfA (COG0216)prfA (PRK00591) → HemK (COG2890)PRK09328 (PRK09328) → SUA5 (COG0009)TIGR00057 (TIGR00057) → ECA_wecA (TIGR02380)GT_WecA_like (cd06853) →                                                                               |
| Mab-42-1 | NZ_AYTF01000002.1 | + | 1614438 | 1614478 | RNA → rpmE (PRK00019)Ribosomal_L31 (pfam01197) → PrfA (COG0216)prfA (PRK00591) → HemK (COG2890)PRK09328 (PRK09328) → SUA5 (COG0009)TIGR00057 (TIGR00057) → hypo →                                                                                                                     |
| Mab-64-1 | NZ_JAOW01000004.1 | + | 209627  | 209667  | Rfe (COG0472) → GT_WecA_like (cd06853)mraY (PRK00108)other_trbK (TIGR04360) → RNA → rpmE (PRK00019)Ribosomal_L31 (pfam01197) → PrfA (COG0216)prfA (PRK00591) → HemK (COG2890)PRK09328 (PRK09328) → SUA5 (COG0009)TIGR00057 (TIGR00057) → ECA_wecA (TIGR02380)GT_WecA_like (cd06853) → |
| Mab-66-1 | NZ_JAOV01000001.1 | + | 1212907 | 1212947 | RNA → rpmE (PRK00019)Ribosomal_L31 (pfam01197) → PrfA (COG0216)prfA (PRK00591) → HemK (COG2890)PRK09328 (PRK09328) → SUA5 (COG0009)TIGR00057 (TIGR00057) → ECA_wecA (TIGR02380)GT_WecA_like (cd06853) →                                                                               |
| Mab-54-1 | NC_021282.1       | + | 1470196 | 1470236 | RNA → rpmE (PRK00019)Ribosomal_L31 (pfam01197) → PrfA (COG0216)prfA (PRK00591) → HemK (COG2890)PRK09328 (PRK09328) → SUA5 (COG0009)TIGR00057 (TIGR00057) → ECA_wecA (TIGR02380)GT_WecA_like (cd06853) →                                                                               |
| Mab-70-1 | NZ_CP009616.1     | - | 3353449 | 3353409 | RNA → rpmE (PRK00019)Ribosomal_L31 (pfam01197) → PrfA (COG0216)prfA (PRK00591) → HemK (COG2890)PRK09328 (PRK09328) → SUA5 (COG0009)TIGR00057 (TIGR00057) → ECA_wecA (TIGR02380)GT_WecA_like (cd06853) →                                                                               |
| Mab-70-2 | NZ_CP009615.1     | - | 3353238 | 3353198 | RNA → rpmE (PRK00019)Ribosomal_L31 (pfam01197) → PrfA (COG0216)prfA (PRK00591) → HemK (COG2890)PRK09328 (PRK09328) → SUA5 (COG0009)TIGR00057 (TIGR00057) → ECA_wecA (TIGR02380)GT_WecA_like (cd06853) →                                                                               |
| Mab-75-1 | NC_018150.2       | - | 3353484 | 3353444 | RNA → rpmE (PRK00019)Ribosomal_L31 (pfam01197) → PrfA (COG0216)prfA (PRK00591) → HemK (COG2890)PRK09328 (PRK09328) → hypo → hypo → ECA_wecA (TIGR02380)GT_WecA_like (cd06853) →                                                                                                       |
| Mab-71-1 | NZ_CP009447.1     | - | 3228707 | 3228667 | RNA → rpmE (PRK00019)Ribosomal_L31 (pfam01197) → PrfA (COG0216)prfA (PRK00591) → HemK (COG2890)PRK09328 (PRK09328) → SUA5 (COG0009)TIGR00057 (TIGR00057) → ECA_wecA (TIGR02380)GT_WecA_like (cd06853) →                                                                               |
| Mab-33-1 | NZ_AKVV01000125.1 | + | 9758    | 9798    | RNA → rpmE (PRK00019)Ribosomal_L31 (pfam01197) → PrfA (COG0216)prfA (PRK00591) → hypo → HemK (COG2890)PRK09328 (PRK09328) → SUA5 (COG0009)TIGR00057 (TIGR00057) → ECA_wecA (TIGR02380)GT_WecA_like (cd06853) →                                                                        |
| Mab-61-1 | NZ_AJLY02000020.1 | + | 60826   | 60866   | RNA → rpmE (PRK00019)Ribosomal_L31 (pfam01197) → PrfA (COG0216)prfA (PRK00591) → HemK (COG2890)PRK09328 (PRK09328) → SUA5 (COG0009)TIGR00057 (TIGR00057) → ECA_wecA (TIGR02380)GT_WecA_like (cd06853) →                                                                               |
| Mab-41-1 | NZ_AYTA01000006.1 | + | 3199797 | 3199837 | RNA → rpmE (PRK00019)Ribosomal_L31 (pfam01197) → PrfA (COG0216)prfA (PRK00591) → HemK (COG2890)PRK09328 (PRK09328) → SUA5 (COG0009)TIGR00057 (TIGR00057) → ECA_wecA (TIGR02380)GT_WecA_like (cd06853) →                                                                               |

|           |                   |   |         |         |                                                                                                                                                                                                         |
|-----------|-------------------|---|---------|---------|---------------------------------------------------------------------------------------------------------------------------------------------------------------------------------------------------------|
| Mab-55-1  | NZ_AHAS01000006.1 | + | 474490  | 474530  | RNA → rpmE (PRK00019)Ribosomal_L31 (pfam01197) → PrfA (COG0216)prfA (PRK00591) → HemK (COG2890)PRK09328 (PRK09328) → SUA5 (COG0009)TIGR00057 (TIGR00057) → ECA_wecA (TIGR02380)GT_WecA_like (cd06853) → |
| Mab-1-114 | NZ_CSZT01000025.1 | - | 39697   | 39657   | RNA → rpmE (PRK00019)Ribosomal_L31 (pfam01197) → PrfA (COG0216)prfA (PRK00591) → HemK (COG2890)PRK09328 (PRK09328) → SUA5 (COG0009)TIGR00057 (TIGR00057) → ECA_wecA (TIGR02380)GT_WecA_like (cd06853) → |
| Mab-1-115 | NZ_CSXD01000003.1 | - | 317249  | 317209  | RNA → rpmE (PRK00019)Ribosomal_L31 (pfam01197) → PrfA (COG0216)prfA (PRK00591) → HemK (COG2890)PRK09328 (PRK09328) → SUA5 (COG0009)TIGR00057 (TIGR00057) → ECA_wecA (TIGR02380)GT_WecA_like (cd06853) → |
| Mab-1-116 | NZ_CSXL01000001.1 | - | 399190  | 399150  | RNA → rpmE (PRK00019)Ribosomal_L31 (pfam01197) → PrfA (COG0216)prfA (PRK00591) → HemK (COG2890)PRK09328 (PRK09328) → SUA5 (COG0009)TIGR00057 (TIGR00057) → ECA_wecA (TIGR02380)GT_WecA_like (cd06853) → |
| Mab-1-117 | NZ_CSXX01000001.1 | - | 143542  | 143502  | RNA → rpmE (PRK00019)Ribosomal_L31 (pfam01197) → PrfA (COG0216)prfA (PRK00591) → HemK (COG2890)PRK09328 (PRK09328) → SUA5 (COG0009)TIGR00057 (TIGR00057) → ECA_wecA (TIGR02380)GT_WecA_like (cd06853) → |
| Mab-1-118 | NZ_CSYS01000007.1 | + | 148924  | 148964  | RNA → rpmE (PRK00019)Ribosomal_L31 (pfam01197) → PrfA (COG0216)prfA (PRK00591) → HemK (COG2890)PRK09328 (PRK09328) → SUA5 (COG0009)TIGR00057 (TIGR00057) → ECA_wecA (TIGR02380)GT_WecA_like (cd06853) → |
| Mab-1-119 | NZ_CSZR01000007.1 | - | 132076  | 132036  | RNA → rpmE (PRK00019)Ribosomal_L31 (pfam01197) → PrfA (COG0216)prfA (PRK00591) → hypo → hypo → SUA5 (COG0009)TIGR00057 (TIGR00057) → ECA_wecA (TIGR02380)GT_WecA_like (cd06853) →                       |
| Mab-1-120 | NZ_CSWC01000003.1 | + | 10427   | 10467   | RNA → rpmE (PRK00019)Ribosomal_L31 (pfam01197) → PrfA (COG0216)prfA (PRK00591) → HemK (COG2890)PRK09328 (PRK09328) → SUA5 (COG0009)TIGR00057 (TIGR00057) → ECA_wecA (TIGR02380)GT_WecA_like (cd06853) → |
| Mab-1-121 | NZ_CSUY01000001.1 | - | 1112929 | 1112889 | RNA → rpmE (PRK00019)Ribosomal_L31 (pfam01197) → PrfA (COG0216)prfA (PRK00591) → HemK (COG2890)PRK09328 (PRK09328) → SUA5 (COG0009)TIGR00057 (TIGR00057) → ECA_wecA (TIGR02380)GT_WecA_like (cd06853) → |
| Mab-1-122 | NZ_CSU01000006.1  | + | 149331  | 149371  | RNA → rpmE (PRK00019)Ribosomal_L31 (pfam01197) → PrfA (COG0216)prfA (PRK00591) → HemK (COG2890)PRK09328 (PRK09328) → SUA5 (COG0009)TIGR00057 (TIGR00057) → ECA_wecA (TIGR02380)GT_WecA_like (cd06853) → |
| Mab-1-123 | NZ_CSYP01000002.1 | - | 294347  | 294307  | RNA → rpmE (PRK00019)Ribosomal_L31 (pfam01197) → PrfA (COG0216)prfA (PRK00591) → HemK (COG2890)PRK09328 (PRK09328) → SUA5 (COG0009)TIGR00057 (TIGR00057) → ECA_wecA (TIGR02380)GT_WecA_like (cd06853) → |
| Mab-1-124 | NZ_CSWK01000002.1 | - | 294251  | 294211  | RNA → rpmE (PRK00019)Ribosomal_L31 (pfam01197) → PrfA (COG0216)prfA (PRK00591) → HemK (COG2890)PRK09328 (PRK09328) → SUA5 (COG0009)TIGR00057 (TIGR00057) → ECA_wecA (TIGR02380)GT_WecA_like (cd06853) → |
| Mab-1-125 | NZ_CSTX01000003.1 | + | 10449   | 10489   | RNA → rpmE (PRK00019)Ribosomal_L31 (pfam01197) → PrfA (COG0216)prfA (PRK00591) → HemK (COG2890)PRK09328 (PRK09328) → SUA5 (COG0009)TIGR00057 (TIGR00057) → ECA_wecA (TIGR02380)GT_WecA_like (cd06853) → |
| Mab-1-126 | NZ_CSUP01000002.1 | - | 294322  | 294282  | RNA → rpmE (PRK00019)Ribosomal_L31 (pfam01197) → PrfA (COG0216)prfA (PRK00591) → HemK (COG2890)PRK09328 (PRK09328) → SUA5 (COG0009)TIGR00057 (TIGR00057) → ECA_wecA (TIGR02380)GT_WecA_like (cd06853) → |
| Mab-1-127 | NZ_CSWL01000001.1 | - | 742508  | 742468  | RNA → rpmE (PRK00019)Ribosomal_L31 (pfam01197) → PrfA (COG0216)prfA (PRK00591) → HemK (COG2890)PRK09328 (PRK09328) → SUA5 (COG0009)TIGR00057 (TIGR00057) → ECA_wecA (TIGR02380)GT_WecA_like (cd06853) → |
| Mab-1-128 | NZ_CSVB01000002.1 | - | 294465  | 294425  | RNA → rpmE (PRK00019)Ribosomal_L31 (pfam01197) → PrfA (COG0216)prfA (PRK00591) → HemK (COG2890)PRK09328 (PRK09328) → SUA5 (COG0009)TIGR00057 (TIGR00057) → ECA_wecA (TIGR02380)GT_WecA_like (cd06853) → |
| Mab-1-129 | NZ_CSTU01000051.1 | - | 20787   | 20747   | RNA → rpmE (PRK00019)Ribosomal_L31 (pfam01197) → PrfA (COG0216)prfA (PRK00591) → HemK (COG2890)PRK09328 (PRK09328) → SUA5 (COG0009)TIGR00057 (TIGR00057) → ECA_wecA (TIGR02380)GT_WecA_like (cd06853) → |
| Mab-1-130 | NZ_CSTO01000003.1 | - | 317251  | 317211  | RNA → rpmE (PRK00019)Ribosomal_L31 (pfam01197) → PrfA (COG0216)prfA (PRK00591) → HemK (COG2890)PRK09328 (PRK09328) → SUA5 (COG0009)TIGR00057 (TIGR00057) → ECA_wecA (TIGR02380)GT_WecA_like (cd06853) → |
| Mab-1-131 | NZ_CSVA01000001.1 | - | 740453  | 740413  | RNA → rpmE (PRK00019)Ribosomal_L31 (pfam01197) → PrfA (COG0216)prfA (PRK00591) → HemK (COG2890)PRK09328 (PRK09328) → SUA5 (COG0009)TIGR00057 (TIGR00057) → ECA_wecA (TIGR02380)GT_WecA_like (cd06853) → |





|           |                   |   |        |        |                                                                                                                                                                                                         |
|-----------|-------------------|---|--------|--------|---------------------------------------------------------------------------------------------------------------------------------------------------------------------------------------------------------|
| Mab-1-151 | NZ_CSUA01000006.1 | - | 299395 | 299355 | RNA → rpmE (PRK00019)Ribosomal_L31 (pfam01197) → PrfA (COG0216)prfA (PRK00591) → HemK (COG2890)PRK09328 (PRK09328) → SUA5 (COG0009)TIGR00057 (TIGR00057) → ECA_wecA (TIGR02380)GT_WecA_like (cd06853) → |
| Mab-1-152 | NZ_CSVG01000002.1 | - | 294334 | 294294 | RNA → rpmE (PRK00019)Ribosomal_L31 (pfam01197) → PrfA (COG0216)prfA (PRK00591) → HemK (COG2890)PRK09328 (PRK09328) → SUA5 (COG0009)TIGR00057 (TIGR00057) → ECA_wecA (TIGR02380)GT_WecA_like (cd06853) → |
| Mab-1-153 | NZ_CSWS01000002.1 | - | 132041 | 132001 | RNA → rpmE (PRK00019)Ribosomal_L31 (pfam01197) → PrfA (COG0216)prfA (PRK00591) → HemK (COG2890)PRK09328 (PRK09328) → SUA5 (COG0009)TIGR00057 (TIGR00057) → ECA_wecA (TIGR02380)GT_WecA_like (cd06853) → |
| Mab-1-154 | NZ_CSUW01000002.1 | - | 143911 | 143871 | RNA → rpmE (PRK00019)Ribosomal_L31 (pfam01197) → PrfA (COG0216)prfA (PRK00591) → HemK (COG2890)PRK09328 (PRK09328) → SUA5 (COG0009)TIGR00057 (TIGR00057) → ECA_wecA (TIGR02380)GT_WecA_like (cd06853) → |
| Mab-1-155 | NZ_CSVR01000004.1 | + | 266215 | 266255 | RNA → rpmE (PRK00019)Ribosomal_L31 (pfam01197) → PrfA (COG0216)prfA (PRK00591) → HemK (COG2890)PRK09328 (PRK09328) → SUA5 (COG0009)TIGR00057 (TIGR00057) → ECA_wecA (TIGR02380)GT_WecA_like (cd06853) → |
| Mab-1-156 | NZ_CSZO01000004.1 | - | 132026 | 131986 | RNA → rpmE (PRK00019)Ribosomal_L31 (pfam01197) → PrfA (COG0216)prfA (PRK00591) → hypo → hypo → SUA5 (COG0009)TIGR00057 (TIGR00057) → ECA_wecA (TIGR02380)GT_WecA_like (cd06853) →                       |
| Mab-1-157 | NZ_CSZW01000003.1 | - | 132152 | 132112 | RNA → rpmE (PRK00019)Ribosomal_L31 (pfam01197) → PrfA (COG0216)prfA (PRK00591) → HemK (COG2890)PRK09328 (PRK09328) → SUA5 (COG0009)TIGR00057 (TIGR00057) → ECA_wecA (TIGR02380)GT_WecA_like (cd06853) → |
| Mab-1-158 | NZ_CSWE01000001.1 | + | 657102 | 657142 | RNA → rpmE (PRK00019)Ribosomal_L31 (pfam01197) → PrfA (COG0216)prfA (PRK00591) → HemK (COG2890)PRK09328 (PRK09328) → SUA5 (COG0009)TIGR00057 (TIGR00057) → ECA_wecA (TIGR02380)GT_WecA_like (cd06853) → |
| Mab-1-159 | NZ_CSZX01000001.1 | - | 143534 | 143494 | RNA → rpmE (PRK00019)Ribosomal_L31 (pfam01197) → PrfA (COG0216)prfA (PRK00591) → HemK (COG2890)PRK09328 (PRK09328) → SUA5 (COG0009)TIGR00057 (TIGR00057) → ECA_wecA (TIGR02380)GT_WecA_like (cd06853) → |
| Mab-1-160 | NZ_CSWN01000005.1 | - | 143616 | 143576 | RNA → rpmE (PRK00019)Ribosomal_L31 (pfam01197) → PrfA (COG0216)prfA (PRK00591) → HemK (COG2890)PRK09328 (PRK09328) → SUA5 (COG0009)TIGR00057 (TIGR00057) → ECA_wecA (TIGR02380)GT_WecA_like (cd06853) → |
| Mab-1-161 | NZ_CSXT01000008.1 | - | 144962 | 144922 | RNA → rpmE (PRK00019)Ribosomal_L31 (pfam01197) → PrfA (COG0216)prfA (PRK00591) → HemK (COG2890)PRK09328 (PRK09328) → SUA5 (COG0009)TIGR00057 (TIGR00057) → ECA_wecA (TIGR02380)GT_WecA_like (cd06853) → |
| Mab-1-162 | NZ_CSZS01000012.1 | - | 49634  | 49594  | RNA → rpmE (PRK00019)Ribosomal_L31 (pfam01197) → PrfA (COG0216)prfA (PRK00591) → HemK (COG2890)PRK09328 (PRK09328) → SUA5 (COG0009)TIGR00057 (TIGR00057) → ECA_wecA (TIGR02380)GT_WecA_like (cd06853) → |
| Mab-1-163 | NZ_CSYL01000003.1 | + | 261973 | 262013 | RNA → rpmE (PRK00019)Ribosomal_L31 (pfam01197) → PrfA (COG0216)prfA (PRK00591) → HemK (COG2890)PRK09328 (PRK09328) → SUA5 (COG0009)TIGR00057 (TIGR00057) → ECA_wecA (TIGR02380)GT_WecA_like (cd06853) → |
| Mab-1-164 | NZ_CSWH01000005.1 | - | 299304 | 299264 | RNA → rpmE (PRK00019)Ribosomal_L31 (pfam01197) → PrfA (COG0216)prfA (PRK00591) → HemK (COG2890)PRK09328 (PRK09328) → SUA5 (COG0009)TIGR00057 (TIGR00057) → ECA_wecA (TIGR02380)GT_WecA_like (cd06853) → |
| Mab-1-165 | NZ_CSTP01000002.1 | - | 317144 | 317104 | RNA → rpmE (PRK00019)Ribosomal_L31 (pfam01197) → PrfA (COG0216)prfA (PRK00591) → HemK (COG2890)PRK09328 (PRK09328) → SUA5 (COG0009)TIGR00057 (TIGR00057) → ECA_wecA (TIGR02380)GT_WecA_like (cd06853) → |
| Mab-43-1  | NZ_AUMY01000010.1 | + | 60813  | 60853  | RNA → rpmE (PRK00019)Ribosomal_L31 (pfam01197) → PrfA (COG0216)prfA (PRK00591) → HemK (COG2890)PRK09328 (PRK09328) → SUA5 (COG0009)TIGR00057 (TIGR00057) → ECA_wecA (TIGR02380)GT_WecA_like (cd06853) → |
| Mab-5-1   | NZ_AKVA01000006.1 | + | 237374 | 237414 | RNA → rpmE (PRK00019)Ribosomal_L31 (pfam01197) → PrfA (COG0216)prfA (PRK00591) → HemK (COG2890)PRK09328 (PRK09328) → SUA5 (COG0009)TIGR00057 (TIGR00057) → ECA_wecA (TIGR02380)GT_WecA_like (cd06853) → |
| Mab-8-1   | NZ_AKVC01000005.1 | + | 141628 | 141668 | RNA → rpmE (PRK00019)Ribosomal_L31 (pfam01197) → PrfA (COG0216)prfA (PRK00591) → HemK (COG2890)PRK09328 (PRK09328) → SUA5 (COG0009)TIGR00057 (TIGR00057) → ECA_wecA (TIGR02380)GT_WecA_like (cd06853) → |
| Mab-14-1  | NZ_AKTV01000003.1 | + | 395176 | 395216 | RNA → rpmE (PRK00019)Ribosomal_L31 (pfam01197) → PrfA (COG0216)prfA (PRK00591) → HemK (COG2890)PRK09328 (PRK09328) → SUA5 (COG0009)TIGR00057 (TIGR00057) → ECA_wecA (TIGR02380)GT_WecA_like (cd06853) → |

|          |                   |   |         |         |                                                                                                                                                                                                                                               |
|----------|-------------------|---|---------|---------|-----------------------------------------------------------------------------------------------------------------------------------------------------------------------------------------------------------------------------------------------|
| Mab-12-1 | NZ_AKUT01000005.1 | + | 138569  | 138609  | RNA → rpmE (PRK00019)Ribosomal_L31 (pfam01197) → PrfA (COG0216)prfA (PRK00591) → HemK (COG2890)PRK09328 (PRK09328) → SUA5 (COG0009)TIGR00057 (TIGR00057) → ECA_wecA (TIGR02380)GT_WecA_like (cd06853) →                                       |
| Mab-11-1 | NZ_AKVE01000002.1 | + | 138525  | 138565  | RNA → rpmE (PRK00019)Ribosomal_L31 (pfam01197) → PrfA (COG0216)prfA (PRK00591) → HemK (COG2890)PRK09328 (PRK09328) → SUA5 (COG0009)TIGR00057 (TIGR00057) → ECA_wecA (TIGR02380)GT_WecA_like (cd06853) →                                       |
| Mab-7-1  | NZ_AKVB01000004.1 | + | 141663  | 141703  | RNA → rpmE (PRK00019)Ribosomal_L31 (pfam01197) → PrfA (COG0216)prfA (PRK00591) → HemK (COG2890)PRK09328 (PRK09328) → SUA5 (COG0009)TIGR00057 (TIGR00057) → ECA_wecA (TIGR02380)GT_WecA_like (cd06853) →                                       |
| Mab-10-1 | NZ_AKVD01000003.1 | + | 1145427 | 1145467 | RNA → rpmE (PRK00019)Ribosomal_L31 (pfam01197) → PrfA (COG0216)prfA (PRK00591) → HemK (COG2890)PRK09328 (PRK09328) → SUA5 (COG0009)TIGR00057 (TIGR00057) → ECA_wecA (TIGR02380)GT_WecA_like (cd06853) →                                       |
| Mab-4-1  | NZ_AKUZ01000006.1 | + | 53482   | 53522   | RNA → rpmE (PRK00019)Ribosomal_L31 (pfam01197) → PrfA (COG0216)prfA (PRK00591) → HemK (COG2890)PRK09328 (PRK09328) → SUA5 (COG0009)TIGR00057 (TIGR00057) → SUA5 (COG0009)TIGR00057 (TIGR00057) → ECA_wecA (TIGR02380)GT_WecA_like (cd06853) → |
| Mab-13-1 | NZ_AKTU01000004.1 | + | 395153  | 395193  | RNA → rpmE (PRK00019)Ribosomal_L31 (pfam01197) → PrfA (COG0216)prfA (PRK00591) → HemK (COG2890)PRK09328 (PRK09328) → SUA5 (COG0009)TIGR00057 (TIGR00057) → ECA_wecA (TIGR02380)GT_WecA_like (cd06853) →                                       |
| Mab-6-1  | NZ_AKUP01000009.1 | + | 141650  | 141690  | RNA → rpmE (PRK00019)Ribosomal_L31 (pfam01197) → PrfA (COG0216)prfA (PRK00591) → HemK (COG2890)PRK09328 (PRK09328) → SUA5 (COG0009)TIGR00057 (TIGR00057) → ECA_wecA (TIGR02380)GT_WecA_like (cd06853) →                                       |
| Mab-3-1  | NZ_AKUY01000014.1 | + | 53426   | 53466   | RNA → rpmE (PRK00019)Ribosomal_L31 (pfam01197) → PrfA (COG0216)prfA (PRK00591) → HemK (COG2890)PRK09328 (PRK09328) → SUA5 (COG0009)TIGR00057 (TIGR00057) → ECA_wecA (TIGR02380)GT_WecA_like (cd06853) →                                       |
| Mab-2-1  | NZ_AKUX01000006.1 | + | 141637  | 141677  | RNA → rpmE (PRK00019)Ribosomal_L31 (pfam01197) → PrfA (COG0216)prfA (PRK00591) → HemK (COG2890)PRK09328 (PRK09328) → SUA5 (COG0009)TIGR00057 (TIGR00057) → ECA_wecA (TIGR02380)GT_WecA_like (cd06853) →                                       |
| Mab-27-1 | NZ_AKUS01000005.1 | + | 141661  | 141701  | RNA → rpmE (PRK00019)Ribosomal_L31 (pfam01197) → PrfA (COG0216)prfA (PRK00591) → HemK (COG2890)PRK09328 (PRK09328) → SUA5 (COG0009)TIGR00057 (TIGR00057) → ECA_wecA (TIGR02380)GT_WecA_like (cd06853) →                                       |
| Mab-26-1 | NZ_AKUR01000007.1 | + | 141644  | 141684  | RNA → rpmE (PRK00019)Ribosomal_L31 (pfam01197) → PrfA (COG0216)prfA (PRK00591) → HemK (COG2890)PRK09328 (PRK09328) → SUA5 (COG0009)TIGR00057 (TIGR00057) → ECA_wecA (TIGR02380)GT_WecA_like (cd06853) →                                       |
| Mab-15-1 | NZ_AKTW01000001.1 | + | 847452  | 847492  | RNA → rpmE (PRK00019)Ribosomal_L31 (pfam01197) → PrfA (COG0216)prfA (PRK00591) → HemK (COG2890)PRK09328 (PRK09328) → SUA5 (COG0009)TIGR00057 (TIGR00057) → ECA_wecA (TIGR02380)GT_WecA_like (cd06853) →                                       |
| Mab-40-1 | NZ_AJGG01000034.1 | - | 91946   | 91906   | RNA → rpmE (PRK00019)Ribosomal_L31 (pfam01197) → PrfA (COG0216)prfA (PRK00591) → HemK (COG2890)PRK09328 (PRK09328) → SUA5 (COG0009)TIGR00057 (TIGR00057) → ECA_wecA (TIGR02380)GT_WecA_like (cd06853) →                                       |
| Mab-39-1 | NZ_AJGF01000010.1 | + | 316074  | 316114  | RNA → rpmE (PRK00019)Ribosomal_L31 (pfam01197) → PrfA (COG0216)prfA (PRK00591) → HemK (COG2890)PRK09328 (PRK09328) → SUA5 (COG0009)TIGR00057 (TIGR00057) → ECA_wecA (TIGR02380)GT_WecA_like (cd06853) →                                       |
| Mab-28-1 | NZ_AKUG01000004.1 | + | 141618  | 141658  | RNA → rpmE (PRK00019)Ribosomal_L31 (pfam01197) → PrfA (COG0216)prfA (PRK00591) → HemK (COG2890)PRK09328 (PRK09328) → SUA5 (COG0009)TIGR00057 (TIGR00057) → ECA_wecA (TIGR02380)GT_WecA_like (cd06853) →                                       |
| Mab-34-1 | NZ_AKVT01000011.1 | - | 15076   | 15036   | RNA → rpmE (PRK00019)Ribosomal_L31 (pfam01197) → PrfA (COG0216)prfA (PRK00591) → HemK (COG2890)PRK09328 (PRK09328) → SUA5 (COG0009)TIGR00057 (TIGR00057) → ECA_wecA (TIGR02380)GT_WecA_like (cd06853) →                                       |
| Mab-29-1 | NZ_AKUH01000010.1 | + | 53471   | 53511   | RNA → rpmE (PRK00019)Ribosomal_L31 (pfam01197) → PrfA (COG0216)prfA (PRK00591) → HemK (COG2890)PRK09328 (PRK09328) → SUA5 (COG0009)TIGR00057 (TIGR00057) → ECA_wecA (TIGR02380)GT_WecA_like (cd06853) →                                       |
| Mab-24-1 | NZ_AKUE01000004.1 | + | 53462   | 53502   | RNA → rpmE (PRK00019)Ribosomal_L31 (pfam01197) → PrfA (COG0216)prfA (PRK00591) → HemK (COG2890)PRK09328 (PRK09328) → SUA5 (COG0009)TIGR00057 (TIGR00057) → ECA_wecA (TIGR02380)GT_WecA_like (cd06853) →                                       |
| Mab-25-1 | NZ_AKUF01000006.1 | + | 464209  | 464249  | RNA → rpmE (PRK00019)Ribosomal_L31 (pfam01197) → PrfA (COG0216)prfA (PRK00591) → HemK (COG2890)PRK09328 (PRK09328) → SUA5 (COG0009)TIGR00057 (TIGR00057) → SUA5 (COG0009)TIGR00057 (TIGR00057) → ECA_wecA (TIGR02380)GT_WecA_like (cd06853) → |



|           |                   |   |         |         |                                                                                                                                                                                                                                                                                                                                                                                                                                                                                                                                               |
|-----------|-------------------|---|---------|---------|-----------------------------------------------------------------------------------------------------------------------------------------------------------------------------------------------------------------------------------------------------------------------------------------------------------------------------------------------------------------------------------------------------------------------------------------------------------------------------------------------------------------------------------------------|
| Mka-1-1   | NZ_JASX01000032.1 | + | 142131  | 142171  | RNA → rpmE (PRK00019)Ribosomal_L31 (pfam01197) → PrfA (COG0216)prfA (PRK00591) → HemK (COG2890)PRK09328 (PRK09328) → SUA5 (COG0009)TIGR00057 (TIGR00057) → ECA_wecA (TIGR02380)GT_WecA_like (cd06853)other_trbK (TIGR04360) →                                                                                                                                                                                                                                                                                                                 |
| Mab-67-1  | NZ_JAOU01000003.1 | + | 1978072 | 1978112 | RNA → rpmE (PRK00019)Ribosomal_L31 (pfam01197) → PrfA (COG0216)prfA (PRK00591) → HemK (COG2890)PRK09328 (PRK09328) → SUA5 (COG0009)TIGR00057 (TIGR00057) → ECA_wecA (TIGR02380)GT_WecA_like (cd06853) →                                                                                                                                                                                                                                                                                                                                       |
| Mab-62-1  | NZ_JAOY01000001.1 | + | 3994798 | 3994838 | RNA → rpmE (PRK00019)Ribosomal_L31 (pfam01197) → PrfA (COG0216)prfA (PRK00591) → HemK (COG2890)PRK09328 (PRK09328) → SUA5 (COG0009)TIGR00057 (TIGR00057) → ECA_wecA (TIGR02380)GT_WecA_like (cd06853) →                                                                                                                                                                                                                                                                                                                                       |
| Mab-68-1  | NZ_JAOT01000003.1 | + | 174381  | 174421  | RNA → rpmE (PRK00019)Ribosomal_L31 (pfam01197) → PrfA (COG0216)prfA (PRK00591) → HemK (COG2890)PRK09328 (PRK09328) → SUA5 (COG0009)TIGR00057 (TIGR00057) → ECA_wecA (TIGR02380)GT_WecA_like (cd06853) →                                                                                                                                                                                                                                                                                                                                       |
| Mch-3-1   | NZ_JAOI01000002.1 | - | 111334  | 111294  | RNA → rpmE (PRK00019)Ribosomal_L31 (pfam01197) → PrfA (COG0216)prfA (PRK00591) → HemK (COG2890)PRK09328 (PRK09328) → SUA5 (COG0009)TIGR00057 (TIGR00057) → ECA_wecA (TIGR02380)GT_WecA_like (cd06853) →                                                                                                                                                                                                                                                                                                                                       |
| Mab-1-1   | NC_010397.1       | + | 1446856 | 1446896 | RNA → rpmE (PRK00019)Ribosomal_L31 (pfam01197) → PrfA (COG0216)prfA (PRK00591) → HemK (COG2890)PRK09328 (PRK09328) → SUA5 (COG0009)TIGR00057 (TIGR00057) → ECA_wecA (TIGR02380)GT_WecA_like (cd06853) →                                                                                                                                                                                                                                                                                                                                       |
| Mab-60-1  | NZ_HE817967.1     | + | 1449314 | 1449354 | RNA → rpmE (PRK00019)Ribosomal_L31 (pfam01197) → PrfA (COG0216)prfA (PRK00591) → HemK (COG2890)PRK09328 (PRK09328) → SUA5 (COG0009)TIGR00057 (TIGR00057) → ECA_wecA (TIGR02380)GT_WecA_like (cd06853) →                                                                                                                                                                                                                                                                                                                                       |
| Mab-30-1  | NZ_KB290571.1     | + | 2284355 | 2284395 | RNA → rpmE (PRK00019)Ribosomal_L31 (pfam01197) → PrfA (COG0216)prfA (PRK00591) → HemK (COG2890)PRK09328 (PRK09328) → SUA5 (COG0009)TIGR00057 (TIGR00057) → ECA_wecA (TIGR02380)GT_WecA_like (cd06853) →                                                                                                                                                                                                                                                                                                                                       |
| Mab-1-166 | NZ_LGCJ01000014.1 | + | 53469   | 53509   | RNA → rpmE (PRK00019)Ribosomal_L31 (pfam01197) → PrfA (COG0216)prfA (PRK00591) → HemK (COG2890)PRK09328 (PRK09328) → SUA5 (COG0009)TIGR00057 (TIGR00057) → ECA_wecA (TIGR02380)GT_WecA_like (cd06853) →                                                                                                                                                                                                                                                                                                                                       |
| Mab-71-2  | NZ_CP009613.1     | + | 1445609 | 1445649 | RNA → rpmE (PRK00019)Ribosomal_L31 (pfam01197) → PrfA (COG0216)prfA (PRK00591) → HemK (COG2890)PRK09328 (PRK09328) → SUA5 (COG0009)TIGR00057 (TIGR00057) → ECA_wecA (TIGR02380)GT_WecA_like (cd06853) →                                                                                                                                                                                                                                                                                                                                       |
| Mab-72-1  | NZ_CP009407.1     | + | 1431380 | 1431420 | RNA → rpmE (PRK00019)Ribosomal_L31 (pfam01197) → PrfA (COG0216)prfA (PRK00591) → HemK (COG2890)PRK09328 (PRK09328) → SUA5 (COG0009)TIGR00057 (TIGR00057) → ECA_wecA (TIGR02380)GT_WecA_like (cd06853) →                                                                                                                                                                                                                                                                                                                                       |
| Mab-71-3  | NZ_CP009408.1     | + | 1446345 | 1446385 | RNA → rpmE (PRK00019)Ribosomal_L31 (pfam01197) → PrfA (COG0216)prfA (PRK00591) → HemK (COG2890)PRK09328 (PRK09328) → SUA5 (COG0009)TIGR00057 (TIGR00057) → ECA_wecA (TIGR02380)GT_WecA_like (cd06853) →                                                                                                                                                                                                                                                                                                                                       |
| Mab-69-1  | NZ_CP012044.1     | + | 1577915 | 1577955 | RNA → rpmE (PRK00019)Ribosomal_L31 (pfam01197) → PrfA (COG0216)prfA (PRK00591) → HemK (COG2890)PRK09328 (PRK09328) → SUA5 (COG0009)TIGR00057 (TIGR00057) → ECA_wecA (TIGR02380)GT_WecA_like (cd06853) →                                                                                                                                                                                                                                                                                                                                       |
| Mab-59-1  | NZ_JAOF01000001.1 | + | 1494986 | 1495026 | RNA → rpmE (PRK00019)Ribosomal_L31 (pfam01197) → PrfA (COG0216)prfA (PRK00591) → HemK (COG2890)PRK09328 (PRK09328) → SUA5 (COG0009)TIGR00057 (TIGR00057) → ECA_wecA (TIGR02380)GT_WecA_like (cd06853) →                                                                                                                                                                                                                                                                                                                                       |
| Mab-63-1  | NZ_JAOX01000001.1 | + | 2028893 | 2028933 | RNA → rpmE (PRK00019)Ribosomal_L31 (pfam01197) → PrfA (COG0216)prfA (PRK00591) → HemK (COG2890)PRK09328 (PRK09328) → SUA5 (COG0009)TIGR00057 (TIGR00057) → ECA_wecA (TIGR02380)GT_WecA_like (cd06853) →                                                                                                                                                                                                                                                                                                                                       |
| Mfo-2-1   | NZ_JASW01000013.1 | - | 78048   | 78008   | RNA → rpmE (PRK00019)Ribosomal_L31 (pfam01197) → PrfA (COG0216)prfA (PRK00591) → HemK (COG2890)PRK09328 (PRK09328) → SUA5 (COG0009)TIGR00057 (TIGR00057) → ECA_wecA (TIGR02380)GT_WecA_like (cd06853)other_trbK (TIGR04360) →                                                                                                                                                                                                                                                                                                                 |
| Mma-1-1   | NZ_AHAR01000007.1 | + | 396447  | 396487  | RNA → rpmE (PRK00019)Ribosomal_L31 (pfam01197) → rpmE (PRK00019)Ribosomal_L31 (pfam01197) → PrfA (COG0216)prfA (PRK00591) → PrfA (COG0216)prfA (PRK00591) → HemK (COG2890)PRK09328 (PRK09328) → HemK (COG2890)RF_mod_PrmC (TIGR03534) → HemK (COG2890)RF_mod_PrmC (TIGR03534) → HemK (COG2890)Methyltransf_25 (pfam13649) → HemK (COG2890)Methyltransf_25 (pfam13649) → SUA5 (COG0009)TIGR00057 (TIGR00057) → SUA5 (COG0009)TIGR00057 (TIGR00057) → ECA_wecA (TIGR02380)GT_WecA_like (cd06853) → ECA_wecA (TIGR02380)GT_WecA_like (cd06853) → |

|           |                         |   |         |         |                                                                                                                                                                                                                                                                                                                                                                                                 |
|-----------|-------------------------|---|---------|---------|-------------------------------------------------------------------------------------------------------------------------------------------------------------------------------------------------------------------------------------------------------------------------------------------------------------------------------------------------------------------------------------------------|
| Mab-56-1  | NZ_AKVF01000003.1       | + | 670171  | 670211  | RNA → rpmE (PRK00019)Ribosomal_L31 (pfam01197) → PrfA (COG0216)prfA (PRK00591) → HemK (COG2890)PRK09328 (PRK09328) → SUA5 (COG0009)TIGR00057 (TIGR00057) → ECA_wecA (TIGR02380)GT_WecA_like (cd06853) →                                                                                                                                                                                         |
| Mab-74-1  | NZ_AP014547.1           | + | 1453421 | 1453461 | RNA → rpmE (PRK00019)Ribosomal_L31 (pfam01197) → PrfA (COG0216)prfA (PRK00591) → HemK (COG2890)PRK09328 (PRK09328) → SUA5 (COG0009)TIGR00057 (TIGR00057) → ECA_wecA (TIGR02380)GT_WecA_like (cd06853) →                                                                                                                                                                                         |
| env-366   | JGI12273J12029_10114025 | + | 13      | 58      | RNA → rpmE (PRK00019)Ribosomal_L31 (pfam01197) →                                                                                                                                                                                                                                                                                                                                                |
| env-367   | JGI12396J12026_1204897  | + | 52      | 134     | RNA → ← hypō                                                                                                                                                                                                                                                                                                                                                                                    |
| env-368   | FNTS_GKKEVUV02IFQEU     | - | 183     | 146     | RNA → hypō →                                                                                                                                                                                                                                                                                                                                                                                    |
| env-369   | JGI20243J16304_127292   | - | 275     | 225     | RNA → ← hypō                                                                                                                                                                                                                                                                                                                                                                                    |
| Tsp-1-1   | NZ_HE997626.1           | - | 24625   | 24578   | RNA → rpmE (PRK00019)Ribosomal_L31 (pfam01197) → PrfA (COG0216)prfA (PRK00591) → HemK (COG2890)PRK09328 (PRK09328) → SUA5 (COG0009)TIGR00057 (TIGR00057) →                                                                                                                                                                                                                                      |
| Tpa-1-1   | NC_014158.1             | + | 1269385 | 1269433 | RNA → rpmE (PRK00019)Ribosomal_L31 (pfam01197) → PrfA (COG0216)prfA (PRK00591) → HemK (COG2890)PRK09328 (PRK09328) → SUA5 (COG0009)TIGR00057 (TIGR00057) →                                                                                                                                                                                                                                      |
| Are-1-1   | NZ_JZKF01000016.1       | + | 13468   | 13514   | RNA → rpmE (PRK00019)Ribosomal_L31 (pfam01197) → PrfA (COG0216)prfA (PRK00591) →                                                                                                                                                                                                                                                                                                                |
| Nca-3-1   | NZ_JOAG01000005.1       | - | 167647  | 167606  | RNA → rpmE (PRK00019)Ribosomal_L31 (pfam01197) → PrfA (COG0216)prfA (PRK00591) → HemK (COG2890)PRK09328 (PRK09328) → SUA5 (COG0009)TIGR00057 (TIGR00057) →                                                                                                                                                                                                                                      |
| env-370   | botACOD_FV90NF402IKWZZ  | + | 231     | 268     | RNA → rpmE (PRK00019)rpmE2 (PRK01678)Ribosomal_L31 (pfam01197) →                                                                                                                                                                                                                                                                                                                                |
| env-371   | JGI24735J21928_10271683 | - | 398     | 355     | RNA → hypō →                                                                                                                                                                                                                                                                                                                                                                                    |
| Mph-1-1   | NZ_AJFJ01000049.1       | - | 15218   | 15165   | RNA → rpmE (PRK00019)Ribosomal_L31 (pfam01197) → rpmE (PRK00019)Ribosomal_L31 (pfam01197) → PrfA (COG0216)prfA (PRK00591) → PrfA (COG0216)prfA (PRK00591) → HemK (COG2890)PRK09328 (PRK09328) → HemK (COG2890)PRK09328 (PRK09328) → SUA5 (COG0009)TIGR00057 (TIGR00057) → SUA5 (COG0009)TIGR00057 (TIGR00057) → GT_WecA_like (cd06853)mraY (PRK00108) → GT_WecA_like (cd06853)mraY (PRK00108) → |
| env-372   | JGI12635J15846_10020978 | + | 510     | 564     | RNA → rpmE (PRK00019)Ribosomal_L31 (pfam01197) →                                                                                                                                                                                                                                                                                                                                                |
| env-373   | JGI12682J13319_1038893  | + | 14      | 68      | RNA → ← hypō                                                                                                                                                                                                                                                                                                                                                                                    |
| env-374   | JGI12714J13572_1002355  | - | 413     | 359     | RNA → ← hypō                                                                                                                                                                                                                                                                                                                                                                                    |
| env-375   | JGI12668J13544_1058045  | + | 205     | 259     | RNA → hypō →                                                                                                                                                                                                                                                                                                                                                                                    |
| env-376   | JGI12712J15308_10190831 | - | 84      | 30      | RNA → ← hypō                                                                                                                                                                                                                                                                                                                                                                                    |
| env-377   | JGI12630J15595_10175159 | - | 290     | 236     | RNA → rpmE (PRK00019)Ribosomal_L31 (pfam01197) →                                                                                                                                                                                                                                                                                                                                                |
| env-378   | JGI12682J13319_1063338  | + | 232     | 286     | RNA →                                                                                                                                                                                                                                                                                                                                                                                           |
| env-379   | JGI20180J14839_1008125  | + | 143     | 208     | RNA → rpmE (PRK00019)Ribosomal_L31 (pfam01197) →                                                                                                                                                                                                                                                                                                                                                |
| env-380   | JGI12712J15308_10202108 | - | 470     | 415     | RNA → rpmE (PRK00019)Ribosomal_L31 (pfam01197) →                                                                                                                                                                                                                                                                                                                                                |
| Sgr-9-1   | NZ_JOBE01000014.1       | - | 122236  | 122189  | RNA → rpmE (PRK00019)Ribosomal_L31 (pfam01197) → PrfA (COG0216)prfA (PRK00591) →                                                                                                                                                                                                                                                                                                                |
| Sex-1-1   | NZ_JOFB01000019.1       | + | 104773  | 104820  | RNA → rpmE (PRK00019)Ribosomal_L31 (pfam01197) → PrfA (COG0216)prfA (PRK00591) →                                                                                                                                                                                                                                                                                                                |
| Sex-1-2   | NZ_JNZP01000018.1       | - | 213017  | 212970  | RNA → rpmE (PRK00019)Ribosomal_L31 (pfam01197) → PrfA (COG0216)prfA (PRK00591) →                                                                                                                                                                                                                                                                                                                |
| Sex-2-1   | NZ_AZSS01000360.1       | - | 24911   | 24864   | RNA → rpmE (PRK00019)Ribosomal_L31 (pfam01197) → PrfA (COG0216)prfA (PRK00591) → HemK (COG2890)PRK09328 (PRK09328) → SUA5 (COG0009)TIGR00057 (TIGR00057) → etp (PRK11391)Wzb (COG0394) →                                                                                                                                                                                                        |
| Ssp-115-1 | NZ_JOGX01000011.1       | - | 107370  | 107323  | RNA → rpmE (PRK00019)Ribosomal_L31 (pfam01197) → PrfA (COG0216)prfA (PRK00591) → HemK (COG2890)PRK09328 (PRK09328) → SUA5 (COG0009)TIGR00057 (TIGR00057) → etp (PRK11391)Wzb (COG0394) →                                                                                                                                                                                                        |
| Ssp-105-1 | NZ_JOHZ01000002.1       | + | 13150   | 13197   | RNA → rpmE (PRK00019)Ribosomal_L31 (pfam01197) → PrfA (COG0216)prfA (PRK00591) → HemK (COG2890)PRK09328 (PRK09328) → SUA5 (COG0009)TIGR00057 (TIGR00057) → etp (PRK11391)Wzb (COG0394) →                                                                                                                                                                                                        |
| Mgl-2-1   | NZ_JOFO01000002.1       | - | 183750  | 183703  | RNA → rpmE (PRK00019)Ribosomal_L31 (pfam01197) → PrfA (COG0216)prfA (PRK00591) → HemK (COG2890)PRK09328 (PRK09328) → SUA5 (COG0009)TIGR00057 (TIGR00057) → etp (PRK11391)Wzb (COG0394) →                                                                                                                                                                                                        |
| Sgr-12-2  | NZ_JNZT01000101.1       | - | 3778    | 3731    | RNA → rpmE (PRK00019)Ribosomal_L31 (pfam01197) → PrfA (COG0216)prfA (PRK00591) → HemK (COG2890)PRK09328 (PRK09328) → SUA5 (COG0009)TIGR00057 (TIGR00057) → etp (PRK11391)Wzb (COG0394) →                                                                                                                                                                                                        |
| Sgr-12-3  | NZ_JOEN01000032.1       | - | 52357   | 52310   | RNA → rpmE (PRK00019)Ribosomal_L31 (pfam01197) → PrfA (COG0216)prfA (PRK00591) → HemK (COG2890)PRK09328 (PRK09328) → SUA5 (COG0009)TIGR00057 (TIGR00057) → etp (PRK11391)Wzb (COG0394) →                                                                                                                                                                                                        |
| Fsp-14-1  | NZ_KQ031391.1           | - | 2026125 | 2026078 | RNA → rpmE (PRK00019)Ribosomal_L31 (pfam01197) → PrfA (COG0216)prfA (PRK00591) → HemK (COG2890)PRK09328 (PRK09328) →                                                                                                                                                                                                                                                                            |

|          |                    |   |         |         |                                                                                                                                                                                                                              |
|----------|--------------------|---|---------|---------|------------------------------------------------------------------------------------------------------------------------------------------------------------------------------------------------------------------------------|
| Fsa-1-1  | NZ_KI912266.1      | + | 2655277 | 2655323 | RNA → rpmE (PRK00019)Ribosomal_L31 (pfam01197) →                                                                                                                                                                             |
| Gar-2-1  | NZ_AXWO01000001.1  | - | 345857  | 345815  | RNA → rpmE (PRK00019)Ribosomal_L31 (pfam01197) → PrfA (COG0216)prfA (PRK00591) → HemK (COG2890)PRK09328 (PRK09328) → SUA5 (COG0009)TIGR00057 (TIGR00057) → LMWpc (smart00226)Wzb (COG0394) → hypo →                          |
| Spa-31-1 | NZ_AZWJ01000013.1  | + | 135671  | 135726  | RNA → rpmE (PRK00019)Ribosomal_L31 (pfam01197) →                                                                                                                                                                             |
| Spa-19-1 | NZ_KB900388.1      | - | 2477139 | 2477084 | RNA → rpmE (PRK00019)Ribosomal_L31 (pfam01197) → rpmE (PRK00019)Ribosomal_L31 (pfam01197) →                                                                                                                                  |
| Spa-3-1  | NZ_KB894983.1      | - | 51486   | 51431   | RNA → hypo → rpmE (PRK00019)Ribosomal_L31 (pfam01197) →                                                                                                                                                                      |
| Spa-39-1 | NZ_AUKU01000004.1  | - | 50781   | 50726   | RNA → rpmE (PRK00019)Ribosomal_L31 (pfam01197) →                                                                                                                                                                             |
| Spa-29-1 | NZ_AZVZ01000001.1  | + | 325608  | 325663  | RNA → rpmE (PRK00019)Ribosomal_L31 (pfam01197) →                                                                                                                                                                             |
| Spa-26-1 | NZ_AZWE01000001.1  | - | 50846   | 50791   | RNA → rpmE (PRK00019)Ribosomal_L31 (pfam01197) →                                                                                                                                                                             |
| Spa-23-1 | NZ_AZWP01000001.1  | + | 356983  | 357038  | RNA → rpmE (PRK00019)Ribosomal_L31 (pfam01197) →                                                                                                                                                                             |
| Spa-22-1 | NZ_AZWN01000007.1  | + | 156487  | 156542  | RNA → rpmE (PRK00019)Ribosomal_L31 (pfam01197) →                                                                                                                                                                             |
| Spa-37-1 | NZ_KI911485.1      | - | 160156  | 160101  | RNA → rpmE (PRK00019)Ribosomal_L31 (pfam01197) →                                                                                                                                                                             |
| Spa-16-1 | NZ_KB905359.1      | + | 4219288 | 4219343 | RNA → rpmE (PRK00019)Ribosomal_L31 (pfam01197) → rpmE (PRK00019)Ribosomal_L31 (pfam01197) →                                                                                                                                  |
| Spa-40-1 | NZ_KB897477.1      | - | 50762   | 50707   | RNA → rpmE (PRK00019)Ribosomal_L31 (pfam01197) →                                                                                                                                                                             |
| Spa-14-1 | NZ_KB897006.1      | - | 50602   | 50547   | RNA → rpmE (PRK00019)Ribosomal_L31 (pfam01197) → rpmE (PRK00019)Ribosomal_L31 (pfam01197) →                                                                                                                                  |
| Spa-35-1 | NZ_AZWM01000001.1  | - | 50720   | 50665   | RNA → rpmE (PRK00019)Ribosomal_L31 (pfam01197) →                                                                                                                                                                             |
| Spa-12-1 | NZ_KB896839.1      | + | 419496  | 419551  | RNA → rpmE (PRK00019)Ribosomal_L31 (pfam01197) → rpmE (PRK00019)Ribosomal_L31 (pfam01197) →                                                                                                                                  |
| Spa-25-1 | NZ_AZWC01000002.1  | - | 50728   | 50673   | RNA → rpmE (PRK00019)Ribosomal_L31 (pfam01197) →                                                                                                                                                                             |
| Spa-34-1 | NZ_AZVW01000001.1  | - | 50891   | 50836   | RNA → rpmE (PRK00019)Ribosomal_L31 (pfam01197) →                                                                                                                                                                             |
| Spa-21-1 | NZ_AZWO01000001.1  | + | 372780  | 372835  | RNA → rpmE (PRK00019)Ribosomal_L31 (pfam01197) →                                                                                                                                                                             |
| Spa-1-1  | NZ_KB904824.1      | - | 50851   | 50796   | RNA → rpmE (PRK00019)Ribosomal_L31 (pfam01197) → rpmE (PRK00019)Ribosomal_L31 (pfam01197) →                                                                                                                                  |
| Nfa-1-1  | NC_006361.1        | + | 1164117 | 1164159 | RNA → rpmE (PRK00019)Ribosomal_L31 (pfam01197) → PrfA (COG0216)prfA (PRK00591) → HemK (COG2890)PRK09328 (PRK09328) → SUA5 (COG0009)TIGR00057 (TIGR00057) → ECA_wecA (TIGR02380)GT_WecA_like (cd06853) → hypo →               |
| Msp-7-1  | NC_008146.1        | - | 4140648 | 4140593 | RNA → rpmE (PRK00019)Ribosomal_L31 (pfam01197) → PrfA (COG0216)prfA (PRK00591) → HemK (COG2890)PRK09328 (PRK09328) → SUA5 (COG0009)TIGR00057 (TIGR00057) → GT_WecA_like (cd06853)mraY (PRK00108) →                           |
| Msp-5-1  | NC_009077.1        | - | 4101693 | 4101638 | RNA → rpmE (PRK00019)Ribosomal_L31 (pfam01197) → PrfA (COG0216)prfA (PRK00591) → HemK (COG2890)PRK09328 (PRK09328) → SUA5 (COG0009)TIGR00057 (TIGR00057) → GT_WecA_like (cd06853)mraY (PRK00108) →                           |
| Msp-6-1  | NC_008705.1        | - | 4175130 | 4175075 | RNA → rpmE (PRK00019)Ribosomal_L31 (pfam01197) → PrfA (COG0216)prfA (PRK00591) → HemK (COG2890)PRK09328 (PRK09328) → SUA5 (COG0009)TIGR00057 (TIGR00057) → GT_WecA_like (cd06853)mraY (PRK00108) →                           |
| Msp-19-1 | NZ_JQKU01000014.1  | + | 205976  | 206017  | RNA → rpmE (PRK00019)Ribosomal_L31 (pfam01197) →                                                                                                                                                                             |
| Mll-1-1  | NZ_JXST01000033.1  | - | 15173   | 15132   | RNA → rpmE (PRK00019)Ribosomal_L31 (pfam01197) →                                                                                                                                                                             |
| Msp-3-1  | NZ_KB911477.1      | + | 59673   | 59714   | RNA → rpmE (PRK00019)Ribosomal_L31 (pfam01197) → PrfA (COG0216)prfA (PRK00591) → HemK (COG2890)PRK09328 (PRK09328) → SUA5 (COG0009)TIGR00057 (TIGR00057) → GT_WecA_like (cd06853)mraY (PRK00108) →                           |
| Msp-20-1 | NZ_JMLM01000001.1  | - | 15820   | 15779   | RNA → rpmE (PRK00019)Ribosomal_L31 (pfam01197) → PrfA (COG0216)prfA (PRK00591) → HemK (COG2890)PRK09328 (PRK09328) → SUA5 (COG0009)TIGR00057 (TIGR00057) → GT_WecA_like (cd06853)mraY (PRK00108) →                           |
| Nsp-7-1  | NZ_JOJF01000034.1  | - | 15463   | 15396   | RNA → rpmE (PRK00019)Ribosomal_L31 (pfam01197) → PrfA (COG0216)prfA (PRK00591) → HemK (COG2890)PRK09328 (PRK09328) → SUA5 (COG0009)TIGR00057 (TIGR00057) → ECA_wecA (TIGR02380)GT_WecA_like (cd06853) → hypo →               |
| Nve-1-1  | NZ_BAGM01000030.1  | + | 22539   | 22606   | RNA → rpmE (PRK00019)Ribosomal_L31 (pfam01197) → PrfA (COG0216)prfA (PRK00591) → HemK (COG2890)PRK09328 (PRK09328) → hypo → hypo → SUA5 (COG0009)TIGR00057 (TIGR00057) → ECA_wecA (TIGR02380)GT_WecA_like (cd06853) → hypo → |
| Nao-1-1  | NZ_BAFQ01000044.1  | + | 45685   | 45752   | RNA → rpmE (PRK00019)Ribosomal_L31 (pfam01197) → PrfA (COG0216)prfA (PRK00591) → HemK (COG2890)PRK09328 (PRK09328) → SUA5 (COG0009)TIGR00057 (TIGR00057) → ECA_wecA (TIGR02380)GT_WecA_like (cd06853) → hypo →               |
| Nce-1-1  | NZ_BAFW01000042.1  | + | 8980    | 9047    | RNA → rpmE (PRK00019)Ribosomal_L31 (pfam01197) → PrfA (COG0216)prfA (PRK00591) → HemK (COG2890)PRK09328 (PRK09328) → SUA5 (COG0009)TIGR00057 (TIGR00057) → ECA_wecA (TIGR02380)GT_WecA_like (cd06853) → hypo →               |
| env-381  | HBC_scaff_10249466 | + | 482     | 527     | RNA →                                                                                                                                                                                                                        |



|          |                         |   |         |         |                                                                                                                                                                                                                             |
|----------|-------------------------|---|---------|---------|-----------------------------------------------------------------------------------------------------------------------------------------------------------------------------------------------------------------------------|
| env-382  | HBC_scaff_10219859      | - | 180     | 135     | RNA→                                                                                                                                                                                                                        |
| env-383  | HBC_ctgs_1182059        | - | 180     | 135     | RNA→                                                                                                                                                                                                                        |
| Bas-2-1  | NZ_KQ033859.1           | - | 419564  | 419519  | RNA→ rpmE (PRK00019)Ribosomal_L31 (pfam01197)→                                                                                                                                                                              |
| env-384  | HBC_scaff_10141359      | - | 127     | 82      | RNA→ hypo→                                                                                                                                                                                                                  |
| env-385  | HBC_ctgs_1281286        | - | 127     | 82      | RNA→ hypo→                                                                                                                                                                                                                  |
| env-386  | HBC_scaff_10035491      | + | 3410    | 3455    | RNA→                                                                                                                                                                                                                        |
| env-387  | HBC_scaff_10160097      | - | 295     | 250     | RNA→ CBS (smart00116)IMPDPH (pfam00478)CBS (pfam00571)→                                                                                                                                                                     |
| env-388  | HBC_ctgs_1268800        | + | 249     | 294     | RNA→                                                                                                                                                                                                                        |
| env-389  | HBC_ctgs_1257867        | - | 295     | 250     | RNA→ CBS (smart00116)IMPDPH (pfam00478)CBS (pfam00571)→                                                                                                                                                                     |
| env-390  | HBC_ctgs_1141466        | + | 482     | 527     | RNA→                                                                                                                                                                                                                        |
| Bas-1-1  | NC_018720.1             | - | 1594861 | 1594816 | RNA→ rpmE (PRK00019)Ribosomal_L31 (pfam01197)→                                                                                                                                                                              |
| Bas-3-1  | NZ_JDTU01000007.1       | + | 50715   | 50760   | RNA→ rpmE (PRK00019)Ribosomal_L31 (pfam01197)→                                                                                                                                                                              |
| Bas-2-2  | NZ_KQ033885.1           | - | 1408476 | 1408431 | RNA→ rpmE (PRK00019)Ribosomal_L31 (pfam01197)→                                                                                                                                                                              |
| Bsp-3-1  | NZ_AWUO01000001.1       | - | 280667  | 280622  | RNA→ rpmE (PRK00019)Ribosomal_L31 (pfam01197)→                                                                                                                                                                              |
| env-391  | BGMT1_NODE_527181       | - | 9150    | 9105    | RNA→ rpmE (PRK00019)Ribosomal_L31 (pfam01197)→                                                                                                                                                                              |
| env-392  | HBC_scaff_10281629      | + | 636     | 681     | RNA→                                                                                                                                                                                                                        |
| env-393  | HBC_ctgs_1093268        | + | 636     | 681     | RNA→                                                                                                                                                                                                                        |
| env-394  | HBC_scaff_10015902      | - | 112     | 67      | RNA→                                                                                                                                                                                                                        |
| env-395  | HBC_ctgs_1269501        | + | 204     | 249     | RNA→                                                                                                                                                                                                                        |
| env-396  | HBC_scaff_10298050      | - | 68      | 23      | RNA→                                                                                                                                                                                                                        |
| env-397  | HBC_ctgs_1066607        | - | 68      | 23      | RNA→                                                                                                                                                                                                                        |
| Bsp-2-1  | NZ_AWUN01000004.1       | - | 167539  | 167494  | RNA→ rpmE (PRK00019)Ribosomal_L31 (pfam01197)→                                                                                                                                                                              |
| Bas-2-3  | NZ_KQ034040.1           | - | 1594375 | 1594330 | RNA→ rpmE (PRK00019)Ribosomal_L31 (pfam01197)→                                                                                                                                                                              |
| Mma-2-1  | NZ_CCBF01000004.1       | - | 15106   | 15057   | RNA→ rpmE (PRK00019)Ribosomal_L31 (pfam01197)→ PrfA (COG0216)prfA (PRK00591)→ HemK (COG2890)PRK09328 (PRK09328)→ SUA5 (COG0009)TIGR00057 (TIGR00057)→ GT_WecA_like (cd06853)mraY (PRK00108)→                                |
| Msp-2-1  | NZ_KB892705.1           | + | 457958  | 457995  | RNA→ rpmE (PRK00019)Ribosomal_L31 (pfam01197)→ PrfA (COG0216)prfA (PRK00591)→ PrfA (COG0216)prfA (PRK00591)→ HemK (COG2890)PRK09328 (PRK09328)→ SUA5 (COG0009)TIGR00057 (TIGR00057)→ GT_WecA_like (cd06853)mraY (PRK00108)→ |
| env-398  | JGI24736J21556_1296931  | - | 194     | 150     | RNA→ rpmE (PRK00019)Ribosomal_L31 (pfam01197)→                                                                                                                                                                              |
| env-399  | JGI24735J21928_10389060 | + | 23      | 67      | RNA→ ←hypo                                                                                                                                                                                                                  |
| Nji-1-1  | NZ_BAGB01000018.1       | + | 17431   | 17475   | RNA→ rpmE (PRK00019)Ribosomal_L31 (pfam01197)→                                                                                                                                                                              |
| Nno-1-1  | NZ_CP006850.1           | + | 1393179 | 1393243 | RNA→ rpmE (PRK00019)Ribosomal_L31 (pfam01197)→                                                                                                                                                                              |
| Nhi-1-1  | NZ_BAGA01000038.1       | + | 57963   | 58015   | RNA→ rpmE (PRK00019)Ribosomal_L31 (pfam01197)→                                                                                                                                                                              |
| Msp-1-1  | NZ_KB908258.1           | - | 178589  | 178551  | RNA→ rpmE (PRK00019)Ribosomal_L31 (pfam01197)→ PrfA (COG0216)prfA (PRK00591)→ HemK (COG2890)PRK09328 (PRK09328)→ SUA5 (COG0009)TIGR00057 (TIGR00057)→ GT_WecA_like (cd06853)mraY (PRK00108)→                                |
| Msp-18-1 | NZ_AUWS01000091.1       | + | 11274   | 11310   | RNA→ rpmE (PRK00019)Ribosomal_L31 (pfam01197)→ PrfA (COG0216)prfA (PRK00591)→ HemK (COG2890)PRK09328 (PRK09328)→ SUA5 (COG0009)TIGR00057 (TIGR00057)→ ECA_wecA (TIGR02380)GT_WecA_like (cd06853)→                           |
| Mfo-1-1  | NZ_JH814764.1           | - | 15543   | 15500   | RNA→ rpmE (PRK00019)Ribosomal_L31 (pfam01197)→                                                                                                                                                                              |
| Msp-25-1 | NZ_CP009914.1           | - | 4482052 | 4482009 | RNA→ rpmE (PRK00019)Ribosomal_L31 (pfam01197)→                                                                                                                                                                              |
| Mvu-1-1  | NZ_CCBG010000002.1      | + | 2131282 | 2131325 | RNA→ rpmE (PRK00019)Ribosomal_L31 (pfam01197)→ PrfA (COG0216)prfA (PRK00591)→ HemK (COG2890)PRK09328 (PRK09328)→ SUA5 (COG0009)TIGR00057 (TIGR00057)→ GT_WecA_like (cd06853)mraY (PRK00108)→                                |
| Mse-1-1  | NZ_LD001000024.1        | + | 85147   | 85190   | RNA→ rpmE (PRK00019)Ribosomal_L31 (pfam01197)→                                                                                                                                                                              |
| Mse-1-2  | NZ_LDPU01000001.1       | + | 5382278 | 5382321 | RNA→ rpmE (PRK00019)Ribosomal_L31 (pfam01197)→                                                                                                                                                                              |
| Mco-1-1  | NZ_LFOD01000024.1       | + | 84808   | 84851   | RNA→ rpmE (PRK00019)Ribosomal_L31 (pfam01197)→                                                                                                                                                                              |
| Mfa-1-1  | NZ_HG964484.1           | + | 494652  | 494695  | RNA→ rpmE (PRK00019)Ribosomal_L31 (pfam01197)→                                                                                                                                                                              |
| Msp-23-1 | NZ_AUEQ01000008.1       | + | 477987  | 478030  | RNA→ rpmE (PRK00019)Ribosomal_L31 (pfam01197)→ PrfA (COG0216)prfA (PRK00591)→ HemK (COG2890)PRK09328 (PRK09328)→ SUA5 (COG0009)TIGR00057 (TIGR00057)→ GT_WecA_like (cd06853)mraY (PRK00108)→                                |

|           |                        |   |         |         |                                                                                                                                                                                                    |
|-----------|------------------------|---|---------|---------|----------------------------------------------------------------------------------------------------------------------------------------------------------------------------------------------------|
| Mse-2-1   | NZ_HG322952.1          | - | 15319   | 15283   | RNA → rpmE (PRK00019)Ribosomal_L31 (pfam01197) → PrfA (COG0216)prfA (PRK00591) → HemK (COG2890)PRK09328 (PRK09328) → SUA5 (COG0009)TIGR00057 (TIGR00057) → GT_WecA_like (cd06853)mraY (PRK00108) → |
| Mse-3-1   | NZ_JTJW01000009.1      | - | 15412   | 15343   | RNA → rpmE (PRK00019)Ribosomal_L31 (pfam01197) → PrfA (COG0216)prfA (PRK00591) → HemK (COG2890)PRK09328 (PRK09328) → SUA5 (COG0009)TIGR00057 (TIGR00057) → GT_WecA_like (cd06853)mraY (PRK00108) → |
| Mse-3-2   | NZ_JTLZ01000009.1      | - | 15489   | 15420   | RNA → rpmE (PRK00019)Ribosomal_L31 (pfam01197) → PrfA (COG0216)prfA (PRK00591) → HemK (COG2890)PRK09328 (PRK09328) → SUA5 (COG0009)TIGR00057 (TIGR00057) → GT_WecA_like (cd06853)mraY (PRK00108) → |
| Msp-22-1  | NZ_JIAW01000013.1      | + | 210744  | 210800  | RNA → rpmE (PRK00019)Ribosomal_L31 (pfam01197) → PrfA (COG0216)prfA (PRK00591) → HemK (COG2890)PRK09328 (PRK09328) → SUA5 (COG0009)TIGR00057 (TIGR00057) →                                         |
| Mne-1-1   | NZ_LK021339.1          | + | 855681  | 855737  | RNA → rpmE (PRK00019)Ribosomal_L31 (pfam01197) → hypo → hypo → HemK (COG2890)PRK09328 (PRK09328) → SUA5 (COG0009)TIGR00057 (TIGR00057) → GT_WecA_like (cd06853)mraY (PRK00108) →                   |
| Mne-2-1   | NZ_JMDW01000012.1      | - | 14937   | 14881   | RNA → rpmE (PRK00019)Ribosomal_L31 (pfam01197) → PrfA (COG0216)prfA (PRK00591) → HemK (COG2890)PRK09328 (PRK09328) → SUA5 (COG0009)TIGR00057 (TIGR00057) → GT_WecA_like (cd06853)mraY (PRK00108) → |
| env-400   | botACOD_F64RS5002I4I65 | + | 261     | 317     | RNA → rpmE (PRK00019)Ribosomal_L31 (pfam01197) →                                                                                                                                                   |
| Msp-21-1  | NZ_JQLT01000006.1      | + | 352100  | 352156  | RNA → rpmE (PRK00019)Ribosomal_L31 (pfam01197) → PrfA (COG0216)prfA (PRK00591) → HemK (COG2890)PRK09328 (PRK09328) → SUA5 (COG0009)TIGR00057 (TIGR00057) → GT_WecA_like (cd06853)mraY (PRK00108) → |
| Sal-7-1   | NZ_CP010519.1          | - | 2455492 | 2455447 | RNA → rpmE (PRK00019)Ribosomal_L31 (pfam01197) →                                                                                                                                                   |
| Szi-1-1   | NZ_AGBF01000094.1      | - | 21824   | 21778   | RNA → rpmE (PRK00019)Ribosomal_L31 (pfam01197) → rpmE (PRK00019)Ribosomal_L31 (pfam01197) →                                                                                                        |
| Ssp-17-1  | NZ_CM002271.1          | - | 1971747 | 1971701 | RNA → rpmE (PRK00019)Ribosomal_L31 (pfam01197) →                                                                                                                                                   |
| Ssp-30-1  | NZ_CM002273.1          | - | 2012002 | 2011956 | RNA → rpmE (PRK00019)Ribosomal_L31 (pfam01197) →                                                                                                                                                   |
| Ssp-52-1  | NZ_JTCK01000075.1      | + | 132364  | 132410  | RNA → rpmE (PRK00019)Ribosomal_L31 (pfam01197) →                                                                                                                                                   |
| Ssp-13-1  | NZ_KB898222.1          | - | 216996  | 216950  | RNA → rpmE (PRK00019)Ribosomal_L31 (pfam01197) →                                                                                                                                                   |
| Ssp-66-1  | NZ_KN549149.1          | - | 230060  | 230014  | RNA → rpmE (PRK00019)Ribosomal_L31 (pfam01197) →                                                                                                                                                   |
| Sgr-12-4  | NZ_JOGU01000005.1      | + | 127939  | 127985  | RNA → rpmE (PRK00019)Ribosomal_L31 (pfam01197) →                                                                                                                                                   |
| Ssp-63-1  | NZ_LAYX01000047.1      | - | 37184   | 37138   | RNA → rpmE (PRK00019)Ribosomal_L31 (pfam01197) →                                                                                                                                                   |
| Ssp-33-1  | NZ_FR873700.1          | - | 1935399 | 1935353 | RNA → rpmE (PRK00019)Ribosomal_L31 (pfam01197) →                                                                                                                                                   |
| Ssp-117-1 | NZ_JOHX01000005.1      | - | 52128   | 52082   | RNA → rpmE (PRK00019)Ribosomal_L31 (pfam01197) →                                                                                                                                                   |
| Swa-1-1   | NZ_JHDU01000001.1      | - | 64349   | 64303   | RNA → hypo → hypo →                                                                                                                                                                                |
| Sal-1-1   | NC_020990.1            | - | 1754401 | 1754355 | RNA → rpmE (PRK00019)Ribosomal_L31 (pfam01197) →                                                                                                                                                   |
| Sgr-12-5  | NZ_JNZI01000004.1      | - | 84767   | 84721   | RNA → rpmE (PRK00019)Ribosomal_L31 (pfam01197) →                                                                                                                                                   |
| Sgr-12-6  | NZ_JOGN01000003.1      | - | 52139   | 52093   | RNA → rpmE (PRK00019)Ribosomal_L31 (pfam01197) →                                                                                                                                                   |
| Ssp-83-1  | NZ_JOGQ01000004.1      | + | 154867  | 154913  | RNA → rpmE (PRK00019)Ribosomal_L31 (pfam01197) →                                                                                                                                                   |
| Ssp-26-1  | NZ_KB890732.1          | + | 167437  | 167483  | RNA → rpmE (PRK00019)Ribosomal_L31 (pfam01197) →                                                                                                                                                   |
| Sal-4-1   | NZ_JOI01000005.1       | + | 181272  | 181318  | RNA → rpmE (PRK00019)Ribosomal_L31 (pfam01197) →                                                                                                                                                   |
| Ssp-123-1 | NZ_KL591007.1          | - | 217831  | 217785  | RNA → rpmE (PRK00019)Ribosomal_L31 (pfam01197) →                                                                                                                                                   |
| Sgr-2-1   | NZ_GG657758.1          | - | 2542467 | 2542421 | RNA → rpmE (PRK00019)Ribosomal_L31 (pfam01197) → rpmE (PRK00019)Ribosomal_L31 (pfam01197) →                                                                                                        |
| Sco-3-1   | NC_021985.1            | + | 5785307 | 5785353 | RNA → rpmE (PRK00019)Ribosomal_L31 (pfam01197) →                                                                                                                                                   |
| Ssp-67-1  | NZ_LARV01000129.1      | + | 3104    | 3150    | RNA → rpmE (PRK00019)Ribosomal_L31 (pfam01197) →                                                                                                                                                   |
| Ssp-98-1  | NZ_KL591912.1          | + | 85133   | 85179   | RNA → rpmE (PRK00019)Ribosomal_L31 (pfam01197) →                                                                                                                                                   |
| Ssp-41-1  | NZ_AGNH01000234.1      | - | 7103    | 7057    | RNA → rpmE (PRK00019)Ribosomal_L31 (pfam01197) →                                                                                                                                                   |
| Ssp-162-1 | NZ_JOCG01000006.1      | + | 231677  | 231723  | RNA → rpmE (PRK00019)Ribosomal_L31 (pfam01197) →                                                                                                                                                   |
| Ssp-137-1 | NZ_JOIZ01000006.1      | + | 380113  | 380159  | RNA → rpmE (PRK00019)Ribosomal_L31 (pfam01197) →                                                                                                                                                   |
| Slu-1-1   | NZ_KN039947.1          | - | 1557714 | 1557668 | RNA → rpmE (PRK00019)Ribosomal_L31 (pfam01197) →                                                                                                                                                   |
| Sga-2-1   | NZ_JRHJ01000022.1      | - | 32900   | 32854   | RNA → rpmE (PRK00019)Ribosomal_L31 (pfam01197) → PrfA (COG0216)prfA (PRK00591) → HemK (COG2890)PRK09328 (PRK09328) → SUA5 (COG0009)TIGR00057 (TIGR00057) → etp (PRK11391)Wzb (COG0394) →           |
| Sau-2-1   | NZ_JNZD01000033.1      | - | 54400   | 54354   | RNA → rpmE (PRK00019)Ribosomal_L31 (pfam01197) →                                                                                                                                                   |
| Ssp-21-1  | NZ_KB891850.1          | + | 297153  | 297200  | RNA → rpmE (PRK00019)Ribosomal_L31 (pfam01197) →                                                                                                                                                   |



|           |                         |   |         |         |                                                                                                                                                                                                                |
|-----------|-------------------------|---|---------|---------|----------------------------------------------------------------------------------------------------------------------------------------------------------------------------------------------------------------|
| Nvu-1-1   | NZ_JNFP01000059.1       | + | 32133   | 32183   | RNA → rpmE (PRK00019)Ribosomal_L31 (pfam01197) → PrfA (COG0216)prfA (PRK00591) → HemK (COG2890)PRK09328 (PRK09328) → SUA5 (COG0009)TIGR00057 (TIGR00057) → ECA_wecA (TIGR02380)GT_WecA_like (cd06853) → hypo → |
| Nbr-3-1   | NZ_BAFT02000053.1       | + | 33276   | 33326   | RNA → rpmE (PRK00019)Ribosomal_L31 (pfam01197) → PrfA (COG0216)prfA (PRK00591) → HemK (COG2890)PRK09328 (PRK09328) → SUA5 (COG0009)TIGR00057 (TIGR00057) → ECA_wecA (TIGR02380)GT_WecA_like (cd06853) → hypo → |
| Nbr-2-1   | NZ_BAUA01000201.1       | + | 29549   | 29599   | RNA → rpmE (PRK00019)Ribosomal_L31 (pfam01197) → PrfA (COG0216)prfA (PRK00591) → HemK (COG2890)PRK09328 (PRK09328) → SUA5 (COG0009)TIGR00057 (TIGR00057) → ECA_wecA (TIGR02380)GT_WecA_like (cd06853) → hypo → |
| Nbr-1-1   | NC_018681.1             | + | 1432741 | 1432791 | RNA → rpmE (PRK00019)Ribosomal_L31 (pfam01197) → PrfA (COG0216)prfA (PRK00591) → HemK (COG2890)PRK09328 (PRK09328) → SUA5 (COG0009)TIGR00057 (TIGR00057) → ECA_wecA (TIGR02380)GT_WecA_like (cd06853) → hypo → |
| Nte-1-1   | NZ_BAGH01000084.1       | + | 1857    | 1906    | RNA → rpmE (PRK00019)Ribosomal_L31 (pfam01197) →                                                                                                                                                               |
| Spr-2-1   | NZ_BARF01000069.1       | + | 97      | 142     | RNA → rpmE (PRK00019)Ribosomal_L31 (pfam01197) →                                                                                                                                                               |
| Ssp-106-1 | NZ_JNXE01000037.1       | + | 11799   | 11844   | RNA → rpmE (PRK00019)Ribosomal_L31 (pfam01197) →                                                                                                                                                               |
| env-401   | JGI24739J22299_10657377 | + | 184     | 230     | RNA →                                                                                                                                                                                                          |
| env-402   | JGI24736J21556_1144543  | - | 314     | 268     | RNA → rpmE (PRK00019)Ribosomal_L31 (pfam01197) →                                                                                                                                                               |
| env-403   | JGI24739J22299_10005583 | + | 3113    | 3159    | RNA → rpmE (PRK00019)Ribosomal_L31 (pfam01197) →                                                                                                                                                               |
| env-404   | JGI24737J22298_10014880 | + | 59      | 105     | RNA → rpmE (PRK00019)Ribosomal_L31 (pfam01197) →                                                                                                                                                               |
| env-405   | JGI24735J21928_10026048 | - | 1497    | 1451    | RNA → rpmE (PRK00019)Ribosomal_L31 (pfam01197) →                                                                                                                                                               |
| env-406   | JGI24738J21930_10016695 | + | 1212    | 1258    | RNA → rpmE (PRK00019)Ribosomal_L31 (pfam01197) →                                                                                                                                                               |
| Ssp-146-1 | NZ_JODC01000003.1       | - | 34066   | 34020   | RNA → rpmE (PRK00019)Ribosomal_L31 (pfam01197) →                                                                                                                                                               |
| Smi-1-1   | NZ_KN050746.1           | + | 104683  | 104729  | RNA → rpmE (PRK00019)Ribosomal_L31 (pfam01197) →                                                                                                                                                               |
| Sda-1-1   | NC_020504.1             | - | 3469508 | 3469462 | RNA → rpmE (PRK00019)Ribosomal_L31 (pfam01197) →                                                                                                                                                               |
| Ssp-161-1 | NZ_JOBZ01000107.1       | + | 4806    | 4852    | RNA → rpmE (PRK00019)Ribosomal_L31 (pfam01197) →                                                                                                                                                               |
| Ssp-71-1  | NZ_LBDA01000053.1       | + | 10440   | 10486   | RNA → rpmE (PRK00019)Ribosomal_L31 (pfam01197) →                                                                                                                                                               |
| Sgr-7-1   | NZ_JOFU01000018.1       | - | 82877   | 82831   | RNA → rpmE (PRK00019)Ribosomal_L31 (pfam01197) →                                                                                                                                                               |
| Sgl-3-1   | NZ_CP009438.1           | + | 5215800 | 5215846 | RNA → rpmE (PRK00019)Ribosomal_L31 (pfam01197) →                                                                                                                                                               |
| Ssp-85-1  | NZ_JOFW01000021.1       | + | 12706   | 12752   | RNA → rpmE (PRK00019)Ribosomal_L31 (pfam01197) →                                                                                                                                                               |
| Ssp-121-1 | NZ_JOIU01000003.1       | + | 182946  | 182992  | RNA → rpmE (PRK00019)Ribosomal_L31 (pfam01197) →                                                                                                                                                               |
| Ssp-104-1 | NZ_JOIA01000044.1       | + | 3117    | 3163    | RNA → rpmE (PRK00019)Ribosomal_L31 (pfam01197) →                                                                                                                                                               |
| Ssp-60-1  | NZ_KI601353.1           | - | 78686   | 78640   | RNA → rpmE (PRK00019)Ribosomal_L31 (pfam01197) →                                                                                                                                                               |
| Ssp-72-1  | NZ_LAVA01000109.1       | - | 30407   | 30361   | RNA → rpmE (PRK00019)Ribosomal_L31 (pfam01197) →                                                                                                                                                               |
| Ssp-99-1  | NZ_JOHW01000005.1       | + | 528394  | 528440  | RNA → rpmE (PRK00019)Ribosomal_L31 (pfam01197) →                                                                                                                                                               |
| Ssp-89-1  | NZ_JOIF01000027.1       | + | 9376    | 9423    | RNA → rpmE (PRK00019)Ribosomal_L31 (pfam01197) →                                                                                                                                                               |
| Sbi-2-1   | NZ_JOFS01000024.1       | - | 108312  | 108266  | RNA → rpmE (PRK00019)Ribosomal_L31 (pfam01197) →                                                                                                                                                               |
| Sbi-2-2   | NZ_JOFR01000024.1       | - | 108305  | 108259  | RNA → rpmE (PRK00019)Ribosomal_L31 (pfam01197) →                                                                                                                                                               |
| Ssp-82-1  | NZ_JOGP01000011.1       | - | 82995   | 82949   | RNA → rpmE (PRK00019)Ribosomal_L31 (pfam01197) →                                                                                                                                                               |
| Ssp-3-1   | NZ_KB911781.1           | - | 84488   | 84442   | RNA → rpmE (PRK00019)Ribosomal_L31 (pfam01197) →                                                                                                                                                               |
| Sam-1-1   | NZ_CP012382.1           | + | 5413021 | 5413067 | RNA → rpmE (PRK00019)Ribosomal_L31 (pfam01197) →                                                                                                                                                               |
| Ssp-108-1 | NZ_JOHJ01000018.1       | - | 81408   | 81362   | RNA → rpmE (PRK00019)Ribosomal_L31 (pfam01197) →                                                                                                                                                               |
| Ssp-128-1 | NZ_JOGT01000006.1       | + | 282015  | 282061  | RNA → rpmE (PRK00019)Ribosomal_L31 (pfam01197) →                                                                                                                                                               |
| Ssp-48-1  | NZ_AUKV01000028.1       | + | 12811   | 12857   | RNA → rpmE (PRK00019)Ribosomal_L31 (pfam01197) →                                                                                                                                                               |
| Ssp-124-1 | NZ_JOHU01000015.1       | + | 140224  | 140270  | RNA → rpmE (PRK00019)Ribosomal_L31 (pfam01197) →                                                                                                                                                               |
| Sga-1-1   | NZ_AOHP01000017.1       | + | 10282   | 10328   | RNA → rpmE (PRK00019)Ribosomal_L31 (pfam01197) →                                                                                                                                                               |
| Ssp-110-1 | NZ_JOGJ01000004.1       | - | 81960   | 81914   | RNA → rpmE (PRK00019)Ribosomal_L31 (pfam01197) →                                                                                                                                                               |
| Ssp-140-1 | NZ_KL585965.1           | + | 42291   | 42337   | RNA → rpmE (PRK00019)Ribosomal_L31 (pfam01197) →                                                                                                                                                               |
| Ssp-142-1 | NZ_KL585205.1           | - | 33182   | 33136   | RNA → rpmE (PRK00019)Ribosomal_L31 (pfam01197) →                                                                                                                                                               |
| Ssp-139-1 | NZ_JOCT01000023.1       | + | 96568   | 96614   | RNA → rpmE (PRK00019)Ribosomal_L31 (pfam01197) →                                                                                                                                                               |
| Ssp-107-1 | NZ_JOHL01000041.1       | - | 81671   | 81625   | RNA → rpmE (PRK00019)Ribosomal_L31 (pfam01197) →                                                                                                                                                               |
| Ssp-112-1 | NZ_JOGV01000023.1       | - | 19434   | 19388   | RNA → rpmE (PRK00019)Ribosomal_L31 (pfam01197) →                                                                                                                                                               |
| Svi-5-1   | NZ_AMLP01000083.1       | - | 20043   | 19997   | RNA → hypo → rpmE (PRK00019)Ribosomal_L31 (pfam01197) →                                                                                                                                                        |
| Ssp-74-1  | NZ_BBNN01000020.1       | + | 195717  | 195763  | RNA → rpmE (PRK00019)Ribosomal_L31 (pfam01197) →                                                                                                                                                               |

|           |                         |   |         |         |                                                                                               |
|-----------|-------------------------|---|---------|---------|-----------------------------------------------------------------------------------------------|
| Sbo-1-1   | NZ_KB405078.1           | - | 426028  | 425982  | RNA → rpmE (PRK00019) Ribosomal_L31 (pfam01197) →                                             |
| Sbo-1-2   | NZ_KB911581.1           | + | 1699487 | 1699533 | RNA → rpmE (PRK00019) Ribosomal_L31 (pfam01197) →                                             |
| env-407   | JGI12419J13241_1020528  | + | 551     | 597     | RNA → rpmE (PRK00019) Ribosomal_L31 (pfam01197) →                                             |
| Ssp-101-1 | NZ_JOHV01000024.1       | - | 31603   | 31557   | RNA → rpmE (PRK00019) Ribosomal_L31 (pfam01197) →                                             |
| Ssp-136-1 | NZ_JOIY01000004.1       | - | 81877   | 81831   | RNA → rpmE (PRK00019) Ribosomal_L31 (pfam01197) →                                             |
| Sto-1-1   | NZ_JFCB01000017.1       | + | 75109   | 75155   | RNA → rpmE (PRK00019) Ribosomal_L31 (pfam01197) →                                             |
| Sch-1-1   | NZ_JH164850.1           | - | 42480   | 42434   | RNA → rpmE (PRK00019) Ribosomal_L31 (pfam01197) →                                             |
| Saf-1-1   | NZ_KE354178.1           | + | 20405   | 20451   | RNA → rpmE (PRK00019) Ribosomal_L31 (pfam01197) →                                             |
| Sva-1-1   | NZ_JYJH01000019.1       | + | 85068   | 85114   | RNA → rpmE (PRK00019) Ribosomal_L31 (pfam01197) →                                             |
| Sfl-7-1   | NZ_JNXD01000019.1       | + | 86558   | 86604   | RNA → rpmE (PRK00019) Ribosomal_L31 (pfam01197) →                                             |
| Ssp-154-1 | NZ_KL579021.1           | + | 79524   | 79570   | RNA → rpmE (PRK00019) Ribosomal_L31 (pfam01197) →                                             |
| Sol-1-1   | NZ_JJOH01000021.1       | + | 109043  | 109089  | RNA → rpmE (PRK00019) Ribosomal_L31 (pfam01197) →                                             |
| Ssp-147-1 | NZ_JODG01000016.1       | - | 75647   | 75601   | RNA → rpmE (PRK00019) Ribosomal_L31 (pfam01197) →                                             |
| Sia-1-1   | NZ_JNXI01000026.1       | - | 85292   | 85246   | RNA → rpmE (PRK00019) Ribosomal_L31 (pfam01197) →                                             |
| Sro-1-1   | NZ_CM002285.1           | - | 2981947 | 2981901 | RNA → rpmE (PRK00019) Ribosomal_L31 (pfam01197) →                                             |
| Scy-3-1   | NZ_CP010849.1           | + | 5238904 | 5238950 | RNA → rpmE (PRK00019) Ribosomal_L31 (pfam01197) →                                             |
| Sac-1-1   | NZ_JODT01000015.1       | + | 134233  | 134279  | RNA → rpmE (PRK00019) Ribosomal_L31 (pfam01197) →                                             |
| Sla-3-1   | NZ_JOBD01000030.1       | + | 53632   | 53678   | RNA → rpmE (PRK00019) Ribosomal_L31 (pfam01197) →                                             |
| Ssp-160-1 | NZ_JNXK01000056.1       | + | 9606    | 9652    | RNA → rpmE (PRK00019) Ribosomal_L31 (pfam01197) →                                             |
| San-1-1   | NZ_LGUX01000300.1       | - | 86940   | 86894   | RNA → rpmE (PRK00019) Ribosomal_L31 (pfam01197) →                                             |
| Ssp-160-2 | NZ_JOCJ01000056.1       | + | 9610    | 9656    | RNA → rpmE (PRK00019) Ribosomal_L31 (pfam01197) →                                             |
| Sfl-3-1   | NZ_JOCU01000056.1       | + | 9567    | 9613    | RNA → rpmE (PRK00019) Ribosomal_L31 (pfam01197) →                                             |
| Ssp-94-1  | NZ_JOIC01000059.1       | - | 87663   | 87617   | RNA → rpmE (PRK00019) Ribosomal_L31 (pfam01197) →                                             |
| Ssp-159-1 | NZ_JOJH01000041.1       | + | 9637    | 9683    | RNA → rpmE (PRK00019) Ribosomal_L31 (pfam01197) →                                             |
| Ssp-130-1 | NZ_JOIV01000034.1       | + | 57899   | 57945   | RNA → rpmE (PRK00019) Ribosomal_L31 (pfam01197) →                                             |
| Sfl-2-1   | NZ_JNWW01000050.1       | - | 87704   | 87658   | RNA → rpmE (PRK00019) Ribosomal_L31 (pfam01197) →                                             |
| Ssp-155-1 | NZ_JOJG01000055.1       | + | 9473    | 9519    | RNA → rpmE (PRK00019) Ribosomal_L31 (pfam01197) →                                             |
| Shy-2-1   | NC_017765.1             | + | 7332293 | 7332339 | RNA → rpmE (PRK00019) Ribosomal_L31 (pfam01197) →                                             |
| Shy-3-1   | NC_020895.1             | + | 7026019 | 7026065 | RNA → rpmE (PRK00019) Ribosomal_L31 (pfam01197) →                                             |
| Ssp-125-1 | NZ_JOAW01000048.1       | + | 11208   | 11254   | RNA → rpmE (PRK00019) Ribosomal_L31 (pfam01197) →                                             |
| Spe-1-1   | NZ_KL575053.1           | + | 113652  | 113698  | RNA → rpmE (PRK00019) Ribosomal_L31 (pfam01197) →                                             |
| Ssp-141-1 | NZ_JOJB01000039.1       | - | 22019   | 21973   | RNA → rpmE (PRK00019) Ribosomal_L31 (pfam01197) →                                             |
| Svi-14-1  | NZ_LFNT01000024.1       | - | 76388   | 76342   | RNA → rpmE (PRK00019) Ribosomal_L31 (pfam01197) →                                             |
| Svi-14-2  | NZ_LGUR01000200.1       | - | 76304   | 76258   | RNA → rpmE (PRK00019) Ribosomal_L31 (pfam01197) →                                             |
| Svi-14-3  | NZ_LGUQ01000026.1       | - | 50743   | 50697   | RNA → rpmE (PRK00019) Ribosomal_L31 (pfam01197) →                                             |
| Svi-4-1   | NZ_GG657757.1           | + | 6015810 | 6015856 | RNA → rpmE (PRK00019) Ribosomal_L31 (pfam01197) → rpmE (PRK00019) Ribosomal_L31 (pfam01197) → |
| env-408   | JGI25153J46596_10164792 | - | 356     | 310     | RNA → ← hyp0                                                                                  |
| Sol-2-1   | NZ_JOFH01000019.1       | - | 80214   | 80168   | RNA → rpmE (PRK00019) Ribosomal_L31 (pfam01197) →                                             |
| Kau-1-2   | NZ_JODU01000015.1       | - | 85909   | 85863   | RNA → rpmE (PRK00019) Ribosomal_L31 (pfam01197) →                                             |
| Svi-12-1  | NZ_JODM01000021.1       | + | 27707   | 27753   | RNA → rpmE (PRK00019) Ribosomal_L31 (pfam01197) →                                             |
| Sco-1-1   | NZ_AHGS01000015.1       | - | 31365   | 31319   | RNA → rpmE (PRK00019) Ribosomal_L31 (pfam01197) →                                             |
| Ssp-58-1  | NZ_APIV01000026.1       | - | 82178   | 82132   | RNA → rpmE (PRK00019) Ribosomal_L31 (pfam01197) →                                             |
| Sno-1-1   | NZ_CP009313.1           | + | 5012088 | 5012134 | RNA → rpmE (PRK00019) Ribosomal_L31 (pfam01197) →                                             |
| Sgr-1-1   | NZ_AEYX01000041.1       | + | 322182  | 322228  | RNA → rpmE (PRK00019) Ribosomal_L31 (pfam01197) → rpmE (PRK00019) Ribosomal_L31 (pfam01197) → |
| Sce-1-1   | NZ_JOEV01000019.1       | - | 107133  | 107087  | RNA → rpmE (PRK00019) Ribosomal_L31 (pfam01197) →                                             |
| Ssp-176-1 | NZ_JXWX01000006.1       | - | 87051   | 87005   | RNA → rpmE (PRK00019) Ribosomal_L31 (pfam01197) →                                             |
| Sco-2-1   | NC_003888.3             | + | 5829950 | 5829996 | RNA → rpmE (PRK00019) Ribosomal_L31 (pfam01197) →                                             |
| Sli-2-1   | NZ_GG657756.1           | - | 2654278 | 2654232 | RNA → rpmE (PRK00019) Ribosomal_L31 (pfam01197) → rpmE (PRK00019) Ribosomal_L31 (pfam01197) → |
| Sli-1-1   | NZ_CM001889.1           | + | 5849426 | 5849472 | RNA → rpmE (PRK00019) Ribosomal_L31 (pfam01197) →                                             |
| Sli-2-2   | NZ_CP009124.1           | - | 2688989 | 2688943 | RNA → rpmE (PRK00019) Ribosomal_L31 (pfam01197) →                                             |
| Svi-11-1  | NZ_JOCE01000023.1       | + | 20903   | 20949   | RNA → rpmE (PRK00019) Ribosomal_L31 (pfam01197) →                                             |
| Ssp-118-1 | NZ_JNXF01000037.1       | + | 33108   | 33153   | RNA → rpmE (PRK00019) Ribosomal_L31 (pfam01197) →                                             |

|           |                   |   |         |         |                                                                                                                                                                                                                        |
|-----------|-------------------|---|---------|---------|------------------------------------------------------------------------------------------------------------------------------------------------------------------------------------------------------------------------|
| Ssp-120-1 | NZ_JOHP01000066.1 | - | 29002   | 28957   | RNA → rpmE (PRK00019)Ribosomal_L31 (pfam01197) →                                                                                                                                                                       |
| Ssp-76-1  | NZ_JNZW01000021.1 | - | 92544   | 92499   | RNA → rpmE (PRK00019)Ribosomal_L31 (pfam01197) →                                                                                                                                                                       |
| Ssp-119-1 | NZ_JOHS01000019.1 | + | 33159   | 33204   | RNA → rpmE (PRK00019)Ribosomal_L31 (pfam01197) →                                                                                                                                                                       |
| Svi-11-2  | NZ_JODI01000003.1 | + | 207039  | 207085  | RNA → rpmE (PRK00019)Ribosomal_L31 (pfam01197) →                                                                                                                                                                       |
| Sgr-12-7  | NZ_JOJE01000033.1 | + | 28750   | 28796   | RNA → rpmE (PRK00019)Ribosomal_L31 (pfam01197) →                                                                                                                                                                       |
| Ssc-4-1   | NZ_JODX01000005.1 | - | 199204  | 199158  | RNA → rpmE (PRK00019)Ribosomal_L31 (pfam01197) →                                                                                                                                                                       |
| Ssp-69-1  | NZ_JUIG01000017.1 | + | 189710  | 189755  | RNA → rpmE (PRK00019)Ribosomal_L31 (pfam01197) →                                                                                                                                                                       |
| Spl-1-1   | NZ_JTDH01000035.1 | + | 15585   | 15630   | RNA → rpmE (PRK00019)Ribosomal_L31 (pfam01197) →                                                                                                                                                                       |
| Spl-1-2   | NZ_JUIF01000051.1 | - | 80126   | 80081   | RNA → rpmE (PRK00019)Ribosomal_L31 (pfam01197) →                                                                                                                                                                       |
| Ssp-153-1 | NZ_JOCA01000016.1 | + | 83466   | 83511   | RNA → rpmE (PRK00019)Ribosomal_L31 (pfam01197) →                                                                                                                                                                       |
| Sye-2-1   | NZ_JNWJ01000028.1 | + | 22848   | 22893   | RNA → rpmE (PRK00019)Ribosomal_L31 (pfam01197) →                                                                                                                                                                       |
| Sse-1-1   | NZ_JNXP01000009.1 | + | 359142  | 359189  | RNA → rpmE (PRK00019)Ribosomal_L31 (pfam01197) →                                                                                                                                                                       |
| Sfu-2-1   | NZ_JOEY01000004.1 | - | 144771  | 144725  | RNA → rpmE (PRK00019)Ribosomal_L31 (pfam01197) →                                                                                                                                                                       |
| Sdu-1-1   | NZ_JNXR01000028.1 | - | 85192   | 85146   | RNA → rpmE (PRK00019)Ribosomal_L31 (pfam01197) →                                                                                                                                                                       |
| Sip-1-1   | NZ_AEJC01000389.1 | + | 1739    | 1785    | RNA → rpmE (PRK00019)Ribosomal_L31 (pfam01197) →                                                                                                                                                                       |
| Ssc-3-1   | NZ_KL997422.1     | + | 1322338 | 1322384 | RNA → rpmE (PRK00019)Ribosomal_L31 (pfam01197) →                                                                                                                                                                       |
| Ssp-59-1  | NZ_LACL01000016.1 | - | 93527   | 93481   | RNA → rpmE (PRK00019)Ribosomal_L31 (pfam01197) →                                                                                                                                                                       |
| Ssp-70-1  | NZ_LBMU01000062.1 | - | 24986   | 24941   | RNA → rpmE (PRK00019)Ribosomal_L31 (pfam01197) →                                                                                                                                                                       |
| Ssp-24-1  | NZ_KB891987.1     | + | 887555  | 887601  | RNA → rpmE (PRK00019)Ribosomal_L31 (pfam01197) →                                                                                                                                                                       |
| Ssp-10-1  | NZ_KB846749.1     | - | 16622   | 16576   | RNA → rpmE (PRK00019)Ribosomal_L31 (pfam01197) →                                                                                                                                                                       |
| Ssp-11-1  | NZ_KB898297.1     | - | 18791   | 18745   | RNA → rpmE (PRK00019)Ribosomal_L31 (pfam01197) →                                                                                                                                                                       |
| Ssp-53-1  | NZ_KI911521.1     | - | 22367   | 22321   | RNA → rpmE (PRK00019)Ribosomal_L31 (pfam01197) →                                                                                                                                                                       |
| Sni-2-1   | NZ_CM002280.1     | - | 2660451 | 2660406 | RNA → rpmE (PRK00019)Ribosomal_L31 (pfam01197) →                                                                                                                                                                       |
| Spr-1-1   | NZ_CM000950.1     | - | 2585594 | 2585547 | RNA → hypo → rpmE (PRK00019)Ribosomal_L31 (pfam01197) →                                                                                                                                                                |
| Ssp-134-1 | NZ_JOCB01000025.1 | - | 28339   | 28293   | RNA → rpmE (PRK00019)Ribosomal_L31 (pfam01197) →                                                                                                                                                                       |
| Sau-1-1   | NZ_JOAP01000030.1 | - | 60155   | 60109   | RNA → rpmE (PRK00019)Ribosomal_L31 (pfam01197) → PrfA (COG0216)prfA (PRK00591) → HemK (COG2890)PRK09328 (PRK09328) → SUA5 (COG0009)TIGR00057 (TIGR00057) → etp (PRK11391)Wzb (COG0394) → etp (PRK11391)Wzb (COG0394) → |
| Sau-1-2   | NZ_JOAR01000022.1 | - | 60248   | 60202   | RNA → rpmE (PRK00019)Ribosomal_L31 (pfam01197) → PrfA (COG0216)prfA (PRK00591) → HemK (COG2890)PRK09328 (PRK09328) → SUA5 (COG0009)TIGR00057 (TIGR00057) → etp (PRK11391)Wzb (COG0394) → etp (PRK11391)Wzb (COG0394) → |
| Asp-7-1   | NZ_JOGW01000010.1 | + | 24341   | 24387   | RNA → rpmE (PRK00019)Ribosomal_L31 (pfam01197) →                                                                                                                                                                       |
| Sal-5-1   | NZ_JNXT01000031.1 | + | 28596   | 28642   | RNA → rpmE (PRK00019)Ribosomal_L31 (pfam01197) → PrfA (COG0216)prfA (PRK00591) → HemK (COG2890)PRK09328 (PRK09328) → SUA5 (COG0009)TIGR00057 (TIGR00057) → etp (PRK11391)Wzb (COG0394) → etp (PRK11391)Wzb (COG0394) → |
| Sru-2-1   | NZ_JODN01000034.1 | + | 28596   | 28642   | RNA → rpmE (PRK00019)Ribosomal_L31 (pfam01197) → PrfA (COG0216)prfA (PRK00591) → HemK (COG2890)PRK09328 (PRK09328) → SUA5 (COG0009)TIGR00057 (TIGR00057) → etp (PRK11391)Wzb (COG0394) → etp (PRK11391)Wzb (COG0394) → |
| Sru-2-2   | NZ_JOAQ01000034.1 | + | 28596   | 28642   | RNA → rpmE (PRK00019)Ribosomal_L31 (pfam01197) → PrfA (COG0216)prfA (PRK00591) → HemK (COG2890)PRK09328 (PRK09328) → SUA5 (COG0009)TIGR00057 (TIGR00057) → etp (PRK11391)Wzb (COG0394) → etp (PRK11391)Wzb (COG0394) → |
| Svi-2-1   | NZ_ASHX01000001.1 | - | 682175  | 682129  | RNA → rpmE (PRK00019)Ribosomal_L31 (pfam01197) →                                                                                                                                                                       |
| Stu-1-1   | NZ_AEJB01000521.1 | + | 12742   | 12788   | RNA → rpmE (PRK00019)Ribosomal_L31 (pfam01197) →                                                                                                                                                                       |
| Sso-1-1   | NZ_AJJM01000112.1 | + | 4156    | 4202    | RNA → rpmE (PRK00019)Ribosomal_L31 (pfam01197) → rpmE (PRK00019)Ribosomal_L31 (pfam01197) →                                                                                                                            |
| Spu-1-1   | NZ_KB913030.1     | + | 5096632 | 5096678 | RNA → rpmE (PRK00019)Ribosomal_L31 (pfam01197) →                                                                                                                                                                       |
| Ssp-12-1  | NZ_KB897776.1     | - | 219651  | 219605  | RNA → rpmE (PRK00019)Ribosomal_L31 (pfam01197) →                                                                                                                                                                       |
| Ssp-78-1  | NZ_JOJM01000058.1 | - | 37844   | 37798   | RNA → rpmE (PRK00019)Ribosomal_L31 (pfam01197) →                                                                                                                                                                       |
| Ssp-158-1 | NZ_JOCD01000378.1 | - | 4063    | 4017    | RNA → rpmE (PRK00019)Ribosomal_L31 (pfam01197) →                                                                                                                                                                       |
| Ssp-79-1  | NZ_JOHG01000018.1 | - | 89216   | 89169   | RNA → rpmE (PRK00019)Ribosomal_L31 (pfam01197) →                                                                                                                                                                       |
| Svi-10-1  | NZ_JNYP01000019.1 | - | 145314  | 145267  | RNA → rpmE (PRK00019)Ribosomal_L31 (pfam01197) →                                                                                                                                                                       |
| Ssp-92-1  | NZ_JOIP01000013.1 | + | 94481   | 94528   | RNA → rpmE (PRK00019)Ribosomal_L31 (pfam01197) →                                                                                                                                                                       |
| Ssp-113-1 | NZ_JOHA01000008.1 | - | 84595   | 84548   | RNA → rpmE (PRK00019)Ribosomal_L31 (pfam01197) →                                                                                                                                                                       |
| Ssp-93-1  | NZ_JOIO01000009.1 | + | 238799  | 238846  | RNA → rpmE (PRK00019)Ribosomal_L31 (pfam01197) →                                                                                                                                                                       |
| Ssp-114-1 | NZ_JOHD01000020.1 | - | 25512   | 25465   | RNA → rpmE (PRK00019)Ribosomal_L31 (pfam01197) →                                                                                                                                                                       |



|           |                    |   |         |         |      |                 |                           |                                           |
|-----------|--------------------|---|---------|---------|------|-----------------|---------------------------|-------------------------------------------|
| Ssp-84-1  | NZ_JOIH01000014.1  | - | 84509   | 84462   | RNA→ | rpmE (PRK00019) | Ribosomal_L31 (pfam01197) | →                                         |
| Sgr-13-1  | NZ_JOFF01000006.1  | + | 316771  | 316818  | RNA→ | rpmE (PRK00019) | Ribosomal_L31 (pfam01197) | →                                         |
| Spu-3-1   | NZ_JOB01000002.1   | - | 133951  | 133904  | RNA→ | rpmE (PRK00019) | Ribosomal_L31 (pfam01197) | →                                         |
| Spu-2-1   | NZ_JOFA01000023.1  | + | 12247   | 12294   | RNA→ | rpmE (PRK00019) | Ribosomal_L31 (pfam01197) | →                                         |
| Sgr-12-8  | NZ_JOIT01000013.1  | - | 26693   | 26646   | RNA→ | rpmE (PRK00019) | Ribosomal_L31 (pfam01197) | →                                         |
| Sfl-9-1   | NZ_JOAC01000008.1  | - | 83545   | 83498   | RNA→ | rpmE (PRK00019) | Ribosomal_L31 (pfam01197) | →                                         |
| Spu-2-2   | NZ_JOAQ01000020.1  | + | 12247   | 12294   | RNA→ | rpmE (PRK00019) | Ribosomal_L31 (pfam01197) | →                                         |
| Spu-3-2   | NZ_JODK01000002.1  | + | 163658  | 163705  | RNA→ | rpmE (PRK00019) | Ribosomal_L31 (pfam01197) | →                                         |
| Sbr-1-1   | NZ_JNXB01000002.1  | - | 133941  | 133894  | RNA→ | rpmE (PRK00019) | Ribosomal_L31 (pfam01197) | →                                         |
| Sca-4-1   | NZ_KL573601.1      | - | 30459   | 30412   | RNA→ | rpmE (PRK00019) | Ribosomal_L31 (pfam01197) | →                                         |
| Sca-4-2   | NZ_KL569933.1      | + | 21968   | 22015   | RNA→ | rpmE (PRK00019) | Ribosomal_L31 (pfam01197) | →                                         |
| Ssp-151-1 | NZ_JOCW01000015.1  | - | 159046  | 158999  | RNA→ | rpmE (PRK00019) | Ribosomal_L31 (pfam01197) | →                                         |
| Sgr-13-2  | NZ_LGUZ01000018.1  | - | 139783  | 139736  | RNA→ | rpmE (PRK00019) | Ribosomal_L31 (pfam01197) | →                                         |
| Sgr-13-3  | NZ_JOFE01000019.1  | - | 139769  | 139722  | RNA→ | rpmE (PRK00019) | Ribosomal_L31 (pfam01197) | →                                         |
| Sgr-13-4  | NZ_JOFD01000010.1  | + | 270523  | 270570  | RNA→ | rpmE (PRK00019) | Ribosomal_L31 (pfam01197) | →                                         |
| Sgr-13-5  | NZ_JODO01000012.1  | - | 158845  | 158798  | RNA→ | rpmE (PRK00019) | Ribosomal_L31 (pfam01197) | →                                         |
| Sat-2-1   | NZ_JNXG01000002.1  | + | 1072335 | 1072381 | RNA→ | rpmE (PRK00019) | Ribosomal_L31 (pfam01197) | →                                         |
| Sfl-8-1   | NZ_JOAB01000003.1  | - | 225755  | 225709  | RNA→ | rpmE (PRK00019) | Ribosomal_L31 (pfam01197) | →                                         |
| Ssp-80-1  | NZ_JOAE01000004.1  | + | 218001  | 218047  | RNA→ | rpmE (PRK00019) | Ribosomal_L31 (pfam01197) | →                                         |
| Ssp-135-1 | NZ_JOIW01000004.1  | - | 216825  | 216779  | RNA→ | rpmE (PRK00019) | Ribosomal_L31 (pfam01197) | →                                         |
| Sfl-1-1   | NC_016114.1        | - | 2388748 | 2388702 | RNA→ | rpmE (PRK00019) | Ribosomal_L31 (pfam01197) | →                                         |
| Ssp-29-1  | NC_021055.1        | + | 5042406 | 5042452 | RNA→ | rpmE (PRK00019) | Ribosomal_L31 (pfam01197) | →                                         |
| [pa-1-1   | NZ_JNYQ01000004.1  | - | 248335  | 248289  | RNA→ | rpmE (PRK00019) | Ribosomal_L31 (pfam01197) | →                                         |
| Sol-2-2   | NZ_JNWM01000003.1  | + | 1016882 | 1016928 | RNA→ | rpmE (PRK00019) | Ribosomal_L31 (pfam01197) | →                                         |
| Sfu-3-1   | NZ_JNXH01000004.1  | - | 245003  | 244957  | RNA→ | rpmE (PRK00019) | Ribosomal_L31 (pfam01197) | →                                         |
| Ssp-126-1 | NZ_KL589835.1      | + | 240377  | 240423  | RNA→ | rpmE (PRK00019) | Ribosomal_L31 (pfam01197) | →                                         |
| Sgr-11-1  | NZ_JYBE01000037.1  | + | 33072   | 33119   | RNA→ | rpmE (PRK00019) | Ribosomal_L31 (pfam01197) | →                                         |
| Sme-1-1   | NZ_JOJK01000017.1  | + | 272123  | 272170  | RNA→ | rpmE (PRK00019) | Ribosomal_L31 (pfam01197) | →                                         |
| Ssp-14-1  | NZ_KB890948.1      | + | 91657   | 91704   | RNA→ | rpmE (PRK00019) | Ribosomal_L31 (pfam01197) | →                                         |
| Ssp-168-1 | NZ_ARPF01000003.1  | + | 344832  | 344879  | RNA→ | rpmE (PRK00019) | Ribosomal_L31 (pfam01197) | →                                         |
| Ssp-49-1  | NZ_CBRG010000147.1 | + | 14666   | 14712   | RNA→ | rpmE (PRK00019) | Ribosomal_L31 (pfam01197) | →                                         |
| Ssp-22-1  | NZ_KB891605.1      | + | 147812  | 147858  | RNA→ | rpmE (PRK00019) | Ribosomal_L31 (pfam01197) | →                                         |
| Ssp-23-1  | NZ_KB891406.1      | - | 421246  | 421200  | RNA→ | rpmE (PRK00019) | Ribosomal_L31 (pfam01197) | →                                         |
| Ssp-65-1  | NZ_KI911349.1      | + | 1102284 | 1102330 | RNA→ | rpmE (PRK00019) | Ribosomal_L31 (pfam01197) | →                                         |
| Ssp-64-1  | NZ_AZVF01000001.1  | - | 420786  | 420740  | RNA→ | rpmE (PRK00019) | Ribosomal_L31 (pfam01197) | →                                         |
| Ssp-25-1  | NZ_KB891774.1      | + | 108968  | 109014  | RNA→ | rpmE (PRK00019) | Ribosomal_L31 (pfam01197) | →                                         |
| Ssp-27-1  | NZ_AQWQ01000004.1  | - | 409548  | 409502  | RNA→ | rpmE (PRK00019) | Ribosomal_L31 (pfam01197) | →                                         |
| Ssp-152-1 | NZ_KL585392.1      | - | 37506   | 37460   | RNA→ | rpmE (PRK00019) | Ribosomal_L31 (pfam01197) | rpmE (PRK00019)Ribosomal_L31 (pfam01197)→ |
| Ssp-57-1  | NZ_AZVE01000001.1  | - | 87318   | 87272   | RNA→ | rpmE (PRK00019) | Ribosomal_L31 (pfam01197) | →                                         |
| Ssp-163-1 | NZ_JJOB01000001.1  | + | 4517158 | 4517204 | RNA→ | rpmE (PRK00019) | Ribosomal_L31 (pfam01197) | →                                         |
| Ssp-40-1  | NC_015953.1        | + | 5035066 | 5035112 | RNA→ | rpmE (PRK00019) | Ribosomal_L31 (pfam01197) | →                                         |
| Ssp-15-1  | NZ_ARPI01000001.1  | - | 414568  | 414522  | RNA→ | rpmE (PRK00019) | Ribosomal_L31 (pfam01197) | →                                         |
| Ssp-6-1   | NZ_KB892001.1      | + | 325904  | 325950  | RNA→ | rpmE (PRK00019) | Ribosomal_L31 (pfam01197) | →                                         |
| Sha-2-1   | NZ_JOAZ01000017.1  | + | 419289  | 419335  | RNA→ | rpmE (PRK00019) | Ribosomal_L31 (pfam01197) | →                                         |
| Sgr-8-1   | NZ_JOFC01000033.1  | + | 41970   | 42016   | RNA→ | rpmE (PRK00019) | Ribosomal_L31 (pfam01197) | →                                         |
| Ssp-43-1  | NZ_AGSW01000051.1  | + | 66077   | 66123   | RNA→ | rpmE (PRK00019) | Ribosomal_L31 (pfam01197) | rpmE (PRK00019)Ribosomal_L31 (pfam01197)→ |
| Scy-2-1   | NZ_JOEM01000014.1  | - | 146064  | 146018  | RNA→ | rpmE (PRK00019) | Ribosomal_L31 (pfam01197) | →                                         |
| Ssp-39-1  | NZ_KB891296.1      | - | 481794  | 481748  | RNA→ | rpmE (PRK00019) | Ribosomal_L31 (pfam01197) | →                                         |
| Sfu-1-1   | NC_021177.1        | + | 5700829 | 5700875 | RNA→ | rpmE (PRK00019) | Ribosomal_L31 (pfam01197) | →                                         |
| Sal-6-1   | NZ_JNWU01000016.1  | + | 9488    | 9534    | RNA→ | rpmE (PRK00019) | Ribosomal_L31 (pfam01197) | →                                         |
| Ssp-145-1 | NZ_JOJC01000009.1  | - | 114395  | 114349  | RNA→ | rpmE (PRK00019) | Ribosomal_L31 (pfam01197) | →                                         |
| Seu-1-1   | NZ_KQ257779.1      | - | 81970   | 81924   | RNA→ | rpmE (PRK00019) | Ribosomal_L31 (pfam01197) | →                                         |

|           |                         |   |         |         |                                                                                                                                                                                                                                    |
|-----------|-------------------------|---|---------|---------|------------------------------------------------------------------------------------------------------------------------------------------------------------------------------------------------------------------------------------|
| Sgr-3-1   | NZ_GL877172.1           | - | 2772173 | 2772127 | RNA → rpmE (PRK00019)Ribosomal_L31 (pfam01197) → rpmE (PRK00019)Ribosomal_L31 (pfam01197) →                                                                                                                                        |
| Sgr-4-1   | NC_010572.1             | - | 2577363 | 2577317 | RNA → rpmE (PRK00019)Ribosomal_L31 (pfam01197) →                                                                                                                                                                                   |
| Sgr-12-9  | NZ_JOBR01000007.1       | - | 141549  | 141503  | RNA → rpmE (PRK00019)Ribosomal_L31 (pfam01197) →                                                                                                                                                                                   |
| Ssp-9-1   | NZ_KB899000.1           | - | 100558  | 100512  | RNA → rpmE (PRK00019)Ribosomal_L31 (pfam01197) →                                                                                                                                                                                   |
| Ssp-68-1  | NZ_JXUQ01000001.1       | + | 5787746 | 5787792 | RNA → rpmE (PRK00019)Ribosomal_L31 (pfam01197) →                                                                                                                                                                                   |
| Sal-8-2   | NZ_JOED01000008.1       | + | 96199   | 96245   | RNA → rpmE (PRK00019)Ribosomal_L31 (pfam01197) →                                                                                                                                                                                   |
| Sba-2-1   | NZ_KL573542.1           | - | 304852  | 304806  | RNA → rpmE (PRK00019)Ribosomal_L31 (pfam01197) →                                                                                                                                                                                   |
| San-2-1   | NZ_JNXS01000009.1       | - | 156824  | 156778  | RNA → rpmE (PRK00019)Ribosomal_L31 (pfam01197) → rpmE (PRK00019)Ribosomal_L31 (pfam01197) →                                                                                                                                        |
| Sod-1-1   | NZ_LATD01000035.1       | + | 9464    | 9510    | RNA → rpmE (PRK00019)Ribosomal_L31 (pfam01197) → PrfA (COG0216)prfA (PRK00591) →                                                                                                                                                   |
| Ssp-149-1 | NZ_JODF01000062.1       | + | 10265   | 10311   | RNA → rpmE (PRK00019)Ribosomal_L31 (pfam01197) →                                                                                                                                                                                   |
| Sfl-4-1   | NZ_AUBE01000011.1       | - | 189557  | 189511  | RNA → rpmE (PRK00019)Ribosomal_L31 (pfam01197) →                                                                                                                                                                                   |
| Ssp-127-1 | NZ_JOGZ01000006.1       | - | 230008  | 229961  | RNA → rpmE (PRK00019)Ribosomal_L31 (pfam01197) →                                                                                                                                                                                   |
| Ssp-81-1  | NZ_JOJO01000001.1       | + | 783410  | 783457  | RNA → rpmE (PRK00019)Ribosomal_L31 (pfam01197) →                                                                                                                                                                                   |
| Sat-1-1   | NZ_JQJU01000001.1       | + | 779795  | 779842  | RNA → rpmE (PRK00019)Ribosomal_L31 (pfam01197) →                                                                                                                                                                                   |
| Ssp-103-1 | NZ_JOHR01000018.1       | - | 2619    | 2572    | RNA → rpmE (PRK00019)Ribosomal_L31 (pfam01197) →                                                                                                                                                                                   |
| Nsp-3-1   | NZ_KB822580.1           | + | 117055  | 117099  | RNA → rpmE (PRK00019)Ribosomal_L31 (pfam01197) → PrfA (COG0216)prfA (PRK00591) →<br>HemK (COG2890)PRK09328 (PRK09328) → SUA5 (COG0009)TIGR00057 (TIGR00057) →<br>GT_WecA_like (cd06853)mraY (PRK00108) →                           |
| env-409   | JGI20200J14955_1027293  | - | 434     | 379     | RNA → rpmE (PRK00019)Ribosomal_L31 (pfam01197) →                                                                                                                                                                                   |
| env-410   | JGI20202J14951_1065050  | + | 200     | 255     | RNA →                                                                                                                                                                                                                              |
| env-411   | JGI12273J12029_10877295 | + | 59      | 107     | RNA → rpmE (PRK00019)Ribosomal_L31 (pfam01197) →                                                                                                                                                                                   |
| env-412   | JGI12397J12024_1240506  | + | 83      | 131     | RNA → ← hypo                                                                                                                                                                                                                       |
| env-413   | JGI12467J12023_1032285  | + | 11      | 56      | RNA → rpmE (PRK00019)Ribosomal_L31 (pfam01197) →                                                                                                                                                                                   |
| env-414   | JGI12419J13241_1175342  | + | 100     | 140     | RNA → rpmE (PRK00019)Ribosomal_L31 (pfam01197) →                                                                                                                                                                                   |
| env-415   | JGI12419J13241_1307864  | + | 48      | 89      | RNA → rpmE (PRK00019)Ribosomal_L31 (pfam01197) →                                                                                                                                                                                   |
| env-416   | 2200077197              | + | 8199    | 8240    | RNA → rpmE (PRK00019)Ribosomal_L31 (pfam01197) →                                                                                                                                                                                   |
| env-417   | ATED1026_F5B15RW01AGPIR | - | 111     | 72      | RNA → ← hypo                                                                                                                                                                                                                       |
| env-418   | JGI12635J15846_12820982 | + | 23      | 77      | RNA → hypo → rpmE (PRK00019)Ribosomal_L31 (pfam01197) →                                                                                                                                                                            |
| Svi-14-4  | NZ_LGUP01000177.1       | - | 36425   | 36378   | RNA → rpmE (PRK00019)Ribosomal_L31 (pfam01197) → PrfA (COG0216)prfA (PRK00591) →<br>HemK (COG2890)PRK09328 (PRK09328) → SUA5 (COG0009)TIGR00057 (TIGR00057) →<br>etp (PRK11391)Wzb (COG0394) → GlyA (COG0112)glyA (PRK00011) →     |
| Swe-1-1   | NZ_JNWK01000034.1       | + | 44732   | 44779   | RNA → rpmE (PRK00019)Ribosomal_L31 (pfam01197) → PrfA (COG0216)prfA (PRK00591) →<br>HemK (COG2890)PRK09328 (PRK09328) → SUA5 (COG0009)TIGR00057 (TIGR00057) →<br>etp (PRK11391)Wzb (COG0394) → GlyA (COG0112)glyA (PRK00011) →     |
| Sve-1-1   | NC_018750.1             | + | 5396901 | 5396948 | RNA → rpmE (PRK00019)Ribosomal_L31 (pfam01197) → PrfA (COG0216)prfA (PRK00591) →<br>HemK (COG2890)PRK09328 (PRK09328) → SUA5 (COG0009)TIGR00057 (TIGR00057) →<br>etp (PRK11391)Wzb (COG0394) → GlyA (COG0112)glyA (PRK00011) →     |
| Ssp-38-1  | NZ_AKXV01000009.1       | - | 392719  | 392672  | RNA → rpmE (PRK00019)Ribosomal_L31 (pfam01197) → PrfA (COG0216)prfA (PRK00591) →<br>HemK (COG2890)PRK09328 (PRK09328) → SUA5 (COG0009)TIGR00057 (TIGR00057) →<br>etp (PRK11391)Wzb (COG0394) → GlyA (COG0112)glyA (PRK00011) →     |
| Sbi-3-1   | NZ_JNWL01000038.1       | + | 44138   | 44185   | RNA → rpmE (PRK00019)Ribosomal_L31 (pfam01197) → PrfA (COG0216)prfA (PRK00591) →<br>HemK (COG2890)PRK09328 (PRK09328) → SUA5 (COG0009)TIGR00057 (TIGR00057) →<br>etp (PRK11391)Wzb (COG0394) →                                     |
| Sbi-3-2   | NZ_JOAU01000021.1       | - | 158964  | 158917  | RNA → rpmE (PRK00019)Ribosomal_L31 (pfam01197) → PrfA (COG0216)prfA (PRK00591) →<br>HemK (COG2890)PRK09328 (PRK09328) → HemK (COG2890)PRK09328 (PRK09328) →<br>SUA5 (COG0009)TIGR00057 (TIGR00057) → etp (PRK11391)Wzb (COG0394) → |
| Sbi-3-3   | NZ_JNXJ01000039.1       | + | 44138   | 44185   | RNA → rpmE (PRK00019)Ribosomal_L31 (pfam01197) → PrfA (COG0216)prfA (PRK00591) →<br>HemK (COG2890)PRK09328 (PRK09328) → HemK (COG2890)PRK09328 (PRK09328) →<br>SUA5 (COG0009)TIGR00057 (TIGR00057) → etp (PRK11391)Wzb (COG0394) → |
| Sgl-4-2   | NZ_JODW01000008.1       | + | 265005  | 265052  | RNA → rpmE (PRK00019)Ribosomal_L31 (pfam01197) → PrfA (COG0216)prfA (PRK00591) →<br>HemK (COG2890)PRK09328 (PRK09328) → SUA5 (COG0009)TIGR00057 (TIGR00057) →<br>etp (PRK11391)Wzb (COG0394) →                                     |
| Svi-9-1   | NZ_CP010407.1           | + | 5717740 | 5717787 | RNA → rpmE (PRK00019)Ribosomal_L31 (pfam01197) → PrfA (COG0216)prfA (PRK00591) →<br>HemK (COG2890)PRK09328 (PRK09328) → SUA5 (COG0009)TIGR00057 (TIGR00057) →<br>etp (PRK11391)Wzb (COG0394) →                                     |



|           |                         |   |         |         |                                                                                                                                                                                                                                                                                    |
|-----------|-------------------------|---|---------|---------|------------------------------------------------------------------------------------------------------------------------------------------------------------------------------------------------------------------------------------------------------------------------------------|
| Fsp-2-1   | NZ_KB893751.1           | + | 18012   | 18059   | RNA → rpmE (PRK00019)Ribosomal_L31 (pfam01197) →                                                                                                                                                                                                                                   |
| Fsp-5-1   | NC_009921.1             | + | 1192038 | 1192085 | RNA → rpmE (PRK00019)Ribosomal_L31 (pfam01197) → PrfA (COG0216)prfA (PRK00591) → HemK (COG2890)PRK09328 (PRK09328) → SUA5 (COG0009)TIGR00057 (TIGR00057) →                                                                                                                         |
| Fsp-1-1   | NZ_KB891208.1           | + | 394290  | 394337  | RNA → rpmE (PRK00019)Ribosomal_L31 (pfam01197) → PrfA (COG0216)prfA (PRK00591) → HemK (COG2890)PRK09328 (PRK09328) → HemK (COG2890)PRK09328 (PRK09328) → SUA5 (COG0009)TIGR00057 (TIGR00057) → GlyA (COG0112)glyA (PRK00011) → ECA_wecA (TIGR02380)GT_WecA_like (cd06853) → hypo → |
| Sgh-1-1   | NZ_DS999641.1           | - | 2595981 | 2595934 | RNA → lytR_cpsA_psr (TIGR00350)LytR_cpsA_psr (pfam03816) → lytR_cpsA_psr (TIGR00350)LytR_cpsA_psr (pfam03816) → lytR_cpsA_psr (TIGR00350)LytR_cpsA_psr (pfam03816) → rpmE (PRK00019)Ribosomal_L31 (pfam01197) → rpmE (PRK00019)Ribosomal_L31 (pfam01197) →                         |
| Svi-6-1   | NZ_JH993790.1           | - | 935516  | 935469  | RNA → lytR_cpsA_psr (TIGR00350)LytR_cpsA_psr (pfam03816) → rpmE (PRK00019)Ribosomal_L31 (pfam01197) →                                                                                                                                                                              |
| Ssp-31-1  | NZ_KB892208.1           | + | 277710  | 277757  | RNA → rpmE (PRK00019)Ribosomal_L31 (pfam01197) →                                                                                                                                                                                                                                   |
| Ssp-172-1 | NZ_KK106988.1           | + | 976736  | 976783  | RNA → rpmE (PRK00019)Ribosomal_L31 (pfam01197) →                                                                                                                                                                                                                                   |
| Sav-2-1   | NZ_JZJK01000090.1       | + | 1230456 | 1230503 | RNA → rpmE (PRK00019)Ribosomal_L31 (pfam01197) →                                                                                                                                                                                                                                   |
| Sav-1-1   | NC_003155.4             | - | 3644711 | 3644664 | RNA → rpmE (PRK00019)Ribosomal_L31 (pfam01197) →                                                                                                                                                                                                                                   |
| Sav-2-2   | NZ_BAVY01000023.1       | - | 106591  | 106544  | RNA → rpmE (PRK00019)Ribosomal_L31 (pfam01197) →                                                                                                                                                                                                                                   |
| Ssp-7-1   | NZ_KB912967.1           | - | 88385   | 88338   | RNA → rpmE (PRK00019)Ribosomal_L31 (pfam01197) →                                                                                                                                                                                                                                   |
| Ssp-44-1  | NZ_GG753626.1           | + | 4185762 | 4185809 | RNA → rpmE (PRK00019)Ribosomal_L31 (pfam01197) → rpmE (PRK00019)Ribosomal_L31 (pfam01197) →                                                                                                                                                                                        |
| Sgr-10-1  | NZ_KL503830.1           | + | 5116277 | 5116324 | RNA → rpmE (PRK00019)Ribosomal_L31 (pfam01197) →                                                                                                                                                                                                                                   |
| Aac-1-1   | NZ_JNYX01000011.1       | - | 75643   | 75596   | RNA → rpmE (PRK00019)Ribosomal_L31 (pfam01197) →                                                                                                                                                                                                                                   |
| Ssp-173-1 | NZ_JMLN01000029.1       | + | 12038   | 12085   | RNA → rpmE (PRK00019)Ribosomal_L31 (pfam01197) →                                                                                                                                                                                                                                   |
| Ssp-16-1  | NZ_KB891492.1           | - | 84534   | 84487   | RNA → rpmE (PRK00019)Ribosomal_L31 (pfam01197) →                                                                                                                                                                                                                                   |
| Ssp-61-1  | NZ_LDZX01000024.1       | + | 53213   | 53260   | RNA → rpmE (PRK00019)Ribosomal_L31 (pfam01197) →                                                                                                                                                                                                                                   |
| Ssp-175-1 | NZ_JXTE01000072.1       | - | 30728   | 30681   | RNA → rpmE (PRK00019)Ribosomal_L31 (pfam01197) →                                                                                                                                                                                                                                   |
| Fsp-6-1   | NZ_ADGX01000178.1       | + | 1918    | 1965    | RNA → rpmE (PRK00019)Ribosomal_L31 (pfam01197) → rpmE (PRK00019)Ribosomal_L31 (pfam01197) →                                                                                                                                                                                        |
| Fsp-13-1  | NZ_JYFN01000018.1       | + | 103666  | 103710  | RNA → rpmE (PRK00019)Ribosomal_L31 (pfam01197) →                                                                                                                                                                                                                                   |
| Fal-1-1   | NC_008278.1             | - | 6445775 | 6445731 | RNA → rpmE (PRK00019)Ribosomal_L31 (pfam01197) →                                                                                                                                                                                                                                   |
| Gte-4-1   | NZ_KL571655.1           | + | 204281  | 204341  | RNA → rpmE (PRK00019)Ribosomal_L31 (pfam01197) →                                                                                                                                                                                                                                   |
| Gte-5-1   | NZ_ATYW01000003.1       | + | 382145  | 382205  | RNA → rpmE (PRK00019)Ribosomal_L31 (pfam01197) →                                                                                                                                                                                                                                   |
| Mrh-1-1   | NZ_AGIQ01000008.1       | + | 20388   | 20443   | RNA → rpmE (PRK00019)Ribosomal_L31 (pfam01197) → PrfA (COG0216)prfA (PRK00591) → HemK (COG2890)PRK09328 (PRK09328) → SUA5 (COG0009)TIGR00057 (TIGR00057) → GT_WecA_like (cd06853)mraY (PRK00108) →                                                                                 |
| env-419   | JGI24741J21665_1351754  | + | 186     | 229     | RNA → hypo →                                                                                                                                                                                                                                                                       |
| env-420   | JGI24740J21852_10109780 | - | 353     | 310     | RNA → rpmE (PRK00019)Ribosomal_L31 (pfam01197) →                                                                                                                                                                                                                                   |
| env-421   | JGI24741J21665_1395540  | + | 54      | 97      | RNA → rpmE (PRK00019)Ribosomal_L31 (pfam01197) →                                                                                                                                                                                                                                   |
| env-422   | JGI24735J21928_11010882 | - | 166     | 123     | RNA → rpmE (PRK00019)Ribosomal_L31 (pfam01197) →                                                                                                                                                                                                                                   |
| env-423   | JGI12269J14319_11006088 | - | 200     | 110     | RNA → rpmE (PRK00019)Ribosomal_L31 (pfam01197) →                                                                                                                                                                                                                                   |
| env-424   | JGI20186J14852_1074806  | + | 71      | 122     | RNA → rpmE (PRK00019)Ribosomal_L31 (pfam01197) →                                                                                                                                                                                                                                   |
| env-425   | JGI20188J14859_1014361  | - | 823     | 772     | RNA → rpmE (PRK00019)Ribosomal_L31 (pfam01197) →                                                                                                                                                                                                                                   |
| env-426   | JGI20190J14840_1016465  | + | 35      | 86      | RNA → rpmE (PRK00019)Ribosomal_L31 (pfam01197) →                                                                                                                                                                                                                                   |
| env-427   | JGI20208J14878_1005722  | - | 584     | 533     | RNA → rpmE (PRK00019)Ribosomal_L31 (pfam01197) →                                                                                                                                                                                                                                   |
| Nsp-11-1  | NZ_LAVL01000009.1       | - | 3292    | 3249    | RNA → rpmE (PRK00019)Ribosomal_L31 (pfam01197) → PrfA (COG0216)prfA (PRK00591) → HemK (COG2890)PRK09328 (PRK09328) → SUA5 (COG0009)TIGR00057 (TIGR00057) → hypo → hypo →                                                                                                           |
| env-428   | JGI26341J46601_10154785 | - | 301     | 238     | RNA → hypo →                                                                                                                                                                                                                                                                       |
| env-429   | JGI26340J50214_10419594 | + | 13      | 52      | RNA → rpmE (PRK00019)Ribosomal_L31 (pfam01197) →                                                                                                                                                                                                                                   |
| env-430   | JGI26340J50214_10140346 | + | 542     | 581     | RNA →                                                                                                                                                                                                                                                                              |
| env-431   | JGI26341J46601_10019475 | + | 120     | 166     | RNA → rpmE (PRK00019)Ribosomal_L31 (pfam01197) → PrfA (COG0216)prfA (PRK00591) → HemK (COG2890)PRK09328 (PRK09328) →                                                                                                                                                               |
| env-432   | JGI26339J46600_10188658 | + | 54      | 100     | RNA → rpmE (PRK00019)Ribosomal_L31 (pfam01197) →                                                                                                                                                                                                                                   |
| env-433   | JGI12712J15308_11072730 | + | 109     | 155     | RNA → rpmE (PRK00019)Ribosomal_L31 (pfam01197) →                                                                                                                                                                                                                                   |
| env-434   | JGI20133J14441_1007812  | - | 3380    | 3329    | RNA → rpmE (PRK00019)Ribosomal_L31 (pfam01197) → PrfA (COG0216)prfA (PRK00591) → HemK (COG2890)PRK09328 (PRK09328) → SUA5 (COG0009)TIGR00057 (TIGR00057) → Rfc (COG0472) →                                                                                                         |

|          |                         |   |         |         |                                                                                                                                                                                                                                           |
|----------|-------------------------|---|---------|---------|-------------------------------------------------------------------------------------------------------------------------------------------------------------------------------------------------------------------------------------------|
| env-435  | 3300001422_101093       | - | 1365    | 1314    | RNA → rpmE (PRK00019)Ribosomal_L31 (pfam01197) → PrfA (COG0216)prfA (PRK00591) →                                                                                                                                                          |
| Str-2-1  | NZ_KB897247.1           | - | 51465   | 51408   | RNA → rpmE (PRK00019)Ribosomal_L31 (pfam01197) →                                                                                                                                                                                          |
| Str-1-1  | NC_009380.1             | - | 4173707 | 4173650 | RNA → rpmE (PRK00019)Ribosomal_L31 (pfam01197) →                                                                                                                                                                                          |
| Str-3-1  | NZ_KB897150.1           | - | 51556   | 51499   | RNA → rpmE (PRK00019)Ribosomal_L31 (pfam01197) →                                                                                                                                                                                          |
| Str-7-1  | NZ_KI911454.1           | + | 198877  | 198934  | RNA → rpmE (PRK00019)Ribosomal_L31 (pfam01197) →                                                                                                                                                                                          |
| Str-10-1 | NZ_KK211108.1           | - | 50876   | 50819   | RNA → rpmE (PRK00019)Ribosomal_L31 (pfam01197) →                                                                                                                                                                                          |
| Str-8-1  | NZ_KK211120.1           | - | 51590   | 51533   | RNA → rpmE (PRK00019)Ribosomal_L31 (pfam01197) →                                                                                                                                                                                          |
| Str-9-1  | NZ_AUKS01000011.1       | - | 51392   | 51335   | RNA → rpmE (PRK00019)Ribosomal_L31 (pfam01197) →                                                                                                                                                                                          |
| Sar-29-1 | NZ_AUEJ01000011.1       | - | 51474   | 51417   | RNA → rpmE (PRK00019)Ribosomal_L31 (pfam01197) →                                                                                                                                                                                          |
| Str-6-1  | NZ_AZXH01000007.1       | - | 51265   | 51208   | RNA → rpmE (PRK00019)Ribosomal_L31 (pfam01197) →                                                                                                                                                                                          |
| Str-4-1  | NZ_AZXE01000005.1       | - | 51306   | 51249   | RNA → rpmE (PRK00019)Ribosomal_L31 (pfam01197) →                                                                                                                                                                                          |
| Str-5-1  | NZ_AZXD01000012.1       | - | 51215   | 51158   | RNA → rpmE (PRK00019)Ribosomal_L31 (pfam01197) →                                                                                                                                                                                          |
| Spa-24-1 | NZ_KE384274.1           | + | 353881  | 353937  | RNA → hypo → rpmE (PRK00019)Ribosomal_L31 (pfam01197) →                                                                                                                                                                                   |
| Spa-32-1 | NZ_KI911397.1           | + | 504459  | 504515  | RNA → hypo → rpmE (PRK00019)Ribosomal_L31 (pfam01197) →                                                                                                                                                                                   |
| Spa-20-1 | NZ_KB900614.1           | - | 901662  | 901606  | RNA → hypo → rpmE (PRK00019)Ribosomal_L31 (pfam01197) →                                                                                                                                                                                   |
| Spa-7-1  | NZ_KB895231.1           | + | 38192   | 38248   | RNA → hypo → rpmE (PRK00019)Ribosomal_L31 (pfam01197) →                                                                                                                                                                                   |
| Spa-6-1  | NZ_KB895117.1           | - | 50778   | 50722   | RNA → hypo → rpmE (PRK00019)Ribosomal_L31 (pfam01197) →                                                                                                                                                                                   |
| Spa-27-1 | NZ_AZWB01000027.1       | + | 22264   | 22320   | RNA → hypo → rpmE (PRK00019)Ribosomal_L31 (pfam01197) →                                                                                                                                                                                   |
| Spa-30-1 | NZ_AZVY01000026.1       | + | 19243   | 19299   | RNA → hypo → rpmE (PRK00019)Ribosomal_L31 (pfam01197) →                                                                                                                                                                                   |
| Spa-18-1 | NZ_KB911579.1           | - | 914415  | 914359  | RNA → hypo → rpmE (PRK00019)Ribosomal_L31 (pfam01197) →                                                                                                                                                                                   |
| Spa-17-1 | NZ_KB913027.1           | - | 891436  | 891380  | RNA → hypo → rpmE (PRK00019)Ribosomal_L31 (pfam01197) →                                                                                                                                                                                   |
| Spa-5-1  | NZ_KB895050.1           | + | 20116   | 20172   | RNA → hypo → rpmE (PRK00019)Ribosomal_L31 (pfam01197) →                                                                                                                                                                                   |
| Spa-4-1  | NZ_KB894900.1           | + | 366858  | 366914  | RNA → hypo → rpmE (PRK00019)Ribosomal_L31 (pfam01197) →                                                                                                                                                                                   |
| Spa-15-1 | NZ_KB913022.1           | - | 4269511 | 4269555 | RNA → hypo → rpmE (PRK00019)Ribosomal_L31 (pfam01197) →                                                                                                                                                                                   |
| Spa-38-1 | NZ_AXVR01000016.1       | + | 40238   | 40293   | RNA → rpmE (PRK00019)Ribosomal_L31 (pfam01197) →                                                                                                                                                                                          |
| env-436  | JGI24770J26754_10002275 | + | 2336    | 2389    | RNA → rpmE (PRK00019)Ribosomal_L31 (pfam01197) →                                                                                                                                                                                          |
| Msp-11-1 | NZ_CP011773.1           | - | 4667799 | 4667746 | RNA → rpmE (PRK00019)Ribosomal_L31 (pfam01197) → PrfA (COG0216)prfA (PRK00591) → HemK (COG2890)PRK09328 (PRK09328) → SUA5 (COG0009)TIGR00057 (TIGR00057) → GT_WecA_like (cd06853)mraY (PRK00108) →                                        |
| env-437  | PCEOT_contig21592       | + | 631     | 671     | RNA → rpmE (PRK00019)Ribosomal_L31 (pfam01197) → prfA (PRK00591)PCRF (pfam03462) →                                                                                                                                                        |
| env-438  | JGI26341J46601_10000390 | + | 11088   | 11139   | RNA → rpmE (PRK00019)Ribosomal_L31 (pfam01197) →                                                                                                                                                                                          |
| env-439  | JGI26340J50214_10007419 | + | 1129    | 1180    | RNA → rpmE (PRK00019)Ribosomal_L31 (pfam01197) →                                                                                                                                                                                          |
| env-440  | C688J13580_1085580      | - | 412     | 368     | RNA → hypo → rpmE (PRK00019)Ribosomal_L31 (pfam01197) → hypo →                                                                                                                                                                            |
| env-441  | JGI26345J50200_1174654  | - | 161     | 109     | RNA → ← hypo                                                                                                                                                                                                                              |
| env-442  | JGI26341J46601_10705222 | - | 114     | 41      | RNA → hypo →                                                                                                                                                                                                                              |
| Gkr-1-1  | NZ_AQYG01000051.1       | - | 16795   | 16754   | RNA → rpmE (PRK00019)Ribosomal_L31 (pfam01197) → PrfA (COG0216)prfA (PRK00591) → HemK (COG2890)PRK09328 (PRK09328) → SUA5 (COG0009)TIGR00057 (TIGR00057) → GT_WecA_like (cd06853)mraY (PRK00108) →                                        |
| env-443  | JGI24721J26819_10140833 | - | 944     | 893     | RNA → ← hypo                                                                                                                                                                                                                              |
| env-444  | JGI24721J44947_10027217 | - | 4805    | 4754    | RNA → rpmE (PRK00019)Ribosomal_L31 (pfam01197) → PrfA (COG0216)prfA (PRK00591) → HemK (COG2890)PRK09328 (PRK09328) → SUA5 (COG0009)TIGR00057 (TIGR00057) → GT_WecA_like (cd06853)mraY (PRK00108) →                                        |
| env-445  | JGI24721J44947_10041083 | - | 3136    | 3085    | RNA → rpmE (PRK00019)Ribosomal_L31 (pfam01197) → PrfA (COG0216)prfA (PRK00591) → HemK (COG2890)PRK09328 (PRK09328) → SUA5 (COG0009)TIGR00057 (TIGR00057) →                                                                                |
| env-446  | JGI20262J16345_11379    | - | 97      | 56      | RNA → hypo →                                                                                                                                                                                                                              |
| env-447  | JGI12272J11983_1061016  | + | 13      | 57      | RNA → rpmE (PRK00019)Ribosomal_L31 (pfam01197) →                                                                                                                                                                                          |
| env-448  | JGI12467J12023_1038166  | + | 90      | 134     | RNA → rpmE (PRK00019)Ribosomal_L31 (pfam01197) →                                                                                                                                                                                          |
| env-449  | DCrCPGB_c205975         | - | 57      | 15      | RNA →                                                                                                                                                                                                                                     |
| Mhe-1-1  | NZ_LDPO01000013.1       | - | 14940   | 14896   | RNA → rpmE (PRK00019)Ribosomal_L31 (pfam01197) → PrfA (COG0216)prfA (PRK00591) → HemK (COG2890)PRK09328 (PRK09328) → SUA5 (COG0009)TIGR00057 (TIGR00057) → GT_WecA_like (cd06853)mraY (PRK00108) →                                        |
| Rrh-1-1  | NZ_APMY01000113.1       | + | 67570   | 67615   | RNA → rpmE (PRK00019)Ribosomal_L31 (pfam01197) → PrfA (COG0216)prfA (PRK00591) → HemK (COG2890)PRK09328 (PRK09328) → SUA5 (COG0009)TIGR00057 (TIGR00057) → ECA_wecA (TIGR02380)GT_WecA_like (cd06853) → EPS_sugtrans (TIGR03025) → hypo → |

|          |                         |   |         |         |                                                                                                                                                                                                    |
|----------|-------------------------|---|---------|---------|----------------------------------------------------------------------------------------------------------------------------------------------------------------------------------------------------|
| Msp-13-1 | NZ_JRML01000027.1       | + | 41320   | 41371   | RNA → rpmE (PRK00019)Ribosomal_L31 (pfam01197) → PrfA (COG0216)prfA (PRK00591) → HemK (COG2890)PRK09328 (PRK09328) → SUA5 (COG0009)TIGR00057 (TIGR00057) → GT_WecA_like (cd06853)mraY (PRK00108) → |
| Mar-2-1  | NZ_LASW02000025.1       | + | 41195   | 41246   | RNA → rpmE (PRK00019)Ribosomal_L31 (pfam01197) → PrfA (COG0216)prfA (PRK00591) → HemK (COG2890)PRK09328 (PRK09328) → SUA5 (COG0009)TIGR00057 (TIGR00057) → GT_WecA_like (cd06853)mraY (PRK00108) → |
| env-450  | 2205805686              | + | 242     | 290     | RNA → rpmE (PRK00019)Ribosomal_L31 (pfam01197) →                                                                                                                                                   |
| env-451  | 2158117515              | + | 242     | 290     | RNA → ←hypo                                                                                                                                                                                        |
| Tbi-1-1  | NZ_BAVQ01000020.1       | - | 15062   | 15016   | RNA → rpmE (PRK00019)Ribosomal_L31 (pfam01197) →                                                                                                                                                   |
| Msp-4-1  | NC_015576.1             | + | 1383199 | 1383245 | RNA → rpmE (PRK00019)Ribosomal_L31 (pfam01197) → PrfA (COG0216)prfA (PRK00591) → HemK (COG2890)PRK09328 (PRK09328) → SUA5 (COG0009)TIGR00057 (TIGR00057) → GT_WecA_like (cd06853)mraY (PRK00108) → |
| Mav-1-1  | NZ_AGAQ01000161.1       | - | 14730   | 14685   | RNA → rpmE (PRK00019)Ribosomal_L31 (pfam01197) → PrfA (COG0216)prfA (PRK00591) → HemK (COG2890)PRK09328 (PRK09328) → SUA5 (COG0009)TIGR00057 (TIGR00057) → GT_WecA_like (cd06853)mraY (PRK00108) → |
| Msp-16-1 | NZ_JRMN01000077.1       | + | 14933   | 14979   | RNA → rpmE (PRK00019)Ribosomal_L31 (pfam01197) → PrfA (COG0216)prfA (PRK00591) → HemK (COG2890)PRK09328 (PRK09328) → SUA5 (COG0009)TIGR00057 (TIGR00057) → GT_WecA_like (cd06853)mraY (PRK00108) → |
| env-452  | JGI24770J26754_10065094 | - | 520     | 475     | RNA → rpmE (PRK00019)Ribosomal_L31 (pfam01197) → PCRf (pfam03462)ABC_tran_CTD (pfam16326) →                                                                                                        |
| Msp-12-1 | NZ_JRMM01000124.1       | - | 7553    | 7509    | RNA → rpmE (PRK00019)Ribosomal_L31 (pfam01197) → PrfA (COG0216)prfA (PRK00591) → HemK (COG2890)PRK09328 (PRK09328) → SUA5 (COG0009)TIGR00057 (TIGR00057) → GT_WecA_like (cd06853)mraY (PRK00108) → |
| Msp-14-1 | NZ_JRMM01000086.1       | + | 10717   | 10763   | RNA → rpmE (PRK00019)Ribosomal_L31 (pfam01197) → PrfA (COG0216)prfA (PRK00591) → HemK (COG2890)PRK09328 (PRK09328) → SUA5 (COG0009)TIGR00057 (TIGR00057) → GT_WecA_like (cd06853)mraY (PRK00108) → |
| Msp-17-1 | NZ_AUWR01000034.1       | + | 51013   | 51059   | RNA → rpmE (PRK00019)Ribosomal_L31 (pfam01197) → PrfA (COG0216)prfA (PRK00591) → HemK (COG2890)PRK09328 (PRK09328) → SUA5 (COG0009)TIGR00057 (TIGR00057) → GT_WecA_like (cd06853)mraY (PRK00108) → |
| env-453  | JGI25151J46595_10355844 | + | 12      | 67      | RNA → rpmE (PRK00019)Ribosomal_L31 (pfam01197) →                                                                                                                                                   |
| Mky-1-1  | NZ_BBKA01000066.1       | - | 14976   | 14925   | RNA → rpmE (PRK00019)Ribosomal_L31 (pfam01197) → PrfA (COG0216)prfA (PRK00591) → hypo → hypo → SUA5 (COG0009)TIGR00057 (TIGR00057) → hypo → hypo → rpmE (PRK00019)Ribosomal_L31 (pfam01197) →      |
| Sar-43-1 | NZ_AZWW01000033.1       | + | 1603    | 1659    | RNA → hypo → rpmE (PRK00019)Ribosomal_L31 (pfam01197) →                                                                                                                                            |
| Sar-41-1 | NZ_KI911429.1           | + | 150303  | 150359  | RNA → hypo → rpmE (PRK00019)Ribosomal_L31 (pfam01197) →                                                                                                                                            |
| Sar-42-1 | NZ_KI911487.1           | + | 12550   | 12606   | RNA → hypo → rpmE (PRK00019)Ribosomal_L31 (pfam01197) →                                                                                                                                            |
| Sar-10-1 | NZ_KB896245.1           | - | 51122   | 51066   | RNA → hypo → rpmE (PRK00019)Ribosomal_L31 (pfam01197) →                                                                                                                                            |
| Sar-11-1 | NZ_KB896343.1           | + | 1657    | 1713    | RNA → hypo → rpmE (PRK00019)Ribosomal_L31 (pfam01197) →                                                                                                                                            |
| env-454  | JGI12396J12026_1015431  | + | 45      | 84      | RNA → hypo →                                                                                                                                                                                       |
| env-455  | C688J13580_1520551      | - | 158     | 116     | RNA → rpmE (PRK00019)Ribosomal_L31 (pfam01197) →                                                                                                                                                   |
| env-456  | JGI24737J22298_11100121 | - | 70      | 27      | RNA →                                                                                                                                                                                              |
| Ase-1-1  | NZ_JOEG01000014.1       | + | 292419  | 292467  | RNA → rpmE (PRK00019)Ribosomal_L31 (pfam01197) →                                                                                                                                                   |
| Fsp-9-1  | NZ_CM001489.1           | + | 6555193 | 6555238 | RNA → rpmE (PRK00019)Ribosomal_L31 (pfam01197) → rpmE (PRK00019)Ribosomal_L31 (pfam01197) →                                                                                                        |
| env-457  | JGI12397J12024_1075610  | + | 11      | 62      | RNA → rpmE (PRK00019)Ribosomal_L31 (pfam01197) →                                                                                                                                                   |
| env-458  | JGI12273J12029_10446706 | + | 9       | 60      | RNA → rpmE (PRK00019)Ribosomal_L31 (pfam01197) →                                                                                                                                                   |
| env-459  | JGI12273J12029_10361449 | - | 52      | 1       | RNA →                                                                                                                                                                                              |
| env-460  | 2044458367              | - | 94      | 11      | RNA →                                                                                                                                                                                              |
| Spa-33-1 | NZ_AZWQ01000015.1       | + | 224755  | 224811  | RNA → hypo → rpmE (PRK00019)Ribosomal_L31 (pfam01197) →                                                                                                                                            |
| Spa-2-1  | NZ_KB894849.1           | - | 95011   | 94955   | RNA → hypo → rpmE (PRK00019)Ribosomal_L31 (pfam01197) →                                                                                                                                            |
| Vma-1-1  | NC_015434.1             | - | 5587166 | 5587106 | RNA → rpmE (PRK00019)Ribosomal_L31 (pfam01197) → PrfA (COG0216)prfA (PRK00591) →                                                                                                                   |
| Gbr-1-1  | NC_013441.1             | + | 2009569 | 2009614 | RNA → rpmE (PRK00019)Ribosomal_L31 (pfam01197) →                                                                                                                                                   |
| Gna-1-1  | NZ_BAHE01000010.1       | - | 25454   | 25409   | RNA → rpmE (PRK00019)Ribosomal_L31 (pfam01197) → rpmE (PRK00019)Ribosomal_L31 (pfam01197) →                                                                                                        |
| Gal-1-1  | NZ_BACI01000100.1       | + | 69601   | 69646   | RNA → rpmE (PRK00019)Ribosomal_L31 (pfam01197) → rpmE (PRK00019)Ribosomal_L31 (pfam01197) →                                                                                                        |
| Gal-2-1  | NZ_KI629793.1           | + | 441597  | 441642  | RNA → rpmE (PRK00019)Ribosomal_L31 (pfam01197) →                                                                                                                                                   |
| Gal-3-1  | NZ_HG764859.1           | + | 14350   | 14395   | RNA → rpmE (PRK00019)Ribosomal_L31 (pfam01197) →                                                                                                                                                   |
| Gam-2-1  | NZ_BANS01000028.1       | + | 75421   | 75466   | RNA → rpmE (PRK00019)Ribosomal_L31 (pfam01197) →                                                                                                                                                   |
| Gsp-1-1  | NC_018581.1             | + | 2102127 | 2102172 | RNA → rpmE (PRK00019)Ribosomal_L31 (pfam01197) →                                                                                                                                                   |



|          |                        |   |         |         |                                                                                                                                                                                                                                                                                                                                                                                                                                                                                                                                                                                                                                                                                                                                                                                                                                                                                                                                                        |
|----------|------------------------|---|---------|---------|--------------------------------------------------------------------------------------------------------------------------------------------------------------------------------------------------------------------------------------------------------------------------------------------------------------------------------------------------------------------------------------------------------------------------------------------------------------------------------------------------------------------------------------------------------------------------------------------------------------------------------------------------------------------------------------------------------------------------------------------------------------------------------------------------------------------------------------------------------------------------------------------------------------------------------------------------------|
| Gte-1-1  | NZ_AQPW01000013.1      | + | 98992   | 99037   | RNA → rpmE (PRK00019)Ribosomal_L31 (pfam01197) →                                                                                                                                                                                                                                                                                                                                                                                                                                                                                                                                                                                                                                                                                                                                                                                                                                                                                                       |
| Gpa-1-1  | NZ_BAOQ01000029.1      | + | 64185   | 64230   | RNA → ←PRK06214 (PRK06214)SiR (cd06199)                                                                                                                                                                                                                                                                                                                                                                                                                                                                                                                                                                                                                                                                                                                                                                                                                                                                                                                |
| Gru-1-1  | NZ_BAHB01000043.1      | + | 60751   | 60796   | RNA → rpmE (PRK00019)Ribosomal_L31 (pfam01197) → rpmE (PRK00019)Ribosomal_L31 (pfam01197) →                                                                                                                                                                                                                                                                                                                                                                                                                                                                                                                                                                                                                                                                                                                                                                                                                                                            |
| Gam-3-1  | NZ_AWTB01000003.1      | + | 200060  | 200105  | RNA → rpmE (PRK00019)Ribosomal_L31 (pfam01197) →                                                                                                                                                                                                                                                                                                                                                                                                                                                                                                                                                                                                                                                                                                                                                                                                                                                                                                       |
| Gte-3-1  | NZ_JNXA01000016.1      | - | 25295   | 25250   | RNA → rpmE (PRK00019)Ribosomal_L31 (pfam01197) →                                                                                                                                                                                                                                                                                                                                                                                                                                                                                                                                                                                                                                                                                                                                                                                                                                                                                                       |
| Gte-2-1  | NZ_BAFD01000064.1      | + | 11988   | 12033   | RNA → rpmE (PRK00019)Ribosomal_L31 (pfam01197) → rpmE (PRK00019)Ribosomal_L31 (pfam01197) →<br>rpmE (PRK00019)Ribosomal_L31 (pfam01197) →                                                                                                                                                                                                                                                                                                                                                                                                                                                                                                                                                                                                                                                                                                                                                                                                              |
| Nsp-1-1  | NZ_KB911522.1          | - | 24205   | 24160   | RNA → rpmE (PRK00019)Ribosomal_L31 (pfam01197) →                                                                                                                                                                                                                                                                                                                                                                                                                                                                                                                                                                                                                                                                                                                                                                                                                                                                                                       |
| Wsp-1-1  | NZ_AYTE01000018.1      | + | 71375   | 71420   | RNA → rpmE (PRK00019)Ribosomal_L31 (pfam01197) →                                                                                                                                                                                                                                                                                                                                                                                                                                                                                                                                                                                                                                                                                                                                                                                                                                                                                                       |
| Kar-2-1  | NZ_JNYV01000009.1      | + | 112546  | 112591  | RNA → rpmE (PRK00019)Ribosomal_L31 (pfam01197) →                                                                                                                                                                                                                                                                                                                                                                                                                                                                                                                                                                                                                                                                                                                                                                                                                                                                                                       |
| Msp-30-1 | NZ_JOAF01000010.1      | + | 112447  | 112492  | RNA → rpmE (PRK00019)Ribosomal_L31 (pfam01197) →                                                                                                                                                                                                                                                                                                                                                                                                                                                                                                                                                                                                                                                                                                                                                                                                                                                                                                       |
| Gef-1-1  | NZ_BAEH01000017.1      | - | 16990   | 16945   | RNA → rpmE (PRK00019)Ribosomal_L31 (pfam01197) → rpmE (PRK00019)Ribosomal_L31 (pfam01197) →<br>PrfA (COG0216)prfA (PRK00591) → PrfA (COG0216)prfA (PRK00591) →<br>HemK (COG2890)PRK09328 (PRK09328) → HemK (COG2890)PRK09328 (PRK09328) →<br>HemK (COG2890)PRK09328 (PRK09328) → SUA5 (COG0009)TIGR00057 (TIGR00057) →<br>SUA5 (COG0009)TIGR00057 (TIGR00057) → GlyA (COG0112)glyA (PRK00011) →<br>GlyA (COG0112)glyA (PRK00011) → GT_WecA_like (cd06853)mraY (PRK00108) →<br>GT_WecA_like (cd06853)mraY (PRK00108) → AnsP (COG1113)AA_permease_2 (pfam13520) →<br>AnsP (COG1113)AA_permease_2 (pfam13520) → AnsP (COG1113)AA_permease_2 (pfam13520) →                                                                                                                                                                                                                                                                                                 |
| env-461  | AglA_G_F499EG101AZGLU  | - | 123     | 78      | RNA →                                                                                                                                                                                                                                                                                                                                                                                                                                                                                                                                                                                                                                                                                                                                                                                                                                                                                                                                                  |
| Gpo-3-1  | NC_016906.1            | + | 2046857 | 2046902 | RNA → rpmE (PRK00019)Ribosomal_L31 (pfam01197) →                                                                                                                                                                                                                                                                                                                                                                                                                                                                                                                                                                                                                                                                                                                                                                                                                                                                                                       |
| Gpo-2-1  | NZ_BAEI01000018.1      | - | 30702   | 30657   | RNA → rpmE (PRK00019)Ribosomal_L31 (pfam01197) → rpmE (PRK00019)Ribosomal_L31 (pfam01197) →                                                                                                                                                                                                                                                                                                                                                                                                                                                                                                                                                                                                                                                                                                                                                                                                                                                            |
| Gpo-1-1  | NZ_ARVZ01000001.1      | - | 3468004 | 3467959 | RNA → rpmE (PRK00019)Ribosomal_L31 (pfam01197) →                                                                                                                                                                                                                                                                                                                                                                                                                                                                                                                                                                                                                                                                                                                                                                                                                                                                                                       |
| Grh-1-1  | NZ_BAHC01000025.1      | - | 28381   | 28336   | RNA → rpmE (PRK00019)Ribosomal_L31 (pfam01197) → rpmE (PRK00019)Ribosomal_L31 (pfam01197) →                                                                                                                                                                                                                                                                                                                                                                                                                                                                                                                                                                                                                                                                                                                                                                                                                                                            |
| env-462  | P3_CLC_Cons143904      | + | 638     | 680     | RNA → rpmE (PRK00019)Ribosomal_L31 (pfam01197) →                                                                                                                                                                                                                                                                                                                                                                                                                                                                                                                                                                                                                                                                                                                                                                                                                                                                                                       |
| Rde-1-1  | NZ_JPOC01000028.1      | - | 15680   | 15635   | RNA → rpmE (PRK00019)Ribosomal_L31 (pfam01197) →                                                                                                                                                                                                                                                                                                                                                                                                                                                                                                                                                                                                                                                                                                                                                                                                                                                                                                       |
| Req-3-1  | NZ_APJC01000016.1      | + | 221235  | 221280  | RNA → rpmE (PRK00019)Ribosomal_L31 (pfam01197) →                                                                                                                                                                                                                                                                                                                                                                                                                                                                                                                                                                                                                                                                                                                                                                                                                                                                                                       |
| Req-1-1  | NC_014659.1            | + | 1850042 | 1850087 | RNA → rpmE (PRK00019)Ribosomal_L31 (pfam01197) →                                                                                                                                                                                                                                                                                                                                                                                                                                                                                                                                                                                                                                                                                                                                                                                                                                                                                                       |
| Req-2-1  | NZ_CM001149.1          | - | 1501379 | 1501334 | RNA → rpmE (PRK00019)Ribosomal_L31 (pfam01197) →                                                                                                                                                                                                                                                                                                                                                                                                                                                                                                                                                                                                                                                                                                                                                                                                                                                                                                       |
| env-463  | JGI12060J13090_100106  | + | 585     | 630     | RNA → rpmE (PRK00019)Ribosomal_L31 (pfam01197) →                                                                                                                                                                                                                                                                                                                                                                                                                                                                                                                                                                                                                                                                                                                                                                                                                                                                                                       |
| env-464  | JGI11829J13087_100888  | + | 1844    | 1889    | RNA → rpmE (PRK00019)Ribosomal_L31 (pfam01197) →                                                                                                                                                                                                                                                                                                                                                                                                                                                                                                                                                                                                                                                                                                                                                                                                                                                                                                       |
| env-465  | JGI12027J13101_100505  | + | 2020    | 2065    | RNA → rpmE (PRK00019)Ribosomal_L31 (pfam01197) →                                                                                                                                                                                                                                                                                                                                                                                                                                                                                                                                                                                                                                                                                                                                                                                                                                                                                                       |
| env-466  | JGI12209J13104_110011  | + | 138     | 183     | RNA → rpmE (PRK00019)Ribosomal_L31 (pfam01197) →                                                                                                                                                                                                                                                                                                                                                                                                                                                                                                                                                                                                                                                                                                                                                                                                                                                                                                       |
| env-467  | JGI12064J13199_100272  | + | 1905    | 1950    | RNA → rpmE (PRK00019)Ribosomal_L31 (pfam01197) →                                                                                                                                                                                                                                                                                                                                                                                                                                                                                                                                                                                                                                                                                                                                                                                                                                                                                                       |
| env-468  | JGI12075J13256_1000008 | - | 18327   | 18282   | RNA → rpmE (PRK00019)Ribosomal_L31 (pfam01197) →                                                                                                                                                                                                                                                                                                                                                                                                                                                                                                                                                                                                                                                                                                                                                                                                                                                                                                       |
| env-469  | JGI12097J13213_1000024 | + | 50065   | 50110   | RNA → rpmE (PRK00019)Ribosomal_L31 (pfam01197) →                                                                                                                                                                                                                                                                                                                                                                                                                                                                                                                                                                                                                                                                                                                                                                                                                                                                                                       |
| env-470  | JGI11758J13082_100031  | - | 5158    | 5113    | RNA → rpmE (PRK00019)Ribosomal_L31 (pfam01197) →                                                                                                                                                                                                                                                                                                                                                                                                                                                                                                                                                                                                                                                                                                                                                                                                                                                                                                       |
| env-471  | JGI12112J13074_1000205 | - | 1882    | 1837    | RNA → rpmE (PRK00019)Ribosomal_L31 (pfam01197) →                                                                                                                                                                                                                                                                                                                                                                                                                                                                                                                                                                                                                                                                                                                                                                                                                                                                                                       |
| env-472  | JGI11819J13099_103704  | + | 158     | 203     | RNA → rpmE (PRK00019)Ribosomal_L31 (pfam01197) →                                                                                                                                                                                                                                                                                                                                                                                                                                                                                                                                                                                                                                                                                                                                                                                                                                                                                                       |
| env-473  | JGI11800J13271_1007055 | - | 1039    | 994     | RNA → rpmE (PRK00019)Ribosomal_L31 (pfam01197) →                                                                                                                                                                                                                                                                                                                                                                                                                                                                                                                                                                                                                                                                                                                                                                                                                                                                                                       |
| Rfa-3-1  | NZ_JMFE01000037.1      | - | 19407   | 19362   | RNA → rpmE (PRK00019)Ribosomal_L31 (pfam01197) → PrfA (COG0216)prfA (PRK00591) →<br>SHOCT (pfam09851) → HemK (COG2890)PRK09328 (PRK09328) → SUA5 (COG0009)TIGR00057 (TIGR00057) →<br>GlyA (COG0112)glyA (PRK00011) → ECA_wecA (TIGR02380)GT_WecA_like (cd06853) → hypo →<br>RNA → rpmE (PRK00019)Ribosomal_L31 (pfam01197) → PrfA (COG0216)prfA (PRK00591) →<br>SHOCT (pfam09851) → HemK (COG2890)PRK09328 (PRK09328) → HemK (COG2890)PRK09328 (PRK09328) →<br>SUA5 (COG0009)TIGR00057 (TIGR00057) → SUA5 (COG0009)TIGR00057 (TIGR00057) →<br>GlyA (COG0112)glyA (PRK00011) → ECA_wecA (TIGR02380)GT_WecA_like (cd06853) → hypo →<br>RNA → rpmE (PRK00019)Ribosomal_L31 (pfam01197) → PrfA (COG0216)prfA (PRK00591) →<br>SHOCT (pfam09851) → HemK (COG2890)PRK09328 (PRK09328) → SUA5 (COG0009)TIGR00057 (TIGR00057) →<br>SUA5 (COG0009)TIGR00057 (TIGR00057) → GlyA (COG0112)glyA (PRK00011) →<br>ECA_wecA (TIGR02380)GT_WecA_like (cd06853) → hypo → |
| Rsp-2-1  | NZ_KB907581.1          | + | 121301  | 121346  | RNA → rpmE (PRK00019)Ribosomal_L31 (pfam01197) → PrfA (COG0216)prfA (PRK00591) →<br>SHOCT (pfam09851) → HemK (COG2890)PRK09328 (PRK09328) → SUA5 (COG0009)TIGR00057 (TIGR00057) →<br>GlyA (COG0112)glyA (PRK00011) → ECA_wecA (TIGR02380)GT_WecA_like (cd06853) → hypo →<br>RNA → rpmE (PRK00019)Ribosomal_L31 (pfam01197) → PrfA (COG0216)prfA (PRK00591) →<br>SHOCT (pfam09851) → HemK (COG2890)PRK09328 (PRK09328) → SUA5 (COG0009)TIGR00057 (TIGR00057) →<br>SUA5 (COG0009)TIGR00057 (TIGR00057) → GlyA (COG0112)glyA (PRK00011) →<br>ECA_wecA (TIGR02380)GT_WecA_like (cd06853) → hypo →                                                                                                                                                                                                                                                                                                                                                          |
| Rsp-1-1  | NZ_KB911561.1          | + | 83738   | 83783   | RNA → rpmE (PRK00019)Ribosomal_L31 (pfam01197) → PrfA (COG0216)prfA (PRK00591) →<br>SHOCT (pfam09851) → HemK (COG2890)PRK09328 (PRK09328) → SUA5 (COG0009)TIGR00057 (TIGR00057) →<br>SUA5 (COG0009)TIGR00057 (TIGR00057) → GlyA (COG0112)glyA (PRK00011) →<br>ECA_wecA (TIGR02380)GT_WecA_like (cd06853) → hypo →                                                                                                                                                                                                                                                                                                                                                                                                                                                                                                                                                                                                                                      |
| Rfa-1-1  | NZ_JOKB01000004.1      | + | 98966   | 99011   | RNA → rpmE (PRK00019)Ribosomal_L31 (pfam01197) → PrfA (COG0216)prfA (PRK00591) →<br>SHOCT (pfam09851) → HemK (COG2890)PRK09328 (PRK09328) → SUA5 (COG0009)TIGR00057 (TIGR00057) →<br>GlyA (COG0112)glyA (PRK00011) → ECA_wecA (TIGR02380)GT_WecA_like (cd06853) → hypo →                                                                                                                                                                                                                                                                                                                                                                                                                                                                                                                                                                                                                                                                               |

|          |                   |   |         |         |                                                                                                                                                                                                                                                                                                                                                                                                                                                                                            |
|----------|-------------------|---|---------|---------|--------------------------------------------------------------------------------------------------------------------------------------------------------------------------------------------------------------------------------------------------------------------------------------------------------------------------------------------------------------------------------------------------------------------------------------------------------------------------------------------|
| Rfa-10-1 | NZ_JMEX01000003.1 | - | 19312   | 19267   | RNA → rpmE (PRK00019)Ribosomal_L31 (pfam01197) → PrfA (COG0216)prfA (PRK00591) → SHOCT (pfam09851) → HemK (COG2890)PRK09328 (PRK09328) → SUA5 (COG0009)TIGR00057 (TIGR00057) → GlyA (COG0112)glyA (PRK00011) → ECA_wecA (TIGR02380)GT_WecA_like (cd06853) → hypo →                                                                                                                                                                                                                         |
| Rfa-11-1 | NZ_JMEW01000005.1 | - | 19530   | 19485   | RNA → rpmE (PRK00019)Ribosomal_L31 (pfam01197) → PrfA (COG0216)prfA (PRK00591) → SHOCT (pfam09851) → HemK (COG2890)PRK09328 (PRK09328) → SUA5 (COG0009)TIGR00057 (TIGR00057) → GlyA (COG0112)glyA (PRK00011) → ECA_wecA (TIGR02380)GT_WecA_like (cd06853) → hypo →                                                                                                                                                                                                                         |
| Rfa-2-1  | NZ_JMFF01000029.1 | + | 83922   | 83967   | RNA → rpmE (PRK00019)Ribosomal_L31 (pfam01197) → PrfA (COG0216)prfA (PRK00591) → SHOCT (pfam09851) → HemK (COG2890)PRK09328 (PRK09328) → SUA5 (COG0009)TIGR00057 (TIGR00057) → GlyA (COG0112)glyA (PRK00011) → ECA_wecA (TIGR02380)GT_WecA_like (cd06853) → hypo →                                                                                                                                                                                                                         |
| Rsp-3-1  | NZ_CAPS01000066.1 | + | 3310    | 3355    | RNA → rpmE (PRK00019)Ribosomal_L31 (pfam01197) → PrfA (COG0216)prfA (PRK00591) →                                                                                                                                                                                                                                                                                                                                                                                                           |
| Rfa-12-1 | NZ_JMEV01000023.1 | - | 619554  | 619509  | RNA → rpmE (PRK00019)Ribosomal_L31 (pfam01197) → PrfA (COG0216)prfA (PRK00591) →                                                                                                                                                                                                                                                                                                                                                                                                           |
| Rsp-13-1 | NZ_CP010797.1     | + | 262870  | 262915  | RNA → rpmE (PRK00019)Ribosomal_L31 (pfam01197) → PrfA (COG0216)prfA (PRK00591) →                                                                                                                                                                                                                                                                                                                                                                                                           |
| Rfa-5-1  | NZ_JMFC01000001.1 | + | 66942   | 66987   | RNA → rpmE (PRK00019)Ribosomal_L31 (pfam01197) → PrfA (COG0216)prfA (PRK00591) →                                                                                                                                                                                                                                                                                                                                                                                                           |
| Rop-1-1  | NC_012522.1       | - | 1262208 | 1262163 | RNA → rpmE (PRK00019)Ribosomal_L31 (pfam01197) → PrfA (COG0216)prfA (PRK00591) → HemK (COG2890)PRK09328 (PRK09328) → SUA5 (COG0009)TIGR00057 (TIGR00057) → ECA_wecA (TIGR02380)GT_WecA_like (cd06853) → hypo →                                                                                                                                                                                                                                                                             |
| Rjo-1-1  | NC_008268.1       | - | 1564922 | 1564877 | RNA → rpmE (PRK00019)Ribosomal_L31 (pfam01197) → PrfA (COG0216)prfA (PRK00591) → HemK (COG2890)PRK09328 (PRK09328) → SUA5 (COG0009)TIGR00057 (TIGR00057) → ECA_wecA (TIGR02380)GT_WecA_like (cd06853) → hypo → PRK05815 (PRK05815)ATP-synt_A (pfam00119) → PRK05815 (PRK05815)ATP-synt_A (pfam00119) → PRK07874 (PRK07874)AtpE (COG0636) → PRK05759 (PRK05759)AtpF (COG0711) → AtpH (COG0712)PRK13430 (PRK13430) → AtpA (COG0056)PRK09281 (PRK09281) → AtpG (COG0224)PRK05621 (PRK05621) → |
| Rop-3-1  | NZ_JH377359.1     | + | 2320813 | 2320858 | RNA → rpmE (PRK00019)Ribosomal_L31 (pfam01197) → PrfA (COG0216)prfA (PRK00591) → HemK (COG2890)PRK09328 (PRK09328) → SUA5 (COG0009)TIGR00057 (TIGR00057) → ECA_wecA (TIGR02380)GT_WecA_like (cd06853) → hypo → PRK05815 (PRK05815)ATP-synt_A (pfam00119) → PRK05815 (PRK05815)ATP-synt_A (pfam00119) → PRK07874 (PRK07874)AtpE (COG0636) → PRK05759 (PRK05759)AtpF (COG0711) → AtpH (COG0712)PRK13430 (PRK13430) → AtpA (COG0056)PRK09281 (PRK09281) → AtpG (COG0224)PRK05621 (PRK05621) → |
| Rop-3-2  | NZ_CP003949.1     | - | 5793207 | 5793162 | RNA → rpmE (PRK00019)Ribosomal_L31 (pfam01197) → PrfA (COG0216)prfA (PRK00591) → HemK (COG2890)PRK09328 (PRK09328) → SUA5 (COG0009)TIGR00057 (TIGR00057) → ECA_wecA (TIGR02380)GT_WecA_like (cd06853) → hypo →                                                                                                                                                                                                                                                                             |
| Rim-1-1  | NZ_AJJH01000159.1 | + | 23732   | 23777   | RNA → rpmE (PRK00019)Ribosomal_L31 (pfam01197) → rpmE (PRK00019)Ribosomal_L31 (pfam01197) → PrfA (COG0216)prfA (PRK00591) → PrfA (COG0216)prfA (PRK00591) → HemK (COG2890)PRK09328 (PRK09328) → HemK (COG2890)PRK09328 (PRK09328) → SUA5 (COG0009)TIGR00057 (TIGR00057) → SUA5 (COG0009)TIGR00057 (TIGR00057) → ECA_wecA (TIGR02380)GT_WecA_like (cd06853) → ECA_wecA (TIGR02380)GT_WecA_like (cd06853) → hypo →                                                                           |
| Rsp-4-1  | NZ_AJLQ01000087.1 | + | 23811   | 23856   | RNA → rpmE (PRK00019)Ribosomal_L31 (pfam01197) → PrfA (COG0216)prfA (PRK00591) → HemK (COG2890)PRK09328 (PRK09328) → SUA5 (COG0009)TIGR00057 (TIGR00057) → ECA_wecA (TIGR02380)GT_WecA_like (cd06853) → hypo → PRK05815 (PRK05815)ATP-synt_A (pfam00119) → PRK05815 (PRK05815)ATP-synt_A (pfam00119) → PRK07874 (PRK07874)AtpE (COG0636) → PRK05759 (PRK05759)AtpF (COG0711) → AtpH (COG0712)PRK13430 (PRK13430) → AtpA (COG0056)PRK09281 (PRK09281) → AtpG (COG0224)PRK05621 (PRK05621) → |
| Rsp-6-1  | NZ_AKKP01000036.1 | - | 14697   | 14652   | RNA → ← hypo                                                                                                                                                                                                                                                                                                                                                                                                                                                                               |
| Rop-2-1  | NZ_AJYC02000166.1 | + | 20908   | 20953   | RNA → rpmE (PRK00019)Ribosomal_L31 (pfam01197) → PrfA (COG0216)prfA (PRK00591) → HemK (COG2890)PRK09328 (PRK09328) → SUA5 (COG0009)TIGR00057 (TIGR00057) → ECA_wecA (TIGR02380)GT_WecA_like (cd06853) → hypo →                                                                                                                                                                                                                                                                             |
| Rwr-1-1  | NZ_ANIU01000624.1 | - | 15537   | 15492   | RNA → rpmE (PRK00019)Ribosomal_L31 (pfam01197) → PrfA (COG0216)prfA (PRK00591) → HemK (COG2890)PRK09328 (PRK09328) → SUA5 (COG0009)TIGR00057 (TIGR00057) → ECA_wecA (TIGR02380)GT_WecA_like (cd06853) → hypo →                                                                                                                                                                                                                                                                             |
| Rwr-2-1  | NZ_BAWF01000054.1 | + | 58602   | 58647   | RNA → rpmE (PRK00019)Ribosomal_L31 (pfam01197) → PrfA (COG0216)prfA (PRK00591) → HemK (COG2890)PRK09328 (PRK09328) → SUA5 (COG0009)TIGR00057 (TIGR00057) → ECA_wecA (TIGR02380)GT_WecA_like (cd06853) → hypo →                                                                                                                                                                                                                                                                             |
| Rfa-21-1 | NZ_JMEN01000002.1 | - | 18231   | 18186   | RNA → rpmE (PRK00019)Ribosomal_L31 (pfam01197) → PrfA (COG0216)prfA (PRK00591) →                                                                                                                                                                                                                                                                                                                                                                                                           |
| Rfa-1-2  | NZ_LFDS01000014.1 | + | 60916   | 60961   | RNA → rpmE (PRK00019)Ribosomal_L31 (pfam01197) → PrfA (COG0216)prfA (PRK00591) →                                                                                                                                                                                                                                                                                                                                                                                                           |
| Rsp-15-1 | NZ_KI519398.1     | - | 4412791 | 4412746 | RNA → rpmE (PRK00019)Ribosomal_L31 (pfam01197) → PrfA (COG0216)prfA (PRK00591) →                                                                                                                                                                                                                                                                                                                                                                                                           |



|          |                   |   |         |         |      |                 |                           |                           |                |                 |   |
|----------|-------------------|---|---------|---------|------|-----------------|---------------------------|---------------------------|----------------|-----------------|---|
| Rsp-17-1 | NZ_KQ031368.1     | - | 244975  | 244930  | RNA→ | rpmE (PRK00019) | Ribosomal_L31 (pfam01197) | →                         | PrfA (COG0216) | prfA (PRK00591) | → |
| Rfa-13-1 | NZ_JMEU01000024.1 | + | 61028   | 61073   | RNA→ | rpmE (PRK00019) | Ribosomal_L31 (pfam01197) | →                         | PrfA (COG0216) | prfA (PRK00591) | → |
| Rfa-14-1 | NZ_JMET01000032.1 | - | 18078   | 18033   | RNA→ | rpmE (PRK00019) | Ribosomal_L31 (pfam01197) | →                         | PrfA (COG0216) | prfA (PRK00591) | → |
| Rfa-6-1  | NZ_JMFB01000009.1 | - | 41568   | 41523   | RNA→ | rpmE (PRK00019) | Ribosomal_L31 (pfam01197) | →                         | PrfA (COG0216) | prfA (PRK00591) | → |
| Rfa-18-1 | NZ_JMEP01000006.1 | - | 18272   | 18227   | RNA→ | rpmE (PRK00019) | Ribosomal_L31 (pfam01197) | →                         | PrfA (COG0216) | prfA (PRK00591) | → |
| Rfa-15-1 | NZ_JMES01000046.1 | + | 65370   | 65415   | RNA→ | rpmE (PRK00019) | Ribosomal_L31 (pfam01197) | →                         | PrfA (COG0216) | prfA (PRK00591) | → |
| Rfa-16-1 | NZ_JMERO1000016.1 | - | 18453   | 18408   | RNA→ | rpmE (PRK00019) | Ribosomal_L31 (pfam01197) | →                         | PrfA (COG0216) | prfA (PRK00591) | → |
| Rfa-19-1 | NZ_JMEO01000036.1 | - | 42912   | 42867   | RNA→ | rpmE (PRK00019) | Ribosomal_L31 (pfam01197) | →                         | PrfA (COG0216) | prfA (PRK00591) | → |
| Rfa-17-1 | NZ_JMEQ01000003.1 | - | 18034   | 17989   | RNA→ | rpmE (PRK00019) | Ribosomal_L31 (pfam01197) | →                         | PrfA (COG0216) | prfA (PRK00591) | → |
| Rfa-9-1  | NZ_JMEY01000018.1 | + | 61117   | 61162   | RNA→ | rpmE (PRK00019) | Ribosomal_L31 (pfam01197) | →                         | PrfA (COG0216) | prfA (PRK00591) | → |
| Rfa-4-1  | NZ_JMFD01000009.1 | - | 18100   | 18055   | RNA→ | rpmE (PRK00019) | Ribosomal_L31 (pfam01197) | →                         | PrfA (COG0216) | prfA (PRK00591) | → |
| Rfa-7-1  | NZ_JMFA01000028.1 | - | 18232   | 18187   | RNA→ | rpmE (PRK00019) | Ribosomal_L31 (pfam01197) | →                         | PrfA (COG0216) | prfA (PRK00591) | → |
| Rfa-20-1 | NZ_JMEM01000014.1 | - | 503930  | 503885  | RNA→ | rpmE (PRK00019) | Ribosomal_L31 (pfam01197) | →                         | PrfA (COG0216) | prfA (PRK00591) | → |
| Rfa-8-1  | NZ_JMEZ01000016.1 | + | 635989  | 636034  | RNA→ | rpmE (PRK00019) | Ribosomal_L31 (pfam01197) | →                         | PrfA (COG0216) | prfA (PRK00591) | → |
| Rtr-1-1  | NZ_AODO01000019.1 | - | 15129   | 15084   | RNA→ | rpmE (PRK00019) | Ribosomal_L31 (pfam01197) | →                         |                |                 |   |
| Rsp-19-1 | NZ_CVQP01000001.1 | + | 953865  | 953910  | RNA→ | rpmE (PRK00019) | Ribosomal_L31 (pfam01197) | →                         |                |                 |   |
| Rsp-21-1 | NZ_JMLO01000036.1 | + | 39540   | 39585   | RNA→ | rpmE (PRK00019) | Ribosomal_L31 (pfam01197) | →                         |                |                 |   |
| Sar-21-1 | NZ_AZWI01000036.1 | - | 51029   | 50973   | RNA→ | hypo→           | rpmE (PRK00019)           | Ribosomal_L31 (pfam01197) | →              |                 |   |
| Sar-40-1 | NZ_AZWX01000003.1 | - | 51034   | 50978   | RNA→ | hypo→           | rpmE (PRK00019)           | Ribosomal_L31 (pfam01197) | →              |                 |   |
| Sar-36-1 | NZ_AZXA01000003.1 | - | 51182   | 51126   | RNA→ | hypo→           | rpmE (PRK00019)           | Ribosomal_L31 (pfam01197) | →              |                 |   |
| Sar-38-1 | NZ_AZXG01000012.1 | - | 51140   | 51084   | RNA→ | hypo→           | rpmE (PRK00019)           | Ribosomal_L31 (pfam01197) | →              |                 |   |
| Sar-25-1 | NZ_AZWV01000001.1 | + | 346941  | 346997  | RNA→ | hypo→           | rpmE (PRK00019)           | Ribosomal_L31 (pfam01197) | →              |                 |   |
| Sar-37-1 | NZ_KI911342.1     | - | 51088   | 51032   | RNA→ | hypo→           | rpmE (PRK00019)           | Ribosomal_L31 (pfam01197) | →              |                 |   |
| Sar-39-1 | NZ_KI911438.1     | - | 51088   | 51032   | RNA→ | hypo→           | rpmE (PRK00019)           | Ribosomal_L31 (pfam01197) | →              |                 |   |
| Sar-9-1  | NZ_KB898403.1     | - | 50932   | 50876   | RNA→ | hypo→           | rpmE (PRK00019)           | Ribosomal_L31 (pfam01197) | →              |                 |   |
| Sar-4-1  | NZ_KB896072.1     | + | 346814  | 346870  | RNA→ | hypo→           | rpmE (PRK00019)           | Ribosomal_L31 (pfam01197) | →              |                 |   |
| Spa-11-1 | NZ_KB892476.1     | - | 51107   | 51051   | RNA→ | hypo→           | rpmE (PRK00019)           | Ribosomal_L31 (pfam01197) | →              |                 |   |
| Sar-19-1 | NZ_KB913036.1     | - | 2994862 | 2994806 | RNA→ | hypo→           | rpmE (PRK00019)           | Ribosomal_L31 (pfam01197) | →              |                 |   |
| Sar-12-1 | NZ_KB896389.1     | + | 143497  | 143553  | RNA→ | hypo→           | rpmE (PRK00019)           | Ribosomal_L31 (pfam01197) | →              |                 |   |
| Sar-1-1  | NZ_KB900168.1     | + | 1524    | 1580    | RNA→ | hypo→           | rpmE (PRK00019)           | Ribosomal_L31 (pfam01197) | →              |                 |   |
| Sar-27-1 | NZ_JAEY01000041.1 | - | 51135   | 51079   | RNA→ | hypo→           | rpmE (PRK00019)           | Ribosomal_L31 (pfam01197) | →              |                 |   |
| Sar-3-1  | NZ_KB896004.1     | + | 346986  | 347042  | RNA→ | hypo→           | rpmE (PRK00019)           | Ribosomal_L31 (pfam01197) | →              |                 |   |
| Sar-33-1 | NZ_AUKM01000035.1 | + | 1712    | 1768    | RNA→ | hypo→           | rpmE (PRK00019)           | Ribosomal_L31 (pfam01197) | →              |                 |   |
| Sar-6-1  | NC_009953.1       | - | 4579559 | 4579503 | RNA→ | hypo→           | rpmE (PRK00019)           | Ribosomal_L31 (pfam01197) | →              |                 |   |
| Sar-32-1 | NZ_KE384262.1     | + | 143944  | 144000  | RNA→ | hypo→           | rpmE (PRK00019)           | Ribosomal_L31 (pfam01197) | →              |                 |   |
| Sar-30-1 | NZ_KI519456.1     | - | 51241   | 51185   | RNA→ | hypo→           | rpmE (PRK00019)           | Ribosomal_L31 (pfam01197) | →              |                 |   |
| Sar-31-1 | NZ_KI911435.1     | - | 51292   | 51236   | RNA→ | hypo→           | rpmE (PRK00019)           | Ribosomal_L31 (pfam01197) | →              |                 |   |
| Sar-16-1 | NZ_KB896701.1     | - | 51106   | 51050   | RNA→ | hypo→           | rpmE (PRK00019)           | Ribosomal_L31 (pfam01197) | →              |                 |   |
| Sar-8-1  | NZ_KB892533.1     | + | 146895  | 146951  | RNA→ | hypo→           | rpmE (PRK00019)           | Ribosomal_L31 (pfam01197) | →              |                 |   |
| Sar-14-1 | NZ_KB905500.1     | - | 51099   | 51043   | RNA→ | hypo→           | rpmE (PRK00019)           | Ribosomal_L31 (pfam01197) | →              |                 |   |
| Sar-34-1 | NZ_KB896161.1     | + | 146321  | 146377  | RNA→ | hypo→           | rpmE (PRK00019)           | Ribosomal_L31 (pfam01197) | →              |                 |   |
| Spa-13-1 | NZ_KB896968.1     | + | 1604    | 1660    | RNA→ | hypo→           | rpmE (PRK00019)           | Ribosomal_L31 (pfam01197) | →              |                 |   |
| Sar-18-1 | NZ_KB905199.1     | + | 351246  | 351302  | RNA→ | hypo→           | rpmE (PRK00019)           | Ribosomal_L31 (pfam01197) | →              |                 |   |
| Sar-5-1  | NZ_KB900324.1     | - | 51168   | 51112   | RNA→ | hypo→           | rpmE (PRK00019)           | Ribosomal_L31 (pfam01197) | →              |                 |   |
| Sar-7-1  | NZ_KB895942.1     | - | 51129   | 51073   | RNA→ | hypo→           | rpmE (PRK00019)           | Ribosomal_L31 (pfam01197) | →              |                 |   |
| Sar-13-1 | NZ_KB896467.1     | + | 146912  | 146968  | RNA→ | hypo→           | rpmE (PRK00019)           | Ribosomal_L31 (pfam01197) | →              |                 |   |
| Sar-15-1 | NZ_KB896531.1     | - | 51113   | 51057   | RNA→ | hypo→           | rpmE (PRK00019)           | Ribosomal_L31 (pfam01197) | →              |                 |   |
| Sar-35-1 | NZ_KI911491.1     | - | 51372   | 51316   | RNA→ | hypo→           | rpmE (PRK00019)           | Ribosomal_L31 (pfam01197) | →              |                 |   |
| Sar-28-1 | NZ_AZWY01000001.1 | + | 356278  | 356334  | RNA→ | hypo→           | rpmE (PRK00019)           | Ribosomal_L31 (pfam01197) | →              |                 |   |
| Sar-26-1 | NZ_KE384230.1     | - | 51394   | 51338   | RNA→ | hypo→           | rpmE (PRK00019)           | Ribosomal_L31 (pfam01197) | →              |                 |   |
| Sar-2-1  | NZ_KB900232.1     | - | 51449   | 51393   | RNA→ | hypo→           | rpmE (PRK00019)           | Ribosomal_L31 (pfam01197) | →              |                 |   |
| Sar-20-1 | NZ_JNLS01000004.1 | - | 51467   | 51411   | RNA→ | hypo→           | rpmE (PRK00019)           | Ribosomal_L31 (pfam01197) | →              |                 |   |

|          |                         |   |         |         |                                                                                                                                                                                                                                                          |
|----------|-------------------------|---|---------|---------|----------------------------------------------------------------------------------------------------------------------------------------------------------------------------------------------------------------------------------------------------------|
| Sar-22-1 | NZ_KI911555.1           | - | 50976   | 50920   | RNA→ hypo→ rpmE (PRK00019)Ribosomal_L31 (pfam01197)→                                                                                                                                                                                                     |
| Sar-17-1 | NZ_KB896609.1           | - | 51038   | 50982   | RNA→ hypo→ rpmE (PRK00019)Ribosomal_L31 (pfam01197)→                                                                                                                                                                                                     |
| Sar-24-1 | NZ_KI911518.1           | + | 208754  | 208810  | RNA→ hypo→ rpmE (PRK00019)Ribosomal_L31 (pfam01197)→                                                                                                                                                                                                     |
| Sar-23-1 | NZ_KI911441.1           | + | 352956  | 353012  | RNA→ hypo→ rpmE (PRK00019)Ribosomal_L31 (pfam01197)→                                                                                                                                                                                                     |
| env-474  | 2200071588              | + | 82438   | 82519   | RNA→ rpmE (PRK00019)Ribosomal_L31 (pfam01197)→                                                                                                                                                                                                           |
| env-475  | JGI12397J12024_1254667  | + | 31      | 93      | RNA→ rpmE (PRK00019)Ribosomal_L31 (pfam01197)→                                                                                                                                                                                                           |
| Whe-1-1  | NZ_JXYP01000014.1       | + | 381001  | 381054  | RNA→ rpmE (PRK00019)Ribosomal_L31 (pfam01197)→ PrfA (COG0216)prfA (PRK00591)→ hypo→ HemK (COG2890)PRK09328 (PRK09328)→ SUA5 (COG0009)TIGR00057 (TIGR00057)→ ECA_wecA (TIGR02380)GT_WecA_like (cd06853)→ ECA_wecA (TIGR02380)GT_WecA_like (cd06853)→      |
| Spa-28-1 | NZ_KI911408.1           | - | 162017  | 161962  | RNA→ rpmE (PRK00019)Ribosomal_L31 (pfam01197)→                                                                                                                                                                                                           |
| Spa-10-1 | NZ_KB904923.1           | + | 18193   | 18248   | RNA→ rpmE (PRK00019)Ribosomal_L31 (pfam01197)→ rpmE (PRK00019)Ribosomal_L31 (pfam01197)→                                                                                                                                                                 |
| Spa-36-1 | NZ_AZWR01000034.1       | + | 18288   | 18342   | RNA→ rpmE (PRK00019)Ribosomal_L31 (pfam01197)→                                                                                                                                                                                                           |
| Spa-8-1  | NZ_KB895313.1           | - | 50515   | 50461   | RNA→ rpmE (PRK00019)Ribosomal_L31 (pfam01197)→                                                                                                                                                                                                           |
| Spa-9-1  | NZ_KB896783.1           | - | 50546   | 50492   | RNA→ rpmE (PRK00019)Ribosomal_L31 (pfam01197)→                                                                                                                                                                                                           |
| Dau-1-1  | NZ_JNYJ01000029.1       | - | 93182   | 93146   | RNA→ rpmE (PRK00019)Ribosomal_L31 (pfam01197)→                                                                                                                                                                                                           |
| Mlu-1-1  | NZ_HF570108.1           | - | 6128873 | 6128807 | RNA→ rpmE (PRK00019)Ribosomal_L31 (pfam01197)→                                                                                                                                                                                                           |
| Mch-6-1  | NZ_JOAN01000006.1       | + | 33922   | 33988   | RNA→ rpmE (PRK00019)Ribosomal_L31 (pfam01197)→                                                                                                                                                                                                           |
| Mpa-1-1  | NZ_JNZS01000011.1       | + | 66563   | 66629   | RNA→ rpmE (PRK00019)Ribosomal_L31 (pfam01197)→                                                                                                                                                                                                           |
| Rsp-9-1  | NZ_AJVB01000148.1       | + | 7131    | 7176    | RNA→ rpmE (PRK00019)Ribosomal_L31 (pfam01197)→ PCRF (smart00937)RF-1 (pfam00472)PCRF (pfam03462)→                                                                                                                                                        |
| Rrh-2-1  | NZ_AGVW02000073.1       | + | 58982   | 59027   | RNA→ rpmE (PRK00019)Ribosomal_L31 (pfam01197)→ PrfA (COG0216)prfA (PRK00591)→                                                                                                                                                                            |
| Rsp-14-1 | NZ_JTIZ01000140.1       | - | 15896   | 15851   | RNA→ rpmE (PRK00019)Ribosomal_L31 (pfam01197)→ PrfA (COG0216)prfA (PRK00591)→                                                                                                                                                                            |
| Rpy-2-1  | NC_023150.1             | + | 5211019 | 5211064 | RNA→ rpmE (PRK00019)Ribosomal_L31 (pfam01197)→ PrfA (COG0216)prfA (PRK00591)→                                                                                                                                                                            |
| Rsp-18-1 | NZ_AFAQ01001953.1       | + | 74360   | 74405   | RNA→ rpmE (PRK00019)Ribosomal_L31 (pfam01197)→ PrfA (COG0216)prfA (PRK00591)→                                                                                                                                                                            |
| Rpy-1-1  | NZ_AHBW01000042.1       | + | 40539   | 40584   | RNA→ rpmE (PRK00019)Ribosomal_L31 (pfam01197)→ rpmE (PRK00019)Ribosomal_L31 (pfam01197)→ PrfA (COG0216)prfA (PRK00591)→ PrfA (COG0216)prfA (PRK00591)→                                                                                                   |
| Rsp-22-1 | NZ_JPJJ01000011.1       | - | 17491   | 17446   | RNA→ rpmE (PRK00019)Ribosomal_L31 (pfam01197)→ PrfA (COG0216)prfA (PRK00591)→                                                                                                                                                                            |
| Rsp-5-1  | NZ_CAVJ010000216.1      | - | 15449   | 15404   | RNA→ rpmE (PRK00019)Ribosomal_L31 (pfam01197)→                                                                                                                                                                                                           |
| Rae-1-1  | NZ_CP011341.1           | + | 2197037 | 2197082 | RNA→ rpmE (PRK00019)Ribosomal_L31 (pfam01197)→                                                                                                                                                                                                           |
| Rrh-6-1  | NZ_AZHI01000044.1       | - | 15673   | 15628   | RNA→ rpmE (PRK00019)Ribosomal_L31 (pfam01197)→                                                                                                                                                                                                           |
| Rru-2-1  | NZ_ANGC01000054.1       | + | 15700   | 15745   | RNA→ rpmE (PRK00019)Ribosomal_L31 (pfam01197)→                                                                                                                                                                                                           |
| Rru-3-1  | NZ_CCSD01000112.1       | + | 217226  | 217271  | RNA→ rpmE (PRK00019)Ribosomal_L31 (pfam01197)→                                                                                                                                                                                                           |
| Rru-3-2  | NZ_LDUF01000007.1       | - | 15446   | 15401   | RNA→ rpmE (PRK00019)Ribosomal_L31 (pfam01197)→                                                                                                                                                                                                           |
| Rsp-7-1  | NZ_AJFC01000306.1       | + | 45552   | 45597   | RNA→ rpmE (PRK00019)Ribosomal_L31 (pfam01197)→ rpmE (PRK00019)Ribosomal_L31 (pfam01197)→                                                                                                                                                                 |
| Rru-1-1  | NZ_AOEX01000028.1       | - | 15828   | 15783   | RNA→ rpmE (PRK00019)Ribosomal_L31 (pfam01197)→                                                                                                                                                                                                           |
| Ntr-1-1  | NZ_BAGL01000019.1       | + | 91420   | 91465   | RNA→ rpmE (PRK00019)Ribosomal_L31 (pfam01197)→ PrfA (COG0216)prfA (PRK00591)→ HemK (COG2890)PRK09328 (PRK09328)→                                                                                                                                         |
| Not-2-1  | NZ_BAGD01000040.1       | + | 28362   | 28407   | RNA→ rpmE (PRK00019)Ribosomal_L31 (pfam01197)→ PrfA (COG0216)prfA (PRK00591)→ HemK (COG2890)PRK09328 (PRK09328)→ HemK (COG2890)PRK09328 (PRK09328)→                                                                                                      |
| Not-1-1  | NZ_BATZ01000015.1       | + | 189934  | 189979  | RNA→ rpmE (PRK00019)Ribosomal_L31 (pfam01197)→ PrfA (COG0216)prfA (PRK00591)→ HemK (COG2890)PRK09328 (PRK09328)→ HemK (COG2890)PRK09328 (PRK09328)→                                                                                                      |
| env-476  | JGI20190J14840_1064086  | + | 179     | 244     | RNA→                                                                                                                                                                                                                                                     |
| Msp-26-1 | NZ_KQ058714.1           | + | 43212   | 43277   | RNA→ hypo→ rpmE (PRK00019)Ribosomal_L31 (pfam01197)→                                                                                                                                                                                                     |
| env-477  | JGI20205J14842_1097635  | + | 188     | 243     | RNA→ hypo→                                                                                                                                                                                                                                               |
| env-478  | JGI12396J12026_1003816  | + | 12      | 59      | RNA→ rpmE (PRK00019)Ribosomal_L31 (pfam01197)→                                                                                                                                                                                                           |
| env-479  | JGI12271J12027_1041588  | + | 10      | 57      | RNA→ rpmE (PRK00019)Ribosomal_L31 (pfam01197)→                                                                                                                                                                                                           |
| env-480  | JGI12273J12029_10019447 | + | 10      | 57      | RNA→ hypo→ rpmE (PRK00019)Ribosomal_L31 (pfam01197)→                                                                                                                                                                                                     |
| Gsp-3-1  | NZ_JOGR01000006.1       | + | 294303  | 294343  | RNA→ rpmE (PRK00019)Ribosomal_L31 (pfam01197)→ prfA (PRK00591)RF-1 (pfam00472)PCRF (pfam03462)→ HemK (COG2890)PRK09328 (PRK09328)→ hypo→ SUA5 (COG0009)TIGR00057 (TIGR00057)→ LMWPc (smart00226)Wzb (COG0394)→ LMWPc (smart00226)LMWPAP (cd16344)→ hypo→ |
| env-481  | JGI24740J21852_10164145 | + | 98      | 134     | RNA→ rpmE (PRK00019)Ribosomal_L31 (pfam01197)→ hypo→                                                                                                                                                                                                     |
| env-482  | botACOD_GAKN62C01CSCDR  | + | 372     | 436     | RNA→ rpmE (PRK00019)Ribosomal_L31 (pfam01197)→                                                                                                                                                                                                           |
| env-483  | topACOD_F95O9CU01EIYTS  | + | 236     | 305     | RNA→ rpmE (PRK00019)Ribosomal_L31 (pfam01197)→                                                                                                                                                                                                           |

|          |                             |   |         |         |                                                                                                                         |
|----------|-----------------------------|---|---------|---------|-------------------------------------------------------------------------------------------------------------------------|
| env-484  | JGI20263J16346_11281        | - | 78      | 28      | RNA → hypo →                                                                                                            |
| env-485  | 2210838270                  | - | 125     | 37      | RNA → hypo →                                                                                                            |
| env-486  | 2034117903                  | - | 276     | 240     | RNA → rpmE (PRK00019) Ribosomal_L31 (pfam01197) →                                                                       |
| Sam-2-1  | NZ_JOEQ01000004.1           | - | 236796  | 236714  | RNA → rpmE (PRK00019) Ribosomal_L31 (pfam01197) →                                                                       |
| Sro-7-1  | NZ_JOEP01000003.1           | - | 250250  | 250165  | RNA → rpmE (PRK00019) Ribosomal_L31 (pfam01197) → PrfA (COG0216) prfA (PRK00591) → HemK (COG2890) PRK09328 (PRK09328) → |
| Sro-3-1  | NC_013595.1                 | + | 1771338 | 1771423 | RNA → rpmE (PRK00019) Ribosomal_L31 (pfam01197) →                                                                       |
| Mau-1-1  | NC_014391.1                 | - | 5788708 | 5788645 | RNA → rpmE (PRK00019) Ribosomal_L31 (pfam01197) → PrfA (COG0216) prfA (PRK00591) →                                      |
| Msp-9-1  | NZ_KB895826.1               | + | 396351  | 396414  | RNA → hypo → rpmE (PRK00019) Ribosomal_L31 (pfam01197) → PrfA (COG0216) prfA (PRK00591) → hypo →                        |
| Msp-10-1 | NC_014815.1                 | + | 3318499 | 3318562 | RNA → rpmE (PRK00019) Ribosomal_L31 (pfam01197) → PrfA (COG0216) prfA (PRK00591) →                                      |
| Msp-28-1 | NZ_LEKG01000129.1           | + | 72      | 135     | RNA → rpmE (PRK00019) Ribosomal_L31 (pfam01197) → PrfA (COG0216) prfA (PRK00591) →                                      |
| Mgl-1-1  | NZ_JNZR01000015.1           | - | 22540   | 22477   | RNA → rpmE (PRK00019) Ribosomal_L31 (pfam01197) → PrfA (COG0216) prfA (PRK00591) →                                      |
| env-487  | JGI12698J15209_1012939      | + | 182     | 248     | RNA → rpmE (PRK00019) Ribosomal_L31 (pfam01197) →                                                                       |
| env-488  | JGI12635J15846_10089936     | + | 506     | 573     | RNA → rpmE (PRK00019) Ribosomal_L31 (pfam01197) →                                                                       |
| Msp-8-1  | NZ_GG657738.1               | - | 2230600 | 2230534 | RNA → rpmE (PRK00019) Ribosomal_L31 (pfam01197) → rpmE (PRK00019) Ribosomal_L31 (pfam01197) →                           |
| env-489  | JGI20206J14855_1044127      | - | 238     | 179     | RNA → rpmE (PRK00019) Ribosomal_L31 (pfam01197) →                                                                       |
| env-490  | JGI20186J14852_1017385      | + | 370     | 429     | RNA → ← hypo                                                                                                            |
| env-491  | JGI20204J15000_1053760      | - | 219     | 160     | RNA → rpmE (PRK00019) Ribosomal_L31 (pfam01197) →                                                                       |
| env-492  | JGI20203J14952_1004251      | - | 245     | 186     | RNA → rpmE (PRK00019) Ribosomal_L31 (pfam01197) →                                                                       |
| env-493  | JGI20204J15135_1053760      | - | 219     | 160     | RNA → rpmE (PRK00019) Ribosomal_L31 (pfam01197) →                                                                       |
| Nco-1-1  | NZ_KB903996.1               | - | 180981  | 180940  | RNA → rpmE (PRK00019) Ribosomal_L31 (pfam01197) →                                                                       |
| env-494  | AP72_2010_repL_A100_1025205 | - | 373     | 326     | RNA → rpmE (PRK00019) Ribosomal_L31 (pfam01197) →                                                                       |
| Mca-1-1  | NZ_JXSX01000002.1           | + | 873352  | 873417  | RNA → rpmE (PRK00019) Ribosomal_L31 (pfam01197) →                                                                       |
| env-495  | JGI20241J16302_105831       | + | 273     | 334     | RNA →                                                                                                                   |
| env-496  | JGI12635J15846_10116580     | + | 1117    | 1162    | RNA → rpmE (PRK00019) Ribosomal_L31 (pfam01197) →                                                                       |
| env-497  | JGI12269J14319_10020994     | - | 2767    | 2730    | RNA → rpmE (PRK00019) Ribosomal_L31 (pfam01197) →                                                                       |
| env-498  | JGI12635J15846_13730630     | - | 99      | 50      | RNA → hypo →                                                                                                            |
| env-499  | JGI12712J15308_10773049     | + | 159     | 209     | RNA →                                                                                                                   |
| env-500  | JGI12269J14319_10090585     | - | 241     | 190     | RNA → rpmE (PRK00019) Ribosomal_L31 (pfam01197) →                                                                       |
| env-501  | JGI12269J14319_10493819     | - | 328     | 279     | RNA → rpmE (PRK00019) Ribosomal_L31 (pfam01197) →                                                                       |
| env-502  | JGI20196J14858_1024988      | - | 290     | 239     | RNA → rpmE (PRK00019) Ribosomal_L31 (pfam01197) →                                                                       |
| env-503  | JGI12712J15308_10023311     | + | 1278    | 1329    | RNA → rpmE (PRK00019) Ribosomal_L31 (pfam01197) →                                                                       |
| env-504  | JGI12659J15293_10227025     | + | 221     | 272     | RNA → rpmE (PRK00019) Ribosomal_L31 (pfam01197) →                                                                       |
| env-505  | JGI20188J14859_1052292      | + | 150     | 201     | RNA → rpmE (PRK00019) Ribosomal_L31 (pfam01197) →                                                                       |
| env-506  | JGI20186J14852_1022270      | - | 272     | 221     | RNA → rpmE (PRK00019) Ribosomal_L31 (pfam01197) →                                                                       |
| env-507  | JGI20203J14952_1005414      | + | 1323    | 1374    | RNA →                                                                                                                   |
| env-508  | JGI20205J14842_1005807      | - | 759     | 708     | RNA → rpmE (PRK00019) Ribosomal_L31 (pfam01197) →                                                                       |
| env-509  | JGI20186J14852_1008003      | - | 59      | 8       | RNA →                                                                                                                   |
| env-510  | JGI20190J14840_1000844      | + | 1262    | 1313    | RNA → rpmE (PRK00019) Ribosomal_L31 (pfam01197) →                                                                       |
| env-511  | JGI20204J15000_1002743      | - | 517     | 466     | RNA → rpmE (PRK00019) Ribosomal_L31 (pfam01197) →                                                                       |
| env-512  | JGI20204J15135_1002743      | - | 517     | 466     | RNA → rpmE (PRK00019) Ribosomal_L31 (pfam01197) →                                                                       |
| env-513  | JGI20183J14883_129429       | - | 281     | 230     | RNA → rpmE (PRK00019) Ribosomal_L31 (pfam01197) →                                                                       |
| env-514  | JGI12635J15846_11642955     | - | 277     | 239     | RNA → rpmE (PRK00019) Ribosomal_L31 (pfam01197) →                                                                       |
| env-515  | C688J13580_1150866          | + | 209     | 247     | RNA → rpmE (PRK00019) Ribosomal_L31 (pfam01197) →                                                                       |
| Nca-2-1  | NZ_BAFV01000016.1           | + | 24171   | 24216   | RNA → rpmE (PRK00019) Ribosomal_L31 (pfam01197) →                                                                       |
| Nca-1-1  | NZ_JNZF01000017.1           | - | 16307   | 16262   | RNA → rpmE (PRK00019) Ribosomal_L31 (pfam01197) →                                                                       |
| Asu-1-1  | NC_015564.1                 | - | 3348646 | 3348602 | RNA → rpmE (PRK00019) Ribosomal_L31 (pfam01197) → PrfA (COG0216) prfA (PRK00591) →                                      |
| env-516  | JGI20245J16306_1034373      | + | 145     | 183     | RNA → rpmE (PRK00019) Ribosomal_L31 (pfam01197) →                                                                       |
| env-517  | JGI12635J15846_10593975     | + | 102     | 140     | RNA → rpmE (PRK00019) Ribosomal_L31 (pfam01197) →                                                                       |
| env-518  | JGI26342J46808_1010879      | + | 391     | 429     | RNA → rpmE (PRK00019) Ribosomal_L31 (pfam01197) →                                                                       |
| env-519  | JGI26337J50220_1100613      | - | 177     | 139     | RNA → hypo →                                                                                                            |
| env-520  | JGI12698J15209_1088486      | + | 118     | 184     | RNA →                                                                                                                   |



|         |                            |   |         |         |                                                                                             |
|---------|----------------------------|---|---------|---------|---------------------------------------------------------------------------------------------|
| env-521 | JGI12659J15293_10241949    | - | 305     | 265     | RNA → ←-hypo                                                                                |
| env-522 | JGI12630J15595_10661370    | - | 218     | 164     | RNA → hypo → rpmE (PRK00019)Ribosomal_L31 (pfam01197) →                                     |
| env-523 | JGI12467J12023_1041632     | + | 41      | 119     | RNA → rpmE (PRK00019)Ribosomal_L31 (pfam01197) →                                            |
| env-524 | JGI20276J16322_104776      | - | 170     | 120     | RNA → rpmE (PRK00019)Ribosomal_L31 (pfam01197) →                                            |
| env-525 | JGI20275J16321_100019      | - | 565     | 515     | RNA → rpmE (PRK00019)Ribosomal_L31 (pfam01197) → PCRf (pfam03462)ABC_tran_CTD (pfam16326) → |
| env-526 | JGI20176J14865_113912      | - | 189     | 138     | RNA → rpmE (PRK00019)Ribosomal_L31 (pfam01197) →                                            |
| env-527 | JGI12694J13545_1030456     | + | 50      | 104     | RNA → rpmE (PRK00019)Ribosomal_L31 (pfam01197) →                                            |
| env-528 | JGI12649J13570_1002003     | - | 2744    | 2690    | RNA → rpmE (PRK00019)Ribosomal_L31 (pfam01197) → PrfA (COG0216)prfA (PRK00591) →            |
| env-529 | JGI12635J15846_10007700    | - | 7040    | 6986    | HemK (COG2890)PRK09328 (PRK09328) → SUA5 (COG0009)TIGR00057 (TIGR00057) →                   |
|         |                            |   |         |         | RNA → rpmE (PRK00019)Ribosomal_L31 (pfam01197) → PrfA (COG0216)prfA (PRK00591) →            |
| env-530 | JGI12681J13546_1004659     | - | 463     | 409     | HemK (COG2890)PRK09328 (PRK09328) → SUA5 (COG0009)TIGR00057 (TIGR00057) →                   |
|         |                            |   |         |         | RNA → rpmE (PRK00019)Ribosomal_L31 (pfam01197) →                                            |
| env-531 | JGI12659J15293_10071495    | + | 208     | 262     | RNA → rpmE (PRK00019)Ribosomal_L31 (pfam01197) → PrfA (COG0216)prfA (PRK00591) →            |
| env-532 | JGI12659J15293_10081505    | + | 640     | 694     | RNA →                                                                                       |
| env-533 | JGI20235J16296_1010410     | + | 109     | 163     | RNA → rpmE (PRK00019)Ribosomal_L31 (pfam01197) →                                            |
| env-534 | JGI12635J15846_10479974    | + | 427     | 511     | RNA → rpmE (PRK00019)Ribosomal_L31 (pfam01197) →                                            |
| env-535 | JGI12648J13191_1102813     | - | 315     | 231     | RNA → rpmE (PRK00019)Ribosomal_L31 (pfam01197) →                                            |
| env-536 | JGI12270J11330_10000477    | + | 1502    | 1555    | RNA → rpmE (PRK00019)Ribosomal_L31 (pfam01197) →                                            |
| env-537 | JGI12269J14319_10000786    | + | 1502    | 1555    | RNA → rpmE (PRK00019)Ribosomal_L31 (pfam01197) →                                            |
| env-538 | 2044437860                 | + | 359     | 441     | RNA →                                                                                       |
| Sna-1-1 | NC_013947.1                | + | 1383336 | 1383378 | RNA → rpmE (PRK00019)Ribosomal_L31 (pfam01197) →                                            |
| env-539 | JGI12269J14319_10084388    | - | 323     | 279     | RNA → rpmE (PRK00019)Ribosomal_L31 (pfam01197) →                                            |
| env-540 | FIHLEPW02RU19J             | - | 259     | 208     | RNA → rpmE (PRK00019)Ribosomal_L31 (pfam01197) →                                            |
| env-541 | FIHLEPW02PK0H8             | - | 435     | 385     | RNA → hypo → rpmE (PRK00019)Ribosomal_L31 (pfam01197) →                                     |
| env-542 | AP72_2010_repLA10_1090062  | - | 355     | 305     | RNA → hypo →                                                                                |
| env-543 | FIHLEPW02TDTYE             | - | 192     | 142     | RNA → hypo →                                                                                |
| env-544 | AF_2010_repIIA1_10229252   | - | 194     | 144     | RNA → rpmE (PRK00019)Ribosomal_L31 (pfam01197) →                                            |
| env-545 | AF_2010_repIIA001_10407533 | - | 209     | 159     | RNA → UMPK_like (cd02028) →                                                                 |
| env-546 | JGI12712J15308_10689240    | + | 44      | 86      | RNA → hypo → rpmE (PRK00019)Ribosomal_L31 (pfam01197) →                                     |
| env-547 | JGI12659J15293_10376808    | + | 47      | 89      | RNA → rpmE (PRK00019)Ribosomal_L31 (pfam01197) →                                            |
| env-548 | JGI12635J15846_12325035    | + | 141     | 177     | RNA → rpmE (PRK00019)Ribosomal_L31 (pfam01197) →                                            |
| env-549 | JGI26341J46601_10034216    | + | 1087    | 1123    | RNA → rpmE (PRK00019)Ribosomal_L31 (pfam01197) →                                            |
| env-550 | JGI26340J50214_10003356    | + | 235     | 271     | RNA → rpmE (PRK00019)Ribosomal_L31 (pfam01197) →                                            |
| env-551 | JGI12630J15595_10226531    | + | 132     | 168     | RNA → ←-hypo                                                                                |
| env-552 | JGI26346J50198_1083412     | - | 251     | 215     | RNA → rpmE (PRK00019)Ribosomal_L31 (pfam01197) →                                            |
| env-553 | JGI12419J13241_1069260     | + | 290     | 354     | RNA → rpmE (PRK00019)Ribosomal_L31 (pfam01197) →                                            |
| env-554 | GBANfinal_FHNL2OP03RHL08   | - | 331     | 267     | RNA → rpmE (PRK00019)Ribosomal_L31 (pfam01197) →                                            |
| Tcu-1-1 | NC_013510.1                | - | 4476819 | 4476755 | RNA → rpmE (PRK00019)Ribosomal_L31 (pfam01197) →                                            |
| env-555 | JGI12681J13546_1026784     | - | 235     | 164     | RNA → rpmE (PRK00019)Ribosomal_L31 (pfam01197) →                                            |
| env-556 | JGI12635J15846_10334590    | - | 676     | 605     | RNA → rpmE (PRK00019)Ribosomal_L31 (pfam01197) →                                            |
| env-557 | JGI12270J11330_10077884    | + | 1435    | 1471    | RNA → rpmE (PRK00019)Ribosomal_L31 (pfam01197) →                                            |
| env-558 | JGI12269J14319_10016588    | + | 541     | 577     | RNA → rpmE (PRK00019)Ribosomal_L31 (pfam01197) →                                            |
| env-559 | JGI12269J14319_10048667    | + | 2404    | 2440    | RNA → rpmE (PRK00019)Ribosomal_L31 (pfam01197) →                                            |
| env-560 | JGI26340J50214_10285047    | + | 212     | 248     | RNA → rpmE (PRK00019)Ribosomal_L31 (pfam01197) →                                            |
| env-561 | JGI12631J13338_1101732     | + | 143     | 179     | RNA → ←-hypo                                                                                |
| env-562 | JGI12635J15846_10088123    | - | 1905    | 1869    | RNA → rpmE (PRK00019)Ribosomal_L31 (pfam01197) →                                            |
| env-563 | JGI12712J15308_10312427    | - | 172     | 136     | RNA → rpmE (PRK00019)Ribosomal_L31 (pfam01197) →                                            |
| env-564 | JGI12635J15846_10115421    | - | 508     | 472     | RNA → rpmE (PRK00019)Ribosomal_L31 (pfam01197) →                                            |
| env-565 | JGI26339J46600_10015394    | - | 475     | 439     | RNA → rpmE (PRK00019)Ribosomal_L31 (pfam01197) →                                            |
| env-566 | JGI26341J46601_10189686    | + | 251     | 287     | RNA → rpmE (PRK00019)Ribosomal_L31 (pfam01197) →                                            |
| env-567 | JGI26340J50214_10034757    | - | 1226    | 1190    | RNA → rpmE (PRK00019)Ribosomal_L31 (pfam01197) →                                            |
| env-568 | JGI12270J11330_10005276    | + | 288     | 324     | RNA → rpmE (PRK00019)Ribosomal_L31 (pfam01197) →                                            |
| env-569 | JGI12269J14319_10440521    | - | 154     | 118     | RNA → rpmE (PRK00019)Ribosomal_L31 (pfam01197) →                                            |



|         |                             |   |         |         |                                                                                                                                                                                                                                                                                                                                                         |
|---------|-----------------------------|---|---------|---------|---------------------------------------------------------------------------------------------------------------------------------------------------------------------------------------------------------------------------------------------------------------------------------------------------------------------------------------------------------|
| env-570 | JGI26341J46601_10146534     | + | 327     | 363     | RNA → rpmE (PRK00019)Ribosomal_L31 (pfam01197) →                                                                                                                                                                                                                                                                                                        |
| env-571 | JGI12635J15846_11977336     | - | 238     | 202     | RNA → rpmE (PRK00019)Ribosomal_L31 (pfam01197) →                                                                                                                                                                                                                                                                                                        |
| env-572 | JGI20272J16309_111800       | - | 126     | 88      | RNA → ←-hypo                                                                                                                                                                                                                                                                                                                                            |
| env-573 | JGI20265J16348_10502        | - | 193     | 155     | RNA → rpmE (PRK00019)Ribosomal_L31 (pfam01197) →                                                                                                                                                                                                                                                                                                        |
| env-574 | JGI20271J16308_100694       | + | 240     | 278     | RNA → rpmE (PRK00019)Ribosomal_L31 (pfam01197) →                                                                                                                                                                                                                                                                                                        |
| env-575 | JGI20279J16325_116846       | + | 78      | 116     | RNA → rpmE (PRK00019)Ribosomal_L31 (pfam01197) →                                                                                                                                                                                                                                                                                                        |
| env-576 | JGI12712J15308_10051662     | - | 98      | 60      | RNA → hypo →                                                                                                                                                                                                                                                                                                                                            |
| env-577 | 2200192263                  | - | 328     | 245     | RNA → rpmE (PRK00019)Ribosomal_L31 (pfam01197) →                                                                                                                                                                                                                                                                                                        |
| env-578 | JGI20180J14839_1055467      | - | 123     | 69      | RNA → rpmE (PRK00528)RpmE (COG0254)rpmE (PRK00019)Ribosomal_L31 (pfam01197) →                                                                                                                                                                                                                                                                           |
| env-579 | JGI20249J16330_111215       | + | 99      | 153     | RNA →                                                                                                                                                                                                                                                                                                                                                   |
| env-580 | JGI20235J16296_1001053      | + | 90      | 144     | RNA → rpmE (PRK00019)Ribosomal_L31 (pfam01197) →                                                                                                                                                                                                                                                                                                        |
| env-581 | JGI20245J16306_1002783      | + | 190     | 244     | RNA → rpmE (PRK00019)Ribosomal_L31 (pfam01197) →                                                                                                                                                                                                                                                                                                        |
| env-582 | FWIREIOz_GKZ9IRQ02JVM2H     | + | 187     | 226     | RNA → rpmE (PRK00019)Ribosomal_L31 (pfam01197) →                                                                                                                                                                                                                                                                                                        |
| env-583 | FWIREIOz_GKZ9IRQ02I5BP1     | - | 345     | 305     | RNA → rpmE (PRK00019)Ribosomal_L31 (pfam01197) →                                                                                                                                                                                                                                                                                                        |
| env-584 | JGI24740J21852_10250692     | + | 94      | 133     | RNA → ←-hypo                                                                                                                                                                                                                                                                                                                                            |
| env-585 | JGI24735J21928_10300159     | - | 425     | 386     | RNA → rpmE (PRK00019)Ribosomal_L31 (pfam01197) →                                                                                                                                                                                                                                                                                                        |
| env-586 | 2044516099                  | + | 244     | 282     | RNA →                                                                                                                                                                                                                                                                                                                                                   |
| env-587 | JGI12269J14319_10006866     | + | 697     | 782     | RNA → rpmE (PRK00019)Ribosomal_L31 (pfam01197) → PrfA (COG0216)prfA (PRK00591) → HemK (COG2890)PRK09328 (PRK09328) → SUA5 (COG0009)TIGR00057 (TIGR00057) → GT_WecA_like (cd06853)mraY (PRK00108)PRK07764 (PRK07764) →                                                                                                                                   |
| env-588 | JGI12269J14319_10074806     | - | 1301    | 1216    | RNA → rpmE (PRK00019)Ribosomal_L31 (pfam01197) →                                                                                                                                                                                                                                                                                                        |
| env-589 | AP72_2010_repL_A10_1033787  | + | 393     | 430     | RNA → rpmE (PRK00019)Ribosomal_L31 (pfam01197) →                                                                                                                                                                                                                                                                                                        |
| env-590 | AP72_2010_repL_A100_1084424 | + | 92      | 129     | RNA → rpmE (PRK00019)Ribosomal_L31 (pfam01197) →                                                                                                                                                                                                                                                                                                        |
| env-591 | FWIREIOz_GKZ9IRQ01DHWYY     | + | 73      | 112     | RNA → rpmE (PRK00019)Ribosomal_L31 (pfam01197) →                                                                                                                                                                                                                                                                                                        |
| env-592 | 2034052008                  | - | 318     | 280     | RNA → hypo → rpmE (PRK00019)Ribosomal_L31 (pfam01197) →                                                                                                                                                                                                                                                                                                 |
| env-593 | JGI12269J14319_10037047     | + | 1283    | 1334    | RNA → rpmE (PRK00019)Ribosomal_L31 (pfam01197) →                                                                                                                                                                                                                                                                                                        |
| env-594 | AP72_2010_repL_A10_1129361  | - | 175     | 130     | RNA → rpmE (PRK00019)Ribosomal_L31 (pfam01197) →                                                                                                                                                                                                                                                                                                        |
| env-595 | AP72_2010_repL_A100_1053081 | + | 201     | 246     | RNA → rpmE (PRK00019)Ribosomal_L31 (pfam01197) →                                                                                                                                                                                                                                                                                                        |
| env-596 | AP72_2010_repL_A01_1302129  | - | 218     | 173     | RNA → rpmE (PRK00019)Ribosomal_L31 (pfam01197) →                                                                                                                                                                                                                                                                                                        |
| env-597 | AP72_2010_repL_A10_1217043  | + | 113     | 158     | RNA → ←-hypo                                                                                                                                                                                                                                                                                                                                            |
| env-598 | JGI12631J13338_1003892      | + | 1735    | 1781    | RNA → rpmE (PRK00019)Ribosomal_L31 (pfam01197) →                                                                                                                                                                                                                                                                                                        |
| env-599 | JGI12635J15846_10008878     | - | 6805    | 6759    | RNA → rpmE (PRK00019)Ribosomal_L31 (pfam01197) →                                                                                                                                                                                                                                                                                                        |
| env-600 | JGI24738J21930_10757540     | + | 34      | 81      | RNA → rpmE (PRK00019)Ribosomal_L31 (pfam01197) →                                                                                                                                                                                                                                                                                                        |
| Nbr-4-1 | NZ_BAFU01000023.1           | + | 104700  | 104745  | RNA → rpmE (PRK00019)Ribosomal_L31 (pfam01197) → PrfA (COG0216)prfA (PRK00591) → HemK (COG2890)PRK09328 (PRK09328) →                                                                                                                                                                                                                                    |
| Npa-1-1 | NZ_BAGE01000019.1           | + | 16102   | 16147   | RNA → rpmE (PRK00019)Ribosomal_L31 (pfam01197) →                                                                                                                                                                                                                                                                                                        |
| env-601 | JGI12272J11983_1372923      | + | 31      | 67      | RNA → hypo → rpmE (PRK00019)Ribosomal_L31 (pfam01197) →                                                                                                                                                                                                                                                                                                 |
| env-602 | botACOD_GAKN62C01ECOXR      | + | 273     | 311     | RNA → rpmE (PRK00019)Ribosomal_L31 (pfam01197) →                                                                                                                                                                                                                                                                                                        |
| Gam-1-1 | NZ_BAED01000048.1           | + | 130922  | 130967  | RNA → rpmE (PRK00019)Ribosomal_L31 (pfam01197) → rpmE (PRK00019)Ribosomal_L31 (pfam01197) → PrfA (COG0216)prfA (PRK00591) → PrfA (COG0216)prfA (PRK00591) → HemK (COG2890)PRK09328 (PRK09328) → HemK (COG2890)PRK09328 (PRK09328) → SUA5 (COG0009)TIGR00057 (TIGR00057) → SUA5 (COG0009)TIGR00057 (TIGR00057) → GT_WecA_like (cd06853)mraY (PRK00108) → |
| Gso-1-1 | NZ_BANX01000039.1           | - | 25611   | 25566   | RNA → ←-hypo                                                                                                                                                                                                                                                                                                                                            |
| Gsh-1-1 | NZ_AUHE01000013.1           | - | 16550   | 16499   | RNA → rpmE (PRK00019)Ribosomal_L31 (pfam01197) →                                                                                                                                                                                                                                                                                                        |
| Nsp-5-1 | NZ_JAFQ01000004.1           | + | 3516432 | 3516476 | RNA → rpmE (PRK00019)Ribosomal_L31 (pfam01197) → PrfA (COG0216)prfA (PRK00591) →                                                                                                                                                                                                                                                                        |
| env-603 | JGI12273J12029_10017424     | + | 27      | 67      | RNA → hypo →                                                                                                                                                                                                                                                                                                                                            |
| Ari-2-1 | NZ_AULB01000013.1           | + | 149713  | 149780  | RNA → rpmE (PRK00019)Ribosomal_L31 (pfam01197) →                                                                                                                                                                                                                                                                                                        |
| env-604 | JGI12272J11983_1083811      | + | 14      | 53      | RNA → hypo → rpmE (PRK00019)Ribosomal_L31 (pfam01197) →                                                                                                                                                                                                                                                                                                 |
| env-605 | JGI12467J12023_1087620      | + | 14      | 53      | RNA → ←-hypo                                                                                                                                                                                                                                                                                                                                            |
| env-606 | JGI12397J12024_1060182      | + | 22      | 61      | RNA → hypo → rpmE (PRK00019)Ribosomal_L31 (pfam01197) →                                                                                                                                                                                                                                                                                                 |
| env-607 | FNTS_GKKEVUV01BZ0X3         | + | 66      | 105     | RNA → rpmE (PRK00019)Ribosomal_L31 (pfam01197) →                                                                                                                                                                                                                                                                                                        |
| env-608 | FWIREIOz_GKZ9IRQ02IPUM4     | + | 167     | 206     | RNA → rpmE (PRK00019)Ribosomal_L31 (pfam01197) →                                                                                                                                                                                                                                                                                                        |

|         |                                 |   |         |         |                                                                                                                                                                                                                                                                                                           |
|---------|---------------------------------|---|---------|---------|-----------------------------------------------------------------------------------------------------------------------------------------------------------------------------------------------------------------------------------------------------------------------------------------------------------|
| Ata-1-1 | NZ_KI912598.1                   | + | 15667   | 15704   | RNA → rpmE (PRK00019)Ribosomal_L31 (pfam01197) →                                                                                                                                                                                                                                                          |
| Aha-1-1 | NZ_AQUI01000002.1               | + | 1265681 | 1265725 | RNA → rpmE (PRK00019)Ribosomal_L31 (pfam01197) → PrfA (COG0216)prfA (PRK00591) →                                                                                                                                                                                                                          |
| env-609 | C688J13580_1464814              | - | 190     | 152     | RNA → ←hypo                                                                                                                                                                                                                                                                                               |
| env-610 | SRS065099_LANL_scaffold_20477   | - | 54      | 11      | RNA →                                                                                                                                                                                                                                                                                                     |
| env-611 | SRS015064_WUGC_scaffold_2261    | - | 310     | 267     | RNA → rpmE (PRK00019)Ribosomal_L31 (pfam01197) →                                                                                                                                                                                                                                                          |
| env-612 | SRS018443_C3583993              | - | 193     | 150     | RNA → rpmE (PRK00019)Ribosomal_L31 (pfam01197) →                                                                                                                                                                                                                                                          |
| env-613 | SRS011126_C4505688              | + | 336     | 379     | RNA →                                                                                                                                                                                                                                                                                                     |
| env-614 | SRS011126_C4505688              | - | 113     | 70      | RNA → hypo → hypo →                                                                                                                                                                                                                                                                                       |
| env-615 | SRS015063_C2095482              | + | 120     | 163     | RNA → rpmE (PRK00019)Ribosomal_L31 (pfam01197) →                                                                                                                                                                                                                                                          |
| env-616 | SRS015440_WUGC_scaffold_50169   | + | 447     | 490     | RNA → rpmE (PRK00019)Ribosomal_L31 (pfam01197) →                                                                                                                                                                                                                                                          |
| env-617 | SRS015470_WUGC_scaffold_6374    | - | 193     | 150     | RNA → ←hypo                                                                                                                                                                                                                                                                                               |
| env-618 | SRS015755_WUGC_scaffold_20709   | - | 47      | 4       | RNA →                                                                                                                                                                                                                                                                                                     |
| env-619 | SRS015989_C2035914              | - | 193     | 150     | RNA → ←hypo                                                                                                                                                                                                                                                                                               |
| env-620 | SRS016331_C3936733              | + | 121     | 164     | RNA → ←hypo                                                                                                                                                                                                                                                                                               |
| env-621 | SRS016575_Baylor_scaffold_58847 | - | 199     | 156     | RNA → ←hypo                                                                                                                                                                                                                                                                                               |
| env-622 | SRS017139_Baylor_scaffold_68943 | + | 377     | 420     | RNA → ←hypo                                                                                                                                                                                                                                                                                               |
| env-623 | SRS017445_C2964102              | + | 117     | 160     | RNA → rpmE (PRK00019)Ribosomal_L31 (pfam01197) →                                                                                                                                                                                                                                                          |
| env-624 | SRS017691_C4999672              | + | 113     | 156     | RNA → ←hypo                                                                                                                                                                                                                                                                                               |
| env-625 | SRS021477_Baylor_scaffold_64383 | - | 113     | 70      | RNA →                                                                                                                                                                                                                                                                                                     |
| env-626 | SRS022536_C4384832              | - | 199     | 156     | RNA → ←hypo                                                                                                                                                                                                                                                                                               |
| env-627 | SRS049268_C4081593              | - | 199     | 156     | RNA → ←hypo                                                                                                                                                                                                                                                                                               |
| env-628 | SRS058053_C5159809              | - | 193     | 150     | RNA → ←hypo                                                                                                                                                                                                                                                                                               |
| Ama-1-1 | NZ_JH711483.1                   | + | 455479  | 455522  | RNA → rpmE (PRK00019)Ribosomal_L31 (pfam01197) →                                                                                                                                                                                                                                                          |
| env-629 | SRS011343_Baylor_scaffold_469   | + | 114     | 157     | RNA → ←hypo                                                                                                                                                                                                                                                                                               |
| Pau-1-1 | NZ_JNYD01000008.1               | + | 34980   | 35057   | RNA → rpmE (PRK00019)Ribosomal_L31 (pfam01197) → PrfA (COG0216)prfA (PRK00591) →<br>HemK (COG2890)PRK09328 (PRK09328) → hypo → SUA5 (COG0009)TIGR00057 (TIGR00057) →<br>SUA5 (COG0009)TIGR00057 (TIGR00057) →                                                                                             |
| Psp-6-1 | NZ_ADUJ01000804.1               | + | 15615   | 15653   | RNA → rpmE (PRK00019)Ribosomal_L31 (pfam01197) → rpmE (PRK00019)Ribosomal_L31 (pfam01197) →                                                                                                                                                                                                               |
| Ses-1-1 | NC_019673.1                     | - | 8141257 | 8141203 | RNA → rpmE (PRK00019)Ribosomal_L31 (pfam01197) → rpmE (PRK00019)Ribosomal_L31 (pfam01197) →<br>PrfA (COG0216)prfA (PRK00591) → PrfA (COG0216)prfA (PRK00591) →<br>DAP2 (COG1506)Bile_Hydr_Trans (pfam04775)BAAT_C (pfam08840) → Lpd (COG1249)PRK07818 (PRK07818) →<br>HemK (COG2890)PRK09328 (PRK09328) → |
| Ksp-2-1 | NZ_KK037166.1                   | + | 7158781 | 7158815 | RNA → rpmE (PRK00019)Ribosomal_L31 (pfam01197) →                                                                                                                                                                                                                                                          |
| Sgl-1-1 | NZ_CM001484.1                   | - | 3488024 | 3487984 | RNA → rpmE (PRK00019)Ribosomal_L31 (pfam01197) → rpmE (PRK00019)Ribosomal_L31 (pfam01197) →                                                                                                                                                                                                               |
| env-630 | JGI24973J35851_1176941          | - | 248     | 206     | RNA → rpmE (PRK00019)Ribosomal_L31 (pfam01197) →                                                                                                                                                                                                                                                          |
| Aba-1-1 | NZ_KB913037.1                   | - | 3577594 | 3577551 | RNA → rpmE (PRK00019)Ribosomal_L31 (pfam01197) → PrfA (COG0216)prfA (PRK00591) →                                                                                                                                                                                                                          |
| Ari-1-1 | NZ_JMQ101000011.1               | - | 164510  | 164467  | RNA → rpmE (PRK00019)Ribosomal_L31 (pfam01197) → PrfA (COG0216)prfA (PRK00591) →                                                                                                                                                                                                                          |
| Ava-2-1 | NZ_JNY01000004.1                | - | 220716  | 220673  | RNA → rpmE (PRK00019)Ribosomal_L31 (pfam01197) → PrfA (COG0216)prfA (PRK00591) →                                                                                                                                                                                                                          |
| Ava-1-1 | NZ_AYOU01000443.1               | - | 35768   | 35725   | RNA → rpmE (PRK00019)Ribosomal_L31 (pfam01197) → PrfA (COG0216)prfA (PRK00591) →                                                                                                                                                                                                                          |
| Aal-2-1 | NZ_JOEF01000005.1               | + | 165358  | 165404  | RNA → rpmE (PRK00019)Ribosomal_L31 (pfam01197) →                                                                                                                                                                                                                                                          |
| env-631 | 2200117070                      | + | 1568    | 1604    | RNA → rpmE (PRK00019)Ribosomal_L31 (pfam01197) →<br>prfA (PRK00591)RF-1 (pfam00472)PCRf (pfam03462) → HemK (COG2890)PRK09328 (PRK09328) →<br>SUA5 (COG0009)TIGR00057 (TIGR00057) →                                                                                                                        |
| env-632 | GBANfinal_FHNL2OP04ZB0BC        | - | 172     | 136     | RNA → rpmE (PRK00019)Ribosomal_L31 (pfam01197) →                                                                                                                                                                                                                                                          |
| env-633 | JGI24740J21852_10800136         | + | 174     | 210     | RNA → hypo →                                                                                                                                                                                                                                                                                              |
| env-634 | JGI24737J22298_10394236         | - | 256     | 220     | RNA → rpmE (PRK00019)Ribosomal_L31 (pfam01197) →                                                                                                                                                                                                                                                          |
| env-635 | JGI24735J21928_10110934         | + | 294     | 330     | RNA → rpmE (PRK00019)Ribosomal_L31 (pfam01197) → PCRf (pfam03462)ABC_tran_CTD (pfam16326) →                                                                                                                                                                                                               |
| env-636 | JGI24738J21930_10339143         | + | 124     | 160     | RNA → ←hypo                                                                                                                                                                                                                                                                                               |
| env-637 | JGI24739J22299_10621000         | + | 75      | 111     | RNA → rpmE (PRK00019)Ribosomal_L31 (pfam01197) →                                                                                                                                                                                                                                                          |
| Lae-1-1 | NZ_JOFI01000046.1               | - | 29517   | 29476   | RNA → rpmE (PRK00019)Ribosomal_L31 (pfam01197) → PrfA (COG0216)prfA (PRK00591) →<br>DLH (COG0412)Bile_Hydr_Trans (pfam04775)BAAT_C (pfam08840) → Lpd (COG1249)PRK07818 (PRK07818) →<br>HemK (COG2890)PRK09328 (PRK09328) →                                                                                |
| env-638 | SRS053917_LANL_scaffold_22599   | + | 286     | 333     | RNA → ←hypo                                                                                                                                                                                                                                                                                               |

|          |                                 |   |         |         |                                                                                                                                                                                                                      |
|----------|---------------------------------|---|---------|---------|----------------------------------------------------------------------------------------------------------------------------------------------------------------------------------------------------------------------|
| env-639  | SRS011255_Baylor_scaffold.25176 | + | 104     | 151     | RNA→ rpmE (PRK00019)Ribosomal_L31 (pfam01197)→                                                                                                                                                                       |
| env-640  | SRS013252_Baylor_scaffold.19505 | + | 1494    | 1541    | RNA→ rpmE (PRK00019)Ribosomal_L31 (pfam01197)→                                                                                                                                                                       |
| env-641  | SRS015215_C2366775              | + | 105     | 152     | RNA→ rpmE (PRK00019)Ribosomal_L31 (pfam01197)→                                                                                                                                                                       |
| env-642  | SRS015278_C1812809              | + | 411     | 458     | RNA→ rpmE (PRK00019)Ribosomal_L31 (pfam01197)→ rpmE (PRK00019)Ribosomal_L31 (pfam01197)→                                                                                                                             |
| env-643  | SRS015278_C1812809              | - | 206     | 159     | RNA→ rpmE (PRK00019)Ribosomal_L31 (pfam01197)→ rpmE (PRK00019)Ribosomal_L31 (pfam01197)→                                                                                                                             |
| env-644  | SRS022725_LANL_scaffold.111342  | - | 197     | 150     | RNA→ ←-hypo                                                                                                                                                                                                          |
| env-645  | SRS051930_LANL_scaffold.6579    | - | 323     | 276     | RNA→ rpmE (PRK00019)Ribosomal_L31 (pfam01197)→                                                                                                                                                                       |
| env-646  | SRS075410_C2925444              | + | 106     | 153     | RNA→ rpmE (PRK00019)Ribosomal_L31 (pfam01197)→                                                                                                                                                                       |
| Ama-2-1  | NZ_AKFT01000226.1               | - | 10315   | 10268   | RNA→ hypo→ rpmE (PRK00019)Ribosomal_L31 (pfam01197)→                                                                                                                                                                 |
| Aen-1-1  | NZ_KB894433.1                   | + | 15128   | 15170   | RNA→ rpmE (PRK00019)Ribosomal_L31 (pfam01197)→                                                                                                                                                                       |
| Aha-3-1  | NZ_KI632509.1                   | - | 4883378 | 4883317 | RNA→ rpmE (PRK00019)Ribosomal_L31 (pfam01197)→                                                                                                                                                                       |
| env-647  | JGI24973J35851_1008812          | + | 1167    | 1208    | RNA→ rpmE (PRK00019)Ribosomal_L31 (pfam01197)→ prfA (PRK00591)PCRF (pfam03462)→                                                                                                                                      |
| env-648  | JGI24973J35851_1010391          | - | 1305    | 1264    | RNA→ rpmE (PRK00019)Ribosomal_L31 (pfam01197)→<br>prfA (PRK00591)RF-1 (pfam00472)PCRF (pfam03462)→                                                                                                                   |
| Ksp-1-1  | NZ_CDME01000015.1               | - | 111616  | 111572  | RNA→ rpmE (PRK00019)Ribosomal_L31 (pfam01197)→ PrfA (COG0216)prfA (PRK00591)→<br>HemK (COG2890)PRK09328 (PRK09328)→                                                                                                  |
| Lal-2-1  | NZ_JOEA01000021.1               | + | 93454   | 93495   | RNA→ rpmE (PRK00019)Ribosomal_L31 (pfam01197)→ PrfA (COG0216)prfA (PRK00591)→<br>DLH (COG0412)Bile_Hydr_Trans (pfam04775)BAAT_C (pfam08840)→ Lpd (COG1249)PRK07818 (PRK07818)→<br>HemK (COG2890)PRK09328 (PRK09328)→ |
| Lae-1-2  | NZ_JYJG01000134.1               | + | 673     | 714     | RNA→ rpmE (PRK00019)Ribosomal_L31 (pfam01197)→ PrfA (COG0216)prfA (PRK00591)→<br>DLH (COG0412)Bile_Hydr_Trans (pfam04775)BAAT_C (pfam08840)→ Lpd (COG1249)PRK07818 (PRK07818)→<br>HemK (COG2890)PRK09328 (PRK09328)→ |
| env-649  | FNTS067_GJ87FRN01CVTQK          | - | 106     | 72      | RNA→                                                                                                                                                                                                                 |
| Psp-9-1  | NZ_AEGE01000437.1               | - | 2109    | 2068    | RNA→ rpmE (PRK00019)Ribosomal_L31 (pfam01197)→ PrfA (COG0216)prfA (PRK00591)→ hypo→ hypo→                                                                                                                            |
| Aje-1-1  | NZ_JNYZ01000004.1               | - | 127926  | 127889  | RNA→ rpmE (PRK00019)Ribosomal_L31 (pfam01197)→ PrfA (COG0216)prfA (PRK00591)→                                                                                                                                        |
| [ir-1-1  | NZ_KE387135.1                   | + | 25080   | 25126   | RNA→ rpmE (PRK00019)Ribosomal_L31 (pfam01197)→ PrfA (COG0216)prfA (PRK00591)→<br>HemK (COG2890)PRK09328 (PRK09328)→ SUA5 (COG0009)TIGR00057 (TIGR00057)→<br>ECA_wecA (TIGR02380)GT_WecA_like (cd06853)→ hypo→        |
| Ain-1-1  | NZ_AXWW01000059.1               | - | 14834   | 14796   | RNA→ rpmE (PRK00019)Ribosomal_L31 (pfam01197)→ PrfA (COG0216)prfA (PRK00591)→<br>HemK (COG2890)PRK09328 (PRK09328)→                                                                                                  |
| Aja-1-1  | NZ_CP008953.1                   | + | 1210103 | 1210138 | RNA→ rpmE (PRK00019)Ribosomal_L31 (pfam01197)→ PrfA (COG0216)prfA (PRK00591)→                                                                                                                                        |
| Asp-6-1  | NZ_JPLW01000003.1               | + | 572205  | 572240  | RNA→ rpmE (PRK00019)Ribosomal_L31 (pfam01197)→ PrfA (COG0216)prfA (PRK00591)→                                                                                                                                        |
| Aaz-1-1  | NZ_ANMG01000003.1               | - | 63867   | 63832   | RNA→ rpmE (PRK00019)Ribosomal_L31 (pfam01197)→ PrfA (COG0216)prfA (PRK00591)→                                                                                                                                        |
| Aor-4-1  | NZ_ASXH01000080.1               | + | 35738   | 35774   | RNA→ rpmE (PRK00019)Ribosomal_L31 (pfam01197)→ PrfA (COG0216)prfA (PRK00591)→                                                                                                                                        |
| Ssp-91-1 | NZ_JOIQ01000021.1               | + | 124197  | 124233  | RNA→ rpmE (PRK00019)Ribosomal_L31 (pfam01197)→ PrfA (COG0216)prfA (PRK00591)→                                                                                                                                        |
| Abe-1-1  | NZ_KB912942.1                   | + | 23653   | 23690   | RNA→ rpmE (PRK00019)Ribosomal_L31 (pfam01197)→ PrfA (COG0216)prfA (PRK00591)→                                                                                                                                        |
| Aor-1-1  | NZ_KN912592.1                   | + | 508571  | 508607  | RNA→ rpmE (PRK00019)Ribosomal_L31 (pfam01197)→ PrfA (COG0216)prfA (PRK00591)→                                                                                                                                        |
| Aor-3-1  | NZ_ASXG01000124.1               | + | 157002  | 157038  | RNA→ rpmE (PRK00019)Ribosomal_L31 (pfam01197)→ PrfA (COG0216)prfA (PRK00591)→                                                                                                                                        |
| Ade-1-1  | NZ_AOHO01000019.1               | - | 158657  | 158622  | RNA→ rpmE (PRK00019)Ribosomal_L31 (pfam01197)→ PrfA (COG0216)prfA (PRK00591)→                                                                                                                                        |
| Ssp-5-1  | NZ_GG657746.1                   | - | 6816029 | 6815993 | RNA→ rpmE (PRK00019)Ribosomal_L31 (pfam01197)→ rpmE (PRK00019)Ribosomal_L31 (pfam01197)→<br>PrfA (COG0216)prfA (PRK00591)→ PrfA (COG0216)prfA (PRK00591)→                                                            |
| Aor-2-1  | NZ_ASJB01000091.1               | + | 88996   | 89032   | RNA→ rpmE (PRK00019)Ribosomal_L31 (pfam01197)→ PrfA (COG0216)prfA (PRK00591)→ hypo→                                                                                                                                  |
| env-650  | JGI24737J22298_10153983         | - | 501     | 462     | RNA→ rpmE (PRK00019)Ribosomal_L31 (pfam01197)→ prfA (PRK00591)PCRF (pfam03462)→                                                                                                                                      |
| env-651  | JGI24738J21930_10140397         | - | 125     | 86      | RNA→                                                                                                                                                                                                                 |
| env-652  | JRH101000725.1                  | + | 25745   | 25791   | RNA→ rpmE (PRK00019)Ribosomal_L31 (pfam01197)→ PrfA (COG0216)prfA (PRK00591)→<br>HemK (COG2890)PRK09328 (PRK09328)→                                                                                                  |
| Sha-1-1  | NZ_KB912506.1                   | - | 125509  | 125456  | RNA→ rpmE (PRK00019)Ribosomal_L31 (pfam01197)→ PrfA (COG0216)prfA (PRK00591)→<br>HemK (COG2890)PRK09328 (PRK09328)→ SUA5 (COG0009)TIGR00057 (TIGR00057)→<br>ECA_wecA (TIGR02380)GT_WecA_like (cd06853)→ hypo→        |
| Spa-41-1 | NZ_KI912213.1                   | - | 219937  | 219883  | RNA→ rpmE (PRK00019)Ribosomal_L31 (pfam01197)→ PrfA (COG0216)prfA (PRK00591)→<br>HemK (COG2890)PRK09328 (PRK09328)→ SUA5 (COG0009)TIGR00057 (TIGR00057)→<br>ECA_wecA (TIGR02380)GT_WecA_like (cd06853)→ hypo→        |
| Kal-2-1  | NZ_CP007155.1                   | - | 8601054 | 8601005 | RNA→ rpmE (PRK00019)Ribosomal_L31 (pfam01197)→                                                                                                                                                                       |
| Kal-1-1  | NZ_JNYH01000160.1               | - | 17281   | 17232   | RNA→ rpmE (PRK00019)Ribosomal_L31 (pfam01197)→                                                                                                                                                                       |
| Saz-1-1  | NZ_CM001466.1                   | - | 1832387 | 1832343 | RNA→ rpmE (PRK00019)Ribosomal_L31 (pfam01197)→ rpmE (PRK00019)Ribosomal_L31 (pfam01197)→                                                                                                                             |



|          |                         |   |         |         |                                                                                                                                                                                                                                                                                                                        |
|----------|-------------------------|---|---------|---------|------------------------------------------------------------------------------------------------------------------------------------------------------------------------------------------------------------------------------------------------------------------------------------------------------------------------|
| Saz-2-1  | NZ_AHBX01000091.1       | - | 27128   | 27084   | RNA → rpmE (PRK00019)Ribosomal_L31 (pfam01197) →                                                                                                                                                                                                                                                                       |
| Svi-1-1  | NC_013159.1             | - | 3233924 | 3233883 | RNA → rpmE (PRK00019)Ribosomal_L31 (pfam01197) →                                                                                                                                                                                                                                                                       |
| Svi-8-1  | NZ_JRZE01000001.1       | - | 241211  | 241170  | RNA → rpmE (PRK00019)Ribosomal_L31 (pfam01197) →                                                                                                                                                                                                                                                                       |
| Ssp-45-1 | NZ_AZUM01000002.1       | - | 62099   | 62059   | RNA → rpmE (PRK00019)Ribosomal_L31 (pfam01197) → PrfA (COG0216)prfA (PRK00591) →<br>HTH_MerR-like_sg3 (cd01282)HTH_MERR (smart00422) → HemK (COG2890)PRK09328 (PRK09328) →<br>SUA5 (COG0009)TIGR00057 (TIGR00057) → ECA_wecA (TIGR02380)GT_WecA_like (cd06853) →                                                       |
| Kar-1-1  | NZ_JNYM01000248.1       | + | 820     | 862     | RNA → rpmE (PRK00019)Ribosomal_L31 (pfam01197) → PrfA (COG0216)prfA (PRK00591) →<br>HemK (COG2890)PRK09328 (PRK09328) → STE14 (COG2020) →                                                                                                                                                                              |
| Ani-1-1  | NZ_ARVW01000001.1       | + | 5123288 | 5123325 | RNA → rpmE (PRK00019)Ribosomal_L31 (pfam01197) → PrfA (COG0216)prfA (PRK00591) →                                                                                                                                                                                                                                       |
| Rrh-3-1  | NZ_JOAA01000025.1       | - | 102373  | 102331  | RNA → rpmE (PRK00019)Ribosomal_L31 (pfam01197) → PrfA (COG0216)prfA (PRK00591) →<br>HemK (COG2890)PRK09328 (PRK09328) →                                                                                                                                                                                                |
| Scy-1-1  | NZ_CM001440.1           | - | 4163623 | 4163579 | RNA → rpmE (PRK00019)Ribosomal_L31 (pfam01197) → rpmE (PRK00019)Ribosomal_L31 (pfam01197) →<br>PrfA (COG0216)prfA (PRK00591) → PrfA (COG0216)prfA (PRK00591) → PrfA (COG0216)prfA (PRK00591) →                                                                                                                         |
| env-653  | JGI12271J12027_1317364  | + | 55      | 90      | RNA → ←hypo                                                                                                                                                                                                                                                                                                            |
| Ame-3-1  | NC_014318.1             | - | 8567126 | 8567084 | RNA → rpmE (PRK00019)Ribosomal_L31 (pfam01197) → PrfA (COG0216)prfA (PRK00591) →                                                                                                                                                                                                                                       |
| Ame-2-1  | NC_017186.1             | - | 8567182 | 8567140 | RNA → rpmE (PRK00019)Ribosomal_L31 (pfam01197) → PrfA (COG0216)prfA (PRK00591) →                                                                                                                                                                                                                                       |
| Ame-2-2  | NC_018266.1             | - | 8577099 | 8577057 | RNA → rpmE (PRK00019)Ribosomal_L31 (pfam01197) → PrfA (COG0216)prfA (PRK00591) →                                                                                                                                                                                                                                       |
| Ame-1-1  | NC_022116.1             | - | 8577043 | 8577001 | RNA → rpmE (PRK00019)Ribosomal_L31 (pfam01197) → PrfA (COG0216)prfA (PRK00591) →                                                                                                                                                                                                                                       |
| Ame-5-1  | NZ_JMQJ01000008.1       | + | 22200   | 22242   | RNA → rpmE (PRK00019)Ribosomal_L31 (pfam01197) → PrfA (COG0216)prfA (PRK00591) →                                                                                                                                                                                                                                       |
| Ame-5-2  | NZ_JMQG01000068.1       | - | 49889   | 49847   | RNA → rpmE (PRK00019)Ribosomal_L31 (pfam01197) → PrfA (COG0216)prfA (PRK00591) →                                                                                                                                                                                                                                       |
| Ssp-46-1 | NZ_JNXC01000009.1       | + | 134688  | 134733  | RNA → rpmE (PRK00019)Ribosomal_L31 (pfam01197) → PrfA (COG0216)prfA (PRK00591) →<br>DLH (COG0412)Bile_Hydr_Trans (pfam04775)BAAT_C (pfam08840) → Lpd (COG1249)PRK07818 (PRK07818) →<br>HemK (COG2890)PRK09328 (PRK09328) →                                                                                             |
| Ami-2-1  | NC_013093.1             | - | 7204512 | 7204468 | RNA → rpmE (PRK00019)Ribosomal_L31 (pfam01197) → hypo → hypo → PrfA (COG0216)prfA (PRK00591) →                                                                                                                                                                                                                         |
| Ssp-1-1  | NZ_GL877878.1           | + | 167629  | 167675  | RNA → rpmE (PRK00019)Ribosomal_L31 (pfam01197) →                                                                                                                                                                                                                                                                       |
| env-654  | JGI26535J51212_1001019  | + | 71      | 108     | RNA → rpmE (PRK00019)Ribosomal_L31 (pfam01197) →                                                                                                                                                                                                                                                                       |
| env-655  | JGI26539J51216_1000587  | - | 26649   | 26612   | RNA → rpmE (PRK00019)Ribosomal_L31 (pfam01197) →                                                                                                                                                                                                                                                                       |
| env-656  | JGI26531J51214_10001689 | - | 15226   | 15189   | RNA → rpmE (PRK00019)Ribosomal_L31 (pfam01197) →                                                                                                                                                                                                                                                                       |
| Sts-1-1  | NZ_AJSZ01000299.1       | - | 3790    | 3744    | RNA → rpmE (PRK00019)Ribosomal_L31 (pfam01197) → rpmE (PRK00019)Ribosomal_L31 (pfam01197) →                                                                                                                                                                                                                            |
| env-657  | JGI12397J12024_1206537  | + | 4       | 58      | RNA → rpmE (PRK00019)Ribosomal_L31 (pfam01197) →                                                                                                                                                                                                                                                                       |
| Rsp-11-1 | NZ_JYOP01000005.1       | - | 14897   | 14852   | RNA → rpmE (PRK00019)Ribosomal_L31 (pfam01197) →                                                                                                                                                                                                                                                                       |
| env-658  | JGI11799J14266_104666   | + | 85      | 130     | RNA → ←hypo                                                                                                                                                                                                                                                                                                            |
| env-659  | JGI1355J14265_100580    | - | 4687    | 4642    | RNA → rpmE (PRK00019)Ribosomal_L31 (pfam01197) →                                                                                                                                                                                                                                                                       |
| env-660  | JGI24972J35695_100056   | - | 16362   | 16317   | RNA → rpmE (PRK00019)Ribosomal_L31 (pfam01197) →                                                                                                                                                                                                                                                                       |
| env-661  | JGI24971J35700_100060   | + | 57533   | 57578   | RNA → rpmE (PRK00019)Ribosomal_L31 (pfam01197) →                                                                                                                                                                                                                                                                       |
| env-662  | JGI24975J35696_100061   | + | 57533   | 57578   | RNA → rpmE (PRK00019)Ribosomal_L31 (pfam01197) →                                                                                                                                                                                                                                                                       |
| Rer-4-1  | NZ_ACNO01000014.1       | + | 120970  | 121015  | RNA → rpmE (PRK00019)Ribosomal_L31 (pfam01197) → rpmE (PRK00019)Ribosomal_L31 (pfam01197) →                                                                                                                                                                                                                            |
| Rqi-1-1  | NZ_AODN01000001.1       | + | 127294  | 127339  | RNA → rpmE (PRK00019)Ribosomal_L31 (pfam01197) →                                                                                                                                                                                                                                                                       |
| Rsp-12-1 | NZ_LEKE01000058.1       | - | 16710   | 16665   | RNA → rpmE (PRK00019)Ribosomal_L31 (pfam01197) →                                                                                                                                                                                                                                                                       |
| Rrh-5-1  | NZ_ASJJ01000026.1       | + | 157576  | 157621  | RNA → rpmE (PRK00019)Ribosomal_L31 (pfam01197) →                                                                                                                                                                                                                                                                       |
| Rsp-10-1 | NZ_CFW01000012.1        | + | 79898   | 79943   | RNA → rpmE (PRK00019)Ribosomal_L31 (pfam01197) →                                                                                                                                                                                                                                                                       |
| Rer-3-1  | NC_012490.1             | - | 4297666 | 4297621 | RNA → rpmE (PRK00019)Ribosomal_L31 (pfam01197) → hypo → PrfA (COG0216)prfA (PRK00591) →<br>HemK (COG2890)PRK09328 (PRK09328) → SUA5 (COG0009)TIGR00057 (TIGR00057) →<br>GlyA (COG0112)glyA (PRK00011) → ECA_wecA (TIGR02380)GT_WecA_like (cd06853) →<br>ECA_wecA (TIGR02380)GT_WecA_like (cd06853) → Tim44 (COG4395) → |
| Rer-1-1  | NC_022115.1             | - | 3994948 | 3994903 | RNA → rpmE (PRK00019)Ribosomal_L31 (pfam01197) →                                                                                                                                                                                                                                                                       |
| Rer-7-1  | NZ_CM002793.1           | - | 3935713 | 3935668 | RNA → rpmE (PRK00019)Ribosomal_L31 (pfam01197) →                                                                                                                                                                                                                                                                       |
| Rer-6-1  | NZ_CP011295.1           | - | 4024740 | 4024695 | RNA → rpmE (PRK00019)Ribosomal_L31 (pfam01197) →                                                                                                                                                                                                                                                                       |
| Rer-5-1  | NZ_AGCF01000002.1       | - | 2284788 | 2284743 | RNA → rpmE (PRK00019)Ribosomal_L31 (pfam01197) →                                                                                                                                                                                                                                                                       |
| Rer-2-1  | NZ_AUZK01000027.1       | - | 16252   | 16207   | RNA → rpmE (PRK00019)Ribosomal_L31 (pfam01197) →                                                                                                                                                                                                                                                                       |
| Rsp-8-1  | NZ_AVCO01000044.1       | - | 15061   | 15016   | RNA → rpmE (PRK00019)Ribosomal_L31 (pfam01197) →                                                                                                                                                                                                                                                                       |
| Rqi-2-1  | NZ_JNCU01000020.1       | + | 109948  | 109993  | RNA → rpmE (PRK00019)Ribosomal_L31 (pfam01197) →                                                                                                                                                                                                                                                                       |
| Rop-4-1  | NZ_JOIM01000019.1       | - | 16215   | 16170   | RNA → rpmE (PRK00019)Ribosomal_L31 (pfam01197) →                                                                                                                                                                                                                                                                       |
| Rrh-4-1  | NZ_JNWS01000014.1       | + | 192760  | 192805  | RNA → rpmE (PRK00019)Ribosomal_L31 (pfam01197) →                                                                                                                                                                                                                                                                       |



|           |                         |   |         |         |                                                                                                                                                                                                                                                                                                                                                                                                                                                                                                                 |
|-----------|-------------------------|---|---------|---------|-----------------------------------------------------------------------------------------------------------------------------------------------------------------------------------------------------------------------------------------------------------------------------------------------------------------------------------------------------------------------------------------------------------------------------------------------------------------------------------------------------------------|
| Ace-1-1   | NC_008578.1             | + | 694535  | 694574  | RNA → rpmE (PRK00019) Ribosomal_L31 (pfam01197) → PrfA (COG0216) prfA (PRK00591) → HemK (COG2890) PRK09328 (PRK09328) → SUA5 (COG0009) TIGR00057 (TIGR00057) → GT_WecA_like (cd06853) mraY (PRK00108) →                                                                                                                                                                                                                                                                                                         |
| Gja-1-1   | NZ_LDTZ01000026.1       | - | 28087   | 28042   | RNA → rpmE (PRK00019) Ribosomal_L31 (pfam01197) → PrfA (COG0216) prfA (PRK00591) → HemK (COG2890) PRK09328 (PRK09328) → SUA5 (COG0009) TIGR00057 (TIGR00057) → GT_WecA_like (cd06853) mraY (PRK00108) →                                                                                                                                                                                                                                                                                                         |
| Gsp-2-1   | NZ_BAFC01000059.1       | - | 28156   | 28111   | RNA → rpmE (PRK00019) Ribosomal_L31 (pfam01197) → rpmE (PRK00019) Ribosomal_L31 (pfam01197) →                                                                                                                                                                                                                                                                                                                                                                                                                   |
| Got-1-1   | NZ_BAFB01000227.1       | - | 28105   | 28060   | RNA → rpmE (PRK00019) Ribosomal_L31 (pfam01197) → rpmE (PRK00019) Ribosomal_L31 (pfam01197) →                                                                                                                                                                                                                                                                                                                                                                                                                   |
| Gai-1-1   | NZ_BANR01000032.1       | - | 28002   | 27957   | RNA → rpmE (PRK00019) Ribosomal_L31 (pfam01197) →                                                                                                                                                                                                                                                                                                                                                                                                                                                               |
| Asp-5-2   | NZ_AYXG01000157.1       | + | 12560   | 12601   | RNA → rpmE (PRK00019) Ribosomal_L31 (pfam01197) → PrfA (COG0216) prfA (PRK00591) → HemK (COG2890) PRK09328 (PRK09328) →                                                                                                                                                                                                                                                                                                                                                                                         |
| env-663   | _GX4IIKE01AVNLA         | + | 402     | 450     | RNA →                                                                                                                                                                                                                                                                                                                                                                                                                                                                                                           |
| Sma-1-1   | NZ_CM001439.1           | - | 4262593 | 4262553 | RNA → rpmE (PRK00019) Ribosomal_L31 (pfam01197) → rpmE (PRK00019) Ribosomal_L31 (pfam01197) → PrfA (COG0216) prfA (PRK00591) → PrfA (COG0216) prfA (PRK00591) →                                                                                                                                                                                                                                                                                                                                                 |
| env-664   | JGI26531J51214_10053388 | + | 189     | 235     | RNA → rpmE (PRK00019) Ribosomal_L31 (pfam01197) →                                                                                                                                                                                                                                                                                                                                                                                                                                                               |
| env-665   | JGI26539J51216_1014970  | + | 457     | 503     | RNA → rpmE (PRK00019) Ribosomal_L31 (pfam01197) →                                                                                                                                                                                                                                                                                                                                                                                                                                                               |
| Ssu-1-1   | NZ_KB905814.1           | - | 250505  | 250461  | RNA → rpmE (PRK00019) Ribosomal_L31 (pfam01197) →                                                                                                                                                                                                                                                                                                                                                                                                                                                               |
| Ssu-2-1   | NZ_AJTQ01000139.1       | - | 131331  | 131287  | RNA → rpmE (PRK00019) Ribosomal_L31 (pfam01197) →                                                                                                                                                                                                                                                                                                                                                                                                                                                               |
| Sje-1-1   | NZ_JOEH01000016.1       | - | 36292   | 36248   | RNA → rpmE (PRK00019) Ribosomal_L31 (pfam01197) →                                                                                                                                                                                                                                                                                                                                                                                                                                                               |
| Sal-2-1   | NZ_BBPL01000004.1       | - | 265730  | 265686  | RNA → rpmE (PRK00019) Ribosomal_L31 (pfam01197) →                                                                                                                                                                                                                                                                                                                                                                                                                                                               |
| Sal-3-1   | NZ_JQML01000001.1       | - | 3284063 | 3284019 | RNA → rpmE (PRK00019) Ribosomal_L31 (pfam01197) →                                                                                                                                                                                                                                                                                                                                                                                                                                                               |
| Sru-1-1   | NZ_JQMJ01000004.1       | - | 6329451 | 6329407 | RNA → rpmE (PRK00019) Ribosomal_L31 (pfam01197) →                                                                                                                                                                                                                                                                                                                                                                                                                                                               |
| Ssp-100-1 | NZ_JOHT01000012.1       | - | 106860  | 106816  | RNA → rpmE (PRK00019) Ribosomal_L31 (pfam01197) →                                                                                                                                                                                                                                                                                                                                                                                                                                                               |
| Ssp-129-1 | NZ_JOGD01000005.1       | - | 35544   | 35500   | RNA → rpmE (PRK00019) Ribosomal_L31 (pfam01197) →                                                                                                                                                                                                                                                                                                                                                                                                                                                               |
| Ssp-171-1 | NZ_AUEV01000006.1       | + | 1894    | 1939    | RNA → rpmE (PRK00019) Ribosomal_L31 (pfam01197) →                                                                                                                                                                                                                                                                                                                                                                                                                                                               |
| Ssp-170-1 | NZ_KE384281.1           | - | 396059  | 396015  | RNA → rpmE (PRK00019) Ribosomal_L31 (pfam01197) →                                                                                                                                                                                                                                                                                                                                                                                                                                                               |
| Ssp-56-1  | NZ_AUKO01000001.1       | - | 376807  | 376763  | RNA → rpmE (PRK00019) Ribosomal_L31 (pfam01197) →                                                                                                                                                                                                                                                                                                                                                                                                                                                               |
| Kaz-1-1   | NZ_JQMO01000003.1       | + | 1403666 | 1403710 | RNA → rpmE (PRK00019) Ribosomal_L31 (pfam01197) →                                                                                                                                                                                                                                                                                                                                                                                                                                                               |
| Svi-7-1   | NZ_KB904663.1           | + | 33286   | 33330   | RNA → rpmE (PRK00019) Ribosomal_L31 (pfam01197) →                                                                                                                                                                                                                                                                                                                                                                                                                                                               |
| Smo-1-1   | NZ_AORZ01000143.1       | - | 15463   | 15418   | RNA → rpmE (PRK00019) Ribosomal_L31 (pfam01197) →                                                                                                                                                                                                                                                                                                                                                                                                                                                               |
| Ama-4-1   | NZ_HE978637.1           | + | 431034  | 431078  | RNA → rpmE (PRK00019) Ribosomal_L31 (pfam01197) → PrfA (COG0216) prfA (PRK00591) → HemK (COG2890) PRK09328 (PRK09328) → YgaA (COG1238) SNARE_assoc (pfam09335) → SUA5 (COG0009) TIGR00057 (TIGR00057) → ECA_wecA (TIGR02380) GT_WecA_like (cd06853) → hypo → hypo → PRK05815 (PRK05815) ATP_synt_A (pfam00119) → PRK07874 (PRK07874) AtpE (COG0636) → PRK05759 (PRK05759) AtpF (COG0711) → AtpH (COG0712) PRK13430 (PRK13430) → AtpA (COG0056) PRK09281 (PRK09281) → PRK05621 (PRK05621) ATP_synt (pfam00231) → |
| env-666   | JGI24770J26754_10081147 | + | 845     | 890     | RNA → rpmE (PRK00019) Ribosomal_L31 (pfam01197) →                                                                                                                                                                                                                                                                                                                                                                                                                                                               |
| Bsc-2-1   | NZ_AP012331.1           | + | 769739  | 769783  | RNA → rpmE (PRK00019) Ribosomal_L31 (pfam01197) →                                                                                                                                                                                                                                                                                                                                                                                                                                                               |
| Bsc-1-2   | NZ_JGZO01000023.1       | - | 265290  | 265246  | RNA → rpmE (PRK00019) Ribosomal_L31 (pfam01197) →                                                                                                                                                                                                                                                                                                                                                                                                                                                               |
| Ssc-1-1   | NC_013929.1             | - | 3291560 | 3291514 | RNA → rpmE (PRK00019) Ribosomal_L31 (pfam01197) →                                                                                                                                                                                                                                                                                                                                                                                                                                                               |
| Ssc-3-2   | NZ_KL997517.1           | + | 318375  | 318421  | RNA → rpmE (PRK00019) Ribosomal_L31 (pfam01197) →                                                                                                                                                                                                                                                                                                                                                                                                                                                               |
| Sle-1-1   | NZ_LN831790.1           | - | 2823297 | 2823251 | RNA → rpmE (PRK00019) Ribosomal_L31 (pfam01197) →                                                                                                                                                                                                                                                                                                                                                                                                                                                               |
| Scl-1-1   | NZ_CM001015.1           | + | 4930378 | 4930424 | RNA → rpmE (PRK00019) Ribosomal_L31 (pfam01197) →                                                                                                                                                                                                                                                                                                                                                                                                                                                               |
| Scl-1-2   | NZ_CM0000913.1          | + | 4939868 | 4939914 | RNA → rpmE (PRK00019) Ribosomal_L31 (pfam01197) → rpmE (PRK00019) Ribosomal_L31 (pfam01197) →                                                                                                                                                                                                                                                                                                                                                                                                                   |
| Sre-3-1   | NZ_KL575619.1           | - | 35887   | 35841   | RNA → rpmE (PRK00019) Ribosomal_L31 (pfam01197) →                                                                                                                                                                                                                                                                                                                                                                                                                                                               |
| Ser-2-1   | NC_009142.1             | - | 7044070 | 7044025 | RNA → rpmE (PRK00019) Ribosomal_L31 (pfam01197) → PrfA (COG0216) prfA (PRK00591) → HemK (COG2890) PRK09328 (PRK09328) →                                                                                                                                                                                                                                                                                                                                                                                         |
| Ser-1-1   | NZ_AVCN01000136.1       | + | 15183   | 15228   | RNA → rpmE (PRK00019) Ribosomal_L31 (pfam01197) → PrfA (COG0216) prfA (PRK00591) → HemK (COG2890) PRK09328 (PRK09328) →                                                                                                                                                                                                                                                                                                                                                                                         |
| Ssp-20-1  | NZ_KE150472.1           | + | 563628  | 563673  | RNA → rpmE (PRK00019) Ribosomal_L31 (pfam01197) →                                                                                                                                                                                                                                                                                                                                                                                                                                                               |
| Ssp-116-1 | NZ_JOHQ01000026.1       | + | 21477   | 21522   | RNA → rpmE (PRK00019) Ribosomal_L31 (pfam01197) →                                                                                                                                                                                                                                                                                                                                                                                                                                                               |
| Ssp-111-1 | NZ_JOGK01000004.1       | + | 39032   | 39077   | RNA → rpmE (PRK00019) Ribosomal_L31 (pfam01197) →                                                                                                                                                                                                                                                                                                                                                                                                                                                               |
| Sgr-5-1   | NZ_JNWT01000006.1       | + | 36815   | 36860   | RNA → rpmE (PRK00019) Ribosomal_L31 (pfam01197) →                                                                                                                                                                                                                                                                                                                                                                                                                                                               |
| Sal-8-3   | NZ_JODZ01000009.1       | + | 43556   | 43601   | RNA → rpmE (PRK00019) Ribosomal_L31 (pfam01197) →                                                                                                                                                                                                                                                                                                                                                                                                                                                               |

|          |                   |   |         |         |                                                                                                                                                                                                          |
|----------|-------------------|---|---------|---------|----------------------------------------------------------------------------------------------------------------------------------------------------------------------------------------------------------|
| Sal-8-4  | NZ_JODR01000008.1 | + | 36815   | 36860   | RNA → rpmE (PRK00019)Ribosomal_L31 (pfam01197) →                                                                                                                                                         |
| Sst-1-1  | NZ_KQ257875.1     | + | 1320008 | 1320054 | RNA → rpmE (PRK00019)Ribosomal_L31 (pfam01197) →                                                                                                                                                         |
| Mne-3-1  | NC_023036.2       | - | 4254218 | 4254162 | RNA → rpmE (PRK00019)Ribosomal_L31 (pfam01197) → PrfA (COG0216)prfA (PRK00591) →<br>HemK (COG2890)PRK09328 (PRK09328) → SUA5 (COG0009)TIGR00057 (TIGR00057) →<br>GT_WecA_like (cd06853)mraY (PRK00108) → |
| Msp-24-1 | NZ_AOHQ01000138.1 | - | 14981   | 14925   | RNA → rpmE (PRK00019)Ribosomal_L31 (pfam01197) → PrfA (COG0216)prfA (PRK00591) →<br>HemK (COG2890)PRK09328 (PRK09328) → SUA5 (COG0009)TIGR00057 (TIGR00057) →<br>GT_WecA_like (cd06853)mraY (PRK00108) → |

### 9.3 Conserved domains

Conserved domains found in protein-coding genes listed in Section 9.2 are shown below, with the first sentence in their description from the Conserved Domain Database (if any). Conserved domains associated with more than one L31-

**cd01128** (1) Transcription termination factor rho is a bacterial ATP-dependent RNA/DNA helicase.

**cd01282** (1) Helix-Turn-Helix DNA binding domain of putative transcription regulators from the MerR superfamily.

**cd02028** (1) Uridine monophosphate kinase-like (UMPkin-like) is a family of proteins highly similar to the uridine monophosphate kinase (UMPK, EC 2).

**cd04601** (1) This cd contains two tandem repeats of the cystathionine beta-synthase (CBS pair) domains in the inosine 5' monophosphate dehydrogenase (IMPDH) protein.

**cd06199** (1) Cytochrome p450-like alpha subunits of E.

**cd06853** (363) This subfamily contains Escherichia coli WecA, Bacillus subtilis TagO and related proteins.

**cd16344** (1) low molecular weight protein arginine phosphatase.

**COG0009** (410) tRNA A37 threonylcarbamoyladenine synthetase subunit TsaC/SUA5/YrdC [Translation, ribosomal structure and biogenesis]

**COG0055** (7) FoF1-type ATP synthase, beta subunit [Energy production and conversion]

**COG0056** (13) FoF1-type ATP synthase, alpha subunit [Energy production and conversion]

**COG0119** (18) Glycine/serine hydroxymethyltransferase [Amino acid transport and metabolism]

**COG0216** (536) Protein chain release factor A [Translation, ribosomal structure and biogenesis]

**COG0224** (3) FoF1-type ATP synthase, gamma subunit [Energy production and conversion]

**COG0254** (1) Ribosomal protein L31 [Translation, ribosomal structure and biogenesis]

**COG0394** (28) Protein-tyrosine-phosphatase [Signal transduction mechanisms]

**COG0412** (4) Dienelactone hydrolase [Secondary metabolites biosynthesis, transport and catabolism]

**COG0472** (2) UDP-N-acetylmuramyl pentapeptide phosphotransferase/UDP-N-acetylglucosamine-1-phosphate transferase [Cell wall/membrane/envelope biogenesis]

**COG0596** (1) Pimeloyl-ACP methyl ester carboxylesterase [Coenzyme transport and metabolism, General function prediction only]

**COG0636** (14) FoF1-type ATP synthase, membrane subunit c/Archaeal/vacuolar-type H<sup>+</sup>-ATPase, subunit K [Energy production and conversion]

**COG0711** (14) FoF1-type ATP synthase, membrane subunit b or b' [Energy production and conversion]

**COG0712** (8) FoF1-type ATP synthase, delta subunit [Energy production and conversion]

**COG1118** (3) L-asparagine transporter and related permeases [Amino acid transport and

metabolism]

**COG1186** (1) Protein chain release factor B [Translation, ribosomal structure and biogenesis]

**COG1238** (1) Uncharacterized membrane protein YqaA, SNARE-associated domain [Function unknown]

**COG1249** (5) Pyruvate/2-oxoglutarate dehydrogenase complex, dihydrolipoamide dehydrogenase (E3) component or related enzyme [Energy production and conversion]

**COG1409** (1) 3',5'-cyclic AMP phosphodiesterase CpdA [Signal transduction mechanisms]

**COG1472** (2) Periplasmic beta-glucosidase and related glycosidases [Carbohydrate transport and metabolism]

**COG1506** (1) Dipeptidyl aminopeptidase/acylaminoacyl peptidase [Amino acid transport and metabolism]

**COG1598** (1) Predicted nuclease of the RNase H fold, HicB family [Defense mechanisms]

**COG2020** (1) Protein-S-isoprenylcysteine O-methyltransferase Ste14 [Posttranslational modification, protein turnover, chaperones]

**COG2197** (2) DNA-binding response regulator, NarL/FixJ family, contains REC and HTH domains [Signal transduction mechanisms, Transcription]

**COG2890** (456) Methylase of polypeptide chain release factors [Translation, ribosomal structure and biogenesis]

**COG4395** (1) Predicted lipid-binding transport protein, Tim44 family [Lipid transport and metabolism]

**COG4586** (8) FoF1-type ATP synthase assembly protein I [Energy production and conversion]

**pfam00119** (18) ATP synthase A chain.

**pfam00213** (6) ATP synthase delta (OSCP) subunit.

**pfam00231** (10) ATP synthase.

**pfam00472** (24) RF-1 domain.

**pfam00478** (2) IMP dehydrogenase / GMP reductase domain.

**pfam00571** (2) CBS domain.

**pfam01197** (1795) Ribosomal protein L31.

**pfam02874** (1) ATP synthase alpha/beta family, beta-barrel domain.

**pfam03462** (49) PCRFB domain.

**pfam03816** (4) Cell envelope-related transcriptional attenuator domain.

**pfam04775** (5) Acyl-CoA thioester hydrolase/BAAT N-terminal region.

**pfam05534** (1) HicB family.

- pfam07690 (1) Major Facilitator Superfamily.  
 pfam08840 (5) BAAT / Acyl-CoA thioester hydrolase C terminal.  
 pfam09335 (1) SNARE associated Golgi protein.  
 pfam09527 (5) Putative F0F1-ATPase subunit Ca<sup>2+</sup>/Mg<sup>2+</sup> transporter.  
 pfam09851 (7) Short C-terminal domain.  
 pfam13520 (3) Amino acid permease.  
 pfam13649 (2) Methyltransferase domain.  
 pfam14330 (1) Domain of unknown function (DUF4387).  
 pfam16326 (5) ABC transporter C-terminal domain.  
 PHA03169 (1) hypothetical protein; Provisional  
 PRK00001 (18) serine hydroxymethyltransferase; Reviewed  
 PRK00019 (1795) 50S ribosomal protein L31; Reviewed  
 PRK00108 (68) phospho-N-acetylmuramoyl-pentapeptide-transferase; Provisional  
 PRK00528 (3) 50S ribosomal protein L31; Reviewed  
 PRK00591 (571) peptide chain release factor 1; Validated  
 PRK01678 (4) 50S ribosomal protein L31 type B; Reviewed  
 PRK05567 (1) inosine 5'-monophosphate dehydrogenase; Reviewed  
 PRK05621 (13) F0F1 ATP synthase subunit gamma; Validated  
 PRK05759 (14) F0F1 ATP synthase subunit B; Validated  
 PRK05815 (18) F0F1 ATP synthase subunit A; Validated  
 PRK06214 (1) sulfite reductase; Provisional  
 PRK06876 (4) F0F1 ATP synthase subunit C; Validated  
 PRK07764 (1) DNA polymerase III subunits gamma and tau; Validated  
 PRK07818 (5) dihydrolipoamide dehydrogenase; Reviewed  
 PRK07874 (10) F0F1 ATP synthase subunit C; Validated  
 PRK08279 (1) long-chain-acyl-CoA synthetase; Validated  
 PRK09280 (7) F0F1 ATP synthase subunit beta; Validated  
 PRK09281 (14) F0F1 ATP synthase subunit alpha; Validated  
 PRK09328 (452) N5-glutamine S-adenosyl-L-methionine-dependent methyltransferase; Provisional  
 PRK09376 (1) transcription termination factor Rho; Provisional  
 PRK10959 (1) outer membrane protein W; Provisional  
 PRK11391 (26) phosphotyrosine-protein phosphatase; Provisional  
 PRK13430 (14) F0F1 ATP synthase subunit delta; Provisional  
 PRK15098 (2) beta-D-glucoside glucohydrolase; Provisional  
 PRK15119 (4) undecaprenyl-phosphate alpha-N-acetylglucosaminyl 1-phosphate transferase; Provisional  
 smart00116 (2) Domain in cystathionine beta-synthase and other proteins.  
 smart00226 (3) Low molecular weight phosphatase family.  
 smart00421 (2) helix\_turn\_helix, Lux Regulon.  
 smart00422 (1) helix\_turn\_helix, mercury resistance.  
 smart00937 (12) This domain is found in peptide chain release factors.  
 TIGR00057 (410) tRNA threonylcarbamoyl adenosine modification protein, Sua5/YciO/YrdC/YwlC family. [Protein synthesis, tRNA and rRNA base modification]  
 TIGR00350 (4) cell envelope-related function transcriptional attenuator common domain. [Regulatory functions, Other]  
 TIGR00711 (1) drug resistance transporter, EmrB/QacA subfamily. [Cellular processes, Toxin production and resistance, Transport and binding proteins, Other]  
 TIGR02380 (291) undecaprenyl-phosphate alpha-N-acetylglucosaminyl 1-phosphatetransferase. [Cell envelope, Biosynthesis and degradation of surface polysaccharides and lipopolysaccharides]  
 TIGR03025 (1) exopolysaccharide biosynthesis polyprenyl glycosylphosphotransferase.  
 TIGR03534 (2) protein-(glutamine-N5) methyltransferase, release factor-specific. [LIV]PRx[DE]TE (in Escherichia coli, IPRPDTE) confers specificity for the release factors rather than for ribosomal protein L3. [Protein fate, Protein modification and repair]  
 TIGR03695 (1) 2-succinyl-6-hydroxy-2,4-cyclohexadiene-1-carboxylate synthase. [Biosynthesis of cofactors, prosthetic groups, and carriers, Menaquinone and ubiquinone]  
 TIGR04211 (1) SH3 domain protein.  
 TIGR04360 (3) conjugative transfer region protein TrbK. [Mobile and extrachromosomal element functions, Plasmid functions]

## 9.4 Multiple-sequence alignment

Each L31-Actinobacteria RNA is denoted by an abbreviation (like “Eco-1-1”) that refers to a taxonomy given in Section 9.1. The alignment may include sequences containing the RNA motif, as well as flanking sequence. The L31-Actinobacteria RNA itself is denoted by the line underneath marked 5' and 3' on either end. Nucleotides in flanking sequences (i.e., not part of the motif) are written in gray letters. Stems of predicted rho-independent transcription terminators, if any, are shaded yellow. (Note: terminator predictions have not been analyzed manually, and many are likely to be false positives. Terminator predictions are those of the RNIE software.) Nucleotides predicted to function (as DNA) as transcription-factor binding sites, if any, are shaded in green. (But note: these predictions are manually annotated, so they might be under-predicted.) Annotated start codons, if any, are shaded green. (Note: start codons are frequently misannotated, especially in environmental samples.) Nucleotides proposed to basepair as part of the consensus structure are shaded in color when they comprise Watson-Crick or G-U

pairs. Otherwise they are shaded gray. Conserved stems are also indicated at the bottom of the alignment by angle brackets, where matching < and > denote base-paired columns. Below these angle brackets, the symbol “2” denotes base pairs exhibiting covariation according to the statistically well-founded R-scape method. “1” denotes base pairs exhibiting covariation according to R2R’s simplistic method. “0” denotes base pairs that are not observed to mutate and “?” denotes base pairs that have a significant frequency of non-canonical nucleotides for Watson-Crick or G-U pairs (> 5%). Below these base pair annotation is the consensus sequence: “R” = “A” or “G”, “Y” = “C” or “U”, red nucleotides: nucleotide identity conserved more than 97% of the time, black nucleotides: 90%, gray nucleotides: 75%, red circle (◉): nucleotide is present 97% of the time, black circle (◐): 90%, gray circle (◑): 75%, white circle (◒): 50%. All percentages of sequences just described (e.g. 97% conserved) assume that sequences have been weighted by the GSC algorithm implemented by the Infernal software package.

Duplicate sequences: the following putative homologs are not shown in the alignment because their sequences are identical to a homolog already shown: Aac-1-1, Acy-2-1, Ade-2-1, Age-1-1, Ama-1-1, Ama-2-1, Ame-1-1, Ame-2-1, Ame-2-2, Ame-4-1, Ame-5-1, Ame-5-2, Ane-1-1, Ava-1-1, Bas-2-1, Bas-3-1, Bbo-1-1, Bbo-2-2, Bco-2-1, Blo-1-1, Blo-10-1, Blo-11-1, Blo-12-1, Blo-13-1, Blo-14-1, Blo-15-1, Blo-16-1, Blo-17-1, Blo-18-1, Blo-2-1, Blo-20-1, Blo-21-1, Blo-22-2, Blo-22-3, Blo-22-4, Blo-22-5, Blo-22-6, Blo-22-7, Blo-22-8, Blo-22-9, Blo-23-1, Blo-24-1, Blo-25-1, Blo-25-2, Blo-26-1, Blo-27-1, Blo-28-1, Blo-29-1, Blo-3-1, Blo-30-1, Blo-31-1, Blo-32-1, Blo-33-1, Blo-35-1, Blo-4-1, Blo-5-1, Blo-6-1, Blo-7-1, Blo-8-1, Blo-9-1, Bme-2-1, Bre-1-2, Bsc-1-2, Bsp-1-1, Bsu-1-1, Bsu-2-2, Bth-1-1, Bth-4-1, Bth-5-2, Bts-2-1, Bts-2-2, Fsp-10-1, Fsp-11-1, Fsp-12-1, Fsp-15-1, Fsp-4-1, Gal-2-1, Gal-3-1, Ghi-1-1, Gpo-1-1, Gpo-2-1, Gte-1-1, Gte-2-1, Gte-5-1, Kal-1-1, Kau-1-1, Mab-1-1, Mab-1-10, Mab-1-100, Mab-1-101, Mab-1-102, Mab-1-103, Mab-1-104, Mab-1-105, Mab-1-106, Mab-1-107, Mab-1-108, Mab-1-109, Mab-1-11, Mab-1-110, Mab-1-111, Mab-1-112, Mab-1-113, Mab-1-115, Mab-1-116, Mab-1-117, Mab-1-118, Mab-1-119, Mab-1-12, Mab-1-120, Mab-1-121, Mab-1-122, Mab-1-123, Mab-1-124, Mab-1-125, Mab-1-126, Mab-1-127, Mab-1-128, Mab-1-129, Mab-1-13, Mab-1-130, Mab-1-131, Mab-1-132, Mab-1-133, Mab-1-134, Mab-1-135, Mab-1-136, Mab-1-137, Mab-1-138, Mab-1-139, Mab-1-14, Mab-1-140, Mab-1-141, Mab-1-142, Mab-1-143, Mab-1-144, Mab-1-145, Mab-1-146, Mab-1-147, Mab-1-148, Mab-1-149, Mab-1-15, Mab-1-150, Mab-1-151, Mab-1-152, Mab-1-153, Mab-1-154, Mab-1-155, Mab-1-156, Mab-1-157, Mab-1-158, Mab-1-159, Mab-1-16, Mab-1-160, Mab-1-161, Mab-1-162, Mab-1-163, Mab-1-164, Mab-1-165, Mab-1-166, Mab-1-17, Mab-1-18, Mab-1-19, Mab-1-2, Mab-1-20, Mab-1-21, Mab-1-22, Mab-1-23, Mab-1-24, Mab-1-25, Mab-1-26, Mab-1-27, Mab-1-28, Mab-1-29, Mab-1-3, Mab-1-30, Mab-1-31, Mab-1-32, Mab-1-33, Mab-1-34, Mab-1-35, Mab-1-36, Mab-1-37, Mab-1-38, Mab-1-39, Mab-1-4, Mab-1-40, Mab-1-41, Mab-1-42, Mab-1-43, Mab-1-44, Mab-1-45, Mab-1-46, Mab-1-47, Mab-1-48, Mab-1-49, Mab-1-5, Mab-1-50, Mab-1-51, Mab-1-52, Mab-1-53, Mab-1-54, Mab-1-55, Mab-1-56, Mab-1-57, Mab-1-58, Mab-1-59, Mab-1-6, Mab-1-60, Mab-1-61, Mab-1-62, Mab-1-63, Mab-1-64, Mab-1-65, Mab-1-66, Mab-1-67, Mab-1-68, Mab-1-69, Mab-1-7, Mab-1-70, Mab-1-71, Mab-1-72, Mab-1-73, Mab-1-74, Mab-1-75, Mab-1-76, Mab-1-77, Mab-1-78, Mab-1-79, Mab-1-8, Mab-1-80, Mab-1-81, Mab-1-82, Mab-1-83, Mab-1-84, Mab-1-85, Mab-1-86, Mab-1-87, Mab-1-88, Mab-1-89, Mab-1-9, Mab-1-90, Mab-1-91, Mab-1-92, Mab-1-93, Mab-1-94, Mab-1-95, Mab-1-96, Mab-1-97, Mab-1-98, Mab-1-99, Mab-10-1, Mab-11-1, Mab-12-1, Mab-13-1, Mab-14-1, Mab-15-1, Mab-16-1, Mab-17-1, Mab-18-1, Mab-19-1, Mab-2-1, Mab-20-1, Mab-21-1, Mab-22-1, Mab-23-1, Mab-24-1, Mab-25-1, Mab-26-1, Mab-27-1, Mab-28-1, Mab-29-1, Mab-3-1, Mab-30-1, Mab-31-1, Mab-32-1, Mab-33-1, Mab-34-1, Mab-35-1, Mab-36-1, Mab-37-1, Mab-38-1, Mab-39-1, Mab-4-1, Mab-40-1, Mab-41-1, Mab-42-1, Mab-43-1, Mab-44-1, Mab-45-1, Mab-46-1, Mab-47-1, Mab-48-1, Mab-49-1, Mab-5-1, Mab-50-1, Mab-51-1, Mab-52-1, Mab-53-1, Mab-54-1, Mab-56-1, Mab-57-1, Mab-58-1, Mab-59-1, Mab-6-1, Mab-60-1, Mab-61-1, Mab-62-1, Mab-63-1, Mab-64-1, Mab-66-1, Mab-67-1, Mab-68-1, Mab-69-1, Mab-7-1, Mab-70-1, Mab-70-2, Mab-71-1, Mab-71-2, Mab-71-3, Mab-72-1, Mab-74-1, Mab-75-1, Mab-8-1, Mab-9-1, Mar-2-1, Mau-3-1, Mch-2-1, Mch-3-1, Mch-4-1, Mco-1-1, Mfa-1-1, Mfo-2-1, Mgi-2-1, Mgl-1-1, Mka-1-1, Mne-2-1, Mse-1-2, Msp-24-1, Msp-25-1, Msp-30-1, Msp-5-1, Msp-6-1, Nas-1-1, Nbr-2-1, Nbr-3-1, Nca-1-1, Nrh-1-2, Pav-1-1, Pav-2-1, Pru-1-1, Psp-2-1, Psp-3-1, Psp-4-1, Psp-5-1, Psp-7-1, Rae-1-1, Req-1-1, Req-2-1, Rer-1-1, Rer-2-1, Rer-3-1, Rer-4-1, Rer-5-1, Rer-6-1, Rer-7-1, Rfa-1-1, Rfa-10-1, Rfa-11-1, Rfa-13-1, Rfa-14-1, Rfa-15-1, Rfa-16-1, Rfa-17-1, Rfa-18-1, Rfa-19-1, Rfa-2-1, Rfa-5-1, Rfa-6-1, Rfa-9-1, Rim-1-1, Rjo-1-1, Rop-2-1, Rop-3-1, Rop-3-2, Rop-4-1, Rpy-1-1, Rpy-2-1, Rqi-1-1, Rqi-2-1, Rrh-5-1, Rrh-6-1, Rru-3-2, Rsp-1-1, Rsp-10-1, Rsp-15-1, Rsp-17-1, Rsp-18-1, Rsp-22-1, Rsp-4-1, Rsp-6-1, Rsp-7-1, Rsp-8-1, Rwr-1-1, Rwr-2-1, Sal-1-1, Sal-3-1, Sal-6-1, Sal-8-3, Sal-8-4, San-1-1, Sar-1-1, Sar-10-1, Sar-12-1, Sar-13-1, Sar-14-1, Sar-15-1, Sar-16-1, Sar-18-1, Sar-19-1, Sar-2-1, Sar-20-1, Sar-23-1, Sar-25-1, Sar-28-1, Sar-29-1, Sar-3-1, Sar-30-1, Sar-31-1, Sar-32-1, Sar-34-1, Sar-35-1, Sar-36-1, Sar-37-1, Sar-38-1, Sar-39-1, Sar-4-1, Sar-41-1, Sar-42-1, Sar-5-1, Sar-6-1, Sar-7-1, Sar-8-1, Sar-9-1, Sau-1-2, Sav-1-1, Sav-2-2, Saz-2-1, Sba-2-1, Sbi-2-2, Sbi-3-2, Sbi-3-3, Sbo-1-2, Sbr-1-1, Sca-2-2, Sca-4-1, Sca-4-2, Sca-5-1, Sca-5-2, Scl-1-2, Sco-2-1, Ser-1-1, Sex-1-1, Sex-1-2, Sfl-2-1, Sfl-3-1, Sfl-6-1, Sfl-7-1, Sfl-9-1, Sfu-3-1, Sga-1-1, Sgl-2-1, Sgr-12-3, Sgr-12-4, Sgr-12-5, Sgr-12-6, Sgr-12-8, Sgr-12-9, Sgr-13-1, Sgr-13-2, Sgr-13-3, Sgr-13-4, Sgr-13-5, Sgr-4-1, Sgr-5-1, Sgr-8-1, Shy-1-1, Shy-3-1, Sla-2-3, Sla-2-4, Sli-1-1, Sli-2-1, Sli-2-2, Sme-1-1, Sol-2-2, Spa-1-1, Spa-10-1, Spa-11-1, Spa-12-1, Spa-13-1, Spa-14-1, Spa-15-1, Spa-16-1, Spa-17-1, Spa-18-1, Spa-19-1, Spa-2-1, Spa-20-1, Spa-21-1, Spa-22-1, Spa-23-1, Spa-26-1, Spa-29-1, Spa-30-1, Spa-34-1, Spa-37-1, Spa-4-1, Spa-40-1, Spa-6-1, Spa-9-1, Spe-2-1, Spl-1-1, Spl-1-2, Spu-2-1, Spu-2-2, Spu-3-1, Spu-3-2, Sre-1-1, Sri-1-1, Sri-2-2, Sri-3-1, Sri-4-10, Sri-4-11, Sri-4-12, Sri-4-13, Sri-4-14, Sri-4-15, Sri-4-17, Sri-4-2, Sri-4-3, Sri-4-4, Sri-4-5, Sri-4-6, Sri-4-7, Sri-4-8, Sri-4-9, Sro-2-1, Sru-2-1, Sru-2-2, Ssc-3-2, Ssp-11-1, Ssp-111-1, Ssp-113-1, Ssp-114-1, Ssp-116-1, Ssp-119-1, Ssp-120-1, Ssp-128-1, Ssp-130-1, Ssp-132-1, Ssp-135-1, Ssp-139-1, Ssp-142-1, Ssp-144-1, Ssp-145-1, Ssp-15-1, Ssp-150-1, Ssp-155-1, Ssp-156-1, Ssp-157-1, Ssp-159-1, Ssp-160-2, Ssp-162-1, Ssp-163-1, Ssp-172-1, Ssp-18-1, Ssp-23-1, Ssp-27-1, Ssp-28-2, Ssp-29-1, Ssp-30-1, Ssp-37-1, Ssp-41-1, Ssp-64-1, Ssp-65-1, Ssp-76-1, Ssp-77-1, Ssp-80-1, Ssp-83-1, Ssp-84-1, Ssp-93-1, Ssp-94-1, Ssp-95-1, Ssp-98-1, Str-10-1, Str-3-1, Str-4-1, Str-5-1, Str-6-1, Str-7-1, Str-8-1, Str-9-1, Sva-2-2, Svi-10-1, Svi-11-1, Svi-13-1, Svi-14-2, Svi-14-3, Svi-6-1, Svi-8-1, Swe-1-1, Tcu-1-1, [pa-1-1, env-100, env-101, env-102, env-106, env-107, env-108, env-109, env-110, env-113, env-118, env-119, env-12, env-120, env-121, env-122, env-123, env-124, env-129, env-134, env-135, env-152, env-155, env-168, env-169, env-171, env-172, env-173, env-174, env-175, env-176, env-177, env-178, env-179, env-180, env-181, env-182, env-183, env-184, env-185, env-186, env-187, env-188, env-189, env-190, env-191, env-192, env-193, env-194, env-195, env-198, env-199, env-200, env-201, env-202, env-203, env-204, env-205, env-206, env-207, env-208, env-209, env-210, env-211, env-212, env-213, env-214, env-215, env-218, env-23, env-234, env-235, env-236, env-246, env-247, env-251, env-269, env-270, env-271, env-272, env-273, env-275, env-276, env-277, env-278, env-284, env-285, env-286, env-287, env-296, env-297, env-305, env-313, env-316, env-326, env-327, env-328, env-332, env-354, env-356, env-357, env-362, env-375, env-376, env-383, env-385,



env-387, env-388, env-389, env-392, env-393, env-395, env-397, env-399, env-403, env-404, env-405, env-406, env-420, env-427, env-439, env-44, env-444, env-445, env-451, env-458, env-464, env-465, env-466, env-467, env-468, env-469, env-470, env-471, env-472, env-473, env-480, env-491, env-492, env-493, env-5, env-504, env-507, env-511, env-512, env-519, env-525, env-528, env-529, env-537, env-545, env-550, env-554, env-556, env-559, env-562, env-566, env-567, env-569, env-574, env-575, env-58, env-580, env-581, env-590, env-595, env-599, env-6, env-612, env-613, env-614, env-615, env-616, env-617, env-618, env-619, env-620, env-621, env-622, env-623, env-624, env-625, env-626, env-627, env-628, env-632, env-634, env-635, env-636, env-640, env-641, env-642, env-643, env-644, env-645, env-646, env-655, env-659, env-660, env-661, env-662, env-665, env-71, env-72, env-76, env-77, env-79, env-89, env-91, env-98

alignment positions 1...79

env-1 CAUGCAGAUCCAGAAGACCAACCGUUGAACCGUCCAACGGGGCGGGCAACGAGGGCUAGCCGCCCCCGUAGACUUGCCCC
env-2 CGUCCCGGUGAUCCCGCGCAUGGGGCAACCCUGAGUUGGGAAGAAAGCAACCCUACAGUCCGCUUAGACUCGUAUGCACACCA
Vca-1-1 GUAGAAGAAATAAAGGUCACCCCCACCCACAUUUUUGUCGAGAGAACUGGCGUUAAGUAACGUGCAAAAGUGGCAUAAUCAA
env-3 .....CGUCAGGUCACGUCAGGUCAGGUCAGGUCACGUCUGGUCAGGUCGCGGUCUGGAGACUCGAGCGU
env-4 GAUGGGCGCCGAGGACUGAGCGUCCGACGAGGGAACAUCCGGAUUCGCGCGCGGUCGAGCAGGUGGCAACAUCGCC
Cac-1-1 GGUCGCGGUGCGCGCGCGCGCGCACCCUGGACGGGCGUGGAAUAACCAACCCCGCGCGCGGCUAAGAUUGGUUC
env-7 .....GCCGAACGGGCAACGAAUUGGCGCUGGAGACACCGCCCGUGGCAAGUCGGAAC
env-8 GUCCAGCGACGACGACUGACCCCGAGGAAUCCGUCCAACAGGGGCCUUUUGGUCACCGCGCCUGGUGGCAUAUA
env-9 CGUCCGUAACGCGCCGCGGGAAAGUUGGGGGCGUCGCGACGUUUGGUCGUAACGGUGCGCCUCUGGACACUCUGUCU
env-10 .....GCUCUGGACACUCGUGCCACGA
env-11 .....UCGCCUCGGAACGGUAGCGCGGGCGCGGAGGGUCGGAACGGUUUGUUCGCGCGGCGUAGUCGGGCAAAUAGUCC
env-13 AGGCCGAGCCGCUUUGAGUCGUGGGAUACCCCGCUGCCGCGUAGCUCCAGCAACGGGCGAGACUGGGGUGACUGGC
env-14 CGUUGGUCGUGUCGGCCAGUUCACUGCGCGGGGGCGUACCGCAUUGGACCGGGGGCGCGGGGUGGCAAAUUGCCA
Apo-1-1 CAUCGGGAUUCUUCGUCUAGCAGCGCCCGGAGCCGCGGAGGAAUUGCGCGGACCCCGCUUUCGUACCAUUGCCA
env-15 CCGAGCGGUGUCGACAGGUCACUGCGCCAGGGCGAAGUCGCAUUGGACCGGGGGCGCGGAGGUGGCAAAUUGCCA
env-16 .....GC
env-17 .....GACUGUC
env-18 CCUGAUCGGAACCGCGCGGGCGGGAAACCCCGGUCGGAUUUGUUGACCCCGUCGACACUGGCAACCAUACUC
Ama-3-1 GGUGGCGCCCCACCGCGAGGUCGCGCACACCGGGCGGAAUUGGUGUCCCGAGGGUGUUGACUCUCUUGUUUG
Nin-1-1 GCGUGCGCGUUUAGGCUACUGGGCGGACUCUGGCAUAUUCGCAACAGGCAUCGCGCCACAGGGCGGAAACGUCANGAC
env-19 GCGUGCGCGUUUAGGCUACUGGGCGGACUCUGGCAUAUUCGCAACAGGCAUCGCGCCACAGGGCGGAAACGUCANGAC
env-20 UCCGUCGUAUCGUGUUCUCCUGGCGGUCGUGAGCGCGGCAAGGAAACACGAUCAAGGUCGCGGCUUUAUACUCACUCU
Jga-1-1 GCAUCGUAUCAGGCAACCGCGGGAUUGCGGAGGCGGCGGACGUGUUCGCAUCUGGACACUCGUAACCGCAACCGU
Hcr-1-1 CUCCUGAACAGCGGGGUGUCGCGGACAGGGAUUCUGGGAUACGCGCGGUCGCGGACCGAUGGCAACAUCGCC
env-21 GGUUCGUAUCGCGGUAUACCGGCGGACCGCGGUAUAGCGGUAUAGGGCGGAAGCAUGGCAAAUAGACG
Asu-2-1 UUCAAGGGGUGGAAUUGCGUGGGGGGUGGUGGUAAGUGCGUUCGCGGCGUCUGGCAAAUAGCCCGCUGACG
Psp-8-1 GGGCGUUUAGGCGAUCGCGGUGUACUCUGGCAUAAGGCGUGUCAUGUCGCGGCUACGGCGGGUGGACCGCGCAC
env-22 .....CAC
env-24 .....AUGGAAUGCGGGCGCAUCUCGCGUUGCAUGUCUGGACACUGGCAACAGG
env-25 CGCCGUCGAGGCGUCAGGAUAUCUUUCGCGCCACCCCGUUUGGGAGAUUGCGCCAGUCUCCGCGACUCUGGUAC
Sfi-5-1 GCGCACAGCAGCAGCGGGGAAACGCGGCGCCACGUGGCGUUUGGUCGCGGGCGCCGACUCUGGAAUAUCUGAUUCU
Jmu-1-1 .....GCUCUGGACACUCGUGCCCU
env-26 CGGCUUCUGCGGACCCCGGGAAUAGAUCCCCCGCCCCCGUUUUGGGGUAUGCGCCAGUCUCCGCGACUCUGGUAC
env-27 .....AUUACCGCAGCGUUCGACAGGUGGCAAAUUCGCCC
env-28 GCGUCCUAGUGGGGUCACCGGCGUGAUGGACGCGGUCGGGACGGUUUGGUAUCUGGCGAGUAGGCAAAUUGGUGG
Cbo-1-1 GCGCGCCGGGAGCAGGAGGACUGAUCGCGGACGGUCGCGGUAUUGCGCGGACCGACCGUCUGGCAACUCUGUCC
aLL-1-1 CCGCGGGGUCUCCCGCGGCAAGGAUAUAGCGGACCCUCGUAUUUCUUGUACCGAGUGCGGAUUGGCAAAUCAAUC
Msp-29-1 AACAGACCGGCAACUCGCGAGCGUUGAGCAGGCGUCAAGGUCGAUUCGCCCCAUGCGGUAAGGCAUUGGCAACUUGGAC
Mch-5-1 GUGCGCGGAGGAAUAGGGGCGCGGUGGUGUUAUUGGUGUUGCGGUAUGCGGCAUUAUGGGCGCGGACAC
Aha-2-1 GAUGAGCAGGUCGCGGAAUAGUAGGCGGUCGCAUGAACAUCUCACGUAUGAUAUCGUGGAAAGAUUGGCAUUAUCU
env-29 AGUAGUAACCGGGCGGUAACGGGGAGGUCGCGCGGUAAGUUGGUAUCAGGGGUGCGGUAUCGGGCAAAUAGGUC
Sni-1-1 UCGAUGGUCGCGGUGUCCACCAAGCCACUGAUUAACAGCUCAGUGGUAACACUGGCAUACUGAGCGGUCGACAAAG
env-30 CUGUUAACCCCGUAAGCGGUCGAGGCGCAUUAUUCGGGACUUCGUGCCCGGUGGCAUACUGGUAUCGUGCAUCCAG
Asp-2-1 GUAUUGGCUUGGCAAAACAGUUGCAACUCGUAUUUCGGCGGUAACGGGAGGCAUGGCAAGUUGAUAUCGGCCAGU
env-31 CGUUAUCGACCAAGGACCGGUAACCGGUCGUAUUUCGUAUCAGGUCUUGGACAUUGGCAACUGGCAACUGGCGG
Hal-1-1 ACGAUACCGGUAACAGUUAUUGGCGUCAAGAAAGGAUUGACGACCAUCUGGCAAGGCGUUCGCGGAAAGCAGCA
env-32 GGGCGGCAUCUGGCGGAAACGCAAGCGGCGACCGCGGCGUGAGCUAGUCGUGCGGCAUCUGGCAACUUAACCAAC
Ssp-169-1 CUUUCGCGGGAGCGCGGAAUUAACAGACCGGACCCCGUUUGGGAGGUGGAGCCAGAAAGGCGGACAGUGGUCC
Dsp-2-1 UGGCUGGCGCGGACAUUCGUCGCGGACCGGACCGGAUACCCCGUUUGGUAUCCGCGGUGUAGCGGCAAAUUGGUGG
Mel-1-1 UCCGUACCCGCGGAAUACGUCGCGGGGACGUGUUUAGGCGUCGCGGUCACACUGGCAUUAUGGACCGUCGACC
env-33 .....GCCGUCUCUGGACACUGUUA
env-34 GUCUCCUACCGUGCGGAAUGCGGACCGGUGCGGCGGCUUUUUGAUGCGGCAUUAUCGUCACACACUGGACCCUC
Car-1-1 UCGGCUUGCGGGUCGCGGACGUCGUGCAGUCAGCGCGGAAUUGGCAACCGCGGCGUUGUUCUGCAUAUUGAGU
env-35 CCGGAACACAGUAGCGCCUCCCGGUGUUGGAGGUGGCGCGGACCGGUGGGCAUCUGGCAACUCGUGUCCCGGAA
Asp-3-1 CCGUGUCGCGCGGACGCGCGGACCAACUGUCGCGCACAGCGGUAUGGUAUUAUCGUGUCGACACUCGUGUACG
env-36 CGCGCGGACCGUCAGAGAUACCGGCAUUCGCGGACGCGGCGGGAUACACCGUCUGGACACUCGUGUACG
Mth-1-1 UCCACGCGGGAUAUAGUCGCGGUAUUGUCGUGUUUUAAGGUCGCGGUCGACUCGCGCAUUAUAGGACCGUCGAC
env-37 GGUGGACAGGACUCGUAUCGAGCGGUGGAGCGGAAUUGCCCGGAUUAUCGCGCGUUGGAGCAGGUGGCAACAUCGCC
env-38 GUGGACAGGACUCGUAUCGAGCGGUGGAGCGGAAUUGCCCGGAUUAUCGCGCGUUGGAGCAGGUGGCAACAUCGCC
env-39 GGUGCGCGCGGUCAGCCGAUCGCGCAACCGUCGCAAGCGCGUUGUUCGUGGGUCGCGCGGUCUGGCAACAUCGUGA
env-40 .....CACCCACCGGUCGCGGAGGACCCCGGAUGGGCGUGGAGCACCGCCCGUGGCAACUCGGAACG
env-41 .....UGCUCUGGACACUCGAGCG
env-42 .....UGCUCUGGACACUCGAGCG
Ssp-96-1 GAAUAGACGGGACCCUUCGCGUUAAGCAGGCGUCUCAGAAUUUUGACAGGCGGCCCGGUCUGGCAACUCGUGUCU
Sya-1-1 GAAUAGACCGGACCCUUCGCGUUAAGCAGGCGUCUCAGAAUUUUGACAGGCGGCCCGGUCUGGCAACUCGUGUCU
Ssp-87-1 GAAUAGUCCGACCCUUCGCGUUAAGGAGAGUUCUCAGAAUUUUGACAGGCAAGCCCGUCCUGGCAACUCGUGUCU
Ssp-122-1 GAAUAGAGCGGACCCUUCGCGUUAAGGAGACGUCUCAGAAUUUUGACAGGCAAGCCCGUCCUGGCAACUCGUGUCU

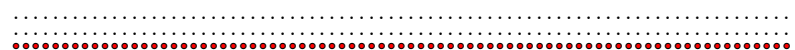





Ssp-35-1 GCGGGCGACCCUCCGUACGGGAUACGAGCGCCCCACCCCGUUUUGGGGAUGCGGCCAGUCUGGCAAAACUGGUCC  
 Ssp-34-1 GCGGGCGACCCUCCGUACGGGAUACGAGCGCCCCACCCCGUUUUGGGGAUGCGGCCAGUCUGGCAAAACUGGUCC  
 Ssp-42-1 GCGGGCGACCCUCCGUACGGGAUACGAGCGCCCCACCCCGUUUUGGGGAUGCGGCCAGUCUGGCAAAACUGGUCC  
 env-150 GGGGAGCGGUUAGCCAGUCUGCCGAUUAUAGGGGGCGGAGGCCCGCCAGUGGCCCGCAACUGGUUGCGGAG  
 Mau-2-1 GGGCGUUUAGGCUACUGGGGUUAGACCGGCAUUAUAGCGAUGUCAGUCUCCGGCCUCCGGCGGGGAGCCGCCAACAC  
 env-151 GUCUCGUACGGAAUACCCUCCGGAGGUGACGGCGUUUUGGGCAGGUGGCGGUAGCCUGGCAUAAUUGUCCCGACAC  
 env-153 .....CU  
 Psp-10-1 CCGGAAUAGCGGGCCCGCACCGGGUUCUACGCGGUGUCGGCCCGUUCACGCUCAUUGGCAGAAUUGGGCAGACAU  
 env-154 .....GCGUUGUCGUCUGACCGCCCGCGCGGGCGGGAUUAACCGGUCAGGACCGCGUUCUACAUAUUGAUCCGU  
 env-156 CCGGUCGUCGUCUGACCCGAGCUGGUCUCCGGGGCGGAAUUCGUCGCGCGGACCCGUGUUAUACUAGAUUUGAUCCGU  
 env-157 GGGCGCCGGAAUACGGGGUCCUACCCAGCGUUUAGCCAAUGUCAAGCCGGUCUGUCACACUAGGGCCGGUCAU  
 env-158 GGGCGCCGGAAUACGGGGUCCUACCGCGUUUACCCUCCGUAAGCCGGUCUGUCACACUAGGGCCGGUCAUA  
 env-159 GGGCGCCGGAAUACGGGGUCCUACCGCGUUUACCCUCCGUAAGCCGGUCUGUCACACUAGGGCCGGUCAUA  
 env-160 CCGGAGCGGAAUACGGGGUUGGCCAGCGCGUUUUGCUAUCUGUCAAGCCGGUCUGGCAACUAGGGCCGGUCAUA  
 Mha-1-1 GGGGAUUCGGCGCACCGUAACCGUCGUGCGGCCCGCGCGCGGAAUCGCGGCCUGGCAUAAUUGAUCCACAC  
 env-161 CGGUCGAGCGGAAUAGCCACCCUCAAGCGAGCGUUUAGGACGUAAGCGGUCAGCCUGGCAUUAUCGACAGCCGAA  
 env-162 UGACCCCGCGUUGCGGGGGAAUGCGCACCGGUCACAAGUGGUUAAACAGUGGGCAAACUAAAAGCCGCUUAGUU  
 env-163 .....GUGGCACAUUGCGU  
 env-164 .....CCUGAAGGAUGGACCCGACCG  
 Asp-5-1 GGUGCGGCCUUGCUGGCGUCUUCGCGCGGUCGCGCGCGGGUCGUGGGUGGACCCUGGCAUUGGCGGUCGAAAC  
 env-165 GCGCGGAGCGCCCGAGGCGGGAAUGUGGCAUUGCAACAAGUGGUUAAACGCGUGGCGACAGUAAAGCCGCUUAGUU  
 Nlu-1-1 CGCCAAAGCUGAGGUCUGUGCGCCCGGGGCGUCGGGAUUAUUCGCGGCCAGGCGUUCACAUACUGAAUUC  
 Nba-1-1 UGAGACGACCCGAGUGCGACGAAACGUAUCGUGGGCCCGGGGAUUAUUCGUGGCCAGGCGUUCACAUACUGAAU  
 Ssp-177-1 CGGAUCGCGGGGUUACCGGAAUUAACCGCCCGCCCGCCCGUUUUGGGAGGCAAGCGGCAUGAUUGGCAGACUGGAC  
 Lal-1-1 GAACCCGGUGACCGGCCAGCCCGCGGUGGCCCGCAUGCGCGGGAUAGCCCGCCCGGCGAGACUGUUAUCGUCGG  
 Gma-1-1 AGGUUAGGCCACCCAAAGCUCGCGGUCGAGGAGGAUUGGACGCGCGGUGACCCUGGGAUUAUCGUGGUCGAG  
 Bme-1-1 CGUUCCGUAACCGGUCGCGGUGCCGCGCGCAUCCUUCACGCGGUCGCGGUGCCAGCCAUUCGUCUACCCUUC  
 Bsu-2-1 CUCGACGAGCCUUGGCAUACGCGCAAGGGCGUACUGCCGACUAGCAAGCGUCCGACAGGUGGCUAUAUUCUG  
 Bre-1-1 CUCGCUUUAUUAUGUAGCGAAAGCAUUAAGCGUGUCUGCAAGCAUUAUCAGUCCAUUAGCAGAUCAUACUCC  
 Blo-34-1 CCCUGCGGCCACUCUUUUGCGUCGUCUCCUGCGGGCGCACAGCGGCUUACAGUCCAGAUAGGCGGUAACAUUCC  
 env-166 CCCUGCGGCCACUCUUUUGCGUCGUCUCCUGCGGGCGCACAGCGGCUUACAGUCCAGAUAGGCGGUAACAUUCC  
 Blo-22-1 CCCUGCGGCCACUCUUUUGCGUCGUCUCCUGCGGGCGCACAGCGGCUUACAGUCCAGAUAGGCGGUAACAUUCC  
 env-167 .....GUCUCCUGCGGGGUAAGCGGUCUACAGUCCAGAUAGGCGGUAACAUUCC  
 env-170 CCCUGCGGCCACUCUUUUGCGUCGUCUCCUGCGGGCGCACAGCGGCUUACAGUCCAGAUAGGCGGUAACAUUCC  
 env-196 CCCUGCGGCCACUCUUUUGCGUCGUCUCCUGCGGGCGCACAGCGGCUUACAGUCCAGAUAGGCGGUAACAUUCC  
 Blo-19-1 CCCUGCGGCCACUCUUUUGCGUCGUCUCCUGCGGGCGCACAGCGGCUUACAGUCCAGAUAGGCGGUAACAUUCC  
 env-197 CCCUGCGGCCACUCUUUUGCGUCGUCUCCUGCGGGCGCACAGCGGCUUACAGUCCAGAUAGGCGGUAACAUUCC  
 env-216 CCCUGCGGCCACUCUUUUGCGUCGUCUCCUGCGGGCGCACAGCGGCUUACAGUCCAGAUAGGCGGUAACAUUCC  
 env-217 CCCUGCGGCCACUCUUUUGCGUCGUCUCCUGCGGGCGCACAGCGGCUUACAGUCCAGAUAGGCGGUAACAUUCC  
 env-219 CGUGCGCCUCCGCGCGCCGCGUCGUGGAGGAUACCGGAAUACCCCGCGUUGCACCGGGUGGCAUUCGCCC  
 Ssp-47-1 CGCAUCUGCGGAAUGCCUUAUGCAGGUGCGUUAUUAACCGGCAACCGGUCUGGCAACUUAAGGGCGGAGCA  
 Sma-2-1 CCGAUCUGCGGAAUGCCUUAUGCAGGUGCGUUAUUAACCGGCAACCGGUCUGGCAACUUAAGGGCGGAGCA  
 Nrh-1-1 GCGUUUAGCAGGCAUCCGGGUGUUUCGGCAUUAUACCGCGGUGCGUCUGGCAUUCGCGGAGCAUUCGCGGAA  
 Nte-2-1 GCGUUUAGCAGGCAUCCGGGUGUUUCGGCAUUAUACCGCGGUGCGUCUGGCAUUCGCGGAGCAUUCGCGGAA  
 Nsp-2-1 CAGAAGCGUGGAAAGCGUCUGGCAUACUGGUCGUGGCGGGCCAGUCCCGCGCACCAACAUCCCGCGUGA  
 env-220 AUGGCGUUGCGGCCUCUCAUUAUGCAGAGCGGAGUGCGGUCGCGAGCGGUGACAAGAAUAGCGCGCGUGCC  
 env-221 .....CUGGACG  
 env-222 .....CGUACUGGCACAUUGGACG  
 env-223 .....CGGUGGGUCUGGGAAUCCCGCAGGCCGACGCGGCUUGGAAAGUUGUGUGCCGGUCAGGCACACUGGUCACGAC  
 env-224 GCGCGUGGGCUAUGGAAUUGCCGAGGCCGACGCGGCUUGGAAAGUUGUGUGCCGGUCUGGCACACUGGUCACGAC  
 env-225 .....CACACUGUAC  
 env-226 .....CACAG  
 env-227 GCGACGAGGACUGACCUCGGAUUCGCGGUCGCCAGGGCGGUAUACCGUGCGCGCGCUCUGGCAGACUGGCGC  
 env-228 .....GCGGACUGGCGC  
 env-229 .....CUCUGGCAGACUGGCGC  
 env-230 UGCGCAUGGCCCAUCGUAAGGAGCCCGCGGACGGGAAAGAUUUGUCCGGGCCCGUGUUCUGGCAGACUGUUC  
 env-231 .....GG  
 env-232 UGUGCGGUGUCGCGGUGUGGAGGCGUCGCGUCACAGCGUUUCGAGCAGACGCCUUGGUCUGGCACACUGGUUC  
 env-233 .....CUGGCACAUUGGACG  
 Fsp-3-1 CCGGGGCUUCGCGCACUGUGGGGACCCUUGCAUCGCGGUCGCGGUCGUGUCAUCCGGCCUUCUGGCAGACUGGCAGCAG  
 Ssy-1-1 GACGACCGCCACGGGAAACAACCGGUGCGCGCACCGUUGCACCGCACGUCAGCCGUAUCUGGCACACUGUCGGGUCGAG  
 Ssp-54-1 GUCGCCCUGGUCGCGGCGGAAUACCGGACCGUCCACCCCGUUUUGUUCGUGUGCGCGGUAUGGCGAGACUGGUAC  
 Ssp-174-1 CGCGGAUUCGUAACGGGUGGGAAUUAUCCCGUUUCCGACCGUUGUUUGGAGAUUGCGGUCUGGCGAGACUGGUCC  
 Ssp-32-1 AGCCACAACCGCACCCGAGGAAUAGACGACAGUGACCCCGUUUUGGGGAAUGCCCGAGUCCUGGCAGACUGGUAC  
 Sxy-1-1 AGCCCGCACCGCAGGAAUAGAUACCGGGCCCGUUUUGGAGAUUGGCUCCAGUCCUGGCAGACUGGUAC  
 env-237 .....GGCACAUGUCCU  
 env-238 .....CUCUGGCACAUUGCCU  
 env-239 UGAGGCGGCUCCCGCGGAAUUCGAGGGCACCGCGGCUUUGGUCGUAACGGUGCGCCUUCUGGCACACUGUCCU  
 env-240 CUGGCAUACUGGGCCGUCGUGGUCACGCGCAUCCGCGAGACCAUCCGGCCUCCCGAGGCGGGCCAAACGCUAC  
 Ssp-102-1 AGGCCCGUUGGAAUGCCGGAAACAGGAGUCGAGCACUCCGGUUUUGGAGAUUGCGCACAGUCUGGCAGACUGGCCC  
 Sca-3-1 AGCGCCCGCGGGCCCGGGAUACCGGCCCCACCCCGUUUUGGGGAUACGCGCACAGUCUGGCAGACUGGUAC  
 Ghi-1-2 CGAUUCGAGGUUAGAAUAGUCUGCGCGCGCGAUUAGCGGUCGGGUCGGGUCUGGAAUUAUUGACCGGUCAG  
 Ssc-5-1 UAGGUGUGGGGCGGAAUCCGGAUUAUUCGCGCACCCCGUUUUGGAGAUACGCGCGGUCUGGCAGACUGGUAC  
 Sro-5-1 CCAGGCCGGAACCCCGGGAAUACCGGCGCGCACUCCCGUUUUGGGGAAUGCGGCAUUAUGGCAAAACUGGUCC  
 Sva-2-1 GCGCGCCCGCGGGCCCGGGAUUAUCCGGCACCGCCCGGCUUUGGGGAUUGCGGCAUUAUGGCAAAACUGGUCC  
 Sye-1-1 ACCUGCGACGUAUGCCAGGAAUUGUCCGUCGCGGACCGUUGUUUGCCAAAGGGCCGUCUUGGCAGACUGGUCC  
 env-241 .....AGCCCGGUCGCGGCAUUGCGCGACGUCGGGAUGUUGGCAACUAGGGC  
 env-242 .....CGGCAUUGCGGCAUUGGGAUGUUGGCAACUAGGGC  
 Nex-1-1 GCGUUUUGGGAGCGUAACCGCAGUUCUGGCAUACUGAACCGUUCGUGGUCUGUCAGGUGAGCAGAGUCCCGCUA  
 Nar-1-1 GCGUUUUGGGAGCGUAACCGCAGUUCUGGCAUACUGAACCGUUCGUGGUCUGUCAGGUGAGCAGAGUCCCGCUA  
 Nab-1-1 GCGUUUUGGGAGCGUAACCGCAGUUCUGGCAUACUGAACCGUUCGUGGUCUGUCAGGUGAGCAGAGUCCCGCUA  
 Mar-1-1 AUCCGUGAGGAUUGGGCGAGCGCCGCGUUUGGCGUGGACGUCUACCGGCAUUAUGGUCUGGACCAAC  
 env-243 CCCGUCGCGGCAUACCUCCGUCGCGGCUUUGGGCAGGUCGACCGCAACUGGCAUACUGAAAGCCGACCAAAAC  
 env-244 CCGCGCGGGAUUGGCGGCAACUCCGCUUUGGGGAUACGCGGCGUACCCUGGCATAUUGGACCCGCGACCAAC

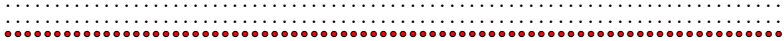



env-245 GGUUAGCGCGGGAAUGCUCAGCUCGUCGCGGCGUUUAGGGGGAGAGCGGCUGACCCUGGCAUUAUCGACAGCCGAAGC  
Agl-1-1 GUUAACCCAGACAGGAUACAGAAUUCGCGUCGUAUUUCUCGCGAGCCCAUUCACAUUGGCAGACUGGUCCAUUCGCCACU  
Msp-15-1 CCGCUCGCGCGGGAAUACCGGCCCGUCCCGGACGUUUUCGCGGUUGGGCGUUGACCCUGGCAUUAUGGACCGCUGACC  
Mco-2-1 CCGCAGCGCGGGAAUACCGGCCCGUCCCGGACGUUUUCGCGGUUGGGCGUGACCCUGGCAUUAUGGACCGCUGACC  
env-248 GGCUAUCUCGCGGGAAUUCGCGGCCGCAUUGUCGCUUUAAGGACAUAGCGGCUGAGCUGGCAUUAUGGACAGCCGAAGU  
env-249 UGUGGAAGCGGGACGAAUAGCCCGCGGUACCCGCGGUUUAAGGAGGUUGGGCGUUGACCCUGGCAUUAUGGACCGUCAC  
Nmu-1-1 CGCAGCCGCGGGAAUAGCCCGCGGUCGCGGCGUUUGGCAUACGACCGUCGGAUUCGGCACACUGGUCGCGGAG  
env-250 GACCGAGACCGGUAAGCGCGAGGAAUUAUGACCGGCGCAAGUGGUUUACGCGUCUGGCAUAGACCGCUAGUGA  
env-252 .....GGCAGACUAGCCCGCUAGUGA  
env-253 AAAACAACCCCGCUCUUGGAAUGCAGCGCAGGGACAUGCAUUGGCGCGGGUGGUAUGCUCGCCUGGCAAAUAGUAGU  
env-254 .....CGAGUGGCACUCGGAUCCGCCCCUGGCAGACUGGACG  
env-255 AAAACACCCCAACGCCACGUGAGACCGGUGCAGGGACACCGAUGGCGCCCGGUGGUAUGGCCUGGCACACUAGUUG  
env-256 .....CGAGUGGCACUCGGAUCCGCCCCUGGCAGACUGGACG  
env-257 .....GAGUGGCACUCGGAUCCGCCCCUGGCAGACUGGACG  
env-258 .....GGGGCCGAGUGGCACUCGGAUCCGCCCCUGGCAGACUGGACG  
env-259 GGAACCGUGACACGCGCGGGAACAUGAGCGGGCGCGCGCGUUUCGACGACGAGUCGCGUCUCUGGCAGACUGGUCC  
env-260 CCGGGGACCGCAACGACUGAGUGUCGCGGACGCGGGAAGGUCGAGGACCUCCCGACGUCUUGGCAGACUGUCC  
env-261 CCUCGGCCACUUCGUCACCGCACCGCGAGCCUAGGUCGUAUUUCGGGUCGCGCGCGGUCUGGCAGACUGUCC  
env-262 GGUGCGCGGACGAGACCGCCGUGCGGGGCGGGGGGGAAGUUUCGAGCCAGCCGCGGUCUUGGCAGACUGUCC  
env-263 .....GGCAGCGCGCAGUCCUGGCAGACUGGACG  
env-264 .....GCCCCGUGUAGCCGCGGGUCCGCUUGGCAGAAUAGACC  
env-265 GAGCGGGUCGAGGCGCGGAGGAAGGUGGGCGUCACCCGGAUUUCGCGGCAUCAGGGGUCUGGCAGACUAGUAGU  
env-266 UACCGGGCGGAGGCGCGGAGGAAGGUGGGCGUCACCCGGAUUUCGCGGACGCGGGUCUGGCAGACUAGUAGU  
Nth-1-1 GGGGCGUUUUCGUCGAGUGCGAGGACUUGGCACUUGGACCAUCGUGCGUCGCGCAUCCGCAAGAUCCGCGCUA  
Pan-1-1 GGGGUGUUUUCGAGGUGCGGCCAUUCUGGCAGAAUGGACCGCUGUGUCUGCGGCUUCGAGACAUCCCGCUA  
Sxi-1-1 AUUAUCUUGGAAUUCGCGCCAUAGGGUGCGUUUAACGGGCAUCUGAGUCUCUGGCAGACUUGUUCGCGUACG  
Ssa-1-1 CGCGCGCCCGCGCGGUCGCGGAUAUCGGGCCCGCGGGGCGUUCGACGUCUGGCAGACUUGUUCGCGUACG  
Mch-1-1 ACGCGUUUAGCUCUGCGGUGCCUGGCAGAAUUAAGUGCCAGUCUGCGCGCUCGCGCGGGUGGACCGCGACAC  
env-267 CGCGGAGGUGCGCGCAGUCUCGGAACCCGAGCAGCGUCGACCAUUGGCGCUCACGGGCGCGCGCAUAAUACCC  
env-268 CGCGGAGGUGCGCGCAGUCUCGGAACCCGAGCAGCGUCGACCAUUGGCGCUCACGGGCGCGCGCAUAAUACCC  
env-274 CGCGGAGGUGCGCGCAGUCUCGGAACCCGAGCAGCGUCGACCAUUGGCGCUCACGGGCGCGCGCAUAAUACCC  
Pas-1-1 CCGGAGCGAAACGACUGAGGACCGCUCGCGCGCGGGAACAGCGCGCAGUACCGAUGGUUCAAUAGCCGCUAAC  
Pdi-1-1 CUGACCUCCCGCAGGGAGUCGCGCCAGGGGCCACCGGGAACAGCCGUGGCGCGGUGGUUCAAUAGCGGUCACCG  
env-279 UCGUGACCCCGGGCGAAGCUCGCGGGGUAAGCAGCGCGGAUUGGUAAGGCGCGGGGUGAUAUUCUGACCC  
env-280 .....GGGAGUUGAAUGGGCUGUCACCG  
Ame-4-2 GUCCAGUACCCGGAUUAUGCGCGUCGCGGGGGGUGUAGCCGUCACGUCAGCGCGUCUGGCAGAAUCAAUCCGCUAACG  
Asp-4-1 GUCCGUAACCCGGAUUAUGCGCGCCCGCGGGGGGUGUAGCCGUCAGUCAGCGCGUCUGGCAGAAUCAAUCCGCUAACG  
Ath-1-1 GUCCGUAACCCGGAUUAUGCGCGCCCGCGGGGGGUGUAGCCGUCACGUCAGCGCGUCUGGCAGAAUCAAUCCGCUAACG  
Sbi-1-1 GACCCUCGUCGAGCCCGGGAUUAUCUGGGCCUACCCCGGUUUUGGGGAGUCGCGCAGUCGCGCAGACUGGUUC  
Shy-4-1 AGCGUUCGCGGGGAGGGCGGGAUUAUCGCGGUCGACCCCGGUUUUGGGGAGUCGCGCAGUACUGGCAGACUGGAUC  
Ssp-73-1 CAGCCUUCGCGGGGCGGGGAUUAUCGCGGCGCGCCCGCGUUUUGGGGAGUCGCGCAGUACUGGCAGAAUUGGAUC  
Sir-1-1 CAGCCUUCGCGGGGCGGGGAUUAUCGCGGCGCGCCCGCGUUUUGGGGAGUCGCGCAGUACUGGCAGAAUUGGAUC  
Ssp-165-1 CAGCCUUCGCGGGGCGGGGAUUAUCGCGGCGCGCCCGCGUUUUGGGGAGUCGCGCAGUACUGGCAGAAUUGGAUC  
Svi-3-1 AGCCUCCGGGAGGGGUCGGAUUAUCGCGGCGGACCCCGGUUUUGGGGAGUCGCGCAGUACUGGCAGAAUUGGAUC  
env-281 CGAUCCGGCGCCCGGUCGCGGUCGCGGUCGCGGCGCGGGGAACAACCCGGGACCGGGGUGUACUGAGCGUAC  
env-282 .....GGCGCAUCGACGCA  
env-283 GGCGCGGAGGUAGCCAGCGGGAAUUCUCCAGUGCCCGCGGCGUUACCGGUCUGGCAGACUGGAAAGCCACACCUA  
env-288 .....GGCGGUCAGCCGAGGUCGCGCGGUGAUC  
env-289 .....GGGAGACUGUACCGGAG  
env-290 UGGCCAGGAGCGCUAGCCCGGGAAUUGCGGACGGUCAGAUUGGUGAGGGGUCUGGCACACUAGAACCGGCUAUA  
Gar-1-1 GGUUAGCCCGGGGAGCGGACCGGUCACGAAUUUCGCGGACCGGACCGCGUGGCAUACUGGAUCGUGCAUAUCAA  
Mro-1-1 GUCACACCGGUGGCGCCAGGAAUAGCCAUUGCCUGGGUAGUUGCAGGUAUUGGCACACUGGUAACCGAACCGC  
env-291 .....CACUGACU  
env-292 ACGUCUCGCGGAGCCUCAGCCCGGGAACACGGUCGACGGAUUGGGUGUAGGGCAACGUCGGGACACACUGUCC  
Psu-1-1 GUUCCUAUUGGUAUCUCGCGGACACCGCCUGAUCCGGGGAUUUUUGCGCGGCGGCGGUUGGAGAAUUGGUC  
Gne-1-1 CGUGUCGACCGCCGAAAGCCCGCACCGUCAGAUUGGUCGACCGGAGGGCCCGUGGAAUAAUUCGCGGUCAG  
Gsi-1-1 UCGCGUGGAGGACCGCAGGCUUCGACCGCGGAUUGGCGGGGUGACCGGGGUGUGGAAUAAUUCUGGUCAG  
Gsi-2-1 GUCGCGUGGAGGACCGCAGGUCGCGACCGCGGAUUGGCGGGGUGACCGGGGUGUGGAAUAAUUCGCGGUCAG  
Nta-1-1 CAGGGCGUUUCGGAAGGUGUCGCGGGAUCUGGCAUACUGGUUCGCGGUCGCGCGCAGACAUCGCGGCUA  
env-293 AAAAAACCCCGCCACCGUUGGAUCCAGCAGGGGCAACGUAUGGCGUGCGGCGCUCUCCUGGCAGACUAGUAGU  
env-294 UAGGGGUGUUGCAAAAGCGGGGCUAGGGCGGGG:GAGGACUCAGCGCGGUGGAAACUUAUGGGUACGCGGAGACGAC  
env-295 CCGCGCGGAGGAAUAGCGGCCCGCGGCGUUUAGGUCGUGCGGGUAGCUGGCAGAAUUGGACCGUCGACCC  
env-298 GGGCCAGCGAUGGAAUUAUCGCGCUCGCGCCGCAAGUUUAGGAAAGCGGUGUAGCUGGCAGAAUUGGACCGCGGACCC  
Mob-1-1 CCGGCGCAGUUUAGGCGUGGCGGUGGCGUGGCAUUAUCCAGGGCAGCCUUCGCGCUCGCGCGGUGGCUACAC  
Mob-1-2 CGGGCGCGUUUAGGCGUGGCGGUGGCGUUGGCAUUAUCCAGGGCAGCCUUCGCGCUCGCGCGGUGGCUACAC  
env-299 UUCGCGUUGGCGCGGACCGGUCUUGCGCCCGCGUCCAGUGCAGCGGAGCCGCAUUGGCAAAUUGGUCUAGCGGC  
Asp-1-1 UUUAUCGACCAAGGACCGGUCGCGCGUUGGAAUUUCUUGGGGCAAGGACGUGGCAGACUGGUUACUUGGCGGAGUC  
env-300 .....GGGAAUUGGCAACCGCUCUGGCAGACUGGUG  
env-301 .....GGAUUGGCAACCGCUCUGGCAGACUGGUG  
env-302 .....CGU  
env-303 .....GU  
Nsp-6-1 GAUUUUAGGGGUAUAGCGGUUCUGGCAUACUGAACGUCGUGGCGUCUCUGCGCCGAGCAGACUUCGCGCUA  
env-304 .....ACCCUGGCAGCGUUUAGGACGUCGCGGUUAGCUGGCAGAAUUGGACCGCGGAC  
env-306 CAGGCGCGGAGGAAUAGCUGACCCUGGCAGCGUUUAGGACGUCGCGGUUAGCUGGCAGAAUUGGACCGCGGAC  
env-307 CAGGCGCGGAGGAAUAGCUGACCCUGGCAGCGUUUAGGACGUCGCGGUUAGCUGGCAGAAUUGGACCGCGGAC  
env-308 .....GGAUACCCACCCUUGGCAAGCGUUUAGGUCGUGGCGUAGCUGGCAGAAUUGGACCGCGGACCC  
env-309 UGGUACAGGAGGAAUACCCACACUCUGGCACGCGUUUAGGUCGUGGCGGUUAGCUGGCAGAAUUGGACCGCGGACCC  
env-310 GAAGACGUAUGCGGAGCGGACGACCGCCCGUCCAGCGCGGAAUUGCUUACCGGCAUCGCGCUAACCUAGCA  
env-311 CGGAUUGCCCGGAAUAGCCGUCGCGCGGCGUUUAGGCUACUAGCGGUUAGCUGGCAGAAUUGGCGCGGAGC  
env-312 .....GUUAGGGGCAUAGCGGUCAGCUGGCAGAAUUAACAGCCGAAU  
env-314 .....UUAGCGGCAACCCCGCGGGGAUUUCGUGGUCGAGGACGUGGUCGCGUUGGCAGACUAGUACUCGCAUA  
Ami-1-1 GUUAACCGGGGAAUUCGUGGCGUCUUGGUAUUUCGUGGUAAGCGGAGGCAUGGCAGACUGGUAUCGCGGCAU  
env-315 .....ACUGACCC  
env-317 .....CAGACUGACCC

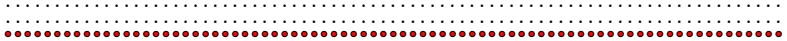



env-379 CUCGCGCGGGCCGUCAGCCGGAAUCAUCGGAGGCCACGAAUGUUGGAGGGUCUGGCACACUAGGAAGCCGGACCA  
env-380 ..... CCGGGUGCCCGCAGCUUACAGCAUCUUGGCACACUUGGAGCCUACGAGA  
Sgr-9-1 GGGGUCGUGAGGUAGCCGGGAAUAUCUUCGCGCCGACCCCGUUUGGGAGAUUGCGCCAGUCCUGGCAGACUGGUAC  
Sex-2-1 UAGCCCCCGGACAGCCGGGAAUAUCUUCGCGCCGACCCCGUUUGGGAGAUUGCGCCGUCUUGGCAGACUGGUAC  
Ssp-115-1 GCCCCUUGCGGACCCCGGAAUAUCGCGCCGCUCCACCCCGUUUGGGAGAUUGCGCCGUCUUGGCAGACUGGUAC  
Ssp-105-1 ACCCCGCGGGGCGGGGAAUAUCGCGCCGUCACCCCGUUUGGGAGAUUGCGCCGUCUUGGCAGACUGGUAC  
Mgl-2-1 CUGACCCCGCGGGCCCGGAAUAUCGCGCCGCUCCACCCCGUUUGGGAGAUUGCGCCGUCUUGGCAGACUGGUAC  
Sgr-12-2 UAGUCCCGGGACACCGGAAUAGGACCGCCACCCCGUUUGGGAGAUUGCGCCGUCUUGGCAGACUGGUAC  
Fsp-14-1 CAGCCGGUUAACAGGCGUGCGCGGUCGUGGCGCGCCGUCGCGCAAGUCCGCGGAAUUGGGAGAUUGGGGUGUA  
Fsa-1-1 GGAUAUAGGCGCGGUCGCGGUCGUAACGGCAUCUGGCACCGUACCCAGUCACAGGUCUGGCAGAUUGGGCCGUA  
Gar-2-1 AGAGCGCCUACGCGCUAUAUGGUAUCGUGGCGCAGGUCGCGCAUCGCAAGAGCCUUGGACUCCGGGCGGA  
Spa-31-1 CGAGUUUACCGUCCAGUCGUGGCGAGCCCGCGUCGCAAGCCGACGUGACCCCGUGGCAGACUGGUUCGUGGCC  
Spa-3-1 CGAGUUUACCGUCCAGUCGUGGCGAGCCCGCGUCGCGAGCCGACGUGACCCCGUGGCAGACUGGUUCGUGGCC  
Spa-39-1 CGAGUUUACCGUCCAGUCGCGCGCGCCCGCGUCGCGAGCCAAACUCCCGCGUGGCAGACUGGUUCGUGGCC  
Spa-35-1 CGAGUUUACCGUCCGUGCGCGCGCGCCCGCGUCGCGAGCUAACUCCCGCGUGGCAGACUGGUUCGUGGCC  
Spa-25-1 CGAGUUUACCGUCCGUGCGCGCGCGCCCGCGUCGCGAGCCAAACUCCCGCGUGGCAGACUGGUUCGUGGCC  
Nfa-1-1 GGGUUUUUGGGGUGACGGCGGUUCUGGCAUAUCGGAUCGUGGCGUCUGGGCUCGCGGAGACAUCGCGGCUA  
Msp-7-1 UCCGCGGAAUAGCCCGUGUCGCGCGUUUAGGCGUUGGGGUGACUCCGCAUUAUAGCCGUAUGACACACC  
Msp-19-1 CGCUGCAAGGAUAUGUACCGCGUCGCGCGUUUAGGACCUUGGGCGUCAGUCCGCAUUAUCGACCGCAACCCC  
Mli-1-1 CGCGGCAAGGAUAUGUACCGCGUCGCGCGUUUAGGACCUUGGGCGUCAGUCCGCAUUAUCGACCGCAACCCC  
Msp-3-1 CAGCGCGAGGAUAUGUACCGCGCGCGAGGCGUUUAGGACCUUGGGCGUCAGUCCGCAUUAUCGACCGCAACCCC  
Msp-20-1 AGGUGCGAGGAUAUGUACCGCGCGCGAGGCGUUUAGGACCUUGGGCGUCAGUCCGCAUUAUCGACCGCAACCCC  
Nsp-7-1 GGUGCGUUGGAGUGCGUAUCGGCGGUUCUGGCAUAUCGACCGUCGUGCGUCUGGAUCGCGAGACCAUCCCGCUA  
Nve-1-1 GGUUGCGUUGGCGUGCAUCGCGGCUUUGGCAUAUCGACCGUCGUGCGUCUGGAUCGCGAGACCAUCCCGCUA  
Nao-1-1 GGUGCGUUGGAGUGCGUAUCGGCGGUUCUGGCAUAUCGACCGUCGUGCGUCUGGAUCGCGAGACCAUCCCGCUA  
Nce-1-1 GGUGCGUUGGAGUGCGUAUCGGCGGUUCUGGCAUAUCGACCGUCGUGCGUCUGGAUCGCGAGACCAUCCCGCUA  
env-381 CCGGUCGCGCACCCGUGGCAUUCGGCGUGGCGCAAGGGGUCGUAUUUCCCGGGUUGCGUAGACUUA  
env-382 CCGGUCGCGCACCCGUGGCAUUCGGCGUGGCGCAAGGGGUCGUAUUUCCCGGGUUGCGUAGACUUA  
env-384 UCCACAGCCACCCGUGGUAUUGAUAUCGGCGUGGCGCAAGGGGUCGUAUUUCCCGGGUUGCGUAGACUUA  
env-386 ..... CGUAUUUCCCGGGUUGCGUAGACUUA  
env-390 GCNCGUCGCCACACCGGUUNUGCAUUCGGCGUGGCGCAAGGGGUCGUAUUUCCCGGGUUGCGUAGACUUA  
Bas-1-1 CUCGCGUCCACACCGUUGGGUUAUCGGCGUGGCGCAAGGGGUCGUAUUUCCCGGGUUGCGUAGACUUA  
Bas-2-2 GUCGACCGGCCUCCGUGUAUUGAUAUCGGCGUGGCGCAAGGGGUCGUAUUUCCCGGGUUGCGUAGACUUA  
Bsp-3-1 GCGGUCGCCACACCGGUGGCAUUCGGCGUGGCGCAAGGGGUCGUAUUUCCCGGGUUGCGUAGACUUA  
env-391 CCGACAGCCACUCCGUGUAGGAUUCGGCGUGGCGCAAGGGGUCGUAUUUCCCGGGUUGCGUAGACUUA  
env-394 CGACUGGUCUCCGGUUGGUAUUCGGCGUGGCGCAAGGGGUCGUAUUUCCCGGGUUGCGUAGACUUA  
env-396 UCCACAGCCACUCCGUGUAGGAUUCGGCGUGGCGCAAGGGGUCGUAUUUCCCGGGUUGCGUAGACUUA  
Bsp-2-1 UCCGUCGCCACACCGGUGGCGAUAUCGGCGUGGCGCAAGGGGUCGUAUUUCCCGGGUUGCGUAGACUUA  
Bas-2-3 CGACUGGUCUCCGGUUGGUAUUCGGCGUGGCGCAAGGGGUCGUAUUUCCCGGGUUGCGUAGACUUA  
Mma-2-1 UGGCGGGCAGGGAAUACCGCCCGUACACGCGUUUAGGAGUCGCGGUGUACUUGCAUUAUGGACCGCGACC  
Msp-2-1 ACCGAGGCGAGAAUACCGCGGGUGGCGCACGUAUAGGGCGUGGCGGCAACUUGCAUUAUGGACCGCGACC  
env-398 ..... CUUAGUUGGCAACAUGCCUA  
Nji-1-1 AACCGAGCCCGGUGGACCCGCGCCGAAACAAAACCGGGGGAUCGGCGUUUACACGUAUUCGUAACAACAUGCCUA  
Nno-1-1 GGUUGGUGGCGUGGUAUCGGCGGUUCUGGCAUAUCGACCGUCGUGCGUAUCGCGCAGACCAUCCCGCUA  
Nhi-1-1 GGGUUGGGGAGGGUAGCAGCGGUUCGGCAUAUCGGAUCGCGGUGGUCGCGCGGUUCCGGCAACAUCGCGCUA  
Msp-1-1 GACCGAUGGCAAGGAUAUCGUGAGGUAUACACAGUUUAGGCGUCGCGCGCAACUUGCAUUAUGGACCGCGACC  
Msp-18-1 CAUCGAGGCGGAAUAGAGCCUGGCGCACGCGUUUAGGCGUCGCGCGCAACUUGCAUUAUGGACCGCGACC  
Mfo-1-1 CAGUAGCGGGAGGAUAUGGCGCGUACUCGGCGUUUAGGAGUUGGCGGUAUCUUGCAUUAUGGACCGCGACC  
Mvu-1-1 CGGUCGCGGAGGAUAUAGGGCGGUAUCGCGCGUUUAGGCGUUGGCGGUAUCUUGCAUUAUGGACCGCGACC  
Mse-1-1 CAAACGGCGGGGAAUAGGCGCGGUAUCGCGCGUUUAGGAGUUGGCGGUAUCUUGCAUUAUGGACCGCGACC  
Msp-23-1 GGAACCGGCGAGGAUAUAGGCGCGGUAUCGCGCGUUUAGGAGUUGGCGGUAUCUUGCAUUAUGGACCGCGACC  
Mse-2-1 CGAGUCCGGGAGGAUAUAGGCGCGGUAUCGCGCGUUUAGGAGUUGGCGGUAUCUUGCAUUAUGGACCGCGACC  
Mse-3-1 GGAACCGGCGGGGAAUAGGCGCGGUAUCGCGCGUUUAGGAGUUGGCGGUAUCUUGCAUUAUGGACCGCGACC  
Mse-3-2 GGAACCGGCGGGGAAUAGGCGCGGUAUCGCGCGUUUAGGAGUUGGCGGUAUCUUGCAUUAUGGACCGCGACC  
Msp-22-1 GGAACUCCAGGAUAUAGGCGCGGUAUCGCGCGUUUAGGAGUUGGCGGUAUCUUGCAUUAUGGACCGCGACC  
Mne-1-1 GCGCGUGGCGGGAAUAGUUGCGUGUACGCGUUUUCGCAACUGGCGGUAUCUUGCAUUAUGGACCGCGACC  
env-400 CCGGCAACCGGAAUAGUCCGCUAAGCACGCGUUUUCGCAACUGGCGGUAUCUUGCAUUAUGGACCGCGACC  
Msp-21-1 GCGCGUGGCGGGAAUAGUUGCGUGUACGCGUUUUCGCAACUGGCGGUAUCUUGCAUUAUGGACCGCGACC  
Sal-7-1 GGCCCGUGCAGCGGCGGGGAAUAACGGGGGCCACCCCGUUUUGGAGAUUGCGGACAGUCCUGGCAGACUGACC  
Szi-1-1 GUGCCCGGUCGCGCGGGGAAUAGAUACCUACCCCGGCUUUGGAGAUUGCGGUCAGUCCUGGCAGACUGGUAC  
Ssp-17-1 CCGGCGGGCGGCUUUGGAAUAACCCAGCGCGCACCCCGUUUUGGAGAUUGCGGUCGCGGAGACUGGACU  
Ssp-52-1 GCGGCGGGCGGCUUUGGAAUAACCCAGCGCGCACCCCGUUUUGGAGAUUGCGGUCGCGGAGACUGGACU  
Ssp-13-1 UCGGUCGGGGGUCGUGGAAUAACCCAGGGGUAACCCCGUUUUGGAGAUUGCGGUCGCGGAGACUGGACU  
Ssp-66-1 CGGAGUCGCGGGGUGGCGGAAUAACCCGGGCGUACCCCGUUUUGGAGAUUGCGGUCGCGGAGACUGGACU  
Ssp-63-1 CCGGCGGGGUCGUAUGGAAUAACCCGGGCGUACCCCGUUUUGGAGAUUGCGGUCGCGGAGACUGGACU  
Ssp-33-1 UCGGUCGGGAGGUCGUGGAAUAACCCAGGGGUAACCCCGUUUUGGAGAUUGCGGUCGCGGAGACUGGACU  
Ssp-117-1 CUCGUCGGGGCGGUGGAAUAACCCAGGGGUAACCCCGUUUUGGAGAUUGCGGUCGCGGAGACUGGACU  
Swa-1-1 UCGGUCGGGGGUCGUGGAAUAACCCAGGGGUAACCCCGUUUUGGAGAUUGCGGUCGCGGAGACUGGACU  
Ssp-26-1 UCGGUCGGGGGUCGUGGAAUAACCCAGGGGUAACCCCGUUUUGGAGAUUGCGGUCGCGGAGACUGGACU  
Sal-4-1 UACCCAGGGGUAACCCCGUUUUAACCCAGGGGUAACCCCGUUUUGGAGAUUGCGGUCGCGGAGACUGGACU  
Ssp-123-1 GAAGCCCGCGGGCGGAAUAAGUAGCGGGCCACCCCGUUUUGGAGAUUGCGGUCGCGGAGACUGGACU  
Sgr-2-1 AAUUCACUUCGCGACCGGGAAACAAACGAGCGGCGCCCGUUUUGGAGAAAGCGGACAGUCCUGGCAGACUGGUAC  
Sco-3-1 CUUUCGCGGAGCCUCUUGAAUAUAGAAACAGCGCACCCCGUUUUGGAGAUUGCGGUCGCGGAGACUGGUAC  
Ssp-67-1 AGGGGUCGGAACACGGGAAUAAGUAGCGGCGCCCGUUUUGGGGAGUCCGCGGACAGUCCUGGCAGACUGGAC  
Ssp-137-1 AGCCCCACCGGCGGAGGAAUAACAAACGCAACCGGCGCCCGUUUUGGGGAGUCCGCGGACAGUCCUGGCAGACUGGAA  
Slu-1-1 AGGGGUCGGAACCGGGAAUAAGCGGCGCCCGUUUUGGGGAGUCCGCGGACAGUCCUGGCAGACUGGUAC  
Sga-2-1 UCCGCGGGGUCGUGGGGAAUAUCGCGGGCGCCCGUUUUGGAGAUUGCGGACAGUCCUGGCAGACUGGUAC  
Sau-2-1 GGGCCCGUCCACCUCCGGAAUAAGUAGCGCGGUCGCGGCUUUGGGGAGUCCGCGGACAGUCCUGGCAGACUGGUAC  
Ssp-21-1 GCGGUGUGCGGGGCGGGAAUAUUCGCGGCGCACCCCGUUUUGGAGAUUGCGGCGGUCGCGGAGACUGGUAC  
Nvu-1-1 CUGUUUUGGAGCGGACAGUUCUGGCAUAUCGAAACGUCGUCGUCGUCACUCGAGCAGACUCCCGGCUA  
Nbr-1-1 CUGUUUUGGAGCGGAGCGACAGUUCUGGCAUAUCGAAACGUCGUCGUCGUCACUCGAGCAGACUCCCGGCUA  
Nte-1-1 CUGUUUUGGAGCGGAGCGACAGUUCUGGCAUAUCGAAACGUCGUCGUCGUCACUCGAGCAGACUCCCGGCUA  
Spr-2-1 GCCCCACCGGCGCAGGGGAAUAGAAACGCAACCCCGUUUUGGAGAUUGCGGACAGUCCUGGCAGACUGGAC  
Ssp-106-1 AGCCCAACCGCACCGGGGAAUAGAAACUACCCCGUUUUGGAGAUUGCGGACAGUCCUGGCAGACUGGAC



env-401 GCGAAGCCAAGGGCGUCUGGAAUAGAUCGCGCUCACCCCGGUUUUGGGGAUGGCCCAAGUCCUGGCAGACUGGUAC  
env-402 .....AUACGGACCCGAACCCCGGUUUUGGGGAUGGCCCAAGUCCUGGCAGACUGGUAC  
Ssp-146-1 AGCCCCACCGGCUGGAGGAAACAUCUGCAGUCGCCCCGGUUUUGGGGAUGGCCCAAGUCCUGGCAGACUGGUAC  
Smi-1-1 GCGGUCGUGACCCUGGAGGAAUAGACCGGGGACCCCGGUUUUGGGGAUGGCCCAAGUCCUGGCAGACUGGUAC  
Sda-1-1 CGCGGUUAGGGGUAACCGGAAUACCUACCCGACCCCGGUUUUGGGGAUGGCCCAAGUCCUGGCAGACUGGUAC  
Ssp-161-1 GCGCGCCGCGGGGGGCGGAAUAGAUCGCGGUCGCCUGGUUUUGGGGAUGGCCCAAGUCCUGGCAGACUGGUAC  
Ssp-71-1 GCGCGCCGACCCCGGAAUAGAACAAGCCGACCCCGGUUUUGGGGAUGGCCCAAGUCCUGGCAGACUGGUAC  
Sgr-7-1 ACGGCGGGGACCGCGGGAAUAGAACAACCGCACCCCGGUUUUGGGGAUGGCCCAAGUCCUGGCAGACUGGUAC  
Sgl-3-1 GCGCGCGGGGAGCAGUGGGAAACAACGACCGGACCCCGGUUUUGGGGAUGGCCCAAGUCCUGGCAGACUGGUAC  
Ssp-85-1 GCGCCUCGCGGGCGCGGAAUACCGGCCACCGCCCGGUUUUGGGGAUGGCCCAAGUCCUGGCAGACUGGUAC  
Ssp-121-1 GCGCCCGCGCGCGCGGAAUAGAACAAGCCGACCCCGGUUUUGGGGAUGGCCCAAGUCCUGGCAGACUGGUAC  
Ssp-104-1 UAGAGCGAAACCGGCGGAAUAGAUCGAGCGGCCCCGGUUUUGGGGAUGGCCCAAGUCCUGGCAGACUGGUAC  
Ssp-60-1 GCCUCCCGGGCGCGCGGAAUAGAACAACCGCACCCCGGUUUUGGGGAUGGCCCAAGUCCUGGCAGACUGGUAC  
Ssp-72-1 GCGGUGCCCGCGCGGAAUAGAUCGCGGACCCCGGUUUUGGGGAUGGCCCAAGUCCUGGCAGACUGGUAC  
Ssp-99-1 GACCGGGGACGGAACCGGAAUAGAACAACCGCACCCCGGUUUUGGGGAUGGCCCAAGUCCUGGCAGACUGGUAC  
Ssp-89-1 AGCCACCCCGGGCGCGGAAUAGAACAACCGCACCCCGGUUUUGGGGAUGGCCCAAGUCCUGGCAGACUGGUAC  
Sbi-2-1 AACCCCUACUCACCUUGGGAAACAACAACGGCAACCCCGGUUUUGGGGAUGGCCCAAGUCCUGGCAGACUGGUAC  
Ssp-82-1 ACCGUGGCGGAGCGGAAUAGAUCGCGGACCCCGGUUUUGGGGAUGGCCCAAGUCCUGGCAGACUGGUAC  
Ssp-3-1 ACCGUGCCGGGAGCGGAAUAGAUCACCGGACCCCGGUUUUGGGGAUGGCCCAAGUCCUGGCAGACUGGUAC  
Sam-1-1 GCCUCGAGGGGCUUGCGGAAUAGAUCGCGCCCGCCCGGUUUUGGGGAUGGCCCAAGUCCUGGCAGACUGGUAC  
Ssp-108-1 ACCGCGCGCGGGCGCGGAAUAGAUCGCGGCAACCCCGGUUUUGGGGAUGGCCCAAGUCCUGGCAGACUGGUAC  
Ssp-48-1 CCGGUCGCGGGGCGCGGAAUAGAUCUCCACCCCGGUUUUGGGGAUGGCCCAAGUCCUGGCAGACUGGUAC  
Ssp-124-1 GAAGCGGAGUGGGCGCGGAAUUCUCCGGGCAACCCCGGUUUUGGGGAUGGCCCAAGUCCUGGCAGACUGGUAC  
Ssp-110-1 ACCGCGCGCGGGCGCGGAAUAGAUCGCGGCAACCCCGGUUUUGGGGAUGGCCCAAGUCCUGGCAGACUGGUAC  
Ssp-140-1 AACACCCACCGGGCGCGGAAACAAGACGGCAACCCCGGUUUUGGGGAUGGCCCAAGUCCUGGCAGACUGGUAC  
Ssp-107-1 GAAGCGGGGUGGGCGCGGAAUUCUCCGGGCAACCCCGGUUUUGGGGAUGGCCCAAGUCCUGGCAGACUGGUAC  
Ssp-112-1 AGGGGUGGUAACCGCGGAAUAGAUCGCGGCAACCCCGGUUUUGGGGAUGGCCCAAGUCCUGGCAGACUGGUAC  
Svi-5-1 GCCCCGUCUCCGCGGAAUAGAUCACCGCCCGCCCGGUUUUGGGGAUGGCCCAAGUCCUGGCAGACUGGUAC  
Ssp-74-1 AGCGGCGCGCGCGCGGAAACAAGAGGGGCGCGCCCGGUUUUGGGGAUGGCCCAAGUCCUGGCAGACUGGUAC  
Sbo-1-1 CGGUGGAGAAACCCGGGAAUACUGAGCCACCCCGGUUUUGGGGAUGGCCCAAGUCCUGGCAGACUGGUAC  
env-407 GCGGGCGCGGACCGCGGAAUAGAUCGAGGCGCGCCCGGUUUUGGGGAUGGCCCAAGUCCUGGCAGACUGGUAC  
Ssp-101-1 GGUCCCGCGGGGCGGAAUUGCGGGGCCCCACCCCGGUUUUGGGGAUGGCCCAAGUCCUGGCAGACUGGUAC  
Ssp-136-1 CCGUGCCGGGUGCGGCGGAAUACUCGACCGGCGCGCCCGGUUUUGGGGAUGGCCCAAGUCCUGGCAGACUGGUAC  
Sto-1-1 ACGGCGGUGGGGUGCGGAAACAAGACGGCAACCCCGGUUUUGGGGAUGGCCCAAGUCCUGGCAGACUGGUAC  
Sch-1-1 AGCCCCACCGGGCGCGGAAACAACAACGGCAACCCCGGUUUUGGGGAUGGCCCAAGUCCUGGCAGACUGGUAC  
Saf-1-1 CGGCGGUAAGGAGCGGGAAACAAGACGGCAACCCCGGUUUUGGGGAUGGCCCAAGUCCUGGCAGACUGGUAC  
Sva-1-1 ACCCCACCGGGCGCGGAAUAGAUCACAGCAACCCCGGUUUUGGGGAUGGCCCAAGUCCUGGCAGACUGGUAC  
Ssp-154-1 CACUCCGUGGGCGCGGAAACAACAACGGCAACCCCGGUUUUGGGGAUGGCCCAAGUCCUGGCAGACUGGUAC  
Sol-1-1 CACUCCGUGGGCGCGGAAACAACAACGGCAACCCCGGUUUUGGGGAUGGCCCAAGUCCUGGCAGACUGGUAC  
Ssp-147-1 CGACAGGUGCCCGCGGAAACAAGACGGCAACCCCGGUUUUGGGGAUGGCCCAAGUCCUGGCAGACUGGUAC  
Sia-1-1 AGCCACACAACGGCGCGGAAACAACAACGGCAACCCCGGUUUUGGGGAUGGCCCAAGUCCUGGCAGACUGGUAC  
Sro-1-1 GACCAUUGCUCACCGGAGAAUAGAACAUCGCAACCCCGGUUUUGGGGAUGGCCCAAGUCCUGGCAGACUGGUAC  
Scv-3-1 CCGCCCCCGCGCGGAAACAAGACGGCAACCCCGGUUUUGGGGAUGGCCCAAGUCCUGGCAGACUGGUAC  
Sac-1-1 AGCGUAUCUCCCGCCGAGAAUAGAACAACCGCACCCCGGUUUUGGGGAUGGCCCAAGUCCUGGCAGACUGGUAC  
Sla-3-1 AGCCCCCGCGCACCCUGGAAUAGAACAACCGCACCCCGGUUUUGGGGAUGGCCCAAGUCCUGGCAGACUGGUAC  
Ssp-160-1 CCCACCGCUCACCGGAGCGGAAUAGAACAACCGCACCCCGGUUUUGGGGAUGGCCCAAGUCCUGGCAGACUGGUAC  
Shy-2-1 CCGUAACUCGCGUAGCGGAAUAGAACAACCGCACCCCGGUUUUGGGGAUGGCCCAAGUCCUGGCAGACUGGUAC  
Ssp-125-1 GGGCGGGGCGGGCGCGGAAUAGAUCACAAACCCCGGUUUUGGGGAUGGCCCAAGUCCUGGCAGACUGGUAC  
Spe-1-1 ACCGUUCGUGAGUUCCGGAAUAGAUCACGGUCCCGCGGUUUUGGGGAUGGCCCAAGUCCUGGCAGACUGGUAC  
Ssp-141-1 ACCCCACCGCGCGGGGAAUAGAUCACCAACCCCGGUUUUGGGGAUGGCCCAAGUCCUGGCAGACUGGUAC  
Svi-14-1 AGCGUUCGUGAGUUCAGGAAUAGAUCACGGUACCCCGGUUUUGGGGAUGGCCCAAGUCCUGGCAGACUGGUAC  
Svi-4-1 CCGCUCACCGGACGCGGAAACAACAACGGCAACCCCGGUUUUGGGGAUGGCCCAAGUCCUGGCAGACUGGUAC  
env-408 GGGCCCGGUCACGGCGGGAAUAGAUCUUGGCCCCCGGUUUUGGGGAUGGCCCAAGUCCUGGCAGACUGGUAC  
Sol-2-1 GGAGCGGGCAGCGGGCGGAAUAGAUCGCGGCGCCCCGGUUUUGGGGAUGGCCCAAGUCCUGGCAGACUGGUAC  
Kau-1-2 AGGGGUGUGCAACACCGGAAUAGUUCACCGCGCCCCCGGUUUUGGGGAUGGCCCAAGUCCUGGCAGACUGGUAC  
Svi-12-1 AGGGGUGUGCAACACCGGAAUAGAUCACCCGCCCCCGGUUUUGGGGAUGGCCCAAGUCCUGGCAGACUGGUAC  
Sco-1-1 AGGGGUGUGAAACCGGGAAUAGUUCACCCCGCCCCCGGUUUUGGGGAUGGCCCAAGUCCUGGCAGACUGGUAC  
Ssp-58-1 GCGGCGGGCAGCGGGCGGAAUAGAUCGCGGCGCCCCGGUUUUGGGGAUGGCCCAAGUCCUGGCAGACUGGUAC  
Sno-1-1 GCGCGCGCGGGGUGGAAACAAGUCCGGCGCCCCCGGUUUUGGGGAUGGCCCAAGUCCUGGCAGACUGGUAC  
Sgr-1-1 GGGGUGUGGCGGGACGAAUAAACCGGCGUACCCCGGUUUUGGGGAUGGCCCAAGUCCUGGCAGACUGGCAC  
Sce-1-1 AGCUGUCCUGAGCCCGGAAUAGACCAACGGGUCGCCCGGUUUUGGGGAUGGCCCAAGUCCUGGCAGACUGGUAC  
Ssp-176-1 AGGGGUGUGCAACACCGGAAUAGUUCACCCGCCCCCGGUUUUGGGGAUGGCCCAAGUCCUGGCAGACUGGUAC  
Ssp-118-1 CCCCCACCCCGGUGCGGAAUAAUCGGCCGCAACCCCGGUUUUGGGGAUGGCCCAAGUCCUGGCAGACUGGCAC  
Svi-11-2 AGCUGUCCUGAGCCCGGAAUAGACCAACGGGCGCCCCGGUUUUGGGGAUGGCCCAAGUCCUGGCAGACUGGUAC  
Sgr-12-7 GACCCUGGACGACCCACCGGAAACAAGACGCAACCCCGGUUUUGGGGAUGGCCCAAGUCCUGGCAGACUGGUAC  
Ssc-4-1 ACCCGGGAGCGGGCGGAAUAGAUCGCGGUCGCCCGGUUUUGGGGAUGGCCCAAGUCCUGGCAGACUGGUAC  
Ssp-69-1 AACACGGACGACUCCGGGAAUACUGAACCGUCGCCCGGUUUUGGGGAUGGCCCAAGUCCUGGCAGACUGGUAC  
Ssp-153-1 AAACCCCAACCGACCGGGAAACAAGAACGGCAACCCCGGUUUUGGGGAUGGCCCAAGUCCUGGCAGACUGGUA  
Sye-2-1 CCACCCCGUACGGCCAGGAAUACAAGACCCCGCCCCCGUUUUGGGGAUGACACCAAGUCGAGUCCUGGCAGACUGGUAC  
Sse-1-1 GGGGCGCGCGGGCGCGGAAUAGAACAAGCCCAACCCCGGUUUUGGGGAUGGCCCAAGUCCUGGCAGACUGGUAC  
Sfu-2-1 AGCCCCACCGGCGCGGAAUAGAUCGCGGACCCCGGUUUUGGGGAUGGCCCAAGUCCUGGCAGACUGGUAC  
Sdu-1-1 GGUUAGCGGUCACCCCGGAAUAGAACAUCGCAACCCCGGUUUUGGGGAUGGCCCAAGUCCUGGCAGACUGGUAC  
Sip-1-1 GGGGUCGGGCGGAGCGGAAUACGUGGGGUGGCCCGGUUUUGGGGAUGGCCCAAGUCCUGGCAGACUGGUAC  
Ssc-3-1 CAGUUAUGGUAACGUGGGAAUACUGAGCCACCCCGGUUUUGGGGAUGGCCCAAGUCCUGGCAGACUGGUAC  
Ssp-59-1 AGCGGUGCGGACGUGGGAAUACCGUGGCGCACCCCGGUUUUGGGGAUGGCCCAAGUCCUGGCAGACUGGUAC  
Ssp-70-1 UGCGACCCCGACGCCCCGAAUAGAUAAGUCCAGGUCGCCCGGUUUUGGGGAUGGCCCAAGUCCUGGCAGACUGGACC  
Ssp-24-1 AGCGCCACACACCCCGGAAUAGAAGAGGACCGCCCGGUUUUGGGGAUGGCCCAAGUCCUGGCAGACUGGUAC  
Ssp-10-1 CCGGAGGCCCCCGCGGAAUACCGGCGGUAACCCCGGUUUUGGGGAUGGCCCAAGUCCUGGCAGACUGGUAC  
Ssp-53-1 CCGGAGGCGCCACCGCGGAAUACCGGCGGUAACCCCGGUUUUGGGGAUGGCCCAAGUCCUGGCAGACUGGUAC  
Sni-2-1 CGGACGCGCCCCGUGGCGGAAUAGAUCGCGGCAACCCCGGUUUUGGGGAUGGCCCAAGUCCUGGCAGACUGGAUC  
Spr-1-1 AUACCCUUCGCGGCCCGGAAUUCUACGCCCAACCCCGGUUUUGGGGAUGGCCCAAGUCCUGGCAGACUGGUAC  
Ssp-134-1 CCGGCCCCCGCACCGGAAUAGAAGACCGGCGUACCCCGGUUUUGGGGAUGGCCCAAGUCCUGGCAGACUGGUAC  
Sau-1-1 CCGCUCGCGGGCGGGCGGAAUUCUCCGGGCAACCCCGGUUUUGGGGAUGGCCCAAGUCCUGGCAGACUGGUAC  
Asp-7-1 ACCUGGAAACACCGGAAUACUGAGCCCAACCCCGGUUUUGGGGAUGGCCCAAGUCCUGGCAGACUGGUAC

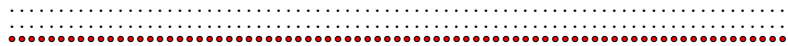



Sal-5-1 CCCUCCGGGGUCCGUCUCCGGGAAUACUUCGGGGCCGACCCCGUUUUGGCGAUGCGGCCAGUCCUGGCAGACUGGUAC  
Svi-2-1 GAACCGGGGCGGAAACGGGGAAUACCCGGCCGCCACCCCGUUUUGGAGAUACGGCCGGUCCUGGCAGACUGGUAC  
Stu-1-1 CCCUCCGGGGUCCGUCUCCGGGAAUACUUCGGGGCCGACCCCGUUUUGGCGAUGCGGCCAGUCCUGGCAGACUGGUAC  
Sso-1-1 GUGAUCGGGGAAACGGGGAAUAGCCGGCCGCCACCCCGUUUUGGAGAUACGGCCGGUCCUGGCAGACUGGUAC  
Spu-1-1 GAAGUAGAGGCAAGCCGGUGAAUAGAUCCGGCCACCCCGUUUUGGAGAUACGGCCGGUCCUGGCAGACUGGUAC  
Ssp-12-1 GCGGAGCAGACCGCCGGUGAAUACCCGGCCGCCACCCCGUUUUGGAGAUACGGCCGGUCCUGGCAGACUGGUAC  
Ssp-78-1 GGCCCGGGAGGGUCCGGGAAUACUUCGGGGCCGACCCCGUUUUGGCGAUGCGGCCAGUCCUGGCAGACUGGUAC  
Ssp-158-1 GCCCGCACCCGGCCGGUGAAUACCCGGCCGCCACCCCGUUUUGGAGAUACGGCCGGUCCUGGCAGACUGGUAC  
Ssp-79-1 GGUGCCCGCCCGGGGGGAAUACCGUACGCCCGCCCGUUUUGGAGAUACGGCCGGUCCUGGCAGACUGGUAC  
Ssp-92-1 GGUGCCCGCCCGGGGGGAAUACCGUACGCCCGCCCGUUUUGGAGAUACGGCCGGUCCUGGCAGACUGGUAC  
Ssp-151-1 GUGCCCGCCCGGGGGGAAUACCGUACGCCCGCCCGUUUUGGAGAUACGGCCGGUCCUGGCAGACUGGUAC  
Sat-2-1 AACGUUCCCGGACGCACGGGAAUACACACGCGCGGGUCCUGUUUUGGAGAUACGGCCGGUCCUGGCAGACUGGUAC  
Sff-8-1 AACGUUCCCGGCCCCACGGGAAUACACACGCGCGGGUCCUGUUUUGGAGAUACGGCCGGUCCUGGCAGACUGGUAC  
Sff-1-1 AACGUUCCCGGCCCCACGGGAAUACACACGCGCGGGUCCUGUUUUGGAGAUACGGCCGGUCCUGGCAGACUGGUAC  
Ssp-126-1 AACGUUCCCGGACGCACGGGAAUACACACGCGCGGGUCCUGUUUUGGAGAUACGGCCGGUCCUGGCAGACUGGUAC  
Sgr-11-1 GGUGCACGGCCGGGUGGGGAAUACCCGGCCCGCCCGUUUUGGAGAUACGGCCGGUCCUGGCAGACUGGUAC  
Ssp-14-1 CACCGGGGGAGGAGCCGGGAAUACCGUGCGGCCCGCCCGUUUUGGAGAUACGGCCGGUCCUGGCAGACUGGUAC  
Ssp-168-1 CACCGGGGGAGGCGUCCGGGAAUACCGUGCGGCCCGCCCGUUUUGGAGAUACGGCCGGUCCUGGCAGACUGGUAC  
Ssp-49-1 GGAUAGACCGGAGUGCCGGGAAUAGUUCGGGCGCACCCCGUUUUGGAGAUACGGCCGGUCCUGGCAGACUGGUAC  
Ssp-22-1 AAGUGACACGGCCGGUCCGGGAAUACCCGGCCGUCUUCUGUUUUGGAGAUACGGCCGGUCCUGGCAGACUGGUAC  
Ssp-25-1 GCCCGCGCCGUGCCGGGGAAUACCCGGCCGUCACCCUGUUUUGGAGAUACGGCCGGUCCUGGCAGACUGGUAC  
Ssp-152-1 AACGUGCCCGGACCGCCGGGAAUAGUCACGCCCCUUCUCCGUUUUUGGAGAUACGGCCGGUCCUGGCAGACUGGUAC  
Ssp-57-1 AACGUAACCGGACAGUACGGGAAUAGUCACGUCCUUCUCCGUUUUUGGAGAUACGGCCGGUCCUGGCAGACUGGUAC  
Ssp-40-1 AACGUAACCGGACAGUACGGGAAUAGUCACGUCCUUCUCCGUUUUUGGAGAUACGGCCGGUCCUGGCAGACUGGUAC  
Ssp-6-1 CAGUACCGGGACCGCCGGGAAUACCCGGCCGUCACCCCGUUUUGGAGAUACGGCCGGUCCUGGCAGACUGGUAC  
Sha-2-1 AACGUAACCGGACAGUACGGGAAUAGUCACGUCCUUCUCCGUUUUUGGAGAUACGGCCGGUCCUGGCAGACUGGUAC  
Ssp-43-1 UCCGUGCGGGGACCGGGGAAUACCGUGCGGCCCGCCCGUUUUGGAGAUACGGCCGGUCCUGGCAGACUGGUAC  
Scy-2-1 ACCGGGCGGAGGGGCCCGGGAAUACCGUGCGGCCCGCCCGUUUUGGAGAUACGGCCGGUCCUGGCAGACUGGUAC  
Ssp-39-1 GCGGGCUGAGGGCCCGGGGAAUACCGUGCGGCCCGCCCGUUUUGGAGAUACGGCCGGUCCUGGCAGACUGGUAC  
Sfu-1-1 CUGGGUCUAGGGUUCGGGAAUACCGUGCGGCCCGCCCGUUUUGGAGAUACGGCCGGUCCUGGCAGACUGGUAC  
Seu-1-1 ACCGUCACCGUCCGGGAAUACCGUGCGGCCCGCCCGUUUUGGAGAUACGGCCGGUCCUGGCAGACUGGUAC  
Sgr-3-1 CCGUGCGGGCCGGGCGGGGAAUACCCGGCCCGCCCGUUUUGGAGAUACGGCCGGUCCUGGCAGACUGGUAC  
Ssp-9-1 UCCGUGCGGGGCAACGGGGAAUACCGUGCGGCCCGCCCGUUUUGGAGAUACGGCCGGUCCUGGCAGACUGGUAC  
Ssp-68-1 UCCGUGCGGGGACCGGGGAAUACCGUGCGGCCGUCUCCCGUUUUGGAGAUACGGCCGGUCCUGGCAGACUGGUAC  
Sal-8-2 UCCGUGCGGGGACCGGGGAAUACCGUGCGGCCGUCUCCCGUUUUGGAGAUACGGCCGGUCCUGGCAGACUGGUAC  
San-2-1 CGUGUGCGGGGCGUCCGGGAAUACCGUGCGGCCGUCUCCCGUUUUGGAGAUACGGCCGGUCCUGGCAGACUGGUAC  
Sod-1-1 GCGGGCGGCCGGGAUACGAAUACUCCCGCGGCCCGCCCGUUUUGGAGAUACGGCCGGUCCUGGCAGACUGGUAC  
Ssp-149-1 CCGGGCCGGAAACCCCGCGGAAUAGAACGGCACCUACCCCGUUUUGGAGAUACGGCCGGUCCUGGCAGACUGGUAC  
Sff-4-1 CAGAGGGGUAAGCGGGCGGGGAAUAGUUCGGCGGCCCGCCCGUUUUGGAGAUACGGCCGGUCCUGGCAGACUGGUAC  
Ssp-127-1 GAGCGUUCGCAAGUGCGGGGAAUAGUUCGGCGCACCCCGUUUUGGAGAUACGGCCGGUCCUGGCAGACUGGUAC  
Ssp-81-1 GAACGUUCGGAACGUCGGGAAUAGUUCGGCGGCCCGCCCGUUUUGGAGAUACGGCCGGUCCUGGCAGACUGGUAC  
Sat-1-1 UGUGUUCGCAACGAUCGGGAAUAGGUGCGGCCGACCCCGUUUUGGAGAUACGGCCGGUCCUGGCAGACUGGUAC  
Ssp-103-1 AGGACGGCGCCCGGGGAAUACUCCGGGGGUCGCCCGUUUUGGAGAUACGGCCGGUCCUGGCAGACUGGUAC  
Nsp-3-1 CUGCCUAAACGAGUCCCGCGUACGAGGACCCCGAGGGAAUUGUUCGCGCGGCGUUGUUCUUAUACUUGCCC  
env-409 .....GCAUACUGGACUCGACCAACC  
env-410 AGGGGCCAGGAUAGGGCCCGGGCCGACCGGUUUGGCGAGGUGACGGUCAACUGGCAUACUGGACUCGACCAACC  
env-411 .....GACUCAGGGACAACUGAUUUUACCCGGACGGGGAUCAUUGGCAGACUAGACG  
env-412 ACAAUGGUGGCCGGCUCGGUACGAGACUCAGGGACAACUGAUUUUACCCGGACGGGGAUCAUUGGCAGACUAGACG  
env-413 .....ACACUGUCC  
env-414 UGCGCAUCCCGGAUCCGGGGCCGGAAUAGGGACCGGCCUGCGCGGGUUGCAACGUCUGGCACACUGGUAAGCCGAACCCG  
env-415 .....CGGCGUGGGUUGGUAACGUCUGGCACACUGGUAAGCCGAGCCG  
env-416 GGGCGAUCCCGGAAUCCGGGGCCGGAAUACCGACCGGCCUGGGCGGGUUGCAACGUCUGGCACACUGGUAAGCCGAGCCG  
env-417 GACUGACGUUCGGAAUAGAUACACACGCGCGGGCGUUCACCCGUGGUCAGAGGUCUGGCACUACUAGUACGUUUUU  
env-418 .....GCAUGGCCACCAUUA  
Svi-14-4 GGGGUCUGGAAUAAACCGGGAAUACCUCCGGACCGACCCCGUUUUGGAGAUACGGCCGGUCCUGGCAGACUGGUAC  
Sve-1-1 CGCCUCCGGGAGCCAGGAUUAUUCGGCCGCCACCCCGUUUUGGAGAUACGGCCGGUCCUGGCAGACUGGUAC  
Ssp-38-1 GGGGUCGUGAGGUAACCCGGAAUACCUCCGGACCGACCCCGUUUUGGAGAUACGGCCGGUCCUGGCAGACUGGUAC  
Sbi-3-1 GGGUCGUGAGGUAAGCCGGGAAUACCUCCGGCCGCCACCCCGUUUUGGAGAUACGGCCGGUCCUGGCAGACUGGUAC  
Sgl-4-2 UAGUCCCGCGAGGGCCGGGAAUACCUCCGGACCGGCCCGUUUUGGAGAUACGGCCGGUCCUGGCAGACUGGUAC  
Svi-9-1 CGACCGGGGACGAGCCGGGAAUACCUCCGGCCGCCACCCCGUUUUGGAGAUACGGCCGGUCCUGGCAGACUGGUAC  
Fsp-2-1 GAAACCGGGUCCCGCGGGGUGUUAACCGCGCGGGGCGAGGUCGGUCGGAACGGGUCUGGCACACUGGCAAAAC  
Fsp-5-1 CACCAGGGCCCGCGGGCGGUUCGCGCGGGCUGGUGGUCGGCCCGGUCACCGGGUCUGGCACACUGGCGACA  
Fsp-1-1 CACCAGGGCCCGGGCGGGUUGUUCGCGGGCUGGUGGUCGGCCCGGUCACCGGGUCUGGCACACUGGCGACA  
Sgh-1-1 GACCGCGCCCCACCGACGGGAAUAGAUCCGCCACCCCGUUUUGGGGAAAGCGCCAGUCCUGGCAGACUGGUAC  
Ssp-31-1 CGGGCCGCUCCCGCGGGGAAUACUAGGCGCACCCCGUUUUGGAGAAAGGCAACAGUCCUGGCAGACUGGUAC  
Sav-2-1 AGGCCACGAAAAGCCUCCGGGAAUAGAUCCGCCACCCCGUUUUGGGGAAUGCGCCAGUCCUGGCAGACUGGUAC  
Ssp-7-1 ACCUCCCGGGCGGGCCGGGAAUACCUCCGGCGGCCCGCCCGUUUUGGGGAAUGCGCCAGUCCUGGCAGACUGGUAC  
Ssp-44-1 ACCUCCCGGGCGGGCCGGGAAUACCUCCGGCGGCCCGCCCGUUUUGGGGAAUGCGCCAGUCCUGGCAGACUGGUAC  
Sgr-10-1 GGAACGAGGGUGGGCCCGGGAAUAGAUCCGGGGCCACCCCGUUUUGGAGACGGCCGCAUCCUGGCAGACUGGUAC  
Ssp-173-1 GACCGGAGGUGGCCCGGGAAUAGUUCGGGGCCACCCCGUUUUGGAGACGGCCGCAUCCUGGCAGACUGGUAC  
Ssp-16-1 GACCGGAGGUGGCCCGGGAAUAGUUCGGGGCCACCCCGUUUUGGAGACGGCCGCAUCCUGGCAGACUGGUAC  
Ssp-61-1 GGAACCGGGUGGGCCCGGGAAUAGAUCCGGGGCCACCCCGUUUUGGAGACGGCCGCAUCCUGGCAGACUGGUAC  
Ssp-175-1 GACCCCGCGGGGGCGGGGAAUAGAUCCGGGGCCACCCCGUUUUGGGGAAUGCGCCAGUCCUGGCAGACUGGUAC  
Fsp-6-1 GUCGAGAGCUCGACCGGGUCCGGUCGAGCGGGUCCUGGCAGACUGGAAACACCGGACACACACAGCGUUAUCGGAAC  
Fsp-13-1 GGCUGGUCUGGGGAGCUUAGCGAGCUGGGAAGUACCGGCGGACGUGGCGUCCCGUCCUGGCAGACUGGAGGCGAG  
Fal-1-1 GGGCGGUCGACGCGGUGUACGUGGACGCGGAGCGGUCGCGGGGACGUGGCGUCCCGUCCUGGCAGACUGGAGGCGAG  
Gte-4-1 AGAGCGGCCUCAAGGCUAACAGGUAACUCCGGGCGCAGGUCGCGCACACCGCAAGCGCCUUGGAUUCGGGGCCGGA  
Mrh-1-1 GACCUACGCGGAAUAGCCGUCGCGACGCGUUGGGCUGGUGACGUGUCCACUGGCAUACUGGACCGUCCAGCAACC  
env-419 GAAACAACGGUUCGGGGCGGGUAGCAACCUUUGGUCACUGGACCGCGUCCUGGCACACUAGUAGCCAUCAGCAG  
env-421 .....GGGUCGUUUUGGUCACUGGACCCGUCCUGGCACACUGGGGGGCAAAACA  
env-422 GGAAGCGCGGAAUACCGGACCGGGGGGUCGUUUUGGUCACUGGACCGCGUCCUGGCACACUGGGGGGCAAAACA  
env-423 CGGCUCUACCGCUGUACCGGGGAAUCCAGGUCACGGAAGGUGGUUUAUGAUCUGGCACACUAGAACCGGCAAAACA  
env-424 .....GGGGGCAAGGGAAUACAGCAGGCCUCCGGCAUGUUGCAGGGUCCUGGCACACUAGUAGCCAUCAGCAG  
env-425 CCGCGGGCCGGGGGAAACGGGAAUACAGCAGGCCUCCGGCAUGUUGCAGGGUCCUGGCACACUAGUAGCCAUCAGCAG



```

env-426 .....UGCAGGGUCUGGCACACUAGUAGCCAUCAGCAG
Nsp-11-1 GCGCUGCCAAUAGGAUCGGGAAUUGGCCGGGGCCGGGCUUGGUAACCAUCUGGCACACUGGUAGCCGACCAUUUU
env-428 GCGGCGGCGCGGCUACGCGGGAAUACACAGGGGCCACGGAACGUACAACUGUCUGGCACACUAGGAACCGCGACCA
env-429 .....AGCCGCUACUA
env-430 GGCACAGGACAGGUAGCACACAGGAAUUGCCUGCCGAGCACCACGUUACGGCGUCUGGCAGACUUAUGAAACCGCUACUA
env-431 ACUUAGUCGCGGGAAUUGCCGCGCGCCGCGCGUUUAGGGGGAGAGCGGCGUGACUCUGGCAUUAUCGACAGCCGAAU
env-432 .....GGCGCGUUUAGGGGGAGAGCGGCGUACUUGGCAUUAUCGACAGCCGAAU
env-433 ACUUAGUCGCGGGAAUUGCCGCGCGUCUGCCUGCGUUUAGGGGGAGAGCGGCGUGACUCUGGCAUUAUCGACAGCCGAAU
env-434 ACGCCGCGCGGGAAUUGCCUGGGCGACAGCCGCGUUUAGGGAUACAGCGGCGUAGCUGGCAUUAUCGACAGCCGAAU
env-435 ACGCCGCGCGGGAAUUGCCAGGCGCCAGCCGCGGCGUUUAGGGAUACAGCGGCGUAGCUGGCAUUAUCGACAGCCGAAU
Str-2-1 CGGCGCGGCGUUUGCCGUCGACGCCCGCAGCCGCGCUGCAGCCGACCUAGACCCCGUGGCAGACUGGUUAGUCGGCC
Str-1-1 CGGCGCGGCGUUUGCCGUCGACGCCCGCAGCCGCGCUGCCGAGCCGACCUAGACCCCGUGGCAGACUGGUUAGUCGGCC
Spa-24-1 CGACGUUUGCGCGCCAGUGGCGCGGCGCGCCCGAUUCCGAGCCGAUCUGCCCGCGUGGCAGACUGGUUAGUCGGCC
Spa-32-1 CGAGUUUGCGCGCCAGUGGCGCGGCGCGCCCGUUUCCGAGCCGACCUAGCCCGUGGCAGACUGGUUAGUCGGCC
Spa-7-1 CGAGUUUGCGCGCCAGUGGCGCGGCGCGCCCGAUUCCGAGCCGACCUAGCCCGUGGCAGACUGGUUAGUCGGCC
Spa-27-1 CGAGUUUGCGCGCCAGUGGCGCGGCGCGCCCGAUUCCGAGCCGACCUAGCCCGUGGCAGACUGGUUAGUCGGCC
Spa-5-1 AGAGUUUGCGCGCCAGUGGCGCGGCGCGCCCGAUUCCGAGCCGACCUAGCCCGUGGCAGACUGGUUAGUCGGCC
Spa-38-1 CGAGUUUGCGCGCCAGUGGCGCGGCGCGCCCGUUUCCGAGCCGACCUAGCCCGUGGCAGACUGGUUAGUCGGCC
env-436 CGCGCCGGGAUUGGCGAGCGCCCGUCCGCGUUUUGGGGAUACGGCGGCGUACUGGCAUUAUCGACCGCCGACCC
Msp-11-1 AUCGCGAGGAUUAUGCCAGGGGCGUCCGCGUUUUGGGCAGGUGAUGGUCCACUUGGCAUUAUCGACCGCGCCACC
env-437 GGAAGAGUAGGGCGACUACGACUCCGCGUAGCGCCACCCGCUUGUCGCGACCCAGCUGAUGGCAUUAUCGACCG
env-438 GGUUAGCGCGGGAAUUGCCGCGCGCGCGUUUAGGGGGAGAGCGGCGUGACUCUGGCAUUAUCGACAGCCGAAU
env-440 .....GACGCGGAUUUCGUGCGGAUUGCGCGCGUGGCACACUUUUUU
env-441 CCGCGCGCGCGCGCGGGGAAUUGCCAGGUCACGGAAUUGGUUCCAGGUCUGGCACACUAGAAAGCCGCAACCA
env-442 CCUCACAGCCCGCGCGGGGAAUUGCCAGGUCACGGAAUUGGUUCCAGGUCUGGCACACUAGAAAGCCGCAACCA
Gkr-1-1 CGAUUGGCUUCUCGCGCGGCUUCUGGCAUUAUUGCCCGUACACAGCGGUGGCUCCGUCGAAAGCCGCAACCCG
env-443 CGGCGAGUCGGAAUUGCGCGGGUUAUCCCGCGUUUGGGUCGACUGGUGCAGCUGGCAUUAUCGACCGUACACCC
env-446 UAACCCUCGCAACCCCGCGG.....GAGGCAUGCGUCGACAGGCCGUUUUGGCAACUCAGGGCGCCGUGGCAGACUGGUAG
env-447 .....GACUGACCC
env-448 GGUAGUGGCGCAGAAUAGCGGCAACGGAAUUGGCGCUCAGCAUUGGCGUUUUGGCGGUCAGUGACAGACUGACCC
env-449 CGAGUGGCGCAGCAGUCACCGGUGGCGGAUUGCGCCCGCGCAUUGGCGUUGCAGGCAGCGUCAGUGACACACUGACCC
Mhe-1-1 ACUGAUCGAAACCCGCGAAUAGCGGGGAGCCUCCCGCGUUUUGGGAGCCGACAGCGUAGCUGGCAUUAUCGAAACCC
Rrh-1-1 CGGGGCGCGCAGGCUUGGAAACACAGCAGGCGGAUUGCGGCGUCCGCGUUGGCAUUAUCGAAAGCGCGGAG
Msp-13-1 UCAGGCUACGCCCCAGGAUUGCGAAACCGCGUCUCCCGCGUUUUGGGGGCGCAGCGCAGCUGGCAUUAUCGAAACCC
env-450 GUCUGGUGUAUCCCGAGAUUAGCGGGGUGCCGAGUCGGGAUUAUUCGCGCUGGCAUUAUCGAAAGGUGAG
Tbi-1-1 GUAGGAAUUAAGCAGGAUAGCAAGCGGUUAGCCGAGUCGGGAAACAAUUCGCGCUGGCAUUAUCGAAAGGUGAG
Msp-4-1 GCGGCGCGCGCGCGGAAUUGCGCACGACCCUCCCGCGUUUUGGGGAGCGCCAGCGCAGCUGGCAUUAUCGAAACCC
Mav-1-1 ACUGACCCGGGCGCAACGAAUAGCGGGGAGGCUCCGACGUUUUGGGAGCCGACAGCGCAGCUGGCAUUAUCGAAACCC
Msp-16-1 GACUGACCCCGCGCGAAUUGCGUGAGCGCUCUCCGCGUUUUGGGGAGUGCGAGCGUAGCUGGCAUUAUCGAAACCC
env-452 CUCCAAAGCCAGCGCGGAAUUGGCAACGACUGAUCGCGUUUUGAGAGCCGACAGCGCAGCUGGCAUUAUCGAAACCC
Msp-12-1 ACGAUCGACCGCGCGAAUUGCGUGAGCGCUCUCCGCGUUUUGGGGAGUGCGAGCGUAGCUGGCAUUAUCGAAACCC
Msp-14-1 GACCCGCGUGACCGGAGAAUAGCGGGGAGCCUCCCGCGUUUUGGGAGCCGACAGCGCAGCUGGCAUUAUCGAAACCC
Msp-17-1 GACCCGCGUGACCGGAGAAUAGCGGGGAGCCUCCCGCGUUUUGGGAGCGGACAGCGCAGCUGGCAUUAUCGAAACCC
env-453 .....GUGACACC
Mky-1-1 ACCGCGUCGCGGAAUUGCGCGCAGUCUCCCGCGUUUGGGCGUAGCGGCGUGAGCUGGCAUUAUCAACCGCCAAACCC
Sar-43-1 CGAUGUUCCGUGUGCUUAUCCCGCGUGCGCCGCGCUGACGAGCCGACCGGCGACACUGGCAUUAUCGCGCC
Sar-11-1 CGAUGUUCCGUGUGCUUAUCCCGCGUGCGCCGCGCUGACGAGCCGACCGGCGACACUGGCAUUAUCGCGCC
env-454 .....UUCAGUACGCGGACUUGGCAUUAUCGCGGAGCUGGCAUUAUCGCGG
env-455 CGACACGCGCGGAAAUUGCGUGAUACUUGCGGGAAGUUCGGAAGUUCGUGGUGUUGCAGCUGGCAUUAUCGCGG
env-456 CAGGGCGAGGAGUAGGGCGGAGUUCGCCAAAGGAUUCAGCACCGCCCGUCCGCGUUGCACCUCUGGCAUUAUCGCGG
Ase-1-1 GGAUUAAGUUGCGGGGUGGGGGCGUUAUCCAGGGGUGUGUUGUUGGAGCAGUGGCAUUAUCGCGGAGCAGCGCGG
Fsp-9-1 GAUGGUCGCGGGGCGUUAUAAAGCGUGGGAAGCGUGCCGCGGACGUGGCGUCCCGCUCUGGCAUUAUCGCGG
env-457 .....UCAG
env-459 AUCGGUCGACCAUAGGGACCCCGCGGGAAUUGCCGAGCAGGAUUUCGCGCUUUCGCGUGCCUGGCACACUGUCAG
env-460 CUGGAACUCAAGUUGGGGCGGGGAUUGUCUUGUGGCGUGGGAUUGGAGGUAUCGCGCACACUGGUAAGCCGAAACCGU
Spa-33-1 CGCGUUUGCGCGCCAGUGCCCGCGCAGCCCGCGCUGCCGAGCCGACCUAGCCCGUGGCAGACUGGUUAGUCGGCC
Vma-1-1 UGAUGUUGCUACCGGGCAGCGUUGGCGGCGAUUCCGCGGCGGCGGAGUUCGCGGCGGCGGAGGCGCAUUGGCAUUAUCGCGC
Gbr-1-1 GGCUGUGACCGAGGAGGAGUAGCAGGUCGCGCAUUAUCGUGUAGUAGCUGGCGGUGGCAUUAUCGAGCGGUGCGAG
Gna-1-1 CGUGCCGUUACCAAACCGCGCAGCGUUGCCGCGAUUUCGCGGCGAAGGGCACACUUGGCAUUAUCGAGCGGUGGAG
Gal-1-1 CCGCGUUGUACCGAGUGCGACCGCGUGCGCGCAUUCGCGGCGAAGGGCACACUUGGCAUUAUCGAGCGGUGCGAG
Gam-2-1 CAUGCCGUUACCAAACCGCGGCGCGCGUCCACGAUUCGCGGCGAUCGCGGCGCAUUGGCAUUAUCGAGCGGUGGAG
Gsp-1-1 CCGCGCGUUGAGGCAACCGCGCAGCGCGGUGACCGGGAUUUUUCGCGUGAUGCCUACGUGGCAUUAUCGAGCGGUGCGAG
Gpa-1-1 UGCUCUUGGCGAACCGCUGCAGCGGUGGUCUCGCGCAUUCGCGGCGGAUUCGCGGCGCAUUGGCAUUAUCGAGCGGUGGAG
Gru-1-1 CCGCGUUGUACCGAGUGCGACCGCGUGCGCGCAUUCGCGGCGAAGGGCACACUUGGCAUUAUCGAGCGGUGCGAG
Gam-3-1 CAUGCCGUUACCAAACCGCGGCGCGUGCCCGCAUUCGCGGCGAAGGGCACACUUGGCAUUAUCGAGCGGUGGAG
Gte-3-1 CCGCGCGUUGAGGCAUCUGCGACCGCGGUGAUCGGGAUUUUUCGCGUGAUGCCUCCGUGGCAUUAUCGAGCGGUGCGAG
Nsp-1-1 CGCAUUGCAGGCGGUCAGCUGCAUUGCGGGAAGGCGAUUCGCAAGGUCGGAGGCGUUCUGGCAUUAUCGAGCGGUGGAG
Wsp-1-1 GAUGUAUGCCCGCCUCGUAUCGCUUAUAUAUAGCAUUCGUGACGUGGUGGAGGCGUCUGGCAUUAUCGAGCGGUGCGAG
Kar-2-1 GAUGUAUGCCCGCCUCGUAUCGCUUAUAUAUAGCAUUCGUGACGUGGUGGAGGCGUCUGGCAUUAUCGAGCGGUGGAG
Gef-1-1 GGUUAGGGCUGGAGAUUCGCCAGUGUGUGCAGGAUUGGUAAGCAUUAUCGCGCGGUGGCAUUAUCGAGCGGUGGAG
env-461 UGAGCCCGUGGAGACCGCAGGAGUGCGGUGGUCAGGAUUUAUUCGCGACCGACCGGCGCAUUAUCGAGCGGUGGAG
Gpo-3-1 CCCUUCGUGGGGCGCGUCACCGGUCACCGAGAUUCGCGGCGGUGCGGUAACCGGUGGCAUUAUCGAGCGGUGGAG
Grh-1-1 CCUCUGGGGUGUUCGAGCCGAGGCGCGGUAUCGCGCAUUCGCGGUGGAGCGGCGGCGGCGGCAUUAUCGAGCGGUGGAG
env-462 GAGUCGCGGCGGAAACAUUCGCGCGACCGGUAUUGGUAAGCAUUAUCGCGCGGUGGCAUUAUCGAGCGGUGGAG
Rde-1-1 CGGGAUUAUCGCGGCGGGGGCGGUAUAGGGAUGCGUCCCGCUGGCGAAGGGGCAUUAUCGCGGUGGCAUUAUCGAGCGGUGGAG
Req-3-1 CGGGAUUAUCGCGGCGGGGGCGGUAUAGGGAAGCGUCCCGCUGGCGAAGGGGCAUUAUCGCGGUGGCAUUAUCGAGCGGUGGAG
env-463 GAAUUAUCGCGGAAACUUAUUAUUCGCGCACAUUCGCGGAGCGCGGAAACAAUUCGCGCAUUAUCGAGCGGUGGAG
Rfa-3-1 CGCAGGGGUCUGGUAAGCCACUGUCGUGAGCGAUUAGCAGGUCGGAUUCGCAUUAUCGCGCAUUAUCGAGCGGUGGAG
Rsp-2-1 GACAGGGGUCUGGUAAGCCACUGUCGUGAGCGAUUAGCAGGUCGGAUUCGCAUUAUCGCGCAUUAUCGAGCGGUGGAG
Rsp-3-1 GCGUUGUAAGCAUCUGUGGCGACAGUUAUCGCGCAUUAUCGAGGUCGGAUUCGCAUUAUCGCGCAUUAUCGAGCGGUGGAG
Rfa-12-1 GCGUUGUAAGCAUCUGUGGCGACAGAAUUCGCGCAUUAUCGAGGUCGGAUUCGCAUUAUCGCGCAUUAUCGAGCGGUGGAG
Rsp-13-1 GCGUUGUAAGCAUCUGUGGCGACAGAAUUCGCGCAUUAUCGAGGUCGGAUUCGCAUUAUCGCGCAUUAUCGAGCGGUGGAG
Rop-1-1 CCAACCGCGUUGACCCACCGCAAGCAAAUUGCCGAUUGGGAUCGCGAACCUGGCAUUAUCGAGCGGUGGAG
Rfa-21-1 CGGUUGUAAGCAUCUGUGGCGACAGAAUUCGCGCAUUAUCGAGGUCGGAUUAUCGCGCAUUAUCGAGCGGUGGAG

```

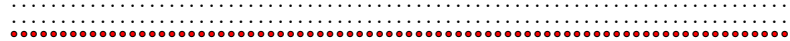

Rfa-1-2 GCGUUGUAAAGCAUCUGUCGGCACAGAAAGUACCGACGUAUAGCAGGGCAGAUACACGCGUCUGGCAUAAUCAACGGCCGAG  
Rfa-4-1 GCGUUGUAAAGCAUCUGUCGGCACAGAAAGUACCGACGUAUAGCAGGGCAGAUACACGCGUCUGGCAUAAUCAACGGCCGAG  
Rfa-7-1 GCGUUGUAAAGCAUCUGUCGGCACAGAAAGUACCGACGUAUAGCAGGGCAGAUACACGCGUCUGGCAUAAUCAACGGCCGAG  
Rfa-20-1 GCGUUGUAAAGCAUCUGUCGGCACAGAAAGUACCGACGUAUAGCAGGGCAGAUACACGCGUCUGGCAUAAUCAACGGCCGAG  
Rfa-8-1 GCGUUGUAAAGCAUCUGUCGGCACAGAAAGUACCGACGUAUAGCAGGGCAGAUACACGCGUCUGGCAUAAUCAACGGCCGAG  
Rtr-1-1 CGUUUAGGAGAACCGUCGGCAGCCUCUGGCAAGAAUGAUCGACCGCGCAUCGCGCGUCGCGCGGUGUUGGAAACACAAG  
Rsp-19-1 CGUUUAGGAGAACCGUCGGCAGCCUCUGGCAAGAAUGAUCGACCGCGCAUCGCGCGUCGCGCGGAAUGUUGGAAACUCAAG  
Rsp-21-1 UCGUUAAGGACUUGAUGCAGCGGUUCUGGCAAGAAUGAUCGACCGCGCGUCGCGCGGUGGAGCACAACAAG  
Sar-21-1 CGAUGUUCCGGUUGUCGUAUCCCGCCGUGUGGCCCGCCUGACGAGCCGACACGCGACCCGUGGCACACUGGUAUUCGGCC  
Sar-40-1 CGAUGUUCCGGUUGUCGUAUCCCGCCGUGUGGCCCGCCUGACGAGCCGACACGCGACCCGUGGCACACUGGUAUUCGGCC  
Sar-27-1 CGAUGUUCCGGUUGUCGUAUCCCGCCGUGUGGCCCGCCUGACGAGCCGACACGCGACCCGUGGCACACUGGUAUUCGGCC  
Sar-33-1 CGAUGUUCCGGUUGUCGUAUCCCGCCGUGUGGCCCGCCUGACGAGCCGACACGCGACCCGUGGCACACUGGUAUUCGGCC  
Sar-26-1 CGAUGUUCCGGUUGUCGUAUCCCGCCGUGUGGCCCGCCUGACGAGCCGACACGCGACCCGUGGCACACUGGUAUUCGGCC  
Sar-22-1 CGGUGUUCCGGUUGUCGUAUCCCGCCGUGUGGCCCGCCUGACGAGCCGACACGCGACCCGUGGCACACUGGUAUUCGGCC  
Sar-17-1 CGAUGUUCCGGUUGUCGUAUCCCGCCGUGUGGCCCGCCUGACGAGCCGACACGCGACCCGUGGCACACUGGUAUUCGGCC  
Sar-24-1 CGAUGUUCCGGUUGUCGUAUCCCGCCGUGUGGCCCGCCUGACGAGCCGACACGCGACCCGUGGCACACUGGUAUUCGGCC  
env-474 CAGACCGUGACGUCACGGAAUGUGGUGCGCGGCCGAAUUCGACCCGCGUGGGCGCGUGGCACACUGGUAUUCGGCC  
env-475 GCGGCACCGAAUUCGGUCCGAGCGCGUUCUGGCAUACUCGUCACCGUUGUGCGCCACCCCGGUGCAUCAUCAACAG  
Whe-1-1 CGCAGUUUACCGUGCCAGUCCCGCGCGCGCCCGCCUGCCGAGCCGACUCGCCCCGUGGCAGACUGGUUUCGUGGCC  
Spa-28-1 CGCAGUUUUGCCGUGGACAGUCCCGCGUGUGGCCCGCCUGCCGCGCCAAACCCACCCCGUGGCAGACUGGUUAGUGGCC  
Spa-36-1 CGCAGUUUUGCCGUGGACAGUCCCGCGUGUGGCCCGCCUGCCGCGCCAAACCCACCCCGUGGCAGACUGGUUAGUGGCC  
Spa-8-1 AUGCCGACCCCGCGCGCGGUGGACAGACACCGUUGAGGUGCGGACCCGUCUACUGGCAGACUUGACCGACCGCCAU  
Dau-1-1 ACGUUGUACGAGUCGGACGAGGUGUGCGGCCCGUUCGCGGUGCGCUCAGGCCAUGGCACACUGGUAUUCGGCC  
Mlu-1-1 ACGUUGUACGAGUCGGACGAGGUGUGCGGCCCGUUCGCGGUGCGCUCAGGCCAUGGCACACUGGUAUUCGGCC  
Mch-6-1 ACGUUGUACGAGUCGGACGAGGUGUGCGGCCCGUUCGCGGUGCGCUCAGGCCAUGGCACACUGGUAUUCGGCC  
Mpa-1-1 ACGUUGUACGAGUCGGACGAGGUGUGCGGCCCGUUCGCGGUGCGCUCAGGCCAUGGCACACUGGUAUUCGGCC  
Rsp-9-1 GGGGCACUCGACGACGUCGCGCGCCCGGGAAUUUCUCCCGGGCCUACGUUUUGCAUAAUAGCAGGUCAG  
Rrh-2-1 GGGGCACUCGACGACGUCGCGCGCCCGGGAAUUUCUCCCGGGCCUACGUUUUGCAUAAUAGCAGGUCAG  
Rsp-14-1 GGGGCACUCGACGACGUCGCGCGCCCGGGAAUUUCUCCCGGGCCUACGUUUUGCAUAAUAGCAGGUCAG  
Rsp-5-1 CGCCCGCGGACGCGCGCCGCGGAAUUUCUCCCGGGCCUACGUUUUGCAUAAUAGCAGGUCAG  
Rru-2-1 UCCCGCGCGCGCGCGCGGCAUGCCCGGGACGAAUUUCUGUCCCGGGCCUACGUUUUGCAUAAUAGCAGGUCAG  
Rru-3-1 UCCCGCGCGCGCGCGCGGCAUGCCCGGGACGAAUUUCUGUCCCGGGCCUACGUUUUGCAUAAUAGCAGGUCAG  
Rru-1-1 UCCCGCGCGCGCGCGCGGCAUGCCCGGGACGAAUUUCUGUCCCGGGCCUACGUUUUGCAUAAUAGCAGGUCAG  
Ntr-1-1 UGUUUUAGUGCGUGUCACGGUUCUGGCAUACUGGACCCGUGGUGCGUCUGUGGAGAGGACACUCCCGCCUA  
Not-2-1 CUGGCGCGCAGCAGCCGAGGGAACCGGAAACAGGCCCGCGAGGCGGCUUUAUCUGGUCGCGGCAACCAUGCCUA  
Not-1-1 CCGGCGCGCAGCAGCCGAGGGAACCGGAAACAGGCCCGCGAGGCGGCUUUAUCUGGUCGCGGCAACCAUGCCUA  
env-476 GCGGUGUCGCGCGCUCAGCUGGGAAUUCAGGGGGACGGAACGUUAACACGUCUGGCACACUAGAAAGCCGACCA  
Msp-26-1 GAGCGUUGCGCGCGGACUUGUCUGUGGGCGCUCGUCGAGUCGGCGGACCGCCGUGGCACACUGGUAUUCGGCC  
env-477 GUUCCGGAGGCGCGGGGCGGGGAAUUGCCAGGCCCGGAGGAUUGUUCGUGUGGCACACUAGAAAGCCGAAACAG  
env-478 ..... GAUACUUGUC  
env-479 ..... CACUUGUC  
Gsp-3-1 UGUUCGAGAGCGGCCUCACGCCUUAUUAUUGAUGCCGGUGCGCAGGUCGCGCACCCACCAUGUGCCAGACGGGCCGGA  
env-481 GGUUAGAGAGCGGCCUCACGCCUUAUUAUUGGAGAGCUGGUGCGCAGGUCGCGCACCCACUUGUGUCCCGGAGGGCCUGA  
env-482 GCGCCCGCGUCCAAAGUCCGGAUUGCCCGGUGACUCGCGCGGUUCGGUACUUGGCACACUUGACUGUGGACCGCC  
env-483 CCGCCCGCGCGUCCAAAGUCCGGAUUGCCCGGUGACUCGCGCAGUUAUCUGGCACACUAGAGGGGCAACCGC  
env-484 UCGGCAACUAAACGUCGUCACAGGGAUUGCCAGGUCACGGAAGUGGUUCCGCGCGGCACACUAGAAAGCCGAAACCA  
env-485 CCGGCGUUCACAGGUCACCGGGAUUAACCGAUGGCCUGGACGUGUAGCGAUCUGGCACACUAGAAAGCCGAAACCA  
env-486 CCGGCGGCGCACUGGCACAGGGGAUUAUCCAGACCGGGGAAUUGGUUCCAGGUCGCGCACACUAGAAAGCCGAAACCA  
Sam-2-1 GGCCCGGUCUGUCCAGGGCGGGGAUUGUCUUGUGGCCUGGGAUGGUUAGGACUUGGCACACUAGAAAGCCGAAACCGC  
Sro-7-1 ACAACGACAGUACUCUAGCGGGAAUUGUCUUGUGGCCUGGGAUGGUUAGGACUUGGCACACUAGAAAGCCGAAACCGC  
Sro-3-1 CAAACGACGGUACUUCUCCCGGGAUUGUCUUGUGGCCUGGGAUGGUUAGGACUUGGCACACUAGAAAGCCGAAACCGC  
Mau-1-1 UGACGGGUGGGCGCGGUGGGGUGGGGACCCUUGUGCGGGGUAAGAUUGCCGUGGACACUAGAAAGCCGAAACCGC  
Msp-9-1 UGACGGGUGGGCGCGGUGGGGUGGGGACCCUUGUGCGGGGUGGAAAGACGCGCGGACACUAGAAAGCCGAAACCGC  
Msp-10-1 UGACGGGUGGGCGCGGUGGGGUGGGGACCCUUGUGCGGGGUGGAAAGAUUGCCGUGGCAGACUGGUAUUCGGCC  
Msp-28-1 ..... GGCCGGUUGGGGUGGGGACCCUUGUGCGGGGUGGAAAGAUUGCCGUGGCAGACUGGUAUUCGGCC  
env-487 CAGACGCCACCAUCCCGGGGAAUCCAGAGGGUACGGAAGUUAUAGCAUCUGGCACACUAGAGCCCGGACCA  
env-488 CACCCUUGGCAGUGGACCGAGACCCGUAAGCAGCAGGAAUUAUUAACCGACGUAACUGGUUUGCGGUCUGGCACACUAG  
Msp-8-1 GCACGUUACGAAAGCCGACUUGUCUGCGCCCGCCGAGAGGCGCGGCUACGCGCAUGGCACACUAGAAAGCCGAAACCGC  
env-489 GACCGAGACCGGUAACGACCGGGAAUUCGACCCGUCAGACUUGGUUACAGGUGUGGCAAAUAGAAAGCCGAAACCGC  
env-490 GACCGAGACCGGUAACGACCGGGAAUUCGACCCGUCAGACUUGGUUACAGGUGUGGCAAAUAGAAAGCCGAAACCGC  
Nco-1-1 CGCGUGCGGGGUCUGCGCGGGAAUUGCGGAGUGCCUGGGAUGGUUACGACUUGGCACACUAGAAAGCCGAAACCGC  
env-494 ACGGUCGGCANUGAUCGCGANGGAAUUGCCAGGCCCGCGCGGUGGUGGUCGCGACACUAGUUAAGCCGAAACCGC  
Mca-1-1 GCACGUUACGAAAGCCGACUUGUCUGUGCGCCCGCCGAGAGGCGCGGCUACGCGCAUGGCACACUAGAAAGCCGAAACCGC  
env-495 CCGCGCGUGGAGGCCACCGGGAAUUGCCCGCGGGCAUUGUGGUUAACAGUUGCGGACAGUAGAAAGCCGAAACCGC  
env-496 ACCACGUCGUCUUCGACCGGGAAUUGCCAGGUCACGGAAAGUGGUUCCAGUACUGGCACACUAGAAAGCCGAAACCGC  
env-497 AGGCAACUGACGCGAGGACGGGAAUUGCCCGCGGGGAAUUGCGUUCACGUCUGGCACACUAGAAAGCCGAAACCGC  
env-498 CGGCUGACGUCUCCGGACGGGAAUACCAAGGCCCGCGGUAACGUCUUGCAGGGUCUGGCACACUAGAAAGCCGAAACCGC  
env-499 CGGCUAACCAACCAACGCGGGAAUACCAAGGCCCGCGGUAACGUCUUGCAGGGUCUGGCACACUAGAAAGCCGAAACCGC  
env-500 CAGCUAACCAACCAACGCGGGAAUACCGGGCCCGCGCAUUGUACGAGGUCUGGCACACUAGAAAGCCGAAACCGC  
env-501 CCGGCGCGGUGGGCAGGCGAGGGGAAUCCAGGGCCCGGUAACGUCUUGGACGUGGUCACACUAGAAAGCCGAAACCGC  
env-502 GACCCCGGUCGUCUUAAGGGGAAUACCAAGGCCCGGUAACGUCUUGGACGUGGUCACACUAGAAAGCCGAAACCGC  
env-503 GACCCCGGUCGUCUUAAGGGGAAUACCAAGGCCCGGUAACGUCUUGGACGUGGUCACACUAGAAAGCCGAAACCGC  
env-504 GACCCCGGUCGUCUUAAGGGGAAUACCAAGGCCCGGUAACGUCUUGGACGUGGUCACACUAGAAAGCCGAAACCGC  
env-505 GACCCCGGUCGUCUUAAGGGGAAUACCAAGGCCCGGUAACGUCUUGGACGUGGUCACACUAGAAAGCCGAAACCGC  
env-506 CCGCGAGCGGGGACAGCGGGAAUACCAAGGCCCGGUAACGUCUUGGACGUGGUCACACUAGAAAGCCGAAACCGC  
env-508 GACCCCGGUCGUCUUAAGGGGAAUACCAAGGCCCGGUAACGUCUUGGACGUGGUCACACUAGAAAGCCGAAACCGC  
env-509 GACCCCGGUCGUCUUAAGGGGAAUACCAAGGCCCGGUAACGUCUUGGACGUGGUCACACUAGAAAGCCGAAACCGC  
env-510 GACCCCGGUCGUCUUAAGGGGAAUACCAAGGCCCGGUAACGUCUUGGACGUGGUCACACUAGAAAGCCGAAACCGC  
env-511 ..... CUUUGGCACUUGGACGAGGUCUGGCACACUAGAAAGCCGAAACCGC  
env-512 CGAGCGAGGCGAGCAGACUCCGGAAUUGCGCGGACCCGUAUUCGUAAGCGGUCUGGCACACUAGAAAGCCGAAACCGC  
env-513 GCGCGCGUCGUGAAAGCCCGGGAAUGCCAGUCGGCAACAGUGGUUUCAGGUCUGGCACACUAGAAAGCCGAAACCGC  
env-514 AGGCGCGUUCAGGGGCGUGCGGAGGUUCGGCAUACUGGACCGCGGUCGCGAAUCGCGGACACUAGAAAGCCGAAACCGC  
Asu-1-1 CUACGUCGCGCGGGAAUAGCCCGGGGACCGGUAUGUGCGGUAAGCAUGUCGUCUUGGCAUACUUGAGCGGCUAC  
env-516 CCGGACCAAGGCGCGCGGAAAGGAUUCACAUUGGUAACUUCGUCUUCACGUAUAGCAGACACUAGAAAGCCGAAACCGC  
env-517 CCGGACCAAGGCGCGCGGAAAGGAUUCACAUUGGUAACUUCGUCUUCACGUAUAGCAGACACUAGAAAGCCGAAACCGC













env-82 CGAGC GUCCGGUUCAGCCGUC ..... AGCA ..... GACGGGACCCGGCG.CCC ..... CGUAUCGAGAGGACCCCG.  
env-83 CGAGC GUCCGGUUCAGCCGUC ..... AGCA ..... GACGGGACCCGGCG.CCC ..... CCGUAUCGAGAGGACCCCG.  
env-84 CGAGC GUCCGGUUCAGCCGUC ..... AGCA ..... GACGGGACCCGGCG.CCC ..... ACGUAUCGAGAGGACCCCG.  
env-85 CGAGC GUCCGGUUCAGCCGUC ..... AGCA ..... GACGGGACCCGGCG.CCC ..... CCGUAUCGAGAGGACCCCG.  
env-86 CGAGC GUCCGGUUCAGCCGUC ..... AGCA ..... GACGGGACCCGGCG.CCC ..... CCGUAUCGAGAGGACCCCG.  
env-87 GCUUG CUCCGGUUCAGCUC.G.CCG ..... ACCC ..... GCGAGUGAGCA.CCCGGC..GCC ..... GUACGGAGCGAAGGAGCUGGA  
env-88 GUCGG CUCCGGUUCAGCUCGC ..... AGCA ..... GCGGGGACCCGGCG.GCU ..... GAGGACCCGAGGAAACCC..  
Sre-2-1 GCUUG CAACGGUUCACCCGUGGG ..... GGCAUUG ..... GUGUGGGGACCCGGCG.CCC ..... GAGUAGGAGGACAAAGGC  
Acy-1-1 CCGGG CUCCGGUUCAGC.CCCGACCCGG.CCCUGGG ..... GAGU ..... GCCAGGCGACCGG.CCCGGGACCCGGCG.CCC ..... CAAGAAGGAAAGGACACAC  
Mrh-2-1 CUCGG UCACGGUUCAGCCGAAACCCUCC ..... UGGUCAAC ..... GGAGG ..... GGGGACCCGGG..GCC ..... AACGAUUAGAGGAAACCC..  
env-90 CUCGG CCACGGUUCAGCCGUCGG ..... CCUC ..... GACGGGACCCGGG..UCC ..... AUCCAGGAGGAAACACCC  
env-92 CUCGG CCACGGUUCAGCCGUCGG ..... CCUC ..... GACGGGACCCGGG..UCC ..... AUCCAGGAGGAAACACCC  
env-93 CUCGG CCACGGUUCAGCCGUCGG ..... CCUC ..... GACGGGACCCGGG..UCC ..... AUCCAGGAGGAAACACCC  
env-94 CUCGG CCACGGUUCAGCCGUCGG ..... CCUC ..... GACGGGACCCGGG..UCC ..... AUCCAGGAGGAAACACCC  
env-95 CUCGG CCACGGUUCAGCCGUCGG ..... CCUC ..... GACGGGACCCGGG..UCC ..... AUCCAGGAGGAAACACCC  
env-96 CUCGG CCACGGUUCAGCCGUCGG ..... CCUC ..... GACGGGACCCGGG..UCC ..... AUCCAGGAGGAAACACCC  
env-97 ACCGGUUUCCGGUUCAGCUCGGC ..... GGCAACGG ..... GCGGGGACCCGGG..GCC ..... AUCCAGGAGGAAACACCC  
env-99 ACCGGUUUCCGGUUCAGCUCGGC ..... GGCAACGG ..... GCGGGGACCCGGG..GCC ..... CUCUGAUGGCUUAAAGGAGACCC  
env-103 ACCGGUUUCCGGUUCAGCUCGGC ..... GGCAACGG ..... GCGGGGACCCGGG..GCC ..... CUCUGAUGGCUUAAAGGAGACCC  
env-104 ACCGGUUUCCGGUUCAGCUCGGC ..... GGCAACGG ..... GCGGGGACCCGGG..GCC ..... CUCUGAUGGCUUAAAGGAGACCC  
env-105 ACCGGUUUCCGGUUCAGCUCGGC ..... GGCAACGG ..... GCGGGGACCCGGG..GCC ..... CUCUGAUGGCUUAAAGGAGACCC  
env-111 ACCGGUUUCCGGUUCAGCUCGGC ..... GGCAACGG ..... GCGGGGACCCGGG..GCC ..... CUCUGAUGGCUUAAAGGAGACCC  
Bin-1-1 UCCGG UUCGGUUCAGGUAGCC ..... AUAGG ..... GUGCGGACCCGGG..GCC ..... CUUUGUCUCCUAGGAGUCCAA  
env-112 UCCGG UUCGGUUCAGGUAGCC ..... AUAGG ..... GUGCGGACCCGGG..GCC ..... CUUUGUCUCCUAGGAGUCCAA  
Bco-1-1 UCCGG UUCGGUUCAGGUAGCC ..... AUAGG ..... GUGCGGACCCGGG..GCC ..... CUUUGUCUCCUAGGAGUCCAA  
env-114 AACGG UUCGGUUCAGGC.CCGUGGG ..... AUCC ..... GCGGGGACCCGGG.CCC ..... AGGCAGGAGUUUC  
env-115 AACGG UUCGGUUCAGGC.CCGUGGG ..... AUCC ..... GCGGGGACCCGGG.CCC ..... AGGCAGGAGUUUC  
env-116 AACGG CUCCGGUUCAGCCACUGGG ..... CUGA ..... GGCA ..... GGGGACCCGGG.CCU ..... AGGCAGGAGUUUC  
Sro-4-1 CUCGG CCACGGUUCAGCCGCC ..... GCAAUCCGG ..... GCGGACCCGGG..GCC ..... CCGGACCAUGGAGUCCAGGAGUCCAG  
Sgl-4-1 CUCGG CCACGGUUCAGCCGCC ..... GCAAUCCGG ..... GCGGACCCGGG..GCC ..... CUCCCGAACUAGGAGACCC  
Sal-8-1 CUCGG CCACGGUUCAGCCGCC ..... GCAAUCCGG ..... GCGGACCCGGG..GCC ..... CUCCCGAACUAGGAGACCC  
Sgr-12-1 CUCGG CCACGGUUCAGCCGCC ..... GCAAUCCGG ..... GCGGACCCGGG..GCC ..... CUCCCGAACUAGGAGACCC  
Ssp-55-1 CUCGG CCACGGUUCAGCCGCC ..... GCAAUCCGG ..... GCGGACCCGGG..GCC ..... CUCCCGAACUAGGAGACCC  
Ssp-62-1 CUCGG CCACGGUUCAGCCGCC ..... GCAAUCCGG ..... GCGGACCCGGG..GCC ..... CUCCCGAACUAGGAGACCC  
Ssp-167-1 CUCGG CCACGGUUCAGCCGCCGGG ..... AUCC ..... GUGUGCGACCCGGG..GCC ..... CUCCCGAACGAGGAGACCC  
Sav-3-1 CUCGG CCACGGUUCAGCCGACGG ..... GCCC ..... GUGUGCGACCCGGG..GCC ..... CUCCCGAUCCGAGGAGACCC  
Ssp-4-1 CCGGG UUCGGUUCAGCCGACGG ..... AUCCGG ..... GUGUGCGACCCGGG..GCC ..... CUCCCGAUCCGAGGAGACCC  
Sxi-2-1 GCUUG CUCCGGUUCAGCCGACGG ..... AUCCGG ..... GUGUGCGACCCGGG..GCC ..... CUCCCGAUCCGAGGAGACCC  
Ssp-90-1 CUIGG CUCCGGUUCAGCCGACGG ..... AUCCGG ..... GUGUGCGACCCGGG..GCC ..... CUCCCGAUCCGAGGAGACCC  
Jal-1-1 GCUUG CUCCGGUUCAGGUCACGAC ..... AUCC ..... GUGUGCGACCCGGG.CCC ..... CAUGAGACCCGAGGAGUCCAG  
env-117 CCGGG CUCCGGUUCAGGUC.CCCAGC ..... ACCU ..... GUGGAGAGGACCCGGG.CCC ..... CGAAAUCCAGCCGGCUCAG  
env-125 GCGGG UUCGGUUCAGGUCGCAU ..... GAUCA ..... GU ..... CCGGGACCCGGG..GCA ..... CGUUUGAUUAAAGGAGAUCC  
Psp-1-1 GCGGG UUCGGUUCAGGUCGCAU ..... GAUCA ..... GU ..... CCGGGACCCGGG..GCA ..... CGUUUGAUUAAAGGAGAUCC  
env-126 GCGGG UUCGGUUCAGGUCGCAU ..... UCC ..... GCGGGGACCCGGG.CCC ..... ACGUACCGAGGAAACCC..  
Pac-1-1 UUCGG UUCGGUUCAGCCCGCC ..... CGCCGA ..... GCGGGGGACCCGGG.CCC ..... ACGAUGAGGAGACCCGUA  
env-127 CUCGG UUCGGUUCAGCCCA ..... GUGCA ..... UGGAGACCCGGG.CCC ..... ACUCGACCCUAGGAGCCGAU  
env-128 GCGGG UUCGGUUCAGGUGGC.GG ..... ACCGG ..... CGCCGAGGACCCGGG.CCC ..... CGACCCUAGGAGGAGACAU  
env-130 AGCGG UUCGGUUCAGGAGC.CCGG ..... AGCC ..... GCGGCGGACCCGGG.CCC ..... CAGAACCCGAGGAGACAC  
env-131 AGCGG UUCGGUUCAGGAGC.CCGG ..... AGCC ..... GCGGCGGACCCGGG.CCC ..... CAGAACCCGAGGAGACAC  
env-132 C.CCG GUCCGGUUCAGGUGG ..... CCGG ..... GCGGACCCGGG.CCC ..... ACAGACUAGGAGGACCA  
env-133 A.CCG GUCCGGUUCAGGUGG ..... UCGC ..... GGACCGACCCGGG.CCC ..... ACGAUGAGGAGGACCC..  
Bth-2-1 GACGG UUCGGUUCAGCCGCC ..... AUAGG ..... GGUUGGGACCCGG..GCC ..... CCGCCGAUUCCAUAGGAGACCA  
Bsc-1-1 AUAGG UUCGGUUCAGCCGCC ..... AUAGG ..... GGUUGGGACCCGGG..UCC ..... CCGGAUUCCAUAGGAGACCA  
Bth-7-1 GACGG UUCGGUUCAGCCGCC ..... AUAGG ..... GGUUGGGACCCGGG..UCC ..... UGAUUCCAUAGGAGACCA  
Bth-8-1 GACGG UUCGGUUCAGCCGCC ..... AUAGG ..... GGUUGGGACCCGGG..UCC ..... CCGGAUUCCAUAGGAGACCA  
Bth-5-1 GACGG UUCGGUUCAGCCGCC ..... AUAGG ..... GGUUGGGACCCGGG..UCC ..... CCGGAUUCCAUAGGAGACCA  
Bth-3-1 GACGG UUCGGUUCAGCCGCC ..... AUAGG ..... GGUUGGGACCCGGG..UCC ..... CCGGAUUCCAUAGGAGACCA  
Bth-6-1 CAAGG UUCGGUUCAGCCGCC ..... AUAGG ..... GGUUGGGACCCGGG..UCC ..... CCGGAUUCCAUAGGAGACCA  
Bbo-2-1 GAGGG UUCGGUUCAGCCGCC ..... AUAGG ..... GGUUGGGACCCGGG..UCC ..... CCGGAUUCCAUAGGAGACCA  
env-136 GCUUG CUCCGGUUCAGCCUCUC ..... GCAGG ..... GAGGGGACCCGGG.CCC ..... GAGGAGGAGACCC..  
Nsp-4-1 CUIGG CUCCGGUUCAGCCUCUC ..... GCAGG ..... GAGGGGACCCGGG.CCC ..... GAGGAGGAGACCC..  
env-137 GCUUG UUCGGUUCAGGUCC.CACGGG ..... ACCA ..... GCGGGUACCCGGGACCCGGG.CCC ..... GAUGAGGAGACCC..  
env-138 CUCGG UCCGGUUCAGGCC.GCACAUCCUUCCGGUC ..... CAUUC ..... GCGGGG.GGGAG ..... GGGGACCCGGG..GCC ..... GAAACCCUCCGAGGAGACCC..  
env-139 CUCGG UCCGGUUCAGGCC.GCACAUCCUUCCGGUC ..... CAUUC ..... GCGGGG.GGGAG ..... GGGGACCCGGG..GCC ..... CCGGAGGAGGAGGAGGCC..  
env-140 CUCGG UCCGGUUCAGGCC.GCACAUCCUUCCGGUC ..... CAUUC ..... GCGGGG.GGGAG ..... GGGGACCCGGG..GCC ..... CCGGAGGAGGAGGAGGCC..  
env-141 AACGG UUCGGUUCAGGGGG ..... CGAUCCGGACACGCCCGCCCGUCUAGGAGCAC ..... CGCCGACCCGGG.CCC ..... CCGGUUCGCGCCAGUCCGGGUCGCAC  
env-142 AACGG UUCGGUUCAGGGGG ..... CGAUCCGGACACGCCCGCCCGUCUAGGAGCAC ..... CGCCGACCCGGG.CCC ..... CCGGUUCGCGCCAGUCCGGGUCGCAC  
Fsp-8-1 CCGGG UUCGGUUCAGGCUUGG ..... CAUAUUUA ..... CGCAGGACCCGGG.CCC ..... CGCGUCCGCGCCAGUCCGGGUCGCAC  
env-143 CUCGGCUUCGCUUCAGGGGG ..... ACCCG ..... CGCAGGACCCGGG.CCC ..... CGCAGGACCCGGG.CCC ..... CGCGUCCGCGCCAGUCCGGGUCGCAC  
Nsp-10-1 GCUUG CUCCGGUUCAGCCACCC ..... GUAGG ..... GCGGACCCGGG.CCC ..... GAGG.GGGGACCCGGG.CCC ..... GAGGAGGAGACCC..  
env-144 CCGGG UUCGGUUCAGGAGUCCGCUUGGGGG ..... GCUCGAUG ..... CAGUGC.GGG ..... CCGG.UCCGACCCGGG.CCC ..... GAGGAGGAGACCC..  
Cja-1-1 AGCGG UUCGGUUCAGCCGUCGAGC ..... AGCC ..... GCUCCGAGACCCGGG.CCC ..... CCGG.UCCGACCCGGG.CCC ..... GAGGAGGAGACCC..  
Fsy-1-1 CCGGG CAACGGUUCAGCCGUCGUC ..... AGG ..... GGAC.AGGGGACCCGGG.CCC ..... CCGG.UCCGACCCGGG.CCC ..... GAGGAGGAGACCC..  
Fco-1-1 CCGGG CAACGGUUCAGCCGUCGUC ..... AGG ..... GGAC.AGGGGACCCGGG.CCC ..... CCGG.UCCGACCCGGG.CCC ..... GAGGAGGAGACCC..  
env-145 UCAGE UAACGGUUCAGCCCGGGG ..... AAUCCA ..... UCCAGGACCCGGG.CCC ..... UCCAGGACCCGGG.CCC ..... CAACGAGGAGACCC..  
Ply-1-1 CUCGG UUCGGUUCAGGCC ..... UUAUUCGUU ..... GGGGACCCGGG.CCC ..... GGGGACCCGGG.CCC ..... AGACAGGAGAAUA  
Ply-2-1 UUCGG UUCGGUUCAGGCC ..... UUAUUCGUU ..... GGGGACCCGGG.CCC ..... GGGGACCCGGG.CCC ..... AGACAGGAGAAUA  
Ssc-2-1 CUCGG CCACGGUUCAGGUGACCC ..... ACUC ..... GGGG.UCCGACCCGGG..GCC ..... GGGG.UCCGACCCGGG..GCC ..... CUCCCGAAACCCAGGAGAUCC  
Sri-4-1 CUCGG UCCGGUUCAGGUGACCC ..... AAUCA ..... GGCCACCCGGG..GCC ..... GGCCACCCGGG..GCC ..... CUCCCGAAACCCAGGAGAUCC  
Sri-2-1 CUCGG UCCGGUUCAGGUGACCC ..... AAUCA ..... GGCCACCCGGG..GCC ..... GGCCACCCGGG..GCC ..... CUCCCGAAACCCAGGAGAUCC  
Sgr-6-1 CUCGG UCCGGUUCAGGUGACCC ..... AAUCA ..... GGCCACCCGGG..GCC ..... GGCCACCCGGG..GCC ..... CUCCCGAAACCCAGGAGAUCC  
Sri-4-16 CUCGG CCACGGUUCAGGUGACCC ..... AAUCA ..... GGCCACCCGGG..GCC ..... GGCCACCCGGG..GCC ..... CUCCCGAAACCCAGGAGAUCC  
Ssp-75-1 CUCGG CCACGGUUCAGGUGACCC ..... AAUCA ..... GGCCACCCGGG..GCC ..... GGCCACCCGGG..GCC ..... CUCCCGAAACCCAGGAGAUCC



















Sgr-10-1 GUCGG. CCGGGUUCAGGU. CCGGC. AUCCC. GGGGGCGGACCGGG. GCG. CUCCCGAAACCUAGGAGACCC  
 Ssp-173-1 GUCGG. CCGGGUUCAGGU. CCGGC. AUCCC. GGGGGCGGACCGGG. GCG. CUCCCGAAACCUAGGAGACCC  
 Ssp-16-1 GUCGG. CUCCGGUUCAGGU. CCGGC. AUCCC. GGGGGCGGACCGGG. GCG. CUCCCGAAACCUAGGAGACCC  
 Ssp-61-1 GUCGG. CUCCGGUUCAGGU. CCGGC. AUCCC. GGGGGCGGACCGGG. GCG. CUCCCGAAACCUAGGAGACCC  
 Ssp-175-1 GUCGG. CCGGGUUCAGGU. CCGGC. AACCC. GGGGGCGGACCGGG. GCG. CUCCCGAAACCUAGGAGACCC  
 Fsp-6-1 AGCGG. CUCCGGUUCAGGUCCCGG. GCCC. GGGG. GGGACCGGGG. GCG. ACAUCGAAAGAGGGACC  
 Fsp-13-1 AACGG. CUCCGGUUCAGGUCCUC. AUCC. GAGCGGGA. CCGGGG. GCG. ACAUCGAAAGAGGGACC  
 Fal-1-1 GACGG. CUCCGGUUCAGGUCCUC. AUCC. GAGCGGGA. CCGGGG. GCG. ACAUCGAAAGAGGGACC  
 Gte-4-1 UGCGG. UACCGGUUCAGGGCC. GCG. CCGGG. GAA. GCGGUGGACGGGGG. CCGGG. ACC. GAACGAGAGGGAAACUC  
 Mrh-1-1 UCAGG. UACCGGUUCAGGUCGUAUACGAGG. GAAAA. CGUGGU. GGGGAC. CCGGGG. ACC. ACAGAAUCGAGAGGACCC  
 env-419 CCGGG. CUCCGGUUCAGGG. CGCACGUCCA. GGGGAC. CCGGGG. GCG. ACCUGAAAGGGAUCCAG  
 env-421 CCGGG. CUCCGGUUCAGGG. CGCACGUCCA. GGGGAC. CCGGGG. GCG. ACCUGAAAGGGAUCCAG  
 env-422 CCGGG. CUCCGGUUCAGGG. CGCACGUCCA. GGGGAC. CCGGGG. GCG. ACCUGAAAGGGAUCCAG  
 env-423 UGCGG. UACCGGUUCAGGUCGUAUGG. CUCUGUUGGUCUUGGGGG. ACGA. CCGCCAGGCC. CGGAAA. CCGAGAGGGGAC. CCGGGG. ACC. GCGAAGGGCAGGAGUUGU  
 env-424 CGCGG. UACCGGUUCAGGUCGAGCGG. CAUCA. GCGCGCGGGG. CCGGGG. ACC. GACCAAGGCAGGAGUACAC  
 env-425 CGCGG. UACCGGUUCAGGUCGAGCGG. CAUCA. GCGCGCGGGG. CCGGGG. ACC. GACCAAGGCAGGAGUACAC  
 env-426 CGCGG. UACCGGUUCAGGUCGAGCGG. CAUCA. GCGCGCGGGG. CCGGGG. ACC. GACCAAGGCAGGAGUACAC  
 Nsp-11-1 CGCGG. UACCGGUUCGCGCA. UG. AGUU. CAUUGGGA. CCGGGG. ACC. GCACCAGGAAAGGACAGCC  
 env-428 CGCGG. UACCGGUUCAGGUACGAAAGCC. AGC. CC. CAU. GGUGUCGGCA. GUGGGA. CCGGGG. ACC. GCACGAGGCAAGGAGGAA  
 env-429 CGCGG. UACCGGUUCAGGUCA. AGUAC. AGUAC. UGGGGA. CCGGGG. ACC. GCUGAGGCAAGGAGGCAAC  
 env-430 CGCGG. UACCGGUUCAGGUCA. AGUAC. AGUAC. UGGGGA. CCGGGG. ACC. GCUGAGGCAAGGAGGCAAC  
 env-431 UGAGG. UUCGGGUUCAGGUCC. AAUAGCUCAUA. GGGGGA. CCGGGG. ACC. GACGAUUGAAGAGGACAU  
 env-432 UGAGG. UUCGGGUUCAGGUCC. AAUAGCUCAUA. GGGGGA. CCGGGG. ACC. GACGAUUGAAGAGGACAU  
 env-433 UCAGG. UUCGGGUUCAGGUCC. ACGAACUCAUA. GGGGGA. CCGGGG. ACC. GACGAUUGAAGAGGACAU  
 env-434 UCAGG. UUCGGGUUCAGGUCCGAUU. UACCAGCAC. GAUCUGGGA. CCGGGG. ACC. GACUACUGAAGAGGACAU  
 env-435 UCAGG. UUCGGGUUCAGGUCCGAUU. UCUUGUCAC. GAUCUGGGA. CCGGGG. ACC. GAUUAUCGAAAGGACAU  
 Str-2-1 ACCGG. UUCGGGUUCAGGCGCUGCCGUGG. UACACC. CCGGG. CCGGGGAC. CCGGGG. ACC. ACCAACGAGAGGACCGAGG  
 Str-1-1 ACCGG. UUCGGGUUCAGGCGCUGCCGUGG. UACACC. CCGGG. CCGGGGAC. CCGGGG. ACC. ACCAACGAGAGGACCGAGG  
 Spa-24-1 ACCGG. UUCGGGUUCAGGCGCAGUCCGUGG. UACACC. CG. CGGC. CCGGGGAC. CCGGGG. ACC. ACCAACGAGAGGACCGAGG  
 Spa-32-1 ACCGG. UUCGGGUUCAGGCGCAGUCCGUGG. UACACC. CG. CGGC. CCGGGGAC. CCGGGG. ACC. ACCAACGAGAGGACCGAGG  
 Spa-7-1 ACCGG. UUCGGGUUCAGGCGCAGUCCGUGG. CACAC. CCACGG. UGGGGA. CCGGGG. ACC. ACCAACGAGAGGACCGAGG  
 Spa-27-1 ACCGG. UUCGGGUUCAGGCGCAGUCCGUGG. CACAC. CCACGG. UGGGGA. CCGGGG. ACC. ACCAACGAGAGGACCGAGG  
 Spa-5-1 ACCGG. UUCGGGUUCAGGCGCAGUCCGUGG. CACAC. CCACGG. UGGGGA. CCGGGG. ACC. ACCAACGAGAGGACCGAGG  
 Spa-38-1 ACUGG. UUCGGGUUCAGGCGCAGUCCGUGG. UACACC. CCGGG. CCGGGGAC. CCGGGG. ACC. ACCAACGAGAGGACCGAGG  
 env-436 UCAGG. UUCGGGUUCAGGCGCAGUAC. CAGGUCA. GAAA. CCGGGGA. CCGGGG. GCG. GACUACUGAAGAGGACAU  
 Msp-11-1 UCAGG. UACCGGUUCAGGUCCGA. AUUG. CAG. GUAAAA. CCGGGGAC. CCGGGG. ACC. AUUGAUCGAGAGGACAU  
 env-437 UCAGG. UUCGGGUUCAGGCGC. GCG. GGGGGA. CCGGGG. ACC. ACUGAGACAGGAGGACAU  
 env-438 UCAGG. UUCGGGUUCAGGUCCGAUUAC. AAGCUCA. GUA. GGGGGA. CCGGGG. ACC. ACCGACGAGAGGACAU  
 env-440 CUUGG. UUCGGGUUCAGGUCCGA. CCG. UCGGGGGA. CCGGGG. ACC. UGAAACCUAGGAGGACUGU  
 env-441 UGCGG. UACCGGUUCAGGUUCU. CGUGGC. UCU. GCGAGU. UAGGGGA. CCGGGG. ACC. GCGGACGAGGAGUUGU  
 env-442 UGCGG. UACCGGUUCAGGUCUUGG. CUCUGGGGG. ACGA. CCGCCAGGCC. CCGAGAA. CCGGGG. ACC. GCGGACGAGGAGUUGU  
 Gkr-1-1 UCAGG. UUCGGGUUCAGGCGC. UGC. CCGUGGGA. CCGGGG. ACC. ACAGAAAGGACAU  
 env-443 UCAGG. UUCGGGUUCAGGCGC. CA. CG. AGCAGUC. CGAUG. CCGGGGAC. CCGGGG. GCG. GACGAUUGAAGAGGACAU  
 env-446 GCGGG. UUCGGGUUCAGGUCGG. ACCC. GGG. GGA. CCGGGG. GCG. CCGGACCGGAGGAGGACAU  
 env-447 UCAGG. UUCGGGUUCAGGUCGG. ACCU. CGCAGGGGA. CCGGGG. ACC. CUGAGCGAAGGACAU  
 env-448 GUCGG. UUCGGGUUCAGGUCGG. ACCU. CGCAGGGGA. CCGGGG. ACC. CUGAGCGAAGGACAU  
 env-449 UCAGG. UUCGGGUUCAGGUCGG. GACC. CGCAGGGGA. CCGGGG. ACC. CUGAAACGAAAGGAC  
 Mhe-1-1 UCAGG. UUCGGGUUCAGGUCGG. ACAU. GGCAGGGGA. CCGGGG. GCG. GACGAUUGAAGAGGACAU  
 Rrh-1-1 UCAGG. UUCGGGUUCAGGUCGG. GCAGG. CGAAGGUA. CCGGGG. GCG. AUUGAAAGGACAU  
 Msp-13-1 UCAGG. UUCGGGUUCAGGUCGGUC. ACUUC. GAAGGGGGGA. CCGGGG. GCG. AACGAUUGAAGAGGACAU  
 env-450 UCAGG. UUCGGGUUCAGGACUUGGAA. AUCC. UUCGAGGGGA. CCGGGG. ACC. AUUCGAGAGGACAU  
 Tbi-1-1 UCAGG. UUCGGGUUCAGGACUUGGAA. AACC. UGAGGGGGA. CCGGGG. ACC. AUUCGAGAGGACAU  
 Msp-4-1 UCAGG. UUCGGGUUCAGGUCCAGCC. CACG. GGGGGGGA. CCGGGG. ACC. CACGAUCGAAAGGACAU  
 Mav-1-1 UCAGG. UUCGGGUUCAGGUCCAGCC. CAAG. GGG. GGGGGA. CCGGGG. ACC. CACGAUCGAAAGGACAU  
 Msp-16-1 UCAGG. UUCGGGUUCAGGUCCGG. CCCACAGC. CCGGGGGA. CCGGGG. GCG. CACGAUUGAAGAGGACAU  
 env-452 UCAGG. UUCGGGUUCAGGUCCGG. UCGAC. GGGGGGGA. CCGGGG. GCG. GACGAUCGAAAGGACAU  
 Msp-12-1 UCAGG. UUCGGGUUCAGGUCCGG. CCAA. GCGGGGGGA. CCGGGG. GCG. GACGAUCGAAAGGACAU  
 Msp-14-1 UCAGG. UUCGGGUUCAGGUCCGG. CGCA. GGGGGGGGA. CCGGGG. GCG. GACGAUCGAAAGGACAU  
 Msp-17-1 UCAGG. UUCGGGUUCAGGUCCGG. CGCA. GGGGGGGGA. CCGGGG. ACC. GACGAUCGAAAGGACAU  
 env-453 UCAGG. UUCGGGUUCAGGCCC. GCAAGCCAGGUUCGAAUCUCA. GGGGGA. CCGGGG. ACC. ACCUACGAAAGGACAU  
 Mky-1-1 UCAGG. UUCGGGUUCAGGUCCGAGCAUCG. GCG. CGAUGC. GGGGGA. CCGGGG. GCG. GACGAUCGAAAGGACAU  
 Sar-43-1 ACUGG. UUCGGGUUCAGGUCCGAGC. UCGCACAU. CGCAGUCGGGGGA. CCGGGG. ACC. ACCGACGAGAGGACCGAGG  
 Sar-11-1 AUUGG. UUCGGGUUCAGGUCCGAGC. UCGCACAU. CGCAGUCGGGGGA. CCGGGG. ACC. ACCGACGAGAGGACCGAGG  
 env-454 CCAGG. UUCGGGUUCAGGCCCC. GCG. CCGGGGGA. CCGGGG. ACC. ACAUCAGUUGAAGGAGGACCGAGG  
 env-455 CGCGG. UUCGGGUUCAGGCCCC. AGCC. CGAGGGGA. CCGGGG. ACC. CACUUGAGAG. GGAGACCC  
 env-456 GGAGG. UUCGGGUUCAGGCCCC. AGUCC. CGAGGGGA. CCGGGG. ACC. GCAGACAGGAGGACCGU  
 Ase-1-1 UGAGG. UUCGGGUUCAGGCCCCGUGG. ACAGG. CGCC. UGGGGA. CCGGGG. ACC. UACCGAGAGGACCGCC  
 Fsp-9-1 ACCGG. CUCCGGUUCAGGCCCCUUC. ACUCG. GAAGGGGA. CCGGGG. GCG. AUUCGAAAGAGGGACC  
 env-457 ACCGG. CUCCGGUUCAGGCCCCUUC. ACCCG. GGGUGAGGGGGA. CCGGGG. GCG. AUUCGAAAGAGGGACC  
 env-459 ACCGG. CUCCGGUUCAGGCCCCUUC. ACCCG. GGGUGAGGGGGA. CCGGGG. GCG. ACCGGAAGGAGGACCGCC  
 env-460 AGCGG. UUCGGGUUCAGGCCCC. CCGCGGC. ACCCCGGUGUCACGCGCGAAGCCUCACAG. GGGGGA. CCGGGG. ACC. GCGUUUGGA  
 Spa-33-1 ACCGG. UUCGGGUUCAGGCCCCUUCGUGUA. CACC. UCGCGCC. GGGGGA. CCGGGG. ACC. ACCAACGAGAGGACCGAGG  
 Vma-1-1 ACCGG. UUCGGGUUCAGGCCCCUUGAUCGGCGGG. AGCG. GGGGGA. CCGGGG. ACC. ACCGACGAGAGGACCGAGG  
 Gbr-1-1 UCAGG. UUCGGGUUCAGGCCCC. AGACA. CGACGGGUA. CCGGGG. ACC. ACAGAAAGGGACCA  
 Gna-1-1 UCAGG. UUCGGGUUCAGGCCCC. AGAGG. CGAGGGUA. CCGGGG. GCG. ACAGAAAGGGACCA  
 Gal-1-1 UCAGG. UUCGGGUUCAGGCCCC. AGAGG. CGACGGGUA. CCGGGG. ACC. CCAGAAAGGGACCA  
 Gam-2-1 UCAGG. UUCGGGUUCAGGCCCC. AGAGG. CGAGGGUA. CCGGGG. ACC. ACAGAAAGGGACCA  
 Gsp-1-1 UCAGG. UUCGGGUUCAGGCCCC. AGAGG. CGACGGGUA. CCGGGG. ACC. ACAGAAAGGGACCA  
 Gpa-1-1 UCAGG. UUCGGGUUCAGGCCCC. AGAGG. CGAGGGUA. CCGGGG. ACC. ACAGAAAGGGACCA  
 Gru-1-1 UCAGG. UUCGGGUUCAGGCCCC. AGAGG. CGACGGGUA. CCGGGG. ACC. CGAGAAAGGGACCA  
 Gam-3-1 UCAGG. UUCGGGUUCAGGCCCC. ACAGG. CGAGGGUA. CCGGGG. ACC. AUAGAAAGGGACCA  
 Gte-3-1 UCAGG. UUCGGGUUCAGGCCCC. ACAAG. CGACGGGUA. CCGGGG. ACC. ACAGAAAGGGACCA  
 Nsp-1-1 UCAGG. UUCGGGUUCAGGCCCC. AUCCG. CGAAGGUA. CCGGGG. ACC. AUGAAAGGGACCA

Wsp-1-1 UCCGG UUCCGGUUCACCCUUCG ..... AUCCG ..... CGAAGGUGACCCGGC ACC ..... AUUGAAAAGGACACCA  
Kar-2-1 UCCGG UUCCGGUUCACCCUUCG ..... AUCCG ..... CGAAGGUGACCCGGC ACC ..... AUUGAAAAGGACACCA  
Gef-1-1 UCCGG UUCCGGUUCACCCUUCG ..... AUCCA ..... CGAUGGUGACCCGGC ACC ..... AUGGAAAAGGACAUCC  
env-461 UCCGG UUCCGGUUCACCCUUCG ..... AUCCA ..... CGAUGGUGACCCGGC ACC ..... ACGAGAAAAGGACACCG  
Gpo-3-1 UCCGG UUCCGGUUCACCCGACG ..... AUCCG ..... CGCGGUGACCCGGC ACC ..... ACGGAAAAGGACACCA  
Grh-1-1 UCCGG UUCCGGUUCACCCGUCG ..... AUCCG ..... CGACGGUGACCCGGC ACC ..... AUAGAAAAGGACACCA  
env-462 UCCGG UUCCGGUUCAGGUACU ..... GACU ..... GAGGGGACCCGGC ACC ..... UUGAAAAGGACGGA  
Rde-1-1 UCCGG UUCCGGUUCAGGUUCG ..... AAUGG ..... CGAGGUGACCCGGC ACC ..... AUUGAAAAGGACACC  
Req-3-1 UCCGG UUCCGGUUCAGGCGUCG ..... AACGG ..... CGAGGACGACCCGGC GCC ..... AUCCGAAAAGGACACC  
env-463 UCCGG UUCCGGUUCAGGUUCG ..... AACGG ..... CGAGGACGACCCGGC ACC ..... AUUGAAAAGGACACC  
Rfa-3-1 UCCGG UUCCGGUUCAGGUUCG ..... AACGG ..... CGAGGACGACCCGGC ACC ..... AUUGAAAAGGACACC  
Rsp-2-1 UCCGG UUCCGGUUCAGGUUCG ..... AACGG ..... CGAGGACGACCCGGC ACC ..... AUUGAAAAGGACACC  
Rsp-3-1 UCCGG UUCCGGUUCAGGUUCG ..... ACAAG ..... CGAAGGGAACCCGGC ACC ..... ACUACGAAAGACGGUAAAGGACACC  
Rfa-12-1 UCCGG UUCCGGUUCAGGUUCG ..... AUCCG ..... CGAAGGGAACCCGGC ACC ..... ACUAGAGAGAACGGUAAAGGACACC  
Rsp-13-1 UCCGG UUCCGGUUCAGGUUCG ..... AUCCG ..... CGAAGGGAACCCGGC ACC ..... AUUGAAAAGGACACC  
Rop-1-1 UCCGG UUCCGGUUCAGGUUCG ..... AUCCG ..... CGAAGGGAACCCGGC ACC ..... AUUGAAAAGGACACC  
Rfa-21-1 UCCGG UUCCGGUUCAGGUUCG ..... AUCCG ..... CGAAGGGAACCCGGC ACC ..... AUUGAAAAGGACACC  
Rfa-1-2 UCCGG UUCCGGUUCAGGUUCG ..... AUCCG ..... CGAAGGGAACCCGGC ACC ..... AUUGAAAAGGACACC  
Rfa-4-1 UCCGG UUCCGGUUCAGGUUCG ..... AUCCG ..... CGAAGGGAACCCGGC ACC ..... AUUGAAAAGGACACC  
Rfa-7-1 UCCGG UUCCGGUUCAGGUUCG ..... AUCCG ..... CGAAGGGAACCCGGC ACC ..... AUUGAAAAGGACACC  
Rfa-20-1 UCCGG UUCCGGUUCAGGUUCG ..... AUCCG ..... CGAAGGGAACCCGGC ACC ..... AUUGAAAAGGACACC  
Rfa-8-1 UCCGG UUCCGGUUCAGGUUCG ..... AUCCG ..... CGAAGGGAACCCGGC ACC ..... AUUGAAAAGGACACC  
Rtr-1-1 UCCGG UUCCGGUUCAGGUUCG ..... AUCCG ..... CGAAGGGAACCCGGC ACC ..... AUUGAAAAGGACACC  
Rsp-19-1 UCCGG UUCCGGUUCAGGUUCG ..... AUCCG ..... CGAAGGGAACCCGGC ACC ..... AUUGAAAAGGACACC  
Rsp-21-1 UCCGG UUCCGGUUCAGGUUCG ..... AUCCG ..... CGAAGGGAACCCGGC ACC ..... AUUGAAAAGGACACC  
Sar-21-1 AUCCG UUCCGGUUCAGGUUCGACUCCGUCG ..... ACAACC ..... GCGAC ..... CCGGGGACCCGGC ACC ..... ACCGACGAGAGGACCGAGG  
Sar-40-1 AUCCG UUCCGGUUCAGGUUCGACUCCGUCG ..... ACAACC ..... GCGAC ..... CCGGGGACCCGGC ACC ..... ACCGACGAGAGGACCGAGG  
Sar-27-1 AUCCG UUCCGGUUCAGGUUCGACUCCGUCG ..... ACAACC ..... GCGAC ..... CCGGGGACCCGGC ACC ..... ACCGACGAGAGGACCGAGG  
Sar-33-1 AUCCG UUCCGGUUCAGGUUCGACUCCGUCG ..... ACAACC ..... GCGAC ..... CCGGGGACCCGGC ACC ..... ACCGACGAGAGGACCGAGG  
Sar-26-1 AUCCG UUCCGGUUCAGGUUCGACUCCGUCG ..... ACAACC ..... GCGAC ..... CCGGGGACCCGGC ACC ..... AUCCACGAGAGGACCGAGG  
Sar-22-1 AUCCG UUCCGGUUCAGGUUCGACUCCGUCG ..... ACAACC ..... GCGAC ..... CCGGGGACCCGGC ACC ..... ACCGACGAGAGGACCGAGG  
Sar-17-1 AUCCG UUCCGGUUCAGGUUCGACUCCGUCG ..... ACAACC ..... GCGAC ..... CCGGGGACCCGGC ACC ..... ACCGACGAGAGGACCGAGG  
Sar-24-1 AUCCG UUCCGGUUCAGGUUCGACUCCGUCG ..... ACAACC ..... GCGAC ..... CCGGGGACCCGGC ACC ..... ACCGACGAGAGGACCGAGG  
env-474 AUCCG UUCCGGUUCAGGCGC ..... GAGUCCGUGCCCGCGCG ..... ACCAUC ..... GCGACA ..... UGGGGACCCGGC ACC ..... AUCCGAGAAAAGGACCGAGGCGAC  
env-475 AUCCG UUCCGGUUCAGGCGC ..... CG AGCC CCGC ..... ACCU ..... UGCGCGCGGGU CGGAGCGCGAGGGGGACCCGGC ACC ..... AUCCGAGAAAAGGACCGAGG  
Whe-1-1 UCCGG UUCCGGUUCAGCCGCGC ..... CCGC ..... ACAC ..... GCGGAC ..... CCGGGGACCCGGC ACC ..... AUUGAAAAGGACACCA  
Spa-28-1 AUCCG UUCCGGUUCAGGCGCAUCUGUCG ..... ACAACC ..... GCGGAC ..... CCGGGGACCCGGC ACC ..... ACCAACGAGAGGACCGAGG  
Spa-36-1 AUCCG UUCCGGUUCAGGCGCAUCCGUCG ..... ACAC ..... GCGGC ..... UGGGGACCCGGC ACC ..... ACCAACGAGAGGACCGAGG  
Spa-8-1 AUCCG UUCCGGUUCAGGCGCAUCCGUCG ..... ACAC ..... GCGGC ..... UGGGGACCCGGC ACC ..... ACCAACGAGAGGACCGAGG  
Dau-1-1 CCGGG UUCCGGUUCAGGCG ..... ACAC ..... GCGGC ..... UGGGGACCCGGC ACC ..... ACUGAACGAGGACCGAGG  
Mlu-1-1 AUCCG UUCCGGUUCAGGCGC ..... CG AGCCCGUGCGU ..... ACG ..... GCGGAC ..... CCGGGGACCCGGC ACC ..... ACCAACGAGAGGACCGAGG  
Mch-6-1 AUCCG UUCCGGUUCAGGCGC ..... CG AGCCCGUGUGU ..... ACG ..... GCGGC ..... UGGGGACCCGGC ACC ..... ACCAACGAGAGGACCGAGG  
Mpa-1-1 AUCCG UUCCGGUUCAGGCGC ..... CG AGCCCGUGCGU ..... ACG ..... GCGGC ..... UGGGGACCCGGC ACC ..... ACCAACGAGAGGACCGAGG  
Rsp-9-1 UCCGG CUCCGGUUCAGGUUCG ..... ACCCG ..... GCGGAC ..... CCGGGGACCCGGC ACC ..... ACUGAACGAGGACCGAGG  
Rrh-2-1 UCCGG CUCCGGUUCAGGUUCG ..... ACCCG ..... GCGGAC ..... CCGGGGACCCGGC ACC ..... ACCAACGAGAGGACCGAGG  
Rsp-14-1 UCCGG CUCCGGUUCAGGUUCG ..... ACCCG ..... GCGGAC ..... CCGGGGACCCGGC ACC ..... ACCAACGAGAGGACCGAGG  
Rsp-5-1 UCCGG UCUCGGUUCAGGUUCG ..... AUCCG ..... GCGGAC ..... CCGGGGACCCGGC ACC ..... ACCAACGAGAGGACCGAGG  
Rru-2-1 UCCGG UCUCGGUUCAGGUUCG ..... AUCCG ..... GCGGAC ..... CCGGGGACCCGGC ACC ..... ACUGAACGAGGACCGAGG  
Rru-3-1 UCCGG UCUCGGUUCAGGUUCG ..... AUCCG ..... GCGGAC ..... CCGGGGACCCGGC ACC ..... ACCAACGAGAGGACCGAGG  
Rru-1-1 UCCGG UCUCGGUUCAGGUUCG ..... AUCCG ..... GCGGAC ..... CCGGGGACCCGGC ACC ..... ACUGAACGAGGACCGAGG  
Ntr-1-1 UCCGG UCUCGGUUCAGGUUCG ..... AUCCG ..... GCGGAC ..... CCGGGGACCCGGC ACC ..... ACCAACGAGAGGACCGAGG  
Not-2-1 UCCGG UCUCGGUUCAGGUUCG ..... AUCCG ..... GCGGAC ..... CCGGGGACCCGGC ACC ..... ACUGAACGAGGACCGAGG  
Not-1-1 UCCGG UCUCGGUUCAGGUUCG ..... AUCCG ..... GCGGAC ..... CCGGGGACCCGGC ACC ..... ACCAACGAGAGGACCGAGG  
env-476 CCGGG UAUCGGUUCAGGCGACAGGCGC CAGCCCG ..... ACAU ..... GGAGCCUGGUA ..... GCGGGGACCCGGC ACC ..... GCACGAGGACGAGGUAUAC  
Msp-26-1 AUCCG UUCCGGUUCAGGCGC ..... CG AGUCCCGUG ..... CACCA ..... CGACGGGACCCGGC ACC ..... ACCGACGAAAAGGACCGAGG  
env-477 UCCGG UAUCGGUUCAGGCGC ..... CCGGCGUG ..... GCAUUA ..... CAUCGCGCGGGGACCCGGC ACC ..... GCGGACGAGGACGAGGUAUAC  
env-478 CACGG UAUCGGUUCAGGUUCGCGCG ..... CUUG ..... CCGGAC ..... GAGGACCCGGC ACC ..... AUUGACGAGGAGGUAUAC  
env-479 CACGG UAUCGGUUCAGGUUCGCGCG ..... UUCG ..... CCGGAC ..... GAGGACCCGGC ACC ..... ACUGAACGAGGACCGAGG  
Gsp-3-1 UCCGG UUCCGGUUCAGGCGUA ..... CCGG ..... UAGCGGACCCGGC ACC ..... CCGGAAAAGGGAAGUC  
env-481 UCCGG UUCCGGUUCAGGCG ..... UCCG ..... GCGGAC ..... CCGGGGACCCGGC ACC ..... CCGGAAAAGGGAAGUC  
env-482 UCCGG UAUCGGUUCAGGCGCCCGUGU CUC CC ..... AUCCG ..... GGCCACUGGUGGAGGGG CCGGGC ACC ..... GCGUAGGCGGAGGAGAAC  
env-483 UCCGG UAUCGGUUCAGGCGUUC CACAUUCUCCACGGG ..... UCCG ..... CCCAUGGGC ..... GUGCGAGGGG CCGGGC ACC ..... GCGUAGGCGGAGGAGAAC  
env-484 UCCGG UAUCGGUUCAGGCGUUC GUGG ..... UUCU ..... CCGGAC ..... GAGGACCCGGC ACC ..... GCGUAGGCGGAGGAGAAC  
env-485 AGCGG UAUCGGUUCGCGC ..... CCGCGUUCAGGUGU ..... GCGGAC ..... GCGGACCGGCG ACC ..... GCGUAGGCGGAGGAGAAC  
env-486 CCGGG UAUCGGUUCGCGC ..... GCGCGUUCAGGUGU ..... GCGGAC ..... GCGGACCGGCG ACC ..... GCGUAGGCGGAGGAGAAC  
Sam-2-1 AGCGG UUCCGGUUCGCGCGC ..... GCGCGUUCAGGUGU ..... GCGGAC ..... GCGGACCGGCG ACC ..... GCGUAGGCGGAGGAGAAC  
Sro-7-1 AGCGG UUCCGGUUCGCGCGCGC ..... GCGCGUUCAGGUGU ..... GCGGAC ..... GCGGACCGGCG ACC ..... GCGUAGGCGGAGGAGAAC  
Sro-3-1 AGCGG UUCCGGUUCGCGCGCGC ..... GCGCGUUCAGGUGU ..... GCGGAC ..... GCGGACCGGCG ACC ..... GCGUAGGCGGAGGAGAAC  
Mau-1-1 AUCCG UUCCGGUUCAGGCGC ..... CG AGCCCGUGC ..... UGA ..... CGACGGG ..... CGCACCGACCGGACCCGGC ACC ..... ACCGACGAAAAGGACCGAGG  
Msp-9-1 AUCCG UUCCGGUUCAGGCGC ..... CG AGCCCGUGC ..... UGA ..... CGACGGG ..... CGCACCGACCGGACCCGGC ACC ..... ACCGACGAAAAGGACCGAGG  
Msp-10-1 AUCCG UUCCGGUUCAGGCGC ..... CG AGCCCGUGC ..... UGA ..... CGACGGG ..... CGCACCGACCGGACCCGGC ACC ..... ACCGACGAAAAGGACCGAGG  
Msp-28-1 AUCCG UUCCGGUUCAGGCGC ..... CG AGCCCGUGC ..... UGA ..... CGACGGG ..... CGCACCGACCGGACCCGGC ACC ..... ACCGACGAAAAGGACCGAGG  
env-487 CCGGG UUCCGGUUCAGGCGCAUACAGGCGCGCGCGUC ..... CCAU ..... GACCGGUGA ..... CG ..... UGGGACCCGGC ACC ..... GCGUAGGCGGAGGAGAAC  
env-488 AUCCG UUCCGGUUCAGGCGC ..... CCGCGUUCGUGU ..... UUCG ..... ACCGGGACCGGCGAGGACCGGACCCGGC ACC ..... AUUGAACGAGGAGGAGAAC  
Msp-8-1 AUCCG UUCCGGUUCAGGCGC ..... CG AGCCCGACGCG ..... CGCCA ..... CCGGUCGGGGCGC ..... CAGCGGACCCGGC ACC ..... ACCAACGAGAGGACCGAGG  
env-489 CCGGG UUCCGGUUCAGGCGCGCGCGCGCGUG ..... UGAA ..... ACCGGGACCGGCG ..... GGGGACCCGGC GCC ..... GCGUAGGCGGAGGAGGAGAAC  
env-490 CCGGG UUCCGGUUCAGGCGCGCGCGCGCGUG ..... UGAA ..... ACCGGGACCGGCG ..... GGGGACCCGGC GCC ..... GCGUAGGCGGAGGAGGAGAAC  
Nco-1-1 UCCGG UUCCGGUUCAGGCGUACG ..... UCA ..... GCGGAC ..... CCGGGGACCCGGC ACC ..... GCGUAGGCGGAGGAGGAGAAC  
env-494 CCGGG UAUCGGUUCAGGCGC ..... CCGGG ..... GCGGAC ..... CCGGGGACCCGGC ACC ..... GCGGACCGGACCCGGC ACC  
Mca-1-1 AUCCG UUCCGGUUCAGGCGCG ..... AUCCGACACG ..... CGA ..... CCGGUCGGGGCGCACCGGCGGACCCGGC ACC ..... CCGGUCGGGGCGCACCGGCGGACCCGGC ACC  
env-495 CCGGG UAUCGGUUCAGGCGCACGAGGGC ..... CCUGCU ..... GAC ..... GGGACGAGUCCG ..... GGGGACCCGGC ACC ..... GCGUAGGCGGAGGAGGAGAAC  
env-496 UCCGG UAUCGGUUCAGGCGUUCGU ..... GAUC ..... GAG ..... AGCGGACCCGGC ACC ..... GCGGACCGGACCCGGC ACC  
env-497 UCCGG UAUCGGUUCAGGCGU ..... GAG ..... AGCGGACCCGGC ACC ..... AGCGGACCCGGC ACC









Aha-2-1 UU.....AUG  
 env-29 .....AUG  
 Sni-1-1 .....AUG  
 env-30 .....AUG  
 Asp-2-1 AGAAGAC..AUG  
 env-31 CGAC.....AUG  
 Hal-1-1 .....AUG  
 env-32 .....AUG  
 Ssp-169-1 .....AUG  
 Dsp-2-1 .....AUG  
 Mel-1-1 .....AUG  
 env-33 .....AUG  
 Car-1-1 .....AUG  
 env-34 .....AUG  
 Asp-3-1 CU.....AUG  
 env-35 .....AUG  
 env-36 .....AUG  
 Mth-1-1 .....AUG  
 env-37 .....AUG  
 env-38 .....AUG  
 env-39 UC.....AUG  
 env-40 .....AUG  
 env-41 .....AUG  
 env-42 .....AUG  
 Ssp-96-1 .....AUG  
 Sya-1-1 .....UUG  
 Ssp-87-1 .....UUG  
 Ssp-122-1 .....UUG  
 Ssp-97-1 .....UUG  
 Ssp-148-1 .....AUG  
 Ssp-88-1 .....UUG  
 Ssp-164-1 .....UUG  
 Svi-13-2 .....UUG  
 Ssp-28-1 .....AUG  
 Ssp-8-1 .....AUG  
 Ssp-143-1 .....UUG  
 Sla-2-1 .....UUG  
 Ska-1-1 .....AUG  
 Sro-6-1 .....UUG  
 Ssp-133-1 .....AUG  
 Sxa-1-1 .....AUG  
 Ska-1-2 .....UUG  
 Ssp-138-1 .....UUG  
 Ser-3-1 .....UUG  
 Sla-2-2 .....UUG  
 Ssp-131-1 .....UUG  
 Ssp-86-1 .....AUG  
 Sla-1-1 .....UUG  
 Ssp-166-1 .....UUG  
 Svi-13-3 .....AUG  
 Dsp-1-1 AC.....AUG  
 Dho-1-1 AC.....AUG  
 Bpa-1-1 .....AUG  
 Bph-1-1 .....AUG  
 Bfa-1-1 .....AUG  
 env-43 .....AUG  
 env-45 .....AUG  
 env-46 .....AUG  
 Bmu-1-1 CG.....AUG  
 Bsqa-1-1 CG.....AUG  
 Sba-1-1 .....AUG  
 env-47 CC.....AUG  
 env-48 .....AUG  
 env-49 .....AUG  
 env-50 C.....GUG  
 env-51 C.....GUG  
 env-52 .....AUG  
 env-53 AAG.....AUG  
 env-54 C.....GUG  
 env-55 .....AUG  
 env-56 GAGUA...AUG  
 env-57 .....AUG  
 env-59 C.....AUG  
 Spo-1-1 .....AUG  
 env-60 .....AUG  
 env-61 GA.....AAG  
 Ssp-51-1 UUG.....AAG  
 Sji-1-1 C.....AUG  
 Aut-1-1 AAGAC...AUG  
 Mtu-1-1 .....AUG  
 Cko-1-1 GGCG...AUG  
 Nla-1-1 U.....AUG  
 Nsp-9-1 C.....AUG  
 env-62 .....AUG

.....  
 .....  
 -----RUG



Afr-1-1 AAACC... AUG  
 env-63 CAACC... AUG  
 env-64 AAGAC... AUG  
 Asu-3-1 AGAUA...  
 env-65 ..... AUG  
 env-66 ..... AUG  
 env-67 ..... AUG  
 env-68 ..... AUG  
 env-69 ..... AUG  
 env-70 ..... AUG  
 env-73 ..... AUG  
 env-74 ..... AUG  
 env-75 ..... AUG  
 env-78 ..... AUG  
 env-80 ..... AUG  
 Ncy-1-1 ..... AUG  
 Ncy-2-1 ..... AUG  
 Npn-1-1 ..... AUG  
 env-81 ..... AAU  
 env-82 ..... AUG  
 env-83 ..... AUG  
 env-84 ..... AUG  
 env-85 ..... AUG  
 env-86 ..... AUG  
 env-87 C..... AUG  
 env-88 ..... AUG  
 Sre-2-1 G..... UUG  
 Acy-1-1 CU..... GUG  
 Mrh-2-1 ..... AUG  
 env-90 ..... AUG  
 env-92 ..... AUG  
 env-93 ..... AUG  
 env-94 ..... AUG  
 env-95 ..... AUG  
 env-96 ..... AUG  
 env-97 ..... AUG  
 env-99 ..... AUG  
 env-103 ..... AUG  
 env-104 ..... AUG  
 env-105 ..... AUG  
 env-111 ..... AUG  
 Bin-1-1 U..... AUG  
 env-112 U..... AUG  
 Bco-1-1 U..... AUG  
 env-114 ACA..... GUG  
 env-115 ACA..... AUG  
 env-116 ..... AUG  
 Sro-4-1 ..... UUG  
 Sgl-4-1 ..... UUG  
 Sal-8-1 ..... UUG  
 Sgr-12-1 ..... UUG  
 Ssp-55-1 ..... UUG  
 Ssp-62-1 ..... UUG  
 Ssp-167-1 ..... AUG  
 Sav-3-1 C..... AUG  
 Ssp-4-1 ..... AUG  
 Sxi-2-1 ..... AUG  
 Ssp-90-1 ..... AUG  
 Jal-1-1 AGC..... AUG  
 env-117 ..... AUG  
 env-125 AU..... AUG  
 Psp-1-1 GU..... AUG  
 env-126 ..... AUG  
 Pac-1-1 A..... AUG  
 env-127 ..... AUG  
 env-128 CG..... AUG  
 env-130 ACCC..... AUG  
 env-131 ACCC..... GUG  
 env-132 UC..... AUG  
 env-133 ..... AUG  
 Bth-2-1 CC..... AUG  
 Bsc-1-1 CC..... AUG  
 Bth-7-1 CC..... AUG  
 Bth-8-1 CC..... AUG  
 Bth-5-1 CC..... AUG  
 Bth-3-1 CC..... AUG  
 Bth-6-1 CC..... AUG  
 Bbo-2-1 CC..... AUG  
 env-136 ..... AUG  
 Nsp-4-1 ..... AUG  
 env-137 ..... AUG  
 env-138 ..... AUG  
 env-139 ..... AUG  
 env-140 ..... AUG

.....  
 .....  
 -----RUG

env-141 .....  
 env-142 .....  
 Fsp-8-1 .....AUG  
 env-143 .....  
 Nsp-10-1 .....  
 env-144 .....  
 Cja-1-1 CAC.....  
 Fsy-1-1 .....AUG  
 Fco-1-1 .....  
 env-145 .....  
 Ply-1-1 AA.....AUG  
 Ply-2-1 AA.....AUG  
 Ssc-2-1 U.....  
 Sri-4-1 C.....UUG  
 Sri-2-1 C.....UUG  
 Sgr-6-1 C.....UUG  
 Sri-4-16 C.....  
 Ssp-75-1 C.....UUG  
 Sri-4-18 C.....UUG  
 Sri-4-19 C.....UUG  
 Sri-4-20 C.....UUG  
 env-146 .....  
 env-147 .....  
 env-148 .....  
 Nal-1-1 C.....  
 env-149 C.....  
 Ssp-36-1 .....  
 Ssp-109-1 .....  
 Ssp-35-1 .....  
 Ssp-34-1 .....  
 Ssp-42-1 .....  
 env-150 GGC.....  
 Mau-2-1 .....  
 env-151 .....  
 env-153 CC.....AUG  
 Psp-10-1 .....  
 env-154 .....  
 env-156 .....  
 env-157 A.....GUG  
 env-158 A.....  
 env-159 A.....GUG  
 env-160 A.....  
 Mha-1-1 .....AUG  
 env-161 .....  
 env-162 AAG.....AUG  
 env-163 CC.....  
 env-164 AGAC.....  
 Asp-5-1 C.....  
 env-165 GU.....AAU  
 Nlu-1-1 .....AUG  
 Nba-1-1 .....  
 Ssp-177-1 .....  
 Lal-1-1 G.....  
 Gma-1-1 .....  
 Bme-1-1 .....  
 Bsu-2-1 .....AUG  
 Bre-1-1 A.....AUG  
 Blo-34-1 AA.....AUG  
 env-166 AA.....  
 Blo-22-1 AA.....AUG  
 env-167 AA.....  
 env-170 AA.....  
 env-196 AA.....  
 Blo-19-1 AA.....AUG  
 env-197 AA.....  
 env-216 AA.....  
 env-217 AA.....  
 env-219 .....  
 Ssp-47-1 .....  
 Sma-2-1 .....  
 Nrh-1-1 .....AUG  
 Nte-2-1 .....  
 Nsp-2-1 .....  
 env-220 .....AUG  
 env-221 .....  
 env-222 .....  
 env-223 C.....  
 env-224 C.....  
 env-225 AA.....GUG  
 env-226 C.....GUG  
 env-227 .....  
 env-228 C.....GUG  
 env-229 U.....  
 env-230 CU.....

.....  
 .....  
 -----RUG

env-231 ..... AUG  
 env-232 ..... GUG  
 env-233 ..... AUG  
 Fsp-3-1 ..... AUG  
 Ssy-1-1 CG ..... AUG  
 Ssp-54-1 ..... AUG  
 Ssp-174-1 ..... AUG  
 Ssp-32-1 ..... AUG  
 Sxy-1-1 ..... AUG  
 env-237 G ..... AUG  
 env-238 G ..... AUG  
 env-239 G ..... AUG  
 env-240 ..... AUG  
 Ssp-102-1 C ..... AUG  
 Sca-3-1 ..... AUG  
 Ghi-1-2 AU ..... AUG  
 Ssc-5-1 ..... AUG  
 Sro-5-1 C ..... AUG  
 Sva-2-1 C ..... AUG  
 Sye-1-1 ..... AUG  
 env-241 ..... AUG  
 env-242 ..... AUG  
 Nex-1-1 ..... AUG  
 Nar-1-1 ..... AUG  
 Nab-1-1 ..... AUG  
 Mar-1-1 ..... AUG  
 env-243 ..... AUG  
 env-244 ..... AUG  
 env-245 ..... AUG  
 Agl-1-1 GAAAC ..... AUG  
 Msp-15-1 ..... AUG  
 Mco-2-1 ..... AUG  
 env-248 ..... AUG  
 env-249 ..... AUG  
 Nmu-1-1 G ..... AUG  
 env-250 CG ..... AUG  
 env-252 CG ..... AUG  
 env-253 ..... AUG  
 env-254 ..... AUG  
 env-255 ..... AUG  
 env-256 ..... AUG  
 env-257 ..... AUG  
 env-258 ..... AUG  
 env-259 GC ..... GUG  
 env-260 C ..... AUG  
 env-261 CU ..... AUG  
 env-262 U ..... AUG  
 env-263 ACCCCAUC ..... AUG  
 env-264 CC ..... AUG  
 env-265 ..... UUG  
 env-266 UU ..... AUG  
 Nth-1-1 ..... AUG  
 Pan-1-1 ..... AUG  
 Sxi-1-1 ..... AUG  
 Ssa-1-1 ..... AUG  
 Mch-1-1 ..... AUG  
 env-267 ..... AUG  
 env-268 ..... AUG  
 env-274 ..... AUG  
 Pas-1-1 ..... AUG  
 Pdi-1-1 ..... AUG  
 env-279 ..... AUG  
 env-280 ..... GUG  
 Ame-4-2 ..... AUG  
 Asp-4-1 ..... AUG  
 Ath-1-1 ..... AUG  
 Sbi-1-1 C ..... AUG  
 Shy-4-1 C ..... UUG  
 Ssp-73-1 C ..... AUG  
 Sir-1-1 C ..... AUG  
 Ssp-165-1 C ..... AUG  
 Svi-3-1 C ..... AUG  
 env-281 C ..... GUG  
 env-282 C ..... AUG  
 env-283 AA ..... AUG  
 env-288 ..... AUG  
 env-289 ..... AUG  
 env-290 C ..... AUG  
 Gar-1-1 ..... AUG  
 Mro-1-1 C ..... AUG  
 env-291 ..... AUG  
 env-292 ..... AUG  
 Psu-1-1 A ..... AUG  
 Gne-1-1 C ..... AUG

.....  
 .....  
 -----RUG

Gsi-1-1 ..... AUG  
 Gsi-2-1 ..... AUG  
 Nta-1-1 ..... AUG  
 env-293 ..... AUG  
 env-294 ..... AUG  
 env-295 ..... AUG  
 env-298 .....  
 Mob-1-1 ..... AUG  
 Mob-1-2 ..... AUG  
 env-299 CUUCC ..... AUG  
 Asp-1-1 CACAC ..... AUG  
 env-300 CACCC ..... AUG  
 env-301 CACCC ..... AUG  
 env-302 ..... AUG  
 env-303 ..... AUG  
 Nsp-6-1 ..... AUG  
 env-304 ..... AUG  
 env-306 ..... AUG  
 env-307 ..... AUG  
 env-308 ..... AUG  
 env-309 ..... AUG  
 env-310 ..... AUG  
 env-311 ..... AUG  
 env-312 ..... AUG  
 env-314 AC ..... AUG  
 Ami-1-1 UAAAC ..... AUG  
 env-315 ..... AUG  
 env-317 ..... AUG  
 env-318 ..... AUG  
 env-319 ..... AUG  
 env-320 ..... AUG  
 env-321 ..... AUG  
 Nni-1-1 ..... AUG  
 Nsp-8-1 ..... AUG  
 env-322 ..... AUG  
 Rsp-20-1 ..... AUG  
 Rsp-16-1 ..... AUG  
 Mpu-1-1 CGAC ..... AUG  
 Msp-27-1 CGAC ..... AUG  
 env-323 ..... AUG  
 env-324 ..... AUG  
 Aal-1-1 ..... AUG  
 env-325 ..... AUG  
 env-329 ..... AUG  
 env-330 CCA ..... AUG  
 env-331 CCA ..... AUG  
 env-333 ..... AUG  
 env-334 ..... AUG  
 env-335 ..... AUG  
 env-336 C ..... AUG  
 env-337 ..... AUG  
 env-338 ..... AUG  
 Bts-1-1 CC ..... AUG  
 Ama-5-1 ..... AUG  
 env-339 C ..... AUG  
 env-340 ..... AUG  
 env-341 ..... AUG  
 env-342 ..... AUG  
 env-343 ..... AUG  
 env-344 ..... AUG  
 env-345 ..... AUG  
 Mva-1-1 ..... AUG  
 Mru-1-1 ..... AUG  
 Mva-2-1 ..... AUG  
 Mgi-1-1 ..... AUG  
 env-346 ..... AUG  
 env-347 GGC ..... AUG  
 env-348 GCC ..... AUG  
 Nas-2-1 ..... AUG  
 Mab-65-1 ..... AUG  
 env-349 ..... AUG  
 env-350 GACUC ..... AUG  
 Fsp-7-1 ..... AUG  
 Sca-1-1 ..... AUG  
 Ssv-1-1 ..... AUG  
 Ssp-50-1 ..... AUG  
 Ssp-19-1 ..... AUG  
 Aro-1-1 ..... AUG  
 Sca-2-1 ..... AUG  
 Nvi-1-1 ..... AUG  
 env-351 C ..... AUG  
 env-352 ..... AUG  
 env-353 ..... AUG  
 env-355 ..... AUG

.....  
 .....  
 -----RUG



env-358 ..... AUG  
 env-359 ..... AUG  
 env-360 ..... AUG  
 env-361 ..... AUG  
 env-363 ..... AUG  
 env-364 ..... AUG  
 env-365 ..... AUG  
 Mim-1-1 ..... AUG  
 Mab-73-1 ..... AUG  
 Mab-55-1 ..... AUG  
 Mab-1-114 ..... AUG  
 Mma-1-1 ..... AUG  
 env-366 ..... AUG  
 env-367 GAC..... AUG  
 env-368 GAC..... AUG  
 env-369 ..... AUG  
 Tsp-1-1 UU..... AUG  
 Tpa-1-1 GAC..... AUG  
 Are-1-1 AAGAC..... AUG  
 Nca-3-1 ..... AUG  
 env-370 ..... AUG  
 env-371 C..... GUG  
 Mph-1-1 ..... AUG  
 env-372 ..... AUG  
 env-373 ..... AUG  
 env-374 ..... AUG  
 env-377 ..... AUG  
 env-378 ..... AUG  
 env-379 ..... AUG  
 env-380 CC..... AUG  
 Sgr-9-1 ..... AUG  
 Sex-2-1 ..... AUG  
 Ssp-115-1 ..... AUG  
 Ssp-105-1 ..... AUG  
 Mgl-2-1 C..... AUG  
 Sgr-12-2 ..... UUG  
 Fsp-14-1 ..... AUG  
 Fsa-1-1 ..... AUG  
 Gar-2-1 ..... AUG  
 Spa-31-1 CGAC..... AUG  
 Spa-3-1 CGAC..... AUG  
 Spa-39-1 CGAC..... AUG  
 Spa-35-1 CGAC..... AUG  
 Spa-25-1 CGAC..... AUG  
 Nfa-1-1 ..... AUG  
 Msp-7-1 ..... AAU  
 Msp-19-1 ..... AUG  
 Mll-1-1 ..... AUG  
 Msp-3-1 ..... AUG  
 Msp-20-1 ..... AUG  
 Nsp-7-1 ..... AUG  
 Nve-1-1 ..... AUG  
 Nao-1-1 ..... AUG  
 Nce-1-1 ..... AUG  
 env-381 .....  
 env-382 ..... AUG  
 env-384 ..... AUG  
 env-386 ..... AUG  
 env-390 .....  
 Bas-1-1 ..... AUG  
 Bas-2-2 ..... AUG  
 Bsp-3-1 ..... AUG  
 env-391 ..... AUG  
 env-394 ..... AUG  
 env-396 ..... AUG  
 Bsp-2-1 ..... AUG  
 Bas-2-3 ..... AUG  
 Mma-2-1 ..... AUG  
 Msp-2-1 ..... AUG  
 env-398 ..... AUG  
 Nji-1-1 ..... AUG  
 Nno-1-1 ..... AUG  
 Nhi-1-1 ..... AUG  
 Msp-1-1 ..... AUG  
 Msp-18-1 ..... AUG  
 Mfo-1-1 ..... AUG  
 Mvu-1-1 ..... AUG  
 Mse-1-1 ..... AUG  
 Msp-23-1 ..... AUG  
 Mse-2-1 ..... AUG  
 Mse-3-1 ..... AUG  
 Mse-3-2 ..... AUG  
 Msp-22-1 ..... AUG  
 Mne-1-1 ..... AUG

.....  
 .....  
 -----RUG

```

env-400 ..... AUG
Msp-21-1 ..... AUG
Sal-7-1 C..... AUG
Szi-1-1 C..... AUG
Ssp-17-1 ..... UUG
Ssp-52-1 ..... UUG
Ssp-13-1 ..... UUG
Ssp-66-1 ..... UUG
Ssp-63-1 ..... UUG
Ssp-33-1 ..... UUG
Ssp-117-1 ..... AUG
Swa-1-1 ..... UUG
Ssp-26-1 ..... UUG
Sal-4-1 ..... UUG
Ssp-123-1 ..... AUG
Sgr-2-1 ..... AUG
Sco-3-1 C..... AUG
Ssp-67-1 ..... UUG
Ssp-137-1 ..... UUG
Slu-1-1 ..... AUG
Sga-2-1 ..... AUG
Sau-2-1 ..... AUG
Ssp-21-1 ..... AUG
Nvu-1-1 ..... AUG
Nbr-1-1 ..... AUG
Nte-1-1 ..... AUG
Spr-2-1 ..... AUG
Ssp-106-1 C..... UUG
env-401 ..... UUG
env-402 ..... UUG
Ssp-146-1 ..... UUG
Smi-1-1 ..... AUG
Sda-1-1 ..... AUG
Ssp-161-1 ..... UUG
Ssp-71-1 ..... UUG
Sgr-7-1 ..... UUG
Sgl-3-1 ..... UUG
Ssp-85-1 ..... AUG
Ssp-121-1 ..... AUG
Ssp-104-1 ..... UUG
Ssp-60-1 ..... UUG
Ssp-72-1 C..... AUG
Ssp-99-1 ..... AUG
Ssp-89-1 ..... AUG
Sbi-2-1 ..... UUG
Ssp-82-1 ..... UUG
Ssp-3-1 ..... AUG
Sam-1-1 ..... UUG
Ssp-108-1 ..... UUG
Ssp-48-1 ..... UUG
Ssp-124-1 ..... UUG
Ssp-110-1 ..... UUG
Ssp-140-1 ..... UUG
Ssp-107-1 ..... UUG
Ssp-112-1 ..... UUG
Svi-5-1 ..... AUG
Ssp-74-1 ..... UUG
Sbo-1-1 ..... AUG
env-407 ..... AUG
Ssp-101-1 ..... AUG
Ssp-136-1 ..... UUG
Sto-1-1 C..... AUG
Sch-1-1 ..... AUG
Saf-1-1 ..... UUG
Sva-1-1 ..... AUG
Ssp-154-1 ..... UUG
Sol-1-1 ..... UUG
Ssp-147-1 ..... UUG
Sia-1-1 ..... UUG
Sro-1-1 ..... UUG
Scy-3-1 ..... UUG
Sac-1-1 ..... UUG
Sla-3-1 ..... UUG
Ssp-160-1 ..... UUG
Shy-2-1 ..... UUG
Ssp-125-1 ..... UUG
Spe-1-1 ..... AUG
Ssp-141-1 ..... UUG
Svi-14-1 ..... UUG
Svi-4-1 ..... AUG
env-408 ..... UUG
Sol-2-1 ..... AUG
Kau-1-2 ..... UUG
Svi-12-1 ..... AUG

```

```

.....
.....
-----RUG

```

Sco-1-1 .....UUG  
 Ssp-58-1 .....UUG  
 Sno-1-1 .....UUG  
 Sgr-1-1 .....UUG  
 Sce-1-1 .....UUG  
 Ssp-176-1 .....UUG  
 Ssp-118-1 .....UUG  
 Svi-11-2 .....UUG  
 Sgr-12-7 .....UUG  
 Ssc-4-1 .....UUG  
 Ssp-69-1 .....UUG  
 Ssp-153-1 .....UUG  
 Sye-2-1 .....UUG  
 Sse-1-1 .....UUG  
 Sfu-2-1 .....UUG  
 Sdu-1-1 .....UUG  
 Sip-1-1 .....UUG  
 Ssc-3-1 .....UUG  
 Ssp-59-1 .....UUG  
 Ssp-70-1 C.....UUG  
 Ssp-24-1 .....UUG  
 Ssp-10-1 C.....UUG  
 Ssp-53-1 C.....UUG  
 Sni-2-1 .....AUG  
 Spr-1-1 .....UUG  
 Ssp-134-1 .....UUG  
 Sau-1-1 .....UUG  
 Asp-7-1 .....UUG  
 Sal-5-1 .....UUG  
 Svi-2-1 .....UUG  
 Stu-1-1 C.....UUG  
 Sso-1-1 .....UUG  
 Spu-1-1 .....UUG  
 Ssp-12-1 .....UUG  
 Ssp-78-1 .....UUG  
 Ssp-158-1 .....UUG  
 Ssp-79-1 .....UUG  
 Ssp-92-1 .....UUG  
 Ssp-151-1 .....UUG  
 Sat-2-1 .....UUG  
 Sff-8-1 .....UUG  
 Sff-1-1 .....UUG  
 Ssp-126-1 .....UUG  
 Sgr-11-1 .....UUG  
 Ssp-14-1 .....UUG  
 Ssp-168-1 .....UUG  
 Ssp-49-1 C.....UUG  
 Ssp-22-1 C.....UUG  
 Ssp-25-1 C.....UUG  
 Ssp-152-1 .....UUG  
 Ssp-57-1 .....UUG  
 Ssp-40-1 .....UUG  
 Ssp-6-1 C.....UUG  
 Sha-2-1 .....UUG  
 Ssp-43-1 .....UUG  
 Scy-2-1 .....UUG  
 Ssp-39-1 .....UUG  
 Sfu-1-1 .....UUG  
 Seu-1-1 .....UUG  
 Sgr-3-1 .....UUG  
 Ssp-9-1 .....UUG  
 Ssp-68-1 .....UUG  
 Sal-8-2 .....UUG  
 San-2-1 .....UUG  
 Sod-1-1 C.....UUG  
 Ssp-149-1 .....UUG  
 Sff-4-1 .....UUG  
 Ssp-127-1 C.....UUG  
 Ssp-81-1 C.....UUG  
 Sat-1-1 C.....UUG  
 Ssp-103-1 C.....UUG  
 Nsp-3-1 .....UUG  
 env-409 .....AUG  
 env-410 .....AUG  
 env-411 .....UUG  
 env-412 .....AUG  
 env-413 .....UUG  
 env-414 .....UUG  
 env-415 .....UUG  
 env-416 .....UUG  
 env-417 .....GUG  
 env-418 GAC.....UUG  
 Svi-14-4 .....UUG  
 Sve-1-1 .....UUG

.....  
 .....  
 -----RUG

Ssp-38-1 .....UUG  
 Sbi-3-1 .....UUU  
 Sgl-4-2 .....UUU  
 Svi-9-1 .....UUG  
 Fsp-2-1 .....UUU  
 Fsp-5-1 .....AUG  
 Fsp-1-1 .....UUU  
 Sgh-1-1 .....UUU  
 Ssp-31-1 .....UUG  
 Sav-2-1 .....UUU  
 Ssp-7-1 .....UUU  
 Ssp-44-1 .....UUU  
 Sgr-10-1 .....UUU  
 Ssp-173-1 .....UUG  
 Ssp-16-1 .....UUU  
 Ssp-61-1 .....UUG  
 Ssp-175-1 .....UUU  
 Fsp-6-1 .....UUU  
 Fsp-13-1 .....UUU  
 Fal-1-1 .....AUG  
 Gte-4-1 .....UUU  
 Mrh-1-1 .....UUU  
 env-419 .....AUG  
 env-421 C.....UUU  
 env-422 C.....UUU  
 env-423 CA.....AUG  
 env-424 AAA.....UUU  
 env-425 AAA.....UUU  
 env-426 AAA.....UUU  
 Nsp-11-1 .....UUU  
 env-428 C.....GUG  
 env-429 GACCA.....UUU  
 env-430 GACCAA.....  
 env-431 .....UUU  
 env-432 .....UUU  
 env-433 .....AUG  
 env-434 .....UUU  
 env-435 .....UUU  
 Str-2-1 CGAC.....AUG  
 Str-1-1 CGAC.....AUG  
 Spa-24-1 CGAC.....AUG  
 Spa-32-1 CGAC.....AUG  
 Spa-7-1 CGAC.....UUU  
 Spa-27-1 CGAC.....AUG  
 Spa-5-1 CGAC.....AUG  
 Spa-38-1 CGAC.....UUU  
 env-436 .....UUU  
 Msp-11-1 .....UUU  
 env-437 C.....UUU  
 env-438 .....UUU  
 env-440 U.....UUU  
 env-441 CC.....AUG  
 env-442 CAC.....AUG  
 Gkr-1-1 .....UUU  
 env-443 .....UUU  
 env-446 C.....GUG  
 env-447 .....AUG  
 env-448 .....UUU  
 env-449 .....  
 Mhe-1-1 .....UUU  
 Rrh-1-1 .....UUU  
 Msp-13-1 .....AUG  
 env-450 .....UUU  
 Tbi-1-1 .....UUU  
 Msp-4-1 .....UUU  
 Mav-1-1 .....UUU  
 Msp-16-1 .....UUU  
 env-452 .....UUU  
 Msp-12-1 .....UUU  
 Msp-14-1 .....AUG  
 Msp-17-1 .....UUU  
 env-453 .....UUU  
 Mky-1-1 .....UUU  
 Sar-43-1 CGAC.....AUG  
 Sar-11-1 CGAC.....AUG  
 env-454 GACAC.....AUG  
 env-455 C.....UUG  
 env-456 .....GUG  
 Ase-1-1 .....UUU  
 Fsp-9-1 .....UUU  
 env-457 C.....GUG  
 env-459 .....  
 env-460 .....  
 Spa-33-1 CGAC.....UUU

.....  
 .....  
 -----RUG

Vma-1-1 CGAC . . . . AUG  
 Gbr-1-1 ACC . . . . AUG  
 Gna-1-1 CAGAC . . . . AUG  
 Gal-1-1 AGAU . . . . AUG  
 Gam-2-1 CAGAC . . . . AUG  
 Gsp-1-1 AGAC . . . . AUG  
 Gpa-1-1 GAC . . . . AUG  
 Gru-1-1 AGAU . . . . AUG  
 Gam-3-1 AGAC . . . . AUG  
 Gte-3-1 CAGAC . . . . AUG  
 Nsp-1-1 GA . . . . AUG  
 Wsp-1-1 GA . . . . AUG  
 Kar-2-1 GA . . . . AUG  
 Gef-1-1 AUC . . . . AUG  
 env-461 AGACC . . . . AUG  
 Gpo-3-1 GAG . . . . AUG  
 Grh-1-1 GAU . . . . AUG  
 env-462 CC . . . . AUG  
 Rde-1-1 . . . . AUG  
 Req-3-1 . . . . AUG  
 env-463 . . . . AUG  
 Rfa-3-1 . . . . AUG  
 Rsp-2-1 . . . . AUG  
 Rsp-3-1 . . . . AUG  
 Rfa-12-1 . . . . AUG  
 Rsp-13-1 . . . . AUG  
 Rop-1-1 . . . . AUG  
 Rfa-21-1 . . . . AUG  
 Rfa-1-2 . . . . AUG  
 Rfa-4-1 . . . . AUG  
 Rfa-7-1 . . . . AUG  
 Rfa-20-1 . . . . AUG  
 Rfa-8-1 . . . . AUG  
 Rtr-1-1 . . . . AUG  
 Rsp-19-1 . . . . AUG  
 Rsp-21-1 . . . . AUG  
 Sar-21-1 CGAC . . . . AUG  
 Sar-40-1 CGAC . . . . AUG  
 Sar-27-1 CGAC . . . . AUG  
 Sar-33-1 CGAC . . . . AUG  
 Sar-26-1 CGAC . . . . AUG  
 Sar-22-1 CGAC . . . . AUG  
 Sar-17-1 CGAC . . . . AUG  
 Sar-24-1 CGAC . . . . AUG  
 env-474 . . . . AUG  
 env-475 CAGAC . . . . AUG  
 Whe-1-1 G . . . . AUG  
 Spa-28-1 CGAC . . . . AUG  
 Spa-36-1 CGAC . . . . AUG  
 Spa-8-1 CGAC . . . . AUG  
 Dau-1-1 CC . . . . AUG  
 Mlu-1-1 . . . . AUG  
 Mch-6-1 . . . . AUG  
 Mpa-1-1 . . . . AUG  
 Rsp-9-1 . . . . AUG  
 Rrh-2-1 . . . . AUG  
 Rsp-14-1 . . . . AUG  
 Rsp-5-1 . . . . AUG  
 Rru-2-1 . . . . AUG  
 Rru-3-1 . . . . AUG  
 Rru-1-1 . . . . AUG  
 Ntr-1-1 . . . . AUG  
 Not-2-1 . . . . AUG  
 Not-1-1 . . . . AUG  
 env-476 . . . . GUG  
 Msp-26-1 CGAC . . . . AUG  
 env-477 AC . . . . GUG  
 env-478 . . . . AUG  
 env-479 . . . . AUG  
 Gsp-3-1 . . . . AUG  
 env-481 . . . . AUG  
 env-482 . . . . AUG  
 env-483 . . . . AUG  
 env-484 CA . . . . AUG  
 env-485 . . . . AUG  
 env-486 AC . . . . AUG  
 Sam-2-1 GAC . . . . AUG  
 Sro-7-1 GCC . . . . AUG  
 Sro-3-1 GCC . . . . AUG  
 Mau-1-1 CGAC . . . . AUG  
 Msp-9-1 CGAC . . . . AUG  
 Msp-10-1 CGAC . . . . AUG  
 Msp-28-1 CGAC . . . . AUG  
 env-487 . . . . AUG

. . . . .  
 . . . . .  
 -----RUG



env-488 UG.....  
 Msp-8-1 CGAC.....  
 env-489 CCG.....  
 env-490 .....  
 Nco-1-1 .....  
 env-494 AA.....  
 Mca-1-1 CGAC.....  
 env-495 UA.....AUG  
 env-496 CC.....  
 env-497 .....  
 env-498 A.....GUG  
 env-499 A.....GUG  
 env-500 A.....  
 env-501 A.....  
 env-502 .....  
 env-503 A.....  
 env-505 A.....  
 env-506 A.....  
 env-508 A.....  
 env-509 .....  
 env-510 A.....  
 env-513 AAA.....  
 env-514 GAA.....  
 env-515 CC.....  
 Nca-2-1 .....  
 Asu-1-1 .....  
 env-516 CC.....  
 env-517 CC.....  
 env-518 CA.....  
 env-520 .....GUG  
 env-521 CAA.....GUG  
 env-522 AC.....  
 env-523 GACUC.....  
 env-524 CA.....  
 env-526 A.....  
 env-527 AU.....AUG  
 env-530 AU.....  
 env-531 AU.....  
 env-532 .....  
 env-533 AC.....  
 env-534 .....  
 env-535 A.....UGA  
 env-536 A.....UUG  
 env-538 AC.....AUG  
 Sna-1-1 .....  
 env-539 CA.....  
 env-540 AC.....  
 env-541 ACA.....  
 env-542 ACA.....GUG  
 env-543 ACA.....GUG  
 env-544 ACA.....  
 env-546 A.....  
 env-547 A.....AUG  
 env-548 C.....AUG  
 env-549 AC.....  
 env-551 AC.....AUG  
 env-552 CC.....  
 env-553 U.....  
 env-555 .....  
 env-557 AC.....  
 env-558 AC.....  
 env-560 AC.....  
 env-561 .....AUG  
 env-563 .....  
 env-564 .....  
 env-565 AC.....  
 env-568 AC.....  
 env-570 AU.....  
 env-571 .....  
 env-572 CC.....AUG  
 env-573 CC.....  
 env-576 C.....AUG  
 env-577 CGUU.....  
 env-578 A.....AUG  
 env-579 AC.....AUG  
 env-582 AC.....  
 env-583 AC.....AUG  
 env-584 AC.....AUG  
 env-585 AC.....  
 env-586 AC.....AUG  
 env-587 .....  
 env-588 .....  
 env-589 AACAG.....  
 env-591 AAGAA.....

.....  
 .....  
 -----RUG

env-592 CAGCA . . . AUG  
 env-593 C . . . . . AUG  
 env-594 ACAC . . . . . AUG  
 env-596 ACAC . . . . . AUG  
 env-597 ACAC . . . . . AUG  
 env-598 C . . . . . AUG  
 env-600 CCA . . . . . AUG  
 Nbr-4-1 . . . . . AUG  
 Npa-1-1 . . . . . AUG  
 env-601 C . . . . . AUG  
 env-602 . . . . . AUG  
 Gam-1-1 . . . . . AUG  
 Gso-1-1 . . . . . AUG  
 Gsh-1-1 . . . . . AUG  
 Nsp-5-1 . . . . . AUG  
 env-603 GACUC . . . . AUG  
 Ari-2-1 C . . . . . AUG  
 env-604 . . . . . AUG  
 env-605 . . . . . AUG  
 env-606 . . . . . AUG  
 env-607 . . . . . AUG  
 env-608 U . . . . . AUG  
 Ata-1-1 . . . . . AUG  
 Aha-1-1 . . . . . AUG  
 env-609 U . . . . . GUG  
 env-610 . . . . . AUG  
 env-611 . . . . . AUG  
 env-629 U . . . . . AUG  
 Pau-1-1 C . . . . . AUG  
 Psp-6-1 CC . . . . . AUG  
 Ses-1-1 CG . . . . . AUG  
 Ksp-2-1 AC . . . . . AUG  
 Sgl-1-1 . . . . . AUG  
 env-630 . . . . . AUG  
 Aba-1-1 . . . . . AUG  
 Ari-1-1 . . . . . AUG  
 Ava-2-1 . . . . . AUG  
 Aal-2-1 . . . . . AUG  
 env-631 . . . . . GUG  
 env-633 . . . . . GUG  
 env-637 . . . . . GUG  
 Lae-1-1 UC . . . . . AUG  
 env-638 U . . . . . AUG  
 env-639 U . . . . . AUG  
 Aen-1-1 ACCAGUUC . . . AUG  
 Aha-3-1 . . . . . AUG  
 env-647 . . . . . AUG  
 env-648 . . . . . AUG  
 Ksp-1-1 A . . . . . AUG  
 Lal-2-1 UC . . . . . AUG  
 Lae-1-2 UC . . . . . AUG  
 env-649 CU . . . . . GUG  
 Psp-9-1 C . . . . . AUG  
 Aje-1-1 . . . . . AUG  
 Iir-1-1 . . . . . AUG  
 Ain-1-1 C . . . . . AUG  
 Aja-1-1 . . . . . AUG  
 Asp-6-1 . . . . . AUG  
 Aaz-1-1 . . . . . AUG  
 Aor-4-1 . . . . . AUG  
 Ssp-91-1 . . . . . AUG  
 Abe-1-1 . . . . . AUG  
 Aor-1-1 . . . . . AUG  
 Aor-3-1 . . . . . AUG  
 Ade-1-1 . . . . . AUG  
 Ssp-5-1 . . . . . AUG  
 Aor-2-1 . . . . . AUG  
 env-650 . . . . . AUG  
 env-651 . . . . . GUG  
 env-652 . . . . . AUG  
 Sha-1-1 . . . . . AUG  
 Spa-41-1 . . . . . AUG  
 Kal-2-1 G . . . . . UUG  
 Saz-1-1 . . . . . AUG  
 Svi-1-1 . . . . . AUG  
 Ssp-45-1 . . . . . AUG  
 Kar-1-1 A . . . . . AUG  
 Ami-1-1 . . . . . AUG  
 Rrh-3-1 A . . . . . AUG  
 Scy-1-1 . . . . . AUG  
 env-653 C . . . . . GUG  
 Ame-3-1 . . . . . AUG  
 Ssp-46-1 CG . . . . . AUG  
 Ami-2-1 G . . . . . AUG

. . . . .  
 . . . . .  
 -----RUG

```

Ssp-1-1      G.....UUU
env-654      .....UUU
env-656      .....UUU
Sts-1-1      .....UUU
env-657      AGAUC....UUU
Rsp-11-1     .....AUG
env-658      .....AUG
Rsp-12-1     .....AUG
Rrh-4-1      .....UUU
Ace-1-1      G.....UUU
Gja-1-1      GA.....UUU
Gsp-2-1      GA.....UUU
Got-1-1      GA.....UUU
Gai-1-1      GAG.....UUU
Asp-5-2      C.....UUU
env-663      .....AUG
Sma-1-1      .....UUU
env-664      C.....UUU
Ssu-1-1      .....UUU
Ssu-2-1      .....UUG
Sje-1-1      C.....UUU
Sal-2-1      C.....UUG
Sru-1-1      C.....UUU
Ssp-100-1    .....UUU
Ssp-129-1    .....UUG
Ssp-171-1    .....UUU
Ssp-170-1    C.....UUU
Ssp-56-1     .....UUU
Kaz-1-1      C.....UUU
Svi-7-1      .....UUU
Smo-1-1      .....UUU
Ama-4-1      .....UUU
env-666      .....UUU
Bsc-2-1      CC.....AUG
Ssc-1-1      .....UUU
Sle-1-1      .....UUG
Scl-1-1      .....UUU
Sre-3-1      .....UUG
Ser-2-1      G.....UUG
Ssp-20-1     .....UUG
Sst-1-1      .....UUU
Mne-3-1      .....AUG
.....
-----RUG

```

## 10 L31-Coriobacteria

### 10.1 Taxa

The taxonomy of each organism containing a putative L31-Coriobacteria RNA will be used to identify each individual L31-Coriobacteria RNA in Sections 10.2 is listed, with abbreviations identifying each hit (e.g., “Eco-1-1” and “Eco-1-2” and 10.4: might hypothetically represent two distinct RNAs in *E. coli*). The abbreviations

| abbrev. of hits    | taxonomy of species                                                                                                                        |
|--------------------|--------------------------------------------------------------------------------------------------------------------------------------------|
| Aeq-1-1            | Bacteria Actinobacteria Coriobacteridae Coriobacteriales Coriobacterineae Coriobacteriaceae <i>Adlercreutzia equolifaciens</i> DSM 19450   |
| Ami-1-1            | Bacteria Actinobacteria Coriobacteridae Coriobacteriales Coriobacterineae Coriobacteriaceae <i>Atopobium minutum</i> 10063974              |
| Apa-1-1            | Bacteria Actinobacteria Coriobacteridae Coriobacteriales Coriobacterineae Coriobacteriaceae <i>Atopobium parvulum</i> DSM 20469            |
| Ari-1-1            | Bacteria Actinobacteria Coriobacteridae Coriobacteriales Coriobacterineae Coriobacteriaceae <i>Atopobium rimae</i> ATCC 49626              |
| Asp-1-1            | Bacteria Actinobacteria Coriobacteridae Coriobacteriales Coriobacterineae Coriobacteriaceae <i>Atopobium sp. BV3Ac4</i>                    |
| Asp-2-1            | Bacteria Actinobacteria Coriobacteridae Coriobacteriales Coriobacterineae Coriobacteriaceae <i>Atopobium sp. oral taxon 199 str. F0494</i> |
| Asp-3-1            | Bacteria Actinobacteria Coriobacteridae Coriobacteriales Coriobacterineae Coriobacteriaceae <i>Atopobium sp. oral taxon 810 str. F0209</i> |
| Ava-1-1 to Ava-1-2 | Bacteria Actinobacteria Coriobacteridae Coriobacteriales Coriobacterineae Coriobacteriaceae <i>Atopobium vaginae</i> DSM 15829             |
| Cae-1-1            | Bacteria Actinobacteria Coriobacteridae Coriobacteriales Coriobacterineae Coriobacteriaceae <i>Collinsella aerofaciens</i> ATCC 25986      |
| Cin-1-1            | Bacteria Actinobacteria Coriobacteridae Coriobacteriales Coriobacterineae Coriobacteriaceae <i>Collinsella intestinalis</i> DSM 13280      |
| Csp-1-1            | Bacteria Actinobacteria Coriobacteridae Coriobacteriales Coriobacterineae Coriobacteriaceae <i>Collinsella sp. GD3</i>                     |
| Cst-1-1            | Bacteria Actinobacteria Coriobacteridae Coriobacteriales Coriobacterineae Coriobacteriaceae <i>Collinsella stercoris</i> DSM 13279         |
| Cta-1-1            | Bacteria Actinobacteria Coriobacteridae Coriobacteriales Coriobacterineae Coriobacteriaceae <i>Collinsella tanakaei</i> YIT 12063          |
| Cba-1-1            | Bacteria Actinobacteria Coriobacteridae Coriobacteriales Coriobacterineae Coriobacteriaceae <i>Coriobacterium BV3Ac1</i>                   |

|                    |                                                                                             |                                                |
|--------------------|---------------------------------------------------------------------------------------------|------------------------------------------------|
| Cba-2-1            | Bacteria Actinobacteria Coriobacteridae Coriobacteriales Coriobacterineae Coriobacteriaceae | <i>bacterium</i> GD5                           |
| Cgl-1-1            | Bacteria Actinobacteria Coriobacteridae Coriobacteriales Coriobacterineae Coriobacteriaceae | <i>Coriobacterium glomerans</i> PW2            |
| Ele-1-1            | Bacteria Actinobacteria Coriobacteridae Coriobacteriales Coriobacterineae Coriobacteriaceae | <i>Eggerthella lenta</i> DSM 2243              |
| Esp-1-1            | Bacteria Actinobacteria Coriobacteridae Coriobacteriales Coriobacterineae Coriobacteriaceae | <i>Eggerthella sp.</i> 1.3.56FAA               |
| Esp-2-1            | Bacteria Actinobacteria Coriobacteridae Coriobacteriales Coriobacterineae Coriobacteriaceae | <i>Eggerthella sp.</i> HGA1                    |
| Esp-3-1            | Bacteria Actinobacteria Coriobacteridae Coriobacteriales Coriobacterineae Coriobacteriaceae | <i>Eggerthella sp.</i> YY7918                  |
| Eca-1-1            | Bacteria Actinobacteria Coriobacteridae Coriobacteriales Coriobacterineae Coriobacteriaceae | <i>Enterorhabdus caecimuris</i> B7             |
| Gpa-1-1            | Bacteria Actinobacteria Coriobacteridae Coriobacteriales Coriobacterineae Coriobacteriaceae | <i>Gordonibacter pamelaecae</i> 7-10-1-b       |
| Opr-1-1            | Bacteria Actinobacteria Coriobacteridae Coriobacteriales Coriobacterineae Coriobacteriaceae | <i>Olsenella profusa</i> F0195                 |
| Osp-1-1            | Bacteria Actinobacteria Coriobacteridae Coriobacteriales Coriobacterineae Coriobacteriaceae | <i>Olsenella sp. oral taxon</i> 809 str. F0356 |
| Oul-1-1            | Bacteria Actinobacteria Coriobacteridae Coriobacteriales Coriobacterineae Coriobacteriaceae | <i>Olsenella uli</i> DSM 7084                  |
| Sex-1-1            | Bacteria Actinobacteria Coriobacteridae Coriobacteriales Coriobacterineae Coriobacteriaceae | <i>Slackia exigua</i> ATCC 700122              |
| She-1-1            | Bacteria Actinobacteria Coriobacteridae Coriobacteriales Coriobacterineae Coriobacteriaceae | <i>Slackia heliotrinireducens</i> DSM 20476    |
| Spi-1-1            | Bacteria Actinobacteria Coriobacteridae Coriobacteriales Coriobacterineae Coriobacteriaceae | <i>Slackia piriformis</i> YIT 12062            |
| Ssp-1-1            | Bacteria Actinobacteria Coriobacteridae Coriobacteriales Coriobacterineae Coriobacteriaceae | <i>Slackia sp.</i> CM382                       |
| Afo-1-1            | Bacteria Actinobacteria Coriobacteridae Coriobacteriales Atopobiaceae                       | <i>Atopobium fossor</i> DSM 15642              |
| Apa-2-1            | Bacteria Actinobacteria Coriobacteriia Coriobacteriales Atopobiaceae                        | <i>Atopobium parvulum</i> DNF00906             |
| Asp-4-1            | Bacteria Actinobacteria Coriobacteriia Coriobacteriales Atopobiaceae                        | <i>Atopobium sp.</i> BS2                       |
| Asp-5-1            | Bacteria Actinobacteria Coriobacteriia Coriobacteriales Atopobiaceae                        | <i>Atopobium sp.</i> ICM42b                    |
| Ava-2-1            | Bacteria Actinobacteria Coriobacteriia Coriobacteriales Atopobiaceae                        | <i>Atopobium vaginae</i>                       |
| Oul-2-1            | Bacteria Actinobacteria Coriobacteriia Coriobacteriales Atopobiaceae                        | <i>Olsenella uli</i> MSTE5                     |
| Csp-2-1            | Bacteria Actinobacteria Coriobacteriia Coriobacteriales Coriobacteriaceae                   | <i>Collinsella sp.</i> 4.8.47FAA               |
| Csp-3-1            | Bacteria Actinobacteria Coriobacteriia Coriobacteriales Coriobacteriaceae                   | <i>Collinsella sp.</i> MS5                     |
| Cba-3-1            | Bacteria Actinobacteria Coriobacteriia Coriobacteriales Coriobacteriaceae                   | <i>bacterium</i> 68-1-3                        |
| Ema-1-1            | Bacteria Actinobacteria Coriobacteriia Coriobacteriales Coriobacteriaceae                   | <i>Enorma massiliensis phi</i>                 |
| San-1-1            | Bacteria Actinobacteria Coriobacteriia Coriobacteriales Coriobacteriaceae                   | <i>Senegalimassilia anaerobia</i> JC110        |
| Ele-2-1 to Ele-2-2 | Bacteria Actinobacteria Coriobacteriia Eggerthellales Eggerthellaceae                       | <i>Eggerthella lenta</i> 1-1.60AFAA            |
| Emu-1-1            | Bacteria Actinobacteria Coriobacteriia Eggerthellales Eggerthellaceae                       | <i>Enterorhabdus mucosicola</i> DSM 19490      |
| env-1 to env-259   | environmental samples                                                                       |                                                |

## 10.2 Gene contexts

Each L31-Coriobacteria RNA (indicated by “RNA→”) is listed. For each hit, the downstream genes predicted to reside in a regulated operon are listed. If the nearest downstream gene is encoding in the opposite strand (and therefore presumed to not be a part of a regulated operon), then that gene is still depicted. Some environmental sequences and some RefSeq entries lack gene annotations, and so no genes are available for such sequences. The direction of each gene is indicated with an arrow (→), and each predicted conserved domain in the gene is named. Conserved domains associated with more than one L31-Coriobacteria RNA are assigned a color; other domains are gray. Information about these con-

served domains is given in Section 10.3. The accession of the sequence containing each L31-Coriobacteria RNA is given in the column named “Seq. accession”. Accessions beginning with “NC\_”, “NS\_”, “NW\_” or “NZ\_” are contained in RefSeq. Other accession refer to environmental samples. Nucleotide coordinates are given for the 5′ and 3′ boundaries of each L31-Coriobacteria RNA. If the 5′ coordinate is greater than the 3′ coordinate, the RNA is present on the reverse-complement strand of the containing genomic DNA sequence. Each hit is denoted by an abbreviation (like “Eco-1-1”) that refers to a taxonomy given in Section 10.1.

| abbrev. | Seq. accession                  | 5′ at | 3′ at | genes                                                                                        |
|---------|---------------------------------|-------|-------|----------------------------------------------------------------------------------------------|
| env-1   | JGI24735.J21928.10303163        | +     | 78    | 111 RNA→ rpmE (PRK00528)Ribosomal_L31 (pfam01197)→ RimL (COG1670)Acetyltransf.3 (pfam13302)→ |
| env-2   | AUXO017004512.1                 | -     | 117   | 84 RNA→ rpmE (PRK00019)rpmE2 (PRK01678)Ribosomal_L31 (pfam01197)→                            |
| env-3   | AUXO016339607.1                 | -     | 94    | 61 RNA→ rpmE (PRK00019)Ribosomal_L31 (pfam01197)→                                            |
| env-4   | SRS011111_Baylor_scaffold.9512  | +     | 2842  | 2874 RNA→ rpmE (PRK00019)Ribosomal_L31 (pfam01197)→                                          |
| env-5   | SRS023468_LANL_scaffold.7759    | +     | 6315  | 6347 RNA→ rpmE (PRK00019)Ribosomal_L31 (pfam01197)→                                          |
| env-6   | SRS023604_Baylor_scaffold.10029 | -     | 18845 | 18813 RNA→ rpmE (PRK00019)Ribosomal_L31 (pfam01197)→                                         |
| env-7   | LWSO2_GGWJX9X02HB8PF            | +     | 220   | 250 RNA→ rpmE (PRK00019)Ribosomal_L31 (pfam01197)→                                           |
| env-8   | 4448818.3_Contig28460           | -     | 132   | 94 RNA→ ←-hypo                                                                               |
| env-9   | 4448807.3_Contig19481           | -     | 164   | 127 RNA→ rpmE (PRK00019)rpmE2 (PRK01678)Ribosomal_L31 (pfam01197)→                           |
| env-10  | 4448811.3_Contig15515           | -     | 234   | 197 RNA→ rpmE (PRK00019)Ribosomal_L31 (pfam01197)→                                           |
| env-11  | 4448816.3_Contig24142           | -     | 467   | 430 RNA→ rpmE (PRK00019)Ribosomal_L31 (pfam01197)→                                           |

|         |                                 |   |        |        |      |                                           |
|---------|---------------------------------|---|--------|--------|------|-------------------------------------------|
| env-12  | 4448820.3.Contig_6849           | - | 894    | 857    | RNA→ | rpmE (PRK00019)Ribosomal_L31 (pfam01197)→ |
| env-13  | DLM013.scaffold31757_3          | - | 262    | 225    | RNA→ | rpmE (PRK00019)Ribosomal_L31 (pfam01197)→ |
| Cta-1-1 | NZ_JH126470.1                   | + | 134255 | 134292 | RNA→ | rpmE (PRK00019)Ribosomal_L31 (pfam01197)→ |
| env-14  | HCF12C.23335                    | + | 238    | 272    | RNA→ | rpmE (PRK00019)Ribosomal_L31 (pfam01197)→ |
| env-15  | AUXO018093914.1                 | + | 291    | 328    | RNA→ | rpmE (PRK00019)Ribosomal_L31 (pfam01197)→ |
| env-16  | 4448811.3.Contig11262           | + | 140    | 176    | RNA→ | ←-hypo                                    |
| env-17  | hgutS7_s7_164738                | - | 1067   | 1032   | RNA→ | rpmE (PRK00019)Ribosomal_L31 (pfam01197)→ |
| env-18  | hgutS7_s7_179880_2              | - | 652    | 617    | RNA→ | rpmE (PRK00019)Ribosomal_L31 (pfam01197)→ |
| env-19  | scaffold83292_1.MH0041          | - | 442    | 407    | RNA→ | rpmE (PRK00019)Ribosomal_L31 (pfam01197)→ |
| env-20  | scaffold8232_5.MH0062           | - | 1352   | 1317   | RNA→ | rpmE (PRK00019)Ribosomal_L31 (pfam01197)→ |
| env-21  | C6781021_1.MH0069               | - | 404    | 369    | RNA→ | rpmE (PRK00019)Ribosomal_L31 (pfam01197)→ |
| env-22  | scaffold58836_1.MH0085          | + | 477    | 512    | RNA→ | rpmE (PRK00019)Ribosomal_L31 (pfam01197)→ |
| env-23  | scaffold18205_4.MH0086          | - | 1313   | 1278   | RNA→ | rpmE (PRK00019)Ribosomal_L31 (pfam01197)→ |
| env-24  | scaffold27957_2.O2.UC-11        | - | 244    | 209    | RNA→ | rpmE (PRK00019)Ribosomal_L31 (pfam01197)→ |
| env-25  | scaffold61969_3.V1.CD-8         | - | 314    | 279    | RNA→ | rpmE (PRK00019)Ribosomal_L31 (pfam01197)→ |
| env-26  | scaffold3383_12.V1.UC-15        | - | 531    | 496    | RNA→ | rpmE (PRK00019)Ribosomal_L31 (pfam01197)→ |
| env-27  | scaffold9272_17.V1.UC-19        | - | 1817   | 1782   | RNA→ | rpmE (PRK00019)Ribosomal_L31 (pfam01197)→ |
| env-28  | SRS049164_WUGC.scaffold_57754   | - | 167    | 132    | RNA→ | rpmE (PRK00019)Ribosomal_L31 (pfam01197)→ |
| env-29  | DLF009.scaffold14997_4          | + | 7628   | 7663   | RNA→ | rpmE (PRK00019)Ribosomal_L31 (pfam01197)→ |
| env-30  | DLM001.scaffold25088_28         | + | 399    | 434    | RNA→ | rpmE (PRK00019)Ribosomal_L31 (pfam01197)→ |
| env-31  | DLM013.scaffold384_15           | + | 9046   | 9081   | RNA→ | rpmE (PRK00019)Ribosomal_L31 (pfam01197)→ |
| env-32  | DLM019.scaffold37572_5          | - | 1768   | 1733   | RNA→ | rpmE (PRK00019)Ribosomal_L31 (pfam01197)→ |
| env-33  | longitudinal_63_388             | + | 48143  | 48178  | RNA→ | rpmE (PRK00019)Ribosomal_L31 (pfam01197)→ |
| env-34  | longitudinal_64_137             | + | 48145  | 48180  | RNA→ | rpmE (PRK00019)Ribosomal_L31 (pfam01197)→ |
| env-35  | longitudinal_65_38              | - | 57705  | 57670  | RNA→ | rpmE (PRK00019)Ribosomal_L31 (pfam01197)→ |
| env-36  | longitudinal_280_54             | + | 6079   | 6114   | RNA→ | rpmE (PRK00019)Ribosomal_L31 (pfam01197)→ |
| env-37  | longitudinal_281_174            | - | 8873   | 8838   | RNA→ | rpmE (PRK00019)Ribosomal_L31 (pfam01197)→ |
| env-38  | longitudinal_282_53             | + | 9862   | 9897   | RNA→ | rpmE (PRK00019)Ribosomal_L31 (pfam01197)→ |
| env-39  | longitudinal_283_45             | + | 6079   | 6114   | RNA→ | rpmE (PRK00019)Ribosomal_L31 (pfam01197)→ |
| env-40  | longitudinal_284_41             | + | 6076   | 6111   | RNA→ | rpmE (PRK00019)Ribosomal_L31 (pfam01197)→ |
| env-41  | longitudinal_285_12             | - | 8873   | 8838   | RNA→ | rpmE (PRK00019)Ribosomal_L31 (pfam01197)→ |
| env-42  | longitudinal_343_62             | + | 6079   | 6114   | RNA→ | rpmE (PRK00019)Ribosomal_L31 (pfam01197)→ |
| env-43  | longitudinal_381_116            | - | 99840  | 99805  | RNA→ | rpmE (PRK00019)Ribosomal_L31 (pfam01197)→ |
| env-44  | longitudinal_420_41             | - | 61707  | 61672  | RNA→ | rpmE (PRK00019)Ribosomal_L31 (pfam01197)→ |
| env-45  | AUXO018332126.1                 | + | 54     | 89     | RNA→ | rpmE (PRK00019)Ribosomal_L31 (pfam01197)→ |
| env-46  | ADJT01003987.1                  | + | 3155   | 3190   | RNA→ | rpmE (PRK00019)Ribosomal_L31 (pfam01197)→ |
| env-47  | SRS012273_C3752464              | + | 1348   | 1383   | RNA→ | rpmE (PRK00019)Ribosomal_L31 (pfam01197)→ |
| env-48  | SRS013687_Baylor.scaffold_51084 | + | 2102   | 2137   | RNA→ | rpmE (PRK00019)Ribosomal_L31 (pfam01197)→ |
| env-49  | SRS013951_C2593644              | - | 285    | 250    | RNA→ | rpmE (PRK00019)Ribosomal_L31 (pfam01197)→ |
| env-50  | SRS014683_C1571330              | + | 245    | 280    | RNA→ | rpmE (PRK00019)Ribosomal_L31 (pfam01197)→ |
| env-51  | SRS015217_C2166290              | + | 152    | 187    | RNA→ | rpmE (PRK00019)Ribosomal_L31 (pfam01197)→ |
| env-52  | SRS015782_C3168068              | + | 130    | 165    | RNA→ | rpmE (PRK00019)Ribosomal_L31 (pfam01197)→ |
| env-53  | SRS017103_C2711990              | - | 528    | 493    | RNA→ | rpmE (PRK00019)Ribosomal_L31 (pfam01197)→ |
| env-54  | SRS018351_C2783037              | + | 825    | 860    | RNA→ | rpmE (PRK00019)Ribosomal_L31 (pfam01197)→ |
| env-55  | SRS019030_C1583151              | - | 162    | 127    | RNA→ | rpmE (PRK00019)Ribosomal_L31 (pfam01197)→ |
| env-56  | SRS020233_C3826123              | - | 273    | 238    | RNA→ | rpmE (PRK00019)Ribosomal_L31 (pfam01197)→ |
| env-57  | SRS020328_Baylor.scaffold_38533 | + | 5089   | 5124   | RNA→ | rpmE (PRK00019)Ribosomal_L31 (pfam01197)→ |
| env-58  | SRS020869_C3184531              | + | 109    | 144    | RNA→ | rpmE (PRK00019)Ribosomal_L31 (pfam01197)→ |
| env-59  | SRS022071_C3051314              | + | 1344   | 1379   | RNA→ | rpmE (PRK00019)Ribosomal_L31 (pfam01197)→ |
| env-60  | SRS023526_C3010627              | - | 178    | 143    | RNA→ | rpmE (PRK00019)Ribosomal_L31 (pfam01197)→ |
| env-61  | SRS023914_C2026054              | + | 315    | 350    | RNA→ | rpmE (PRK00019)Ribosomal_L31 (pfam01197)→ |
| env-62  | SRS047014_C3267765              | - | 281    | 246    | RNA→ | rpmE (PRK00019)Ribosomal_L31 (pfam01197)→ |



|         |                                 |   |         |         |      |                                                                                       |
|---------|---------------------------------|---|---------|---------|------|---------------------------------------------------------------------------------------|
| env-63  | SRS050422_LANL_scaffold_39298   | - | 288     | 253     | RNA→ | rpmE (PRK00019)Ribosomal_L31 (pfam01197)→                                             |
| Cae-1-1 | NZ_AAVN02000005.1               | + | 56643   | 56678   | RNA→ | rpmE (PRK00019)Ribosomal_L31 (pfam01197)→ rpmE (PRK00019)Ribosomal_L31 (pfam01197)→ h |
| Csp-2-1 | NZ_KN214135.1                   | - | 212670  | 212635  | RNA→ | rpmE (PRK00019)Ribosomal_L31 (pfam01197)→                                             |
| env-64  | BABA01020564.1                  | - | 774     | 739     | RNA→ | rpmE (PRK00019)Ribosomal_L31 (pfam01197)→                                             |
| env-65  | 4491422.3_NODE_1607             | - | 337     | 302     | RNA→ | rpmE (PRK00019)Ribosomal_L31 (pfam01197)→                                             |
| env-66  | longitudinal_286_70             | - | 8161    | 8126    | RNA→ | rpmE (PRK00019)Ribosomal_L31 (pfam01197)→                                             |
| env-67  | longitudinal_287_87             | - | 11143   | 11108   | RNA→ | rpmE (PRK00019)Ribosomal_L31 (pfam01197)→                                             |
| env-68  | longitudinal_288_88             | - | 3650    | 3615    | RNA→ | rpmE (PRK00019)Ribosomal_L31 (pfam01197)→                                             |
| env-69  | longitudinal_289_88             | - | 8161    | 8126    | RNA→ | rpmE (PRK00019)Ribosomal_L31 (pfam01197)→                                             |
| env-70  | longitudinal_290_101            | + | 12604   | 12639   | RNA→ | rpmE (PRK00019)Ribosomal_L31 (pfam01197)→                                             |
| env-71  | longitudinal_338_112            | - | 8161    | 8126    | RNA→ | rpmE (PRK00019)Ribosomal_L31 (pfam01197)→                                             |
| env-72  | longitudinal_339_157            | + | 12969   | 13004   | RNA→ | rpmE (PRK00019)Ribosomal_L31 (pfam01197)→                                             |
| env-73  | longitudinal_340_81             | - | 3439    | 3404    | RNA→ | rpmE (PRK00019)Ribosomal_L31 (pfam01197)→                                             |
| env-74  | longitudinal_341_75             | + | 12952   | 12987   | RNA→ | rpmE (PRK00019)Ribosomal_L31 (pfam01197)→                                             |
| env-75  | longitudinal_342_144            | + | 12957   | 12992   | RNA→ | rpmE (PRK00019)Ribosomal_L31 (pfam01197)→                                             |
| env-76  | SRS014235_WUGC_scaffold_14702   | + | 1430    | 1465    | RNA→ | rpmE (PRK00019)Ribosomal_L31 (pfam01197)→                                             |
| env-77  | SRS014979_C3174944              | - | 413     | 378     | RNA→ | rpmE (PRK00019)Ribosomal_L31 (pfam01197)→                                             |
| env-78  | SRS017521_Baylor_scaffold_30477 | + | 4003    | 4038    | RNA→ | rpmE (PRK00019)Ribosomal_L31 (pfam01197)→                                             |
| env-79  | SRS065504_C3275369              | - | 421     | 386     | RNA→ | rpmE (PRK00019)Ribosomal_L31 (pfam01197)→                                             |
| Opr-1-1 | NZ_AWEZ01000030.1               | - | 64182   | 64151   | RNA→ | rpmE (PRK00019)Ribosomal_L31 (pfam01197)→                                             |
| Ema-1-1 | NZ_HE978575.1                   | + | 590068  | 590102  | RNA→ | rpmE (PRK00019)Ribosomal_L31 (pfam01197)→                                             |
| Cba-2-1 | NZ_CAPF01000059.1               | - | 2507    | 2473    | RNA→ | rpmE (PRK00019)Ribosomal_L31 (pfam01197)→                                             |
| Csp-1-1 | NZ_CAPI01000012.1               | + | 2962    | 2996    | RNA→ | rpmE (PRK00019)Ribosomal_L31 (pfam01197)→                                             |
| Oul-1-1 | NC_014363.1                     | + | 119036  | 119067  | RNA→ | rpmE (PRK00019)Ribosomal_L31 (pfam01197)→                                             |
| Oul-2-1 | NZ_JANC01000012.1               | - | 45561   | 45530   | RNA→ | rpmE (PRK00019)Ribosomal_L31 (pfam01197)→                                             |
| env-80  | AUXO010118135.1                 | + | 576     | 609     | RNA→ | rpmE (PRK00019)Ribosomal_L31 (pfam01197)→                                             |
| env-81  | 2204694758                      | + | 334     | 365     | RNA→ |                                                                                       |
| Cgl-1-1 | NC_015389.1                     | + | 824421  | 824455  | RNA→ | rpmE (PRK00019)Ribosomal_L31 (pfam01197)→                                             |
| env-82  | SRS049268_C4052608              | - | 112     | 80      | RNA→ | hypo→                                                                                 |
| Ari-1-1 | NZ_ACFE01000002.1               | + | 328239  | 328271  | RNA→ | rpmE (PRK00019)Ribosomal_L31 (pfam01197)→ rpmE (PRK00019)Ribosomal_L31 (pfam01197)→   |
| Asp-2-1 | NZ_KE150486.1                   | - | 1050194 | 1050162 | RNA→ | rpmE (PRK00019)Ribosomal_L31 (pfam01197)→                                             |
| env-83  | SRS011086_C2736760              | - | 326     | 294     | RNA→ | rpmE (PRK00019)Ribosomal_L31 (pfam01197)→                                             |
| env-84  | SRS017076_Baylor_scaffold_23156 | + | 449     | 481     | RNA→ | rpmE (PRK00019)Ribosomal_L31 (pfam01197)→                                             |
| env-85  | SRS075404_C3618531              | + | 64      | 96      | RNA→ | rpmE (PRK00019)Ribosomal_L31 (pfam01197)→                                             |
| env-86  | SRS013818_C2768522              | + | 223     | 255     | RNA→ | rpmE (PRK00019)Ribosomal_L31 (pfam01197)→                                             |
| env-87  | SRS014271_C2867060              | - | 517     | 485     | RNA→ | rpmE (PRK00019)Ribosomal_L31 (pfam01197)→                                             |
| env-88  | SRS015209_WUGC_scaffold_51435   | + | 5240    | 5272    | RNA→ | rpmE (PRK00019)Ribosomal_L31 (pfam01197)→                                             |
| env-89  | SRS015272_C3481572              | + | 65      | 97      | RNA→ | rpmE (PRK00019)Ribosomal_L31 (pfam01197)→                                             |
| env-90  | SRS015395_C2406090              | + | 1317    | 1349    | RNA→ | rpmE (PRK00019)Ribosomal_L31 (pfam01197)→                                             |
| env-91  | SRS015537_C1264717              | + | 921     | 953     | RNA→ |                                                                                       |
| env-92  | SRS016501_C1505461              | - | 140     | 108     | RNA→ | hypo→                                                                                 |
| env-93  | SRS016569_Baylor_scaffold_22226 | - | 109     | 77      | RNA→ |                                                                                       |
| env-94  | SRS016569_C2401739              | + | 329     | 361     | RNA→ |                                                                                       |
| env-95  | SRS018739_C3648710              | - | 753     | 721     | RNA→ | rpmE (PRK00019)Ribosomal_L31 (pfam01197)→                                             |
| env-96  | SRS020856_C2570764              | + | 315     | 347     | RNA→ | ←hypo                                                                                 |
| env-97  | SRS022143_WUGC_scaffold_36034   | + | 110     | 142     | RNA→ | rpmE (PRK00019)Ribosomal_L31 (pfam01197)→                                             |
| env-98  | SRS023835_Baylor_scaffold_50858 | - | 904     | 872     | RNA→ | rpmE (PRK00019)Ribosomal_L31 (pfam01197)→                                             |
| env-99  | SRS024015_Baylor_scaffold_31148 | + | 637     | 669     | RNA→ | ←hypo                                                                                 |
| env-100 | SRS024277_C2768622              | - | 400     | 368     | RNA→ | rpmE (PRK00019)Ribosomal_L31 (pfam01197)→                                             |
| env-101 | SRS042131_WUGC_scaffold_2856    | + | 6       | 38      | RNA→ | rpmE (PRK00019)Ribosomal_L31 (pfam01197)→                                             |
| env-102 | SRS042643_WUGC_scaffold_10098   | + | 423     | 455     | RNA→ | rpmE (PRK00019)Ribosomal_L31 (pfam01197)→ AAA (smart00382)AAA (cd00009)→              |
| env-103 | SRS047210_WUGC_scaffold_60400   | + | 673     | 705     | RNA→ | rpmE (PRK00019)Ribosomal_L31 (pfam01197)→                                             |

|         |                                 |   |        |        |      |                                                 |
|---------|---------------------------------|---|--------|--------|------|-------------------------------------------------|
| env-104 | SRS047219.WUGC_scaffold_9164    | + | 1127   | 1159   | RNA→ | rpmE (PRK00019)Ribosomal_L31 (pfam01197)→       |
| env-105 | SRS047824.WUGC_scaffold_52711   | - | 887    | 855    | RNA→ | rpmE (PRK00019)Ribosomal_L31 (pfam01197)→       |
| env-106 | SRS049147.C4119585              | + | 6      | 38     | RNA→ | rpmE (PRK00019)Ribosomal_L31 (pfam01197)→       |
| env-107 | SRS049389.C4562091              | - | 221    | 189    | RNA→ | ←hypo                                           |
| env-108 | SRS056323.LANL_scaffold_14744   | + | 220    | 252    | RNA→ | rpmE (PRK00019)Ribosomal_L31 (pfam01197)→       |
| env-109 | SRS056622.LANL_scaffold_16043   | - | 1899   | 1867   | RNA→ | rpmE (PRK00019)Ribosomal_L31 (pfam01197)→       |
| env-110 | SRS057791.C3637891              | + | 69     | 101    | RNA→ | rpmE (PRK00019)Ribosomal_L31 (pfam01197)→       |
| env-111 | SRS062540.C2336651              | - | 952    | 920    | RNA→ | rpmE (PRK00019)Ribosomal_L31 (pfam01197)→       |
| env-112 | SRS062544.LANL_scaffold_33267   | + | 527    | 559    | RNA→ | rpmE (PRK00019)Ribosomal_L31 (pfam01197)→       |
| env-113 | SRS077736.C1828913              | - | 488    | 456    | RNA→ | rpmE (PRK00019)Ribosomal_L31 (pfam01197)→       |
| Apa-1-1 | NC_013203.1                     | + | 128868 | 128900 | RNA→ | rpmE (PRK00019)Ribosomal_L31 (pfam01197)→       |
| Asp-4-1 | NZ_JDFG01000048.1               | + | 63761  | 63793  | RNA→ | rpmE (PRK00019)Ribosomal_L31 (pfam01197)→       |
| Asp-5-1 | NZ_JDFH01000035.1               | + | 5736   | 5768   | RNA→ | rpmE (PRK00019)Ribosomal_L31 (pfam01197)→       |
| env-114 | SRS021496.Baylor_scaffold_7910  | - | 3781   | 3749   | RNA→ | rpmE (PRK00019)Ribosomal_L31 (pfam01197)→       |
| env-115 | SRS011140.C4988252              | + | 126    | 158    | RNA→ | rpmE (PRK00019)Ribosomal_L31 (pfam01197)→       |
| env-116 | Buccal_mucosa_LANL_C65146548    | - | 471    | 439    | RNA→ | hypo→ rpmE (PRK00019)Ribosomal_L31 (pfam01197)→ |
| env-117 | SRS016740.Baylor_scaffold_9629  | + | 219    | 251    | RNA→ | rpmE (PRK00019)Ribosomal_L31 (pfam01197)→       |
| env-118 | SRS017076.C2662728              | + | 253    | 285    | RNA→ | rpmE (PRK00019)Ribosomal_L31 (pfam01197)→       |
| env-119 | SRS064329.C2589301              | + | 141    | 173    | RNA→ | rpmE (PRK00019)Ribosomal_L31 (pfam01197)→       |
| env-120 | Tongue_dor.WUGI_scaffold_55993  | - | 447    | 415    | RNA→ | rpmE (PRK00019)Ribosomal_L31 (pfam01197)→       |
| env-121 | SRS012279.Baylor_scaffold_57650 | - | 899    | 867    | RNA→ | rpmE (PRK00019)Ribosomal_L31 (pfam01197)→       |
| env-122 | SRS013234.C2966946              | - | 305    | 273    | RNA→ | rpmE (PRK00019)Ribosomal_L31 (pfam01197)→       |
| env-123 | SRS013705.C3713865              | - | 413    | 381    | RNA→ | rpmE (PRK00019)Ribosomal_L31 (pfam01197)→       |
| env-124 | SRS014124.WUGC_scaffold_11711   | - | 938    | 906    | RNA→ | rpmE (PRK00019)Ribosomal_L31 (pfam01197)→       |
| env-125 | SRS014470.WUGC_scaffold_24370   | - | 840    | 808    | RNA→ | rpmE (PRK00019)Ribosomal_L31 (pfam01197)→       |
| env-126 | SRS014573.C3542830              | - | 341    | 309    | RNA→ | rpmE (PRK00019)Ribosomal_L31 (pfam01197)→       |
| env-127 | SRS014689.C1283327              | - | 400    | 368    | RNA→ | rpmE (PRK00019)Ribosomal_L31 (pfam01197)→       |
| env-128 | SRS015038.C1928591              | + | 27     | 59     | RNA→ | rpmE (PRK00019)Ribosomal_L31 (pfam01197)→       |
| env-129 | SRS015055.C1676308              | - | 723    | 691    | RNA→ | rpmE (PRK00019)Ribosomal_L31 (pfam01197)→       |
| env-130 | SRS015057.WUGC_scaffold_9742    | - | 825    | 793    | RNA→ | rpmE (PRK00019)Ribosomal_L31 (pfam01197)→       |
| env-131 | SRS015434.C5898733              | + | 82     | 114    | RNA→ | rpmE (PRK00019)Ribosomal_L31 (pfam01197)→       |
| env-132 | SRS015537.WUGC_scaffold_19165   | - | 44     | 12     | RNA→ |                                                 |
| env-133 | SRS015644.WUGC_scaffold_49316   | - | 942    | 910    | RNA→ | rpmE (PRK00019)Ribosomal_L31 (pfam01197)→       |
| env-134 | SRS015762.C3578704              | - | 639    | 607    | RNA→ | rpmE (PRK00019)Ribosomal_L31 (pfam01197)→       |
| env-135 | SRS015941.WUGC_scaffold_59228   | - | 663    | 631    | RNA→ | rpmE (PRK00019)Ribosomal_L31 (pfam01197)→       |
| env-136 | SRS016002.C2556868              | + | 244    | 276    | RNA→ | rpmE (PRK00019)Ribosomal_L31 (pfam01197)→       |
| env-137 | SRS016086.C2442888              | + | 67     | 99     | RNA→ | rpmE (PRK00019)Ribosomal_L31 (pfam01197)→       |
| env-138 | SRS016319.WUGC_scaffold_11364   | + | 212    | 244    | RNA→ | rpmE (PRK00019)Ribosomal_L31 (pfam01197)→       |
| env-139 | SRS016342.Baylor_scaffold_20579 | + | 525    | 557    | RNA→ | rpmE (PRK00019)Ribosomal_L31 (pfam01197)→       |
| env-140 | SRS017120.C2921280              | - | 413    | 381    | RNA→ | rpmE (PRK00019)Ribosomal_L31 (pfam01197)→       |
| env-141 | SRS017439.C3698549              | + | 202    | 234    | RNA→ |                                                 |
| env-142 | SRS017713.C3305279              | + | 126    | 158    | RNA→ | rpmE (PRK00019)Ribosomal_L31 (pfam01197)→       |
| env-143 | SRS017808.Baylor_scaffold_44287 | + | 230    | 262    | RNA→ | rpmE (PRK00019)Ribosomal_L31 (pfam01197)→       |
| env-144 | SRS018591.WUGC_scaffold_42629   | + | 65     | 97     | RNA→ | rpmE (PRK00019)Ribosomal_L31 (pfam01197)→       |
| env-145 | SRS018791.WUGC_scaffold_2836    | - | 1590   | 1558   | RNA→ | rpmE (PRK00019)Ribosomal_L31 (pfam01197)→       |
| env-146 | SRS018969.WUGC_scaffold_53133   | + | 372    | 404    | RNA→ | rpmE (PRK00019)Ribosomal_L31 (pfam01197)→       |
| env-147 | SRS019022.WUGC_scaffold_39687   | + | 232    | 264    | RNA→ | rpmE (PRK00019)Ribosomal_L31 (pfam01197)→       |
| env-148 | SRS019045.WUGC_scaffold_40812   | - | 851    | 819    | RNA→ | rpmE (PRK00019)Ribosomal_L31 (pfam01197)→       |
| env-149 | SRS019071.C5034475              | - | 400    | 368    | RNA→ | rpmE (PRK00019)Ribosomal_L31 (pfam01197)→       |
| env-150 | SRS019122.C5873801              | - | 732    | 700    | RNA→ | rpmE (PRK00019)Ribosomal_L31 (pfam01197)→       |
| env-151 | SRS019126.C2212554              | - | 968    | 936    | RNA→ | rpmE (PRK00019)Ribosomal_L31 (pfam01197)→       |
| env-152 | SRS019389.C2194616              | - | 65     | 33     | RNA→ | ←hypo                                           |

|         |                                 |   |        |        |      |                                                                                          |
|---------|---------------------------------|---|--------|--------|------|------------------------------------------------------------------------------------------|
| env-153 | SRS019607_WUGC_scaffold_12800   | + | 225    | 257    | RNA→ | rpmE (PRK00019)Ribosomal_L31 (pfam01197)→                                                |
| env-154 | SRS019894_WUGC_scaffold_47801   | - | 658    | 626    | RNA→ | rpmE (PRK00019)Ribosomal_L31 (pfam01197)→                                                |
| env-155 | SRS020220_Baylor_scaffold_50196 | + | 6      | 38     | RNA→ | rpmE (PRK00019)Ribosomal_L31 (pfam01197)→                                                |
| env-156 | SRS020334_Baylor_scaffold_19799 | + | 232    | 264    | RNA→ | rpmE (PRK00019)Ribosomal_L31 (pfam01197)→                                                |
| env-157 | SRS021954_Baylor_scaffold_39267 | + | 219    | 251    | RNA→ | rpmE (PRK00019)Ribosomal_L31 (pfam01197)→                                                |
| env-158 | SRS022077_Baylor_scaffold_32981 | - | 527    | 495    | RNA→ | rpmE (PRK00019)Ribosomal_L31 (pfam01197)→                                                |
| env-159 | SRS022621_C4071744              | + | 67     | 99     | RNA→ | rpmE (PRK00019)Ribosomal_L31 (pfam01197)→                                                |
| env-160 | SRS023352_LANL_scaffold_13686   | + | 219    | 251    | RNA→ | rpmE (PRK00019)Ribosomal_L31 (pfam01197)→                                                |
| env-161 | SRS023557_C1683448              | - | 223    | 191    | RNA→ | ←hypo                                                                                    |
| env-162 | SRS023926_Baylor_scaffold_72447 | - | 407    | 375    | RNA→ | rpmE (PRK00019)Ribosomal_L31 (pfam01197)→                                                |
| env-163 | SRS024015_C2963407              | - | 44     | 12     | RNA→ |                                                                                          |
| env-164 | SRS024081_C2590902              | + | 126    | 158    | RNA→ | rpmE (PRK00019)Ribosomal_L31 (pfam01197)→                                                |
| env-165 | SRS024138_C2654625              | + | 123    | 155    | RNA→ | rpmE (PRK00019)Ribosomal_L31 (pfam01197)→                                                |
| env-166 | SRS024318_C3676033              | + | 65     | 97     | RNA→ | rpmE (PRK00019)Ribosomal_L31 (pfam01197)→                                                |
| env-167 | SRS024375_C2434347              | - | 486    | 454    | RNA→ | rpmE (PRK00019)Ribosomal_L31 (pfam01197)→                                                |
| env-168 | SRS024580_C3075706              | - | 295    | 263    | RNA→ | rpmE (PRK00019)Ribosomal_L31 (pfam01197)→                                                |
| env-169 | SRS042910_C5601812              | - | 747    | 715    | RNA→ | rpmE (PRK00019)Ribosomal_L31 (pfam01197)→                                                |
| env-170 | SRS044373_WUGC_scaffold_65551   | - | 486    | 518    | RNA→ | rpmE (PRK00019)Ribosomal_L31 (pfam01197)→                                                |
| env-171 | SRS045715_C4791115              | + | 108    | 140    | RNA→ | rpmE (PRK00019)Ribosomal_L31 (pfam01197)→                                                |
| env-172 | SRS048791_C3164330              | + | 64     | 96     | RNA→ | rpmE (PRK00019)Ribosomal_L31 (pfam01197)→                                                |
| env-173 | SRS050244_LANL_scaffold_45098   | - | 963    | 931    | RNA→ | rpmE (PRK00019)Ribosomal_L31 (pfam01197)→                                                |
| env-174 | SRS051791_C1722574              | + | 65     | 97     | RNA→ | rpmE (PRK00019)Ribosomal_L31 (pfam01197)→                                                |
| env-175 | SRS053854_C1994549              | + | 108    | 140    | RNA→ | rpmE (PRK00019)Ribosomal_L31 (pfam01197)→                                                |
| env-176 | SRS055426_C3209603              | + | 265    | 297    | RNA→ |                                                                                          |
| env-177 | SRS057205_C3503245              | + | 65     | 97     | RNA→ | rpmE (PRK00019)Ribosomal_L31 (pfam01197)→                                                |
| env-178 | SRS057355_C2264004              | + | 154    | 186    | RNA→ | rpmE (PRK00019)Ribosomal_L31 (pfam01197)→                                                |
| env-179 | SRS057539_LANL_scaffold_40891   | + | 200    | 232    | RNA→ | rpmE (PRK00019)Ribosomal_L31 (pfam01197)→                                                |
| env-180 | SRS058336_C2156394              | + | 459    | 491    | RNA→ | rpmE (PRK00019)Ribosomal_L31 (pfam01197)→                                                |
| env-181 | SRS062761_C4283446              | + | 402    | 434    | RNA→ | rpmE (PRK00019)Ribosomal_L31 (pfam01197)→                                                |
| env-182 | SRS063193_C2860763              | + | 152    | 184    | RNA→ | rpmE (PRK00019)Ribosomal_L31 (pfam01197)→                                                |
| env-183 | SRS064423_LANL_scaffold_34929   | + | 253    | 285    | RNA→ | rpmE (PRK00019)Ribosomal_L31 (pfam01197)→                                                |
| env-184 | SRS064774_LANL_scaffold_58893   | - | 1834   | 1802   | RNA→ | rpmE (PRK00019)Ribosomal_L31 (pfam01197)→                                                |
| env-185 | SRS065278_LANL_scaffold_41028   | + | 438    | 470    | RNA→ | rpmE (PRK00019)Ribosomal_L31 (pfam01197)→                                                |
| Apa-2-1 | NZ_JRND01000030.1               | + | 5302   | 5334   | RNA→ | rpmE (PRK00019)Ribosomal_L31 (pfam01197)→                                                |
| Ami-1-1 | NZ_KB822533.1                   | + | 353125 | 353157 | RNA→ | rpmE (PRK00019)Ribosomal_L31 (pfam01197)→                                                |
| Asp-1-1 | NZ_AWUQ01000004.1               | - | 226500 | 226468 | RNA→ | rpmE (PRK00019)Ribosomal_L31 (pfam01197)→ hypo→ COG4932 (COG4932)SdrD_B (pfam17210)      |
| Afo-1-1 | NZ_AXXR01000003.1               | - | 295118 | 295086 | RNA→ | rpmE (PRK00019)Ribosomal_L31 (pfam01197)→                                                |
| env-186 | SRS023468_C1197102              | + | 689    | 721    | RNA→ | rpmE (PRK00019)Ribosomal_L31 (pfam01197)→                                                |
| env-187 | SRS013542_C162841               | - | 662    | 630    | RNA→ | rpmE (PRK00019)Ribosomal_L31 (pfam01197)→                                                |
| env-188 | SRS017497_Baylor_scaffold_221   | - | 4581   | 4549   | RNA→ | rpmE (PRK00019)Ribosomal_L31 (pfam01197)→                                                |
| Ava-2-1 | NZ_LFWE01000006.1               | - | 17065  | 17033  | RNA→ | rpmE (PRK00019)Ribosomal_L31 (pfam01197)→                                                |
| Ava-1-1 | NZ_ADNA01000024.1               | - | 342    | 310    | RNA→ | hypo→ rpmE (PRK00019)Ribosomal_L31 (pfam01197)→ rpmE (PRK00019)Ribosomal_L31 (pfam01197) |
| Ava-1-2 | NZ_ACGK02000004.1               | - | 17226  | 17194  | RNA→ | ←hypo                                                                                    |
| env-189 | AUXO010832507.1                 | - | 84     | 52     | RNA→ |                                                                                          |
| env-190 | AUXO013415356.1                 | + | 198    | 230    | RNA→ |                                                                                          |
| Csp-3-1 | NZ_CDJG01000012.1               | - | 162765 | 162730 | RNA→ | rpmE (PRK00019)Ribosomal_L31 (pfam01197)→                                                |
| env-191 | 4448817.3.Contig32874           | - | 129    | 92     | RNA→ | rpmE (PRK00019)Ribosomal_L31 (pfam01197)→                                                |
| env-192 | UnmappedStool_Broad_C253114623  | - | 177    | 145    | RNA→ | rpmE (PRK00019)Ribosomal_L31 (pfam01197)→                                                |
| env-193 | SRS012273_C3491547              | - | 170    | 138    | RNA→ |                                                                                          |
| env-194 | SRS014923_WUGC_scaffold_45412   | + | 37736  | 37768  | RNA→ | rpmE (PRK00019)Ribosomal_L31 (pfam01197)→                                                |
| env-195 | SRS015782_C3338422              | - | 62     | 30     | RNA→ |                                                                                          |
| Cba-3-1 | NZ_CP009302.1                   | + | 539611 | 539643 | RNA→ | rpmE (PRK00019)Ribosomal_L31 (pfam01197)→                                                |

|         |                                     |   |         |         |      |                                                           |
|---------|-------------------------------------|---|---------|---------|------|-----------------------------------------------------------|
| env-196 | longitudinal_131_L1                 | + | 94369   | 94405   | RNA→ | rpmE (PRK00019)Ribosomal_L31 (pfam01197)→                 |
| env-197 | longitudinal_132_108                | + | 94370   | 94406   | RNA→ | rpmE (PRK00019)Ribosomal_L31 (pfam01197)→                 |
| Cin-1-1 | NZ_GG692710.1                       | - | 781470  | 781434  | RNA→ | rpmE (PRK00019)Ribosomal_L31 (pfam01197)→                 |
| env-198 | C5333626_1_V1.UC-13                 | - | 179     | 143     | RNA→ | rpmE (PRK00019)Ribosomal_L31 (pfam01197)→                 |
| env-199 | 4448808.3_Contig27735               | + | 205     | 241     | RNA→ | rpmE (PRK00019)Ribosomal_L31 (pfam01197)→                 |
| Cst-1-1 | NZ_DS995474.1                       | + | 655651  | 655687  | RNA→ | rpmE (PRK00019)Ribosomal_L31 (pfam01197)→                 |
| env-200 | 4448815.3_Contig8776                | + | 771     | 807     | RNA→ | rpmE (PRK00019)Ribosomal_L31 (pfam01197)→                 |
| env-201 | hgutS7_s7_160723                    | + | 1179    | 1211    | RNA→ | rpmE (PRK00019)Ribosomal_L31 (pfam01197)→                 |
| env-202 | scaffold16601_1_MH0086              | + | 702     | 731     | RNA→ | rpmE (PRK00019)rpmE2 (PRK01678)Ribosomal_L31 (pfam01197)→ |
| env-203 | scaffold88090_1_V1.UC-8             | - | 230     | 201     | RNA→ | rpmE (PRK00019)Ribosomal_L31 (pfam01197)→                 |
| env-204 | scaffold14720_2_V1.UC-9             | + | 1271    | 1300    | RNA→ | rpmE (PRK00019)Ribosomal_L31 (pfam01197)→                 |
| env-205 | UnmappedStool_Broad_C252282338      | + | 322     | 351     | RNA→ | rpmE (PRK00019)Ribosomal_L31 (pfam01197)→                 |
| Aeq-1-1 | NC_022567.1                         | - | 1728457 | 1728428 | RNA→ | rpmE (PRK00019)Ribosomal_L31 (pfam01197)→                 |
| Eca-1-1 | NZ_KE159646.1                       | - | 1050872 | 1050842 | RNA→ | rpmE (PRK00019)Ribosomal_L31 (pfam01197)→                 |
| Emu-1-1 | NZ_AUGK01000020.1                   | + | 30651   | 30681   | RNA→ | rpmE (PRK00019)Ribosomal_L31 (pfam01197)→                 |
| env-206 | scaffold28919_2_O2.UC-11            | - | 258     | 226     | RNA→ | rpmE (PRK00019)Ribosomal_L31 (pfam01197)→                 |
| Esp-3-1 | NC_015738.1                         | + | 1175139 | 1175171 | RNA→ | rpmE (PRK00019)Ribosomal_L31 (pfam01197)→                 |
| env-207 | UnmappedStool_Broad_C251071986      | - | 178     | 143     | RNA→ | rpmE (PRK00019)Ribosomal_L31 (pfam01197)→                 |
| env-208 | SRS013687_C2417546                  | + | 245     | 280     | RNA→ |                                                           |
| Gpa-1-1 | NC_021021.1                         | - | 3191605 | 3191573 | RNA→ | rpmE (PRK00019)Ribosomal_L31 (pfam01197)→                 |
| env-209 | HCF14C_9070                         | + | 2040    | 2073    | RNA→ | rpmE (PRK00019)Ribosomal_L31 (pfam01197)→                 |
| env-210 | HCF12C_364780                       | + | 265     | 298     | RNA→ | rpmE (PRK00019)Ribosomal_L31 (pfam01197)→                 |
| env-211 | DLF014_scaffold10759_1              | + | 16339   | 16371   | RNA→ | rpmE (PRK00019)Ribosomal_L31 (pfam01197)→                 |
| env-212 | SRS014923_C3176260                  | + | 293     | 325     | RNA→ | rpmE (PRK00019)Ribosomal_L31 (pfam01197)→                 |
| env-213 | scaffold261738_2_MH0006             | - | 448     | 417     | RNA→ | rpmE (PRK00019)Ribosomal_L31 (pfam01197)→                 |
| env-214 | scaffold603_48_V1.UC-9              | - | 384     | 353     | RNA→ | rpmE (PRK00019)Ribosomal_L31 (pfam01197)→                 |
| env-215 | 4491403.3_NODE_18899                | + | 21      | 52      | RNA→ | ←hypo                                                     |
| env-216 | scaffold77902_2_O2.UC-20            | - | 409     | 378     | RNA→ | rpmE (PRK00019)Ribosomal_L31 (pfam01197)→                 |
| env-217 | 4491421.3_NODE_60554                | - | 777     | 746     | RNA→ | rpmE (PRK00019)Ribosomal_L31 (pfam01197)→                 |
| env-218 | scaffold30007_3_V1.UC-13            | + | 2845    | 2876    | RNA→ | ←hypo                                                     |
| env-219 | DLM013_scaffold15861_2              | + | 869     | 900     | RNA→ | rpmE (PRK00019)Ribosomal_L31 (pfam01197)→                 |
| env-220 | 4491482.3_NODE_97544                | - | 175288  | 175256  | RNA→ | rpmE (PRK00019)Ribosomal_L31 (pfam01197)→                 |
| env-221 | 4448814.3_Contig25164               | - | 206     | 176     | RNA→ | rpmE (PRK00019)Ribosomal_L31 (pfam01197)→                 |
| Sex-1-1 | NZ_GG700631.1                       | - | 393259  | 393228  | RNA→ | rpmE (PRK00019)Ribosomal_L31 (pfam01197)→                 |
| Ssp-1-1 | NZ_ALNO01000001.1                   | - | 333235  | 333204  | RNA→ | rpmE (PRK00019)Ribosomal_L31 (pfam01197)→                 |
| Spi-1-1 | NZ_JH815198.1                       | + | 276110  | 276143  | RNA→ | rpmE (PRK00019)Ribosomal_L31 (pfam01197)→                 |
| env-222 | AUXO012801284.1                     | - | 272     | 242     | RNA→ | rpmE (PRK00019)Ribosomal_L31 (pfam01197)→                 |
| She-1-1 | NC_013165.1                         | + | 551648  | 551679  | RNA→ | rpmE (PRK00019)Ribosomal_L31 (pfam01197)→                 |
| env-223 | AUXO013603529.1                     | - | 63      | 33      | RNA→ | hypo→                                                     |
| env-224 | AUXO015651590.1                     | - | 285     | 255     | RNA→ | rpmE (PRK00019)Ribosomal_L31 (pfam01197)→                 |
| env-225 | UnmappedStool_Broad_scaffold_663971 | - | 151     | 120     | RNA→ | rpmE (PRK00019)Ribosomal_L31 (pfam01197)→                 |
| env-226 | longitudinal_468_349                | + | 53949   | 53980   | RNA→ | rpmE (PRK00019)Ribosomal_L31 (pfam01197)→                 |
| env-227 | longitudinal_469_265                | + | 204513  | 204544  | RNA→ | rpmE (PRK00019)Ribosomal_L31 (pfam01197)→                 |
| env-228 | longitudinal_470_162                | + | 204460  | 204491  | RNA→ | rpmE (PRK00019)Ribosomal_L31 (pfam01197)→                 |
| env-229 | longitudinal_471_135                | + | 204422  | 204453  | RNA→ | rpmE (PRK00019)Ribosomal_L31 (pfam01197)→                 |
| env-230 | longitudinal_472_50                 | + | 103193  | 103224  | RNA→ | rpmE (PRK00019)Ribosomal_L31 (pfam01197)→                 |
| env-231 | longitudinal_473_767                | + | 27039   | 27070   | RNA→ | rpmE (PRK00019)Ribosomal_L31 (pfam01197)→                 |
| env-232 | longitudinal_474_318                | - | 36846   | 36815   | RNA→ | rpmE (PRK00019)Ribosomal_L31 (pfam01197)→                 |
| env-233 | longitudinal_475_209                | - | 8208    | 8177    | RNA→ | rpmE (PRK00019)Ribosomal_L31 (pfam01197)→                 |
| Ele-1-1 | NC_013204.1                         | + | 1346970 | 1347001 | RNA→ | rpmE (PRK00019)Ribosomal_L31 (pfam01197)→                 |
| Esp-2-1 | NZ_AEXR01000022.1                   | - | 17235   | 17204   | RNA→ | rpmE (PRK00019)Ribosomal_L31 (pfam01197)→                 |
| Esp-1-1 | NZ_GL622579.1                       | - | 777790  | 777759  | RNA→ | rpmE (PRK00019)Ribosomal_L31 (pfam01197)→                 |



|         |                                           |   |        |        |                                                                   |
|---------|-------------------------------------------|---|--------|--------|-------------------------------------------------------------------|
| Ele-2-1 | NZ_KN214095.1                             | - | 32073  | 32042  | RNA → rpmE (PRK00019) Ribosomal_L31 (pfam01197) →                 |
| env-234 | DLF009_scaffold20110.2                    | + | 444    | 475    | RNA → rpmE (PRK00019) Ribosomal_L31 (pfam01197) →                 |
| env-235 | AUXO017671678.1                           | - | 38     | 8      | RNA →                                                             |
| env-236 | AUXO015549318.1                           | + | 182    | 212    | RNA → rpmE (PRK00019) Ribosomal_L31 (pfam01197) →                 |
| env-237 | AUXO011881503.1                           | - | 224    | 194    | RNA → rpmE (PRK00019) Ribosomal_L31 (pfam01197) →                 |
| San-1-1 | NZ_HE611014.1                             | + | 742774 | 742807 | RNA → rpmE (PRK00019) Ribosomal_L31 (pfam01197) →                 |
| env-238 | AUXO018607472.1                           | - | 131    | 98     | RNA → rpmE (PRK00019) Ribosomal_L31 (pfam01197) →                 |
| env-239 | AUXO012093637.1                           | + | 87     | 120    | RNA → rpmE (PRK00019) Ribosomal_L31 (pfam01197) →                 |
| env-240 | 4448808.3_Contig1066                      | + | 3701   | 3732   | RNA → rpmE (PRK00019) Ribosomal_L31 (pfam01197) → hypo →          |
| env-241 | 4448811.3_Contig16884                     | - | 73     | 42     | RNA → ← hypo                                                      |
| env-242 | 4448813.3_Contig3373                      | + | 962    | 993    | RNA → rpmE (PRK00019) Ribosomal_L31 (pfam01197) →                 |
| env-243 | 4448814.3_Contig31153                     | - | 302    | 271    | RNA → rpmE (PRK00019) Ribosomal_L31 (pfam01197) →                 |
| env-244 | 4448816.3_Contig28865                     | - | 364    | 333    | RNA → rpmE (PRK00019) Ribosomal_L31 (pfam01197) →                 |
| env-245 | AUXO017402315.1                           | - | 978    | 947    | RNA → rpmE (PRK00019) Ribosomal_L31 (pfam01197) →                 |
| Cba-1-1 | NZ_AWUP01000003.1                         | + | 66691  | 66722  | RNA → rpmE (PRK00019) Ribosomal_L31 (pfam01197) →                 |
| Asp-3-1 | NZ_KE952956.1                             | + | 5823   | 5854   | RNA → rpmE (PRK00019) Ribosomal_L31 (pfam01197) →                 |
| env-246 | 2158020257                                | + | 333    | 364    | RNA → ← hypo                                                      |
| Osp-1-1 | NZ_JH376563.1                             | - | 464047 | 464016 | RNA → rpmE (PRK00019) Ribosomal_L31 (pfam01197) →                 |
| env-247 | AUXO013076199.1                           | + | 598    | 629    | RNA → rpmE (PRK00019) Ribosomal_L31 (pfam01197) →                 |
| env-248 | JGI20225J20221_1001165                    | + | 34179  | 34210  | RNA → rpmE (PRK00019) Ribosomal_L31 (pfam01197) →                 |
| env-249 | JGI2065J20421_1004925                     | + | 1069   | 1100   | RNA → rpmE (PRK00019) Ribosomal_L31 (pfam01197) →                 |
| env-250 | SRS024561_C2821916                        | + | 707    | 738    | RNA → rpmE (PRK00019) Ribosomal_L31 (pfam01197) →                 |
| env-251 | SRS018443_Baylor_scaffold_60373           | - | 2651   | 2620   | RNA → rpmE (PRK00019) rpsP (PRK14521) Ribosomal_L31 (pfam01197) → |
| env-252 | Supragingival_plaque_LANL_scaffold_407597 | - | 335    | 304    | RNA → rpmE (PRK00019) Ribosomal_L31 (pfam01197) →                 |
| env-253 | SRS013836_C4767505                        | + | 351    | 382    | RNA → rpmE (PRK00019) Ribosomal_L31 (pfam01197) →                 |
| env-254 | SRS047634_C4113595                        | + | 242    | 273    | RNA →                                                             |
| env-255 | SRS058808_LANL_scaffold_72397             | - | 425    | 394    | RNA → rpmE (PRK00019) Ribosomal_L31 (pfam01197) →                 |
| env-256 | HCF12C_292540                             | - | 428    | 397    | RNA → rpmE (PRK00019) Ribosomal_L31 (pfam01197) →                 |
| env-257 | HCF14C_2.1.1_newblercontig36662           | + | 561    | 592    | RNA → rpmE (PRK00019) Ribosomal_L31 (pfam01197) →                 |
| env-258 | HCF12C_352730                             | + | 46     | 77     | RNA → rpmE (PRK00019) Ribosomal_L31 (pfam01197) →                 |
| env-259 | HCF12C_263188                             | - | 719    | 688    | RNA → rpmE (PRK00019) Ribosomal_L31 (pfam01197) →                 |
| Ele-2-2 | NZ_KN214097.1                             | + | 94244  | 94275  | RNA → ← Transposase_20 (pfam02371)                                |

### 10.3 Conserved domains

Conserved domains found in protein-coding genes listed in Section 10.2 are shown below, with the first sentence in their description from the Conserved Domain Database (if any). Conserved domains associated with more than one L31-

Coriobacteria RNA are assigned a color, while others are shown in gray. The number in parentheses after the colored domain name is the number of occurrences in Section 10.2.

**cd00009** (1) The AAA+ (ATPases Associated with a wide variety of cellular Activities) superfamily represents an ancient group of ATPases belonging to the ASCE (for additional strand, catalytic E) division of the P-loop NTPase fold.

**COG1670** (1) Protein N-acetyltransferase, RimJ/RimL family [Translation, ribosomal structure and biogenesis, Posttranslational modification, protein turnover, chaperones]

**COG4932** (1) Uncharacterized surface anchored protein [Function unknown]

**pfam01197** (277) Ribosomal protein L31.

**pfam02371** (1) Transposase IS116/IS110/IS902 family.

**pfam13302** (1) Acetyltransferase (GNAT) domain.

**pfam17210** (1) SdrD B-like domain.

**PRK00019** (276) 50S ribosomal protein L31; Reviewed

**PRK00528** (1) 50S ribosomal protein L31; Reviewed

**PRK01678** (3) 50S ribosomal protein L31 type B; Reviewed

**PRK14521** (1) 30S ribosomal protein S16; Provisional

**smart00382** (1) ATPases associated with a variety of cellular activities.



## 10.4 Multiple-sequence alignment

Each L31-Coriobacteria RNA is denoted by an abbreviation (like “Eco-1-1”) that refers to a taxonomy given in Section 10.1. The alignment may include sequences containing the RNA motif, as well as flanking sequence. The L31-Coriobacteria RNA itself is denoted by the line underneath marked 5′ and 3′ on either end. Nucleotides in flanking sequences (i.e., not part of the motif) are written in gray letters. Stems of predicted rho-independent transcription terminators, if any, are shaded yellow. (Note: terminator predictions have not been analyzed manually, and many are likely to be false positives. Terminator predictions are those of the RNIE software.) Nucleotides predicted to function (as DNA) as transcription-factor binding sites, if any, are shaded in green. (But note: these predictions are manually annotated, so they might be under-predicted.) Annotated start codons, if any, are shaded green. (Note: start codons are frequently misannotated, especially in environmental samples.) Nucleotides proposed to basepair as part of the consensus structure are shaded in color when they comprise Watson-Crick or G-U

pairs. Otherwise they are shaded gray. Conserved stems are also indicated at the bottom of the alignment by angle brackets, where matching < and > denote base-paired columns. Below these angle brackets, the symbol “2” denotes base pairs exhibiting covariation according to the statistically well-founded R-scape method. “1” denotes base pairs exhibiting covariation according to R2R’s simplistic method. “0” denotes base pairs that are not observed to mutate and “?” denotes base pairs that have a significant frequency of non-canonical nucleotides for Watson-Crick or G-U pairs (> 5%). Below these base pair annotation is the consensus sequence: “R” = “A” or “G”, “Y” = “C” or “U”, red nucleotides: nucleotide identity conserved more than 97% of the time, black nucleotides: 90%, gray nucleotides: 75%, red circle (◉): nucleotide is present 97% of the time, black circle (◐): 90%, gray circle (◑): 75%, white circle (○): 50%. All percentages of sequences just described (e.g. 97% conserved) assume that sequences have been weighted by the GSC algorithm implemented by the Infernal software package.

Duplicate sequences: the following putative homologs are not shown in the alignment because their sequences are identical to a homolog already shown: Aeq-1-1, Apa-1-1, Apa-2-1, Ari-1-1, Asp-1-1, Asp-2-1, Asp-4-1, Asp-5-1, Ava-1-1, Ava-1-2, Ava-2-1, Cae-1-1, Cin-1-1, Csp-1-1, Csp-2-1, Cst-1-1, Cta-1-1, Ele-1-1, Ele-2-1, Esp-1-1, Esp-2-1, Oul-2-1, Ssp-1-1, env-10, env-100, env-101, env-102, env-103, env-104, env-105, env-106, env-107, env-108, env-109, env-11, env-110, env-111, env-112, env-113, env-117, env-118, env-119, env-12, env-120, env-121, env-122, env-123, env-124, env-125, env-126, env-127, env-128, env-129, env-13, env-130, env-131, env-132, env-133, env-134, env-135, env-136, env-137, env-138, env-139, env-140, env-141, env-142, env-143, env-144, env-145, env-146, env-147, env-148, env-149, env-150, env-151, env-152, env-153, env-154, env-155, env-156, env-157, env-158, env-159, env-160, env-161, env-162, env-163, env-164, env-165, env-166, env-167, env-168, env-169, env-170, env-171, env-172, env-173, env-174, env-175, env-176, env-177, env-178, env-179, env-18, env-180, env-181, env-182, env-183, env-184, env-185, env-187, env-188, env-19, env-193, env-194, env-195, env-197, env-199, env-20, env-203, env-204, env-205, env-208, env-21, env-210, env-215, env-219, env-22, env-226, env-227, env-228, env-229, env-23, env-230, env-231, env-232, env-233, env-239, env-24, env-241, env-242, env-243, env-244, env-245, env-249, env-25, env-252, env-253, env-254, env-255, env-258, env-26, env-27, env-28, env-29, env-30, env-31, env-32, env-33, env-34, env-35, env-36, env-37, env-38, env-39, env-40, env-41, env-42, env-43, env-44, env-45, env-46, env-47, env-48, env-49, env-5, env-50, env-51, env-52, env-53, env-54, env-55, env-56, env-57, env-58, env-59, env-6, env-60, env-61, env-62, env-63, env-65, env-66, env-67, env-68, env-69, env-70, env-71, env-72, env-73, env-74, env-75, env-76, env-77, env-78, env-79, env-84, env-85, env-86, env-87, env-88, env-89, env-90, env-91, env-92, env-93, env-94, env-95, env-96, env-97, env-98, env-99

```

alignment positions 1...52
env-1 CC.GCUGGUCGGAAACC.AGGGG...CUAACCCAAGGAA..AACACACUUU
env-2 GU.UCUGGUCGGUAAACC.AGAAC...ACUUGCGAAGGAG...ACCAACUUU
env-3 AC.GAUGGUCGGAAACC.AUCCG...CCGAAAGAGAGGAG...AUUAAACAUG
env-4 GG.CUUGGUCGGAAACC.AAGCC...UCGAUAAAGGAG...ACUAUUUU
env-7 GG.CCUGGUCGGAAACC.AGGCC...ACCUAUGGAGGUUAUGAACAUUU
env-8 GU.UCUGGUCGGUAAACCUAGAACGCCAGUAAUUAAGAGGAG...CCCGCCCAUG
env-9 GU.UCUGGUCGGUAAACC.AGAACGCCAGUAAUUAAGAGGAG...CCCGCCCAUG
env-14 GC.UCUGGUCGGAAACC.AGGGC...GCGACAAAGAGGAG..UGUUACACUUU
env-15 GC.ACUGGUCGGAAACC.AGUGC...GCGUUCUUAUGAAGGAG..UCUUGCCUUU
env-16 GC.GCUGAUCGGUAAACC.AGGCC...CUGACUAAUUAAGGAG..UCCUACCAUG
env-17 GC.GCUGAUCGGUAAACC.AGGCC...CUGACUAAUUAAGGAG..UCCUACCAUG
env-64 CG.CCUGGUCGGAAACC.AGGCC...CAAUGAAGGAGCCUGAACUUU
Ema-1-1 GC.CCUGGUCGGUAAACC.AGGAC...GAGAUCGUUAGGAG..UCCUGCUUUU
Cba-2-1 GU.CCUGGUCGGUAAACC.AGGAC...GCGAUGGUUAGGAG..UCCUGCAUG
Oul-1-1 GG.UCUGGUCGGAAACC.AGA.C...AGGCAGAAGGAG..UCCCGACUUU
env-80 GC.CUUGAUCGGAAACC.AGGC...ACAGAAAGAGGAGAGUUCAGCUUU
env-81 GC.CUGGUCGGAAACC..AGGC...CAAACGAAGGAG..UCCUGAAAUU

<<.<<<<<<.....>>>>>>.....
#2.222101.....101.2222.....
5'-YUGGUCGGAACC-AR-C---o-o-o-o-RAAGGAG--o-1-••••AUG
5

```

```

Cgl-1-1 GC UCUGGUCGAAAACC. AGAGC. . . . .ACGAUCACAAGGAG. . .CCCUUGU
env-82 GC UCUGGUCGAAAACC. AGAGC. . . . .CGAUGUAAGGAG. . .UCCUGUAUG
env-83 GC UCUGGUCGAAAACC. AGAGC. . . . .CGAUGUAAGGAG. . .UCCUGC
env-114 GC UCUGGUCGAAAACC. AGGGC. . . . .CGAUGUAAGGAG. . .UUCUGCAUG
env-115 GC UCUGGUCGAAAACC. AGGGC. . . . .CGAUGUAAGGAG. . .UCCGCG
env-116 GC UCUGGUCGAAAACC. AGGGC. . . . .CGAUGUAAGGAG. . .UCCUGC
Ami-1-1 GC UCUGGUCGAAAACC. AGAGC. . . . .CGUUAGAAGGAG. . .UUUUAU
Afo-1-1 GC UCUGGUCGAAAACC. AGAGU. . . . .CGUUAGAAGGAG. . .UCCUU
env-186 AG CCUGAUCGAAAACC. AGGCA. . . . .AACAAAGAAGGAG. . .UCCUGUC
env-189 GC UCUGGUCGAAAACC. AGGGC. . . . .ACGAAAGAAGGAG. . .UCCUGCUAUG
env-190 GU CCUGGUCGAAAACC. AGGAC. . . . .ACGAAAGAAGGAG. . .ACCGAAAUG
Csp-3-1 GU CCUGGUCGAAAACC. AGGAC. .GCAUUCAGAGGAG. . .CCUGGCC
env-191 GC ACUGGUCGAAAACC. AGUGC. .CGUACGAGAAGGAG. . .CCUGGCC
env-192 GC ACUUGGUCGAAAACC. AGGCC. . . . .ACUAGAAGGAG. . .ACCAAC
Cba-3-1 GA CUUGGUCGAAAACC. AAGUC. . . . .CUCGAAAAGGAG. . .AACCAU
env-196 GU CCUGGUCGUAACC. AGGAC. .GCGACCAGAAGGAG. . .CCUGGCC
env-198 GU CCUGGUCGUAACC. AGGAC. .GUGACCAGAAGGAG. . .CCUGGCC
env-200 GU CCUGGUCGUAACC. AGGAC. .GUGACCAGAAGGAG. . .CCUGGCC
env-201 GC CCUGGUCG. . . . .AACC. . . . .CGACGAAACAGGAG. . .UCCUGCU
env-202 CC CUUGGUCGAAAACC. AAGGA. . . . .AGUUAGGAG. . .AACCA
Eca-1-1 UC CUUGGUCGAAAACC. AAGGG. . . . .AAGUAGGAG. . .AACCC
Emu-1-1 CC CUUGGUCGAAAACC. AAGGG. . . . .AAGUAGGAG. . .AACCC
env-206 AU CUUGGUCGAAAACC. AAGGU. . . . .AUUAGUAGGAG. . .AAUCA
Esp-3-1 GC CUUGGUCGAAAACC. AAGGC. . . . .AUGUCAAGGAG. . .AACAGAA
env-207 GC CUUGGUCGAAAACC. AAGGC. .ACUCUGCAAAGGAG. . .AAUACCAAUG
Gpa-1-1 GC CUUGGUCGAAAACC. AAGGC. . . . .CUGUCAAGGAG. . .AACCA
env-209 GC CCUGGUCGAAAACC. AGGGC. . . . .CCGUAAGGAG. . .UCCUGCA
env-211 GU CCUGGUCGAAAACC. AGGAC. . . . .CGACAAAGGAG. . .UCCUGCA
env-212 GC CUUGGUCGAAAACC. AAGGC. . . . .AUACAAAGGAG. . .CAAGA
env-213 GU CUUGGUCGAAAACC. AAGGC. . . . .AUAGUAAGGAG. . .AACCA
env-214 GC CUUGGUCGAAAACC. AAGGC. . . . .AUAGUAAGGAG. . .AACCA
env-216 GC CUUGGUCGGAACC. AAGGC. . . . .AUACGAAGGAG. . .AACCA
env-217 GC CUUGGUCGAAAACC. AAGGC. . . . .AUACGAAGGAG. . .AACCA
env-218 GC CUUGGUCGAAAACC. AAGGC. . . . .AUUAGAAGGAG. . .AACCA
env-220 GC CUUGGUCGAAAACC. AAGAC. . . . .AAUAAAAGGAG. . .AACCA
env-221 GU CUUGGUCGAAAACC. AAGAC. . . . .CGCAAAGGAG. . .AACCA
Sex-1-1 GC CUUGGUCGAAAACC. AAGGC. . . . .AUGAAAAGGAG. . .AACCA
Spi-1-1 GU CUUGGUCGAAAACC. AAGGC. . . . .GCCUGAAAAGGAG. . .AACCA
env-222 GC CUUGGUCGAAAACC. AAGGC. . . . .AGAAUAGGAG. . .AACCA
She-1-1 GU CUUGGUCGAAAACC. AAGAC. . . . .AUGAAAAGGAG. . .AACCA
env-223 GC CUUGGUCGAAAACC. AAGGC. . . . .GGAAAAGGAG. . .AAAACCAUG
env-224 GC CUUGGUCGAAAACC. AAGGC. . . . .GGAAAAGGAG. . .AACCA
env-225 GC CUUGGUCGAAAACC. AAGGC. . . . .CCGUAAGGAG. . .AACCA
env-234 GC CUUGGUCGAAAACC. AAGGC. . . . .CCGUAAGGAG. . .AACCA
env-235 GC CUUGGUCGAAAACC. AAGGC. . . . .AGAAAGGAG. . . . .AAUG
env-236 GC CUUGGUCGAAAACC. AAGGC. . . . .AGAAAGGAG. . .AACCA
env-237 AC CUUGGUCGAAAACC. AAGGC. . . . .GGAAUAGGAG. . . . .AAAUG
San-1-1 GC CUUGGUCGAAAACC. AAGGC. . . . .ACGUAAAAGGAG. . .AACCA
env-238 GC CCUGGUCGAAAACC. AGGGC. . . . .ACGAAAGAAGGAG. . .UCCAA
env-240 CG UCUGGUCGAAAACC. AGACC. . . . .UACCAAAGGAG. . .UCCUGCC
Cba-1-1 UG CCUGGUCGAAAACC. AGGCC. . . . .UACGUUAGGAG. . .UUGUC
Asp-3-1 CG CCUGGUCGAAAACC. AGGCC. . . . .UACGUUAGGAG. . .UUGUC
env-246 CG CCUGGUCGAAAACC. AGGCC. . . . .AAACGAAGGAG. . .UCCGAAAUG
Osp-1-1 UG UCUGGUCGAAAACC. AGGCC. . . . .GAAAGAAGGAG. . .UCCGAAA
env-247 CG CCUGGUCGAAAACC. AGGCC. . . . .UACCAAAGGAG. . .UCCAGU
env-248 CG CCUGGUCGAAAACC. AGGCA. . . . .AACCAAGGAG. . .UCCGAC
env-250 CG CCUGGUCGAAAACC. AGGCC. . . . .AAUCAAGGAG. . .UCCAA
env-251 CG CCUGGUCGAAAACC. AGGCC. . . . .AACCAAGGAG. . .UCCAA
env-256 CG CCUGGUCGAAAACC. AGGCC. . . . .AACGAAGGAG. . .CCA
env-257 UG CCUGGUCGAAAACC. AGGCC. . . . .AACGAAGGAG. . .UCA
env-259 CG CCUGGUCGAAAACC. AGGCC. . . . .AACGUUAGGAG. . .UCAGC
Ele-2-2 GC CGGCGCCGGAAGCG. CUGCC. . . . .GGAAAAGGAG. . .AACCA
<< <<<<<< . . . . .>>>> >>>>>> . . . . .
2. 222101 . . . . .101. 2222. . . . .
5'-YUGGUCGGAACC-ARR-C-----o●●●RAAGGAG--oY●●●AUG
5' 3'

```

## 11 L31-Firmicutes

### 11.1 Taxa

The taxonomy of each organism containing a putative L31-Firmicutes RNA is listed, with abbreviations identifying each hit (e.g., “Eco-1-1” and “Eco-1-2” is listed, with abbreviations identifying each hit (e.g., “Eco-1-1” and “Eco-1-2” might hypothetically represent two distinct RNAs in *E. coli*). The abbreviations will be used to identify each individual L31-Firmicutes RNA in Sections 11.3 and 11.5:.

## abbrev. of hits

Mab-1-1 to Mab-1-2

bLF-1-1

Axy-1-1

Afl-1-1

Bam-1-1

Bam-2-1

Bam-3-1

Bam-7-1

Bam-8-1

Bam-4-1

Bam-5-1

Bam-6-1

Bat-1-1

Baz-1-1

Bba-1-1

Bce-1-1

Bcl-1-1

Bco-1-1

Bco-2-1

Bco-3-1

Bha-1-1

Bis-1-1

Bli-1-1 to Bli-1-2

Bma-1-1

Bme-1-1

Bme-2-1

Bme-3-1

Bme-4-1

Bps-1-1

Bps-2-1

Bpu-1-1

Bpu-2-1

Bse-1-1

Bsp-1-1

Bsp-2-1

Bsp-3-1

Bsp-4-1

Bsp-5-1

Bsp-6-1

Bsp-8-1

Bsp-7-1

Bsu-1-1

Bsu-2-1

Bsu-3-1

Bsu-5-1

Bsu-4-1

Bsu-6-1 to Bsu-6-2

Bsu-7-1

Bsu-8-1

Bsu-9-1

Bsu-10-1

Ban-2-1

Ban-3-1

Ban-4-1

Ban-5-1

Ban-6-1

Ban-7-1

Ban-8-1

Ban-9-1

Ban-10-1

Ban-11-1

Ban-12-1

Ban-13-1

Ban-14-1

## taxonomy of species

Bacteria Actinobacteria Corynebacteriales Mycobacteriaceae *Mycobacterium abscessus*

Bacteria bacterium LF-3

Bacteria Firmicutes Bacillales Bacillaceae *Amphibacillus xylanus* NBRC 15112Bacteria Firmicutes Bacillales Bacillaceae *Anoxybacillus flavithermus* WK1Bacteria Firmicutes Bacillales Bacillaceae *Bacillus amyloliquefaciens* DSM7Bacteria Firmicutes Bacillales Bacillaceae *Bacillus amyloliquefaciens* FZB42Bacteria Firmicutes Bacillales Bacillaceae *Bacillus amyloliquefaciens* LL3Bacteria Firmicutes Bacillales Bacillaceae *Bacillus amyloliquefaciens* subsp. *plantarum* CAU B946Bacteria Firmicutes Bacillales Bacillaceae *Bacillus amyloliquefaciens* subsp. *plantarum* YAU B9601-Y2Bacteria Firmicutes Bacillales Bacillaceae *Bacillus amyloliquefaciens* TA208Bacteria Firmicutes Bacillales Bacillaceae *Bacillus amyloliquefaciens* XH7Bacteria Firmicutes Bacillales Bacillaceae *Bacillus amyloliquefaciens* Y2Bacteria Firmicutes Bacillales Bacillaceae *Bacillus atrophaeus* 1942Bacteria Firmicutes Bacillales Bacillaceae *Bacillus azotoformans* LMG 9581Bacteria Firmicutes Bacillales Bacillaceae *Bacillus bataviensis* LMG 21833Bacteria Firmicutes Bacillales Bacillaceae *Bacillus cellulosilyticus* DSM 2522Bacteria Firmicutes Bacillales Bacillaceae *Bacillus clausii* KSM-K16Bacteria Firmicutes Bacillales Bacillaceae *Bacillus coagulans* 2-6Bacteria Firmicutes Bacillales Bacillaceae *Bacillus coagulans* 36D1Bacteria Firmicutes Bacillales Bacillaceae *Bacillus coahuilensis* m4-4Bacteria Firmicutes Bacillales Bacillaceae *Bacillus halodurans* C-125Bacteria Firmicutes Bacillales Bacillaceae *Bacillus isronensis* B3W22Bacteria Firmicutes Bacillales Bacillaceae *Bacillus licheniformis* ATCC 14580 (DSM 13)Bacteria Firmicutes Bacillales Bacillaceae *Bacillus macauensis* ZFHKF-1Bacteria Firmicutes Bacillales Bacillaceae *Bacillus megaterium* DSM 319Bacteria Firmicutes Bacillales Bacillaceae *Bacillus megaterium* QM B1551Bacteria Firmicutes Bacillales Bacillaceae *Bacillus megaterium* WSH-002Bacteria Firmicutes Bacillales Bacillaceae *Bacillus methanolicus* PB1Bacteria Firmicutes Bacillales Bacillaceae *Bacillus pseudofirmus* OF4Bacteria Firmicutes Bacillales Bacillaceae *Bacillus pseudomycooides* DSM 12442Bacteria Firmicutes Bacillales Bacillaceae *Bacillus pumilus* ATCC 7061Bacteria Firmicutes Bacillales Bacillaceae *Bacillus pumilus* SAFR-032Bacteria Firmicutes Bacillales Bacillaceae *Bacillus selenitireducens* MLS10Bacteria Firmicutes Bacillales Bacillaceae *Bacillus* sp. 5B6Bacteria Firmicutes Bacillales Bacillaceae *Bacillus* sp. 916Bacteria Firmicutes Bacillales Bacillaceae *Bacillus* sp. B14905Bacteria Firmicutes Bacillales Bacillaceae *Bacillus* sp. HYC-10Bacteria Firmicutes Bacillales Bacillaceae *Bacillus* sp. JSBacteria Firmicutes Bacillales Bacillaceae *Bacillus* sp. M 2-6Bacteria Firmicutes Bacillales Bacillaceae *Bacillus* sp. m3-13Bacteria Firmicutes Bacillales Bacillaceae *Bacillus* sp. NRRL B-14911Bacteria Firmicutes Bacillales Bacillaceae *Bacillus subtilis* BSn5Bacteria Firmicutes Bacillales Bacillaceae *Bacillus subtilis* QB928Bacteria Firmicutes Bacillales Bacillaceae *Bacillus subtilis* subsp. *spizizenii* ATCC 6633Bacteria Firmicutes Bacillales Bacillaceae *Bacillus subtilis* subsp. *spizizenii* str. W23Bacteria Firmicutes Bacillales Bacillaceae *Bacillus subtilis* subsp. *spizizenii* TU-B-10Bacteria Firmicutes Bacillales Bacillaceae *Bacillus subtilis* subsp. *subtilis* str. 168Bacteria Firmicutes Bacillales Bacillaceae *Bacillus subtilis* subsp. *subtilis* str. JH642Bacteria Firmicutes Bacillales Bacillaceae *Bacillus subtilis* subsp. *subtilis* str. NCIB 3610Bacteria Firmicutes Bacillales Bacillaceae *Bacillus subtilis* subsp. *subtilis* str. RO-NN-1Bacteria Firmicutes Bacillales Bacillaceae *Bacillus subtilis* subsp. *subtilis* str. SMYBacteria Firmicutes Bacillales Bacillaceae Bacillus Bacilluscereus group *Bacillus anthracis* str. 'Ames Ancestor'Bacteria Firmicutes Bacillales Bacillaceae Bacillus Bacilluscereus group *Bacillus anthracis* str. A0174Bacteria Firmicutes Bacillales Bacillaceae Bacillus Bacilluscereus group *Bacillus anthracis* str. A0193Bacteria Firmicutes Bacillales Bacillaceae Bacillus Bacilluscereus group *Bacillus anthracis* str. A0248Bacteria Firmicutes Bacillales Bacillaceae Bacillus Bacilluscereus group *Bacillus anthracis* str. A0389Bacteria Firmicutes Bacillales Bacillaceae Bacillus Bacilluscereus group *Bacillus anthracis* str. A0442Bacteria Firmicutes Bacillales Bacillaceae Bacillus Bacilluscereus group *Bacillus anthracis* str. A0465Bacteria Firmicutes Bacillales Bacillaceae Bacillus Bacilluscereus group *Bacillus anthracis* str. A0488Bacteria Firmicutes Bacillales Bacillaceae Bacillus Bacilluscereus group *Bacillus anthracis* str. A1055Bacteria Firmicutes Bacillales Bacillaceae Bacillus Bacilluscereus group *Bacillus anthracis* str. AmesBacteria Firmicutes Bacillales Bacillaceae Bacillus Bacilluscereus group *Bacillus anthracis* str. Australia 94Bacteria Firmicutes Bacillales Bacillaceae Bacillus Bacilluscereus group *Bacillus anthracis* str. CDC 684Bacteria Firmicutes Bacillales Bacillaceae Bacillus Bacilluscereus group *Bacillus anthracis* str. CNEVA-9066



|                    |                                                                     |                                                        |                                                                        |
|--------------------|---------------------------------------------------------------------|--------------------------------------------------------|------------------------------------------------------------------------|
| Bth-11-1           | Bacteria Firmicutes Bacillales Bacillaceae                          | Bacillus Bacilluscereus group                          | <i>Bacillus thuringiensis</i> serovar <i>huazhongensis</i> BGSC 4BD1   |
| Bth-12-1           | Bacteria Firmicutes Bacillales Bacillaceae                          | Bacillus Bacilluscereus group                          | <i>Bacillus thuringiensis</i> serovar <i>konkukian</i> str. 97-27      |
| Bth-13-1           | Bacteria Firmicutes Bacillales Bacillaceae                          | Bacillus Bacilluscereus group                          | <i>Bacillus thuringiensis</i> serovar <i>kurstaki</i> str. T03a001     |
| Bth-14-1           | Bacteria Firmicutes Bacillales Bacillaceae                          | Bacillus Bacilluscereus group                          | <i>Bacillus thuringiensis</i> serovar <i>monterrey</i> BGSC 4AJ1       |
| Bth-15-1           | Bacteria Firmicutes Bacillales Bacillaceae                          | Bacillus Bacilluscereus group                          | <i>Bacillus thuringiensis</i> serovar <i>pakistanii</i> str. T13001    |
| Bth-16-1           | Bacteria Firmicutes Bacillales Bacillaceae                          | Bacillus Bacilluscereus group                          | <i>Bacillus thuringiensis</i> serovar <i>pondicheriensis</i> BGSC 4BA1 |
| Bth-17-1           | Bacteria Firmicutes Bacillales Bacillaceae                          | Bacillus Bacilluscereus group                          | <i>Bacillus thuringiensis</i> serovar <i>pulstensis</i> BGSC 4CC1      |
| Bth-18-1           | Bacteria Firmicutes Bacillales Bacillaceae                          | Bacillus Bacilluscereus group                          | <i>Bacillus thuringiensis</i> serovar <i>thuringiensis</i> str. T01001 |
| Bth-19-1           | Bacteria Firmicutes Bacillales Bacillaceae                          | Bacillus Bacilluscereus group                          | <i>Bacillus thuringiensis</i> serovar <i>tochigiensis</i> BGSC 4Y1     |
| Bth-20-1           | Bacteria Firmicutes Bacillales Bacillaceae                          | Bacillus Bacilluscereus group                          | <i>Bacillus thuringiensis</i> str. Al Hakam                            |
| Bwe-1-1            | Bacteria Firmicutes Bacillales Bacillaceae                          | Bacillus Bacilluscereus group                          | <i>Bacillus weihenstephanensis</i> KBAB4                               |
| Cth-1-1            | Bacteria Firmicutes Bacillales Bacillaceae                          | <i>Caldalkalibacillus thermarum</i> TA2.A1             |                                                                        |
| Gka-1-1            | Bacteria Firmicutes Bacillales Bacillaceae                          | <i>Geobacillus kaustophilus</i> HTA426                 |                                                                        |
| Gsp-1-1            | Bacteria Firmicutes Bacillales Bacillaceae                          | <i>Geobacillus</i> sp. C56-T3                          |                                                                        |
| Gsp-2-1            | Bacteria Firmicutes Bacillales Bacillaceae                          | <i>Geobacillus</i> sp. G11MC16                         |                                                                        |
| Gsp-3-1            | Bacteria Firmicutes Bacillales Bacillaceae                          | <i>Geobacillus</i> sp. WCH70                           |                                                                        |
| Gsp-4-1            | Bacteria Firmicutes Bacillales Bacillaceae                          | <i>Geobacillus</i> sp. Y4.1MC1                         |                                                                        |
| Gsp-5-1            | Bacteria Firmicutes Bacillales Bacillaceae                          | <i>Geobacillus</i> sp. Y412MC10                        |                                                                        |
| Gsp-6-1            | Bacteria Firmicutes Bacillales Bacillaceae                          | <i>Geobacillus</i> sp. Y412MC52                        |                                                                        |
| Gsp-7-1            | Bacteria Firmicutes Bacillales Bacillaceae                          | <i>Geobacillus</i> sp. Y412MC61                        |                                                                        |
| Gth-1-1            | Bacteria Firmicutes Bacillales Bacillaceae                          | <i>Geobacillus thermodenitrificans</i> NG80-2          |                                                                        |
| Gth-2-1            | Bacteria Firmicutes Bacillales Bacillaceae                          | <i>Geobacillus thermoglucosidasius</i> C56-YS93        |                                                                        |
| Gth-3-1            | Bacteria Firmicutes Bacillales Bacillaceae                          | <i>Geobacillus thermoleovorans</i> CCB_US3_UF5         |                                                                        |
| Hha-1-1            | Bacteria Firmicutes Bacillales Bacillaceae                          | <i>Halobacillus halophilus</i> DSM 2266                |                                                                        |
| Lsp-1-1            | Bacteria Firmicutes Bacillales Bacillaceae                          | <i>Lentibacillus</i> sp. Grbi                          |                                                                        |
| Lfu-1-1            | Bacteria Firmicutes Bacillales Bacillaceae                          | <i>Lysinibacillus fusiformis</i> ZC1                   |                                                                        |
| Oih-1-1            | Bacteria Firmicutes Bacillales Bacillaceae                          | <i>Oceanobacillus ihyensii</i> HTE831                  |                                                                        |
| Osc-1-1            | Bacteria Firmicutes Bacillales Bacillaceae                          | <i>Ornithinibacillus scapharcae</i> TW25               |                                                                        |
| Ssp-1-1            | Bacteria Firmicutes Bacillales Bacillaceae                          | <i>Salimicrobium</i> sp. MJ3                           |                                                                        |
| Gha-1-1            | Bacteria Firmicutes Bacillales Bacillales Family XI. IncertaeSedis  | <i>Gemella haemolysans</i> ATCC 10379                  |                                                                        |
| Ean-1-1            | Bacteria Firmicutes Bacillales Bacillales Family XII. IncertaeSedis | <i>Exiguobacterium antarcticum</i> B7                  |                                                                        |
| Esi-1-1            | Bacteria Firmicutes Bacillales Bacillales Family XII. IncertaeSedis | <i>Exiguobacterium sibiricum</i> 255-15                |                                                                        |
| Esp-1-1            | Bacteria Firmicutes Bacillales Bacillales Family XII. IncertaeSedis | <i>Exiguobacterium</i> sp. AT1b                        |                                                                        |
| Lin-1-1            | Bacteria Firmicutes Bacillales Listeriaceae                         | <i>Listeria innocua</i> Clip11262                      |                                                                        |
| Liv-1-1 to Liv-1-2 | Bacteria Firmicutes Bacillales Listeriaceae                         | <i>Listeria ivanovii</i> subsp. <i>ivanovii</i> PAM 55 |                                                                        |
| Lmo-1-1            | Bacteria Firmicutes Bacillales Listeriaceae                         | <i>Listeria monocytogenes</i> 07PF0776                 |                                                                        |
| Lmo-2-1            | Bacteria Firmicutes Bacillales Listeriaceae                         | <i>Listeria monocytogenes</i> 08-5923                  |                                                                        |
| Lmo-3-1            | Bacteria Firmicutes Bacillales Listeriaceae                         | <i>Listeria monocytogenes</i> 10403S                   |                                                                        |
| Lmo-4-1            | Bacteria Firmicutes Bacillales Listeriaceae                         | <i>Listeria monocytogenes</i> ATCC 19117               |                                                                        |
| Lmo-5-1            | Bacteria Firmicutes Bacillales Listeriaceae                         | <i>Listeria monocytogenes</i> Clip80459                |                                                                        |
| Lmo-6-1            | Bacteria Firmicutes Bacillales Listeriaceae                         | <i>Listeria monocytogenes</i> EGD-e                    |                                                                        |
| Lmo-7-1            | Bacteria Firmicutes Bacillales Listeriaceae                         | <i>Listeria monocytogenes</i> F6900                    |                                                                        |
| Lmo-13-1           | Bacteria Firmicutes Bacillales Listeriaceae                         | <i>Listeria monocytogenes</i> Finland 1998             |                                                                        |
| Lmo-8-1            | Bacteria Firmicutes Bacillales Listeriaceae                         | <i>Listeria monocytogenes</i> FSL J1-194               |                                                                        |
| Lmo-9-1            | Bacteria Firmicutes Bacillales Listeriaceae                         | <i>Listeria monocytogenes</i> FSL N1-017               |                                                                        |
| Lmo-10-1           | Bacteria Firmicutes Bacillales Listeriaceae                         | <i>Listeria monocytogenes</i> FSL N3-165               |                                                                        |
| Lmo-11-1           | Bacteria Firmicutes Bacillales Listeriaceae                         | <i>Listeria monocytogenes</i> FSL R2-503               |                                                                        |
| Lmo-12-1           | Bacteria Firmicutes Bacillales Listeriaceae                         | <i>Listeria monocytogenes</i> FSL R2-561               |                                                                        |
| Lmo-14-1           | Bacteria Firmicutes Bacillales Listeriaceae                         | <i>Listeria monocytogenes</i> HCC23                    |                                                                        |
| Lmo-15-1           | Bacteria Firmicutes Bacillales Listeriaceae                         | <i>Listeria monocytogenes</i> HPB2262                  |                                                                        |
| Lmo-16-1           | Bacteria Firmicutes Bacillales Listeriaceae                         | <i>Listeria monocytogenes</i> J0161                    |                                                                        |
| Lmo-17-1           | Bacteria Firmicutes Bacillales Listeriaceae                         | <i>Listeria monocytogenes</i> J2818                    |                                                                        |
| Lmo-18-1           | Bacteria Firmicutes Bacillales Listeriaceae                         | <i>Listeria monocytogenes</i> L312                     |                                                                        |
| Lmo-19-1           | Bacteria Firmicutes Bacillales Listeriaceae                         | <i>Listeria monocytogenes</i> L99                      |                                                                        |
| Lmo-20-1           | Bacteria Firmicutes Bacillales Listeriaceae                         | <i>Listeria monocytogenes</i> M7                       |                                                                        |
| Lmo-29-1           | Bacteria Firmicutes Bacillales Listeriaceae                         | <i>Listeria monocytogenes</i> serotype 7 str. SLCC2482 |                                                                        |
| Lmo-21-1           | Bacteria Firmicutes Bacillales Listeriaceae                         | <i>Listeria monocytogenes</i> SLCC2372                 |                                                                        |
| Lmo-22-1           | Bacteria Firmicutes Bacillales Listeriaceae                         | <i>Listeria monocytogenes</i> SLCC2376                 |                                                                        |
| Lmo-23-1           | Bacteria Firmicutes Bacillales Listeriaceae                         | <i>Listeria monocytogenes</i> SLCC2378                 |                                                                        |
| Lmo-24-1           | Bacteria Firmicutes Bacillales Listeriaceae                         | <i>Listeria monocytogenes</i> SLCC2479                 |                                                                        |
| Lmo-25-1           | Bacteria Firmicutes Bacillales Listeriaceae                         | <i>Listeria monocytogenes</i> SLCC2540                 |                                                                        |
| Lmo-26-1           | Bacteria Firmicutes Bacillales Listeriaceae                         | <i>Listeria monocytogenes</i> SLCC2755                 |                                                                        |
| Lmo-27-1           | Bacteria Firmicutes Bacillales Listeriaceae                         | <i>Listeria monocytogenes</i> SLCC5850                 |                                                                        |
| Lmo-28-1           | Bacteria Firmicutes Bacillales Listeriaceae                         | <i>Listeria monocytogenes</i> SLCC7179                 |                                                                        |
| Lmo-30-1           | Bacteria Firmicutes Bacillales Listeriaceae                         | <i>Listeria monocytogenes</i> str. 1/2a F6854          |                                                                        |



|                    |                                                      |                                                        |
|--------------------|------------------------------------------------------|--------------------------------------------------------|
| Lmo-31-1           | Bacteria Firmicutes Bacillales Listeriaceae          | <i>Listeria monocytogenes str. 4b</i> F2365            |
| Lmo-32-1           | Bacteria Firmicutes Bacillales Listeriaceae          | <i>Listeria monocytogenes str. 4b</i> H7858            |
| Lse-1-1            | Bacteria Firmicutes Bacillales Listeriaceae          | <i>Listeria seeligeri serovar 1/2b str.</i> SLCC3954   |
| Lwe-1-1            | Bacteria Firmicutes Bacillales Listeriaceae          | <i>Listeria welshimeri serovar 6b str.</i> SLCC5334    |
| Lba-1-1            | Bacteria Firmicutes Bacillales Listeriaceae          | <i>bacterium</i> TTU M1-001                            |
| Mca-1-1            | Bacteria Firmicutes Bacillales                       | <i>Macrococcus caseolyticus</i> JCSC5402               |
| Bbr-1-1            | Bacteria Firmicutes Bacillales Paenibacillaceae      | <i>Brevibacillus brevis</i> NBRC 100599                |
| Bsp-9-1            | Bacteria Firmicutes Bacillales Paenibacillaceae      | <i>Brevibacillus sp.</i> BC25                          |
| Bsp-10-1           | Bacteria Firmicutes Bacillales Paenibacillaceae      | <i>Brevibacillus sp.</i> CF112                         |
| Pal-1-1            | Bacteria Firmicutes Bacillales Paenibacillaceae      | <i>Paenibacillus alvei</i> DSM 29                      |
| Pcu-1-1            | Bacteria Firmicutes Bacillales Paenibacillaceae      | <i>Paenibacillus curdolanolyticus</i> YK9              |
| Pel-1-1            | Bacteria Firmicutes Bacillales Paenibacillaceae      | <i>Paenibacillus elgii</i> B69                         |
| Pla-1-1            | Bacteria Firmicutes Bacillales Paenibacillaceae      | <i>Paenibacillus lactis</i> 154                        |
| Pla-2-1            | Bacteria Firmicutes Bacillales Paenibacillaceae      | <i>Paenibacillus larvae subsp. larvae</i> BRL-230010   |
| Pmu-1-1            | Bacteria Firmicutes Bacillales Paenibacillaceae      | <i>Paenibacillus mucilaginosus</i> 3016                |
| Pmu-2-1            | Bacteria Firmicutes Bacillales Paenibacillaceae      | <i>Paenibacillus mucilaginosus</i> KNP414              |
| Ppe-1-1            | Bacteria Firmicutes Bacillales Paenibacillaceae      | <i>Paenibacillus peoriae</i> KCTC 3763                 |
| Ppo-1-1            | Bacteria Firmicutes Bacillales Paenibacillaceae      | <i>Paenibacillus polymyxa</i> M1                       |
| Psp-1-1            | Bacteria Firmicutes Bacillales Paenibacillaceae      | <i>Paenibacillus sp.</i> Aloe-11                       |
| Psp-2-1            | Bacteria Firmicutes Bacillales Paenibacillaceae      | <i>Paenibacillus sp.</i> HGF5                          |
| Psp-3-1            | Bacteria Firmicutes Bacillales Paenibacillaceae      | <i>Paenibacillus sp.</i> HGF7                          |
| Psp-4-1            | Bacteria Firmicutes Bacillales Paenibacillaceae      | <i>Paenibacillus sp.</i> JDR-2                         |
| Psp-5-1            | Bacteria Firmicutes Bacillales Paenibacillaceae      | <i>Paenibacillus sp. oral taxon</i> 786 str. D14       |
| Pte-1-1            | Bacteria Firmicutes Bacillales Paenibacillaceae      | <i>Paenibacillus terrae</i> HPL-003                    |
| Pvo-1-1            | Bacteria Firmicutes Bacillales Paenibacillaceae      | <i>Paenibacillus vortex</i> V453                       |
| Pan-1-1            | Bacteria Firmicutes Bacillales Planococcaceae        | <i>Planococcus antarcticus</i> DSM 14505               |
| Pdo-1-1            | Bacteria Firmicutes Bacillales Planococcaceae        | <i>Planococcus donghaensis</i> MPA1U2                  |
| Ssi-1-1            | Bacteria Firmicutes Bacillales Planococcaceae        | <i>Solibacillus silvestris</i> StLB046                 |
| Svi-1-1 to Svi-1-2 | Bacteria Firmicutes Bacillales Sporolactobacillaceae | <i>Sporolactobacillus vineae</i> DSM 21990 = SL153     |
| Sar-1-1            | Bacteria Firmicutes Bacillales                       | <i>Staphylococcus arlettae</i> CVD059                  |
| Sau-1-1            | Bacteria Firmicutes Bacillales                       | <i>Staphylococcus aureus</i> 04-02981                  |
| Sau-2-1            | Bacteria Firmicutes Bacillales                       | <i>Staphylococcus aureus</i> 08BA02176                 |
| Sau-3-1            | Bacteria Firmicutes Bacillales                       | <i>Staphylococcus aureus</i> 930918-3                  |
| Sau-4-1            | Bacteria Firmicutes Bacillales                       | <i>Staphylococcus aureus</i> A10102                    |
| Sau-5-1            | Bacteria Firmicutes Bacillales                       | <i>Staphylococcus aureus</i> A5937                     |
| Sau-6-1            | Bacteria Firmicutes Bacillales                       | <i>Staphylococcus aureus</i> A5948                     |
| Sau-7-1            | Bacteria Firmicutes Bacillales                       | <i>Staphylococcus aureus</i> A6224                     |
| Sau-8-1            | Bacteria Firmicutes Bacillales                       | <i>Staphylococcus aureus</i> A6300                     |
| Sau-9-1            | Bacteria Firmicutes Bacillales                       | <i>Staphylococcus aureus</i> A8115                     |
| Sau-10-1           | Bacteria Firmicutes Bacillales                       | <i>Staphylococcus aureus</i> A8117                     |
| Sau-11-1           | Bacteria Firmicutes Bacillales                       | <i>Staphylococcus aureus</i> A8796                     |
| Sau-12-1           | Bacteria Firmicutes Bacillales                       | <i>Staphylococcus aureus</i> A8819                     |
| Sau-13-1           | Bacteria Firmicutes Bacillales                       | <i>Staphylococcus aureus</i> A9299                     |
| Sau-14-1           | Bacteria Firmicutes Bacillales                       | <i>Staphylococcus aureus</i> A9635                     |
| Sau-15-1           | Bacteria Firmicutes Bacillales                       | <i>Staphylococcus aureus</i> A9719                     |
| Sau-16-1           | Bacteria Firmicutes Bacillales                       | <i>Staphylococcus aureus</i> A9754                     |
| Sau-17-1           | Bacteria Firmicutes Bacillales                       | <i>Staphylococcus aureus</i> A9763                     |
| Sau-18-1           | Bacteria Firmicutes Bacillales                       | <i>Staphylococcus aureus</i> A9765                     |
| Sau-19-1           | Bacteria Firmicutes Bacillales                       | <i>Staphylococcus aureus</i> A9781                     |
| Sau-20-1           | Bacteria Firmicutes Bacillales                       | <i>Staphylococcus aureus</i> D30                       |
| Sau-21-1           | Bacteria Firmicutes Bacillales                       | <i>Staphylococcus aureus</i> RF122                     |
| Sau-22-1           | Bacteria Firmicutes Bacillales                       | <i>Staphylococcus aureus subsp. aureus</i> 11819-97    |
| Sau-23-1           | Bacteria Firmicutes Bacillales                       | <i>Staphylococcus aureus subsp. aureus</i> 132         |
| Sau-24-1           | Bacteria Firmicutes Bacillales                       | <i>Staphylococcus aureus subsp. aureus</i> 58-424      |
| Sau-25-1           | Bacteria Firmicutes Bacillales                       | <i>Staphylococcus aureus subsp. aureus</i> 65-1322     |
| Sau-26-1           | Bacteria Firmicutes Bacillales                       | <i>Staphylococcus aureus subsp. aureus</i> 68-397      |
| Sau-27-1           | Bacteria Firmicutes Bacillales                       | <i>Staphylococcus aureus subsp. aureus</i> 71193       |
| Sau-28-1           | Bacteria Firmicutes Bacillales                       | <i>Staphylococcus aureus subsp. aureus</i> A017934/97  |
| Sau-29-1           | Bacteria Firmicutes Bacillales                       | <i>Staphylococcus aureus subsp. aureus</i> ATCC 51811  |
| Sau-30-1           | Bacteria Firmicutes Bacillales                       | <i>Staphylococcus aureus subsp. aureus</i> ATCC BAA-39 |
| Sau-31-1           | Bacteria Firmicutes Bacillales                       | <i>Staphylococcus aureus subsp. aureus</i> Btn1260     |
| Sau-32-1           | Bacteria Firmicutes Bacillales                       | <i>Staphylococcus aureus subsp. aureus</i> C101        |
| Sau-33-1           | Bacteria Firmicutes Bacillales                       | <i>Staphylococcus aureus subsp. aureus</i> C160        |
| Sau-34-1           | Bacteria Firmicutes Bacillales                       | <i>Staphylococcus aureus subsp. aureus</i> C427        |
| Sau-35-1           | Bacteria Firmicutes Bacillales                       | <i>Staphylococcus aureus subsp. aureus</i> COL         |

|                      |                                |                                                          |                 |
|----------------------|--------------------------------|----------------------------------------------------------|-----------------|
| Sau-36-1             | Bacteria Firmicutes Bacillales | <i>Staphylococcus aureus subsp. aureus</i>               | D139            |
| Sau-37-1             | Bacteria Firmicutes Bacillales | <i>Staphylococcus aureus subsp. aureus</i>               | E1410           |
| Sau-38-1             | Bacteria Firmicutes Bacillales | <i>Staphylococcus aureus subsp. aureus</i>               | ECT-R 2         |
| Sau-39-1             | Bacteria Firmicutes Bacillales | <i>Staphylococcus aureus subsp. aureus</i>               | ED133           |
| Sau-40-1             | Bacteria Firmicutes Bacillales | <i>Staphylococcus aureus subsp. aureus</i>               | ED98            |
| Sau-41-1             | Bacteria Firmicutes Bacillales | <i>Staphylococcus aureus subsp. aureus</i>               | EMRSA16         |
| Sau-42-1             | Bacteria Firmicutes Bacillales | <i>Staphylococcus aureus subsp. aureus</i>               | H19             |
| Sau-43-1             | Bacteria Firmicutes Bacillales | <i>Staphylococcus aureus subsp. aureus</i>               | HO 5096 0412    |
| Sau-44-1             | Bacteria Firmicutes Bacillales | <i>Staphylococcus aureus subsp. aureus</i>               | JH1             |
| Sau-45-1             | Bacteria Firmicutes Bacillales | <i>Staphylococcus aureus subsp. aureus</i>               | JH9             |
| Sau-46-1             | Bacteria Firmicutes Bacillales | <i>Staphylococcus aureus subsp. aureus</i>               | JKD6159         |
| Sau-47-1             | Bacteria Firmicutes Bacillales | <i>Staphylococcus aureus subsp. aureus</i>               | LGA251          |
| Sau-48-1             | Bacteria Firmicutes Bacillales | <i>Staphylococcus aureus subsp. aureus</i>               | M013            |
| Sau-49-1             | Bacteria Firmicutes Bacillales | <i>Staphylococcus aureus subsp. aureus</i>               | M1015           |
| Sau-50-1             | Bacteria Firmicutes Bacillales | <i>Staphylococcus aureus subsp. aureus</i>               | M809            |
| Sau-51-1             | Bacteria Firmicutes Bacillales | <i>Staphylococcus aureus subsp. aureus</i>               | M876            |
| Sau-52-1             | Bacteria Firmicutes Bacillales | <i>Staphylococcus aureus subsp. aureus</i>               | M899            |
| Sau-53-1             | Bacteria Firmicutes Bacillales | <i>Staphylococcus aureus subsp. aureus</i>               | MN8             |
| Sau-54-1             | Bacteria Firmicutes Bacillales | <i>Staphylococcus aureus subsp. aureus</i>               | MR1             |
| Sau-55-1             | Bacteria Firmicutes Bacillales | <i>Staphylococcus aureus subsp. aureus</i>               | MRSA252         |
| Sau-56-1             | Bacteria Firmicutes Bacillales | <i>Staphylococcus aureus subsp. aureus</i>               | MSHR1132        |
| Sau-57-1             | Bacteria Firmicutes Bacillales | <i>Staphylococcus aureus subsp. aureus</i>               | MSSA476         |
| Sau-59-1 to Sau-59-2 | Bacteria Firmicutes Bacillales | <i>Staphylococcus aureus subsp. aureus</i>               | Mu3             |
| Sau-60-1             | Bacteria Firmicutes Bacillales | <i>Staphylococcus aureus subsp. aureus</i>               | Mu50            |
| Sau-61-1             | Bacteria Firmicutes Bacillales | <i>Staphylococcus aureus subsp. aureus</i>               | Mu50-omega      |
| Sau-58-1             | Bacteria Firmicutes Bacillales | <i>Staphylococcus aureus subsp. aureus</i>               | MW2             |
| Sau-62-1             | Bacteria Firmicutes Bacillales | <i>Staphylococcus aureus subsp. aureus</i>               | N315            |
| Sau-63-1             | Bacteria Firmicutes Bacillales | <i>Staphylococcus aureus subsp. aureus</i>               | NCTC 8325       |
| Sau-64-1             | Bacteria Firmicutes Bacillales | <i>Staphylococcus aureus subsp. aureus</i>               | ST398           |
| Sau-75-1             | Bacteria Firmicutes Bacillales | <i>Staphylococcus aureus subsp. aureus str.</i>          | CF-Marseille    |
| Sau-76-1             | Bacteria Firmicutes Bacillales | <i>Staphylococcus aureus subsp. aureus str.</i>          | JKD6008         |
| Sau-77-1             | Bacteria Firmicutes Bacillales | <i>Staphylococcus aureus subsp. aureus str.</i>          | JKD6009         |
| Sau-78-1             | Bacteria Firmicutes Bacillales | <i>Staphylococcus aureus subsp. aureus str.</i>          | Newman          |
| Sau-65-1             | Bacteria Firmicutes Bacillales | <i>Staphylococcus aureus subsp. aureus</i>               | T0131           |
| Sau-66-1             | Bacteria Firmicutes Bacillales | <i>Staphylococcus aureus subsp. aureus</i>               | TCH130          |
| Sau-67-1             | Bacteria Firmicutes Bacillales | <i>Staphylococcus aureus subsp. aureus</i>               | TCH60           |
| Sau-68-1             | Bacteria Firmicutes Bacillales | <i>Staphylococcus aureus subsp. aureus</i>               | TW20            |
| Sau-69-1             | Bacteria Firmicutes Bacillales | <i>Staphylococcus aureus subsp. aureus</i>               | USA300_FPR3757  |
| Sau-70-1             | Bacteria Firmicutes Bacillales | <i>Staphylococcus aureus subsp. aureus</i>               | USA300_TCH1516  |
| Sau-71-1             | Bacteria Firmicutes Bacillales | <i>Staphylococcus aureus subsp. aureus</i>               | USA300_TCH959   |
| Sau-72-1             | Bacteria Firmicutes Bacillales | <i>Staphylococcus aureus subsp. aureus</i>               | VC40            |
| Sau-73-1             | Bacteria Firmicutes Bacillales | <i>Staphylococcus aureus subsp. aureus</i>               | WBG10049        |
| Sau-74-1             | Bacteria Firmicutes Bacillales | <i>Staphylococcus aureus subsp. aureus</i>               | WW2703/97       |
| Sca-1-1              | Bacteria Firmicutes Bacillales | <i>Staphylococcus capitis</i>                            | SK14            |
| Sca-2-1              | Bacteria Firmicutes Bacillales | <i>Staphylococcus caprae</i>                             | C87             |
| Sca-3-1              | Bacteria Firmicutes Bacillales | <i>Staphylococcus carnosus subsp. carnosus</i>           | TM300           |
| Sep-1-1              | Bacteria Firmicutes Bacillales | <i>Staphylococcus epidermidis</i>                        | ATCC 12228      |
| Sep-2-1              | Bacteria Firmicutes Bacillales | <i>Staphylococcus epidermidis</i>                        | BCM-HMP0060     |
| Sep-3-1              | Bacteria Firmicutes Bacillales | <i>Staphylococcus epidermidis</i>                        | M23864:W1       |
| Sep-4-1              | Bacteria Firmicutes Bacillales | <i>Staphylococcus epidermidis</i>                        | M23864:W2(grey) |
| Sep-5-1              | Bacteria Firmicutes Bacillales | <i>Staphylococcus epidermidis</i>                        | RP62A           |
| Sep-6-1              | Bacteria Firmicutes Bacillales | <i>Staphylococcus epidermidis</i>                        | SK135           |
| Sep-7-1              | Bacteria Firmicutes Bacillales | <i>Staphylococcus epidermidis</i>                        | W23144          |
| Seq-1-1              | Bacteria Firmicutes Bacillales | <i>Staphylococcus equorum subsp. equorum</i>             | Mu2             |
| Sha-1-1              | Bacteria Firmicutes Bacillales | <i>Staphylococcus haemolyticus</i>                       | JCSC1435        |
| Sho-1-1              | Bacteria Firmicutes Bacillales | <i>Staphylococcus hominis</i>                            | SK119           |
| Sho-2-1              | Bacteria Firmicutes Bacillales | <i>Staphylococcus hominis subsp. hominis</i>             | C80             |
| Slu-1-1              | Bacteria Firmicutes Bacillales | <i>Staphylococcus lugdunensis</i>                        | HKU09-01        |
| Slu-2-1              | Bacteria Firmicutes Bacillales | <i>Staphylococcus lugdunensis</i>                        | N920143         |
| Sps-1-1              | Bacteria Firmicutes Bacillales | <i>Staphylococcus pseudintermedius</i>                   | ED99            |
| Sps-2-1              | Bacteria Firmicutes Bacillales | <i>Staphylococcus pseudintermedius</i>                   | HKU10-03        |
| Ssa-1-1              | Bacteria Firmicutes Bacillales | <i>Staphylococcus saprophyticus subsp. saprophyticus</i> | ATCC 15305      |
| Ssi-2-1              | Bacteria Firmicutes Bacillales | <i>Staphylococcus simiae</i>                             | CCM 7213        |
| Ssp-2-1              | Bacteria Firmicutes Bacillales | <i>Staphylococcus sp.</i>                                | OJ82            |
| Swa-1-1              | Bacteria Firmicutes Bacillales | <i>Staphylococcus warneri</i>                            | L37603          |

|                    |                     |         |            |             |                                                                                                 |
|--------------------|---------------------|---------|------------|-------------|-------------------------------------------------------------------------------------------------|
| Apa-1-1            | Bacteria Firmicutes | Bacilli | Bacillales | Bacillaceae | <i>Aeribacillus pallidus</i>                                                                    |
| Aha-1-1            | Bacteria Firmicutes | Bacilli | Bacillales | Bacillaceae | <i>Alkalibacillus haloalkaliphilus</i> C5                                                       |
| Aji-1-1            | Bacteria Firmicutes | Bacilli | Bacillales | Bacillaceae | <i>Amphibacillus jilinensis</i> Y1                                                              |
| Ama-1-1            | Bacteria Firmicutes | Bacilli | Bacillales | Bacillaceae | <i>Anaerobacillus macyae</i>                                                                    |
| Aay-1-1            | Bacteria Firmicutes | Bacilli | Bacillales | Bacillaceae | <i>Anoxybacillus ayderensis</i>                                                                 |
| Afl-2-1            | Bacteria Firmicutes | Bacilli | Bacillales | Bacillaceae | <i>Anoxybacillus flavithermus</i>                                                               |
| Afl-3-1            | Bacteria Firmicutes | Bacilli | Bacillales | Bacillaceae | <i>Anoxybacillus flavithermus</i> AK1                                                           |
| Afl-4-1            | Bacteria Firmicutes | Bacilli | Bacillales | Bacillaceae | <i>Anoxybacillus flavithermus</i> NBRC 109594                                                   |
| Afl-6-1            | Bacteria Firmicutes | Bacilli | Bacillales | Bacillaceae | <i>Anoxybacillus flavithermus</i> subsp. <i>yunnanensis</i> str. E13                            |
| Afl-5-1            | Bacteria Firmicutes | Bacilli | Bacillales | Bacillaceae | <i>Anoxybacillus flavithermus</i> TNO-09.006                                                    |
| Age-1-1 to Age-1-2 | Bacteria Firmicutes | Bacilli | Bacillales | Bacillaceae | <i>Anoxybacillus geothermalis</i>                                                               |
| Ago-1-1            | Bacteria Firmicutes | Bacilli | Bacillales | Bacillaceae | <i>Anoxybacillus gonensis</i>                                                                   |
| Aka-1-1            | Bacteria Firmicutes | Bacilli | Bacillales | Bacillaceae | <i>Anoxybacillus kamchatkensis</i> G10                                                          |
| Asp-1-1            | Bacteria Firmicutes | Bacilli | Bacillales | Bacillaceae | <i>Anoxybacillus</i> sp. BCO1                                                                   |
| Asp-2-1            | Bacteria Firmicutes | Bacilli | Bacillales | Bacillaceae | <i>Anoxybacillus</i> sp. DT3-1                                                                  |
| Asp-3-1            | Bacteria Firmicutes | Bacilli | Bacillales | Bacillaceae | <i>Anoxybacillus</i> sp. KU2-6(11)                                                              |
| Asp-4-1            | Bacteria Firmicutes | Bacilli | Bacillales | Bacillaceae | <i>Anoxybacillus</i> sp. SK3-4                                                                  |
| Ate-1-1            | Bacteria Firmicutes | Bacilli | Bacillales | Bacillaceae | <i>Anoxybacillus tepidamans</i> PS2                                                             |
| Ath-1-1            | Bacteria Firmicutes | Bacilli | Bacillales | Bacillaceae | <i>Anoxybacillus thermarum</i>                                                                  |
| Bac-1-1            | Bacteria Firmicutes | Bacilli | Bacillales | Bacillaceae | <i>Bacillus acidiproducens</i> DSM 23148                                                        |
| Bae-1-1            | Bacteria Firmicutes | Bacilli | Bacillales | Bacillaceae | <i>Bacillus aerophilus</i>                                                                      |
| Bak-1-1            | Bacteria Firmicutes | Bacilli | Bacillales | Bacillaceae | <i>Bacillus akibai</i> JCM 9157                                                                 |
| Bal-1-1            | Bacteria Firmicutes | Bacilli | Bacillales | Bacillaceae | <i>Bacillus alcalophilus</i> ATCC 27647 = CGMCC 1.3604                                          |
| Bal-2-1 to Bal-2-3 | Bacteria Firmicutes | Bacilli | Bacillales | Bacillaceae | <i>Bacillus altitudinis</i>                                                                     |
| Bal-3-1            | Bacteria Firmicutes | Bacilli | Bacillales | Bacillaceae | <i>Bacillus altitudinis</i> 41KF2b                                                              |
| Bal-4-1 to Bal-4-2 | Bacteria Firmicutes | Bacilli | Bacillales | Bacillaceae | <i>Bacillus alveayuensis</i>                                                                    |
| Bam-9-1 to Bam-9-3 | Bacteria Firmicutes | Bacilli | Bacillales | Bacillaceae | <i>Bacillus amyloliquefaciens</i>                                                               |
| Bam-10-1           | Bacteria Firmicutes | Bacilli | Bacillales | Bacillaceae | <i>Bacillus amyloliquefaciens</i> CC178                                                         |
| Bam-11-1           | Bacteria Firmicutes | Bacilli | Bacillales | Bacillaceae | <i>Bacillus amyloliquefaciens</i> EGD-AQ14                                                      |
| Bam-9-1 to Bam-9-3 | Bacteria Firmicutes | Bacilli | Bacillales | Bacillaceae | <i>Bacillus</i> <i>Bacillus amyloliquefaciens</i> group <i>Bacillus amyloliquefaciens</i>       |
| Bam-15-1           | Bacteria Firmicutes | Bacilli | Bacillales | Bacillaceae | <i>Bacillus</i> <i>Bacillus amyloliquefaciens</i> group <i>Bacillus amyloliquefaciens</i> EBL11 |
| Bam-16-1           | Bacteria Firmicutes | Bacilli | Bacillales | Bacillaceae | <i>Bacillus</i> <i>Bacillus amyloliquefaciens</i> group <i>Bacillus amyloliquefaciens</i> HB-26 |
| Bam-17-1           | Bacteria Firmicutes | Bacilli | Bacillales | Bacillaceae | <i>Bacillus</i> <i>Bacillus amyloliquefaciens</i> group <i>Bacillus amyloliquefaciens</i> KHG19 |
| Bam-18-1           | Bacteria Firmicutes | Bacilli | Bacillales | Bacillaceae | <i>Bacillus</i> <i>Bacillus amyloliquefaciens</i> group <i>Bacillus amyloliquefaciens</i> Lx-11 |
| Bsi-1-1            | Bacteria Firmicutes | Bacilli | Bacillales | Bacillaceae | <i>Bacillus</i> <i>Bacillus amyloliquefaciens</i> group <i>Bacillus siamensis</i>               |
| Bve-1-1 to Bve-1-4 | Bacteria Firmicutes | Bacilli | Bacillales | Bacillaceae | <i>Bacillus</i> <i>Bacillus amyloliquefaciens</i> group <i>Bacillus velezensis</i>              |
| Bve-2-1            | Bacteria Firmicutes | Bacilli | Bacillales | Bacillaceae | <i>Bacillus</i> <i>Bacillus amyloliquefaciens</i> group <i>Bacillus velezensis</i> NJN-6        |
| Bve-3-1            | Bacteria Firmicutes | Bacilli | Bacillales | Bacillaceae | <i>Bacillus</i> <i>Bacillus amyloliquefaciens</i> group <i>Bacillus velezensis</i> SK19.001     |
| Bve-4-1            | Bacteria Firmicutes | Bacilli | Bacillales | Bacillaceae | <i>Bacillus</i> <i>Bacillus amyloliquefaciens</i> group <i>Bacillus velezensis</i> SQR9         |
| Bve-5-1            | Bacteria Firmicutes | Bacilli | Bacillales | Bacillaceae | <i>Bacillus</i> <i>Bacillus amyloliquefaciens</i> group <i>Bacillus velezensis</i> TrigoCor1448 |
| Bam-12-1           | Bacteria Firmicutes | Bacilli | Bacillales | Bacillaceae | <i>Bacillus amyloliquefaciens</i> IT-45                                                         |
| Bam-13-1           | Bacteria Firmicutes | Bacilli | Bacillales | Bacillaceae | <i>Bacillus amyloliquefaciens</i> LFB112                                                        |
| Bam-19-1           | Bacteria Firmicutes | Bacilli | Bacillales | Bacillaceae | <i>Bacillus amyloliquefaciens</i> subsp. <i>amyloliquefaciens</i> DC-12                         |
| Bam-20-1           | Bacteria Firmicutes | Bacilli | Bacillales | Bacillaceae | <i>Bacillus amyloliquefaciens</i> subsp. <i>plantarum</i> AS43.3                                |
| Bam-21-1           | Bacteria Firmicutes | Bacilli | Bacillales | Bacillaceae | <i>Bacillus amyloliquefaciens</i> subsp. <i>plantarum</i> M27                                   |
| Bam-22-1           | Bacteria Firmicutes | Bacilli | Bacillales | Bacillaceae | <i>Bacillus amyloliquefaciens</i> subsp. <i>plantarum</i> NAU-B3                                |
| Bam-23-1           | Bacteria Firmicutes | Bacilli | Bacillales | Bacillaceae | <i>Bacillus amyloliquefaciens</i> subsp. <i>plantarum</i> UCMB5033                              |
| Bam-24-1           | Bacteria Firmicutes | Bacilli | Bacillales | Bacillaceae | <i>Bacillus amyloliquefaciens</i> subsp. <i>plantarum</i> UCMB5036                              |
| Bam-25-1           | Bacteria Firmicutes | Bacilli | Bacillales | Bacillaceae | <i>Bacillus amyloliquefaciens</i> subsp. <i>plantarum</i> UCMB5113                              |
| Bam-14-1           | Bacteria Firmicutes | Bacilli | Bacillales | Bacillaceae | <i>Bacillus amyloliquefaciens</i> UASWS BA1                                                     |
| Ban-20-1           | Bacteria Firmicutes | Bacilli | Bacillales | Bacillaceae | <i>Bacillus andreraoultii</i>                                                                   |
| Baq-1-1 to Baq-1-2 | Bacteria Firmicutes | Bacilli | Bacillales | Bacillaceae | <i>Bacillus aquimaris</i>                                                                       |
| Bar-1-1 to Bar-1-5 | Bacteria Firmicutes | Bacilli | Bacillales | Bacillaceae | <i>Bacillus aryabhatai</i>                                                                      |
| Bar-2-1            | Bacteria Firmicutes | Bacilli | Bacillales | Bacillaceae | <i>Bacillus aryabhatai</i> B8W22                                                                |
| Bat-2-1            | Bacteria Firmicutes | Bacilli | Bacillales | Bacillaceae | <i>Bacillus atrophaeus</i>                                                                      |
| Bat-3-1            | Bacteria Firmicutes | Bacilli | Bacillales | Bacillaceae | <i>Bacillus atrophaeus</i> 1013-1                                                               |
| Bat-4-1            | Bacteria Firmicutes | Bacilli | Bacillales | Bacillaceae | <i>Bacillus atrophaeus</i> 1013-2                                                               |
| Bat-5-1            | Bacteria Firmicutes | Bacilli | Bacillales | Bacillaceae | <i>Bacillus atrophaeus</i> ATCC 49822-1                                                         |
| Bat-6-1            | Bacteria Firmicutes | Bacilli | Bacillales | Bacillaceae | <i>Bacillus atrophaeus</i> ATCC 49822-2                                                         |
| Bat-7-1            | Bacteria Firmicutes | Bacilli | Bacillales | Bacillaceae | <i>Bacillus atrophaeus</i> ATCC 9372-1                                                          |
| Bat-8-1            | Bacteria Firmicutes | Bacilli | Bacillales | Bacillaceae | <i>Bacillus atrophaeus</i> ATCC 9372-2                                                          |
| Bat-9-1            | Bacteria Firmicutes | Bacilli | Bacillales | Bacillaceae | <i>Bacillus atrophaeus</i> BAC1051-E                                                            |
| Bat-10-1           | Bacteria Firmicutes | Bacilli | Bacillales | Bacillaceae | <i>Bacillus atrophaeus</i> BAC1051-N                                                            |
| Bat-11-1           | Bacteria Firmicutes | Bacilli | Bacillales | Bacillaceae | <i>Bacillus atrophaeus</i> C89                                                                  |
| Bat-12-1           | Bacteria Firmicutes | Bacilli | Bacillales | Bacillaceae | <i>Bacillus atrophaeus</i> Detrick-1                                                            |

|                       |                     |         |            |             |                                |                                                                           |
|-----------------------|---------------------|---------|------------|-------------|--------------------------------|---------------------------------------------------------------------------|
| Bat-13-1              | Bacteria Firmicutes | Bacilli | Bacillales | Bacillaceae | <i>Bacillus atrophaeus</i>     | Detrick-2                                                                 |
| Bat-14-1              | Bacteria Firmicutes | Bacilli | Bacillales | Bacillaceae | <i>Bacillus atrophaeus</i>     | Detrick-3                                                                 |
| Bat-16-1              | Bacteria Firmicutes | Bacilli | Bacillales | Bacillaceae | <i>Bacillus atrophaeus</i>     | str. Dugway                                                               |
| Bat-17-1              | Bacteria Firmicutes | Bacilli | Bacillales | Bacillaceae | <i>Bacillus atrophaeus</i>     | subsp. <i>globigii</i>                                                    |
| Bat-15-1              | Bacteria Firmicutes | Bacilli | Bacillales | Bacillaceae | <i>Bacillus atrophaeus</i>     | UCMB-5137                                                                 |
| Bau-1-1               | Bacteria Firmicutes | Bacilli | Bacillales | Bacillaceae | <i>Bacillus aurantiacus</i>    | DSM 18675                                                                 |
| Baz-2-1               | Bacteria Firmicutes | Bacilli | Bacillales | Bacillaceae | <i>Bacillus azotoformans</i>   | MEV2011                                                                   |
| Bba-2-1 to Bba-2-2    | Bacteria Firmicutes | Bacilli | Bacillales | Bacillaceae | <i>Bacillus badius</i>         |                                                                           |
| Bbo-1-1               | Bacteria Firmicutes | Bacilli | Bacillales | Bacillaceae | <i>Bacillus bogoriensis</i>    | ATCC BAA-922                                                              |
| Bbo-2-1               | Bacteria Firmicutes | Bacilli | Bacillales | Bacillaceae | <i>Bacillus bombysepticus</i>  | str. Wang                                                                 |
| Bbo-3-1               | Bacteria Firmicutes | Bacilli | Bacillales | Bacillaceae | <i>Bacillus boroniphilus</i>   | JCM 21738                                                                 |
| Bbu-1-1               | Bacteria Firmicutes | Bacilli | Bacillales | Bacillaceae | <i>Bacillus butanolivorans</i> |                                                                           |
| Bca-1-1               | Bacteria Firmicutes | Bacilli | Bacillales | Bacillaceae | <i>Bacillus campisalis</i>     |                                                                           |
| Ban-21-1 to Ban-21-20 | Bacteria Firmicutes | Bacilli | Bacillales | Bacillaceae | <i>Bacillus</i>                | <i>Bacillus cereus</i> group <i>Bacillus anthracis</i>                    |
| Ban-22-1              | Bacteria Firmicutes | Bacilli | Bacillales | Bacillaceae | <i>Bacillus</i>                | <i>Bacillus cereus</i> group <i>Bacillus anthracis</i> 52-G               |
| Ban-23-1              | Bacteria Firmicutes | Bacilli | Bacillales | Bacillaceae | <i>Bacillus</i>                | <i>Bacillus cereus</i> group <i>Bacillus anthracis</i> 8903-G             |
| Ban-24-1              | Bacteria Firmicutes | Bacilli | Bacillales | Bacillaceae | <i>Bacillus</i>                | <i>Bacillus cereus</i> group <i>Bacillus anthracis</i> 9080-G             |
| Ban-25-1              | Bacteria Firmicutes | Bacilli | Bacillales | Bacillaceae | <i>Bacillus</i>                | <i>Bacillus cereus</i> group <i>Bacillus anthracis</i> CZC5               |
| Ban-26-1              | Bacteria Firmicutes | Bacilli | Bacillales | Bacillaceae | <i>Bacillus</i>                | <i>Bacillus cereus</i> group <i>Bacillus anthracis</i> str. 3154          |
| Ban-27-1              | Bacteria Firmicutes | Bacilli | Bacillales | Bacillaceae | <i>Bacillus</i>                | <i>Bacillus cereus</i> group <i>Bacillus anthracis</i> str. 3166          |
| Ban-28-1              | Bacteria Firmicutes | Bacilli | Bacillales | Bacillaceae | <i>Bacillus</i>                | <i>Bacillus cereus</i> group <i>Bacillus anthracis</i> str. A16           |
| Ban-29-1              | Bacteria Firmicutes | Bacilli | Bacillales | Bacillaceae | <i>Bacillus</i>                | <i>Bacillus cereus</i> group <i>Bacillus anthracis</i> str. A16R          |
| Ban-30-1              | Bacteria Firmicutes | Bacilli | Bacillales | Bacillaceae | <i>Bacillus</i>                | <i>Bacillus cereus</i> group <i>Bacillus anthracis</i> str. BF1           |
| Ban-31-1              | Bacteria Firmicutes | Bacilli | Bacillales | Bacillaceae | <i>Bacillus</i>                | <i>Bacillus cereus</i> group <i>Bacillus anthracis</i> str. Carbosap      |
| Ban-32-1              | Bacteria Firmicutes | Bacilli | Bacillales | Bacillaceae | <i>Bacillus</i>                | <i>Bacillus cereus</i> group <i>Bacillus anthracis</i> str. Gmb1          |
| Ban-33-1              | Bacteria Firmicutes | Bacilli | Bacillales | Bacillaceae | <i>Bacillus</i>                | <i>Bacillus cereus</i> group <i>Bacillus anthracis</i> str. Heroin Ba4599 |
| Ban-35-1              | Bacteria Firmicutes | Bacilli | Bacillales | Bacillaceae | <i>Bacillus</i>                | <i>Bacillus cereus</i> group <i>Bacillus anthracis</i> str. Sen2Col2      |
| Ban-36-1              | Bacteria Firmicutes | Bacilli | Bacillales | Bacillaceae | <i>Bacillus</i>                | <i>Bacillus cereus</i> group <i>Bacillus anthracis</i> str. Sen3          |
| Ban-17-1 to Ban-17-2  | Bacteria Firmicutes | Bacilli | Bacillales | Bacillaceae | <i>Bacillus</i>                | <i>Bacillus cereus</i> group <i>Bacillus anthracis</i> str. Sterne        |
| Ban-34-1              | Bacteria Firmicutes | Bacilli | Bacillales | Bacillaceae | <i>Bacillus</i>                | <i>Bacillus cereus</i> group <i>Bacillus anthracis</i> str. SVA11         |
| Ban-37-1              | Bacteria Firmicutes | Bacilli | Bacillales | Bacillaceae | <i>Bacillus</i>                | <i>Bacillus cereus</i> group <i>Bacillus anthracis</i> str. Turkey32      |
| Ban-38-1              | Bacteria Firmicutes | Bacilli | Bacillales | Bacillaceae | <i>Bacillus</i>                | <i>Bacillus cereus</i> group <i>Bacillus anthracis</i> str. V770-NP-1R    |
| Ban-39-1              | Bacteria Firmicutes | Bacilli | Bacillales | Bacillaceae | <i>Bacillus</i>                | <i>Bacillus cereus</i> group <i>Bacillus anthracis</i> str. V770-NP1-R    |
| Ban-18-1 to Ban-18-2  | Bacteria Firmicutes | Bacilli | Bacillales | Bacillaceae | <i>Bacillus</i>                | <i>Bacillus cereus</i> group <i>Bacillus anthracis</i> str. Vollum        |
| Bce-47-1 to Bce-47-5  | Bacteria Firmicutes | Bacilli | Bacillales | Bacillaceae | <i>Bacillus</i>                | <i>Bacillus cereus</i>                                                    |
| Bce-2-1 to Bce-2-2    | Bacteria Firmicutes | Bacilli | Bacillales | Bacillaceae | <i>Bacillus</i>                | <i>Bacillus cereus</i> group <i>Bacillus cereus</i> 03BB102               |
| Bce-48-1              | Bacteria Firmicutes | Bacilli | Bacillales | Bacillaceae | <i>Bacillus</i>                | <i>Bacillus cereus</i> group <i>Bacillus cereus</i> 03BB108               |
| Bce-49-1              | Bacteria Firmicutes | Bacilli | Bacillales | Bacillaceae | <i>Bacillus</i>                | <i>Bacillus cereus</i> group <i>Bacillus cereus</i> AND1407               |
| Bce-14-1 to Bce-14-2  | Bacteria Firmicutes | Bacilli | Bacillales | Bacillaceae | <i>Bacillus</i>                | <i>Bacillus cereus</i> group <i>Bacillus cereus</i> ATCC 10876            |
| Bce-17-1 to Bce-17-2  | Bacteria Firmicutes | Bacilli | Bacillales | Bacillaceae | <i>Bacillus</i>                | <i>Bacillus cereus</i> group <i>Bacillus cereus</i> ATCC 4342             |
| Bce-50-1              | Bacteria Firmicutes | Bacilli | Bacillales | Bacillaceae | <i>Bacillus</i>                | <i>Bacillus cereus</i> group <i>Bacillus cereus</i> B5-2                  |
| Bce-51-1              | Bacteria Firmicutes | Bacilli | Bacillales | Bacillaceae | <i>Bacillus</i>                | <i>Bacillus cereus</i> group <i>Bacillus cereus</i> BAG10-1               |
| Bce-52-1              | Bacteria Firmicutes | Bacilli | Bacillales | Bacillaceae | <i>Bacillus</i>                | <i>Bacillus cereus</i> group <i>Bacillus cereus</i> BAG10-2               |
| Bce-53-1              | Bacteria Firmicutes | Bacilli | Bacillales | Bacillaceae | <i>Bacillus</i>                | <i>Bacillus cereus</i> group <i>Bacillus cereus</i> BAG10-3               |
| Bce-54-1              | Bacteria Firmicutes | Bacilli | Bacillales | Bacillaceae | <i>Bacillus</i>                | <i>Bacillus cereus</i> group <i>Bacillus cereus</i> BAG1X1-1              |
| Bce-55-1              | Bacteria Firmicutes | Bacilli | Bacillales | Bacillaceae | <i>Bacillus</i>                | <i>Bacillus cereus</i> group <i>Bacillus cereus</i> BAG1X1-2              |
| Bce-56-1              | Bacteria Firmicutes | Bacilli | Bacillales | Bacillaceae | <i>Bacillus</i>                | <i>Bacillus cereus</i> group <i>Bacillus cereus</i> BAG1X1-3              |
| Bce-57-1              | Bacteria Firmicutes | Bacilli | Bacillales | Bacillaceae | <i>Bacillus</i>                | <i>Bacillus cereus</i> group <i>Bacillus cereus</i> BAG1X2-1              |
| Bce-58-1              | Bacteria Firmicutes | Bacilli | Bacillales | Bacillaceae | <i>Bacillus</i>                | <i>Bacillus cereus</i> group <i>Bacillus cereus</i> BAG1X2-2              |
| Bce-59-1              | Bacteria Firmicutes | Bacilli | Bacillales | Bacillaceae | <i>Bacillus</i>                | <i>Bacillus cereus</i> group <i>Bacillus cereus</i> BAG1X2-3              |
| Bce-60-1              | Bacteria Firmicutes | Bacilli | Bacillales | Bacillaceae | <i>Bacillus</i>                | <i>Bacillus cereus</i> group <i>Bacillus cereus</i> BAG20-1               |
| Bce-61-1              | Bacteria Firmicutes | Bacilli | Bacillales | Bacillaceae | <i>Bacillus</i>                | <i>Bacillus cereus</i> group <i>Bacillus cereus</i> BAG20-2               |
| Bce-62-1              | Bacteria Firmicutes | Bacilli | Bacillales | Bacillaceae | <i>Bacillus</i>                | <i>Bacillus cereus</i> group <i>Bacillus cereus</i> BAG20-3               |
| Bce-63-1              | Bacteria Firmicutes | Bacilli | Bacillales | Bacillaceae | <i>Bacillus</i>                | <i>Bacillus cereus</i> group <i>Bacillus cereus</i> BAG2X1-1              |
| Bce-64-1              | Bacteria Firmicutes | Bacilli | Bacillales | Bacillaceae | <i>Bacillus</i>                | <i>Bacillus cereus</i> group <i>Bacillus cereus</i> BAG2X1-2              |
| Bce-65-1              | Bacteria Firmicutes | Bacilli | Bacillales | Bacillaceae | <i>Bacillus</i>                | <i>Bacillus cereus</i> group <i>Bacillus cereus</i> BAG2X1-3              |
| Bce-66-1              | Bacteria Firmicutes | Bacilli | Bacillales | Bacillaceae | <i>Bacillus</i>                | <i>Bacillus cereus</i> group <i>Bacillus cereus</i> BAG30-1               |
| Bce-67-1              | Bacteria Firmicutes | Bacilli | Bacillales | Bacillaceae | <i>Bacillus</i>                | <i>Bacillus cereus</i> group <i>Bacillus cereus</i> BAG30-2               |
| Bce-68-1              | Bacteria Firmicutes | Bacilli | Bacillales | Bacillaceae | <i>Bacillus</i>                | <i>Bacillus cereus</i> group <i>Bacillus cereus</i> BAG3X2-1              |
| Bce-69-1              | Bacteria Firmicutes | Bacilli | Bacillales | Bacillaceae | <i>Bacillus</i>                | <i>Bacillus cereus</i> group <i>Bacillus cereus</i> BAG3X2-2              |
| Bce-70-1              | Bacteria Firmicutes | Bacilli | Bacillales | Bacillaceae | <i>Bacillus</i>                | <i>Bacillus cereus</i> group <i>Bacillus cereus</i> BAG40-1               |
| Bce-71-1              | Bacteria Firmicutes | Bacilli | Bacillales | Bacillaceae | <i>Bacillus</i>                | <i>Bacillus cereus</i> group <i>Bacillus cereus</i> BAG4X12-1             |
| Bce-72-1              | Bacteria Firmicutes | Bacilli | Bacillales | Bacillaceae | <i>Bacillus</i>                | <i>Bacillus cereus</i> group <i>Bacillus cereus</i> BAG4X2-1              |
| Bce-73-1              | Bacteria Firmicutes | Bacilli | Bacillales | Bacillaceae | <i>Bacillus</i>                | <i>Bacillus cereus</i> group <i>Bacillus cereus</i> BAG50-1               |
| Bce-74-1              | Bacteria Firmicutes | Bacilli | Bacillales | Bacillaceae | <i>Bacillus</i>                | <i>Bacillus cereus</i> group <i>Bacillus cereus</i> BAG5X1-1              |





|                      |                     |         |            |             |                                |                   |        |       |                                                          |                         |
|----------------------|---------------------|---------|------------|-------------|--------------------------------|-------------------|--------|-------|----------------------------------------------------------|-------------------------|
| Bce-137-1            | Bacteria Firmicutes | Bacilli | Bacillales | Bacillaceae | Bacillus                       | Bacillus          | cereus | group | <i>Bacillus cereus</i>                                   | VD196                   |
| Bce-138-1            | Bacteria Firmicutes | Bacilli | Bacillales | Bacillaceae | Bacillus                       | Bacillus          | cereus | group | <i>Bacillus cereus</i>                                   | VD200                   |
| Bce-139-1            | Bacteria Firmicutes | Bacilli | Bacillales | Bacillaceae | Bacillus                       | Bacillus          | cereus | group | <i>Bacillus cereus</i>                                   | VD214                   |
| Bce-140-1            | Bacteria Firmicutes | Bacilli | Bacillales | Bacillaceae | Bacillus                       | Bacillus          | cereus | group | <i>Bacillus cereus</i>                                   | VDM006                  |
| Bce-141-1            | Bacteria Firmicutes | Bacilli | Bacillales | Bacillaceae | Bacillus                       | Bacillus          | cereus | group | <i>Bacillus cereus</i>                                   | VDM019                  |
| Bce-142-1            | Bacteria Firmicutes | Bacilli | Bacillales | Bacillaceae | Bacillus                       | Bacillus          | cereus | group | <i>Bacillus cereus</i>                                   | VDM021                  |
| Bce-143-1            | Bacteria Firmicutes | Bacilli | Bacillales | Bacillaceae | Bacillus                       | Bacillus          | cereus | group | <i>Bacillus cereus</i>                                   | VDM022                  |
| Bce-144-1            | Bacteria Firmicutes | Bacilli | Bacillales | Bacillaceae | Bacillus                       | Bacillus          | cereus | group | <i>Bacillus cereus</i>                                   | VDM034                  |
| Bce-145-1            | Bacteria Firmicutes | Bacilli | Bacillales | Bacillaceae | Bacillus                       | Bacillus          | cereus | group | <i>Bacillus cereus</i>                                   | VDM053                  |
| Bce-146-1            | Bacteria Firmicutes | Bacilli | Bacillales | Bacillaceae | Bacillus                       | Bacillus          | cereus | group | <i>Bacillus cereus</i>                                   | VDM062                  |
| Bcy-2-1              | Bacteria Firmicutes | Bacilli | Bacillales | Bacillaceae | Bacillus                       | Bacillus          | cereus | group | <i>Bacillus cytotoxicus</i>                              |                         |
| Bga-1-1              | Bacteria Firmicutes | Bacilli | Bacillales | Bacillaceae | Bacillus                       | Bacillus          | cereus | group | <i>Bacillus gaemokensis</i>                              |                         |
| Bma-2-1              | Bacteria Firmicutes | Bacilli | Bacillales | Bacillaceae | Bacillus                       | Bacillus          | cereus | group | <i>Bacillus mantliponensis</i>                           |                         |
| Bmy-4-1 to Bmy-4-4   | Bacteria Firmicutes | Bacilli | Bacillales | Bacillaceae | Bacillus                       | Bacillus          | cereus | group | <i>Bacillus mycoides</i>                                 |                         |
| Bmy-5-1              | Bacteria Firmicutes | Bacilli | Bacillales | Bacillaceae | Bacillus                       | Bacillus          | cereus | group | <i>Bacillus mycoides</i>                                 | FSL H7-687              |
| Bmy-6-1              | Bacteria Firmicutes | Bacilli | Bacillales | Bacillaceae | Bacillus                       | Bacillus          | cereus | group | <i>Bacillus mycoides</i>                                 | FSL R5-860              |
| Bmy-7-1              | Bacteria Firmicutes | Bacilli | Bacillales | Bacillaceae | Bacillus                       | Bacillus          | cereus | group | <i>Bacillus mycoides</i>                                 | NBRC 101238 = DSM 11821 |
| Bsp-11-1             | Bacteria Firmicutes | Bacilli | Bacillales | Bacillaceae | Bacillus                       | Bacillus          | cereus | group | <i>Bacillus sp.</i>                                      | 7.6_55CFAA_CT2          |
| Bth-21-1             | Bacteria Firmicutes | Bacilli | Bacillales | Bacillaceae | Bacillus                       | Bacillus          | cereus | group | <i>Bacillus thuringiensis</i>                            |                         |
| Bth-22-1 to Bth-22-2 | Bacteria Firmicutes | Bacilli | Bacillales | Bacillaceae | Bacillus                       | Bacillus          | cereus | group | <i>Bacillus thuringiensis</i>                            | DAR 81934               |
| Bth-23-1             | Bacteria Firmicutes | Bacilli | Bacillales | Bacillaceae | Bacillus                       | Bacillus          | cereus | group | <i>Bacillus thuringiensis</i>                            | DB27                    |
| Bth-24-1             | Bacteria Firmicutes | Bacilli | Bacillales | Bacillaceae | Bacillus                       | Bacillus          | cereus | group | <i>Bacillus thuringiensis</i>                            | HD-789                  |
| Bth-25-1             | Bacteria Firmicutes | Bacilli | Bacillales | Bacillaceae | Bacillus                       | Bacillus          | cereus | group | <i>Bacillus thuringiensis</i>                            | HD1002                  |
| Bth-26-1             | Bacteria Firmicutes | Bacilli | Bacillales | Bacillaceae | Bacillus                       | Bacillus          | cereus | group | <i>Bacillus thuringiensis</i>                            | JM-Mgvvxx-63            |
| Bth-27-1             | Bacteria Firmicutes | Bacilli | Bacillales | Bacillaceae | Bacillus                       | Bacillus          | cereus | group | <i>Bacillus thuringiensis</i>                            | LM1212                  |
| Bth-28-1             | Bacteria Firmicutes | Bacilli | Bacillales | Bacillaceae | Bacillus                       | Bacillus          | cereus | group | <i>Bacillus thuringiensis</i>                            | Sbt003                  |
| Bth-31-1             | Bacteria Firmicutes | Bacilli | Bacillales | Bacillaceae | Bacillus                       | Bacillus          | cereus | group | <i>Bacillus thuringiensis serovar aizawai str.</i>       | Hu4-2                   |
| Bth-32-1             | Bacteria Firmicutes | Bacilli | Bacillales | Bacillaceae | Bacillus                       | Bacillus          | cereus | group | <i>Bacillus thuringiensis serovar aizawai str.</i>       | Leapi01                 |
| Bth-33-1             | Bacteria Firmicutes | Bacilli | Bacillales | Bacillaceae | Bacillus                       | Bacillus          | cereus | group | <i>Bacillus thuringiensis serovar galleriae</i>          |                         |
| Bth-34-1             | Bacteria Firmicutes | Bacilli | Bacillales | Bacillaceae | Bacillus                       | Bacillus          | cereus | group | <i>Bacillus thuringiensis serovar indiana</i>            |                         |
| Bth-35-1             | Bacteria Firmicutes | Bacilli | Bacillales | Bacillaceae | Bacillus                       | Bacillus          | cereus | group | <i>Bacillus thuringiensis serovar israelensis</i>        |                         |
| Bth-36-1             | Bacteria Firmicutes | Bacilli | Bacillales | Bacillaceae | Bacillus                       | Bacillus          | cereus | group | <i>Bacillus thuringiensis serovar kurstaki</i>           |                         |
| Bth-37-1             | Bacteria Firmicutes | Bacilli | Bacillales | Bacillaceae | Bacillus                       | Bacillus          | cereus | group | <i>Bacillus thuringiensis serovar kurstaki str.</i>      | HD-1                    |
| Bth-38-1             | Bacteria Firmicutes | Bacilli | Bacillales | Bacillaceae | Bacillus                       | Bacillus          | cereus | group | <i>Bacillus thuringiensis serovar kurstaki str.</i>      | HD73                    |
| Bth-39-1 to Bth-39-2 | Bacteria Firmicutes | Bacilli | Bacillales | Bacillaceae | Bacillus                       | Bacillus          | cereus | group | <i>Bacillus thuringiensis serovar kurstaki str.</i>      | YBT-1520                |
| Bth-40-1             | Bacteria Firmicutes | Bacilli | Bacillales | Bacillaceae | Bacillus                       | Bacillus          | cereus | group | <i>Bacillus thuringiensis serovar mexicanensis</i>       |                         |
| Bth-41-1             | Bacteria Firmicutes | Bacilli | Bacillales | Bacillaceae | Bacillus                       | Bacillus          | cereus | group | <i>Bacillus thuringiensis serovar morrisoni</i>          |                         |
| Bth-42-1             | Bacteria Firmicutes | Bacilli | Bacillales | Bacillaceae | Bacillus                       | Bacillus          | cereus | group | <i>Bacillus thuringiensis serovar thuringiensis str.</i> | IS5056                  |
| Bth-43-1             | Bacteria Firmicutes | Bacilli | Bacillales | Bacillaceae | Bacillus                       | Bacillus          | cereus | group | <i>Bacillus thuringiensis serovar tolworthi</i>          | NA205-3                 |
| Bth-29-1             | Bacteria Firmicutes | Bacilli | Bacillales | Bacillaceae | Bacillus                       | Bacillus          | cereus | group | <i>Bacillus thuringiensis</i>                            | T01-328                 |
| Bth-30-1             | Bacteria Firmicutes | Bacilli | Bacillales | Bacillaceae | Bacillus                       | Bacillus          | cereus | group | <i>Bacillus thuringiensis</i>                            | YBT-1518                |
| Bto-1-1              | Bacteria Firmicutes | Bacilli | Bacillales | Bacillaceae | Bacillus                       | Bacillus          | cereus | group | <i>Bacillus toyonensis</i>                               | BCT-7112                |
| Bwe-2-1              | Bacteria Firmicutes | Bacilli | Bacillales | Bacillaceae | Bacillus                       | Bacillus          | cereus | group | <i>Bacillus weihenstephanensis</i>                       |                         |
| Bch-1-1              | Bacteria Firmicutes | Bacilli | Bacillales | Bacillaceae | <i>Bacillus chagannorensis</i> |                   |        |       | DSM 18086                                                |                         |
| Bci-1-1              | Bacteria Firmicutes | Bacilli | Bacillales | Bacillaceae | <i>Bacillus cihuenensis</i>    |                   |        |       |                                                          |                         |
| Bci-2-1              | Bacteria Firmicutes | Bacilli | Bacillales | Bacillaceae | <i>Bacillus circulans</i>      |                   |        |       |                                                          |                         |
| Bcl-2-1              | Bacteria Firmicutes | Bacilli | Bacillales | Bacillaceae | <i>Bacillus clausii</i>        |                   |        |       |                                                          |                         |
| Bco-4-1 to Bco-4-2   | Bacteria Firmicutes | Bacilli | Bacillales | Bacillaceae | <i>Bacillus coagulans</i>      |                   |        |       |                                                          |                         |
| Bco-5-1              | Bacteria Firmicutes | Bacilli | Bacillales | Bacillaceae | <i>Bacillus coagulans</i>      | CSIL1             |        |       |                                                          |                         |
| Bco-6-1              | Bacteria Firmicutes | Bacilli | Bacillales | Bacillaceae | <i>Bacillus coagulans</i>      | DSM 1 = ATCC 7050 |        |       |                                                          |                         |
| Bco-7-1              | Bacteria Firmicutes | Bacilli | Bacillales | Bacillaceae | <i>Bacillus coagulans</i>      | H-1               |        |       |                                                          |                         |
| Bco-8-1              | Bacteria Firmicutes | Bacilli | Bacillales | Bacillaceae | <i>Bacillus coagulans</i>      | P38               |        |       |                                                          |                         |
| Bco-9-1              | Bacteria Firmicutes | Bacilli | Bacillales | Bacillaceae | <i>Bacillus coagulans</i>      | XZL4              |        |       |                                                          |                         |
| Bco-10-1             | Bacteria Firmicutes | Bacilli | Bacillales | Bacillaceae | <i>Bacillus coagulans</i>      | XZL9              |        |       |                                                          |                         |
| Bdi-1-1              | Bacteria Firmicutes | Bacilli | Bacillales | Bacillaceae | <i>Bacillus dielmoensis</i>    |                   |        |       |                                                          |                         |
| Ben-1-1              | Bacteria Firmicutes | Bacilli | Bacillales | Bacillaceae | <i>Bacillus endophyticus</i>   |                   |        |       |                                                          |                         |
| Ben-2-1              | Bacteria Firmicutes | Bacilli | Bacillales | Bacillaceae | <i>Bacillus endophyticus</i>   | 2102              |        |       |                                                          |                         |
| Bfi-1-1              | Bacteria Firmicutes | Bacilli | Bacillales | Bacillaceae | <i>Bacillus firmus</i>         |                   |        |       |                                                          |                         |
| Bfi-2-1              | Bacteria Firmicutes | Bacilli | Bacillales | Bacillaceae | <i>Bacillus firmus</i>         | DS1               |        |       |                                                          |                         |
| Bfl-1-1              | Bacteria Firmicutes | Bacilli | Bacillales | Bacillaceae | <i>Bacillus flexus</i>         |                   |        |       |                                                          |                         |
| Bfl-2-1              | Bacteria Firmicutes | Bacilli | Bacillales | Bacillaceae | <i>Bacillus flexus</i>         | 27Col1.1E         |        |       |                                                          |                         |
| Bfl-3-1              | Bacteria Firmicutes | Bacilli | Bacillales | Bacillaceae | <i>Bacillus flexus</i>         | T6186-2           |        |       |                                                          |                         |
| Bfo-1-1              | Bacteria Firmicutes | Bacilli | Bacillales | Bacillaceae | <i>Bacillus fordii</i>         | DSM 16014         |        |       |                                                          |                         |
| Bgi-1-1              | Bacteria Firmicutes | Bacilli | Bacillales | Bacillaceae | <i>Bacillus ginsengihumi</i>   |                   |        |       |                                                          |                         |
| Bgi-2-1              | Bacteria Firmicutes | Bacilli | Bacillales | Bacillaceae | <i>Bacillus ginsengihumi</i>   | J57               |        |       |                                                          |                         |

|                    |                     |         |            |             |                                                     |
|--------------------|---------------------|---------|------------|-------------|-----------------------------------------------------|
| Bgl-1-1            | Bacteria Firmicutes | Bacilli | Bacillales | Bacillaceae | <i>Bacillus glycinifermentans</i>                   |
| Bhe-1-1            | Bacteria Firmicutes | Bacilli | Bacillales | Bacillaceae | <i>Bacillus hemicellulosilyticus</i> JCM 9152       |
| Bin-1-1            | Bacteria Firmicutes | Bacilli | Bacillales | Bacillaceae | <i>Bacillus indicus</i>                             |
| Bin-2-1            | Bacteria Firmicutes | Bacilli | Bacillales | Bacillaceae | <i>Bacillus indicus</i> LMG 22858                   |
| Bin-3-1            | Bacteria Firmicutes | Bacilli | Bacillales | Bacillaceae | <i>Bacillus infantis</i> NRRL B-14911               |
| Bje-1-1            | Bacteria Firmicutes | Bacilli | Bacillales | Bacillaceae | <i>Bacillus jeddahensis</i>                         |
| Bko-1-1            | Bacteria Firmicutes | Bacilli | Bacillales | Bacillaceae | <i>Bacillus koreensis</i>                           |
| Bkr-1-1            | Bacteria Firmicutes | Bacilli | Bacillales | Bacillaceae | <i>Bacillus kribbensis</i> DSM 17871                |
| Ble-1-1            | Bacteria Firmicutes | Bacilli | Bacillales | Bacillaceae | <i>Bacillus lehensis</i> G1                         |
| Bli-2-1 to Bli-2-3 | Bacteria Firmicutes | Bacilli | Bacillales | Bacillaceae | <i>Bacillus licheniformis</i>                       |
| Bli-3-1            | Bacteria Firmicutes | Bacilli | Bacillales | Bacillaceae | <i>Bacillus licheniformis</i> 10-1-A                |
| Bli-4-1            | Bacteria Firmicutes | Bacilli | Bacillales | Bacillaceae | <i>Bacillus licheniformis</i> 5-2-D                 |
| Bli-5-1            | Bacteria Firmicutes | Bacilli | Bacillales | Bacillaceae | <i>Bacillus licheniformis</i> 9945A                 |
| Bli-6-1            | Bacteria Firmicutes | Bacilli | Bacillales | Bacillaceae | <i>Bacillus licheniformis</i> CG-B52                |
| Bli-7-1            | Bacteria Firmicutes | Bacilli | Bacillales | Bacillaceae | <i>Bacillus licheniformis</i> CGMCC 3963            |
| Bli-8-1            | Bacteria Firmicutes | Bacilli | Bacillales | Bacillaceae | <i>Bacillus licheniformis</i> F1-1                  |
| Bli-9-1            | Bacteria Firmicutes | Bacilli | Bacillales | Bacillaceae | <i>Bacillus licheniformis</i> F2-1                  |
| Bli-10-1           | Bacteria Firmicutes | Bacilli | Bacillales | Bacillaceae | <i>Bacillus licheniformis</i> S 16                  |
| Bli-11-1           | Bacteria Firmicutes | Bacilli | Bacillales | Bacillaceae | <i>Bacillus licheniformis</i> WX-02                 |
| Blo-1-1            | Bacteria Firmicutes | Bacilli | Bacillales | Bacillaceae | <i>Bacillus loiseleuriae</i>                        |
| Bma-3-1            | Bacteria Firmicutes | Bacilli | Bacillales | Bacillaceae | <i>Bacillus mannanilyticus</i> JCM 10596            |
| Bma-4-1 to Bma-4-4 | Bacteria Firmicutes | Bacilli | Bacillales | Bacillaceae | <i>Bacillus marisflavi</i>                          |
| Bma-5-1            | Bacteria Firmicutes | Bacilli | Bacillales | Bacillaceae | <i>Bacillus marmarensis</i> DSM 21297               |
| Bma-6-1            | Bacteria Firmicutes | Bacilli | Bacillales | Bacillaceae | <i>Bacillus massiliogorillae</i>                    |
| Bma-7-1            | Bacteria Firmicutes | Bacilli | Bacillales | Bacillaceae | <i>Bacillus massiosenegalensis</i> JC6              |
| Bme-5-1            | Bacteria Firmicutes | Bacilli | Bacillales | Bacillaceae | <i>Bacillus megaterium</i>                          |
| Bme-6-1            | Bacteria Firmicutes | Bacilli | Bacillales | Bacillaceae | <i>Bacillus megaterium</i> MSP20.1                  |
| Bme-7-1            | Bacteria Firmicutes | Bacilli | Bacillales | Bacillaceae | <i>Bacillus megaterium</i> NBRC 15308 = ATCC 14581  |
| Bme-8-1            | Bacteria Firmicutes | Bacilli | Bacillales | Bacillaceae | <i>Bacillus megaterium</i> NCT-2                    |
| Bme-9-1            | Bacteria Firmicutes | Bacilli | Bacillales | Bacillaceae | <i>Bacillus megaterium</i> Q3                       |
| Bme-10-1           | Bacteria Firmicutes | Bacilli | Bacillales | Bacillaceae | <i>Bacillus methanolicus</i> MGA3                   |
| Bmo-1-1            | Bacteria Firmicutes | Bacilli | Bacillales | Bacillaceae | <i>Bacillus mojavensis</i> RO-H-1 = KCTC 3706       |
| Bmo-2-1            | Bacteria Firmicutes | Bacilli | Bacillales | Bacillaceae | <i>Bacillus mojavensis</i> RRC 101                  |
| Bmu-1-1            | Bacteria Firmicutes | Bacilli | Bacillales | Bacillaceae | <i>Bacillus murimartini</i>                         |
| Bnd-1-1            | Bacteria Firmicutes | Bacilli | Bacillales | Bacillaceae | <i>Bacillus ndiopicus</i>                           |
| Bne-1-1            | Bacteria Firmicutes | Bacilli | Bacillales | Bacillaceae | <i>Bacillus nealsonii</i> AAU1                      |
| Bni-1-1            | Bacteria Firmicutes | Bacilli | Bacillales | Bacillaceae | <i>Bacillus niacini</i>                             |
| Boc-1-1            | Bacteria Firmicutes | Bacilli | Bacillales | Bacillaceae | <i>Bacillus oceanisediminis</i> 2691                |
| Bok-1-1            | Bacteria Firmicutes | Bacilli | Bacillales | Bacillaceae | <i>Bacillus okhensis</i>                            |
| Bok-2-1            | Bacteria Firmicutes | Bacilli | Bacillales | Bacillaceae | <i>Bacillus okuhidensis</i>                         |
| Bpa-1-1            | Bacteria Firmicutes | Bacilli | Bacillales | Bacillaceae | <i>Bacillus panaciterrae</i> DSM 19096              |
| Bpa-2-1            | Bacteria Firmicutes | Bacilli | Bacillales | Bacillaceae | <i>Bacillus paralicheniformis</i>                   |
| Bpa-3-1            | Bacteria Firmicutes | Bacilli | Bacillales | Bacillaceae | <i>Bacillus paralicheniformis</i> G-1               |
| Bps-3-1            | Bacteria Firmicutes | Bacilli | Bacillales | Bacillaceae | <i>Bacillus pseudocaliphilus</i>                    |
| Bps-4-1            | Bacteria Firmicutes | Bacilli | Bacillales | Bacillaceae | <i>Bacillus psychrosaccharolyticus</i> ATCC 23296   |
| Bpu-3-1 to Bpu-3-3 | Bacteria Firmicutes | Bacilli | Bacillales | Bacillaceae | <i>Bacillus pumilus</i>                             |
| Bpu-4-1            | Bacteria Firmicutes | Bacilli | Bacillales | Bacillaceae | <i>Bacillus pumilus</i> BA06                        |
| Bpu-5-1            | Bacteria Firmicutes | Bacilli | Bacillales | Bacillaceae | <i>Bacillus pumilus</i> CCMA-560                    |
| Bpu-6-1            | Bacteria Firmicutes | Bacilli | Bacillales | Bacillaceae | <i>Bacillus pumilus</i> INR7                        |
| Bpu-7-1            | Bacteria Firmicutes | Bacilli | Bacillales | Bacillaceae | <i>Bacillus pumilus</i> S-1                         |
| Bru-1-1            | Bacteria Firmicutes | Bacilli | Bacillales | Bacillaceae | <i>Bacillus rubiinfantis</i>                        |
| Bsa-1-1 to Bsa-1-3 | Bacteria Firmicutes | Bacilli | Bacillales | Bacillaceae | <i>Bacillus safensis</i>                            |
| Bsa-2-1            | Bacteria Firmicutes | Bacilli | Bacillales | Bacillaceae | <i>Bacillus safensis</i> FO-36b                     |
| Bsa-3-1            | Bacteria Firmicutes | Bacilli | Bacillales | Bacillaceae | <i>Bacillus safensis</i> VK                         |
| Bse-2-1            | Bacteria Firmicutes | Bacilli | Bacillales | Bacillaceae | <i>Bacillus selenatarsenatis</i> SF-1               |
| Bsi-2-1            | Bacteria Firmicutes | Bacilli | Bacillales | Bacillaceae | <i>Bacillus siamensis</i> KCTC 13613                |
| Bsi-3-1            | Bacteria Firmicutes | Bacilli | Bacillales | Bacillaceae | <i>Bacillus simplex</i> BA2H3                       |
| Bsm-1-1            | Bacteria Firmicutes | Bacilli | Bacillales | Bacillaceae | <i>Bacillus smithii</i>                             |
| Bsm-2-1            | Bacteria Firmicutes | Bacilli | Bacillales | Bacillaceae | <i>Bacillus smithii</i> 7_3.47FAA                   |
| Bso-1-1            | Bacteria Firmicutes | Bacilli | Bacillales | Bacillaceae | <i>Bacillus sonorensis</i> L12                      |
| Bso-2-1            | Bacteria Firmicutes | Bacilli | Bacillales | Bacillaceae | <i>Bacillus sonorensis</i> NBRC 101234 = KCTC 13918 |
| Bsp-12-1           | Bacteria Firmicutes | Bacilli | Bacillales | Bacillaceae | <i>Bacillus</i> sp. ( <i>in</i> : Bacteria)         |
| Bsp-13-1           | Bacteria Firmicutes | Bacilli | Bacillales | Bacillaceae | <i>Bacillus</i> sp. 10403023                        |
| Bsp-14-1           | Bacteria Firmicutes | Bacilli | Bacillales | Bacillaceae | <i>Bacillus</i> sp. 105MF                           |
| Bsp-15-1           | Bacteria Firmicutes | Bacilli | Bacillales | Bacillaceae | <i>Bacillus</i> sp. 123MFChir2                      |

|                      |                                                    |                     |            |
|----------------------|----------------------------------------------------|---------------------|------------|
| Bsp-16-1             | Bacteria Firmicutes Bacilli Bacillales Bacillaceae | <i>Bacillus sp.</i> | 171095_106 |
| Bsp-17-1             | Bacteria Firmicutes Bacilli Bacillales Bacillaceae | <i>Bacillus sp.</i> | 17376      |
| Bsp-18-1             | Bacteria Firmicutes Bacilli Bacillales Bacillaceae | <i>Bacillus sp.</i> | 1NLA3E     |
| Bsp-19-1             | Bacteria Firmicutes Bacilli Bacillales Bacillaceae | <i>Bacillus sp.</i> | 220_BSPC   |
| Bsp-20-1             | Bacteria Firmicutes Bacilli Bacillales Bacillaceae | <i>Bacillus sp.</i> | 278922_107 |
| Bsp-21-1             | Bacteria Firmicutes Bacilli Bacillales Bacillaceae | <i>Bacillus sp.</i> | 2_A_57_CT2 |
| Bsp-22-1             | Bacteria Firmicutes Bacilli Bacillales Bacillaceae | <i>Bacillus sp.</i> | 37MA       |
| Bsp-23-1             | Bacteria Firmicutes Bacilli Bacillales Bacillaceae | <i>Bacillus sp.</i> | 445_BSPC   |
| Bsp-24-1             | Bacteria Firmicutes Bacilli Bacillales Bacillaceae | <i>Bacillus sp.</i> | 522_BSPC   |
| Bsp-25-1             | Bacteria Firmicutes Bacilli Bacillales Bacillaceae | <i>Bacillus sp.</i> | 72         |
| Bsp-26-1             | Bacteria Firmicutes Bacilli Bacillales Bacillaceae | <i>Bacillus sp.</i> | 95MFCvi2.1 |
| Bsp-27-1             | Bacteria Firmicutes Bacilli Bacillales Bacillaceae | <i>Bacillus sp.</i> | A053       |
| Bsp-28-1             | Bacteria Firmicutes Bacilli Bacillales Bacillaceae | <i>Bacillus sp.</i> | AP8        |
| Bsp-29-1             | Bacteria Firmicutes Bacilli Bacillales Bacillaceae | <i>Bacillus sp.</i> | Aph1       |
| Bsp-30-1             | Bacteria Firmicutes Bacilli Bacillales Bacillaceae | <i>Bacillus sp.</i> | B-jedd     |
| Bsp-31-1             | Bacteria Firmicutes Bacilli Bacillales Bacillaceae | <i>Bacillus sp.</i> | BH072      |
| Bsp-32-1             | Bacteria Firmicutes Bacilli Bacillales Bacillaceae | <i>Bacillus sp.</i> | BSC154     |
| Bsp-33-1             | Bacteria Firmicutes Bacilli Bacillales Bacillaceae | <i>Bacillus sp.</i> | BT1B_CT2   |
| Bsp-34-1             | Bacteria Firmicutes Bacilli Bacillales Bacillaceae | <i>Bacillus sp.</i> | CMAA 1185  |
| Bsp-36-1             | Bacteria Firmicutes Bacilli Bacillales Bacillaceae | <i>Bacillus sp.</i> | Co1-6      |
| Bsp-35-1             | Bacteria Firmicutes Bacilli Bacillales Bacillaceae | <i>Bacillus sp.</i> | CPSM8      |
| Bsp-37-1             | Bacteria Firmicutes Bacilli Bacillales Bacillaceae | <i>Bacillus sp.</i> | EB01       |
| Bsp-38-1             | Bacteria Firmicutes Bacilli Bacillales Bacillaceae | <i>Bacillus sp.</i> | EGD-AK10   |
| Bsp-39-1             | Bacteria Firmicutes Bacilli Bacillales Bacillaceae | <i>Bacillus sp.</i> | FJAT-13831 |
| Bsp-40-1             | Bacteria Firmicutes Bacilli Bacillales Bacillaceae | <i>Bacillus sp.</i> | FJAT-14578 |
| Bsp-41-1             | Bacteria Firmicutes Bacilli Bacillales Bacillaceae | <i>Bacillus sp.</i> | FJAT-26652 |
| Bsp-42-1             | Bacteria Firmicutes Bacilli Bacillales Bacillaceae | <i>Bacillus sp.</i> | FJAT-27231 |
| Bsp-43-1             | Bacteria Firmicutes Bacilli Bacillales Bacillaceae | <i>Bacillus sp.</i> | FJAT-27238 |
| Bsp-44-1             | Bacteria Firmicutes Bacilli Bacillales Bacillaceae | <i>Bacillus sp.</i> | FJAT-27245 |
| Bsp-45-1             | Bacteria Firmicutes Bacilli Bacillales Bacillaceae | <i>Bacillus sp.</i> | FJAT-27251 |
| Bsp-46-1             | Bacteria Firmicutes Bacilli Bacillales Bacillaceae | <i>Bacillus sp.</i> | FJAT-27445 |
| Bsp-47-1             | Bacteria Firmicutes Bacilli Bacillales Bacillaceae | <i>Bacillus sp.</i> | FJAT-27916 |
| Bsp-49-1             | Bacteria Firmicutes Bacilli Bacillales Bacillaceae | <i>Bacillus sp.</i> | GeD10      |
| Bsp-48-1             | Bacteria Firmicutes Bacilli Bacillales Bacillaceae | <i>Bacillus sp.</i> | GO-13      |
| Bsp-50-1             | Bacteria Firmicutes Bacilli Bacillales Bacillaceae | <i>Bacillus sp.</i> | H1a        |
| Bsp-51-1             | Bacteria Firmicutes Bacilli Bacillales Bacillaceae | <i>Bacillus sp.</i> | H1m        |
| Bsp-52-1             | Bacteria Firmicutes Bacilli Bacillales Bacillaceae | <i>Bacillus sp.</i> | J13        |
| Bsp-53-1             | Bacteria Firmicutes Bacilli Bacillales Bacillaceae | <i>Bacillus sp.</i> | J33        |
| Bsp-54-1             | Bacteria Firmicutes Bacilli Bacillales Bacillaceae | <i>Bacillus sp.</i> | J37        |
| Bsp-55-1             | Bacteria Firmicutes Bacilli Bacillales Bacillaceae | <i>Bacillus sp.</i> | JCA        |
| Bsp-56-1             | Bacteria Firmicutes Bacilli Bacillales Bacillaceae | <i>Bacillus sp.</i> | JCM 19045  |
| Bsp-57-1             | Bacteria Firmicutes Bacilli Bacillales Bacillaceae | <i>Bacillus sp.</i> | JCM 19046  |
| Bsp-58-1             | Bacteria Firmicutes Bacilli Bacillales Bacillaceae | <i>Bacillus sp.</i> | JCM 19047  |
| Bsp-59-1             | Bacteria Firmicutes Bacilli Bacillales Bacillaceae | <i>Bacillus sp.</i> | JFL15      |
| Bsp-60-1             | Bacteria Firmicutes Bacilli Bacillales Bacillaceae | <i>Bacillus sp.</i> | KJ-16      |
| Bsp-61-1             | Bacteria Firmicutes Bacilli Bacillales Bacillaceae | <i>Bacillus sp.</i> | KW-12      |
| Bsp-62-1             | Bacteria Firmicutes Bacilli Bacillales Bacillaceae | <i>Bacillus sp.</i> | L1(2012)   |
| Bsp-68-1             | Bacteria Firmicutes Bacilli Bacillales Bacillaceae | <i>Bacillus sp.</i> | L_1B0_12   |
| Bsp-69-1             | Bacteria Firmicutes Bacilli Bacillales Bacillaceae | <i>Bacillus sp.</i> | L_1B0_5    |
| Bsp-70-1             | Bacteria Firmicutes Bacilli Bacillales Bacillaceae | <i>Bacillus sp.</i> | L_1B0_8    |
| Bsp-63-1             | Bacteria Firmicutes Bacilli Bacillales Bacillaceae | <i>Bacillus sp.</i> | LK10       |
| Bsp-64-1             | Bacteria Firmicutes Bacilli Bacillales Bacillaceae | <i>Bacillus sp.</i> | LK2        |
| Bsp-65-1             | Bacteria Firmicutes Bacilli Bacillales Bacillaceae | <i>Bacillus sp.</i> | LK7        |
| Bsp-66-1 to Bsp-66-2 | Bacteria Firmicutes Bacilli Bacillales Bacillaceae | <i>Bacillus sp.</i> | LL01       |
| Bsp-67-1             | Bacteria Firmicutes Bacilli Bacillales Bacillaceae | <i>Bacillus sp.</i> | LM 4-2     |
| Bsp-71-1             | Bacteria Firmicutes Bacilli Bacillales Bacillaceae | <i>Bacillus sp.</i> | MB2021     |
| Bsp-72-1             | Bacteria Firmicutes Bacilli Bacillales Bacillaceae | <i>Bacillus sp.</i> | MSP13      |
| Bsp-73-1             | Bacteria Firmicutes Bacilli Bacillales Bacillaceae | <i>Bacillus sp.</i> | MSP5.4     |
| Bsp-74-1             | Bacteria Firmicutes Bacilli Bacillales Bacillaceae | <i>Bacillus sp.</i> | NSP2.1     |
| Bsp-75-1             | Bacteria Firmicutes Bacilli Bacillales Bacillaceae | <i>Bacillus sp.</i> | NSP22.2    |
| Bsp-76-1             | Bacteria Firmicutes Bacilli Bacillales Bacillaceae | <i>Bacillus sp.</i> | NSP9.1     |
| Bsp-77-1             | Bacteria Firmicutes Bacilli Bacillales Bacillaceae | <i>Bacillus sp.</i> | OxB-1      |
| Bsp-78-1             | Bacteria Firmicutes Bacilli Bacillales Bacillaceae | <i>Bacillus sp.</i> | Pc3        |
| Bsp-79-1             | Bacteria Firmicutes Bacilli Bacillales Bacillaceae | <i>Bacillus sp.</i> | REN51N     |
| Bsp-80-1             | Bacteria Firmicutes Bacilli Bacillales Bacillaceae | <i>Bacillus sp.</i> | RP1137     |

|                      |                     |         |            |             |                                                                          |
|----------------------|---------------------|---------|------------|-------------|--------------------------------------------------------------------------|
| Bsp-81-1             | Bacteria Firmicutes | Bacilli | Bacillales | Bacillaceae | <i>Bacillus sp.</i> SA1-12                                               |
| Bsp-82-1             | Bacteria Firmicutes | Bacilli | Bacillales | Bacillaceae | <i>Bacillus sp.</i> SB47                                                 |
| Bsp-83-1             | Bacteria Firmicutes | Bacilli | Bacillales | Bacillaceae | <i>Bacillus sp.</i> SB49                                                 |
| Bsp-84-1             | Bacteria Firmicutes | Bacilli | Bacillales | Bacillaceae | <i>Bacillus sp.</i> SJS                                                  |
| Bsp-85-1             | Bacteria Firmicutes | Bacilli | Bacillales | Bacillaceae | <i>Bacillus sp.</i> TH008                                                |
| Bsp-86-1             | Bacteria Firmicutes | Bacilli | Bacillales | Bacillaceae | <i>Bacillus sp.</i> TS-2                                                 |
| Bsp-87-1             | Bacteria Firmicutes | Bacilli | Bacillales | Bacillaceae | <i>Bacillus sp.</i> UMTAT18                                              |
| Bsp-88-1             | Bacteria Firmicutes | Bacilli | Bacillales | Bacillaceae | <i>Bacillus sp.</i> UNC125MFCrub1.1                                      |
| Bsp-89-1             | Bacteria Firmicutes | Bacilli | Bacillales | Bacillaceae | <i>Bacillus sp.</i> UNC322MFCChr4.1                                      |
| Bsp-90-1             | Bacteria Firmicutes | Bacilli | Bacillales | Bacillaceae | <i>Bacillus sp.</i> UNC41MFS5                                            |
| Bsp-91-1             | Bacteria Firmicutes | Bacilli | Bacillales | Bacillaceae | <i>Bacillus sp.</i> UNC437CL72CviS29                                     |
| Bsp-92-1             | Bacteria Firmicutes | Bacilli | Bacillales | Bacillaceae | <i>Bacillus sp.</i> UNC438CL73TsuS30                                     |
| Bsp-93-1             | Bacteria Firmicutes | Bacilli | Bacillales | Bacillaceae | <i>Bacillus sp.</i> UNC69MF                                              |
| Bsp-94-1             | Bacteria Firmicutes | Bacilli | Bacillales | Bacillaceae | <i>Bacillus sp.</i> URHB0009                                             |
| Bsp-95-1             | Bacteria Firmicutes | Bacilli | Bacillales | Bacillaceae | <i>Bacillus sp.</i> WPS                                                  |
| Bsp-96-1             | Bacteria Firmicutes | Bacilli | Bacillales | Bacillaceae | <i>Bacillus sp.</i> X1(2014)                                             |
| Bsp-97-1             | Bacteria Firmicutes | Bacilli | Bacillales | Bacillaceae | <i>Bacillus sp.</i> YP1                                                  |
| Bsp-98-1             | Bacteria Firmicutes | Bacilli | Bacillales | Bacillaceae | <i>Bacillus sp.</i> ZYK                                                  |
| Bst-1-1 to Bst-1-6   | Bacteria Firmicutes | Bacilli | Bacillales | Bacillaceae | <i>Bacillus stratosphericus</i>                                          |
| Bst-2-1              | Bacteria Firmicutes | Bacilli | Bacillales | Bacillaceae | <i>Bacillus stratosphericus</i> LAMA 585                                 |
| Bsu-11-1             | Bacteria Firmicutes | Bacilli | Bacillales | Bacillaceae | <i>Bacillus subterraneus</i>                                             |
| Bsu-12-1             | Bacteria Firmicutes | Bacilli | Bacillales | Bacillaceae | <i>Bacillus subtilis</i>                                                 |
| Bsu-13-1             | Bacteria Firmicutes | Bacilli | Bacillales | Bacillaceae | <i>Bacillus subtilis</i> B7-s                                            |
| Bsu-14-1             | Bacteria Firmicutes | Bacilli | Bacillales | Bacillaceae | <i>Bacillus subtilis</i> BEST7003                                        |
| Bsu-15-1             | Bacteria Firmicutes | Bacilli | Bacillales | Bacillaceae | <i>Bacillus subtilis</i> E1                                              |
| Bsu-16-1             | Bacteria Firmicutes | Bacilli | Bacillales | Bacillaceae | <i>Bacillus subtilis</i> GB03                                            |
| Bsu-28-1             | Bacteria Firmicutes | Bacilli | Bacillales | Bacillaceae | <i>Bacillus subtilis</i> gtP20b                                          |
| Bsu-18-1             | Bacteria Firmicutes | Bacilli | Bacillales | Bacillaceae | <i>Bacillus subtilis</i> Hal1                                            |
| Bsu-17-1             | Bacteria Firmicutes | Bacilli | Bacillales | Bacillaceae | <i>Bacillus subtilis</i> HJ5                                             |
| Bsu-19-1             | Bacteria Firmicutes | Bacilli | Bacillales | Bacillaceae | <i>Bacillus subtilis</i> KCTC 1028                                       |
| Bsu-20-1             | Bacteria Firmicutes | Bacilli | Bacillales | Bacillaceae | <i>Bacillus subtilis</i> MB73/2                                          |
| Bsu-21-1             | Bacteria Firmicutes | Bacilli | Bacillales | Bacillaceae | <i>Bacillus subtilis</i> Miyagi-4                                        |
| Bsu-22-1             | Bacteria Firmicutes | Bacilli | Bacillales | Bacillaceae | <i>Bacillus subtilis</i> PS216                                           |
| Bsu-23-1             | Bacteria Firmicutes | Bacilli | Bacillales | Bacillaceae | <i>Bacillus subtilis</i> PTS-394                                         |
| Bsu-24-1             | Bacteria Firmicutes | Bacilli | Bacillales | Bacillaceae | <i>Bacillus subtilis</i> PY79                                            |
| Bsu-25-1             | Bacteria Firmicutes | Bacilli | Bacillales | Bacillaceae | <i>Bacillus subtilis</i> QH-1                                            |
| Bsu-26-1             | Bacteria Firmicutes | Bacilli | Bacillales | Bacillaceae | <i>Bacillus subtilis</i> S1-4                                            |
| Bsu-29-1             | Bacteria Firmicutes | Bacilli | Bacillales | Bacillaceae | <i>Bacillus subtilis</i> subsp. <i>inaquosorum</i> KCTC 13429            |
| Bsu-30-1             | Bacteria Firmicutes | Bacilli | Bacillales | Bacillaceae | <i>Bacillus subtilis</i> subsp. <i>natto</i> BEST195                     |
| Bsu-31-1             | Bacteria Firmicutes | Bacilli | Bacillales | Bacillaceae | <i>Bacillus subtilis</i> subsp. <i>niger</i>                             |
| Bsu-32-1             | Bacteria Firmicutes | Bacilli | Bacillales | Bacillaceae | <i>Bacillus subtilis</i> subsp. <i>spizizenii</i>                        |
| Bsu-33-1             | Bacteria Firmicutes | Bacilli | Bacillales | Bacillaceae | <i>Bacillus subtilis</i> subsp. <i>spizizenii</i> DV1-B-1                |
| Bsu-34-1             | Bacteria Firmicutes | Bacilli | Bacillales | Bacillaceae | <i>Bacillus subtilis</i> subsp. <i>spizizenii</i> RFWG1A3                |
| Bsu-35-1             | Bacteria Firmicutes | Bacilli | Bacillales | Bacillaceae | <i>Bacillus subtilis</i> subsp. <i>spizizenii</i> RFWG1A4                |
| Bsu-36-1             | Bacteria Firmicutes | Bacilli | Bacillales | Bacillaceae | <i>Bacillus subtilis</i> subsp. <i>spizizenii</i> RFWG4C10               |
| Bsu-37-1             | Bacteria Firmicutes | Bacilli | Bacillales | Bacillaceae | <i>Bacillus subtilis</i> subsp. <i>spizizenii</i> RFWG5B15               |
| Bsu-38-1             | Bacteria Firmicutes | Bacilli | Bacillales | Bacillaceae | <i>Bacillus subtilis</i> subsp. <i>subtilis</i>                          |
| Bsu-39-1             | Bacteria Firmicutes | Bacilli | Bacillales | Bacillaceae | <i>Bacillus subtilis</i> subsp. <i>subtilis</i> 6051-HGW                 |
| Bsu-6-1 to Bsu-6-2   | Bacteria Firmicutes | Bacilli | Bacillales | Bacillaceae | <i>Bacillus subtilis</i> subsp. <i>subtilis</i> str. 168                 |
| Bsu-40-1             | Bacteria Firmicutes | Bacilli | Bacillales | Bacillaceae | <i>Bacillus subtilis</i> subsp. <i>subtilis</i> str. AG1839              |
| Bsu-41-1             | Bacteria Firmicutes | Bacilli | Bacillales | Bacillaceae | <i>Bacillus subtilis</i> subsp. <i>subtilis</i> str. AUSI98              |
| Bsu-42-1             | Bacteria Firmicutes | Bacilli | Bacillales | Bacillaceae | <i>Bacillus subtilis</i> subsp. <i>subtilis</i> str. BAB-1               |
| Bsu-43-1             | Bacteria Firmicutes | Bacilli | Bacillales | Bacillaceae | <i>Bacillus subtilis</i> subsp. <i>subtilis</i> str. BSP1                |
| Bsu-44-1             | Bacteria Firmicutes | Bacilli | Bacillales | Bacillaceae | <i>Bacillus subtilis</i> subsp. <i>subtilis</i> str. JH642 substr. AG174 |
| Bsu-45-1             | Bacteria Firmicutes | Bacilli | Bacillales | Bacillaceae | <i>Bacillus subtilis</i> subsp. <i>subtilis</i> str. MP11                |
| Bsu-46-1             | Bacteria Firmicutes | Bacilli | Bacillales | Bacillaceae | <i>Bacillus subtilis</i> subsp. <i>subtilis</i> str. MP9                 |
| Bsu-47-1             | Bacteria Firmicutes | Bacilli | Bacillales | Bacillaceae | <i>Bacillus subtilis</i> subsp. <i>subtilis</i> str. OH 131.1            |
| Bsu-48-1             | Bacteria Firmicutes | Bacilli | Bacillales | Bacillaceae | <i>Bacillus subtilis</i> subsp. <i>subtilis</i> str. SC-8                |
| Bsu-27-1             | Bacteria Firmicutes | Bacilli | Bacillales | Bacillaceae | <i>Bacillus subtilis</i> XF-1                                            |
| Bte-1-1              | Bacteria Firmicutes | Bacilli | Bacillales | Bacillaceae | <i>Bacillus tequilensis</i> KCTC 13622                                   |
| Bte-2-1              | Bacteria Firmicutes | Bacilli | Bacillales | Bacillaceae | <i>Bacillus testis</i>                                                   |
| Bth-44-1 to Bth-44-5 | Bacteria Firmicutes | Bacilli | Bacillales | Bacillaceae | <i>Bacillus thermoamylovorans</i>                                        |
| Bva-1-1              | Bacteria Firmicutes | Bacilli | Bacillales | Bacillaceae | <i>Bacillus vallismortis</i> DV1-F-3                                     |
| Bvi-1-1              | Bacteria Firmicutes | Bacilli | Bacillales | Bacillaceae | <i>Bacillus vietnamensis</i>                                             |
| Bvi-2-1              | Bacteria Firmicutes | Bacilli | Bacillales | Bacillaceae | <i>Bacillus vireti</i>                                                   |

|                    |                                                    |                                                                                                  |
|--------------------|----------------------------------------------------|--------------------------------------------------------------------------------------------------|
| Bvi-3-1            | Bacteria Firmicutes Bacilli Bacillales Bacillaceae | <i>Bacillus vireti</i> LMG 21834                                                                 |
| Bwa-1-1            | Bacteria Firmicutes Bacilli Bacillales Bacillaceae | <i>Bacillus wakoensis</i> JCM 9140                                                               |
| Bzh-1-1            | Bacteria Firmicutes Bacilli Bacillales Bacillaceae | <i>Bacillus zhangzhouensis</i>                                                                   |
| Cde-1-1            | Bacteria Firmicutes Bacilli Bacillales Bacillaceae | <i>Caldibacillus debilis</i> DSM 16016                                                           |
| Den-1-1            | Bacteria Firmicutes Bacilli Bacillales Bacillaceae | <i>Domibacillus enclensis</i>                                                                    |
| Din-1-1            | Bacteria Firmicutes Bacilli Bacillales Bacillaceae | <i>Domibacillus indicus</i>                                                                      |
| Dro-1-1            | Bacteria Firmicutes Bacilli Bacillales Bacillaceae | <i>Domibacillus robiginosus</i>                                                                  |
| Dtu-1-1            | Bacteria Firmicutes Bacilli Bacillales Bacillaceae | <i>Domibacillus tundrae</i>                                                                      |
| Fge-1-1            | Bacteria Firmicutes Bacilli Bacillales Bacillaceae | <i>Fictibacillus gelatini</i> DSM 15865                                                          |
| Gca-1-1            | Bacteria Firmicutes Bacilli Bacillales Bacillaceae | <i>Geobacillus caldorylosilyticus</i> CIC9                                                       |
| Gic-1-1            | Bacteria Firmicutes Bacilli Bacillales Bacillaceae | <i>Geobacillus icigianus</i>                                                                     |
| Gka-2-1            | Bacteria Firmicutes Bacilli Bacillales Bacillaceae | <i>Geobacillus kaustophilus</i> GBlys                                                            |
| Gsp-8-1            | Bacteria Firmicutes Bacilli Bacillales Bacillaceae | <i>Geobacillus</i> sp. 12AMOR1                                                                   |
| Gsp-9-1            | Bacteria Firmicutes Bacilli Bacillales Bacillaceae | <i>Geobacillus</i> sp. A8                                                                        |
| Gsp-10-1           | Bacteria Firmicutes Bacilli Bacillales Bacillaceae | <i>Geobacillus</i> sp. CAMR5420                                                                  |
| Gsp-11-1           | Bacteria Firmicutes Bacilli Bacillales Bacillaceae | <i>Geobacillus</i> sp. FW23                                                                      |
| Gsp-12-1           | Bacteria Firmicutes Bacilli Bacillales Bacillaceae | <i>Geobacillus</i> sp. GHH01                                                                     |
| Gsp-13-1           | Bacteria Firmicutes Bacilli Bacillales Bacillaceae | <i>Geobacillus</i> sp. JF8                                                                       |
| Gsp-14-1           | Bacteria Firmicutes Bacilli Bacillales Bacillaceae | <i>Geobacillus</i> sp. LC300                                                                     |
| Gsp-15-1           | Bacteria Firmicutes Bacilli Bacillales Bacillaceae | <i>Geobacillus</i> sp. MAS1                                                                      |
| Gsp-16-1           | Bacteria Firmicutes Bacilli Bacillales Bacillaceae | <i>Geobacillus</i> sp. T6                                                                        |
| Gsp-17-1           | Bacteria Firmicutes Bacilli Bacillales Bacillaceae | <i>Geobacillus</i> sp. WSUCF1                                                                    |
| Gsp-18-1           | Bacteria Firmicutes Bacilli Bacillales Bacillaceae | <i>Geobacillus</i> sp. ZGt-1                                                                     |
| Gst-1-1 to Gst-1-5 | Bacteria Firmicutes Bacilli Bacillales Bacillaceae | <i>Geobacillus stearothermophilus</i>                                                            |
| Gst-2-1            | Bacteria Firmicutes Bacilli Bacillales Bacillaceae | <i>Geobacillus stearothermophilus</i> 10                                                         |
| Gst-3-1            | Bacteria Firmicutes Bacilli Bacillales Bacillaceae | <i>Geobacillus stearothermophilus</i> ATCC 7953                                                  |
| Gsu-1-1            | Bacteria Firmicutes Bacilli Bacillales Bacillaceae | <i>Geobacillus subterraneus</i> PSS2                                                             |
| Gth-4-1            | Bacteria Firmicutes Bacilli Bacillales Bacillaceae | <i>Geobacillus thermodenitrificans</i> subsp. <i>thermodenitrificans</i> DSM 465                 |
| Gth-5-1            | Bacteria Firmicutes Bacilli Bacillales Bacillaceae | <i>Geobacillus thermoglucosidans</i> TNO-09.020                                                  |
| Gka-3-1 to Gka-3-2 | Bacteria Firmicutes Bacilli Bacillales Bacillaceae | <i>Geobacillus</i> Geobacillus thermoleovorans group <i>Geobacillus kaustophilus</i>             |
| Gka-4-1            | Bacteria Firmicutes Bacilli Bacillales Bacillaceae | <i>Geobacillus</i> Geobacillus thermoleovorans group <i>Geobacillus kaustophilus</i> NBRC 102445 |
| Gth-6-1            | Bacteria Firmicutes Bacilli Bacillales Bacillaceae | <i>Geobacillus</i> Geobacillus thermoleovorans group <i>Geobacillus thermocatenulatus</i> GS-1   |
| Gth-7-1            | Bacteria Firmicutes Bacilli Bacillales Bacillaceae | <i>Geobacillus</i> Geobacillus thermoleovorans group <i>Geobacillus thermoleovorans</i> B23      |
| Gvu-1-1            | Bacteria Firmicutes Bacilli Bacillales Bacillaceae | <i>Geobacillus</i> Geobacillus thermoleovorans group <i>Geobacillus vulcani</i> PSS1             |
| Gbo-1-1            | Bacteria Firmicutes Bacilli Bacillales Bacillaceae | <i>Gracilibacillus boracitolerans</i> JCM 21714                                                  |
| Gha-2-1            | Bacteria Firmicutes Bacilli Bacillales Bacillaceae | <i>Gracilibacillus halophilus</i> YIM-C55.5                                                      |
| Gla-1-1            | Bacteria Firmicutes Bacilli Bacillales Bacillaceae | <i>Gracilibacillus lacisalsi</i> DSM 19029                                                       |
| Hha-2-1            | Bacteria Firmicutes Bacilli Bacillales Bacillaceae | <i>Halalkalibacillus halophilus</i> DSM 18494                                                    |
| Hda-1-1            | Bacteria Firmicutes Bacilli Bacillales Bacillaceae | <i>Halobacillus dabanensis</i>                                                                   |
| Hka-1-1            | Bacteria Firmicutes Bacilli Bacillales Bacillaceae | <i>Halobacillus karajensis</i>                                                                   |
| Hku-1-1            | Bacteria Firmicutes Bacilli Bacillales Bacillaceae | <i>Halobacillus kuroshimensis</i> DSM 18393                                                      |
| Hsp-1-1            | Bacteria Firmicutes Bacilli Bacillales Bacillaceae | <i>Halobacillus</i> sp. BAB-2008                                                                 |
| Hsp-2-1            | Bacteria Firmicutes Bacilli Bacillales Bacillaceae | <i>Halobacillus</i> sp. BBL2006                                                                  |
| Htr-1-1            | Bacteria Firmicutes Bacilli Bacillales Bacillaceae | <i>Halobacillus trueperi</i>                                                                     |
| Lbo-1-1            | Bacteria Firmicutes Bacilli Bacillales Bacillaceae | <i>Lysinibacillus boronitolerans</i> JCM 21713 = 10a = NBRC 103108                               |
| Lfu-2-1            | Bacteria Firmicutes Bacilli Bacillales Bacillaceae | <i>Lysinibacillus fusiformis</i>                                                                 |
| Lfu-3-1            | Bacteria Firmicutes Bacilli Bacillales Bacillaceae | <i>Lysinibacillus fusiformis</i> H1k                                                             |
| Lfu-4-1            | Bacteria Firmicutes Bacilli Bacillales Bacillaceae | <i>Lysinibacillus fusiformis</i> ZB2                                                             |
| Lma-1-1            | Bacteria Firmicutes Bacilli Bacillales Bacillaceae | <i>Lysinibacillus manganicus</i> DSM 26584                                                       |
| Lma-2-1            | Bacteria Firmicutes Bacilli Bacillales Bacillaceae | <i>Lysinibacillus massiliensis</i> 4400831 = CIP 108448 = CCUG 49529                             |
| Lod-1-1            | Bacteria Firmicutes Bacilli Bacillales Bacillaceae | <i>Lysinibacillus odysseyi</i> 34hs-1 = NBRC 100172                                              |
| Lsi-1-1            | Bacteria Firmicutes Bacilli Bacillales Bacillaceae | <i>Lysinibacillus sinduriensis</i> BLB-1 = JCM 15800                                             |
| Lsp-2-1            | Bacteria Firmicutes Bacilli Bacillales Bacillaceae | <i>Lysinibacillus</i> sp. A1                                                                     |
| Lsp-3-1            | Bacteria Firmicutes Bacilli Bacillales Bacillaceae | <i>Lysinibacillus</i> sp. BF-4                                                                   |
| Lsp-4-1            | Bacteria Firmicutes Bacilli Bacillales Bacillaceae | <i>Lysinibacillus</i> sp. LK3                                                                    |
| Lsp-5-1 to Lsp-5-5 | Bacteria Firmicutes Bacilli Bacillales Bacillaceae | <i>Lysinibacillus sphaericus</i>                                                                 |
| Lsp-6-1            | Bacteria Firmicutes Bacilli Bacillales Bacillaceae | <i>Lysinibacillus sphaericus</i> CBAM5                                                           |
| Lsp-7-1            | Bacteria Firmicutes Bacilli Bacillales Bacillaceae | <i>Lysinibacillus sphaericus</i> KCTC 3346                                                       |
| Lsp-8-1            | Bacteria Firmicutes Bacilli Bacillales Bacillaceae | <i>Lysinibacillus sphaericus</i> OT4b.31                                                         |
| Lva-1-1            | Bacteria Firmicutes Bacilli Bacillales Bacillaceae | <i>Lysinibacillus varians</i>                                                                    |
| Lxy-1-1            | Bacteria Firmicutes Bacilli Bacillales Bacillaceae | <i>Lysinibacillus xylanilyticus</i>                                                              |
| Oje-1-1            | Bacteria Firmicutes Bacilli Bacillales Bacillaceae | <i>Oceanobacillus jeddahense</i>                                                                 |
| Oki-1-1            | Bacteria Firmicutes Bacilli Bacillales Bacillaceae | <i>Oceanobacillus kimchii</i> X50                                                                |
| Oma-1-1            | Bacteria Firmicutes Bacilli Bacillales Bacillaceae | <i>Oceanobacillus manasiensis</i>                                                                |
| Oon-1-1            | Bacteria Firmicutes Bacilli Bacillales Bacillaceae | <i>Oceanobacillus oncorhynchii</i>                                                               |



|                      |                     |         |            |              |                                                                          |
|----------------------|---------------------|---------|------------|--------------|--------------------------------------------------------------------------|
| Opi-1-1              | Bacteria Firmicutes | Bacilli | Bacillales | Bacillaceae  | <i>Oceanobacillus picturae</i>                                           |
| Osp-1-1              | Bacteria Firmicutes | Bacilli | Bacillales | Bacillaceae  | <i>Oceanobacillus</i> sp. Ndiop                                          |
| Oco-1-1              | Bacteria Firmicutes | Bacilli | Bacillales | Bacillaceae  | <i>Ornithinibacillus californiensis</i>                                  |
| Oco-1-1              | Bacteria Firmicutes | Bacilli | Bacillales | Bacillaceae  | <i>Ornithinibacillus contaminans</i>                                     |
| Pca-1-1              | Bacteria Firmicutes | Bacilli | Bacillales | Bacillaceae  | <i>Parageobacillus caldoxylosilyticus</i> NBRC 107762                    |
| Pge-1-1              | Bacteria Firmicutes | Bacilli | Bacillales | Bacillaceae  | <i>Parageobacillus genomosp.</i> 1                                       |
| Pth-1-1              | Bacteria Firmicutes | Bacilli | Bacillales | Bacillaceae  | <i>Parageobacillus thermoglucosidasius</i>                               |
| Pth-2-1              | Bacteria Firmicutes | Bacilli | Bacillales | Bacillaceae  | <i>Parageobacillus thermoglucosidasius</i> NBRC 107763                   |
| Pgl-1-1              | Bacteria Firmicutes | Bacilli | Bacillales | Bacillaceae  | <i>Paucisalibacillus globulus</i> DSM 18846                              |
| Psp-6-1              | Bacteria Firmicutes | Bacilli | Bacillales | Bacillaceae  | <i>Paucisalibacillus</i> sp. EB02                                        |
| Pch-1-1              | Bacteria Firmicutes | Bacilli | Bacillales | Bacillaceae  | <i>Pontibacillus chungwhensis</i> BH030062                               |
| Pha-1-1 to Pha-1-2   | Bacteria Firmicutes | Bacilli | Bacillales | Bacillaceae  | <i>Pontibacillus halophilus</i> JSM 076056 = DSM 19796                   |
| Pli-1-1              | Bacteria Firmicutes | Bacilli | Bacillales | Bacillaceae  | <i>Pontibacillus litoralis</i> JSM 072002                                |
| Pma-1-1              | Bacteria Firmicutes | Bacilli | Bacillales | Bacillaceae  | <i>Pontibacillus marinus</i> BH030004 = DSM 16465                        |
| Pya-1-1              | Bacteria Firmicutes | Bacilli | Bacillales | Bacillaceae  | <i>Pontibacillus yanchengensis</i> Y32                                   |
| Qth-1-1 to Qth-1-2   | Bacteria Firmicutes | Bacilli | Bacillales | Bacillaceae  | <i>Quasibacillus thermotolerans</i>                                      |
| Rma-1-1              | Bacteria Firmicutes | Bacilli | Bacillales | Bacillaceae  | <i>Rubeoparvulum massiliense</i>                                         |
| Sai-1-1 to Sai-1-2   | Bacteria Firmicutes | Bacilli | Bacillales | Bacillaceae  | <i>Salinibacillus aidingensis</i> MSP4                                   |
| Sk0-1-1              | Bacteria Firmicutes | Bacilli | Bacillales | Bacillaceae  | <i>Salsuginibacillus kocurii</i> DSM 18087                               |
| Sha-2-1              | Bacteria Firmicutes | Bacilli | Bacillales | Bacillaceae  | <i>Sediminibacillus halophilus</i> NSP9.3                                |
| Tai-1-1              | Bacteria Firmicutes | Bacilli | Bacillales | Bacillaceae  | <i>Terribacillus aidingensis</i>                                         |
| Tde-1-1              | Bacteria Firmicutes | Bacilli | Bacillales | Bacillaceae  | <i>Thalassobacillus devorans</i> MSP14                                   |
| Bba-3-1              | Bacteria Firmicutes | Bacilli | Bacillales | Bacillaceae  | unclassified Bacillaceae <i>Bacillaceae bacterium</i> MTCC 10057         |
| Val-1-1              | Bacteria Firmicutes | Bacilli | Bacillales | Bacillaceae  | <i>Virgibacillus alimentarius</i>                                        |
| Vha-1-1              | Bacteria Firmicutes | Bacilli | Bacillales | Bacillaceae  | <i>Virgibacillus halodenitrificans</i> 1806                              |
| Vma-1-1              | Bacteria Firmicutes | Bacilli | Bacillales | Bacillaceae  | <i>Virgibacillus massiliensis</i>                                        |
| Vpa-1-1              | Bacteria Firmicutes | Bacilli | Bacillales | Bacillaceae  | <i>Virgibacillus pantothenicus</i>                                       |
| Vse-1-1              | Bacteria Firmicutes | Bacilli | Bacillales | Bacillaceae  | <i>Virgibacillus senegalensis</i>                                        |
| Vsp-1-1              | Bacteria Firmicutes | Bacilli | Bacillales | Bacillaceae  | <i>Virgibacillus</i> sp. CM-4                                            |
| Vsp-2-1              | Bacteria Firmicutes | Bacilli | Bacillales | Bacillaceae  | <i>Virgibacillus</i> sp. SK37                                            |
| Tae-1-1              | Bacteria Firmicutes | Bacilli | Bacillales | Bacillales   | Family X.Incertae Sedis <i>Thermicanus aegyptius</i> DSM 12793           |
| Gbe-1-1              | Bacteria Firmicutes | Bacilli | Bacillales | Bacillales   | Family XI.Incertae Sedis <i>Gemella bergeriae</i> ATCC 700627            |
| Gcu-1-1              | Bacteria Firmicutes | Bacilli | Bacillales | Bacillales   | Family XI.Incertae Sedis <i>Gemella cuniculi</i> DSM 15828               |
| Gha-3-1              | Bacteria Firmicutes | Bacilli | Bacillales | Bacillales   | Family XI.Incertae Sedis <i>Gemella haemolysans</i> M341                 |
| Gmo-1-1              | Bacteria Firmicutes | Bacilli | Bacillales | Bacillales   | Family XI.Incertae Sedis <i>Gemella morbillorum</i> M424                 |
| Gsa-1-1              | Bacteria Firmicutes | Bacilli | Bacillales | Bacillales   | Family XI.Incertae Sedis <i>Gemella sanguinis</i> ATCC 700632            |
| Gsa-2-1              | Bacteria Firmicutes | Bacilli | Bacillales | Bacillales   | Family XI.Incertae Sedis <i>Gemella sanguinis</i> M325                   |
| Eac-1-1              | Bacteria Firmicutes | Bacilli | Bacillales | Bacillales   | Family XII.Incertae Sedis <i>Exiguobacterium acetylicum</i>              |
| Eac-2-1              | Bacteria Firmicutes | Bacilli | Bacillales | Bacillales   | Family XII.Incertae Sedis <i>Exiguobacterium acetylicum</i> DSM 20416    |
| Eal-1-1              | Bacteria Firmicutes | Bacilli | Bacillales | Bacillales   | Family XII.Incertae Sedis <i>Exiguobacterium alkaliphilum</i> 12/1       |
| Ean-2-1              | Bacteria Firmicutes | Bacilli | Bacillales | Bacillales   | Family XII.Incertae Sedis <i>Exiguobacterium antarcticum</i> DSM 14480   |
| Eau-1-1              | Bacteria Firmicutes | Bacilli | Bacillales | Bacillales   | Family XII.Incertae Sedis <i>Exiguobacterium aurantiacum</i> DSM 6208    |
| Ech-1-1              | Bacteria Firmicutes | Bacilli | Bacillales | Bacillales   | Family XII.Incertae Sedis <i>Exiguobacterium chiriquicha</i>             |
| Ema-1-1              | Bacteria Firmicutes | Bacilli | Bacillales | Bacillales   | Family XII.Incertae Sedis <i>Exiguobacterium marinum</i> DSM 16307       |
| Eme-1-1              | Bacteria Firmicutes | Bacilli | Bacillales | Bacillales   | Family XII.Incertae Sedis <i>Exiguobacterium mexicanum</i>               |
| Eox-1-1              | Bacteria Firmicutes | Bacilli | Bacillales | Bacillales   | Family XII.Incertae Sedis <i>Exiguobacterium oxidotolerans</i> JCM 12280 |
| Epa-1-1              | Bacteria Firmicutes | Bacilli | Bacillales | Bacillales   | Family XII.Incertae Sedis <i>Exiguobacterium pavilionensis</i> RW-2      |
| Esi-2-1              | Bacteria Firmicutes | Bacilli | Bacillales | Bacillales   | Family XII.Incertae Sedis <i>Exiguobacterium sibiricum</i> 7-3           |
| Esp-2-1              | Bacteria Firmicutes | Bacilli | Bacillales | Bacillales   | Family XII.Incertae Sedis <i>Exiguobacterium</i> sp. 8-11-1              |
| Esp-3-1              | Bacteria Firmicutes | Bacilli | Bacillales | Bacillales   | Family XII.Incertae Sedis <i>Exiguobacterium</i> sp. AB2                 |
| Esp-4-1              | Bacteria Firmicutes | Bacilli | Bacillales | Bacillales   | Family XII.Incertae Sedis <i>Exiguobacterium</i> sp. JLM-2               |
| Esp-5-1              | Bacteria Firmicutes | Bacilli | Bacillales | Bacillales   | Family XII.Incertae Sedis <i>Exiguobacterium</i> sp. MH3                 |
| Esp-6-1              | Bacteria Firmicutes | Bacilli | Bacillales | Bacillales   | Family XII.Incertae Sedis <i>Exiguobacterium</i> sp. NG55                |
| Esp-7-1              | Bacteria Firmicutes | Bacilli | Bacillales | Bacillales   | Family XII.Incertae Sedis <i>Exiguobacterium</i> sp. OS-77               |
| Esp-8-1              | Bacteria Firmicutes | Bacilli | Bacillales | Bacillales   | Family XII.Incertae Sedis <i>Exiguobacterium</i> sp. RIT341              |
| Esp-9-1              | Bacteria Firmicutes | Bacilli | Bacillales | Bacillales   | Family XII.Incertae Sedis <i>Exiguobacterium</i> sp. S17                 |
| Esp-10-1             | Bacteria Firmicutes | Bacilli | Bacillales | Bacillales   | Family XII.Incertae Sedis <i>Exiguobacterium</i> sp. ZOR0005             |
| Esp-11-1             | Bacteria Firmicutes | Bacilli | Bacillales | Bacillales   | Family XII.Incertae Sedis <i>Exiguobacterium</i> sp. ZWU0009             |
| Eun-1-1              | Bacteria Firmicutes | Bacilli | Bacillales | Bacillales   | Family XII.Incertae Sedis <i>Exiguobacterium undae</i> 190-11            |
| Eun-2-1              | Bacteria Firmicutes | Bacilli | Bacillales | Bacillales   | Family XII.Incertae Sedis <i>Exiguobacterium undae</i> DSM 14481         |
| Bce-148-1            | Bacteria Firmicutes | Bacilli | Bacillales | Bacillales   | <i>Bhargavaea cecembensis</i> DSE10                                      |
| Bca-2-1              | Bacteria Firmicutes | Bacilli | Bacillales | Listeriaceae | <i>Brochothrix campestris</i> FSL F6-1037                                |
| Bth-45-1 to Bth-45-2 | Bacteria Firmicutes | Bacilli | Bacillales | Listeriaceae | <i>Brochothrix thermosphacta</i> DSM 20171 = FSL F6-1036                 |
| Laq-1-1              | Bacteria Firmicutes | Bacilli | Bacillales | Listeriaceae | <i>Listeria aquatica</i> FSL S10-1188                                    |
| Lbo-2-1              | Bacteria Firmicutes | Bacilli | Bacillales | Listeriaceae | <i>Listeria booriae</i>                                                  |

|                      |                                                     |                                                                 |
|----------------------|-----------------------------------------------------|-----------------------------------------------------------------|
| Lco-1-1              | Bacteria Firmicutes Bacilli Bacillales Listeriaceae | <i>Listeria cornellensis</i> FSL F6-0969                        |
| Lff-1-1              | Bacteria Firmicutes Bacilli Bacillales Listeriaceae | <i>Listeria fleischmannii</i> FSL S10-1203                      |
| Lff-2-1              | Bacteria Firmicutes Bacilli Bacillales Listeriaceae | <i>Listeria fleischmannii</i> LU2006-1                          |
| Lff-3-1              | Bacteria Firmicutes Bacilli Bacillales Listeriaceae | <i>Listeria floridensis</i> FSL S10-1187                        |
| Lgr-1-1              | Bacteria Firmicutes Bacilli Bacillales Listeriaceae | <i>Listeria grandensis</i> FSL F6-0971                          |
| Lgr-2-1              | Bacteria Firmicutes Bacilli Bacillales Listeriaceae | <i>Listeria grayi</i> DSM 20601                                 |
| Lgr-3-1              | Bacteria Firmicutes Bacilli Bacillales Listeriaceae | <i>Listeria grayi</i> FSL F6-1183                               |
| Lin-2-1 to Lin-2-3   | Bacteria Firmicutes Bacilli Bacillales Listeriaceae | <i>Listeria innocua</i>                                         |
| Lin-3-1              | Bacteria Firmicutes Bacilli Bacillales Listeriaceae | <i>Listeria innocua</i> ATCC 33091                              |
| Lin-4-1              | Bacteria Firmicutes Bacilli Bacillales Listeriaceae | <i>Listeria innocua</i> FSL J1-023                              |
| Liv-3-1              | Bacteria Firmicutes Bacilli Bacillales Listeriaceae | <i>Listeria ivanovii subsp. ivanovii</i>                        |
| Liv-1-1 to Liv-1-2   | Bacteria Firmicutes Bacilli Bacillales Listeriaceae | <i>Listeria ivanovii subsp. ivanovii</i> PAM 55                 |
| Liv-4-1 to Liv-4-2   | Bacteria Firmicutes Bacilli Bacillales Listeriaceae | <i>Listeria ivanovii subsp. londoniensis</i>                    |
| Liv-2-1              | Bacteria Firmicutes Bacilli Bacillales Listeriaceae | <i>Listeria ivanovii</i> WSLC3009                               |
| Lmo-33-1 to Lmo-33-9 | Bacteria Firmicutes Bacilli Bacillales Listeriaceae | <i>Listeria monocytogenes</i>                                   |
| Lmo-34-1             | Bacteria Firmicutes Bacilli Bacillales Listeriaceae | <i>Listeria monocytogenes</i> 08-5578                           |
| Lmo-35-1             | Bacteria Firmicutes Bacilli Bacillales Listeriaceae | <i>Listeria monocytogenes</i> 4423                              |
| Lmo-36-1             | Bacteria Firmicutes Bacilli Bacillales Listeriaceae | <i>Listeria monocytogenes</i> 6179                              |
| Lmo-37-1             | Bacteria Firmicutes Bacilli Bacillales Listeriaceae | <i>Listeria monocytogenes</i> CFSAN002349                       |
| Lmo-38-1             | Bacteria Firmicutes Bacilli Bacillales Listeriaceae | <i>Listeria monocytogenes</i> EGD                               |
| Lmo-39-1             | Bacteria Firmicutes Bacilli Bacillales Listeriaceae | <i>Listeria monocytogenes</i> FSL F6-684                        |
| Lmo-40-1             | Bacteria Firmicutes Bacilli Bacillales Listeriaceae | <i>Listeria monocytogenes</i> FSL J1-208                        |
| Lmo-41-1             | Bacteria Firmicutes Bacilli Bacillales Listeriaceae | <i>Listeria monocytogenes</i> J1-220                            |
| Lmo-42-1             | Bacteria Firmicutes Bacilli Bacillales Listeriaceae | <i>Listeria monocytogenes</i> J1816                             |
| Lmo-44-1             | Bacteria Firmicutes Bacilli Bacillales Listeriaceae | <i>Listeria monocytogenes</i> Lm19860                           |
| Lmo-43-1             | Bacteria Firmicutes Bacilli Bacillales Listeriaceae | <i>Listeria monocytogenes</i> LM201                             |
| Lmo-45-1             | Bacteria Firmicutes Bacilli Bacillales Listeriaceae | <i>Listeria monocytogenes</i> Lm21045                           |
| Lmo-46-1             | Bacteria Firmicutes Bacilli Bacillales Listeriaceae | <i>Listeria monocytogenes</i> Lm25180                           |
| Lmo-47-1             | Bacteria Firmicutes Bacilli Bacillales Listeriaceae | <i>Listeria monocytogenes</i> Lm26686                           |
| Lmo-48-1             | Bacteria Firmicutes Bacilli Bacillales Listeriaceae | <i>Listeria monocytogenes</i> Lm.1823                           |
| Lmo-49-1             | Bacteria Firmicutes Bacilli Bacillales Listeriaceae | <i>Listeria monocytogenes</i> Lm.1824                           |
| Lmo-50-1             | Bacteria Firmicutes Bacilli Bacillales Listeriaceae | <i>Listeria monocytogenes</i> Lm.1840                           |
| Lmo-51-1             | Bacteria Firmicutes Bacilli Bacillales Listeriaceae | <i>Listeria monocytogenes</i> Lm.1880                           |
| Lmo-52-1             | Bacteria Firmicutes Bacilli Bacillales Listeriaceae | <i>Listeria monocytogenes</i> Lm.1886                           |
| Lmo-53-1             | Bacteria Firmicutes Bacilli Bacillales Listeriaceae | <i>Listeria monocytogenes</i> Lm.1889                           |
| Lmo-54-1             | Bacteria Firmicutes Bacilli Bacillales Listeriaceae | <i>Listeria monocytogenes</i> N53-1                             |
| Lmo-55-1             | Bacteria Firmicutes Bacilli Bacillales Listeriaceae | <i>Listeria monocytogenes</i> QOC1                              |
| Lmo-56-1             | Bacteria Firmicutes Bacilli Bacillales Listeriaceae | <i>Listeria monocytogenes</i> QOC2                              |
| Lmo-57-1             | Bacteria Firmicutes Bacilli Bacillales Listeriaceae | <i>Listeria monocytogenes</i> R479a                             |
| Lmo-72-1             | Bacteria Firmicutes Bacilli Bacillales Listeriaceae | <i>Listeria monocytogenes serotype</i> 1/2a str. NCCP No. 15743 |
| Lmo-73-1             | Bacteria Firmicutes Bacilli Bacillales Listeriaceae | <i>Listeria monocytogenes serotype</i> 4b str. LL195            |
| Lmo-74-1             | Bacteria Firmicutes Bacilli Bacillales Listeriaceae | <i>Listeria monocytogenes serotype</i> 4bV str. LS542           |
| Lmo-75-1             | Bacteria Firmicutes Bacilli Bacillales Listeriaceae | <i>Listeria monocytogenes serotype</i> 4bV str. LS642           |
| Lmo-76-1             | Bacteria Firmicutes Bacilli Bacillales Listeriaceae | <i>Listeria monocytogenes serotype</i> 4bV str. LS643           |
| Lmo-77-1             | Bacteria Firmicutes Bacilli Bacillales Listeriaceae | <i>Listeria monocytogenes serotype</i> 4bV str. LS644           |
| Lmo-78-1             | Bacteria Firmicutes Bacilli Bacillales Listeriaceae | <i>Listeria monocytogenes serotype</i> 4bV str. LS645           |
| Lmo-58-1             | Bacteria Firmicutes Bacilli Bacillales Listeriaceae | <i>Listeria monocytogenes</i> SHL001                            |
| Lmo-59-1             | Bacteria Firmicutes Bacilli Bacillales Listeriaceae | <i>Listeria monocytogenes</i> SHL002                            |
| Lmo-60-1             | Bacteria Firmicutes Bacilli Bacillales Listeriaceae | <i>Listeria monocytogenes</i> SHL004                            |
| Lmo-61-1             | Bacteria Firmicutes Bacilli Bacillales Listeriaceae | <i>Listeria monocytogenes</i> SHL005                            |
| Lmo-62-1             | Bacteria Firmicutes Bacilli Bacillales Listeriaceae | <i>Listeria monocytogenes</i> SHL006                            |
| Lmo-63-1             | Bacteria Firmicutes Bacilli Bacillales Listeriaceae | <i>Listeria monocytogenes</i> SHL007                            |
| Lmo-64-1             | Bacteria Firmicutes Bacilli Bacillales Listeriaceae | <i>Listeria monocytogenes</i> SHL008                            |
| Lmo-65-1             | Bacteria Firmicutes Bacilli Bacillales Listeriaceae | <i>Listeria monocytogenes</i> SHL009                            |
| Lmo-66-1             | Bacteria Firmicutes Bacilli Bacillales Listeriaceae | <i>Listeria monocytogenes</i> SHL010                            |
| Lmo-67-1             | Bacteria Firmicutes Bacilli Bacillales Listeriaceae | <i>Listeria monocytogenes</i> SHL011                            |
| Lmo-68-1             | Bacteria Firmicutes Bacilli Bacillales Listeriaceae | <i>Listeria monocytogenes</i> SHL012                            |
| Lmo-69-1             | Bacteria Firmicutes Bacilli Bacillales Listeriaceae | <i>Listeria monocytogenes</i> SHL013                            |
| Lmo-79-1             | Bacteria Firmicutes Bacilli Bacillales Listeriaceae | <i>Listeria monocytogenes str.</i> Scott A                      |
| Lmo-70-1             | Bacteria Firmicutes Bacilli Bacillales Listeriaceae | <i>Listeria monocytogenes</i> WSLC1001                          |
| Lmo-71-1             | Bacteria Firmicutes Bacilli Bacillales Listeriaceae | <i>Listeria monocytogenes</i> WSLC1042                          |
| Lne-1-1              | Bacteria Firmicutes Bacilli Bacillales Listeriaceae | <i>Listeria newyorkensis</i>                                    |
| Lri-1-1              | Bacteria Firmicutes Bacilli Bacillales Listeriaceae | <i>Listeria riparia</i> FSL S10-1204                            |
| Lro-1-1              | Bacteria Firmicutes Bacilli Bacillales Listeriaceae | <i>Listeria rocourtiae</i> FSL F6-920                           |
| Lse-2-1              | Bacteria Firmicutes Bacilli Bacillales Listeriaceae | <i>Listeria seeligeri</i>                                       |

|                    |                                                         |                                                                           |
|--------------------|---------------------------------------------------------|---------------------------------------------------------------------------|
| Lse-3-1            | Bacteria Firmicutes Bacilli Bacillales Listeriaceae     | <i>Listeria seeligeri</i> FSL N1-067                                      |
| Lwe-2-1            | Bacteria Firmicutes Bacilli Bacillales Listeriaceae     | <i>Listeria weihenstephanensis</i> FSL R9-0317                            |
| Lba-2-1            | Bacteria Firmicutes Bacilli Bacillales Listeriaceae     | <i>Listeria bacterium</i> FSL A5-0209                                     |
| Aan-1-1            | Bacteria Firmicutes Bacilli Bacillales Paenibacillaceae | Aneurinibacillus group <i>Aneurinibacillus aneurinilyticus</i> ATCC 12856 |
| Ami-1-1 to Ami-1-3 | Bacteria Firmicutes Bacilli Bacillales Paenibacillaceae | Aneurinibacillus group <i>Aneurinibacillus migulanus</i>                  |
| Ate-2-1            | Bacteria Firmicutes Bacilli Bacillales Paenibacillaceae | Aneurinibacillus group <i>Aneurinibacillus terranovensensis</i> DSM 18919 |
| Aty-1-1            | Bacteria Firmicutes Bacilli Bacillales Paenibacillaceae | Aneurinibacillus group <i>Aneurinibacillus tyrosinisolvans</i>            |
| Bag-1-1            | Bacteria Firmicutes Bacilli Bacillales Paenibacillaceae | <i>Brevibacillus agri</i> 5-2                                             |
| Bag-2-1            | Bacteria Firmicutes Bacilli Bacillales Paenibacillaceae | <i>Brevibacillus agri</i> BAB-2500                                        |
| Bbo-4-1            | Bacteria Firmicutes Bacilli Bacillales Paenibacillaceae | <i>Brevibacillus borstelensis</i>                                         |
| Bbo-5-1            | Bacteria Firmicutes Bacilli Bacillales Paenibacillaceae | <i>Brevibacillus borstelensis</i> 3096-7                                  |
| Bbo-6-1            | Bacteria Firmicutes Bacilli Bacillales Paenibacillaceae | <i>Brevibacillus borstelensis</i> AK1                                     |
| Bbo-7-1            | Bacteria Firmicutes Bacilli Bacillales Paenibacillaceae | <i>Brevibacillus borstelensis cifa_chp40</i>                              |
| Bbr-2-1            | Bacteria Firmicutes Bacilli Bacillales Paenibacillaceae | <i>Brevibacillus brevis</i>                                               |
| Bbr-3-1            | Bacteria Firmicutes Bacilli Bacillales Paenibacillaceae | <i>Brevibacillus brevis</i> FJAT-0809-GLX                                 |
| Bbr-4-1            | Bacteria Firmicutes Bacilli Bacillales Paenibacillaceae | <i>Brevibacillus brevis</i> X23                                           |
| Bfo-2-1            | Bacteria Firmicutes Bacilli Bacillales Paenibacillaceae | <i>Brevibacillus formosus</i>                                             |
| Bla-1-1            | Bacteria Firmicutes Bacilli Bacillales Paenibacillaceae | <i>Brevibacillus laterosporus</i>                                         |
| Bla-2-1            | Bacteria Firmicutes Bacilli Bacillales Paenibacillaceae | <i>Brevibacillus laterosporus</i> DSM 25                                  |
| Bla-3-1            | Bacteria Firmicutes Bacilli Bacillales Paenibacillaceae | <i>Brevibacillus laterosporus</i> GI-9                                    |
| Bla-4-1            | Bacteria Firmicutes Bacilli Bacillales Paenibacillaceae | <i>Brevibacillus laterosporus</i> LMG 15441                               |
| Bla-5-1            | Bacteria Firmicutes Bacilli Bacillales Paenibacillaceae | <i>Brevibacillus laterosporus</i> PE36                                    |
| Bpa-4-1            | Bacteria Firmicutes Bacilli Bacillales Paenibacillaceae | <i>Brevibacillus panacihumi</i> W25                                       |
| Bre-1-1            | Bacteria Firmicutes Bacilli Bacillales Paenibacillaceae | <i>Brevibacillus reuszeri</i>                                             |
| Bsp-99-1           | Bacteria Firmicutes Bacilli Bacillales Paenibacillaceae | <i>Brevibacillus sp. phR</i>                                              |
| Bth-46-1           | Bacteria Firmicutes Bacilli Bacillales Paenibacillaceae | <i>Brevibacillus thermoruber</i> 423                                      |
| Bth-47-1           | Bacteria Firmicutes Bacilli Bacillales Paenibacillaceae | <i>Brevibacillus thermoruber</i> PM1                                      |
| Cko-1-1            | Bacteria Firmicutes Bacilli Bacillales Paenibacillaceae | <i>Cohnella kolymensis</i>                                                |
| Cla-1-1            | Bacteria Firmicutes Bacilli Bacillales Paenibacillaceae | <i>Cohnella laeviribosi</i> DSM 21336                                     |
| Cth-2-1            | Bacteria Firmicutes Bacilli Bacillales Paenibacillaceae | <i>Cohnella thermotolerans</i> DSM 17683                                  |
| Gma-1-1            | Bacteria Firmicutes Bacilli Bacillales Paenibacillaceae | <i>Gorillibacterium massiliense</i>                                       |
| Pal-2-1            | Bacteria Firmicutes Bacilli Bacillales Paenibacillaceae | <i>Paenibacillus alginolyticus</i> DSM 5050 = NBRC 15375                  |
| Pal-3-1            | Bacteria Firmicutes Bacilli Bacillales Paenibacillaceae | <i>Paenibacillus algorifonticola</i>                                      |
| Pal-4-1            | Bacteria Firmicutes Bacilli Bacillales Paenibacillaceae | <i>Paenibacillus alvei</i> A6-6i-x                                        |
| Pal-5-1            | Bacteria Firmicutes Bacilli Bacillales Paenibacillaceae | <i>Paenibacillus alvei</i> TS-15                                          |
| Pan-2-1            | Bacteria Firmicutes Bacilli Bacillales Paenibacillaceae | <i>Paenibacillus antibioticophila</i>                                     |
| Pas-1-1            | Bacteria Firmicutes Bacilli Bacillales Paenibacillaceae | <i>Paenibacillus assamensis</i> DSM 18201                                 |
| Pba-1-1            | Bacteria Firmicutes Bacilli Bacillales Paenibacillaceae | <i>Paenibacillus barengoltzii</i> G22                                     |
| Pbe-1-1            | Bacteria Firmicutes Bacilli Bacillales Paenibacillaceae | <i>Paenibacillus beijingensis</i>                                         |
| Pch-2-1            | Bacteria Firmicutes Bacilli Bacillales Paenibacillaceae | <i>Paenibacillus chitinolyticus</i> NBRC 15660                            |
| Pch-3-1            | Bacteria Firmicutes Bacilli Bacillales Paenibacillaceae | <i>Paenibacillus chondroitinus</i>                                        |
| Pda-1-1 to Pda-1-3 | Bacteria Firmicutes Bacilli Bacillales Paenibacillaceae | <i>Paenibacillus darwinianus</i>                                          |
| Peh-1-1            | Bacteria Firmicutes Bacilli Bacillales Paenibacillaceae | <i>Paenibacillus ehimensis</i> A2                                         |
| Pgi-1-1            | Bacteria Firmicutes Bacilli Bacillales Paenibacillaceae | <i>Paenibacillus ginsengihumi</i> DSM 21568                               |
| Pgo-1-1            | Bacteria Firmicutes Bacilli Bacillales Paenibacillaceae | <i>Paenibacillus gorillae</i>                                             |
| Pha-2-1            | Bacteria Firmicutes Bacilli Bacillales Paenibacillaceae | <i>Paenibacillus harenae</i> DSM 16969                                    |
| Pla-3-1            | Bacteria Firmicutes Bacilli Bacillales Paenibacillaceae | <i>Paenibacillus larvae</i>                                               |
| Pla-4-1            | Bacteria Firmicutes Bacilli Bacillales Paenibacillaceae | <i>Paenibacillus larvae</i> subsp. <i>larvae</i> DSM 25430                |
| Pla-5-1            | Bacteria Firmicutes Bacilli Bacillales Paenibacillaceae | <i>Paenibacillus larvae</i> subsp. <i>larvae</i> DSM 25719                |
| Pma-2-1            | Bacteria Firmicutes Bacilli Bacillales Paenibacillaceae | <i>Paenibacillus macerans</i>                                             |
| Pma-3-1            | Bacteria Firmicutes Bacilli Bacillales Paenibacillaceae | <i>Paenibacillus massiliensis</i> 2301065 = DSM 16942                     |
| Pma-4-1            | Bacteria Firmicutes Bacilli Bacillales Paenibacillaceae | <i>Paenibacillus massiliensis</i> T7                                      |
| Pmu-3-1            | Bacteria Firmicutes Bacilli Bacillales Paenibacillaceae | <i>Paenibacillus mucilaginosus</i> K02                                    |
| Ppa-1-1            | Bacteria Firmicutes Bacilli Bacillales Paenibacillaceae | <i>Paenibacillus panacisoli</i> DSM 21345                                 |
| Ppa-2-1            | Bacteria Firmicutes Bacilli Bacillales Paenibacillaceae | <i>Paenibacillus pasadenensis</i> DSM 19293                               |
| Ppe-2-1            | Bacteria Firmicutes Bacilli Bacillales Paenibacillaceae | <i>Paenibacillus peoriae</i>                                              |
| Ppi-1-1            | Bacteria Firmicutes Bacilli Bacillales Paenibacillaceae | <i>Paenibacillus pini</i> JCM 16418                                       |
| Ppi-2-1            | Bacteria Firmicutes Bacilli Bacillales Paenibacillaceae | <i>Paenibacillus pinihumi</i> DSM 23905 = JCM 16419                       |
| Ppo-2-1 to Ppo-2-2 | Bacteria Firmicutes Bacilli Bacillales Paenibacillaceae | <i>Paenibacillus polymyxa</i>                                             |
| Ppo-3-1            | Bacteria Firmicutes Bacilli Bacillales Paenibacillaceae | <i>Paenibacillus polymyxa</i> 1-43                                        |
| Ppo-4-1            | Bacteria Firmicutes Bacilli Bacillales Paenibacillaceae | <i>Paenibacillus polymyxa</i> A18                                         |
| Ppo-5-1            | Bacteria Firmicutes Bacilli Bacillales Paenibacillaceae | <i>Paenibacillus polymyxa</i> ATCC 842                                    |
| Ppo-6-1            | Bacteria Firmicutes Bacilli Bacillales Paenibacillaceae | <i>Paenibacillus polymyxa</i> E681                                        |
| Ppo-7-1            | Bacteria Firmicutes Bacilli Bacillales Paenibacillaceae | <i>Paenibacillus polymyxa</i> OSY-DF                                      |
| Ppo-8-1            | Bacteria Firmicutes Bacilli Bacillales Paenibacillaceae | <i>Paenibacillus polymyxa</i> SC2                                         |

|                        |                                                         |                                                     |
|------------------------|---------------------------------------------------------|-----------------------------------------------------|
| Ppo-9-1                | Bacteria Firmicutes Bacilli Bacillales Paenibacillaceae | <i>Paenibacillus polymyxa</i> SQR-21                |
| Ppo-10-1               | Bacteria Firmicutes Bacilli Bacillales Paenibacillaceae | <i>Paenibacillus polymyxa</i> TD94                  |
| Psa-1-1                | Bacteria Firmicutes Bacilli Bacillales Paenibacillaceae | <i>Paenibacillus sanguinis</i> 2301083 = DSM 16941  |
| Psp-7-1                | Bacteria Firmicutes Bacilli Bacillales Paenibacillaceae | <i>Paenibacillus sp.</i> 1-18                       |
| Psp-8-1                | Bacteria Firmicutes Bacilli Bacillales Paenibacillaceae | <i>Paenibacillus sp.</i> 1-49                       |
| Psp-9-1                | Bacteria Firmicutes Bacilli Bacillales Paenibacillaceae | <i>Paenibacillus sp.</i> D9                         |
| Psp-10-1               | Bacteria Firmicutes Bacilli Bacillales Paenibacillaceae | <i>Paenibacillus sp.</i> DMB20                      |
| Psp-11-1               | Bacteria Firmicutes Bacilli Bacillales Paenibacillaceae | <i>Paenibacillus sp.</i> E194                       |
| Psp-12-1               | Bacteria Firmicutes Bacilli Bacillales Paenibacillaceae | <i>Paenibacillus sp.</i> FJAT-27812                 |
| Psp-13-1               | Bacteria Firmicutes Bacilli Bacillales Paenibacillaceae | <i>Paenibacillus sp.</i> FSL H7-689                 |
| Psp-14-1               | Bacteria Firmicutes Bacilli Bacillales Paenibacillaceae | <i>Paenibacillus sp.</i> FSL H8-457                 |
| Psp-15-1               | Bacteria Firmicutes Bacilli Bacillales Paenibacillaceae | <i>Paenibacillus sp.</i> FSL R5-192                 |
| Psp-16-1               | Bacteria Firmicutes Bacilli Bacillales Paenibacillaceae | <i>Paenibacillus sp.</i> FSL R5-808                 |
| Psp-17-1               | Bacteria Firmicutes Bacilli Bacillales Paenibacillaceae | <i>Paenibacillus sp.</i> HGH0039                    |
| Psp-18-1               | Bacteria Firmicutes Bacilli Bacillales Paenibacillaceae | <i>Paenibacillus sp.</i> ICGEB2008                  |
| Psp-19-1               | Bacteria Firmicutes Bacilli Bacillales Paenibacillaceae | <i>Paenibacillus sp.</i> IHBB 10380                 |
| Psp-20-1               | Bacteria Firmicutes Bacilli Bacillales Paenibacillaceae | <i>Paenibacillus sp.</i> J14                        |
| Psp-21-1               | Bacteria Firmicutes Bacilli Bacillales Paenibacillaceae | <i>Paenibacillus sp.</i> JC66                       |
| Psp-22-1               | Bacteria Firmicutes Bacilli Bacillales Paenibacillaceae | <i>Paenibacillus sp.</i> MAEPY1                     |
| Psp-23-1               | Bacteria Firmicutes Bacilli Bacillales Paenibacillaceae | <i>Paenibacillus sp.</i> MAEPY2                     |
| Psp-24-1               | Bacteria Firmicutes Bacilli Bacillales Paenibacillaceae | <i>Paenibacillus sp.</i> P1XP2                      |
| Psp-25-1               | Bacteria Firmicutes Bacilli Bacillales Paenibacillaceae | <i>Paenibacillus sp.</i> P22                        |
| Psp-26-1               | Bacteria Firmicutes Bacilli Bacillales Paenibacillaceae | <i>Paenibacillus sp.</i> PAMC 26794                 |
| Psp-27-1               | Bacteria Firmicutes Bacilli Bacillales Paenibacillaceae | <i>Paenibacillus sp.</i> TCA20                      |
| Psp-28-1               | Bacteria Firmicutes Bacilli Bacillales Paenibacillaceae | <i>Paenibacillus sp.</i> UNC217MF                   |
| Psp-29-1               | Bacteria Firmicutes Bacilli Bacillales Paenibacillaceae | <i>Paenibacillus sp.</i> UNC451MF                   |
| Psp-30-1               | Bacteria Firmicutes Bacilli Bacillales Paenibacillaceae | <i>Paenibacillus sp.</i> UNCCL52                    |
| Psp-31-1               | Bacteria Firmicutes Bacilli Bacillales Paenibacillaceae | <i>Paenibacillus sp.</i> URHA0014                   |
| Psp-32-1               | Bacteria Firmicutes Bacilli Bacillales Paenibacillaceae | <i>Paenibacillus sp.</i> VKM B-2647                 |
| Psp-33-1               | Bacteria Firmicutes Bacilli Bacillales Paenibacillaceae | <i>Paenibacillus sp.</i> VT-400                     |
| Pst-1-1                | Bacteria Firmicutes Bacilli Bacillales Paenibacillaceae | <i>Paenibacillus stellifer</i>                      |
| Pta-1-1                | Bacteria Firmicutes Bacilli Bacillales Paenibacillaceae | <i>Paenibacillus taiwanensis</i> DSM 18679          |
| Pte-2-1                | Bacteria Firmicutes Bacilli Bacillales Paenibacillaceae | <i>Paenibacillus terrae</i>                         |
| Pte-3-1                | Bacteria Firmicutes Bacilli Bacillales Paenibacillaceae | <i>Paenibacillus terrigena</i> DSM 21567            |
| Pty-1-1                | Bacteria Firmicutes Bacilli Bacillales Paenibacillaceae | <i>Paenibacillus tyrfis</i>                         |
| Pwy-1-1                | Bacteria Firmicutes Bacilli Bacillales Paenibacillaceae | <i>Paenibacillus wynnii</i>                         |
| Tco-1-1                | Bacteria Firmicutes Bacilli Bacillales Paenibacillaceae | <i>Thermobacillus composti</i> KWC4                 |
| Bce-149-1 to Bce-149-2 | Bacteria Firmicutes Bacilli Bacillales Planococcaceae   | <i>Bhargavaea cecembensis</i>                       |
| Jal-1-1                | Bacteria Firmicutes Bacilli Bacillales Planococcaceae   | <i>Jeotgalibacillus alimentarius</i>                |
| Jca-1-1                | Bacteria Firmicutes Bacilli Bacillales Planococcaceae   | <i>Jeotgalibacillus campisalis</i>                  |
| Jma-1-1                | Bacteria Firmicutes Bacilli Bacillales Planococcaceae   | <i>Jeotgalibacillus malaysiensis</i>                |
| Jma-2-1                | Bacteria Firmicutes Bacilli Bacillales Planococcaceae   | <i>Jeotgalibacillus marinus</i>                     |
| Jso-1-1                | Bacteria Firmicutes Bacilli Bacillales Planococcaceae   | <i>Jeotgalibacillus soli</i>                        |
| Khu-1-1                | Bacteria Firmicutes Bacilli Bacillales Planococcaceae   | <i>Kurthia huakuii</i> LAM0618                      |
| Kma-1-1                | Bacteria Firmicutes Bacilli Bacillales Planococcaceae   | <i>Kurthia massiliensis</i>                         |
| Ksp-1-1                | Bacteria Firmicutes Bacilli Bacillales Planococcaceae   | <i>Kurthia sp.</i> Dielmo                           |
| Ksp-2-1                | Bacteria Firmicutes Bacilli Bacillales Planococcaceae   | <i>Kurthia sp.</i> JC8E                             |
| Psp-34-1               | Bacteria Firmicutes Bacilli Bacillales Planococcaceae   | <i>Paenisporosarcina sp.</i> HGH0030                |
| Psp-35-1               | Bacteria Firmicutes Bacilli Bacillales Planococcaceae   | <i>Paenisporosarcina sp.</i> TG-14                  |
| Psp-36-1               | Bacteria Firmicutes Bacilli Bacillales Planococcaceae   | <i>Paenisporosarcina sp.</i> TG20                   |
| Pha-3-1                | Bacteria Firmicutes Bacilli Bacillales Planococcaceae   | <i>Planococcus halocryophilus</i> Or1               |
| Pma-5-1                | Bacteria Firmicutes Bacilli Bacillales Planococcaceae   | <i>Planococcus massiliensis</i>                     |
| Psp-37-1               | Bacteria Firmicutes Bacilli Bacillales Planococcaceae   | <i>Planococcus sp.</i> CAU13                        |
| Psp-38-1               | Bacteria Firmicutes Bacilli Bacillales Planococcaceae   | <i>Planococcus sp.</i> L10.15                       |
| Psp-39-1               | Bacteria Firmicutes Bacilli Bacillales Planococcaceae   | <i>Planococcus sp.</i> PAMC 21323                   |
| Pgl-2-1                | Bacteria Firmicutes Bacilli Bacillales Planococcaceae   | <i>Planomicrobium glaciei</i>                       |
| Pgl-3-1                | Bacteria Firmicutes Bacilli Bacillales Planococcaceae   | <i>Planomicrobium glaciei</i> CHR43                 |
| Sgl-1-1                | Bacteria Firmicutes Bacilli Bacillales Planococcaceae   | <i>Sporosarcina globispora</i>                      |
| Sko-2-1                | Bacteria Firmicutes Bacilli Bacillales Planococcaceae   | <i>Sporosarcina koreensis</i>                       |
| Sne-1-1                | Bacteria Firmicutes Bacilli Bacillales Planococcaceae   | <i>Sporosarcina newyorkensis</i> 2681               |
| Ssp-3-1                | Bacteria Firmicutes Bacilli Bacillales Planococcaceae   | <i>Sporosarcina sp.</i> D27                         |
| Ssp-4-1                | Bacteria Firmicutes Bacilli Bacillales Planococcaceae   | <i>Sporosarcina sp.</i> EUR3 2.2.2                  |
| Ssp-5-1                | Bacteria Firmicutes Bacilli Bacillales Planococcaceae   | <i>Sporosarcina sp.</i> ZBG7A                       |
| Sur-1-1                | Bacteria Firmicutes Bacilli Bacillales Planococcaceae   | <i>Sporosarcina ureae</i> DSM 2281                  |
| Uth-1-1                | Bacteria Firmicutes Bacilli Bacillales Planococcaceae   | <i>Ureibacillus thermosphaericus str.</i> Thermo-BF |

|                      |                                                              |                                                    |
|----------------------|--------------------------------------------------------------|----------------------------------------------------|
| Var-1-1              | Bacteria Firmicutes Bacilli Bacillales Planococcaceae        | <i>Viridibacillus arenosi</i> FSL R5-213           |
| Var-2-1              | Bacteria Firmicutes Bacilli Bacillales Planococcaceae        | <i>Viridibacillus arvi</i>                         |
| Sal-1-1              | Bacteria Firmicutes Bacilli Bacillales                       | <i>Salinicoccus albus</i> DSM 19776                |
| Sca-4-1              | Bacteria Firmicutes Bacilli Bacillales                       | <i>Salinicoccus carnicancrri</i> Crm               |
| Sin-1-1              | Bacteria Firmicutes Bacilli Bacillales Sporolactobacillaceae | <i>Sporolactobacillus inulinus</i> CASD            |
| Sla-1-1              | Bacteria Firmicutes Bacilli Bacillales Sporolactobacillaceae | <i>Sporolactobacillus laevolacticus</i> DSM 442    |
| Ste-1-1              | Bacteria Firmicutes Bacilli Bacillales Sporolactobacillaceae | <i>Sporolactobacillus terrae</i> DSM 11697         |
| Ste-2-1              | Bacteria Firmicutes Bacilli Bacillales Sporolactobacillaceae | <i>Sporolactobacillus terrae</i> HKM-1             |
| Svi-1-1 to Svi-1-2   | Bacteria Firmicutes Bacilli Bacillales Sporolactobacillaceae | <i>Sporolactobacillus vineae</i> DSM 21990 = SL153 |
| Tca-1-1              | Bacteria Firmicutes Bacilli Bacillales Sporolactobacillaceae | <i>Tuberibacillus calidus</i> DSM 17572            |
| Jma-3-1              | Bacteria Firmicutes Bacilli Bacillales Staphylococcaceae     | <i>Jeotgalicoccus marinus</i> DSM 19772            |
| Jps-1-1              | Bacteria Firmicutes Bacilli Bacillales Staphylococcaceae     | <i>Jeotgalicoccus psychrophilus</i> DSM 19085      |
| Jsa-1-1              | Bacteria Firmicutes Bacilli Bacillales Staphylococcaceae     | <i>Jeotgalicoccus sauidimassiliensis</i>           |
| Nma-1-1              | Bacteria Firmicutes Bacilli Bacillales Staphylococcaceae     | <i>Nosocomiicoccus massiliensis</i>                |
| Sha-3-1              | Bacteria Firmicutes Bacilli Bacillales Staphylococcaceae     | <i>Salinicoccus halodurans</i>                     |
| Slu-3-1              | Bacteria Firmicutes Bacilli Bacillales Staphylococcaceae     | <i>Salinicoccus luteus</i> DSM 17002               |
| Sro-1-1              | Bacteria Firmicutes Bacilli Bacillales Staphylococcaceae     | <i>Salinicoccus roseus</i>                         |
| Sse-1-1              | Bacteria Firmicutes Bacilli Bacillales Staphylococcaceae     | <i>Salinicoccus sediminis</i>                      |
| Ssp-6-1              | Bacteria Firmicutes Bacilli Bacillales Staphylococcaceae     | <i>Salinicoccus sp.</i> YB14-2                     |
| Sag-1-1              | Bacteria Firmicutes Bacilli Bacillales Staphylococcaceae     | <i>Staphylococcus agnetis</i>                      |
| Sar-2-1              | Bacteria Firmicutes Bacilli Bacillales Staphylococcaceae     | <i>Staphylococcus argenteus</i>                    |
| Sau-79-1 to Sau-79-2 | Bacteria Firmicutes Bacilli Bacillales Staphylococcaceae     | <i>Staphylococcus aureus</i>                       |
| Sau-80-1             | Bacteria Firmicutes Bacilli Bacillales Staphylococcaceae     | <i>Staphylococcus aureus</i> 07-03450              |
| Sau-81-1             | Bacteria Firmicutes Bacilli Bacillales Staphylococcaceae     | <i>Staphylococcus aureus</i> 07-03451              |
| Sau-82-1             | Bacteria Firmicutes Bacilli Bacillales Staphylococcaceae     | <i>Staphylococcus aureus</i> 08-01059              |
| Sau-83-1             | Bacteria Firmicutes Bacilli Bacillales Staphylococcaceae     | <i>Staphylococcus aureus</i> 08-01062              |
| Sau-84-1             | Bacteria Firmicutes Bacilli Bacillales Staphylococcaceae     | <i>Staphylococcus aureus</i> 08-01084              |
| Sau-85-1             | Bacteria Firmicutes Bacilli Bacillales Staphylococcaceae     | <i>Staphylococcus aureus</i> 08-01085              |
| Sau-86-1             | Bacteria Firmicutes Bacilli Bacillales Staphylococcaceae     | <i>Staphylococcus aureus</i> 08-01229              |
| Sau-87-1             | Bacteria Firmicutes Bacilli Bacillales Staphylococcaceae     | <i>Staphylococcus aureus</i> 08-01728              |
| Sau-88-1             | Bacteria Firmicutes Bacilli Bacillales Staphylococcaceae     | <i>Staphylococcus aureus</i> 08-02906              |
| Sau-89-1             | Bacteria Firmicutes Bacilli Bacillales Staphylococcaceae     | <i>Staphylococcus aureus</i> 08134-6               |
| Sau-90-1             | Bacteria Firmicutes Bacilli Bacillales Staphylococcaceae     | <i>Staphylococcus aureus</i> 08139-6               |
| Sau-91-1             | Bacteria Firmicutes Bacilli Bacillales Staphylococcaceae     | <i>Staphylococcus aureus</i> 08142-8               |
| Sau-92-1             | Bacteria Firmicutes Bacilli Bacillales Staphylococcaceae     | <i>Staphylococcus aureus</i> 08143-5               |
| Sau-93-1             | Bacteria Firmicutes Bacilli Bacillales Staphylococcaceae     | <i>Staphylococcus aureus</i> 09-00736              |
| Sau-94-1             | Bacteria Firmicutes Bacilli Bacillales Staphylococcaceae     | <i>Staphylococcus aureus</i> 09S00475              |
| Sau-95-1             | Bacteria Firmicutes Bacilli Bacillales Staphylococcaceae     | <i>Staphylococcus aureus</i> 09S01694              |
| Sau-96-1             | Bacteria Firmicutes Bacilli Bacillales Staphylococcaceae     | <i>Staphylococcus aureus</i> 1(04GN_04-02-52-07)   |
| Sau-97-1             | Bacteria Firmicutes Bacilli Bacillales Staphylococcaceae     | <i>Staphylococcus aureus</i> 10S00488              |
| Sau-98-1             | Bacteria Firmicutes Bacilli Bacillales Staphylococcaceae     | <i>Staphylococcus aureus</i> 10S01493              |
| Sau-99-1             | Bacteria Firmicutes Bacilli Bacillales Staphylococcaceae     | <i>Staphylococcus aureus</i> 1101-1 2010           |
| Sau-100-1            | Bacteria Firmicutes Bacilli Bacillales Staphylococcaceae     | <i>Staphylococcus aureus</i> 1101-1 2011           |
| Sau-101-1            | Bacteria Firmicutes Bacilli Bacillales Staphylococcaceae     | <i>Staphylococcus aureus</i> 1101-2 2010           |
| Sau-102-1            | Bacteria Firmicutes Bacilli Bacillales Staphylococcaceae     | <i>Staphylococcus aureus</i> 1101-2 2011           |
| Sau-103-1            | Bacteria Firmicutes Bacilli Bacillales Staphylococcaceae     | <i>Staphylococcus aureus</i> 110802495             |
| Sau-104-1            | Bacteria Firmicutes Bacilli Bacillales Staphylococcaceae     | <i>Staphylococcus aureus</i> 1110601704            |
| Sau-105-1            | Bacteria Firmicutes Bacilli Bacillales Staphylococcaceae     | <i>Staphylococcus aureus</i> 1110601896            |
| Sau-106-1            | Bacteria Firmicutes Bacilli Bacillales Staphylococcaceae     | <i>Staphylococcus aureus</i> 1110700562            |
| Sau-107-1            | Bacteria Firmicutes Bacilli Bacillales Staphylococcaceae     | <i>Staphylococcus aureus</i> 1110700610            |
| Sau-108-1            | Bacteria Firmicutes Bacilli Bacillales Staphylococcaceae     | <i>Staphylococcus aureus</i> 1110701127            |
| Sau-109-1            | Bacteria Firmicutes Bacilli Bacillales Staphylococcaceae     | <i>Staphylococcus aureus</i> 1110802883            |
| Sau-110-1            | Bacteria Firmicutes Bacilli Bacillales Staphylococcaceae     | <i>Staphylococcus aureus</i> 1110803248            |
| Sau-111-1            | Bacteria Firmicutes Bacilli Bacillales Staphylococcaceae     | <i>Staphylococcus aureus</i> 1110807699            |
| Sau-112-1            | Bacteria Firmicutes Bacilli Bacillales Staphylococcaceae     | <i>Staphylococcus aureus</i> 1110904178            |
| Sau-113-1            | Bacteria Firmicutes Bacilli Bacillales Staphylococcaceae     | <i>Staphylococcus aureus</i> 1111000175            |
| Sau-114-1            | Bacteria Firmicutes Bacilli Bacillales Staphylococcaceae     | <i>Staphylococcus aureus</i> 1111000177            |
| Sau-115-1            | Bacteria Firmicutes Bacilli Bacillales Staphylococcaceae     | <i>Staphylococcus aureus</i> 1111001578            |
| Sau-116-1            | Bacteria Firmicutes Bacilli Bacillales Staphylococcaceae     | <i>Staphylococcus aureus</i> 1111100370            |
| Sau-117-1            | Bacteria Firmicutes Bacilli Bacillales Staphylococcaceae     | <i>Staphylococcus aureus</i> 1111101949            |
| Sau-118-1            | Bacteria Firmicutes Bacilli Bacillales Staphylococcaceae     | <i>Staphylococcus aureus</i> 1111102620            |
| Sau-119-1            | Bacteria Firmicutes Bacilli Bacillales Staphylococcaceae     | <i>Staphylococcus aureus</i> 1111200013            |
| Sau-120-1            | Bacteria Firmicutes Bacilli Bacillales Staphylococcaceae     | <i>Staphylococcus aureus</i> 1111203374            |
| Sau-121-1            | Bacteria Firmicutes Bacilli Bacillales Staphylococcaceae     | <i>Staphylococcus aureus</i> 1111205429            |
| Sau-122-1            | Bacteria Firmicutes Bacilli Bacillales Staphylococcaceae     | <i>Staphylococcus aureus</i> 1111206270            |









































































































































|                      |                                                          |                                                       |
|----------------------|----------------------------------------------------------|-------------------------------------------------------|
| Sch-1-1              | Bacteria Firmicutes Bacilli Bacillales Staphylococcaceae | <i>Staphylococcus chromogenes</i> MU 970              |
| Sco-1-1              | Bacteria Firmicutes Bacilli Bacillales Staphylococcaceae | <i>Staphylococcus cohnii</i> hu-01                    |
| Sco-2-1 to Sco-2-3   | Bacteria Firmicutes Bacilli Bacillales Staphylococcaceae | <i>Staphylococcus cohnii</i> subsp. <i>cohnii</i>     |
| Sco-3-1              | Bacteria Firmicutes Bacilli Bacillales Staphylococcaceae | <i>Staphylococcus condimenti</i>                      |
| Sep-8-1 to Sep-8-3   | Bacteria Firmicutes Bacilli Bacillales Staphylococcaceae | <i>Staphylococcus epidermidis</i>                     |
| Sep-9-1              | Bacteria Firmicutes Bacilli Bacillales Staphylococcaceae | <i>Staphylococcus epidermidis</i> AG42                |
| Sep-10-1             | Bacteria Firmicutes Bacilli Bacillales Staphylococcaceae | <i>Staphylococcus epidermidis</i> M0026               |
| Sep-11-1             | Bacteria Firmicutes Bacilli Bacillales Staphylococcaceae | <i>Staphylococcus epidermidis</i> PM221               |
| Sep-12-1             | Bacteria Firmicutes Bacilli Bacillales Staphylococcaceae | <i>Staphylococcus epidermidis</i> UC7032              |
| Sep-13-1             | Bacteria Firmicutes Bacilli Bacillales Staphylococcaceae | <i>Staphylococcus epidermidis</i> VCU013              |
| Sep-14-1             | Bacteria Firmicutes Bacilli Bacillales Staphylococcaceae | <i>Staphylococcus epidermidis</i> VCU014              |
| Sep-15-1             | Bacteria Firmicutes Bacilli Bacillales Staphylococcaceae | <i>Staphylococcus epidermidis</i> VCU036              |
| Sep-16-1             | Bacteria Firmicutes Bacilli Bacillales Staphylococcaceae | <i>Staphylococcus epidermidis</i> VCU050              |
| Sep-17-1             | Bacteria Firmicutes Bacilli Bacillales Staphylococcaceae | <i>Staphylococcus epidermidis</i> VCU111              |
| Seq-2-1              | Bacteria Firmicutes Bacilli Bacillales Staphylococcaceae | <i>Staphylococcus equorum</i> subsp. <i>equorum</i>   |
| Sga-1-1              | Bacteria Firmicutes Bacilli Bacillales Staphylococcaceae | <i>Staphylococcus gallinarum</i>                      |
| Sha-4-1 to Sha-4-119 | Bacteria Firmicutes Bacilli Bacillales Staphylococcaceae | <i>Staphylococcus haemolyticus</i>                    |
| Sha-5-1              | Bacteria Firmicutes Bacilli Bacillales Staphylococcaceae | <i>Staphylococcus haemolyticus</i> DNF00585           |
| Sho-3-1 to Sho-3-17  | Bacteria Firmicutes Bacilli Bacillales Staphylococcaceae | <i>Staphylococcus hominis</i>                         |
| Shy-1-1              | Bacteria Firmicutes Bacilli Bacillales Staphylococcaceae | <i>Staphylococcus hyicus</i>                          |
| Slu-4-1              | Bacteria Firmicutes Bacilli Bacillales Staphylococcaceae | <i>Staphylococcus lugdunensis</i> UCIM6116            |
| Slu-5-1              | Bacteria Firmicutes Bacilli Bacillales Staphylococcaceae | <i>Staphylococcus lugdunensis</i> VCU148              |
| Slu-6-1              | Bacteria Firmicutes Bacilli Bacillales Staphylococcaceae | <i>Staphylococcus lugdunensis</i> VCU150              |
| Smi-1-1              | Bacteria Firmicutes Bacilli Bacillales Staphylococcaceae | <i>Staphylococcus microti</i>                         |
| Spa-1-1 to Spa-1-2   | Bacteria Firmicutes Bacilli Bacillales Staphylococcaceae | <i>Staphylococcus pasteurii</i>                       |
| Spe-1-1 to Spe-1-2   | Bacteria Firmicutes Bacilli Bacillales Staphylococcaceae | <i>Staphylococcus pettenkoferi</i>                    |
| Sps-3-1              | Bacteria Firmicutes Bacilli Bacillales Staphylococcaceae | <i>Staphylococcus pseudintermedius</i> E140           |
| Ssa-2-1 to Ssa-2-3   | Bacteria Firmicutes Bacilli Bacillales Staphylococcaceae | <i>Staphylococcus saprophyticus</i>                   |
| Ssc-1-1 to Ssc-1-4   | Bacteria Firmicutes Bacilli Bacillales Staphylococcaceae | <i>Staphylococcus schleiferi</i>                      |
| Ssc-2-1 to Ssc-2-3   | Bacteria Firmicutes Bacilli Bacillales Staphylococcaceae | <i>Staphylococcus schweitzeri</i>                     |
| Ssc-3-1              | Bacteria Firmicutes Bacilli Bacillales Staphylococcaceae | <i>Staphylococcus sciuri</i> subsp. <i>sciuri</i>     |
| Ssc-4-1              | Bacteria Firmicutes Bacilli Bacillales Staphylococcaceae | <i>Staphylococcus sciuri</i> subsp. <i>sciuri</i> Z8  |
| Ssp-7-1              | Bacteria Firmicutes Bacilli Bacillales Staphylococcaceae | <i>Staphylococcus</i> sp. M0480                       |
| Ssp-8-1              | Bacteria Firmicutes Bacilli Bacillales Staphylococcaceae | <i>Staphylococcus</i> sp. TE8                         |
| Ssp-9-1              | Bacteria Firmicutes Bacilli Bacillales Staphylococcaceae | <i>Staphylococcus</i> sp. URHA0057                    |
| Ssp-10-1             | Bacteria Firmicutes Bacilli Bacillales Staphylococcaceae | <i>Staphylococcus</i> sp. ZWU0021                     |
| Ssu-1-1              | Bacteria Firmicutes Bacilli Bacillales Staphylococcaceae | <i>Staphylococcus succinus</i> subsp. <i>succinus</i> |
| Swa-2-1 to Swa-2-6   | Bacteria Firmicutes Bacilli Bacillales Staphylococcaceae | <i>Staphylococcus warneri</i>                         |
| Swa-3-1              | Bacteria Firmicutes Bacilli Bacillales Staphylococcaceae | <i>Staphylococcus warneri</i> Lyso 1 2011             |
| Swa-4-1              | Bacteria Firmicutes Bacilli Bacillales Staphylococcaceae | <i>Staphylococcus warneri</i> Lyso 2 2011             |
| Sxy-1-1              | Bacteria Firmicutes Bacilli Bacillales Staphylococcaceae | <i>Staphylococcus xylosus</i>                         |
| Sxy-2-1              | Bacteria Firmicutes Bacilli Bacillales Staphylococcaceae | <i>Staphylococcus xylosus</i> DMB3-Bh1                |
| Sau-79-1 to Sau-79-2 | Bacteria Firmicutes Bacilli Bacillales                   | <i>Staphylococcus aureus</i>                          |
| Sau-3758-1           | Bacteria Firmicutes Bacilli Bacillales                   | <i>Staphylococcus aureus</i> 16K                      |
| Sau-3759-1           | Bacteria Firmicutes Bacilli Bacillales                   | <i>Staphylococcus aureus</i> 3957                     |
| Sau-3760-1           | Bacteria Firmicutes Bacilli Bacillales                   | <i>Staphylococcus aureus</i> B147830                  |
| Sau-3761-1           | Bacteria Firmicutes Bacilli Bacillales                   | <i>Staphylococcus aureus</i> B40723                   |
| Sau-3762-1           | Bacteria Firmicutes Bacilli Bacillales                   | <i>Staphylococcus aureus</i> B40950                   |
| Sau-3763-1           | Bacteria Firmicutes Bacilli Bacillales                   | <i>Staphylococcus aureus</i> B53639                   |
| Sau-3764-1           | Bacteria Firmicutes Bacilli Bacillales                   | <i>Staphylococcus aureus</i> Bmb9393                  |
| Sau-3765-1           | Bacteria Firmicutes Bacilli Bacillales                   | <i>Staphylococcus aureus</i> CA-347                   |
| Sau-3766-1           | Bacteria Firmicutes Bacilli Bacillales                   | <i>Staphylococcus aureus</i> CN79                     |
| Sau-3767-1           | Bacteria Firmicutes Bacilli Bacillales                   | <i>Staphylococcus aureus</i> HI010                    |
| Sau-3768-1           | Bacteria Firmicutes Bacilli Bacillales                   | <i>Staphylococcus aureus</i> HI010B                   |
| Sau-3769-1           | Bacteria Firmicutes Bacilli Bacillales                   | <i>Staphylococcus aureus</i> HI013                    |
| Sau-3770-1           | Bacteria Firmicutes Bacilli Bacillales                   | <i>Staphylococcus aureus</i> HI022                    |
| Sau-3771-1           | Bacteria Firmicutes Bacilli Bacillales                   | <i>Staphylococcus aureus</i> HI049                    |
| Sau-3772-1           | Bacteria Firmicutes Bacilli Bacillales                   | <i>Staphylococcus aureus</i> HI049B                   |
| Sau-3773-1           | Bacteria Firmicutes Bacilli Bacillales                   | <i>Staphylococcus aureus</i> HI049C                   |
| Sau-3774-1           | Bacteria Firmicutes Bacilli Bacillales                   | <i>Staphylococcus aureus</i> HI111                    |
| Sau-3775-1           | Bacteria Firmicutes Bacilli Bacillales                   | <i>Staphylococcus aureus</i> HI168                    |
| Sau-3776-1           | Bacteria Firmicutes Bacilli Bacillales                   | <i>Staphylococcus aureus</i> HIF003_B2N-C             |
| Sau-3777-1           | Bacteria Firmicutes Bacilli Bacillales                   | <i>Staphylococcus aureus</i> KLT6                     |
| Sau-3778-1           | Bacteria Firmicutes Bacilli Bacillales                   | <i>Staphylococcus aureus</i> KT/314250                |
| Sau-3779-1           | Bacteria Firmicutes Bacilli Bacillales                   | <i>Staphylococcus aureus</i> KT/Y21                   |













|                    |                                        |                                                 |              |
|--------------------|----------------------------------------|-------------------------------------------------|--------------|
| Sau-4121-1         | Bacteria Firmicutes Bacilli Bacillales | <i>Staphylococcus aureus subsp. aureus str.</i> | Newbould 305 |
| Sau-4105-1         | Bacteria Firmicutes Bacilli Bacillales | <i>Staphylococcus aureus subsp. aureus</i>      | Tager 104    |
| Sau-4104-1         | Bacteria Firmicutes Bacilli Bacillales | <i>Staphylococcus aureus subsp. aureus</i>      | TCH70        |
| Sau-4106-1         | Bacteria Firmicutes Bacilli Bacillales | <i>Staphylococcus aureus subsp. aureus</i>      | VCU006       |
| Sau-4107-1         | Bacteria Firmicutes Bacilli Bacillales | <i>Staphylococcus aureus subsp. aureus</i>      | VH60         |
| Sau-4108-1         | Bacteria Firmicutes Bacilli Bacillales | <i>Staphylococcus aureus subsp. aureus</i>      | VRS1         |
| Sau-4109-1         | Bacteria Firmicutes Bacilli Bacillales | <i>Staphylococcus aureus subsp. aureus</i>      | VRS10        |
| Sau-4110-1         | Bacteria Firmicutes Bacilli Bacillales | <i>Staphylococcus aureus subsp. aureus</i>      | VRS11a       |
| Sau-4111-1         | Bacteria Firmicutes Bacilli Bacillales | <i>Staphylococcus aureus subsp. aureus</i>      | VRS11b       |
| Sau-4112-1         | Bacteria Firmicutes Bacilli Bacillales | <i>Staphylococcus aureus subsp. aureus</i>      | VRS2         |
| Sau-4113-1         | Bacteria Firmicutes Bacilli Bacillales | <i>Staphylococcus aureus subsp. aureus</i>      | VRS3a        |
| Sau-4114-1         | Bacteria Firmicutes Bacilli Bacillales | <i>Staphylococcus aureus subsp. aureus</i>      | VRS4         |
| Sau-4115-1         | Bacteria Firmicutes Bacilli Bacillales | <i>Staphylococcus aureus subsp. aureus</i>      | VRS5         |
| Sau-4116-1         | Bacteria Firmicutes Bacilli Bacillales | <i>Staphylococcus aureus subsp. aureus</i>      | VRS6         |
| Sau-4117-1         | Bacteria Firmicutes Bacilli Bacillales | <i>Staphylococcus aureus subsp. aureus</i>      | VRS7         |
| Sau-4118-1         | Bacteria Firmicutes Bacilli Bacillales | <i>Staphylococcus aureus subsp. aureus</i>      | VRS8         |
| Sau-4119-1         | Bacteria Firmicutes Bacilli Bacillales | <i>Staphylococcus aureus subsp. aureus</i>      | VRS9         |
| Sau-4120-1         | Bacteria Firmicutes Bacilli Bacillales | <i>Staphylococcus aureus subsp. aureus</i>      | Z172         |
| Sau-3995-1         | Bacteria Firmicutes Bacilli Bacillales | <i>Staphylococcus aureus</i>                    | VH221        |
| Sca-9-1            | Bacteria Firmicutes Bacilli Bacillales | <i>Staphylococcus capitis</i>                   | CR01         |
| Sca-10-1           | Bacteria Firmicutes Bacilli Bacillales | <i>Staphylococcus capitis</i>                   | QN1          |
| Sca-11-1           | Bacteria Firmicutes Bacilli Bacillales | <i>Staphylococcus capitis</i>                   | VCU116       |
| Sde-1-1            | Bacteria Firmicutes Bacilli Bacillales | <i>Staphylococcus delphini</i>                  | 8086         |
| Sep-8-1 to Sep-8-3 | Bacteria Firmicutes Bacilli Bacillales | <i>Staphylococcus epidermidis</i>               |              |
| Sep-18-1           | Bacteria Firmicutes Bacilli Bacillales | <i>Staphylococcus epidermidis</i>               | 12142587     |
| Sep-19-1           | Bacteria Firmicutes Bacilli Bacillales | <i>Staphylococcus epidermidis</i>               | 14.1.R1.SE   |
| Sep-20-1           | Bacteria Firmicutes Bacilli Bacillales | <i>Staphylococcus epidermidis</i>               | APO27        |
| Sep-21-1           | Bacteria Firmicutes Bacilli Bacillales | <i>Staphylococcus epidermidis</i>               | APO35        |
| Sep-22-1           | Bacteria Firmicutes Bacilli Bacillales | <i>Staphylococcus epidermidis</i>               | AU12-03      |
| Sep-23-1           | Bacteria Firmicutes Bacilli Bacillales | <i>Staphylococcus epidermidis</i>               | BVS058A4     |
| Sep-24-1           | Bacteria Firmicutes Bacilli Bacillales | <i>Staphylococcus epidermidis</i>               | CIM28        |
| Sep-25-1           | Bacteria Firmicutes Bacilli Bacillales | <i>Staphylococcus epidermidis</i>               | CIM37        |
| Sep-26-1           | Bacteria Firmicutes Bacilli Bacillales | <i>Staphylococcus epidermidis</i>               | CIM40        |
| Sep-27-1           | Bacteria Firmicutes Bacilli Bacillales | <i>Staphylococcus epidermidis</i>               | E13A         |
| Sep-28-1           | Bacteria Firmicutes Bacilli Bacillales | <i>Staphylococcus epidermidis</i>               | FRI909       |
| Sep-29-1           | Bacteria Firmicutes Bacilli Bacillales | <i>Staphylococcus epidermidis</i>               | IS-250       |
| Sep-30-1           | Bacteria Firmicutes Bacilli Bacillales | <i>Staphylococcus epidermidis</i>               | IS-K         |
| Sep-31-1           | Bacteria Firmicutes Bacilli Bacillales | <i>Staphylococcus epidermidis</i>               | M0881        |
| Sep-32-1           | Bacteria Firmicutes Bacilli Bacillales | <i>Staphylococcus epidermidis</i>               | MC16         |
| Sep-33-1           | Bacteria Firmicutes Bacilli Bacillales | <i>Staphylococcus epidermidis</i>               | MC19         |
| Sep-34-1           | Bacteria Firmicutes Bacilli Bacillales | <i>Staphylococcus epidermidis</i>               | MC28         |
| Sep-35-1           | Bacteria Firmicutes Bacilli Bacillales | <i>Staphylococcus epidermidis</i>               | NIH04003     |
| Sep-36-1           | Bacteria Firmicutes Bacilli Bacillales | <i>Staphylococcus epidermidis</i>               | NIH04008     |
| Sep-37-1           | Bacteria Firmicutes Bacilli Bacillales | <i>Staphylococcus epidermidis</i>               | NIH05001     |
| Sep-38-1           | Bacteria Firmicutes Bacilli Bacillales | <i>Staphylococcus epidermidis</i>               | NIH05003     |
| Sep-39-1           | Bacteria Firmicutes Bacilli Bacillales | <i>Staphylococcus epidermidis</i>               | NIH05005     |
| Sep-40-1           | Bacteria Firmicutes Bacilli Bacillales | <i>Staphylococcus epidermidis</i>               | NIH051475    |
| Sep-41-1           | Bacteria Firmicutes Bacilli Bacillales | <i>Staphylococcus epidermidis</i>               | NIH051668    |
| Sep-42-1           | Bacteria Firmicutes Bacilli Bacillales | <i>Staphylococcus epidermidis</i>               | NIH06004     |
| Sep-43-1           | Bacteria Firmicutes Bacilli Bacillales | <i>Staphylococcus epidermidis</i>               | NIH08001     |
| Sep-44-1           | Bacteria Firmicutes Bacilli Bacillales | <i>Staphylococcus epidermidis</i>               | NIHLM001     |
| Sep-45-1           | Bacteria Firmicutes Bacilli Bacillales | <i>Staphylococcus epidermidis</i>               | NIHLM003     |
| Sep-46-1           | Bacteria Firmicutes Bacilli Bacillales | <i>Staphylococcus epidermidis</i>               | NIHLM008     |
| Sep-47-1           | Bacteria Firmicutes Bacilli Bacillales | <i>Staphylococcus epidermidis</i>               | NIHLM015     |
| Sep-48-1           | Bacteria Firmicutes Bacilli Bacillales | <i>Staphylococcus epidermidis</i>               | NIHLM018     |
| Sep-49-1           | Bacteria Firmicutes Bacilli Bacillales | <i>Staphylococcus epidermidis</i>               | NIHLM020     |
| Sep-50-1           | Bacteria Firmicutes Bacilli Bacillales | <i>Staphylococcus epidermidis</i>               | NIHLM021     |
| Sep-51-1           | Bacteria Firmicutes Bacilli Bacillales | <i>Staphylococcus epidermidis</i>               | NIHLM023     |
| Sep-52-1           | Bacteria Firmicutes Bacilli Bacillales | <i>Staphylococcus epidermidis</i>               | NIHLM031     |
| Sep-53-1           | Bacteria Firmicutes Bacilli Bacillales | <i>Staphylococcus epidermidis</i>               | NIHLM037     |
| Sep-54-1           | Bacteria Firmicutes Bacilli Bacillales | <i>Staphylococcus epidermidis</i>               | NIHLM039     |
| Sep-55-1           | Bacteria Firmicutes Bacilli Bacillales | <i>Staphylococcus epidermidis</i>               | NIHLM040     |
| Sep-56-1           | Bacteria Firmicutes Bacilli Bacillales | <i>Staphylococcus epidermidis</i>               | NIHLM049     |
| Sep-57-1           | Bacteria Firmicutes Bacilli Bacillales | <i>Staphylococcus epidermidis</i>               | NIHLM053     |
| Sep-58-1           | Bacteria Firmicutes Bacilli Bacillales | <i>Staphylococcus epidermidis</i>               | NIHLM057     |

|                      |                                             |                                     |                                                                 |
|----------------------|---------------------------------------------|-------------------------------------|-----------------------------------------------------------------|
| Sep-59-1             | Bacteria Firmicutes Bacilli Bacillales      | <i>Staphylococcus epidermidis</i>   | NIHLM061                                                        |
| Sep-60-1             | Bacteria Firmicutes Bacilli Bacillales      | <i>Staphylococcus epidermidis</i>   | NIHLM067                                                        |
| Sep-61-1             | Bacteria Firmicutes Bacilli Bacillales      | <i>Staphylococcus epidermidis</i>   | NIHLM087                                                        |
| Sep-62-1             | Bacteria Firmicutes Bacilli Bacillales      | <i>Staphylococcus epidermidis</i>   | NIHLM088                                                        |
| Sep-63-1             | Bacteria Firmicutes Bacilli Bacillales      | <i>Staphylococcus epidermidis</i>   | NIHLM095                                                        |
| Sep-64-1             | Bacteria Firmicutes Bacilli Bacillales      | <i>Staphylococcus epidermidis</i>   | Scl19                                                           |
| Sep-65-1             | Bacteria Firmicutes Bacilli Bacillales      | <i>Staphylococcus epidermidis</i>   | Scl22                                                           |
| Sep-66-1             | Bacteria Firmicutes Bacilli Bacillales      | <i>Staphylococcus epidermidis</i>   | Scl25                                                           |
| Sep-67-1             | Bacteria Firmicutes Bacilli Bacillales      | <i>Staphylococcus epidermidis</i>   | Scl31                                                           |
| Sep-68-1             | Bacteria Firmicutes Bacilli Bacillales      | <i>Staphylococcus epidermidis</i>   | VCU028                                                          |
| Sep-69-1             | Bacteria Firmicutes Bacilli Bacillales      | <i>Staphylococcus epidermidis</i>   | VCU037                                                          |
| Sep-70-1             | Bacteria Firmicutes Bacilli Bacillales      | <i>Staphylococcus epidermidis</i>   | VCU041                                                          |
| Sep-71-1             | Bacteria Firmicutes Bacilli Bacillales      | <i>Staphylococcus epidermidis</i>   | VCU045                                                          |
| Sep-72-1             | Bacteria Firmicutes Bacilli Bacillales      | <i>Staphylococcus epidermidis</i>   | VCU065                                                          |
| Sep-73-1             | Bacteria Firmicutes Bacilli Bacillales      | <i>Staphylococcus epidermidis</i>   | VCU071                                                          |
| Sep-74-1             | Bacteria Firmicutes Bacilli Bacillales      | <i>Staphylococcus epidermidis</i>   | VCU081                                                          |
| Sep-75-1             | Bacteria Firmicutes Bacilli Bacillales      | <i>Staphylococcus epidermidis</i>   | VCU105                                                          |
| Sep-76-1             | Bacteria Firmicutes Bacilli Bacillales      | <i>Staphylococcus epidermidis</i>   | VCU109                                                          |
| Sep-77-1             | Bacteria Firmicutes Bacilli Bacillales      | <i>Staphylococcus epidermidis</i>   | VCU117                                                          |
| Sep-78-1             | Bacteria Firmicutes Bacilli Bacillales      | <i>Staphylococcus epidermidis</i>   | VCU118                                                          |
| Sep-79-1             | Bacteria Firmicutes Bacilli Bacillales      | <i>Staphylococcus epidermidis</i>   | VCU120                                                          |
| Sep-80-1             | Bacteria Firmicutes Bacilli Bacillales      | <i>Staphylococcus epidermidis</i>   | VCU123                                                          |
| Sep-81-1             | Bacteria Firmicutes Bacilli Bacillales      | <i>Staphylococcus epidermidis</i>   | VCU125                                                          |
| Sep-82-1             | Bacteria Firmicutes Bacilli Bacillales      | <i>Staphylococcus epidermidis</i>   | VCU126                                                          |
| Sep-83-1             | Bacteria Firmicutes Bacilli Bacillales      | <i>Staphylococcus epidermidis</i>   | VCU127                                                          |
| Sep-84-1             | Bacteria Firmicutes Bacilli Bacillales      | <i>Staphylococcus epidermidis</i>   | VCU128                                                          |
| Sep-85-1             | Bacteria Firmicutes Bacilli Bacillales      | <i>Staphylococcus epidermidis</i>   | VCU129                                                          |
| Sep-86-1             | Bacteria Firmicutes Bacilli Bacillales      | <i>Staphylococcus epidermidis</i>   | VCU144                                                          |
| Sep-87-1             | Bacteria Firmicutes Bacilli Bacillales      | <i>Staphylococcus epidermidis</i>   | WI05                                                            |
| Sep-88-1             | Bacteria Firmicutes Bacilli Bacillales      | <i>Staphylococcus epidermidis</i>   | WI09                                                            |
| Seq-3-1              | Bacteria Firmicutes Bacilli Bacillales      | <i>Staphylococcus equorum</i>       | UMC-CNS-924                                                     |
| Sha-4-1 to Sha-4-119 | Bacteria Firmicutes Bacilli Bacillales      | <i>Staphylococcus haemolyticus</i>  |                                                                 |
| Sha-6-1              | Bacteria Firmicutes Bacilli Bacillales      | <i>Staphylococcus haemolyticus</i>  | R1P1                                                            |
| Sho-5-1              | Bacteria Firmicutes Bacilli Bacillales      | <i>Staphylococcus hominis</i>       | subsp. <i>hominis</i> ZBW5                                      |
| Sho-4-1              | Bacteria Firmicutes Bacilli Bacillales      | <i>Staphylococcus hominis</i>       | VCU122                                                          |
| Sin-2-1              | Bacteria Firmicutes Bacilli Bacillales      | <i>Staphylococcus intermedius</i>   | NCTC 11048                                                      |
| Slu-7-1              | Bacteria Firmicutes Bacilli Bacillales      | <i>Staphylococcus lugdunensis</i>   | ACS-027-V-Sch2                                                  |
| Slu-8-1              | Bacteria Firmicutes Bacilli Bacillales      | <i>Staphylococcus lugdunensis</i>   | M23590                                                          |
| Slu-9-1              | Bacteria Firmicutes Bacilli Bacillales      | <i>Staphylococcus lugdunensis</i>   | VCU139                                                          |
| Sma-1-1              | Bacteria Firmicutes Bacilli Bacillales      | <i>Staphylococcus massiliensis</i>  | CCUG 55927                                                      |
| Sma-2-1              | Bacteria Firmicutes Bacilli Bacillales      | <i>Staphylococcus massiliensis</i>  | S46                                                             |
| Spa-2-1              | Bacteria Firmicutes Bacilli Bacillales      | <i>Staphylococcus pasteurii</i>     | SP1                                                             |
| Spe-2-1              | Bacteria Firmicutes Bacilli Bacillales      | <i>Staphylococcus pettenkoferi</i>  | VCU012                                                          |
| Ssa-3-1              | Bacteria Firmicutes Bacilli Bacillales      | <i>Staphylococcus saprophyticus</i> | subsp. <i>saprophyticus</i> KACC 16562                          |
| Ssi-3-1              | Bacteria Firmicutes Bacilli Bacillales      | <i>Staphylococcus simulans</i>      | ACS-120-V-Sch1                                                  |
| Ssi-4-1              | Bacteria Firmicutes Bacilli Bacillales      | <i>Staphylococcus simulans</i>      | UMC-CNS-990                                                     |
| Ssp-11-1             | Bacteria Firmicutes Bacilli Bacillales      | <i>Staphylococcus</i>               | sp. AL1                                                         |
| Ssp-12-1             | Bacteria Firmicutes Bacilli Bacillales      | <i>Staphylococcus</i>               | sp. E463                                                        |
| Ssp-13-1             | Bacteria Firmicutes Bacilli Bacillales      | <i>Staphylococcus</i>               | sp. EGD-HP3                                                     |
| Ssp-14-1             | Bacteria Firmicutes Bacilli Bacillales      | <i>Staphylococcus</i>               | sp. HGB0015                                                     |
| Svi-2-1              | Bacteria Firmicutes Bacilli Bacillales      | <i>Staphylococcus vitulinus</i>     | F1028                                                           |
| Swa-5-1              | Bacteria Firmicutes Bacilli Bacillales      | <i>Staphylococcus warneri</i>       | A487                                                            |
| Swa-6-1              | Bacteria Firmicutes Bacilli Bacillales      | <i>Staphylococcus warneri</i>       | SG1                                                             |
| Swa-7-1              | Bacteria Firmicutes Bacilli Bacillales      | <i>Staphylococcus warneri</i>       | VCU121                                                          |
| Sxy-3-1              | Bacteria Firmicutes Bacilli Bacillales      | <i>Staphylococcus xylosus</i>       | NJ                                                              |
| Bba-4-1              | Bacteria Firmicutes Bacilli bacterium       | VT-13-104                           |                                                                 |
| Fso-1-1              | Bacteria Firmicutes Bacilli Lactobacillales | Aerococcaceae                       | <i>Facklamia sourekkii</i> ATCC 700629                          |
| Aot-1-1              | Bacteria Firmicutes Bacilli Lactobacillales | Carnobacteriaceae                   | <i>Alloiococcus otitis</i> ATCC 51267                           |
| Aph-1-1              | Bacteria Firmicutes Bacilli Lactobacillales | Carnobacteriaceae                   | <i>Atopobacter phocae</i> ATCC BAA-285                          |
| Ata-1-1              | Bacteria Firmicutes Bacilli Lactobacillales | Carnobacteriaceae                   | <i>Atopococcus tabaci</i> DSM 17538                             |
| Cal-1-1              | Bacteria Firmicutes Bacilli Lactobacillales | Carnobacteriaceae                   | <i>Carnobacterium alterfunditum</i> DSM 5972                    |
| Cdi-1-1              | Bacteria Firmicutes Bacilli Lactobacillales | Carnobacteriaceae                   | <i>Carnobacterium divergens</i> DSM 20623                       |
| Cfu-1-1              | Bacteria Firmicutes Bacilli Lactobacillales | Carnobacteriaceae                   | <i>Carnobacterium funditum</i> DSM 5970                         |
| Cga-1-1              | Bacteria Firmicutes Bacilli Lactobacillales | Carnobacteriaceae                   | <i>Carnobacterium gallinarum</i> DSM 4847                       |
| Cin-1-1              | Bacteria Firmicutes Bacilli Lactobacillales | Carnobacteriaceae                   | <i>Carnobacterium inhibens</i> subsp. <i>inhibens</i> DSM 13024 |

|                      |                                                               |                                                    |
|----------------------|---------------------------------------------------------------|----------------------------------------------------|
| Cje-1-1              | Bacteria Firmicutes Bacilli Lactobacillales Carnobacteriaceae | <i>Carnobacterium jeotgali</i>                     |
| Cje-2-1              | Bacteria Firmicutes Bacilli Lactobacillales Carnobacteriaceae | <i>Carnobacterium jeotgali</i> MS3                 |
| Cma-1-1              | Bacteria Firmicutes Bacilli Lactobacillales Carnobacteriaceae | <i>Carnobacterium maltaromaticum</i>               |
| Cma-2-1              | Bacteria Firmicutes Bacilli Lactobacillales Carnobacteriaceae | <i>Carnobacterium maltaromaticum</i> DSM 20342     |
| Cma-3-1              | Bacteria Firmicutes Bacilli Lactobacillales Carnobacteriaceae | <i>Carnobacterium maltaromaticum</i> LMA28         |
| Cmo-1-1              | Bacteria Firmicutes Bacilli Lactobacillales Carnobacteriaceae | <i>Carnobacterium mobile</i> DSM 4848              |
| Cpl-1-1              | Bacteria Firmicutes Bacilli Lactobacillales Carnobacteriaceae | <i>Carnobacterium pleistocenium</i> FTR1           |
| Csp-1-1              | Bacteria Firmicutes Bacilli Lactobacillales Carnobacteriaceae | <i>Carnobacterium sp.</i> WN1359                   |
| Csp-2-1              | Bacteria Firmicutes Bacilli Lactobacillales Carnobacteriaceae | <i>Carnobacterium sp.</i> WN1374                   |
| Csp-3-1              | Bacteria Firmicutes Bacilli Lactobacillales Carnobacteriaceae | <i>Carnobacterium sp.</i> ZWU0011                  |
| Gel-1-1              | Bacteria Firmicutes Bacilli Lactobacillales Carnobacteriaceae | <i>Granulicatella elegans</i> ATCC 700633          |
| Gsp-19-1             | Bacteria Firmicutes Bacilli Lactobacillales Carnobacteriaceae | <i>Granulicatella sp.</i> 572.rep1_STHE            |
| Gsp-20-1             | Bacteria Firmicutes Bacilli Lactobacillales Carnobacteriaceae | <i>Granulicatella sp.</i> 572.rep2_STHE            |
| Lna-1-1              | Bacteria Firmicutes Bacilli Lactobacillales Carnobacteriaceae | <i>Lacticigenium naphtae</i> DSM 19658             |
| Bse-3-1              | Bacteria Firmicutes Bacilli Lactobacillales Enterococcaceae   | <i>Bavariococcus seileri</i> DSM 19936             |
| Cma-4-1              | Bacteria Firmicutes Bacilli Lactobacillales Enterococcaceae   | <i>Catelliococcus marimammalium</i> M35/04/3       |
| Eas-1-1              | Bacteria Firmicutes Bacilli Lactobacillales Enterococcaceae   | <i>Enterococcus asini</i> ATCC 700915              |
| Eav-1-1              | Bacteria Firmicutes Bacilli Lactobacillales Enterococcaceae   | <i>Enterococcus avium</i>                          |
| Eav-2-1 to Eav-2-2   | Bacteria Firmicutes Bacilli Lactobacillales Enterococcaceae   | <i>Enterococcus avium</i> ATCC 14025               |
| Eca-1-1              | Bacteria Firmicutes Bacilli Lactobacillales Enterococcaceae   | <i>Enterococcus caccae</i> ATCC BAA-1240           |
| Eca-2-1              | Bacteria Firmicutes Bacilli Lactobacillales Enterococcaceae   | <i>Enterococcus casseliflavus</i> 14-MB-W-14       |
| Eca-3-1              | Bacteria Firmicutes Bacilli Lactobacillales Enterococcaceae   | <i>Enterococcus casseliflavus</i> ATCC 12755       |
| Eca-4-1              | Bacteria Firmicutes Bacilli Lactobacillales Enterococcaceae   | <i>Enterococcus casseliflavus</i> EC20             |
| Ece-1-1 to Ece-1-7   | Bacteria Firmicutes Bacilli Lactobacillales Enterococcaceae   | <i>Enterococcus cecorum</i>                        |
| Ece-2-1              | Bacteria Firmicutes Bacilli Lactobacillales Enterococcaceae   | <i>Enterococcus cecorum</i> DSM 20682 = ATCC 43198 |
| Eco-1-1              | Bacteria Firmicutes Bacilli Lactobacillales Enterococcaceae   | <i>Enterococcus columbae</i> DSM 7374 = ATCC 51263 |
| Edi-1-1              | Bacteria Firmicutes Bacilli Lactobacillales Enterococcaceae   | <i>Enterococcus dispar</i> ATCC 51266              |
| Edu-1-1 to Edu-1-2   | Bacteria Firmicutes Bacilli Lactobacillales Enterococcaceae   | <i>Enterococcus durans</i>                         |
| Edu-2-1 to Edu-2-2   | Bacteria Firmicutes Bacilli Lactobacillales Enterococcaceae   | <i>Enterococcus durans</i> ATCC 6056               |
| Edu-3-1              | Bacteria Firmicutes Bacilli Lactobacillales Enterococcaceae   | <i>Enterococcus durans</i> FB129-CNAB-4            |
| Edu-4-1              | Bacteria Firmicutes Bacilli Lactobacillales Enterococcaceae   | <i>Enterococcus durans</i> IPLA 655                |
| Efa-1-1 to Efa-1-87  | Bacteria Firmicutes Bacilli Lactobacillales Enterococcaceae   | <i>Enterococcus faecalis</i>                       |
| Efa-2-1              | Bacteria Firmicutes Bacilli Lactobacillales Enterococcaceae   | <i>Enterococcus faecalis</i> 02-MB-BW-10           |
| Efa-3-1              | Bacteria Firmicutes Bacilli Lactobacillales Enterococcaceae   | <i>Enterococcus faecalis</i> 02-MB-P-10            |
| Efa-4-1              | Bacteria Firmicutes Bacilli Lactobacillales Enterococcaceae   | <i>Enterococcus faecalis</i> 06-MB-DW-09           |
| Efa-5-1              | Bacteria Firmicutes Bacilli Lactobacillales Enterococcaceae   | <i>Enterococcus faecalis</i> 06-MB-S-04            |
| Efa-6-1              | Bacteria Firmicutes Bacilli Lactobacillales Enterococcaceae   | <i>Enterococcus faecalis</i> 06-MB-S-10            |
| Efa-7-1              | Bacteria Firmicutes Bacilli Lactobacillales Enterococcaceae   | <i>Enterococcus faecalis</i> 10244                 |
| Efa-8-1              | Bacteria Firmicutes Bacilli Lactobacillales Enterococcaceae   | <i>Enterococcus faecalis</i> 13-SD-W-01            |
| Efa-9-1              | Bacteria Firmicutes Bacilli Lactobacillales Enterococcaceae   | <i>Enterococcus faecalis</i> 20-SD-BW-06           |
| Efa-10-1             | Bacteria Firmicutes Bacilli Lactobacillales Enterococcaceae   | <i>Enterococcus faecalis</i> 20-SD-BW-08           |
| Efa-11-1             | Bacteria Firmicutes Bacilli Lactobacillales Enterococcaceae   | <i>Enterococcus faecalis</i> 20.SD.W.06            |
| Efa-12-1             | Bacteria Firmicutes Bacilli Lactobacillales Enterococcaceae   | <i>Enterococcus faecalis</i> 599                   |
| Efa-13-1             | Bacteria Firmicutes Bacilli Lactobacillales Enterococcaceae   | <i>Enterococcus faecalis</i> 918                   |
| Efa-14-1             | Bacteria Firmicutes Bacilli Lactobacillales Enterococcaceae   | <i>Enterococcus faecalis</i> ATCC 10100            |
| Efa-15-1             | Bacteria Firmicutes Bacilli Lactobacillales Enterococcaceae   | <i>Enterococcus faecalis</i> ATCC 19433            |
| Efa-16-1             | Bacteria Firmicutes Bacilli Lactobacillales Enterococcaceae   | <i>Enterococcus faecalis</i> ATCC 27275            |
| Efa-17-1             | Bacteria Firmicutes Bacilli Lactobacillales Enterococcaceae   | <i>Enterococcus faecalis</i> ATCC 27959            |
| Efa-18-1 to Efa-18-2 | Bacteria Firmicutes Bacilli Lactobacillales Enterococcaceae   | <i>Enterococcus faecalis</i> ATCC 29200            |
| Efa-19-1             | Bacteria Firmicutes Bacilli Lactobacillales Enterococcaceae   | <i>Enterococcus faecalis</i> ATCC 29212            |
| Efa-20-1             | Bacteria Firmicutes Bacilli Lactobacillales Enterococcaceae   | <i>Enterococcus faecalis</i> ATCC 35038            |
| Efa-21-1             | Bacteria Firmicutes Bacilli Lactobacillales Enterococcaceae   | <i>Enterococcus faecalis</i> ATCC 6055             |
| Efa-22-1             | Bacteria Firmicutes Bacilli Lactobacillales Enterococcaceae   | <i>Enterococcus faecalis</i> AZ19                  |
| Efa-23-1             | Bacteria Firmicutes Bacilli Lactobacillales Enterococcaceae   | <i>Enterococcus faecalis</i> B83616-1              |
| Efa-24-1             | Bacteria Firmicutes Bacilli Lactobacillales Enterococcaceae   | <i>Enterococcus faecalis</i> BM4539                |
| Efa-25-1             | Bacteria Firmicutes Bacilli Lactobacillales Enterococcaceae   | <i>Enterococcus faecalis</i> BM4654                |
| Efa-26-1             | Bacteria Firmicutes Bacilli Lactobacillales Enterococcaceae   | <i>Enterococcus faecalis</i> D811610-10            |
| Efa-27-1             | Bacteria Firmicutes Bacilli Lactobacillales Enterococcaceae   | <i>Enterococcus faecalis</i> DAPTO 512             |
| Efa-28-1             | Bacteria Firmicutes Bacilli Lactobacillales Enterococcaceae   | <i>Enterococcus faecalis</i> DAPTO 516             |
| Efa-29-1             | Bacteria Firmicutes Bacilli Lactobacillales Enterococcaceae   | <i>Enterococcus faecalis</i> DENG1                 |
| Efa-30-1             | Bacteria Firmicutes Bacilli Lactobacillales Enterococcaceae   | <i>Enterococcus faecalis</i> E12                   |
| Efa-47-1             | Bacteria Firmicutes Bacilli Lactobacillales Enterococcaceae   | <i>Enterococcus faecalis</i> Efa HS0914            |
| Efa-48-1             | Bacteria Firmicutes Bacilli Lactobacillales Enterococcaceae   | <i>Enterococcus faecalis</i> EnGen0058             |
| Efa-49-1             | Bacteria Firmicutes Bacilli Lactobacillales Enterococcaceae   | <i>Enterococcus faecalis</i> EnGen0059             |
| Efa-50-1             | Bacteria Firmicutes Bacilli Lactobacillales Enterococcaceae   | <i>Enterococcus faecalis</i> EnGen0060             |



















|                    |                                                             |                                                 |
|--------------------|-------------------------------------------------------------|-------------------------------------------------|
| Efa-342-1          | Bacteria Firmicutes Bacilli Lactobacillales Enterococcaceae | <i>Enterococcus faecium</i> ERV102              |
| Efa-343-1          | Bacteria Firmicutes Bacilli Lactobacillales Enterococcaceae | <i>Enterococcus faecium</i> ERV161              |
| Efa-344-1          | Bacteria Firmicutes Bacilli Lactobacillales Enterococcaceae | <i>Enterococcus faecium</i> ERV165              |
| Efa-345-1          | Bacteria Firmicutes Bacilli Lactobacillales Enterococcaceae | <i>Enterococcus faecium</i> ERV168              |
| Efa-346-1          | Bacteria Firmicutes Bacilli Lactobacillales Enterococcaceae | <i>Enterococcus faecium</i> ERV26               |
| Efa-347-1          | Bacteria Firmicutes Bacilli Lactobacillales Enterococcaceae | <i>Enterococcus faecium</i> ERV38               |
| Efa-348-1          | Bacteria Firmicutes Bacilli Lactobacillales Enterococcaceae | <i>Enterococcus faecium</i> ERV69               |
| Efa-349-1          | Bacteria Firmicutes Bacilli Lactobacillales Enterococcaceae | <i>Enterococcus faecium</i> ERV99               |
| Efa-498-1          | Bacteria Firmicutes Bacilli Lactobacillales Enterococcaceae | <i>Enterococcus faecium</i> LA4B-2              |
| Efa-499-1          | Bacteria Firmicutes Bacilli Lactobacillales Enterococcaceae | <i>Enterococcus faecium</i> LCT-EF128           |
| Efa-500-1          | Bacteria Firmicutes Bacilli Lactobacillales Enterococcaceae | <i>Enterococcus faecium</i> LCT-EF20            |
| Efa-501-1          | Bacteria Firmicutes Bacilli Lactobacillales Enterococcaceae | <i>Enterococcus faecium</i> LCT-EF258           |
| Efa-502-1          | Bacteria Firmicutes Bacilli Lactobacillales Enterococcaceae | <i>Enterococcus faecium</i> LCT-EF297           |
| Efa-503-1          | Bacteria Firmicutes Bacilli Lactobacillales Enterococcaceae | <i>Enterococcus faecium</i> LCT-EF301           |
| Efa-504-1          | Bacteria Firmicutes Bacilli Lactobacillales Enterococcaceae | <i>Enterococcus faecium</i> LCT-EF90            |
| Efa-505-1          | Bacteria Firmicutes Bacilli Lactobacillales Enterococcaceae | <i>Enterococcus faecium</i> MRSN 11639          |
| Efa-506-1          | Bacteria Firmicutes Bacilli Lactobacillales Enterococcaceae | <i>Enterococcus faecium</i> MRSN 3418           |
| Efa-507-1          | Bacteria Firmicutes Bacilli Lactobacillales Enterococcaceae | <i>Enterococcus faecium</i> NEF1                |
| Efa-508-1          | Bacteria Firmicutes Bacilli Lactobacillales Enterococcaceae | <i>Enterococcus faecium</i> NRRL B-2354         |
| Efa-509-1          | Bacteria Firmicutes Bacilli Lactobacillales Enterococcaceae | <i>Enterococcus faecium</i> OC2A-1              |
| Efa-510-1          | Bacteria Firmicutes Bacilli Lactobacillales Enterococcaceae | <i>Enterococcus faecium</i> P1123               |
| Efa-511-1          | Bacteria Firmicutes Bacilli Lactobacillales Enterococcaceae | <i>Enterococcus faecium</i> P1137               |
| Efa-512-1          | Bacteria Firmicutes Bacilli Lactobacillales Enterococcaceae | <i>Enterococcus faecium</i> P1139               |
| Efa-513-1          | Bacteria Firmicutes Bacilli Lactobacillales Enterococcaceae | <i>Enterococcus faecium</i> P1140               |
| Efa-514-1          | Bacteria Firmicutes Bacilli Lactobacillales Enterococcaceae | <i>Enterococcus faecium</i> P1190               |
| Efa-515-1          | Bacteria Firmicutes Bacilli Lactobacillales Enterococcaceae | <i>Enterococcus faecium</i> P1986               |
| Efa-516-1          | Bacteria Firmicutes Bacilli Lactobacillales Enterococcaceae | <i>Enterococcus faecium</i> R446                |
| Efa-517-1          | Bacteria Firmicutes Bacilli Lactobacillales Enterococcaceae | <i>Enterococcus faecium</i> R494                |
| Efa-518-1          | Bacteria Firmicutes Bacilli Lactobacillales Enterococcaceae | <i>Enterococcus faecium</i> R496                |
| Efa-519-1          | Bacteria Firmicutes Bacilli Lactobacillales Enterococcaceae | <i>Enterococcus faecium</i> R497                |
| Efa-520-1          | Bacteria Firmicutes Bacilli Lactobacillales Enterococcaceae | <i>Enterococcus faecium</i> R499                |
| Efa-521-1          | Bacteria Firmicutes Bacilli Lactobacillales Enterococcaceae | <i>Enterococcus faecium</i> R501                |
| Efa-522-1          | Bacteria Firmicutes Bacilli Lactobacillales Enterococcaceae | <i>Enterococcus faecium</i> S447                |
| Efa-523-1          | Bacteria Firmicutes Bacilli Lactobacillales Enterococcaceae | <i>Enterococcus faecium</i> SB2C-2              |
| Efa-524-1          | Bacteria Firmicutes Bacilli Lactobacillales Enterococcaceae | <i>Enterococcus faecium</i> SD1C-2              |
| Efa-525-1          | Bacteria Firmicutes Bacilli Lactobacillales Enterococcaceae | <i>Enterococcus faecium</i> SD2A-2              |
| Efa-526-1          | Bacteria Firmicutes Bacilli Lactobacillales Enterococcaceae | <i>Enterococcus faecium</i> SD3B-2              |
| Efa-527-1          | Bacteria Firmicutes Bacilli Lactobacillales Enterococcaceae | <i>Enterococcus faecium</i> T110                |
| Efa-528-1          | Bacteria Firmicutes Bacilli Lactobacillales Enterococcaceae | <i>Enterococcus faecium</i> TX0082              |
| Efa-529-1          | Bacteria Firmicutes Bacilli Lactobacillales Enterococcaceae | <i>Enterococcus faecium</i> TX0133A             |
| Efa-532-1          | Bacteria Firmicutes Bacilli Lactobacillales Enterococcaceae | <i>Enterococcus faecium</i> TX0133a01           |
| Efa-533-1          | Bacteria Firmicutes Bacilli Lactobacillales Enterococcaceae | <i>Enterococcus faecium</i> TX0133a04           |
| Efa-530-1          | Bacteria Firmicutes Bacilli Lactobacillales Enterococcaceae | <i>Enterococcus faecium</i> TX0133B             |
| Efa-531-1          | Bacteria Firmicutes Bacilli Lactobacillales Enterococcaceae | <i>Enterococcus faecium</i> TX0133C             |
| Efa-534-1          | Bacteria Firmicutes Bacilli Lactobacillales Enterococcaceae | <i>Enterococcus faecium</i> TX1337RF            |
| Efa-535-1          | Bacteria Firmicutes Bacilli Lactobacillales Enterococcaceae | <i>Enterococcus faecium</i> UC10237             |
| Efa-536-1          | Bacteria Firmicutes Bacilli Lactobacillales Enterococcaceae | <i>Enterococcus faecium</i> UC7251              |
| Efa-537-1          | Bacteria Firmicutes Bacilli Lactobacillales Enterococcaceae | <i>Enterococcus faecium</i> UC7256              |
| Efa-538-1          | Bacteria Firmicutes Bacilli Lactobacillales Enterococcaceae | <i>Enterococcus faecium</i> UC7267              |
| Efa-539-1          | Bacteria Firmicutes Bacilli Lactobacillales Enterococcaceae | <i>Enterococcus faecium</i> UC8668              |
| Efa-540-1          | Bacteria Firmicutes Bacilli Lactobacillales Enterococcaceae | <i>Enterococcus faecium</i> UC8733              |
| Efa-541-1          | Bacteria Firmicutes Bacilli Lactobacillales Enterococcaceae | <i>Enterococcus faecium</i> V689                |
| Efa-542-1          | Bacteria Firmicutes Bacilli Lactobacillales Enterococcaceae | <i>Enterococcus faecium</i> VRE0576             |
| Efa-543-1          | Bacteria Firmicutes Bacilli Lactobacillales Enterococcaceae | <i>Enterococcus faecium</i> VRE1044             |
| Efa-544-1          | Bacteria Firmicutes Bacilli Lactobacillales Enterococcaceae | <i>Enterococcus faecium</i> VRE1261             |
| Efa-545-1          | Bacteria Firmicutes Bacilli Lactobacillales Enterococcaceae | <i>Enterococcus faecium</i> VSE1036             |
| Efl-1-1            | Bacteria Firmicutes Bacilli Lactobacillales Enterococcaceae | <i>Enterococcus flavescens</i> ATCC 49996       |
| Ega-1-1 to Ega-1-2 | Bacteria Firmicutes Bacilli Lactobacillales Enterococcaceae | <i>Enterococcus gallinarum</i>                  |
| Egi-1-1            | Bacteria Firmicutes Bacilli Lactobacillales Enterococcaceae | <i>Enterococcus gilvus</i> ATCC BAA-350         |
| Eha-1-1            | Bacteria Firmicutes Bacilli Lactobacillales Enterococcaceae | <i>Enterococcus haemoperoxidus</i> ATCC BAA-382 |
| Ehi-1-1 to Ehi-1-2 | Bacteria Firmicutes Bacilli Lactobacillales Enterococcaceae | <i>Enterococcus hirae</i>                       |
| Ehi-2-1 to Ehi-2-2 | Bacteria Firmicutes Bacilli Lactobacillales Enterococcaceae | <i>Enterococcus hirae</i> ATCC 9790             |
| Eit-1-1            | Bacteria Firmicutes Bacilli Lactobacillales Enterococcaceae | <i>Enterococcus italicus</i> DSM 15952          |
| Ema-2-1            | Bacteria Firmicutes Bacilli Lactobacillales Enterococcaceae | <i>Enterococcus malodoratus</i> ATCC 43197      |
| Ema-3-1            | Bacteria Firmicutes Bacilli Lactobacillales Enterococcaceae | <i>Enterococcus massiliensis</i>                |

|                      |                                                              |                                                                    |
|----------------------|--------------------------------------------------------------|--------------------------------------------------------------------|
| Emo-1-1              | Bacteria Firmicutes Bacilli Lactobacillales Enterococcaceae  | <i>Enterococcus moraviensis</i> ATCC BAA-383                       |
| Emu-1-1              | Bacteria Firmicutes Bacilli Lactobacillales Enterococcaceae  | <i>Enterococcus mundtii</i> ATCC 882                               |
| Emu-4-1              | Bacteria Firmicutes Bacilli Lactobacillales Enterococcaceae  | <i>Enterococcus mundtii</i> cr1/656                                |
| Emu-2-1              | Bacteria Firmicutes Bacilli Lactobacillales Enterococcaceae  | <i>Enterococcus mundtii</i> CRL35                                  |
| Emu-3-1              | Bacteria Firmicutes Bacilli Lactobacillales Enterococcaceae  | <i>Enterococcus mundtii</i> QU 25                                  |
| Epa-2-1              | Bacteria Firmicutes Bacilli Lactobacillales Enterococcaceae  | <i>Enterococcus pallens</i> ATCC BAA-351                           |
| Eph-1-1              | Bacteria Firmicutes Bacilli Lactobacillales Enterococcaceae  | <i>Enterococcus phoeniculicola</i> ATCC BAA-412                    |
| Era-1-1              | Bacteria Firmicutes Bacilli Lactobacillales Enterococcaceae  | <i>Enterococcus raffinosus</i> ATCC 49464                          |
| Esa-1-1              | Bacteria Firmicutes Bacilli Lactobacillales Enterococcaceae  | <i>Enterococcus saccharolyticus</i> 30_1                           |
| Esa-2-1 to Esa-2-2   | Bacteria Firmicutes Bacilli Lactobacillales Enterococcaceae  | <i>Enterococcus saccharolyticus</i> ATCC 43076                     |
| Esp-12-1             | Bacteria Firmicutes Bacilli Lactobacillales Enterococcaceae  | <i>Enterococcus</i> sp. 1140_ESPC                                  |
| Esp-13-1             | Bacteria Firmicutes Bacilli Lactobacillales Enterococcaceae  | <i>Enterococcus</i> sp. 255_ESPC                                   |
| Esp-14-1             | Bacteria Firmicutes Bacilli Lactobacillales Enterococcaceae  | <i>Enterococcus</i> sp. C1                                         |
| Esp-15-1             | Bacteria Firmicutes Bacilli Lactobacillales Enterococcaceae  | <i>Enterococcus</i> sp. GMD3E                                      |
| Esp-16-1             | Bacteria Firmicutes Bacilli Lactobacillales Enterococcaceae  | <i>Enterococcus</i> sp. GMD5E                                      |
| Esp-17-1             | Bacteria Firmicutes Bacilli Lactobacillales Enterococcaceae  | <i>Enterococcus</i> sp. TR                                         |
| Esu-1-1              | Bacteria Firmicutes Bacilli Lactobacillales Enterococcaceae  | <i>Enterococcus sulfureus</i> ATCC 49903                           |
| Evi-1-1              | Bacteria Firmicutes Bacilli Lactobacillales Enterococcaceae  | <i>Enterococcus villorum</i> ATCC 700913                           |
| Mpl-1-1 to Mpl-1-11  | Bacteria Firmicutes Bacilli Lactobacillales Enterococcaceae  | <i>Melissococcus plutonius</i>                                     |
| Tmu-1-1              | Bacteria Firmicutes Bacilli Lactobacillales Enterococcaceae  | <i>Tetragenococcus muriaticus</i> 3MR10-3                          |
| Tmu-2-1              | Bacteria Firmicutes Bacilli Lactobacillales Enterococcaceae  | <i>Tetragenococcus muriaticus</i> DSM 15685                        |
| Tmu-3-1              | Bacteria Firmicutes Bacilli Lactobacillales Enterococcaceae  | <i>Tetragenococcus muriaticus</i> PMC-11-5                         |
| Vlu-1-1              | Bacteria Firmicutes Bacilli Lactobacillales Enterococcaceae  | <i>Vagococcus lutrae</i> LBD1                                      |
| Lac-1-1              | Bacteria Firmicutes Bacilli Lactobacillales Lactobacillaceae | <i>Lactobacillus acidophilus</i>                                   |
| Lac-2-1              | Bacteria Firmicutes Bacilli Lactobacillales Lactobacillaceae | <i>Lactobacillus acidophilus</i> CFH                               |
| Lac-3-1              | Bacteria Firmicutes Bacilli Lactobacillales Lactobacillaceae | <i>Lactobacillus acidophilus</i> CIP 76.13                         |
| Lac-4-1              | Bacteria Firmicutes Bacilli Lactobacillales Lactobacillaceae | <i>Lactobacillus acidophilus</i> CIRM-BIA 442                      |
| Lac-5-1              | Bacteria Firmicutes Bacilli Lactobacillales Lactobacillaceae | <i>Lactobacillus acidophilus</i> CIRM-BIA 445                      |
| Lac-6-1              | Bacteria Firmicutes Bacilli Lactobacillales Lactobacillaceae | <i>Lactobacillus acidophilus</i> DSM 20079 = JCM 1132 = NBRC 13951 |
| Lac-7-1              | Bacteria Firmicutes Bacilli Lactobacillales Lactobacillaceae | <i>Lactobacillus acidophilus</i> DSM 20242                         |
| Lac-8-1              | Bacteria Firmicutes Bacilli Lactobacillales Lactobacillaceae | <i>Lactobacillus acidophilus</i> DSM 9126                          |
| Lac-9-1              | Bacteria Firmicutes Bacilli Lactobacillales Lactobacillaceae | <i>Lactobacillus acidophilus</i> La-14                             |
| Lag-1-1              | Bacteria Firmicutes Bacilli Lactobacillales Lactobacillaceae | <i>Lactobacillus agilis</i>                                        |
| Lan-1-1              | Bacteria Firmicutes Bacilli Lactobacillales Lactobacillaceae | <i>Lactobacillus animalis</i>                                      |
| Lan-2-1              | Bacteria Firmicutes Bacilli Lactobacillales Lactobacillaceae | <i>Lactobacillus animalis</i> KCTC 3501 = DSM 20602                |
| Lap-1-1              | Bacteria Firmicutes Bacilli Lactobacillales Lactobacillaceae | <i>Lactobacillus apidemi</i>                                       |
| Lap-2-1              | Bacteria Firmicutes Bacilli Lactobacillales Lactobacillaceae | <i>Lactobacillus apidemi</i> DSM 16634 = JCM 16172                 |
| Lbr-1-1 to Lbr-1-6   | Bacteria Firmicutes Bacilli Lactobacillales Lactobacillaceae | <i>Lactobacillus brevis</i>                                        |
| Lbr-2-1              | Bacteria Firmicutes Bacilli Lactobacillales Lactobacillaceae | <i>Lactobacillus brevis</i> AG48                                   |
| Lbr-3-1              | Bacteria Firmicutes Bacilli Lactobacillales Lactobacillaceae | <i>Lactobacillus brevis</i> ATCC 14869 = DSM 20054                 |
| Lbr-4-1              | Bacteria Firmicutes Bacilli Lactobacillales Lactobacillaceae | <i>Lactobacillus brevis</i> EW                                     |
| Lbr-5-1              | Bacteria Firmicutes Bacilli Lactobacillales Lactobacillaceae | <i>Lactobacillus brevis</i> KB290                                  |
| Lca-1-1 to Lca-1-6   | Bacteria Firmicutes Bacilli Lactobacillales Lactobacillaceae | <i>Lactobacillus casei</i>                                         |
| Lca-2-1              | Bacteria Firmicutes Bacilli Lactobacillales Lactobacillaceae | <i>Lactobacillus casei</i> 12A                                     |
| Lca-3-1              | Bacteria Firmicutes Bacilli Lactobacillales Lactobacillaceae | <i>Lactobacillus casei</i> 21/1                                    |
| Lca-4-1              | Bacteria Firmicutes Bacilli Lactobacillales Lactobacillaceae | <i>Lactobacillus casei</i> 32G                                     |
| Lca-5-1              | Bacteria Firmicutes Bacilli Lactobacillales Lactobacillaceae | <i>Lactobacillus casei</i> 5b                                      |
| Lca-6-1 to Lca-6-2   | Bacteria Firmicutes Bacilli Lactobacillales Lactobacillaceae | <i>Lactobacillus casei</i> A2-362                                  |
| Lca-7-1              | Bacteria Firmicutes Bacilli Lactobacillales Lactobacillaceae | <i>Lactobacillus casei</i> CRF28                                   |
| Lca-9-1              | Bacteria Firmicutes Bacilli Lactobacillales Lactobacillaceae | <i>Lactobacillus casei</i> Lc-10                                   |
| Lca-10-1             | Bacteria Firmicutes Bacilli Lactobacillales Lactobacillaceae | <i>Lactobacillus casei</i> LcA                                     |
| Lca-11-1             | Bacteria Firmicutes Bacilli Lactobacillales Lactobacillaceae | <i>Lactobacillus casei</i> LcY                                     |
| Lca-8-1              | Bacteria Firmicutes Bacilli Lactobacillales Lactobacillaceae | <i>Lactobacillus casei</i> LOCK919                                 |
| Lca-12-1             | Bacteria Firmicutes Bacilli Lactobacillales Lactobacillaceae | <i>Lactobacillus casei</i> Lpc-37                                  |
| Lca-13-1             | Bacteria Firmicutes Bacilli Lactobacillales Lactobacillaceae | <i>Lactobacillus casei</i> M36                                     |
| Lca-18-1             | Bacteria Firmicutes Bacilli Lactobacillales Lactobacillaceae | <i>Lactobacillus casei</i> str. Zhang                              |
| Lca-19-1             | Bacteria Firmicutes Bacilli Lactobacillales Lactobacillaceae | <i>Lactobacillus casei</i> subsp. <i>casei</i> ATCC 393            |
| Lca-14-1             | Bacteria Firmicutes Bacilli Lactobacillales Lactobacillaceae | <i>Lactobacillus casei</i> T71499                                  |
| Lca-15-1             | Bacteria Firmicutes Bacilli Lactobacillales Lactobacillaceae | <i>Lactobacillus casei</i> UCD174                                  |
| Lca-16-1             | Bacteria Firmicutes Bacilli Lactobacillales Lactobacillaceae | <i>Lactobacillus casei</i> UW1                                     |
| Lca-17-1 to Lca-17-2 | Bacteria Firmicutes Bacilli Lactobacillales Lactobacillaceae | <i>Lactobacillus casei</i> UW4                                     |
| Lce-1-1              | Bacteria Firmicutes Bacilli Lactobacillales Lactobacillaceae | <i>Lactobacillus ceti</i> DSM 22408                                |
| Lco-2-1              | Bacteria Firmicutes Bacilli Lactobacillales Lactobacillaceae | <i>Lactobacillus composti</i> DSM 18527 = JCM 14202                |
| Lcr-1-1              | Bacteria Firmicutes Bacilli Lactobacillales Lactobacillaceae | <i>Lactobacillus crispatus</i> EM-LC1                              |
| Lcr-2-1              | Bacteria Firmicutes Bacilli Lactobacillales Lactobacillaceae | <i>Lactobacillus crispatus</i> FB049-03                            |

|                    |                                                              |                                                                                        |
|--------------------|--------------------------------------------------------------|----------------------------------------------------------------------------------------|
| Lcr-3-1            | Bacteria Firmicutes Bacilli Lactobacillales Lactobacillaceae | <i>Lactobacillus crispatus</i> FB077-07                                                |
| Lcr-4-1            | Bacteria Firmicutes Bacilli Lactobacillales Lactobacillaceae | <i>Lactobacillus crispatus</i> MV-1A-US                                                |
| Lcr-5-1            | Bacteria Firmicutes Bacilli Lactobacillales Lactobacillaceae | <i>Lactobacillus crispatus</i> SJ-3C-US                                                |
| Lcu-1-1            | Bacteria Firmicutes Bacilli Lactobacillales Lactobacillaceae | <i>Lactobacillus curiciae</i>                                                          |
| Leq-1-1            | Bacteria Firmicutes Bacilli Lactobacillales Lactobacillaceae | <i>Lactobacillus equi</i> DPC 6820                                                     |
| Leq-2-1            | Bacteria Firmicutes Bacilli Lactobacillales Lactobacillaceae | <i>Lactobacillus equi</i> DSM 15833 = JCM 10991                                        |
| Lfa-1-1            | Bacteria Firmicutes Bacilli Lactobacillales Lactobacillaceae | <i>Lactobacillus fabifermentans</i> DSM 21115                                          |
| Lfa-2-1            | Bacteria Firmicutes Bacilli Lactobacillales Lactobacillaceae | <i>Lactobacillus fabifermentans</i> T30PCM01                                           |
| Lfa-3-1            | Bacteria Firmicutes Bacilli Lactobacillales Lactobacillaceae | <i>Lactobacillus farciminis</i> KCTC 3681 = DSM 20184                                  |
| Lfa-4-1            | Bacteria Firmicutes Bacilli Lactobacillales Lactobacillaceae | <i>Lactobacillus farraginis</i> DSM 18382 = JCM 14108                                  |
| Lfe-1-1 to Lfe-1-4 | Bacteria Firmicutes Bacilli Lactobacillales Lactobacillaceae | <i>Lactobacillus fermentum</i>                                                         |
| Lfe-2-1            | Bacteria Firmicutes Bacilli Lactobacillales Lactobacillaceae | <i>Lactobacillus fermentum</i> 3872                                                    |
| Lfe-3-1            | Bacteria Firmicutes Bacilli Lactobacillales Lactobacillaceae | <i>Lactobacillus fermentum</i> F-6                                                     |
| Lfe-4-1            | Bacteria Firmicutes Bacilli Lactobacillales Lactobacillaceae | <i>Lactobacillus fermentum</i> FTDC8312                                                |
| Lfe-5-1            | Bacteria Firmicutes Bacilli Lactobacillales Lactobacillaceae | <i>Lactobacillus fermentum</i> L930BB                                                  |
| Lfe-6-1            | Bacteria Firmicutes Bacilli Lactobacillales Lactobacillaceae | <i>Lactobacillus fermentum</i> Lf1                                                     |
| Lfe-7-1            | Bacteria Firmicutes Bacilli Lactobacillales Lactobacillaceae | <i>Lactobacillus fermentum</i> MTCC 8711                                               |
| Lfe-8-1            | Bacteria Firmicutes Bacilli Lactobacillales Lactobacillaceae | <i>Lactobacillus fermentum</i> NB-22                                                   |
| Lga-1-1            | Bacteria Firmicutes Bacilli Lactobacillales Lactobacillaceae | <i>Lactobacillus gallinarum</i> DSM 10532 = JCM 2011                                   |
| Lga-2-1 to Lga-2-6 | Bacteria Firmicutes Bacilli Lactobacillales Lactobacillaceae | <i>Lactobacillus gasseri</i>                                                           |
| Lga-3-1            | Bacteria Firmicutes Bacilli Lactobacillales Lactobacillaceae | <i>Lactobacillus gasseri</i> 130918                                                    |
| Lga-4-1            | Bacteria Firmicutes Bacilli Lactobacillales Lactobacillaceae | <i>Lactobacillus gasseri</i> 2016                                                      |
| Lga-5-1            | Bacteria Firmicutes Bacilli Lactobacillales Lactobacillaceae | <i>Lactobacillus gasseri</i> ATCC 33323 = JCM 1131                                     |
| Lga-6-1            | Bacteria Firmicutes Bacilli Lactobacillales Lactobacillaceae | <i>Lactobacillus gasseri</i> CECT 5714                                                 |
| Lga-7-1            | Bacteria Firmicutes Bacilli Lactobacillales Lactobacillaceae | <i>Lactobacillus gasseri</i> JV-V03                                                    |
| Lga-8-1            | Bacteria Firmicutes Bacilli Lactobacillales Lactobacillaceae | <i>Lactobacillus gasseri</i> K7                                                        |
| Lga-9-1            | Bacteria Firmicutes Bacilli Lactobacillales Lactobacillaceae | <i>Lactobacillus gasseri</i> SJ-9E-US                                                  |
| Lga-10-1           | Bacteria Firmicutes Bacilli Lactobacillales Lactobacillaceae | <i>Lactobacillus gasseri</i> SV-16A-US                                                 |
| Lgi-1-1            | Bacteria Firmicutes Bacilli Lactobacillales Lactobacillaceae | <i>Lactobacillus ginsenosidimutans</i>                                                 |
| Lha-1-1            | Bacteria Firmicutes Bacilli Lactobacillales Lactobacillaceae | <i>Lactobacillus hamsteri</i> DSM 5661 = JCM 6256                                      |
| Lha-2-1            | Bacteria Firmicutes Bacilli Lactobacillales Lactobacillaceae | <i>Lactobacillus harbinensis</i> DSM 16991                                             |
| Lha-3-1            | Bacteria Firmicutes Bacilli Lactobacillales Lactobacillaceae | <i>Lactobacillus hayakitensis</i> DSM 18933 = JCM 14209                                |
| Lhe-1-1            | Bacteria Firmicutes Bacilli Lactobacillales Lactobacillaceae | <i>Lactobacillus heilongjiangensis</i>                                                 |
| Lhe-2-1            | Bacteria Firmicutes Bacilli Lactobacillales Lactobacillaceae | <i>Lactobacillus helsingborgensis</i>                                                  |
| Lhe-3-1 to Lhe-3-2 | Bacteria Firmicutes Bacilli Lactobacillales Lactobacillaceae | <i>Lactobacillus helveticus</i>                                                        |
| Lhe-4-1            | Bacteria Firmicutes Bacilli Lactobacillales Lactobacillaceae | <i>Lactobacillus helveticus</i> CIRM-BIA 101                                           |
| Lhe-5-1            | Bacteria Firmicutes Bacilli Lactobacillales Lactobacillaceae | <i>Lactobacillus helveticus</i> CIRM-BIA 103                                           |
| Lhe-6-1            | Bacteria Firmicutes Bacilli Lactobacillales Lactobacillaceae | <i>Lactobacillus helveticus</i> CIRM-BIA 104                                           |
| Lhe-7-1            | Bacteria Firmicutes Bacilli Lactobacillales Lactobacillaceae | <i>Lactobacillus helveticus</i> CIRM-BIA 951                                           |
| Lhe-8-1            | Bacteria Firmicutes Bacilli Lactobacillales Lactobacillaceae | <i>Lactobacillus helveticus</i> CIRM-BIA 953                                           |
| Lhe-9-1            | Bacteria Firmicutes Bacilli Lactobacillales Lactobacillaceae | <i>Lactobacillus helveticus</i> CNRZ32                                                 |
| Lhe-10-1           | Bacteria Firmicutes Bacilli Lactobacillales Lactobacillaceae | <i>Lactobacillus helveticus</i> H9                                                     |
| Lhe-11-1           | Bacteria Firmicutes Bacilli Lactobacillales Lactobacillaceae | <i>Lactobacillus herbarum</i>                                                          |
| Lho-1-1            | Bacteria Firmicutes Bacilli Lactobacillales Lactobacillaceae | <i>Lactobacillus hokkaidonensis</i> JCM 18461                                          |
| Lin-5-1            | Bacteria Firmicutes Bacilli Lactobacillales Lactobacillaceae | <i>Lactobacillus iners</i> ATCC 55195                                                  |
| Lin-6-1            | Bacteria Firmicutes Bacilli Lactobacillales Lactobacillaceae | <i>Lactobacillus ingluviei</i> str. Autruche 4                                         |
| Ljo-1-1            | Bacteria Firmicutes Bacilli Lactobacillales Lactobacillaceae | <i>Lactobacillus johnsonii</i> 16                                                      |
| Ljo-2-1            | Bacteria Firmicutes Bacilli Lactobacillales Lactobacillaceae | <i>Lactobacillus johnsonii</i> N6.2                                                    |
| Ljo-3-1            | Bacteria Firmicutes Bacilli Lactobacillales Lactobacillaceae | <i>Lactobacillus johnsonii</i> pf01                                                    |
| Lke-1-1            | Bacteria Firmicutes Bacilli Lactobacillales Lactobacillaceae | <i>Lactobacillus kefiranofaciens</i> subsp. <i>kefiranofaciens</i> DSM 5016 = JCM 6985 |
| Lki-1-1            | Bacteria Firmicutes Bacilli Lactobacillales Lactobacillaceae | <i>Lactobacillus kimbladii</i>                                                         |
| Lki-2-1            | Bacteria Firmicutes Bacilli Lactobacillales Lactobacillaceae | <i>Lactobacillus kisonensis</i> F0435                                                  |
| Lki-3-1            | Bacteria Firmicutes Bacilli Lactobacillales Lactobacillaceae | <i>Lactobacillus kitatonis</i> DSM 16761 = JCM 1039                                    |
| Lko-1-1            | Bacteria Firmicutes Bacilli Lactobacillales Lactobacillaceae | <i>Lactobacillus koreensis</i>                                                         |
| Lku-1-1            | Bacteria Firmicutes Bacilli Lactobacillales Lactobacillaceae | <i>Lactobacillus kullabergensis</i>                                                    |
| Lku-2-1 to Lku-2-2 | Bacteria Firmicutes Bacilli Lactobacillales Lactobacillaceae | <i>Lactobacillus kunkeei</i>                                                           |
| Lku-3-1            | Bacteria Firmicutes Bacilli Lactobacillales Lactobacillaceae | <i>Lactobacillus kunkeei</i> EFB6                                                      |
| Lma-3-1 to Lma-3-2 | Bacteria Firmicutes Bacilli Lactobacillales Lactobacillaceae | <i>Lactobacillus mali</i> KCTC 3596 = DSM 20444                                        |
| Lme-1-1            | Bacteria Firmicutes Bacilli Lactobacillales Lactobacillaceae | <i>Lactobacillus melliventris</i>                                                      |
| Lmu-1-1 to Lmu-1-2 | Bacteria Firmicutes Bacilli Lactobacillales Lactobacillaceae | <i>Lactobacillus mucosae</i>                                                           |
| Lmu-2-1            | Bacteria Firmicutes Bacilli Lactobacillales Lactobacillaceae | <i>Lactobacillus mucosae</i> LM1                                                       |
| Lmu-3-1            | Bacteria Firmicutes Bacilli Lactobacillales Lactobacillaceae | <i>Lactobacillus murinus</i> ASF361                                                    |
| Lna-2-1            | Bacteria Firmicutes Bacilli Lactobacillales Lactobacillaceae | <i>Lactobacillus namurensis</i> str. Chizuka 01                                        |
| Lno-1-1            | Bacteria Firmicutes Bacilli Lactobacillales Lactobacillaceae | <i>Lactobacillus nanshanensis</i> DSM 19682 = JCM 14932 = NBRC 107160                  |
| Lor-1-1            | Bacteria Firmicutes Bacilli Lactobacillales Lactobacillaceae | <i>Lactobacillus oris</i> F0423                                                        |



|                    |                                                              |                                                                                             |
|--------------------|--------------------------------------------------------------|---------------------------------------------------------------------------------------------|
| Lor-2-1            | Bacteria Firmicutes Bacilli Lactobacillales Lactobacillaceae | <i>Lactobacillus oryzae</i> JCM 18671                                                       |
| Lot-1-1            | Bacteria Firmicutes Bacilli Lactobacillales Lactobacillaceae | <i>Lactobacillus otakiensis</i> JCM 15040                                                   |
| Lpa-1-1            | Bacteria Firmicutes Bacilli Lactobacillales Lactobacillaceae | <i>Lactobacillus panis</i> DSM 6035                                                         |
| Lpa-2-1            | Bacteria Firmicutes Bacilli Lactobacillales Lactobacillaceae | <i>Lactobacillus parabrevis</i> ATCC 53295                                                  |
| Lpa-3-1 to Lpa-3-2 | Bacteria Firmicutes Bacilli Lactobacillales Lactobacillaceae | <i>Lactobacillus paracasei</i>                                                              |
| Lpa-4-1            | Bacteria Firmicutes Bacilli Lactobacillales Lactobacillaceae | <i>Lactobacillus paracasei</i> COM0101                                                      |
| Lpa-5-1            | Bacteria Firmicutes Bacilli Lactobacillales Lactobacillaceae | <i>Lactobacillus paracasei</i> N1115                                                        |
| Lpa-6-1            | Bacteria Firmicutes Bacilli Lactobacillales Lactobacillaceae | <i>Lactobacillus paracasei</i> NRIC 0644                                                    |
| Lpa-7-1            | Bacteria Firmicutes Bacilli Lactobacillales Lactobacillaceae | <i>Lactobacillus paracasei</i> NRIC 1917                                                    |
| Lpa-8-1            | Bacteria Firmicutes Bacilli Lactobacillales Lactobacillaceae | <i>Lactobacillus paracasei</i> NRIC 1981                                                    |
| Lpa-9-1            | Bacteria Firmicutes Bacilli Lactobacillales Lactobacillaceae | <i>Lactobacillus paracasei</i> subsp. <i>paracasei</i> 8700:2                               |
| Lpa-10-1           | Bacteria Firmicutes Bacilli Lactobacillales Lactobacillaceae | <i>Lactobacillus paracasei</i> subsp. <i>paracasei</i> CNCM I-2877                          |
| Lpa-11-1           | Bacteria Firmicutes Bacilli Lactobacillales Lactobacillaceae | <i>Lactobacillus paracasei</i> subsp. <i>paracasei</i> CNCM I-4270                          |
| Lpa-12-1           | Bacteria Firmicutes Bacilli Lactobacillales Lactobacillaceae | <i>Lactobacillus paracasei</i> subsp. <i>paracasei</i> CNCM I-4649                          |
| Lpa-13-1           | Bacteria Firmicutes Bacilli Lactobacillales Lactobacillaceae | <i>Lactobacillus paracasei</i> subsp. <i>paracasei</i> JCM 8130                             |
| Lpa-14-1           | Bacteria Firmicutes Bacilli Lactobacillales Lactobacillaceae | <i>Lactobacillus paracasei</i> subsp. <i>paracasei</i> Lpp120                               |
| Lpa-15-1           | Bacteria Firmicutes Bacilli Lactobacillales Lactobacillaceae | <i>Lactobacillus paracasei</i> subsp. <i>paracasei</i> Lpp122                               |
| Lpa-16-1           | Bacteria Firmicutes Bacilli Lactobacillales Lactobacillaceae | <i>Lactobacillus paracasei</i> subsp. <i>paracasei</i> Lpp125                               |
| Lpa-17-1           | Bacteria Firmicutes Bacilli Lactobacillales Lactobacillaceae | <i>Lactobacillus paracasei</i> subsp. <i>paracasei</i> Lpp14                                |
| Lpa-18-1           | Bacteria Firmicutes Bacilli Lactobacillales Lactobacillaceae | <i>Lactobacillus paracasei</i> subsp. <i>paracasei</i> Lpp17                                |
| Lpa-19-1           | Bacteria Firmicutes Bacilli Lactobacillales Lactobacillaceae | <i>Lactobacillus paracasei</i> subsp. <i>paracasei</i> Lpp189                               |
| Lpa-20-1           | Bacteria Firmicutes Bacilli Lactobacillales Lactobacillaceae | <i>Lactobacillus paracasei</i> subsp. <i>paracasei</i> Lpp219                               |
| Lpa-21-1           | Bacteria Firmicutes Bacilli Lactobacillales Lactobacillaceae | <i>Lactobacillus paracasei</i> subsp. <i>paracasei</i> Lpp22                                |
| Lpa-22-1           | Bacteria Firmicutes Bacilli Lactobacillales Lactobacillaceae | <i>Lactobacillus paracasei</i> subsp. <i>paracasei</i> Lpp221                               |
| Lpa-23-1           | Bacteria Firmicutes Bacilli Lactobacillales Lactobacillaceae | <i>Lactobacillus paracasei</i> subsp. <i>paracasei</i> Lpp223                               |
| Lpa-24-1           | Bacteria Firmicutes Bacilli Lactobacillales Lactobacillaceae | <i>Lactobacillus paracasei</i> subsp. <i>paracasei</i> Lpp225                               |
| Lpa-25-1           | Bacteria Firmicutes Bacilli Lactobacillales Lactobacillaceae | <i>Lactobacillus paracasei</i> subsp. <i>paracasei</i> Lpp226                               |
| Lpa-26-1           | Bacteria Firmicutes Bacilli Lactobacillales Lactobacillaceae | <i>Lactobacillus paracasei</i> subsp. <i>paracasei</i> Lpp227                               |
| Lpa-27-1           | Bacteria Firmicutes Bacilli Lactobacillales Lactobacillaceae | <i>Lactobacillus paracasei</i> subsp. <i>paracasei</i> Lpp228                               |
| Lpa-28-1           | Bacteria Firmicutes Bacilli Lactobacillales Lactobacillaceae | <i>Lactobacillus paracasei</i> subsp. <i>paracasei</i> Lpp229                               |
| Lpa-29-1           | Bacteria Firmicutes Bacilli Lactobacillales Lactobacillaceae | <i>Lactobacillus paracasei</i> subsp. <i>paracasei</i> Lpp230                               |
| Lpa-30-1           | Bacteria Firmicutes Bacilli Lactobacillales Lactobacillaceae | <i>Lactobacillus paracasei</i> subsp. <i>paracasei</i> Lpp37                                |
| Lpa-31-1           | Bacteria Firmicutes Bacilli Lactobacillales Lactobacillaceae | <i>Lactobacillus paracasei</i> subsp. <i>paracasei</i> Lpp43                                |
| Lpa-32-1           | Bacteria Firmicutes Bacilli Lactobacillales Lactobacillaceae | <i>Lactobacillus paracasei</i> subsp. <i>paracasei</i> Lpp46                                |
| Lpa-33-1           | Bacteria Firmicutes Bacilli Lactobacillales Lactobacillaceae | <i>Lactobacillus paracasei</i> subsp. <i>paracasei</i> Lpp49                                |
| Lpa-34-1           | Bacteria Firmicutes Bacilli Lactobacillales Lactobacillaceae | <i>Lactobacillus paracasei</i> subsp. <i>paracasei</i> Lpp7                                 |
| Lpa-35-1           | Bacteria Firmicutes Bacilli Lactobacillales Lactobacillaceae | <i>Lactobacillus paracasei</i> subsp. <i>paracasei</i> Lpp70                                |
| Lpa-36-1           | Bacteria Firmicutes Bacilli Lactobacillales Lactobacillaceae | <i>Lactobacillus paracasei</i> subsp. <i>paracasei</i> Lpp74                                |
| Lpa-37-1           | Bacteria Firmicutes Bacilli Lactobacillales Lactobacillaceae | <i>Lactobacillus paracasei</i> subsp. <i>tolerans</i> Lpl14                                 |
| Lpa-38-1           | Bacteria Firmicutes Bacilli Lactobacillales Lactobacillaceae | <i>Lactobacillus paracasei</i> subsp. <i>tolerans</i> Lpl7                                  |
| Lpa-39-1           | Bacteria Firmicutes Bacilli Lactobacillales Lactobacillaceae | <i>Lactobacillus parafarraginis</i> F0439                                                   |
| Lpa-40-1           | Bacteria Firmicutes Bacilli Lactobacillales Lactobacillaceae | <i>Lactobacillus paralimentarius</i> DSM 13238 = JCM 10415                                  |
| Lpa-41-1           | Bacteria Firmicutes Bacilli Lactobacillales Lactobacillaceae | <i>Lactobacillus paraplantarum</i>                                                          |
| Lpe-1-1            | Bacteria Firmicutes Bacilli Lactobacillales Lactobacillaceae | <i>Lactobacillus pentosus</i>                                                               |
| Lpe-2-1            | Bacteria Firmicutes Bacilli Lactobacillales Lactobacillaceae | <i>Lactobacillus pentosus</i> KCA1                                                          |
| Lpl-1-1            | Bacteria Firmicutes Bacilli Lactobacillales Lactobacillaceae | <i>Lactobacillus plantarum</i>                                                              |
| Lpl-2-1            | Bacteria Firmicutes Bacilli Lactobacillales Lactobacillaceae | <i>Lactobacillus plantarum</i> 16                                                           |
| Lpl-3-1            | Bacteria Firmicutes Bacilli Lactobacillales Lactobacillaceae | <i>Lactobacillus plantarum</i> 19L3                                                         |
| Lpl-4-1            | Bacteria Firmicutes Bacilli Lactobacillales Lactobacillaceae | <i>Lactobacillus plantarum</i> 2165                                                         |
| Lpl-5-1            | Bacteria Firmicutes Bacilli Lactobacillales Lactobacillaceae | <i>Lactobacillus plantarum</i> 4.3                                                          |
| Lpl-6-1            | Bacteria Firmicutes Bacilli Lactobacillales Lactobacillaceae | <i>Lactobacillus plantarum</i> AY01                                                         |
| Lpl-7-1            | Bacteria Firmicutes Bacilli Lactobacillales Lactobacillaceae | <i>Lactobacillus plantarum</i> CMPG5300                                                     |
| Lpl-8-1            | Bacteria Firmicutes Bacilli Lactobacillales Lactobacillaceae | <i>Lactobacillus plantarum</i> EGD-AQ4                                                      |
| Lpl-9-1            | Bacteria Firmicutes Bacilli Lactobacillales Lactobacillaceae | <i>Lactobacillus plantarum</i> IPLA88                                                       |
| Lpl-10-1           | Bacteria Firmicutes Bacilli Lactobacillales Lactobacillaceae | <i>Lactobacillus plantarum</i> LP91                                                         |
| Lpl-14-1           | Bacteria Firmicutes Bacilli Lactobacillales Lactobacillaceae | <i>Lactobacillus plantarum</i> subsp. <i>plantarum</i>                                      |
| Lpl-15-1           | Bacteria Firmicutes Bacilli Lactobacillales Lactobacillaceae | <i>Lactobacillus plantarum</i> subsp. <i>plantarum</i> ATCC 14917                           |
| Lpl-16-1           | Bacteria Firmicutes Bacilli Lactobacillales Lactobacillaceae | <i>Lactobacillus plantarum</i> subsp. <i>plantarum</i> ATCC 14917 = JCM 1149 = CGMCC 1.2437 |
| Lpl-17-1           | Bacteria Firmicutes Bacilli Lactobacillales Lactobacillaceae | <i>Lactobacillus plantarum</i> subsp. <i>plantarum</i> NC8                                  |
| Lpl-18-1           | Bacteria Firmicutes Bacilli Lactobacillales Lactobacillaceae | <i>Lactobacillus plantarum</i> subsp. <i>plantarum</i> P-8                                  |
| Lpl-11-1           | Bacteria Firmicutes Bacilli Lactobacillales Lactobacillaceae | <i>Lactobacillus plantarum</i> UCMA 3037                                                    |
| Lpl-12-1           | Bacteria Firmicutes Bacilli Lactobacillales Lactobacillaceae | <i>Lactobacillus plantarum</i> WJL                                                          |
| Lpl-13-1           | Bacteria Firmicutes Bacilli Lactobacillales Lactobacillaceae | <i>Lactobacillus plantarum</i> ZJ316                                                        |
| Lpo-1-1            | Bacteria Firmicutes Bacilli Lactobacillales Lactobacillaceae | <i>Lactobacillus pobuzhii</i> E100301                                                       |
| Lre-1-1            | Bacteria Firmicutes Bacilli Lactobacillales Lactobacillaceae | <i>Lactobacillus reuteri</i>                                                                |

|                     |                                                              |                                                                                                |
|---------------------|--------------------------------------------------------------|------------------------------------------------------------------------------------------------|
| Lre-2-1             | Bacteria Firmicutes Bacilli Lactobacillales Lactobacillaceae | <i>Lactobacillus reuteri</i> ATCC 53608                                                        |
| Lre-3-1             | Bacteria Firmicutes Bacilli Lactobacillales Lactobacillaceae | <i>Lactobacillus reuteri</i> I5007                                                             |
| Lre-5-1             | Bacteria Firmicutes Bacilli Lactobacillales Lactobacillaceae | <i>Lactobacillus reuteri</i> lpuph                                                             |
| Lre-6-1             | Bacteria Firmicutes Bacilli Lactobacillales Lactobacillaceae | <i>Lactobacillus reuteri</i> mlc3                                                              |
| Lre-4-1             | Bacteria Firmicutes Bacilli Lactobacillales Lactobacillaceae | <i>Lactobacillus reuteri</i> TD1                                                               |
| Lrh-1-1 to Lrh-1-28 | Bacteria Firmicutes Bacilli Lactobacillales Lactobacillaceae | <i>Lactobacillus rhamnosus</i>                                                                 |
| Lrh-2-1             | Bacteria Firmicutes Bacilli Lactobacillales Lactobacillaceae | <i>Lactobacillus rhamnosus</i> 51B                                                             |
| Lrh-3-1             | Bacteria Firmicutes Bacilli Lactobacillales Lactobacillaceae | <i>Lactobacillus rhamnosus</i> ATCC 21052                                                      |
| Lrh-4-1             | Bacteria Firmicutes Bacilli Lactobacillales Lactobacillaceae | <i>Lactobacillus rhamnosus</i> CASL                                                            |
| Lrh-5-1             | Bacteria Firmicutes Bacilli Lactobacillales Lactobacillaceae | <i>Lactobacillus rhamnosus</i> CRL1505                                                         |
| Lrh-6-1             | Bacteria Firmicutes Bacilli Lactobacillales Lactobacillaceae | <i>Lactobacillus rhamnosus</i> E800                                                            |
| Lrh-7-1             | Bacteria Firmicutes Bacilli Lactobacillales Lactobacillaceae | <i>Lactobacillus rhamnosus</i> K32                                                             |
| Lrh-8-1             | Bacteria Firmicutes Bacilli Lactobacillales Lactobacillaceae | <i>Lactobacillus rhamnosus</i> L31                                                             |
| Lrh-9-1             | Bacteria Firmicutes Bacilli Lactobacillales Lactobacillaceae | <i>Lactobacillus rhamnosus</i> L34                                                             |
| Lrh-10-1            | Bacteria Firmicutes Bacilli Lactobacillales Lactobacillaceae | <i>Lactobacillus rhamnosus</i> L35                                                             |
| Lrh-11-1            | Bacteria Firmicutes Bacilli Lactobacillales Lactobacillaceae | <i>Lactobacillus rhamnosus</i> LOCK900                                                         |
| Lrh-12-1            | Bacteria Firmicutes Bacilli Lactobacillales Lactobacillaceae | <i>Lactobacillus rhamnosus</i> LOCK908                                                         |
| Lrh-13-1            | Bacteria Firmicutes Bacilli Lactobacillales Lactobacillaceae | <i>Lactobacillus rhamnosus</i> LR231                                                           |
| Lrh-14-1            | Bacteria Firmicutes Bacilli Lactobacillales Lactobacillaceae | <i>Lactobacillus rhamnosus</i> LRHMDP2                                                         |
| Lrh-15-1            | Bacteria Firmicutes Bacilli Lactobacillales Lactobacillaceae | <i>Lactobacillus rhamnosus</i> LRHMDP3                                                         |
| Lrh-16-1            | Bacteria Firmicutes Bacilli Lactobacillales Lactobacillaceae | <i>Lactobacillus rhamnosus</i> PEL5                                                            |
| Lrh-17-1            | Bacteria Firmicutes Bacilli Lactobacillales Lactobacillaceae | <i>Lactobacillus rhamnosus</i> PEL6                                                            |
| Lrh-18-1            | Bacteria Firmicutes Bacilli Lactobacillales Lactobacillaceae | <i>Lactobacillus rhamnosus</i> R0011                                                           |
| Lro-2-1 to Lro-2-2  | Bacteria Firmicutes Bacilli Lactobacillales Lactobacillaceae | <i>Lactobacillus rossiae</i> DSM 15814                                                         |
| Lru-1-1 to Lru-1-2  | Bacteria Firmicutes Bacilli Lactobacillales Lactobacillaceae | <i>Lactobacillus ruminis</i>                                                                   |
| Lru-2-1             | Bacteria Firmicutes Bacilli Lactobacillales Lactobacillaceae | <i>Lactobacillus ruminis</i> ATCC 25644                                                        |
| Lru-3-1             | Bacteria Firmicutes Bacilli Lactobacillales Lactobacillaceae | <i>Lactobacillus ruminis</i> DPC 6832                                                          |
| Lru-4-1             | Bacteria Firmicutes Bacilli Lactobacillales Lactobacillaceae | <i>Lactobacillus ruminis</i> S23                                                               |
| Lsa-1-1             | Bacteria Firmicutes Bacilli Lactobacillales Lactobacillaceae | <i>Lactobacillus saerimneri</i> 30a                                                            |
| Lsa-2-1             | Bacteria Firmicutes Bacilli Lactobacillales Lactobacillaceae | <i>Lactobacillus saerimneri</i> DSM 16049                                                      |
| Lsa-3-1             | Bacteria Firmicutes Bacilli Lactobacillales Lactobacillaceae | <i>Lactobacillus salivarius</i>                                                                |
| Lsa-7-1             | Bacteria Firmicutes Bacilli Lactobacillales Lactobacillaceae | <i>Lactobacillus salivarius</i> cp400                                                          |
| Lsa-4-1             | Bacteria Firmicutes Bacilli Lactobacillales Lactobacillaceae | <i>Lactobacillus salivarius</i> GJ-24                                                          |
| Lsa-5-1             | Bacteria Firmicutes Bacilli Lactobacillales Lactobacillaceae | <i>Lactobacillus salivarius</i> NIAS840                                                        |
| Lsa-6-1             | Bacteria Firmicutes Bacilli Lactobacillales Lactobacillaceae | <i>Lactobacillus salivarius</i> SMXD51                                                         |
| Lsa-8-1             | Bacteria Firmicutes Bacilli Lactobacillales Lactobacillaceae | <i>Lactobacillus salivarius</i> str. Ren                                                       |
| Lsh-1-1             | Bacteria Firmicutes Bacilli Lactobacillales Lactobacillaceae | <i>Lactobacillus shenzhenensis</i> LY-73                                                       |
| Lsp-9-1             | Bacteria Firmicutes Bacilli Lactobacillales Lactobacillaceae | <i>Lactobacillus</i> sp. 7.1.47FAA                                                             |
| Lsp-10-1            | Bacteria Firmicutes Bacilli Lactobacillales Lactobacillaceae | <i>Lactobacillus</i> sp. ASF360                                                                |
| Lsp-11-1            | Bacteria Firmicutes Bacilli Lactobacillales Lactobacillaceae | <i>Lactobacillus</i> sp. FMNP02                                                                |
| Lsp-12-1            | Bacteria Firmicutes Bacilli Lactobacillales Lactobacillaceae | <i>Lactobacillus</i> sp. OTU4228                                                               |
| Lsp-13-1            | Bacteria Firmicutes Bacilli Lactobacillales Lactobacillaceae | <i>Lactobacillus</i> sp. wkB10                                                                 |
| Lsp-14-1            | Bacteria Firmicutes Bacilli Lactobacillales Lactobacillaceae | <i>Lactobacillus</i> sp. wkB8                                                                  |
| Lsp-15-1            | Bacteria Firmicutes Bacilli Lactobacillales Lactobacillaceae | <i>Lactobacillus spicheri</i>                                                                  |
| Lsu-1-1             | Bacteria Firmicutes Bacilli Lactobacillales Lactobacillaceae | <i>Lactobacillus sucicola</i> DSM 21376 = JCM 15457                                            |
| Lvi-1-1             | Bacteria Firmicutes Bacilli Lactobacillales Lactobacillaceae | <i>Lactobacillus vini</i> JP7.8.9                                                              |
| Lwa-1-1             | Bacteria Firmicutes Bacilli Lactobacillales Lactobacillaceae | <i>Lactobacillus wasatchensis</i>                                                              |
| Pac-1-1             | Bacteria Firmicutes Bacilli Lactobacillales Lactobacillaceae | <i>Pediococcus acidilactici</i> D3                                                             |
| Pac-3-1             | Bacteria Firmicutes Bacilli Lactobacillales Lactobacillaceae | <i>Pediococcus</i> <i>Pediococcus</i> acidilactici group <i>Pediococcus acidilactici</i> AGR20 |
| Pac-2-1             | Bacteria Firmicutes Bacilli Lactobacillales Lactobacillaceae | <i>Pediococcus acidilactici</i> MA18/5M                                                        |
| Pda-2-1             | Bacteria Firmicutes Bacilli Lactobacillales Lactobacillaceae | <i>Pediococcus damnosus</i> LMG 28219                                                          |
| Plo-1-1             | Bacteria Firmicutes Bacilli Lactobacillales Lactobacillaceae | <i>Pediococcus lohii</i> NGRI 0510Q                                                            |
| Ppe-3-1             | Bacteria Firmicutes Bacilli Lactobacillales Lactobacillaceae | <i>Pediococcus pentosaceus</i> CGMCC 7049                                                      |
| Ppe-4-1             | Bacteria Firmicutes Bacilli Lactobacillales Lactobacillaceae | <i>Pediococcus pentosaceus</i> IE-3                                                            |
| Ppe-5-1             | Bacteria Firmicutes Bacilli Lactobacillales Lactobacillaceae | <i>Pediococcus pentosaceus</i> SL4                                                             |
| Lci-1-1             | Bacteria Firmicutes Bacilli Lactobacillales                  | <i>Leuconostoc citreum</i> LBAE C10                                                            |
| Lci-2-1             | Bacteria Firmicutes Bacilli Lactobacillales                  | <i>Leuconostoc citreum</i> LBAE C11                                                            |
| Lci-3-1             | Bacteria Firmicutes Bacilli Lactobacillales                  | <i>Leuconostoc citreum</i> LBAE E16                                                            |
| Lci-4-1 to Lci-4-3  | Bacteria Firmicutes Bacilli Lactobacillales                  | Leuconostocaceae <i>Leuconostoc citreum</i>                                                    |
| Wci-1-1 to Wci-1-3  | Bacteria Firmicutes Bacilli Lactobacillales                  | Leuconostocaceae <i>Weissella cibaria</i>                                                      |
| Whe-1-1             | Bacteria Firmicutes Bacilli Lactobacillales                  | Leuconostocaceae <i>Weissella hellemica</i>                                                    |
| Spn-1-1 to Spn-1-8  | Bacteria Firmicutes Bacilli Lactobacillales                  | Streptococcaceae <i>Streptococcus pneumoniae</i>                                               |
| Ssp-15-1            | Bacteria Firmicutes Bacilli Lactobacillales                  | Streptococcaceae <i>Streptococcus</i> sp. 263_SSPC                                             |
| Wko-1-1             | Bacteria Firmicutes Bacilli Lactobacillales                  | <i>Weissella koreensis</i> KCTC 3621                                                           |
| Bma-8-1             | Bacteria Firmicutes Clostridia Clostridiales                 | Clostridiaceae <i>Beduini massiliensis</i>                                                     |

|                        |                                                                                                                                                 |
|------------------------|-------------------------------------------------------------------------------------------------------------------------------------------------|
| Cul-1-1                | Bacteria Firmicutes Clostridia Clostridiales Clostridiaceae <i>Clostridium ultunense</i> Esp                                                    |
| Cba-1-1                | Bacteria Firmicutes Clostridia <i>Clostridiales bacterium</i> VE202-01                                                                          |
| Esp-18-1               | Bacteria Firmicutes Clostridia Clostridiales Eubacteriaceae <i>Eubacterium</i> sp. 3_1_31                                                       |
| Bsp-100-1              | Bacteria Firmicutes Clostridia Clostridiales Lachnospiraceae <i>Butyrivibrio</i> sp. MC2021                                                     |
| Lba-3-1                | Bacteria Firmicutes Clostridia Clostridiales <i>Lachnospiraceae bacterium</i> A2                                                                |
| Cmi-1-1                | Bacteria Firmicutes Erysipelotrichi Erysipelotrichales Erysipelotrichaceae <i>Catenibacterium mitsuokai</i> DSM 15897                           |
| Csp-4-1                | Bacteria Firmicutes Erysipelotrichi Erysipelotrichales Erysipelotrichaceae <i>Clostridium spiroforme</i> DSM 1552                               |
| Edo-1-1                | Bacteria Firmicutes Erysipelotrichi Erysipelotrichales Erysipelotrichaceae <i>Eubacterium dolichum</i> DSM 3991                                 |
| Hfi-1-1                | Bacteria Firmicutes Erysipelotrichi Erysipelotrichales Erysipelotrichaceae <i>Holdemania filiformis</i> DSM 12042                               |
| Tsp-1-1                | Bacteria Firmicutes Erysipelotrichi Erysipelotrichales Erysipelotrichaceae <i>Turicibacter</i> sp. HGF1                                         |
| Tsp-2-1                | Bacteria Firmicutes Erysipelotrichi Erysipelotrichales Erysipelotrichaceae <i>Turicibacter</i> sp. PC909                                        |
| Ast-1-1                | Bacteria Firmicutes Erysipelotrichia Erysipelotrichales Erysipelotrichaceae <i>Allobaculum stercoricanis</i> DSM 13633                          |
| CSt-1-1                | Bacteria Firmicutes Erysipelotrichia Erysipelotrichales Erysipelotrichaceae <i>Candidatus</i> Stoquefichus massiliensis AP9                     |
| CSt-2-1                | Bacteria Firmicutes Erysipelotrichia Erysipelotrichales Erysipelotrichaceae <i>Candidatus</i> Stoquefichus sp. SB1                              |
| Csp-5-1                | Bacteria Firmicutes Erysipelotrichia Erysipelotrichales Erysipelotrichaceae <i>Coprobacillus</i> sp. 29_1                                       |
| Csp-6-1                | Bacteria Firmicutes Erysipelotrichia Erysipelotrichales Erysipelotrichaceae <i>Coprobacillus</i> sp. 8_1_38FAA                                  |
| Csp-7-1                | Bacteria Firmicutes Erysipelotrichia Erysipelotrichales Erysipelotrichaceae <i>Coprobacillus</i> sp. D6                                         |
| Eca-5-1                | Bacteria Firmicutes Erysipelotrichia Erysipelotrichales Erysipelotrichaceae <i>Eggerthia cateniformis</i> OT 569 = DSM 20559                    |
| [sa-1-1                | Bacteria Firmicutes Erysipelotrichia Erysipelotrichales Erysipelotrichaceae <i>Erysipelatoclostridium</i> [Clostridium] saccharogumia DSM 17460 |
| Eba-1-1                | Bacteria Firmicutes Erysipelotrichia Erysipelotrichales <i>Erysipelotrichaceae bacterium</i> 5_2_54FAA                                          |
| Hma-1-1                | Bacteria Firmicutes Erysipelotrichia Erysipelotrichales Erysipelotrichaceae <i>Holdemania massiliensis</i> AP2                                  |
| Kvi-1-1                | Bacteria Firmicutes Erysipelotrichia Erysipelotrichales Erysipelotrichaceae <i>Kandleria vitulina</i> DSM 20405                                 |
| Kvi-2-1                | Bacteria Firmicutes Erysipelotrichia Erysipelotrichales Erysipelotrichaceae <i>Kandleria vitulina</i> MC3001                                    |
| Kvi-3-1                | Bacteria Firmicutes Erysipelotrichia Erysipelotrichales Erysipelotrichaceae <i>Kandleria vitulina</i> WCE2011                                   |
| Fba-1-1                | Bacteria Firmicutes <i>bacterium</i> M10-2                                                                                                      |
| Cma-5-1                | Bacteria Firmicutes Lactobacillales Carnobacteriaceae <i>Carnobacterium maltaromaticum</i> ATCC 35586                                           |
| Csp-8-1                | Bacteria Firmicutes Lactobacillales Carnobacteriaceae <i>Carnobacterium</i> sp. 17-4                                                            |
| Csp-9-1                | Bacteria Firmicutes Lactobacillales Carnobacteriaceae <i>Carnobacterium</i> sp. AT7                                                             |
| Gad-1-1                | Bacteria Firmicutes Lactobacillales Carnobacteriaceae <i>Granulicatella adiacens</i> ATCC 49175                                                 |
| Eca-6-1                | Bacteria Firmicutes Lactobacillales Enterococcaceae <i>Enterococcus casseliflavus</i> EC10                                                      |
| Eca-7-1                | Bacteria Firmicutes Lactobacillales Enterococcaceae <i>Enterococcus casseliflavus</i> EC30                                                      |
| Efa-546-1              | Bacteria Firmicutes Lactobacillales Enterococcaceae <i>Enterococcus faecalis</i> AR01/DG                                                        |
| Efa-18-1 to Efa-18-2   | Bacteria Firmicutes Lactobacillales Enterococcaceae <i>Enterococcus faecalis</i> ATCC 29200                                                     |
| Efa-547-1              | Bacteria Firmicutes Lactobacillales Enterococcaceae <i>Enterococcus faecalis</i> ATCC 4200                                                      |
| Efa-548-1              | Bacteria Firmicutes Lactobacillales Enterococcaceae <i>Enterococcus faecalis</i> CH188                                                          |
| Efa-549-1              | Bacteria Firmicutes Lactobacillales Enterococcaceae <i>Enterococcus faecalis</i> D32                                                            |
| Efa-550-1              | Bacteria Firmicutes Lactobacillales Enterococcaceae <i>Enterococcus faecalis</i> D6                                                             |
| Efa-551-1              | Bacteria Firmicutes Lactobacillales Enterococcaceae <i>Enterococcus faecalis</i> DS5                                                            |
| Efa-552-1              | Bacteria Firmicutes Lactobacillales Enterococcaceae <i>Enterococcus faecalis</i> E1Sol                                                          |
| Efa-553-1              | Bacteria Firmicutes Lactobacillales Enterococcaceae <i>Enterococcus faecalis</i> Fly1                                                           |
| Efa-554-1              | Bacteria Firmicutes Lactobacillales Enterococcaceae <i>Enterococcus faecalis</i> HH22                                                           |
| Efa-555-1              | Bacteria Firmicutes Lactobacillales Enterococcaceae <i>Enterococcus faecalis</i> HIP11704                                                       |
| Efa-556-1              | Bacteria Firmicutes Lactobacillales Enterococcaceae <i>Enterococcus faecalis</i> JH1                                                            |
| Efa-557-1              | Bacteria Firmicutes Lactobacillales Enterococcaceae <i>Enterococcus faecalis</i> Merz96                                                         |
| Efa-558-1              | Bacteria Firmicutes Lactobacillales Enterococcaceae <i>Enterococcus faecalis</i> OG1RF                                                          |
| Efa-559-1              | Bacteria Firmicutes Lactobacillales Enterococcaceae <i>Enterococcus faecalis</i> PC1.1                                                          |
| Efa-560-1              | Bacteria Firmicutes Lactobacillales Enterococcaceae <i>Enterococcus faecalis</i> R712                                                           |
| Efa-561-1              | Bacteria Firmicutes Lactobacillales Enterococcaceae <i>Enterococcus faecalis</i> S613                                                           |
| Efa-562-1              | Bacteria Firmicutes Lactobacillales Enterococcaceae <i>Enterococcus faecalis</i> T1                                                             |
| Efa-563-1              | Bacteria Firmicutes Lactobacillales Enterococcaceae <i>Enterococcus faecalis</i> T11                                                            |
| Efa-564-1              | Bacteria Firmicutes Lactobacillales Enterococcaceae <i>Enterococcus faecalis</i> T2                                                             |
| Efa-565-1              | Bacteria Firmicutes Lactobacillales Enterococcaceae <i>Enterococcus faecalis</i> T3                                                             |
| Efa-566-1              | Bacteria Firmicutes Lactobacillales Enterococcaceae <i>Enterococcus faecalis</i> T8                                                             |
| Efa-567-1              | Bacteria Firmicutes Lactobacillales Enterococcaceae <i>Enterococcus faecalis</i> TUSoD Efi1                                                     |
| Efa-568-1              | Bacteria Firmicutes Lactobacillales Enterococcaceae <i>Enterococcus faecalis</i> TX0104                                                         |
| Efa-569-1              | Bacteria Firmicutes Lactobacillales Enterococcaceae <i>Enterococcus faecalis</i> TX0855                                                         |
| Efa-570-1              | Bacteria Firmicutes Lactobacillales Enterococcaceae <i>Enterococcus faecalis</i> TX1322                                                         |
| Efa-571-1              | Bacteria Firmicutes Lactobacillales Enterococcaceae <i>Enterococcus faecalis</i> TX2134                                                         |
| Efa-572-1              | Bacteria Firmicutes Lactobacillales Enterococcaceae <i>Enterococcus faecalis</i> TX4248                                                         |
| Efa-309-1 to Efa-309-3 | Bacteria Firmicutes Lactobacillales Enterococcaceae <i>Enterococcus faecalis</i> V583                                                           |
| Efa-573-1              | Bacteria Firmicutes Lactobacillales Enterococcaceae <i>Enterococcus faecalis</i> X98                                                            |
| Efa-574-1              | Bacteria Firmicutes Lactobacillales Enterococcaceae <i>Enterococcus faecium</i> 1,141,733                                                       |
| Efa-575-1              | Bacteria Firmicutes Lactobacillales Enterococcaceae <i>Enterococcus faecium</i> 1,230,933                                                       |
| Efa-576-1              | Bacteria Firmicutes Lactobacillales Enterococcaceae <i>Enterococcus faecium</i> 1,231,408                                                       |
| Efa-577-1              | Bacteria Firmicutes Lactobacillales Enterococcaceae <i>Enterococcus faecium</i> 1,231,410                                                       |

|                    |                                                      |                                                                  |
|--------------------|------------------------------------------------------|------------------------------------------------------------------|
| Efa-578-1          | Bacteria Firmicutes Lactobacillales Enterococcaceae  | <i>Enterococcus faecium</i> 1,231,501                            |
| Efa-579-1          | Bacteria Firmicutes Lactobacillales Enterococcaceae  | <i>Enterococcus faecium</i> 1,231,502                            |
| Efa-580-1          | Bacteria Firmicutes Lactobacillales Enterococcaceae  | <i>Enterococcus faecium</i> Aus0004                              |
| Efa-581-1          | Bacteria Firmicutes Lactobacillales Enterococcaceae  | <i>Enterococcus faecium</i> Com12                                |
| Efa-582-1          | Bacteria Firmicutes Lactobacillales Enterococcaceae  | <i>Enterococcus faecium</i> Com15                                |
| Efa-583-1          | Bacteria Firmicutes Lactobacillales Enterococcaceae  | <i>Enterococcus faecium</i> D344SRF                              |
| Efa-584-1          | Bacteria Firmicutes Lactobacillales Enterococcaceae  | <i>Enterococcus faecium</i> DO                                   |
| Efa-585-1          | Bacteria Firmicutes Lactobacillales Enterococcaceae  | <i>Enterococcus faecium</i> E1039                                |
| Efa-586-1          | Bacteria Firmicutes Lactobacillales Enterococcaceae  | <i>Enterococcus faecium</i> E1071                                |
| Efa-587-1          | Bacteria Firmicutes Lactobacillales Enterococcaceae  | <i>Enterococcus faecium</i> E1162                                |
| Efa-588-1          | Bacteria Firmicutes Lactobacillales Enterococcaceae  | <i>Enterococcus faecium</i> E1636                                |
| Efa-589-1          | Bacteria Firmicutes Lactobacillales Enterococcaceae  | <i>Enterococcus faecium</i> E1679                                |
| Efa-590-1          | Bacteria Firmicutes Lactobacillales Enterococcaceae  | <i>Enterococcus faecium</i> E980                                 |
| Efa-591-1          | Bacteria Firmicutes Lactobacillales Enterococcaceae  | <i>Enterococcus faecium</i> PC4.1                                |
| Efa-592-1          | Bacteria Firmicutes Lactobacillales Enterococcaceae  | <i>Enterococcus faecium</i> TC 6                                 |
| Efa-593-1          | Bacteria Firmicutes Lactobacillales Enterococcaceae  | <i>Enterococcus faecium</i> TX1330                               |
| Efa-594-1          | Bacteria Firmicutes Lactobacillales Enterococcaceae  | <i>Enterococcus faecium</i> U0317                                |
| Ega-2-1            | Bacteria Firmicutes Lactobacillales Enterococcaceae  | <i>Enterococcus gallinarum</i> EG2                               |
| Ehi-2-1 to Ehi-2-2 | Bacteria Firmicutes Lactobacillales Enterococcaceae  | <i>Enterococcus hirae</i> ATCC 9790                              |
| Esp-19-1           | Bacteria Firmicutes Lactobacillales Enterococcaceae  | <i>Enterococcus</i> sp. GMD1E                                    |
| Esp-20-1           | Bacteria Firmicutes Lactobacillales Enterococcaceae  | <i>Enterococcus</i> sp. GMD2E                                    |
| Esp-21-1           | Bacteria Firmicutes Lactobacillales Enterococcaceae  | <i>Enterococcus</i> sp. GMD4E                                    |
| Mpl-2-1            | Bacteria Firmicutes Lactobacillales Enterococcaceae  | <i>Melissococcus plutonius</i> ATCC 35311                        |
| Mpl-3-1            | Bacteria Firmicutes Lactobacillales Enterococcaceae  | <i>Melissococcus plutonius</i> DAT561                            |
| Tha-1-1            | Bacteria Firmicutes Lactobacillales Enterococcaceae  | <i>Tetragenococcus halophilus</i> NBRC 12172                     |
| Lac-10-1           | Bacteria Firmicutes Lactobacillales Lactobacillaceae | <i>Lactobacillus acidipiscis</i> KCTC 13900                      |
| Lac-11-1           | Bacteria Firmicutes Lactobacillales Lactobacillaceae | <i>Lactobacillus acidophilus</i> 30SC                            |
| Lac-12-1           | Bacteria Firmicutes Lactobacillales Lactobacillaceae | <i>Lactobacillus acidophilus</i> ATCC 4796                       |
| Lac-13-1           | Bacteria Firmicutes Lactobacillales Lactobacillaceae | <i>Lactobacillus acidophilus</i> NCFM                            |
| Lam-1-1            | Bacteria Firmicutes Lactobacillales Lactobacillaceae | <i>Lactobacillus amylolyticus</i> DSM 11664                      |
| Lam-2-1            | Bacteria Firmicutes Lactobacillales Lactobacillaceae | <i>Lactobacillus amylovorus</i> GRL 1112                         |
| Lam-3-1            | Bacteria Firmicutes Lactobacillales Lactobacillaceae | <i>Lactobacillus amylovorus</i> GRL1118                          |
| Lan-3-1            | Bacteria Firmicutes Lactobacillales Lactobacillaceae | <i>Lactobacillus antri</i> DSM 16041                             |
| Lbr-6-1            | Bacteria Firmicutes Lactobacillales Lactobacillaceae | <i>Lactobacillus brevis</i> ATCC 367                             |
| Lbr-7-1            | Bacteria Firmicutes Lactobacillales Lactobacillaceae | <i>Lactobacillus brevis</i> subsp. <i>gravesensis</i> ATCC 27305 |
| Lbu-1-1            | Bacteria Firmicutes Lactobacillales Lactobacillaceae | <i>Lactobacillus buchneri</i> ATCC 11577                         |
| Lbu-2-1            | Bacteria Firmicutes Lactobacillales Lactobacillaceae | <i>Lactobacillus buchneri</i> CD034                              |
| Lbu-3-1            | Bacteria Firmicutes Lactobacillales Lactobacillaceae | <i>Lactobacillus buchneri</i> NRRL B-30929                       |
| Lca-20-1           | Bacteria Firmicutes Lactobacillales Lactobacillaceae | <i>Lactobacillus casei</i> ATCC 334                              |
| Lca-21-1           | Bacteria Firmicutes Lactobacillales Lactobacillaceae | <i>Lactobacillus casei</i> BD-II                                 |
| Lca-22-1           | Bacteria Firmicutes Lactobacillales Lactobacillaceae | <i>Lactobacillus casei</i> BL23                                  |
| Lca-23-1           | Bacteria Firmicutes Lactobacillales Lactobacillaceae | <i>Lactobacillus casei</i> LC2W                                  |
| Lca-24-1           | Bacteria Firmicutes Lactobacillales Lactobacillaceae | <i>Lactobacillus casei</i> W56                                   |
| Lco-3-1            | Bacteria Firmicutes Lactobacillales Lactobacillaceae | <i>Lactobacillus coleohominis</i> 101-4-CHN                      |
| Lcr-6-1            | Bacteria Firmicutes Lactobacillales Lactobacillaceae | <i>Lactobacillus crispatus</i> 125-2-CHN                         |
| Lcr-7-1            | Bacteria Firmicutes Lactobacillales Lactobacillaceae | <i>Lactobacillus crispatus</i> 214-1                             |
| Lcr-8-1            | Bacteria Firmicutes Lactobacillales Lactobacillaceae | <i>Lactobacillus crispatus</i> CTV-05                            |
| Lcr-9-1            | Bacteria Firmicutes Lactobacillales Lactobacillaceae | <i>Lactobacillus crispatus</i> JV-V01                            |
| Lcr-10-1           | Bacteria Firmicutes Lactobacillales Lactobacillaceae | <i>Lactobacillus crispatus</i> MV-3A-US                          |
| Lcr-11-1           | Bacteria Firmicutes Lactobacillales Lactobacillaceae | <i>Lactobacillus crispatus</i> ST1                               |
| Lfe-9-1            | Bacteria Firmicutes Lactobacillales Lactobacillaceae | <i>Lactobacillus fermentum</i> 28-3-CHN                          |
| Lfe-10-1           | Bacteria Firmicutes Lactobacillales Lactobacillaceae | <i>Lactobacillus fermentum</i> ATCC 14931                        |
| Lfe-11-1           | Bacteria Firmicutes Lactobacillales Lactobacillaceae | <i>Lactobacillus fermentum</i> CECT 5716                         |
| Lfe-12-1           | Bacteria Firmicutes Lactobacillales Lactobacillaceae | <i>Lactobacillus fermentum</i> IFO 3956                          |
| Lga-11-1           | Bacteria Firmicutes Lactobacillales Lactobacillaceae | <i>Lactobacillus gasseri</i> 202-4                               |
| Lga-12-1           | Bacteria Firmicutes Lactobacillales Lactobacillaceae | <i>Lactobacillus gasseri</i> ATCC 33323                          |
| Lga-13-1           | Bacteria Firmicutes Lactobacillales Lactobacillaceae | <i>Lactobacillus gastricus</i> PS3                               |
| Lgi-2-1            | Bacteria Firmicutes Lactobacillales Lactobacillaceae | <i>Lactobacillus gigeriorum</i> CRBIP 24.85                      |
| Lhe-12-1           | Bacteria Firmicutes Lactobacillales Lactobacillaceae | <i>Lactobacillus helveticus</i> DPC 4571                         |
| Lhe-13-1           | Bacteria Firmicutes Lactobacillales Lactobacillaceae | <i>Lactobacillus helveticus</i> DSM 20075                        |
| Lhe-14-1           | Bacteria Firmicutes Lactobacillales Lactobacillaceae | <i>Lactobacillus helveticus</i> H10                              |
| Lhe-15-1           | Bacteria Firmicutes Lactobacillales Lactobacillaceae | <i>Lactobacillus helveticus</i> R0052                            |
| Lhi-1-1            | Bacteria Firmicutes Lactobacillales Lactobacillaceae | <i>Lactobacillus hilgardii</i> ATCC 8290                         |
| Lho-2-1            | Bacteria Firmicutes Lactobacillales Lactobacillaceae | <i>Lactobacillus hominis</i> CRBIP 24.179                        |
| Lin-7-1            | Bacteria Firmicutes Lactobacillales Lactobacillaceae | <i>Lactobacillus iners</i> AB-1                                  |

|                      |                                                                                  |                                                                       |
|----------------------|----------------------------------------------------------------------------------|-----------------------------------------------------------------------|
| Lin-8-1              | Bacteria Firmicutes Lactobacillales Lactobacillaceae                             | <i>Lactobacillus iners</i> DSM 13335                                  |
| Lin-13-1             | Bacteria Firmicutes Lactobacillales Lactobacillaceae                             | <i>Lactobacillus iners</i> LactinV 01V1-a                             |
| Lin-14-1             | Bacteria Firmicutes Lactobacillales Lactobacillaceae                             | <i>Lactobacillus iners</i> LactinV 03V1-b                             |
| Lin-15-1             | Bacteria Firmicutes Lactobacillales Lactobacillaceae                             | <i>Lactobacillus iners</i> LactinV 09V1-c                             |
| Lin-16-1             | Bacteria Firmicutes Lactobacillales Lactobacillaceae                             | <i>Lactobacillus iners</i> LactinV 11V1-d                             |
| Lin-9-1              | Bacteria Firmicutes Lactobacillales Lactobacillaceae                             | <i>Lactobacillus iners</i> LEAF 2052A-d                               |
| Lin-10-1             | Bacteria Firmicutes Lactobacillales Lactobacillaceae                             | <i>Lactobacillus iners</i> LEAF 2053A-b                               |
| Lin-11-1             | Bacteria Firmicutes Lactobacillales Lactobacillaceae                             | <i>Lactobacillus iners</i> LEAF 2062A-h1                              |
| Lin-12-1             | Bacteria Firmicutes Lactobacillales Lactobacillaceae                             | <i>Lactobacillus iners</i> LEAF 3008A-a                               |
| Lin-17-1             | Bacteria Firmicutes Lactobacillales Lactobacillaceae                             | <i>Lactobacillus iners</i> SPIN 1401G                                 |
| Lin-18-1             | Bacteria Firmicutes Lactobacillales Lactobacillaceae                             | <i>Lactobacillus iners</i> SPIN 2503V10-D                             |
| Lin-19-1             | Bacteria Firmicutes Lactobacillales Lactobacillaceae                             | <i>Lactobacillus iners</i> UPII 143-D                                 |
| Lin-20-1             | Bacteria Firmicutes Lactobacillales Lactobacillaceae                             | <i>Lactobacillus iners</i> UPII 60-B                                  |
| Ljo-4-1              | Bacteria Firmicutes Lactobacillales Lactobacillaceae                             | <i>Lactobacillus johnsonii</i> ATCC 33200                             |
| Ljo-5-1              | Bacteria Firmicutes Lactobacillales Lactobacillaceae                             | <i>Lactobacillus johnsonii</i> DPC 6026                               |
| Ljo-6-1              | Bacteria Firmicutes Lactobacillales Lactobacillaceae                             | <i>Lactobacillus johnsonii</i> F19785                                 |
| Ljo-7-1              | Bacteria Firmicutes Lactobacillales Lactobacillaceae                             | <i>Lactobacillus johnsonii</i> NCC 533                                |
| Lke-2-1              | Bacteria Firmicutes Lactobacillales Lactobacillaceae                             | <i>Lactobacillus kefranofaciens</i> ZW3                               |
| Lma-4-1              | Bacteria Firmicutes Lactobacillales Lactobacillaceae                             | <i>Lactobacillus malefermentans</i> KCTC 3548                         |
| Lma-3-1 to Lma-3-2   | Bacteria Firmicutes Lactobacillales Lactobacillaceae                             | <i>Lactobacillus mali</i> KCTC 3596 = DSM 20444                       |
| Lor-3-1              | Bacteria Firmicutes Lactobacillales Lactobacillaceae                             | <i>Lactobacillus oris</i> PB013-T2-3                                  |
| Lpa-42-1             | Bacteria Firmicutes Lactobacillales Lactobacillaceae                             | <i>Lactobacillus paracasei</i> subsp. <i>paracasei</i> ATCC 25302     |
| Lpl-19-1             | Bacteria Firmicutes Lactobacillales Lactobacillaceae                             | <i>Lactobacillus plantarum</i> JDM1                                   |
| Lpl-21-1             | Bacteria Firmicutes Lactobacillales Lactobacillaceae                             | <i>Lactobacillus plantarum</i> subsp. <i>plantarum</i> ST-III         |
| Lpl-20-1             | Bacteria Firmicutes Lactobacillales Lactobacillaceae                             | <i>Lactobacillus plantarum</i> WCFS1                                  |
| Lre-7-1              | Bacteria Firmicutes Lactobacillales Lactobacillaceae                             | <i>Lactobacillus reuteri</i> 100-23                                   |
| Lre-8-1              | Bacteria Firmicutes Lactobacillales Lactobacillaceae                             | <i>Lactobacillus reuteri</i> CF48-3A                                  |
| Lre-9-1              | Bacteria Firmicutes Lactobacillales Lactobacillaceae                             | <i>Lactobacillus reuteri</i> DSM 20016                                |
| Lre-10-1             | Bacteria Firmicutes Lactobacillales Lactobacillaceae                             | <i>Lactobacillus reuteri</i> JCM 1112                                 |
| Lre-11-1             | Bacteria Firmicutes Lactobacillales Lactobacillaceae                             | <i>Lactobacillus reuteri</i> MM2-3                                    |
| Lre-12-1             | Bacteria Firmicutes Lactobacillales Lactobacillaceae                             | <i>Lactobacillus reuteri</i> MM4-1A                                   |
| Lre-13-1             | Bacteria Firmicutes Lactobacillales Lactobacillaceae                             | <i>Lactobacillus reuteri</i> SD2112                                   |
| Lrh-19-1             | Bacteria Firmicutes Lactobacillales Lactobacillaceae                             | <i>Lactobacillus rhamnosus</i> ATCC 8530                              |
| Lrh-20-1 to Lrh-20-2 | Bacteria Firmicutes Lactobacillales Lactobacillaceae                             | <i>Lactobacillus rhamnosus</i> GG                                     |
| Lrh-21-1             | Bacteria Firmicutes Lactobacillales Lactobacillaceae                             | <i>Lactobacillus rhamnosus</i> HN001                                  |
| Lrh-23-1             | Bacteria Firmicutes Lactobacillales Lactobacillaceae                             | <i>Lactobacillus rhamnosus</i> Lc 705                                 |
| Lrh-22-1             | Bacteria Firmicutes Lactobacillales Lactobacillaceae                             | <i>Lactobacillus rhamnosus</i> LMS2-1                                 |
| Lru-5-1              | Bacteria Firmicutes Lactobacillales Lactobacillaceae                             | <i>Lactobacillus ruminis</i> ATCC 27782                               |
| Lru-6-1              | Bacteria Firmicutes Lactobacillales Lactobacillaceae                             | <i>Lactobacillus ruminis</i> SPM0211                                  |
| Lsa-9-1              | Bacteria Firmicutes Lactobacillales Lactobacillaceae                             | <i>Lactobacillus salivarius</i> ACS-116-V-Col5a                       |
| Lsa-10-1             | Bacteria Firmicutes Lactobacillales Lactobacillaceae                             | <i>Lactobacillus salivarius</i> ATCC 11741                            |
| Lsa-11-1             | Bacteria Firmicutes Lactobacillales Lactobacillaceae                             | <i>Lactobacillus salivarius</i> CECT 5713                             |
| Lsa-12-1             | Bacteria Firmicutes Lactobacillales Lactobacillaceae                             | <i>Lactobacillus salivarius</i> UCC118                                |
| Lsa-13-1             | Bacteria Firmicutes Lactobacillales Lactobacillaceae                             | <i>Lactobacillus sanfranciscensis</i> TMW 1.1304                      |
| Lsu-2-1              | Bacteria Firmicutes Lactobacillales Lactobacillaceae                             | <i>Lactobacillus suebicus</i> KCTC 3549                               |
| Lul-1-1              | Bacteria Firmicutes Lactobacillales Lactobacillaceae                             | <i>Lactobacillus ultunensis</i> DSM 16047                             |
| Lva-2-1              | Bacteria Firmicutes Lactobacillales Lactobacillaceae                             | <i>Lactobacillus vaginalis</i> ATCC 49540                             |
| Lve-1-1              | Bacteria Firmicutes Lactobacillales Lactobacillaceae                             | <i>Lactobacillus versmoldensis</i> KCTC 3814                          |
| Lvi-2-1              | Bacteria Firmicutes Lactobacillales Lactobacillaceae                             | <i>Lactobacillus vini</i> DSM 20605                                   |
| Lze-1-1              | Bacteria Firmicutes Lactobacillales Lactobacillaceae                             | <i>Lactobacillus zeae</i> KCTC 3804                                   |
| Pac-4-1              | Bacteria Firmicutes Lactobacillales Lactobacillaceae                             | <i>Pediococcus acidilactici</i> 7.4                                   |
| Pac-5-1              | Bacteria Firmicutes Lactobacillales Lactobacillaceae                             | <i>Pediococcus acidilactici</i> DSM 20284                             |
| Pcl-1-1              | Bacteria Firmicutes Lactobacillales Lactobacillaceae                             | <i>Pediococcus claussenii</i> ATCC BAA-344                            |
| Ppe-6-1              | Bacteria Firmicutes Lactobacillales Lactobacillaceae                             | <i>Pediococcus pentosaceus</i> ATCC 25745                             |
| Lca-25-1             | Bacteria Firmicutes Lactobacillales                                              | <i>Leuconostoc carnosum</i> JB16                                      |
| Lci-5-1              | Bacteria Firmicutes Lactobacillales                                              | <i>Leuconostoc citreum</i> KM20                                       |
| Lki-4-1              | Bacteria Firmicutes Lactobacillales                                              | <i>Leuconostoc kimchii</i> IMSNU 11154                                |
| Lsp-16-1             | Bacteria Firmicutes Lactobacillales                                              | <i>Leuconostoc</i> sp. C2                                             |
| Wci-2-1              | Bacteria Firmicutes Lactobacillales                                              | <i>Weissella cibaria</i> KACC 11862                                   |
| Wko-2-1              | Bacteria Firmicutes Lactobacillales                                              | <i>Weissella koreensis</i> KACC 15510                                 |
| Hco-1-1              | Bacteria Haloplasmatales Haloplasmataceae                                        | <i>Haloplasma contractile</i> SSD-17B                                 |
| Ecl-1-1              | Bacteria Proteobacteria Gammaproteobacteria Enterobacteriales Enterobacteriaceae | Enterobacter Enterobacter cloacae complex <i>Enterobacter cloacae</i> |
| Psp-40-1             | Bacteria Proteobacteria Gammaproteobacteria Pseudomonadales Pseudomonadaceae     | <i>Pseudomonas</i> sp. EGD-AK9                                        |
| Xca-1-1              | Bacteria Proteobacteria Gammaproteobacteria Xanthomonadales Xanthomonadaceae     | <i>Xanthomonas campestris</i> pv. <i>musacearum</i> NCPPB 2005        |
| Xca-2-1              | Bacteria Proteobacteria Gammaproteobacteria Xanthomonadales Xanthomonadaceae     | <i>Xanthomonas campestris</i> pv. <i>musacearum</i> NCPPB 4379        |



|                   |                                                                              |                                                         |
|-------------------|------------------------------------------------------------------------------|---------------------------------------------------------|
| Xca-3-1           | Bacteria Proteobacteria Gammaproteobacteria Xanthomonadales Xanthomonadaceae | <i>Xanthomonas campestris pv. musacearum</i> NCPPB 4380 |
| Xca-4-1           | Bacteria Proteobacteria Gammaproteobacteria Xanthomonadales Xanthomonadaceae | <i>Xanthomonas campestris pv. musacearum</i> NCPPB 4392 |
| Xca-5-1           | Bacteria Proteobacteria Gammaproteobacteria Xanthomonadales Xanthomonadaceae | <i>Xanthomonas campestris pv. musacearum</i> NCPPB 4394 |
| Xor-1-1           | Bacteria Proteobacteria Gammaproteobacteria Xanthomonadales Xanthomonadaceae | <i>Xanthomonas oryzae pv. oryzae</i> PXO99A             |
| Xva-1-1           | Bacteria Proteobacteria Gammaproteobacteria Xanthomonadales Xanthomonadaceae | <i>Xanthomonas vasicola pv. vasculorum</i> NCPPB 1326   |
| Xva-2-1           | Bacteria Proteobacteria Gammaproteobacteria Xanthomonadales Xanthomonadaceae | <i>Xanthomonas vasicola pv. vasculorum</i> NCPPB 1381   |
| Xva-3-1           | Bacteria Proteobacteria Gammaproteobacteria Xanthomonadales Xanthomonadaceae | <i>Xanthomonas vasicola pv. vasculorum</i> NCPPB 206    |
| Agr-1-1           | Bacteria Tenericutes Mollicutes Acholeplasmatales Acholeplasmataceae         | <i>Acholeplasma granularum</i> ATCC 19168               |
| Aoc-1-1           | Bacteria Tenericutes Mollicutes Acholeplasmatales Acholeplasmataceae         | <i>Acholeplasma oculi</i>                               |
| env-1 to env-1514 | environmental samples                                                        |                                                         |

## 11.2 Notes

Superscript numbers are used to annotate any L31-Firmicutes RNA that has special characteristics (described below). These numeric annotations will be used in Sections 11.3 and 11.5. The meaning of the numbers are as follows.

<sup>1</sup> A different alignment would have a somewhat stronger hairpin, but would somewhat lose conserved nucleotides. It's unclear which alignment of this se-

quence is better.

## 11.3 Gene contexts

Each L31-Firmicutes RNA (indicated by “RNA→”) is listed. For each hit, the downstream genes predicted to reside in a regulated operon are listed. If the nearest downstream gene is encoding in the opposite strand (and therefore presumed to not be a part of a regulated operon), then that gene is still depicted. Some environmental sequences and some RefSeq entries lack gene annotations, and so no genes are available for such sequences. The direction of each gene is indicated with an arrow (→), and each predicted conserved domain in the gene is named. Conserved domains associated with more than one L31-Firmicutes RNA are assigned a color; other domains are gray. Information about these conserved

domains is given in Section 11.4. The accession of the sequence containing each L31-Firmicutes RNA is given in the column named “Seq. accession”. Accessions beginning with “NC\_”, “NS\_”, “NW\_” or “NZ\_” are contained in RefSeq. Other accessions refer to environmental samples. Nucleotide coordinates are given for the 5′ and 3′ boundaries of each L31-Firmicutes RNA. If the 5′ coordinate is greater than the 3′ coordinate, the RNA is present on the reverse-complement strand of the containing genomic DNA sequence. Each hit is denoted by an abbreviation (like “Eco-1-1”) that refers to a taxonomy given in Section 11.1. (Superscript numbers refer to annotations listed in Section 11.2)

| abbrev. | Seq. accession                   | 5′ at | 3′ at   | genes                                                                           |
|---------|----------------------------------|-------|---------|---------------------------------------------------------------------------------|
| env-1   | SL_5KL_010_SED_10059915          | -     | 521     | 483 RNA→ hypo→                                                                  |
| env-2   | 2200881906                       | -     | 21321   | 21291 RNA→ HXXSHH (pfam07586)→                                                  |
| env-3   | BISONR_C7447                     | +     | 805     | 839 RNA→ hypo→                                                                  |
| env-4   | JGI24025J20009_10001343          | +     | 4419    | 4451 RNA→ ← REC (smart00448)Trans_reg_C (smart00862)OmpR (COG0745)              |
| env-5   | JGI24724J26744_10982735          | +     | 117     | 149 RNA→ ← Trans_reg_C (smart00862)trans_reg_C (cd00383)Trans_reg_C (pfam00486) |
| env-6   | JGI994J12354_10174172            | +     | 602     | 631 RNA→ int (PHA02601)→                                                        |
| Cmo-1-1 | NZ_JQMR01000001.1                | -     | 1464079 | 1464047 RNA→ rpmE2 (PRK01678)Ribosomal_L31 (pfam01197)→                         |
| env-7   | ASHM260b_GM9OZ8V02GSY54          | +     | 254     | 292 RNA→ hypo→                                                                  |
| env-8   | 08_19_CONTROL_DNA_scaffold7482.7 | -     | 8235    | 8202 RNA→ rpmE (PRK00019)Ribosomal_L31 (pfam01197)→                             |
| Ast-1-1 | NZ_KB913034.1                    | -     | 1959703 | 1959670 RNA→ rpmE (PRK00019)Ribosomal_L31 (pfam01197)→                          |
| env-9   | JGI24713J26584_10168935          | +     | 112     | 146 RNA→ PurM (COG0150)PRK05385 (PRK05385)→                                     |
| env-10  | SL_1KL_011_SED_10415685          | -     | 130     | 99 RNA→ hypo→                                                                   |
| env-11  | SL_9KL_010_SED_10025487          | +     | 283     | 314 RNA→ dnaG (PRK05667)USP_Like (cd00293)→                                     |
| env-12  | SL_7KL_010_BRINE_10007095        | +     | 279     | 310 RNA→ dnaG (PRK05667)USP_Like (cd00293)→                                     |
| env-13  | HCF14C_2.1.1_newblercontig17407  | +     | 809     | 842 RNA→ rpmE (PRK00019)Ribosomal_L31 (pfam01197)→                              |

|          |                                   |   |         |         |                                                                                                                                                                                      |
|----------|-----------------------------------|---|---------|---------|--------------------------------------------------------------------------------------------------------------------------------------------------------------------------------------|
| env-14   | HCF12C_35575                      | - | 214     | 181     | RNA → rpmE (PRK00019)Ribosomal_L31 (pfam01197) →                                                                                                                                     |
| env-15   | scaffold5088_2.V1.CD-11           | - | 8404    | 8367    | RNA → hypo →                                                                                                                                                                         |
| env-16   | RUMENNODE_3996658.1               | - | 12142   | 12105   | RNA → rpmE (PRK00019)Ribosomal_L31 (pfam01197) → RhaT (COG0697) → ArcA (COG2235)PRK01388 (PRK01388) → PRK02102 (PRK02102)ArgF (COG0078) → MetG (COG0143)PRK11893 (PRK11893) →        |
| env-17   | topACOD_FV90NF401C3W26            | - | 154     | 126     | RNA → hypo →                                                                                                                                                                         |
| env-18   | SRS016335_C5226868                | - | 1031    | 997     | RNA → ←hypo                                                                                                                                                                          |
| env-19   | RUMENNODE_2334914_25000           | - | 39974   | 39943   | RNA → hypo →                                                                                                                                                                         |
| env-20   | JGI12341J12878_1000327            | - | 8875    | 8843    | RNA → rpmE (PRK00019)Ribosomal_L31 (pfam01197) →                                                                                                                                     |
| env-21   | JGI12298J13902_1000429            | + | 6154    | 6186    | RNA → rpmE (PRK00019)Ribosomal_L31 (pfam01197) →                                                                                                                                     |
| env-22   | JGI12298J13902_1007687            | + | 173     | 205     | RNA → ←hypo                                                                                                                                                                          |
| Cde-1-1  | NZ_KB912881.1                     | - | 64384   | 64352   | RNA → rpmE (PRK00019)Ribosomal_L31 (pfam01197) →                                                                                                                                     |
| Psp-27-1 | NZ_BBIW01000023.1                 | - | 4864    | 4830    | RNA → rpmE (PRK00019)Ribosomal_L31 (pfam01197) →                                                                                                                                     |
| Lsp-1-1  | NZ_AGAV01000016.1                 | + | 19061   | 19094   | RNA → rpmE2 (PRK01678)Ribosomal_L31 (pfam01197) → rpmE2 (PRK01678)Ribosomal_L31 (pfam01197) →                                                                                        |
| Xor-1-1  | NC_010717.2                       | + | 5213900 | 5213934 | RNA → HSDR_N (pfam04313)HSDR_N_2 (pfam13588) →                                                                                                                                       |
| Xva-3-1  | NZ_AKBM01000002.1                 | + | 13187   | 13221   | RNA → HSDR_N (pfam04313)HSDR_N_2 (pfam13588) →                                                                                                                                       |
| Xva-2-1  | NZ_KB373231.1                     | - | 59457   | 59423   | RNA → HSDR_N (pfam04313)HSDR_N_2 (pfam13588) →                                                                                                                                       |
| Xca-5-1  | NZ_KB373047.1                     | + | 93162   | 93196   | RNA → HSDR_N (pfam04313)HSDR_N_2 (pfam13588) →                                                                                                                                       |
| Xca-2-1  | NZ_KB372855.1                     | - | 57748   | 57714   | RNA → HSDR_N (pfam04313)HSDR_N_2 (pfam13588) →                                                                                                                                       |
| Xca-4-1  | NZ_KB373012.1                     | - | 34001   | 33967   | RNA → HSDR_N (pfam04313)HSDR_N_2 (pfam13588) →                                                                                                                                       |
| Xca-3-1  | NZ_KB372889.1                     | - | 57694   | 57660   | RNA → HSDR_N (pfam04313)HSDR_N_2 (pfam13588) →                                                                                                                                       |
| Xva-1-1  | NZ_KB373142.1                     | - | 59417   | 59383   | RNA → HSDR_N (pfam04313)HSDR_N_2 (pfam13588) →                                                                                                                                       |
| Xca-1-1  | NZ_AKBE01000040.1                 | + | 196     | 230     | RNA → HSDR_N (pfam04313)HSDR_N_2 (pfam13588) →                                                                                                                                       |
| env-23   | JGI24721J26819_10249650           | + | 591     | 632     | RNA → hypo →                                                                                                                                                                         |
| env-24   | JGI24721J44947_10005316           | + | 2145    | 2186    | RNA → vWFA (cd00198) → hypo → hypo → AAA (smart00382)SpoVK (COG0464)CDC48 (TIGR01243) → NHT_00031 (TIGR04181)AHBA_syn (cd00616) → CesT (pfam05932)YbjN (pfam10722)FtsA (pfam14450) → |
| env-25   | 2016923541                        | + | 557     | 598     | RNA → hypo →                                                                                                                                                                         |
| env-26   | JGI20130J15003_1005706            | + | 4068    | 4109    | RNA → vWFA (cd00198) → hypo → hypo → AAA (smart00382)SpoVK (COG0464)CDC48 (TIGR01243) →                                                                                              |
| env-27   | JGI20130J15133_1005706            | + | 4068    | 4109    | RNA → vWFA (cd00198) → hypo → hypo → AAA (smart00382)SpoVK (COG0464)CDC48 (TIGR01243) →                                                                                              |
| env-28   | SRS015985_C1514630                | + | 276     | 309     | RNA → rpmE (PRK00019)rpmE2 (PRK01678)L31 (TIGR00105)Ribosomal_L31 (pfam01197) →                                                                                                      |
| env-29   | SRS018443_C3751049                | + | 219     | 252     | RNA → rpmE2 (PRK01678)Ribosomal_L31 (pfam01197) →                                                                                                                                    |
| env-30   | Subgingival_plaque_LANL_C11194098 | - | 247     | 214     | RNA → rpmE2 (PRK01678)Ribosomal_L31 (pfam01197) →                                                                                                                                    |
| env-31   | SRS011152_C4313074                | - | 268     | 235     | RNA → rpmE2 (PRK01678)Ribosomal_L31 (pfam01197) →                                                                                                                                    |
| env-32   | SRS013533_C5440500                | - | 268     | 235     | RNA → rpmE2 (PRK01678)Ribosomal_L31 (pfam01197) →                                                                                                                                    |
| env-33   | SRS013723_C3407064                | - | 247     | 214     | RNA → rpmE2 (PRK01678)Ribosomal_L31 (pfam01197) →                                                                                                                                    |
| env-34   | SRS013945_WUGC_scaffold_2673      | - | 368     | 335     | RNA → rpmE2 (PRK01678)Ribosomal_L31 (pfam01197) →                                                                                                                                    |
| env-35   | SRS013949_C3416715                | + | 114     | 147     | RNA → rpmE2 (PRK01678)Ribosomal_L31 (pfam01197) →                                                                                                                                    |
| env-36   | SRS014690_C1785810                | + | 89      | 122     | RNA → rpmE2 (PRK01678)Ribosomal_L31 (pfam01197) →                                                                                                                                    |
| env-37   | SRS015044_WUGC_scaffold_37694     | - | 255     | 222     | RNA → rpmE2 (PRK01678)Ribosomal_L31 (pfam01197) →                                                                                                                                    |
| env-38   | SRS015470_C3354823                | + | 848     | 881     | RNA → rpmE2 (PRK01678)Ribosomal_L31 (pfam01197) →                                                                                                                                    |
| env-39   | SRS015755_C1607169                | + | 161     | 194     | RNA → rpmE2 (PRK01678)Ribosomal_L31 (pfam01197) →                                                                                                                                    |
| env-40   | SRS015803_C2579404                | - | 268     | 235     | RNA → rpmE2 (PRK01678)Ribosomal_L31 (pfam01197) →                                                                                                                                    |
| env-41   | SRS015947_WUGC_scaffold_25971     | - | 575     | 542     | RNA → rpmE2 (PRK01678)Ribosomal_L31 (pfam01197) →                                                                                                                                    |
| env-42   | SRS015989_C2127565                | + | 350     | 383     | RNA → rpmE2 (PRK01678)Ribosomal_L31 (pfam01197) →                                                                                                                                    |
| env-43   | SRS016200_C2226629                | - | 247     | 214     | RNA → rpmE2 (PRK01678)Ribosomal_L31 (pfam01197) →                                                                                                                                    |
| env-44   | SRS016360_Baylor_scaffold_38732   | - | 406     | 373     | RNA → rpmE2 (PRK01678)Ribosomal_L31 (pfam01197) →                                                                                                                                    |
| env-45   | SRS017139_Baylor_scaffold_102199  | + | 117     | 150     | RNA → rpmE2 (PRK01678)Ribosomal_L31 (pfam01197) →                                                                                                                                    |
| env-46   | SRS017227_Baylor_scaffold_86694   | + | 354     | 387     | RNA → rpmE2 (PRK01678)Ribosomal_L31 (pfam01197) →                                                                                                                                    |
| env-47   | SRS018573_C2469306                | - | 223     | 190     | RNA → rpmE2 (PRK01678)Ribosomal_L31 (pfam01197) →                                                                                                                                    |
| env-48   | SRS018665_C3678853                | + | 290     | 323     | RNA → rpmE2 (PRK01678)Ribosomal_L31 (pfam01197) →                                                                                                                                    |
| env-49   | SRS019029_C3197161                | + | 182     | 215     | RNA → rpmE2 (PRK01678)Ribosomal_L31 (pfam01197) →                                                                                                                                    |
| env-50   | SRS019225_C1506735                | + | 84      | 117     | RNA → rpmE2 (PRK01678)Ribosomal_L31 (pfam01197) →                                                                                                                                    |
| env-51   | SRS019387_C1744036                | - | 62      | 29      | RNA →                                                                                                                                                                                |

|          |                                 |   |       |       |                                                   |
|----------|---------------------------------|---|-------|-------|---------------------------------------------------|
| env-52   | SRS019591_WUGC_scaffold_36465   | - | 268   | 235   | RNA → rpmE2 (PRK01678)Ribosomal_L31 (pfam01197) → |
| env-53   | SRS019980_C3067094              | + | 4283  | 4316  | RNA → rpmE2 (PRK01678)Ribosomal_L31 (pfam01197) → |
| env-54   | SRS020226_C3471976              | - | 268   | 235   | RNA → rpmE2 (PRK01678)Ribosomal_L31 (pfam01197) → |
| env-55   | SRS020340_Baylor_scaffold_9891  | + | 1969  | 2002  | RNA → rpmE2 (PRK01678)Ribosomal_L31 (pfam01197) → |
| env-56   | SRS022725_LANL_scaffold_22307   | + | 709   | 742   | RNA → rpmE2 (PRK01678)Ribosomal_L31 (pfam01197) → |
| env-57   | SRS023358_C3441410              | + | 264   | 297   | RNA → rpmE2 (PRK01678)Ribosomal_L31 (pfam01197) → |
| env-58   | SRS023595_C6937803              | - | 247   | 214   | RNA → rpmE2 (PRK01678)Ribosomal_L31 (pfam01197) → |
| env-59   | SRS023938_Baylor_scaffold_23028 | - | 14585 | 14552 | RNA → rpmE2 (PRK01678)Ribosomal_L31 (pfam01197) → |
| env-60   | SRS024021_C2019462              | + | 712   | 745   | RNA → rpmE2 (PRK01678)Ribosomal_L31 (pfam01197) → |
| env-61   | SRS024355_C4162431              | - | 268   | 235   | RNA → rpmE2 (PRK01678)Ribosomal_L31 (pfam01197) → |
| env-62   | SRS024447_LANL_scaffold_46821   | + | 2480  | 2513  | RNA → rpmE2 (PRK01678)Ribosomal_L31 (pfam01197) → |
| env-63   | SRS024649_C3520887              | - | 189   | 156   | RNA → rpmE2 (PRK01678)Ribosomal_L31 (pfam01197) → |
| env-64   | SRS043772_C1744867              | + | 214   | 247   | RNA → rpmE2 (PRK01678)Ribosomal_L31 (pfam01197) → |
| env-65   | SRS045197_C3371889              | - | 247   | 214   | RNA → rpmE2 (PRK01678)Ribosomal_L31 (pfam01197) → |
| env-66   | SRS045313_C1320319              | - | 229   | 196   | RNA → rpmE2 (PRK01678)Ribosomal_L31 (pfam01197) → |
| env-67   | SRS047100_C2004330              | + | 101   | 134   | RNA → rpmE2 (PRK01678)Ribosomal_L31 (pfam01197) → |
| env-68   | SRS047113_C5226893              | + | 186   | 219   | RNA → rpmE2 (PRK01678)Ribosomal_L31 (pfam01197) → |
| env-69   | SRS051930_C3120842              | - | 245   | 212   | RNA → rpmE2 (PRK01678)Ribosomal_L31 (pfam01197) → |
| env-70   | SRS051941_C3883544              | + | 96    | 129   | RNA → rpmE2 (PRK01678)Ribosomal_L31 (pfam01197) → |
| env-71   | SRS052876_C2340555              | + | 941   | 974   | RNA → rpmE2 (PRK01678)Ribosomal_L31 (pfam01197) → |
| env-72   | SRS063215_C2148515              | - | 183   | 150   | RNA → rpmE2 (PRK01678)Ribosomal_L31 (pfam01197) → |
| Gsp-20-1 | NZ_JVBN01000045.1               | - | 69014 | 68981 | RNA → rpmE2 (PRK01678)Ribosomal_L31 (pfam01197) → |
| Gsp-19-1 | NZ_JVBO01000013.1               | - | 39564 | 39531 | RNA → rpmE2 (PRK01678)Ribosomal_L31 (pfam01197) → |
| Gad-1-1  | NZ_GG694015.1                   | + | 59433 | 59466 | RNA → rpmE2 (PRK01678)Ribosomal_L31 (pfam01197) → |
| env-73   | Palatine_Tonsils_LANL_C6167790  | - | 268   | 235   | RNA → rpmE2 (PRK01678)Ribosomal_L31 (pfam01197) → |
| env-74   | SRS011086_C2691210              | - | 244   | 211   | RNA → rpmE2 (PRK01678)Ribosomal_L31 (pfam01197) → |
| env-75   | SRS014692_C1451880              | - | 214   | 181   | RNA → rpmE2 (PRK01678)Ribosomal_L31 (pfam01197) → |
| env-76   | SRS016740_Baylor_scaffold_14962 | - | 415   | 382   | RNA → rpmE2 (PRK01678)Ribosomal_L31 (pfam01197) → |
| env-77   | SRS017076_Baylor_scaffold_28499 | + | 465   | 498   | RNA → rpmE2 (PRK01678)Ribosomal_L31 (pfam01197) → |
| env-78   | SRS043239_C1988916              | + | 172   | 205   | RNA → rpmE2 (PRK01678)Ribosomal_L31 (pfam01197) → |
| env-79   | SRS062878_LANL_scaffold_15918   | + | 3373  | 3406  | RNA → rpmE2 (PRK01678)Ribosomal_L31 (pfam01197) → |
| env-80   | SRS064329_LANL_scaffold_17894   | + | 446   | 479   | RNA → rpmE2 (PRK01678)Ribosomal_L31 (pfam01197) → |
| env-81   | SRS075404_C3523540              | - | 268   | 235   | RNA → rpmE2 (PRK01678)Ribosomal_L31 (pfam01197) → |
| env-82   | Throat_LANL_C5742344            | + | 171   | 204   | RNA → rpmE2 (PRK01678)Ribosomal_L31 (pfam01197) → |
| env-83   | Contig123769.1                  | - | 237   | 204   | RNA → rpmE2 (PRK01678)Ribosomal_L31 (pfam01197) → |
| env-84   | SRS011243_C2055318              | + | 1110  | 1143  | RNA → rpmE2 (PRK01678)Ribosomal_L31 (pfam01197) → |
| env-85   | SRS011306_Baylor_scaffold_38054 | - | 414   | 381   | RNA → rpmE2 (PRK01678)Ribosomal_L31 (pfam01197) → |
| env-86   | SRS013164_C2328665              | - | 268   | 235   | RNA → rpmE2 (PRK01678)Ribosomal_L31 (pfam01197) → |
| env-87   | SRS013234_Baylor_scaffold_22883 | + | 896   | 929   | RNA → rpmE2 (PRK01678)Ribosomal_L31 (pfam01197) → |
| env-88   | SRS013502_C2111881              | - | 244   | 211   | RNA → rpmE2 (PRK01678)Ribosomal_L31 (pfam01197) → |
| env-89   | SRS013818_C2698254              | - | 268   | 235   | RNA → rpmE2 (PRK01678)Ribosomal_L31 (pfam01197) → |
| env-90   | SRS013879_C2728982              | + | 120   | 153   | RNA → rpmE2 (PRK01678)Ribosomal_L31 (pfam01197) → |
| env-91   | SRS013947_C1595611              | + | 309   | 342   | RNA → rpmE2 (PRK01678)Ribosomal_L31 (pfam01197) → |
| env-92   | SRS013948_C1493527              | + | 350   | 383   | RNA → rpmE2 (PRK01678)Ribosomal_L31 (pfam01197) → |
| env-93   | SRS014124_WUGC_scaffold_3490    | - | 2369  | 2336  | RNA → rpmE2 (PRK01678)Ribosomal_L31 (pfam01197) → |
| env-94   | SRS014271_C2843132              | + | 377   | 410   | RNA → rpmE2 (PRK01678)Ribosomal_L31 (pfam01197) → |
| env-95   | SRS014573_WUGC_scaffold_16789   | - | 448   | 415   | RNA → rpmE2 (PRK01678)Ribosomal_L31 (pfam01197) → |
| env-96   | SRS014684_WUGC_scaffold_42590   | + | 348   | 381   | RNA → rpmE2 (PRK01678)Ribosomal_L31 (pfam01197) → |
| env-97   | SRS014888_C3007517              | - | 268   | 235   | RNA → rpmE2 (PRK01678)Ribosomal_L31 (pfam01197) → |
| env-98   | SRS015038_C1904815              | + | 588   | 621   | RNA → rpmE2 (PRK01678)Ribosomal_L31 (pfam01197) → |
| env-99   | SRS015057_C3337539              | + | 168   | 201   | RNA → rpmE2 (PRK01678)Ribosomal_L31 (pfam01197) → |
| env-100  | SRS015272_C3470509              | - | 244   | 211   | RNA → rpmE2 (PRK01678)Ribosomal_L31 (pfam01197) → |

|         |                                 |   |      |      |                                                   |
|---------|---------------------------------|---|------|------|---------------------------------------------------|
| env-101 | SRS015762.WUGC_scaffold_27214   | - | 414  | 381  | RNA → rpmE2 (PRK01678)Ribosomal_L31 (pfam01197) → |
| env-102 | SRS015893.C2300612              | + | 271  | 304  | RNA → rpmE2 (PRK01678)Ribosomal_L31 (pfam01197) → |
| env-103 | SRS015941.C3418565              | - | 268  | 235  | RNA → rpmE2 (PRK01678)Ribosomal_L31 (pfam01197) → |
| env-104 | SRS016002.WUGC_scaffold_52168   | + | 5156 | 5189 | RNA → rpmE2 (PRK01678)Ribosomal_L31 (pfam01197) → |
| env-105 | SRS016037.C1931603              | - | 241  | 208  | RNA → rpmE2 (PRK01678)Ribosomal_L31 (pfam01197) → |
| env-106 | SRS016086.WUGC_scaffold_11609   | + | 396  | 429  | RNA → rpmE2 (PRK01678)Ribosomal_L31 (pfam01197) → |
| env-107 | SRS016225.C2969359              | - | 268  | 235  | RNA → rpmE2 (PRK01678)Ribosomal_L31 (pfam01197) → |
| env-108 | SRS016319.WUGC_scaffold_44666   | + | 293  | 326  | RNA → rpmE2 (PRK01678)Ribosomal_L31 (pfam01197) → |
| env-109 | SRS016342.Baylor_scaffold_17442 | + | 168  | 201  | RNA → rpmE2 (PRK01678)Ribosomal_L31 (pfam01197) → |
| env-110 | SRS016501.LANL_scaffold_6156    | - | 521  | 488  | RNA → rpmE2 (PRK01678)Ribosomal_L31 (pfam01197) → |
| env-111 | SRS016529.Baylor_scaffold_15023 | + | 368  | 401  | RNA → rpmE2 (PRK01678)Ribosomal_L31 (pfam01197) → |
| env-112 | SRS016569.C2383218              | - | 244  | 211  | RNA → rpmE2 (PRK01678)Ribosomal_L31 (pfam01197) → |
| env-113 | SRS017209.Baylor_scaffold_58383 | - | 268  | 235  | RNA → rpmE2 (PRK01678)Ribosomal_L31 (pfam01197) → |
| env-114 | SRS017439.Baylor_scaffold_37092 | + | 293  | 326  | RNA → rpmE2 (PRK01678)Ribosomal_L31 (pfam01197) → |
| env-115 | SRS017713.C3280511              | - | 268  | 235  | RNA → rpmE2 (PRK01678)Ribosomal_L31 (pfam01197) → |
| env-116 | SRS018145.Baylor_scaffold_27253 | + | 848  | 881  | RNA → rpmE2 (PRK01678)Ribosomal_L31 (pfam01197) → |
| env-117 | SRS018300.C3233287              | - | 226  | 193  | RNA → rpmE2 (PRK01678)Ribosomal_L31 (pfam01197) → |
| env-118 | SRS018357.Baylor_scaffold_42581 | + | 135  | 168  | RNA → rpmE2 (PRK01678)Ribosomal_L31 (pfam01197) → |
| env-119 | SRS018439.Baylor_scaffold_58366 | + | 168  | 201  | RNA → rpmE2 (PRK01678)Ribosomal_L31 (pfam01197) → |
| env-120 | SRS018739.C3514291              | + | 146  | 179  | RNA → rpmE2 (PRK01678)Ribosomal_L31 (pfam01197) → |
| env-121 | SRS018969.C2923925              | + | 368  | 401  | RNA → rpmE2 (PRK01678)Ribosomal_L31 (pfam01197) → |
| env-122 | SRS019026.C1883714              | - | 268  | 235  | RNA → rpmE2 (PRK01678)Ribosomal_L31 (pfam01197) → |
| env-123 | SRS019027.C1899173              | + | 198  | 231  | RNA → rpmE2 (PRK01678)Ribosomal_L31 (pfam01197) → |
| env-124 | SRS019045.C2664370              | - | 268  | 235  | RNA → rpmE2 (PRK01678)Ribosomal_L31 (pfam01197) → |
| env-125 | SRS019126.WUGC_scaffold_19544   | - | 439  | 406  | RNA → rpmE2 (PRK01678)Ribosomal_L31 (pfam01197) → |
| env-126 | SRS019127.C1552693              | + | 350  | 383  | RNA →                                             |
| env-127 | SRS019219.WUGC_scaffold_61972   | - | 268  | 235  | RNA → rpmE2 (PRK01678)Ribosomal_L31 (pfam01197) → |
| env-128 | SRS019327.C2685469              | + | 198  | 231  | RNA → rpmE2 (PRK01678)Ribosomal_L31 (pfam01197) → |
| env-129 | SRS019389.C2182350              | - | 268  | 235  | RNA → rpmE2 (PRK01678)Ribosomal_L31 (pfam01197) → |
| env-130 | SRS019607.WUGC_scaffold_1340    | - | 345  | 312  | RNA → rpmE2 (PRK01678)Ribosomal_L31 (pfam01197) → |
| env-131 | SRS019894.WUGC_scaffold_51316   | + | 473  | 506  | RNA → rpmE2 (PRK01678)Ribosomal_L31 (pfam01197) → |
| env-132 | SRS019974.Baylor_scaffold_9326  | + | 378  | 411  | RNA → rpmE2 (PRK01678)Ribosomal_L31 (pfam01197) → |
| env-133 | SRS020334.Baylor_scaffold_42522 | + | 168  | 201  | RNA → rpmE2 (PRK01678)Ribosomal_L31 (pfam01197) → |
| env-134 | SRS020856.Baylor_scaffold_27114 | - | 452  | 419  | RNA → rpmE2 (PRK01678)Ribosomal_L31 (pfam01197) → |
| env-135 | SRS021496.Baylor_scaffold_12527 | + | 531  | 564  | RNA → rpmE2 (PRK01678)Ribosomal_L31 (pfam01197) → |
| env-136 | SRS021954.Baylor_scaffold_16680 | - | 268  | 235  | RNA → rpmE2 (PRK01678)Ribosomal_L31 (pfam01197) → |
| env-137 | SRS022077.Baylor_scaffold_52875 | + | 492  | 525  | RNA → rpmE2 (PRK01678)Ribosomal_L31 (pfam01197) → |
| env-138 | SRS022143.WUGC_scaffold_12069   | - | 406  | 373  | RNA → rpmE2 (PRK01678)Ribosomal_L31 (pfam01197) → |
| env-139 | SRS022621.Baylor_scaffold_80034 | - | 244  | 211  | RNA → rpmE2 (PRK01678)Ribosomal_L31 (pfam01197) → |
| env-140 | SRS023352.C4538890              | - | 268  | 235  | RNA → rpmE2 (PRK01678)Ribosomal_L31 (pfam01197) → |
| env-141 | SRS023557.Baylor_scaffold_4832  | - | 347  | 314  | RNA → rpmE2 (PRK01678)Ribosomal_L31 (pfam01197) → |
| env-142 | SRS023617.C3098017              | - | 244  | 211  | RNA → rpmE2 (PRK01678)Ribosomal_L31 (pfam01197) → |
| env-143 | SRS023835.Baylor_scaffold_35031 | + | 515  | 548  | RNA → rpmE2 (PRK01678)Ribosomal_L31 (pfam01197) → |
| env-144 | SRS023926.C2767560              | - | 244  | 211  | RNA → rpmE2 (PRK01678)Ribosomal_L31 (pfam01197) → |
| env-145 | SRS023958.Baylor_scaffold_30996 | + | 299  | 332  | RNA → rpmE2 (PRK01678)Ribosomal_L31 (pfam01197) → |
| env-146 | SRS024015.Baylor_scaffold_18521 | + | 1374 | 1407 | RNA → rpmE2 (PRK01678)Ribosomal_L31 (pfam01197) → |
| env-147 | SRS024081.C2462482              | - | 244  | 211  | RNA → rpmE2 (PRK01678)Ribosomal_L31 (pfam01197) → |
| env-148 | SRS024138.C2623584              | + | 135  | 168  | RNA → rpmE2 (PRK01678)Ribosomal_L31 (pfam01197) → |
| env-149 | SRS024277.LANL_scaffold_21966   | + | 716  | 749  | RNA → rpmE2 (PRK01678)Ribosomal_L31 (pfam01197) → |
| env-150 | SRS024375.C2363158              | + | 113  | 146  | RNA → rpmE2 (PRK01678)Ribosomal_L31 (pfam01197) → |
| env-151 | SRS024580.LANL_scaffold_27268   | + | 614  | 647  | RNA → rpmE2 (PRK01678)Ribosomal_L31 (pfam01197) → |
| env-152 | SRS024637.LANL_scaffold_24099   | - | 453  | 420  | RNA → rpmE2 (PRK01678)Ribosomal_L31 (pfam01197) → |



|          |                                 |   |       |       |                                                   |
|----------|---------------------------------|---|-------|-------|---------------------------------------------------|
| env-153  | SRS042643.C3064743              | - | 268   | 235   | RNA → rpmE2 (PRK01678)Ribosomal_L31 (pfam01197) → |
| env-154  | SRS042910.C5549436              | + | 368   | 401   | RNA →                                             |
| env-155  | SRS044486.C2150381              | + | 120   | 153   | RNA → rpmE2 (PRK01678)Ribosomal_L31 (pfam01197) → |
| env-156  | SRS045127.LANL_scaffold_25618   | + | 1248  | 1281  | RNA → rpmE2 (PRK01678)Ribosomal_L31 (pfam01197) → |
| env-157  | SRS045715.LANL_scaffold_6690    | + | 225   | 258   | RNA → rpmE2 (PRK01678)Ribosomal_L31 (pfam01197) → |
| env-158  | SRS048411.C6826029              | - | 214   | 181   | RNA → rpmE2 (PRK01678)Ribosomal_L31 (pfam01197) → |
| env-159  | SRS048791.LANL_scaffold_26361   | + | 823   | 856   | RNA → rpmE2 (PRK01678)Ribosomal_L31 (pfam01197) → |
| env-160  | SRS049147.LANL_scaffold_33494   | + | 596   | 629   | RNA → rpmE2 (PRK01678)Ribosomal_L31 (pfam01197) → |
| env-161  | SRS049389.C4709343              | - | 268   | 235   | RNA → rpmE2 (PRK01678)Ribosomal_L31 (pfam01197) → |
| env-162  | SRS050029.C709046               | - | 268   | 235   | RNA → rpmE2 (PRK01678)Ribosomal_L31 (pfam01197) → |
| env-163  | SRS050244.LANL_scaffold_4525    | - | 353   | 320   | RNA → rpmE2 (PRK01678)Ribosomal_L31 (pfam01197) → |
| env-164  | SRS050669.C2638407              | + | 270   | 303   | RNA → rpmE2 (PRK01678)Ribosomal_L31 (pfam01197) → |
| env-165  | SRS052227.LANL_scaffold_51410   | + | 309   | 342   | RNA → rpmE2 (PRK01678)Ribosomal_L31 (pfam01197) → |
| env-166  | SRS053854.LANL_scaffold_49593   | + | 459   | 492   | RNA → rpmE2 (PRK01678)Ribosomal_L31 (pfam01197) → |
| env-167  | SRS054687.LANL_scaffold_44325   | - | 268   | 235   | RNA → rpmE2 (PRK01678)Ribosomal_L31 (pfam01197) → |
| env-168  | SRS055426.C3289545              | + | 1043  | 1076  | RNA → rpmE2 (PRK01678)Ribosomal_L31 (pfam01197) → |
| env-169  | SRS056323.LANL_scaffold_27832   | + | 486   | 519   | RNA → rpmE2 (PRK01678)Ribosomal_L31 (pfam01197) → |
| env-170  | SRS056622.LANL_scaffold_18765   | - | 268   | 235   | RNA → rpmE2 (PRK01678)Ribosomal_L31 (pfam01197) → |
| env-171  | SRS057355.C2278348              | - | 268   | 235   | RNA → rpmE2 (PRK01678)Ribosomal_L31 (pfam01197) → |
| env-172  | SRS057539.LANL_scaffold_15960   | + | 387   | 420   | RNA → rpmE2 (PRK01678)Ribosomal_L31 (pfam01197) → |
| env-173  | SRS057692.LANL_scaffold_21980   | + | 239   | 272   | RNA → rpmE2 (PRK01678)Ribosomal_L31 (pfam01197) → |
| env-174  | SRS057791.C3542302              | + | 165   | 198   | RNA → rpmE2 (PRK01678)Ribosomal_L31 (pfam01197) → |
| env-175  | SRS058336.LANL_scaffold_61029   | - | 4000  | 3967  | RNA → rpmE2 (PRK01678)Ribosomal_L31 (pfam01197) → |
| env-176  | SRS062540.LANL_scaffold_56123   | + | 317   | 350   | RNA → rpmE2 (PRK01678)Ribosomal_L31 (pfam01197) → |
| env-177  | SRS062544.C2960130              | + | 486   | 519   | RNA → rpmE2 (PRK01678)Ribosomal_L31 (pfam01197) → |
| env-178  | SRS062761.C4244060              | + | 411   | 444   | RNA → rpmE2 (PRK01678)Ribosomal_L31 (pfam01197) → |
| env-179  | SRS063193.LANL_scaffold_32922   | + | 1090  | 1123  | RNA → rpmE2 (PRK01678)Ribosomal_L31 (pfam01197) → |
| env-180  | SRS063287.LANL_scaffold_18471   | + | 811   | 844   | RNA → rpmE2 (PRK01678)Ribosomal_L31 (pfam01197) → |
| env-181  | SRS064423.LANL_scaffold_27210   | + | 531   | 564   | RNA → rpmE2 (PRK01678)Ribosomal_L31 (pfam01197) → |
| env-182  | SRS064774.C2766594              | - | 244   | 211   | RNA → rpmE2 (PRK01678)Ribosomal_L31 (pfam01197) → |
| env-183  | SRS065278.LANL_scaffold_64678   | + | 186   | 219   | RNA → rpmE2 (PRK01678)Ribosomal_L31 (pfam01197) → |
| env-184  | SRS077736.C1812325              | + | 270   | 303   | RNA → rpmE2 (PRK01678)Ribosomal_L31 (pfam01197) → |
| Cma-1-1  | NZ_JUUF01000442.1               | - | 723   | 690   | RNA → rpmE2 (PRK01678)Ribosomal_L31 (pfam01197) → |
| Ssp-15-1 | NZ_JVNU01000059.1               | - | 61303 | 61270 | RNA → rpmE2 (PRK01678)Ribosomal_L31 (pfam01197) → |
| env-185  | SRS044373.WUGC_scaffold_4958    | - | 268   | 235   | RNA → rpmE2 (PRK01678)Ribosomal_L31 (pfam01197) → |
| env-186  | SRS011140.Baylor_scaffold_5150  | - | 244   | 211   | RNA → rpmE2 (PRK01678)Ribosomal_L31 (pfam01197) → |
| env-187  | SRS012279.Baylor_scaffold_62508 | + | 168   | 201   | RNA → rpmE2 (PRK01678)Ribosomal_L31 (pfam01197) → |
| env-188  | SRS014470.WUGC_scaffold_48055   | + | 444   | 477   | RNA → rpmE2 (PRK01678)Ribosomal_L31 (pfam01197) → |
| env-189  | SRS014689.C1291827              | + | 299   | 332   | RNA → rpmE2 (PRK01678)Ribosomal_L31 (pfam01197) → |
| env-190  | SRS015209.WUGC_scaffold_29650   | + | 114   | 147   | RNA → rpmE2 (PRK01678)Ribosomal_L31 (pfam01197) → |
| env-191  | SRS015395.WUGC_scaffold_12946   | - | 404   | 371   | RNA → rpmE2 (PRK01678)Ribosomal_L31 (pfam01197) → |
| env-192  | SRS015434.C5741645              | + | 153   | 186   | RNA → rpmE2 (PRK01678)Ribosomal_L31 (pfam01197) → |
| env-193  | SRS015537.WUGC_scaffold_11805   | + | 344   | 377   | RNA → rpmE2 (PRK01678)Ribosomal_L31 (pfam01197) → |
| env-194  | SRS015644.C1875711              | + | 241   | 274   | RNA → rpmE2 (PRK01678)Ribosomal_L31 (pfam01197) → |
| env-195  | SRS015797.C2623703              | - | 268   | 235   | RNA → rpmE2 (PRK01678)Ribosomal_L31 (pfam01197) → |
| env-196  | SRS017533.Baylor_scaffold_28274 | + | 359   | 392   | RNA → rpmE2 (PRK01678)Ribosomal_L31 (pfam01197) → |
| env-197  | SRS017808.Baylor_scaffold_52314 | + | 368   | 401   | RNA → rpmE2 (PRK01678)Ribosomal_L31 (pfam01197) → |
| env-198  | SRS018591.WUGC_scaffold_33617   | + | 344   | 377   | RNA → rpmE2 (PRK01678)Ribosomal_L31 (pfam01197) → |
| env-199  | SRS018791.C2231902              | + | 258   | 291   | RNA → rpmE2 (PRK01678)Ribosomal_L31 (pfam01197) → |
| env-200  | SRS020220.Baylor_scaffold_50081 | - | 244   | 211   | RNA → rpmE2 (PRK01678)Ribosomal_L31 (pfam01197) → |
| env-201  | SRS022530.C2101381              | + | 194   | 227   | RNA → rpmE2 (PRK01678)Ribosomal_L31 (pfam01197) → |
| env-202  | SRS022719.C2849471              | - | 268   | 235   | RNA → rpmE2 (PRK01678)Ribosomal_L31 (pfam01197) → |



|          |                                     |   |         |         |                                                                                                                                                         |
|----------|-------------------------------------|---|---------|---------|---------------------------------------------------------------------------------------------------------------------------------------------------------|
| env-203  | SRS024318.LANL_scaffold_10943       | - | 268     | 235     | RNA → rpmE2 (PRK01678)Ribosomal_L31 (pfam01197) →                                                                                                       |
| env-204  | SRS024441.LANL_scaffold_48378       | + | 368     | 401     | RNA → rpmE2 (PRK01678)Ribosomal_L31 (pfam01197) →                                                                                                       |
| env-205  | SRS042131.C2145624                  | + | 93      | 126     | RNA → rpmE2 (PRK01678)Ribosomal_L31 (pfam01197) →                                                                                                       |
| env-206  | SRS047210.WUGC_scaffold_39313       | + | 344     | 377     | RNA → rpmE2 (PRK01678)Ribosomal_L31 (pfam01197) →                                                                                                       |
| env-207  | SRS053603.LANL_scaffold_60119       | + | 368     | 401     | RNA → rpmE2 (PRK01678)Ribosomal_L31 (pfam01197) →                                                                                                       |
| env-208  | SRS063288.LANL_scaffold_41825       | - | 431     | 398     | RNA → rpmE2 (PRK01678)Ribosomal_L31 (pfam01197) → hypo →                                                                                                |
| env-209  | SRS011126.C4392817                  | + | 93      | 126     | RNA → rpmE2 (PRK01678)Ribosomal_L31 (pfam01197) →                                                                                                       |
| env-210  | SRS016092.WUGC_scaffold_23228       | + | 983     | 1016    | RNA → rpmE2 (PRK01678)Ribosomal_L31 (pfam01197) →                                                                                                       |
| env-211  | SRS022536.LANL_scaffold_79011       | - | 827     | 794     | RNA → rpmE2 (PRK01678)Ribosomal_L31 (pfam01197) →                                                                                                       |
| env-212  | SRS065099.LANL_scaffold_8242        | + | 652     | 685     | RNA → rpmE2 (PRK01678)Ribosomal_L31 (pfam01197) →                                                                                                       |
| env-213  | SRS051791.LANL_scaffold_16929       | + | 1106    | 1139    | RNA → rpmE2 (PRK01678)Ribosomal_L31 (pfam01197) →                                                                                                       |
| Eas-1-1  | NZ_KB946293.1                       | + | 500548  | 500580  | RNA → rpmE2 (PRK01678)Ribosomal_L31 (pfam01197) →                                                                                                       |
| env-214  | JGI12273J12029_10202314             | + | 41      | 80      | RNA → ← hypo                                                                                                                                            |
| Pch-2-1  | NZ_BBJT01000019.1                   | + | 57434   | 57468   | RNA → ← hypo                                                                                                                                            |
| Psp-3-1  | NZ_AFDH01000010.1                   | + | 58110   | 58144   | RNA → ← hypo                                                                                                                                            |
| Psp-17-1 | NZ_KE150412.1                       | - | 2575869 | 2575835 | RNA → rpmE (PRK00019)Ribosomal_L31 (pfam01197) →                                                                                                        |
| Wci-1-1  | NZ_JWHV01000015.1                   | + | 4485    | 4517    | RNA → rpmE2 (PRK01678)Ribosomal_L31 (pfam01197) →                                                                                                       |
| Wci-1-2  | NZ_JWHU01000017.1                   | - | 4782    | 4750    | RNA → rpmE2 (PRK01678)Ribosomal_L31 (pfam01197) →                                                                                                       |
| env-215  | BS_KBA_SWE02_21m_10495365           | - | 109     | 79      | RNA → rpmE (PRK00528)rpmE (PRK00019)rpmE2 (PRK01678)Ribosomal_L31 (pfam01197) →                                                                         |
| env-216  | 08_07_GOS_DNA_scaffold115360_2      | - | 274     | 241     | RNA → rpmE (PRK00019)Ribosomal_L31 (pfam01197) →                                                                                                        |
| env-217  | 08_19_CONTROL_DNA_scaffold125820_3  | - | 76      | 43      | RNA →                                                                                                                                                   |
| env-218  | 4491412.3.NODE.32910                | - | 173     | 140     | RNA → rpmE (PRK00019)Ribosomal_L31 (pfam01197) →                                                                                                        |
| env-219  | JGI24709J26583_10035806             | + | 1098    | 1132    | RNA → rpmE (PRK00019)Ribosomal_L31 (pfam01197) → Tdk (COG1435)PRK04296 (PRK04296) → PrfA (COG0216)prfA (PRK00591) →                                     |
| env-220  | JGI24707J26582_10000007             | + | 1235    | 1269    | RNA → rpmE (PRK00019)Ribosomal_L31 (pfam01197) → Tdk (COG1435)PRK04296 (PRK04296) → PrfA (COG0216)prfA (PRK00591) → HemK (COG2890)PRK09328 (PRK09328) → |
| env-221  | JGI24708J26588_10003174             | - | 10819   | 10785   | RNA → rpmE (PRK00019)Ribosomal_L31 (pfam01197) → Tdk (COG1435)PRK04296 (PRK04296) → PrfA (COG0216)prfA (PRK00591) → HemK (COG2890)PRK09328 (PRK09328) → |
| env-222  | JGI24710J26742_10050102             | - | 660     | 626     | RNA → rpmE (PRK00019)Ribosomal_L31 (pfam01197) → Tdk (COG1435)PRK04296 (PRK04296) →                                                                     |
| env-223  | JGI24500J29687_10037880             | + | 135     | 169     | RNA → rpmE (PRK00019)Ribosomal_L31 (pfam01197) → Tdk (COG1435)PRK04296 (PRK04296) → PrfA (COG0216)prfA (PRK00591) → HemK (COG2890)PRK09328 (PRK09328) → |
| env-224  | JGI24711J26586_10152175             | + | 278     | 312     | RNA → rpmE (PRK00019)Ribosomal_L31 (pfam01197) →                                                                                                        |
| env-225  | AUXO011483282.1                     | - | 168     | 141     | RNA → rpmE (PRK00019)Ribosomal_L31 (pfam01197) →                                                                                                        |
| env-226  | AUXO010436543.1                     | + | 860     | 887     | RNA → rpmE (PRK00019)Ribosomal_L31 (pfam01197) →                                                                                                        |
| Epa-2-1  | NZ_KB946300.1                       | + | 1021113 | 1021145 | RNA → rpmE2 (PRK01678)Ribosomal_L31 (pfam01197) →                                                                                                       |
| env-227  | JGI24025J20009_10344154             | - | 59      | 26      | RNA →                                                                                                                                                   |
| env-228  | BARV01035863.1                      | + | 366     | 399     | RNA → hypo →                                                                                                                                            |
| env-229  | UnmappedStool_Broad_scaffold_766897 | + | 949     | 975     | RNA → AprE (COG1404)T7SS_mycosin (TIGR03921) →                                                                                                          |
| env-230  | longitudinal_143_760                | - | 43663   | 43630   | RNA → rpmE2 (PRK01678)Ribosomal_L31 (pfam01197) →                                                                                                       |
| env-231  | longitudinal_144_2080               | - | 43746   | 43713   | RNA → rpmE2 (PRK01678)Ribosomal_L31 (pfam01197) →                                                                                                       |
| env-232  | longitudinal_145_864                | - | 2639    | 2606    | RNA → rpmE2 (PRK01678)Ribosomal_L31 (pfam01197) →                                                                                                       |
| Lca-1-1  | NZ_JXNV01000006.1                   | + | 54157   | 54190   | RNA → rpmE2 (PRK01678)Ribosomal_L31 (pfam01197) →                                                                                                       |
| Lca-17-1 | NZ_AQVS01000053.1                   | + | 10357   | 10324   | RNA → rpmE2 (PRK01678)Ribosomal_L31 (pfam01197) →                                                                                                       |
| Lpa-33-1 | NZ_ANKJ01000022.1                   | + | 2648    | 2681    | RNA → rpmE2 (PRK01678)Ribosomal_L31 (pfam01197) →                                                                                                       |
| Lpa-29-1 | NZ_ANKY01000024.1                   | + | 53357   | 53390   | RNA → rpmE2 (PRK01678)Ribosomal_L31 (pfam01197) →                                                                                                       |
| Lpa-14-1 | NZ_ANMK01000192.1                   | - | 3633    | 3600    | RNA → rpmE2 (PRK01678)Ribosomal_L31 (pfam01197) →                                                                                                       |
| Lpa-24-1 | NZ_ANMM01000002.1                   | - | 44657   | 44624   | RNA → rpmE2 (PRK01678)Ribosomal_L31 (pfam01197) →                                                                                                       |
| Lpa-32-1 | NZ_ANMJ01000006.1                   | + | 1533    | 1566    | RNA → rpmE2 (PRK01678)Ribosomal_L31 (pfam01197) →                                                                                                       |
| Lpa-25-1 | NZ_ANMN01000105.1                   | - | 46066   | 46033   | RNA → rpmE2 (PRK01678)Ribosomal_L31 (pfam01197) →                                                                                                       |
| Lpa-37-1 | NZ_ANKB01000003.1                   | - | 44594   | 44561   | RNA → rpmE2 (PRK01678)Ribosomal_L31 (pfam01197) →                                                                                                       |
| Lpa-36-1 | NZ_ANJU01000008.1                   | + | 58114   | 58147   | RNA → rpmE2 (PRK01678)Ribosomal_L31 (pfam01197) →                                                                                                       |
| Lpa-27-1 | NZ_ANKA01000008.1                   | - | 29182   | 29149   | RNA → rpmE2 (PRK01678)Ribosomal_L31 (pfam01197) →                                                                                                       |
| Lpa-38-1 | NZ_ANKV01000009.1                   | - | 44491   | 44458   | RNA → rpmE2 (PRK01678)Ribosomal_L31 (pfam01197) →                                                                                                       |

|          |                    |   |         |         |                                                   |
|----------|--------------------|---|---------|---------|---------------------------------------------------|
| Lpa-15-1 | NZ_ANKW01000003.1  | + | 99166   | 99199   | RNA → rpmE2 (PRK01678)Ribosomal_L31 (pfam01197) → |
| Lpa-23-1 | NZ_ANML01000015.1  | + | 50153   | 50186   | RNA → rpmE2 (PRK01678)Ribosomal_L31 (pfam01197) → |
| Lpa-16-1 | NZ_ANKM01000001.1  | - | 46054   | 46021   | RNA → rpmE2 (PRK01678)Ribosomal_L31 (pfam01197) → |
| Lpa-19-1 | NZ_ANJY01000018.1  | - | 13430   | 13397   | RNA → rpmE2 (PRK01678)Ribosomal_L31 (pfam01197) → |
| Lpa-21-1 | NZ_ANMI01000231.1  | + | 4976    | 5009    | RNA → rpmE2 (PRK01678)Ribosomal_L31 (pfam01197) → |
| Lpa-18-1 | NZ_ANMH01000022.1  | + | 1835    | 1868    | RNA → rpmE2 (PRK01678)Ribosomal_L31 (pfam01197) → |
| Lpa-31-1 | NZ_ANKI01000072.1  | + | 10689   | 10722   | RNA → rpmE2 (PRK01678)Ribosomal_L31 (pfam01197) → |
| Lpa-35-1 | NZ_ANLF01000101.1  | + | 3217    | 3250    | RNA → rpmE2 (PRK01678)Ribosomal_L31 (pfam01197) → |
| Lpa-20-1 | NZ_ANJS01000007.1  | + | 49686   | 49719   | RNA → rpmE2 (PRK01678)Ribosomal_L31 (pfam01197) → |
| Lpa-10-1 | NZ_ANLE01000428.1  | - | 11217   | 11184   | RNA → rpmE2 (PRK01678)Ribosomal_L31 (pfam01197) → |
| Lpa-12-1 | NZ_ANKH01000172.1  | - | 1356    | 1323    | RNA → rpmE2 (PRK01678)Ribosomal_L31 (pfam01197) → |
| Lpa-30-1 | NZ_ANKG01000146.1  | + | 1496    | 1529    | RNA → rpmE2 (PRK01678)Ribosomal_L31 (pfam01197) → |
| Lpa-28-1 | NZ_ANJT01000272.1  | + | 1638    | 1671    | RNA → rpmE2 (PRK01678)Ribosomal_L31 (pfam01197) → |
| Lpa-17-1 | NZ_ANJZ01000255.1  | + | 27968   | 28001   | RNA → rpmE2 (PRK01678)Ribosomal_L31 (pfam01197) → |
| Lpa-34-1 | NZ_ANJV01000073.1  | - | 302     | 269     | RNA → rpmE2 (PRK01678)Ribosomal_L31 (pfam01197) → |
| Lpa-22-1 | NZ_ANKF01000041.1  | + | 18918   | 18951   | RNA → rpmE2 (PRK01678)Ribosomal_L31 (pfam01197) → |
| Lpa-11-1 | NZ_ANJX01000256.1  | - | 27031   | 26998   | RNA → rpmE2 (PRK01678)Ribosomal_L31 (pfam01197) → |
| Lpa-26-1 | NZ_ANKK01000559.1  | + | 21036   | 21069   | RNA → rpmE2 (PRK01678)Ribosomal_L31 (pfam01197) → |
| Lpa-6-1  | NZ_BAYM01000151.1  | - | 43683   | 43650   | RNA → rpmE2 (PRK01678)Ribosomal_L31 (pfam01197) → |
| Lpa-7-1  | NZ_BAYN01000089.1  | + | 23335   | 23368   | RNA → rpmE2 (PRK01678)Ribosomal_L31 (pfam01197) → |
| Lpa-8-1  | NZ_BAYO01000435.1  | - | 618     | 585     | RNA → rpmE2 (PRK01678)Ribosomal_L31 (pfam01197) → |
| Lca-5-1  | NZ_AUYM01000001.1  | + | 51678   | 51711   | RNA → rpmE2 (PRK01678)Ribosomal_L31 (pfam01197) → |
| Lca-1-2  | NZ_JVUB01000117.1  | + | 92912   | 92945   | RNA → rpmE2 (PRK01678)Ribosomal_L31 (pfam01197) → |
| Lca-1-3  | NZ_JVUA01000053.1  | - | 246     | 213     | RNA → rpmE2 (PRK01678)Ribosomal_L31 (pfam01197) → |
| Lca-1-4  | NZ_JUJQW01000038.1 | + | 57117   | 57150   | RNA → rpmE2 (PRK01678)Ribosomal_L31 (pfam01197) → |
| Lca-12-1 | NZ_AFYU01000056.1  | - | 16249   | 16216   | RNA → rpmE2 (PRK01678)Ribosomal_L31 (pfam01197) → |
| Lca-14-1 | NZ_AFYU01000041.1  | - | 44459   | 44426   | RNA → rpmE2 (PRK01678)Ribosomal_L31 (pfam01197) → |
| Lca-15-1 | NZ_AFYQ01000094.1  | - | 7962    | 7929    | RNA → rpmE2 (PRK01678)Ribosomal_L31 (pfam01197) → |
| Lca-16-1 | NZ_AFYR01000102.1  | - | 44152   | 44119   | RNA → rpmE2 (PRK01678)Ribosomal_L31 (pfam01197) → |
| Lca-17-2 | NZ_AFYS01000052.1  | - | 106073  | 106040  | RNA → rpmE2 (PRK01678)Ribosomal_L31 (pfam01197) → |
| Lca-9-1  | NZ_AFYT01000048.1  | - | 11682   | 11649   | RNA → rpmE2 (PRK01678)Ribosomal_L31 (pfam01197) → |
| Lca-13-1 | NZ_AFYO01000057.1  | - | 34209   | 34176   | RNA → rpmE2 (PRK01678)Ribosomal_L31 (pfam01197) → |
| Lca-3-1  | NZ_AFYK01000043.1  | - | 38236   | 38203   | RNA → rpmE2 (PRK01678)Ribosomal_L31 (pfam01197) → |
| Lpa-4-1  | NZ_BAGT01000089.1  | - | 46077   | 46044   | RNA → rpmE2 (PRK01678)Ribosomal_L31 (pfam01197) → |
| Lca-20-1 | NC_008526.1        | - | 2550073 | 2550040 | RNA → rpmE2 (PRK01678)Ribosomal_L31 (pfam01197) → |
| Lpa-42-1 | NZ_GG670156.1      | + | 291360  | 291393  | RNA → rpmE2 (PRK01678)Ribosomal_L31 (pfam01197) → |
| Lca-11-1 | NZ_CM001848.2      | - | 2654316 | 2654283 | RNA → rpmE2 (PRK01678)Ribosomal_L31 (pfam01197) → |
| Lca-22-1 | NC_010999.1        | - | 2690859 | 2690826 | RNA → rpmE2 (PRK01678)Ribosomal_L31 (pfam01197) → |
| Lca-21-1 | NC_017474.1        | - | 2681824 | 2681791 | RNA → rpmE2 (PRK01678)Ribosomal_L31 (pfam01197) → |
| Lca-23-1 | NC_017473.1        | - | 2650937 | 2650904 | RNA → rpmE2 (PRK01678)Ribosomal_L31 (pfam01197) → |
| Lpa-3-1  | NZ_CP012187.1      | - | 2514242 | 2514209 | RNA → rpmE2 (PRK01678)Ribosomal_L31 (pfam01197) → |
| Lca-24-1 | NC_018641.1        | - | 2687463 | 2687430 | RNA → rpmE2 (PRK01678)Ribosomal_L31 (pfam01197) → |
| Lca-8-1  | NC_021721.1        | - | 2731500 | 2731467 | RNA → rpmE2 (PRK01678)Ribosomal_L31 (pfam01197) → |
| Lpa-9-1  | NC_022112.1        | - | 2544386 | 2544353 | RNA → rpmE2 (PRK01678)Ribosomal_L31 (pfam01197) → |
| Lpa-5-1  | NZ_CP007122.1      | - | 2486141 | 2486108 | RNA → rpmE2 (PRK01678)Ribosomal_L31 (pfam01197) → |
| Lpa-13-1 | NZ_AP012541.1      | - | 2658289 | 2658256 | RNA → rpmE2 (PRK01678)Ribosomal_L31 (pfam01197) → |
| Lca-18-1 | NC_014334.2        | - | 2478752 | 2478719 | RNA → rpmE2 (PRK01678)Ribosomal_L31 (pfam01197) → |
| Lca-2-1  | NZ_CP006690.1      | - | 2512933 | 2512900 | RNA → rpmE2 (PRK01678)Ribosomal_L31 (pfam01197) → |
| Lca-10-1 | NZ_CM001861.1      | - | 2680824 | 2680791 | RNA → rpmE2 (PRK01678)Ribosomal_L31 (pfam01197) → |
| Lpa-3-2  | NZ_CP012148.1      | - | 2678238 | 2678205 | RNA → rpmE2 (PRK01678)Ribosomal_L31 (pfam01197) → |
| Lca-4-1  | NZ_AFYL01000034.1  | - | 39968   | 39935   | RNA → rpmE2 (PRK01678)Ribosomal_L31 (pfam01197) → |
| Lca-6-1  | NZ_AFYM01000082.1  | - | 5581    | 5548    | RNA → rpmE2 (PRK01678)Ribosomal_L31 (pfam01197) → |

|          |                      |   |         |         |                                                                                               |
|----------|----------------------|---|---------|---------|-----------------------------------------------------------------------------------------------|
| Lca-7-1  | NZ_AFYN01000040.1    | - | 56503   | 56470   | RNA → rpmE2 (PRK01678)Ribosomal_L31 (pfam01197) →                                             |
| Lca-6-2  | NZ_AZOE01000015.1    | - | 5466    | 5433    | RNA → rpmE2 (PRK01678)Ribosomal_L31 (pfam01197) →                                             |
| Lze-1-1  | NZ_BACQ01000037.1    | + | 45109   | 45142   | RNA → rpmE2 (PRK01678)Ribosomal_L31 (pfam01197) → rpmE2 (PRK01678)Ribosomal_L31 (pfam01197) → |
| Lca-1-5  | NZ_LCUN01000013.1    | + | 753391  | 753424  | RNA → rpmE2 (PRK01678)Ribosomal_L31 (pfam01197) →                                             |
| Lsp-11-1 | NZ_KN714896.1        | + | 1114375 | 1114408 | RNA → rpmE2 (PRK01678)Ribosomal_L31 (pfam01197) →                                             |
| Lca-19-1 | NZ_AP012544.1        | - | 2516623 | 2516590 | RNA → rpmE2 (PRK01678)Ribosomal_L31 (pfam01197) →                                             |
| Lrh-14-1 | NZ_AMQW01000012.1    | - | 9617    | 9584    | RNA → rpmE2 (PRK01678)Ribosomal_L31 (pfam01197) →                                             |
| Lrh-15-1 | NZ_AMQX01000009.1    | + | 73746   | 73779   | RNA → rpmE2 (PRK01678)Ribosomal_L31 (pfam01197) →                                             |
| Lrh-1-1  | NZ_JUWG01000100.1    | - | 9704    | 9671    | RNA → rpmE2 (PRK01678)Ribosomal_L31 (pfam01197) →                                             |
| Lrh-1-2  | NZ_JUWQ01000064.1    | + | 8431    | 8464    | RNA → rpmE2 (PRK01678)Ribosomal_L31 (pfam01197) →                                             |
| env-233  | longitudinal_146_787 | + | 90575   | 90608   | RNA → rpmE2 (PRK01678)Ribosomal_L31 (pfam01197) →                                             |
| Lrh-21-1 | NZ_ABWJ01000022.1    | - | 40553   | 40520   | RNA → rpmE2 (PRK01678)Ribosomal_L31 (pfam01197) → rpmE2 (PRK01678)Ribosomal_L31 (pfam01197) → |
| Lrh-1-3  | NZ_LFNB01000004.1    | - | 40563   | 40530   | RNA → rpmE2 (PRK01678)Ribosomal_L31 (pfam01197) →                                             |
| Lrh-1-4  | NZ_JUIL01000391.1    | + | 6444    | 6477    | RNA → rpmE2 (PRK01678)Ribosomal_L31 (pfam01197) →                                             |
| Lrh-1-5  | NZ_JVPR01000084.1    | + | 1525    | 1558    | RNA → rpmE2 (PRK01678)Ribosomal_L31 (pfam01197) →                                             |
| Lrh-1-6  | NZ_JVQV01000076.1    | + | 3853    | 3886    | RNA → rpmE2 (PRK01678)Ribosomal_L31 (pfam01197) →                                             |
| Lrh-1-7  | NZ_JVIZ01000364.1    | - | 40597   | 40564   | RNA → rpmE2 (PRK01678)Ribosomal_L31 (pfam01197) →                                             |
| Lrh-1-8  | NZ_JULF01000226.1    | - | 3136    | 3103    | RNA → rpmE2 (PRK01678)Ribosomal_L31 (pfam01197) →                                             |
| Lrh-1-9  | NZ_JPZB01000036.1    | - | 4961    | 4928    | RNA → rpmE2 (PRK01678)Ribosomal_L31 (pfam01197) →                                             |
| Lrh-16-1 | NZ_JDFQ01000007.1    | + | 73438   | 73471   | RNA → rpmE2 (PRK01678)Ribosomal_L31 (pfam01197) →                                             |
| Lrh-17-1 | NZ_JDFR01000003.1    | - | 40564   | 40531   | RNA → rpmE2 (PRK01678)Ribosomal_L31 (pfam01197) →                                             |
| Lrh-6-1  | NZ_JDRW01000008.1    | + | 93238   | 93271   | RNA → rpmE2 (PRK01678)Ribosomal_L31 (pfam01197) →                                             |
| Lrh-20-1 | NC_013198.1          | - | 2611055 | 2611022 | RNA → rpmE2 (PRK01678)Ribosomal_L31 (pfam01197) →                                             |
| Lrh-20-2 | NC_017482.1          | - | 2606025 | 2605992 | RNA → rpmE2 (PRK01678)Ribosomal_L31 (pfam01197) →                                             |
| Lrh-1-10 | NZ_JTDC01000034.1    | + | 23421   | 23454   | RNA → rpmE2 (PRK01678)Ribosomal_L31 (pfam01197) →                                             |
| Lrh-1-11 | NZ_JWHC01000058.1    | - | 565     | 532     | RNA → rpmE2 (PRK01678)Ribosomal_L31 (pfam01197) →                                             |
| Lrh-1-12 | NZ_JYCS01000044.1    | + | 1501    | 1534    | RNA → rpmE2 (PRK01678)Ribosomal_L31 (pfam01197) →                                             |
| Lrh-5-1  | NZ_ATBI01000016.1    | - | 42313   | 42280   | RNA → rpmE2 (PRK01678)Ribosomal_L31 (pfam01197) →                                             |
| Lrh-1-13 | NZ_LAZE01000069.1    | - | 88154   | 88121   | RNA → rpmE2 (PRK01678)Ribosomal_L31 (pfam01197) →                                             |
| Lrh-1-14 | NZ_JUIH01000135.1    | - | 7237    | 7204    | RNA → rpmE2 (PRK01678)Ribosomal_L31 (pfam01197) →                                             |
| Lrh-1-15 | NZ_LFNA01000007.1    | - | 565     | 532     | RNA → rpmE2 (PRK01678)Ribosomal_L31 (pfam01197) →                                             |
| Lrh-1-16 | NZ_JUII01000291.1    | - | 7276    | 7243    | RNA → rpmE2 (PRK01678)Ribosomal_L31 (pfam01197) →                                             |
| Lrh-1-17 | NZ_JUIK01000056.1    | - | 6917    | 6884    | RNA → rpmE2 (PRK01678)Ribosomal_L31 (pfam01197) →                                             |
| Lrh-1-18 | NZ_JVLT01000012.1    | + | 180026  | 180059  | RNA → rpmE2 (PRK01678)Ribosomal_L31 (pfam01197) →                                             |
| Lrh-1-19 | NZ_JVDP01000093.1    | + | 4098    | 4065    | RNA → rpmE2 (PRK01678)Ribosomal_L31 (pfam01197) →                                             |
| Lrh-1-20 | NZ_JVCX01000037.1    | - | 27316   | 27349   | RNA → rpmE2 (PRK01678)Ribosomal_L31 (pfam01197) →                                             |
| Lrh-1-21 | NZ_JUTS01000037.1    | + | 27414   | 27447   | RNA → rpmE2 (PRK01678)Ribosomal_L31 (pfam01197) →                                             |
| Lrh-1-22 | NZ_JUPX01000230.1    | + | 1814    | 1847    | RNA → rpmE2 (PRK01678)Ribosomal_L31 (pfam01197) →                                             |
| Lrh-1-23 | NZ_JUTB01000107.1    | + | 26945   | 26978   | RNA → rpmE2 (PRK01678)Ribosomal_L31 (pfam01197) →                                             |
| Lrh-1-24 | NZ_JUPA01000162.1    | - | 40691   | 40658   | RNA → rpmE2 (PRK01678)Ribosomal_L31 (pfam01197) →                                             |
| Lrh-1-25 | NZ_JUMP01000096.1    | - | 3386    | 3353    | RNA → rpmE2 (PRK01678)Ribosomal_L31 (pfam01197) →                                             |
| Lrh-1-26 | NZ_JUON01000171.1    | + | 1814    | 1847    | RNA → rpmE2 (PRK01678)Ribosomal_L31 (pfam01197) →                                             |
| Lrh-1-27 | NZ_JUM001000067.1    | - | 9622    | 9589    | RNA → rpmE2 (PRK01678)Ribosomal_L31 (pfam01197) →                                             |
| Lrh-1-28 | NZ_JUKV01000061.1    | - | 3386    | 3353    | RNA → rpmE2 (PRK01678)Ribosomal_L31 (pfam01197) →                                             |
| Lrh-18-1 | NZ_AGKC01000002.1    | - | 40627   | 40594   | RNA → rpmE2 (PRK01678)Ribosomal_L31 (pfam01197) →                                             |
| Lrh-8-1  | NZ_AYTQ01000044.1    | - | 40961   | 40928   | RNA → rpmE2 (PRK01678)Ribosomal_L31 (pfam01197) →                                             |
| Lrh-2-1  | NZ_JMSI01000003.1    | + | 364620  | 364653  | RNA → rpmE2 (PRK01678)Ribosomal_L31 (pfam01197) →                                             |
| Lrh-7-1  | NZ_JNNV01000002.1    | + | 523226  | 523259  | RNA → rpmE2 (PRK01678)Ribosomal_L31 (pfam01197) →                                             |
| Lrh-13-1 | NZ_AZHJ01000147.1    | - | 296     | 263     | RNA → rpmE2 (PRK01678)Ribosomal_L31 (pfam01197) →                                             |
| Lrh-4-1  | NZ_JH159058.1        | + | 1505    | 1538    | RNA → rpmE2 (PRK01678)Ribosomal_L31 (pfam01197) →                                             |
| Lrh-3-1  | NZ_JH379496.1        | + | 1535    | 1568    | RNA → rpmE2 (PRK01678)Ribosomal_L31 (pfam01197) →                                             |
| Lrh-23-1 | NC_013199.1          | - | 2590593 | 2590560 | RNA → rpmE2 (PRK01678)Ribosomal_L31 (pfam01197) →                                             |



|          |                                    |   |         |         |                                                                                                                                                                                                                                                                                                                                      |
|----------|------------------------------------|---|---------|---------|--------------------------------------------------------------------------------------------------------------------------------------------------------------------------------------------------------------------------------------------------------------------------------------------------------------------------------------|
| Lrh-19-1 | NC_017491.1                        | - | 2582498 | 2582465 | RNA → rpmE2 (PRK01678)Ribosomal_L31 (pfam01197) →                                                                                                                                                                                                                                                                                    |
| Lrh-12-1 | NC_021725.1                        | - | 2608939 | 2608906 | RNA → rpmE2 (PRK01678)Ribosomal_L31 (pfam01197) →                                                                                                                                                                                                                                                                                    |
| Lrh-11-1 | NC_021723.1                        | - | 2514116 | 2514083 | RNA → rpmE2 (PRK01678)Ribosomal_L31 (pfam01197) →                                                                                                                                                                                                                                                                                    |
| Lrh-22-1 | NZ_GG692961.1                      | + | 684435  | 684468  | RNA → rpmE2 (PRK01678)Ribosomal_L31 (pfam01197) →                                                                                                                                                                                                                                                                                    |
| Lrh-10-1 | NZ_AYTP01000042.1                  | + | 63172   | 63205   | RNA → rpmE2 (PRK01678)Ribosomal_L31 (pfam01197) →                                                                                                                                                                                                                                                                                    |
| Lrh-9-1  | NZ_AYTR01000028.1                  | + | 40856   | 40823   | RNA → rpmE2 (PRK01678)Ribosomal_L31 (pfam01197) →                                                                                                                                                                                                                                                                                    |
| Lca-1-6  | NZ_JUPZ01000004.1                  | + | 21466   | 21499   | RNA → rpmE2 (PRK01678)Ribosomal_L31 (pfam01197) →                                                                                                                                                                                                                                                                                    |
| Fba-1-1  | NZ_KE159698.1                      | - | 41156   | 41122   | RNA → rpmE (PRK00019)Ribosomal_L31 (pfam01197) → PRK07681 (PRK07681)AspB (COG0436) → hypo                                                                                                                                                                                                                                            |
| env-234  | UnmappedStool_Broad_scaffold_36047 | + | 3764    | 3797    | RNA → rpmE (PRK00019)Ribosomal_L31 (pfam01197) →                                                                                                                                                                                                                                                                                     |
| env-235  | SRS017521_C2731538                 | - | 110     | 77      | RNA → rpmE (PRK00019)Ribosomal_L31 (pfam01197) →                                                                                                                                                                                                                                                                                     |
| env-236  | SRS019601_WUGC_scaffold_47824      | - | 1213    | 1180    | RNA → rpmE (PRK00019)Ribosomal_L31 (pfam01197) →                                                                                                                                                                                                                                                                                     |
| Esp-18-1 | NZ_JH594450.1                      | + | 256315  | 256348  | RNA → rpmE (PRK00019)Ribosomal_L31 (pfam01197) →                                                                                                                                                                                                                                                                                     |
| Eba-1-1  | NZ_KI391958.1                      | + | 308940  | 308973  | RNA → rpmE (PRK00019)Ribosomal_L31 (pfam01197) →                                                                                                                                                                                                                                                                                     |
| env-237  | AUXO015079216.1                    | - | 64      | 31      | RNA → hypo →                                                                                                                                                                                                                                                                                                                         |
| env-238  | AUXO018658602.1                    | + | 131     | 164     | RNA → rpmE (PRK00019)Ribosomal_L31 (pfam01197) →                                                                                                                                                                                                                                                                                     |
| env-239  | SRS049318_C6167461                 | - | 259     | 226     | RNA → PRK05452 (PRK05452)Rubredoxin (pfam00301) →                                                                                                                                                                                                                                                                                    |
| env-240  | JGI24724J26744_10023391            | + | 2361    | 2388    | RNA → hypo →                                                                                                                                                                                                                                                                                                                         |
| env-241  | 3300000052_087558                  | + | 1786    | 1819    | RNA → rpmE (PRK00019)Ribosomal_L31 (pfam01197) → hypo →                                                                                                                                                                                                                                                                              |
| Pwy-1-1  | NZ_JQCR01000002.1                  | - | 1896394 | 1896362 | RNA → rpmE (PRK00019)Ribosomal_L31 (pfam01197) →                                                                                                                                                                                                                                                                                     |
| Bsp-41-1 | NZ_LIGF01000001.1                  | + | 2484836 | 2484867 | RNA → rpmE2 (PRK01678)Ribosomal_L31 (pfam01197) →                                                                                                                                                                                                                                                                                    |
| env-242  | 3300001580_10921771                | + | 174     | 205     | RNA → rpmE (PRK00019)Ribosomal_L31 (pfam01197) →                                                                                                                                                                                                                                                                                     |
| env-243  | 3300001580_11398849                | + | 190     | 221     | RNA →                                                                                                                                                                                                                                                                                                                                |
| env-244  | 2227341862                         | - | 257     | 226     | RNA → rpmE (PRK00019)Ribosomal_L31 (pfam01197) →                                                                                                                                                                                                                                                                                     |
| env-245  | JGI994J12354_10052525              | + | 1979    | 2010    | RNA → ← hypo                                                                                                                                                                                                                                                                                                                         |
| env-246  | KGL_S1_ANT02_95m.c10164418         | - | 454     | 421     | RNA → rpmE2 (PRK01678)Ribosomal_L31 (pfam01197) →                                                                                                                                                                                                                                                                                    |
| Cal-1-1  | NZ_JQLG01000004.1                  | + | 1333377 | 1333410 | RNA → rpmE2 (PRK01678)Ribosomal_L31 (pfam01197) →                                                                                                                                                                                                                                                                                    |
| env-247  | KGL_S1_ANT01_95m.c10000058         | + | 18408   | 18441   | RNA → rpmE2 (PRK01678)Ribosomal_L31 (pfam01197) →                                                                                                                                                                                                                                                                                    |
| env-248  | KGL_S2_ANT05_2345m.c1001626        | - | 5035    | 5002    | RNA → rpmE2 (PRK01678)Ribosomal_L31 (pfam01197) →                                                                                                                                                                                                                                                                                    |
| Cpl-1-1  | NZ_JLQ01000002.1                   | - | 2377756 | 2377723 | RNA → rpmE2 (PRK01678)Ribosomal_L31 (pfam01197) → hypo →                                                                                                                                                                                                                                                                             |
| Csp-1-1  | NC_022606.1                        | + | 216680  | 216713  | RNA → rpmE2 (PRK01678)Ribosomal_L31 (pfam01197) →                                                                                                                                                                                                                                                                                    |
| Cin-1-1  | NZ_JQIV01000006.1                  | + | 1981645 | 1981678 | RNA → rpmE2 (PRK01678)Ribosomal_L31 (pfam01197) →                                                                                                                                                                                                                                                                                    |
| Csp-9-1  | NZ_ABHH01000004.1                  | - | 75193   | 75160   | RNA → rpmE2 (PRK01678)Ribosomal_L31 (pfam01197) → rpmE2 (PRK01678)Ribosomal_L31 (pfam01197)                                                                                                                                                                                                                                          |
| Cje-1-1  | NZ_JEMH01000028.1                  | + | 73321   | 73354   | RNA → rpmE2 (PRK01678)Ribosomal_L31 (pfam01197) →                                                                                                                                                                                                                                                                                    |
| Cje-2-1  | NZ_JQNF01000010.1                  | + | 922204  | 922237  | RNA → rpmE2 (PRK01678)Ribosomal_L31 (pfam01197) →                                                                                                                                                                                                                                                                                    |
| Pas-1-1  | NZ_AULU01000019.1                  | + | 60564   | 60597   | RNA → rpmE (PRK00019)Ribosomal_L31 (pfam01197) →                                                                                                                                                                                                                                                                                     |
| env-249  | AUXO012865815.1                    | - | 7672    | 7641    | RNA → rpmE (PRK00019)Ribosomal_L31 (pfam01197) → U3_snoRNA_assoc (pfam08297) →<br>PRK05571 (PRK05571)LacAB_rpiB (pfam02502) → DUF1146 (pfam06612) →<br>PRK11649 (PRK11649)Peptidase_M23 (pfam01551) → MreB_like (cd10225)PRK13930 (PRK13930) →<br>ECA_wecA (TIGR02380)GT_WecA_like (cd06853) → LytTR (smart00850)LytTR (pfam04397) → |
| env-250  | RUMENNODE_2681326.1                | + | 10151   | 10184   | RNA → rpmE (PRK00019)Ribosomal_L31 (pfam01197) →                                                                                                                                                                                                                                                                                     |
| env-251  | 2204978118                         | - | 261     | 228     | RNA → rpmE2 (PRK01678)Ribosomal_L31 (pfam01197) →                                                                                                                                                                                                                                                                                    |
| env-252  | 2157636633                         | - | 261     | 228     | RNA → rpmE2 (PRK01678)Ribosomal_L31 (pfam01197) →                                                                                                                                                                                                                                                                                    |
| Lbu-2-1  | NC_018610.1                        | - | 1624612 | 1624579 | RNA → rpmE2 (PRK01678)Ribosomal_L31 (pfam01197) →                                                                                                                                                                                                                                                                                    |
| Tca-1-1  | NZ_AUMM01000004.1                  | + | 100153  | 100187  | RNA → rpmE (PRK00019)Ribosomal_L31 (pfam01197) →                                                                                                                                                                                                                                                                                     |
| Sin-1-1  | NZ_AFVQ02000220.1                  | - | 17111   | 17077   | RNA → rpmE2 (PRK01678)Ribosomal_L31 (pfam01197) →                                                                                                                                                                                                                                                                                    |
| Sla-1-1  | NZ_AWTC01000005.1                  | - | 157176  | 157144  | RNA → rpmE2 (PRK01678)Ribosomal_L31 (pfam01197) →                                                                                                                                                                                                                                                                                    |
| Svi-1-2  | NZ_KB899046.1                      | - | 55946   | 55912   | RNA → rpmE2 (PRK01678)Ribosomal_L31 (pfam01197) →                                                                                                                                                                                                                                                                                    |
| Svi-1-1  | NZ_BAEY01000002.1                  | - | 55800   | 55766   | RNA → rpmE2 (PRK01678)Ribosomal_L31 (pfam01197) → rpmE2 (PRK01678)Ribosomal_L31 (pfam01197)                                                                                                                                                                                                                                          |
| Ste-2-1  | NZ_JAQS01000032.1                  | + | 2004    | 2038    | RNA → rpmE2 (PRK01678)Ribosomal_L31 (pfam01197) → hypo → Tdk (COG1435)PRK04296 (PRK04296)                                                                                                                                                                                                                                            |
| Ste-1-1  | NZ_JFZC01000099.1                  | + | 3894    | 3928    | RNA → rpmE2 (PRK01678)Ribosomal_L31 (pfam01197) → hypo → Tdk (COG1435)PRK04296 (PRK04296)                                                                                                                                                                                                                                            |
| Pma-3-1  | NZ_KB898207.1                      | + | 5632    | 5598    | RNA → rpmE (PRK00019)Ribosomal_L31 (pfam01197) →                                                                                                                                                                                                                                                                                     |
| Pma-4-1  | NZ_ASSE01000237.1                  | + | 58736   | 58770   | RNA → rpmE (PRK00019)Ribosomal_L31 (pfam01197) →                                                                                                                                                                                                                                                                                     |
| Ppa-1-1  | NZ_AUFO01000034.1                  | - | 5491    | 5457    | RNA → rpmE (PRK00019)Ribosomal_L31 (pfam01197) →                                                                                                                                                                                                                                                                                     |

|          |                                   |   |         |         |                                                                                             |
|----------|-----------------------------------|---|---------|---------|---------------------------------------------------------------------------------------------|
| Hco-1-1  | NZ_AFNU02000004.1                 | + | 304522  | 304555  | RNA → rpmE (PRK00019)Ribosomal_L31 (pfam01197) →                                            |
| Esp-4-1  | NZ_LDNY01000001.1                 | + | 240696  | 240729  | RNA → rpmE2 (PRK01678)Ribosomal_L31 (pfam01197) → NhaP (COG0025)PRK05326 (PRK05326) →       |
| Esp-1-1  | NC_012673.1                       | - | 1311255 | 1311222 | RNA → rpmE2 (PRK01678)Ribosomal_L31 (pfam01197) → NhaP (COG0025)PRK05326 (PRK05326) →       |
| Esp-6-1  | NZ_JPOD01000003.1                 | + | 360593  | 360626  | RNA → rpmE2 (PRK01678)Ribosomal_L31 (pfam01197) → NhaP (COG0025)PRK05326 (PRK05326) →       |
| Ema-1-1  | NZ_KK211189.1                     | + | 798722  | 798755  | RNA → rpmE2 (PRK01678)Ribosomal_L31 (pfam01197) → NhaP (COG0025)PRK05326 (PRK05326) →       |
| Eme-1-1  | NZ_JQGI01000001.1                 | - | 1863165 | 1863132 | RNA → rpmE2 (PRK01678)Ribosomal_L31 (pfam01197) → NhaP (COG0025)PRK05326 (PRK05326) →       |
| Esp-2-1  | NZ_ATKK01000002.1                 | - | 493876  | 493843  | RNA → rpmE2 (PRK01678)Ribosomal_L31 (pfam01197) →                                           |
| Esp-10-1 | NZ_JTLB01000028.1                 | - | 13345   | 13312   | RNA → rpmE2 (PRK01678)Ribosomal_L31 (pfam01197) →                                           |
| Esp-3-1  | NZ_JNAA01000057.1                 | - | 81113   | 81080   | RNA → rpmE2 (PRK01678)Ribosomal_L31 (pfam01197) →                                           |
| Eal-1-1  | NZ_JJMW01000013.1                 | + | 23661   | 23694   | RNA → rpmE2 (PRK01678)Ribosomal_L31 (pfam01197) →                                           |
| Eau-1-1  | NZ_JNIQ01000001.1                 | + | 873212  | 873245  | RNA → rpmE2 (PRK01678)Ribosomal_L31 (pfam01197) →                                           |
| Ech-1-1  | NZ_JNIP01000001.1                 | + | 361382  | 361419  | RNA → rpmE2 (PRK01678)Ribosomal_L31 (pfam01197) →                                           |
| Epa-1-1  | NZ_ATCL01000014.1                 | + | 231351  | 231388  | RNA → rpmE2 (PRK01678)Ribosomal_L31 (pfam01197) →                                           |
| Esp-9-1  | NZ_ASXD01000010.1                 | - | 15774   | 15737   | RNA → rpmE2 (PRK01678)Ribosomal_L31 (pfam01197) → NhaP (COG0025)PRK05326 (PRK05326) →       |
| env-253  | 3300000558_10315482               | - | 274     | 246     | Tdk (COG1435)PRK04296 (PRK04296) →                                                          |
| Lba-3-1  | NZ_KE159636.1                     | - | 2955335 | 2955279 | RNA → rpmE (PRK00019)Ribosomal_L31 (pfam01197) →                                            |
|          |                                   |   |         |         | RNA → ArgC (COG0002)argC (PRK00436) → ArgC (COG0002) →                                      |
|          |                                   |   |         |         | RimI (COG0456)Acetyltransf.7 (pfam13508) → argJ (PRK05388)ArgJ (pfam01960) → hypo →         |
|          |                                   |   |         |         | PRK00942 (PRK00942)AAK_NAGK-C (cd04250) →                                                   |
| env-254  | JGI24712J26585_10086008           | - | 716     | 686     | RNA → rpmE (PRK00019)Ribosomal_L31 (pfam01197) → Tdk (COG1435)PRK04296 (PRK04296) →         |
| env-255  | JGI24711J26586_10149403           | - | 518     | 488     | RNA → rpmE (PRK00019)Ribosomal_L31 (pfam01197) → Tdk (COG1435)PRK04296 (PRK04296) →         |
| env-256  | JGI24710J26742_10010214           | - | 6368    | 6338    | RNA → rpmE (PRK00019)Ribosomal_L31 (pfam01197) → Tdk (COG1435)PRK04296 (PRK04296) →         |
|          |                                   |   |         |         | TadA (COG0590)MafB19-deam (pfam14437) → hypo → PRK10351 (PRK10351)ACPS (pfam01648) → hypo → |
|          |                                   |   |         |         | Peptidase_S9_N (pfam02897) → TktA (COG0021)PRK05899 (PRK05899) →                            |
|          |                                   |   |         |         | MnmG (COG0445)PRK05192 (PRK05192) →                                                         |
| env-257  | JGI24501J29690_1009900            | + | 30      | 60      | RNA → rpmE (PRK00019)Ribosomal_L31 (pfam01197) → Tdk (COG1435)PRK04296 (PRK04296) →         |
|          |                                   |   |         |         | TadA (COG0590)MafB19-deam (pfam14437) → hypo → pantethn_trn (TIGR00556)ACPS (pfam01648) →   |
| env-258  | JGI24709J26583_10005562           | - | 7770    | 7740    | RNA → rpmE (PRK00019)Ribosomal_L31 (pfam01197) → Tdk (COG1435)PRK04296 (PRK04296) →         |
|          |                                   |   |         |         | TadA (COG0590)MafB19-deam (pfam14437) → hypo → PRK10351 (PRK10351)ACPS (pfam01648) → hypo → |
|          |                                   |   |         |         | Peptidase_S9_N (pfam02897) → TktA (COG0021)PRK05899 (PRK05899) →                            |
|          |                                   |   |         |         | MnmG (COG0445)PRK05192 (PRK05192) → RsmG (COG0357)gidB (PRK00107) →                         |
| env-259  | JGI24710J26742_10005602           | - | 43      | 13      | RNA →                                                                                       |
| env-260  | JGI24500J29687_10005571           | + | 1219    | 1249    | RNA → rpmE (PRK00019)Ribosomal_L31 (pfam01197) → Tdk (COG1435)PRK04296 (PRK04296) →         |
|          |                                   |   |         |         | TadA (COG0590)MafB19-deam (pfam14437) →                                                     |
| env-261  | JGI24501J29690_1029221            | + | 1220    | 1250    | RNA →                                                                                       |
| env-262  | JGI24710J26742_10016493           | + | 1755    | 1785    | RNA → rpmE (PRK00019)Ribosomal_L31 (pfam01197) → Tdk (COG1435)PRK04296 (PRK04296) →         |
|          |                                   |   |         |         | TadA (COG0590)MafB19-deam (pfam14437) → hypo → PRK10351 (PRK10351)ACPS (pfam01648) → hypo → |
|          |                                   |   |         |         | Peptidase_S9_N (pfam02897) →                                                                |
| env-263  | JGI24500J29687_10031739           | + | 4985    | 5015    | RNA →                                                                                       |
| env-264  | JGI24502J29692_10005043           | + | 3736    | 3766    | RNA → rpmE (PRK00019)Ribosomal_L31 (pfam01197) →                                            |
| env-265  | JGI24501J29690_1033374            | + | 4316    | 4346    | RNA →                                                                                       |
| env-266  | JGI24503J29689_10039384           | + | 6502    | 6532    | RNA → rpmE (PRK00019)Ribosomal_L31 (pfam01197) →                                            |
| env-267  | AUXO014528965.1                   | + | 1985    | 2017    | RNA → rpmE (PRK00019)Ribosomal_L31 (pfam01197) →                                            |
| env-268  | IMNBL1_c0363154                   | + | 140     | 173     | RNA → rpmE (PRK00019)Ribosomal_L31 (pfam01197) →                                            |
| Lki-4-1  | NC_014136.1                       | + | 1067907 | 1067938 | RNA → rpmE2 (PRK01678)Ribosomal_L31 (pfam01197) →                                           |
| Lsp-16-1 | NC_015734.1                       | - | 1357217 | 1357186 | RNA → rpmE2 (PRK01678)Ribosomal_L31 (pfam01197) →                                           |
| Gel-1-1  | NZ_KI391971.1                     | - | 1673422 | 1673389 | RNA → rpmE2 (PRK01678)Ribosomal_L31 (pfam01197) →                                           |
| env-269  | SRS043422_C2569170                | - | 275     | 242     | RNA → rpmE2 (PRK01678)Ribosomal_L31 (pfam01197) →                                           |
| env-270  | Keratinized_gingiva.LANL_C5703483 | - | 63      | 30      | RNA →                                                                                       |
| env-271  | SRS011310_C881309                 | + | 999     | 1032    | RNA →                                                                                       |
| env-272  | SRS014687_WUGC_scaffold_8481      | + | 7722    | 7755    | RNA → rpmE2 (PRK01678)Ribosomal_L31 (pfam01197) →                                           |
| env-273  | SRS017025_Baylor_scaffold_6778    | - | 376     | 343     | RNA → rpmE2 (PRK01678)Ribosomal_L31 (pfam01197) →                                           |
| env-274  | SRS019329_WUGC_scaffold_4099      | + | 368     | 401     | RNA →                                                                                       |
| env-275  | SRS022532.LANL_scaffold_5089      | - | 4704    | 4671    | RNA → rpmE2 (PRK01678)Ribosomal_L31 (pfam01197) →                                           |



|          |                                  |   |        |        |                                                                                                                                                          |
|----------|----------------------------------|---|--------|--------|----------------------------------------------------------------------------------------------------------------------------------------------------------|
| env-276  | SRS045049.C1523482               | + | 219    | 252    | RNA → rpmE2 (PRK01678)Ribosomal_L31 (pfam01197) →                                                                                                        |
| env-277  | SRS045262.C1292262               | - | 269    | 236    | RNA → rpmE2 (PRK01678)Ribosomal_L31 (pfam01197) →                                                                                                        |
| env-278  | SRS046686.C925134                | + | 3676   | 3709   | RNA → rpmE2 (PRK01678)Ribosomal_L31 (pfam01197) →                                                                                                        |
| env-279  | SRS063272.LANL_scaffold_6091     | + | 2727   | 2760   | RNA → rpmE2 (PRK01678)Ribosomal_L31 (pfam01197) →                                                                                                        |
| env-280  | SRS024281.C971068                | + | 203    | 236    | RNA → rpmE2 (PRK01678)Ribosomal_L31 (pfam01197) →                                                                                                        |
| env-281  | SRS015040.WUGC_scaffold_8734     | + | 814    | 847    | RNA → rpmE (PRK00019)rpmE2 (PRK01678)Ribosomal_L31 (pfam01197) →                                                                                         |
| env-282  | SRS057022.LANL_scaffold_6226     | - | 269    | 236    | RNA → rpmE2 (PRK01678)Ribosomal_L31 (pfam01197) →                                                                                                        |
| env-283  | SRS064809.C825416                | - | 269    | 236    | RNA → rpmE2 (PRK01678)Ribosomal_L31 (pfam01197) →                                                                                                        |
| env-284  | SRS062878.LANL_scaffold_75258    | + | 1643   | 1676   | RNA → rpmE2 (PRK01678)Ribosomal_L31 (pfam01197) →                                                                                                        |
| env-285  | SRS013946.WUGC_scaffold_12274    | + | 714    | 747    | RNA → rpmE2 (PRK01678)Ribosomal_L31 (pfam01197) →                                                                                                        |
| env-286  | SRS019125.C601743                | + | 481    | 514    | RNA → rpmE2 (PRK01678)Ribosomal_L31 (pfam01197) →                                                                                                        |
| env-287  | SRS013506.C1062755               | + | 32     | 65     | RNA → rpmE2 (PRK01678)Ribosomal_L31 (pfam01197) →                                                                                                        |
| env-288  | SRS017215.C2571075               | - | 275    | 242    | RNA → rpmE2 (PRK01678)Ribosomal_L31 (pfam01197) →                                                                                                        |
| env-289  | SRS019976.C721550                | - | 269    | 236    | RNA → rpmE2 (PRK01678)Ribosomal_L31 (pfam01197) →                                                                                                        |
| env-290  | JGI994J12354_10282062            | - | 254    | 221    | RNA → rpmE (PRK00019)Ribosomal_L31 (pfam01197) →                                                                                                         |
| env-291  | AUXO015979915.1                  | + | 3013   | 3043   | RNA → rpmE (PRK00019)Ribosomal_L31 (pfam01197) →                                                                                                         |
| Lsa-13-1 | NC_015978.1                      | + | 397684 | 397715 | RNA → rpmE2 (PRK01678)Ribosomal_L31 (pfam01197) →                                                                                                        |
| Cla-1-1  | NZ_KB899855.1                    | - | 6693   | 6660   | RNA → rpmE (PRK00019)Ribosomal_L31 (pfam01197) → hypo →                                                                                                  |
| env-292  | JGI26057J44791_1087402           | - | 384    | 351    | RNA → rpmE (PRK00019)Ribosomal_L31 (pfam01197) →                                                                                                         |
| Cth-2-1  | NZ_AUCP01000036.1                | - | 6324   | 6291   | RNA → rpmE (PRK00019)Ribosomal_L31 (pfam01197) → rpmE (PRK00019)Ribosomal_L31 (pfam01197) →                                                              |
| env-293  | 2200552946                       | - | 269    | 235    | RNA → rpmE (PRK00019)Ribosomal_L31 (pfam01197) →                                                                                                         |
| env-294  | SRS043422.LANL_scaffold_14382    | - | 926    | 891    | RNA → rpmE2 (PRK01678)Ribosomal_L31 (pfam01197) → Tdk (COG1435)PRK04296 (PRK04296) →                                                                     |
| env-295  | SRS013946.WUGC_scaffold_5190     | + | 2187   | 2222   | RNA → rpmE2 (PRK01678)Ribosomal_L31 (pfam01197) → Tdk (COG1435)PRK04296 (PRK04296) → PrfA (COG0216)prfA (PRK00591) → HemK (COG2890)PRK09328 (PRK09328) → |
| env-296  | SRS019125.C619186                | - | 154    | 119    | RNA → rpmE2 (PRK01678)Ribosomal_L31 (pfam01197) →                                                                                                        |
| env-297  | SRS019591.WUGC_scaffold_32512    | + | 94     | 129    | RNA → rpmE2 (PRK01678)Ribosomal_L31 (pfam01197) →                                                                                                        |
| env-298  | SRS042984.C4030266               | - | 687    | 652    | RNA → rpmE2 (PRK01678)Ribosomal_L31 (pfam01197) →                                                                                                        |
| Gmo-1-1  | NZ_GL622607.1                    | - | 253537 | 253502 | RNA → rpmE2 (PRK01678)Ribosomal_L31 (pfam01197) →                                                                                                        |
| env-299  | SRS013723.C3219578               | - | 291    | 256    | RNA → rpmE2 (PRK01678)Ribosomal_L31 (pfam01197) →                                                                                                        |
| env-300  | SRS047265.WUGC_scaffold_11943    | + | 10     | 45     | RNA → hypo →                                                                                                                                             |
| Spa-1-1  | NZ_JUOB01000065.1                | + | 14924  | 14959  | RNA → rpmE2 (PRK01678)Ribosomal_L31 (pfam01197) → Tdk (COG1435)PRK04296 (PRK04296) → PrfA (COG0216)prfA (PRK00591) → HemK (COG2890)PRK09328 (PRK09328) → |
| env-301  | SRS024017.C910720                | + | 74     | 109    | RNA → rpmE2 (PRK01678)Ribosomal_L31 (pfam01197) →                                                                                                        |
| env-302  | SRS017088.Baylor_scaffold_355    | - | 773    | 738    | RNA → rpmE2 (PRK01678)Ribosomal_L31 (pfam01197) → Tdk (COG1435)PRK04296 (PRK04296) →                                                                     |
| env-303  | SRS011086.WUGC_scaffold_19008    | - | 3516   | 3481   | RNA → rpmE2 (PRK01678)Ribosomal_L31 (pfam01197) → Tdk (COG1435)PRK04296 (PRK04296) →                                                                     |
| env-304  | SRS062878.LANL_scaffold_75449    | + | 78     | 113    | RNA → rpmE2 (PRK01678)Ribosomal_L31 (pfam01197) →                                                                                                        |
| env-305  | SRS064329.LANL_scaffold_50995    | - | 917    | 882    | RNA → rpmE2 (PRK01678)Ribosomal_L31 (pfam01197) → Tdk (COG1435)PRK04296 (PRK04296) →                                                                     |
| env-306  | SRS075404.C3430783               | - | 262    | 227    | RNA → rpmE2 (PRK01678)Ribosomal_L31 (pfam01197) →                                                                                                        |
| env-307  | Contig7283290.1                  | + | 2435   | 2470   | RNA → rpmE2 (PRK01678)Ribosomal_L31 (pfam01197) → Tdk (COG1435)PRK04296 (PRK04296) → PrfA (COG0216)prfA (PRK00591) →                                     |
| env-308  | Tongue_dor.WUGI_scaffold_7283291 | + | 2435   | 2470   | RNA → rpmE2 (PRK01678)Ribosomal_L31 (pfam01197) → Tdk (COG1435)PRK04296 (PRK04296) → PrfA (COG0216)prfA (PRK00591) →                                     |
| env-309  | SRS011140.Baylor_scaffold_32790  | + | 1053   | 1088   | RNA → rpmE2 (PRK01678)Ribosomal_L31 (pfam01197) →                                                                                                        |
| env-310  | SRS011306.Baylor_scaffold_64442  | - | 2134   | 2099   | RNA → rpmE2 (PRK01678)Ribosomal_L31 (pfam01197) → Tdk (COG1435)PRK04296 (PRK04296) → PrfA (COG0216)prfA (PRK00591) → hypo →                              |
| env-311  | SRS013164.Baylor_scaffold_712    | - | 2890   | 2855   | RNA → rpmE2 (PRK01678)Ribosomal_L31 (pfam01197) → Tdk (COG1435)PRK04296 (PRK04296) → PrfA (COG0216)prfA (PRK00591) → HemK (COG2890)PRK09328 (PRK09328) → |
| env-312  | SRS013502.C2198940               | + | 2237   | 2272   | RNA → rpmE2 (PRK01678)Ribosomal_L31 (pfam01197) →                                                                                                        |
| env-313  | SRS013879.WUGC_scaffold_47221    | + | 203    | 238    | RNA → rpmE2 (PRK01678)Ribosomal_L31 (pfam01197) → Tdk (COG1435)PRK04296 (PRK04296) → PrfA (COG0216)prfA (PRK00591) →                                     |
| env-314  | SRS013947.C1620328               | - | 850    | 815    | RNA → rpmE2 (PRK01678)Ribosomal_L31 (pfam01197) → Tdk (COG1435)PRK04296 (PRK04296) →                                                                     |
| env-315  | SRS013948.C1539802               | + | 2096   | 2131   | RNA → rpmE2 (PRK01678)Ribosomal_L31 (pfam01197) →                                                                                                        |
| env-316  | SRS014124.WUGC_scaffold_51107    | - | 1607   | 1572   | RNA → rpmE2 (PRK01678)Ribosomal_L31 (pfam01197) → Tdk (COG1435)PRK04296 (PRK04296) → PrfA (COG0216)prfA (PRK00591) → PCRf (smart00937)PCRf (pfam03462) → |

|         |                                 |   |       |       |                                                                                                                                                                                                              |
|---------|---------------------------------|---|-------|-------|--------------------------------------------------------------------------------------------------------------------------------------------------------------------------------------------------------------|
| env-317 | SRS014271_C2958958              | + | 1617  | 1652  | RNA → rpmE2 (PRK01678)Ribosomal_L31 (pfam01197) → Tdk (COG1435)PRK04296 (PRK04296) → PrfA (COG0216)prfA (PRK00591) →                                                                                         |
| env-318 | SRS014470_C3747072              | + | 118   | 153   | RNA → rpmE2 (PRK01678)Ribosomal_L31 (pfam01197) → Tdk (COG1435)PRK04296 (PRK04296) → PCRf (smart00937)PrfA (COG0216) →                                                                                       |
| env-319 | SRS014573_WUGC_scaffold_12834   | + | 2379  | 2414  | RNA → rpmE2 (PRK01678)Ribosomal_L31 (pfam01197) → Tdk (COG1435)PRK04296 (PRK04296) → PrfA (COG0216)prfA (PRK00591) → HemK (COG2890)PRK09328 (PRK09328) →                                                     |
| env-320 | SRS014684_WUGC_scaffold_38221   | + | 2822  | 2857  | RNA →                                                                                                                                                                                                        |
| env-321 | SRS014888_WUGC_scaffold_15364   | - | 262   | 227   | RNA → rpmE2 (PRK01678)Ribosomal_L31 (pfam01197) →                                                                                                                                                            |
| env-322 | SRS015038_C1778554              | + | 200   | 235   | RNA →                                                                                                                                                                                                        |
| env-323 | SRS015057_C3433924              | - | 538   | 503   | RNA → rpmE2 (PRK01678)Ribosomal_L31 (pfam01197) → Tdk (COG1435)PRK04296 (PRK04296) →                                                                                                                         |
| env-324 | SRS015209_C1830245              | + | 66    | 101   | RNA → rpmE2 (PRK01678)Ribosomal_L31 (pfam01197) → Tdk (COG1435)PRK04296 (PRK04296) →                                                                                                                         |
| env-325 | SRS015395_C2370059              | + | 417   | 452   | RNA → rpmE2 (PRK01678)Ribosomal_L31 (pfam01197) →                                                                                                                                                            |
| env-326 | SRS015644_WUGC_scaffold_3189    | - | 3443  | 3408  | RNA → rpmE2 (PRK01678)Ribosomal_L31 (pfam01197) → Tdk (COG1435)PRK04296 (PRK04296) → PrfA (COG0216)prfA (PRK00591) → HemK (COG2890)PRK09328 (PRK09328) →                                                     |
| env-327 | SRS015762_WUGC_scaffold_41049   | + | 1448  | 1483  | RNA → rpmE2 (PRK01678)Ribosomal_L31 (pfam01197) → Tdk (COG1435)PRK04296 (PRK04296) →                                                                                                                         |
| env-328 | SRS015893_C2246048              | + | 233   | 268   | RNA → rpmE2 (PRK01678)Ribosomal_L31 (pfam01197) →                                                                                                                                                            |
| env-329 | SRS015941_WUGC_scaffold_75574   | - | 3643  | 3608  | RNA → rpmE2 (PRK01678)Ribosomal_L31 (pfam01197) → Tdk (COG1435)PRK04296 (PRK04296) → PrfA (COG0216)prfA (PRK00591) → HemK (COG2890)PRK09328 (PRK09328) →                                                     |
| env-330 | SRS016002_C2451425              | - | 191   | 156   | RNA → rpmE2 (PRK01678)Ribosomal_L31 (pfam01197) →                                                                                                                                                            |
| env-331 | SRS016037_WUGC_scaffold_43287   | + | 2263  | 2298  | RNA → rpmE2 (PRK01678)Ribosomal_L31 (pfam01197) → Tdk (COG1435)PRK04296 (PRK04296) → PCRf (smart00937)PrfA (COG0216) →                                                                                       |
| env-332 | SRS016319_C4011283              | + | 1508  | 1543  | RNA → rpmE2 (PRK01678)Ribosomal_L31 (pfam01197) →                                                                                                                                                            |
| env-333 | SRS016501_LANL_scaffold_17609   | + | 16039 | 16074 | RNA → rpmE2 (PRK01678)Ribosomal_L31 (pfam01197) → Tdk (COG1435)PRK04296 (PRK04296) → PrfA (COG0216)prfA (PRK00591) → HemK (COG2890)Methyltransf_25 (pfam13649) → HemK (COG2890)PRK09328 (PRK09328) →         |
| env-334 | SRS016529_Baylor_scaffold_10943 | - | 3202  | 3167  | RNA → rpmE2 (PRK01678)Ribosomal_L31 (pfam01197) → Tdk (COG1435)PRK04296 (PRK04296) → PrfA (COG0216)prfA (PRK00591) → HemK (COG2890)PRK09328 (PRK09328) →                                                     |
| env-335 | SRS016569_Baylor_scaffold_31963 | + | 118   | 153   | RNA → rpmE2 (PRK01678)Ribosomal_L31 (pfam01197) → Tdk (COG1435)PRK04296 (PRK04296) → PrfA (COG0216)prfA (PRK00591) → HemK (COG2890)PRK09328 (PRK09328) →                                                     |
| env-336 | SRS017533_Baylor_scaffold_37499 | - | 805   | 770   | RNA → rpmE2 (PRK01678)Ribosomal_L31 (pfam01197) → Tdk (COG1435)PRK04296 (PRK04296) →                                                                                                                         |
| env-337 | SRS017713_C3328455              | + | 417   | 452   | RNA → rpmE2 (PRK01678)Ribosomal_L31 (pfam01197) →                                                                                                                                                            |
| env-338 | SRS018300_Baylor_scaffold_22706 | + | 2963  | 2998  | RNA → rpmE2 (PRK01678)Ribosomal_L31 (pfam01197) → Tdk (COG1435)PRK04296 (PRK04296) →                                                                                                                         |
| env-339 | SRS018357_C3945649              | - | 294   | 259   | RNA → rpmE2 (PRK01678)Ribosomal_L31 (pfam01197) →                                                                                                                                                            |
| env-340 | SRS018591_WUGC_scaffold_4474    | + | 2628  | 2663  | RNA → rpmE2 (PRK01678)Ribosomal_L31 (pfam01197) → Tdk (COG1435)PRK04296 (PRK04296) → PrfA (COG0216)prfA (PRK00591) → hypo →                                                                                  |
| env-341 | SRS018739_C3708741              | - | 3712  | 3677  | RNA → rpmE2 (PRK01678)Ribosomal_L31 (pfam01197) → Tdk (COG1435)PRK04296 (PRK04296) → PrfA (COG0216)prfA (PRK00591) → HemK (COG2890)PRK09328 (PRK09328) →                                                     |
| env-342 | SRS018969_C2941119              | - | 810   | 775   | RNA → rpmE2 (PRK01678)Ribosomal_L31 (pfam01197) → Tdk (COG1435)PRK04296 (PRK04296) →                                                                                                                         |
| env-343 | SRS019022_WUGC_scaffold_46130   | + | 7621  | 7656  | RNA → rpmE2 (PRK01678)Ribosomal_L31 (pfam01197) → Tdk (COG1435)PRK04296 (PRK04296) → PrfA (COG0216)prfA (PRK00591) → hypo →                                                                                  |
| env-344 | SRS019045_WUGC_scaffold_60915   | + | 699   | 734   | RNA → rpmE2 (PRK01678)Ribosomal_L31 (pfam01197) → Tdk (COG1435)PRK04296 (PRK04296) → PrfA (COG0216)prfA (PRK00591) →                                                                                         |
| env-345 | SRS019120_C1292577              | - | 263   | 228   | RNA → rpmE2 (PRK01678)Ribosomal_L31 (pfam01197) →                                                                                                                                                            |
| env-346 | SRS019219_WUGC_scaffold_73816   | - | 1354  | 1319  | RNA → rpmE2 (PRK01678)Ribosomal_L31 (pfam01197) → Tdk (COG1435)PRK04296 (PRK04296) → PCRf (smart00937)PrfA (COG0216) →                                                                                       |
| env-347 | SRS019327_WUGC_scaffold_24797   | - | 2643  | 2608  | RNA → rpmE2 (PRK01678)Ribosomal_L31 (pfam01197) → Tdk (COG1435)PRK04296 (PRK04296) → PCRf (smart00937)RF-1 (pfam00472)PCRf (pfam03462) → PrfA (COG0216)prfA (PRK00591) → HemK (COG2890)PRK09328 (PRK09328) → |
| env-348 | SRS019389_C2216180              | - | 368   | 333   | RNA → rpmE2 (PRK01678)Ribosomal_L31 (pfam01197) →                                                                                                                                                            |
| env-349 | SRS019607_C2754939              | + | 1076  | 1111  | RNA → rpmE2 (PRK01678)Ribosomal_L31 (pfam01197) → Tdk (COG1435)PRK04296 (PRK04296) → PCRf (smart00937)PrfA (COG0216) →                                                                                       |
| env-350 | SRS019894_C3902787              | + | 118   | 153   | RNA → rpmE2 (PRK01678)Ribosomal_L31 (pfam01197) → Tdk (COG1435)PRK04296 (PRK04296) →                                                                                                                         |
| env-351 | SRS019974_Baylor_scaffold_14514 | - | 187   | 152   | RNA → rpmE2 (PRK01678)Ribosomal_L31 (pfam01197) →                                                                                                                                                            |
| env-352 | SRS020334_C2666501              | - | 1354  | 1319  | RNA → rpmE2 (PRK01678)Ribosomal_L31 (pfam01197) → Tdk (COG1435)PRK04296 (PRK04296) → PCRf (smart00937)PrfA (COG0216) →                                                                                       |
| env-353 | SRS020856_C2525502              | + | 118   | 153   | RNA → rpmE2 (PRK01678)Ribosomal_L31 (pfam01197) →                                                                                                                                                            |

|         |                                 |   |       |       |                                                                                                                                                          |
|---------|---------------------------------|---|-------|-------|----------------------------------------------------------------------------------------------------------------------------------------------------------|
| env-354 | SRS022077_Baylor_scaffold_56764 | - | 2255  | 2220  | RNA → rpmE2 (PRK01678)Ribosomal_L31 (pfam01197) → Tdk (COG1435)PRK04296 (PRK04296) → PrfA (COG0216)prfA (PRK00591) → hypo →                              |
| env-355 | SRS022530_LANL_scaffold_14562   | - | 5660  | 5625  | RNA → rpmE2 (PRK01678)Ribosomal_L31 (pfam01197) → Tdk (COG1435)PRK04296 (PRK04296) → PrfA (COG0216)prfA (PRK00591) → HemK (COG2890)PRK09328 (PRK09328) → |
| env-356 | SRS022719_LANL_scaffold_70646   | + | 27983 | 28018 | RNA → rpmE2 (PRK01678)Ribosomal_L31 (pfam01197) → Tdk (COG1435)PRK04296 (PRK04296) → PrfA (COG0216)prfA (PRK00591) → HemK (COG2890)PRK09328 (PRK09328) → |
| env-357 | SRS023557_Baylor_scaffold_14708 | + | 229   | 264   | RNA → rpmE2 (PRK01678)Ribosomal_L31 (pfam01197) → Tdk (COG1435)PRK04296 (PRK04296) → PrfA (COG0216)prfA (PRK00591) → HemK (COG2890)PRK09328 (PRK09328) → |
| env-358 | SRS023617_Baylor_scaffold_71319 | - | 3925  | 3890  | RNA → rpmE2 (PRK01678)Ribosomal_L31 (pfam01197) → Tdk (COG1435)PRK04296 (PRK04296) → PrfA (COG0216)prfA (PRK00591) → HemK (COG2890)PRK09328 (PRK09328) → |
| env-359 | SRS024015_Baylor_scaffold_40979 | - | 1229  | 1194  | RNA → rpmE2 (PRK01678)Ribosomal_L31 (pfam01197) → Tdk (COG1435)PRK04296 (PRK04296) → PrfA (COG0216)prfA (PRK00591) →                                     |
| env-360 | SRS024081_LANL_scaffold_2024    | + | 46179 | 46214 | RNA → rpmE2 (PRK01678)Ribosomal_L31 (pfam01197) → Tdk (COG1435)PRK04296 (PRK04296) → PrfA (COG0216)prfA (PRK00591) → HemK (COG2890)PRK09328 (PRK09328) → |
| env-361 | SRS024277_LANL_scaffold_37737   | - | 2929  | 2894  | RNA → rpmE2 (PRK01678)Ribosomal_L31 (pfam01197) → Tdk (COG1435)PRK04296 (PRK04296) → PrfA (COG0216)prfA (PRK00591) → HemK (COG2890)PRK09328 (PRK09328) → |
| env-362 | SRS024375_LANL_scaffold_1816    | - | 937   | 902   | RNA → rpmE2 (PRK01678)Ribosomal_L31 (pfam01197) → Tdk (COG1435)PRK04296 (PRK04296) →                                                                     |
| env-363 | SRS024580_C3090129              | - | 224   | 189   | RNA → rpmE2 (PRK01678)Ribosomal_L31 (pfam01197) →                                                                                                        |
| env-364 | SRS042131_WUGC_scaffold_29424   | + | 4098  | 4133  | RNA → rpmE2 (PRK01678)Ribosomal_L31 (pfam01197) → Tdk (COG1435)PRK04296 (PRK04296) →                                                                     |
| env-365 | SRS042643_C3133050              | + | 468   | 503   | RNA → rpmE2 (PRK01678)Ribosomal_L31 (pfam01197) → Tdk (COG1435)PRK04296 (PRK04296) → PrfA (COG0216)prfA (PRK00591) → HemK (COG2890)PRK09328 (PRK09328) → |
| env-366 | SRS042910_C5598748              | + | 491   | 526   | RNA → rpmE2 (PRK01678)Ribosomal_L31 (pfam01197) →                                                                                                        |
| env-367 | SRS043663_LANL_scaffold_3211    | + | 5442  | 5477  | RNA → rpmE2 (PRK01678)Ribosomal_L31 (pfam01197) → Tdk (COG1435)PRK04296 (PRK04296) → PrfA (COG0216)prfA (PRK00591) →                                     |
| env-368 | SRS044662_LANL_scaffold_39333   | + | 2021  | 2056  | RNA → rpmE2 (PRK01678)Ribosomal_L31 (pfam01197) → Tdk (COG1435)PRK04296 (PRK04296) → PrfA (COG0216)prfA (PRK00591) → HemK (COG2890)PRK09328 (PRK09328) → |
| env-369 | SRS045127_LANL_scaffold_35833   | + | 349   | 384   | RNA → rpmE2 (PRK01678)Ribosomal_L31 (pfam01197) → Tdk (COG1435)PRK04296 (PRK04296) →                                                                     |
| env-370 | SRS045715_LANL_scaffold_77986   | - | 3368  | 3333  | RNA → rpmE2 (PRK01678)Ribosomal_L31 (pfam01197) → Tdk (COG1435)PRK04296 (PRK04296) → PrfA (COG0216)prfA (PRK00591) → HemK (COG2890)PRK09328 (PRK09328) → |
| env-371 | SRS047210_C3329896              | + | 1570  | 1605  | RNA → rpmE2 (PRK01678)Ribosomal_L31 (pfam01197) → Tdk (COG1435)PRK04296 (PRK04296) →                                                                     |
| env-372 | SRS048411_C6946699              | - | 702   | 667   | RNA → rpmE2 (PRK01678)Ribosomal_L31 (pfam01197) → Tdk (COG1435)PRK04296 (PRK04296) →                                                                     |
| env-373 | SRS048791_C3209121              | + | 266   | 301   | RNA → rpmE2 (PRK01678)Ribosomal_L31 (pfam01197) →                                                                                                        |
| env-374 | SRS049147_C4027824              | - | 262   | 227   | RNA → rpmE2 (PRK01678)Ribosomal_L31 (pfam01197) →                                                                                                        |
| env-375 | SRS049389_C4719865              | - | 154   | 119   | RNA → rpmE2 (PRK01678)Ribosomal_L31 (pfam01197) →                                                                                                        |
| env-376 | SRS050244_LANL_scaffold_70126   | + | 6532  | 6567  | RNA → rpmE2 (PRK01678)Ribosomal_L31 (pfam01197) → Tdk (COG1435)PRK04296 (PRK04296) → PCRf (smart00937)PrfA (COG0216) →                                   |
| env-377 | SRS050669_LANL_scaffold_8194    | - | 943   | 908   | RNA → rpmE2 (PRK01678)Ribosomal_L31 (pfam01197) → Tdk (COG1435)PRK04296 (PRK04296) →                                                                     |
| env-378 | SRS051791_LANL_scaffold_43760   | + | 9622  | 9657  | RNA → rpmE2 (PRK01678)Ribosomal_L31 (pfam01197) → Tdk (COG1435)PRK04296 (PRK04296) → PrfA (COG0216)prfA (PRK00591) → HemK (COG2890)PRK09328 (PRK09328) → |
| env-379 | SRS052227_LANL_scaffold_52022   | - | 2929  | 2894  | RNA → rpmE2 (PRK01678)Ribosomal_L31 (pfam01197) → Tdk (COG1435)PRK04296 (PRK04296) → PrfA (COG0216)prfA (PRK00591) → HemK (COG2890)PRK09328 (PRK09328) → |
| env-380 | SRS054687_C3486600              | + | 417   | 452   | RNA → rpmE2 (PRK01678)Ribosomal_L31 (pfam01197) → Tdk (COG1435)PRK04296 (PRK04296) →                                                                     |
| env-381 | SRS055426_LANL_scaffold_55091   | - | 2268  | 2233  | RNA → rpmE2 (PRK01678)Ribosomal_L31 (pfam01197) → Tdk (COG1435)PRK04296 (PRK04296) → PrfA (COG0216)prfA (PRK00591) → hypo →                              |
| env-382 | SRS056622_LANL_scaffold_45323   | + | 692   | 727   | RNA → rpmE2 (PRK01678)Ribosomal_L31 (pfam01197) → Tdk (COG1435)PRK04296 (PRK04296) → PrfA (COG0216)prfA (PRK00591) → HemK (COG2890)PRK09328 (PRK09328) → |
| env-383 | SRS057205_LANL_scaffold_27098   | + | 2436  | 2471  | RNA → rpmE2 (PRK01678)Ribosomal_L31 (pfam01197) →                                                                                                        |
| env-384 | SRS057539_LANL_scaffold_62110   | + | 203   | 238   | RNA → rpmE2 (PRK01678)Ribosomal_L31 (pfam01197) → Tdk (COG1435)PRK04296 (PRK04296) →                                                                     |
| env-385 | SRS057791_LANL_scaffold_34993   | + | 1095  | 1130  | RNA → rpmE2 (PRK01678)Ribosomal_L31 (pfam01197) → Tdk (COG1435)PRK04296 (PRK04296) → PrfA (COG0216)prfA (PRK00591) → HemK (COG2890)PRK09328 (PRK09328) → |
| env-386 | SRS058336_C1967939              | - | 245   | 210   | RNA → rpmE2 (PRK01678)Ribosomal_L31 (pfam01197) →                                                                                                        |
| env-387 | SRS062544_C2916403              | + | 186   | 221   | RNA → rpmE2 (PRK01678)Ribosomal_L31 (pfam01197) →                                                                                                        |
| env-388 | SRS062761_LANL_scaffold_51063   | - | 2240  | 2205  | RNA → rpmE2 (PRK01678)Ribosomal_L31 (pfam01197) → Tdk (COG1435)PRK04296 (PRK04296) → PrfA (COG0216)prfA (PRK00591) → hypo →                              |
| env-389 | SRS063193_LANL_scaffold_65781   | + | 1299  | 1334  | RNA → rpmE2 (PRK01678)Ribosomal_L31 (pfam01197) → Tdk (COG1435)PRK04296 (PRK04296) → PrfA (COG0216)prfA (PRK00591) → hypo →                              |



|         |                                         |   |        |        |                                                                                                                                                                      |
|---------|-----------------------------------------|---|--------|--------|----------------------------------------------------------------------------------------------------------------------------------------------------------------------|
| env-390 | SRS063288_C2613515                      | - | 1918   | 1883   | RNA → rpmE2 (PRK01678) Ribosomal_L31 (pfam01197) → Tdk (COG1435) PRK04296 (PRK04296) → PrfA (COG0216) prfA (PRK00591) →                                              |
| env-391 | SRS064423_LANL_scaffold_69154           | - | 1354   | 1319   | RNA → rpmE2 (PRK01678) Ribosomal_L31 (pfam01197) → Tdk (COG1435) PRK04296 (PRK04296) → PCRf (smart00937) PrfA (COG0216) →                                            |
| env-392 | SRS064774_C2890698                      | - | 627    | 592    | RNA → rpmE2 (PRK01678) Ribosomal_L31 (pfam01197) → Tdk (COG1435) PRK04296 (PRK04296) →                                                                               |
| env-393 | SRS065278_C2548946                      | + | 1202   | 1237   | RNA → rpmE2 (PRK01678) Ribosomal_L31 (pfam01197) →                                                                                                                   |
| env-394 | SRS077736_LANL_scaffold_17623           | + | 229    | 264    | RNA → rpmE2 (PRK01678) Ribosomal_L31 (pfam01197) → Tdk (COG1435) PRK04296 (PRK04296) → PrfA (COG0216) prfA (PRK00591) → HemK (COG2890) Methyltransf_25 (pfam13649) → |
| Gsa-2-1 | NZ_ACRY02000001.1                       | + | 10104  | 10139  | RNA → rpmE2 (PRK01678) Ribosomal_L31 (pfam01197) → Tdk (COG1435) PRK04296 (PRK04296) → PrfA (COG0216) prfA (PRK00591) → hypo → HemK (COG2890) PRK09328 (PRK09328) →  |
| env-395 | SRS015540_C1145684                      | - | 441    | 406    | RNA → rpmE2 (PRK01678) Ribosomal_L31 (pfam01197) → Tdk (COG1435) PRK04296 (PRK04296) →                                                                               |
| env-396 | SRS015985_WUGC_scaffold_1374            | + | 106    | 141    | RNA → rpmE2 (PRK01678) Ribosomal_L31 (pfam01197) →                                                                                                                   |
| env-397 | SRS062878_LANL_scaffold_77532           | + | 103    | 138    | RNA → rpmE2 (PRK01678) Ribosomal_L31 (pfam01197) →                                                                                                                   |
| env-398 | SRS014686_C893659                       | - | 161    | 126    | RNA → rpmE2 (PRK01678) Ribosomal_L31 (pfam01197) →                                                                                                                   |
| env-399 | SRS014690_WUGC_scaffold_25959           | - | 648    | 613    | RNA → rpmE2 (PRK01678) Ribosomal_L31 (pfam01197) → Tdk (COG1435) PRK04296 (PRK04296) →                                                                               |
| env-400 | SRS015799_C834453                       | + | 101    | 136    | RNA → rpmE2 (PRK01678) Ribosomal_L31 (pfam01197) →                                                                                                                   |
| env-401 | SRS015895_C570099                       | - | 828    | 793    | RNA → rpmE2 (PRK01678) Ribosomal_L31 (pfam01197) → Tdk (COG1435) PRK04296 (PRK04296) →                                                                               |
| env-402 | SRS015989_C2178125                      | + | 3039   | 3074   | RNA → rpmE2 (PRK01678) Ribosomal_L31 (pfam01197) → Tdk (COG1435) PRK04296 (PRK04296) →                                                                               |
| env-403 | SRS017025_C1697043                      | - | 417    | 382    | RNA → rpmE2 (PRK01678) Ribosomal_L31 (pfam01197) →                                                                                                                   |
| env-404 | SRS017215_Baylor_scaffold_6391          | + | 667    | 702    | RNA → rpmE2 (PRK01678) Ribosomal_L31 (pfam01197) → Tdk (COG1435) PRK04296 (PRK04296) →                                                                               |
| env-405 | SRS018971_WUGC_scaffold_9088            | + | 2824   | 2859   | RNA → rpmE2 (PRK01678) Ribosomal_L31 (pfam01197) → Tdk (COG1435) PRK04296 (PRK04296) → PrfA (COG0216) prfA (PRK00591) → HemK (COG2890) PRK09328 (PRK09328) →         |
| env-406 | SRS019587_C1062782                      | + | 2489   | 2524   | RNA → rpmE2 (PRK01678) Ribosomal_L31 (pfam01197) → Tdk (COG1435) PRK04296 (PRK04296) →                                                                               |
| env-407 | SRS022625_Baylor_scaffold_8635          | + | 256    | 291    | RNA → rpmE2 (PRK01678) Ribosomal_L31 (pfam01197) →                                                                                                                   |
| env-408 | SRS023987_Baylor_scaffold_8935          | + | 101    | 136    | RNA → rpmE2 (PRK01678) Ribosomal_L31 (pfam01197) →                                                                                                                   |
| env-409 | SRS024447_LANL_scaffold_55871           | + | 3040   | 3075   | RNA → rpmE2 (PRK01678) Ribosomal_L31 (pfam01197) → Tdk (COG1435) PRK04296 (PRK04296) → PrfA (COG0216) prfA (PRK00591) →                                              |
| env-410 | SRS024470_C1034718                      | - | 291    | 256    | RNA → rpmE2 (PRK01678) Ribosomal_L31 (pfam01197) →                                                                                                                   |
| env-411 | SRS043755_C2262638                      | + | 181    | 216    | RNA → rpmE2 (PRK01678) Ribosomal_L31 (pfam01197) →                                                                                                                   |
| env-412 | SRS050029_WUGC_scaffold_8539            | - | 2986   | 2951   | RNA → rpmE2 (PRK01678) Ribosomal_L31 (pfam01197) → Tdk (COG1435) PRK04296 (PRK04296) → PrfA (COG0216) prfA (PRK00591) → HemK (COG2890) PRK09328 (PRK09328) →         |
| env-413 | SRS054776_C1596217                      | + | 158    | 193    | RNA → rpmE2 (PRK01678) Ribosomal_L31 (pfam01197) →                                                                                                                   |
| env-414 | SRS056892_LANL_scaffold_10358           | - | 1175   | 1140   | RNA → rpmE2 (PRK01678) Ribosomal_L31 (pfam01197) → Tdk (COG1435) PRK04296 (PRK04296) → PrfA (COG0216) prfA (PRK00591) →                                              |
| env-415 | SRS063272_C727711                       | + | 103    | 138    | RNA → rpmE2 (PRK01678) Ribosomal_L31 (pfam01197) →                                                                                                                   |
| Gha-3-1 | NZ_GL883582.1                           | + | 200120 | 200155 | RNA → rpmE2 (PRK01678) Ribosomal_L31 (pfam01197) → Tdk (COG1435) PRK04296 (PRK04296) → PrfA (COG0216) prfA (PRK00591) → HemK (COG2890) PRK09328 (PRK09328) → hypo →  |
| env-416 | Keratinized_gingiva_LANL_scaffold_12580 | - | 518    | 483    | RNA → rpmE2 (PRK01678) Ribosomal_L31 (pfam01197) → Tdk (COG1435) PRK04296 (PRK04296) →                                                                               |
| env-417 | SRS020222_C1000314                      | + | 31     | 66     | RNA → rpmE2 (PRK01678) Ribosomal_L31 (pfam01197) →                                                                                                                   |
| env-418 | SRS021986_Baylor_scaffold_5911          | + | 3030   | 3065   | RNA → rpmE2 (PRK01678) Ribosomal_L31 (pfam01197) →                                                                                                                   |
| env-419 | SRS024281_C990110                       | - | 3626   | 3591   | RNA → rpmE2 (PRK01678) Ribosomal_L31 (pfam01197) → Tdk (COG1435) PRK04296 (PRK04296) → PrfA (COG0216) prfA (PRK00591) → HemK (COG2890) PRK09328 (PRK09328) →         |
| env-420 | SRS055495_C1103822                      | + | 223    | 258    | RNA → rpmE2 (PRK01678) Ribosomal_L31 (pfam01197) →                                                                                                                   |
| env-421 | SRS056157_LANL_scaffold_3130            | - | 22443  | 22408  | RNA → rpmE2 (PRK01678) Ribosomal_L31 (pfam01197) → Tdk (COG1435) PRK04296 (PRK04296) → PrfA (COG0216) prfA (PRK00591) → HemK (COG2890) PRK09328 (PRK09328) →         |
| env-422 | SRS011247_Baylor_scaffold_24154         | + | 56     | 91     | RNA → rpmE2 (PRK01678) Ribosomal_L31 (pfam01197) → Tdk (COG1435) PRK04296 (PRK04296) → PCRf (smart00937) PCRf (pfam03462) →                                          |
| env-423 | SRS013506_C1071539                      | - | 305    | 270    | RNA → rpmE2 (PRK01678) Ribosomal_L31 (pfam01197) →                                                                                                                   |
| env-424 | SRS013711_C1759566                      | + | 247    | 282    | RNA → rpmE2 (PRK01678) Ribosomal_L31 (pfam01197) →                                                                                                                   |
| env-425 | SRS013947_WUGC_scaffold_13565           | + | 157    | 192    | RNA → rpmE2 (PRK01678) Ribosomal_L31 (pfam01197) → Tdk (COG1435) PRK04296 (PRK04296) →                                                                               |
| env-426 | SRS014687_WUGC_scaffold_3449            | - | 286    | 251    | RNA → rpmE2 (PRK01678) Ribosomal_L31 (pfam01197) →                                                                                                                   |
| env-427 | SRS014691_C2541310                      | + | 149    | 184    | RNA → rpmE2 (PRK01678) Ribosomal_L31 (pfam01197) →                                                                                                                   |
| env-428 | SRS015040_WUGC_scaffold_9073            | + | 246    | 281    | RNA → rpmE2 (PRK01678) Ribosomal_L31 (pfam01197) →                                                                                                                   |
| env-429 | SRS015154_C749644                       | + | 103    | 138    | RNA → rpmE2 (PRK01678) Ribosomal_L31 (pfam01197) → Tdk (COG1435) PRK04296 (PRK04296) →                                                                               |
| env-430 | SRS015374_C303312                       | + | 108    | 143    | RNA → rpmE2 (PRK01678) Ribosomal_L31 (pfam01197) →                                                                                                                   |

|         |                                   |   |        |        |                                                                                                                                                                                                                                                                                                             |
|---------|-----------------------------------|---|--------|--------|-------------------------------------------------------------------------------------------------------------------------------------------------------------------------------------------------------------------------------------------------------------------------------------------------------------|
| env-431 | SRS015378.C1036454                | + | 558    | 593    | RNA → rpmE2 (PRK01678)Ribosomal_L31 (pfam01197) →                                                                                                                                                                                                                                                           |
| env-432 | SRS015436.C1704957                | - | 351    | 316    | RNA → rpmE2 (PRK01678)Ribosomal_L31 (pfam01197) →                                                                                                                                                                                                                                                           |
| env-433 | SRS015440.WUGC_scaffold_48560     | - | 6395   | 6360   | RNA → rpmE2 (PRK01678)Ribosomal_L31 (pfam01197) → Tdk (COG1435)PRK04296 (PRK04296) → PrfA (COG0216)prfA (PRK00591) → HemK (COG2890)PRK09328 (PRK09328) →                                                                                                                                                    |
| env-434 | SRS015470.WUGC_scaffold_63490     | - | 348    | 313    | RNA → rpmE2 (PRK01678)Ribosomal_L31 (pfam01197) →                                                                                                                                                                                                                                                           |
| env-435 | SRS015745.WUGC_scaffold_6005      | - | 482    | 447    | RNA → rpmE2 (PRK01678)Ribosomal_L31 (pfam01197) → Tdk (COG1435)PRK04296 (PRK04296) →                                                                                                                                                                                                                        |
| env-436 | SRS016196.C484943                 | + | 277    | 312    | RNA → rpmE2 (PRK01678)Ribosomal_L31 (pfam01197) → Tdk (COG1435)PRK04296 (PRK04296) →                                                                                                                                                                                                                        |
| env-437 | SRS016600.Baylor_scaffold_2683    | + | 3030   | 3065   | RNA → rpmE2 (PRK01678)Ribosomal_L31 (pfam01197) → Tdk (COG1435)PRK04296 (PRK04296) → PrfA (COG0216)prfA (PRK00591) → HemK (COG2890)PRK09328 (PRK09328) →                                                                                                                                                    |
| env-438 | SRS017013.Baylor_scaffold_6676    | - | 592    | 557    | RNA → rpmE2 (PRK01678)Ribosomal_L31 (pfam01197) →                                                                                                                                                                                                                                                           |
| env-439 | SRS018329.C1551846                | + | 51     | 86     | RNA → rpmE2 (PRK01678)Ribosomal_L31 (pfam01197) →                                                                                                                                                                                                                                                           |
| env-440 | SRS018359.C1220600                | - | 348    | 313    | RNA → rpmE2 (PRK01678)Ribosomal_L31 (pfam01197) →                                                                                                                                                                                                                                                           |
| env-441 | SRS019073.C2443412                | - | 309    | 274    | RNA → rpmE2 (PRK01678)Ribosomal_L31 (pfam01197) →                                                                                                                                                                                                                                                           |
| env-442 | SRS019125.C619240                 | - | 154    | 119    | RNA → rpmE2 (PRK01678)Ribosomal_L31 (pfam01197) →                                                                                                                                                                                                                                                           |
| env-443 | SRS019126.C2186810                | + | 232    | 267    | RNA → rpmE2 (PRK01678)Ribosomal_L31 (pfam01197) → Tdk (COG1435)PRK04296 (PRK04296) →                                                                                                                                                                                                                        |
| env-444 | SRS019221.C295755                 | + | 3024   | 3059   | RNA → rpmE2 (PRK01678)Ribosomal_L31 (pfam01197) → Tdk (COG1435)PRK04296 (PRK04296) →                                                                                                                                                                                                                        |
| env-445 | SRS019976.C716661                 | + | 59     | 94     | RNA → rpmE2 (PRK01678)Ribosomal_L31 (pfam01197) → Tdk (COG1435)PRK04296 (PRK04296) →                                                                                                                                                                                                                        |
| env-446 | SRS020858.Baylor_scaffold_5085    | + | 3032   | 3067   | RNA → rpmE2 (PRK01678)Ribosomal_L31 (pfam01197) → Tdk (COG1435)PRK04296 (PRK04296) → PrfA (COG0216)prfA (PRK00591) → HemK (COG2890)PRK09328 (PRK09328) →                                                                                                                                                    |
| env-447 | SRS021473.C876560                 | - | 603    | 568    | RNA → rpmE2 (PRK01678)Ribosomal_L31 (pfam01197) → Tdk (COG1435)PRK04296 (PRK04296) →                                                                                                                                                                                                                        |
| env-448 | SRS022079.C372086                 | - | 276    | 241    | RNA → rpmE2 (PRK01678)Ribosomal_L31 (pfam01197) →                                                                                                                                                                                                                                                           |
| env-449 | SRS022145.C598868                 | - | 166    | 131    | RNA → rpmE2 (PRK01678)Ribosomal_L31 (pfam01197) →                                                                                                                                                                                                                                                           |
| env-450 | SRS022532.LANL_scaffold_6630      | - | 1673   | 1638   | RNA → rpmE2 (PRK01678)Ribosomal_L31 (pfam01197) → Tdk (COG1435)PRK04296 (PRK04296) → Tdk (COG1435)PRK04296 (PRK04296) → hypo → PrfA (COG0216)prfA (PRK00591) →                                                                                                                                              |
| env-451 | SRS022721.LANL_scaffold_429       | + | 210    | 245    | RNA → rpmE2 (PRK01678)Ribosomal_L31 (pfam01197) →                                                                                                                                                                                                                                                           |
| env-452 | SRS023837.C579087                 | - | 296    | 261    | RNA → rpmE2 (PRK01678)Ribosomal_L31 (pfam01197) →                                                                                                                                                                                                                                                           |
| env-453 | SRS024140.C1189075                | + | 4828   | 4863   | RNA → rpmE2 (PRK01678)Ribosomal_L31 (pfam01197) →                                                                                                                                                                                                                                                           |
| env-454 | SRS024377.LANL_scaffold_4712      | - | 1160   | 1125   | RNA → rpmE2 (PRK01678)Ribosomal_L31 (pfam01197) → Tdk (COG1435)PRK04296 (PRK04296) → PrfA (COG0216)prfA (PRK00591) →                                                                                                                                                                                        |
| env-455 | SRS042457.C486662                 | - | 351    | 316    | RNA → rpmE2 (PRK01678)Ribosomal_L31 (pfam01197) →                                                                                                                                                                                                                                                           |
| env-456 | SRS045254.C914869                 | - | 3935   | 3900   | RNA → rpmE2 (PRK01678)Ribosomal_L31 (pfam01197) → Tdk (COG1435)PRK04296 (PRK04296) → PrfA (COG0216)prfA (PRK00591) → HemK (COG2890)PRK09328 (PRK09328) →                                                                                                                                                    |
| env-457 | SRS045978.C985323                 | + | 72     | 107    | RNA → rpmE2 (PRK01678)Ribosomal_L31 (pfam01197) →                                                                                                                                                                                                                                                           |
| env-458 | SRS050628.LANL_scaffold_17394     | + | 458    | 493    | RNA → rpmE2 (PRK01678)Ribosomal_L31 (pfam01197) →                                                                                                                                                                                                                                                           |
| env-459 | SRS051116.C251615                 | + | 534    | 569    | RNA → rpmE2 (PRK01678)Ribosomal_L31 (pfam01197) →                                                                                                                                                                                                                                                           |
| env-460 | SRS052668.LANL_scaffold_27772     | + | 2906   | 2941   | RNA → rpmE2 (PRK01678)Ribosomal_L31 (pfam01197) → Tdk (COG1435)PRK04296 (PRK04296) → PrfA (COG0216)prfA (PRK00591) →                                                                                                                                                                                        |
| env-461 | SRS052874.LANL_scaffold_5089      | - | 290    | 255    | RNA → hypo →                                                                                                                                                                                                                                                                                                |
| env-462 | SRS054569.LANL_scaffold_12877     | + | 354    | 319    | RNA → rpmE2 (PRK01678)Ribosomal_L31 (pfam01197) →                                                                                                                                                                                                                                                           |
| env-463 | SRS058105.LANL_scaffold_13652     | + | 469    | 504    | RNA → rpmE2 (PRK01678)Ribosomal_L31 (pfam01197) →                                                                                                                                                                                                                                                           |
| env-464 | SRS064809.C824160                 | - | 603    | 568    | RNA → rpmE2 (PRK01678)Ribosomal_L31 (pfam01197) → Tdk (COG1435)PRK04296 (PRK04296) →                                                                                                                                                                                                                        |
| env-465 | SRS075406.C835742                 | - | 348    | 313    | RNA → rpmE2 (PRK01678)Ribosomal_L31 (pfam01197) →                                                                                                                                                                                                                                                           |
| env-466 | SRS077738.LANL_scaffold_4679      | - | 647    | 612    | RNA → rpmE2 (PRK01678)Ribosomal_L31 (pfam01197) → Tdk (COG1435)PRK04296 (PRK04296) →                                                                                                                                                                                                                        |
| Gha-1-1 | NZ_ACD202000014.1                 | - | 557531 | 557496 | RNA → rpmE2 (PRK01678)Ribosomal_L31 (pfam01197) → rpmE2 (PRK01678)Ribosomal_L31 (pfam01197) → Tdk (COG1435)PRK04296 (PRK04296) → Tdk (COG1435)PRK04296 (PRK04296) → PrfA (COG0216)prfA (PRK00591) → PrfA (COG0216)prfA (PRK00591) → HemK (COG2890)PRK09328 (PRK09328) → HemK (COG2890)PRK09328 (PRK09328) → |
| env-467 | SRS053917.LANL_scaffold_15970     | - | 444    | 409    | RNA → rpmE2 (PRK01678)Ribosomal_L31 (pfam01197) →                                                                                                                                                                                                                                                           |
| env-468 | Subgingival_plaque.LANL.C11235616 | - | 423    | 388    | RNA → rpmE2 (PRK01678)Ribosomal_L31 (pfam01197) →                                                                                                                                                                                                                                                           |
| env-469 | SRS012285.Baylor_scaffold_61830   | - | 316    | 281    | RNA → rpmE2 (PRK01678)Ribosomal_L31 (pfam01197) →                                                                                                                                                                                                                                                           |
| env-470 | SRS013252.C3418322                | - | 215    | 180    | RNA → rpmE2 (PRK01678)Ribosomal_L31 (pfam01197) →                                                                                                                                                                                                                                                           |
| env-471 | SRS015574.C3437002                | + | 238    | 273    | RNA → rpmE2 (PRK01678)Ribosomal_L31 (pfam01197) →                                                                                                                                                                                                                                                           |
| env-472 | SRS022725.C5893417                | - | 3760   | 3725   | RNA → rpmE2 (PRK01678)Ribosomal_L31 (pfam01197) →                                                                                                                                                                                                                                                           |
| env-473 | SRS047634.C4297156                | - | 346    | 311    | RNA → rpmE2 (PRK01678)Ribosomal_L31 (pfam01197) →                                                                                                                                                                                                                                                           |



|         |                                |   |        |        |                                                                                                                                                                                   |
|---------|--------------------------------|---|--------|--------|-----------------------------------------------------------------------------------------------------------------------------------------------------------------------------------|
| env-474 | SRS049268.C4258038             | - | 364    | 329    | RNA → rpmE2 (PRK01678)Ribosomal_L31 (pfam01197) →                                                                                                                                 |
| env-475 | SRS049318.LANL_scaffold_177316 | - | 852    | 817    | RNA → rpmE2 (PRK01678)Ribosomal_L31 (pfam01197) →                                                                                                                                 |
| env-476 | SRS049389.C4591629             | - | 154    | 119    | RNA → rpmE2 (PRK01678)Ribosomal_L31 (pfam01197) →                                                                                                                                 |
| env-477 | SRS051244.C3395339             | - | 351    | 316    | RNA → rpmE2 (PRK01678)Ribosomal_L31 (pfam01197) →                                                                                                                                 |
| env-478 | SRS063932.C3959092             | - | 4053   | 4018   | RNA → rpmE2 (PRK01678)Ribosomal_L31 (pfam01197) →                                                                                                                                 |
| env-479 | SRS014126.C559610              | - | 349    | 314    | RNA → rpmE2 (PRK01678)Ribosomal_L31 (pfam01197) →                                                                                                                                 |
| env-480 | SRS015060.C1555206             | - | 905    | 870    | RNA → rpmE2 (PRK01678)Ribosomal_L31 (pfam01197) → Tdk (COG1435)PRK04296 (PRK04296) →                                                                                              |
| env-481 | SRS022536.LANL_scaffold_96129  | - | 893    | 858    | RNA → rpmE2 (PRK01678)Ribosomal_L31 (pfam01197) →                                                                                                                                 |
| env-482 | SRS017511.C3422862             | + | 34     | 69     | RNA → rpmE2 (PRK01678)Ribosomal_L31 (pfam01197) →                                                                                                                                 |
| env-483 | SRS015537.C1260669             | + | 407    | 442    | RNA → rpmE2 (PRK01678)Ribosomal_L31 (pfam01197) →                                                                                                                                 |
| env-484 | SRS019126.WUGC_scaffold_4752   | - | 943    | 908    | RNA → rpmE2 (PRK01678)Ribosomal_L31 (pfam01197) → Tdk (COG1435)PRK04296 (PRK04296) →                                                                                              |
| env-485 | SRS020220.C3566657             | - | 510    | 475    | RNA → rpmE2 (PRK01678)Ribosomal_L31 (pfam01197) → Tdk (COG1435)PRK04296 (PRK04296) →                                                                                              |
| env-486 | SRS024441.LANL_scaffold_37855  | + | 2333   | 2368   | RNA → rpmE2 (PRK01678)Ribosomal_L31 (pfam01197) → Tdk (COG1435)PRK04296 (PRK04296) → PrfA (COG0216)prfA (PRK00591) → HemK (COG2890)PRK09328 (PRK09328) →                          |
| Gsa-1-1 | NZ_JNJO01000009.1              | - | 39706  | 39671  | RNA → rpmE2 (PRK01678)Ribosomal_L31 (pfam01197) → Tdk (COG1435)PRK04296 (PRK04296) → PrfA (COG0216)prfA (PRK00591) → HemK (COG2890)PRK09328 (PRK09328) →                          |
| env-487 | SRS019387.C1674147             | - | 222    | 187    | RNA → rpmE2 (PRK01678)Ribosomal_L31 (pfam01197) →                                                                                                                                 |
| env-488 | SRS043676.WUGC_scaffold_7376   | - | 288    | 253    | RNA →                                                                                                                                                                             |
| env-489 | SRS045262.WUGC_scaffold_5583   | - | 417    | 382    | RNA → rpmE2 (PRK01678)Ribosomal_L31 (pfam01197) →                                                                                                                                 |
| env-490 | SRS057022.LANL_scaffold_32496  | - | 164    | 129    | RNA → rpmE2 (PRK01678)Ribosomal_L31 (pfam01197) →                                                                                                                                 |
| Gcu-1-1 | NZ_KE384431.1                  | + | 63435  | 63471  | RNA → rpmE2 (PRK01678)Ribosomal_L31 (pfam01197) →                                                                                                                                 |
| Gbe-1-1 | NZ_KI271855.1                  | + | 37507  | 37542  | RNA → rpmE2 (PRK01678)Ribosomal_L31 (pfam01197) →                                                                                                                                 |
| env-491 | AUXO018174862.1                | - | 1094   | 1063   | RNA → rpmE (PRK00019)Ribosomal_L31 (pfam01197) → PRK05571 (PRK05571)LacAB_rpiB (pfam02502) int_mem_yvwzB (TIGR02327)DUF1146 (pfam06612) → hypo →                                  |
| env-492 | NLM004_scaffold46339.1         | - | 437    | 405    | RNA → rpmE (PRK00019)Ribosomal_L31 (pfam01197) → YycJ-like_MBL-fold (cd07733) →                                                                                                   |
| env-493 | SRS012273.C3440542             | + | 90     | 122    | RNA → rpmE (PRK00019)Ribosomal_L31 (pfam01197) →                                                                                                                                  |
| env-494 | scaffold33486_3_MH0073         | - | 380    | 348    | RNA → rpmE (PRK00019)Ribosomal_L31 (pfam01197) → YycJ-like_MBL-fold (cd07733) →                                                                                                   |
| env-495 | NOF010_scaffold2338_8          | - | 578    | 546    | RNA → rpmE (PRK00019)Ribosomal_L31 (pfam01197) → Lactamase_B (smart00849)metallo-hydrolase-like_MBL-fold (cd06262) →                                                              |
| env-496 | NOF012_C785263.1               | - | 175    | 143    | RNA → rpmE (PRK00019)Ribosomal_L31 (pfam01197) →                                                                                                                                  |
| env-497 | NOM002_scaffold12570_2         | - | 538    | 506    | RNA → rpmE (PRK00019)Ribosomal_L31 (pfam01197) → Lactamase_B (smart00849)metallo-hydrolase-like_MBL-fold (cd06262) →                                                              |
| env-498 | NOM028_scaffold34027.1         | - | 2866   | 2834   | RNA → rpmE (PRK00019)Ribosomal_L31 (pfam01197) → Lactamase_B (smart00849)PhnP (COG1235) → PRK00103 (PRK00103)SPOUT_MTase (pfam02590) → hypo → PRK15482 (PRK15482)RpiR (COG1737) → |
| env-499 | 4491401.3_NODE.43820           | - | 1176   | 1144   | RNA → rpmE (PRK00019)Ribosomal_L31 (pfam01197) →                                                                                                                                  |
| env-500 | SRS015854.C5461434             | + | 375    | 407    | RNA → rpmE (PRK00019)Ribosomal_L31 (pfam01197) →                                                                                                                                  |
| Csp-6-1 | NZ_KQ235810.1                  | - | 156185 | 156153 | RNA → rpmE (PRK00019)Ribosomal_L31 (pfam01197) → Lactamase_B (smart00849)PhnP (COG1235) → PRK00103 (PRK00103)SPOUT_MTase (pfam02590) →                                            |
| env-501 | NLM032_scaffold64463_2         | + | 2904   | 2936   | RNA → rpmE (PRK00019)Ribosomal_L31 (pfam01197) → Lactamase_B (smart00849)PhnP (COG1235) → PRK00103 (PRK00103)SPOUT_MTase (pfam02590) → hypo → PRK15482 (PRK15482)RpiR (COG1737) → |
| env-502 | BABG01003555.1                 | - | 601    | 569    | RNA → rpmE (PRK00019)Ribosomal_L31 (pfam01197) → Lactamase_B (smart00849)metallo-hydrolase-like_MBL-fold (cd06262) →                                                              |
| env-503 | NLM027_scaffold7634.1          | + | 182    | 214    | RNA → rpmE (PRK00019)Ribosomal_L31 (pfam01197) → Lactamase_B (smart00849)PhnP (COG1235) → PRK00103 (PRK00103)SPOUT_MTase (pfam02590) →                                            |
| env-504 | NOF005_scaffold9442_3          | + | 1100   | 1132   | RNA → rpmE (PRK00019)Ribosomal_L31 (pfam01197) →                                                                                                                                  |
| env-505 | NOM009_scaffold48146_7         | + | 6961   | 6993   | RNA → rpmE (PRK00019)Ribosomal_L31 (pfam01197) → Lactamase_B (smart00849)PhnP (COG1235) → PRK00103 (PRK00103)SPOUT_MTase (pfam02590) → hypo → PRK15482 (PRK15482)RpiR (COG1737) → |
| env-506 | SRS020233.C4059603             | - | 223    | 191    | RNA → rpmE (PRK00019)Ribosomal_L31 (pfam01197) →                                                                                                                                  |
| [sa-1-1 | NZ_JMLH01000001.1              | - | 51630  | 51598  | RNA → rpmE (PRK00019)Ribosomal_L31 (pfam01197) → Lactamase_B (smart00849)PhnP (COG1235) → PRK00103 (PRK00103)SPOUT_MTase (pfam02590) →                                            |
| Cba-1-1 | NZ_BAHP02000099.1              | - | 13426  | 13394  | RNA → rpmE (PRK00019)Ribosomal_L31 (pfam01197) → Lactamase_B (smart00849)PhnP (COG1235) → PRK00103 (PRK00103)SPOUT_MTase (pfam02590) →                                            |
| env-507 | SRS014313.WUGC_scaffold_17457  | + | 2437   | 2470   | RNA → rpmE (PRK00019)Ribosomal_L31 (pfam01197) →                                                                                                                                  |
| env-508 | SRS016517.C20315060            | + | 178    | 211    | RNA → rpmE (PRK00019)Ribosomal_L31 (pfam01197) →                                                                                                                                  |
| env-509 | SRS011586.C3323726             | + | 256    | 289    | RNA → rpmE (PRK00019)rpmE2 (PRK01678)Ribosomal_L31 (pfam01197) →                                                                                                                  |

|           |                                     |   |         |         |                                                                                                               |
|-----------|-------------------------------------|---|---------|---------|---------------------------------------------------------------------------------------------------------------|
| env-510   | SRS016267_C4307118                  | + | 16      | 49      | RNA → rpmE (PRK00019)Ribosomal_L31 (pfam01197) →                                                              |
| env-511   | SRS016495_C1903365                  | + | 841     | 874     | RNA → hypo →                                                                                                  |
| env-512   | SRS019601_C1887446                  | - | 239     | 206     | RNA → rpmE (PRK00019)Ribosomal_L31 (pfam01197) → rpmE (PRK00019)Ribosomal_L31 (pfam01197) →                   |
| Csp-4-1   | NZ_DS562854.1                       | - | 119936  | 119903  | RNA → rpmE (PRK00019)Ribosomal_L31 (pfam01197) → rpmE (PRK00019)Ribosomal_L31 (pfam01197) →                   |
| env-513   | AKZA01000288.1                      | + | 213     | 245     | RNA → rpmE2 (PRK01678)Ribosomal_L31 (pfam01197) →                                                             |
| Eca-6-1   | NZ_GG692817.1                       | + | 313634  | 313666  | RNA → rpmE2 (PRK01678)Ribosomal_L31 (pfam01197) → rpmE2 (PRK01678)Ribosomal_L31 (pfam01197) →                 |
| Eca-7-1   | NZ_GG670387.1                       | + | 312337  | 312369  | RNA → rpmE2 (PRK01678)Ribosomal_L31 (pfam01197) → rpmE2 (PRK01678)Ribosomal_L31 (pfam01197) →                 |
| Eca-4-1   | NC_020995.1                         | - | 2799854 | 2799822 | RNA → rpmE2 (PRK01678)Ribosomal_L31 (pfam01197) →                                                             |
| Efl-1-1   | NZ_KB946265.1                       | - | 427638  | 427606  | RNA → rpmE2 (PRK01678)Ribosomal_L31 (pfam01197) →                                                             |
| Eca-2-1   | NZ_KE350248.1                       | - | 72485   | 72453   | RNA → rpmE2 (PRK01678)Ribosomal_L31 (pfam01197) →                                                             |
| Eca-3-1   | NZ_GL872323.1                       | + | 1257066 | 1257098 | RNA → rpmE2 (PRK01678)Ribosomal_L31 (pfam01197) →                                                             |
| Efa-315-1 | NZ_KE350268.1                       | - | 261980  | 261948  | RNA → rpmE2 (PRK01678)Ribosomal_L31 (pfam01197) →                                                             |
| Efa-4-1   | NZ_KE351443.1                       | - | 174912  | 174880  | RNA → rpmE2 (PRK01678)Ribosomal_L31 (pfam01197) →                                                             |
| Esp-14-1  | NZ_AKKS01000010.1                   | + | 102506  | 102538  | RNA → rpmE2 (PRK01678)Ribosomal_L31 (pfam01197) →                                                             |
| env-514   | AUXO014118027.1                     | + | 50137   | 50167   | RNA → rpmE (PRK00019)Ribosomal_L31 (pfam01197) → Tdk (COG1435)PRK04296 (PRK04296) → hypo → LemA (pfam04011) → |
| Hma-1-1   | NZ_HE998568.1                       | - | 708686  | 708652  | RNA → rpmE (PRK00019)Ribosomal_L31 (pfam01197) →                                                              |
| env-515   | SRS054590.LANL_scaffold_6972        | - | 112     | 78      | RNA → rpmE (PRK00019)rpmE2 (PRK01678)Ribosomal_L31 (pfam01197) →                                              |
| Hfi-1-1   | NZ_GG657553.1                       | - | 397887  | 397853  | RNA → rpmE (PRK00019)Ribosomal_L31 (pfam01197) →                                                              |
| env-516   | SRS015217.WUGC_scaffold_37705       | + | 9104    | 9137    | RNA → rpmE (PRK00019)Ribosomal_L31 (pfam01197) → Tdk (COG1435)PRK04296 (PRK04296) →                           |
| Edo-1-1   | NZ_DS483478.1                       | - | 12891   | 12858   | NDK (smart00562)NDK (pfam00334) → Tdk (COG1435)PRK04296 (PRK04296) → NDK (smart00562)NDK (pfam00334) →        |
| env-517   | AUXO014926912.1                     | + | 1177    | 1210    | RNA →                                                                                                         |
| Rma-1-1   | NZ_CVPE01000005.1                   | - | 403752  | 403721  | RNA → rpmE (PRK00019)Ribosomal_L31 (pfam01197) →                                                              |
| env-518   | JGI12273J12029_10010743             | + | 2725    | 2769    | RNA → rpmE (PRK00019)Ribosomal_L31 (pfam01197) →                                                              |
| env-519   | 2200826318                          | - | 563     | 529     | RNA → ← hypo                                                                                                  |
| Lpa-39-1  | NZ_JH414991.1                       | + | 1619    | 1652    | RNA → rpmE2 (PRK01678)Ribosomal_L31 (pfam01197) →                                                             |
| env-520   | HBC_scaff_10134855                  | - | 119     | 87      | RNA → rpmE (PRK00019)rpmE2 (PRK01678)Ribosomal_L31 (pfam01197) →                                              |
| env-521   | HBC_ctgs_1288573                    | - | 119     | 87      | RNA → rpmE (PRK00019)rpmE2 (PRK01678)Ribosomal_L31 (pfam01197) →                                              |
| Lku-2-1   | NZ_JPYX01000004.1                   | - | 23057   | 23025   | RNA → rpmE2 (PRK01678)Ribosomal_L31 (pfam01197) →                                                             |
| Lku-2-2   | NZ_JPUI01000040.1                   | + | 29050   | 29082   | RNA → rpmE2 (PRK01678)Ribosomal_L31 (pfam01197) →                                                             |
| Lku-3-1   | NZ_AZBY01000009.1                   | - | 22976   | 22944   | RNA → rpmE2 (PRK01678)Ribosomal_L31 (pfam01197) →                                                             |
| env-522   | AUXO010035532.1                     | - | 150     | 121     | RNA → rpmE (PRK00019)Ribosomal_L31 (pfam01197) →                                                              |
| env-523   | AUXO010163029.1                     | - | 150     | 121     | RNA → rpmE (PRK00019)Ribosomal_L31 (pfam01197) →                                                              |
| env-524   | JGI24502J29692_10015897             | + | 1091    | 1123    | RNA → rpmE (PRK00019)Ribosomal_L31 (pfam01197) →                                                              |
| env-525   | JGI24503J29689_10022200             | + | 1121    | 1153    | RNA → rpmE (PRK00019)Ribosomal_L31 (pfam01197) →                                                              |
| env-526   | JGI24500J29687_10017177             | + | 1046    | 1078    | RNA → rpmE (PRK00019)Ribosomal_L31 (pfam01197) →                                                              |
| env-527   | SRS014979_C3222903                  | + | 585     | 613     | RNA → NrdG (COG0602)Fer4_12 (pfam13353) → Dut (COG0756)dut (PRK00601) →                                       |
| env-528   | SRS065504.LANL_scaffold_46983       | - | 2440    | 2412    | RNA → NrdG (COG0602)Fer4_12 (pfam13353) → Dut (COG0756)dut (PRK00601) →                                       |
| env-529   | scaffold1558_1.MH0054               | + | 596     | 624     | RNA → NrdG (COG0602)Fer4_12 (pfam13353) →                                                                     |
| env-530   | scaffold31141_5.O2.UC-19            | - | 124     | 96      | RNA → NrdG (COG0602)Fer4_12 (pfam13353) → Dut (COG0756)dut (PRK00601) →                                       |
| env-531   | SRS017821_C2327271                  | + | 300     | 328     | RNA → NrdG (COG0602)Fer4_12 (pfam13353) → Dut (COG0756)dut (PRK00601) →                                       |
| env-532   | SRS024435_C3071163                  | - | 138     | 110     | RNA → NrdG (COG0602)Fer4_12 (pfam13353) → Dut (COG0756)dut (PRK00601) →                                       |
| env-533   | scaffold53311_1.MH0066              | - | 2650    | 2622    | RNA → NrdG (COG0602)Fer4_12 (pfam13353) → Dut (COG0756)dut (PRK00601) →                                       |
| env-534   | scaffold65125_1.V1.UC-10            | + | 484     | 512     | RNA → NrdG (COG0602)Fer4_12 (pfam13353) → trimeric_dUTPase (cd07557)dut (PRK00601) →                          |
| env-535   | SRS014235_C3411809                  | - | 244     | 216     | RNA → NrdG (COG0602)Fer4_12 (pfam13353) → trimeric_dUTPase (cd07557)dut (PRK00601) →                          |
| env-536   | scaffold3439_3.MH0002               | - | 672     | 644     | RNA → NrdG (COG0602)Fer4_12 (pfam13353) → Dut (COG0756)dut (PRK00601) →                                       |
| env-537   | C6319386_1.MH0064                   | + | 429     | 457     | RNA → NrdG (COG0602)Fer4_12 (pfam13353) → trimeric_dUTPase (cd07557)dut (PRK00601) →                          |
| env-538   | scaffold208933_1.MH0006             | - | 2939    | 2911    | RNA → NrdG (COG0602)Fer4_12 (pfam13353) → Dut (COG0756)dut (PRK00601) →                                       |
| env-539   | UnmappedStool_Broad_scaffold_489424 | + | 400     | 428     | RNA → NrdG (COG0602)Fer4_12 (pfam13353) →                                                                     |
| env-540   | SRS011586.WUGC_scaffold_28380       | + | 890     | 918     | RNA → NrdG (COG0602)Fer4_12 (pfam13353) → dut (PRK00601) →                                                    |
| env-541   | SRS012273_C3719647                  | - | 681     | 653     | RNA → NrdG (COG0602)Fer4_12 (pfam13353) → Dut (COG0756)dut (PRK00601) →                                       |

|                      |                                 |   |         |         |                                                                                               |
|----------------------|---------------------------------|---|---------|---------|-----------------------------------------------------------------------------------------------|
| env-542              | SRS014613.WUGC_scaffold_29094   | - | 2441    | 2413    | RNA → NrdG (COG0602)Fer4_12 (pfam13353) → Dut (COG0756)dut (PRK00601) →                       |
| env-543              | SRS015782.C3240512              | - | 148     | 120     | RNA → NrdG (COG0602)Fer4_12 (pfam13353) → Dut (COG0756)dut (PRK00601) →                       |
| env-544              | SRS020869.Baylor_scaffold_15611 | + | 608     | 636     | RNA → NrdG (COG0602)Fer4_12 (pfam13353) → trimeric_dUTPase (cd07557)dut (PRK00601) →          |
| env-545              | SRS022071.C3053836              | - | 2440    | 2412    | RNA → NrdG (COG0602)Fer4_12 (pfam13353) → Dut (COG0756)dut (PRK00601) →                       |
| env-546              | SRS047014.C3437135              | - | 64      | 36      | RNA → NrdG (COG0602)Fer4_12 (pfam13353) →                                                     |
| env-547              | SRS064276.LANL_scaffold_22062   | - | 2440    | 2412    | RNA → NrdG (COG0602)Fer4_12 (pfam13353) → Dut (COG0756)dut (PRK00601) →                       |
| Fso-1-1              | NZ_KI912400.1                   | + | 87614   | 87648   | RNA → rpmE2 (PRK01678)Ribosomal_L31 (pfam01197) →                                             |
| env-548              | HCF12C_316963                   | + | 338     | 369     | RNA → rpmE (PRK00019)Ribosomal_L31 (pfam01197) → secG (TIGR00810)SecG (pfam03840) →           |
| env-549              | HCF12C_1.1.newblercontig523487  | - | 64      | 33      | RNA → hypo →                                                                                  |
| env-550              | JGI24724J26744_10133593         | + | 70      | 102     | RNA → rpmE (PRK00019)Ribosomal_L31 (pfam01197) → Tdk (COG1435)PRK04296 (PRK04296) →           |
| Psp-21-1             | NZ_HE610963.1                   | + | 234443  | 234480  | RNA → rpmE (PRK00019)Ribosomal_L31 (pfam01197) → rpmE (PRK00019)Ribosomal_L31 (pfam01197) →   |
| env-551              | AUXO014364427.1                 | - | 119     | 87      | RNA → rpmE (PRK00019)rpmE2 (PRK01678)Ribosomal_L31 (pfam01197) →                              |
| env-552              | AUXO016753630.1                 | + | 178     | 210     | RNA → rpmE (PRK00019)Ribosomal_L31 (pfam01197) → Aes (COG0657)Abhydrolase_3 (pfam07859) →     |
| env-553              | RUMENNODE_4188936_197001        | - | 14624   | 14592   | RNA → ← F420_ligase (pfam01996)                                                               |
| env-554              | RUMENNODE_4260751_1             | + | 37231   | 37263   | RNA → rpmE (PRK00019)Ribosomal_L31 (pfam01197) →                                              |
| env-555              | RUMENNODE_4260751_1             | + | 24591   | 24623   | RNA → rpmE (PRK00019)Ribosomal_L31 (pfam01197) →                                              |
| Ssp-3-1              | NZ_AZUC01000056.1               | + | 43289   | 43319   | RNA → rpmE (PRK00019)Ribosomal_L31 (pfam01197) →                                              |
| Ssp-5-1              | NZ_JWIB01000052.1               | - | 9860    | 9830    | RNA → rpmE (PRK00019)Ribosomal_L31 (pfam01197) →                                              |
| env-556              | JGI24024J18818_10001192         | - | 358     | 328     | RNA → rpmE (PRK00019)Ribosomal_L31 (pfam01197) →                                              |
| env-557              | JGI24024J18818_10116008         | + | 495     | 525     | RNA → rpmE (PRK00019)Ribosomal_L31 (pfam01197) →                                              |
| env-558              | JGI2065J20421_1018486           | - | 780     | 747     | RNA → rpmE (PRK00019)Ribosomal_L31 (pfam01197) → hypo →                                       |
| env-559              | JGI26050J44790_1028750          | + | 320     | 352     | RNA →                                                                                         |
| env-560              | JGI26051J44788_1026204          | - | 292     | 260     | RNA → rpmE2 (PRK01678)Ribosomal_L31 (pfam01197) →                                             |
| env-561              | JGI26053J44789_1023599          | - | 308     | 276     | RNA → rpmE2 (PRK01678)Ribosomal_L31 (pfam01197) →                                             |
| env-562              | JGI26052J44787_1030737          | + | 185     | 217     | RNA → rpmE2 (PRK01678)Ribosomal_L31 (pfam01197) →                                             |
| env-563              | JGI26055J44792_1008714          | + | 1514    | 1546    | RNA → rpmE2 (PRK01678)Ribosomal_L31 (pfam01197) →                                             |
| env-564              | JGI26057J44791_1000928          | - | 1554    | 1522    | RNA → rpmE2 (PRK01678)Ribosomal_L31 (pfam01197) →                                             |
| env-565              | JGI26054J46599_1005137          | + | 1615    | 1647    | RNA → rpmE2 (PRK01678)Ribosomal_L31 (pfam01197) →                                             |
| Wci-1-3              | NZ_JWHT01000082.1               | + | 3980    | 4012    | RNA → rpmE2 (PRK01678)Ribosomal_L31 (pfam01197) →                                             |
| Wci-2-1              | NZ_AEK01000044.1                | - | 80525   | 80493   | RNA → rpmE2 (PRK01678)Ribosomal_L31 (pfam01197) → rpmE2 (PRK01678)Ribosomal_L31 (pfam01197) → |
| Whe-1-1              | NZ_BBIK01000004.1               | + | 62770   | 62802   | RNA → rpmE2 (PRK01678)Ribosomal_L31 (pfam01197) →                                             |
| env-566              | BMHBC_2_3182488                 | - | 96      | 63      | RNA → hypo →                                                                                  |
| env-567              | BMHBC_2_4390494                 | - | 96      | 63      | RNA → hypo →                                                                                  |
| env-568              | BMHBC_2_6409884                 | + | 19      | 52      | RNA →                                                                                         |
| env-569              | BMHBC_2_1969890                 | + | 19      | 52      | RNA →                                                                                         |
| env-570              | BMHBC_2_1356989                 | + | 19      | 52      | RNA →                                                                                         |
| env-571              | BMHBC_2_7096089                 | + | 19      | 52      | RNA →                                                                                         |
| env-572              | BMHBC_2_3756228                 | - | 96      | 63      | RNA → hypo →                                                                                  |
| env-573              | BMHBC_2_5769464                 | - | 96      | 63      | RNA → hypo →                                                                                  |
| env-574              | BMHBC_2_5120317                 | - | 96      | 63      | RNA → hypo →                                                                                  |
| env-575              | BMHBC_2_2565350                 | - | 96      | 63      | RNA → hypo →                                                                                  |
| <sup>1</sup> env-576 | 3300001422_104017               | - | 1678    | 1638    | RNA → ← COG5421 (COG5421)                                                                     |
| env-577              | C927572_1                       | - | 10779   | 10748   | RNA → ← hypo                                                                                  |
| Lci-4-1              | NZ_CCNH01000002.1               | + | 172817  | 172848  | RNA → rpmE2 (PRK01678)Ribosomal_L31 (pfam01197) →                                             |
| Lci-4-2              | NZ_CCNH01000004.1               | + | 146295  | 146326  | RNA → rpmE2 (PRK01678)Ribosomal_L31 (pfam01197) →                                             |
| Lci-4-3              | NZ_JVUU01000031.1               | - | 65028   | 64997   | RNA → rpmE2 (PRK01678)Ribosomal_L31 (pfam01197) →                                             |
| Lci-5-1              | NC_010471.1                     | + | 373008  | 373039  | RNA → rpmE2 (PRK01678)Ribosomal_L31 (pfam01197) →                                             |
| Lci-2-1              | NZ_CAGF01000011.1               | - | 59597   | 59566   | RNA → rpmE2 (PRK01678)Ribosomal_L31 (pfam01197) →                                             |
| Lci-1-1              | NZ_CAGE01000004.1               | - | 59603   | 59572   | RNA → rpmE2 (PRK01678)Ribosomal_L31 (pfam01197) →                                             |
| Lci-3-1              | NZ_CAGG01000003.1               | - | 59603   | 59572   | RNA → rpmE2 (PRK01678)Ribosomal_L31 (pfam01197) →                                             |
| Lca-25-1             | NC_018673.1                     | - | 1311252 | 1311221 | RNA → rpmE2 (PRK01678)Ribosomal_L31 (pfam01197) →                                             |
| env-578              | F76GVBA01AN3WN                  | - | 315     | 284     | RNA → rpmE2 (PRK01678)Ribosomal_L31 (pfam01197) →                                             |



|          |                                 |   |        |        |                                                                                           |
|----------|---------------------------------|---|--------|--------|-------------------------------------------------------------------------------------------|
| env-579  | AUXO011646564.1                 | + | 63     | 96     | RNA →                                                                                     |
| Psa-1-1  | NZ_KB895396.1                   | - | 5948   | 5915   | RNA → rpmE (PRK00019)Ribosomal_L31 (pfam01197)→                                           |
| env-580  | AUXO010493877.1                 | - | 441    | 409    | RNA → rpmE (PRK00019)Ribosomal_L31 (pfam01197)→ MetG (COG0143)PRK12267 (PRK12267)→        |
| env-581  | JGI12273J12029_10023051         | + | 247    | 288    | RNA → rpmE (PRK00019)Ribosomal_L31 (pfam01197)→                                           |
| env-582  | scaffold70953_1_MH0035          | - | 9668   | 9638   | RNA → rpmE (PRK00019)Ribosomal_L31 (pfam01197)→ Tdk (COG1435)PRK04296 (PRK04296)→         |
| env-583  | SRS022609_Baylor_scaffold_81875 | - | 4601   | 4571   | RNA → rpmE (PRK00019)Ribosomal_L31 (pfam01197)→ Tdk (COG1435)PRK04296 (PRK04296)→         |
| env-584  | scaffold175278_1_MH0012         | - | 648    | 618    | TadA (COG0590)MafB19-deam (pfam14437)→ hypo→ hypo→ hypo→ hypo→ hypo→                      |
| env-585  | C3957884_1_MH0040               | + | 1247   | 1277   | RNA → rpmE (PRK00019)Ribosomal_L31 (pfam01197)→ Tdk (COG1435)PRK04296 (PRK04296)→         |
| env-586  | scaffold111154_1_MH0065         | + | 2910   | 2940   | RNA → rpmE (PRK00019)Ribosomal_L31 (pfam01197)→ Tdk (COG1435)PRK04296 (PRK04296)→         |
| env-587  | 4491423.3_NODE_1010             | - | 11026  | 10996  | TadA (COG0590)MafB19-deam (pfam14437)→ hypo→ hypo→ hypo→ hypo→                            |
| env-588  | scaffold73462_1_MH0044          | - | 3763   | 3733   | RNA → rpmE (PRK00019)Ribosomal_L31 (pfam01197)→ Tdk (COG1435)PRK04296 (PRK04296)→         |
| env-589  | scaffold17516_6_MH0066          | + | 1479   | 1509   | TadA (COG0590)MafB19-deam (pfam14437)→ hypo→ hypo→ hypo→ hypo→                            |
| env-590  | scaffold114987_1_MH0070         | - | 572    | 542    | RNA → rpmE (PRK00019)Ribosomal_L31 (pfam01197)→ Tdk (COG1435)PRK04296 (PRK04296)→         |
| env-591  | scaffold24028_2_MH0076          | + | 2809   | 2839   | RNA → rpmE (PRK00019)Ribosomal_L31 (pfam01197)→ Tdk (COG1435)PRK04296 (PRK04296)→         |
| env-592  | C3731285_1_MH0081               | - | 958    | 928    | TadA (COG0590)MafB19-deam (pfam14437)→ hypo→ hypo→ hypo→ hypo→                            |
| env-593  | SRS015663_C3126280              | + | 4752   | 4782   | RNA → rpmE (PRK00019)Ribosomal_L31 (pfam01197)→ Tdk (COG1435)PRK04296 (PRK04296)→ hypo→   |
| env-594  | SRS019582_WUGC_scaffold_86237   | - | 1630   | 1600   | TadA (COG0590)MafB19-deam (pfam14437)→                                                    |
| env-595  | SRS051031_LANL_scaffold_20891   | - | 3442   | 3412   | RNA → rpmE (PRK00019)Ribosomal_L31 (pfam01197)→ Tdk (COG1435)PRK04296 (PRK04296)→         |
| Cko-1-1  | NZ_JXAL01000029.1               | + | 95618  | 95652  | PRK10860 (PRK10860)TadA (COG0590)→ hypo→ hypo→ hypo→ hypo→ hypo→                          |
| env-596  | CTBMPR_c3813                    | - | 1882   | 1848   | RNA → rpmE (PRK00019)Ribosomal_L31 (pfam01197)→ hypo→                                     |
| env-597  | 2200758960                      | - | 2614   | 2581   | RNA → rpmE (PRK00019)Ribosomal_L31 (pfam01197)→ hypo→ hypo→ hypo→ hypo→ hypo→             |
| env-598  | CTBMPR_c24234                   | + | 49     | 82     | DnaX (COG2812)PRK05563 (PRK05563)→                                                        |
| Pta-1-1  | NZ_AULE01000002.1               | - | 8222   | 8189   | RNA → rpmE (PRK00019)Ribosomal_L31 (pfam01197)→                                           |
| Psp-11-1 | NZ_JMDX01000001.1               | - | 7605   | 7572   | RNA → rpmE (PRK00019)Ribosomal_L31 (pfam01197)→                                           |
| Pal-4-1  | NZ_ATMS01000017.1               | - | 7605   | 7572   | RNA → rpmE (PRK00019)Ribosomal_L31 (pfam01197)→                                           |
| Psp-28-1 | NZ_JMLT01000022.1               | + | 85290  | 85323  | RNA → rpmE (PRK00019)Ribosomal_L31 (pfam01197)→                                           |
| env-599  | JGI25151J46595_10251769         | - | 302    | 269    | RNA → rpmE (PRK00019)Ribosomal_L31 (pfam01197)→                                           |
| Pal-1-1  | NZ_AMBZ01000002.1               | + | 805774 | 805807 | RNA → rpmE (PRK00019)Ribosomal_L31 (pfam01197)→ rpmE (PRK00019)Ribosomal_L31 (pfam01197)→ |
| Pal-5-1  | NZ_ATMT01000041.1               | + | 2855   | 2888   | RNA → rpmE (PRK00019)Ribosomal_L31 (pfam01197)→                                           |
| Pte-3-1  | NZ_KB895427.1                   | + | 72449  | 72482  | RNA → rpmE (PRK00019)Ribosomal_L31 (pfam01197)→                                           |
| env-600  | JGI25151J46595_10020550         | - | 1564   | 1531   | RNA → rpmE (PRK00019)Ribosomal_L31 (pfam01197)→                                           |
| Psp-32-1 | NZ_JXAK01000056.1               | - | 6498   | 6465   | RNA → rpmE (PRK00019)Ribosomal_L31 (pfam01197)→                                           |
| env-601  | JGI12341J12878_1004125          | + | 582    | 615    | RNA → rpmE (PRK00019)Ribosomal_L31 (pfam01197)→ hypo→ hypo→ hypo→                         |
| env-602  | sg4i_contig13910                | + | 382    | 415    | RNA → rpmE (PRK00019)Ribosomal_L31 (pfam01197)→                                           |
| env-603  | sg4i_contig20097                | + | 2292   | 2325   | RNA → ←hypo                                                                               |
| env-604  | JGI12341J12878_1005421          | - | 1095   | 1062   | RNA → rpmE (PRK00019)Ribosomal_L31 (pfam01197)→ hypo→ hypo→ hypo→                         |
| env-605  | sgz454il_contig08209            | + | 30513  | 30546  | RNA → rpmE (PRK00019)Ribosomal_L31 (pfam01197)→                                           |
| env-606  | 2200252324                      | - | 7897   | 7866   | RNA → rpmE (PRK00019)Ribosomal_L31 (pfam01197)→ DUF4969 (pfam16339)→                      |
| env-607  | GBANfinal_FHNL2OP04XNKIIV       | - | 208    | 170    | RNA → rpmE (PRK00019)Ribosomal_L31 (pfam01197)→                                           |
| env-608  | JGI25151J46595_10336534         | + | 21     | 56     | RNA → ←hypo                                                                               |
| Pan-2-1  | NZ_HG005146.1                   | + | 43659  | 43692  | RNA → rpmE (PRK00019)Ribosomal_L31 (pfam01197)→                                           |
| env-609  | 2200180934                      | + | 143    | 179    | RNA → ←hypo                                                                               |
| Pte-2-1  | NZ_JTHP01000028.1               | + | 65669  | 65702  | RNA → rpmE (PRK00019)Ribosomal_L31 (pfam01197)→                                           |

|          |                            |   |         |         |                                                                                                                                     |
|----------|----------------------------|---|---------|---------|-------------------------------------------------------------------------------------------------------------------------------------|
| Psp-7-1  | NZ_ASSB01000327.1          | + | 24049   | 24082   | RNA → rpmE (PRK00019)Ribosomal_L31 (pfam01197)→                                                                                     |
| Psp-1-1  | NZ_JH601038.1              | + | 56254   | 56287   | RNA → rpmE (PRK00019)Ribosomal_L31 (pfam01197)→ rpmE (PRK00019)Ribosomal_L31 (pfam01197)→                                           |
| Ppe-1-1  | NZ_AGF01000014.1           | + | 59100   | 59133   | RNA → rpmE (PRK00019)Ribosomal_L31 (pfam01197)→ rpmE (PRK00019)Ribosomal_L31 (pfam01197)→                                           |
| Ppo-3-1  | NZ_ASRZ01000123.1          | + | 30332   | 30365   | RNA → rpmE (PRK00019)Ribosomal_L31 (pfam01197)→                                                                                     |
| Ppo-4-1  | NZ_JWJJ01000013.1          | - | 4811    | 4778    | RNA → rpmE (PRK00019)Ribosomal_L31 (pfam01197)→                                                                                     |
| Ppo-7-1  | NZ_AIPP01000115.1          | + | 55583   | 55616   | RNA → rpmE (PRK00019)Ribosomal_L31 (pfam01197)→                                                                                     |
| Psp-18-1 | NZ_AMQU01000013.1          | + | 55780   | 55813   | RNA → rpmE (PRK00019)Ribosomal_L31 (pfam01197)→                                                                                     |
| Ppo-2-1  | NZ_CP009909.1              | + | 3174641 | 3174674 | RNA → rpmE (PRK00019)Ribosomal_L31 (pfam01197)→                                                                                     |
| Ppo-9-1  | NZ_CP006872.1              | + | 173664  | 173697  | RNA → rpmE (PRK00019)Ribosomal_L31 (pfam01197)→                                                                                     |
| Ppo-5-1  | NZ_GL905390.1              | + | 151743  | 151776  | RNA → rpmE (PRK00019)Ribosomal_L31 (pfam01197)→                                                                                     |
| Ppo-1-1  | NC_017542.1                | + | 175402  | 175435  | RNA → rpmE (PRK00019)Ribosomal_L31 (pfam01197)→                                                                                     |
| Ppo-2-2  | NZ_CP010268.1              | - | 2491086 | 2491053 | RNA → rpmE (PRK00019)Ribosomal_L31 (pfam01197)→                                                                                     |
| Ppo-8-1  | NC_014622.2                | + | 176703  | 176736  | RNA → rpmE (PRK00019)Ribosomal_L31 (pfam01197)→                                                                                     |
| Psp-8-1  | NZ_ASRY01000124.1          | + | 19295   | 19328   | RNA → rpmE (PRK00019)Ribosomal_L31 (pfam01197)→                                                                                     |
| Pte-1-1  | NC_016641.1                | + | 1753265 | 1753298 | RNA → rpmE (PRK00019)Ribosomal_L31 (pfam01197)→                                                                                     |
| Psp-30-1 | NZ_JMLR01000019.1          | - | 4809    | 4776    | RNA → rpmE (PRK00019)Ribosomal_L31 (pfam01197)→                                                                                     |
| Ppe-2-1  | NZ_CP011512.1              | + | 178280  | 178313  | RNA → rpmE (PRK00019)Ribosomal_L31 (pfam01197)→                                                                                     |
| Ppo-6-1  | NC_014483.2                | + | 176239  | 176272  | RNA → rpmE (PRK00019)Ribosomal_L31 (pfam01197)→                                                                                     |
| Ppo-10-1 | NZ_ASSA01000052.1          | - | 4575    | 4542    | RNA → rpmE (PRK00019)Ribosomal_L31 (pfam01197)→                                                                                     |
| env-610  | GI4A6AL01D1VT0             | - | 327     | 303     | RNA → rplB (PRK09374)Ribosomal_L2_C (pfam03947)→                                                                                    |
| Ppi-1-1  | NZ_BAVZ01000024.1          | + | 39507   | 39540   | RNA → rpmE (PRK00019)Ribosomal_L31 (pfam01197)→                                                                                     |
| Psp-24-1 | NZ_JRNV01000066.1          | + | 20032   | 20065   | RNA → rpmE (PRK00019)Ribosomal_L31 (pfam01197)→                                                                                     |
| Psp-19-1 | NZ_CP010976.1              | + | 5003103 | 5003136 | RNA → rpmE (PRK00019)Ribosomal_L31 (pfam01197)→                                                                                     |
| env-611  | MA40A_GDRVJ9S02I8S30_right | + | 185     | 218     | RNA → rpmE (PRK00019)Ribosomal_L31 (pfam01197)→                                                                                     |
| env-612  | JGI25162J39368_1010853     | - | 531     | 498     | RNA → rpmE (PRK00019)Ribosomal_L31 (pfam01197)→                                                                                     |
| env-613  | CLOF_F4EQGSL02GBV14        | - | 158     | 125     | RNA → rpmE (PRK00019)Ribosomal_L31 (pfam01197)→                                                                                     |
| Psp-33-1 | NZ_LELF01000050.1          | - | 4969    | 4936    | RNA → rpmE (PRK00019)Ribosomal_L31 (pfam01197)→                                                                                     |
| Psp-13-1 | NZ_ASPU01000009.1          | - | 4594    | 4561    | RNA → rpmE (PRK00019)Ribosomal_L31 (pfam01197)→                                                                                     |
| Psp-15-1 | NZ_ASPR01000001.1          | + | 36319   | 36352   | RNA → rpmE (PRK00019)Ribosomal_L31 (pfam01197)→                                                                                     |
| Psp-26-1 | NZ_ANHX01000073.1          | - | 4568    | 4535    | RNA → rpmE (PRK00019)Ribosomal_L31 (pfam01197)→                                                                                     |
| Psp-23-1 | NZ_AWUK01000005.1          | - | 4782    | 4749    | RNA → rpmE (PRK00019)Ribosomal_L31 (pfam01197)→                                                                                     |
| Psp-22-1 | NZ_AWUJ01000041.1          | + | 47513   | 47546   | RNA → rpmE (PRK00019)Ribosomal_L31 (pfam01197)→                                                                                     |
| Psp-2-1  | NZ_AEXS01000174.1          | - | 4730    | 4697    | RNA → rpmE (PRK00019)Ribosomal_L31 (pfam01197)→ rpmE (PRK00019)Ribosomal_L31 (pfam01197)→ rpmE (PRK00019)Ribosomal_L31 (pfam01197)→ |
| Pvo-1-1  | NZ_ADHJ01000005.1          | + | 51394   | 51427   | RNA → rpmE (PRK00019)Ribosomal_L31 (pfam01197)→ rpmE (PRK00019)Ribosomal_L31 (pfam01197)→                                           |
| Psp-16-1 | NZ_ASPT01000039.1          | + | 51294   | 51327   | RNA → rpmE (PRK00019)Ribosomal_L31 (pfam01197)→                                                                                     |
| Gsp-5-1  | NC_013406.1                | + | 153054  | 153087  | RNA → rpmE (PRK00019)Ribosomal_L31 (pfam01197)→                                                                                     |
| Psp-14-1 | NZ_ASPW01000021.1          | - | 4809    | 4776    | RNA → rpmE (PRK00019)Ribosomal_L31 (pfam01197)→                                                                                     |
| Psp-10-1 | NZ_LAZU01000035.1          | + | 58827   | 58860   | RNA → rpmE (PRK00019)Ribosomal_L31 (pfam01197)→                                                                                     |
| Bsp-52-1 | NZ_JAEO01000062.1          | - | 4215    | 4182    | RNA → rpmE (PRK00019)Ribosomal_L31 (pfam01197)→                                                                                     |
| Pla-1-1  | NZ_AGIP01000028.1          | - | 5136    | 5103    | RNA → rpmE (PRK00019)Ribosomal_L31 (pfam01197)→ rpmE (PRK00019)Ribosomal_L31 (pfam01197)→ rpmE (PRK00019)Ribosomal_L31 (pfam01197)→ |
| env-614  | CLOF_F4EQGSL02H5UCR        | - | 445     | 412     | RNA → rpmE (PRK00019)Ribosomal_L31 (pfam01197)→                                                                                     |
| Pst-1-1  | NZ_CP009286.1              | + | 179434  | 179466  | RNA → rpmE (PRK00019)Ribosomal_L31 (pfam01197)→                                                                                     |
| Psp-20-1 | NZ_JADQ01000029.1          | + | 50634   | 50667   | RNA → rpmE (PRK00019)Ribosomal_L31 (pfam01197)→                                                                                     |
| env-615  | 2200248758                 | - | 316     | 283     | RNA → rpmE (PRK00019)Ribosomal_L31 (pfam01197)→                                                                                     |
| Pba-1-1  | NZ_KE159656.1              | - | 11310   | 11277   | RNA → rpmE (PRK00019)Ribosomal_L31 (pfam01197)→                                                                                     |
| Psp-5-1  | NZ_GG695996.1              | + | 45052   | 45085   | RNA → rpmE (PRK00019)Ribosomal_L31 (pfam01197)→ rpmE (PRK00019)Ribosomal_L31 (pfam01197)→                                           |
| Pma-2-1  | NZ_KN125580.1              | - | 10211   | 10177   | RNA → rpmE (PRK00019)Ribosomal_L31 (pfam01197)→                                                                                     |
| Pbe-1-1  | NZ_CP011058.1              | + | 2435438 | 2435472 | RNA → rpmE (PRK00019)Ribosomal_L31 (pfam01197)→                                                                                     |
| Pha-2-1  | NZ_AULV01000020.1          | - | 5328    | 5295    | RNA → rpmE (PRK00019)Ribosomal_L31 (pfam01197)→ YscJ_FliF_C (pfam08345)→                                                            |
| Ppi-2-1  | NZ_AULX01000026.1          | + | 122523  | 122557  | RNA → rpmE (PRK00019)Ribosomal_L31 (pfam01197)→ hypo → hypo → hypo → hypo → hypo →                                                  |
| env-616  | sgz454il.contig00281       | + | 26477   | 26515   | RNA → rpmE (PRK00019)Ribosomal_L31 (pfam01197)→ hypo →                                                                              |





|         |                               |   |        |        |                                                                                                                                                                                                                                                                                                           |
|---------|-------------------------------|---|--------|--------|-----------------------------------------------------------------------------------------------------------------------------------------------------------------------------------------------------------------------------------------------------------------------------------------------------------|
| env-642 | SRS015663_C3017608            | - | 163    | 131    | RNA → rpmE (PRK00019)Ribosomal_L31 (pfam01197) →                                                                                                                                                                                                                                                          |
| env-643 | SRS016095_WUGC_scaffold_38231 | + | 6582   | 6614   | RNA →                                                                                                                                                                                                                                                                                                     |
| env-644 | SRS048164_C2096952            | + | 94     | 126    | RNA → rpmE (PRK00019)Ribosomal_L31 (pfam01197) →                                                                                                                                                                                                                                                          |
| env-645 | SRS051031_LANL_scaffold_12183 | - | 370    | 338    | RNA → rpmE (PRK00019)Ribosomal_L31 (pfam01197) → YycJ-like_MBL-fold (cd07733) →                                                                                                                                                                                                                           |
| env-646 | SRS058723_C6768793            | - | 194    | 162    | RNA → rpmE (PRK00019)Ribosomal_L31 (pfam01197) →                                                                                                                                                                                                                                                          |
| env-647 | SRS063985_C2384154            | - | 226    | 194    | RNA → rpmE (PRK00019)Ribosomal_L31 (pfam01197) →                                                                                                                                                                                                                                                          |
| bLF-1-1 | NZ_CCMM01000012.1             | - | 232933 | 232901 | RNA → rpmE (PRK00019)Ribosomal_L31 (pfam01197) → Lactamase_B (smart00849)PhnP (COG1235) → PRK00103 (PRK00103)SPOUT_MTase (pfam02590) →                                                                                                                                                                    |
| env-648 | SL_9KL_010_SED_10062519       | + | 317    | 344    | RNA → rpmE (PRK00019)Ribosomal_L31 (pfam01197) →                                                                                                                                                                                                                                                          |
| env-649 | SL_3KL_010_SED_10161252       | + | 369    | 396    | RNA → rpmE (PRK00019)Ribosomal_L31 (pfam01197) → Tdk (COG1435)PRK04296 (PRK04296) →                                                                                                                                                                                                                       |
| env-650 | JGI24500J29687_10038433       | + | 5406   | 5434   | RNA → rpmE (PRK00019)Ribosomal_L31 (pfam01197) → Tdk (COG1435)PRK04296 (PRK04296) → TadA (COG0590)MafB19-deam (pfam14437) →                                                                                                                                                                               |
| env-651 | JGI24502J29692_10023353       | + | 2154   | 2182   | RNA → rpmE (PRK00019)Ribosomal_L31 (pfam01197) → Tdk (COG1435)PRK04296 (PRK04296) → TadA (COG0590)MafB19-deam (pfam14437) → hypo → hypo → TktA (COG0021)PRK05899 (PRK05899) → MnmG (COG0445)PRK05192 (PRK05192) → RsmG (COG0357)gidB (PRK00107) → ParB (smart00470)Spo0J (COG1475) → DUF951 (pfam06107) → |
| env-652 | JGI24501J29690_1029513        | + | 2144   | 2172   | RNA → rpmE (PRK00019)Ribosomal_L31 (pfam01197) → Tdk (COG1435)PRK04296 (PRK04296) →                                                                                                                                                                                                                       |
| env-653 | JGI24503J29689_10024265       | + | 9945   | 9973   | RNA → rpmE (PRK00019)Ribosomal_L31 (pfam01197) → Tdk (COG1435)PRK04296 (PRK04296) → TadA (COG0590)MafB19-deam (pfam14437) →                                                                                                                                                                               |
| env-654 | JGI24499J29688_1021746        | + | 118    | 146    | RNA → rpmE (PRK00019)Ribosomal_L31 (pfam01197) →                                                                                                                                                                                                                                                          |
| env-655 | RUMENNODE_1702127.1           | - | 23333  | 23300  | RNA → rpmE (PRK00019)Ribosomal_L31 (pfam01197) →                                                                                                                                                                                                                                                          |
| env-656 | RUMENNODE_3744369.1           | - | 1562   | 1528   | RNA → rpmE (PRK00019)Ribosomal_L31 (pfam01197) → hypo → hypo → 2A78 (TIGR00950)EamA (pfam00892) → MetG (COG0143)PRK12267 (PRK12267) →                                                                                                                                                                     |
| env-657 | AUXO015798099.1               | + | 1486   | 1520   | RNA → rpmE (PRK00019)Ribosomal_L31 (pfam01197) →                                                                                                                                                                                                                                                          |
| env-658 | RUMENNODE_3527277.1           | + | 1709   | 1743   | RNA → (big gap) RhaT (COG0697) → ArcA (COG2235)PRK01388 (PRK01388) → ArcA (COG2235)PRK01388 (PRK01388) →                                                                                                                                                                                                  |
| env-659 | RUMENNODE_3876952.1           | - | 3758   | 3725   | RNA → rpmE (PRK00019)Ribosomal_L31 (pfam01197) →                                                                                                                                                                                                                                                          |
| env-660 | 2211729444                    | + | 222    | 255    | RNA → rpmE (PRK00019)Ribosomal_L31 (pfam01197) →                                                                                                                                                                                                                                                          |
| env-661 | 2156473860                    | + | 222    | 255    | RNA → rpmE (PRK00019)Ribosomal_L31 (pfam01197) →                                                                                                                                                                                                                                                          |
| env-662 | RUMENNODE_3728468.1           | - | 2906   | 2873   | RNA → rpmE (PRK00019)Ribosomal_L31 (pfam01197) → EamA (pfam00892) → DegV (TIGR00762)DegV (pfam02645) → Hydrolase_4 (pfam12146) →                                                                                                                                                                          |
| env-663 | RUMENNODE_3917021_13000       | - | 6817   | 6784   | RNA → rpmE (PRK00019)Ribosomal_L31 (pfam01197) →                                                                                                                                                                                                                                                          |
| env-664 | AUXO018183523.1               | - | 52     | 19     | RNA →                                                                                                                                                                                                                                                                                                     |
| env-665 | JGI24707J26582_10000610       | + | 18900  | 18931  | RNA → rpmE (PRK00019)Ribosomal_L31 (pfam01197) →                                                                                                                                                                                                                                                          |
| env-666 | JGI24708J26588_10001567       | - | 9771   | 9740   | RNA → rpmE (PRK00019)Ribosomal_L31 (pfam01197) →                                                                                                                                                                                                                                                          |
| env-667 | JGI24712J26585_10002850       | - | 486    | 455    | RNA → rpmE (PRK00019)Ribosomal_L31 (pfam01197) →                                                                                                                                                                                                                                                          |
| env-668 | JGI24712J26585_10002883       | - | 486    | 455    | RNA → rpmE (PRK00019)Ribosomal_L31 (pfam01197) →                                                                                                                                                                                                                                                          |
| env-669 | JGI24711J26586_10044882       | + | 779    | 810    | RNA → rpmE (PRK00019)Ribosomal_L31 (pfam01197) →                                                                                                                                                                                                                                                          |
| env-670 | JGI24709J26583_10001041       | - | 9926   | 9895   | RNA → rpmE (PRK00019)Ribosomal_L31 (pfam01197) →                                                                                                                                                                                                                                                          |
| env-671 | JGI24710J26742_10005051       | + | 8426   | 8457   | RNA → rpmE (PRK00019)Ribosomal_L31 (pfam01197) →                                                                                                                                                                                                                                                          |
| env-672 | JGI24500J29687_10039037       | + | 2191   | 2222   | RNA → rpmE (PRK00019)Ribosomal_L31 (pfam01197) →                                                                                                                                                                                                                                                          |
| env-673 | JGI24502J29692_10024412       | + | 325    | 356    | RNA → rpmE (PRK00019)Ribosomal_L31 (pfam01197) →                                                                                                                                                                                                                                                          |
| env-674 | JGI24501J29690_1058253        | + | 141    | 172    | RNA → rpmE (PRK00019)Ribosomal_L31 (pfam01197) →                                                                                                                                                                                                                                                          |
| env-675 | JGI24503J29689_10041332       | + | 125    | 156    | RNA → rpmE (PRK00019)Ribosomal_L31 (pfam01197) →                                                                                                                                                                                                                                                          |
| env-676 | JGI24712J26585_10116731       | - | 699    | 670    | RNA → rpmE (PRK00019)Ribosomal_L31 (pfam01197) →                                                                                                                                                                                                                                                          |
| env-677 | JGI24502J29692_10067855       | + | 403    | 432    | RNA → rpmE (PRK00019)Ribosomal_L31 (pfam01197) →                                                                                                                                                                                                                                                          |
| env-678 | AUXO010821195.1               | + | 270    | 300    | RNA → rpmE (PRK00019)Ribosomal_L31 (pfam01197) →                                                                                                                                                                                                                                                          |
| env-679 | RUMENNODE_4230474.1           | - | 923    | 893    | RNA → rpmE (PRK00019)Ribosomal_L31 (pfam01197) → PRK05571 (PRK05571)LacAB_rpiB (pfam02502) hypo → int_mem_ywzB (TIGR02327)DUF1146 (pfam06612) →                                                                                                                                                           |
| env-680 | AUXO015533467.1               | - | 756    | 724    | RNA → rpmE (PRK00019)Ribosomal_L31 (pfam01197) → PRK05571 (PRK05571)LacAB_rpiB (pfam02502)                                                                                                                                                                                                                |
| env-681 | AUXO014634809.1               | + | 2187   | 2219   | RNA → rpmE (PRK00019)Ribosomal_L31 (pfam01197) →                                                                                                                                                                                                                                                          |
| Lga-2-1 | NZ_JVEV01000034.1             | + | 23868  | 23900  | RNA → rpmE2 (PRK01678)Ribosomal_L31 (pfam01197) →                                                                                                                                                                                                                                                         |
| Lho-2-1 | NZ_CAKE01000002.1             | - | 165569 | 165537 | RNA → rpmE2 (PRK01678)Ribosomal_L31 (pfam01197) → rpmE2 (PRK01678)Ribosomal_L31 (pfam01197)                                                                                                                                                                                                               |

|          |                                |   |         |         |                                                                                                                            |
|----------|--------------------------------|---|---------|---------|----------------------------------------------------------------------------------------------------------------------------|
| env-682  | UnmappedStool_Broad_C251615744 | - | 374     | 333     | RNA → ← <b>COG4603 (COG4603)</b>                                                                                           |
| env-683  | SRS011239_C2568925             | - | 248     | 207     | RNA → ← <b>COG4603 (COG4603)</b>                                                                                           |
| env-684  | JGI24707J26582_10604531        | - | 183     | 149     | RNA → <b>rpmE2 (PRK01678)Ribosomal_L31 (pfam01197)</b> →                                                                   |
| Bse-3-1  | NZ_ATXL01000033.1              | - | 11293   | 11261   | RNA → <b>RpmE (COG0254)rpmE2 (PRK01678)</b> →                                                                              |
| Aph-1-1  | NZ_JAGN01000024.1              | - | 682     | 650     | RNA → <b>rpmE2 (PRK01678)Ribosomal_L31 (pfam01197)</b> →                                                                   |
| env-685  | scaffold9639_3_MH0012          | + | 1656    | 1677    | RNA →<br>biotinyl_domain (cd06850)DRE_TIM_PC_TC_5S (cd07937)AccC (COG0439)PRK12999 (PRK12999)PYC_O                         |
| env-686  | 3300000558_10113212            | + | 2767    | 2797    | hypo →<br>RNA → <b>rpmE (PRK00019)Ribosomal_L31 (pfam01197)</b> →                                                          |
| env-687  | 3300001580_11274066            | - | 128     | 98      | RNA → <b>rpmE (PRK00019)Ribosomal_L31 (pfam01197)</b> →                                                                    |
| Lbu-1-1  | NZ_GG669719.1                  | + | 45475   | 45508   | RNA → <b>rpmE2 (PRK01678)Ribosomal_L31 (pfam01197)</b> →                                                                   |
| Lhi-1-1  | NZ_GG669998.1                  | + | 89473   | 89506   | RNA → <b>rpmE2 (PRK01678)Ribosomal_L31 (pfam01197)</b> →                                                                   |
| Lbr-7-1  | NZ_GG669611.1                  | + | 46598   | 46631   | RNA → <b>rpmE2 (PRK01678)Ribosomal_L31 (pfam01197)</b> →                                                                   |
| Lfa-4-1  | NZ_BAK101000010.1              | + | 39794   | 39827   | RNA → <b>rpmE2 (PRK01678)Ribosomal_L31 (pfam01197)</b> →                                                                   |
| Lcu-1-1  | NZ_JTAL01000005.1              | - | 26638   | 26605   | RNA → <b>rpmE2 (PRK01678)Ribosomal_L31 (pfam01197)</b> →                                                                   |
| Lki-2-1  | NZ_JH591051.1                  | + | 2889    | 2922    | RNA → <b>rpmE2 (PRK01678)Ribosomal_L31 (pfam01197)</b> →                                                                   |
| Lot-1-1  | NZ_BASH01000008.1              | + | 45034   | 45067   | RNA → <b>rpmE2 (PRK01678)Ribosomal_L31 (pfam01197)</b> →                                                                   |
| env-688  | 2205249974                     | - | 100     | 67      | RNA → hypo →                                                                                                               |
| env-689  | 2204581147                     | - | 204     | 171     | RNA → <b>rpmE2 (PRK01678)Ribosomal_L31 (pfam01197)</b> →                                                                   |
| env-690  | 2158547212                     | - | 204     | 171     | RNA → <b>rpmE2 (PRK01678)Ribosomal_L31 (pfam01197)</b> →                                                                   |
| Lbu-3-1  | NC_015428.1                    | - | 1626594 | 1626561 | RNA → <b>rpmE2 (PRK01678)Ribosomal_L31 (pfam01197)</b> →                                                                   |
| Ata-1-1  | NZ_AUCD01000015.1              | + | 29931   | 29963   | RNA → <b>rpmE2 (PRK01678)Ribosomal_L31 (pfam01197)</b> →                                                                   |
| env-691  | 2200849697                     | + | 2519    | 2552    | RNA → <b>rpmE (PRK00019)Ribosomal_L31 (pfam01197)</b> → <b>spore_YhcN_YlaJ (TIGR02898)</b> → hypo → hypo →                 |
| Pcu-1-1  | NZ_AEDD01000010.1              | - | 172375  | 172342  | RNA → <b>rpmE (PRK00019)Ribosomal_L31 (pfam01197)</b> → <b>rpmE (PRK00019)Ribosomal_L31 (pfam01197)</b> →<br>hypo → hypo → |
| env-692  | SRS011111_C511282              | + | 1560    | 1591    | RNA → <b>rpmE2 (PRK01678)Ribosomal_L31 (pfam01197)</b> →                                                                   |
| env-693  | SRS023604_C786152              | - | 5199    | 5168    | RNA → <b>rpmE2 (PRK01678)Ribosomal_L31 (pfam01197)</b> →                                                                   |
| env-694  | SRS015072_WUGC_scaffold_306    | + | 2849    | 2880    | RNA → <b>rpmE2 (PRK01678)Ribosomal_L31 (pfam01197)</b> →                                                                   |
| env-695  | SRS015073_C87470               | - | 246     | 215     | RNA → <b>rpmE2 (PRK01678)Ribosomal_L31 (pfam01197)</b> →                                                                   |
| env-696  | SRS015225_WUGC_scaffold_40     | + | 4907    | 4938    | RNA → <b>rpmE2 (PRK01678)Ribosomal_L31 (pfam01197)</b> →                                                                   |
| env-697  | SRS042428_WUGC_scaffold_125    | + | 5251    | 5282    | RNA → <b>rpmE2 (PRK01678)Ribosomal_L31 (pfam01197)</b> →                                                                   |
| env-698  | SRS044742_C45202               | + | 404     | 435     | RNA →                                                                                                                      |
| env-699  | SRS049237_WUGC_scaffold_364    | - | 44771   | 44740   | RNA → <b>rpmE2 (PRK01678)Ribosomal_L31 (pfam01197)</b> →                                                                   |
| env-700  | SRS051505_C116585              | - | 5949    | 5918    | RNA → <b>rpmE2 (PRK01678)Ribosomal_L31 (pfam01197)</b> →                                                                   |
| env-701  | SRS052756_LANL_scaffold_202    | + | 30811   | 30842   | RNA → <b>rpmE2 (PRK01678)Ribosomal_L31 (pfam01197)</b> →                                                                   |
| env-702  | SRS054962_LANL_scaffold_154    | + | 7561    | 7592    | RNA → <b>rpmE2 (PRK01678)Ribosomal_L31 (pfam01197)</b> →                                                                   |
| env-703  | SRS055298_LANL_scaffold_1060   | + | 56113   | 56144   | RNA → <b>rpmE2 (PRK01678)Ribosomal_L31 (pfam01197)</b> →                                                                   |
| Lin-7-1  | NZ_ADHG01000001.1              | - | 204612  | 204581  | RNA → <b>rpmE2 (PRK01678)Ribosomal_L31 (pfam01197)</b> → <b>rpmE2 (PRK01678)Ribosomal_L31 (pfam01197)</b> →                |
| Lin-11-1 | NZ_AEKJ01000015.1              | - | 74795   | 74764   | RNA → <b>rpmE2 (PRK01678)Ribosomal_L31 (pfam01197)</b> → <b>rpmE2 (PRK01678)Ribosomal_L31 (pfam01197)</b> →                |
| Lin-12-1 | NZ_AEKK01000016.1              | - | 44828   | 44797   | RNA → <b>rpmE2 (PRK01678)Ribosomal_L31 (pfam01197)</b> → <b>rpmE2 (PRK01678)Ribosomal_L31 (pfam01197)</b> →                |
| Lin-9-1  | NZ_AEKI01000026.1              | - | 46443   | 46412   | RNA → <b>rpmE2 (PRK01678)Ribosomal_L31 (pfam01197)</b> → <b>rpmE2 (PRK01678)Ribosomal_L31 (pfam01197)</b> →                |
| Lin-15-1 | NZ_AEHO01000007.1              | - | 160441  | 160410  | RNA → <b>rpmE2 (PRK01678)Ribosomal_L31 (pfam01197)</b> → <b>rpmE2 (PRK01678)Ribosomal_L31 (pfam01197)</b> →                |
| Lin-14-1 | NZ_AEHP01000054.1              | - | 71416   | 71385   | RNA → <b>rpmE2 (PRK01678)Ribosomal_L31 (pfam01197)</b> → <b>rpmE2 (PRK01678)Ribosomal_L31 (pfam01197)</b> →                |
| Lin-18-1 | NZ_AEHR01000018.1              | - | 44815   | 44784   | RNA → <b>rpmE2 (PRK01678)Ribosomal_L31 (pfam01197)</b> → <b>rpmE2 (PRK01678)Ribosomal_L31 (pfam01197)</b> →                |
| Lin-20-1 | NZ_AEXK01000022.1              | - | 74609   | 74578   | RNA → <b>rpmE2 (PRK01678)Ribosomal_L31 (pfam01197)</b> → <b>rpmE2 (PRK01678)Ribosomal_L31 (pfam01197)</b> →                |
| Lin-17-1 | NZ_AEXP01000019.1              | - | 175111  | 175080  | RNA → <b>rpmE2 (PRK01678)Ribosomal_L31 (pfam01197)</b> → <b>rpmE2 (PRK01678)Ribosomal_L31 (pfam01197)</b> →                |
| Lin-8-1  | NZ_GG700805.1                  | + | 256231  | 256262  | RNA → <b>rpmE2 (PRK01678)Ribosomal_L31 (pfam01197)</b> →                                                                   |
| Lin-5-1  | NZ_GL622333.1                  | - | 1005713 | 1005682 | RNA → <b>rpmE2 (PRK01678)Ribosomal_L31 (pfam01197)</b> →                                                                   |
| Lin-10-1 | NZ_AEKH01000010.1              | - | 74730   | 74699   | RNA → <b>rpmE2 (PRK01678)Ribosomal_L31 (pfam01197)</b> → <b>rpmE2 (PRK01678)Ribosomal_L31 (pfam01197)</b> →                |
| env-704  | SRS016105_WUGC_scaffold_100    | - | 158089  | 158058  | RNA → <b>rpmE2 (PRK01678)Ribosomal_L31 (pfam01197)</b> →                                                                   |
| env-705  | SRS023468_LANL_scaffold_19280  | + | 4225    | 4256    | RNA → <b>rpmE2 (PRK01678)Ribosomal_L31 (pfam01197)</b> →                                                                   |
| env-706  | SRS016111_WUGC_scaffold_61     | - | 45180   | 45149   | RNA → <b>rpmE2 (PRK01678)Ribosomal_L31 (pfam01197)</b> →                                                                   |
| env-707  | SRS022545_LANL_scaffold_139    | - | 1695    | 1664    | RNA → <b>rpmE2 (PRK01678)Ribosomal_L31 (pfam01197)</b> →                                                                   |



|          |                               |   |         |         |                                                                                               |
|----------|-------------------------------|---|---------|---------|-----------------------------------------------------------------------------------------------|
| env-708  | SRS050184.LANL_scaffold_130   | - | 17992   | 17961   | RNA → rpmE2 (PRK01678)Ribosomal_L31 (pfam01197) →                                             |
| env-709  | SRS064704.LANL_scaffold_211   | - | 17993   | 17962   | RNA → rpmE2 (PRK01678)Ribosomal_L31 (pfam01197) →                                             |
| Lin-16-1 | NZ_AEHN01000014.1             | - | 44898   | 44867   | RNA → rpmE2 (PRK01678)Ribosomal_L31 (pfam01197) → rpmE2 (PRK01678)Ribosomal_L31 (pfam01197) → |
| Lin-19-1 | NZ_AEXJ01000019.1             | - | 44735   | 44704   | RNA → rpmE2 (PRK01678)Ribosomal_L31 (pfam01197) → rpmE2 (PRK01678)Ribosomal_L31 (pfam01197) → |
| Lsp-9-1  | NZ_JH164952.1                 | - | 574321  | 574290  | RNA → rpmE2 (PRK01678)Ribosomal_L31 (pfam01197) →                                             |
| Lin-13-1 | NZ_AEHQ01000072.1             | - | 7349    | 7318    | RNA → rpmE2 (PRK01678)Ribosomal_L31 (pfam01197) → rpmE2 (PRK01678)Ribosomal_L31 (pfam01197) → |
| env-710  | 2205772966                    | + | 552     | 584     | RNA → rpmE2 (PRK01678)Ribosomal_L31 (pfam01197) →                                             |
| env-711  | 2157969722                    | + | 325     | 357     | RNA → rpmE2 (PRK01678)Ribosomal_L31 (pfam01197) →                                             |
| env-712  | SRS075419.C110109             | - | 966     | 934     | RNA → rpmE2 (PRK01678)Ribosomal_L31 (pfam01197) →                                             |
| env-713  | SRS019379.C28234              | + | 18298   | 18330   | RNA → rpmE2 (PRK01678)Ribosomal_L31 (pfam01197) →                                             |
| env-714  | SRS022734.LANL_scaffold_274   | + | 10950   | 10982   | RNA → rpmE2 (PRK01678)Ribosomal_L31 (pfam01197) →                                             |
| env-715  | SRS023850.C136155             | + | 237     | 269     | RNA → rpmE2 (PRK01678)Ribosomal_L31 (pfam01197) →                                             |
| env-716  | SRS024428.C55026              | + | 18356   | 18388   | RNA → rpmE2 (PRK01678)Ribosomal_L31 (pfam01197) →                                             |
| env-717  | SRS047335.WUGC_scaffold_762   | + | 4747    | 4779    | RNA → rpmE2 (PRK01678)Ribosomal_L31 (pfam01197) →                                             |
| env-718  | SRS052620.C35955              | + | 10950   | 10982   | RNA → rpmE2 (PRK01678)Ribosomal_L31 (pfam01197) →                                             |
| env-719  | SRS062520.LANL_scaffold_96    | - | 17372   | 17340   | RNA → rpmE2 (PRK01678)Ribosomal_L31 (pfam01197) →                                             |
| Lga-2-2  | NZ_JVOU01000020.1             | - | 137321  | 137289  | RNA → rpmE2 (PRK01678)Ribosomal_L31 (pfam01197) →                                             |
| Lga-2-3  | NZ_JVOL01000001.1             | - | 22205   | 22173   | RNA → rpmE2 (PRK01678)Ribosomal_L31 (pfam01197) →                                             |
| Lga-2-4  | NZ_JUTQ01000039.1             | - | 22209   | 22177   | RNA → rpmE2 (PRK01678)Ribosomal_L31 (pfam01197) →                                             |
| Lga-12-1 | NC_008530.1                   | + | 296324  | 296356  | RNA → rpmE2 (PRK01678)Ribosomal_L31 (pfam01197) →                                             |
| Lga-11-1 | NZ_ACOZ01000042.1             | + | 4725    | 4757    | RNA → rpmE2 (PRK01678)Ribosomal_L31 (pfam01197) → rpmE2 (PRK01678)Ribosomal_L31 (pfam01197) → |
| Lga-9-1  | NZ_KN050667.1                 | - | 187618  | 187586  | RNA → rpmE2 (PRK01678)Ribosomal_L31 (pfam01197) →                                             |
| Lga-10-1 | NZ_KN050675.1                 | - | 196087  | 196055  | RNA → rpmE2 (PRK01678)Ribosomal_L31 (pfam01197) →                                             |
| Lga-4-1  | NZ_AUUE01000002.1             | + | 86255   | 86287   | RNA → rpmE2 (PRK01678)Ribosomal_L31 (pfam01197) →                                             |
| Lga-5-1  | NZ_BALQ01000001.1             | + | 396473  | 396505  | RNA → rpmE2 (PRK01678)Ribosomal_L31 (pfam01197) →                                             |
| Lga-6-1  | NZ_AKFQ01000002.1             | - | 180385  | 180353  | RNA → rpmE2 (PRK01678)Ribosomal_L31 (pfam01197) → rpmE2 (PRK01678)Ribosomal_L31 (pfam01197) → |
| Ljo-3-1  | NZ_AFQJ01000004.1             | + | 1347121 | 1347153 | RNA → rpmE2 (PRK01678)Ribosomal_L31 (pfam01197) →                                             |
| Ljo-5-1  | NC_017477.1                   | + | 311419  | 311451  | RNA → rpmE2 (PRK01678)Ribosomal_L31 (pfam01197) →                                             |
| Ljo-6-1  | NC_013504.1                   | + | 280910  | 280942  | RNA → rpmE2 (PRK01678)Ribosomal_L31 (pfam01197) →                                             |
| Ljo-2-1  | NC_022909.1                   | + | 308188  | 308220  | RNA → rpmE2 (PRK01678)Ribosomal_L31 (pfam01197) →                                             |
| env-720  | scaffold23403_2.V1.CD-11      | + | 274     | 306     | RNA → rpmE2 (PRK01678)Ribosomal_L31 (pfam01197) →                                             |
| Ljo-7-1  | NC_005362.1                   | + | 301703  | 301735  | RNA → rpmE2 (PRK01678)Ribosomal_L31 (pfam01197) →                                             |
| env-721  | SRS011269.Baylor_scaffold_351 | - | 274     | 242     | RNA → rpmE2 (PRK01678)Ribosomal_L31 (pfam01197) →                                             |
| Lga-2-5  | NZ_JUKW01000060.1             | + | 23407   | 23439   | RNA → rpmE2 (PRK01678)Ribosomal_L31 (pfam01197) →                                             |
| Lga-7-1  | NZ_GL379581.1                 | - | 187468  | 187436  | RNA → rpmE2 (PRK01678)Ribosomal_L31 (pfam01197) →                                             |
| Lga-3-1  | NZ_CP006809.1                 | + | 312647  | 312679  | RNA → rpmE2 (PRK01678)Ribosomal_L31 (pfam01197) →                                             |
| Lga-8-1  | NZ_KL402718.1                 | + | 399124  | 399156  | RNA → rpmE2 (PRK01678)Ribosomal_L31 (pfam01197) →                                             |
| Ljo-1-1  | NZ_LIGY01000084.1             | - | 24710   | 24678   | RNA → rpmE2 (PRK01678)Ribosomal_L31 (pfam01197) →                                             |
| env-722  | DOF012_scaffold379_3          | + | 2956    | 2988    | RNA → rpmE2 (PRK01678)Ribosomal_L31 (pfam01197) →                                             |
| Lga-2-6  | NZ_JVG01000050.1              | + | 18423   | 18455   | RNA → rpmE2 (PRK01678)Ribosomal_L31 (pfam01197) →                                             |
| Ljo-4-1  | NZ_GG670121.1                 | - | 182612  | 182580  | RNA → rpmE2 (PRK01678)Ribosomal_L31 (pfam01197) →                                             |
| Lgi-2-1  | NZ_CAKC01000030.1             | + | 8283    | 8315    | RNA → rpmE2 (PRK01678)Ribosomal_L31 (pfam01197) → rpmE2 (PRK01678)Ribosomal_L31 (pfam01197) → |
| Lsp-10-1 | NZ_KB822435.1                 | - | 181390  | 181358  | RNA → rpmE2 (PRK01678)Ribosomal_L31 (pfam01197) →                                             |
| Lcr-11-1 | NC_014106.1                   | + | 276225  | 276256  | RNA → rpmE2 (PRK01678)Ribosomal_L31 (pfam01197) →                                             |
| env-723  | SRS056796.LANL_scaffold_1239  | - | 1183    | 1152    | RNA → rpmE2 (PRK01678)Ribosomal_L31 (pfam01197) →                                             |
| env-724  | DLM012_C404467_1              | - | 274     | 243     | RNA → rpmE2 (PRK01678)Ribosomal_L31 (pfam01197) →                                             |
| env-725  | SRS015425.WUGC_scaffold_461   | + | 3773    | 3804    | RNA → rpmE2 (PRK01678)Ribosomal_L31 (pfam01197) →                                             |
| env-726  | SRS062752.LANL_scaffold_621   | + | 1742    | 1773    | RNA → rpmE2 (PRK01678)Ribosomal_L31 (pfam01197) →                                             |
| env-727  | SRS064376.LANL_scaffold_486   | + | 2458    | 2489    | RNA → rpmE2 (PRK01678)Ribosomal_L31 (pfam01197) →                                             |
| Lcr-7-1  | NZ_ADGR01000062.1             | + | 8752    | 8783    | RNA → rpmE2 (PRK01678)Ribosomal_L31 (pfam01197) → rpmE2 (PRK01678)Ribosomal_L31 (pfam01197) → |
| env-728  | Contig2087.1                  | + | 770     | 801     | RNA → rpmE (PRK00019)rpmE2 (PRK01678)L31 (TIGR00105)Ribosomal_L31 (pfam01197) →               |
| env-729  | SRS024310.LANL_scaffold_284   | - | 5059    | 5028    | RNA → rpmE2 (PRK01678)Ribosomal_L31 (pfam01197) →                                             |

|          |                                   |   |        |        |                                                                                             |
|----------|-----------------------------------|---|--------|--------|---------------------------------------------------------------------------------------------|
| env-730  | SRS011355_Baylor_scaffold_238     | - | 4759   | 4728   | RNA → rpmE2 (PRK01678)Ribosomal_L31 (pfam01197) →                                           |
| env-731  | SRS014465_C104071                 | + | 8731   | 8762   | RNA → rpmE2 (PRK01678)Ribosomal_L31 (pfam01197) →                                           |
| env-732  | SRS014466_C33055                  | + | 8731   | 8762   | RNA → rpmE2 (PRK01678)Ribosomal_L31 (pfam01197) →                                           |
| env-733  | SRS014494_C170078                 | - | 239    | 208    | RNA → rpmE2 (PRK01678)Ribosomal_L31 (pfam01197) →                                           |
| env-734  | SRS015054_WUGC_scaffold_298       | + | 8828   | 8859   | RNA → rpmE2 (PRK01678)Ribosomal_L31 (pfam01197) →                                           |
| env-735  | SRS015072_WUGC_scaffold_197       | + | 8688   | 8719   | RNA → rpmE2 (PRK01678)Ribosomal_L31 (pfam01197) →                                           |
| env-736  | SRS015073_C87312                  | + | 548    | 579    | RNA → rpmE (PRK00019)rpmE2 (PRK01678)L31 (TIGR00105)Ribosomal_L31 (pfam01197) →             |
| env-737  | SRS015168_WUGC_scaffold_217       | - | 11230  | 11199  | RNA → rpmE2 (PRK01678)Ribosomal_L31 (pfam01197) →                                           |
| env-738  | SRS016191_WUGC_scaffold_240       | - | 4886   | 4855   | RNA → rpmE2 (PRK01678)Ribosomal_L31 (pfam01197) →                                           |
| env-739  | SRS016516_LANL_scaffold_146       | - | 19252  | 19221  | RNA → rpmE2 (PRK01678)Ribosomal_L31 (pfam01197) →                                           |
| env-740  | SRS016559_Baylor_scaffold_103     | + | 8762   | 8793   | RNA → rpmE2 (PRK01678)Ribosomal_L31 (pfam01197) →                                           |
| env-741  | SRS017520_Baylor_scaffold_434     | + | 8671   | 8702   | RNA → rpmE2 (PRK01678)Ribosomal_L31 (pfam01197) →                                           |
| env-742  | SRS017700_Baylor_scaffold_322     | + | 924    | 955    | RNA → rpmE2 (PRK01678)Ribosomal_L31 (pfam01197) →                                           |
| env-743  | SRS018769_WUGC_scaffold_137       | + | 8731   | 8762   | RNA → rpmE2 (PRK01678)Ribosomal_L31 (pfam01197) →                                           |
| env-744  | SRS019600_WUGC_scaffold_105       | - | 4891   | 4860   | RNA → rpmE2 (PRK01678)Ribosomal_L31 (pfam01197) →                                           |
| env-745  | SRS019989_Baylor_scaffold_99      | - | 4890   | 4859   | RNA → rpmE2 (PRK01678)Ribosomal_L31 (pfam01197) →                                           |
| env-746  | SRS020349_Baylor_scaffold_168     | - | 19254  | 19223  | RNA → rpmE2 (PRK01678)Ribosomal_L31 (pfam01197) →                                           |
| env-747  | SRS021969_C38256                  | + | 8828   | 8859   | RNA → rpmE2 (PRK01678)Ribosomal_L31 (pfam01197) →                                           |
| env-748  | SRS022158_LANL_scaffold_360       | + | 8827   | 8858   | RNA → rpmE2 (PRK01678)Ribosomal_L31 (pfam01197) →                                           |
| env-749  | SRS042858_LANL_scaffold_175       | + | 8751   | 8782   | RNA → rpmE2 (PRK01678)Ribosomal_L31 (pfam01197) →                                           |
| env-750  | SRS049237_C38452                  | + | 8826   | 8857   | RNA → rpmE2 (PRK01678)Ribosomal_L31 (pfam01197) →                                           |
| env-751  | SRS051505_C116175                 | - | 244    | 213    | RNA → rpmE2 (PRK01678)Ribosomal_L31 (pfam01197) →                                           |
| env-752  | SRS056695_LANL_scaffold_347       | + | 8772   | 8803   | RNA → rpmE2 (PRK01678)Ribosomal_L31 (pfam01197) →                                           |
| env-753  | SRS057807_LANL_scaffold_81        | + | 7964   | 7995   | RNA → rpmE2 (PRK01678)Ribosomal_L31 (pfam01197) →                                           |
| env-754  | SRS065347_LANL_scaffold_257       | - | 4891   | 4860   | RNA → rpmE2 (PRK01678)Ribosomal_L31 (pfam01197) →                                           |
| env-755  | SRS077751_C52761                  | + | 8762   | 8793   | RNA → rpmE2 (PRK01678)Ribosomal_L31 (pfam01197) →                                           |
| Lcr-9-1  | NZ_GG669835.1                     | + | 9537   | 9568   | RNA → rpmE2 (PRK01678)Ribosomal_L31 (pfam01197) →                                           |
| Lcr-10-1 | NZ_GG704612.1                     | - | 70406  | 70375  | RNA → rpmE2 (PRK01678)Ribosomal_L31 (pfam01197) → rpmE2 (PRK01678)Ribosomal_L31 (pfam01197) |
| Lcr-6-1  | NZ_GG698762.1                     | + | 215551 | 215582 | RNA → rpmE2 (PRK01678)Ribosomal_L31 (pfam01197) → rpmE2 (PRK01678)Ribosomal_L31 (pfam01197) |
| Lcr-2-1  | NZ_JH932290.1                     | - | 67347  | 67316  | RNA → rpmE2 (PRK01678)Ribosomal_L31 (pfam01197) →                                           |
| Lcr-3-1  | NZ_JH932272.1                     | + | 214526 | 214557 | RNA → rpmE2 (PRK01678)Ribosomal_L31 (pfam01197) →                                           |
| Lcr-4-1  | NZ_KI391980.1                     | - | 180476 | 180445 | RNA → rpmE2 (PRK01678)Ribosomal_L31 (pfam01197) →                                           |
| Lcr-8-1  | NZ_GL531743.1                     | + | 68214  | 68245  | RNA → rpmE2 (PRK01678)Ribosomal_L31 (pfam01197) → rpmE2 (PRK01678)Ribosomal_L31 (pfam01197) |
| Lcr-5-1  | NZ_GL877787.1                     | + | 47874  | 47905  | RNA → rpmE2 (PRK01678)Ribosomal_L31 (pfam01197) →                                           |
| Lcr-1-1  | NZ_AXLM01000027.1                 | - | 82277  | 82246  | RNA → rpmE2 (PRK01678)Ribosomal_L31 (pfam01197) →                                           |
| Lam-1-1  | NZ_ADNY01000029.1                 | - | 80869  | 80837  | RNA → rpmE2 (PRK01678)Ribosomal_L31 (pfam01197) → rpmE2 (PRK01678)Ribosomal_L31 (pfam01197) |
| Lha-1-1  | NZ_BALY01000007.1                 | - | 20680  | 20648  | RNA → rpmE2 (PRK01678)Ribosomal_L31 (pfam01197) →                                           |
| env-756  | C4681636_1_MH0065                 | - | 1489   | 1459   | RNA → rpmE (PRK00019)Ribosomal_L31 (pfam01197) → ATPgrasp_ST (pfam14397) →                  |
|          |                                   |   |        |        | PRK05571 (PRK05571)LacAB_rpiB (pfam02502) →                                                 |
| env-757  | AUXO014458590.1                   | + | 1212   | 1242   | RNA → hypo → rpmE (PRK00019)Ribosomal_L31 (pfam01197) →                                     |
|          |                                   |   |        |        | PRK05571 (PRK05571)LacAB_rpiB (pfam02502) → DUF1146 (pfam06612) →                           |
|          |                                   |   |        |        | SpoIID (COG2385)SpoIID (pfam08486) →                                                        |
| env-758  | AUXO016429116.1                   | + | 81     | 111    | RNA → rpmE (PRK00019)Ribosomal_L31 (pfam01197) →                                            |
| env-759  | AUXO011676208.1                   | - | 513    | 483    | RNA → rpmE (PRK00019)Ribosomal_L31 (pfam01197) → PRK05571 (PRK05571)LacAB_rpiB (pfam02502)  |
| env-760  | AUXO011678380.1                   | + | 143    | 173    | RNA → rpmE (PRK00019)Ribosomal_L31 (pfam01197) →                                            |
| env-761  | RUMENNODE_4330698.1               | + | 57826  | 57856  | RNA → rpmE (PRK00019)Ribosomal_L31 (pfam01197) → PRK05571 (PRK05571)LacAB_rpiB (pfam02502)  |
|          |                                   |   |        |        | DUF1146 (pfam06612) → SpoIID (COG2385)SpoIID_LytB (TIGR02669) →                             |
|          |                                   |   |        |        | PRK11649 (PRK11649)Peptidase_M23 (pfam01551) → hypo → LytTR (smart00850)LytTR (pfam04397) → |
| env-762  | AUXO017045166.1                   | - | 207    | 177    | RNA → rpmE (PRK00019)Ribosomal_L31 (pfam01197) →                                            |
| env-763  | 08_07_CONTROL_DNA_scaffold35288.1 | + | 373    | 404    | RNA → rpmE (PRK00019)Ribosomal_L31 (pfam01197) →                                            |
| Csp-2-1  | NZ_JQNG01000002.1                 | + | 962368 | 962401 | RNA → rpmE2 (PRK01678)Ribosomal_L31 (pfam01197) →                                           |
| Csp-8-1  | NC_015391.1                       | + | 305155 | 305188 | RNA → rpmE2 (PRK01678)Ribosomal_L31 (pfam01197) →                                           |
| env-764  | AUXO010645718.1                   | - | 720    | 689    | RNA → rpmE (PRK00019)Ribosomal_L31 (pfam01197) → hypo →                                     |



|          |                          |   |         |         |                                                                                                                                                                                                                                |
|----------|--------------------------|---|---------|---------|--------------------------------------------------------------------------------------------------------------------------------------------------------------------------------------------------------------------------------|
| env-765  | 2227219885               | + | 182     | 213     | RNA → rpmE (PRK00019)Ribosomal_L31 (pfam01197) →                                                                                                                                                                               |
| env-766  | HCF12C_86226             | - | 167     | 134     | RNA → rpmE (PRK00019)Ribosomal_L31 (pfam01197) →                                                                                                                                                                               |
| env-767  | HCF12C_91840             | - | 3217    | 3187    | RNA → rpmE (PRK00019)Ribosomal_L31 (pfam01197) → rpoC2 (CHL00117)CYK3 (COG5279) → RimK (COG0189)ATPgrasp_ST (pfam14397) → PRK05571 (PRK05571)LacAB_rpiB (pfam02502) → Tdk (COG1435)PRK04296 (PRK04296) →                       |
| env-768  | JGI24728J21555_1043850   | - | 433     | 404     | RNA → rpmE (PRK00019)Ribosomal_L31 (pfam01197) →                                                                                                                                                                               |
| Lhe-5-1  | NZ_HG531246.1            | + | 152     | 183     | RNA → rpmE2 (PRK01678)Ribosomal_L31 (pfam01197) →                                                                                                                                                                              |
| Lhe-9-1  | NC_021744.1              | - | 2084137 | 2084106 | RNA → rpmE2 (PRK01678)Ribosomal_L31 (pfam01197) →                                                                                                                                                                              |
| env-769  | DOF008_scaffold29004.2   | - | 2511    | 2480    | RNA → rpmE2 (PRK01678)Ribosomal_L31 (pfam01197) →                                                                                                                                                                              |
| Lga-1-1  | NZ_BALB01000002.1        | - | 148004  | 147973  | RNA → rpmE2 (PRK01678)Ribosomal_L31 (pfam01197) →                                                                                                                                                                              |
| env-770  | SRS017103_C2505406       | - | 285     | 254     | RNA → rpmE2 (PRK01678)Ribosomal_L31 (pfam01197) →                                                                                                                                                                              |
| Lac-13-1 | NC_006814.3              | + | 256007  | 256038  | RNA → rpmE2 (PRK01678)Ribosomal_L31 (pfam01197) →                                                                                                                                                                              |
| Lac-5-1  | NZ_HG313783.1            | + | 85062   | 85093   | RNA → rpmE2 (PRK01678)Ribosomal_L31 (pfam01197) → hypo → MurF (COG0770)Mur_ligase_M (pfam01197) → HELICc (smart00490)DEXDc (smart00487)SrmB (COG0513) → AcpS (COG0736)acpS (PRK00070) → PLPDE_III_AR (cd00430)alr (PRK00053) → |
| Lac-3-1  | NZ_HG313752.1            | + | 48471   | 48502   | RNA → rpmE2 (PRK01678)Ribosomal_L31 (pfam01197) → hypo → MurF (COG0770)Mur_ligase_M (pfam01197) → HELICc (smart00490)DEXDc (smart00487)SrmB (COG0513) → AcpS (COG0736)acpS (PRK00070) → PLPDE_III_AR (cd00430)alr (PRK00053) → |
| Lac-8-1  | NZ_HG313829.1            | + | 85041   | 85072   | RNA → rpmE2 (PRK01678)Ribosomal_L31 (pfam01197) → hypo → MurF (COG0770)Mur_ligase_M (pfam01197) → HELICc (smart00490)DEXDc (smart00487)SrmB (COG0513) → AcpS (COG0736)acpS (PRK00070) → PLPDE_III_AR (cd00430)alr (PRK00053) → |
| Lac-9-1  | NC_021181.2              | + | 256004  | 256035  | RNA → rpmE2 (PRK01678)Ribosomal_L31 (pfam01197) →                                                                                                                                                                              |
| Lac-1-1  | NZ_CP010432.1            | + | 256305  | 256336  | RNA → rpmE2 (PRK01678)Ribosomal_L31 (pfam01197) →                                                                                                                                                                              |
| Lac-12-1 | NZ_GG669567.1            | + | 189473  | 189504  | RNA → rpmE2 (PRK01678)Ribosomal_L31 (pfam01197) →                                                                                                                                                                              |
| Lac-4-1  | NZ_CBLP01000004.1        | + | 134601  | 134632  | RNA → rpmE2 (PRK01678)Ribosomal_L31 (pfam01197) → hypo → MurF (COG0770)Mur_ligase_M (pfam01197) → HELICc (smart00490)DEXDc (smart00487)SrmB (COG0513) → AcpS (COG0736)acpS (PRK00070) → PLPDE_III_AR (cd00430)alr (PRK00053) → |
| Lac-7-1  | NZ_CBLT010000021.1       | + | 93153   | 93184   | RNA → rpmE2 (PRK01678)Ribosomal_L31 (pfam01197) → hypo → MurF (COG0770)Mur_ligase_M (pfam01197) → HELICc (smart00490)DEXDc (smart00487)SrmB (COG0513) → AcpS (COG0736)acpS (PRK00070) → PLPDE_III_AR (cd00430)alr (PRK00053) → |
| Lac-2-1  | NZ_AYUB01000060.1        | + | 523     | 554     | RNA → rpmE2 (PRK01678)Ribosomal_L31 (pfam01197) →                                                                                                                                                                              |
| Lac-6-1  | NZ_BALR01000003.1        | - | 87861   | 87830   | RNA → rpmE2 (PRK01678)Ribosomal_L31 (pfam01197) →                                                                                                                                                                              |
| Lhe-13-1 | NZ_GG700752.1            | + | 521294  | 521325  | RNA → rpmE2 (PRK01678)Ribosomal_L31 (pfam01197) →                                                                                                                                                                              |
| Lhe-6-1  | NZ_HG531010.1            | + | 1181    | 1212    | RNA → rpmE2 (PRK01678)Ribosomal_L31 (pfam01197) →                                                                                                                                                                              |
| Lhe-4-1  | NZ_CBUN010000034.1       | + | 1463    | 1494    | RNA → rpmE2 (PRK01678)Ribosomal_L31 (pfam01197) →                                                                                                                                                                              |
| Lhe-12-1 | NC_010080.1              | + | 286737  | 286768  | RNA → rpmE2 (PRK01678)Ribosomal_L31 (pfam01197) →                                                                                                                                                                              |
| Lhe-7-1  | NZ_HG530779.1            | - | 32078   | 32047   | RNA → rpmE2 (PRK01678)Ribosomal_L31 (pfam01197) →                                                                                                                                                                              |
| Lhe-10-1 | NZ_CP002427.1            | + | 229346  | 229377  | RNA → rpmE2 (PRK01678)Ribosomal_L31 (pfam01197) →                                                                                                                                                                              |
| Lhe-3-1  | NZ_CP009907.1            | + | 452665  | 452696  | RNA → rpmE2 (PRK01678)Ribosomal_L31 (pfam01197) →                                                                                                                                                                              |
| Lhe-3-2  | NZ_CP011386.1            | + | 241847  | 241878  | RNA → rpmE2 (PRK01678)Ribosomal_L31 (pfam01197) →                                                                                                                                                                              |
| Lhe-14-1 | NC_017467.1              | + | 267989  | 268020  | RNA → rpmE2 (PRK01678)Ribosomal_L31 (pfam01197) →                                                                                                                                                                              |
| Lhe-8-1  | NZ_CBUH010000066.1       | - | 32297   | 32266   | RNA → rpmE2 (PRK01678)Ribosomal_L31 (pfam01197) →                                                                                                                                                                              |
| Lhe-15-1 | NC_018528.1              | + | 260860  | 260891  | RNA → rpmE2 (PRK01678)Ribosomal_L31 (pfam01197) →                                                                                                                                                                              |
| env-771  | scaffold10515_1_V1.CD-11 | + | 1726    | 1757    | RNA → rpmE2 (PRK01678)Ribosomal_L31 (pfam01197) →                                                                                                                                                                              |
| env-772  | DLM027_scaffold20299.1   | + | 2704    | 2735    | RNA → rpmE2 (PRK01678)Ribosomal_L31 (pfam01197) →                                                                                                                                                                              |
| env-773  | 2205115470               | - | 638     | 607     | RNA → rpmE2 (PRK01678)Ribosomal_L31 (pfam01197) →                                                                                                                                                                              |
| env-774  | 2210389846               | - | 188     | 157     | RNA → rpmE2 (PRK01678)Ribosomal_L31 (pfam01197) →                                                                                                                                                                              |
| env-775  | 2157274238               | - | 188     | 157     | RNA → rpmE2 (PRK01678)Ribosomal_L31 (pfam01197) →                                                                                                                                                                              |
| env-776  | 2157676175               | - | 638     | 607     | RNA → rpmE2 (PRK01678)Ribosomal_L31 (pfam01197) →                                                                                                                                                                              |
| Lsp-12-1 | NZ_CDLD01000004.1        | + | 49487   | 49518   | RNA → rpmE2 (PRK01678)Ribosomal_L31 (pfam01197) →                                                                                                                                                                              |
| Lam-3-1  | NC_017470.1              | + | 259874  | 259905  | RNA → rpmE2 (PRK01678)Ribosomal_L31 (pfam01197) →                                                                                                                                                                              |
| Lac-11-1 | NC_015214.1              | + | 258247  | 258278  | RNA → rpmE2 (PRK01678)Ribosomal_L31 (pfam01197) → hypo → hypo →                                                                                                                                                                |
| Lam-2-1  | NC_014724.1              | + | 283638  | 283669  | RNA → rpmE2 (PRK01678)Ribosomal_L31 (pfam01197) →                                                                                                                                                                              |
| Lki-3-1  | NZ_BALU01000004.1        | - | 89390   | 89359   | RNA → rpmE2 (PRK01678)Ribosomal_L31 (pfam01197) →                                                                                                                                                                              |
| Lke-2-1  | NC_015602.1              | + | 2075582 | 2075613 | RNA → rpmE2 (PRK01678)Ribosomal_L31 (pfam01197) →                                                                                                                                                                              |

|         |                                     |   |         |         |                                                                                                                                                                                                                                                                                                                                                                                                            |
|---------|-------------------------------------|---|---------|---------|------------------------------------------------------------------------------------------------------------------------------------------------------------------------------------------------------------------------------------------------------------------------------------------------------------------------------------------------------------------------------------------------------------|
| Lke-1-1 | NZ_BAMG01000001.1                   | + | 24696   | 24727   | RNA → rpmE2 (PRK01678)Ribosomal_L31 (pfam01197) →                                                                                                                                                                                                                                                                                                                                                          |
| Lul-1-1 | NZ_GG693256.1                       | + | 130929  | 130960  | RNA → rpmE2 (PRK01678)Ribosomal_L31 (pfam01197) →                                                                                                                                                                                                                                                                                                                                                          |
| env-777 | AUXO018661423.1                     | + | 171     | 201     | RNA → rpmE (PRK00528)rpmE (PRK00019)rpmE2 (PRK01678)Ribosomal_L31 (pfam01197) →                                                                                                                                                                                                                                                                                                                            |
| env-778 | AUXO016587397.1                     | + | 680     | 712     | RNA →                                                                                                                                                                                                                                                                                                                                                                                                      |
| env-779 | NLF011_scaffold650_4                | + | 511     | 541     | RNA → rpmE (PRK00019)Ribosomal_L31 (pfam01197) →                                                                                                                                                                                                                                                                                                                                                           |
| env-780 | scaffold17049_11_MH0065             | - | 1359    | 1329    | RNA → rpmE (PRK00019)Ribosomal_L31 (pfam01197) → PRK05571 (PRK05571) LacAB_rpiB (pfam02502)<br>DUF1146 (pfam06612) → SpoIID (COG2385) SpoIID (pfam08486) →                                                                                                                                                                                                                                                 |
| Slu-3-1 | NZ_JONV01000007.1                   | - | 39962   | 39933   | RNA → rpmE (PRK00019)Ribosomal_L31 (pfam01197) → PrfA (COG0216)prfA (PRK00591) →<br>HemK (COG2890)PRK09328 (PRK09328) → SUA5 (COG0009)TIGR00057 (TIGR00057)SUA5 (pfam03481)<br>LMWPc (smart00226)Wzb (COG0394) → PRK05571 (PRK05571) LacAB_rpiB (pfam02502) →<br>PRK13690 (PRK13690)DUF436 (pfam04260) → GlyA (COG0112)glyA (PRK00011) →<br>Upp (COG0035)upp (PRK00129) → WecB (COG0381)wecB (TIGR00236) → |
| Sro-1-1 | NZ_JXII01000006.1                   | - | 39825   | 39796   | RNA → rpmE (PRK00019)Ribosomal_L31 (pfam01197) → PrfA (COG0216)prfA (PRK00591) →<br>HemK (COG2890)PRK09328 (PRK09328) → SUA5 (COG0009)TIGR00057 (TIGR00057)SUA5 (pfam03481)<br>LMWPc (smart00226)Wzb (COG0394) → PRK05571 (PRK05571) LacAB_rpiB (pfam02502) →<br>PRK13690 (PRK13690)DUF436 (pfam04260) → GlyA (COG0112)glyA (PRK00011) →<br>Upp (COG0035)upp (PRK00129) → WecB (COG0381)wecB (TIGR00236) → |
| env-781 | 4491423.3_NODE.115429               | + | 19212   | 19243   | RNA → rpmE (PRK00019)Ribosomal_L31 (pfam01197) → PRK05571 (PRK05571) LacAB_rpiB (pfam02502)<br>DUF1146 (pfam06612) → SpoIID (COG2385) SpoIID_LytB (TIGR02669) →                                                                                                                                                                                                                                            |
| env-782 | scaffold74606_2_MH0009              | - | 3256    | 3225    | RNA → rpmE (PRK00019)Ribosomal_L31 (pfam01197) → PRK05571 (PRK05571) LacAB_rpiB (pfam02502)<br>DUF1146 (pfam06612) → SpoIID (COG2385) SpoIID_LytB (TIGR02669) →<br>PRK11649 (PRK11649)Peptidase_M23 (pfam01551) →                                                                                                                                                                                          |
| env-783 | scaffold25277_3_MH0012              | + | 3494    | 3525    | RNA → rpmE (PRK00019)Ribosomal_L31 (pfam01197) → PRK05571 (PRK05571) LacAB_rpiB (pfam02502)<br>DUF1146 (pfam06612) → SpoIID (COG2385) SpoIID_LytB (TIGR02669) →<br>PRK11649 (PRK11649)Peptidase_M23 (pfam01551) →                                                                                                                                                                                          |
| env-784 | scaffold97436_3_MH0042              | + | 652     | 683     | RNA → rpmE (PRK00019)Ribosomal_L31 (pfam01197) →                                                                                                                                                                                                                                                                                                                                                           |
| env-785 | scaffold96667_1_MH0050              | + | 19222   | 19253   | RNA → rpmE (PRK00019)Ribosomal_L31 (pfam01197) → PRK05571 (PRK05571) LacAB_rpiB (pfam02502)<br>DUF1146 (pfam06612) → SpoIID (COG2385) SpoIID_LytB (TIGR02669) →<br>PRK11649 (PRK11649)Peptidase_M23 (pfam01551) →                                                                                                                                                                                          |
| env-786 | scaffold29407_4_MH0059              | + | 1082    | 1113    | RNA → rpmE (PRK00019)Ribosomal_L31 (pfam01197) → PRK05571 (PRK05571) LacAB_rpiB (pfam02502)<br>DUF1146 (pfam06612) → SpoIID (COG2385) SpoIID_LytB (TIGR02669) →<br>PRK11649 (PRK11649)Peptidase_M23 (pfam01551) → hypo →                                                                                                                                                                                   |
| env-787 | scaffold81381_2_MH0060              | - | 1784    | 1753    | PorA (COG0674)PorB (COG1013)PorG (COG1014)NapF (COG1145)Fer4_7 (pfam12838) →<br>RNA → rpmE (PRK00019)Ribosomal_L31 (pfam01197) → PRK05571 (PRK05571) LacAB_rpiB (pfam02502)<br>DUF1146 (pfam06612) → SpoIID (COG2385) SpoIID (pfam08486) →                                                                                                                                                                 |
| env-788 | scaffold27176_1_MH0065              | + | 124     | 155     | RNA → rpmE (PRK00019)Ribosomal_L31 (pfam01197) → PRK05571 (PRK05571) LacAB_rpiB (pfam02502)<br>DUF1146 (pfam06612) → SpoIID (COG2385) SpoIID_LytB (TIGR02669) →<br>PRK11649 (PRK11649)Peptidase_M23 (pfam01551) → hypo →                                                                                                                                                                                   |
| env-789 | scaffold62388_2_MH0077              | - | 688     | 657     | RNA → rpmE (PRK00019)Ribosomal_L31 (pfam01197) → PRK05571 (PRK05571) LacAB_rpiB (pfam02502)                                                                                                                                                                                                                                                                                                                |
| env-790 | scaffold19282_4_MH0081              | - | 2750    | 2719    | RNA → rpmE (PRK00019)Ribosomal_L31 (pfam01197) → PRK05571 (PRK05571) LacAB_rpiB (pfam02502)<br>DUF1146 (pfam06612) → SpoIID (COG2385) SpoIID_LytB (TIGR02669) →<br>PRK11649 (PRK11649)Peptidase_M23 (pfam01551) →                                                                                                                                                                                          |
| env-791 | scaffold70033_3_V1.UC-14            | + | 2592    | 2623    | RNA → rpmE (PRK00019)Ribosomal_L31 (pfam01197) → PRK05571 (PRK05571) LacAB_rpiB (pfam02502)<br>DUF1146 (pfam06612) → SpoIID (pfam08486) →                                                                                                                                                                                                                                                                  |
| env-792 | 4491477.3_NODE.7390                 | + | 65032   | 65063   | RNA → rpmE (PRK00019)Ribosomal_L31 (pfam01197) → PRK05571 (PRK05571) LacAB_rpiB (pfam02502)<br>DUF1146 (pfam06612) → SpoIID (COG2385) SpoIID_LytB (TIGR02669) →<br>PRK11649 (PRK11649)Peptidase_M23 (pfam01551) → hypo →                                                                                                                                                                                   |
| env-793 | scaffold16126_4_MH0031              | + | 2616    | 2647    | PorA (COG0674)PorB (COG1013)PorG (COG1014)NapF (COG1145)Fer4_7 (pfam12838) →<br>RNA → rpmE (PRK00019)Ribosomal_L31 (pfam01197) →                                                                                                                                                                                                                                                                           |
| env-794 | C2024528_1_MH0079                   | + | 208     | 239     | RNA → rpmE (PRK00019)Ribosomal_L31 (pfam01197) → PRK05571 (PRK05571) LacAB_rpiB (pfam02502)                                                                                                                                                                                                                                                                                                                |
| Aot-1-1 | NZ_JH992958.1                       | + | 468018  | 468051  | RNA → rpmE2 (PRK01678)Ribosomal_L31 (pfam01197) →                                                                                                                                                                                                                                                                                                                                                          |
| env-795 | scaffold28040_3_MH0086              | - | 152     | 127     | RNA → hypo →                                                                                                                                                                                                                                                                                                                                                                                               |
| env-796 | UnmappedStool_Broad_scaffold_784042 | - | 503     | 478     | RNA → hypo →                                                                                                                                                                                                                                                                                                                                                                                               |
| env-797 | longitudinal_415_272                | + | 46843   | 46868   | RNA → BID_2 (smart00635)YjdB (COG5492)Big_2 (pfam02368)T2SS-T3SS_pil_N (pfam13629) →                                                                                                                                                                                                                                                                                                                       |
| Tae-1-1 | NZ_KI783301.1                       | - | 3374080 | 3374047 | RNA → rpmE (PRK00019)Ribosomal_L31 (pfam01197) →                                                                                                                                                                                                                                                                                                                                                           |

|          |                                |   |         |         |                                                                                                 |
|----------|--------------------------------|---|---------|---------|-------------------------------------------------------------------------------------------------|
| Cul-1-1  | NZ_HG764817.1                  | - | 1769012 | 1768979 | RNA → rpmE (PRK00019)Ribosomal_L31 (pfam01197) →                                                |
| env-798  | JGI25320J50211.1018643         | + | 13      | 44      | RNA → rpmE (PRK00019)Ribosomal_L31 (pfam01197) → Tdk (COG1435)PRK04296 (PRK04296) →             |
| env-799  | IMNBL1_c0022815                | - | 113     | 83      | RNA → rpmE (PRK00019)Ribosomal_L31 (pfam01197) →                                                |
| env-800  | JGI24707J26582.10026421        | - | 2395    | 2364    | RNA → rpmE2 (PRK01678)Ribosomal_L31 (pfam01197) →                                               |
| env-801  | JGI24708J26588.10036079        | - | 1320    | 1289    | RNA → rpmE2 (PRK01678)Ribosomal_L31 (pfam01197) →                                               |
| env-802  | JGI24707J26582.10002967        | - | 12238   | 12207   | RNA → rpmE2 (PRK01678)Ribosomal_L31 (pfam01197) →                                               |
| env-803  | JGI24708J26588.10002912        | + | 155     | 186     | RNA → rpmE2 (PRK01678)Ribosomal_L31 (pfam01197) →                                               |
| Axy-1-1  | NC_018704.1                    | - | 2161096 | 2161065 | RNA → rpmE2 (PRK01678)Ribosomal_L31 (pfam01197) →                                               |
| Bsp-24-1 | NZ_JVDT01000240.1              | + | 19685   | 19715   | RNA → rpmE (PRK00019)Ribosomal_L31 (pfam01197) →                                                |
| Bsp-71-1 | NZ_JNJ01000072.1               | - | 7691    | 7661    | RNA → rpmE (PRK00019)Ribosomal_L31 (pfam01197) →                                                |
| env-804  | 2222084013.11956.1             | - | 385     | 353     | RNA → ←hypo                                                                                     |
| Lro-2-1  | NZ_AKZK01000018.1              | - | 29624   | 29592   | RNA → rpmE2 (PRK01678)Ribosomal_L31 (pfam01197) →                                               |
| Lro-2-2  | NZ_AUAW01000007.1              | - | 29920   | 29888   | RNA → rpmE2 (PRK01678)Ribosomal_L31 (pfam01197) →                                               |
| env-805  | RUMENNODE_2902945_304500       | + | 18085   | 18113   | RNA → rpmE (PRK00019)Ribosomal_L31 (pfam01197) →                                                |
| env-806  | AUXO013799381.1                | - | 329     | 301     | RNA → rpmE (PRK00019)Ribosomal_L31 (pfam01197) →                                                |
| env-807  | JGI24707J26582.10473385        | - | 185     | 151     | RNA → rpmE2 (PRK01678)Ribosomal_L31 (pfam01197) →                                               |
| Aha-1-1  | NZ_AKIF01000052.1              | + | 15837   | 15871   | RNA → rpmE2 (PRK01678)Ribosomal_L31 (pfam01197) →                                               |
| Hha-2-1  | NZ_KE383978.1                  | + | 253591  | 253623  | RNA → rpmE2 (PRK01678)Ribosomal_L31 (pfam01197) →                                               |
| Ssp-1-1  | NZ_AMPQ01000010.1              | - | 54400   | 54366   | RNA → rpmE2 (PRK01678)Ribosomal_L31 (pfam01197) → rpmE2 (PRK01678)Ribosomal_L31 (pfam01197) →   |
| Lgi-1-1  | NZ_CP012034.1                  | - | 1055820 | 1055788 | RNA → rpmE2 (PRK01678)Ribosomal_L31 (pfam01197) →                                               |
| Lve-1-1  | NZ_BACR01000034.1              | - | 75029   | 74997   | RNA → rpmE2 (PRK01678)Ribosomal_L31 (pfam01197) → rpmE2 (PRK01678)Ribosomal_L31 (pfam01197) →   |
| env-808  | SRS015578_WUGC_scaffold_46456  | - | 16584   | 16552   | RNA → rpmE (PRK00019)Ribosomal_L31 (pfam01197) →                                                |
| Tsp-2-1  | NZ_ADMN01000100.1              | - | 335     | 303     | RNA → rpmE (PRK00019)Ribosomal_L31 (pfam01197) → rpmE (PRK00019)Ribosomal_L31 (pfam01197) →     |
| Tsp-1-1  | NZ_AEXQ01000118.1              | - | 20412   | 20380   | RNA → rpmE (PRK00019)Ribosomal_L31 (pfam01197) → rpmE (PRK00019)Ribosomal_L31 (pfam01197) →     |
| env-809  | MC6.MG3.AS1.C1503              | + | 221     | 253     | RNA → rpmE (PRK00019)Ribosomal_L31 (pfam01197) →                                                |
| env-810  | UnmappedStool_Broad_C252689365 | - | 137     | 105     | RNA → rpmE (PRK00019)Ribosomal_L31 (pfam01197) →                                                |
| env-811  | 2204775796                     | + | 330     | 362     | RNA →                                                                                           |
| env-812  | 2205048070                     | - | 223     | 191     | RNA → rpmE (PRK00019)Ribosomal_L31 (pfam01197) →                                                |
| env-813  | 2157595394                     | - | 223     | 191     | RNA → hypo →                                                                                    |
| env-814  | 2157503615                     | + | 330     | 363     | RNA →                                                                                           |
| env-815  | 2033367913                     | + | 113     | 152     | RNA → rpmE (PRK00019)Ribosomal_L31 (pfam01197) →                                                |
| env-816  | AUXO013136741.1                | - | 78      | 48      | RNA →                                                                                           |
| env-817  | RUMENNODE_3528681.1            | + | 6693    | 6724    | RNA → rpmE (PRK00019)Ribosomal_L31 (pfam01197) →                                                |
| env-818  | JGI24503J29689.10133851        | - | 152     | 124     | RNA → rpmE (PRK00019)Ribosomal_L31 (pfam01197) →                                                |
| env-819  | DLM022_scaffold4159_5          | - | 1098    | 1067    | RNA → rpmE (PRK00019)Ribosomal_L31 (pfam01197) → hypo →                                         |
| env-820  | AUXO011650987.1                | + | 229     | 260     | PRK05571 (PRK05571)LacAB_rpiB (pfam02502) →<br>RNA → rpmE (PRK00019)Ribosomal_L31 (pfam01197) → |
| env-821  | BMHBC_2.6286536                | + | 6       | 40      | RNA →                                                                                           |
| env-822  | BMHBC_2.6988570                | + | 6       | 40      | RNA → rpmE (PRK00019)rpmE2 (PRK01678)Ribosomal_L31 (pfam01197) →                                |
| env-823  | 3300001197.1008646             | - | 7405    | 7372    | RNA → rpmE2 (PRK01678)Ribosomal_L31 (pfam01197) →                                               |
| env-824  | 3300001196.1009145             | - | 2558    | 2525    | RNA → rpmE2 (PRK01678)Ribosomal_L31 (pfam01197) →                                               |
| env-825  | BMHBC_1.1.newblercontig70055   | + | 6       | 39      | RNA → rpmE2 (PRK01678)Ribosomal_L31 (pfam01197) →                                               |
| env-826  | 3300000053.013632              | - | 6432    | 6399    | RNA → rpmE (PRK00019)Ribosomal_L31 (pfam01197) → spore_YhcN_YlaJ (TIGR02898) →                  |
| Bsp-84-1 | NZ_JAQQV01000014.1             | + | 67184   | 67217   | RNA → rpmE (PRK00019)Ribosomal_L31 (pfam01197) →                                                |
| env-827  | P_1C_Sed_2_UnCty_1183832       | - | 137     | 104     | RNA → rpmE (PRK00019)Ribosomal_L31 (pfam01197) →                                                |
| env-828  | AUXO014850948.1                | - | 56      | 28      | RNA →                                                                                           |
| env-829  | BS_KBA_SWE12.21m_c10145057     | + | 465     | 493     | RNA → rpmE (PRK00019)rpmE2 (PRK01678)Ribosomal_L31 (pfam01197) →                                |
| env-830  | BS_KBA_SWE02.21m_10031375      | + | 450     | 478     | RNA → rpmE (PRK00019)Ribosomal_L31 (pfam01197) →                                                |
| env-831  | AUXO010522381.1                | + | 1127    | 1157    | RNA →                                                                                           |
| env-832  | JGI24709J26583.10053541        | + | 1520    | 1554    | RNA →                                                                                           |
| env-833  | JGI24709J26583.10110457        | + | 290     | 324     | RNA → rpmE (PRK00019)Ribosomal_L31 (pfam01197) →                                                |
| env-834  | JGI24709J26583.10523343        | + | 18      | 52      | RNA → rpmE (PRK00019)Ribosomal_L31 (pfam01197) →                                                |



|         |                               |   |        |        |                                                                                                                                                                                                                                                                                            |
|---------|-------------------------------|---|--------|--------|--------------------------------------------------------------------------------------------------------------------------------------------------------------------------------------------------------------------------------------------------------------------------------------------|
| env-835 | JGI24710J26742_10524727       | + | 26     | 60     | RNA → rpmE (PRK00019)Ribosomal_L31 (pfam01197)→                                                                                                                                                                                                                                            |
| env-836 | JGI24500J29687_10015483       | - | 3498   | 3464   | RNA → rpmE (PRK00019)Ribosomal_L31 (pfam01197)→                                                                                                                                                                                                                                            |
| env-837 | JGI24503J29689_10008717       | + | 739    | 773    | RNA → rpmE (PRK00019)Ribosomal_L31 (pfam01197)→                                                                                                                                                                                                                                            |
| env-838 | JGI24710J26742_10079609       | + | 457    | 491    | RNA → rpmE (PRK00019)Ribosomal_L31 (pfam01197)→                                                                                                                                                                                                                                            |
| env-839 | JGI24502J29692_10016940       | + | 738    | 772    | RNA → rpmE (PRK00019)Ribosomal_L31 (pfam01197)→                                                                                                                                                                                                                                            |
| env-840 | JGI24710J26742_10183948       | + | 545    | 579    | RNA →                                                                                                                                                                                                                                                                                      |
| env-841 | AUXO015967212.1               | - | 302    | 272    | RNA → rpmE (PRK00019)Ribosomal_L31 (pfam01197)→                                                                                                                                                                                                                                            |
| env-842 | JGI24023J19991_10028404       | - | 525    | 497    | RNA → rpmE (PRK00019)Ribosomal_L31 (pfam01197)→                                                                                                                                                                                                                                            |
| env-843 | AUXO016697288.1               | - | 2054   | 2024   | RNA → rpmE (PRK00019)Ribosomal_L31 (pfam01197)→ FemAB (pfam02388)→                                                                                                                                                                                                                         |
| env-844 | AUXO012356518.1               | + | 680    | 712    | RNA → rpmE (PRK00019)Ribosomal_L31 (pfam01197)→ RimK (COG0189)ATPgrasp_ST (pfam14397)→ PRK05571 (PRK05571)LacAB_rpiB (pfam02502)→ int_mem_ywzB (TIGR02327)DUF1146 (pfam06612)→                                                                                                             |
| env-845 | AUXO013477821.1               | - | 57     | 25     | RNA →                                                                                                                                                                                                                                                                                      |
| env-846 | AUXO018606034.1               | + | 3910   | 3942   | RNA → rpmE (PRK00019)Ribosomal_L31 (pfam01197)→                                                                                                                                                                                                                                            |
| env-847 | AUXO016358659.1               | + | 2136   | 2166   | RNA → rpmE (PRK00019)Ribosomal_L31 (pfam01197)→                                                                                                                                                                                                                                            |
| env-848 | scaffold24133_4_MH0077        | + | 267    | 297    | RNA → rpmE (PRK00019)Ribosomal_L31 (pfam01197)→                                                                                                                                                                                                                                            |
| env-849 | AUXO014157167.1               | + | 27     | 57     | RNA → rpmE (PRK00019)Ribosomal_L31 (pfam01197)→ PRK05571 (PRK05571)LacAB_rpiB (pfam02502)                                                                                                                                                                                                  |
| env-850 | SL_8KL_010_SED_10000546       | + | 24347  | 24375  | RNA → rpmE (PRK00019)Ribosomal_L31 (pfam01197)→ TadA (COG0590)MafB19-deam (pfam14437)→ hypo → hypo →                                                                                                                                                                                       |
| env-851 | AUXO015488917.1               | - | 184    | 154    | RNA → rpmE (PRK00019)Ribosomal_L31 (pfam01197)→                                                                                                                                                                                                                                            |
| env-852 | 2157781566                    | + | 227    | 261    | RNA → ← hypo                                                                                                                                                                                                                                                                               |
| env-853 | 2204752571                    | + | 238    | 270    | RNA → rpmE (PRK00019)Ribosomal_L31 (pfam01197)→                                                                                                                                                                                                                                            |
| env-854 | 2158287102                    | + | 231    | 263    | RNA → ← hypo                                                                                                                                                                                                                                                                               |
| env-855 | SRS022137_WUGC_scaffold_49347 | + | 225    | 256    | RNA → rpmE (PRK00019)Ribosomal_L31 (pfam01197)→                                                                                                                                                                                                                                            |
| env-856 | SRS055982_C1494925            | + | 133    | 164    | RNA → rpmE (PRK00019)Ribosomal_L31 (pfam01197)→                                                                                                                                                                                                                                            |
| env-857 | scaffold4806_3_MH0070         | - | 1189   | 1159   | RNA → rpmE (PRK00019)Ribosomal_L31 (pfam01197)→                                                                                                                                                                                                                                            |
| env-858 | scaffold29628_1_MH0069        | - | 3846   | 3816   | RNA → rpmE (PRK00019)Ribosomal_L31 (pfam01197)→                                                                                                                                                                                                                                            |
| env-859 | SRS011134_C5190448            | + | 4072   | 4102   | RNA → rpmE (PRK00019)Ribosomal_L31 (pfam01197)→                                                                                                                                                                                                                                            |
| env-860 | scaffold84902_4_MH0077        | + | 2414   | 2444   | RNA → rpmE (PRK00019)Ribosomal_L31 (pfam01197)→ ATPgrasp_ST (pfam14397)→ PRK05571 (PRK05571)LacAB_rpiB (pfam02502)→ int_mem_ywzB (TIGR02327)DUF1146 (pfam06612)→ SpoIID (COG2385)SpoIID_LytB (TIGR02669)→                                                                                  |
| env-861 | AUXO014546959.1               | - | 171    | 139    | RNA → rpmE (PRK00019)Ribosomal_L31 (pfam01197)→                                                                                                                                                                                                                                            |
| env-862 | AUXO018657893.1               | - | 531    | 499    | RNA → rpmE (PRK00019)Ribosomal_L31 (pfam01197)→ PRK05571 (PRK05571)LacAB_rpiB (pfam02502)                                                                                                                                                                                                  |
| env-863 | 3300001592_10049945           | - | 1173   | 1142   | RNA → rpmE (PRK00019)Ribosomal_L31 (pfam01197)→                                                                                                                                                                                                                                            |
| Sko-1-1 | NZ_KB898626.1                 | - | 216304 | 216273 | RNA → rpmE2 (PRK01678)Ribosomal_L31 (pfam01197)→                                                                                                                                                                                                                                           |
| env-864 | 2204604922                    | + | 33     | 77     | RNA → rpmE2 (PRK01678)Ribosomal_L31 (pfam01197)→                                                                                                                                                                                                                                           |
| env-865 | 2158230023                    | + | 33     | 77     | RNA → rpmE2 (PRK01678)Ribosomal_L31 (pfam01197)→                                                                                                                                                                                                                                           |
| Cma-4-1 | NZ_AMYT01000021.1             | + | 149937 | 149969 | RNA → rpmE2 (PRK01678)Ribosomal_L31 (pfam01197)→                                                                                                                                                                                                                                           |
| env-866 | AUXO018393888.1               | - | 164    | 134    | RNA → rpmE (PRK00019)Ribosomal_L31 (pfam01197)→                                                                                                                                                                                                                                            |
| env-867 | SL_3KL_010_SED_10124865       | + | 289    | 318    | RNA → rpmE (PRK00019)Ribosomal_L31 (pfam01197)→ Tdk (COG1435)PRK04296 (PRK04296)→ TadA (COG0590)MafB19-deam (pfam14437)→                                                                                                                                                                   |
| env-868 | SL_3KL_010_SED_10254284       | + | 507    | 536    | RNA → rpmE (PRK00019)Ribosomal_L31 (pfam01197)→                                                                                                                                                                                                                                            |
| Cth-1-1 | NZ_AFCE01000162.1             | - | 72996  | 72965  | RNA → rpmE (PRK00019)Ribosomal_L31 (pfam01197)→ rpmE (PRK00019)Ribosomal_L31 (pfam01197)→                                                                                                                                                                                                  |
| Pya-1-1 | NZ_AVBF01000041.1             | - | 31350  | 31318  | RNA → rpmE2 (PRK01678)Ribosomal_L31 (pfam01197)→                                                                                                                                                                                                                                           |
| Lsa-1-1 | NZ_ANAG01000022.1             | - | 33056  | 33024  | RNA → rpmE2 (PRK01678)Ribosomal_L31 (pfam01197)→                                                                                                                                                                                                                                           |
| Lsa-2-1 | NZ_AUHQ01000006.1             | + | 37298  | 37330  | RNA → rpmE2 (PRK01678)Ribosomal_L31 (pfam01197)→                                                                                                                                                                                                                                           |
| env-869 | 3300000053_219615             | - | 205    | 173    | RNA → rpmE2 (PRK01678)Ribosomal_L31 (pfam01197)→                                                                                                                                                                                                                                           |
| Lko-1-1 | NZ_CP012033.1                 | - | 493955 | 493923 | RNA → rpmE2 (PRK01678)Ribosomal_L31 (pfam01197)→                                                                                                                                                                                                                                           |
| Bak-1-1 | NZ_BAUV01000003.1             | + | 60587  | 60617  | RNA → rpmE2 (PRK01678)Ribosomal_L31 (pfam01197)→                                                                                                                                                                                                                                           |
| Lsp-3-1 | NZ_JPUW01000022.1             | + | 34339  | 34372  | RNA → rpmE (PRK00019)Ribosomal_L31 (pfam01197)→ Tdk (COG1435)PRK04296 (PRK04296)→ PrfA (COG0216)prfA (PRK00591)→ HemK (COG2890)PRK09328 (PRK09328)→ SUA5 (COG0009)TIGR00057 (TIGR00057)SUA5 (pfam03481)→ LMWPc (smart00226)LMWPAP (cd1634)→ HAMP (smart00304)MA (smart00283)Tar (COG0840)→ |
| Efa-8-1 | NZ_KE351649.1                 | - | 195752 | 195720 | RNA → rpmE2 (PRK01678)Ribosomal_L31 (pfam01197)→                                                                                                                                                                                                                                           |
| Lna-1-1 | NZ_AUEG01000014.1             | - | 9119   | 9086   | RNA → rpmE2 (PRK01678)Ribosomal_L31 (pfam01197)→                                                                                                                                                                                                                                           |

|           |                         |   |         |         |                                                                                               |
|-----------|-------------------------|---|---------|---------|-----------------------------------------------------------------------------------------------|
| Efa-538-1 | NZ_ASAM01000214.1       | + | 9303    | 9335    | RNA → rpmE2 (PRK01678)Ribosomal_L31 (pfam01197) →                                             |
| Bma-6-1   | NZ_HG428742.1           | - | 441263  | 441230  | RNA → rpmE (PRK00019)Ribosomal_L31 (pfam01197) →                                              |
| Pla-3-1   | NZ_LAWY01000043.1       | - | 5907    | 5874    | RNA → rpmE (PRK00019)Ribosomal_L31 (pfam01197) →                                              |
| Pla-2-1   | NZ_CH981517.1           | - | 2321    | 2288    | RNA → rpmE (PRK00019)Ribosomal_L31 (pfam01197) →                                              |
| Pla-4-1   | NC_023134.1             | - | 3814299 | 3814266 | RNA → rpmE (PRK00019)Ribosomal_L31 (pfam01197) →                                              |
| Pla-5-1   | NZ_ADFW01000001.1       | + | 2677802 | 2677835 | RNA → rpmE (PRK00019)Ribosomal_L31 (pfam01197) →                                              |
| Pal-2-1   | NZ_AUGY01000067.1       | + | 40909   | 40942   | RNA → rpmE (PRK00019)Ribosomal_L31 (pfam01197) → DUF3501 (pfam12007) → hypo → hypo → hypo →   |
| env-870   | ABMY01031648.1          | - | 61      | 28      | RNA → hypo →                                                                                  |
| Pch-3-1   | NZ_JUGY01000072.1       | - | 6755    | 6722    | RNA → rpmE (PRK00019)Ribosomal_L31 (pfam01197) → DUF3501 (pfam12007) →                        |
| Psp-31-1  | NZ_JIAZ01000009.1       | - | 5052    | 5019    | RNA → rpmE (PRK00019)Ribosomal_L31 (pfam01197) → hypo →                                       |
| Lpa-2-1   | NZ_KB911377.1           | - | 1976    | 1944    | RNA → rpmE2 (PRK01678)Ribosomal_L31 (pfam01197) →                                             |
| Cdi-1-1   | NZ_JQLO01000001.1       | - | 1825701 | 1825669 | RNA → rpmE2 (PRK01678)Ribosomal_L31 (pfam01197) →                                             |
| Lag-1-1   | NZ_LN851172.1           | + | 41190   | 41222   | RNA → rpmE2 (PRK01678)Ribosomal_L31 (pfam01197) →                                             |
| env-871   | JGI24707J26582_10010170 | + | 4961    | 4993    | RNA → rpmE2 (PRK01678)Ribosomal_L31 (pfam01197) →                                             |
| env-872   | JGI24708J26588_10015525 | - | 566     | 534     | RNA → rpmE2 (PRK01678)Ribosomal_L31 (pfam01197) →                                             |
| env-873   | JGI24711J26586_10162716 | - | 244     | 212     | RNA → rpmE2 (PRK01678)Ribosomal_L31 (pfam01197) →                                             |
| Ece-1-1   | NZ_LDEA01000016.1       | + | 14732   | 14764   | RNA → rpmE2 (PRK01678)Ribosomal_L31 (pfam01197) →                                             |
| Ece-1-2   | NZ_LDOX01000011.1       | + | 32174   | 32206   | RNA → rpmE2 (PRK01678)Ribosomal_L31 (pfam01197) →                                             |
| Ece-1-3   | NZ_LDOW01000005.1       | - | 101274  | 101242  | RNA → rpmE2 (PRK01678)Ribosomal_L31 (pfam01197) →                                             |
| Ece-1-4   | NZ_LDEB01000042.1       | - | 2043    | 2011    | RNA → rpmE2 (PRK01678)Ribosomal_L31 (pfam01197) →                                             |
| Ece-1-5   | NZ_LDED01000027.1       | + | 14737   | 14769   | RNA → rpmE2 (PRK01678)Ribosomal_L31 (pfam01197) →                                             |
| Ece-1-6   | NZ_LDEC01000037.1       | + | 3278    | 3310    | RNA → rpmE2 (PRK01678)Ribosomal_L31 (pfam01197) →                                             |
| Ece-1-7   | NZ_LDDZ01000019.1       | - | 1843    | 1811    | RNA → rpmE2 (PRK01678)Ribosomal_L31 (pfam01197) →                                             |
| Ece-2-1   | NZ_KI535313.1           | + | 35980   | 36012   | RNA → rpmE2 (PRK01678)Ribosomal_L31 (pfam01197) →                                             |
| Ema-3-1   | NZ_CVRN01000007.1       | + | 579351  | 579383  | RNA → rpmE2 (PRK01678)Ribosomal_L31 (pfam01197) →                                             |
| env-874   | JGI26052J44787_1053424  | + | 319     | 352     | RNA →                                                                                         |
| Esp-8-1   | NZ_JFYW01000008.1       | - | 343971  | 343938  | RNA → rpmE2 (PRK01678)Ribosomal_L31 (pfam01197) →                                             |
| Eun-1-1   | NZ_KK211188.1           | + | 424175  | 424208  | RNA → rpmE2 (PRK01678)Ribosomal_L31 (pfam01197) →                                             |
| Ean-1-1   | NC_018665.1             | - | 2501740 | 2501707 | RNA → rpmE2 (PRK01678)Ribosomal_L31 (pfam01197) → rpmE2 (PRK01678)Ribosomal_L31 (pfam01197) → |
| Ean-2-1   | NZ_JMKS01000003.1       | - | 1069913 | 1069880 | RNA → rpmE2 (PRK01678)Ribosomal_L31 (pfam01197) →                                             |
| Esi-1-1   | NC_010556.1             | - | 2710763 | 2710730 | RNA → rpmE2 (PRK01678)Ribosomal_L31 (pfam01197) →                                             |
| Esi-2-1   | NZ_KK211190.1           | + | 331383  | 331416  | RNA → rpmE2 (PRK01678)Ribosomal_L31 (pfam01197) →                                             |
| Eun-2-1   | NZ_KK211187.1           | + | 420534  | 420567  | RNA → rpmE2 (PRK01678)Ribosomal_L31 (pfam01197) →                                             |
| env-875   | JGI26053J44789_1022240  | - | 446     | 413     | RNA → rpmE2 (PRK01678)Ribosomal_L31 (pfam01197) →                                             |
| env-876   | JGI26055J44792_1047538  | - | 417     | 384     | RNA → rpmE2 (PRK01678)Ribosomal_L31 (pfam01197) →                                             |
| env-877   | JGI26057J44791_1003846  | - | 2204    | 2171    | RNA → rpmE2 (PRK01678)Ribosomal_L31 (pfam01197) →                                             |
| env-878   | JGI26051J44788_1013255  | + | 79      | 112     | RNA → rpmE2 (PRK01678)Ribosomal_L31 (pfam01197) →                                             |
| env-879   | JGI26052J44787_1019914  | - | 555     | 522     | RNA → rpmE2 (PRK01678)Ribosomal_L31 (pfam01197) →                                             |
| env-880   | JGI26054J46599_1007412  | - | 248     | 215     | RNA → rpmE2 (PRK01678)Ribosomal_L31 (pfam01197) →                                             |
| Eac-1-1   | NZ_LFQN01000004.1       | - | 62759   | 62726   | RNA → rpmE2 (PRK01678)Ribosomal_L31 (pfam01197) →                                             |
| Eac-2-1   | NZ_JNIR01000001.1       | - | 2404781 | 2404748 | RNA → rpmE2 (PRK01678)Ribosomal_L31 (pfam01197) →                                             |
| Esp-11-1  | NZ_JTLL01000020.1       | + | 64609   | 64642   | RNA → rpmE2 (PRK01678)Ribosomal_L31 (pfam01197) →                                             |
| Esp-5-1   | NC_022794.1             | - | 2814663 | 2814630 | RNA → rpmE2 (PRK01678)Ribosomal_L31 (pfam01197) →                                             |
| Esp-7-1   | NZ_BARY01000003.1       | + | 65109   | 65142   | RNA → rpmE2 (PRK01678)Ribosomal_L31 (pfam01197) →                                             |
| env-881   | JGI26050J44790_1013333  | - | 517     | 484     | RNA → rpmE2 (PRK01678)Ribosomal_L31 (pfam01197) →                                             |
| Eox-1-1   | NZ_JNIS01000001.1       | - | 1240167 | 1240134 | RNA → rpmE2 (PRK01678)Ribosomal_L31 (pfam01197) →                                             |
| Lvi-2-1   | NZ_AHYZ01000045.1       | - | 4802    | 4770    | RNA → rpmE2 (PRK01678)Ribosomal_L31 (pfam01197) → rpmE2 (PRK01678)Ribosomal_L31 (pfam01197) → |
| Lvi-1-1   | NZ_AHZA01000166.1       | - | 3988    | 3956    | RNA → rpmE2 (PRK01678)Ribosomal_L31 (pfam01197) →                                             |
| Fge-1-1   | NZ_AUMPO1000005.1       | + | 28726   | 28757   | RNA → rpmE (PRK00019)Ribosomal_L31 (pfam01197) →                                              |
| Apa-1-1   | NZ_JYCD01000078.1       | - | 32801   | 32767   | RNA → rpmE (PRK00019)Ribosomal_L31 (pfam01197) →                                              |
| Bth-46-1  | NZ_KE695653.1           | - | 188547  | 188513  | RNA → rpmE (PRK00019)Ribosomal_L31 (pfam01197) →                                              |



|          |                                |   |         |         |                                                                                                                                                                                                                                                                                                                                                                                                                                                                                                                                                             |
|----------|--------------------------------|---|---------|---------|-------------------------------------------------------------------------------------------------------------------------------------------------------------------------------------------------------------------------------------------------------------------------------------------------------------------------------------------------------------------------------------------------------------------------------------------------------------------------------------------------------------------------------------------------------------|
| Bth-47-1 | NZ_JQMH01000003.1              | - | 220631  | 220597  | RNA → rpmE (PRK00019)Ribosomal_L31 (pfam01197) →                                                                                                                                                                                                                                                                                                                                                                                                                                                                                                            |
| env-882  | 2200565360                     | - | 568     | 535     | RNA → rpmE (PRK00019)Ribosomal_L31 (pfam01197) →<br>crypto_DASH (TIGR02765)DNA_photolyase (pfam00875) →                                                                                                                                                                                                                                                                                                                                                                                                                                                     |
| Bsp-74-1 | NZ_KI301970.1                  | - | 166095  | 166062  | RNA → rpmE (PRK00019)Ribosomal_L31 (pfam01197) →                                                                                                                                                                                                                                                                                                                                                                                                                                                                                                            |
| Bag-1-1  | NZ_JATL01000001.1              | - | 68309   | 68276   | RNA → rpmE (PRK00019)Ribosomal_L31 (pfam01197) → PRK10674 (PRK10674)FAD_binding_7 (pfam034)                                                                                                                                                                                                                                                                                                                                                                                                                                                                 |
| Bsp-10-1 | NZ_AKKB01000126.1              | - | 33889   | 33856   | hypo → Tdk (COG1435)PRK04296 (PRK04296) →<br>RNA → rpmE (PRK00019)Ribosomal_L31 (pfam01197) → rpmE (PRK00019)Ribosomal_L31 (pfam01197)                                                                                                                                                                                                                                                                                                                                                                                                                      |
| Bag-2-1  | NZ_AOBR01000012.1              | - | 25158   | 25125   | RNA → rpmE (PRK00019)Ribosomal_L31 (pfam01197) →                                                                                                                                                                                                                                                                                                                                                                                                                                                                                                            |
| Bpa-4-1  | NZ_KI629787.1                  | + | 57528   | 57561   | RNA → rpmE (PRK00019)Ribosomal_L31 (pfam01197) → Tdk (COG1435)PRK04296 (PRK04296) →<br>Spore_YhcN_YlaJ (pfam09580) →                                                                                                                                                                                                                                                                                                                                                                                                                                        |
| Bbr-4-1  | NZ_AKYF01000027.1              | - | 190401  | 190368  | RNA → rpmE (PRK00019)Ribosomal_L31 (pfam01197) → P_hrB (COG0415)photolyase_8HDF (TIGR03556)                                                                                                                                                                                                                                                                                                                                                                                                                                                                 |
| Bbr-2-1  | NZ_LDZV01000001.1              | - | 5378424 | 5378391 | Tdk (COG1435)PRK04296 (PRK04296) → Spore_YhcN_YlaJ (pfam09580) →<br>RNA → rpmE (PRK00019)Ribosomal_L31 (pfam01197) → P_hrB (COG0415)photolyase_8HDF (TIGR03556)                                                                                                                                                                                                                                                                                                                                                                                             |
| Bsp-43-1 | NZ_LGJF01000001.1              | + | 5142336 | 5142369 | Tdk (COG1435)PRK04296 (PRK04296) → Spore_YhcN_YlaJ (pfam09580) →<br>RNA → rpmE (PRK00019)Ribosomal_L31 (pfam01197) → P_hrB (COG0415)PRK10674 (PRK10674) →                                                                                                                                                                                                                                                                                                                                                                                                   |
| Bbr-3-1  | NZ_AHKL01000034.1              | + | 80549   | 80582   | Tdk (COG1435)PRK04296 (PRK04296) → hypo →<br>RNA → rpmE (PRK00019)Ribosomal_L31 (pfam01197) → P_hrB (COG0415)PRK10674 (PRK10674) →                                                                                                                                                                                                                                                                                                                                                                                                                          |
| Bbr-1-1  | NC_012491.1                    | - | 5785760 | 5785727 | Tdk (COG1435)PRK04296 (PRK04296) → hypo →<br>RNA → rpmE (PRK00019)Ribosomal_L31 (pfam01197) → P_hrB (COG0415)PRK10674 (PRK10674) →                                                                                                                                                                                                                                                                                                                                                                                                                          |
| Bsp-9-1  | NZ_AKIX01000074.1              | - | 36982   | 36949   | Tdk (COG1435)PRK04296 (PRK04296) → hypo →<br>RNA → rpmE (PRK00019)Ribosomal_L31 (pfam01197) → rpmE (PRK00019)Ribosomal_L31 (pfam01197) →<br>P_hrB (COG0415)photolyase_8HDF (TIGR03556) → P_hrB (COG0415)photolyase_8HDF (TIGR03556) →<br>Tdk (COG1435)PRK04296 (PRK04296) → Tdk (COG1435)PRK04296 (PRK04296) →<br>Spore_YhcN_YlaJ (pfam09580) → Spore_YhcN_YlaJ (pfam09580) → PrfA (COG0216)prfA (PRK00591) →<br>PrfA (COG0216)prfA (PRK00591) → PrfA (COG0216)prfA (PRK00591) →<br>HemK (COG2890)PRK09328 (PRK09328) → HemK (COG2890)PRK09328 (PRK09328) → |
| Bfo-2-1  | NZ_LDCN01000003.1              | - | 391782  | 391749  | RNA → rpmE (PRK00019)Ribosomal_L31 (pfam01197) → P_hrB (COG0415)photolyase_8HDF (TIGR03556)                                                                                                                                                                                                                                                                                                                                                                                                                                                                 |
| Bre-1-1  | NZ_LGIQ01000009.1              | + | 2036993 | 2037026 | Tdk (COG1435)PRK04296 (PRK04296) → hypo →<br>RNA → rpmE (PRK00019)Ribosomal_L31 (pfam01197) → hypo → hypo →<br>Tdk (COG1435)PRK04296 (PRK04296) → Tdk (COG1435)PRK04296 (PRK04296) →                                                                                                                                                                                                                                                                                                                                                                        |
| Bbo-4-1  | NZ_JXAV01000005.1              | - | 191334  | 191300  | RNA → rpmE (PRK00019)Ribosomal_L31 (pfam01197) →                                                                                                                                                                                                                                                                                                                                                                                                                                                                                                            |
| Bbo-7-1  | NZ_JPRB01000009.1              | - | 190353  | 190319  | RNA → rpmE (PRK00019)Ribosomal_L31 (pfam01197) →                                                                                                                                                                                                                                                                                                                                                                                                                                                                                                            |
| Bbo-6-1  | NZ_APB01000004.1               | - | 192154  | 192120  | RNA → rpmE (PRK00019)Ribosomal_L31 (pfam01197) →                                                                                                                                                                                                                                                                                                                                                                                                                                                                                                            |
| Bbo-5-1  | NZ_JAQG01000025.1              | + | 126951  | 126985  | RNA → rpmE (PRK00019)Ribosomal_L31 (pfam01197) →                                                                                                                                                                                                                                                                                                                                                                                                                                                                                                            |
| Bla-3-1  | NZ_CAGD01000009.1              | + | 76465   | 76498   | RNA → rpmE (PRK00019)Ribosomal_L31 (pfam01197) →                                                                                                                                                                                                                                                                                                                                                                                                                                                                                                            |
| Bla-4-1  | NZ_CP007806.1                  | - | 4868784 | 4868751 | RNA → rpmE (PRK00019)Ribosomal_L31 (pfam01197) →                                                                                                                                                                                                                                                                                                                                                                                                                                                                                                            |
| Bla-1-1  | NZ_JNFS01000001.1              | + | 2136709 | 2136742 | RNA → rpmE (PRK00019)Ribosomal_L31 (pfam01197) →                                                                                                                                                                                                                                                                                                                                                                                                                                                                                                            |
| Bla-5-1  | NZ_AXBT01000034.1              | + | 271405  | 271438  | RNA → rpmE (PRK00019)Ribosomal_L31 (pfam01197) →                                                                                                                                                                                                                                                                                                                                                                                                                                                                                                            |
| Bla-2-1  | NZ_KB894284.1                  | + | 113737  | 113770  | RNA → rpmE (PRK00019)Ribosomal_L31 (pfam01197) →                                                                                                                                                                                                                                                                                                                                                                                                                                                                                                            |
| Bsp-99-1 | NZ_HE978538.1                  | + | 272130  | 272163  | RNA → rpmE (PRK00019)Ribosomal_L31 (pfam01197) →                                                                                                                                                                                                                                                                                                                                                                                                                                                                                                            |
| Bsp-45-1 | NZ_LIGG01000001.1              | + | 934797  | 934765  | RNA → rpmE (PRK00019)Ribosomal_L31 (pfam01197) →                                                                                                                                                                                                                                                                                                                                                                                                                                                                                                            |
| Bca-1-1  | NZ_LAYY01000010.1              | - | 43036   | 43004   | RNA → rpmE (PRK00019)Ribosomal_L31 (pfam01197) →                                                                                                                                                                                                                                                                                                                                                                                                                                                                                                            |
| Aji-1-1  | NZ_JH976434.1                  | - | 707904  | 707873  | RNA → rpmE2 (PRK01678)Ribosomal_L31 (pfam01197) →                                                                                                                                                                                                                                                                                                                                                                                                                                                                                                           |
| Lmu-1-1  | NZ_JSWI01000015.1              | + | 46921   | 46954   | RNA → rpmE2 (PRK01678)Ribosomal_L31 (pfam01197) → sortase_fam (TIGR01076)Sortase_A (cd06165) →                                                                                                                                                                                                                                                                                                                                                                                                                                                              |
| env-883  | DLF014_scaffold12613.4         | + | 22418   | 22451   | RNA → rpmE2 (PRK01678)Ribosomal_L31 (pfam01197) → sortase_fam (TIGR01076)Sortase_A (cd06165) →                                                                                                                                                                                                                                                                                                                                                                                                                                                              |
| env-884  | DOF012_scaffold14126.6         | + | 21527   | 21560   | RNA → rpmE2 (PRK01678)Ribosomal_L31 (pfam01197) → sortase_fam (TIGR01076)Sortase_A (cd06165) →                                                                                                                                                                                                                                                                                                                                                                                                                                                              |
| env-885  | 2204848799                     | - | 1517    | 1484    | RNA → rpmE2 (PRK01678)Ribosomal_L31 (pfam01197) → sortase_fam (TIGR01076)Sortase_A (cd06165) →                                                                                                                                                                                                                                                                                                                                                                                                                                                              |
| env-886  | 2157775506                     | - | 1517    | 1484    | RNA → rpmE2 (PRK01678)Ribosomal_L31 (pfam01197) → sortase_fam (TIGR01076)Sortase_A (cd06165) →                                                                                                                                                                                                                                                                                                                                                                                                                                                              |
| Lmu-2-1  | NZ_CP011013.1                  | - | 2121237 | 2121204 | RNA → rpmE2 (PRK01678)Ribosomal_L31 (pfam01197) → sortase_fam (TIGR01076)Sortase_A (cd06165) →                                                                                                                                                                                                                                                                                                                                                                                                                                                              |
| Lmu-1-2  | NZ_JROC01000031.1              | - | 24602   | 24569   | RNA → rpmE2 (PRK01678)Ribosomal_L31 (pfam01197) → hypo → hypo →                                                                                                                                                                                                                                                                                                                                                                                                                                                                                             |
| Lwa-1-1  | NZ_AWTT01000003.1              | + | 39579   | 39611   | RNA → rpmE2 (PRK01678)Ribosomal_L31 (pfam01197) →                                                                                                                                                                                                                                                                                                                                                                                                                                                                                                           |
| Lho-1-1  | NZ_AP014680.1                  | + | 411316  | 411348  | RNA → rpmE2 (PRK01678)Ribosomal_L31 (pfam01197) →                                                                                                                                                                                                                                                                                                                                                                                                                                                                                                           |
| env-887  | SRS011111_Baylor_scaffold_3888 | - | 333     | 301     | RNA → rpmE2 (PRK01678)Ribosomal_L31 (pfam01197) →                                                                                                                                                                                                                                                                                                                                                                                                                                                                                                           |
| Lco-3-1  | NZ_GG698805.1                  | + | 187441  | 187473  | RNA → rpmE2 (PRK01678)Ribosomal_L31 (pfam01197) → rpmE2 (PRK01678)Ribosomal_L31 (pfam01197)                                                                                                                                                                                                                                                                                                                                                                                                                                                                 |
| Lin-6-1  | NZ_HE997174.1                  | + | 292603  | 292635  | RNA → rpmE2 (PRK01678)Ribosomal_L31 (pfam01197) →                                                                                                                                                                                                                                                                                                                                                                                                                                                                                                           |

|          |                             |   |         |         |                                                                                                                                           |
|----------|-----------------------------|---|---------|---------|-------------------------------------------------------------------------------------------------------------------------------------------|
| env-888  | 2205128598                  | + | 89      | 121     | RNA → rpmE2 (PRK01678)Ribosomal_L31 (pfam01197) →                                                                                         |
| env-889  | 2157599913                  | + | 89      | 121     | RNA →                                                                                                                                     |
| env-890  | 2158270211                  | - | 125     | 92      | RNA → rpmE (PRK00019)rpmE2 (PRK01678)L31 (TIGR00105)Ribosomal_L31 (pfam01197) →                                                           |
| Lpa-1-1  | NZ_LDPB01000046.1           | + | 40254   | 40287   | RNA → rpmE2 (PRK01678)Ribosomal_L31 (pfam01197) →                                                                                         |
| Lan-3-1  | NZ_GG700738.1               | + | 134448  | 134481  | RNA → rpmE2 (PRK01678)Ribosomal_L31 (pfam01197) →                                                                                         |
| env-891  | 2158307163                  | - | 217     | 184     | RNA → rpmE2 (PRK01678)Ribosomal_L31 (pfam01197) →                                                                                         |
| Lor-3-1  | NZ_AEKL01000068.1           | - | 23595   | 23562   | RNA → rpmE2 (PRK01678)Ribosomal_L31 (pfam01197) → rpmE2 (PRK01678)Ribosomal_L31 (pfam01197) →                                             |
| env-892  | 2205774333                  | - | 527     | 494     | RNA → rpmE2 (PRK01678)Ribosomal_L31 (pfam01197) →                                                                                         |
| Lor-1-1  | NZ_AFTL01000008.1           | - | 55820   | 55787   | RNA → rpmE2 (PRK01678)Ribosomal_L31 (pfam01197) →                                                                                         |
| Lfe-7-1  | NZ_AVAB01000001.1           | + | 249983  | 250016  | RNA → rpmE2 (PRK01678)Ribosomal_L31 (pfam01197) →                                                                                         |
| env-893  | scaffold63933_1_V1.CD-11    | - | 667     | 634     | RNA → rpmE2 (PRK01678)Ribosomal_L31 (pfam01197) →                                                                                         |
| Lfe-1-1  | NZ_LAIK01000005.1           | - | 289790  | 289757  | RNA → rpmE2 (PRK01678)Ribosomal_L31 (pfam01197) →                                                                                         |
| Lfe-1-2  | NZ_LBDH01000005.1           | + | 42885   | 42918   | RNA → rpmE2 (PRK01678)Ribosomal_L31 (pfam01197) →                                                                                         |
| Lfe-1-3  | NZ_LBDG01000019.1           | - | 2690    | 2657    | RNA → rpmE2 (PRK01678)Ribosomal_L31 (pfam01197) →                                                                                         |
| Lfe-5-1  | NZ_CBUR010000031.1          | - | 23728   | 23695   | RNA → rpmE2 (PRK01678)Ribosomal_L31 (pfam01197) →                                                                                         |
| Lfe-1-4  | NZ_JUTH01000116.1           | + | 4117    | 4150    | RNA → rpmE2 (PRK01678)Ribosomal_L31 (pfam01197) →                                                                                         |
| Lfe-11-1 | NC_017465.1                 | + | 250243  | 250276  | RNA → rpmE2 (PRK01678)Ribosomal_L31 (pfam01197) → rpmE2 (PRK01678)Ribosomal_L31 (pfam01197) → rpmE2 (PRK01678)Ribosomal_L31 (pfam01197) → |
| Lfe-12-1 | NC_010610.1                 | + | 249776  | 249809  | RNA → rpmE2 (PRK01678)Ribosomal_L31 (pfam01197) →                                                                                         |
| Lfe-9-1  | NZ_GG704707.1               | + | 45973   | 46006   | RNA → rpmE2 (PRK01678)Ribosomal_L31 (pfam01197) → rpmE2 (PRK01678)Ribosomal_L31 (pfam01197) →                                             |
| Lfe-10-1 | NZ_GG669907.1               | + | 47108   | 47141   | RNA → rpmE2 (PRK01678)Ribosomal_L31 (pfam01197) →                                                                                         |
| Lfe-3-1  | NC_021235.1                 | + | 246048  | 246081  | RNA → rpmE2 (PRK01678)Ribosomal_L31 (pfam01197) →                                                                                         |
| Lfe-4-1  | NZ_KE356737.1               | + | 45908   | 45941   | RNA → rpmE2 (PRK01678)Ribosomal_L31 (pfam01197) →                                                                                         |
| Lfe-8-1  | NZ_KI546217.1               | + | 36406   | 36439   | RNA → rpmE2 (PRK01678)Ribosomal_L31 (pfam01197) →                                                                                         |
| Lfe-2-1  | NZ_CP011536.1               | + | 270394  | 270427  | RNA → rpmE2 (PRK01678)Ribosomal_L31 (pfam01197) →                                                                                         |
| Lfe-6-1  | NZ_AWXS01000029.1           | + | 34177   | 34210   | RNA → rpmE2 (PRK01678)Ribosomal_L31 (pfam01197) →                                                                                         |
| env-894  | scaffold29246_2_V1.CD-11    | - | 3405    | 3372    | RNA → rpmE2 (PRK01678)Ribosomal_L31 (pfam01197) →                                                                                         |
| env-895  | SRS014343_WUGC_scaffold_819 | - | 226     | 193     | RNA → rpmE2 (PRK01678)Ribosomal_L31 (pfam01197) →                                                                                         |
| env-896  | DLM027_scaffold17_2         | - | 19027   | 18994   | RNA → rpmE2 (PRK01678)Ribosomal_L31 (pfam01197) →                                                                                         |
| env-897  | 2157436120                  | - | 110     | 77      | RNA → hypo →                                                                                                                              |
| Lre-12-1 | NZ_ACGX02000004.1           | + | 87043   | 87076   | RNA → rpmE2 (PRK01678)Ribosomal_L31 (pfam01197) → rpmE2 (PRK01678)Ribosomal_L31 (pfam01197) →                                             |
| Lre-9-1  | NC_009513.1                 | + | 269553  | 269586  | RNA → rpmE2 (PRK01678)Ribosomal_L31 (pfam01197) →                                                                                         |
| Lre-5-1  | NZ_AEAX01000117.1           | + | 5106    | 5139    | RNA → rpmE2 (PRK01678)Ribosomal_L31 (pfam01197) →                                                                                         |
| Lre-10-1 | NC_010609.1                 | + | 269373  | 269406  | RNA → rpmE2 (PRK01678)Ribosomal_L31 (pfam01197) →                                                                                         |
| Lre-11-1 | NZ_GG693761.1               | + | 83277   | 83310   | RNA → rpmE2 (PRK01678)Ribosomal_L31 (pfam01197) →                                                                                         |
| Lre-4-1  | NC_021872.1                 | + | 288927  | 288960  | RNA → rpmE2 (PRK01678)Ribosomal_L31 (pfam01197) →                                                                                         |
| Lre-1-1  | NZ_CP011024.1               | + | 269552  | 269585  | RNA → rpmE2 (PRK01678)Ribosomal_L31 (pfam01197) →                                                                                         |
| env-898  | Contig9771.1                | + | 339     | 372     | RNA →                                                                                                                                     |
| env-899  | JGI24707J26582_10423514     | - | 118     | 85      | RNA →                                                                                                                                     |
| Lre-13-1 | NC_015697.1                 | + | 1423149 | 1423182 | RNA → rpmE2 (PRK01678)Ribosomal_L31 (pfam01197) →                                                                                         |
| Lre-8-1  | NZ_GG693671.1               | - | 45330   | 45297   | RNA → rpmE2 (PRK01678)Ribosomal_L31 (pfam01197) →                                                                                         |
| Lva-2-1  | NZ_GG693416.1               | + | 80452   | 80485   | RNA → rpmE2 (PRK01678)Ribosomal_L31 (pfam01197) →                                                                                         |
| env-900  | 2157771745                  | + | 128     | 161     | RNA → rpmE (PRK00019)rpmE2 (PRK01678)L31 (TIGR00105)Ribosomal_L31 (pfam01197) →                                                           |
| env-901  | CTBMPR_c23                  | + | 46289   | 46321   | RNA → rpmE (PRK00019)Ribosomal_L31 (pfam01197) → Tdk (COG1435)PRK04296 (PRK04296) →                                                       |
| Ate-2-1  | NZ_AUMJ01000018.1           | - | 70832   | 70800   | RNA → rpmE (PRK00019)Ribosomal_L31 (pfam01197) →                                                                                          |
| Bth-45-1 | NZ_AODI01000040.1           | - | 38625   | 38596   | RNA → rpmE2 (PRK01678)Ribosomal_L31 (pfam01197) →                                                                                         |
| Bth-45-2 | NZ_JHZM01000007.1           | - | 126566  | 126537  | RNA → rpmE2 (PRK01678)Ribosomal_L31 (pfam01197) →                                                                                         |
| env-902  | JGI26050J44790_1004361      | + | 1747    | 1778    | RNA → rpmE (PRK00019)Ribosomal_L31 (pfam01197) →                                                                                          |
| Bth-44-1 | NZ_JXLU01000136.1           | + | 78859   | 78890   | RNA → rpmE (PRK00019)Ribosomal_L31 (pfam01197) →                                                                                          |
| Bth-44-2 | NZ_JXLR01000022.1           | + | 37521   | 37552   | RNA → rpmE (PRK00019)Ribosomal_L31 (pfam01197) →                                                                                          |
| Bth-44-3 | NZ_JXLS01000066.1           | + | 66077   | 66108   | RNA → rpmE (PRK00019)Ribosomal_L31 (pfam01197) →                                                                                          |
| Bth-44-4 | NZ_JXLT01000090.1           | - | 39361   | 39330   | RNA → rpmE (PRK00019)Ribosomal_L31 (pfam01197) →                                                                                          |

|          |                        |   |         |         |                                                                                                       |
|----------|------------------------|---|---------|---------|-------------------------------------------------------------------------------------------------------|
| Bth-44-5 | NZ_CCRF01000101.1      | - | 36758   | 36727   | RNA → rpmE (PRK00019)Ribosomal_L31 (pfam01197) →                                                      |
| env-903  | JGI26050J44790_1000142 | - | 20101   | 20070   | RNA → rpmE (PRK00019)Ribosomal_L31 (pfam01197) →                                                      |
| Bca-2-1  | NZ_AODH01000022.1      | - | 112821  | 112792  | RNA → rpmE2 (PRK01678)Ribosomal_L31 (pfam01197) →                                                     |
| Pda-2-1  | NZ_JANK01000056.1      | + | 12835   | 12867   | RNA → rpmE2 (PRK01678)Ribosomal_L31 (pfam01197) →                                                     |
| env-904  | 2205852404             | + | 261     | 293     | RNA → rpmE2 (PRK01678)Ribosomal_L31 (pfam01197) →                                                     |
| env-905  | 2157565684             | + | 721     | 753     | RNA → rpmE2 (PRK01678)Ribosomal_L31 (pfam01197) →                                                     |
| Lsu-2-1  | NZ_BACC01000082.1      | - | 343     | 311     | RNA → rpmE2 (PRK01678)Ribosomal_L31 (pfam01197) → rpmE2 (PRK01678)Ribosomal_L31 (pfam01197) →         |
| Lmu-3-1  | NZ_KB822405.1          | - | 369578  | 369546  | RNA → rpmE2 (PRK01678)Ribosomal_L31 (pfam01197) →                                                     |
| env-906  | 2204772568             | - | 71      | 39      | RNA →                                                                                                 |
| env-907  | 2158052713             | - | 71      | 39      | RNA →                                                                                                 |
| Lan-2-1  | NZ_GL573157.1          | - | 796104  | 796072  | RNA → rpmE2 (PRK01678)Ribosomal_L31 (pfam01197) →                                                     |
| Lan-1-1  | NZ_JMHU01000004.1      | - | 157949  | 157917  | RNA → rpmE2 (PRK01678)Ribosomal_L31 (pfam01197) →                                                     |
| env-908  | 2205292183             | - | 156     | 124     | RNA → rpmE2 (PRK01678)Ribosomal_L31 (pfam01197) →                                                     |
| env-909  | 2204671542             | - | 405     | 373     | RNA → rpmE2 (PRK01678)Ribosomal_L31 (pfam01197) →                                                     |
| env-910  | 4491487.3_NODE.48029   | - | 135     | 103     | RNA → rpmE2 (PRK01678)Ribosomal_L31 (pfam01197) →                                                     |
| env-911  | DLM009_scaffold15_5    | - | 432     | 400     | RNA → rpmE2 (PRK01678)Ribosomal_L31 (pfam01197) →                                                     |
| env-912  | SRS020869_C3352487     | + | 513     | 545     | RNA → rpmE2 (PRK01678)Ribosomal_L31 (pfam01197) →                                                     |
| Lru-3-1  | NZ_AWYA01000122.1      | - | 13216   | 13184   | RNA → rpmE2 (PRK01678)Ribosomal_L31 (pfam01197) →                                                     |
| Lru-1-1  | NZ_JHAB01000034.1      | - | 29783   | 29751   | RNA → rpmE2 (PRK01678)Ribosomal_L31 (pfam01197) →                                                     |
| Lru-4-1  | NZ_AWYB01000385.1      | + | 1155    | 1187    | RNA → rpmE2 (PRK01678)Ribosomal_L31 (pfam01197) →                                                     |
| Lru-6-1  | NZ_AFOJ01000007.1      | - | 259420  | 259388  | RNA → rpmE2 (PRK01678)Ribosomal_L31 (pfam01197) → rpmE2 (PRK01678)Ribosomal_L31 (pfam01197) →         |
| Lru-2-1  | NZ_GL833115.1          | + | 94026   | 94058   | hypo → hypo → rpmE2 (PRK01678)Ribosomal_L31 (pfam01197) → rpmE2 (PRK01678)Ribosomal_L31 (pfam01197) → |
| Lru-1-2  | NZ_JHAJ01000117.1      | + | 20548   | 20580   | hypo → rpmE2 (PRK01678)Ribosomal_L31 (pfam01197) →                                                    |
| Lru-5-1  | NC_015975.1            | + | 524423  | 524455  | RNA → rpmE2 (PRK01678)Ribosomal_L31 (pfam01197) →                                                     |
| env-913  | JXWR01003518.1         | - | 29634   | 29602   | RNA → rpmE2 (PRK01678)Ribosomal_L31 (pfam01197) →                                                     |
| Ppe-6-1  | NC_008525.1            | - | 1537440 | 1537408 | RNA → rpmE2 (PRK01678)Ribosomal_L31 (pfam01197) →                                                     |
| Ppe-5-1  | NC_022780.1            | - | 1501615 | 1501583 | RNA → rpmE2 (PRK01678)Ribosomal_L31 (pfam01197) →                                                     |
| Ppe-3-1  | NZ_JDVW01000008.1      | - | 330588  | 330556  | RNA → rpmE2 (PRK01678)Ribosomal_L31 (pfam01197) →                                                     |
| Ppe-4-1  | NZ_CAHU01000002.1      | + | 140218  | 140250  | RNA → rpmE2 (PRK01678)Ribosomal_L31 (pfam01197) →                                                     |
| Pac-2-1  | NZ_AGKB01000010.1      | - | 350604  | 350572  | RNA → rpmE2 (PRK01678)Ribosomal_L31 (pfam01197) →                                                     |
| Pac-5-1  | NZ_GL397067.1          | - | 1011122 | 1011090 | RNA → rpmE2 (PRK01678)Ribosomal_L31 (pfam01197) →                                                     |
| Pac-4-1  | NZ_GG730083.1          | + | 429682  | 429714  | RNA → rpmE2 (PRK01678)Ribosomal_L31 (pfam01197) → rpmE2 (PRK01678)Ribosomal_L31 (pfam01197) →         |
| Pac-1-1  | NZ_KB889550.1          | + | 1414333 | 1414365 | RNA → rpmE2 (PRK01678)Ribosomal_L31 (pfam01197) →                                                     |
| Pac-3-1  | NZ_JAGU01000001.1      | + | 1340990 | 1341022 | RNA → rpmE2 (PRK01678)Ribosomal_L31 (pfam01197) →                                                     |
| Plo-1-1  | NZ_BANK01000009.1      | + | 51598   | 51630   | RNA → rpmE2 (PRK01678)Ribosomal_L31 (pfam01197) →                                                     |
| Lco-2-1  | NZ_BAMK01000007.1      | + | 99264   | 99296   | RNA → rpmE2 (PRK01678)Ribosomal_L31 (pfam01197) →                                                     |
| Lce-1-1  | NZ_AUHP01000014.1      | - | 58515   | 58483   | RNA → rpmE2 (PRK01678)Ribosomal_L31 (pfam01197) →                                                     |
| Esa-2-1  | NZ_KE136389.1          | + | 614122  | 614154  | RNA → rpmE2 (PRK01678)Ribosomal_L31 (pfam01197) →                                                     |
| Esa-2-2  | NZ_KE136523.1          | + | 816131  | 816163  | RNA → rpmE2 (PRK01678)Ribosomal_L31 (pfam01197) →                                                     |
| Eph-1-1  | NZ_KB946326.1          | + | 83226   | 83258   | RNA → rpmE2 (PRK01678)Ribosomal_L31 (pfam01197) →                                                     |
| Mpl-1-1  | NZ_JSAX01000004.1      | - | 863     | 831     | RNA → rpmE2 (PRK01678)Ribosomal_L31 (pfam01197) →                                                     |
| Mpl-1-2  | NZ_JSAY01000004.1      | - | 166842  | 166810  | RNA → rpmE2 (PRK01678)Ribosomal_L31 (pfam01197) →                                                     |
| Mpl-1-3  | NZ_JSAV01000005.1      | - | 866     | 834     | RNA → rpmE2 (PRK01678)Ribosomal_L31 (pfam01197) →                                                     |
| Mpl-1-4  | NZ_JSBC01000004.1      | - | 866     | 834     | RNA → rpmE2 (PRK01678)Ribosomal_L31 (pfam01197) →                                                     |
| Mpl-1-5  | NZ_JSBA01000004.1      | - | 597     | 565     | RNA → rpmE2 (PRK01678)Ribosomal_L31 (pfam01197) →                                                     |
| Mpl-1-6  | NZ_JSBF01000004.1      | - | 866     | 834     | RNA → rpmE2 (PRK01678)Ribosomal_L31 (pfam01197) →                                                     |
| Mpl-1-7  | NZ_JSBD01000006.1      | - | 866     | 834     | RNA → rpmE2 (PRK01678)Ribosomal_L31 (pfam01197) →                                                     |
| Mpl-1-8  | NZ_JSAW01000002.1      | - | 1025447 | 1025415 | RNA → rpmE2 (PRK01678)Ribosomal_L31 (pfam01197) →                                                     |
| Mpl-1-9  | NZ_JSBE01000004.1      | - | 857     | 825     | RNA → rpmE2 (PRK01678)Ribosomal_L31 (pfam01197) →                                                     |
| Mpl-2-1  | NC_015516.1            | - | 1279834 | 1279802 | RNA → rpmE2 (PRK01678)Ribosomal_L31 (pfam01197) →                                                     |
| Mpl-3-1  | NC_016938.1            | + | 824026  | 824058  | RNA → rpmE2 (PRK01678)Ribosomal_L31 (pfam01197) →                                                     |



|          |                      |   |         |         |                                                                                                      |
|----------|----------------------|---|---------|---------|------------------------------------------------------------------------------------------------------|
| Mpl-1-10 | NZ_JSAZ01000004.1    | - | 1471    | 1439    | RNA → rpmE2 (PRK01678)Ribosomal_L31 (pfam01197) →                                                    |
| Mpl-1-11 | NZ_JSBB01000006.1    | - | 626     | 594     | RNA → rpmE2 (PRK01678)Ribosomal_L31 (pfam01197) →                                                    |
| Lsu-1-1  | NZ_BALC01000008.1    | + | 59522   | 59554   | RNA → rpmE2 (PRK01678)Ribosomal_L31 (pfam01197) →                                                    |
| env-914  | 2205830766           | - | 165     | 133     | RNA → ←hypo                                                                                          |
| env-915  | 2157581444           | - | 165     | 133     | RNA → ←hypo                                                                                          |
| Lfa-2-1  | NZ_KK036465.1        | + | 21547   | 21579   | RNA → rpmE2 (PRK01678)Ribosomal_L31 (pfam01197) →                                                    |
| Lfa-1-1  | NZ_AYGX01000076.1    | - | 1369    | 1337    | RNA → rpmE2 (PRK01678)Ribosomal_L31 (pfam01197) →                                                    |
| Lor-2-1  | NZ_BBJM01000005.1    | - | 31903   | 31871   | RNA → rpmE2 (PRK01678)Ribosomal_L31 (pfam01197) →                                                    |
| Lma-4-1  | NZ_BACN01000090.1    | - | 11120   | 11088   | RNA → rpmE2 (PRK01678)Ribosomal_L31 (pfam01197) → rpmE2 (PRK01678)Ribosomal_L31 (pfam01197) →        |
| Lhe-11-1 | NZ_LFEE01000004.1    | + | 26276   | 26308   | RNA → rpmE2 (PRK01678)Ribosomal_L31 (pfam01197) →                                                    |
| env-916  | 2205834061           | + | 655     | 687     | RNA → rpmE2 (PRK01678)Ribosomal_L31 (pfam01197) →                                                    |
| env-917  | JXWR01000016.1       | + | 2483    | 2515    | RNA → rpmE2 (PRK01678)Ribosomal_L31 (pfam01197) →                                                    |
| env-918  | 2157560113           | + | 655     | 687     | RNA → rpmE2 (PRK01678)Ribosomal_L31 (pfam01197) →                                                    |
| Lpl-9-1  | NZ_ASJE01000081.1    | + | 29802   | 29834   | RNA → rpmE2 (PRK01678)Ribosomal_L31 (pfam01197) →                                                    |
| Lpl-10-1 | NZ_AXDQ01000018.1    | + | 2888    | 2920    | RNA → rpmE2 (PRK01678)Ribosomal_L31 (pfam01197) →                                                    |
| Lpl-12-1 | NZ_AUTE01000054.1    | - | 8536    | 8504    | RNA → rpmE2 (PRK01678)Ribosomal_L31 (pfam01197) →                                                    |
| Lpl-16-1 | NZ_BALV01000016.1    | + | 25883   | 25915   | RNA → rpmE2 (PRK01678)Ribosomal_L31 (pfam01197) →                                                    |
| Lpl-17-1 | NZ_AGR101000003.1    | + | 112355  | 112387  | RNA → rpmE2 (PRK01678)Ribosomal_L31 (pfam01197) →                                                    |
| Lpl-3-1  | NZ_AWTS01000023.1    | + | 15075   | 15107   | RNA → rpmE2 (PRK01678)Ribosomal_L31 (pfam01197) →                                                    |
| Lpl-4-1  | NZ_AVFI01000125.1    | - | 215     | 183     | RNA → rpmE2 (PRK01678)Ribosomal_L31 (pfam01197) →                                                    |
| Lpl-20-1 | NC_004567.2          | + | 458540  | 458572  | RNA → rpmE2 (PRK01678)Ribosomal_L31 (pfam01197) →                                                    |
| Lpl-5-1  | NZ_AYTU01000005.1    | - | 6825    | 6793    | RNA → rpmE2 (PRK01678)Ribosomal_L31 (pfam01197) →                                                    |
| Lpl-21-1 | NC_014554.1          | + | 434946  | 434978  | RNA → rpmE2 (PRK01678)Ribosomal_L31 (pfam01197) →                                                    |
| Lpl-2-1  | NC_021514.1          | + | 466087  | 466119  | RNA → rpmE2 (PRK01678)Ribosomal_L31 (pfam01197) →                                                    |
| Lpl-19-1 | NC_012984.1          | + | 438813  | 438845  | RNA → rpmE2 (PRK01678)Ribosomal_L31 (pfam01197) →                                                    |
| Lpl-15-1 | NZ_GL379763.1        | + | 506009  | 506041  | RNA → rpmE2 (PRK01678)Ribosomal_L31 (pfam01197) →                                                    |
| Lpl-11-1 | NZ_KB644964.1        | + | 98775   | 98807   | RNA → rpmE2 (PRK01678)Ribosomal_L31 (pfam01197) →                                                    |
| Lpl-18-1 | NC_021224.2          | + | 416447  | 416479  | RNA → rpmE2 (PRK01678)Ribosomal_L31 (pfam01197) →                                                    |
| Lpl-1-1  | NZ_CP010528.1        | + | 455988  | 456020  | RNA → rpmE2 (PRK01678)Ribosomal_L31 (pfam01197) →                                                    |
| Lpl-7-1  | NZ_CM002918.1        | + | 447842  | 447874  | RNA → rpmE2 (PRK01678)Ribosomal_L31 (pfam01197) →                                                    |
| Lpl-14-1 | NZ_CM003439.1        | + | 3104335 | 3104367 | RNA → rpmE2 (PRK01678)Ribosomal_L31 (pfam01197) →                                                    |
| Lpl-8-1  | NZ_AVAQ01000014.1    | + | 3252    | 3284    | RNA → rpmE2 (PRK01678)Ribosomal_L31 (pfam01197) →                                                    |
| Lpl-6-1  | NZ_AVAI01000131.1    | - | 14495   | 14463   | RNA → rpmE2 (PRK01678)Ribosomal_L31 (pfam01197) → hypo →                                             |
| Lpl-13-1 | NC_020229.1          | + | 683468  | 683500  | RNA → rpmE2 (PRK01678)Ribosomal_L31 (pfam01197) →                                                    |
| Lpe-2-1  | NZ_CM001538.1        | + | 477939  | 477971  | RNA → rpmE2 (PRK01678)Ribosomal_L31 (pfam01197) →                                                    |
| Lpe-1-1  | NZ_LFLY01000001.1    | - | 100060  | 100028  | RNA → rpmE2 (PRK01678)Ribosomal_L31 (pfam01197) →                                                    |
| Lpa-41-1 | NZ_KN173718.1        | - | 48885   | 48853   | RNA → rpmE2 (PRK01678)Ribosomal_L31 (pfam01197) →                                                    |
| Eit-1-1  | NZ_GL622241.1        | - | 1826854 | 1826822 | RNA → rpmE2 (PRK01678)Ribosomal_L31 (pfam01197) →                                                    |
| env-919  | 2210741799           | + | 170     | 204     | RNA →                                                                                                |
| Vlu-1-1  | NZ_AYSH01000010.1    | + | 32998   | 33030   | RNA → rpmE2 (PRK01678)Ribosomal_L31 (pfam01197) →                                                    |
| env-920  | 2158154984           | + | 1083    | 1115    | RNA → rpmE (PRK00019)rpmE2 (PRK01678)Ribosomal_L31 (pfam01197) →                                     |
| env-921  | 2205359904           | + | 1115    | 1115    | RNA → rpmE2 (PRK01678)Ribosomal_L31 (pfam01197) →                                                    |
| Tha-1-1  | NC_016052.1          | + | 990867  | 990899  | RNA → rpmE2 (PRK01678)Ribosomal_L31 (pfam01197) →                                                    |
| Tmu-2-1  | NZ_KE384092.1        | - | 4460    | 4428    | RNA → rpmE2 (PRK01678)Ribosomal_L31 (pfam01197) →                                                    |
| Tmu-1-1  | NZ_JPVT01000082.1    | + | 2641    | 2673    | RNA → rpmE2 (PRK01678)Ribosomal_L31 (pfam01197) →                                                    |
| Tmu-3-1  | NZ_JPVU01000102.1    | + | 5752    | 5784    | RNA → rpmE2 (PRK01678)Ribosomal_L31 (pfam01197) →                                                    |
| env-922  | 4491401.3.NODE.92843 | + | 4662    | 4694    | RNA → rpmE2 (PRK01678)Ribosomal_L31 (pfam01197) →                                                    |
| Lsa-11-1 | NC_017481.1          | + | 378680  | 378712  | RNA → rpmE2 (PRK01678)Ribosomal_L31 (pfam01197) → rpmE2 (PRK01678)Ribosomal_L31 (pfam01197) → hypo → |
| Lsa-9-1  | NZ_AEBA01000017.1    | + | 18818   | 18850   | RNA → rpmE2 (PRK01678)Ribosomal_L31 (pfam01197) → hypo → hypo →                                      |
| Lsa-5-1  | NZ_AFMN01000001.1    | - | 7360    | 7328    | RNA → rpmE2 (PRK01678)Ribosomal_L31 (pfam01197) → hypo →                                             |
| Lsa-10-1 | NZ_GG693222.1        | - | 64281   | 64249   | RNA → rpmE2 (PRK01678)Ribosomal_L31 (pfam01197) → hypo →                                             |

|          |                        |   |         |         |                                                                                                                   |
|----------|------------------------|---|---------|---------|-------------------------------------------------------------------------------------------------------------------|
| Lsa-6-1  | NZ_AICL01000001.1      | - | 7340    | 7308    | RNA → rpmE2 (PRK01678)Ribosomal_L31 (pfam01197) → hypo →                                                          |
| Lsa-8-1  | NZ_CP011403.1          | + | 377103  | 377135  | RNA → rpmE2 (PRK01678)Ribosomal_L31 (pfam01197) → hypo →                                                          |
| env-923  | NLM027_scaffold41938.1 | + | 38289   | 38321   | RNA → rpmE2 (PRK01678)Ribosomal_L31 (pfam01197) → hypo →                                                          |
| Lsa-4-1  | NZ_AFOI01000007.1      | - | 10694   | 10662   | RNA → rpmE2 (PRK01678)Ribosomal_L31 (pfam01197) → hypo →                                                          |
| Lsa-3-1  | NZ_CP007646.1          | + | 359733  | 359765  | RNA → rpmE2 (PRK01678)Ribosomal_L31 (pfam01197) → hypo → hypo → hypo → hypo →                                     |
| Lsa-7-1  | NZ_CBVR010000053.1     | - | 1525    | 1493    | RNA → rpmE2 (PRK01678)Ribosomal_L31 (pfam01197) → hypo →                                                          |
| Pcl-1-1  | NC_016605.1            | + | 219415  | 219447  | RNA → rpmE2 (PRK01678)Ribosomal_L31 (pfam01197) →                                                                 |
| Bfo-1-1  | NZ_KB894703.1          | + | 46890   | 46924   | RNA → rpmE (PRK00019)Ribosomal_L31 (pfam01197) →                                                                  |
| Gic-1-1  | NZ_JPYA01000113.1      | - | 36992   | 36961   | RNA → rpmE (PRK00019)Ribosomal_L31 (pfam01197) →                                                                  |
| Gsu-1-1  | NZ_JQMN01000001.1      | + | 536242  | 536273  | RNA → rpmE (PRK00019)Ribosomal_L31 (pfam01197) →                                                                  |
| Gth-6-1  | NZ_JFHZ01000051.1      | - | 48767   | 48736   | RNA → rpmE (PRK00019)Ribosomal_L31 (pfam01197) →                                                                  |
| Gsp-16-1 | NZ_LDNZ01000071.1      | + | 7084    | 7115    | RNA → rpmE (PRK00019)Ribosomal_L31 (pfam01197) →                                                                  |
| Gst-1-1  | NZ_LDNS01000203.1      | - | 1968    | 1937    | RNA → rpmE (PRK00019)Ribosomal_L31 (pfam01197) →                                                                  |
| Gst-1-2  | NZ_LDNT01000178.1      | - | 1956    | 1925    | RNA → rpmE (PRK00019)Ribosomal_L31 (pfam01197) →                                                                  |
| Gth-1-1  | NC_009328.1            | - | 3431917 | 3431886 | RNA → rpmE (PRK00019)Ribosomal_L31 (pfam01197) →                                                                  |
| Gsp-2-1  | NZ_ABVH01000007.1      | - | 54857   | 54826   | RNA → rpmE (PRK00019)Ribosomal_L31 (pfam01197) → rpmE (PRK00019)Ribosomal_L31 (pfam01197) →                       |
| Age-1-1  | NZ_JYCG01000286.1      | - | 19333   | 19302   | RNA → rpmE (PRK00019)Ribosomal_L31 (pfam01197) →                                                                  |
| Gst-1-3  | NZ_JQCS01000028.1      | - | 13433   | 13402   | RNA → rpmE (PRK00019)Ribosomal_L31 (pfam01197) →                                                                  |
| Gst-1-4  | NZ_JPYV01000032.1      | - | 54116   | 54085   | RNA → rpmE (PRK00019)Ribosomal_L31 (pfam01197) →                                                                  |
| Gsp-14-1 | NZ_CP008903.1          | - | 1776671 | 1776640 | RNA → rpmE (PRK00019)Ribosomal_L31 (pfam01197) →                                                                  |
| Gsp-8-1  | NZ_CP011832.1          | - | 3291606 | 3291575 | RNA → rpmE (PRK00019)Ribosomal_L31 (pfam01197) →                                                                  |
| Gth-4-1  | NZ_AYKT01000007.1      | + | 122211  | 122242  | RNA → rpmE (PRK00019)Ribosomal_L31 (pfam01197) →                                                                  |
| Gst-1-5  | NZ_LDNU01000010.1      | + | 23005   | 23036   | RNA → rpmE (PRK00019)Ribosomal_L31 (pfam01197) →                                                                  |
| Gst-3-1  | NZ_JALS01000096.1      | - | 12601   | 12570   | RNA → rpmE (PRK00019)Ribosomal_L31 (pfam01197) →                                                                  |
| Gka-3-1  | NZ_JYCF01000134.1      | - | 47171   | 47140   | RNA → rpmE (PRK00019)Ribosomal_L31 (pfam01197) →                                                                  |
| Gka-3-2  | NZ_JYBP01000003.1      | - | 3309423 | 3309392 | RNA → rpmE (PRK00019)Ribosomal_L31 (pfam01197) →                                                                  |
| Gvu-1-1  | NZ_JPOI01000001.1      | + | 1071989 | 1072020 | RNA → rpmE (PRK00019)Ribosomal_L31 (pfam01197) →                                                                  |
| Gsp-9-1  | NZ_AUXP01000009.1      | + | 97898   | 97929   | RNA → rpmE (PRK00019)Ribosomal_L31 (pfam01197) →                                                                  |
| Gsp-7-1  | NC_013411.1            | - | 3495641 | 3495610 | RNA → rpmE (PRK00019)Ribosomal_L31 (pfam01197) →                                                                  |
| Gsp-6-1  | NC_014915.1            | - | 3501607 | 3501576 | RNA → rpmE (PRK00019)Ribosomal_L31 (pfam01197) →                                                                  |
| Gsp-1-1  | NC_014206.1            | - | 3537049 | 3537018 | RNA → rpmE (PRK00019)Ribosomal_L31 (pfam01197) →                                                                  |
| Gst-2-1  | NZ_CP008934.1          | - | 1637831 | 1637800 | RNA → rpmE (PRK00019)Ribosomal_L31 (pfam01197) →                                                                  |
| Gka-4-1  | NZ_BBJV01000020.1      | - | 289     | 258     | RNA → rpmE (PRK00019)Ribosomal_L31 (pfam01197) →                                                                  |
| Gsp-18-1 | NZ_LDPD01000028.1      | - | 53895   | 53864   | RNA → rpmE (PRK00019)Ribosomal_L31 (pfam01197) →                                                                  |
| Gka-2-1  | NZ_BASG01000006.1      | + | 56589   | 56620   | RNA → rpmE (PRK00019)Ribosomal_L31 (pfam01197) →                                                                  |
| Gsp-15-1 | NZ_AYSF01000001.1      | - | 65897   | 65866   | RNA → rpmE (PRK00019)Ribosomal_L31 (pfam01197) →                                                                  |
| Gsp-11-1 | NZ_JGCJ01000027.1      | + | 42199   | 42230   | RNA → rpmE (PRK00019)Ribosomal_L31 (pfam01197) →                                                                  |
| Gsp-10-1 | NZ_JHUS01000002.1      | - | 21989   | 21958   | RNA → rpmE (PRK00019)Ribosomal_L31 (pfam01197) →                                                                  |
| Gka-1-1  | NC_006510.1            | - | 3419800 | 3419769 | RNA → rpmE (PRK00019)Ribosomal_L31 (pfam01197) →                                                                  |
| Gth-3-1  | NC_016593.1            | - | 3486231 | 3486200 | RNA → rpmE (PRK00019)Ribosomal_L31 (pfam01197) →                                                                  |
| Gsp-12-1 | NC_020210.1            | - | 3468659 | 3468628 | RNA → rpmE (PRK00019)Ribosomal_L31 (pfam01197) →                                                                  |
| Gth-7-1  | NZ_BATY01000060.1      | + | 41926   | 41957   | RNA → rpmE (PRK00019)Ribosomal_L31 (pfam01197) →                                                                  |
| Gsp-17-1 | NZ_ATCO01000040.1      | + | 14050   | 14081   | RNA → rpmE (PRK00019)Ribosomal_L31 (pfam01197) → rpmE (PRK00019)Ribosomal_L31 (pfam01197) →                       |
| Bin-1-1  | NZ_JNVC02000013.1      | + | 220889  | 220922  | RNA → rpmE (PRK00019)Ribosomal_L31 (pfam01197) →                                                                  |
| Bin-2-1  | NZ_JGVU02000005.1      | + | 287101  | 287134  | RNA → rpmE (PRK00019)Ribosomal_L31 (pfam01197) →                                                                  |
| env-924  | JGI25317J35169_1191885 | + | 62      | 94      | RNA → rpmE (PRK00019)Ribosomal_L31 (pfam01197) →                                                                  |
| env-925  | JGI25319J35699_1005535 | + | 969     | 1001    | RNA → rpmE (PRK00019)Ribosomal_L31 (pfam01197) → Tdk (COG1435)PRK04296 (PRK04296) → spore_YhcN_YlaJ (TIGR02898) → |
| env-926  | JGI25318J35512_1000658 | - | 8238    | 8206    | RNA → rpmE (PRK00019)Ribosomal_L31 (pfam01197) → Tdk (COG1435)PRK04296 (PRK04296) → spore_YhcN_YlaJ (TIGR02898) → |
| env-927  | JGI25321J39296_1018370 | + | 355     | 387     | RNA → rpmE (PRK00019)Ribosomal_L31 (pfam01197) → Tdk (COG1435)PRK04296 (PRK04296) → hypo →                        |
| env-928  | JGI25320J50211_1070748 | - | 116     | 84      | RNA → hypo →                                                                                                      |



|          |                         |   |         |         |                                                                                                                                                                   |
|----------|-------------------------|---|---------|---------|-------------------------------------------------------------------------------------------------------------------------------------------------------------------|
| env-929  | JGI25321J50212.10003866 | + | 2270    | 2302    | RNA → rpmE (PRK00019)Ribosomal_L31 (pfam01197) → Tdk (COG1435)PRK04296 (PRK04296) → spore_YhcN_YlaJ (TIGR02898) →                                                 |
| Aan-1-1  | NZ_KE952903.1           | - | 93698   | 93667   | RNA → rpmE (PRK00019)Ribosomal_L31 (pfam01197) → rpmE (PRK00019)Ribosomal_L31 (pfam01197) →                                                                       |
| Ami-1-1  | NZ_JYBN01000089.1       | - | 268857  | 268826  | RNA → rpmE (PRK00019)Ribosomal_L31 (pfam01197) →                                                                                                                  |
| Ami-1-2  | NZ_JYBO01000103.1       | + | 23763   | 23794   | RNA → rpmE (PRK00019)Ribosomal_L31 (pfam01197) →                                                                                                                  |
| Ami-1-3  | NZ_LGUG01000004.1       | + | 127332  | 127363  | RNA → rpmE (PRK00019)Ribosomal_L31 (pfam01197) →                                                                                                                  |
| Aty-1-1  | NZ_BBWZ01000002.1       | + | 104374  | 104405  | RNA → rpmE (PRK00019)Ribosomal_L31 (pfam01197) →                                                                                                                  |
| env-930  | 2211283201              | + | 84      | 115     | RNA →                                                                                                                                                             |
| env-931  | 2156330801              | + | 84      | 115     | RNA →                                                                                                                                                             |
| Bma-7-1  | NZ_HE978512.1           | - | 417836  | 417805  | RNA → rpmE (PRK00019)Ribosomal_L31 (pfam01197) →                                                                                                                  |
| Jal-1-1  | NZ_JXRQ01000028.1       | - | 38185   | 38155   | RNA → rpmE (PRK00019)Ribosomal_L31 (pfam01197) →                                                                                                                  |
| Jma-1-1  | NZ_CP009416.1           | - | 2865774 | 2865744 | RNA → rpmE (PRK00019)Ribosomal_L31 (pfam01197) →                                                                                                                  |
| Jso-1-1  | NZ_JXRP01000009.1       | + | 567308  | 567338  | RNA → rpmE (PRK00019)Ribosomal_L31 (pfam01197) →                                                                                                                  |
| Jca-1-1  | NZ_JXRR01000001.1       | - | 1685    | 1655    | RNA → rpmE (PRK00019)Ribosomal_L31 (pfam01197) →                                                                                                                  |
| env-932  | JGI24024J18818.10362070 | - | 302     | 268     | RNA → rpmE (PRK00019)Ribosomal_L31 (pfam01197) →                                                                                                                  |
| Bsp-8-1  | NZ_ACPC01000050.1       | - | 203195  | 203164  | RNA → rpmE2 (PRK01678)Ribosomal_L31 (pfam01197) → rpmE2 (PRK01678)Ribosomal_L31 (pfam01197) →                                                                     |
| Bsp-66-1 | NZ_LFEL01000002.1       | - | 551243  | 551212  | RNA → rpmE2 (PRK01678)Ribosomal_L31 (pfam01197) →                                                                                                                 |
| env-933  | JGI25151J46595.10000061 | - | 4986    | 4953    | RNA → rpmE (PRK00019)Ribosomal_L31 (pfam01197) → Tdk (COG1435)PRK04296 (PRK04296) →                                                                               |
| Bsp-95-1 | NZ_CP010075.1           | - | 3326407 | 3326374 | RNA → rpmE (PRK00019)Ribosomal_L31 (pfam01197) → Tdk (COG1435)PRK04296 (PRK04296) →                                                                               |
| Bst-1-1  | NZ_LDWL01000001.1       | - | 56445   | 56412   | RNA → rpmE (PRK00019)Ribosomal_L31 (pfam01197) → Tdk (COG1435)PRK04296 (PRK04296) →                                                                               |
| Bst-1-2  | NZ_LDWU01000019.1       | - | 72041   | 72008   | RNA → rpmE (PRK00019)Ribosomal_L31 (pfam01197) → Tdk (COG1435)PRK04296 (PRK04296) →                                                                               |
| Bst-1-3  | NZ_LDUH01000009.1       | + | 243731  | 243764  | RNA → rpmE (PRK00019)Ribosomal_L31 (pfam01197) → Tdk (COG1435)PRK04296 (PRK04296) →                                                                               |
| Bsp-63-1 | NZ_LDUQ01000001.1       | + | 281801  | 281834  | RNA → rpmE (PRK00019)Ribosomal_L31 (pfam01197) → Tdk (COG1435)PRK04296 (PRK04296) →                                                                               |
| Bsp-4-1  | NZ_AMSH01000002.1       | - | 87481   | 87448   | RNA → rpmE (PRK00019)Ribosomal_L31 (pfam01197) → rpmE (PRK00019)Ribosomal_L31 (pfam01197) → Tdk (COG1435)PRK04296 (PRK04296) → Tdk (COG1435)PRK04296 (PRK04296) → |
| Bst-1-4  | NZ_LDWS01000018.1       | - | 87668   | 87635   | RNA → rpmE (PRK00019)Ribosomal_L31 (pfam01197) → Tdk (COG1435)PRK04296 (PRK04296) →                                                                               |
| Bst-1-5  | NZ_LDWI01000005.1       | - | 421554  | 421521  | RNA → rpmE (PRK00019)Ribosomal_L31 (pfam01197) → Tdk (COG1435)PRK04296 (PRK04296) →                                                                               |
| Bst-1-6  | NZ_LFMM01000007.1       | - | 76273   | 76240   | RNA → rpmE (PRK00019)Ribosomal_L31 (pfam01197) → Tdk (COG1435)PRK04296 (PRK04296) →                                                                               |
| Bsp-68-1 | NZ_LAVH01000010.1       | - | 169347  | 169314  | RNA → rpmE (PRK00019)Ribosomal_L31 (pfam01197) → Tdk (COG1435)PRK04296 (PRK04296) →                                                                               |
| Bpu-3-1  | NZ_CP009108.1           | - | 589531  | 589498  | RNA → rpmE (PRK00019)Ribosomal_L31 (pfam01197) → Tdk (COG1435)PRK04296 (PRK04296) →                                                                               |
| Bpu-3-2  | NZ_CP007436.1           | - | 3366927 | 3366894 | RNA → rpmE (PRK00019)Ribosomal_L31 (pfam01197) → Tdk (COG1435)PRK04296 (PRK04296) →                                                                               |
| Bpu-3-3  | NZ_CP011150.1           | - | 3353307 | 3353274 | RNA → rpmE (PRK00019)Ribosomal_L31 (pfam01197) → Tdk (COG1435)PRK04296 (PRK04296) →                                                                               |
| Bso-1-1  | NZ_AOFM01000009.1       | - | 593767  | 593734  | RNA → rpmE (PRK00019)Ribosomal_L31 (pfam01197) → Tdk (COG1435)PRK04296 (PRK04296) →                                                                               |
| Bso-2-1  | NZ_AYTN01000054.1       | - | 411813  | 411780  | RNA → rpmE (PRK00019)Ribosomal_L31 (pfam01197) → Tdk (COG1435)PRK04296 (PRK04296) →                                                                               |
| Bli-2-1  | NZ_JYBQ01000001.1       | - | 358665  | 358632  | RNA → rpmE (PRK00019)Ribosomal_L31 (pfam01197) → Tdk (COG1435)PRK04296 (PRK04296) →                                                                               |
| Bsp-33-1 | NZ_GL635727.1           | - | 941278  | 941245  | RNA → rpmE (PRK00019)Ribosomal_L31 (pfam01197) → Tdk (COG1435)PRK04296 (PRK04296) →                                                                               |
| Bli-11-1 | NZ_CP012110.1           | - | 3865351 | 3865318 | RNA → rpmE (PRK00019)Ribosomal_L31 (pfam01197) → Tdk (COG1435)PRK04296 (PRK04296) →                                                                               |
| Bli-3-1  | NZ_AJLV01000020.1       | + | 429445  | 429478  | RNA → rpmE (PRK00019)Ribosomal_L31 (pfam01197) → Tdk (COG1435)PRK04296 (PRK04296) →                                                                               |
| Bli-4-1  | NZ_AJLW01000015.1       | - | 100805  | 100772  | RNA → rpmE (PRK00019)Ribosomal_L31 (pfam01197) → Tdk (COG1435)PRK04296 (PRK04296) →                                                                               |
| Bli-1-1  | NC_006270.3             | - | 3780071 | 3780038 | RNA → rpmE (PRK00019)Ribosomal_L31 (pfam01197) → Tdk (COG1435)PRK04296 (PRK04296) →                                                                               |
| Bli-1-2  | NC_006322.1             | - | 3779923 | 3779890 | RNA → rpmE (PRK00019)Ribosomal_L31 (pfam01197) → rpmE (PRK00019)Ribosomal_L31 (pfam01197) → Tdk (COG1435)PRK04296 (PRK04296) → Tdk (COG1435)PRK04296 (PRK04296) → |
| Bli-7-1  | NZ_AMWQ01000015.1       | - | 37002   | 36969   | RNA → rpmE (PRK00019)Ribosomal_L31 (pfam01197) → Tdk (COG1435)PRK04296 (PRK04296) →                                                                               |
| Bli-9-1  | NZ_AZSM01000001.1       | - | 309421  | 309388  | RNA → rpmE (PRK00019)Ribosomal_L31 (pfam01197) → Tdk (COG1435)PRK04296 (PRK04296) →                                                                               |
| Bli-8-1  | NZ_AZSL01000025.1       | + | 7611    | 7644    | RNA → rpmE (PRK00019)Ribosomal_L31 (pfam01197) → Tdk (COG1435)PRK04296 (PRK04296) →                                                                               |
| Bli-2-2  | NZ_JFYM01000008.1       | + | 428524  | 428557  | RNA → rpmE (PRK00019)Ribosomal_L31 (pfam01197) → Tdk (COG1435)PRK04296 (PRK04296) →                                                                               |
| Bli-6-1  | NZ_AVEZ01000039.1       | - | 520363  | 520330  | RNA → rpmE (PRK00019)Ribosomal_L31 (pfam01197) → Tdk (COG1435)PRK04296 (PRK04296) →                                                                               |
| Bsp-85-1 | NZ_JZBT01000024.1       | + | 30280   | 30313   | RNA → rpmE (PRK00019)Ribosomal_L31 (pfam01197) → Tdk (COG1435)PRK04296 (PRK04296) →                                                                               |
| Bgl-1-1  | NZ_LECV01000100.1       | + | 7406    | 7439    | RNA → rpmE (PRK00019)Ribosomal_L31 (pfam01197) → Tdk (COG1435)PRK04296 (PRK04296) →                                                                               |
| Bsp-48-1 | NZ_LECW01000089.1       | + | 25275   | 25308   | RNA → rpmE (PRK00019)Ribosomal_L31 (pfam01197) → Tdk (COG1435)PRK04296 (PRK04296) →                                                                               |
| Bli-2-3  | NZ_LFIM01000002.1       | - | 153023  | 152990  | RNA → rpmE (PRK00019)Ribosomal_L31 (pfam01197) → Tdk (COG1435)PRK04296 (PRK04296) →                                                                               |
| Bli-5-1  | NC_021362.1             | - | 3959595 | 3959562 | RNA → rpmE (PRK00019)Ribosomal_L31 (pfam01197) → Tdk (COG1435)PRK04296 (PRK04296) →                                                                               |
| Bsp-73-1 | NZ_JXAP01000005.1       | - | 592676  | 592643  | RNA → rpmE (PRK00019)Ribosomal_L31 (pfam01197) → Tdk (COG1435)PRK04296 (PRK04296) →                                                                               |

|          |                        |   |         |         |                                                                                                                                                                                                                                                                                         |
|----------|------------------------|---|---------|---------|-----------------------------------------------------------------------------------------------------------------------------------------------------------------------------------------------------------------------------------------------------------------------------------------|
| Bli-10-1 | NZ_AZYP01000003.1      | - | 89779   | 89746   | RNA → rpmE (PRK00019)Ribosomal_L31 (pfam01197) → Tdk (COG1435)PRK04296 (PRK04296) →                                                                                                                                                                                                     |
| Bsp-35-1 | NZ_ANNR02000031.1      | + | 423248  | 423281  | RNA → rpmE (PRK00019)Ribosomal_L31 (pfam01197) → Tdk (COG1435)PRK04296 (PRK04296) →                                                                                                                                                                                                     |
| Bsp-82-1 | NZ_KE819960.1          | - | 635927  | 635894  | RNA → rpmE (PRK00019)Ribosomal_L31 (pfam01197) → Tdk (COG1435)PRK04296 (PRK04296) →                                                                                                                                                                                                     |
| Bpa-2-1  | NZ_CP010524.1          | - | 3979133 | 3979100 | RNA → rpmE (PRK00019)Ribosomal_L31 (pfam01197) → Tdk (COG1435)PRK04296 (PRK04296) →                                                                                                                                                                                                     |
| Bsp-60-1 | NZ_LBMN01000080.1      | + | 48203   | 48236   | RNA → rpmE (PRK00019)Ribosomal_L31 (pfam01197) → Tdk (COG1435)PRK04296 (PRK04296) →                                                                                                                                                                                                     |
| Bpa-3-1  | NZ_AZSK01000014.1      | + | 416910  | 416943  | RNA → rpmE (PRK00019)Ribosomal_L31 (pfam01197) → Tdk (COG1435)PRK04296 (PRK04296) →                                                                                                                                                                                                     |
| Bsp-76-1 | NZ_KE819965.1          | - | 716299  | 716266  | RNA → rpmE (PRK00019)Ribosomal_L31 (pfam01197) → Tdk (COG1435)PRK04296 (PRK04296) →                                                                                                                                                                                                     |
| Bsp-98-1 | NZ_KB223527.1          | - | 1669518 | 1669487 | RNA → rpmE (PRK00019)Ribosomal_L31 (pfam01197) →                                                                                                                                                                                                                                        |
| Ama-1-1  | NZ_LELK01000004.1      | + | 263335  | 263366  | RNA → rpmE (PRK00019)Ribosomal_L31 (pfam01197) →                                                                                                                                                                                                                                        |
| Baz-1-1  | NZ_AJLR01000149.1      | - | 16199   | 16168   | RNA → rpmE (PRK00019)Ribosomal_L31 (pfam01197) → rpmE (PRK00019)Ribosomal_L31 (pfam01197) →                                                                                                                                                                                             |
| Baz-2-1  | NZ_JJRY01000009.1      | + | 91459   | 91490   | RNA → rpmE (PRK00019)Ribosomal_L31 (pfam01197) →                                                                                                                                                                                                                                        |
| Bsp-7-1  | NZ_CH672356.1          | + | 28004   | 28034   | RNA → rpmE (PRK00019)Ribosomal_L31 (pfam01197) →                                                                                                                                                                                                                                        |
| Bin-3-1  | NC_022524.1            | - | 4499937 | 4499907 | RNA → rpmE (PRK00019)Ribosomal_L31 (pfam01197) →                                                                                                                                                                                                                                        |
| Bse-1-1  | NC_014219.1            | - | 3427416 | 3427386 | RNA → rpmE2 (PRK01678)Ribosomal_L31 (pfam01197) →                                                                                                                                                                                                                                       |
| Bsp-13-1 | NZ_HE610986.1          | - | 937568  | 937535  | RNA → rpmE (PRK00019)Ribosomal_L31 (pfam01197) →                                                                                                                                                                                                                                        |
| Bch-1-1  | NZ_KE386944.1          | + | 305910  | 305940  | RNA → rpmE2 (PRK01678)Ribosomal_L31 (pfam01197) →                                                                                                                                                                                                                                       |
| env-934  | SR_TP_S2_1011259       | - | 203     | 173     | RNA → rpmE2 (PRK01678)Ribosomal_L31 (pfam01197) →                                                                                                                                                                                                                                       |
| Bsp-58-1 | NZ_BAWC01000008.1      | + | 52801   | 52832   | RNA → rpmE2 (PRK01678)Ribosomal_L31 (pfam01197) → Tdk (COG1435)PRK04296 (PRK04296) → hypo                                                                                                                                                                                               |
| Ble-1-1  | NZ_CP003923.1          | - | 3605244 | 3605213 | RNA → rpmE2 (PRK01678)Ribosomal_L31 (pfam01197) → Tdk (COG1435)PRK04296 (PRK04296) → hypo                                                                                                                                                                                               |
| Bsp-86-1 | NZ_BAWL01000044.1      | - | 10324   | 10293   | RNA → rpmE2 (PRK01678)Ribosomal_L31 (pfam01197) →                                                                                                                                                                                                                                       |
| Bcl-1-1  | NC_006582.1            | - | 4034646 | 4034615 | RNA → rpmE2 (PRK01678)Ribosomal_L31 (pfam01197) → Tdk (COG1435)PRK04296 (PRK04296) →                                                                                                                                                                                                    |
| Bcl-2-1  | NZ_JMCA01000031.1      | + | 272380  | 272411  | RNA → rpmE2 (PRK01678)Ribosomal_L31 (pfam01197) → Tdk (COG1435)PRK04296 (PRK04296) →                                                                                                                                                                                                    |
| Bal-1-1  | NZ_ALPT02000041.1      | - | 32350   | 32319   | RNA → rpmE2 (PRK01678)Ribosomal_L31 (pfam01197) →                                                                                                                                                                                                                                       |
| Bwa-1-1  | NZ_BAUT01000070.1      | + | 16215   | 16246   | RNA → rpmE2 (PRK01678)Ribosomal_L31 (pfam01197) →                                                                                                                                                                                                                                       |
| Bps-3-1  | NZ_LFJO01000001.1      | + | 460473  | 460504  | RNA → rpmE2 (PRK01678)Ribosomal_L31 (pfam01197) →                                                                                                                                                                                                                                       |
| env-935  | JGI25318J35512_1127720 | - | 223     | 192     | RNA → rpmE2 (PRK01678)Ribosomal_L31 (pfam01197) →                                                                                                                                                                                                                                       |
| Bhe-1-1  | NZ_BAUU01000018.1      | + | 23923   | 23954   | RNA → rpmE2 (PRK01678)Ribosomal_L31 (pfam01197) →                                                                                                                                                                                                                                       |
| Bok-1-1  | NZ_JRJU01000042.1      | - | 26874   | 26843   | RNA → rpmE2 (PRK01678)Ribosomal_L31 (pfam01197) →                                                                                                                                                                                                                                       |
| Bsp-56-1 | NZ_BAWA01000009.1      | + | 100911  | 100942  | RNA → rpmE2 (PRK01678)Ribosomal_L31 (pfam01197) → Tdk (COG1435)PRK04296 (PRK04296) → hypo                                                                                                                                                                                               |
| Bsp-57-1 | NZ_BAWB01000007.1      | + | 27806   | 27775   | RNA → rpmE2 (PRK01678)Ribosomal_L31 (pfam01197) → Tdk (COG1435)PRK04296 (PRK04296) → hypo                                                                                                                                                                                               |
| Bco-3-1  | NZ_ABFU01000064.1      | + | 21206   | 21236   | RNA → rpmE (PRK00019)Ribosomal_L31 (pfam01197) → rpmE (PRK00019)Ribosomal_L31 (pfam01197) →                                                                                                                                                                                             |
| Din-1-1  | NZ_LAJB01000003.1      | - | 562219  | 562188  | RNA → rpmE (PRK00019)Ribosomal_L31 (pfam01197) →                                                                                                                                                                                                                                        |
| Dro-1-1  | NZ_LAHL01000040.1      | - | 107117  | 107086  | RNA → rpmE (PRK00019)Ribosomal_L31 (pfam01197) →                                                                                                                                                                                                                                        |
| Den-1-1  | NZ_LAHK01000087.1      | - | 2617    | 2586    | RNA → rpmE (PRK00019)Ribosomal_L31 (pfam01197) → Tdk (COG1435)PRK04296 (PRK04296) →                                                                                                                                                                                                     |
| Dtu-1-1  | NZ_LAJA01000003.1      | - | 28076   | 28045   | RNA → rpmE (PRK00019)Ribosomal_L31 (pfam01197) → Tdk (COG1435)PRK04296 (PRK04296) →<br>PrfA (COG0216)prfA (PRK00591) → HemK (COG2890)PRK09328 (PRK09328) →<br>HemK (COG2890)RF_mod_PrmC (TIGR03534) → Spore_II_R (pfam09551) →<br>SUA5 (COG0009)TIGR00057 (TIGR00057)SUA5 (pfam03481) → |
| Bsp-22-1 | NZ_KB889752.1          | - | 2982398 | 2982367 | RNA → rpmE (PRK00019)Ribosomal_L31 (pfam01197) → Tdk (COG1435)PRK04296 (PRK04296) →<br>PrfA (COG0216)prfA (PRK00591) → HemK (COG2890)PRK09328 (PRK09328) → Spore_II_R (pfam09551)                                                                                                       |
| Bsp-25-1 | NZ_JQMI01000018.1      | - | 92785   | 92754   | RNA → rpmE (PRK00019)Ribosomal_L31 (pfam01197) → Tdk (COG1435)PRK04296 (PRK04296) →<br>PrfA (COG0216)prfA (PRK00591) → HemK (COG2890)PRK09328 (PRK09328) → Spore_II_R (pfam09551)                                                                                                       |
| Baq-1-1  | NZ_CCMN01000031.1      | - | 310685  | 310655  | RNA → hypo →                                                                                                                                                                                                                                                                            |
| Bma-4-1  | NZ_LDWO01000012.1      | - | 159466  | 159436  | RNA → rpmE (PRK00019)Ribosomal_L31 (pfam01197) →                                                                                                                                                                                                                                        |
| Bma-4-2  | NZ_LDWH01000003.1      | + | 320886  | 320916  | RNA → rpmE (PRK00019)Ribosomal_L31 (pfam01197) →                                                                                                                                                                                                                                        |
| Bma-4-3  | NZ_LDWJ01000024.1      | + | 11492   | 11522   | RNA → rpmE (PRK00019)Ribosomal_L31 (pfam01197) →                                                                                                                                                                                                                                        |
| Bma-4-4  | NZ_LGUE01000008.1      | - | 276011  | 275981  | RNA → rpmE (PRK00019)Ribosomal_L31 (pfam01197) →                                                                                                                                                                                                                                        |
| Baq-1-2  | NZ_JXZC01000015.1      | - | 12969   | 12939   | RNA → rpmE (PRK00019)Ribosomal_L31 (pfam01197) →                                                                                                                                                                                                                                        |
| Bvi-1-1  | NZ_CCDN010000007.1     | + | 193142  | 193172  | RNA → rpmE (PRK00019)Ribosomal_L31 (pfam01197) →                                                                                                                                                                                                                                        |
| Lfl-3-1  | NZ_AODF01000010.1      | - | 26924   | 26895   | RNA → rpmE2 (PRK01678)Ribosomal_L31 (pfam01197) →                                                                                                                                                                                                                                       |
| Lse-2-1  | NZ_JYOM01000013.1      | + | 11559   | 11588   | RNA → rpmE2 (PRK01678)Ribosomal_L31 (pfam01197) →                                                                                                                                                                                                                                       |
| Lse-3-1  | NZ_CM001051.1          | - | 2676151 | 2676122 | RNA → rpmE2 (PRK01678)Ribosomal_L31 (pfam01197) →                                                                                                                                                                                                                                       |
| Lin-4-1  | NZ_CM001049.1          | - | 2550007 | 2549978 | RNA → rpmE2 (PRK01678)Ribosomal_L31 (pfam01197) →                                                                                                                                                                                                                                       |

|          |                    |   |         |         |                                                                                             |
|----------|--------------------|---|---------|---------|---------------------------------------------------------------------------------------------|
| Liv-4-1  | NZ_CP009576.1      | - | 2778969 | 2778940 | RNA → rpmE2 (PRK01678)Ribosomal_L31 (pfam01197) →                                           |
| Liv-4-2  | NZ_CP009575.1      | - | 2712836 | 2712807 | RNA → rpmE2 (PRK01678)Ribosomal_L31 (pfam01197) →                                           |
| Lmo-60-1 | NZ_APID01000006.1  | - | 151683  | 151654  | RNA → rpmE2 (PRK01678)Ribosomal_L31 (pfam01197) →                                           |
| Lmo-48-1 | NZ_KK073984.1      | + | 11327   | 11356   | RNA → rpmE2 (PRK01678)Ribosomal_L31 (pfam01197) →                                           |
| Lmo-53-1 | NZ_KK074072.1      | - | 99569   | 99540   | RNA → rpmE2 (PRK01678)Ribosomal_L31 (pfam01197) →                                           |
| Lmo-2-1  | NC_013768.1        | - | 2704320 | 2704291 | RNA → rpmE2 (PRK01678)Ribosomal_L31 (pfam01197) →                                           |
| Lmo-13-1 | NC_017547.1        | - | 2563087 | 2563058 | RNA → rpmE2 (PRK01678)Ribosomal_L31 (pfam01197) →                                           |
| Lmo-33-1 | NC_021823.1        | - | 2117345 | 2117316 | RNA → rpmE2 (PRK01678)Ribosomal_L31 (pfam01197) →                                           |
| Lmo-57-1 | NZ_HG813247.1      | - | 2626503 | 2626474 | RNA → rpmE2 (PRK01678)Ribosomal_L31 (pfam01197) →                                           |
| Lmo-34-1 | NC_013766.2        | - | 2737889 | 2737860 | RNA → rpmE2 (PRK01678)Ribosomal_L31 (pfam01197) →                                           |
| Lmo-45-1 | NZ_KK211194.1      | - | 179779  | 179750  | RNA → rpmE2 (PRK01678)Ribosomal_L31 (pfam01197) →                                           |
| Lmo-58-1 | NZ_APIB01000006.1  | + | 47839   | 47868   | RNA → rpmE2 (PRK01678)Ribosomal_L31 (pfam01197) →                                           |
| Liv-1-2  | NZ_CVPH01000006.1  | - | 842440  | 842411  | RNA → rpmE2 (PRK01678)Ribosomal_L31 (pfam01197) →                                           |
| Liv-1-1  | NC_016011.1        | - | 2607332 | 2607303 | RNA → rpmE2 (PRK01678)Ribosomal_L31 (pfam01197) →                                           |
| Liv-2-1  | NZ_CP007172.1      | - | 2653509 | 2653480 | RNA → rpmE2 (PRK01678)Ribosomal_L31 (pfam01197) →                                           |
| Liv-3-1  | NZ_CP009577.1      | - | 2653506 | 2653477 | RNA → rpmE2 (PRK01678)Ribosomal_L31 (pfam01197) →                                           |
| Lwe-1-1  | NC_008555.1        | - | 2535354 | 2535325 | RNA → rpmE2 (PRK01678)Ribosomal_L31 (pfam01197) →                                           |
| Laq-1-1  | NZ_AOCG01000011.1  | - | 164581  | 164552  | RNA → rpmE2 (PRK01678)Ribosomal_L31 (pfam01197) →                                           |
| Lmo-69-1 | NZ_APIM01000007.1  | - | 151862  | 151833  | RNA → rpmE2 (PRK01678)Ribosomal_L31 (pfam01197) →                                           |
| Lmo-67-1 | NZ_APIK01000004.1  | + | 47841   | 47870   | RNA → rpmE2 (PRK01678)Ribosomal_L31 (pfam01197) →                                           |
| Lmo-62-1 | NZ_APIF01000007.1  | - | 153381  | 153352  | RNA → rpmE2 (PRK01678)Ribosomal_L31 (pfam01197) →                                           |
| Lmo-65-1 | NZ_API01000006.1   | + | 47845   | 47874   | RNA → rpmE2 (PRK01678)Ribosomal_L31 (pfam01197) →                                           |
| Lmo-63-1 | NZ_APIG01000008.1  | - | 113788  | 113759  | RNA → rpmE2 (PRK01678)Ribosomal_L31 (pfam01197) →                                           |
| Lmo-64-1 | NZ_APIH01000007.1  | - | 153278  | 153249  | RNA → rpmE2 (PRK01678)Ribosomal_L31 (pfam01197) →                                           |
| Lmo-66-1 | NZ_APIJ01000011.1  | - | 84673   | 84644   | RNA → rpmE2 (PRK01678)Ribosomal_L31 (pfam01197) →                                           |
| Lmo-59-1 | NZ_APIC01000008.1  | - | 153115  | 153086  | RNA → rpmE2 (PRK01678)Ribosomal_L31 (pfam01197) →                                           |
| Lmo-68-1 | NZ_APIL01000007.1  | - | 113787  | 113758  | RNA → rpmE2 (PRK01678)Ribosomal_L31 (pfam01197) →                                           |
| Lmo-17-1 | NZ_AARX02000004.1  | - | 163846  | 163817  | RNA → rpmE2 (PRK01678)Ribosomal_L31 (pfam01197) → rpmE2 (PRK01678)Ribosomal_L31 (pfam01197) |
| Lmo-11-1 | NZ_AARR02000015.1  | + | 11297   | 11326   | RNA → rpmE2 (PRK01678)Ribosomal_L31 (pfam01197) → rpmE2 (PRK01678)Ribosomal_L31 (pfam01197) |
| Lmo-7-1  | NZ_AARU02000004.1  | - | 163847  | 163818  | RNA → rpmE2 (PRK01678)Ribosomal_L31 (pfam01197) → rpmE2 (PRK01678)Ribosomal_L31 (pfam01197) |
| Lmo-9-1  | NZ_AARP04000011.1  | + | 2287    | 2316    | RNA → rpmE2 (PRK01678)Ribosomal_L31 (pfam01197) → rpmE2 (PRK01678)Ribosomal_L31 (pfam01197) |
| Lmo-46-1 | NZ_JHZR01000009.1  | - | 28003   | 27974   | RNA → rpmE2 (PRK01678)Ribosomal_L31 (pfam01197) →                                           |
| Lmo-10-1 | NZ_AARQ02000005.1  | - | 151823  | 151794  | RNA → rpmE2 (PRK01678)Ribosomal_L31 (pfam01197) → rpmE2 (PRK01678)Ribosomal_L31 (pfam01197) |
| Lmo-30-1 | NZ_AADQ01000100.1  | - | 57      | 28      | RNA →                                                                                       |
| Lmo-56-1 | NZ_CBVW010000004.1 | - | 151863  | 151834  | RNA → rpmE2 (PRK01678)Ribosomal_L31 (pfam01197) →                                           |
| Lmo-8-1  | NZ_AARJ02000005.1  | + | 11105   | 11134   | RNA → rpmE2 (PRK01678)Ribosomal_L31 (pfam01197) → rpmE2 (PRK01678)Ribosomal_L31 (pfam01197) |
| Lmo-55-1 | NZ_CBVZ010000006.1 | - | 152406  | 152377  | RNA → rpmE2 (PRK01678)Ribosomal_L31 (pfam01197) →                                           |
| Lmo-47-1 | NZ_JHUY01000011.1  | - | 182393  | 182364  | RNA → rpmE2 (PRK01678)Ribosomal_L31 (pfam01197) →                                           |
| Lmo-72-1 | NZ_APJT01000001.1  | - | 2489181 | 2489152 | RNA → rpmE2 (PRK01678)Ribosomal_L31 (pfam01197) →                                           |
| Lmo-6-1  | NC_003210.1        | - | 2624918 | 2624889 | RNA → rpmE2 (PRK01678)Ribosomal_L31 (pfam01197) →                                           |
| Lmo-50-1 | NZ_KK074038.1      | - | 152233  | 152204  | RNA → rpmE2 (PRK01678)Ribosomal_L31 (pfam01197) →                                           |
| Lmo-52-1 | NZ_KK074046.1      | + | 41826   | 41855   | RNA → rpmE2 (PRK01678)Ribosomal_L31 (pfam01197) →                                           |
| Lmo-26-1 | NC_018587.1        | - | 2636237 | 2636208 | RNA → rpmE2 (PRK01678)Ribosomal_L31 (pfam01197) →                                           |
| Lmo-39-1 | NZ_KN050647.1      | - | 713680  | 713651  | RNA → rpmE2 (PRK01678)Ribosomal_L31 (pfam01197) →                                           |
| Lmo-16-1 | NC_017545.1        | - | 2634195 | 2634166 | RNA → rpmE2 (PRK01678)Ribosomal_L31 (pfam01197) →                                           |
| Lmo-3-1  | NC_017544.1        | - | 2579403 | 2579374 | RNA → rpmE2 (PRK01678)Ribosomal_L31 (pfam01197) →                                           |
| Lmo-12-1 | NC_017546.1        | - | 2643374 | 2643345 | RNA → rpmE2 (PRK01678)Ribosomal_L31 (pfam01197) →                                           |
| Lmo-28-1 | NC_018593.1        | - | 2525570 | 2525541 | RNA → rpmE2 (PRK01678)Ribosomal_L31 (pfam01197) →                                           |
| Lmo-27-1 | NC_018592.1        | - | 2583378 | 2583349 | RNA → rpmE2 (PRK01678)Ribosomal_L31 (pfam01197) →                                           |
| Lmo-24-1 | NC_018589.1        | - | 2642056 | 2642027 | RNA → rpmE2 (PRK01678)Ribosomal_L31 (pfam01197) →                                           |
| Lmo-21-1 | NC_018588.1        | - | 2642444 | 2642415 | RNA → rpmE2 (PRK01678)Ribosomal_L31 (pfam01197) →                                           |
| Lmo-25-1 | NC_018586.1        | - | 2643186 | 2643157 | RNA → rpmE2 (PRK01678)Ribosomal_L31 (pfam01197) →                                           |



|          |                         |   |         |         |                                                                                             |
|----------|-------------------------|---|---------|---------|---------------------------------------------------------------------------------------------|
| Lmo-33-2 | NC_021838.1             | - | 242759  | 242730  | RNA → rpmE2 (PRK01678)Ribosomal_L31 (pfam01197) →                                           |
| Lmo-33-3 | NC_021824.1             | - | 186543  | 186514  | RNA → rpmE2 (PRK01678)Ribosomal_L31 (pfam01197) →                                           |
| Lmo-33-4 | NC_021837.1             | + | 850722  | 850751  | RNA → rpmE2 (PRK01678)Ribosomal_L31 (pfam01197) →                                           |
| Lmo-33-5 | NC_021826.1             | - | 1589345 | 1589316 | RNA → rpmE2 (PRK01678)Ribosomal_L31 (pfam01197) →                                           |
| Lmo-38-1 | NC_022568.1             | - | 2583826 | 2583797 | RNA → rpmE2 (PRK01678)Ribosomal_L31 (pfam01197) →                                           |
| Lmo-70-1 | NZ_CP007160.1           | - | 1351849 | 1351820 | RNA → rpmE2 (PRK01678)Ribosomal_L31 (pfam01197) →                                           |
| Lmo-29-1 | NC_018591.1             | - | 2606775 | 2606746 | RNA → rpmE2 (PRK01678)Ribosomal_L31 (pfam01197) → rpmE2 (PRK01678)Ribosomal_L31 (pfam01197) |
| Lmo-44-1 | NZ_KK211033.1           | + | 43201   | 43230   | RNA → rpmE2 (PRK01678)Ribosomal_L31 (pfam01197) →                                           |
| Lmo-61-1 | NZ_APIE01000007.1       | - | 153398  | 153369  | RNA → rpmE2 (PRK01678)Ribosomal_L31 (pfam01197) →                                           |
| Lin-2-1  | NZ_JZCS01000009.1       | + | 49208   | 49237   | RNA → rpmE2 (PRK01678)Ribosomal_L31 (pfam01197) →                                           |
| Lin-1-1  | NC_003212.1             | - | 2709363 | 2709334 | RNA → rpmE2 (PRK01678)Ribosomal_L31 (pfam01197) →                                           |
| Lin-2-2  | NZ_JZCU01000001.1       | - | 177547  | 177518  | RNA → rpmE2 (PRK01678)Ribosomal_L31 (pfam01197) →                                           |
| Lin-2-3  | NZ_JRYX01000006.1       | - | 193559  | 193530  | RNA → rpmE2 (PRK01678)Ribosomal_L31 (pfam01197) →                                           |
| Lmo-14-1 | NC_011660.1             | + | 46092   | 46121   | RNA → rpmE2 (PRK01678)Ribosomal_L31 (pfam01197) →                                           |
| Lmo-20-1 | NC_017537.1             | - | 2607884 | 2607855 | RNA → rpmE2 (PRK01678)Ribosomal_L31 (pfam01197) →                                           |
| Lmo-19-1 | NC_017529.1             | - | 2609930 | 2609901 | RNA → rpmE2 (PRK01678)Ribosomal_L31 (pfam01197) →                                           |
| Lin-3-1  | NZ_JH556648.1           | + | 28282   | 28311   | RNA → rpmE2 (PRK01678)Ribosomal_L31 (pfam01197) →                                           |
| Lmo-22-1 | NC_018590.1             | - | 2520256 | 2520227 | RNA → rpmE2 (PRK01678)Ribosomal_L31 (pfam01197) →                                           |
| Lba-1-1  | NZ_AGUG01000004.1       | - | 22582   | 22553   | RNA → rpmE2 (PRK01678)Ribosomal_L31 (pfam01197) → rpmE2 (PRK01678)Ribosomal_L31 (pfam01197) |
| Lfl-2-1  | NZ_ALWW01000045.1       | + | 21645   | 21674   | RNA → rpmE2 (PRK01678)Ribosomal_L31 (pfam01197) →                                           |
| Lfl-1-1  | NZ_AODM01000033.1       | + | 275     | 304     | RNA → rpmE2 (PRK01678)Ribosomal_L31 (pfam01197) →                                           |
| Lse-1-1  | NC_013891.1             | - | 2523334 | 2523305 | RNA → rpmE2 (PRK01678)Ribosomal_L31 (pfam01197) →                                           |
| Lmo-40-1 | NZ_CM001469.1           | - | 2232849 | 2232820 | RNA → rpmE2 (PRK01678)Ribosomal_L31 (pfam01197) →                                           |
| Lmo-32-1 | NZ_AADR01000056.1       | - | 5830    | 5801    | RNA → rpmE2 (PRK01678)Ribosomal_L31 (pfam01197) → rpmE2 (PRK01678)Ribosomal_L31 (pfam01197) |
| Lmo-42-1 | NC_021829.1             | + | 1457392 | 1457421 | RNA → rpmE2 (PRK01678)Ribosomal_L31 (pfam01197) →                                           |
| Lmo-33-6 | NC_021840.1             | + | 2164270 | 2164299 | RNA → rpmE2 (PRK01678)Ribosomal_L31 (pfam01197) →                                           |
| Lmo-33-7 | NC_021839.1             | - | 2383018 | 2382989 | RNA → rpmE2 (PRK01678)Ribosomal_L31 (pfam01197) →                                           |
| Lmo-33-8 | NC_021827.1             | + | 563127  | 563156  | RNA → rpmE2 (PRK01678)Ribosomal_L31 (pfam01197) →                                           |
| Lgr-2-1  | NZ_GL538353.1           | + | 812725  | 812754  | RNA → rpmE2 (PRK01678)Ribosomal_L31 (pfam01197) →                                           |
| Lgr-3-1  | NZ_AODG01000008.1       | + | 5832    | 5861    | RNA → rpmE2 (PRK01678)Ribosomal_L31 (pfam01197) →                                           |
| Lco-1-1  | NZ_AODE01000004.1       | + | 8681    | 8710    | RNA → rpmE2 (PRK01678)Ribosomal_L31 (pfam01197) →                                           |
| Lro-1-1  | NZ_AODK01000010.1       | - | 13603   | 13574   | RNA → rpmE2 (PRK01678)Ribosomal_L31 (pfam01197) →                                           |
| Lri-1-1  | NZ_AODL01000006.1       | - | 88179   | 88150   | RNA → rpmE2 (PRK01678)Ribosomal_L31 (pfam01197) →                                           |
| Lgr-1-1  | NZ_AODD01000005.1       | + | 122902  | 122931  | RNA → rpmE2 (PRK01678)Ribosomal_L31 (pfam01197) →                                           |
| Lba-2-1  | NZ_JNEZ01000001.1       | + | 49115   | 49144   | RNA → rpmE2 (PRK01678)Ribosomal_L31 (pfam01197) →                                           |
| Lne-1-1  | NZ_JNFB01000007.1       | + | 9799    | 9828    | RNA → rpmE2 (PRK01678)Ribosomal_L31 (pfam01197) →                                           |
| Lbo-2-1  | NZ_JNFA01000028.1       | + | 27486   | 27515   | RNA → rpmE2 (PRK01678)Ribosomal_L31 (pfam01197) →                                           |
| Bsp-94-1 | NZ_KE384493.1           | - | 53262   | 53231   | RNA → rpmE (PRK00019)Ribosomal_L31 (pfam01197) →                                            |
| Bsm-2-1  | NZ_JH414746.1           | - | 53667   | 53635   | RNA → rpmE (PRK00019)Ribosomal_L31 (pfam01197) → hypo → Tdk (COG1435)PRK04296 (PRK04296)    |
| Bsm-1-1  | NZ_CP012024.1           | - | 3221214 | 3221182 | hypo → RNA → rpmE (PRK00019)Ribosomal_L31 (pfam01197) →                                     |
| Blo-1-1  | NZ_LFZW01000001.1       | - | 4911598 | 4911567 | RNA → rpmE (PRK00019)Ribosomal_L31 (pfam01197) →                                            |
| Bci-1-1  | NZ_KI632498.1           | + | 78172   | 78203   | RNA → rpmE (PRK00019)Ribosomal_L31 (pfam01197) →                                            |
| Pth-2-1  | NZ_BAWP01000010.1       | - | 111204  | 111173  | RNA → rpmE (PRK00019)Ribosomal_L31 (pfam01197) →                                            |
| Pth-1-1  | NZ_LAKX01000004.1       | - | 74606   | 74575   | RNA → rpmE (PRK00019)Ribosomal_L31 (pfam01197) →                                            |
| Gsp-4-1  | NC_014650.1             | - | 3717664 | 3717633 | RNA → rpmE (PRK00019)Ribosomal_L31 (pfam01197) →                                            |
| Gth-2-1  | NC_015660.1             | - | 3764572 | 3764541 | RNA → rpmE (PRK00019)Ribosomal_L31 (pfam01197) →                                            |
| Gth-5-1  | NZ_CM001483.1           | - | 3617423 | 3617392 | RNA → rpmE (PRK00019)Ribosomal_L31 (pfam01197) →                                            |
| Bps-1-1  | NC_013791.2             | - | 3665301 | 3665270 | RNA → rpmE2 (PRK01678)Ribosomal_L31 (pfam01197) →                                           |
| Bma-5-1  | NZ_ATAE01000042.1       | - | 128216  | 128185  | RNA → rpmE2 (PRK01678)Ribosomal_L31 (pfam01197) →                                           |
| Bsp-66-2 | NZ_LFEL01000017.1       | - | 3671    | 3640    | RNA → rpmE2 (PRK01678)Ribosomal_L31 (pfam01197) →                                           |
| Bsp-92-1 | NZ_AXVA01000010.1       | + | 75959   | 75989   | RNA → rpmE (PRK00019)Ribosomal_L31 (pfam01197) →                                            |
| env-936  | SL_3KL_010_SED_10258389 | - | 407     | 377     | RNA → rpmE2 (PRK01678)Ribosomal_L31 (pfam01197) →                                           |

|          |                          |   |         |         |                                                                                            |
|----------|--------------------------|---|---------|---------|--------------------------------------------------------------------------------------------|
| Pge-1-1  | NZ_CM002692.1            | - | 3407512 | 3407481 | RNA → rpmE (PRK00019)Ribosomal_L31 (pfam01197)→                                            |
| Pca-1-1  | NZ_BAWO01000004.1        | - | 18666   | 18635   | RNA → rpmE (PRK00019)Ribosomal_L31 (pfam01197)→                                            |
| Gca-1-1  | NZ_AMRO01000071.1        | - | 76191   | 76160   | RNA → rpmE (PRK00019)Ribosomal_L31 (pfam01197)→                                            |
| Bsp-79-1 | NZ_JXAB01000020.1        | - | 297461  | 297431  | RNA → rpmE (PRK00019)Ribosomal_L31 (pfam01197)→                                            |
| Ben-1-1  | NZ_CP011974.1            | - | 4727388 | 4727358 | RNA → rpmE (PRK00019)Ribosomal_L31 (pfam01197)→                                            |
| Ben-2-1  | NZ_ALIM01000035.1        | + | 148874  | 148904  | RNA → rpmE (PRK00019)Ribosomal_L31 (pfam01197)→                                            |
| env-937  | C917852_1                | + | 160     | 193     | RNA → rpmE (PRK00019)Ribosomal_L31 (pfam01197)→                                            |
| Bsp-54-1 | NZ_KI912515.1            | + | 222431  | 222461  | RNA → rpmE (PRK00019)Ribosomal_L31 (pfam01197)→                                            |
| Bsp-30-1 | NZ_CCXR01000001.1        | - | 4062665 | 4062634 | RNA → rpmE (PRK00019)Ribosomal_L31 (pfam01197)→                                            |
| Bba-2-1  | NZ_JXLO01000001.1        | - | 609426  | 609395  | RNA → rpmE (PRK00019)Ribosomal_L31 (pfam01197)→                                            |
| Bba-2-2  | NZ_JXLP01000009.1        | - | 431011  | 430980  | RNA → rpmE (PRK00019)Ribosomal_L31 (pfam01197)→                                            |
| Bkr-1-1  | NZ_KE387244.1            | + | 195969  | 196000  | RNA → rpmE (PRK00019)Ribosomal_L31 (pfam01197)→                                            |
| Bsp-17-1 | NZ_KI547188.1            | + | 304476  | 304508  | RNA → rpmE (PRK00019)Ribosomal_L31 (pfam01197)→ hypo→                                      |
| Bbo-3-1  | NZ_BAUW01000047.1        | - | 11315   | 11283   | RNA → rpmE (PRK00019)Ribosomal_L31 (pfam01197)→                                            |
| Bse-2-1  | NZ_BASE01000017.1        | - | 87101   | 87069   | RNA → rpmE (PRK00019)Ribosomal_L31 (pfam01197)→                                            |
| Bsu-11-1 | NZ_JXIQ01000068.1        | - | 277     | 245     | RNA → rpmE (PRK00019)Ribosomal_L31 (pfam01197)→                                            |
| Bsp-37-1 | NZ_HG964497.1            | - | 510465  | 510434  | RNA → rpmE (PRK00019)Ribosomal_L31 (pfam01197)→                                            |
| Bru-1-1  | NZ_CCFE01000013.1        | - | 20014   | 19983   | RNA → rpmE (PRK00019)Ribosomal_L31 (pfam01197)→                                            |
| Bba-3-1  | NZ_JWIR02000001.1        | + | 37168   | 37199   | RNA → rpmE (PRK00019)Ribosomal_L31 (pfam01197)→                                            |
| Qth-1-1  | NZ_JWIR02000025.1        | - | 127899  | 127868  | RNA → rpmE (PRK00019)Ribosomal_L31 (pfam01197)→                                            |
| Qth-1-2  | NZ_JWJE02000018.1        | + | 61399   | 61430   | RNA → rpmE (PRK00019)Ribosomal_L31 (pfam01197)→                                            |
| Bsp-40-1 | NZ_AYSE01000005.1        | + | 137089  | 137120  | RNA → rpmE (PRK00019)Ribosomal_L31 (pfam01197)→                                            |
| Bsp-42-1 | NZ_LFZU01000001.1        | - | 3871902 | 3871871 | RNA → rpmE (PRK00019)Ribosomal_L31 (pfam01197)→                                            |
| Bsp-96-1 | NZ_CP008855.1            | - | 1758854 | 1758824 | RNA → rpmE (PRK00019)Ribosomal_L31 (pfam01197)→                                            |
| Bfl-3-1  | NZ_JANV01000077.1        | + | 41386   | 41417   | RNA → rpmE (PRK00019)Ribosomal_L31 (pfam01197)→                                            |
| Bsp-81-1 | NZ_LATZ01000128.1        | + | 256709  | 256739  | RNA → rpmE (PRK00019)Ribosomal_L31 (pfam01197)→                                            |
| Bme-1-1  | NC_014103.1              | - | 4971544 | 4971513 | RNA → rpmE (PRK00019)Ribosomal_L31 (pfam01197)→ hypo→                                      |
| Bfl-1-1  | NZ_LFQJ01000038.1        | + | 103356  | 103387  | RNA → rpmE (PRK00019)Ribosomal_L31 (pfam01197)→                                            |
| Bsp-16-1 | NZ_AZVK01000006.1        | - | 237288  | 237257  | RNA → rpmE (PRK00019)Ribosomal_L31 (pfam01197)→                                            |
| env-938  | JGI25151.J46595_10060291 | - | 778     | 747     | RNA → rpmE (PRK00019)Ribosomal_L31 (pfam01197)→                                            |
| Bar-1-1  | NZ_JPIE01000004.1        | + | 106798  | 106829  | RNA → rpmE (PRK00019)Ribosomal_L31 (pfam01197)→                                            |
| Bar-1-2  | NZ_JXRC01000013.1        | - | 240051  | 240020  | RNA → rpmE (PRK00019)Ribosomal_L31 (pfam01197)→                                            |
| Bar-2-1  | NZ_JYOO01000022.1        | - | 64775   | 64744   | RNA → rpmE (PRK00019)Ribosomal_L31 (pfam01197)→                                            |
| Bar-1-3  | NZ_JMTL01000003.1        | + | 275950  | 275981  | RNA → rpmE (PRK00019)Ribosomal_L31 (pfam01197)→                                            |
| Bar-1-4  | NZ_LDWN01000019.1        | + | 134934  | 134965  | RNA → rpmE (PRK00019)Ribosomal_L31 (pfam01197)→                                            |
| Bar-1-5  | NZ_LDUV01000024.1        | + | 134934  | 134965  | RNA → rpmE (PRK00019)Ribosomal_L31 (pfam01197)→                                            |
| Bme-2-1  | NC_014019.1              | - | 4974394 | 4974363 | RNA → rpmE (PRK00019)Ribosomal_L31 (pfam01197)→ hypo→                                      |
| Bme-3-1  | NC_017138.1              | + | 117060  | 117091  | RNA → rpmE (PRK00019)Ribosomal_L31 (pfam01197)→ hypo→                                      |
| Bme-7-1  | NZ_CP009920.1            | - | 1998706 | 1998675 | RNA → rpmE (PRK00019)Ribosomal_L31 (pfam01197)→                                            |
| Bme-5-1  | NZ_KN125581.1            | + | 150847  | 150878  | RNA → rpmE (PRK00019)Ribosomal_L31 (pfam01197)→                                            |
| Bme-9-1  | NZ_CP010586.1            | - | 5000760 | 5000729 | RNA → rpmE (PRK00019)Ribosomal_L31 (pfam01197)→                                            |
| Bme-8-1  | NZ_AHTF01000099.1        | - | 240086  | 240055  | RNA → rpmE (PRK00019)Ribosomal_L31 (pfam01197)→                                            |
| Bsp-29-1 | NZ_ANNS01000002.1        | + | 6424    | 6455    | RNA → rpmE (PRK00019)Ribosomal_L31 (pfam01197)→                                            |
| Bsp-80-1 | NZ_AXZS01000001.1        | - | 241083  | 241052  | RNA → rpmE (PRK00019)Ribosomal_L31 (pfam01197)→                                            |
| Bsp-20-1 | NZ_AZVI01000006.1        | + | 135180  | 135211  | RNA → rpmE (PRK00019)Ribosomal_L31 (pfam01197)→                                            |
| Bfl-2-1  | NZ_AZUJ01000010.1        | + | 127695  | 127726  | RNA → rpmE (PRK00019)Ribosomal_L31 (pfam01197)→                                            |
| Bpa-1-1  | NZ_AUMR01000038.1        | + | 35351   | 35383   | RNA → rpmE2 (PRK01678)Ribosomal_L31 (pfam01197)→                                           |
| Ban-4-1  | NZ_ABK01000017.1         | - | 739     | 707     | RNA → rpmE2 (PRK01678)Ribosomal_L31 (pfam01197)→ rpmE2 (PRK01678)Ribosomal_L31 (pfam01197) |
| Ban-3-1  | NZ_ABLT01000007.1        | - | 8251    | 8219    | RNA → rpmE2 (PRK01678)Ribosomal_L31 (pfam01197)→ rpmE2 (PRK01678)Ribosomal_L31 (pfam01197) |
| Ban-9-1  | NZ_ABJC01000012.1        | - | 8278    | 8246    | RNA → rpmE2 (PRK01678)Ribosomal_L31 (pfam01197)→ rpmE2 (PRK01678)Ribosomal_L31 (pfam01197) |
| Ban-8-1  | NZ_ABLH01000015.1        | - | 7672    | 7640    | RNA → rpmE2 (PRK01678)Ribosomal_L31 (pfam01197)→ rpmE2 (PRK01678)Ribosomal_L31 (pfam01197) |
| Ban-7-1  | NZ_ABK01000040.1         | - | 8162    | 8130    | RNA → rpmE2 (PRK01678)Ribosomal_L31 (pfam01197)→ rpmE2 (PRK01678)Ribosomal_L31 (pfam01197) |



|           |                   |   |         |         |                                                                                                    |
|-----------|-------------------|---|---------|---------|----------------------------------------------------------------------------------------------------|
| Ban-6-1   | NZ_ABLB01000054.1 | - | 8201    | 8169    | RNA → rpmE2 (PRK01678)Ribosomal_L31 (pfam01197) → rpmE2 (PRK01678)Ribosomal_L31 (pfam01197)        |
| Ban-33-1  | NZ_AGQP01000037.1 | - | 62679   | 62647   | RNA → rpmE2 (PRK01678)Ribosomal_L31 (pfam01197) → rpmE2 (PRK01678)Ribosomal_L31 (pfam01197)        |
| Ban-10-1  | NZ_AAEO01000027.3 | + | 266     | 298     | RNA → rpmE2 (PRK01678)Ribosomal_L31 (pfam01197) → rpmE2 (PRK01678)Ribosomal_L31 (pfam01197)        |
| Ban-18-1  | NZ_AAEP01000040.1 | - | 8079    | 8047    | RNA → rpmE2 (PRK01678)Ribosomal_L31 (pfam01197) → rpmE2 (PRK01678)Ribosomal_L31 (pfam01197)        |
| Bce-32-1  | NZ_ABDK02000015.1 | + | 132650  | 132682  | RNA → hypo → rpmE2 (PRK01678)Ribosomal_L31 (pfam01197) → rpmE2 (PRK01678)Ribosomal_L31 (pfam01197) |
| Ban-14-1  | NZ_AAEN01000018.1 | + | 262     | 294     | RNA → rpmE2 (PRK01678)Ribosomal_L31 (pfam01197) → rpmE2 (PRK01678)Ribosomal_L31 (pfam01197)        |
| Ban-1-1   | NZ_ABDN02000023.1 | + | 47027   | 47059   | RNA → rpmE2 (PRK01678)Ribosomal_L31 (pfam01197) → rpmE2 (PRK01678)Ribosomal_L31 (pfam01197)        |
| Ban-26-1  | NZ_ANFF01000003.1 | - | 1790045 | 1790013 | RNA → rpmE2 (PRK01678)Ribosomal_L31 (pfam01197) → rpmE2 (PRK01678)Ribosomal_L31 (pfam01197)        |
| Ban-27-1  | NZ_ANFG01000003.1 | - | 4312050 | 4312018 | RNA → rpmE2 (PRK01678)Ribosomal_L31 (pfam01197) → rpmE2 (PRK01678)Ribosomal_L31 (pfam01197)        |
| Ban-39-1  | NZ_AZQO01000036.1 | - | 61859   | 61827   | RNA → rpmE2 (PRK01678)Ribosomal_L31 (pfam01197) → rpmE2 (PRK01678)Ribosomal_L31 (pfam01197)        |
| Ban-11-1  | NC_003997.3       | - | 5058754 | 5058722 | RNA → rpmE2 (PRK01678)Ribosomal_L31 (pfam01197) → rpmE2 (PRK01678)Ribosomal_L31 (pfam01197)        |
| Ban-17-1  | NC_005945.1       | - | 5060089 | 5060057 | RNA → rpmE2 (PRK01678)Ribosomal_L31 (pfam01197) → rpmE2 (PRK01678)Ribosomal_L31 (pfam01197)        |
| Bce-2-1   | NC_012472.1       | - | 5099695 | 5099663 | RNA → rpmE2 (PRK01678)Ribosomal_L31 (pfam01197) → rpmE2 (PRK01678)Ribosomal_L31 (pfam01197)        |
| Ban-5-1   | NC_012659.1       | - | 5058780 | 5058748 | RNA → rpmE2 (PRK01678)Ribosomal_L31 (pfam01197) → rpmE2 (PRK01678)Ribosomal_L31 (pfam01197)        |
| Ban-13-1  | NC_012581.1       | - | 5061412 | 5061380 | RNA → rpmE2 (PRK01678)Ribosomal_L31 (pfam01197) → rpmE2 (PRK01678)Ribosomal_L31 (pfam01197)        |
| Bce-44-1  | NC_014335.1       | - | 5012311 | 5012279 | RNA → rpmE2 (PRK01678)Ribosomal_L31 (pfam01197) → rpmE2 (PRK01678)Ribosomal_L31 (pfam01197)        |
| Ban-15-1  | NC_017729.1       | - | 5050417 | 5050385 | RNA → rpmE2 (PRK01678)Ribosomal_L31 (pfam01197) → rpmE2 (PRK01678)Ribosomal_L31 (pfam01197)        |
| Bce-26-1  | NC_016779.1       | - | 5052968 | 5052936 | RNA → rpmE2 (PRK01678)Ribosomal_L31 (pfam01197) → rpmE2 (PRK01678)Ribosomal_L31 (pfam01197)        |
| Ban-34-1  | NZ_CP006742.1     | - | 5042149 | 5042117 | RNA → rpmE2 (PRK01678)Ribosomal_L31 (pfam01197) → rpmE2 (PRK01678)Ribosomal_L31 (pfam01197)        |
| Ban-21-1  | NZ_CP008752.1     | + | 436721  | 436753  | RNA → rpmE2 (PRK01678)Ribosomal_L31 (pfam01197) → rpmE2 (PRK01678)Ribosomal_L31 (pfam01197)        |
| Ban-28-1  | NZ_CP001970.1     | - | 5059354 | 5059322 | RNA → rpmE2 (PRK01678)Ribosomal_L31 (pfam01197) → rpmE2 (PRK01678)Ribosomal_L31 (pfam01197)        |
| Ban-29-1  | NZ_CP001974.1     | - | 5059103 | 5059071 | RNA → rpmE2 (PRK01678)Ribosomal_L31 (pfam01197) → rpmE2 (PRK01678)Ribosomal_L31 (pfam01197)        |
| Ban-21-2  | NZ_CP007618.1     | + | 4193405 | 4193437 | RNA → rpmE2 (PRK01678)Ribosomal_L31 (pfam01197) → rpmE2 (PRK01678)Ribosomal_L31 (pfam01197)        |
| Ban-18-2  | NZ_CP007666.1     | - | 3933034 | 3933002 | RNA → rpmE2 (PRK01678)Ribosomal_L31 (pfam01197) → rpmE2 (PRK01678)Ribosomal_L31 (pfam01197)        |
| Ban-21-3  | NZ_CP007704.1     | - | 3393140 | 3393108 | RNA → rpmE2 (PRK01678)Ribosomal_L31 (pfam01197) → rpmE2 (PRK01678)Ribosomal_L31 (pfam01197)        |
| Ban-21-4  | NZ_CP008846.1     | - | 5044915 | 5044883 | RNA → rpmE2 (PRK01678)Ribosomal_L31 (pfam01197) → rpmE2 (PRK01678)Ribosomal_L31 (pfam01197)        |
| Ban-25-1  | NZ_BAVT01000022.1 | - | 402375  | 402343  | RNA → rpmE2 (PRK01678)Ribosomal_L31 (pfam01197) → rpmE2 (PRK01678)Ribosomal_L31 (pfam01197)        |
| Ban-16-1  | NZ_AAEO01000042.3 | - | 254390  | 254358  | RNA → rpmE2 (PRK01678)Ribosomal_L31 (pfam01197) → rpmE2 (PRK01678)Ribosomal_L31 (pfam01197)        |
| Ban-19-1  | NZ_AAER01000027.3 | - | 85456   | 85424   | RNA → rpmE2 (PRK01678)Ribosomal_L31 (pfam01197) → rpmE2 (PRK01678)Ribosomal_L31 (pfam01197)        |
| Ban-12-1  | NZ_AAES01000044.3 | - | 7983    | 7951    | RNA → rpmE2 (PRK01678)Ribosomal_L31 (pfam01197) → rpmE2 (PRK01678)Ribosomal_L31 (pfam01197)        |
| Bce-25-1  | NZ_CM000736.1     | - | 4877394 | 4877362 | RNA → rpmE2 (PRK01678)Ribosomal_L31 (pfam01197) → rpmE2 (PRK01678)Ribosomal_L31 (pfam01197)        |
| Bth-17-1  | NZ_CM000757.1     | + | 4954695 | 4954727 | RNA → rpmE2 (PRK01678)Ribosomal_L31 (pfam01197) → rpmE2 (PRK01678)Ribosomal_L31 (pfam01197)        |
| Ban-31-1  | NZ_KL649663.1     | - | 404429  | 404397  | RNA → rpmE2 (PRK01678)Ribosomal_L31 (pfam01197) → rpmE2 (PRK01678)Ribosomal_L31 (pfam01197)        |
| Bce-104-1 | NZ_JH792132.1     | + | 255191  | 255223  | RNA → rpmE2 (PRK01678)Ribosomal_L31 (pfam01197) → rpmE2 (PRK01678)Ribosomal_L31 (pfam01197)        |
| Ban-24-1  | NZ_CM002398.1     | - | 5063652 | 5063620 | RNA → rpmE2 (PRK01678)Ribosomal_L31 (pfam01197) → rpmE2 (PRK01678)Ribosomal_L31 (pfam01197)        |
| Ban-21-5  | NZ_CP010342.1     | - | 5058896 | 5058864 | RNA → rpmE2 (PRK01678)Ribosomal_L31 (pfam01197) → rpmE2 (PRK01678)Ribosomal_L31 (pfam01197)        |
| Ban-2-1   | NC_007530.2       | - | 5058880 | 5058848 | RNA → rpmE2 (PRK01678)Ribosomal_L31 (pfam01197) → rpmE2 (PRK01678)Ribosomal_L31 (pfam01197)        |
| Bth-7-1   | NZ_CM000754.1     | - | 4909086 | 4909054 | RNA → rpmE2 (PRK01678)Ribosomal_L31 (pfam01197) → rpmE2 (PRK01678)Ribosomal_L31 (pfam01197)        |
| Ban-21-6  | NZ_CP009325.1     | + | 150594  | 150626  | RNA → rpmE2 (PRK01678)Ribosomal_L31 (pfam01197) → rpmE2 (PRK01678)Ribosomal_L31 (pfam01197)        |
| Ban-21-7  | NZ_CP009328.1     | - | 3853585 | 3853553 | RNA → rpmE2 (PRK01678)Ribosomal_L31 (pfam01197) → rpmE2 (PRK01678)Ribosomal_L31 (pfam01197)        |
| Ban-21-8  | NZ_CP009331.1     | + | 1617335 | 1617367 | RNA → rpmE2 (PRK01678)Ribosomal_L31 (pfam01197) → rpmE2 (PRK01678)Ribosomal_L31 (pfam01197)        |
| Ban-21-9  | NZ_CP010792.1     | - | 5058855 | 5058823 | RNA → rpmE2 (PRK01678)Ribosomal_L31 (pfam01197) → rpmE2 (PRK01678)Ribosomal_L31 (pfam01197)        |
| Ban-21-10 | NZ_CP009341.1     | - | 2358106 | 2358074 | RNA → rpmE2 (PRK01678)Ribosomal_L31 (pfam01197) → rpmE2 (PRK01678)Ribosomal_L31 (pfam01197)        |
| Ban-21-11 | NZ_CP010813.1     | - | 5058858 | 5058826 | RNA → rpmE2 (PRK01678)Ribosomal_L31 (pfam01197) → rpmE2 (PRK01678)Ribosomal_L31 (pfam01197)        |
| Ban-21-12 | NZ_CP009464.1     | + | 1265383 | 1265415 | RNA → rpmE2 (PRK01678)Ribosomal_L31 (pfam01197) → rpmE2 (PRK01678)Ribosomal_L31 (pfam01197)        |
| Ban-21-13 | NZ_CP009544.1     | - | 5118540 | 5118508 | RNA → rpmE2 (PRK01678)Ribosomal_L31 (pfam01197) → rpmE2 (PRK01678)Ribosomal_L31 (pfam01197)        |
| Ban-37-1  | NZ_CP009315.1     | - | 1636902 | 1636870 | RNA → rpmE2 (PRK01678)Ribosomal_L31 (pfam01197) → rpmE2 (PRK01678)Ribosomal_L31 (pfam01197)        |
| Ban-21-14 | NZ_CP009700.1     | + | 2531860 | 2531892 | RNA → rpmE2 (PRK01678)Ribosomal_L31 (pfam01197) → rpmE2 (PRK01678)Ribosomal_L31 (pfam01197)        |
| Bce-85-1  | NZ_CP009300.1     | + | 4697208 | 4697240 | RNA → rpmE2 (PRK01678)Ribosomal_L31 (pfam01197) → rpmE2 (PRK01678)Ribosomal_L31 (pfam01197)        |
| Bce-2-2   | NZ_CP009318.1     | - | 5169359 | 5169327 | RNA → rpmE2 (PRK01678)Ribosomal_L31 (pfam01197) → rpmE2 (PRK01678)Ribosomal_L31 (pfam01197)        |
| Ban-21-15 | NZ_CP009476.1     | + | 2929400 | 2929432 | RNA → rpmE2 (PRK01678)Ribosomal_L31 (pfam01197) → rpmE2 (PRK01678)Ribosomal_L31 (pfam01197)        |
| Ban-21-16 | NZ_CP009902.1     | + | 2026472 | 2026504 | RNA → rpmE2 (PRK01678)Ribosomal_L31 (pfam01197) → rpmE2 (PRK01678)Ribosomal_L31 (pfam01197)        |

|           |                         |   |         |         |                                                                                               |
|-----------|-------------------------|---|---------|---------|-----------------------------------------------------------------------------------------------|
| Ban-21-17 | NZ_CP009697.1           | - | 3050717 | 3050685 | RNA → rpmE2 (PRK01678)Ribosomal_L31 (pfam01197) →                                             |
| Ban-21-18 | NZ_CP010322.1           | - | 2776009 | 2775977 | RNA → rpmE2 (PRK01678)Ribosomal_L31 (pfam01197) →                                             |
| Ban-17-2  | NZ_CP009541.1           | + | 2794066 | 2794098 | RNA → rpmE2 (PRK01678)Ribosomal_L31 (pfam01197) →                                             |
| Ban-38-1  | NZ_CP009598.1           | + | 5033290 | 5033322 | RNA → rpmE2 (PRK01678)Ribosomal_L31 (pfam01197) →                                             |
| Ban-21-19 | NZ_CP009981.1           | + | 4660357 | 4660389 | RNA → rpmE2 (PRK01678)Ribosomal_L31 (pfam01197) →                                             |
| Ban-21-20 | NZ_CP010852.1           | - | 113594  | 113562  | RNA → rpmE2 (PRK01678)Ribosomal_L31 (pfam01197) →                                             |
| Ban-23-1  | NZ_CM002401.1           | - | 5059774 | 5059742 | RNA → rpmE2 (PRK01678)Ribosomal_L31 (pfam01197) →                                             |
| Ban-22-1  | NZ_CM002395.1           | - | 5059426 | 5059394 | RNA → rpmE2 (PRK01678)Ribosomal_L31 (pfam01197) →                                             |
| Bce-23-1  | NZ_CM000716.1           | - | 4974285 | 4974253 | RNA → rpmE2 (PRK01678)Ribosomal_L31 (pfam01197) → rpmE2 (PRK01678)Ribosomal_L31 (pfam01197) → |
| Ban-32-1  | NZ_CAVE010000038.1      | - | 61746   | 61714   | RNA → rpmE2 (PRK01678)Ribosomal_L31 (pfam01197) →                                             |
| Ban-35-1  | NZ_CAVC010000043.1      | - | 61881   | 61849   | RNA → rpmE2 (PRK01678)Ribosomal_L31 (pfam01197) →                                             |
| Ban-36-1  | NZ_CAVD010000049.1      | - | 61891   | 61859   | RNA → rpmE2 (PRK01678)Ribosomal_L31 (pfam01197) →                                             |
| Ban-30-1  | NZ_AMDT01000019.1       | - | 27183   | 27151   | RNA → rpmE2 (PRK01678)Ribosomal_L31 (pfam01197) →                                             |
| Bce-63-1  | NZ_JH792376.1           | + | 195540  | 195572  | RNA → rpmE2 (PRK01678)Ribosomal_L31 (pfam01197) →                                             |
| env-939   | JGI25159J45721_1011137  | + | 238     | 270     | RNA → rpmE2 (PRK01678)Ribosomal_L31 (pfam01197) →                                             |
| env-940   | JGI25151J46595_10014267 | - | 737     | 705     | RNA → rpmE2 (PRK01678)Ribosomal_L31 (pfam01197) →                                             |
| Bps-2-1   | NZ_CM000745.1           | - | 4565126 | 4565094 | RNA → rpmE2 (PRK01678)Ribosomal_L31 (pfam01197) → rpmE2 (PRK01678)Ribosomal_L31 (pfam01197) → |
| Bmy-2-1   | NZ_CM000743.1           | + | 4269323 | 4269355 | RNA → rpmE2 (PRK01678)Ribosomal_L31 (pfam01197) →                                             |
| Bmy-3-1   | NZ_CM000744.1           | - | 4468592 | 4468560 | RNA → rpmE2 (PRK01678)Ribosomal_L31 (pfam01197) →                                             |
| Bsp-26-1  | NZ_KB895693.1           | + | 28519   | 28551   | RNA → rpmE2 (PRK01678)Ribosomal_L31 (pfam01197) →                                             |
| Bsp-14-1  | NZ_KB895568.1           | + | 173140  | 173172  | RNA → rpmE2 (PRK01678)Ribosomal_L31 (pfam01197) →                                             |
| Bce-142-1 | NZ_KB976905.1           | - | 423230  | 423198  | RNA → rpmE2 (PRK01678)Ribosomal_L31 (pfam01197) →                                             |
| Bce-127-1 | NZ_KB976717.1           | - | 420881  | 420849  | RNA → rpmE2 (PRK01678)Ribosomal_L31 (pfam01197) →                                             |
| Bce-140-1 | NZ_KB976864.1           | - | 344767  | 344735  | RNA → rpmE2 (PRK01678)Ribosomal_L31 (pfam01197) →                                             |
| Bmy-4-1   | NZ_CP009651.1           | + | 2534010 | 2534042 | RNA → rpmE2 (PRK01678)Ribosomal_L31 (pfam01197) →                                             |
| Bmy-4-2   | NZ_CP007626.1           | - | 2305106 | 2305074 | RNA → rpmE2 (PRK01678)Ribosomal_L31 (pfam01197) →                                             |
| Bma-2-1   | NZ_JOTN01000001.1       | - | 308890  | 308858  | RNA → rpmE2 (PRK01678)Ribosomal_L31 (pfam01197) →                                             |
| Bcy-2-1   | NZ_JYPG01000024.1       | - | 242719  | 242687  | RNA → rpmE2 (PRK01678)Ribosomal_L31 (pfam01197) →                                             |
| Bcy-1-1   | NC_009674.1             | - | 3909710 | 3909678 | RNA → rpmE2 (PRK01678)Ribosomal_L31 (pfam01197) → rpmE2 (PRK01678)Ribosomal_L31 (pfam01197) → |
| Bsp-39-1  | NZ_JH921519.1           | - | 365021  | 364989  | RNA → rpmE2 (PRK01678)Ribosomal_L31 (pfam01197) →                                             |
| Bdi-1-1   | NZ_HG942082.1           | - | 119037  | 119005  | RNA → rpmE (PRK00019)Ribosomal_L31 (pfam01197) →                                              |
| Bfi-1-1   | NZ_LDWQ01000106.1       | - | 1219    | 1189    | RNA → rpmE (PRK00019)Ribosomal_L31 (pfam01197) →                                              |
| Bba-1-1   | NZ_AJLS01000139.1       | - | 4099    | 4069    | RNA → rpmE (PRK00019)Ribosomal_L31 (pfam01197) → rpmE (PRK00019)Ribosomal_L31 (pfam01197) →   |
| Bni-1-1   | NZ_BAWM01000007.1       | - | 1879    | 1849    | Tdk (COG1435)PRK04296 (PRK04296) → Tdk (COG1435)PRK04296 (PRK04296) →                         |
| Bsp-53-1  | NZ_JAEL01000147.1       | - | 1653    | 1623    | RNA → rpmE (PRK00019)Ribosomal_L31 (pfam01197) →                                              |
| Age-1-2   | NZ_JYCG01000013.1       | + | 44653   | 44684   | RNA → rpmE (PRK00019)Ribosomal_L31 (pfam01197) →                                              |
| Ate-1-1   | NZ_JHVN01000001.1       | - | 392015  | 391984  | RNA → rpmE (PRK00019)Ribosomal_L31 (pfam01197) →                                              |
| Bce-6-1   | NZ_CM000739.1           | + | 4869077 | 4869109 | RNA → rpmE2 (PRK01678)Ribosomal_L31 (pfam01197) → rpmE2 (PRK01678)Ribosomal_L31 (pfam01197) → |
| Bce-106-1 | NZ_KE504110.1           | + | 260069  | 260101  | RNA → rpmE2 (PRK01678)Ribosomal_L31 (pfam01197) →                                             |
| Bce-108-1 | NZ_KE504107.1           | + | 259819  | 259851  | RNA → rpmE2 (PRK01678)Ribosomal_L31 (pfam01197) →                                             |
| Bce-107-1 | NZ_JH636004.1           | + | 259670  | 259702  | RNA → rpmE2 (PRK01678)Ribosomal_L31 (pfam01197) →                                             |
| env-941   | JGI25151J46595_10017439 | + | 2866    | 2898    | RNA → rpmE2 (PRK01678)Ribosomal_L31 (pfam01197) →                                             |
| Bce-40-1  | NZ_CM000733.1           | + | 4212588 | 4212620 | RNA → rpmE2 (PRK01678)Ribosomal_L31 (pfam01197) → rpmE2 (PRK01678)Ribosomal_L31 (pfam01197) → |
| Bsp-91-1  | NZ_AXVB01000011.1       | + | 29512   | 29544   | RNA → rpmE2 (PRK01678)Ribosomal_L31 (pfam01197) →                                             |
| env-942   | JGI25151J46595_10061557 | - | 473     | 441     | RNA → rpmE2 (PRK01678)Ribosomal_L31 (pfam01197) →                                             |
| Bsp-89-1  | NZ_JQKQ01000011.1       | - | 200394  | 200362  | RNA → rpmE2 (PRK01678)Ribosomal_L31 (pfam01197) →                                             |
| Bsp-15-1  | NZ_KB910926.1           | + | 143065  | 143097  | RNA → rpmE2 (PRK01678)Ribosomal_L31 (pfam01197) →                                             |
| Bga-1-1   | NZ_JOTM01000002.1       | - | 410823  | 410791  | RNA → rpmE2 (PRK01678)Ribosomal_L31 (pfam01197) →                                             |
| env-943   | JGI12273J12029_10707276 | + | 98      | 128     | RNA → rpmE (PRK00019)Ribosomal_L31 (pfam01197) →                                              |
| env-944   | JGI25159J45721_1056023  | - | 243     | 211     | RNA → rpmE2 (PRK01678)Ribosomal_L31 (pfam01197) →                                             |
| Bth-31-1  | NZ_AMXT02000005.1       | + | 2115    | 2147    | RNA → rpmE2 (PRK01678)Ribosomal_L31 (pfam01197) →                                             |

|          |                    |   |         |         |                                                                                             |
|----------|--------------------|---|---------|---------|---------------------------------------------------------------------------------------------|
| Bth-29-1 | NZ_ARXZ02000005.1  | - | 247882  | 247850  | RNA → rpmE2 (PRK01678)Ribosomal_L31 (pfam01197) →                                           |
| Bsp-70-1 | NZ_JXIT01000003.1  | + | 4627    | 4659    | RNA → rpmE2 (PRK01678)Ribosomal_L31 (pfam01197) →                                           |
| Bsp-49-1 | NZ_CAVI010000079.1 | + | 24082   | 24114   | RNA → rpmE2 (PRK01678)Ribosomal_L31 (pfam01197) →                                           |
| Bsp-69-1 | NZ_JXIS01000025.1  | - | 246925  | 246893  | RNA → rpmE2 (PRK01678)Ribosomal_L31 (pfam01197) →                                           |
| Bsp-87-1 | NZ_JSFD01000003.1  | + | 203781  | 203813  | RNA → rpmE2 (PRK01678)Ribosomal_L31 (pfam01197) →                                           |
| Bth-40-1 | NZ_JWJY01000024.1  | - | 60949   | 60917   | RNA → rpmE2 (PRK01678)Ribosomal_L31 (pfam01197) →                                           |
| Spn-1-1  | NZ_CVOG01000306.1  | - | 327     | 295     | RNA → rpmE2 (PRK01678)Ribosomal_L31 (pfam01197) →                                           |
| Bce-5-1  | NZ_ABDA02000004.1  | - | 370284  | 370252  | RNA → rpmE2 (PRK01678)Ribosomal_L31 (pfam01197) → rpmE2 (PRK01678)Ribosomal_L31 (pfam01197) |
| Bce-28-1 | NZ_AAEK01000096.1  | + | 280     | 312     | RNA → rpmE2 (PRK01678)Ribosomal_L31 (pfam01197) → rpmE2 (PRK01678)Ribosomal_L31 (pfam01197) |
| Bce-43-1 | NZ_ABCZ02000035.1  | + | 6718    | 6750    | RNA → rpmE2 (PRK01678)Ribosomal_L31 (pfam01197) → rpmE2 (PRK01678)Ribosomal_L31 (pfam01197) |
| Bsp-51-1 | NZ_AYMM01000025.1  | + | 100909  | 100941  | RNA → rpmE2 (PRK01678)Ribosomal_L31 (pfam01197) →                                           |
| Bth-27-1 | NZ_AYPV01000046.1  | - | 235676  | 235644  | RNA → rpmE2 (PRK01678)Ribosomal_L31 (pfam01197) →                                           |
| Spn-1-2  | NZ_CKVP01000064.1  | - | 2654    | 2622    | RNA → rpmE2 (PRK01678)Ribosomal_L31 (pfam01197) →                                           |
| Bth-26-1 | NZ_AYSM01000032.1  | - | 413082  | 413050  | RNA → rpmE2 (PRK01678)Ribosomal_L31 (pfam01197) →                                           |
| Spn-1-3  | NZ_CLRF01000045.1  | - | 5931    | 5899    | RNA → rpmE2 (PRK01678)Ribosomal_L31 (pfam01197) →                                           |
| Bmy-6-1  | NZ_ASPZ01000051.1  | + | 183225  | 183257  | RNA → rpmE2 (PRK01678)Ribosomal_L31 (pfam01197) →                                           |
| Bth-32-1 | NZ_AMXS02000116.1  | + | 31044   | 31076   | RNA → rpmE2 (PRK01678)Ribosomal_L31 (pfam01197) →                                           |
| Bsu-13-1 | NZ_AZNI01000006.1  | + | 152247  | 152279  | RNA → rpmE2 (PRK01678)Ribosomal_L31 (pfam01197) →                                           |
| Spn-1-4  | NZ_CLBL01000054.1  | + | 4140    | 4172    | RNA → rpmE2 (PRK01678)Ribosomal_L31 (pfam01197) →                                           |
| Spn-1-5  | NZ_CKVY01000040.1  | + | 5832    | 5864    | RNA → rpmE2 (PRK01678)Ribosomal_L31 (pfam01197) →                                           |
| Bth-43-1 | NZ_AYXQ01000009.1  | - | 85575   | 85543   | RNA → rpmE2 (PRK01678)Ribosomal_L31 (pfam01197) →                                           |
| Spn-1-6  | NZ_CMDP01000044.1  | + | 4474    | 4506    | RNA → rpmE2 (PRK01678)Ribosomal_L31 (pfam01197) →                                           |
| Bth-35-1 | NZ_JEOC01000013.1  | - | 7003    | 6971    | RNA → rpmE2 (PRK01678)Ribosomal_L31 (pfam01197) →                                           |
| Bth-12-1 | NC_005957.1        | - | 5064430 | 5064398 | RNA → rpmE2 (PRK01678)Ribosomal_L31 (pfam01197) →                                           |
| Bce-16-1 | NC_004722.1        | - | 5237467 | 5237435 | RNA → rpmE2 (PRK01678)Ribosomal_L31 (pfam01197) → rpmE2 (PRK01678)Ribosomal_L31 (pfam01197) |
| Bce-24-1 | NC_006274.1        | - | 5128915 | 5128883 | RNA → rpmE2 (PRK01678)Ribosomal_L31 (pfam01197) →                                           |
| Bce-29-1 | NC_011772.1        | - | 5199166 | 5199134 | RNA → rpmE2 (PRK01678)Ribosomal_L31 (pfam01197) →                                           |
| Bce-33-1 | NC_011969.1        | - | 5036818 | 5036786 | RNA → rpmE2 (PRK01678)Ribosomal_L31 (pfam01197) → rpmE2 (PRK01678)Ribosomal_L31 (pfam01197) |
| Bce-13-1 | NC_011773.1        | - | 5118565 | 5118533 | rpmE2 (PRK01678)Ribosomal_L31 (pfam01197) →                                                 |
| Bce-15-1 | NC_003909.8        | - | 5038240 | 5038208 | RNA → rpmE2 (PRK01678)Ribosomal_L31 (pfam01197) →                                           |
| Bce-9-1  | NC_011658.1        | - | 5092666 | 5092634 | RNA → rpmE2 (PRK01678)Ribosomal_L31 (pfam01197) →                                           |
| Bth-10-1 | NC_017200.1        | - | 5177466 | 5177434 | RNA → rpmE2 (PRK01678)Ribosomal_L31 (pfam01197) →                                           |
| Bth-9-1  | NC_017208.1        | - | 5312273 | 5312241 | RNA → rpmE2 (PRK01678)Ribosomal_L31 (pfam01197) →                                           |
| Bce-31-1 | NC_016771.1        | - | 5044989 | 5044957 | RNA → rpmE2 (PRK01678)Ribosomal_L31 (pfam01197) →                                           |
| Bth-2-1  | NC_018877.1        | - | 5325945 | 5325913 | RNA → rpmE2 (PRK01678)Ribosomal_L31 (pfam01197) →                                           |
| Bth-24-1 | NC_018508.1        | - | 4822974 | 4822942 | RNA → rpmE2 (PRK01678)Ribosomal_L31 (pfam01197) →                                           |
| Bth-38-1 | NC_020238.1        | - | 5466196 | 5466164 | RNA → rpmE2 (PRK01678)Ribosomal_L31 (pfam01197) →                                           |
| Bth-3-1  | NC_018500.1        | + | 4315030 | 4315062 | RNA → rpmE2 (PRK01678)Ribosomal_L31 (pfam01197) →                                           |
| Bth-42-1 | NC_020376.1        | - | 5315959 | 5315927 | RNA → rpmE2 (PRK01678)Ribosomal_L31 (pfam01197) →                                           |
| Bth-6-1  | NC_018693.1        | - | 4426098 | 4426066 | RNA → rpmE2 (PRK01678)Ribosomal_L31 (pfam01197) → rpmE2 (PRK01678)Ribosomal_L31 (pfam01197) |
| Bce-27-1 | NC_018491.1        | + | 1766387 | 1766419 | rpmE2 (PRK01678)Ribosomal_L31 (pfam01197) →                                                 |
| Bto-1-1  | NC_022781.1        | - | 2454301 | 2454269 | RNA → rpmE2 (PRK01678)Ribosomal_L31 (pfam01197) → rpmE2 (PRK01678)Ribosomal_L31 (pfam01197) |
| Bth-39-1 | NZ_CP004858.1      | - | 5422066 | 5422034 | RNA → rpmE2 (PRK01678)Ribosomal_L31 (pfam01197) →                                           |
| Bth-39-2 | NZ_CP007607.1      | + | 517856  | 517888  | RNA → rpmE2 (PRK01678)Ribosomal_L31 (pfam01197) →                                           |
| Bth-37-1 | NZ_CP004870.1      | - | 5435621 | 5435589 | RNA → rpmE2 (PRK01678)Ribosomal_L31 (pfam01197) →                                           |
| Bbo-2-1  | NZ_CP007512.1      | - | 4973045 | 4973013 | RNA → rpmE2 (PRK01678)Ribosomal_L31 (pfam01197) →                                           |
| Bce-36-1 | NZ_CM000728.1      | - | 5006615 | 5006583 | RNA → rpmE2 (PRK01678)Ribosomal_L31 (pfam01197) → rpmE2 (PRK01678)Ribosomal_L31 (pfam01197) |
| Bce-12-1 | NZ_CM000738.1      | - | 4797858 | 4797826 | RNA → rpmE2 (PRK01678)Ribosomal_L31 (pfam01197) → rpmE2 (PRK01678)Ribosomal_L31 (pfam01197) |
| Bce-17-1 | NZ_CM000721.1      | + | 5030069 | 5030101 | RNA → rpmE2 (PRK01678)Ribosomal_L31 (pfam01197) → rpmE2 (PRK01678)Ribosomal_L31 (pfam01197) |
| Bth-11-1 | NZ_CM000756.1      | + | 5063643 | 5063675 | RNA → rpmE2 (PRK01678)Ribosomal_L31 (pfam01197) → rpmE2 (PRK01678)Ribosomal_L31 (pfam01197) |
| Bth-8-1  | NZ_CM000753.1      | + | 4929359 | 4929391 | RNA → rpmE2 (PRK01678)Ribosomal_L31 (pfam01197) → rpmE2 (PRK01678)Ribosomal_L31 (pfam01197) |



|           |               |   |         |         |                                                                                             |
|-----------|---------------|---|---------|---------|---------------------------------------------------------------------------------------------|
| Bce-37-1  | NZ_CM000730.1 | - | 4893712 | 4893680 | RNA → rpmE2 (PRK01678)Ribosomal_L31 (pfam01197) → rpmE2 (PRK01678)Ribosomal_L31 (pfam01197) |
| Bth-14-1  | NZ_CM000752.1 | - | 5032858 | 5032826 | RNA → rpmE2 (PRK01678)Ribosomal_L31 (pfam01197) → rpmE2 (PRK01678)Ribosomal_L31 (pfam01197) |
| Bce-41-1  | NZ_CM000735.1 | + | 4903796 | 4903828 | RNA → rpmE2 (PRK01678)Ribosomal_L31 (pfam01197) → rpmE2 (PRK01678)Ribosomal_L31 (pfam01197) |
| Bce-3-1   | NZ_CM000717.1 | - | 4853496 | 4853464 | RNA → rpmE2 (PRK01678)Ribosomal_L31 (pfam01197) → rpmE2 (PRK01678)Ribosomal_L31 (pfam01197) |
| Bce-46-1  | NZ_CM000722.1 | - | 4959910 | 4959878 | RNA → rpmE2 (PRK01678)Ribosomal_L31 (pfam01197) → rpmE2 (PRK01678)Ribosomal_L31 (pfam01197) |
| Bce-34-1  | NZ_CM000720.1 | + | 4913556 | 4913588 | RNA → rpmE2 (PRK01678)Ribosomal_L31 (pfam01197) → rpmE2 (PRK01678)Ribosomal_L31 (pfam01197) |
| Bce-14-1  | NZ_CM000715.1 | - | 5133278 | 5133246 | RNA → rpmE2 (PRK01678)Ribosomal_L31 (pfam01197) → rpmE2 (PRK01678)Ribosomal_L31 (pfam01197) |
| Bth-16-1  | NZ_CM000755.1 | + | 4886738 | 4886770 | RNA → rpmE2 (PRK01678)Ribosomal_L31 (pfam01197) → rpmE2 (PRK01678)Ribosomal_L31 (pfam01197) |
| Bth-4-1   | NZ_CM000758.1 | + | 5153478 | 5153510 | RNA → rpmE2 (PRK01678)Ribosomal_L31 (pfam01197) → rpmE2 (PRK01678)Ribosomal_L31 (pfam01197) |
| Bth-18-1  | NZ_CM000748.1 | + | 4896324 | 4896356 | RNA → rpmE2 (PRK01678)Ribosomal_L31 (pfam01197) → rpmE2 (PRK01678)Ribosomal_L31 (pfam01197) |
| Bce-38-1  | NZ_CM000731.1 | - | 4919707 | 4919675 | RNA → rpmE2 (PRK01678)Ribosomal_L31 (pfam01197) → rpmE2 (PRK01678)Ribosomal_L31 (pfam01197) |
| Bce-21-1  | NZ_CM000723.1 | + | 5024748 | 5024780 | RNA → rpmE2 (PRK01678)Ribosomal_L31 (pfam01197) → rpmE2 (PRK01678)Ribosomal_L31 (pfam01197) |
| Bth-15-1  | NZ_CM000750.1 | - | 4887859 | 4887827 | RNA → rpmE2 (PRK01678)Ribosomal_L31 (pfam01197) → rpmE2 (PRK01678)Ribosomal_L31 (pfam01197) |
| Bce-42-1  | NZ_CM000734.1 | - | 5035278 | 5035246 | RNA → rpmE2 (PRK01678)Ribosomal_L31 (pfam01197) → rpmE2 (PRK01678)Ribosomal_L31 (pfam01197) |
| Bce-35-1  | NZ_CM000729.1 | + | 4857814 | 4857846 | RNA → rpmE2 (PRK01678)Ribosomal_L31 (pfam01197) → rpmE2 (PRK01678)Ribosomal_L31 (pfam01197) |
| Bth-21-1  | NZ_KK088334.1 | - | 242518  | 242486  | RNA → rpmE2 (PRK01678)Ribosomal_L31 (pfam01197) → rpmE2 (PRK01678)Ribosomal_L31 (pfam01197) |
| Bce-14-2  | NZ_KN050654.1 | - | 491347  | 491315  | RNA → rpmE2 (PRK01678)Ribosomal_L31 (pfam01197) → rpmE2 (PRK01678)Ribosomal_L31 (pfam01197) |
| Bce-45-1  | NZ_CM000714.1 | - | 4850950 | 4850918 | RNA → rpmE2 (PRK01678)Ribosomal_L31 (pfam01197) → rpmE2 (PRK01678)Ribosomal_L31 (pfam01197) |
| Bsp-11-1  | NZ_JH414711.1 | + | 182856  | 182888  | RNA → rpmE2 (PRK01678)Ribosomal_L31 (pfam01197) → rpmE2 (PRK01678)Ribosomal_L31 (pfam01197) |
| Bce-69-1  | NZ_JH791968.1 | - | 5087536 | 5087504 | RNA → rpmE2 (PRK01678)Ribosomal_L31 (pfam01197) → rpmE2 (PRK01678)Ribosomal_L31 (pfam01197) |
| Bce-131-1 | NZ_JH792156.1 | + | 248131  | 248163  | RNA → rpmE2 (PRK01678)Ribosomal_L31 (pfam01197) → rpmE2 (PRK01678)Ribosomal_L31 (pfam01197) |
| Bce-55-1  | NZ_JH792223.1 | - | 409655  | 409623  | RNA → rpmE2 (PRK01678)Ribosomal_L31 (pfam01197) → rpmE2 (PRK01678)Ribosomal_L31 (pfam01197) |
| Bce-49-1  | NZ_JH792265.1 | + | 266039  | 266071  | RNA → rpmE2 (PRK01678)Ribosomal_L31 (pfam01197) → rpmE2 (PRK01678)Ribosomal_L31 (pfam01197) |
| Bce-134-1 | NZ_JH791855.1 | - | 412679  | 412647  | RNA → rpmE2 (PRK01678)Ribosomal_L31 (pfam01197) → rpmE2 (PRK01678)Ribosomal_L31 (pfam01197) |
| Bce-115-1 | NZ_JH792025.1 | - | 5004746 | 5004714 | RNA → rpmE2 (PRK01678)Ribosomal_L31 (pfam01197) → rpmE2 (PRK01678)Ribosomal_L31 (pfam01197) |
| Bce-67-1  | NZ_JH791899.1 | + | 254004  | 254036  | RNA → rpmE2 (PRK01678)Ribosomal_L31 (pfam01197) → rpmE2 (PRK01678)Ribosomal_L31 (pfam01197) |
| Bce-87-1  | NZ_JH804653.1 | + | 246240  | 246272  | RNA → rpmE2 (PRK01678)Ribosomal_L31 (pfam01197) → rpmE2 (PRK01678)Ribosomal_L31 (pfam01197) |
| Bce-121-1 | NZ_JH792240.1 | + | 257458  | 257490  | RNA → rpmE2 (PRK01678)Ribosomal_L31 (pfam01197) → rpmE2 (PRK01678)Ribosomal_L31 (pfam01197) |
| Bce-71-1  | NZ_JH791951.1 | - | 4892243 | 4892211 | RNA → rpmE2 (PRK01678)Ribosomal_L31 (pfam01197) → rpmE2 (PRK01678)Ribosomal_L31 (pfam01197) |
| Bce-52-1  | NZ_JH792321.1 | + | 243223  | 243255  | RNA → rpmE2 (PRK01678)Ribosomal_L31 (pfam01197) → rpmE2 (PRK01678)Ribosomal_L31 (pfam01197) |
| Bce-111-1 | NZ_JH792105.1 | + | 243201  | 243233  | RNA → rpmE2 (PRK01678)Ribosomal_L31 (pfam01197) → rpmE2 (PRK01678)Ribosomal_L31 (pfam01197) |
| Bce-138-1 | NZ_JH791819.1 | - | 5219376 | 5219344 | RNA → rpmE2 (PRK01678)Ribosomal_L31 (pfam01197) → rpmE2 (PRK01678)Ribosomal_L31 (pfam01197) |
| Bce-77-1  | NZ_JH804624.1 | + | 259696  | 259728  | RNA → rpmE2 (PRK01678)Ribosomal_L31 (pfam01197) → rpmE2 (PRK01678)Ribosomal_L31 (pfam01197) |
| Bce-96-1  | NZ_JH804690.1 | + | 254845  | 254877  | RNA → rpmE2 (PRK01678)Ribosomal_L31 (pfam01197) → rpmE2 (PRK01678)Ribosomal_L31 (pfam01197) |
| Bce-73-1  | NZ_JH791945.1 | - | 4359897 | 4359865 | RNA → rpmE2 (PRK01678)Ribosomal_L31 (pfam01197) → rpmE2 (PRK01678)Ribosomal_L31 (pfam01197) |
| Bce-97-1  | NZ_JH792136.1 | - | 384123  | 384091  | RNA → rpmE2 (PRK01678)Ribosomal_L31 (pfam01197) → rpmE2 (PRK01678)Ribosomal_L31 (pfam01197) |
| Bce-72-1  | NZ_JH804617.1 | + | 315988  | 316020  | RNA → rpmE2 (PRK01678)Ribosomal_L31 (pfam01197) → rpmE2 (PRK01678)Ribosomal_L31 (pfam01197) |
| Bce-113-1 | NZ_JH792018.1 | + | 281199  | 281231  | RNA → rpmE2 (PRK01678)Ribosomal_L31 (pfam01197) → rpmE2 (PRK01678)Ribosomal_L31 (pfam01197) |
| Bce-99-1  | NZ_JH792120.1 | - | 5021047 | 5021015 | RNA → rpmE2 (PRK01678)Ribosomal_L31 (pfam01197) → rpmE2 (PRK01678)Ribosomal_L31 (pfam01197) |
| Bce-133-1 | NZ_JH791865.1 | + | 265832  | 265864  | RNA → rpmE2 (PRK01678)Ribosomal_L31 (pfam01197) → rpmE2 (PRK01678)Ribosomal_L31 (pfam01197) |
| Bce-117-1 | NZ_JH792282.1 | + | 186404  | 186436  | RNA → rpmE2 (PRK01678)Ribosomal_L31 (pfam01197) → rpmE2 (PRK01678)Ribosomal_L31 (pfam01197) |
| Bce-123-1 | NZ_JH792166.1 | + | 257716  | 257748  | RNA → rpmE2 (PRK01678)Ribosomal_L31 (pfam01197) → rpmE2 (PRK01678)Ribosomal_L31 (pfam01197) |
| Bce-132-1 | NZ_JH791884.1 | - | 152349  | 152317  | RNA → rpmE2 (PRK01678)Ribosomal_L31 (pfam01197) → rpmE2 (PRK01678)Ribosomal_L31 (pfam01197) |
| Bce-135-1 | NZ_JH791833.1 | - | 4979784 | 4979752 | RNA → rpmE2 (PRK01678)Ribosomal_L31 (pfam01197) → rpmE2 (PRK01678)Ribosomal_L31 (pfam01197) |
| Bce-118-1 | NZ_JH792081.1 | - | 393135  | 393103  | RNA → rpmE2 (PRK01678)Ribosomal_L31 (pfam01197) → rpmE2 (PRK01678)Ribosomal_L31 (pfam01197) |
| Bce-70-1  | NZ_JH791942.1 | - | 5132776 | 5132744 | RNA → rpmE2 (PRK01678)Ribosomal_L31 (pfam01197) → rpmE2 (PRK01678)Ribosomal_L31 (pfam01197) |
| Bce-94-1  | NZ_JH804683.1 | + | 440203  | 440235  | RNA → rpmE2 (PRK01678)Ribosomal_L31 (pfam01197) → rpmE2 (PRK01678)Ribosomal_L31 (pfam01197) |
| Bce-112-1 | NZ_JH792039.1 | + | 21430   | 21462   | RNA → rpmE2 (PRK01678)Ribosomal_L31 (pfam01197) → rpmE2 (PRK01678)Ribosomal_L31 (pfam01197) |
| Bce-86-1  | NZ_CM001787.1 | - | 5054594 | 5054562 | RNA → rpmE2 (PRK01678)Ribosomal_L31 (pfam01197) → rpmE2 (PRK01678)Ribosomal_L31 (pfam01197) |
| Bth-22-1  | NZ_CM001804.1 | - | 5584093 | 5584061 | RNA → rpmE2 (PRK01678)Ribosomal_L31 (pfam01197) → rpmE2 (PRK01678)Ribosomal_L31 (pfam01197) |
| Bth-22-2  | NZ_CM001804.1 | - | 5582913 | 5582881 | RNA → rpmE2 (PRK01678)Ribosomal_L31 (pfam01197) → rpmE2 (PRK01678)Ribosomal_L31 (pfam01197) |
| Bce-95-1  | NZ_KB976627.1 | - | 250768  | 250736  | RNA → rpmE2 (PRK01678)Ribosomal_L31 (pfam01197) → rpmE2 (PRK01678)Ribosomal_L31 (pfam01197) |

|           |               |   |         |         |                                                                                                                                           |
|-----------|---------------|---|---------|---------|-------------------------------------------------------------------------------------------------------------------------------------------|
| Bce-60-1  | NZ_KB976517.1 | - | 5040982 | 5040950 | RNA → rpmE2 (PRK01678)Ribosomal_L31 (pfam01197) →                                                                                         |
| Bce-81-1  | NZ_KB976593.1 | + | 263858  | 263890  | RNA → rpmE2 (PRK01678)Ribosomal_L31 (pfam01197) →                                                                                         |
| Bce-61-1  | NZ_KE332507.1 | - | 5030046 | 5030014 | RNA → rpmE2 (PRK01678)Ribosomal_L31 (pfam01197) →                                                                                         |
| Bce-114-1 | NZ_KB976039.1 | + | 263486  | 263518  | RNA → rpmE2 (PRK01678)Ribosomal_L31 (pfam01197) →                                                                                         |
| Bce-126-1 | NZ_KB976184.1 | - | 868527  | 868495  | RNA → rpmE2 (PRK01678)Ribosomal_L31 (pfam01197) →                                                                                         |
| Bce-98-1  | NZ_KB976545.1 | - | 220766  | 220734  | RNA → rpmE2 (PRK01678)Ribosomal_L31 (pfam01197) →                                                                                         |
| Bce-58-1  | NZ_KB976220.1 | + | 193877  | 193909  | RNA → rpmE2 (PRK01678)Ribosomal_L31 (pfam01197) →                                                                                         |
| Bth-23-1  | NZ_HG810020.1 | - | 443455  | 443423  | RNA → rpmE2 (PRK01678)Ribosomal_L31 (pfam01197) →                                                                                         |
| Bce-89-1  | NZ_KB976661.1 | - | 379081  | 379049  | RNA → rpmE2 (PRK01678)Ribosomal_L31 (pfam01197) →                                                                                         |
| Bce-102-1 | NZ_KB976311.1 | - | 1309599 | 1309567 | RNA → rpmE2 (PRK01678)Ribosomal_L31 (pfam01197) →                                                                                         |
| Bce-128-1 | NZ_KB976808.1 | - | 405722  | 405690  | RNA → rpmE2 (PRK01678)Ribosomal_L31 (pfam01197) →                                                                                         |
| Bce-147-1 | NZ_KB976117.1 | - | 411767  | 411735  | RNA → rpmE2 (PRK01678)Ribosomal_L31 (pfam01197) →                                                                                         |
| Bce-125-1 | NZ_KB976650.1 | - | 386069  | 386037  | RNA → rpmE2 (PRK01678)Ribosomal_L31 (pfam01197) →                                                                                         |
| Bce-57-1  | NZ_KB976207.1 | - | 5024371 | 5024339 | RNA → rpmE2 (PRK01678)Ribosomal_L31 (pfam01197) →                                                                                         |
| Bce-103-1 | NZ_KB976769.1 | - | 440019  | 439987  | RNA → rpmE2 (PRK01678)Ribosomal_L31 (pfam01197) →                                                                                         |
| Bce-54-1  | NZ_KB976160.1 | + | 255650  | 255682  | RNA → rpmE2 (PRK01678)Ribosomal_L31 (pfam01197) →                                                                                         |
| Bce-75-1  | NZ_KB976554.1 | - | 419271  | 419239  | RNA → rpmE2 (PRK01678)Ribosomal_L31 (pfam01197) →                                                                                         |
| Bce-137-1 | NZ_KB976266.1 | - | 422107  | 422075  | RNA → rpmE2 (PRK01678)Ribosomal_L31 (pfam01197) →                                                                                         |
| Bce-53-1  | NZ_KE332537.1 | - | 411040  | 411008  | RNA → rpmE2 (PRK01678)Ribosomal_L31 (pfam01197) →                                                                                         |
| Bce-59-1  | NZ_KB976237.1 | - | 4422472 | 4422440 | RNA → rpmE2 (PRK01678)Ribosomal_L31 (pfam01197) →                                                                                         |
| Bce-136-1 | NZ_KB976843.1 | - | 70671   | 70639   | RNA → rpmE2 (PRK01678)Ribosomal_L31 (pfam01197) →                                                                                         |
| Bth-13-1  | NZ_CM000751.1 | + | 4809697 | 4809729 | RNA → rpmE2 (PRK01678)Ribosomal_L31 (pfam01197) → rpmE2 (PRK01678)Ribosomal_L31 (pfam01197) →                                             |
| Bth-5-1   | NZ_CM000759.1 | + | 4781622 | 4781654 | RNA → rpmE2 (PRK01678)Ribosomal_L31 (pfam01197) → rpmE2 (PRK01678)Ribosomal_L31 (pfam01197) →                                             |
| Bth-34-1  | NZ_CP010106.1 | - | 5260251 | 5260219 | RNA → rpmE2 (PRK01678)Ribosomal_L31 (pfam01197) →                                                                                         |
| Bce-47-1  | NZ_CP009941.1 | + | 100239  | 100271  | RNA → rpmE2 (PRK01678)Ribosomal_L31 (pfam01197) →                                                                                         |
| Bth-33-1  | NZ_CP010089.1 | - | 5435610 | 5435578 | RNA → rpmE2 (PRK01678)Ribosomal_L31 (pfam01197) →                                                                                         |
| Bth-20-1  | NC_008600.1   | - | 5087437 | 5087405 | RNA → rpmE2 (PRK01678)Ribosomal_L31 (pfam01197) → rpmE2 (PRK01678)Ribosomal_L31 (pfam01197) → rpmE2 (PRK01678)Ribosomal_L31 (pfam01197) → |
| Bth-1-1   | NC_014171.1   | - | 5149570 | 5149538 | rpmE2 (PRK01678)Ribosomal_L31 (pfam01197) → rpmE2 (PRK01678)Ribosomal_L31 (pfam01197) → rpmE2 (PRK01678)Ribosomal_L31 (pfam01197) →       |
| Bce-139-1 | NZ_KB976695.1 | - | 4408716 | 4408684 | RNA → rpmE2 (PRK01678)Ribosomal_L31 (pfam01197) →                                                                                         |
| Bce-105-1 | NZ_KB976300.1 | + | 263669  | 263701  | RNA → rpmE2 (PRK01678)Ribosomal_L31 (pfam01197) →                                                                                         |
| Bce-101-1 | NZ_KB976325.1 | - | 1320401 | 1320369 | RNA → rpmE2 (PRK01678)Ribosomal_L31 (pfam01197) →                                                                                         |
| Bth-30-1  | NC_022873.1   | - | 5825716 | 5825684 | RNA → rpmE2 (PRK01678)Ribosomal_L31 (pfam01197) →                                                                                         |
| Bce-28-2  | NZ_CP009590.1 | + | 2646537 | 2646569 | RNA → rpmE2 (PRK01678)Ribosomal_L31 (pfam01197) →                                                                                         |
| Bce-17-2  | NZ_CP009628.1 | + | 2800811 | 2800843 | RNA → rpmE2 (PRK01678)Ribosomal_L31 (pfam01197) →                                                                                         |
| Bce-47-2  | NZ_CP009596.1 | + | 3811663 | 3811695 | RNA → rpmE2 (PRK01678)Ribosomal_L31 (pfam01197) →                                                                                         |
| Bce-48-1  | NZ_CP009641.1 | - | 3825469 | 3825437 | RNA → rpmE2 (PRK01678)Ribosomal_L31 (pfam01197) →                                                                                         |
| Bce-47-3  | NZ_CP009369.1 | + | 5167894 | 5167926 | RNA → rpmE2 (PRK01678)Ribosomal_L31 (pfam01197) →                                                                                         |
| Bce-24-2  | NZ_CP009968.1 | + | 333073  | 333105  | RNA → rpmE2 (PRK01678)Ribosomal_L31 (pfam01197) →                                                                                         |
| Bth-25-1  | NZ_CP009351.1 | + | 4083244 | 4083276 | RNA → rpmE2 (PRK01678)Ribosomal_L31 (pfam01197) →                                                                                         |
| Bce-47-4  | NZ_CP009605.1 | + | 4356486 | 4356518 | RNA → rpmE2 (PRK01678)Ribosomal_L31 (pfam01197) →                                                                                         |
| Bth-36-1  | NZ_CP010005.1 | + | 361032  | 361064  | RNA → rpmE2 (PRK01678)Ribosomal_L31 (pfam01197) →                                                                                         |
| Bth-41-1  | NZ_CP010577.1 | - | 5464481 | 5464449 | RNA → rpmE2 (PRK01678)Ribosomal_L31 (pfam01197) →                                                                                         |
| Bth-28-1  | NZ_KN849185.1 | - | 117278  | 117246  | RNA → rpmE2 (PRK01678)Ribosomal_L31 (pfam01197) →                                                                                         |
| Bce-47-5  | NZ_CP009686.1 | - | 5177931 | 5177899 | RNA → rpmE2 (PRK01678)Ribosomal_L31 (pfam01197) →                                                                                         |
| Bth-19-1  | NZ_CM000746.1 | + | 5020833 | 5020865 | RNA → rpmE2 (PRK01678)Ribosomal_L31 (pfam01197) → rpmE2 (PRK01678)Ribosomal_L31 (pfam01197) →                                             |
| Bce-19-1  | NZ_CM000726.1 | - | 4943444 | 4943412 | RNA → rpmE2 (PRK01678)Ribosomal_L31 (pfam01197) → rpmE2 (PRK01678)Ribosomal_L31 (pfam01197) →                                             |
| Bce-22-1  | NZ_CM000724.1 | + | 4921172 | 4921204 | RNA → rpmE2 (PRK01678)Ribosomal_L31 (pfam01197) → rpmE2 (PRK01678)Ribosomal_L31 (pfam01197) →                                             |
| Bce-39-1  | NZ_CM000732.1 | + | 4928815 | 4928847 | RNA → rpmE2 (PRK01678)Ribosomal_L31 (pfam01197) → rpmE2 (PRK01678)Ribosomal_L31 (pfam01197) →                                             |
| Bce-4-1   | NZ_CM000727.1 | + | 4964402 | 4964370 | RNA → rpmE2 (PRK01678)Ribosomal_L31 (pfam01197) → rpmE2 (PRK01678)Ribosomal_L31 (pfam01197) →                                             |
| Bce-100-1 | NZ_KE150020.1 | + | 186887  | 186919  | RNA → rpmE2 (PRK01678)Ribosomal_L31 (pfam01197) →                                                                                         |
| Bce-18-1  | NC_011725.1   | - | 5245447 | 5245415 | RNA → rpmE2 (PRK01678)Ribosomal_L31 (pfam01197) →                                                                                         |



|           |                         |   |         |         |                                                                                             |
|-----------|-------------------------|---|---------|---------|---------------------------------------------------------------------------------------------|
| Spn-1-7   | NZ_CRRFT01000061.1      | + | 4487    | 4519    | RNA → rpmE2 (PRK01678)Ribosomal_L31 (pfam01197) →                                           |
| env-945   | 3300000053_144823       | - | 80      | 50      | RNA → hypo →                                                                                |
| Bsp-21-1  | NZ_GL635751.1           | - | 651664  | 651634  | RNA → rpmE (PRK00019)Ribosomal_L31 (pfam01197) →                                            |
| Boc-1-1   | NZ_ALEG01000028.1       | + | 150357  | 150387  | RNA → rpmE (PRK00019)Ribosomal_L31 (pfam01197) →                                            |
| Bfi-2-1   | NZ_APVL01000003.1       | - | 169647  | 169617  | RNA → rpmE (PRK00019)Ribosomal_L31 (pfam01197) →                                            |
| Sgl-1-1   | NZ_LGUF01000007.1       | + | 808393  | 808423  | RNA → rpmE (PRK00019)Ribosomal_L31 (pfam01197) →                                            |
| Bsp-44-1  | NZ_LIGI01000001.1       | - | 4212263 | 4212232 | RNA → rpmE (PRK00019)Ribosomal_L31 (pfam01197) →                                            |
| env-946   | JGI25159J45721_1006073  | + | 2550    | 2582    | RNA → rpmE2 (PRK01678)Ribosomal_L31 (pfam01197) →                                           |
| env-947   | JGI25151J46595_10041049 | + | 116     | 148     | RNA → rpmE2 (PRK01678)Ribosomal_L31 (pfam01197) →                                           |
| Bsp-64-1  | NZ_LDUK01000040.1       | - | 27734   | 27702   | RNA → rpmE2 (PRK01678)Ribosomal_L31 (pfam01197) →                                           |
| Bsp-50-1  | NZ_AYMH01000001.1       | + | 178427  | 178459  | RNA → rpmE2 (PRK01678)Ribosomal_L31 (pfam01197) →                                           |
| Bwe-2-1   | NZ_JNLY01000008.1       | + | 176304  | 176336  | RNA → rpmE2 (PRK01678)Ribosomal_L31 (pfam01197) →                                           |
| Bmy-5-1   | NZ_ASFY01000107.1       | - | 7718    | 7686    | RNA → rpmE2 (PRK01678)Ribosomal_L31 (pfam01197) →                                           |
| Bwe-1-1   | NC_010184.1             | - | 5092651 | 5092619 | RNA → rpmE2 (PRK01678)Ribosomal_L31 (pfam01197) → rpmE2 (PRK01678)Ribosomal_L31 (pfam01197) |
| Bmy-7-1   | NZ_BAUY01000041.1       | - | 41558   | 41526   | RNA → rpmE2 (PRK01678)Ribosomal_L31 (pfam01197) →                                           |
| Bce-91-1  | NZ_KB976154.1           | - | 405933  | 405901  | RNA → rpmE2 (PRK01678)Ribosomal_L31 (pfam01197) →                                           |
| Bce-10-1  | NZ_CM000737.1           | + | 4934442 | 4934474 | RNA → rpmE2 (PRK01678)Ribosomal_L31 (pfam01197) → rpmE2 (PRK01678)Ribosomal_L31 (pfam01197) |
| Bce-11-1  | NZ_CM000719.1           | - | 4835424 | 4835392 | RNA → rpmE2 (PRK01678)Ribosomal_L31 (pfam01197) →                                           |
| Bce-20-1  | NZ_CM000725.1           | + | 4915535 | 4915567 | RNA → rpmE2 (PRK01678)Ribosomal_L31 (pfam01197) → rpmE2 (PRK01678)Ribosomal_L31 (pfam01197) |
| Bce-30-1  | NZ_CM000718.1           | + | 5004963 | 5004995 | RNA → rpmE2 (PRK01678)Ribosomal_L31 (pfam01197) → rpmE2 (PRK01678)Ribosomal_L31 (pfam01197) |
| Bce-7-1   | NZ_CM000740.1           | - | 4811048 | 4811016 | RNA → rpmE2 (PRK01678)Ribosomal_L31 (pfam01197) → rpmE2 (PRK01678)Ribosomal_L31 (pfam01197) |
| Bmy-1-1   | NZ_CM000742.1           | + | 4692039 | 4692071 | RNA → rpmE2 (PRK01678)Ribosomal_L31 (pfam01197) → rpmE2 (PRK01678)Ribosomal_L31 (pfam01197) |
| Bce-8-1   | NZ_CM000741.1           | + | 4823193 | 4823225 | RNA → rpmE2 (PRK01678)Ribosomal_L31 (pfam01197) → rpmE2 (PRK01678)Ribosomal_L31 (pfam01197) |
| Bce-83-1  | NZ_JH792011.1           | - | 5058984 | 5058952 | RNA → rpmE2 (PRK01678)Ribosomal_L31 (pfam01197) →                                           |
| Bce-144-1 | NZ_JH791809.1           | - | 4517571 | 4517539 | RNA → rpmE2 (PRK01678)Ribosomal_L31 (pfam01197) →                                           |
| Bce-110-1 | NZ_JH792113.1           | + | 2442694 | 2442726 | RNA → rpmE2 (PRK01678)Ribosomal_L31 (pfam01197) →                                           |
| Bce-84-1  | NZ_JH791991.1           | + | 263206  | 263238  | RNA → rpmE2 (PRK01678)Ribosomal_L31 (pfam01197) →                                           |
| Bce-93-1  | NZ_JH792148.1           | + | 254398  | 254430  | RNA → rpmE2 (PRK01678)Ribosomal_L31 (pfam01197) →                                           |
| Bce-119-1 | NZ_JH792311.1           | + | 243877  | 243909  | RNA → rpmE2 (PRK01678)Ribosomal_L31 (pfam01197) →                                           |
| Bce-90-1  | NZ_JH792097.1           | - | 5038004 | 5037972 | RNA → rpmE2 (PRK01678)Ribosomal_L31 (pfam01197) →                                           |
| Bce-120-1 | NZ_JH792251.1           | + | 232233  | 232265  | RNA → rpmE2 (PRK01678)Ribosomal_L31 (pfam01197) →                                           |
| Bce-143-1 | NZ_JH791837.1           | + | 232980  | 233012  | RNA → rpmE2 (PRK01678)Ribosomal_L31 (pfam01197) →                                           |
| Bce-82-1  | NZ_JH804642.1           | - | 5078164 | 5078132 | RNA → rpmE2 (PRK01678)Ribosomal_L31 (pfam01197) →                                           |
| Bce-146-1 | NZ_JH791802.1           | + | 495409  | 495441  | RNA → rpmE2 (PRK01678)Ribosomal_L31 (pfam01197) →                                           |
| Bce-88-1  | NZ_JH804673.1           | + | 262212  | 262244  | RNA → rpmE2 (PRK01678)Ribosomal_L31 (pfam01197) →                                           |
| Bce-80-1  | NZ_JH791985.1           | + | 199165  | 199197  | RNA → rpmE2 (PRK01678)Ribosomal_L31 (pfam01197) →                                           |
| Bce-122-1 | NZ_JH792233.1           | - | 403322  | 403290  | RNA → rpmE2 (PRK01678)Ribosomal_L31 (pfam01197) →                                           |
| Bce-64-1  | NZ_JH791910.1           | + | 261506  | 261538  | RNA → rpmE2 (PRK01678)Ribosomal_L31 (pfam01197) →                                           |
| Bce-76-1  | NZ_JH791976.1           | + | 253248  | 253280  | RNA → rpmE2 (PRK01678)Ribosomal_L31 (pfam01197) →                                           |
| Bce-79-1  | NZ_JH804637.1           | - | 4782587 | 4782555 | RNA → rpmE2 (PRK01678)Ribosomal_L31 (pfam01197) →                                           |
| Bce-65-1  | NZ_JH791914.1           | + | 33644   | 33676   | RNA → rpmE2 (PRK01678)Ribosomal_L31 (pfam01197) →                                           |
| Bce-68-1  | NZ_JH791923.1           | + | 273803  | 273835  | RNA → rpmE2 (PRK01678)Ribosomal_L31 (pfam01197) →                                           |
| Bce-74-1  | NZ_JH791996.1           | + | 184561  | 184593  | RNA → rpmE2 (PRK01678)Ribosomal_L31 (pfam01197) →                                           |
| Bce-78-1  | NZ_JH804628.1           | - | 2665814 | 2665782 | RNA → rpmE2 (PRK01678)Ribosomal_L31 (pfam01197) →                                           |
| Bce-56-1  | NZ_JH792182.1           | + | 234573  | 234605  | RNA → rpmE2 (PRK01678)Ribosomal_L31 (pfam01197) →                                           |
| Bce-66-1  | NZ_KB976982.1           | - | 397475  | 397443  | RNA → rpmE2 (PRK01678)Ribosomal_L31 (pfam01197) →                                           |
| Bce-124-1 | NZ_KB976800.1           | - | 1744786 | 1744754 | RNA → rpmE2 (PRK01678)Ribosomal_L31 (pfam01197) →                                           |
| Bce-92-1  | NZ_KB976147.1           | + | 190193  | 190225  | RNA → rpmE2 (PRK01678)Ribosomal_L31 (pfam01197) →                                           |
| Bce-116-1 | NZ_KB976281.1           | - | 389591  | 389559  | RNA → rpmE2 (PRK01678)Ribosomal_L31 (pfam01197) →                                           |
| Bce-109-1 | NZ_KB976394.1           | + | 45840   | 45872   | RNA → rpmE2 (PRK01678)Ribosomal_L31 (pfam01197) →                                           |
| Bce-50-1  | NZ_KB976960.1           | - | 380250  | 380218  | RNA → rpmE2 (PRK01678)Ribosomal_L31 (pfam01197) →                                           |
| Bce-130-1 | NZ_KB976678.1           | - | 402912  | 402880  | RNA → rpmE2 (PRK01678)Ribosomal_L31 (pfam01197) →                                           |

|           |                         |   |         |         |                                                                                                                                                                                    |
|-----------|-------------------------|---|---------|---------|------------------------------------------------------------------------------------------------------------------------------------------------------------------------------------|
| Bce-141-1 | NZ_KB976199.1           | + | 251413  | 251445  | RNA → rpmE2 (PRK01678)Ribosomal_L31 (pfam01197) →                                                                                                                                  |
| Bce-145-1 | NZ_KB976714.1           | - | 422602  | 422570  | RNA → rpmE2 (PRK01678)Ribosomal_L31 (pfam01197) →                                                                                                                                  |
| Bce-51-1  | NZ_KB976291.1           | - | 415314  | 415282  | RNA → rpmE2 (PRK01678)Ribosomal_L31 (pfam01197) →                                                                                                                                  |
| Bce-129-1 | NZ_KE150047.1           | + | 205009  | 205041  | RNA → rpmE2 (PRK01678)Ribosomal_L31 (pfam01197) →                                                                                                                                  |
| Bmy-4-3   | NZ_CP009746.1           | + | 4223781 | 4223813 | RNA → rpmE2 (PRK01678)Ribosomal_L31 (pfam01197) →                                                                                                                                  |
| Bce-62-1  | NZ_KB976530.1           | + | 248857  | 248889  | RNA → rpmE2 (PRK01678)Ribosomal_L31 (pfam01197) →                                                                                                                                  |
| Bmy-4-4   | NZ_CP009692.1           | + | 659279  | 659311  | RNA → rpmE2 (PRK01678)Ribosomal_L31 (pfam01197) →                                                                                                                                  |
| Afl-1-1   | NC_011567.1             | - | 2710818 | 2710787 | RNA → rpmE (PRK00019)Ribosomal_L31 (pfam01197) →                                                                                                                                   |
| Afl-3-1   | NZ_APCD01000007.1       | - | 45792   | 45761   | RNA → rpmE (PRK00019)Ribosomal_L31 (pfam01197) → Tdk (COG1435)PRK04296 (PRK04296) → PrfA (COG0216)prfA (PRK00591) → HemK (COG2890)RF_mod_PrmC (TIGR03534) → Spore_II_R (pfam09551) |
| Ath-1-1   | NZ_JXTH01000088.1       | + | 6006    | 6037    | RNA → rpmE (PRK00019)Ribosomal_L31 (pfam01197) → Tdk (COG1435)PRK04296 (PRK04296) →                                                                                                |
| Afl-6-1   | NZ_KN127223.1           | - | 319655  | 319624  | RNA → rpmE (PRK00019)Ribosomal_L31 (pfam01197) → Tdk (COG1435)PRK04296 (PRK04296) → PrfA (COG0216)prfA (PRK00591) → HemK (COG2890)RF_mod_PrmC (TIGR03534) → Spore_II_R (pfam09551) |
| Afl-4-1   | NZ_BARH01000011.1       | - | 11777   | 11746   | RNA → rpmE (PRK00019)Ribosomal_L31 (pfam01197) → Tdk (COG1435)PRK04296 (PRK04296) → PrfA (COG0216)prfA (PRK00591) → HemK (COG2890)RF_mod_PrmC (TIGR03534) → Spore_II_R (pfam09551) |
| Afl-5-1   | NZ_KB205935.1           | - | 2540628 | 2540597 | RNA → rpmE (PRK00019)Ribosomal_L31 (pfam01197) → Tdk (COG1435)PRK04296 (PRK04296) →                                                                                                |
| Asp-3-1   | NZ_JPZN01000073.1       | + | 26746   | 26777   | RNA → rpmE (PRK00019)Ribosomal_L31 (pfam01197) → Tdk (COG1435)PRK04296 (PRK04296) → PrfA (COG0216)prfA (PRK00591) → HemK (COG2890)RF_mod_PrmC (TIGR03534) → Spore_II_R (pfam09551) |
| Ago-1-1   | NZ_CP012152.1           | - | 2661090 | 2661059 | RNA → rpmE (PRK00019)Ribosomal_L31 (pfam01197) → Tdk (COG1435)PRK04296 (PRK04296) → PrfA (COG0216)prfA (PRK00591) → HemK (COG2890)RF_mod_PrmC (TIGR03534) → Spore_II_R (pfam09551) |
| Aka-1-1   | NZ_ALJT01000059.1       | - | 42386   | 42355   | RNA → rpmE (PRK00019)Ribosomal_L31 (pfam01197) → Tdk (COG1435)PRK04296 (PRK04296) → PrfA (COG0216)prfA (PRK00591) → HemK (COG2890)RF_mod_PrmC (TIGR03534) → Spore_II_R (pfam09551) |
| Asp-2-1   | NZ_ANMT01000010.1       | - | 18982   | 18951   | RNA → rpmE (PRK00019)Ribosomal_L31 (pfam01197) → Tdk (COG1435)PRK04296 (PRK04296) → PrfA (COG0216)prfA (PRK00591) → HemK (COG2890)RF_mod_PrmC (TIGR03534) → Spore_II_R (pfam09551) |
| Afl-2-1   | NZ_JPZO01000009.1       | + | 56873   | 56904   | RNA → rpmE (PRK00019)Ribosomal_L31 (pfam01197) → hypo →                                                                                                                            |
| Aay-1-1   | NZ_JXTG01000005.1       | + | 108572  | 108603  | RNA → rpmE (PRK00019)Ribosomal_L31 (pfam01197) → Tdk (COG1435)PRK04296 (PRK04296) →                                                                                                |
| Asp-4-1   | NZ_ANOC01000013.1       | - | 1020    | 989     | RNA → rpmE (PRK00019)Ribosomal_L31 (pfam01197) → Tdk (COG1435)PRK04296 (PRK04296) →                                                                                                |
| Asp-1-1   | NZ_JRLC01000005.1       | + | 88913   | 88944   | RNA → rpmE (PRK00019)Ribosomal_L31 (pfam01197) → Tdk (COG1435)PRK04296 (PRK04296) →                                                                                                |
| Bsp-18-1  | NC_021171.1             | - | 4666274 | 4666244 | RNA → rpmE (PRK00019)Ribosomal_L31 (pfam01197) →                                                                                                                                   |
| Bje-1-1   | NZ_CCAS01000008.1       | - | 57067   | 57037   | RNA → rpmE (PRK00019)Ribosomal_L31 (pfam01197) →                                                                                                                                   |
| Bme-4-1   | NZ_AFEU01000002.1       | + | 535147  | 535177  | RNA → rpmE (PRK00019)Ribosomal_L31 (pfam01197) → rpmE (PRK00019)Ribosomal_L31 (pfam01197) → hypo → Tdk (COG1435)PRK04296 (PRK04296) → Tdk (COG1435)PRK04296 (PRK04296) →           |
| Bvi-2-1   | NZ_LDNB01000013.1       | - | 34089   | 34059   | RNA → rpmE (PRK00019)Ribosomal_L31 (pfam01197) →                                                                                                                                   |
| Bvi-3-1   | NZ_ALAN01000227.1       | - | 990     | 960     | RNA → rpmE (PRK00019)Ribosomal_L31 (pfam01197) →                                                                                                                                   |
| env-948   | JGI12467J12023_1238085  | + | 6       | 36      | RNA → rpmE (PRK00019)Ribosomal_L31 (pfam01197) →                                                                                                                                   |
| Bsp-55-1  | NZ_CCYL01000041.1       | + | 25429   | 25459   | RNA → rpmE (PRK00019)Ribosomal_L31 (pfam01197) →                                                                                                                                   |
| Bme-10-1  | NZ_CP007739.1           | - | 3209895 | 3209865 | RNA → rpmE (PRK00019)Ribosomal_L31 (pfam01197) →                                                                                                                                   |
| Bsp-90-1  | NZ_KK366020.1           | + | 182519  | 182549  | RNA → rpmE (PRK00019)Ribosomal_L31 (pfam01197) →                                                                                                                                   |
| Bal-4-1   | NZ_JYCE01000071.1       | + | 107377  | 107408  | RNA → rpmE (PRK00019)Ribosomal_L31 (pfam01197) →                                                                                                                                   |
| Bce-1-1   | NC_014829.1             | - | 4418863 | 4418833 | RNA → rpmE2 (PRK01678)Ribosomal_L31 (pfam01197) →                                                                                                                                  |
| env-949   | JGI12273J12029_10233837 | + | 19      | 49      | RNA → rpmE (PRK00019)Ribosomal_L31 (pfam01197) →                                                                                                                                   |
| env-950   | JGI12273J12029_10168107 | + | 25      | 55      | RNA → rpmE (PRK00019)Ribosomal_L31 (pfam01197) →                                                                                                                                   |
| Bgi-2-1   | NZ_JAGM01000007.1       | + | 56131   | 56162   | RNA → rpmE (PRK00019)Ribosomal_L31 (pfam01197) →                                                                                                                                   |
| Bgi-1-1   | NZ_JRUN01000002.1       | - | 45090   | 45059   | RNA → rpmE (PRK00019)Ribosomal_L31 (pfam01197) →                                                                                                                                   |
| env-951   | JGI26050J44790_1003763  | - | 2351    | 2320    | RNA → rpmE (PRK00019)Ribosomal_L31 (pfam01197) →                                                                                                                                   |
| Bco-9-1   | NZ_GL995240.1           | - | 74763   | 74732   | RNA → rpmE (PRK00019)Ribosomal_L31 (pfam01197) →                                                                                                                                   |
| env-952   | JGI26053J44789_1114936  | - | 54      | 23      | RNA → ← hypo                                                                                                                                                                       |
| env-953   | JGI26052J44787_1127615  | - | 54      | 23      | RNA → ← hypo                                                                                                                                                                       |
| Bco-1-1   | NC_015634.1             | - | 2895571 | 2895540 | RNA → rpmE (PRK00019)Ribosomal_L31 (pfam01197) →                                                                                                                                   |
| Bco-6-1   | NZ_CP009709.1           | - | 2007760 | 2007729 | RNA → rpmE (PRK00019)Ribosomal_L31 (pfam01197) →                                                                                                                                   |
| Bco-7-1   | NZ_ANAQ01000305.1       | - | 8529    | 8498    | RNA → rpmE (PRK00019)Ribosomal_L31 (pfam01197) →                                                                                                                                   |
| Bco-5-1   | NZ_AXVW01000015.1       | - | 43301   | 43270   | RNA → rpmE (PRK00019)Ribosomal_L31 (pfam01197) →                                                                                                                                   |
| env-954   | JGI26050J44790_1001615  | + | 5122    | 5153    | RNA → rpmE (PRK00019)Ribosomal_L31 (pfam01197) →                                                                                                                                   |
| env-955   | JGI26051J44788_1000227  | - | 27870   | 27839   | RNA → rpmE (PRK00019)Ribosomal_L31 (pfam01197) →                                                                                                                                   |

|            |                         |   |         |         |                                                                                                 |
|------------|-------------------------|---|---------|---------|-------------------------------------------------------------------------------------------------|
| env-956    | JGI26053J44789_1000222  | + | 6061    | 6092    | RNA → rpmE (PRK00019)Ribosomal_L31 (pfam01197) →                                                |
| env-957    | JGI26052J44787_1000106  | + | 3807    | 3838    | RNA → rpmE (PRK00019)Ribosomal_L31 (pfam01197) →                                                |
| Bco-4-1    | NZ_CP010525.1           | + | 190910  | 190941  | RNA → rpmE (PRK00019)Ribosomal_L31 (pfam01197) →                                                |
| Bco-4-2    | NZ_CP011939.1           | - | 899232  | 899201  | RNA → rpmE (PRK00019)Ribosomal_L31 (pfam01197) →                                                |
| Bco-8-1    | NZ_JSUI01000029.1       | - | 42813   | 42782   | RNA → rpmE (PRK00019)Ribosomal_L31 (pfam01197) →                                                |
| Bal-4-2    | NZ_JYCE01000129.1       | + | 44156   | 44188   | RNA → rpmE (PRK00019)Ribosomal_L31 (pfam01197) →                                                |
| Bps-4-1    | NZ_AJTN02000012.1       | + | 1662    | 1692    | RNA → rpmE (PRK00019)Ribosomal_L31 (pfam01197) →                                                |
| Bac-1-1    | NZ_KB893980.1           | - | 42221   | 42189   | RNA → rpmE (PRK00019)Ribosomal_L31 (pfam01197) → <b>Tdk (COG1435)PRK04296 (PRK04296) → hypo</b> |
| Bbu-1-1    | NZ_LGYA01000005.1       | + | 190988  | 191018  | RNA → rpmE (PRK00019)Ribosomal_L31 (pfam01197) →                                                |
| env-958    | JGI25151J46595_10101225 | - | 365     | 335     | RNA → rpmE (PRK00019)Ribosomal_L31 (pfam01197) →                                                |
| Bsi-3-1    | NZ_KN360957.1           | - | 114752  | 114722  | RNA → rpmE (PRK00019)Ribosomal_L31 (pfam01197) →                                                |
| Bsp-19-1   | NZ_JVPL01000166.1       | - | 5209    | 5179    | RNA → rpmE (PRK00019)Ribosomal_L31 (pfam01197) →                                                |
| Bsp-23-1   | NZ_JVGU01000213.1       | + | 50658   | 50688   | RNA → rpmE (PRK00019)Ribosomal_L31 (pfam01197) →                                                |
| Lwe-2-1    | NZ_AODJ01000048.1       | + | 3854    | 3883    | RNA → rpmE2 (PRK01678)Ribosomal_L31 (pfam01197) →                                               |
| Bsp-47-1   | NZ_LFZV01000001.1       | + | 123654  | 123684  | RNA → rpmE (PRK00019)Ribosomal_L31 (pfam01197) →                                                |
| Bko-1-1    | NZ_LILC01000037.1       | - | 253710  | 253680  | RNA → rpmE (PRK00019)Ribosomal_L31 (pfam01197) →                                                |
| Bsp-28-1   | NZ_CAPG01000064.1       | - | 31592   | 31559   | RNA → rpmE (PRK00019)Ribosomal_L31 (pfam01197) →                                                |
| Bbo-1-1    | NZ_JHYI01000015.1       | + | 60410   | 60441   | RNA → rpmE2 (PRK01678)Ribosomal_L31 (pfam01197) →                                               |
| Bsp-62-1   | NZ_ANNK01000010.1       | + | 7189    | 7219    | RNA → rpmE2 (PRK01678)Ribosomal_L31 (pfam01197) →                                               |
| Ssp-6-1    | NZ_LFKO01000001.1       | - | 486806  | 486777  | RNA → rpmE2 (PRK01678)Ribosomal_L31 (pfam01197) →                                               |
| Sxy-3-1    | NZ_ANMR01000002.1       | + | 49266   | 49295   | RNA → rpmE2 (PRK01678)Ribosomal_L31 (pfam01197) →                                               |
| Sau-1739-1 | NZ_JBBJ01000003.1       | - | 216439  | 216410  | RNA → rpmE2 (PRK01678)Ribosomal_L31 (pfam01197) →                                               |
| Sau-1769-1 | NZ_KI992435.1           | - | 25185   | 25156   | RNA → rpmE2 (PRK01678)Ribosomal_L31 (pfam01197) →                                               |
| Sau-1679-1 | NZ_KI967511.1           | - | 112495  | 112466  | RNA → rpmE2 (PRK01678)Ribosomal_L31 (pfam01197) →                                               |
| Sau-1491-1 | NZ_KI971326.1           | - | 56746   | 56717   | RNA → rpmE2 (PRK01678)Ribosomal_L31 (pfam01197) →                                               |
| Sau-1693-1 | NZ_KI968014.1           | - | 35351   | 35322   | RNA → rpmE2 (PRK01678)Ribosomal_L31 (pfam01197) →                                               |
| Sau-1542-1 | NZ_KI971399.1           | - | 61596   | 61567   | RNA → rpmE2 (PRK01678)Ribosomal_L31 (pfam01197) →                                               |
| Sau-1546-1 | NZ_KK013510.1           | - | 216438  | 216409  | RNA → rpmE2 (PRK01678)Ribosomal_L31 (pfam01197) →                                               |
| Sau-1575-1 | NZ_KK014639.1           | - | 35451   | 35422   | RNA → rpmE2 (PRK01678)Ribosomal_L31 (pfam01197) →                                               |
| Sau-1532-1 | NZ_KK012782.1           | - | 216438  | 216409  | RNA → rpmE2 (PRK01678)Ribosomal_L31 (pfam01197) →                                               |
| Sau-1880-1 | NZ_KI985727.1           | - | 216439  | 216410  | RNA → rpmE2 (PRK01678)Ribosomal_L31 (pfam01197) →                                               |
| Sau-1592-1 | NZ_KK015414.1           | - | 216633  | 216604  | RNA → rpmE2 (PRK01678)Ribosomal_L31 (pfam01197) →                                               |
| Sau-1618-1 | NZ_KK016761.1           | - | 216617  | 216588  | RNA → rpmE2 (PRK01678)Ribosomal_L31 (pfam01197) →                                               |
| Sau-1602-1 | NZ_KK015955.1           | - | 64567   | 64538   | RNA → rpmE2 (PRK01678)Ribosomal_L31 (pfam01197) →                                               |
| Sau-1573-1 | NZ_KK014537.1           | - | 58791   | 58762   | RNA → rpmE2 (PRK01678)Ribosomal_L31 (pfam01197) →                                               |
| Sau-1639-1 | NZ_KK017820.1           | - | 217330  | 217301  | RNA → rpmE2 (PRK01678)Ribosomal_L31 (pfam01197) →                                               |
| Sau-1595-1 | NZ_KK015575.1           | - | 35621   | 35592   | RNA → rpmE2 (PRK01678)Ribosomal_L31 (pfam01197) →                                               |
| Sau-305-1  | NZ_AZJQ01000024.1       | - | 16337   | 16308   | RNA → rpmE2 (PRK01678)Ribosomal_L31 (pfam01197) →                                               |
| env-959    | JGI25842J50178_100820   | - | 933     | 904     | RNA → hypo → rpmE2 (PRK01678)Ribosomal_L31 (pfam01197) → hypo →                                 |
| Sma-1-1    | NZ_JH815597.1           | + | 44577   | 44606   | RNA → rpmE2 (PRK01678)Ribosomal_L31 (pfam01197) →                                               |
| Sma-2-1    | NZ_AMSQ01000012.1       | + | 44261   | 44232   | RNA → rpmE2 (PRK01678)Ribosomal_L31 (pfam01197) →                                               |
| Smi-1-1    | NZ_JXWY01000016.1       | + | 12700   | 12729   | RNA → rpmE2 (PRK01678)Ribosomal_L31 (pfam01197) →                                               |
| Sco-3-1    | NZ_LAQN01000018.1       | + | 45418   | 45447   | RNA → rpmE2 (PRK01678)Ribosomal_L31 (pfam01197) →                                               |
| Sca-8-1    | NZ_LAIU01000009.1       | + | 42687   | 42716   | RNA → rpmE2 (PRK01678)Ribosomal_L31 (pfam01197) →                                               |
| Sca-3-1    | NC_012121.1             | - | 1639890 | 1639861 | RNA → rpmE2 (PRK01678)Ribosomal_L31 (pfam01197) →                                               |
| env-960    | SRS024482_C750297       | + | 80      | 109     | RNA → hypo → rpmE2 (PRK01678)Ribosomal_L31 (pfam01197) →                                        |
| Sca-7-1    | NZ_JXXP01000003.1       | + | 44879   | 44850   | RNA → rpmE2 (PRK01678)Ribosomal_L31 (pfam01197) →                                               |
| Swa-2-1    | NZ_JVOH01000089.1       | + | 43702   | 43731   | RNA → rpmE2 (PRK01678)Ribosomal_L31 (pfam01197) →                                               |
| Sep-3-1    | NZ_GG696776.1           | - | 44864   | 44835   | RNA → rpmE2 (PRK01678)Ribosomal_L31 (pfam01197) →                                               |
| env-961    | 2204530485              | - | 260     | 231     | RNA → rpmE2 (PRK01678)Ribosomal_L31 (pfam01197) →                                               |
| Sca-5-1    | NZ_JVVH01000157.1       | + | 44024   | 44053   | RNA → rpmE2 (PRK01678)Ribosomal_L31 (pfam01197) →                                               |
| Sca-5-2    | NZ_JWAZ01000042.1       | - | 19537   | 19508   | RNA → rpmE2 (PRK01678)Ribosomal_L31 (pfam01197) →                                               |



|          |                        |   |         |         |                                                                                             |
|----------|------------------------|---|---------|---------|---------------------------------------------------------------------------------------------|
| Sca-5-3  | NZ_JVAJ01000041.1      | + | 44028   | 44057   | RNA → rpmE2 (PRK01678)Ribosomal_L31 (pfam01197) →                                           |
| Sca-5-4  | NZ_JVOP01000070.1      | + | 37095   | 37124   | RNA → rpmE2 (PRK01678)Ribosomal_L31 (pfam01197) →                                           |
| Sca-5-5  | NZ_JVCF01000017.1      | + | 44034   | 44063   | RNA → rpmE2 (PRK01678)Ribosomal_L31 (pfam01197) →                                           |
| Sca-5-6  | NZ_JVEM01000037.1      | + | 44014   | 44043   | RNA → rpmE2 (PRK01678)Ribosomal_L31 (pfam01197) →                                           |
| Sca-5-7  | NZ_JUXY01000026.1      | - | 18262   | 18233   | RNA → rpmE2 (PRK01678)Ribosomal_L31 (pfam01197) →                                           |
| Sca-5-8  | NZ_JVGZ01000010.1      | + | 43166   | 43195   | RNA → rpmE2 (PRK01678)Ribosomal_L31 (pfam01197) →                                           |
| Sca-5-9  | NZ_JWFD01000012.1      | - | 18272   | 18243   | RNA → rpmE2 (PRK01678)Ribosomal_L31 (pfam01197) →                                           |
| Sca-5-10 | NZ_JWDH01000031.1      | - | 44279   | 44250   | RNA → rpmE2 (PRK01678)Ribosomal_L31 (pfam01197) →                                           |
| Sca-5-11 | NZ_JWED01000063.1      | + | 44037   | 44066   | RNA → rpmE2 (PRK01678)Ribosomal_L31 (pfam01197) →                                           |
| Sca-5-12 | NZ_JVXS01000017.1      | + | 44023   | 44052   | RNA → rpmE2 (PRK01678)Ribosomal_L31 (pfam01197) →                                           |
| Sca-5-13 | NZ_JUZV01000013.1      | - | 18262   | 18233   | RNA → rpmE2 (PRK01678)Ribosomal_L31 (pfam01197) →                                           |
| Swa-2-2  | NZ_JVCA01000015.1      | + | 43256   | 43285   | RNA → rpmE2 (PRK01678)Ribosomal_L31 (pfam01197) →                                           |
| Sca-5-14 | NZ_JZUS01000030.1      | - | 18266   | 18237   | RNA → rpmE2 (PRK01678)Ribosomal_L31 (pfam01197) →                                           |
| Sca-5-15 | NZ_JUYG01000060.1      | - | 18397   | 18368   | RNA → rpmE2 (PRK01678)Ribosomal_L31 (pfam01197) →                                           |
| Sca-5-16 | NZ_JUXJ01000067.1      | - | 18197   | 18168   | RNA → rpmE2 (PRK01678)Ribosomal_L31 (pfam01197) →                                           |
| Sca-5-17 | NZ_JUYU01000011.1      | + | 44037   | 44066   | RNA → rpmE2 (PRK01678)Ribosomal_L31 (pfam01197) →                                           |
| Sca-5-18 | NZ_JUPO01000096.1      | - | 18246   | 18217   | RNA → rpmE2 (PRK01678)Ribosomal_L31 (pfam01197) →                                           |
| Sca-5-19 | NZ_JUVR01000034.1      | + | 25145   | 25174   | RNA → rpmE2 (PRK01678)Ribosomal_L31 (pfam01197) →                                           |
| Sca-5-20 | NZ_CVUF01000004.1      | - | 44302   | 44273   | RNA → rpmE2 (PRK01678)Ribosomal_L31 (pfam01197) →                                           |
| Sca-1-1  | NZ_ACFR01000009.1      | - | 44309   | 44280   | RNA → rpmE2 (PRK01678)Ribosomal_L31 (pfam01197) → rpmE2 (PRK01678)Ribosomal_L31 (pfam01197) |
| Sca-11-1 | NZ_AFTX01000024.1      | - | 44300   | 44271   | RNA → rpmE2 (PRK01678)Ribosomal_L31 (pfam01197) →                                           |
| Sca-2-1  | NZ_GL545276.1          | - | 45468   | 45439   | RNA → rpmE2 (PRK01678)Ribosomal_L31 (pfam01197) → rpmE2 (PRK01678)Ribosomal_L31 (pfam01197) |
| Sca-10-1 | NZ_AJTH01000006.1      | + | 43719   | 43748   | RNA → rpmE2 (PRK01678)Ribosomal_L31 (pfam01197) →                                           |
| Sca-9-1  | NZ_HG737333.1          | + | 976669  | 976698  | RNA → rpmE2 (PRK01678)Ribosomal_L31 (pfam01197) →                                           |
| Sca-6-1  | NZ_CP007601.1          | - | 1335238 | 1335209 | RNA → rpmE2 (PRK01678)Ribosomal_L31 (pfam01197) →                                           |
| Ssp-8-1  | NZ_JMGB01000004.1      | - | 44292   | 44263   | RNA → rpmE2 (PRK01678)Ribosomal_L31 (pfam01197) →                                           |
| Sca-5-21 | NZ_JGYJ01000035.1      | + | 44028   | 44057   | RNA → rpmE2 (PRK01678)Ribosomal_L31 (pfam01197) →                                           |
| Sca-4-1  | NZ_ANAM01000008.1      | - | 746220  | 746191  | RNA → rpmE (PRK00019)Ribosomal_L31 (pfam01197) →                                            |
| Sse-1-1  | NZ_LAYZ01000002.1      | + | 453097  | 453126  | RNA → rpmE (PRK00019)Ribosomal_L31 (pfam01197) →                                            |
| Sha-3-1  | NZ_CP011366.1          | - | 2293755 | 2293726 | RNA → rpmE (PRK00019)Ribosomal_L31 (pfam01197) →                                            |
| Sal-1-1  | NZ_ARQJ01000026.1      | - | 43414   | 43385   | RNA → rpmE (PRK00019)Ribosomal_L31 (pfam01197) →                                            |
| Sep-24-1 | NZ_ATDF02000020.1      | + | 416334  | 416363  | RNA → rpmE2 (PRK01678)Ribosomal_L31 (pfam01197) →                                           |
| Sep-25-1 | NZ_ATDE02000029.1      | - | 44595   | 44566   | RNA → rpmE2 (PRK01678)Ribosomal_L31 (pfam01197) →                                           |
| Sep-32-1 | NZ_ATCX020000207.1     | - | 29244   | 29215   | RNA → rpmE2 (PRK01678)Ribosomal_L31 (pfam01197) →                                           |
| Sep-87-1 | NZ_ATDG02000039.1      | + | 247203  | 247232  | RNA → rpmE2 (PRK01678)Ribosomal_L31 (pfam01197) →                                           |
| Sep-88-1 | NZ_ATDH02000068.1      | - | 1665536 | 1665507 | RNA → rpmE2 (PRK01678)Ribosomal_L31 (pfam01197) →                                           |
| Sep-34-1 | NZ_ATCZ020000376.1     | - | 26212   | 26183   | RNA → rpmE2 (PRK01678)Ribosomal_L31 (pfam01197) →                                           |
| Sep-33-1 | NZ_ATCY02000151.1      | + | 36943   | 36972   | RNA → rpmE2 (PRK01678)Ribosomal_L31 (pfam01197) →                                           |
| Sep-26-1 | NZ_ATCW02000120.1      | + | 37472   | 37501   | RNA → rpmE2 (PRK01678)Ribosomal_L31 (pfam01197) →                                           |
| Sep-20-1 | NZ_ATCU02000163.1      | + | 37472   | 37501   | RNA → rpmE2 (PRK01678)Ribosomal_L31 (pfam01197) →                                           |
| Sep-64-1 | NZ_ATDA02000118.1      | - | 202474  | 202445  | RNA → rpmE2 (PRK01678)Ribosomal_L31 (pfam01197) →                                           |
| Sep-52-1 | NZ_AKGX01000053.1      | - | 46122   | 46093   | RNA → rpmE2 (PRK01678)Ribosomal_L31 (pfam01197) →                                           |
| Sep-78-1 | NZ_AHLB01000045.1      | - | 45382   | 45353   | RNA → rpmE2 (PRK01678)Ribosomal_L31 (pfam01197) →                                           |
| Sep-28-1 | NZ_AENR01000048.1      | - | 45384   | 45355   | RNA → rpmE2 (PRK01678)Ribosomal_L31 (pfam01197) →                                           |
| Sep-65-1 | NZ_KE367254.1          | + | 1492    | 1521    | RNA → rpmE2 (PRK01678)Ribosomal_L31 (pfam01197) →                                           |
| Sep-21-1 | NZ_KE365561.1          | + | 6822    | 6851    | RNA → rpmE2 (PRK01678)Ribosomal_L31 (pfam01197) →                                           |
| Sep-8-1  | NZ_CP009046.1          | + | 687865  | 687836  | RNA → rpmE2 (PRK01678)Ribosomal_L31 (pfam01197) →                                           |
| env-962  | JGI26050J44790_1048163 | + | 124     | 153     | RNA → rpmE2 (PRK01678)Ribosomal_L31 (pfam01197) →                                           |
| env-963  | JGI26053J44789_1028520 | + | 99      | 128     | RNA → rpmE2 (PRK01678)Ribosomal_L31 (pfam01197) →                                           |
| env-964  | JGI26055J44792_1004441 | + | 1972    | 2001    | RNA → rpmE2 (PRK01678)Ribosomal_L31 (pfam01197) →                                           |
| env-965  | JGI26057J44791_1004975 | + | 2013    | 2042    | RNA → rpmE2 (PRK01678)Ribosomal_L31 (pfam01197) →                                           |
| env-966  | JGI26054J46599_1003011 | + | 3005    | 3034    | RNA → rpmE2 (PRK01678)Ribosomal_L31 (pfam01197) →                                           |

|           |                                |   |        |        |                                                                                               |
|-----------|--------------------------------|---|--------|--------|-----------------------------------------------------------------------------------------------|
| env-967   | JGI26054J46599_1013284         | + | 556    | 585    | RNA → rpmE2 (PRK01678)Ribosomal_L31 (pfam01197) →                                             |
| Ssc-3-1   | NZ_LEOS01000012.1              | - | 44440  | 44411  | RNA → rpmE2 (PRK01678)Ribosomal_L31 (pfam01197) →                                             |
| Ssc-4-1   | NZ_JANE01000008.1              | + | 23593  | 23622  | RNA → rpmE2 (PRK01678)Ribosomal_L31 (pfam01197) →                                             |
| Sco-1-1   | NZ_AYOS02000031.1              | + | 49441  | 49470  | RNA → rpmE2 (PRK01678)Ribosomal_L31 (pfam01197) →                                             |
| Sco-2-1   | NZ_LAKJ01000007.1              | - | 19353  | 19324  | RNA → rpmE2 (PRK01678)Ribosomal_L31 (pfam01197) →                                             |
| Ssp-11-1  | NZ_ALOZ01000051.1              | + | 21417  | 21446  | RNA → rpmE2 (PRK01678)Ribosomal_L31 (pfam01197) →                                             |
| Sho-3-1   | NZ_JWBV01000049.1              | - | 19534  | 19505  | RNA → rpmE2 (PRK01678)Ribosomal_L31 (pfam01197) →                                             |
| Sho-1-1   | NZ_ACLP01000009.1              | + | 36054  | 36083  | RNA → rpmE2 (PRK01678)Ribosomal_L31 (pfam01197) → rpmE2 (PRK01678)Ribosomal_L31 (pfam01197) → |
| Sho-2-1   | NZ_GL545257.1                  | + | 36461  | 36490  | RNA → rpmE2 (PRK01678)Ribosomal_L31 (pfam01197) → rpmE2 (PRK01678)Ribosomal_L31 (pfam01197) → |
| Sau-255-1 | NZ_KK222755.1                  | - | 45892  | 45863  | RNA → rpmE2 (PRK01678)Ribosomal_L31 (pfam01197) →                                             |
| env-968   | SRS015381_WUGC_scaffold.18506  | - | 443    | 414    | RNA → rpmE2 (PRK01678)Ribosomal_L31 (pfam01197) →                                             |
| env-969   | SRS015937_C169098              | + | 201    | 230    | RNA → rpmE2 (PRK01678)Ribosomal_L31 (pfam01197) →                                             |
| env-970   | SRS016752_C178754              | + | 488    | 517    | RNA → rpmE2 (PRK01678)Ribosomal_L31 (pfam01197) →                                             |
| env-971   | SRS017851_Baylor_scaffold.8802 | - | 406    | 377    | RNA → rpmE2 (PRK01678)Ribosomal_L31 (pfam01197) →                                             |
| env-972   | SRS018978_WUGC_scaffold.15620  | - | 7277   | 7248   | RNA → rpmE2 (PRK01678)Ribosomal_L31 (pfam01197) →                                             |
| env-973   | SRS019015_WUGC_scaffold.1731   | + | 3050   | 3079   | RNA → rpmE2 (PRK01678)Ribosomal_L31 (pfam01197) →                                             |
| env-974   | SRS019033_C268848              | + | 114    | 143    | RNA → rpmE2 (PRK01678)Ribosomal_L31 (pfam01197) →                                             |
| env-975   | SRS019064_WUGC_scaffold.6269   | + | 5563   | 5592   | RNA → rpmE2 (PRK01678)Ribosomal_L31 (pfam01197) →                                             |
| env-976   | SRS019081_WUGC_scaffold.29513  | + | 2508   | 2537   | RNA → rpmE2 (PRK01678)Ribosomal_L31 (pfam01197) →                                             |
| env-977   | SRS020263_C2700470             | + | 162    | 191    | RNA → rpmE2 (PRK01678)Ribosomal_L31 (pfam01197) →                                             |
| env-978   | SRS020386_C348936              | + | 3349   | 3378   | RNA → rpmE2 (PRK01678)Ribosomal_L31 (pfam01197) →                                             |
| env-979   | SRS022006_C151996              | - | 510    | 481    | RNA → rpmE2 (PRK01678)Ribosomal_L31 (pfam01197) →                                             |
| env-980   | SRS023847_Baylor_scaffold.786  | - | 3438   | 3409   | RNA → rpmE2 (PRK01678)Ribosomal_L31 (pfam01197) →                                             |
| env-981   | SRS024424_C245768              | + | 366    | 395    | RNA → rpmE2 (PRK01678)Ribosomal_L31 (pfam01197) →                                             |
| env-982   | SRS024482_C760912              | + | 1367   | 1396   | RNA → rpmE2 (PRK01678)Ribosomal_L31 (pfam01197) →                                             |
| env-983   | SRS024598_C1602584             | - | 406    | 377    | RNA → rpmE2 (PRK01678)Ribosomal_L31 (pfam01197) →                                             |
| env-984   | SRS024620_C112548              | + | 227    | 256    | RNA → rpmE2 (PRK01678)Ribosomal_L31 (pfam01197) →                                             |
| env-985   | SRS024655_LANL_scaffold.2040   | + | 198    | 227    | RNA → rpmE2 (PRK01678)Ribosomal_L31 (pfam01197) →                                             |
| env-986   | SRS047225_C228287              | - | 184    | 155    | RNA → rpmE2 (PRK01678)Ribosomal_L31 (pfam01197) →                                             |
| env-987   | SRS058221_C352952              | - | 181    | 152    | RNA → rpmE2 (PRK01678)Ribosomal_L31 (pfam01197) →                                             |
| env-988   | LWFCAn2_GMINUVW02I5FNM         | + | 286    | 315    | RNA → RpmE (COG0254)rpmE (PRK00019)rpmE2 (PRK01678)L31 (TIGR00105) →                          |
| env-989   | GMINUVW02I5FNM                 | + | 286    | 315    | RNA → ← hyp0                                                                                  |
| Sep-73-1  | NZ_AGUB01000039.1              | - | 45436  | 45407  | RNA → rpmE2 (PRK01678)Ribosomal_L31 (pfam01197) →                                             |
| Sep-79-1  | NZ_AHLC01000046.1              | - | 45370  | 45341  | RNA → rpmE2 (PRK01678)Ribosomal_L31 (pfam01197) →                                             |
| Sep-27-1  | NZ_AURC01000030.1              | - | 45614  | 45585  | RNA → rpmE2 (PRK01678)Ribosomal_L31 (pfam01197) →                                             |
| Sep-68-1  | NZ_AFEH01000030.1              | - | 45376  | 45347  | RNA → rpmE2 (PRK01678)Ribosomal_L31 (pfam01197) →                                             |
| Sep-8-2   | NZ_JWEE01001238.1              | + | 36923  | 36952  | RNA → rpmE2 (PRK01678)Ribosomal_L31 (pfam01197) →                                             |
| Ecl-1-1   | NZ_JUOF01000855.1              | - | 2934   | 2905   | RNA → rpmE2 (PRK01678)Ribosomal_L31 (pfam01197) →                                             |
| Sep-67-1  | NZ_ATDD02000322.1              | - | 45352  | 45323  | RNA → rpmE2 (PRK01678)Ribosomal_L31 (pfam01197) →                                             |
| Sep-66-1  | NZ_ATDC02000013.1              | + | 455134 | 455163 | RNA → rpmE2 (PRK01678)Ribosomal_L31 (pfam01197) →                                             |
| Sep-12-1  | NZ_ARWU01000119.1              | + | 37127  | 37156  | RNA → rpmE2 (PRK01678)Ribosomal_L31 (pfam01197) →                                             |
| Sep-18-1  | NZ_AMSJ01000011.1              | - | 45378  | 45349  | RNA → rpmE2 (PRK01678)Ribosomal_L31 (pfam01197) →                                             |
| Sep-54-1  | NZ_AKGS01000031.1              | - | 45430  | 45401  | RNA → rpmE2 (PRK01678)Ribosomal_L31 (pfam01197) →                                             |
| Sep-44-1  | NZ_AKHC01000051.1              | - | 45770  | 45741  | RNA → rpmE2 (PRK01678)Ribosomal_L31 (pfam01197) →                                             |
| Sep-71-1  | NZ_AFEI01000056.1              | - | 45365  | 45336  | RNA → rpmE2 (PRK01678)Ribosomal_L31 (pfam01197) →                                             |
| Sep-42-1  | NZ_AKHH01000041.1              | - | 45857  | 45828  | RNA → rpmE2 (PRK01678)Ribosomal_L31 (pfam01197) →                                             |
| Sep-83-1  | NZ_AHLH01000072.1              | + | 37358  | 37387  | RNA → rpmE2 (PRK01678)Ribosomal_L31 (pfam01197) →                                             |
| Sep-30-1  | NZ_AJJS01000025.1              | - | 45803  | 45774  | RNA → rpmE2 (PRK01678)Ribosomal_L31 (pfam01197) →                                             |
| Sep-60-1  | NZ_AKGM01000033.1              | - | 45003  | 44974  | RNA → rpmE2 (PRK01678)Ribosomal_L31 (pfam01197) →                                             |
| Sep-50-1  | NZ_AKGV01000047.1              | - | 45770  | 45741  | RNA → rpmE2 (PRK01678)Ribosomal_L31 (pfam01197) →                                             |
| Sep-55-1  | NZ_AKGR01000047.1              | - | 45779  | 45750  | RNA → rpmE2 (PRK01678)Ribosomal_L31 (pfam01197) →                                             |
| Sep-56-1  | NZ_AKQQ01000033.1              | - | 45918  | 45889  | RNA → rpmE2 (PRK01678)Ribosomal_L31 (pfam01197) →                                             |



|          |                    |   |         |         |       |                                                                                         |
|----------|--------------------|---|---------|---------|-------|-----------------------------------------------------------------------------------------|
| Sep-49-1 | NZ_AKGW01000040.1  | - | 42734   | 42705   | RNA → | rpmE2 (PRK01678)Ribosomal_L31 (pfam01197) →                                             |
| Sep-43-1 | NZ_AKHG01000037.1  | + | 37775   | 37804   | RNA → | rpmE2 (PRK01678)Ribosomal_L31 (pfam01197) →                                             |
| Sep-45-1 | NZ_AKHB01000044.1  | - | 45769   | 45740   | RNA → | rpmE2 (PRK01678)Ribosomal_L31 (pfam01197) →                                             |
| Sep-40-1 | NZ_AKHL01000049.1  | - | 45769   | 45740   | RNA → | rpmE2 (PRK01678)Ribosomal_L31 (pfam01197) →                                             |
| Sep-75-1 | NZ_AFTZ01000029.1  | - | 45374   | 45345   | RNA → | rpmE2 (PRK01678)Ribosomal_L31 (pfam01197) →                                             |
| Sep-86-1 | NZ_AFED01000053.1  | + | 37355   | 37384   | RNA → | rpmE2 (PRK01678)Ribosomal_L31 (pfam01197) →                                             |
| Sep-46-1 | NZ_AKHA01000034.1  | - | 45852   | 45823   | RNA → | rpmE2 (PRK01678)Ribosomal_L31 (pfam01197) →                                             |
| Sep-37-1 | NZ_AKHE01000040.1  | - | 45851   | 45822   | RNA → | rpmE2 (PRK01678)Ribosomal_L31 (pfam01197) →                                             |
| Sep-35-1 | NZ_AKHJ01000042.1  | - | 45795   | 45766   | RNA → | rpmE2 (PRK01678)Ribosomal_L31 (pfam01197) →                                             |
| Sep-9-1  | NZ_JNLI01000004.1  | - | 2344918 | 2344889 | RNA → | rpmE2 (PRK01678)Ribosomal_L31 (pfam01197) →                                             |
| Sep-41-1 | NZ_AKHK01000049.1  | - | 45785   | 45756   | RNA → | rpmE2 (PRK01678)Ribosomal_L31 (pfam01197) →                                             |
| Sep-14-1 | NZ_JHQB01000048.1  | - | 45371   | 45342   | RNA → | rpmE2 (PRK01678)Ribosomal_L31 (pfam01197) →                                             |
| Sep-17-1 | NZ_JHUB01000024.1  | + | 37356   | 37385   | RNA → | rpmE2 (PRK01678)Ribosomal_L31 (pfam01197) →                                             |
| Sep-15-1 | NZ_JHUA01000050.1  | + | 37358   | 37387   | RNA → | rpmE2 (PRK01678)Ribosomal_L31 (pfam01197) →                                             |
| Sep-62-1 | NZ_AKJ01000034.1   | - | 44971   | 44942   | RNA → | rpmE2 (PRK01678)Ribosomal_L31 (pfam01197) →                                             |
| Sep-74-1 | NZ_AHLU01000006.1  | - | 45373   | 45344   | RNA → | rpmE2 (PRK01678)Ribosomal_L31 (pfam01197) →                                             |
| Sep-48-1 | NZ_AKGY01000040.1  | - | 45875   | 45846   | RNA → | rpmE2 (PRK01678)Ribosomal_L31 (pfam01197) →                                             |
| Sep-39-1 | NZ_AKHD01000041.1  | - | 45762   | 45733   | RNA → | rpmE2 (PRK01678)Ribosomal_L31 (pfam01197) →                                             |
| Sep-82-1 | NZ_AHLG01000074.1  | + | 37361   | 37390   | RNA → | rpmE2 (PRK01678)Ribosomal_L31 (pfam01197) →                                             |
| Sep-38-1 | NZ_AKHI01000037.1  | - | 20728   | 20699   | RNA → | rpmE2 (PRK01678)Ribosomal_L31 (pfam01197) →                                             |
| Sep-81-1 | NZ_AHLF01000023.1  | + | 3788    | 3817    | RNA → | rpmE2 (PRK01678)Ribosomal_L31 (pfam01197) →                                             |
| Sep-29-1 | NZ_AJJR01000021.1  | - | 45750   | 45721   | RNA → | rpmE2 (PRK01678)Ribosomal_L31 (pfam01197) →                                             |
| Sep-80-1 | NZ_AHLE01000046.1  | + | 33561   | 33590   | RNA → | rpmE2 (PRK01678)Ribosomal_L31 (pfam01197) →                                             |
| Sep-16-1 | NZ_JHQC01000010.1  | - | 45434   | 45405   | RNA → | rpmE2 (PRK01678)Ribosomal_L31 (pfam01197) →                                             |
| Sep-13-1 | NZ_JHTZ01000129.1  | - | 45369   | 45340   | RNA → | rpmE2 (PRK01678)Ribosomal_L31 (pfam01197) →                                             |
| Sep-72-1 | NZ_AHKZ01000035.1  | - | 45377   | 45348   | RNA → | rpmE2 (PRK01678)Ribosomal_L31 (pfam01197) →                                             |
| Sep-70-1 | NZ_AHKX01000019.1  | - | 45378   | 45349   | RNA → | rpmE2 (PRK01678)Ribosomal_L31 (pfam01197) →                                             |
| Sep-69-1 | NZ_AFTY01000016.1  | - | 45374   | 45345   | RNA → | rpmE2 (PRK01678)Ribosomal_L31 (pfam01197) →                                             |
| Sep-77-1 | NZ_AHLA01000084.1  | + | 37357   | 37386   | RNA → | rpmE2 (PRK01678)Ribosomal_L31 (pfam01197) →                                             |
| Sep-6-1  | NZ_ADEA01000022.1  | + | 42387   | 42416   | RNA → | rpmE2 (PRK01678)Ribosomal_L31 (pfam01197) → rpmE2 (PRK01678)Ribosomal_L31 (pfam01197) → |
| Sep-76-1 | NZ_AFUA01000029.1  | - | 45373   | 45344   | RNA → | rpmE2 (PRK01678)Ribosomal_L31 (pfam01197) →                                             |
| Sep-1-1  | NC_004461.1        | - | 1769319 | 1769290 | RNA → | rpmE2 (PRK01678)Ribosomal_L31 (pfam01197) →                                             |
| Sep-4-1  | NZ_GG749263.1      | - | 45373   | 45344   | RNA → | rpmE2 (PRK01678)Ribosomal_L31 (pfam01197) →                                             |
| Sep-23-1 | NZ_KB373339.1      | + | 37355   | 37384   | RNA → | rpmE2 (PRK01678)Ribosomal_L31 (pfam01197) →                                             |
| Sep-2-1  | NZ_GG696732.1      | + | 38912   | 38941   | RNA → | rpmE2 (PRK01678)Ribosomal_L31 (pfam01197) →                                             |
| Sep-10-1 | NZ_KI999596.1      | - | 46485   | 46456   | RNA → | rpmE2 (PRK01678)Ribosomal_L31 (pfam01197) →                                             |
| Sep-31-1 | NZ_KB821725.1      | - | 47636   | 47607   | RNA → | rpmE2 (PRK01678)Ribosomal_L31 (pfam01197) →                                             |
| Sep-11-1 | NZ_HG813242.1      | - | 1766133 | 1766104 | RNA → | rpmE2 (PRK01678)Ribosomal_L31 (pfam01197) →                                             |
| Sep-5-1  | NC_002976.3        | - | 1764344 | 1764315 | RNA → | rpmE2 (PRK01678)Ribosomal_L31 (pfam01197) →                                             |
| Sep-63-1 | NZ_AKGI01000029.1  | - | 45860   | 45831   | RNA → | rpmE2 (PRK01678)Ribosomal_L31 (pfam01197) →                                             |
| Sep-36-1 | NZ_AKHF01000108.1  | - | 45856   | 45827   | RNA → | rpmE2 (PRK01678)Ribosomal_L31 (pfam01197) →                                             |
| Sep-61-1 | NZ_AK GK01000061.1 | + | 37967   | 37996   | RNA → | rpmE2 (PRK01678)Ribosomal_L31 (pfam01197) →                                             |
| Sep-8-3  | NZ_JTAY01000002.1  | - | 2023535 | 2023506 | RNA → | rpmE2 (PRK01678)Ribosomal_L31 (pfam01197) →                                             |
| Sep-22-1 | NZ_AMCS01000045.1  | - | 10592   | 10563   | RNA → | rpmE2 (PRK01678)Ribosomal_L31 (pfam01197) →                                             |
| Sho-3-2  | NZ_LFKQ01000006.1  | - | 87471   | 87442   | RNA → | rpmE2 (PRK01678)Ribosomal_L31 (pfam01197) →                                             |
| Sho-3-3  | NZ_LFKR01000016.1  | - | 44376   | 44347   | RNA → | rpmE2 (PRK01678)Ribosomal_L31 (pfam01197) →                                             |
| Sho-3-4  | NZ_JWCO01000048.1  | - | 44146   | 44117   | RNA → | rpmE2 (PRK01678)Ribosomal_L31 (pfam01197) →                                             |
| Sho-3-5  | NZ_JVOX01000029.1  | + | 15211   | 15240   | RNA → | rpmE2 (PRK01678)Ribosomal_L31 (pfam01197) →                                             |
| Sho-3-6  | NZ_JVEB01000043.1  | + | 25236   | 25265   | RNA → | rpmE2 (PRK01678)Ribosomal_L31 (pfam01197) →                                             |
| Sho-3-7  | NZ_JVHC01000034.1  | + | 17068   | 17097   | RNA → | rpmE2 (PRK01678)Ribosomal_L31 (pfam01197) →                                             |
| Sho-3-8  | NZ_JVHB01000032.1  | + | 17072   | 17101   | RNA → | rpmE2 (PRK01678)Ribosomal_L31 (pfam01197) →                                             |
| Sho-3-9  | NZ_JVED01000048.1  | - | 45867   | 45838   | RNA → | rpmE2 (PRK01678)Ribosomal_L31 (pfam01197) →                                             |

|          |                                |   |        |        |                                                                                               |
|----------|--------------------------------|---|--------|--------|-----------------------------------------------------------------------------------------------|
| Sho-3-10 | NZ_JUWW01000005.1              | - | 44144  | 44115  | RNA → rpmE2 (PRK01678)Ribosomal_L31 (pfam01197) →                                             |
| Sho-3-11 | NZ_JUYH01000010.1              | - | 44135  | 44106  | RNA → rpmE2 (PRK01678)Ribosomal_L31 (pfam01197) →                                             |
| Sho-3-12 | NZ_JVQD01000023.1              | + | 17103  | 17132  | RNA → rpmE2 (PRK01678)Ribosomal_L31 (pfam01197) →                                             |
| Sho-3-13 | NZ_JUQI01000082.1              | + | 6927   | 6956   | RNA → rpmE2 (PRK01678)Ribosomal_L31 (pfam01197) →                                             |
| Sho-3-14 | NZ_JUSP01000026.1              | + | 17103  | 17132  | RNA → rpmE2 (PRK01678)Ribosomal_L31 (pfam01197) →                                             |
| Ssp-7-1  | NZ_KK013383.1                  | + | 44200  | 44171  | RNA → rpmE2 (PRK01678)Ribosomal_L31 (pfam01197) →                                             |
| Sho-5-1  | NZ_AKGC01000005.1              | + | 15228  | 15257  | RNA → rpmE2 (PRK01678)Ribosomal_L31 (pfam01197) →                                             |
| Sho-3-15 | NZ_JVLC01000025.1              | - | 44260  | 44231  | RNA → rpmE2 (PRK01678)Ribosomal_L31 (pfam01197) →                                             |
| Sho-3-16 | NZ_JVVJ01000020.1              | + | 35612  | 35641  | RNA → rpmE2 (PRK01678)Ribosomal_L31 (pfam01197) →                                             |
| Sho-3-17 | NZ_JUSR01000027.1              | + | 35703  | 35732  | RNA → rpmE2 (PRK01678)Ribosomal_L31 (pfam01197) →                                             |
| Sho-4-1  | NZ_AHLD01000027.1              | - | 44211  | 44182  | RNA → rpmE2 (PRK01678)Ribosomal_L31 (pfam01197) →                                             |
| Sar-1-1  | NZ_ALWK01000038.1              | - | 15430  | 15401  | RNA → rpmE2 (PRK01678)Ribosomal_L31 (pfam01197) → rpmE2 (PRK01678)Ribosomal_L31 (pfam01197) → |
| Ssp-13-1 | NZ_AVOQ01000005.1              | - | 15464  | 15435  | RNA → rpmE2 (PRK01678)Ribosomal_L31 (pfam01197) →                                             |
| env-990  | SRS013261_Baylor_scaffold_8914 | - | 2516   | 2487   | RNA → rpmE2 (PRK01678)Ribosomal_L31 (pfam01197) →                                             |
| env-991  | SRS017849_Baylor_scaffold_7958 | + | 46     | 75     | RNA → hypo → rpmE2 (PRK01678)Ribosomal_L31 (pfam01197) →                                      |
| env-992  | SRS019016_C462472              | - | 361    | 332    | RNA → hypo → rpmE2 (PRK01678)Ribosomal_L31 (pfam01197) →                                      |
| env-993  | SRS019986_C240789              | - | 293    | 264    | RNA → hypo → rpmE2 (PRK01678)Ribosomal_L31 (pfam01197) →                                      |
| env-994  | SRS020261_C1261455             | + | 44     | 73     | RNA → hypo → rpmE2 (PRK01678)Ribosomal_L31 (pfam01197) →                                      |
| env-995  | SRS024596_C1351232             | + | 18     | 47     | RNA → rpmE2 (PRK01678)Ribosomal_L31 (pfam01197) →                                             |
| env-996  | SRS044474_C210137              | - | 285    | 256    | RNA → hypo → rpmE2 (PRK01678)Ribosomal_L31 (pfam01197) →                                      |
| Sep-59-1 | NZ_AKGN01000019.1              | - | 46028  | 45999  | RNA → rpmE2 (PRK01678)Ribosomal_L31 (pfam01197) →                                             |
| Sep-84-1 | NZ_AHLI01000052.1              | - | 45571  | 45542  | RNA → rpmE2 (PRK01678)Ribosomal_L31 (pfam01197) →                                             |
| Sep-51-1 | NZ_AKGU01000068.1              | - | 46036  | 46007  | RNA → rpmE2 (PRK01678)Ribosomal_L31 (pfam01197) →                                             |
| Sep-47-1 | NZ_AKZ01000025.1               | - | 45840  | 45811  | RNA → rpmE2 (PRK01678)Ribosomal_L31 (pfam01197) →                                             |
| Sep-85-1 | NZ_AHLJ01000016.1              | + | 37388  | 37417  | RNA → rpmE2 (PRK01678)Ribosomal_L31 (pfam01197) →                                             |
| Sep-53-1 | NZ_AKGT01000051.1              | - | 45819  | 45790  | RNA → rpmE2 (PRK01678)Ribosomal_L31 (pfam01197) →                                             |
| Sep-19-1 | NZ_AGUC01000054.1              | - | 26493  | 26464  | RNA → rpmE2 (PRK01678)Ribosomal_L31 (pfam01197) →                                             |
| Sep-7-1  | NZ_GG696805.1                  | - | 45383  | 45354  | RNA → rpmE2 (PRK01678)Ribosomal_L31 (pfam01197) →                                             |
| Sep-57-1 | NZ_AKGP01000102.1              | - | 46107  | 46078  | RNA → rpmE2 (PRK01678)Ribosomal_L31 (pfam01197) →                                             |
| Sep-58-1 | NZ_AKGO01000080.1              | - | 46140  | 46111  | RNA → rpmE2 (PRK01678)Ribosomal_L31 (pfam01197) →                                             |
| env-997  | SRS058213_C232285              | - | 939    | 910    | RNA → hypo → rpmE2 (PRK01678)Ribosomal_L31 (pfam01197) →                                      |
| Sco-2-2  | NZ_LATV01000002.1              | + | 49828  | 49857  | RNA → rpmE2 (PRK01678)Ribosomal_L31 (pfam01197) →                                             |
| Sco-2-3  | NZ_LATU01000008.1              | + | 50130  | 50159  | RNA → rpmE2 (PRK01678)Ribosomal_L31 (pfam01197) →                                             |
| Swa-2-3  | NZ_LAKH01000008.1              | + | 42884  | 42913  | RNA → rpmE2 (PRK01678)Ribosomal_L31 (pfam01197) →                                             |
| Swa-2-4  | NZ_JUWX01000004.1              | - | 44955  | 44926  | RNA → rpmE2 (PRK01678)Ribosomal_L31 (pfam01197) →                                             |
| Swa-7-1  | NZ_AFEC010000100.1             | - | 45052  | 45023  | RNA → rpmE2 (PRK01678)Ribosomal_L31 (pfam01197) →                                             |
| Swa-6-1  | NC_020164.1                    | + | 811839 | 811868 | RNA → rpmE2 (PRK01678)Ribosomal_L31 (pfam01197) →                                             |
| Spn-1-8  | NZ_CRBR01000009.1              | - | 45357  | 45328  | RNA → rpmE2 (PRK01678)Ribosomal_L31 (pfam01197) →                                             |
| Swa-5-1  | NZ_CANQ01000031.1              | - | 44983  | 44954  | RNA → rpmE2 (PRK01678)Ribosomal_L31 (pfam01197) →                                             |
| Swa-4-1  | NZ_JOPV01000022.1              | + | 43084  | 43113  | RNA → rpmE2 (PRK01678)Ribosomal_L31 (pfam01197) →                                             |
| Swa-3-1  | NZ_JOPU01000025.1              | + | 43225  | 43254  | RNA → rpmE2 (PRK01678)Ribosomal_L31 (pfam01197) →                                             |
| Swa-2-5  | NZ_JPOW01000004.1              | + | 45929  | 45958  | RNA → rpmE2 (PRK01678)Ribosomal_L31 (pfam01197) →                                             |
| Spa-2-1  | NC_022737.1                    | - | 619055 | 619026 | RNA → rpmE2 (PRK01678)Ribosomal_L31 (pfam01197) →                                             |
| Swa-2-6  | NZ_JUVB01000015.1              | - | 26153  | 26124  | RNA → rpmE2 (PRK01678)Ribosomal_L31 (pfam01197) →                                             |
| Spa-1-2  | NZ_LAKF01000005.1              | + | 42862  | 42891  | RNA → rpmE2 (PRK01678)Ribosomal_L31 (pfam01197) →                                             |
| Ssp-12-1 | NZ_ANBY01000017.1              | - | 33706  | 33677  | RNA → rpmE2 (PRK01678)Ribosomal_L31 (pfam01197) →                                             |
| Ssp-9-1  | NZ_JHVS01000011.1              | + | 42798  | 42827  | RNA → rpmE2 (PRK01678)Ribosomal_L31 (pfam01197) →                                             |
| Ssu-1-1  | NZ_LCSH01000018.1              | - | 44953  | 44924  | RNA → rpmE2 (PRK01678)Ribosomal_L31 (pfam01197) →                                             |
| Mab-1-1  | NZ_CSZP01001570.1              | - | 287    | 258    | RNA → rpmE2 (PRK01678)Ribosomal_L31 (pfam01197) →                                             |
| Swa-1-1  | NZ_ACPZ01000047.1              | - | 44428  | 44399  | RNA → rpmE2 (PRK01678)Ribosomal_L31 (pfam01197) → rpmE2 (PRK01678)Ribosomal_L31 (pfam01197) → |
| Ssa-2-1  | NZ_JUTO01000006.1              | + | 44286  | 44315  | RNA → rpmE2 (PRK01678)Ribosomal_L31 (pfam01197) →                                             |
| Sga-1-1  | NZ_JXCF01000018.1              | + | 48546  | 48575  | RNA → rpmE2 (PRK01678)Ribosomal_L31 (pfam01197) →                                             |

|          |                   |   |         |         |                                                   |
|----------|-------------------|---|---------|---------|---------------------------------------------------|
| Sps-2-1  | NC_014925.1       | - | 1856805 | 1856776 | RNA → rpmE2 (PRK01678)Ribosomal_L31 (pfam01197) → |
| Sps-1-1  | NC_017568.1       | + | 768136  | 768165  | RNA → rpmE2 (PRK01678)Ribosomal_L31 (pfam01197) → |
| Sps-3-1  | NZ_ANOI01000001.1 | + | 901751  | 901780  | RNA → rpmE2 (PRK01678)Ribosomal_L31 (pfam01197) → |
| Sin-2-1  | NZ_CAIB01000243.1 | + | 11672   | 11701   | RNA → rpmE2 (PRK01678)Ribosomal_L31 (pfam01197) → |
| Sde-1-1  | NZ_CAIA01000073.1 | + | 28519   | 28548   | RNA → rpmE2 (PRK01678)Ribosomal_L31 (pfam01197) → |
| Mca-1-1  | NC_011999.1       | - | 1910962 | 1910933 | RNA → rpmE2 (PRK01678)Ribosomal_L31 (pfam01197) → |
| Sch-1-1  | NZ_JMJF01000010.1 | + | 39072   | 39101   | RNA → rpmE2 (PRK01678)Ribosomal_L31 (pfam01197) → |
| Sha-4-1  | NZ_JQHA01000012.1 | - | 44057   | 44028   | RNA → rpmE2 (PRK01678)Ribosomal_L31 (pfam01197) → |
| Sha-4-2  | NZ_CUGE01000009.1 | - | 19556   | 19527   | RNA → rpmE2 (PRK01678)Ribosomal_L31 (pfam01197) → |
| Sha-4-3  | NZ_CUHF01000018.1 | - | 17451   | 17422   | RNA → rpmE2 (PRK01678)Ribosomal_L31 (pfam01197) → |
| Sha-4-4  | NZ_JQHB01000033.1 | - | 44057   | 44028   | RNA → rpmE2 (PRK01678)Ribosomal_L31 (pfam01197) → |
| Ssc-1-1  | NZ_CP010309.1     | + | 858128  | 858157  | RNA → rpmE2 (PRK01678)Ribosomal_L31 (pfam01197) → |
| Ssc-1-2  | NZ_CP009762.1     | + | 793853  | 793882  | RNA → rpmE2 (PRK01678)Ribosomal_L31 (pfam01197) → |
| Ssc-1-3  | NZ_CP009676.1     | + | 818914  | 818943  | RNA → rpmE2 (PRK01678)Ribosomal_L31 (pfam01197) → |
| Ssc-1-4  | NZ_CP009470.1     | + | 790202  | 790231  | RNA → rpmE2 (PRK01678)Ribosomal_L31 (pfam01197) → |
| Ssp-14-1 | NZ_KE150418.1     | + | 949481  | 949510  | RNA → rpmE2 (PRK01678)Ribosomal_L31 (pfam01197) → |
| Sha-4-5  | NZ_LAKG01000019.1 | - | 24111   | 24082   | RNA → rpmE2 (PRK01678)Ribosomal_L31 (pfam01197) → |
| Sha-4-6  | NZ_CUEY01000017.1 | + | 28755   | 28784   | RNA → rpmE2 (PRK01678)Ribosomal_L31 (pfam01197) → |
| Sha-4-7  | NZ_CUEJ01000017.1 | + | 28692   | 28721   | RNA → rpmE2 (PRK01678)Ribosomal_L31 (pfam01197) → |
| Sha-4-8  | NZ_CUEF01000018.1 | + | 15555   | 15584   | RNA → rpmE2 (PRK01678)Ribosomal_L31 (pfam01197) → |
| Sha-4-9  | NZ_CUHK01000019.1 | + | 28699   | 28728   | RNA → rpmE2 (PRK01678)Ribosomal_L31 (pfam01197) → |
| Sha-4-10 | NZ_CUES01000010.1 | - | 44033   | 44004   | RNA → rpmE2 (PRK01678)Ribosomal_L31 (pfam01197) → |
| Sha-4-11 | NZ_CUEH01000020.1 | + | 28721   | 28750   | RNA → rpmE2 (PRK01678)Ribosomal_L31 (pfam01197) → |
| Sha-4-12 | NZ_CUHH01000016.1 | + | 28696   | 28725   | RNA → rpmE2 (PRK01678)Ribosomal_L31 (pfam01197) → |
| Sha-4-13 | NZ_CUGA01000012.1 | + | 33827   | 33856   | RNA → rpmE2 (PRK01678)Ribosomal_L31 (pfam01197) → |
| Sha-4-14 | NZ_CUEZ01000009.1 | - | 43979   | 43950   | RNA → rpmE2 (PRK01678)Ribosomal_L31 (pfam01197) → |
| Sha-4-15 | NZ_CUCM01000013.1 | - | 23830   | 23801   | RNA → rpmE2 (PRK01678)Ribosomal_L31 (pfam01197) → |
| Sha-4-16 | NZ_CUGK01000016.1 | - | 23911   | 23882   | RNA → rpmE2 (PRK01678)Ribosomal_L31 (pfam01197) → |
| Sha-4-17 | NZ_CUFM01000019.1 | + | 28709   | 28738   | RNA → rpmE2 (PRK01678)Ribosomal_L31 (pfam01197) → |
| Sha-4-18 | NZ_CUFQ01000015.1 | + | 28720   | 28749   | RNA → rpmE2 (PRK01678)Ribosomal_L31 (pfam01197) → |
| Sha-4-19 | NZ_CUFJ01000015.1 | + | 28722   | 28751   | RNA → rpmE2 (PRK01678)Ribosomal_L31 (pfam01197) → |
| Sha-4-20 | NZ_CUHB01000013.1 | - | 23912   | 23883   | RNA → rpmE2 (PRK01678)Ribosomal_L31 (pfam01197) → |
| Sha-4-21 | NZ_CUGI01000021.1 | + | 15611   | 15640   | RNA → rpmE2 (PRK01678)Ribosomal_L31 (pfam01197) → |
| Sha-4-22 | NZ_CUFR01000016.1 | + | 28709   | 28738   | RNA → rpmE2 (PRK01678)Ribosomal_L31 (pfam01197) → |
| Sha-4-23 | NZ_CUDZ01000003.1 | - | 23912   | 23883   | RNA → rpmE2 (PRK01678)Ribosomal_L31 (pfam01197) → |
| Sha-4-24 | NZ_CUGW01000017.1 | + | 28731   | 28760   | RNA → rpmE2 (PRK01678)Ribosomal_L31 (pfam01197) → |
| Sha-4-25 | NZ_CUGZ01000014.1 | - | 23911   | 23882   | RNA → rpmE2 (PRK01678)Ribosomal_L31 (pfam01197) → |
| Sha-4-26 | NZ_CUDY01000028.1 | - | 23835   | 23806   | RNA → rpmE2 (PRK01678)Ribosomal_L31 (pfam01197) → |
| Sha-4-27 | NZ_CUGN01000014.1 | + | 15549   | 15578   | RNA → rpmE2 (PRK01678)Ribosomal_L31 (pfam01197) → |
| Sha-4-28 | NZ_CUDQ01000009.1 | + | 28732   | 28761   | RNA → rpmE2 (PRK01678)Ribosomal_L31 (pfam01197) → |
| Sha-4-29 | NZ_CUEI01000018.1 | + | 15557   | 15586   | RNA → rpmE2 (PRK01678)Ribosomal_L31 (pfam01197) → |
| Sha-4-30 | NZ_CUEQ01000020.1 | + | 15546   | 15575   | RNA → rpmE2 (PRK01678)Ribosomal_L31 (pfam01197) → |
| Sha-4-31 | NZ_CUFS01000017.1 | + | 28821   | 28850   | RNA → rpmE2 (PRK01678)Ribosomal_L31 (pfam01197) → |
| Sha-4-32 | NZ_CUFE01000014.1 | - | 23893   | 23864   | RNA → rpmE2 (PRK01678)Ribosomal_L31 (pfam01197) → |
| Sha-4-33 | NZ_CUEX01000014.1 | - | 23899   | 23870   | RNA → rpmE2 (PRK01678)Ribosomal_L31 (pfam01197) → |
| Sha-4-34 | NZ_CUFY01000018.1 | + | 28706   | 28735   | RNA → rpmE2 (PRK01678)Ribosomal_L31 (pfam01197) → |
| Sha-4-35 | NZ_CUGP01000016.1 | + | 28690   | 28719   | RNA → rpmE2 (PRK01678)Ribosomal_L31 (pfam01197) → |
| Sha-4-36 | NZ_CUFX01000017.1 | + | 28755   | 28784   | RNA → rpmE2 (PRK01678)Ribosomal_L31 (pfam01197) → |
| Sha-4-37 | NZ_CUFL01000026.1 | + | 15613   | 15642   | RNA → rpmE2 (PRK01678)Ribosomal_L31 (pfam01197) → |
| Sha-4-38 | NZ_CUDS01000018.1 | + | 28713   | 28742   | RNA → rpmE2 (PRK01678)Ribosomal_L31 (pfam01197) → |
| Sha-4-39 | NZ_CUDX01000015.1 | - | 18076   | 18047   | RNA → rpmE2 (PRK01678)Ribosomal_L31 (pfam01197) → |
| Sha-4-40 | NZ_CUDU01000005.1 | - | 23912   | 23883   | RNA → rpmE2 (PRK01678)Ribosomal_L31 (pfam01197) → |



|           |                   |   |        |        |                                                   |
|-----------|-------------------|---|--------|--------|---------------------------------------------------|
| Sha-4-41  | NZ_CUHQ01000018.1 | + | 28694  | 28723  | RNA → rpmE2 (PRK01678)Ribosomal_L31 (pfam01197) → |
| Sha-4-42  | NZ_CUCK01000012.1 | + | 28720  | 28749  | RNA → rpmE2 (PRK01678)Ribosomal_L31 (pfam01197) → |
| Sha-4-43  | NZ_CUGA01000014.1 | + | 28691  | 28720  | RNA → rpmE2 (PRK01678)Ribosomal_L31 (pfam01197) → |
| Sha-4-44  | NZ_CUGC01000018.1 | + | 15618  | 15647  | RNA → rpmE2 (PRK01678)Ribosomal_L31 (pfam01197) → |
| Sha-4-45  | NZ_CUDI01000019.1 | + | 28702  | 28731  | RNA → rpmE2 (PRK01678)Ribosomal_L31 (pfam01197) → |
| Sha-4-46  | NZ_CUER01000015.1 | - | 23834  | 23805  | RNA → rpmE2 (PRK01678)Ribosomal_L31 (pfam01197) → |
| Sha-4-47  | NZ_CUDO01000015.1 | - | 23830  | 23801  | RNA → rpmE2 (PRK01678)Ribosomal_L31 (pfam01197) → |
| Sha-4-48  | NZ_CUDW01000027.1 | - | 23825  | 23796  | RNA → rpmE2 (PRK01678)Ribosomal_L31 (pfam01197) → |
| Sha-4-49  | NZ_CUCL01000019.1 | + | 30377  | 30406  | RNA → rpmE2 (PRK01678)Ribosomal_L31 (pfam01197) → |
| Sha-4-50  | NZ_CUEV01000014.1 | + | 28711  | 28740  | RNA → rpmE2 (PRK01678)Ribosomal_L31 (pfam01197) → |
| Sha-4-51  | NZ_CUFD01000015.1 | + | 28739  | 28768  | RNA → rpmE2 (PRK01678)Ribosomal_L31 (pfam01197) → |
| Sha-4-52  | NZ_CUGQ01000018.1 | + | 28691  | 28720  | RNA → rpmE2 (PRK01678)Ribosomal_L31 (pfam01197) → |
| Sha-4-53  | NZ_CUDF01000019.1 | + | 28709  | 28738  | RNA → rpmE2 (PRK01678)Ribosomal_L31 (pfam01197) → |
| Sha-4-119 | NZ_CUED01000013.1 | - | 23912  | 23883  | RNA → rpmE2 (PRK01678)Ribosomal_L31 (pfam01197) → |
| Sha-4-54  | NZ_CUGU01000016.1 | + | 28755  | 28784  | RNA → rpmE2 (PRK01678)Ribosomal_L31 (pfam01197) → |
| Sha-4-55  | NZ_CUDC01000014.1 | - | 33897  | 33868  | RNA → rpmE2 (PRK01678)Ribosomal_L31 (pfam01197) → |
| Sha-4-56  | NZ_CUGT01000014.1 | - | 23922  | 23893  | RNA → rpmE2 (PRK01678)Ribosomal_L31 (pfam01197) → |
| Sha-4-57  | NZ_CUFN01000017.1 | - | 23836  | 23807  | RNA → rpmE2 (PRK01678)Ribosomal_L31 (pfam01197) → |
| Sha-4-58  | NZ_CUDG01000021.1 | + | 21475  | 21504  | RNA → rpmE2 (PRK01678)Ribosomal_L31 (pfam01197) → |
| Sha-4-59  | NZ_CUEK01000015.1 | - | 23830  | 23801  | RNA → rpmE2 (PRK01678)Ribosomal_L31 (pfam01197) → |
| Sha-4-60  | NZ_CUCS01000032.1 | - | 23842  | 23813  | RNA → rpmE2 (PRK01678)Ribosomal_L31 (pfam01197) → |
| Sha-4-61  | NZ_CUCI01000016.1 | - | 23842  | 23813  | RNA → rpmE2 (PRK01678)Ribosomal_L31 (pfam01197) → |
| Sha-4-62  | NZ_CUCR01000015.1 | + | 28672  | 28701  | RNA → rpmE2 (PRK01678)Ribosomal_L31 (pfam01197) → |
| Sha-4-63  | NZ_CUFW01000024.1 | - | 23791  | 23762  | RNA → rpmE2 (PRK01678)Ribosomal_L31 (pfam01197) → |
| Sha-4-64  | NZ_CUGD01000018.1 | + | 28719  | 28748  | RNA → rpmE2 (PRK01678)Ribosomal_L31 (pfam01197) → |
| Sha-4-65  | NZ_CUEL01000014.1 | - | 23842  | 23813  | RNA → rpmE2 (PRK01678)Ribosomal_L31 (pfam01197) → |
| Sha-4-66  | NZ_CUHI01000017.1 | + | 22937  | 22966  | RNA → rpmE2 (PRK01678)Ribosomal_L31 (pfam01197) → |
| Sha-4-67  | NZ_CUEN01000018.1 | + | 28728  | 28757  | RNA → rpmE2 (PRK01678)Ribosomal_L31 (pfam01197) → |
| Sha-4-68  | NZ_CUDM01000018.1 | + | 28755  | 28784  | RNA → rpmE2 (PRK01678)Ribosomal_L31 (pfam01197) → |
| Sha-4-69  | NZ_CUDV01000012.1 | - | 23830  | 23801  | RNA → rpmE2 (PRK01678)Ribosomal_L31 (pfam01197) → |
| Sha-4-70  | NZ_CUGR01000015.1 | - | 23922  | 23893  | RNA → rpmE2 (PRK01678)Ribosomal_L31 (pfam01197) → |
| Sha-4-71  | NZ_CUFI01000017.1 | + | 26650  | 26679  | RNA → rpmE2 (PRK01678)Ribosomal_L31 (pfam01197) → |
| Sha-4-72  | NZ_CUHE01000019.1 | + | 21344  | 21373  | RNA → rpmE2 (PRK01678)Ribosomal_L31 (pfam01197) → |
| Sha-4-73  | NZ_CUGY01000021.1 | + | 15570  | 15599  | RNA → rpmE2 (PRK01678)Ribosomal_L31 (pfam01197) → |
| Sha-4-74  | NZ_CUGO01000018.1 | - | 24793  | 24764  | RNA → rpmE2 (PRK01678)Ribosomal_L31 (pfam01197) → |
| Sha-4-75  | NZ_CUCY01000018.1 | - | 23911  | 23882  | RNA → rpmE2 (PRK01678)Ribosomal_L31 (pfam01197) → |
| Sha-4-76  | NZ_CUHC01000010.1 | - | 23911  | 23882  | RNA → rpmE2 (PRK01678)Ribosomal_L31 (pfam01197) → |
| Sha-4-77  | NZ_CUFH01000015.1 | - | 23912  | 23883  | RNA → rpmE2 (PRK01678)Ribosomal_L31 (pfam01197) → |
| Sha-4-78  | NZ_CUFA01000016.1 | + | 28691  | 28720  | RNA → rpmE2 (PRK01678)Ribosomal_L31 (pfam01197) → |
| Sha-4-79  | NZ_CUCP01000012.1 | - | 23830  | 23801  | RNA → rpmE2 (PRK01678)Ribosomal_L31 (pfam01197) → |
| Sha-4-80  | NZ_CUEB01000022.1 | + | 15564  | 15593  | RNA → rpmE2 (PRK01678)Ribosomal_L31 (pfam01197) → |
| Sha-4-81  | NZ_CUDV01000014.1 | - | 44049  | 44020  | RNA → rpmE2 (PRK01678)Ribosomal_L31 (pfam01197) → |
| Sha-4-82  | NZ_CUHG01000015.1 | + | 23286  | 23315  | RNA → rpmE2 (PRK01678)Ribosomal_L31 (pfam01197) → |
| Sha-4-83  | NZ_CUCW01000018.1 | + | 28694  | 28723  | RNA → rpmE2 (PRK01678)Ribosomal_L31 (pfam01197) → |
| Sha-4-84  | NZ_CUFT01000020.1 | + | 20131  | 20160  | RNA → rpmE2 (PRK01678)Ribosomal_L31 (pfam01197) → |
| Sha-4-85  | NZ_CUFG01000017.1 | + | 22976  | 23005  | RNA → rpmE2 (PRK01678)Ribosomal_L31 (pfam01197) → |
| Sha-4-86  | NZ_CUCO01000013.1 | - | 23842  | 23813  | RNA → rpmE2 (PRK01678)Ribosomal_L31 (pfam01197) → |
| Sha-4-87  | NZ_CUCU01000018.1 | - | 23911  | 23882  | RNA → rpmE2 (PRK01678)Ribosomal_L31 (pfam01197) → |
| Sha-4-88  | NZ_CUFK01000001.1 | + | 248538 | 248567 | RNA → rpmE2 (PRK01678)Ribosomal_L31 (pfam01197) → |
| Sha-4-89  | NZ_CUEW01000014.1 | - | 23922  | 23893  | RNA → rpmE2 (PRK01678)Ribosomal_L31 (pfam01197) → |
| Sha-4-90  | NZ_CUEC01000012.1 | + | 11448  | 11477  | RNA → rpmE2 (PRK01678)Ribosomal_L31 (pfam01197) → |
| Sha-4-91  | NZ_CUCN01000006.1 | + | 59873  | 59902  | RNA → rpmE2 (PRK01678)Ribosomal_L31 (pfam01197) → |

|            |                                      |   |        |        |                                                                                               |
|------------|--------------------------------------|---|--------|--------|-----------------------------------------------------------------------------------------------|
| Sha-4-92   | NZ_CUGF01000017.1                    | + | 28713  | 28742  | RNA → rpmE2 (PRK01678)Ribosomal_L31 (pfam01197) →                                             |
| Sha-4-93   | NZ_CUEA01000021.1                    | + | 5363   | 5392   | RNA → rpmE2 (PRK01678)Ribosomal_L31 (pfam01197) →                                             |
| Sha-4-94   | NZ_CUCQ01000013.1                    | - | 23830  | 23801  | RNA → rpmE2 (PRK01678)Ribosomal_L31 (pfam01197) →                                             |
| Sha-4-95   | NZ_CUET01000018.1                    | + | 28738  | 28767  | RNA → rpmE2 (PRK01678)Ribosomal_L31 (pfam01197) →                                             |
| Sha-4-96   | NZ_CUFU01000016.1                    | + | 28711  | 28740  | RNA → rpmE2 (PRK01678)Ribosomal_L31 (pfam01197) →                                             |
| Sha-4-97   | NZ_CUFV01000018.1                    | + | 28699  | 28728  | RNA → rpmE2 (PRK01678)Ribosomal_L31 (pfam01197) →                                             |
| Sha-4-98   | NZ_CUDR01000018.1                    | + | 28709  | 28738  | RNA → rpmE2 (PRK01678)Ribosomal_L31 (pfam01197) →                                             |
| Sha-4-99   | NZ_CUHL01000016.1                    | + | 28755  | 28784  | RNA → rpmE2 (PRK01678)Ribosomal_L31 (pfam01197) →                                             |
| Sha-4-100  | NZ_CUHD01000018.1                    | + | 28731  | 28760  | RNA → rpmE2 (PRK01678)Ribosomal_L31 (pfam01197) →                                             |
| Sha-4-101  | NZ_CUFF01000017.1                    | + | 28705  | 28734  | RNA → rpmE2 (PRK01678)Ribosomal_L31 (pfam01197) →                                             |
| Sha-4-102  | NZ_CUEU01000016.1                    | - | 23911  | 23882  | RNA → rpmE2 (PRK01678)Ribosomal_L31 (pfam01197) →                                             |
| Sha-4-103  | NZ_CUHM01000013.1                    | + | 28722  | 28751  | RNA → rpmE2 (PRK01678)Ribosomal_L31 (pfam01197) →                                             |
| Sha-4-104  | NZ_CUWC01000015.1                    | + | 28730  | 28759  | RNA → rpmE2 (PRK01678)Ribosomal_L31 (pfam01197) →                                             |
| Sha-4-105  | NZ_CUFB01000016.1                    | - | 24282  | 24253  | RNA → rpmE2 (PRK01678)Ribosomal_L31 (pfam01197) →                                             |
| Sha-4-106  | NZ_CUDT01000017.1                    | + | 28729  | 28758  | RNA → rpmE2 (PRK01678)Ribosomal_L31 (pfam01197) →                                             |
| Sha-4-107  | NZ_CUEO01000007.1                    | - | 43987  | 43958  | RNA → rpmE2 (PRK01678)Ribosomal_L31 (pfam01197) →                                             |
| Sha-4-108  | NZ_CUDN01000016.1                    | - | 23911  | 23882  | RNA → rpmE2 (PRK01678)Ribosomal_L31 (pfam01197) →                                             |
| Sha-4-109  | NZ_CVRV01000016.1                    | + | 28691  | 28720  | RNA → rpmE2 (PRK01678)Ribosomal_L31 (pfam01197) →                                             |
| Sha-4-110  | NZ_JVTM01000047.1                    | + | 28698  | 28727  | RNA → rpmE2 (PRK01678)Ribosomal_L31 (pfam01197) →                                             |
| Sha-4-111  | NZ_JVVE01000004.1                    | - | 23752  | 23723  | RNA → rpmE2 (PRK01678)Ribosomal_L31 (pfam01197) →                                             |
| Sha-4-112  | NZ_JVRQ01000084.1                    | + | 15522  | 15551  | RNA → rpmE2 (PRK01678)Ribosomal_L31 (pfam01197) →                                             |
| Sha-4-113  | NZ_JVMX01000090.1                    | + | 28692  | 28721  | RNA → rpmE2 (PRK01678)Ribosomal_L31 (pfam01197) →                                             |
| Sha-4-114  | NZ_JVPA01000099.1                    | - | 23890  | 23861  | RNA → rpmE2 (PRK01678)Ribosomal_L31 (pfam01197) →                                             |
| Sha-1-1    | NC_007168.1                          | + | 923690 | 923719 | RNA → rpmE2 (PRK01678)Ribosomal_L31 (pfam01197) →                                             |
| Sha-6-1    | NZ_AJVA01000015.1                    | - | 23726  | 23697  | RNA → rpmE2 (PRK01678)Ribosomal_L31 (pfam01197) →                                             |
| Sau-4078-1 | NZ_JHTU01000062.1                    | + | 15552  | 15581  | RNA → rpmE2 (PRK01678)Ribosomal_L31 (pfam01197) →                                             |
| Sha-4-115  | NZ_JPRW01000011.1                    | - | 23862  | 23833  | RNA → rpmE2 (PRK01678)Ribosomal_L31 (pfam01197) →                                             |
| Sha-4-116  | NZ_JFOJ01000025.1                    | - | 23956  | 23927  | RNA → rpmE2 (PRK01678)Ribosomal_L31 (pfam01197) →                                             |
| Sha-4-117  | NZ_CUFO01000010.1                    | - | 43975  | 43946  | RNA → rpmE2 (PRK01678)Ribosomal_L31 (pfam01197) →                                             |
| Sha-5-1    | NZ_JRKN01000025.1                    | + | 36628  | 36657  | RNA → rpmE2 (PRK01678)Ribosomal_L31 (pfam01197) →                                             |
| Sha-4-118  | NZ_CUEE01000012.1                    | + | 20689  | 20718  | RNA → rpmE2 (PRK01678)Ribosomal_L31 (pfam01197) →                                             |
| Spe-1-1    | NZ_JVAY01000023.1                    | + | 42057  | 42086  | RNA → rpmE2 (PRK01678)Ribosomal_L31 (pfam01197) →                                             |
| Spe-2-1    | NZ_AGUA01000050.1                    | - | 22376  | 22347  | RNA → rpmE2 (PRK01678)Ribosomal_L31 (pfam01197) →                                             |
| Ssi-2-1    | NZ_AEUN01000494.1                    | + | 1616   | 1645   | RNA → rpmE2 (PRK01678)Ribosomal_L31 (pfam01197) → rpmE2 (PRK01678)Ribosomal_L31 (pfam01197) → |
| Ssp-10-1   | NZ_JTLN01000023.1                    | - | 19694  | 19665  | RNA → rpmE2 (PRK01678)Ribosomal_L31 (pfam01197) →                                             |
| Ssa-2-2    | NZ_JXBG01000018.1                    | - | 45141  | 45112  | RNA → rpmE2 (PRK01678)Ribosomal_L31 (pfam01197) →                                             |
| Mab-1-2    | NZ_CSZG01001468.1                    | - | 266    | 237    | RNA → rpmE2 (PRK01678)Ribosomal_L31 (pfam01197) →                                             |
| Ssa-2-3    | NZ_JUUE01000025.1                    | + | 26596  | 26625  | RNA → rpmE2 (PRK01678)Ribosomal_L31 (pfam01197) →                                             |
| Ssa-1-1    | NC_007350.1                          | + | 796466 | 796495 | RNA → rpmE2 (PRK01678)Ribosomal_L31 (pfam01197) →                                             |
| Ssa-3-1    | NZ_AHKB01000013.1                    | + | 47770  | 47799  | RNA → rpmE2 (PRK01678)Ribosomal_L31 (pfam01197) →                                             |
| Shy-1-1    | NZ_CP008747.1                        | + | 799781 | 799810 | RNA → rpmE2 (PRK01678)Ribosomal_L31 (pfam01197) →                                             |
| Sag-1-1    | NZ_JPRT01000013.1                    | + | 14025  | 14054  | RNA → rpmE2 (PRK01678)Ribosomal_L31 (pfam01197) →                                             |
| Ssi-3-1    | NZ_KB373330.1                        | - | 50416  | 50387  | RNA → rpmE2 (PRK01678)Ribosomal_L31 (pfam01197) →                                             |
| Ssi-4-1    | NZ_AXDY01000013.1                    | - | 48926  | 48897  | RNA → rpmE2 (PRK01678)Ribosomal_L31 (pfam01197) →                                             |
| env-998    | Anterior_nares_Baylor_scaffold_40137 | + | 669    | 698    | RNA → rpmE2 (PRK01678)Ribosomal_L31 (pfam01197) →                                             |
| env-999    | SRS011105_WUGC_scaffold_1835         | + | 18318  | 18347  | RNA → rpmE2 (PRK01678)Ribosomal_L31 (pfam01197) →                                             |
| env-1000   | SRS024424_C251219                    | - | 635    | 606    | RNA → rpmE2 (PRK01678)Ribosomal_L31 (pfam01197) →                                             |
| Sau-4004-1 | NZ_AGRN01000012.1                    | - | 54847  | 54818  | RNA → rpmE2 (PRK01678)Ribosomal_L31 (pfam01197) →                                             |
| Sau-4084-1 | NZ_AICH01000086.1                    | - | 47226  | 47197  | RNA → rpmE2 (PRK01678)Ribosomal_L31 (pfam01197) →                                             |
| Sau-4117-1 | NZ_AHBQ01000042.1                    | - | 25505  | 25476  | RNA → rpmE2 (PRK01678)Ribosomal_L31 (pfam01197) →                                             |
| Sau-4095-1 | NZ_AHZL01000017.1                    | + | 18318  | 18347  | RNA → rpmE2 (PRK01678)Ribosomal_L31 (pfam01197) →                                             |
| Sau-3020-1 | NZ_JBMO01000011.1                    | - | 56759  | 56730  | RNA → rpmE2 (PRK01678)Ribosomal_L31 (pfam01197) →                                             |



|            |                    |   |         |         |                                                                                               |
|------------|--------------------|---|---------|---------|-----------------------------------------------------------------------------------------------|
| Sau-808-1  | NZ_JEUZ01000006.1  | - | 56894   | 56865   | RNA → rpmE2 (PRK01678)Ribosomal_L31 (pfam01197) →                                             |
| Sau-306-1  | NZ_AZMZ01000011.1  | + | 54437   | 54466   | RNA → rpmE2 (PRK01678)Ribosomal_L31 (pfam01197) →                                             |
| Sau-1117-1 | NZ_AVPR01000004.1  | - | 48328   | 48299   | RNA → rpmE2 (PRK01678)Ribosomal_L31 (pfam01197) →                                             |
| Sau-2628-1 | NZ_JANQ01000006.1  | - | 31901   | 31872   | RNA → rpmE2 (PRK01678)Ribosomal_L31 (pfam01197) →                                             |
| Sau-1164-1 | NZ_JANM01000001.1  | - | 103797  | 103768  | RNA → rpmE2 (PRK01678)Ribosomal_L31 (pfam01197) →                                             |
| Sau-2630-1 | NZ_LBIJ01000052.1  | - | 15717   | 15688   | RNA → rpmE2 (PRK01678)Ribosomal_L31 (pfam01197) →                                             |
| Sau-3721-1 | NZ_LAKI01000016.1  | + | 20378   | 20407   | RNA → rpmE2 (PRK01678)Ribosomal_L31 (pfam01197) →                                             |
| Sau-1163-1 | NZ_JANO01000008.1  | + | 54412   | 54441   | RNA → rpmE2 (PRK01678)Ribosomal_L31 (pfam01197) →                                             |
| Sau-4074-1 | NZ_AJKD01000046.1  | - | 54814   | 54785   | RNA → rpmE2 (PRK01678)Ribosomal_L31 (pfam01197) →                                             |
| Sau-59-2   | NZ_CTYB01000015.1  | - | 25255   | 25226   | RNA → rpmE2 (PRK01678)Ribosomal_L31 (pfam01197) →                                             |
| Sau-2631-1 | NZ_LBII01000034.1  | - | 54843   | 54814   | RNA → rpmE2 (PRK01678)Ribosomal_L31 (pfam01197) →                                             |
| Sau-2629-1 | NZ_LBIF01000025.1  | - | 54839   | 54810   | RNA → rpmE2 (PRK01678)Ribosomal_L31 (pfam01197) →                                             |
| Sau-3759-1 | NZ_AOFU01000007.1  | - | 54626   | 54597   | RNA → rpmE2 (PRK01678)Ribosomal_L31 (pfam01197) →                                             |
| Sau-3984-1 | NZ_BAFI01000013.1  | - | 34888   | 34859   | RNA → rpmE2 (PRK01678)Ribosomal_L31 (pfam01197) →                                             |
| Sau-14-1   | NZ_ACKI01000009.1  | + | 51796   | 51825   | RNA → rpmE2 (PRK01678)Ribosomal_L31 (pfam01197) → rpmE2 (PRK01678)Ribosomal_L31 (pfam01197) → |
| Sau-3768-1 | NZ_AIVJ01000015.1  | - | 56838   | 56809   | RNA → rpmE2 (PRK01678)Ribosomal_L31 (pfam01197) →                                             |
| Sau-6-1    | NZ_ACKD01000061.1  | + | 18428   | 18457   | RNA → rpmE2 (PRK01678)Ribosomal_L31 (pfam01197) → rpmE2 (PRK01678)Ribosomal_L31 (pfam01197) → |
| Sau-3779-1 | NZ_AOCQ01000048.1  | + | 53422   | 53451   | RNA → rpmE2 (PRK01678)Ribosomal_L31 (pfam01197) →                                             |
| Sau-3985-1 | NZ_AEUQ01000018.1  | + | 18711   | 18740   | RNA → rpmE2 (PRK01678)Ribosomal_L31 (pfam01197) →                                             |
| Sau-3758-1 | NZ_BABZ01000029.1  | + | 54326   | 54355   | RNA → rpmE2 (PRK01678)Ribosomal_L31 (pfam01197) →                                             |
| Sau-12-1   | NZ_ADJK01000010.1  | - | 35339   | 35310   | RNA → rpmE2 (PRK01678)Ribosomal_L31 (pfam01197) → rpmE2 (PRK01678)Ribosomal_L31 (pfam01197) → |
| Sau-4-1    | NZ_ACSS01000022.1  | - | 25134   | 25105   | RNA → rpmE2 (PRK01678)Ribosomal_L31 (pfam01197) → rpmE2 (PRK01678)Ribosomal_L31 (pfam01197) → |
| Sau-19-1   | NZ_ACKL01000025.1  | - | 34879   | 34850   | RNA → rpmE2 (PRK01678)Ribosomal_L31 (pfam01197) → rpmE2 (PRK01678)Ribosomal_L31 (pfam01197) → |
| Sau-20-1   | NZ_ABF01000013.1   | + | 18336   | 18365   | RNA → rpmE2 (PRK01678)Ribosomal_L31 (pfam01197) → rpmE2 (PRK01678)Ribosomal_L31 (pfam01197) → |
| Sau-9-1    | NZ_ACKG01000001.1  | + | 18295   | 18324   | RNA → rpmE2 (PRK01678)Ribosomal_L31 (pfam01197) → rpmE2 (PRK01678)Ribosomal_L31 (pfam01197) → |
| Sau-3780-1 | NZ_AOFV01000008.1  | + | 53462   | 53491   | RNA → rpmE2 (PRK01678)Ribosomal_L31 (pfam01197) →                                             |
| Sau-16-1   | NZ_ADJI01000011.1  | - | 25055   | 25026   | RNA → rpmE2 (PRK01678)Ribosomal_L31 (pfam01197) → rpmE2 (PRK01678)Ribosomal_L31 (pfam01197) → |
| Sau-3778-1 | NZ_AOCP01000035.1  | - | 54850   | 54821   | RNA → rpmE2 (PRK01678)Ribosomal_L31 (pfam01197) →                                             |
| Sau-17-1   | NZ_ACKK01000004.1  | - | 34778   | 34749   | RNA → rpmE2 (PRK01678)Ribosomal_L31 (pfam01197) → rpmE2 (PRK01678)Ribosomal_L31 (pfam01197) → |
| Sau-8-1    | NZ_ACKF01000025.1  | + | 18300   | 18329   | RNA → rpmE2 (PRK01678)Ribosomal_L31 (pfam01197) → rpmE2 (PRK01678)Ribosomal_L31 (pfam01197) → |
| Sau-5-1    | NZ_ACKC01000004.1  | - | 34879   | 34850   | RNA → rpmE2 (PRK01678)Ribosomal_L31 (pfam01197) → rpmE2 (PRK01678)Ribosomal_L31 (pfam01197) → |
| Sau-3781-1 | NZ_AOFW01000023.1  | - | 55027   | 54998   | RNA → rpmE2 (PRK01678)Ribosomal_L31 (pfam01197) →                                             |
| Sau-10-1   | NZ_ACYO01000010.1  | - | 25192   | 25163   | RNA → rpmE2 (PRK01678)Ribosomal_L31 (pfam01197) → rpmE2 (PRK01678)Ribosomal_L31 (pfam01197) → |
| Sau-11-1   | NZ_ADJJ01000011.1  | - | 25197   | 25168   | RNA → rpmE2 (PRK01678)Ribosomal_L31 (pfam01197) → rpmE2 (PRK01678)Ribosomal_L31 (pfam01197) → |
| Sau-18-1   | NZ_ACSN01000014.1  | - | 54849   | 54820   | RNA → rpmE2 (PRK01678)Ribosomal_L31 (pfam01197) → rpmE2 (PRK01678)Ribosomal_L31 (pfam01197) → |
| Sau-3766-1 | NZ_ANCJ01000020.1  | - | 54772   | 54743   | RNA → rpmE2 (PRK01678)Ribosomal_L31 (pfam01197) →                                             |
| Sau-15-1   | NZ_ACKJ01000053.1  | - | 34879   | 34850   | RNA → rpmE2 (PRK01678)Ribosomal_L31 (pfam01197) → rpmE2 (PRK01678)Ribosomal_L31 (pfam01197) → |
| Sau-13-1   | NZ_ACKH01000023.1  | + | 18294   | 18323   | RNA → rpmE2 (PRK01678)Ribosomal_L31 (pfam01197) → rpmE2 (PRK01678)Ribosomal_L31 (pfam01197) → |
| Sau-7-1    | NZ_ACKE01000044.1  | + | 18294   | 18323   | RNA → rpmE2 (PRK01678)Ribosomal_L31 (pfam01197) → rpmE2 (PRK01678)Ribosomal_L31 (pfam01197) → |
| Sau-3983-1 | NZ_AMTC01000034.1  | - | 15812   | 15783   | RNA → rpmE2 (PRK01678)Ribosomal_L31 (pfam01197) →                                             |
| Sau-4108-1 | NZ_AHBK01000071.1  | - | 35128   | 35099   | RNA → rpmE2 (PRK01678)Ribosomal_L31 (pfam01197) →                                             |
| Sau-4057-1 | NZ_AHKE01000014.1  | - | 59009   | 58980   | RNA → rpmE2 (PRK01678)Ribosomal_L31 (pfam01197) →                                             |
| Sau-4109-1 | NZ_AHBT01000029.1  | - | 25283   | 25254   | RNA → rpmE2 (PRK01678)Ribosomal_L31 (pfam01197) →                                             |
| Sau-77-1   | NZ_ABSA01000077.1  | - | 54759   | 54730   | RNA → rpmE2 (PRK01678)Ribosomal_L31 (pfam01197) → rpmE2 (PRK01678)Ribosomal_L31 (pfam01197) → |
| Sau-4107-1 | NZ_ALWG01000007.1  | - | 54626   | 54597   | RNA → rpmE2 (PRK01678)Ribosomal_L31 (pfam01197) →                                             |
| Sau-4070-1 | NZ_AHVT01000022.1  | - | 59124   | 59095   | RNA → rpmE2 (PRK01678)Ribosomal_L31 (pfam01197) →                                             |
| Sau-4066-1 | NZ_AHVV01000011.1  | - | 20421   | 20392   | RNA → rpmE2 (PRK01678)Ribosomal_L31 (pfam01197) →                                             |
| Sau-4100-1 | NZ_AFGU010000104.1 | + | 55716   | 55745   | RNA → rpmE2 (PRK01678)Ribosomal_L31 (pfam01197) →                                             |
| Sau-4069-1 | NZ_AHVO01000012.1  | - | 58156   | 58127   | RNA → rpmE2 (PRK01678)Ribosomal_L31 (pfam01197) →                                             |
| Sau-61-1   | NZ_BABM01000001.1  | - | 2248261 | 2248232 | RNA → rpmE2 (PRK01678)Ribosomal_L31 (pfam01197) → rpmE2 (PRK01678)Ribosomal_L31 (pfam01197) → |
| Sau-4110-1 | NZ_AHBU01000033.1  | - | 35144   | 35115   | RNA → rpmE2 (PRK01678)Ribosomal_L31 (pfam01197) →                                             |
| Sau-4116-1 | NZ_AHBP01000045.1  | - | 35049   | 35020   | RNA → rpmE2 (PRK01678)Ribosomal_L31 (pfam01197) →                                             |

|            |                   |   |       |       |                                                                                               |
|------------|-------------------|---|-------|-------|-----------------------------------------------------------------------------------------------|
| Sau-4080-1 | NZ_AJLX01000024.1 | - | 54759 | 54730 | RNA → rpmE2 (PRK01678)Ribosomal_L31 (pfam01197) →                                             |
| Sau-4112-1 | NZ_AHBL01000051.1 | - | 35238 | 35209 | RNA → rpmE2 (PRK01678)Ribosomal_L31 (pfam01197) →                                             |
| Sau-3744-1 | NZ_ANHW01000011.1 | + | 18294 | 18323 | RNA → rpmE2 (PRK01678)Ribosomal_L31 (pfam01197) →                                             |
| Sau-4064-1 | NZ_AIES01000019.1 | - | 57510 | 57481 | RNA → rpmE2 (PRK01678)Ribosomal_L31 (pfam01197) →                                             |
| Sau-4068-1 | NZ_AHVL01000023.1 | - | 58578 | 58549 | RNA → rpmE2 (PRK01678)Ribosomal_L31 (pfam01197) →                                             |
| Sau-4065-1 | NZ_AHVQ01000012.1 | - | 57736 | 57707 | RNA → rpmE2 (PRK01678)Ribosomal_L31 (pfam01197) →                                             |
| Sau-4079-1 | NZ_AIDT01000006.1 | - | 56349 | 56320 | RNA → rpmE2 (PRK01678)Ribosomal_L31 (pfam01197) →                                             |
| Sau-4060-1 | NZ_AHVG01000019.1 | - | 59351 | 59322 | RNA → rpmE2 (PRK01678)Ribosomal_L31 (pfam01197) →                                             |
| Sau-4087-1 | NZ_AHLL01000033.1 | - | 35267 | 35238 | RNA → rpmE2 (PRK01678)Ribosomal_L31 (pfam01197) →                                             |
| Sau-4111-1 | NZ_AHBV01000033.1 | - | 35172 | 35143 | RNA → rpmE2 (PRK01678)Ribosomal_L31 (pfam01197) →                                             |
| Sau-4062-1 | NZ_AIEQ01000010.1 | - | 58114 | 58085 | RNA → rpmE2 (PRK01678)Ribosomal_L31 (pfam01197) →                                             |
| Sau-4059-1 | NZ_AHVX01000043.1 | - | 60169 | 60140 | RNA → rpmE2 (PRK01678)Ribosomal_L31 (pfam01197) →                                             |
| Sau-4071-1 | NZ_AHVD01000025.1 | - | 48130 | 48101 | RNA → rpmE2 (PRK01678)Ribosomal_L31 (pfam01197) →                                             |
| Sau-4121-1 | NZ_AKYW01000010.1 | + | 28884 | 28913 | RNA → rpmE2 (PRK01678)Ribosomal_L31 (pfam01197) →                                             |
| Sau-4115-1 | NZ_AHBO01000053.1 | - | 25113 | 25084 | RNA → rpmE2 (PRK01678)Ribosomal_L31 (pfam01197) →                                             |
| Sau-4083-1 | NZ_AHLT01000090.1 | + | 53400 | 53429 | RNA → rpmE2 (PRK01678)Ribosomal_L31 (pfam01197) →                                             |
| Sau-54-1   | NZ_ACZQ01000016.1 | + | 18318 | 18347 | RNA → rpmE2 (PRK01678)Ribosomal_L31 (pfam01197) → rpmE2 (PRK01678)Ribosomal_L31 (pfam01197) → |
| Sau-4088-1 | NZ_AHLO01000010.1 | - | 41581 | 41552 | RNA → rpmE2 (PRK01678)Ribosomal_L31 (pfam01197) →                                             |
| Sau-3746-1 | NZ_ANIB01000005.1 | + | 55076 | 55105 | RNA → rpmE2 (PRK01678)Ribosomal_L31 (pfam01197) →                                             |
| Sau-4067-1 | NZ_AHVR01000009.1 | - | 58247 | 58218 | RNA → rpmE2 (PRK01678)Ribosomal_L31 (pfam01197) →                                             |
| Sau-3743-2 | NZ_AMYL01000009.1 | - | 20386 | 20357 | RNA → rpmE2 (PRK01678)Ribosomal_L31 (pfam01197) →                                             |
| Sau-4098-1 | NZ_BAEA01000005.1 | - | 54851 | 54822 | RNA → rpmE2 (PRK01678)Ribosomal_L31 (pfam01197) →                                             |
| Sau-4119-1 | NZ_AHBS01000048.1 | - | 35093 | 35064 | RNA → rpmE2 (PRK01678)Ribosomal_L31 (pfam01197) →                                             |
| Sau-4114-1 | NZ_AHBN01000052.1 | - | 25427 | 25398 | RNA → rpmE2 (PRK01678)Ribosomal_L31 (pfam01197) →                                             |
| Sau-4113-1 | NZ_AHBM01000041.1 | - | 25182 | 25153 | RNA → rpmE2 (PRK01678)Ribosomal_L31 (pfam01197) →                                             |
| Sau-4118-1 | NZ_AHBR01000039.1 | - | 35181 | 35152 | RNA → rpmE2 (PRK01678)Ribosomal_L31 (pfam01197) →                                             |
| Sau-4009-1 | NZ_ANAL01000031.1 | - | 18161 | 18132 | RNA → rpmE2 (PRK01678)Ribosomal_L31 (pfam01197) →                                             |
| Sau-3995-1 | NZ_AOFX01000036.1 | - | 20485 | 20456 | RNA → rpmE2 (PRK01678)Ribosomal_L31 (pfam01197) →                                             |
| Sau-4028-1 | NZ_AGTV01000033.1 | + | 42513 | 42542 | RNA → rpmE2 (PRK01678)Ribosomal_L31 (pfam01197) →                                             |
| Sau-4014-1 | NZ_AGTY01000039.1 | - | 54848 | 54819 | RNA → rpmE2 (PRK01678)Ribosomal_L31 (pfam01197) →                                             |
| Sau-4051-1 | NZ_AHVV01000014.1 | - | 15829 | 15800 | RNA → rpmE2 (PRK01678)Ribosomal_L31 (pfam01197) →                                             |
| Sau-4042-1 | NZ_ABWY01000017.1 | - | 34879 | 34850 | RNA → rpmE2 (PRK01678)Ribosomal_L31 (pfam01197) →                                             |
| Sau-3999-1 | NZ_AHZK01000003.1 | + | 18314 | 18343 | RNA → rpmE2 (PRK01678)Ribosomal_L31 (pfam01197) →                                             |
| Sau-4036-1 | NZ_ALWH01000007.1 | - | 54626 | 54597 | RNA → rpmE2 (PRK01678)Ribosomal_L31 (pfam01197) →                                             |
| Sau-4054-1 | NZ_AHVP01000029.1 | - | 55599 | 55570 | RNA → rpmE2 (PRK01678)Ribosomal_L31 (pfam01197) →                                             |
| Sau-4019-1 | NZ_AHJW01000027.1 | - | 55010 | 54981 | RNA → rpmE2 (PRK01678)Ribosomal_L31 (pfam01197) →                                             |
| Sau-4048-1 | NZ_AHVJ01000017.1 | - | 20743 | 20714 | RNA → rpmE2 (PRK01678)Ribosomal_L31 (pfam01197) →                                             |
| Sau-4047-1 | NZ_AHVE01000012.1 | - | 36420 | 36391 | RNA → rpmE2 (PRK01678)Ribosomal_L31 (pfam01197) →                                             |
| Sau-4031-1 | NZ_AGTX01000020.1 | - | 54805 | 54776 | RNA → rpmE2 (PRK01678)Ribosomal_L31 (pfam01197) →                                             |
| Sau-4000-1 | NZ_AJGE01000006.1 | + | 18324 | 18353 | RNA → rpmE2 (PRK01678)Ribosomal_L31 (pfam01197) →                                             |
| Sau-4030-1 | NZ_AGTW01000035.1 | - | 54768 | 54739 | RNA → rpmE2 (PRK01678)Ribosomal_L31 (pfam01197) →                                             |
| Sau-3997-1 | NZ_AHZH01000007.1 | - | 22857 | 22828 | RNA → rpmE2 (PRK01678)Ribosomal_L31 (pfam01197) →                                             |
| Sau-4055-1 | NZ_AIEP01000019.1 | - | 22405 | 22376 | RNA → rpmE2 (PRK01678)Ribosomal_L31 (pfam01197) →                                             |
| Sau-4008-1 | NZ_AFTM01000022.1 | - | 28890 | 28861 | RNA → rpmE2 (PRK01678)Ribosomal_L31 (pfam01197) →                                             |
| Sau-4027-1 | NZ_AFPN01000048.1 | - | 54627 | 54598 | RNA → rpmE2 (PRK01678)Ribosomal_L31 (pfam01197) →                                             |
| Sau-4001-1 | NZ_ALWE01000045.1 | - | 54609 | 54580 | RNA → rpmE2 (PRK01678)Ribosomal_L31 (pfam01197) →                                             |
| Sau-4032-1 | NZ_AHKU01000089.1 | - | 20842 | 20813 | RNA → rpmE2 (PRK01678)Ribosomal_L31 (pfam01197) →                                             |
| Sau-4043-1 | NZ_AHVK01000015.1 | - | 56807 | 56778 | RNA → rpmE2 (PRK01678)Ribosomal_L31 (pfam01197) →                                             |
| Sau-3996-1 | NZ_ARXY01000030.1 | - | 54931 | 54902 | RNA → rpmE2 (PRK01678)Ribosomal_L31 (pfam01197) →                                             |
| Sau-4049-1 | NZ_AHVF01000014.1 | - | 56620 | 56591 | RNA → rpmE2 (PRK01678)Ribosomal_L31 (pfam01197) →                                             |
| Sau-4003-1 | NZ_AFEF01000009.1 | - | 34890 | 34861 | RNA → rpmE2 (PRK01678)Ribosomal_L31 (pfam01197) →                                             |
| Sau-4039-1 | NZ_ASHS01000035.1 | - | 34898 | 34869 | RNA → rpmE2 (PRK01678)Ribosomal_L31 (pfam01197) →                                             |

|            |                    |   |       |       |                                                                                               |
|------------|--------------------|---|-------|-------|-----------------------------------------------------------------------------------------------|
| Sau-4002-1 | NZ_AHZJ01000009.1  | + | 18316 | 18345 | RNA → rpmE2 (PRK01678)Ribosomal_L31 (pfam01197) →                                             |
| Sau-4010-1 | NZ_AFTN01000024.1  | - | 54601 | 54572 | RNA → rpmE2 (PRK01678)Ribosomal_L31 (pfam01197) →                                             |
| Sau-4016-1 | NZ_ANAK01000023.1  | - | 25281 | 25252 | RNA → rpmE2 (PRK01678)Ribosomal_L31 (pfam01197) →                                             |
| Sau-3987-1 | NZ_BAFA01000003.1  | + | 54805 | 54834 | RNA → rpmE2 (PRK01678)Ribosomal_L31 (pfam01197) →                                             |
| Sau-4035-1 | NZ_ALWF01000054.1  | - | 54609 | 54580 | RNA → rpmE2 (PRK01678)Ribosomal_L31 (pfam01197) →                                             |
| Sau-3998-1 | NZ_AHZI01000003.1  | - | 54609 | 54580 | RNA → rpmE2 (PRK01678)Ribosomal_L31 (pfam01197) →                                             |
| Sau-4053-1 | NZ_AHVS01000012.1  | - | 29787 | 29758 | RNA → rpmE2 (PRK01678)Ribosomal_L31 (pfam01197) →                                             |
| Sau-3994-1 | NZ_ASTH01000013.1  | + | 53397 | 53426 | RNA → rpmE2 (PRK01678)Ribosomal_L31 (pfam01197) →                                             |
| Sau-4023-1 | NZ_AHJY01000021.1  | + | 53399 | 53428 | RNA → rpmE2 (PRK01678)Ribosomal_L31 (pfam01197) →                                             |
| Sau-4056-1 | NZ_AHVI01000012.1  | - | 58959 | 58930 | RNA → rpmE2 (PRK01678)Ribosomal_L31 (pfam01197) →                                             |
| Sau-4041-1 | NZ_ABWT01000015.1  | + | 18336 | 18365 | RNA → rpmE2 (PRK01678)Ribosomal_L31 (pfam01197) →                                             |
| Sau-4017-1 | NZ_AHJV01000045.1  | - | 54800 | 54771 | RNA → rpmE2 (PRK01678)Ribosomal_L31 (pfam01197) →                                             |
| Sau-3986-1 | NZ_AEUR01000019.1  | - | 55149 | 55120 | RNA → rpmE2 (PRK01678)Ribosomal_L31 (pfam01197) →                                             |
| Sau-4029-1 | NZ_AHKA01000008.1  | - | 54672 | 54643 | RNA → rpmE2 (PRK01678)Ribosomal_L31 (pfam01197) →                                             |
| Sau-4025-1 | NZ_AHJZ01000033.1  | - | 15521 | 15492 | RNA → rpmE2 (PRK01678)Ribosomal_L31 (pfam01197) →                                             |
| Sau-4033-1 | NZ_AHKV01000021.1  | + | 18430 | 18459 | RNA → rpmE2 (PRK01678)Ribosomal_L31 (pfam01197) →                                             |
| Sau-4034-1 | NZ_AHKW01000042.1  | + | 28774 | 28803 | RNA → rpmE2 (PRK01678)Ribosomal_L31 (pfam01197) →                                             |
| Sau-4050-1 | NZ_AHVM01000014.1  | - | 59158 | 59129 | RNA → rpmE2 (PRK01678)Ribosomal_L31 (pfam01197) →                                             |
| Sau-4046-1 | NZ_AHVN01000038.1  | - | 35168 | 35139 | RNA → rpmE2 (PRK01678)Ribosomal_L31 (pfam01197) →                                             |
| Sau-4005-1 | NZ_AFEE01000059.1  | - | 55023 | 54994 | RNA → rpmE2 (PRK01678)Ribosomal_L31 (pfam01197) →                                             |
| Sau-23-1   | NZ_ACOT01000040.1  | - | 54845 | 54816 | RNA → rpmE2 (PRK01678)Ribosomal_L31 (pfam01197) → rpmE2 (PRK01678)Ribosomal_L31 (pfam01197) → |
| Sau-4012-1 | NZ_AGRO01000055.1  | - | 15808 | 15779 | RNA → rpmE2 (PRK01678)Ribosomal_L31 (pfam01197) →                                             |
| Sau-4020-1 | NZ_AHJX01000009.1  | - | 20656 | 20627 | RNA → rpmE2 (PRK01678)Ribosomal_L31 (pfam01197) →                                             |
| Sau-4044-1 | NZ_AIER01000007.1  | - | 61496 | 61467 | RNA → rpmE2 (PRK01678)Ribosomal_L31 (pfam01197) →                                             |
| Sau-2704-1 | NZ_CBWW010000060.1 | + | 7143  | 7172  | RNA → rpmE2 (PRK01678)Ribosomal_L31 (pfam01197) →                                             |
| Sau-500-1  | NZ_JFOW01000018.1  | - | 36391 | 36362 | RNA → rpmE2 (PRK01678)Ribosomal_L31 (pfam01197) →                                             |
| Sau-505-1  | NZ_JFPB01000020.1  | - | 36391 | 36362 | RNA → rpmE2 (PRK01678)Ribosomal_L31 (pfam01197) →                                             |
| Sau-510-1  | NZ_JFPG01000019.1  | - | 35659 | 35630 | RNA → rpmE2 (PRK01678)Ribosomal_L31 (pfam01197) →                                             |
| Sau-537-1  | NZ_JFQF01000015.1  | - | 36391 | 36362 | RNA → rpmE2 (PRK01678)Ribosomal_L31 (pfam01197) →                                             |
| Sau-538-1  | NZ_JFQG01000016.1  | - | 36391 | 36362 | RNA → rpmE2 (PRK01678)Ribosomal_L31 (pfam01197) →                                             |
| Sau-409-1  | NZ_JFRP01000016.1  | - | 36265 | 36236 | RNA → rpmE2 (PRK01678)Ribosomal_L31 (pfam01197) →                                             |
| Sau-501-1  | NZ_JFOX01000017.1  | - | 36391 | 36362 | RNA → rpmE2 (PRK01678)Ribosomal_L31 (pfam01197) →                                             |
| Sau-506-1  | NZ_JFPC01000017.1  | - | 35086 | 35057 | RNA → rpmE2 (PRK01678)Ribosomal_L31 (pfam01197) →                                             |
| Sau-507-1  | NZ_JFPD01000019.1  | - | 36391 | 36362 | RNA → rpmE2 (PRK01678)Ribosomal_L31 (pfam01197) →                                             |
| Sau-511-1  | NZ_JFPH01000018.1  | - | 36391 | 36362 | RNA → rpmE2 (PRK01678)Ribosomal_L31 (pfam01197) →                                             |
| Sau-512-1  | NZ_JFPI01000018.1  | - | 36391 | 36362 | RNA → rpmE2 (PRK01678)Ribosomal_L31 (pfam01197) →                                             |
| Sau-534-1  | NZ_JFQC01000018.1  | - | 36391 | 36362 | RNA → rpmE2 (PRK01678)Ribosomal_L31 (pfam01197) →                                             |
| Sau-539-1  | NZ_JFQH01000018.1  | - | 36391 | 36362 | RNA → rpmE2 (PRK01678)Ribosomal_L31 (pfam01197) →                                             |
| Sau-413-1  | NZ_JFRL01000015.1  | - | 36391 | 36362 | RNA → rpmE2 (PRK01678)Ribosomal_L31 (pfam01197) →                                             |
| Sau-412-1  | NZ_JFRM01000016.1  | - | 35284 | 35255 | RNA → rpmE2 (PRK01678)Ribosomal_L31 (pfam01197) →                                             |
| Sau-408-1  | NZ_JFRQ01000020.1  | - | 25129 | 25100 | RNA → rpmE2 (PRK01678)Ribosomal_L31 (pfam01197) →                                             |
| Sau-457-1  | NZ_JGNN01000006.1  | - | 56762 | 56733 | RNA → rpmE2 (PRK01678)Ribosomal_L31 (pfam01197) →                                             |
| Sau-499-1  | NZ_JFOV01000016.1  | - | 36391 | 36362 | RNA → rpmE2 (PRK01678)Ribosomal_L31 (pfam01197) →                                             |
| Sau-504-1  | NZ_JFPA01000017.1  | - | 36391 | 36362 | RNA → rpmE2 (PRK01678)Ribosomal_L31 (pfam01197) →                                             |
| Sau-509-1  | NZ_JFPF01000019.1  | - | 35659 | 35630 | RNA → rpmE2 (PRK01678)Ribosomal_L31 (pfam01197) →                                             |
| Sau-536-1  | NZ_JFQE01000017.1  | - | 36391 | 36362 | RNA → rpmE2 (PRK01678)Ribosomal_L31 (pfam01197) →                                             |
| Sau-410-1  | NZ_JFRO01000016.1  | - | 36390 | 36361 | RNA → rpmE2 (PRK01678)Ribosomal_L31 (pfam01197) →                                             |
| Sau-497-1  | NZ_JFOT01000022.1  | - | 25361 | 25332 | RNA → rpmE2 (PRK01678)Ribosomal_L31 (pfam01197) →                                             |
| Sau-498-1  | NZ_JFOU01000016.1  | - | 36391 | 36362 | RNA → rpmE2 (PRK01678)Ribosomal_L31 (pfam01197) →                                             |
| Sau-502-1  | NZ_JFOY01000020.1  | - | 36391 | 36362 | RNA → rpmE2 (PRK01678)Ribosomal_L31 (pfam01197) →                                             |
| Sau-503-1  | NZ_JFOZ01000016.1  | - | 36391 | 36362 | RNA → rpmE2 (PRK01678)Ribosomal_L31 (pfam01197) →                                             |
| Sau-508-1  | NZ_JFPE01000019.1  | - | 36391 | 36362 | RNA → rpmE2 (PRK01678)Ribosomal_L31 (pfam01197) →                                             |



|            |                   |   |         |         |       |                                             |
|------------|-------------------|---|---------|---------|-------|---------------------------------------------|
| Sau-535-1  | NZ_JFQD01000018.1 | - | 36391   | 36362   | RNA → | rpmE2 (PRK01678)Ribosomal_L31 (pfam01197) → |
| Sau-540-1  | NZ_JFQI01000018.1 | - | 36391   | 36362   | RNA → | rpmE2 (PRK01678)Ribosomal_L31 (pfam01197) → |
| Sau-411-1  | NZ_JFRN01000019.1 | - | 36149   | 36120   | RNA → | rpmE2 (PRK01678)Ribosomal_L31 (pfam01197) → |
| Sau-488-1  | NZ_JGNO01000001.1 | - | 1681337 | 1681308 | RNA → | rpmE2 (PRK01678)Ribosomal_L31 (pfam01197) → |
| Sau-529-1  | NZ_JFPX01000018.1 | - | 36391   | 36362   | RNA → | rpmE2 (PRK01678)Ribosomal_L31 (pfam01197) → |
| Sau-527-1  | NZ_JFPV01000016.1 | - | 36492   | 36463   | RNA → | rpmE2 (PRK01678)Ribosomal_L31 (pfam01197) → |
| Sau-528-1  | NZ_JFPW01000019.1 | - | 34974   | 34945   | RNA → | rpmE2 (PRK01678)Ribosomal_L31 (pfam01197) → |
| Sau-532-1  | NZ_JFQA01000016.1 | - | 35261   | 35232   | RNA → | rpmE2 (PRK01678)Ribosomal_L31 (pfam01197) → |
| Sau-533-1  | NZ_JFQB01000018.1 | - | 36391   | 36362   | RNA → | rpmE2 (PRK01678)Ribosomal_L31 (pfam01197) → |
| Sau-515-1  | NZ_JFPL01000018.1 | - | 36391   | 36362   | RNA → | rpmE2 (PRK01678)Ribosomal_L31 (pfam01197) → |
| Sau-521-1  | NZ_JFPQ01000016.1 | - | 36391   | 36362   | RNA → | rpmE2 (PRK01678)Ribosomal_L31 (pfam01197) → |
| Sau-523-1  | NZ_JFPR01000018.1 | - | 36391   | 36362   | RNA → | rpmE2 (PRK01678)Ribosomal_L31 (pfam01197) → |
| Sau-516-1  | NZ_JFPM01000019.1 | - | 36391   | 36362   | RNA → | rpmE2 (PRK01678)Ribosomal_L31 (pfam01197) → |
| Sau-517-1  | NZ_JFPN01000018.1 | - | 36391   | 36362   | RNA → | rpmE2 (PRK01678)Ribosomal_L31 (pfam01197) → |
| Sau-524-1  | NZ_JFPS01000015.1 | - | 35659   | 35630   | RNA → | rpmE2 (PRK01678)Ribosomal_L31 (pfam01197) → |
| Sau-526-1  | NZ_JFPU01000020.1 | - | 36391   | 36362   | RNA → | rpmE2 (PRK01678)Ribosomal_L31 (pfam01197) → |
| Sau-531-1  | NZ_JFPZ01000015.1 | - | 36392   | 36363   | RNA → | rpmE2 (PRK01678)Ribosomal_L31 (pfam01197) → |
| Sau-514-1  | NZ_JFPK01000019.1 | - | 35659   | 35630   | RNA → | rpmE2 (PRK01678)Ribosomal_L31 (pfam01197) → |
| Sau-520-1  | NZ_JFPP01000018.1 | - | 36391   | 36362   | RNA → | rpmE2 (PRK01678)Ribosomal_L31 (pfam01197) → |
| Sau-525-1  | NZ_JFPT01000019.1 | - | 36391   | 36362   | RNA → | rpmE2 (PRK01678)Ribosomal_L31 (pfam01197) → |
| Sau-530-1  | NZ_JFPY01000018.1 | - | 36391   | 36362   | RNA → | rpmE2 (PRK01678)Ribosomal_L31 (pfam01197) → |
| Sau-513-1  | NZ_JFPJ01000016.1 | - | 36391   | 36362   | RNA → | rpmE2 (PRK01678)Ribosomal_L31 (pfam01197) → |
| Sau-519-1  | NZ_JFPO01000018.1 | - | 36391   | 36362   | RNA → | rpmE2 (PRK01678)Ribosomal_L31 (pfam01197) → |
| Sau-1746-1 | NZ_JBBD01000006.1 | - | 49963   | 49934   | RNA → | rpmE2 (PRK01678)Ribosomal_L31 (pfam01197) → |
| Sau-1817-1 | NZ_JDCJ01000001.1 | - | 49963   | 49934   | RNA → | rpmE2 (PRK01678)Ribosomal_L31 (pfam01197) → |
| Sau-1847-1 | NZ_JDCO01000002.1 | - | 24749   | 24720   | RNA → | rpmE2 (PRK01678)Ribosomal_L31 (pfam01197) → |
| Sau-1865-1 | NZ_JDCT01000008.1 | - | 91437   | 91408   | RNA → | rpmE2 (PRK01678)Ribosomal_L31 (pfam01197) → |
| Sau-1908-1 | NZ_JDCY01000012.1 | - | 55496   | 55467   | RNA → | rpmE2 (PRK01678)Ribosomal_L31 (pfam01197) → |
| Sau-1949-1 | NZ_JDDD01000016.1 | - | 21401   | 21372   | RNA → | rpmE2 (PRK01678)Ribosomal_L31 (pfam01197) → |
| Sau-1829-1 | NZ_JDCK01000012.1 | - | 24749   | 24720   | RNA → | rpmE2 (PRK01678)Ribosomal_L31 (pfam01197) → |
| Sau-1850-1 | NZ_JDCP01000011.1 | - | 36391   | 36362   | RNA → | rpmE2 (PRK01678)Ribosomal_L31 (pfam01197) → |
| Sau-1879-1 | NZ_JDCU01000001.1 | - | 49963   | 49934   | RNA → | rpmE2 (PRK01678)Ribosomal_L31 (pfam01197) → |
| Sau-1915-1 | NZ_JDCZ01000010.1 | - | 35154   | 35125   | RNA → | rpmE2 (PRK01678)Ribosomal_L31 (pfam01197) → |
| Sau-1950-1 | NZ_JDDE01000006.1 | - | 133588  | 133559  | RNA → | rpmE2 (PRK01678)Ribosomal_L31 (pfam01197) → |
| Sau-1952-1 | NZ_JDDF01000002.1 | - | 238695  | 238666  | RNA → | rpmE2 (PRK01678)Ribosomal_L31 (pfam01197) → |
| Sau-1758-1 | NZ_JDDZ01000011.1 | - | 36491   | 36462   | RNA → | rpmE2 (PRK01678)Ribosomal_L31 (pfam01197) → |
| Sau-1735-1 | NZ_JBBN01000017.1 | - | 35603   | 35574   | RNA → | rpmE2 (PRK01678)Ribosomal_L31 (pfam01197) → |
| Sau-1830-1 | NZ_JDCL01000012.1 | - | 35918   | 35889   | RNA → | rpmE2 (PRK01678)Ribosomal_L31 (pfam01197) → |
| Sau-1836-1 | NZ_JDCM01000007.1 | - | 62156   | 62127   | RNA → | rpmE2 (PRK01678)Ribosomal_L31 (pfam01197) → |
| Sau-1852-1 | NZ_JDCQ01000009.1 | - | 62354   | 62325   | RNA → | rpmE2 (PRK01678)Ribosomal_L31 (pfam01197) → |
| Sau-1859-1 | NZ_JDCR01000003.1 | - | 24749   | 24720   | RNA → | rpmE2 (PRK01678)Ribosomal_L31 (pfam01197) → |
| Sau-1895-1 | NZ_JDCW01000003.1 | - | 24749   | 24720   | RNA → | rpmE2 (PRK01678)Ribosomal_L31 (pfam01197) → |
| Sau-1922-1 | NZ_JDDA01000006.1 | - | 24749   | 24720   | RNA → | rpmE2 (PRK01678)Ribosomal_L31 (pfam01197) → |
| Sau-1939-1 | NZ_JDDB01000001.1 | - | 238862  | 238833  | RNA → | rpmE2 (PRK01678)Ribosomal_L31 (pfam01197) → |
| Sau-1767-1 | NZ_JDEA01000006.1 | - | 24749   | 24720   | RNA → | rpmE2 (PRK01678)Ribosomal_L31 (pfam01197) → |
| Sau-1798-1 | NZ_JDFE01000010.1 | - | 61261   | 61232   | RNA → | rpmE2 (PRK01678)Ribosomal_L31 (pfam01197) → |
| Sau-1681-1 | NZ_JBAY01000005.1 | - | 57586   | 57557   | RNA → | rpmE2 (PRK01678)Ribosomal_L31 (pfam01197) → |
| Sau-1732-1 | NZ_JBBP01000013.1 | - | 61797   | 61768   | RNA → | rpmE2 (PRK01678)Ribosomal_L31 (pfam01197) → |
| Sau-1748-1 | NZ_JDCI01000012.1 | - | 35617   | 35588   | RNA → | rpmE2 (PRK01678)Ribosomal_L31 (pfam01197) → |
| Sau-1838-1 | NZ_JDCN01000012.1 | - | 36391   | 36362   | RNA → | rpmE2 (PRK01678)Ribosomal_L31 (pfam01197) → |
| Sau-1863-1 | NZ_JDCS01000002.1 | - | 238606  | 238577  | RNA → | rpmE2 (PRK01678)Ribosomal_L31 (pfam01197) → |
| Sau-1897-1 | NZ_JDCX01000012.1 | - | 35605   | 35576   | RNA → | rpmE2 (PRK01678)Ribosomal_L31 (pfam01197) → |

|            |                   |   |        |        |       |                                             |
|------------|-------------------|---|--------|--------|-------|---------------------------------------------|
| Sau-1940-1 | NZ_JDDC01000013.1 | - | 35656  | 35627  | RNA → | rpmE2 (PRK01678)Ribosomal_L31 (pfam01197) → |
| Sau-1684-1 | NZ_JBDH01000007.1 | - | 111776 | 111747 | RNA → | rpmE2 (PRK01678)Ribosomal_L31 (pfam01197) → |
| Sau-1680-1 | NZ_JBDK01000007.1 | - | 109916 | 109887 | RNA → | rpmE2 (PRK01678)Ribosomal_L31 (pfam01197) → |
| Sau-1715-1 | NZ_JBCF01000011.1 | - | 36100  | 36071  | RNA → | rpmE2 (PRK01678)Ribosomal_L31 (pfam01197) → |
| Sau-1666-1 | NZ_JBDX01000010.1 | - | 58580  | 58551  | RNA → | rpmE2 (PRK01678)Ribosomal_L31 (pfam01197) → |
| Sau-1977-1 | NZ_JDDK01000001.1 | - | 58248  | 58219  | RNA → | rpmE2 (PRK01678)Ribosomal_L31 (pfam01197) → |
| Sau-1720-1 | NZ_JBCA01000017.1 | - | 3620   | 3591   | RNA → | rpmE2 (PRK01678)Ribosomal_L31 (pfam01197) → |
| Sau-1664-1 | NZ_JBDZ01000012.1 | - | 19785  | 19756  | RNA → | rpmE2 (PRK01678)Ribosomal_L31 (pfam01197) → |
| Sau-1972-1 | NZ_JDDI01000010.1 | - | 21997  | 21968  | RNA → | rpmE2 (PRK01678)Ribosomal_L31 (pfam01197) → |
| Sau-1992-1 | NZ_JDDN01000007.1 | - | 62153  | 62124  | RNA → | rpmE2 (PRK01678)Ribosomal_L31 (pfam01197) → |
| Sau-1730-1 | NZ_JBBR01000006.1 | - | 112235 | 112206 | RNA → | rpmE2 (PRK01678)Ribosomal_L31 (pfam01197) → |
| Sau-1653-1 | NZ_JBEJ01000011.1 | - | 32842  | 32813  | RNA → | rpmE2 (PRK01678)Ribosomal_L31 (pfam01197) → |
| Sau-1966-1 | NZ_JDDH01000008.1 | - | 24749  | 24720  | RNA → | rpmE2 (PRK01678)Ribosomal_L31 (pfam01197) → |
| Sau-1988-1 | NZ_JDDM01000012.1 | - | 36292  | 36263  | RNA → | rpmE2 (PRK01678)Ribosomal_L31 (pfam01197) → |
| Sau-1707-1 | NZ_JBCM01000016.1 | - | 35136  | 35107  | RNA → | rpmE2 (PRK01678)Ribosomal_L31 (pfam01197) → |
| Sau-1705-1 | NZ_JBCO01000009.1 | - | 24749  | 24720  | RNA → | rpmE2 (PRK01678)Ribosomal_L31 (pfam01197) → |
| Sau-1671-1 | NZ_JBDT01000006.1 | - | 112159 | 112130 | RNA → | rpmE2 (PRK01678)Ribosomal_L31 (pfam01197) → |
| Sau-1675-1 | NZ_JBDP01000014.1 | - | 36391  | 36362  | RNA → | rpmE2 (PRK01678)Ribosomal_L31 (pfam01197) → |
| Sau-1959-1 | NZ_JDDG01000010.1 | - | 34416  | 34387  | RNA → | rpmE2 (PRK01678)Ribosomal_L31 (pfam01197) → |
| Sau-1982-1 | NZ_JDDL01000012.1 | - | 36391  | 36362  | RNA → | rpmE2 (PRK01678)Ribosomal_L31 (pfam01197) → |
| Sau-1142-1 | NZ_JBFF01000002.1 | - | 56894  | 56865  | RNA → | rpmE2 (PRK01678)Ribosomal_L31 (pfam01197) → |
| Sau-1149-1 | NZ_JBRF01000002.1 | - | 49802  | 49773  | RNA → | rpmE2 (PRK01678)Ribosomal_L31 (pfam01197) → |
| Sau-1151-1 | NZ_JBNB01000002.1 | - | 56893  | 56864  | RNA → | rpmE2 (PRK01678)Ribosomal_L31 (pfam01197) → |
| Sau-1007-1 | NZ_JDZL01000002.1 | - | 54924  | 54895  | RNA → | rpmE2 (PRK01678)Ribosomal_L31 (pfam01197) → |
| Sau-996-1  | NZ_JDGS01000003.1 | - | 56894  | 56865  | RNA → | rpmE2 (PRK01678)Ribosomal_L31 (pfam01197) → |
| Sau-1051-1 | NZ_JFSI01000003.1 | - | 54887  | 54858  | RNA → | rpmE2 (PRK01678)Ribosomal_L31 (pfam01197) → |
| Sau-1012-1 | NZ_JGFD01000019.1 | - | 34972  | 34943  | RNA → | rpmE2 (PRK01678)Ribosomal_L31 (pfam01197) → |
| Sau-979-1  | NZ_JGIB01000018.1 | - | 34873  | 34844  | RNA → | rpmE2 (PRK01678)Ribosomal_L31 (pfam01197) → |
| Sau-1116-1 | NZ_AVPA01000008.1 | + | 55340  | 55369  | RNA → | rpmE2 (PRK01678)Ribosomal_L31 (pfam01197) → |
| Sau-952-1  | NZ_JDGS01000010.1 | - | 56694  | 56665  | RNA → | rpmE2 (PRK01678)Ribosomal_L31 (pfam01197) → |
| Sau-1044-1 | NZ_JFSJ01000001.1 | - | 56794  | 56765  | RNA → | rpmE2 (PRK01678)Ribosomal_L31 (pfam01197) → |
| Sau-951-1  | NZ_JEUI01000002.1 | - | 56994  | 56965  | RNA → | rpmE2 (PRK01678)Ribosomal_L31 (pfam01197) → |
| Sau-1013-1 | NZ_JGFE01000018.1 | - | 35013  | 34984  | RNA → | rpmE2 (PRK01678)Ribosomal_L31 (pfam01197) → |
| Sau-2351-1 | NZ_JDEI01000006.1 | - | 24749  | 24720  | RNA → | rpmE2 (PRK01678)Ribosomal_L31 (pfam01197) → |
| Sau-2256-1 | NZ_JDEN01000007.1 | - | 49944  | 49915  | RNA → | rpmE2 (PRK01678)Ribosomal_L31 (pfam01197) → |
| Sau-2278-1 | NZ_JDEE01000003.1 | - | 215968 | 215939 | RNA → | rpmE2 (PRK01678)Ribosomal_L31 (pfam01197) → |
| Sau-2356-1 | NZ_JDEJ01000004.1 | - | 24749  | 24720  | RNA → | rpmE2 (PRK01678)Ribosomal_L31 (pfam01197) → |
| Sau-2259-1 | NZ_JDEO01000013.1 | - | 35331  | 35302  | RNA → | rpmE2 (PRK01678)Ribosomal_L31 (pfam01197) → |
| Sau-2166-1 | NZ_JEFF01000010.1 | - | 55960  | 55931  | RNA → | rpmE2 (PRK01678)Ribosomal_L31 (pfam01197) → |
| Sau-2120-1 | NZ_JEFK01000013.1 | - | 35321  | 35292  | RNA → | rpmE2 (PRK01678)Ribosomal_L31 (pfam01197) → |
| Sau-2217-1 | NZ_JEFC01000001.1 | - | 217173 | 217144 | RNA → | rpmE2 (PRK01678)Ribosomal_L31 (pfam01197) → |
| Sau-2160-1 | NZ_JEFG01000011.1 | - | 72453  | 72424  | RNA → | rpmE2 (PRK01678)Ribosomal_L31 (pfam01197) → |
| Sau-2156-1 | NZ_JEFH01000015.1 | - | 35809  | 35780  | RNA → | rpmE2 (PRK01678)Ribosomal_L31 (pfam01197) → |
| Sau-2117-1 | NZ_JEFL01000001.1 | - | 56498  | 56469  | RNA → | rpmE2 (PRK01678)Ribosomal_L31 (pfam01197) → |
| Sau-2230-1 | NZ_JEFB01000013.1 | - | 36391  | 36362  | RNA → | rpmE2 (PRK01678)Ribosomal_L31 (pfam01197) → |
| Sau-2281-1 | NZ_JDEF01000001.1 | - | 238570 | 238541 | RNA → | rpmE2 (PRK01678)Ribosomal_L31 (pfam01197) → |
| Sau-2237-1 | NZ_JDEK01000015.1 | - | 35331  | 35302  | RNA → | rpmE2 (PRK01678)Ribosomal_L31 (pfam01197) → |
| Sau-2263-1 | NZ_JDEB01000008.1 | - | 61334  | 61305  | RNA → | rpmE2 (PRK01678)Ribosomal_L31 (pfam01197) → |
| Sau-2295-1 | NZ_JDEG01000006.1 | - | 112279 | 112250 | RNA → | rpmE2 (PRK01678)Ribosomal_L31 (pfam01197) → |
| Sau-2307-1 | NZ_JDEH01000002.1 | - | 236160 | 236131 | RNA → | rpmE2 (PRK01678)Ribosomal_L31 (pfam01197) → |
| Sau-2240-1 | NZ_JDEL01000012.1 | - | 15617  | 15588  | RNA → | rpmE2 (PRK01678)Ribosomal_L31 (pfam01197) → |
| Sau-2255-1 | NZ_JDEM01000010.1 | - | 15617  | 15588  | RNA → | rpmE2 (PRK01678)Ribosomal_L31 (pfam01197) → |



|            |                   |   |        |        |                                                   |
|------------|-------------------|---|--------|--------|---------------------------------------------------|
| Sau-2183-1 | NZ_JEFE01000002.1 | - | 109185 | 109156 | RNA → rpmE2 (PRK01678)Ribosomal_L31 (pfam01197) → |
| Sau-2125-1 | NZ_JEFJ01000009.1 | - | 36391  | 36362  | RNA → rpmE2 (PRK01678)Ribosomal_L31 (pfam01197) → |
| Sau-2206-1 | NZ_JEFD01000004.1 | - | 217229 | 217200 | RNA → rpmE2 (PRK01678)Ribosomal_L31 (pfam01197) → |
| Sau-2135-1 | NZ_JEFI01000012.1 | - | 35661  | 35632  | RNA → rpmE2 (PRK01678)Ribosomal_L31 (pfam01197) → |
| Sau-2026-1 | NZ_JDDU01000006.1 | - | 58331  | 58302  | RNA → rpmE2 (PRK01678)Ribosomal_L31 (pfam01197) → |
| Sau-2008-1 | NZ_JDDS01000012.1 | - | 17025  | 16996  | RNA → rpmE2 (PRK01678)Ribosomal_L31 (pfam01197) → |
| Sau-2010-1 | NZ_JDDT01000010.1 | - | 36391  | 36362  | RNA → rpmE2 (PRK01678)Ribosomal_L31 (pfam01197) → |
| Sau-2065-1 | NZ_JEFV01000001.1 | - | 24749  | 24720  | RNA → rpmE2 (PRK01678)Ribosomal_L31 (pfam01197) → |
| Sau-2034-1 | NZ_JEFZ01000009.1 | - | 111533 | 111504 | RNA → rpmE2 (PRK01678)Ribosomal_L31 (pfam01197) → |
| Sau-2033-1 | NZ_JEGA01000001.1 | - | 117350 | 117321 | RNA → rpmE2 (PRK01678)Ribosomal_L31 (pfam01197) → |
| Sau-2006-1 | NZ_JDDR01000012.1 | - | 35129  | 35100  | RNA → rpmE2 (PRK01678)Ribosomal_L31 (pfam01197) → |
| Sau-2029-1 | NZ_JDDW01000011.1 | - | 43765  | 43736  | RNA → rpmE2 (PRK01678)Ribosomal_L31 (pfam01197) → |
| Sau-2048-1 | NZ_JEFW01000009.1 | - | 115262 | 115233 | RNA → rpmE2 (PRK01678)Ribosomal_L31 (pfam01197) → |
| Sau-995-1  | NZ_JGHN01000005.1 | - | 56893  | 56864  | RNA → rpmE2 (PRK01678)Ribosomal_L31 (pfam01197) → |
| Sau-1027-1 | NZ_JGIC01000015.1 | - | 34817  | 34788  | RNA → rpmE2 (PRK01678)Ribosomal_L31 (pfam01197) → |
| Sau-1090-1 | NZ_JGID01000011.1 | - | 34971  | 34942  | RNA → rpmE2 (PRK01678)Ribosomal_L31 (pfam01197) → |
| Sau-1137-1 | NZ_JBEM01000001.1 | - | 228947 | 228918 | RNA → rpmE2 (PRK01678)Ribosomal_L31 (pfam01197) → |
| Sau-1110-1 | NZ_JBMR01000004.1 | - | 56790  | 56761  | RNA → rpmE2 (PRK01678)Ribosomal_L31 (pfam01197) → |
| Sau-1143-1 | NZ_JBFE01000003.1 | - | 56893  | 56864  | RNA → rpmE2 (PRK01678)Ribosomal_L31 (pfam01197) → |
| Sau-1093-1 | NZ_JDGA01000018.1 | - | 34873  | 34844  | RNA → rpmE2 (PRK01678)Ribosomal_L31 (pfam01197) → |
| Sau-1010-1 | NZ_JDZK01000005.1 | - | 56892  | 56863  | RNA → rpmE2 (PRK01678)Ribosomal_L31 (pfam01197) → |
| Sau-1076-1 | NZ_JFSG01000002.1 | - | 56794  | 56765  | RNA → rpmE2 (PRK01678)Ribosomal_L31 (pfam01197) → |
| Sau-1058-1 | NZ_JFSH01000001.1 | - | 56894  | 56865  | RNA → rpmE2 (PRK01678)Ribosomal_L31 (pfam01197) → |
| Sau-938-1  | NZ_JFSL01000006.1 | - | 56794  | 56765  | RNA → rpmE2 (PRK01678)Ribosomal_L31 (pfam01197) → |
| Sau-942-1  | NZ_JEUF01000007.1 | - | 56894  | 56865  | RNA → rpmE2 (PRK01678)Ribosomal_L31 (pfam01197) → |
| Sau-1047-1 | NZ_JEVJ01000006.1 | - | 56789  | 56760  | RNA → rpmE2 (PRK01678)Ribosomal_L31 (pfam01197) → |
| Sau-1049-1 | NZ_JEVK01000016.1 | - | 34913  | 34884  | RNA → rpmE2 (PRK01678)Ribosomal_L31 (pfam01197) → |
| Sau-1077-1 | NZ_JFSF01000001.1 | - | 56794  | 56765  | RNA → rpmE2 (PRK01678)Ribosomal_L31 (pfam01197) → |
| Sau-1026-1 | NZ_JFSK01000009.1 | - | 55117  | 55088  | RNA → rpmE2 (PRK01678)Ribosomal_L31 (pfam01197) → |
| Sau-1025-1 | NZ_JEVI01000008.1 | - | 56894  | 56865  | RNA → rpmE2 (PRK01678)Ribosomal_L31 (pfam01197) → |
| Sau-1015-1 | NZ_JGFF01000005.1 | - | 56894  | 56865  | RNA → rpmE2 (PRK01678)Ribosomal_L31 (pfam01197) → |
| Sau-1120-1 | NZ_AZTI01000010.1 | + | 7310   | 7339   | RNA → rpmE2 (PRK01678)Ribosomal_L31 (pfam01197) → |
| Sau-1105-1 | NZ_JBPF01000002.1 | - | 238686 | 238657 | RNA → rpmE2 (PRK01678)Ribosomal_L31 (pfam01197) → |
| Sau-1118-1 | NZ_AZTF01000013.1 | - | 54734  | 54705  | RNA → rpmE2 (PRK01678)Ribosomal_L31 (pfam01197) → |
| Sau-1082-1 | NZ_JDYS01000002.1 | - | 56893  | 56864  | RNA → rpmE2 (PRK01678)Ribosomal_L31 (pfam01197) → |
| Sau-1068-1 | NZ_JDYT01000002.1 | - | 56894  | 56865  | RNA → rpmE2 (PRK01678)Ribosomal_L31 (pfam01197) → |
| Sau-1115-1 | NZ_JBKG01000002.1 | - | 56926  | 56897  | RNA → rpmE2 (PRK01678)Ribosomal_L31 (pfam01197) → |
| Sau-1119-1 | NZ_AZTH01000013.1 | + | 18429  | 18458  | RNA → rpmE2 (PRK01678)Ribosomal_L31 (pfam01197) → |
| Sau-1104-1 | NZ_JBPX01000004.1 | - | 238686 | 238657 | RNA → rpmE2 (PRK01678)Ribosomal_L31 (pfam01197) → |
| Sau-1121-1 | NZ_AZTG01000009.1 | - | 54919  | 54890  | RNA → rpmE2 (PRK01678)Ribosomal_L31 (pfam01197) → |
| Sau-961-1  | NZ_JEUQ01000005.1 | - | 55117  | 55088  | RNA → rpmE2 (PRK01678)Ribosomal_L31 (pfam01197) → |
| Sau-963-1  | NZ_JEUR01000001.1 | - | 56994  | 56965  | RNA → rpmE2 (PRK01678)Ribosomal_L31 (pfam01197) → |
| Sau-980-1  | NZ_JEUV01000003.1 | - | 56894  | 56865  | RNA → rpmE2 (PRK01678)Ribosomal_L31 (pfam01197) → |
| Sau-983-1  | NZ_JEUW01000011.1 | - | 34849  | 34820  | RNA → rpmE2 (PRK01678)Ribosomal_L31 (pfam01197) → |
| Sau-978-1  | NZ_JGGS01000006.1 | - | 55136  | 55107  | RNA → rpmE2 (PRK01678)Ribosomal_L31 (pfam01197) → |
| Sau-1069-1 | NZ_JGGT01000012.1 | - | 34913  | 34884  | RNA → rpmE2 (PRK01678)Ribosomal_L31 (pfam01197) → |
| Sau-1066-1 | NZ_JDYV01000004.1 | - | 56894  | 56865  | RNA → rpmE2 (PRK01678)Ribosomal_L31 (pfam01197) → |
| Sau-969-1  | NZ_JGGR01000001.1 | - | 56894  | 56865  | RNA → rpmE2 (PRK01678)Ribosomal_L31 (pfam01197) → |
| Sau-1067-1 | NZ_JDYU01000002.1 | - | 56893  | 56864  | RNA → rpmE2 (PRK01678)Ribosomal_L31 (pfam01197) → |
| Sau-972-1  | NZ_JEUT01000006.1 | - | 25226  | 25197  | RNA → rpmE2 (PRK01678)Ribosomal_L31 (pfam01197) → |
| Sau-289-1  | NZ_JBLW01000002.1 | - | 56894  | 56865  | RNA → rpmE2 (PRK01678)Ribosomal_L31 (pfam01197) → |
| Sau-287-1  | NZ_JBNU01000003.1 | - | 56894  | 56865  | RNA → rpmE2 (PRK01678)Ribosomal_L31 (pfam01197) → |

|            |                   |   |         |         |       |                                  |                               |                             |   |
|------------|-------------------|---|---------|---------|-------|----------------------------------|-------------------------------|-----------------------------|---|
| Sau-282-1  | NZ_JBMG01000007.1 | - | 56893   | 56864   | RNA → | <a href="#">rpmE2 (PRK01678)</a> | <a href="#">Ribosomal_L31</a> | <a href="#">(pfam01197)</a> | → |
| Sau-237-1  | NZ_JBOA01000007.1 | - | 188315  | 188286  | RNA → | <a href="#">rpmE2 (PRK01678)</a> | <a href="#">Ribosomal_L31</a> | <a href="#">(pfam01197)</a> | → |
| Sau-310-1  | NZ_JFOR01000024.1 | - | 25129   | 25100   | RNA → | <a href="#">rpmE2 (PRK01678)</a> | <a href="#">Ribosomal_L31</a> | <a href="#">(pfam01197)</a> | → |
| Sau-249-1  | NZ_JDXI01000001.1 | - | 1674371 | 1674342 | RNA → | <a href="#">rpmE2 (PRK01678)</a> | <a href="#">Ribosomal_L31</a> | <a href="#">(pfam01197)</a> | → |
| Sau-256-1  | NZ_JIZR01000010.1 | - | 56310   | 56281   | RNA → | <a href="#">rpmE2 (PRK01678)</a> | <a href="#">Ribosomal_L31</a> | <a href="#">(pfam01197)</a> | → |
| Sau-147-1  | NZ_JOQA01000063.1 | - | 55594   | 55565   | RNA → | <a href="#">rpmE2 (PRK01678)</a> | <a href="#">Ribosomal_L31</a> | <a href="#">(pfam01197)</a> | → |
| Sau-101-1  | NZ_JOPR01000046.1 | - | 55273   | 55244   | RNA → | <a href="#">rpmE2 (PRK01678)</a> | <a href="#">Ribosomal_L31</a> | <a href="#">(pfam01197)</a> | → |
| Sau-148-1  | NZ_JOPT01000040.1 | - | 56454   | 56425   | RNA → | <a href="#">rpmE2 (PRK01678)</a> | <a href="#">Ribosomal_L31</a> | <a href="#">(pfam01197)</a> | → |
| Sau-385-1  | NZ_JFOS01000021.1 | - | 36291   | 36262   | RNA → | <a href="#">rpmE2 (PRK01678)</a> | <a href="#">Ribosomal_L31</a> | <a href="#">(pfam01197)</a> | → |
| Sau-252-1  | NZ_JIZV01000007.1 | - | 52502   | 52473   | RNA → | <a href="#">rpmE2 (PRK01678)</a> | <a href="#">Ribosomal_L31</a> | <a href="#">(pfam01197)</a> | → |
| Sau-81-1   | NZ_JJEY01000022.1 | - | 20463   | 20434   | RNA → | <a href="#">rpmE2 (PRK01678)</a> | <a href="#">Ribosomal_L31</a> | <a href="#">(pfam01197)</a> | → |
| Sau-100-1  | NZ_JOPY01000062.1 | - | 55189   | 55160   | RNA → | <a href="#">rpmE2 (PRK01678)</a> | <a href="#">Ribosomal_L31</a> | <a href="#">(pfam01197)</a> | → |
| Sau-102-1  | NZ_JOPZ01000029.1 | - | 55106   | 55077   | RNA → | <a href="#">rpmE2 (PRK01678)</a> | <a href="#">Ribosomal_L31</a> | <a href="#">(pfam01197)</a> | → |
| Sau-285-1  | NZ_JBQY01000001.1 | - | 120363  | 120334  | RNA → | <a href="#">rpmE2 (PRK01678)</a> | <a href="#">Ribosomal_L31</a> | <a href="#">(pfam01197)</a> | → |
| Sau-244-1  | NZ_JBLJ01000007.1 | - | 61838   | 61809   | RNA → | <a href="#">rpmE2 (PRK01678)</a> | <a href="#">Ribosomal_L31</a> | <a href="#">(pfam01197)</a> | → |
| Sau-303-1  | NZ_AZMY01000008.1 | - | 54950   | 54921   | RNA → | <a href="#">rpmE2 (PRK01678)</a> | <a href="#">Ribosomal_L31</a> | <a href="#">(pfam01197)</a> | → |
| Sau-301-1  | NZ_JBFS01000008.1 | - | 62157   | 62128   | RNA → | <a href="#">rpmE2 (PRK01678)</a> | <a href="#">Ribosomal_L31</a> | <a href="#">(pfam01197)</a> | → |
| Sau-298-1  | NZ_JBHF01000004.1 | - | 56894   | 56865   | RNA → | <a href="#">rpmE2 (PRK01678)</a> | <a href="#">Ribosomal_L31</a> | <a href="#">(pfam01197)</a> | → |
| Sau-284-1  | NZ_JBRA01000002.1 | - | 56893   | 56864   | RNA → | <a href="#">rpmE2 (PRK01678)</a> | <a href="#">Ribosomal_L31</a> | <a href="#">(pfam01197)</a> | → |
| Sau-320-1  | NZ_JFOQ01000016.1 | - | 15539   | 15510   | RNA → | <a href="#">rpmE2 (PRK01678)</a> | <a href="#">Ribosomal_L31</a> | <a href="#">(pfam01197)</a> | → |
| Sau-381-1  | NZ_JGNP01000003.1 | - | 462809  | 462780  | RNA → | <a href="#">rpmE2 (PRK01678)</a> | <a href="#">Ribosomal_L31</a> | <a href="#">(pfam01197)</a> | → |
| Sau-268-1  | NZ_JIZF01000012.1 | - | 26024   | 25995   | RNA → | <a href="#">rpmE2 (PRK01678)</a> | <a href="#">Ribosomal_L31</a> | <a href="#">(pfam01197)</a> | → |
| Sau-99-1   | NZ_JOPQ01000036.1 | - | 55216   | 55187   | RNA → | <a href="#">rpmE2 (PRK01678)</a> | <a href="#">Ribosomal_L31</a> | <a href="#">(pfam01197)</a> | → |
| Sau-338-1  | NZ_JFOO01000014.1 | - | 36224   | 36195   | RNA → | <a href="#">rpmE2 (PRK01678)</a> | <a href="#">Ribosomal_L31</a> | <a href="#">(pfam01197)</a> | → |
| Sau-327-1  | NZ_JFOP01000014.1 | - | 36391   | 36362   | RNA → | <a href="#">rpmE2 (PRK01678)</a> | <a href="#">Ribosomal_L31</a> | <a href="#">(pfam01197)</a> | → |
| Sau-210-1  | NZ_JJAH01000015.1 | - | 26024   | 25995   | RNA → | <a href="#">rpmE2 (PRK01678)</a> | <a href="#">Ribosomal_L31</a> | <a href="#">(pfam01197)</a> | → |
| Sau-149-1  | NZ_JOQB01000066.1 | - | 55222   | 55193   | RNA → | <a href="#">rpmE2 (PRK01678)</a> | <a href="#">Ribosomal_L31</a> | <a href="#">(pfam01197)</a> | → |
| Sau-223-1  | NZ_JBQV01000005.1 | - | 58248   | 58219   | RNA → | <a href="#">rpmE2 (PRK01678)</a> | <a href="#">Ribosomal_L31</a> | <a href="#">(pfam01197)</a> | → |
| Sau-224-1  | NZ_JBQD01000005.1 | - | 56994   | 56965   | RNA → | <a href="#">rpmE2 (PRK01678)</a> | <a href="#">Ribosomal_L31</a> | <a href="#">(pfam01197)</a> | → |
| Sau-93-1   | NZ_JJEM01000015.1 | - | 26024   | 25995   | RNA → | <a href="#">rpmE2 (PRK01678)</a> | <a href="#">Ribosomal_L31</a> | <a href="#">(pfam01197)</a> | → |
| Sau-95-1   | NZ_JJEK01000015.1 | - | 26024   | 25995   | RNA → | <a href="#">rpmE2 (PRK01678)</a> | <a href="#">Ribosomal_L31</a> | <a href="#">(pfam01197)</a> | → |
| Sau-82-1   | NZ_JJEX01000015.1 | - | 26024   | 25995   | RNA → | <a href="#">rpmE2 (PRK01678)</a> | <a href="#">Ribosomal_L31</a> | <a href="#">(pfam01197)</a> | → |
| Sau-192-1  | NZ_JJAZ01000013.1 | - | 26024   | 25995   | RNA → | <a href="#">rpmE2 (PRK01678)</a> | <a href="#">Ribosomal_L31</a> | <a href="#">(pfam01197)</a> | → |
| Sau-138-1  | NZ_JJCZ01000013.1 | - | 54858   | 54829   | RNA → | <a href="#">rpmE2 (PRK01678)</a> | <a href="#">Ribosomal_L31</a> | <a href="#">(pfam01197)</a> | → |
| Sau-304-1  | NZ_AZMX01000004.1 | - | 54950   | 54921   | RNA → | <a href="#">rpmE2 (PRK01678)</a> | <a href="#">Ribosomal_L31</a> | <a href="#">(pfam01197)</a> | → |
| Sau-183-1  | NZ_JJB01000015.1  | - | 26024   | 25995   | RNA → | <a href="#">rpmE2 (PRK01678)</a> | <a href="#">Ribosomal_L31</a> | <a href="#">(pfam01197)</a> | → |
| Sau-128-1  | NZ_JJDH01000013.1 | - | 54814   | 54785   | RNA → | <a href="#">rpmE2 (PRK01678)</a> | <a href="#">Ribosomal_L31</a> | <a href="#">(pfam01197)</a> | → |
| Sau-96-1   | NZ_JJEJ01000010.1 | - | 26024   | 25995   | RNA → | <a href="#">rpmE2 (PRK01678)</a> | <a href="#">Ribosomal_L31</a> | <a href="#">(pfam01197)</a> | → |
| Sau-204-1  | NZ_JJAN01000014.1 | - | 26024   | 25995   | RNA → | <a href="#">rpmE2 (PRK01678)</a> | <a href="#">Ribosomal_L31</a> | <a href="#">(pfam01197)</a> | → |
| Sau-195-1  | NZ_JJAW01000011.1 | - | 26024   | 25995   | RNA → | <a href="#">rpmE2 (PRK01678)</a> | <a href="#">Ribosomal_L31</a> | <a href="#">(pfam01197)</a> | → |
| Sau-143-1  | NZ_JJCS01000014.1 | - | 26024   | 25995   | RNA → | <a href="#">rpmE2 (PRK01678)</a> | <a href="#">Ribosomal_L31</a> | <a href="#">(pfam01197)</a> | → |
| Sau-97-1   | NZ_JJEO01000012.1 | - | 25790   | 25761   | RNA → | <a href="#">rpmE2 (PRK01678)</a> | <a href="#">Ribosomal_L31</a> | <a href="#">(pfam01197)</a> | → |
| Sau-86-1   | NZ_JJET01000013.1 | - | 26024   | 25995   | RNA → | <a href="#">rpmE2 (PRK01678)</a> | <a href="#">Ribosomal_L31</a> | <a href="#">(pfam01197)</a> | → |
| Sau-83-1   | NZ_JJEW01000012.1 | - | 26024   | 25995   | RNA → | <a href="#">rpmE2 (PRK01678)</a> | <a href="#">Ribosomal_L31</a> | <a href="#">(pfam01197)</a> | → |
| Sau-168-1  | NZ_JJBX01000016.1 | - | 26024   | 25995   | RNA → | <a href="#">rpmE2 (PRK01678)</a> | <a href="#">Ribosomal_L31</a> | <a href="#">(pfam01197)</a> | → |
| Sau-167-1  | NZ_JJBY01000016.1 | - | 26024   | 25995   | RNA → | <a href="#">rpmE2 (PRK01678)</a> | <a href="#">Ribosomal_L31</a> | <a href="#">(pfam01197)</a> | → |
| Sau-115-1  | NZ_JJDU01000014.1 | - | 26024   | 25995   | RNA → | <a href="#">rpmE2 (PRK01678)</a> | <a href="#">Ribosomal_L31</a> | <a href="#">(pfam01197)</a> | → |
| Sau-3592-1 | NZ_JJEU01000005.1 | - | 56549   | 56520   | RNA → | <a href="#">rpmE2 (PRK01678)</a> | <a href="#">Ribosomal_L31</a> | <a href="#">(pfam01197)</a> | → |
| Sau-3598-1 | NZ_JEUL01000008.1 | - | 56993   | 56964   | RNA → | <a href="#">rpmE2 (PRK01678)</a> | <a href="#">Ribosomal_L31</a> | <a href="#">(pfam01197)</a> | → |
| Sau-3623-1 | NZ_JGCG01000005.1 | - | 34873   | 34844   | RNA → | <a href="#">rpmE2 (PRK01678)</a> | <a href="#">Ribosomal_L31</a> | <a href="#">(pfam01197)</a> | → |
| Sau-3639-1 | NZ_JGGD01000007.1 | - | 56894   | 56865   | RNA → | <a href="#">rpmE2 (PRK01678)</a> | <a href="#">Ribosomal_L31</a> | <a href="#">(pfam01197)</a> | → |
| Sau-3636-1 | NZ_JGHW01000008.1 | - | 55000   | 54971   | RNA → | <a href="#">rpmE2 (PRK01678)</a> | <a href="#">Ribosomal_L31</a> | <a href="#">(pfam01197)</a> | → |

|            |                   |   |       |       |                                                   |
|------------|-------------------|---|-------|-------|---------------------------------------------------|
| Sau-3565-1 | NZ_JIGG01000013.1 | - | 35013 | 34984 | RNA → rpmE2 (PRK01678)Ribosomal_L31 (pfam01197) → |
| Sau-3473-1 | NZ_JIFS01000014.1 | - | 26024 | 25995 | RNA → rpmE2 (PRK01678)Ribosomal_L31 (pfam01197) → |
| Sau-3457-1 | NZ_JIGI01000014.1 | - | 25997 | 25968 | RNA → rpmE2 (PRK01678)Ribosomal_L31 (pfam01197) → |
| Sau-3455-1 | NZ_JIGK01000015.1 | - | 25968 | 25939 | RNA → rpmE2 (PRK01678)Ribosomal_L31 (pfam01197) → |
| Sau-3419-1 | NZ_JIHU01000011.1 | - | 26024 | 25995 | RNA → rpmE2 (PRK01678)Ribosomal_L31 (pfam01197) → |
| Sau-3414-1 | NZ_JIHZ01000011.1 | - | 26024 | 25995 | RNA → rpmE2 (PRK01678)Ribosomal_L31 (pfam01197) → |
| Sau-3621-1 | NZ_JDZC01000002.1 | - | 56894 | 56865 | RNA → rpmE2 (PRK01678)Ribosomal_L31 (pfam01197) → |
| Sau-3600-1 | NZ_JDZD01000004.1 | - | 56894 | 56865 | RNA → rpmE2 (PRK01678)Ribosomal_L31 (pfam01197) → |
| Sau-3564-1 | NZ_JFRU01000011.1 | - | 34913 | 34884 | RNA → rpmE2 (PRK01678)Ribosomal_L31 (pfam01197) → |
| Sau-3615-1 | NZ_JEVR01000008.1 | - | 55017 | 54988 | RNA → rpmE2 (PRK01678)Ribosomal_L31 (pfam01197) → |
| Sau-3529-1 | NZ_JGFO01000005.1 | - | 34873 | 34844 | RNA → rpmE2 (PRK01678)Ribosomal_L31 (pfam01197) → |
| Sau-3563-1 | NZ_JGFP01000010.1 | - | 27857 | 27828 | RNA → rpmE2 (PRK01678)Ribosomal_L31 (pfam01197) → |
| Sau-3637-1 | NZ_JGHX01000008.1 | - | 56894 | 56865 | RNA → rpmE2 (PRK01678)Ribosomal_L31 (pfam01197) → |
| Sau-3471-1 | NZ_JIFU01000012.1 | - | 26024 | 25995 | RNA → rpmE2 (PRK01678)Ribosomal_L31 (pfam01197) → |
| Sau-3446-1 | NZ_JIGT01000015.1 | - | 26024 | 25995 | RNA → rpmE2 (PRK01678)Ribosomal_L31 (pfam01197) → |
| Sau-3400-1 | NZ_JIIN01000014.1 | - | 26024 | 25995 | RNA → rpmE2 (PRK01678)Ribosomal_L31 (pfam01197) → |
| Sau-3479-1 | NZ_JDGG01000002.1 | - | 56894 | 56865 | RNA → rpmE2 (PRK01678)Ribosomal_L31 (pfam01197) → |
| Sau-3483-1 | NZ_JFRW01000003.1 | - | 54900 | 54871 | RNA → rpmE2 (PRK01678)Ribosomal_L31 (pfam01197) → |
| Sau-3590-1 | NZ_JEUK01000012.1 | - | 56894 | 56865 | RNA → rpmE2 (PRK01678)Ribosomal_L31 (pfam01197) → |
| Sau-3480-1 | NZ_JGFM01000002.1 | - | 56994 | 56965 | RNA → rpmE2 (PRK01678)Ribosomal_L31 (pfam01197) → |
| Sau-3622-1 | NZ_JGGB01000014.1 | - | 56893 | 56864 | RNA → rpmE2 (PRK01678)Ribosomal_L31 (pfam01197) → |
| Sau-3634-1 | NZ_JGHV01000012.1 | - | 34913 | 34884 | RNA → rpmE2 (PRK01678)Ribosomal_L31 (pfam01197) → |
| Sau-3517-1 | NZ_JGIF01000026.1 | - | 18838 | 18809 | RNA → rpmE2 (PRK01678)Ribosomal_L31 (pfam01197) → |
| Sau-3485-1 | NZ_JGMY01000009.1 | - | 56790 | 56761 | RNA → rpmE2 (PRK01678)Ribosomal_L31 (pfam01197) → |
| Sau-3463-1 | NZ_JIGC01000014.1 | - | 26024 | 25995 | RNA → rpmE2 (PRK01678)Ribosomal_L31 (pfam01197) → |
| Sau-3433-1 | NZ_JIHG01000011.1 | - | 26024 | 25995 | RNA → rpmE2 (PRK01678)Ribosomal_L31 (pfam01197) → |
| Sau-3528-1 | NZ_JDFZ01000009.1 | - | 56694 | 56665 | RNA → rpmE2 (PRK01678)Ribosomal_L31 (pfam01197) → |
| Sau-3501-1 | NZ_JFRV01000012.1 | - | 34962 | 34933 | RNA → rpmE2 (PRK01678)Ribosomal_L31 (pfam01197) → |
| Sau-3633-1 | NZ_JEVS01000016.1 | - | 34913 | 34884 | RNA → rpmE2 (PRK01678)Ribosomal_L31 (pfam01197) → |
| Sau-3512-1 | NZ_JGHT01000010.1 | - | 55117 | 55088 | RNA → rpmE2 (PRK01678)Ribosomal_L31 (pfam01197) → |
| Sau-3550-1 | NZ_JGHU01000010.1 | - | 56790 | 56761 | RNA → rpmE2 (PRK01678)Ribosomal_L31 (pfam01197) → |
| Sau-3466-1 | NZ_JIFZ01000014.1 | - | 26024 | 25995 | RNA → rpmE2 (PRK01678)Ribosomal_L31 (pfam01197) → |
| Sau-3441-1 | NZ_JIGY01000015.1 | - | 26024 | 25995 | RNA → rpmE2 (PRK01678)Ribosomal_L31 (pfam01197) → |
| Sau-3553-1 | NZ_JGHD01000011.1 | - | 34872 | 34843 | RNA → rpmE2 (PRK01678)Ribosomal_L31 (pfam01197) → |
| Sau-3541-1 | NZ_JGHC01000005.1 | - | 56894 | 56865 | RNA → rpmE2 (PRK01678)Ribosomal_L31 (pfam01197) → |
| Sau-3523-1 | NZ_JDYM01000011.1 | - | 56793 | 56764 | RNA → rpmE2 (PRK01678)Ribosomal_L31 (pfam01197) → |
| Sau-3498-1 | NZ_JGHB01000006.1 | - | 55218 | 55189 | RNA → rpmE2 (PRK01678)Ribosomal_L31 (pfam01197) → |
| Sau-3580-1 | NZ_JGHF01000009.1 | - | 55116 | 55087 | RNA → rpmE2 (PRK01678)Ribosomal_L31 (pfam01197) → |
| Sau-3547-1 | NZ_JDYL01000002.1 | - | 56893 | 56864 | RNA → rpmE2 (PRK01678)Ribosomal_L31 (pfam01197) → |
| Sau-3603-1 | NZ_JEUP01000007.1 | - | 56894 | 56865 | RNA → rpmE2 (PRK01678)Ribosomal_L31 (pfam01197) → |
| Sau-3611-1 | NZ_JEJU01000002.1 | - | 56894 | 56865 | RNA → rpmE2 (PRK01678)Ribosomal_L31 (pfam01197) → |
| Sau-3394-1 | NZ_JIIT01000011.1 | - | 26024 | 25995 | RNA → rpmE2 (PRK01678)Ribosomal_L31 (pfam01197) → |
| Sau-3392-1 | NZ_JIIV01000015.1 | - | 54582 | 54553 | RNA → rpmE2 (PRK01678)Ribosomal_L31 (pfam01197) → |
| Sau-3555-1 | NZ_JGHE01000006.1 | - | 56893 | 56864 | RNA → rpmE2 (PRK01678)Ribosomal_L31 (pfam01197) → |
| Sau-3395-1 | NZ_JIIS01000014.1 | - | 26024 | 25995 | RNA → rpmE2 (PRK01678)Ribosomal_L31 (pfam01197) → |
| Sau-612-1  | NZ_JDGR01000007.1 | - | 56894 | 56865 | RNA → rpmE2 (PRK01678)Ribosomal_L31 (pfam01197) → |
| Sau-637-1  | NZ_JDZQ01000002.1 | - | 56894 | 56865 | RNA → rpmE2 (PRK01678)Ribosomal_L31 (pfam01197) → |
| Sau-632-1  | NZ_JDZR01000002.1 | - | 56993 | 56964 | RNA → rpmE2 (PRK01678)Ribosomal_L31 (pfam01197) → |
| Sau-543-1  | NZ_JFQL01000019.1 | - | 36391 | 36362 | RNA → rpmE2 (PRK01678)Ribosomal_L31 (pfam01197) → |
| Sau-548-1  | NZ_JFQQ01000018.1 | - | 36391 | 36362 | RNA → rpmE2 (PRK01678)Ribosomal_L31 (pfam01197) → |
| Sau-555-1  | NZ_JFQV01000017.1 | - | 36392 | 36363 | RNA → rpmE2 (PRK01678)Ribosomal_L31 (pfam01197) → |
| Sau-561-1  | NZ_JFRA01000020.1 | - | 36391 | 36362 | RNA → rpmE2 (PRK01678)Ribosomal_L31 (pfam01197) → |



|            |                   |   |        |        |                                                   |
|------------|-------------------|---|--------|--------|---------------------------------------------------|
| Sau-568-1  | NZ_JFRF01000018.1 | - | 36391  | 36362  | RNA → rpmE2 (PRK01678)Ribosomal_L31 (pfam01197) → |
| Sau-574-1  | NZ_JFRK01000024.1 | - | 28808  | 28779  | RNA → rpmE2 (PRK01678)Ribosomal_L31 (pfam01197) → |
| Sau-620-1  | NZ_JGEY01000017.1 | - | 34972  | 34943  | RNA → rpmE2 (PRK01678)Ribosomal_L31 (pfam01197) → |
| Sau-631-1  | NZ_JGFS01000010.1 | - | 34973  | 34944  | RNA → rpmE2 (PRK01678)Ribosomal_L31 (pfam01197) → |
| Sau-665-1  | NZ_JGGH01000012.1 | - | 34971  | 34942  | RNA → rpmE2 (PRK01678)Ribosomal_L31 (pfam01197) → |
| Sau-684-1  | NZ_JGGI01000011.1 | - | 34817  | 34788  | RNA → rpmE2 (PRK01678)Ribosomal_L31 (pfam01197) → |
| Sau-666-1  | NZ_JGHH01000012.1 | - | 34872  | 34843  | RNA → rpmE2 (PRK01678)Ribosomal_L31 (pfam01197) → |
| Sau-654-1  | NZ_JDGN01000011.1 | - | 56894  | 56865  | RNA → rpmE2 (PRK01678)Ribosomal_L31 (pfam01197) → |
| Sau-669-1  | NZ_JFSO01000007.1 | - | 56894  | 56865  | RNA → rpmE2 (PRK01678)Ribosomal_L31 (pfam01197) → |
| Sau-544-1  | NZ_JFQM01000014.1 | - | 36385  | 36356  | RNA → rpmE2 (PRK01678)Ribosomal_L31 (pfam01197) → |
| Sau-550-1  | NZ_JFQR01000016.1 | - | 36391  | 36362  | RNA → rpmE2 (PRK01678)Ribosomal_L31 (pfam01197) → |
| Sau-556-1  | NZ_JFQW01000017.1 | - | 36280  | 36251  | RNA → rpmE2 (PRK01678)Ribosomal_L31 (pfam01197) → |
| Sau-563-1  | NZ_JFRB01000017.1 | - | 36391  | 36362  | RNA → rpmE2 (PRK01678)Ribosomal_L31 (pfam01197) → |
| Sau-569-1  | NZ_JFRG01000017.1 | - | 36391  | 36362  | RNA → rpmE2 (PRK01678)Ribosomal_L31 (pfam01197) → |
| Sau-623-1  | NZ_JGEZ01000001.1 | - | 56894  | 56865  | RNA → rpmE2 (PRK01678)Ribosomal_L31 (pfam01197) → |
| Sau-638-1  | NZ_JDZP01000004.1 | - | 235328 | 235299 | RNA → rpmE2 (PRK01678)Ribosomal_L31 (pfam01197) → |
| Sau-541-1  | NZ_JFQJ01000018.1 | - | 36391  | 36362  | RNA → rpmE2 (PRK01678)Ribosomal_L31 (pfam01197) → |
| Sau-542-1  | NZ_JFQK01000019.1 | - | 36391  | 36362  | RNA → rpmE2 (PRK01678)Ribosomal_L31 (pfam01197) → |
| Sau-546-1  | NZ_JFQO01000019.1 | - | 36391  | 36362  | RNA → rpmE2 (PRK01678)Ribosomal_L31 (pfam01197) → |
| Sau-547-1  | NZ_JFQP01000017.1 | - | 35397  | 35368  | RNA → rpmE2 (PRK01678)Ribosomal_L31 (pfam01197) → |
| Sau-553-1  | NZ_JFQT01000018.1 | - | 35225  | 35196  | RNA → rpmE2 (PRK01678)Ribosomal_L31 (pfam01197) → |
| Sau-554-1  | NZ_JFQU01000017.1 | - | 36391  | 36362  | RNA → rpmE2 (PRK01678)Ribosomal_L31 (pfam01197) → |
| Sau-560-1  | NZ_JFQZ01000016.1 | - | 36391  | 36362  | RNA → rpmE2 (PRK01678)Ribosomal_L31 (pfam01197) → |
| Sau-566-1  | NZ_JFRE01000022.1 | - | 18347  | 18318  | RNA → rpmE2 (PRK01678)Ribosomal_L31 (pfam01197) → |
| Sau-572-1  | NZ_JFRJ01000015.1 | - | 36391  | 36362  | RNA → rpmE2 (PRK01678)Ribosomal_L31 (pfam01197) → |
| Sau-616-1  | NZ_JGEX01000037.1 | - | 4832   | 4803   | RNA → rpmE2 (PRK01678)Ribosomal_L31 (pfam01197) → |
| Sau-657-1  | NZ_JGFC01000011.1 | - | 32964  | 32935  | RNA → rpmE2 (PRK01678)Ribosomal_L31 (pfam01197) → |
| Sau-611-1  | NZ_JGFR01000013.1 | - | 34817  | 34788  | RNA → rpmE2 (PRK01678)Ribosomal_L31 (pfam01197) → |
| Sau-655-1  | NZ_JDGO01000005.1 | - | 56893  | 56864  | RNA → rpmE2 (PRK01678)Ribosomal_L31 (pfam01197) → |
| Sau-650-1  | NZ_JDZO01000001.1 | - | 56894  | 56865  | RNA → rpmE2 (PRK01678)Ribosomal_L31 (pfam01197) → |
| Sau-545-1  | NZ_JFQN01000020.1 | - | 36391  | 36362  | RNA → rpmE2 (PRK01678)Ribosomal_L31 (pfam01197) → |
| Sau-552-1  | NZ_JFQS01000032.1 | - | 15721  | 15692  | RNA → rpmE2 (PRK01678)Ribosomal_L31 (pfam01197) → |
| Sau-557-1  | NZ_JFQX01000016.1 | - | 36391  | 36362  | RNA → rpmE2 (PRK01678)Ribosomal_L31 (pfam01197) → |
| Sau-558-1  | NZ_JFQY01000018.1 | - | 36391  | 36362  | RNA → rpmE2 (PRK01678)Ribosomal_L31 (pfam01197) → |
| Sau-564-1  | NZ_JFRC01000016.1 | - | 36391  | 36362  | RNA → rpmE2 (PRK01678)Ribosomal_L31 (pfam01197) → |
| Sau-565-1  | NZ_JFRD01000015.1 | - | 36391  | 36362  | RNA → rpmE2 (PRK01678)Ribosomal_L31 (pfam01197) → |
| Sau-570-1  | NZ_JFRH01000018.1 | - | 36391  | 36362  | RNA → rpmE2 (PRK01678)Ribosomal_L31 (pfam01197) → |
| Sau-571-1  | NZ_JFRI01000019.1 | - | 36391  | 36362  | RNA → rpmE2 (PRK01678)Ribosomal_L31 (pfam01197) → |
| Sau-629-1  | NZ_JGFA01000016.1 | - | 34872  | 34843  | RNA → rpmE2 (PRK01678)Ribosomal_L31 (pfam01197) → |
| Sau-630-1  | NZ_JGFB01000026.1 | - | 19182  | 19153  | RNA → rpmE2 (PRK01678)Ribosomal_L31 (pfam01197) → |
| Sau-610-1  | NZ_JGFQ01000023.1 | - | 34972  | 34943  | RNA → rpmE2 (PRK01678)Ribosomal_L31 (pfam01197) → |
| Sau-672-1  | NZ_JDYY01000005.1 | - | 56894  | 56865  | RNA → rpmE2 (PRK01678)Ribosomal_L31 (pfam01197) → |
| Sau-662-1  | NZ_JGHG01000005.1 | - | 56894  | 56865  | RNA → rpmE2 (PRK01678)Ribosomal_L31 (pfam01197) → |
| Sau-2272-1 | NZ_JDEC01000003.1 | - | 24747  | 24718  | RNA → rpmE2 (PRK01678)Ribosomal_L31 (pfam01197) → |
| Sau-2277-1 | NZ_JDED01000012.1 | - | 55865  | 55836  | RNA → rpmE2 (PRK01678)Ribosomal_L31 (pfam01197) → |
| Sau-1996-1 | NZ_JDDO01000011.1 | - | 36390  | 36361  | RNA → rpmE2 (PRK01678)Ribosomal_L31 (pfam01197) → |
| Sau-1998-1 | NZ_JDDP01000008.1 | - | 24749  | 24720  | RNA → rpmE2 (PRK01678)Ribosomal_L31 (pfam01197) → |
| Sau-2001-1 | NZ_JDDQ01000007.1 | - | 24749  | 24720  | RNA → rpmE2 (PRK01678)Ribosomal_L31 (pfam01197) → |
| Sau-2028-1 | NZ_JDDV01000012.1 | - | 55495  | 55466  | RNA → rpmE2 (PRK01678)Ribosomal_L31 (pfam01197) → |
| Sau-2097-1 | NZ_JEFP01000012.1 | - | 14444  | 14415  | RNA → rpmE2 (PRK01678)Ribosomal_L31 (pfam01197) → |
| Sau-2083-1 | NZ_JEFQ01000002.1 | - | 217273 | 217244 | RNA → rpmE2 (PRK01678)Ribosomal_L31 (pfam01197) → |
| Sau-2067-1 | NZ_JEFU01000008.1 | - | 113736 | 113707 | RNA → rpmE2 (PRK01678)Ribosomal_L31 (pfam01197) → |

|            |                   |   |        |        |                                                   |
|------------|-------------------|---|--------|--------|---------------------------------------------------|
| Sau-2204-1 | NZ_JDYR01000002.1 | - | 56893  | 56864  | RNA → rpmE2 (PRK01678)Ribosomal_L31 (pfam01197) → |
| Sau-2109-1 | NZ_JEFM01000011.1 | - | 36391  | 36362  | RNA → rpmE2 (PRK01678)Ribosomal_L31 (pfam01197) → |
| Sau-2079-1 | NZ_JEFR01000002.1 | - | 139075 | 139046 | RNA → rpmE2 (PRK01678)Ribosomal_L31 (pfam01197) → |
| Sau-2038-1 | NZ_JEFY01000008.1 | - | 61496  | 61467  | RNA → rpmE2 (PRK01678)Ribosomal_L31 (pfam01197) → |
| Sau-2098-1 | NZ_JEFO01000010.1 | - | 43610  | 43581  | RNA → rpmE2 (PRK01678)Ribosomal_L31 (pfam01197) → |
| Sau-2072-1 | NZ_JEFT01000011.1 | - | 56148  | 56119  | RNA → rpmE2 (PRK01678)Ribosomal_L31 (pfam01197) → |
| Sau-2042-1 | NZ_JEFX01000012.1 | - | 36390  | 36361  | RNA → rpmE2 (PRK01678)Ribosomal_L31 (pfam01197) → |
| Sau-2108-1 | NZ_JEFN01000005.1 | - | 59118  | 59089  | RNA → rpmE2 (PRK01678)Ribosomal_L31 (pfam01197) → |
| Sau-2076-1 | NZ_JEFS01000016.1 | - | 25227  | 25198  | RNA → rpmE2 (PRK01678)Ribosomal_L31 (pfam01197) → |
| Sau-3351-1 | NZ_JIKK01000013.1 | - | 26024  | 25995  | RNA → rpmE2 (PRK01678)Ribosomal_L31 (pfam01197) → |
| Sau-3326-1 | NZ_JILJ01000008.1 | - | 56390  | 56361  | RNA → rpmE2 (PRK01678)Ribosomal_L31 (pfam01197) → |
| Sau-3299-1 | NZ_JIMK01000012.1 | - | 26024  | 25995  | RNA → rpmE2 (PRK01678)Ribosomal_L31 (pfam01197) → |
| Sau-1388-1 | NZ_JBUH01000001.1 | - | 231344 | 231315 | RNA → rpmE2 (PRK01678)Ribosomal_L31 (pfam01197) → |
| Sau-3271-1 | NZ_JINM01000015.1 | - | 26024  | 25995  | RNA → rpmE2 (PRK01678)Ribosomal_L31 (pfam01197) → |
| Sau-1423-1 | NZ_JBUM01000011.1 | - | 81129  | 81100  | RNA → rpmE2 (PRK01678)Ribosomal_L31 (pfam01197) → |
| Sau-3237-1 | NZ_JIOU01000001.1 | - | 56224  | 56195  | RNA → rpmE2 (PRK01678)Ribosomal_L31 (pfam01197) → |
| Sau-1465-1 | NZ_JBUR01000008.1 | - | 61690  | 61661  | RNA → rpmE2 (PRK01678)Ribosomal_L31 (pfam01197) → |
| Sau-3193-1 | NZ_JIQM01000010.1 | - | 26024  | 25995  | RNA → rpmE2 (PRK01678)Ribosomal_L31 (pfam01197) → |
| Sau-1508-1 | NZ_JBUW01000015.1 | - | 35370  | 35341  | RNA → rpmE2 (PRK01678)Ribosomal_L31 (pfam01197) → |
| Sau-3367-1 | NZ_JIJU01000014.1 | - | 26024  | 25995  | RNA → rpmE2 (PRK01678)Ribosomal_L31 (pfam01197) → |
| Sau-1555-1 | NZ_JBVB01000007.1 | - | 111475 | 111446 | RNA → rpmE2 (PRK01678)Ribosomal_L31 (pfam01197) → |
| Sau-3350-1 | NZ_JIKL01000010.1 | - | 56354  | 56325  | RNA → rpmE2 (PRK01678)Ribosomal_L31 (pfam01197) → |
| Sau-1393-1 | NZ_JBUI01000001.1 | - | 25185  | 25156  | RNA → rpmE2 (PRK01678)Ribosomal_L31 (pfam01197) → |
| Sau-3318-1 | NZ_JILR01000013.1 | - | 56439  | 56410  | RNA → rpmE2 (PRK01678)Ribosomal_L31 (pfam01197) → |
| Sau-3283-1 | NZ_JINA01000007.1 | - | 18519  | 18490  | RNA → rpmE2 (PRK01678)Ribosomal_L31 (pfam01197) → |
| Sau-1431-1 | NZ_JBUN01000009.1 | - | 7477   | 7448   | RNA → rpmE2 (PRK01678)Ribosomal_L31 (pfam01197) → |
| Sau-3270-1 | NZ_JINN01000013.1 | - | 26024  | 25995  | RNA → rpmE2 (PRK01678)Ribosomal_L31 (pfam01197) → |
| Sau-1480-1 | NZ_JBUS01000012.1 | - | 36391  | 36362  | RNA → rpmE2 (PRK01678)Ribosomal_L31 (pfam01197) → |
| Sau-3234-1 | NZ_JIOX01000011.1 | - | 26024  | 25995  | RNA → rpmE2 (PRK01678)Ribosomal_L31 (pfam01197) → |
| Sau-1513-1 | NZ_JBUX01000008.1 | - | 109368 | 109339 | RNA → rpmE2 (PRK01678)Ribosomal_L31 (pfam01197) → |
| Sau-3229-1 | NZ_JIPC01000010.1 | - | 26024  | 25995  | RNA → rpmE2 (PRK01678)Ribosomal_L31 (pfam01197) → |
| Sau-1558-1 | NZ_JBVC01000008.1 | - | 25029  | 25000  | RNA → rpmE2 (PRK01678)Ribosomal_L31 (pfam01197) → |
| Sau-3192-1 | NZ_JIQN01000013.1 | - | 23148  | 23119  | RNA → rpmE2 (PRK01678)Ribosomal_L31 (pfam01197) → |
| Sau-3190-1 | NZ_JIQP01000009.1 | - | 26024  | 25995  | RNA → rpmE2 (PRK01678)Ribosomal_L31 (pfam01197) → |
| Sau-1158-1 | NZ_JBIB01000002.1 | - | 54889  | 54860  | RNA → rpmE2 (PRK01678)Ribosomal_L31 (pfam01197) → |
| Sau-3358-1 | NZ_JIKD01000012.1 | - | 26024  | 25995  | RNA → rpmE2 (PRK01678)Ribosomal_L31 (pfam01197) → |
| Sau-3352-1 | NZ_JIKJ01000007.1 | - | 56354  | 56325  | RNA → rpmE2 (PRK01678)Ribosomal_L31 (pfam01197) → |
| Sau-1172-1 | NZ_JOPW01000064.1 | - | 55306  | 55277  | RNA → rpmE2 (PRK01678)Ribosomal_L31 (pfam01197) → |
| Sau-3346-1 | NZ_JIKP01000012.1 | - | 26024  | 25995  | RNA → rpmE2 (PRK01678)Ribosomal_L31 (pfam01197) → |
| Sau-1176-1 | NZ_JOPN01000049.1 | - | 55239  | 55210  | RNA → rpmE2 (PRK01678)Ribosomal_L31 (pfam01197) → |
| Sau-3327-1 | NZ_JILI01000015.1 | - | 26024  | 25995  | RNA → rpmE2 (PRK01678)Ribosomal_L31 (pfam01197) → |
| Sau-1175-1 | NZ_JOPM01000079.1 | - | 48479  | 48450  | RNA → rpmE2 (PRK01678)Ribosomal_L31 (pfam01197) → |
| Sau-3309-1 | NZ_JIMA01000009.1 | - | 26024  | 25995  | RNA → rpmE2 (PRK01678)Ribosomal_L31 (pfam01197) → |
| Sau-3273-1 | NZ_JINK01000012.1 | - | 26024  | 25995  | RNA → rpmE2 (PRK01678)Ribosomal_L31 (pfam01197) → |
| Sau-1403-1 | NZ_JBUJ01000008.1 | - | 58248  | 58219  | RNA → rpmE2 (PRK01678)Ribosomal_L31 (pfam01197) → |
| Sau-3242-1 | NZ_JIOP01000015.1 | - | 26024  | 25995  | RNA → rpmE2 (PRK01678)Ribosomal_L31 (pfam01197) → |
| Sau-1452-1 | NZ_JBUO01000008.1 | - | 111533 | 111504 | RNA → rpmE2 (PRK01678)Ribosomal_L31 (pfam01197) → |
| Sau-3198-1 | NZ_JIQH01000007.1 | - | 56439  | 56410  | RNA → rpmE2 (PRK01678)Ribosomal_L31 (pfam01197) → |
| Sau-1482-1 | NZ_JBUT01000007.1 | - | 49861  | 49832  | RNA → rpmE2 (PRK01678)Ribosomal_L31 (pfam01197) → |
| Sau-3361-1 | NZ_JIKA01000011.1 | - | 26024  | 25995  | RNA → rpmE2 (PRK01678)Ribosomal_L31 (pfam01197) → |
| Sau-1521-1 | NZ_JBUY01000010.1 | - | 62303  | 62274  | RNA → rpmE2 (PRK01678)Ribosomal_L31 (pfam01197) → |
| Sau-3348-1 | NZ_JIKN01000014.1 | - | 25790  | 25761  | RNA → rpmE2 (PRK01678)Ribosomal_L31 (pfam01197) → |



|            |                   |   |        |        |                                                   |
|------------|-------------------|---|--------|--------|---------------------------------------------------|
| Sau-3316-1 | NZ_JILT01000015.1 | - | 26023  | 25994  | RNA → rpmE2 (PRK01678)Ribosomal_L31 (pfam01197) → |
| Sau-1533-1 | NZ_JBUZ01000007.1 | - | 111873 | 111844 | RNA → rpmE2 (PRK01678)Ribosomal_L31 (pfam01197) → |
| Sau-3314-1 | NZ_JILV01000006.1 | - | 56352  | 56323  | RNA → rpmE2 (PRK01678)Ribosomal_L31 (pfam01197) → |
| Sau-1560-1 | NZ_JBVD01000009.1 | - | 62053  | 62024  | RNA → rpmE2 (PRK01678)Ribosomal_L31 (pfam01197) → |
| Sau-3279-1 | NZ_JINE01000013.1 | - | 26024  | 25995  | RNA → rpmE2 (PRK01678)Ribosomal_L31 (pfam01197) → |
| Sau-1583-1 | NZ_JBVE01000001.1 | - | 49963  | 49934  | RNA → rpmE2 (PRK01678)Ribosomal_L31 (pfam01197) → |
| Sau-3276-1 | NZ_JINH01000013.1 | - | 26024  | 25995  | RNA → rpmE2 (PRK01678)Ribosomal_L31 (pfam01197) → |
| Sau-1409-1 | NZ_JBUC01000012.1 | - | 25998  | 25969  | RNA → rpmE2 (PRK01678)Ribosomal_L31 (pfam01197) → |
| Sau-3261-1 | NZ_JINW01000011.1 | - | 26024  | 25995  | RNA → rpmE2 (PRK01678)Ribosomal_L31 (pfam01197) → |
| Sau-1415-1 | NZ_JBUL01000002.1 | - | 217273 | 217244 | RNA → rpmE2 (PRK01678)Ribosomal_L31 (pfam01197) → |
| Sau-3253-1 | NZ_JIOE01000008.1 | - | 56354  | 56325  | RNA → rpmE2 (PRK01678)Ribosomal_L31 (pfam01197) → |
| Sau-3201-1 | NZ_JIQE01000003.1 | - | 56305  | 56276  | RNA → rpmE2 (PRK01678)Ribosomal_L31 (pfam01197) → |
| Sau-1456-1 | NZ_JBUP01000010.1 | - | 56229  | 56200  | RNA → rpmE2 (PRK01678)Ribosomal_L31 (pfam01197) → |
| Sau-1462-1 | NZ_JBUQ01000009.1 | - | 110386 | 110357 | RNA → rpmE2 (PRK01678)Ribosomal_L31 (pfam01197) → |
| Sau-3126-1 | NZ_JITB01000012.1 | - | 26024  | 25995  | RNA → rpmE2 (PRK01678)Ribosomal_L31 (pfam01197) → |
| Sau-1484-1 | NZ_JBUU01000002.1 | - | 61690  | 61661  | RNA → rpmE2 (PRK01678)Ribosomal_L31 (pfam01197) → |
| Sau-3138-1 | NZ_JISP01000015.1 | - | 26024  | 25995  | RNA → rpmE2 (PRK01678)Ribosomal_L31 (pfam01197) → |
| Sau-1493-1 | NZ_JBUV01000006.1 | - | 117314 | 117285 | RNA → rpmE2 (PRK01678)Ribosomal_L31 (pfam01197) → |
| Sau-3129-1 | NZ_JISY01000012.1 | - | 56390  | 56361  | RNA → rpmE2 (PRK01678)Ribosomal_L31 (pfam01197) → |
| Sau-1551-1 | NZ_JBVA01000011.1 | - | 56828  | 56799  | RNA → rpmE2 (PRK01678)Ribosomal_L31 (pfam01197) → |
| Sau-3391-1 | NZ_JIHW01000010.1 | - | 54536  | 54507  | RNA → rpmE2 (PRK01678)Ribosomal_L31 (pfam01197) → |
| Sau-1604-1 | NZ_JBVF01000006.1 | - | 112234 | 112205 | RNA → rpmE2 (PRK01678)Ribosomal_L31 (pfam01197) → |
| Sau-3173-1 | NZ_JIRG01000010.1 | - | 26024  | 25995  | RNA → rpmE2 (PRK01678)Ribosomal_L31 (pfam01197) → |
| Sau-3149-1 | NZ_JISE01000012.1 | - | 26024  | 25995  | RNA → rpmE2 (PRK01678)Ribosomal_L31 (pfam01197) → |
| Sau-3386-1 | NZ_JJB01000012.1  | - | 26024  | 25995  | RNA → rpmE2 (PRK01678)Ribosomal_L31 (pfam01197) → |
| Sau-3168-1 | NZ_JIRL01000019.1 | - | 26024  | 25995  | RNA → rpmE2 (PRK01678)Ribosomal_L31 (pfam01197) → |
| Sau-1173-1 | NZ_JOPP01000047.1 | - | 55266  | 55237  | RNA → rpmE2 (PRK01678)Ribosomal_L31 (pfam01197) → |
| Sau-3164-1 | NZ_JIRP01000014.1 | - | 26024  | 25995  | RNA → rpmE2 (PRK01678)Ribosomal_L31 (pfam01197) → |
| Sau-1171-1 | NZ_JOPO01000040.1 | - | 55193  | 55164  | RNA → rpmE2 (PRK01678)Ribosomal_L31 (pfam01197) → |
| Sau-3148-1 | NZ_JISF01000014.1 | - | 26023  | 25994  | RNA → rpmE2 (PRK01678)Ribosomal_L31 (pfam01197) → |
| Sau-1234-1 | NZ_JBTY01000001.1 | - | 36391  | 36362  | RNA → rpmE2 (PRK01678)Ribosomal_L31 (pfam01197) → |
| Sau-3145-1 | NZ_JISI01000011.1 | - | 26024  | 25995  | RNA → rpmE2 (PRK01678)Ribosomal_L31 (pfam01197) → |
| Sau-1322-1 | NZ_JBUD01000004.1 | - | 212475 | 212446 | RNA → rpmE2 (PRK01678)Ribosomal_L31 (pfam01197) → |
| Sau-3140-1 | NZ_JISN01000008.1 | - | 2541   | 2512   | RNA → rpmE2 (PRK01678)Ribosomal_L31 (pfam01197) → |
| Sau-3176-1 | NZ_JIRD01000012.1 | - | 26024  | 25995  | RNA → rpmE2 (PRK01678)Ribosomal_L31 (pfam01197) → |
| Sau-1283-1 | NZ_JBUB01000010.1 | - | 62005  | 61976  | RNA → rpmE2 (PRK01678)Ribosomal_L31 (pfam01197) → |
| Sau-3150-1 | NZ_JISD01000013.1 | - | 26024  | 25995  | RNA → rpmE2 (PRK01678)Ribosomal_L31 (pfam01197) → |
| Sau-1303-1 | NZ_JBUC01000009.1 | - | 62354  | 62325  | RNA → rpmE2 (PRK01678)Ribosomal_L31 (pfam01197) → |
| Sau-3142-1 | NZ_JISL01000013.1 | - | 26024  | 25995  | RNA → rpmE2 (PRK01678)Ribosomal_L31 (pfam01197) → |
| Sau-1386-1 | NZ_JBUG01000011.1 | - | 81189  | 81160  | RNA → rpmE2 (PRK01678)Ribosomal_L31 (pfam01197) → |
| Sau-3370-1 | NZ_JIJR01000008.1 | - | 56439  | 56410  | RNA → rpmE2 (PRK01678)Ribosomal_L31 (pfam01197) → |
| Sau-1277-1 | NZ_JBUA01000006.1 | - | 94681  | 94652  | RNA → rpmE2 (PRK01678)Ribosomal_L31 (pfam01197) → |
| Sau-3184-1 | NZ_JIQV01000013.1 | - | 26024  | 25995  | RNA → rpmE2 (PRK01678)Ribosomal_L31 (pfam01197) → |
| Sau-1381-1 | NZ_JBUF01000011.1 | - | 36390  | 36361  | RNA → rpmE2 (PRK01678)Ribosomal_L31 (pfam01197) → |
| Sau-3163-1 | NZ_JIRQ01000012.1 | - | 26024  | 25995  | RNA → rpmE2 (PRK01678)Ribosomal_L31 (pfam01197) → |
| Sau-2442-1 | NZ_JDDY01000011.1 | - | 36391  | 36362  | RNA → rpmE2 (PRK01678)Ribosomal_L31 (pfam01197) → |
| Sau-1216-1 | NZ_JBTT01000019.1 | - | 1860   | 1831   | RNA → rpmE2 (PRK01678)Ribosomal_L31 (pfam01197) → |
| Sau-1191-1 | NZ_JBTR01000006.1 | - | 61373  | 61344  | RNA → rpmE2 (PRK01678)Ribosomal_L31 (pfam01197) → |
| Sau-2389-1 | NZ_JDES01000013.1 | - | 35318  | 35289  | RNA → rpmE2 (PRK01678)Ribosomal_L31 (pfam01197) → |
| Sau-1206-1 | NZ_JBTS01000015.1 | - | 36413  | 36384  | RNA → rpmE2 (PRK01678)Ribosomal_L31 (pfam01197) → |
| Sau-2414-1 | NZ_JDEX01000004.1 | - | 24749  | 24720  | RNA → rpmE2 (PRK01678)Ribosomal_L31 (pfam01197) → |
| Sau-1229-1 | NZ_JBTW01000008.1 | - | 62105  | 62076  | RNA → rpmE2 (PRK01678)Ribosomal_L31 (pfam01197) → |

|            |                   |   |        |        |                                                   |
|------------|-------------------|---|--------|--------|---------------------------------------------------|
| Sau-1230-1 | NZ_JBTX01000001.1 | - | 238687 | 238658 | RNA → rpmE2 (PRK01678)Ribosomal_L31 (pfam01197) → |
| Sau-2424-1 | NZ_JDFC01000011.1 | - | 62331  | 62302  | RNA → rpmE2 (PRK01678)Ribosomal_L31 (pfam01197) → |
| Sau-1155-1 | NZ_JBJQ01000004.1 | - | 56894  | 56865  | RNA → rpmE2 (PRK01678)Ribosomal_L31 (pfam01197) → |
| Sau-2398-1 | NZ_JDET01000011.1 | - | 35318  | 35289  | RNA → rpmE2 (PRK01678)Ribosomal_L31 (pfam01197) → |
| Sau-1265-1 | NZ_JBTZ01000013.1 | - | 36391  | 36362  | RNA → rpmE2 (PRK01678)Ribosomal_L31 (pfam01197) → |
| Sau-2416-1 | NZ_JDEY01000008.1 | - | 24714  | 24685  | RNA → rpmE2 (PRK01678)Ribosomal_L31 (pfam01197) → |
| Sau-1373-1 | NZ_JBUE01000006.1 | - | 108030 | 108001 | RNA → rpmE2 (PRK01678)Ribosomal_L31 (pfam01197) → |
| Sau-2426-1 | NZ_JDFD01000013.1 | - | 35847  | 35818  | RNA → rpmE2 (PRK01678)Ribosomal_L31 (pfam01197) → |
| Sau-1174-1 | NZ_JOPX01000065.1 | - | 55322  | 55293  | RNA → rpmE2 (PRK01678)Ribosomal_L31 (pfam01197) → |
| Sau-2602-1 | NZ_JBMQ01000004.1 | - | 56893  | 56864  | RNA → rpmE2 (PRK01678)Ribosomal_L31 (pfam01197) → |
| Sau-1225-1 | NZ_JBTV01000007.1 | - | 61112  | 61083  | RNA → rpmE2 (PRK01678)Ribosomal_L31 (pfam01197) → |
| Sau-2606-1 | NZ_JBNI01000001.1 | - | 25229  | 25200  | RNA → rpmE2 (PRK01678)Ribosomal_L31 (pfam01197) → |
| Sau-1220-1 | NZ_JBTU01000016.1 | - | 35881  | 35852  | RNA → rpmE2 (PRK01678)Ribosomal_L31 (pfam01197) → |
| Sau-2580-1 | NZ_JDGH01000008.1 | - | 56939  | 56910  | RNA → rpmE2 (PRK01678)Ribosomal_L31 (pfam01197) → |
| Sau-2566-1 | NZ_JDZG01000011.1 | - | 34913  | 34884  | RNA → rpmE2 (PRK01678)Ribosomal_L31 (pfam01197) → |
| Sau-2520-1 | NZ_JDZH01000007.1 | - | 121803 | 121774 | RNA → rpmE2 (PRK01678)Ribosomal_L31 (pfam01197) → |
| Sau-2479-1 | NZ_JEUG01000001.1 | - | 233210 | 233181 | RNA → rpmE2 (PRK01678)Ribosomal_L31 (pfam01197) → |
| Sau-2489-1 | NZ_JEUM01000013.1 | - | 34873  | 34844  | RNA → rpmE2 (PRK01678)Ribosomal_L31 (pfam01197) → |
| Sau-2518-1 | NZ_JEVL01000007.1 | - | 56894  | 56865  | RNA → rpmE2 (PRK01678)Ribosomal_L31 (pfam01197) → |
| Sau-2559-1 | NZ_JGFX01000009.1 | - | 34871  | 34842  | RNA → rpmE2 (PRK01678)Ribosomal_L31 (pfam01197) → |
| Sau-2573-1 | NZ_JGHR01000013.1 | - | 34913  | 34884  | RNA → rpmE2 (PRK01678)Ribosomal_L31 (pfam01197) → |
| Sau-2633-1 | NZ_JIXP01000012.1 | - | 26024  | 25995  | RNA → rpmE2 (PRK01678)Ribosomal_L31 (pfam01197) → |
| Sau-2446-1 | NZ_JDGD01000014.1 | - | 15438  | 15409  | RNA → rpmE2 (PRK01678)Ribosomal_L31 (pfam01197) → |
| Sau-2515-1 | NZ_JDZI01000002.1 | - | 56994  | 56965  | RNA → rpmE2 (PRK01678)Ribosomal_L31 (pfam01197) → |
| Sau-2578-1 | NZ_JFSE01000001.1 | - | 56894  | 56865  | RNA → rpmE2 (PRK01678)Ribosomal_L31 (pfam01197) → |
| Sau-2491-1 | NZ_JEUN01000013.1 | - | 34872  | 34843  | RNA → rpmE2 (PRK01678)Ribosomal_L31 (pfam01197) → |
| Sau-2632-1 | NZ_JIXQ01000009.1 | - | 56348  | 56319  | RNA → rpmE2 (PRK01678)Ribosomal_L31 (pfam01197) → |
| Sau-2370-1 | NZ_JDEP01000015.1 | - | 35216  | 35187  | RNA → rpmE2 (PRK01678)Ribosomal_L31 (pfam01197) → |
| Sau-2402-1 | NZ_JDEU01000003.1 | - | 39489  | 39460  | RNA → rpmE2 (PRK01678)Ribosomal_L31 (pfam01197) → |
| Sau-2409-1 | NZ_JDEV01000007.1 | - | 24749  | 24720  | RNA → rpmE2 (PRK01678)Ribosomal_L31 (pfam01197) → |
| Sau-2417-1 | NZ_JDEZ01000006.1 | - | 25059  | 25030  | RNA → rpmE2 (PRK01678)Ribosomal_L31 (pfam01197) → |
| Sau-2418-1 | NZ_JDFA01000008.1 | - | 61335  | 61306  | RNA → rpmE2 (PRK01678)Ribosomal_L31 (pfam01197) → |
| Sau-2647-1 | NZ_JBLP01000001.1 | - | 215968 | 215939 | RNA → rpmE2 (PRK01678)Ribosomal_L31 (pfam01197) → |
| Sau-2376-1 | NZ_JDEQ01000012.1 | - | 35318  | 35289  | RNA → rpmE2 (PRK01678)Ribosomal_L31 (pfam01197) → |
| Sau-2383-1 | NZ_JDER01000017.1 | - | 35042  | 35013  | RNA → rpmE2 (PRK01678)Ribosomal_L31 (pfam01197) → |
| Sau-2411-1 | NZ_JDEW01000013.1 | - | 36055  | 36026  | RNA → rpmE2 (PRK01678)Ribosomal_L31 (pfam01197) → |
| Sau-2423-1 | NZ_JDFB01000001.1 | - | 217173 | 217144 | RNA → rpmE2 (PRK01678)Ribosomal_L31 (pfam01197) → |
| Sau-2503-1 | NZ_JDQG01000002.1 | - | 56893  | 56864  | RNA → rpmE2 (PRK01678)Ribosomal_L31 (pfam01197) → |
| Sau-2540-1 | NZ_JGFH01000002.1 | - | 56894  | 56865  | RNA → rpmE2 (PRK01678)Ribosomal_L31 (pfam01197) → |
| Sau-2558-1 | NZ_JGFW01000015.1 | - | 56894  | 56865  | RNA → rpmE2 (PRK01678)Ribosomal_L31 (pfam01197) → |
| Sau-2634-1 | NZ_JIXO01000015.1 | - | 25829  | 25800  | RNA → rpmE2 (PRK01678)Ribosomal_L31 (pfam01197) → |
| Sau-2508-1 | NZ_JDZJ01000012.1 | - | 34873  | 34844  | RNA → rpmE2 (PRK01678)Ribosomal_L31 (pfam01197) → |
| Sau-2533-1 | NZ_JGFG01000001.1 | - | 4918   | 4889   | RNA → rpmE2 (PRK01678)Ribosomal_L31 (pfam01197) → |
| Sau-2538-1 | NZ_JGHO01000011.1 | - | 34817  | 34788  | RNA → rpmE2 (PRK01678)Ribosomal_L31 (pfam01197) → |
| Sau-2544-1 | NZ_JGHP01000003.1 | - | 56794  | 56765  | RNA → rpmE2 (PRK01678)Ribosomal_L31 (pfam01197) → |
| Sau-2429-1 | NZ_JDDX01000014.1 | - | 36107  | 36078  | RNA → rpmE2 (PRK01678)Ribosomal_L31 (pfam01197) → |
| Sau-2593-1 | NZ_JGGY01000001.1 | - | 15617  | 15588  | RNA → rpmE2 (PRK01678)Ribosomal_L31 (pfam01197) → |
| Sau-2575-1 | NZ_JGGX01000007.1 | - | 56894  | 56865  | RNA → rpmE2 (PRK01678)Ribosomal_L31 (pfam01197) → |
| Sau-2625-1 | NZ_JMBT01000062.1 | - | 15983  | 15954  | RNA → rpmE2 (PRK01678)Ribosomal_L31 (pfam01197) → |
| Sau-2449-1 | NZ_JDYZ01000003.1 | - | 56894  | 56865  | RNA → rpmE2 (PRK01678)Ribosomal_L31 (pfam01197) → |
| Sau-2495-1 | NZ_JGGV01000002.1 | - | 55197  | 55168  | RNA → rpmE2 (PRK01678)Ribosomal_L31 (pfam01197) → |
| Sau-2526-1 | NZ_JGGW01000003.1 | - | 55216  | 55187  | RNA → rpmE2 (PRK01678)Ribosomal_L31 (pfam01197) → |

|            |                   |   |       |       |                                                   |
|------------|-------------------|---|-------|-------|---------------------------------------------------|
| Sau-2467-1 | NZ_JDGT01000002.1 | - | 56893 | 56864 | RNA → rpmE2 (PRK01678)Ribosomal_L31 (pfam01197) → |
| Sau-2583-1 | NZ_JDYP01000017.1 | - | 34873 | 34844 | RNA → rpmE2 (PRK01678)Ribosomal_L31 (pfam01197) → |
| Sau-2458-1 | NZ_JGGU01000008.1 | - | 56173 | 56144 | RNA → rpmE2 (PRK01678)Ribosomal_L31 (pfam01197) → |
| Sau-857-1  | NZ_JBHL01000002.1 | - | 56894 | 56865 | RNA → rpmE2 (PRK01678)Ribosomal_L31 (pfam01197) → |
| Sau-864-1  | NZ_JBFO01000002.1 | - | 56895 | 56866 | RNA → rpmE2 (PRK01678)Ribosomal_L31 (pfam01197) → |
| Sau-844-1  | NZ_JBSM01000001.1 | - | 35014 | 34985 | RNA → rpmE2 (PRK01678)Ribosomal_L31 (pfam01197) → |
| Sau-812-1  | NZ_JDGM01000009.1 | - | 56895 | 56866 | RNA → rpmE2 (PRK01678)Ribosomal_L31 (pfam01197) → |
| Sau-697-1  | NZ_JFSN01000008.1 | - | 55000 | 54971 | RNA → rpmE2 (PRK01678)Ribosomal_L31 (pfam01197) → |
| Sau-695-1  | NZ_JGFN01000035.1 | - | 14467 | 14438 | RNA → rpmE2 (PRK01678)Ribosomal_L31 (pfam01197) → |
| Sau-772-1  | NZ_JGGM01000002.1 | - | 55117 | 55088 | RNA → rpmE2 (PRK01678)Ribosomal_L31 (pfam01197) → |
| Sau-901-1  | NZ_JGGN01000002.1 | - | 34873 | 34844 | RNA → rpmE2 (PRK01678)Ribosomal_L31 (pfam01197) → |
| Sau-914-1  | NZ_JGHM01000008.1 | - | 55315 | 55286 | RNA → rpmE2 (PRK01678)Ribosomal_L31 (pfam01197) → |
| Sau-698-1  | NZ_JDGI01000012.1 | - | 56940 | 56911 | RNA → rpmE2 (PRK01678)Ribosomal_L31 (pfam01197) → |
| Sau-784-1  | NZ_JDZN01000010.1 | - | 56502 | 56473 | RNA → rpmE2 (PRK01678)Ribosomal_L31 (pfam01197) → |
| Sau-813-1  | NZ_JGFT01000009.1 | - | 34482 | 34453 | RNA → rpmE2 (PRK01678)Ribosomal_L31 (pfam01197) → |
| Sau-827-1  | NZ_JGFU01000011.1 | - | 56894 | 56865 | RNA → rpmE2 (PRK01678)Ribosomal_L31 (pfam01197) → |
| Sau-710-1  | NZ_JGGJ01000004.1 | - | 55164 | 55135 | RNA → rpmE2 (PRK01678)Ribosomal_L31 (pfam01197) → |
| Sau-707-1  | NZ_JGHI01000005.1 | - | 55117 | 55088 | RNA → rpmE2 (PRK01678)Ribosomal_L31 (pfam01197) → |
| Sau-751-1  | NZ_JGHY01000012.1 | - | 34873 | 34844 | RNA → rpmE2 (PRK01678)Ribosomal_L31 (pfam01197) → |
| Sau-883-1  | NZ_JBOF01000005.1 | - | 56994 | 56965 | RNA → rpmE2 (PRK01678)Ribosomal_L31 (pfam01197) → |
| Sau-893-1  | NZ_JBEQ01000002.1 | - | 56894 | 56865 | RNA → rpmE2 (PRK01678)Ribosomal_L31 (pfam01197) → |
| Sau-896-1  | NZ_JDGB01000010.1 | - | 56939 | 56910 | RNA → rpmE2 (PRK01678)Ribosomal_L31 (pfam01197) → |
| Sau-727-1  | NZ_JDGG01000010.1 | - | 56894 | 56865 | RNA → rpmE2 (PRK01678)Ribosomal_L31 (pfam01197) → |
| Sau-754-1  | NZ_JFSM01000005.1 | - | 56993 | 56964 | RNA → rpmE2 (PRK01678)Ribosomal_L31 (pfam01197) → |
| Sau-763-1  | NZ_JGGL01000008.1 | - | 56894 | 56865 | RNA → rpmE2 (PRK01678)Ribosomal_L31 (pfam01197) → |
| Sau-897-1  | NZ_JGHL01000002.1 | - | 54839 | 54810 | RNA → rpmE2 (PRK01678)Ribosomal_L31 (pfam01197) → |
| Sau-829-1  | NZ_JGIA01000006.1 | - | 56894 | 56865 | RNA → rpmE2 (PRK01678)Ribosomal_L31 (pfam01197) → |
| Sau-877-1  | NZ_JIYB01000010.1 | - | 26024 | 25995 | RNA → rpmE2 (PRK01678)Ribosomal_L31 (pfam01197) → |
| Sau-741-1  | NZ_JDGG01000011.1 | - | 34817 | 34788 | RNA → rpmE2 (PRK01678)Ribosomal_L31 (pfam01197) → |
| Sau-745-1  | NZ_JETZ01000011.1 | - | 34913 | 34884 | RNA → rpmE2 (PRK01678)Ribosomal_L31 (pfam01197) → |
| Sau-747-1  | NZ_JEUE01000003.1 | - | 55117 | 55088 | RNA → rpmE2 (PRK01678)Ribosomal_L31 (pfam01197) → |
| Sau-760-1  | NZ_JEUJ01000021.1 | - | 32991 | 32962 | RNA → rpmE2 (PRK01678)Ribosomal_L31 (pfam01197) → |
| Sau-828-1  | NZ_JGFV01000005.1 | - | 56894 | 56865 | RNA → rpmE2 (PRK01678)Ribosomal_L31 (pfam01197) → |
| Sau-715-1  | NZ_JGGL01000013.1 | - | 34968 | 34939 | RNA → rpmE2 (PRK01678)Ribosomal_L31 (pfam01197) → |
| Sau-708-1  | NZ_JGHJ01000001.1 | - | 56896 | 56867 | RNA → rpmE2 (PRK01678)Ribosomal_L31 (pfam01197) → |
| Sau-764-1  | NZ_JGHZ01000008.1 | - | 55117 | 55088 | RNA → rpmE2 (PRK01678)Ribosomal_L31 (pfam01197) → |
| Sau-879-1  | NZ_JIXZ01000015.1 | - | 26023 | 25994 | RNA → rpmE2 (PRK01678)Ribosomal_L31 (pfam01197) → |
| Sau-711-1  | NZ_JDYX01000002.1 | - | 56894 | 56865 | RNA → rpmE2 (PRK01678)Ribosomal_L31 (pfam01197) → |
| Sau-821-1  | NZ_JEVC01000011.1 | - | 55117 | 55088 | RNA → rpmE2 (PRK01678)Ribosomal_L31 (pfam01197) → |
| Sau-838-1  | NZ_JEVH01000002.1 | - | 56894 | 56865 | RNA → rpmE2 (PRK01678)Ribosomal_L31 (pfam01197) → |
| Sau-714-1  | NZ_JDYW01000002.1 | - | 56893 | 56864 | RNA → rpmE2 (PRK01678)Ribosomal_L31 (pfam01197) → |
| Sau-820-1  | NZ_JEVB01000002.1 | - | 56894 | 56865 | RNA → rpmE2 (PRK01678)Ribosomal_L31 (pfam01197) → |
| Sau-837-1  | NZ_JEVG01000001.1 | - | 56894 | 56865 | RNA → rpmE2 (PRK01678)Ribosomal_L31 (pfam01197) → |
| Sau-774-1  | NZ_JEUS01000002.1 | - | 56893 | 56864 | RNA → rpmE2 (PRK01678)Ribosomal_L31 (pfam01197) → |
| Sau-909-1  | NZ_JGGO01000004.1 | - | 56894 | 56865 | RNA → rpmE2 (PRK01678)Ribosomal_L31 (pfam01197) → |
| Sau-818-1  | NZ_JEVA01000007.1 | - | 56894 | 56865 | RNA → rpmE2 (PRK01678)Ribosomal_L31 (pfam01197) → |
| Sau-833-1  | NZ_JEVE01000001.1 | - | 56794 | 56765 | RNA → rpmE2 (PRK01678)Ribosomal_L31 (pfam01197) → |
| Sau-836-1  | NZ_JEVF01000008.1 | - | 56894 | 56865 | RNA → rpmE2 (PRK01678)Ribosomal_L31 (pfam01197) → |
| Sau-911-1  | NZ_JGGQ01000003.1 | - | 56894 | 56865 | RNA → rpmE2 (PRK01678)Ribosomal_L31 (pfam01197) → |
| Sau-831-1  | NZ_JEVD01000006.1 | - | 56893 | 56864 | RNA → rpmE2 (PRK01678)Ribosomal_L31 (pfam01197) → |
| Sau-806-1  | NZ_JEUY01000001.1 | - | 56890 | 56861 | RNA → rpmE2 (PRK01678)Ribosomal_L31 (pfam01197) → |
| Sau-910-1  | NZ_JGGP01000013.1 | - | 34873 | 34844 | RNA → rpmE2 (PRK01678)Ribosomal_L31 (pfam01197) → |



|            |                    |   |         |         |       |                                  |                               |                             |   |
|------------|--------------------|---|---------|---------|-------|----------------------------------|-------------------------------|-----------------------------|---|
| Sau-1881-1 | NZ_JDCV01000012.1  | - | 58694   | 58665   | RNA → | <a href="#">rpmE2 (PRK01678)</a> | <a href="#">Ribosomal_L31</a> | <a href="#">(pfam01197)</a> | → |
| Sau-1161-1 | NZ_JBGI01000001.1  | - | 115280  | 115251  | RNA → | <a href="#">rpmE2 (PRK01678)</a> | <a href="#">Ribosomal_L31</a> | <a href="#">(pfam01197)</a> | → |
| Sau-1976-1 | NZ_JDDJ01000009.1  | - | 61461   | 61432   | RNA → | <a href="#">rpmE2 (PRK01678)</a> | <a href="#">Ribosomal_L31</a> | <a href="#">(pfam01197)</a> | → |
| Sau-2702-1 | NZ_CBWV010000285.1 | + | 3236    | 3265    | RNA → | <a href="#">rpmE2 (PRK01678)</a> | <a href="#">Ribosomal_L31</a> | <a href="#">(pfam01197)</a> | → |
| Sau-3050-1 | NZ_JBGU01000002.1  | - | 56894   | 56865   | RNA → | <a href="#">rpmE2 (PRK01678)</a> | <a href="#">Ribosomal_L31</a> | <a href="#">(pfam01197)</a> | → |
| Sau-2935-1 | NZ_JDGC01000008.1  | - | 56894   | 56865   | RNA → | <a href="#">rpmE2 (PRK01678)</a> | <a href="#">Ribosomal_L31</a> | <a href="#">(pfam01197)</a> | → |
| Sau-2996-1 | NZ_JFRX01000004.1  | - | 56894   | 56865   | RNA → | <a href="#">rpmE2 (PRK01678)</a> | <a href="#">Ribosomal_L31</a> | <a href="#">(pfam01197)</a> | → |
| Sau-2894-1 | NZ_JFRY01000002.1  | - | 56894   | 56865   | RNA → | <a href="#">rpmE2 (PRK01678)</a> | <a href="#">Ribosomal_L31</a> | <a href="#">(pfam01197)</a> | → |
| Sau-2973-1 | NZ_JEUB01000002.1  | - | 56894   | 56865   | RNA → | <a href="#">rpmE2 (PRK01678)</a> | <a href="#">Ribosomal_L31</a> | <a href="#">(pfam01197)</a> | → |
| Sau-2892-1 | NZ_JEVQ01000001.1  | - | 56894   | 56865   | RNA → | <a href="#">rpmE2 (PRK01678)</a> | <a href="#">Ribosomal_L31</a> | <a href="#">(pfam01197)</a> | → |
| Sau-2862-1 | NZ_JGFI01000005.1  | - | 56894   | 56865   | RNA → | <a href="#">rpmE2 (PRK01678)</a> | <a href="#">Ribosomal_L31</a> | <a href="#">(pfam01197)</a> | → |
| Sau-3013-1 | NZ_JIVX01000016.1  | - | 26024   | 25995   | RNA → | <a href="#">rpmE2 (PRK01678)</a> | <a href="#">Ribosomal_L31</a> | <a href="#">(pfam01197)</a> | → |
| Sau-2876-1 | NZ_JFRZ01000002.1  | - | 55051   | 55022   | RNA → | <a href="#">rpmE2 (PRK01678)</a> | <a href="#">Ribosomal_L31</a> | <a href="#">(pfam01197)</a> | → |
| Sau-2961-1 | NZ_JETY01000002.1  | - | 56894   | 56865   | RNA → | <a href="#">rpmE2 (PRK01678)</a> | <a href="#">Ribosomal_L31</a> | <a href="#">(pfam01197)</a> | → |
| Sau-2970-1 | NZ_JEUC01000005.1  | - | 56894   | 56865   | RNA → | <a href="#">rpmE2 (PRK01678)</a> | <a href="#">Ribosomal_L31</a> | <a href="#">(pfam01197)</a> | → |
| Sau-2972-1 | NZ_JEUD01000005.1  | - | 56790   | 56761   | RNA → | <a href="#">rpmE2 (PRK01678)</a> | <a href="#">Ribosomal_L31</a> | <a href="#">(pfam01197)</a> | → |
| Sau-3026-1 | NZ_JDXY01000001.1  | - | 1675824 | 1675795 | RNA → | <a href="#">rpmE2 (PRK01678)</a> | <a href="#">Ribosomal_L31</a> | <a href="#">(pfam01197)</a> | → |
| Sau-2883-1 | NZ_JGFJ01000014.1  | - | 34971   | 34942   | RNA → | <a href="#">rpmE2 (PRK01678)</a> | <a href="#">Ribosomal_L31</a> | <a href="#">(pfam01197)</a> | → |
| Sau-2857-1 | NZ_JGHS01000010.1  | - | 54968   | 54939   | RNA → | <a href="#">rpmE2 (PRK01678)</a> | <a href="#">Ribosomal_L31</a> | <a href="#">(pfam01197)</a> | → |
| Sau-3092-1 | NZ_JIUJ01000012.1  | - | 26024   | 25995   | RNA → | <a href="#">rpmE2 (PRK01678)</a> | <a href="#">Ribosomal_L31</a> | <a href="#">(pfam01197)</a> | → |
| Sau-3069-1 | NZ_JIVG01000012.1  | - | 26024   | 25995   | RNA → | <a href="#">rpmE2 (PRK01678)</a> | <a href="#">Ribosomal_L31</a> | <a href="#">(pfam01197)</a> | → |
| Sau-3054-1 | NZ_JBEZ01000002.1  | - | 56894   | 56865   | RNA → | <a href="#">rpmE2 (PRK01678)</a> | <a href="#">Ribosomal_L31</a> | <a href="#">(pfam01197)</a> | → |
| Sau-3042-1 | NZ_JBIW01000007.1  | - | 56994   | 56965   | RNA → | <a href="#">rpmE2 (PRK01678)</a> | <a href="#">Ribosomal_L31</a> | <a href="#">(pfam01197)</a> | → |
| Sau-3006-1 | NZ_JBMK01000003.1  | - | 56894   | 56865   | RNA → | <a href="#">rpmE2 (PRK01678)</a> | <a href="#">Ribosomal_L31</a> | <a href="#">(pfam01197)</a> | → |
| Sau-3051-1 | NZ_JBGO01000002.1  | - | 56894   | 56865   | RNA → | <a href="#">rpmE2 (PRK01678)</a> | <a href="#">Ribosomal_L31</a> | <a href="#">(pfam01197)</a> | → |
| Sau-3022-1 | NZ_JBMM01000002.1  | - | 56894   | 56865   | RNA → | <a href="#">rpmE2 (PRK01678)</a> | <a href="#">Ribosomal_L31</a> | <a href="#">(pfam01197)</a> | → |
| Sau-2951-1 | NZ_JDGF01000011.1  | - | 56894   | 56865   | RNA → | <a href="#">rpmE2 (PRK01678)</a> | <a href="#">Ribosomal_L31</a> | <a href="#">(pfam01197)</a> | → |
| Sau-2974-1 | NZ_JDGL01000007.1  | - | 56940   | 56911   | RNA → | <a href="#">rpmE2 (PRK01678)</a> | <a href="#">Ribosomal_L31</a> | <a href="#">(pfam01197)</a> | → |
| Sau-2872-1 | NZ_JDZF01000002.1  | - | 56894   | 56865   | RNA → | <a href="#">rpmE2 (PRK01678)</a> | <a href="#">Ribosomal_L31</a> | <a href="#">(pfam01197)</a> | → |
| Sau-2969-1 | NZ_JEUA01000013.1  | - | 34872   | 34843   | RNA → | <a href="#">rpmE2 (PRK01678)</a> | <a href="#">Ribosomal_L31</a> | <a href="#">(pfam01197)</a> | → |
| Sau-2889-1 | NZ_JEVP01000011.1  | - | 56993   | 56964   | RNA → | <a href="#">rpmE2 (PRK01678)</a> | <a href="#">Ribosomal_L31</a> | <a href="#">(pfam01197)</a> | → |
| Sau-3062-1 | NZ_JIVO01000013.1  | - | 26162   | 26133   | RNA → | <a href="#">rpmE2 (PRK01678)</a> | <a href="#">Ribosomal_L31</a> | <a href="#">(pfam01197)</a> | → |
| Sau-3014-1 | NZ_JIVW01000016.1  | - | 26024   | 25995   | RNA → | <a href="#">rpmE2 (PRK01678)</a> | <a href="#">Ribosomal_L31</a> | <a href="#">(pfam01197)</a> | → |
| Sau-2948-1 | NZ_JDGE01000007.1  | - | 56894   | 56865   | RNA → | <a href="#">rpmE2 (PRK01678)</a> | <a href="#">Ribosomal_L31</a> | <a href="#">(pfam01197)</a> | → |
| Sau-2965-1 | NZ_JDGP01000009.1  | - | 56794   | 56765   | RNA → | <a href="#">rpmE2 (PRK01678)</a> | <a href="#">Ribosomal_L31</a> | <a href="#">(pfam01197)</a> | → |
| Sau-2891-1 | NZ_JDZE01000003.1  | - | 56894   | 56865   | RNA → | <a href="#">rpmE2 (PRK01678)</a> | <a href="#">Ribosomal_L31</a> | <a href="#">(pfam01197)</a> | → |
| Sau-2861-1 | NZ_JFSA01000002.1  | - | 54854   | 54825   | RNA → | <a href="#">rpmE2 (PRK01678)</a> | <a href="#">Ribosomal_L31</a> | <a href="#">(pfam01197)</a> | → |
| Sau-2987-1 | NZ_JEUO01000013.1  | - | 34874   | 34845   | RNA → | <a href="#">rpmE2 (PRK01678)</a> | <a href="#">Ribosomal_L31</a> | <a href="#">(pfam01197)</a> | → |
| Sau-2866-1 | NZ_JEVO01000016.1  | - | 34913   | 34884   | RNA → | <a href="#">rpmE2 (PRK01678)</a> | <a href="#">Ribosomal_L31</a> | <a href="#">(pfam01197)</a> | → |
| Sau-2884-1 | NZ_JGFK01000007.1  | - | 56894   | 56865   | RNA → | <a href="#">rpmE2 (PRK01678)</a> | <a href="#">Ribosomal_L31</a> | <a href="#">(pfam01197)</a> | → |
| Sau-2885-1 | NZ_JGFL01000019.1  | - | 34913   | 34884   | RNA → | <a href="#">rpmE2 (PRK01678)</a> | <a href="#">Ribosomal_L31</a> | <a href="#">(pfam01197)</a> | → |
| Sau-2895-1 | NZ_JGIE01000009.1  | - | 34972   | 34943   | RNA → | <a href="#">rpmE2 (PRK01678)</a> | <a href="#">Ribosomal_L31</a> | <a href="#">(pfam01197)</a> | → |
| Sau-3076-1 | NZ_JIUZ01000012.1  | - | 26024   | 25995   | RNA → | <a href="#">rpmE2 (PRK01678)</a> | <a href="#">Ribosomal_L31</a> | <a href="#">(pfam01197)</a> | → |
| Sau-3067-1 | NZ_JIVI01000014.1  | - | 26024   | 25995   | RNA → | <a href="#">rpmE2 (PRK01678)</a> | <a href="#">Ribosomal_L31</a> | <a href="#">(pfam01197)</a> | → |
| Sau-3031-1 | NZ_JBPA01000003.1  | - | 56894   | 56865   | RNA → | <a href="#">rpmE2 (PRK01678)</a> | <a href="#">Ribosomal_L31</a> | <a href="#">(pfam01197)</a> | → |
| Sau-3112-1 | NZ_JITP01000016.1  | - | 26024   | 25995   | RNA → | <a href="#">rpmE2 (PRK01678)</a> | <a href="#">Ribosomal_L31</a> | <a href="#">(pfam01197)</a> | → |
| Sau-3094-1 | NZ_JIUH01000008.1  | - | 53212   | 53183   | RNA → | <a href="#">rpmE2 (PRK01678)</a> | <a href="#">Ribosomal_L31</a> | <a href="#">(pfam01197)</a> | → |
| Sau-2938-1 | NZ_JDYN01000002.1  | - | 56894   | 56865   | RNA → | <a href="#">rpmE2 (PRK01678)</a> | <a href="#">Ribosomal_L31</a> | <a href="#">(pfam01197)</a> | → |
| Sau-2913-1 | NZ_JGHA01000007.1  | - | 56894   | 56865   | RNA → | <a href="#">rpmE2 (PRK01678)</a> | <a href="#">Ribosomal_L31</a> | <a href="#">(pfam01197)</a> | → |
| Sau-3118-1 | NZ_JITJ01000011.1  | - | 26024   | 25995   | RNA → | <a href="#">rpmE2 (PRK01678)</a> | <a href="#">Ribosomal_L31</a> | <a href="#">(pfam01197)</a> | → |
| Sau-2901-1 | NZ_JGGZ01000007.1  | - | 55217   | 55188   | RNA → | <a href="#">rpmE2 (PRK01678)</a> | <a href="#">Ribosomal_L31</a> | <a href="#">(pfam01197)</a> | → |
| Sau-3120-1 | NZ_JITH01000016.1  | - | 26024   | 25995   | RNA → | <a href="#">rpmE2 (PRK01678)</a> | <a href="#">Ribosomal_L31</a> | <a href="#">(pfam01197)</a> | → |

|            |                   |   |        |        |       |                                             |
|------------|-------------------|---|--------|--------|-------|---------------------------------------------|
| Sau-2859-1 | NZ_JDGU01000008.1 | - | 56894  | 56865  | RNA → | rpmE2 (PRK01678)Ribosomal_L31 (pfam01197) → |
| Sau-2924-1 | NZ_JDYO01000002.1 | - | 56993  | 56964  | RNA → | rpmE2 (PRK01678)Ribosomal_L31 (pfam01197) → |
| Sau-2738-1 | NZ_JBET01000002.1 | - | 25029  | 25000  | RNA → | rpmE2 (PRK01678)Ribosomal_L31 (pfam01197) → |
| Sau-2671-1 | NZ_JBGE01000011.1 | - | 110326 | 110297 | RNA → | rpmE2 (PRK01678)Ribosomal_L31 (pfam01197) → |
| Sau-2686-1 | NZ_JBEU01000002.1 | - | 56893  | 56864  | RNA → | rpmE2 (PRK01678)Ribosomal_L31 (pfam01197) → |
| Sau-2668-1 | NZ_JBGL01000001.1 | - | 35179  | 35150  | RNA → | rpmE2 (PRK01678)Ribosomal_L31 (pfam01197) → |
| Sau-2664-1 | NZ_JBGW01000001.1 | - | 626825 | 626796 | RNA → | rpmE2 (PRK01678)Ribosomal_L31 (pfam01197) → |
| Sau-2756-1 | NZ_JBOD01000002.1 | - | 56894  | 56865  | RNA → | rpmE2 (PRK01678)Ribosomal_L31 (pfam01197) → |
| Sau-2834-1 | NZ_JFSD01000003.1 | - | 55116  | 55087  | RNA → | rpmE2 (PRK01678)Ribosomal_L31 (pfam01197) → |
| Sau-2851-1 | NZ_JEVM01000005.1 | - | 56894  | 56865  | RNA → | rpmE2 (PRK01678)Ribosomal_L31 (pfam01197) → |
| Sau-2843-1 | NZ_JGFY01000026.1 | - | 15832  | 15803  | RNA → | rpmE2 (PRK01678)Ribosomal_L31 (pfam01197) → |
| Sau-2844-1 | NZ_JGFZ01000004.1 | - | 27750  | 27721  | RNA → | rpmE2 (PRK01678)Ribosomal_L31 (pfam01197) → |
| Sau-2713-1 | NZ_JIWP01000013.1 | - | 26024  | 25995  | RNA → | rpmE2 (PRK01678)Ribosomal_L31 (pfam01197) → |
| Sau-2681-1 | NZ_JBMH01000008.1 | - | 113883 | 113854 | RNA → | rpmE2 (PRK01678)Ribosomal_L31 (pfam01197) → |
| Sau-2812-1 | NZ_JBMW01000001.1 | - | 238687 | 238658 | RNA → | rpmE2 (PRK01678)Ribosomal_L31 (pfam01197) → |
| Sau-2785-1 | NZ_JBNL01000003.1 | - | 56894  | 56865  | RNA → | rpmE2 (PRK01678)Ribosomal_L31 (pfam01197) → |
| Sau-2726-1 | NZ_JHEA01000010.1 | - | 54919  | 54890  | RNA → | rpmE2 (PRK01678)Ribosomal_L31 (pfam01197) → |
| Sau-3993-1 | NZ_ASZO01000074.1 | - | 61790  | 61761  | RNA → | rpmE2 (PRK01678)Ribosomal_L31 (pfam01197) → |
| Sau-3992-1 | NZ_AUPW01000016.1 | + | 65946  | 65975  | RNA → | rpmE2 (PRK01678)Ribosomal_L31 (pfam01197) → |
| Sau-3988-1 | NZ_AUPS01000015.1 | + | 42609  | 42638  | RNA → | rpmE2 (PRK01678)Ribosomal_L31 (pfam01197) → |
| Sau-2718-1 | NZ_JHEB01000009.1 | - | 56494  | 56465  | RNA → | rpmE2 (PRK01678)Ribosomal_L31 (pfam01197) → |
| Sau-2808-1 | NZ_JBRE01000003.1 | - | 25227  | 25198  | RNA → | rpmE2 (PRK01678)Ribosomal_L31 (pfam01197) → |
| Sau-2743-1 | NZ_JBMX01000003.1 | - | 56994  | 56965  | RNA → | rpmE2 (PRK01678)Ribosomal_L31 (pfam01197) → |
| Sau-2803-1 | NZ_JBNS01000002.1 | - | 56894  | 56865  | RNA → | rpmE2 (PRK01678)Ribosomal_L31 (pfam01197) → |
| Sau-2753-1 | NZ_JBOI01000004.1 | - | 56894  | 56865  | RNA → | rpmE2 (PRK01678)Ribosomal_L31 (pfam01197) → |
| Sau-2836-1 | NZ_JFSB01000009.1 | - | 56993  | 56964  | RNA → | rpmE2 (PRK01678)Ribosomal_L31 (pfam01197) → |
| Sau-2835-1 | NZ_JFSC01000005.1 | - | 56893  | 56864  | RNA → | rpmE2 (PRK01678)Ribosomal_L31 (pfam01197) → |
| Sau-2694-1 | NZ_JIXA01000010.1 | - | 56395  | 56366  | RNA → | rpmE2 (PRK01678)Ribosomal_L31 (pfam01197) → |
| Sau-2852-1 | NZ_JEVN01000007.1 | - | 56893  | 56864  | RNA → | rpmE2 (PRK01678)Ribosomal_L31 (pfam01197) → |
| Sau-2845-1 | NZ_JGGA01000010.1 | - | 34872  | 34843  | RNA → | rpmE2 (PRK01678)Ribosomal_L31 (pfam01197) → |
| Sau-2712-1 | NZ_JIWQ01000014.1 | - | 26024  | 25995  | RNA → | rpmE2 (PRK01678)Ribosomal_L31 (pfam01197) → |
| Sau-2720-1 | NZ_JHED01000008.1 | - | 54920  | 54891  | RNA → | rpmE2 (PRK01678)Ribosomal_L31 (pfam01197) → |
| Sau-3989-1 | NZ_AUPV01000011.1 | + | 18390  | 18419  | RNA → | rpmE2 (PRK01678)Ribosomal_L31 (pfam01197) → |
| Sau-2719-1 | NZ_JHEC01000014.1 | - | 28996  | 28967  | RNA → | rpmE2 (PRK01678)Ribosomal_L31 (pfam01197) → |
| Sau-2778-1 | NZ_JBPS01000005.1 | - | 56894  | 56865  | RNA → | rpmE2 (PRK01678)Ribosomal_L31 (pfam01197) → |
| Sau-2682-1 | NZ_JBPD01000001.1 | - | 57499  | 57470  | RNA → | rpmE2 (PRK01678)Ribosomal_L31 (pfam01197) → |
| Sau-2730-1 | NZ_JBQF01000003.1 | - | 56893  | 56864  | RNA → | rpmE2 (PRK01678)Ribosomal_L31 (pfam01197) → |
| Sau-2799-1 | NZ_JBJV01000008.1 | - | 57499  | 57470  | RNA → | rpmE2 (PRK01678)Ribosomal_L31 (pfam01197) → |
| Sau-2816-1 | NZ_JBLA01000002.1 | - | 56994  | 56965  | RNA → | rpmE2 (PRK01678)Ribosomal_L31 (pfam01197) → |
| Sau-2793-1 | NZ_JBKV01000001.1 | - | 238854 | 238825 | RNA → | rpmE2 (PRK01678)Ribosomal_L31 (pfam01197) → |
| Sau-2725-1 | NZ_JHDZ01000008.1 | + | 52043  | 52072  | RNA → | rpmE2 (PRK01678)Ribosomal_L31 (pfam01197) → |
| Sau-2724-1 | NZ_JHDY01000010.1 | + | 55746  | 55775  | RNA → | rpmE2 (PRK01678)Ribosomal_L31 (pfam01197) → |
| Sau-2831-1 | NZ_JEUX01000013.1 | - | 15617  | 15588  | RNA → | rpmE2 (PRK01678)Ribosomal_L31 (pfam01197) → |
| Sau-2721-1 | NZ_JHDV01000014.1 | - | 54961  | 54932  | RNA → | rpmE2 (PRK01678)Ribosomal_L31 (pfam01197) → |
| Sau-3990-1 | NZ_AUPU01000015.1 | + | 65947  | 65976  | RNA → | rpmE2 (PRK01678)Ribosomal_L31 (pfam01197) → |
| Sau-2770-1 | NZ_JBJF01000002.1 | - | 56894  | 56865  | RNA → | rpmE2 (PRK01678)Ribosomal_L31 (pfam01197) → |
| Sau-2652-1 | NZ_JBKF01000004.1 | - | 56894  | 56865  | RNA → | rpmE2 (PRK01678)Ribosomal_L31 (pfam01197) → |
| Sau-2723-1 | NZ_JHDX01000009.1 | + | 55746  | 55775  | RNA → | rpmE2 (PRK01678)Ribosomal_L31 (pfam01197) → |
| Sau-3991-1 | NZ_AUPT01000016.1 | - | 25833  | 25804  | RNA → | rpmE2 (PRK01678)Ribosomal_L31 (pfam01197) → |
| Sau-2798-1 | NZ_JBJX01000002.1 | - | 57001  | 56972  | RNA → | rpmE2 (PRK01678)Ribosomal_L31 (pfam01197) → |
| Sau-2764-1 | NZ_JBLC01000001.1 | - | 110684 | 110655 | RNA → | rpmE2 (PRK01678)Ribosomal_L31 (pfam01197) → |
| Sau-2722-1 | NZ_JHDW01000009.1 | + | 55746  | 55775  | RNA → | rpmE2 (PRK01678)Ribosomal_L31 (pfam01197) → |



|            |                   |   |         |         |       |                                                                                       |
|------------|-------------------|---|---------|---------|-------|---------------------------------------------------------------------------------------|
| Sau-3683-1 | NZ_JBGQ01000002.1 | - | 56894   | 56865   | RNA → | rpmE2 (PRK01678)Ribosomal_L31 (pfam01197) →                                           |
| Sau-3697-1 | NZ_JBHG01000002.1 | - | 56894   | 56865   | RNA → | rpmE2 (PRK01678)Ribosomal_L31 (pfam01197) →                                           |
| Sau-3680-1 | NZ_JBEW01000006.1 | - | 56894   | 56865   | RNA → | rpmE2 (PRK01678)Ribosomal_L31 (pfam01197) →                                           |
| Sau-3695-1 | NZ_JBFM01000003.1 | - | 56894   | 56865   | RNA → | rpmE2 (PRK01678)Ribosomal_L31 (pfam01197) →                                           |
| Sau-3725-1 | NZ_JHPT01000009.1 | - | 54839   | 54810   | RNA → | rpmE2 (PRK01678)Ribosomal_L31 (pfam01197) →                                           |
| Sau-3731-1 | NZ_JHPY01000018.1 | - | 54601   | 54572   | RNA → | rpmE2 (PRK01678)Ribosomal_L31 (pfam01197) →                                           |
| Sau-3711-1 | NZ_JIFL01000015.1 | - | 26024   | 25995   | RNA → | rpmE2 (PRK01678)Ribosomal_L31 (pfam01197) →                                           |
| Sau-3733-1 | NZ_JHTY01000067.1 | + | 18293   | 18322   | RNA → | rpmE2 (PRK01678)Ribosomal_L31 (pfam01197) →                                           |
| Sau-3652-1 | NZ_JGGE01000007.1 | - | 55082   | 55053   | RNA → | rpmE2 (PRK01678)Ribosomal_L31 (pfam01197) →                                           |
| Sau-3641-1 | NZ_JGIH01000019.1 | - | 34817   | 34788   | RNA → | rpmE2 (PRK01678)Ribosomal_L31 (pfam01197) →                                           |
| Sau-3739-1 | NZ_JHQD01000034.1 | - | 1801    | 1772    | RNA → | rpmE2 (PRK01678)Ribosomal_L31 (pfam01197) →                                           |
| Sau-3742-1 | NZ_JHTV01000022.1 | - | 25152   | 25123   | RNA → | rpmE2 (PRK01678)Ribosomal_L31 (pfam01197) →                                           |
| Sau-3732-1 | NZ_JHTX01000003.1 | - | 54710   | 54681   | RNA → | rpmE2 (PRK01678)Ribosomal_L31 (pfam01197) →                                           |
| Sau-3692-1 | NZ_JBGM01000002.1 | - | 56994   | 56965   | RNA → | rpmE2 (PRK01678)Ribosomal_L31 (pfam01197) →                                           |
| Sau-3690-1 | NZ_JBGZ01000002.1 | - | 56790   | 56761   | RNA → | rpmE2 (PRK01678)Ribosomal_L31 (pfam01197) →                                           |
| Sau-3660-1 | NZ_JEVU01000005.1 | - | 56890   | 56861   | RNA → | rpmE2 (PRK01678)Ribosomal_L31 (pfam01197) →                                           |
| Sau-3663-1 | NZ_JGGG01000011.1 | - | 34867   | 34838   | RNA → | rpmE2 (PRK01678)Ribosomal_L31 (pfam01197) →                                           |
| Sau-3727-1 | NZ_JHPU01000026.1 | - | 54858   | 54829   | RNA → | rpmE2 (PRK01678)Ribosomal_L31 (pfam01197) →                                           |
| Sau-3741-1 | NZ_JHQF01000031.1 | - | 55187   | 55158   | RNA → | rpmE2 (PRK01678)Ribosomal_L31 (pfam01197) →                                           |
| Sau-3735-1 | NZ_JHQA01000009.1 | - | 54489   | 54460   | RNA → | rpmE2 (PRK01678)Ribosomal_L31 (pfam01197) →                                           |
| Sau-3713-1 | NZ_JIFJ01000017.1 | - | 26024   | 25995   | RNA → | rpmE2 (PRK01678)Ribosomal_L31 (pfam01197) →                                           |
| Sau-3726-1 | NZ_JHTW01000035.1 | - | 54627   | 54598   | RNA → | rpmE2 (PRK01678)Ribosomal_L31 (pfam01197) →                                           |
| Sau-3738-1 | NZ_AJKC01000001.1 | + | 18638   | 18667   | RNA → | rpmE2 (PRK01678)Ribosomal_L31 (pfam01197) →                                           |
| Sau-4105-1 | NZ_AVBR01000007.1 | - | 54901   | 54872   | RNA → | rpmE2 (PRK01678)Ribosomal_L31 (pfam01197) →                                           |
| Sau-3645-1 | NZ_JEVT01000001.1 | - | 56893   | 56864   | RNA → | rpmE2 (PRK01678)Ribosomal_L31 (pfam01197) →                                           |
| Sau-3655-1 | NZ_JGGF01000011.1 | - | 56894   | 56865   | RNA → | rpmE2 (PRK01678)Ribosomal_L31 (pfam01197) →                                           |
| Sau-3740-1 | NZ_JHQE01000027.1 | - | 55261   | 55232   | RNA → | rpmE2 (PRK01678)Ribosomal_L31 (pfam01197) →                                           |
| Sau-3729-1 | NZ_JHPW01000011.1 | - | 54780   | 54751   | RNA → | rpmE2 (PRK01678)Ribosomal_L31 (pfam01197) →                                           |
| Sau-3720-1 | NZ_JIFC01000012.1 | - | 56390   | 56361   | RNA → | rpmE2 (PRK01678)Ribosomal_L31 (pfam01197) →                                           |
| Sau-3745-1 | NZ_ANPO01000022.1 | - | 54581   | 54552   | RNA → | rpmE2 (PRK01678)Ribosomal_L31 (pfam01197) →                                           |
| Sau-3668-1 | NZ_JBQW01000006.1 | - | 117087  | 117058  | RNA → | rpmE2 (PRK01678)Ribosomal_L31 (pfam01197) →                                           |
| Sau-3649-1 | NZ_JDZB01000004.1 | - | 56894   | 56865   | RNA → | rpmE2 (PRK01678)Ribosomal_L31 (pfam01197) →                                           |
| Sau-3736-1 | NZ_JASL01000006.1 | - | 54744   | 54715   | RNA → | rpmE2 (PRK01678)Ribosomal_L31 (pfam01197) →                                           |
| Sau-3723-1 | NZ_JHUH01000009.1 | - | 18886   | 18857   | RNA → | rpmE2 (PRK01678)Ribosomal_L31 (pfam01197) →                                           |
| Sau-3665-1 | NZ_JDZA01000002.1 | - | 56894   | 56865   | RNA → | rpmE2 (PRK01678)Ribosomal_L31 (pfam01197) →                                           |
| Sau-3737-1 | NZ_JASK01000008.1 | + | 52532   | 52561   | RNA → | rpmE2 (PRK01678)Ribosomal_L31 (pfam01197) →                                           |
| Sau-3666-1 | NZ_JDYZ01000006.1 | - | 56894   | 56865   | RNA → | rpmE2 (PRK01678)Ribosomal_L31 (pfam01197) →                                           |
| Sau-3-1    | NZ_ABFA01000032.1 | - | 15628   | 15599   | RNA → | rpmE2 (PRK01678)Ribosomal_L31 (pfam01197) → rpmE2 (PRK01678)Ribosomal_L31 (pfam01197) |
| Sau-63-1   | NC_007795.1       | - | 2182895 | 2182866 | RNA → | rpmE2 (PRK01678)Ribosomal_L31 (pfam01197) →                                           |
| Sau-60-1   | NC_002758.2       | - | 2247063 | 2247034 | RNA → | rpmE2 (PRK01678)Ribosomal_L31 (pfam01197) →                                           |
| Sau-55-1   | NC_002952.2       | - | 2274990 | 2274961 | RNA → | rpmE2 (PRK01678)Ribosomal_L31 (pfam01197) →                                           |
| Sau-59-1   | NC_009782.1       | - | 2248701 | 2248672 | RNA → | rpmE2 (PRK01678)Ribosomal_L31 (pfam01197) →                                           |
| Sau-58-1   | NC_003923.1       | - | 2197274 | 2197245 | RNA → | rpmE2 (PRK01678)Ribosomal_L31 (pfam01197) →                                           |
| Sau-21-1   | NC_007622.1       | - | 2134777 | 2134748 | RNA → | rpmE2 (PRK01678)Ribosomal_L31 (pfam01197) →                                           |
| Sau-35-1   | NC_002951.2       | - | 2172171 | 2172142 | RNA → | rpmE2 (PRK01678)Ribosomal_L31 (pfam01197) →                                           |
| Sau-57-1   | NC_002953.3       | - | 2176379 | 2176350 | RNA → | rpmE2 (PRK01678)Ribosomal_L31 (pfam01197) →                                           |
| Sau-45-1   | NC_009487.1       | - | 2277078 | 2277049 | RNA → | rpmE2 (PRK01678)Ribosomal_L31 (pfam01197) →                                           |
| Sau-78-1   | NC_009641.1       | - | 2240554 | 2240525 | RNA → | rpmE2 (PRK01678)Ribosomal_L31 (pfam01197) →                                           |
| Sau-62-1   | NC_002745.2       | - | 2170631 | 2170602 | RNA → | rpmE2 (PRK01678)Ribosomal_L31 (pfam01197) →                                           |
| Sau-44-1   | NC_009632.1       | - | 2276953 | 2276924 | RNA → | rpmE2 (PRK01678)Ribosomal_L31 (pfam01197) →                                           |
| Sau-40-1   | NC_013450.1       | - | 2193468 | 2193439 | RNA → | rpmE2 (PRK01678)Ribosomal_L31 (pfam01197) →                                           |
| Sau-76-1   | NC_017341.1       | - | 2266296 | 2266267 | RNA → | rpmE2 (PRK01678)Ribosomal_L31 (pfam01197) →                                           |

|            |                   |   |         |         |       |                                                                                                                       |
|------------|-------------------|---|---------|---------|-------|-----------------------------------------------------------------------------------------------------------------------|
| Sau-67-1   | NC_017342.1       | + | 1146277 | 1146306 | RNA → | <a href="#">rpmE2 (PRK01678)Ribosomal_L31 (pfam01197)</a> →                                                           |
| Sau-4024-1 | NZ_AMPF01000068.1 | - | 15521   | 15492   | RNA → | <a href="#">rpmE2 (PRK01678)Ribosomal_L31 (pfam01197)</a> →                                                           |
| Sau-47-1   | NC_017349.1       | - | 2132497 | 2132468 | RNA → | <a href="#">rpmE2 (PRK01678)Ribosomal_L31 (pfam01197)</a> →                                                           |
| Sau-48-1   | NC_016928.1       | - | 2140391 | 2140362 | RNA → | <a href="#">rpmE2 (PRK01678)Ribosomal_L31 (pfam01197)</a> →                                                           |
| Sau-43-1   | NC_017763.1       | - | 2198775 | 2198746 | RNA → | <a href="#">rpmE2 (PRK01678)Ribosomal_L31 (pfam01197)</a> →                                                           |
| Sau-4038-1 | NC_022222.1       | - | 2087639 | 2087610 | RNA → | <a href="#">rpmE2 (PRK01678)Ribosomal_L31 (pfam01197)</a> →                                                           |
| Sau-73-1   | NZ_GG730215.1     | - | 55940   | 55911   | RNA → | <a href="#">rpmE2 (PRK01678)Ribosomal_L31 (pfam01197)</a> → <a href="#">rpmE2 (PRK01678)Ribosomal_L31 (pfam01197)</a> |
| Sau-74-1   | NZ_GG730248.1     | - | 57166   | 57137   | RNA → | <a href="#">rpmE2 (PRK01678)Ribosomal_L31 (pfam01197)</a> → <a href="#">rpmE2 (PRK01678)Ribosomal_L31 (pfam01197)</a> |
| Sau-32-1   | NZ_GG730136.1     | - | 56479   | 56450   | RNA → | <a href="#">rpmE2 (PRK01678)Ribosomal_L31 (pfam01197)</a> → <a href="#">rpmE2 (PRK01678)Ribosomal_L31 (pfam01197)</a> |
| Sau-31-1   | NZ_GG730266.1     | - | 56408   | 56379   | RNA → | <a href="#">rpmE2 (PRK01678)Ribosomal_L31 (pfam01197)</a> → <a href="#">rpmE2 (PRK01678)Ribosomal_L31 (pfam01197)</a> |
| Sau-25-1   | NZ_GG700568.1     | - | 56291   | 56262   | RNA → | <a href="#">rpmE2 (PRK01678)Ribosomal_L31 (pfam01197)</a> → <a href="#">rpmE2 (PRK01678)Ribosomal_L31 (pfam01197)</a> |
| Sau-4096-1 | NZ_GL638179.1     | + | 18326   | 18355   | RNA → | <a href="#">rpmE2 (PRK01678)Ribosomal_L31 (pfam01197)</a> →                                                           |
| Sau-50-1   | NZ_GG749318.1     | - | 55764   | 55735   | RNA → | <a href="#">rpmE2 (PRK01678)Ribosomal_L31 (pfam01197)</a> → <a href="#">rpmE2 (PRK01678)Ribosomal_L31 (pfam01197)</a> |
| Sau-41-1   | NZ_GG770528.1     | - | 56131   | 56102   | RNA → | <a href="#">rpmE2 (PRK01678)Ribosomal_L31 (pfam01197)</a> → <a href="#">rpmE2 (PRK01678)Ribosomal_L31 (pfam01197)</a> |
| Sau-33-1   | NZ_GG730293.1     | - | 56576   | 56547   | RNA → | <a href="#">rpmE2 (PRK01678)Ribosomal_L31 (pfam01197)</a> → <a href="#">rpmE2 (PRK01678)Ribosomal_L31 (pfam01197)</a> |
| Sau-52-1   | NZ_GG730203.1     | - | 55609   | 55580   | RNA → | <a href="#">rpmE2 (PRK01678)Ribosomal_L31 (pfam01197)</a> → <a href="#">rpmE2 (PRK01678)Ribosomal_L31 (pfam01197)</a> |
| Sau-37-1   | NZ_GG700611.1     | - | 55640   | 55611   | RNA → | <a href="#">rpmE2 (PRK01678)Ribosomal_L31 (pfam01197)</a> → <a href="#">rpmE2 (PRK01678)Ribosomal_L31 (pfam01197)</a> |
| Sau-29-1   | NZ_GG774481.1     | + | 1087427 | 1087456 | RNA → | <a href="#">rpmE2 (PRK01678)Ribosomal_L31 (pfam01197)</a> →                                                           |
| Sau-28-1   | NZ_GG731509.1     | - | 56401   | 56372   | RNA → | <a href="#">rpmE2 (PRK01678)Ribosomal_L31 (pfam01197)</a> → <a href="#">rpmE2 (PRK01678)Ribosomal_L31 (pfam01197)</a> |
| Sau-4097-1 | NZ_GL638212.1     | + | 18325   | 18354   | RNA → | <a href="#">rpmE2 (PRK01678)Ribosomal_L31 (pfam01197)</a> →                                                           |
| Sau-24-1   | NZ_GG749070.1     | - | 56614   | 56585   | RNA → | <a href="#">rpmE2 (PRK01678)Ribosomal_L31 (pfam01197)</a> → <a href="#">rpmE2 (PRK01678)Ribosomal_L31 (pfam01197)</a> |
| Sau-51-1   | NZ_GG700626.1     | - | 56171   | 56142   | RNA → | <a href="#">rpmE2 (PRK01678)Ribosomal_L31 (pfam01197)</a> → <a href="#">rpmE2 (PRK01678)Ribosomal_L31 (pfam01197)</a> |
| Sau-49-1   | NZ_GG749011.1     | - | 56128   | 56099   | RNA → | <a href="#">rpmE2 (PRK01678)Ribosomal_L31 (pfam01197)</a> → <a href="#">rpmE2 (PRK01678)Ribosomal_L31 (pfam01197)</a> |
| Sau-66-1   | NZ_GG698162.1     | + | 52322   | 52351   | RNA → | <a href="#">rpmE2 (PRK01678)Ribosomal_L31 (pfam01197)</a> →                                                           |
| Sau-26-1   | NZ_GG700588.1     | - | 56037   | 56008   | RNA → | <a href="#">rpmE2 (PRK01678)Ribosomal_L31 (pfam01197)</a> → <a href="#">rpmE2 (PRK01678)Ribosomal_L31 (pfam01197)</a> |
| Sau-4104-1 | NZ_GL538356.1     | + | 1145007 | 1145036 | RNA → | <a href="#">rpmE2 (PRK01678)Ribosomal_L31 (pfam01197)</a> →                                                           |
| Sau-3769-1 | NZ_KB820900.1     | - | 56894   | 56865   | RNA → | <a href="#">rpmE2 (PRK01678)Ribosomal_L31 (pfam01197)</a> →                                                           |
| Sau-3803-1 | NZ_KB821084.1     | - | 129644  | 129615  | RNA → | <a href="#">rpmE2 (PRK01678)Ribosomal_L31 (pfam01197)</a> →                                                           |
| Sau-3808-1 | NZ_KB821121.1     | - | 234536  | 234507  | RNA → | <a href="#">rpmE2 (PRK01678)Ribosomal_L31 (pfam01197)</a> →                                                           |
| Sau-3770-1 | NZ_KB820903.1     | - | 2188304 | 2188275 | RNA → | <a href="#">rpmE2 (PRK01678)Ribosomal_L31 (pfam01197)</a> →                                                           |
| Sau-3783-1 | NZ_KB820952.1     | - | 170256  | 170227  | RNA → | <a href="#">rpmE2 (PRK01678)Ribosomal_L31 (pfam01197)</a> →                                                           |
| Sau-3776-1 | NZ_KB820925.1     | - | 1613986 | 1613957 | RNA → | <a href="#">rpmE2 (PRK01678)Ribosomal_L31 (pfam01197)</a> →                                                           |
| Sau-3795-1 | NZ_KB821037.1     | - | 472750  | 472721  | RNA → | <a href="#">rpmE2 (PRK01678)Ribosomal_L31 (pfam01197)</a> →                                                           |
| Sau-3773-1 | NZ_KB820909.1     | - | 2209641 | 2209612 | RNA → | <a href="#">rpmE2 (PRK01678)Ribosomal_L31 (pfam01197)</a> →                                                           |
| Sau-3817-1 | NZ_KB821167.1     | - | 239480  | 239451  | RNA → | <a href="#">rpmE2 (PRK01678)Ribosomal_L31 (pfam01197)</a> →                                                           |
| Sau-3807-1 | NZ_KB821115.1     | - | 229502  | 229473  | RNA → | <a href="#">rpmE2 (PRK01678)Ribosomal_L31 (pfam01197)</a> →                                                           |
| Sau-3812-1 | NZ_KB821128.1     | - | 1585082 | 1585053 | RNA → | <a href="#">rpmE2 (PRK01678)Ribosomal_L31 (pfam01197)</a> →                                                           |
| Sau-3820-1 | NZ_KB821195.1     | - | 180341  | 180312  | RNA → | <a href="#">rpmE2 (PRK01678)Ribosomal_L31 (pfam01197)</a> →                                                           |
| Sau-3767-1 | NZ_KB820894.1     | - | 56894   | 56865   | RNA → | <a href="#">rpmE2 (PRK01678)Ribosomal_L31 (pfam01197)</a> →                                                           |
| Sau-3824-1 | NZ_KB821208.1     | - | 56783   | 56754   | RNA → | <a href="#">rpmE2 (PRK01678)Ribosomal_L31 (pfam01197)</a> →                                                           |
| Sau-3801-1 | NZ_KB821081.1     | - | 126216  | 126187  | RNA → | <a href="#">rpmE2 (PRK01678)Ribosomal_L31 (pfam01197)</a> →                                                           |
| Sau-3802-1 | NZ_KB821076.1     | - | 1638120 | 1638091 | RNA → | <a href="#">rpmE2 (PRK01678)Ribosomal_L31 (pfam01197)</a> →                                                           |
| Sau-3819-1 | NZ_KB821188.1     | - | 183209  | 183180  | RNA → | <a href="#">rpmE2 (PRK01678)Ribosomal_L31 (pfam01197)</a> →                                                           |
| Sau-3799-1 | NZ_KB821067.1     | - | 181606  | 181577  | RNA → | <a href="#">rpmE2 (PRK01678)Ribosomal_L31 (pfam01197)</a> →                                                           |
| Sau-3788-1 | NZ_KB820982.1     | - | 114751  | 114722  | RNA → | <a href="#">rpmE2 (PRK01678)Ribosomal_L31 (pfam01197)</a> →                                                           |
| Sau-3814-1 | NZ_KB821141.1     | - | 359642  | 359613  | RNA → | <a href="#">rpmE2 (PRK01678)Ribosomal_L31 (pfam01197)</a> →                                                           |
| Sau-3805-1 | NZ_KB821105.1     | - | 1111629 | 1111600 | RNA → | <a href="#">rpmE2 (PRK01678)Ribosomal_L31 (pfam01197)</a> →                                                           |
| Sau-3822-1 | NZ_KB821198.1     | - | 2190463 | 2190434 | RNA → | <a href="#">rpmE2 (PRK01678)Ribosomal_L31 (pfam01197)</a> →                                                           |
| Sau-3813-1 | NZ_KB821144.1     | - | 57288   | 57259   | RNA → | <a href="#">rpmE2 (PRK01678)Ribosomal_L31 (pfam01197)</a> →                                                           |
| Sau-3818-1 | NZ_KB821175.1     | - | 1680280 | 1680251 | RNA → | <a href="#">rpmE2 (PRK01678)Ribosomal_L31 (pfam01197)</a> →                                                           |
| Sau-3811-1 | NZ_KB821137.1     | - | 114925  | 114896  | RNA → | <a href="#">rpmE2 (PRK01678)Ribosomal_L31 (pfam01197)</a> →                                                           |
| Sau-3775-1 | NZ_KB820921.1     | - | 1705142 | 1705113 | RNA → | <a href="#">rpmE2 (PRK01678)Ribosomal_L31 (pfam01197)</a> →                                                           |

|            |               |   |         |         |                                                   |
|------------|---------------|---|---------|---------|---------------------------------------------------|
| Sau-3784-1 | NZ_KB820963.1 | - | 1638154 | 1638125 | RNA → rpmE2 (PRK01678)Ribosomal_L31 (pfam01197) → |
| Sau-3800-1 | NZ_KB821070.1 | - | 253442  | 253413  | RNA → rpmE2 (PRK01678)Ribosomal_L31 (pfam01197) → |
| Sau-3774-1 | NZ_KB820916.1 | - | 1896448 | 1896419 | RNA → rpmE2 (PRK01678)Ribosomal_L31 (pfam01197) → |
| Sau-3809-1 | NZ_KB821124.1 | - | 192056  | 192027  | RNA → rpmE2 (PRK01678)Ribosomal_L31 (pfam01197) → |
| Sau-3771-1 | NZ_KB820912.1 | - | 1676207 | 1676178 | RNA → rpmE2 (PRK01678)Ribosomal_L31 (pfam01197) → |
| Sau-3794-1 | NZ_KB821023.1 | - | 115012  | 114983  | RNA → rpmE2 (PRK01678)Ribosomal_L31 (pfam01197) → |
| Sau-3793-1 | NZ_KB821021.1 | - | 59768   | 59739   | RNA → rpmE2 (PRK01678)Ribosomal_L31 (pfam01197) → |
| Sau-3816-1 | NZ_KB821155.1 | - | 56763   | 56734   | RNA → rpmE2 (PRK01678)Ribosomal_L31 (pfam01197) → |
| Sau-3806-1 | NZ_KB821113.1 | - | 435020  | 434991  | RNA → rpmE2 (PRK01678)Ribosomal_L31 (pfam01197) → |
| Sau-3782-1 | NZ_KB820938.1 | - | 56763   | 56734   | RNA → rpmE2 (PRK01678)Ribosomal_L31 (pfam01197) → |
| Sau-3786-1 | NZ_KB820971.1 | - | 459385  | 459356  | RNA → rpmE2 (PRK01678)Ribosomal_L31 (pfam01197) → |
| Sau-3840-1 | NZ_KB821307.1 | - | 468982  | 468953  | RNA → rpmE2 (PRK01678)Ribosomal_L31 (pfam01197) → |
| Sau-3848-1 | NZ_KB821355.1 | - | 1644452 | 1644423 | RNA → rpmE2 (PRK01678)Ribosomal_L31 (pfam01197) → |
| Sau-3837-1 | NZ_KB821284.1 | - | 124072  | 124043  | RNA → rpmE2 (PRK01678)Ribosomal_L31 (pfam01197) → |
| Sau-3804-1 | NZ_KB821093.1 | - | 61324   | 61295   | RNA → rpmE2 (PRK01678)Ribosomal_L31 (pfam01197) → |
| Sau-3849-1 | NZ_KB821366.1 | - | 230978  | 230949  | RNA → rpmE2 (PRK01678)Ribosomal_L31 (pfam01197) → |
| Sau-3828-1 | NZ_KB821234.1 | - | 184607  | 184578  | RNA → rpmE2 (PRK01678)Ribosomal_L31 (pfam01197) → |
| Sau-3797-1 | NZ_KB821056.1 | - | 198382  | 198353  | RNA → rpmE2 (PRK01678)Ribosomal_L31 (pfam01197) → |
| Sau-3791-1 | NZ_KB821003.1 | - | 200561  | 200532  | RNA → rpmE2 (PRK01678)Ribosomal_L31 (pfam01197) → |
| Sau-3850-1 | NZ_KB821373.1 | - | 58248   | 58219   | RNA → rpmE2 (PRK01678)Ribosomal_L31 (pfam01197) → |
| Sau-3798-1 | NZ_KB821045.1 | - | 56967   | 56938   | RNA → rpmE2 (PRK01678)Ribosomal_L31 (pfam01197) → |
| Sau-3785-1 | NZ_KB820966.1 | - | 1684535 | 1684506 | RNA → rpmE2 (PRK01678)Ribosomal_L31 (pfam01197) → |
| Sau-3906-1 | NZ_KB821822.1 | - | 230922  | 230893  | RNA → rpmE2 (PRK01678)Ribosomal_L31 (pfam01197) → |
| Sau-3877-1 | NZ_KB821568.1 | - | 232229  | 232200  | RNA → rpmE2 (PRK01678)Ribosomal_L31 (pfam01197) → |
| Sau-3868-1 | NZ_KB821491.1 | - | 468075  | 468046  | RNA → rpmE2 (PRK01678)Ribosomal_L31 (pfam01197) → |
| Sau-3930-1 | NZ_KB822033.1 | - | 56588   | 56559   | RNA → rpmE2 (PRK01678)Ribosomal_L31 (pfam01197) → |
| Sau-3825-1 | NZ_KB821214.1 | - | 470766  | 470737  | RNA → rpmE2 (PRK01678)Ribosomal_L31 (pfam01197) → |
| Sau-3938-1 | NZ_KB822062.1 | - | 468208  | 468179  | RNA → rpmE2 (PRK01678)Ribosomal_L31 (pfam01197) → |
| Sau-3951-1 | NZ_KB822134.1 | - | 1633116 | 1633087 | RNA → rpmE2 (PRK01678)Ribosomal_L31 (pfam01197) → |
| Sau-3929-1 | NZ_KB822014.1 | - | 49965   | 49936   | RNA → rpmE2 (PRK01678)Ribosomal_L31 (pfam01197) → |
| Sau-3889-1 | NZ_KB821698.1 | - | 217486  | 217457  | RNA → rpmE2 (PRK01678)Ribosomal_L31 (pfam01197) → |
| Sau-3911-1 | NZ_KB821846.1 | - | 231900  | 231871  | RNA → rpmE2 (PRK01678)Ribosomal_L31 (pfam01197) → |
| Sau-3879-1 | NZ_KB821583.1 | - | 49963   | 49934   | RNA → rpmE2 (PRK01678)Ribosomal_L31 (pfam01197) → |
| Sau-3815-1 | NZ_KB821139.1 | - | 417187  | 417158  | RNA → rpmE2 (PRK01678)Ribosomal_L31 (pfam01197) → |
| Sau-3940-1 | NZ_KB822075.1 | - | 1587356 | 1587327 | RNA → rpmE2 (PRK01678)Ribosomal_L31 (pfam01197) → |
| Sau-3905-1 | NZ_KB821817.1 | - | 60935   | 60906   | RNA → rpmE2 (PRK01678)Ribosomal_L31 (pfam01197) → |
| Sau-3870-1 | NZ_KB821499.1 | - | 57430   | 57401   | RNA → rpmE2 (PRK01678)Ribosomal_L31 (pfam01197) → |
| Sau-3937-1 | NZ_KB822053.1 | - | 231944  | 231915  | RNA → rpmE2 (PRK01678)Ribosomal_L31 (pfam01197) → |
| Sau-3838-1 | NZ_KB821316.1 | - | 175381  | 175352  | RNA → rpmE2 (PRK01678)Ribosomal_L31 (pfam01197) → |
| Sau-3942-1 | NZ_KB822082.1 | - | 925424  | 925395  | RNA → rpmE2 (PRK01678)Ribosomal_L31 (pfam01197) → |
| Sau-3885-1 | NZ_KB821667.1 | - | 232434  | 232405  | RNA → rpmE2 (PRK01678)Ribosomal_L31 (pfam01197) → |
| Sau-3854-1 | NZ_KB821402.1 | - | 222935  | 222906  | RNA → rpmE2 (PRK01678)Ribosomal_L31 (pfam01197) → |
| Sau-3931-1 | NZ_KB822005.1 | - | 102504  | 102475  | RNA → rpmE2 (PRK01678)Ribosomal_L31 (pfam01197) → |
| Sau-3887-1 | NZ_KB821650.1 | - | 172485  | 172456  | RNA → rpmE2 (PRK01678)Ribosomal_L31 (pfam01197) → |
| Sau-3860-1 | NZ_KB821438.1 | - | 1666799 | 1666770 | RNA → rpmE2 (PRK01678)Ribosomal_L31 (pfam01197) → |
| Sau-3892-1 | NZ_KB821706.1 | - | 100662  | 100633  | RNA → rpmE2 (PRK01678)Ribosomal_L31 (pfam01197) → |
| Sau-3875-1 | NZ_KB821519.1 | - | 56762   | 56733   | RNA → rpmE2 (PRK01678)Ribosomal_L31 (pfam01197) → |
| Sau-3943-1 | NZ_KB822376.1 | - | 54872   | 54843   | RNA → rpmE2 (PRK01678)Ribosomal_L31 (pfam01197) → |
| Sau-3882-1 | NZ_KB821615.1 | - | 57538   | 57509   | RNA → rpmE2 (PRK01678)Ribosomal_L31 (pfam01197) → |
| Sau-3982-1 | NZ_KB822322.1 | - | 233801  | 233772  | RNA → rpmE2 (PRK01678)Ribosomal_L31 (pfam01197) → |
| Sau-3853-1 | NZ_KB821387.1 | - | 109205  | 109176  | RNA → rpmE2 (PRK01678)Ribosomal_L31 (pfam01197) → |
| Sau-3865-1 | NZ_KB821484.1 | - | 219814  | 219785  | RNA → rpmE2 (PRK01678)Ribosomal_L31 (pfam01197) → |



|            |               |   |         |         |       |                                  |                               |                             |   |
|------------|---------------|---|---------|---------|-------|----------------------------------|-------------------------------|-----------------------------|---|
| Sau-3950-1 | NZ_KB822128.1 | - | 401009  | 400980  | RNA → | <a href="#">rpmE2 (PRK01678)</a> | <a href="#">Ribosomal_L31</a> | <a href="#">(pfam01197)</a> | → |
| Sau-3863-1 | NZ_KB821442.1 | - | 167231  | 167202  | RNA → | <a href="#">rpmE2 (PRK01678)</a> | <a href="#">Ribosomal_L31</a> | <a href="#">(pfam01197)</a> | → |
| Sau-3923-1 | NZ_KB822366.1 | - | 61547   | 61518   | RNA → | <a href="#">rpmE2 (PRK01678)</a> | <a href="#">Ribosomal_L31</a> | <a href="#">(pfam01197)</a> | → |
| Sau-3894-1 | NZ_KB821734.1 | - | 57586   | 57557   | RNA → | <a href="#">rpmE2 (PRK01678)</a> | <a href="#">Ribosomal_L31</a> | <a href="#">(pfam01197)</a> | → |
| Sau-3946-1 | NZ_KB822105.1 | - | 105409  | 105380  | RNA → | <a href="#">rpmE2 (PRK01678)</a> | <a href="#">Ribosomal_L31</a> | <a href="#">(pfam01197)</a> | → |
| Sau-3904-1 | NZ_KB821811.1 | - | 507764  | 507735  | RNA → | <a href="#">rpmE2 (PRK01678)</a> | <a href="#">Ribosomal_L31</a> | <a href="#">(pfam01197)</a> | → |
| Sau-3924-1 | NZ_KB821972.1 | - | 25249   | 25220   | RNA → | <a href="#">rpmE2 (PRK01678)</a> | <a href="#">Ribosomal_L31</a> | <a href="#">(pfam01197)</a> | → |
| Sau-3953-1 | NZ_KB822142.1 | - | 106748  | 106719  | RNA → | <a href="#">rpmE2 (PRK01678)</a> | <a href="#">Ribosomal_L31</a> | <a href="#">(pfam01197)</a> | → |
| Sau-3921-1 | NZ_KB821932.1 | - | 231611  | 231582  | RNA → | <a href="#">rpmE2 (PRK01678)</a> | <a href="#">Ribosomal_L31</a> | <a href="#">(pfam01197)</a> | → |
| Sau-3971-1 | NZ_KB822385.1 | - | 111190  | 111161  | RNA → | <a href="#">rpmE2 (PRK01678)</a> | <a href="#">Ribosomal_L31</a> | <a href="#">(pfam01197)</a> | → |
| Sau-3878-1 | NZ_KB821575.1 | - | 229624  | 229595  | RNA → | <a href="#">rpmE2 (PRK01678)</a> | <a href="#">Ribosomal_L31</a> | <a href="#">(pfam01197)</a> | → |
| Sau-3925-1 | NZ_KB821957.1 | - | 61593   | 61564   | RNA → | <a href="#">rpmE2 (PRK01678)</a> | <a href="#">Ribosomal_L31</a> | <a href="#">(pfam01197)</a> | → |
| Sau-3909-1 | NZ_KB821826.1 | - | 233560  | 233531  | RNA → | <a href="#">rpmE2 (PRK01678)</a> | <a href="#">Ribosomal_L31</a> | <a href="#">(pfam01197)</a> | → |
| Sau-3845-1 | NZ_KB821335.1 | - | 2130755 | 2130726 | RNA → | <a href="#">rpmE2 (PRK01678)</a> | <a href="#">Ribosomal_L31</a> | <a href="#">(pfam01197)</a> | → |
| Sau-3952-1 | NZ_KB822138.1 | - | 229498  | 229469  | RNA → | <a href="#">rpmE2 (PRK01678)</a> | <a href="#">Ribosomal_L31</a> | <a href="#">(pfam01197)</a> | → |
| Sau-3834-1 | NZ_KB821269.1 | - | 56603   | 56574   | RNA → | <a href="#">rpmE2 (PRK01678)</a> | <a href="#">Ribosomal_L31</a> | <a href="#">(pfam01197)</a> | → |
| Sau-3900-1 | NZ_KB821789.1 | + | 61055   | 61084   | RNA → | <a href="#">rpmE2 (PRK01678)</a> | <a href="#">Ribosomal_L31</a> | <a href="#">(pfam01197)</a> | → |
| Sau-3917-1 | NZ_KB821900.1 | - | 469540  | 469511  | RNA → | <a href="#">rpmE2 (PRK01678)</a> | <a href="#">Ribosomal_L31</a> | <a href="#">(pfam01197)</a> | → |
| Sau-3941-1 | NZ_KB822074.1 | - | 55982   | 55953   | RNA → | <a href="#">rpmE2 (PRK01678)</a> | <a href="#">Ribosomal_L31</a> | <a href="#">(pfam01197)</a> | → |
| Sau-3893-1 | NZ_KB821716.1 | + | 53720   | 53749   | RNA → | <a href="#">rpmE2 (PRK01678)</a> | <a href="#">Ribosomal_L31</a> | <a href="#">(pfam01197)</a> | → |
| Sau-3957-1 | NZ_KB822184.1 | - | 58538   | 58509   | RNA → | <a href="#">rpmE2 (PRK01678)</a> | <a href="#">Ribosomal_L31</a> | <a href="#">(pfam01197)</a> | → |
| Sau-3839-1 | NZ_KB821299.1 | - | 1190418 | 1190389 | RNA → | <a href="#">rpmE2 (PRK01678)</a> | <a href="#">Ribosomal_L31</a> | <a href="#">(pfam01197)</a> | → |
| Sau-3872-1 | NZ_KB821506.1 | - | 1691566 | 1691537 | RNA → | <a href="#">rpmE2 (PRK01678)</a> | <a href="#">Ribosomal_L31</a> | <a href="#">(pfam01197)</a> | → |
| Sau-3796-1 | NZ_KB821038.1 | - | 178180  | 178151  | RNA → | <a href="#">rpmE2 (PRK01678)</a> | <a href="#">Ribosomal_L31</a> | <a href="#">(pfam01197)</a> | → |
| Sau-3862-1 | NZ_KB821450.1 | - | 176222  | 176193  | RNA → | <a href="#">rpmE2 (PRK01678)</a> | <a href="#">Ribosomal_L31</a> | <a href="#">(pfam01197)</a> | → |
| Sau-3884-1 | NZ_KB821638.1 | - | 458897  | 458868  | RNA → | <a href="#">rpmE2 (PRK01678)</a> | <a href="#">Ribosomal_L31</a> | <a href="#">(pfam01197)</a> | → |
| Sau-3949-1 | NZ_KB822114.1 | + | 1120890 | 1120919 | RNA → | <a href="#">rpmE2 (PRK01678)</a> | <a href="#">Ribosomal_L31</a> | <a href="#">(pfam01197)</a> | → |
| Sau-3855-1 | NZ_KB821405.1 | - | 1639677 | 1639648 | RNA → | <a href="#">rpmE2 (PRK01678)</a> | <a href="#">Ribosomal_L31</a> | <a href="#">(pfam01197)</a> | → |
| Sau-3831-1 | NZ_KB821253.1 | - | 194612  | 194583  | RNA → | <a href="#">rpmE2 (PRK01678)</a> | <a href="#">Ribosomal_L31</a> | <a href="#">(pfam01197)</a> | → |
| Sau-3830-1 | NZ_KB821248.1 | - | 1686649 | 1686620 | RNA → | <a href="#">rpmE2 (PRK01678)</a> | <a href="#">Ribosomal_L31</a> | <a href="#">(pfam01197)</a> | → |
| Sau-3843-1 | NZ_KB821317.1 | - | 56762   | 56733   | RNA → | <a href="#">rpmE2 (PRK01678)</a> | <a href="#">Ribosomal_L31</a> | <a href="#">(pfam01197)</a> | → |
| Sau-3842-1 | NZ_KB821326.1 | - | 56154   | 56125   | RNA → | <a href="#">rpmE2 (PRK01678)</a> | <a href="#">Ribosomal_L31</a> | <a href="#">(pfam01197)</a> | → |
| Sau-3832-1 | NZ_KB821262.1 | - | 231637  | 231608  | RNA → | <a href="#">rpmE2 (PRK01678)</a> | <a href="#">Ribosomal_L31</a> | <a href="#">(pfam01197)</a> | → |
| Sau-3835-1 | NZ_KB821276.1 | - | 225444  | 225415  | RNA → | <a href="#">rpmE2 (PRK01678)</a> | <a href="#">Ribosomal_L31</a> | <a href="#">(pfam01197)</a> | → |
| Sau-3897-1 | NZ_KB821760.1 | - | 464567  | 464538  | RNA → | <a href="#">rpmE2 (PRK01678)</a> | <a href="#">Ribosomal_L31</a> | <a href="#">(pfam01197)</a> | → |
| Sau-3912-1 | NZ_KB821848.1 | + | 952842  | 952871  | RNA → | <a href="#">rpmE2 (PRK01678)</a> | <a href="#">Ribosomal_L31</a> | <a href="#">(pfam01197)</a> | → |
| Sau-1858-1 | NZ_KI985158.1 | - | 238686  | 238657  | RNA → | <a href="#">rpmE2 (PRK01678)</a> | <a href="#">Ribosomal_L31</a> | <a href="#">(pfam01197)</a> | → |
| Sau-1866-1 | NZ_KI985258.1 | - | 217786  | 217757  | RNA → | <a href="#">rpmE2 (PRK01678)</a> | <a href="#">Ribosomal_L31</a> | <a href="#">(pfam01197)</a> | → |
| Sau-1867-1 | NZ_KI985276.1 | - | 36026   | 35997   | RNA → | <a href="#">rpmE2 (PRK01678)</a> | <a href="#">Ribosomal_L31</a> | <a href="#">(pfam01197)</a> | → |
| Sau-1980-1 | NZ_KI989431.1 | - | 24749   | 24720   | RNA → | <a href="#">rpmE2 (PRK01678)</a> | <a href="#">Ribosomal_L31</a> | <a href="#">(pfam01197)</a> | → |
| Sau-1873-1 | NZ_KI985536.1 | - | 61531   | 61502   | RNA → | <a href="#">rpmE2 (PRK01678)</a> | <a href="#">Ribosomal_L31</a> | <a href="#">(pfam01197)</a> | → |
| Sau-2017-1 | NZ_KI990677.1 | - | 113811  | 113782  | RNA → | <a href="#">rpmE2 (PRK01678)</a> | <a href="#">Ribosomal_L31</a> | <a href="#">(pfam01197)</a> | → |
| Sau-1878-1 | NZ_KI985707.1 | - | 143557  | 143528  | RNA → | <a href="#">rpmE2 (PRK01678)</a> | <a href="#">Ribosomal_L31</a> | <a href="#">(pfam01197)</a> | → |
| Sau-2023-1 | NZ_KI990898.1 | - | 35180   | 35151   | RNA → | <a href="#">rpmE2 (PRK01678)</a> | <a href="#">Ribosomal_L31</a> | <a href="#">(pfam01197)</a> | → |
| Sau-1886-1 | NZ_KI985949.1 | - | 133925  | 133896  | RNA → | <a href="#">rpmE2 (PRK01678)</a> | <a href="#">Ribosomal_L31</a> | <a href="#">(pfam01197)</a> | → |
| Sau-1762-1 | NZ_KI992135.1 | - | 55326   | 55297   | RNA → | <a href="#">rpmE2 (PRK01678)</a> | <a href="#">Ribosomal_L31</a> | <a href="#">(pfam01197)</a> | → |
| Sau-1768-1 | NZ_KI992364.1 | - | 55372   | 55343   | RNA → | <a href="#">rpmE2 (PRK01678)</a> | <a href="#">Ribosomal_L31</a> | <a href="#">(pfam01197)</a> | → |
| Sau-2271-1 | NZ_KI992891.1 | - | 36491   | 36462   | RNA → | <a href="#">rpmE2 (PRK01678)</a> | <a href="#">Ribosomal_L31</a> | <a href="#">(pfam01197)</a> | → |
| Sau-279-1  | NZ_KI978876.1 | - | 56894   | 56865   | RNA → | <a href="#">rpmE2 (PRK01678)</a> | <a href="#">Ribosomal_L31</a> | <a href="#">(pfam01197)</a> | → |
| Sau-2280-1 | NZ_KI993053.1 | - | 20693   | 20664   | RNA → | <a href="#">rpmE2 (PRK01678)</a> | <a href="#">Ribosomal_L31</a> | <a href="#">(pfam01197)</a> | → |
| Sau-2287-1 | NZ_KI993232.1 | - | 123205  | 123176  | RNA → | <a href="#">rpmE2 (PRK01678)</a> | <a href="#">Ribosomal_L31</a> | <a href="#">(pfam01197)</a> | → |
| Sau-281-1  | NZ_KI978885.1 | - | 194479  | 194450  | RNA → | <a href="#">rpmE2 (PRK01678)</a> | <a href="#">Ribosomal_L31</a> | <a href="#">(pfam01197)</a> | → |

|            |                |   |         |         |       |                                                             |
|------------|----------------|---|---------|---------|-------|-------------------------------------------------------------|
| Sau-2293-1 | NZ_KI1993390.1 | - | 43602   | 43573   | RNA → | <a href="#">rpmE2 (PRK01678)Ribosomal_L31 (pfam01197)</a> → |
| Sau-1141-1 | NZ_KI1979009.1 | - | 239541  | 239512  | RNA → | <a href="#">rpmE2 (PRK01678)Ribosomal_L31 (pfam01197)</a> → |
| Sau-2299-1 | NZ_KI1993707.1 | - | 113749  | 113720  | RNA → | <a href="#">rpmE2 (PRK01678)Ribosomal_L31 (pfam01197)</a> → |
| Sau-2304-1 | NZ_KI1993857.1 | - | 79464   | 79435   | RNA → | <a href="#">rpmE2 (PRK01678)Ribosomal_L31 (pfam01197)</a> → |
| Sau-859-1  | NZ_KI1979238.1 | - | 56894   | 56865   | RNA → | <a href="#">rpmE2 (PRK01678)Ribosomal_L31 (pfam01197)</a> → |
| Sau-1969-1 | NZ_KI1988913.1 | - | 118854  | 118825  | RNA → | <a href="#">rpmE2 (PRK01678)Ribosomal_L31 (pfam01197)</a> → |
| Sau-1755-1 | NZ_KI1981742.1 | - | 61399   | 61370   | RNA → | <a href="#">rpmE2 (PRK01678)Ribosomal_L31 (pfam01197)</a> → |
| Sau-2009-1 | NZ_KI1990354.1 | - | 28766   | 28737   | RNA → | <a href="#">rpmE2 (PRK01678)Ribosomal_L31 (pfam01197)</a> → |
| Sau-1764-1 | NZ_KI1992236.1 | - | 113065  | 113036  | RNA → | <a href="#">rpmE2 (PRK01678)Ribosomal_L31 (pfam01197)</a> → |
| Sau-1777-1 | NZ_KI1981979.1 | - | 54757   | 54728   | RNA → | <a href="#">rpmE2 (PRK01678)Ribosomal_L31 (pfam01197)</a> → |
| Sau-2276-1 | NZ_KI1992998.1 | - | 78935   | 78906   | RNA → | <a href="#">rpmE2 (PRK01678)Ribosomal_L31 (pfam01197)</a> → |
| Sau-294-1  | NZ_KI1976868.1 | - | 56894   | 56865   | RNA → | <a href="#">rpmE2 (PRK01678)Ribosomal_L31 (pfam01197)</a> → |
| Sau-2285-1 | NZ_KI1993140.1 | - | 116825  | 116796  | RNA → | <a href="#">rpmE2 (PRK01678)Ribosomal_L31 (pfam01197)</a> → |
| Sau-1134-1 | NZ_KI1977602.1 | - | 112534  | 112505  | RNA → | <a href="#">rpmE2 (PRK01678)Ribosomal_L31 (pfam01197)</a> → |
| Sau-2291-1 | NZ_KI1993346.1 | - | 55372   | 55343   | RNA → | <a href="#">rpmE2 (PRK01678)Ribosomal_L31 (pfam01197)</a> → |
| Sau-852-1  | NZ_KI1977780.1 | - | 56893   | 56864   | RNA → | <a href="#">rpmE2 (PRK01678)Ribosomal_L31 (pfam01197)</a> → |
| Sau-2297-1 | NZ_KI1993607.1 | - | 55327   | 55298   | RNA → | <a href="#">rpmE2 (PRK01678)Ribosomal_L31 (pfam01197)</a> → |
| Sau-855-1  | NZ_KI1977949.1 | - | 56894   | 56865   | RNA → | <a href="#">rpmE2 (PRK01678)Ribosomal_L31 (pfam01197)</a> → |
| Sau-2302-1 | NZ_KI1993828.1 | - | 62154   | 62125   | RNA → | <a href="#">rpmE2 (PRK01678)Ribosomal_L31 (pfam01197)</a> → |
| Sau-2614-1 | NZ_KI1978573.1 | - | 110501  | 110472  | RNA → | <a href="#">rpmE2 (PRK01678)Ribosomal_L31 (pfam01197)</a> → |
| Sau-2308-1 | NZ_KI1993984.1 | - | 35334   | 35305   | RNA → | <a href="#">rpmE2 (PRK01678)Ribosomal_L31 (pfam01197)</a> → |
| Sau-888-1  | NZ_KI1978673.1 | - | 56894   | 56865   | RNA → | <a href="#">rpmE2 (PRK01678)Ribosomal_L31 (pfam01197)</a> → |
| Sau-2242-1 | NZ_KI1996121.1 | - | 25129   | 25100   | RNA → | <a href="#">rpmE2 (PRK01678)Ribosomal_L31 (pfam01197)</a> → |
| Sau-2273-1 | NZ_KI1992923.1 | - | 25227   | 25198   | RNA → | <a href="#">rpmE2 (PRK01678)Ribosomal_L31 (pfam01197)</a> → |
| Sau-2283-1 | NZ_KI1993098.1 | - | 15617   | 15588   | RNA → | <a href="#">rpmE2 (PRK01678)Ribosomal_L31 (pfam01197)</a> → |
| Sau-2294-1 | NZ_KI1993454.1 | - | 29085   | 29056   | RNA → | <a href="#">rpmE2 (PRK01678)Ribosomal_L31 (pfam01197)</a> → |
| Sau-2296-1 | NZ_KI1993543.1 | - | 56763   | 56734   | RNA → | <a href="#">rpmE2 (PRK01678)Ribosomal_L31 (pfam01197)</a> → |
| Sau-2305-1 | NZ_KI1993943.1 | - | 24749   | 24720   | RNA → | <a href="#">rpmE2 (PRK01678)Ribosomal_L31 (pfam01197)</a> → |
| Sau-863-1  | NZ_KI1978799.1 | - | 56894   | 56865   | RNA → | <a href="#">rpmE2 (PRK01678)Ribosomal_L31 (pfam01197)</a> → |
| Sau-1760-1 | NZ_KI1992041.1 | - | 70324   | 70295   | RNA → | <a href="#">rpmE2 (PRK01678)Ribosomal_L31 (pfam01197)</a> → |
| Sau-2270-1 | NZ_KI1992811.1 | - | 36041   | 36012   | RNA → | <a href="#">rpmE2 (PRK01678)Ribosomal_L31 (pfam01197)</a> → |
| Sau-1098-1 | NZ_KI1978949.1 | - | 111685  | 111656  | RNA → | <a href="#">rpmE2 (PRK01678)Ribosomal_L31 (pfam01197)</a> → |
| Sau-2279-1 | NZ_KI1993025.1 | - | 35767   | 35738   | RNA → | <a href="#">rpmE2 (PRK01678)Ribosomal_L31 (pfam01197)</a> → |
| Sau-1138-1 | NZ_KI1979264.1 | - | 110974  | 110945  | RNA → | <a href="#">rpmE2 (PRK01678)Ribosomal_L31 (pfam01197)</a> → |
| Sau-2298-1 | NZ_KI1993612.1 | - | 25185   | 25156   | RNA → | <a href="#">rpmE2 (PRK01678)Ribosomal_L31 (pfam01197)</a> → |
| Sau-1754-1 | NZ_KI1981682.1 | - | 54757   | 54728   | RNA → | <a href="#">rpmE2 (PRK01678)Ribosomal_L31 (pfam01197)</a> → |
| Sau-2303-1 | NZ_KI1993830.1 | - | 131178  | 131149  | RNA → | <a href="#">rpmE2 (PRK01678)Ribosomal_L31 (pfam01197)</a> → |
| Sau-1775-1 | NZ_KI1981936.1 | - | 56120   | 56091   | RNA → | <a href="#">rpmE2 (PRK01678)Ribosomal_L31 (pfam01197)</a> → |
| Sau-2309-1 | NZ_KI1994027.1 | - | 35968   | 35939   | RNA → | <a href="#">rpmE2 (PRK01678)Ribosomal_L31 (pfam01197)</a> → |
| Sau-2264-1 | NZ_KI1992684.1 | - | 35290   | 35261   | RNA → | <a href="#">rpmE2 (PRK01678)Ribosomal_L31 (pfam01197)</a> → |
| Sau-2251-1 | NZ_KI1996449.1 | - | 35284   | 35255   | RNA → | <a href="#">rpmE2 (PRK01678)Ribosomal_L31 (pfam01197)</a> → |
| Sau-2260-1 | NZ_KI1996704.1 | - | 291284  | 291255  | RNA → | <a href="#">rpmE2 (PRK01678)Ribosomal_L31 (pfam01197)</a> → |
| Sau-2640-1 | NZ_KI1975748.1 | - | 111952  | 111923  | RNA → | <a href="#">rpmE2 (PRK01678)Ribosomal_L31 (pfam01197)</a> → |
| Sau-1124-1 | NZ_KI1977461.1 | - | 235312  | 235283  | RNA → | <a href="#">rpmE2 (PRK01678)Ribosomal_L31 (pfam01197)</a> → |
| Sau-1135-1 | NZ_KI1977932.1 | - | 238639  | 238610  | RNA → | <a href="#">rpmE2 (PRK01678)Ribosomal_L31 (pfam01197)</a> → |
| Sau-3827-1 | NZ_KB821221.1  | - | 62154   | 62125   | RNA → | <a href="#">rpmE2 (PRK01678)Ribosomal_L31 (pfam01197)</a> → |
| Sau-3836-1 | NZ_KB821280.1  | - | 58197   | 58168   | RNA → | <a href="#">rpmE2 (PRK01678)Ribosomal_L31 (pfam01197)</a> → |
| Sau-3826-1 | NZ_KB821233.1  | - | 57586   | 57557   | RNA → | <a href="#">rpmE2 (PRK01678)Ribosomal_L31 (pfam01197)</a> → |
| Sau-3852-1 | NZ_KB821382.1  | - | 61675   | 61646   | RNA → | <a href="#">rpmE2 (PRK01678)Ribosomal_L31 (pfam01197)</a> → |
| Sau-3895-1 | NZ_KB821746.1  | - | 231536  | 231507  | RNA → | <a href="#">rpmE2 (PRK01678)Ribosomal_L31 (pfam01197)</a> → |
| Sau-3810-1 | NZ_KB821130.1  | - | 2768476 | 2768447 | RNA → | <a href="#">rpmE2 (PRK01678)Ribosomal_L31 (pfam01197)</a> → |
| Sau-3888-1 | NZ_KB821686.1  | - | 233138  | 233109  | RNA → | <a href="#">rpmE2 (PRK01678)Ribosomal_L31 (pfam01197)</a> → |



|            |               |   |         |         |       |                                                                                       |
|------------|---------------|---|---------|---------|-------|---------------------------------------------------------------------------------------|
| Sau-3886-1 | NZ_KB821678.1 | - | 1113791 | 1113762 | RNA → | rpmE2 (PRK01678)Ribosomal_L31 (pfam01197) →                                           |
| Sau-3857-1 | NZ_KB821413.1 | + | 2436466 | 2436495 | RNA → | rpmE2 (PRK01678)Ribosomal_L31 (pfam01197) →                                           |
| Sau-3915-1 | NZ_KB821872.1 | - | 61469   | 61440   | RNA → | rpmE2 (PRK01678)Ribosomal_L31 (pfam01197) →                                           |
| Sau-3874-1 | NZ_KB821512.1 | - | 459630  | 459601  | RNA → | rpmE2 (PRK01678)Ribosomal_L31 (pfam01197) →                                           |
| Sau-3876-1 | NZ_KB821535.1 | - | 179512  | 179483  | RNA → | rpmE2 (PRK01678)Ribosomal_L31 (pfam01197) →                                           |
| Sau-3866-1 | NZ_KB821477.1 | - | 459748  | 459719  | RNA → | rpmE2 (PRK01678)Ribosomal_L31 (pfam01197) →                                           |
| Sau-3856-1 | NZ_KB821410.1 | - | 414274  | 414245  | RNA → | rpmE2 (PRK01678)Ribosomal_L31 (pfam01197) →                                           |
| Sau-3864-1 | NZ_KB821473.1 | - | 101203  | 101174  | RNA → | rpmE2 (PRK01678)Ribosomal_L31 (pfam01197) →                                           |
| Sau-3833-1 | NZ_KB821272.1 | - | 2101380 | 2101351 | RNA → | rpmE2 (PRK01678)Ribosomal_L31 (pfam01197) →                                           |
| Sau-3792-1 | NZ_KB821011.1 | - | 57688   | 57659   | RNA → | rpmE2 (PRK01678)Ribosomal_L31 (pfam01197) →                                           |
| Sau-3869-1 | NZ_KB821500.1 | - | 101923  | 101894  | RNA → | rpmE2 (PRK01678)Ribosomal_L31 (pfam01197) →                                           |
| Sau-3880-1 | NZ_KB821595.1 | - | 116823  | 116794  | RNA → | rpmE2 (PRK01678)Ribosomal_L31 (pfam01197) →                                           |
| Sau-3871-1 | NZ_KB821504.1 | - | 1313322 | 1313293 | RNA → | rpmE2 (PRK01678)Ribosomal_L31 (pfam01197) →                                           |
| Sau-3861-1 | NZ_KB821468.1 | - | 1493399 | 1493370 | RNA → | rpmE2 (PRK01678)Ribosomal_L31 (pfam01197) →                                           |
| Sau-3859-1 | NZ_KB821431.1 | - | 123349  | 123320  | RNA → | rpmE2 (PRK01678)Ribosomal_L31 (pfam01197) →                                           |
| Sau-3847-1 | NZ_KB821345.1 | - | 1062611 | 1062582 | RNA → | rpmE2 (PRK01678)Ribosomal_L31 (pfam01197) →                                           |
| Sau-3974-1 | NZ_KB822266.1 | - | 2762750 | 2762721 | RNA → | rpmE2 (PRK01678)Ribosomal_L31 (pfam01197) →                                           |
| Sau-3962-1 | NZ_KB822216.1 | - | 190880  | 190851  | RNA → | rpmE2 (PRK01678)Ribosomal_L31 (pfam01197) →                                           |
| Sau-3789-1 | NZ_KB820997.1 | - | 61740   | 61711   | RNA → | rpmE2 (PRK01678)Ribosomal_L31 (pfam01197) →                                           |
| Sau-3947-1 | NZ_KB822112.1 | - | 237858  | 237829  | RNA → | rpmE2 (PRK01678)Ribosomal_L31 (pfam01197) →                                           |
| Sau-3790-1 | NZ_KB822350.1 | - | 229728  | 229699  | RNA → | rpmE2 (PRK01678)Ribosomal_L31 (pfam01197) →                                           |
| Sau-3965-1 | NZ_KB822547.1 | - | 102904  | 102875  | RNA → | rpmE2 (PRK01678)Ribosomal_L31 (pfam01197) →                                           |
| Sau-3955-1 | NZ_KB822161.1 | - | 59333   | 59304   | RNA → | rpmE2 (PRK01678)Ribosomal_L31 (pfam01197) →                                           |
| Sau-3821-1 | NZ_KB822352.1 | - | 195129  | 195100  | RNA → | rpmE2 (PRK01678)Ribosomal_L31 (pfam01197) →                                           |
| Sau-3964-1 | NZ_KB822228.1 | - | 231908  | 231879  | RNA → | rpmE2 (PRK01678)Ribosomal_L31 (pfam01197) →                                           |
| Sau-3944-1 | NZ_KB822110.1 | - | 61121   | 61092   | RNA → | rpmE2 (PRK01678)Ribosomal_L31 (pfam01197) →                                           |
| Sau-3981-1 | NZ_KB822299.1 | - | 421723  | 421694  | RNA → | rpmE2 (PRK01678)Ribosomal_L31 (pfam01197) →                                           |
| Sau-3970-1 | NZ_KB822563.1 | - | 61444   | 61415   | RNA → | rpmE2 (PRK01678)Ribosomal_L31 (pfam01197) →                                           |
| Sau-3969-1 | NZ_KB822552.1 | - | 1670678 | 1670649 | RNA → | rpmE2 (PRK01678)Ribosomal_L31 (pfam01197) →                                           |
| Sau-3980-1 | NZ_KB822308.1 | - | 325379  | 325350  | RNA → | rpmE2 (PRK01678)Ribosomal_L31 (pfam01197) →                                           |
| Sau-3967-1 | NZ_KB822238.1 | - | 229453  | 229424  | RNA → | rpmE2 (PRK01678)Ribosomal_L31 (pfam01197) →                                           |
| Sau-34-1   | NZ_GG730155.1 | - | 56187   | 56158   | RNA → | rpmE2 (PRK01678)Ribosomal_L31 (pfam01197) → rpmE2 (PRK01678)Ribosomal_L31 (pfam01197) |
| Sau-3956-1 | NZ_KB822177.1 | + | 1184966 | 1184995 | RNA → | rpmE2 (PRK01678)Ribosomal_L31 (pfam01197) →                                           |
| Sau-3858-1 | NZ_KB821416.1 | - | 458073  | 458044  | RNA → | rpmE2 (PRK01678)Ribosomal_L31 (pfam01197) →                                           |
| Sau-3934-1 | NZ_KB822067.1 | - | 238429  | 238400  | RNA → | rpmE2 (PRK01678)Ribosomal_L31 (pfam01197) →                                           |
| Sau-3975-1 | NZ_KB822273.1 | - | 466868  | 466839  | RNA → | rpmE2 (PRK01678)Ribosomal_L31 (pfam01197) →                                           |
| Sau-3898-1 | NZ_KB821769.1 | - | 57927   | 57898   | RNA → | rpmE2 (PRK01678)Ribosomal_L31 (pfam01197) →                                           |
| Sau-3960-1 | NZ_KB822204.1 | - | 230327  | 230298  | RNA → | rpmE2 (PRK01678)Ribosomal_L31 (pfam01197) →                                           |
| Sau-4072-1 | NZ_JH806525.1 | + | 18328   | 18357   | RNA → | rpmE2 (PRK01678)Ribosomal_L31 (pfam01197) →                                           |
| Sau-3926-1 | NZ_KB821950.1 | - | 354313  | 354284  | RNA → | rpmE2 (PRK01678)Ribosomal_L31 (pfam01197) →                                           |
| Sau-3903-1 | NZ_KB821777.1 | - | 1099170 | 1099141 | RNA → | rpmE2 (PRK01678)Ribosomal_L31 (pfam01197) →                                           |
| Sau-3977-1 | NZ_KB822288.1 | - | 61009   | 60980   | RNA → | rpmE2 (PRK01678)Ribosomal_L31 (pfam01197) →                                           |
| Sau-3945-1 | NZ_KB822087.1 | - | 215839  | 215810  | RNA → | rpmE2 (PRK01678)Ribosomal_L31 (pfam01197) →                                           |
| Sau-3918-1 | NZ_KB821918.1 | - | 233981  | 233952  | RNA → | rpmE2 (PRK01678)Ribosomal_L31 (pfam01197) →                                           |
| Sau-3896-1 | NZ_KB821749.1 | - | 57585   | 57556   | RNA → | rpmE2 (PRK01678)Ribosomal_L31 (pfam01197) →                                           |
| Sau-3958-1 | NZ_KB822187.1 | - | 60783   | 60754   | RNA → | rpmE2 (PRK01678)Ribosomal_L31 (pfam01197) →                                           |
| Sau-3973-1 | NZ_KB822261.1 | - | 61691   | 61662   | RNA → | rpmE2 (PRK01678)Ribosomal_L31 (pfam01197) →                                           |
| Sau-3963-1 | NZ_KB822226.1 | - | 56762   | 56733   | RNA → | rpmE2 (PRK01678)Ribosomal_L31 (pfam01197) →                                           |
| Sau-3961-1 | NZ_KB822208.1 | - | 1698775 | 1698746 | RNA → | rpmE2 (PRK01678)Ribosomal_L31 (pfam01197) →                                           |
| Sau-3883-1 | NZ_KB821635.1 | - | 234212  | 234183  | RNA → | rpmE2 (PRK01678)Ribosomal_L31 (pfam01197) →                                           |
| Sau-3772-1 | NZ_KB820906.1 | - | 1674159 | 1674130 | RNA → | rpmE2 (PRK01678)Ribosomal_L31 (pfam01197) →                                           |
| Sau-3959-1 | NZ_KB822201.1 | - | 1063697 | 1063668 | RNA → | rpmE2 (PRK01678)Ribosomal_L31 (pfam01197) →                                           |

|            |               |   |         |         |       |                                                             |
|------------|---------------|---|---------|---------|-------|-------------------------------------------------------------|
| Sau-3891-1 | NZ_KB821711.1 | - | 60935   | 60906   | RNA → | <a href="#">rpmE2 (PRK01678)Ribosomal_L31 (pfam01197)</a> → |
| Sau-3902-1 | NZ_KB821806.1 | - | 424380  | 424351  | RNA → | <a href="#">rpmE2 (PRK01678)Ribosomal_L31 (pfam01197)</a> → |
| Sau-3881-1 | NZ_KB821605.1 | - | 115520  | 115491  | RNA → | <a href="#">rpmE2 (PRK01678)Ribosomal_L31 (pfam01197)</a> → |
| Sau-3913-1 | NZ_KB821869.1 | - | 56763   | 56734   | RNA → | <a href="#">rpmE2 (PRK01678)Ribosomal_L31 (pfam01197)</a> → |
| Sau-3761-1 | NZ_KB822326.1 | - | 232181  | 232152  | RNA → | <a href="#">rpmE2 (PRK01678)Ribosomal_L31 (pfam01197)</a> → |
| Sau-3919-1 | NZ_KB821906.1 | - | 114248  | 114219  | RNA → | <a href="#">rpmE2 (PRK01678)Ribosomal_L31 (pfam01197)</a> → |
| Sau-3916-1 | NZ_KB822368.1 | - | 109574  | 109545  | RNA → | <a href="#">rpmE2 (PRK01678)Ribosomal_L31 (pfam01197)</a> → |
| Sau-3968-1 | NZ_KB822245.1 | - | 230562  | 230533  | RNA → | <a href="#">rpmE2 (PRK01678)Ribosomal_L31 (pfam01197)</a> → |
| Sau-3867-1 | NZ_KB821486.1 | - | 1313769 | 1313740 | RNA → | <a href="#">rpmE2 (PRK01678)Ribosomal_L31 (pfam01197)</a> → |
| Sau-3762-1 | NZ_KB822339.1 | - | 232013  | 231984  | RNA → | <a href="#">rpmE2 (PRK01678)Ribosomal_L31 (pfam01197)</a> → |
| Sau-3901-1 | NZ_KB821798.1 | - | 57585   | 57556   | RNA → | <a href="#">rpmE2 (PRK01678)Ribosomal_L31 (pfam01197)</a> → |
| Sau-3972-1 | NZ_KB822251.1 | - | 237694  | 237665  | RNA → | <a href="#">rpmE2 (PRK01678)Ribosomal_L31 (pfam01197)</a> → |
| Sau-3933-1 | NZ_KB822049.1 | - | 102188  | 102159  | RNA → | <a href="#">rpmE2 (PRK01678)Ribosomal_L31 (pfam01197)</a> → |
| Sau-3927-1 | NZ_KB821985.1 | - | 60324   | 60295   | RNA → | <a href="#">rpmE2 (PRK01678)Ribosomal_L31 (pfam01197)</a> → |
| Sau-3976-1 | NZ_KB822264.1 | - | 1610982 | 1610953 | RNA → | <a href="#">rpmE2 (PRK01678)Ribosomal_L31 (pfam01197)</a> → |
| Sau-3966-1 | NZ_KB822379.1 | - | 104248  | 104219  | RNA → | <a href="#">rpmE2 (PRK01678)Ribosomal_L31 (pfam01197)</a> → |
| Sau-3910-1 | NZ_KB821839.1 | - | 57581   | 57552   | RNA → | <a href="#">rpmE2 (PRK01678)Ribosomal_L31 (pfam01197)</a> → |
| Sau-3936-1 | NZ_KB822373.1 | - | 230489  | 230460  | RNA → | <a href="#">rpmE2 (PRK01678)Ribosomal_L31 (pfam01197)</a> → |
| Sau-3922-1 | NZ_KB821953.1 | - | 105045  | 105016  | RNA → | <a href="#">rpmE2 (PRK01678)Ribosomal_L31 (pfam01197)</a> → |
| Sau-3928-1 | NZ_KB822034.1 | - | 182165  | 182136  | RNA → | <a href="#">rpmE2 (PRK01678)Ribosomal_L31 (pfam01197)</a> → |
| Sau-3914-1 | NZ_KB821925.1 | - | 230555  | 230526  | RNA → | <a href="#">rpmE2 (PRK01678)Ribosomal_L31 (pfam01197)</a> → |
| Sau-4093-1 | NZ_KI669385.1 | - | 192582  | 192553  | RNA → | <a href="#">rpmE2 (PRK01678)Ribosomal_L31 (pfam01197)</a> → |
| Sau-3979-1 | NZ_KB822296.1 | - | 230666  | 230637  | RNA → | <a href="#">rpmE2 (PRK01678)Ribosomal_L31 (pfam01197)</a> → |
| Sau-3935-1 | NZ_KB822060.1 | - | 56193   | 56164   | RNA → | <a href="#">rpmE2 (PRK01678)Ribosomal_L31 (pfam01197)</a> → |
| Sau-4092-1 | NZ_KI669391.1 | + | 1112462 | 1112491 | RNA → | <a href="#">rpmE2 (PRK01678)Ribosomal_L31 (pfam01197)</a> → |
| Sau-3763-1 | NZ_KB822345.1 | - | 235630  | 235601  | RNA → | <a href="#">rpmE2 (PRK01678)Ribosomal_L31 (pfam01197)</a> → |
| Sau-3954-1 | NZ_KB822171.1 | - | 545143  | 545114  | RNA → | <a href="#">rpmE2 (PRK01678)Ribosomal_L31 (pfam01197)</a> → |
| Sau-3932-1 | NZ_KB821989.1 | - | 61902   | 61873   | RNA → | <a href="#">rpmE2 (PRK01678)Ribosomal_L31 (pfam01197)</a> → |
| Sau-3760-1 | NZ_KB822317.1 | - | 56642   | 56613   | RNA → | <a href="#">rpmE2 (PRK01678)Ribosomal_L31 (pfam01197)</a> → |
| Sau-331-1  | NZ_KI966042.1 | - | 1673431 | 1673402 | RNA → | <a href="#">rpmE2 (PRK01678)Ribosomal_L31 (pfam01197)</a> → |
| Sau-1682-1 | NZ_KI967573.1 | - | 118186  | 118157  | RNA → | <a href="#">rpmE2 (PRK01678)Ribosomal_L31 (pfam01197)</a> → |
| Sau-339-1  | NZ_KI966058.1 | - | 57585   | 57556   | RNA → | <a href="#">rpmE2 (PRK01678)Ribosomal_L31 (pfam01197)</a> → |
| Sau-344-1  | NZ_KI966065.1 | - | 107924  | 107895  | RNA → | <a href="#">rpmE2 (PRK01678)Ribosomal_L31 (pfam01197)</a> → |
| Sau-598-1  | NZ_KI966196.1 | - | 60037   | 60008   | RNA → | <a href="#">rpmE2 (PRK01678)Ribosomal_L31 (pfam01197)</a> → |
| Sau-399-1  | NZ_KI966087.1 | - | 56209   | 56180   | RNA → | <a href="#">rpmE2 (PRK01678)Ribosomal_L31 (pfam01197)</a> → |
| Sau-1676-1 | NZ_KI967272.1 | - | 62156   | 62127   | RNA → | <a href="#">rpmE2 (PRK01678)Ribosomal_L31 (pfam01197)</a> → |
| Sau-1683-1 | NZ_KI967631.1 | - | 112163  | 112134  | RNA → | <a href="#">rpmE2 (PRK01678)Ribosomal_L31 (pfam01197)</a> → |
| Sau-1689-1 | NZ_KI967913.1 | - | 62153   | 62124   | RNA → | <a href="#">rpmE2 (PRK01678)Ribosomal_L31 (pfam01197)</a> → |
| Sau-1695-1 | NZ_KI968141.1 | - | 16918   | 16889   | RNA → | <a href="#">rpmE2 (PRK01678)Ribosomal_L31 (pfam01197)</a> → |
| Sau-1709-1 | NZ_KI969434.1 | - | 112994  | 112965  | RNA → | <a href="#">rpmE2 (PRK01678)Ribosomal_L31 (pfam01197)</a> → |
| Sau-1716-1 | NZ_KI969660.1 | - | 49963   | 49934   | RNA → | <a href="#">rpmE2 (PRK01678)Ribosomal_L31 (pfam01197)</a> → |
| Sau-1717-1 | NZ_KI969744.1 | - | 62203   | 62174   | RNA → | <a href="#">rpmE2 (PRK01678)Ribosomal_L31 (pfam01197)</a> → |
| Sau-398-1  | NZ_KI966076.1 | - | 57163   | 57134   | RNA → | <a href="#">rpmE2 (PRK01678)Ribosomal_L31 (pfam01197)</a> → |
| Sau-1724-1 | NZ_KI970048.1 | - | 54695   | 54666   | RNA → | <a href="#">rpmE2 (PRK01678)Ribosomal_L31 (pfam01197)</a> → |
| Sau-602-1  | NZ_KI966138.1 | - | 59482   | 59453   | RNA → | <a href="#">rpmE2 (PRK01678)Ribosomal_L31 (pfam01197)</a> → |
| Sau-1702-1 | NZ_KI971027.1 | - | 402695  | 402666  | RNA → | <a href="#">rpmE2 (PRK01678)Ribosomal_L31 (pfam01197)</a> → |
| Sau-603-1  | NZ_KI966131.1 | - | 59482   | 59453   | RNA → | <a href="#">rpmE2 (PRK01678)Ribosomal_L31 (pfam01197)</a> → |
| Sau-1925-1 | NZ_KI972225.1 | - | 61649   | 61620   | RNA → | <a href="#">rpmE2 (PRK01678)Ribosomal_L31 (pfam01197)</a> → |
| Sau-588-1  | NZ_KI966224.1 | - | 59482   | 59453   | RNA → | <a href="#">rpmE2 (PRK01678)Ribosomal_L31 (pfam01197)</a> → |
| Sau-2111-1 | NZ_KI972814.1 | - | 230550  | 230521  | RNA → | <a href="#">rpmE2 (PRK01678)Ribosomal_L31 (pfam01197)</a> → |
| Sau-589-1  | NZ_KI966239.1 | - | 59692   | 59663   | RNA → | <a href="#">rpmE2 (PRK01678)Ribosomal_L31 (pfam01197)</a> → |
| Sau-549-1  | NZ_KI966323.1 | - | 64187   | 64158   | RNA → | <a href="#">rpmE2 (PRK01678)Ribosomal_L31 (pfam01197)</a> → |

|            |               |   |         |         |       |                                  |                                           |   |
|------------|---------------|---|---------|---------|-------|----------------------------------|-------------------------------------------|---|
| Sau-1654-1 | NZ_KI966474.1 | - | 12988   | 12959   | RNA → | <a href="#">rpmE2 (PRK01678)</a> | <a href="#">Ribosomal_L31 (pfam01197)</a> | → |
| Sau-1668-1 | NZ_KI967046.1 | - | 113920  | 113891  | RNA → | <a href="#">rpmE2 (PRK01678)</a> | <a href="#">Ribosomal_L31 (pfam01197)</a> | → |
| Sau-2268-1 | NZ_KI972451.1 | - | 55454   | 55425   | RNA → | <a href="#">rpmE2 (PRK01678)</a> | <a href="#">Ribosomal_L31 (pfam01197)</a> | → |
| Sau-1289-1 | NZ_KI971633.1 | - | 1595760 | 1595731 | RNA → | <a href="#">rpmE2 (PRK01678)</a> | <a href="#">Ribosomal_L31 (pfam01197)</a> | → |
| Sau-1194-1 | NZ_KI971786.1 | - | 465526  | 465497  | RNA → | <a href="#">rpmE2 (PRK01678)</a> | <a href="#">Ribosomal_L31 (pfam01197)</a> | → |
| Sau-1677-1 | NZ_KI967404.1 | - | 61724   | 61695   | RNA → | <a href="#">rpmE2 (PRK01678)</a> | <a href="#">Ribosomal_L31 (pfam01197)</a> | → |
| Sau-2147-1 | NZ_KI972833.1 | - | 235217  | 235188  | RNA → | <a href="#">rpmE2 (PRK01678)</a> | <a href="#">Ribosomal_L31 (pfam01197)</a> | → |
| Sau-1697-1 | NZ_KI968271.1 | - | 21252   | 21223   | RNA → | <a href="#">rpmE2 (PRK01678)</a> | <a href="#">Ribosomal_L31 (pfam01197)</a> | → |
| Sau-1883-1 | NZ_KI972146.1 | - | 234345  | 234316  | RNA → | <a href="#">rpmE2 (PRK01678)</a> | <a href="#">Ribosomal_L31 (pfam01197)</a> | → |
| Sau-2363-1 | NZ_KI973005.1 | - | 56593   | 56564   | RNA → | <a href="#">rpmE2 (PRK01678)</a> | <a href="#">Ribosomal_L31 (pfam01197)</a> | → |
| Sau-1984-1 | NZ_KI972323.1 | - | 57587   | 57558   | RNA → | <a href="#">rpmE2 (PRK01678)</a> | <a href="#">Ribosomal_L31 (pfam01197)</a> | → |
| Sau-2095-1 | NZ_KI972772.1 | - | 230296  | 230267  | RNA → | <a href="#">rpmE2 (PRK01678)</a> | <a href="#">Ribosomal_L31 (pfam01197)</a> | → |
| Sau-1719-1 | NZ_KI969805.1 | - | 54994   | 54965   | RNA → | <a href="#">rpmE2 (PRK01678)</a> | <a href="#">Ribosomal_L31 (pfam01197)</a> | → |
| Sau-1726-1 | NZ_KI970096.1 | - | 43785   | 43756   | RNA → | <a href="#">rpmE2 (PRK01678)</a> | <a href="#">Ribosomal_L31 (pfam01197)</a> | → |
| Sau-1741-1 | NZ_KI970705.1 | - | 61571   | 61542   | RNA → | <a href="#">rpmE2 (PRK01678)</a> | <a href="#">Ribosomal_L31 (pfam01197)</a> | → |
| Sau-1815-1 | NZ_KI972023.1 | - | 231732  | 231703  | RNA → | <a href="#">rpmE2 (PRK01678)</a> | <a href="#">Ribosomal_L31 (pfam01197)</a> | → |
| Sau-2368-1 | NZ_KI973034.1 | - | 58943   | 58914   | RNA → | <a href="#">rpmE2 (PRK01678)</a> | <a href="#">Ribosomal_L31 (pfam01197)</a> | → |
| Sau-1831-1 | NZ_KI972040.1 | - | 233784  | 233755  | RNA → | <a href="#">rpmE2 (PRK01678)</a> | <a href="#">Ribosomal_L31 (pfam01197)</a> | → |
| Sau-605-1  | NZ_KI966013.1 | - | 1657877 | 1657848 | RNA → | <a href="#">rpmE2 (PRK01678)</a> | <a href="#">Ribosomal_L31 (pfam01197)</a> | → |
| Sau-518-1  | NZ_KI966340.1 | - | 60905   | 60876   | RNA → | <a href="#">rpmE2 (PRK01678)</a> | <a href="#">Ribosomal_L31 (pfam01197)</a> | → |
| Sau-1656-1 | NZ_KI966575.1 | - | 63214   | 63185   | RNA → | <a href="#">rpmE2 (PRK01678)</a> | <a href="#">Ribosomal_L31 (pfam01197)</a> | → |
| Sau-1686-1 | NZ_KI967724.1 | - | 35475   | 35446   | RNA → | <a href="#">rpmE2 (PRK01678)</a> | <a href="#">Ribosomal_L31 (pfam01197)</a> | → |
| Sau-1662-1 | NZ_KI966829.1 | - | 36390   | 36361   | RNA → | <a href="#">rpmE2 (PRK01678)</a> | <a href="#">Ribosomal_L31 (pfam01197)</a> | → |
| Sau-1557-1 | NZ_KI971102.1 | - | 56763   | 56734   | RNA → | <a href="#">rpmE2 (PRK01678)</a> | <a href="#">Ribosomal_L31 (pfam01197)</a> | → |
| Sau-1669-1 | NZ_KI967058.1 | - | 36295   | 36266   | RNA → | <a href="#">rpmE2 (PRK01678)</a> | <a href="#">Ribosomal_L31 (pfam01197)</a> | → |
| Sau-1554-1 | NZ_KI971422.1 | - | 56762   | 56733   | RNA → | <a href="#">rpmE2 (PRK01678)</a> | <a href="#">Ribosomal_L31 (pfam01197)</a> | → |
| Sau-1596-1 | NZ_KI971192.1 | - | 49963   | 49934   | RNA → | <a href="#">rpmE2 (PRK01678)</a> | <a href="#">Ribosomal_L31 (pfam01197)</a> | → |
| Sau-1312-1 | NZ_KI971667.1 | - | 398213  | 398184  | RNA → | <a href="#">rpmE2 (PRK01678)</a> | <a href="#">Ribosomal_L31 (pfam01197)</a> | → |
| Sau-1461-1 | NZ_KI971570.1 | - | 402113  | 402084  | RNA → | <a href="#">rpmE2 (PRK01678)</a> | <a href="#">Ribosomal_L31 (pfam01197)</a> | → |
| Sau-1335-1 | NZ_KI971720.1 | - | 61106   | 61077   | RNA → | <a href="#">rpmE2 (PRK01678)</a> | <a href="#">Ribosomal_L31 (pfam01197)</a> | → |
| Sau-1237-1 | NZ_KI971878.1 | - | 56852   | 56823   | RNA → | <a href="#">rpmE2 (PRK01678)</a> | <a href="#">Ribosomal_L31 (pfam01197)</a> | → |
| Sau-1704-1 | NZ_KI968528.1 | - | 55116   | 55087   | RNA → | <a href="#">rpmE2 (PRK01678)</a> | <a href="#">Ribosomal_L31 (pfam01197)</a> | → |
| Sau-1750-1 | NZ_KI971930.1 | - | 272475  | 272446  | RNA → | <a href="#">rpmE2 (PRK01678)</a> | <a href="#">Ribosomal_L31 (pfam01197)</a> | → |
| Sau-1714-1 | NZ_KI969563.1 | - | 5387    | 5358    | RNA → | <a href="#">rpmE2 (PRK01678)</a> | <a href="#">Ribosomal_L31 (pfam01197)</a> | → |
| Sau-1907-1 | NZ_KI972180.1 | - | 116961  | 116932  | RNA → | <a href="#">rpmE2 (PRK01678)</a> | <a href="#">Ribosomal_L31 (pfam01197)</a> | → |
| Sau-1743-1 | NZ_KI970708.1 | - | 27279   | 27250   | RNA → | <a href="#">rpmE2 (PRK01678)</a> | <a href="#">Ribosomal_L31 (pfam01197)</a> | → |
| Sau-601-1  | NZ_KI966158.1 | - | 59483   | 59454   | RNA → | <a href="#">rpmE2 (PRK01678)</a> | <a href="#">Ribosomal_L31 (pfam01197)</a> | → |
| Sau-1744-1 | NZ_KI970818.1 | - | 62202   | 62173   | RNA → | <a href="#">rpmE2 (PRK01678)</a> | <a href="#">Ribosomal_L31 (pfam01197)</a> | → |
| Sau-1776-1 | NZ_KI971952.1 | - | 58283   | 58254   | RNA → | <a href="#">rpmE2 (PRK01678)</a> | <a href="#">Ribosomal_L31 (pfam01197)</a> | → |
| Sau-1657-1 | NZ_KI966643.1 | - | 35225   | 35196   | RNA → | <a href="#">rpmE2 (PRK01678)</a> | <a href="#">Ribosomal_L31 (pfam01197)</a> | → |
| Sau-2187-1 | NZ_KI972860.1 | - | 828427  | 828398  | RNA → | <a href="#">rpmE2 (PRK01678)</a> | <a href="#">Ribosomal_L31 (pfam01197)</a> | → |
| Sau-1663-1 | NZ_KI966880.1 | - | 34180   | 34151   | RNA → | <a href="#">rpmE2 (PRK01678)</a> | <a href="#">Ribosomal_L31 (pfam01197)</a> | → |
| Sau-1672-1 | NZ_KI967105.1 | - | 35862   | 35833   | RNA → | <a href="#">rpmE2 (PRK01678)</a> | <a href="#">Ribosomal_L31 (pfam01197)</a> | → |
| Sau-1628-1 | NZ_KI971233.1 | - | 494957  | 494928  | RNA → | <a href="#">rpmE2 (PRK01678)</a> | <a href="#">Ribosomal_L31 (pfam01197)</a> | → |
| Sau-1530-1 | NZ_KI971392.1 | - | 113065  | 113036  | RNA → | <a href="#">rpmE2 (PRK01678)</a> | <a href="#">Ribosomal_L31 (pfam01197)</a> | → |
| Sau-600-1  | NZ_KI966173.1 | - | 66056   | 66027   | RNA → | <a href="#">rpmE2 (PRK01678)</a> | <a href="#">Ribosomal_L31 (pfam01197)</a> | → |
| Sau-567-1  | NZ_KI966294.1 | - | 59482   | 59453   | RNA → | <a href="#">rpmE2 (PRK01678)</a> | <a href="#">Ribosomal_L31 (pfam01197)</a> | → |
| Sau-551-1  | NZ_KI966306.1 | - | 59679   | 59650   | RNA → | <a href="#">rpmE2 (PRK01678)</a> | <a href="#">Ribosomal_L31 (pfam01197)</a> | → |
| Sau-1658-1 | NZ_KI966704.1 | - | 62196   | 62167   | RNA → | <a href="#">rpmE2 (PRK01678)</a> | <a href="#">Ribosomal_L31 (pfam01197)</a> | → |
| Sau-1734-1 | NZ_KI970382.1 | - | 99800   | 99771   | RNA → | <a href="#">rpmE2 (PRK01678)</a> | <a href="#">Ribosomal_L31 (pfam01197)</a> | → |
| Sau-1665-1 | NZ_KI966922.1 | - | 58301   | 58272   | RNA → | <a href="#">rpmE2 (PRK01678)</a> | <a href="#">Ribosomal_L31 (pfam01197)</a> | → |
| Sau-1673-1 | NZ_KI967166.1 | - | 36412   | 36383   | RNA → | <a href="#">rpmE2 (PRK01678)</a> | <a href="#">Ribosomal_L31 (pfam01197)</a> | → |



|            |               |   |         |         |       |                                  |                               |                             |   |
|------------|---------------|---|---------|---------|-------|----------------------------------|-------------------------------|-----------------------------|---|
| Sau-1733-1 | NZ_KI971070.1 | - | 173252  | 173223  | RNA → | <a href="#">rpmE2 (PRK01678)</a> | <a href="#">Ribosomal_L31</a> | <a href="#">(pfam01197)</a> | → |
| Sau-1674-1 | NZ_KI967226.1 | - | 81102   | 81073   | RNA → | <a href="#">rpmE2 (PRK01678)</a> | <a href="#">Ribosomal_L31</a> | <a href="#">(pfam01197)</a> | → |
| Sau-1670-1 | NZ_KI970968.1 | - | 58348   | 58319   | RNA → | <a href="#">rpmE2 (PRK01678)</a> | <a href="#">Ribosomal_L31</a> | <a href="#">(pfam01197)</a> | → |
| Sau-1280-1 | NZ_KI971631.1 | - | 56763   | 56734   | RNA → | <a href="#">rpmE2 (PRK01678)</a> | <a href="#">Ribosomal_L31</a> | <a href="#">(pfam01197)</a> | → |
| Sau-1861-1 | NZ_KI972120.1 | - | 58043   | 58014   | RNA → | <a href="#">rpmE2 (PRK01678)</a> | <a href="#">Ribosomal_L31</a> | <a href="#">(pfam01197)</a> | → |
| Sau-1740-1 | NZ_KI970586.1 | - | 61333   | 61304   | RNA → | <a href="#">rpmE2 (PRK01678)</a> | <a href="#">Ribosomal_L31</a> | <a href="#">(pfam01197)</a> | → |
| Sau-1444-1 | NZ_KI971546.1 | - | 56493   | 56464   | RNA → | <a href="#">rpmE2 (PRK01678)</a> | <a href="#">Ribosomal_L31</a> | <a href="#">(pfam01197)</a> | → |
| Sau-1483-1 | NZ_KI971311.1 | - | 183428  | 183399  | RNA → | <a href="#">rpmE2 (PRK01678)</a> | <a href="#">Ribosomal_L31</a> | <a href="#">(pfam01197)</a> | → |
| Sau-1511-1 | NZ_KI971375.1 | - | 56763   | 56734   | RNA → | <a href="#">rpmE2 (PRK01678)</a> | <a href="#">Ribosomal_L31</a> | <a href="#">(pfam01197)</a> | → |
| Sau-1696-1 | NZ_KI968191.1 | - | 36391   | 36362   | RNA → | <a href="#">rpmE2 (PRK01678)</a> | <a href="#">Ribosomal_L31</a> | <a href="#">(pfam01197)</a> | → |
| Sau-1889-1 | NZ_KI972165.1 | - | 253911  | 253882  | RNA → | <a href="#">rpmE2 (PRK01678)</a> | <a href="#">Ribosomal_L31</a> | <a href="#">(pfam01197)</a> | → |
| Sau-2199-1 | NZ_KI972918.1 | - | 464236  | 464207  | RNA → | <a href="#">rpmE2 (PRK01678)</a> | <a href="#">Ribosomal_L31</a> | <a href="#">(pfam01197)</a> | → |
| Sau-1710-1 | NZ_KI969464.1 | - | 2446    | 2417    | RNA → | <a href="#">rpmE2 (PRK01678)</a> | <a href="#">Ribosomal_L31</a> | <a href="#">(pfam01197)</a> | → |
| Sau-1711-1 | NZ_KI969482.1 | - | 35467   | 35438   | RNA → | <a href="#">rpmE2 (PRK01678)</a> | <a href="#">Ribosomal_L31</a> | <a href="#">(pfam01197)</a> | → |
| Sau-1718-1 | NZ_KI969749.1 | - | 35697   | 35668   | RNA → | <a href="#">rpmE2 (PRK01678)</a> | <a href="#">Ribosomal_L31</a> | <a href="#">(pfam01197)</a> | → |
| Sau-1298-1 | NZ_KI971655.1 | - | 56843   | 56814   | RNA → | <a href="#">rpmE2 (PRK01678)</a> | <a href="#">Ribosomal_L31</a> | <a href="#">(pfam01197)</a> | → |
| Sau-1721-1 | NZ_KI969874.1 | - | 59617   | 59588   | RNA → | <a href="#">rpmE2 (PRK01678)</a> | <a href="#">Ribosomal_L31</a> | <a href="#">(pfam01197)</a> | → |
| Sau-1727-1 | NZ_KI970143.1 | - | 35100   | 35071   | RNA → | <a href="#">rpmE2 (PRK01678)</a> | <a href="#">Ribosomal_L31</a> | <a href="#">(pfam01197)</a> | → |
| Sau-1916-1 | NZ_KI972193.1 | - | 57081   | 57052   | RNA → | <a href="#">rpmE2 (PRK01678)</a> | <a href="#">Ribosomal_L31</a> | <a href="#">(pfam01197)</a> | → |
| Sau-2374-1 | NZ_KI973037.1 | - | 213705  | 213676  | RNA → | <a href="#">rpmE2 (PRK01678)</a> | <a href="#">Ribosomal_L31</a> | <a href="#">(pfam01197)</a> | → |
| Sau-1655-1 | NZ_KI966501.1 | - | 55094   | 55065   | RNA → | <a href="#">rpmE2 (PRK01678)</a> | <a href="#">Ribosomal_L31</a> | <a href="#">(pfam01197)</a> | → |
| Sau-1723-1 | NZ_KI971047.1 | - | 494175  | 494146  | RNA → | <a href="#">rpmE2 (PRK01678)</a> | <a href="#">Ribosomal_L31</a> | <a href="#">(pfam01197)</a> | → |
| Sau-1648-1 | NZ_KI971263.1 | - | 118819  | 118790  | RNA → | <a href="#">rpmE2 (PRK01678)</a> | <a href="#">Ribosomal_L31</a> | <a href="#">(pfam01197)</a> | → |
| Sau-1319-1 | NZ_KI971674.1 | - | 173915  | 173886  | RNA → | <a href="#">rpmE2 (PRK01678)</a> | <a href="#">Ribosomal_L31</a> | <a href="#">(pfam01197)</a> | → |
| Sau-1712-1 | NZ_KI969558.1 | - | 61890   | 61861   | RNA → | <a href="#">rpmE2 (PRK01678)</a> | <a href="#">Ribosomal_L31</a> | <a href="#">(pfam01197)</a> | → |
| Sau-1706-1 | NZ_KI968629.1 | - | 36512   | 36483   | RNA → | <a href="#">rpmE2 (PRK01678)</a> | <a href="#">Ribosomal_L31</a> | <a href="#">(pfam01197)</a> | → |
| Sau-1844-1 | NZ_KI972088.1 | - | 227707  | 227678  | RNA → | <a href="#">rpmE2 (PRK01678)</a> | <a href="#">Ribosomal_L31</a> | <a href="#">(pfam01197)</a> | → |
| Sau-1703-1 | NZ_KI968479.1 | - | 35162   | 35133   | RNA → | <a href="#">rpmE2 (PRK01678)</a> | <a href="#">Ribosomal_L31</a> | <a href="#">(pfam01197)</a> | → |
| Sau-2367-1 | NZ_KI973007.1 | - | 56367   | 56338   | RNA → | <a href="#">rpmE2 (PRK01678)</a> | <a href="#">Ribosomal_L31</a> | <a href="#">(pfam01197)</a> | → |
| Sau-1728-1 | NZ_KI970221.1 | - | 32991   | 32962   | RNA → | <a href="#">rpmE2 (PRK01678)</a> | <a href="#">Ribosomal_L31</a> | <a href="#">(pfam01197)</a> | → |
| Sau-1694-1 | NZ_KI968123.1 | - | 62146   | 62117   | RNA → | <a href="#">rpmE2 (PRK01678)</a> | <a href="#">Ribosomal_L31</a> | <a href="#">(pfam01197)</a> | → |
| Sau-1745-1 | NZ_KI970848.1 | - | 36005   | 35976   | RNA → | <a href="#">rpmE2 (PRK01678)</a> | <a href="#">Ribosomal_L31</a> | <a href="#">(pfam01197)</a> | → |
| Sau-1701-1 | NZ_KI968449.1 | - | 35643   | 35614   | RNA → | <a href="#">rpmE2 (PRK01678)</a> | <a href="#">Ribosomal_L31</a> | <a href="#">(pfam01197)</a> | → |
| Sau-2094-1 | NZ_KI972762.1 | - | 230995  | 230966  | RNA → | <a href="#">rpmE2 (PRK01678)</a> | <a href="#">Ribosomal_L31</a> | <a href="#">(pfam01197)</a> | → |
| Sau-1659-1 | NZ_KI970964.1 | - | 61955   | 61926   | RNA → | <a href="#">rpmE2 (PRK01678)</a> | <a href="#">Ribosomal_L31</a> | <a href="#">(pfam01197)</a> | → |
| Sau-1637-1 | NZ_KI971244.1 | - | 58248   | 58219   | RNA → | <a href="#">rpmE2 (PRK01678)</a> | <a href="#">Ribosomal_L31</a> | <a href="#">(pfam01197)</a> | → |
| Sau-2362-1 | NZ_KI972975.1 | - | 2198240 | 2198211 | RNA → | <a href="#">rpmE2 (PRK01678)</a> | <a href="#">Ribosomal_L31</a> | <a href="#">(pfam01197)</a> | → |
| Sau-1520-1 | NZ_KI971383.1 | - | 56459   | 56430   | RNA → | <a href="#">rpmE2 (PRK01678)</a> | <a href="#">Ribosomal_L31</a> | <a href="#">(pfam01197)</a> | → |
| Sau-1201-1 | NZ_KI971799.1 | - | 180429  | 180400  | RNA → | <a href="#">rpmE2 (PRK01678)</a> | <a href="#">Ribosomal_L31</a> | <a href="#">(pfam01197)</a> | → |
| Sau-1840-1 | NZ_KI972070.1 | - | 61630   | 61601   | RNA → | <a href="#">rpmE2 (PRK01678)</a> | <a href="#">Ribosomal_L31</a> | <a href="#">(pfam01197)</a> | → |
| Sau-1466-1 | NZ_KI971272.1 | - | 56763   | 56734   | RNA → | <a href="#">rpmE2 (PRK01678)</a> | <a href="#">Ribosomal_L31</a> | <a href="#">(pfam01197)</a> | → |
| Sau-1747-1 | NZ_KI970852.1 | - | 35561   | 35532   | RNA → | <a href="#">rpmE2 (PRK01678)</a> | <a href="#">Ribosomal_L31</a> | <a href="#">(pfam01197)</a> | → |
| Sau-1585-1 | NZ_KI971155.1 | - | 56782   | 56753   | RNA → | <a href="#">rpmE2 (PRK01678)</a> | <a href="#">Ribosomal_L31</a> | <a href="#">(pfam01197)</a> | → |
| Sau-1272-1 | NZ_KI971596.1 | - | 57586   | 57557   | RNA → | <a href="#">rpmE2 (PRK01678)</a> | <a href="#">Ribosomal_L31</a> | <a href="#">(pfam01197)</a> | → |
| Sau-2269-1 | NZ_KI972465.1 | - | 58992   | 58963   | RNA → | <a href="#">rpmE2 (PRK01678)</a> | <a href="#">Ribosomal_L31</a> | <a href="#">(pfam01197)</a> | → |
| Sau-2358-1 | NZ_KI972951.1 | - | 464468  | 464439  | RNA → | <a href="#">rpmE2 (PRK01678)</a> | <a href="#">Ribosomal_L31</a> | <a href="#">(pfam01197)</a> | → |
| Sau-1612-1 | NZ_KI971209.1 | - | 465008  | 464979  | RNA → | <a href="#">rpmE2 (PRK01678)</a> | <a href="#">Ribosomal_L31</a> | <a href="#">(pfam01197)</a> | → |
| Sau-1708-1 | NZ_KI968648.1 | - | 26789   | 26760   | RNA → | <a href="#">rpmE2 (PRK01678)</a> | <a href="#">Ribosomal_L31</a> | <a href="#">(pfam01197)</a> | → |
| Sau-1652-1 | NZ_KI970947.1 | - | 56763   | 56734   | RNA → | <a href="#">rpmE2 (PRK01678)</a> | <a href="#">Ribosomal_L31</a> | <a href="#">(pfam01197)</a> | → |
| Sau-1258-1 | NZ_KI971893.1 | - | 463233  | 463204  | RNA → | <a href="#">rpmE2 (PRK01678)</a> | <a href="#">Ribosomal_L31</a> | <a href="#">(pfam01197)</a> | → |
| Sau-1872-1 | NZ_KI972138.1 | - | 54695   | 54666   | RNA → | <a href="#">rpmE2 (PRK01678)</a> | <a href="#">Ribosomal_L31</a> | <a href="#">(pfam01197)</a> | → |
| Sau-2239-1 | NZ_KI972925.1 | - | 239945  | 239916  | RNA → | <a href="#">rpmE2 (PRK01678)</a> | <a href="#">Ribosomal_L31</a> | <a href="#">(pfam01197)</a> | → |

|            |               |   |        |        |       |                                  |                               |                             |   |
|------------|---------------|---|--------|--------|-------|----------------------------------|-------------------------------|-----------------------------|---|
| Sau-2382-1 | NZ_KI973077.1 | - | 25085  | 25056  | RNA → | <a href="#">rpmE2 (PRK01678)</a> | <a href="#">Ribosomal_L31</a> | <a href="#">(pfam01197)</a> | → |
| Sau-2198-1 | NZ_KI972897.1 | - | 198468 | 198439 | RNA → | <a href="#">rpmE2 (PRK01678)</a> | <a href="#">Ribosomal_L31</a> | <a href="#">(pfam01197)</a> | → |
| Sau-1700-1 | NZ_KI968406.1 | - | 61630  | 61601  | RNA → | <a href="#">rpmE2 (PRK01678)</a> | <a href="#">Ribosomal_L31</a> | <a href="#">(pfam01197)</a> | → |
| Sau-1722-1 | NZ_KI969940.1 | - | 35400  | 35371  | RNA → | <a href="#">rpmE2 (PRK01678)</a> | <a href="#">Ribosomal_L31</a> | <a href="#">(pfam01197)</a> | → |
| Sau-1731-1 | NZ_KI970334.1 | - | 62156  | 62127  | RNA → | <a href="#">rpmE2 (PRK01678)</a> | <a href="#">Ribosomal_L31</a> | <a href="#">(pfam01197)</a> | → |
| Sau-1691-1 | NZ_KI971018.1 | - | 57585  | 57556  | RNA → | <a href="#">rpmE2 (PRK01678)</a> | <a href="#">Ribosomal_L31</a> | <a href="#">(pfam01197)</a> | → |
| Sau-1742-1 | NZ_KI971082.1 | - | 405094 | 405065 | RNA → | <a href="#">rpmE2 (PRK01678)</a> | <a href="#">Ribosomal_L31</a> | <a href="#">(pfam01197)</a> | → |
| Sau-280-1  | NZ_KI973576.1 | - | 34872  | 34843  | RNA → | <a href="#">rpmE2 (PRK01678)</a> | <a href="#">Ribosomal_L31</a> | <a href="#">(pfam01197)</a> | → |
| Sau-283-1  | NZ_KI974226.1 | - | 120491 | 120462 | RNA → | <a href="#">rpmE2 (PRK01678)</a> | <a href="#">Ribosomal_L31</a> | <a href="#">(pfam01197)</a> | → |
| Sau-1699-1 | NZ_KI968398.1 | - | 54833  | 54804  | RNA → | <a href="#">rpmE2 (PRK01678)</a> | <a href="#">Ribosomal_L31</a> | <a href="#">(pfam01197)</a> | → |
| Sau-1729-1 | NZ_KI970276.1 | - | 56493  | 56464  | RNA → | <a href="#">rpmE2 (PRK01678)</a> | <a href="#">Ribosomal_L31</a> | <a href="#">(pfam01197)</a> | → |
| Sau-1472-1 | NZ_KI971305.1 | - | 56763  | 56734  | RNA → | <a href="#">rpmE2 (PRK01678)</a> | <a href="#">Ribosomal_L31</a> | <a href="#">(pfam01197)</a> | → |
| Sau-288-1  | NZ_KI974232.1 | - | 56893  | 56864  | RNA → | <a href="#">rpmE2 (PRK01678)</a> | <a href="#">Ribosomal_L31</a> | <a href="#">(pfam01197)</a> | → |
| Sau-2274-1 | NZ_KI972485.1 | - | 57586  | 57557  | RNA → | <a href="#">rpmE2 (PRK01678)</a> | <a href="#">Ribosomal_L31</a> | <a href="#">(pfam01197)</a> | → |
| Sau-242-1  | NZ_KI974540.1 | - | 56894  | 56865  | RNA → | <a href="#">rpmE2 (PRK01678)</a> | <a href="#">Ribosomal_L31</a> | <a href="#">(pfam01197)</a> | → |
| Sau-2379-1 | NZ_KI973048.1 | - | 231806 | 231777 | RNA → | <a href="#">rpmE2 (PRK01678)</a> | <a href="#">Ribosomal_L31</a> | <a href="#">(pfam01197)</a> | → |
| Sau-227-1  | NZ_KI974962.1 | - | 55407  | 55378  | RNA → | <a href="#">rpmE2 (PRK01678)</a> | <a href="#">Ribosomal_L31</a> | <a href="#">(pfam01197)</a> | → |
| Sau-2782-1 | NZ_KI973820.1 | - | 55262  | 55233  | RNA → | <a href="#">rpmE2 (PRK01678)</a> | <a href="#">Ribosomal_L31</a> | <a href="#">(pfam01197)</a> | → |
| Sau-396-1  | NZ_KI966105.1 | - | 55022  | 54993  | RNA → | <a href="#">rpmE2 (PRK01678)</a> | <a href="#">Ribosomal_L31</a> | <a href="#">(pfam01197)</a> | → |
| Sau-2032-1 | NZ_KI972434.1 | - | 56417  | 56388  | RNA → | <a href="#">rpmE2 (PRK01678)</a> | <a href="#">Ribosomal_L31</a> | <a href="#">(pfam01197)</a> | → |
| Sau-2754-1 | NZ_KI973379.1 | - | 34913  | 34884  | RNA → | <a href="#">rpmE2 (PRK01678)</a> | <a href="#">Ribosomal_L31</a> | <a href="#">(pfam01197)</a> | → |
| Sau-2742-1 | NZ_KI973985.1 | - | 56894  | 56865  | RNA → | <a href="#">rpmE2 (PRK01678)</a> | <a href="#">Ribosomal_L31</a> | <a href="#">(pfam01197)</a> | → |
| Sau-238-1  | NZ_KI973531.1 | - | 56894  | 56865  | RNA → | <a href="#">rpmE2 (PRK01678)</a> | <a href="#">Ribosomal_L31</a> | <a href="#">(pfam01197)</a> | → |
| Sau-2650-1 | NZ_KI974790.1 | - | 110356 | 110327 | RNA → | <a href="#">rpmE2 (PRK01678)</a> | <a href="#">Ribosomal_L31</a> | <a href="#">(pfam01197)</a> | → |
| Sau-239-1  | NZ_KI973724.1 | - | 57687  | 57658  | RNA → | <a href="#">rpmE2 (PRK01678)</a> | <a href="#">Ribosomal_L31</a> | <a href="#">(pfam01197)</a> | → |
| Sau-1101-1 | NZ_KI974926.1 | - | 216089 | 216060 | RNA → | <a href="#">rpmE2 (PRK01678)</a> | <a href="#">Ribosomal_L31</a> | <a href="#">(pfam01197)</a> | → |
| Sau-2752-1 | NZ_KI973351.1 | - | 56894  | 56865  | RNA → | <a href="#">rpmE2 (PRK01678)</a> | <a href="#">Ribosomal_L31</a> | <a href="#">(pfam01197)</a> | → |
| Sau-2757-1 | NZ_KI973508.1 | - | 56508  | 56479  | RNA → | <a href="#">rpmE2 (PRK01678)</a> | <a href="#">Ribosomal_L31</a> | <a href="#">(pfam01197)</a> | → |
| Sau-2680-1 | NZ_KI974183.1 | - | 56894  | 56865  | RNA → | <a href="#">rpmE2 (PRK01678)</a> | <a href="#">Ribosomal_L31</a> | <a href="#">(pfam01197)</a> | → |
| Sau-2762-1 | NZ_KI974398.1 | - | 56000  | 55971  | RNA → | <a href="#">rpmE2 (PRK01678)</a> | <a href="#">Ribosomal_L31</a> | <a href="#">(pfam01197)</a> | → |
| Sau-1807-1 | NZ_KI972001.1 | - | 476505 | 476476 | RNA → | <a href="#">rpmE2 (PRK01678)</a> | <a href="#">Ribosomal_L31</a> | <a href="#">(pfam01197)</a> | → |
| Sau-2679-1 | NZ_KI973605.1 | - | 172385 | 172356 | RNA → | <a href="#">rpmE2 (PRK01678)</a> | <a href="#">Ribosomal_L31</a> | <a href="#">(pfam01197)</a> | → |
| Sau-2760-1 | NZ_KI974240.1 | - | 117788 | 117759 | RNA → | <a href="#">rpmE2 (PRK01678)</a> | <a href="#">Ribosomal_L31</a> | <a href="#">(pfam01197)</a> | → |
| Sau-2646-1 | NZ_KI974468.1 | - | 114326 | 114297 | RNA → | <a href="#">rpmE2 (PRK01678)</a> | <a href="#">Ribosomal_L31</a> | <a href="#">(pfam01197)</a> | → |
| Sau-2746-1 | NZ_KI974843.1 | - | 111732 | 111703 | RNA → | <a href="#">rpmE2 (PRK01678)</a> | <a href="#">Ribosomal_L31</a> | <a href="#">(pfam01197)</a> | → |
| Sau-2745-1 | NZ_KI974880.1 | - | 56894  | 56865  | RNA → | <a href="#">rpmE2 (PRK01678)</a> | <a href="#">Ribosomal_L31</a> | <a href="#">(pfam01197)</a> | → |
| Sau-2748-1 | NZ_KI974888.1 | - | 34967  | 34938  | RNA → | <a href="#">rpmE2 (PRK01678)</a> | <a href="#">Ribosomal_L31</a> | <a href="#">(pfam01197)</a> | → |
| Sau-2777-1 | NZ_KI976193.1 | - | 110423 | 110394 | RNA → | <a href="#">rpmE2 (PRK01678)</a> | <a href="#">Ribosomal_L31</a> | <a href="#">(pfam01197)</a> | → |
| Sau-2732-1 | NZ_KI976327.1 | - | 56894  | 56865  | RNA → | <a href="#">rpmE2 (PRK01678)</a> | <a href="#">Ribosomal_L31</a> | <a href="#">(pfam01197)</a> | → |
| Sau-2651-1 | NZ_KI976449.1 | - | 56643  | 56614  | RNA → | <a href="#">rpmE2 (PRK01678)</a> | <a href="#">Ribosomal_L31</a> | <a href="#">(pfam01197)</a> | → |
| Sau-2769-1 | NZ_KI976741.1 | - | 163294 | 163265 | RNA → | <a href="#">rpmE2 (PRK01678)</a> | <a href="#">Ribosomal_L31</a> | <a href="#">(pfam01197)</a> | → |
| Sau-2784-1 | NZ_KI973792.1 | - | 56894  | 56865  | RNA → | <a href="#">rpmE2 (PRK01678)</a> | <a href="#">Ribosomal_L31</a> | <a href="#">(pfam01197)</a> | → |
| Sau-2649-1 | NZ_KI974493.1 | - | 112597 | 112568 | RNA → | <a href="#">rpmE2 (PRK01678)</a> | <a href="#">Ribosomal_L31</a> | <a href="#">(pfam01197)</a> | → |
| Sau-2776-1 | NZ_KI975309.1 | - | 55262  | 55233  | RNA → | <a href="#">rpmE2 (PRK01678)</a> | <a href="#">Ribosomal_L31</a> | <a href="#">(pfam01197)</a> | → |
| Sau-2731-1 | NZ_KI976242.1 | - | 111777 | 111748 | RNA → | <a href="#">rpmE2 (PRK01678)</a> | <a href="#">Ribosomal_L31</a> | <a href="#">(pfam01197)</a> | → |
| Sau-2763-1 | NZ_KI976564.1 | - | 57686  | 57657  | RNA → | <a href="#">rpmE2 (PRK01678)</a> | <a href="#">Ribosomal_L31</a> | <a href="#">(pfam01197)</a> | → |
| Sau-2759-1 | NZ_KI973929.1 | - | 56894  | 56865  | RNA → | <a href="#">rpmE2 (PRK01678)</a> | <a href="#">Ribosomal_L31</a> | <a href="#">(pfam01197)</a> | → |
| Sau-2774-1 | NZ_KI975249.1 | - | 118410 | 118381 | RNA → | <a href="#">rpmE2 (PRK01678)</a> | <a href="#">Ribosomal_L31</a> | <a href="#">(pfam01197)</a> | → |
| Sau-2773-1 | NZ_KI975250.1 | - | 113458 | 113429 | RNA → | <a href="#">rpmE2 (PRK01678)</a> | <a href="#">Ribosomal_L31</a> | <a href="#">(pfam01197)</a> | → |
| Sau-2740-1 | NZ_KI975832.1 | - | 238778 | 238749 | RNA → | <a href="#">rpmE2 (PRK01678)</a> | <a href="#">Ribosomal_L31</a> | <a href="#">(pfam01197)</a> | → |
| Sau-2779-1 | NZ_KI976188.1 | - | 238384 | 238355 | RNA → | <a href="#">rpmE2 (PRK01678)</a> | <a href="#">Ribosomal_L31</a> | <a href="#">(pfam01197)</a> | → |
| Sau-2765-1 | NZ_KI976626.1 | - | 237053 | 237024 | RNA → | <a href="#">rpmE2 (PRK01678)</a> | <a href="#">Ribosomal_L31</a> | <a href="#">(pfam01197)</a> | → |



|            |               |   |        |        |       |                                             |
|------------|---------------|---|--------|--------|-------|---------------------------------------------|
| Sau-2747-1 | NZ_KI974841.1 | - | 62196  | 62167  | RNA → | rpmE2 (PRK01678)Ribosomal_L31 (pfam01197) → |
| Sau-2749-1 | NZ_KI975069.1 | - | 25249  | 25220  | RNA → | rpmE2 (PRK01678)Ribosomal_L31 (pfam01197) → |
| Sau-2729-1 | NZ_KI975199.1 | - | 119992 | 119963 | RNA → | rpmE2 (PRK01678)Ribosomal_L31 (pfam01197) → |
| Sau-2750-1 | NZ_KI975679.1 | - | 111359 | 111330 | RNA → | rpmE2 (PRK01678)Ribosomal_L31 (pfam01197) → |
| Sau-1099-1 | NZ_KI973769.1 | - | 56488  | 56459  | RNA → | rpmE2 (PRK01678)Ribosomal_L31 (pfam01197) → |
| Sau-2751-1 | NZ_KI975684.1 | - | 35284  | 35255  | RNA → | rpmE2 (PRK01678)Ribosomal_L31 (pfam01197) → |
| Sau-2780-1 | NZ_KI976171.1 | - | 56894  | 56865  | RNA → | rpmE2 (PRK01678)Ribosomal_L31 (pfam01197) → |
| Sau-240-1  | NZ_KI974041.1 | - | 61027  | 60998  | RNA → | rpmE2 (PRK01678)Ribosomal_L31 (pfam01197) → |
| Sau-2767-1 | NZ_KI976602.1 | - | 35015  | 34986  | RNA → | rpmE2 (PRK01678)Ribosomal_L31 (pfam01197) → |
| Sau-245-1  | NZ_KI974590.1 | - | 112127 | 112098 | RNA → | rpmE2 (PRK01678)Ribosomal_L31 (pfam01197) → |
| Sau-2653-1 | NZ_KI977062.1 | - | 19182  | 19153  | RNA → | rpmE2 (PRK01678)Ribosomal_L31 (pfam01197) → |
| Sau-1605-1 | NZ_KI971201.1 | - | 122322 | 122293 | RNA → | rpmE2 (PRK01678)Ribosomal_L31 (pfam01197) → |
| Sau-1188-1 | NZ_KI971784.1 | - | 56663  | 56634  | RNA → | rpmE2 (PRK01678)Ribosomal_L31 (pfam01197) → |
| Sau-1661-1 | NZ_KI966824.1 | - | 62005  | 61976  | RNA → | rpmE2 (PRK01678)Ribosomal_L31 (pfam01197) → |
| Sau-1738-1 | NZ_KI970529.1 | - | 58829  | 58800  | RNA → | rpmE2 (PRK01678)Ribosomal_L31 (pfam01197) → |
| Sau-1368-1 | NZ_KI971436.1 | - | 57585  | 57556  | RNA → | rpmE2 (PRK01678)Ribosomal_L31 (pfam01197) → |
| Sau-236-1  | NZ_KI973490.1 | - | 56894  | 56865  | RNA → | rpmE2 (PRK01678)Ribosomal_L31 (pfam01197) → |
| Sau-2328-1 | NZ_KI972569.1 | - | 118224 | 118195 | RNA → | rpmE2 (PRK01678)Ribosomal_L31 (pfam01197) → |
| Sau-225-1  | NZ_KI974722.1 | - | 119048 | 119019 | RNA → | rpmE2 (PRK01678)Ribosomal_L31 (pfam01197) → |
| Sau-1420-1 | NZ_KI971523.1 | - | 118776 | 118747 | RNA → | rpmE2 (PRK01678)Ribosomal_L31 (pfam01197) → |
| Sau-1713-1 | NZ_KI971041.1 | - | 467476 | 467447 | RNA → | rpmE2 (PRK01678)Ribosomal_L31 (pfam01197) → |
| Sau-1500-1 | NZ_KI971347.1 | - | 56521  | 56492  | RNA → | rpmE2 (PRK01678)Ribosomal_L31 (pfam01197) → |
| Sau-2644-1 | NZ_KI973974.1 | - | 56894  | 56865  | RNA → | rpmE2 (PRK01678)Ribosomal_L31 (pfam01197) → |
| Sau-229-1  | NZ_KI974994.1 | - | 34872  | 34843  | RNA → | rpmE2 (PRK01678)Ribosomal_L31 (pfam01197) → |
| Sau-231-1  | NZ_KI975047.1 | - | 56894  | 56865  | RNA → | rpmE2 (PRK01678)Ribosomal_L31 (pfam01197) → |
| Sau-233-1  | NZ_KI975535.1 | - | 469077 | 469048 | RNA → | rpmE2 (PRK01678)Ribosomal_L31 (pfam01197) → |
| Sau-1103-1 | NZ_KI975861.1 | - | 107623 | 107594 | RNA → | rpmE2 (PRK01678)Ribosomal_L31 (pfam01197) → |
| Sau-1154-1 | NZ_KI974747.1 | - | 56828  | 56799  | RNA → | rpmE2 (PRK01678)Ribosomal_L31 (pfam01197) → |
| Sau-884-1  | NZ_KI973539.1 | - | 100527 | 100498 | RNA → | rpmE2 (PRK01678)Ribosomal_L31 (pfam01197) → |
| Sau-241-1  | NZ_KI974535.1 | - | 56894  | 56865  | RNA → | rpmE2 (PRK01678)Ribosomal_L31 (pfam01197) → |
| Sau-246-1  | NZ_KI974603.1 | - | 56894  | 56865  | RNA → | rpmE2 (PRK01678)Ribosomal_L31 (pfam01197) → |
| Sau-230-1  | NZ_KI975061.1 | - | 56994  | 56965  | RNA → | rpmE2 (PRK01678)Ribosomal_L31 (pfam01197) → |
| Sau-2605-1 | NZ_KI973836.1 | - | 239089 | 239060 | RNA → | rpmE2 (PRK01678)Ribosomal_L31 (pfam01197) → |
| Sau-881-1  | NZ_KI975875.1 | - | 113460 | 113431 | RNA → | rpmE2 (PRK01678)Ribosomal_L31 (pfam01197) → |
| Sau-2603-1 | NZ_KI973853.1 | - | 61889  | 61860  | RNA → | rpmE2 (PRK01678)Ribosomal_L31 (pfam01197) → |
| Sau-1146-1 | NZ_KI975396.1 | - | 238621 | 238592 | RNA → | rpmE2 (PRK01678)Ribosomal_L31 (pfam01197) → |
| Sau-291-1  | NZ_KI975911.1 | - | 56994  | 56965  | RNA → | rpmE2 (PRK01678)Ribosomal_L31 (pfam01197) → |
| Sau-302-1  | NZ_KI976160.1 | - | 56994  | 56965  | RNA → | rpmE2 (PRK01678)Ribosomal_L31 (pfam01197) → |
| Sau-2611-1 | NZ_KI975631.1 | - | 57506  | 57477  | RNA → | rpmE2 (PRK01678)Ribosomal_L31 (pfam01197) → |
| Sau-293-1  | NZ_KI976683.1 | - | 239227 | 239198 | RNA → | rpmE2 (PRK01678)Ribosomal_L31 (pfam01197) → |
| Sau-243-1  | NZ_KI974552.1 | - | 56894  | 56865  | RNA → | rpmE2 (PRK01678)Ribosomal_L31 (pfam01197) → |
| Sau-2641-1 | NZ_KI975976.1 | - | 107609 | 107580 | RNA → | rpmE2 (PRK01678)Ribosomal_L31 (pfam01197) → |
| Sau-1102-1 | NZ_KI975389.1 | - | 56894  | 56865  | RNA → | rpmE2 (PRK01678)Ribosomal_L31 (pfam01197) → |
| Sau-1128-1 | NZ_KI976091.1 | - | 35048  | 35019  | RNA → | rpmE2 (PRK01678)Ribosomal_L31 (pfam01197) → |
| Sau-2620-1 | NZ_KI976472.1 | - | 56994  | 56965  | RNA → | rpmE2 (PRK01678)Ribosomal_L31 (pfam01197) → |
| Sau-235-1  | NZ_KI975491.1 | - | 56894  | 56865  | RNA → | rpmE2 (PRK01678)Ribosomal_L31 (pfam01197) → |
| Sau-1113-1 | NZ_KI976543.1 | - | 107627 | 107598 | RNA → | rpmE2 (PRK01678)Ribosomal_L31 (pfam01197) → |
| Sau-234-1  | NZ_KI975519.1 | - | 233482 | 233453 | RNA → | rpmE2 (PRK01678)Ribosomal_L31 (pfam01197) → |
| Sau-1114-1 | NZ_KI976959.1 | - | 628831 | 628802 | RNA → | rpmE2 (PRK01678)Ribosomal_L31 (pfam01197) → |
| Sau-1131-1 | NZ_KI977383.1 | - | 117531 | 117502 | RNA → | rpmE2 (PRK01678)Ribosomal_L31 (pfam01197) → |
| Sau-1150-1 | NZ_KI973423.1 | - | 54893  | 54864  | RNA → | rpmE2 (PRK01678)Ribosomal_L31 (pfam01197) → |
| Sau-1108-1 | NZ_KI973888.1 | - | 118746 | 118717 | RNA → | rpmE2 (PRK01678)Ribosomal_L31 (pfam01197) → |

|            |               |   |         |         |       |                                             |
|------------|---------------|---|---------|---------|-------|---------------------------------------------|
| Sau-2618-1 | NZ_KI974606.1 | - | 1344431 | 1344402 | RNA → | rpmE2 (PRK01678)Ribosomal_L31 (pfam01197) → |
| Sau-2610-1 | NZ_KI975651.1 | - | 58425   | 58396   | RNA → | rpmE2 (PRK01678)Ribosomal_L31 (pfam01197) → |
| Sau-1125-1 | NZ_KI975789.1 | - | 109375  | 109346  | RNA → | rpmE2 (PRK01678)Ribosomal_L31 (pfam01197) → |
| Sau-1111-1 | NZ_KI974177.1 | - | 57506   | 57477   | RNA → | rpmE2 (PRK01678)Ribosomal_L31 (pfam01197) → |
| Sau-286-1  | NZ_KI976422.1 | - | 56267   | 56238   | RNA → | rpmE2 (PRK01678)Ribosomal_L31 (pfam01197) → |
| Sau-1145-1 | NZ_KI975105.1 | - | 56894   | 56865   | RNA → | rpmE2 (PRK01678)Ribosomal_L31 (pfam01197) → |
| Sau-846-1  | NZ_KI976517.1 | - | 61690   | 61661   | RNA → | rpmE2 (PRK01678)Ribosomal_L31 (pfam01197) → |
| Sau-292-1  | NZ_KI976620.1 | - | 56894   | 56865   | RNA → | rpmE2 (PRK01678)Ribosomal_L31 (pfam01197) → |
| Sau-2638-1 | NZ_KI975338.1 | - | 59010   | 58981   | RNA → | rpmE2 (PRK01678)Ribosomal_L31 (pfam01197) → |
| Sau-247-1  | NZ_KI977331.1 | - | 61890   | 61861   | RNA → | rpmE2 (PRK01678)Ribosomal_L31 (pfam01197) → |
| Sau-1165-1 | NZ_KI975607.1 | - | 56894   | 56865   | RNA → | rpmE2 (PRK01678)Ribosomal_L31 (pfam01197) → |
| Sau-2608-1 | NZ_KI976071.1 | - | 56894   | 56865   | RNA → | rpmE2 (PRK01678)Ribosomal_L31 (pfam01197) → |
| Sau-1095-1 | NZ_KI975565.1 | - | 56894   | 56865   | RNA → | rpmE2 (PRK01678)Ribosomal_L31 (pfam01197) → |
| Sau-2612-1 | NZ_KI977119.1 | - | 115884  | 115855  | RNA → | rpmE2 (PRK01678)Ribosomal_L31 (pfam01197) → |
| Sau-3021-1 | NZ_KI974138.1 | - | 56894   | 56865   | RNA → | rpmE2 (PRK01678)Ribosomal_L31 (pfam01197) → |
| Sau-232-1  | NZ_KI975573.1 | - | 239942  | 239913  | RNA → | rpmE2 (PRK01678)Ribosomal_L31 (pfam01197) → |
| Sau-2817-1 | NZ_KI974715.1 | - | 238688  | 238659  | RNA → | rpmE2 (PRK01678)Ribosomal_L31 (pfam01197) → |
| Sau-295-1  | NZ_KI976942.1 | - | 56894   | 56865   | RNA → | rpmE2 (PRK01678)Ribosomal_L31 (pfam01197) → |
| Sau-1109-1 | NZ_KI973890.1 | - | 213618  | 213589  | RNA → | rpmE2 (PRK01678)Ribosomal_L31 (pfam01197) → |
| Sau-1170-1 | NZ_KI974428.1 | - | 56894   | 56865   | RNA → | rpmE2 (PRK01678)Ribosomal_L31 (pfam01197) → |
| Sau-2645-1 | NZ_KI974438.1 | - | 57225   | 57196   | RNA → | rpmE2 (PRK01678)Ribosomal_L31 (pfam01197) → |
| Sau-1152-1 | NZ_KI974611.1 | - | 118606  | 118577  | RNA → | rpmE2 (PRK01678)Ribosomal_L31 (pfam01197) → |
| Sau-2639-1 | NZ_KI975328.1 | - | 424201  | 424172  | RNA → | rpmE2 (PRK01678)Ribosomal_L31 (pfam01197) → |
| Sau-1148-1 | NZ_KI975476.1 | - | 56994   | 56965   | RNA → | rpmE2 (PRK01678)Ribosomal_L31 (pfam01197) → |
| Sau-3019-1 | NZ_KI974078.1 | - | 34873   | 34844   | RNA → | rpmE2 (PRK01678)Ribosomal_L31 (pfam01197) → |
| Sau-1126-1 | NZ_KI975802.1 | - | 35013   | 34984   | RNA → | rpmE2 (PRK01678)Ribosomal_L31 (pfam01197) → |
| Sau-2789-1 | NZ_KI974201.1 | - | 56893   | 56864   | RNA → | rpmE2 (PRK01678)Ribosomal_L31 (pfam01197) → |
| Sau-2607-1 | NZ_KI976384.1 | - | 56258   | 56229   | RNA → | rpmE2 (PRK01678)Ribosomal_L31 (pfam01197) → |
| Sau-2813-1 | NZ_KI974294.1 | - | 25249   | 25220   | RNA → | rpmE2 (PRK01678)Ribosomal_L31 (pfam01197) → |
| Sau-1129-1 | NZ_KI976498.1 | - | 110548  | 110519  | RNA → | rpmE2 (PRK01678)Ribosomal_L31 (pfam01197) → |
| Sau-3699-1 | NZ_KI973666.1 | - | 56588   | 56559   | RNA → | rpmE2 (PRK01678)Ribosomal_L31 (pfam01197) → |
| Sau-2790-1 | NZ_KI974271.1 | - | 56894   | 56865   | RNA → | rpmE2 (PRK01678)Ribosomal_L31 (pfam01197) → |
| Sau-2809-1 | NZ_KI975113.1 | - | 110250  | 110221  | RNA → | rpmE2 (PRK01678)Ribosomal_L31 (pfam01197) → |
| Sau-3689-1 | NZ_KI973743.1 | - | 56893   | 56864   | RNA → | rpmE2 (PRK01678)Ribosomal_L31 (pfam01197) → |
| Sau-3688-1 | NZ_KI974031.1 | - | 237053  | 237024  | RNA → | rpmE2 (PRK01678)Ribosomal_L31 (pfam01197) → |
| Sau-3701-1 | NZ_KI974146.1 | + | 48532   | 48561   | RNA → | rpmE2 (PRK01678)Ribosomal_L31 (pfam01197) → |
| Sau-3703-1 | NZ_KI974376.1 | - | 56894   | 56865   | RNA → | rpmE2 (PRK01678)Ribosomal_L31 (pfam01197) → |
| Sau-3028-1 | NZ_KI974655.1 | - | 113124  | 113095  | RNA → | rpmE2 (PRK01678)Ribosomal_L31 (pfam01197) → |
| Sau-2810-1 | NZ_KI975172.1 | - | 57695   | 57666   | RNA → | rpmE2 (PRK01678)Ribosomal_L31 (pfam01197) → |
| Sau-3018-1 | NZ_KI975754.1 | - | 56894   | 56865   | RNA → | rpmE2 (PRK01678)Ribosomal_L31 (pfam01197) → |
| Sau-2804-1 | NZ_KI976335.1 | - | 35013   | 34984   | RNA → | rpmE2 (PRK01678)Ribosomal_L31 (pfam01197) → |
| Sau-3032-1 | NZ_KI977132.1 | - | 55117   | 55088   | RNA → | rpmE2 (PRK01678)Ribosomal_L31 (pfam01197) → |
| Sau-3702-1 | NZ_KI974426.1 | - | 58231   | 58202   | RNA → | rpmE2 (PRK01678)Ribosomal_L31 (pfam01197) → |
| Sau-3029-1 | NZ_KI974659.1 | - | 56588   | 56559   | RNA → | rpmE2 (PRK01678)Ribosomal_L31 (pfam01197) → |
| Sau-2811-1 | NZ_KI975174.1 | - | 216298  | 216269  | RNA → | rpmE2 (PRK01678)Ribosomal_L31 (pfam01197) → |
| Sau-3025-1 | NZ_KI975987.1 | - | 34872   | 34843   | RNA → | rpmE2 (PRK01678)Ribosomal_L31 (pfam01197) → |
| Sau-3673-1 | NZ_KI976036.1 | - | 239284  | 239255  | RNA → | rpmE2 (PRK01678)Ribosomal_L31 (pfam01197) → |
| Sau-3023-1 | NZ_KI976376.1 | - | 119659  | 119630  | RNA → | rpmE2 (PRK01678)Ribosomal_L31 (pfam01197) → |
| Sau-2792-1 | NZ_KI976774.1 | - | 35284   | 35255   | RNA → | rpmE2 (PRK01678)Ribosomal_L31 (pfam01197) → |
| Sau-3670-1 | NZ_KI974020.1 | - | 56894   | 56865   | RNA → | rpmE2 (PRK01678)Ribosomal_L31 (pfam01197) → |
| Sau-3027-1 | NZ_KI975953.1 | - | 121790  | 121761  | RNA → | rpmE2 (PRK01678)Ribosomal_L31 (pfam01197) → |
| Sau-2797-1 | NZ_KI976725.1 | - | 121803  | 121774  | RNA → | rpmE2 (PRK01678)Ribosomal_L31 (pfam01197) → |

|            |               |   |        |        |                                                   |
|------------|---------------|---|--------|--------|---------------------------------------------------|
| Sau-3705-1 | NZ_KI976952.1 | - | 56893  | 56864  | RNA → rpmE2 (PRK01678)Ribosomal_L31 (pfam01197) → |
| Sau-2802-1 | NZ_KI973735.1 | - | 56890  | 56861  | RNA → rpmE2 (PRK01678)Ribosomal_L31 (pfam01197) → |
| Sau-2787-1 | NZ_KI974371.1 | - | 110422 | 110393 | RNA → rpmE2 (PRK01678)Ribosomal_L31 (pfam01197) → |
| Sau-2807-1 | NZ_KI976065.1 | - | 25258  | 25229  | RNA → rpmE2 (PRK01678)Ribosomal_L31 (pfam01197) → |
| Sau-2794-1 | NZ_KI976690.1 | - | 58248  | 58219  | RNA → rpmE2 (PRK01678)Ribosomal_L31 (pfam01197) → |
| Sau-1471-1 | NZ_KK010128.1 | - | 36391  | 36362  | RNA → rpmE2 (PRK01678)Ribosomal_L31 (pfam01197) → |
| Sau-1524-1 | NZ_KK012312.1 | - | 35094  | 35065  | RNA → rpmE2 (PRK01678)Ribosomal_L31 (pfam01197) → |
| Sau-1541-1 | NZ_KK013214.1 | - | 35398  | 35369  | RNA → rpmE2 (PRK01678)Ribosomal_L31 (pfam01197) → |
| Sau-2350-1 | NZ_KI995645.1 | - | 36089  | 36060  | RNA → rpmE2 (PRK01678)Ribosomal_L31 (pfam01197) → |
| Sau-2387-1 | NZ_KI997549.1 | - | 61851  | 61822  | RNA → rpmE2 (PRK01678)Ribosomal_L31 (pfam01197) → |
| Sau-2397-1 | NZ_KI997918.1 | - | 213793 | 213764 | RNA → rpmE2 (PRK01678)Ribosomal_L31 (pfam01197) → |
| Sau-1568-1 | NZ_KK014253.1 | - | 35305  | 35276  | RNA → rpmE2 (PRK01678)Ribosomal_L31 (pfam01197) → |
| Sau-2399-1 | NZ_KI997937.1 | - | 118626 | 118597 | RNA → rpmE2 (PRK01678)Ribosomal_L31 (pfam01197) → |
| Sau-1516-1 | NZ_KK012056.1 | - | 32527  | 32498  | RNA → rpmE2 (PRK01678)Ribosomal_L31 (pfam01197) → |
| Sau-2404-1 | NZ_KI998095.1 | - | 110981 | 110952 | RNA → rpmE2 (PRK01678)Ribosomal_L31 (pfam01197) → |
| Sau-2421-1 | NZ_KI998596.1 | - | 24749  | 24720  | RNA → rpmE2 (PRK01678)Ribosomal_L31 (pfam01197) → |
| Sau-1527-1 | NZ_KK012536.1 | - | 110244 | 110215 | RNA → rpmE2 (PRK01678)Ribosomal_L31 (pfam01197) → |
| Sau-2247-1 | NZ_KI996273.1 | - | 122904 | 122875 | RNA → rpmE2 (PRK01678)Ribosomal_L31 (pfam01197) → |
| Sau-1540-1 | NZ_KK013208.1 | - | 25227  | 25198  | RNA → rpmE2 (PRK01678)Ribosomal_L31 (pfam01197) → |
| Sau-2359-1 | NZ_KI996835.1 | - | 62199  | 62170  | RNA → rpmE2 (PRK01678)Ribosomal_L31 (pfam01197) → |
| Sau-1494-1 | NZ_KK011060.1 | - | 35151  | 35122  | RNA → rpmE2 (PRK01678)Ribosomal_L31 (pfam01197) → |
| Sau-2366-1 | NZ_KI997029.1 | - | 62104  | 62075  | RNA → rpmE2 (PRK01678)Ribosomal_L31 (pfam01197) → |
| Sau-1917-1 | NZ_KI987117.1 | - | 110394 | 110365 | RNA → rpmE2 (PRK01678)Ribosomal_L31 (pfam01197) → |
| Sau-1499-1 | NZ_KK011331.1 | - | 35760  | 35731  | RNA → rpmE2 (PRK01678)Ribosomal_L31 (pfam01197) → |
| Sau-2375-1 | NZ_KI997218.1 | - | 24749  | 24720  | RNA → rpmE2 (PRK01678)Ribosomal_L31 (pfam01197) → |
| Sau-2384-1 | NZ_KI997424.1 | - | 35349  | 35320  | RNA → rpmE2 (PRK01678)Ribosomal_L31 (pfam01197) → |
| Sau-1548-1 | NZ_KK013557.1 | - | 36391  | 36362  | RNA → rpmE2 (PRK01678)Ribosomal_L31 (pfam01197) → |
| Sau-2395-1 | NZ_KI997821.1 | - | 98284  | 98255  | RNA → rpmE2 (PRK01678)Ribosomal_L31 (pfam01197) → |
| Sau-1556-1 | NZ_KK013787.1 | - | 35610  | 35581  | RNA → rpmE2 (PRK01678)Ribosomal_L31 (pfam01197) → |
| Sau-1965-1 | NZ_KI988768.1 | - | 55131  | 55102  | RNA → rpmE2 (PRK01678)Ribosomal_L31 (pfam01197) → |
| Sau-2407-1 | NZ_KI998233.1 | - | 35955  | 35926  | RNA → rpmE2 (PRK01678)Ribosomal_L31 (pfam01197) → |
| Sau-1564-1 | NZ_KK014054.1 | - | 36391  | 36362  | RNA → rpmE2 (PRK01678)Ribosomal_L31 (pfam01197) → |
| Sau-2415-1 | NZ_KI998474.1 | - | 21021  | 20992  | RNA → rpmE2 (PRK01678)Ribosomal_L31 (pfam01197) → |
| Sau-2425-1 | NZ_KI998629.1 | - | 52040  | 52011  | RNA → rpmE2 (PRK01678)Ribosomal_L31 (pfam01197) → |
| Sau-1987-1 | NZ_KI989651.1 | - | 56762  | 56733  | RNA → rpmE2 (PRK01678)Ribosomal_L31 (pfam01197) → |
| Sau-1460-1 | NZ_KK009730.1 | - | 36391  | 36362  | RNA → rpmE2 (PRK01678)Ribosomal_L31 (pfam01197) → |
| Sau-2322-1 | NZ_KI994432.1 | - | 24749  | 24720  | RNA → rpmE2 (PRK01678)Ribosomal_L31 (pfam01197) → |
| Sau-2003-1 | NZ_KI990116.1 | - | 24749  | 24720  | RNA → rpmE2 (PRK01678)Ribosomal_L31 (pfam01197) → |
| Sau-2235-1 | NZ_KI995970.1 | - | 35290  | 35261  | RNA → rpmE2 (PRK01678)Ribosomal_L31 (pfam01197) → |
| Sau-1514-1 | NZ_KK011889.1 | - | 77885  | 77856  | RNA → rpmE2 (PRK01678)Ribosomal_L31 (pfam01197) → |
| Sau-2012-1 | NZ_KI990411.1 | - | 83970  | 83941  | RNA → rpmE2 (PRK01678)Ribosomal_L31 (pfam01197) → |
| Sau-1519-1 | NZ_KK012183.1 | - | 36391  | 36362  | RNA → rpmE2 (PRK01678)Ribosomal_L31 (pfam01197) → |
| Sau-2246-1 | NZ_KI996258.1 | - | 150172 | 150143 | RNA → rpmE2 (PRK01678)Ribosomal_L31 (pfam01197) → |
| Sau-2434-1 | NZ_KI991416.1 | - | 35701  | 35672  | RNA → rpmE2 (PRK01678)Ribosomal_L31 (pfam01197) → |
| Sau-1526-1 | NZ_KK012427.1 | - | 36391  | 36362  | RNA → rpmE2 (PRK01678)Ribosomal_L31 (pfam01197) → |
| Sau-2365-1 | NZ_KI997025.1 | - | 24749  | 24720  | RNA → rpmE2 (PRK01678)Ribosomal_L31 (pfam01197) → |
| Sau-2388-1 | NZ_KI997568.1 | - | 35672  | 35643  | RNA → rpmE2 (PRK01678)Ribosomal_L31 (pfam01197) → |
| Sau-2435-1 | NZ_KI991448.1 | - | 36391  | 36362  | RNA → rpmE2 (PRK01678)Ribosomal_L31 (pfam01197) → |
| Sau-2394-1 | NZ_KI997810.1 | - | 514560 | 514531 | RNA → rpmE2 (PRK01678)Ribosomal_L31 (pfam01197) → |
| Sau-1756-1 | NZ_KI991889.1 | - | 24749  | 24720  | RNA → rpmE2 (PRK01678)Ribosomal_L31 (pfam01197) → |
| Sau-2400-1 | NZ_KI997959.1 | - | 36391  | 36362  | RNA → rpmE2 (PRK01678)Ribosomal_L31 (pfam01197) → |
| Sau-1539-1 | NZ_KK013085.1 | - | 26900  | 26871  | RNA → rpmE2 (PRK01678)Ribosomal_L31 (pfam01197) → |

|            |               |   |        |        |       |                                             |
|------------|---------------|---|--------|--------|-------|---------------------------------------------|
| Sau-2310-1 | NZ_KI994065.1 | - | 62157  | 62128  | RNA → | rpmE2 (PRK01678)Ribosomal_L31 (pfam01197) → |
| Sau-2406-1 | NZ_KI998165.1 | - | 35156  | 35127  | RNA → | rpmE2 (PRK01678)Ribosomal_L31 (pfam01197) → |
| Sau-1559-1 | NZ_KK013862.1 | - | 114870 | 114841 | RNA → | rpmE2 (PRK01678)Ribosomal_L31 (pfam01197) → |
| Sau-2422-1 | NZ_KI998604.1 | - | 24749  | 24720  | RNA → | rpmE2 (PRK01678)Ribosomal_L31 (pfam01197) → |
| Sau-1956-1 | NZ_KI988450.1 | - | 76879  | 76850  | RNA → | rpmE2 (PRK01678)Ribosomal_L31 (pfam01197) → |
| Sau-1565-1 | NZ_KK014174.1 | - | 113266 | 113237 | RNA → | rpmE2 (PRK01678)Ribosomal_L31 (pfam01197) → |
| Sau-2354-1 | NZ_KI995816.1 | - | 35969  | 35940  | RNA → | rpmE2 (PRK01678)Ribosomal_L31 (pfam01197) → |
| Sau-1983-1 | NZ_KI989506.1 | - | 3698   | 3669   | RNA → | rpmE2 (PRK01678)Ribosomal_L31 (pfam01197) → |
| Sau-2385-1 | NZ_KI997468.1 | - | 35156  | 35127  | RNA → | rpmE2 (PRK01678)Ribosomal_L31 (pfam01197) → |
| Sau-2403-1 | NZ_KI998058.1 | - | 103696 | 103667 | RNA → | rpmE2 (PRK01678)Ribosomal_L31 (pfam01197) → |
| Sau-1999-1 | NZ_KI990012.1 | - | 125991 | 125962 | RNA → | rpmE2 (PRK01678)Ribosomal_L31 (pfam01197) → |
| Sau-2408-1 | NZ_KI998319.1 | - | 61384  | 61355  | RNA → | rpmE2 (PRK01678)Ribosomal_L31 (pfam01197) → |
| Sau-2410-1 | NZ_KI998325.1 | - | 36340  | 36311  | RNA → | rpmE2 (PRK01678)Ribosomal_L31 (pfam01197) → |
| Sau-2021-1 | NZ_KI990840.1 | - | 62157  | 62128  | RNA → | rpmE2 (PRK01678)Ribosomal_L31 (pfam01197) → |
| Sau-2419-1 | NZ_KI998493.1 | - | 35170  | 35141  | RNA → | rpmE2 (PRK01678)Ribosomal_L31 (pfam01197) → |
| Sau-1180-1 | NZ_KI998844.1 | - | 55131  | 55102  | RNA → | rpmE2 (PRK01678)Ribosomal_L31 (pfam01197) → |
| Sau-2432-1 | NZ_KI991367.1 | - | 36413  | 36384  | RNA → | rpmE2 (PRK01678)Ribosomal_L31 (pfam01197) → |
| Sau-2378-1 | NZ_KI997278.1 | - | 36491  | 36462  | RNA → | rpmE2 (PRK01678)Ribosomal_L31 (pfam01197) → |
| Sau-1770-1 | NZ_KI992468.1 | - | 70571  | 70542  | RNA → | rpmE2 (PRK01678)Ribosomal_L31 (pfam01197) → |
| Sau-2412-1 | NZ_KI998382.1 | - | 35390  | 35361  | RNA → | rpmE2 (PRK01678)Ribosomal_L31 (pfam01197) → |
| Sau-2266-1 | NZ_KI992708.1 | - | 35936  | 35907  | RNA → | rpmE2 (PRK01678)Ribosomal_L31 (pfam01197) → |
| Sau-2249-1 | NZ_KI996364.1 | - | 498623 | 498594 | RNA → | rpmE2 (PRK01678)Ribosomal_L31 (pfam01197) → |
| Sau-1203-1 | NZ_KK000026.1 | - | 27865  | 27836  | RNA → | rpmE2 (PRK01678)Ribosomal_L31 (pfam01197) → |
| Sau-2257-1 | NZ_KI996580.1 | - | 3545   | 3516   | RNA → | rpmE2 (PRK01678)Ribosomal_L31 (pfam01197) → |
| Sau-2275-1 | NZ_KI992964.1 | - | 27699  | 27670  | RNA → | rpmE2 (PRK01678)Ribosomal_L31 (pfam01197) → |
| Sau-1215-1 | NZ_KK000626.1 | - | 35264  | 35235  | RNA → | rpmE2 (PRK01678)Ribosomal_L31 (pfam01197) → |
| Sau-2396-1 | NZ_KI997868.1 | - | 24749  | 24720  | RNA → | rpmE2 (PRK01678)Ribosomal_L31 (pfam01197) → |
| Sau-2284-1 | NZ_KI993105.1 | - | 35349  | 35320  | RNA → | rpmE2 (PRK01678)Ribosomal_L31 (pfam01197) → |
| Sau-1178-1 | NZ_KI998708.1 | - | 36172  | 36143  | RNA → | rpmE2 (PRK01678)Ribosomal_L31 (pfam01197) → |
| Sau-2427-1 | NZ_KI998671.1 | - | 24749  | 24720  | RNA → | rpmE2 (PRK01678)Ribosomal_L31 (pfam01197) → |
| Sau-1182-1 | NZ_KI998925.1 | - | 36391  | 36362  | RNA → | rpmE2 (PRK01678)Ribosomal_L31 (pfam01197) → |
| Sau-2289-1 | NZ_KI993273.1 | - | 216283 | 216254 | RNA → | rpmE2 (PRK01678)Ribosomal_L31 (pfam01197) → |
| Sau-1321-1 | NZ_KK004815.1 | - | 110935 | 110906 | RNA → | rpmE2 (PRK01678)Ribosomal_L31 (pfam01197) → |
| Sau-2320-1 | NZ_KI994356.1 | - | 23949  | 23920  | RNA → | rpmE2 (PRK01678)Ribosomal_L31 (pfam01197) → |
| Sau-2413-1 | NZ_KI998446.1 | - | 24749  | 24720  | RNA → | rpmE2 (PRK01678)Ribosomal_L31 (pfam01197) → |
| Sau-1235-1 | NZ_KK001260.1 | - | 109425 | 109396 | RNA → | rpmE2 (PRK01678)Ribosomal_L31 (pfam01197) → |
| Sau-1933-1 | NZ_KI987796.1 | - | 36390  | 36361  | RNA → | rpmE2 (PRK01678)Ribosomal_L31 (pfam01197) → |
| Sau-1307-1 | NZ_KK004030.1 | - | 9107   | 9078   | RNA → | rpmE2 (PRK01678)Ribosomal_L31 (pfam01197) → |
| Sau-1247-1 | NZ_KK001698.1 | - | 238687 | 238658 | RNA → | rpmE2 (PRK01678)Ribosomal_L31 (pfam01197) → |
| Sau-2401-1 | NZ_KI998009.1 | - | 24749  | 24720  | RNA → | rpmE2 (PRK01678)Ribosomal_L31 (pfam01197) → |
| Sau-2002-1 | NZ_KI990083.1 | - | 114771 | 114742 | RNA → | rpmE2 (PRK01678)Ribosomal_L31 (pfam01197) → |
| Sau-1271-1 | NZ_KK002585.1 | - | 62105  | 62076  | RNA → | rpmE2 (PRK01678)Ribosomal_L31 (pfam01197) → |
| Sau-2011-1 | NZ_KI990359.1 | - | 61128  | 61099  | RNA → | rpmE2 (PRK01678)Ribosomal_L31 (pfam01197) → |
| Sau-1186-1 | NZ_KI999175.1 | - | 2421   | 2392   | RNA → | rpmE2 (PRK01678)Ribosomal_L31 (pfam01197) → |
| Sau-2016-1 | NZ_KI990652.1 | - | 56605  | 56576  | RNA → | rpmE2 (PRK01678)Ribosomal_L31 (pfam01197) → |
| Sau-1195-1 | NZ_KI999511.1 | - | 1611   | 1582   | RNA → | rpmE2 (PRK01678)Ribosomal_L31 (pfam01197) → |
| Sau-2031-1 | NZ_KI991141.1 | - | 56154  | 56125  | RNA → | rpmE2 (PRK01678)Ribosomal_L31 (pfam01197) → |
| Sau-1205-1 | NZ_KK000098.1 | - | 2518   | 2489   | RNA → | rpmE2 (PRK01678)Ribosomal_L31 (pfam01197) → |
| Sau-2433-1 | NZ_KI991414.1 | - | 81526  | 81497  | RNA → | rpmE2 (PRK01678)Ribosomal_L31 (pfam01197) → |
| Sau-1752-1 | NZ_KI991788.1 | - | 35329  | 35300  | RNA → | rpmE2 (PRK01678)Ribosomal_L31 (pfam01197) → |
| Sau-1389-1 | NZ_KK006830.1 | - | 24749  | 24720  | RNA → | rpmE2 (PRK01678)Ribosomal_L31 (pfam01197) → |
| Sau-1211-1 | NZ_KK000497.1 | - | 25129  | 25100  | RNA → | rpmE2 (PRK01678)Ribosomal_L31 (pfam01197) → |



|            |               |   |        |        |       |                                             |
|------------|---------------|---|--------|--------|-------|---------------------------------------------|
| Sau-2380-1 | NZ_KI997336.1 | - | 62256  | 62227  | RNA → | rpmE2 (PRK01678)Ribosomal_L31 (pfam01197) → |
| Sau-1251-1 | NZ_KK001764.1 | - | 110415 | 110386 | RNA → | rpmE2 (PRK01678)Ribosomal_L31 (pfam01197) → |
| Sau-1761-1 | NZ_KI992078.1 | - | 24749  | 24720  | RNA → | rpmE2 (PRK01678)Ribosomal_L31 (pfam01197) → |
| Sau-1270-1 | NZ_KK002552.1 | - | 100428 | 100399 | RNA → | rpmE2 (PRK01678)Ribosomal_L31 (pfam01197) → |
| Sau-1404-1 | NZ_KK007400.1 | - | 52215  | 52186  | RNA → | rpmE2 (PRK01678)Ribosomal_L31 (pfam01197) → |
| Sau-1765-1 | NZ_KI992241.1 | - | 36491  | 36462  | RNA → | rpmE2 (PRK01678)Ribosomal_L31 (pfam01197) → |
| Sau-1179-1 | NZ_KI998742.1 | - | 36390  | 36361  | RNA → | rpmE2 (PRK01678)Ribosomal_L31 (pfam01197) → |
| Sau-1399-1 | NZ_KK007204.1 | - | 119705 | 119676 | RNA → | rpmE2 (PRK01678)Ribosomal_L31 (pfam01197) → |
| Sau-1766-1 | NZ_KI992307.1 | - | 24749  | 24720  | RNA → | rpmE2 (PRK01678)Ribosomal_L31 (pfam01197) → |
| Sau-1184-1 | NZ_KI999066.1 | - | 36391  | 36362  | RNA → | rpmE2 (PRK01678)Ribosomal_L31 (pfam01197) → |
| Sau-1405-1 | NZ_KK007455.1 | - | 25264  | 25235  | RNA → | rpmE2 (PRK01678)Ribosomal_L31 (pfam01197) → |
| Sau-1771-1 | NZ_KI992525.1 | - | 55426  | 55397  | RNA → | rpmE2 (PRK01678)Ribosomal_L31 (pfam01197) → |
| Sau-1412-1 | NZ_KK007629.1 | - | 105070 | 105041 | RNA → | rpmE2 (PRK01678)Ribosomal_L31 (pfam01197) → |
| Sau-1192-1 | NZ_KI999469.1 | - | 107905 | 107876 | RNA → | rpmE2 (PRK01678)Ribosomal_L31 (pfam01197) → |
| Sau-1418-1 | NZ_KK007813.1 | - | 62057  | 62028  | RNA → | rpmE2 (PRK01678)Ribosomal_L31 (pfam01197) → |
| Sau-1209-1 | NZ_KK000279.1 | - | 2421   | 2392   | RNA → | rpmE2 (PRK01678)Ribosomal_L31 (pfam01197) → |
| Sau-2262-1 | NZ_KI992643.1 | - | 61990  | 61961  | RNA → | rpmE2 (PRK01678)Ribosomal_L31 (pfam01197) → |
| Sau-1419-1 | NZ_KK007920.1 | - | 62157  | 62128  | RNA → | rpmE2 (PRK01678)Ribosomal_L31 (pfam01197) → |
| Sau-2286-1 | NZ_KI993169.1 | - | 35990  | 35961  | RNA → | rpmE2 (PRK01678)Ribosomal_L31 (pfam01197) → |
| Sau-1426-1 | NZ_KK008138.1 | - | 35323  | 35294  | RNA → | rpmE2 (PRK01678)Ribosomal_L31 (pfam01197) → |
| Sau-1217-1 | NZ_KK000731.1 | - | 25029  | 25000  | RNA → | rpmE2 (PRK01678)Ribosomal_L31 (pfam01197) → |
| Sau-1438-1 | NZ_KK008729.1 | - | 36391  | 36362  | RNA → | rpmE2 (PRK01678)Ribosomal_L31 (pfam01197) → |
| Sau-1255-1 | NZ_KK001985.1 | - | 36391  | 36362  | RNA → | rpmE2 (PRK01678)Ribosomal_L31 (pfam01197) → |
| Sau-1443-1 | NZ_KK009013.1 | - | 34375  | 34346  | RNA → | rpmE2 (PRK01678)Ribosomal_L31 (pfam01197) → |
| Sau-1261-1 | NZ_KK002301.1 | - | 113854 | 113825 | RNA → | rpmE2 (PRK01678)Ribosomal_L31 (pfam01197) → |
| Sau-1449-1 | NZ_KK009222.1 | - | 56828  | 56799  | RNA → | rpmE2 (PRK01678)Ribosomal_L31 (pfam01197) → |
| Sau-1268-1 | NZ_KK002505.1 | - | 63488  | 63459  | RNA → | rpmE2 (PRK01678)Ribosomal_L31 (pfam01197) → |
| Sau-1486-1 | NZ_KK010739.1 | - | 56205  | 56176  | RNA → | rpmE2 (PRK01678)Ribosomal_L31 (pfam01197) → |
| Sau-1299-1 | NZ_KK003662.1 | - | 194176 | 194147 | RNA → | rpmE2 (PRK01678)Ribosomal_L31 (pfam01197) → |
| Sau-1398-1 | NZ_KK007165.1 | - | 26132  | 26103  | RNA → | rpmE2 (PRK01678)Ribosomal_L31 (pfam01197) → |
| Sau-1208-1 | NZ_KK000225.1 | - | 36390  | 36361  | RNA → | rpmE2 (PRK01678)Ribosomal_L31 (pfam01197) → |
| Sau-1411-1 | NZ_KK007527.1 | - | 36177  | 36148  | RNA → | rpmE2 (PRK01678)Ribosomal_L31 (pfam01197) → |
| Sau-1214-1 | NZ_KK000556.1 | - | 2418   | 2389   | RNA → | rpmE2 (PRK01678)Ribosomal_L31 (pfam01197) → |
| Sau-1429-1 | NZ_KK008343.1 | - | 61334  | 61305  | RNA → | rpmE2 (PRK01678)Ribosomal_L31 (pfam01197) → |
| Sau-1221-1 | NZ_KK000817.1 | - | 36279  | 36250  | RNA → | rpmE2 (PRK01678)Ribosomal_L31 (pfam01197) → |
| Sau-1442-1 | NZ_KK008967.1 | - | 35730  | 35701  | RNA → | rpmE2 (PRK01678)Ribosomal_L31 (pfam01197) → |
| Sau-1236-1 | NZ_KK001262.1 | - | 217172 | 217143 | RNA → | rpmE2 (PRK01678)Ribosomal_L31 (pfam01197) → |
| Sau-1455-1 | NZ_KK009463.1 | - | 35974  | 35945  | RNA → | rpmE2 (PRK01678)Ribosomal_L31 (pfam01197) → |
| Sau-1463-1 | NZ_KK009790.1 | - | 36145  | 36116  | RNA → | rpmE2 (PRK01678)Ribosomal_L31 (pfam01197) → |
| Sau-1238-1 | NZ_KK001281.1 | - | 217172 | 217143 | RNA → | rpmE2 (PRK01678)Ribosomal_L31 (pfam01197) → |
| Sau-1242-1 | NZ_KK001486.1 | - | 62157  | 62128  | RNA → | rpmE2 (PRK01678)Ribosomal_L31 (pfam01197) → |
| Sau-1394-1 | NZ_KK006995.1 | - | 192301 | 192272 | RNA → | rpmE2 (PRK01678)Ribosomal_L31 (pfam01197) → |
| Sau-1395-1 | NZ_KK007015.1 | - | 36391  | 36362  | RNA → | rpmE2 (PRK01678)Ribosomal_L31 (pfam01197) → |
| Sau-1243-1 | NZ_KK001565.1 | - | 111533 | 111504 | RNA → | rpmE2 (PRK01678)Ribosomal_L31 (pfam01197) → |
| Sau-1400-1 | NZ_KK007261.1 | - | 67891  | 67862  | RNA → | rpmE2 (PRK01678)Ribosomal_L31 (pfam01197) → |
| Sau-1249-1 | NZ_KK001741.1 | - | 58247  | 58218  | RNA → | rpmE2 (PRK01678)Ribosomal_L31 (pfam01197) → |
| Sau-1401-1 | NZ_KK007264.1 | - | 50765  | 50736  | RNA → | rpmE2 (PRK01678)Ribosomal_L31 (pfam01197) → |
| Sau-1254-1 | NZ_KK001938.1 | - | 61872  | 61843  | RNA → | rpmE2 (PRK01678)Ribosomal_L31 (pfam01197) → |
| Sau-1406-1 | NZ_KK007468.1 | - | 56418  | 56389  | RNA → | rpmE2 (PRK01678)Ribosomal_L31 (pfam01197) → |
| Sau-1267-1 | NZ_KK002428.1 | - | 118636 | 118607 | RNA → | rpmE2 (PRK01678)Ribosomal_L31 (pfam01197) → |
| Sau-1407-1 | NZ_KK007482.1 | - | 36225  | 36196  | RNA → | rpmE2 (PRK01678)Ribosomal_L31 (pfam01197) → |
| Sau-1304-1 | NZ_KK003871.1 | - | 36491  | 36462  | RNA → | rpmE2 (PRK01678)Ribosomal_L31 (pfam01197) → |



|            |               |   |        |        |                                                   |
|------------|---------------|---|--------|--------|---------------------------------------------------|
| Sau-1413-1 | NZ_KK007634.1 | - | 36391  | 36362  | RNA → rpmE2 (PRK01678)Ribosomal_L31 (pfam01197) → |
| Sau-1414-1 | NZ_KK007734.1 | - | 114172 | 114143 | RNA → rpmE2 (PRK01678)Ribosomal_L31 (pfam01197) → |
| Sau-1198-1 | NZ_KI999796.1 | - | 28749  | 28720  | RNA → rpmE2 (PRK01678)Ribosomal_L31 (pfam01197) → |
| Sau-1427-1 | NZ_KK008172.1 | - | 35163  | 35134  | RNA → rpmE2 (PRK01678)Ribosomal_L31 (pfam01197) → |
| Sau-1204-1 | NZ_KK000032.1 | - | 55130  | 55101  | RNA → rpmE2 (PRK01678)Ribosomal_L31 (pfam01197) → |
| Sau-1467-1 | NZ_KK009893.1 | - | 30144  | 30115  | RNA → rpmE2 (PRK01678)Ribosomal_L31 (pfam01197) → |
| Sau-1218-1 | NZ_KK000734.1 | - | 35215  | 35186  | RNA → rpmE2 (PRK01678)Ribosomal_L31 (pfam01197) → |
| Sau-1479-1 | NZ_KK010576.1 | - | 61380  | 61351  | RNA → rpmE2 (PRK01678)Ribosomal_L31 (pfam01197) → |
| Sau-1390-1 | NZ_KK006869.1 | - | 25227  | 25198  | RNA → rpmE2 (PRK01678)Ribosomal_L31 (pfam01197) → |
| Sau-1226-1 | NZ_KK000948.1 | - | 36490  | 36461  | RNA → rpmE2 (PRK01678)Ribosomal_L31 (pfam01197) → |
| Sau-1396-1 | NZ_KK007071.1 | - | 36390  | 36361  | RNA → rpmE2 (PRK01678)Ribosomal_L31 (pfam01197) → |
| Sau-1233-1 | NZ_KK001167.1 | - | 56086  | 56057  | RNA → rpmE2 (PRK01678)Ribosomal_L31 (pfam01197) → |
| Sau-1402-1 | NZ_KK007347.1 | - | 62157  | 62128  | RNA → rpmE2 (PRK01678)Ribosomal_L31 (pfam01197) → |
| Sau-1240-1 | NZ_KK001353.1 | - | 36491  | 36462  | RNA → rpmE2 (PRK01678)Ribosomal_L31 (pfam01197) → |
| Sau-1422-1 | NZ_KK007990.1 | - | 6175   | 6146   | RNA → rpmE2 (PRK01678)Ribosomal_L31 (pfam01197) → |
| Sau-1428-1 | NZ_KK008239.1 | - | 35607  | 35578  | RNA → rpmE2 (PRK01678)Ribosomal_L31 (pfam01197) → |
| Sau-1245-1 | NZ_KK001682.1 | - | 61334  | 61305  | RNA → rpmE2 (PRK01678)Ribosomal_L31 (pfam01197) → |
| Sau-1446-1 | NZ_KK009114.1 | - | 113893 | 113864 | RNA → rpmE2 (PRK01678)Ribosomal_L31 (pfam01197) → |
| Sau-1269-1 | NZ_KK002539.1 | - | 36391  | 36362  | RNA → rpmE2 (PRK01678)Ribosomal_L31 (pfam01197) → |
| Sau-1453-1 | NZ_KK009347.1 | - | 36413  | 36384  | RNA → rpmE2 (PRK01678)Ribosomal_L31 (pfam01197) → |
| Sau-1282-1 | NZ_KK002976.1 | - | 36391  | 36362  | RNA → rpmE2 (PRK01678)Ribosomal_L31 (pfam01197) → |
| Sau-1183-1 | NZ_KI999003.1 | - | 2467   | 2438   | RNA → rpmE2 (PRK01678)Ribosomal_L31 (pfam01197) → |
| Sau-1468-1 | NZ_KK010017.1 | - | 61805  | 61776  | RNA → rpmE2 (PRK01678)Ribosomal_L31 (pfam01197) → |
| Sau-1469-1 | NZ_KK010031.1 | - | 8424   | 8395   | RNA → rpmE2 (PRK01678)Ribosomal_L31 (pfam01197) → |
| Sau-1187-1 | NZ_KI999294.1 | - | 28749  | 28720  | RNA → rpmE2 (PRK01678)Ribosomal_L31 (pfam01197) → |
| Sau-1189-1 | NZ_KI999318.1 | - | 56493  | 56464  | RNA → rpmE2 (PRK01678)Ribosomal_L31 (pfam01197) → |
| Sau-1857-1 | NZ_KI985139.1 | - | 215969 | 215940 | RNA → rpmE2 (PRK01678)Ribosomal_L31 (pfam01197) → |
| Sau-1219-1 | NZ_KK000810.1 | - | 107780 | 107751 | RNA → rpmE2 (PRK01678)Ribosomal_L31 (pfam01197) → |
| Sau-1946-1 | NZ_KI988207.1 | - | 112019 | 111990 | RNA → rpmE2 (PRK01678)Ribosomal_L31 (pfam01197) → |
| Sau-1263-1 | NZ_KK002379.1 | - | 119174 | 119145 | RNA → rpmE2 (PRK01678)Ribosomal_L31 (pfam01197) → |
| Sau-1974-1 | NZ_KI989131.1 | - | 36695  | 36666  | RNA → rpmE2 (PRK01678)Ribosomal_L31 (pfam01197) → |
| Sau-1266-1 | NZ_KK002416.1 | - | 110123 | 110094 | RNA → rpmE2 (PRK01678)Ribosomal_L31 (pfam01197) → |
| Sau-1302-1 | NZ_KK003802.1 | - | 36391  | 36362  | RNA → rpmE2 (PRK01678)Ribosomal_L31 (pfam01197) → |
| Sau-1981-1 | NZ_KI989453.1 | - | 26580  | 26551  | RNA → rpmE2 (PRK01678)Ribosomal_L31 (pfam01197) → |
| Sau-2013-1 | NZ_KI990459.1 | - | 36490  | 36461  | RNA → rpmE2 (PRK01678)Ribosomal_L31 (pfam01197) → |
| Sau-2019-1 | NZ_KI990696.1 | - | 35503  | 35474  | RNA → rpmE2 (PRK01678)Ribosomal_L31 (pfam01197) → |
| Sau-2025-1 | NZ_KI991022.1 | - | 36391  | 36362  | RNA → rpmE2 (PRK01678)Ribosomal_L31 (pfam01197) → |
| Sau-2431-1 | NZ_KI991290.1 | - | 24739  | 24710  | RNA → rpmE2 (PRK01678)Ribosomal_L31 (pfam01197) → |
| Sau-2436-1 | NZ_KI991526.1 | - | 61378  | 61349  | RNA → rpmE2 (PRK01678)Ribosomal_L31 (pfam01197) → |
| Sau-2673-1 | NZ_KI978813.1 | - | 56893  | 56864  | RNA → rpmE2 (PRK01678)Ribosomal_L31 (pfam01197) → |
| Sau-1757-1 | NZ_KI991896.1 | - | 36391  | 36362  | RNA → rpmE2 (PRK01678)Ribosomal_L31 (pfam01197) → |
| Sau-2744-1 | NZ_KI976555.1 | - | 56894  | 56865  | RNA → rpmE2 (PRK01678)Ribosomal_L31 (pfam01197) → |
| Sau-1763-1 | NZ_KI992197.1 | - | 54757  | 54728  | RNA → rpmE2 (PRK01678)Ribosomal_L31 (pfam01197) → |
| Sau-2265-1 | NZ_KI992696.1 | - | 113715 | 113686 | RNA → rpmE2 (PRK01678)Ribosomal_L31 (pfam01197) → |
| Sau-2288-1 | NZ_KI993242.1 | - | 35381  | 35352  | RNA → rpmE2 (PRK01678)Ribosomal_L31 (pfam01197) → |
| Sau-2300-1 | NZ_KI993733.1 | - | 62256  | 62227  | RNA → rpmE2 (PRK01678)Ribosomal_L31 (pfam01197) → |
| Sau-2306-1 | NZ_KI993956.1 | - | 107880 | 107851 | RNA → rpmE2 (PRK01678)Ribosomal_L31 (pfam01197) → |
| Sau-2768-1 | NZ_KI976650.1 | - | 25095  | 25066  | RNA → rpmE2 (PRK01678)Ribosomal_L31 (pfam01197) → |
| Sau-2800-1 | NZ_KI977253.1 | - | 25249  | 25220  | RNA → rpmE2 (PRK01678)Ribosomal_L31 (pfam01197) → |
| Sau-2818-1 | NZ_KI977480.1 | - | 60074  | 60045  | RNA → rpmE2 (PRK01678)Ribosomal_L31 (pfam01197) → |
| Sau-2440-1 | NZ_KI991672.1 | - | 36491  | 36462  | RNA → rpmE2 (PRK01678)Ribosomal_L31 (pfam01197) → |
| Sau-2428-1 | NZ_KI991190.1 | - | 36391  | 36362  | RNA → rpmE2 (PRK01678)Ribosomal_L31 (pfam01197) → |

|            |               |   |        |        |       |                                             |
|------------|---------------|---|--------|--------|-------|---------------------------------------------|
| Sau-2437-1 | NZ_KI991531.1 | - | 35701  | 35672  | RNA → | rpmE2 (PRK01678)Ribosomal_L31 (pfam01197) → |
| Sau-2317-1 | NZ_KI994282.1 | - | 120140 | 120111 | RNA → | rpmE2 (PRK01678)Ribosomal_L31 (pfam01197) → |
| Sau-2323-1 | NZ_KI994449.1 | - | 35159  | 35130  | RNA → | rpmE2 (PRK01678)Ribosomal_L31 (pfam01197) → |
| Sau-2443-1 | NZ_KI991753.1 | - | 36391  | 36362  | RNA → | rpmE2 (PRK01678)Ribosomal_L31 (pfam01197) → |
| Sau-2441-1 | NZ_KI991745.1 | - | 25124  | 25095  | RNA → | rpmE2 (PRK01678)Ribosomal_L31 (pfam01197) → |
| Sau-2331-1 | NZ_KI994746.1 | - | 56149  | 56120  | RNA → | rpmE2 (PRK01678)Ribosomal_L31 (pfam01197) → |
| Sau-2336-1 | NZ_KI994986.1 | - | 35090  | 35061  | RNA → | rpmE2 (PRK01678)Ribosomal_L31 (pfam01197) → |
| Sau-2352-1 | NZ_KI995731.1 | - | 24749  | 24720  | RNA → | rpmE2 (PRK01678)Ribosomal_L31 (pfam01197) → |
| Sau-2313-1 | NZ_KI994181.1 | - | 37036  | 37007  | RNA → | rpmE2 (PRK01678)Ribosomal_L31 (pfam01197) → |
| Sau-2325-1 | NZ_KI994561.1 | - | 111473 | 111444 | RNA → | rpmE2 (PRK01678)Ribosomal_L31 (pfam01197) → |
| Sau-2333-1 | NZ_KI994804.1 | - | 36390  | 36361  | RNA → | rpmE2 (PRK01678)Ribosomal_L31 (pfam01197) → |
| Sau-2338-1 | NZ_KI995065.1 | - | 35148  | 35119  | RNA → | rpmE2 (PRK01678)Ribosomal_L31 (pfam01197) → |
| Sau-2405-1 | NZ_KI998115.1 | - | 24749  | 24720  | RNA → | rpmE2 (PRK01678)Ribosomal_L31 (pfam01197) → |
| Sau-2349-1 | NZ_KI995640.1 | - | 61396  | 61367  | RNA → | rpmE2 (PRK01678)Ribosomal_L31 (pfam01197) → |
| Sau-1197-1 | NZ_KI999666.1 | - | 36413  | 36384  | RNA → | rpmE2 (PRK01678)Ribosomal_L31 (pfam01197) → |
| Sau-2430-1 | NZ_KI991285.1 | - | 61214  | 61185  | RNA → | rpmE2 (PRK01678)Ribosomal_L31 (pfam01197) → |
| Sau-1210-1 | NZ_KK000352.1 | - | 26067  | 26038  | RNA → | rpmE2 (PRK01678)Ribosomal_L31 (pfam01197) → |
| Sau-2319-1 | NZ_KI994335.1 | - | 36391  | 36362  | RNA → | rpmE2 (PRK01678)Ribosomal_L31 (pfam01197) → |
| Sau-1222-1 | NZ_KK000868.1 | - | 35170  | 35141  | RNA → | rpmE2 (PRK01678)Ribosomal_L31 (pfam01197) → |
| Sau-2337-1 | NZ_KI995029.1 | - | 35284  | 35255  | RNA → | rpmE2 (PRK01678)Ribosomal_L31 (pfam01197) → |
| Sau-2342-1 | NZ_KI995318.1 | - | 26613  | 26584  | RNA → | rpmE2 (PRK01678)Ribosomal_L31 (pfam01197) → |
| Sau-1224-1 | NZ_KK000942.1 | - | 117871 | 117842 | RNA → | rpmE2 (PRK01678)Ribosomal_L31 (pfam01197) → |
| Sau-1231-1 | NZ_KK001077.1 | - | 119874 | 119845 | RNA → | rpmE2 (PRK01678)Ribosomal_L31 (pfam01197) → |
| Sau-2438-1 | NZ_KI991621.1 | - | 94599  | 94570  | RNA → | rpmE2 (PRK01678)Ribosomal_L31 (pfam01197) → |
| Sau-1232-1 | NZ_KK001101.1 | - | 36391  | 36362  | RNA → | rpmE2 (PRK01678)Ribosomal_L31 (pfam01197) → |
| Sau-1244-1 | NZ_KK001577.1 | - | 36391  | 36362  | RNA → | rpmE2 (PRK01678)Ribosomal_L31 (pfam01197) → |
| Sau-2316-1 | NZ_KI994268.1 | - | 26559  | 26530  | RNA → | rpmE2 (PRK01678)Ribosomal_L31 (pfam01197) → |
| Sau-2321-1 | NZ_KI994414.1 | - | 24749  | 24720  | RNA → | rpmE2 (PRK01678)Ribosomal_L31 (pfam01197) → |
| Sau-1250-1 | NZ_KK001743.1 | - | 215988 | 215959 | RNA → | rpmE2 (PRK01678)Ribosomal_L31 (pfam01197) → |
| Sau-2326-1 | NZ_KI994570.1 | - | 36391  | 36362  | RNA → | rpmE2 (PRK01678)Ribosomal_L31 (pfam01197) → |
| Sau-1293-1 | NZ_KK003417.1 | - | 36390  | 36361  | RNA → | rpmE2 (PRK01678)Ribosomal_L31 (pfam01197) → |
| Sau-2329-1 | NZ_KI994621.1 | - | 22790  | 22761  | RNA → | rpmE2 (PRK01678)Ribosomal_L31 (pfam01197) → |
| Sau-1300-1 | NZ_KK003735.1 | - | 61791  | 61762  | RNA → | rpmE2 (PRK01678)Ribosomal_L31 (pfam01197) → |
| Sau-1305-1 | NZ_KK003928.1 | - | 36491  | 36462  | RNA → | rpmE2 (PRK01678)Ribosomal_L31 (pfam01197) → |
| Sau-2335-1 | NZ_KI994913.1 | - | 54634  | 54605  | RNA → | rpmE2 (PRK01678)Ribosomal_L31 (pfam01197) → |
| Sau-1317-1 | NZ_KK004598.1 | - | 111224 | 111195 | RNA → | rpmE2 (PRK01678)Ribosomal_L31 (pfam01197) → |
| Sau-1324-1 | NZ_KK004885.1 | - | 60436  | 60407  | RNA → | rpmE2 (PRK01678)Ribosomal_L31 (pfam01197) → |
| Sau-1329-1 | NZ_KK005157.1 | - | 61801  | 61772  | RNA → | rpmE2 (PRK01678)Ribosomal_L31 (pfam01197) → |
| Sau-2311-1 | NZ_KI994155.1 | - | 190898 | 190869 | RNA → | rpmE2 (PRK01678)Ribosomal_L31 (pfam01197) → |
| Sau-1358-1 | NZ_KK006237.1 | - | 37057  | 37028  | RNA → | rpmE2 (PRK01678)Ribosomal_L31 (pfam01197) → |
| Sau-2318-1 | NZ_KI994328.1 | - | 62150  | 62121  | RNA → | rpmE2 (PRK01678)Ribosomal_L31 (pfam01197) → |
| Sau-2341-1 | NZ_KI995272.1 | - | 35284  | 35255  | RNA → | rpmE2 (PRK01678)Ribosomal_L31 (pfam01197) → |
| Sau-2390-1 | NZ_KI997593.1 | - | 35188  | 35159  | RNA → | rpmE2 (PRK01678)Ribosomal_L31 (pfam01197) → |
| Sau-2346-1 | NZ_KI995457.1 | - | 24749  | 24720  | RNA → | rpmE2 (PRK01678)Ribosomal_L31 (pfam01197) → |
| Sau-1200-1 | NZ_KI999903.1 | - | 151572 | 151543 | RNA → | rpmE2 (PRK01678)Ribosomal_L31 (pfam01197) → |
| Sau-2364-1 | NZ_KI996937.1 | - | 35318  | 35289  | RNA → | rpmE2 (PRK01678)Ribosomal_L31 (pfam01197) → |
| Sau-1212-1 | NZ_KK000534.1 | - | 65122  | 65093  | RNA → | rpmE2 (PRK01678)Ribosomal_L31 (pfam01197) → |
| Sau-1252-1 | NZ_KK001778.1 | - | 119887 | 119858 | RNA → | rpmE2 (PRK01678)Ribosomal_L31 (pfam01197) → |
| Sau-2372-1 | NZ_KI997187.1 | - | 24749  | 24720  | RNA → | rpmE2 (PRK01678)Ribosomal_L31 (pfam01197) → |
| Sau-1278-1 | NZ_KK002782.1 | - | 37084  | 37055  | RNA → | rpmE2 (PRK01678)Ribosomal_L31 (pfam01197) → |
| Sau-2373-1 | NZ_KI997194.1 | - | 213232 | 213203 | RNA → | rpmE2 (PRK01678)Ribosomal_L31 (pfam01197) → |
| Sau-1291-1 | NZ_KK003367.1 | - | 115636 | 115607 | RNA → | rpmE2 (PRK01678)Ribosomal_L31 (pfam01197) → |

|            |               |   |        |        |       |                                  |                               |                             |   |
|------------|---------------|---|--------|--------|-------|----------------------------------|-------------------------------|-----------------------------|---|
| Sau-2381-1 | NZ_KI997418.1 | - | 58459  | 58430  | RNA → | <a href="#">rpmE2 (PRK01678)</a> | <a href="#">Ribosomal_L31</a> | <a href="#">(pfam01197)</a> | → |
| Sau-1296-1 | NZ_KK003598.1 | - | 151040 | 151011 | RNA → | <a href="#">rpmE2 (PRK01678)</a> | <a href="#">Ribosomal_L31</a> | <a href="#">(pfam01197)</a> | → |
| Sau-2343-1 | NZ_KI995366.1 | - | 36391  | 36362  | RNA → | <a href="#">rpmE2 (PRK01678)</a> | <a href="#">Ribosomal_L31</a> | <a href="#">(pfam01197)</a> | → |
| Sau-1308-1 | NZ_KK004075.1 | - | 58187  | 58158  | RNA → | <a href="#">rpmE2 (PRK01678)</a> | <a href="#">Ribosomal_L31</a> | <a href="#">(pfam01197)</a> | → |
| Sau-2355-1 | NZ_KI995873.1 | - | 36226  | 36197  | RNA → | <a href="#">rpmE2 (PRK01678)</a> | <a href="#">Ribosomal_L31</a> | <a href="#">(pfam01197)</a> | → |
| Sau-1314-1 | NZ_KK004401.1 | - | 1461   | 1432   | RNA → | <a href="#">rpmE2 (PRK01678)</a> | <a href="#">Ribosomal_L31</a> | <a href="#">(pfam01197)</a> | → |
| Sau-2360-1 | NZ_KI996842.1 | - | 34585  | 34556  | RNA → | <a href="#">rpmE2 (PRK01678)</a> | <a href="#">Ribosomal_L31</a> | <a href="#">(pfam01197)</a> | → |
| Sau-1326-1 | NZ_KK004974.1 | - | 116790 | 116761 | RNA → | <a href="#">rpmE2 (PRK01678)</a> | <a href="#">Ribosomal_L31</a> | <a href="#">(pfam01197)</a> | → |
| Sau-1327-1 | NZ_KK004981.1 | - | 37010  | 36981  | RNA → | <a href="#">rpmE2 (PRK01678)</a> | <a href="#">Ribosomal_L31</a> | <a href="#">(pfam01197)</a> | → |
| Sau-1338-1 | NZ_KK005486.1 | - | 116912 | 116883 | RNA → | <a href="#">rpmE2 (PRK01678)</a> | <a href="#">Ribosomal_L31</a> | <a href="#">(pfam01197)</a> | → |
| Sau-2369-1 | NZ_KI997125.1 | - | 60974  | 60945  | RNA → | <a href="#">rpmE2 (PRK01678)</a> | <a href="#">Ribosomal_L31</a> | <a href="#">(pfam01197)</a> | → |
| Sau-1339-1 | NZ_KK005523.1 | - | 171217 | 171188 | RNA → | <a href="#">rpmE2 (PRK01678)</a> | <a href="#">Ribosomal_L31</a> | <a href="#">(pfam01197)</a> | → |
| Sau-2377-1 | NZ_KI997228.1 | - | 35318  | 35289  | RNA → | <a href="#">rpmE2 (PRK01678)</a> | <a href="#">Ribosomal_L31</a> | <a href="#">(pfam01197)</a> | → |
| Sau-1193-1 | NZ_KI999496.1 | - | 116493 | 116464 | RNA → | <a href="#">rpmE2 (PRK01678)</a> | <a href="#">Ribosomal_L31</a> | <a href="#">(pfam01197)</a> | → |
| Sau-2391-1 | NZ_KI997674.1 | - | 109253 | 109224 | RNA → | <a href="#">rpmE2 (PRK01678)</a> | <a href="#">Ribosomal_L31</a> | <a href="#">(pfam01197)</a> | → |
| Sau-1275-1 | NZ_KK002702.1 | - | 117105 | 117076 | RNA → | <a href="#">rpmE2 (PRK01678)</a> | <a href="#">Ribosomal_L31</a> | <a href="#">(pfam01197)</a> | → |
| Sau-1290-1 | NZ_KK003277.1 | - | 35572  | 35543  | RNA → | <a href="#">rpmE2 (PRK01678)</a> | <a href="#">Ribosomal_L31</a> | <a href="#">(pfam01197)</a> | → |
| Sau-2420-1 | NZ_KI998546.1 | - | 35801  | 35772  | RNA → | <a href="#">rpmE2 (PRK01678)</a> | <a href="#">Ribosomal_L31</a> | <a href="#">(pfam01197)</a> | → |
| Sau-1348-1 | NZ_KK005851.1 | - | 130981 | 130952 | RNA → | <a href="#">rpmE2 (PRK01678)</a> | <a href="#">Ribosomal_L31</a> | <a href="#">(pfam01197)</a> | → |
| Sau-2334-1 | NZ_KI994905.1 | - | 61334  | 61305  | RNA → | <a href="#">rpmE2 (PRK01678)</a> | <a href="#">Ribosomal_L31</a> | <a href="#">(pfam01197)</a> | → |
| Sau-1202-1 | NZ_KI999924.1 | - | 36491  | 36462  | RNA → | <a href="#">rpmE2 (PRK01678)</a> | <a href="#">Ribosomal_L31</a> | <a href="#">(pfam01197)</a> | → |
| Sau-2339-1 | NZ_KI995125.1 | - | 55231  | 55202  | RNA → | <a href="#">rpmE2 (PRK01678)</a> | <a href="#">Ribosomal_L31</a> | <a href="#">(pfam01197)</a> | → |
| Sau-1228-1 | NZ_KK001064.1 | - | 109928 | 109899 | RNA → | <a href="#">rpmE2 (PRK01678)</a> | <a href="#">Ribosomal_L31</a> | <a href="#">(pfam01197)</a> | → |
| Sau-1248-1 | NZ_KK001705.1 | - | 232070 | 232041 | RNA → | <a href="#">rpmE2 (PRK01678)</a> | <a href="#">Ribosomal_L31</a> | <a href="#">(pfam01197)</a> | → |
| Sau-2340-1 | NZ_KI995267.1 | - | 24749  | 24720  | RNA → | <a href="#">rpmE2 (PRK01678)</a> | <a href="#">Ribosomal_L31</a> | <a href="#">(pfam01197)</a> | → |
| Sau-1273-1 | NZ_KK002613.1 | - | 108221 | 108192 | RNA → | <a href="#">rpmE2 (PRK01678)</a> | <a href="#">Ribosomal_L31</a> | <a href="#">(pfam01197)</a> | → |
| Sau-2344-1 | NZ_KI995407.1 | - | 35284  | 35255  | RNA → | <a href="#">rpmE2 (PRK01678)</a> | <a href="#">Ribosomal_L31</a> | <a href="#">(pfam01197)</a> | → |
| Sau-1279-1 | NZ_KK002853.1 | - | 2466   | 2437   | RNA → | <a href="#">rpmE2 (PRK01678)</a> | <a href="#">Ribosomal_L31</a> | <a href="#">(pfam01197)</a> | → |
| Sau-2345-1 | NZ_KI995448.1 | - | 215968 | 215939 | RNA → | <a href="#">rpmE2 (PRK01678)</a> | <a href="#">Ribosomal_L31</a> | <a href="#">(pfam01197)</a> | → |
| Sau-1286-1 | NZ_KK003159.1 | - | 36393  | 36364  | RNA → | <a href="#">rpmE2 (PRK01678)</a> | <a href="#">Ribosomal_L31</a> | <a href="#">(pfam01197)</a> | → |
| Sau-2357-1 | NZ_KI995960.1 | - | 62204  | 62175  | RNA → | <a href="#">rpmE2 (PRK01678)</a> | <a href="#">Ribosomal_L31</a> | <a href="#">(pfam01197)</a> | → |
| Sau-1292-1 | NZ_KK003413.1 | - | 25129  | 25100  | RNA → | <a href="#">rpmE2 (PRK01678)</a> | <a href="#">Ribosomal_L31</a> | <a href="#">(pfam01197)</a> | → |
| Sau-2361-1 | NZ_KI996884.1 | - | 25291  | 25262  | RNA → | <a href="#">rpmE2 (PRK01678)</a> | <a href="#">Ribosomal_L31</a> | <a href="#">(pfam01197)</a> | → |
| Sau-1297-1 | NZ_KK003607.1 | - | 36492  | 36463  | RNA → | <a href="#">rpmE2 (PRK01678)</a> | <a href="#">Ribosomal_L31</a> | <a href="#">(pfam01197)</a> | → |
| Sau-2371-1 | NZ_KI997144.1 | - | 12936  | 12907  | RNA → | <a href="#">rpmE2 (PRK01678)</a> | <a href="#">Ribosomal_L31</a> | <a href="#">(pfam01197)</a> | → |
| Sau-1309-1 | NZ_KK004207.1 | - | 108037 | 108008 | RNA → | <a href="#">rpmE2 (PRK01678)</a> | <a href="#">Ribosomal_L31</a> | <a href="#">(pfam01197)</a> | → |
| Sau-1323-1 | NZ_KK004825.1 | - | 36391  | 36362  | RNA → | <a href="#">rpmE2 (PRK01678)</a> | <a href="#">Ribosomal_L31</a> | <a href="#">(pfam01197)</a> | → |
| Sau-2392-1 | NZ_KI997700.1 | - | 35990  | 35961  | RNA → | <a href="#">rpmE2 (PRK01678)</a> | <a href="#">Ribosomal_L31</a> | <a href="#">(pfam01197)</a> | → |
| Sau-1334-1 | NZ_KK005353.1 | - | 118726 | 118697 | RNA → | <a href="#">rpmE2 (PRK01678)</a> | <a href="#">Ribosomal_L31</a> | <a href="#">(pfam01197)</a> | → |
| Sau-2393-1 | NZ_KI997749.1 | - | 35711  | 35682  | RNA → | <a href="#">rpmE2 (PRK01678)</a> | <a href="#">Ribosomal_L31</a> | <a href="#">(pfam01197)</a> | → |
| Sau-1351-1 | NZ_KK005962.1 | - | 36391  | 36362  | RNA → | <a href="#">rpmE2 (PRK01678)</a> | <a href="#">Ribosomal_L31</a> | <a href="#">(pfam01197)</a> | → |
| Sau-2324-1 | NZ_KI994478.1 | - | 56277  | 56248  | RNA → | <a href="#">rpmE2 (PRK01678)</a> | <a href="#">Ribosomal_L31</a> | <a href="#">(pfam01197)</a> | → |
| Sau-2332-1 | NZ_KI994753.1 | - | 36391  | 36362  | RNA → | <a href="#">rpmE2 (PRK01678)</a> | <a href="#">Ribosomal_L31</a> | <a href="#">(pfam01197)</a> | → |
| Sau-2347-1 | NZ_KI995510.1 | - | 36391  | 36362  | RNA → | <a href="#">rpmE2 (PRK01678)</a> | <a href="#">Ribosomal_L31</a> | <a href="#">(pfam01197)</a> | → |
| Sau-2353-1 | NZ_KI995810.1 | - | 36413  | 36384  | RNA → | <a href="#">rpmE2 (PRK01678)</a> | <a href="#">Ribosomal_L31</a> | <a href="#">(pfam01197)</a> | → |
| Sau-1534-1 | NZ_KK012823.1 | - | 122391 | 122362 | RNA → | <a href="#">rpmE2 (PRK01678)</a> | <a href="#">Ribosomal_L31</a> | <a href="#">(pfam01197)</a> | → |
| Sau-1518-1 | NZ_KK012119.1 | - | 35384  | 35355  | RNA → | <a href="#">rpmE2 (PRK01678)</a> | <a href="#">Ribosomal_L31</a> | <a href="#">(pfam01197)</a> | → |
| Sau-1888-1 | NZ_KI986039.1 | - | 24746  | 24717  | RNA → | <a href="#">rpmE2 (PRK01678)</a> | <a href="#">Ribosomal_L31</a> | <a href="#">(pfam01197)</a> | → |
| Sau-1547-1 | NZ_KK013532.1 | - | 21758  | 21729  | RNA → | <a href="#">rpmE2 (PRK01678)</a> | <a href="#">Ribosomal_L31</a> | <a href="#">(pfam01197)</a> | → |
| Sau-1890-1 | NZ_KI986058.1 | - | 54570  | 54541  | RNA → | <a href="#">rpmE2 (PRK01678)</a> | <a href="#">Ribosomal_L31</a> | <a href="#">(pfam01197)</a> | → |
| Sau-1522-1 | NZ_KK012212.1 | - | 36391  | 36362  | RNA → | <a href="#">rpmE2 (PRK01678)</a> | <a href="#">Ribosomal_L31</a> | <a href="#">(pfam01197)</a> | → |
| Sau-1894-1 | NZ_KI986254.1 | - | 35104  | 35075  | RNA → | <a href="#">rpmE2 (PRK01678)</a> | <a href="#">Ribosomal_L31</a> | <a href="#">(pfam01197)</a> | → |

|            |               |   |        |        |                                                   |
|------------|---------------|---|--------|--------|---------------------------------------------------|
| Sau-1567-1 | NZ_KK014247.1 | - | 61380  | 61351  | RNA → rpmE2 (PRK01678)Ribosomal_L31 (pfam01197) → |
| Sau-1896-1 | NZ_KI986312.1 | - | 56289  | 56260  | RNA → rpmE2 (PRK01678)Ribosomal_L31 (pfam01197) → |
| Sau-1906-1 | NZ_KI986770.1 | - | 54695  | 54666  | RNA → rpmE2 (PRK01678)Ribosomal_L31 (pfam01197) → |
| Sau-1549-1 | NZ_KK013599.1 | - | 55101  | 55072  | RNA → rpmE2 (PRK01678)Ribosomal_L31 (pfam01197) → |
| Sau-1909-1 | NZ_KI986816.1 | - | 36119  | 36090  | RNA → rpmE2 (PRK01678)Ribosomal_L31 (pfam01197) → |
| Sau-1921-1 | NZ_KI987324.1 | - | 43760  | 43731  | RNA → rpmE2 (PRK01678)Ribosomal_L31 (pfam01197) → |
| Sau-1898-1 | NZ_KI986353.1 | - | 36391  | 36362  | RNA → rpmE2 (PRK01678)Ribosomal_L31 (pfam01197) → |
| Sau-1811-1 | NZ_KI983623.1 | - | 54651  | 54622  | RNA → rpmE2 (PRK01678)Ribosomal_L31 (pfam01197) → |
| Sau-1910-1 | NZ_KI986850.1 | - | 35287  | 35258  | RNA → rpmE2 (PRK01678)Ribosomal_L31 (pfam01197) → |
| Sau-1812-1 | NZ_KI983692.1 | - | 54757  | 54728  | RNA → rpmE2 (PRK01678)Ribosomal_L31 (pfam01197) → |
| Sau-1935-1 | NZ_KI987851.1 | - | 61891  | 61862  | RNA → rpmE2 (PRK01678)Ribosomal_L31 (pfam01197) → |
| Sau-1887-1 | NZ_KI985955.1 | - | 61433  | 61404  | RNA → rpmE2 (PRK01678)Ribosomal_L31 (pfam01197) → |
| Sau-1819-1 | NZ_KI983880.1 | - | 61430  | 61401  | RNA → rpmE2 (PRK01678)Ribosomal_L31 (pfam01197) → |
| Sau-1893-1 | NZ_KI986224.1 | - | 24749  | 24720  | RNA → rpmE2 (PRK01678)Ribosomal_L31 (pfam01197) → |
| Sau-1905-1 | NZ_KI986766.1 | - | 116758 | 116729 | RNA → rpmE2 (PRK01678)Ribosomal_L31 (pfam01197) → |
| Sau-1823-1 | NZ_KI984111.1 | - | 24749  | 24720  | RNA → rpmE2 (PRK01678)Ribosomal_L31 (pfam01197) → |
| Sau-1913-1 | NZ_KI987032.1 | - | 36391  | 36362  | RNA → rpmE2 (PRK01678)Ribosomal_L31 (pfam01197) → |
| Sau-1824-1 | NZ_KI984172.1 | - | 36391  | 36362  | RNA → rpmE2 (PRK01678)Ribosomal_L31 (pfam01197) → |
| Sau-1892-1 | NZ_KI986135.1 | - | 35377  | 35348  | RNA → rpmE2 (PRK01678)Ribosomal_L31 (pfam01197) → |
| Sau-1832-1 | NZ_KI984424.1 | - | 61797  | 61768  | RNA → rpmE2 (PRK01678)Ribosomal_L31 (pfam01197) → |
| Sau-1924-1 | NZ_KI987398.1 | - | 24749  | 24720  | RNA → rpmE2 (PRK01678)Ribosomal_L31 (pfam01197) → |
| Sau-1901-1 | NZ_KI986519.1 | - | 35292  | 35263  | RNA → rpmE2 (PRK01678)Ribosomal_L31 (pfam01197) → |
| Sau-1839-1 | NZ_KI984673.1 | - | 54994  | 54965  | RNA → rpmE2 (PRK01678)Ribosomal_L31 (pfam01197) → |
| Sau-1902-1 | NZ_KI986631.1 | - | 111669 | 111640 | RNA → rpmE2 (PRK01678)Ribosomal_L31 (pfam01197) → |
| Sau-1846-1 | NZ_KI984939.1 | - | 54651  | 54622  | RNA → rpmE2 (PRK01678)Ribosomal_L31 (pfam01197) → |
| Sau-1914-1 | NZ_KI987041.1 | - | 111532 | 111503 | RNA → rpmE2 (PRK01678)Ribosomal_L31 (pfam01197) → |
| Sau-1855-1 | NZ_KI985103.1 | - | 61792  | 61763  | RNA → rpmE2 (PRK01678)Ribosomal_L31 (pfam01197) → |
| Sau-1928-1 | NZ_KI987591.1 | - | 24749  | 24720  | RNA → rpmE2 (PRK01678)Ribosomal_L31 (pfam01197) → |
| Sau-1862-1 | NZ_KI985187.1 | - | 49963  | 49934  | RNA → rpmE2 (PRK01678)Ribosomal_L31 (pfam01197) → |
| Sau-1942-1 | NZ_KI988047.1 | - | 24103  | 24074  | RNA → rpmE2 (PRK01678)Ribosomal_L31 (pfam01197) → |
| Sau-1875-1 | NZ_KI985644.1 | - | 56762  | 56733  | RNA → rpmE2 (PRK01678)Ribosomal_L31 (pfam01197) → |
| Sau-1948-1 | NZ_KI988232.1 | - | 36390  | 36361  | RNA → rpmE2 (PRK01678)Ribosomal_L31 (pfam01197) → |
| Sau-1882-1 | NZ_KI985801.1 | - | 111898 | 111869 | RNA → rpmE2 (PRK01678)Ribosomal_L31 (pfam01197) → |
| Sau-1957-1 | NZ_KI988497.1 | - | 21173  | 21144  | RNA → rpmE2 (PRK01678)Ribosomal_L31 (pfam01197) → |
| Sau-1813-1 | NZ_KI983712.1 | - | 24749  | 24720  | RNA → rpmE2 (PRK01678)Ribosomal_L31 (pfam01197) → |
| Sau-1820-1 | NZ_KI983954.1 | - | 36391  | 36362  | RNA → rpmE2 (PRK01678)Ribosomal_L31 (pfam01197) → |
| Sau-1912-1 | NZ_KI986932.1 | - | 55136  | 55107  | RNA → rpmE2 (PRK01678)Ribosomal_L31 (pfam01197) → |
| Sau-1825-1 | NZ_KI984221.1 | - | 36391  | 36362  | RNA → rpmE2 (PRK01678)Ribosomal_L31 (pfam01197) → |
| Sau-1919-1 | NZ_KI987227.1 | - | 111530 | 111501 | RNA → rpmE2 (PRK01678)Ribosomal_L31 (pfam01197) → |
| Sau-1833-1 | NZ_KI984431.1 | - | 35144  | 35115  | RNA → rpmE2 (PRK01678)Ribosomal_L31 (pfam01197) → |
| Sau-1920-1 | NZ_KI987293.1 | - | 61749  | 61720  | RNA → rpmE2 (PRK01678)Ribosomal_L31 (pfam01197) → |
| Sau-1926-1 | NZ_KI987485.1 | - | 126282 | 126253 | RNA → rpmE2 (PRK01678)Ribosomal_L31 (pfam01197) → |
| Sau-1841-1 | NZ_KI984804.1 | - | 26803  | 26774  | RNA → rpmE2 (PRK01678)Ribosomal_L31 (pfam01197) → |
| Sau-1927-1 | NZ_KI987518.1 | - | 203212 | 203183 | RNA → rpmE2 (PRK01678)Ribosomal_L31 (pfam01197) → |
| Sau-1848-1 | NZ_KI984951.1 | - | 111102 | 111073 | RNA → rpmE2 (PRK01678)Ribosomal_L31 (pfam01197) → |
| Sau-1856-1 | NZ_KI985109.1 | - | 113831 | 113802 | RNA → rpmE2 (PRK01678)Ribosomal_L31 (pfam01197) → |
| Sau-1932-1 | NZ_KI987777.1 | - | 108267 | 108238 | RNA → rpmE2 (PRK01678)Ribosomal_L31 (pfam01197) → |
| Sau-1864-1 | NZ_KI985225.1 | - | 62105  | 62076  | RNA → rpmE2 (PRK01678)Ribosomal_L31 (pfam01197) → |
| Sau-1941-1 | NZ_KI987988.1 | - | 25168  | 25139  | RNA → rpmE2 (PRK01678)Ribosomal_L31 (pfam01197) → |
| Sau-1947-1 | NZ_KI988220.1 | - | 24749  | 24720  | RNA → rpmE2 (PRK01678)Ribosomal_L31 (pfam01197) → |
| Sau-1871-1 | NZ_KI985527.1 | - | 61434  | 61405  | RNA → rpmE2 (PRK01678)Ribosomal_L31 (pfam01197) → |
| Sau-1899-1 | NZ_KI986431.1 | - | 212475 | 212446 | RNA → rpmE2 (PRK01678)Ribosomal_L31 (pfam01197) → |



|            |               |   |        |        |       |                                  |                               |                             |   |
|------------|---------------|---|--------|--------|-------|----------------------------------|-------------------------------|-----------------------------|---|
| Sau-1876-1 | NZ_KI985685.1 | - | 177827 | 177798 | RNA → | <a href="#">rpmE2 (PRK01678)</a> | <a href="#">Ribosomal_L31</a> | <a href="#">(pfam01197)</a> | → |
| Sau-1904-1 | NZ_KI986675.1 | - | 36390  | 36361  | RNA → | <a href="#">rpmE2 (PRK01678)</a> | <a href="#">Ribosomal_L31</a> | <a href="#">(pfam01197)</a> | → |
| Sau-1877-1 | NZ_KI985700.1 | - | 24749  | 24720  | RNA → | <a href="#">rpmE2 (PRK01678)</a> | <a href="#">Ribosomal_L31</a> | <a href="#">(pfam01197)</a> | → |
| Sau-1884-1 | NZ_KI985807.1 | - | 36391  | 36362  | RNA → | <a href="#">rpmE2 (PRK01678)</a> | <a href="#">Ribosomal_L31</a> | <a href="#">(pfam01197)</a> | → |
| Sau-1911-1 | NZ_KI986876.1 | - | 36391  | 36362  | RNA → | <a href="#">rpmE2 (PRK01678)</a> | <a href="#">Ribosomal_L31</a> | <a href="#">(pfam01197)</a> | → |
| Sau-1810-1 | NZ_KI983559.1 | - | 36391  | 36362  | RNA → | <a href="#">rpmE2 (PRK01678)</a> | <a href="#">Ribosomal_L31</a> | <a href="#">(pfam01197)</a> | → |
| Sau-1918-1 | NZ_KI987165.1 | - | 24749  | 24720  | RNA → | <a href="#">rpmE2 (PRK01678)</a> | <a href="#">Ribosomal_L31</a> | <a href="#">(pfam01197)</a> | → |
| Sau-1930-1 | NZ_KI987653.1 | - | 81097  | 81068  | RNA → | <a href="#">rpmE2 (PRK01678)</a> | <a href="#">Ribosomal_L31</a> | <a href="#">(pfam01197)</a> | → |
| Sau-1816-1 | NZ_KI983765.1 | - | 36391  | 36362  | RNA → | <a href="#">rpmE2 (PRK01678)</a> | <a href="#">Ribosomal_L31</a> | <a href="#">(pfam01197)</a> | → |
| Sau-1822-1 | NZ_KI984061.1 | - | 36391  | 36362  | RNA → | <a href="#">rpmE2 (PRK01678)</a> | <a href="#">Ribosomal_L31</a> | <a href="#">(pfam01197)</a> | → |
| Sau-1931-1 | NZ_KI987730.1 | - | 32891  | 32862  | RNA → | <a href="#">rpmE2 (PRK01678)</a> | <a href="#">Ribosomal_L31</a> | <a href="#">(pfam01197)</a> | → |
| Sau-1936-1 | NZ_KI987962.1 | - | 113737 | 113708 | RNA → | <a href="#">rpmE2 (PRK01678)</a> | <a href="#">Ribosomal_L31</a> | <a href="#">(pfam01197)</a> | → |
| Sau-1827-1 | NZ_KI984308.1 | - | 36490  | 36461  | RNA → | <a href="#">rpmE2 (PRK01678)</a> | <a href="#">Ribosomal_L31</a> | <a href="#">(pfam01197)</a> | → |
| Sau-1938-1 | NZ_KI987963.1 | - | 239096 | 239067 | RNA → | <a href="#">rpmE2 (PRK01678)</a> | <a href="#">Ribosomal_L31</a> | <a href="#">(pfam01197)</a> | → |
| Sau-1828-1 | NZ_KI984334.1 | - | 61334  | 61305  | RNA → | <a href="#">rpmE2 (PRK01678)</a> | <a href="#">Ribosomal_L31</a> | <a href="#">(pfam01197)</a> | → |
| Sau-1944-1 | NZ_KI988094.1 | - | 25058  | 25029  | RNA → | <a href="#">rpmE2 (PRK01678)</a> | <a href="#">Ribosomal_L31</a> | <a href="#">(pfam01197)</a> | → |
| Sau-1837-1 | NZ_KI984667.1 | - | 56763  | 56734  | RNA → | <a href="#">rpmE2 (PRK01678)</a> | <a href="#">Ribosomal_L31</a> | <a href="#">(pfam01197)</a> | → |
| Sau-1954-1 | NZ_KI988428.1 | - | 26791  | 26762  | RNA → | <a href="#">rpmE2 (PRK01678)</a> | <a href="#">Ribosomal_L31</a> | <a href="#">(pfam01197)</a> | → |
| Sau-1843-1 | NZ_KI984882.1 | - | 62156  | 62127  | RNA → | <a href="#">rpmE2 (PRK01678)</a> | <a href="#">Ribosomal_L31</a> | <a href="#">(pfam01197)</a> | → |
| Sau-1961-1 | NZ_KI988618.1 | - | 212692 | 212663 | RNA → | <a href="#">rpmE2 (PRK01678)</a> | <a href="#">Ribosomal_L31</a> | <a href="#">(pfam01197)</a> | → |
| Sau-1845-1 | NZ_KI984898.1 | - | 113835 | 113806 | RNA → | <a href="#">rpmE2 (PRK01678)</a> | <a href="#">Ribosomal_L31</a> | <a href="#">(pfam01197)</a> | → |
| Sau-1891-1 | NZ_KI986108.1 | - | 49963  | 49934  | RNA → | <a href="#">rpmE2 (PRK01678)</a> | <a href="#">Ribosomal_L31</a> | <a href="#">(pfam01197)</a> | → |
| Sau-1854-1 | NZ_KI985077.1 | - | 61542  | 61513  | RNA → | <a href="#">rpmE2 (PRK01678)</a> | <a href="#">Ribosomal_L31</a> | <a href="#">(pfam01197)</a> | → |
| Sau-1923-1 | NZ_KI987331.1 | - | 61334  | 61305  | RNA → | <a href="#">rpmE2 (PRK01678)</a> | <a href="#">Ribosomal_L31</a> | <a href="#">(pfam01197)</a> | → |
| Sau-1860-1 | NZ_KI985163.1 | - | 110439 | 110410 | RNA → | <a href="#">rpmE2 (PRK01678)</a> | <a href="#">Ribosomal_L31</a> | <a href="#">(pfam01197)</a> | → |
| Sau-1929-1 | NZ_KI987601.1 | - | 35801  | 35772  | RNA → | <a href="#">rpmE2 (PRK01678)</a> | <a href="#">Ribosomal_L31</a> | <a href="#">(pfam01197)</a> | → |
| Sau-1868-1 | NZ_KI985296.1 | - | 151137 | 151108 | RNA → | <a href="#">rpmE2 (PRK01678)</a> | <a href="#">Ribosomal_L31</a> | <a href="#">(pfam01197)</a> | → |
| Sau-1943-1 | NZ_KI988056.1 | - | 36103  | 36074  | RNA → | <a href="#">rpmE2 (PRK01678)</a> | <a href="#">Ribosomal_L31</a> | <a href="#">(pfam01197)</a> | → |
| Sau-1874-1 | NZ_KI985617.1 | - | 212631 | 212602 | RNA → | <a href="#">rpmE2 (PRK01678)</a> | <a href="#">Ribosomal_L31</a> | <a href="#">(pfam01197)</a> | → |
| Sau-1951-1 | NZ_KI988269.1 | - | 116669 | 116640 | RNA → | <a href="#">rpmE2 (PRK01678)</a> | <a href="#">Ribosomal_L31</a> | <a href="#">(pfam01197)</a> | → |
| Sau-1953-1 | NZ_KI988356.1 | - | 112019 | 111990 | RNA → | <a href="#">rpmE2 (PRK01678)</a> | <a href="#">Ribosomal_L31</a> | <a href="#">(pfam01197)</a> | → |
| Sau-1814-1 | NZ_KI983758.1 | - | 64944  | 64915  | RNA → | <a href="#">rpmE2 (PRK01678)</a> | <a href="#">Ribosomal_L31</a> | <a href="#">(pfam01197)</a> | → |
| Sau-1821-1 | NZ_KI984014.1 | - | 58248  | 58219  | RNA → | <a href="#">rpmE2 (PRK01678)</a> | <a href="#">Ribosomal_L31</a> | <a href="#">(pfam01197)</a> | → |
| Sau-1958-1 | NZ_KI988547.1 | - | 111812 | 111783 | RNA → | <a href="#">rpmE2 (PRK01678)</a> | <a href="#">Ribosomal_L31</a> | <a href="#">(pfam01197)</a> | → |
| Sau-1826-1 | NZ_KI984299.1 | - | 35013  | 34984  | RNA → | <a href="#">rpmE2 (PRK01678)</a> | <a href="#">Ribosomal_L31</a> | <a href="#">(pfam01197)</a> | → |
| Sau-1960-1 | NZ_KI988571.1 | - | 212691 | 212662 | RNA → | <a href="#">rpmE2 (PRK01678)</a> | <a href="#">Ribosomal_L31</a> | <a href="#">(pfam01197)</a> | → |
| Sau-1834-1 | NZ_KI984496.1 | - | 36390  | 36361  | RNA → | <a href="#">rpmE2 (PRK01678)</a> | <a href="#">Ribosomal_L31</a> | <a href="#">(pfam01197)</a> | → |
| Sau-1842-1 | NZ_KI984850.1 | - | 215908 | 215879 | RNA → | <a href="#">rpmE2 (PRK01678)</a> | <a href="#">Ribosomal_L31</a> | <a href="#">(pfam01197)</a> | → |
| Sau-1849-1 | NZ_KI984965.1 | - | 49963  | 49934  | RNA → | <a href="#">rpmE2 (PRK01678)</a> | <a href="#">Ribosomal_L31</a> | <a href="#">(pfam01197)</a> | → |
| Sau-1851-1 | NZ_KI984994.1 | - | 49963  | 49934  | RNA → | <a href="#">rpmE2 (PRK01678)</a> | <a href="#">Ribosomal_L31</a> | <a href="#">(pfam01197)</a> | → |
| Sau-2244-1 | NZ_KI996151.1 | - | 56764  | 56735  | RNA → | <a href="#">rpmE2 (PRK01678)</a> | <a href="#">Ribosomal_L31</a> | <a href="#">(pfam01197)</a> | → |
| Sau-885-1  | NZ_KI978043.1 | - | 56894  | 56865  | RNA → | <a href="#">rpmE2 (PRK01678)</a> | <a href="#">Ribosomal_L31</a> | <a href="#">(pfam01197)</a> | → |
| Sau-2267-1 | NZ_KI992801.1 | - | 62204  | 62175  | RNA → | <a href="#">rpmE2 (PRK01678)</a> | <a href="#">Ribosomal_L31</a> | <a href="#">(pfam01197)</a> | → |
| Sau-2292-1 | NZ_KI993348.1 | - | 61238  | 61209  | RNA → | <a href="#">rpmE2 (PRK01678)</a> | <a href="#">Ribosomal_L31</a> | <a href="#">(pfam01197)</a> | → |
| Sau-226-1  | NZ_KI978154.1 | - | 111076 | 111047 | RNA → | <a href="#">rpmE2 (PRK01678)</a> | <a href="#">Ribosomal_L31</a> | <a href="#">(pfam01197)</a> | → |
| Sau-2245-1 | NZ_KI996196.1 | - | 54989  | 54960  | RNA → | <a href="#">rpmE2 (PRK01678)</a> | <a href="#">Ribosomal_L31</a> | <a href="#">(pfam01197)</a> | → |
| Sau-853-1  | NZ_KI978238.1 | - | 220164 | 220135 | RNA → | <a href="#">rpmE2 (PRK01678)</a> | <a href="#">Ribosomal_L31</a> | <a href="#">(pfam01197)</a> | → |
| Sau-2250-1 | NZ_KI996381.1 | - | 35318  | 35289  | RNA → | <a href="#">rpmE2 (PRK01678)</a> | <a href="#">Ribosomal_L31</a> | <a href="#">(pfam01197)</a> | → |
| Sau-886-1  | NZ_KI978243.1 | - | 239301 | 239272 | RNA → | <a href="#">rpmE2 (PRK01678)</a> | <a href="#">Ribosomal_L31</a> | <a href="#">(pfam01197)</a> | → |
| Sau-2258-1 | NZ_KI996669.1 | - | 5943   | 5914   | RNA → | <a href="#">rpmE2 (PRK01678)</a> | <a href="#">Ribosomal_L31</a> | <a href="#">(pfam01197)</a> | → |
| Sau-1159-1 | NZ_KI978422.1 | - | 20728  | 20699  | RNA → | <a href="#">rpmE2 (PRK01678)</a> | <a href="#">Ribosomal_L31</a> | <a href="#">(pfam01197)</a> | → |
| Sau-887-1  | NZ_KI978548.1 | - | 35013  | 34984  | RNA → | <a href="#">rpmE2 (PRK01678)</a> | <a href="#">Ribosomal_L31</a> | <a href="#">(pfam01197)</a> | → |



|            |               |   |        |        |       |                                             |
|------------|---------------|---|--------|--------|-------|---------------------------------------------|
| Sau-861-1  | NZ_KI978733.1 | - | 56403  | 56374  | RNA → | rpmE2 (PRK01678)Ribosomal_L31 (pfam01197) → |
| Sau-2301-1 | NZ_KI993776.1 | - | 119058 | 119029 | RNA → | rpmE2 (PRK01678)Ribosomal_L31 (pfam01197) → |
| Sau-2241-1 | NZ_KI996065.1 | - | 36110  | 36081  | RNA → | rpmE2 (PRK01678)Ribosomal_L31 (pfam01197) → |
| Sau-2248-1 | NZ_KI996301.1 | - | 55372  | 55343  | RNA → | rpmE2 (PRK01678)Ribosomal_L31 (pfam01197) → |
| Sau-2252-1 | NZ_KI996482.1 | - | 35349  | 35320  | RNA → | rpmE2 (PRK01678)Ribosomal_L31 (pfam01197) → |
| Sau-2254-1 | NZ_KI996531.1 | - | 35898  | 35869  | RNA → | rpmE2 (PRK01678)Ribosomal_L31 (pfam01197) → |
| Sau-2261-1 | NZ_KI996725.1 | - | 35672  | 35643  | RNA → | rpmE2 (PRK01678)Ribosomal_L31 (pfam01197) → |
| Sau-890-1  | NZ_KI979155.1 | - | 34872  | 34843  | RNA → | rpmE2 (PRK01678)Ribosomal_L31 (pfam01197) → |
| Sau-1749-1 | NZ_KI981588.1 | - | 36412  | 36383  | RNA → | rpmE2 (PRK01678)Ribosomal_L31 (pfam01197) → |
| Sau-296-1  | NZ_KI976905.1 | - | 107173 | 107144 | RNA → | rpmE2 (PRK01678)Ribosomal_L31 (pfam01197) → |
| Sau-850-1  | NZ_KI977560.1 | - | 107669 | 107640 | RNA → | rpmE2 (PRK01678)Ribosomal_L31 (pfam01197) → |
| Sau-250-1  | NZ_KI977699.1 | - | 34817  | 34788  | RNA → | rpmE2 (PRK01678)Ribosomal_L31 (pfam01197) → |
| Sau-2613-1 | NZ_KI977844.1 | - | 56852  | 56823  | RNA → | rpmE2 (PRK01678)Ribosomal_L31 (pfam01197) → |
| Sau-2615-1 | NZ_KI978633.1 | - | 61789  | 61760  | RNA → | rpmE2 (PRK01678)Ribosomal_L31 (pfam01197) → |
| Sau-299-1  | NZ_KI978780.1 | - | 56894  | 56865  | RNA → | rpmE2 (PRK01678)Ribosomal_L31 (pfam01197) → |
| Sau-1097-1 | NZ_KI978896.1 | - | 56994  | 56965  | RNA → | rpmE2 (PRK01678)Ribosomal_L31 (pfam01197) → |
| Sau-1772-1 | NZ_KI981781.1 | - | 115444 | 115415 | RNA → | rpmE2 (PRK01678)Ribosomal_L31 (pfam01197) → |
| Sau-2734-1 | NZ_KI977873.1 | - | 56880  | 56851  | RNA → | rpmE2 (PRK01678)Ribosomal_L31 (pfam01197) → |
| Sau-1778-1 | NZ_KI982017.1 | - | 143557 | 143528 | RNA → | rpmE2 (PRK01678)Ribosomal_L31 (pfam01197) → |
| Sau-3043-1 | NZ_KI977944.1 | - | 56645  | 56616  | RNA → | rpmE2 (PRK01678)Ribosomal_L31 (pfam01197) → |
| Sau-891-1  | NZ_KI976989.1 | - | 56894  | 56865  | RNA → | rpmE2 (PRK01678)Ribosomal_L31 (pfam01197) → |
| Sau-3045-1 | NZ_KI978159.1 | - | 90758  | 90729  | RNA → | rpmE2 (PRK01678)Ribosomal_L31 (pfam01197) → |
| Sau-3672-1 | NZ_KI978274.1 | - | 118921 | 118892 | RNA → | rpmE2 (PRK01678)Ribosomal_L31 (pfam01197) → |
| Sau-1133-1 | NZ_KI977398.1 | - | 111528 | 111499 | RNA → | rpmE2 (PRK01678)Ribosomal_L31 (pfam01197) → |
| Sau-2678-1 | NZ_KI976313.1 | - | 56894  | 56865  | RNA → | rpmE2 (PRK01678)Ribosomal_L31 (pfam01197) → |
| Sau-1123-1 | NZ_KI977413.1 | - | 240524 | 240495 | RNA → | rpmE2 (PRK01678)Ribosomal_L31 (pfam01197) → |
| Sau-2814-1 | NZ_KI976836.1 | - | 238123 | 238094 | RNA → | rpmE2 (PRK01678)Ribosomal_L31 (pfam01197) → |
| Sau-248-1  | NZ_KI977505.1 | - | 34816  | 34787  | RNA → | rpmE2 (PRK01678)Ribosomal_L31 (pfam01197) → |
| Sau-3035-1 | NZ_KI977215.1 | - | 59010  | 58981  | RNA → | rpmE2 (PRK01678)Ribosomal_L31 (pfam01197) → |
| Sau-1156-1 | NZ_KI977699.1 | - | 49965  | 49936  | RNA → | rpmE2 (PRK01678)Ribosomal_L31 (pfam01197) → |
| Sau-3671-1 | NZ_KI977580.1 | - | 117552 | 117523 | RNA → | rpmE2 (PRK01678)Ribosomal_L31 (pfam01197) → |
| Sau-2657-1 | NZ_KI977740.1 | - | 34872  | 34843  | RNA → | rpmE2 (PRK01678)Ribosomal_L31 (pfam01197) → |
| Sau-856-1  | NZ_KI977962.1 | - | 56894  | 56865  | RNA → | rpmE2 (PRK01678)Ribosomal_L31 (pfam01197) → |
| Sau-2819-1 | NZ_KI977852.1 | - | 238406 | 238377 | RNA → | rpmE2 (PRK01678)Ribosomal_L31 (pfam01197) → |
| Sau-2616-1 | NZ_KI978193.1 | - | 106543 | 106514 | RNA → | rpmE2 (PRK01678)Ribosomal_L31 (pfam01197) → |
| Sau-2659-1 | NZ_KI977995.1 | - | 19102  | 19073  | RNA → | rpmE2 (PRK01678)Ribosomal_L31 (pfam01197) → |
| Sau-3044-1 | NZ_KI978127.1 | - | 25029  | 25000  | RNA → | rpmE2 (PRK01678)Ribosomal_L31 (pfam01197) → |
| Sau-2737-1 | NZ_KI978649.1 | - | 115251 | 115222 | RNA → | rpmE2 (PRK01678)Ribosomal_L31 (pfam01197) → |
| Sau-2739-1 | NZ_KI975825.1 | - | 56894  | 56865  | RNA → | rpmE2 (PRK01678)Ribosomal_L31 (pfam01197) → |
| Sau-1538-1 | NZ_KK013038.1 | - | 36391  | 36362  | RNA → | rpmE2 (PRK01678)Ribosomal_L31 (pfam01197) → |
| Sau-2781-1 | NZ_KI976300.1 | - | 114787 | 114758 | RNA → | rpmE2 (PRK01678)Ribosomal_L31 (pfam01197) → |
| Sau-2795-1 | NZ_KI976795.1 | - | 117314 | 117285 | RNA → | rpmE2 (PRK01678)Ribosomal_L31 (pfam01197) → |
| Sau-1544-1 | NZ_KK013332.1 | - | 110285 | 110256 | RNA → | rpmE2 (PRK01678)Ribosomal_L31 (pfam01197) → |
| Sau-2654-1 | NZ_KI977000.1 | - | 19182  | 19153  | RNA → | rpmE2 (PRK01678)Ribosomal_L31 (pfam01197) → |
| Sau-1613-1 | NZ_KK016426.1 | - | 56093  | 56064  | RNA → | rpmE2 (PRK01678)Ribosomal_L31 (pfam01197) → |
| Sau-3034-1 | NZ_KI977152.1 | - | 107193 | 107164 | RNA → | rpmE2 (PRK01678)Ribosomal_L31 (pfam01197) → |
| Sau-2771-1 | NZ_KI977188.1 | - | 35071  | 35042  | RNA → | rpmE2 (PRK01678)Ribosomal_L31 (pfam01197) → |
| Sau-1619-1 | NZ_KK016776.1 | - | 36492  | 36463  | RNA → | rpmE2 (PRK01678)Ribosomal_L31 (pfam01197) → |
| Sau-3041-1 | NZ_KI977433.1 | - | 59010  | 58981  | RNA → | rpmE2 (PRK01678)Ribosomal_L31 (pfam01197) → |
| Sau-2735-1 | NZ_KI977911.1 | - | 35284  | 35255  | RNA → | rpmE2 (PRK01678)Ribosomal_L31 (pfam01197) → |
| Sau-1630-1 | NZ_KK017358.1 | - | 35246  | 35217  | RNA → | rpmE2 (PRK01678)Ribosomal_L31 (pfam01197) → |
| Sau-2660-1 | NZ_KI977970.1 | - | 238655 | 238626 | RNA → | rpmE2 (PRK01678)Ribosomal_L31 (pfam01197) → |

|            |               |   |         |         |       |                                                             |
|------------|---------------|---|---------|---------|-------|-------------------------------------------------------------|
| Sau-3046-1 | NZ_KI978198.1 | - | 118242  | 118213  | RNA → | <a href="#">rpmE2 (PRK01678)Ribosomal_L31 (pfam01197)</a> → |
| Sau-1635-1 | NZ_KK017643.1 | - | 16230   | 16201   | RNA → | <a href="#">rpmE2 (PRK01678)Ribosomal_L31 (pfam01197)</a> → |
| Sau-3047-1 | NZ_KI978290.1 | - | 962431  | 962402  | RNA → | <a href="#">rpmE2 (PRK01678)Ribosomal_L31 (pfam01197)</a> → |
| Sau-3049-1 | NZ_KI978514.1 | - | 149156  | 149127  | RNA → | <a href="#">rpmE2 (PRK01678)Ribosomal_L31 (pfam01197)</a> → |
| Sau-1370-1 | NZ_KK018920.1 | - | 111870  | 111841  | RNA → | <a href="#">rpmE2 (PRK01678)Ribosomal_L31 (pfam01197)</a> → |
| Sau-2667-1 | NZ_KI978541.1 | - | 111456  | 111427  | RNA → | <a href="#">rpmE2 (PRK01678)Ribosomal_L31 (pfam01197)</a> → |
| Sau-2683-1 | NZ_KI978725.1 | - | 56894   | 56865   | RNA → | <a href="#">rpmE2 (PRK01678)Ribosomal_L31 (pfam01197)</a> → |
| Sau-2674-1 | NZ_KI978826.1 | - | 56993   | 56964   | RNA → | <a href="#">rpmE2 (PRK01678)Ribosomal_L31 (pfam01197)</a> → |
| Sau-3676-1 | NZ_KI978841.1 | - | 56894   | 56865   | RNA → | <a href="#">rpmE2 (PRK01678)Ribosomal_L31 (pfam01197)</a> → |
| Sau-2588-1 | NZ_KK021149.1 | - | 56940   | 56911   | RNA → | <a href="#">rpmE2 (PRK01678)Ribosomal_L31 (pfam01197)</a> → |
| Sau-3053-1 | NZ_KI979026.1 | - | 56894   | 56865   | RNA → | <a href="#">rpmE2 (PRK01678)Ribosomal_L31 (pfam01197)</a> → |
| Sau-724-1  | NZ_KK022333.1 | - | 34817   | 34788   | RNA → | <a href="#">rpmE2 (PRK01678)Ribosomal_L31 (pfam01197)</a> → |
| Sau-2672-1 | NZ_KI979249.1 | - | 56894   | 56865   | RNA → | <a href="#">rpmE2 (PRK01678)Ribosomal_L31 (pfam01197)</a> → |
| Sau-3030-1 | NZ_KI976484.1 | - | 25119   | 25090   | RNA → | <a href="#">rpmE2 (PRK01678)Ribosomal_L31 (pfam01197)</a> → |
| Sau-1492-1 | NZ_KK011005.1 | - | 37315   | 37286   | RNA → | <a href="#">rpmE2 (PRK01678)Ribosomal_L31 (pfam01197)</a> → |
| Sau-2815-1 | NZ_KI976882.1 | - | 34912   | 34883   | RNA → | <a href="#">rpmE2 (PRK01678)Ribosomal_L31 (pfam01197)</a> → |
| Sau-3033-1 | NZ_KI977135.1 | - | 237869  | 237840  | RNA → | <a href="#">rpmE2 (PRK01678)Ribosomal_L31 (pfam01197)</a> → |
| Sau-1512-1 | NZ_KK011855.1 | - | 36391   | 36362   | RNA → | <a href="#">rpmE2 (PRK01678)Ribosomal_L31 (pfam01197)</a> → |
| Sau-2801-1 | NZ_KI977270.1 | - | 118641  | 118612  | RNA → | <a href="#">rpmE2 (PRK01678)Ribosomal_L31 (pfam01197)</a> → |
| Sau-1525-1 | NZ_KK012360.1 | - | 37317   | 37288   | RNA → | <a href="#">rpmE2 (PRK01678)Ribosomal_L31 (pfam01197)</a> → |
| Sau-2656-1 | NZ_KI977550.1 | - | 238684  | 238655  | RNA → | <a href="#">rpmE2 (PRK01678)Ribosomal_L31 (pfam01197)</a> → |
| Sau-3040-1 | NZ_KI977638.1 | - | 58910   | 58881   | RNA → | <a href="#">rpmE2 (PRK01678)Ribosomal_L31 (pfam01197)</a> → |
| Sau-1543-1 | NZ_KK013328.1 | - | 111936  | 111907  | RNA → | <a href="#">rpmE2 (PRK01678)Ribosomal_L31 (pfam01197)</a> → |
| Sau-2658-1 | NZ_KI977831.1 | - | 61890   | 61861   | RNA → | <a href="#">rpmE2 (PRK01678)Ribosomal_L31 (pfam01197)</a> → |
| Sau-1553-1 | NZ_KK013748.1 | - | 36491   | 36462   | RNA → | <a href="#">rpmE2 (PRK01678)Ribosomal_L31 (pfam01197)</a> → |
| Sau-3007-1 | NZ_KI977892.1 | - | 56894   | 56865   | RNA → | <a href="#">rpmE2 (PRK01678)Ribosomal_L31 (pfam01197)</a> → |
| Sau-1563-1 | NZ_KK014046.1 | - | 109373  | 109344  | RNA → | <a href="#">rpmE2 (PRK01678)Ribosomal_L31 (pfam01197)</a> → |
| Sau-2736-1 | NZ_KI978070.1 | - | 56894   | 56865   | RNA → | <a href="#">rpmE2 (PRK01678)Ribosomal_L31 (pfam01197)</a> → |
| Sau-2661-1 | NZ_KI978282.1 | - | 56894   | 56865   | RNA → | <a href="#">rpmE2 (PRK01678)Ribosomal_L31 (pfam01197)</a> → |
| Sau-1569-1 | NZ_KK014352.1 | - | 111576  | 111547  | RNA → | <a href="#">rpmE2 (PRK01678)Ribosomal_L31 (pfam01197)</a> → |
| Sau-2665-1 | NZ_KI978489.1 | - | 60162   | 60133   | RNA → | <a href="#">rpmE2 (PRK01678)Ribosomal_L31 (pfam01197)</a> → |
| Sau-1611-1 | NZ_KK016386.1 | - | 36390   | 36361   | RNA → | <a href="#">rpmE2 (PRK01678)Ribosomal_L31 (pfam01197)</a> → |
| Sau-1369-1 | NZ_KK018861.1 | - | 217144  | 217115  | RNA → | <a href="#">rpmE2 (PRK01678)Ribosomal_L31 (pfam01197)</a> → |
| Sau-2669-1 | NZ_KI978611.1 | - | 58910   | 58881   | RNA → | <a href="#">rpmE2 (PRK01678)Ribosomal_L31 (pfam01197)</a> → |
| Sau-2670-1 | NZ_KI978696.1 | - | 56892   | 56863   | RNA → | <a href="#">rpmE2 (PRK01678)Ribosomal_L31 (pfam01197)</a> → |
| Sau-1375-1 | NZ_KK019079.1 | - | 35364   | 35335   | RNA → | <a href="#">rpmE2 (PRK01678)Ribosomal_L31 (pfam01197)</a> → |
| Sau-682-1  | NZ_KK021052.1 | - | 35169   | 35140   | RNA → | <a href="#">rpmE2 (PRK01678)Ribosomal_L31 (pfam01197)</a> → |
| Sau-2684-1 | NZ_KI978769.1 | - | 211074  | 211045  | RNA → | <a href="#">rpmE2 (PRK01678)Ribosomal_L31 (pfam01197)</a> → |
| Sau-2517-1 | NZ_KK022591.1 | - | 2239603 | 2239574 | RNA → | <a href="#">rpmE2 (PRK01678)Ribosomal_L31 (pfam01197)</a> → |
| Sau-2504-1 | NZ_KK022875.1 | - | 56994   | 56965   | RNA → | <a href="#">rpmE2 (PRK01678)Ribosomal_L31 (pfam01197)</a> → |
| Sau-2536-1 | NZ_KK023228.1 | - | 2240385 | 2240356 | RNA → | <a href="#">rpmE2 (PRK01678)Ribosomal_L31 (pfam01197)</a> → |
| Sau-1509-1 | NZ_KK011811.1 | - | 115367  | 115338  | RNA → | <a href="#">rpmE2 (PRK01678)Ribosomal_L31 (pfam01197)</a> → |
| Sau-1536-1 | NZ_KK012906.1 | - | 35687   | 35658   | RNA → | <a href="#">rpmE2 (PRK01678)Ribosomal_L31 (pfam01197)</a> → |
| Sau-1552-1 | NZ_KK013743.1 | - | 123305  | 123276  | RNA → | <a href="#">rpmE2 (PRK01678)Ribosomal_L31 (pfam01197)</a> → |
| Sau-1574-1 | NZ_KK014582.1 | - | 28890   | 28861   | RNA → | <a href="#">rpmE2 (PRK01678)Ribosomal_L31 (pfam01197)</a> → |
| Sau-1587-1 | NZ_KK015127.1 | - | 29142   | 29113   | RNA → | <a href="#">rpmE2 (PRK01678)Ribosomal_L31 (pfam01197)</a> → |
| Sau-1598-1 | NZ_KK015734.1 | - | 62157   | 62128   | RNA → | <a href="#">rpmE2 (PRK01678)Ribosomal_L31 (pfam01197)</a> → |
| Sau-1621-1 | NZ_KK016884.1 | - | 49963   | 49934   | RNA → | <a href="#">rpmE2 (PRK01678)Ribosomal_L31 (pfam01197)</a> → |
| Sau-1632-1 | NZ_KK017470.1 | - | 61337   | 61308   | RNA → | <a href="#">rpmE2 (PRK01678)Ribosomal_L31 (pfam01197)</a> → |
| Sau-1644-1 | NZ_KK018094.1 | - | 62090   | 62061   | RNA → | <a href="#">rpmE2 (PRK01678)Ribosomal_L31 (pfam01197)</a> → |
| Sau-1072-1 | NZ_KK021514.1 | - | 27192   | 27163   | RNA → | <a href="#">rpmE2 (PRK01678)Ribosomal_L31 (pfam01197)</a> → |
| Sau-803-1  | NZ_KK021567.1 | - | 34817   | 34788   | RNA → | <a href="#">rpmE2 (PRK01678)Ribosomal_L31 (pfam01197)</a> → |

|            |               |   |         |         |       |                                  |                               |                             |   |
|------------|---------------|---|---------|---------|-------|----------------------------------|-------------------------------|-----------------------------|---|
| Sau-1523-1 | NZ_KK012278.1 | - | 60738   | 60709   | RNA → | <a href="#">rpmE2 (PRK01678)</a> | <a href="#">Ribosomal_L31</a> | <a href="#">(pfam01197)</a> | → |
| Sau-1535-1 | NZ_KK012841.1 | - | 107715  | 107686  | RNA → | <a href="#">rpmE2 (PRK01678)</a> | <a href="#">Ribosomal_L31</a> | <a href="#">(pfam01197)</a> | → |
| Sau-2685-1 | NZ_KI979084.1 | - | 153683  | 153654  | RNA → | <a href="#">rpmE2 (PRK01678)</a> | <a href="#">Ribosomal_L31</a> | <a href="#">(pfam01197)</a> | → |
| Sau-1545-1 | NZ_KK013431.1 | - | 27285   | 27256   | RNA → | <a href="#">rpmE2 (PRK01678)</a> | <a href="#">Ribosomal_L31</a> | <a href="#">(pfam01197)</a> | → |
| Sau-1550-1 | NZ_KK013704.1 | - | 111824  | 111795  | RNA → | <a href="#">rpmE2 (PRK01678)</a> | <a href="#">Ribosomal_L31</a> | <a href="#">(pfam01197)</a> | → |
| Sau-1642-1 | NZ_KK017973.1 | - | 35605   | 35576   | RNA → | <a href="#">rpmE2 (PRK01678)</a> | <a href="#">Ribosomal_L31</a> | <a href="#">(pfam01197)</a> | → |
| Sau-679-1  | NZ_KK020982.1 | - | 56941   | 56912   | RNA → | <a href="#">rpmE2 (PRK01678)</a> | <a href="#">Ribosomal_L31</a> | <a href="#">(pfam01197)</a> | → |
| Sau-2238-1 | NZ_KK021925.1 | - | 55904   | 55875   | RNA → | <a href="#">rpmE2 (PRK01678)</a> | <a href="#">Ribosomal_L31</a> | <a href="#">(pfam01197)</a> | → |
| Sau-1016-1 | NZ_KK022619.1 | - | 2237211 | 2237182 | RNA → | <a href="#">rpmE2 (PRK01678)</a> | <a href="#">Ribosomal_L31</a> | <a href="#">(pfam01197)</a> | → |
| Sau-1591-1 | NZ_KK015352.1 | - | 35169   | 35140   | RNA → | <a href="#">rpmE2 (PRK01678)</a> | <a href="#">Ribosomal_L31</a> | <a href="#">(pfam01197)</a> | → |
| Sau-1372-1 | NZ_KK018965.1 | - | 63907   | 63878   | RNA → | <a href="#">rpmE2 (PRK01678)</a> | <a href="#">Ribosomal_L31</a> | <a href="#">(pfam01197)</a> | → |
| Sau-2706-1 | NZ_KK021460.1 | - | 34873   | 34844   | RNA → | <a href="#">rpmE2 (PRK01678)</a> | <a href="#">Ribosomal_L31</a> | <a href="#">(pfam01197)</a> | → |
| Sau-1577-1 | NZ_KK014667.1 | - | 36391   | 36362   | RNA → | <a href="#">rpmE2 (PRK01678)</a> | <a href="#">Ribosomal_L31</a> | <a href="#">(pfam01197)</a> | → |
| Sau-1589-1 | NZ_KK015302.1 | - | 111429  | 111400  | RNA → | <a href="#">rpmE2 (PRK01678)</a> | <a href="#">Ribosomal_L31</a> | <a href="#">(pfam01197)</a> | → |
| Sau-694-1  | NZ_KK021452.1 | - | 56940   | 56911   | RNA → | <a href="#">rpmE2 (PRK01678)</a> | <a href="#">Ribosomal_L31</a> | <a href="#">(pfam01197)</a> | → |
| Sau-152-1  | NZ_KK220206.1 | - | 34754   | 34725   | RNA → | <a href="#">rpmE2 (PRK01678)</a> | <a href="#">Ribosomal_L31</a> | <a href="#">(pfam01197)</a> | → |
| Sau-673-1  | NZ_KK039814.1 | - | 34873   | 34844   | RNA → | <a href="#">rpmE2 (PRK01678)</a> | <a href="#">Ribosomal_L31</a> | <a href="#">(pfam01197)</a> | → |
| Sau-419-1  | NZ_KK097822.1 | - | 222887  | 222858  | RNA → | <a href="#">rpmE2 (PRK01678)</a> | <a href="#">Ribosomal_L31</a> | <a href="#">(pfam01197)</a> | → |
| Sau-2509-1 | NZ_KK041010.1 | - | 34912   | 34883   | RNA → | <a href="#">rpmE2 (PRK01678)</a> | <a href="#">Ribosomal_L31</a> | <a href="#">(pfam01197)</a> | → |
| Sau-337-1  | NZ_KK099176.1 | - | 464015  | 463986  | RNA → | <a href="#">rpmE2 (PRK01678)</a> | <a href="#">Ribosomal_L31</a> | <a href="#">(pfam01197)</a> | → |
| Sau-3071-1 | NZ_KK226598.1 | - | 26024   | 25995   | RNA → | <a href="#">rpmE2 (PRK01678)</a> | <a href="#">Ribosomal_L31</a> | <a href="#">(pfam01197)</a> | → |
| Sau-1085-1 | NZ_KK039088.1 | - | 35209   | 35180   | RNA → | <a href="#">rpmE2 (PRK01678)</a> | <a href="#">Ribosomal_L31</a> | <a href="#">(pfam01197)</a> | → |
| Sau-151-1  | NZ_KK220145.1 | - | 56395   | 56366   | RNA → | <a href="#">rpmE2 (PRK01678)</a> | <a href="#">Ribosomal_L31</a> | <a href="#">(pfam01197)</a> | → |
| Sau-1036-1 | NZ_KK041081.1 | - | 34817   | 34788   | RNA → | <a href="#">rpmE2 (PRK01678)</a> | <a href="#">Ribosomal_L31</a> | <a href="#">(pfam01197)</a> | → |
| Sau-185-1  | NZ_KK221386.1 | - | 26024   | 25995   | RNA → | <a href="#">rpmE2 (PRK01678)</a> | <a href="#">Ribosomal_L31</a> | <a href="#">(pfam01197)</a> | → |
| Sau-2207-1 | NZ_KK039044.1 | - | 34862   | 34833   | RNA → | <a href="#">rpmE2 (PRK01678)</a> | <a href="#">Ribosomal_L31</a> | <a href="#">(pfam01197)</a> | → |
| Sau-2900-1 | NZ_KK095025.1 | - | 56894   | 56865   | RNA → | <a href="#">rpmE2 (PRK01678)</a> | <a href="#">Ribosomal_L31</a> | <a href="#">(pfam01197)</a> | → |
| Sau-313-1  | NZ_KK099030.1 | - | 180328  | 180299  | RNA → | <a href="#">rpmE2 (PRK01678)</a> | <a href="#">Ribosomal_L31</a> | <a href="#">(pfam01197)</a> | → |
| Sau-1035-1 | NZ_KK041118.1 | - | 34862   | 34833   | RNA → | <a href="#">rpmE2 (PRK01678)</a> | <a href="#">Ribosomal_L31</a> | <a href="#">(pfam01197)</a> | → |
| Sau-139-1  | NZ_KK219769.1 | - | 25612   | 25583   | RNA → | <a href="#">rpmE2 (PRK01678)</a> | <a href="#">Ribosomal_L31</a> | <a href="#">(pfam01197)</a> | → |
| Sau-2710-1 | NZ_KK225426.1 | - | 26024   | 25995   | RNA → | <a href="#">rpmE2 (PRK01678)</a> | <a href="#">Ribosomal_L31</a> | <a href="#">(pfam01197)</a> | → |
| Sau-731-1  | NZ_KK039411.1 | - | 34872   | 34843   | RNA → | <a href="#">rpmE2 (PRK01678)</a> | <a href="#">Ribosomal_L31</a> | <a href="#">(pfam01197)</a> | → |
| Sau-251-1  | NZ_KK222651.1 | - | 26024   | 25995   | RNA → | <a href="#">rpmE2 (PRK01678)</a> | <a href="#">Ribosomal_L31</a> | <a href="#">(pfam01197)</a> | → |
| Sau-2700-1 | NZ_KK225337.1 | - | 53513   | 53484   | RNA → | <a href="#">rpmE2 (PRK01678)</a> | <a href="#">Ribosomal_L31</a> | <a href="#">(pfam01197)</a> | → |
| Sau-1022-1 | NZ_KK041284.1 | - | 55804   | 55775   | RNA → | <a href="#">rpmE2 (PRK01678)</a> | <a href="#">Ribosomal_L31</a> | <a href="#">(pfam01197)</a> | → |
| Sau-3057-1 | NZ_KK226422.1 | - | 56441   | 56412   | RNA → | <a href="#">rpmE2 (PRK01678)</a> | <a href="#">Ribosomal_L31</a> | <a href="#">(pfam01197)</a> | → |
| Sau-416-1  | NZ_KK097804.1 | - | 56588   | 56559   | RNA → | <a href="#">rpmE2 (PRK01678)</a> | <a href="#">Ribosomal_L31</a> | <a href="#">(pfam01197)</a> | → |
| Sau-1021-1 | NZ_KK041296.1 | - | 34873   | 34844   | RNA → | <a href="#">rpmE2 (PRK01678)</a> | <a href="#">Ribosomal_L31</a> | <a href="#">(pfam01197)</a> | → |
| Sau-2822-1 | NZ_KK225732.1 | - | 26024   | 25995   | RNA → | <a href="#">rpmE2 (PRK01678)</a> | <a href="#">Ribosomal_L31</a> | <a href="#">(pfam01197)</a> | → |
| Sau-145-1  | NZ_KK220079.1 | - | 56310   | 56281   | RNA → | <a href="#">rpmE2 (PRK01678)</a> | <a href="#">Ribosomal_L31</a> | <a href="#">(pfam01197)</a> | → |
| Sau-804-1  | NZ_KK041645.1 | - | 34873   | 34844   | RNA → | <a href="#">rpmE2 (PRK01678)</a> | <a href="#">Ribosomal_L31</a> | <a href="#">(pfam01197)</a> | → |
| Sau-3061-1 | NZ_KK226326.1 | - | 56210   | 56181   | RNA → | <a href="#">rpmE2 (PRK01678)</a> | <a href="#">Ribosomal_L31</a> | <a href="#">(pfam01197)</a> | → |
| Sau-270-1  | NZ_KK223267.1 | - | 26024   | 25995   | RNA → | <a href="#">rpmE2 (PRK01678)</a> | <a href="#">Ribosomal_L31</a> | <a href="#">(pfam01197)</a> | → |
| Sau-898-1  | NZ_KK039334.1 | - | 34872   | 34843   | RNA → | <a href="#">rpmE2 (PRK01678)</a> | <a href="#">Ribosomal_L31</a> | <a href="#">(pfam01197)</a> | → |
| Sau-2922-1 | NZ_KK095176.1 | - | 56894   | 56865   | RNA → | <a href="#">rpmE2 (PRK01678)</a> | <a href="#">Ribosomal_L31</a> | <a href="#">(pfam01197)</a> | → |
| Sau-94-1   | NZ_KK218433.1 | - | 26024   | 25995   | RNA → | <a href="#">rpmE2 (PRK01678)</a> | <a href="#">Ribosomal_L31</a> | <a href="#">(pfam01197)</a> | → |
| Sau-1034-1 | NZ_KK041147.1 | - | 34873   | 34844   | RNA → | <a href="#">rpmE2 (PRK01678)</a> | <a href="#">Ribosomal_L31</a> | <a href="#">(pfam01197)</a> | → |
| Sau-3081-1 | NZ_KK226999.1 | - | 26023   | 25994   | RNA → | <a href="#">rpmE2 (PRK01678)</a> | <a href="#">Ribosomal_L31</a> | <a href="#">(pfam01197)</a> | → |
| Sau-3086-1 | NZ_KK227206.1 | - | 26024   | 25995   | RNA → | <a href="#">rpmE2 (PRK01678)</a> | <a href="#">Ribosomal_L31</a> | <a href="#">(pfam01197)</a> | → |
| Sau-202-1  | NZ_KK221958.1 | - | 26024   | 25995   | RNA → | <a href="#">rpmE2 (PRK01678)</a> | <a href="#">Ribosomal_L31</a> | <a href="#">(pfam01197)</a> | → |
| Sau-1008-1 | NZ_KK041409.1 | - | 56894   | 56865   | RNA → | <a href="#">rpmE2 (PRK01678)</a> | <a href="#">Ribosomal_L31</a> | <a href="#">(pfam01197)</a> | → |
| Sau-815-1  | NZ_KK041546.1 | - | 34872   | 34843   | RNA → | <a href="#">rpmE2 (PRK01678)</a> | <a href="#">Ribosomal_L31</a> | <a href="#">(pfam01197)</a> | → |



|            |               |   |       |       |                                                   |
|------------|---------------|---|-------|-------|---------------------------------------------------|
| Sau-2927-1 | NZ_KK095216.1 | - | 29170 | 29141 | RNA → rpmE2 (PRK01678)Ribosomal_L31 (pfam01197) → |
| Sau-2675-1 | NZ_KK224694.1 | - | 26024 | 25995 | RNA → rpmE2 (PRK01678)Ribosomal_L31 (pfam01197) → |
| Sau-174-1  | NZ_KK221018.1 | - | 26024 | 25995 | RNA → rpmE2 (PRK01678)Ribosomal_L31 (pfam01197) → |
| Sau-2823-1 | NZ_KK225762.1 | - | 26024 | 25995 | RNA → rpmE2 (PRK01678)Ribosomal_L31 (pfam01197) → |
| Sau-190-1  | NZ_KK221571.1 | - | 56395 | 56366 | RNA → rpmE2 (PRK01678)Ribosomal_L31 (pfam01197) → |
| Sau-2828-1 | NZ_KK225934.1 | - | 26024 | 25995 | RNA → rpmE2 (PRK01678)Ribosomal_L31 (pfam01197) → |
| Sau-114-1  | NZ_KK218941.1 | - | 55009 | 54980 | RNA → rpmE2 (PRK01678)Ribosomal_L31 (pfam01197) → |
| Sau-3079-1 | NZ_KK226919.1 | - | 26024 | 25995 | RNA → rpmE2 (PRK01678)Ribosomal_L31 (pfam01197) → |
| Sau-3089-1 | NZ_KK227338.1 | - | 26024 | 25995 | RNA → rpmE2 (PRK01678)Ribosomal_L31 (pfam01197) → |
| Sau-275-1  | NZ_KK223430.1 | - | 26024 | 25995 | RNA → rpmE2 (PRK01678)Ribosomal_L31 (pfam01197) → |
| Sau-3009-1 | NZ_KK226022.1 | - | 26024 | 25995 | RNA → rpmE2 (PRK01678)Ribosomal_L31 (pfam01197) → |
| Sau-2827-1 | NZ_KK225900.1 | - | 24379 | 24350 | RNA → rpmE2 (PRK01678)Ribosomal_L31 (pfam01197) → |
| Sau-3075-1 | NZ_KK225773.1 | - | 53698 | 53669 | RNA → rpmE2 (PRK01678)Ribosomal_L31 (pfam01197) → |
| Sau-3084-1 | NZ_KK227106.1 | - | 56390 | 56361 | RNA → rpmE2 (PRK01678)Ribosomal_L31 (pfam01197) → |
| Sau-2577-1 | NZ_KK094808.1 | - | 35013 | 34984 | RNA → rpmE2 (PRK01678)Ribosomal_L31 (pfam01197) → |
| Sau-2691-1 | NZ_KK225002.1 | - | 26024 | 25995 | RNA → rpmE2 (PRK01678)Ribosomal_L31 (pfam01197) → |
| Sau-2825-1 | NZ_KK225836.1 | - | 24806 | 24777 | RNA → rpmE2 (PRK01678)Ribosomal_L31 (pfam01197) → |
| Sau-2688-1 | NZ_KK224861.1 | - | 26024 | 25995 | RNA → rpmE2 (PRK01678)Ribosomal_L31 (pfam01197) → |
| Sau-2693-1 | NZ_KK225109.1 | - | 56438 | 56409 | RNA → rpmE2 (PRK01678)Ribosomal_L31 (pfam01197) → |
| Sau-2907-1 | NZ_KK038479.1 | - | 92275 | 92246 | RNA → rpmE2 (PRK01678)Ribosomal_L31 (pfam01197) → |
| Sau-2567-1 | NZ_KK038957.1 | - | 56894 | 56865 | RNA → rpmE2 (PRK01678)Ribosomal_L31 (pfam01197) → |
| Sau-2904-1 | NZ_KK038550.1 | - | 34872 | 34843 | RNA → rpmE2 (PRK01678)Ribosomal_L31 (pfam01197) → |
| Sau-2898-1 | NZ_KK038628.1 | - | 34872 | 34843 | RNA → rpmE2 (PRK01678)Ribosomal_L31 (pfam01197) → |
| Sau-2903-1 | NZ_KK038592.1 | - | 29243 | 29214 | RNA → rpmE2 (PRK01678)Ribosomal_L31 (pfam01197) → |
| Sau-2568-1 | NZ_KK038929.1 | - | 56894 | 56865 | RNA → rpmE2 (PRK01678)Ribosomal_L31 (pfam01197) → |
| Sau-2854-1 | NZ_KK040538.1 | - | 54999 | 54970 | RNA → rpmE2 (PRK01678)Ribosomal_L31 (pfam01197) → |
| Sau-2847-1 | NZ_KK040724.1 | - | 54739 | 54710 | RNA → rpmE2 (PRK01678)Ribosomal_L31 (pfam01197) → |
| Sau-2555-1 | NZ_KK040779.1 | - | 34817 | 34788 | RNA → rpmE2 (PRK01678)Ribosomal_L31 (pfam01197) → |
| Sau-2525-1 | NZ_KK040917.1 | - | 54858 | 54829 | RNA → rpmE2 (PRK01678)Ribosomal_L31 (pfam01197) → |
| Sau-3004-1 | NZ_KK040206.1 | - | 34817 | 34788 | RNA → rpmE2 (PRK01678)Ribosomal_L31 (pfam01197) → |
| Sau-2709-1 | NZ_KK040748.1 | - | 54695 | 54666 | RNA → rpmE2 (PRK01678)Ribosomal_L31 (pfam01197) → |
| Sau-2563-1 | NZ_KK040762.1 | - | 56894 | 56865 | RNA → rpmE2 (PRK01678)Ribosomal_L31 (pfam01197) → |
| Sau-2541-1 | NZ_KK040861.1 | - | 54905 | 54876 | RNA → rpmE2 (PRK01678)Ribosomal_L31 (pfam01197) → |
| Sau-2511-1 | NZ_KK040948.1 | - | 56895 | 56866 | RNA → rpmE2 (PRK01678)Ribosomal_L31 (pfam01197) → |
| Sau-3005-1 | NZ_KK040197.1 | - | 57094 | 57065 | RNA → rpmE2 (PRK01678)Ribosomal_L31 (pfam01197) → |
| Sau-2853-1 | NZ_KK040540.1 | - | 34872 | 34843 | RNA → rpmE2 (PRK01678)Ribosomal_L31 (pfam01197) → |
| Sau-2846-1 | NZ_KK040730.1 | - | 56888 | 56859 | RNA → rpmE2 (PRK01678)Ribosomal_L31 (pfam01197) → |
| Sau-3011-1 | NZ_KK226077.1 | - | 56336 | 56307 | RNA → rpmE2 (PRK01678)Ribosomal_L31 (pfam01197) → |
| Sau-3002-1 | NZ_KK040256.1 | - | 34817 | 34788 | RNA → rpmE2 (PRK01678)Ribosomal_L31 (pfam01197) → |
| Sau-3001-1 | NZ_KK040296.1 | - | 34872 | 34843 | RNA → rpmE2 (PRK01678)Ribosomal_L31 (pfam01197) → |
| Sau-2871-1 | NZ_KK040488.1 | - | 56894 | 56865 | RNA → rpmE2 (PRK01678)Ribosomal_L31 (pfam01197) → |
| Sau-2860-1 | NZ_KK040503.1 | - | 35442 | 35413 | RNA → rpmE2 (PRK01678)Ribosomal_L31 (pfam01197) → |
| Sau-2848-1 | NZ_KK040659.1 | - | 34817 | 34788 | RNA → rpmE2 (PRK01678)Ribosomal_L31 (pfam01197) → |
| Sau-2570-1 | NZ_KK038869.1 | - | 34873 | 34844 | RNA → rpmE2 (PRK01678)Ribosomal_L31 (pfam01197) → |
| Sau-817-1  | NZ_KK041442.1 | - | 34817 | 34788 | RNA → rpmE2 (PRK01678)Ribosomal_L31 (pfam01197) → |
| Sau-796-1  | NZ_KK041680.1 | - | 34872 | 34843 | RNA → rpmE2 (PRK01678)Ribosomal_L31 (pfam01197) → |
| Sau-814-1  | NZ_KK041583.1 | - | 34817 | 34788 | RNA → rpmE2 (PRK01678)Ribosomal_L31 (pfam01197) → |
| Sau-3136-1 | NZ_KK228932.1 | - | 26023 | 25994 | RNA → rpmE2 (PRK01678)Ribosomal_L31 (pfam01197) → |
| Sau-2880-1 | NZ_KK040429.1 | - | 56894 | 56865 | RNA → rpmE2 (PRK01678)Ribosomal_L31 (pfam01197) → |
| Sau-2554-1 | NZ_KK040817.1 | - | 56894 | 56865 | RNA → rpmE2 (PRK01678)Ribosomal_L31 (pfam01197) → |
| Sau-3495-1 | NZ_KK070557.1 | - | 34913 | 34884 | RNA → rpmE2 (PRK01678)Ribosomal_L31 (pfam01197) → |
| Sau-2485-1 | NZ_KK071187.1 | - | 35013 | 34984 | RNA → rpmE2 (PRK01678)Ribosomal_L31 (pfam01197) → |

|            |               |   |         |         |                                                   |
|------------|---------------|---|---------|---------|---------------------------------------------------|
| Sau-2474-1 | NZ_KK070701.1 | - | 56894   | 56865   | RNA → rpmE2 (PRK01678)Ribosomal_L31 (pfam01197) → |
| Sau-1043-1 | NZ_KK041058.1 | - | 56994   | 56965   | RNA → rpmE2 (PRK01678)Ribosomal_L31 (pfam01197) → |
| Sau-816-1  | NZ_KK041539.1 | - | 56894   | 56865   | RNA → rpmE2 (PRK01678)Ribosomal_L31 (pfam01197) → |
| Sau-2064-1 | NZ_KK068774.1 | - | 36390   | 36361   | RNA → rpmE2 (PRK01678)Ribosomal_L31 (pfam01197) → |
| Sau-316-1  | NZ_KK099049.1 | - | 1657695 | 1657666 | RNA → rpmE2 (PRK01678)Ribosomal_L31 (pfam01197) → |
| Sau-427-1  | NZ_KK097890.1 | - | 61690   | 61661   | RNA → rpmE2 (PRK01678)Ribosomal_L31 (pfam01197) → |
| Sau-176-1  | NZ_KK221090.1 | - | 26024   | 25995   | RNA → rpmE2 (PRK01678)Ribosomal_L31 (pfam01197) → |
| Sau-187-1  | NZ_KK221466.1 | - | 56305   | 56276   | RNA → rpmE2 (PRK01678)Ribosomal_L31 (pfam01197) → |
| Sau-205-1  | NZ_KK222053.1 | - | 56438   | 56409   | RNA → rpmE2 (PRK01678)Ribosomal_L31 (pfam01197) → |
| Sau-2099-1 | NZ_KK224356.1 | - | 56390   | 56361   | RNA → rpmE2 (PRK01678)Ribosomal_L31 (pfam01197) → |
| Sau-2626-1 | NZ_KK224503.1 | - | 56353   | 56324   | RNA → rpmE2 (PRK01678)Ribosomal_L31 (pfam01197) → |
| Sau-3497-1 | NZ_KK095369.1 | - | 34913   | 34884   | RNA → rpmE2 (PRK01678)Ribosomal_L31 (pfam01197) → |
| Sau-2984-1 | NZ_KK095312.1 | - | 2231827 | 2231798 | RNA → rpmE2 (PRK01678)Ribosomal_L31 (pfam01197) → |
| Sau-3544-1 | NZ_KK095555.1 | - | 34972   | 34943   | RNA → rpmE2 (PRK01678)Ribosomal_L31 (pfam01197) → |
| Sau-2890-1 | NZ_KK040372.1 | - | 34873   | 34844   | RNA → rpmE2 (PRK01678)Ribosomal_L31 (pfam01197) → |
| Sau-1053-1 | NZ_KK041050.1 | - | 328859  | 328830  | RNA → rpmE2 (PRK01678)Ribosomal_L31 (pfam01197) → |
| Sau-2562-1 | NZ_KK040771.1 | - | 235119  | 235090  | RNA → rpmE2 (PRK01678)Ribosomal_L31 (pfam01197) → |
| Sau-2532-1 | NZ_KK040873.1 | - | 28693   | 28664   | RNA → rpmE2 (PRK01678)Ribosomal_L31 (pfam01197) → |
| Sau-2514-1 | NZ_KK073114.1 | - | 55192   | 55163   | RNA → rpmE2 (PRK01678)Ribosomal_L31 (pfam01197) → |
| Sau-2582-1 | NZ_KK038808.1 | - | 34817   | 34788   | RNA → rpmE2 (PRK01678)Ribosomal_L31 (pfam01197) → |
| Sau-1024-1 | NZ_KK073057.1 | - | 56894   | 56865   | RNA → rpmE2 (PRK01678)Ribosomal_L31 (pfam01197) → |
| Sau-2455-1 | NZ_KK038978.1 | - | 56893   | 56864   | RNA → rpmE2 (PRK01678)Ribosomal_L31 (pfam01197) → |
| Sau-3489-1 | NZ_KK074863.1 | - | 34873   | 34844   | RNA → rpmE2 (PRK01678)Ribosomal_L31 (pfam01197) → |
| Sau-2542-1 | NZ_KK040825.1 | - | 34913   | 34884   | RNA → rpmE2 (PRK01678)Ribosomal_L31 (pfam01197) → |
| Sau-962-1  | NZ_KK071614.1 | - | 54903   | 54874   | RNA → rpmE2 (PRK01678)Ribosomal_L31 (pfam01197) → |
| Sau-1435-1 | NZ_KI971533.1 | - | 116484  | 116455  | RNA → rpmE2 (PRK01678)Ribosomal_L31 (pfam01197) → |
| Sau-810-1  | NZ_KK072686.1 | - | 34913   | 34884   | RNA → rpmE2 (PRK01678)Ribosomal_L31 (pfam01197) → |
| Sau-2591-1 | NZ_KK038780.1 | - | 34913   | 34884   | RNA → rpmE2 (PRK01678)Ribosomal_L31 (pfam01197) → |
| Sau-704-1  | NZ_KK096038.1 | - | 56789   | 56760   | RNA → rpmE2 (PRK01678)Ribosomal_L31 (pfam01197) → |
| Sau-3619-1 | NZ_KK040006.1 | - | 34873   | 34844   | RNA → rpmE2 (PRK01678)Ribosomal_L31 (pfam01197) → |
| Sau-1000-1 | NZ_KK073013.1 | - | 56794   | 56765   | RNA → rpmE2 (PRK01678)Ribosomal_L31 (pfam01197) → |
| Sau-1042-1 | NZ_KK041070.1 | - | 56894   | 56865   | RNA → rpmE2 (PRK01678)Ribosomal_L31 (pfam01197) → |
| Sau-2893-1 | NZ_KK073491.1 | - | 56994   | 56965   | RNA → rpmE2 (PRK01678)Ribosomal_L31 (pfam01197) → |
| Sau-1006-1 | NZ_KK041418.1 | - | 56893   | 56864   | RNA → rpmE2 (PRK01678)Ribosomal_L31 (pfam01197) → |
| Sau-3538-1 | NZ_KK097292.1 | - | 34913   | 34884   | RNA → rpmE2 (PRK01678)Ribosomal_L31 (pfam01197) → |
| Sau-1331-1 | NZ_KI971688.1 | - | 61711   | 61682   | RNA → rpmE2 (PRK01678)Ribosomal_L31 (pfam01197) → |
| Sau-2939-1 | NZ_KK038351.1 | - | 25254   | 25225   | RNA → rpmE2 (PRK01678)Ribosomal_L31 (pfam01197) → |
| Sau-2920-1 | NZ_KK038460.1 | - | 56894   | 56865   | RNA → rpmE2 (PRK01678)Ribosomal_L31 (pfam01197) → |
| Sau-2513-1 | NZ_KK072349.1 | - | 2229291 | 2229262 | RNA → rpmE2 (PRK01678)Ribosomal_L31 (pfam01197) → |
| Sau-2944-1 | NZ_KK075050.1 | - | 56645   | 56616   | RNA → rpmE2 (PRK01678)Ribosomal_L31 (pfam01197) → |
| Sau-2572-1 | NZ_KK075358.1 | - | 56988   | 56959   | RNA → rpmE2 (PRK01678)Ribosomal_L31 (pfam01197) → |
| Sau-2055-1 | NZ_KI972673.1 | - | 57557   | 57528   | RNA → rpmE2 (PRK01678)Ribosomal_L31 (pfam01197) → |
| Sau-2545-1 | NZ_KK075468.1 | - | 54839   | 54810   | RNA → rpmE2 (PRK01678)Ribosomal_L31 (pfam01197) → |
| Sau-3511-1 | NZ_KK038216.1 | - | 56894   | 56865   | RNA → rpmE2 (PRK01678)Ribosomal_L31 (pfam01197) → |
| Sau-2519-1 | NZ_KK040927.1 | - | 232923  | 232894  | RNA → rpmE2 (PRK01678)Ribosomal_L31 (pfam01197) → |
| Sau-834-1  | NZ_KK072896.1 | - | 56892   | 56863   | RNA → rpmE2 (PRK01678)Ribosomal_L31 (pfam01197) → |
| Sau-809-1  | NZ_KK072626.1 | - | 34913   | 34884   | RNA → rpmE2 (PRK01678)Ribosomal_L31 (pfam01197) → |
| Sau-647-1  | NZ_KK076222.1 | - | 54999   | 54970   | RNA → rpmE2 (PRK01678)Ribosomal_L31 (pfam01197) → |
| Sau-2118-1 | NZ_KK066962.1 | - | 36213   | 36184   | RNA → rpmE2 (PRK01678)Ribosomal_L31 (pfam01197) → |
| Sau-2497-1 | NZ_KK071854.1 | - | 34913   | 34884   | RNA → rpmE2 (PRK01678)Ribosomal_L31 (pfam01197) → |
| Sau-2887-1 | NZ_KK075168.1 | - | 56741   | 56712   | RNA → rpmE2 (PRK01678)Ribosomal_L31 (pfam01197) → |
| Sau-1092-1 | NZ_KK096426.1 | - | 34874   | 34845   | RNA → rpmE2 (PRK01678)Ribosomal_L31 (pfam01197) → |



|            |               |   |         |         |                                                   |
|------------|---------------|---|---------|---------|---------------------------------------------------|
| Sau-2553-1 | NZ_KK075434.1 | - | 56893   | 56864   | RNA → rpmE2 (PRK01678)Ribosomal_L31 (pfam01197) → |
| Sau-805-1  | NZ_KK041613.1 | - | 34873   | 34844   | RNA → rpmE2 (PRK01678)Ribosomal_L31 (pfam01197) → |
| Sau-1089-1 | NZ_KK075606.1 | - | 34873   | 34844   | RNA → rpmE2 (PRK01678)Ribosomal_L31 (pfam01197) → |
| Sau-3642-1 | NZ_KK074550.1 | - | 34913   | 34884   | RNA → rpmE2 (PRK01678)Ribosomal_L31 (pfam01197) → |
| Sau-1032-1 | NZ_KK075777.1 | - | 55218   | 55189   | RNA → rpmE2 (PRK01678)Ribosomal_L31 (pfam01197) → |
| Sau-3482-1 | NZ_KK075000.1 | - | 56794   | 56765   | RNA → rpmE2 (PRK01678)Ribosomal_L31 (pfam01197) → |
| Sau-646-1  | NZ_KK076258.1 | - | 56894   | 56865   | RNA → rpmE2 (PRK01678)Ribosomal_L31 (pfam01197) → |
| Sau-761-1  | NZ_KK071031.1 | - | 34817   | 34788   | RNA → rpmE2 (PRK01678)Ribosomal_L31 (pfam01197) → |
| Sau-3531-1 | NZ_KK038182.1 | - | 56091   | 56062   | RNA → rpmE2 (PRK01678)Ribosomal_L31 (pfam01197) → |
| Sau-2579-1 | NZ_KK075298.1 | - | 56894   | 56865   | RNA → rpmE2 (PRK01678)Ribosomal_L31 (pfam01197) → |
| Sau-990-1  | NZ_KK072916.1 | - | 34913   | 34884   | RNA → rpmE2 (PRK01678)Ribosomal_L31 (pfam01197) → |
| Sau-671-1  | NZ_KK076023.1 | - | 34970   | 34941   | RNA → rpmE2 (PRK01678)Ribosomal_L31 (pfam01197) → |
| Sau-1037-1 | NZ_KK075763.1 | - | 55117   | 55088   | RNA → rpmE2 (PRK01678)Ribosomal_L31 (pfam01197) → |
| Sau-1028-1 | NZ_KK075856.1 | - | 34872   | 34843   | RNA → rpmE2 (PRK01678)Ribosomal_L31 (pfam01197) → |
| Sau-2594-1 | NZ_KK075244.1 | - | 55129   | 55100   | RNA → rpmE2 (PRK01678)Ribosomal_L31 (pfam01197) → |
| Sau-1055-1 | NZ_KK075684.1 | - | 55117   | 55088   | RNA → rpmE2 (PRK01678)Ribosomal_L31 (pfam01197) → |
| Sau-752-1  | NZ_KK075969.1 | - | 34873   | 34844   | RNA → rpmE2 (PRK01678)Ribosomal_L31 (pfam01197) → |
| Sau-991-1  | NZ_KK072423.1 | - | 34913   | 34884   | RNA → rpmE2 (PRK01678)Ribosomal_L31 (pfam01197) → |
| Sau-2527-1 | NZ_KK094731.1 | - | 25249   | 25220   | RNA → rpmE2 (PRK01678)Ribosomal_L31 (pfam01197) → |
| Sau-2906-1 | NZ_KK038504.1 | - | 34913   | 34884   | RNA → rpmE2 (PRK01678)Ribosomal_L31 (pfam01197) → |
| Sau-2855-1 | NZ_KK073344.1 | - | 34913   | 34884   | RNA → rpmE2 (PRK01678)Ribosomal_L31 (pfam01197) → |
| Sau-2468-1 | NZ_KK096641.1 | - | 15617   | 15588   | RNA → rpmE2 (PRK01678)Ribosomal_L31 (pfam01197) → |
| Sau-3499-1 | NZ_KK074762.1 | - | 34962   | 34933   | RNA → rpmE2 (PRK01678)Ribosomal_L31 (pfam01197) → |
| Sau-2481-1 | NZ_KK224412.1 | - | 56439   | 56410   | RNA → rpmE2 (PRK01678)Ribosomal_L31 (pfam01197) → |
| Sau-2699-1 | NZ_KK225314.1 | - | 26024   | 25995   | RNA → rpmE2 (PRK01678)Ribosomal_L31 (pfam01197) → |
| Sau-3058-1 | NZ_KK226264.1 | - | 26024   | 25995   | RNA → rpmE2 (PRK01678)Ribosomal_L31 (pfam01197) → |
| Sau-2695-1 | NZ_KK225169.1 | - | 26024   | 25995   | RNA → rpmE2 (PRK01678)Ribosomal_L31 (pfam01197) → |
| Sau-2727-1 | NZ_KK225600.1 | - | 26024   | 25995   | RNA → rpmE2 (PRK01678)Ribosomal_L31 (pfam01197) → |
| Sau-436-1  | NZ_KK097984.1 | - | 56858   | 56829   | RNA → rpmE2 (PRK01678)Ribosomal_L31 (pfam01197) → |
| Sau-363-1  | NZ_KK099356.1 | - | 465519  | 465490  | RNA → rpmE2 (PRK01678)Ribosomal_L31 (pfam01197) → |
| Sau-2946-1 | NZ_KK097098.1 | - | 19182   | 19153   | RNA → rpmE2 (PRK01678)Ribosomal_L31 (pfam01197) → |
| Sau-645-1  | NZ_KK072543.1 | - | 55176   | 55147   | RNA → rpmE2 (PRK01678)Ribosomal_L31 (pfam01197) → |
| Sau-197-1  | NZ_KK221759.1 | - | 25790   | 25761   | RNA → rpmE2 (PRK01678)Ribosomal_L31 (pfam01197) → |
| Sau-477-1  | NZ_KK098514.1 | - | 1677866 | 1677837 | RNA → rpmE2 (PRK01678)Ribosomal_L31 (pfam01197) → |
| Sau-372-1  | NZ_KK099440.1 | - | 57593   | 57564   | RNA → rpmE2 (PRK01678)Ribosomal_L31 (pfam01197) → |
| Sau-357-1  | NZ_KK099307.1 | - | 2100797 | 2100768 | RNA → rpmE2 (PRK01678)Ribosomal_L31 (pfam01197) → |
| Sau-142-1  | NZ_KK219997.1 | - | 56395   | 56366   | RNA → rpmE2 (PRK01678)Ribosomal_L31 (pfam01197) → |
| Sau-216-1  | NZ_KK222467.1 | - | 26024   | 25995   | RNA → rpmE2 (PRK01678)Ribosomal_L31 (pfam01197) → |
| Sau-173-1  | NZ_KK220987.1 | - | 55471   | 55442   | RNA → rpmE2 (PRK01678)Ribosomal_L31 (pfam01197) → |
| Sau-429-1  | NZ_KK097926.1 | - | 57675   | 57646   | RNA → rpmE2 (PRK01678)Ribosomal_L31 (pfam01197) → |
| Sau-472-1  | NZ_KK098444.1 | - | 61574   | 61545   | RNA → rpmE2 (PRK01678)Ribosomal_L31 (pfam01197) → |
| Sau-264-1  | NZ_KK223042.1 | - | 56390   | 56361   | RNA → rpmE2 (PRK01678)Ribosomal_L31 (pfam01197) → |
| Sau-162-1  | NZ_KK220613.1 | - | 55707   | 55678   | RNA → rpmE2 (PRK01678)Ribosomal_L31 (pfam01197) → |
| Sau-2587-1 | NZ_KK094871.1 | - | 34972   | 34943   | RNA → rpmE2 (PRK01678)Ribosomal_L31 (pfam01197) → |
| Sau-211-1  | NZ_KK222290.1 | - | 1768    | 1739    | RNA → rpmE2 (PRK01678)Ribosomal_L31 (pfam01197) → |
| Sau-442-1  | NZ_KK098091.1 | - | 409713  | 409684  | RNA → rpmE2 (PRK01678)Ribosomal_L31 (pfam01197) → |
| Sau-621-1  | NZ_KK072459.1 | - | 34873   | 34844   | RNA → rpmE2 (PRK01678)Ribosomal_L31 (pfam01197) → |
| Sau-390-1  | NZ_KK099582.1 | - | 59481   | 59452   | RNA → rpmE2 (PRK01678)Ribosomal_L31 (pfam01197) → |
| Sau-522-1  | NZ_KK074253.1 | - | 35659   | 35630   | RNA → rpmE2 (PRK01678)Ribosomal_L31 (pfam01197) → |
| Sau-184-1  | NZ_KK221358.1 | - | 25790   | 25761   | RNA → rpmE2 (PRK01678)Ribosomal_L31 (pfam01197) → |
| Sau-189-1  | NZ_KK221549.1 | - | 56395   | 56366   | RNA → rpmE2 (PRK01678)Ribosomal_L31 (pfam01197) → |
| Sau-324-1  | NZ_KK099086.1 | - | 1640651 | 1640622 | RNA → rpmE2 (PRK01678)Ribosomal_L31 (pfam01197) → |

|            |               |   |        |        |       |                                             |
|------------|---------------|---|--------|--------|-------|---------------------------------------------|
| Sau-360-1  | NZ_KK099334.1 | - | 61691  | 61662  | RNA → | rpmE2 (PRK01678)Ribosomal_L31 (pfam01197) → |
| Sau-137-1  | NZ_KK219743.1 | - | 56439  | 56410  | RNA → | rpmE2 (PRK01678)Ribosomal_L31 (pfam01197) → |
| Sau-122-1  | NZ_KK219261.1 | - | 3263   | 3234   | RNA → | rpmE2 (PRK01678)Ribosomal_L31 (pfam01197) → |
| Sau-562-1  | NZ_KK074340.1 | - | 36224  | 36195  | RNA → | rpmE2 (PRK01678)Ribosomal_L31 (pfam01197) → |
| Sau-2599-1 | NZ_KK096816.1 | - | 25255  | 25226  | RNA → | rpmE2 (PRK01678)Ribosomal_L31 (pfam01197) → |
| Sau-171-1  | NZ_KK220922.1 | - | 26024  | 25995  | RNA → | rpmE2 (PRK01678)Ribosomal_L31 (pfam01197) → |
| Sau-876-1  | NZ_KK224237.1 | - | 56390  | 56361  | RNA → | rpmE2 (PRK01678)Ribosomal_L31 (pfam01197) → |
| Sau-462-1  | NZ_KK098326.1 | - | 226837 | 226808 | RNA → | rpmE2 (PRK01678)Ribosomal_L31 (pfam01197) → |
| Sau-2833-1 | NZ_KK094970.1 | - | 34913  | 34884  | RNA → | rpmE2 (PRK01678)Ribosomal_L31 (pfam01197) → |
| Sau-2921-1 | NZ_KK095162.1 | - | 55084  | 55055  | RNA → | rpmE2 (PRK01678)Ribosomal_L31 (pfam01197) → |
| Sau-874-1  | NZ_KK224189.1 | - | 56441  | 56412  | RNA → | rpmE2 (PRK01678)Ribosomal_L31 (pfam01197) → |
| Sau-2915-1 | NZ_KK095113.1 | - | 35168  | 35139  | RNA → | rpmE2 (PRK01678)Ribosomal_L31 (pfam01197) → |
| Sau-2516-1 | NZ_KK224471.1 | - | 26024  | 25995  | RNA → | rpmE2 (PRK01678)Ribosomal_L31 (pfam01197) → |
| Sau-2997-1 | NZ_KK095339.1 | - | 56894  | 56865  | RNA → | rpmE2 (PRK01678)Ribosomal_L31 (pfam01197) → |
| Sau-595-1  | NZ_KK099762.1 | - | 59750  | 59721  | RNA → | rpmE2 (PRK01678)Ribosomal_L31 (pfam01197) → |
| Sau-1651-1 | NZ_KK018430.1 | - | 217332 | 217303 | RNA → | rpmE2 (PRK01678)Ribosomal_L31 (pfam01197) → |
| Sau-1963-1 | NZ_KI988686.1 | - | 113409 | 113380 | RNA → | rpmE2 (PRK01678)Ribosomal_L31 (pfam01197) → |
| Sau-1970-1 | NZ_KI988920.1 | - | 35742  | 35713  | RNA → | rpmE2 (PRK01678)Ribosomal_L31 (pfam01197) → |
| Sau-1978-1 | NZ_KI989249.1 | - | 36391  | 36362  | RNA → | rpmE2 (PRK01678)Ribosomal_L31 (pfam01197) → |
| Sau-1979-1 | NZ_KI989299.1 | - | 24749  | 24720  | RNA → | rpmE2 (PRK01678)Ribosomal_L31 (pfam01197) → |
| Sau-1985-1 | NZ_KI989585.1 | - | 61571  | 61542  | RNA → | rpmE2 (PRK01678)Ribosomal_L31 (pfam01197) → |
| Sau-1986-1 | NZ_KI989593.1 | - | 25029  | 25000  | RNA → | rpmE2 (PRK01678)Ribosomal_L31 (pfam01197) → |
| Sau-1991-1 | NZ_KI989778.1 | - | 62206  | 62177  | RNA → | rpmE2 (PRK01678)Ribosomal_L31 (pfam01197) → |
| Sau-1994-1 | NZ_KI989785.1 | - | 36391  | 36362  | RNA → | rpmE2 (PRK01678)Ribosomal_L31 (pfam01197) → |
| Sau-2022-1 | NZ_KI990875.1 | - | 175788 | 175759 | RNA → | rpmE2 (PRK01678)Ribosomal_L31 (pfam01197) → |
| Sau-1962-1 | NZ_KI988673.1 | - | 35180  | 35151  | RNA → | rpmE2 (PRK01678)Ribosomal_L31 (pfam01197) → |
| Sau-1975-1 | NZ_KI989201.1 | - | 56091  | 56062  | RNA → | rpmE2 (PRK01678)Ribosomal_L31 (pfam01197) → |
| Sau-1990-1 | NZ_KI989707.1 | - | 217268 | 217239 | RNA → | rpmE2 (PRK01678)Ribosomal_L31 (pfam01197) → |
| Sau-2000-1 | NZ_KI990071.1 | - | 61380  | 61351  | RNA → | rpmE2 (PRK01678)Ribosomal_L31 (pfam01197) → |
| Sau-2005-1 | NZ_KI990204.1 | - | 35421  | 35392  | RNA → | rpmE2 (PRK01678)Ribosomal_L31 (pfam01197) → |
| Sau-1967-1 | NZ_KI988891.1 | - | 62202  | 62173  | RNA → | rpmE2 (PRK01678)Ribosomal_L31 (pfam01197) → |
| Sau-1989-1 | NZ_KI989655.1 | - | 36391  | 36362  | RNA → | rpmE2 (PRK01678)Ribosomal_L31 (pfam01197) → |
| Sau-2004-1 | NZ_KI990131.1 | - | 35829  | 35800  | RNA → | rpmE2 (PRK01678)Ribosomal_L31 (pfam01197) → |
| Sau-2020-1 | NZ_KI990737.1 | - | 62257  | 62228  | RNA → | rpmE2 (PRK01678)Ribosomal_L31 (pfam01197) → |
| Sau-3706-1 | NZ_KI977880.1 | - | 56997  | 56968  | RNA → | rpmE2 (PRK01678)Ribosomal_L31 (pfam01197) → |
| Sau-2024-1 | NZ_KI990951.1 | - | 54994  | 54965  | RNA → | rpmE2 (PRK01678)Ribosomal_L31 (pfam01197) → |
| Sau-3677-1 | NZ_KI978852.1 | - | 239539 | 239510 | RNA → | rpmE2 (PRK01678)Ribosomal_L31 (pfam01197) → |
| Sau-3681-1 | NZ_KI979204.1 | - | 58513  | 58484  | RNA → | rpmE2 (PRK01678)Ribosomal_L31 (pfam01197) → |
| Sau-3678-1 | NZ_KI978909.1 | - | 175828 | 175799 | RNA → | rpmE2 (PRK01678)Ribosomal_L31 (pfam01197) → |
| Sau-3687-1 | NZ_KI977321.1 | - | 56894  | 56865  | RNA → | rpmE2 (PRK01678)Ribosomal_L31 (pfam01197) → |
| Sau-3707-1 | NZ_KI978114.1 | - | 57605  | 57576  | RNA → | rpmE2 (PRK01678)Ribosomal_L31 (pfam01197) → |
| Sau-1964-1 | NZ_KI988761.1 | - | 62331  | 62302  | RNA → | rpmE2 (PRK01678)Ribosomal_L31 (pfam01197) → |
| Sau-3679-1 | NZ_KI979142.1 | - | 56893  | 56864  | RNA → | rpmE2 (PRK01678)Ribosomal_L31 (pfam01197) → |
| Sau-3698-1 | NZ_KI975542.1 | - | 60192  | 60163  | RNA → | rpmE2 (PRK01678)Ribosomal_L31 (pfam01197) → |
| Sau-1973-1 | NZ_KI989113.1 | - | 62156  | 62127  | RNA → | rpmE2 (PRK01678)Ribosomal_L31 (pfam01197) → |
| Sau-3686-1 | NZ_KI977286.1 | - | 34913  | 34884  | RNA → | rpmE2 (PRK01678)Ribosomal_L31 (pfam01197) → |
| Sau-1995-1 | NZ_KI989832.1 | - | 35563  | 35534  | RNA → | rpmE2 (PRK01678)Ribosomal_L31 (pfam01197) → |
| Sau-1356-1 | NZ_KK006186.1 | - | 58196  | 58167  | RNA → | rpmE2 (PRK01678)Ribosomal_L31 (pfam01197) → |
| Sau-1384-1 | NZ_KK006658.1 | - | 36391  | 36362  | RNA → | rpmE2 (PRK01678)Ribosomal_L31 (pfam01197) → |
| Sau-1392-1 | NZ_KK006921.1 | - | 36491  | 36462  | RNA → | rpmE2 (PRK01678)Ribosomal_L31 (pfam01197) → |
| Sau-1430-1 | NZ_KK008404.1 | - | 107989 | 107960 | RNA → | rpmE2 (PRK01678)Ribosomal_L31 (pfam01197) → |
| Sau-1432-1 | NZ_KK008462.1 | - | 62050  | 62021  | RNA → | rpmE2 (PRK01678)Ribosomal_L31 (pfam01197) → |

|            |               |   |        |        |       |                                  |                               |                             |   |
|------------|---------------|---|--------|--------|-------|----------------------------------|-------------------------------|-----------------------------|---|
| Sau-1457-1 | NZ_KK009531.1 | - | 28985  | 28956  | RNA → | <a href="#">rpmE2 (PRK01678)</a> | <a href="#">Ribosomal_L31</a> | <a href="#">(pfam01197)</a> | → |
| Sau-1464-1 | NZ_KK009890.1 | - | 24262  | 24233  | RNA → | <a href="#">rpmE2 (PRK01678)</a> | <a href="#">Ribosomal_L31</a> | <a href="#">(pfam01197)</a> | → |
| Sau-1477-1 | NZ_KK010450.1 | - | 61373  | 61344  | RNA → | <a href="#">rpmE2 (PRK01678)</a> | <a href="#">Ribosomal_L31</a> | <a href="#">(pfam01197)</a> | → |
| Sau-3841-1 | NZ_KK010958.1 | - | 35474  | 35445  | RNA → | <a href="#">rpmE2 (PRK01678)</a> | <a href="#">Ribosomal_L31</a> | <a href="#">(pfam01197)</a> | → |
| Sau-1497-1 | NZ_KK011269.1 | - | 58247  | 58218  | RNA → | <a href="#">rpmE2 (PRK01678)</a> | <a href="#">Ribosomal_L31</a> | <a href="#">(pfam01197)</a> | → |
| Sau-1498-1 | NZ_KK011277.1 | - | 36188  | 36159  | RNA → | <a href="#">rpmE2 (PRK01678)</a> | <a href="#">Ribosomal_L31</a> | <a href="#">(pfam01197)</a> | → |
| Sau-1391-1 | NZ_KK006918.1 | - | 111834 | 111805 | RNA → | <a href="#">rpmE2 (PRK01678)</a> | <a href="#">Ribosomal_L31</a> | <a href="#">(pfam01197)</a> | → |
| Sau-1417-1 | NZ_KK007810.1 | - | 26012  | 25983  | RNA → | <a href="#">rpmE2 (PRK01678)</a> | <a href="#">Ribosomal_L31</a> | <a href="#">(pfam01197)</a> | → |
| Sau-1424-1 | NZ_KK008053.1 | - | 108168 | 108139 | RNA → | <a href="#">rpmE2 (PRK01678)</a> | <a href="#">Ribosomal_L31</a> | <a href="#">(pfam01197)</a> | → |
| Sau-3038-1 | NZ_KK019246.1 | - | 56418  | 56389  | RNA → | <a href="#">rpmE2 (PRK01678)</a> | <a href="#">Ribosomal_L31</a> | <a href="#">(pfam01197)</a> | → |
| Sau-1436-1 | NZ_KK008599.1 | - | 36391  | 36362  | RNA → | <a href="#">rpmE2 (PRK01678)</a> | <a href="#">Ribosomal_L31</a> | <a href="#">(pfam01197)</a> | → |
| Sau-1437-1 | NZ_KK008721.1 | - | 61334  | 61305  | RNA → | <a href="#">rpmE2 (PRK01678)</a> | <a href="#">Ribosomal_L31</a> | <a href="#">(pfam01197)</a> | → |
| Sau-1441-1 | NZ_KK008960.1 | - | 114097 | 114068 | RNA → | <a href="#">rpmE2 (PRK01678)</a> | <a href="#">Ribosomal_L31</a> | <a href="#">(pfam01197)</a> | → |
| Sau-1447-1 | NZ_KK009126.1 | - | 36392  | 36363  | RNA → | <a href="#">rpmE2 (PRK01678)</a> | <a href="#">Ribosomal_L31</a> | <a href="#">(pfam01197)</a> | → |
| Sau-3648-1 | NZ_KK022617.1 | - | 56894  | 56865  | RNA → | <a href="#">rpmE2 (PRK01678)</a> | <a href="#">Ribosomal_L31</a> | <a href="#">(pfam01197)</a> | → |
| Sau-1448-1 | NZ_KK009212.1 | - | 114343 | 114314 | RNA → | <a href="#">rpmE2 (PRK01678)</a> | <a href="#">Ribosomal_L31</a> | <a href="#">(pfam01197)</a> | → |
| Sau-3037-1 | NZ_KK019319.1 | - | 35193  | 35164  | RNA → | <a href="#">rpmE2 (PRK01678)</a> | <a href="#">Ribosomal_L31</a> | <a href="#">(pfam01197)</a> | → |
| Sau-1470-1 | NZ_KK010081.1 | - | 2000   | 1971   | RNA → | <a href="#">rpmE2 (PRK01678)</a> | <a href="#">Ribosomal_L31</a> | <a href="#">(pfam01197)</a> | → |
| Sau-3527-1 | NZ_KK021203.1 | - | 34872  | 34843  | RNA → | <a href="#">rpmE2 (PRK01678)</a> | <a href="#">Ribosomal_L31</a> | <a href="#">(pfam01197)</a> | → |
| Sau-1485-1 | NZ_KK010686.1 | - | 119529 | 119500 | RNA → | <a href="#">rpmE2 (PRK01678)</a> | <a href="#">Ribosomal_L31</a> | <a href="#">(pfam01197)</a> | → |
| Sau-1490-1 | NZ_KK010894.1 | - | 37315  | 37286  | RNA → | <a href="#">rpmE2 (PRK01678)</a> | <a href="#">Ribosomal_L31</a> | <a href="#">(pfam01197)</a> | → |
| Sau-3514-1 | NZ_KK020708.1 | - | 95189  | 95160  | RNA → | <a href="#">rpmE2 (PRK01678)</a> | <a href="#">Ribosomal_L31</a> | <a href="#">(pfam01197)</a> | → |
| Sau-1496-1 | NZ_KK011178.1 | - | 55103  | 55074  | RNA → | <a href="#">rpmE2 (PRK01678)</a> | <a href="#">Ribosomal_L31</a> | <a href="#">(pfam01197)</a> | → |
| Sau-2950-1 | NZ_KK022846.1 | - | 56894  | 56865  | RNA → | <a href="#">rpmE2 (PRK01678)</a> | <a href="#">Ribosomal_L31</a> | <a href="#">(pfam01197)</a> | → |
| Sau-1502-1 | NZ_KK011440.1 | - | 61555  | 61526  | RNA → | <a href="#">rpmE2 (PRK01678)</a> | <a href="#">Ribosomal_L31</a> | <a href="#">(pfam01197)</a> | → |
| Sau-1408-1 | NZ_KK007517.1 | - | 195989 | 195960 | RNA → | <a href="#">rpmE2 (PRK01678)</a> | <a href="#">Ribosomal_L31</a> | <a href="#">(pfam01197)</a> | → |
| Sau-1416-1 | NZ_KK007738.1 | - | 113597 | 113568 | RNA → | <a href="#">rpmE2 (PRK01678)</a> | <a href="#">Ribosomal_L31</a> | <a href="#">(pfam01197)</a> | → |
| Sau-1434-1 | NZ_KK008532.1 | - | 36391  | 36362  | RNA → | <a href="#">rpmE2 (PRK01678)</a> | <a href="#">Ribosomal_L31</a> | <a href="#">(pfam01197)</a> | → |
| Sau-1440-1 | NZ_KK008864.1 | - | 61213  | 61184  | RNA → | <a href="#">rpmE2 (PRK01678)</a> | <a href="#">Ribosomal_L31</a> | <a href="#">(pfam01197)</a> | → |
| Sau-1454-1 | NZ_KK009420.1 | - | 36491  | 36462  | RNA → | <a href="#">rpmE2 (PRK01678)</a> | <a href="#">Ribosomal_L31</a> | <a href="#">(pfam01197)</a> | → |
| Sau-1459-1 | NZ_KK009661.1 | - | 36391  | 36362  | RNA → | <a href="#">rpmE2 (PRK01678)</a> | <a href="#">Ribosomal_L31</a> | <a href="#">(pfam01197)</a> | → |
| Sau-1185-1 | NZ_KI999129.1 | - | 36391  | 36362  | RNA → | <a href="#">rpmE2 (PRK01678)</a> | <a href="#">Ribosomal_L31</a> | <a href="#">(pfam01197)</a> | → |
| Sau-1475-1 | NZ_KK010309.1 | - | 111814 | 111785 | RNA → | <a href="#">rpmE2 (PRK01678)</a> | <a href="#">Ribosomal_L31</a> | <a href="#">(pfam01197)</a> | → |
| Sau-1481-1 | NZ_KK010625.1 | - | 111577 | 111548 | RNA → | <a href="#">rpmE2 (PRK01678)</a> | <a href="#">Ribosomal_L31</a> | <a href="#">(pfam01197)</a> | → |
| Sau-1281-1 | NZ_KK002970.1 | - | 62354  | 62325  | RNA → | <a href="#">rpmE2 (PRK01678)</a> | <a href="#">Ribosomal_L31</a> | <a href="#">(pfam01197)</a> | → |
| Sau-1489-1 | NZ_KK010871.1 | - | 62005  | 61976  | RNA → | <a href="#">rpmE2 (PRK01678)</a> | <a href="#">Ribosomal_L31</a> | <a href="#">(pfam01197)</a> | → |
| Sau-1495-1 | NZ_KK011169.1 | - | 61380  | 61351  | RNA → | <a href="#">rpmE2 (PRK01678)</a> | <a href="#">Ribosomal_L31</a> | <a href="#">(pfam01197)</a> | → |
| Sau-1287-1 | NZ_KK003215.1 | - | 126484 | 126455 | RNA → | <a href="#">rpmE2 (PRK01678)</a> | <a href="#">Ribosomal_L31</a> | <a href="#">(pfam01197)</a> | → |
| Sau-1421-1 | NZ_KK007928.1 | - | 36391  | 36362  | RNA → | <a href="#">rpmE2 (PRK01678)</a> | <a href="#">Ribosomal_L31</a> | <a href="#">(pfam01197)</a> | → |
| Sau-1288-1 | NZ_KK003234.1 | - | 43829  | 43800  | RNA → | <a href="#">rpmE2 (PRK01678)</a> | <a href="#">Ribosomal_L31</a> | <a href="#">(pfam01197)</a> | → |
| Sau-1445-1 | NZ_KK009087.1 | - | 145173 | 145144 | RNA → | <a href="#">rpmE2 (PRK01678)</a> | <a href="#">Ribosomal_L31</a> | <a href="#">(pfam01197)</a> | → |
| Sau-1294-1 | NZ_KK003529.1 | - | 61480  | 61451  | RNA → | <a href="#">rpmE2 (PRK01678)</a> | <a href="#">Ribosomal_L31</a> | <a href="#">(pfam01197)</a> | → |
| Sau-1458-1 | NZ_KK009644.1 | - | 108047 | 108018 | RNA → | <a href="#">rpmE2 (PRK01678)</a> | <a href="#">Ribosomal_L31</a> | <a href="#">(pfam01197)</a> | → |
| Sau-1306-1 | NZ_KK003976.1 | - | 36861  | 36832  | RNA → | <a href="#">rpmE2 (PRK01678)</a> | <a href="#">Ribosomal_L31</a> | <a href="#">(pfam01197)</a> | → |
| Sau-1473-1 | NZ_KK010162.1 | - | 82709  | 82680  | RNA → | <a href="#">rpmE2 (PRK01678)</a> | <a href="#">Ribosomal_L31</a> | <a href="#">(pfam01197)</a> | → |
| Sau-1311-1 | NZ_KK004318.1 | - | 114419 | 114390 | RNA → | <a href="#">rpmE2 (PRK01678)</a> | <a href="#">Ribosomal_L31</a> | <a href="#">(pfam01197)</a> | → |
| Sau-1474-1 | NZ_KK010214.1 | - | 25255  | 25226  | RNA → | <a href="#">rpmE2 (PRK01678)</a> | <a href="#">Ribosomal_L31</a> | <a href="#">(pfam01197)</a> | → |
| Sau-1336-1 | NZ_KK005381.1 | - | 15850  | 15821  | RNA → | <a href="#">rpmE2 (PRK01678)</a> | <a href="#">Ribosomal_L31</a> | <a href="#">(pfam01197)</a> | → |
| Sau-1478-1 | NZ_KK010455.1 | - | 36021  | 35992  | RNA → | <a href="#">rpmE2 (PRK01678)</a> | <a href="#">Ribosomal_L31</a> | <a href="#">(pfam01197)</a> | → |
| Sau-1341-1 | NZ_KK005590.1 | - | 62005  | 61976  | RNA → | <a href="#">rpmE2 (PRK01678)</a> | <a href="#">Ribosomal_L31</a> | <a href="#">(pfam01197)</a> | → |
| Sau-1487-1 | NZ_KK010743.1 | - | 35170  | 35141  | RNA → | <a href="#">rpmE2 (PRK01678)</a> | <a href="#">Ribosomal_L31</a> | <a href="#">(pfam01197)</a> | → |
| Sau-1505-1 | NZ_KK011613.1 | - | 35397  | 35368  | RNA → | <a href="#">rpmE2 (PRK01678)</a> | <a href="#">Ribosomal_L31</a> | <a href="#">(pfam01197)</a> | → |



|            |               |   |        |        |       |                                  |                               |                             |   |
|------------|---------------|---|--------|--------|-------|----------------------------------|-------------------------------|-----------------------------|---|
| Sau-1352-1 | NZ_KK006057.1 | - | 114518 | 114489 | RNA → | <a href="#">rpmE2 (PRK01678)</a> | <a href="#">Ribosomal_L31</a> | <a href="#">(pfam01197)</a> | → |
| Sau-1366-1 | NZ_KK006305.1 | - | 35908  | 35879  | RNA → | <a href="#">rpmE2 (PRK01678)</a> | <a href="#">Ribosomal_L31</a> | <a href="#">(pfam01197)</a> | → |
| Sau-1488-1 | NZ_KK010792.1 | - | 178313 | 178284 | RNA → | <a href="#">rpmE2 (PRK01678)</a> | <a href="#">Ribosomal_L31</a> | <a href="#">(pfam01197)</a> | → |
| Sau-1476-1 | NZ_KK010315.1 | - | 36391  | 36362  | RNA → | <a href="#">rpmE2 (PRK01678)</a> | <a href="#">Ribosomal_L31</a> | <a href="#">(pfam01197)</a> | → |
| Sau-1380-1 | NZ_KK006558.1 | - | 117031 | 117002 | RNA → | <a href="#">rpmE2 (PRK01678)</a> | <a href="#">Ribosomal_L31</a> | <a href="#">(pfam01197)</a> | → |
| Sau-1507-1 | NZ_KK011728.1 | - | 35371  | 35342  | RNA → | <a href="#">rpmE2 (PRK01678)</a> | <a href="#">Ribosomal_L31</a> | <a href="#">(pfam01197)</a> | → |
| Sau-1382-1 | NZ_KK006578.1 | - | 116022 | 115993 | RNA → | <a href="#">rpmE2 (PRK01678)</a> | <a href="#">Ribosomal_L31</a> | <a href="#">(pfam01197)</a> | → |
| Sau-1503-1 | NZ_KK011501.1 | - | 36513  | 36484  | RNA → | <a href="#">rpmE2 (PRK01678)</a> | <a href="#">Ribosomal_L31</a> | <a href="#">(pfam01197)</a> | → |
| Sau-1199-1 | NZ_KI999874.1 | - | 28749  | 28720  | RNA → | <a href="#">rpmE2 (PRK01678)</a> | <a href="#">Ribosomal_L31</a> | <a href="#">(pfam01197)</a> | → |
| Sau-1504-1 | NZ_KK011582.1 | - | 178484 | 178455 | RNA → | <a href="#">rpmE2 (PRK01678)</a> | <a href="#">Ribosomal_L31</a> | <a href="#">(pfam01197)</a> | → |
| Sau-1284-1 | NZ_KK003030.1 | - | 65411  | 65382  | RNA → | <a href="#">rpmE2 (PRK01678)</a> | <a href="#">Ribosomal_L31</a> | <a href="#">(pfam01197)</a> | → |
| Sau-1510-1 | NZ_KK011817.1 | - | 56781  | 56752  | RNA → | <a href="#">rpmE2 (PRK01678)</a> | <a href="#">Ribosomal_L31</a> | <a href="#">(pfam01197)</a> | → |
| Sau-1295-1 | NZ_KK003538.1 | - | 36220  | 36191  | RNA → | <a href="#">rpmE2 (PRK01678)</a> | <a href="#">Ribosomal_L31</a> | <a href="#">(pfam01197)</a> | → |
| Sau-1517-1 | NZ_KK012068.1 | - | 35253  | 35224  | RNA → | <a href="#">rpmE2 (PRK01678)</a> | <a href="#">Ribosomal_L31</a> | <a href="#">(pfam01197)</a> | → |
| Sau-1301-1 | NZ_KK003741.1 | - | 36391  | 36362  | RNA → | <a href="#">rpmE2 (PRK01678)</a> | <a href="#">Ribosomal_L31</a> | <a href="#">(pfam01197)</a> | → |
| Sau-1501-1 | NZ_KK011400.1 | - | 2500   | 2471   | RNA → | <a href="#">rpmE2 (PRK01678)</a> | <a href="#">Ribosomal_L31</a> | <a href="#">(pfam01197)</a> | → |
| Sau-1313-1 | NZ_KK004322.1 | - | 36491  | 36462  | RNA → | <a href="#">rpmE2 (PRK01678)</a> | <a href="#">Ribosomal_L31</a> | <a href="#">(pfam01197)</a> | → |
| Sau-1318-1 | NZ_KK004611.1 | - | 1824   | 1795   | RNA → | <a href="#">rpmE2 (PRK01678)</a> | <a href="#">Ribosomal_L31</a> | <a href="#">(pfam01197)</a> | → |
| Sau-1325-1 | NZ_KK004904.1 | - | 2235   | 2206   | RNA → | <a href="#">rpmE2 (PRK01678)</a> | <a href="#">Ribosomal_L31</a> | <a href="#">(pfam01197)</a> | → |
| Sau-1330-1 | NZ_KK005165.1 | - | 36491  | 36462  | RNA → | <a href="#">rpmE2 (PRK01678)</a> | <a href="#">Ribosomal_L31</a> | <a href="#">(pfam01197)</a> | → |
| Sau-1344-1 | NZ_KK005683.1 | - | 62156  | 62127  | RNA → | <a href="#">rpmE2 (PRK01678)</a> | <a href="#">Ribosomal_L31</a> | <a href="#">(pfam01197)</a> | → |
| Sau-1349-1 | NZ_KK005857.1 | - | 36390  | 36361  | RNA → | <a href="#">rpmE2 (PRK01678)</a> | <a href="#">Ribosomal_L31</a> | <a href="#">(pfam01197)</a> | → |
| Sau-1354-1 | NZ_KK006093.1 | - | 114114 | 114085 | RNA → | <a href="#">rpmE2 (PRK01678)</a> | <a href="#">Ribosomal_L31</a> | <a href="#">(pfam01197)</a> | → |
| Sau-1383-1 | NZ_KK006590.1 | - | 22238  | 22209  | RNA → | <a href="#">rpmE2 (PRK01678)</a> | <a href="#">Ribosomal_L31</a> | <a href="#">(pfam01197)</a> | → |
| Sau-1310-1 | NZ_KK004215.1 | - | 36391  | 36362  | RNA → | <a href="#">rpmE2 (PRK01678)</a> | <a href="#">Ribosomal_L31</a> | <a href="#">(pfam01197)</a> | → |
| Sau-1315-1 | NZ_KK004456.1 | - | 35757  | 35728  | RNA → | <a href="#">rpmE2 (PRK01678)</a> | <a href="#">Ribosomal_L31</a> | <a href="#">(pfam01197)</a> | → |
| Sau-573-1  | NZ_KI966278.1 | - | 59905  | 59876  | RNA → | <a href="#">rpmE2 (PRK01678)</a> | <a href="#">Ribosomal_L31</a> | <a href="#">(pfam01197)</a> | → |
| Sau-1316-1 | NZ_KK004546.1 | - | 109745 | 109716 | RNA → | <a href="#">rpmE2 (PRK01678)</a> | <a href="#">Ribosomal_L31</a> | <a href="#">(pfam01197)</a> | → |
| Sau-1346-1 | NZ_KK005738.1 | - | 35986  | 35957  | RNA → | <a href="#">rpmE2 (PRK01678)</a> | <a href="#">Ribosomal_L31</a> | <a href="#">(pfam01197)</a> | → |
| Sau-1687-1 | NZ_KI967761.1 | - | 36281  | 36252  | RNA → | <a href="#">rpmE2 (PRK01678)</a> | <a href="#">Ribosomal_L31</a> | <a href="#">(pfam01197)</a> | → |
| Sau-1357-1 | NZ_KK006191.1 | - | 56146  | 56117  | RNA → | <a href="#">rpmE2 (PRK01678)</a> | <a href="#">Ribosomal_L31</a> | <a href="#">(pfam01197)</a> | → |
| Sau-1692-1 | NZ_KI967978.1 | - | 36579  | 36550  | RNA → | <a href="#">rpmE2 (PRK01678)</a> | <a href="#">Ribosomal_L31</a> | <a href="#">(pfam01197)</a> | → |
| Sau-1385-1 | NZ_KK006727.1 | - | 36016  | 35987  | RNA → | <a href="#">rpmE2 (PRK01678)</a> | <a href="#">Ribosomal_L31</a> | <a href="#">(pfam01197)</a> | → |
| Sau-1698-1 | NZ_KI968309.1 | - | 36391  | 36362  | RNA → | <a href="#">rpmE2 (PRK01678)</a> | <a href="#">Ribosomal_L31</a> | <a href="#">(pfam01197)</a> | → |
| Sau-1196-1 | NZ_KI999558.1 | - | 36632  | 36603  | RNA → | <a href="#">rpmE2 (PRK01678)</a> | <a href="#">Ribosomal_L31</a> | <a href="#">(pfam01197)</a> | → |
| Sau-1207-1 | NZ_KK000219.1 | - | 28749  | 28720  | RNA → | <a href="#">rpmE2 (PRK01678)</a> | <a href="#">Ribosomal_L31</a> | <a href="#">(pfam01197)</a> | → |
| Sau-1227-1 | NZ_KK000992.1 | - | 7425   | 7396   | RNA → | <a href="#">rpmE2 (PRK01678)</a> | <a href="#">Ribosomal_L31</a> | <a href="#">(pfam01197)</a> | → |
| Sau-1320-1 | NZ_KK004674.1 | - | 36391  | 36362  | RNA → | <a href="#">rpmE2 (PRK01678)</a> | <a href="#">Ribosomal_L31</a> | <a href="#">(pfam01197)</a> | → |
| Sau-1332-1 | NZ_KK005270.1 | - | 114270 | 114241 | RNA → | <a href="#">rpmE2 (PRK01678)</a> | <a href="#">Ribosomal_L31</a> | <a href="#">(pfam01197)</a> | → |
| Sau-1333-1 | NZ_KK005279.1 | - | 36391  | 36362  | RNA → | <a href="#">rpmE2 (PRK01678)</a> | <a href="#">Ribosomal_L31</a> | <a href="#">(pfam01197)</a> | → |
| Sau-1345-1 | NZ_KK005685.1 | - | 36391  | 36362  | RNA → | <a href="#">rpmE2 (PRK01678)</a> | <a href="#">Ribosomal_L31</a> | <a href="#">(pfam01197)</a> | → |
| Sau-1350-1 | NZ_KK005907.1 | - | 32991  | 32962  | RNA → | <a href="#">rpmE2 (PRK01678)</a> | <a href="#">Ribosomal_L31</a> | <a href="#">(pfam01197)</a> | → |
| Sau-1241-1 | NZ_KK001441.1 | - | 25227  | 25198  | RNA → | <a href="#">rpmE2 (PRK01678)</a> | <a href="#">Ribosomal_L31</a> | <a href="#">(pfam01197)</a> | → |
| Sau-1285-1 | NZ_KK003118.1 | - | 25185  | 25156  | RNA → | <a href="#">rpmE2 (PRK01678)</a> | <a href="#">Ribosomal_L31</a> | <a href="#">(pfam01197)</a> | → |
| Sau-1378-1 | NZ_KK006456.1 | - | 94742  | 94713  | RNA → | <a href="#">rpmE2 (PRK01678)</a> | <a href="#">Ribosomal_L31</a> | <a href="#">(pfam01197)</a> | → |
| Sau-1337-1 | NZ_KK005431.1 | - | 36391  | 36362  | RNA → | <a href="#">rpmE2 (PRK01678)</a> | <a href="#">Ribosomal_L31</a> | <a href="#">(pfam01197)</a> | → |
| Sau-1782-1 | NZ_KI982238.1 | - | 113825 | 113796 | RNA → | <a href="#">rpmE2 (PRK01678)</a> | <a href="#">Ribosomal_L31</a> | <a href="#">(pfam01197)</a> | → |
| Sau-1343-1 | NZ_KK005632.1 | - | 130992 | 130963 | RNA → | <a href="#">rpmE2 (PRK01678)</a> | <a href="#">Ribosomal_L31</a> | <a href="#">(pfam01197)</a> | → |
| Sau-1788-1 | NZ_KI982535.1 | - | 61379  | 61350  | RNA → | <a href="#">rpmE2 (PRK01678)</a> | <a href="#">Ribosomal_L31</a> | <a href="#">(pfam01197)</a> | → |
| Sau-1355-1 | NZ_KK006099.1 | - | 81276  | 81247  | RNA → | <a href="#">rpmE2 (PRK01678)</a> | <a href="#">Ribosomal_L31</a> | <a href="#">(pfam01197)</a> | → |
| Sau-1800-1 | NZ_KI983038.1 | - | 36391  | 36362  | RNA → | <a href="#">rpmE2 (PRK01678)</a> | <a href="#">Ribosomal_L31</a> | <a href="#">(pfam01197)</a> | → |
| Sau-1805-1 | NZ_KI983336.1 | - | 36390  | 36361  | RNA → | <a href="#">rpmE2 (PRK01678)</a> | <a href="#">Ribosomal_L31</a> | <a href="#">(pfam01197)</a> | → |

|            |               |   |        |        |                                                   |
|------------|---------------|---|--------|--------|---------------------------------------------------|
| Sau-1377-1 | NZ_KK006414.1 | - | 113836 | 113807 | RNA → rpmE2 (PRK01678)Ribosomal_L31 (pfam01197) → |
| Sau-1190-1 | NZ_KI999369.1 | - | 35872  | 35843  | RNA → rpmE2 (PRK01678)Ribosomal_L31 (pfam01197) → |
| Sau-1340-1 | NZ_KK005535.1 | - | 9413   | 9384   | RNA → rpmE2 (PRK01678)Ribosomal_L31 (pfam01197) → |
| Sau-1379-1 | NZ_KK006465.1 | - | 36491  | 36462  | RNA → rpmE2 (PRK01678)Ribosomal_L31 (pfam01197) → |
| Sau-1783-1 | NZ_KI982243.1 | - | 35387  | 35358  | RNA → rpmE2 (PRK01678)Ribosomal_L31 (pfam01197) → |
| Sau-1347-1 | NZ_KK005768.1 | - | 35179  | 35150  | RNA → rpmE2 (PRK01678)Ribosomal_L31 (pfam01197) → |
| Sau-1789-1 | NZ_KI982539.1 | - | 47628  | 47599  | RNA → rpmE2 (PRK01678)Ribosomal_L31 (pfam01197) → |
| Sau-1790-1 | NZ_KI982579.1 | - | 55496  | 55467  | RNA → rpmE2 (PRK01678)Ribosomal_L31 (pfam01197) → |
| Sau-1795-1 | NZ_KI982920.1 | - | 107814 | 107785 | RNA → rpmE2 (PRK01678)Ribosomal_L31 (pfam01197) → |
| Sau-1801-1 | NZ_KI983087.1 | - | 11532  | 11503  | RNA → rpmE2 (PRK01678)Ribosomal_L31 (pfam01197) → |
| Sau-1802-1 | NZ_KI983209.1 | - | 61379  | 61350  | RNA → rpmE2 (PRK01678)Ribosomal_L31 (pfam01197) → |
| Sau-1806-1 | NZ_KI983445.1 | - | 25184  | 25155  | RNA → rpmE2 (PRK01678)Ribosomal_L31 (pfam01197) → |
| Sau-583-1  | NZ_KI966250.1 | - | 110430 | 110401 | RNA → rpmE2 (PRK01678)Ribosomal_L31 (pfam01197) → |
| Sau-1690-1 | NZ_KI967971.1 | - | 26596  | 26567  | RNA → rpmE2 (PRK01678)Ribosomal_L31 (pfam01197) → |
| Sau-1725-1 | NZ_KI970090.1 | - | 25227  | 25198  | RNA → rpmE2 (PRK01678)Ribosomal_L31 (pfam01197) → |
| Sau-1624-1 | NZ_KK017043.1 | - | 15812  | 15783  | RNA → rpmE2 (PRK01678)Ribosomal_L31 (pfam01197) → |
| Sau-1626-1 | NZ_KK017149.1 | - | 11533  | 11504  | RNA → rpmE2 (PRK01678)Ribosomal_L31 (pfam01197) → |
| Sau-892-1  | NZ_KI979231.1 | - | 113578 | 113549 | RNA → rpmE2 (PRK01678)Ribosomal_L31 (pfam01197) → |
| Sau-1751-1 | NZ_KI981591.1 | - | 81045  | 81016  | RNA → rpmE2 (PRK01678)Ribosomal_L31 (pfam01197) → |
| Sau-1650-1 | NZ_KK018407.1 | - | 62157  | 62128  | RNA → rpmE2 (PRK01678)Ribosomal_L31 (pfam01197) → |
| Sau-1781-1 | NZ_KI982144.1 | - | 36391  | 36362  | RNA → rpmE2 (PRK01678)Ribosomal_L31 (pfam01197) → |
| Sau-1593-1 | NZ_KK015493.1 | - | 62156  | 62127  | RNA → rpmE2 (PRK01678)Ribosomal_L31 (pfam01197) → |
| Sau-1787-1 | NZ_KI982431.1 | - | 54695  | 54666  | RNA → rpmE2 (PRK01678)Ribosomal_L31 (pfam01197) → |
| Sau-1617-1 | NZ_KK016736.1 | - | 96856  | 96827  | RNA → rpmE2 (PRK01678)Ribosomal_L31 (pfam01197) → |
| Sau-1633-1 | NZ_KK017532.1 | - | 35482  | 35453  | RNA → rpmE2 (PRK01678)Ribosomal_L31 (pfam01197) → |
| Sau-1792-1 | NZ_KI982725.1 | - | 56593  | 56564  | RNA → rpmE2 (PRK01678)Ribosomal_L31 (pfam01197) → |
| Sau-1799-1 | NZ_KI982988.1 | - | 24749  | 24720  | RNA → rpmE2 (PRK01678)Ribosomal_L31 (pfam01197) → |
| Sau-1804-1 | NZ_KI983259.1 | - | 25185  | 25156  | RNA → rpmE2 (PRK01678)Ribosomal_L31 (pfam01197) → |
| Sau-604-1  | NZ_KI966123.1 | - | 63210  | 63181  | RNA → rpmE2 (PRK01678)Ribosomal_L31 (pfam01197) → |
| Sau-599-1  | NZ_KI966182.1 | - | 61249  | 61220  | RNA → rpmE2 (PRK01678)Ribosomal_L31 (pfam01197) → |
| Sau-1597-1 | NZ_KK015613.1 | - | 28883  | 28854  | RNA → rpmE2 (PRK01678)Ribosomal_L31 (pfam01197) → |
| Sau-300-1  | NZ_KI978791.1 | - | 56893  | 56864  | RNA → rpmE2 (PRK01678)Ribosomal_L31 (pfam01197) → |
| Sau-889-1  | NZ_KI978849.1 | - | 56894  | 56865  | RNA → rpmE2 (PRK01678)Ribosomal_L31 (pfam01197) → |
| Sau-278-1  | NZ_KI979258.1 | - | 56995  | 56966  | RNA → rpmE2 (PRK01678)Ribosomal_L31 (pfam01197) → |
| Sau-1773-1 | NZ_KI981785.1 | - | 70324  | 70295  | RNA → rpmE2 (PRK01678)Ribosomal_L31 (pfam01197) → |
| Sau-1342-1 | NZ_KK018458.1 | - | 36391  | 36362  | RNA → rpmE2 (PRK01678)Ribosomal_L31 (pfam01197) → |
| Sau-1774-1 | NZ_KI981898.1 | - | 61468  | 61439  | RNA → rpmE2 (PRK01678)Ribosomal_L31 (pfam01197) → |
| Sau-1779-1 | NZ_KI982023.1 | - | 61894  | 61865  | RNA → rpmE2 (PRK01678)Ribosomal_L31 (pfam01197) → |
| Sau-1371-1 | NZ_KK018935.1 | - | 35170  | 35141  | RNA → rpmE2 (PRK01678)Ribosomal_L31 (pfam01197) → |
| Sau-1780-1 | NZ_KI982082.1 | - | 36320  | 36291  | RNA → rpmE2 (PRK01678)Ribosomal_L31 (pfam01197) → |
| Sau-619-1  | NZ_KK022635.1 | - | 34873  | 34844  | RNA → rpmE2 (PRK01678)Ribosomal_L31 (pfam01197) → |
| Sau-1785-1 | NZ_KI982294.1 | - | 24749  | 24720  | RNA → rpmE2 (PRK01678)Ribosomal_L31 (pfam01197) → |
| Sau-1786-1 | NZ_KI982353.1 | - | 36491  | 36462  | RNA → rpmE2 (PRK01678)Ribosomal_L31 (pfam01197) → |
| Sau-1791-1 | NZ_KI982675.1 | - | 25129  | 25100  | RNA → rpmE2 (PRK01678)Ribosomal_L31 (pfam01197) → |
| Sau-1579-1 | NZ_KK014783.1 | - | 36139  | 36110  | RNA → rpmE2 (PRK01678)Ribosomal_L31 (pfam01197) → |
| Sau-1797-1 | NZ_KI982953.1 | - | 49963  | 49934  | RNA → rpmE2 (PRK01678)Ribosomal_L31 (pfam01197) → |
| Sau-1638-1 | NZ_KK017770.1 | - | 36391  | 36362  | RNA → rpmE2 (PRK01678)Ribosomal_L31 (pfam01197) → |
| Sau-1803-1 | NZ_KI983216.1 | - | 35204  | 35175  | RNA → rpmE2 (PRK01678)Ribosomal_L31 (pfam01197) → |
| Sau-1809-1 | NZ_KI983518.1 | - | 50063  | 50034  | RNA → rpmE2 (PRK01678)Ribosomal_L31 (pfam01197) → |
| Sau-1649-1 | NZ_KK018347.1 | - | 62154  | 62125  | RNA → rpmE2 (PRK01678)Ribosomal_L31 (pfam01197) → |
| Sau-1374-1 | NZ_KK019025.1 | - | 16360  | 16331  | RNA → rpmE2 (PRK01678)Ribosomal_L31 (pfam01197) → |
| Sau-1759-1 | NZ_KI991973.1 | - | 36391  | 36362  | RNA → rpmE2 (PRK01678)Ribosomal_L31 (pfam01197) → |



|            |               |   |         |         |       |                                             |
|------------|---------------|---|---------|---------|-------|---------------------------------------------|
| Sau-1753-1 | NZ_KI991857.1 | - | 61333   | 61304   | RNA → | rpmE2 (PRK01678)Ribosomal_L31 (pfam01197) → |
| Sau-3525-1 | NZ_KK021290.1 | - | 34873   | 34844   | RNA → | rpmE2 (PRK01678)Ribosomal_L31 (pfam01197) → |
| Sau-895-1  | NZ_KK022550.1 | - | 34874   | 34845   | RNA → | rpmE2 (PRK01678)Ribosomal_L31 (pfam01197) → |
| Sau-1599-1 | NZ_KK015745.1 | - | 36750   | 36721   | RNA → | rpmE2 (PRK01678)Ribosomal_L31 (pfam01197) → |
| Sau-1623-1 | NZ_KK017004.1 | - | 107853  | 107824  | RNA → | rpmE2 (PRK01678)Ribosomal_L31 (pfam01197) → |
| Sau-1629-1 | NZ_KK017303.1 | - | 35334   | 35305   | RNA → | rpmE2 (PRK01678)Ribosomal_L31 (pfam01197) → |
| Sau-1645-1 | NZ_KK018155.1 | - | 62156   | 62127   | RNA → | rpmE2 (PRK01678)Ribosomal_L31 (pfam01197) → |
| Sau-678-1  | NZ_KK021099.1 | - | 34874   | 34845   | RNA → | rpmE2 (PRK01678)Ribosomal_L31 (pfam01197) → |
| Sau-3551-1 | NZ_KK021976.1 | - | 25255   | 25226   | RNA → | rpmE2 (PRK01678)Ribosomal_L31 (pfam01197) → |
| Sau-1600-1 | NZ_KK015795.1 | - | 35719   | 35690   | RNA → | rpmE2 (PRK01678)Ribosomal_L31 (pfam01197) → |
| Sau-2457-1 | NZ_KK022793.1 | - | 123801  | 123772  | RNA → | rpmE2 (PRK01678)Ribosomal_L31 (pfam01197) → |
| Sau-2949-1 | NZ_KK022818.1 | - | 56940   | 56911   | RNA → | rpmE2 (PRK01678)Ribosomal_L31 (pfam01197) → |
| Sau-2121-1 | NZ_KK066900.1 | - | 62105   | 62076   | RNA → | rpmE2 (PRK01678)Ribosomal_L31 (pfam01197) → |
| Sau-2115-1 | NZ_KK067042.1 | - | 111347  | 111318  | RNA → | rpmE2 (PRK01678)Ribosomal_L31 (pfam01197) → |
| Sau-2106-1 | NZ_KK067270.1 | - | 36390   | 36361   | RNA → | rpmE2 (PRK01678)Ribosomal_L31 (pfam01197) → |
| Sau-2146-1 | NZ_KK065789.1 | - | 36748   | 36719   | RNA → | rpmE2 (PRK01678)Ribosomal_L31 (pfam01197) → |
| Sau-2124-1 | NZ_KK066757.1 | - | 35379   | 35350   | RNA → | rpmE2 (PRK01678)Ribosomal_L31 (pfam01197) → |
| Sau-2110-1 | NZ_KK067172.1 | - | 35461   | 35432   | RNA → | rpmE2 (PRK01678)Ribosomal_L31 (pfam01197) → |
| Sau-2154-1 | NZ_KK065505.1 | - | 61121   | 61092   | RNA → | rpmE2 (PRK01678)Ribosomal_L31 (pfam01197) → |
| Sau-2149-1 | NZ_KK065701.1 | - | 54674   | 54645   | RNA → | rpmE2 (PRK01678)Ribosomal_L31 (pfam01197) → |
| Sau-2143-1 | NZ_KK065925.1 | - | 36181   | 36152   | RNA → | rpmE2 (PRK01678)Ribosomal_L31 (pfam01197) → |
| Sau-2093-1 | NZ_KK067569.1 | - | 24083   | 24054   | RNA → | rpmE2 (PRK01678)Ribosomal_L31 (pfam01197) → |
| Sau-2128-1 | NZ_KK066638.1 | - | 60124   | 60095   | RNA → | rpmE2 (PRK01678)Ribosomal_L31 (pfam01197) → |
| Sau-681-1  | NZ_KK020994.1 | - | 34816   | 34787   | RNA → | rpmE2 (PRK01678)Ribosomal_L31 (pfam01197) → |
| Sau-699-1  | NZ_KK023877.1 | - | 33076   | 33047   | RNA → | rpmE2 (PRK01678)Ribosomal_L31 (pfam01197) → |
| Sau-800-1  | NZ_KK027143.1 | - | 34869   | 34840   | RNA → | rpmE2 (PRK01678)Ribosomal_L31 (pfam01197) → |
| Sau-824-1  | NZ_KK027509.1 | - | 34873   | 34844   | RNA → | rpmE2 (PRK01678)Ribosomal_L31 (pfam01197) → |
| Sau-664-1  | NZ_KK029115.1 | - | 34873   | 34844   | RNA → | rpmE2 (PRK01678)Ribosomal_L31 (pfam01197) → |
| Sau-667-1  | NZ_KK029215.1 | - | 34863   | 34834   | RNA → | rpmE2 (PRK01678)Ribosomal_L31 (pfam01197) → |
| Sau-757-1  | NZ_KK029350.1 | - | 34872   | 34843   | RNA → | rpmE2 (PRK01678)Ribosomal_L31 (pfam01197) → |
| Sau-785-1  | NZ_KK041807.1 | - | 34873   | 34844   | RNA → | rpmE2 (PRK01678)Ribosomal_L31 (pfam01197) → |
| Sau-705-1  | NZ_KK021611.1 | - | 34873   | 34844   | RNA → | rpmE2 (PRK01678)Ribosomal_L31 (pfam01197) → |
| Sau-693-1  | NZ_KK023840.1 | - | 2239382 | 2239353 | RNA → | rpmE2 (PRK01678)Ribosomal_L31 (pfam01197) → |
| Sau-755-1  | NZ_KK025445.1 | - | 34873   | 34844   | RNA → | rpmE2 (PRK01678)Ribosomal_L31 (pfam01197) → |
| Sau-762-1  | NZ_KK025890.1 | + | 18543   | 18572   | RNA → | rpmE2 (PRK01678)Ribosomal_L31 (pfam01197) → |
| Sau-770-1  | NZ_KK026102.1 | - | 56893   | 56864   | RNA → | rpmE2 (PRK01678)Ribosomal_L31 (pfam01197) → |
| Sau-790-1  | NZ_KK026722.1 | - | 34872   | 34843   | RNA → | rpmE2 (PRK01678)Ribosomal_L31 (pfam01197) → |
| Sau-801-1  | NZ_KK027198.1 | - | 32356   | 32327   | RNA → | rpmE2 (PRK01678)Ribosomal_L31 (pfam01197) → |
| Sau-825-1  | NZ_KK027558.1 | - | 34817   | 34788   | RNA → | rpmE2 (PRK01678)Ribosomal_L31 (pfam01197) → |
| Sau-840-1  | NZ_KK027859.1 | - | 56502   | 56473   | RNA → | rpmE2 (PRK01678)Ribosomal_L31 (pfam01197) → |
| Sau-783-1  | NZ_KK029395.1 | - | 54878   | 54849   | RNA → | rpmE2 (PRK01678)Ribosomal_L31 (pfam01197) → |
| Sau-689-1  | NZ_KK039752.1 | - | 34817   | 34788   | RNA → | rpmE2 (PRK01678)Ribosomal_L31 (pfam01197) → |
| Sau-782-1  | NZ_KK041853.1 | - | 34864   | 34835   | RNA → | rpmE2 (PRK01678)Ribosomal_L31 (pfam01197) → |
| Sau-732-1  | NZ_KK024821.1 | - | 57040   | 57011   | RNA → | rpmE2 (PRK01678)Ribosomal_L31 (pfam01197) → |
| Sau-739-1  | NZ_KK024990.1 | - | 34872   | 34843   | RNA → | rpmE2 (PRK01678)Ribosomal_L31 (pfam01197) → |
| Sau-743-1  | NZ_KK029255.1 | - | 34730   | 34701   | RNA → | rpmE2 (PRK01678)Ribosomal_L31 (pfam01197) → |
| Sau-2934-1 | NZ_KK021933.1 | - | 54878   | 54849   | RNA → | rpmE2 (PRK01678)Ribosomal_L31 (pfam01197) → |
| Sau-2174-1 | NZ_KK024197.1 | - | 34873   | 34844   | RNA → | rpmE2 (PRK01678)Ribosomal_L31 (pfam01197) → |
| Sau-2869-1 | NZ_KK023742.1 | - | 34872   | 34843   | RNA → | rpmE2 (PRK01678)Ribosomal_L31 (pfam01197) → |
| Sau-2460-1 | NZ_KK025154.1 | - | 34872   | 34843   | RNA → | rpmE2 (PRK01678)Ribosomal_L31 (pfam01197) → |
| Sau-2942-1 | NZ_KK024911.1 | - | 34864   | 34835   | RNA → | rpmE2 (PRK01678)Ribosomal_L31 (pfam01197) → |
| Sau-2989-1 | NZ_KK026829.1 | - | 34872   | 34843   | RNA → | rpmE2 (PRK01678)Ribosomal_L31 (pfam01197) → |

|            |               |   |         |         |                                                   |
|------------|---------------|---|---------|---------|---------------------------------------------------|
| Sau-2988-1 | NZ_KK026878.1 | - | 34872   | 34843   | RNA → rpmE2 (PRK01678)Ribosomal_L31 (pfam01197) → |
| Sau-2231-1 | NZ_KK062836.1 | - | 101112  | 101083  | RNA → rpmE2 (PRK01678)Ribosomal_L31 (pfam01197) → |
| Sau-2966-1 | NZ_KK028360.1 | - | 34873   | 34844   | RNA → rpmE2 (PRK01678)Ribosomal_L31 (pfam01197) → |
| Sau-2224-1 | NZ_KK063022.1 | - | 15595   | 15566   | RNA → rpmE2 (PRK01678)Ribosomal_L31 (pfam01197) → |
| Sau-2219-1 | NZ_KK063290.1 | - | 115797  | 115768  | RNA → rpmE2 (PRK01678)Ribosomal_L31 (pfam01197) → |
| Sau-2878-1 | NZ_KK031157.1 | - | 56894   | 56865   | RNA → rpmE2 (PRK01678)Ribosomal_L31 (pfam01197) → |
| Sau-2956-1 | NZ_KK031325.1 | - | 30759   | 30730   | RNA → rpmE2 (PRK01678)Ribosomal_L31 (pfam01197) → |
| Sau-2218-1 | NZ_KK063294.1 | - | 36281   | 36252   | RNA → rpmE2 (PRK01678)Ribosomal_L31 (pfam01197) → |
| Sau-907-1  | NZ_KK024505.1 | - | 34817   | 34788   | RNA → rpmE2 (PRK01678)Ribosomal_L31 (pfam01197) → |
| Sau-2968-1 | NZ_KK031580.1 | - | 35073   | 35044   | RNA → rpmE2 (PRK01678)Ribosomal_L31 (pfam01197) → |
| Sau-931-1  | NZ_KK025407.1 | - | 34874   | 34845   | RNA → rpmE2 (PRK01678)Ribosomal_L31 (pfam01197) → |
| Sau-2212-1 | NZ_KK063495.1 | - | 49963   | 49934   | RNA → rpmE2 (PRK01678)Ribosomal_L31 (pfam01197) → |
| Sau-2991-1 | NZ_KK031859.1 | - | 30812   | 30783   | RNA → rpmE2 (PRK01678)Ribosomal_L31 (pfam01197) → |
| Sau-947-1  | NZ_KK025832.1 | - | 25029   | 25000   | RNA → rpmE2 (PRK01678)Ribosomal_L31 (pfam01197) → |
| Sau-3492-1 | NZ_KK032127.1 | - | 34872   | 34843   | RNA → rpmE2 (PRK01678)Ribosomal_L31 (pfam01197) → |
| Sau-936-1  | NZ_KK026316.1 | - | 34872   | 34843   | RNA → rpmE2 (PRK01678)Ribosomal_L31 (pfam01197) → |
| Sau-2201-1 | NZ_KK063757.1 | - | 61749   | 61720   | RNA → rpmE2 (PRK01678)Ribosomal_L31 (pfam01197) → |
| Sau-2940-1 | NZ_KK022765.1 | - | 121855  | 121826  | RNA → rpmE2 (PRK01678)Ribosomal_L31 (pfam01197) → |
| Sau-2194-1 | NZ_KK063959.1 | - | 36391   | 36362   | RNA → rpmE2 (PRK01678)Ribosomal_L31 (pfam01197) → |
| Sau-2963-1 | NZ_KK025704.1 | - | 56894   | 56865   | RNA → rpmE2 (PRK01678)Ribosomal_L31 (pfam01197) → |
| Sau-966-1  | NZ_KK026630.1 | - | 56502   | 56473   | RNA → rpmE2 (PRK01678)Ribosomal_L31 (pfam01197) → |
| Sau-2990-1 | NZ_KK026950.1 | - | 34872   | 34843   | RNA → rpmE2 (PRK01678)Ribosomal_L31 (pfam01197) → |
| Sau-976-1  | NZ_KK027088.1 | - | 56976   | 56947   | RNA → rpmE2 (PRK01678)Ribosomal_L31 (pfam01197) → |
| Sau-2188-1 | NZ_KK064220.1 | - | 35462   | 35433   | RNA → rpmE2 (PRK01678)Ribosomal_L31 (pfam01197) → |
| Sau-988-1  | NZ_KK027269.1 | - | 25256   | 25227   | RNA → rpmE2 (PRK01678)Ribosomal_L31 (pfam01197) → |
| Sau-2896-1 | NZ_KK031188.1 | - | 57033   | 57004   | RNA → rpmE2 (PRK01678)Ribosomal_L31 (pfam01197) → |
| Sau-932-1  | NZ_KK029535.1 | - | 34872   | 34843   | RNA → rpmE2 (PRK01678)Ribosomal_L31 (pfam01197) → |
| Sau-2897-1 | NZ_KK031197.1 | - | 34872   | 34843   | RNA → rpmE2 (PRK01678)Ribosomal_L31 (pfam01197) → |
| Sau-2181-1 | NZ_KK064488.1 | - | 108622  | 108593  | RNA → rpmE2 (PRK01678)Ribosomal_L31 (pfam01197) → |
| Sau-950-1  | NZ_KK029765.1 | - | 34913   | 34884   | RNA → rpmE2 (PRK01678)Ribosomal_L31 (pfam01197) → |
| Sau-2957-1 | NZ_KK031395.1 | - | 34872   | 34843   | RNA → rpmE2 (PRK01678)Ribosomal_L31 (pfam01197) → |
| Sau-1005-1 | NZ_KK030022.1 | - | 34817   | 34788   | RNA → rpmE2 (PRK01678)Ribosomal_L31 (pfam01197) → |
| Sau-2975-1 | NZ_KK031628.1 | - | 34817   | 34788   | RNA → rpmE2 (PRK01678)Ribosomal_L31 (pfam01197) → |
| Sau-2176-1 | NZ_KK064706.1 | - | 54695   | 54666   | RNA → rpmE2 (PRK01678)Ribosomal_L31 (pfam01197) → |
| Sau-2976-1 | NZ_KK031665.1 | - | 34873   | 34844   | RNA → rpmE2 (PRK01678)Ribosomal_L31 (pfam01197) → |
| Sau-858-1  | NZ_KK047717.1 | - | 1678825 | 1678796 | RNA → rpmE2 (PRK01678)Ribosomal_L31 (pfam01197) → |
| Sau-900-1  | NZ_KK023995.1 | - | 34872   | 34843   | RNA → rpmE2 (PRK01678)Ribosomal_L31 (pfam01197) → |
| Sau-2992-1 | NZ_KK031903.1 | - | 34772   | 34743   | RNA → rpmE2 (PRK01678)Ribosomal_L31 (pfam01197) → |
| Sau-2167-1 | NZ_KK064958.1 | - | 36391   | 36362   | RNA → rpmE2 (PRK01678)Ribosomal_L31 (pfam01197) → |
| Sau-3493-1 | NZ_KK032159.1 | - | 34817   | 34788   | RNA → rpmE2 (PRK01678)Ribosomal_L31 (pfam01197) → |
| Sau-905-1  | NZ_KK024562.1 | - | 34873   | 34844   | RNA → rpmE2 (PRK01678)Ribosomal_L31 (pfam01197) → |
| Sau-1622-1 | NZ_KK016918.1 | - | 36391   | 36362   | RNA → rpmE2 (PRK01678)Ribosomal_L31 (pfam01197) → |
| Sau-2914-1 | NZ_KK023853.1 | - | 56893   | 56864   | RNA → rpmE2 (PRK01678)Ribosomal_L31 (pfam01197) → |
| Sau-854-1  | NZ_KK047726.1 | - | 56893   | 56864   | RNA → rpmE2 (PRK01678)Ribosomal_L31 (pfam01197) → |
| Sau-2964-1 | NZ_KK025714.1 | - | 34872   | 34843   | RNA → rpmE2 (PRK01678)Ribosomal_L31 (pfam01197) → |
| Sau-860-1  | NZ_KK019362.1 | - | 34872   | 34843   | RNA → rpmE2 (PRK01678)Ribosomal_L31 (pfam01197) → |
| Sau-1634-1 | NZ_KK017640.1 | - | 36390   | 36361   | RNA → rpmE2 (PRK01678)Ribosomal_L31 (pfam01197) → |
| Sau-2918-1 | NZ_KK028274.1 | - | 34961   | 34932   | RNA → rpmE2 (PRK01678)Ribosomal_L31 (pfam01197) → |
| Sau-929-1  | NZ_KK025290.1 | - | 34873   | 34844   | RNA → rpmE2 (PRK01678)Ribosomal_L31 (pfam01197) → |
| Sau-2902-1 | NZ_KK031248.1 | - | 34846   | 34817   | RNA → rpmE2 (PRK01678)Ribosomal_L31 (pfam01197) → |
| Sau-948-1  | NZ_KK025784.1 | - | 56893   | 56864   | RNA → rpmE2 (PRK01678)Ribosomal_L31 (pfam01197) → |
| Sau-2234-1 | NZ_KK047930.1 | - | 43687   | 43658   | RNA → rpmE2 (PRK01678)Ribosomal_L31 (pfam01197) → |

|            |               |   |         |         |                                                   |
|------------|---------------|---|---------|---------|---------------------------------------------------|
| Sau-2959-1 | NZ_KK031455.1 | - | 34872   | 34843   | RNA → rpmE2 (PRK01678)Ribosomal_L31 (pfam01197) → |
| Sau-2977-1 | NZ_KK031711.1 | - | 56894   | 56865   | RNA → rpmE2 (PRK01678)Ribosomal_L31 (pfam01197) → |
| Sau-2228-1 | NZ_KK062861.1 | - | 35170   | 35141   | RNA → rpmE2 (PRK01678)Ribosomal_L31 (pfam01197) → |
| Sau-985-1  | NZ_KK028757.1 | - | 19182   | 19153   | RNA → rpmE2 (PRK01678)Ribosomal_L31 (pfam01197) → |
| Sau-2994-1 | NZ_KK032014.1 | - | 34873   | 34844   | RNA → rpmE2 (PRK01678)Ribosomal_L31 (pfam01197) → |
| Sau-940-1  | NZ_KK029729.1 | - | 34773   | 34744   | RNA → rpmE2 (PRK01678)Ribosomal_L31 (pfam01197) → |
| Sau-2227-1 | NZ_KK062912.1 | - | 36391   | 36362   | RNA → rpmE2 (PRK01678)Ribosomal_L31 (pfam01197) → |
| Sau-2917-1 | NZ_KK021166.1 | - | 34773   | 34744   | RNA → rpmE2 (PRK01678)Ribosomal_L31 (pfam01197) → |
| Sau-1018-1 | NZ_KK030137.1 | - | 34872   | 34843   | RNA → rpmE2 (PRK01678)Ribosomal_L31 (pfam01197) → |
| Sau-2223-1 | NZ_KK063053.1 | - | 36390   | 36361   | RNA → rpmE2 (PRK01678)Ribosomal_L31 (pfam01197) → |
| Sau-848-1  | NZ_KK019147.1 | - | 59010   | 58981   | RNA → rpmE2 (PRK01678)Ribosomal_L31 (pfam01197) → |
| Sau-2882-1 | NZ_KK023322.1 | - | 56894   | 56865   | RNA → rpmE2 (PRK01678)Ribosomal_L31 (pfam01197) → |
| Sau-2943-1 | NZ_KK024836.1 | - | 34872   | 34843   | RNA → rpmE2 (PRK01678)Ribosomal_L31 (pfam01197) → |
| Sau-2216-1 | NZ_KK063340.1 | - | 64842   | 64813   | RNA → rpmE2 (PRK01678)Ribosomal_L31 (pfam01197) → |
| Sau-906-1  | NZ_KK024727.1 | - | 34874   | 34845   | RNA → rpmE2 (PRK01678)Ribosomal_L31 (pfam01197) → |
| Sau-2999-1 | NZ_KK027403.1 | - | 34872   | 34843   | RNA → rpmE2 (PRK01678)Ribosomal_L31 (pfam01197) → |
| Sau-949-1  | NZ_KK025817.1 | - | 56941   | 56912   | RNA → rpmE2 (PRK01678)Ribosomal_L31 (pfam01197) → |
| Sau-2445-1 | NZ_KK030612.1 | - | 34862   | 34833   | RNA → rpmE2 (PRK01678)Ribosomal_L31 (pfam01197) → |
| Sau-2877-1 | NZ_KK031078.1 | - | 34873   | 34844   | RNA → rpmE2 (PRK01678)Ribosomal_L31 (pfam01197) → |
| Sau-935-1  | NZ_KK026006.1 | - | 34863   | 34834   | RNA → rpmE2 (PRK01678)Ribosomal_L31 (pfam01197) → |
| Sau-2941-1 | NZ_KK031298.1 | - | 56894   | 56865   | RNA → rpmE2 (PRK01678)Ribosomal_L31 (pfam01197) → |
| Sau-2233-1 | NZ_KK047970.1 | - | 36391   | 36362   | RNA → rpmE2 (PRK01678)Ribosomal_L31 (pfam01197) → |
| Sau-965-1  | NZ_KK026604.1 | - | 56894   | 56865   | RNA → rpmE2 (PRK01678)Ribosomal_L31 (pfam01197) → |
| Sau-2981-1 | NZ_KK031750.1 | - | 34873   | 34844   | RNA → rpmE2 (PRK01678)Ribosomal_L31 (pfam01197) → |
| Sau-923-1  | NZ_KK028350.1 | - | 57199   | 57170   | RNA → rpmE2 (PRK01678)Ribosomal_L31 (pfam01197) → |
| Sau-2226-1 | NZ_KK062953.1 | - | 96895   | 96866   | RNA → rpmE2 (PRK01678)Ribosomal_L31 (pfam01197) → |
| Sau-986-1  | NZ_KK028808.1 | - | 19182   | 19153   | RNA → rpmE2 (PRK01678)Ribosomal_L31 (pfam01197) → |
| Sau-3039-1 | NZ_KK019290.1 | - | 54764   | 54735   | RNA → rpmE2 (PRK01678)Ribosomal_L31 (pfam01197) → |
| Sau-2221-1 | NZ_KK063145.1 | - | 49861   | 49832   | RNA → rpmE2 (PRK01678)Ribosomal_L31 (pfam01197) → |
| Sau-925-1  | NZ_KK029504.1 | - | 25062   | 25033   | RNA → rpmE2 (PRK01678)Ribosomal_L31 (pfam01197) → |
| Sau-2930-1 | NZ_KK021792.1 | - | 56894   | 56865   | RNA → rpmE2 (PRK01678)Ribosomal_L31 (pfam01197) → |
| Sau-1003-1 | NZ_KK029896.1 | - | 34874   | 34845   | RNA → rpmE2 (PRK01678)Ribosomal_L31 (pfam01197) → |
| Sau-2215-1 | NZ_KK063417.1 | - | 111834  | 111805  | RNA → rpmE2 (PRK01678)Ribosomal_L31 (pfam01197) → |
| Sau-2962-1 | NZ_KK025626.1 | - | 56894   | 56865   | RNA → rpmE2 (PRK01678)Ribosomal_L31 (pfam01197) → |
| Sau-1019-1 | NZ_KK030205.1 | - | 56894   | 56865   | RNA → rpmE2 (PRK01678)Ribosomal_L31 (pfam01197) → |
| Sau-2205-1 | NZ_KK063588.1 | - | 36391   | 36362   | RNA → rpmE2 (PRK01678)Ribosomal_L31 (pfam01197) → |
| Sau-2983-1 | NZ_KK031848.1 | - | 34817   | 34788   | RNA → rpmE2 (PRK01678)Ribosomal_L31 (pfam01197) → |
| Sau-851-1  | NZ_KK047742.1 | - | 1679220 | 1679191 | RNA → rpmE2 (PRK01678)Ribosomal_L31 (pfam01197) → |
| Sau-2993-1 | NZ_KK031941.1 | - | 34872   | 34843   | RNA → rpmE2 (PRK01678)Ribosomal_L31 (pfam01197) → |
| Sau-997-1  | NZ_KK072945.1 | - | 34874   | 34845   | RNA → rpmE2 (PRK01678)Ribosomal_L31 (pfam01197) → |
| Sau-2185-1 | NZ_KK064346.1 | + | 117742  | 117771  | RNA → rpmE2 (PRK01678)Ribosomal_L31 (pfam01197) → |
| Sau-3491-1 | NZ_KK032093.1 | - | 2229537 | 2229508 | RNA → rpmE2 (PRK01678)Ribosomal_L31 (pfam01197) → |
| Sau-918-1  | NZ_KK024778.1 | - | 2236157 | 2236128 | RNA → rpmE2 (PRK01678)Ribosomal_L31 (pfam01197) → |
| Sau-2958-1 | NZ_KK031432.1 | - | 56894   | 56865   | RNA → rpmE2 (PRK01678)Ribosomal_L31 (pfam01197) → |
| Sau-958-1  | NZ_KK029827.1 | - | 34817   | 34788   | RNA → rpmE2 (PRK01678)Ribosomal_L31 (pfam01197) → |
| Sau-2179-1 | NZ_KK064605.1 | - | 59118   | 59089   | RNA → rpmE2 (PRK01678)Ribosomal_L31 (pfam01197) → |
| Sau-3036-1 | NZ_KK019241.1 | - | 56894   | 56865   | RNA → rpmE2 (PRK01678)Ribosomal_L31 (pfam01197) → |
| Sau-1039-1 | NZ_KK030281.1 | - | 2238815 | 2238786 | RNA → rpmE2 (PRK01678)Ribosomal_L31 (pfam01197) → |
| Sau-1625-1 | NZ_KK017092.1 | - | 36490   | 36461   | RNA → rpmE2 (PRK01678)Ribosomal_L31 (pfam01197) → |
| Sau-2881-1 | NZ_KK023296.1 | - | 56894   | 56865   | RNA → rpmE2 (PRK01678)Ribosomal_L31 (pfam01197) → |
| Sau-917-1  | NZ_KK024797.1 | - | 56893   | 56864   | RNA → rpmE2 (PRK01678)Ribosomal_L31 (pfam01197) → |
| Sau-2982-1 | NZ_KK027319.1 | - | 34872   | 34843   | RNA → rpmE2 (PRK01678)Ribosomal_L31 (pfam01197) → |



|            |                   |   |         |         |       |                                                                                                                       |
|------------|-------------------|---|---------|---------|-------|-----------------------------------------------------------------------------------------------------------------------|
| Sau-987-1  | NZ_KK027315.1     | - | 56939   | 56910   | RNA → | <a href="#">rpmE2 (PRK01678)Ribosomal_L31 (pfam01197)</a> →                                                           |
| Sau-1631-1 | NZ_KK017466.1     | - | 62257   | 62228   | RNA → | <a href="#">rpmE2 (PRK01678)Ribosomal_L31 (pfam01197)</a> →                                                           |
| Sau-2899-1 | NZ_KK023472.1     | - | 34872   | 34843   | RNA → | <a href="#">rpmE2 (PRK01678)Ribosomal_L31 (pfam01197)</a> →                                                           |
| Sau-959-1  | NZ_KK029882.1     | - | 2252120 | 2252091 | RNA → | <a href="#">rpmE2 (PRK01678)Ribosomal_L31 (pfam01197)</a> →                                                           |
| Sau-75-1   | NZ_CABA01000062.1 | - | 16773   | 16744   | RNA → | <a href="#">rpmE2 (PRK01678)Ribosomal_L31 (pfam01197)</a> → <a href="#">rpmE2 (PRK01678)Ribosomal_L31 (pfam01197)</a> |
| Sau-2998-1 | NZ_KK027252.1     | - | 2235915 | 2235886 | RNA → | <a href="#">rpmE2 (PRK01678)Ribosomal_L31 (pfam01197)</a> →                                                           |
| Sau-847-1  | NZ_KK019119.1     | - | 56794   | 56765   | RNA → | <a href="#">rpmE2 (PRK01678)Ribosomal_L31 (pfam01197)</a> →                                                           |
| Sau-2444-1 | NZ_KK024715.1     | - | 34873   | 34844   | RNA → | <a href="#">rpmE2 (PRK01678)Ribosomal_L31 (pfam01197)</a> →                                                           |
| Sau-3000-1 | NZ_KK027444.1     | - | 34872   | 34843   | RNA → | <a href="#">rpmE2 (PRK01678)Ribosomal_L31 (pfam01197)</a> →                                                           |
| Sau-1001-1 | NZ_KK022887.1     | - | 34872   | 34843   | RNA → | <a href="#">rpmE2 (PRK01678)Ribosomal_L31 (pfam01197)</a> →                                                           |
| Sau-2459-1 | NZ_KK025101.1     | - | 34817   | 34788   | RNA → | <a href="#">rpmE2 (PRK01678)Ribosomal_L31 (pfam01197)</a> →                                                           |
| Sau-2967-1 | NZ_KK031544.1     | - | 35471   | 35442   | RNA → | <a href="#">rpmE2 (PRK01678)Ribosomal_L31 (pfam01197)</a> →                                                           |
| Sau-922-1  | NZ_KK028309.1     | - | 56894   | 56865   | RNA → | <a href="#">rpmE2 (PRK01678)Ribosomal_L31 (pfam01197)</a> →                                                           |
| Sau-3484-1 | NZ_KK032086.1     | - | 56894   | 56865   | RNA → | <a href="#">rpmE2 (PRK01678)Ribosomal_L31 (pfam01197)</a> →                                                           |
| Sau-2470-1 | NZ_KK025595.1     | - | 34872   | 34843   | RNA → | <a href="#">rpmE2 (PRK01678)Ribosomal_L31 (pfam01197)</a> →                                                           |
| Sau-924-1  | NZ_KK029438.1     | - | 25255   | 25226   | RNA → | <a href="#">rpmE2 (PRK01678)Ribosomal_L31 (pfam01197)</a> →                                                           |
| Sau-960-1  | NZ_KK029884.1     | - | 2237296 | 2237267 | RNA → | <a href="#">rpmE2 (PRK01678)Ribosomal_L31 (pfam01197)</a> →                                                           |
| Sau-2232-1 | NZ_KK048054.1     | - | 101158  | 101129  | RNA → | <a href="#">rpmE2 (PRK01678)Ribosomal_L31 (pfam01197)</a> →                                                           |
| Sau-849-1  | NZ_KK019137.1     | - | 36391   | 36362   | RNA → | <a href="#">rpmE2 (PRK01678)Ribosomal_L31 (pfam01197)</a> →                                                           |
| Sau-913-1  | NZ_KK022144.1     | - | 55982   | 55953   | RNA → | <a href="#">rpmE2 (PRK01678)Ribosomal_L31 (pfam01197)</a> →                                                           |
| Sau-2225-1 | NZ_KK063004.1     | - | 28766   | 28737   | RNA → | <a href="#">rpmE2 (PRK01678)Ribosomal_L31 (pfam01197)</a> →                                                           |
| Sau-904-1  | NZ_KK024427.1     | - | 34817   | 34788   | RNA → | <a href="#">rpmE2 (PRK01678)Ribosomal_L31 (pfam01197)</a> →                                                           |
| Sau-2214-1 | NZ_KK063464.1     | - | 26628   | 26599   | RNA → | <a href="#">rpmE2 (PRK01678)Ribosomal_L31 (pfam01197)</a> →                                                           |
| Sau-977-1  | NZ_KK027082.1     | - | 56894   | 56865   | RNA → | <a href="#">rpmE2 (PRK01678)Ribosomal_L31 (pfam01197)</a> →                                                           |
| Sau-998-1  | NZ_KK027716.1     | - | 34873   | 34844   | RNA → | <a href="#">rpmE2 (PRK01678)Ribosomal_L31 (pfam01197)</a> →                                                           |
| Sau-2052-1 | NZ_KK069221.1     | - | 36391   | 36362   | RNA → | <a href="#">rpmE2 (PRK01678)Ribosomal_L31 (pfam01197)</a> →                                                           |
| Sau-941-1  | NZ_KK029756.1     | - | 2237277 | 2237248 | RNA → | <a href="#">rpmE2 (PRK01678)Ribosomal_L31 (pfam01197)</a> →                                                           |
| Sau-1004-1 | NZ_KK029957.1     | - | 34817   | 34788   | RNA → | <a href="#">rpmE2 (PRK01678)Ribosomal_L31 (pfam01197)</a> →                                                           |
| Sau-1616-1 | NZ_KK016624.1     | - | 36391   | 36362   | RNA → | <a href="#">rpmE2 (PRK01678)Ribosomal_L31 (pfam01197)</a> →                                                           |
| Sau-2175-1 | NZ_KK024257.1     | - | 34872   | 34843   | RNA → | <a href="#">rpmE2 (PRK01678)Ribosomal_L31 (pfam01197)</a> →                                                           |
| Sau-2569-1 | NZ_KK038922.1     | - | 56895   | 56866   | RNA → | <a href="#">rpmE2 (PRK01678)Ribosomal_L31 (pfam01197)</a> →                                                           |
| Sau-1640-1 | NZ_KK017841.1     | - | 28307   | 28278   | RNA → | <a href="#">rpmE2 (PRK01678)Ribosomal_L31 (pfam01197)</a> →                                                           |
| Sau-1641-1 | NZ_KK017902.1     | - | 2421    | 2392    | RNA → | <a href="#">rpmE2 (PRK01678)Ribosomal_L31 (pfam01197)</a> →                                                           |
| Sau-2584-1 | NZ_KK020717.1     | - | 34869   | 34840   | RNA → | <a href="#">rpmE2 (PRK01678)Ribosomal_L31 (pfam01197)</a> →                                                           |
| Sau-1646-1 | NZ_KK018231.1     | - | 2421    | 2392    | RNA → | <a href="#">rpmE2 (PRK01678)Ribosomal_L31 (pfam01197)</a> →                                                           |
| Sau-2863-1 | NZ_KK023001.1     | - | 34817   | 34788   | RNA → | <a href="#">rpmE2 (PRK01678)Ribosomal_L31 (pfam01197)</a> →                                                           |
| Sau-1580-1 | NZ_KK014893.1     | - | 62256   | 62227   | RNA → | <a href="#">rpmE2 (PRK01678)Ribosomal_L31 (pfam01197)</a> →                                                           |
| Sau-2868-1 | NZ_KK023547.1     | - | 34872   | 34843   | RNA → | <a href="#">rpmE2 (PRK01678)Ribosomal_L31 (pfam01197)</a> →                                                           |
| Sau-2463-1 | NZ_KK025514.1     | - | 56894   | 56865   | RNA → | <a href="#">rpmE2 (PRK01678)Ribosomal_L31 (pfam01197)</a> →                                                           |
| Sau-2581-1 | NZ_KK023799.1     | - | 34817   | 34788   | RNA → | <a href="#">rpmE2 (PRK01678)Ribosomal_L31 (pfam01197)</a> →                                                           |
| Sau-1586-1 | NZ_KK015113.1     | - | 61277   | 61248   | RNA → | <a href="#">rpmE2 (PRK01678)Ribosomal_L31 (pfam01197)</a> →                                                           |
| Sau-2462-1 | NZ_KK025523.1     | - | 34873   | 34844   | RNA → | <a href="#">rpmE2 (PRK01678)Ribosomal_L31 (pfam01197)</a> →                                                           |
| Sau-2841-1 | NZ_KK028984.1     | - | 34862   | 34833   | RNA → | <a href="#">rpmE2 (PRK01678)Ribosomal_L31 (pfam01197)</a> →                                                           |
| Sau-1603-1 | NZ_KK016033.1     | - | 61228   | 61199   | RNA → | <a href="#">rpmE2 (PRK01678)Ribosomal_L31 (pfam01197)</a> →                                                           |
| Sau-1620-1 | NZ_KK016818.1     | - | 36391   | 36362   | RNA → | <a href="#">rpmE2 (PRK01678)Ribosomal_L31 (pfam01197)</a> →                                                           |
| Sau-2492-1 | NZ_KK030749.1     | - | 34873   | 34844   | RNA → | <a href="#">rpmE2 (PRK01678)Ribosomal_L31 (pfam01197)</a> →                                                           |
| Sau-1610-1 | NZ_KK016378.1     | - | 61369   | 61340   | RNA → | <a href="#">rpmE2 (PRK01678)Ribosomal_L31 (pfam01197)</a> →                                                           |
| Sau-2597-1 | NZ_KK038693.1     | - | 34913   | 34884   | RNA → | <a href="#">rpmE2 (PRK01678)Ribosomal_L31 (pfam01197)</a> →                                                           |
| Sau-1359-1 | NZ_KK018504.1     | - | 36392   | 36363   | RNA → | <a href="#">rpmE2 (PRK01678)Ribosomal_L31 (pfam01197)</a> →                                                           |
| Sau-2622-1 | NZ_KK047755.1     | - | 57585   | 57556   | RNA → | <a href="#">rpmE2 (PRK01678)Ribosomal_L31 (pfam01197)</a> →                                                           |
| Sau-1636-1 | NZ_KK017766.1     | - | 107508  | 107479  | RNA → | <a href="#">rpmE2 (PRK01678)Ribosomal_L31 (pfam01197)</a> →                                                           |
| Sau-1130-1 | NZ_KK019217.1     | - | 56763   | 56734   | RNA → | <a href="#">rpmE2 (PRK01678)Ribosomal_L31 (pfam01197)</a> →                                                           |

|            |               |   |         |         |       |                                                             |
|------------|---------------|---|---------|---------|-------|-------------------------------------------------------------|
| Sau-2788-1 | NZ_KK047909.1 | - | 1673122 | 1673093 | RNA → | <a href="#">rpmE2 (PRK01678)Ribosomal_L31 (pfam01197)</a> → |
| Sau-1647-1 | NZ_KK018303.1 | - | 117245  | 117216  | RNA → | <a href="#">rpmE2 (PRK01678)Ribosomal_L31 (pfam01197)</a> → |
| Sau-1060-1 | NZ_KK030519.1 | - | 34873   | 34844   | RNA → | <a href="#">rpmE2 (PRK01678)Ribosomal_L31 (pfam01197)</a> → |
| Sau-2556-1 | NZ_KK023258.1 | - | 56894   | 56865   | RNA → | <a href="#">rpmE2 (PRK01678)Ribosomal_L31 (pfam01197)</a> → |
| Sau-2236-1 | NZ_KK021870.1 | - | 57040   | 57011   | RNA → | <a href="#">rpmE2 (PRK01678)Ribosomal_L31 (pfam01197)</a> → |
| Sau-2564-1 | NZ_KK023376.1 | - | 34817   | 34788   | RNA → | <a href="#">rpmE2 (PRK01678)Ribosomal_L31 (pfam01197)</a> → |
| Sau-1107-1 | NZ_KK047803.1 | - | 1683613 | 1683584 | RNA → | <a href="#">rpmE2 (PRK01678)Ribosomal_L31 (pfam01197)</a> → |
| Sau-2829-1 | NZ_KK028877.1 | - | 56940   | 56911   | RNA → | <a href="#">rpmE2 (PRK01678)Ribosomal_L31 (pfam01197)</a> → |
| Sau-1581-1 | NZ_KK014900.1 | - | 36391   | 36362   | RNA → | <a href="#">rpmE2 (PRK01678)Ribosomal_L31 (pfam01197)</a> → |
| Sau-2171-1 | NZ_KK024130.1 | - | 34872   | 34843   | RNA → | <a href="#">rpmE2 (PRK01678)Ribosomal_L31 (pfam01197)</a> → |
| Sau-2666-1 | NZ_KK047697.1 | - | 1708894 | 1708865 | RNA → | <a href="#">rpmE2 (PRK01678)Ribosomal_L31 (pfam01197)</a> → |
| Sau-1073-1 | NZ_KK023603.1 | - | 34817   | 34788   | RNA → | <a href="#">rpmE2 (PRK01678)Ribosomal_L31 (pfam01197)</a> → |
| Sau-2806-1 | NZ_KK047849.1 | - | 2267822 | 2267793 | RNA → | <a href="#">rpmE2 (PRK01678)Ribosomal_L31 (pfam01197)</a> → |
| Sau-2617-1 | NZ_KK047918.1 | + | 620873  | 620902  | RNA → | <a href="#">rpmE2 (PRK01678)Ribosomal_L31 (pfam01197)</a> → |
| Sau-1084-1 | NZ_KK024366.1 | - | 34913   | 34884   | RNA → | <a href="#">rpmE2 (PRK01678)Ribosomal_L31 (pfam01197)</a> → |
| Sau-2600-1 | NZ_KK021676.1 | - | 34873   | 34844   | RNA → | <a href="#">rpmE2 (PRK01678)Ribosomal_L31 (pfam01197)</a> → |
| Sau-1040-1 | NZ_KK030295.1 | - | 34870   | 34841   | RNA → | <a href="#">rpmE2 (PRK01678)Ribosomal_L31 (pfam01197)</a> → |
| Sau-2535-1 | NZ_KK023119.1 | - | 56940   | 56911   | RNA → | <a href="#">rpmE2 (PRK01678)Ribosomal_L31 (pfam01197)</a> → |
| Sau-2832-1 | NZ_KK027642.1 | - | 56894   | 56865   | RNA → | <a href="#">rpmE2 (PRK01678)Ribosomal_L31 (pfam01197)</a> → |
| Sau-1061-1 | NZ_KK030574.1 | - | 34773   | 34744   | RNA → | <a href="#">rpmE2 (PRK01678)Ribosomal_L31 (pfam01197)</a> → |
| Sau-2703-1 | NZ_KK027868.1 | - | 34863   | 34834   | RNA → | <a href="#">rpmE2 (PRK01678)Ribosomal_L31 (pfam01197)</a> → |
| Sau-1132-1 | NZ_KK047765.1 | - | 61246   | 61217   | RNA → | <a href="#">rpmE2 (PRK01678)Ribosomal_L31 (pfam01197)</a> → |
| Sau-2842-1 | NZ_KK027964.1 | - | 34817   | 34788   | RNA → | <a href="#">rpmE2 (PRK01678)Ribosomal_L31 (pfam01197)</a> → |
| Sau-2537-1 | NZ_KK030874.1 | - | 2244515 | 2244486 | RNA → | <a href="#">rpmE2 (PRK01678)Ribosomal_L31 (pfam01197)</a> → |
| Sau-1106-1 | NZ_KK047819.1 | - | 252534  | 252505  | RNA → | <a href="#">rpmE2 (PRK01678)Ribosomal_L31 (pfam01197)</a> → |
| Sau-2548-1 | NZ_KK030899.1 | - | 56893   | 56864   | RNA → | <a href="#">rpmE2 (PRK01678)Ribosomal_L31 (pfam01197)</a> → |
| Sau-1608-1 | NZ_KK016202.1 | - | 36491   | 36462   | RNA → | <a href="#">rpmE2 (PRK01678)Ribosomal_L31 (pfam01197)</a> → |
| Sau-2592-1 | NZ_KK038742.1 | - | 34871   | 34842   | RNA → | <a href="#">rpmE2 (PRK01678)Ribosomal_L31 (pfam01197)</a> → |
| Sau-2663-1 | NZ_KK047703.1 | - | 240492  | 240463  | RNA → | <a href="#">rpmE2 (PRK01678)Ribosomal_L31 (pfam01197)</a> → |
| Sau-2624-1 | NZ_KK047734.1 | - | 1731888 | 1731859 | RNA → | <a href="#">rpmE2 (PRK01678)Ribosomal_L31 (pfam01197)</a> → |
| Sau-2772-1 | NZ_KK047773.1 | - | 56894   | 56865   | RNA → | <a href="#">rpmE2 (PRK01678)Ribosomal_L31 (pfam01197)</a> → |
| Sau-1167-1 | NZ_KK047866.1 | - | 55137   | 55108   | RNA → | <a href="#">rpmE2 (PRK01678)Ribosomal_L31 (pfam01197)</a> → |
| Sau-2805-1 | NZ_KK047827.1 | - | 56893   | 56864   | RNA → | <a href="#">rpmE2 (PRK01678)Ribosomal_L31 (pfam01197)</a> → |
| Sau-2733-1 | NZ_KK047830.1 | - | 2196141 | 2196112 | RNA → | <a href="#">rpmE2 (PRK01678)Ribosomal_L31 (pfam01197)</a> → |
| Sau-1168-1 | NZ_KK047922.1 | - | 1709647 | 1709618 | RNA → | <a href="#">rpmE2 (PRK01678)Ribosomal_L31 (pfam01197)</a> → |
| Sau-2609-1 | NZ_KK047855.1 | - | 1123865 | 1123836 | RNA → | <a href="#">rpmE2 (PRK01678)Ribosomal_L31 (pfam01197)</a> → |
| Sau-1572-1 | NZ_KK014503.1 | - | 115765  | 115736  | RNA → | <a href="#">rpmE2 (PRK01678)Ribosomal_L31 (pfam01197)</a> → |
| Sau-2623-1 | NZ_KK019284.1 | - | 25062   | 25033   | RNA → | <a href="#">rpmE2 (PRK01678)Ribosomal_L31 (pfam01197)</a> → |
| Sau-2493-1 | NZ_KK022189.1 | - | 34873   | 34844   | RNA → | <a href="#">rpmE2 (PRK01678)Ribosomal_L31 (pfam01197)</a> → |
| Sau-1590-1 | NZ_KK015343.1 | - | 108273  | 108244  | RNA → | <a href="#">rpmE2 (PRK01678)Ribosomal_L31 (pfam01197)</a> → |
| Sau-2475-1 | NZ_KK030727.1 | - | 56993   | 56964   | RNA → | <a href="#">rpmE2 (PRK01678)Ribosomal_L31 (pfam01197)</a> → |
| Sau-1363-1 | NZ_KK018751.1 | - | 194096  | 194067  | RNA → | <a href="#">rpmE2 (PRK01678)Ribosomal_L31 (pfam01197)</a> → |
| Sau-2549-1 | NZ_KK030912.1 | - | 34872   | 34843   | RNA → | <a href="#">rpmE2 (PRK01678)Ribosomal_L31 (pfam01197)</a> → |
| Sau-1059-1 | NZ_KK030508.1 | - | 25166   | 25137   | RNA → | <a href="#">rpmE2 (PRK01678)Ribosomal_L31 (pfam01197)</a> → |
| Sau-2662-1 | NZ_KK047710.1 | - | 56776   | 56747   | RNA → | <a href="#">rpmE2 (PRK01678)Ribosomal_L31 (pfam01197)</a> → |
| Sau-2621-1 | NZ_KK047748.1 | - | 1679024 | 1678995 | RNA → | <a href="#">rpmE2 (PRK01678)Ribosomal_L31 (pfam01197)</a> → |
| Sau-1094-1 | NZ_KK039071.1 | - | 56892   | 56863   | RNA → | <a href="#">rpmE2 (PRK01678)Ribosomal_L31 (pfam01197)</a> → |
| Sau-2791-1 | NZ_KK047784.1 | - | 55958   | 55929   | RNA → | <a href="#">rpmE2 (PRK01678)Ribosomal_L31 (pfam01197)</a> → |
| Sau-1080-1 | NZ_KK039235.1 | - | 34873   | 34844   | RNA → | <a href="#">rpmE2 (PRK01678)Ribosomal_L31 (pfam01197)</a> → |
| Sau-2766-1 | NZ_KK047798.1 | - | 230868  | 230839  | RNA → | <a href="#">rpmE2 (PRK01678)Ribosomal_L31 (pfam01197)</a> → |
| Sau-2642-1 | NZ_KK047838.1 | - | 56762   | 56733   | RNA → | <a href="#">rpmE2 (PRK01678)Ribosomal_L31 (pfam01197)</a> → |
| Sau-1166-1 | NZ_KK047870.1 | - | 2236752 | 2236723 | RNA → | <a href="#">rpmE2 (PRK01678)Ribosomal_L31 (pfam01197)</a> → |



|            |               |   |         |         |                                                   |
|------------|---------------|---|---------|---------|---------------------------------------------------|
| Sau-2741-1 | NZ_KK047902.1 | - | 1723084 | 1723055 | RNA → rpmE2 (PRK01678)Ribosomal_L31 (pfam01197) → |
| Sau-2557-1 | NZ_KK031009.1 | - | 56893   | 56864   | RNA → rpmE2 (PRK01678)Ribosomal_L31 (pfam01197) → |
| Sau-1562-1 | NZ_KK013946.1 | - | 36391   | 36362   | RNA → rpmE2 (PRK01678)Ribosomal_L31 (pfam01197) → |
| Sau-2531-1 | NZ_KK030789.1 | - | 34872   | 34843   | RNA → rpmE2 (PRK01678)Ribosomal_L31 (pfam01197) → |
| Sau-1360-1 | NZ_KK018605.1 | - | 36413   | 36384   | RNA → rpmE2 (PRK01678)Ribosomal_L31 (pfam01197) → |
| Sau-2715-1 | NZ_KK024671.1 | - | 34807   | 34778   | RNA → rpmE2 (PRK01678)Ribosomal_L31 (pfam01197) → |
| Sau-2487-1 | NZ_KK026516.1 | - | 34826   | 34797   | RNA → rpmE2 (PRK01678)Ribosomal_L31 (pfam01197) → |
| Sau-1367-1 | NZ_KK018811.1 | - | 2420    | 2391    | RNA → rpmE2 (PRK01678)Ribosomal_L31 (pfam01197) → |
| Sau-1054-1 | NZ_KK023207.1 | - | 56940   | 56911   | RNA → rpmE2 (PRK01678)Ribosomal_L31 (pfam01197) → |
| Sau-2830-1 | NZ_KK028950.1 | - | 56894   | 56865   | RNA → rpmE2 (PRK01678)Ribosomal_L31 (pfam01197) → |
| Sau-2471-1 | NZ_KK030648.1 | - | 34817   | 34788   | RNA → rpmE2 (PRK01678)Ribosomal_L31 (pfam01197) → |
| Sau-2864-1 | NZ_KK031045.1 | - | 2239804 | 2239775 | RNA → rpmE2 (PRK01678)Ribosomal_L31 (pfam01197) → |
| Sau-2586-1 | NZ_KK020798.1 | - | 34872   | 34843   | RNA → rpmE2 (PRK01678)Ribosomal_L31 (pfam01197) → |
| Sau-2601-1 | NZ_KK021735.1 | - | 30842   | 30813   | RNA → rpmE2 (PRK01678)Ribosomal_L31 (pfam01197) → |
| Sau-1433-1 | NZ_KK008467.1 | - | 36391   | 36362   | RNA → rpmE2 (PRK01678)Ribosomal_L31 (pfam01197) → |
| Sau-2529-1 | NZ_KK073242.1 | - | 34871   | 34842   | RNA → rpmE2 (PRK01678)Ribosomal_L31 (pfam01197) → |
| Sau-1570-1 | NZ_KK014417.1 | - | 36391   | 36362   | RNA → rpmE2 (PRK01678)Ribosomal_L31 (pfam01197) → |
| Sau-1361-1 | NZ_KK018612.1 | - | 36391   | 36362   | RNA → rpmE2 (PRK01678)Ribosomal_L31 (pfam01197) → |
| Sau-1074-1 | NZ_KK023648.1 | - | 2239930 | 2239901 | RNA → rpmE2 (PRK01678)Ribosomal_L31 (pfam01197) → |
| Sau-3539-1 | NZ_KK021748.1 | - | 34872   | 34843   | RNA → rpmE2 (PRK01678)Ribosomal_L31 (pfam01197) → |
| Sau-1571-1 | NZ_KK014495.1 | - | 94568   | 94539   | RNA → rpmE2 (PRK01678)Ribosomal_L31 (pfam01197) → |
| Sau-1582-1 | NZ_KK014951.1 | - | 118923  | 118894  | RNA → rpmE2 (PRK01678)Ribosomal_L31 (pfam01197) → |
| Sau-1614-1 | NZ_KK016472.1 | - | 35286   | 35257   | RNA → rpmE2 (PRK01678)Ribosomal_L31 (pfam01197) → |
| Sau-1362-1 | NZ_KK018658.1 | - | 1772    | 1743    | RNA → rpmE2 (PRK01678)Ribosomal_L31 (pfam01197) → |
| Sau-3595-1 | NZ_KK026049.1 | - | 56652   | 56623   | RNA → rpmE2 (PRK01678)Ribosomal_L31 (pfam01197) → |
| Sau-1065-1 | NZ_KK023463.1 | - | 2236651 | 2236622 | RNA → rpmE2 (PRK01678)Ribosomal_L31 (pfam01197) → |
| Sau-1075-1 | NZ_KK023651.1 | - | 55804   | 55775   | RNA → rpmE2 (PRK01678)Ribosomal_L31 (pfam01197) → |
| Sau-3709-1 | NZ_KK047684.1 | - | 56894   | 56865   | RNA → rpmE2 (PRK01678)Ribosomal_L31 (pfam01197) → |
| Sau-1041-1 | NZ_KK030362.1 | - | 34873   | 34844   | RNA → rpmE2 (PRK01678)Ribosomal_L31 (pfam01197) → |
| Sau-3708-1 | NZ_KK047688.1 | - | 1704238 | 1704209 | RNA → rpmE2 (PRK01678)Ribosomal_L31 (pfam01197) → |
| Sau-3674-1 | NZ_KK047843.1 | - | 1673624 | 1673595 | RNA → rpmE2 (PRK01678)Ribosomal_L31 (pfam01197) → |
| Sau-64-1   | NC_017333.1   | - | 2238912 | 2238883 | RNA → rpmE2 (PRK01678)Ribosomal_L31 (pfam01197) → |
| Sau-1561-1 | NZ_KK013917.1 | - | 62156   | 62127   | RNA → rpmE2 (PRK01678)Ribosomal_L31 (pfam01197) → |
| Sau-1578-1 | NZ_KK014718.1 | - | 55189   | 55160   | RNA → rpmE2 (PRK01678)Ribosomal_L31 (pfam01197) → |
| Sau-3593-1 | NZ_KK025962.1 | - | 33076   | 33047   | RNA → rpmE2 (PRK01678)Ribosomal_L31 (pfam01197) → |
| Sau-1584-1 | NZ_KK014983.1 | - | 36390   | 36361   | RNA → rpmE2 (PRK01678)Ribosomal_L31 (pfam01197) → |
| Sau-3586-1 | NZ_KK028408.1 | - | 46630   | 46601   | RNA → rpmE2 (PRK01678)Ribosomal_L31 (pfam01197) → |
| Sau-1601-1 | NZ_KK015846.1 | - | 36391   | 36362   | RNA → rpmE2 (PRK01678)Ribosomal_L31 (pfam01197) → |
| Sau-3577-1 | NZ_KK032474.1 | - | 34872   | 34843   | RNA → rpmE2 (PRK01678)Ribosomal_L31 (pfam01197) → |
| Sau-1052-1 | NZ_KK030433.1 | - | 34872   | 34843   | RNA → rpmE2 (PRK01678)Ribosomal_L31 (pfam01197) → |
| Sau-3591-1 | NZ_KK032745.1 | - | 34873   | 34844   | RNA → rpmE2 (PRK01678)Ribosomal_L31 (pfam01197) → |
| Sau-3704-1 | NZ_KK047880.1 | - | 1658923 | 1658894 | RNA → rpmE2 (PRK01678)Ribosomal_L31 (pfam01197) → |
| Sau-3594-1 | NZ_KK025972.1 | - | 34872   | 34843   | RNA → rpmE2 (PRK01678)Ribosomal_L31 (pfam01197) → |
| Sau-3587-1 | NZ_KK028466.1 | - | 46746   | 46717   | RNA → rpmE2 (PRK01678)Ribosomal_L31 (pfam01197) → |
| Sau-3588-1 | NZ_KK028533.1 | - | 15176   | 15147   | RNA → rpmE2 (PRK01678)Ribosomal_L31 (pfam01197) → |
| Sau-3578-1 | NZ_KK032489.1 | - | 34872   | 34843   | RNA → rpmE2 (PRK01678)Ribosomal_L31 (pfam01197) → |
| Sau-3601-1 | NZ_KK032800.1 | - | 34817   | 34788   | RNA → rpmE2 (PRK01678)Ribosomal_L31 (pfam01197) → |
| Sau-3658-1 | NZ_KK033002.1 | - | 34817   | 34788   | RNA → rpmE2 (PRK01678)Ribosomal_L31 (pfam01197) → |
| Sau-3696-1 | NZ_KK047674.1 | - | 56228   | 56199   | RNA → rpmE2 (PRK01678)Ribosomal_L31 (pfam01197) → |
| Sau-3684-1 | NZ_KK047888.1 | - | 237730  | 237701  | RNA → rpmE2 (PRK01678)Ribosomal_L31 (pfam01197) → |
| Sau-3496-1 | NZ_KK023149.1 | - | 34817   | 34788   | RNA → rpmE2 (PRK01678)Ribosomal_L31 (pfam01197) → |
| Sau-3631-1 | NZ_KK027664.1 | - | 34873   | 34844   | RNA → rpmE2 (PRK01678)Ribosomal_L31 (pfam01197) → |

|            |               |   |         |         |                                                   |
|------------|---------------|---|---------|---------|---------------------------------------------------|
| Sau-3507-1 | NZ_KK032260.1 | - | 54968   | 54939   | RNA → rpmE2 (PRK01678)Ribosomal_L31 (pfam01197) → |
| Sau-3664-1 | NZ_KK033064.1 | - | 34873   | 34844   | RNA → rpmE2 (PRK01678)Ribosomal_L31 (pfam01197) → |
| Sau-3675-1 | NZ_KK047678.1 | - | 2241127 | 2241098 | RNA → rpmE2 (PRK01678)Ribosomal_L31 (pfam01197) → |
| Sau-3691-1 | NZ_KK047705.1 | - | 1675481 | 1675452 | RNA → rpmE2 (PRK01678)Ribosomal_L31 (pfam01197) → |
| Sau-3568-1 | NZ_KK022849.1 | - | 2229307 | 2229278 | RNA → rpmE2 (PRK01678)Ribosomal_L31 (pfam01197) → |
| Sau-3504-1 | NZ_KK023326.1 | - | 33076   | 33047   | RNA → rpmE2 (PRK01678)Ribosomal_L31 (pfam01197) → |
| Sau-3548-1 | NZ_KK023919.1 | - | 34873   | 34844   | RNA → rpmE2 (PRK01678)Ribosomal_L31 (pfam01197) → |
| Sau-3508-1 | NZ_KK032308.1 | - | 34841   | 34812   | RNA → rpmE2 (PRK01678)Ribosomal_L31 (pfam01197) → |
| Sau-3576-1 | NZ_KK032381.1 | - | 34873   | 34844   | RNA → rpmE2 (PRK01678)Ribosomal_L31 (pfam01197) → |
| Sau-3584-1 | NZ_KK032670.1 | - | 34872   | 34843   | RNA → rpmE2 (PRK01678)Ribosomal_L31 (pfam01197) → |
| Sau-3650-1 | NZ_KK032923.1 | - | 55477   | 55448   | RNA → rpmE2 (PRK01678)Ribosomal_L31 (pfam01197) → |
| Sau-795-1  | NZ_KK041736.1 | - | 56993   | 56964   | RNA → rpmE2 (PRK01678)Ribosomal_L31 (pfam01197) → |
| Sau-3526-1 | NZ_KK021419.1 | - | 34817   | 34788   | RNA → rpmE2 (PRK01678)Ribosomal_L31 (pfam01197) → |
| Sau-787-1  | NZ_KK041753.1 | - | 35209   | 35180   | RNA → rpmE2 (PRK01678)Ribosomal_L31 (pfam01197) → |
| Sau-3545-1 | NZ_KK021833.1 | - | 56790   | 56761   | RNA → rpmE2 (PRK01678)Ribosomal_L31 (pfam01197) → |
| Sau-781-1  | NZ_KK041899.1 | - | 19182   | 19153   | RNA → rpmE2 (PRK01678)Ribosomal_L31 (pfam01197) → |
| Sau-3607-1 | NZ_KK032863.1 | - | 34872   | 34843   | RNA → rpmE2 (PRK01678)Ribosomal_L31 (pfam01197) → |
| Sau-661-1  | NZ_KK041939.1 | - | 35066   | 35037   | RNA → rpmE2 (PRK01678)Ribosomal_L31 (pfam01197) → |
| Sau-3651-1 | NZ_KK032992.1 | - | 2236249 | 2236220 | RNA → rpmE2 (PRK01678)Ribosomal_L31 (pfam01197) → |
| Sau-725-1  | NZ_KK022396.1 | - | 30868   | 30839   | RNA → rpmE2 (PRK01678)Ribosomal_L31 (pfam01197) → |
| Sau-3685-1 | NZ_KK019345.1 | - | 56994   | 56965   | RNA → rpmE2 (PRK01678)Ribosomal_L31 (pfam01197) → |
| Sau-740-1  | NZ_KK025058.1 | - | 34873   | 34844   | RNA → rpmE2 (PRK01678)Ribosomal_L31 (pfam01197) → |
| Sau-791-1  | NZ_KK026781.1 | - | 34817   | 34788   | RNA → rpmE2 (PRK01678)Ribosomal_L31 (pfam01197) → |
| Sau-3558-1 | NZ_KK024371.1 | - | 57040   | 57011   | RNA → rpmE2 (PRK01678)Ribosomal_L31 (pfam01197) → |
| Sau-756-1  | NZ_KK029293.1 | - | 34872   | 34843   | RNA → rpmE2 (PRK01678)Ribosomal_L31 (pfam01197) → |
| Sau-3575-1 | NZ_KK025280.1 | - | 56994   | 56965   | RNA → rpmE2 (PRK01678)Ribosomal_L31 (pfam01197) → |
| Sau-786-1  | NZ_KK041769.1 | - | 34817   | 34788   | RNA → rpmE2 (PRK01678)Ribosomal_L31 (pfam01197) → |
| Sau-3503-1 | NZ_KK028175.1 | - | 34872   | 34843   | RNA → rpmE2 (PRK01678)Ribosomal_L31 (pfam01197) → |
| Sau-660-1  | NZ_KK041973.1 | - | 34872   | 34843   | RNA → rpmE2 (PRK01678)Ribosomal_L31 (pfam01197) → |
| Sau-3506-1 | NZ_KK032215.1 | - | 19182   | 19153   | RNA → rpmE2 (PRK01678)Ribosomal_L31 (pfam01197) → |
| Sau-722-1  | NZ_KK022244.1 | - | 34873   | 34844   | RNA → rpmE2 (PRK01678)Ribosomal_L31 (pfam01197) → |
| Sau-3534-1 | NZ_KK023872.1 | - | 2238473 | 2238444 | RNA → rpmE2 (PRK01678)Ribosomal_L31 (pfam01197) → |
| Sau-788-1  | NZ_KK026645.1 | - | 34872   | 34843   | RNA → rpmE2 (PRK01678)Ribosomal_L31 (pfam01197) → |
| Sau-3559-1 | NZ_KK024423.1 | - | 56940   | 56911   | RNA → rpmE2 (PRK01678)Ribosomal_L31 (pfam01197) → |
| Sau-839-1  | NZ_KK027771.1 | - | 34772   | 34743   | RNA → rpmE2 (PRK01678)Ribosomal_L31 (pfam01197) → |
| Sau-3569-1 | NZ_KK024897.1 | - | 56894   | 56865   | RNA → rpmE2 (PRK01678)Ribosomal_L31 (pfam01197) → |
| Sau-771-1  | NZ_KK029389.1 | - | 2236533 | 2236504 | RNA → rpmE2 (PRK01678)Ribosomal_L31 (pfam01197) → |
| Sau-3612-1 | NZ_KK027253.1 | - | 2240851 | 2240822 | RNA → rpmE2 (PRK01678)Ribosomal_L31 (pfam01197) → |
| Sau-723-1  | NZ_KK022328.1 | - | 56894   | 56865   | RNA → rpmE2 (PRK01678)Ribosomal_L31 (pfam01197) → |
| Sau-759-1  | NZ_KK026434.1 | - | 34873   | 34844   | RNA → rpmE2 (PRK01678)Ribosomal_L31 (pfam01197) → |
| Sau-3583-1 | NZ_KK032605.1 | - | 34873   | 34844   | RNA → rpmE2 (PRK01678)Ribosomal_L31 (pfam01197) → |
| Sau-794-1  | NZ_KK028873.1 | - | 2236659 | 2236630 | RNA → rpmE2 (PRK01678)Ribosomal_L31 (pfam01197) → |
| Sau-3659-1 | NZ_KK033045.1 | - | 56894   | 56865   | RNA → rpmE2 (PRK01678)Ribosomal_L31 (pfam01197) → |
| Sau-742-1  | NZ_KK029243.1 | - | 56891   | 56862   | RNA → rpmE2 (PRK01678)Ribosomal_L31 (pfam01197) → |
| Sau-826-1  | NZ_KK022877.1 | - | 2236712 | 2236683 | RNA → rpmE2 (PRK01678)Ribosomal_L31 (pfam01197) → |
| Sau-777-1  | NZ_KK026178.1 | - | 34913   | 34884   | RNA → rpmE2 (PRK01678)Ribosomal_L31 (pfam01197) → |
| Sau-2105-1 | NZ_KK067350.1 | - | 36490   | 36461   | RNA → rpmE2 (PRK01678)Ribosomal_L31 (pfam01197) → |
| Sau-792-1  | NZ_KK026776.1 | - | 56894   | 56865   | RNA → rpmE2 (PRK01678)Ribosomal_L31 (pfam01197) → |
| Sau-2092-1 | NZ_KK067612.1 | - | 236801  | 236772  | RNA → rpmE2 (PRK01678)Ribosomal_L31 (pfam01197) → |
| Sau-802-1  | NZ_KK027250.1 | - | 56894   | 56865   | RNA → rpmE2 (PRK01678)Ribosomal_L31 (pfam01197) → |
| Sau-712-1  | NZ_KK070316.1 | - | 2245370 | 2245341 | RNA → rpmE2 (PRK01678)Ribosomal_L31 (pfam01197) → |
| Sau-3599-1 | NZ_KK071292.1 | - | 56894   | 56865   | RNA → rpmE2 (PRK01678)Ribosomal_L31 (pfam01197) → |

|            |               |   |         |         |                                                   |
|------------|---------------|---|---------|---------|---------------------------------------------------|
| Sau-726-1  | NZ_KK022489.1 | - | 34873   | 34844   | RNA → rpmE2 (PRK01678)Ribosomal_L31 (pfam01197) → |
| Sau-2152-1 | NZ_KK065541.1 | - | 36806   | 36777   | RNA → rpmE2 (PRK01678)Ribosomal_L31 (pfam01197) → |
| Sau-677-1  | NZ_KK023680.1 | - | 35161   | 35132   | RNA → rpmE2 (PRK01678)Ribosomal_L31 (pfam01197) → |
| Sau-778-1  | NZ_KK026259.1 | - | 19182   | 19153   | RNA → rpmE2 (PRK01678)Ribosomal_L31 (pfam01197) → |
| Sau-2130-1 | NZ_KK066572.1 | - | 55458   | 55429   | RNA → rpmE2 (PRK01678)Ribosomal_L31 (pfam01197) → |
| Sau-767-1  | NZ_KK028585.1 | - | 34873   | 34844   | RNA → rpmE2 (PRK01678)Ribosomal_L31 (pfam01197) → |
| Sau-2090-1 | NZ_KK067652.1 | - | 56044   | 56015   | RNA → rpmE2 (PRK01678)Ribosomal_L31 (pfam01197) → |
| Sau-3571-1 | NZ_KK070199.1 | - | 1094703 | 1094674 | RNA → rpmE2 (PRK01678)Ribosomal_L31 (pfam01197) → |
| Sau-2978-1 | NZ_KK070975.1 | - | 34870   | 34841   | RNA → rpmE2 (PRK01678)Ribosomal_L31 (pfam01197) → |
| Sau-3606-1 | NZ_KK071564.1 | - | 56894   | 56865   | RNA → rpmE2 (PRK01678)Ribosomal_L31 (pfam01197) → |
| Sau-2502-1 | NZ_KK070240.1 | - | 236894  | 236865  | RNA → rpmE2 (PRK01678)Ribosomal_L31 (pfam01197) → |
| Sau-2447-1 | NZ_KK070432.1 | - | 58560   | 58531   | RNA → rpmE2 (PRK01678)Ribosomal_L31 (pfam01197) → |
| Sau-2506-1 | NZ_KK071935.1 | - | 56894   | 56865   | RNA → rpmE2 (PRK01678)Ribosomal_L31 (pfam01197) → |
| Sau-3610-1 | NZ_KK071957.1 | - | 34913   | 34884   | RNA → rpmE2 (PRK01678)Ribosomal_L31 (pfam01197) → |
| Sau-2598-1 | NZ_KK038666.1 | - | 34913   | 34884   | RNA → rpmE2 (PRK01678)Ribosomal_L31 (pfam01197) → |
| Sau-2161-1 | NZ_KK065316.1 | - | 54697   | 54668   | RNA → rpmE2 (PRK01678)Ribosomal_L31 (pfam01197) → |
| Sau-2483-1 | NZ_KK071147.1 | - | 34954   | 34925   | RNA → rpmE2 (PRK01678)Ribosomal_L31 (pfam01197) → |
| Sau-2158-1 | NZ_KK065367.1 | - | 35190   | 35161   | RNA → rpmE2 (PRK01678)Ribosomal_L31 (pfam01197) → |
| Sau-2101-1 | NZ_KK067484.1 | - | 35296   | 35267   | RNA → rpmE2 (PRK01678)Ribosomal_L31 (pfam01197) → |
| Sau-2498-1 | NZ_KK071690.1 | - | 34973   | 34944   | RNA → rpmE2 (PRK01678)Ribosomal_L31 (pfam01197) → |
| Sau-2122-1 | NZ_KK066887.1 | - | 62203   | 62174   | RNA → rpmE2 (PRK01678)Ribosomal_L31 (pfam01197) → |
| Sau-2114-1 | NZ_KK067114.1 | - | 190679  | 190650  | RNA → rpmE2 (PRK01678)Ribosomal_L31 (pfam01197) → |
| Sau-2059-1 | NZ_KK069017.1 | - | 36579   | 36550   | RNA → rpmE2 (PRK01678)Ribosomal_L31 (pfam01197) → |
| Sau-2084-1 | NZ_KK067969.1 | - | 61690   | 61661   | RNA → rpmE2 (PRK01678)Ribosomal_L31 (pfam01197) → |
| Sau-1387-1 | NZ_KI971464.1 | - | 56763   | 56734   | RNA → rpmE2 (PRK01678)Ribosomal_L31 (pfam01197) → |
| Sau-2087-1 | NZ_KK067883.1 | - | 61546   | 61517   | RNA → rpmE2 (PRK01678)Ribosomal_L31 (pfam01197) → |
| Sau-2071-1 | NZ_KK068467.1 | - | 25128   | 25099   | RNA → rpmE2 (PRK01678)Ribosomal_L31 (pfam01197) → |
| Sau-2051-1 | NZ_KK069266.1 | - | 25029   | 25000   | RNA → rpmE2 (PRK01678)Ribosomal_L31 (pfam01197) → |
| Sau-2044-1 | NZ_KK069594.1 | - | 24749   | 24720   | RNA → rpmE2 (PRK01678)Ribosomal_L31 (pfam01197) → |
| Sau-2062-1 | NZ_KK068890.1 | - | 36390   | 36361   | RNA → rpmE2 (PRK01678)Ribosomal_L31 (pfam01197) → |
| Sau-1062-1 | NZ_KK033122.1 | - | 56644   | 56615   | RNA → rpmE2 (PRK01678)Ribosomal_L31 (pfam01197) → |
| Sau-2081-1 | NZ_KK068115.1 | - | 8576    | 8547    | RNA → rpmE2 (PRK01678)Ribosomal_L31 (pfam01197) → |
| Sau-717-1  | NZ_KK070061.1 | - | 1690011 | 1689982 | RNA → rpmE2 (PRK01678)Ribosomal_L31 (pfam01197) → |
| Sau-769-1  | NZ_KK070254.1 | - | 1658420 | 1658391 | RNA → rpmE2 (PRK01678)Ribosomal_L31 (pfam01197) → |
| Sau-2069-1 | NZ_KK068572.1 | - | 35669   | 35640   | RNA → rpmE2 (PRK01678)Ribosomal_L31 (pfam01197) → |
| Sau-2080-1 | NZ_KK068152.1 | - | 32991   | 32962   | RNA → rpmE2 (PRK01678)Ribosomal_L31 (pfam01197) → |
| Sau-2073-1 | NZ_KK068424.1 | - | 54564   | 54535   | RNA → rpmE2 (PRK01678)Ribosomal_L31 (pfam01197) → |
| Sau-2066-1 | NZ_KK068711.1 | - | 2421    | 2392    | RNA → rpmE2 (PRK01678)Ribosomal_L31 (pfam01197) → |
| Sau-2060-1 | NZ_KK068997.1 | - | 62153   | 62124   | RNA → rpmE2 (PRK01678)Ribosomal_L31 (pfam01197) → |
| Sau-2047-1 | NZ_KK069374.1 | - | 24749   | 24720   | RNA → rpmE2 (PRK01678)Ribosomal_L31 (pfam01197) → |
| Sau-2037-1 | NZ_KK069794.1 | - | 111530  | 111501  | RNA → rpmE2 (PRK01678)Ribosomal_L31 (pfam01197) → |
| Sau-957-1  | NZ_KK071339.1 | - | 34894   | 34865   | RNA → rpmE2 (PRK01678)Ribosomal_L31 (pfam01197) → |
| Sau-659-1  | NZ_KK042057.1 | - | 34874   | 34845   | RNA → rpmE2 (PRK01678)Ribosomal_L31 (pfam01197) → |
| Sau-633-1  | NZ_KK042196.1 | - | 54968   | 54939   | RNA → rpmE2 (PRK01678)Ribosomal_L31 (pfam01197) → |
| Sau-635-1  | NZ_KK029047.1 | - | 29278   | 29249   | RNA → rpmE2 (PRK01678)Ribosomal_L31 (pfam01197) → |
| Sau-651-1  | NZ_KK042077.1 | - | 56894   | 56865   | RNA → rpmE2 (PRK01678)Ribosomal_L31 (pfam01197) → |
| Sau-625-1  | NZ_KK042274.1 | - | 25255   | 25226   | RNA → rpmE2 (PRK01678)Ribosomal_L31 (pfam01197) → |
| Sau-624-1  | NZ_KK042282.1 | - | 56894   | 56865   | RNA → rpmE2 (PRK01678)Ribosomal_L31 (pfam01197) → |
| Sau-290-1  | NZ_KK047913.1 | - | 2192944 | 2192915 | RNA → rpmE2 (PRK01678)Ribosomal_L31 (pfam01197) → |
| Sau-636-1  | NZ_KK029097.1 | - | 121888  | 121859  | RNA → rpmE2 (PRK01678)Ribosomal_L31 (pfam01197) → |
| Sau-649-1  | NZ_KK042095.1 | - | 33080   | 33051   | RNA → rpmE2 (PRK01678)Ribosomal_L31 (pfam01197) → |
| Sau-640-1  | NZ_KK042104.1 | - | 34913   | 34884   | RNA → rpmE2 (PRK01678)Ribosomal_L31 (pfam01197) → |



|            |               |   |         |         |                                                   |
|------------|---------------|---|---------|---------|---------------------------------------------------|
| Sau-618-1  | NZ_KK042299.1 | - | 34873   | 34844   | RNA → rpmE2 (PRK01678)Ribosomal_L31 (pfam01197) → |
| Sau-955-1  | NZ_KK071439.1 | - | 34873   | 34844   | RNA → rpmE2 (PRK01678)Ribosomal_L31 (pfam01197) → |
| Sau-613-1  | NZ_KK022975.1 | - | 34872   | 34843   | RNA → rpmE2 (PRK01678)Ribosomal_L31 (pfam01197) → |
| Sau-639-1  | NZ_KK042131.1 | - | 25255   | 25226   | RNA → rpmE2 (PRK01678)Ribosomal_L31 (pfam01197) → |
| Sau-617-1  | NZ_KK042394.1 | - | 34817   | 34788   | RNA → rpmE2 (PRK01678)Ribosomal_L31 (pfam01197) → |
| Sau-765-1  | NZ_KK071370.1 | - | 34873   | 34844   | RNA → rpmE2 (PRK01678)Ribosomal_L31 (pfam01197) → |
| Sau-2040-1 | NZ_KK069665.1 | - | 35499   | 35470   | RNA → rpmE2 (PRK01678)Ribosomal_L31 (pfam01197) → |
| Sau-744-1  | NZ_KK070618.1 | - | 56894   | 56865   | RNA → rpmE2 (PRK01678)Ribosomal_L31 (pfam01197) → |
| Sau-799-1  | NZ_KK072266.1 | - | 15832   | 15803   | RNA → rpmE2 (PRK01678)Ribosomal_L31 (pfam01197) → |
| Sau-1376-1 | NZ_KI971452.1 | - | 56763   | 56734   | RNA → rpmE2 (PRK01678)Ribosomal_L31 (pfam01197) → |
| Sau-973-1  | NZ_KK071835.1 | - | 56794   | 56765   | RNA → rpmE2 (PRK01678)Ribosomal_L31 (pfam01197) → |
| Sau-944-1  | NZ_KK070909.1 | - | 56894   | 56865   | RNA → rpmE2 (PRK01678)Ribosomal_L31 (pfam01197) → |
| Sau-797-1  | NZ_KK072197.1 | - | 56883   | 56854   | RNA → rpmE2 (PRK01678)Ribosomal_L31 (pfam01197) → |
| Sau-1410-1 | NZ_KI971503.1 | - | 58300   | 58271   | RNA → rpmE2 (PRK01678)Ribosomal_L31 (pfam01197) → |
| Sau-2088-1 | NZ_KK067776.1 | - | 35384   | 35355   | RNA → rpmE2 (PRK01678)Ribosomal_L31 (pfam01197) → |
| Sau-819-1  | NZ_KK072733.1 | - | 56894   | 56865   | RNA → rpmE2 (PRK01678)Ribosomal_L31 (pfam01197) → |
| Sau-981-1  | NZ_KK071993.1 | - | 34865   | 34836   | RNA → rpmE2 (PRK01678)Ribosomal_L31 (pfam01197) → |
| Sau-1064-1 | NZ_KK072299.1 | - | 31125   | 31096   | RNA → rpmE2 (PRK01678)Ribosomal_L31 (pfam01197) → |
| Sau-749-1  | NZ_KK070937.1 | - | 56894   | 56865   | RNA → rpmE2 (PRK01678)Ribosomal_L31 (pfam01197) → |
| Sau-2127-1 | NZ_KK066657.1 | - | 35451   | 35422   | RNA → rpmE2 (PRK01678)Ribosomal_L31 (pfam01197) → |
| Sau-644-1  | NZ_KK022681.1 | - | 34817   | 34788   | RNA → rpmE2 (PRK01678)Ribosomal_L31 (pfam01197) → |
| Sau-648-1  | NZ_KK029104.1 | - | 2228793 | 2228764 | RNA → rpmE2 (PRK01678)Ribosomal_L31 (pfam01197) → |
| Sau-720-1  | NZ_KK070340.1 | - | 58240   | 58211   | RNA → rpmE2 (PRK01678)Ribosomal_L31 (pfam01197) → |
| Sau-974-1  | NZ_KK070262.1 | - | 1639617 | 1639588 | RNA → rpmE2 (PRK01678)Ribosomal_L31 (pfam01197) → |
| Sau-823-1  | NZ_KK072797.1 | - | 56714   | 56685   | RNA → rpmE2 (PRK01678)Ribosomal_L31 (pfam01197) → |
| Sau-701-1  | NZ_KK070279.1 | - | 56894   | 56865   | RNA → rpmE2 (PRK01678)Ribosomal_L31 (pfam01197) → |
| Sau-2136-1 | NZ_KK066349.1 | - | 91457   | 91428   | RNA → rpmE2 (PRK01678)Ribosomal_L31 (pfam01197) → |
| Sau-2141-1 | NZ_KK065990.1 | - | 35404   | 35375   | RNA → rpmE2 (PRK01678)Ribosomal_L31 (pfam01197) → |
| Sau-2488-1 | NZ_KK070113.1 | - | 54795   | 54766   | RNA → rpmE2 (PRK01678)Ribosomal_L31 (pfam01197) → |
| Sau-2971-1 | NZ_KK070751.1 | - | 35013   | 34984   | RNA → rpmE2 (PRK01678)Ribosomal_L31 (pfam01197) → |
| Sau-2954-1 | NZ_KK070449.1 | - | 1725436 | 1725407 | RNA → rpmE2 (PRK01678)Ribosomal_L31 (pfam01197) → |
| Sau-3574-1 | NZ_KK070474.1 | - | 224376  | 224347  | RNA → rpmE2 (PRK01678)Ribosomal_L31 (pfam01197) → |
| Sau-2138-1 | NZ_KK066185.1 | - | 35169   | 35140   | RNA → rpmE2 (PRK01678)Ribosomal_L31 (pfam01197) → |
| Sau-2132-1 | NZ_KK066446.1 | - | 36391   | 36362   | RNA → rpmE2 (PRK01678)Ribosomal_L31 (pfam01197) → |
| Sau-3604-1 | NZ_KK071651.1 | - | 25255   | 25226   | RNA → rpmE2 (PRK01678)Ribosomal_L31 (pfam01197) → |
| Sau-2496-1 | NZ_KK071775.1 | - | 34913   | 34884   | RNA → rpmE2 (PRK01678)Ribosomal_L31 (pfam01197) → |
| Sau-2448-1 | NZ_KK038990.1 | - | 34817   | 34788   | RNA → rpmE2 (PRK01678)Ribosomal_L31 (pfam01197) → |
| Sau-2986-1 | NZ_KK071519.1 | - | 34872   | 34843   | RNA → rpmE2 (PRK01678)Ribosomal_L31 (pfam01197) → |
| Sau-2550-1 | NZ_KK073273.1 | - | 55214   | 55185   | RNA → rpmE2 (PRK01678)Ribosomal_L31 (pfam01197) → |
| Sau-2499-1 | NZ_KK072095.1 | - | 109235  | 109206  | RNA → rpmE2 (PRK01678)Ribosomal_L31 (pfam01197) → |
| Sau-1353-1 | NZ_KI971738.1 | - | 56763   | 56734   | RNA → rpmE2 (PRK01678)Ribosomal_L31 (pfam01197) → |
| Sau-2500-1 | NZ_KK072188.1 | - | 34967   | 34938   | RNA → rpmE2 (PRK01678)Ribosomal_L31 (pfam01197) → |
| Sau-1934-1 | NZ_KI972241.1 | - | 57675   | 57646   | RNA → rpmE2 (PRK01678)Ribosomal_L31 (pfam01197) → |
| Sau-2523-1 | NZ_KK073134.1 | - | 34862   | 34833   | RNA → rpmE2 (PRK01678)Ribosomal_L31 (pfam01197) → |
| Sau-1784-1 | NZ_KI971981.1 | - | 56762   | 56733   | RNA → rpmE2 (PRK01678)Ribosomal_L31 (pfam01197) → |
| Sau-1945-1 | NZ_KI972277.1 | - | 141138  | 141109  | RNA → rpmE2 (PRK01678)Ribosomal_L31 (pfam01197) → |
| Sau-3613-1 | NZ_KK072381.1 | - | 34913   | 34884   | RNA → rpmE2 (PRK01678)Ribosomal_L31 (pfam01197) → |
| Sau-1365-1 | NZ_KI971747.1 | - | 56763   | 56734   | RNA → rpmE2 (PRK01678)Ribosomal_L31 (pfam01197) → |
| Sau-1796-1 | NZ_KI971983.1 | - | 234880  | 234851  | RNA → rpmE2 (PRK01678)Ribosomal_L31 (pfam01197) → |
| Sau-1937-1 | NZ_KI972261.1 | - | 61715   | 61686   | RNA → rpmE2 (PRK01678)Ribosomal_L31 (pfam01197) → |
| Sau-1955-1 | NZ_KI972284.1 | - | 880152  | 880123  | RNA → rpmE2 (PRK01678)Ribosomal_L31 (pfam01197) → |
| Sau-2007-1 | NZ_KI972388.1 | - | 59768   | 59739   | RNA → rpmE2 (PRK01678)Ribosomal_L31 (pfam01197) → |

|            |               |   |         |         |                                                   |
|------------|---------------|---|---------|---------|---------------------------------------------------|
| Sau-2314-1 | NZ_KI972526.1 | - | 228594  | 228565  | RNA → rpmE2 (PRK01678)Ribosomal_L31 (pfam01197) → |
| Sau-2327-1 | NZ_KI972558.1 | - | 115301  | 115272  | RNA → rpmE2 (PRK01678)Ribosomal_L31 (pfam01197) → |
| Sau-615-1  | NZ_KK092943.1 | - | 34972   | 34943   | RNA → rpmE2 (PRK01678)Ribosomal_L31 (pfam01197) → |
| Sau-2867-1 | NZ_KK093446.1 | - | 55983   | 55954   | RNA → rpmE2 (PRK01678)Ribosomal_L31 (pfam01197) → |
| Sau-2085-1 | NZ_KI972742.1 | - | 234815  | 234786  | RNA → rpmE2 (PRK01678)Ribosomal_L31 (pfam01197) → |
| Sau-1968-1 | NZ_KI972321.1 | - | 119786  | 119757  | RNA → rpmE2 (PRK01678)Ribosomal_L31 (pfam01197) → |
| Sau-2018-1 | NZ_KI972401.1 | - | 56763   | 56734   | RNA → rpmE2 (PRK01678)Ribosomal_L31 (pfam01197) → |
| Sau-1002-1 | NZ_KK028024.1 | - | 34872   | 34843   | RNA → rpmE2 (PRK01678)Ribosomal_L31 (pfam01197) → |
| Sau-2282-1 | NZ_KI972493.1 | - | 401361  | 401332  | RNA → rpmE2 (PRK01678)Ribosomal_L31 (pfam01197) → |
| Sau-2315-1 | NZ_KI972541.1 | - | 55259   | 55230   | RNA → rpmE2 (PRK01678)Ribosomal_L31 (pfam01197) → |
| Sau-2330-1 | NZ_KI972603.1 | - | 474378  | 474349  | RNA → rpmE2 (PRK01678)Ribosomal_L31 (pfam01197) → |
| Sau-3532-1 | NZ_KK038133.1 | - | 56894   | 56865   | RNA → rpmE2 (PRK01678)Ribosomal_L31 (pfam01197) → |
| Sau-686-1  | NZ_KK093676.1 | - | 34872   | 34843   | RNA → rpmE2 (PRK01678)Ribosomal_L31 (pfam01197) → |
| Sau-2476-1 | NZ_KK092439.1 | - | 35556   | 35527   | RNA → rpmE2 (PRK01678)Ribosomal_L31 (pfam01197) → |
| Sau-2077-1 | NZ_KI972732.1 | - | 56763   | 56734   | RNA → rpmE2 (PRK01678)Ribosomal_L31 (pfam01197) → |
| Sau-1853-1 | NZ_KI972093.1 | - | 56763   | 56734   | RNA → rpmE2 (PRK01678)Ribosomal_L31 (pfam01197) → |
| Sau-3552-1 | NZ_KK022059.1 | - | 34872   | 34843   | RNA → rpmE2 (PRK01678)Ribosomal_L31 (pfam01197) → |
| Sau-2041-1 | NZ_KI972629.1 | - | 468563  | 468534  | RNA → rpmE2 (PRK01678)Ribosomal_L31 (pfam01197) → |
| Sau-3543-1 | NZ_KK038080.1 | - | 56894   | 56865   | RNA → rpmE2 (PRK01678)Ribosomal_L31 (pfam01197) → |
| Sau-3520-1 | NZ_KK020928.1 | - | 56940   | 56911   | RNA → rpmE2 (PRK01678)Ribosomal_L31 (pfam01197) → |
| Sau-2484-1 | NZ_KK092708.1 | - | 34913   | 34884   | RNA → rpmE2 (PRK01678)Ribosomal_L31 (pfam01197) → |
| Sau-3567-1 | NZ_KK038067.1 | - | 2160060 | 2160031 | RNA → rpmE2 (PRK01678)Ribosomal_L31 (pfam01197) → |
| Sau-2050-1 | NZ_KI972665.1 | - | 61740   | 61711   | RNA → rpmE2 (PRK01678)Ribosomal_L31 (pfam01197) → |
| Sau-2058-1 | NZ_KI972713.1 | - | 56763   | 56734   | RNA → rpmE2 (PRK01678)Ribosomal_L31 (pfam01197) → |
| Sau-2057-1 | NZ_KI972702.1 | - | 216427  | 216398  | RNA → rpmE2 (PRK01678)Ribosomal_L31 (pfam01197) → |
| Sau-3540-1 | NZ_KK022054.1 | - | 57040   | 57011   | RNA → rpmE2 (PRK01678)Ribosomal_L31 (pfam01197) → |
| Sau-3627-1 | NZ_KK028083.1 | - | 34874   | 34845   | RNA → rpmE2 (PRK01678)Ribosomal_L31 (pfam01197) → |
| Sau-683-1  | NZ_KK093607.1 | - | 29170   | 29141   | RNA → rpmE2 (PRK01678)Ribosomal_L31 (pfam01197) → |
| Sau-3542-1 | NZ_KK038087.1 | - | 2155644 | 2155615 | RNA → rpmE2 (PRK01678)Ribosomal_L31 (pfam01197) → |
| Sau-3533-1 | NZ_KK038099.1 | - | 56940   | 56911   | RNA → rpmE2 (PRK01678)Ribosomal_L31 (pfam01197) → |
| Sau-2585-1 | NZ_KK020778.1 | - | 56893   | 56864   | RNA → rpmE2 (PRK01678)Ribosomal_L31 (pfam01197) → |
| Sau-3573-1 | NZ_KK038019.1 | - | 56877   | 56848   | RNA → rpmE2 (PRK01678)Ribosomal_L31 (pfam01197) → |
| Sau-3510-1 | NZ_KK038233.1 | - | 34872   | 34843   | RNA → rpmE2 (PRK01678)Ribosomal_L31 (pfam01197) → |
| Sau-2933-1 | NZ_KK038394.1 | - | 56894   | 56865   | RNA → rpmE2 (PRK01678)Ribosomal_L31 (pfam01197) → |
| Sau-2955-1 | NZ_KK038274.1 | - | 34817   | 34788   | RNA → rpmE2 (PRK01678)Ribosomal_L31 (pfam01197) → |
| Sau-2925-1 | NZ_KK038441.1 | - | 56894   | 56865   | RNA → rpmE2 (PRK01678)Ribosomal_L31 (pfam01197) → |
| Sau-3509-1 | NZ_KK038264.1 | - | 56794   | 56765   | RNA → rpmE2 (PRK01678)Ribosomal_L31 (pfam01197) → |
| Sau-2931-1 | NZ_KK038399.1 | - | 34873   | 34844   | RNA → rpmE2 (PRK01678)Ribosomal_L31 (pfam01197) → |
| Sau-696-1  | NZ_KK093807.1 | - | 34913   | 34884   | RNA → rpmE2 (PRK01678)Ribosomal_L31 (pfam01197) → |
| Sau-2947-1 | NZ_KK038331.1 | - | 121725  | 121696  | RNA → rpmE2 (PRK01678)Ribosomal_L31 (pfam01197) → |
| Sau-2923-1 | NZ_KK038451.1 | - | 56894   | 56865   | RNA → rpmE2 (PRK01678)Ribosomal_L31 (pfam01197) → |
| Sau-2919-1 | NZ_KK038477.1 | - | 56789   | 56760   | RNA → rpmE2 (PRK01678)Ribosomal_L31 (pfam01197) → |
| Sau-3572-1 | NZ_KK038059.1 | - | 56894   | 56865   | RNA → rpmE2 (PRK01678)Ribosomal_L31 (pfam01197) → |
| Sau-688-1  | NZ_KK093755.1 | - | 34872   | 34843   | RNA → rpmE2 (PRK01678)Ribosomal_L31 (pfam01197) → |
| Sau-793-1  | NZ_KK093938.1 | - | 55100   | 55071   | RNA → rpmE2 (PRK01678)Ribosomal_L31 (pfam01197) → |
| Sau-920-1  | NZ_KK094093.1 | - | 54889   | 54860   | RNA → rpmE2 (PRK01678)Ribosomal_L31 (pfam01197) → |
| Sau-908-1  | NZ_KK094033.1 | - | 34872   | 34843   | RNA → rpmE2 (PRK01678)Ribosomal_L31 (pfam01197) → |
| Sau-1048-1 | NZ_KK093310.1 | - | 56894   | 56865   | RNA → rpmE2 (PRK01678)Ribosomal_L31 (pfam01197) → |
| Sau-894-1  | NZ_KK093961.1 | - | 56889   | 56860   | RNA → rpmE2 (PRK01678)Ribosomal_L31 (pfam01197) → |
| Sau-967-1  | NZ_KK094117.1 | - | 55199   | 55170   | RNA → rpmE2 (PRK01678)Ribosomal_L31 (pfam01197) → |
| Sau-446-1  | NZ_KK098159.1 | - | 400765  | 400736  | RNA → rpmE2 (PRK01678)Ribosomal_L31 (pfam01197) → |
| Sau-395-1  | NZ_KK099647.1 | - | 56709   | 56680   | RNA → rpmE2 (PRK01678)Ribosomal_L31 (pfam01197) → |



|            |               |   |         |         |       |                                  |                               |                             |   |
|------------|---------------|---|---------|---------|-------|----------------------------------|-------------------------------|-----------------------------|---|
| Sau-424-1  | NZ_KK097860.1 | - | 470236  | 470207  | RNA → | <a href="#">rpmE2 (PRK01678)</a> | <a href="#">Ribosomal_L31</a> | <a href="#">(pfam01197)</a> | → |
| Sau-444-1  | NZ_KK098125.1 | - | 56419   | 56390   | RNA → | <a href="#">rpmE2 (PRK01678)</a> | <a href="#">Ribosomal_L31</a> | <a href="#">(pfam01197)</a> | → |
| Sau-465-1  | NZ_KK098357.1 | - | 121861  | 121832  | RNA → | <a href="#">rpmE2 (PRK01678)</a> | <a href="#">Ribosomal_L31</a> | <a href="#">(pfam01197)</a> | → |
| Sau-2480-1 | NZ_KK094627.1 | - | 34973   | 34944   | RNA → | <a href="#">rpmE2 (PRK01678)</a> | <a href="#">Ribosomal_L31</a> | <a href="#">(pfam01197)</a> | → |
| Sau-3579-1 | NZ_KK095731.1 | - | 55116   | 55087   | RNA → | <a href="#">rpmE2 (PRK01678)</a> | <a href="#">Ribosomal_L31</a> | <a href="#">(pfam01197)</a> | → |
| Sau-111-1  | NZ_KK218822.1 | - | 56439   | 56410   | RNA → | <a href="#">rpmE2 (PRK01678)</a> | <a href="#">Ribosomal_L31</a> | <a href="#">(pfam01197)</a> | → |
| Sau-2453-1 | NZ_KK096504.1 | - | 34972   | 34943   | RNA → | <a href="#">rpmE2 (PRK01678)</a> | <a href="#">Ribosomal_L31</a> | <a href="#">(pfam01197)</a> | → |
| Sau-493-1  | NZ_KK098720.1 | - | 36391   | 36362   | RNA → | <a href="#">rpmE2 (PRK01678)</a> | <a href="#">Ribosomal_L31</a> | <a href="#">(pfam01197)</a> | → |
| Sau-468-1  | NZ_KK098407.1 | - | 58283   | 58254   | RNA → | <a href="#">rpmE2 (PRK01678)</a> | <a href="#">Ribosomal_L31</a> | <a href="#">(pfam01197)</a> | → |
| Sau-365-1  | NZ_KK099370.1 | - | 410097  | 410068  | RNA → | <a href="#">rpmE2 (PRK01678)</a> | <a href="#">Ribosomal_L31</a> | <a href="#">(pfam01197)</a> | → |
| Sau-3536-1 | NZ_KK097202.1 | - | 34871   | 34842   | RNA → | <a href="#">rpmE2 (PRK01678)</a> | <a href="#">Ribosomal_L31</a> | <a href="#">(pfam01197)</a> | → |
| Sau-422-1  | NZ_KK097842.1 | - | 908056  | 908027  | RNA → | <a href="#">rpmE2 (PRK01678)</a> | <a href="#">Ribosomal_L31</a> | <a href="#">(pfam01197)</a> | → |
| Sau-329-1  | NZ_KK099108.1 | - | 466349  | 466320  | RNA → | <a href="#">rpmE2 (PRK01678)</a> | <a href="#">Ribosomal_L31</a> | <a href="#">(pfam01197)</a> | → |
| Sau-2451-1 | NZ_KK094499.1 | - | 19182   | 19153   | RNA → | <a href="#">rpmE2 (PRK01678)</a> | <a href="#">Ribosomal_L31</a> | <a href="#">(pfam01197)</a> | → |
| Sau-335-1  | NZ_KK099161.1 | - | 1644242 | 1644213 | RNA → | <a href="#">rpmE2 (PRK01678)</a> | <a href="#">Ribosomal_L31</a> | <a href="#">(pfam01197)</a> | → |
| Sau-3597-1 | NZ_KK095813.1 | - | 41430   | 41401   | RNA → | <a href="#">rpmE2 (PRK01678)</a> | <a href="#">Ribosomal_L31</a> | <a href="#">(pfam01197)</a> | → |
| Sau-117-1  | NZ_KK219060.1 | - | 1684    | 1655    | RNA → | <a href="#">rpmE2 (PRK01678)</a> | <a href="#">Ribosomal_L31</a> | <a href="#">(pfam01197)</a> | → |
| Sau-915-1  | NZ_KK096211.1 | - | 35013   | 34984   | RNA → | <a href="#">rpmE2 (PRK01678)</a> | <a href="#">Ribosomal_L31</a> | <a href="#">(pfam01197)</a> | → |
| Sau-414-1  | NZ_KK097788.1 | - | 56497   | 56468   | RNA → | <a href="#">rpmE2 (PRK01678)</a> | <a href="#">Ribosomal_L31</a> | <a href="#">(pfam01197)</a> | → |
| Sau-355-1  | NZ_KK099294.1 | - | 59967   | 59938   | RNA → | <a href="#">rpmE2 (PRK01678)</a> | <a href="#">Ribosomal_L31</a> | <a href="#">(pfam01197)</a> | → |
| Sau-641-1  | NZ_KK095880.1 | - | 34873   | 34844   | RNA → | <a href="#">rpmE2 (PRK01678)</a> | <a href="#">Ribosomal_L31</a> | <a href="#">(pfam01197)</a> | → |
| Sau-2937-1 | NZ_KK097015.1 | - | 55117   | 55088   | RNA → | <a href="#">rpmE2 (PRK01678)</a> | <a href="#">Ribosomal_L31</a> | <a href="#">(pfam01197)</a> | → |
| Sau-406-1  | NZ_KK099723.1 | - | 57585   | 57556   | RNA → | <a href="#">rpmE2 (PRK01678)</a> | <a href="#">Ribosomal_L31</a> | <a href="#">(pfam01197)</a> | → |
| Sau-775-1  | NZ_KK096138.1 | - | 55250   | 55221   | RNA → | <a href="#">rpmE2 (PRK01678)</a> | <a href="#">Ribosomal_L31</a> | <a href="#">(pfam01197)</a> | → |
| Sau-272-1  | NZ_KK223341.1 | - | 26024   | 25995   | RNA → | <a href="#">rpmE2 (PRK01678)</a> | <a href="#">Ribosomal_L31</a> | <a href="#">(pfam01197)</a> | → |
| Sau-591-1  | NZ_KK099825.1 | - | 107062  | 107033  | RNA → | <a href="#">rpmE2 (PRK01678)</a> | <a href="#">Ribosomal_L31</a> | <a href="#">(pfam01197)</a> | → |
| Sau-426-1  | NZ_KK097878.1 | - | 56763   | 56734   | RNA → | <a href="#">rpmE2 (PRK01678)</a> | <a href="#">Ribosomal_L31</a> | <a href="#">(pfam01197)</a> | → |
| Sau-358-1  | NZ_KK099312.1 | - | 173069  | 173040  | RNA → | <a href="#">rpmE2 (PRK01678)</a> | <a href="#">Ribosomal_L31</a> | <a href="#">(pfam01197)</a> | → |
| Sau-386-1  | NZ_KK099532.1 | - | 59566   | 59537   | RNA → | <a href="#">rpmE2 (PRK01678)</a> | <a href="#">Ribosomal_L31</a> | <a href="#">(pfam01197)</a> | → |
| Sau-2637-1 | NZ_KK224655.1 | - | 26024   | 25995   | RNA → | <a href="#">rpmE2 (PRK01678)</a> | <a href="#">Ribosomal_L31</a> | <a href="#">(pfam01197)</a> | → |
| Sau-154-1  | NZ_KK220279.1 | - | 56395   | 56366   | RNA → | <a href="#">rpmE2 (PRK01678)</a> | <a href="#">Ribosomal_L31</a> | <a href="#">(pfam01197)</a> | → |
| Sau-970-1  | NZ_KK094165.1 | - | 34940   | 34911   | RNA → | <a href="#">rpmE2 (PRK01678)</a> | <a href="#">Ribosomal_L31</a> | <a href="#">(pfam01197)</a> | → |
| Sau-458-1  | NZ_KK098272.1 | - | 61690   | 61661   | RNA → | <a href="#">rpmE2 (PRK01678)</a> | <a href="#">Ribosomal_L31</a> | <a href="#">(pfam01197)</a> | → |
| Sau-125-1  | NZ_KK219385.1 | - | 54858   | 54829   | RNA → | <a href="#">rpmE2 (PRK01678)</a> | <a href="#">Ribosomal_L31</a> | <a href="#">(pfam01197)</a> | → |
| Sau-2507-1 | NZ_KK094656.1 | - | 34872   | 34843   | RNA → | <a href="#">rpmE2 (PRK01678)</a> | <a href="#">Ribosomal_L31</a> | <a href="#">(pfam01197)</a> | → |
| Sau-362-1  | NZ_KK099351.1 | - | 233436  | 233407  | RNA → | <a href="#">rpmE2 (PRK01678)</a> | <a href="#">Ribosomal_L31</a> | <a href="#">(pfam01197)</a> | → |
| Sau-449-1  | NZ_KK098183.1 | - | 1089082 | 1089053 | RNA → | <a href="#">rpmE2 (PRK01678)</a> | <a href="#">Ribosomal_L31</a> | <a href="#">(pfam01197)</a> | → |
| Sau-367-1  | NZ_KK099388.1 | - | 57279   | 57250   | RNA → | <a href="#">rpmE2 (PRK01678)</a> | <a href="#">Ribosomal_L31</a> | <a href="#">(pfam01197)</a> | → |
| Sau-3070-1 | NZ_KK226556.1 | - | 56354   | 56325   | RNA → | <a href="#">rpmE2 (PRK01678)</a> | <a href="#">Ribosomal_L31</a> | <a href="#">(pfam01197)</a> | → |
| Sau-309-1  | NZ_KK223593.1 | - | 29633   | 29604   | RNA → | <a href="#">rpmE2 (PRK01678)</a> | <a href="#">Ribosomal_L31</a> | <a href="#">(pfam01197)</a> | → |
| Sau-2209-1 | NZ_KK094375.1 | - | 34873   | 34844   | RNA → | <a href="#">rpmE2 (PRK01678)</a> | <a href="#">Ribosomal_L31</a> | <a href="#">(pfam01197)</a> | → |
| Sau-383-1  | NZ_KK099521.1 | - | 462571  | 462542  | RNA → | <a href="#">rpmE2 (PRK01678)</a> | <a href="#">Ribosomal_L31</a> | <a href="#">(pfam01197)</a> | → |
| Sau-473-1  | NZ_KK098455.1 | - | 57586   | 57557   | RNA → | <a href="#">rpmE2 (PRK01678)</a> | <a href="#">Ribosomal_L31</a> | <a href="#">(pfam01197)</a> | → |
| Sau-133-1  | NZ_KK219580.1 | - | 56395   | 56366   | RNA → | <a href="#">rpmE2 (PRK01678)</a> | <a href="#">Ribosomal_L31</a> | <a href="#">(pfam01197)</a> | → |
| Sau-496-1  | NZ_KK098769.1 | - | 108030  | 108001  | RNA → | <a href="#">rpmE2 (PRK01678)</a> | <a href="#">Ribosomal_L31</a> | <a href="#">(pfam01197)</a> | → |
| Sau-196-1  | NZ_KK221721.1 | - | 26024   | 25995   | RNA → | <a href="#">rpmE2 (PRK01678)</a> | <a href="#">Ribosomal_L31</a> | <a href="#">(pfam01197)</a> | → |
| Sau-843-1  | NZ_KK223787.1 | - | 54494   | 54465   | RNA → | <a href="#">rpmE2 (PRK01678)</a> | <a href="#">Ribosomal_L31</a> | <a href="#">(pfam01197)</a> | → |
| Sau-219-1  | NZ_KK22532.1  | - | 26024   | 25995   | RNA → | <a href="#">rpmE2 (PRK01678)</a> | <a href="#">Ribosomal_L31</a> | <a href="#">(pfam01197)</a> | → |
| Sau-609-1  | NZ_KK223686.1 | - | 56439   | 56410   | RNA → | <a href="#">rpmE2 (PRK01678)</a> | <a href="#">Ribosomal_L31</a> | <a href="#">(pfam01197)</a> | → |
| Sau-404-1  | NZ_KK099699.1 | - | 118463  | 118434  | RNA → | <a href="#">rpmE2 (PRK01678)</a> | <a href="#">Ribosomal_L31</a> | <a href="#">(pfam01197)</a> | → |
| Sau-2714-1 | NZ_KK225547.1 | - | 26024   | 25995   | RNA → | <a href="#">rpmE2 (PRK01678)</a> | <a href="#">Ribosomal_L31</a> | <a href="#">(pfam01197)</a> | → |
| Sau-375-1  | NZ_KK099461.1 | - | 1319543 | 1319514 | RNA → | <a href="#">rpmE2 (PRK01678)</a> | <a href="#">Ribosomal_L31</a> | <a href="#">(pfam01197)</a> | → |

|            |               |   |         |         |                                                   |
|------------|---------------|---|---------|---------|---------------------------------------------------|
| Sau-3554-1 | NZ_KK095573.1 | - | 56893   | 56864   | RNA → rpmE2 (PRK01678)Ribosomal_L31 (pfam01197) → |
| Sau-3624-1 | NZ_KK097427.1 | - | 34913   | 34884   | RNA → rpmE2 (PRK01678)Ribosomal_L31 (pfam01197) → |
| Sau-2689-1 | NZ_KK224908.1 | - | 26024   | 25995   | RNA → rpmE2 (PRK01678)Ribosomal_L31 (pfam01197) → |
| Sau-3059-1 | NZ_KK226275.1 | - | 56395   | 56366   | RNA → rpmE2 (PRK01678)Ribosomal_L31 (pfam01197) → |
| Sau-869-1  | NZ_KK223977.1 | - | 56305   | 56276   | RNA → rpmE2 (PRK01678)Ribosomal_L31 (pfam01197) → |
| Sau-2952-1 | NZ_KK095283.1 | - | 55307   | 55278   | RNA → rpmE2 (PRK01678)Ribosomal_L31 (pfam01197) → |
| Sau-161-1  | NZ_KK220557.1 | - | 56395   | 56366   | RNA → rpmE2 (PRK01678)Ribosomal_L31 (pfam01197) → |
| Sau-593-1  | NZ_KK099779.1 | - | 56232   | 56203   | RNA → rpmE2 (PRK01678)Ribosomal_L31 (pfam01197) → |
| Sau-676-1  | NZ_KK095985.1 | - | 55117   | 55088   | RNA → rpmE2 (PRK01678)Ribosomal_L31 (pfam01197) → |
| Sau-169-1  | NZ_KK220854.1 | - | 2211    | 2182    | RNA → rpmE2 (PRK01678)Ribosomal_L31 (pfam01197) → |
| Sau-368-1  | NZ_KK099392.1 | - | 459748  | 459719  | RNA → rpmE2 (PRK01678)Ribosomal_L31 (pfam01197) → |
| Sau-590-1  | NZ_KK099840.1 | - | 59481   | 59452   | RNA → rpmE2 (PRK01678)Ribosomal_L31 (pfam01197) → |
| Sau-208-1  | NZ_KK222133.1 | - | 26024   | 25995   | RNA → rpmE2 (PRK01678)Ribosomal_L31 (pfam01197) → |
| Sau-480-1  | NZ_KK098543.1 | - | 56762   | 56733   | RNA → rpmE2 (PRK01678)Ribosomal_L31 (pfam01197) → |
| Sau-88-1   | NZ_KK218170.1 | - | 54759   | 54730   | RNA → rpmE2 (PRK01678)Ribosomal_L31 (pfam01197) → |
| Sau-451-1  | NZ_KK098208.1 | - | 56763   | 56734   | RNA → rpmE2 (PRK01678)Ribosomal_L31 (pfam01197) → |
| Sau-456-1  | NZ_KK098255.1 | - | 467917  | 467888  | RNA → rpmE2 (PRK01678)Ribosomal_L31 (pfam01197) → |
| Sau-350-1  | NZ_KK099258.1 | - | 459805  | 459776  | RNA → rpmE2 (PRK01678)Ribosomal_L31 (pfam01197) → |
| Sau-2953-1 | NZ_KK095290.1 | - | 55137   | 55108   | RNA → rpmE2 (PRK01678)Ribosomal_L31 (pfam01197) → |
| Sau-370-1  | NZ_KK099415.1 | - | 57012   | 56983   | RNA → rpmE2 (PRK01678)Ribosomal_L31 (pfam01197) → |
| Sau-460-1  | NZ_KK098302.1 | - | 434310  | 434281  | RNA → rpmE2 (PRK01678)Ribosomal_L31 (pfam01197) → |
| Sau-261-1  | NZ_KK222954.1 | - | 26024   | 25995   | RNA → rpmE2 (PRK01678)Ribosomal_L31 (pfam01197) → |
| Sau-441-1  | NZ_KK098077.1 | - | 238988  | 238959  | RNA → rpmE2 (PRK01678)Ribosomal_L31 (pfam01197) → |
| Sau-377-1  | NZ_KK099474.1 | - | 57059   | 57030   | RNA → rpmE2 (PRK01678)Ribosomal_L31 (pfam01197) → |
| Sau-91-1   | NZ_KK218289.1 | - | 26024   | 25995   | RNA → rpmE2 (PRK01678)Ribosomal_L31 (pfam01197) → |
| Sau-193-1  | NZ_KK221644.1 | - | 26024   | 25995   | RNA → rpmE2 (PRK01678)Ribosomal_L31 (pfam01197) → |
| Sau-157-1  | NZ_KK220407.1 | - | 56439   | 56410   | RNA → rpmE2 (PRK01678)Ribosomal_L31 (pfam01197) → |
| Sau-421-1  | NZ_KK097837.1 | - | 246307  | 246278  | RNA → rpmE2 (PRK01678)Ribosomal_L31 (pfam01197) → |
| Sau-127-1  | NZ_KK219466.1 | - | 54814   | 54785   | RNA → rpmE2 (PRK01678)Ribosomal_L31 (pfam01197) → |
| Sau-434-1  | NZ_KK097963.1 | - | 399430  | 399401  | RNA → rpmE2 (PRK01678)Ribosomal_L31 (pfam01197) → |
| Sau-393-1  | NZ_KK099625.1 | - | 1650562 | 1650533 | RNA → rpmE2 (PRK01678)Ribosomal_L31 (pfam01197) → |
| Sau-311-1  | NZ_KK099010.1 | + | 55670   | 55699   | RNA → rpmE2 (PRK01678)Ribosomal_L31 (pfam01197) → |
| Sau-342-1  | NZ_KK099199.1 | - | 59941   | 59912   | RNA → rpmE2 (PRK01678)Ribosomal_L31 (pfam01197) → |
| Sau-388-1  | NZ_KK099558.1 | - | 63060   | 63031   | RNA → rpmE2 (PRK01678)Ribosomal_L31 (pfam01197) → |
| Sau-179-1  | NZ_KK221204.1 | - | 1732    | 1703    | RNA → rpmE2 (PRK01678)Ribosomal_L31 (pfam01197) → |
| Sau-373-1  | NZ_KK099448.1 | - | 1640441 | 1640412 | RNA → rpmE2 (PRK01678)Ribosomal_L31 (pfam01197) → |
| Sau-2465-1 | NZ_KK094548.1 | - | 56894   | 56865   | RNA → rpmE2 (PRK01678)Ribosomal_L31 (pfam01197) → |
| Sau-104-1  | NZ_KK218547.1 | - | 56439   | 56410   | RNA → rpmE2 (PRK01678)Ribosomal_L31 (pfam01197) → |
| Sau-109-1  | NZ_KK218732.1 | - | 26024   | 25995   | RNA → rpmE2 (PRK01678)Ribosomal_L31 (pfam01197) → |
| Sau-482-1  | NZ_KK098582.1 | - | 56588   | 56559   | RNA → rpmE2 (PRK01678)Ribosomal_L31 (pfam01197) → |
| Sau-432-1  | NZ_KK097945.1 | - | 372981  | 372952  | RNA → rpmE2 (PRK01678)Ribosomal_L31 (pfam01197) → |
| Sau-470-1  | NZ_KK098421.1 | - | 109456  | 109427  | RNA → rpmE2 (PRK01678)Ribosomal_L31 (pfam01197) → |
| Sau-378-1  | NZ_KK099485.1 | - | 466934  | 466905  | RNA → rpmE2 (PRK01678)Ribosomal_L31 (pfam01197) → |
| Sau-397-1  | NZ_KK099653.1 | - | 1568744 | 1568715 | RNA → rpmE2 (PRK01678)Ribosomal_L31 (pfam01197) → |
| Sau-580-1  | NZ_KK098940.1 | - | 59584   | 59555   | RNA → rpmE2 (PRK01678)Ribosomal_L31 (pfam01197) → |
| Sau-596-1  | NZ_KK099745.1 | - | 59482   | 59453   | RNA → rpmE2 (PRK01678)Ribosomal_L31 (pfam01197) → |
| Sau-135-1  | NZ_KK219653.1 | - | 54858   | 54829   | RNA → rpmE2 (PRK01678)Ribosomal_L31 (pfam01197) → |
| Sau-452-1  | NZ_KK098220.1 | + | 681871  | 681900  | RNA → rpmE2 (PRK01678)Ribosomal_L31 (pfam01197) → |
| Sau-3108-1 | NZ_KK227993.1 | - | 26024   | 25995   | RNA → rpmE2 (PRK01678)Ribosomal_L31 (pfam01197) → |
| Sau-463-1  | NZ_KK098335.1 | - | 58446   | 58417   | RNA → rpmE2 (PRK01678)Ribosomal_L31 (pfam01197) → |
| Sau-131-1  | NZ_KK219851.1 | - | 54858   | 54829   | RNA → rpmE2 (PRK01678)Ribosomal_L31 (pfam01197) → |
| Sau-1087-1 | NZ_KK094299.1 | - | 34913   | 34884   | RNA → rpmE2 (PRK01678)Ribosomal_L31 (pfam01197) → |

|            |               |   |         |         |                                                   |
|------------|---------------|---|---------|---------|---------------------------------------------------|
| Sau-3096-1 | NZ_KK227523.1 | - | 26024   | 25995   | RNA → rpmE2 (PRK01678)Ribosomal_L31 (pfam01197) → |
| Sau-1086-1 | NZ_KK094251.1 | - | 34873   | 34844   | RNA → rpmE2 (PRK01678)Ribosomal_L31 (pfam01197) → |
| Sau-2450-1 | NZ_KK094446.1 | - | 34871   | 34842   | RNA → rpmE2 (PRK01678)Ribosomal_L31 (pfam01197) → |
| Sau-431-1  | NZ_KK097940.1 | - | 61789   | 61760   | RNA → rpmE2 (PRK01678)Ribosomal_L31 (pfam01197) → |
| Sau-3661-1 | NZ_KK097614.1 | - | 34872   | 34843   | RNA → rpmE2 (PRK01678)Ribosomal_L31 (pfam01197) → |
| Sau-3091-1 | NZ_KK227403.1 | - | 56305   | 56276   | RNA → rpmE2 (PRK01678)Ribosomal_L31 (pfam01197) → |
| Sau-164-1  | NZ_KK220717.1 | - | 26024   | 25995   | RNA → rpmE2 (PRK01678)Ribosomal_L31 (pfam01197) → |
| Sau-3098-1 | NZ_KK227605.1 | - | 26024   | 25995   | RNA → rpmE2 (PRK01678)Ribosomal_L31 (pfam01197) → |
| Sau-181-1  | NZ_KK221262.1 | - | 26024   | 25995   | RNA → rpmE2 (PRK01678)Ribosomal_L31 (pfam01197) → |
| Sau-866-1  | NZ_KK223867.1 | - | 26024   | 25995   | RNA → rpmE2 (PRK01678)Ribosomal_L31 (pfam01197) → |
| Sau-3103-1 | NZ_KK227783.1 | - | 26024   | 25995   | RNA → rpmE2 (PRK01678)Ribosomal_L31 (pfam01197) → |
| Sau-199-1  | NZ_KK221848.1 | - | 56395   | 56366   | RNA → rpmE2 (PRK01678)Ribosomal_L31 (pfam01197) → |
| Sau-871-1  | NZ_KK224053.1 | - | 15457   | 15428   | RNA → rpmE2 (PRK01678)Ribosomal_L31 (pfam01197) → |
| Sau-3114-1 | NZ_KK228187.1 | - | 26024   | 25995   | RNA → rpmE2 (PRK01678)Ribosomal_L31 (pfam01197) → |
| Sau-487-1  | NZ_KK098646.1 | - | 404926  | 404897  | RNA → rpmE2 (PRK01678)Ribosomal_L31 (pfam01197) → |
| Sau-3106-1 | NZ_KK227907.1 | - | 56439   | 56410   | RNA → rpmE2 (PRK01678)Ribosomal_L31 (pfam01197) → |
| Sau-439-1  | NZ_KK098013.1 | - | 56745   | 56716   | RNA → rpmE2 (PRK01678)Ribosomal_L31 (pfam01197) → |
| Sau-3117-1 | NZ_KK228324.1 | - | 26024   | 25995   | RNA → rpmE2 (PRK01678)Ribosomal_L31 (pfam01197) → |
| Sau-3131-1 | NZ_KK228748.1 | - | 26024   | 25995   | RNA → rpmE2 (PRK01678)Ribosomal_L31 (pfam01197) → |
| Sau-467-1  | NZ_KK098392.1 | - | 56588   | 56559   | RNA → rpmE2 (PRK01678)Ribosomal_L31 (pfam01197) → |
| Sau-475-1  | NZ_KK098491.1 | - | 58997   | 58968   | RNA → rpmE2 (PRK01678)Ribosomal_L31 (pfam01197) → |
| Sau-3518-1 | NZ_KK095445.1 | - | 34913   | 34884   | RNA → rpmE2 (PRK01678)Ribosomal_L31 (pfam01197) → |
| Sau-332-1  | NZ_KK099134.1 | - | 56588   | 56559   | RNA → rpmE2 (PRK01678)Ribosomal_L31 (pfam01197) → |
| Sau-485-1  | NZ_KK098623.1 | - | 58248   | 58219   | RNA → rpmE2 (PRK01678)Ribosomal_L31 (pfam01197) → |
| Sau-166-1  | NZ_KK220803.1 | - | 26185   | 26156   | RNA → rpmE2 (PRK01678)Ribosomal_L31 (pfam01197) → |
| Sau-579-1  | NZ_KK099886.1 | - | 237855  | 237826  | RNA → rpmE2 (PRK01678)Ribosomal_L31 (pfam01197) → |
| Sau-417-1  | NZ_KK097808.1 | - | 1414448 | 1414419 | RNA → rpmE2 (PRK01678)Ribosomal_L31 (pfam01197) → |
| Sau-577-1  | NZ_KK099906.1 | - | 58726   | 58697   | RNA → rpmE2 (PRK01678)Ribosomal_L31 (pfam01197) → |
| Sau-582-1  | NZ_KK098916.1 | - | 337935  | 337906  | RNA → rpmE2 (PRK01678)Ribosomal_L31 (pfam01197) → |
| Sau-348-1  | NZ_KK099241.1 | - | 119478  | 119449  | RNA → rpmE2 (PRK01678)Ribosomal_L31 (pfam01197) → |
| Sau-2456-1 | NZ_KK038959.1 | - | 233095  | 233066  | RNA → rpmE2 (PRK01678)Ribosomal_L31 (pfam01197) → |
| Sau-3139-1 | NZ_KK229019.1 | - | 53234   | 53205   | RNA → rpmE2 (PRK01678)Ribosomal_L31 (pfam01197) → |
| Sau-106-1  | NZ_KK218624.1 | - | 56439   | 56410   | RNA → rpmE2 (PRK01678)Ribosomal_L31 (pfam01197) → |
| Sau-3101-1 | NZ_KK227710.1 | - | 56439   | 56410   | RNA → rpmE2 (PRK01678)Ribosomal_L31 (pfam01197) → |
| Sau-2208-1 | NZ_KK039024.1 | - | 36293   | 36264   | RNA → rpmE2 (PRK01678)Ribosomal_L31 (pfam01197) → |
| Sau-254-1  | NZ_KK222726.1 | - | 26024   | 25995   | RNA → rpmE2 (PRK01678)Ribosomal_L31 (pfam01197) → |
| Sau-3124-1 | NZ_KK228551.1 | - | 26024   | 25995   | RNA → rpmE2 (PRK01678)Ribosomal_L31 (pfam01197) → |
| Sau-1079-1 | NZ_KK039281.1 | - | 34793   | 34764   | RNA → rpmE2 (PRK01678)Ribosomal_L31 (pfam01197) → |
| Sau-318-1  | NZ_KK099065.1 | - | 56568   | 56539   | RNA → rpmE2 (PRK01678)Ribosomal_L31 (pfam01197) → |
| Sau-3144-1 | NZ_KK229110.1 | - | 56390   | 56361   | RNA → rpmE2 (PRK01678)Ribosomal_L31 (pfam01197) → |
| Sau-735-1  | NZ_KK039382.1 | - | 34970   | 34941   | RNA → rpmE2 (PRK01678)Ribosomal_L31 (pfam01197) → |
| Sau-120-1  | NZ_KK219160.1 | - | 26024   | 25995   | RNA → rpmE2 (PRK01678)Ribosomal_L31 (pfam01197) → |
| Sau-899-1  | NZ_KK039331.1 | - | 56994   | 56965   | RNA → rpmE2 (PRK01678)Ribosomal_L31 (pfam01197) → |
| Sau-3620-1 | NZ_KK039998.1 | - | 70352   | 70323   | RNA → rpmE2 (PRK01678)Ribosomal_L31 (pfam01197) → |
| Sau-352-1  | NZ_KK099276.1 | - | 57586   | 57557   | RNA → rpmE2 (PRK01678)Ribosomal_L31 (pfam01197) → |
| Sau-692-1  | NZ_KK039589.1 | - | 34817   | 34788   | RNA → rpmE2 (PRK01678)Ribosomal_L31 (pfam01197) → |
| Sau-3502-1 | NZ_KK040133.1 | - | 34817   | 34788   | RNA → rpmE2 (PRK01678)Ribosomal_L31 (pfam01197) → |
| Sau-691-1  | NZ_KK039640.1 | - | 34873   | 34844   | RNA → rpmE2 (PRK01678)Ribosomal_L31 (pfam01197) → |
| Sau-3626-1 | NZ_KK039943.1 | - | 34873   | 34844   | RNA → rpmE2 (PRK01678)Ribosomal_L31 (pfam01197) → |
| Sau-345-1  | NZ_KK099219.1 | - | 461736  | 461707  | RNA → rpmE2 (PRK01678)Ribosomal_L31 (pfam01197) → |
| Sau-3494-1 | NZ_KK040167.1 | - | 34872   | 34843   | RNA → rpmE2 (PRK01678)Ribosomal_L31 (pfam01197) → |
| Sau-2290-1 | NZ_KI972513.1 | - | 476429  | 476400  | RNA → rpmE2 (PRK01678)Ribosomal_L31 (pfam01197) → |



|            |                   |   |         |         |       |                                             |
|------------|-------------------|---|---------|---------|-------|---------------------------------------------|
| Sau-401-1  | NZ_KK099682.1     | - | 1641421 | 1641392 | RNA → | rpmE2 (PRK01678)Ribosomal_L31 (pfam01197) → |
| Sau-3121-1 | NZ_KK228395.1     | - | 56354   | 56325   | RNA → | rpmE2 (PRK01678)Ribosomal_L31 (pfam01197) → |
| Sau-1083-1 | NZ_KK039143.1     | - | 34873   | 34844   | RNA → | rpmE2 (PRK01678)Ribosomal_L31 (pfam01197) → |
| Sau-178-1  | NZ_KK221159.1     | - | 56395   | 56366   | RNA → | rpmE2 (PRK01678)Ribosomal_L31 (pfam01197) → |
| Sau-3152-1 | NZ_KK229299.1     | - | 26024   | 25995   | RNA → | rpmE2 (PRK01678)Ribosomal_L31 (pfam01197) → |
| Sau-729-1  | NZ_KK039514.1     | - | 34913   | 34884   | RNA → | rpmE2 (PRK01678)Ribosomal_L31 (pfam01197) → |
| Sau-3111-1 | NZ_KK228117.1     | - | 26024   | 25995   | RNA → | rpmE2 (PRK01678)Ribosomal_L31 (pfam01197) → |
| Sau-266-1  | NZ_KK223125.1     | - | 56439   | 56410   | RNA → | rpmE2 (PRK01678)Ribosomal_L31 (pfam01197) → |
| Sau-1081-1 | NZ_KK039198.1     | - | 34873   | 34844   | RNA → | rpmE2 (PRK01678)Ribosomal_L31 (pfam01197) → |
| Sau-3638-1 | NZ_KK039930.1     | - | 56893   | 56864   | RNA → | rpmE2 (PRK01678)Ribosomal_L31 (pfam01197) → |
| Sau-201-1  | NZ_KK221926.1     | - | 26024   | 25995   | RNA → | rpmE2 (PRK01678)Ribosomal_L31 (pfam01197) → |
| Sau-675-1  | NZ_KK039788.1     | - | 56894   | 56865   | RNA → | rpmE2 (PRK01678)Ribosomal_L31 (pfam01197) → |
| Sau-3602-1 | NZ_KK040125.1     | - | 56894   | 56865   | RNA → | rpmE2 (PRK01678)Ribosomal_L31 (pfam01197) → |
| Sau-928-1  | NZ_KK039302.1     | - | 34817   | 34788   | RNA → | rpmE2 (PRK01678)Ribosomal_L31 (pfam01197) → |
| Sau-213-1  | NZ_KK222349.1     | - | 56439   | 56410   | RNA → | rpmE2 (PRK01678)Ribosomal_L31 (pfam01197) → |
| Sau-690-1  | NZ_KK039683.1     | - | 34817   | 34788   | RNA → | rpmE2 (PRK01678)Ribosomal_L31 (pfam01197) → |
| Sau-85-1   | NZ_KK218112.1     | - | 26024   | 25995   | RNA → | rpmE2 (PRK01678)Ribosomal_L31 (pfam01197) → |
| Sau-2510-1 | NZ_KK040956.1     | - | 34913   | 34884   | RNA → | rpmE2 (PRK01678)Ribosomal_L31 (pfam01197) → |
| Sau-4040-1 | NZ_ABWS01000010.1 | - | 56850   | 56821   | RNA → | rpmE2 (PRK01678)Ribosomal_L31 (pfam01197) → |
| Sau-4021-1 | NZ_AFTT01000003.1 | - | 54788   | 54759   | RNA → | rpmE2 (PRK01678)Ribosomal_L31 (pfam01197) → |
| Sau-4026-1 | NZ_AFNO01000007.1 | - | 54488   | 54459   | RNA → | rpmE2 (PRK01678)Ribosomal_L31 (pfam01197) → |
| Sau-4011-1 | NZ_AFTO01000031.1 | - | 25119   | 25090   | RNA → | rpmE2 (PRK01678)Ribosomal_L31 (pfam01197) → |
| Sau-4018-1 | NZ_AFTS01000008.1 | - | 54482   | 54453   | RNA → | rpmE2 (PRK01678)Ribosomal_L31 (pfam01197) → |
| Sau-4007-1 | NZ_AGTU01000208.1 | + | 6464    | 6493    | RNA → | rpmE2 (PRK01678)Ribosomal_L31 (pfam01197) → |
| Sau-4022-1 | NZ_AFTU01000056.1 | - | 54711   | 54682   | RNA → | rpmE2 (PRK01678)Ribosomal_L31 (pfam01197) → |
| Sau-3073-1 | NZ_KK226674.1     | - | 26024   | 25995   | RNA → | rpmE2 (PRK01678)Ribosomal_L31 (pfam01197) → |
| Sau-2697-1 | NZ_KK225236.1     | - | 25968   | 25939   | RNA → | rpmE2 (PRK01678)Ribosomal_L31 (pfam01197) → |
| Sau-454-1  | NZ_KK098243.1     | - | 56418   | 56389   | RNA → | rpmE2 (PRK01678)Ribosomal_L31 (pfam01197) → |
| Sau-3012-1 | NZ_KK226129.1     | - | 26024   | 25995   | RNA → | rpmE2 (PRK01678)Ribosomal_L31 (pfam01197) → |
| Sau-353-1  | NZ_KK099285.1     | - | 232864  | 232835  | RNA → | rpmE2 (PRK01678)Ribosomal_L31 (pfam01197) → |
| Sau-2677-1 | NZ_KK224759.1     | - | 56390   | 56361   | RNA → | rpmE2 (PRK01678)Ribosomal_L31 (pfam01197) → |
| Sau-437-1  | NZ_KK097990.1     | - | 467385  | 467356  | RNA → | rpmE2 (PRK01678)Ribosomal_L31 (pfam01197) → |
| Sau-159-1  | NZ_KK220472.1     | - | 18748   | 18719   | RNA → | rpmE2 (PRK01678)Ribosomal_L31 (pfam01197) → |
| Sau-491-1  | NZ_KK098694.1     | - | 1600347 | 1600318 | RNA → | rpmE2 (PRK01678)Ribosomal_L31 (pfam01197) → |
| Sau-403-1  | NZ_KK099696.1     | - | 57586   | 57557   | RNA → | rpmE2 (PRK01678)Ribosomal_L31 (pfam01197) → |
| Sau-259-1  | NZ_KK222863.1     | - | 56935   | 56906   | RNA → | rpmE2 (PRK01678)Ribosomal_L31 (pfam01197) → |
| Sau-3016-1 | NZ_KK226203.1     | - | 55550   | 55521   | RNA → | rpmE2 (PRK01678)Ribosomal_L31 (pfam01197) → |
| Sau-277-1  | NZ_KK223489.1     | - | 26024   | 25995   | RNA → | rpmE2 (PRK01678)Ribosomal_L31 (pfam01197) → |
| Sau-3064-1 | NZ_KK226405.1     | - | 26024   | 25995   | RNA → | rpmE2 (PRK01678)Ribosomal_L31 (pfam01197) → |
| Sau-141-1  | NZ_KK219948.1     | - | 54814   | 54785   | RNA → | rpmE2 (PRK01678)Ribosomal_L31 (pfam01197) → |
| Sau-993-1  | NZ_KK096312.1     | - | 56894   | 56865   | RNA → | rpmE2 (PRK01678)Ribosomal_L31 (pfam01197) → |
| Sau-1014-1 | NZ_KK096345.1     | - | 56790   | 56761   | RNA → | rpmE2 (PRK01678)Ribosomal_L31 (pfam01197) → |
| Sau-3066-1 | NZ_KK226495.1     | - | 56354   | 56325   | RNA → | rpmE2 (PRK01678)Ribosomal_L31 (pfam01197) → |
| Sau-322-1  | NZ_KK099076.1     | - | 1682860 | 1682831 | RNA → | rpmE2 (PRK01678)Ribosomal_L31 (pfam01197) → |
| Sau-2820-1 | NZ_KK225657.1     | - | 56395   | 56366   | RNA → | rpmE2 (PRK01678)Ribosomal_L31 (pfam01197) → |
| Sau-391-1  | NZ_KK099601.1     | - | 59482   | 59453   | RNA → | rpmE2 (PRK01678)Ribosomal_L31 (pfam01197) → |
| Sau-30-1   | NZ_GL397103.1     | - | 275482  | 275453  | RNA → | rpmE2 (PRK01678)Ribosomal_L31 (pfam01197) → |
| Sau-2936-1 | NZ_KK095262.1     | - | 34873   | 34844   | RNA → | rpmE2 (PRK01678)Ribosomal_L31 (pfam01197) → |
| Sau-2985-1 | NZ_KK095314.1     | - | 56790   | 56761   | RNA → | rpmE2 (PRK01678)Ribosomal_L31 (pfam01197) → |
| Sau-3530-1 | NZ_KK095505.1     | - | 25255   | 25226   | RNA → | rpmE2 (PRK01678)Ribosomal_L31 (pfam01197) → |
| Sau-3656-1 | NZ_KK093561.1     | - | 15617   | 15588   | RNA → | rpmE2 (PRK01678)Ribosomal_L31 (pfam01197) → |
| Sau-3581-1 | NZ_KK092334.1     | - | 25129   | 25100   | RNA → | rpmE2 (PRK01678)Ribosomal_L31 (pfam01197) → |

|            |               |   |         |         |                                                   |
|------------|---------------|---|---------|---------|---------------------------------------------------|
| Sau-3561-1 | NZ_KK095655.1 | - | 34913   | 34884   | RNA → rpmE2 (PRK01678)Ribosomal_L31 (pfam01197) → |
| Sau-3519-1 | NZ_KK097131.1 | - | 56994   | 56965   | RNA → rpmE2 (PRK01678)Ribosomal_L31 (pfam01197) → |
| Sau-3549-1 | NZ_KK097344.1 | - | 35013   | 34984   | RNA → rpmE2 (PRK01678)Ribosomal_L31 (pfam01197) → |
| Sau-3635-1 | NZ_KK097502.1 | - | 25255   | 25226   | RNA → rpmE2 (PRK01678)Ribosomal_L31 (pfam01197) → |
| Sau-3585-1 | NZ_KK095753.1 | - | 56992   | 56963   | RNA → rpmE2 (PRK01678)Ribosomal_L31 (pfam01197) → |
| Sau-3562-1 | NZ_KK095700.1 | - | 56894   | 56865   | RNA → rpmE2 (PRK01678)Ribosomal_L31 (pfam01197) → |
| Sau-3640-1 | NZ_KK097564.1 | - | 34873   | 34844   | RNA → rpmE2 (PRK01678)Ribosomal_L31 (pfam01197) → |
| Sau-2926-1 | NZ_KK095190.1 | - | 56893   | 56864   | RNA → rpmE2 (PRK01678)Ribosomal_L31 (pfam01197) → |
| Sau-2960-1 | NZ_KK095306.1 | - | 55166   | 55137   | RNA → rpmE2 (PRK01678)Ribosomal_L31 (pfam01197) → |
| Sau-3556-1 | NZ_KK095597.1 | - | 55082   | 55053   | RNA → rpmE2 (PRK01678)Ribosomal_L31 (pfam01197) → |
| Sau-3596-1 | NZ_KK095778.1 | - | 34913   | 34884   | RNA → rpmE2 (PRK01678)Ribosomal_L31 (pfam01197) → |
| Sau-2945-1 | NZ_KK097035.1 | - | 19182   | 19153   | RNA → rpmE2 (PRK01678)Ribosomal_L31 (pfam01197) → |
| Sau-3537-1 | NZ_KK097238.1 | - | 34873   | 34844   | RNA → rpmE2 (PRK01678)Ribosomal_L31 (pfam01197) → |
| Sau-3625-1 | NZ_KK097452.1 | - | 56894   | 56865   | RNA → rpmE2 (PRK01678)Ribosomal_L31 (pfam01197) → |
| Sau-626-1  | NZ_KK095848.1 | - | 55116   | 55087   | RNA → rpmE2 (PRK01678)Ribosomal_L31 (pfam01197) → |
| Sau-447-1  | NZ_KK098166.1 | - | 120192  | 120163  | RNA → rpmE2 (PRK01678)Ribosomal_L31 (pfam01197) → |
| Sau-628-1  | NZ_KK093018.1 | - | 34972   | 34943   | RNA → rpmE2 (PRK01678)Ribosomal_L31 (pfam01197) → |
| Sau-687-1  | NZ_KK093705.1 | - | 34872   | 34843   | RNA → rpmE2 (PRK01678)Ribosomal_L31 (pfam01197) → |
| Sau-652-1  | NZ_KK095905.1 | - | 56894   | 56865   | RNA → rpmE2 (PRK01678)Ribosomal_L31 (pfam01197) → |
| Sau-706-1  | NZ_KK096064.1 | - | 56894   | 56865   | RNA → rpmE2 (PRK01678)Ribosomal_L31 (pfam01197) → |
| Sau-448-1  | NZ_KK098177.1 | - | 36791   | 36762   | RNA → rpmE2 (PRK01678)Ribosomal_L31 (pfam01197) → |
| Sau-474-1  | NZ_KK098474.1 | - | 471096  | 471067  | RNA → rpmE2 (PRK01678)Ribosomal_L31 (pfam01197) → |
| Sau-614-1  | NZ_KK092835.1 | - | 34972   | 34943   | RNA → rpmE2 (PRK01678)Ribosomal_L31 (pfam01197) → |
| Sau-685-1  | NZ_KK093635.1 | - | 34756   | 34727   | RNA → rpmE2 (PRK01678)Ribosomal_L31 (pfam01197) → |
| Sau-709-1  | NZ_KK093823.1 | - | 56893   | 56864   | RNA → rpmE2 (PRK01678)Ribosomal_L31 (pfam01197) → |
| Sau-658-1  | NZ_KK093149.1 | - | 55082   | 55053   | RNA → rpmE2 (PRK01678)Ribosomal_L31 (pfam01197) → |
| Sau-430-1  | NZ_KK097929.1 | - | 1652335 | 1652306 | RNA → rpmE2 (PRK01678)Ribosomal_L31 (pfam01197) → |
| Sau-435-1  | NZ_KK097974.1 | - | 61771   | 61742   | RNA → rpmE2 (PRK01678)Ribosomal_L31 (pfam01197) → |
| Sau-440-1  | NZ_KK098041.1 | - | 56763   | 56734   | RNA → rpmE2 (PRK01678)Ribosomal_L31 (pfam01197) → |
| Sau-445-1  | NZ_KK098149.1 | - | 57586   | 57557   | RNA → rpmE2 (PRK01678)Ribosomal_L31 (pfam01197) → |
| Sau-450-1  | NZ_KK098195.1 | - | 57586   | 57557   | RNA → rpmE2 (PRK01678)Ribosomal_L31 (pfam01197) → |
| Sau-606-1  | NZ_KK098961.1 | - | 62155   | 62126   | RNA → rpmE2 (PRK01678)Ribosomal_L31 (pfam01197) → |
| Sau-438-1  | NZ_KK097995.1 | - | 466008  | 465979  | RNA → rpmE2 (PRK01678)Ribosomal_L31 (pfam01197) → |
| Sau-425-1  | NZ_KK097867.1 | - | 231594  | 231565  | RNA → rpmE2 (PRK01678)Ribosomal_L31 (pfam01197) → |
| Sau-443-1  | NZ_KK098104.1 | - | 469570  | 469541  | RNA → rpmE2 (PRK01678)Ribosomal_L31 (pfam01197) → |
| Sau-453-1  | NZ_KK098229.1 | - | 254240  | 254211  | RNA → rpmE2 (PRK01678)Ribosomal_L31 (pfam01197) → |
| Sau-459-1  | NZ_KK098290.1 | - | 56763   | 56734   | RNA → rpmE2 (PRK01678)Ribosomal_L31 (pfam01197) → |
| Sau-469-1  | NZ_KK098416.1 | - | 56419   | 56390   | RNA → rpmE2 (PRK01678)Ribosomal_L31 (pfam01197) → |
| Sau-479-1  | NZ_KK098532.1 | - | 1650917 | 1650888 | RNA → rpmE2 (PRK01678)Ribosomal_L31 (pfam01197) → |
| Sau-575-1  | NZ_KK099949.1 | - | 59485   | 59456   | RNA → rpmE2 (PRK01678)Ribosomal_L31 (pfam01197) → |
| Sau-703-1  | NZ_KK096018.1 | - | 54999   | 54970   | RNA → rpmE2 (PRK01678)Ribosomal_L31 (pfam01197) → |
| Sau-478-1  | NZ_KK098526.1 | - | 784642  | 784613  | RNA → rpmE2 (PRK01678)Ribosomal_L31 (pfam01197) → |
| Sau-483-1  | NZ_KK098587.1 | - | 826998  | 826969  | RNA → rpmE2 (PRK01678)Ribosomal_L31 (pfam01197) → |
| Sau-484-1  | NZ_KK098605.1 | - | 56763   | 56734   | RNA → rpmE2 (PRK01678)Ribosomal_L31 (pfam01197) → |
| Sau-490-1  | NZ_KK098680.1 | - | 56763   | 56734   | RNA → rpmE2 (PRK01678)Ribosomal_L31 (pfam01197) → |
| Sau-607-1  | NZ_KK099001.1 | - | 976089  | 976060  | RNA → rpmE2 (PRK01678)Ribosomal_L31 (pfam01197) → |
| Sau-495-1  | NZ_KK098762.1 | - | 61689   | 61660   | RNA → rpmE2 (PRK01678)Ribosomal_L31 (pfam01197) → |
| Sau-585-1  | NZ_KK098836.1 | - | 60916   | 60887   | RNA → rpmE2 (PRK01678)Ribosomal_L31 (pfam01197) → |
| Sau-728-1  | NZ_KK096097.1 | - | 34913   | 34884   | RNA → rpmE2 (PRK01678)Ribosomal_L31 (pfam01197) → |
| Sau-455-1  | NZ_KK098247.1 | - | 57585   | 57556   | RNA → rpmE2 (PRK01678)Ribosomal_L31 (pfam01197) → |
| Sau-461-1  | NZ_KK098312.1 | - | 1097381 | 1097352 | RNA → rpmE2 (PRK01678)Ribosomal_L31 (pfam01197) → |
| Sau-466-1  | NZ_KK098379.1 | - | 56763   | 56734   | RNA → rpmE2 (PRK01678)Ribosomal_L31 (pfam01197) → |



|            |               |   |         |         |       |                                  |                               |                             |   |
|------------|---------------|---|---------|---------|-------|----------------------------------|-------------------------------|-----------------------------|---|
| Sau-471-1  | NZ_KK098433.1 | - | 1674196 | 1674167 | RNA → | <a href="#">rpmE2 (PRK01678)</a> | <a href="#">Ribosomal_L31</a> | <a href="#">(pfam01197)</a> | → |
| Sau-481-1  | NZ_KK098572.1 | - | 1944061 | 1944032 | RNA → | <a href="#">rpmE2 (PRK01678)</a> | <a href="#">Ribosomal_L31</a> | <a href="#">(pfam01197)</a> | → |
| Sau-486-1  | NZ_KK098636.1 | - | 488835  | 488806  | RNA → | <a href="#">rpmE2 (PRK01678)</a> | <a href="#">Ribosomal_L31</a> | <a href="#">(pfam01197)</a> | → |
| Sau-492-1  | NZ_KK098700.1 | - | 56416   | 56387   | RNA → | <a href="#">rpmE2 (PRK01678)</a> | <a href="#">Ribosomal_L31</a> | <a href="#">(pfam01197)</a> | → |
| Sau-592-1  | NZ_KK099811.1 | - | 58064   | 58035   | RNA → | <a href="#">rpmE2 (PRK01678)</a> | <a href="#">Ribosomal_L31</a> | <a href="#">(pfam01197)</a> | → |
| Sau-586-1  | NZ_KK098796.1 | - | 59482   | 59453   | RNA → | <a href="#">rpmE2 (PRK01678)</a> | <a href="#">Ribosomal_L31</a> | <a href="#">(pfam01197)</a> | → |
| Sau-581-1  | NZ_KK098920.1 | - | 59482   | 59453   | RNA → | <a href="#">rpmE2 (PRK01678)</a> | <a href="#">Ribosomal_L31</a> | <a href="#">(pfam01197)</a> | → |
| Sau-733-1  | NZ_KK093853.1 | - | 34873   | 34844   | RNA → | <a href="#">rpmE2 (PRK01678)</a> | <a href="#">Ribosomal_L31</a> | <a href="#">(pfam01197)</a> | → |
| Sau-2211-1 | NZ_KK094430.1 | - | 56434   | 56405   | RNA → | <a href="#">rpmE2 (PRK01678)</a> | <a href="#">Ribosomal_L31</a> | <a href="#">(pfam01197)</a> | → |
| Sau-2837-1 | NZ_KK095014.1 | - | 56793   | 56764   | RNA → | <a href="#">rpmE2 (PRK01678)</a> | <a href="#">Ribosomal_L31</a> | <a href="#">(pfam01197)</a> | → |
| Sau-2916-1 | NZ_KK095141.1 | - | 34872   | 34843   | RNA → | <a href="#">rpmE2 (PRK01678)</a> | <a href="#">Ribosomal_L31</a> | <a href="#">(pfam01197)</a> | → |
| Sau-1091-1 | NZ_KK096393.1 | - | 35074   | 35045   | RNA → | <a href="#">rpmE2 (PRK01678)</a> | <a href="#">Ribosomal_L31</a> | <a href="#">(pfam01197)</a> | → |
| Sau-415-1  | NZ_KK097796.1 | - | 1631360 | 1631331 | RNA → | <a href="#">rpmE2 (PRK01678)</a> | <a href="#">Ribosomal_L31</a> | <a href="#">(pfam01197)</a> | → |
| Sau-2560-1 | NZ_KK096785.1 | - | 55181   | 55152   | RNA → | <a href="#">rpmE2 (PRK01678)</a> | <a href="#">Ribosomal_L31</a> | <a href="#">(pfam01197)</a> | → |
| Sau-314-1  | NZ_KK099035.1 | - | 60257   | 60228   | RNA → | <a href="#">rpmE2 (PRK01678)</a> | <a href="#">Ribosomal_L31</a> | <a href="#">(pfam01197)</a> | → |
| Sau-1070-1 | NZ_KK094214.1 | - | 34874   | 34845   | RNA → | <a href="#">rpmE2 (PRK01678)</a> | <a href="#">Ribosomal_L31</a> | <a href="#">(pfam01197)</a> | → |
| Sau-319-1  | NZ_KK099068.1 | - | 1269188 | 1269159 | RNA → | <a href="#">rpmE2 (PRK01678)</a> | <a href="#">Ribosomal_L31</a> | <a href="#">(pfam01197)</a> | → |
| Sau-340-1  | NZ_KK099188.1 | - | 57320   | 57291   | RNA → | <a href="#">rpmE2 (PRK01678)</a> | <a href="#">Ribosomal_L31</a> | <a href="#">(pfam01197)</a> | → |
| Sau-351-1  | NZ_KK099273.1 | - | 1590185 | 1590156 | RNA → | <a href="#">rpmE2 (PRK01678)</a> | <a href="#">Ribosomal_L31</a> | <a href="#">(pfam01197)</a> | → |
| Sau-356-1  | NZ_KK099300.1 | - | 1636052 | 1636023 | RNA → | <a href="#">rpmE2 (PRK01678)</a> | <a href="#">Ribosomal_L31</a> | <a href="#">(pfam01197)</a> | → |
| Sau-361-1  | NZ_KK099337.1 | - | 61553   | 61524   | RNA → | <a href="#">rpmE2 (PRK01678)</a> | <a href="#">Ribosomal_L31</a> | <a href="#">(pfam01197)</a> | → |
| Sau-371-1  | NZ_KK099427.1 | - | 1594352 | 1594323 | RNA → | <a href="#">rpmE2 (PRK01678)</a> | <a href="#">Ribosomal_L31</a> | <a href="#">(pfam01197)</a> | → |
| Sau-746-1  | NZ_KK092605.1 | - | 602     | 573     | RNA → | <a href="#">rpmE2 (PRK01678)</a> | <a href="#">Ribosomal_L31</a> | <a href="#">(pfam01197)</a> | → |
| Sau-428-1  | NZ_KK097904.1 | - | 114869  | 114840  | RNA → | <a href="#">rpmE2 (PRK01678)</a> | <a href="#">Ribosomal_L31</a> | <a href="#">(pfam01197)</a> | → |
| Sau-349-1  | NZ_KK099251.1 | - | 459747  | 459718  | RNA → | <a href="#">rpmE2 (PRK01678)</a> | <a href="#">Ribosomal_L31</a> | <a href="#">(pfam01197)</a> | → |
| Sau-359-1  | NZ_KK099321.1 | - | 1593274 | 1593245 | RNA → | <a href="#">rpmE2 (PRK01678)</a> | <a href="#">Ribosomal_L31</a> | <a href="#">(pfam01197)</a> | → |
| Sau-364-1  | NZ_KK099361.1 | - | 255990  | 255961  | RNA → | <a href="#">rpmE2 (PRK01678)</a> | <a href="#">Ribosomal_L31</a> | <a href="#">(pfam01197)</a> | → |
| Sau-369-1  | NZ_KK099403.1 | - | 460546  | 460517  | RNA → | <a href="#">rpmE2 (PRK01678)</a> | <a href="#">Ribosomal_L31</a> | <a href="#">(pfam01197)</a> | → |
| Sau-374-1  | NZ_KK099456.1 | - | 60524   | 60495   | RNA → | <a href="#">rpmE2 (PRK01678)</a> | <a href="#">Ribosomal_L31</a> | <a href="#">(pfam01197)</a> | → |
| Sau-405-1  | NZ_KK099718.1 | - | 56726   | 56697   | RNA → | <a href="#">rpmE2 (PRK01678)</a> | <a href="#">Ribosomal_L31</a> | <a href="#">(pfam01197)</a> | → |
| Sau-1088-1 | NZ_KK094350.1 | - | 56794   | 56765   | RNA → | <a href="#">rpmE2 (PRK01678)</a> | <a href="#">Ribosomal_L31</a> | <a href="#">(pfam01197)</a> | → |
| Sau-2464-1 | NZ_KK094533.1 | - | 56894   | 56865   | RNA → | <a href="#">rpmE2 (PRK01678)</a> | <a href="#">Ribosomal_L31</a> | <a href="#">(pfam01197)</a> | → |
| Sau-2521-1 | NZ_KK094681.1 | - | 15617   | 15588   | RNA → | <a href="#">rpmE2 (PRK01678)</a> | <a href="#">Ribosomal_L31</a> | <a href="#">(pfam01197)</a> | → |
| Sau-2595-1 | NZ_KK094924.1 | - | 34913   | 34884   | RNA → | <a href="#">rpmE2 (PRK01678)</a> | <a href="#">Ribosomal_L31</a> | <a href="#">(pfam01197)</a> | → |
| Sau-2546-1 | NZ_KK096768.1 | - | 56894   | 56865   | RNA → | <a href="#">rpmE2 (PRK01678)</a> | <a href="#">Ribosomal_L31</a> | <a href="#">(pfam01197)</a> | → |
| Sau-2840-1 | NZ_KK096936.1 | - | 34913   | 34884   | RNA → | <a href="#">rpmE2 (PRK01678)</a> | <a href="#">Ribosomal_L31</a> | <a href="#">(pfam01197)</a> | → |
| Sau-2858-1 | NZ_KK096966.1 | - | 54878   | 54849   | RNA → | <a href="#">rpmE2 (PRK01678)</a> | <a href="#">Ribosomal_L31</a> | <a href="#">(pfam01197)</a> | → |
| Sau-902-1  | NZ_KK093986.1 | - | 34913   | 34884   | RNA → | <a href="#">rpmE2 (PRK01678)</a> | <a href="#">Ribosomal_L31</a> | <a href="#">(pfam01197)</a> | → |
| Sau-968-1  | NZ_KK094143.1 | - | 34874   | 34845   | RNA → | <a href="#">rpmE2 (PRK01678)</a> | <a href="#">Ribosomal_L31</a> | <a href="#">(pfam01197)</a> | → |
| Sau-418-1  | NZ_KK097815.1 | - | 2121940 | 2121911 | RNA → | <a href="#">rpmE2 (PRK01678)</a> | <a href="#">Ribosomal_L31</a> | <a href="#">(pfam01197)</a> | → |
| Sau-423-1  | NZ_KK097848.1 | - | 1643406 | 1643377 | RNA → | <a href="#">rpmE2 (PRK01678)</a> | <a href="#">Ribosomal_L31</a> | <a href="#">(pfam01197)</a> | → |
| Sau-2909-1 | NZ_KK095085.1 | - | 57030   | 57001   | RNA → | <a href="#">rpmE2 (PRK01678)</a> | <a href="#">Ribosomal_L31</a> | <a href="#">(pfam01197)</a> | → |
| Sau-392-1  | NZ_KK099615.1 | - | 244736  | 244707  | RNA → | <a href="#">rpmE2 (PRK01678)</a> | <a href="#">Ribosomal_L31</a> | <a href="#">(pfam01197)</a> | → |
| Sau-945-1  | NZ_KK096297.1 | - | 56894   | 56865   | RNA → | <a href="#">rpmE2 (PRK01678)</a> | <a href="#">Ribosomal_L31</a> | <a href="#">(pfam01197)</a> | → |
| Sau-2534-1 | NZ_KK096682.1 | - | 19182   | 19153   | RNA → | <a href="#">rpmE2 (PRK01678)</a> | <a href="#">Ribosomal_L31</a> | <a href="#">(pfam01197)</a> | → |
| Sau-2886-1 | NZ_KK093486.1 | - | 56794   | 56765   | RNA → | <a href="#">rpmE2 (PRK01678)</a> | <a href="#">Ribosomal_L31</a> | <a href="#">(pfam01197)</a> | → |
| Sau-315-1  | NZ_KK099043.1 | - | 56467   | 56438   | RNA → | <a href="#">rpmE2 (PRK01678)</a> | <a href="#">Ribosomal_L31</a> | <a href="#">(pfam01197)</a> | → |
| Sau-321-1  | NZ_KK099074.1 | - | 238688  | 238659  | RNA → | <a href="#">rpmE2 (PRK01678)</a> | <a href="#">Ribosomal_L31</a> | <a href="#">(pfam01197)</a> | → |
| Sau-734-1  | NZ_KK093901.1 | - | 34873   | 34844   | RNA → | <a href="#">rpmE2 (PRK01678)</a> | <a href="#">Ribosomal_L31</a> | <a href="#">(pfam01197)</a> | → |
| Sau-334-1  | NZ_KK099151.1 | - | 1670304 | 1670275 | RNA → | <a href="#">rpmE2 (PRK01678)</a> | <a href="#">Ribosomal_L31</a> | <a href="#">(pfam01197)</a> | → |
| Sau-341-1  | NZ_KK099197.1 | - | 122934  | 122905  | RNA → | <a href="#">rpmE2 (PRK01678)</a> | <a href="#">Ribosomal_L31</a> | <a href="#">(pfam01197)</a> | → |
| Sau-916-1  | NZ_KK096255.1 | - | 34913   | 34884   | RNA → | <a href="#">rpmE2 (PRK01678)</a> | <a href="#">Ribosomal_L31</a> | <a href="#">(pfam01197)</a> | → |

|            |                |   |         |         |                                                   |
|------------|----------------|---|---------|---------|---------------------------------------------------|
| Sau-347-1  | NZ_KK099239.1  | - | 299829  | 299800  | RNA → rpmE2 (PRK01678)Ribosomal_L31 (pfam01197) → |
| Sau-1020-1 | NZ_KK096369.1  | - | 55328   | 55299   | RNA → rpmE2 (PRK01678)Ribosomal_L31 (pfam01197) → |
| Sau-2466-1 | NZ_KK094572.1  | - | 34871   | 34842   | RNA → rpmE2 (PRK01678)Ribosomal_L31 (pfam01197) → |
| Sau-2574-1 | NZ_KK094758.1  | - | 35013   | 34984   | RNA → rpmE2 (PRK01678)Ribosomal_L31 (pfam01197) → |
| Sau-835-1  | NZ_KK096188.1  | - | 56987   | 56958   | RNA → rpmE2 (PRK01678)Ribosomal_L31 (pfam01197) → |
| Sau-2873-1 | NZ_KK097003.1  | - | 55000   | 54971   | RNA → rpmE2 (PRK01678)Ribosomal_L31 (pfam01197) → |
| Sau-2253-1 | NZ_KK096457.1  | - | 34913   | 34884   | RNA → rpmE2 (PRK01678)Ribosomal_L31 (pfam01197) → |
| Sau-2839-1 | NZ_KK096872.1  | - | 34913   | 34884   | RNA → rpmE2 (PRK01678)Ribosomal_L31 (pfam01197) → |
| Sau-312-1  | NZ_KK099020.1  | - | 1063131 | 1063102 | RNA → rpmE2 (PRK01678)Ribosomal_L31 (pfam01197) → |
| Sau-317-1  | NZ_KK099057.1  | - | 1584677 | 1584648 | RNA → rpmE2 (PRK01678)Ribosomal_L31 (pfam01197) → |
| Sau-330-1  | NZ_KK099121.1  | - | 267595  | 267566  | RNA → rpmE2 (PRK01678)Ribosomal_L31 (pfam01197) → |
| Sau-336-1  | NZ_KK099170.1  | - | 1586288 | 1586259 | RNA → rpmE2 (PRK01678)Ribosomal_L31 (pfam01197) → |
| Sau-402-1  | NZ_KK099688.1  | - | 1609421 | 1609392 | RNA → rpmE2 (PRK01678)Ribosomal_L31 (pfam01197) → |
| Sau-2454-1 | NZ_KK096555.1  | - | 34872   | 34843   | RNA → rpmE2 (PRK01678)Ribosomal_L31 (pfam01197) → |
| Sau-346-1  | NZ_KK099233.1  | - | 234593  | 234564  | RNA → rpmE2 (PRK01678)Ribosomal_L31 (pfam01197) → |
| Sau-3662-1 | NZ_KK097659.1  | - | 34872   | 34843   | RNA → rpmE2 (PRK01678)Ribosomal_L31 (pfam01197) → |
| Sau-464-1  | NZ_KK098341.1  | - | 468366  | 468337  | RNA → rpmE2 (PRK01678)Ribosomal_L31 (pfam01197) → |
| Sau-394-1  | NZ_KK099633.1  | - | 133140  | 133111  | RNA → rpmE2 (PRK01678)Ribosomal_L31 (pfam01197) → |
| Sau-343-1  | NZ_KK099211.1  | - | 56663   | 56634   | RNA → rpmE2 (PRK01678)Ribosomal_L31 (pfam01197) → |
| Sau-354-1  | NZ_KK099287.1  | - | 465984  | 465955  | RNA → rpmE2 (PRK01678)Ribosomal_L31 (pfam01197) → |
| Sau-379-1  | NZ_KK099491.1  | - | 231563  | 231534  | RNA → rpmE2 (PRK01678)Ribosomal_L31 (pfam01197) → |
| Sau-400-1  | NZ_KK099667.1  | - | 59483   | 59454   | RNA → rpmE2 (PRK01678)Ribosomal_L31 (pfam01197) → |
| Sau-594-1  | NZ_KK099766.1  | - | 130624  | 130595  | RNA → rpmE2 (PRK01678)Ribosomal_L31 (pfam01197) → |
| Sau-587-1  | NZ_KK099859.1  | - | 2340216 | 2340187 | RNA → rpmE2 (PRK01678)Ribosomal_L31 (pfam01197) → |
| Sau-387-1  | NZ_KK099544.1  | - | 61697   | 61668   | RNA → rpmE2 (PRK01678)Ribosomal_L31 (pfam01197) → |
| Sau-3515-1 | NZ_KK095401.1  | - | 34867   | 34838   | RNA → rpmE2 (PRK01678)Ribosomal_L31 (pfam01197) → |
| Sau-380-1  | NZ_KK099504.1  | - | 61507   | 61478   | RNA → rpmE2 (PRK01678)Ribosomal_L31 (pfam01197) → |
| Sau-407-1  | NZ_KK099728.1  | - | 60837   | 60808   | RNA → rpmE2 (PRK01678)Ribosomal_L31 (pfam01197) → |
| Sau-494-1  | NZ_KK098743.1  | - | 122322  | 122293  | RNA → rpmE2 (PRK01678)Ribosomal_L31 (pfam01197) → |
| Sau-576-1  | NZ_KK099921.1  | - | 61323   | 61294   | RNA → rpmE2 (PRK01678)Ribosomal_L31 (pfam01197) → |
| Sau-919-1  | NZ_KK0994076.1 | - | 25255   | 25226   | RNA → rpmE2 (PRK01678)Ribosomal_L31 (pfam01197) → |
| Sau-584-1  | NZ_KK098856.1  | - | 56240   | 56211   | RNA → rpmE2 (PRK01678)Ribosomal_L31 (pfam01197) → |
| Sau-656-1  | NZ_KK095933.1  | - | 34972   | 34943   | RNA → rpmE2 (PRK01678)Ribosomal_L31 (pfam01197) → |
| Sau-112-1  | NZ_KK218847.1  | - | 55733   | 55704   | RNA → rpmE2 (PRK01678)Ribosomal_L31 (pfam01197) → |
| Sau-123-1  | NZ_KK219305.1  | - | 56310   | 56281   | RNA → rpmE2 (PRK01678)Ribosomal_L31 (pfam01197) → |
| Sau-150-1  | NZ_KK220114.1  | - | 31722   | 31693   | RNA → rpmE2 (PRK01678)Ribosomal_L31 (pfam01197) → |
| Sau-92-1   | NZ_KK218349.1  | - | 56395   | 56366   | RNA → rpmE2 (PRK01678)Ribosomal_L31 (pfam01197) → |
| Sau-130-1  | NZ_KK219549.1  | - | 54860   | 54831   | RNA → rpmE2 (PRK01678)Ribosomal_L31 (pfam01197) → |
| Sau-98-1   | NZ_KK218470.1  | - | 55289   | 55260   | RNA → rpmE2 (PRK01678)Ribosomal_L31 (pfam01197) → |
| Sau-107-1  | NZ_KK218658.1  | - | 26024   | 25995   | RNA → rpmE2 (PRK01678)Ribosomal_L31 (pfam01197) → |
| Sau-129-1  | NZ_KK219518.1  | - | 26024   | 25995   | RNA → rpmE2 (PRK01678)Ribosomal_L31 (pfam01197) → |
| Sau-132-1  | NZ_KK219900.1  | - | 26024   | 25995   | RNA → rpmE2 (PRK01678)Ribosomal_L31 (pfam01197) → |
| Sau-155-1  | NZ_KK220312.1  | - | 26024   | 25995   | RNA → rpmE2 (PRK01678)Ribosomal_L31 (pfam01197) → |
| Sau-160-1  | NZ_KK220514.1  | - | 26024   | 25995   | RNA → rpmE2 (PRK01678)Ribosomal_L31 (pfam01197) → |
| Sau-165-1  | NZ_KK220763.1  | - | 26024   | 25995   | RNA → rpmE2 (PRK01678)Ribosomal_L31 (pfam01197) → |
| Sau-172-1  | NZ_KK220954.1  | - | 55963   | 55934   | RNA → rpmE2 (PRK01678)Ribosomal_L31 (pfam01197) → |
| Sau-177-1  | NZ_KK221128.1  | - | 26024   | 25995   | RNA → rpmE2 (PRK01678)Ribosomal_L31 (pfam01197) → |
| Sau-260-1  | NZ_KK222914.1  | - | 26024   | 25995   | RNA → rpmE2 (PRK01678)Ribosomal_L31 (pfam01197) → |
| Sau-3080-1 | NZ_KK226958.1  | - | 53265   | 53236   | RNA → rpmE2 (PRK01678)Ribosomal_L31 (pfam01197) → |
| Sau-271-1  | NZ_KK223311.1  | - | 26024   | 25995   | RNA → rpmE2 (PRK01678)Ribosomal_L31 (pfam01197) → |
| Sau-3085-1 | NZ_KK227159.1  | - | 25965   | 25936   | RNA → rpmE2 (PRK01678)Ribosomal_L31 (pfam01197) → |
| Sau-276-1  | NZ_KK223462.1  | - | 30762   | 30733   | RNA → rpmE2 (PRK01678)Ribosomal_L31 (pfam01197) → |

|            |               |   |       |       |                                                   |
|------------|---------------|---|-------|-------|---------------------------------------------------|
| Sau-3099-1 | NZ_KK227638.1 | - | 26024 | 25995 | RNA → rpmE2 (PRK01678)Ribosomal_L31 (pfam01197) → |
| Sau-608-1  | NZ_KK223626.1 | - | 56394 | 56365 | RNA → rpmE2 (PRK01678)Ribosomal_L31 (pfam01197) → |
| Sau-3143-1 | NZ_KK229081.1 | - | 26024 | 25995 | RNA → rpmE2 (PRK01678)Ribosomal_L31 (pfam01197) → |
| Sau-865-1  | NZ_KK223829.1 | - | 56395 | 56366 | RNA → rpmE2 (PRK01678)Ribosomal_L31 (pfam01197) → |
| Sau-188-1  | NZ_KK221506.1 | - | 26024 | 25995 | RNA → rpmE2 (PRK01678)Ribosomal_L31 (pfam01197) → |
| Sau-194-1  | NZ_KK221684.1 | - | 26024 | 25995 | RNA → rpmE2 (PRK01678)Ribosomal_L31 (pfam01197) → |
| Sau-136-1  | NZ_KK219698.1 | - | 46806 | 46777 | RNA → rpmE2 (PRK01678)Ribosomal_L31 (pfam01197) → |
| Sau-3063-1 | NZ_KK226363.1 | - | 26024 | 25995 | RNA → rpmE2 (PRK01678)Ribosomal_L31 (pfam01197) → |
| Sau-206-1  | NZ_KK222184.1 | - | 20478 | 20449 | RNA → rpmE2 (PRK01678)Ribosomal_L31 (pfam01197) → |
| Sau-3068-1 | NZ_KK226529.1 | - | 26024 | 25995 | RNA → rpmE2 (PRK01678)Ribosomal_L31 (pfam01197) → |
| Sau-214-1  | NZ_KK222381.1 | - | 18988 | 18959 | RNA → rpmE2 (PRK01678)Ribosomal_L31 (pfam01197) → |
| Sau-3166-1 | NZ_KK229800.1 | - | 56439 | 56410 | RNA → rpmE2 (PRK01678)Ribosomal_L31 (pfam01197) → |
| Sau-267-1  | NZ_KK223163.1 | - | 26024 | 25995 | RNA → rpmE2 (PRK01678)Ribosomal_L31 (pfam01197) → |
| Sau-273-1  | NZ_KK223372.1 | - | 56439 | 56410 | RNA → rpmE2 (PRK01678)Ribosomal_L31 (pfam01197) → |
| Sau-307-1  | NZ_KK223517.1 | - | 26024 | 25995 | RNA → rpmE2 (PRK01678)Ribosomal_L31 (pfam01197) → |
| Sau-872-1  | NZ_KK224086.1 | - | 56439 | 56410 | RNA → rpmE2 (PRK01678)Ribosomal_L31 (pfam01197) → |
| Sau-878-1  | NZ_KK224279.1 | - | 26024 | 25995 | RNA → rpmE2 (PRK01678)Ribosomal_L31 (pfam01197) → |
| Sau-2692-1 | NZ_KK225056.1 | - | 26024 | 25995 | RNA → rpmE2 (PRK01678)Ribosomal_L31 (pfam01197) → |
| Sau-3090-1 | NZ_KK227375.1 | - | 56354 | 56325 | RNA → rpmE2 (PRK01678)Ribosomal_L31 (pfam01197) → |
| Sau-175-1  | NZ_KK221058.1 | - | 26024 | 25995 | RNA → rpmE2 (PRK01678)Ribosomal_L31 (pfam01197) → |
| Sau-2821-1 | NZ_KK225696.1 | - | 56395 | 56366 | RNA → rpmE2 (PRK01678)Ribosomal_L31 (pfam01197) → |
| Sau-2505-1 | NZ_KK224434.1 | - | 56439 | 56410 | RNA → rpmE2 (PRK01678)Ribosomal_L31 (pfam01197) → |
| Sau-257-1  | NZ_KK222794.1 | - | 56395 | 56366 | RNA → rpmE2 (PRK01678)Ribosomal_L31 (pfam01197) → |
| Sau-126-1  | NZ_KK219434.1 | - | 56261 | 56232 | RNA → rpmE2 (PRK01678)Ribosomal_L31 (pfam01197) → |
| Sau-269-1  | NZ_KK223216.1 | - | 52550 | 52521 | RNA → rpmE2 (PRK01678)Ribosomal_L31 (pfam01197) → |
| Sau-134-1  | NZ_KK219611.1 | - | 26024 | 25995 | RNA → rpmE2 (PRK01678)Ribosomal_L31 (pfam01197) → |
| Sau-274-1  | NZ_KK223399.1 | - | 26024 | 25995 | RNA → rpmE2 (PRK01678)Ribosomal_L31 (pfam01197) → |
| Sau-200-1  | NZ_KK221878.1 | - | 54642 | 54613 | RNA → rpmE2 (PRK01678)Ribosomal_L31 (pfam01197) → |
| Sau-873-1  | NZ_KK224144.1 | - | 56395 | 56366 | RNA → rpmE2 (PRK01678)Ribosomal_L31 (pfam01197) → |
| Sau-207-1  | NZ_KK222088.1 | - | 26024 | 25995 | RNA → rpmE2 (PRK01678)Ribosomal_L31 (pfam01197) → |
| Sau-3082-1 | NZ_KK227042.1 | - | 26024 | 25995 | RNA → rpmE2 (PRK01678)Ribosomal_L31 (pfam01197) → |
| Sau-217-1  | NZ_KK222503.1 | - | 26024 | 25995 | RNA → rpmE2 (PRK01678)Ribosomal_L31 (pfam01197) → |
| Sau-3087-1 | NZ_KK227240.1 | - | 26024 | 25995 | RNA → rpmE2 (PRK01678)Ribosomal_L31 (pfam01197) → |
| Sau-253-1  | NZ_KK222701.1 | - | 18846 | 18817 | RNA → rpmE2 (PRK01678)Ribosomal_L31 (pfam01197) → |
| Sau-3095-1 | NZ_KK227491.1 | - | 26024 | 25995 | RNA → rpmE2 (PRK01678)Ribosomal_L31 (pfam01197) → |
| Sau-875-1  | NZ_KK224222.1 | - | 26024 | 25995 | RNA → rpmE2 (PRK01678)Ribosomal_L31 (pfam01197) → |
| Sau-2676-1 | NZ_KK224731.1 | - | 26024 | 25995 | RNA → rpmE2 (PRK01678)Ribosomal_L31 (pfam01197) → |
| Sau-2701-1 | NZ_KK225372.1 | - | 56390 | 56361 | RNA → rpmE2 (PRK01678)Ribosomal_L31 (pfam01197) → |
| Sau-144-1  | NZ_KK220038.1 | - | 26024 | 25995 | RNA → rpmE2 (PRK01678)Ribosomal_L31 (pfam01197) → |
| Sau-153-1  | NZ_KK220240.1 | - | 55477 | 55448 | RNA → rpmE2 (PRK01678)Ribosomal_L31 (pfam01197) → |
| Sau-158-1  | NZ_KK220436.1 | - | 25968 | 25939 | RNA → rpmE2 (PRK01678)Ribosomal_L31 (pfam01197) → |
| Sau-163-1  | NZ_KK220641.1 | - | 56390 | 56361 | RNA → rpmE2 (PRK01678)Ribosomal_L31 (pfam01197) → |
| Sau-170-1  | NZ_KK220886.1 | - | 31818 | 31789 | RNA → rpmE2 (PRK01678)Ribosomal_L31 (pfam01197) → |
| Sau-180-1  | NZ_KK221232.1 | - | 26024 | 25995 | RNA → rpmE2 (PRK01678)Ribosomal_L31 (pfam01197) → |
| Sau-186-1  | NZ_KK221416.1 | - | 56310 | 56281 | RNA → rpmE2 (PRK01678)Ribosomal_L31 (pfam01197) → |
| Sau-209-1  | NZ_KK222240.1 | - | 26024 | 25995 | RNA → rpmE2 (PRK01678)Ribosomal_L31 (pfam01197) → |
| Sau-220-1  | NZ_KK222577.1 | - | 26024 | 25995 | RNA → rpmE2 (PRK01678)Ribosomal_L31 (pfam01197) → |
| Sau-215-1  | NZ_KK222425.1 | - | 56395 | 56366 | RNA → rpmE2 (PRK01678)Ribosomal_L31 (pfam01197) → |
| Sau-841-1  | NZ_KK223720.1 | - | 26024 | 25995 | RNA → rpmE2 (PRK01678)Ribosomal_L31 (pfam01197) → |
| Sau-222-1  | NZ_KK222619.1 | - | 7609  | 7580  | RNA → rpmE2 (PRK01678)Ribosomal_L31 (pfam01197) → |
| Sau-2698-1 | NZ_KK225257.1 | - | 56390 | 56361 | RNA → rpmE2 (PRK01678)Ribosomal_L31 (pfam01197) → |
| Sau-258-1  | NZ_KK222826.1 | - | 26024 | 25995 | RNA → rpmE2 (PRK01678)Ribosomal_L31 (pfam01197) → |



|            |               |   |       |       |                                                   |
|------------|---------------|---|-------|-------|---------------------------------------------------|
| Sau-2711-1 | NZ_KK225491.1 | - | 26024 | 25995 | RNA → rpmE2 (PRK01678)Ribosomal_L31 (pfam01197) → |
| Sau-263-1  | NZ_KK223018.1 | - | 25790 | 25761 | RNA → rpmE2 (PRK01678)Ribosomal_L31 (pfam01197) → |
| Sau-308-1  | NZ_KK223557.1 | - | 26024 | 25995 | RNA → rpmE2 (PRK01678)Ribosomal_L31 (pfam01197) → |
| Sau-2826-1 | NZ_KK225869.1 | - | 26024 | 25995 | RNA → rpmE2 (PRK01678)Ribosomal_L31 (pfam01197) → |
| Sau-842-1  | NZ_KK223754.1 | - | 30994 | 30965 | RNA → rpmE2 (PRK01678)Ribosomal_L31 (pfam01197) → |
| Sau-3115-1 | NZ_KK228218.1 | - | 26024 | 25995 | RNA → rpmE2 (PRK01678)Ribosomal_L31 (pfam01197) → |
| Sau-868-1  | NZ_KK223946.1 | - | 56390 | 56361 | RNA → rpmE2 (PRK01678)Ribosomal_L31 (pfam01197) → |
| Sau-3160-1 | NZ_KK229644.1 | - | 56439 | 56410 | RNA → rpmE2 (PRK01678)Ribosomal_L31 (pfam01197) → |
| Sau-191-1  | NZ_KK221597.1 | - | 26024 | 25995 | RNA → rpmE2 (PRK01678)Ribosomal_L31 (pfam01197) → |
| Sau-2636-1 | NZ_KK224621.1 | - | 26024 | 25995 | RNA → rpmE2 (PRK01678)Ribosomal_L31 (pfam01197) → |
| Sau-198-1  | NZ_KK221811.1 | - | 56165 | 56136 | RNA → rpmE2 (PRK01678)Ribosomal_L31 (pfam01197) → |
| Sau-212-1  | NZ_KK222314.1 | - | 26024 | 25995 | RNA → rpmE2 (PRK01678)Ribosomal_L31 (pfam01197) → |
| Sau-2690-1 | NZ_KK224950.1 | - | 56395 | 56366 | RNA → rpmE2 (PRK01678)Ribosomal_L31 (pfam01197) → |
| Sau-3065-1 | NZ_KK226453.1 | - | 26024 | 25995 | RNA → rpmE2 (PRK01678)Ribosomal_L31 (pfam01197) → |
| Sau-2469-1 | NZ_KK224385.1 | - | 55969 | 55940 | RNA → rpmE2 (PRK01678)Ribosomal_L31 (pfam01197) → |
| Sau-2627-1 | NZ_KK224533.1 | - | 26024 | 25995 | RNA → rpmE2 (PRK01678)Ribosomal_L31 (pfam01197) → |
| Sau-118-1  | NZ_KK219075.1 | - | 56395 | 56366 | RNA → rpmE2 (PRK01678)Ribosomal_L31 (pfam01197) → |
| Sau-87-1   | NZ_KK218139.1 | - | 55553 | 55524 | RNA → rpmE2 (PRK01678)Ribosomal_L31 (pfam01197) → |
| Sau-262-1  | NZ_KK222984.1 | - | 56438 | 56409 | RNA → rpmE2 (PRK01678)Ribosomal_L31 (pfam01197) → |
| Sau-3109-1 | NZ_KK228029.1 | - | 26024 | 25995 | RNA → rpmE2 (PRK01678)Ribosomal_L31 (pfam01197) → |
| Sau-3122-1 | NZ_KK228451.1 | - | 53737 | 53708 | RNA → rpmE2 (PRK01678)Ribosomal_L31 (pfam01197) → |
| Sau-80-1   | NZ_KK218041.1 | - | 54768 | 54739 | RNA → rpmE2 (PRK01678)Ribosomal_L31 (pfam01197) → |
| Sau-3175-1 | NZ_KK230124.1 | - | 56354 | 56325 | RNA → rpmE2 (PRK01678)Ribosomal_L31 (pfam01197) → |
| Sau-84-1   | NZ_KK218077.1 | - | 56261 | 56232 | RNA → rpmE2 (PRK01678)Ribosomal_L31 (pfam01197) → |
| Sau-880-1  | NZ_KK224318.1 | - | 56390 | 56361 | RNA → rpmE2 (PRK01678)Ribosomal_L31 (pfam01197) → |
| Sau-89-1   | NZ_KK218219.1 | - | 26024 | 25995 | RNA → rpmE2 (PRK01678)Ribosomal_L31 (pfam01197) → |
| Sau-3077-1 | NZ_KK226834.1 | - | 26024 | 25995 | RNA → rpmE2 (PRK01678)Ribosomal_L31 (pfam01197) → |
| Sau-90-1   | NZ_KK218244.1 | - | 26024 | 25995 | RNA → rpmE2 (PRK01678)Ribosomal_L31 (pfam01197) → |
| Sau-3083-1 | NZ_KK227076.1 | - | 26024 | 25995 | RNA → rpmE2 (PRK01678)Ribosomal_L31 (pfam01197) → |
| Sau-113-1  | NZ_KK218892.1 | - | 54808 | 54779 | RNA → rpmE2 (PRK01678)Ribosomal_L31 (pfam01197) → |
| Sau-3088-1 | NZ_KK227288.1 | - | 26024 | 25995 | RNA → rpmE2 (PRK01678)Ribosomal_L31 (pfam01197) → |
| Sau-119-1  | NZ_KK219116.1 | - | 26024 | 25995 | RNA → rpmE2 (PRK01678)Ribosomal_L31 (pfam01197) → |
| Sau-3116-1 | NZ_KK228289.1 | - | 18618 | 18589 | RNA → rpmE2 (PRK01678)Ribosomal_L31 (pfam01197) → |
| Sau-124-1  | NZ_KK219338.1 | - | 56310 | 56281 | RNA → rpmE2 (PRK01678)Ribosomal_L31 (pfam01197) → |
| Sau-3123-1 | NZ_KK228505.1 | - | 26024 | 25995 | RNA → rpmE2 (PRK01678)Ribosomal_L31 (pfam01197) → |
| Sau-3130-1 | NZ_KK228701.1 | - | 26024 | 25995 | RNA → rpmE2 (PRK01678)Ribosomal_L31 (pfam01197) → |
| Sau-3157-1 | NZ_KK229539.1 | - | 26024 | 25995 | RNA → rpmE2 (PRK01678)Ribosomal_L31 (pfam01197) → |
| Sau-3162-1 | NZ_KK229729.1 | - | 26024 | 25995 | RNA → rpmE2 (PRK01678)Ribosomal_L31 (pfam01197) → |
| Sau-3093-1 | NZ_KK227448.1 | - | 56353 | 56324 | RNA → rpmE2 (PRK01678)Ribosomal_L31 (pfam01197) → |
| Sau-140-1  | NZ_KK219813.1 | - | 26024 | 25995 | RNA → rpmE2 (PRK01678)Ribosomal_L31 (pfam01197) → |
| Sau-2824-1 | NZ_KK225802.1 | - | 56165 | 56136 | RNA → rpmE2 (PRK01678)Ribosomal_L31 (pfam01197) → |
| Sau-3060-1 | NZ_KK226308.1 | - | 26024 | 25995 | RNA → rpmE2 (PRK01678)Ribosomal_L31 (pfam01197) → |
| Sau-3153-1 | NZ_KK229332.1 | - | 26024 | 25995 | RNA → rpmE2 (PRK01678)Ribosomal_L31 (pfam01197) → |
| Sau-3154-1 | NZ_KK229377.1 | - | 26024 | 25995 | RNA → rpmE2 (PRK01678)Ribosomal_L31 (pfam01197) → |
| Sau-3165-1 | NZ_KK229754.1 | - | 56395 | 56366 | RNA → rpmE2 (PRK01678)Ribosomal_L31 (pfam01197) → |
| Sau-3183-1 | NZ_KK230455.1 | - | 26024 | 25995 | RNA → rpmE2 (PRK01678)Ribosomal_L31 (pfam01197) → |
| Sau-182-1  | NZ_KK221300.1 | - | 56439 | 56410 | RNA → rpmE2 (PRK01678)Ribosomal_L31 (pfam01197) → |
| Sau-265-1  | NZ_KK223082.1 | - | 56395 | 56366 | RNA → rpmE2 (PRK01678)Ribosomal_L31 (pfam01197) → |
| Sau-870-1  | NZ_KK224019.1 | - | 26024 | 25995 | RNA → rpmE2 (PRK01678)Ribosomal_L31 (pfam01197) → |
| Sau-103-1  | NZ_KK218519.1 | - | 26024 | 25995 | RNA → rpmE2 (PRK01678)Ribosomal_L31 (pfam01197) → |
| Sau-3010-1 | NZ_KK226052.1 | - | 56395 | 56366 | RNA → rpmE2 (PRK01678)Ribosomal_L31 (pfam01197) → |
| Sau-108-1  | NZ_KK218685.1 | - | 26024 | 25995 | RNA → rpmE2 (PRK01678)Ribosomal_L31 (pfam01197) → |

|            |               |   |       |       |                                                   |
|------------|---------------|---|-------|-------|---------------------------------------------------|
| Sau-3017-1 | NZ_KK226235.1 | - | 26024 | 25995 | RNA → rpmE2 (PRK01678)Ribosomal_L31 (pfam01197) → |
| Sau-3119-1 | NZ_KK228363.1 | - | 26024 | 25995 | RNA → rpmE2 (PRK01678)Ribosomal_L31 (pfam01197) → |
| Sau-3132-1 | NZ_KK228781.1 | - | 57286 | 57257 | RNA → rpmE2 (PRK01678)Ribosomal_L31 (pfam01197) → |
| Sau-3147-1 | NZ_KK229226.1 | - | 56354 | 56325 | RNA → rpmE2 (PRK01678)Ribosomal_L31 (pfam01197) → |
| Sau-3179-1 | NZ_KK230245.1 | - | 26023 | 25994 | RNA → rpmE2 (PRK01678)Ribosomal_L31 (pfam01197) → |
| Sau-3097-1 | NZ_KK227565.1 | - | 26024 | 25995 | RNA → rpmE2 (PRK01678)Ribosomal_L31 (pfam01197) → |
| Sau-110-1  | NZ_KK218762.1 | - | 54882 | 54853 | RNA → rpmE2 (PRK01678)Ribosomal_L31 (pfam01197) → |
| Sau-116-1  | NZ_KK219000.1 | - | 54756 | 54727 | RNA → rpmE2 (PRK01678)Ribosomal_L31 (pfam01197) → |
| Sau-121-1  | NZ_KK219204.1 | - | 43868 | 43839 | RNA → rpmE2 (PRK01678)Ribosomal_L31 (pfam01197) → |
| Sau-105-1  | NZ_KK218599.1 | - | 26024 | 25995 | RNA → rpmE2 (PRK01678)Ribosomal_L31 (pfam01197) → |
| Sau-3312-1 | NZ_KK235067.1 | - | 26024 | 25995 | RNA → rpmE2 (PRK01678)Ribosomal_L31 (pfam01197) → |
| Sau-3320-1 | NZ_KK235290.1 | - | 26024 | 25995 | RNA → rpmE2 (PRK01678)Ribosomal_L31 (pfam01197) → |
| Sau-3321-1 | NZ_KK23519.1  | - | 56439 | 56410 | RNA → rpmE2 (PRK01678)Ribosomal_L31 (pfam01197) → |
| Sau-3328-1 | NZ_KK235526.1 | - | 26024 | 25995 | RNA → rpmE2 (PRK01678)Ribosomal_L31 (pfam01197) → |
| Sau-3332-1 | NZ_KK235680.1 | - | 26024 | 25995 | RNA → rpmE2 (PRK01678)Ribosomal_L31 (pfam01197) → |
| Sau-3333-1 | NZ_KK235727.1 | - | 26024 | 25995 | RNA → rpmE2 (PRK01678)Ribosomal_L31 (pfam01197) → |
| Sau-3338-1 | NZ_KK235952.1 | - | 26024 | 25995 | RNA → rpmE2 (PRK01678)Ribosomal_L31 (pfam01197) → |
| Sau-3379-1 | NZ_KK237259.1 | - | 54480 | 54451 | RNA → rpmE2 (PRK01678)Ribosomal_L31 (pfam01197) → |
| Sau-3384-1 | NZ_KK237467.1 | - | 56317 | 56288 | RNA → rpmE2 (PRK01678)Ribosomal_L31 (pfam01197) → |
| Sau-3390-1 | NZ_KK237651.1 | - | 54281 | 54252 | RNA → rpmE2 (PRK01678)Ribosomal_L31 (pfam01197) → |
| Sau-3399-1 | NZ_KK237828.1 | - | 26024 | 25995 | RNA → rpmE2 (PRK01678)Ribosomal_L31 (pfam01197) → |
| Sau-3405-1 | NZ_KK238039.1 | - | 53570 | 53541 | RNA → rpmE2 (PRK01678)Ribosomal_L31 (pfam01197) → |
| Sau-3410-1 | NZ_KK238232.1 | - | 56439 | 56410 | RNA → rpmE2 (PRK01678)Ribosomal_L31 (pfam01197) → |
| Sau-3417-1 | NZ_KK238513.1 | - | 26024 | 25995 | RNA → rpmE2 (PRK01678)Ribosomal_L31 (pfam01197) → |
| Sau-3422-1 | NZ_KK238712.1 | - | 26024 | 25995 | RNA → rpmE2 (PRK01678)Ribosomal_L31 (pfam01197) → |
| Sau-3423-1 | NZ_KK238762.1 | - | 26024 | 25995 | RNA → rpmE2 (PRK01678)Ribosomal_L31 (pfam01197) → |
| Sau-3427-1 | NZ_KK238898.1 | - | 26024 | 25995 | RNA → rpmE2 (PRK01678)Ribosomal_L31 (pfam01197) → |
| Sau-3428-1 | NZ_KK238957.1 | - | 26024 | 25995 | RNA → rpmE2 (PRK01678)Ribosomal_L31 (pfam01197) → |
| Sau-3372-1 | NZ_KK236944.1 | - | 26024 | 25995 | RNA → rpmE2 (PRK01678)Ribosomal_L31 (pfam01197) → |
| Sau-3373-1 | NZ_KK236999.1 | - | 29618 | 29589 | RNA → rpmE2 (PRK01678)Ribosomal_L31 (pfam01197) → |
| Sau-3378-1 | NZ_KK237210.1 | - | 53941 | 53912 | RNA → rpmE2 (PRK01678)Ribosomal_L31 (pfam01197) → |
| Sau-3383-1 | NZ_KK237441.1 | - | 56279 | 56250 | RNA → rpmE2 (PRK01678)Ribosomal_L31 (pfam01197) → |
| Sau-3389-1 | NZ_KK237594.1 | - | 56353 | 56324 | RNA → rpmE2 (PRK01678)Ribosomal_L31 (pfam01197) → |
| Sau-3398-1 | NZ_KK237796.1 | - | 26332 | 26303 | RNA → rpmE2 (PRK01678)Ribosomal_L31 (pfam01197) → |
| Sau-3404-1 | NZ_KK237995.1 | - | 54477 | 54448 | RNA → rpmE2 (PRK01678)Ribosomal_L31 (pfam01197) → |
| Sau-3409-1 | NZ_KK238213.1 | - | 26024 | 25995 | RNA → rpmE2 (PRK01678)Ribosomal_L31 (pfam01197) → |
| Sau-3415-1 | NZ_KK238417.1 | - | 26024 | 25995 | RNA → rpmE2 (PRK01678)Ribosomal_L31 (pfam01197) → |
| Sau-3431-1 | NZ_KK239111.1 | - | 26024 | 25995 | RNA → rpmE2 (PRK01678)Ribosomal_L31 (pfam01197) → |
| Sau-3432-1 | NZ_KK239165.1 | - | 56395 | 56366 | RNA → rpmE2 (PRK01678)Ribosomal_L31 (pfam01197) → |
| Sau-3421-1 | NZ_KK238654.1 | - | 26024 | 25995 | RNA → rpmE2 (PRK01678)Ribosomal_L31 (pfam01197) → |
| Sau-3426-1 | NZ_KK238862.1 | - | 26024 | 25995 | RNA → rpmE2 (PRK01678)Ribosomal_L31 (pfam01197) → |
| Sau-3376-1 | NZ_KK237117.1 | - | 54536 | 54507 | RNA → rpmE2 (PRK01678)Ribosomal_L31 (pfam01197) → |
| Sau-3377-1 | NZ_KK237165.1 | - | 54481 | 54452 | RNA → rpmE2 (PRK01678)Ribosomal_L31 (pfam01197) → |
| Sau-3382-1 | NZ_KK237395.1 | - | 56390 | 56361 | RNA → rpmE2 (PRK01678)Ribosomal_L31 (pfam01197) → |
| Sau-3387-1 | NZ_KK237537.1 | - | 26024 | 25995 | RNA → rpmE2 (PRK01678)Ribosomal_L31 (pfam01197) → |
| Sau-3388-1 | NZ_KK237569.1 | - | 26024 | 25995 | RNA → rpmE2 (PRK01678)Ribosomal_L31 (pfam01197) → |
| Sau-3396-1 | NZ_KK237741.1 | - | 2607  | 2578  | RNA → rpmE2 (PRK01678)Ribosomal_L31 (pfam01197) → |
| Sau-3397-1 | NZ_KK237767.1 | - | 56395 | 56366 | RNA → rpmE2 (PRK01678)Ribosomal_L31 (pfam01197) → |
| Sau-3403-1 | NZ_KK237967.1 | - | 26024 | 25995 | RNA → rpmE2 (PRK01678)Ribosomal_L31 (pfam01197) → |
| Sau-3408-1 | NZ_KK238161.1 | - | 56394 | 56365 | RNA → rpmE2 (PRK01678)Ribosomal_L31 (pfam01197) → |
| Sau-3413-1 | NZ_KK238364.1 | - | 56395 | 56366 | RNA → rpmE2 (PRK01678)Ribosomal_L31 (pfam01197) → |
| Sau-3430-1 | NZ_KK239060.1 | - | 26024 | 25995 | RNA → rpmE2 (PRK01678)Ribosomal_L31 (pfam01197) → |



|            |               |   |       |       |                                                   |
|------------|---------------|---|-------|-------|---------------------------------------------------|
| Sau-3420-1 | NZ_KK238600.1 | - | 55512 | 55483 | RNA → rpmE2 (PRK01678)Ribosomal_L31 (pfam01197) → |
| Sau-3425-1 | NZ_KK238827.1 | - | 26025 | 25996 | RNA → rpmE2 (PRK01678)Ribosomal_L31 (pfam01197) → |
| Sau-3393-1 | NZ_KK237699.1 | - | 26024 | 25995 | RNA → rpmE2 (PRK01678)Ribosomal_L31 (pfam01197) → |
| Sau-3401-1 | NZ_KK237884.1 | - | 19182 | 19153 | RNA → rpmE2 (PRK01678)Ribosomal_L31 (pfam01197) → |
| Sau-3402-1 | NZ_KK237920.1 | - | 56438 | 56409 | RNA → rpmE2 (PRK01678)Ribosomal_L31 (pfam01197) → |
| Sau-3406-1 | NZ_KK238084.1 | - | 26024 | 25995 | RNA → rpmE2 (PRK01678)Ribosomal_L31 (pfam01197) → |
| Sau-3407-1 | NZ_KK238117.1 | - | 26024 | 25995 | RNA → rpmE2 (PRK01678)Ribosomal_L31 (pfam01197) → |
| Sau-3411-1 | NZ_KK238270.1 | - | 25968 | 25939 | RNA → rpmE2 (PRK01678)Ribosomal_L31 (pfam01197) → |
| Sau-3412-1 | NZ_KK238306.1 | - | 56390 | 56361 | RNA → rpmE2 (PRK01678)Ribosomal_L31 (pfam01197) → |
| Sau-3418-1 | NZ_KK238556.1 | - | 17345 | 17316 | RNA → rpmE2 (PRK01678)Ribosomal_L31 (pfam01197) → |
| Sau-3424-1 | NZ_KK238790.1 | - | 26025 | 25996 | RNA → rpmE2 (PRK01678)Ribosomal_L31 (pfam01197) → |
| Sau-3429-1 | NZ_KK239008.1 | - | 26024 | 25995 | RNA → rpmE2 (PRK01678)Ribosomal_L31 (pfam01197) → |
| Sau-3337-1 | NZ_KK235896.1 | - | 26024 | 25995 | RNA → rpmE2 (PRK01678)Ribosomal_L31 (pfam01197) → |
| Sau-3341-1 | NZ_KK236088.1 | - | 26024 | 25995 | RNA → rpmE2 (PRK01678)Ribosomal_L31 (pfam01197) → |
| Sau-3362-1 | NZ_KK236638.1 | - | 54582 | 54553 | RNA → rpmE2 (PRK01678)Ribosomal_L31 (pfam01197) → |
| Sau-3434-1 | NZ_KK239222.1 | - | 26024 | 25995 | RNA → rpmE2 (PRK01678)Ribosomal_L31 (pfam01197) → |
| Sau-3439-1 | NZ_KK239416.1 | - | 26024 | 25995 | RNA → rpmE2 (PRK01678)Ribosomal_L31 (pfam01197) → |
| Sau-3445-1 | NZ_KK239632.1 | - | 26024 | 25995 | RNA → rpmE2 (PRK01678)Ribosomal_L31 (pfam01197) → |
| Sau-3458-1 | NZ_KK240009.1 | - | 25997 | 25968 | RNA → rpmE2 (PRK01678)Ribosomal_L31 (pfam01197) → |
| Sau-3464-1 | NZ_KK240210.1 | - | 26024 | 25995 | RNA → rpmE2 (PRK01678)Ribosomal_L31 (pfam01197) → |
| Sau-3284-1 | NZ_KK233856.1 | - | 26024 | 25995 | RNA → rpmE2 (PRK01678)Ribosomal_L31 (pfam01197) → |
| Sau-3470-1 | NZ_KK240383.1 | - | 56384 | 56355 | RNA → rpmE2 (PRK01678)Ribosomal_L31 (pfam01197) → |
| Sau-3477-1 | NZ_KK240551.1 | - | 56439 | 56410 | RNA → rpmE2 (PRK01678)Ribosomal_L31 (pfam01197) → |
| Sau-3715-1 | NZ_KK240724.1 | - | 56439 | 56410 | RNA → rpmE2 (PRK01678)Ribosomal_L31 (pfam01197) → |
| Sau-3437-1 | NZ_KK239359.1 | - | 26027 | 25998 | RNA → rpmE2 (PRK01678)Ribosomal_L31 (pfam01197) → |
| Sau-3438-1 | NZ_KK239396.1 | - | 26024 | 25995 | RNA → rpmE2 (PRK01678)Ribosomal_L31 (pfam01197) → |
| Sau-3443-1 | NZ_KK239562.1 | - | 5833  | 5804  | RNA → rpmE2 (PRK01678)Ribosomal_L31 (pfam01197) → |
| Sau-3444-1 | NZ_KK239596.1 | - | 26024 | 25995 | RNA → rpmE2 (PRK01678)Ribosomal_L31 (pfam01197) → |
| Sau-3450-1 | NZ_KK239796.1 | - | 26024 | 25995 | RNA → rpmE2 (PRK01678)Ribosomal_L31 (pfam01197) → |
| Sau-3456-1 | NZ_KK239979.1 | - | 25389 | 25360 | RNA → rpmE2 (PRK01678)Ribosomal_L31 (pfam01197) → |
| Sau-3225-1 | NZ_KK231905.1 | - | 56309 | 56280 | RNA → rpmE2 (PRK01678)Ribosomal_L31 (pfam01197) → |
| Sau-3469-1 | NZ_KK240355.1 | - | 56384 | 56355 | RNA → rpmE2 (PRK01678)Ribosomal_L31 (pfam01197) → |
| Sau-3266-1 | NZ_KK233355.1 | - | 26024 | 25995 | RNA → rpmE2 (PRK01678)Ribosomal_L31 (pfam01197) → |
| Sau-3476-1 | NZ_KK240520.1 | - | 26332 | 26303 | RNA → rpmE2 (PRK01678)Ribosomal_L31 (pfam01197) → |
| Sau-3323-1 | NZ_KK235408.1 | - | 26024 | 25995 | RNA → rpmE2 (PRK01678)Ribosomal_L31 (pfam01197) → |
| Sau-3714-1 | NZ_KK240688.1 | - | 56441 | 56412 | RNA → rpmE2 (PRK01678)Ribosomal_L31 (pfam01197) → |
| Sau-3719-1 | NZ_KK240874.1 | - | 26024 | 25995 | RNA → rpmE2 (PRK01678)Ribosomal_L31 (pfam01197) → |
| Sau-3330-1 | NZ_KK235606.1 | - | 25733 | 25704 | RNA → rpmE2 (PRK01678)Ribosomal_L31 (pfam01197) → |
| Sau-3353-1 | NZ_KK236370.1 | - | 26024 | 25995 | RNA → rpmE2 (PRK01678)Ribosomal_L31 (pfam01197) → |
| Sau-3365-1 | NZ_KK236756.1 | - | 54478 | 54449 | RNA → rpmE2 (PRK01678)Ribosomal_L31 (pfam01197) → |
| Sau-3366-1 | NZ_KK236796.1 | - | 54582 | 54553 | RNA → rpmE2 (PRK01678)Ribosomal_L31 (pfam01197) → |
| Sau-3436-1 | NZ_KK239317.1 | - | 26024 | 25995 | RNA → rpmE2 (PRK01678)Ribosomal_L31 (pfam01197) → |
| Sau-3442-1 | NZ_KK239489.1 | - | 26024 | 25995 | RNA → rpmE2 (PRK01678)Ribosomal_L31 (pfam01197) → |
| Sau-3448-1 | NZ_KK239707.1 | - | 26024 | 25995 | RNA → rpmE2 (PRK01678)Ribosomal_L31 (pfam01197) → |
| Sau-597-1  | NZ_KI966209.1 | - | 59482 | 59453 | RNA → rpmE2 (PRK01678)Ribosomal_L31 (pfam01197) → |
| Sau-3449-1 | NZ_KK239758.1 | - | 26024 | 25995 | RNA → rpmE2 (PRK01678)Ribosomal_L31 (pfam01197) → |
| Sau-3453-1 | NZ_KK239901.1 | - | 26024 | 25995 | RNA → rpmE2 (PRK01678)Ribosomal_L31 (pfam01197) → |
| Sau-3288-1 | NZ_KK234034.1 | - | 26024 | 25995 | RNA → rpmE2 (PRK01678)Ribosomal_L31 (pfam01197) → |
| Sau-3454-1 | NZ_KK239942.1 | - | 26024 | 25995 | RNA → rpmE2 (PRK01678)Ribosomal_L31 (pfam01197) → |
| Sau-3460-1 | NZ_KK240086.1 | - | 26024 | 25995 | RNA → rpmE2 (PRK01678)Ribosomal_L31 (pfam01197) → |
| Sau-3461-1 | NZ_KK240125.1 | - | 26024 | 25995 | RNA → rpmE2 (PRK01678)Ribosomal_L31 (pfam01197) → |
| Sau-3467-1 | NZ_KK240284.1 | - | 56403 | 56374 | RNA → rpmE2 (PRK01678)Ribosomal_L31 (pfam01197) → |

|            |               |   |       |       |                                                   |
|------------|---------------|---|-------|-------|---------------------------------------------------|
| Sau-3468-1 | NZ_KK240323.1 | - | 26024 | 25995 | RNA → rpmE2 (PRK01678)Ribosomal_L31 (pfam01197) → |
| Sau-3475-1 | NZ_KK240494.1 | - | 26024 | 25995 | RNA → rpmE2 (PRK01678)Ribosomal_L31 (pfam01197) → |
| Sau-3712-1 | NZ_KK240655.1 | - | 56395 | 56366 | RNA → rpmE2 (PRK01678)Ribosomal_L31 (pfam01197) → |
| Sau-3718-1 | NZ_KK240836.1 | - | 26024 | 25995 | RNA → rpmE2 (PRK01678)Ribosomal_L31 (pfam01197) → |
| Sau-3440-1 | NZ_KK239446.1 | - | 26024 | 25995 | RNA → rpmE2 (PRK01678)Ribosomal_L31 (pfam01197) → |
| Sau-3447-1 | NZ_KK239680.1 | - | 26024 | 25995 | RNA → rpmE2 (PRK01678)Ribosomal_L31 (pfam01197) → |
| Sau-3223-1 | NZ_KK231839.1 | - | 55801 | 55772 | RNA → rpmE2 (PRK01678)Ribosomal_L31 (pfam01197) → |
| Sau-3452-1 | NZ_KK239862.1 | - | 56310 | 56281 | RNA → rpmE2 (PRK01678)Ribosomal_L31 (pfam01197) → |
| Sau-3291-1 | NZ_KK234207.1 | - | 33041 | 33012 | RNA → rpmE2 (PRK01678)Ribosomal_L31 (pfam01197) → |
| Sau-3459-1 | NZ_KK240053.1 | - | 26024 | 25995 | RNA → rpmE2 (PRK01678)Ribosomal_L31 (pfam01197) → |
| Sau-3472-1 | NZ_KK240411.1 | - | 26024 | 25995 | RNA → rpmE2 (PRK01678)Ribosomal_L31 (pfam01197) → |
| Sau-3296-1 | NZ_KK234444.1 | - | 56354 | 56325 | RNA → rpmE2 (PRK01678)Ribosomal_L31 (pfam01197) → |
| Sau-3474-1 | NZ_KK240451.1 | - | 26059 | 26030 | RNA → rpmE2 (PRK01678)Ribosomal_L31 (pfam01197) → |
| Sau-3313-1 | NZ_KK235112.1 | - | 26024 | 25995 | RNA → rpmE2 (PRK01678)Ribosomal_L31 (pfam01197) → |
| Sau-3478-1 | NZ_KK240580.1 | - | 26024 | 25995 | RNA → rpmE2 (PRK01678)Ribosomal_L31 (pfam01197) → |
| Sau-3322-1 | NZ_KK235373.1 | - | 26024 | 25995 | RNA → rpmE2 (PRK01678)Ribosomal_L31 (pfam01197) → |
| Sau-3246-1 | NZ_KK232545.1 | - | 56439 | 56410 | RNA → rpmE2 (PRK01678)Ribosomal_L31 (pfam01197) → |
| Sau-3344-1 | NZ_KK236227.1 | - | 324   | 295   | RNA → rpmE2 (PRK01678)Ribosomal_L31 (pfam01197) → |
| Sau-3710-1 | NZ_KK240619.1 | - | 26024 | 25995 | RNA → rpmE2 (PRK01678)Ribosomal_L31 (pfam01197) → |
| Sau-3349-1 | NZ_KK236311.1 | - | 56305 | 56276 | RNA → rpmE2 (PRK01678)Ribosomal_L31 (pfam01197) → |
| Sau-3247-1 | NZ_KK232579.1 | - | 26024 | 25995 | RNA → rpmE2 (PRK01678)Ribosomal_L31 (pfam01197) → |
| Sau-3716-1 | NZ_KK240757.1 | - | 26024 | 25995 | RNA → rpmE2 (PRK01678)Ribosomal_L31 (pfam01197) → |
| Sau-3717-1 | NZ_KK240801.1 | - | 26024 | 25995 | RNA → rpmE2 (PRK01678)Ribosomal_L31 (pfam01197) → |
| Sau-3357-1 | NZ_KK236523.1 | - | 19385 | 19356 | RNA → rpmE2 (PRK01678)Ribosomal_L31 (pfam01197) → |
| Sau-3251-1 | NZ_KK232759.1 | - | 25789 | 25760 | RNA → rpmE2 (PRK01678)Ribosomal_L31 (pfam01197) → |
| Sau-3364-1 | NZ_KK236725.1 | - | 2562  | 2533  | RNA → rpmE2 (PRK01678)Ribosomal_L31 (pfam01197) → |
| Sau-3252-1 | NZ_KK232802.1 | - | 26023 | 25994 | RNA → rpmE2 (PRK01678)Ribosomal_L31 (pfam01197) → |
| Sau-3257-1 | NZ_KK233004.1 | - | 26024 | 25995 | RNA → rpmE2 (PRK01678)Ribosomal_L31 (pfam01197) → |
| Sau-3258-1 | NZ_KK233060.1 | - | 26024 | 25995 | RNA → rpmE2 (PRK01678)Ribosomal_L31 (pfam01197) → |
| Sau-3264-1 | NZ_KK233293.1 | - | 56395 | 56366 | RNA → rpmE2 (PRK01678)Ribosomal_L31 (pfam01197) → |
| Sau-3269-1 | NZ_KK233491.1 | - | 26024 | 25995 | RNA → rpmE2 (PRK01678)Ribosomal_L31 (pfam01197) → |
| Sau-3301-1 | NZ_KK234667.1 | - | 26024 | 25995 | RNA → rpmE2 (PRK01678)Ribosomal_L31 (pfam01197) → |
| Sau-3278-1 | NZ_KK233668.1 | - | 26024 | 25995 | RNA → rpmE2 (PRK01678)Ribosomal_L31 (pfam01197) → |
| Sau-3347-1 | NZ_KK236266.1 | - | 26024 | 25995 | RNA → rpmE2 (PRK01678)Ribosomal_L31 (pfam01197) → |
| Sau-3285-1 | NZ_KK233916.1 | - | 26024 | 25995 | RNA → rpmE2 (PRK01678)Ribosomal_L31 (pfam01197) → |
| Sau-3356-1 | NZ_KK236493.1 | - | 56439 | 56410 | RNA → rpmE2 (PRK01678)Ribosomal_L31 (pfam01197) → |
| Sau-3243-1 | NZ_KK232425.1 | - | 56395 | 56366 | RNA → rpmE2 (PRK01678)Ribosomal_L31 (pfam01197) → |
| Sau-3369-1 | NZ_KK236870.1 | - | 18726 | 18697 | RNA → rpmE2 (PRK01678)Ribosomal_L31 (pfam01197) → |
| Sau-3248-1 | NZ_KK232626.1 | - | 56390 | 56361 | RNA → rpmE2 (PRK01678)Ribosomal_L31 (pfam01197) → |
| Sau-3375-1 | NZ_KK237079.1 | - | 56389 | 56360 | RNA → rpmE2 (PRK01678)Ribosomal_L31 (pfam01197) → |
| Sau-3259-1 | NZ_KK233125.1 | - | 3349  | 3320  | RNA → rpmE2 (PRK01678)Ribosomal_L31 (pfam01197) → |
| Sau-3380-1 | NZ_KK237308.1 | - | 26024 | 25995 | RNA → rpmE2 (PRK01678)Ribosomal_L31 (pfam01197) → |
| Sau-3265-1 | NZ_KK233320.1 | - | 26024 | 25995 | RNA → rpmE2 (PRK01678)Ribosomal_L31 (pfam01197) → |
| Sau-3385-1 | NZ_KK237500.1 | - | 56354 | 56325 | RNA → rpmE2 (PRK01678)Ribosomal_L31 (pfam01197) → |
| Sau-3272-1 | NZ_KK233526.1 | - | 26024 | 25995 | RNA → rpmE2 (PRK01678)Ribosomal_L31 (pfam01197) → |
| Sau-3315-1 | NZ_KK235151.1 | - | 26023 | 25994 | RNA → rpmE2 (PRK01678)Ribosomal_L31 (pfam01197) → |
| Sau-3302-1 | NZ_KK234707.1 | - | 26024 | 25995 | RNA → rpmE2 (PRK01678)Ribosomal_L31 (pfam01197) → |
| Sau-3329-1 | NZ_KK235571.1 | - | 26024 | 25995 | RNA → rpmE2 (PRK01678)Ribosomal_L31 (pfam01197) → |
| Sau-3303-1 | NZ_KK234760.1 | - | 26024 | 25995 | RNA → rpmE2 (PRK01678)Ribosomal_L31 (pfam01197) → |
| Sau-3334-1 | NZ_KK235765.1 | - | 56310 | 56281 | RNA → rpmE2 (PRK01678)Ribosomal_L31 (pfam01197) → |
| Sau-3307-1 | NZ_KK234915.1 | - | 26024 | 25995 | RNA → rpmE2 (PRK01678)Ribosomal_L31 (pfam01197) → |
| Sau-3339-1 | NZ_KK235994.1 | - | 26024 | 25995 | RNA → rpmE2 (PRK01678)Ribosomal_L31 (pfam01197) → |

|            |               |   |       |       |                                                   |
|------------|---------------|---|-------|-------|---------------------------------------------------|
| Sau-3308-1 | NZ_KK234944.1 | - | 26024 | 25995 | RNA → rpmE2 (PRK01678)Ribosomal_L31 (pfam01197) → |
| Sau-3371-1 | NZ_KK236898.1 | - | 2481  | 2452  | RNA → rpmE2 (PRK01678)Ribosomal_L31 (pfam01197) → |
| Sau-3290-1 | NZ_KK234154.1 | - | 26024 | 25995 | RNA → rpmE2 (PRK01678)Ribosomal_L31 (pfam01197) → |
| Sau-3280-1 | NZ_KK233714.1 | - | 26024 | 25995 | RNA → rpmE2 (PRK01678)Ribosomal_L31 (pfam01197) → |
| Sau-3381-1 | NZ_KK237351.1 | - | 26024 | 25995 | RNA → rpmE2 (PRK01678)Ribosomal_L31 (pfam01197) → |
| Sau-3295-1 | NZ_KK234384.1 | - | 26024 | 25995 | RNA → rpmE2 (PRK01678)Ribosomal_L31 (pfam01197) → |
| Sau-3286-1 | NZ_KK233953.1 | - | 56439 | 56410 | RNA → rpmE2 (PRK01678)Ribosomal_L31 (pfam01197) → |
| Sau-3306-1 | NZ_KK234874.1 | - | 56440 | 56411 | RNA → rpmE2 (PRK01678)Ribosomal_L31 (pfam01197) → |
| Sau-3245-1 | NZ_KK232506.1 | - | 54852 | 54823 | RNA → rpmE2 (PRK01678)Ribosomal_L31 (pfam01197) → |
| Sau-3319-1 | NZ_KK235253.1 | - | 56439 | 56410 | RNA → rpmE2 (PRK01678)Ribosomal_L31 (pfam01197) → |
| Sau-3325-1 | NZ_KK235486.1 | - | 26024 | 25995 | RNA → rpmE2 (PRK01678)Ribosomal_L31 (pfam01197) → |
| Sau-3250-1 | NZ_KK232698.1 | - | 26024 | 25995 | RNA → rpmE2 (PRK01678)Ribosomal_L31 (pfam01197) → |
| Sau-3324-1 | NZ_KK235447.1 | - | 25968 | 25939 | RNA → rpmE2 (PRK01678)Ribosomal_L31 (pfam01197) → |
| Sau-3343-1 | NZ_KK236171.1 | - | 25968 | 25939 | RNA → rpmE2 (PRK01678)Ribosomal_L31 (pfam01197) → |
| Sau-3331-1 | NZ_KK235649.1 | - | 26024 | 25995 | RNA → rpmE2 (PRK01678)Ribosomal_L31 (pfam01197) → |
| Sau-3256-1 | NZ_KK232949.1 | - | 26024 | 25995 | RNA → rpmE2 (PRK01678)Ribosomal_L31 (pfam01197) → |
| Sau-3336-1 | NZ_KK235845.1 | - | 26024 | 25995 | RNA → rpmE2 (PRK01678)Ribosomal_L31 (pfam01197) → |
| Sau-3363-1 | NZ_KK236694.1 | - | 26024 | 25995 | RNA → rpmE2 (PRK01678)Ribosomal_L31 (pfam01197) → |
| Sau-3262-1 | NZ_KK233186.1 | - | 56439 | 56410 | RNA → rpmE2 (PRK01678)Ribosomal_L31 (pfam01197) → |
| Sau-3342-1 | NZ_KK236132.1 | - | 26024 | 25995 | RNA → rpmE2 (PRK01678)Ribosomal_L31 (pfam01197) → |
| Sau-3345-1 | NZ_KK328125.1 | - | 25997 | 25968 | RNA → rpmE2 (PRK01678)Ribosomal_L31 (pfam01197) → |
| Sau-3263-1 | NZ_KK233245.1 | - | 26024 | 25995 | RNA → rpmE2 (PRK01678)Ribosomal_L31 (pfam01197) → |
| Sau-3354-1 | NZ_KK236396.1 | - | 56390 | 56361 | RNA → rpmE2 (PRK01678)Ribosomal_L31 (pfam01197) → |
| Sau-3267-1 | NZ_KK233392.1 | - | 26024 | 25995 | RNA → rpmE2 (PRK01678)Ribosomal_L31 (pfam01197) → |
| Sau-3355-1 | NZ_KK236455.1 | - | 56395 | 56366 | RNA → rpmE2 (PRK01678)Ribosomal_L31 (pfam01197) → |
| Sau-3268-1 | NZ_KK233439.1 | - | 26024 | 25995 | RNA → rpmE2 (PRK01678)Ribosomal_L31 (pfam01197) → |
| Sau-3368-1 | NZ_KK236834.1 | - | 56279 | 56250 | RNA → rpmE2 (PRK01678)Ribosomal_L31 (pfam01197) → |
| Sau-3275-1 | NZ_KK233602.1 | - | 26024 | 25995 | RNA → rpmE2 (PRK01678)Ribosomal_L31 (pfam01197) → |
| Sau-3374-1 | NZ_KK237046.1 | - | 26024 | 25995 | RNA → rpmE2 (PRK01678)Ribosomal_L31 (pfam01197) → |
| Sau-3277-1 | NZ_KK233637.1 | - | 26024 | 25995 | RNA → rpmE2 (PRK01678)Ribosomal_L31 (pfam01197) → |
| Sau-3317-1 | NZ_KK235201.1 | - | 26024 | 25995 | RNA → rpmE2 (PRK01678)Ribosomal_L31 (pfam01197) → |
| Sau-3294-1 | NZ_KK234337.1 | - | 26024 | 25995 | RNA → rpmE2 (PRK01678)Ribosomal_L31 (pfam01197) → |
| Sau-3300-1 | NZ_KK234614.1 | - | 53444 | 53415 | RNA → rpmE2 (PRK01678)Ribosomal_L31 (pfam01197) → |
| Sau-3340-1 | NZ_KK236040.1 | - | 26024 | 25995 | RNA → rpmE2 (PRK01678)Ribosomal_L31 (pfam01197) → |
| Sau-3305-1 | NZ_KK234843.1 | - | 26024 | 25995 | RNA → rpmE2 (PRK01678)Ribosomal_L31 (pfam01197) → |
| Sau-3311-1 | NZ_KK235031.1 | - | 26024 | 25995 | RNA → rpmE2 (PRK01678)Ribosomal_L31 (pfam01197) → |
| Sau-3359-1 | NZ_KK236567.1 | - | 26024 | 25995 | RNA → rpmE2 (PRK01678)Ribosomal_L31 (pfam01197) → |
| Sau-3282-1 | NZ_KK233806.1 | - | 26024 | 25995 | RNA → rpmE2 (PRK01678)Ribosomal_L31 (pfam01197) → |
| Sau-3360-1 | NZ_KK236596.1 | - | 26024 | 25995 | RNA → rpmE2 (PRK01678)Ribosomal_L31 (pfam01197) → |
| Sau-3289-1 | NZ_KK234091.1 | - | 56439 | 56410 | RNA → rpmE2 (PRK01678)Ribosomal_L31 (pfam01197) → |
| Sau-3244-1 | NZ_KK232479.1 | - | 26023 | 25994 | RNA → rpmE2 (PRK01678)Ribosomal_L31 (pfam01197) → |
| Sau-3249-1 | NZ_KK232671.1 | - | 56439 | 56410 | RNA → rpmE2 (PRK01678)Ribosomal_L31 (pfam01197) → |
| Sau-3255-1 | NZ_KK232899.1 | - | 26024 | 25995 | RNA → rpmE2 (PRK01678)Ribosomal_L31 (pfam01197) → |
| Sau-3260-1 | NZ_KK233161.1 | - | 26024 | 25995 | RNA → rpmE2 (PRK01678)Ribosomal_L31 (pfam01197) → |
| Sau-3274-1 | NZ_KK233565.1 | - | 26024 | 25995 | RNA → rpmE2 (PRK01678)Ribosomal_L31 (pfam01197) → |
| Sau-3292-1 | NZ_KK234244.1 | - | 26024 | 25995 | RNA → rpmE2 (PRK01678)Ribosomal_L31 (pfam01197) → |
| Sau-3293-1 | NZ_KK234279.1 | - | 26024 | 25995 | RNA → rpmE2 (PRK01678)Ribosomal_L31 (pfam01197) → |
| Sau-3297-1 | NZ_KK234517.1 | - | 26024 | 25995 | RNA → rpmE2 (PRK01678)Ribosomal_L31 (pfam01197) → |
| Sau-3298-1 | NZ_KK234558.1 | - | 26024 | 25995 | RNA → rpmE2 (PRK01678)Ribosomal_L31 (pfam01197) → |
| Sau-3304-1 | NZ_KK234801.1 | - | 26024 | 25995 | RNA → rpmE2 (PRK01678)Ribosomal_L31 (pfam01197) → |
| Sau-3310-1 | NZ_KK234978.1 | - | 26024 | 25995 | RNA → rpmE2 (PRK01678)Ribosomal_L31 (pfam01197) → |
| Sau-3281-1 | NZ_KK233762.1 | - | 26024 | 25995 | RNA → rpmE2 (PRK01678)Ribosomal_L31 (pfam01197) → |



|            |                   |   |       |       |                                                   |
|------------|-------------------|---|-------|-------|---------------------------------------------------|
| Sau-3287-1 | NZ_KK233998.1     | - | 26024 | 25995 | RNA → rpmE2 (PRK01678)Ribosomal_L31 (pfam01197) → |
| Sau-3180-1 | NZ_KK230294.1     | - | 26024 | 25995 | RNA → rpmE2 (PRK01678)Ribosomal_L31 (pfam01197) → |
| Sau-3181-1 | NZ_KK230346.1     | - | 29589 | 29560 | RNA → rpmE2 (PRK01678)Ribosomal_L31 (pfam01197) → |
| Sau-3202-1 | NZ_KK230956.1     | - | 56439 | 56410 | RNA → rpmE2 (PRK01678)Ribosomal_L31 (pfam01197) → |
| Sau-867-1  | NZ_KK223898.1     | - | 56351 | 56322 | RNA → rpmE2 (PRK01678)Ribosomal_L31 (pfam01197) → |
| Sau-3207-1 | NZ_KK231188.1     | - | 26024 | 25995 | RNA → rpmE2 (PRK01678)Ribosomal_L31 (pfam01197) → |
| Sau-3212-1 | NZ_KK231386.1     | - | 26024 | 25995 | RNA → rpmE2 (PRK01678)Ribosomal_L31 (pfam01197) → |
| Sau-2687-1 | NZ_KK224793.1     | - | 56395 | 56366 | RNA → rpmE2 (PRK01678)Ribosomal_L31 (pfam01197) → |
| Sau-4013-1 | NZ_AGRP01000086.1 | - | 54853 | 54824 | RNA → rpmE2 (PRK01678)Ribosomal_L31 (pfam01197) → |
| Sau-4015-1 | NZ_AFTQ01000078.1 | - | 55162 | 55133 | RNA → rpmE2 (PRK01678)Ribosomal_L31 (pfam01197) → |
| Sau-3217-1 | NZ_KK231605.1     | - | 26024 | 25995 | RNA → rpmE2 (PRK01678)Ribosomal_L31 (pfam01197) → |
| Sau-3222-1 | NZ_KK231797.1     | - | 26024 | 25995 | RNA → rpmE2 (PRK01678)Ribosomal_L31 (pfam01197) → |
| Sau-3104-1 | NZ_KK227826.1     | - | 26023 | 25994 | RNA → rpmE2 (PRK01678)Ribosomal_L31 (pfam01197) → |
| Sau-3227-1 | NZ_KK231957.1     | - | 56309 | 56280 | RNA → rpmE2 (PRK01678)Ribosomal_L31 (pfam01197) → |
| Sau-3128-1 | NZ_KK228659.1     | - | 26024 | 25995 | RNA → rpmE2 (PRK01678)Ribosomal_L31 (pfam01197) → |
| Sau-3233-1 | NZ_KK232123.1     | - | 26024 | 25995 | RNA → rpmE2 (PRK01678)Ribosomal_L31 (pfam01197) → |
| Sau-3240-1 | NZ_KK232321.1     | - | 53699 | 53670 | RNA → rpmE2 (PRK01678)Ribosomal_L31 (pfam01197) → |
| Sau-3134-1 | NZ_KK228852.1     | - | 26024 | 25995 | RNA → rpmE2 (PRK01678)Ribosomal_L31 (pfam01197) → |
| Sau-3186-1 | NZ_KK230550.1     | - | 56420 | 56391 | RNA → rpmE2 (PRK01678)Ribosomal_L31 (pfam01197) → |
| Sau-3141-1 | NZ_KK229051.1     | - | 56395 | 56366 | RNA → rpmE2 (PRK01678)Ribosomal_L31 (pfam01197) → |
| Sau-3187-1 | NZ_KK230593.1     | - | 56395 | 56366 | RNA → rpmE2 (PRK01678)Ribosomal_L31 (pfam01197) → |
| Sau-3195-1 | NZ_KK230781.1     | - | 56304 | 56275 | RNA → rpmE2 (PRK01678)Ribosomal_L31 (pfam01197) → |
| Sau-3151-1 | NZ_KK229266.1     | - | 26024 | 25995 | RNA → rpmE2 (PRK01678)Ribosomal_L31 (pfam01197) → |
| Sau-3182-1 | NZ_KK230400.1     | - | 56395 | 56366 | RNA → rpmE2 (PRK01678)Ribosomal_L31 (pfam01197) → |
| Sau-3203-1 | NZ_KK231012.1     | - | 26024 | 25995 | RNA → rpmE2 (PRK01678)Ribosomal_L31 (pfam01197) → |
| Sau-3155-1 | NZ_KK229434.1     | - | 56395 | 56366 | RNA → rpmE2 (PRK01678)Ribosomal_L31 (pfam01197) → |
| Sau-3208-1 | NZ_KK231221.1     | - | 56439 | 56410 | RNA → rpmE2 (PRK01678)Ribosomal_L31 (pfam01197) → |
| Sau-3213-1 | NZ_KK231435.1     | - | 26024 | 25995 | RNA → rpmE2 (PRK01678)Ribosomal_L31 (pfam01197) → |
| Sau-3167-1 | NZ_KK229842.1     | - | 56395 | 56366 | RNA → rpmE2 (PRK01678)Ribosomal_L31 (pfam01197) → |
| Sau-3218-1 | NZ_KK231633.1     | - | 26024 | 25995 | RNA → rpmE2 (PRK01678)Ribosomal_L31 (pfam01197) → |
| Sau-3174-1 | NZ_KK230081.1     | - | 26024 | 25995 | RNA → rpmE2 (PRK01678)Ribosomal_L31 (pfam01197) → |
| Sau-3228-1 | NZ_KK231982.1     | - | 26024 | 25995 | RNA → rpmE2 (PRK01678)Ribosomal_L31 (pfam01197) → |
| Sau-3230-1 | NZ_KK232006.1     | - | 56353 | 56324 | RNA → rpmE2 (PRK01678)Ribosomal_L31 (pfam01197) → |
| Sau-3235-1 | NZ_KK232151.1     | - | 26024 | 25995 | RNA → rpmE2 (PRK01678)Ribosomal_L31 (pfam01197) → |
| Sau-3236-1 | NZ_KK232180.1     | - | 26025 | 25996 | RNA → rpmE2 (PRK01678)Ribosomal_L31 (pfam01197) → |
| Sau-3241-1 | NZ_KK232371.1     | - | 56394 | 56365 | RNA → rpmE2 (PRK01678)Ribosomal_L31 (pfam01197) → |
| Sau-203-1  | NZ_KK222014.1     | - | 34754 | 34725 | RNA → rpmE2 (PRK01678)Ribosomal_L31 (pfam01197) → |
| Sau-3188-1 | NZ_KK230635.1     | - | 26024 | 25995 | RNA → rpmE2 (PRK01678)Ribosomal_L31 (pfam01197) → |
| Sau-3196-1 | NZ_KK230828.1     | - | 26024 | 25995 | RNA → rpmE2 (PRK01678)Ribosomal_L31 (pfam01197) → |
| Sau-3105-1 | NZ_KK227870.1     | - | 26023 | 25994 | RNA → rpmE2 (PRK01678)Ribosomal_L31 (pfam01197) → |
| Sau-3185-1 | NZ_KK230491.1     | - | 56439 | 56410 | RNA → rpmE2 (PRK01678)Ribosomal_L31 (pfam01197) → |
| Sau-3110-1 | NZ_KK228070.1     | - | 26024 | 25995 | RNA → rpmE2 (PRK01678)Ribosomal_L31 (pfam01197) → |
| Sau-3200-1 | NZ_KK230930.1     | - | 53254 | 53225 | RNA → rpmE2 (PRK01678)Ribosomal_L31 (pfam01197) → |
| Sau-3205-1 | NZ_KK231074.1     | - | 26287 | 26258 | RNA → rpmE2 (PRK01678)Ribosomal_L31 (pfam01197) → |
| Sau-3135-1 | NZ_KK228890.1     | - | 26024 | 25995 | RNA → rpmE2 (PRK01678)Ribosomal_L31 (pfam01197) → |
| Sau-3206-1 | NZ_KK231155.1     | - | 56394 | 56365 | RNA → rpmE2 (PRK01678)Ribosomal_L31 (pfam01197) → |
| Sau-3210-1 | NZ_KK231317.1     | - | 26024 | 25995 | RNA → rpmE2 (PRK01678)Ribosomal_L31 (pfam01197) → |
| Sau-3156-1 | NZ_KK229493.1     | - | 26024 | 25995 | RNA → rpmE2 (PRK01678)Ribosomal_L31 (pfam01197) → |
| Sau-3211-1 | NZ_KK231348.1     | - | 25968 | 25939 | RNA → rpmE2 (PRK01678)Ribosomal_L31 (pfam01197) → |
| Sau-3216-1 | NZ_KK231552.1     | - | 9739  | 9710  | RNA → rpmE2 (PRK01678)Ribosomal_L31 (pfam01197) → |
| Sau-3161-1 | NZ_KK229686.1     | - | 26024 | 25995 | RNA → rpmE2 (PRK01678)Ribosomal_L31 (pfam01197) → |
| Sau-3221-1 | NZ_KK231752.1     | - | 26024 | 25995 | RNA → rpmE2 (PRK01678)Ribosomal_L31 (pfam01197) → |

|            |               |   |       |       |                                                   |
|------------|---------------|---|-------|-------|---------------------------------------------------|
| Sau-3226-1 | NZ_KK231934.1 | - | 54426 | 54397 | RNA → rpmE2 (PRK01678)Ribosomal_L31 (pfam01197) → |
| Sau-3169-1 | NZ_KK229903.1 | - | 56339 | 56310 | RNA → rpmE2 (PRK01678)Ribosomal_L31 (pfam01197) → |
| Sau-3232-1 | NZ_KK232090.1 | - | 324   | 295   | RNA → rpmE2 (PRK01678)Ribosomal_L31 (pfam01197) → |
| Sau-3239-1 | NZ_KK232282.1 | - | 56310 | 56281 | RNA → rpmE2 (PRK01678)Ribosomal_L31 (pfam01197) → |
| Sau-3170-1 | NZ_KK229956.1 | - | 26024 | 25995 | RNA → rpmE2 (PRK01678)Ribosomal_L31 (pfam01197) → |
| Sau-3191-1 | NZ_KK230709.1 | - | 56439 | 56410 | RNA → rpmE2 (PRK01678)Ribosomal_L31 (pfam01197) → |
| Sau-3194-1 | NZ_KK230757.1 | - | 56310 | 56281 | RNA → rpmE2 (PRK01678)Ribosomal_L31 (pfam01197) → |
| Sau-3177-1 | NZ_KK230171.1 | - | 26023 | 25994 | RNA → rpmE2 (PRK01678)Ribosomal_L31 (pfam01197) → |
| Sau-3199-1 | NZ_KK230896.1 | - | 26024 | 25995 | RNA → rpmE2 (PRK01678)Ribosomal_L31 (pfam01197) → |
| Sau-3204-1 | NZ_KK231053.1 | - | 26024 | 25995 | RNA → rpmE2 (PRK01678)Ribosomal_L31 (pfam01197) → |
| Sau-3209-1 | NZ_KK231265.1 | - | 26024 | 25995 | RNA → rpmE2 (PRK01678)Ribosomal_L31 (pfam01197) → |
| Sau-3214-1 | NZ_KK231470.1 | - | 26149 | 26120 | RNA → rpmE2 (PRK01678)Ribosomal_L31 (pfam01197) → |
| Sau-3215-1 | NZ_KK231503.1 | - | 26024 | 25995 | RNA → rpmE2 (PRK01678)Ribosomal_L31 (pfam01197) → |
| Sau-3219-1 | NZ_KK231663.1 | - | 53737 | 53708 | RNA → rpmE2 (PRK01678)Ribosomal_L31 (pfam01197) → |
| Sau-3220-1 | NZ_KK231710.1 | - | 26024 | 25995 | RNA → rpmE2 (PRK01678)Ribosomal_L31 (pfam01197) → |
| Sau-3224-1 | NZ_KK231877.1 | - | 26024 | 25995 | RNA → rpmE2 (PRK01678)Ribosomal_L31 (pfam01197) → |
| Sau-3231-1 | NZ_KK232044.1 | - | 26024 | 25995 | RNA → rpmE2 (PRK01678)Ribosomal_L31 (pfam01197) → |
| Sau-3238-1 | NZ_KK232221.1 | - | 26024 | 25995 | RNA → rpmE2 (PRK01678)Ribosomal_L31 (pfam01197) → |
| Sau-3100-1 | NZ_KK227661.1 | - | 57233 | 57204 | RNA → rpmE2 (PRK01678)Ribosomal_L31 (pfam01197) → |
| Sau-3189-1 | NZ_KK230662.1 | - | 56439 | 56410 | RNA → rpmE2 (PRK01678)Ribosomal_L31 (pfam01197) → |
| Sau-3197-1 | NZ_KK230870.1 | - | 26024 | 25995 | RNA → rpmE2 (PRK01678)Ribosomal_L31 (pfam01197) → |
| Sau-3074-1 | NZ_KK226711.1 | - | 26024 | 25995 | RNA → rpmE2 (PRK01678)Ribosomal_L31 (pfam01197) → |
| Sau-3107-1 | NZ_KK227954.1 | - | 26024 | 25995 | RNA → rpmE2 (PRK01678)Ribosomal_L31 (pfam01197) → |
| Sau-3113-1 | NZ_KK228153.1 | - | 26024 | 25995 | RNA → rpmE2 (PRK01678)Ribosomal_L31 (pfam01197) → |
| Sau-3125-1 | NZ_KK228588.1 | - | 26024 | 25995 | RNA → rpmE2 (PRK01678)Ribosomal_L31 (pfam01197) → |
| Sau-3127-1 | NZ_KK228618.1 | - | 26024 | 25995 | RNA → rpmE2 (PRK01678)Ribosomal_L31 (pfam01197) → |
| Sau-3133-1 | NZ_KK228823.1 | - | 56380 | 56351 | RNA → rpmE2 (PRK01678)Ribosomal_L31 (pfam01197) → |
| Sau-3159-1 | NZ_KK229612.1 | - | 26024 | 25995 | RNA → rpmE2 (PRK01678)Ribosomal_L31 (pfam01197) → |
| Sau-3172-1 | NZ_KK230044.1 | - | 26024 | 25995 | RNA → rpmE2 (PRK01678)Ribosomal_L31 (pfam01197) → |
| Sau-2635-1 | NZ_KK224580.1 | - | 31457 | 31428 | RNA → rpmE2 (PRK01678)Ribosomal_L31 (pfam01197) → |
| Sau-2696-1 | NZ_KK225209.1 | - | 26024 | 25995 | RNA → rpmE2 (PRK01678)Ribosomal_L31 (pfam01197) → |
| Sau-2728-1 | NZ_KK225630.1 | - | 26024 | 25995 | RNA → rpmE2 (PRK01678)Ribosomal_L31 (pfam01197) → |
| Sau-3008-1 | NZ_KK225971.1 | - | 26024 | 25995 | RNA → rpmE2 (PRK01678)Ribosomal_L31 (pfam01197) → |
| Sau-3015-1 | NZ_KK226169.1 | - | 26024 | 25995 | RNA → rpmE2 (PRK01678)Ribosomal_L31 (pfam01197) → |
| Sau-3072-1 | NZ_KK226639.1 | - | 26024 | 25995 | RNA → rpmE2 (PRK01678)Ribosomal_L31 (pfam01197) → |
| Sau-3078-1 | NZ_KK226872.1 | - | 56439 | 56410 | RNA → rpmE2 (PRK01678)Ribosomal_L31 (pfam01197) → |
| Sau-3137-1 | NZ_KK228988.1 | - | 56439 | 56410 | RNA → rpmE2 (PRK01678)Ribosomal_L31 (pfam01197) → |
| Sau-3146-1 | NZ_KK229172.1 | - | 26024 | 25995 | RNA → rpmE2 (PRK01678)Ribosomal_L31 (pfam01197) → |
| Sau-3158-1 | NZ_KK229579.1 | - | 26024 | 25995 | RNA → rpmE2 (PRK01678)Ribosomal_L31 (pfam01197) → |
| Sau-3171-1 | NZ_KK229998.1 | - | 26024 | 25995 | RNA → rpmE2 (PRK01678)Ribosomal_L31 (pfam01197) → |
| Sau-3178-1 | NZ_KK230206.1 | - | 56440 | 56411 | RNA → rpmE2 (PRK01678)Ribosomal_L31 (pfam01197) → |
| Sau-3102-1 | NZ_KK227736.1 | - | 56395 | 56366 | RNA → rpmE2 (PRK01678)Ribosomal_L31 (pfam01197) → |
| Sau-3416-1 | NZ_KK238465.1 | - | 26024 | 25995 | RNA → rpmE2 (PRK01678)Ribosomal_L31 (pfam01197) → |
| Sau-3451-1 | NZ_KK239825.1 | - | 56352 | 56323 | RNA → rpmE2 (PRK01678)Ribosomal_L31 (pfam01197) → |
| Sau-366-1  | NZ_KK099382.1 | - | 57558 | 57529 | RNA → rpmE2 (PRK01678)Ribosomal_L31 (pfam01197) → |
| Sau-384-1  | NZ_KK098824.1 | - | 58224 | 58195 | RNA → rpmE2 (PRK01678)Ribosomal_L31 (pfam01197) → |
| Sau-1071-1 | NZ_KK097754.1 | - | 34817 | 34788 | RNA → rpmE2 (PRK01678)Ribosomal_L31 (pfam01197) → |
| Sau-994-1  | NZ_KK096328.1 | - | 56794 | 56765 | RNA → rpmE2 (PRK01678)Ribosomal_L31 (pfam01197) → |
| Sau-3435-1 | NZ_KK239279.1 | - | 56439 | 56410 | RNA → rpmE2 (PRK01678)Ribosomal_L31 (pfam01197) → |
| Sau-3465-1 | NZ_KK240248.1 | - | 26024 | 25995 | RNA → rpmE2 (PRK01678)Ribosomal_L31 (pfam01197) → |
| Sau-2705-1 | NZ_KK093341.1 | - | 25162 | 25133 | RNA → rpmE2 (PRK01678)Ribosomal_L31 (pfam01197) → |
| Sau-3254-1 | NZ_KK232846.1 | - | 26024 | 25995 | RNA → rpmE2 (PRK01678)Ribosomal_L31 (pfam01197) → |



|            |               |   |         |         |       |                                                             |
|------------|---------------|---|---------|---------|-------|-------------------------------------------------------------|
| Sau-3560-1 | NZ_KK097381.1 | - | 56894   | 56865   | RNA → | <a href="#">rpmE2 (PRK01678)Ribosomal_L31 (pfam01197)</a> → |
| Sau-3335-1 | NZ_KK235791.1 | - | 26024   | 25995   | RNA → | <a href="#">rpmE2 (PRK01678)Ribosomal_L31 (pfam01197)</a> → |
| Sau-323-1  | NZ_KK099083.1 | - | 423928  | 423899  | RNA → | <a href="#">rpmE2 (PRK01678)Ribosomal_L31 (pfam01197)</a> → |
| Sau-3462-1 | NZ_KK240163.1 | - | 26024   | 25995   | RNA → | <a href="#">rpmE2 (PRK01678)Ribosomal_L31 (pfam01197)</a> → |
| Sau-2908-1 | NZ_KK095057.1 | - | 34913   | 34884   | RNA → | <a href="#">rpmE2 (PRK01678)Ribosomal_L31 (pfam01197)</a> → |
| Sau-433-1  | NZ_KK097952.1 | - | 402019  | 401990  | RNA → | <a href="#">rpmE2 (PRK01678)Ribosomal_L31 (pfam01197)</a> → |
| Sau-476-1  | NZ_KK098504.1 | - | 56762   | 56733   | RNA → | <a href="#">rpmE2 (PRK01678)Ribosomal_L31 (pfam01197)</a> → |
| Sau-578-1  | NZ_KK099895.1 | - | 64875   | 64846   | RNA → | <a href="#">rpmE2 (PRK01678)Ribosomal_L31 (pfam01197)</a> → |
| Sau-3535-1 | NZ_KK097153.1 | - | 34913   | 34884   | RNA → | <a href="#">rpmE2 (PRK01678)Ribosomal_L31 (pfam01197)</a> → |
| Sau-382-1  | NZ_KK099509.1 | - | 119448  | 119419  | RNA → | <a href="#">rpmE2 (PRK01678)Ribosomal_L31 (pfam01197)</a> → |
| Sau-420-1  | NZ_KK097832.1 | - | 238441  | 238412  | RNA → | <a href="#">rpmE2 (PRK01678)Ribosomal_L31 (pfam01197)</a> → |
| Sau-389-1  | NZ_KK099568.1 | - | 59482   | 59453   | RNA → | <a href="#">rpmE2 (PRK01678)Ribosomal_L31 (pfam01197)</a> → |
| Sau-489-1  | NZ_KK098660.1 | - | 247385  | 247356  | RNA → | <a href="#">rpmE2 (PRK01678)Ribosomal_L31 (pfam01197)</a> → |
| Sau-326-1  | NZ_KK099092.1 | - | 56763   | 56734   | RNA → | <a href="#">rpmE2 (PRK01678)Ribosomal_L31 (pfam01197)</a> → |
| Sau-325-1  | NZ_KI966037.1 | - | 60735   | 60706   | RNA → | <a href="#">rpmE2 (PRK01678)Ribosomal_L31 (pfam01197)</a> → |
| Sau-1993-1 | NZ_KI972366.1 | - | 56763   | 56734   | RNA → | <a href="#">rpmE2 (PRK01678)Ribosomal_L31 (pfam01197)</a> → |
| Sau-3052-1 | NZ_KI979037.1 | - | 56994   | 56965   | RNA → | <a href="#">rpmE2 (PRK01678)Ribosomal_L31 (pfam01197)</a> → |
| Sau-3048-1 | NZ_KI978310.1 | + | 30719   | 30748   | RNA → | <a href="#">rpmE2 (PRK01678)Ribosomal_L31 (pfam01197)</a> → |
| Sau-2386-1 | NZ_KI997506.1 | - | 94282   | 94253   | RNA → | <a href="#">rpmE2 (PRK01678)Ribosomal_L31 (pfam01197)</a> → |
| Sau-3643-1 | NZ_KK027977.1 | - | 34874   | 34845   | RNA → | <a href="#">rpmE2 (PRK01678)Ribosomal_L31 (pfam01197)</a> → |
| Sau-2786-1 | NZ_KI974346.1 | - | 238794  | 238765  | RNA → | <a href="#">rpmE2 (PRK01678)Ribosomal_L31 (pfam01197)</a> → |
| Sau-2796-1 | NZ_KI976735.1 | - | 230191  | 230162  | RNA → | <a href="#">rpmE2 (PRK01678)Ribosomal_L31 (pfam01197)</a> → |
| Sau-627-1  | NZ_KK029040.1 | - | 56891   | 56862   | RNA → | <a href="#">rpmE2 (PRK01678)Ribosomal_L31 (pfam01197)</a> → |
| Sau-2708-1 | NZ_KK028975.1 | - | 56893   | 56864   | RNA → | <a href="#">rpmE2 (PRK01678)Ribosomal_L31 (pfam01197)</a> → |
| Sau-297-1  | NZ_KI978058.1 | - | 56894   | 56865   | RNA → | <a href="#">rpmE2 (PRK01678)Ribosomal_L31 (pfam01197)</a> → |
| Sau-2229-1 | NZ_KK021866.1 | - | 92275   | 92246   | RNA → | <a href="#">rpmE2 (PRK01678)Ribosomal_L31 (pfam01197)</a> → |
| Sau-228-1  | NZ_KI974986.1 | - | 56894   | 56865   | RNA → | <a href="#">rpmE2 (PRK01678)Ribosomal_L31 (pfam01197)</a> → |
| Sau-2870-1 | NZ_KK031065.1 | - | 56894   | 56865   | RNA → | <a href="#">rpmE2 (PRK01678)Ribosomal_L31 (pfam01197)</a> → |
| Sau-2312-1 | NZ_KI994172.1 | - | 218046  | 218017  | RNA → | <a href="#">rpmE2 (PRK01678)Ribosomal_L31 (pfam01197)</a> → |
| Sau-2707-1 | NZ_KK028867.1 | - | 56893   | 56864   | RNA → | <a href="#">rpmE2 (PRK01678)Ribosomal_L31 (pfam01197)</a> → |
| Sau-3700-1 | NZ_KI974015.1 | - | 108552  | 108523  | RNA → | <a href="#">rpmE2 (PRK01678)Ribosomal_L31 (pfam01197)</a> → |
| Sau-3693-1 | NZ_KI978641.1 | - | 55562   | 55533   | RNA → | <a href="#">rpmE2 (PRK01678)Ribosomal_L31 (pfam01197)</a> → |
| Sau-2439-1 | NZ_KI991670.1 | - | 36391   | 36362   | RNA → | <a href="#">rpmE2 (PRK01678)Ribosomal_L31 (pfam01197)</a> → |
| Sau-2565-1 | NZ_KK031039.1 | - | 56891   | 56862   | RNA → | <a href="#">rpmE2 (PRK01678)Ribosomal_L31 (pfam01197)</a> → |
| Sau-933-1  | NZ_KK029598.1 | - | 34817   | 34788   | RNA → | <a href="#">rpmE2 (PRK01678)Ribosomal_L31 (pfam01197)</a> → |
| Sau-2461-1 | NZ_KK025203.1 | - | 34913   | 34884   | RNA → | <a href="#">rpmE2 (PRK01678)Ribosomal_L31 (pfam01197)</a> → |
| Sau-716-1  | NZ_KK024072.1 | - | 36850   | 36821   | RNA → | <a href="#">rpmE2 (PRK01678)Ribosomal_L31 (pfam01197)</a> → |
| Sau-934-1  | NZ_KK029661.1 | - | 34873   | 34844   | RNA → | <a href="#">rpmE2 (PRK01678)Ribosomal_L31 (pfam01197)</a> → |
| Sau-2643-1 | NZ_KI973965.1 | - | 113174  | 113145  | RNA → | <a href="#">rpmE2 (PRK01678)Ribosomal_L31 (pfam01197)</a> → |
| Sau-2980-1 | NZ_KK026111.1 | - | 34913   | 34884   | RNA → | <a href="#">rpmE2 (PRK01678)Ribosomal_L31 (pfam01197)</a> → |
| Sau-3582-1 | NZ_KK032539.1 | - | 34872   | 34843   | RNA → | <a href="#">rpmE2 (PRK01678)Ribosomal_L31 (pfam01197)</a> → |
| Sau-2543-1 | NZ_KK023131.1 | - | 122766  | 122737  | RNA → | <a href="#">rpmE2 (PRK01678)Ribosomal_L31 (pfam01197)</a> → |
| Sau-780-1  | NZ_KK028731.1 | - | 56894   | 56865   | RNA → | <a href="#">rpmE2 (PRK01678)Ribosomal_L31 (pfam01197)</a> → |
| Sau-2596-1 | NZ_KK038732.1 | - | 56894   | 56865   | RNA → | <a href="#">rpmE2 (PRK01678)Ribosomal_L31 (pfam01197)</a> → |
| Sau-2210-1 | NZ_KK063536.1 | - | 36340   | 36311   | RNA → | <a href="#">rpmE2 (PRK01678)Ribosomal_L31 (pfam01197)</a> → |
| Sau-2203-1 | NZ_KK063687.1 | - | 55327   | 55298   | RNA → | <a href="#">rpmE2 (PRK01678)Ribosomal_L31 (pfam01197)</a> → |
| Sau-882-1  | NZ_KK047892.1 | - | 1743431 | 1743402 | RNA → | <a href="#">rpmE2 (PRK01678)Ribosomal_L31 (pfam01197)</a> → |
| Sau-2879-1 | NZ_KK040438.1 | - | 34873   | 34844   | RNA → | <a href="#">rpmE2 (PRK01678)Ribosomal_L31 (pfam01197)</a> → |
| Sau-2213-1 | NZ_KK063477.1 | - | 61690   | 61661   | RNA → | <a href="#">rpmE2 (PRK01678)Ribosomal_L31 (pfam01197)</a> → |
| Sau-2202-1 | NZ_KK063693.1 | - | 89866   | 89837   | RNA → | <a href="#">rpmE2 (PRK01678)Ribosomal_L31 (pfam01197)</a> → |
| Sau-2202-2 | NZ_KK063701.1 | - | 729     | 700     | RNA → | <a href="#">rpmE2 (PRK01678)Ribosomal_L31 (pfam01197)</a> → |
| Sau-2200-1 | NZ_KK063759.1 | - | 62102   | 62073   | RNA → | <a href="#">rpmE2 (PRK01678)Ribosomal_L31 (pfam01197)</a> → |

|            |               |   |         |         |                                                   |
|------------|---------------|---|---------|---------|---------------------------------------------------|
| Sau-3524-1 | NZ_KK038189.1 | - | 34817   | 34788   | RNA → rpmE2 (PRK01678)Ribosomal_L31 (pfam01197) → |
| Sau-3570-1 | NZ_KK070196.1 | - | 56763   | 56734   | RNA → rpmE2 (PRK01678)Ribosomal_L31 (pfam01197) → |
| Sau-2197-1 | NZ_KK063823.1 | - | 49861   | 49832   | RNA → rpmE2 (PRK01678)Ribosomal_L31 (pfam01197) → |
| Sau-1038-1 | NZ_KK023042.1 | - | 34817   | 34788   | RNA → rpmE2 (PRK01678)Ribosomal_L31 (pfam01197) → |
| Sau-1594-1 | NZ_KK015498.1 | - | 36391   | 36362   | RNA → rpmE2 (PRK01678)Ribosomal_L31 (pfam01197) → |
| Sau-1017-1 | NZ_KK030121.1 | - | 34874   | 34845   | RNA → rpmE2 (PRK01678)Ribosomal_L31 (pfam01197) → |
| Sau-1808-1 | NZ_KI983480.1 | - | 159047  | 159018  | RNA → rpmE2 (PRK01678)Ribosomal_L31 (pfam01197) → |
| Sau-2911-1 | NZ_KK028256.1 | - | 56893   | 56864   | RNA → rpmE2 (PRK01678)Ribosomal_L31 (pfam01197) → |
| Sau-1033-1 | NZ_KK030215.1 | - | 34817   | 34788   | RNA → rpmE2 (PRK01678)Ribosomal_L31 (pfam01197) → |
| Sau-2910-1 | NZ_KK070146.1 | - | 2279611 | 2279582 | RNA → rpmE2 (PRK01678)Ribosomal_L31 (pfam01197) → |
| Sau-1364-1 | NZ_KK018792.1 | - | 54650   | 54621   | RNA → rpmE2 (PRK01678)Ribosomal_L31 (pfam01197) → |
| Sau-3667-1 | NZ_KK039880.1 | - | 34723   | 34694   | RNA → rpmE2 (PRK01678)Ribosomal_L31 (pfam01197) → |
| Sau-1136-1 | NZ_KI978371.1 | - | 114662  | 114633  | RNA → rpmE2 (PRK01678)Ribosomal_L31 (pfam01197) → |
| Sau-1140-1 | NZ_KI978955.1 | + | 28862   | 28891   | RNA → rpmE2 (PRK01678)Ribosomal_L31 (pfam01197) → |
| Sau-2849-1 | NZ_KK040624.1 | - | 34913   | 34884   | RNA → rpmE2 (PRK01678)Ribosomal_L31 (pfam01197) → |
| Sau-975-1  | NZ_KK027004.1 | - | 35252   | 35223   | RNA → rpmE2 (PRK01678)Ribosomal_L31 (pfam01197) → |
| Sau-3644-1 | NZ_KK070141.1 | - | 58499   | 58470   | RNA → rpmE2 (PRK01678)Ribosomal_L31 (pfam01197) → |
| Sau-2850-1 | NZ_KK040575.1 | - | 34872   | 34843   | RNA → rpmE2 (PRK01678)Ribosomal_L31 (pfam01197) → |
| Sau-1045-1 | NZ_KK028163.1 | - | 56839   | 56810   | RNA → rpmE2 (PRK01678)Ribosomal_L31 (pfam01197) → |
| Sau-3618-1 | NZ_KK040065.1 | - | 34913   | 34884   | RNA → rpmE2 (PRK01678)Ribosomal_L31 (pfam01197) → |
| Sau-1157-1 | NZ_KI977819.1 | - | 56711   | 56682   | RNA → rpmE2 (PRK01678)Ribosomal_L31 (pfam01197) → |
| Sau-3546-1 | NZ_KK070463.1 | - | 233759  | 233730  | RNA → rpmE2 (PRK01678)Ribosomal_L31 (pfam01197) → |
| Sau-1900-1 | NZ_KI986469.1 | - | 36391   | 36362   | RNA → rpmE2 (PRK01678)Ribosomal_L31 (pfam01197) → |
| Sau-3566-1 | NZ_KK070522.1 | - | 56894   | 56865   | RNA → rpmE2 (PRK01678)Ribosomal_L31 (pfam01197) → |
| Sau-1046-1 | NZ_KK028120.1 | - | 56840   | 56811   | RNA → rpmE2 (PRK01678)Ribosomal_L31 (pfam01197) → |
| Sau-2932-1 | NZ_KK070434.1 | - | 1317508 | 1317479 | RNA → rpmE2 (PRK01678)Ribosomal_L31 (pfam01197) → |
| Sau-1506-1 | NZ_KK011654.1 | - | 29343   | 29314   | RNA → rpmE2 (PRK01678)Ribosomal_L31 (pfam01197) → |
| Sau-3589-1 | NZ_KK070796.1 | - | 34817   | 34788   | RNA → rpmE2 (PRK01678)Ribosomal_L31 (pfam01197) → |
| Sau-1144-1 | NZ_KI979048.1 | + | 28862   | 28891   | RNA → rpmE2 (PRK01678)Ribosomal_L31 (pfam01197) → |
| Sau-1425-1 | NZ_KK008095.1 | - | 16412   | 16383   | RNA → rpmE2 (PRK01678)Ribosomal_L31 (pfam01197) → |
| Sau-2089-1 | NZ_KK067715.1 | - | 35432   | 35403   | RNA → rpmE2 (PRK01678)Ribosomal_L31 (pfam01197) → |
| Sau-1903-1 | NZ_KI986668.1 | - | 61890   | 61861   | RNA → rpmE2 (PRK01678)Ribosomal_L31 (pfam01197) → |
| Sau-1515-1 | NZ_KK011935.1 | - | 28890   | 28861   | RNA → rpmE2 (PRK01678)Ribosomal_L31 (pfam01197) → |
| Sau-2070-1 | NZ_KK068525.1 | - | 25129   | 25100   | RNA → rpmE2 (PRK01678)Ribosomal_L31 (pfam01197) → |
| Sau-2137-1 | NZ_KK066290.1 | - | 100337  | 100308  | RNA → rpmE2 (PRK01678)Ribosomal_L31 (pfam01197) → |
| Sau-1971-1 | NZ_KI988985.1 | - | 35965   | 35936   | RNA → rpmE2 (PRK01678)Ribosomal_L31 (pfam01197) → |
| Sau-2133-1 | NZ_KK066410.1 | - | 36391   | 36362   | RNA → rpmE2 (PRK01678)Ribosomal_L31 (pfam01197) → |
| Sau-2222-1 | NZ_KK063117.1 | - | 113837  | 113808  | RNA → rpmE2 (PRK01678)Ribosomal_L31 (pfam01197) → |
| Sau-2014-1 | NZ_KI990584.1 | - | 97672   | 97643   | RNA → rpmE2 (PRK01678)Ribosomal_L31 (pfam01197) → |
| Sau-2015-1 | NZ_KI990591.1 | - | 35811   | 35782   | RNA → rpmE2 (PRK01678)Ribosomal_L31 (pfam01197) → |
| Sau-2184-1 | NZ_KK064370.1 | - | 238606  | 238577  | RNA → rpmE2 (PRK01678)Ribosomal_L31 (pfam01197) → |
| Sau-954-1  | NZ_KK028703.1 | - | 56794   | 56765   | RNA → rpmE2 (PRK01678)Ribosomal_L31 (pfam01197) → |
| Sau-779-1  | NZ_KK070244.1 | - | 1717691 | 1717662 | RNA → rpmE2 (PRK01678)Ribosomal_L31 (pfam01197) → |
| Sau-953-1  | NZ_KK028665.1 | - | 56794   | 56765   | RNA → rpmE2 (PRK01678)Ribosomal_L31 (pfam01197) → |
| Sau-2178-1 | NZ_KK064644.1 | - | 39446   | 39417   | RNA → rpmE2 (PRK01678)Ribosomal_L31 (pfam01197) → |
| Sau-1537-1 | NZ_KK012963.1 | - | 28970   | 28941   | RNA → rpmE2 (PRK01678)Ribosomal_L31 (pfam01197) → |
| Sau-2116-1 | NZ_KK067026.1 | - | 190797  | 190768  | RNA → rpmE2 (PRK01678)Ribosomal_L31 (pfam01197) → |
| Sau-2096-1 | NZ_KI972794.1 | - | 132173  | 132144  | RNA → rpmE2 (PRK01678)Ribosomal_L31 (pfam01197) → |
| Sau-946-1  | NZ_KK070928.1 | - | 56894   | 56865   | RNA → rpmE2 (PRK01678)Ribosomal_L31 (pfam01197) → |
| Sau-2113-1 | NZ_KI972829.1 | - | 1690075 | 1690046 | RNA → rpmE2 (PRK01678)Ribosomal_L31 (pfam01197) → |
| Sau-912-1  | NZ_KK070406.1 | - | 60273   | 60244   | RNA → rpmE2 (PRK01678)Ribosomal_L31 (pfam01197) → |
| Sau-2148-1 | NZ_KK065750.1 | - | 14631   | 14602   | RNA → rpmE2 (PRK01678)Ribosomal_L31 (pfam01197) → |

|            |               |   |         |         |       |                                             |
|------------|---------------|---|---------|---------|-------|---------------------------------------------|
| Sau-964-1  | NZ_KK070258.1 | - | 2212058 | 2212029 | RNA → | rpmE2 (PRK01678)Ribosomal_L31 (pfam01197) → |
| Sau-1276-1 | NZ_KK002718.1 | - | 2467    | 2438    | RNA → | rpmE2 (PRK01678)Ribosomal_L31 (pfam01197) → |
| Sau-2153-1 | NZ_KK065535.1 | - | 35318   | 35289   | RNA → | rpmE2 (PRK01678)Ribosomal_L31 (pfam01197) → |
| Sau-2177-1 | NZ_KK064649.1 | + | 92353   | 92382   | RNA → | rpmE2 (PRK01678)Ribosomal_L31 (pfam01197) → |
| Sau-2046-1 | NZ_KK069412.1 | - | 36391   | 36362   | RNA → | rpmE2 (PRK01678)Ribosomal_L31 (pfam01197) → |
| Sau-2168-1 | NZ_KK064917.1 | - | 35170   | 35141   | RNA → | rpmE2 (PRK01678)Ribosomal_L31 (pfam01197) → |
| Sau-2195-1 | NZ_KK063955.1 | - | 65032   | 65003   | RNA → | rpmE2 (PRK01678)Ribosomal_L31 (pfam01197) → |
| Sau-927-1  | NZ_KK070415.1 | - | 56894   | 56865   | RNA → | rpmE2 (PRK01678)Ribosomal_L31 (pfam01197) → |
| Sau-2155-1 | NZ_KK065442.1 | - | 36391   | 36362   | RNA → | rpmE2 (PRK01678)Ribosomal_L31 (pfam01197) → |
| Sau-2180-1 | NZ_KK064502.1 | - | 54695   | 54666   | RNA → | rpmE2 (PRK01678)Ribosomal_L31 (pfam01197) → |
| Sau-2104-1 | NZ_KI972810.1 | - | 272641  | 272612  | RNA → | rpmE2 (PRK01678)Ribosomal_L31 (pfam01197) → |
| Sau-2173-1 | NZ_KK064758.1 | - | 35655   | 35626   | RNA → | rpmE2 (PRK01678)Ribosomal_L31 (pfam01197) → |
| Sau-2182-1 | NZ_KK064385.1 | - | 36390   | 36361   | RNA → | rpmE2 (PRK01678)Ribosomal_L31 (pfam01197) → |
| Sau-2142-1 | NZ_KK065987.1 | - | 36390   | 36361   | RNA → | rpmE2 (PRK01678)Ribosomal_L31 (pfam01197) → |
| Sau-2165-1 | NZ_KK065079.1 | - | 56863   | 56834   | RNA → | rpmE2 (PRK01678)Ribosomal_L31 (pfam01197) → |
| Sau-2054-1 | NZ_KK069179.1 | - | 111617  | 111588  | RNA → | rpmE2 (PRK01678)Ribosomal_L31 (pfam01197) → |
| Sau-2053-1 | NZ_KK069187.1 | - | 62157   | 62128   | RNA → | rpmE2 (PRK01678)Ribosomal_L31 (pfam01197) → |
| Sau-2068-1 | NZ_KK068648.1 | - | 29575   | 29546   | RNA → | rpmE2 (PRK01678)Ribosomal_L31 (pfam01197) → |
| Sau-2027-1 | NZ_KI972421.1 | - | 58040   | 58011   | RNA → | rpmE2 (PRK01678)Ribosomal_L31 (pfam01197) → |
| Sau-2473-1 | NZ_KK070688.1 | - | 56894   | 56865   | RNA → | rpmE2 (PRK01678)Ribosomal_L31 (pfam01197) → |
| Sau-2102-1 | NZ_KK067436.1 | - | 440     | 411     | RNA → | rpmE2 (PRK01678)Ribosomal_L31 (pfam01197) → |
| Sau-2129-1 | NZ_KK066608.1 | - | 215967  | 215938  | RNA → | rpmE2 (PRK01678)Ribosomal_L31 (pfam01197) → |
| Sau-2131-1 | NZ_KK066564.1 | - | 111834  | 111805  | RNA → | rpmE2 (PRK01678)Ribosomal_L31 (pfam01197) → |
| Sau-2126-1 | NZ_KK066755.1 | - | 54695   | 54666   | RNA → | rpmE2 (PRK01678)Ribosomal_L31 (pfam01197) → |
| Sau-2119-1 | NZ_KK066925.1 | - | 36391   | 36362   | RNA → | rpmE2 (PRK01678)Ribosomal_L31 (pfam01197) → |
| Sau-1009-1 | NZ_KK041351.1 | - | 34912   | 34883   | RNA → | rpmE2 (PRK01678)Ribosomal_L31 (pfam01197) → |
| Sau-2186-1 | NZ_KK064262.1 | - | 36340   | 36311   | RNA → | rpmE2 (PRK01678)Ribosomal_L31 (pfam01197) → |
| Sau-2091-1 | NZ_KK067619.1 | - | 43771   | 43742   | RNA → | rpmE2 (PRK01678)Ribosomal_L31 (pfam01197) → |
| Sau-2074-1 | NZ_KK068353.1 | - | 36391   | 36362   | RNA → | rpmE2 (PRK01678)Ribosomal_L31 (pfam01197) → |
| Sau-2086-1 | NZ_KK067890.1 | - | 36391   | 36362   | RNA → | rpmE2 (PRK01678)Ribosomal_L31 (pfam01197) → |
| Sau-2192-1 | NZ_KK064013.1 | - | 35704   | 35675   | RNA → | rpmE2 (PRK01678)Ribosomal_L31 (pfam01197) → |
| Sau-2063-1 | NZ_KK068829.1 | - | 35670   | 35641   | RNA → | rpmE2 (PRK01678)Ribosomal_L31 (pfam01197) → |
| Sau-713-1  | NZ_KK070332.1 | - | 60061   | 60032   | RNA → | rpmE2 (PRK01678)Ribosomal_L31 (pfam01197) → |
| Sau-2145-1 | NZ_KK065895.1 | - | 62202   | 62173   | RNA → | rpmE2 (PRK01678)Ribosomal_L31 (pfam01197) → |
| Sau-2035-1 | NZ_KK069868.1 | - | 35148   | 35119   | RNA → | rpmE2 (PRK01678)Ribosomal_L31 (pfam01197) → |
| Sau-2150-1 | NZ_KK065628.1 | - | 61380   | 61351   | RNA → | rpmE2 (PRK01678)Ribosomal_L31 (pfam01197) → |
| Sau-943-1  | NZ_KK070851.1 | - | 34873   | 34844   | RNA → | rpmE2 (PRK01678)Ribosomal_L31 (pfam01197) → |
| Sau-2112-1 | NZ_KK067126.1 | - | 36391   | 36362   | RNA → | rpmE2 (PRK01678)Ribosomal_L31 (pfam01197) → |
| Sau-2043-1 | NZ_KK069655.1 | - | 110269  | 110240  | RNA → | rpmE2 (PRK01678)Ribosomal_L31 (pfam01197) → |
| Sau-2107-1 | NZ_KK067213.1 | - | 36391   | 36362   | RNA → | rpmE2 (PRK01678)Ribosomal_L31 (pfam01197) → |
| Sau-1023-1 | NZ_KK041205.1 | - | 34913   | 34884   | RNA → | rpmE2 (PRK01678)Ribosomal_L31 (pfam01197) → |
| Sau-984-1  | NZ_KK041433.1 | - | 56986   | 56957   | RNA → | rpmE2 (PRK01678)Ribosomal_L31 (pfam01197) → |
| Sau-2189-1 | NZ_KK064216.1 | - | 101158  | 101129  | RNA → | rpmE2 (PRK01678)Ribosomal_L31 (pfam01197) → |
| Sau-2162-1 | NZ_KK065224.1 | - | 36491   | 36462   | RNA → | rpmE2 (PRK01678)Ribosomal_L31 (pfam01197) → |
| Sau-2144-1 | NZ_KK065899.1 | - | 54697   | 54668   | RNA → | rpmE2 (PRK01678)Ribosomal_L31 (pfam01197) → |
| Sau-2139-1 | NZ_KK066119.1 | - | 35307   | 35278   | RNA → | rpmE2 (PRK01678)Ribosomal_L31 (pfam01197) → |
| Sau-1063-1 | NZ_KK070162.1 | - | 61782   | 61753   | RNA → | rpmE2 (PRK01678)Ribosomal_L31 (pfam01197) → |
| Sau-903-1  | NZ_KK070387.1 | - | 1675784 | 1675755 | RNA → | rpmE2 (PRK01678)Ribosomal_L31 (pfam01197) → |
| Sau-2157-1 | NZ_KK065402.1 | - | 35959   | 35930   | RNA → | rpmE2 (PRK01678)Ribosomal_L31 (pfam01197) → |
| Sau-2082-1 | NZ_KK068024.1 | - | 62005   | 61976   | RNA → | rpmE2 (PRK01678)Ribosomal_L31 (pfam01197) → |
| Sau-2151-1 | NZ_KK065582.1 | - | 35786   | 35757   | RNA → | rpmE2 (PRK01678)Ribosomal_L31 (pfam01197) → |
| Sau-700-1  | NZ_KK070274.1 | - | 1613796 | 1613767 | RNA → | rpmE2 (PRK01678)Ribosomal_L31 (pfam01197) → |



|            |               |   |         |         |                                                   |
|------------|---------------|---|---------|---------|---------------------------------------------------|
| Sau-2045-1 | NZ_KK069459.1 | - | 35844   | 35815   | RNA → rpmE2 (PRK01678)Ribosomal_L31 (pfam01197) → |
| Sau-2169-1 | NZ_KK064864.1 | - | 36391   | 36362   | RNA → rpmE2 (PRK01678)Ribosomal_L31 (pfam01197) → |
| Sau-2140-1 | NZ_KK066058.1 | - | 10628   | 10599   | RNA → rpmE2 (PRK01678)Ribosomal_L31 (pfam01197) → |
| Sau-680-1  | NZ_KK070046.1 | - | 57065   | 57036   | RNA → rpmE2 (PRK01678)Ribosomal_L31 (pfam01197) → |
| Sau-2100-1 | NZ_KK067537.1 | - | 11745   | 11716   | RNA → rpmE2 (PRK01678)Ribosomal_L31 (pfam01197) → |
| Sau-736-1  | NZ_KK070488.1 | - | 34988   | 34959   | RNA → rpmE2 (PRK01678)Ribosomal_L31 (pfam01197) → |
| Sau-2172-1 | NZ_KK070074.1 | - | 62003   | 61974   | RNA → rpmE2 (PRK01678)Ribosomal_L31 (pfam01197) → |
| Sau-702-1  | NZ_KK070315.1 | - | 60739   | 60710   | RNA → rpmE2 (PRK01678)Ribosomal_L31 (pfam01197) → |
| Sau-2036-1 | NZ_KK069801.1 | - | 36390   | 36361   | RNA → rpmE2 (PRK01678)Ribosomal_L31 (pfam01197) → |
| Sau-738-1  | NZ_KK070550.1 | - | 56893   | 56864   | RNA → rpmE2 (PRK01678)Ribosomal_L31 (pfam01197) → |
| Sau-2159-1 | NZ_KK065320.1 | - | 36391   | 36362   | RNA → rpmE2 (PRK01678)Ribosomal_L31 (pfam01197) → |
| Sau-2061-1 | NZ_KK068950.1 | - | 36391   | 36362   | RNA → rpmE2 (PRK01678)Ribosomal_L31 (pfam01197) → |
| Sau-768-1  | NZ_KK070248.1 | - | 1659107 | 1659078 | RNA → rpmE2 (PRK01678)Ribosomal_L31 (pfam01197) → |
| Sau-730-1  | NZ_KK039465.1 | - | 34872   | 34843   | RNA → rpmE2 (PRK01678)Ribosomal_L31 (pfam01197) → |
| Sau-758-1  | NZ_KK070953.1 | - | 56991   | 56962   | RNA → rpmE2 (PRK01678)Ribosomal_L31 (pfam01197) → |
| Sau-721-1  | NZ_KK070384.1 | - | 61506   | 61477   | RNA → rpmE2 (PRK01678)Ribosomal_L31 (pfam01197) → |
| Sau-718-1  | NZ_KK039541.1 | - | 36294   | 36265   | RNA → rpmE2 (PRK01678)Ribosomal_L31 (pfam01197) → |
| Sau-663-1  | NZ_KK070269.1 | - | 1624827 | 1624798 | RNA → rpmE2 (PRK01678)Ribosomal_L31 (pfam01197) → |
| Sau-2482-1 | NZ_KK071089.1 | - | 34873   | 34844   | RNA → rpmE2 (PRK01678)Ribosomal_L31 (pfam01197) → |
| Sau-2039-1 | NZ_KK069750.1 | - | 31193   | 31164   | RNA → rpmE2 (PRK01678)Ribosomal_L31 (pfam01197) → |
| Sau-2191-1 | NZ_KK064074.1 | - | 54917   | 54888   | RNA → rpmE2 (PRK01678)Ribosomal_L31 (pfam01197) → |
| Sau-2190-1 | NZ_KK064116.1 | - | 59845   | 59816   | RNA → rpmE2 (PRK01678)Ribosomal_L31 (pfam01197) → |
| Sau-2472-1 | NZ_KK070711.1 | - | 56892   | 56863   | RNA → rpmE2 (PRK01678)Ribosomal_L31 (pfam01197) → |
| Sau-2979-1 | NZ_KK071027.1 | - | 56993   | 56964   | RNA → rpmE2 (PRK01678)Ribosomal_L31 (pfam01197) → |
| Sau-748-1  | NZ_KK070598.1 | - | 56994   | 56965   | RNA → rpmE2 (PRK01678)Ribosomal_L31 (pfam01197) → |
| Sau-737-1  | NZ_KK070534.1 | - | 56790   | 56761   | RNA → rpmE2 (PRK01678)Ribosomal_L31 (pfam01197) → |
| Sau-2078-1 | NZ_KK068249.1 | - | 62156   | 62127   | RNA → rpmE2 (PRK01678)Ribosomal_L31 (pfam01197) → |
| Sau-830-1  | NZ_KK072816.1 | - | 56894   | 56865   | RNA → rpmE2 (PRK01678)Ribosomal_L31 (pfam01197) → |
| Sau-2123-1 | NZ_KK066844.1 | - | 52141   | 52112   | RNA → rpmE2 (PRK01678)Ribosomal_L31 (pfam01197) → |
| Sau-2486-1 | NZ_KK071243.1 | - | 34872   | 34843   | RNA → rpmE2 (PRK01678)Ribosomal_L31 (pfam01197) → |
| Sau-3003-1 | NZ_KK071918.1 | - | 55194   | 55165   | RNA → rpmE2 (PRK01678)Ribosomal_L31 (pfam01197) → |
| Sau-2501-1 | NZ_KK070232.1 | - | 1675361 | 1675332 | RNA → rpmE2 (PRK01678)Ribosomal_L31 (pfam01197) → |
| Sau-956-1  | NZ_KK071309.1 | - | 34873   | 34844   | RNA → rpmE2 (PRK01678)Ribosomal_L31 (pfam01197) → |
| Sau-3609-1 | NZ_KK071940.1 | - | 56893   | 56864   | RNA → rpmE2 (PRK01678)Ribosomal_L31 (pfam01197) → |
| Sau-798-1  | NZ_KK072206.1 | - | 34913   | 34884   | RNA → rpmE2 (PRK01678)Ribosomal_L31 (pfam01197) → |
| Sau-2838-1 | NZ_KK073322.1 | - | 34973   | 34944   | RNA → rpmE2 (PRK01678)Ribosomal_L31 (pfam01197) → |
| Sau-2478-1 | NZ_KK070966.1 | - | 56894   | 56865   | RNA → rpmE2 (PRK01678)Ribosomal_L31 (pfam01197) → |
| Sau-971-1  | NZ_KK071827.1 | - | 56994   | 56965   | RNA → rpmE2 (PRK01678)Ribosomal_L31 (pfam01197) → |
| Sau-2490-1 | NZ_KK071516.1 | - | 55217   | 55188   | RNA → rpmE2 (PRK01678)Ribosomal_L31 (pfam01197) → |
| Sau-2856-1 | NZ_KK073413.1 | - | 54968   | 54939   | RNA → rpmE2 (PRK01678)Ribosomal_L31 (pfam01197) → |
| Sau-807-1  | NZ_KK072576.1 | - | 34872   | 34843   | RNA → rpmE2 (PRK01678)Ribosomal_L31 (pfam01197) → |
| Sau-3505-1 | NZ_KK070053.1 | - | 1681745 | 1681716 | RNA → rpmE2 (PRK01678)Ribosomal_L31 (pfam01197) → |
| Sau-811-1  | NZ_KK072713.1 | - | 56894   | 56865   | RNA → rpmE2 (PRK01678)Ribosomal_L31 (pfam01197) → |
| Sau-992-1  | NZ_KK072419.1 | - | 54895   | 54866   | RNA → rpmE2 (PRK01678)Ribosomal_L31 (pfam01197) → |
| Sau-1011-1 | NZ_KK073025.1 | - | 58371   | 58342   | RNA → rpmE2 (PRK01678)Ribosomal_L31 (pfam01197) → |
| Sau-3617-1 | NZ_KK073538.1 | - | 19183   | 19154   | RNA → rpmE2 (PRK01678)Ribosomal_L31 (pfam01197) → |
| Sau-1056-1 | NZ_KK073074.1 | - | 56894   | 56865   | RNA → rpmE2 (PRK01678)Ribosomal_L31 (pfam01197) → |
| Sau-2524-1 | NZ_KK073170.1 | - | 56893   | 56864   | RNA → rpmE2 (PRK01678)Ribosomal_L31 (pfam01197) → |
| Sau-3605-1 | NZ_KK071587.1 | - | 56790   | 56761   | RNA → rpmE2 (PRK01678)Ribosomal_L31 (pfam01197) → |
| Sau-999-1  | NZ_KK072994.1 | - | 55000   | 54971   | RNA → rpmE2 (PRK01678)Ribosomal_L31 (pfam01197) → |
| Sau-2528-1 | NZ_KK073191.1 | - | 55116   | 55087   | RNA → rpmE2 (PRK01678)Ribosomal_L31 (pfam01197) → |
| Sau-2134-1 | NZ_KK066353.1 | - | 54695   | 54666   | RNA → rpmE2 (PRK01678)Ribosomal_L31 (pfam01197) → |

|            |               |   |         |         |                                                   |
|------------|---------------|---|---------|---------|---------------------------------------------------|
| Sau-989-1  | NZ_KK072905.1 | - | 56645   | 56616   | RNA → rpmE2 (PRK01678)Ribosomal_L31 (pfam01197) → |
| Sau-3646-1 | NZ_KK073630.1 | - | 34873   | 34844   | RNA → rpmE2 (PRK01678)Ribosomal_L31 (pfam01197) → |
| Sau-982-1  | NZ_KK072140.1 | - | 34872   | 34843   | RNA → rpmE2 (PRK01678)Ribosomal_L31 (pfam01197) → |
| Sau-3616-1 | NZ_KK072352.1 | - | 54968   | 54939   | RNA → rpmE2 (PRK01678)Ribosomal_L31 (pfam01197) → |
| Sau-2995-1 | NZ_KK071742.1 | - | 29186   | 29157   | RNA → rpmE2 (PRK01678)Ribosomal_L31 (pfam01197) → |
| Sau-750-1  | NZ_KK070624.1 | - | 34913   | 34884   | RNA → rpmE2 (PRK01678)Ribosomal_L31 (pfam01197) → |
| Sau-3608-1 | NZ_KK072054.1 | - | 34873   | 34844   | RNA → rpmE2 (PRK01678)Ribosomal_L31 (pfam01197) → |
| Sau-2512-1 | NZ_KK072288.1 | - | 56894   | 56865   | RNA → rpmE2 (PRK01678)Ribosomal_L31 (pfam01197) → |
| Sau-3628-1 | NZ_KK073585.1 | - | 56894   | 56865   | RNA → rpmE2 (PRK01678)Ribosomal_L31 (pfam01197) → |
| Sau-2530-1 | NZ_KK073263.1 | - | 55117   | 55088   | RNA → rpmE2 (PRK01678)Ribosomal_L31 (pfam01197) → |
| Sau-3614-1 | NZ_KK073511.1 | - | 34913   | 34884   | RNA → rpmE2 (PRK01678)Ribosomal_L31 (pfam01197) → |
| Sau-822-1  | NZ_KK072745.1 | - | 34913   | 34884   | RNA → rpmE2 (PRK01678)Ribosomal_L31 (pfam01197) → |
| Sau-2888-1 | NZ_KK073475.1 | - | 2229157 | 2229128 | RNA → rpmE2 (PRK01678)Ribosomal_L31 (pfam01197) → |
| Sau-3632-1 | NZ_KK073602.1 | - | 56994   | 56965   | RNA → rpmE2 (PRK01678)Ribosomal_L31 (pfam01197) → |
| Sau-2874-1 | NZ_KK073433.1 | - | 35013   | 34984   | RNA → rpmE2 (PRK01678)Ribosomal_L31 (pfam01197) → |
| Sau-2522-1 | NZ_KK073121.1 | - | 55150   | 55121   | RNA → rpmE2 (PRK01678)Ribosomal_L31 (pfam01197) → |
| Sau-3657-1 | NZ_KK073725.1 | - | 35266   | 35237   | RNA → rpmE2 (PRK01678)Ribosomal_L31 (pfam01197) → |
| Sau-766-1  | NZ_KK071427.1 | - | 56894   | 56865   | RNA → rpmE2 (PRK01678)Ribosomal_L31 (pfam01197) → |
| Sau-832-1  | NZ_KK072828.1 | - | 34913   | 34884   | RNA → rpmE2 (PRK01678)Ribosomal_L31 (pfam01197) → |
| Sau-1057-1 | NZ_KK073082.1 | - | 56894   | 56865   | RNA → rpmE2 (PRK01678)Ribosomal_L31 (pfam01197) → |
| Sau-2865-1 | NZ_KK073426.1 | - | 56994   | 56965   | RNA → rpmE2 (PRK01678)Ribosomal_L31 (pfam01197) → |
| Sau-3486-1 | NZ_KK073499.1 | - | 55180   | 55151   | RNA → rpmE2 (PRK01678)Ribosomal_L31 (pfam01197) → |
| Sau-2551-1 | NZ_KK073287.1 | - | 25259   | 25230   | RNA → rpmE2 (PRK01678)Ribosomal_L31 (pfam01197) → |
| Sau-773-1  | NZ_KK071626.1 | - | 34913   | 34884   | RNA → rpmE2 (PRK01678)Ribosomal_L31 (pfam01197) → |
| Sau-3647-1 | NZ_KK073682.1 | - | 34873   | 34844   | RNA → rpmE2 (PRK01678)Ribosomal_L31 (pfam01197) → |
| Sau-2452-1 | NZ_KK075555.1 | - | 34913   | 34884   | RNA → rpmE2 (PRK01678)Ribosomal_L31 (pfam01197) → |
| Sau-622-1  | NZ_KK072501.1 | - | 34972   | 34943   | RNA → rpmE2 (PRK01678)Ribosomal_L31 (pfam01197) → |
| Sau-3557-1 | NZ_KK074598.1 | - | 54895   | 54866   | RNA → rpmE2 (PRK01678)Ribosomal_L31 (pfam01197) → |
| Sau-2875-1 | NZ_KK075183.1 | - | 56794   | 56765   | RNA → rpmE2 (PRK01678)Ribosomal_L31 (pfam01197) → |
| Sau-1078-1 | NZ_KK075649.1 | - | 56545   | 56516   | RNA → rpmE2 (PRK01678)Ribosomal_L31 (pfam01197) → |
| Sau-3654-1 | NZ_KK074429.1 | - | 55082   | 55053   | RNA → rpmE2 (PRK01678)Ribosomal_L31 (pfam01197) → |
| Sau-3653-1 | NZ_KK074489.1 | - | 54955   | 54926   | RNA → rpmE2 (PRK01678)Ribosomal_L31 (pfam01197) → |
| Sau-2576-1 | NZ_KK075313.1 | - | 34817   | 34788   | RNA → rpmE2 (PRK01678)Ribosomal_L31 (pfam01197) → |
| Sau-1050-1 | NZ_KK075688.1 | - | 34817   | 34788   | RNA → rpmE2 (PRK01678)Ribosomal_L31 (pfam01197) → |
| Sau-2589-1 | NZ_KK075278.1 | - | 56893   | 56864   | RNA → rpmE2 (PRK01678)Ribosomal_L31 (pfam01197) → |
| Sau-2571-1 | NZ_KK075413.1 | - | 56893   | 56864   | RNA → rpmE2 (PRK01678)Ribosomal_L31 (pfam01197) → |
| Sau-2552-1 | NZ_KK075464.1 | - | 56893   | 56864   | RNA → rpmE2 (PRK01678)Ribosomal_L31 (pfam01197) → |
| Sau-3490-1 | NZ_KK074798.1 | - | 34817   | 34788   | RNA → rpmE2 (PRK01678)Ribosomal_L31 (pfam01197) → |
| Sau-3488-1 | NZ_KK074916.1 | - | 34873   | 34844   | RNA → rpmE2 (PRK01678)Ribosomal_L31 (pfam01197) → |
| Sau-3521-1 | NZ_KK074673.1 | - | 55184   | 55155   | RNA → rpmE2 (PRK01678)Ribosomal_L31 (pfam01197) → |
| Sau-1029-1 | NZ_KK075843.1 | - | 56993   | 56964   | RNA → rpmE2 (PRK01678)Ribosomal_L31 (pfam01197) → |
| Sau-1031-1 | NZ_KK075811.1 | - | 56892   | 56863   | RNA → rpmE2 (PRK01678)Ribosomal_L31 (pfam01197) → |
| Sau-1030-1 | NZ_KK075827.1 | - | 55165   | 55136   | RNA → rpmE2 (PRK01678)Ribosomal_L31 (pfam01197) → |
| Sau-3481-1 | NZ_KK075042.1 | - | 56893   | 56864   | RNA → rpmE2 (PRK01678)Ribosomal_L31 (pfam01197) → |
| Sau-3487-1 | NZ_KK074958.1 | - | 34873   | 34844   | RNA → rpmE2 (PRK01678)Ribosomal_L31 (pfam01197) → |
| Sau-2928-1 | NZ_KK075123.1 | - | 34913   | 34884   | RNA → rpmE2 (PRK01678)Ribosomal_L31 (pfam01197) → |
| Sau-2590-1 | NZ_KK075264.1 | - | 56893   | 56864   | RNA → rpmE2 (PRK01678)Ribosomal_L31 (pfam01197) → |
| Sau-937-1  | NZ_KK075909.1 | - | 56794   | 56765   | RNA → rpmE2 (PRK01678)Ribosomal_L31 (pfam01197) → |
| Sau-939-1  | NZ_KK075889.1 | - | 56794   | 56765   | RNA → rpmE2 (PRK01678)Ribosomal_L31 (pfam01197) → |
| Sau-668-1  | NZ_KK076136.1 | - | 56894   | 56865   | RNA → rpmE2 (PRK01678)Ribosomal_L31 (pfam01197) → |
| Sau-670-1  | NZ_KK076076.1 | - | 34873   | 34844   | RNA → rpmE2 (PRK01678)Ribosomal_L31 (pfam01197) → |
| Sau-634-1  | NZ_KK076386.1 | - | 34817   | 34788   | RNA → rpmE2 (PRK01678)Ribosomal_L31 (pfam01197) → |



|            |               |   |         |         |                                                                                             |
|------------|---------------|---|---------|---------|---------------------------------------------------------------------------------------------|
| Sau-642-1  | NZ_KK076331.1 | - | 34873   | 34844   | RNA → rpmE2 (PRK01678)Ribosomal_L31 (pfam01197) →                                           |
| Sau-921-1  | NZ_KK075946.1 | - | 56894   | 56865   | RNA → rpmE2 (PRK01678)Ribosomal_L31 (pfam01197) →                                           |
| Sau-559-1  | NZ_KK074307.1 | - | 35225   | 35196   | RNA → rpmE2 (PRK01678)Ribosomal_L31 (pfam01197) →                                           |
| Sau-3500-1 | NZ_KK074734.1 | - | 34862   | 34833   | RNA → rpmE2 (PRK01678)Ribosomal_L31 (pfam01197) →                                           |
| Sau-2561-1 | NZ_KK075418.1 | - | 55143   | 55114   | RNA → rpmE2 (PRK01678)Ribosomal_L31 (pfam01197) →                                           |
| Sau-2929-1 | NZ_KK075070.1 | - | 34913   | 34884   | RNA → rpmE2 (PRK01678)Ribosomal_L31 (pfam01197) →                                           |
| Sau-2494-1 | NZ_KK075544.1 | - | 55129   | 55100   | RNA → rpmE2 (PRK01678)Ribosomal_L31 (pfam01197) →                                           |
| Sau-653-1  | NZ_KK076162.1 | - | 55117   | 55088   | RNA → rpmE2 (PRK01678)Ribosomal_L31 (pfam01197) →                                           |
| Sau-3516-1 | NZ_KK074684.1 | - | 18844   | 18815   | RNA → rpmE2 (PRK01678)Ribosomal_L31 (pfam01197) →                                           |
| Sau-3948-1 | NZ_KB822121.1 | - | 61693   | 61664   | RNA → rpmE2 (PRK01678)Ribosomal_L31 (pfam01197) →                                           |
| Sau-3846-1 | NZ_KB821353.1 | - | 423199  | 423170  | RNA → rpmE2 (PRK01678)Ribosomal_L31 (pfam01197) →                                           |
| Sau-3978-1 | NZ_KB822284.1 | - | 61557   | 61528   | RNA → rpmE2 (PRK01678)Ribosomal_L31 (pfam01197) →                                           |
| Sau-46-1   | NC_017338.1   | - | 2183672 | 2183643 | RNA → rpmE2 (PRK01678)Ribosomal_L31 (pfam01197) →                                           |
| Sau-42-1   | NZ_GG730345.1 | - | 54966   | 54937   | RNA → rpmE2 (PRK01678)Ribosomal_L31 (pfam01197) → rpmE2 (PRK01678)Ribosomal_L31 (pfam01197) |
| Sau-753-1  | NZ_KK075956.1 | - | 56988   | 56959   | RNA → rpmE2 (PRK01678)Ribosomal_L31 (pfam01197) →                                           |
| Sau-53-1   | NZ_CM000952.1 | + | 1580336 | 1580365 | RNA → rpmE2 (PRK01678)Ribosomal_L31 (pfam01197) →                                           |
| Sau-36-1   | NZ_GG730180.1 | - | 55039   | 55010   | RNA → rpmE2 (PRK01678)Ribosomal_L31 (pfam01197) → rpmE2 (PRK01678)Ribosomal_L31 (pfam01197) |
| Sau-65-1   | NC_017347.1   | - | 2231645 | 2231616 | RNA → rpmE2 (PRK01678)Ribosomal_L31 (pfam01197) →                                           |
| Sau-39-1   | NC_017337.1   | - | 2207066 | 2207037 | RNA → rpmE2 (PRK01678)Ribosomal_L31 (pfam01197) →                                           |
| Sau-22-1   | NC_017351.1   | - | 2218864 | 2218835 | RNA → rpmE2 (PRK01678)Ribosomal_L31 (pfam01197) →                                           |
| Sau-72-1   | NC_016912.1   | - | 2054189 | 2054160 | RNA → rpmE2 (PRK01678)Ribosomal_L31 (pfam01197) →                                           |
| Sau-3722-5 | NZ_CP012120.1 | + | 1585676 | 1585705 | RNA → rpmE2 (PRK01678)Ribosomal_L31 (pfam01197) →                                           |
| Sau-27-1   | NC_017673.1   | - | 2081692 | 2081663 | RNA → rpmE2 (PRK01678)Ribosomal_L31 (pfam01197) →                                           |
| Sau-2-1    | NC_018608.1   | - | 2149095 | 2149066 | RNA → rpmE2 (PRK01678)Ribosomal_L31 (pfam01197) →                                           |
| Sau-3844-1 | NZ_KB821340.1 | - | 240089  | 240060  | RNA → rpmE2 (PRK01678)Ribosomal_L31 (pfam01197) →                                           |
| Sau-3823-1 | NZ_KB821215.1 | - | 1776670 | 1776641 | RNA → rpmE2 (PRK01678)Ribosomal_L31 (pfam01197) →                                           |
| Sau-3851-1 | NZ_KB821359.1 | - | 1730139 | 1730110 | RNA → rpmE2 (PRK01678)Ribosomal_L31 (pfam01197) →                                           |
| Sau-3920-1 | NZ_KB821944.1 | - | 59999   | 59970   | RNA → rpmE2 (PRK01678)Ribosomal_L31 (pfam01197) →                                           |
| Sau-3787-1 | NZ_KB820976.1 | - | 2184946 | 2184917 | RNA → rpmE2 (PRK01678)Ribosomal_L31 (pfam01197) →                                           |
| Sau-3873-1 | NZ_KB821509.1 | - | 242380  | 242351  | RNA → rpmE2 (PRK01678)Ribosomal_L31 (pfam01197) →                                           |
| Sau-3908-1 | NZ_KB821832.1 | - | 56781   | 56752   | RNA → rpmE2 (PRK01678)Ribosomal_L31 (pfam01197) →                                           |
| Sau-3829-1 | NZ_KB821242.1 | - | 56893   | 56864   | RNA → rpmE2 (PRK01678)Ribosomal_L31 (pfam01197) →                                           |
| Sau-3890-1 | NZ_KB821688.1 | - | 1733325 | 1733296 | RNA → rpmE2 (PRK01678)Ribosomal_L31 (pfam01197) →                                           |
| Sau-3899-1 | NZ_KB821782.1 | - | 56963   | 56934   | RNA → rpmE2 (PRK01678)Ribosomal_L31 (pfam01197) →                                           |
| Sau-3907-1 | NC_021059.1   | - | 2228162 | 2228133 | RNA → rpmE2 (PRK01678)Ribosomal_L31 (pfam01197) →                                           |
| Sau-4103-1 | NC_020566.1   | - | 2120659 | 2120630 | RNA → rpmE2 (PRK01678)Ribosomal_L31 (pfam01197) → rpmE2 (PRK01678)Ribosomal_L31 (pfam01197) |
| Sau-4103-2 | NC_020533.1   | - | 2121038 | 2121009 | RNA → rpmE2 (PRK01678)Ribosomal_L31 (pfam01197) → rpmE2 (PRK01678)Ribosomal_L31 (pfam01197) |
| Sau-4103-3 | NC_020568.1   | - | 2120524 | 2120495 | RNA → rpmE2 (PRK01678)Ribosomal_L31 (pfam01197) → rpmE2 (PRK01678)Ribosomal_L31 (pfam01197) |
| Sau-38-1   | NC_017343.1   | - | 2100233 | 2100204 | RNA → rpmE2 (PRK01678)Ribosomal_L31 (pfam01197) →                                           |
| Sau-3764-1 | NC_021670.1   | - | 2323309 | 2323280 | RNA → rpmE2 (PRK01678)Ribosomal_L31 (pfam01197) →                                           |
| Sau-3765-1 | NC_021554.1   | - | 2228321 | 2228292 | RNA → rpmE2 (PRK01678)Ribosomal_L31 (pfam01197) →                                           |
| Sau-4037-1 | NC_022113.1   | - | 2130139 | 2130110 | RNA → rpmE2 (PRK01678)Ribosomal_L31 (pfam01197) →                                           |
| Sau-4073-1 | NC_022226.1   | - | 2123384 | 2123355 | RNA → rpmE2 (PRK01678)Ribosomal_L31 (pfam01197) →                                           |
| Sau-4101-1 | NC_022443.1   | - | 2079264 | 2079235 | RNA → rpmE2 (PRK01678)Ribosomal_L31 (pfam01197) →                                           |
| Sau-4102-1 | NC_022442.1   | - | 2140502 | 2140473 | RNA → rpmE2 (PRK01678)Ribosomal_L31 (pfam01197) →                                           |
| Sau-4099-1 | NZ_KI542650.1 | - | 54850   | 54821   | RNA → rpmE2 (PRK01678)Ribosomal_L31 (pfam01197) →                                           |
| Sau-3722-1 | NZ_CP009681.1 | - | 2385668 | 2385639 | RNA → rpmE2 (PRK01678)Ribosomal_L31 (pfam01197) →                                           |
| Sau-2348-1 | NZ_KI995558.1 | - | 94306   | 94277   | RNA → rpmE2 (PRK01678)Ribosomal_L31 (pfam01197) →                                           |
| Sau-221-1  | NZ_KN716005.1 | - | 83047   | 83018   | RNA → rpmE2 (PRK01678)Ribosomal_L31 (pfam01197) →                                           |
| Sau-69-1   | NC_007793.1   | - | 2235973 | 2235944 | RNA → rpmE2 (PRK01678)Ribosomal_L31 (pfam01197) →                                           |
| Sau-70-1   | NC_010079.1   | - | 2236367 | 2236338 | RNA → rpmE2 (PRK01678)Ribosomal_L31 (pfam01197) →                                           |
| Sau-68-1   | NC_017331.1   | - | 2388545 | 2388516 | RNA → rpmE2 (PRK01678)Ribosomal_L31 (pfam01197) →                                           |

|            |               |   |         |         |                                                   |
|------------|---------------|---|---------|---------|---------------------------------------------------|
| Sau-71-1   | NZ_GG697988.1 | + | 54821   | 54850   | RNA → rpmE2 (PRK01678)Ribosomal_L31 (pfam01197) → |
| Sau-4120-1 | NC_022604.1   | - | 2332120 | 2332091 | RNA → rpmE2 (PRK01678)Ribosomal_L31 (pfam01197) → |
| Sau-719-1  | NZ_KK070335.1 | - | 2250080 | 2250051 | RNA → rpmE2 (PRK01678)Ribosomal_L31 (pfam01197) → |
| Sau-3682-1 | NZ_KI978453.1 | - | 54812   | 54783   | RNA → rpmE2 (PRK01678)Ribosomal_L31 (pfam01197) → |
| Sau-674-1  | NZ_KK039802.1 | - | 54900   | 54871   | RNA → rpmE2 (PRK01678)Ribosomal_L31 (pfam01197) → |
| Sau-3055-1 | NZ_KI979115.1 | - | 56894   | 56865   | RNA → rpmE2 (PRK01678)Ribosomal_L31 (pfam01197) → |
| Sau-2758-1 | NZ_KI973663.1 | - | 56625   | 56596   | RNA → rpmE2 (PRK01678)Ribosomal_L31 (pfam01197) → |
| Sau-845-1  | NZ_KI974683.1 | - | 56626   | 56597   | RNA → rpmE2 (PRK01678)Ribosomal_L31 (pfam01197) → |
| Sau-1147-1 | NZ_KI975430.1 | - | 56660   | 56631   | RNA → rpmE2 (PRK01678)Ribosomal_L31 (pfam01197) → |
| Sau-3024-1 | NZ_KI976149.1 | - | 60297   | 60268   | RNA → rpmE2 (PRK01678)Ribosomal_L31 (pfam01197) → |
| Sau-2755-1 | NZ_KI973439.1 | - | 60262   | 60233   | RNA → rpmE2 (PRK01678)Ribosomal_L31 (pfam01197) → |
| Sau-1439-1 | NZ_KK008820.1 | - | 54837   | 54808   | RNA → rpmE2 (PRK01678)Ribosomal_L31 (pfam01197) → |
| Sau-1139-1 | NZ_KI979287.1 | - | 56523   | 56494   | RNA → rpmE2 (PRK01678)Ribosomal_L31 (pfam01197) → |
| Sau-3722-2 | NZ_CP009554.1 | - | 2260619 | 2260590 | RNA → rpmE2 (PRK01678)Ribosomal_L31 (pfam01197) → |
| Sau-1667-1 | NZ_KI966968.1 | - | 54889   | 54860   | RNA → rpmE2 (PRK01678)Ribosomal_L31 (pfam01197) → |
| Sau-1688-1 | NZ_KI967791.1 | - | 55129   | 55100   | RNA → rpmE2 (PRK01678)Ribosomal_L31 (pfam01197) → |
| Sau-2243-1 | NZ_KI972937.1 | - | 1063329 | 1063300 | RNA → rpmE2 (PRK01678)Ribosomal_L31 (pfam01197) → |
| Sau-1264-1 | NZ_KI971916.1 | - | 237016  | 236987  | RNA → rpmE2 (PRK01678)Ribosomal_L31 (pfam01197) → |
| Sau-1450-1 | NZ_KI971554.1 | - | 1106971 | 1106942 | RNA → rpmE2 (PRK01678)Ribosomal_L31 (pfam01197) → |
| Sau-1685-1 | NZ_KI967653.1 | - | 55327   | 55298   | RNA → rpmE2 (PRK01678)Ribosomal_L31 (pfam01197) → |
| Sau-1177-1 | NZ_KI971760.1 | - | 57191   | 57162   | RNA → rpmE2 (PRK01678)Ribosomal_L31 (pfam01197) → |
| Sau-2193-1 | NZ_KI972880.1 | - | 56529   | 56500   | RNA → rpmE2 (PRK01678)Ribosomal_L31 (pfam01197) → |
| Sau-1660-1 | NZ_KI966712.1 | - | 55956   | 55927   | RNA → rpmE2 (PRK01678)Ribosomal_L31 (pfam01197) → |
| Sau-1566-1 | NZ_KI971107.1 | - | 1157441 | 1157412 | RNA → rpmE2 (PRK01678)Ribosomal_L31 (pfam01197) → |
| Sau-2905-1 | NZ_KK038542.1 | - | 56893   | 56864   | RNA → rpmE2 (PRK01678)Ribosomal_L31 (pfam01197) → |
| Sau-1576-1 | NZ_KI971132.1 | - | 56529   | 56500   | RNA → rpmE2 (PRK01678)Ribosomal_L31 (pfam01197) → |
| Sau-1223-1 | NZ_KI971849.1 | - | 60286   | 60257   | RNA → rpmE2 (PRK01678)Ribosomal_L31 (pfam01197) → |
| Sau-1678-1 | NZ_KI967412.1 | - | 56005   | 55976   | RNA → rpmE2 (PRK01678)Ribosomal_L31 (pfam01197) → |
| Sau-862-1  | NZ_KI978748.1 | - | 792665  | 792636  | RNA → rpmE2 (PRK01678)Ribosomal_L31 (pfam01197) → |
| Sau-1246-1 | NZ_KI971881.1 | - | 1655839 | 1655810 | RNA → rpmE2 (PRK01678)Ribosomal_L31 (pfam01197) → |
| Sau-2163-1 | NZ_KK065158.1 | - | 55513   | 55484   | RNA → rpmE2 (PRK01678)Ribosomal_L31 (pfam01197) → |
| Sau-1153-1 | NZ_KI974632.1 | - | 56894   | 56865   | RNA → rpmE2 (PRK01678)Ribosomal_L31 (pfam01197) → |
| Sau-1736-1 | NZ_KI970390.1 | - | 60042   | 60013   | RNA → rpmE2 (PRK01678)Ribosomal_L31 (pfam01197) → |
| Sau-1737-1 | NZ_KI970462.1 | - | 55043   | 55014   | RNA → rpmE2 (PRK01678)Ribosomal_L31 (pfam01197) → |
| Sau-3629-1 | NZ_KK073589.1 | - | 56894   | 56865   | RNA → rpmE2 (PRK01678)Ribosomal_L31 (pfam01197) → |
| Sau-3669-1 | NZ_KI973764.1 | - | 56993   | 56964   | RNA → rpmE2 (PRK01678)Ribosomal_L31 (pfam01197) → |
| Sau-2648-1 | NZ_KI974486.1 | - | 56892   | 56863   | RNA → rpmE2 (PRK01678)Ribosomal_L31 (pfam01197) → |
| Sau-1100-1 | NZ_KK047877.1 | - | 55212   | 55183   | RNA → rpmE2 (PRK01678)Ribosomal_L31 (pfam01197) → |
| Sau-2103-1 | NZ_KI972799.1 | - | 160062  | 160033  | RNA → rpmE2 (PRK01678)Ribosomal_L31 (pfam01197) → |
| Sau-1835-1 | NZ_KI984554.1 | - | 55326   | 55297   | RNA → rpmE2 (PRK01678)Ribosomal_L31 (pfam01197) → |
| Sau-1213-1 | NZ_KI971833.1 | - | 56529   | 56500   | RNA → rpmE2 (PRK01678)Ribosomal_L31 (pfam01197) → |
| Sau-1529-1 | NZ_KK012683.1 | - | 55280   | 55251   | RNA → rpmE2 (PRK01678)Ribosomal_L31 (pfam01197) → |
| Sau-789-1  | NZ_KK070096.1 | - | 237242  | 237213  | RNA → rpmE2 (PRK01678)Ribosomal_L31 (pfam01197) → |
| Sau-1793-1 | NZ_KI982734.1 | - | 55094   | 55065   | RNA → rpmE2 (PRK01678)Ribosomal_L31 (pfam01197) → |
| Sau-1607-1 | NZ_KK016117.1 | - | 54989   | 54960   | RNA → rpmE2 (PRK01678)Ribosomal_L31 (pfam01197) → |
| Sau-3513-1 | NZ_KK023462.1 | - | 56940   | 56911   | RNA → rpmE2 (PRK01678)Ribosomal_L31 (pfam01197) → |
| Sau-1169-1 | NZ_KI976235.1 | - | 56894   | 56865   | RNA → rpmE2 (PRK01678)Ribosomal_L31 (pfam01197) → |
| Sau-1160-1 | NZ_KI978692.1 | - | 56894   | 56865   | RNA → rpmE2 (PRK01678)Ribosomal_L31 (pfam01197) → |
| Sau-1397-1 | NZ_KI971474.1 | - | 56724   | 56695   | RNA → rpmE2 (PRK01678)Ribosomal_L31 (pfam01197) → |
| Sau-926-1  | NZ_KK024977.1 | - | 56894   | 56865   | RNA → rpmE2 (PRK01678)Ribosomal_L31 (pfam01197) → |
| Sau-1112-1 | NZ_KI974788.1 | - | 56994   | 56965   | RNA → rpmE2 (PRK01678)Ribosomal_L31 (pfam01197) → |
| Sau-1096-1 | NZ_KK047666.1 | - | 56405   | 56376   | RNA → rpmE2 (PRK01678)Ribosomal_L31 (pfam01197) → |

|            |               |   |         |         |                                                   |
|------------|---------------|---|---------|---------|---------------------------------------------------|
| Sau-2030-1 | NZ_KI991135.1 | - | 54894   | 54865   | RNA → rpmE2 (PRK01678)Ribosomal_L31 (pfam01197) → |
| Sau-3056-1 | NZ_CP007176.1 | - | 2285144 | 2285115 | RNA → rpmE2 (PRK01678)Ribosomal_L31 (pfam01197) → |
| Sau-3757-1 | NZ_CP010526.1 | - | 2229272 | 2229243 | RNA → rpmE2 (PRK01678)Ribosomal_L31 (pfam01197) → |
| Sau-2619-1 | NZ_KI976828.1 | - | 56994   | 56965   | RNA → rpmE2 (PRK01678)Ribosomal_L31 (pfam01197) → |
| Sau-1260-1 | NZ_KK002230.1 | - | 55140   | 55111   | RNA → rpmE2 (PRK01678)Ribosomal_L31 (pfam01197) → |
| Sau-1588-1 | NZ_KK015179.1 | - | 55189   | 55160   | RNA → rpmE2 (PRK01678)Ribosomal_L31 (pfam01197) → |
| Sau-1615-1 | NZ_KK016620.1 | - | 54989   | 54960   | RNA → rpmE2 (PRK01678)Ribosomal_L31 (pfam01197) → |
| Sau-2220-1 | NZ_KK063185.1 | - | 55259   | 55230   | RNA → rpmE2 (PRK01678)Ribosomal_L31 (pfam01197) → |
| Sau-1870-1 | NZ_KI985398.1 | - | 55233   | 55204   | RNA → rpmE2 (PRK01678)Ribosomal_L31 (pfam01197) → |
| Sau-1997-1 | NZ_KI989969.1 | - | 54889   | 54860   | RNA → rpmE2 (PRK01678)Ribosomal_L31 (pfam01197) → |
| Sau-2056-1 | NZ_KK069096.1 | - | 55426   | 55397   | RNA → rpmE2 (PRK01678)Ribosomal_L31 (pfam01197) → |
| Sau-3522-1 | NZ_KK070456.1 | - | 279710  | 279681  | RNA → rpmE2 (PRK01678)Ribosomal_L31 (pfam01197) → |
| Sau-2196-1 | NZ_KK063830.1 | - | 55189   | 55160   | RNA → rpmE2 (PRK01678)Ribosomal_L31 (pfam01197) → |
| Sau-1451-1 | NZ_KK009269.1 | - | 54889   | 54860   | RNA → rpmE2 (PRK01678)Ribosomal_L31 (pfam01197) → |
| Sau-2655-1 | NZ_KK019219.1 | - | 792664  | 792635  | RNA → rpmE2 (PRK01678)Ribosomal_L31 (pfam01197) → |
| Sau-1257-1 | NZ_KK002069.1 | - | 55131   | 55102   | RNA → rpmE2 (PRK01678)Ribosomal_L31 (pfam01197) → |
| Sau-2912-1 | NZ_KK020889.1 | - | 41304   | 41275   | RNA → rpmE2 (PRK01678)Ribosomal_L31 (pfam01197) → |
| Sau-1127-1 | NZ_KI975919.1 | - | 56894   | 56865   | RNA → rpmE2 (PRK01678)Ribosomal_L31 (pfam01197) → |
| Sau-1239-1 | NZ_KK001294.1 | - | 55148   | 55119   | RNA → rpmE2 (PRK01678)Ribosomal_L31 (pfam01197) → |
| Sau-1274-1 | NZ_KK002623.1 | - | 55426   | 55397   | RNA → rpmE2 (PRK01678)Ribosomal_L31 (pfam01197) → |
| Sau-1794-1 | NZ_KI982815.1 | - | 55130   | 55101   | RNA → rpmE2 (PRK01678)Ribosomal_L31 (pfam01197) → |
| Sau-1885-1 | NZ_KI985844.1 | - | 55424   | 55395   | RNA → rpmE2 (PRK01678)Ribosomal_L31 (pfam01197) → |
| Sau-1262-1 | NZ_KK002316.1 | - | 55407   | 55378   | RNA → rpmE2 (PRK01678)Ribosomal_L31 (pfam01197) → |
| Sau-1528-1 | NZ_KK012556.1 | - | 55135   | 55106   | RNA → rpmE2 (PRK01678)Ribosomal_L31 (pfam01197) → |
| Sau-1609-1 | NZ_KK016307.1 | - | 55043   | 55014   | RNA → rpmE2 (PRK01678)Ribosomal_L31 (pfam01197) → |
| Sau-776-1  | NZ_KK026432.1 | - | 29424   | 29395   | RNA → rpmE2 (PRK01678)Ribosomal_L31 (pfam01197) → |
| Sau-2604-1 | NZ_KI973827.1 | - | 56894   | 56865   | RNA → rpmE2 (PRK01678)Ribosomal_L31 (pfam01197) → |
| Sau-1328-1 | NZ_KK005051.1 | - | 55231   | 55202   | RNA → rpmE2 (PRK01678)Ribosomal_L31 (pfam01197) → |
| Sau-1531-1 | NZ_KK012699.1 | - | 55135   | 55106   | RNA → rpmE2 (PRK01678)Ribosomal_L31 (pfam01197) → |
| Sau-1181-1 | NZ_KI998921.1 | - | 54889   | 54860   | RNA → rpmE2 (PRK01678)Ribosomal_L31 (pfam01197) → |
| Sau-1627-1 | NZ_KK017224.1 | - | 54989   | 54960   | RNA → rpmE2 (PRK01678)Ribosomal_L31 (pfam01197) → |
| Sau-930-1  | NZ_KK025367.1 | - | 56894   | 56865   | RNA → rpmE2 (PRK01678)Ribosomal_L31 (pfam01197) → |
| Sau-2075-1 | NZ_KK068270.1 | - | 55231   | 55202   | RNA → rpmE2 (PRK01678)Ribosomal_L31 (pfam01197) → |
| Sau-2164-1 | NZ_KK065099.1 | - | 25205   | 25176   | RNA → rpmE2 (PRK01678)Ribosomal_L31 (pfam01197) → |
| Sau-2775-1 | NZ_KI975292.1 | - | 56894   | 56865   | RNA → rpmE2 (PRK01678)Ribosomal_L31 (pfam01197) → |
| Sau-1869-1 | NZ_KI985316.1 | - | 55331   | 55302   | RNA → rpmE2 (PRK01678)Ribosomal_L31 (pfam01197) → |
| Sau-1259-1 | NZ_KK002154.1 | - | 55231   | 55202   | RNA → rpmE2 (PRK01678)Ribosomal_L31 (pfam01197) → |
| Sau-1643-1 | NZ_KK018033.1 | - | 60065   | 60036   | RNA → rpmE2 (PRK01678)Ribosomal_L31 (pfam01197) → |
| Sau-1606-1 | NZ_KK016041.1 | - | 55331   | 55302   | RNA → rpmE2 (PRK01678)Ribosomal_L31 (pfam01197) → |
| Sau-1818-1 | NZ_KI983816.1 | - | 27093   | 27064   | RNA → rpmE2 (PRK01678)Ribosomal_L31 (pfam01197) → |
| Sau-1256-1 | NZ_KK001992.1 | - | 55372   | 55343   | RNA → rpmE2 (PRK01678)Ribosomal_L31 (pfam01197) → |
| Sau-2170-1 | NZ_KK064806.1 | - | 55454   | 55425   | RNA → rpmE2 (PRK01678)Ribosomal_L31 (pfam01197) → |
| Sau-1253-1 | NZ_KK001790.1 | - | 55131   | 55102   | RNA → rpmE2 (PRK01678)Ribosomal_L31 (pfam01197) → |
| Sau-2049-1 | NZ_KK069306.1 | - | 54994   | 54965   | RNA → rpmE2 (PRK01678)Ribosomal_L31 (pfam01197) → |
| Sau-2539-1 | NZ_KK096734.1 | - | 34913   | 34884   | RNA → rpmE2 (PRK01678)Ribosomal_L31 (pfam01197) → |
| Sau-2477-1 | NZ_KK092636.1 | - | 56894   | 56865   | RNA → rpmE2 (PRK01678)Ribosomal_L31 (pfam01197) → |
| Sau-3630-1 | NZ_KK097480.1 | - | 57198   | 57169   | RNA → rpmE2 (PRK01678)Ribosomal_L31 (pfam01197) → |
| Sau-643-1  | NZ_KK076265.1 | - | 34873   | 34844   | RNA → rpmE2 (PRK01678)Ribosomal_L31 (pfam01197) → |
| Sau-328-1  | NZ_KK099102.1 | - | 348428  | 348399  | RNA → rpmE2 (PRK01678)Ribosomal_L31 (pfam01197) → |
| Sau-333-1  | NZ_KK099145.1 | + | 57760   | 57789   | RNA → rpmE2 (PRK01678)Ribosomal_L31 (pfam01197) → |
| Sau-376-1  | NZ_KK099464.1 | - | 350084  | 350055  | RNA → rpmE2 (PRK01678)Ribosomal_L31 (pfam01197) → |
| Sau-156-1  | NZ_KK220355.1 | - | 26024   | 25995   | RNA → rpmE2 (PRK01678)Ribosomal_L31 (pfam01197) → |



|            |                    |   |         |         |       |                                                                                                                       |
|------------|--------------------|---|---------|---------|-------|-----------------------------------------------------------------------------------------------------------------------|
| Sau-3722-3 | NZ_CP007659.1      | - | 2212795 | 2212766 | RNA → | <a href="#">rpmE2 (PRK01678)Ribosomal_L31 (pfam01197)</a> →                                                           |
| Sau-3755-1 | NZ_CP006630.1      | - | 2169570 | 2169541 | RNA → | <a href="#">rpmE2 (PRK01678)Ribosomal_L31 (pfam01197)</a> →                                                           |
| Sau-3756-1 | NZ_KL662263.1      | - | 54767   | 54738   | RNA → | <a href="#">rpmE2 (PRK01678)Ribosomal_L31 (pfam01197)</a> →                                                           |
| Sau-3722-4 | NZ_CP009361.1      | - | 2152383 | 2152354 | RNA → | <a href="#">rpmE2 (PRK01678)Ribosomal_L31 (pfam01197)</a> →                                                           |
| Sau-79-1   | NZ_LN626917.1      | - | 2210527 | 2210498 | RNA → | <a href="#">rpmE2 (PRK01678)Ribosomal_L31 (pfam01197)</a> →                                                           |
| Sau-4103-4 | NC_020529.1        | - | 2120722 | 2120693 | RNA → | <a href="#">rpmE2 (PRK01678)Ribosomal_L31 (pfam01197)</a> → <a href="#">rpmE2 (PRK01678)Ribosomal_L31 (pfam01197)</a> |
| Sau-4103-5 | NC_020564.1        | - | 2120709 | 2120680 | RNA → | <a href="#">rpmE2 (PRK01678)Ribosomal_L31 (pfam01197)</a> → <a href="#">rpmE2 (PRK01678)Ribosomal_L31 (pfam01197)</a> |
| Sau-4103-6 | NC_020536.1        | - | 2120708 | 2120679 | RNA → | <a href="#">rpmE2 (PRK01678)Ribosomal_L31 (pfam01197)</a> → <a href="#">rpmE2 (PRK01678)Ribosomal_L31 (pfam01197)</a> |
| Sau-4103-7 | NC_020537.1        | - | 2120471 | 2120442 | RNA → | <a href="#">rpmE2 (PRK01678)Ribosomal_L31 (pfam01197)</a> → <a href="#">rpmE2 (PRK01678)Ribosomal_L31 (pfam01197)</a> |
| Sau-4103-8 | NC_020532.1        | - | 2121018 | 2120989 | RNA → | <a href="#">rpmE2 (PRK01678)Ribosomal_L31 (pfam01197)</a> → <a href="#">rpmE2 (PRK01678)Ribosomal_L31 (pfam01197)</a> |
| Sau-218-1  | NZ_KK240911.1      | + | 56430   | 56459   | RNA → | <a href="#">rpmE2 (PRK01678)Ribosomal_L31 (pfam01197)</a> →                                                           |
| Sau-3939-1 | NZ_KB822069.1      | - | 1303682 | 1303653 | RNA → | <a href="#">rpmE2 (PRK01678)Ribosomal_L31 (pfam01197)</a> →                                                           |
| Sau-79-2   | NZ_CP007539.1      | - | 2184540 | 2184511 | RNA → | <a href="#">rpmE2 (PRK01678)Ribosomal_L31 (pfam01197)</a> →                                                           |
| Sau-1-1    | NC_017340.1        | - | 2190574 | 2190545 | RNA → | <a href="#">rpmE2 (PRK01678)Ribosomal_L31 (pfam01197)</a> →                                                           |
| Sau-3722-6 | NZ_CP012119.1      | + | 2562238 | 2562267 | RNA → | <a href="#">rpmE2 (PRK01678)Ribosomal_L31 (pfam01197)</a> →                                                           |
| Sau-3743-1 | NZ_CP011526.1      | - | 2117394 | 2117365 | RNA → | <a href="#">rpmE2 (PRK01678)Ribosomal_L31 (pfam01197)</a> →                                                           |
| Sau-4094-1 | NZ_JH691956.1      | - | 1623707 | 1623678 | RNA → | <a href="#">rpmE2 (PRK01678)Ribosomal_L31 (pfam01197)</a> →                                                           |
| Sau-1162-1 | NZ_KE503211.1      | + | 1132666 | 1132695 | RNA → | <a href="#">rpmE2 (PRK01678)Ribosomal_L31 (pfam01197)</a> →                                                           |
| Sau-4075-1 | NZ_AJKF01000031.1  | - | 3066    | 3037    | RNA → | <a href="#">rpmE2 (PRK01678)Ribosomal_L31 (pfam01197)</a> →                                                           |
| Sau-4106-1 | NZ_AGTZ01000005.1  | + | 28862   | 28891   | RNA → | <a href="#">rpmE2 (PRK01678)Ribosomal_L31 (pfam01197)</a> →                                                           |
| Sau-4085-1 | NZ_AICI01000200.1  | - | 15991   | 15962   | RNA → | <a href="#">rpmE2 (PRK01678)Ribosomal_L31 (pfam01197)</a> →                                                           |
| Sau-4089-1 | NZ_AHLP01000002.1  | - | 55170   | 55141   | RNA → | <a href="#">rpmE2 (PRK01678)Ribosomal_L31 (pfam01197)</a> →                                                           |
| Sau-4061-1 | NZ_AHVN01000011.1  | - | 57147   | 57118   | RNA → | <a href="#">rpmE2 (PRK01678)Ribosomal_L31 (pfam01197)</a> →                                                           |
| Sau-4090-1 | NZ_AHLQ01000001.1  | - | 25176   | 25147   | RNA → | <a href="#">rpmE2 (PRK01678)Ribosomal_L31 (pfam01197)</a> →                                                           |
| Sau-4063-1 | NZ_AHVV01000014.1  | - | 59240   | 59211   | RNA → | <a href="#">rpmE2 (PRK01678)Ribosomal_L31 (pfam01197)</a> →                                                           |
| Sau-4081-1 | NZ_AHLR01000057.1  | - | 54627   | 54598   | RNA → | <a href="#">rpmE2 (PRK01678)Ribosomal_L31 (pfam01197)</a> →                                                           |
| Sau-4082-1 | NZ_AHLS01000123.1  | - | 9926    | 9897    | RNA → | <a href="#">rpmE2 (PRK01678)Ribosomal_L31 (pfam01197)</a> →                                                           |
| Sau-4045-1 | NZ_AHKD01000013.1  | - | 59992   | 59963   | RNA → | <a href="#">rpmE2 (PRK01678)Ribosomal_L31 (pfam01197)</a> →                                                           |
| Sau-4086-1 | NZ_AHLM01000010.1  | - | 55240   | 55211   | RNA → | <a href="#">rpmE2 (PRK01678)Ribosomal_L31 (pfam01197)</a> →                                                           |
| Sau-4006-1 | NZ_AFEG01000024.1  | - | 54491   | 54462   | RNA → | <a href="#">rpmE2 (PRK01678)Ribosomal_L31 (pfam01197)</a> →                                                           |
| Sau-4091-1 | NZ_AJLD01000001.1  | - | 35341   | 35312   | RNA → | <a href="#">rpmE2 (PRK01678)Ribosomal_L31 (pfam01197)</a> →                                                           |
| Sau-3749-1 | NZ_CAWB010000325.1 | + | 6522    | 6551    | RNA → | <a href="#">rpmE2 (PRK01678)Ribosomal_L31 (pfam01197)</a> →                                                           |
| Sau-3694-1 | NZ_JBFR01000002.1  | - | 56894   | 56865   | RNA → | <a href="#">rpmE2 (PRK01678)Ribosomal_L31 (pfam01197)</a> →                                                           |
| Sau-3747-1 | NZ_CAVH010000032.1 | - | 25734   | 25705   | RNA → | <a href="#">rpmE2 (PRK01678)Ribosomal_L31 (pfam01197)</a> →                                                           |
| Sau-1122-1 | NZ_JBJK01000006.1  | - | 56894   | 56865   | RNA → | <a href="#">rpmE2 (PRK01678)Ribosomal_L31 (pfam01197)</a> →                                                           |
| Sau-2783-1 | NZ_JBNJ01000001.1  | - | 1322998 | 1322969 | RNA → | <a href="#">rpmE2 (PRK01678)Ribosomal_L31 (pfam01197)</a> →                                                           |
| Sau-3752-1 | NZ_CAWA010000012.1 | + | 48028   | 48057   | RNA → | <a href="#">rpmE2 (PRK01678)Ribosomal_L31 (pfam01197)</a> →                                                           |
| Sau-2761-1 | NZ_JBLV01000002.1  | - | 56894   | 56865   | RNA → | <a href="#">rpmE2 (PRK01678)Ribosomal_L31 (pfam01197)</a> →                                                           |
| Sau-3754-1 | NZ_CAVW010000042.1 | + | 18308   | 18337   | RNA → | <a href="#">rpmE2 (PRK01678)Ribosomal_L31 (pfam01197)</a> →                                                           |
| Sau-3753-1 | NZ_CAVV010000049.1 | - | 15697   | 15668   | RNA → | <a href="#">rpmE2 (PRK01678)Ribosomal_L31 (pfam01197)</a> →                                                           |
| Sau-3748-1 | NZ_CAVX010000008.1 | - | 25736   | 25707   | RNA → | <a href="#">rpmE2 (PRK01678)Ribosomal_L31 (pfam01197)</a> →                                                           |
| Sau-3750-1 | NZ_CAVY010000101.1 | - | 20464   | 20435   | RNA → | <a href="#">rpmE2 (PRK01678)Ribosomal_L31 (pfam01197)</a> →                                                           |
| Sau-3751-1 | NZ_CAVU010000011.1 | + | 48082   | 48111   | RNA → | <a href="#">rpmE2 (PRK01678)Ribosomal_L31 (pfam01197)</a> →                                                           |
| Sau-2547-1 | NZ_JGHQ01000002.1  | - | 56894   | 56865   | RNA → | <a href="#">rpmE2 (PRK01678)Ribosomal_L31 (pfam01197)</a> →                                                           |
| Sau-2716-1 | NZ_JEMM01000011.1  | - | 54849   | 54820   | RNA → | <a href="#">rpmE2 (PRK01678)Ribosomal_L31 (pfam01197)</a> →                                                           |
| Sau-3734-1 | NZ_JHPZ01000040.1  | - | 54712   | 54683   | RNA → | <a href="#">rpmE2 (PRK01678)Ribosomal_L31 (pfam01197)</a> →                                                           |
| Sau-3730-1 | NZ_JHPX01000001.1  | - | 54958   | 54929   | RNA → | <a href="#">rpmE2 (PRK01678)Ribosomal_L31 (pfam01197)</a> →                                                           |
| Sau-3724-1 | NZ_JHPS01000026.1  | - | 29607   | 29578   | RNA → | <a href="#">rpmE2 (PRK01678)Ribosomal_L31 (pfam01197)</a> →                                                           |
| Sau-4076-1 | NZ_JHQG01000095.1  | - | 503     | 474     | RNA → | <a href="#">rpmE2 (PRK01678)Ribosomal_L31 (pfam01197)</a> →                                                           |
| Sau-3728-1 | NZ_JHPV01000038.1  | - | 56085   | 56056   | RNA → | <a href="#">rpmE2 (PRK01678)Ribosomal_L31 (pfam01197)</a> →                                                           |
| Sau-4077-1 | NZ_JHTT01000096.1  | - | 55218   | 55189   | RNA → | <a href="#">rpmE2 (PRK01678)Ribosomal_L31 (pfam01197)</a> →                                                           |
| Sau-2717-1 | NZ_JDRT01000006.1  | + | 46152   | 46181   | RNA → | <a href="#">rpmE2 (PRK01678)Ribosomal_L31 (pfam01197)</a> →                                                           |





|           |                         |   |         |         |                                                                                             |
|-----------|-------------------------|---|---------|---------|---------------------------------------------------------------------------------------------|
| Oki-1-1   | NZ_CM001792.1           | - | 3174116 | 3174084 | RNA → rpmE2 (PRK01678)Ribosomal_L31 (pfam01197) →                                           |
| Oih-1-1   | NC_004193.1             | - | 3108848 | 3108816 | RNA → rpmE2 (PRK01678)Ribosomal_L31 (pfam01197) →                                           |
| Pgl-1-1   | NZ_KI519435.1           | - | 42469   | 42438   | RNA → rpmE2 (PRK01678)Ribosomal_L31 (pfam01197) →                                           |
| Osp-1-1   | NZ_HE610976.1           | - | 738196  | 738164  | RNA → rpmE2 (PRK01678)Ribosomal_L31 (pfam01197) →                                           |
| Oma-1-1   | NZ_CCDL01000001.1       | + | 930544  | 930575  | RNA → rpmE2 (PRK01678)Ribosomal_L31 (pfam01197) →                                           |
| Bba-4-1   | NZ_LAZH01000073.1       | + | 72597   | 72628   | RNA → rpmE2 (PRK01678)Ribosomal_L31 (pfam01197) →                                           |
| Sai-1-1   | NZ_KE007196.1           | - | 146719  | 146687  | RNA → rpmE2 (PRK01678)Ribosomal_L31 (pfam01197) →                                           |
| Pch-1-1   | NZ_AVBG01000002.1       | - | 81446   | 81414   | RNA → rpmE2 (PRK01678)Ribosomal_L31 (pfam01197) →                                           |
| Bme-6-1   | NZ_KI518593.1           | - | 65186   | 65154   | RNA → rpmE2 (PRK01678)Ribosomal_L31 (pfam01197) →                                           |
| Pli-1-1   | NZ_AVPG01000013.1       | - | 37362   | 37330   | RNA → rpmE2 (PRK01678)Ribosomal_L31 (pfam01197) →                                           |
| Opi-1-1   | NZ_CCAX010000004.1      | - | 131537  | 131506  | RNA → rpmE2 (PRK01678)Ribosomal_L31 (pfam01197) →                                           |
| Bsp-83-1  | NZ_KI270940.1           | + | 507592  | 507624  | RNA → rpmE2 (PRK01678)Ribosomal_L31 (pfam01197) →                                           |
| Hsp-1-1   | NZ_ANPF01000001.1       | + | 62661   | 62693   | RNA → rpmE2 (PRK01678)Ribosomal_L31 (pfam01197) →                                           |
| Hsp-2-1   | NZ_JRNX01000108.1       | - | 3575    | 3543    | RNA → rpmE2 (PRK01678)Ribosomal_L31 (pfam01197) →                                           |
| Tde-1-1   | NZ_KI543237.1           | - | 735753  | 735721  | RNA → rpmE2 (PRK01678)Ribosomal_L31 (pfam01197) →                                           |
| Htr-1-1   | NZ_CCDJ010000001.1      | - | 775405  | 775373  | RNA → rpmE2 (PRK01678)Ribosomal_L31 (pfam01197) →                                           |
| Hda-1-1   | NZ_CCDH010000001.1      | + | 1071371 | 1071403 | RNA → rpmE2 (PRK01678)Ribosomal_L31 (pfam01197) →                                           |
| Hka-1-1   | NZ_CCDI010000001.1      | - | 1280886 | 1280854 | RNA → rpmE2 (PRK01678)Ribosomal_L31 (pfam01197) →                                           |
| Vsp-1-1   | NZ_AUQA01000002.1       | - | 1068398 | 1068366 | RNA → rpmE2 (PRK01678)Ribosomal_L31 (pfam01197) →                                           |
| Vma-1-1   | NZ_CCDP010000001.1      | + | 560592  | 560624  | RNA → rpmE2 (PRK01678)Ribosomal_L31 (pfam01197) →                                           |
| Vpa-1-1   | NZ_LGTO01000005.1       | + | 626906  | 626938  | RNA → rpmE2 (PRK01678)Ribosomal_L31 (pfam01197) →                                           |
| Oco-1-1   | NZ_LDPV02000007.1       | - | 9420    | 9389    | RNA → rpmE2 (PRK01678)Ribosomal_L31 (pfam01197) →                                           |
| Psp-6-1   | NZ_CBYO010000007.1      | - | 292529  | 292498  | RNA → rpmE2 (PRK01678)Ribosomal_L31 (pfam01197) →                                           |
| Oca-1-1   | NZ_LDUE01000021.1       | - | 69650   | 69619   | RNA → rpmE2 (PRK01678)Ribosomal_L31 (pfam01197) →                                           |
| Val-1-1   | NZ_JFBD01000064.1       | - | 10605   | 10572   | RNA → rpmE2 (PRK01678)Ribosomal_L31 (pfam01197) →                                           |
| env-1007  | TV14_100008             | - | 68254   | 68222   | RNA → rpmE2 (PRK01678)Ribosomal_L31 (pfam01197) →                                           |
| Gha-2-1   | NZ_AFML01000077.1       | - | 3139    | 3107    | RNA → rpmE2 (PRK01678)Ribosomal_L31 (pfam01197) →                                           |
| Pgl-2-1   | NZ_LGAF01000018.1       | - | 43190   | 43163   | RNA → rpmE (PRK00019)Ribosomal_L31 (pfam01197) →                                            |
| Pgl-3-1   | NZ_AUYR01000095.1       | + | 35852   | 35879   | RNA → rpmE (PRK00019)Ribosomal_L31 (pfam01197) →                                            |
| Pma-5-1   | NZ_CCXS01000001.1       | + | 811716  | 811743  | RNA → rpmE (PRK00019)Ribosomal_L31 (pfam01197) →                                            |
| env-1008  | 3300001196_1064895      | - | 266     | 236     | RNA → rpmE (PRK00019)Ribosomal_L31 (pfam01197) →                                            |
| env-1009  | 3300001197_1032424      | - | 97      | 67      | RNA → hypo →                                                                                |
| Sur-1-1   | NZ_AUDQ01000005.1       | - | 34401   | 34371   | RNA → rpmE (PRK00019)Ribosomal_L31 (pfam01197) →                                            |
| Var-2-1   | NZ_LILB01000005.1       | - | 1317698 | 1317668 | RNA → rpmE (PRK00019)Ribosomal_L31 (pfam01197) →                                            |
| Var-1-1   | NZ_ASQA01000009.1       | - | 79603   | 79573   | RNA → rpmE (PRK00019)Ribosomal_L31 (pfam01197) →                                            |
| Bce-148-1 | NZ_AOFT01000001.1       | + | 212893  | 212923  | RNA → rpmE (PRK00019)Ribosomal_L31 (pfam01197) → Tdk (COG1435)PRK04296 (PRK04296) →         |
| env-1010  | topACOD_FV90NF401DKND5  | - | 503     | 472     | RNA → rpmE (PRK00019)Ribosomal_L31 (pfam01197) → Tdk (COG1435)PRK04296 (PRK04296) →         |
| env-1011  | 2204573945              | - | 257     | 227     | RNA → rpmE (PRK00019)Ribosomal_L31 (pfam01197) →                                            |
| env-1012  | 2157810416              | - | 257     | 227     | RNA → rpmE (PRK00019)Ribosomal_L31 (pfam01197) →                                            |
| env-1013  | MA40A.contig22098       | + | 215     | 245     | RNA → rpmE (PRK00019)Ribosomal_L31 (pfam01197) →                                            |
| Bsp-77-1  | NZ_AP013294.1           | + | 1455730 | 1455760 | RNA → rpmE (PRK00019)Ribosomal_L31 (pfam01197) →                                            |
| Sko-2-1   | NZ_CDGU01000008.1       | - | 326072  | 326042  | RNA → rpmE (PRK00019)Ribosomal_L31 (pfam01197) →                                            |
| Sne-1-1   | NZ_GL982997.1           | - | 1321838 | 1321808 | RNA → rpmE (PRK00019)Ribosomal_L31 (pfam01197) →                                            |
| env-1014  | 3300001196_1006164      | - | 2809    | 2779    | RNA → rpmE (PRK00019)Ribosomal_L31 (pfam01197) →                                            |
| env-1015  | JGI24024J18818_10026976 | + | 2203    | 2233    | RNA → ← hypo                                                                                |
| env-1016  | JGI24024J18818_10198670 | + | 28      | 58      | RNA → rpmE (PRK00019)Ribosomal_L31 (pfam01197) →                                            |
| env-1017  | JGI24024J18818_10035368 | - | 167     | 137     | RNA → rpmE (PRK00019)Ribosomal_L31 (pfam01197) →                                            |
| Bce-149-1 | NZ_CDGP01000041.1       | + | 2627    | 2657    | RNA → rpmE (PRK00019)Ribosomal_L31 (pfam01197) →                                            |
| Bce-149-2 | NZ_CDGP01000042.1       | + | 2627    | 2657    | RNA → rpmE (PRK00019)Ribosomal_L31 (pfam01197) →                                            |
| Psp-37-1  | NZ_JRGN01000034.1       | - | 1132    | 1102    | RNA → rpmE (PRK00019)Ribosomal_L31 (pfam01197) →                                            |
| Pan-1-1   | NZ_AJYB01000017.1       | - | 68220   | 68190   | RNA → rpmE (PRK00019)Ribosomal_L31 (pfam01197) → rpmE (PRK00019)Ribosomal_L31 (pfam01197) → |

|          |                             |   |         |         |                                                                                              |
|----------|-----------------------------|---|---------|---------|----------------------------------------------------------------------------------------------|
| Psp-38-1 | NZ_JHDT01000001.1           | - | 6165    | 6135    | RNA → rpmE (PRK00019)Ribosomal_L31 (pfam01197)→                                              |
| Pha-3-1  | NZ_ANBV01000010.1           | + | 146734  | 146764  | RNA → rpmE (PRK00019)Ribosomal_L31 (pfam01197)→                                              |
| Psp-39-1 | NZ_CP009129.1               | - | 2482118 | 2482088 | RNA → rpmE (PRK00019)Ribosomal_L31 (pfam01197)→                                              |
| Pdo-1-1  | NZ_AEPB01000064.1           | + | 9346    | 9376    | RNA → rpmE (PRK00019)Ribosomal_L31 (pfam01197)→ rpmE (PRK00019)Ribosomal_L31 (pfam01197)→    |
| env-1018 | KGI_S2_ANT04_2345m.c1001284 | - | 9677    | 9647    | RNA → rpmE (PRK00019)Ribosomal_L31 (pfam01197)→ hypo→                                        |
| env-1019 | KGI_S2_ANT04_2345m.c1014326 | + | 879     | 909     | RNA → rpmE (PRK00019)Ribosomal_L31 (pfam01197)→                                              |
| env-1020 | KGI_S2_ANT05_2345m.c1009878 | - | 1148    | 1118    | RNA → rpmE (PRK00019)Ribosomal_L31 (pfam01197)→ hypo→                                        |
| env-1021 | KGI_S1_ANT02_95m.c10007926  | - | 333     | 303     | RNA → rpmE (PRK00019)Ribosomal_L31 (pfam01197)→                                              |
| Uth-1-1  | NZ_AJIK01000003.1           | - | 25693   | 25662   | RNA → rpmE (PRK00019)Ribosomal_L31 (pfam01197)→ Tdk (COG1435)PRK04296 (PRK04296)→            |
| env-1022 | JGI24505J29691_1082918      | + | 38      | 68      | RNA → rpmE (PRK00019)Ribosomal_L31 (pfam01197)→                                              |
| Bnd-1-1  | NZ_HG964403.1               | + | 361882  | 361912  | RNA → rpmE (PRK00019)Ribosomal_L31 (pfam01197)→ Tdk (COG1435)PRK04296 (PRK04296)→            |
| Lbo-1-1  | NZ_JPVR01000063.1           | + | 12881   | 12911   | PrfA (COG0216)prfA (PRK00591)→ HemK (COG2890)RF_mod_PrmC (TIGR03534)→ Spore_ILR (pfam01197)→ |
| env-1023 | JGI25151J46595_10149639     | + | 515     | 545     | RNA → rpmE (PRK00019)Ribosomal_L31 (pfam01197)→                                              |
| Lsp-8-1  | NZ_KB933398.1               | + | 1093231 | 1093261 | RNA → rpmE (PRK00019)Ribosomal_L31 (pfam01197)→                                              |
| Lsp-5-1  | NZ_JPDM01000191.1           | - | 6944    | 6914    | RNA → rpmE (PRK00019)Ribosomal_L31 (pfam01197)→                                              |
| env-1024 | JGI25151J46595_10018623     | - | 794     | 764     | RNA → rpmE (PRK00019)Ribosomal_L31 (pfam01197)→                                              |
| Bsp-3-1  | NZ_AAXV01000038.1           | - | 28491   | 28461   | RNA → rpmE (PRK00019)Ribosomal_L31 (pfam01197)→ rpmE (PRK00019)Ribosomal_L31 (pfam01197)→    |
| Lsp-2-1  | NZ_JSZM01000017.1           | + | 118321  | 118351  | RNA → rpmE (PRK00019)Ribosomal_L31 (pfam01197)→                                              |
| Lfu-3-1  | NZ_AYMK01000007.1           | - | 69241   | 69211   | RNA → rpmE (PRK00019)Ribosomal_L31 (pfam01197)→                                              |
| Lsp-5-2  | NZ_JMMU01000037.1           | + | 118169  | 118199  | RNA → rpmE (PRK00019)Ribosomal_L31 (pfam01197)→                                              |
| Lfu-2-1  | NZ_JRBA01000001.1           | + | 118968  | 118998  | RNA → rpmE (PRK00019)Ribosomal_L31 (pfam01197)→                                              |
| Lfu-1-1  | NZ_ADJR01000052.1           | + | 46794   | 46824   | RNA → rpmE (PRK00019)Ribosomal_L31 (pfam01197)→ rpmE (PRK00019)Ribosomal_L31 (pfam01197)→    |
| Lfu-4-1  | NZ_AMQZ01000018.1           | - | 70817   | 70787   | RNA → rpmE (PRK00019)Ribosomal_L31 (pfam01197)→                                              |
| Lva-1-1  | NZ_CP006837.1               | + | 564657  | 564687  | RNA → rpmE (PRK00019)Ribosomal_L31 (pfam01197)→                                              |
| Lsp-7-1  | NZ_AUOZ01000018.1           | + | 205124  | 205154  | RNA → rpmE (PRK00019)Ribosomal_L31 (pfam01197)→                                              |
| env-1025 | JGI25151J46595_10124138     | - | 251     | 221     | RNA → rpmE (PRK00019)Ribosomal_L31 (pfam01197)→                                              |
| Lxy-1-1  | NZ_LFXJ01000010.1           | + | 171030  | 171060  | RNA → rpmE (PRK00019)Ribosomal_L31 (pfam01197)→                                              |
| Lsp-6-1  | NZ_KK037167.1               | + | 1006983 | 1007013 | RNA → rpmE (PRK00019)Ribosomal_L31 (pfam01197)→                                              |
| Lsp-5-3  | NZ_JPDJ01000203.1           | + | 13735   | 13765   | RNA → rpmE (PRK00019)Ribosomal_L31 (pfam01197)→                                              |
| Lsp-5-4  | NZ_JPDK01000128.1           | + | 109979  | 110009  | RNA → rpmE (PRK00019)Ribosomal_L31 (pfam01197)→                                              |
| Lsp-5-5  | NZ_JPDL01000110.1           | + | 13742   | 13772   | RNA → rpmE (PRK00019)Ribosomal_L31 (pfam01197)→                                              |
| Lma-2-1  | NZ_JPVQ01000001.1           | + | 254351  | 254381  | RNA → rpmE (PRK00019)Ribosomal_L31 (pfam01197)→                                              |
| Lsp-4-1  | NZ_LDUJ01000035.1           | + | 13772   | 13802   | RNA → rpmE (PRK00019)Ribosomal_L31 (pfam01197)→                                              |
| Lod-1-1  | NZ_JPVP01000053.1           | - | 366     | 336     | RNA → rpmE (PRK00019)Ribosomal_L31 (pfam01197)→                                              |
| Ssi-1-1  | NC_018065.1                 | - | 3510116 | 3510086 | RNA → rpmE (PRK00019)Ribosomal_L31 (pfam01197)→                                              |
| Bis-1-1  | NZ_AMCK01000003.1           | - | 71858   | 71828   | RNA → rpmE (PRK00019)Ribosomal_L31 (pfam01197)→ rpmE (PRK00019)Ribosomal_L31 (pfam01197)→    |
| Lma-1-1  | NZ_JPVN01000002.1           | - | 107895  | 107865  | RNA → rpmE (PRK00019)Ribosomal_L31 (pfam01197)→                                              |
| Khu-1-1  | NZ_AYTB01000002.1           | + | 218270  | 218300  | RNA → rpmE (PRK00019)Ribosomal_L31 (pfam01197)→                                              |
| Kma-1-1  | NZ_HE610996.1               | - | 681420  | 681390  | RNA → rpmE (PRK00019)Ribosomal_L31 (pfam01197)→                                              |
| Ksp-1-1  | NZ_HE578956.1               | + | 151508  | 151538  | RNA → rpmE (PRK00019)Ribosomal_L31 (pfam01197)→                                              |
| env-1026 | GBANfinal_FHNL2OP03R1YNQ    | - | 115     | 85      | RNA → rpmE (PRK00019)rpmE2 (PRK01678)Ribosomal_L31 (pfam01197)→                              |
| Lsi-1-1  | NZ_JPVO01000048.1           | + | 100905  | 100935  | RNA → rpmE (PRK00019)Ribosomal_L31 (pfam01197)→                                              |
| Ksp-2-1  | NZ_HE611064.1               | - | 867109  | 867079  | RNA → rpmE (PRK00019)Ribosomal_L31 (pfam01197)→                                              |
| env-1027 | JGI24024J18818_10110073     | + | 370     | 400     | RNA → rpmE (PRK00019)Ribosomal_L31 (pfam01197)→                                              |
| env-1028 | JGI24024J18818_10018649     | - | 700     | 670     | RNA → rpmE (PRK00019)Ribosomal_L31 (pfam01197)→                                              |
| env-1029 | JGI24024J18818_10129236     | - | 495     | 465     | RNA → rpmE (PRK00019)Ribosomal_L31 (pfam01197)→                                              |
| env-1030 | JGI24024J18818_10222139     | + | 165     | 195     | RNA → rpmE (PRK00019)Ribosomal_L31 (pfam01197)→                                              |
| Psp-34-1 | NZ_KE150421.1               | - | 1801271 | 1801241 | RNA → rpmE (PRK00019)Ribosomal_L31 (pfam01197)→                                              |
| Psp-35-1 | NZ_AMGD01000100.1           | + | 11731   | 11761   | RNA → rpmE (PRK00019)Ribosomal_L31 (pfam01197)→                                              |
| Psp-36-1 | NZ_ALJG01000332.1           | + | 26178   | 26208   | RNA → rpmE (PRK00019)Ribosomal_L31 (pfam01197)→ hypo→                                        |
| env-1031 | JGI24024J18818_10369468     | - | 280     | 250     | RNA → rpmE (PRK00019)Ribosomal_L31 (pfam01197)→                                              |

|          |                         |   |         |         |                                                                                                                             |
|----------|-------------------------|---|---------|---------|-----------------------------------------------------------------------------------------------------------------------------|
| env-1032 | JGI24024J18818_10113359 | - | 224     | 194     | RNA → rpmE (PRK00019)Ribosomal_L31 (pfam01197)→                                                                             |
| Ssp-4-1  | NZ_AXVE01000011.1       | - | 120561  | 120531  | RNA → rpmE (PRK00019)Ribosomal_L31 (pfam01197)→                                                                             |
| env-1033 | JGI24024J18818_10141399 | + | 497     | 527     | RNA → rpmE (PRK00019)Ribosomal_L31 (pfam01197)→                                                                             |
| env-1034 | 2204743222              | - | 7004    | 6972    | RNA → rpmE2 (PRK01678)Ribosomal_L31 (pfam01197)→                                                                            |
| env-1035 | 2157908317              | - | 7005    | 6973    | RNA → rpmE2 (PRK01678)Ribosomal_L31 (pfam01197)→                                                                            |
| Lpo-1-1  | NZ_APCP01000064.1       | - | 31463   | 31431   | RNA → rpmE2 (PRK01678)Ribosomal_L31 (pfam01197)→                                                                            |
| Lac-10-1 | NZ_BACS01000323.1       | + | 3193    | 3225    | RNA → rpmE2 (PRK01678)Ribosomal_L31 (pfam01197)→ rpmE2 (PRK01678)Ribosomal_L31 (pfam01197)→                                 |
| env-1036 | 2204529503              | + | 210     | 242     | RNA → rpmE2 (PRK01678)Ribosomal_L31 (pfam01197)→                                                                            |
| env-1037 | 2157700330              | - | 115     | 83      | RNA → hypo→                                                                                                                 |
| Lha-2-1  | NZ_AUEH01000024.1       | + | 33012   | 33044   | RNA → rpmE2 (PRK01678)Ribosomal_L31 (pfam01197)→                                                                            |
| Lsh-1-1  | NZ_KI271609.1           | + | 4007    | 4039    | RNA → rpmE2 (PRK01678)Ribosomal_L31 (pfam01197)→                                                                            |
| env-1038 | JGI25151J46595_10001160 | + | 404     | 435     | RNA → rpmE2 (PRK01678)Ribosomal_L31 (pfam01197)→                                                                            |
| env-1039 | JGI25151J46595_10040961 | - | 97      | 66      | RNA → rpmE (PRK00019)rpmE2 (PRK01678)Ribosomal_L31 (pfam01197)→                                                             |
| env-1040 | JGI25151J46595_10160259 | + | 129     | 160     | RNA → rpmE2 (PRK01678)Ribosomal_L31 (pfam01197)→                                                                            |
| Bsp-36-1 | NZ_CVPA01000001.1       | - | 2715811 | 2715778 | RNA → rpmE (PRK00019)Ribosomal_L31 (pfam01197)→ Tdk (COG1435)PRK04296 (PRK04296)→                                           |
| Bam-14-1 | NZ_AWQY01000001.1       | + | 376504  | 376537  | RNA → rpmE (PRK00019)Ribosomal_L31 (pfam01197)→ Tdk (COG1435)PRK04296 (PRK04296)→                                           |
| Bsp-65-1 | NZ_LDUN01000006.1       | - | 82154   | 82121   | RNA → rpmE (PRK00019)Ribosomal_L31 (pfam01197)→ Tdk (COG1435)PRK04296 (PRK04296)→                                           |
| Bam-19-1 | NZ_KB206087.1           | + | 429369  | 429402  | RNA → rpmE (PRK00019)Ribosomal_L31 (pfam01197)→ Tdk (COG1435)PRK04296 (PRK04296)→                                           |
| Bam-7-1  | NC_016784.1             | - | 3652345 | 3652312 | RNA → rpmE (PRK00019)Ribosomal_L31 (pfam01197)→ Tdk (COG1435)PRK04296 (PRK04296)→                                           |
| Bam-12-1 | NC_020272.1             | + | 365167  | 365200  | RNA → rpmE (PRK00019)Ribosomal_L31 (pfam01197)→ Tdk (COG1435)PRK04296 (PRK04296)→                                           |
| Bam-13-1 | NC_023073.1             | - | 3586155 | 3586122 | RNA → rpmE (PRK00019)Ribosomal_L31 (pfam01197)→ Tdk (COG1435)PRK04296 (PRK04296)→                                           |
| Bsp-78-1 | NZ_CP010406.1           | + | 2434203 | 2434236 | RNA → rpmE (PRK00019)Ribosomal_L31 (pfam01197)→ Tdk (COG1435)PRK04296 (PRK04296)→                                           |
| Bam-9-2  | NZ_CP010556.1           | - | 3527608 | 3527575 | RNA → rpmE (PRK00019)Ribosomal_L31 (pfam01197)→ Tdk (COG1435)PRK04296 (PRK04296)→                                           |
| Bve-4-1  | NZ_CP006890.1           | - | 3733812 | 3733779 | RNA → rpmE (PRK00019)Ribosomal_L31 (pfam01197)→ Tdk (COG1435)PRK04296 (PRK04296)→                                           |
| Bve-2-1  | NZ_CP007165.1           | - | 3688006 | 3687973 | RNA → rpmE (PRK00019)Ribosomal_L31 (pfam01197)→ Tdk (COG1435)PRK04296 (PRK04296)→                                           |
| Bam-9-3  | NZ_CP011278.1           | - | 3524652 | 3524619 | RNA → rpmE (PRK00019)Ribosomal_L31 (pfam01197)→ Tdk (COG1435)PRK04296 (PRK04296)→                                           |
| Bve-1-1  | NZ_CP011346.1           | - | 3740648 | 3740615 | RNA → rpmE (PRK00019)Ribosomal_L31 (pfam01197)→ Tdk (COG1435)PRK04296 (PRK04296)→                                           |
| Bam-21-1 | NZ_AMPK01000004.1       | + | 201753  | 201786  | RNA → rpmE (PRK00019)Ribosomal_L31 (pfam01197)→ Tdk (COG1435)PRK04296 (PRK04296)→                                           |
| Bsp-34-1 | NZ_LAKC01000010.1       | - | 628356  | 628323  | RNA → rpmE (PRK00019)Ribosomal_L31 (pfam01197)→ Tdk (COG1435)PRK04296 (PRK04296)→                                           |
| Bsu-18-1 | NZ_AMCA01000303.1       | + | 4300    | 4333    | RNA → rpmE (PRK00019)Ribosomal_L31 (pfam01197)→ Tdk (COG1435)PRK04296 (PRK04296)→                                           |
| Bmo-2-1  | NZ_ASJT01000105.1       | - | 9779    | 9746    | RNA → rpmE (PRK00019)Ribosomal_L31 (pfam01197)→ Tdk (COG1435)PRK04296 (PRK04296)→                                           |
| Sai-1-2  | NZ_KE007193.1           | - | 641613  | 641580  | RNA → rpmE (PRK00019)Ribosomal_L31 (pfam01197)→ Tdk (COG1435)PRK04296 (PRK04296)→                                           |
| Bam-4-1  | NC_017188.1             | - | 3565005 | 3564972 | RNA → rpmE (PRK00019)Ribosomal_L31 (pfam01197)→ Tdk (COG1435)PRK04296 (PRK04296)→                                           |
| Bam-3-1  | NC_017190.1             | - | 3611825 | 3611792 | RNA → rpmE (PRK00019)Ribosomal_L31 (pfam01197)→ Tdk (COG1435)PRK04296 (PRK04296)→                                           |
| Bam-5-1  | NC_017191.1             | - | 3566668 | 3566635 | RNA → rpmE (PRK00019)Ribosomal_L31 (pfam01197)→ Tdk (COG1435)PRK04296 (PRK04296)→                                           |
| Bam-1-1  | NC_014551.1             | - | 3595990 | 3595957 | RNA → rpmE (PRK00019)Ribosomal_L31 (pfam01197)→ Tdk (COG1435)PRK04296 (PRK04296)→                                           |
| Bsu-23-1 | NZ_AWXG01000034.1       | + | 431293  | 431326  | RNA → rpmE (PRK00019)Ribosomal_L31 (pfam01197)→ Tdk (COG1435)PRK04296 (PRK04296)→                                           |
| Bsu-47-1 | NZ_CP007409.1           | - | 3624807 | 3624774 | RNA → rpmE (PRK00019)Ribosomal_L31 (pfam01197)→ Tdk (COG1435)PRK04296 (PRK04296)→                                           |
| Bsp-27-1 | NZ_JXAJ01000001.1       | + | 580404  | 580437  | RNA → rpmE (PRK00019)Ribosomal_L31 (pfam01197)→ Tdk (COG1435)PRK04296 (PRK04296)→                                           |
| Bsp-5-1  | NC_017743.1             | - | 3700469 | 3700436 | RNA → rpmE (PRK00019)Ribosomal_L31 (pfam01197)→ Tdk (COG1435)PRK04296 (PRK04296)→                                           |
| Bva-1-1  | NZ_JH600237.1           | - | 355087  | 355054  | RNA → rpmE (PRK00019)Ribosomal_L31 (pfam01197)→ Tdk (COG1435)PRK04296 (PRK04296)→                                           |
| Bsu-35-1 | NZ_AJHM01000011.1       | - | 146308  | 146275  | RNA → rpmE (PRK00019)Ribosomal_L31 (pfam01197)→ Tdk (COG1435)PRK04296 (PRK04296)→                                           |
| Bsu-34-1 | NZ_AJHL01000019.1       | - | 135154  | 135121  | RNA → rpmE (PRK00019)Ribosomal_L31 (pfam01197)→ Tdk (COG1435)PRK04296 (PRK04296)→                                           |
| Bsu-37-1 | NZ_AJHO01000010.1       | - | 629627  | 629594  | RNA → rpmE (PRK00019)Ribosomal_L31 (pfam01197)→ Tdk (COG1435)PRK04296 (PRK04296)→                                           |
| Bsu-36-1 | NZ_AJHN01000013.1       | - | 368376  | 368343  | RNA → rpmE (PRK00019)Ribosomal_L31 (pfam01197)→ Tdk (COG1435)PRK04296 (PRK04296)→                                           |
| Bsu-29-1 | NZ_AMXN01000001.1       | - | 386697  | 386664  | RNA → rpmE (PRK00019)Ribosomal_L31 (pfam01197)→ Tdk (COG1435)PRK04296 (PRK04296)→                                           |
| Bsu-33-1 | NZ_AFSG01000020.1       | - | 365508  | 365475  | RNA → rpmE (PRK00019)Ribosomal_L31 (pfam01197)→ Tdk (COG1435)PRK04296 (PRK04296)→                                           |
| Bsu-3-1  | NZ_ADGS01000016.1       | - | 106516  | 106483  | RNA → rpmE (PRK00019)Ribosomal_L31 (pfam01197)→ rpmE (PRK00019)Ribosomal_L31 (pfam01197)→ Tdk (COG1435)PRK04296 (PRK04296)→ |
| Jma-2-1  | NZ_LILA01000013.1       | - | 203741  | 203708  | RNA → rpmE (PRK00019)Ribosomal_L31 (pfam01197)→ Tdk (COG1435)PRK04296 (PRK04296)→                                           |
| Bsu-28-1 | NZ_AEHM01000061.1       | - | 125708  | 125675  | RNA → rpmE (PRK00019)Ribosomal_L31 (pfam01197)→ Tdk (COG1435)PRK04296 (PRK04296)→                                           |
| Bsu-5-1  | NC_014479.1             | - | 3613005 | 3612972 | RNA → rpmE (PRK00019)Ribosomal_L31 (pfam01197)→ Tdk (COG1435)PRK04296 (PRK04296)→                                           |



|          |                          |   |         |         |                                                   |                                            |
|----------|--------------------------|---|---------|---------|---------------------------------------------------|--------------------------------------------|
| Bsu-32-1 | NZ_CP010434.1            | - | 3612998 | 3612965 | RNA → rpmE (PRK00019)Ribosomal_L31 (pfam01197) →  | Tdk (COG1435)PRK04296 (PRK04296) →         |
| Bsu-4-1  | NC_016047.1              | - | 3790206 | 3790173 | RNA → rpmE (PRK00019)Ribosomal_L31 (pfam01197) →  | Tdk (COG1435)PRK04296 (PRK04296) →         |
| Bsp-32-1 | NZ_JPWY01000014.1        | + | 425314  | 425347  | RNA → rpmE (PRK00019)Ribosomal_L31 (pfam01197) →  | Tdk (COG1435)PRK04296 (PRK04296) →         |
| env-1041 | JGI11877J14254_119565    | - | 68      | 35      | RNA →                                             |                                            |
| env-1042 | GBANfinal_FHNL2OP03QJMDD | - | 298     | 265     | RNA → rpmE (PRK00019)Ribosomal_L31 (pfam01197) →  |                                            |
| Bsp-72-1 | NZ_JXAQ01000010.1        | + | 225785  | 225818  | RNA → rpmE (PRK00019)Ribosomal_L31 (pfam01197) →  | Tdk (COG1435)PRK04296 (PRK04296) →         |
| Bsp-38-1 | NZ_AVPM01000060.1        | - | 644910  | 644877  | RNA → rpmE (PRK00019)Ribosomal_L31 (pfam01197) →  | Tdk (COG1435)PRK04296 (PRK04296) → hypo    |
| Bsp-46-1 | NZ_LFZT01000003.1        | + | 506089  | 506122  | RNA → rpmE (PRK00019)Ribosomal_L31 (pfam01197) →  | Tdk (COG1435)PRK04296 (PRK04296) →         |
| Bsu-48-1 | NZ_AGFW01000001.1        | + | 494266  | 494299  | RNA → rpmE (PRK00019)Ribosomal_L31 (pfam01197) →  | Tdk (COG1435)PRK04296 (PRK04296) →         |
| Bsu-15-1 | NZ_CAUC01000015.1        | - | 644806  | 644773  | RNA → rpmE (PRK00019)Ribosomal_L31 (pfam01197) →  | Tdk (COG1435)PRK04296 (PRK04296) →         |
| Bmu-1-1  | NZ_LGUH01000009.1        | - | 624647  | 624614  | RNA → rpmE (PRK00019)Ribosomal_L31 (pfam01197) →  | Tdk (COG1435)PRK04296 (PRK04296) →         |
| Bsu-6-1  | NC_000964.3              | - | 3803324 | 3803291 | RNA → rpmE (PRK00019)Ribosomal_L31 (pfam01197) →  | Tdk (COG1435)PRK04296 (PRK04296) →         |
| Bsu-30-1 | NC_017196.2              | - | 3675052 | 3675019 | RNA → rpmE (PRK00019)Ribosomal_L31 (pfam01197) →  | Tdk (COG1435)PRK04296 (PRK04296) →         |
| Bsu-10-1 | NZ_CM000490.1            | - | 3802359 | 3802326 | RNA → rpmE (PRK00019)Ribosomal_L31 (pfam01197) →  | Tdk (COG1435)PRK04296 (PRK04296) →         |
| Bsu-7-1  | NZ_CM000489.1            | - | 3775336 | 3775303 | RNA → rpmE (PRK00019)Ribosomal_L31 (pfam01197) →  | Tdk (COG1435)PRK04296 (PRK04296) →         |
| Bsu-41-1 | NZ_JH600164.1            | + | 17381   | 17414   | RNA → rpmE (PRK00019)Ribosomal_L31 (pfam01197) →  | Tdk (COG1435)PRK04296 (PRK04296) →         |
| Bsu-1-1  | NC_014976.1              | - | 1804697 | 1804664 | RNA → rpmE (PRK00019)Ribosomal_L31 (pfam01197) →  | Tdk (COG1435)PRK04296 (PRK04296) →         |
| Bsu-9-1  | NC_017195.1              | - | 3606494 | 3606461 | RNA → rpmE (PRK00019)Ribosomal_L31 (pfam01197) →  | Tdk (COG1435)PRK04296 (PRK04296) →         |
| Bsu-2-1  | NC_018520.1              | - | 3734766 | 3734733 | RNA → rpmE (PRK00019)Ribosomal_L31 (pfam01197) →  | rpmE (PRK00019)Ribosomal_L31 (pfam01197) → |
|          |                          |   |         |         | Tdk (COG1435)PRK04296 (PRK04296) →                |                                            |
| Bsu-43-1 | NC_019896.1              | + | 403519  | 403552  | RNA → rpmE (PRK00019)Ribosomal_L31 (pfam01197) →  | Tdk (COG1435)PRK04296 (PRK04296) →         |
| Bsu-27-1 | NC_020244.1              | - | 3642206 | 3642173 | RNA → rpmE (PRK00019)Ribosomal_L31 (pfam01197) →  | Tdk (COG1435)PRK04296 (PRK04296) →         |
| Bsu-42-1 | NC_020832.1              | - | 3605096 | 3605063 | RNA → rpmE (PRK00019)Ribosomal_L31 (pfam01197) →  | Tdk (COG1435)PRK04296 (PRK04296) →         |
| Bsu-39-1 | NC_020507.1              | - | 3803329 | 3803296 | RNA → rpmE (PRK00019)Ribosomal_L31 (pfam01197) →  | Tdk (COG1435)PRK04296 (PRK04296) →         |
| Bsu-24-1 | NC_022898.1              | - | 3621179 | 3621146 | RNA → rpmE (PRK00019)Ribosomal_L31 (pfam01197) →  | Tdk (COG1435)PRK04296 (PRK04296) → hypo    |
| Bsu-14-1 | NZ_AP012496.1            | - | 3630878 | 3630845 | RNA → rpmE (PRK00019)Ribosomal_L31 (pfam01197) →  | Tdk (COG1435)PRK04296 (PRK04296) →         |
| Bsu-6-2  | NZ_CP010052.1            | - | 3803337 | 3803304 | RNA → rpmE (PRK00019)Ribosomal_L31 (pfam01197) →  | Tdk (COG1435)PRK04296 (PRK04296) →         |
| Bsu-38-1 | NZ_CP010314.1            | - | 3782820 | 3782787 | RNA → rpmE (PRK00019)Ribosomal_L31 (pfam01197) →  | Tdk (COG1435)PRK04296 (PRK04296) →         |
| Bsp-97-1 | NZ_CP010014.1            | - | 3439669 | 3439636 | RNA → rpmE (PRK00019)Ribosomal_L31 (pfam01197) →  | Tdk (COG1435)PRK04296 (PRK04296) →         |
| Bsu-44-1 | NZ_CP007800.1            | - | 3776092 | 3776059 | RNA → rpmE (PRK00019)Ribosomal_L31 (pfam01197) →  | Tdk (COG1435)PRK04296 (PRK04296) →         |
| Bsu-40-1 | NZ_CP008698.1            | - | 3781363 | 3781330 | RNA → rpmE (PRK00019)Ribosomal_L31 (pfam01197) →  | Tdk (COG1435)PRK04296 (PRK04296) →         |
| Bsp-12-1 | NZ_LN680001.1            | - | 3821333 | 3821300 | RNA → rpmE (PRK00019)Ribosomal_L31 (pfam01197) →  | Tdk (COG1435)PRK04296 (PRK04296) →         |
| Bsu-12-1 | NZ_LN649259.1            | - | 3839370 | 3839337 | RNA → rpmE (PRK00019)Ribosomal_L31 (pfam01197) →  | Tdk (COG1435)PRK04296 (PRK04296) →         |
| Bsu-17-1 | NZ_CP007173.1            | - | 3594029 | 3593996 | RNA → rpmE (PRK00019)Ribosomal_L31 (pfam01197) →  | Tdk (COG1435)PRK04296 (PRK04296) →         |
| Bsp-67-1 | NZ_CP011101.1            | - | 3656783 | 3656750 | RNA → rpmE (PRK00019)Ribosomal_L31 (pfam01197) →  | Tdk (COG1435)PRK04296 (PRK04296) →         |
| Bsu-19-1 | NZ_CP011115.1            | - | 3803352 | 3803319 | RNA → rpmE (PRK00019)Ribosomal_L31 (pfam01197) →  | Tdk (COG1435)PRK04296 (PRK04296) →         |
| Bsu-8-1  | NZ_CM000488.1            | - | 3802318 | 3802285 | RNA → rpmE (PRK00019)Ribosomal_L31 (pfam01197) →  | Tdk (COG1435)PRK04296 (PRK04296) →         |
| Bsu-26-1 | NZ_ANIP01000016.1        | + | 8075    | 8108    | RNA → rpmE (PRK00019)Ribosomal_L31 (pfam01197) →  | Tdk (COG1435)PRK04296 (PRK04296) →         |
| Bsu-22-1 | NZ_AQGR01000122.1        | + | 80257   | 80290   | RNA → rpmE (PRK00019)Ribosomal_L31 (pfam01197) →  | Tdk (COG1435)PRK04296 (PRK04296) →         |
| Psp-40-1 | NZ_AVOF01000755.1        | + | 314     | 347     | RNA → rpmE (PRK00019)Ribosomal_L31 (pfam01197) →  | rpmE (PRK00019)Ribosomal_L31 (pfam01197) → |
|          |                          |   |         |         | rpmE (PRK00019)Ribosomal_L31 (pfam01197) → hypo → |                                            |
| Bsu-46-1 | NZ_APMW01000035.1        | + | 8558    | 8591    | RNA → rpmE (PRK00019)Ribosomal_L31 (pfam01197) →  | Tdk (COG1435)PRK04296 (PRK04296) →         |
| Bsu-45-1 | NZ_APMX01000221.1        | + | 12037   | 12070   | RNA → rpmE (PRK00019)Ribosomal_L31 (pfam01197) →  | Tdk (COG1435)PRK04296 (PRK04296) →         |
| Bsu-25-1 | NZ_AZQS01000001.1        | + | 419264  | 419297  | RNA → rpmE (PRK00019)Ribosomal_L31 (pfam01197) →  | Tdk (COG1435)PRK04296 (PRK04296) →         |
| Bsu-20-1 | NZ_AOTY01000001.1        | - | 624810  | 624777  | RNA → rpmE (PRK00019)Ribosomal_L31 (pfam01197) →  | Tdk (COG1435)PRK04296 (PRK04296) → hypo    |
| Bsu-21-1 | NZ_BALZ01000225.1        | - | 36042   | 36009   | RNA → rpmE (PRK00019)Ribosomal_L31 (pfam01197) →  | Tdk (COG1435)PRK04296 (PRK04296) →         |
| Bte-1-1  | NZ_AYTO01000009.1        | - | 97581   | 97548   | RNA → rpmE (PRK00019)Ribosomal_L31 (pfam01197) →  | Tdk (COG1435)PRK04296 (PRK04296) →         |
| Bsi-1-1  | NZ_LAGT01000025.1        | - | 10366   | 10333   | RNA → rpmE (PRK00019)Ribosomal_L31 (pfam01197) →  | Tdk (COG1435)PRK04296 (PRK04296) →         |
| Bsi-2-1  | NZ_AJVF01000039.1        | + | 357272  | 357305  | RNA → rpmE (PRK00019)Ribosomal_L31 (pfam01197) →  | Tdk (COG1435)PRK04296 (PRK04296) →         |
| Bsp-59-1 | NZ_KQ236689.1            | - | 1238300 | 1238267 | RNA → rpmE (PRK00019)Ribosomal_L31 (pfam01197) →  | Tdk (COG1435)PRK04296 (PRK04296) →         |
| Bat-8-1  | NZ_AEFU01000001.1        | + | 154389  | 154422  | RNA → rpmE (PRK00019)Ribosomal_L31 (pfam01197) →  | Tdk (COG1435)PRK04296 (PRK04296) →         |
| Bat-7-1  | NZ_AEFM01000002.1        | + | 154389  | 154422  | RNA → rpmE (PRK00019)Ribosomal_L31 (pfam01197) →  | Tdk (COG1435)PRK04296 (PRK04296) →         |
| Bat-6-1  | NZ_AEFW01000008.1        | + | 154400  | 154433  | RNA → rpmE (PRK00019)Ribosomal_L31 (pfam01197) →  | Tdk (COG1435)PRK04296 (PRK04296) →         |

|          |                                           |   |         |         |                                                                                                                                            |
|----------|-------------------------------------------|---|---------|---------|--------------------------------------------------------------------------------------------------------------------------------------------|
| Bat-5-1  | NZ_AEFV01000008.1                         | - | 321837  | 321804  | RNA → rpmE (PRK00019)Ribosomal_L31 (pfam01197) → Tdk (COG1435)PRK04296 (PRK04296) →                                                        |
| Bat-1-1  | NC_014639.1                               | - | 3225185 | 3225152 | RNA → rpmE (PRK00019)Ribosomal_L31 (pfam01197) → Tdk (COG1435)PRK04296 (PRK04296) →                                                        |
| Bat-14-1 | NZ_AEFR01000017.1                         | - | 96226   | 96193   | RNA → rpmE (PRK00019)Ribosomal_L31 (pfam01197) → Tdk (COG1435)PRK04296 (PRK04296) →                                                        |
| Bat-3-1  | NZ_AEFS01000014.1                         | + | 412950  | 412983  | RNA → rpmE (PRK00019)Ribosomal_L31 (pfam01197) → Tdk (COG1435)PRK04296 (PRK04296) →                                                        |
| Bat-4-1  | NZ_AEFT01000005.1                         | + | 154391  | 154424  | RNA → rpmE (PRK00019)Ribosomal_L31 (pfam01197) → Tdk (COG1435)PRK04296 (PRK04296) →                                                        |
| Bat-9-1  | NZ_AEFX01000018.1                         | - | 116510  | 116477  | RNA → rpmE (PRK00019)Ribosomal_L31 (pfam01197) → Tdk (COG1435)PRK04296 (PRK04296) →                                                        |
| Bat-13-1 | NZ_AEFQ01000015.1                         | - | 96075   | 96042   | RNA → rpmE (PRK00019)Ribosomal_L31 (pfam01197) → Tdk (COG1435)PRK04296 (PRK04296) →                                                        |
| Bat-12-1 | NZ_AEFP01000005.1                         | + | 154382  | 154415  | RNA → rpmE (PRK00019)Ribosomal_L31 (pfam01197) → Tdk (COG1435)PRK04296 (PRK04296) →                                                        |
| Bat-10-1 | NZ_AEFY01000001.1                         | - | 7160    | 7127    | RNA → rpmE (PRK00019)Ribosomal_L31 (pfam01197) → Tdk (COG1435)PRK04296 (PRK04296) →                                                        |
| Bat-16-1 | NZ_AEFO01000028.1                         | - | 116543  | 116510  | RNA → rpmE (PRK00019)Ribosomal_L31 (pfam01197) → Tdk (COG1435)PRK04296 (PRK04296) →                                                        |
| Bat-2-1  | NZ_CP010778.1                             | - | 3150625 | 3150592 | RNA → rpmE (PRK00019)Ribosomal_L31 (pfam01197) → Tdk (COG1435)PRK04296 (PRK04296) →                                                        |
| Bat-17-1 | NZ_CP007640.1                             | - | 3150622 | 3150589 | RNA → rpmE (PRK00019)Ribosomal_L31 (pfam01197) → Tdk (COG1435)PRK04296 (PRK04296) →                                                        |
| Bsu-31-1 | NZ_KN049968.1                             | + | 491770  | 491803  | RNA → rpmE (PRK00019)Ribosomal_L31 (pfam01197) → Tdk (COG1435)PRK04296 (PRK04296) →                                                        |
| Bat-11-1 | NZ_AJRJ01000028.1                         | + | 60488   | 60521   | RNA → rpmE (PRK00019)Ribosomal_L31 (pfam01197) → Tdk (COG1435)PRK04296 (PRK04296) →                                                        |
| Bat-15-1 | NZ_CP011802.1                             | - | 3582239 | 3582206 | RNA → rpmE (PRK00019)Ribosomal_L31 (pfam01197) → Tdk (COG1435)PRK04296 (PRK04296) →                                                        |
| Gsp-3-1  | NC_012793.1                               | - | 3352755 | 3352724 | RNA → rpmE (PRK00019)Ribosomal_L31 (pfam01197) →                                                                                           |
| Pmu-2-1  | NC_015690.1                               | - | 8332068 | 8332036 | RNA → rpmE (PRK00019)Ribosomal_L31 (pfam01197) → rpmE (PRK00019)Ribosomal_L31 (pfam01197) →                                                |
| Pmu-1-1  | NC_016935.1                               | - | 8401920 | 8401888 | RNA → rpmE (PRK00019)Ribosomal_L31 (pfam01197) → hypo →                                                                                    |
| Pmu-3-1  | NC_017672.3                               | - | 8491650 | 8491618 | RNA → rpmE (PRK00019)Ribosomal_L31 (pfam01197) → hypo →                                                                                    |
| Pty-1-1  | NZ_JNVM01000021.1                         | + | 226105  | 226137  | RNA → rpmE (PRK00019)Ribosomal_L31 (pfam01197) → hypo → hypo → hypo → hypo → hypo →                                                        |
| Pel-1-1  | NZ_AFW01000134.1                          | + | 17241   | 17273   | RNA → rpmE (PRK00019)Ribosomal_L31 (pfam01197) → rpmE (PRK00019)Ribosomal_L31 (pfam01197) →                                                |
| Peh-1-1  | NZ_JFHX01000117.1                         | - | 6087    | 6055    | RNA → rpmE (PRK00019)Ribosomal_L31 (pfam01197) → hypo → hypo → hypo → hypo → hypo →                                                        |
| Pgi-1-1  | NZ_KB905580.1                             | + | 47463   | 47495   | RNA → rpmE (PRK00019)Ribosomal_L31 (pfam01197) → hypo → hypo → hypo → hypo → hypo → hypo →                                                 |
| Psp-29-1 | NZ_JMLS01000043.1                         | - | 6126    | 6094    | RNA → rpmE (PRK00019)Ribosomal_L31 (pfam01197) →                                                                                           |
| Nma-1-1  | NZ_CAVG01000025.1                         | - | 41899   | 41870   | RNA → rpmE (PRK00019)Ribosomal_L31 (pfam01197) →                                                                                           |
| env-1043 | JGI24731J21663.1114416                    | + | 271     | 291     | RNA → vfiA (TIGR00741) →                                                                                                                   |
| Bte-2-1  | NZ_LN851186.1                             | - | 3875235 | 3875202 | RNA → rpmE (PRK00019)Ribosomal_L31 (pfam01197) →                                                                                           |
| Lga-13-1 | NZ_AICN01000021.1                         | - | 56274   | 56241   | RNA → rpmE2 (PRK01678)Ribosomal_L31 (pfam01197) → rpmE2 (PRK01678)Ribosomal_L31 (pfam01197) →                                              |
| env-1044 | Subgingival_plaque_LANL_C11222194         | - | 533     | 502     | RNA → rpmE (PRK00019)Ribosomal_L31 (pfam01197) → sortase_fam (TIGR01076)Sortase_A (cd06165) → sortase_fam (TIGR01076)Sortase_A (cd06165) → |
| env-1045 | Supragingival_plaque_LANL_scaffold_212735 | - | 387     | 356     | RNA → rpmE (PRK00019)Ribosomal_L31 (pfam01197) → PRK05571 (PRK05571)LacAB_rpiB (pfam02502) →                                               |
| env-1046 | SRS015215_WUGC_scaffold_60585             | + | 10090   | 10121   | RNA → rpmE (PRK00019)Ribosomal_L31 (pfam01197) → PRK05571 (PRK05571)LacAB_rpiB (pfam02502) →                                               |
| env-1047 | SRS058808_LANL_scaffold_75639             | - | 12573   | 12542   | RNA → rpmE (PRK00019)Ribosomal_L31 (pfam01197) → GT_WecA_like (cd06853)mraY (PRK00108) → PRK05571 (PRK05571)LacAB_rpiB (pfam02502) →       |
| env-1048 | SRS014691_C2747958                        | - | 181     | 150     | RNA → rpmE (PRK00019)Ribosomal_L31 (pfam01197) →                                                                                           |
| env-1049 | SRS016331_C3935637                        | + | 51      | 82      | RNA → rpmE (PRK00019)Ribosomal_L31 (pfam01197) →                                                                                           |
| env-1050 | AUXO010054219.1                           | + | 1093    | 1119    | RNA → rpmE (PRK00019)Ribosomal_L31 (pfam01197) →                                                                                           |
| env-1051 | AUXO011270623.1                           | - | 268     | 242     | RNA → rpmE (PRK00019)Ribosomal_L31 (pfam01197) →                                                                                           |
| env-1052 | AUXO013500089.1                           | - | 2645    | 2619    | RNA → rpmE (PRK00019)Ribosomal_L31 (pfam01197) → PRK05571 (PRK05571)LacAB_rpiB (pfam02502) →                                               |
| env-1053 | AUXO016543257.1                           | + | 22      | 48      | hypo → PRK11649 (PRK11649)Peptidase_M23 (pfam01551) → PLN02662 (PLN02662) → MreB_like (cd10225)PRK13930 (PRK13930) →                       |
| env-1054 | RUMENNODE_4189451_1                       | - | 803     | 777     | RNA → rpmE (PRK00019)Ribosomal_L31 (pfam01197) →                                                                                           |
| env-1055 | AUXO015505626.1                           | - | 271     | 245     | RNA → rpmE (PRK00019)Ribosomal_L31 (pfam01197) → PRK05571 (PRK05571)LacAB_rpiB (pfam02502) →                                               |
| env-1056 | AUXO010144317.1                           | - | 519     | 493     | RNA → rpmE (PRK00019)Ribosomal_L31 (pfam01197) →                                                                                           |
| env-1057 | AUXO011567691.1                           | + | 201     | 227     | RNA → rpmE (PRK00019)Ribosomal_L31 (pfam01197) → PRK05571 (PRK05571)LacAB_rpiB (pfam02502) →                                               |
| env-1058 | AUXO017972327.1                           | - | 2127    | 2101    | RNA → rpmE (PRK00019)Ribosomal_L31 (pfam01197) → PRK05571 (PRK05571)LacAB_rpiB (pfam02502) →                                               |
| env-1059 | AUXO014943907.1                           | + | 26      | 52      | RNA → rpmE (PRK00019)Ribosomal_L31 (pfam01197) → PRK05571 (PRK05571)LacAB_rpiB (pfam02502) →                                               |
| Esu-1-1  | NZ_KE136394.1                             | - | 693694  | 693662  | RNA → rpmE2 (PRK01678)Ribosomal_L31 (pfam01197) →                                                                                          |
| Lno-1-1  | NZ_BAMN01000015.1                         | + | 13011   | 13043   | RNA → rpmE2 (PRK01678)Ribosomal_L31 (pfam01197) →                                                                                          |
| env-1060 | 2157768806                                | - | 3632    | 3600    | RNA → rpmE2 (PRK01678)Ribosomal_L31 (pfam01197) →                                                                                          |



|          |                         |   |        |        |                                                                                                                                                                                                                                                                                                                                                                                                      |
|----------|-------------------------|---|--------|--------|------------------------------------------------------------------------------------------------------------------------------------------------------------------------------------------------------------------------------------------------------------------------------------------------------------------------------------------------------------------------------------------------------|
| env-1061 | 2204671115              | - | 175    | 143    | RNA → rpmE2 (PRK01678)Ribosomal_L31 (pfam01197) →                                                                                                                                                                                                                                                                                                                                                    |
| env-1062 | 2204576607              | - | 346    | 314    | RNA → rpmE2 (PRK01678)Ribosomal_L31 (pfam01197) →                                                                                                                                                                                                                                                                                                                                                    |
| env-1063 | 2158343614              | + | 370    | 402    | RNA → rpmE2 (PRK01678)Ribosomal_L31 (pfam01197) →                                                                                                                                                                                                                                                                                                                                                    |
| Lhe-1-1  | NZ_JXR02000018.1        | + | 19659  | 19691  | RNA → rpmE2 (PRK01678)Ribosomal_L31 (pfam01197) →                                                                                                                                                                                                                                                                                                                                                    |
| env-1064 | 2205034447              | + | 3      | 35     | RNA → rpmE2 (PRK01678)Ribosomal_L31 (pfam01197) →                                                                                                                                                                                                                                                                                                                                                    |
| env-1065 | 2157868829              | + | 3      | 35     | RNA → rpmE2 (PRK01678)Ribosomal_L31 (pfam01197) →                                                                                                                                                                                                                                                                                                                                                    |
| env-1066 | 2157842730              | + | 168    | 200    | RNA → rpmE2 (PRK01678)Ribosomal_L31 (pfam01197) →                                                                                                                                                                                                                                                                                                                                                    |
| Lfa-3-1  | NZ_GL575016.1           | + | 462497 | 462529 | RNA → rpmE2 (PRK01678)Ribosomal_L31 (pfam01197) →                                                                                                                                                                                                                                                                                                                                                    |
| env-1067 | 2205326546              | - | 113    | 81     | RNA → RpmE (COG0254)rpmE (PRK00019)rpmE2 (PRK01678) →                                                                                                                                                                                                                                                                                                                                                |
| env-1068 | 2205768956              | - | 49     | 17     | RNA → hypo →                                                                                                                                                                                                                                                                                                                                                                                         |
| env-1069 | 2157958570              | - | 130    | 98     | RNA → rpmE2 (PRK01678)Ribosomal_L31 (pfam01197) →                                                                                                                                                                                                                                                                                                                                                    |
| env-1070 | 2158360337              | - | 1026   | 994    | RNA → rpmE2 (PRK01678)Ribosomal_L31 (pfam01197) →                                                                                                                                                                                                                                                                                                                                                    |
| env-1071 | 2158215248              | + | 1955   | 1987   | RNA → rpmE2 (PRK01678)Ribosomal_L31 (pfam01197) →                                                                                                                                                                                                                                                                                                                                                    |
| Lpa-40-1 | NZ_BAMH01000001.1       | + | 33535  | 33567  | RNA → rpmE2 (PRK01678)Ribosomal_L31 (pfam01197) →                                                                                                                                                                                                                                                                                                                                                    |
| env-1072 | 2204592145              | - | 130    | 98     | RNA → rpmE2 (PRK01678)Ribosomal_L31 (pfam01197) →                                                                                                                                                                                                                                                                                                                                                    |
| env-1073 | 2204759623              | - | 130    | 98     | RNA → rpmE2 (PRK01678)Ribosomal_L31 (pfam01197) →                                                                                                                                                                                                                                                                                                                                                    |
| env-1074 | 2204902668              | - | 219    | 185    | RNA → rpmE2 (PRK01678)Ribosomal_L31 (pfam01197) →                                                                                                                                                                                                                                                                                                                                                    |
| env-1075 | 2205863775              | - | 892    | 860    | RNA → rpmE2 (PRK01678)Ribosomal_L31 (pfam01197) →                                                                                                                                                                                                                                                                                                                                                    |
| env-1076 | 2205378811              | + | 115    | 147    | RNA →                                                                                                                                                                                                                                                                                                                                                                                                |
| env-1077 | AUXO011544979.1         | + | 300    | 333    | RNA → rpmE (PRK00019)Ribosomal_L31 (pfam01197) →                                                                                                                                                                                                                                                                                                                                                     |
| env-1078 | HCE12Call500_c0130983   | - | 383    | 350    | RNA → rpmE (PRK00019)Ribosomal_L31 (pfam01197) →                                                                                                                                                                                                                                                                                                                                                     |
| env-1079 | AUXO016321813.1         | + | 31     | 59     | RNA → rpmE (PRK00019)Ribosomal_L31 (pfam01197) → PRK05571 (PRK05571)LacAB_rpiB (pfam02502) →                                                                                                                                                                                                                                                                                                         |
| env-1080 | AUXO010547256.1         | - | 1503   | 1473   | RNA → rpmE (PRK00019)Ribosomal_L31 (pfam01197) → hypo →                                                                                                                                                                                                                                                                                                                                              |
| env-1081 | 3300000558_10011235     | - | 8705   | 8678   | PRK05571 (PRK05571)LacAB_rpiB (pfam02502) →<br>RNA → rpmE (PRK00019)Ribosomal_L31 (pfam01197) → Tdk (COG1435)PRK04296 (PRK04296) →<br>TadA (COG0590)MafB19-deam (pfam14437) → hypo → hypo → TktA (COG0021)PRK05899 (PRK05899) →<br>MnmG (COG0445)PRK05192 (PRK05192) → RsmG (COG0357)gidB (PRK00107) →<br>BcsQ (COG1192)AAA_31 (pfam13614) → ParB (smart00470)Spo0J (COG1475) → DUF951 (pfam06107) → |
| env-1082 | 3300000558_10025197     | + | 11494  | 11521  | RNA → rpmE (PRK00019)Ribosomal_L31 (pfam01197) → Tdk (COG1435)PRK04296 (PRK04296) →                                                                                                                                                                                                                                                                                                                  |
| env-1083 | JG124732J26686_1021304  | - | 562    | 535    | RNA → rpmE (PRK00019)Ribosomal_L31 (pfam01197) → Tdk (COG1435)PRK04296 (PRK04296) →                                                                                                                                                                                                                                                                                                                  |
| env-1084 | 3300000558_11733789     | + | 20189  | 20216  | RNA → rpmE (PRK00019)Ribosomal_L31 (pfam01197) → Tdk (COG1435)PRK04296 (PRK04296) →<br>TadA (COG0590)MafB19-deam (pfam14437) → hypo →                                                                                                                                                                                                                                                                |
| env-1085 | 3300000568_10173220     | - | 1263   | 1236   | RNA → rpmE (PRK00019)Ribosomal_L31 (pfam01197) → Tdk (COG1435)PRK04296 (PRK04296) →<br>TadA (COG0590)MafB19-deam (pfam14437) →                                                                                                                                                                                                                                                                       |
| env-1086 | 3300001592_10282939     | + | 145    | 172    | RNA → rpmE (PRK00019)Ribosomal_L31 (pfam01197) → Tdk (COG1435)PRK04296 (PRK04296) →                                                                                                                                                                                                                                                                                                                  |
| env-1087 | 3300001605_10004551     | - | 1637   | 1610   | RNA → rpmE (PRK00019)Ribosomal_L31 (pfam01197) → Tdk (COG1435)PRK04296 (PRK04296) →<br>TadA (COG0590)MafB19-deam (pfam14437) → hypo → hypo →                                                                                                                                                                                                                                                         |
| env-1088 | C687J13896_1000025      | - | 8927   | 8900   | RNA → rpmE (PRK00019)Ribosomal_L31 (pfam01197) → Tdk (COG1435)PRK04296 (PRK04296) →<br>TadA (COG0590)MafB19-deam (pfam14437) → hypo → hypo → TktA (COG0021)PRK05899 (PRK05899) →<br>MnmG (COG0445)PRK05192 (PRK05192) → RsmG (COG0357)gidB (PRK00107) →<br>BcsQ (COG1192)AAA_31 (pfam13614) → ParB (smart00470)Spo0J (COG1475) → DUF951 (pfam06107) →                                                |
| env-1089 | C687J26661_1000263      | + | 11891  | 11918  | RNA → rpmE (PRK00019)Ribosomal_L31 (pfam01197) → Tdk (COG1435)PRK04296 (PRK04296) →<br>TadA (COG0590)MafB19-deam (pfam14437) → hypo → hypo → TktA (COG0021)PRK05899 (PRK05899) →<br>MnmG (COG0445)PRK05192 (PRK05192) → RsmG (COG0357)gidB (PRK00107) →                                                                                                                                              |
| env-1090 | C687J26609_1000080      | + | 30209  | 30236  | RNA → rpmE (PRK00019)Ribosomal_L31 (pfam01197) → Tdk (COG1435)PRK04296 (PRK04296) →<br>TadA (COG0590)MafB19-deam (pfam14437) → hypo → hypo → TktA (COG0021)PRK05899 (PRK05899) →<br>MnmG (COG0445)PRK05192 (PRK05192) → RsmG (COG0357)gidB (PRK00107) →<br>BcsQ (COG1192)AAA_31 (pfam13614) → ParB (smart00470)Spo0J (COG1475) → DUF951 (pfam06107) →                                                |
| env-1091 | AUXO014680939.1         | - | 290    | 261    | RNA → rpmE (PRK00019)Ribosomal_L31 (pfam01197) →                                                                                                                                                                                                                                                                                                                                                     |
| env-1092 | AUXO018499996.1         | + | 1229   | 1256   | RNA → hypo →                                                                                                                                                                                                                                                                                                                                                                                         |
| env-1093 | AUXO015654006.1         | - | 159    | 129    | RNA → rpmE (PRK00019)rpmE2 (PRK01678)Ribosomal_L31 (pfam01197) →                                                                                                                                                                                                                                                                                                                                     |
| env-1094 | AUXO015665870.1         | - | 168    | 139    | RNA → rpmE (PRK00019)Ribosomal_L31 (pfam01197) →                                                                                                                                                                                                                                                                                                                                                     |
| env-1095 | scaffold116237_1_MH0011 | + | 11558  | 11589  | RNA → rpmE (PRK00019)Ribosomal_L31 (pfam01197) →                                                                                                                                                                                                                                                                                                                                                     |
| env-1096 | DLM006_scaffold1604_48  | - | 400    | 369    | RNA → rpmE (PRK00019)Ribosomal_L31 (pfam01197) →                                                                                                                                                                                                                                                                                                                                                     |

|          |                                      |   |        |        |                                                                                                                                                                                                                                                                                                                      |
|----------|--------------------------------------|---|--------|--------|----------------------------------------------------------------------------------------------------------------------------------------------------------------------------------------------------------------------------------------------------------------------------------------------------------------------|
| env-1097 | DLF005_scaffold873_28                | - | 1819   | 1788   | RNA → rpmE (PRK00019)Ribosomal.L31 (pfam01197) →                                                                                                                                                                                                                                                                     |
| env-1098 | scaffold3783_3_MH0012                | - | 1230   | 1199   | RNA → rpmE (PRK00019)Ribosomal.L31 (pfam01197) →                                                                                                                                                                                                                                                                     |
| env-1099 | C8408919_1_O2.UC-16                  | + | 1665   | 1696   | RNA → rpmE (PRK00019) →                                                                                                                                                                                                                                                                                              |
| env-1100 | scaffold3759_1_V1.UC-14              | + | 4949   | 4980   | RNA → rpmE (PRK00019)Ribosomal.L31 (pfam01197) →                                                                                                                                                                                                                                                                     |
| env-1101 | AUXO018500014.1                      | + | 475    | 506    | RNA → rpmE (PRK00019)Ribosomal.L31 (pfam01197) →                                                                                                                                                                                                                                                                     |
| env-1102 | AUXO011648946.1                      | - | 105    | 74     | RNA → rpmE (PRK00019)Ribosomal.L31 (pfam01197) →                                                                                                                                                                                                                                                                     |
| env-1103 | SL_7KL.010_BRINE_10014548            | + | 2019   | 2047   | RNA → rpmE (PRK00019)Ribosomal.L31 (pfam01197) → Tdk (COG1435)PRK04296 (PRK04296) →<br>TadA (COG0590)MafB19-deam (pfam14437) → hypo →                                                                                                                                                                                |
| env-1104 | SL_8KL.010_SED_10014681              | - | 2941   | 2913   | RNA → rpmE (PRK00019)Ribosomal.L31 (pfam01197) → Tdk (COG1435)PRK04296 (PRK04296) →<br>TadA (COG0590)MafB19-deam (pfam14437) → hypo → hypo →                                                                                                                                                                         |
| env-1105 | SL_8KL.010_SED_10058133              | + | 931    | 959    | RNA → rpmE (PRK00019)Ribosomal.L31 (pfam01197) → Tdk (COG1435)PRK04296 (PRK04296) →                                                                                                                                                                                                                                  |
| env-1106 | SL_5KL.010_BRINE_10000476            | - | 7556   | 7527   | RNA → rpmE (PRK00019)Ribosomal.L31 (pfam01197) → Tdk (COG1435)PRK04296 (PRK04296) →<br>TadA (COG0590)MafB19-deam (pfam14437) → hypo → hypo → Cof (COG0561)Hydrolase_3 (pfam08282) →<br>MnmG (COG0445)PRK05192 (PRK05192) → RsmG (COG0357)gidB (PRK00107) → TehA (COG1275) → hypo →                                   |
| env-1107 | scaffold18398_5_MH0031               | - | 1738   | 1709   | RNA → rpmE (PRK00019)Ribosomal.L31 (pfam01197) → PRK05571 (PRK05571)LacAB_rpiB (pfam02502) →<br>DUF1146 (pfam06612) → PRK11649 (PRK11649)Peptidase_M23 (pfam01551) →                                                                                                                                                 |
| env-1108 | AUXO015774907.1                      | + | 144    | 170    | RNA → rpmE (PRK00019)Ribosomal.L31 (pfam01197) →                                                                                                                                                                                                                                                                     |
| env-1109 | AUXO017297246.1                      | + | 839    | 867    | RNA → rpmE (PRK00019)Ribosomal.L31 (pfam01197) → pssA (TIGR00473)CDP-OH_P.transf (pfam01066) →<br>PRK00723 (PRK00723)PS_Dcarboxylase (pfam02666) →<br>EpsL (COG4632)NAGPA (pfam09992)DUF5011 (pfam16403) →<br>EpsL (COG4632)NAGPA (pfam09992)DUF5011 (pfam16403) →                                                   |
| env-1110 | SRS020869_Baylor_scaffold_16775      | - | 3733   | 3695   | RNA → rpmE (PRK00019)Ribosomal.L31 (pfam01197) →                                                                                                                                                                                                                                                                     |
| env-1111 | SRS052697_LANL_scaffold_55776        | + | 28     | 66     | RNA → rpmE (PRK00019)Ribosomal.L31 (pfam01197) →                                                                                                                                                                                                                                                                     |
| Agr-1-1  | NZ_JAFR01000008.1                    | + | 156062 | 156094 | RNA → rpmE2 (PRK01678)Ribosomal.L31 (pfam01197) → Tdk (COG1435)PRK04296 (PRK04296) →<br>TadA (COG0590)MafB19-deam (pfam14437) → hypo → hypo → ND5 (MTH00151)DUF1510 (pfam07423) →<br>TktA (COG0021)PRK05899 (PRK05899) → MnmG (COG0445)PRK05192 (PRK05192) →<br>RsmG (COG0357)gidB (PRK00107) → DUF951 (pfam06107) → |
| env-1112 | AUXO012476243.1                      | + | 239    | 265    | RNA → rpmE (PRK00019)Ribosomal.L31 (pfam01197) →                                                                                                                                                                                                                                                                     |
| env-1113 | AUXO016581159.1                      | + | 430    | 458    | RNA → rpmE (PRK00019)Ribosomal.L31 (pfam01197) → TadA (COG0590)MafB19-deam (pfam14437) →                                                                                                                                                                                                                             |
| env-1114 | AUXO016692971.1                      | + | 59     | 85     | RNA → rpmE (PRK00019)Ribosomal.L31 (pfam01197) → Tdk (COG1435)PRK04296 (PRK04296) →<br>TadA (COG0590)MafB19-deam (pfam14437) → hypo →                                                                                                                                                                                |
| env-1115 | AUXO018402175.1                      | + | 2437   | 2463   | RNA → rpmE (PRK00019)Ribosomal.L31 (pfam01197) →                                                                                                                                                                                                                                                                     |
| env-1116 | AUXO016106023.1                      | - | 236    | 204    | RNA → rpmE (PRK00019)Ribosomal.L31 (pfam01197) →                                                                                                                                                                                                                                                                     |
| env-1117 | AUXO014725215.1                      | + | 295    | 325    | RNA → rpmE (PRK00019)Ribosomal.L31 (pfam01197) → PRK05571 (PRK05571)LacAB_rpiB (pfam02502) →<br>rim_protein (TIGR01257)DUF1146 (pfam06612) → PRK11649 (PRK11649)Peptidase_M23 (pfam01551) →                                                                                                                          |
| env-1118 | SRS011586_WUGC_scaffold_12590        | - | 3042   | 3012   | RNA → rpmE (PRK00019)Ribosomal.L31 (pfam01197) →                                                                                                                                                                                                                                                                     |
| env-1119 | AUXO015284327.1                      | + | 113    | 143    | RNA → rpmE (PRK00019)Ribosomal.L31 (pfam01197) →                                                                                                                                                                                                                                                                     |
| env-1120 | AUXO014723598.1                      | - | 601    | 571    | RNA → rpmE (PRK00019)Ribosomal.L31 (pfam01197) →                                                                                                                                                                                                                                                                     |
| env-1121 | 4491414.3_NODE.610                   | + | 253    | 284    | RNA → rpmE (PRK00019)Ribosomal.L31 (pfam01197) →                                                                                                                                                                                                                                                                     |
| env-1122 | NLF005_scaffold40809_5               | + | 841    | 872    | RNA → rpmE (PRK00019)Ribosomal.L31 (pfam01197) →                                                                                                                                                                                                                                                                     |
| env-1123 | NOM007_scaffold19881_17              | - | 705    | 674    | RNA → rpmE (PRK00019)Ribosomal.L31 (pfam01197) →                                                                                                                                                                                                                                                                     |
| env-1124 | SRS019267_WUGC_scaffold_19133        | + | 141    | 171    | RNA → rpmE (PRK00019)Ribosomal.L31 (pfam01197) → PRK05571 (PRK05571)LacAB_rpiB (pfam02502) →                                                                                                                                                                                                                         |
| env-1125 | scaffold41612_1_MH0035               | - | 275    | 245    | RNA → rpmE (PRK00019)Ribosomal.L31 (pfam01197) →                                                                                                                                                                                                                                                                     |
| env-1126 | scaffold10444_1_O2.UC-4              | - | 2270   | 2240   | RNA → rpmE (PRK00019)Ribosomal.L31 (pfam01197) →                                                                                                                                                                                                                                                                     |
| env-1127 | UnmappedStool_Broad_scaffold_1068660 | - | 502    | 472    | RNA → rpmE (PRK00019)Ribosomal.L31 (pfam01197) → hypo →                                                                                                                                                                                                                                                              |
| env-1128 | SRS016335_WUGC_scaffold_10606        | + | 18701  | 18731  | RNA → rpmE (PRK00019)Ribosomal.L31 (pfam01197) → hypo →<br>PRK05571 (PRK05571)LacAB_rpiB (pfam02502) → DUF1146 (pfam06612) →<br>PRK11649 (PRK11649)Peptidase_M23 (pfam01551) →                                                                                                                                       |
| env-1129 | 4491401.3_NODE_20020                 | - | 5413   | 5376   | RNA → rpmE (PRK00019)Ribosomal.L31 (pfam01197) →                                                                                                                                                                                                                                                                     |
| env-1130 | 4491412.3_NODE_76939                 | + | 15872  | 15909  | RNA → rpmE (PRK00019)Ribosomal.L31 (pfam01197) →                                                                                                                                                                                                                                                                     |
| env-1131 | SRS049995_LANL_scaffold_7413         | + | 31138  | 31175  | RNA → rpmE (PRK00019)Ribosomal.L31 (pfam01197) →                                                                                                                                                                                                                                                                     |
| env-1132 | AUXO016739573.1                      | - | 186    | 155    | RNA → rpmE (PRK00019)Ribosomal.L31 (pfam01197) →                                                                                                                                                                                                                                                                     |
| env-1133 | AUXO011888757.1                      | - | 275    | 242    | RNA → rpmE (PRK00019)Ribosomal.L31 (pfam01197) →                                                                                                                                                                                                                                                                     |
| env-1134 | JG1994J12354_10205797                | - | 625    | 593    | RNA → rpmE (PRK00019)Ribosomal.L31 (pfam01197) → PRK05571 (PRK05571)LacAB_rpiB (pfam02502) →                                                                                                                                                                                                                         |

|          |                                   |   |        |        |                                                                                                                                                                                                                                                                                                                                                       |
|----------|-----------------------------------|---|--------|--------|-------------------------------------------------------------------------------------------------------------------------------------------------------------------------------------------------------------------------------------------------------------------------------------------------------------------------------------------------------|
| env-1135 | 07_22_PECTIN_DNA_scaffold7405_9   | + | 1633   | 1665   | RNA → rpmE (PRK00019)Ribosomal.L31 (pfam01197) →                                                                                                                                                                                                                                                                                                      |
| env-1136 | O8_19_POLYDEXT_DNA_scaffold8118_8 | + | 655    | 687    | RNA → rpmE (PRK00019)Ribosomal.L31 (pfam01197) →                                                                                                                                                                                                                                                                                                      |
| env-1137 | scaffold70386_2_MH0028            | + | 1501   | 1538   | RNA → rpmE (PRK00019)Ribosomal.L31 (pfam01197) →                                                                                                                                                                                                                                                                                                      |
| env-1138 | scaffold177066_1_MH0012           | - | 3152   | 3115   | RNA → rpmE (PRK00019)Ribosomal.L31 (pfam01197) →                                                                                                                                                                                                                                                                                                      |
| env-1139 | scaffold63114_3_MH0038            | - | 266    | 229    | RNA → rpmE (PRK00019)Ribosomal.L31 (pfam01197) →                                                                                                                                                                                                                                                                                                      |
| env-1140 | scaffold111032_6_MH0043           | - | 25214  | 25177  | RNA → rpmE (PRK00019)Ribosomal.L31 (pfam01197) →                                                                                                                                                                                                                                                                                                      |
| env-1141 | 4491410.3_NODE.3015               | + | 6163   | 6200   | RNA → rpmE (PRK00019)Ribosomal.L31 (pfam01197) →                                                                                                                                                                                                                                                                                                      |
| env-1142 | 4491417.3_NODE.443                | - | 12219  | 12182  | RNA → rpmE (PRK00019)Ribosomal.L31 (pfam01197) →                                                                                                                                                                                                                                                                                                      |
| env-1143 | SRS015782_C3503917                | + | 101    | 138    | RNA → rpmE (PRK00019)Ribosomal.L31 (pfam01197) →                                                                                                                                                                                                                                                                                                      |
| env-1144 | SRS016335_C5149495                | + | 101    | 138    | RNA → rpmE (PRK00019)Ribosomal.L31 (pfam01197) →                                                                                                                                                                                                                                                                                                      |
| env-1145 | SRS048870_WUGC_scaffold_10582     | + | 47080  | 47117  | RNA → rpmE (PRK00019)Ribosomal.L31 (pfam01197) →                                                                                                                                                                                                                                                                                                      |
| env-1146 | scaffold78818_1_MH0009            | + | 44     | 81     | RNA → rpmE (PRK00019)Ribosomal.L31 (pfam01197) →                                                                                                                                                                                                                                                                                                      |
| env-1147 | scaffold73433_1_MH0066            | - | 11981  | 11944  | RNA → rpmE (PRK00019)Ribosomal.L31 (pfam01197) →                                                                                                                                                                                                                                                                                                      |
| env-1148 | scaffold75138_2_MH0075            | - | 4600   | 4563   | RNA → rpmE (PRK00019)Ribosomal.L31 (pfam01197) →                                                                                                                                                                                                                                                                                                      |
| env-1149 | scaffold77905_1_V1_CD-9           | + | 6094   | 6131   | RNA → rpmE (PRK00019)Ribosomal.L31 (pfam01197) →                                                                                                                                                                                                                                                                                                      |
| env-1150 | 4491402.3_NODE.210                | + | 11945  | 11982  | RNA → rpmE (PRK00019)Ribosomal.L31 (pfam01197) →                                                                                                                                                                                                                                                                                                      |
| env-1151 | 4491407.3_NODE.396                | - | 93635  | 93598  | RNA → rpmE (PRK00019)Ribosomal.L31 (pfam01197) →                                                                                                                                                                                                                                                                                                      |
| env-1152 | 4491488.3_NODE.1475               | + | 52307  | 52344  | RNA → rpmE (PRK00019)Ribosomal.L31 (pfam01197) →                                                                                                                                                                                                                                                                                                      |
| env-1153 | 4491490.3_NODE.508                | + | 123464 | 123501 | RNA → rpmE (PRK00019)Ribosomal.L31 (pfam01197) →                                                                                                                                                                                                                                                                                                      |
| env-1154 | SRS016541_C1560402                | - | 510    | 473    | RNA → rpmE (PRK00019)Ribosomal.L31 (pfam01197) →                                                                                                                                                                                                                                                                                                      |
| env-1155 | SRS011239_Baylor_scaffold_7795    | - | 1685   | 1648   | RNA → rpmE (PRK00019)Ribosomal.L31 (pfam01197) →                                                                                                                                                                                                                                                                                                      |
| env-1156 | SRS013476_C3124393                | + | 101    | 138    | RNA → rpmE (PRK00019)Ribosomal.L31 (pfam01197) →                                                                                                                                                                                                                                                                                                      |
| env-1157 | SRS013687_C2512595                | - | 510    | 473    | RNA → rpmE (PRK00019)Ribosomal.L31 (pfam01197) →                                                                                                                                                                                                                                                                                                      |
| env-1158 | SRS014235_WUGC_scaffold_15445     | + | 6150   | 6187   | RNA → rpmE (PRK00019)Ribosomal.L31 (pfam01197) →                                                                                                                                                                                                                                                                                                      |
| env-1159 | SRS016203_C1523113                | - | 510    | 473    | RNA → rpmE (PRK00019)Ribosomal.L31 (pfam01197) →                                                                                                                                                                                                                                                                                                      |
| env-1160 | SRS019685_WUGC_scaffold_52356     | - | 2456   | 2419   | RNA → rpmE (PRK00019)Ribosomal.L31 (pfam01197) →                                                                                                                                                                                                                                                                                                      |
| env-1161 | SRS022071_C3064241                | - | 4175   | 4138   | RNA → rpmE (PRK00019)Ribosomal.L31 (pfam01197) →                                                                                                                                                                                                                                                                                                      |
| env-1162 | SRS024009_Baylor_scaffold_14978   | - | 11946  | 11909  | RNA → rpmE (PRK00019)Ribosomal.L31 (pfam01197) →                                                                                                                                                                                                                                                                                                      |
| env-1163 | SRS065504_C3190398                | - | 326    | 289    | RNA → rpmE (PRK00019)Ribosomal.L31 (pfam01197) →                                                                                                                                                                                                                                                                                                      |
| env-1164 | SRS014979_WUGC_scaffold_36099     | + | 2031   | 2068   | RNA → rpmE (PRK00019)Ribosomal.L31 (pfam01197) →                                                                                                                                                                                                                                                                                                      |
| env-1165 | AUXO014604482.1                   | - | 186    | 156    | RNA → rpmE (PRK00019)Ribosomal.L31 (pfam01197) →                                                                                                                                                                                                                                                                                                      |
| env-1166 | SS_3KL_010_SOIL_10002557          | - | 6348   | 6319   | RNA → rpmE (PRK00019)Ribosomal.L31 (pfam01197) → Tdk (COG1435)PRK04296 (PRK04296) →<br>TadA (COG0590)MafB19-deam (pfam14437) → hypo → hypo → Hydrolase_3 (pfam08282)HAD_Pase (cd07516) →<br>MnmG (COG0445)PRK05192 (PRK05192) → RsmG (COG0357)gidB (PRK00107) → TrkG (COG0168) → hypo                                                                 |
| env-1167 | SL_3KL_010_SED_10143958           | + | 940    | 969    | RNA → rpmE (PRK00019)Ribosomal.L31 (pfam01197) →                                                                                                                                                                                                                                                                                                      |
| env-1168 | AUXO013330472.1                   | + | 709    | 739    | RNA → rpmE (PRK00019)Ribosomal.L31 (pfam01197) →                                                                                                                                                                                                                                                                                                      |
| env-1169 | C687J13239_1000702                | + | 13944  | 13972  | RNA → rpmE (PRK00019)Ribosomal.L31 (pfam01197) → Tdk (COG1435)PRK04296 (PRK04296) →<br>TadA (COG0590)MafB19-deam (pfam14437) → hypo → hypo →                                                                                                                                                                                                          |
| env-1170 | SakLake120mDRAFT_c0000643         | - | 13148  | 13120  | RNA → rpmE (PRK00019)Ribosomal.L31 (pfam01197) → Tdk (COG1435)PRK04296 (PRK04296) →<br>TadA (COG0590)MafB19-deam (pfam14437) → hypo → hypo → TktA (COG0021)PRK05899 (PRK05899) →<br>MnmG (COG0445)PRK05192 (PRK05192) → RsmG (COG0357)gidB (PRK00107) →<br>BcsQ (COG1192)AAA_31 (pfam13614) → ParB (smart00470)Spo0J (COG1475) → DUF951 (pfam06107) → |
| env-1171 | BS_KBA_SWE12_21m.c10169119        | + | 346    | 374    | RNA → rpmE (PRK00019)Ribosomal.L31 (pfam01197) →                                                                                                                                                                                                                                                                                                      |
| env-1172 | BS_KBA_SWE12_21m.c10534462        | + | 125    | 153    | RNA → rpmE (PRK00019)Ribosomal.L31 (pfam01197) →                                                                                                                                                                                                                                                                                                      |
| env-1173 | BS_KBA_SWE12_21m.c10227724        | - | 46     | 18     | RNA →                                                                                                                                                                                                                                                                                                                                                 |
| env-1174 | BS_KBA_SWE02_21m.10520892         | + | 149    | 177    | RNA → rpmE (PRK00019)Ribosomal.L31 (pfam01197) →                                                                                                                                                                                                                                                                                                      |
| env-1175 | 3300000558_10171620               | - | 3674   | 3646   | RNA → rpmE (PRK00019)Ribosomal.L31 (pfam01197) → Tdk (COG1435)PRK04296 (PRK04296) →<br>TadA (COG0590)MafB19-deam (pfam14437) → hypo → RseC_MucC (pfam04246) →<br>TktA (COG0021)PRK05899 (PRK05899) →                                                                                                                                                  |
| env-1176 | 3300001605_10461389               | - | 587    | 559    | RNA → rpmE (PRK00019)Ribosomal.L31 (pfam01197) → Tdk (COG1435)PRK04296 (PRK04296) →                                                                                                                                                                                                                                                                   |
| env-1177 | AUXO018660770.1                   | + | 201    | 234    | RNA →                                                                                                                                                                                                                                                                                                                                                 |
| env-1178 | DLM022_scaffold47491_2            | - | 2757   | 2724   | RNA → rpmE (PRK00019)Ribosomal.L31 (pfam01197) →                                                                                                                                                                                                                                                                                                      |
| env-1179 | 4491423.3_NODE.55225              | + | 274    | 307    | RNA → hypo →                                                                                                                                                                                                                                                                                                                                          |



|          |                                |   |       |       |                                                                                                                                                                                                                                                                                                                                                                                                                             |
|----------|--------------------------------|---|-------|-------|-----------------------------------------------------------------------------------------------------------------------------------------------------------------------------------------------------------------------------------------------------------------------------------------------------------------------------------------------------------------------------------------------------------------------------|
| env-1180 | UnmappedStool_Broad_C252973095 | + | 238   | 271   | RNA → rpmE (PRK00019)Ribosomal_L31 (pfam01197) →                                                                                                                                                                                                                                                                                                                                                                            |
| env-1181 | DOF002_scaffold67521_1         | - | 8868  | 8835  | RNA → rpmE (PRK00019)Ribosomal_L31 (pfam01197) →                                                                                                                                                                                                                                                                                                                                                                            |
| env-1182 | scaffold4818_2_MH0033          | - | 6655  | 6624  | RNA → rpmE (PRK00019)Ribosomal_L31 (pfam01197) →                                                                                                                                                                                                                                                                                                                                                                            |
| env-1183 | 4491487.3_NODE.36255           | - | 194   | 163   | RNA → rpmE (PRK00019)Ribosomal_L31 (pfam01197) →                                                                                                                                                                                                                                                                                                                                                                            |
| env-1184 | UnmappedStool_Broad_C253824745 | + | 1657  | 1688  | RNA → rpmE (PRK00019)Ribosomal_L31 (pfam01197) →                                                                                                                                                                                                                                                                                                                                                                            |
| env-1185 | SRS049995_LANL_scaffold_41479  | - | 17405 | 17374 | RNA → rpmE (PRK00019)Ribosomal_L31 (pfam01197) →                                                                                                                                                                                                                                                                                                                                                                            |
| env-1186 | DLF005_scaffold22529_20        | - | 1910  | 1879  | RNA → rpmE (PRK00019)Ribosomal_L31 (pfam01197) →                                                                                                                                                                                                                                                                                                                                                                            |
| env-1187 | scaffold55864_1_MH0024         | + | 736   | 767   | RNA → rpmE (PRK00019)Ribosomal_L31 (pfam01197) →                                                                                                                                                                                                                                                                                                                                                                            |
| env-1188 | SL_3KL_010_SED_10386470        | - | 84    | 54    | RNA →                                                                                                                                                                                                                                                                                                                                                                                                                       |
| env-1189 | AUXO016893802.1                | - | 348   | 317   | RNA → rpmE (PRK00019)Ribosomal_L31 (pfam01197) →                                                                                                                                                                                                                                                                                                                                                                            |
| env-1190 | AUXO013205533.1                | - | 927   | 896   | RNA → rpmE (PRK00019)Ribosomal_L31 (pfam01197) → PRK05571 (PRK05571)LacAB_rpiB (pfam02502) →<br>DUF1146 (pfam06612) →                                                                                                                                                                                                                                                                                                       |
| env-1191 | scaffold110634_1_MH0033        | + | 575   | 607   | RNA → rpmE (PRK00019)Ribosomal_L31 (pfam01197) → PRK05571 (PRK05571)LacAB_rpiB (pfam02502) →<br>SpoIID (COG2385)SpoIID_LytB (TIGR02669) → PRK11649 (PRK11649)Peptidase_M23 (pfam01551) →                                                                                                                                                                                                                                    |
| env-1192 | scaffold73146_1_MH0035         | - | 2482  | 2450  | RNA → rpmE (PRK00019)Ribosomal_L31 (pfam01197) → PRK05571 (PRK05571)LacAB_rpiB (pfam02502) →<br>SpoIID (COG2385)SpoIID_LytB (TIGR02669) → PRK11649 (PRK11649)Peptidase_M23 (pfam01551) →                                                                                                                                                                                                                                    |
| env-1193 | UnmappedStool_Broad_C253558353 | - | 162   | 130   | RNA → rpmE (PRK00019)Ribosomal_L31 (pfam01197) →                                                                                                                                                                                                                                                                                                                                                                            |
| env-1194 | DOM014_scaffold175_1           | + | 11760 | 11792 | RNA → rpmE (PRK00019)Ribosomal_L31 (pfam01197) → PRK05571 (PRK05571)LacAB_rpiB (pfam02502) →                                                                                                                                                                                                                                                                                                                                |
| env-1195 | SRS049995_LANL_scaffold_25862  | - | 46739 | 46707 | RNA → rpmE (PRK00019)Ribosomal_L31 (pfam01197) → PRK05571 (PRK05571)LacAB_rpiB (pfam02502) →<br>SpoIID (COG2385)SpoIID_LytB (TIGR02669) → PRK11649 (PRK11649)Peptidase_M23 (pfam01551) →<br>Tra8 (COG2826)SpoIID (pfam12116) → PRK13930 (PRK13930)MreB_Mbl (pfam06723) →<br>ECA_wecA (TIGR02380)GT_WecA_like (cd06853) → CheY (COG0784) →<br>HATPase_c (smart00387)HATPase_c (pfam02518) →                                  |
| env-1196 | SRS078176_C2331252             | + | 1688  | 1720  | RNA → rpmE (PRK00019)Ribosomal_L31 (pfam01197) → PRK05571 (PRK05571)LacAB_rpiB (pfam02502) →<br>SpoIID (COG2385)SpoIID (pfam08486) →                                                                                                                                                                                                                                                                                        |
| env-1197 | 3300000558_10030915            | - | 447   | 420   | RNA → rpmE (PRK00019)Ribosomal_L31 (pfam01197) → Tdk (COG1435)PRK04296 (PRK04296) →                                                                                                                                                                                                                                                                                                                                         |
| env-1198 | AUXO010231042.1                | + | 5787  | 5817  | RNA → rpmE (PRK00019)Ribosomal_L31 (pfam01197) → PRK05571 (PRK05571)LacAB_rpiB (pfam02502) →<br>hypo → PRK11649 (PRK11649)Peptidase_M23 (pfam01551) → MreB_like (cd10225)PRK13930 (PRK13930) →<br>ECA_wecA (TIGR02380)GT_WecA_like (cd06853) → LytTR (smart00850)LytTR (pfam04397) →<br>CSP (smart00357)CspC (COG1278) → yfiA (TIGR00741)RaiA (COG1544)Ribosom_S30AE_C (pfam16321) →<br>SecA (COG0653)PRK12904 (PRK12904) → |
| env-1199 | AUXO016989467.1                | - | 1131  | 1100  | RNA → rpmE (PRK00019)Ribosomal_L31 (pfam01197) → PRK05571 (PRK05571)LacAB_rpiB (pfam02502) →<br>SpoIID (COG2385)SpoIID (pfam08486) →                                                                                                                                                                                                                                                                                        |
| env-1200 | AUXO014231841.1                | + | 3562  | 3595  | RNA → rpmE (PRK00019)Ribosomal_L31 (pfam01197) →                                                                                                                                                                                                                                                                                                                                                                            |
| env-1201 | AUXO017411865.1                | + | 2453  | 2484  | RNA → rpmE (PRK00019)Ribosomal_L31 (pfam01197) → PRK05571 (PRK05571)LacAB_rpiB (pfam02502) →<br>hypo → ECA_wecA (TIGR02380)GT_WecA_like (cd06853) → yfiA (TIGR00741)Ribosomal_S30AE (pfam02482) →                                                                                                                                                                                                                           |
| env-1202 | AUXO013834857.1                | - | 8878  | 8847  | RNA → rpmE (PRK00019)Ribosomal_L31 (pfam01197) →                                                                                                                                                                                                                                                                                                                                                                            |
| env-1203 | 2227602434                     | - | 1896  | 1866  | RNA → rpmE (PRK00019)Ribosomal_L31 (pfam01197) → PRK05571 (PRK05571)LacAB_rpiB (pfam02502) →<br>hypo → Peptidase_M23 (pfam01551) → SpoIID (pfam12116) →                                                                                                                                                                                                                                                                     |
| env-1204 | JGI994J12354_10000780          | + | 359   | 389   | RNA → rpmE (PRK00019)Ribosomal_L31 (pfam01197) → PRK05571 (PRK05571)LacAB_rpiB (pfam02502) →<br>hypo → Peptidase_M23 (pfam01551) → SpoIID (pfam12116) → MreB_like (cd10225)PRK13930 (PRK13930) →                                                                                                                                                                                                                            |
| env-1205 | IMNBL1_c0133606                | - | 538   | 508   | RNA → rpmE (PRK00019)Ribosomal_L31 (pfam01197) → PRK05571 (PRK05571)LacAB_rpiB (pfam02502) →                                                                                                                                                                                                                                                                                                                                |
| env-1206 | AUXO015478559.1                | + | 273   | 302   | RNA → rpmE (PRK00019)Ribosomal_L31 (pfam01197) →                                                                                                                                                                                                                                                                                                                                                                            |
| env-1207 | AUXO013760466.1                | - | 331   | 301   | RNA → rpmE (PRK00019)Ribosomal_L31 (pfam01197) →                                                                                                                                                                                                                                                                                                                                                                            |
| env-1208 | 4491477.3_NODE.1076            | - | 3022  | 2991  | RNA → rpmE (PRK00019)Ribosomal_L31 (pfam01197) →                                                                                                                                                                                                                                                                                                                                                                            |
| env-1209 | 3300001592_10522345            | - | 327   | 300   | RNA → rpmE (PRK00019)Ribosomal_L31 (pfam01197) →                                                                                                                                                                                                                                                                                                                                                                            |
| env-1210 | AUXO013710643.1                | - | 2677  | 2647  | RNA → rpmE (PRK00019)Ribosomal_L31 (pfam01197) → PRK05571 (PRK05571)LacAB_rpiB (pfam02502) →<br>hypo → SpoIID (COG2385)SpoIID_LytB (TIGR02669) → PRK11649 (PRK11649)Peptidase_M23 (pfam01551) →                                                                                                                                                                                                                             |
| env-1211 | AUXO013726310.1                | - | 252   | 222   | RNA → rpmE (PRK00019)Ribosomal_L31 (pfam01197) →                                                                                                                                                                                                                                                                                                                                                                            |
| env-1212 | AUXO012175234.1                | + | 1448  | 1480  | RNA → rpmE (PRK00019)Ribosomal_L31 (pfam01197) →                                                                                                                                                                                                                                                                                                                                                                            |
| env-1213 | AUXO013960360.1                | - | 83    | 52    | RNA → rpmE (PRK00019)Ribosomal_L31 (pfam01197) →                                                                                                                                                                                                                                                                                                                                                                            |
| env-1214 | AUXO013939667.1                | + | 1121  | 1152  | RNA → rpmE (PRK00019)Ribosomal_L31 (pfam01197) →                                                                                                                                                                                                                                                                                                                                                                            |
| env-1215 | RUMENNODE.3847397.1            | + | 357   | 387   | RNA → rpmE (PRK00019)Ribosomal_L31 (pfam01197) →                                                                                                                                                                                                                                                                                                                                                                            |
| env-1216 | AUXO012691611.1                | + | 29    | 59    | RNA → rpmE (PRK00019)Ribosomal_L31 (pfam01197) → YcaP (COG2323) →<br>PRK10776 (PRK10776)Nudix_Hydrolase_1 (cd03674) → hypo →                                                                                                                                                                                                                                                                                                |

|          |                                    |   |       |       |                                                                                                                                                                                                                                                                                                                                                            |
|----------|------------------------------------|---|-------|-------|------------------------------------------------------------------------------------------------------------------------------------------------------------------------------------------------------------------------------------------------------------------------------------------------------------------------------------------------------------|
| env-1217 | AUXO011512029.1                    | + | 159   | 189   | RNA → hypo → rpmE (PRK00019)Ribosomal.L31 (pfam01197) →                                                                                                                                                                                                                                                                                                    |
| env-1218 | O8_19_POLYDEXT_DNA_scaffold41145.1 | + | 5890  | 5919  | RNA → rpmE (PRK00019)Ribosomal.L31 (pfam01197) → YcaP (COG2323) →<br>Nudix_Hydrolase_1 (cd03674)IPP_isom_1 (TIGR02150) → hypo →                                                                                                                                                                                                                            |
| env-1219 | AUXO011585839.1                    | - | 183   | 153   | RNA → rpmE (PRK00019)Ribosomal.L31 (pfam01197) →                                                                                                                                                                                                                                                                                                           |
| env-1220 | AUXO012730652.1                    | + | 843   | 873   | RNA → rpmE (PRK00019)Ribosomal.L31 (pfam01197) →                                                                                                                                                                                                                                                                                                           |
| env-1221 | RUMENNODE_4178079.1                | - | 13408 | 13378 | RNA → rpmE (PRK00019)Ribosomal.L31 (pfam01197) → YcaP (COG2323) →                                                                                                                                                                                                                                                                                          |
| env-1222 | SRS011134_C5183664                 | - | 3140  | 3109  | RNA → ←COG3415 (COG3415)HTH_28 (pfam13518)                                                                                                                                                                                                                                                                                                                 |
| env-1223 | SRS049959_WUGC_scaffold_60445      | + | 13512 | 13543 | RNA → rpmE (PRK00019)Ribosomal.L31 (pfam01197) →                                                                                                                                                                                                                                                                                                           |
| env-1224 | AUXO015487162.1                    | - | 138   | 107   | RNA → rpmE (PRK00019)Ribosomal.L31 (pfam01197) →                                                                                                                                                                                                                                                                                                           |
| env-1225 | SRS049164_WUGC_scaffold_33709      | + | 1599  | 1630  | RNA → rpmE (PRK00019)Ribosomal.L31 (pfam01197) →                                                                                                                                                                                                                                                                                                           |
| env-1226 | SRS016335_WUGC_scaffold_45869      | - | 8316  | 8285  | RNA → rpmE (PRK00019)Ribosomal.L31 (pfam01197) →                                                                                                                                                                                                                                                                                                           |
| env-1227 | SRS047014_WUGC_scaffold_63392      | - | 774   | 743   | RNA → rpmE (PRK00019)Ribosomal.L31 (pfam01197) →                                                                                                                                                                                                                                                                                                           |
| env-1228 | 08_07_CONTROL_DNA_scaffold13296_18 | + | 817   | 848   | RNA → rpmE (PRK00019)Ribosomal.L31 (pfam01197) →                                                                                                                                                                                                                                                                                                           |
| env-1229 | 08_07_XOS_DNA_scaffold66974.1      | + | 19539 | 19570 | RNA → rpmE (PRK00019)Ribosomal.L31 (pfam01197) →                                                                                                                                                                                                                                                                                                           |
| env-1230 | AUXO014710346.1                    | - | 273   | 242   | RNA → rpmE (PRK00019)Ribosomal.L31 (pfam01197) →                                                                                                                                                                                                                                                                                                           |
| env-1231 | AUXO017881809.1                    | + | 781   | 812   | RNA →                                                                                                                                                                                                                                                                                                                                                      |
| env-1232 | AUXO012078207.1                    | - | 183   | 153   | RNA → rpmE (PRK00019)Ribosomal.L31 (pfam01197) →                                                                                                                                                                                                                                                                                                           |
| env-1233 | SRS015663_WUGC_scaffold_1238       | - | 20838 | 20806 | RNA → rpmE (PRK00019)Ribosomal.L31 (pfam01197) →                                                                                                                                                                                                                                                                                                           |
| env-1234 | AUXO013159041.1                    | + | 29    | 59    | RNA → rpmE (PRK00019)Ribosomal.L31 (pfam01197) → YcaP (COG2323) →                                                                                                                                                                                                                                                                                          |
| env-1235 | 07_22_CONTROL_DNA_scaffold85199_3  | + | 352   | 378   | RNA → rpmE (PRK00019)Ribosomal.L31 (pfam01197) →                                                                                                                                                                                                                                                                                                           |
| env-1236 | AUXO012376566.1                    | + | 1531  | 1559  | RNA → rpmE (PRK00019)Ribosomal.L31 (pfam01197) →                                                                                                                                                                                                                                                                                                           |
| env-1237 | AUXO015435427.1                    | - | 1944  | 1915  | Lactamase_B (smart00849)metallo-hydrolase-like_MBL-fold (cd07743) →<br>RNA → rpmE (PRK00019)Ribosomal.L31 (pfam01197) → PRK05571 (PRK05571)LacAB_rpiB (pfam02502) →<br>int_mem_ywzB (TIGR02327)DUF1146 (pfam06612) → SpoIID (COG2385)SpoIID_LytB (TIGR02669) →                                                                                             |
| env-1238 | JGI24708J26588_10236894            | - | 59    | 34    | RNA →                                                                                                                                                                                                                                                                                                                                                      |
| env-1239 | SR_TTP_S3_1000105                  | + | 34613 | 34642 | RNA → rpmE (PRK00019)Ribosomal.L31 (pfam01197) → Tdk (COG1435)PRK04296 (PRK04296) →<br>TadA (COG0590)MafB19-deam (pfam14437) → hypo → hypo → hypo → TktA (COG0021)PRK05899 (PRK05899)<br>MnmG (COG0445)PRK05192 (PRK05192) → RsmG (COG0357)gidB (PRK00107) →<br>BcsQ (COG1192)AAA_31 (pfam13614) → ParB (smart00470)Spo0J (COG1475) → DUF951 (pfam06107) → |
| env-1240 | AUXO016960809.1                    | - | 487   | 455   | RNA → rpmE (PRK00019)Ribosomal.L31 (pfam01197) → Pacs-1 (pfam10254) →                                                                                                                                                                                                                                                                                      |
| env-1241 | AUXO016034446.1                    | - | 1236  | 1204  | RNA → rpmE (PRK00019)Ribosomal.L31 (pfam01197) → Pacs-1 (pfam10254) →<br>HTH_XRE (smart00530)XRE (COG1476) → hypo →                                                                                                                                                                                                                                        |
| env-1242 | AUXO011570238.1                    | + | 4931  | 4963  | RNA →                                                                                                                                                                                                                                                                                                                                                      |
| env-1243 | AUXO012487438.1                    | + | 2243  | 2275  | RNA →                                                                                                                                                                                                                                                                                                                                                      |
| env-1244 | AUXO010195109.1                    | + | 4196  | 4228  | RNA → rpmE (PRK00019)Ribosomal.L31 (pfam01197) →                                                                                                                                                                                                                                                                                                           |
| env-1245 | AUXO014081958.1                    | + | 1464  | 1496  | RNA → rpmE (PRK00019)Ribosomal.L31 (pfam01197) →                                                                                                                                                                                                                                                                                                           |
| env-1246 | NLF005_scaffold13642_7             | + | 92    | 122   | RNA → rpmE (PRK00019)Ribosomal.L31 (pfam01197) → PRK05571 (PRK05571)LacAB_rpiB (pfam02502) →<br>DUF1146 (pfam06612) → SpoIID (COG2385)SpoIID_LytB (TIGR02669) →<br>PRK11649 (PRK11649)Peptidase_M23 (pfam01551) → SpoIIID (pfam12116) →<br>MreB_like (cd10225)PRK13930 (PRK13930) →                                                                        |
| env-1247 | scaffold87272_2_MH0081             | - | 271   | 241   | RNA → rpmE (PRK00019)Ribosomal.L31 (pfam01197) →                                                                                                                                                                                                                                                                                                           |
| env-1248 | AUXO018221316.1                    | - | 119   | 89    | RNA → rpmE (PRK00019)rpmE2 (PRK01678)Ribosomal.L31 (pfam01197) →                                                                                                                                                                                                                                                                                           |
| env-1249 | scaffold1635_5_MH0082              | + | 249   | 278   | RNA → rpmE (PRK00019)Ribosomal.L31 (pfam01197) →                                                                                                                                                                                                                                                                                                           |
| env-1250 | SR_TP_S2_1000079                   | + | 14131 | 14157 | RNA → rpmE (PRK00019)Ribosomal.L31 (pfam01197) →                                                                                                                                                                                                                                                                                                           |
| env-1251 | 3300001605_10172276                | + | 1019  | 1045  | RNA → rpmE (PRK00019)Ribosomal.L31 (pfam01197) →                                                                                                                                                                                                                                                                                                           |
| env-1252 | AUXO018756927.1                    | + | 1687  | 1717  | RNA → rpmE (PRK00019)Ribosomal.L31 (pfam01197) →                                                                                                                                                                                                                                                                                                           |
| env-1253 | JGI24710J26742_10162176            | + | 368   | 399   | RNA → rpmE (PRK00019)Ribosomal.L31 (pfam01197) →                                                                                                                                                                                                                                                                                                           |
| env-1254 | AUXO016786490.1                    | + | 2740  | 2766  | RNA → rpmE (PRK00019)Ribosomal.L31 (pfam01197) → PRK05571 (PRK05571)LacAB_rpiB (pfam02502) →                                                                                                                                                                                                                                                               |
| env-1255 | AUXO011123210.1                    | - | 174   | 143   | RNA → rpmE (PRK00019)Ribosomal.L31 (pfam01197) →                                                                                                                                                                                                                                                                                                           |
| env-1256 | AUXO015180417.1                    | + | 171   | 201   | RNA → rpmE (PRK00019)Ribosomal.L31 (pfam01197) → YcaP (COG2323) →                                                                                                                                                                                                                                                                                          |
| env-1257 | O8_19_POLYDEXT_DNA_scaffold85068_3 | + | 626   | 656   | RNA → rpmE (PRK00019)Ribosomal.L31 (pfam01197) →                                                                                                                                                                                                                                                                                                           |
| env-1258 | scaffold4959_2_MH0065              | + | 497   | 523   | RNA → rpmE (PRK00019)Ribosomal.L31 (pfam01197) →                                                                                                                                                                                                                                                                                                           |
| env-1259 | JGI24713J26584_10183766            | + | 158   | 188   | RNA → rpmE (PRK00019)Ribosomal.L31 (pfam01197) →                                                                                                                                                                                                                                                                                                           |
| env-1260 | AUXO013227359.1                    | - | 65    | 34    | RNA →                                                                                                                                                                                                                                                                                                                                                      |



|          |                      |   |       |       |                                                                                                                                                                                                                                                                                                                         |
|----------|----------------------|---|-------|-------|-------------------------------------------------------------------------------------------------------------------------------------------------------------------------------------------------------------------------------------------------------------------------------------------------------------------------|
| env-1261 | AUXO010399693.1      | - | 1188  | 1160  | RNA → rpmE (PRK00019)Ribosomal.L31 (pfam01197) → PRK05571 (PRK05571)LacAB_rpiB (pfam02502) → DUF1146 (pfam06612) → hypo →                                                                                                                                                                                               |
| env-1262 | AUXO012301092.1      | - | 266   | 236   | RNA → rpmE (PRK00019)Ribosomal.L31 (pfam01197) →                                                                                                                                                                                                                                                                        |
| env-1263 | AUXO014076405.1      | + | 105   | 135   | RNA → rpmE (PRK00019)Ribosomal.L31 (pfam01197) → PRK05571 (PRK05571)LacAB_rpiB (pfam02502) → rim_protein (TIGR01257)DUF1146 (pfam06612) → PRK11649 (PRK11649)Peptidase_M23 (pfam01551) → MreB_like (cd10225)PRK13930 (PRK13930) → ECA_wecA (TIGR02380)GT_WecA_like (cd06853) →                                          |
| env-1264 | SRMUA_GNVGR9Q01AT41D | + | 16    | 47    | LytTR (smart00850)LytTR (pfam04397) →                                                                                                                                                                                                                                                                                   |
| env-1265 | AUXO010283157.1      | + | 10331 | 10362 | RNA → rpmE (PRK00019)Ribosomal.L31 (pfam01197) → PRK05571 (PRK05571)LacAB_rpiB (pfam02502) → DUF1146 (pfam06612) → PRK11649 (PRK11649)Peptidase_M23 (pfam01551) → MreB_like (cd10225)PRK13930 (PRK13930) → ECA_wecA (TIGR02380)GT_WecA_like (cd06853) →                                                                 |
| env-1266 | AUXO014310563.1      | + | 270   | 301   | LytTR (smart00850)LytTR (pfam04397) → RNA → rpmE (PRK00019)Ribosomal.L31 (pfam01197) → PRK05571 (PRK05571)LacAB_rpiB (pfam02502) → rim_protein (TIGR01257)DUF1146 (pfam06612) → nlpD (PRK10871)Peptidase_M23 (pfam01551) → MreB_like (cd10225)PRK13930 (PRK13930) → ECA_wecA (TIGR02380)GT_WecA_like (cd06853) → hypo → |
| env-1267 | AUXO011380099.1      | + | 513   | 544   | RNA →                                                                                                                                                                                                                                                                                                                   |
| env-1268 | AUXO014310801.1      | - | 4992  | 4964  | RNA → rpmE (PRK00019)Ribosomal.L31 (pfam01197) → PRK05571 (PRK05571)LacAB_rpiB (pfam02502) → DUF1146 (pfam06612) → PRK11649 (PRK11649)Peptidase_M23 (pfam01551) → MreB_like (cd10225)PRK13930 (PRK13930) → ECA_wecA (TIGR02380)GT_WecA_like (cd06853) →                                                                 |
| env-1269 | AUXO017364526.1      | - | 66    | 35    | RNA →                                                                                                                                                                                                                                                                                                                   |
| env-1270 | AUXO011848655.1      | + | 2629  | 2660  | RNA → rpmE (PRK00019)Ribosomal.L31 (pfam01197) → PRK05571 (PRK05571)LacAB_rpiB (pfam02502) → DUF1146 (pfam06612) → MreB_like (cd10225)PRK13930 (PRK13930) → ECA_wecA (TIGR02380)GT_WecA_like (cd06853) →                                                                                                                |
| env-1271 | AUXO014937547.1      | - | 5403  | 5374  | RNA → rpmE (PRK00019)Ribosomal.L31 (pfam01197) → ycf1 (CHL00204)Amidoligase_2 (pfam12224) → PRK05571 (PRK05571)LacAB_rpiB (pfam02502) → DUF1146 (pfam06612) → PRK11649 (PRK11649)Peptidase_M23 (pfam01551) → MreB_like (cd10225)PRK13930 (PRK13930) → ECA_wecA (TIGR02380)GT_WecA_like (cd06853) → CheY (COG0784) →     |
| env-1272 | AUXO015447990.1      | - | 61    | 32    | RNA →                                                                                                                                                                                                                                                                                                                   |
| env-1273 | AUXO011771154.1      | - | 1416  | 1383  | RNA → rpmE (PRK00019)Ribosomal.L31 (pfam01197) → Acetyltransf_1 (pfam00583)Acetyltransf_7 (pfam1350) → hypo → PRK05571 (PRK05571)LacAB_rpiB (pfam02502) →                                                                                                                                                               |
| env-1274 | SRS013951_C2824150   | - | 311   | 281   | RNA → rpmE (PRK00019)Ribosomal.L31 (pfam01197) →                                                                                                                                                                                                                                                                        |
| env-1275 | AUXO016081430.1      | + | 434   | 465   | RNA →                                                                                                                                                                                                                                                                                                                   |
| env-1276 | AUXO016398220.1      | - | 197   | 166   | RNA → rpmE (PRK00019)Ribosomal.L31 (pfam01197) →                                                                                                                                                                                                                                                                        |
| env-1277 | AUXO016483557.1      | + | 979   | 1009  | RNA → rpmE (PRK00019)SGNH_hydrolase (cd00229)Ribosomal.L31 (pfam01197)Lipase_GDSL_2 (pfam13472) → PRK05571 (PRK05571)LacAB_rpiB (pfam02502) → hypo → PRK11649 (PRK11649)Peptidase_M23 (pfam01551) →                                                                                                                     |
| env-1278 | AUXO016479613.1      | + | 343   | 374   | RNA →                                                                                                                                                                                                                                                                                                                   |
| env-1279 | AUXO013409902.1      | + | 482   | 514   | RNA → rpmE (PRK00019)Ribosomal.L31 (pfam01197) →                                                                                                                                                                                                                                                                        |
| env-1280 | AUXO017875554.1      | + | 7952  | 7983  | RNA → SGNH_hydrolase (cd00229) → rpmE (PRK00019)Ribosomal.L31 (pfam01197) → PRK05571 (PRK05571)LacAB_rpiB (pfam02502) → DUF1146 (pfam06612) → PRK11649 (PRK11649)Peptidase_M23 (pfam01551) →                                                                                                                            |
| env-1281 | AUXO012311456.1      | - | 82    | 52    | RNA → rpmE (PRK00528)Ribosomal.L31 (pfam01197) →                                                                                                                                                                                                                                                                        |
| env-1282 | AUXO013805451.1      | - | 82    | 52    | RNA → rpmE (PRK00528)Ribosomal.L31 (pfam01197) →                                                                                                                                                                                                                                                                        |
| env-1283 | AUXO013112282.1      | - | 284   | 252   | RNA → rpmE (PRK00019)Ribosomal.L31 (pfam01197) →                                                                                                                                                                                                                                                                        |
| env-1284 | AUXO014919177.1      | - | 130   | 100   | RNA → rpmE (PRK00019)Ribosomal.L31 (pfam01197) →                                                                                                                                                                                                                                                                        |
| env-1285 | AUXO012946948.1      | - | 173   | 142   | RNA → rpmE (PRK00019)Ribosomal.L31 (pfam01197) →                                                                                                                                                                                                                                                                        |
| env-1286 | AUXO013252499.1      | + | 233   | 263   | RNA → rpmE (PRK00528)rpmE (PRK00019)Ribosomal.L31 (pfam01197) →                                                                                                                                                                                                                                                         |
| env-1287 | SRS019582_C2881833   | - | 282   | 252   | RNA → rpmE (PRK00019)Ribosomal.L31 (pfam01197) →                                                                                                                                                                                                                                                                        |
| env-1288 | SRS012273_C3602910   | - | 368   | 337   | RNA → rpmE (PRK00019)Ribosomal.L31 (pfam01197) →                                                                                                                                                                                                                                                                        |
| env-1289 | SRS022071_C2951214   | + | 292   | 323   | RNA → rpmE (PRK00019)Ribosomal.L31 (pfam01197) →                                                                                                                                                                                                                                                                        |
| env-1290 | AUXO012038790.1      | + | 252   | 281   | RNA → rpmE (PRK00019)Ribosomal.L31 (pfam01197) → hypo → thioredoxin (TIGR01068)TRX_family (cd02947) → bPH_3 (pfam14470) → hypo →                                                                                                                                                                                        |
| env-1291 | AUXO011416548.1      | - | 68    | 41    | RNA →                                                                                                                                                                                                                                                                                                                   |
| env-1292 | AUXO017181277.1      | - | 182   | 152   | RNA → rpmE (PRK00019)Ribosomal.L31 (pfam01197) →                                                                                                                                                                                                                                                                        |

|          |                               |   |       |       |                                                                                                                                                                                                                     |
|----------|-------------------------------|---|-------|-------|---------------------------------------------------------------------------------------------------------------------------------------------------------------------------------------------------------------------|
| env-1293 | AUXO016134728.1               | + | 1040  | 1070  | RNA → rpmE (PRK00019)Ribosomal_L31 (pfam01197) → PRK05571 (PRK05571)LacAB_rpiB (pfam02502) → DUF1146 (pfam06612) →                                                                                                  |
| env-1294 | AUXO011423476.1               | + | 2455  | 2485  | RNA →                                                                                                                                                                                                               |
| env-1295 | AUXO011517276.1               | + | 28    | 58    | RNA → rpmE (PRK00019)Ribosomal_L31 (pfam01197) →                                                                                                                                                                    |
| env-1296 | JG1994J12354.10524623         | + | 105   | 134   | RNA → rpmE (PRK00019)Ribosomal_L31 (pfam01197) →                                                                                                                                                                    |
| env-1297 | AUXO012504192.1               | + | 415   | 446   | RNA → rpmE (PRK00019)Ribosomal_L31 (pfam01197) →                                                                                                                                                                    |
| env-1298 | AUXO014624430.1               | + | 363   | 389   | RNA → rpmE (PRK00019) →                                                                                                                                                                                             |
| env-1299 | AUXO012372966.1               | + | 82    | 112   | RNA → rpmE (PRK00019)Ribosomal_L31 (pfam01197) →                                                                                                                                                                    |
| env-1300 | SRMUA_GNVGR9Q01DNPCS          | + | 60    | 87    | RNA → rpmE (PRK00019)Ribosomal_L31 (pfam01197) →                                                                                                                                                                    |
| env-1301 | AUXO016542428.1               | - | 1502  | 1471  | RNA → rpmE (PRK00019)Ribosomal_L31 (pfam01197) →                                                                                                                                                                    |
| env-1302 | AUXO014856272.1               | - | 1536  | 1505  | RNA → rpmE (PRK00019)Ribosomal_L31 (pfam01197) →                                                                                                                                                                    |
| env-1303 | AUXO012441124.1               | - | 149   | 121   | RNA → rpmE (PRK00019)Ribosomal_L31 (pfam01197) →                                                                                                                                                                    |
| env-1304 | 3300000558.10084062           | + | 2958  | 2985  | RNA → rpmE (PRK00019)Ribosomal_L31 (pfam01197) → Tdk (COG1435)PRK04296 (PRK04296) →                                                                                                                                 |
| env-1305 | AUXO012809103.1               | - | 1236  | 1207  | RNA → rpmE (PRK00019)Ribosomal_L31 (pfam01197) → PRK05571 (PRK05571)LacAB_rpiB (pfam02502) → DUF1146 (pfam06612) → hypo →                                                                                           |
| env-1306 | AUXO010815353.1               | + | 82    | 112   | RNA → rpmE (PRK00019)Ribosomal_L31 (pfam01197) → YcaP (COG2323) →                                                                                                                                                   |
| env-1307 | AUXO015985898.1               | - | 109   | 79    | RNA → rpmE (PRK00019)rpmE2 (PRK01678)Ribosomal_L31 (pfam01197) →                                                                                                                                                    |
| env-1308 | RUMENNODE_4377773.84001       | + | 25108 | 25136 | RNA → rpmE (PRK00019)Ribosomal_L31 (pfam01197) → PRK13759 (PRK13759)LTA_synthase (cd16015) → PRK11361 (PRK11361)LytTR (smart00850)LytT (COG3279) → CitA (COG3290)WcaJ_sugtrans (TIGR03023)HATPase_c.5 (pfam14501) → |
| env-1309 | AUXO011141601.1               | - | 618   | 590   | RNA → rpmE (PRK00019)Ribosomal_L31 (pfam01197) → hypo →                                                                                                                                                             |
| env-1310 | AUXO010916397.1               | + | 5920  | 5948  | RNA → rpmE (PRK00019)Ribosomal_L31 (pfam01197) → MdoB (COG1368)PRK13759 (PRK13759) → PRK11361 (PRK11361)LytTR (smart00850)LytT (COG3279) → CitA (COG3290)PRK11086 (PRK11086) →                                      |
| env-1311 | AUXO017784779.1               | - | 2057  | 2027  | RNA → rpmE (PRK00019)Ribosomal_L31 (pfam01197) → PRK05571 (PRK05571)LacAB_rpiB (pfam02502) → DUF1146 (pfam06612) → PRK11649 (PRK11649)Peptidase_M23 (pfam01551) →                                                   |
| env-1312 | scaffold30364.4_MH0066        | - | 520   | 493   | RNA → rpmE (PRK00019)Ribosomal_L31 (pfam01197) →                                                                                                                                                                    |
| env-1313 | C4277000.1_V1.UC-14           | - | 882   | 855   | RNA → rpmE (PRK00019)Ribosomal_L31 (pfam01197) →                                                                                                                                                                    |
| env-1314 | scaffold4347.1_V1.UC-19       | + | 160   | 187   | RNA → rpmE (PRK00019)Ribosomal_L31 (pfam01197) →                                                                                                                                                                    |
| env-1315 | SRS049164.WUGC_scaffold.87487 | - | 15418 | 15391 | RNA → rpmE (PRK00019)Ribosomal_L31 (pfam01197) →                                                                                                                                                                    |
| env-1316 | DOF002_scaffold60922.2        | + | 3588  | 3615  | RNA → rpmE (PRK00019)Ribosomal_L31 (pfam01197) →                                                                                                                                                                    |
| env-1317 | DOM013.scaffold66250.2        | + | 114   | 141   | RNA → rpmE (PRK00019)Ribosomal_L31 (pfam01197) →                                                                                                                                                                    |
| env-1318 | DOM014.scaffold2248.7.2       | - | 1915  | 1888  | RNA → rpmE (PRK00019)Ribosomal_L31 (pfam01197) →                                                                                                                                                                    |
| env-1319 | NOF001_scaffold58173.1        | + | 4467  | 4494  | RNA → rpmE (PRK00019)Ribosomal_L31 (pfam01197) →                                                                                                                                                                    |
| env-1320 | NOF014_scaffold69538.9        | - | 2379  | 2352  | RNA → rpmE (PRK00019)Ribosomal_L31 (pfam01197) →                                                                                                                                                                    |
| env-1321 | NOM013_scaffold55288.1        | - | 18149 | 18122 | RNA → rpmE (PRK00019)Ribosomal_L31 (pfam01197) →                                                                                                                                                                    |
| env-1322 | NOM019_scaffold49208.1        | + | 249   | 276   | RNA → rpmE (PRK00019)Ribosomal_L31 (pfam01197) →                                                                                                                                                                    |
| env-1323 | SRS011271.WUGC_scaffold.4131  | - | 16966 | 16939 | RNA → rpmE (PRK00019)Ribosomal_L31 (pfam01197) →                                                                                                                                                                    |
| env-1324 | SRS011586.WUGC_scaffold.25822 | - | 10363 | 10336 | RNA → rpmE (PRK00019)Ribosomal_L31 (pfam01197) →                                                                                                                                                                    |
| env-1325 | SRS015578.C2525326            | - | 256   | 229   | RNA → rpmE (PRK00019)Ribosomal_L31 (pfam01197) →                                                                                                                                                                    |
| env-1326 | SRS016335.WUGC_scaffold.45818 | - | 9930  | 9903  | RNA → rpmE (PRK00019)Ribosomal_L31 (pfam01197) →                                                                                                                                                                    |
| env-1327 | SRS020233.C4068279            | + | 109   | 136   | RNA → rpmE (PRK00019)Ribosomal_L31 (pfam01197) →                                                                                                                                                                    |
| env-1328 | SRS020869.C3081547            | - | 165   | 138   | RNA → rpmE (PRK00019)Ribosomal_L31 (pfam01197) →                                                                                                                                                                    |
| env-1329 | SRS021948.C2732547            | - | 488   | 461   | RNA → rpmE (PRK00019)Ribosomal_L31 (pfam01197) →                                                                                                                                                                    |
| env-1330 | SRS022071.C3057294            | - | 2824  | 2797  | RNA → rpmE (PRK00019)Ribosomal_L31 (pfam01197) →                                                                                                                                                                    |
| env-1331 | SRS023526.C2997413            | - | 272   | 245   | RNA → rpmE (PRK00019)Ribosomal_L31 (pfam01197) →                                                                                                                                                                    |
| env-1332 | SRS047014.C3660042            | + | 154   | 181   | RNA → rpmE (PRK00019)Ribosomal_L31 (pfam01197) →                                                                                                                                                                    |
| env-1333 | SRS048870.WUGC_scaffold.52503 | + | 97    | 124   | RNA → rpmE (PRK00019)Ribosomal_L31 (pfam01197) →                                                                                                                                                                    |
| env-1334 | SRS049959.C3987040            | - | 11396 | 11369 | RNA → rpmE (PRK00019)Ribosomal_L31 (pfam01197) →                                                                                                                                                                    |
| env-1335 | SRS049995.LANL_scaffold.33915 | - | 4520  | 4493  | RNA → rpmE (PRK00019)Ribosomal_L31 (pfam01197) →                                                                                                                                                                    |
| env-1336 | SRS078176.LANL_scaffold.951   | - | 4520  | 4493  | RNA → rpmE (PRK00019)Ribosomal_L31 (pfam01197) →                                                                                                                                                                    |
| env-1337 | scaffold129929.1_MH0012       | + | 17    | 44    | RNA → rpmE (PRK00019)Ribosomal_L31 (pfam01197) →                                                                                                                                                                    |
| env-1338 | SRS012273.C3781305            | + | 19    | 46    | RNA → rpmE (PRK00019)Ribosomal_L31 (pfam01197) →                                                                                                                                                                    |
| env-1339 | SRS014979.C3210300            | + | 19    | 46    | RNA → rpmE (PRK00019)Ribosomal_L31 (pfam01197) →                                                                                                                                                                    |

|          |                                 |   |       |       |                                                                                                                                                                                                                   |
|----------|---------------------------------|---|-------|-------|-------------------------------------------------------------------------------------------------------------------------------------------------------------------------------------------------------------------|
| env-1340 | SRS024435_C3024763              | + | 19    | 46    | RNA → rpmE (PRK00019)Ribosomal_L31 (pfam01197) →                                                                                                                                                                  |
| env-1341 | SRS045645_C2053142              | - | 2027  | 2000  | RNA → rpmE (PRK00019)Ribosomal_L31 (pfam01197) →                                                                                                                                                                  |
| env-1342 | scaffold4802_1_MH0014           | - | 1015  | 989   | RNA → rpmE (PRK00019)Ribosomal_L31 (pfam01197) → hypo →                                                                                                                                                           |
| env-1343 | C4062675_1_MH0016               | - | 447   | 421   | RNA → rpmE (PRK00019)Ribosomal_L31 (pfam01197) → hypo →                                                                                                                                                           |
| env-1344 | scaffold207_2_MH0026            | - | 473   | 447   | RNA → rpmE (PRK00019)Ribosomal_L31 (pfam01197) → hypo →                                                                                                                                                           |
| env-1345 | scaffold29535_1_MH0035          | + | 8024  | 8050  | RNA → rpmE (PRK00019)Ribosomal_L31 (pfam01197) → PRK13759 (PRK13759)LTA_synthase (cd16015) → PRK11361 (PRK11361)LytTR (smart00850)LytT (COG3279) → CitA (COG3290)HATPase_c.5 (pfam14501) →                        |
| env-1346 | scaffold78402_1_MH0064          | - | 449   | 423   | RNA → rpmE (PRK00019)Ribosomal_L31 (pfam01197) → hypo →                                                                                                                                                           |
| env-1347 | scaffold87074_1_MH0075          | + | 319   | 345   | RNA → rpmE (PRK00019)Ribosomal_L31 (pfam01197) →                                                                                                                                                                  |
| env-1348 | scaffold104927_2_V1.CD-14       | - | 230   | 204   | RNA → rpmE (PRK00019)Ribosomal_L31 (pfam01197) →                                                                                                                                                                  |
| env-1349 | 4491482.3_NODE.16610            | - | 635   | 609   | RNA → rpmE (PRK00019)Ribosomal_L31 (pfam01197) → hypo →                                                                                                                                                           |
| env-1350 | 4491487.3_NODE.42294            | - | 2870  | 2844  | RNA → rpmE (PRK00019)SGNH_hydrolase (cd00229)Ribosomal_L31 (pfam01197) → PRK13759 (PRK13759)LTA_synthase (cd16015) → PRK11361 (PRK11361)REC (cd00156) →                                                           |
| env-1351 | NLM025_scaffold35660_1          | - | 351   | 325   | RNA → rpmE (PRK00019)Lipase_GDSL (pfam00657)Ribosomal_L31 (pfam01197) →                                                                                                                                           |
| env-1352 | NLM029_scaffold44136_3          | - | 436   | 410   | RNA → rpmE (PRK00019)Ribosomal_L31 (pfam01197) → hypo →                                                                                                                                                           |
| env-1353 | SRS011134_C5157013              | - | 291   | 265   | RNA → rpmE (PRK00019)Ribosomal_L31 (pfam01197) →                                                                                                                                                                  |
| env-1354 | SRS011239_Baylor_scaffold_29786 | + | 725   | 751   | RNA → rpmE (PRK00019)Ribosomal_L31 (pfam01197) → hypo →                                                                                                                                                           |
| env-1355 | SRS012273_Baylor_scaffold_10464 | + | 11441 | 11467 | RNA → rpmE (PRK00019)Ribosomal_L31 (pfam01197) → PRK13759 (PRK13759)LTA_synthase (cd16015) → PRK11361 (PRK11361)LytTR (smart00850)LytT (COG3279) → HATPase_c (pfam02518)HATPase_c.5 (pfam14501) →                 |
| env-1356 | SRS017701_Baylor_scaffold_18247 | + | 358   | 384   | RNA → rpmE (PRK00019)Ribosomal_L31 (pfam01197) → hypo →                                                                                                                                                           |
| env-1357 | SRS018656_WUGC_scaffold_5423    | - | 1241  | 1215  | RNA → rpmE (PRK00019)Ribosomal_L31 (pfam01197) → LTA_synthase (cd16015) →                                                                                                                                         |
| env-1358 | SRS022071_C2877461              | + | 104   | 130   | RNA → rpmE (PRK00019)Ribosomal_L31 (pfam01197) →                                                                                                                                                                  |
| env-1359 | SRS050752_LANL_scaffold_27273   | + | 33215 | 33241 | RNA → rpmE (PRK00019)Ribosomal_L31 (pfam01197) → PRK13759 (PRK13759)LTA_synthase (cd16015) → PRK11361 (PRK11361)LytTR (smart00850)LytT (COG3279) → CitA (COG3290)HATPase_c.5 (pfam14501) →                        |
| env-1360 | 4491410.3_NODE.39918            | + | 398   | 424   | RNA → rpmE (PRK00019)Ribosomal_L31 (pfam01197) →                                                                                                                                                                  |
| env-1361 | SRS011302_Baylor_scaffold_316   | + | 5248  | 5274  | RNA → rpmE (PRK00019)Ribosomal_L31 (pfam01197) → PRK13759 (PRK13759)LTA_synthase (cd16015) → PRK11361 (PRK11361)LytTR (smart00850)LytT (COG3279) →                                                                |
| env-1362 | scaffold70250_1_MH0012          | + | 907   | 933   | RNA → rpmE (PRK00019)Ribosomal_L31 (pfam01197) → MdoB (COG1368) →                                                                                                                                                 |
| env-1363 | scaffold70665_1_MH0028          | + | 5114  | 5140  | RNA → rpmE (PRK00019)Ribosomal_L31 (pfam01197) → PRK13759 (PRK13759)LTA_synthase (cd16015) → PRK11361 (PRK11361)LytTR (smart00850)LytT (COG3279) → CitA (COG3290)HATPase_c.5 (pfam14501) →                        |
| env-1364 | scaffold109810_1_MH0033         | - | 175   | 149   | RNA → rpmE (PRK00019)Ribosomal_L31 (pfam01197) →                                                                                                                                                                  |
| env-1365 | scaffold62702_1_MH0066          | + | 253   | 279   | RNA → rpmE (PRK00019)Ribosomal_L31 (pfam01197) → hypo →                                                                                                                                                           |
| env-1366 | scaffold25252_2_MH0081          | + | 5634  | 5660  | RNA → rpmE (PRK00019)Ribosomal_L31 (pfam01197) → LTA_synthase (cd16015) →                                                                                                                                         |
| env-1367 | 4491423.3_NODE.40207            | - | 509   | 483   | RNA → rpmE (PRK00019)Ribosomal_L31 (pfam01197) → hypo →                                                                                                                                                           |
| env-1368 | DLF003_scaffold13796_5          | - | 219   | 193   | RNA → rpmE (PRK00019)Ribosomal_L31 (pfam01197) →                                                                                                                                                                  |
| env-1369 | DOM012_scaffold215_3            | + | 9962  | 9988  | RNA → rpmE (PRK00019)Lipase_GDSL (pfam00657)Ribosomal_L31 (pfam01197) → PRK13759 (PRK13759)LTA_synthase (cd16015) → PRK11361 (PRK11361)LytTR (smart00850)LytT (COG3279) → CitA (COG3290)HATPase_c.5 (pfam14501) → |
| env-1370 | NLM015_scaffold4789_7           | + | 420   | 446   | RNA → rpmE (PRK00019)Ribosomal_L31 (pfam01197) →                                                                                                                                                                  |
| env-1371 | SRS011529_WUGC_scaffold_2327    | + | 32692 | 32718 | RNA → rpmE (PRK00019)Ribosomal_L31 (pfam01197) → PRK13759 (PRK13759)LTA_synthase (cd16015) → PRK11361 (PRK11361)LytTR (smart00850)LytT (COG3279) → CitA (COG3290)HATPase_c.5 (pfam14501) →                        |
| env-1372 | SRS015782_WUGC_scaffold_16117   | - | 5795  | 5769  | RNA → rpmE (PRK00019)Ribosomal_L31 (pfam01197) → PRK13759 (PRK13759)LTA_synthase (cd16015) → PRK11361 (PRK11361)LytTR (smart00850)LytT (COG3279) → CitA (COG3290)HATPase_c.5 (pfam14501) →                        |
| env-1373 | SRS018817_C1984407              | - | 174   | 148   | RNA → rpmE (PRK00019)Ribosomal_L31 (pfam01197) →                                                                                                                                                                  |
| env-1374 | SRS020233_C4276649              | + | 1616  | 1642  | RNA → rpmE (PRK00019)Ribosomal_L31 (pfam01197) → PRK13759 (PRK13759)LTA_synthase (cd16015) → PRK11361 (PRK11361)LytTR (smart00850)LytT (COG3279) → CitA (COG3290)HATPase_c.5 (pfam14501) →                        |
| env-1375 | SRS021948_C2860438              | + | 1458  | 1484  | RNA → rpmE (PRK00019)Ribosomal_L31 (pfam01197) → hypo →                                                                                                                                                           |
| env-1376 | SRS047044_WUGC_scaffold_15413   | + | 11469 | 11495 | RNA → rpmE (PRK00019)Ribosomal_L31 (pfam01197) → PRK13759 (PRK13759)LTA_synthase (cd16015) → PRK11361 (PRK11361)LytTR (smart00850)LytT (COG3279) → hypo →                                                         |
| env-1377 | SRS052697_C3372869              | - | 2793  | 2767  | RNA → rpmE (PRK00019)Ribosomal_L31 (pfam01197) → PRK13759 (PRK13759)LTA_synthase (cd16015) → PRK11361 (PRK11361)REC (cd00156) →                                                                                   |
| env-1378 | SRS065504_LANL_scaffold_33624   | - | 18639 | 18613 | RNA → rpmE (PRK00019)Ribosomal_L31 (pfam01197) → PRK13759 (PRK13759)LTA_synthase (cd16015) → PRK11361 (PRK11361)LytTR (smart00850)LytT (COG3279) → CitA (COG3290)HATPase_c.5 (pfam14501) →                        |
| env-1379 | C2077074_1_MH0079               | + | 2299  | 2326  | RNA → rpmE (PRK00019)Ribosomal_L31 (pfam01197) →                                                                                                                                                                  |



|          |                                 |   |        |        |                                                                                                                                                                                                                                                                           |
|----------|---------------------------------|---|--------|--------|---------------------------------------------------------------------------------------------------------------------------------------------------------------------------------------------------------------------------------------------------------------------------|
| env-1380 | DLF003_scaffold7759.1           | - | 143    | 116    | RNA → rpmE (PRK00019)Ribosomal_L31 (pfam01197) →                                                                                                                                                                                                                          |
| env-1381 | SRS011271_WUGC_scaffold_24401   | - | 16266  | 16240  | RNA → rpmE (PRK00019)Ribosomal_L31 (pfam01197) → PRK13759 (PRK13759)LTA_synthase (cd16015) → hypo →                                                                                                                                                                       |
| env-1382 | SRS023526_Baylor_scaffold_35082 | + | 302    | 328    | RNA → rpmE (PRK00019)Ribosomal_L31 (pfam01197) → PRK13759 (PRK13759)LTA_synthase (cd16015) → PRK11361 (PRK11361)LytTR (smart00850)LytT (COG3279) → CitA (COG3290)HATPase.c.5 (pfam14501) →                                                                                |
| env-1383 | AUXO018649474.1                 | + | 79     | 105    | RNA → rpmE (PRK00019)Ribosomal_L31 (pfam01197) →                                                                                                                                                                                                                          |
| env-1384 | SRS011134_C4857448              | + | 310    | 337    | RNA → Ribosomal_L31 (pfam01197) →                                                                                                                                                                                                                                         |
| env-1385 | DLF004_scaffold6617.4           | - | 1944   | 1917   | RNA → rpmE (PRK00019)SGNH_hydrolase (cd00229)Ribosomal_L31 (pfam01197)Lipase_GDSL_2 (pfam13472) PRK12363 (PRK12363)LTA_synthase (cd16015) →                                                                                                                               |
| env-1386 | DLF010_scaffold22656.1          | - | 107791 | 107764 | RNA → rpmE (PRK00019)Ribosomal_L31 (pfam01197) → PRK12363 (PRK12363)MdoB (COG1368) → cztr_silR_copR (TIGR01387)LytTR (smart00850)LytT (COG3279) → CitA (COG3290)HATPase.c.5 (pfam14501) →                                                                                 |
| env-1387 | 4491414.3_NODE.12936            | + | 3149   | 3176   | RNA → SGNH_hydrolase (cd00229)Lipase_GDSL_2 (pfam13472) → rpmE (PRK00019)Ribosomal_L31 (pfam01197) → PRK12363 (PRK12363)LTA_synthase (cd16015) → cztr_silR_copR (TIGR01387)LytTR (smart00850)LytT (COG3279) → CitA (COG3290)HATPase.c.5 (pfam14501) →                     |
| env-1388 | AUXO017324133.1                 | - | 24508  | 24481  | RNA → SGNH_hydrolase (cd00229)Lipase_GDSL_2 (pfam13472) → rpmE (PRK00019)Ribosomal_L31 (pfam01197) → MdoB (COG1368)PRK13759 (PRK13759) → PRK11361 (PRK11361)LytTR (smart00850)LytT (COG3279) → PRK11086 (PRK11086)HATPase.c (pfam0251)                                    |
| env-1389 | AUXO015658258.1                 | - | 64     | 35     | RNA →                                                                                                                                                                                                                                                                     |
| env-1390 | AUXO014149459.1                 | - | 2076   | 2045   | RNA → rpmE (PRK00019)Ribosomal_L31 (pfam01197) → CYK3 (COG5279) →                                                                                                                                                                                                         |
| env-1391 | scaffold84569_2_MH0038          | - | 567    | 538    | RNA → rpmE (PRK00019)Ribosomal_L31 (pfam01197) →                                                                                                                                                                                                                          |
| env-1392 | SRS011586_WUGC_scaffold_19197   | - | 7279   | 7250   | RNA → rpmE (PRK00019)Ribosomal_L31 (pfam01197) →                                                                                                                                                                                                                          |
| env-1393 | AUXO015167000.1                 | + | 837    | 867    | RNA → rpmE (PRK00019)Ribosomal_L31 (pfam01197) →                                                                                                                                                                                                                          |
| env-1394 | AUXO017088504.1                 | + | 293    | 323    | RNA → rpmE (PRK00019)Ribosomal_L31 (pfam01197) →                                                                                                                                                                                                                          |
| env-1395 | UnmappedStool_Broad_C253180942  | - | 644    | 614    | RNA → rpmE (PRK00019)Ribosomal_L31 (pfam01197) →                                                                                                                                                                                                                          |
| env-1396 | NLM026_scaffold61948_3          | + | 70     | 100    | RNA → rpmE (PRK00019)Ribosomal_L31 (pfam01197) →                                                                                                                                                                                                                          |
| env-1397 | AUXO016873222.1                 | + | 8429   | 8460   | RNA → rpmE (PRK00019)Ribosomal_L31 (pfam01197) →                                                                                                                                                                                                                          |
| env-1398 | AUXO017217394.1                 | + | 2799   | 2830   | RNA → rpmE (PRK00019)Ribosomal_L31 (pfam01197) → PRK05571 (PRK05571)LacAB_rpiB (pfam02502) → DUF1146 (pfam06612) → MreB_like (cd10225)PRK13930 (PRK13930) → ECA_wecA (TIGR02380)GT_WecA_like (cd06853) →                                                                  |
| env-1399 | C1643059.1_MH0013               | + | 4131   | 4161   | RNA → rpmE (PRK00019)Ribosomal_L31 (pfam01197) → PRK05571 (PRK05571)LacAB_rpiB (pfam02502) → DUF1146 (pfam06612) → hypo →                                                                                                                                                 |
| env-1400 | scaffold22971.1_MH0030          | + | 23528  | 23558  | RNA → rpmE (PRK00019)Ribosomal_L31 (pfam01197) → PRK05571 (PRK05571)LacAB_rpiB (pfam02502) →                                                                                                                                                                              |
| env-1401 | SRS011134_C5179588              | + | 1191   | 1221   | RNA → rpmE (PRK00019)Ribosomal_L31 (pfam01197) → PRK05571 (PRK05571)LacAB_rpiB (pfam02502) → DUF1146 (pfam06612) → PRK11649 (PRK11649)Peptidase_M23 (pfam01551) → SpoIID (pfam12116) →                                                                                    |
| env-1402 | 2227080773                      | - | 117461 | 117431 | RNA → rpmE (PRK00019)Ribosomal_L31 (pfam01197) → YcaP (COG2323) → hypo →                                                                                                                                                                                                  |
| env-1403 | JGI996J12353_1033205            | + | 84     | 114    | RNA → rpmE (PRK00019)Ribosomal_L31 (pfam01197) → hypo →                                                                                                                                                                                                                   |
| env-1404 | AUXO017836399.1                 | - | 2207   | 2180   | RNA → rpmE (PRK00019)Ribosomal_L31 (pfam01197) →                                                                                                                                                                                                                          |
| env-1405 | AUXO014543416.1                 | + | 2000   | 2027   | RNA →                                                                                                                                                                                                                                                                     |
| env-1406 | AUXO014166827.1                 | + | 585    | 612    | RNA →                                                                                                                                                                                                                                                                     |
| env-1407 | AUXO013533263.1                 | - | 71     | 44     | RNA →                                                                                                                                                                                                                                                                     |
| env-1408 | AUXO015166946.1                 | + | 1763   | 1790   | RNA → rpmE (PRK00019)Ribosomal_L31 (pfam01197) →                                                                                                                                                                                                                          |
| env-1409 | SRS053917_LANL_scaffold_40441   | - | 12785  | 12754  | RNA → rpmE (PRK00019)Ribosomal_L31 (pfam01197) → PRK05571 (PRK05571)LacAB_rpiB (pfam02502) → GT_WecA_like (cd06853)mraY (PRK00108) → hypo → vfiA (TIGR00741)Ribosomal_S30AE (pfam02482)Ribosom_S30AE_C (pfam16321) → SecA (COG0653)PRK12904 (PRK12904)SEC-C (pfam02810) → |
| env-1410 | SRS018157_C4833607              | + | 933    | 964    | RNA → rpmE (PRK00019)Ribosomal_L31 (pfam01197) →                                                                                                                                                                                                                          |
| env-1411 | SRS022725_LANL_scaffold_39231   | - | 12149  | 12118  | RNA → rpmE (PRK00019)Ribosomal_L31 (pfam01197) → PRK05571 (PRK05571)LacAB_rpiB (pfam02502) → GT_WecA_like (cd06853)mraY (PRK00108) → hypo → vfiA (TIGR00741)Ribosomal_S30AE (pfam02482)Ribosom_S30AE_C (pfam16321) → SecA (COG0653)PRK12904 (PRK12904)SEC-C (pfam02810) → |
| env-1412 | SRS047113_LANL_scaffold_83317   | + | 5415   | 5446   | RNA → rpmE (PRK00019)Ribosomal_L31 (pfam01197) → PRK05571 (PRK05571)LacAB_rpiB (pfam02502) → ECA_wecA (TIGR02380)GT_WecA_like (cd06853) → hypo →                                                                                                                          |
| env-1413 | SRS018394_C3985949              | - | 346    | 315    | RNA → rpmE (PRK00019)Ribosomal_L31 (pfam01197) →                                                                                                                                                                                                                          |

|          |                                 |   |       |       |                                                                                                                                                                                                                                                              |
|----------|---------------------------------|---|-------|-------|--------------------------------------------------------------------------------------------------------------------------------------------------------------------------------------------------------------------------------------------------------------|
| env-1414 | SRS018739_C3705271              | + | 412   | 443   | RNA → rpmE (PRK00019)Ribosomal.L31 (pfam01197) → PRK05571 (PRK05571)LacAB_rpiB (pfam02502) → GT_WecA_like (cd06853)mraY (PRK00108) →                                                                                                                         |
| env-1415 | SRS019028_WUGC_scaffold.67797   | - | 1216  | 1185  | RNA → rpmE (PRK00019)Ribosomal.L31 (pfam01197) → PRK05571 (PRK05571)LacAB_rpiB (pfam02502) → ECA_wecA (TIGR02380)GT_WecA_like (cd06853) →                                                                                                                    |
| env-1416 | SRS013705_Baylor_scaffold.29455 | - | 274   | 244   | RNA → rpmE (PRK00019)Ribosomal.L31 (pfam01197) →                                                                                                                                                                                                             |
| env-1417 | SRS015434_C5843902              | + | 15    | 45    | RNA → rpmE (PRK00019)Ribosomal.L31 (pfam01197) → PRK05571 (PRK05571)LacAB_rpiB (pfam02502) →                                                                                                                                                                 |
| env-1418 | SRS049389_C4729994              | - | 1752  | 1722  | RNA → rpmE (PRK00019)Ribosomal.L31 (pfam01197) → PRK05571 (PRK05571)LacAB_rpiB (pfam02502) → GT_WecA_like (cd06853)mraY (PRK00108) →                                                                                                                         |
| env-1419 | SRS017209_C2431801              | + | 21    | 51    | RNA → rpmE (PRK00019)Ribosomal.L31 (pfam01197) →                                                                                                                                                                                                             |
| env-1420 | SRS022530_LANL_scaffold.38958   | + | 323   | 353   | RNA → rpmE (PRK00019)Ribosomal.L31 (pfam01197) →                                                                                                                                                                                                             |
| env-1421 | SRS021496_C2799659              | - | 346   | 316   | RNA → rpmE (PRK00019)Ribosomal.L31 (pfam01197) →                                                                                                                                                                                                             |
| env-1422 | SRS057692_C2577720              | - | 245   | 215   | RNA → rpmE (PRK00019)Ribosomal.L31 (pfam01197) →                                                                                                                                                                                                             |
| env-1423 | SRS015762_C3673319              | - | 5711  | 5680  | RNA → rpmE (PRK00019)Ribosomal.L31 (pfam01197) → PRK05571 (PRK05571)LacAB_rpiB (pfam02502) → GT_WecA_like (cd06853)mraY (PRK00108) → hypo →                                                                                                                  |
| env-1424 | SRS064329_LANL_scaffold.43584   | - | 16350 | 16319 | vfIA (TIGR00741)RaiA (cd00552)Ribosom_S30AE_C (pfam16321) → RNA → rpmE (PRK00019)Ribosomal.L31 (pfam01197) → PRK05571 (PRK05571)LacAB_rpiB (pfam02502) → GT_WecA_like (cd06853)mraY (PRK00108) → hypo →                                                      |
| env-1425 | SRS014271_C2962237              | - | 3039  | 3008  | vfIA (TIGR00741)RaiA (cd00552)Ribosom_S30AE_C (pfam16321) → SecA (COG0653)PRK12904 (PRK12904)SEC-C (pfam02810) → RNA → rpmE (PRK00019)Ribosomal.L31 (pfam01197) → PRK05571 (PRK05571)LacAB_rpiB (pfam02502) → GT_WecA_like (cd06853)mraY (PRK00108) → hypo → |
| env-1426 | SRS016002_C2638962              | + | 1640  | 1671  | RNA → rpmE (PRK00019)Ribosomal.L31 (pfam01197) → PRK05571 (PRK05571)LacAB_rpiB (pfam02502) → Rfe (COG0472) →                                                                                                                                                 |
| env-1427 | SRS016319_WUGC_scaffold.23354   | + | 464   | 495   | RNA → rpmE (PRK00019)Ribosomal.L31 (pfam01197) → PRK05571 (PRK05571)LacAB_rpiB (pfam02502) → GT_WecA_like (cd06853)mraY (PRK00108) → hypo →                                                                                                                  |
| env-1428 | SRS016569_C2512869              | + | 593   | 624   | vfIA (TIGR00741)RaiA (cd00552)Ribosom_S30AE_C (pfam16321) → SecA (COG0653)PRK12904 (PRK12904)SEC-C (pfam02810) → RNA → rpmE (PRK00019)Ribosomal.L31 (pfam01197) → PRK05571 (PRK05571)LacAB_rpiB (pfam02502) → GT_WecA_like (cd06853)mraY (PRK00108) → hypo → |
| env-1429 | SRS017209_C2525129              | + | 21    | 52    | vfIA (TIGR00741)RaiA (cd00552)Ribosom_S30AE_C (pfam16321) → RNA → rpmE (PRK00019)Ribosomal.L31 (pfam01197) → PRK05571 (PRK05571)LacAB_rpiB (pfam02502) →                                                                                                     |
| env-1430 | SRS018300_C3361889              | - | 1806  | 1775  | RNA → rpmE (PRK00019)Ribosomal.L31 (pfam01197) → PRK05571 (PRK05571)LacAB_rpiB (pfam02502) → GT_WecA_like (cd06853)mraY (PRK00108) →                                                                                                                         |
| env-1431 | SRS021496_C2821855              | + | 460   | 491   | RNA → rpmE (PRK00019)Ribosomal.L31 (pfam01197) → PRK05571 (PRK05571)LacAB_rpiB (pfam02502) →                                                                                                                                                                 |
| env-1432 | SRS024081_LANL_scaffold.71404   | - | 16350 | 16319 | RNA → rpmE (PRK00019)Ribosomal.L31 (pfam01197) → PRK05571 (PRK05571)LacAB_rpiB (pfam02502) → GT_WecA_like (cd06853)mraY (PRK00108) → hypo →                                                                                                                  |
| env-1433 | SRS042643_WUGC_scaffold.65941   | - | 5725  | 5694  | vfIA (TIGR00741)RaiA (cd00552)Ribosom_S30AE_C (pfam16321) → SecA (COG0653)PRK12904 (PRK12904)SEC-C (pfam02810) → RNA → rpmE (PRK00019)Ribosomal.L31 (pfam01197) → PRK05571 (PRK05571)LacAB_rpiB (pfam02502) → GT_WecA_like (cd06853)mraY (PRK00108) → hypo → |
| env-1434 | SRS049389_WUGC_scaffold.9485    | + | 15    | 46    | RNA → rpmE (PRK00019)Ribosomal.L31 (pfam01197) → PRK05571 (PRK05571)LacAB_rpiB (pfam02502) → GT_WecA_like (cd06853)mraY (PRK00108) → hypo →                                                                                                                  |
| env-1435 | SRS050244_LANL_scaffold.89207   | + | 322   | 353   | RNA → rpmE (PRK00019)Ribosomal.L31 (pfam01197) →                                                                                                                                                                                                             |
| env-1436 | SRS057205_C3408538              | - | 470   | 439   | RNA → rpmE (PRK00019)Ribosomal.L31 (pfam01197) → PRK05571 (PRK05571)LacAB_rpiB (pfam02502) →                                                                                                                                                                 |
| env-1437 | SRS062544_LANL_scaffold.15860   | + | 10967 | 10998 | RNA → rpmE (PRK00019)Ribosomal.L31 (pfam01197) → PRK05571 (PRK05571)LacAB_rpiB (pfam02502) → GT_WecA_like (cd06853)mraY (PRK00108) → hypo →                                                                                                                  |
| env-1438 | SRS015434_C5843986              | - | 559   | 528   | vfIA (TIGR00741)RaiA (cd00552)Ribosom_S30AE_C (pfam16321) → SecA (COG0653)PRK12904 (PRK12904)SEC-C (pfam02810) → RNA → rpmE (PRK00019)Ribosomal.L31 (pfam01197) → PRK05571 (PRK05571)LacAB_rpiB (pfam02502) →                                                |
| env-1439 | JGI24707J26582_10016376         | + | 3058  | 3088  | RNA → rpmE (PRK00019)Ribosomal.L31 (pfam01197) →                                                                                                                                                                                                             |
| env-1440 | JGI24708J26588_10079158         | + | 766   | 796   | RNA → rpmE (PRK00019)Ribosomal.L31 (pfam01197) →                                                                                                                                                                                                             |
| env-1441 | JGI24709J26583_10002472         | - | 2550  | 2520  | RNA → rpmE (PRK00019)Ribosomal.L31 (pfam01197) →                                                                                                                                                                                                             |
| env-1442 | JGI24710J26742_10002773         | - | 2550  | 2520  | RNA → rpmE (PRK00019)Ribosomal.L31 (pfam01197) →                                                                                                                                                                                                             |
| env-1443 | AUXO011514504.1                 | - | 134   | 105   | RNA → rpmE (PRK00019)Ribosomal.L31 (pfam01197) →                                                                                                                                                                                                             |



|           |                                 |   |         |         |                                                                                                                                                                                                                                                                             |
|-----------|---------------------------------|---|---------|---------|-----------------------------------------------------------------------------------------------------------------------------------------------------------------------------------------------------------------------------------------------------------------------------|
| Aoc-1-1   | NZ_LK028559.1                   | - | 1499011 | 1498981 | RNA → rpmE2 (PRK01678)Ribosomal_L31 (pfam01197) → Tdk (COG1435)PRK04296 (PRK04296) → TadA (COG0590)MafB19-deam (pfam14437) → hypo → hypo → hypo → TktA (COG0021)PRK05899 (PRK05899)MnmG (COG0445)PRK05192 (PRK05192) → RsmG (COG0357)gidB (PRK00107) → DUF951 (pfam06107) → |
| env-1444  | AUXO011017412.1                 | - | 412     | 381     | RNA → rpmE (PRK00019)Ribosomal_L31 (pfam01197) →                                                                                                                                                                                                                            |
| env-1445  | SL_3KL_010_SED.10003070         | + | 5652    | 5682    | RNA → rpmE (PRK00019)Ribosomal_L31 (pfam01197) → Tdk (COG1435)PRK04296 (PRK04296) → TadA (COG0590)MafB19-deam (pfam14437) → hypo → hypo →                                                                                                                                   |
| env-1446  | BGMT1_NODE.617975               | - | 5130    | 5099    | RNA → rpmE2 (PRK01678)Ribosomal_L31 (pfam01197) →                                                                                                                                                                                                                           |
| env-1447  | HBC_scaff.10321092              | + | 809     | 840     | RNA → rpmE2 (PRK01678)Ribosomal_L31 (pfam01197) →                                                                                                                                                                                                                           |
| env-1448  | HBC_ctgs.1025513                | + | 809     | 840     | RNA → rpmE2 (PRK01678)Ribosomal_L31 (pfam01197) →                                                                                                                                                                                                                           |
| Lap-1-1   | NZ_KQ034000.1                   | - | 943418  | 943387  | RNA → rpmE2 (PRK01678)Ribosomal_L31 (pfam01197) →                                                                                                                                                                                                                           |
| env-1449  | BGMT1_NODE.652147               | - | 6023    | 5992    | RNA → rpmE2 (PRK01678)Ribosomal_L31 (pfam01197) →                                                                                                                                                                                                                           |
| env-1450  | HBC_scaff.10316565              | - | 378     | 346     | RNA → rpmE2 (PRK01678)Ribosomal_L31 (pfam01197) →                                                                                                                                                                                                                           |
| Lsp-13-1  | NZ_JRJB01000014.1               | - | 24691   | 24659   | RNA → rpmE2 (PRK01678)Ribosomal_L31 (pfam01197) →                                                                                                                                                                                                                           |
| env-1451  | BGMT1_NODE.398163               | + | 8659    | 8691    | RNA → rpmE2 (PRK01678)Ribosomal_L31 (pfam01197) →                                                                                                                                                                                                                           |
| Lsp-14-1  | NZ_CP009531.1                   | - | 1466989 | 1466957 | RNA → rpmE2 (PRK01678)Ribosomal_L31 (pfam01197) →                                                                                                                                                                                                                           |
| Lhe-2-1   | NZ_KQ034047.1                   | - | 141369  | 141337  | RNA → rpmE2 (PRK01678)Ribosomal_L31 (pfam01197) →                                                                                                                                                                                                                           |
| Lku-1-1   | NZ_KQ033871.1                   | - | 1476483 | 1476451 | RNA → rpmE2 (PRK01678)Ribosomal_L31 (pfam01197) →                                                                                                                                                                                                                           |
| Lki-1-1   | NZ_KQ034007.1                   | - | 1482946 | 1482914 | RNA → rpmE2 (PRK01678)Ribosomal_L31 (pfam01197) →                                                                                                                                                                                                                           |
| env-1452  | BGMT1_NODE.274826               | - | 167     | 135     | RNA → rpmE2 (PRK01678)Ribosomal_L31 (pfam01197) →                                                                                                                                                                                                                           |
| Lme-1-1   | NZ_KQ034022.1                   | - | 150781  | 150749  | RNA → rpmE2 (PRK01678)Ribosomal_L31 (pfam01197) →                                                                                                                                                                                                                           |
| env-1453  | HBC_scaff.10010740              | + | 12482   | 12514   | RNA →                                                                                                                                                                                                                                                                       |
| env-1454  | HBC_ctgs.1000528                | + | 8470    | 8502    | RNA →                                                                                                                                                                                                                                                                       |
| env-1455  | HBC_scaff.10029449              | - | 222     | 190     | RNA → rpmE2 (PRK01678)Ribosomal_L31 (pfam01197) →                                                                                                                                                                                                                           |
| env-1456  | HBC_scaff.10290669              | + | 700     | 732     | RNA →                                                                                                                                                                                                                                                                       |
| env-1457  | HBC_ctgs.1243392                | - | 222     | 190     | RNA → rpmE2 (PRK01678)Ribosomal_L31 (pfam01197) →                                                                                                                                                                                                                           |
| env-1458  | HBC_ctgs.1078860                | + | 700     | 732     | RNA →                                                                                                                                                                                                                                                                       |
| env-1459  | AUXO017032561.1                 | - | 631     | 600     | RNA → rpmE (PRK00019)Ribosomal_L31 (pfam01197) → PRK05571 (PRK05571)LacAB_rpiB (pfam02502) →                                                                                                                                                                                |
| env-1460  | AUXO011120786.1                 | + | 459     | 485     | RNA → rpmE (PRK00019)Ribosomal_L31 (pfam01197) → PRK05571 (PRK05571)LacAB_rpiB (pfam02502) →                                                                                                                                                                                |
| env-1461  | 4491477.3_NODE.17856            | - | 7482    | 7445    | RNA → rpmE (PRK00019)Ribosomal_L31 (pfam01197) →                                                                                                                                                                                                                            |
| env-1462  | scaffold72512.1_MH0030          | + | 4464    | 4501    | RNA → rpmE (PRK00019)Ribosomal_L31 (pfam01197) →                                                                                                                                                                                                                            |
| env-1463  | scaffold36821.2_MH0063          | + | 24014   | 24051   | RNA → rpmE (PRK00019)Ribosomal_L31 (pfam01197) →                                                                                                                                                                                                                            |
| env-1464  | C3728251.1_MH0081               | - | 290     | 253     | RNA → rpmE (PRK00019)Ribosomal_L31 (pfam01197) →                                                                                                                                                                                                                            |
| env-1465  | 4491403.3_NODE.270              | - | 47741   | 47704   | RNA → rpmE (PRK00019)Ribosomal_L31 (pfam01197) →                                                                                                                                                                                                                            |
| env-1466  | SRS011134_Baylor_scaffold.23202 | - | 157     | 120     | RNA → rpmE (PRK00019)Ribosomal_L31 (pfam01197) →                                                                                                                                                                                                                            |
| env-1467  | SRS011271_WUGC_scaffold.22780   | - | 25462   | 25425   | RNA → rpmE (PRK00019)Ribosomal_L31 (pfam01197) →                                                                                                                                                                                                                            |
| env-1468  | SRS017307_Baylor_scaffold.2382  | - | 311     | 274     | RNA → rpmE (PRK00019)Ribosomal_L31 (pfam01197) →                                                                                                                                                                                                                            |
| env-1469  | SRS022609_C3091801              | - | 312     | 275     | RNA → rpmE (PRK00019)Ribosomal_L31 (pfam01197) →                                                                                                                                                                                                                            |
| env-1470  | SRS023526_C2985960              | + | 101     | 138     | RNA → rpmE (PRK00019)Ribosomal_L31 (pfam01197) →                                                                                                                                                                                                                            |
| env-1471  | scaffold16809.2_MH0022          | - | 760     | 723     | RNA → rpmE (PRK00019)Ribosomal_L31 (pfam01197) →                                                                                                                                                                                                                            |
| env-1472  | C4139562.1_MH0024               | + | 184     | 221     | RNA → rpmE (PRK00019)Ribosomal_L31 (pfam01197) →                                                                                                                                                                                                                            |
| env-1473  | scaffold76898.1_MH0054          | - | 1475    | 1438    | RNA → rpmE (PRK00019)Ribosomal_L31 (pfam01197) →                                                                                                                                                                                                                            |
| env-1474  | 4491421.3_NODE.66616            | + | 1471    | 1508    | RNA → rpmE (PRK00019)Ribosomal_L31 (pfam01197) →                                                                                                                                                                                                                            |
| env-1475  | DLM019_scaffold25402.3          | + | 922     | 959     | RNA → rpmE (PRK00019)Ribosomal_L31 (pfam01197) →                                                                                                                                                                                                                            |
| env-1476  | AUXO017642701.1                 | + | 963     | 933     | RNA → rpmE (PRK00019)Ribosomal_L31 (pfam01197) →                                                                                                                                                                                                                            |
| env-1477  | AUXO014022239.1                 | - | 67      | 93      | RNA → rpmE (PRK00019)Ribosomal_L31 (pfam01197) →                                                                                                                                                                                                                            |
| env-1478  | RUMENNODE.3890134.54500         | + | 4623    | 4649    | RNA → rpmE (PRK00019)Ribosomal_L31 (pfam01197) → Tdk (COG1435)PRK04296 (PRK04296) → PRK10860 (PRK10860)TadA (COG0590) →                                                                                                                                                     |
| Efa-353-1 | NZ_KB029550.1                   | - | 223357  | 223325  | RNA → rpmE2 (PRK01678)Ribosomal_L31 (pfam01197) →                                                                                                                                                                                                                           |
| Efa-526-1 | NZ_KE351936.1                   | + | 9306    | 9338    | RNA → rpmE2 (PRK01678)Ribosomal_L31 (pfam01197) →                                                                                                                                                                                                                           |
| Efa-537-1 | NZ_AWWM01000112.1               | - | 6178    | 6210    | RNA → rpmE2 (PRK01678)Ribosomal_L31 (pfam01197) →                                                                                                                                                                                                                           |
| env-1479  | DLM012_scaffold178.4            | - | 1663    | 1631    | RNA → rpmE2 (PRK01678)Ribosomal_L31 (pfam01197) →                                                                                                                                                                                                                           |
| env-1480  | longitudinal.178.386            | + | 58976   | 59008   | RNA → rpmE2 (PRK01678)Ribosomal_L31 (pfam01197) →                                                                                                                                                                                                                           |
| Efa-544-1 | NZ_JAAM01000007.1               | - | 69039   | 69007   | RNA → rpmE2 (PRK01678)Ribosomal_L31 (pfam01197) →                                                                                                                                                                                                                           |

|           |                   |   |         |         |                                                                                               |
|-----------|-------------------|---|---------|---------|-----------------------------------------------------------------------------------------------|
| Efa-335-1 | NZ_AUWX01000117.1 | + | 5605    | 5637    | RNA → rpmE2 (PRK01678)Ribosomal_L31 (pfam01197) →                                             |
| Efa-505-1 | NZ_LBIN01000026.1 | + | 8852    | 8884    | RNA → rpmE2 (PRK01678)Ribosomal_L31 (pfam01197) →                                             |
| Efa-506-1 | NZ_LBIM01000105.1 | + | 9159    | 9191    | RNA → rpmE2 (PRK01678)Ribosomal_L31 (pfam01197) →                                             |
| Efa-425-1 | NZ_AITP01000010.1 | + | 63892   | 63924   | RNA → rpmE2 (PRK01678)Ribosomal_L31 (pfam01197) →                                             |
| Efa-334-1 | NZ_AUWW01000110.1 | - | 3516    | 3484    | RNA → rpmE2 (PRK01678)Ribosomal_L31 (pfam01197) →                                             |
| Efa-340-1 | NZ_AUWV01000070.1 | - | 7538    | 7506    | RNA → rpmE2 (PRK01678)Ribosomal_L31 (pfam01197) →                                             |
| Efa-535-1 | NZ_AWVP01000021.1 | - | 7580    | 7548    | RNA → rpmE2 (PRK01678)Ribosomal_L31 (pfam01197) →                                             |
| Efa-539-1 | NZ_AWWN01000088.1 | + | 41487   | 41519   | RNA → rpmE2 (PRK01678)Ribosomal_L31 (pfam01197) →                                             |
| Efa-540-1 | NZ_AWVO01000049.1 | - | 7504    | 7472    | RNA → rpmE2 (PRK01678)Ribosomal_L31 (pfam01197) →                                             |
| Efa-536-1 | NZ_ASAL01000014.1 | + | 40701   | 40733   | RNA → rpmE2 (PRK01678)Ribosomal_L31 (pfam01197) →                                             |
| Efa-587-1 | NZ_ABQJ01000011.1 | - | 45637   | 45605   | RNA → rpmE2 (PRK01678)Ribosomal_L31 (pfam01197) → rpmE2 (PRK01678)Ribosomal_L31 (pfam01197) → |
| Efa-588-1 | NZ_ABR01000165.1  | + | 23876   | 23908   | RNA → rpmE2 (PRK01678)Ribosomal_L31 (pfam01197) → rpmE2 (PRK01678)Ribosomal_L31 (pfam01197) → |
| Esp-20-1  | NZ_AJQZ01000052.1 | - | 7648    | 7616    | RNA → rpmE2 (PRK01678)Ribosomal_L31 (pfam01197) → rpmE2 (PRK01678)Ribosomal_L31 (pfam01197) → |
| Efa-545-1 | NZ_JAAJ01000007.1 | - | 74320   | 74288   | RNA → rpmE2 (PRK01678)Ribosomal_L31 (pfam01197) →                                             |
| Efa-338-1 | NZ_AEOU01000253.1 | + | 6244    | 6276    | RNA → rpmE2 (PRK01678)Ribosomal_L31 (pfam01197) →                                             |
| Efa-339-1 | NZ_AEDZ01000214.1 | + | 6288    | 6320    | RNA → rpmE2 (PRK01678)Ribosomal_L31 (pfam01197) →                                             |
| Esp-16-1  | NZ_AJRF02000013.1 | + | 59040   | 59072   | RNA → rpmE2 (PRK01678)Ribosomal_L31 (pfam01197) → rpmE2 (PRK01678)Ribosomal_L31 (pfam01197) → |
| Efa-542-1 | NZ_JAAK01000063.1 | - | 6286    | 6254    | RNA → rpmE2 (PRK01678)Ribosomal_L31 (pfam01197) →                                             |
| Efa-586-1 | NZ_ABQI01000014.1 | - | 45654   | 45622   | RNA → rpmE2 (PRK01678)Ribosomal_L31 (pfam01197) → rpmE2 (PRK01678)Ribosomal_L31 (pfam01197) → |
| Efa-543-1 | NZ_JAAL01000009.1 | - | 75132   | 75100   | RNA → rpmE2 (PRK01678)Ribosomal_L31 (pfam01197) →                                             |
| Efa-589-1 | NZ_ABSC01000180.1 | - | 3586    | 3554    | RNA → rpmE2 (PRK01678)Ribosomal_L31 (pfam01197) → rpmE2 (PRK01678)Ribosomal_L31 (pfam01197) → |
| Efa-330-1 | NZ_AJTW01000196.1 | + | 6625    | 6657    | RNA → rpmE2 (PRK01678)Ribosomal_L31 (pfam01197) →                                             |
| Efa-585-1 | NZ_ACOS01000122.1 | + | 43812   | 43844   | RNA → rpmE2 (PRK01678)Ribosomal_L31 (pfam01197) → rpmE2 (PRK01678)Ribosomal_L31 (pfam01197) → |
| Efa-591-1 | NZ_ADM01000075.1  | - | 28289   | 28257   | RNA → rpmE2 (PRK01678)Ribosomal_L31 (pfam01197) → rpmE2 (PRK01678)Ribosomal_L31 (pfam01197) → |
| Efa-583-1 | NZ_ACZZ01000032.1 | + | 23875   | 23907   | RNA → rpmE2 (PRK01678)Ribosomal_L31 (pfam01197) → rpmE2 (PRK01678)Ribosomal_L31 (pfam01197) → |
| Esp-21-1  | NZ_AJRD01000052.1 | + | 27318   | 27350   | RNA → rpmE2 (PRK01678)Ribosomal_L31 (pfam01197) → rpmE2 (PRK01678)Ribosomal_L31 (pfam01197) → |
| Esp-19-1  | NZ_AJQX01000101.1 | + | 6288    | 6320    | RNA → rpmE2 (PRK01678)Ribosomal_L31 (pfam01197) → rpmE2 (PRK01678)Ribosomal_L31 (pfam01197) → |
| Efa-333-1 | NZ_ACJQ02000001.1 | + | 927330  | 927362  | RNA → rpmE2 (PRK01678)Ribosomal_L31 (pfam01197) →                                             |
| Efa-584-1 | NC_017960.1       | + | 728948  | 728980  | RNA → rpmE2 (PRK01678)Ribosomal_L31 (pfam01197) →                                             |
| Esp-15-1  | NZ_AJRB03000048.1 | + | 20083   | 20115   | RNA → rpmE2 (PRK01678)Ribosomal_L31 (pfam01197) →                                             |
| Efa-580-1 | NC_017022.1       | + | 732071  | 732103  | RNA → rpmE2 (PRK01678)Ribosomal_L31 (pfam01197) →                                             |
| Efa-508-1 | NC_020207.1       | - | 2017175 | 2017143 | RNA → rpmE2 (PRK01678)Ribosomal_L31 (pfam01197) →                                             |
| Efa-590-1 | NZ_ABQA01000008.1 | - | 7649    | 7617    | RNA → rpmE2 (PRK01678)Ribosomal_L31 (pfam01197) → rpmE2 (PRK01678)Ribosomal_L31 (pfam01197) → |
| Efa-594-1 | NZ_ABSW01000073.1 | + | 6353    | 6385    | RNA → rpmE2 (PRK01678)Ribosomal_L31 (pfam01197) → rpmE2 (PRK01678)Ribosomal_L31 (pfam01197) → |
| Efa-592-1 | NZ_GG703586.1     | + | 23876   | 23908   | RNA → rpmE2 (PRK01678)Ribosomal_L31 (pfam01197) → rpmE2 (PRK01678)Ribosomal_L31 (pfam01197) → |
| Efa-581-1 | NZ_GG670309.1     | - | 219486  | 219454  | RNA → rpmE2 (PRK01678)Ribosomal_L31 (pfam01197) → rpmE2 (PRK01678)Ribosomal_L31 (pfam01197) → |
| Efa-574-1 | NZ_GG688464.1     | + | 40627   | 40659   | RNA → rpmE2 (PRK01678)Ribosomal_L31 (pfam01197) → rpmE2 (PRK01678)Ribosomal_L31 (pfam01197) → |
| Efa-577-1 | NZ_GG692469.1     | + | 248894  | 248926  | RNA → rpmE2 (PRK01678)Ribosomal_L31 (pfam01197) → rpmE2 (PRK01678)Ribosomal_L31 (pfam01197) → |
| Efa-576-1 | NZ_GG688550.1     | + | 52869   | 52901   | RNA → rpmE2 (PRK01678)Ribosomal_L31 (pfam01197) → rpmE2 (PRK01678)Ribosomal_L31 (pfam01197) → |
| Efa-575-1 | NZ_GG692539.1     | + | 253964  | 253996  | RNA → rpmE2 (PRK01678)Ribosomal_L31 (pfam01197) → rpmE2 (PRK01678)Ribosomal_L31 (pfam01197) → |
| Efa-579-1 | NZ_GG688488.1     | - | 158427  | 158395  | RNA → rpmE2 (PRK01678)Ribosomal_L31 (pfam01197) → rpmE2 (PRK01678)Ribosomal_L31 (pfam01197) → |
| Efa-593-1 | NZ_GG669062.1     | + | 41557   | 41589   | RNA → rpmE2 (PRK01678)Ribosomal_L31 (pfam01197) →                                             |
| Efa-578-1 | NZ_GG688437.1     | + | 44705   | 44737   | RNA → rpmE2 (PRK01678)Ribosomal_L31 (pfam01197) → rpmE2 (PRK01678)Ribosomal_L31 (pfam01197) → |
| Efa-582-1 | NZ_GG670326.1     | - | 265655  | 265623  | RNA → rpmE2 (PRK01678)Ribosomal_L31 (pfam01197) → rpmE2 (PRK01678)Ribosomal_L31 (pfam01197) → |
| Efa-379-1 | NZ_KB029743.1     | - | 212272  | 212240  | RNA → rpmE2 (PRK01678)Ribosomal_L31 (pfam01197) →                                             |
| Efa-429-1 | NZ_KN150989.1     | - | 1835052 | 1835020 | RNA → rpmE2 (PRK01678)Ribosomal_L31 (pfam01197) →                                             |
| Efa-533-1 | NZ_GL454927.1     | - | 99217   | 99185   | RNA → rpmE2 (PRK01678)Ribosomal_L31 (pfam01197) →                                             |
| Efa-528-1 | NZ_GL455899.1     | + | 2806    | 2838    | RNA → rpmE2 (PRK01678)Ribosomal_L31 (pfam01197) →                                             |
| Efa-530-1 | NZ_GL456960.1     | - | 7536    | 7504    | RNA → rpmE2 (PRK01678)Ribosomal_L31 (pfam01197) →                                             |
| Efa-529-1 | NZ_GL456579.1     | + | 8753    | 8785    | RNA → rpmE2 (PRK01678)Ribosomal_L31 (pfam01197) →                                             |
| Efa-532-1 | NZ_GL476228.1     | - | 58872   | 58840   | RNA → rpmE2 (PRK01678)Ribosomal_L31 (pfam01197) →                                             |
| Efa-520-1 | NZ_JH807512.1     | - | 73032   | 73000   | RNA → rpmE2 (PRK01678)Ribosomal_L31 (pfam01197) →                                             |

|           |               |   |         |         |                                                                   |
|-----------|---------------|---|---------|---------|-------------------------------------------------------------------|
| Efa-517-1 | NZ_JH807894.1 | - | 7534    | 7502    | RNA → <a href="#">rpmE2 (PRK01678)Ribosomal_L31 (pfam01197)</a> → |
| Efa-534-1 | NZ_JH804714.1 | + | 41265   | 41297   | RNA → <a href="#">rpmE2 (PRK01678)Ribosomal_L31 (pfam01197)</a> → |
| Efa-521-1 | NZ_JH807180.1 | - | 7534    | 7502    | RNA → <a href="#">rpmE2 (PRK01678)Ribosomal_L31 (pfam01197)</a> → |
| Efa-511-1 | NZ_JH810149.1 | - | 7536    | 7504    | RNA → <a href="#">rpmE2 (PRK01678)Ribosomal_L31 (pfam01197)</a> → |
| Efa-329-1 | NZ_JH811665.1 | + | 6276    | 6308    | RNA → <a href="#">rpmE2 (PRK01678)Ribosomal_L31 (pfam01197)</a> → |
| Efa-331-1 | NZ_JH812054.1 | - | 7536    | 7504    | RNA → <a href="#">rpmE2 (PRK01678)Ribosomal_L31 (pfam01197)</a> → |
| Efa-317-1 | NZ_JH811476.1 | - | 75604   | 75572   | RNA → <a href="#">rpmE2 (PRK01678)Ribosomal_L31 (pfam01197)</a> → |
| Efa-349-1 | NZ_JH810334.1 | - | 7536    | 7504    | RNA → <a href="#">rpmE2 (PRK01678)Ribosomal_L31 (pfam01197)</a> → |
| Efa-541-1 | NZ_JH806654.1 | + | 6276    | 6308    | RNA → <a href="#">rpmE2 (PRK01678)Ribosomal_L31 (pfam01197)</a> → |
| Efa-513-1 | NZ_JH808985.1 | + | 6274    | 6306    | RNA → <a href="#">rpmE2 (PRK01678)Ribosomal_L31 (pfam01197)</a> → |
| Efa-346-1 | NZ_JH809915.1 | + | 6276    | 6308    | RNA → <a href="#">rpmE2 (PRK01678)Ribosomal_L31 (pfam01197)</a> → |
| Efa-316-1 | NZ_JH809460.1 | + | 6276    | 6308    | RNA → <a href="#">rpmE2 (PRK01678)Ribosomal_L31 (pfam01197)</a> → |
| Efa-347-1 | NZ_JH811408.1 | + | 2744    | 2776    | RNA → <a href="#">rpmE2 (PRK01678)Ribosomal_L31 (pfam01197)</a> → |
| Efa-519-1 | NZ_JH807528.1 | - | 7534    | 7502    | RNA → <a href="#">rpmE2 (PRK01678)Ribosomal_L31 (pfam01197)</a> → |
| Efa-344-1 | NZ_JH810983.1 | + | 6276    | 6308    | RNA → <a href="#">rpmE2 (PRK01678)Ribosomal_L31 (pfam01197)</a> → |
| Efa-325-1 | NZ_JH812576.1 | + | 6274    | 6306    | RNA → <a href="#">rpmE2 (PRK01678)Ribosomal_L31 (pfam01197)</a> → |
| Efa-320-1 | NZ_JH814080.1 | + | 6276    | 6308    | RNA → <a href="#">rpmE2 (PRK01678)Ribosomal_L31 (pfam01197)</a> → |
| Efa-516-1 | NZ_JH808111.1 | - | 7536    | 7504    | RNA → <a href="#">rpmE2 (PRK01678)Ribosomal_L31 (pfam01197)</a> → |
| Efa-522-1 | NZ_JH806976.1 | + | 6276    | 6308    | RNA → <a href="#">rpmE2 (PRK01678)Ribosomal_L31 (pfam01197)</a> → |
| Efa-514-1 | NZ_JH808870.1 | + | 6276    | 6308    | RNA → <a href="#">rpmE2 (PRK01678)Ribosomal_L31 (pfam01197)</a> → |
| Efa-319-1 | NZ_JH813837.1 | - | 7536    | 7504    | RNA → <a href="#">rpmE2 (PRK01678)Ribosomal_L31 (pfam01197)</a> → |
| Efa-512-1 | NZ_JH809227.1 | - | 7535    | 7503    | RNA → <a href="#">rpmE2 (PRK01678)Ribosomal_L31 (pfam01197)</a> → |
| Efa-342-1 | NZ_JH811828.1 | + | 6272    | 6304    | RNA → <a href="#">rpmE2 (PRK01678)Ribosomal_L31 (pfam01197)</a> → |
| Efa-341-1 | NZ_JH813598.1 | + | 6276    | 6308    | RNA → <a href="#">rpmE2 (PRK01678)Ribosomal_L31 (pfam01197)</a> → |
| Efa-322-1 | NZ_JH812725.1 | + | 6276    | 6308    | RNA → <a href="#">rpmE2 (PRK01678)Ribosomal_L31 (pfam01197)</a> → |
| Efa-510-1 | NZ_JH810528.1 | + | 6251    | 6283    | RNA → <a href="#">rpmE2 (PRK01678)Ribosomal_L31 (pfam01197)</a> → |
| Efa-345-1 | NZ_JH809769.1 | + | 6276    | 6308    | RNA → <a href="#">rpmE2 (PRK01678)Ribosomal_L31 (pfam01197)</a> → |
| Efa-332-1 | NZ_JH813224.1 | + | 6276    | 6308    | RNA → <a href="#">rpmE2 (PRK01678)Ribosomal_L31 (pfam01197)</a> → |
| Efa-324-1 | NZ_JH812225.1 | + | 6276    | 6308    | RNA → <a href="#">rpmE2 (PRK01678)Ribosomal_L31 (pfam01197)</a> → |
| Efa-323-1 | NZ_JH812970.1 | + | 6276    | 6308    | RNA → <a href="#">rpmE2 (PRK01678)Ribosomal_L31 (pfam01197)</a> → |
| Efa-518-1 | NZ_JH808617.1 | + | 6276    | 6308    | RNA → <a href="#">rpmE2 (PRK01678)Ribosomal_L31 (pfam01197)</a> → |
| Efa-336-1 | NZ_JH813478.1 | - | 7536    | 7504    | RNA → <a href="#">rpmE2 (PRK01678)Ribosomal_L31 (pfam01197)</a> → |
| Efa-337-1 | NZ_JH814258.1 | + | 6276    | 6308    | RNA → <a href="#">rpmE2 (PRK01678)Ribosomal_L31 (pfam01197)</a> → |
| Edu-3-1   | NZ_JH992913.1 | - | 613071  | 613039  | RNA → <a href="#">rpmE2 (PRK01678)Ribosomal_L31 (pfam01197)</a> → |
| Efa-402-1 | NZ_KB030118.1 | + | 255203  | 255235  | RNA → <a href="#">rpmE2 (PRK01678)Ribosomal_L31 (pfam01197)</a> → |
| Efa-393-1 | NZ_KB030094.1 | + | 695384  | 695416  | RNA → <a href="#">rpmE2 (PRK01678)Ribosomal_L31 (pfam01197)</a> → |
| Efa-394-1 | NZ_KB029982.1 | + | 44399   | 44431   | RNA → <a href="#">rpmE2 (PRK01678)Ribosomal_L31 (pfam01197)</a> → |
| Efa-368-1 | NZ_KB029483.1 | - | 213888  | 213856  | RNA → <a href="#">rpmE2 (PRK01678)Ribosomal_L31 (pfam01197)</a> → |
| Efa-361-1 | NZ_KB029403.1 | + | 60851   | 60883   | RNA → <a href="#">rpmE2 (PRK01678)Ribosomal_L31 (pfam01197)</a> → |
| Efa-356-1 | NZ_KB029682.1 | - | 1934997 | 1934965 | RNA → <a href="#">rpmE2 (PRK01678)Ribosomal_L31 (pfam01197)</a> → |
| Efa-386-1 | NZ_KB029828.1 | + | 57930   | 57962   | RNA → <a href="#">rpmE2 (PRK01678)Ribosomal_L31 (pfam01197)</a> → |
| Efa-400-1 | NZ_KB030037.1 | + | 67862   | 67894   | RNA → <a href="#">rpmE2 (PRK01678)Ribosomal_L31 (pfam01197)</a> → |
| Efa-366-1 | NZ_KB029503.1 | - | 253720  | 253688  | RNA → <a href="#">rpmE2 (PRK01678)Ribosomal_L31 (pfam01197)</a> → |
| Efa-354-1 | NZ_KB029387.1 | - | 40753   | 40721   | RNA → <a href="#">rpmE2 (PRK01678)Ribosomal_L31 (pfam01197)</a> → |
| Efa-369-1 | NZ_KB029676.1 | + | 67496   | 67528   | RNA → <a href="#">rpmE2 (PRK01678)Ribosomal_L31 (pfam01197)</a> → |
| Efa-380-1 | NZ_KB029722.1 | - | 211836  | 211804  | RNA → <a href="#">rpmE2 (PRK01678)Ribosomal_L31 (pfam01197)</a> → |
| Efa-392-1 | NZ_KB030159.1 | + | 265610  | 265642  | RNA → <a href="#">rpmE2 (PRK01678)Ribosomal_L31 (pfam01197)</a> → |
| Efa-397-1 | NZ_KB030080.1 | - | 108961  | 108929  | RNA → <a href="#">rpmE2 (PRK01678)Ribosomal_L31 (pfam01197)</a> → |
| Efa-395-1 | NZ_KB030014.1 | - | 219917  | 219885  | RNA → <a href="#">rpmE2 (PRK01678)Ribosomal_L31 (pfam01197)</a> → |
| Efa-399-1 | NZ_KB029993.1 | + | 62268   | 62300   | RNA → <a href="#">rpmE2 (PRK01678)Ribosomal_L31 (pfam01197)</a> → |
| Efa-363-1 | NZ_KB029436.1 | - | 960038  | 960006  | RNA → <a href="#">rpmE2 (PRK01678)Ribosomal_L31 (pfam01197)</a> → |
| Efa-357-1 | NZ_KB029490.1 | - | 459393  | 459361  | RNA → <a href="#">rpmE2 (PRK01678)Ribosomal_L31 (pfam01197)</a> → |



|           |               |   |         |         |                                                   |
|-----------|---------------|---|---------|---------|---------------------------------------------------|
| Efa-358-1 | NZ_KB029598.1 | + | 46434   | 46466   | RNA → rpmE2 (PRK01678)Ribosomal_L31 (pfam01197) → |
| Efa-391-1 | NZ_KB029933.1 | - | 53494   | 53462   | RNA → rpmE2 (PRK01678)Ribosomal_L31 (pfam01197) → |
| Efa-398-1 | NZ_KB030041.1 | + | 682995  | 683027  | RNA → rpmE2 (PRK01678)Ribosomal_L31 (pfam01197) → |
| Efa-401-1 | NZ_KB029969.1 | + | 44072   | 44104   | RNA → rpmE2 (PRK01678)Ribosomal_L31 (pfam01197) → |
| Efa-365-1 | NZ_KB029577.1 | + | 250792  | 250824  | RNA → rpmE2 (PRK01678)Ribosomal_L31 (pfam01197) → |
| Efa-370-1 | NZ_KB029606.1 | + | 45552   | 45584   | RNA → rpmE2 (PRK01678)Ribosomal_L31 (pfam01197) → |
| Efa-359-1 | NZ_KB029431.1 | + | 44918   | 44950   | RNA → rpmE2 (PRK01678)Ribosomal_L31 (pfam01197) → |
| Efa-367-1 | NZ_KB029659.1 | - | 211055  | 211023  | RNA → rpmE2 (PRK01678)Ribosomal_L31 (pfam01197) → |
| Efa-378-1 | NZ_KB029972.1 | + | 432907  | 432939  | RNA → rpmE2 (PRK01678)Ribosomal_L31 (pfam01197) → |
| Efa-375-1 | NZ_KB029716.1 | + | 48115   | 48147   | RNA → rpmE2 (PRK01678)Ribosomal_L31 (pfam01197) → |
| Efa-382-1 | NZ_KB029943.1 | - | 105802  | 105770  | RNA → rpmE2 (PRK01678)Ribosomal_L31 (pfam01197) → |
| Efa-377-1 | NZ_KB029704.1 | - | 1594555 | 1594523 | RNA → rpmE2 (PRK01678)Ribosomal_L31 (pfam01197) → |
| Efa-351-1 | NZ_KB029533.1 | + | 233100  | 233132  | RNA → rpmE2 (PRK01678)Ribosomal_L31 (pfam01197) → |
| Efa-381-1 | NZ_KB029905.1 | - | 1598264 | 1598232 | RNA → rpmE2 (PRK01678)Ribosomal_L31 (pfam01197) → |
| Efa-389-1 | NZ_KB029866.1 | + | 45982   | 46014   | RNA → rpmE2 (PRK01678)Ribosomal_L31 (pfam01197) → |
| Efa-360-1 | NZ_KB029516.1 | - | 210212  | 210180  | RNA → rpmE2 (PRK01678)Ribosomal_L31 (pfam01197) → |
| Efa-350-1 | NZ_KB029609.1 | - | 213120  | 213088  | RNA → rpmE2 (PRK01678)Ribosomal_L31 (pfam01197) → |
| Efa-373-1 | NZ_KB029748.1 | + | 68700   | 68732   | RNA → rpmE2 (PRK01678)Ribosomal_L31 (pfam01197) → |
| Efa-396-1 | NZ_KB030126.1 | + | 888746  | 888778  | RNA → rpmE2 (PRK01678)Ribosomal_L31 (pfam01197) → |
| Efa-500-1 | NZ_KB206111.1 | - | 78995   | 78963   | RNA → rpmE2 (PRK01678)Ribosomal_L31 (pfam01197) → |
| Efa-362-1 | NZ_KB029455.1 | + | 253636  | 253668  | RNA → rpmE2 (PRK01678)Ribosomal_L31 (pfam01197) → |
| Efa-352-1 | NZ_KB029696.1 | + | 44617   | 44649   | RNA → rpmE2 (PRK01678)Ribosomal_L31 (pfam01197) → |
| Efa-384-1 | NZ_KB029840.1 | + | 281406  | 281438  | RNA → rpmE2 (PRK01678)Ribosomal_L31 (pfam01197) → |
| Efa-385-1 | NZ_KB029962.1 | + | 326959  | 326991  | RNA → rpmE2 (PRK01678)Ribosomal_L31 (pfam01197) → |
| Efa-376-1 | NZ_KB029699.1 | + | 411594  | 411626  | RNA → rpmE2 (PRK01678)Ribosomal_L31 (pfam01197) → |
| Efa-501-1 | NZ_KB206122.1 | - | 78218   | 78186   | RNA → rpmE2 (PRK01678)Ribosomal_L31 (pfam01197) → |
| Efa-372-1 | NZ_KB029904.1 | + | 77834   | 77866   | RNA → rpmE2 (PRK01678)Ribosomal_L31 (pfam01197) → |
| Efa-314-1 | NZ_KI518313.1 | + | 70480   | 70512   | RNA → rpmE2 (PRK01678)Ribosomal_L31 (pfam01197) → |
| Efa-507-1 | NZ_KI518270.1 | + | 253442  | 253474  | RNA → rpmE2 (PRK01678)Ribosomal_L31 (pfam01197) → |
| Efa-328-1 | NZ_KI518258.1 | + | 257242  | 257274  | RNA → rpmE2 (PRK01678)Ribosomal_L31 (pfam01197) → |
| Efa-498-1 | NZ_KE352418.1 | + | 6276    | 6308    | RNA → rpmE2 (PRK01678)Ribosomal_L31 (pfam01197) → |
| Efa-403-1 | NZ_KB932617.1 | - | 925358  | 925326  | RNA → rpmE2 (PRK01678)Ribosomal_L31 (pfam01197) → |
| Efa-408-1 | NZ_KB932649.1 | + | 43998   | 44030   | RNA → rpmE2 (PRK01678)Ribosomal_L31 (pfam01197) → |
| Efa-417-1 | NZ_KB932697.1 | + | 45823   | 45855   | RNA → rpmE2 (PRK01678)Ribosomal_L31 (pfam01197) → |
| Efa-423-1 | NZ_KB932732.1 | - | 232272  | 232240  | RNA → rpmE2 (PRK01678)Ribosomal_L31 (pfam01197) → |
| Efa-388-1 | NZ_KB932310.1 | + | 486449  | 486481  | RNA → rpmE2 (PRK01678)Ribosomal_L31 (pfam01197) → |
| Efa-416-1 | NZ_KB932687.1 | + | 40891   | 40923   | RNA → rpmE2 (PRK01678)Ribosomal_L31 (pfam01197) → |
| Efa-494-1 | NZ_KB944883.1 | - | 208506  | 208474  | RNA → rpmE2 (PRK01678)Ribosomal_L31 (pfam01197) → |
| Efa-326-1 | NZ_KB946243.1 | - | 119734  | 119702  | RNA → rpmE2 (PRK01678)Ribosomal_L31 (pfam01197) → |
| Efa-191-1 | NZ_KB946795.1 | + | 45506   | 45538   | RNA → rpmE2 (PRK01678)Ribosomal_L31 (pfam01197) → |
| Efa-422-1 | NZ_KB932724.1 | + | 45780   | 45812   | RNA → rpmE2 (PRK01678)Ribosomal_L31 (pfam01197) → |
| Efa-493-1 | NZ_KB944903.1 | - | 207618  | 207586  | RNA → rpmE2 (PRK01678)Ribosomal_L31 (pfam01197) → |
| Efa-413-1 | NZ_KB932656.1 | + | 329826  | 329858  | RNA → rpmE2 (PRK01678)Ribosomal_L31 (pfam01197) → |
| Efa-355-1 | NZ_KB932305.1 | - | 1992059 | 1992027 | RNA → rpmE2 (PRK01678)Ribosomal_L31 (pfam01197) → |
| Efa-424-1 | NZ_KB945952.1 | + | 60323   | 60355   | RNA → rpmE2 (PRK01678)Ribosomal_L31 (pfam01197) → |
| Efa-475-1 | NZ_KB946010.1 | - | 253687  | 253655  | RNA → rpmE2 (PRK01678)Ribosomal_L31 (pfam01197) → |
| Efa-480-1 | NZ_KB946685.1 | + | 64486   | 64518   | RNA → rpmE2 (PRK01678)Ribosomal_L31 (pfam01197) → |
| Efa-409-1 | NZ_KB932665.1 | - | 232386  | 232354  | RNA → rpmE2 (PRK01678)Ribosomal_L31 (pfam01197) → |
| Efa-404-1 | NZ_KB932624.1 | + | 43998   | 44030   | RNA → rpmE2 (PRK01678)Ribosomal_L31 (pfam01197) → |
| Efa-485-1 | NZ_KB946908.1 | + | 771396  | 771428  | RNA → rpmE2 (PRK01678)Ribosomal_L31 (pfam01197) → |
| Efa-411-1 | NZ_KB945924.1 | + | 45600   | 45632   | RNA → rpmE2 (PRK01678)Ribosomal_L31 (pfam01197) → |
| Efa-418-1 | NZ_KB932703.1 | - | 1430349 | 1430317 | RNA → rpmE2 (PRK01678)Ribosomal_L31 (pfam01197) → |

|           |               |   |         |         |                                                   |
|-----------|---------------|---|---------|---------|---------------------------------------------------|
| Efa-421-1 | NZ_KB932718.1 | + | 45649   | 45681   | RNA → rpmE2 (PRK01678)Ribosomal_L31 (pfam01197) → |
| Efa-426-1 | NZ_KB932745.1 | + | 43998   | 44030   | RNA → rpmE2 (PRK01678)Ribosomal_L31 (pfam01197) → |
| Efa-405-1 | NZ_KB932639.1 | - | 230561  | 230529  | RNA → rpmE2 (PRK01678)Ribosomal_L31 (pfam01197) → |
| Efa-492-1 | NZ_KB947018.1 | - | 253035  | 253003  | RNA → rpmE2 (PRK01678)Ribosomal_L31 (pfam01197) → |
| Efa-407-1 | NZ_KB932671.1 | - | 230654  | 230622  | RNA → rpmE2 (PRK01678)Ribosomal_L31 (pfam01197) → |
| Efa-420-1 | NZ_KB945940.1 | + | 43998   | 44030   | RNA → rpmE2 (PRK01678)Ribosomal_L31 (pfam01197) → |
| Efa-428-1 | NZ_KB932766.1 | - | 210553  | 210521  | RNA → rpmE2 (PRK01678)Ribosomal_L31 (pfam01197) → |
| Efa-478-1 | NZ_KB946134.1 | + | 255837  | 255869  | RNA → rpmE2 (PRK01678)Ribosomal_L31 (pfam01197) → |
| Efa-444-1 | NZ_KB947903.1 | - | 206421  | 206389  | RNA → rpmE2 (PRK01678)Ribosomal_L31 (pfam01197) → |
| Efa-490-1 | NZ_KB946990.1 | - | 151958  | 151926  | RNA → rpmE2 (PRK01678)Ribosomal_L31 (pfam01197) → |
| Efa-482-1 | NZ_KB946712.1 | + | 70071   | 70103   | RNA → rpmE2 (PRK01678)Ribosomal_L31 (pfam01197) → |
| Efa-483-1 | NZ_KB946903.1 | - | 1377984 | 1377952 | RNA → rpmE2 (PRK01678)Ribosomal_L31 (pfam01197) → |
| Efa-487-1 | NZ_KB946953.1 | + | 258359  | 258391  | RNA → rpmE2 (PRK01678)Ribosomal_L31 (pfam01197) → |
| Efa-433-1 | NZ_KB947584.1 | - | 1000879 | 1000847 | RNA → rpmE2 (PRK01678)Ribosomal_L31 (pfam01197) → |
| Efa-439-1 | NZ_KB947721.1 | + | 66082   | 66114   | RNA → rpmE2 (PRK01678)Ribosomal_L31 (pfam01197) → |
| Efa-449-1 | NZ_KB948008.1 | + | 60821   | 60853   | RNA → rpmE2 (PRK01678)Ribosomal_L31 (pfam01197) → |
| Efa-491-1 | NZ_KB946830.1 | - | 1257899 | 1257867 | RNA → rpmE2 (PRK01678)Ribosomal_L31 (pfam01197) → |
| Efa-458-1 | NZ_KB949403.1 | + | 44027   | 44059   | RNA → rpmE2 (PRK01678)Ribosomal_L31 (pfam01197) → |
| Efa-489-1 | NZ_KB946824.1 | + | 264128  | 264160  | RNA → rpmE2 (PRK01678)Ribosomal_L31 (pfam01197) → |
| Efa-414-1 | NZ_KB932642.1 | + | 43998   | 44030   | RNA → rpmE2 (PRK01678)Ribosomal_L31 (pfam01197) → |
| Efa-479-1 | NZ_KB946149.1 | - | 76166   | 76134   | RNA → rpmE2 (PRK01678)Ribosomal_L31 (pfam01197) → |
| Efa-445-1 | NZ_KB947916.1 | - | 208388  | 208356  | RNA → rpmE2 (PRK01678)Ribosomal_L31 (pfam01197) → |
| Efa-419-1 | NZ_KB932708.1 | + | 43998   | 44030   | RNA → rpmE2 (PRK01678)Ribosomal_L31 (pfam01197) → |
| Efa-476-1 | NZ_KB946063.1 | + | 254275  | 254307  | RNA → rpmE2 (PRK01678)Ribosomal_L31 (pfam01197) → |
| Efa-481-1 | NZ_KB947049.1 | - | 255740  | 255708  | RNA → rpmE2 (PRK01678)Ribosomal_L31 (pfam01197) → |
| Efa-436-1 | NZ_KB947641.1 | + | 252182  | 252214  | RNA → rpmE2 (PRK01678)Ribosomal_L31 (pfam01197) → |
| Efa-446-1 | NZ_KB947936.1 | - | 247560  | 247528  | RNA → rpmE2 (PRK01678)Ribosomal_L31 (pfam01197) → |
| Efa-451-1 | NZ_KB948052.1 | - | 225651  | 225619  | RNA → rpmE2 (PRK01678)Ribosomal_L31 (pfam01197) → |
| Efa-456-1 | NZ_KB948239.1 | + | 8756    | 8788    | RNA → rpmE2 (PRK01678)Ribosomal_L31 (pfam01197) → |
| Efa-461-1 | NZ_KB949440.1 | + | 43998   | 44030   | RNA → rpmE2 (PRK01678)Ribosomal_L31 (pfam01197) → |
| Efa-440-1 | NZ_KB947747.1 | + | 98352   | 98384   | RNA → rpmE2 (PRK01678)Ribosomal_L31 (pfam01197) → |
| Efa-450-1 | NZ_KB948035.1 | + | 269630  | 269662  | RNA → rpmE2 (PRK01678)Ribosomal_L31 (pfam01197) → |
| Efa-459-1 | NZ_KB949415.1 | - | 904667  | 904635  | RNA → rpmE2 (PRK01678)Ribosomal_L31 (pfam01197) → |
| Efa-460-1 | NZ_KB949423.1 | + | 43998   | 44030   | RNA → rpmE2 (PRK01678)Ribosomal_L31 (pfam01197) → |
| Efa-469-1 | NZ_KB949696.1 | - | 260133  | 260101  | RNA → rpmE2 (PRK01678)Ribosomal_L31 (pfam01197) → |
| Efa-412-1 | NZ_KB945908.1 | + | 40855   | 40887   | RNA → rpmE2 (PRK01678)Ribosomal_L31 (pfam01197) → |
| Efa-443-1 | NZ_KB947850.1 | + | 252543  | 252575  | RNA → rpmE2 (PRK01678)Ribosomal_L31 (pfam01197) → |
| Efa-448-1 | NZ_KB947954.1 | + | 66239   | 66271   | RNA → rpmE2 (PRK01678)Ribosomal_L31 (pfam01197) → |
| Efa-454-1 | NZ_KB948170.1 | - | 254051  | 254019  | RNA → rpmE2 (PRK01678)Ribosomal_L31 (pfam01197) → |
| Efa-463-1 | NZ_KB949473.1 | + | 44026   | 44058   | RNA → rpmE2 (PRK01678)Ribosomal_L31 (pfam01197) → |
| Efa-464-1 | NZ_KB949489.1 | + | 65425   | 65457   | RNA → rpmE2 (PRK01678)Ribosomal_L31 (pfam01197) → |
| Efa-472-1 | NZ_KB949806.1 | + | 255072  | 255104  | RNA → rpmE2 (PRK01678)Ribosomal_L31 (pfam01197) → |
| Efa-441-1 | NZ_KB947813.1 | + | 267269  | 267301  | RNA → rpmE2 (PRK01678)Ribosomal_L31 (pfam01197) → |
| Efa-466-1 | NZ_KB949541.1 | + | 252270  | 252302  | RNA → rpmE2 (PRK01678)Ribosomal_L31 (pfam01197) → |
| Efa-488-1 | NZ_KB946960.1 | + | 771616  | 771648  | RNA → rpmE2 (PRK01678)Ribosomal_L31 (pfam01197) → |
| Efa-437-1 | NZ_KB947662.1 | - | 210708  | 210676  | RNA → rpmE2 (PRK01678)Ribosomal_L31 (pfam01197) → |
| Efa-442-1 | NZ_KB947831.1 | + | 264751  | 264783  | RNA → rpmE2 (PRK01678)Ribosomal_L31 (pfam01197) → |
| Efa-447-1 | NZ_KB947952.1 | + | 67274   | 67306   | RNA → rpmE2 (PRK01678)Ribosomal_L31 (pfam01197) → |
| Efa-452-1 | NZ_KB948120.1 | - | 309201  | 309169  | RNA → rpmE2 (PRK01678)Ribosomal_L31 (pfam01197) → |
| Efa-453-1 | NZ_KB948121.1 | + | 719806  | 719838  | RNA → rpmE2 (PRK01678)Ribosomal_L31 (pfam01197) → |
| Efa-457-1 | NZ_KB948267.1 | + | 336995  | 337027  | RNA → rpmE2 (PRK01678)Ribosomal_L31 (pfam01197) → |
| Efa-462-1 | NZ_KB949451.1 | + | 44122   | 44154   | RNA → rpmE2 (PRK01678)Ribosomal_L31 (pfam01197) → |



|           |                   |   |         |         |       |                                                                                                               |
|-----------|-------------------|---|---------|---------|-------|---------------------------------------------------------------------------------------------------------------|
| Efa-471-1 | NZ_KB949770.1     | - | 251932  | 251900  | RNA → | rpmE2 (PRK01678)Ribosomal_L31 (pfam01197) →                                                                   |
| Efa-430-1 | NZ_KB947513.1     | + | 43998   | 44030   | RNA → | rpmE2 (PRK01678)Ribosomal_L31 (pfam01197) →                                                                   |
| Efa-465-1 | NZ_KB949525.1     | + | 67931   | 67963   | RNA → | rpmE2 (PRK01678)Ribosomal_L31 (pfam01197) →                                                                   |
| Efa-473-1 | NZ_KB949826.1     | - | 237195  | 237163  | RNA → | rpmE2 (PRK01678)Ribosomal_L31 (pfam01197) →                                                                   |
| Efa-470-1 | NZ_KB949740.1     | + | 704139  | 704171  | RNA → | rpmE2 (PRK01678)Ribosomal_L31 (pfam01197) →                                                                   |
| Efa-497-1 | NZ_KE136460.1     | - | 106574  | 106542  | RNA → | rpmE2 (PRK01678)Ribosomal_L31 (pfam01197) →                                                                   |
| Efa-188-1 | NZ_KB946782.1     | - | 205906  | 205874  | RNA → | rpmE2 (PRK01678)Ribosomal_L31 (pfam01197) →                                                                   |
| Efa-474-1 | NZ_KB949842.1     | + | 63724   | 63756   | RNA → | rpmE2 (PRK01678)Ribosomal_L31 (pfam01197) →                                                                   |
| Efa-468-1 | NZ_KB949632.1     | - | 176857  | 176825  | RNA → | rpmE2 (PRK01678)Ribosomal_L31 (pfam01197) →                                                                   |
| Efa-496-1 | NZ_KE136534.1     | + | 253712  | 253744  | RNA → | rpmE2 (PRK01678)Ribosomal_L31 (pfam01197) →                                                                   |
| Efa-497-2 | NZ_KE136554.1     | - | 152402  | 152370  | RNA → | rpmE2 (PRK01678)Ribosomal_L31 (pfam01197) →                                                                   |
| Efa-495-1 | NZ_KE136411.1     | - | 134559  | 134527  | RNA → | rpmE2 (PRK01678)Ribosomal_L31 (pfam01197) →                                                                   |
| Efa-496-2 | NZ_KE136427.1     | + | 256865  | 256897  | RNA → | rpmE2 (PRK01678)Ribosomal_L31 (pfam01197) →                                                                   |
| Efa-503-1 | NZ_KE150233.1     | + | 502299  | 502331  | RNA → | rpmE2 (PRK01678)Ribosomal_L31 (pfam01197) →                                                                   |
| Efa-524-1 | NZ_KE352068.1     | - | 7536    | 7504    | RNA → | rpmE2 (PRK01678)Ribosomal_L31 (pfam01197) →                                                                   |
| Efa-502-1 | NZ_KE150065.1     | + | 429121  | 429153  | RNA → | rpmE2 (PRK01678)Ribosomal_L31 (pfam01197) →                                                                   |
| Efa-509-1 | NZ_KE352399.1     | + | 52532   | 52564   | RNA → | rpmE2 (PRK01678)Ribosomal_L31 (pfam01197) →                                                                   |
| Efa-525-1 | NZ_KE351986.1     | - | 34152   | 34120   | RNA → | rpmE2 (PRK01678)Ribosomal_L31 (pfam01197) →                                                                   |
| Efa-531-1 | NZ_GL455151.1     | - | 99216   | 99184   | RNA → | rpmE2 (PRK01678)Ribosomal_L31 (pfam01197) →                                                                   |
| Efa-427-1 | NZ_KB932760.1     | - | 105635  | 105603  | RNA → | rpmE2 (PRK01678)Ribosomal_L31 (pfam01197) →                                                                   |
| Efa-343-1 | NZ_JH811220.1     | - | 379     | 347     | RNA → | rpmE2 (PRK01678)Ribosomal_L31 (pfam01197) →                                                                   |
| Efa-327-1 | NC_021994.1       | + | 687115  | 687147  | RNA → | rpmE2 (PRK01678)Ribosomal_L31 (pfam01197) →                                                                   |
| Efa-515-1 | NZ_JH808280.1     | - | 7536    | 7504    | RNA → | rpmE2 (PRK01678)Ribosomal_L31 (pfam01197) →                                                                   |
| Efa-321-1 | NZ_JH814453.1     | - | 7536    | 7504    | RNA → | rpmE2 (PRK01678)Ribosomal_L31 (pfam01197) →                                                                   |
| Efa-348-1 | NZ_JH810749.1     | - | 7536    | 7504    | RNA → | rpmE2 (PRK01678)Ribosomal_L31 (pfam01197) →                                                                   |
| Efa-313-1 | NZ_KN985989.1     | - | 2662842 | 2662810 | RNA → | rpmE2 (PRK01678)Ribosomal_L31 (pfam01197) →                                                                   |
| Efa-504-1 | NZ_JH636590.1     | - | 73897   | 73865   | RNA → | rpmE2 (PRK01678)Ribosomal_L31 (pfam01197) →                                                                   |
| Efa-499-1 | NZ_JH691958.1     | - | 1923172 | 1923140 | RNA → | rpmE2 (PRK01678)Ribosomal_L31 (pfam01197) →                                                                   |
| Emu-4-1   | NZ_AFWZ01000014.1 | - | 14870   | 14838   | RNA → | rpmE2 (PRK01678)Ribosomal_L31 (pfam01197) →                                                                   |
| Emu-1-1   | NZ_KB946218.1     | - | 1566975 | 1566943 | RNA → | rpmE2 (PRK01678)Ribosomal_L31 (pfam01197) →                                                                   |
| Emu-3-1   | NC_022878.1       | + | 768682  | 768714  | RNA → | rpmE2 (PRK01678)Ribosomal_L31 (pfam01197) →                                                                   |
| Emu-2-1   | NZ_JDF01000010.1  | - | 62363   | 62331   | RNA → | rpmE2 (PRK01678)Ribosomal_L31 (pfam01197) →                                                                   |
| Cga-1-1   | NZ_JQLU01000005.1 | + | 2105866 | 2105898 | RNA → | rpmE2 (PRK01678)Ribosomal_L31 (pfam01197) →                                                                   |
| env-1481  | JXWR01031192.1    | - | 596     | 564     | RNA → | rpmE2 (PRK01678)Ribosomal_L31 (pfam01197) →                                                                   |
| Lbr-1-1   | NZ_JOKA01000068.1 | + | 76768   | 76800   | RNA → | rpmE2 (PRK01678)Ribosomal_L31 (pfam01197) →                                                                   |
| Lbr-1-2   | NZ_BBOW01000057.1 | + | 73685   | 73717   | RNA → | rpmE2 (PRK01678)Ribosomal_L31 (pfam01197) →                                                                   |
| Lbr-1-3   | NZ_JXUE01000015.1 | - | 385418  | 385386  | RNA → | rpmE2 (PRK01678)Ribosomal_L31 (pfam01197) →                                                                   |
| Lbr-1-4   | NZ_JXCD01000008.1 | - | 3214    | 3182    | RNA → | rpmE2 (PRK01678)Ribosomal_L31 (pfam01197) →                                                                   |
| Lbr-1-5   | NZ_LBHR01000024.1 | - | 33108   | 33076   | RNA → | rpmE2 (PRK01678)Ribosomal_L31 (pfam01197) →                                                                   |
| Lbr-5-1   | NC_020819.1       | + | 528420  | 528452  | RNA → | rpmE2 (PRK01678)Ribosomal_L31 (pfam01197) → hypo → <a href="#">sortase_fam (TIGR01076)</a> Sortase_A (cd0610) |
| Lbr-6-1   | NC_008497.1       | + | 531348  | 531380  | RNA → | rpmE2 (PRK01678)Ribosomal_L31 (pfam01197) →                                                                   |
| Lbr-3-1   | NZ_KI271225.1     | + | 5864    | 5896    | RNA → | rpmE2 (PRK01678)Ribosomal_L31 (pfam01197) → hypo → <a href="#">sortase_fam (TIGR01076)</a> Sortase_A (cd0610) |
| Lbr-2-1   | NZ_JAGR01000001.1 | - | 737769  | 737737  | RNA → | rpmE2 (PRK01678)Ribosomal_L31 (pfam01197) →                                                                   |
| Lbr-1-6   | NZ_JXUG01000016.1 | - | 41734   | 41702   | RNA → | rpmE2 (PRK01678)Ribosomal_L31 (pfam01197) →                                                                   |
| Lbr-4-1   | NZ_AUTD01000009.1 | - | 11717   | 11685   | RNA → | rpmE2 (PRK01678)Ribosomal_L31 (pfam01197) →                                                                   |
| Lna-2-1   | NZ_BAOT01000056.1 | - | 26005   | 25972   | RNA → | rpmE2 (PRK01678)Ribosomal_L31 (pfam01197) →                                                                   |
| env-1482  | 2204712971        | - | 160     | 127     | RNA → | rpmE2 (PRK01678)Ribosomal_L31 (pfam01197) →                                                                   |
| env-1483  | 2157898307        | + | 162     | 195     | RNA → | rpmE2 (PRK01678)Ribosomal_L31 (pfam01197) →                                                                   |
| Lsp-15-1  | NZ_JZCR01000012.1 | - | 34731   | 34698   | RNA → | rpmE2 (PRK01678)Ribosomal_L31 (pfam01197) →                                                                   |
| Lma-3-2   | NZ_BACP01000068.1 | + | 42656   | 42688   | RNA → | rpmE2 (PRK01678)Ribosomal_L31 (pfam01197) → rpmE2 (PRK01678)Ribosomal_L31 (pfam01197) →                       |
| Lma-3-1   | NZ_AKKT01000010.1 | + | 8614    | 8646    | RNA → | rpmE2 (PRK01678)Ribosomal_L31 (pfam01197) →                                                                   |
| Cfu-1-1   | NZ_JQLL01000001.1 | - | 1384361 | 1384329 | RNA → | rpmE2 (PRK01678)Ribosomal_L31 (pfam01197) →                                                                   |

|           |                         |   |         |         |                                                                                               |
|-----------|-------------------------|---|---------|---------|-----------------------------------------------------------------------------------------------|
| Cma-5-1   | NZ_AGNS01000026.1       | + | 96248   | 96281   | RNA → rpmE2 (PRK01678)Ribosomal_L31 (pfam01197) → rpmE2 (PRK01678)Ribosomal_L31 (pfam01197) → |
| Cma-3-1   | NC_019425.2             | - | 2842409 | 2842376 | RNA → rpmE2 (PRK01678)Ribosomal_L31 (pfam01197) →                                             |
| Cma-2-1   | NZ_JQMX01000001.1       | + | 3115749 | 3115782 | RNA → rpmE2 (PRK01678)Ribosomal_L31 (pfam01197) →                                             |
| Ema-2-1   | NZ_KB946249.1           | - | 604276  | 604244  | RNA → rpmE2 (PRK01678)Ribosomal_L31 (pfam01197) →                                             |
| Eav-1-1   | NZ_JUZB01000046.1       | + | 16390   | 16422   | RNA → rpmE2 (PRK01678)Ribosomal_L31 (pfam01197) →                                             |
| Era-1-1   | NZ_KB946257.1           | + | 170182  | 170214  | RNA → rpmE2 (PRK01678)Ribosomal_L31 (pfam01197) →                                             |
| Ehi-1-1   | NZ_JUPQ01000184.1       | + | 9015    | 9047    | RNA → rpmE2 (PRK01678)Ribosomal_L31 (pfam01197) →                                             |
| Eav-2-1   | NZ_KE136363.1           | + | 39237   | 39269   | RNA → rpmE2 (PRK01678)Ribosomal_L31 (pfam01197) →                                             |
| Eav-2-2   | NZ_KE136509.1           | - | 615844  | 615812  | RNA → rpmE2 (PRK01678)Ribosomal_L31 (pfam01197) →                                             |
| env-1484  | 2205839497              | - | 267     | 235     | RNA → rpmE2 (PRK01678)Ribosomal_L31 (pfam01197) →                                             |
| env-1485  | 2158422988              | - | 267     | 235     | RNA → rpmE2 (PRK01678)Ribosomal_L31 (pfam01197) →                                             |
| Ehi-2-1   | NZ_KB946231.1           | - | 1167763 | 1167731 | RNA → rpmE2 (PRK01678)Ribosomal_L31 (pfam01197) →                                             |
| Efa-406-1 | NZ_KB932610.1           | - | 340657  | 340625  | RNA → rpmE2 (PRK01678)Ribosomal_L31 (pfam01197) →                                             |
| Ehi-2-2   | NC_018081.1             | + | 1570676 | 1570708 | RNA → rpmE2 (PRK01678)Ribosomal_L31 (pfam01197) →                                             |
| Ehi-1-2   | NZ_JMIG01000005.1       | + | 48625   | 48657   | RNA → rpmE2 (PRK01678)Ribosomal_L31 (pfam01197) →                                             |
| Edu-2-1   | NZ_KE136383.1           | + | 49835   | 49867   | RNA → rpmE2 (PRK01678)Ribosomal_L31 (pfam01197) →                                             |
| Edu-2-2   | NZ_KE136516.1           | + | 45291   | 45323   | RNA → rpmE2 (PRK01678)Ribosomal_L31 (pfam01197) →                                             |
| Edu-1-1   | NZ_CP012384.1           | - | 2493264 | 2493232 | RNA → rpmE2 (PRK01678)Ribosomal_L31 (pfam01197) →                                             |
| Edu-1-2   | NZ_CP012366.1           | - | 697844  | 697812  | RNA → rpmE2 (PRK01678)Ribosomal_L31 (pfam01197) →                                             |
| Edu-4-1   | NZ_AOSM01000013.1       | + | 23749   | 23781   | RNA → rpmE2 (PRK01678)Ribosomal_L31 (pfam01197) →                                             |
| env-1486  | ACOFG987_F36MELC02HSZ0T | + | 32      | 64      | RNA → hypo → rpmE2 (PRK01678)Ribosomal_L31 (pfam01197) →                                      |
| Evi-1-1   | NZ_KB946287.1           | - | 791418  | 791386  | RNA → rpmE2 (PRK01678)Ribosomal_L31 (pfam01197) →                                             |
| Efa-172-1 | NZ_AJET01000006.1       | + | 629973  | 630005  | RNA → rpmE2 (PRK01678)Ribosomal_L31 (pfam01197) →                                             |
| Esp-12-1  | NZ_JWBQ01000066.1       | + | 72115   | 72147   | RNA → rpmE2 (PRK01678)Ribosomal_L31 (pfam01197) →                                             |
| Efa-1-1   | NZ_JVQP01000016.1       | + | 72248   | 72280   | RNA → rpmE2 (PRK01678)Ribosomal_L31 (pfam01197) →                                             |
| Efa-1-2   | NZ_JVOA01000123.1       | + | 50507   | 50539   | RNA → rpmE2 (PRK01678)Ribosomal_L31 (pfam01197) →                                             |
| Efa-1-3   | NZ_JVOF01000024.1       | - | 136699  | 136667  | RNA → rpmE2 (PRK01678)Ribosomal_L31 (pfam01197) →                                             |
| Efa-1-4   | NZ_JVZS01000075.1       | - | 80355   | 80323   | RNA → rpmE2 (PRK01678)Ribosomal_L31 (pfam01197) →                                             |
| Efa-1-5   | NZ_JVQT01000017.1       | - | 155630  | 155598  | RNA → rpmE2 (PRK01678)Ribosomal_L31 (pfam01197) →                                             |
| Efa-1-6   | NZ_JVQS01000014.1       | + | 72248   | 72280   | RNA → rpmE2 (PRK01678)Ribosomal_L31 (pfam01197) →                                             |
| Efa-1-7   | NZ_JVIK01000038.1       | - | 75811   | 75779   | RNA → rpmE2 (PRK01678)Ribosomal_L31 (pfam01197) →                                             |
| Efa-1-8   | NZ_JVBG01000102.1       | - | 20244   | 20212   | RNA → rpmE2 (PRK01678)Ribosomal_L31 (pfam01197) →                                             |
| Efa-1-9   | NZ_JVPG01000107.1       | - | 20252   | 20220   | RNA → rpmE2 (PRK01678)Ribosomal_L31 (pfam01197) →                                             |
| Efa-1-10  | NZ_JVIY01000046.1       | - | 20244   | 20212   | RNA → rpmE2 (PRK01678)Ribosomal_L31 (pfam01197) →                                             |
| Esp-13-1  | NZ_JVOE01000070.1       | + | 50458   | 50490   | RNA → rpmE2 (PRK01678)Ribosomal_L31 (pfam01197) →                                             |
| Efa-1-11  | NZ_JVQO01000033.1       | - | 155729  | 155697  | RNA → rpmE2 (PRK01678)Ribosomal_L31 (pfam01197) →                                             |
| Efa-1-12  | NZ_JVQF01000009.1       | + | 50546   | 50578   | RNA → rpmE2 (PRK01678)Ribosomal_L31 (pfam01197) →                                             |
| Efa-1-13  | NZ_JVBD01000057.1       | + | 50551   | 50583   | RNA → rpmE2 (PRK01678)Ribosomal_L31 (pfam01197) →                                             |
| Efa-1-14  | NZ_JVPS01000092.1       | + | 50507   | 50539   | RNA → rpmE2 (PRK01678)Ribosomal_L31 (pfam01197) →                                             |
| Efa-1-15  | NZ_JUZT01000074.1       | + | 50507   | 50539   | RNA → rpmE2 (PRK01678)Ribosomal_L31 (pfam01197) →                                             |
| Efa-1-16  | NZ_JVOB01000025.1       | + | 50497   | 50529   | RNA → rpmE2 (PRK01678)Ribosomal_L31 (pfam01197) →                                             |
| Efa-1-17  | NZ_JVOC01000134.1       | - | 75987   | 75955   | RNA → rpmE2 (PRK01678)Ribosomal_L31 (pfam01197) →                                             |
| Efa-1-18  | NZ_JVAM01000128.1       | - | 78901   | 78869   | RNA → rpmE2 (PRK01678)Ribosomal_L31 (pfam01197) →                                             |
| Efa-1-19  | NZ_JUWK01000014.1       | + | 66857   | 66889   | RNA → rpmE2 (PRK01678)Ribosomal_L31 (pfam01197) →                                             |
| Efa-1-20  | NZ_JVJB01000035.1       | - | 75865   | 75833   | RNA → rpmE2 (PRK01678)Ribosomal_L31 (pfam01197) →                                             |
| Efa-1-21  | NZ_JUMK01000040.1       | + | 72186   | 72218   | RNA → rpmE2 (PRK01678)Ribosomal_L31 (pfam01197) →                                             |
| Efa-1-22  | NZ_JUOO01000146.1       | - | 20246   | 20214   | RNA → rpmE2 (PRK01678)Ribosomal_L31 (pfam01197) →                                             |
| Efa-1-23  | NZ_JUVP01000129.1       | - | 75833   | 75801   | RNA → rpmE2 (PRK01678)Ribosomal_L31 (pfam01197) →                                             |
| Efa-567-1 | NZ_ACOX02000001.1       | - | 165398  | 165366  | RNA → rpmE2 (PRK01678)Ribosomal_L31 (pfam01197) → rpmE2 (PRK01678)Ribosomal_L31 (pfam01197) → |
| Efa-559-1 | NZ_ADKN01000064.1       | + | 5576    | 5608    | RNA → rpmE2 (PRK01678)Ribosomal_L31 (pfam01197) → rpmE2 (PRK01678)Ribosomal_L31 (pfam01197) → |
| Efa-278-1 | NZ_AYKU01000027.1       | - | 144500  | 144468  | RNA → rpmE2 (PRK01678)Ribosomal_L31 (pfam01197) →                                             |
| Efa-22-1  | NZ_AYLU01000042.1       | + | 97278   | 97310   | RNA → rpmE2 (PRK01678)Ribosomal_L31 (pfam01197) →                                             |

|           |                   |   |         |         |                                                                                                  |
|-----------|-------------------|---|---------|---------|--------------------------------------------------------------------------------------------------|
| Efa-1-24  | NZ_JPTY01000024.1 | + | 98124   | 98156   | RNA → rpmE2 (PRK01678)Ribosomal_L31 (pfam01197) →                                                |
| Efa-549-1 | NC_018221.1       | + | 1022628 | 1022660 | RNA → rpmE2 (PRK01678)Ribosomal_L31 (pfam01197) →                                                |
| Efa-312-1 | NC_019770.1       | + | 1028524 | 1028556 | RNA → rpmE2 (PRK01678)Ribosomal_L31 (pfam01197) →                                                |
| Efa-19-1  | NZ_CP008816.1     | + | 231325  | 231357  | RNA → rpmE2 (PRK01678)Ribosomal_L31 (pfam01197) →                                                |
| Efa-560-1 | NZ_GG739846.1     | - | 421383  | 421351  | RNA → rpmE2 (PRK01678)Ribosomal_L31 (pfam01197) →                                                |
| Efa-562-1 | NZ_GG670358.1     | - | 1399663 | 1399631 | RNA → rpmE2 (PRK01678)Ribosomal_L31 (pfam01197) → rpmE2 (PRK01678)Ribosomal_L31 (pfam01197) →    |
| Efa-551-1 | NZ_GG692891.1     | + | 121192  | 121224  | RNA → rpmE2 (PRK01678)Ribosomal_L31 (pfam01197) → rpmE2 (PRK01678)Ribosomal_L31 (pfam01197) →    |
| Efa-18-2  | NZ_GG668755.1     | - | 1351023 | 1350991 | RNA → rpmE2 (PRK01678)Ribosomal_L31 (pfam01197) →                                                |
| Efa-557-1 | NZ_GG692929.1     | - | 1368435 | 1368403 | RNA → rpmE2 (PRK01678)Ribosomal_L31 (pfam01197) → rpmE2 (PRK01678)Ribosomal_L31 (pfam01197) →    |
| Efa-573-1 | NZ_GG688434.1     | - | 1376486 | 1376454 | RNA → rpmE2 (PRK01678)Ribosomal_L31 (pfam01197) → rpmE2 (PRK01678)Ribosomal_L31 (pfam01197) →    |
| Efa-553-1 | NZ_GG692670.1     | - | 1446803 | 1446771 | RNA → rpmE2 (PRK01678)Ribosomal_L31 (pfam01197) → rpmE2 (PRK01678)Ribosomal_L31 (pfam01197) →    |
| Efa-556-1 | NZ_GG692696.1     | - | 38543   | 38511   | RNA → rpmE2 (PRK01678)Ribosomal_L31 (pfam01197) → rpmE2 (PRK01678)Ribosomal_L31 (pfam01197) →    |
| Efa-552-1 | NZ_GG692683.1     | - | 1370149 | 1370117 | RNA → rpmE2 (PRK01678)Ribosomal_L31 (pfam01197) → rpmE2 (PRK01678)Ribosomal_L31 (pfam01197) →    |
| Efa-289-1 | NZ_GL454506.1     | - | 3215    | 3183    | RNA → rpmE2 (PRK01678)Ribosomal_L31 (pfam01197) → hypo → DUF916 (pfam06030)DUF3324 (pfam11797) → |
| Efa-300-1 | NZ_GL454537.1     | + | 136485  | 136517  | hypo → hypo → NagC (COG1940)ROK_glcA_fam (TIGR00744) → CsbD (pfam05532) →                        |
| Efa-28-1  | NZ_GL455718.1     | + | 15340   | 15372   | RNA → rpmE2 (PRK01678)Ribosomal_L31 (pfam01197) →                                                |
| Efa-285-1 | NZ_GL456486.1     | + | 15327   | 15359   | RNA → rpmE2 (PRK01678)Ribosomal_L31 (pfam01197) →                                                |
| Efa-27-1  | NZ_GL455808.1     | + | 15343   | 15375   | RNA → rpmE2 (PRK01678)Ribosomal_L31 (pfam01197) →                                                |
| Efa-294-1 | NZ_GL456782.1     | - | 70795   | 70763   | RNA → rpmE2 (PRK01678)Ribosomal_L31 (pfam01197) →                                                |
| Efa-290-1 | NZ_GL455121.1     | + | 15383   | 15415   | RNA → rpmE2 (PRK01678)Ribosomal_L31 (pfam01197) →                                                |
| Efa-572-1 | NZ_GL454430.1     | - | 79041   | 79009   | RNA → rpmE2 (PRK01678)Ribosomal_L31 (pfam01197) → hypo → DUF916 (pfam06030)DUF3324 (pfam11797) → |
| Efa-571-1 | NZ_GL455597.1     | + | 15307   | 15339   | hypo → hypo → NagC (COG1940)ROK_glcA_fam (TIGR00744) → CsbD (pfam05532)YtxH (pfam12732) →        |
| Efa-303-1 | NZ_GL454593.1     | + | 75214   | 75246   | RNA → rpmE2 (PRK01678)Ribosomal_L31 (pfam01197) →                                                |
| Efa-288-1 | NZ_GL454737.1     | - | 70823   | 70791   | RNA → rpmE2 (PRK01678)Ribosomal_L31 (pfam01197) →                                                |
| Efa-291-1 | NZ_GL455457.1     | - | 99932   | 99900   | RNA → rpmE2 (PRK01678)Ribosomal_L31 (pfam01197) →                                                |
| Efa-286-1 | NZ_GL454210.1     | + | 100704  | 100736  | RNA → rpmE2 (PRK01678)Ribosomal_L31 (pfam01197) →                                                |
| Efa-287-1 | NZ_GL454392.1     | - | 79063   | 79031   | RNA → rpmE2 (PRK01678)Ribosomal_L31 (pfam01197) →                                                |
| Efa-252-1 | NZ_KI913024.1     | + | 162848  | 162880  | RNA → rpmE2 (PRK01678)Ribosomal_L31 (pfam01197) →                                                |
| Efa-245-1 | NZ_KI912990.1     | + | 249634  | 249666  | RNA → rpmE2 (PRK01678)Ribosomal_L31 (pfam01197) →                                                |
| Efa-258-1 | NZ_KI913061.1     | + | 883273  | 883305  | RNA → rpmE2 (PRK01678)Ribosomal_L31 (pfam01197) →                                                |
| Efa-241-1 | NZ_KI912966.1     | + | 125732  | 125764  | RNA → rpmE2 (PRK01678)Ribosomal_L31 (pfam01197) →                                                |
| Efa-254-1 | NZ_KI913040.1     | + | 118788  | 118820  | RNA → rpmE2 (PRK01678)Ribosomal_L31 (pfam01197) →                                                |
| Efa-243-1 | NZ_KI912979.1     | + | 120525  | 120557  | RNA → rpmE2 (PRK01678)Ribosomal_L31 (pfam01197) →                                                |
| Efa-240-1 | NZ_KI912960.1     | + | 882120  | 882152  | RNA → rpmE2 (PRK01678)Ribosomal_L31 (pfam01197) →                                                |
| Efa-263-1 | NZ_KI913093.1     | + | 1162405 | 1162437 | RNA → rpmE2 (PRK01678)Ribosomal_L31 (pfam01197) →                                                |
| Efa-239-1 | NZ_KI912956.1     | + | 166079  | 166111  | RNA → rpmE2 (PRK01678)Ribosomal_L31 (pfam01197) →                                                |
| Efa-250-1 | NZ_KI913015.1     | + | 134778  | 134810  | RNA → rpmE2 (PRK01678)Ribosomal_L31 (pfam01197) →                                                |
| Efa-262-1 | NZ_KI913086.1     | + | 243014  | 243046  | RNA → rpmE2 (PRK01678)Ribosomal_L31 (pfam01197) →                                                |
| Efa-249-1 | NZ_KI913011.1     | + | 1118035 | 1118067 | RNA → rpmE2 (PRK01678)Ribosomal_L31 (pfam01197) →                                                |
| Efa-238-1 | NZ_KI912939.1     | + | 893011  | 893043  | RNA → rpmE2 (PRK01678)Ribosomal_L31 (pfam01197) →                                                |
| Efa-242-1 | NZ_KI912974.1     | + | 120793  | 120825  | RNA → rpmE2 (PRK01678)Ribosomal_L31 (pfam01197) →                                                |
| Efa-255-1 | NZ_KI913051.1     | + | 1065840 | 1065872 | RNA → rpmE2 (PRK01678)Ribosomal_L31 (pfam01197) →                                                |
| Efa-260-1 | NZ_KI913083.1     | - | 1336694 | 1336662 | RNA → rpmE2 (PRK01678)Ribosomal_L31 (pfam01197) →                                                |
| Efa-259-1 | NZ_KI913069.1     | + | 815731  | 815763  | RNA → rpmE2 (PRK01678)Ribosomal_L31 (pfam01197) →                                                |
| Efa-228-1 | NZ_KB944632.1     | + | 125914  | 125946  | RNA → rpmE2 (PRK01678)Ribosomal_L31 (pfam01197) →                                                |
| Efa-217-1 | NZ_KB944671.1     | + | 124502  | 124534  | RNA → rpmE2 (PRK01678)Ribosomal_L31 (pfam01197) →                                                |
| Efa-214-1 | NZ_KB944586.1     | + | 118308  | 118340  | RNA → rpmE2 (PRK01678)Ribosomal_L31 (pfam01197) →                                                |
| Efa-215-1 | NZ_KB944615.1     | + | 121371  | 121403  | RNA → rpmE2 (PRK01678)Ribosomal_L31 (pfam01197) →                                                |
| Efa-222-1 | NZ_KB944766.1     | + | 142847  | 142879  | RNA → rpmE2 (PRK01678)Ribosomal_L31 (pfam01197) →                                                |
| Efa-68-1  | NZ_KB932378.1     | + | 125977  | 126009  | RNA → rpmE2 (PRK01678)Ribosomal_L31 (pfam01197) →                                                |
| Efa-20-1  | NZ_KB944642.1     | + | 125027  | 125059  | RNA → rpmE2 (PRK01678)Ribosomal_L31 (pfam01197) →                                                |



|           |                   |   |        |        |                                                                                                |
|-----------|-------------------|---|--------|--------|------------------------------------------------------------------------------------------------|
| Efa-195-1 | NZ_KB945025.1     | + | 125183 | 125215 | RNA → rpmE2 (PRK01678)Ribosomal_L31 (pfam01197) →                                              |
| Efa-203-1 | NZ_KB945029.1     | + | 168632 | 168664 | RNA → rpmE2 (PRK01678)Ribosomal_L31 (pfam01197) →                                              |
| Efa-216-1 | NZ_KB944663.1     | + | 122100 | 122132 | RNA → rpmE2 (PRK01678)Ribosomal_L31 (pfam01197) →                                              |
| Efa-14-1  | NZ_KB944873.1     | + | 123793 | 123825 | RNA → rpmE2 (PRK01678)Ribosomal_L31 (pfam01197) →                                              |
| Efa-200-1 | NZ_KB944979.1     | + | 120581 | 120613 | RNA → rpmE2 (PRK01678)Ribosomal_L31 (pfam01197) →                                              |
| Efa-198-1 | NZ_KB945018.1     | + | 120521 | 120553 | RNA → rpmE2 (PRK01678)Ribosomal_L31 (pfam01197) →                                              |
| Efa-221-1 | NZ_KB944759.1     | + | 143579 | 143611 | RNA → rpmE2 (PRK01678)Ribosomal_L31 (pfam01197) → hypo → DUF916 (pfam06030)DUF3324 (pfam11797) |
| Efa-196-1 | NZ_KB944971.1     | + | 149512 | 149544 | hypo → RNA → rpmE2 (PRK01678)Ribosomal_L31 (pfam01197) →                                       |
| Efa-16-1  | NZ_KB947429.1     | + | 157881 | 157913 | RNA → rpmE2 (PRK01678)Ribosomal_L31 (pfam01197) →                                              |
| Efa-67-1  | NZ_KB932366.1     | + | 139890 | 139922 | RNA → rpmE2 (PRK01678)Ribosomal_L31 (pfam01197) →                                              |
| Efa-162-1 | NZ_KB946671.1     | + | 158011 | 158043 | RNA → rpmE2 (PRK01678)Ribosomal_L31 (pfam01197) →                                              |
| Efa-152-1 | NZ_KB946409.1     | + | 160128 | 160160 | RNA → rpmE2 (PRK01678)Ribosomal_L31 (pfam01197) →                                              |
| Efa-218-1 | NZ_KB944674.1     | + | 123199 | 123231 | RNA → rpmE2 (PRK01678)Ribosomal_L31 (pfam01197) →                                              |
| Efa-165-1 | NZ_KB947327.1     | + | 97950  | 97982  | RNA → rpmE2 (PRK01678)Ribosomal_L31 (pfam01197) →                                              |
| Efa-179-1 | NZ_KB947400.1     | + | 122702 | 122734 | RNA → rpmE2 (PRK01678)Ribosomal_L31 (pfam01197) →                                              |
| Efa-174-1 | NZ_KB947439.1     | + | 149395 | 149427 | RNA → rpmE2 (PRK01678)Ribosomal_L31 (pfam01197) →                                              |
| Efa-176-1 | NZ_KB947300.1     | + | 865457 | 865489 | RNA → rpmE2 (PRK01678)Ribosomal_L31 (pfam01197) →                                              |
| Efa-167-1 | NZ_KB947338.1     | + | 123113 | 123145 | RNA → rpmE2 (PRK01678)Ribosomal_L31 (pfam01197) →                                              |
| Efa-177-1 | NZ_KB947421.1     | + | 121290 | 121322 | RNA → rpmE2 (PRK01678)Ribosomal_L31 (pfam01197) →                                              |
| Efa-175-1 | NZ_KB947485.1     | + | 846302 | 846334 | RNA → rpmE2 (PRK01678)Ribosomal_L31 (pfam01197) →                                              |
| Efa-17-1  | NZ_KB947435.1     | + | 136478 | 136510 | RNA → rpmE2 (PRK01678)Ribosomal_L31 (pfam01197) →                                              |
| Efa-187-1 | NZ_KB947334.1     | + | 785472 | 785504 | RNA → rpmE2 (PRK01678)Ribosomal_L31 (pfam01197) →                                              |
| Efa-171-1 | NZ_KB947466.1     | + | 150408 | 150440 | RNA → rpmE2 (PRK01678)Ribosomal_L31 (pfam01197) →                                              |
| Efa-168-1 | NZ_KB947308.1     | + | 122445 | 122477 | RNA → rpmE2 (PRK01678)Ribosomal_L31 (pfam01197) →                                              |
| Efa-18-1  | NZ_KB947320.1     | + | 123023 | 123055 | RNA → rpmE2 (PRK01678)Ribosomal_L31 (pfam01197) →                                              |
| Efa-169-1 | NZ_KB947506.1     | + | 123365 | 123397 | RNA → rpmE2 (PRK01678)Ribosomal_L31 (pfam01197) →                                              |
| Efa-467-1 | NZ_KB949610.1     | + | 123805 | 123837 | RNA → rpmE2 (PRK01678)Ribosomal_L31 (pfam01197) →                                              |
| Efa-145-1 | NZ_KB949669.1     | + | 125345 | 125377 | RNA → rpmE2 (PRK01678)Ribosomal_L31 (pfam01197) →                                              |
| Efa-23-1  | NZ_KE351093.1     | + | 66098  | 66130  | RNA → rpmE2 (PRK01678)Ribosomal_L31 (pfam01197) →                                              |
| Efa-10-1  | NZ_KE351720.1     | + | 133898 | 133930 | RNA → rpmE2 (PRK01678)Ribosomal_L31 (pfam01197) →                                              |
| Efa-9-1   | NZ_KE350863.1     | + | 133929 | 133961 | RNA → rpmE2 (PRK01678)Ribosomal_L31 (pfam01197) →                                              |
| Efa-311-1 | NZ_KE352562.1     | - | 571410 | 571378 | RNA → rpmE2 (PRK01678)Ribosomal_L31 (pfam01197) →                                              |
| Efa-523-1 | NZ_KE352305.1     | + | 15319  | 15351  | RNA → rpmE2 (PRK01678)Ribosomal_L31 (pfam01197) →                                              |
| Efa-308-1 | NZ_KE352699.1     | + | 133744 | 133776 | RNA → rpmE2 (PRK01678)Ribosomal_L31 (pfam01197) →                                              |
| Efa-3-1   | NZ_KE350832.1     | + | 97516  | 97548  | RNA → rpmE2 (PRK01678)Ribosomal_L31 (pfam01197) →                                              |
| Efa-11-1  | NZ_KE351747.1     | + | 101809 | 101841 | RNA → rpmE2 (PRK01678)Ribosomal_L31 (pfam01197) →                                              |
| Efa-561-1 | NZ_GG739749.1     | + | 72311  | 72343  | RNA → rpmE2 (PRK01678)Ribosomal_L31 (pfam01197) →                                              |
| Efa-104-1 | NZ_KB932565.1     | + | 120769 | 120801 | RNA → rpmE2 (PRK01678)Ribosomal_L31 (pfam01197) →                                              |
| Efa-247-1 | NZ_KI913001.1     | + | 251023 | 251055 | RNA → rpmE2 (PRK01678)Ribosomal_L31 (pfam01197) →                                              |
| Efa-268-1 | NZ_AYLV01000014.1 | + | 15346  | 15378  | RNA → rpmE2 (PRK01678)Ribosomal_L31 (pfam01197) →                                              |
| Efa-1-25  | NZ_JTKW01000031.1 | - | 79072  | 79040  | RNA → rpmE2 (PRK01678)Ribosomal_L31 (pfam01197) →                                              |
| Efa-1-26  | NZ_JTKT01000016.1 | - | 79072  | 79040  | RNA → rpmE2 (PRK01678)Ribosomal_L31 (pfam01197) →                                              |
| Efa-1-27  | NZ_JUPP01000126.1 | - | 23368  | 23336  | RNA → rpmE2 (PRK01678)Ribosomal_L31 (pfam01197) →                                              |
| env-1487  | AEQT01000844.1    | + | 5466   | 5498   | RNA → rpmE2 (PRK01678)Ribosomal_L31 (pfam01197) →                                              |
| Efa-1-28  | NZ_JPTZ01000018.1 | + | 98763  | 98795  | RNA → rpmE2 (PRK01678)Ribosomal_L31 (pfam01197) →                                              |
| Efa-30-1  | NZ_AWPI01000053.1 | - | 23340  | 23308  | RNA → rpmE2 (PRK01678)Ribosomal_L31 (pfam01197) →                                              |
| Efa-193-1 | NZ_AOPW01000055.1 | - | 6414   | 6382   | RNA → rpmE2 (PRK01678)Ribosomal_L31 (pfam01197) →                                              |
| Efa-1-29  | NZ_LAEB01000001.1 | + | 120172 | 120204 | RNA → rpmE2 (PRK01678)Ribosomal_L31 (pfam01197) →                                              |
| Efa-281-1 | NZ_AFH01000009.1  | + | 5589   | 5621   | RNA → rpmE2 (PRK01678)Ribosomal_L31 (pfam01197) →                                              |
| Efa-273-1 | NZ_AGVN01000048.1 | - | 71733  | 71701  | RNA → rpmE2 (PRK01678)Ribosomal_L31 (pfam01197) →                                              |
| Efa-1-30  | NZ_JWAW01000015.1 | - | 23381  | 23349  | RNA → rpmE2 (PRK01678)Ribosomal_L31 (pfam01197) →                                              |
| Efa-1-31  | NZ_JWBU01000140.1 | - | 3760   | 3728   | RNA → rpmE2 (PRK01678)Ribosomal_L31 (pfam01197) →                                              |

|           |                   |   |        |        |                                                   |
|-----------|-------------------|---|--------|--------|---------------------------------------------------|
| Efa-1-32  | NZ_JVYW01000023.1 | - | 39746  | 39714  | RNA → rpmE2 (PRK01678)Ribosomal_L31 (pfam01197) → |
| Efa-1-33  | NZ_JVTX01000024.1 | - | 139814 | 139782 | RNA → rpmE2 (PRK01678)Ribosomal_L31 (pfam01197) → |
| Efa-1-34  | NZ_JVVS01000038.1 | + | 50558  | 50590  | RNA → rpmE2 (PRK01678)Ribosomal_L31 (pfam01197) → |
| Efa-1-35  | NZ_JVSW01000024.1 | + | 67849  | 67881  | RNA → rpmE2 (PRK01678)Ribosomal_L31 (pfam01197) → |
| Efa-1-36  | NZ_JVTK01000025.1 | - | 139814 | 139782 | RNA → rpmE2 (PRK01678)Ribosomal_L31 (pfam01197) → |
| Efa-1-37  | NZ_JVZM01000052.1 | + | 50559  | 50591  | RNA → rpmE2 (PRK01678)Ribosomal_L31 (pfam01197) → |
| Efa-1-38  | NZ_JVTP01000163.1 | - | 139757 | 139725 | RNA → rpmE2 (PRK01678)Ribosomal_L31 (pfam01197) → |
| Efa-1-39  | NZ_JVXY01000154.1 | + | 72669  | 72701  | RNA → rpmE2 (PRK01678)Ribosomal_L31 (pfam01197) → |
| Efa-1-40  | NZ_JVUK01000009.1 | + | 50550  | 50582  | RNA → rpmE2 (PRK01678)Ribosomal_L31 (pfam01197) → |
| Efa-1-41  | NZ_JVCH01000106.1 | + | 50558  | 50590  | RNA → rpmE2 (PRK01678)Ribosomal_L31 (pfam01197) → |
| Efa-1-42  | NZ_JVSV01000004.1 | - | 139638 | 139606 | RNA → rpmE2 (PRK01678)Ribosomal_L31 (pfam01197) → |
| Efa-1-43  | NZ_JVTG01000037.1 | + | 100342 | 100374 | RNA → rpmE2 (PRK01678)Ribosomal_L31 (pfam01197) → |
| Efa-1-44  | NZ_JVKC01000009.1 | + | 66961  | 66993  | RNA → rpmE2 (PRK01678)Ribosomal_L31 (pfam01197) → |
| Efa-1-45  | NZ_JVGB01000067.1 | - | 41207  | 41175  | RNA → rpmE2 (PRK01678)Ribosomal_L31 (pfam01197) → |
| Efa-1-46  | NZ_JVAI01000107.1 | + | 72273  | 72305  | RNA → rpmE2 (PRK01678)Ribosomal_L31 (pfam01197) → |
| Efa-1-47  | NZ_JVPV01000250.1 | + | 3341   | 3373   | RNA → rpmE2 (PRK01678)Ribosomal_L31 (pfam01197) → |
| Efa-1-48  | NZ_JVXC01000110.1 | + | 72810  | 72842  | RNA → rpmE2 (PRK01678)Ribosomal_L31 (pfam01197) → |
| Efa-1-49  | NZ_JVQY01000105.1 | - | 40275  | 40243  | RNA → rpmE2 (PRK01678)Ribosomal_L31 (pfam01197) → |
| Efa-1-50  | NZ_JVPJ01000031.1 | - | 150815 | 150783 | RNA → rpmE2 (PRK01678)Ribosomal_L31 (pfam01197) → |
| Efa-1-51  | NZ_JVBW01000037.1 | + | 66956  | 66988  | RNA → rpmE2 (PRK01678)Ribosomal_L31 (pfam01197) → |
| Efa-1-52  | NZ_JVBV01000042.1 | + | 72347  | 72379  | RNA → rpmE2 (PRK01678)Ribosomal_L31 (pfam01197) → |
| Efa-1-53  | NZ_JVHL01000037.1 | - | 260046 | 260014 | RNA → rpmE2 (PRK01678)Ribosomal_L31 (pfam01197) → |
| Efa-1-54  | NZ_JVOQ01000069.1 | - | 77612  | 77580  | RNA → rpmE2 (PRK01678)Ribosomal_L31 (pfam01197) → |
| Efa-1-55  | NZ_JVOG01000063.1 | - | 40276  | 40244  | RNA → rpmE2 (PRK01678)Ribosomal_L31 (pfam01197) → |
| Efa-1-56  | NZ_JVNY01000006.1 | + | 50558  | 50590  | RNA → rpmE2 (PRK01678)Ribosomal_L31 (pfam01197) → |
| Efa-1-57  | NZ_JVID01000037.1 | + | 89220  | 89252  | RNA → rpmE2 (PRK01678)Ribosomal_L31 (pfam01197) → |
| Efa-1-58  | NZ_JUJ01000069.1  | - | 3396   | 3364   | RNA → rpmE2 (PRK01678)Ribosomal_L31 (pfam01197) → |
| Efa-1-59  | NZ_JUXT01000064.1 | - | 3510   | 3478   | RNA → rpmE2 (PRK01678)Ribosomal_L31 (pfam01197) → |
| Efa-1-60  | NZ_JUQC01000149.1 | - | 23381  | 23349  | RNA → rpmE2 (PRK01678)Ribosomal_L31 (pfam01197) → |
| Efa-1-61  | NZ_JULA01000068.1 | - | 39749  | 39717  | RNA → rpmE2 (PRK01678)Ribosomal_L31 (pfam01197) → |
| Efa-1-62  | NZ_JUNN01000112.1 | + | 8486   | 8518   | RNA → rpmE2 (PRK01678)Ribosomal_L31 (pfam01197) → |
| Efa-1-63  | NZ_JUPR01000265.1 | - | 45791  | 45759  | RNA → rpmE2 (PRK01678)Ribosomal_L31 (pfam01197) → |
| Efa-1-64  | NZ_JUUM01000251.1 | + | 72669  | 72701  | RNA → rpmE2 (PRK01678)Ribosomal_L31 (pfam01197) → |
| Efa-1-65  | NZ_JUXC01000167.1 | - | 17001  | 16969  | RNA → rpmE2 (PRK01678)Ribosomal_L31 (pfam01197) → |
| Efa-1-66  | NZ_JUOP01000166.1 | + | 50540  | 50572  | RNA → rpmE2 (PRK01678)Ribosomal_L31 (pfam01197) → |
| Efa-1-67  | NZ_JUVA01000209.1 | + | 4910   | 4942   | RNA → rpmE2 (PRK01678)Ribosomal_L31 (pfam01197) → |
| Efa-1-68  | NZ_JUMJ01000040.1 | + | 50550  | 50582  | RNA → rpmE2 (PRK01678)Ribosomal_L31 (pfam01197) → |
| Efa-1-69  | NZ_JUVH01000090.1 | + | 50547  | 50579  | RNA → rpmE2 (PRK01678)Ribosomal_L31 (pfam01197) → |
| Efa-1-70  | NZ_JUWE01000037.1 | - | 23379  | 23347  | RNA → rpmE2 (PRK01678)Ribosomal_L31 (pfam01197) → |
| Efa-1-71  | NZ_JVAN01000023.1 | - | 19069  | 19037  | RNA → rpmE2 (PRK01678)Ribosomal_L31 (pfam01197) → |
| Efa-1-72  | NZ_JUNQ01000033.1 | - | 139778 | 139746 | RNA → rpmE2 (PRK01678)Ribosomal_L31 (pfam01197) → |
| Efa-1-73  | NZ_JUNL01000200.1 | + | 1215   | 1247   | RNA → rpmE2 (PRK01678)Ribosomal_L31 (pfam01197) → |
| Efa-7-1   | NZ_ASWX01000016.1 | - | 74824  | 74792  | RNA → rpmE2 (PRK01678)Ribosomal_L31 (pfam01197) → |
| Efa-267-1 | NZ_AYKL01000013.1 | - | 139637 | 139605 | RNA → rpmE2 (PRK01678)Ribosomal_L31 (pfam01197) → |
| Efa-1-74  | NZ_JPWN01000003.1 | - | 424614 | 424582 | RNA → rpmE2 (PRK01678)Ribosomal_L31 (pfam01197) → |
| Efa-271-1 | NZ_AYND01000026.1 | - | 83291  | 83259  | RNA → rpmE2 (PRK01678)Ribosomal_L31 (pfam01197) → |
| Efa-275-1 | NZ_AYLN01000020.1 | - | 38399  | 38367  | RNA → rpmE2 (PRK01678)Ribosomal_L31 (pfam01197) → |
| Efa-279-1 | NZ_AYOK01000014.1 | - | 39604  | 39572  | RNA → rpmE2 (PRK01678)Ribosomal_L31 (pfam01197) → |
| Efa-280-1 | NZ_AYOL01000011.1 | + | 15280  | 15312  | RNA → rpmE2 (PRK01678)Ribosomal_L31 (pfam01197) → |
| Efa-266-1 | NZ_AYKK01000037.1 | + | 15346  | 15378  | RNA → rpmE2 (PRK01678)Ribosomal_L31 (pfam01197) → |
| Efa-276-1 | NZ_AYKM01000017.1 | + | 50490  | 50522  | RNA → rpmE2 (PRK01678)Ribosomal_L31 (pfam01197) → |
| Efa-274-1 | NZ_ANMP01000017.1 | + | 15298  | 15330  | RNA → rpmE2 (PRK01678)Ribosomal_L31 (pfam01197) → |



|           |               |   |         |         |                                                                                               |
|-----------|---------------|---|---------|---------|-----------------------------------------------------------------------------------------------|
| Efa-309-3 | NC_004668.1   | + | 1142020 | 1142052 | RNA → rpmE2 (PRK01678)Ribosomal_L31 (pfam01197) →                                             |
| Efa-558-1 | NC_017316.1   | + | 990713  | 990745  | RNA → rpmE2 (PRK01678)Ribosomal_L31 (pfam01197) →                                             |
| Efa-29-1  | NZ_CP004081.1 | + | 1156388 | 1156420 | RNA → rpmE2 (PRK01678)Ribosomal_L31 (pfam01197) →                                             |
| Efa-550-1 | NZ_GG688629.1 | + | 120120  | 120152  | RNA → rpmE2 (PRK01678)Ribosomal_L31 (pfam01197) → rpmE2 (PRK01678)Ribosomal_L31 (pfam01197) → |
| Efa-547-1 | NZ_GG670383.1 | + | 188194  | 188226  | RNA → rpmE2 (PRK01678)Ribosomal_L31 (pfam01197) → rpmE2 (PRK01678)Ribosomal_L31 (pfam01197) → |
| Efa-565-1 | NZ_GG670369.1 | + | 117194  | 117226  | RNA → rpmE2 (PRK01678)Ribosomal_L31 (pfam01197) → rpmE2 (PRK01678)Ribosomal_L31 (pfam01197) → |
| Efa-555-1 | NZ_GG692656.1 | - | 743973  | 743941  | RNA → rpmE2 (PRK01678)Ribosomal_L31 (pfam01197) → rpmE2 (PRK01678)Ribosomal_L31 (pfam01197) → |
| Efa-570-1 | NZ_GG669017.1 | - | 1360589 | 1360557 | RNA → rpmE2 (PRK01678)Ribosomal_L31 (pfam01197) →                                             |
| Efa-564-1 | NZ_GG692851.1 | - | 1436735 | 1436703 | RNA → rpmE2 (PRK01678)Ribosomal_L31 (pfam01197) → rpmE2 (PRK01678)Ribosomal_L31 (pfam01197) → |
| Efa-554-1 | NZ_GG668819.1 | + | 119410  | 119442  | RNA → rpmE2 (PRK01678)Ribosomal_L31 (pfam01197) →                                             |
| Efa-546-1 | NZ_GG692906.1 | + | 759872  | 759904  | RNA → rpmE2 (PRK01678)Ribosomal_L31 (pfam01197) → rpmE2 (PRK01678)Ribosomal_L31 (pfam01197) → |
| Efa-563-1 | NZ_GG688647.1 | + | 124828  | 124860  | RNA → rpmE2 (PRK01678)Ribosomal_L31 (pfam01197) → rpmE2 (PRK01678)Ribosomal_L31 (pfam01197) → |
| Efa-566-1 | NZ_GG698878.1 | + | 119116  | 119148  | RNA → rpmE2 (PRK01678)Ribosomal_L31 (pfam01197) → rpmE2 (PRK01678)Ribosomal_L31 (pfam01197) → |
| Efa-548-1 | NZ_GG688666.1 | + | 121000  | 121032  | RNA → rpmE2 (PRK01678)Ribosomal_L31 (pfam01197) → rpmE2 (PRK01678)Ribosomal_L31 (pfam01197) → |
| Efa-13-1  | NZ_KK640475.1 | + | 209811  | 209843  | RNA → rpmE2 (PRK01678)Ribosomal_L31 (pfam01197) →                                             |
| Efa-307-1 | NZ_GL454691.1 | - | 3308    | 3276    | RNA → rpmE2 (PRK01678)Ribosomal_L31 (pfam01197) →                                             |
| Efa-302-1 | NZ_GL454579.1 | + | 99322   | 99354   | RNA → rpmE2 (PRK01678)Ribosomal_L31 (pfam01197) →                                             |
| Efa-569-1 | NZ_GL455684.1 | + | 72259   | 72291   | RNA → rpmE2 (PRK01678)Ribosomal_L31 (pfam01197) →                                             |
| Efa-306-1 | NZ_GL476280.1 | - | 39719   | 39687   | RNA → rpmE2 (PRK01678)Ribosomal_L31 (pfam01197) →                                             |
| Efa-305-1 | NZ_GL457030.1 | + | 98133   | 98165   | RNA → rpmE2 (PRK01678)Ribosomal_L31 (pfam01197) →                                             |
| Efa-296-1 | NZ_GL456521.1 | + | 98921   | 98953   | RNA → rpmE2 (PRK01678)Ribosomal_L31 (pfam01197) →                                             |
| Efa-301-1 | NZ_GL457177.1 | + | 98525   | 98557   | RNA → rpmE2 (PRK01678)Ribosomal_L31 (pfam01197) →                                             |
| Efa-292-1 | NZ_GL454300.1 | - | 6431    | 6399    | RNA → rpmE2 (PRK01678)Ribosomal_L31 (pfam01197) →                                             |
| Efa-293-1 | NZ_GL454272.1 | + | 99142   | 99174   | RNA → rpmE2 (PRK01678)Ribosomal_L31 (pfam01197) →                                             |
| Efa-298-1 | NZ_GL457134.1 | - | 6431    | 6399    | RNA → rpmE2 (PRK01678)Ribosomal_L31 (pfam01197) →                                             |
| Efa-304-1 | NZ_GL454064.1 | - | 6435    | 6403    | RNA → rpmE2 (PRK01678)Ribosomal_L31 (pfam01197) →                                             |
| Efa-299-1 | NZ_GL455510.1 | - | 6363    | 6331    | RNA → rpmE2 (PRK01678)Ribosomal_L31 (pfam01197) →                                             |
| Efa-295-1 | NZ_GL456440.1 | + | 97150   | 97182   | RNA → rpmE2 (PRK01678)Ribosomal_L31 (pfam01197) →                                             |
| Efa-297-1 | NZ_GL454840.1 | + | 73694   | 73726   | RNA → rpmE2 (PRK01678)Ribosomal_L31 (pfam01197) →                                             |
| Efa-12-1  | NZ_JH805581.1 | - | 73970   | 73938   | RNA → rpmE2 (PRK01678)Ribosomal_L31 (pfam01197) →                                             |
| Efa-282-1 | NZ_JH804753.1 | - | 81850   | 81818   | RNA → rpmE2 (PRK01678)Ribosomal_L31 (pfam01197) →                                             |
| Efa-269-1 | NZ_KI518257.1 | + | 122898  | 122930  | RNA → rpmE2 (PRK01678)Ribosomal_L31 (pfam01197) →                                             |
| Efa-24-1  | NZ_KI518253.1 | + | 125179  | 125211  | RNA → rpmE2 (PRK01678)Ribosomal_L31 (pfam01197) →                                             |
| Efa-25-1  | NZ_KI518248.1 | + | 118972  | 119004  | RNA → rpmE2 (PRK01678)Ribosomal_L31 (pfam01197) →                                             |
| Efa-257-1 | NZ_KI913060.1 | + | 999492  | 999524  | RNA → rpmE2 (PRK01678)Ribosomal_L31 (pfam01197) →                                             |
| Efa-261-1 | NZ_KI913085.1 | + | 715722  | 715754  | RNA → rpmE2 (PRK01678)Ribosomal_L31 (pfam01197) →                                             |
| Efa-251-1 | NZ_KI913020.1 | + | 730724  | 730756  | RNA → rpmE2 (PRK01678)Ribosomal_L31 (pfam01197) →                                             |
| Efa-244-1 | NZ_KI912988.1 | + | 1001606 | 1001638 | RNA → rpmE2 (PRK01678)Ribosomal_L31 (pfam01197) →                                             |
| Efa-248-1 | NZ_KI913005.1 | + | 642798  | 642830  | RNA → rpmE2 (PRK01678)Ribosomal_L31 (pfam01197) →                                             |
| Efa-253-1 | NZ_KI913031.1 | + | 861627  | 861659  | RNA → rpmE2 (PRK01678)Ribosomal_L31 (pfam01197) →                                             |
| Efa-237-1 | NZ_KI912926.1 | + | 1097807 | 1097839 | RNA → rpmE2 (PRK01678)Ribosomal_L31 (pfam01197) →                                             |
| Efa-256-1 | NZ_KI913055.1 | + | 119066  | 119098  | RNA → rpmE2 (PRK01678)Ribosomal_L31 (pfam01197) →                                             |
| Efa-246-1 | NZ_KI912997.1 | + | 996595  | 996627  | RNA → rpmE2 (PRK01678)Ribosomal_L31 (pfam01197) →                                             |
| Efa-264-1 | NZ_KI913096.1 | + | 119261  | 119293  | RNA → rpmE2 (PRK01678)Ribosomal_L31 (pfam01197) →                                             |
| Efa-50-1  | NZ_KB932381.1 | + | 121925  | 121957  | RNA → rpmE2 (PRK01678)Ribosomal_L31 (pfam01197) →                                             |
| Efa-213-1 | NZ_KB944581.1 | + | 247558  | 247590  | RNA → rpmE2 (PRK01678)Ribosomal_L31 (pfam01197) →                                             |
| Efa-232-1 | NZ_KB944838.1 | + | 119466  | 119498  | RNA → rpmE2 (PRK01678)Ribosomal_L31 (pfam01197) →                                             |
| Efa-56-1  | NZ_KB932331.1 | + | 160762  | 160794  | RNA → rpmE2 (PRK01678)Ribosomal_L31 (pfam01197) →                                             |
| Efa-15-1  | NZ_KB944590.1 | + | 122729  | 122761  | RNA → rpmE2 (PRK01678)Ribosomal_L31 (pfam01197) →                                             |
| Efa-206-1 | NZ_KB944678.1 | + | 122933  | 122965  | RNA → rpmE2 (PRK01678)Ribosomal_L31 (pfam01197) →                                             |
| Efa-231-1 | NZ_KB944545.1 | + | 233956  | 233988  | RNA → rpmE2 (PRK01678)Ribosomal_L31 (pfam01197) →                                             |
| Efa-49-1  | NZ_KB932337.1 | + | 157468  | 157500  | RNA → rpmE2 (PRK01678)Ribosomal_L31 (pfam01197) →                                             |

|           |               |   |         |         |                                                   |
|-----------|---------------|---|---------|---------|---------------------------------------------------|
| Efa-63-1  | NZ_KB932363.1 | + | 104909  | 104941  | RNA → rpmE2 (PRK01678)Ribosomal_L31 (pfam01197) → |
| Efa-52-1  | NZ_KB932317.1 | - | 1903453 | 1903421 | RNA → rpmE2 (PRK01678)Ribosomal_L31 (pfam01197) → |
| Efa-229-1 | NZ_KB944658.1 | + | 124147  | 124179  | RNA → rpmE2 (PRK01678)Ribosomal_L31 (pfam01197) → |
| Efa-66-1  | NZ_KB932344.1 | + | 120296  | 120328  | RNA → rpmE2 (PRK01678)Ribosomal_L31 (pfam01197) → |
| Efa-233-1 | NZ_KB944807.1 | + | 190819  | 190851  | RNA → rpmE2 (PRK01678)Ribosomal_L31 (pfam01197) → |
| Efa-224-1 | NZ_KB944819.1 | + | 123718  | 123750  | RNA → rpmE2 (PRK01678)Ribosomal_L31 (pfam01197) → |
| Efa-202-1 | NZ_KB945035.1 | + | 122741  | 122773  | RNA → rpmE2 (PRK01678)Ribosomal_L31 (pfam01197) → |
| Efa-201-1 | NZ_KB933473.1 | + | 116902  | 116934  | RNA → rpmE2 (PRK01678)Ribosomal_L31 (pfam01197) → |
| Efa-73-1  | NZ_KB932398.1 | - | 1315435 | 1315403 | RNA → rpmE2 (PRK01678)Ribosomal_L31 (pfam01197) → |
| Efa-235-1 | NZ_KB944800.1 | + | 125536  | 125568  | RNA → rpmE2 (PRK01678)Ribosomal_L31 (pfam01197) → |
| Efa-207-1 | NZ_KB944930.1 | + | 854300  | 854332  | RNA → rpmE2 (PRK01678)Ribosomal_L31 (pfam01197) → |
| Efa-70-1  | NZ_KB932385.1 | + | 120253  | 120285  | RNA → rpmE2 (PRK01678)Ribosomal_L31 (pfam01197) → |
| Efa-210-1 | NZ_KB944537.1 | + | 641238  | 641270  | RNA → rpmE2 (PRK01678)Ribosomal_L31 (pfam01197) → |
| Efa-62-1  | NZ_KB932405.1 | - | 1393944 | 1393912 | RNA → rpmE2 (PRK01678)Ribosomal_L31 (pfam01197) → |
| Efa-227-1 | NZ_KB944601.1 | + | 125725  | 125757  | RNA → rpmE2 (PRK01678)Ribosomal_L31 (pfam01197) → |
| Efa-95-1  | NZ_KB932427.1 | + | 123804  | 123836  | RNA → rpmE2 (PRK01678)Ribosomal_L31 (pfam01197) → |
| Efa-205-1 | NZ_KB944666.1 | + | 1303327 | 1303359 | RNA → rpmE2 (PRK01678)Ribosomal_L31 (pfam01197) → |
| Efa-92-1  | NZ_KB932581.1 | + | 230841  | 230873  | RNA → rpmE2 (PRK01678)Ribosomal_L31 (pfam01197) → |
| Efa-225-1 | NZ_KB944826.1 | + | 121386  | 121418  | RNA → rpmE2 (PRK01678)Ribosomal_L31 (pfam01197) → |
| Efa-54-1  | NZ_KB932324.1 | - | 1596841 | 1596809 | RNA → rpmE2 (PRK01678)Ribosomal_L31 (pfam01197) → |
| Efa-197-1 | NZ_KB945039.1 | + | 117789  | 117821  | RNA → rpmE2 (PRK01678)Ribosomal_L31 (pfam01197) → |
| Efa-65-1  | NZ_KB945185.1 | + | 122889  | 122921  | RNA → rpmE2 (PRK01678)Ribosomal_L31 (pfam01197) → |
| Efa-219-1 | NZ_KB944718.1 | + | 119546  | 119578  | RNA → rpmE2 (PRK01678)Ribosomal_L31 (pfam01197) → |
| Efa-71-1  | NZ_KB932389.1 | + | 120253  | 120285  | RNA → rpmE2 (PRK01678)Ribosomal_L31 (pfam01197) → |
| Efa-61-1  | NZ_KB945241.1 | + | 125221  | 125253  | RNA → rpmE2 (PRK01678)Ribosomal_L31 (pfam01197) → |
| Efa-209-1 | NZ_KB944833.1 | + | 125453  | 125485  | RNA → rpmE2 (PRK01678)Ribosomal_L31 (pfam01197) → |
| Efa-57-1  | NZ_KB932410.1 | + | 121919  | 121951  | RNA → rpmE2 (PRK01678)Ribosomal_L31 (pfam01197) → |
| Efa-77-1  | NZ_KB932431.1 | + | 683611  | 683643  | RNA → rpmE2 (PRK01678)Ribosomal_L31 (pfam01197) → |
| Efa-184-1 | NZ_KB946767.1 | + | 124364  | 124396  | RNA → rpmE2 (PRK01678)Ribosomal_L31 (pfam01197) → |
| Efa-99-1  | NZ_KB932453.1 | + | 124004  | 124036  | RNA → rpmE2 (PRK01678)Ribosomal_L31 (pfam01197) → |
| Efa-234-1 | NZ_KB944754.1 | + | 837249  | 837281  | RNA → rpmE2 (PRK01678)Ribosomal_L31 (pfam01197) → |
| Efa-86-1  | NZ_KB932513.1 | + | 681664  | 681696  | RNA → rpmE2 (PRK01678)Ribosomal_L31 (pfam01197) → |
| Efa-93-1  | NZ_KB932585.1 | + | 229409  | 229441  | RNA → rpmE2 (PRK01678)Ribosomal_L31 (pfam01197) → |
| Efa-75-1  | NZ_KB932562.1 | + | 663647  | 663679  | RNA → rpmE2 (PRK01678)Ribosomal_L31 (pfam01197) → |
| Efa-51-1  | NZ_KB932320.1 | - | 1554080 | 1554048 | RNA → rpmE2 (PRK01678)Ribosomal_L31 (pfam01197) → |
| Efa-108-1 | NZ_KB932479.1 | + | 121580  | 121612  | RNA → rpmE2 (PRK01678)Ribosomal_L31 (pfam01197) → |
| Efa-64-1  | NZ_KB932347.1 | - | 696492  | 696460  | RNA → rpmE2 (PRK01678)Ribosomal_L31 (pfam01197) → |
| Efa-103-1 | NZ_KB932539.1 | + | 121716  | 121748  | RNA → rpmE2 (PRK01678)Ribosomal_L31 (pfam01197) → |
| Efa-69-1  | NZ_KB932372.1 | - | 1782054 | 1782022 | RNA → rpmE2 (PRK01678)Ribosomal_L31 (pfam01197) → |
| Efa-156-1 | NZ_KB946490.1 | + | 123693  | 123725  | RNA → rpmE2 (PRK01678)Ribosomal_L31 (pfam01197) → |
| Efa-59-1  | NZ_KB932417.1 | + | 122720  | 122752  | RNA → rpmE2 (PRK01678)Ribosomal_L31 (pfam01197) → |
| Efa-78-1  | NZ_KB932437.1 | + | 2252823 | 2252855 | RNA → rpmE2 (PRK01678)Ribosomal_L31 (pfam01197) → |
| Efa-181-1 | NZ_KB947238.1 | + | 125685  | 125717  | RNA → rpmE2 (PRK01678)Ribosomal_L31 (pfam01197) → |
| Efa-83-1  | NZ_KB932490.1 | + | 123557  | 123589  | RNA → rpmE2 (PRK01678)Ribosomal_L31 (pfam01197) → |
| Efa-90-1  | NZ_KB932574.1 | + | 123230  | 123262  | RNA → rpmE2 (PRK01678)Ribosomal_L31 (pfam01197) → |
| Efa-48-1  | NZ_KB932356.1 | + | 156551  | 156583  | RNA → rpmE2 (PRK01678)Ribosomal_L31 (pfam01197) → |
| Efa-230-1 | NZ_KB944688.1 | + | 122685  | 122717  | RNA → rpmE2 (PRK01678)Ribosomal_L31 (pfam01197) → |
| Efa-100-1 | NZ_KB932473.1 | + | 698382  | 698414  | RNA → rpmE2 (PRK01678)Ribosomal_L31 (pfam01197) → |
| Efa-211-1 | NZ_KB944694.1 | + | 122838  | 122870  | RNA → rpmE2 (PRK01678)Ribosomal_L31 (pfam01197) → |
| Efa-105-1 | NZ_KB932593.1 | + | 185323  | 185355  | RNA → rpmE2 (PRK01678)Ribosomal_L31 (pfam01197) → |
| Efa-85-1  | NZ_KB932506.1 | + | 121940  | 121972  | RNA → rpmE2 (PRK01678)Ribosomal_L31 (pfam01197) → |
| Efa-153-1 | NZ_KB946414.1 | + | 120628  | 120660  | RNA → rpmE2 (PRK01678)Ribosomal_L31 (pfam01197) → |

|           |               |   |         |         |                                                   |
|-----------|---------------|---|---------|---------|---------------------------------------------------|
| Efa-97-1  | NZ_KB932559.1 | + | 123243  | 123275  | RNA → rpmE2 (PRK01678)Ribosomal_L31 (pfam01197) → |
| Efa-158-1 | NZ_KB946508.1 | + | 125411  | 125443  | RNA → rpmE2 (PRK01678)Ribosomal_L31 (pfam01197) → |
| Efa-55-1  | NZ_KB945106.1 | + | 124044  | 124076  | RNA → rpmE2 (PRK01678)Ribosomal_L31 (pfam01197) → |
| Efa-182-1 | NZ_KB946719.1 | + | 944180  | 944212  | RNA → rpmE2 (PRK01678)Ribosomal_L31 (pfam01197) → |
| Efa-212-1 | NZ_KB944552.1 | + | 121578  | 121610  | RNA → rpmE2 (PRK01678)Ribosomal_L31 (pfam01197) → |
| Efa-72-1  | NZ_KB932393.1 | - | 1371754 | 1371722 | RNA → rpmE2 (PRK01678)Ribosomal_L31 (pfam01197) → |
| Efa-58-1  | NZ_KB932415.1 | + | 909832  | 909864  | RNA → rpmE2 (PRK01678)Ribosomal_L31 (pfam01197) → |
| Efa-185-1 | NZ_KB947273.1 | + | 125433  | 125465  | RNA → rpmE2 (PRK01678)Ribosomal_L31 (pfam01197) → |
| Efa-60-1  | NZ_KB932422.1 | - | 1981852 | 1981820 | RNA → rpmE2 (PRK01678)Ribosomal_L31 (pfam01197) → |
| Efa-226-1 | NZ_KB944566.1 | + | 121785  | 121817  | RNA → rpmE2 (PRK01678)Ribosomal_L31 (pfam01197) → |
| Efa-199-1 | NZ_KB945052.1 | + | 119630  | 119662  | RNA → rpmE2 (PRK01678)Ribosomal_L31 (pfam01197) → |
| Efa-79-1  | NZ_KB932442.1 | + | 121860  | 121892  | RNA → rpmE2 (PRK01678)Ribosomal_L31 (pfam01197) → |
| Efa-102-1 | NZ_KB932532.1 | + | 118858  | 118890  | RNA → rpmE2 (PRK01678)Ribosomal_L31 (pfam01197) → |
| Efa-80-1  | NZ_KB932457.1 | + | 123784  | 123816  | RNA → rpmE2 (PRK01678)Ribosomal_L31 (pfam01197) → |
| Efa-74-1  | NZ_KB932469.1 | + | 697454  | 697486  | RNA → rpmE2 (PRK01678)Ribosomal_L31 (pfam01197) → |
| Efa-84-1  | NZ_KB932497.1 | + | 124103  | 124135  | RNA → rpmE2 (PRK01678)Ribosomal_L31 (pfam01197) → |
| Efa-101-1 | NZ_KB932518.1 | + | 685526  | 685558  | RNA → rpmE2 (PRK01678)Ribosomal_L31 (pfam01197) → |
| Efa-180-1 | NZ_KB947112.1 | + | 654286  | 654318  | RNA → rpmE2 (PRK01678)Ribosomal_L31 (pfam01197) → |
| Efa-88-1  | NZ_KB932527.1 | + | 119530  | 119562  | RNA → rpmE2 (PRK01678)Ribosomal_L31 (pfam01197) → |
| Efa-220-1 | NZ_KB944728.1 | + | 122601  | 122633  | RNA → rpmE2 (PRK01678)Ribosomal_L31 (pfam01197) → |
| Efa-91-1  | NZ_KB932577.1 | + | 229782  | 229814  | RNA → rpmE2 (PRK01678)Ribosomal_L31 (pfam01197) → |
| Efa-154-1 | NZ_KB946433.1 | + | 119307  | 119339  | RNA → rpmE2 (PRK01678)Ribosomal_L31 (pfam01197) → |
| Efa-161-1 | NZ_KB946666.1 | + | 115624  | 115656  | RNA → rpmE2 (PRK01678)Ribosomal_L31 (pfam01197) → |
| Efa-163-1 | NZ_KB946616.1 | + | 125518  | 125550  | RNA → rpmE2 (PRK01678)Ribosomal_L31 (pfam01197) → |
| Efa-53-1  | NZ_KB932336.1 | + | 887741  | 887773  | RNA → rpmE2 (PRK01678)Ribosomal_L31 (pfam01197) → |
| Efa-98-1  | NZ_KB932447.1 | + | 118980  | 119012  | RNA → rpmE2 (PRK01678)Ribosomal_L31 (pfam01197) → |
| Efa-107-1 | NZ_KB932601.1 | + | 230184  | 230216  | RNA → rpmE2 (PRK01678)Ribosomal_L31 (pfam01197) → |
| Efa-157-1 | NZ_KB946499.1 | + | 125503  | 125535  | RNA → rpmE2 (PRK01678)Ribosomal_L31 (pfam01197) → |
| Efa-160-1 | NZ_KB946551.1 | + | 122102  | 122134  | RNA → rpmE2 (PRK01678)Ribosomal_L31 (pfam01197) → |
| Efa-94-1  | NZ_KB932589.1 | + | 223552  | 223584  | RNA → rpmE2 (PRK01678)Ribosomal_L31 (pfam01197) → |
| Efa-186-1 | NZ_KB947205.1 | + | 126658  | 126690  | RNA → rpmE2 (PRK01678)Ribosomal_L31 (pfam01197) → |
| Efa-123-1 | NZ_KB948613.1 | + | 692248  | 692280  | RNA → rpmE2 (PRK01678)Ribosomal_L31 (pfam01197) → |
| Efa-109-1 | NZ_KB932435.1 | + | 903029  | 903061  | RNA → rpmE2 (PRK01678)Ribosomal_L31 (pfam01197) → |
| Efa-89-1  | NZ_KB932545.1 | + | 118833  | 118865  | RNA → rpmE2 (PRK01678)Ribosomal_L31 (pfam01197) → |
| Efa-76-1  | NZ_KB932553.1 | + | 688587  | 688619  | RNA → rpmE2 (PRK01678)Ribosomal_L31 (pfam01197) → |
| Efa-106-1 | NZ_KB932597.1 | + | 227160  | 227192  | RNA → rpmE2 (PRK01678)Ribosomal_L31 (pfam01197) → |
| Efa-178-1 | NZ_KB947149.1 | + | 1211418 | 1211450 | RNA → rpmE2 (PRK01678)Ribosomal_L31 (pfam01197) → |
| Efa-170-1 | NZ_KB947405.1 | + | 113537  | 113569  | RNA → rpmE2 (PRK01678)Ribosomal_L31 (pfam01197) → |
| Efa-21-1  | NZ_KB944862.1 | + | 135281  | 135313  | RNA → rpmE2 (PRK01678)Ribosomal_L31 (pfam01197) → |
| Efa-208-1 | NZ_KB944938.1 | + | 119215  | 119247  | RNA → rpmE2 (PRK01678)Ribosomal_L31 (pfam01197) → |
| Efa-151-1 | NZ_KB946400.1 | + | 121933  | 121965  | RNA → rpmE2 (PRK01678)Ribosomal_L31 (pfam01197) → |
| Efa-144-1 | NZ_KB946638.1 | + | 122019  | 122051  | RNA → rpmE2 (PRK01678)Ribosomal_L31 (pfam01197) → |
| Efa-166-1 | NZ_KB947183.1 | + | 852047  | 852079  | RNA → rpmE2 (PRK01678)Ribosomal_L31 (pfam01197) → |
| Efa-173-1 | NZ_KB947341.1 | + | 861817  | 861849  | RNA → rpmE2 (PRK01678)Ribosomal_L31 (pfam01197) → |
| Efa-118-1 | NZ_KB948491.1 | + | 118961  | 118993  | RNA → rpmE2 (PRK01678)Ribosomal_L31 (pfam01197) → |
| Efa-81-1  | NZ_KB932465.1 | + | 122091  | 122123  | RNA → rpmE2 (PRK01678)Ribosomal_L31 (pfam01197) → |
| Efa-87-1  | NZ_KB932522.1 | + | 707656  | 707688  | RNA → rpmE2 (PRK01678)Ribosomal_L31 (pfam01197) → |
| Efa-96-1  | NZ_KB932550.1 | + | 119174  | 119206  | RNA → rpmE2 (PRK01678)Ribosomal_L31 (pfam01197) → |
| Efa-147-1 | NZ_KB946069.1 | + | 834258  | 834290  | RNA → rpmE2 (PRK01678)Ribosomal_L31 (pfam01197) → |
| Efa-148-1 | NZ_KB946181.1 | + | 121938  | 121970  | RNA → rpmE2 (PRK01678)Ribosomal_L31 (pfam01197) → |
| Efa-192-1 | NZ_KB947132.1 | + | 903557  | 903589  | RNA → rpmE2 (PRK01678)Ribosomal_L31 (pfam01197) → |
| Efa-164-1 | NZ_KB946584.1 | + | 846944  | 846976  | RNA → rpmE2 (PRK01678)Ribosomal_L31 (pfam01197) → |



|           |               |   |         |         |       |                                                                                          |
|-----------|---------------|---|---------|---------|-------|------------------------------------------------------------------------------------------|
| Efa-183-1 | NZ_KB947346.1 | + | 912443  | 912475  | RNA → | rpmE2 (PRK01678)Ribosomal_L31 (pfam01197) →                                              |
| Efa-117-1 | NZ_KB948452.1 | + | 121982  | 122014  | RNA → | rpmE2 (PRK01678)Ribosomal_L31 (pfam01197) →                                              |
| Efa-121-1 | NZ_KB948631.1 | + | 118986  | 119018  | RNA → | rpmE2 (PRK01678)Ribosomal_L31 (pfam01197) →                                              |
| Efa-139-1 | NZ_KB949292.1 | + | 118895  | 118927  | RNA → | rpmE2 (PRK01678)Ribosomal_L31 (pfam01197) →                                              |
| Efa-159-1 | NZ_KB946519.1 | + | 746880  | 746912  | RNA → | rpmE2 (PRK01678)Ribosomal_L31 (pfam01197) →                                              |
| Efa-111-1 | NZ_KB948306.1 | + | 692749  | 692781  | RNA → | rpmE2 (PRK01678)Ribosomal_L31 (pfam01197) →                                              |
| Efa-113-1 | NZ_KB948374.1 | + | 121434  | 121466  | RNA → | rpmE2 (PRK01678)Ribosomal_L31 (pfam01197) →                                              |
| Efa-134-1 | NZ_KB949098.1 | + | 679266  | 679298  | RNA → | rpmE2 (PRK01678)Ribosomal_L31 (pfam01197) →                                              |
| Efa-115-1 | NZ_KB948411.1 | + | 124207  | 124239  | RNA → | rpmE2 (PRK01678)Ribosomal_L31 (pfam01197) →                                              |
| Efa-128-1 | NZ_KB948910.1 | + | 125113  | 125145  | RNA → | rpmE2 (PRK01678)Ribosomal_L31 (pfam01197) →                                              |
| Efa-142-1 | NZ_KB949380.1 | + | 121687  | 121719  | RNA → | rpmE2 (PRK01678)Ribosomal_L31 (pfam01197) →                                              |
| Efa-194-1 | NZ_KB947266.1 | + | 125568  | 125600  | RNA → | rpmE2 (PRK01678)Ribosomal_L31 (pfam01197) →                                              |
| Efa-116-1 | NZ_KB948432.1 | + | 119775  | 119807  | RNA → | rpmE2 (PRK01678)Ribosomal_L31 (pfam01197) →                                              |
| Efa-124-1 | NZ_KB948773.1 | + | 122070  | 122102  | RNA → | rpmE2 (PRK01678)Ribosomal_L31 (pfam01197) →                                              |
| Efa-129-1 | NZ_KB948924.1 | + | 681265  | 681297  | RNA → | rpmE2 (PRK01678)Ribosomal_L31 (pfam01197) →                                              |
| Efa-189-1 | NZ_KB947291.1 | + | 120577  | 120609  | RNA → | rpmE2 (PRK01678)Ribosomal_L31 (pfam01197) →                                              |
| Efa-146-1 | NZ_KB949772.1 | + | 1111167 | 1111199 | RNA → | rpmE2 (PRK01678)Ribosomal_L31 (pfam01197) →                                              |
| Efa-110-1 | NZ_KB948281.1 | + | 119213  | 119245  | RNA → | rpmE2 (PRK01678)Ribosomal_L31 (pfam01197) →                                              |
| Efa-120-1 | NZ_KB948590.1 | + | 120205  | 120237  | RNA → | rpmE2 (PRK01678)Ribosomal_L31 (pfam01197) →                                              |
| Efa-190-1 | NZ_KB947168.1 | + | 124005  | 124037  | RNA → | rpmE2 (PRK01678)Ribosomal_L31 (pfam01197) →                                              |
| Efa-204-1 | NZ_KB947484.1 | + | 121690  | 121722  | RNA → | rpmE2 (PRK01678)Ribosomal_L31 (pfam01197) →                                              |
| Efa-137-1 | NZ_KB949231.1 | + | 119523  | 119555  | RNA → | rpmE2 (PRK01678)Ribosomal_L31 (pfam01197) →                                              |
| Efa-125-1 | NZ_KB948803.1 | + | 121909  | 121941  | RNA → | rpmE2 (PRK01678)Ribosomal_L31 (pfam01197) →                                              |
| Efa-133-1 | NZ_KB949059.1 | + | 676773  | 676805  | RNA → | rpmE2 (PRK01678)Ribosomal_L31 (pfam01197) →                                              |
| Efa-130-1 | NZ_KB948962.1 | + | 121896  | 121928  | RNA → | rpmE2 (PRK01678)Ribosomal_L31 (pfam01197) →                                              |
| Efa-135-1 | NZ_KB949160.1 | + | 121821  | 121853  | RNA → | rpmE2 (PRK01678)Ribosomal_L31 (pfam01197) →                                              |
| Efa-119-1 | NZ_KB948517.1 | + | 121976  | 122008  | RNA → | rpmE2 (PRK01678)Ribosomal_L31 (pfam01197) →                                              |
| Efa-143-1 | NZ_KB948681.1 | + | 121876  | 121908  | RNA → | rpmE2 (PRK01678)Ribosomal_L31 (pfam01197) →                                              |
| Efa-122-1 | NZ_KB948722.1 | + | 687418  | 687450  | RNA → | rpmE2 (PRK01678)Ribosomal_L31 (pfam01197) →                                              |
| Efa-126-1 | NZ_KB948846.1 | + | 119055  | 119087  | RNA → | rpmE2 (PRK01678)Ribosomal_L31 (pfam01197) →                                              |
| Efa-127-1 | NZ_KB948878.1 | + | 118805  | 118837  | RNA → | rpmE2 (PRK01678)Ribosomal_L31 (pfam01197) →                                              |
| Efa-141-1 | NZ_KB949363.1 | + | 123019  | 123051  | RNA → | rpmE2 (PRK01678)Ribosomal_L31 (pfam01197) →                                              |
| Efa-131-1 | NZ_KB948990.1 | + | 122095  | 122127  | RNA → | rpmE2 (PRK01678)Ribosomal_L31 (pfam01197) →                                              |
| Efa-132-1 | NZ_KB949021.1 | + | 123650  | 123682  | RNA → | rpmE2 (PRK01678)Ribosomal_L31 (pfam01197) →                                              |
| Efa-136-1 | NZ_KB949171.1 | + | 652090  | 652122  | RNA → | rpmE2 (PRK01678)Ribosomal_L31 (pfam01197) →                                              |
| Efa-112-1 | NZ_KB948356.1 | + | 692356  | 692388  | RNA → | rpmE2 (PRK01678)Ribosomal_L31 (pfam01197) →                                              |
| Efa-140-1 | NZ_KB949324.1 | + | 694227  | 694259  | RNA → | rpmE2 (PRK01678)Ribosomal_L31 (pfam01197) →                                              |
| Efa-236-1 | NZ_KB948740.1 | + | 118896  | 118928  | RNA → | rpmE2 (PRK01678)Ribosomal_L31 (pfam01197) →                                              |
| Efa-138-1 | NZ_KB949265.1 | + | 686455  | 686487  | RNA → | rpmE2 (PRK01678)Ribosomal_L31 (pfam01197) →                                              |
| Efa-309-1 | NZ_KE136528.1 | + | 119156  | 119188  | RNA → | rpmE2 (PRK01678)Ribosomal_L31 (pfam01197) →                                              |
| Efa-309-2 | NZ_KE136402.1 | - | 2324068 | 2324036 | RNA → | rpmE2 (PRK01678)Ribosomal_L31 (pfam01197) →                                              |
| Efa-283-1 | NZ_KE351799.1 | - | 6437    | 6405    | RNA → | rpmE2 (PRK01678)Ribosomal_L31 (pfam01197) →                                              |
| Efa-26-1  | NZ_KE351073.1 | + | 72178   | 72210   | RNA → | rpmE2 (PRK01678)Ribosomal_L31 (pfam01197) →                                              |
| Efa-5-1   | NZ_KE351325.1 | + | 7087    | 7119    | RNA → | rpmE2 (PRK01678)Ribosomal_L31 (pfam01197) →                                              |
| Efa-2-1   | NZ_KE350972.1 | + | 65344   | 65376   | RNA → | rpmE2 (PRK01678)Ribosomal_L31 (pfam01197) → hypo → DUF916 (pfam06030)DUF3324 (pfam11797) |
| Efa-310-1 | NZ_KE352642.1 | + | 15337   | 15369   | RNA → | rpmE2 (PRK01678)Ribosomal_L31 (pfam01197) →                                              |
| Efa-284-1 | NZ_KE352762.1 | + | 15329   | 15361   | RNA → | rpmE2 (PRK01678)Ribosomal_L31 (pfam01197) →                                              |
| Efa-265-1 | NZ_KE351588.1 | - | 236352  | 236320  | RNA → | rpmE2 (PRK01678)Ribosomal_L31 (pfam01197) →                                              |
| Efa-6-1   | NZ_KE351218.1 | + | 7091    | 7123    | RNA → | rpmE2 (PRK01678)Ribosomal_L31 (pfam01197) →                                              |
| Efa-270-1 | NZ_KE350323.1 | - | 128689  | 128657  | RNA → | rpmE2 (PRK01678)Ribosomal_L31 (pfam01197) →                                              |
| Efa-272-1 | NZ_KE352792.1 | + | 15345   | 15377   | RNA → | rpmE2 (PRK01678)Ribosomal_L31 (pfam01197) →                                              |
| Efa-47-1  | NZ_KL584693.1 | - | 424542  | 424510  | RNA → | rpmE2 (PRK01678)Ribosomal_L31 (pfam01197) →                                              |

|           |                     |   |         |         |                                                                                               |
|-----------|---------------------|---|---------|---------|-----------------------------------------------------------------------------------------------|
| Efa-277-1 | NZ_AYOJ01000045.1   | + | 50557   | 50589   | RNA → rpmE2 (PRK01678)Ribosomal_L31 (pfam01197) →                                             |
| Efa-1-75  | NZ_JSES01000004.1   | - | 229328  | 229296  | RNA → rpmE2 (PRK01678)Ribosomal_L31 (pfam01197) →                                             |
| Efa-1-76  | NZ_JTKS01000008.1   | + | 98901   | 98933   | RNA → rpmE2 (PRK01678)Ribosomal_L31 (pfam01197) →                                             |
| Efa-1-77  | NZ_JTKU01000015.1   | - | 557832  | 557800  | RNA → rpmE2 (PRK01678)Ribosomal_L31 (pfam01197) →                                             |
| Efa-1-78  | NZ_JTKX01000056.1   | + | 101015  | 101047  | RNA → rpmE2 (PRK01678)Ribosomal_L31 (pfam01197) →                                             |
| Efa-1-79  | NZ_JTKV01000020.1   | - | 229146  | 229114  | RNA → rpmE2 (PRK01678)Ribosomal_L31 (pfam01197) →                                             |
| Efa-1-80  | NZ_JQHD01000026.1   | - | 3289    | 3257    | RNA → rpmE2 (PRK01678)Ribosomal_L31 (pfam01197) →                                             |
| Efa-1-81  | NZ_JWAR01000070.1   | - | 87014   | 86982   | RNA → rpmE2 (PRK01678)Ribosomal_L31 (pfam01197) →                                             |
| Efa-1-82  | NZ_JVAD01000032.1   | - | 86836   | 86804   | RNA → rpmE2 (PRK01678)Ribosomal_L31 (pfam01197) →                                             |
| Efa-1-83  | NZ_JVDH01000056.1   | - | 120626  | 120594  | RNA → rpmE2 (PRK01678)Ribosomal_L31 (pfam01197) →                                             |
| Efa-1-84  | NZ_JUXV01000036.1   | - | 86836   | 86804   | RNA → rpmE2 (PRK01678)Ribosomal_L31 (pfam01197) →                                             |
| Efa-1-85  | NZ_JUXZ01000087.1   | + | 50554   | 50586   | RNA → rpmE2 (PRK01678)Ribosomal_L31 (pfam01197) →                                             |
| Efa-1-86  | NZ_JUXL01000154.1   | + | 5045    | 5077    | RNA → rpmE2 (PRK01678)Ribosomal_L31 (pfam01197) →                                             |
| Efa-1-87  | NZ_JUYS01000097.1   | + | 15659   | 15691   | RNA → rpmE2 (PRK01678)Ribosomal_L31 (pfam01197) →                                             |
| Efa-568-1 | NZ_GG668922.1       | + | 118017  | 118049  | RNA → rpmE2 (PRK01678)Ribosomal_L31 (pfam01197) →                                             |
| Efa-38-1  | NZ_JH805817.1       | + | 98302   | 98334   | RNA → rpmE2 (PRK01678)Ribosomal_L31 (pfam01197) →                                             |
| Efa-33-1  | NZ_JH806227.1       | + | 15338   | 15370   | RNA → rpmE2 (PRK01678)Ribosomal_L31 (pfam01197) →                                             |
| Efa-32-1  | NZ_JH806069.1       | + | 98267   | 98299   | RNA → rpmE2 (PRK01678)Ribosomal_L31 (pfam01197) →                                             |
| Efa-35-1  | NZ_JH806464.1       | - | 198218  | 198186  | RNA → rpmE2 (PRK01678)Ribosomal_L31 (pfam01197) →                                             |
| Efa-34-1  | NZ_JH806329.1       | + | 72149   | 72181   | RNA → rpmE2 (PRK01678)Ribosomal_L31 (pfam01197) →                                             |
| Efa-37-1  | NZ_JH805939.1       | - | 198203  | 198171  | RNA → rpmE2 (PRK01678)Ribosomal_L31 (pfam01197) →                                             |
| Efa-42-1  | NZ_JH805527.1       | + | 75536   | 75568   | RNA → rpmE2 (PRK01678)Ribosomal_L31 (pfam01197) →                                             |
| Efa-31-1  | NZ_JH805886.1       | + | 72171   | 72203   | RNA → rpmE2 (PRK01678)Ribosomal_L31 (pfam01197) →                                             |
| Efa-36-1  | NZ_JH806144.1       | - | 198240  | 198208  | RNA → rpmE2 (PRK01678)Ribosomal_L31 (pfam01197) →                                             |
| Efa-43-1  | NZ_JH805255.1       | - | 198654  | 198622  | RNA → rpmE2 (PRK01678)Ribosomal_L31 (pfam01197) →                                             |
| Efa-46-1  | NZ_JH804975.1       | + | 15342   | 15374   | RNA → rpmE2 (PRK01678)Ribosomal_L31 (pfam01197) →                                             |
| Efa-41-1  | NZ_JH805339.1       | + | 72173   | 72205   | RNA → rpmE2 (PRK01678)Ribosomal_L31 (pfam01197) →                                             |
| Efa-44-1  | NZ_JH805118.1       | + | 15343   | 15375   | RNA → rpmE2 (PRK01678)Ribosomal_L31 (pfam01197) →                                             |
| Efa-39-1  | NZ_JH805694.1       | - | 198161  | 198129  | RNA → rpmE2 (PRK01678)Ribosomal_L31 (pfam01197) →                                             |
| Efa-45-1  | NZ_JH804884.1       | - | 198224  | 198192  | RNA → rpmE2 (PRK01678)Ribosomal_L31 (pfam01197) →                                             |
| Efa-223-1 | NZ_KB944788.1       | + | 121130  | 121162  | RNA → rpmE2 (PRK01678)Ribosomal_L31 (pfam01197) →                                             |
| Efa-150-1 | NZ_KB946369.1       | + | 121423  | 121455  | RNA → rpmE2 (PRK01678)Ribosomal_L31 (pfam01197) →                                             |
| Efa-149-1 | NZ_KB946341.1       | + | 120776  | 120808  | RNA → rpmE2 (PRK01678)Ribosomal_L31 (pfam01197) →                                             |
| Efa-114-1 | NZ_KB948391.1       | + | 123030  | 123062  | RNA → rpmE2 (PRK01678)Ribosomal_L31 (pfam01197) →                                             |
| Efa-155-1 | NZ_KB946441.1       | + | 121214  | 121246  | RNA → rpmE2 (PRK01678)Ribosomal_L31 (pfam01197) →                                             |
| Efa-40-1  | NZ_JH805440.1       | - | 198081  | 198049  | RNA → rpmE2 (PRK01678)Ribosomal_L31 (pfam01197) →                                             |
| Efa-82-1  | NZ_KB932483.1       | + | 121271  | 121303  | RNA → rpmE2 (PRK01678)Ribosomal_L31 (pfam01197) →                                             |
| Csp-3-1   | NZ_JTLM01000039.1   | + | 16014   | 16047   | RNA → rpmE2 (PRK01678)Ribosomal_L31 (pfam01197) →                                             |
| Eca-1-1   | NZ_KB946333.1       | + | 919506  | 919538  | RNA → rpmE2 (PRK01678)Ribosomal_L31 (pfam01197) →                                             |
| Emo-1-1   | NZ_KB946318.1       | + | 836233  | 836265  | RNA → rpmE2 (PRK01678)Ribosomal_L31 (pfam01197) →                                             |
| Eha-1-1   | NZ_KB946315.1       | + | 715011  | 715043  | RNA → rpmE2 (PRK01678)Ribosomal_L31 (pfam01197) →                                             |
| Esp-17-1  | NZ_AYPQ01000003.1   | - | 139381  | 139349  | RNA → rpmE2 (PRK01678)Ribosomal_L31 (pfam01197) →                                             |
| Edi-1-1   | NZ_KE136354.1       | - | 1524939 | 1524907 | RNA → rpmE2 (PRK01678)Ribosomal_L31 (pfam01197) → rpmE2 (PRK01678)Ribosomal_L31 (pfam01197) → |
| Lap-2-1   | NZ_BAMM01000001.1   | + | 55628   | 55660   | RNA → rpmE2 (PRK01678)Ribosomal_L31 (pfam01197) →                                             |
| env-1488  | AglaG_GBVDVL01EDQX8 | + | 207     | 239     | RNA →                                                                                         |
| Ega-1-1   | NZ_JMGP01000013.1   | + | 62327   | 62359   | RNA → rpmE2 (PRK01678)Ribosomal_L31 (pfam01197) →                                             |
| Ega-2-1   | NZ_GG670288.1       | + | 67876   | 67908   | RNA → rpmE2 (PRK01678)Ribosomal_L31 (pfam01197) → hypo →                                      |
| Esa-1-1   | NZ_JH376940.1       | + | 68614   | 68646   | RNA → rpmE2 (PRK01678)Ribosomal_L31 (pfam01197) →                                             |
| Ega-1-2   | NZ_JNLR01000003.1   | - | 2516883 | 2516851 | RNA → rpmE2 (PRK01678)Ribosomal_L31 (pfam01197) →                                             |
| Eco-1-1   | NZ_KB890286.1       | + | 27222   | 27254   | RNA → rpmE2 (PRK01678)Ribosomal_L31 (pfam01197) →                                             |
| Lha-3-1   | NZ_BAML01000008.1   | - | 24487   | 24455   | RNA → rpmE2 (PRK01678)Ribosomal_L31 (pfam01197) → hypo →                                      |
| Leq-1-1   | NZ_AWWH01000135.1   | + | 28867   | 28900   | RNA → rpmE2 (PRK01678)Ribosomal_L31 (pfam01197) →                                             |



|           |                                 |   |         |         |                                                                                                                                        |
|-----------|---------------------------------|---|---------|---------|----------------------------------------------------------------------------------------------------------------------------------------|
| Leq-2-1   | NZ_BAMI01000008.1               | - | 21982   | 21949   | RNA → rpmE2 (PRK01678)Ribosomal_L31 (pfam01197) →                                                                                      |
| env-1489  | 2204882122                      | - | 2442    | 2410    | RNA → rpmE2 (PRK01678)Ribosomal_L31 (pfam01197) →                                                                                      |
| env-1490  | 2158238682                      | + | 11762   | 11794   | RNA → rpmE2 (PRK01678)Ribosomal_L31 (pfam01197) →                                                                                      |
| Bok-2-1   | NZ_LILD01000001.1               | + | 243048  | 243079  | RNA → rpmE2 (PRK01678)Ribosomal_L31 (pfam01197) →                                                                                      |
| Bha-1-1   | NC_002570.2                     | - | 3899644 | 3899613 | RNA → rpmE2 (PRK01678)Ribosomal_L31 (pfam01197) →                                                                                      |
| Wko-2-1   | NC_015759.1                     | - | 274266  | 274233  | RNA → rpmE2 (PRK01678)Ribosomal_L31 (pfam01197) →                                                                                      |
| Wko-1-1   | NZ_AKGG01000014.1               | - | 93148   | 93115   | RNA → rpmE2 (PRK01678)Ribosomal_L31 (pfam01197) →                                                                                      |
| Bma-8-1   | NZ_CDP01000002.1                | - | 333009  | 332973  | RNA → rpmE (PRK00019)Ribosomal_L31 (pfam01197) → Lactamase_B (smart00849)PhnP (COG1235) → PRK00103 (PRK00103)SPOUT_MTase (pfam02590) → |
| env-1491  | AKYZ01003788.1                  | - | 1483    | 1450    | RNA → rpmE (PRK00019)Ribosomal_L31 (pfam01197) →                                                                                       |
| env-1492  | AKZA01003178.1                  | + | 2474    | 2507    | RNA → rpmE (PRK00019)Ribosomal_L31 (pfam01197) →                                                                                       |
| env-1493  | SRS011586_C3401226              | - | 110     | 77      | RNA → rpmE (PRK00019)rpmE2 (PRK01678)Ribosomal_L31 (pfam01197) →                                                                       |
| env-1494  | SRS017521_C2775917              | + | 102     | 135     | RNA → rpmE (PRK00019)Ribosomal_L31 (pfam01197) →                                                                                       |
| Csp-7-1   | NZ_AKCB01000001.1               | - | 1308492 | 1308459 | RNA → rpmE (PRK00019)Ribosomal_L31 (pfam01197) →                                                                                       |
| Csp-5-1   | NZ_GL636577.1                   | + | 412437  | 412470  | RNA → rpmE (PRK00019)Ribosomal_L31 (pfam01197) →                                                                                       |
| env-1495  | BAAV01014627.1                  | - | 242     | 209     | RNA → rpmE (PRK00019)Ribosomal_L31 (pfam01197) →                                                                                       |
| env-1496  | scaffold83146_5_MH0053          | - | 142     | 109     | RNA → rpmE (PRK00019)Ribosomal_L31 (pfam01197) →                                                                                       |
| env-1497  | scaffold10346_4_MH0082          | - | 929     | 896     | RNA → rpmE (PRK00019)Ribosomal_L31 (pfam01197) →                                                                                       |
| env-1498  | scaffold21466_3_MH0083          | - | 331     | 298     | RNA → rpmE (PRK00019)Ribosomal_L31 (pfam01197) →                                                                                       |
| env-1499  | scaffold30922_4_O2.UC-12        | + | 780     | 813     | RNA → rpmE (PRK00019)Ribosomal_L31 (pfam01197) →                                                                                       |
| env-1500  | scaffold47149_2_V1.CD-6         | + | 2716    | 2749    | RNA → rpmE (PRK00019)Ribosomal_L31 (pfam01197) →                                                                                       |
| env-1501  | scaffold42088_2_V1.UC-14        | - | 149     | 116     | RNA → rpmE (PRK00019)Ribosomal_L31 (pfam01197) →                                                                                       |
| env-1502  | 4491405_3_NODE.38711            | - | 355     | 322     | RNA → rpmE (PRK00019)Ribosomal_L31 (pfam01197) →                                                                                       |
| env-1503  | NLM004_scaffold5032_16          | + | 1211    | 1244    | RNA → rpmE (PRK00019)Ribosomal_L31 (pfam01197) →                                                                                       |
| env-1504  | SRS011134_Baylor_scaffold_20481 | + | 1045    | 1078    | RNA →                                                                                                                                  |
| env-1505  | SRS014683_WUGC_scaffold_50673   | + | 1869    | 1902    | RNA → rpmE (PRK00019)Ribosomal_L31 (pfam01197) →                                                                                       |
| env-1506  | SRS019582_C3007814              | + | 421     | 454     | RNA → rpmE (PRK00019)Ribosomal_L31 (pfam01197) →                                                                                       |
| env-1507  | SRS049712_C15539391             | - | 84      | 51      | RNA →                                                                                                                                  |
| env-1508  | 4448807_3_Contig4303            | + | 447     | 480     | RNA → rpmE (PRK00019)Ribosomal_L31 (pfam01197) →                                                                                       |
| env-1509  | scaffold112155_1_MH0012         | - | 1337    | 1304    | RNA → rpmE (PRK00019)Ribosomal_L31 (pfam01197) →                                                                                       |
| Cmi-1-1   | NZ_ACCK01000449.1               | - | 23456   | 23423   | RNA → rpmE (PRK00019)Ribosomal_L31 (pfam01197) → rpmE (PRK00019)Ribosomal_L31 (pfam01197) →                                            |
| env-1510  | 4448819_3_Contig3697            | - | 316     | 283     | RNA → rpmE (PRK00019)Ribosomal_L31 (pfam01197) →                                                                                       |
| CSt-1-1   | NZ_HG005284.1                   | - | 229433  | 229400  | RNA → rpmE (PRK00019)Ribosomal_L31 (pfam01197) →                                                                                       |
| env-1511  | SRS019601_C2033027              | + | 1675    | 1708    | RNA → rpmE (PRK00019)Ribosomal_L31 (pfam01197) →                                                                                       |
| env-1512  | 2211711892                      | + | 393     | 426     | RNA →                                                                                                                                  |
| env-1513  | 2156523182                      | + | 393     | 426     | RNA → hypo →                                                                                                                           |
| env-1514  | TB_AS07.7DRAFT_10000101         | - | 48063   | 48032   | RNA → rpmE (PRK00019)Ribosomal_L31 (pfam01197) → Tdk (COG1435)PRK04296 (PRK04296) → spore_YhcN_YlaJ (TIGR02898) →                      |
| Bsp-100-1 | NZ_JHXX01000001.1               | - | 753957  | 753936  | RNA → Acetyltransf_1 (pfam00583)Acetyltransf_7 (pfam13508) → CAT (smart01059)CAT (pfam00302) →                                         |
| Lmo-37-1  | NZ_LHRX01000005.1               | + | 41811   | 41840   | RNA → rpmE2 (PRK01678)Ribosomal_L31 (pfam01197) →                                                                                      |
| Lmo-74-1  | NZ_AVQQ01000001.1               | + | 10648   | 10677   | RNA → rpmE2 (PRK01678)Ribosomal_L31 (pfam01197) →                                                                                      |
| Lmo-15-1  | NZ_AATL02000007.1               | + | 41815   | 41844   | RNA → rpmE2 (PRK01678)Ribosomal_L31 (pfam01197) → rpmE2 (PRK01678)Ribosomal_L31 (pfam01197) →                                          |
| Lmo-75-1  | NZ_AVQM01000001.1               | - | 155185  | 155156  | RNA → rpmE2 (PRK01678)Ribosomal_L31 (pfam01197) →                                                                                      |
| Lmo-76-1  | NZ_AVQN01000027.1               | + | 41830   | 41859   | RNA → rpmE2 (PRK01678)Ribosomal_L31 (pfam01197) →                                                                                      |
| Lmo-77-1  | NZ_AVQO01000004.1               | + | 11588   | 11617   | RNA → rpmE2 (PRK01678)Ribosomal_L31 (pfam01197) →                                                                                      |
| Lmo-78-1  | NZ_AVQP01000004.1               | + | 41830   | 41859   | RNA → rpmE2 (PRK01678)Ribosomal_L31 (pfam01197) →                                                                                      |
| Lmo-73-1  | NC_019556.1                     | - | 2579159 | 2579130 | RNA → rpmE2 (PRK01678)Ribosomal_L31 (pfam01197) →                                                                                      |
| Lmo-79-1  | NZ_CM001159.1                   | - | 2710091 | 2710062 | RNA → rpmE2 (PRK01678)Ribosomal_L31 (pfam01197) →                                                                                      |
| Lmo-49-1  | NZ_KK074009.1                   | - | 101216  | 101187  | RNA → rpmE2 (PRK01678)Ribosomal_L31 (pfam01197) →                                                                                      |
| Lmo-5-1   | NC_012488.1                     | - | 2597658 | 2597629 | RNA → rpmE2 (PRK01678)Ribosomal_L31 (pfam01197) →                                                                                      |
| Lmo-1-1   | NC_017728.1                     | - | 2576506 | 2576477 | RNA → rpmE2 (PRK01678)Ribosomal_L31 (pfam01197) →                                                                                      |
| Lmo-18-1  | NC_018642.1                     | - | 2597808 | 2597779 | RNA → rpmE2 (PRK01678)Ribosomal_L31 (pfam01197) →                                                                                      |
| Lmo-4-1   | NC_018584.1                     | - | 2640176 | 2640147 | RNA → rpmE2 (PRK01678)Ribosomal_L31 (pfam01197) →                                                                                      |

|           |                   |   |         |         |                                                                                                                                                                           |
|-----------|-------------------|---|---------|---------|---------------------------------------------------------------------------------------------------------------------------------------------------------------------------|
| Lmo-23-1  | NC_018585.1       | - | 2616367 | 2616338 | RNA → rpmE2 (PRK01678)Ribosomal_L31 (pfam01197) →                                                                                                                         |
| Lmo-33-9  | NC_021825.1       | + | 457670  | 457699  | RNA → rpmE2 (PRK01678)Ribosomal_L31 (pfam01197) →                                                                                                                         |
| Lmo-41-1  | NC_021830.1       | - | 2435601 | 2435572 | RNA → rpmE2 (PRK01678)Ribosomal_L31 (pfam01197) →                                                                                                                         |
| Lmo-31-1  | NC_002973.6       | - | 2579689 | 2579660 | RNA → rpmE2 (PRK01678)Ribosomal_L31 (pfam01197) →                                                                                                                         |
| Lmo-71-1  | NZ_CP007210.1     | - | 2025111 | 2025082 | RNA → rpmE2 (PRK01678)Ribosomal_L31 (pfam01197) →                                                                                                                         |
| Lmo-43-1  | NZ_AYPT01000018.1 | - | 101218  | 101189  | RNA → rpmE2 (PRK01678)Ribosomal_L31 (pfam01197) →                                                                                                                         |
| Bsa-1-1   | NZ_JYKW01000002.1 | - | 36424   | 36391   | RNA → rpmE (PRK00019)Ribosomal_L31 (pfam01197) → Tdk (COG1435)PRK04296 (PRK04296) →                                                                                       |
| Bsa-1-2   | NZ_LATH01000002.1 | + | 378778  | 378811  | RNA → rpmE (PRK00019)Ribosomal_L31 (pfam01197) → Tdk (COG1435)PRK04296 (PRK04296) →                                                                                       |
| Bpu-5-1   | NZ_AUYP01000013.1 | - | 87433   | 87400   | RNA → rpmE (PRK00019)Ribosomal_L31 (pfam01197) → Tdk (COG1435)PRK04296 (PRK04296) →                                                                                       |
| Bsa-3-1   | NZ_AUPF01000002.1 | - | 584661  | 584628  | RNA → rpmE (PRK00019)Ribosomal_L31 (pfam01197) → Tdk (COG1435)PRK04296 (PRK04296) →                                                                                       |
| Bsa-2-1   | NZ_ASJD01000002.1 | - | 402680  | 402647  | RNA → rpmE (PRK00019)Ribosomal_L31 (pfam01197) → Tdk (COG1435)PRK04296 (PRK04296) →                                                                                       |
| Bsa-1-3   | NZ_JNBO01000025.1 | + | 19403   | 19436   | RNA → rpmE (PRK00019)Ribosomal_L31 (pfam01197) → Tdk (COG1435)PRK04296 (PRK04296) →                                                                                       |
| Bae-1-1   | NZ_JXRO01000016.1 | - | 570625  | 570592  | RNA → rpmE (PRK00019)Ribosomal_L31 (pfam01197) → Tdk (COG1435)PRK04296 (PRK04296) →                                                                                       |
| Bal-2-1   | NZ_JXAI01000001.1 | + | 295974  | 296007  | RNA → rpmE (PRK00019)Ribosomal_L31 (pfam01197) → Tdk (COG1435)PRK04296 (PRK04296) →                                                                                       |
| Bal-2-2   | NZ_LDPI01000008.1 | - | 79586   | 79553   | RNA → rpmE (PRK00019)Ribosomal_L31 (pfam01197) → Tdk (COG1435)PRK04296 (PRK04296) →                                                                                       |
| Bpu-7-1   | NZ_JH137675.1     | + | 97459   | 97492   | RNA → rpmE (PRK00019)Ribosomal_L31 (pfam01197) → Tdk (COG1435)PRK04296 (PRK04296) →                                                                                       |
| Bpu-4-1   | NZ_AMDH01000015.1 | - | 232565  | 232532  | RNA → rpmE (PRK00019)Ribosomal_L31 (pfam01197) → Tdk (COG1435)PRK04296 (PRK04296) →                                                                                       |
| Bst-2-1   | NZ_APAS01000013.1 | - | 90146   | 90113   | RNA → rpmE (PRK00019)Ribosomal_L31 (pfam01197) → rpmE (PRK00019)Ribosomal_L31 (pfam01197) → Tdk (COG1435)PRK04296 (PRK04296) →                                            |
| Bpu-6-1   | NZ_AYTK01000014.1 | - | 90600   | 90567   | RNA → rpmE (PRK00019)Ribosomal_L31 (pfam01197) → Tdk (COG1435)PRK04296 (PRK04296) →                                                                                       |
| Bal-3-1   | NZ_ASJC01000004.1 | - | 121394  | 121361  | RNA → rpmE (PRK00019)Ribosomal_L31 (pfam01197) → Tdk (COG1435)PRK04296 (PRK04296) →                                                                                       |
| Bsp-88-1  | NZ_JNIG01000009.1 | - | 635721  | 635688  | RNA → rpmE (PRK00019)Ribosomal_L31 (pfam01197) → Tdk (COG1435)PRK04296 (PRK04296) →                                                                                       |
| Bzh-1-1   | NZ_JOTP01000003.1 | + | 53546   | 53579   | RNA → rpmE (PRK00019)Ribosomal_L31 (pfam01197) → Tdk (COG1435)PRK04296 (PRK04296) →                                                                                       |
| Bsp-6-1   | NZ_AJWW01000012.1 | - | 126382  | 126349  | RNA → rpmE (PRK00019)Ribosomal_L31 (pfam01197) → rpmE (PRK00019)Ribosomal_L31 (pfam01197) → Tdk (COG1435)PRK04296 (PRK04296) → Tdk (COG1435)PRK04296 (PRK04296) →         |
| Bal-2-3   | NZ_JOVS01000001.1 | + | 321014  | 321047  | RNA → rpmE (PRK00019)Ribosomal_L31 (pfam01197) → Tdk (COG1435)PRK04296 (PRK04296) →                                                                                       |
| Bpu-2-1   | NC_009848.1       | - | 3327937 | 3327904 | RNA → rpmE (PRK00019)Ribosomal_L31 (pfam01197) → Tdk (COG1435)PRK04296 (PRK04296) →                                                                                       |
| Bpu-1-1   | NZ_ABRX01000004.1 | - | 80659   | 80626   | RNA → rpmE (PRK00019)Ribosomal_L31 (pfam01197) → rpmE (PRK00019)Ribosomal_L31 (pfam01197) → Tdk (COG1435)PRK04296 (PRK04296) → Tdk (COG1435)PRK04296 (PRK04296) →         |
| Efa-374-1 | NZ_KB029918.1     | - | 250318  | 250286  | RNA → rpmE2 (PRK01678)Ribosomal_L31 (pfam01197) →                                                                                                                         |
| Efa-364-1 | NZ_KB029496.1     | + | 333459  | 333491  | RNA → rpmE2 (PRK01678)Ribosomal_L31 (pfam01197) →                                                                                                                         |
| Bam-9-1   | NZ_LGYP01000016.1 | - | 457684  | 457651  | RNA → rpmE (PRK00019)Ribosomal_L31 (pfam01197) → Tdk (COG1435)PRK04296 (PRK04296) →                                                                                       |
| Bam-18-1  | NZ_AUNGO1000003.1 | + | 391952  | 391985  | RNA → rpmE (PRK00019)Ribosomal_L31 (pfam01197) → Tdk (COG1435)PRK04296 (PRK04296) →                                                                                       |
| Bsp-93-1  | NZ_JQKM01000003.1 | + | 344087  | 344120  | RNA → rpmE (PRK00019)Ribosomal_L31 (pfam01197) → Tdk (COG1435)PRK04296 (PRK04296) →                                                                                       |
| Bam-16-1  | NZ_AUWK01000002.1 | + | 389923  | 389956  | RNA → rpmE (PRK00019)Ribosomal_L31 (pfam01197) → Tdk (COG1435)PRK04296 (PRK04296) →                                                                                       |
| Bsu-16-1  | NZ_AYTJ01000005.1 | - | 83015   | 82982   | RNA → rpmE (PRK00019)Ribosomal_L31 (pfam01197) → Tdk (COG1435)PRK04296 (PRK04296) →                                                                                       |
| Bsp-2-1   | NZ_AFSU01000009.1 | - | 134410  | 134377  | RNA → rpmE (PRK00019)Ribosomal_L31 (pfam01197) → rpmE (PRK00019)Ribosomal_L31 (pfam01197) → Tdk (COG1435)PRK04296 (PRK04296) → Tdk (COG1435)PRK04296 (PRK04296) →         |
| Bve-3-1   | NZ_AOFO01000001.1 | - | 406706  | 406673  | RNA → rpmE (PRK00019)Ribosomal_L31 (pfam01197) → Tdk (COG1435)PRK04296 (PRK04296) →                                                                                       |
| Bam-15-1  | NZ_JCOC01000009.1 | + | 36110   | 36143   | RNA → rpmE (PRK00019)Ribosomal_L31 (pfam01197) → Tdk (COG1435)PRK04296 (PRK04296) →                                                                                       |
| Bam-2-1   | NC_009725.1       | - | 3531629 | 3531596 | RNA → rpmE (PRK00019)Ribosomal_L31 (pfam01197) → Tdk (COG1435)PRK04296 (PRK04296) →                                                                                       |
| Bam-6-1   | NC_017912.1       | - | 3841226 | 3841193 | RNA → rpmE (PRK00019)Ribosomal_L31 (pfam01197) → rpmE (PRK00019)Ribosomal_L31 (pfam01197) → rpmE (PRK00019)Ribosomal_L31 (pfam01197) → Tdk (COG1435)PRK04296 (PRK04296) → |
| Bam-8-1   | NC_017061.1       | - | 3845102 | 3845069 | RNA → rpmE (PRK00019)Ribosomal_L31 (pfam01197) → Tdk (COG1435)PRK04296 (PRK04296) →                                                                                       |
| Bam-20-1  | NC_019842.1       | - | 3566773 | 3566740 | RNA → rpmE (PRK00019)Ribosomal_L31 (pfam01197) → Tdk (COG1435)PRK04296 (PRK04296) →                                                                                       |
| Bam-24-1  | NC_020410.1       | - | 3525764 | 3525731 | RNA → rpmE (PRK00019)Ribosomal_L31 (pfam01197) → Tdk (COG1435)PRK04296 (PRK04296) →                                                                                       |
| Bam-25-1  | NC_022081.1       | - | 3517148 | 3517115 | RNA → rpmE (PRK00019)Ribosomal_L31 (pfam01197) → Tdk (COG1435)PRK04296 (PRK04296) →                                                                                       |
| Bam-23-1  | NC_022075.1       | - | 3685897 | 3685864 | RNA → rpmE (PRK00019)Ribosomal_L31 (pfam01197) → Tdk (COG1435)PRK04296 (PRK04296) →                                                                                       |
| Bam-10-1  | NC_022653.1       | - | 3529867 | 3529834 | RNA → rpmE (PRK00019)Ribosomal_L31 (pfam01197) → rpmE (PRK00019)Ribosomal_L31 (pfam01197) → Tdk (COG1435)PRK04296 (PRK04296) →                                            |
| Bam-22-1  | NC_022530.1       | - | 3806043 | 3806010 | RNA → rpmE (PRK00019)Ribosomal_L31 (pfam01197) → Tdk (COG1435)PRK04296 (PRK04296) →                                                                                       |
| Bve-1-2   | NZ_CP009679.1     | - | 3615874 | 3615841 | RNA → rpmE (PRK00019)Ribosomal_L31 (pfam01197) → Tdk (COG1435)PRK04296 (PRK04296) →                                                                                       |
| Bve-5-1   | NZ_CP007244.1     | - | 3565547 | 3565514 | RNA → rpmE (PRK00019)Ribosomal_L31 (pfam01197) → Tdk (COG1435)PRK04296 (PRK04296) →                                                                                       |
| Bsp-31-1  | NZ_CP009938.1     | - | 151413  | 151380  | RNA → rpmE (PRK00019)Ribosomal_L31 (pfam01197) → Tdk (COG1435)PRK04296 (PRK04296) →                                                                                       |

|           |                   |   |         |         |                                                                                                                                                                   |
|-----------|-------------------|---|---------|---------|-------------------------------------------------------------------------------------------------------------------------------------------------------------------|
| Bam-17-1  | NZ_CP007242.1     | - | 3385240 | 3385207 | RNA → rpmE (PRK00019)Ribosomal_L31 (pfam01197) → Tdk (COG1435)PRK04296 (PRK04296) →                                                                               |
| Bve-1-3   | NZ_CP011347.1     | + | 385791  | 385824  | RNA → rpmE (PRK00019)Ribosomal_L31 (pfam01197) → Tdk (COG1435)PRK04296 (PRK04296) →                                                                               |
| Bve-1-4   | NZ_CP011686.1     | - | 3621002 | 3620969 | RNA → rpmE (PRK00019)Ribosomal_L31 (pfam01197) → Tdk (COG1435)PRK04296 (PRK04296) →                                                                               |
| Bsp-1-1   | NZ_AJST01000001.1 | - | 3334151 | 3334118 | RNA → rpmE (PRK00019)Ribosomal_L31 (pfam01197) → rpmE (PRK00019)Ribosomal_L31 (pfam01197) → Tdk (COG1435)PRK04296 (PRK04296) → Tdk (COG1435)PRK04296 (PRK04296) → |
| Bam-11-1  | NZ_AVQH01000023.1 | + | 411156  | 411189  | RNA → rpmE (PRK00019)Ribosomal_L31 (pfam01197) → Tdk (COG1435)PRK04296 (PRK04296) → Tdk (COG1435)PRK04296 (PRK04296) →                                            |
| Ban-20-1  | NZ_LN868937.1     | + | 267111  | 267142  | RNA → rpmE (PRK00019)Ribosomal_L31 (pfam01197) →                                                                                                                  |
| Bsp-61-1  | NZ_CCNM01000041.1 | + | 187611  | 187642  | RNA → rpmE (PRK00019)Ribosomal_L31 (pfam01197) →                                                                                                                  |
| Efa-527-1 | NZ_CP006030.1     | - | 2037832 | 2037800 | RNA → rpmE2 (PRK01678)Ribosomal_L31 (pfam01197) →                                                                                                                 |
| Efa-318-1 | NZ_JH813136.1     | - | 88872   | 88840   | RNA → rpmE2 (PRK01678)Ribosomal_L31 (pfam01197) →                                                                                                                 |
| Efa-477-1 | NZ_KB946089.1     | + | 43740   | 43772   | RNA → rpmE2 (PRK01678)Ribosomal_L31 (pfam01197) →                                                                                                                 |
| Bmo-1-1   | NZ_JH600279.1     | - | 659896  | 659863  | RNA → rpmE (PRK00019)Ribosomal_L31 (pfam01197) → Tdk (COG1435)PRK04296 (PRK04296) →                                                                               |
| Egi-1-1   | NZ_KB946874.1     | - | 1793866 | 1793834 | RNA → rpmE2 (PRK01678)Ribosomal_L31 (pfam01197) →                                                                                                                 |
| Bco-2-1   | NC_016023.1       | + | 1562815 | 1562846 | RNA → rpmE (PRK00019)Ribosomal_L31 (pfam01197) →                                                                                                                  |
| Bco-10-1  | NZ_ANAP01000032.1 | - | 35355   | 35324   | RNA → rpmE (PRK00019)Ribosomal_L31 (pfam01197) →                                                                                                                  |
| Efa-371-1 | NZ_KB029417.1     | - | 209198  | 209166  | RNA → rpmE2 (PRK01678)Ribosomal_L31 (pfam01197) →                                                                                                                 |
| Efa-387-1 | NZ_KB029838.1     | + | 68007   | 68039   | RNA → rpmE2 (PRK01678)Ribosomal_L31 (pfam01197) →                                                                                                                 |
| Efa-390-1 | NZ_KB029937.1     | + | 330992  | 331024  | RNA → rpmE2 (PRK01678)Ribosomal_L31 (pfam01197) →                                                                                                                 |
| Efa-383-1 | NZ_KB029808.1     | - | 211176  | 211144  | RNA → rpmE2 (PRK01678)Ribosomal_L31 (pfam01197) →                                                                                                                 |
| Efa-415-1 | NZ_KB945936.1     | + | 53148   | 53180   | RNA → rpmE2 (PRK01678)Ribosomal_L31 (pfam01197) →                                                                                                                 |
| Efa-484-1 | NZ_KB946737.1     | + | 59491   | 59523   | RNA → rpmE2 (PRK01678)Ribosomal_L31 (pfam01197) →                                                                                                                 |
| Efa-435-1 | NZ_KB947613.1     | - | 208560  | 208528  | RNA → rpmE2 (PRK01678)Ribosomal_L31 (pfam01197) →                                                                                                                 |
| Efa-486-1 | NZ_KB946762.1     | - | 207793  | 207761  | RNA → rpmE2 (PRK01678)Ribosomal_L31 (pfam01197) →                                                                                                                 |
| Efa-434-1 | NZ_KB947589.1     | - | 209551  | 209519  | RNA → rpmE2 (PRK01678)Ribosomal_L31 (pfam01197) →                                                                                                                 |
| Efa-438-1 | NZ_KB947681.1     | + | 53471   | 53503   | RNA → rpmE2 (PRK01678)Ribosomal_L31 (pfam01197) →                                                                                                                 |
| Efa-431-1 | NZ_KB947540.1     | + | 60225   | 60257   | RNA → rpmE2 (PRK01678)Ribosomal_L31 (pfam01197) →                                                                                                                 |
| Efa-432-1 | NZ_KB947550.1     | - | 209167  | 209135  | RNA → rpmE2 (PRK01678)Ribosomal_L31 (pfam01197) →                                                                                                                 |
| Efa-455-1 | NZ_KB948198.1     | - | 210063  | 210031  | RNA → rpmE2 (PRK01678)Ribosomal_L31 (pfam01197) →                                                                                                                 |
| Efa-410-1 | NZ_KB932608.1     | - | 210349  | 210317  | RNA → rpmE2 (PRK01678)Ribosomal_L31 (pfam01197) →                                                                                                                 |
| Sar-2-1   | NZ_KK096598.1     | - | 56203   | 56174   | RNA → rpmE2 (PRK01678)Ribosomal_L31 (pfam01197) →                                                                                                                 |
| Sau-56-1  | NC_016941.1       | - | 2116146 | 2116117 | RNA → rpmE2 (PRK01678)Ribosomal_L31 (pfam01197) →                                                                                                                 |
| Lre-7-1   | NZ_AAPZ02000001.1 | + | 1432470 | 1432503 | RNA → rpmE2 (PRK01678)Ribosomal_L31 (pfam01197) → rpmE2 (PRK01678)Ribosomal_L31 (pfam01197) →                                                                     |
| Lre-6-1   | NZ_AEAW01000058.1 | + | 71250   | 71283   | RNA → rpmE2 (PRK01678)Ribosomal_L31 (pfam01197) →                                                                                                                 |
| Lre-2-1   | NZ_FR854362.1     | + | 95442   | 95475   | RNA → rpmE2 (PRK01678)Ribosomal_L31 (pfam01197) →                                                                                                                 |
| Lre-3-1   | NC_021494.1       | - | 1774307 | 1774274 | RNA → rpmE2 (PRK01678)Ribosomal_L31 (pfam01197) →                                                                                                                 |
| Lsa-12-1  | NC_007929.1       | + | 378133  | 378165  | RNA → rpmE2 (PRK01678)Ribosomal_L31 (pfam01197) → hypo →                                                                                                          |
| Lmo-35-1  | NZ_CBXR01000002.1 | - | 221773  | 221744  | RNA → rpmE2 (PRK01678)Ribosomal_L31 (pfam01197) →                                                                                                                 |
| Lmo-54-1  | NZ_AXDU01000020.1 | + | 11271   | 11300   | RNA → rpmE2 (PRK01678)Ribosomal_L31 (pfam01197) →                                                                                                                 |
| Lmo-51-1  | NZ_KK074120.1     | - | 120845  | 120816  | RNA → rpmE2 (PRK01678)Ribosomal_L31 (pfam01197) →                                                                                                                 |
| Lmo-36-1  | NZ_HG813249.1     | + | 1613739 | 1613768 | RNA → rpmE2 (PRK01678)Ribosomal_L31 (pfam01197) →                                                                                                                 |
| Sxy-1-1   | NZ_LN554884.1     | + | 870932  | 870961  | RNA → rpmE2 (PRK01678)Ribosomal_L31 (pfam01197) →                                                                                                                 |
| Sxy-2-1   | NZ_AURW01000004.1 | - | 45188   | 45159   | RNA → rpmE2 (PRK01678)Ribosomal_L31 (pfam01197) →                                                                                                                 |

## 11.4 Conserved domains

Conserved domains found in protein-coding genes listed in Section 11.3 are shown below, with the first sentence in their description from the Conserved Domain Database (if any). Conserved domains associated with more than one L31-Firmicutes RNA are assigned a color, while others are shown in gray. The symbols ‘d’ and ‘u’ (if any) to the left of the colored domain name indicate whether the

domain occurs upstream or downstream of the RNA motif. Domains marked with lower-case ‘d’ occur (at least once) present downstream of some L31-Firmicutes RNA in the opposite orientation. Domains marked with capital ‘D’ occur downstream and in the same orientation (i.e., a potential *cis*-regulatory arrangement). Domains marked with a ‘u’ occur upstream of the RNA in either orientation. If



the ‘d’/‘u’ symbols are missing, then the domain is downstream and in the same strand. (This mode is used for motifs predicted as *cis*-regulatory.) The num-

**cd00156** (2) Signal receiver domain; originally thought to be unique to bacteria (CheY, OmpR, NtrC, and PhoB), now recently identified in eukaryotes ETR1 *Arabidopsis thaliana*; this domain receives the signal from the sensor partner in a two-component systems; contains a phosphoacceptor site that is phosphorylated by histidine kinase homologs; usually found N-terminal to a DNA binding effector domain; forms homodimers

**cd00198** (3) Von Willebrand factor type A (vWA) domain was originally found in the blood coagulation protein von Willebrand factor (vWF).

**cd00229** (6) SGNH\_hydrolase, or GDSL\_hydrolase, is a diverse family of lipases and esterases.

**cd00293** (2) Usp: Universal stress protein family.

**cd00383** (1) DNA-binding effector domain of two-component system response regulators.

**cd00430** (5) Type III Pyridoxal 5-phosphate (PLP)-Dependent Enzyme Alanine Racemase.

**cd00552** (6) RaiA (“ribosome-associated inhibitor A”, also known as Protein Y (PY), YfiA, and SpotY, is a stress-response protein that binds the ribosomal subunit interface and arrests translation by interfering with aminoacyl-tRNA binding to the ribosomal A site.

**cd00616** (1) 3-amino-5-hydroxybenzoic acid synthase family (AHBA\_syn).

**cd02947** (1) TRX family; composed of two groups: Group I, which includes proteins that exclusively encode a TRX domain; and Group II, which are composed of fusion proteins of TRX and additional domains.

**cd03674** (2) Members of the Nudix hydrolase superfamily catalyze the hydrolysis of Nucleoside Diphosphates linked to other moieties, X.

**cd04250** (1) AAK\_NAGK-C: N-Acetyl-L-glutamate kinase - cyclic (NAGK-C) catalyzes the phosphorylation of the gamma-COOH group of N-acetyl-L-glutamate (NAG) by ATP in the second step of arginine biosynthesis found in some bacteria and photosynthetic organisms using the non-acetylated, cyclic route of ornithine biosynthesis.

**cd06165** (10) Sortase domain found in class A sortases.

**cd06262** (4) mainly hydrolytic enzymes and related proteins which carry out various biological functions; MBL-fold metallohydrolase domain.

**cd06850** (1) The biotinyl-domain or biotin carboxyl carrier protein (BCCP) domain is present in all biotin-dependent enzymes, such as acetyl-CoA carboxylase, pyruvate carboxylase, propionyl-CoA carboxylase, methylcrotonyl-CoA carboxylase, geranyl-CoA carboxylase, oxaloacetate decarboxylase, methylmalonyl-CoA decarboxylase, transcarboxylase and urea amidolyase.

**cd06853** (29) This subfamily contains *Escherichia coli* WecA, *Bacillus subtilis* TagO and related proteins.

**cd07516** (1) phosphatase, similar to *Escherichia coli* Cof and *Thermotoga maritima* TM0651; belongs to the haloacid dehalogenase-like superfamily.

**cd07557** (4) Trimeric dUTP diphosphatases.

**cd07733** (3) uncharacterized subgroup which includes *Bacillus subtilis* YycJ and related proteins; MBL-fold metallo hydrolase domain.

**cd07743** (1) uncharacterized subgroup of the MBL-fold\_metallo-hydrolase superfamily; MBL-fold metallo hydrolase domain.

**cd07937** (1) Pyruvate carboxylase and Transcarboxylase 5S, carboxyltransferase domain.

**cd10225** (12) MreB and similar proteins.

**cd12114** (1) The adenylation domain of nonribosomal peptide synthetases (NRPS), including *Streptoalloteichus tallsomycin* biosynthesis genes.

ber in parentheses after the colored domain name is the number of occurrences in Section 11.3.

**cd16015** (20) Lipoteichoic acid synthase like.

**cd16344** (1) low molecular weight protein arginine phosphatase.

**CHL00117** (1) RNA polymerase beta” subunit; Reviewed

**CHL00204** (1) Ycf1; Provisional

**COG0002** (2) N-acetyl-gamma-glutamylphosphate reductase [Amino acid transport and metabolism]

**COG0009** (5) tRNA A37 threonylcarbamoyladenosine synthetase subunit TsaC/SUA5/YrdC [Translation, ribosomal structure and biogenesis]

**COG0021** (12) Transketolase [Carbohydrate transport and metabolism]

**COG0025** (6) NhaP-type Na<sup>+</sup>/H<sup>+</sup> or K<sup>+</sup>/H<sup>+</sup> antiporter [Inorganic ion transport and metabolism]

**COG0035** (3) Uracil phosphoribosyltransferase [Nucleotide transport and metabolism]

**COG0053** (1) Divalent metal cation (Fe/Co/Zn/Cd) transporter [Inorganic ion transport and metabolism]

**COG0078** (1) Ornithine carbamoyltransferase [Amino acid transport and metabolism]

**COG0112** (3) Glycine/serine hydroxymethyltransferase [Amino acid transport and metabolism]

**COG0143** (3) Methionyl-tRNA synthetase [Translation, ribosomal structure and biogenesis]

**COG0150** (1) Phosphoribosylaminoimidazole (AIR) synthetase [Nucleotide transport and metabolism]

**COG0168** (1) Trk-type K<sup>+</sup> transport system, membrane component [Inorganic ion transport and metabolism]

**COG0189** (2) Glutathione synthase/RimK-type ligase, ATP-grasp superfamily [Coenzyme transport and metabolism, Translation, ribosomal structure and biogenesis]

**COG0216** (90) Protein chain release factor A [Translation, ribosomal structure and biogenesis]

**COG0254** (3) Ribosomal protein L31 [Translation, ribosomal structure and biogenesis]

**COG0357** (12) 16S rRNA G527 N7-methylase RsmG (former glucose-inhibited division protein B) [Translation, ribosomal structure and biogenesis]

**COG0381** (3) UDP-N-acetylglucosamine 2-epimerase [Cell wall/membrane/envelope biogenesis]

**COG0394** (3) Protein-tyrosine-phosphatase [Signal transduction mechanisms]

**COG0415** (8) Deoxyribodipyrimidine photolyase [Replication, recombination and repair]

**COG0436** (1) Aspartate/methionine/tyrosine aminotransferase [Amino acid transport and metabolism]

**COG0439** (1) Biotin carboxylase [Lipid transport and metabolism]

**COG0445** (13) tRNA U34 5-carboxymethylaminomethyl modifying enzyme MnmG/GidA [Translation, ribosomal structure and biogenesis]

**COG0456** (1) Ribosomal protein S18 acetylase RimI and related acetyltransferases [Translation, ribosomal structure and biogenesis]

**COG0461** (3) AAA+-type ATPase, SpoVK/Ycf46/Vps4 family [Cell wall/membrane/envelope biogenesis, Cell cycle control, cell division, chromosome partitioning, Signal transduction mechanisms]

**COG0472** (1) UDP-N-acetylmuramyl pentapeptide phosphotransferase/UDP-N-acetylglucosamine-1-phosphate transferase [Cell wall/membrane/envelope biogenesis]

**COG0518** (5) Superfamily II DNA and RNA helicase [Replication, recombination and repair]

**COG0561** (1) Hydroxymethylpyrimidine pyrophosphatase and other HAD family phosphatases [Coenzyme transport and metabolism, General function prediction only]

**COG0590** (43) tRNA(Arg) A34 adenosine deaminase Tada [Translation, ribosomal structure

and biogenesis]

- COG0602** (21) Organic radical activating enzyme [General function prediction only]  
**COG0653** (8) Preprotein translocase subunit SecA (ATPase, RNA helicase) [Intracellular trafficking, secretion, and vesicular transport]  
**COG0657** (1) Acetyl esterase/lipase [Lipid transport and metabolism]  
**COG0674** (3) Pyruvate:ferredoxin oxidoreductase or related 2-oxoacid:ferredoxin oxidoreductase, alpha subunit [Energy production and conversion]  
**COG0697** (2) Permease of the drug/metabolite transporter (DMT) superfamily [Carbohydrate transport and metabolism, Amino acid transport and metabolism, General function prediction only]  
**COG0736** (5) Phosphopantetheinyl transferase (holo-ACP synthase) [Lipid transport and metabolism]  
**COG0745** (1) DNA-binding response regulator, OmpR family, contains REC and winged-helix (wHTH) domain [Signal transduction mechanisms, Transcription]  
**COG0756** (13) dUTPase [Nucleotide transport and metabolism, Defense mechanisms]  
**COG0770** (5) UDP-N-acetylmuramyl pentapeptide synthase [Cell wall/membrane/envelope biogenesis]  
**COG0784** (2) CheY chemotaxis protein or a CheY-like REC (receiver) domain [Signal transduction mechanisms]  
**COG0840** (1) Methyl-accepting chemotaxis protein [Cell motility, Signal transduction mechanisms]  
**COG1013** (2) Pyruvate:ferredoxin oxidoreductase or related 2-oxoacid:ferredoxin oxidoreductase, beta subunit [Energy production and conversion]  
**COG1014** (2) Pyruvate:ferredoxin oxidoreductase or related 2-oxoacid:ferredoxin oxidoreductase, gamma subunit [Energy production and conversion]  
**COG1145** (2) Ferredoxin [Energy production and conversion]  
**COG1192** (5) Cellulose biosynthesis protein BcsQ [Cell motility]  
**COG1235** (12) Phosphoribosyl 1,2-cyclic phosphodiesterase [Inorganic ion transport and metabolism]  
**COG1275** (1) Tellurite resistance protein TehA and related permeases [Defense mechanisms]  
**COG1278** (1) Cold shock protein, CspA family [Transcription]  
**COG1368** (4) Phosphoglycerol transferase MdoB or a related enzyme of AlkP superfamily [Cell wall/membrane/envelope biogenesis]  
**COG1404** (1) Serine protease, subtilisin family [Posttranslational modification, protein turnover, chaperones]  
**COG1435** (423) Thymidine kinase [Nucleotide transport and metabolism]  
**COG1475** (6) Chromosome segregation protein Spo0J, contains ParB-like nuclease domain [Cell cycle control, cell division, chromosome partitioning]  
**COG1476** (1) DNA-binding transcriptional regulator, XRE-family HTH domain [Transcription]  
**COG1544** (2) Ribosome-associated translation inhibitor RaiA [Translation, ribosomal structure and biogenesis]  
**COG1737** (4) DNA-binding transcriptional regulator, MurR/RpiR family, contains HTH and SIS domains [Transcription]  
**COG1940** (2) Sugar kinase of the NBD/HSP70 family, may contain an N-terminal HTH domain [Transcription, Carbohydrate transport and metabolism]  
**COG2235** (4) Arginine deiminase [Amino acid transport and metabolism]  
**COG2323** (7) Uncharacterized membrane protein YcaP, DUF421 family [Function unknown]  
**COG2335** (21) Peptidoglycan hydrolase (amidase) enhancer domain [Cell

wall/membrane/envelope biogenesis]

- COG2812** (2) DNA polymerase III, gamma/tau subunits [Replication, recombination and repair]  
**COG2826** (1) Transposase and inactivated derivatives, IS30 family [Mobilome: prophages, transposons]  
**COG2890** (62) Methylase of polypeptide chain release factors [Translation, ribosomal structure and biogenesis]  
**COG3279** (17) DNA-binding response regulator, LytR/AlgR family [Transcription, Signal transduction mechanisms]  
**COG3290** (13) Sensor histidine kinase regulating citrate/malate metabolism [Signal transduction mechanisms]  
**COG3415** (1) Transposase [Mobilome: prophages, transposons]  
**COG3608** (2) ABC-type uncharacterized transport system, permease component [General function prediction only]  
**COG4632** (2) Exopolysaccharide biosynthesis protein related to N-acetylglucosamine-1-phosphodiester alpha-N-acety. [Carbohydrate transport and metabolism]  
**COG5279** (2) Cytokinesis protein 3, contains TGc (transglutaminase/protease-like) domain [Cell cycle control, cell division, chromosome partitioning]  
**COG5421** (1) Transposase [Mobilome: prophages, transposons]  
**COG5492** (1) Uncharacterized conserved protein YjdB, contains Ig-like domain [General function prediction only]  
**MTH00151** (1) NADH dehydrogenase subunit 5; Provisional  
**pfam00301** (1) Rubredoxin.  
**pfam00302** (1) Chloramphenicol acetyltransferase.  
**pfam00334** (2) Nucleoside diphosphate kinase.  
**pfam00472** (1) RF-1 domain.  
**pfam00486** (1) Transcriptional regulatory protein, C terminal.  
**pfam00583** (2) Acetyltransferase (GNAT) family.  
**pfam00657** (2) GDSL-like Lipase/Acylhydrolase.  
**pfam00875** (1) DNA photolyase.  
**pfam00892** (2) EamA-like transporter family.  
**pfam01066** (1) CDP-alcohol phosphatidyltransferase.  
**pfam01197** (8437) Ribosomal protein L31.  
**pfam01551** (31) Peptidase family M23.  
**pfam01648** (4) 4'-phosphopantetheinyl transferase superfamily.  
**pfam01960** (1) ArgJ family.  
**pfam01996** (1) F420-0:Gamma-glutamyl ligase.  
**pfam02368** (1) Bacterial Ig-like domain (group 2).  
**pfam02388** (1) FemAB family.  
**pfam02436** (1) Conserved carboxylase domain.  
**pfam02482** (3) Sigma 54 modulation protein / S30EA ribosomal protein.  
**pfam02502** (104) Ribose/Galactose Isomerase.  
**pfam02518** (3) Histidine kinase-, DNA gyrase B-, and HSP90-like ATPase.  
**pfam02575** (1) YbaB/Ebfc DNA-binding family.  
**pfam02590** (12) Predicted SPOUT methyltransferase.  
**pfam02645** (1) Uncharacterized protein, DegV family COG1307.  
**pfam02666** (1) Phosphatidylserine decarboxylase.  
**pfam02810** (6) SEC-C motif. [HC]  
**pfam02897** (3) Prolyl oligopeptidase, N-terminal beta-propeller domain.  
**pfam03441** (1) FAD binding domain of DNA photolyase.



- [pfam03462](#) (3) PCR domain.  
[pfam03481](#) (5) Putative GTP-binding controlling metal-binding.  
[pfam03840](#) (1) Preprotein translocase SecG subunit.  
[pfam03947](#) (1) Ribosomal Proteins L2, C-terminal domain.  
[pfam04011](#) (1) LemA family.  
[pfam04246](#) (1) Positive regulator of sigma(E), RseC/MucC.  
[pfam04260](#) (3) Protein of unknown function (DUF436).  
[pfam04313](#) (9) Type I restriction enzyme R protein N terminus (HSDR\_N).  
[pfam04397](#) (5) LytTr DNA-binding domain.  
[pfam05532](#) (2) CsbD-like.  
[pfam05932](#) (1) Tir chaperone protein (CesT) family.  
[pfam06030](#) (4) Bacterial protein of unknown function (DUF916).  
[pfam06107](#) (8) Bacterial protein of unknown function (DUF951).  
[pfam06612](#) (38) Protein of unknown function (DUF1146).  
[pfam06723](#) (1) MreB/Mbl protein.  
[pfam07423](#) (1) Protein of unknown function (DUF1510).  
[pfam07586](#) (1) Protein of unknown function (DUF1552).  
[pfam07859](#) (1) alpha/beta hydrolase fold.  
[pfam08245](#) (5) Mur ligase middle domain.  
[pfam08282](#) (2) haloacid dehalogenase-like hydrolase.  
[pfam08297](#) (1) U3 snoRNA associated.  
[pfam08345](#) (1) Flagellar M-ring protein C-terminal.  
[pfam08486](#) (6) Stage II sporulation protein.  
[pfam09551](#) (11) Stage II sporulation protein R (spore\_II.R).  
[pfam09580](#) (6) Sporulation lipoprotein YhcN/YlaJ (Spore-YhcN-YlaJ).  
[pfam09992](#) (2) Phosphodiester glycosidase.  
[pfam10254](#) (2) PACS-1 cytosolic sorting protein.  
[pfam10722](#) (1) Putative bacterial sensory transduction regulator.  
[pfam11797](#) (4) Protein of unknown function C-terminal (DUF3324).  
[pfam12007](#) (2) Protein of unknown function (DUF3501).  
[pfam12116](#) (5) Stage III sporulation protein D.  
[pfam12146](#) (1) Serine aminopeptidase, S33.  
[pfam12224](#) (1) Putative amidoligase enzyme.  
[pfam12732](#) (1) YtxH-like protein.  
[pfam12838](#) (2) 4Fe-4S dicluster domain.  
[pfam13353](#) (21) 4Fe-4S single cluster domain.  
[pfam13472](#) (4) GDSL-like Lipase/Acylhydrolase family.  
[pfam13508](#) (3) Acetyltransferase (GNAT) domain.  
[pfam13518](#) (1) Helix-turn-helix domain.  
[pfam13588](#) (9) Type I restriction enzyme R protein N terminus (HSDR\_N).  
[pfam13614](#) (5) AAA domain.  
[pfam13629](#) (1) Pilus formation protein N terminal region.  
[pfam13649](#) (3) Methyltransferase domain.  
[pfam14397](#) (4) Sugar-transfer associated ATP-grasp.  
[pfam14437](#) (40) MafB19-like deaminase.  
[pfam14450](#) (1) Cell division protein FtsA.  
[pfam14470](#) (1) Bacterial PH domain.  
[pfam14501](#) (13) GHKL domain.  
[pfam16321](#) (10) Sigma 54 modulation/S30EA ribosomal protein C terminus.  
[pfam16339](#) (1) Domain of unknown function (DUF4969).  
[pfam16403](#) (2) Domain of unknown function (DUF5011).  
[pfam16916](#) (1) Dimerisation domain of Zinc Transporter.  
[PHA02601](#) (1) integrase; Provisional  
[PLN02662](#) (1) cinnamyl-alcohol dehydrogenase family protein  
[PRK00011](#) (3) serine hydroxymethyltransferase; Reviewed  
[PRK00019](#) (1362) 50S ribosomal protein L31; Reviewed  
[PRK00053](#) (5) alanine racemase; Reviewed  
[PRK00070](#) (5) 4'-phosphopantetheinyl transferase; Provisional  
[PRK00103](#) (12) rRNA large subunit methyltransferase; Provisional  
[PRK00107](#) (12) 16S rRNA methyltransferase GidB; Reviewed  
[PRK00108](#) (16) phospho-N-acetylmuramoyl-pentapeptide-transferase; Provisional  
[PRK00129](#) (3) uracil phosphoribosyltransferase; Reviewed  
[PRK00153](#) (1) hypothetical protein; Validated  
[PRK00436](#) (2) N-acetyl-gamma-glutamyl-phosphate reductase; Validated  
[PRK00528](#) (5) 50S ribosomal protein L31; Reviewed  
[PRK00591](#) (83) peptide chain release factor 1; Validated  
[PRK00601](#) (18) deoxyuridine 5'-triphosphate nucleotidohydrolase; Provisional  
[PRK00723](#) (1) phosphatidylserine decarboxylase; Provisional  
[PRK00942](#) (1) acetylglutamate kinase; Provisional  
[PRK01388](#) (4) arginine deiminase; Provisional  
[PRK01678](#) (7101) 50S ribosomal protein L31 type B; Reviewed  
[PRK02102](#) (1) ornithine carbamoyltransferase; Validated  
[PRK04296](#) (423) thymidine kinase; Provisional  
[PRK05192](#) (13) tRNA uridine 5-carboxymethylaminomethyl modification enzyme GidA; Validated  
[PRK05326](#) (6) potassium/proton antiporter; Reviewed  
[PRK05385](#) (1) phosphoribosylaminoimidazole synthetase; Provisional  
[PRK05388](#) (1) bifunctional ornithine acetyltransferase/N-acetylglutamate synthase protein; Validated  
[PRK05452](#) (1) anaerobic nitric oxide reductase flavorubredoxin; Provisional  
[PRK05563](#) (2) DNA polymerase III subunits gamma and tau; Validated  
[PRK05571](#) (104) ribose-5-phosphate isomerase B; Provisional  
[PRK05667](#) (2) DNA primase; Validated  
[PRK05899](#) (12) transketolase; Reviewed  
[PRK07681](#) (1) aspartate aminotransferase; Provisional  
[PRK09328](#) (51) N5-glutamine S-adenosyl-L-methionine-dependent methyltransferase; Provisional  
[PRK09374](#) (1) 50S ribosomal protein L2; Validated  
[PRK10351](#) (3) holo-(acyl carrier protein) synthase 2; Provisional  
[PRK10671](#) (4) deoxyribodipyrimidine photolyase; Provisional  
[PRK10776](#) (1) nucleoside triphosphate pyrophosphohydrolase; Provisional  
[PRK10860](#) (3) tRNA-specific adenosine deaminase; Provisional  
[PRK10871](#) (1) lipoprotein NlpD; Provisional  
[PRK11086](#) (2) sensory histidine kinase DcuS; Provisional  
[PRK11361](#) (17) acetoacetate metabolism regulatory protein AtoC; Provisional  
[PRK11649](#) (28) putative peptidase; Provisional  
[PRK11893](#) (1) methionyl-tRNA synthetase; Reviewed  
[PRK12267](#) (2) methionyl-tRNA synthetase; Reviewed  
[PRK12363](#) (3) phosphoglycerol transferase I; Provisional  
[PRK12901](#) (8) preprotein translocase subunit SecA; Reviewed  
[PRK12999](#) (1) pyruvate carboxylase; Reviewed  
[PRK13690](#) (3) hypothetical protein; Provisional  
[PRK13759](#) (18) arylsulfatase; Provisional  
[PRK13930](#) (13) rod shape-determining protein MreB; Provisional

- PRK15182** (4) transcriptional regulator MurR; Provisional  
**smart00226** (4) Low molecular weight phosphatase family.  
**smart00283** (1) Methyl-accepting chemotaxis-like domains (chemotaxis sensory transducer).  
**smart00304** (1) HAMP (Histidine kinases, Adenylyl cyclases, Methyl binding proteins, Phosphatases) domain.  
**smart00357** (1) Cold shock protein domain.  
**smart00382** (3) ATPases associated with a variety of cellular activities.  
**smart00387** (1) Histidine kinase-like ATPases.  
**smart00448** (1) cheY-homologous receiver domain.  
**smart00470** (6) ParB-like nuclease domain.  
**smart00487** (5) DEAD-like helicases superfamily.  
**smart00490** (5) helicase superfamily c-terminal domain.  
**smart00530** (1) Helix-turn-helix XRE-family like proteins.  
**smart00562** (2) Enzymes that catalyze nonsubstrate specific conversions of nucleoside diphosphates to nucleoside triphosphates.  
**smart00635** (1) Bacterial Ig-like domain 2.  
**smart00849** (17) Metallo-beta-lactamase superfamily.  
**smart00850** (22) LytTr DNA-binding domain.  
**smart00862** (2) Transcriptional regulatory protein, C terminal.  
**smart00937** (10) This domain is found in peptide chain release factors.  
**smart01059** (1) Chloramphenicol acetyltransferase.  
**TIGR00057** (5) tRNA threonylcarbamoyl adenosine modification protein, Sua5/YciO/YrdC/YwIC family. [Protein synthesis, tRNA and rRNA base modification]  
**TIGR00105** (6) ribosomal protein L31. [Protein synthesis, Ribosomal proteins: synthesis and modification]  
**TIGR00236** (3) UDP-N-acetylglucosamine 2-epimerase. [Cell envelope, Biosynthesis and degradation of surface polysaccharides and lipopolysaccharides]  
**TIGR00473** (1) CDP-diacylglycerol-serine O-phosphatidyltransferase. [Fatty acid and phospholipid metabolism, Biosynthesis]  
**TIGR00556** (1) phosphopantetheine-protein transferase domain. [Protein fate, Protein modification and repair]  
**TCR00711** (12) ribosomal subunit interface protein. [Protein synthesis, Translation factors]  
**TIGR00744** (2) ROK family protein (putative glucokinase). [Unknown function, General]  
**TIGR00762** (1) EDD domain protein, DegV family. [Unknown function, General]  
**TIGR00810** (1) protein translocase, SecG subunit. [Protein fate, Protein and peptide secretion and trafficking]  
**TIGR00950** (1) Carboxylate/Amino Acid/Amine Transporter. [Transport and binding proteins, Amino acids, peptides and amines]  
**TIGR01068** (1) thioredoxin. [Energy metabolism, Electron transport]  
**TIGR01076** (10) LPXTG-site transpeptidase (sortase) family protein. [Cell envelope, Other, Protein fate, Protein and peptide secretion and trafficking]  
**TIGR01248** (3) AAA family ATPase, CDC48 subfamily.  
**TIGR01257** (3) retinal-specific rim ABC transporter. [Transport and binding proteins, Other]  
**TIGR01387** (2) heavy metal response regulator. [Regulatory functions, DNA interactions]  
**TIGR02150** (1) isopentenyl-diphosphate delta-isomerase, type 1. [Biosynthesis of cofactors, prosthetic groups, and carriers, Other]  
**TIGR02176** (1) pyruvate:ferredoxin (flavodoxin) oxidoreductase, homodimeric.  
**TIGR02377** (5) conserved hypothetical integral membrane protein.  
**TIGR02380** (13) undecaprenyl-phosphate alpha-N-acetylglucosaminyl 1-phosphatettransferase. [Cell envelope, Biosynthesis and degradation of surface polysaccharides and lipopolysaccharides]  
**TIGR02669** (16) SpoIID/LytB domain. [Unknown function, General]  
**TIGR02765** (1) cryptochrome, DASH family. [Cellular processes, Adaptations to atypical conditions]  
**TIGR02898** (7) sporulation lipoprotein, YhcN/YlaJ family. [Cellular processes, Sporulation and germination]  
**TIGR03023** (1) Undecaprenyl-phosphate glucose phosphotransferase.  
**TIGR03534** (8) protein-(glutamine-N5) methyltransferase, release factor-specific. [LIV]PRx[DE]TE (in Escherichia coli, IPRPDTE) confers specificity for the release factors rather than for ribosomal protein L3. [Protein fate, Protein modification and repair]  
**TIGR03556** (5) deoxyribodipyrimidine photo-lyase, 8-HDF type. [DNA metabolism, DNA replication, recombination, and repair]  
**TIGR03921** (1) type VII secretion-associated serine protease mycosin. [Protein fate, Protein and peptide secretion and trafficking, Protein fate, Protein modification and repair]  
**TIGR04181** (1) aminotransferase, LLPSF\_NHT\_00031 family.

## 11.5 Multiple-sequence alignment

Each L31-Firmicutes RNA is denoted by an abbreviation (like “Eco-1-1”) that refers to a taxonomy given in Section 11.1. (Superscript numbers refer to annotations listed in Section 11.2) The alignment may include sequences containing the RNA motif, as well as flanking sequence. The L31-Firmicutes RNA itself is denoted by the line underneath marked 5' and 3' on either end. Nucleotides in flanking sequences (i.e., not part of the motif) are written in *gray letters*. Stems of predicted rho-independent transcription terminators, if any, are shaded **yellow**. (Note: terminator predictions have not been analyzed manually, and many are likely to be false positives. Terminator predictions are those of the RNIE software.) Nucleotides predicted to function (as DNA) as transcription-factor binding sites, if any, are shaded in **green**. (But note: these predictions are manually an-

notated, so they might be under-predicted.) Annotated start codons, if any, are shaded **green**. (Note: start codons are frequently misannotated, especially in environmental samples.) Nucleotides proposed to basepair as part of the consensus structure are shaded in color when they comprise Watson-Crick or G-U pairs. Otherwise they are shaded gray. Conserved stems are also indicated at the bottom of the alignment by angle brackets, where matching < and > denote base-paired columns. Below these angle brackets, the symbol “2” denotes base pairs exhibiting covariation according to the statistically well-founded R-scape method. “1” denotes base pairs exhibiting covariation according to R2R’s simplistic method. “0” denotes base pairs that are not observed to mutate and “?” denotes base pairs that have a significant frequency of non-canonical nucleotides for Watson-Crick or G-U

pairs (> 5%). Below these base pair annotation is the consensus sequence: “R” = “A” or “G”, “Y” = “C” or “U”, **red nucleotides**: nucleotide identity conserved more than 97% of the time, **black nucleotides**: 90%, **gray nucleotides**: 75%, **red circle** (◉): nucleotide is present 97% of the time, **black circle** (●): 90%, **gray circle** (◐): 75%, **white circle** (○): 50%. All percentages of sequences just described (e.g. 97% conserved) assume that sequences have been weighted by the GSC algorithm implemented by the Infernal software package.

Duplicate sequences: the following putative homologs are not shown in the alignment because their sequences are identical to a homolog already shown: Aka-1-1, Ami-1-3, Asp-1-1, Asp-2-1, Asp-4-1, Axy-1-1, Bag-1-1, Bag-2-1, Bal-2-1, Bal-2-2, Bal-2-3, Bal-3-1, Bam-1-1, Bam-10-1, Bam-11-1, Bam-12-1, Bam-13-1, Bam-14-1, Bam-15-1, Bam-16-1, Bam-17-1, Bam-18-1, Bam-19-1, Bam-2-1, Bam-20-1, Bam-21-1, Bam-22-1, Bam-23-1, Bam-24-1, Bam-25-1, Bam-3-1, Bam-5-1, Bam-6-1, Bam-7-1, Bam-8-1, Bam-9-2, Bam-9-3, Ban-1-1, Ban-10-1, Ban-11-1, Ban-12-1, Ban-13-1, Ban-14-1, Ban-15-1, Ban-16-1, Ban-17-1, Ban-17-2, Ban-18-1, Ban-18-2, Ban-19-1, Ban-2-1, Ban-21-1, Ban-21-10, Ban-21-11, Ban-21-12, Ban-21-13, Ban-21-14, Ban-21-15, Ban-21-16, Ban-21-17, Ban-21-18, Ban-21-19, Ban-21-2, Ban-21-20, Ban-21-3, Ban-21-4, Ban-21-5, Ban-21-6, Ban-21-7, Ban-21-8, Ban-21-9, Ban-22-1, Ban-23-1, Ban-24-1, Ban-25-1, Ban-26-1, Ban-27-1, Ban-28-1, Ban-29-1, Ban-3-1, Ban-30-1, Ban-31-1, Ban-32-1, Ban-33-1, Ban-34-1, Ban-35-1, Ban-36-1, Ban-37-1, Ban-38-1, Ban-39-1, Ban-5-1, Ban-6-1, Ban-7-1, Ban-8-1, Ban-9-1, Bar-1-1, Bar-1-2, Bar-1-3, Bar-1-4, Bar-1-5, Bar-2-1, Bat-1-1, Bat-10-1, Bat-11-1, Bat-12-1, Bat-13-1, Bat-14-1, Bat-16-1, Bat-17-1, Bat-2-1, Bat-3-1, Bat-4-1, Bat-5-1, Bat-6-1, Bat-7-1, Bat-9-1, Baz-2-1, Bba-2-2, Bbo-2-1, Bbo-3-1, Bbo-6-1, Bbo-7-1, Bbr-3-1, Bce-10-1, Bce-100-1, Bce-101-1, Bce-102-1, Bce-103-1, Bce-104-1, Bce-105-1, Bce-107-1, Bce-108-1, Bce-109-1, Bce-11-1, Bce-110-1, Bce-111-1, Bce-112-1, Bce-113-1, Bce-114-1, Bce-115-1, Bce-116-1, Bce-117-1, Bce-118-1, Bce-119-1, Bce-12-1, Bce-120-1, Bce-121-1, Bce-122-1, Bce-123-1, Bce-124-1, Bce-125-1, Bce-126-1, Bce-127-1, Bce-128-1, Bce-129-1, Bce-13-1, Bce-130-1, Bce-131-1, Bce-132-1, Bce-133-1, Bce-134-1, Bce-135-1, Bce-136-1, Bce-137-1, Bce-138-1, Bce-139-1, Bce-14-1, Bce-14-2, Bce-140-1, Bce-141-1, Bce-142-1, Bce-143-1, Bce-144-1, Bce-145-1, Bce-146-1, Bce-147-1, Bce-149-2, Bce-15-1, Bce-16-1, Bce-17-1, Bce-17-2, Bce-18-1, Bce-19-1, Bce-2-1, Bce-2-2, Bce-20-1, Bce-21-1, Bce-22-1, Bce-23-1, Bce-24-1, Bce-24-2, Bce-25-1, Bce-26-1, Bce-27-1, Bce-28-1, Bce-28-2, Bce-29-1, Bce-3-1, Bce-30-1, Bce-31-1, Bce-32-1, Bce-33-1, Bce-34-1, Bce-35-1, Bce-36-1, Bce-37-1, Bce-38-1, Bce-39-1, Bce-4-1, Bce-40-1, Bce-41-1, Bce-42-1, Bce-43-1, Bce-44-1, Bce-45-1, Bce-46-1, Bce-47-1, Bce-47-2, Bce-47-3, Bce-47-4, Bce-47-5, Bce-48-1, Bce-49-1, Bce-5-1, Bce-50-1, Bce-51-1, Bce-52-1, Bce-53-1, Bce-54-1, Bce-55-1, Bce-56-1, Bce-57-1, Bce-58-1, Bce-59-1, Bce-60-1, Bce-61-1, Bce-62-1, Bce-64-1, Bce-65-1, Bce-66-1, Bce-67-1, Bce-68-1, Bce-69-1, Bce-7-1, Bce-70-1, Bce-71-1, Bce-72-1, Bce-73-1, Bce-74-1, Bce-75-1, Bce-76-1, Bce-77-1, Bce-78-1, Bce-79-1, Bce-8-1, Bce-80-1, Bce-81-1, Bce-82-1, Bce-83-1, Bce-84-1, Bce-85-1, Bce-86-1, Bce-87-1, Bce-88-1, Bce-89-1, Bce-9-1, Bce-90-1, Bce-91-1, Bce-92-1, Bce-93-1, Bce-94-1, Bce-95-1, Bce-96-1, Bce-97-1, Bce-98-1, Bce-99-1, Bcl-2-1, Bco-1-1, Bco-10-1, Bco-4-1, Bco-4-2, Bco-6-1, Bco-7-1, Bco-8-1, Bcy-1-1, Ben-1-1, Ben-2-1, Bff-2-1, Bgi-1-1, Bgl-1-1, Bha-1-1, Bin-2-1, Bin-3-1, Bis-1-1, Bla-1-1, Bla-4-1, Bla-5-1, Bli-1-1, Bli-1-2, Bli-10-1, Bli-11-1, Bli-2-2, Bli-3-1, Bli-4-1, Bli-5-1, Bli-6-1, Bli-7-1, Bli-8-1, Bli-9-1, Bma-4-2, Bma-4-3, Bme-10-1, Bme-2-1, Bme-3-1, Bme-5-1, Bme-7-1, Bme-8-1, Bme-9-1, Bmu-1-1, Bmy-1-1, Bmy-2-1, Bmy-3-1, Bmy-4-1, Bmy-4-2, Bmy-4-3, Bmy-4-4, Bmy-5-1, Bmy-6-1, Bmy-7-1, Boc-1-1, Bpa-2-1, Bpa-3-1, Bps-2-1, Bpu-1-1, Bpu-3-1, Bpu-3-2, Bpu-3-3, Bpu-4-1, Bpu-5-1, Bpu-6-1, Bpu-7-1, Bsa-1-2, Bsa-1-3, Bsa-2-1, Bsa-3-1, Bsi-2-1, Bsi-3-1, Bsm-1-1, Bso-2-1, Bsp-1-1, Bsp-10-1, Bsp-11-1, Bsp-12-1, Bsp-14-1, Bsp-16-1, Bsp-2-1, Bsp-20-1, Bsp-23-1, Bsp-25-1, Bsp-26-1, Bsp-29-1, Bsp-31-1, Bsp-32-1, Bsp-33-1, Bsp-35-1, Bsp-38-1, Bsp-46-1, Bsp-48-1, Bsp-49-1, Bsp-5-1, Bsp-50-1, Bsp-51-1, Bsp-55-1, Bsp-57-1, Bsp-59-1, Bsp-6-1, Bsp-61-1, Bsp-63-1, Bsp-64-1, Bsp-65-1, Bsp-67-1, Bsp-68-1, Bsp-69-1, Bsp-70-1, Bsp-71-1, Bsp-72-1, Bsp-78-1, Bsp-80-1, Bsp-82-1, Bsp-87-1, Bsp-88-1, Bsp-89-1, Bsp-91-1, Bsp-93-1, Bsp-95-1, Bsp-97-1, Bst-1-2, Bst-1-3, Bst-1-5, Bst-2-1, Bsu-1-1, Bsu-10-1, Bsu-12-1, Bsu-13-1, Bsu-14-1, Bsu-15-1, Bsu-16-1, Bsu-17-1, Bsu-18-1, Bsu-19-1, Bsu-2-1, Bsu-20-1, Bsu-21-1, Bsu-22-1, Bsu-24-1, Bsu-25-1, Bsu-26-1, Bsu-27-1, Bsu-28-1, Bsu-29-1, Bsu-3-1, Bsu-30-1, Bsu-31-1, Bsu-32-1, Bsu-33-1, Bsu-34-1, Bsu-36-1, Bsu-37-1, Bsu-38-1, Bsu-39-1, Bsu-4-1, Bsu-40-1, Bsu-41-1, Bsu-42-1, Bsu-43-1, Bsu-44-1, Bsu-45-1, Bsu-46-1, Bsu-47-1, Bsu-48-1, Bsu-5-1, Bsu-6-1, Bsu-6-2, Bsu-7-1, Bsu-8-1, Bsu-9-1, Bth-1-1, Bth-10-1, Bth-11-1, Bth-12-1, Bth-13-1, Bth-14-1, Bth-15-1, Bth-16-1, Bth-17-1, Bth-18-1, Bth-19-1, Bth-2-1, Bth-20-1, Bth-21-1, Bth-22-1, Bth-22-2, Bth-23-1, Bth-24-1, Bth-25-1, Bth-26-1, Bth-27-1, Bth-28-1, Bth-29-1, Bth-3-1, Bth-30-1, Bth-31-1, Bth-32-1, Bth-33-1, Bth-34-1, Bth-35-1, Bth-36-1, Bth-37-1, Bth-38-1, Bth-39-1, Bth-39-2, Bth-4-1, Bth-40-1, Bth-41-1, Bth-42-1, Bth-43-1, Bth-44-1, Bth-44-2, Bth-44-3, Bth-44-5, Bth-45-2, Bth-46-1, Bth-47-1, Bth-5-1, Bth-6-1, Bth-7-1, Bth-8-1, Bth-9-1, Bto-1-1, Bva-1-1, Bve-1-1, Bve-1-2, Bve-1-3, Bve-1-4, Bve-2-1, Bve-3-1, Bve-4-1, Bve-5-1, Bvi-3-1, Bwe-1-1, Bwe-2-1, Bzh-1-1, Cde-1-1, Cin-1-1, Cje-1-1, Cje-2-1, Cma-1-1, Cma-2-1, Cmi-1-1, Csp-4-1, Csp-5-1, Csp-6-1, Csp-7-1, Ean-2-1, Eav-2-1, Eav-2-2, Eba-1-1, Eca-2-1, Eca-4-1, Eca-6-1, Eca-7-1, Ece-1-1, Ece-1-2, Ece-1-3, Ece-1-4, Ece-1-5, Ece-1-6, Ece-1-7, Ece-2-1, Ecl-1-1, Edo-1-1, Edu-1-1, Edu-1-2, Edu-2-2, Edu-3-1, Edu-4-1, Efa-1-1, Efa-1-10, Efa-1-11, Efa-1-12, Efa-1-13, Efa-1-14, Efa-1-15, Efa-1-16, Efa-1-17, Efa-1-18, Efa-1-19, Efa-1-2, Efa-1-20, Efa-1-21, Efa-1-22, Efa-1-23, Efa-1-24, Efa-1-25, Efa-1-26, Efa-1-28, Efa-1-29, Efa-1-3, Efa-1-30, Efa-1-31, Efa-1-32, Efa-1-33, Efa-1-34, Efa-1-35, Efa-1-36, Efa-1-37, Efa-1-38, Efa-1-39, Efa-1-4, Efa-1-40, Efa-1-41, Efa-1-42, Efa-1-43, Efa-1-44, Efa-1-45, Efa-1-46, Efa-1-47, Efa-1-48, Efa-1-49, Efa-1-5, Efa-1-50, Efa-1-51, Efa-1-52, Efa-1-53, Efa-1-54, Efa-1-55, Efa-1-56, Efa-1-57, Efa-1-58, Efa-1-59, Efa-1-6, Efa-1-60, Efa-1-61, Efa-1-62, Efa-1-63, Efa-1-64, Efa-1-65, Efa-1-66, Efa-1-67, Efa-1-68, Efa-1-69, Efa-1-7, Efa-1-70, Efa-1-71, Efa-1-72, Efa-1-73, Efa-1-74, Efa-1-75, Efa-1-76, Efa-1-77, Efa-1-78, Efa-1-79, Efa-1-8, Efa-1-80, Efa-1-82, Efa-1-83, Efa-1-84, Efa-1-85, Efa-1-86, Efa-1-87, Efa-1-9, Efa-10-1, Efa-100-1, Efa-101-1,





Lca-12-1, Lca-13-1, Lca-14-1, Lca-15-1, Lca-16-1, Lca-17-1, Lca-17-2, Lca-18-1, Lca-19-1, Lca-2-1, Lca-20-1, Lca-21-1, Lca-22-1, Lca-23-1, Lca-24-1, Lca-3-1, Lca-4-1, Lca-5-1, Lca-6-2, Lca-7-1, Lca-8-1, Lca-9-1, Lci-1-1, Lci-2-1, Lci-3-1, Lci-4-1, Lci-4-2, Lci-4-3, Lci-5-1, Lcr-10-1, Lcr-2-1, Lcr-3-1, Lcr-4-1, Lcr-5-1, Lcr-6-1, Lcr-7-1, Lcr-8-1, Lcr-9-1, Lfa-1-1, Lfe-1-1, Lfe-1-2, Lfe-1-3, Lfe-1-4, Lfe-10-1, Lfe-11-1, Lfe-12-1, Lfe-2-1, Lfe-3-1, Lfe-4-1, Lfe-5-1, Lfe-6-1, Lfe-8-1, Lfe-9-1, Lff-1-1, Lff-2-1, Lfu-2-1, Lfu-3-1, Lfu-4-1, Lga-1-1, Lga-10-1, Lga-11-1, Lga-12-1, Lga-2-2, Lga-2-3, Lga-2-4, Lga-2-5, Lga-3-1, Lga-4-1, Lga-5-1, Lga-6-1, Lga-7-1, Lga-8-1, Lga-9-1, Lhe-10-1, Lhe-2-1, Lhe-3-1, Lhe-3-2, Lhe-4-1, Lhe-6-1, Lhe-7-1, Lhe-8-1, Lhe-9-1, Lhi-1-1, Lin-1-1, Lin-11-1, Lin-12-1, Lin-14-1, Lin-15-1, Lin-16-1, Lin-17-1, Lin-18-1, Lin-19-1, Lin-2-3, Lin-20-1, Lin-3-1, Lin-5-1, Lin-7-1, Lin-8-1, Lin-9-1, Liv-1-1, Liv-2-1, Liv-3-1, Liv-4-2, Ljo-2-1, Ljo-7-1, Lke-1-1, Lki-3-1, Lku-2-1, Lku-2-2, Lma-3-1, Lme-1-1, Lmo-1-1, Lmo-10-1, Lmo-11-1, Lmo-12-1, Lmo-13-1, Lmo-14-1, Lmo-15-1, Lmo-16-1, Lmo-17-1, Lmo-18-1, Lmo-19-1, Lmo-2-1, Lmo-20-1, Lmo-21-1, Lmo-22-1, Lmo-23-1, Lmo-24-1, Lmo-25-1, Lmo-26-1, Lmo-27-1, Lmo-28-1, Lmo-29-1, Lmo-3-1, Lmo-30-1, Lmo-31-1, Lmo-33-1, Lmo-33-2, Lmo-33-3, Lmo-33-4, Lmo-33-5, Lmo-33-6, Lmo-33-7, Lmo-33-8, Lmo-33-9, Lmo-34-1, Lmo-36-1, Lmo-38-1, Lmo-39-1, Lmo-4-1, Lmo-41-1, Lmo-42-1, Lmo-43-1, Lmo-44-1, Lmo-45-1, Lmo-46-1, Lmo-47-1, Lmo-48-1, Lmo-49-1, Lmo-5-1, Lmo-50-1, Lmo-51-1, Lmo-52-1, Lmo-53-1, Lmo-54-1, Lmo-55-1, Lmo-56-1, Lmo-57-1, Lmo-58-1, Lmo-59-1, Lmo-6-1, Lmo-61-1, Lmo-62-1, Lmo-63-1, Lmo-64-1, Lmo-65-1, Lmo-66-1, Lmo-67-1, Lmo-68-1, Lmo-7-1, Lmo-70-1, Lmo-71-1, Lmo-72-1, Lmo-73-1, Lmo-74-1, Lmo-75-1, Lmo-76-1, Lmo-77-1, Lmo-78-1, Lmo-79-1, Lmo-8-1, Lmo-9-1, Lmu-1-2, Lmu-2-1, Lne-1-1, Lpa-1-1, Lpa-10-1, Lpa-11-1, Lpa-12-1, Lpa-13-1, Lpa-14-1, Lpa-15-1, Lpa-16-1, Lpa-17-1, Lpa-18-1, Lpa-19-1, Lpa-20-1, Lpa-21-1, Lpa-22-1, Lpa-23-1, Lpa-24-1, Lpa-25-1, Lpa-26-1, Lpa-27-1, Lpa-28-1, Lpa-29-1, Lpa-3-1, Lpa-3-2, Lpa-30-1, Lpa-31-1, Lpa-32-1, Lpa-33-1, Lpa-34-1, Lpa-35-1, Lpa-36-1, Lpa-37-1, Lpa-38-1, Lpa-4-1, Lpa-40-1, Lpa-42-1, Lpa-5-1, Lpa-6-1, Lpa-7-1, Lpa-8-1, Lpa-9-1, Lpl-1-1, Lpl-10-1, Lpl-11-1, Lpl-12-1, Lpl-14-1, Lpl-15-1, Lpl-16-1, Lpl-17-1, Lpl-18-1, Lpl-19-1, Lpl-2-1, Lpl-20-1, Lpl-21-1, Lpl-3-1, Lpl-4-1, Lpl-5-1, Lpl-7-1, Lpl-9-1, Lre-1-1, Lre-10-1, Lre-11-1, Lre-12-1, Lre-13-1, Lre-2-1, Lre-3-1, Lre-4-1, Lre-5-1, Lre-6-1, Lre-8-1, Lre-9-1, Lrh-1-1, Lrh-1-11, Lrh-1-12, Lrh-1-13, Lrh-1-14, Lrh-1-15, Lrh-1-16, Lrh-1-17, Lrh-1-18, Lrh-1-19, Lrh-1-2, Lrh-1-20, Lrh-1-21, Lrh-1-22, Lrh-1-23, Lrh-1-24, Lrh-1-25, Lrh-1-26, Lrh-1-27, Lrh-1-28, Lrh-1-3, Lrh-1-4, Lrh-1-5, Lrh-1-6, Lrh-1-7, Lrh-1-8, Lrh-1-9, Lrh-11-1, Lrh-12-1, Lrh-13-1, Lrh-15-1, Lrh-16-1, Lrh-17-1, Lrh-18-1, Lrh-19-1, Lrh-2-1, Lrh-20-1, Lrh-20-2, Lrh-21-1, Lrh-22-1, Lrh-23-1, Lrh-3-1, Lrh-4-1, Lrh-5-1, Lrh-6-1, Lrh-7-1, Lrh-8-1, Lrh-9-1, Lro-2-2, Lru-1-1, Lru-2-1, Lru-3-1, Lru-4-1, Lru-5-1, Lru-6-1, Lsa-10-1, Lsa-11-1, Lsa-2-1, Lsa-4-1, Lsa-5-1, Lsa-6-1, Lsa-7-1, Lsa-8-1, Lsa-9-1, Lse-3-1, Lsp-11-1, Lsp-12-1, Lsp-14-1, Lsp-15-1, Lsp-16-1, Lsp-2-1, Lsp-5-2, Lsp-5-3, Lsp-5-4, Lsp-5-5, Lsp-7-1, Lsp-9-1, Lvi-1-1, Mab-1-2, Mpl-1-11, Mpl-1-2, Mpl-1-3, Mpl-1-4, Mpl-1-5, Mpl-1-6, Mpl-1-7, Mpl-1-8, Mpl-1-9, Mpl-2-1, Mpl-3-1, Pac-3-1, Pac-4-1, Pac-5-1, Pal-4-1, Pda-1-2, Pda-1-3, Pgl-3-1, Pha-1-2, Pla-2-1, Pla-4-1, Pla-5-1, Plo-1-1, Pma-4-1, Pmu-1-1, Pmu-3-1, Ppe-2-1, Ppe-3-1, Ppe-5-1, Ppe-6-1, Ppo-2-1, Ppo-2-2, Ppo-5-1, Ppo-7-1, Ppo-8-1, Ppo-9-1, Psp-13-1, Psp-14-1, Psp-15-1, Psp-16-1, Psp-17-1, Psp-18-1, Psp-22-1, Psp-28-1, Psp-40-1, Psp-9-1, Pte-1-1, Pth-1-1, Qth-1-1, Qth-1-2, Sai-1-2, Sau-1-1, Sau-10-1, Sau-100-1, Sau-1000-1, Sau-1001-1, Sau-1002-1, Sau-1003-1, Sau-1004-1, Sau-1005-1, Sau-1006-1, Sau-1007-1, Sau-1008-1, Sau-1009-1, Sau-101-1, Sau-1010-1, Sau-1011-1, Sau-1012-1, Sau-1013-1, Sau-1014-1, Sau-1015-1, Sau-1016-1, Sau-1017-1, Sau-1018-1, Sau-1019-1, Sau-102-1, Sau-1020-1, Sau-1021-1, Sau-1022-1, Sau-1023-1, Sau-1024-1, Sau-1025-1, Sau-1026-1, Sau-1027-1, Sau-1028-1, Sau-1029-1, Sau-103-1, Sau-1030-1, Sau-1031-1, Sau-1032-1, Sau-1033-1, Sau-1034-1, Sau-1035-1, Sau-1036-1, Sau-1037-1, Sau-1038-1, Sau-1039-1, Sau-104-1, Sau-1040-1, Sau-1041-1, Sau-1042-1, Sau-1043-1, Sau-1044-1, Sau-1045-1, Sau-1046-1, Sau-1047-1, Sau-1048-1, Sau-1049-1, Sau-105-1, Sau-1050-1, Sau-1051-1, Sau-1052-1, Sau-1053-1, Sau-1054-1, Sau-1055-1, Sau-1056-1, Sau-1057-1, Sau-1058-1, Sau-1059-1, Sau-106-1, Sau-1060-1, Sau-1061-1, Sau-1062-1, Sau-1063-1, Sau-1064-1, Sau-1065-1, Sau-1066-1, Sau-1067-1, Sau-1068-1, Sau-1069-1, Sau-107-1, Sau-1070-1, Sau-1071-1, Sau-1072-1, Sau-1073-1, Sau-1074-1, Sau-1075-1, Sau-1076-1, Sau-1077-1, Sau-1078-1, Sau-1079-1, Sau-108-1, Sau-1080-1, Sau-1081-1, Sau-1082-1, Sau-1083-1, Sau-1084-1, Sau-1085-1, Sau-1086-1, Sau-1087-1, Sau-1088-1, Sau-1089-1, Sau-109-1, Sau-1090-1, Sau-1091-1, Sau-1092-1, Sau-1093-1, Sau-1094-1, Sau-1095-1, Sau-1096-1, Sau-1097-1, Sau-1098-1, Sau-1099-1, Sau-11-1, Sau-110-1, Sau-1100-1, Sau-1101-1, Sau-1102-1, Sau-1103-1, Sau-1104-1, Sau-1105-1, Sau-1106-1, Sau-1107-1, Sau-1108-1, Sau-1109-1, Sau-111-1, Sau-1110-1, Sau-1111-1, Sau-1112-1, Sau-1113-1, Sau-1114-1, Sau-1115-1, Sau-1116-1, Sau-1117-1, Sau-1118-1, Sau-1119-1, Sau-112-1, Sau-1120-1, Sau-1121-1, Sau-1122-1, Sau-1123-1, Sau-1124-1, Sau-1125-1, Sau-1126-1, Sau-1127-1, Sau-1128-1, Sau-1129-1, Sau-113-1, Sau-1130-1, Sau-1131-1, Sau-1132-1, Sau-1133-1, Sau-1134-1, Sau-1135-1, Sau-1136-1, Sau-1137-1, Sau-1138-1, Sau-1139-1, Sau-114-1, Sau-1140-1, Sau-1141-1, Sau-1142-1, Sau-1143-1, Sau-1144-1, Sau-1145-1, Sau-1146-1, Sau-1147-1, Sau-1148-1, Sau-1149-1, Sau-115-1, Sau-1150-1, Sau-1151-1, Sau-1152-1, Sau-1153-1, Sau-1154-1, Sau-1155-1, Sau-1156-1, Sau-1157-1, Sau-1158-1, Sau-1159-1, Sau-116-1, Sau-1160-1, Sau-1161-1, Sau-1162-1, Sau-1163-1, Sau-1164-1, Sau-1165-1, Sau-1166-1, Sau-1167-1, Sau-1168-1, Sau-1169-1, Sau-117-1, Sau-1170-1, Sau-1171-1, Sau-1172-1, Sau-1173-1, Sau-1174-1, Sau-1175-1, Sau-1176-1, Sau-1177-1, Sau-1178-1, Sau-1179-1, Sau-118-1, Sau-1180-1, Sau-1181-1, Sau-1182-1, Sau-1183-1, Sau-1184-1, Sau-1185-1, Sau-1186-1, Sau-1187-1, Sau-1188-1, Sau-1189-1, Sau-119-1, Sau-1190-1, Sau-1191-1, Sau-1192-1, Sau-1193-1, Sau-1194-1, Sau-1195-1, Sau-1196-1, Sau-1197-1, Sau-1198-1, Sau-1199-1, Sau-12-1, Sau-120-1, Sau-1200-1, Sau-1201-1, Sau-1202-1, Sau-1203-1, Sau-1204-1, Sau-1205-1, Sau-1206-1, Sau-1207-1, Sau-1208-1, Sau-1209-1, Sau-121-1, Sau-1210-1, Sau-1211-1, Sau-1212-1, Sau-1213-1, Sau-1214-1, Sau-1215-1, Sau-1216-1, Sau-1217-1, Sau-1218-1, Sau-1219-1, Sau-122-1, Sau-1220-1, Sau-1221-1, Sau-1222-1, Sau-1223-1, Sau-1224-1, Sau-1225-1, Sau-1226-1, Sau-1227-1, Sau-1228-1, Sau-1229-1, Sau-123-1, Sau-1230-1, Sau-1231-1, Sau-1232-1, Sau-1233-1, Sau-1234-1, Sau-1235-1, Sau-1236-1, Sau-1237-1, Sau-1238-1, Sau-1239-1, Sau-124-1, Sau-1240-1, Sau-1241-1, Sau-1242-1, Sau-1243-1, Sau-1244-1, Sau-1245-1, Sau-1246-1, Sau-1247-1, Sau-1248-1, Sau-1249-1, Sau-125-1, Sau-1250-1, Sau-1251-1, Sau-1252-1, Sau-1253-1, Sau-1254-1, Sau-1255-1,















Sau-784-1, Sau-785-1, Sau-786-1, Sau-787-1, Sau-788-1, Sau-789-1, Sau-79-1, Sau-79-2, Sau-790-1, Sau-791-1, Sau-792-1, Sau-793-1, Sau-794-1, Sau-795-1, Sau-796-1, Sau-797-1, Sau-798-1, Sau-799-1, Sau-8-1, Sau-80-1, Sau-800-1, Sau-801-1, Sau-802-1, Sau-803-1, Sau-804-1, Sau-805-1, Sau-806-1, Sau-807-1, Sau-808-1, Sau-809-1, Sau-81-1, Sau-810-1, Sau-811-1, Sau-812-1, Sau-813-1, Sau-814-1, Sau-815-1, Sau-816-1, Sau-817-1, Sau-818-1, Sau-819-1, Sau-82-1, Sau-820-1, Sau-821-1, Sau-822-1, Sau-823-1, Sau-824-1, Sau-825-1, Sau-826-1, Sau-827-1, Sau-828-1, Sau-829-1, Sau-83-1, Sau-830-1, Sau-831-1, Sau-832-1, Sau-833-1, Sau-834-1, Sau-835-1, Sau-836-1, Sau-837-1, Sau-838-1, Sau-839-1, Sau-84-1, Sau-840-1, Sau-841-1, Sau-842-1, Sau-843-1, Sau-844-1, Sau-845-1, Sau-846-1, Sau-847-1, Sau-848-1, Sau-849-1, Sau-85-1, Sau-850-1, Sau-851-1, Sau-852-1, Sau-853-1, Sau-854-1, Sau-855-1, Sau-856-1, Sau-857-1, Sau-858-1, Sau-859-1, Sau-86-1, Sau-860-1, Sau-861-1, Sau-862-1, Sau-863-1, Sau-864-1, Sau-865-1, Sau-866-1, Sau-867-1, Sau-868-1, Sau-869-1, Sau-87-1, Sau-870-1, Sau-871-1, Sau-872-1, Sau-873-1, Sau-874-1, Sau-875-1, Sau-876-1, Sau-877-1, Sau-878-1, Sau-879-1, Sau-88-1, Sau-880-1, Sau-881-1, Sau-882-1, Sau-883-1, Sau-884-1, Sau-885-1, Sau-886-1, Sau-887-1, Sau-888-1, Sau-889-1, Sau-89-1, Sau-890-1, Sau-891-1, Sau-892-1, Sau-893-1, Sau-894-1, Sau-895-1, Sau-896-1, Sau-897-1, Sau-898-1, Sau-899-1, Sau-9-1, Sau-90-1, Sau-900-1, Sau-901-1, Sau-902-1, Sau-903-1, Sau-904-1, Sau-905-1, Sau-906-1, Sau-907-1, Sau-908-1, Sau-909-1, Sau-91-1, Sau-910-1, Sau-911-1, Sau-912-1, Sau-913-1, Sau-914-1, Sau-915-1, Sau-916-1, Sau-917-1, Sau-918-1, Sau-919-1, Sau-92-1, Sau-920-1, Sau-921-1, Sau-922-1, Sau-923-1, Sau-924-1, Sau-925-1, Sau-926-1, Sau-927-1, Sau-928-1, Sau-929-1, Sau-93-1, Sau-930-1, Sau-931-1, Sau-932-1, Sau-933-1, Sau-934-1, Sau-935-1, Sau-936-1, Sau-937-1, Sau-938-1, Sau-939-1, Sau-94-1, Sau-940-1, Sau-941-1, Sau-942-1, Sau-943-1, Sau-944-1, Sau-945-1, Sau-946-1, Sau-947-1, Sau-948-1, Sau-949-1, Sau-95-1, Sau-950-1, Sau-951-1, Sau-952-1, Sau-953-1, Sau-954-1, Sau-955-1, Sau-956-1, Sau-957-1, Sau-958-1, Sau-959-1, Sau-96-1, Sau-960-1, Sau-961-1, Sau-962-1, Sau-963-1, Sau-964-1, Sau-965-1, Sau-966-1, Sau-967-1, Sau-968-1, Sau-969-1, Sau-97-1, Sau-970-1, Sau-971-1, Sau-972-1, Sau-973-1, Sau-974-1, Sau-975-1, Sau-976-1, Sau-977-1, Sau-978-1, Sau-979-1, Sau-98-1, Sau-980-1, Sau-981-1, Sau-982-1, Sau-983-1, Sau-984-1, Sau-985-1, Sau-986-1, Sau-987-1, Sau-988-1, Sau-989-1, Sau-99-1, Sau-990-1, Sau-991-1, Sau-992-1, Sau-993-1, Sau-994-1, Sau-995-1, Sau-996-1, Sau-997-1, Sau-998-1, Sau-999-1, Sca-1-1, Sca-10-1, Sca-11-1, Sca-2-1, Sca-3-1, Sca-5-10, Sca-5-11, Sca-5-12, Sca-5-13, Sca-5-14, Sca-5-15, Sca-5-16, Sca-5-17, Sca-5-18, Sca-5-19, Sca-5-2, Sca-5-20, Sca-5-21, Sca-5-3, Sca-5-4, Sca-5-5, Sca-5-6, Sca-5-7, Sca-5-8, Sca-5-9, Sca-6-1, Sca-9-1, Sco-2-1, Sco-2-3, Sep-1-1, Sep-10-1, Sep-11-1, Sep-12-1, Sep-13-1, Sep-14-1, Sep-15-1, Sep-16-1, Sep-17-1, Sep-18-1, Sep-19-1, Sep-2-1, Sep-20-1, Sep-21-1, Sep-22-1, Sep-23-1, Sep-25-1, Sep-26-1, Sep-27-1, Sep-28-1, Sep-29-1, Sep-3-1, Sep-30-1, Sep-31-1, Sep-32-1, Sep-33-1, Sep-34-1, Sep-35-1, Sep-36-1, Sep-37-1, Sep-38-1, Sep-39-1, Sep-4-1, Sep-40-1, Sep-41-1, Sep-42-1, Sep-43-1, Sep-44-1, Sep-45-1, Sep-46-1, Sep-47-1, Sep-48-1, Sep-49-1, Sep-5-1, Sep-50-1, Sep-51-1, Sep-52-1, Sep-53-1, Sep-54-1, Sep-55-1, Sep-56-1, Sep-57-1, Sep-58-1, Sep-59-1, Sep-6-1, Sep-60-1, Sep-61-1, Sep-62-1, Sep-63-1, Sep-64-1, Sep-65-1, Sep-66-1, Sep-67-1, Sep-68-1, Sep-69-1, Sep-7-1, Sep-70-1, Sep-71-1, Sep-72-1, Sep-73-1, Sep-74-1, Sep-75-1, Sep-76-1, Sep-77-1, Sep-78-1, Sep-79-1, Sep-8-2, Sep-8-3, Sep-80-1, Sep-81-1, Sep-82-1, Sep-83-1, Sep-84-1, Sep-85-1, Sep-86-1, Sep-87-1, Sep-88-1, Sep-9-1, Seq-1-1, Seq-3-1, Sha-1-1, Sha-2-1, Sha-4-10, Sha-4-100, Sha-4-101, Sha-4-102, Sha-4-103, Sha-4-104, Sha-4-105, Sha-4-106, Sha-4-107, Sha-4-108, Sha-4-109, Sha-4-11, Sha-4-110, Sha-4-111, Sha-4-112, Sha-4-113, Sha-4-114, Sha-4-115, Sha-4-116, Sha-4-119, Sha-4-12, Sha-4-13, Sha-4-14, Sha-4-15, Sha-4-16, Sha-4-17, Sha-4-18, Sha-4-19, Sha-4-2, Sha-4-20, Sha-4-21, Sha-4-22, Sha-4-23, Sha-4-24, Sha-4-25, Sha-4-26, Sha-4-27, Sha-4-28, Sha-4-29, Sha-4-3, Sha-4-30, Sha-4-31, Sha-4-32, Sha-4-33, Sha-4-34, Sha-4-35, Sha-4-36, Sha-4-37, Sha-4-38, Sha-4-39, Sha-4-4, Sha-4-40, Sha-4-41, Sha-4-42, Sha-4-43, Sha-4-44, Sha-4-45, Sha-4-46, Sha-4-47, Sha-4-48, Sha-4-49, Sha-4-50, Sha-4-51, Sha-4-52, Sha-4-53, Sha-4-54, Sha-4-55, Sha-4-56, Sha-4-57, Sha-4-58, Sha-4-59, Sha-4-6, Sha-4-60, Sha-4-61, Sha-4-62, Sha-4-63, Sha-4-64, Sha-4-65, Sha-4-66, Sha-4-67, Sha-4-68, Sha-4-69, Sha-4-7, Sha-4-70, Sha-4-71, Sha-4-72, Sha-4-73, Sha-4-74, Sha-4-75, Sha-4-76, Sha-4-77, Sha-4-78, Sha-4-79, Sha-4-8, Sha-4-80, Sha-4-81, Sha-4-82, Sha-4-83, Sha-4-84, Sha-4-85, Sha-4-86, Sha-4-87, Sha-4-88, Sha-4-89, Sha-4-9, Sha-4-90, Sha-4-91, Sha-4-92, Sha-4-93, Sha-4-94, Sha-4-95, Sha-4-96, Sha-4-97, Sha-4-98, Sha-4-99, Sha-5-1, Sha-6-1, Sho-1-1, Sho-2-1, Sho-3-10, Sho-3-11, Sho-3-12, Sho-3-13, Sho-3-14, Sho-3-16, Sho-3-17, Sho-3-3, Sho-3-4, Sho-3-5, Sho-3-6, Sho-3-7, Sho-3-8, Sho-3-9, Sho-4-1, Sho-5-1, Slu-2-1, Slu-4-1, Slu-5-1, Slu-6-1, Slu-7-1, Slu-8-1, Slu-9-1, Sma-2-1, Spe-2-1, Spn-1-1, Spn-1-2, Spn-1-3, Spn-1-4, Spn-1-5, Spn-1-6, Spn-1-7, Spn-1-8, Sps-1-1, Sps-3-1, Ssa-1-1, Ssa-2-2, Ssa-2-3, Ssa-3-1, Ssc-1-2, Ssc-1-3, Ssc-1-4, Ssc-2-2, Ssc-2-3, Ssc-3-1, Ssc-4-1, Ssi-4-1, Ssp-11-1, Ssp-12-1, Ssp-13-1, Ssp-15-1, Ssp-2-1, Ssp-4-1, Ssp-7-1, Ssp-8-1, Ssp-9-1, Ste-1-1, Svi-1-1, Swa-2-1, Swa-2-2, Swa-2-4, Swa-2-5, Swa-3-1, Swa-4-1, Swa-5-1, Swa-6-1, Swa-7-1, Sxy-2-1, Tmu-1-1, Tmu-3-1, Tsp-1-1, Tsp-2-1, Vma-1-1, Wci-1-2, Wci-1-3, Wci-2-1, Wko-1-1, Xca-1-1, Xca-2-1, Xca-3-1, Xca-4-1, Xca-5-1, Xva-1-1, Xva-2-1, bLF-1-1, env-100, env-1000, env-101, env-1012, env-1016, env-1019, env-102, env-1020, env-1021, env-103, env-1030, env-1035, env-1037, env-104, env-1042, env-1046, env-1047, env-105, env-106, env-1063, env-1065, env-1068, env-1069, env-107, env-1070, env-1071, env-108, env-1083, env-1085, env-1086, env-1087, env-1089, env-109, env-1090, env-1096, env-1099, env-11, env-110, env-1100, env-111, env-1111, env-112, env-1123, env-1126, env-1127, env-1128, env-113, env-1130, env-1131, env-1136, env-114, env-1140, env-1141, env-1142, env-1143, env-1144, env-1145, env-1147, env-1148, env-1149, env-115, env-1150, env-1151, env-1152, env-1153, env-1154, env-1155, env-1156, env-1157, env-1158, env-1159, env-116, env-1160, env-1161, env-1162, env-1163, env-1167, env-117, env-1173, env-1174, env-1176, env-118, env-1180, env-1181, env-1183, env-1185, env-119, env-1192, env-1193, env-1194, env-1195, env-1196, env-12, env-120, env-121, env-122, env-1223, env-1226, env-1227, env-1229, env-123, env-124, env-125, env-126, env-127, env-128, env-1289, env-129, env-130, env-131, env-1313, env-1314, env-1315, env-1316, env-1317, env-1318, env-1319, env-132, env-1320, env-1321, env-1322, env-1323, env-1324, env-1325, env-1326, env-1327, env-1328, env-1329, env-133, env-1330, env-1331, env-1332, env-1333, env-1334, env-1335, env-1336, env-1338, env-1339, env-134, env-1340, env-1341, env-1343, env-1344, env-1345, env-1346, env-1347, env-1348, env-1349, env-135, env-1350, env-1351,

















































## 12 L31-Gammaproteobacteria

### 12.1 Taxa

The taxonomy of each organism containing a putative L31- in *E. coli*). The abbreviations will be used to identify each individual L31-Gammaproteobacteria RNA is listed, with abbreviations identifying each hit Gammaproteobacteria RNA in Sections 12.2 and 12.4. (e.g., “Eco-1-1” and “Eco-1-2” might hypothetically represent two distinct RNAs

#### abbrev. of hits

Sen-1-1

#### taxonomy of species

AKU\_12601Bacteria Proteobacteria Gammaproteobacteria Enterobacteriales Enterobacteriaceae *Salmonella enterica* subsp. *enterica* serovar Paratyphi A

str

|                    |                                                                                                                                          |
|--------------------|------------------------------------------------------------------------------------------------------------------------------------------|
| Ban-1-1            | Bacteria Actinobacteria Actinobacteridae Bifidobacteriales Bifidobacteriaceae <i>Bifidobacterium animalis</i> subsp. <i>lactis</i> HN019 |
| bsy-1-1            | Bacteria bacteria symbiont BFO1 of <i>Frankliniella occidentalis</i>                                                                     |
| Cmi-1-1            | Bacteria Proteobacteria Betaproteobacteria Burkholderiales Burkholderiaceae <i>Caballeronia mineralivorans</i> PML1(12)                  |
| Aal-1-1 to Aal-1-2 | Bacteria Proteobacteria Gammaproteobacteria Aeromonadales Aeromonadaceae <i>Aeromonas allosaccharophila</i>                              |
| Aaq-1-1            | Bacteria Proteobacteria Gammaproteobacteria Aeromonadales Aeromonadaceae <i>Aeromonas aquariorum</i> AAK1                                |
| Aaq-2-1            | Bacteria Proteobacteria Gammaproteobacteria Aeromonadales Aeromonadaceae <i>Aeromonas aquatica</i>                                       |
| Aau-1-1            | Bacteria Proteobacteria Gammaproteobacteria Aeromonadales Aeromonadaceae <i>Aeromonas australiensis</i>                                  |
| Abe-1-1            | Bacteria Proteobacteria Gammaproteobacteria Aeromonadales Aeromonadaceae <i>Aeromonas bestiarum</i>                                      |
| Abi-1-1            | Bacteria Proteobacteria Gammaproteobacteria Aeromonadales Aeromonadaceae <i>Aeromonas bivalvium</i>                                      |
| Aca-1-1            | Bacteria Proteobacteria Gammaproteobacteria Aeromonadales Aeromonadaceae <i>Aeromonas caviae</i>                                         |
| Aca-2-1            | Bacteria Proteobacteria Gammaproteobacteria Aeromonadales Aeromonadaceae <i>Aeromonas caviae</i> Ae398                                   |
| Adh-1-1 to Adh-1-3 | Bacteria Proteobacteria Gammaproteobacteria Aeromonadales Aeromonadaceae <i>Aeromonas dhakensis</i>                                      |
| Adi-1-1            | Bacteria Proteobacteria Gammaproteobacteria Aeromonadales Aeromonadaceae <i>Aeromonas diversa</i> 2478-85                                |
| Adi-2-1            | Bacteria Proteobacteria Gammaproteobacteria Aeromonadales Aeromonadaceae <i>Aeromonas diversa</i> CDC 2478-85                            |
| Aen-1-1            | Bacteria Proteobacteria Gammaproteobacteria Aeromonadales Aeromonadaceae <i>Aeromonas encheleia</i>                                      |
| Aen-2-1 to Aen-2-3 | Bacteria Proteobacteria Gammaproteobacteria Aeromonadales Aeromonadaceae <i>Aeromonas enteropelogenes</i>                                |
| Aeu-1-1            | Bacteria Proteobacteria Gammaproteobacteria Aeromonadales Aeromonadaceae <i>Aeromonas eucrenophila</i>                                   |
| Afi-1-1            | Bacteria Proteobacteria Gammaproteobacteria Aeromonadales Aeromonadaceae <i>Aeromonas finlandiensis</i>                                  |
| Afl-1-1            | Bacteria Proteobacteria Gammaproteobacteria Aeromonadales Aeromonadaceae <i>Aeromonas fluvialis</i>                                      |
| Ahy-1-1 to Ahy-1-2 | Bacteria Proteobacteria Gammaproteobacteria Aeromonadales Aeromonadaceae <i>Aeromonas hydrophila</i>                                     |
| Ahy-2-1            | Bacteria Proteobacteria Gammaproteobacteria Aeromonadales Aeromonadaceae <i>Aeromonas hydrophila</i> 113                                 |
| Ahy-3-1            | Bacteria Proteobacteria Gammaproteobacteria Aeromonadales Aeromonadaceae <i>Aeromonas hydrophila</i> 14                                  |
| Ahy-4-1            | Bacteria Proteobacteria Gammaproteobacteria Aeromonadales Aeromonadaceae <i>Aeromonas hydrophila</i> 145                                 |
| Ahy-5-1            | Bacteria Proteobacteria Gammaproteobacteria Aeromonadales Aeromonadaceae <i>Aeromonas hydrophila</i> 173                                 |
| Ahy-6-1            | Bacteria Proteobacteria Gammaproteobacteria Aeromonadales Aeromonadaceae <i>Aeromonas hydrophila</i> 187                                 |
| Ahy-7-1            | Bacteria Proteobacteria Gammaproteobacteria Aeromonadales Aeromonadaceae <i>Aeromonas hydrophila</i> 226                                 |
| Ahy-8-1            | Bacteria Proteobacteria Gammaproteobacteria Aeromonadales Aeromonadaceae <i>Aeromonas hydrophila</i> 259                                 |
| Ahy-9-1            | Bacteria Proteobacteria Gammaproteobacteria Aeromonadales Aeromonadaceae <i>Aeromonas hydrophila</i> 277                                 |
| Ahy-10-1           | Bacteria Proteobacteria Gammaproteobacteria Aeromonadales Aeromonadaceae <i>Aeromonas hydrophila</i> 4AK4                                |
| Ahy-11-1           | Bacteria Proteobacteria Gammaproteobacteria Aeromonadales Aeromonadaceae <i>Aeromonas hydrophila</i> AD9                                 |
| Ahy-12-1           | Bacteria Proteobacteria Gammaproteobacteria Aeromonadales Aeromonadaceae <i>Aeromonas hydrophila</i> AL09-71                             |
| Ahy-13-1           | Bacteria Proteobacteria Gammaproteobacteria Aeromonadales Aeromonadaceae <i>Aeromonas hydrophila</i> J-1                                 |
| Ahy-14-1           | Bacteria Proteobacteria Gammaproteobacteria Aeromonadales Aeromonadaceae <i>Aeromonas hydrophila</i> ML09-119                            |
| Ahy-15-1           | Bacteria Proteobacteria Gammaproteobacteria Aeromonadales Aeromonadaceae <i>Aeromonas hydrophila</i> NJ-35                               |
| Ahy-19-1           | Bacteria Proteobacteria Gammaproteobacteria Aeromonadales Aeromonadaceae <i>Aeromonas hydrophila</i> pc104A                              |
| Ahy-16-1           | Bacteria Proteobacteria Gammaproteobacteria Aeromonadales Aeromonadaceae <i>Aeromonas hydrophila</i> SNUFPC-A8                           |
| Ahy-17-1           | Bacteria Proteobacteria Gammaproteobacteria Aeromonadales Aeromonadaceae <i>Aeromonas hydrophila</i> SSU                                 |
| Ahy-20-1           | Bacteria Proteobacteria Gammaproteobacteria Aeromonadales Aeromonadaceae <i>Aeromonas hydrophila</i> subsp. <i>hydrophila</i> ATCC 7966  |
| Ahy-21-1           | Bacteria Proteobacteria Gammaproteobacteria Aeromonadales Aeromonadaceae <i>Aeromonas hydrophila</i> subsp. <i>ranae</i>                 |
| Ahy-18-1           | Bacteria Proteobacteria Gammaproteobacteria Aeromonadales Aeromonadaceae <i>Aeromonas hydrophila</i> YL17                                |
| Aja-1-1 to Aja-1-2 | Bacteria Proteobacteria Gammaproteobacteria Aeromonadales Aeromonadaceae <i>Aeromonas jandaei</i>                                        |
| Aja-2-1            | Bacteria Proteobacteria Gammaproteobacteria Aeromonadales Aeromonadaceae <i>Aeromonas jandaei</i> Riv2                                   |
| Ala-1-1            | Bacteria Proteobacteria Gammaproteobacteria Aeromonadales Aeromonadaceae <i>Aeromonas lacus</i>                                          |
| Ame-1-1 to Ame-1-3 | Bacteria Proteobacteria Gammaproteobacteria Aeromonadales Aeromonadaceae <i>Aeromonas media</i>                                          |
| Ame-2-1            | Bacteria Proteobacteria Gammaproteobacteria Aeromonadales Aeromonadaceae <i>Aeromonas media</i> WS                                       |
| Amo-1-1            | Bacteria Proteobacteria Gammaproteobacteria Aeromonadales Aeromonadaceae <i>Aeromonas molluscorum</i> 848                                |
| Api-1-1            | Bacteria Proteobacteria Gammaproteobacteria Aeromonadales Aeromonadaceae <i>Aeromonas piscicola</i>                                      |
| Apo-1-1            | Bacteria Proteobacteria Gammaproteobacteria Aeromonadales Aeromonadaceae <i>Aeromonas popoffii</i>                                       |

|                    |          |                |                     |                 |                     |                                                                 |
|--------------------|----------|----------------|---------------------|-----------------|---------------------|-----------------------------------------------------------------|
| Ari-1-1            | Bacteria | Proteobacteria | Gammaproteobacteria | Aeromonadales   | Aeromonadaceae      | <i>Aeromonas rivuli</i>                                         |
| Asa-1-1            | Bacteria | Proteobacteria | Gammaproteobacteria | Aeromonadales   | Aeromonadaceae      | <i>Aeromonas salmonicida</i>                                    |
| Asa-2-1            | Bacteria | Proteobacteria | Gammaproteobacteria | Aeromonadales   | Aeromonadaceae      | <i>Aeromonas salmonicida</i> subsp. <i>achromogenes</i> AS03    |
| Asa-3-1            | Bacteria | Proteobacteria | Gammaproteobacteria | Aeromonadales   | Aeromonadaceae      | <i>Aeromonas salmonicida</i> subsp. <i>masoucida</i> NBRC 13784 |
| Asa-4-1            | Bacteria | Proteobacteria | Gammaproteobacteria | Aeromonadales   | Aeromonadaceae      | <i>Aeromonas salmonicida</i> subsp. <i>pectinolytica</i> 34mel  |
| Asa-5-1 to Asa-5-4 | Bacteria | Proteobacteria | Gammaproteobacteria | Aeromonadales   | Aeromonadaceae      | <i>Aeromonas salmonicida</i> subsp. <i>salmonicida</i>          |
| Asa-6-1            | Bacteria | Proteobacteria | Gammaproteobacteria | Aeromonadales   | Aeromonadaceae      | <i>Aeromonas salmonicida</i> subsp. <i>salmonicida</i> 01-B526  |
| Asa-7-1            | Bacteria | Proteobacteria | Gammaproteobacteria | Aeromonadales   | Aeromonadaceae      | <i>Aeromonas salmonicida</i> subsp. <i>salmonicida</i> A449     |
| Asa-8-1            | Bacteria | Proteobacteria | Gammaproteobacteria | Aeromonadales   | Aeromonadaceae      | <i>Aeromonas sanarellii</i>                                     |
| Asc-1-1            | Bacteria | Proteobacteria | Gammaproteobacteria | Aeromonadales   | Aeromonadaceae      | <i>Aeromonas schubertii</i>                                     |
| Asi-1-1            | Bacteria | Proteobacteria | Gammaproteobacteria | Aeromonadales   | Aeromonadaceae      | <i>Aeromonas simiae</i>                                         |
| Aso-1-1            | Bacteria | Proteobacteria | Gammaproteobacteria | Aeromonadales   | Aeromonadaceae      | <i>Aeromonas sobria</i>                                         |
| Asp-1-1            | Bacteria | Proteobacteria | Gammaproteobacteria | Aeromonadales   | Aeromonadaceae      | <i>Aeromonas</i> sp. HZM                                        |
| Asp-2-1            | Bacteria | Proteobacteria | Gammaproteobacteria | Aeromonadales   | Aeromonadaceae      | <i>Aeromonas</i> sp. L1B5.3                                     |
| Asp-3-1            | Bacteria | Proteobacteria | Gammaproteobacteria | Aeromonadales   | Aeromonadaceae      | <i>Aeromonas</i> sp. ZOR0001                                    |
| Asp-4-1            | Bacteria | Proteobacteria | Gammaproteobacteria | Aeromonadales   | Aeromonadaceae      | <i>Aeromonas</i> sp. ZOR0002                                    |
| Ata-1-1 to Ata-1-2 | Bacteria | Proteobacteria | Gammaproteobacteria | Aeromonadales   | Aeromonadaceae      | <i>Aeromonas taiwanensis</i>                                    |
| Ate-1-1            | Bacteria | Proteobacteria | Gammaproteobacteria | Aeromonadales   | Aeromonadaceae      | <i>Aeromonas tecta</i>                                          |
| Ave-1-1 to Ave-1-3 | Bacteria | Proteobacteria | Gammaproteobacteria | Aeromonadales   | Aeromonadaceae      | <i>Aeromonas veronii</i>                                        |
| Ave-2-1            | Bacteria | Proteobacteria | Gammaproteobacteria | Aeromonadales   | Aeromonadaceae      | <i>Aeromonas veronii</i> AER39                                  |
| Ave-3-1            | Bacteria | Proteobacteria | Gammaproteobacteria | Aeromonadales   | Aeromonadaceae      | <i>Aeromonas veronii</i> AER397                                 |
| Ave-4-1            | Bacteria | Proteobacteria | Gammaproteobacteria | Aeromonadales   | Aeromonadaceae      | <i>Aeromonas veronii</i> AMC34                                  |
| Ave-5-1            | Bacteria | Proteobacteria | Gammaproteobacteria | Aeromonadales   | Aeromonadaceae      | <i>Aeromonas veronii</i> AMC35                                  |
| Ave-6-1            | Bacteria | Proteobacteria | Gammaproteobacteria | Aeromonadales   | Aeromonadaceae      | <i>Aeromonas veronii</i> B565                                   |
| Ave-8-1            | Bacteria | Proteobacteria | Gammaproteobacteria | Aeromonadales   | Aeromonadaceae      | <i>Aeromonas veronii</i> bv. <i>sobria</i>                      |
| Ave-9-1            | Bacteria | Proteobacteria | Gammaproteobacteria | Aeromonadales   | Aeromonadaceae      | <i>Aeromonas veronii</i> bv. <i>veronii</i>                     |
| Ave-7-1            | Bacteria | Proteobacteria | Gammaproteobacteria | Aeromonadales   | Aeromonadaceae      | <i>Aeromonas veronii</i> Hm21                                   |
| Osm-1-1            | Bacteria | Proteobacteria | Gammaproteobacteria | Aeromonadales   | Aeromonadaceae      | <i>Oceanimonas smirnovii</i> ATCC BAA-899                       |
| Osp-1-1            | Bacteria | Proteobacteria | Gammaproteobacteria | Aeromonadales   | Aeromonadaceae      | <i>Oceanimonas</i> sp. GK1                                      |
| Tau-1-1            | Bacteria | Proteobacteria | Gammaproteobacteria | Aeromonadales   | Aeromonadaceae      | <i>Tolumonas auensis</i> DSM 9187                               |
| Tli-1-1            | Bacteria | Proteobacteria | Gammaproteobacteria | Aeromonadales   | Aeromonadaceae      | <i>Tolumonas lignilytica</i>                                    |
| Sam-1-1            | Bacteria | Proteobacteria | Gammaproteobacteria | Aeromonadales   | Succinivibrionaceae | <i>Succinimonas amylolytica</i> DSM 2873                        |
| Asa-9-1            | Bacteria | Proteobacteria | Gammaproteobacteria | Alteromonadales | Alteromonadaceae    | <i>Aestuariibacter salexigens</i> DSM 15300                     |
| Aal-2-1            | Bacteria | Proteobacteria | Gammaproteobacteria | Alteromonadales | Alteromonadaceae    | <i>Agarivorans albus</i> MKT 106                                |
| Ama-1-1            | Bacteria | Proteobacteria | Gammaproteobacteria | Alteromonadales | Alteromonadaceae    | <i>Aliagarivorans marinus</i> DSM 23064                         |
| Ata-2-1            | Bacteria | Proteobacteria | Gammaproteobacteria | Alteromonadales | Alteromonadaceae    | <i>Aliagarivorans taiwanensis</i> DSM 22990                     |
| Aae-1-1            | Bacteria | Proteobacteria | Gammaproteobacteria | Alteromonadales | Alteromonadaceae    | <i>Alishewanella aestuarii</i> B11                              |
| Aag-1-1            | Bacteria | Proteobacteria | Gammaproteobacteria | Alteromonadales | Alteromonadaceae    | <i>Alishewanella agri</i> BL06                                  |
| Aje-1-1            | Bacteria | Proteobacteria | Gammaproteobacteria | Alteromonadales | Alteromonadaceae    | <i>Alishewanella jeotgali</i> KCTC 22429                        |
| Aau-2-1 to Aau-2-2 | Bacteria | Proteobacteria | Gammaproteobacteria | Alteromonadales | Alteromonadaceae    | <i>Alteromonas australica</i>                                   |
| Ama-2-1 to Ama-2-3 | Bacteria | Proteobacteria | Gammaproteobacteria | Alteromonadales | Alteromonadaceae    | <i>Alteromonas macleodii</i>                                    |
| Ama-4-1            | Bacteria | Proteobacteria | Gammaproteobacteria | Alteromonadales | Alteromonadaceae    | <i>Alteromonas macleodii</i> AltDE1                             |
| Ama-3-1            | Bacteria | Proteobacteria | Gammaproteobacteria | Alteromonadales | Alteromonadaceae    | <i>Alteromonas macleodii</i> ATCC 27126                         |
| Ama-5-1            | Bacteria | Proteobacteria | Gammaproteobacteria | Alteromonadales | Alteromonadaceae    | <i>Alteromonas macleodii</i> str. 'Aegean Sea MED64'            |
| Ama-6-1            | Bacteria | Proteobacteria | Gammaproteobacteria | Alteromonadales | Alteromonadaceae    | <i>Alteromonas macleodii</i> str. 'Balearic Sea AD45'           |
| Ama-7-1            | Bacteria | Proteobacteria | Gammaproteobacteria | Alteromonadales | Alteromonadaceae    | <i>Alteromonas macleodii</i> str. 'Black Sea 11'                |
| Ama-8-1            | Bacteria | Proteobacteria | Gammaproteobacteria | Alteromonadales | Alteromonadaceae    | <i>Alteromonas macleodii</i> str. 'Deep ecotype'                |
| Ama-9-1            | Bacteria | Proteobacteria | Gammaproteobacteria | Alteromonadales | Alteromonadaceae    | <i>Alteromonas macleodii</i> str. 'English Channel 673'         |
| Ama-10-1           | Bacteria | Proteobacteria | Gammaproteobacteria | Alteromonadales | Alteromonadaceae    | <i>Alteromonas macleodii</i> str. 'Ionian Sea U7'               |
| Ama-11-1           | Bacteria | Proteobacteria | Gammaproteobacteria | Alteromonadales | Alteromonadaceae    | <i>Alteromonas macleodii</i> str. 'Ionian Sea U8'               |
| Ama-12-1           | Bacteria | Proteobacteria | Gammaproteobacteria | Alteromonadales | Alteromonadaceae    | <i>Alteromonas macleodii</i> str. 'Ionian Sea UM4b'             |
| Ama-13-1           | Bacteria | Proteobacteria | Gammaproteobacteria | Alteromonadales | Alteromonadaceae    | <i>Alteromonas macleodii</i> str. 'Ionian Sea UM7'              |
| Ama-14-1           | Bacteria | Proteobacteria | Gammaproteobacteria | Alteromonadales | Alteromonadaceae    | <i>Alteromonas marina</i>                                       |
| Asp-5-1            | Bacteria | Proteobacteria | Gammaproteobacteria | Alteromonadales | Alteromonadaceae    | <i>Alteromonas</i> sp. ALT199                                   |
| Asp-6-1            | Bacteria | Proteobacteria | Gammaproteobacteria | Alteromonadales | Alteromonadaceae    | <i>Alteromonas</i> sp. LOR                                      |
| Asp-7-1            | Bacteria | Proteobacteria | Gammaproteobacteria | Alteromonadales | Alteromonadaceae    | <i>Alteromonas</i> sp. LTR                                      |
| Asp-8-1            | Bacteria | Proteobacteria | Gammaproteobacteria | Alteromonadales | Alteromonadaceae    | <i>Alteromonas</i> sp. SN2                                      |
| Gag-1-1            | Bacteria | Proteobacteria | Gammaproteobacteria | Alteromonadales | Alteromonadaceae    | <i>Glaciacola agarilytica</i> NO2                               |
| Gar-1-1            | Bacteria | Proteobacteria | Gammaproteobacteria | Alteromonadales | Alteromonadaceae    | <i>Glaciacola arctica</i> BSs20135                              |
| Gch-1-1            | Bacteria | Proteobacteria | Gammaproteobacteria | Alteromonadales | Alteromonadaceae    | <i>Glaciacola chathamensis</i> S18K6                            |
| Gli-1-1            | Bacteria | Proteobacteria | Gammaproteobacteria | Alteromonadales | Alteromonadaceae    | <i>Glaciacola lipolytica</i> E3                                 |
| Gme-1-1            | Bacteria | Proteobacteria | Gammaproteobacteria | Alteromonadales | Alteromonadaceae    | <i>Glaciacola mesophila</i> KMM 241                             |
| Gni-1-1            | Bacteria | Proteobacteria | Gammaproteobacteria | Alteromonadales | Alteromonadaceae    | <i>Glaciacola nitratireducens</i> FR1064                        |
| Gpa-1-1            | Bacteria | Proteobacteria | Gammaproteobacteria | Alteromonadales | Alteromonadaceae    | <i>Glaciacola pallidula</i> DSM 14239 = ACAM 615                |
| Gpo-1-1            | Bacteria | Proteobacteria | Gammaproteobacteria | Alteromonadales | Alteromonadaceae    | <i>Glaciacola polaris</i> LMG 21857                             |

|                    |          |                |                     |                 |                        |                                                                 |
|--------------------|----------|----------------|---------------------|-----------------|------------------------|-----------------------------------------------------------------|
| Gps-1-1            | Bacteria | Proteobacteria | Gammaproteobacteria | Alteromonadales | Alteromonadaceae       | <i>Glaciacola psychrophila</i> 170                              |
| Gpu-1-1            | Bacteria | Proteobacteria | Gammaproteobacteria | Alteromonadales | Alteromonadaceae       | <i>Glaciacola punicea</i> DSM 14233 = ACAM 611                  |
| Gsp-1-1            | Bacteria | Proteobacteria | Gammaproteobacteria | Alteromonadales | Alteromonadaceae       | <i>Glaciacola sp.</i> 4H-3-7+YE-5                               |
| Gsp-2-1            | Bacteria | Proteobacteria | Gammaproteobacteria | Alteromonadales | Alteromonadaceae       | <i>Glaciacola sp.</i> HTCC2999                                  |
| Maq-1-1            | Bacteria | Proteobacteria | Gammaproteobacteria | Alteromonadales | Alteromonadaceae       | <i>Marinobacter aquaeolei</i> VT8                               |
| Mhy-1-1            | Bacteria | Proteobacteria | Gammaproteobacteria | Alteromonadales | Alteromonadaceae       | <i>Marinobacter hydrocarbonoclasticus</i> ATCC 49840            |
| Msp-1-1            | Bacteria | Proteobacteria | Gammaproteobacteria | Alteromonadales | Alteromonadaceae       | <i>Marinobacter sp.</i> C1S70                                   |
| Msp-2-1            | Bacteria | Proteobacteria | Gammaproteobacteria | Alteromonadales | Alteromonadaceae       | <i>Marinobacter sp.</i> EN3                                     |
| Msp-3-1            | Bacteria | Proteobacteria | Gammaproteobacteria | Alteromonadales | Alteromonadaceae       | <i>Marinobacter sp.</i> EVN1                                    |
| Msu-1-1            | Bacteria | Proteobacteria | Gammaproteobacteria | Alteromonadales | Alteromonadaceae       | <i>Marinobacter subterrani</i>                                  |
| Sch-1-1            | Bacteria | Proteobacteria | Gammaproteobacteria | Alteromonadales | Alteromonadaceae       | <i>Salinimonas chungwhensis</i> DSM 16280                       |
| Aba-1-1            | Bacteria | Proteobacteria | Gammaproteobacteria | Alteromonadales |                        | <i>bacterium</i> TW-7                                           |
| Csp-1-1            | Bacteria | Proteobacteria | Gammaproteobacteria | Alteromonadales | Colwelliaceae          | <i>Colwellia sp.</i> 8_GOM-1096m                                |
| Tac-1-1            | Bacteria | Proteobacteria | Gammaproteobacteria | Alteromonadales | Colwelliaceae          | <i>Thalassomonas actiniarum</i>                                 |
| Tvi-1-1            | Bacteria | Proteobacteria | Gammaproteobacteria | Alteromonadales | Colwelliaceae          | <i>Thalassomonas viridans</i>                                   |
| Tsp-1-1            | Bacteria | Proteobacteria | Gammaproteobacteria | Alteromonadales | Colwelliaceae          | <i>Thalassotalea sp.</i> ND16A                                  |
| Fba-1-1            | Bacteria | Proteobacteria | Gammaproteobacteria | Alteromonadales | Ferrimonadaceae        | <i>Ferrimonas balearica</i> DSM 9799                            |
| Ffu-1-1            | Bacteria | Proteobacteria | Gammaproteobacteria | Alteromonadales | Ferrimonadaceae        | <i>Ferrimonas futtsuensis</i> DSM 18154                         |
| Fky-1-1            | Bacteria | Proteobacteria | Gammaproteobacteria | Alteromonadales | Ferrimonadaceae        | <i>Ferrimonas kyonanensis</i> DSM 18153                         |
| Fse-1-1            | Bacteria | Proteobacteria | Gammaproteobacteria | Alteromonadales | Ferrimonadaceae        | <i>Ferrimonas senticii</i> DSM 18821                            |
| Iat-1-1            | Bacteria | Proteobacteria | Gammaproteobacteria | Alteromonadales | Idiomarinaceae         | <i>Idiomarina atlantica</i>                                     |
| Iba-1-1            | Bacteria | Proteobacteria | Gammaproteobacteria | Alteromonadales | Idiomarinaceae         | <i>Idiomarina baltica</i> OS145                                 |
| Ilo-1-1            | Bacteria | Proteobacteria | Gammaproteobacteria | Alteromonadales | Idiomarinaceae         | <i>Idiomarina loihiensis</i> GSL 199                            |
| Ilo-2-1            | Bacteria | Proteobacteria | Gammaproteobacteria | Alteromonadales | Idiomarinaceae         | <i>Idiomarina loihiensis</i> L2TR                               |
| Isa-1-1            | Bacteria | Proteobacteria | Gammaproteobacteria | Alteromonadales | Idiomarinaceae         | <i>Idiomarina salinarum</i>                                     |
| Ise-1-1            | Bacteria | Proteobacteria | Gammaproteobacteria | Alteromonadales | Idiomarinaceae         | <i>Idiomarina sediminum</i> DSM 21906                           |
| Isp-1-1            | Bacteria | Proteobacteria | Gammaproteobacteria | Alteromonadales | Idiomarinaceae         | <i>Idiomarina sp.</i> 28-8                                      |
| Isp-2-1            | Bacteria | Proteobacteria | Gammaproteobacteria | Alteromonadales | Idiomarinaceae         | <i>Idiomarina sp.</i> A28L                                      |
| Ixi-1-1            | Bacteria | Proteobacteria | Gammaproteobacteria | Alteromonadales | Idiomarinaceae         | <i>Idiomarina xiamenensis</i> 10-D-4                            |
| Mma-1-1            | Bacteria | Proteobacteria | Gammaproteobacteria | Alteromonadales | Moritellaceae          | <i>Moritella marina</i> ATCC 15381                              |
| Asa-10-1           | Bacteria | Proteobacteria | Gammaproteobacteria | Alteromonadales | Pseudoalteromonadaceae | <i>Algicola sagamiensis</i> DSM 14643                           |
| Pag-1-1            | Bacteria | Proteobacteria | Gammaproteobacteria | Alteromonadales | Pseudoalteromonadaceae | <i>Pseudoalteromonas agarivorans</i> S816                       |
| Par-1-1            | Bacteria | Proteobacteria | Gammaproteobacteria | Alteromonadales | Pseudoalteromonadaceae | <i>Pseudoalteromonas arctica</i> A 37-1-2                       |
| Pat-1-1            | Bacteria | Proteobacteria | Gammaproteobacteria | Alteromonadales | Pseudoalteromonadaceae | <i>Pseudoalteromonas atlantica</i> T6c                          |
| Pci-1-1            | Bacteria | Proteobacteria | Gammaproteobacteria | Alteromonadales | Pseudoalteromonadaceae | <i>Pseudoalteromonas citrea</i> NCIMB 1889                      |
| Pdi-1-1            | Bacteria | Proteobacteria | Gammaproteobacteria | Alteromonadales | Pseudoalteromonadaceae | <i>Pseudoalteromonas distincta</i>                              |
| Pel-1-1            | Bacteria | Proteobacteria | Gammaproteobacteria | Alteromonadales | Pseudoalteromonadaceae | <i>Pseudoalteromonas elyakovii</i>                              |
| Pfl-1-1            | Bacteria | Proteobacteria | Gammaproteobacteria | Alteromonadales | Pseudoalteromonadaceae | <i>Pseudoalteromonas flavipulchra</i> JG1                       |
| Pfl-2-1            | Bacteria | Proteobacteria | Gammaproteobacteria | Alteromonadales | Pseudoalteromonadaceae | <i>Pseudoalteromonas flavipulchra</i> NCIMB 2033 = ATCC BAA-314 |
| Pfu-1-1            | Bacteria | Proteobacteria | Gammaproteobacteria | Alteromonadales | Pseudoalteromonadaceae | <i>Pseudoalteromonas fuliginea</i>                              |
| Pha-1-1            | Bacteria | Proteobacteria | Gammaproteobacteria | Alteromonadales | Pseudoalteromonadaceae | <i>Pseudoalteromonas haloplanktis</i> ANT/505                   |
| Pha-2-1            | Bacteria | Proteobacteria | Gammaproteobacteria | Alteromonadales | Pseudoalteromonadaceae | <i>Pseudoalteromonas haloplanktis</i> ATCC 14393                |
| Pha-3-1            | Bacteria | Proteobacteria | Gammaproteobacteria | Alteromonadales | Pseudoalteromonadaceae | <i>Pseudoalteromonas haloplanktis</i> TAC125                    |
| Pli-1-1            | Bacteria | Proteobacteria | Gammaproteobacteria | Alteromonadales | Pseudoalteromonadaceae | <i>Pseudoalteromonas lipolytica</i> SCSIO 04301                 |
| Plu-1-1            | Bacteria | Proteobacteria | Gammaproteobacteria | Alteromonadales | Pseudoalteromonadaceae | <i>Pseudoalteromonas luteoviolacea</i>                          |
| Plu-2-1            | Bacteria | Proteobacteria | Gammaproteobacteria | Alteromonadales | Pseudoalteromonadaceae | <i>Pseudoalteromonas luteoviolacea</i> 2ta16                    |
| Plu-3-1            | Bacteria | Proteobacteria | Gammaproteobacteria | Alteromonadales | Pseudoalteromonadaceae | <i>Pseudoalteromonas luteoviolacea</i> B = ATCC 29581           |
| Plu-4-1            | Bacteria | Proteobacteria | Gammaproteobacteria | Alteromonadales | Pseudoalteromonadaceae | <i>Pseudoalteromonas luteoviolacea</i> S4054                    |
| Pma-1-1            | Bacteria | Proteobacteria | Gammaproteobacteria | Alteromonadales | Pseudoalteromonadaceae | <i>Pseudoalteromonas marina</i> mano4                           |
| Ppi-1-1            | Bacteria | Proteobacteria | Gammaproteobacteria | Alteromonadales | Pseudoalteromonadaceae | <i>Pseudoalteromonas piratica</i>                               |
| Ppi-2-1 to Ppi-2-2 | Bacteria | Proteobacteria | Gammaproteobacteria | Alteromonadales | Pseudoalteromonadaceae | <i>Pseudoalteromonas piscicida</i>                              |
| Ppi-3-1            | Bacteria | Proteobacteria | Gammaproteobacteria | Alteromonadales | Pseudoalteromonadaceae | <i>Pseudoalteromonas piscicida</i> ATCC 15057                   |
| Ppi-4-1            | Bacteria | Proteobacteria | Gammaproteobacteria | Alteromonadales | Pseudoalteromonadaceae | <i>Pseudoalteromonas piscicida</i> JCM 20779                    |
| Pru-1-1 to Pru-1-2 | Bacteria | Proteobacteria | Gammaproteobacteria | Alteromonadales | Pseudoalteromonadaceae | <i>Pseudoalteromonas rubra</i>                                  |
| Pru-2-1            | Bacteria | Proteobacteria | Gammaproteobacteria | Alteromonadales | Pseudoalteromonadaceae | <i>Pseudoalteromonas rubra</i> ATCC 29570                       |
| Pru-3-1 to Pru-3-2 | Bacteria | Proteobacteria | Gammaproteobacteria | Alteromonadales | Pseudoalteromonadaceae | <i>Pseudoalteromonas ruthenica</i>                              |
| Pru-4-1            | Bacteria | Proteobacteria | Gammaproteobacteria | Alteromonadales | Pseudoalteromonadaceae | <i>Pseudoalteromonas ruthenica</i> CP76                         |
| Psp-1-1            | Bacteria | Proteobacteria | Gammaproteobacteria | Alteromonadales | Pseudoalteromonadaceae | <i>Pseudoalteromonas sp.</i> '520P1 No. 412'                    |
| Psp-2-1            | Bacteria | Proteobacteria | Gammaproteobacteria | Alteromonadales | Pseudoalteromonadaceae | <i>Pseudoalteromonas sp.</i> 23_GOM-1509m                       |
| Psp-3-1            | Bacteria | Proteobacteria | Gammaproteobacteria | Alteromonadales | Pseudoalteromonadaceae | <i>Pseudoalteromonas sp.</i> 6BO_GOM-1096m                      |
| Psp-4-1            | Bacteria | Proteobacteria | Gammaproteobacteria | Alteromonadales | Pseudoalteromonadaceae | <i>Pseudoalteromonas sp.</i> A2                                 |
| Psp-5-1            | Bacteria | Proteobacteria | Gammaproteobacteria | Alteromonadales | Pseudoalteromonadaceae | <i>Pseudoalteromonas sp.</i> AC163                              |
| Psp-6-1            | Bacteria | Proteobacteria | Gammaproteobacteria | Alteromonadales | Pseudoalteromonadaceae | <i>Pseudoalteromonas sp.</i> BSi20311                           |
| Psp-7-1            | Bacteria | Proteobacteria | Gammaproteobacteria | Alteromonadales | Pseudoalteromonadaceae | <i>Pseudoalteromonas sp.</i> BSi20429                           |
| Psp-8-1            | Bacteria | Proteobacteria | Gammaproteobacteria | Alteromonadales | Pseudoalteromonadaceae | <i>Pseudoalteromonas sp.</i> BSi20439                           |



|          |          |                |                     |                 |                        |                                   |                         |
|----------|----------|----------------|---------------------|-----------------|------------------------|-----------------------------------|-------------------------|
| Psp-9-1  | Bacteria | Proteobacteria | Gammaproteobacteria | Alteromonadales | Pseudoalteromonadaceae | <i>Pseudoalteromonas</i> sp.      | BSi20480                |
| Psp-10-1 | Bacteria | Proteobacteria | Gammaproteobacteria | Alteromonadales | Pseudoalteromonadaceae | <i>Pseudoalteromonas</i> sp.      | BSi20495                |
| Psp-11-1 | Bacteria | Proteobacteria | Gammaproteobacteria | Alteromonadales | Pseudoalteromonadaceae | <i>Pseudoalteromonas</i> sp.      | BSi20652                |
| Psp-12-1 | Bacteria | Proteobacteria | Gammaproteobacteria | Alteromonadales | Pseudoalteromonadaceae | <i>Pseudoalteromonas</i> sp.      | Bsw20308                |
| Psp-13-1 | Bacteria | Proteobacteria | Gammaproteobacteria | Alteromonadales | Pseudoalteromonadaceae | <i>Pseudoalteromonas</i> sp.      | ECSMB14103              |
| Psp-14-1 | Bacteria | Proteobacteria | Gammaproteobacteria | Alteromonadales | Pseudoalteromonadaceae | <i>Pseudoalteromonas</i> sp.      | ND6B                    |
| Psp-15-1 | Bacteria | Proteobacteria | Gammaproteobacteria | Alteromonadales | Pseudoalteromonadaceae | <i>Pseudoalteromonas</i> sp.      | NJ631                   |
| Psp-16-1 | Bacteria | Proteobacteria | Gammaproteobacteria | Alteromonadales | Pseudoalteromonadaceae | <i>Pseudoalteromonas</i> sp.      | NW 4327                 |
| Psp-17-1 | Bacteria | Proteobacteria | Gammaproteobacteria | Alteromonadales | Pseudoalteromonadaceae | <i>Pseudoalteromonas</i> sp.      | PAMC 22718              |
| Psp-18-1 | Bacteria | Proteobacteria | Gammaproteobacteria | Alteromonadales | Pseudoalteromonadaceae | <i>Pseudoalteromonas</i> sp.      | PLSV                    |
| Psp-19-1 | Bacteria | Proteobacteria | Gammaproteobacteria | Alteromonadales | Pseudoalteromonadaceae | <i>Pseudoalteromonas</i> sp.      | S2292                   |
| Psp-20-1 | Bacteria | Proteobacteria | Gammaproteobacteria | Alteromonadales | Pseudoalteromonadaceae | <i>Pseudoalteromonas</i> sp.      | S3431                   |
| Psp-21-1 | Bacteria | Proteobacteria | Gammaproteobacteria | Alteromonadales | Pseudoalteromonadaceae | <i>Pseudoalteromonas</i> sp.      | S8-38                   |
| Psp-22-1 | Bacteria | Proteobacteria | Gammaproteobacteria | Alteromonadales | Pseudoalteromonadaceae | <i>Pseudoalteromonas</i> sp.      | S8-8                    |
| Psp-23-1 | Bacteria | Proteobacteria | Gammaproteobacteria | Alteromonadales | Pseudoalteromonadaceae | <i>Pseudoalteromonas</i> sp.      | SCSIO_11900             |
| Psp-24-1 | Bacteria | Proteobacteria | Gammaproteobacteria | Alteromonadales | Pseudoalteromonadaceae | <i>Pseudoalteromonas</i> sp.      | SM9913                  |
| Psp-25-1 | Bacteria | Proteobacteria | Gammaproteobacteria | Alteromonadales | Pseudoalteromonadaceae | <i>Pseudoalteromonas</i> sp.      | TAB23                   |
| Psp-26-1 | Bacteria | Proteobacteria | Gammaproteobacteria | Alteromonadales | Pseudoalteromonadaceae | <i>Pseudoalteromonas</i> sp.      | TAE56                   |
| Psp-27-1 | Bacteria | Proteobacteria | Gammaproteobacteria | Alteromonadales | Pseudoalteromonadaceae | <i>Pseudoalteromonas</i> sp.      | TAE79                   |
| Psp-28-1 | Bacteria | Proteobacteria | Gammaproteobacteria | Alteromonadales | Pseudoalteromonadaceae | <i>Pseudoalteromonas</i> sp.      | TAE80                   |
| Psp-29-1 | Bacteria | Proteobacteria | Gammaproteobacteria | Alteromonadales | Pseudoalteromonadaceae | <i>Pseudoalteromonas</i> sp.      | TB13                    |
| Psp-30-1 | Bacteria | Proteobacteria | Gammaproteobacteria | Alteromonadales | Pseudoalteromonadaceae | <i>Pseudoalteromonas</i> sp.      | TB25                    |
| Psp-31-1 | Bacteria | Proteobacteria | Gammaproteobacteria | Alteromonadales | Pseudoalteromonadaceae | <i>Pseudoalteromonas</i> sp.      | TB41                    |
| Psp-32-1 | Bacteria | Proteobacteria | Gammaproteobacteria | Alteromonadales | Pseudoalteromonadaceae | <i>Pseudoalteromonas</i> sp.      | TB64                    |
| Psp-33-1 | Bacteria | Proteobacteria | Gammaproteobacteria | Alteromonadales | Pseudoalteromonadaceae | <i>Pseudoalteromonas spongiae</i> | UST010723-006           |
| Ptu-1-1  | Bacteria | Proteobacteria | Gammaproteobacteria | Alteromonadales | Pseudoalteromonadaceae | <i>Pseudoalteromonas tunicata</i> | D2                      |
| Pun-1-1  | Bacteria | Proteobacteria | Gammaproteobacteria | Alteromonadales | Pseudoalteromonadaceae | <i>Pseudoalteromonas undina</i>   | NCIMB 2128              |
| Paq-1-1  | Bacteria | Proteobacteria | Gammaproteobacteria | Alteromonadales | Psychromonadaceae      | <i>Psychromonas aquimarina</i>    | ATCC BAA-1526           |
| Par-2-1  | Bacteria | Proteobacteria | Gammaproteobacteria | Alteromonadales | Psychromonadaceae      | <i>Psychromonas arctica</i>       | DSM 14288               |
| Pha-4-1  | Bacteria | Proteobacteria | Gammaproteobacteria | Alteromonadales | Psychromonadaceae      | <i>Psychromonas hadalis</i>       | ATCC BAA-638            |
| Pin-1-1  | Bacteria | Proteobacteria | Gammaproteobacteria | Alteromonadales | Psychromonadaceae      | <i>Psychromonas ingrahamii</i>    | 37                      |
| Pos-1-1  | Bacteria | Proteobacteria | Gammaproteobacteria | Alteromonadales | Psychromonadaceae      | <i>Psychromonas ossibalaenae</i>  | ATCC BAA-1528           |
| Psp-34-1 | Bacteria | Proteobacteria | Gammaproteobacteria | Alteromonadales | Psychromonadaceae      | <i>Psychromonas</i> sp.           | CNPT3                   |
| Psp-35-1 | Bacteria | Proteobacteria | Gammaproteobacteria | Alteromonadales | Psychromonadaceae      | <i>Psychromonas</i> sp.           | SP041                   |
| Sal-1-1  | Bacteria | Proteobacteria | Gammaproteobacteria | Alteromonadales | Shewanellaceae         | <i>Shewanella algae</i>           |                         |
| Sal-2-1  | Bacteria | Proteobacteria | Gammaproteobacteria | Alteromonadales | Shewanellaceae         | <i>Shewanella algae</i>           | JCM 21037 = NBRC 103173 |
| Sam-2-1  | Bacteria | Proteobacteria | Gammaproteobacteria | Alteromonadales | Shewanellaceae         | <i>Shewanella amazonensis</i>     | SB2B                    |
| Sba-1-1  | Bacteria | Proteobacteria | Gammaproteobacteria | Alteromonadales | Shewanellaceae         | <i>Shewanella baltica</i>         | BA175                   |
| Sba-2-1  | Bacteria | Proteobacteria | Gammaproteobacteria | Alteromonadales | Shewanellaceae         | <i>Shewanella baltica</i>         | OS117                   |
| Sba-3-1  | Bacteria | Proteobacteria | Gammaproteobacteria | Alteromonadales | Shewanellaceae         | <i>Shewanella baltica</i>         | OS155                   |
| Sba-4-1  | Bacteria | Proteobacteria | Gammaproteobacteria | Alteromonadales | Shewanellaceae         | <i>Shewanella baltica</i>         | OS183                   |
| Sba-5-1  | Bacteria | Proteobacteria | Gammaproteobacteria | Alteromonadales | Shewanellaceae         | <i>Shewanella baltica</i>         | OS185                   |
| Sba-6-1  | Bacteria | Proteobacteria | Gammaproteobacteria | Alteromonadales | Shewanellaceae         | <i>Shewanella baltica</i>         | OS195                   |
| Sba-7-1  | Bacteria | Proteobacteria | Gammaproteobacteria | Alteromonadales | Shewanellaceae         | <i>Shewanella baltica</i>         | OS223                   |
| Sba-8-1  | Bacteria | Proteobacteria | Gammaproteobacteria | Alteromonadales | Shewanellaceae         | <i>Shewanella baltica</i>         | OS625                   |
| Sba-9-1  | Bacteria | Proteobacteria | Gammaproteobacteria | Alteromonadales | Shewanellaceae         | <i>Shewanella baltica</i>         | OS678                   |
| Sbe-1-1  | Bacteria | Proteobacteria | Gammaproteobacteria | Alteromonadales | Shewanellaceae         | <i>Shewanella benthica</i>        | KT99                    |
| Sco-1-1  | Bacteria | Proteobacteria | Gammaproteobacteria | Alteromonadales | Shewanellaceae         | <i>Shewanella colwelliana</i>     | ATCC 39565              |
| Sde-1-1  | Bacteria | Proteobacteria | Gammaproteobacteria | Alteromonadales | Shewanellaceae         | <i>Shewanella decolorationis</i>  | S12                     |
| Sde-2-1  | Bacteria | Proteobacteria | Gammaproteobacteria | Alteromonadales | Shewanellaceae         | <i>Shewanella denitrificans</i>   | OS217                   |
| Sfi-1-1  | Bacteria | Proteobacteria | Gammaproteobacteria | Alteromonadales | Shewanellaceae         | <i>Shewanella fidelis</i>         | ATCC BAA-318            |
| Sfr-1-1  | Bacteria | Proteobacteria | Gammaproteobacteria | Alteromonadales | Shewanellaceae         | <i>Shewanella frigidimarina</i>   | NCIMB 400               |
| Sha-1-1  | Bacteria | Proteobacteria | Gammaproteobacteria | Alteromonadales | Shewanellaceae         | <i>Shewanella halifaxensis</i>    | HAW-EB4                 |
| Sha-2-1  | Bacteria | Proteobacteria | Gammaproteobacteria | Alteromonadales | Shewanellaceae         | <i>Shewanella haliotis</i>        | JCM 14758               |
| Slo-1-1  | Bacteria | Proteobacteria | Gammaproteobacteria | Alteromonadales | Shewanellaceae         | <i>Shewanella loihica</i>         | PV-4                    |
| Sma-1-1  | Bacteria | Proteobacteria | Gammaproteobacteria | Alteromonadales | Shewanellaceae         | <i>Shewanella mangrovi</i>        |                         |
| Sma-2-1  | Bacteria | Proteobacteria | Gammaproteobacteria | Alteromonadales | Shewanellaceae         | <i>Shewanella marina</i>          | JCM 15074               |
| Son-1-1  | Bacteria | Proteobacteria | Gammaproteobacteria | Alteromonadales | Shewanellaceae         | <i>Shewanella oneidensis</i>      | MR-1                    |
| Spe-1-1  | Bacteria | Proteobacteria | Gammaproteobacteria | Alteromonadales | Shewanellaceae         | <i>Shewanella pealeana</i>        | ATCC 700345             |
| Spi-1-1  | Bacteria | Proteobacteria | Gammaproteobacteria | Alteromonadales | Shewanellaceae         | <i>Shewanella piezotolerans</i>   | WP3                     |
| Spu-1-1  | Bacteria | Proteobacteria | Gammaproteobacteria | Alteromonadales | Shewanellaceae         | <i>Shewanella putrefaciens</i>    | 200                     |
| Spu-2-1  | Bacteria | Proteobacteria | Gammaproteobacteria | Alteromonadales | Shewanellaceae         | <i>Shewanella putrefaciens</i>    | CN-32                   |
| Sse-1-1  | Bacteria | Proteobacteria | Gammaproteobacteria | Alteromonadales | Shewanellaceae         | <i>Shewanella sediminis</i>       | HAW-EB3                 |
| Ssp-1-1  | Bacteria | Proteobacteria | Gammaproteobacteria | Alteromonadales | Shewanellaceae         | <i>Shewanella</i> sp.             | 38A_GOM-205m            |
| Ssp-2-1  | Bacteria | Proteobacteria | Gammaproteobacteria | Alteromonadales | Shewanellaceae         | <i>Shewanella</i> sp.             | ANA-3                   |

|                    |          |                |                     |                     |                    |                                    |                                                                                |
|--------------------|----------|----------------|---------------------|---------------------|--------------------|------------------------------------|--------------------------------------------------------------------------------|
| Ssp-11-1           | Bacteria | Proteobacteria | Gammaproteobacteria | Alteromonadales     | Shewanellaceae     | <i>Shewanella sp.</i>              | cp20                                                                           |
| Ssp-3-1            | Bacteria | Proteobacteria | Gammaproteobacteria | Alteromonadales     | Shewanellaceae     | <i>Shewanella sp.</i>              | ECSMB14101                                                                     |
| Ssp-4-1            | Bacteria | Proteobacteria | Gammaproteobacteria | Alteromonadales     | Shewanellaceae     | <i>Shewanella sp.</i>              | ECSMB14102                                                                     |
| Ssp-5-1            | Bacteria | Proteobacteria | Gammaproteobacteria | Alteromonadales     | Shewanellaceae     | <i>Shewanella sp.</i>              | HN-41                                                                          |
| Ssp-6-1            | Bacteria | Proteobacteria | Gammaproteobacteria | Alteromonadales     | Shewanellaceae     | <i>Shewanella sp.</i>              | MR-4                                                                           |
| Ssp-7-1            | Bacteria | Proteobacteria | Gammaproteobacteria | Alteromonadales     | Shewanellaceae     | <i>Shewanella sp.</i>              | MR-7                                                                           |
| Ssp-8-1            | Bacteria | Proteobacteria | Gammaproteobacteria | Alteromonadales     | Shewanellaceae     | <i>Shewanella sp.</i>              | POL2                                                                           |
| Ssp-9-1            | Bacteria | Proteobacteria | Gammaproteobacteria | Alteromonadales     | Shewanellaceae     | <i>Shewanella sp.</i>              | W3-18-1                                                                        |
| Ssp-10-1           | Bacteria | Proteobacteria | Gammaproteobacteria | Alteromonadales     | Shewanellaceae     | <i>Shewanella sp.</i>              | ZOR0012                                                                        |
| Svi-1-1            | Bacteria | Proteobacteria | Gammaproteobacteria | Alteromonadales     | Shewanellaceae     | <i>Shewanella violacea</i>         | DSS12                                                                          |
| Swa-1-1            | Bacteria | Proteobacteria | Gammaproteobacteria | Alteromonadales     | Shewanellaceae     | <i>Shewanella waksmanii</i>        | ATCC BAA-643                                                                   |
| Swo-1-1            | Bacteria | Proteobacteria | Gammaproteobacteria | Alteromonadales     | Shewanellaceae     | <i>Shewanella woodyi</i>           | ATCC 51908                                                                     |
| Sxi-1-1            | Bacteria | Proteobacteria | Gammaproteobacteria | Alteromonadales     | Shewanellaceae     | <i>Shewanella xiamenensis</i>      |                                                                                |
| CBa-1-1            | Bacteria | Proteobacteria | Gammaproteobacteria | CandidatusBaumannia | <i>Candidatus</i>  | <i>Baumannia cicadellinicola</i>   |                                                                                |
| Aik-1-1            | Bacteria | Proteobacteria | Gammaproteobacteria | Chromatiales        | Chromatiaceae      | <i>Arsukibacterium ikkense</i>     |                                                                                |
| Asp-9-1            | Bacteria | Proteobacteria | Gammaproteobacteria | Chromatiales        | Chromatiaceae      | <i>Arsukibacterium sp.</i>         | MJ3                                                                            |
| Pme-1-1            | Bacteria | Proteobacteria | Gammaproteobacteria | Chromatiales        | Chromatiaceae      | <i>Pararheinheimera mesophila</i>  |                                                                                |
| Pte-1-1            | Bacteria | Proteobacteria | Gammaproteobacteria | Chromatiales        | Chromatiaceae      | <i>Pararheinheimera texasensis</i> | DSM 17496                                                                      |
| Rba-1-1            | Bacteria | Proteobacteria | Gammaproteobacteria | Chromatiales        | Chromatiaceae      | <i>Rheinheimera baltica</i>        | DSM 14885                                                                      |
| Rna-1-1            | Bacteria | Proteobacteria | Gammaproteobacteria | Chromatiales        | Chromatiaceae      | <i>Rheinheimera nanhaiensis</i>    | E407-8                                                                         |
| Rpe-1-1            | Bacteria | Proteobacteria | Gammaproteobacteria | Chromatiales        | Chromatiaceae      | <i>Rheinheimera perlucida</i>      | DSM 18276                                                                      |
| Rsp-1-1            | Bacteria | Proteobacteria | Gammaproteobacteria | Chromatiales        | Chromatiaceae      | <i>Rheinheimera sp.</i>            | A13L                                                                           |
| Rsp-2-1            | Bacteria | Proteobacteria | Gammaproteobacteria | Chromatiales        | Chromatiaceae      | <i>Rheinheimera sp.</i>            | KL1                                                                            |
| Baq-1-1            | Bacteria | Proteobacteria | Gammaproteobacteria | Enterobacteriales   | Budviciaceae       | <i>Budvicia aquatica</i>           | DSM 5075 = ATCC 35567                                                          |
| Lgr-1-1 to Lgr-1-2 | Bacteria | Proteobacteria | Gammaproteobacteria | Enterobacteriales   | Budviciaceae       | <i>Lemnimorella grimontii</i>      | ATCC 33999 = DSM 5078                                                          |
| Pfo-1-1            | Bacteria | Proteobacteria | Gammaproteobacteria | Enterobacteriales   | Budviciaceae       | <i>Pragia fontium</i>              |                                                                                |
| Bag-1-1            | Bacteria | Proteobacteria | Gammaproteobacteria | Enterobacteriales   | Enterobacteriaceae | <i>Buttiauxella agrestis</i>       |                                                                                |
| Bag-2-1            | Bacteria | Proteobacteria | Gammaproteobacteria | Enterobacteriales   | Enterobacteriaceae | <i>Buttiauxella agrestis</i>       | ATCC 33320                                                                     |
| Cne-1-1 to Cne-1-3 | Bacteria | Proteobacteria | Gammaproteobacteria | Enterobacteriales   | Enterobacteriaceae | <i>Cedecea neteri</i>              |                                                                                |
| Cam-1-1 to Cam-1-3 | Bacteria | Proteobacteria | Gammaproteobacteria | Enterobacteriales   | Enterobacteriaceae | <i>Citrobacter amalonicus</i>      |                                                                                |
| Cam-2-1            | Bacteria | Proteobacteria | Gammaproteobacteria | Enterobacteriales   | Enterobacteriaceae | <i>Citrobacter amalonicus</i>      | Y19                                                                            |
| Cfa-1-1            | Bacteria | Proteobacteria | Gammaproteobacteria | Enterobacteriales   | Enterobacteriaceae | <i>Citrobacter farmeri</i>         | GTC 1319                                                                       |
| Cbr-1-1 to Cbr-1-7 | Bacteria | Proteobacteria | Gammaproteobacteria | Enterobacteriales   | Enterobacteriaceae | Citrobacter                        | Citrobacter freundii complex <i>Citrobacter braakii</i>                        |
| Cfr-1-1 to Cfr-1-4 | Bacteria | Proteobacteria | Gammaproteobacteria | Enterobacteriales   | Enterobacteriaceae | Citrobacter                        | Citrobacter freundii complex <i>Citrobacter freundii</i>                       |
| Cfr-2-1 to Cfr-2-2 | Bacteria | Proteobacteria | Gammaproteobacteria | Enterobacteriales   | Enterobacteriaceae | Citrobacter                        | Citrobacter freundii complex <i>Citrobacter freundii</i> ATCC 8090 = MTCC 1658 |
| Cfr-3-1            | Bacteria | Proteobacteria | Gammaproteobacteria | Enterobacteriales   | Enterobacteriaceae | Citrobacter                        | Citrobacter freundii complex <i>Citrobacter freundii</i> CFNIH1                |
| Cfr-4-1            | Bacteria | Proteobacteria | Gammaproteobacteria | Enterobacteriales   | Enterobacteriaceae | Citrobacter                        | Citrobacter freundii complex <i>Citrobacter freundii</i> MGH 56                |
| Cfr-5-1            | Bacteria | Proteobacteria | Gammaproteobacteria | Enterobacteriales   | Enterobacteriaceae | Citrobacter                        | Citrobacter freundii complex <i>Citrobacter freundii</i> NBRC 12681            |
| Cfr-6-1            | Bacteria | Proteobacteria | Gammaproteobacteria | Enterobacteriales   | Enterobacteriaceae | Citrobacter                        | Citrobacter freundii complex <i>Citrobacter freundii</i> RLS1                  |
| Cfr-7-1            | Bacteria | Proteobacteria | Gammaproteobacteria | Enterobacteriales   | Enterobacteriaceae | Citrobacter                        | Citrobacter freundii complex <i>Citrobacter freundii</i> UCI 31                |
| Cfr-8-1            | Bacteria | Proteobacteria | Gammaproteobacteria | Enterobacteriales   | Enterobacteriaceae | Citrobacter                        | Citrobacter freundii complex <i>Citrobacter freundii</i> UCI 32                |
| Cse-1-1            | Bacteria | Proteobacteria | Gammaproteobacteria | Enterobacteriales   | Enterobacteriaceae | Citrobacter                        | Citrobacter freundii complex <i>Citrobacter sedlakii</i> NBRC 105722           |
| Csp-2-1            | Bacteria | Proteobacteria | Gammaproteobacteria | Enterobacteriales   | Enterobacteriaceae | Citrobacter                        | Citrobacter freundii complex <i>Citrobacter sp.</i> BIDMC107                   |
| Csp-3-1            | Bacteria | Proteobacteria | Gammaproteobacteria | Enterobacteriales   | Enterobacteriaceae | Citrobacter                        | Citrobacter freundii complex <i>Citrobacter sp.</i> BIDMC108                   |
| Csp-4-1            | Bacteria | Proteobacteria | Gammaproteobacteria | Enterobacteriales   | Enterobacteriaceae | Citrobacter                        | Citrobacter freundii complex <i>Citrobacter sp.</i> MGH100                     |
| Csp-5-1            | Bacteria | Proteobacteria | Gammaproteobacteria | Enterobacteriales   | Enterobacteriaceae | Citrobacter                        | Citrobacter freundii complex <i>Citrobacter sp.</i> MGH103                     |
| Csp-6-1            | Bacteria | Proteobacteria | Gammaproteobacteria | Enterobacteriales   | Enterobacteriaceae | Citrobacter                        | Citrobacter freundii complex <i>Citrobacter sp.</i> MGH104                     |
| Csp-7-1            | Bacteria | Proteobacteria | Gammaproteobacteria | Enterobacteriales   | Enterobacteriaceae | Citrobacter                        | Citrobacter freundii complex <i>Citrobacter sp.</i> MGH105                     |
| Csp-8-1            | Bacteria | Proteobacteria | Gammaproteobacteria | Enterobacteriales   | Enterobacteriaceae | Citrobacter                        | Citrobacter freundii complex <i>Citrobacter sp.</i> MGH106                     |
| Csp-9-1            | Bacteria | Proteobacteria | Gammaproteobacteria | Enterobacteriales   | Enterobacteriaceae | Citrobacter                        | Citrobacter freundii complex <i>Citrobacter sp.</i> MGH109                     |
| Csp-10-1           | Bacteria | Proteobacteria | Gammaproteobacteria | Enterobacteriales   | Enterobacteriaceae | Citrobacter                        | Citrobacter freundii complex <i>Citrobacter sp.</i> MGH110                     |
| Csp-11-1           | Bacteria | Proteobacteria | Gammaproteobacteria | Enterobacteriales   | Enterobacteriaceae | Citrobacter                        | Citrobacter freundii complex <i>Citrobacter sp.</i> MGH99                      |
| Cwe-1-1            | Bacteria | Proteobacteria | Gammaproteobacteria | Enterobacteriales   | Enterobacteriaceae | Citrobacter                        | Citrobacter freundii complex <i>Citrobacter werkmanii</i> NBRC 105721          |
| Cko-1-1 to Cko-1-2 | Bacteria | Proteobacteria | Gammaproteobacteria | Enterobacteriales   | Enterobacteriaceae | <i>Citrobacter koseri</i>          |                                                                                |
| Cpa-1-1            | Bacteria | Proteobacteria | Gammaproteobacteria | Enterobacteriales   | Enterobacteriaceae | <i>Citrobacter pasteurii</i>       |                                                                                |
| Cro-1-1            | Bacteria | Proteobacteria | Gammaproteobacteria | Enterobacteriales   | Enterobacteriaceae | <i>Citrobacter rodentium</i>       |                                                                                |
| Cro-2-1            | Bacteria | Proteobacteria | Gammaproteobacteria | Enterobacteriales   | Enterobacteriaceae | <i>Citrobacter rodentium</i>       | NBRC 105723                                                                    |
| Csp-12-1           | Bacteria | Proteobacteria | Gammaproteobacteria | Enterobacteriales   | Enterobacteriaceae | <i>Citrobacter sp.</i>             | JT3                                                                            |
| Csp-13-1           | Bacteria | Proteobacteria | Gammaproteobacteria | Enterobacteriales   | Enterobacteriaceae | <i>Citrobacter sp.</i>             | MGH 55                                                                         |



































|                        |          |                |                     |                   |                    |                                                    |
|------------------------|----------|----------------|---------------------|-------------------|--------------------|----------------------------------------------------|
| Eco-720-1              | Bacteria | Proteobacteria | Gammaproteobacteria | Enterobacteriales | Enterobacteriaceae | <i>Escherichia coli</i> O69:H11 str. 2009C-3601    |
| Eco-721-1              | Bacteria | Proteobacteria | Gammaproteobacteria | Enterobacteriales | Enterobacteriaceae | <i>Escherichia coli</i> O6:H16 str. 99-3165        |
| Eco-722-1              | Bacteria | Proteobacteria | Gammaproteobacteria | Enterobacteriales | Enterobacteriaceae | <i>Escherichia coli</i> O6:H16 str. F5656C1        |
| Eco-723-1              | Bacteria | Proteobacteria | Gammaproteobacteria | Enterobacteriales | Enterobacteriaceae | <i>Escherichia coli</i> O6:H16:CFA/II str. B2C     |
| Eco-724-1              | Bacteria | Proteobacteria | Gammaproteobacteria | Enterobacteriales | Enterobacteriaceae | <i>Escherichia coli</i> O78:H12 str. 00-3279       |
| Eco-725-1              | Bacteria | Proteobacteria | Gammaproteobacteria | Enterobacteriales | Enterobacteriaceae | <i>Escherichia coli</i> O79:H7 str. 06-3501        |
| Eco-726-1              | Bacteria | Proteobacteria | Gammaproteobacteria | Enterobacteriales | Enterobacteriaceae | <i>Escherichia coli</i> O81:NM str. 02-3012        |
| Eco-727-1              | Bacteria | Proteobacteria | Gammaproteobacteria | Enterobacteriales | Enterobacteriaceae | <i>Escherichia coli</i> O86:H34 str. 99-3124       |
| Eco-728-1 to Eco-728-2 | Bacteria | Proteobacteria | Gammaproteobacteria | Enterobacteriales | Enterobacteriaceae | <i>Escherichia coli</i> O91                        |
| Eco-729-1              | Bacteria | Proteobacteria | Gammaproteobacteria | Enterobacteriales | Enterobacteriaceae | <i>Escherichia coli</i> O91:H14 str. 06-3691       |
| Eco-730-1              | Bacteria | Proteobacteria | Gammaproteobacteria | Enterobacteriales | Enterobacteriaceae | <i>Escherichia coli</i> O91:H14 str. 2009C-3227    |
| Eco-731-1              | Bacteria | Proteobacteria | Gammaproteobacteria | Enterobacteriales | Enterobacteriaceae | <i>Escherichia coli</i> O91:H21 str. 2009C-3740    |
| Eco-732-1              | Bacteria | Proteobacteria | Gammaproteobacteria | Enterobacteriales | Enterobacteriaceae | <i>Escherichia coli</i> O91:H21 str. 2009C-4646    |
| Eco-733-1              | Bacteria | Proteobacteria | Gammaproteobacteria | Enterobacteriales | Enterobacteriaceae | <i>Escherichia coli</i> O91:NM str. 2009C-3745     |
| Eco-734-1              | Bacteria | Proteobacteria | Gammaproteobacteria | Enterobacteriales | Enterobacteriaceae | <i>Escherichia coli</i> PCN033                     |
| Eco-735-1              | Bacteria | Proteobacteria | Gammaproteobacteria | Enterobacteriales | Enterobacteriaceae | <i>Escherichia coli</i> PCN061                     |
| Eco-736-1              | Bacteria | Proteobacteria | Gammaproteobacteria | Enterobacteriales | Enterobacteriaceae | <i>Escherichia coli</i> RS218                      |
| Eco-737-1              | Bacteria | Proteobacteria | Gammaproteobacteria | Enterobacteriales | Enterobacteriaceae | <i>Escherichia coli</i> STEC O174:H2 str. 02-04446 |
| Eco-738-1              | Bacteria | Proteobacteria | Gammaproteobacteria | Enterobacteriales | Enterobacteriaceae | <i>Escherichia coli</i> STEC O174:H46 str. I-151   |
| Eco-739-1              | Bacteria | Proteobacteria | Gammaproteobacteria | Enterobacteriales | Enterobacteriaceae | <i>Escherichia coli</i> STEC O174:H8 str. 02-07607 |
| Eco-751-1              | Bacteria | Proteobacteria | Gammaproteobacteria | Enterobacteriales | Enterobacteriaceae | <i>Escherichia coli</i> str. K-12 substr. MC4100   |
| Eco-752-1 to Eco-752-2 | Bacteria | Proteobacteria | Gammaproteobacteria | Enterobacteriales | Enterobacteriaceae | <i>Escherichia coli</i> str. K-12 substr. MG1655   |
| Eco-740-1              | Bacteria | Proteobacteria | Gammaproteobacteria | Enterobacteriales | Enterobacteriaceae | <i>Escherichia coli</i> UCI 51                     |
| Eco-741-1              | Bacteria | Proteobacteria | Gammaproteobacteria | Enterobacteriales | Enterobacteriaceae | <i>Escherichia coli</i> UCI 53                     |
| Eco-742-1              | Bacteria | Proteobacteria | Gammaproteobacteria | Enterobacteriales | Enterobacteriaceae | <i>Escherichia coli</i> UCI 57                     |
| Eco-743-1              | Bacteria | Proteobacteria | Gammaproteobacteria | Enterobacteriales | Enterobacteriaceae | <i>Escherichia coli</i> UCI 58                     |
| Eco-744-1              | Bacteria | Proteobacteria | Gammaproteobacteria | Enterobacteriales | Enterobacteriaceae | <i>Escherichia coli</i> UCI 65                     |
| Eco-745-1              | Bacteria | Proteobacteria | Gammaproteobacteria | Enterobacteriales | Enterobacteriaceae | <i>Escherichia coli</i> UCI 66                     |
| Eco-746-1              | Bacteria | Proteobacteria | Gammaproteobacteria | Enterobacteriales | Enterobacteriaceae | <i>Escherichia coli</i> VR50                       |
| Eco-749-1              | Bacteria | Proteobacteria | Gammaproteobacteria | Enterobacteriales | Enterobacteriaceae | <i>Escherichia coli</i> Wa1                        |
| Eco-750-1              | Bacteria | Proteobacteria | Gammaproteobacteria | Enterobacteriales | Enterobacteriaceae | <i>Escherichia coli</i> Wa2                        |
| Eco-747-1              | Bacteria | Proteobacteria | Gammaproteobacteria | Enterobacteriales | Enterobacteriaceae | <i>Escherichia coli</i> WC1                        |
| Eco-748-1              | Bacteria | Proteobacteria | Gammaproteobacteria | Enterobacteriales | Enterobacteriaceae | <i>Escherichia coli</i> WC2                        |
| Ema-1-1                | Bacteria | Proteobacteria | Gammaproteobacteria | Enterobacteriales | Enterobacteriaceae | <i>Escherichia marmotae</i>                        |
| Esp-52-1               | Bacteria | Proteobacteria | Gammaproteobacteria | Enterobacteriales | Enterobacteriaceae | <i>Escherichia sp.</i> 3.2.53FAA                   |
| Esp-53-1               | Bacteria | Proteobacteria | Gammaproteobacteria | Enterobacteriales | Enterobacteriaceae | <i>Escherichia sp.</i> TW14182                     |
| Esp-54-1               | Bacteria | Proteobacteria | Gammaproteobacteria | Enterobacteriales | Enterobacteriaceae | <i>Escherichia sp.</i> TW15838                     |
| Fhe-1-1                | Bacteria | Proteobacteria | Gammaproteobacteria | Enterobacteriales | Enterobacteriaceae | <i>Franconibacter helveticus</i>                   |
| Fhe-2-1                | Bacteria | Proteobacteria | Gammaproteobacteria | Enterobacteriales | Enterobacteriaceae | <i>Franconibacter helveticus</i> 1159              |
| Fhe-3-1                | Bacteria | Proteobacteria | Gammaproteobacteria | Enterobacteriales | Enterobacteriaceae | <i>Franconibacter helveticus</i> 513               |
| Fhe-4-1                | Bacteria | Proteobacteria | Gammaproteobacteria | Enterobacteriales | Enterobacteriaceae | <i>Franconibacter helveticus</i> LMG 23732         |
| Fpu-1-1                | Bacteria | Proteobacteria | Gammaproteobacteria | Enterobacteriales | Enterobacteriaceae | <i>Franconibacter pulveris</i>                     |
| Fpu-2-1                | Bacteria | Proteobacteria | Gammaproteobacteria | Enterobacteriales | Enterobacteriaceae | <i>Franconibacter pulveris</i> 1160                |
| Fpu-3-1                | Bacteria | Proteobacteria | Gammaproteobacteria | Enterobacteriales | Enterobacteriaceae | <i>Franconibacter pulveris</i> 601                 |
| Fpu-4-1                | Bacteria | Proteobacteria | Gammaproteobacteria | Enterobacteriales | Enterobacteriaceae | <i>Franconibacter pulveris</i> DSM 19144           |
| Fpu-5-1                | Bacteria | Proteobacteria | Gammaproteobacteria | Enterobacteriales | Enterobacteriaceae | <i>Franconibacter pulveris</i> LMG 24059           |
| Kae-1-1                | Bacteria | Proteobacteria | Gammaproteobacteria | Enterobacteriales | Enterobacteriaceae | <i>Klebsiella aerogenes</i>                        |
| Kae-2-1                | Bacteria | Proteobacteria | Gammaproteobacteria | Enterobacteriales | Enterobacteriaceae | <i>Klebsiella aerogenes</i> MGH 61                 |
| Kae-3-1                | Bacteria | Proteobacteria | Gammaproteobacteria | Enterobacteriales | Enterobacteriaceae | <i>Klebsiella aerogenes</i> MGH 62                 |
| Kae-4-1                | Bacteria | Proteobacteria | Gammaproteobacteria | Enterobacteriales | Enterobacteriaceae | <i>Klebsiella aerogenes</i> MGH 77                 |
| Kae-5-1                | Bacteria | Proteobacteria | Gammaproteobacteria | Enterobacteriales | Enterobacteriaceae | <i>Klebsiella aerogenes</i> MGH 78                 |
| Kae-6-1                | Bacteria | Proteobacteria | Gammaproteobacteria | Enterobacteriales | Enterobacteriaceae | <i>Klebsiella aerogenes</i> UCI 15                 |
| Kae-7-1                | Bacteria | Proteobacteria | Gammaproteobacteria | Enterobacteriales | Enterobacteriaceae | <i>Klebsiella aerogenes</i> UCI 16                 |
| Kae-8-1                | Bacteria | Proteobacteria | Gammaproteobacteria | Enterobacteriales | Enterobacteriaceae | <i>Klebsiella aerogenes</i> UCI 27                 |
| Kae-9-1                | Bacteria | Proteobacteria | Gammaproteobacteria | Enterobacteriales | Enterobacteriaceae | <i>Klebsiella aerogenes</i> UCI 28                 |
| Kae-10-1               | Bacteria | Proteobacteria | Gammaproteobacteria | Enterobacteriales | Enterobacteriaceae | <i>Klebsiella aerogenes</i> UCI 45                 |
| Kae-11-1               | Bacteria | Proteobacteria | Gammaproteobacteria | Enterobacteriales | Enterobacteriaceae | <i>Klebsiella aerogenes</i> UCI 46                 |
| Kae-12-1               | Bacteria | Proteobacteria | Gammaproteobacteria | Enterobacteriales | Enterobacteriaceae | <i>Klebsiella aerogenes</i> UCI 47                 |
| Kae-13-1               | Bacteria | Proteobacteria | Gammaproteobacteria | Enterobacteriales | Enterobacteriaceae | <i>Klebsiella aerogenes</i> UCI 48                 |
| Kcf-1-1                | Bacteria | Proteobacteria | Gammaproteobacteria | Enterobacteriales | Enterobacteriaceae | <i>Klebsiella cf. planticola</i> B43               |
| Kmi-1-1 to Kmi-1-2     | Bacteria | Proteobacteria | Gammaproteobacteria | Enterobacteriales | Enterobacteriaceae | <i>Klebsiella michiganensis</i>                    |
| Kmi-2-1                | Bacteria | Proteobacteria | Gammaproteobacteria | Enterobacteriales | Enterobacteriaceae | <i>Klebsiella michiganensis</i> H1g                |
| Kmi-3-1                | Bacteria | Proteobacteria | Gammaproteobacteria | Enterobacteriales | Enterobacteriaceae | <i>Klebsiella michiganensis</i> HKOPL1             |
| Kox-1-1 to Kox-1-4     | Bacteria | Proteobacteria | Gammaproteobacteria | Enterobacteriales | Enterobacteriaceae | <i>Klebsiella oxytoca</i>                          |
| Kox-2-1                | Bacteria | Proteobacteria | Gammaproteobacteria | Enterobacteriales | Enterobacteriaceae | <i>Klebsiella oxytoca</i> 09-7231                  |









|                        |          |                |                     |                   |                    |                                                                    |
|------------------------|----------|----------------|---------------------|-------------------|--------------------|--------------------------------------------------------------------|
| Kpn-223-1              | Bacteria | Proteobacteria | Gammaproteobacteria | Enterobacteriales | Enterobacteriaceae | <i>Klebsiella pneumoniae</i> subsp. <i>pneumoniae</i> SA1          |
| Kpn-224-1              | Bacteria | Proteobacteria | Gammaproteobacteria | Enterobacteriales | Enterobacteriaceae | <i>Klebsiella pneumoniae</i> subsp. <i>pneumoniae</i> T69          |
| Kpn-225-1              | Bacteria | Proteobacteria | Gammaproteobacteria | Enterobacteriales | Enterobacteriaceae | <i>Klebsiella pneumoniae</i> subsp. <i>rhinoscleromatis</i> SB3432 |
| Kpn-170-1              | Bacteria | Proteobacteria | Gammaproteobacteria | Enterobacteriales | Enterobacteriaceae | <i>Klebsiella pneumoniae</i> T2-1-1                                |
| Kpn-171-1              | Bacteria | Proteobacteria | Gammaproteobacteria | Enterobacteriales | Enterobacteriaceae | <i>Klebsiella pneumoniae</i> T2-1-2                                |
| Kpn-172-1              | Bacteria | Proteobacteria | Gammaproteobacteria | Enterobacteriales | Enterobacteriaceae | <i>Klebsiella pneumoniae</i> UCI 17                                |
| Kpn-173-1              | Bacteria | Proteobacteria | Gammaproteobacteria | Enterobacteriales | Enterobacteriaceae | <i>Klebsiella pneumoniae</i> UCI 19                                |
| Kpn-174-1              | Bacteria | Proteobacteria | Gammaproteobacteria | Enterobacteriales | Enterobacteriaceae | <i>Klebsiella pneumoniae</i> UCI 20                                |
| Kpn-175-1              | Bacteria | Proteobacteria | Gammaproteobacteria | Enterobacteriales | Enterobacteriaceae | <i>Klebsiella pneumoniae</i> UCI 21                                |
| Kpn-176-1              | Bacteria | Proteobacteria | Gammaproteobacteria | Enterobacteriales | Enterobacteriaceae | <i>Klebsiella pneumoniae</i> UCI 22                                |
| Kpn-177-1              | Bacteria | Proteobacteria | Gammaproteobacteria | Enterobacteriales | Enterobacteriaceae | <i>Klebsiella pneumoniae</i> UCI 25                                |
| Kpn-178-1              | Bacteria | Proteobacteria | Gammaproteobacteria | Enterobacteriales | Enterobacteriaceae | <i>Klebsiella pneumoniae</i> UCI 26                                |
| Kpn-179-1              | Bacteria | Proteobacteria | Gammaproteobacteria | Enterobacteriales | Enterobacteriaceae | <i>Klebsiella pneumoniae</i> UCI 33                                |
| Kpn-180-1              | Bacteria | Proteobacteria | Gammaproteobacteria | Enterobacteriales | Enterobacteriaceae | <i>Klebsiella pneumoniae</i> UCI 34                                |
| Kpn-181-1              | Bacteria | Proteobacteria | Gammaproteobacteria | Enterobacteriales | Enterobacteriaceae | <i>Klebsiella pneumoniae</i> UCI 37                                |
| Kpn-182-1              | Bacteria | Proteobacteria | Gammaproteobacteria | Enterobacteriales | Enterobacteriaceae | <i>Klebsiella pneumoniae</i> UCI 38                                |
| Kpn-183-1              | Bacteria | Proteobacteria | Gammaproteobacteria | Enterobacteriales | Enterobacteriaceae | <i>Klebsiella pneumoniae</i> UCI 41                                |
| Kpn-184-1              | Bacteria | Proteobacteria | Gammaproteobacteria | Enterobacteriales | Enterobacteriaceae | <i>Klebsiella pneumoniae</i> UCI 42                                |
| Kpn-185-1              | Bacteria | Proteobacteria | Gammaproteobacteria | Enterobacteriales | Enterobacteriaceae | <i>Klebsiella pneumoniae</i> UCI 43                                |
| Kpn-186-1              | Bacteria | Proteobacteria | Gammaproteobacteria | Enterobacteriales | Enterobacteriaceae | <i>Klebsiella pneumoniae</i> UCI 44                                |
| Kpn-187-1              | Bacteria | Proteobacteria | Gammaproteobacteria | Enterobacteriales | Enterobacteriaceae | <i>Klebsiella pneumoniae</i> UCI 55                                |
| Kpn-188-1              | Bacteria | Proteobacteria | Gammaproteobacteria | Enterobacteriales | Enterobacteriaceae | <i>Klebsiella pneumoniae</i> UCI 56                                |
| Kpn-189-1              | Bacteria | Proteobacteria | Gammaproteobacteria | Enterobacteriales | Enterobacteriaceae | <i>Klebsiella pneumoniae</i> UCI 59                                |
| Kpn-190-1              | Bacteria | Proteobacteria | Gammaproteobacteria | Enterobacteriales | Enterobacteriaceae | <i>Klebsiella pneumoniae</i> UCI 60                                |
| Kpn-191-1              | Bacteria | Proteobacteria | Gammaproteobacteria | Enterobacteriales | Enterobacteriaceae | <i>Klebsiella pneumoniae</i> UCI 61                                |
| Kpn-192-1              | Bacteria | Proteobacteria | Gammaproteobacteria | Enterobacteriales | Enterobacteriaceae | <i>Klebsiella pneumoniae</i> UCI 62                                |
| Kpn-193-1              | Bacteria | Proteobacteria | Gammaproteobacteria | Enterobacteriales | Enterobacteriaceae | <i>Klebsiella pneumoniae</i> UCI 63                                |
| Kpn-194-1              | Bacteria | Proteobacteria | Gammaproteobacteria | Enterobacteriales | Enterobacteriaceae | <i>Klebsiella pneumoniae</i> UCI 64                                |
| Kpn-195-1              | Bacteria | Proteobacteria | Gammaproteobacteria | Enterobacteriales | Enterobacteriaceae | <i>Klebsiella pneumoniae</i> UCI 67                                |
| Kpn-196-1              | Bacteria | Proteobacteria | Gammaproteobacteria | Enterobacteriales | Enterobacteriaceae | <i>Klebsiella pneumoniae</i> UCI 68                                |
| Kpn-197-1              | Bacteria | Proteobacteria | Gammaproteobacteria | Enterobacteriales | Enterobacteriaceae | <i>Klebsiella pneumoniae</i> UCICRE 1                              |
| Kpn-198-1              | Bacteria | Proteobacteria | Gammaproteobacteria | Enterobacteriales | Enterobacteriaceae | <i>Klebsiella pneumoniae</i> UCICRE 13                             |
| Kpn-199-1 to Kpn-199-2 | Bacteria | Proteobacteria | Gammaproteobacteria | Enterobacteriales | Enterobacteriaceae | <i>Klebsiella pneumoniae</i> UHKPC 52                              |
| Kpn-200-1 to Kpn-200-2 | Bacteria | Proteobacteria | Gammaproteobacteria | Enterobacteriales | Enterobacteriaceae | <i>Klebsiella pneumoniae</i> UHKPC05                               |
| Kpn-201-1              | Bacteria | Proteobacteria | Gammaproteobacteria | Enterobacteriales | Enterobacteriaceae | <i>Klebsiella pneumoniae</i> UHKPC07                               |
| Kpn-202-1              | Bacteria | Proteobacteria | Gammaproteobacteria | Enterobacteriales | Enterobacteriaceae | <i>Klebsiella pneumoniae</i> UHKPC33                               |
| Kpn-203-1 to Kpn-203-2 | Bacteria | Proteobacteria | Gammaproteobacteria | Enterobacteriales | Enterobacteriaceae | <i>Klebsiella pneumoniae</i> UHKPC45                               |
| Kpn-204-1 to Kpn-204-2 | Bacteria | Proteobacteria | Gammaproteobacteria | Enterobacteriales | Enterobacteriaceae | <i>Klebsiella pneumoniae</i> VAKPC278                              |
| Kqu-1-1                | Bacteria | Proteobacteria | Gammaproteobacteria | Enterobacteriales | Enterobacteriaceae | <i>Klebsiella quasipneumoniae</i> subsp. <i>quasipneumoniae</i>    |
| Kqu-2-1 to Kqu-2-4     | Bacteria | Proteobacteria | Gammaproteobacteria | Enterobacteriales | Enterobacteriaceae | <i>Klebsiella quasipneumoniae</i> subsp. <i>similipneumoniae</i>   |
| Ksp-1-1                | Bacteria | Proteobacteria | Gammaproteobacteria | Enterobacteriales | Enterobacteriaceae | <i>Klebsiella</i> sp. 10982                                        |
| Ksp-2-1                | Bacteria | Proteobacteria | Gammaproteobacteria | Enterobacteriales | Enterobacteriaceae | <i>Klebsiella</i> sp. AS10                                         |
| Ksp-3-1                | Bacteria | Proteobacteria | Gammaproteobacteria | Enterobacteriales | Enterobacteriaceae | <i>Klebsiella</i> sp. RIT-PI-d                                     |
| Kva-1-1 to Kva-1-7     | Bacteria | Proteobacteria | Gammaproteobacteria | Enterobacteriales | Enterobacteriaceae | <i>Klebsiella variicola</i>                                        |
| Kas-1-1                | Bacteria | Proteobacteria | Gammaproteobacteria | Enterobacteriales | Enterobacteriaceae | <i>Kluyvera ascorbata</i> ATCC 33433                               |
| Kcr-1-1                | Bacteria | Proteobacteria | Gammaproteobacteria | Enterobacteriales | Enterobacteriaceae | <i>Kluyvera cryocrescens</i>                                       |
| Kor-1-1                | Bacteria | Proteobacteria | Gammaproteobacteria | Enterobacteriales | Enterobacteriaceae | <i>Kosakonia oryzae</i>                                            |
| Kra-1-1                | Bacteria | Proteobacteria | Gammaproteobacteria | Enterobacteriales | Enterobacteriaceae | <i>Kosakonia radicincitans</i> UMEnt01/12                          |
| Kra-2-1                | Bacteria | Proteobacteria | Gammaproteobacteria | Enterobacteriales | Enterobacteriaceae | <i>Kosakonia radicincitans</i> YD4                                 |
| Lad-1-1 to Lad-1-2     | Bacteria | Proteobacteria | Gammaproteobacteria | Enterobacteriales | Enterobacteriaceae | <i>Leclercia adecarboxylata</i>                                    |
| Lad-2-1                | Bacteria | Proteobacteria | Gammaproteobacteria | Enterobacteriales | Enterobacteriaceae | <i>Leclercia adecarboxylata</i> ATCC 23216 = NBRC 102595           |
| Lsp-1-1                | Bacteria | Proteobacteria | Gammaproteobacteria | Enterobacteriales | Enterobacteriaceae | <i>Leclercia</i> sp. LK8                                           |
| Lam-1-1                | Bacteria | Proteobacteria | Gammaproteobacteria | Enterobacteriales | Enterobacteriaceae | <i>Lelliottia amnigena</i> CHS 78                                  |
| Msp-4-1                | Bacteria | Proteobacteria | Gammaproteobacteria | Enterobacteriales | Enterobacteriaceae | <i>Mangrovibacter</i> sp. MFB070                                   |
| Mma-2-1                | Bacteria | Proteobacteria | Gammaproteobacteria | Enterobacteriales | Enterobacteriaceae | <i>Metakosakonia massiliensis</i> JC163                            |
| Pge-1-1                | Bacteria | Proteobacteria | Gammaproteobacteria | Enterobacteriales | Enterobacteriaceae | <i>Pluralibacter gergoviae</i>                                     |
| Pvu-1-1                | Bacteria | Proteobacteria | Gammaproteobacteria | Enterobacteriales | Enterobacteriaceae | <i>Pseudeschерichia vulneris</i> NBRC 102420                       |
| Ror-1-1                | Bacteria | Proteobacteria | Gammaproteobacteria | Enterobacteriales | Enterobacteriaceae | <i>Raoultella ornithinolytica</i>                                  |
| Ror-2-1                | Bacteria | Proteobacteria | Gammaproteobacteria | Enterobacteriales | Enterobacteriaceae | <i>Raoultella ornithinolytica</i> 2-156-04.S1.C1                   |
| Ror-3-1                | Bacteria | Proteobacteria | Gammaproteobacteria | Enterobacteriales | Enterobacteriaceae | <i>Raoultella ornithinolytica</i> 2-156-04.S1.C2                   |
| Ror-4-1 to Ror-4-2     | Bacteria | Proteobacteria | Gammaproteobacteria | Enterobacteriales | Enterobacteriaceae | <i>Raoultella ornithinolytica</i> B6                               |
| Rpl-1-1 to Rpl-1-3     | Bacteria | Proteobacteria | Gammaproteobacteria | Enterobacteriales | Enterobacteriaceae | <i>Raoultella planticola</i>                                       |
| Rpl-2-1                | Bacteria | Proteobacteria | Gammaproteobacteria | Enterobacteriales | Enterobacteriaceae | <i>Raoultella planticola</i> ATCC 33531                            |
| Rte-1-1                | Bacteria | Proteobacteria | Gammaproteobacteria | Enterobacteriales | Enterobacteriaceae | <i>Raoultella terrigena</i>                                        |
| Sbo-1-1                | Bacteria | Proteobacteria | Gammaproteobacteria | Enterobacteriales | Enterobacteriaceae | <i>Salmonella bongori</i> serovar 48:z41:- str. RKS3044            |















|                      |          |                |                     |                   |                    |                                       |                                                                   |
|----------------------|----------|----------------|---------------------|-------------------|--------------------|---------------------------------------|-------------------------------------------------------------------|
| Sfl-46-1             | Bacteria | Proteobacteria | Gammaproteobacteria | Enterobacteriales | Enterobacteriaceae | <i>Shigella flexneri</i>              | Shi06HN244                                                        |
| Sfl-47-1             | Bacteria | Proteobacteria | Gammaproteobacteria | Enterobacteriales | Enterobacteriaceae | <i>Shigella flexneri</i>              | Shi06HN250                                                        |
| Sfl-48-1             | Bacteria | Proteobacteria | Gammaproteobacteria | Enterobacteriales | Enterobacteriaceae | <i>Shigella flexneri</i>              | Shi06HN378                                                        |
| Sfl-49-1             | Bacteria | Proteobacteria | Gammaproteobacteria | Enterobacteriales | Enterobacteriaceae | <i>Shigella flexneri</i>              | Shi06SX36                                                         |
| Sfl-50-1             | Bacteria | Proteobacteria | Gammaproteobacteria | Enterobacteriales | Enterobacteriaceae | <i>Shigella flexneri</i>              | Shi06SX53                                                         |
| Sfl-51-1 to Sfl-51-2 | Bacteria | Proteobacteria | Gammaproteobacteria | Enterobacteriales | Enterobacteriaceae | <i>Shigella flexneri</i>              | Y                                                                 |
| Sso-1-1 to Sso-1-547 | Bacteria | Proteobacteria | Gammaproteobacteria | Enterobacteriales | Enterobacteriaceae | <i>Shigella sonnei</i>                |                                                                   |
| Sso-2-1              | Bacteria | Proteobacteria | Gammaproteobacteria | Enterobacteriales | Enterobacteriaceae | <i>Shigella sonnei</i>                | 1DT-1                                                             |
| Sco-2-1              | Bacteria | Proteobacteria | Gammaproteobacteria | Enterobacteriales | Enterobacteriaceae | <i>Siccibacter colletis</i>           |                                                                   |
| Stu-1-1              | Bacteria | Proteobacteria | Gammaproteobacteria | Enterobacteriales | Enterobacteriaceae | <i>Siccibacter turicensis</i>         | LMG 23730                                                         |
| Tgu-1-1              | Bacteria | Proteobacteria | Gammaproteobacteria | Enterobacteriales | Enterobacteriaceae | <i>Trabulsiella guamensis</i>         | ATCC 49490                                                        |
| Tod-1-1 to Tod-1-2   | Bacteria | Proteobacteria | Gammaproteobacteria | Enterobacteriales | Enterobacteriaceae | <i>Trabulsiella odontotermis</i>      |                                                                   |
| Eam-1-1              | Bacteria | Proteobacteria | Gammaproteobacteria | Enterobacteriales | Erwiniaceae        | <i>Erwinia amylovora</i>              | NBRC 12687                                                        |
| Ebi-1-1              | Bacteria | Proteobacteria | Gammaproteobacteria | Enterobacteriales | Erwiniaceae        | <i>Erwinia billingiae</i>             |                                                                   |
| Ein-1-1 to Ein-1-2   | Bacteria | Proteobacteria | Gammaproteobacteria | Enterobacteriales | Erwiniaceae        | <i>Erwinia iniecta</i>                |                                                                   |
| Ema-2-1              | Bacteria | Proteobacteria | Gammaproteobacteria | Enterobacteriales | Erwiniaceae        | <i>Erwinia mallotivora</i>            |                                                                   |
| Eol-1-1              | Bacteria | Proteobacteria | Gammaproteobacteria | Enterobacteriales | Erwiniaceae        | <i>Erwinia oleae</i>                  |                                                                   |
| Esp-55-1             | Bacteria | Proteobacteria | Gammaproteobacteria | Enterobacteriales | Erwiniaceae        | <i>Erwinia sp.</i>                    | 9145                                                              |
| Etr-1-1              | Bacteria | Proteobacteria | Gammaproteobacteria | Enterobacteriales | Erwiniaceae        | <i>Erwinia tracheiphila</i>           |                                                                   |
| Ety-1-1              | Bacteria | Proteobacteria | Gammaproteobacteria | Enterobacteriales | Erwiniaceae        | <i>Erwinia typographi</i>             |                                                                   |
| Pag-2-1 to Pag-2-6   | Bacteria | Proteobacteria | Gammaproteobacteria | Enterobacteriales | Erwiniaceae        | <i>Pantoea</i>                        | <i>Pantoea agglomerans</i> group <i>Pantoea agglomerans</i>       |
| Pag-3-1              | Bacteria | Proteobacteria | Gammaproteobacteria | Enterobacteriales | Erwiniaceae        | <i>Pantoea</i>                        | <i>Pantoea agglomerans</i> group <i>Pantoea agglomerans</i> Eh318 |
| Pan-1-1 to Pan-1-5   | Bacteria | Proteobacteria | Gammaproteobacteria | Enterobacteriales | Erwiniaceae        | <i>Pantoea ananatis</i>               |                                                                   |
| Pan-2-1              | Bacteria | Proteobacteria | Gammaproteobacteria | Enterobacteriales | Erwiniaceae        | <i>Pantoea ananatis</i>               | BD442                                                             |
| Pan-3-1 to Pan-3-2   | Bacteria | Proteobacteria | Gammaproteobacteria | Enterobacteriales | Erwiniaceae        | <i>Pantoea ananatis</i>               | LMG 2665                                                          |
| Pan-4-1              | Bacteria | Proteobacteria | Gammaproteobacteria | Enterobacteriales | Erwiniaceae        | <i>Pantoea ananatis</i>               | Sd-1                                                              |
| Pan-5-1              | Bacteria | Proteobacteria | Gammaproteobacteria | Enterobacteriales | Erwiniaceae        | <i>Pantoea anthophila</i>             |                                                                   |
| Pro-1-1              | Bacteria | Proteobacteria | Gammaproteobacteria | Enterobacteriales | Erwiniaceae        | <i>Pantoea rodasi</i>                 |                                                                   |
| Prw-1-1              | Bacteria | Proteobacteria | Gammaproteobacteria | Enterobacteriales | Erwiniaceae        | <i>Pantoea rwandensis</i>             |                                                                   |
| Pse-1-1              | Bacteria | Proteobacteria | Gammaproteobacteria | Enterobacteriales | Erwiniaceae        | <i>Pantoea septica</i>                |                                                                   |
| Psp-36-1             | Bacteria | Proteobacteria | Gammaproteobacteria | Enterobacteriales | Erwiniaceae        | <i>Pantoea sp.</i>                    | 3.5.1                                                             |
| Psp-37-1             | Bacteria | Proteobacteria | Gammaproteobacteria | Enterobacteriales | Erwiniaceae        | <i>Pantoea sp.</i>                    | 9140                                                              |
| Psp-38-1             | Bacteria | Proteobacteria | Gammaproteobacteria | Enterobacteriales | Erwiniaceae        | <i>Pantoea sp.</i>                    | BL1                                                               |
| Psp-39-1             | Bacteria | Proteobacteria | Gammaproteobacteria | Enterobacteriales | Erwiniaceae        | <i>Pantoea sp.</i>                    | CFSAN033090                                                       |
| Psp-40-1             | Bacteria | Proteobacteria | Gammaproteobacteria | Enterobacteriales | Erwiniaceae        | <i>Pantoea sp.</i>                    | IMH                                                               |
| Psp-41-1             | Bacteria | Proteobacteria | Gammaproteobacteria | Enterobacteriales | Erwiniaceae        | <i>Pantoea sp.</i>                    | MBLJ3                                                             |
| Psp-42-1             | Bacteria | Proteobacteria | Gammaproteobacteria | Enterobacteriales | Erwiniaceae        | <i>Pantoea sp.</i>                    | NGS-ED-1003                                                       |
| Psp-43-1             | Bacteria | Proteobacteria | Gammaproteobacteria | Enterobacteriales | Erwiniaceae        | <i>Pantoea sp.</i>                    | PSNIH1                                                            |
| Psp-44-1             | Bacteria | Proteobacteria | Gammaproteobacteria | Enterobacteriales | Erwiniaceae        | <i>Pantoea sp.</i>                    | PSNIH2                                                            |
| Psp-45-1             | Bacteria | Proteobacteria | Gammaproteobacteria | Enterobacteriales | Erwiniaceae        | <i>Pantoea sp.</i>                    | RIT-PI-b                                                          |
| Psp-46-1             | Bacteria | Proteobacteria | Gammaproteobacteria | Enterobacteriales | Erwiniaceae        | <i>Pantoea sp.</i>                    | SM3                                                               |
| Pst-1-1 to Pst-1-2   | Bacteria | Proteobacteria | Gammaproteobacteria | Enterobacteriales | Erwiniaceae        | <i>Pantoea stewartii</i>              |                                                                   |
| Pva-1-1 to Pva-1-3   | Bacteria | Proteobacteria | Gammaproteobacteria | Enterobacteriales | Erwiniaceae        | <i>Pantoea vagans</i>                 |                                                                   |
| Pfl-3-1              | Bacteria | Proteobacteria | Gammaproteobacteria | Enterobacteriales | Erwiniaceae        | <i>Phaseolibacter flectens</i>        | ATCC 12775                                                        |
| Tmo-1-1              | Bacteria | Proteobacteria | Gammaproteobacteria | Enterobacteriales | Erwiniaceae        | <i>Tatumella morbirosei</i>           |                                                                   |
| Tpt-1-1 to Tpt-1-2   | Bacteria | Proteobacteria | Gammaproteobacteria | Enterobacteriales | Erwiniaceae        | <i>Tatumella ptyseos</i>              | ATCC 33301                                                        |
| Tsa-1-1              | Bacteria | Proteobacteria | Gammaproteobacteria | Enterobacteriales | Erwiniaceae        | <i>Tatumella saanichensis</i>         |                                                                   |
| Tsp-2-1              | Bacteria | Proteobacteria | Gammaproteobacteria | Enterobacteriales | Erwiniaceae        | <i>Tatumella sp.</i>                  | UCD-D_suzukii                                                     |
| Ean-1-1              | Bacteria | Proteobacteria | Gammaproteobacteria | Enterobacteriales | Hafniaceae         | <i>Edwardsiella anguillarum</i>       | ET070829                                                          |
| Ean-2-1              | Bacteria | Proteobacteria | Gammaproteobacteria | Enterobacteriales | Hafniaceae         | <i>Edwardsiella anguillarum</i>       | ET080729                                                          |
| Ean-3-1              | Bacteria | Proteobacteria | Gammaproteobacteria | Enterobacteriales | Hafniaceae         | <i>Edwardsiella anguillarum</i>       | ET080813                                                          |
| Ean-4-1              | Bacteria | Proteobacteria | Gammaproteobacteria | Enterobacteriales | Hafniaceae         | <i>Edwardsiella anguillarum</i>       | ET081126R                                                         |
| Eho-5-1              | Bacteria | Proteobacteria | Gammaproteobacteria | Enterobacteriales | Hafniaceae         | <i>Edwardsiella hoshinae</i>          | NBRC 105699 = ATCC 33379                                          |
| Eic-1-1              | Bacteria | Proteobacteria | Gammaproteobacteria | Enterobacteriales | Hafniaceae         | <i>Edwardsiella ictaluri</i>          | ATCC 33202                                                        |
| Epi-1-1 to Epi-1-2   | Bacteria | Proteobacteria | Gammaproteobacteria | Enterobacteriales | Hafniaceae         | <i>Edwardsiella piscicida</i>         |                                                                   |
| Esp-56-1             | Bacteria | Proteobacteria | Gammaproteobacteria | Enterobacteriales | Hafniaceae         | <i>Edwardsiella sp.</i>               | EA181011                                                          |
| Eta-1-1              | Bacteria | Proteobacteria | Gammaproteobacteria | Enterobacteriales | Hafniaceae         | <i>Edwardsiella tarda</i>             |                                                                   |
| Eta-2-1              | Bacteria | Proteobacteria | Gammaproteobacteria | Enterobacteriales | Hafniaceae         | <i>Edwardsiella tarda</i>             | ATCC 15947 = NBRC 105688                                          |
| Eta-3-1              | Bacteria | Proteobacteria | Gammaproteobacteria | Enterobacteriales | Hafniaceae         | <i>Edwardsiella tarda</i>             | DT                                                                |
| Hal-1-1 to Hal-1-4   | Bacteria | Proteobacteria | Gammaproteobacteria | Enterobacteriales | Hafniaceae         | <i>Hafnia alvei</i>                   |                                                                   |
| Hal-2-1              | Bacteria | Proteobacteria | Gammaproteobacteria | Enterobacteriales | Hafniaceae         | <i>Hafnia alvei</i>                   | ATCC 13337                                                        |
| Hal-3-1              | Bacteria | Proteobacteria | Gammaproteobacteria | Enterobacteriales | Hafniaceae         | <i>Hafnia alvei</i>                   | FB1                                                               |
| Hpa-1-1 to Hpa-1-2   | Bacteria | Proteobacteria | Gammaproteobacteria | Enterobacteriales | Hafniaceae         | <i>Hafnia paralvei</i>                |                                                                   |
| Aen-3-1              | Bacteria | Proteobacteria | Gammaproteobacteria | Enterobacteriales | Morganellaceae     | <i>Arsenophonus endosymbiont str.</i> | Hangzhou of Nilaparvata lugens                                    |
| Ana-1-1              | Bacteria | Proteobacteria | Gammaproteobacteria | Enterobacteriales | Morganellaceae     | <i>Arsenophonus nasoniae</i>          | DSM 15247                                                         |

|                    |          |                |                     |                   |                   |                                                            |
|--------------------|----------|----------------|---------------------|-------------------|-------------------|------------------------------------------------------------|
| Mwi-1-1            | Bacteria | Proteobacteria | Gammaproteobacteria | Enterobacteriales | Morganeliaceae    | <i>Moellerella wisconsensis</i>                            |
| Mmo-1-1 to Mmo-1-8 | Bacteria | Proteobacteria | Gammaproteobacteria | Enterobacteriales | Morganeliaceae    | <i>Morganella morganii</i>                                 |
| Mmo-2-1            | Bacteria | Proteobacteria | Gammaproteobacteria | Enterobacteriales | Morganeliaceae    | <i>Morganella morganii</i> F675                            |
| Mmo-3-1            | Bacteria | Proteobacteria | Gammaproteobacteria | Enterobacteriales | Morganeliaceae    | <i>Morganella morganii</i> H1r                             |
| Mmo-4-1            | Bacteria | Proteobacteria | Gammaproteobacteria | Enterobacteriales | Morganeliaceae    | <i>Morganella morganii</i> IS15                            |
| Msp-5-1            | Bacteria | Proteobacteria | Gammaproteobacteria | Enterobacteriales | Morganeliaceae    | <i>Morganella sp.</i> EGD-HP17                             |
| Pas-1-1            | Bacteria | Proteobacteria | Gammaproteobacteria | Enterobacteriales | Morganeliaceae    | <i>Photorhabdus asymbiotica subsp. australis</i> DSM 17609 |
| Plu-5-1 to Plu-5-2 | Bacteria | Proteobacteria | Gammaproteobacteria | Enterobacteriales | Morganeliaceae    | <i>Photorhabdus luminescens</i>                            |
| Plu-6-1            | Bacteria | Proteobacteria | Gammaproteobacteria | Enterobacteriales | Morganeliaceae    | <i>Photorhabdus luminescens</i> BA1                        |
| Plu-7-1            | Bacteria | Proteobacteria | Gammaproteobacteria | Enterobacteriales | Morganeliaceae    | <i>Photorhabdus luminescens</i> NBAIL H75HRPL105           |
| Plu-8-1            | Bacteria | Proteobacteria | Gammaproteobacteria | Enterobacteriales | Morganeliaceae    | <i>Photorhabdus luminescens</i> NBAIL HiPL101              |
| Plu-9-1            | Bacteria | Proteobacteria | Gammaproteobacteria | Enterobacteriales | Morganeliaceae    | <i>Photorhabdus luminescens subsp. luminescens</i>         |
| Pte-2-1            | Bacteria | Proteobacteria | Gammaproteobacteria | Enterobacteriales | Morganeliaceae    | <i>Photorhabdus temperata subsp. kharii</i> NC19           |
| Pte-3-1            | Bacteria | Proteobacteria | Gammaproteobacteria | Enterobacteriales | Morganeliaceae    | <i>Photorhabdus temperata subsp. temperata</i> Meg1        |
| Pte-4-1            | Bacteria | Proteobacteria | Gammaproteobacteria | Enterobacteriales | Morganeliaceae    | <i>Photorhabdus temperata subsp. thracensis</i>            |
| Pmi-1-1 to Pmi-1-6 | Bacteria | Proteobacteria | Gammaproteobacteria | Enterobacteriales | Morganeliaceae    | <i>Proteus mirabilis</i>                                   |
| Pvu-2-1            | Bacteria | Proteobacteria | Gammaproteobacteria | Enterobacteriales | Morganeliaceae    | <i>Proteus vulgaris</i>                                    |
| Pal-1-1            | Bacteria | Proteobacteria | Gammaproteobacteria | Enterobacteriales | Morganeliaceae    | <i>Providencia alcalifaciens</i> 205/92                    |
| Pal-2-1            | Bacteria | Proteobacteria | Gammaproteobacteria | Enterobacteriales | Morganeliaceae    | <i>Providencia alcalifaciens</i> F90-2004                  |
| Pal-3-1            | Bacteria | Proteobacteria | Gammaproteobacteria | Enterobacteriales | Morganeliaceae    | <i>Providencia alcalifaciens</i> PAL-1                     |
| Pal-4-1            | Bacteria | Proteobacteria | Gammaproteobacteria | Enterobacteriales | Morganeliaceae    | <i>Providencia alcalifaciens</i> PAL-2                     |
| Pal-5-1            | Bacteria | Proteobacteria | Gammaproteobacteria | Enterobacteriales | Morganeliaceae    | <i>Providencia alcalifaciens</i> PAL-3                     |
| Pal-6-1            | Bacteria | Proteobacteria | Gammaproteobacteria | Enterobacteriales | Morganeliaceae    | <i>Providencia alcalifaciens</i> R90-1475                  |
| Pal-7-1            | Bacteria | Proteobacteria | Gammaproteobacteria | Enterobacteriales | Morganeliaceae    | <i>Providencia alcalifaciens</i> RIMD 1656011              |
| Pre-1-1 to Pre-1-2 | Bacteria | Proteobacteria | Gammaproteobacteria | Enterobacteriales | Morganeliaceae    | <i>Providencia rettgeri</i>                                |
| Pst-2-1            | Bacteria | Proteobacteria | Gammaproteobacteria | Enterobacteriales | Morganeliaceae    | <i>Providencia stuartii</i>                                |
| Xbo-1-1            | Bacteria | Proteobacteria | Gammaproteobacteria | Enterobacteriales | Morganeliaceae    | <i>Xenorhabdus bovienii</i>                                |
| Xbo-4-1            | Bacteria | Proteobacteria | Gammaproteobacteria | Enterobacteriales | Morganeliaceae    | <i>Xenorhabdus bovienii str. feltiae</i> Florida           |
| Xbo-5-1            | Bacteria | Proteobacteria | Gammaproteobacteria | Enterobacteriales | Morganeliaceae    | <i>Xenorhabdus bovienii str. feltiae</i> France            |
| Xbo-6-1            | Bacteria | Proteobacteria | Gammaproteobacteria | Enterobacteriales | Morganeliaceae    | <i>Xenorhabdus bovienii str. feltiae</i> Moldova           |
| Xbo-2-1            | Bacteria | Proteobacteria | Gammaproteobacteria | Enterobacteriales | Morganeliaceae    | <i>Xenorhabdus bovienii str. Intermedium</i>               |
| Xbo-3-1            | Bacteria | Proteobacteria | Gammaproteobacteria | Enterobacteriales | Morganeliaceae    | <i>Xenorhabdus bovienii str. Jollieti</i>                  |
| Xbo-7-1            | Bacteria | Proteobacteria | Gammaproteobacteria | Enterobacteriales | Morganeliaceae    | <i>Xenorhabdus bovienii str. kraussei</i> Becker Underwood |
| Xbo-8-1            | Bacteria | Proteobacteria | Gammaproteobacteria | Enterobacteriales | Morganeliaceae    | <i>Xenorhabdus bovienii str. kraussei</i> Quebec           |
| Xbo-9-1            | Bacteria | Proteobacteria | Gammaproteobacteria | Enterobacteriales | Morganeliaceae    | <i>Xenorhabdus bovienii str. oregonense</i>                |
| Xbo-10-1           | Bacteria | Proteobacteria | Gammaproteobacteria | Enterobacteriales | Morganeliaceae    | <i>Xenorhabdus bovienii str. puntauense</i>                |
| Xca-1-1            | Bacteria | Proteobacteria | Gammaproteobacteria | Enterobacteriales | Morganeliaceae    | <i>Xenorhabdus cabanillasii</i> JM26                       |
| Xdo-1-1            | Bacteria | Proteobacteria | Gammaproteobacteria | Enterobacteriales | Morganeliaceae    | <i>Xenorhabdus doucetiae</i>                               |
| Xgr-1-1            | Bacteria | Proteobacteria | Gammaproteobacteria | Enterobacteriales | Morganeliaceae    | <i>Xenorhabdus griffiniae</i>                              |
| Xkh-1-1            | Bacteria | Proteobacteria | Gammaproteobacteria | Enterobacteriales | Morganeliaceae    | <i>Xenorhabdus khoisanae</i>                               |
| Xne-1-1            | Bacteria | Proteobacteria | Gammaproteobacteria | Enterobacteriales | Morganeliaceae    | <i>Xenorhabdus nematophila</i>                             |
| Xne-2-1            | Bacteria | Proteobacteria | Gammaproteobacteria | Enterobacteriales | Morganeliaceae    | <i>Xenorhabdus nematophila</i> AN6/1                       |
| Xpo-1-1            | Bacteria | Proteobacteria | Gammaproteobacteria | Enterobacteriales | Morganeliaceae    | <i>Xenorhabdus poimarii</i> G6                             |
| Xsp-1-1            | Bacteria | Proteobacteria | Gammaproteobacteria | Enterobacteriales | Morganeliaceae    | <i>Xenorhabdus sp.</i> NBAIL XenSa04                       |
| Xsz-1-1            | Bacteria | Proteobacteria | Gammaproteobacteria | Enterobacteriales | Morganeliaceae    | <i>Xenorhabdus szentirmai</i> DSM 16338                    |
| Bgo-1-1            | Bacteria | Proteobacteria | Gammaproteobacteria | Enterobacteriales | Pectobacteriaceae | <i>Brenneria goodwinii</i>                                 |
| Dch-1-1 to Dch-1-2 | Bacteria | Proteobacteria | Gammaproteobacteria | Enterobacteriales | Pectobacteriaceae | <i>Dickeya chrysanthemi</i>                                |
| Dch-2-1            | Bacteria | Proteobacteria | Gammaproteobacteria | Enterobacteriales | Pectobacteriaceae | <i>Dickeya chrysanthemi</i> NCPPB 3533                     |
| Dch-3-1            | Bacteria | Proteobacteria | Gammaproteobacteria | Enterobacteriales | Pectobacteriaceae | <i>Dickeya chrysanthemi</i> NCPPB 402                      |
| Dch-4-1            | Bacteria | Proteobacteria | Gammaproteobacteria | Enterobacteriales | Pectobacteriaceae | <i>Dickeya chrysanthemi</i> NCPPB 516                      |
| Dda-1-1            | Bacteria | Proteobacteria | Gammaproteobacteria | Enterobacteriales | Pectobacteriaceae | <i>Dickeya dadantii</i> NCPPB 3537                         |
| Dda-2-1            | Bacteria | Proteobacteria | Gammaproteobacteria | Enterobacteriales | Pectobacteriaceae | <i>Dickeya dadantii</i> NCPPB 898                          |
| Dda-3-1            | Bacteria | Proteobacteria | Gammaproteobacteria | Enterobacteriales | Pectobacteriaceae | <i>Dickeya dadantii subsp. dieffenbachiae</i> NCPPB 2976   |
| Ddi-1-1            | Bacteria | Proteobacteria | Gammaproteobacteria | Enterobacteriales | Pectobacteriaceae | <i>Dickeya dianthicola</i> IPO 980                         |
| Ddi-2-1            | Bacteria | Proteobacteria | Gammaproteobacteria | Enterobacteriales | Pectobacteriaceae | <i>Dickeya dianthicola</i> RNS04.9                         |
| Dso-1-1            | Bacteria | Proteobacteria | Gammaproteobacteria | Enterobacteriales | Pectobacteriaceae | <i>Dickeya solani</i>                                      |
| Dsp-1-1            | Bacteria | Proteobacteria | Gammaproteobacteria | Enterobacteriales | Pectobacteriaceae | <i>Dickeya sp.</i> 2B12                                    |
| Dsp-2-1            | Bacteria | Proteobacteria | Gammaproteobacteria | Enterobacteriales | Pectobacteriaceae | <i>Dickeya sp.</i> B16                                     |
| Dsp-3-1            | Bacteria | Proteobacteria | Gammaproteobacteria | Enterobacteriales | Pectobacteriaceae | <i>Dickeya sp.</i> DW 0440                                 |
| Dsp-4-1            | Bacteria | Proteobacteria | Gammaproteobacteria | Enterobacteriales | Pectobacteriaceae | <i>Dickeya sp.</i> MK7                                     |
| Dsp-5-1            | Bacteria | Proteobacteria | Gammaproteobacteria | Enterobacteriales | Pectobacteriaceae | <i>Dickeya sp.</i> NCPPB 3274                              |
| Dsp-6-1            | Bacteria | Proteobacteria | Gammaproteobacteria | Enterobacteriales | Pectobacteriaceae | <i>Dickeya sp.</i> S1                                      |
| Dze-1-1            | Bacteria | Proteobacteria | Gammaproteobacteria | Enterobacteriales | Pectobacteriaceae | <i>Dickeya zeae</i> CSL RW192                              |
| Dze-2-1            | Bacteria | Proteobacteria | Gammaproteobacteria | Enterobacteriales | Pectobacteriaceae | <i>Dickeya zeae</i> DZ2Q                                   |
| Dze-3-1            | Bacteria | Proteobacteria | Gammaproteobacteria | Enterobacteriales | Pectobacteriaceae | <i>Dickeya zeae</i> EC1                                    |

|                      |          |                |                     |                   |                   |                                                                         |
|----------------------|----------|----------------|---------------------|-------------------|-------------------|-------------------------------------------------------------------------|
| Dze-4-1              | Bacteria | Proteobacteria | Gammaproteobacteria | Enterobacteriales | Pectobacteriaceae | <i>Dickeya zeae</i> MK19                                                |
| Dze-5-1              | Bacteria | Proteobacteria | Gammaproteobacteria | Enterobacteriales | Pectobacteriaceae | <i>Dickeya zeae</i> NCPPB 2538                                          |
| Dze-6-1              | Bacteria | Proteobacteria | Gammaproteobacteria | Enterobacteriales | Pectobacteriaceae | <i>Dickeya zeae</i> NCPPB 3531                                          |
| Lqu-1-1 to Lqu-1-3   | Bacteria | Proteobacteria | Gammaproteobacteria | Enterobacteriales | Pectobacteriaceae | <i>Lonsdalea quercina</i> subsp. <i>quercina</i>                        |
| Pat-2-1 to Pat-2-2   | Bacteria | Proteobacteria | Gammaproteobacteria | Enterobacteriales | Pectobacteriaceae | <i>Pectobacterium atrosepticum</i>                                      |
| Pat-3-1              | Bacteria | Proteobacteria | Gammaproteobacteria | Enterobacteriales | Pectobacteriaceae | <i>Pectobacterium atrosepticum</i> CFBP 6276                            |
| Pbe-1-1 to Pbe-1-2   | Bacteria | Proteobacteria | Gammaproteobacteria | Enterobacteriales | Pectobacteriaceae | <i>Pectobacterium betavascolorum</i>                                    |
| Pca-1-1              | Bacteria | Proteobacteria | Gammaproteobacteria | Enterobacteriales | Pectobacteriaceae | <i>Pectobacterium carotovorum</i>                                       |
| Pca-2-1              | Bacteria | Proteobacteria | Gammaproteobacteria | Enterobacteriales | Pectobacteriaceae | <i>Pectobacterium carotovorum</i> subsp. <i>actinidiae</i>              |
| Pca-3-1 to Pca-3-15  | Bacteria | Proteobacteria | Gammaproteobacteria | Enterobacteriales | Pectobacteriaceae | <i>Pectobacterium carotovorum</i> subsp. <i>brasiliense</i>             |
| Pca-4-1              | Bacteria | Proteobacteria | Gammaproteobacteria | Enterobacteriales | Pectobacteriaceae | <i>Pectobacterium carotovorum</i> subsp. <i>brasiliensis</i> ICMP 19477 |
| Pca-5-1 to Pca-5-11  | Bacteria | Proteobacteria | Gammaproteobacteria | Enterobacteriales | Pectobacteriaceae | <i>Pectobacterium carotovorum</i> subsp. <i>carotovorum</i>             |
| Pca-6-1              | Bacteria | Proteobacteria | Gammaproteobacteria | Enterobacteriales | Pectobacteriaceae | <i>Pectobacterium carotovorum</i> subsp. <i>carotovorum</i> ICMP 5702   |
| Pca-7-1              | Bacteria | Proteobacteria | Gammaproteobacteria | Enterobacteriales | Pectobacteriaceae | <i>Pectobacterium carotovorum</i> subsp. <i>carotovorum</i> UGC32       |
| Pca-8-1 to Pca-8-2   | Bacteria | Proteobacteria | Gammaproteobacteria | Enterobacteriales | Pectobacteriaceae | <i>Pectobacterium carotovorum</i> subsp. <i>odoriferum</i>              |
| Ppa-1-1              | Bacteria | Proteobacteria | Gammaproteobacteria | Enterobacteriales | Pectobacteriaceae | <i>Pectobacterium parmentieri</i>                                       |
| Ppa-2-1              | Bacteria | Proteobacteria | Gammaproteobacteria | Enterobacteriales | Pectobacteriaceae | <i>Pectobacterium parmentieri</i> CFIA1002                              |
| Ppo-1-1              | Bacteria | Proteobacteria | Gammaproteobacteria | Enterobacteriales | Pectobacteriaceae | <i>Pectobacterium polaris</i>                                           |
| Pwa-1-1 to Pwa-1-2   | Bacteria | Proteobacteria | Gammaproteobacteria | Enterobacteriales | Pectobacteriaceae | <i>Pectobacterium wasabiae</i>                                          |
| CSo-1-1              | Bacteria | Proteobacteria | Gammaproteobacteria | Enterobacteriales | Pectobacteriaceae | <i>Sodalis Candidatus Sodalis pierantonius</i> str. SOPE                |
| Spr-1-1              | Bacteria | Proteobacteria | Gammaproteobacteria | Enterobacteriales | Pectobacteriaceae | <i>Sodalis praecaptivus</i>                                             |
| Pur-1-1              | Bacteria | Proteobacteria | Gammaproteobacteria | Enterobacteriales | unclassified      | Enterobacteriales <i>Phytobacter ursingii</i>                           |
| Psh-1-1              | Bacteria | Proteobacteria | Gammaproteobacteria | Enterobacteriales | unclassified      | Enterobacteriales <i>Plesiomonas shigelloides</i>                       |
| Psp-47-1             | Bacteria | Proteobacteria | Gammaproteobacteria | Enterobacteriales | unclassified      | Enterobacteriales <i>Plesiomonas</i> sp. ZOR0011                        |
| Cmu-2-1              | Bacteria | Proteobacteria | Gammaproteobacteria | Enterobacteriales | Yersiniaceae      | <i>Chania multitudinisentens</i> RB-25                                  |
| Eam-2-1              | Bacteria | Proteobacteria | Gammaproteobacteria | Enterobacteriales | Yersiniaceae      | <i>Ewingella americana</i> ATCC 33852                                   |
| Raq-1-1 to Raq-1-2   | Bacteria | Proteobacteria | Gammaproteobacteria | Enterobacteriales | Yersiniaceae      | <i>Rahnella aquatilis</i>                                               |
| Raq-2-1 to Raq-2-2   | Bacteria | Proteobacteria | Gammaproteobacteria | Enterobacteriales | Yersiniaceae      | <i>Rahnella aquatilis</i> CIP 78.65 = ATCC 33071                        |
| Rsp-3-1              | Bacteria | Proteobacteria | Gammaproteobacteria | Enterobacteriales | Yersiniaceae      | <i>Rahnella</i> sp. WP5                                                 |
| Rch-1-1              | Bacteria | Proteobacteria | Gammaproteobacteria | Enterobacteriales | Yersiniaceae      | <i>Rouxiiella chamberiensis</i>                                         |
| Sfo-1-1              | Bacteria | Proteobacteria | Gammaproteobacteria | Enterobacteriales | Yersiniaceae      | <i>Serratia fonticola</i>                                               |
| Sfo-2-1              | Bacteria | Proteobacteria | Gammaproteobacteria | Enterobacteriales | Yersiniaceae      | <i>Serratia fonticola</i> LMG 7882                                      |
| Sfo-3-1              | Bacteria | Proteobacteria | Gammaproteobacteria | Enterobacteriales | Yersiniaceae      | <i>Serratia fonticola</i> UTAD54                                        |
| Sgr-1-1              | Bacteria | Proteobacteria | Gammaproteobacteria | Enterobacteriales | Yersiniaceae      | <i>Serratia grimesii</i>                                                |
| Sli-1-1              | Bacteria | Proteobacteria | Gammaproteobacteria | Enterobacteriales | Yersiniaceae      | <i>Serratia liquefaciens</i>                                            |
| Sli-2-1              | Bacteria | Proteobacteria | Gammaproteobacteria | Enterobacteriales | Yersiniaceae      | <i>Serratia liquefaciens</i> FK01                                       |
| Sma-3-1 to Sma-3-4   | Bacteria | Proteobacteria | Gammaproteobacteria | Enterobacteriales | Yersiniaceae      | <i>Serratia marcescens</i>                                              |
| Sma-4-1              | Bacteria | Proteobacteria | Gammaproteobacteria | Enterobacteriales | Yersiniaceae      | <i>Serratia marcescens</i> AB42556419-isolate1                          |
| Sma-5-1              | Bacteria | Proteobacteria | Gammaproteobacteria | Enterobacteriales | Yersiniaceae      | <i>Serratia marcescens</i> BIDMC 44                                     |
| Sma-6-1              | Bacteria | Proteobacteria | Gammaproteobacteria | Enterobacteriales | Yersiniaceae      | <i>Serratia marcescens</i> BIDMC 50                                     |
| Sma-7-1              | Bacteria | Proteobacteria | Gammaproteobacteria | Enterobacteriales | Yersiniaceae      | <i>Serratia marcescens</i> BIDMC 80                                     |
| Sma-8-1              | Bacteria | Proteobacteria | Gammaproteobacteria | Enterobacteriales | Yersiniaceae      | <i>Serratia marcescens</i> BIDMC 81                                     |
| Sma-9-1              | Bacteria | Proteobacteria | Gammaproteobacteria | Enterobacteriales | Yersiniaceae      | <i>Serratia marcescens</i> H1q                                          |
| Sma-10-1             | Bacteria | Proteobacteria | Gammaproteobacteria | Enterobacteriales | Yersiniaceae      | <i>Serratia marcescens</i> LCT-SM166                                    |
| Sma-11-1             | Bacteria | Proteobacteria | Gammaproteobacteria | Enterobacteriales | Yersiniaceae      | <i>Serratia marcescens</i> LCT-SM262                                    |
| Sma-12-1             | Bacteria | Proteobacteria | Gammaproteobacteria | Enterobacteriales | Yersiniaceae      | <i>Serratia marcescens</i> MC458                                        |
| Sma-13-1             | Bacteria | Proteobacteria | Gammaproteobacteria | Enterobacteriales | Yersiniaceae      | <i>Serratia marcescens</i> MC459                                        |
| Sma-14-1             | Bacteria | Proteobacteria | Gammaproteobacteria | Enterobacteriales | Yersiniaceae      | <i>Serratia marcescens</i> MC460                                        |
| Sma-15-1             | Bacteria | Proteobacteria | Gammaproteobacteria | Enterobacteriales | Yersiniaceae      | <i>Serratia marcescens</i> MC6000                                       |
| Sma-16-1             | Bacteria | Proteobacteria | Gammaproteobacteria | Enterobacteriales | Yersiniaceae      | <i>Serratia marcescens</i> MC6001                                       |
| Sma-17-1             | Bacteria | Proteobacteria | Gammaproteobacteria | Enterobacteriales | Yersiniaceae      | <i>Serratia marcescens</i> MC620                                        |
| Sma-18-1             | Bacteria | Proteobacteria | Gammaproteobacteria | Enterobacteriales | Yersiniaceae      | <i>Serratia marcescens</i> PH1a                                         |
| Sma-19-1             | Bacteria | Proteobacteria | Gammaproteobacteria | Enterobacteriales | Yersiniaceae      | <i>Serratia marcescens</i> SM39                                         |
| Sma-20-1 to Sma-20-2 | Bacteria | Proteobacteria | Gammaproteobacteria | Enterobacteriales | Yersiniaceae      | <i>Serratia marcescens</i> subsp. <i>marcescens</i>                     |
| Sma-21-1             | Bacteria | Proteobacteria | Gammaproteobacteria | Enterobacteriales | Yersiniaceae      | <i>Serratia marcescens</i> subsp. <i>marcescens</i> ATCC 13880          |
| Sma-22-1             | Bacteria | Proteobacteria | Gammaproteobacteria | Enterobacteriales | Yersiniaceae      | <i>Serratia marcescens</i> subsp. <i>marcescens</i> Db11                |
| Sne-1-1              | Bacteria | Proteobacteria | Gammaproteobacteria | Enterobacteriales | Yersiniaceae      | <i>Serratia nematodiphila</i> DZ0503SBS1                                |
| Spl-1-1              | Bacteria | Proteobacteria | Gammaproteobacteria | Enterobacteriales | Yersiniaceae      | <i>Serratia plymuthica</i> RVH1                                         |
| Ssp-12-1             | Bacteria | Proteobacteria | Gammaproteobacteria | Enterobacteriales | Yersiniaceae      | <i>Serratia</i> sp. 506.PEND                                            |
| Ssp-13-1             | Bacteria | Proteobacteria | Gammaproteobacteria | Enterobacteriales | Yersiniaceae      | <i>Serratia</i> sp. Ag1                                                 |
| Ssp-14-1             | Bacteria | Proteobacteria | Gammaproteobacteria | Enterobacteriales | Yersiniaceae      | <i>Serratia</i> sp. Ag2                                                 |
| Ssp-15-1             | Bacteria | Proteobacteria | Gammaproteobacteria | Enterobacteriales | Yersiniaceae      | <i>Serratia</i> sp. DD3                                                 |
| Ssp-16-1             | Bacteria | Proteobacteria | Gammaproteobacteria | Enterobacteriales | Yersiniaceae      | <i>Serratia</i> sp. FS14                                                |
| Ssp-17-1             | Bacteria | Proteobacteria | Gammaproteobacteria | Enterobacteriales | Yersiniaceae      | <i>Serratia</i> sp. H1n                                                 |
| Ssp-18-1             | Bacteria | Proteobacteria | Gammaproteobacteria | Enterobacteriales | Yersiniaceae      | <i>Serratia</i> sp. H1w                                                 |



|                      |          |                |                     |                   |              |                                                                    |
|----------------------|----------|----------------|---------------------|-------------------|--------------|--------------------------------------------------------------------|
| Ssp-19-1             | Bacteria | Proteobacteria | Gammaproteobacteria | Enterobacteriales | Yersiniaceae | <i>Serratia sp.</i> SCBI                                           |
| Ssp-20-1 to Ssp-20-2 | Bacteria | Proteobacteria | Gammaproteobacteria | Enterobacteriales | Yersiniaceae | <i>Serratia sp.</i> TEL                                            |
| Ssy-1-1              | Bacteria | Proteobacteria | Gammaproteobacteria | Enterobacteriales | Yersiniaceae | <i>Serratia symbiotica</i>                                         |
| Sur-1-1              | Bacteria | Proteobacteria | Gammaproteobacteria | Enterobacteriales | Yersiniaceae | <i>Serratia ureilytica</i>                                         |
| Yal-1-1 to Yal-1-4   | Bacteria | Proteobacteria | Gammaproteobacteria | Enterobacteriales | Yersiniaceae | <i>Yersinia aldovae</i>                                            |
| Yal-2-1              | Bacteria | Proteobacteria | Gammaproteobacteria | Enterobacteriales | Yersiniaceae | <i>Yersinia aldovae</i> 670-83                                     |
| Yal-3-1              | Bacteria | Proteobacteria | Gammaproteobacteria | Enterobacteriales | Yersiniaceae | <i>Yersinia aleksiciae</i>                                         |
| Ybe-1-1              | Bacteria | Proteobacteria | Gammaproteobacteria | Enterobacteriales | Yersiniaceae | <i>Yersinia bercovieri</i>                                         |
| Yen-1-1 to Yen-1-4   | Bacteria | Proteobacteria | Gammaproteobacteria | Enterobacteriales | Yersiniaceae | <i>Yersinia enterocolitica</i>                                     |
| Yen-2-1              | Bacteria | Proteobacteria | Gammaproteobacteria | Enterobacteriales | Yersiniaceae | <i>Yersinia enterocolitica</i> (type O:2) str. YE3094/96           |
| Yen-3-1              | Bacteria | Proteobacteria | Gammaproteobacteria | Enterobacteriales | Yersiniaceae | <i>Yersinia enterocolitica</i> (type O:5) str. YE53/03             |
| Yen-4-1              | Bacteria | Proteobacteria | Gammaproteobacteria | Enterobacteriales | Yersiniaceae | <i>Yersinia enterocolitica</i> (type O:9) str. YE56/03             |
| Yen-5-1              | Bacteria | Proteobacteria | Gammaproteobacteria | Enterobacteriales | Yersiniaceae | <i>Yersinia enterocolitica</i> subsp. <i>palaearctica</i> 556/8265 |
| Yen-6-1              | Bacteria | Proteobacteria | Gammaproteobacteria | Enterobacteriales | Yersiniaceae | <i>Yersinia enterocolitica</i> subsp. <i>palaearctica</i> 647/5307 |
| Yen-7-1              | Bacteria | Proteobacteria | Gammaproteobacteria | Enterobacteriales | Yersiniaceae | <i>Yersinia enterocolitica</i> subsp. <i>palaearctica</i> YO527    |
| Yfr-1-1 to Yfr-1-17  | Bacteria | Proteobacteria | Gammaproteobacteria | Enterobacteriales | Yersiniaceae | <i>Yersinia frederiksenii</i>                                      |
| Yfr-2-1 to Yfr-2-2   | Bacteria | Proteobacteria | Gammaproteobacteria | Enterobacteriales | Yersiniaceae | <i>Yersinia frederiksenii</i> ATCC 33641                           |
| Yfr-3-1              | Bacteria | Proteobacteria | Gammaproteobacteria | Enterobacteriales | Yersiniaceae | <i>Yersinia frederiksenii</i> Y225                                 |
| Yin-1-1              | Bacteria | Proteobacteria | Gammaproteobacteria | Enterobacteriales | Yersiniaceae | <i>Yersinia intermedia</i>                                         |
| Ykr-1-1 to Ykr-1-2   | Bacteria | Proteobacteria | Gammaproteobacteria | Enterobacteriales | Yersiniaceae | <i>Yersinia kristensenii</i>                                       |
| Yma-1-1              | Bacteria | Proteobacteria | Gammaproteobacteria | Enterobacteriales | Yersiniaceae | <i>Yersinia massiliensis</i>                                       |
| Yma-2-1              | Bacteria | Proteobacteria | Gammaproteobacteria | Enterobacteriales | Yersiniaceae | <i>Yersinia massiliensis</i> CCUG 53443                            |
| Ymo-1-1 to Ymo-1-7   | Bacteria | Proteobacteria | Gammaproteobacteria | Enterobacteriales | Yersiniaceae | <i>Yersinia mollaretii</i>                                         |
| Ynu-1-1              | Bacteria | Proteobacteria | Gammaproteobacteria | Enterobacteriales | Yersiniaceae | <i>Yersinia nurmii</i>                                             |
| Ype-1-1 to Ype-1-2   | Bacteria | Proteobacteria | Gammaproteobacteria | Enterobacteriales | Yersiniaceae | <i>Yersinia pekkanenii</i>                                         |
| Ype-2-1 to Ype-2-9   | Bacteria | Proteobacteria | Gammaproteobacteria | Enterobacteriales | Yersiniaceae | <i>Yersinia pestis</i>                                             |
| Ype-3-1              | Bacteria | Proteobacteria | Gammaproteobacteria | Enterobacteriales | Yersiniaceae | <i>Yersinia pestis</i> 1045                                        |
| Ype-4-1              | Bacteria | Proteobacteria | Gammaproteobacteria | Enterobacteriales | Yersiniaceae | <i>Yersinia pestis</i> 12                                          |
| Ype-5-1              | Bacteria | Proteobacteria | Gammaproteobacteria | Enterobacteriales | Yersiniaceae | <i>Yersinia pestis</i> 1412                                        |
| Ype-6-1              | Bacteria | Proteobacteria | Gammaproteobacteria | Enterobacteriales | Yersiniaceae | <i>Yersinia pestis</i> 1413                                        |
| Ype-7-1              | Bacteria | Proteobacteria | Gammaproteobacteria | Enterobacteriales | Yersiniaceae | <i>Yersinia pestis</i> 14735                                       |
| Ype-8-1              | Bacteria | Proteobacteria | Gammaproteobacteria | Enterobacteriales | Yersiniaceae | <i>Yersinia pestis</i> 1522                                        |
| Ype-9-1              | Bacteria | Proteobacteria | Gammaproteobacteria | Enterobacteriales | Yersiniaceae | <i>Yersinia pestis</i> 164                                         |
| Ype-10-1             | Bacteria | Proteobacteria | Gammaproteobacteria | Enterobacteriales | Yersiniaceae | <i>Yersinia pestis</i> 1670                                        |
| Ype-11-1             | Bacteria | Proteobacteria | Gammaproteobacteria | Enterobacteriales | Yersiniaceae | <i>Yersinia pestis</i> 2                                           |
| Ype-12-1             | Bacteria | Proteobacteria | Gammaproteobacteria | Enterobacteriales | Yersiniaceae | <i>Yersinia pestis</i> 2944                                        |
| Ype-13-1             | Bacteria | Proteobacteria | Gammaproteobacteria | Enterobacteriales | Yersiniaceae | <i>Yersinia pestis</i> 3067                                        |
| Ype-14-1             | Bacteria | Proteobacteria | Gammaproteobacteria | Enterobacteriales | Yersiniaceae | <i>Yersinia pestis</i> 34008                                       |
| Ype-15-1             | Bacteria | Proteobacteria | Gammaproteobacteria | Enterobacteriales | Yersiniaceae | <i>Yersinia pestis</i> 34202                                       |
| Ype-16-1             | Bacteria | Proteobacteria | Gammaproteobacteria | Enterobacteriales | Yersiniaceae | <i>Yersinia pestis</i> 351001                                      |
| Ype-17-1             | Bacteria | Proteobacteria | Gammaproteobacteria | Enterobacteriales | Yersiniaceae | <i>Yersinia pestis</i> 3770                                        |
| Ype-18-1             | Bacteria | Proteobacteria | Gammaproteobacteria | Enterobacteriales | Yersiniaceae | <i>Yersinia pestis</i> 42095                                       |
| Ype-19-1             | Bacteria | Proteobacteria | Gammaproteobacteria | Enterobacteriales | Yersiniaceae | <i>Yersinia pestis</i> 5                                           |
| Ype-20-1             | Bacteria | Proteobacteria | Gammaproteobacteria | Enterobacteriales | Yersiniaceae | <i>Yersinia pestis</i> 620024                                      |
| Ype-21-1             | Bacteria | Proteobacteria | Gammaproteobacteria | Enterobacteriales | Yersiniaceae | <i>Yersinia pestis</i> 71021                                       |
| Ype-22-1             | Bacteria | Proteobacteria | Gammaproteobacteria | Enterobacteriales | Yersiniaceae | <i>Yersinia pestis</i> 710317                                      |
| Ype-23-1             | Bacteria | Proteobacteria | Gammaproteobacteria | Enterobacteriales | Yersiniaceae | <i>Yersinia pestis</i> 7338                                        |
| Ype-24-1             | Bacteria | Proteobacteria | Gammaproteobacteria | Enterobacteriales | Yersiniaceae | <i>Yersinia pestis</i> 790                                         |
| Ype-25-1             | Bacteria | Proteobacteria | Gammaproteobacteria | Enterobacteriales | Yersiniaceae | <i>Yersinia pestis</i> 8787                                        |
| Ype-26-1             | Bacteria | Proteobacteria | Gammaproteobacteria | Enterobacteriales | Yersiniaceae | <i>Yersinia pestis</i> 9                                           |
| Ype-27-1             | Bacteria | Proteobacteria | Gammaproteobacteria | Enterobacteriales | Yersiniaceae | <i>Yersinia pestis</i> 945                                         |
| Ype-28-1             | Bacteria | Proteobacteria | Gammaproteobacteria | Enterobacteriales | Yersiniaceae | <i>Yersinia pestis</i> 970754                                      |
| Ype-29-1 to Ype-29-2 | Bacteria | Proteobacteria | Gammaproteobacteria | Enterobacteriales | Yersiniaceae | <i>Yersinia pestis</i> A1122                                       |
| Ype-30-1             | Bacteria | Proteobacteria | Gammaproteobacteria | Enterobacteriales | Yersiniaceae | <i>Yersinia pestis</i> A1973001                                    |
| Ype-31-1 to Ype-31-2 | Bacteria | Proteobacteria | Gammaproteobacteria | Enterobacteriales | Yersiniaceae | <i>Yersinia pestis</i> Angola                                      |
| Ype-32-1 to Ype-32-2 | Bacteria | Proteobacteria | Gammaproteobacteria | Enterobacteriales | Yersiniaceae | <i>Yersinia pestis</i> Antiqua                                     |
| Ype-104-1            | Bacteria | Proteobacteria | Gammaproteobacteria | Enterobacteriales | Yersiniaceae | <i>Yersinia pestis</i> biovar Orientalis str. AS200901156          |
| Ype-105-1            | Bacteria | Proteobacteria | Gammaproteobacteria | Enterobacteriales | Yersiniaceae | <i>Yersinia pestis</i> biovar Orientalis str. AS200901434          |
| Ype-106-1            | Bacteria | Proteobacteria | Gammaproteobacteria | Enterobacteriales | Yersiniaceae | <i>Yersinia pestis</i> biovar Orientalis str. AS200901509          |
| Ype-107-1            | Bacteria | Proteobacteria | Gammaproteobacteria | Enterobacteriales | Yersiniaceae | <i>Yersinia pestis</i> biovar Orientalis str. AS200901539          |
| Ype-108-1            | Bacteria | Proteobacteria | Gammaproteobacteria | Enterobacteriales | Yersiniaceae | <i>Yersinia pestis</i> biovar Orientalis str. AS200902147          |
| Ype-109-1            | Bacteria | Proteobacteria | Gammaproteobacteria | Enterobacteriales | Yersiniaceae | <i>Yersinia pestis</i> biovar Orientalis str. BA200901703          |
| Ype-110-1            | Bacteria | Proteobacteria | Gammaproteobacteria | Enterobacteriales | Yersiniaceae | <i>Yersinia pestis</i> biovar Orientalis str. BA200901799          |
| Ype-111-1            | Bacteria | Proteobacteria | Gammaproteobacteria | Enterobacteriales | Yersiniaceae | <i>Yersinia pestis</i> biovar Orientalis str. BA200901990          |
| Ype-112-1            | Bacteria | Proteobacteria | Gammaproteobacteria | Enterobacteriales | Yersiniaceae | <i>Yersinia pestis</i> biovar Orientalis str. BA200902009          |



|                        |          |                |                     |                   |                    |                                                                                            |
|------------------------|----------|----------------|---------------------|-------------------|--------------------|--------------------------------------------------------------------------------------------|
| Ype-113-1              | Bacteria | Proteobacteria | Gammaproteobacteria | Enterobacteriales | Yersiniaceae       | <i>Yersinia pestis</i> str. Pestoides B                                                    |
| Ype-114-1 to Ype-114-2 | Bacteria | Proteobacteria | Gammaproteobacteria | Enterobacteriales | Yersiniaceae       | <i>Yersinia pestis</i> subsp. <i>microtus</i> bv. Ulegeica                                 |
| Ype-115-1              | Bacteria | Proteobacteria | Gammaproteobacteria | Enterobacteriales | Yersiniaceae       | <i>Yersinia pestis</i> subsp. <i>pestis</i> bv. Orientalis                                 |
| Ype-98-1               | Bacteria | Proteobacteria | Gammaproteobacteria | Enterobacteriales | Yersiniaceae       | <i>Yersinia pestis</i> YN1065                                                              |
| Ype-99-1               | Bacteria | Proteobacteria | Gammaproteobacteria | Enterobacteriales | Yersiniaceae       | <i>Yersinia pestis</i> YN1683                                                              |
| Ype-100-1              | Bacteria | Proteobacteria | Gammaproteobacteria | Enterobacteriales | Yersiniaceae       | <i>Yersinia pestis</i> YN2179                                                              |
| Ype-101-1              | Bacteria | Proteobacteria | Gammaproteobacteria | Enterobacteriales | Yersiniaceae       | <i>Yersinia pestis</i> YN2588                                                              |
| Ype-102-1              | Bacteria | Proteobacteria | Gammaproteobacteria | Enterobacteriales | Yersiniaceae       | <i>Yersinia pestis</i> YN472                                                               |
| Ype-103-1              | Bacteria | Proteobacteria | Gammaproteobacteria | Enterobacteriales | Yersiniaceae       | <i>Yersinia pestis</i> YN663                                                               |
| Yps-1-1 to Yps-1-4     | Bacteria | Proteobacteria | Gammaproteobacteria | Enterobacteriales | Yersiniaceae       | <i>Yersinia pseudotuberculosis</i>                                                         |
| Yps-2-1                | Bacteria | Proteobacteria | Gammaproteobacteria | Enterobacteriales | Yersiniaceae       | <i>Yersinia pseudotuberculosis</i> B-6796                                                  |
| Yps-3-1                | Bacteria | Proteobacteria | Gammaproteobacteria | Enterobacteriales | Yersiniaceae       | <i>Yersinia pseudotuberculosis</i> B-6862                                                  |
| Yps-4-1                | Bacteria | Proteobacteria | Gammaproteobacteria | Enterobacteriales | Yersiniaceae       | <i>Yersinia pseudotuberculosis</i> B-6863                                                  |
| Yps-5-1                | Bacteria | Proteobacteria | Gammaproteobacteria | Enterobacteriales | Yersiniaceae       | <i>Yersinia pseudotuberculosis</i> B-6864                                                  |
| Yps-6-1                | Bacteria | Proteobacteria | Gammaproteobacteria | Enterobacteriales | Yersiniaceae       | <i>Yersinia pseudotuberculosis</i> B-6865                                                  |
| Yps-7-1                | Bacteria | Proteobacteria | Gammaproteobacteria | Enterobacteriales | Yersiniaceae       | <i>Yersinia pseudotuberculosis</i> B-6866                                                  |
| Yps-8-1                | Bacteria | Proteobacteria | Gammaproteobacteria | Enterobacteriales | Yersiniaceae       | <i>Yersinia pseudotuberculosis</i> B-7194                                                  |
| Yps-9-1                | Bacteria | Proteobacteria | Gammaproteobacteria | Enterobacteriales | Yersiniaceae       | <i>Yersinia pseudotuberculosis</i> B-7195                                                  |
| Yps-10-1 to Yps-10-2   | Bacteria | Proteobacteria | Gammaproteobacteria | Enterobacteriales | Yersiniaceae       | <i>Yersinia pseudotuberculosis</i> IP 32953                                                |
| Yps-11-1 to Yps-11-2   | Bacteria | Proteobacteria | Gammaproteobacteria | Enterobacteriales | Yersiniaceae       | <i>Yersinia pseudotuberculosis</i> PB1/+                                                   |
| Yps-13-1               | Bacteria | Proteobacteria | Gammaproteobacteria | Enterobacteriales | Yersiniaceae       | <i>Yersinia pseudotuberculosis</i> str. PA3606                                             |
| Yps-12-1 to Yps-12-2   | Bacteria | Proteobacteria | Gammaproteobacteria | Enterobacteriales | Yersiniaceae       | <i>Yersinia pseudotuberculosis</i> YPIII                                                   |
| Yro-1-1                | Bacteria | Proteobacteria | Gammaproteobacteria | Enterobacteriales | Yersiniaceae       | <i>Yersinia rohdei</i>                                                                     |
| Yru-1-1 to Yru-1-3     | Bacteria | Proteobacteria | Gammaproteobacteria | Enterobacteriales | Yersiniaceae       | <i>Yersinia ruckeri</i>                                                                    |
| Yru-2-1 to Yru-2-2     | Bacteria | Proteobacteria | Gammaproteobacteria | Enterobacteriales | Yersiniaceae       | <i>Yersinia ruckeri</i> ATCC 29473                                                         |
| Ysi-1-1                | Bacteria | Proteobacteria | Gammaproteobacteria | Enterobacteriales | Yersiniaceae       | <i>Yersinia similis</i>                                                                    |
| Ywa-1-1 to Ywa-1-2     | Bacteria | Proteobacteria | Gammaproteobacteria | Enterobacteriales | Yersiniaceae       | <i>Yersinia wautersii</i>                                                                  |
| CRe-1-1                | Bacteria | Proteobacteria | Gammaproteobacteria | Enterobacteriales | Enterobacteriaceae | aphid secondary symbionts <i>Candidatus</i> Regiella insecticola LSR1                      |
| Bsp-1-1                | Bacteria | Proteobacteria | Gammaproteobacteria | Enterobacteriales | Enterobacteriaceae | <i>Brenneria</i> sp. EniD312                                                               |
| Cda-1-1                | Bacteria | Proteobacteria | Gammaproteobacteria | Enterobacteriales | Enterobacteriaceae | <i>Cedecea davisae</i> DSM 4568                                                            |
| Cfr-1-1 to Cfr-1-4     | Bacteria | Proteobacteria | Gammaproteobacteria | Enterobacteriales | Enterobacteriaceae | Citrobacter Citrobacter freundii complex <i>Citrobacter freundii</i>                       |
| Cfr-9-1                | Bacteria | Proteobacteria | Gammaproteobacteria | Enterobacteriales | Enterobacteriaceae | Citrobacter Citrobacter freundii complex <i>Citrobacter freundii</i>                       |
|                        |          |                |                     |                   |                    | 4.7.47CFAA                                                                                 |
| Cfr-2-1 to Cfr-2-2     | Bacteria | Proteobacteria | Gammaproteobacteria | Enterobacteriales | Enterobacteriaceae | Citrobacter Citrobacter freundii complex <i>Citrobacter freundii</i> ATCC 8090 = MTCC 1658 |
| Cfr-10-1               | Bacteria | Proteobacteria | Gammaproteobacteria | Enterobacteriales | Enterobacteriaceae | Citrobacter Citrobacter freundii complex <i>Citrobacter freundii</i> GTC 09479             |
| Cfr-11-1               | Bacteria | Proteobacteria | Gammaproteobacteria | Enterobacteriales | Enterobacteriaceae | Citrobacter Citrobacter freundii complex <i>Citrobacter freundii</i> GTC 09629             |
| Cko-1-1 to Cko-1-2     | Bacteria | Proteobacteria | Gammaproteobacteria | Enterobacteriales | Enterobacteriaceae | <i>Citrobacter koseri</i>                                                                  |
| Cko-2-1                | Bacteria | Proteobacteria | Gammaproteobacteria | Enterobacteriales | Enterobacteriaceae | <i>Citrobacter koseri</i> ATCC BAA-895                                                     |
| Cro-3-1                | Bacteria | Proteobacteria | Gammaproteobacteria | Enterobacteriales | Enterobacteriaceae | <i>Citrobacter rodentium</i> ICC168                                                        |
| Csp-15-1               | Bacteria | Proteobacteria | Gammaproteobacteria | Enterobacteriales | Enterobacteriaceae | <i>Citrobacter</i> sp. 30_2                                                                |
| Csp-16-1               | Bacteria | Proteobacteria | Gammaproteobacteria | Enterobacteriales | Enterobacteriaceae | <i>Citrobacter</i> sp. A1                                                                  |
| Csp-17-1               | Bacteria | Proteobacteria | Gammaproteobacteria | Enterobacteriales | Enterobacteriaceae | <i>Citrobacter</i> sp. KTE151                                                              |
| Csp-18-1               | Bacteria | Proteobacteria | Gammaproteobacteria | Enterobacteriales | Enterobacteriaceae | <i>Citrobacter</i> sp. KTE30                                                               |
| Csp-19-1               | Bacteria | Proteobacteria | Gammaproteobacteria | Enterobacteriales | Enterobacteriaceae | <i>Citrobacter</i> sp. KTE32                                                               |
| Csp-20-1               | Bacteria | Proteobacteria | Gammaproteobacteria | Enterobacteriales | Enterobacteriaceae | <i>Citrobacter</i> sp. L17                                                                 |
| Cyo-1-1                | Bacteria | Proteobacteria | Gammaproteobacteria | Enterobacteriales | Enterobacteriaceae | <i>Citrobacter youngae</i> ATCC 29220                                                      |
| Cco-1-1                | Bacteria | Proteobacteria | Gammaproteobacteria | Enterobacteriales | Enterobacteriaceae | <i>Cronobacter condimenti</i> 1330                                                         |
| Cdu-4-1                | Bacteria | Proteobacteria | Gammaproteobacteria | Enterobacteriales | Enterobacteriaceae | <i>Cronobacter dublinensis</i> 1210                                                        |
| Cdu-5-1                | Bacteria | Proteobacteria | Gammaproteobacteria | Enterobacteriales | Enterobacteriaceae | <i>Cronobacter dublinensis</i> 582                                                         |
| Cma-4-1                | Bacteria | Proteobacteria | Gammaproteobacteria | Enterobacteriales | Enterobacteriaceae | <i>Cronobacter malonaticus</i> 507                                                         |
| Cma-5-1                | Bacteria | Proteobacteria | Gammaproteobacteria | Enterobacteriales | Enterobacteriaceae | <i>Cronobacter malonaticus</i> 681                                                         |
| Csa-9-1                | Bacteria | Proteobacteria | Gammaproteobacteria | Enterobacteriales | Enterobacteriaceae | <i>Cronobacter sakazakii</i> 680                                                           |
| Csa-10-1               | Bacteria | Proteobacteria | Gammaproteobacteria | Enterobacteriales | Enterobacteriaceae | <i>Cronobacter sakazakii</i> 696                                                           |
| Csa-11-1               | Bacteria | Proteobacteria | Gammaproteobacteria | Enterobacteriales | Enterobacteriaceae | <i>Cronobacter sakazakii</i> 701                                                           |
| Csa-12-1               | Bacteria | Proteobacteria | Gammaproteobacteria | Enterobacteriales | Enterobacteriaceae | <i>Cronobacter sakazakii</i> ATCC BAA-894                                                  |
| Csa-13-1               | Bacteria | Proteobacteria | Gammaproteobacteria | Enterobacteriales | Enterobacteriaceae | <i>Cronobacter sakazakii</i> CMCC 45402                                                    |
| Csa-14-1               | Bacteria | Proteobacteria | Gammaproteobacteria | Enterobacteriales | Enterobacteriaceae | <i>Cronobacter sakazakii</i> E899                                                          |
| Csa-15-1               | Bacteria | Proteobacteria | Gammaproteobacteria | Enterobacteriales | Enterobacteriaceae | <i>Cronobacter sakazakii</i> ES15                                                          |
| Csa-16-1               | Bacteria | Proteobacteria | Gammaproteobacteria | Enterobacteriales | Enterobacteriaceae | <i>Cronobacter sakazakii</i> SP291                                                         |
| Ctu-3-1                | Bacteria | Proteobacteria | Gammaproteobacteria | Enterobacteriales | Enterobacteriaceae | <i>Cronobacter turicensis</i> 564                                                          |

|                      |          |                |                     |                   |                    |                                                                                                                                                                                            |
|----------------------|----------|----------------|---------------------|-------------------|--------------------|--------------------------------------------------------------------------------------------------------------------------------------------------------------------------------------------|
| Ctu-4-1              | Bacteria | Proteobacteria | Gammaproteobacteria | Enterobacteriales | Enterobacteriaceae | <i>Cronobacter turicensis</i> z3032                                                                                                                                                        |
| Cun-1-1 to Cun-1-2   | Bacteria | Proteobacteria | Gammaproteobacteria | Enterobacteriales | Enterobacteriaceae | <i>Cronobacter universalis</i> NCTC 9529                                                                                                                                                   |
| Dda-4-1              | Bacteria | Proteobacteria | Gammaproteobacteria | Enterobacteriales | Enterobacteriaceae | <i>Dickeya dadantii</i> 3937                                                                                                                                                               |
| Dda-5-1              | Bacteria | Proteobacteria | Gammaproteobacteria | Enterobacteriales | Enterobacteriaceae | <i>Dickeya dadantii</i> Ech586                                                                                                                                                             |
| Ddi-3-1              | Bacteria | Proteobacteria | Gammaproteobacteria | Enterobacteriales | Enterobacteriaceae | <i>Dickeya dianthicola</i> GBBC 2039                                                                                                                                                       |
| Ddi-4-1              | Bacteria | Proteobacteria | Gammaproteobacteria | Enterobacteriales | Enterobacteriaceae | <i>Dickeya dianthicola</i> NCPPB 3534                                                                                                                                                      |
| Ddi-5-1              | Bacteria | Proteobacteria | Gammaproteobacteria | Enterobacteriales | Enterobacteriaceae | <i>Dickeya dianthicola</i> NCPPB 453                                                                                                                                                       |
| Dpa-1-1              | Bacteria | Proteobacteria | Gammaproteobacteria | Enterobacteriales | Enterobacteriaceae | <i>Dickeya paradisiaca</i> NCPPB 2511                                                                                                                                                      |
| Dso-2-1              | Bacteria | Proteobacteria | Gammaproteobacteria | Enterobacteriales | Enterobacteriaceae | <i>Dickeya solani</i> GBBC 2040                                                                                                                                                            |
| Dso-3-1              | Bacteria | Proteobacteria | Gammaproteobacteria | Enterobacteriales | Enterobacteriaceae | <i>Dickeya solani</i> IPO 2222                                                                                                                                                             |
| Dso-4-1              | Bacteria | Proteobacteria | Gammaproteobacteria | Enterobacteriales | Enterobacteriaceae | <i>Dickeya solani</i> MK10                                                                                                                                                                 |
| Dso-5-1              | Bacteria | Proteobacteria | Gammaproteobacteria | Enterobacteriales | Enterobacteriaceae | <i>Dickeya solani</i> MK16                                                                                                                                                                 |
| Dso-6-1              | Bacteria | Proteobacteria | Gammaproteobacteria | Enterobacteriales | Enterobacteriaceae | <i>Dickeya solani</i> RNS 08.23.3.1.A                                                                                                                                                      |
| Dsp-7-1              | Bacteria | Proteobacteria | Gammaproteobacteria | Enterobacteriales | Enterobacteriaceae | <i>Dickeya sp.</i> CSL RW240                                                                                                                                                               |
| Dsp-8-1              | Bacteria | Proteobacteria | Gammaproteobacteria | Enterobacteriales | Enterobacteriaceae | <i>Dickeya sp.</i> D s0432-1                                                                                                                                                               |
| Dsp-9-1              | Bacteria | Proteobacteria | Gammaproteobacteria | Enterobacteriales | Enterobacteriaceae | <i>Dickeya sp.</i> NCPPB 569                                                                                                                                                               |
| Dze-7-1              | Bacteria | Proteobacteria | Gammaproteobacteria | Enterobacteriales | Enterobacteriaceae | <i>Dickeya zeae</i> MS1                                                                                                                                                                    |
| Dze-8-1              | Bacteria | Proteobacteria | Gammaproteobacteria | Enterobacteriales | Enterobacteriaceae | <i>Dickeya zeae</i> NCPPB 3532                                                                                                                                                             |
| Dze-9-1              | Bacteria | Proteobacteria | Gammaproteobacteria | Enterobacteriales | Enterobacteriaceae | <i>Dickeya zeae</i> ZJU1202                                                                                                                                                                |
| Eic-2-1              | Bacteria | Proteobacteria | Gammaproteobacteria | Enterobacteriales | Enterobacteriaceae | <i>Edwardsiella ictaluri</i> 93-146                                                                                                                                                        |
| Eta-4-1              | Bacteria | Proteobacteria | Gammaproteobacteria | Enterobacteriales | Enterobacteriaceae | <i>Edwardsiella tarda</i> ATCC 23685                                                                                                                                                       |
| Eta-5-1              | Bacteria | Proteobacteria | Gammaproteobacteria | Enterobacteriales | Enterobacteriaceae | <i>Edwardsiella tarda</i> C07-087                                                                                                                                                          |
| Eta-6-1              | Bacteria | Proteobacteria | Gammaproteobacteria | Enterobacteriales | Enterobacteriaceae | <i>Edwardsiella tarda</i> EIB202                                                                                                                                                           |
| Eta-7-1              | Bacteria | Proteobacteria | Gammaproteobacteria | Enterobacteriales | Enterobacteriaceae | <i>Edwardsiella tarda</i> FL6-60                                                                                                                                                           |
| Eta-8-1              | Bacteria | Proteobacteria | Gammaproteobacteria | Enterobacteriales | Enterobacteriaceae | <i>Edwardsiella tarda</i> NBRC 105688                                                                                                                                                      |
| Eae-1-1              | Bacteria | Proteobacteria | Gammaproteobacteria | Enterobacteriales | Enterobacteriaceae | <i>Enterobacter aerogenes</i> EA1509E                                                                                                                                                      |
| Eae-2-1              | Bacteria | Proteobacteria | Gammaproteobacteria | Enterobacteriales | Enterobacteriaceae | <i>Enterobacter aerogenes</i> FGI35                                                                                                                                                        |
| Eae-3-1              | Bacteria | Proteobacteria | Gammaproteobacteria | Enterobacteriales | Enterobacteriaceae | <i>Enterobacter aerogenes</i> KCTC 2190                                                                                                                                                    |
| Eca-3-1              | Bacteria | Proteobacteria | Gammaproteobacteria | Enterobacteriales | Enterobacteriaceae | <i>Enterobacter cancerogenus</i> ATCC 35316                                                                                                                                                |
| Eas-1-1 to Eas-1-2   | Bacteria | Proteobacteria | Gammaproteobacteria | Enterobacteriales | Enterobacteriaceae | Enterobacter Enterobacter cloacae complex <i>Enterobacter asburiae</i>                                                                                                                     |
| Eas-4-1              | Bacteria | Proteobacteria | Gammaproteobacteria | Enterobacteriales | Enterobacteriaceae | Enterobacter Enterobacter cloacae complex <i>Enterobacter asburiae</i> LF7a                                                                                                                |
| Ecl-1-1 to Ecl-1-12  | Bacteria | Proteobacteria | Gammaproteobacteria | Enterobacteriales | Enterobacteriaceae | Enterobacter Enterobacter cloacae complex <i>Enterobacter cloacae</i>                                                                                                                      |
| Ecl-55-1             | Bacteria | Proteobacteria | Gammaproteobacteria | Enterobacteriales | Enterobacteriaceae | Enterobacter Enterobacter cloacae complex <i>Enterobacter cloacae</i> BWH                                                                                                                  |
| Ecl-56-1             |          |                |                     |                   |                    | 29<br>Bacteria Proteobacteria Gammaproteobacteria Enterobacteriales Enterobacteriaceae Enterobacter Enterobacter cloacae complex <i>Enterobacter cloacae</i> BWH                           |
| Ecl-57-1             |          |                |                     |                   |                    | 31<br>Bacteria Proteobacteria Gammaproteobacteria Enterobacteriales Enterobacteriaceae Enterobacter Enterobacter cloacae complex <i>Enterobacter cloacae</i>                               |
| Ecl-58-1             |          |                |                     |                   |                    | EC_38VIM1<br>Bacteria Proteobacteria Gammaproteobacteria Enterobacteriales Enterobacteriaceae Enterobacter Enterobacter cloacae complex <i>Enterobacter cloacae</i>                        |
| Ecl-59-1             |          |                |                     |                   |                    | EcWSU1<br>Bacteria Proteobacteria Gammaproteobacteria Enterobacteriales Enterobacteriaceae Enterobacter Enterobacter cloacae complex <i>Enterobacter cloacae</i> S611                      |
| Ecl-60-1             |          |                |                     |                   |                    | Bacteria Proteobacteria Gammaproteobacteria Enterobacteriales Enterobacteriaceae Enterobacter Enterobacter cloacae complex <i>Enterobacter cloacae</i> SCF1                                |
| Ecl-66-1             |          |                |                     |                   |                    | Bacteria Proteobacteria Gammaproteobacteria Enterobacteriales Enterobacteriaceae Enterobacter Enterobacter cloacae complex <i>Enterobacter cloacae str.</i>                                |
| Ecl-52-1 to Ecl-52-5 |          |                |                     |                   |                    | Hanford<br>Bacteria Proteobacteria Gammaproteobacteria Enterobacteriales Enterobacteriaceae Enterobacter Enterobacter cloacae complex <i>Enterobacter cloacae subsp.</i>                   |
| Ecl-67-1             |          |                |                     |                   |                    | <i>cloacae</i><br>Bacteria Proteobacteria Gammaproteobacteria Enterobacteriales Enterobacteriaceae Enterobacter Enterobacter cloacae complex <i>Enterobacter cloacae subsp.</i>            |
| Ecl-68-1             |          |                |                     |                   |                    | <i>cloacae</i> 08XA1<br>Bacteria Proteobacteria Gammaproteobacteria Enterobacteriales Enterobacteriaceae Enterobacter Enterobacter cloacae complex <i>Enterobacter cloacae subsp.</i>      |
| Ecl-69-1             |          |                |                     |                   |                    | <i>cloacae</i> ATCC 13047<br>Bacteria Proteobacteria Gammaproteobacteria Enterobacteriales Enterobacteriaceae Enterobacter Enterobacter cloacae complex <i>Enterobacter cloacae subsp.</i> |
| Ecl-70-1             |          |                |                     |                   |                    | <i>cloacae</i> ENHKU01<br>Bacteria Proteobacteria Gammaproteobacteria Enterobacteriales Enterobacteriaceae Enterobacter Enterobacter cloacae complex <i>Enterobacter cloacae subsp.</i>    |
| Ecl-61-1             |          |                |                     |                   |                    | <i>dissolvens</i> SDM<br>Bacteria Proteobacteria Gammaproteobacteria Enterobacteriales Enterobacteriaceae Enterobacter Enterobacter cloacae complex <i>Enterobacter cloacae</i> UCI-       |
| Ecl-62-1             |          |                |                     |                   |                    | CRE 11<br>Bacteria Proteobacteria Gammaproteobacteria Enterobacteriales Enterobacteriaceae Enterobacter Enterobacter cloacae complex <i>Enterobacter cloacae</i> UCI-                      |
|                      |          |                |                     |                   |                    | CRE 12                                                                                                                                                                                     |

|                    |          |                |                     |                   |                    |              |                              |                                                   |
|--------------------|----------|----------------|---------------------|-------------------|--------------------|--------------|------------------------------|---------------------------------------------------|
| Ecl-63-1           | Bacteria | Proteobacteria | Gammaproteobacteria | Enterobacteriales | Enterobacteriaceae | Enterobacter | Enterobacter cloacae complex | <i>Enterobacter cloacae</i> UCI-CRE 3             |
| Ecl-64-1           | Bacteria | Proteobacteria | Gammaproteobacteria | Enterobacteriales | Enterobacteriaceae | Enterobacter | Enterobacter cloacae complex | <i>Enterobacter cloacae</i> UCI-CRE 5             |
| Ecl-65-1           | Bacteria | Proteobacteria | Gammaproteobacteria | Enterobacteriales | Enterobacteriaceae | Enterobacter | Enterobacter cloacae complex | <i>Enterobacter cloacae</i> UCI-CRE 9             |
| Eho-6-1            | Bacteria | Proteobacteria | Gammaproteobacteria | Enterobacteriales | Enterobacteriaceae | Enterobacter | Enterobacter cloacae complex | <i>Enterobacter hormaechei</i> ATCC 49162         |
| Eho-7-1            | Bacteria | Proteobacteria | Gammaproteobacteria | Enterobacteriales | Enterobacteriaceae | Enterobacter | Enterobacter cloacae complex | <i>Enterobacter hormaechei</i> YT2                |
| Eho-8-1            | Bacteria | Proteobacteria | Gammaproteobacteria | Enterobacteriales | Enterobacteriaceae | Enterobacter | Enterobacter cloacae complex | <i>Enterobacter hormaechei</i> YT3                |
| Esp-57-1           | Bacteria | Proteobacteria | Gammaproteobacteria | Enterobacteriales | Enterobacteriaceae | Enterobacter | Enterobacter cloacae complex | <i>Enterobacter sp.</i> MGH 14                    |
| Esp-58-1           | Bacteria | Proteobacteria | Gammaproteobacteria | Enterobacteriales | Enterobacteriaceae | Enterobacter | Enterobacter cloacae complex | <i>Enterobacter sp.</i> MGH 16                    |
| Esp-59-1           | Bacteria | Proteobacteria | Gammaproteobacteria | Enterobacteriales | Enterobacteriaceae | Enterobacter | Enterobacter cloacae complex | <i>Enterobacter sp.</i> MGH 22                    |
| Esp-60-1           | Bacteria | Proteobacteria | Gammaproteobacteria | Enterobacteriales | Enterobacteriaceae | Enterobacter | Enterobacter cloacae complex | <i>Enterobacter sp.</i> MGH 23                    |
| Esp-61-1           | Bacteria | Proteobacteria | Gammaproteobacteria | Enterobacteriales | Enterobacteriaceae | Enterobacter | Enterobacter cloacae complex | <i>Enterobacter sp.</i> MGH 24                    |
| Esp-62-1           | Bacteria | Proteobacteria | Gammaproteobacteria | Enterobacteriales | Enterobacteriaceae | Enterobacter | Enterobacter cloacae complex | <i>Enterobacter sp.</i> MGH 25                    |
| Esp-63-1           | Bacteria | Proteobacteria | Gammaproteobacteria | Enterobacteriales | Enterobacteriaceae | Enterobacter | Enterobacter cloacae complex | <i>Enterobacter sp.</i> MGH 26                    |
| Esp-64-1           | Bacteria | Proteobacteria | Gammaproteobacteria | Enterobacteriales | Enterobacteriaceae | Enterobacter | Enterobacter cloacae complex | <i>Enterobacter sp.</i> MGH 34                    |
| Esp-65-1           | Bacteria | Proteobacteria | Gammaproteobacteria | Enterobacteriales | Enterobacteriaceae | Enterobacter | Enterobacter cloacae complex | <i>Enterobacter sp.</i> MGH 38                    |
| Esp-66-1           | Bacteria | Proteobacteria | Gammaproteobacteria | Enterobacteriales | Enterobacteriaceae | Enterobacter | Enterobacter cloacae complex | <i>Enterobacter sp.</i> MGH 8                     |
| Emo-1-1            | Bacteria | Proteobacteria | Gammaproteobacteria | Enterobacteriales | Enterobacteriaceae |              |                              | <i>Enterobacter mori</i> LMG 25706                |
| Esp-67-1           | Bacteria | Proteobacteria | Gammaproteobacteria | Enterobacteriales | Enterobacteriaceae |              |                              | <i>Enterobacter sp.</i> 638                       |
| Esp-68-1           | Bacteria | Proteobacteria | Gammaproteobacteria | Enterobacteriales | Enterobacteriaceae |              |                              | <i>Enterobacter sp.</i> Ag1                       |
| Esp-69-1           | Bacteria | Proteobacteria | Gammaproteobacteria | Enterobacteriales | Enterobacteriaceae |              |                              | <i>Enterobacter sp.</i> E20                       |
| Esp-70-1           | Bacteria | Proteobacteria | Gammaproteobacteria | Enterobacteriales | Enterobacteriaceae |              |                              | <i>Enterobacter sp.</i> GN02454                   |
| Esp-71-1           | Bacteria | Proteobacteria | Gammaproteobacteria | Enterobacteriales | Enterobacteriaceae |              |                              | <i>Enterobacter sp.</i> GN02457                   |
| Esp-72-1           | Bacteria | Proteobacteria | Gammaproteobacteria | Enterobacteriales | Enterobacteriaceae |              |                              | <i>Enterobacter sp.</i> R4-368                    |
| Esp-73-1           | Bacteria | Proteobacteria | Gammaproteobacteria | Enterobacteriales | Enterobacteriaceae |              |                              | <i>Enterobacter sp.</i> SST3                      |
| Eba-3-1            | Bacteria | Proteobacteria | Gammaproteobacteria | Enterobacteriales | Enterobacteriaceae |              |                              | <i>Enterobacteriaceae bacterium</i> 9_2_54FAA     |
| Eba-4-1            | Bacteria | Proteobacteria | Gammaproteobacteria | Enterobacteriales | Enterobacteriaceae |              |                              | <i>Enterobacteriaceae bacterium</i> LSJC7         |
| Eba-5-1            | Bacteria | Proteobacteria | Gammaproteobacteria | Enterobacteriales | Enterobacteriaceae |              |                              | <i>Enterobacteriaceae bacterium strain</i> FGI 57 |
| Eam-3-1            | Bacteria | Proteobacteria | Gammaproteobacteria | Enterobacteriales | Enterobacteriaceae |              |                              | <i>Erwinia amylovora</i> 01SFR-BO                 |
| Eam-4-1            | Bacteria | Proteobacteria | Gammaproteobacteria | Enterobacteriales | Enterobacteriaceae |              |                              | <i>Erwinia amylovora</i> ACW56400                 |
| Eam-5-1            | Bacteria | Proteobacteria | Gammaproteobacteria | Enterobacteriales | Enterobacteriaceae |              |                              | <i>Erwinia amylovora</i> ATCC 49946               |
| Eam-6-1            | Bacteria | Proteobacteria | Gammaproteobacteria | Enterobacteriales | Enterobacteriaceae |              |                              | <i>Erwinia amylovora</i> CFBP 1232                |
| Eam-7-1            | Bacteria | Proteobacteria | Gammaproteobacteria | Enterobacteriales | Enterobacteriaceae |              |                              | <i>Erwinia amylovora</i> CFBP 2585                |
| Eam-8-1            | Bacteria | Proteobacteria | Gammaproteobacteria | Enterobacteriales | Enterobacteriaceae |              |                              | <i>Erwinia amylovora</i> CFBP1430                 |
| Eam-9-1            | Bacteria | Proteobacteria | Gammaproteobacteria | Enterobacteriales | Enterobacteriaceae |              |                              | <i>Erwinia amylovora</i> Ea266                    |
| Eam-10-1           | Bacteria | Proteobacteria | Gammaproteobacteria | Enterobacteriales | Enterobacteriaceae |              |                              | <i>Erwinia amylovora</i> Ea356                    |
| Eam-11-1           | Bacteria | Proteobacteria | Gammaproteobacteria | Enterobacteriales | Enterobacteriaceae |              |                              | <i>Erwinia amylovora</i> Ea644                    |
| Eam-12-1           | Bacteria | Proteobacteria | Gammaproteobacteria | Enterobacteriales | Enterobacteriaceae |              |                              | <i>Erwinia amylovora</i> LA635                    |
| Eam-13-1           | Bacteria | Proteobacteria | Gammaproteobacteria | Enterobacteriales | Enterobacteriaceae |              |                              | <i>Erwinia amylovora</i> LA636                    |
| Eam-14-1           | Bacteria | Proteobacteria | Gammaproteobacteria | Enterobacteriales | Enterobacteriaceae |              |                              | <i>Erwinia amylovora</i> LA637                    |
| Eam-15-1           | Bacteria | Proteobacteria | Gammaproteobacteria | Enterobacteriales | Enterobacteriaceae |              |                              | <i>Erwinia amylovora</i> UPN527                   |
| Ebi-2-1            | Bacteria | Proteobacteria | Gammaproteobacteria | Enterobacteriales | Enterobacteriaceae |              |                              | <i>Erwinia billingiae</i> Eb661                   |
| Epi-2-1            | Bacteria | Proteobacteria | Gammaproteobacteria | Enterobacteriales | Enterobacteriaceae |              |                              | <i>Erwinia piriflorinivgrans</i> CFBP 5888        |
| Epy-1-1            | Bacteria | Proteobacteria | Gammaproteobacteria | Enterobacteriales | Enterobacteriaceae |              |                              | <i>Erwinia pyrifoliae</i> DSM 12163               |
| Epy-2-1            | Bacteria | Proteobacteria | Gammaproteobacteria | Enterobacteriales | Enterobacteriaceae |              |                              | <i>Erwinia pyrifoliae</i> Ep1/96                  |
| Esp-74-1           | Bacteria | Proteobacteria | Gammaproteobacteria | Enterobacteriales | Enterobacteriaceae |              |                              | <i>Erwinia sp.</i> Ejp617                         |
| Eta-9-1            | Bacteria | Proteobacteria | Gammaproteobacteria | Enterobacteriales | Enterobacteriaceae |              |                              | <i>Erwinia tasmaniensis</i> Et1/99                |
| Eto-1-1            | Bacteria | Proteobacteria | Gammaproteobacteria | Enterobacteriales | Enterobacteriaceae |              |                              | <i>Erwinia toletana</i> DAPP-PG 735               |
| Etr-2-1            | Bacteria | Proteobacteria | Gammaproteobacteria | Enterobacteriales | Enterobacteriaceae |              |                              | <i>Erwinia tracheiphila</i> PSU-1                 |
| Eal-3-1            | Bacteria | Proteobacteria | Gammaproteobacteria | Enterobacteriales | Enterobacteriaceae |              |                              | <i>Escherichia albertii</i> TW07627               |
| Eal-4-1            | Bacteria | Proteobacteria | Gammaproteobacteria | Enterobacteriales | Enterobacteriaceae |              |                              | <i>Escherichia albertii</i> TW08933               |
| Eal-5-1            | Bacteria | Proteobacteria | Gammaproteobacteria | Enterobacteriales | Enterobacteriaceae |              |                              | <i>Escherichia albertii</i> TW15818               |
| Ebl-1-1            | Bacteria | Proteobacteria | Gammaproteobacteria | Enterobacteriales | Enterobacteriaceae |              |                              | <i>Escherichia blattae</i> DSM 4481               |
| Eco-1-1 to Eco-1-4 | Bacteria | Proteobacteria | Gammaproteobacteria | Enterobacteriales | Enterobacteriaceae |              |                              | <i>Escherichia coli</i>                           |
| Eco-753-1          | Bacteria | Proteobacteria | Gammaproteobacteria | Enterobacteriales | Enterobacteriaceae |              |                              | <i>Escherichia coli</i> 0.1288                    |
| Eco-754-1          | Bacteria | Proteobacteria | Gammaproteobacteria | Enterobacteriales | Enterobacteriaceae |              |                              | <i>Escherichia coli</i> 0.1304                    |
| Eco-755-1          | Bacteria | Proteobacteria | Gammaproteobacteria | Enterobacteriales | Enterobacteriaceae |              |                              | <i>Escherichia coli</i> 042                       |































































|                     |          |                |                     |                   |                    |                                                                                  |
|---------------------|----------|----------------|---------------------|-------------------|--------------------|----------------------------------------------------------------------------------|
| Pan-10-1            | Bacteria | Proteobacteria | Gammaproteobacteria | Enterobacteriales | Enterobacteriaceae | <i>Pantoea ananatis</i> PA13                                                     |
| Pdi-2-1             | Bacteria | Proteobacteria | Gammaproteobacteria | Enterobacteriales | Enterobacteriaceae | <i>Pantoea dispersa</i> EGD-AAK13                                                |
| Psp-48-1            | Bacteria | Proteobacteria | Gammaproteobacteria | Enterobacteriales | Enterobacteriaceae | <i>Pantoea sp.</i> A4                                                            |
| Psp-54-1            | Bacteria | Proteobacteria | Gammaproteobacteria | Enterobacteriales | Enterobacteriaceae | <i>Pantoea sp.</i> aB                                                            |
| Psp-49-1            | Bacteria | Proteobacteria | Gammaproteobacteria | Enterobacteriales | Enterobacteriaceae | <i>Pantoea sp.</i> At-9b                                                         |
| Psp-50-1            | Bacteria | Proteobacteria | Gammaproteobacteria | Enterobacteriales | Enterobacteriaceae | <i>Pantoea sp.</i> GM01                                                          |
| Psp-52-1            | Bacteria | Proteobacteria | Gammaproteobacteria | Enterobacteriales | Enterobacteriaceae | <i>Pantoea sp.</i> Sc1                                                           |
| Psp-51-1            | Bacteria | Proteobacteria | Gammaproteobacteria | Enterobacteriales | Enterobacteriaceae | <i>Pantoea sp.</i> SL1.M5                                                        |
| Psp-53-1            | Bacteria | Proteobacteria | Gammaproteobacteria | Enterobacteriales | Enterobacteriaceae | <i>Pantoea sp.</i> YR343                                                         |
| Pst-3-1             | Bacteria | Proteobacteria | Gammaproteobacteria | Enterobacteriales | Enterobacteriaceae | <i>Pantoea stewartii subsp. indologenes</i>                                      |
| Pst-4-1             | Bacteria | Proteobacteria | Gammaproteobacteria | Enterobacteriales | Enterobacteriaceae | <i>Pantoea stewartii subsp. stewartii</i> DC283                                  |
| Pva-2-1             | Bacteria | Proteobacteria | Gammaproteobacteria | Enterobacteriales | Enterobacteriaceae | <i>Pantoea vagans</i> C9-1                                                       |
| Pat-4-1             | Bacteria | Proteobacteria | Gammaproteobacteria | Enterobacteriales | Enterobacteriaceae | <i>Pectobacterium atrosepticum</i> SCRI1043                                      |
| Pca-9-1             | Bacteria | Proteobacteria | Gammaproteobacteria | Enterobacteriales | Enterobacteriaceae | <i>Pectobacterium carotovorum subsp. brasiliensis</i> PBR1692                    |
| Pca-5-1 to Pca-5-11 | Bacteria | Proteobacteria | Gammaproteobacteria | Enterobacteriales | Enterobacteriaceae | <i>Pectobacterium carotovorum subsp. carotovorum</i>                             |
| Pca-10-1            | Bacteria | Proteobacteria | Gammaproteobacteria | Enterobacteriales | Enterobacteriaceae | <i>Pectobacterium carotovorum subsp. carotovorum</i> PC1                         |
| Pca-11-1            | Bacteria | Proteobacteria | Gammaproteobacteria | Enterobacteriales | Enterobacteriaceae | <i>Pectobacterium carotovorum subsp. carotovorum</i> PCC21                       |
| Pca-12-1            | Bacteria | Proteobacteria | Gammaproteobacteria | Enterobacteriales | Enterobacteriaceae | <i>Pectobacterium carotovorum subsp. carotovorum</i> WPP14                       |
| Psp-55-1            | Bacteria | Proteobacteria | Gammaproteobacteria | Enterobacteriales | Enterobacteriaceae | <i>Pectobacterium sp.</i> SCC3193                                                |
| Pwa-2-1             | Bacteria | Proteobacteria | Gammaproteobacteria | Enterobacteriales | Enterobacteriaceae | <i>Pectobacterium wasabiae</i> CFBP 3304                                         |
| Pwa-3-1             | Bacteria | Proteobacteria | Gammaproteobacteria | Enterobacteriales | Enterobacteriaceae | <i>Pectobacterium wasabiae</i> WPP163                                            |
| Pas-2-1             | Bacteria | Proteobacteria | Gammaproteobacteria | Enterobacteriales | Enterobacteriaceae | <i>Photorhabdus asymbiotica</i>                                                  |
| Plu-10-1            | Bacteria | Proteobacteria | Gammaproteobacteria | Enterobacteriales | Enterobacteriaceae | <i>Photorhabdus luminescens subsp. laumondii</i> TTO1                            |
| Pte-5-1             | Bacteria | Proteobacteria | Gammaproteobacteria | Enterobacteriales | Enterobacteriaceae | <i>Photorhabdus temperata</i> J3                                                 |
| Pte-6-1             | Bacteria | Proteobacteria | Gammaproteobacteria | Enterobacteriales | Enterobacteriaceae | <i>Photorhabdus temperata subsp. temperata</i> M1021                             |
| Pst-5-1             | Bacteria | Proteobacteria | Gammaproteobacteria | Enterobacteriales | Enterobacteriaceae | <i>Plautia stali symbiont</i>                                                    |
| Psh-2-1             | Bacteria | Proteobacteria | Gammaproteobacteria | Enterobacteriales | Enterobacteriaceae | <i>Plesiomonas shigelloides</i> 302-73                                           |
| Pha-5-1             | Bacteria | Proteobacteria | Gammaproteobacteria | Enterobacteriales | Enterobacteriaceae | <i>Proteus hauseri</i> ZMd44                                                     |
| Pmi-1-1 to Pmi-1-6  | Bacteria | Proteobacteria | Gammaproteobacteria | Enterobacteriales | Enterobacteriaceae | <i>Proteus mirabilis</i>                                                         |
| Pmi-2-1             | Bacteria | Proteobacteria | Gammaproteobacteria | Enterobacteriales | Enterobacteriaceae | <i>Proteus mirabilis</i> ATCC 29906                                              |
| Pmi-3-1             | Bacteria | Proteobacteria | Gammaproteobacteria | Enterobacteriales | Enterobacteriaceae | <i>Proteus mirabilis</i> BB2000                                                  |
| Pmi-4-1             | Bacteria | Proteobacteria | Gammaproteobacteria | Enterobacteriales | Enterobacteriaceae | <i>Proteus mirabilis</i> C05028                                                  |
| Pmi-5-1             | Bacteria | Proteobacteria | Gammaproteobacteria | Enterobacteriales | Enterobacteriaceae | <i>Proteus mirabilis</i> HI4320                                                  |
| Pmi-6-1             | Bacteria | Proteobacteria | Gammaproteobacteria | Enterobacteriales | Enterobacteriaceae | <i>Proteus mirabilis</i> PR03                                                    |
| Pmi-7-1             | Bacteria | Proteobacteria | Gammaproteobacteria | Enterobacteriales | Enterobacteriaceae | <i>Proteus mirabilis</i> WGLW4                                                   |
| Pmi-8-1             | Bacteria | Proteobacteria | Gammaproteobacteria | Enterobacteriales | Enterobacteriaceae | <i>Proteus mirabilis</i> WGLW6                                                   |
| Pal-9-1             | Bacteria | Proteobacteria | Gammaproteobacteria | Enterobacteriales | Enterobacteriaceae | <i>Providencia alcalifaciens</i> Dmel2                                           |
| Pal-8-1             | Bacteria | Proteobacteria | Gammaproteobacteria | Enterobacteriales | Enterobacteriaceae | <i>Providencia alcalifaciens</i> DSM 30120                                       |
| Pbu-1-1             | Bacteria | Proteobacteria | Gammaproteobacteria | Enterobacteriales | Enterobacteriaceae | <i>Providencia burhodogranariae</i> DSM 19968                                    |
| Pre-3-1             | Bacteria | Proteobacteria | Gammaproteobacteria | Enterobacteriales | Enterobacteriaceae | <i>Providencia rettgeri</i> Dmel1                                                |
| Pre-2-1             | Bacteria | Proteobacteria | Gammaproteobacteria | Enterobacteriales | Enterobacteriaceae | <i>Providencia rettgeri</i> DSM 1131                                             |
| Pru-5-1             | Bacteria | Proteobacteria | Gammaproteobacteria | Enterobacteriales | Enterobacteriaceae | <i>Providencia rustigianii</i> DSM 4541                                          |
| Psn-1-1             | Bacteria | Proteobacteria | Gammaproteobacteria | Enterobacteriales | Enterobacteriaceae | <i>Providencia sneebia</i> DSM 19967                                             |
| Pst-6-1             | Bacteria | Proteobacteria | Gammaproteobacteria | Enterobacteriales | Enterobacteriaceae | <i>Providencia stuartii</i> ATCC 25827                                           |
| Pst-7-1             | Bacteria | Proteobacteria | Gammaproteobacteria | Enterobacteriales | Enterobacteriaceae | <i>Providencia stuartii</i> MRSN 2154                                            |
| Raq-2-1 to Raq-2-2  | Bacteria | Proteobacteria | Gammaproteobacteria | Enterobacteriales | Enterobacteriaceae | <i>Rahnella aquatilis</i> CIP 78.65 = ATCC 33071                                 |
| Raq-3-1             | Bacteria | Proteobacteria | Gammaproteobacteria | Enterobacteriales | Enterobacteriaceae | <i>Rahnella aquatilis</i> HX2                                                    |
| Rsp-4-1             | Bacteria | Proteobacteria | Gammaproteobacteria | Enterobacteriales | Enterobacteriaceae | <i>Rahnella sp.</i> Y9602                                                        |
| Ror-4-1 to Ror-4-2  | Bacteria | Proteobacteria | Gammaproteobacteria | Enterobacteriales | Enterobacteriaceae | <i>Raoultella ornithinolytica</i> B6                                             |
| Rpl-1-1 to Rpl-1-3  | Bacteria | Proteobacteria | Gammaproteobacteria | Enterobacteriales | Enterobacteriaceae | <i>Raoultella planticola</i>                                                     |
| Sbo-3-1             | Bacteria | Proteobacteria | Gammaproteobacteria | Enterobacteriales | Enterobacteriaceae | <i>Salmonella bongori</i> N268-08                                                |
| Sbo-4-1             | Bacteria | Proteobacteria | Gammaproteobacteria | Enterobacteriales | Enterobacteriaceae | <i>Salmonella bongori</i> NCTC 12419                                             |
| Sen-2-1 to Sen-2-2  | Bacteria | Proteobacteria | Gammaproteobacteria | Enterobacteriales | Enterobacteriaceae | <i>Salmonella enterica</i>                                                       |
| Sen-311-1           | Bacteria | Proteobacteria | Gammaproteobacteria | Enterobacteriales | Enterobacteriaceae | <i>Salmonella enterica subsp. arizonae serovar</i> 62:z4,z23:-                   |
| Sen-312-1           | Bacteria | Proteobacteria | Gammaproteobacteria | Enterobacteriales | Enterobacteriaceae | <i>Salmonella enterica subsp. diarizonae serovar</i> 60:r:e,n,x,z15 str. 01-0170 |
| Sen-313-1           | Bacteria | Proteobacteria | Gammaproteobacteria | Enterobacteriales | Enterobacteriaceae | <i>Salmonella enterica subsp. enterica serovar</i> 4,[5],12:i:- str. 08-1700     |
| Sen-314-1           | Bacteria | Proteobacteria | Gammaproteobacteria | Enterobacteriales | Enterobacteriaceae | <i>Salmonella enterica subsp. enterica serovar</i> 4,[5],12:i:- str. 08-1736     |
| Sen-315-1           | Bacteria | Proteobacteria | Gammaproteobacteria | Enterobacteriales | Enterobacteriaceae | <i>Salmonella enterica subsp. enterica serovar</i> 4,[5],12:i:- str. 08-1739     |
| Sen-316-1           | Bacteria | Proteobacteria | Gammaproteobacteria | Enterobacteriales | Enterobacteriaceae | <i>Salmonella enterica subsp. enterica serovar</i> Agona str. 01.O.05            |
| Sen-317-1           | Bacteria | Proteobacteria | Gammaproteobacteria | Enterobacteriales | Enterobacteriaceae | <i>Salmonella enterica subsp. enterica serovar</i> Agona str. 02.O.05            |
| Sen-318-1           | Bacteria | Proteobacteria | Gammaproteobacteria | Enterobacteriales | Enterobacteriaceae | <i>Salmonella enterica subsp. enterica serovar</i> Agona str. 0292               |
| Sen-319-1           | Bacteria | Proteobacteria | Gammaproteobacteria | Enterobacteriales | Enterobacteriaceae | <i>Salmonella enterica subsp. enterica serovar</i> Agona str. 03.O.05            |
| Sen-320-1           | Bacteria | Proteobacteria | Gammaproteobacteria | Enterobacteriales | Enterobacteriaceae | <i>Salmonella enterica subsp. enterica serovar</i> Agona str. 0322               |
| Sen-321-1           | Bacteria | Proteobacteria | Gammaproteobacteria | Enterobacteriales | Enterobacteriaceae | <i>Salmonella enterica subsp. enterica serovar</i> Agona str. 04.O.05            |































|                        |                                                                                                                                                                                                                   |
|------------------------|-------------------------------------------------------------------------------------------------------------------------------------------------------------------------------------------------------------------|
| Sen-983-1              | Bacteria Proteobacteria Gammaproteobacteria Enterobacteriales Enterobacteriaceae <i>Salmonella enterica subsp. enterica serovar</i> Typhimurium str. STM5                                                         |
| Sen-984-1              | Bacteria Proteobacteria Gammaproteobacteria Enterobacteriales Enterobacteriaceae <i>Salmonella enterica subsp. enterica serovar</i> Typhimurium str. STM6                                                         |
| Sen-985-1              | Bacteria Proteobacteria Gammaproteobacteria Enterobacteriales Enterobacteriaceae <i>Salmonella enterica subsp. enterica serovar</i> Typhimurium str. STM7                                                         |
| Sen-986-1              | Bacteria Proteobacteria Gammaproteobacteria Enterobacteriales Enterobacteriaceae <i>Salmonella enterica subsp. enterica serovar</i> Typhimurium str. STM8                                                         |
| Sen-987-1              | Bacteria Proteobacteria Gammaproteobacteria Enterobacteriales Enterobacteriaceae <i>Salmonella enterica subsp. enterica serovar</i> Typhimurium str. STM9                                                         |
| Sen-988-1              | Bacteria Proteobacteria Gammaproteobacteria Enterobacteriales Enterobacteriaceae <i>Salmonella enterica subsp. enterica serovar</i> Typhimurium str. T000240                                                      |
| Sen-989-1              | Bacteria Proteobacteria Gammaproteobacteria Enterobacteriales Enterobacteriaceae <i>Salmonella enterica subsp. enterica serovar</i> Typhimurium str. TN061786                                                     |
| Sen-990-1              | Bacteria Proteobacteria Gammaproteobacteria Enterobacteriales Enterobacteriaceae <i>Salmonella enterica subsp. enterica serovar</i> Typhimurium str. U288                                                         |
| Sen-991-1              | Bacteria Proteobacteria Gammaproteobacteria Enterobacteriales Enterobacteriaceae <i>Salmonella enterica subsp. enterica serovar</i> Typhimurium str. UK-1                                                         |
| Sen-992-1              | Bacteria Proteobacteria Gammaproteobacteria Enterobacteriales Enterobacteriaceae <i>Salmonella enterica subsp. enterica serovar</i> Typhimurium str. USDA-ARS-USMARC-1899                                         |
| Sen-993-1              | Bacteria Proteobacteria Gammaproteobacteria Enterobacteriales Enterobacteriaceae <i>Salmonella enterica subsp. enterica serovar</i> Typhimurium var. 5- str. CFSAN001921                                          |
| Sen-994-1              | Bacteria Proteobacteria Gammaproteobacteria Enterobacteriales Enterobacteriaceae <i>Salmonella enterica subsp. enterica serovar</i> Typhimurium var. 5- str. CFSAN004345                                          |
| Sen-995-1              | Bacteria Proteobacteria Gammaproteobacteria Enterobacteriales Enterobacteriaceae <i>Salmonella enterica subsp. enterica serovar</i> Typhimurium var. Copenhagen str. 0084                                         |
| Sen-996-1              | Bacteria Proteobacteria Gammaproteobacteria Enterobacteriales Enterobacteriaceae <i>Salmonella enterica subsp. enterica serovar</i> Uganda str. R8-3404                                                           |
| Sen-997-1              | Bacteria Proteobacteria Gammaproteobacteria Enterobacteriales Enterobacteriaceae <i>Salmonella enterica subsp. enterica serovar</i> Urbana str. ATCC 9261                                                         |
| Sen-998-1              | Bacteria Proteobacteria Gammaproteobacteria Enterobacteriales Enterobacteriaceae <i>Salmonella enterica subsp. enterica serovar</i> Worthington str. ATCC 9607                                                    |
| Sen-999-1              | Bacteria Proteobacteria Gammaproteobacteria Enterobacteriales Enterobacteriaceae <i>Salmonella enterica subsp. enterica serovar</i> Agona <i>Salmonella enterica subsp. enterica serovar</i> Agona str. SL483     |
| Sen-1000-1             | Bacteria Proteobacteria Gammaproteobacteria Enterobacteriales Enterobacteriaceae <i>Salmonella enterica subsp. enterica serovar</i> Choleraesuis str. SCSA50                                                      |
| Sen-1001-1             | Bacteria Proteobacteria Gammaproteobacteria Enterobacteriales Enterobacteriaceae <i>Salmonella enterica subsp. enterica serovar</i> Dublin str. CT_02021853                                                       |
| Sen-1002-1             | Bacteria Proteobacteria Gammaproteobacteria Enterobacteriales Enterobacteriaceae <i>Salmonella enterica subsp. enterica serovar</i> Gallinarum/pullorum str. RKS5078                                              |
| Sen-1003-1             | Bacteria Proteobacteria Gammaproteobacteria Enterobacteriales Enterobacteriaceae <i>Salmonella enterica subsp. enterica serovar</i> Gallinarum str. 287/91                                                        |
| Sen-1004-1             | Bacteria Proteobacteria Gammaproteobacteria Enterobacteriales Enterobacteriaceae <i>Salmonella enterica subsp. enterica serovar</i> Hadar <i>Salmonella enterica subsp. enterica serovar</i> Hadar str. RI_05P066 |
| Sen-1005-1             | Bacteria Proteobacteria Gammaproteobacteria Enterobacteriales Enterobacteriaceae <i>Salmonella enterica subsp. enterica serovar</i> Heidelberg str. B182                                                          |
| Sen-1006-1             | Bacteria Proteobacteria Gammaproteobacteria Enterobacteriales Enterobacteriaceae <i>Salmonella enterica subsp. enterica serovar</i> Heidelberg str. SL476                                                         |
| Sen-1007-1             | Bacteria Proteobacteria Gammaproteobacteria Enterobacteriales Enterobacteriaceae <i>Salmonella enterica subsp. enterica serovar</i> Heidelberg str. SL486                                                         |
| Sen-1008-1             | Bacteria Proteobacteria Gammaproteobacteria Enterobacteriales Enterobacteriaceae <i>Salmonella enterica subsp. enterica serovar</i> Kentucky str. CDC 191                                                         |
| Sen-1009-1             | Bacteria Proteobacteria Gammaproteobacteria Enterobacteriales Enterobacteriaceae <i>Salmonella enterica subsp. enterica serovar</i> Kentucky str. CVM29188                                                        |
| Sen-266-1 to Sen-266-2 | Bacteria Proteobacteria Gammaproteobacteria Enterobacteriales Enterobacteriaceae <i>Salmonella enterica subsp. enterica serovar</i> Newport str. SL254                                                            |
| Sen-1010-1             | Bacteria Proteobacteria Gammaproteobacteria Enterobacteriales Enterobacteriaceae <i>Salmonella enterica subsp. enterica serovar</i> Newport str. SL317                                                            |
| Sen-1011-1             | Bacteria Proteobacteria Gammaproteobacteria Enterobacteriales Enterobacteriaceae <i>Salmonella enterica subsp. enterica serovar</i> Paratyphi B str. SPB7                                                         |
| Sen-1012-1             | Bacteria Proteobacteria Gammaproteobacteria Enterobacteriales Enterobacteriaceae <i>Salmonella enterica subsp. enterica serovar</i> Saintpaul str. SARA23                                                         |
| Sen-1013-1             | Bacteria Proteobacteria Gammaproteobacteria Enterobacteriales Enterobacteriaceae <i>Salmonella enterica subsp. enterica serovar</i> Saintpaul str. SARA29                                                         |



|                     |                                                                                                                                                                                                                             |
|---------------------|-----------------------------------------------------------------------------------------------------------------------------------------------------------------------------------------------------------------------------|
| Sen-1014-1          | Bacteria Proteobacteria Gammaproteobacteria Enterobacteriales Enterobacteriaceae Salmonella Salmonella enterica subsp. enterica serovar Typhi <i>Salmonella enterica subsp. enterica serovar Typhi str. CT18</i>            |
| Sen-1015-1          | Bacteria Proteobacteria Gammaproteobacteria Enterobacteriales Enterobacteriaceae Salmonella Salmonella enterica subsp. enterica serovar Typhi <i>Salmonella enterica subsp. enterica serovar Typhi str. E00-7866</i>        |
| Sen-1016-1          | Bacteria Proteobacteria Gammaproteobacteria Enterobacteriales Enterobacteriaceae Salmonella Salmonella enterica subsp. enterica serovar Typhi <i>Salmonella enterica subsp. enterica serovar Typhi str. Ty2</i>             |
| Sen-1017-1          | Bacteria Proteobacteria Gammaproteobacteria Enterobacteriales Enterobacteriaceae Salmonella Salmonella enterica subsp. enterica serovar Typhimurium <i>Salmonella enterica subsp. enterica serovar Typhimurium str. LT2</i> |
| Sen-1018-1          | Bacteria Proteobacteria Gammaproteobacteria Enterobacteriales Enterobacteriaceae Salmonella Salmonella enterica subsp. enterica serovar Virchow <i>Salmonella enterica subsp. enterica serovar Virchow str. SL491</i>       |
| Sen-1019-1          | Bacteria Proteobacteria Gammaproteobacteria Enterobacteriales Enterobacteriaceae <i>Salmonella enterica subsp. houtenae</i>                                                                                                 |
| Sen-1020-1          | Bacteria Proteobacteria Gammaproteobacteria Enterobacteriales Enterobacteriaceae <i>Salmonella enterica subsp. houtenae serovar 16:z4,z32:- str. RKS3027</i>                                                                |
| Sen-1021-1          | Bacteria Proteobacteria Gammaproteobacteria Enterobacteriales Enterobacteriaceae <i>Salmonella enterica subsp. houtenae serovar 50:g,z51:- str. 01-0133</i>                                                                 |
| Sen-1022-1          | Bacteria Proteobacteria Gammaproteobacteria Enterobacteriales Enterobacteriaceae <i>Salmonella enterica subsp. houtenae str. ATCC BAA-1581</i>                                                                              |
| Sen-1023-1          | Bacteria Proteobacteria Gammaproteobacteria Enterobacteriales Enterobacteriaceae <i>Salmonella enterica subsp. indica serovar 6,14,25:z10:1,(2),7 str. 1121</i>                                                             |
| Sen-1024-1          | Bacteria Proteobacteria Gammaproteobacteria Enterobacteriales Enterobacteriaceae <i>Salmonella enterica subsp. salamae serovar 58:l,z13,z28:z6 str. 00-0163</i>                                                             |
| Sen-1025-1          | Bacteria Proteobacteria Gammaproteobacteria Enterobacteriales Enterobacteriaceae <i>Salmonella enterica subsp. salamae str. 3588/07</i>                                                                                     |
| Sfo-4-1             | Bacteria Proteobacteria Gammaproteobacteria Enterobacteriales Enterobacteriaceae <i>Serratia fonticola AU-AP2C</i>                                                                                                          |
| Sfo-5-1             | Bacteria Proteobacteria Gammaproteobacteria Enterobacteriales Enterobacteriaceae <i>Serratia fonticola AU-P3(3)</i>                                                                                                         |
| Sli-3-1             | Bacteria Proteobacteria Gammaproteobacteria Enterobacteriales Enterobacteriaceae <i>Serratia liquefaciens ATCC 27592</i>                                                                                                    |
| Sma-3-1 to Sma-3-4  | Bacteria Proteobacteria Gammaproteobacteria Enterobacteriales Enterobacteriaceae <i>Serratia marcescens</i>                                                                                                                 |
| Sma-23-1            | Bacteria Proteobacteria Gammaproteobacteria Enterobacteriales Enterobacteriaceae <i>Serratia marcescens EGD-HP20</i>                                                                                                        |
| Sma-24-1            | Bacteria Proteobacteria Gammaproteobacteria Enterobacteriales Enterobacteriaceae <i>Serratia marcescens FGI94</i>                                                                                                           |
| Sma-25-1            | Bacteria Proteobacteria Gammaproteobacteria Enterobacteriales Enterobacteriaceae <i>Serratia marcescens LCT-SM213</i>                                                                                                       |
| Sma-26-1            | Bacteria Proteobacteria Gammaproteobacteria Enterobacteriales Enterobacteriaceae <i>Serratia marcescens VGH107</i>                                                                                                          |
| Sma-27-1            | Bacteria Proteobacteria Gammaproteobacteria Enterobacteriales Enterobacteriaceae <i>Serratia marcescens W2.3</i>                                                                                                            |
| Sma-28-1            | Bacteria Proteobacteria Gammaproteobacteria Enterobacteriales Enterobacteriaceae <i>Serratia marcescens WW4</i>                                                                                                             |
| Sod-1-1             | Bacteria Proteobacteria Gammaproteobacteria Enterobacteriales Enterobacteriaceae <i>Serratia odorifera DSM 4582</i>                                                                                                         |
| Spl-2-1             | Bacteria Proteobacteria Gammaproteobacteria Enterobacteriales Enterobacteriaceae <i>Serratia plymuthica 4Rx13</i>                                                                                                           |
| Spl-3-1             | Bacteria Proteobacteria Gammaproteobacteria Enterobacteriales Enterobacteriaceae <i>Serratia plymuthica A30</i>                                                                                                             |
| Spl-4-1             | Bacteria Proteobacteria Gammaproteobacteria Enterobacteriales Enterobacteriaceae <i>Serratia plymuthica AS9</i>                                                                                                             |
| Spl-5-1             | Bacteria Proteobacteria Gammaproteobacteria Enterobacteriales Enterobacteriaceae <i>Serratia plymuthica PRI-2C</i>                                                                                                          |
| Spl-6-1             | Bacteria Proteobacteria Gammaproteobacteria Enterobacteriales Enterobacteriaceae <i>Serratia plymuthica S13</i>                                                                                                             |
| Spr-2-1             | Bacteria Proteobacteria Gammaproteobacteria Enterobacteriales Enterobacteriaceae <i>Serratia proteamaculans 568</i>                                                                                                         |
| Ssp-21-1            | Bacteria Proteobacteria Gammaproteobacteria Enterobacteriales Enterobacteriaceae <i>Serratia sp. AS12</i>                                                                                                                   |
| Ssp-22-1            | Bacteria Proteobacteria Gammaproteobacteria Enterobacteriales Enterobacteriaceae <i>Serratia sp. AS13</i>                                                                                                                   |
| Ssp-23-1            | Bacteria Proteobacteria Gammaproteobacteria Enterobacteriales Enterobacteriaceae <i>Serratia sp. ATCC 39006</i>                                                                                                             |
| Ssp-24-1            | Bacteria Proteobacteria Gammaproteobacteria Enterobacteriales Enterobacteriaceae <i>Serratia sp. M24T3</i>                                                                                                                  |
| Ssp-25-1            | Bacteria Proteobacteria Gammaproteobacteria Enterobacteriales Enterobacteriaceae <i>Serratia sp. S4</i>                                                                                                                     |
| Ssy-2-1             | Bacteria Proteobacteria Gammaproteobacteria Enterobacteriales Enterobacteriaceae <i>Serratia Serratia symbiotica str. Tucson</i>                                                                                            |
| Sbo-2-1 to Sbo-2-10 | Bacteria Proteobacteria Gammaproteobacteria Enterobacteriales Enterobacteriaceae <i>Shigella boydii</i>                                                                                                                     |
| Sbo-5-1             | Bacteria Proteobacteria Gammaproteobacteria Enterobacteriales Enterobacteriaceae <i>Shigella boydii 08-0009</i>                                                                                                             |
| Sbo-6-1             | Bacteria Proteobacteria Gammaproteobacteria Enterobacteriales Enterobacteriaceae <i>Shigella boydii 08-0280</i>                                                                                                             |
| Sbo-7-1             | Bacteria Proteobacteria Gammaproteobacteria Enterobacteriales Enterobacteriaceae <i>Shigella boydii 08-2671</i>                                                                                                             |
| Sbo-8-1             | Bacteria Proteobacteria Gammaproteobacteria Enterobacteriales Enterobacteriaceae <i>Shigella boydii 08-2675</i>                                                                                                             |
| Sbo-9-1             | Bacteria Proteobacteria Gammaproteobacteria Enterobacteriales Enterobacteriaceae <i>Shigella boydii 08-6341</i>                                                                                                             |
| Sbo-10-1            | Bacteria Proteobacteria Gammaproteobacteria Enterobacteriales Enterobacteriaceae <i>Shigella boydii 09-0344</i>                                                                                                             |
| Sbo-11-1            | Bacteria Proteobacteria Gammaproteobacteria Enterobacteriales Enterobacteriaceae <i>Shigella boydii 248-1B</i>                                                                                                              |
| Sbo-12-1            | Bacteria Proteobacteria Gammaproteobacteria Enterobacteriales Enterobacteriaceae <i>Shigella boydii 4444-74</i>                                                                                                             |
| Sbo-13-1            | Bacteria Proteobacteria Gammaproteobacteria Enterobacteriales Enterobacteriaceae <i>Shigella boydii 5216-82</i>                                                                                                             |
| Sbo-14-1            | Bacteria Proteobacteria Gammaproteobacteria Enterobacteriales Enterobacteriaceae <i>Shigella boydii ATCC 9905</i>                                                                                                           |
| Sbo-15-1            | Bacteria Proteobacteria Gammaproteobacteria Enterobacteriales Enterobacteriaceae <i>Shigella boydii CDC 3083-94</i>                                                                                                         |
| Sbo-16-1            | Bacteria Proteobacteria Gammaproteobacteria Enterobacteriales Enterobacteriaceae <i>Shigella boydii S6614</i>                                                                                                               |
| Sbo-17-1            | Bacteria Proteobacteria Gammaproteobacteria Enterobacteriales Enterobacteriaceae <i>Shigella boydii S7334</i>                                                                                                               |
| Sbo-18-1            | Bacteria Proteobacteria Gammaproteobacteria Enterobacteriales Enterobacteriaceae <i>Shigella boydii Sb227</i>                                                                                                               |
| Sdy-3-1             | Bacteria Proteobacteria Gammaproteobacteria Enterobacteriales Enterobacteriaceae <i>Shigella dysenteriae 1012</i>                                                                                                           |
| Sdy-4-1             | Bacteria Proteobacteria Gammaproteobacteria Enterobacteriales Enterobacteriaceae <i>Shigella dysenteriae 225-75</i>                                                                                                         |
| Sdy-5-1             | Bacteria Proteobacteria Gammaproteobacteria Enterobacteriales Enterobacteriaceae <i>Shigella dysenteriae 4</i>                                                                                                              |
| Sdy-6-1             | Bacteria Proteobacteria Gammaproteobacteria Enterobacteriales Enterobacteriaceae <i>Shigella dysenteriae CDC 74-1112</i>                                                                                                    |
| Sdy-7-1             | Bacteria Proteobacteria Gammaproteobacteria Enterobacteriales Enterobacteriaceae <i>Shigella dysenteriae S6554</i>                                                                                                          |
| Sdy-8-1             | Bacteria Proteobacteria Gammaproteobacteria Enterobacteriales Enterobacteriaceae <i>Shigella dysenteriae Sd197</i>                                                                                                          |
| Sdy-9-1             | Bacteria Proteobacteria Gammaproteobacteria Enterobacteriales Enterobacteriaceae <i>Shigella dysenteriae WRSd3</i>                                                                                                          |
| Sdy-10-1            | Bacteria Proteobacteria Gammaproteobacteria Enterobacteriales Enterobacteriaceae <i>Shigella dysenteriae WRSd5</i>                                                                                                          |

|                       |          |                |                     |                   |                    |                                                            |
|-----------------------|----------|----------------|---------------------|-------------------|--------------------|------------------------------------------------------------|
| Sfl-1-1 to Sfl-1-2    | Bacteria | Proteobacteria | Gammaproteobacteria | Enterobacteriales | Enterobacteriaceae | <i>Shigella flexneri</i>                                   |
| Sfl-52-1              | Bacteria | Proteobacteria | Gammaproteobacteria | Enterobacteriales | Enterobacteriaceae | <i>Shigella flexneri</i> 2001020                           |
| Sfl-53-1              | Bacteria | Proteobacteria | Gammaproteobacteria | Enterobacteriales | Enterobacteriaceae | <i>Shigella flexneri</i> 2002017                           |
| Sfl-54-1              | Bacteria | Proteobacteria | Gammaproteobacteria | Enterobacteriales | Enterobacteriaceae | <i>Shigella flexneri</i> 2002028                           |
| Sfl-55-1              | Bacteria | Proteobacteria | Gammaproteobacteria | Enterobacteriales | Enterobacteriaceae | <i>Shigella flexneri</i> 2002106                           |
| Sfl-56-1              | Bacteria | Proteobacteria | Gammaproteobacteria | Enterobacteriales | Enterobacteriaceae | <i>Shigella flexneri</i> 2003035                           |
| Sfl-57-1              | Bacteria | Proteobacteria | Gammaproteobacteria | Enterobacteriales | Enterobacteriaceae | <i>Shigella flexneri</i> 2003036                           |
| Sfl-58-1              | Bacteria | Proteobacteria | Gammaproteobacteria | Enterobacteriales | Enterobacteriaceae | <i>Shigella flexneri</i> 2005002                           |
| Sfl-59-1              | Bacteria | Proteobacteria | Gammaproteobacteria | Enterobacteriales | Enterobacteriaceae | <i>Shigella flexneri</i> 2005025                           |
| Sfl-60-1              | Bacteria | Proteobacteria | Gammaproteobacteria | Enterobacteriales | Enterobacteriaceae | <i>Shigella flexneri</i> 2005184                           |
| Sfl-61-1              | Bacteria | Proteobacteria | Gammaproteobacteria | Enterobacteriales | Enterobacteriaceae | <i>Shigella flexneri</i> 2930-71                           |
| Sfl-25-1 to Sfl-25-14 | Bacteria | Proteobacteria | Gammaproteobacteria | Enterobacteriales | Enterobacteriaceae | <i>Shigella flexneri</i> 2a                                |
| Sfl-62-1              | Bacteria | Proteobacteria | Gammaproteobacteria | Enterobacteriales | Enterobacteriaceae | <i>Shigella flexneri</i> 2a str. 2457T                     |
| Sfl-63-1              | Bacteria | Proteobacteria | Gammaproteobacteria | Enterobacteriales | Enterobacteriaceae | <i>Shigella flexneri</i> 2a str. 301                       |
| Sfl-64-1 to Sfl-64-2  | Bacteria | Proteobacteria | Gammaproteobacteria | Enterobacteriales | Enterobacteriaceae | <i>Shigella flexneri</i> 3a                                |
| Sfl-65-1              | Bacteria | Proteobacteria | Gammaproteobacteria | Enterobacteriales | Enterobacteriaceae | <i>Shigella flexneri</i> 4343-70                           |
| Sfl-66-1              | Bacteria | Proteobacteria | Gammaproteobacteria | Enterobacteriales | Enterobacteriaceae | <i>Shigella flexneri</i> 5 str. 8401                       |
| Sfl-67-1              | Bacteria | Proteobacteria | Gammaproteobacteria | Enterobacteriales | Enterobacteriaceae | <i>Shigella flexneri</i> 51581                             |
| Sfl-68-1              | Bacteria | Proteobacteria | Gammaproteobacteria | Enterobacteriales | Enterobacteriaceae | <i>Shigella flexneri</i> 5a str. M90T                      |
| Sfl-69-1              | Bacteria | Proteobacteria | Gammaproteobacteria | Enterobacteriales | Enterobacteriaceae | <i>Shigella flexneri</i> 6                                 |
| Sfl-70-1              | Bacteria | Proteobacteria | Gammaproteobacteria | Enterobacteriales | Enterobacteriaceae | <i>Shigella flexneri</i> CCH060                            |
| Sfl-71-1              | Bacteria | Proteobacteria | Gammaproteobacteria | Enterobacteriales | Enterobacteriaceae | <i>Shigella flexneri</i> CDC 796-83                        |
| Sfl-72-1              | Bacteria | Proteobacteria | Gammaproteobacteria | Enterobacteriales | Enterobacteriaceae | <i>Shigella flexneri</i> G1663                             |
| Sfl-73-1              | Bacteria | Proteobacteria | Gammaproteobacteria | Enterobacteriales | Enterobacteriaceae | <i>Shigella flexneri</i> MT1457                            |
| Sfl-74-1              | Bacteria | Proteobacteria | Gammaproteobacteria | Enterobacteriales | Enterobacteriaceae | <i>Shigella flexneri</i> S5644                             |
| Sfl-75-1              | Bacteria | Proteobacteria | Gammaproteobacteria | Enterobacteriales | Enterobacteriaceae | <i>Shigella flexneri</i> S5717                             |
| Sfl-76-1              | Bacteria | Proteobacteria | Gammaproteobacteria | Enterobacteriales | Enterobacteriaceae | <i>Shigella flexneri</i> S6162                             |
| Sfl-77-1              | Bacteria | Proteobacteria | Gammaproteobacteria | Enterobacteriales | Enterobacteriaceae | <i>Shigella flexneri</i> S6585                             |
| Sfl-78-1              | Bacteria | Proteobacteria | Gammaproteobacteria | Enterobacteriales | Enterobacteriaceae | <i>Shigella flexneri</i> S6678                             |
| Sfl-79-1              | Bacteria | Proteobacteria | Gammaproteobacteria | Enterobacteriales | Enterobacteriaceae | <i>Shigella flexneri</i> S6764                             |
| Sfl-80-1              | Bacteria | Proteobacteria | Gammaproteobacteria | Enterobacteriales | Enterobacteriaceae | <i>Shigella flexneri</i> S7737                             |
| Sfl-81-1              | Bacteria | Proteobacteria | Gammaproteobacteria | Enterobacteriales | Enterobacteriaceae | <i>Shigella flexneri</i> Shi06GS02                         |
| Sfl-82-1              | Bacteria | Proteobacteria | Gammaproteobacteria | Enterobacteriales | Enterobacteriaceae | <i>Shigella flexneri</i> Shi06HN006                        |
| Sfl-83-1              | Bacteria | Proteobacteria | Gammaproteobacteria | Enterobacteriales | Enterobacteriaceae | <i>Shigella flexneri</i> Shi06HN344                        |
| Sfl-84-1              | Bacteria | Proteobacteria | Gammaproteobacteria | Enterobacteriales | Enterobacteriaceae | <i>Shigella flexneri</i> Shi06HN347                        |
| Sfl-85-1              | Bacteria | Proteobacteria | Gammaproteobacteria | Enterobacteriales | Enterobacteriaceae | <i>Shigella flexneri</i> VA-6                              |
| Sfl-51-1 to Sfl-51-2  | Bacteria | Proteobacteria | Gammaproteobacteria | Enterobacteriales | Enterobacteriaceae | <i>Shigella flexneri</i> Y                                 |
| Sso-1-1 to Sso-1-547  | Bacteria | Proteobacteria | Gammaproteobacteria | Enterobacteriales | Enterobacteriaceae | <i>Shigella sonnei</i>                                     |
| Sso-3-1               | Bacteria | Proteobacteria | Gammaproteobacteria | Enterobacteriales | Enterobacteriaceae | <i>Shigella sonnei</i> 08-7761                             |
| Sso-4-1               | Bacteria | Proteobacteria | Gammaproteobacteria | Enterobacteriales | Enterobacteriaceae | <i>Shigella sonnei</i> 08-7765                             |
| Sso-5-1               | Bacteria | Proteobacteria | Gammaproteobacteria | Enterobacteriales | Enterobacteriaceae | <i>Shigella sonnei</i> 09-1032                             |
| Sso-6-1               | Bacteria | Proteobacteria | Gammaproteobacteria | Enterobacteriales | Enterobacteriaceae | <i>Shigella sonnei</i> 09-2245                             |
| Sso-7-1               | Bacteria | Proteobacteria | Gammaproteobacteria | Enterobacteriales | Enterobacteriaceae | <i>Shigella sonnei</i> 09-4962                             |
| Sso-8-1               | Bacteria | Proteobacteria | Gammaproteobacteria | Enterobacteriales | Enterobacteriaceae | <i>Shigella sonnei</i> 3233-85                             |
| Sso-9-1               | Bacteria | Proteobacteria | Gammaproteobacteria | Enterobacteriales | Enterobacteriaceae | <i>Shigella sonnei</i> 4822-66                             |
| Sso-10-1              | Bacteria | Proteobacteria | Gammaproteobacteria | Enterobacteriales | Enterobacteriaceae | <i>Shigella sonnei</i> 53G                                 |
| Sso-11-1              | Bacteria | Proteobacteria | Gammaproteobacteria | Enterobacteriales | Enterobacteriaceae | <i>Shigella sonnei</i> S6513                               |
| Sso-12-1              | Bacteria | Proteobacteria | Gammaproteobacteria | Enterobacteriales | Enterobacteriaceae | <i>Shigella sonnei</i> Ss046                               |
| Sso-13-1              | Bacteria | Proteobacteria | Gammaproteobacteria | Enterobacteriales | Enterobacteriaceae | <i>Shigella sonnei</i> str. Moseley                        |
| Ssp-26-1              | Bacteria | Proteobacteria | Gammaproteobacteria | Enterobacteriales | Enterobacteriaceae | <i>Shigella</i> sp. D9                                     |
| Sbl-1-1               | Bacteria | Proteobacteria | Gammaproteobacteria | Enterobacteriales | Enterobacteriaceae | <i>Shimwellia blattae</i> DSM 4481 = NBRC 105725           |
| Sgl-1-1               | Bacteria | Proteobacteria | Gammaproteobacteria | Enterobacteriales | Enterobacteriaceae | <i>Sodalis glossinidius</i> str. 'morsitans'               |
| Xbo-11-1              | Bacteria | Proteobacteria | Gammaproteobacteria | Enterobacteriales | Enterobacteriaceae | <i>Xenorhabdus bovienii</i> SS-2004                        |
| Xne-3-1               | Bacteria | Proteobacteria | Gammaproteobacteria | Enterobacteriales | Enterobacteriaceae | <i>Xenorhabdus nematophila</i> ATCC 19061                  |
| Xne-4-1               | Bacteria | Proteobacteria | Gammaproteobacteria | Enterobacteriales | Enterobacteriaceae | <i>Xenorhabdus nematophila</i> F1                          |
| Xne-5-1 to Xne-5-2    | Bacteria | Proteobacteria | Gammaproteobacteria | Enterobacteriales | Enterobacteriaceae | <i>Xenorhabdus nematophila</i> str. Anatoliense            |
| Xne-6-1               | Bacteria | Proteobacteria | Gammaproteobacteria | Enterobacteriales | Enterobacteriaceae | <i>Xenorhabdus nematophila</i> str. Websteri               |
| Yal-4-1               | Bacteria | Proteobacteria | Gammaproteobacteria | Enterobacteriales | Enterobacteriaceae | <i>Yersinia aldovae</i> ATCC 35236                         |
| Ybe-2-1               | Bacteria | Proteobacteria | Gammaproteobacteria | Enterobacteriales | Enterobacteriaceae | <i>Yersinia bercovieri</i> ATCC 43970                      |
| Yen-8-1               | Bacteria | Proteobacteria | Gammaproteobacteria | Enterobacteriales | Enterobacteriaceae | <i>Yersinia enterocolitica</i> (type O:3) str. YE12/03     |
| Yen-9-1               | Bacteria | Proteobacteria | Gammaproteobacteria | Enterobacteriales | Enterobacteriaceae | <i>Yersinia enterocolitica</i> (type O:5,27) str. YE149/02 |
| Yen-10-1              | Bacteria | Proteobacteria | Gammaproteobacteria | Enterobacteriales | Enterobacteriaceae | <i>Yersinia enterocolitica</i> (type O:9) str. YE212/02    |
| Yen-11-1              | Bacteria | Proteobacteria | Gammaproteobacteria | Enterobacteriales | Enterobacteriaceae | <i>Yersinia enterocolitica</i> IP 10393                    |
| Yen-12-1              | Bacteria | Proteobacteria | Gammaproteobacteria | Enterobacteriales | Enterobacteriaceae | <i>Yersinia enterocolitica</i> IP2222                      |
| Yen-13-1              | Bacteria | Proteobacteria | Gammaproteobacteria | Enterobacteriales | Enterobacteriaceae | <i>Yersinia enterocolitica</i> NFO                         |

|                        |          |                |                     |                   |                    |                                                                     |
|------------------------|----------|----------------|---------------------|-------------------|--------------------|---------------------------------------------------------------------|
| Yen-14-1               | Bacteria | Proteobacteria | Gammaproteobacteria | Enterobacteriales | Enterobacteriaceae | <i>Yersinia enterocolitica</i> subsp. <i>enterocolitica</i> 8081    |
| Yen-15-1               | Bacteria | Proteobacteria | Gammaproteobacteria | Enterobacteriales | Enterobacteriaceae | <i>Yersinia enterocolitica</i> subsp. <i>enterocolitica</i> WA-314  |
| Yen-16-1               | Bacteria | Proteobacteria | Gammaproteobacteria | Enterobacteriales | Enterobacteriaceae | <i>Yersinia enterocolitica</i> subsp. <i>palaearctica</i> 105.5R(r) |
| Yen-17-1               | Bacteria | Proteobacteria | Gammaproteobacteria | Enterobacteriales | Enterobacteriaceae | <i>Yersinia enterocolitica</i> subsp. <i>palaearctica</i> PhRBD_Ye1 |
| Yen-18-1               | Bacteria | Proteobacteria | Gammaproteobacteria | Enterobacteriales | Enterobacteriaceae | <i>Yersinia enterocolitica</i> subsp. <i>palaearctica</i> Y11       |
| Yen-19-1               | Bacteria | Proteobacteria | Gammaproteobacteria | Enterobacteriales | Enterobacteriaceae | <i>Yersinia enterocolitica</i> subsp. <i>palaearctica</i> YE-149    |
| Yen-20-1               | Bacteria | Proteobacteria | Gammaproteobacteria | Enterobacteriales | Enterobacteriaceae | <i>Yersinia enterocolitica</i> subsp. <i>palaearctica</i> YE-150    |
| Yen-21-1               | Bacteria | Proteobacteria | Gammaproteobacteria | Enterobacteriales | Enterobacteriaceae | <i>Yersinia enterocolitica</i> subsp. <i>palaearctica</i> YE-P1     |
| Yen-22-1               | Bacteria | Proteobacteria | Gammaproteobacteria | Enterobacteriales | Enterobacteriaceae | <i>Yersinia enterocolitica</i> subsp. <i>palaearctica</i> YE-P4     |
| Yfr-2-1 to Yfr-2-2     | Bacteria | Proteobacteria | Gammaproteobacteria | Enterobacteriales | Enterobacteriaceae | <i>Yersinia frederiksenii</i> ATCC 33641                            |
| Yin-2-1                | Bacteria | Proteobacteria | Gammaproteobacteria | Enterobacteriales | Enterobacteriaceae | <i>Yersinia intermedia</i> ATCC 29909                               |
| Ykr-2-1                | Bacteria | Proteobacteria | Gammaproteobacteria | Enterobacteriales | Enterobacteriaceae | <i>Yersinia kristensenii</i> ATCC 33638                             |
| Ymo-2-1                | Bacteria | Proteobacteria | Gammaproteobacteria | Enterobacteriales | Enterobacteriaceae | <i>Yersinia mollaretii</i> ATCC 43969                               |
| Ype-116-1              | Bacteria | Proteobacteria | Gammaproteobacteria | Enterobacteriales | Enterobacteriaceae | <i>Yersinia pestis</i> 113                                          |
| Ype-117-1              | Bacteria | Proteobacteria | Gammaproteobacteria | Enterobacteriales | Enterobacteriaceae | <i>Yersinia pestis</i> 2330                                         |
| Ype-118-1              | Bacteria | Proteobacteria | Gammaproteobacteria | Enterobacteriales | Enterobacteriaceae | <i>Yersinia pestis</i> 2501                                         |
| Ype-119-1              | Bacteria | Proteobacteria | Gammaproteobacteria | Enterobacteriales | Enterobacteriaceae | <i>Yersinia pestis</i> 2504                                         |
| Ype-120-1              | Bacteria | Proteobacteria | Gammaproteobacteria | Enterobacteriales | Enterobacteriaceae | <i>Yersinia pestis</i> 2506                                         |
| Ype-121-1              | Bacteria | Proteobacteria | Gammaproteobacteria | Enterobacteriales | Enterobacteriaceae | <i>Yersinia pestis</i> 30017                                        |
| Ype-122-1              | Bacteria | Proteobacteria | Gammaproteobacteria | Enterobacteriales | Enterobacteriaceae | <i>Yersinia pestis</i> 42013                                        |
| Ype-123-1              | Bacteria | Proteobacteria | Gammaproteobacteria | Enterobacteriales | Enterobacteriaceae | <i>Yersinia pestis</i> 42091                                        |
| Ype-124-1              | Bacteria | Proteobacteria | Gammaproteobacteria | Enterobacteriales | Enterobacteriaceae | <i>Yersinia pestis</i> 5761                                         |
| Ype-125-1              | Bacteria | Proteobacteria | Gammaproteobacteria | Enterobacteriales | Enterobacteriaceae | <i>Yersinia pestis</i> 7                                            |
| Ype-126-1              | Bacteria | Proteobacteria | Gammaproteobacteria | Enterobacteriales | Enterobacteriaceae | <i>Yersinia pestis</i> 735                                          |
| Ype-127-1              | Bacteria | Proteobacteria | Gammaproteobacteria | Enterobacteriales | Enterobacteriaceae | <i>Yersinia pestis</i> 780441                                       |
| Ype-128-1              | Bacteria | Proteobacteria | Gammaproteobacteria | Enterobacteriales | Enterobacteriaceae | <i>Yersinia pestis</i> 91                                           |
| Ype-29-1 to Ype-29-2   | Bacteria | Proteobacteria | Gammaproteobacteria | Enterobacteriales | Enterobacteriaceae | <i>Yersinia pestis</i> A1122                                        |
| Ype-129-1              | Bacteria | Proteobacteria | Gammaproteobacteria | Enterobacteriales | Enterobacteriaceae | <i>Yersinia pestis</i> A1956001                                     |
| Ype-31-1 to Ype-31-2   | Bacteria | Proteobacteria | Gammaproteobacteria | Enterobacteriales | Enterobacteriaceae | <i>Yersinia pestis</i> Angola                                       |
| Ype-32-1 to Ype-32-2   | Bacteria | Proteobacteria | Gammaproteobacteria | Enterobacteriales | Enterobacteriaceae | <i>Yersinia pestis</i> Antiqua                                      |
| Ype-218-1              | Bacteria | Proteobacteria | Gammaproteobacteria | Enterobacteriales | Enterobacteriaceae | <i>Yersinia pestis biovar</i> Antiqua str. B42003004                |
| Ype-219-1 to Ype-219-2 | Bacteria | Proteobacteria | Gammaproteobacteria | Enterobacteriales | Enterobacteriaceae | <i>Yersinia pestis biovar</i> Antiqua str. E1979001                 |
| Ype-220-1              | Bacteria | Proteobacteria | Gammaproteobacteria | Enterobacteriales | Enterobacteriaceae | <i>Yersinia pestis biovar</i> Antiqua str. UG05-0454                |
| Ype-221-1              | Bacteria | Proteobacteria | Gammaproteobacteria | Enterobacteriales | Enterobacteriaceae | <i>Yersinia pestis biovar</i> Mediaevalis str. K1973002             |
| Ype-222-1              | Bacteria | Proteobacteria | Gammaproteobacteria | Enterobacteriales | Enterobacteriaceae | <i>Yersinia pestis biovar</i> Mediaevalis str. Harbin 35            |
| Ype-223-1              | Bacteria | Proteobacteria | Gammaproteobacteria | Enterobacteriales | Enterobacteriaceae | <i>Yersinia pestis biovar</i> Microtus str. 91001                   |
| Ype-224-1              | Bacteria | Proteobacteria | Gammaproteobacteria | Enterobacteriales | Enterobacteriaceae | <i>Yersinia pestis biovar</i> Orientalis str. F1991016              |
| Ype-226-1              | Bacteria | Proteobacteria | Gammaproteobacteria | Enterobacteriales | Enterobacteriaceae | <i>Yersinia pestis biovar</i> Orientalis str. India 195             |
| Ype-225-1              | Bacteria | Proteobacteria | Gammaproteobacteria | Enterobacteriales | Enterobacteriaceae | <i>Yersinia pestis biovar</i> Orientalis str. IP275                 |
| Ype-227-1              | Bacteria | Proteobacteria | Gammaproteobacteria | Enterobacteriales | Enterobacteriaceae | <i>Yersinia pestis biovar</i> Orientalis str. MG05-1020             |
| Ype-228-1              | Bacteria | Proteobacteria | Gammaproteobacteria | Enterobacteriales | Enterobacteriaceae | <i>Yersinia pestis biovar</i> Orientalis str. PEXU2                 |
| Ype-130-1              | Bacteria | Proteobacteria | Gammaproteobacteria | Enterobacteriales | Enterobacteriaceae | <i>Yersinia pestis</i> C1976001                                     |
| Ype-131-1              | Bacteria | Proteobacteria | Gammaproteobacteria | Enterobacteriales | Enterobacteriaceae | <i>Yersinia pestis</i> C1989001                                     |
| Ype-132-1              | Bacteria | Proteobacteria | Gammaproteobacteria | Enterobacteriales | Enterobacteriaceae | <i>Yersinia pestis</i> CA88-4125                                    |
| Ype-133-1              | Bacteria | Proteobacteria | Gammaproteobacteria | Enterobacteriales | Enterobacteriaceae | <i>Yersinia pestis</i> CMCC125002                                   |
| Ype-134-1              | Bacteria | Proteobacteria | Gammaproteobacteria | Enterobacteriales | Enterobacteriaceae | <i>Yersinia pestis</i> CMCC348002                                   |
| Ype-135-1              | Bacteria | Proteobacteria | Gammaproteobacteria | Enterobacteriales | Enterobacteriaceae | <i>Yersinia pestis</i> CMCC49003                                    |
| Ype-136-1              | Bacteria | Proteobacteria | Gammaproteobacteria | Enterobacteriales | Enterobacteriaceae | <i>Yersinia pestis</i> CMCC64001                                    |
| Ype-137-1              | Bacteria | Proteobacteria | Gammaproteobacteria | Enterobacteriales | Enterobacteriaceae | <i>Yersinia pestis</i> CMCC8211                                     |
| Ype-138-1              | Bacteria | Proteobacteria | Gammaproteobacteria | Enterobacteriales | Enterobacteriaceae | <i>Yersinia pestis</i> CMCC87001                                    |
| Ype-139-1              | Bacteria | Proteobacteria | Gammaproteobacteria | Enterobacteriales | Enterobacteriaceae | <i>Yersinia pestis</i> CMCC91090                                    |
| Ype-140-1              | Bacteria | Proteobacteria | Gammaproteobacteria | Enterobacteriales | Enterobacteriaceae | <i>Yersinia pestis</i> CMCC93014                                    |
| Ype-141-1              | Bacteria | Proteobacteria | Gammaproteobacteria | Enterobacteriales | Enterobacteriaceae | <i>Yersinia pestis</i> CMCC96001                                    |
| Ype-142-1              | Bacteria | Proteobacteria | Gammaproteobacteria | Enterobacteriales | Enterobacteriaceae | <i>Yersinia pestis</i> CO92                                         |
| Ype-143-1              | Bacteria | Proteobacteria | Gammaproteobacteria | Enterobacteriales | Enterobacteriaceae | <i>Yersinia pestis</i> D106004                                      |
| Ype-144-1              | Bacteria | Proteobacteria | Gammaproteobacteria | Enterobacteriales | Enterobacteriaceae | <i>Yersinia pestis</i> D182038                                      |
| Ype-145-1              | Bacteria | Proteobacteria | Gammaproteobacteria | Enterobacteriales | Enterobacteriaceae | <i>Yersinia pestis</i> D1982001                                     |
| Ype-146-1              | Bacteria | Proteobacteria | Gammaproteobacteria | Enterobacteriales | Enterobacteriaceae | <i>Yersinia pestis</i> FV-1                                         |
| Ype-147-1              | Bacteria | Proteobacteria | Gammaproteobacteria | Enterobacteriales | Enterobacteriaceae | <i>Yersinia pestis</i> G1996006                                     |
| Ype-148-1              | Bacteria | Proteobacteria | Gammaproteobacteria | Enterobacteriales | Enterobacteriaceae | <i>Yersinia pestis</i> G1996010                                     |
| Ype-149-1              | Bacteria | Proteobacteria | Gammaproteobacteria | Enterobacteriales | Enterobacteriaceae | <i>Yersinia pestis</i> G8786                                        |
| Ype-150-1              | Bacteria | Proteobacteria | Gammaproteobacteria | Enterobacteriales | Enterobacteriaceae | <i>Yersinia pestis</i> H1959004                                     |
| Ype-151-1              | Bacteria | Proteobacteria | Gammaproteobacteria | Enterobacteriales | Enterobacteriaceae | <i>Yersinia pestis</i> INS                                          |
| Ype-152-1              | Bacteria | Proteobacteria | Gammaproteobacteria | Enterobacteriales | Enterobacteriaceae | <i>Yersinia pestis</i> K11973002                                    |
| Ype-153-1              | Bacteria | Proteobacteria | Gammaproteobacteria | Enterobacteriales | Enterobacteriaceae | <i>Yersinia pestis</i> KIM                                          |



|                      |          |                |                     |                   |                    |                                                                      |
|----------------------|----------|----------------|---------------------|-------------------|--------------------|----------------------------------------------------------------------|
| Yps-14-1             | Bacteria | Proteobacteria | Gammaproteobacteria | Enterobacteriales | Enterobacteriaceae | <i>Yersinia pseudotuberculosis</i> IP 31758                          |
| Yps-10-1 to Yps-10-2 | Bacteria | Proteobacteria | Gammaproteobacteria | Enterobacteriales | Enterobacteriaceae | <i>Yersinia pseudotuberculosis</i> IP 32953                          |
| Yps-15-1             | Bacteria | Proteobacteria | Gammaproteobacteria | Enterobacteriales | Enterobacteriaceae | <i>Yersinia pseudotuberculosis</i> NBRC 105692                       |
| Yps-11-1 to Yps-11-2 | Bacteria | Proteobacteria | Gammaproteobacteria | Enterobacteriales | Enterobacteriaceae | <i>Yersinia pseudotuberculosis</i> PB1/+                             |
| Yps-12-1 to Yps-12-2 | Bacteria | Proteobacteria | Gammaproteobacteria | Enterobacteriales | Enterobacteriaceae | <i>Yersinia pseudotuberculosis</i> YPIII                             |
| Yro-2-1              | Bacteria | Proteobacteria | Gammaproteobacteria | Enterobacteriales | Enterobacteriaceae | <i>Yersinia rohdei</i> ATCC 43380                                    |
| Yru-1-1 to Yru-1-3   | Bacteria | Proteobacteria | Gammaproteobacteria | Enterobacteriales | Enterobacteriaceae | <i>Yersinia ruckeri</i>                                              |
| Yru-2-1 to Yru-2-2   | Bacteria | Proteobacteria | Gammaproteobacteria | Enterobacteriales | Enterobacteriaceae | <i>Yersinia ruckeri</i> ATCC 29473                                   |
| Gpe-1-1              | Bacteria | Proteobacteria | Gammaproteobacteria |                   |                    | <i>Gallaecimonas pentaromativorans</i>                               |
| Gxi-1-1              | Bacteria | Proteobacteria | Gammaproteobacteria |                   |                    | <i>Gallaecimonas xiamenensis</i> 3-C-1                               |
| gpr-1-1              | Bacteria | Proteobacteria | Gammaproteobacteria |                   |                    | gamma proteobacterium WG36                                           |
| Aca-3-1              | Bacteria | Proteobacteria | Gammaproteobacteria | Pasteurellales    | Pasteurellaceae    | <i>Actinobacillus capsulatus</i> DSM 19761                           |
| Aeq-1-1              | Bacteria | Proteobacteria | Gammaproteobacteria | Pasteurellales    | Pasteurellaceae    | <i>Actinobacillus equuli</i> subsp. <i>equuli</i>                    |
| Ami-1-1              | Bacteria | Proteobacteria | Gammaproteobacteria | Pasteurellales    | Pasteurellaceae    | <i>Actinobacillus minor</i> 202                                      |
| Ami-2-1              | Bacteria | Proteobacteria | Gammaproteobacteria | Pasteurellales    | Pasteurellaceae    | <i>Actinobacillus minor</i> NM305                                    |
| Apl-1-1 to Apl-1-6   | Bacteria | Proteobacteria | Gammaproteobacteria | Pasteurellales    | Pasteurellaceae    | <i>Actinobacillus pleuropneumoniae</i>                               |
| Apl-2-1              | Bacteria | Proteobacteria | Gammaproteobacteria | Pasteurellales    | Pasteurellaceae    | <i>Actinobacillus pleuropneumoniae</i> L20                           |
| Apl-3-1              | Bacteria | Proteobacteria | Gammaproteobacteria | Pasteurellales    | Pasteurellaceae    | <i>Actinobacillus pleuropneumoniae</i> S8                            |
| Apl-4-1 to Apl-4-2   | Bacteria | Proteobacteria | Gammaproteobacteria | Pasteurellales    | Pasteurellaceae    | <i>Actinobacillus pleuropneumoniae</i> serovar 1 str. 4074           |
| Apl-5-1              | Bacteria | Proteobacteria | Gammaproteobacteria | Pasteurellales    | Pasteurellaceae    | <i>Actinobacillus pleuropneumoniae</i> serovar 10 str. D13039        |
| Apl-6-1              | Bacteria | Proteobacteria | Gammaproteobacteria | Pasteurellales    | Pasteurellaceae    | <i>Actinobacillus pleuropneumoniae</i> serovar 11 str. 56153         |
| Apl-7-1              | Bacteria | Proteobacteria | Gammaproteobacteria | Pasteurellales    | Pasteurellaceae    | <i>Actinobacillus pleuropneumoniae</i> serovar 12 str. S1536         |
| Apl-8-1              | Bacteria | Proteobacteria | Gammaproteobacteria | Pasteurellales    | Pasteurellaceae    | <i>Actinobacillus pleuropneumoniae</i> serovar 13 str. N273          |
| Apl-9-1              | Bacteria | Proteobacteria | Gammaproteobacteria | Pasteurellales    | Pasteurellaceae    | <i>Actinobacillus pleuropneumoniae</i> serovar 2 str. 4226           |
| Apl-10-1             | Bacteria | Proteobacteria | Gammaproteobacteria | Pasteurellales    | Pasteurellaceae    | <i>Actinobacillus pleuropneumoniae</i> serovar 2 str. S1536          |
| Apl-11-1             | Bacteria | Proteobacteria | Gammaproteobacteria | Pasteurellales    | Pasteurellaceae    | <i>Actinobacillus pleuropneumoniae</i> serovar 3 str. JL03           |
| Apl-12-1             | Bacteria | Proteobacteria | Gammaproteobacteria | Pasteurellales    | Pasteurellaceae    | <i>Actinobacillus pleuropneumoniae</i> serovar 4 str. M62            |
| Apl-13-1 to Apl-13-2 | Bacteria | Proteobacteria | Gammaproteobacteria | Pasteurellales    | Pasteurellaceae    | <i>Actinobacillus pleuropneumoniae</i> serovar 6 str. Femo           |
| Apl-14-1             | Bacteria | Proteobacteria | Gammaproteobacteria | Pasteurellales    | Pasteurellaceae    | <i>Actinobacillus pleuropneumoniae</i> serovar 7 str. AP76           |
| Apl-15-1             | Bacteria | Proteobacteria | Gammaproteobacteria | Pasteurellales    | Pasteurellaceae    | <i>Actinobacillus pleuropneumoniae</i> serovar 9 str. CVJ13261       |
| Asu-1-1              | Bacteria | Proteobacteria | Gammaproteobacteria | Pasteurellales    | Pasteurellaceae    | <i>Actinobacillus succinogenes</i> 130Z                              |
| Asu-2-1              | Bacteria | Proteobacteria | Gammaproteobacteria | Pasteurellales    | Pasteurellaceae    | <i>Actinobacillus suis</i> ATCC 33415                                |
| Asu-3-1              | Bacteria | Proteobacteria | Gammaproteobacteria | Pasteurellales    | Pasteurellaceae    | <i>Actinobacillus suis</i> H91-0380                                  |
| Aur-1-1              | Bacteria | Proteobacteria | Gammaproteobacteria | Pasteurellales    | Pasteurellaceae    | <i>Actinobacillus ureae</i> ATCC 25976                               |
| Aac-1-1              | Bacteria | Proteobacteria | Gammaproteobacteria | Pasteurellales    | Pasteurellaceae    | <i>Aggregatibacter actinomycetemcomitans</i> ANH9381                 |
| Aac-2-1              | Bacteria | Proteobacteria | Gammaproteobacteria | Pasteurellales    | Pasteurellaceae    | <i>Aggregatibacter actinomycetemcomitans</i> D17P-3                  |
| Aac-3-1              | Bacteria | Proteobacteria | Gammaproteobacteria | Pasteurellales    | Pasteurellaceae    | <i>Aggregatibacter actinomycetemcomitans</i> D7S-1                   |
| Aac-4-1              | Bacteria | Proteobacteria | Gammaproteobacteria | Pasteurellales    | Pasteurellaceae    | <i>Aggregatibacter actinomycetemcomitans</i> DSM 8324                |
| Aac-5-1 to Aac-5-2   | Bacteria | Proteobacteria | Gammaproteobacteria | Pasteurellales    | Pasteurellaceae    | <i>Aggregatibacter actinomycetemcomitans</i> HK1651                  |
| Aac-6-1 to Aac-6-2   | Bacteria | Proteobacteria | Gammaproteobacteria | Pasteurellales    | Pasteurellaceae    | <i>Aggregatibacter actinomycetemcomitans</i> RhAA1                   |
| Aac-8-1              | Bacteria | Proteobacteria | Gammaproteobacteria | Pasteurellales    | Pasteurellaceae    | <i>Aggregatibacter actinomycetemcomitans</i> serotype a str. A160    |
| Aac-9-1              | Bacteria | Proteobacteria | Gammaproteobacteria | Pasteurellales    | Pasteurellaceae    | <i>Aggregatibacter actinomycetemcomitans</i> serotype a str. H5P1    |
| Aac-10-1             | Bacteria | Proteobacteria | Gammaproteobacteria | Pasteurellales    | Pasteurellaceae    | <i>Aggregatibacter actinomycetemcomitans</i> serotype b str. I23C    |
| Aac-11-1             | Bacteria | Proteobacteria | Gammaproteobacteria | Pasteurellales    | Pasteurellaceae    | <i>Aggregatibacter actinomycetemcomitans</i> serotype b str. S23A    |
| Aac-12-1             | Bacteria | Proteobacteria | Gammaproteobacteria | Pasteurellales    | Pasteurellaceae    | <i>Aggregatibacter actinomycetemcomitans</i> serotype b str. SCC1398 |
| Aac-13-1             | Bacteria | Proteobacteria | Gammaproteobacteria | Pasteurellales    | Pasteurellaceae    | <i>Aggregatibacter actinomycetemcomitans</i> serotype b str. SCC4092 |
| Aac-14-1             | Bacteria | Proteobacteria | Gammaproteobacteria | Pasteurellales    | Pasteurellaceae    | <i>Aggregatibacter actinomycetemcomitans</i> serotype c str. AAS4A   |
| Aac-15-1             | Bacteria | Proteobacteria | Gammaproteobacteria | Pasteurellales    | Pasteurellaceae    | <i>Aggregatibacter actinomycetemcomitans</i> serotype c str. D17P-2  |
| Aac-16-1             | Bacteria | Proteobacteria | Gammaproteobacteria | Pasteurellales    | Pasteurellaceae    | <i>Aggregatibacter actinomycetemcomitans</i> serotype c str. SCC2302 |
| Aac-17-1             | Bacteria | Proteobacteria | Gammaproteobacteria | Pasteurellales    | Pasteurellaceae    | <i>Aggregatibacter actinomycetemcomitans</i> serotype d str. I63B    |
| Aac-18-1             | Bacteria | Proteobacteria | Gammaproteobacteria | Pasteurellales    | Pasteurellaceae    | <i>Aggregatibacter actinomycetemcomitans</i> serotype e str. SC1083  |
| Aac-19-1             | Bacteria | Proteobacteria | Gammaproteobacteria | Pasteurellales    | Pasteurellaceae    | <i>Aggregatibacter actinomycetemcomitans</i> serotype e str. SCC393  |
| Aac-20-1             | Bacteria | Proteobacteria | Gammaproteobacteria | Pasteurellales    | Pasteurellaceae    | <i>Aggregatibacter actinomycetemcomitans</i> serotype f str. D18P1   |
| Aac-7-1              | Bacteria | Proteobacteria | Gammaproteobacteria | Pasteurellales    | Pasteurellaceae    | <i>Aggregatibacter actinomycetemcomitans</i> Y4                      |
| Aap-1-1              | Bacteria | Proteobacteria | Gammaproteobacteria | Pasteurellales    | Pasteurellaceae    | <i>Aggregatibacter aphrophilus</i>                                   |
| Aap-2-1              | Bacteria | Proteobacteria | Gammaproteobacteria | Pasteurellales    | Pasteurellaceae    | <i>Aggregatibacter aphrophilus</i> ATCC 33389                        |
| Aap-3-1              | Bacteria | Proteobacteria | Gammaproteobacteria | Pasteurellales    | Pasteurellaceae    | <i>Aggregatibacter aphrophilus</i> F0387                             |
| Aap-4-1              | Bacteria | Proteobacteria | Gammaproteobacteria | Pasteurellales    | Pasteurellaceae    | <i>Aggregatibacter aphrophilus</i> NJ8700                            |
| Ase-1-1              | Bacteria | Proteobacteria | Gammaproteobacteria | Pasteurellales    | Pasteurellaceae    | <i>Aggregatibacter segnis</i>                                        |
| Ase-2-1              | Bacteria | Proteobacteria | Gammaproteobacteria | Pasteurellales    | Pasteurellaceae    | <i>Aggregatibacter segnis</i> ATCC 33393                             |
| Asp-10-1             | Bacteria | Proteobacteria | Gammaproteobacteria | Pasteurellales    | Pasteurellaceae    | <i>Aggregatibacter</i> sp. oral taxon 458 str. W10330                |
| Apa-1-1 to Apa-1-2   | Bacteria | Proteobacteria | Gammaproteobacteria | Pasteurellales    | Pasteurellaceae    | <i>Avibacterium paragallinarum</i>                                   |
| Apa-2-1              | Bacteria | Proteobacteria | Gammaproteobacteria | Pasteurellales    | Pasteurellaceae    | <i>Avibacterium paragallinarum</i> 221                               |
| Apa-3-1              | Bacteria | Proteobacteria | Gammaproteobacteria | Pasteurellales    | Pasteurellaceae    | <i>Avibacterium paragallinarum</i> 72                                |
| Apa-4-1              | Bacteria | Proteobacteria | Gammaproteobacteria | Pasteurellales    | Pasteurellaceae    | <i>Avibacterium paragallinarum</i> JF4211                            |



|                       |          |                |                     |                |                 |                                                         |
|-----------------------|----------|----------------|---------------------|----------------|-----------------|---------------------------------------------------------|
| Cor-1-1               | Bacteria | Proteobacteria | Gammaproteobacteria | Pasteurellales | Pasteurellaceae | <i>Chelonobacter oris</i>                               |
| Hae-1-1               | Bacteria | Proteobacteria | Gammaproteobacteria | Pasteurellales | Pasteurellaceae | <i>Haemophilus aegyptius</i> ATCC 11116                 |
| Hha-1-1 to Hha-1-4    | Bacteria | Proteobacteria | Gammaproteobacteria | Pasteurellales | Pasteurellaceae | <i>Haemophilus haemolyticus</i>                         |
| Hha-2-1               | Bacteria | Proteobacteria | Gammaproteobacteria | Pasteurellales | Pasteurellaceae | <i>Haemophilus haemolyticus</i> HK386                   |
| Hha-3-1               | Bacteria | Proteobacteria | Gammaproteobacteria | Pasteurellales | Pasteurellaceae | <i>Haemophilus haemolyticus</i> M19501                  |
| Hha-4-1               | Bacteria | Proteobacteria | Gammaproteobacteria | Pasteurellales | Pasteurellaceae | <i>Haemophilus haemolyticus</i> M21127                  |
| Hha-5-1               | Bacteria | Proteobacteria | Gammaproteobacteria | Pasteurellales | Pasteurellaceae | <i>Haemophilus haemolyticus</i> M21621                  |
| Hha-6-1               | Bacteria | Proteobacteria | Gammaproteobacteria | Pasteurellales | Pasteurellaceae | <i>Haemophilus haemolyticus</i> M21639                  |
| Hin-1-1 to Hin-1-4    | Bacteria | Proteobacteria | Gammaproteobacteria | Pasteurellales | Pasteurellaceae | <i>Haemophilus influenzae</i>                           |
| Hin-2-1               | Bacteria | Proteobacteria | Gammaproteobacteria | Pasteurellales | Pasteurellaceae | <i>Haemophilus influenzae</i> 10810                     |
| Hin-3-1               | Bacteria | Proteobacteria | Gammaproteobacteria | Pasteurellales | Pasteurellaceae | <i>Haemophilus influenzae</i> 2019                      |
| Hin-4-1               | Bacteria | Proteobacteria | Gammaproteobacteria | Pasteurellales | Pasteurellaceae | <i>Haemophilus influenzae</i> 3655                      |
| Hin-5-1               | Bacteria | Proteobacteria | Gammaproteobacteria | Pasteurellales | Pasteurellaceae | <i>Haemophilus influenzae</i> 60294N1                   |
| Hin-6-1               | Bacteria | Proteobacteria | Gammaproteobacteria | Pasteurellales | Pasteurellaceae | <i>Haemophilus influenzae</i> 6P18H1                    |
| Hin-7-1               | Bacteria | Proteobacteria | Gammaproteobacteria | Pasteurellales | Pasteurellaceae | <i>Haemophilus influenzae</i> 7P49H1                    |
| Hin-8-1               | Bacteria | Proteobacteria | Gammaproteobacteria | Pasteurellales | Pasteurellaceae | <i>Haemophilus influenzae</i> 86-028NP                  |
| Hin-9-1               | Bacteria | Proteobacteria | Gammaproteobacteria | Pasteurellales | Pasteurellaceae | <i>Haemophilus influenzae</i> CGSHiCZ412602             |
| Hin-10-1              | Bacteria | Proteobacteria | Gammaproteobacteria | Pasteurellales | Pasteurellaceae | <i>Haemophilus influenzae</i> F3031                     |
| Hin-11-1              | Bacteria | Proteobacteria | Gammaproteobacteria | Pasteurellales | Pasteurellaceae | <i>Haemophilus influenzae</i> F3047                     |
| Hin-12-1              | Bacteria | Proteobacteria | Gammaproteobacteria | Pasteurellales | Pasteurellaceae | <i>Haemophilus influenzae</i> KR494                     |
| Hin-13-1              | Bacteria | Proteobacteria | Gammaproteobacteria | Pasteurellales | Pasteurellaceae | <i>Haemophilus influenzae</i> NT127                     |
| Hin-14-1              | Bacteria | Proteobacteria | Gammaproteobacteria | Pasteurellales | Pasteurellaceae | <i>Haemophilus influenzae</i> PittAA                    |
| Hin-15-1              | Bacteria | Proteobacteria | Gammaproteobacteria | Pasteurellales | Pasteurellaceae | <i>Haemophilus influenzae</i> PittEE                    |
| Hin-16-1              | Bacteria | Proteobacteria | Gammaproteobacteria | Pasteurellales | Pasteurellaceae | <i>Haemophilus influenzae</i> PittHH                    |
| Hin-17-1 to Hin-17-2  | Bacteria | Proteobacteria | Gammaproteobacteria | Pasteurellales | Pasteurellaceae | <i>Haemophilus influenzae</i> PittII                    |
| Hin-18-1 to Hin-18-2  | Bacteria | Proteobacteria | Gammaproteobacteria | Pasteurellales | Pasteurellaceae | <i>Haemophilus influenzae</i> R2846                     |
| Hin-19-1 to Hin-19-2  | Bacteria | Proteobacteria | Gammaproteobacteria | Pasteurellales | Pasteurellaceae | <i>Haemophilus influenzae</i> R2866                     |
| Hin-20-1              | Bacteria | Proteobacteria | Gammaproteobacteria | Pasteurellales | Pasteurellaceae | <i>Haemophilus influenzae</i> Rd KW20                   |
| Hin-21-1              | Bacteria | Proteobacteria | Gammaproteobacteria | Pasteurellales | Pasteurellaceae | <i>Haemophilus influenzae</i> RdAW                      |
| Hma-1-1               | Bacteria | Proteobacteria | Gammaproteobacteria | Pasteurellales | Pasteurellaceae | <i>Haemophilus massiliensis</i>                         |
| Hpa-2-1 to Hpa-2-11   | Bacteria | Proteobacteria | Gammaproteobacteria | Pasteurellales | Pasteurellaceae | <i>Haemophilus parainfluenzae</i>                       |
| Hpa-3-1               | Bacteria | Proteobacteria | Gammaproteobacteria | Pasteurellales | Pasteurellaceae | <i>Haemophilus parainfluenzae</i> ATCC 33392            |
| Hpa-4-1               | Bacteria | Proteobacteria | Gammaproteobacteria | Pasteurellales | Pasteurellaceae | <i>Haemophilus parainfluenzae</i> HK2019                |
| Hpa-5-1               | Bacteria | Proteobacteria | Gammaproteobacteria | Pasteurellales | Pasteurellaceae | <i>Haemophilus parainfluenzae</i> HK262                 |
| Hpa-6-1               | Bacteria | Proteobacteria | Gammaproteobacteria | Pasteurellales | Pasteurellaceae | <i>Haemophilus parainfluenzae</i> T3T1                  |
| Hpa-7-1               | Bacteria | Proteobacteria | Gammaproteobacteria | Pasteurellales | Pasteurellaceae | <i>Haemophilus paraphrohaemolyticus</i> HK411           |
| Hsp-1-1               | Bacteria | Proteobacteria | Gammaproteobacteria | Pasteurellales | Pasteurellaceae | <i>Haemophilus sp.</i> FF7                              |
| Hsp-2-1               | Bacteria | Proteobacteria | Gammaproteobacteria | Pasteurellales | Pasteurellaceae | <i>Haemophilus sp. oral taxon</i> 851 str. F0397        |
| Hsp-3-1               | Bacteria | Proteobacteria | Gammaproteobacteria | Pasteurellales | Pasteurellaceae | <i>Haemophilus sputorum</i> CCUG 13788                  |
| Hsp-4-1               | Bacteria | Proteobacteria | Gammaproteobacteria | Pasteurellales | Pasteurellaceae | <i>Haemophilus sputorum</i> HK 2154                     |
| Mgr-1-1               | Bacteria | Proteobacteria | Gammaproteobacteria | Pasteurellales | Pasteurellaceae | <i>Mannheimia granulomatis</i> DSM 19156                |
| Mha-1-1               | Bacteria | Proteobacteria | Gammaproteobacteria | Pasteurellales | Pasteurellaceae | <i>Mannheimia haemolytica serotype</i> A1/A6 str. PKL10 |
| Mma-3-1               | Bacteria | Proteobacteria | Gammaproteobacteria | Pasteurellales | Pasteurellaceae | <i>Mannheimia massilioguelmaensis</i>                   |
| Msu-2-1               | Bacteria | Proteobacteria | Gammaproteobacteria | Pasteurellales | Pasteurellaceae | <i>Mannheimia succiniciproducens</i> MBEL55E            |
| Mmu-1-1               | Bacteria | Proteobacteria | Gammaproteobacteria | Pasteurellales | Pasteurellaceae | <i>Muribacter muris</i>                                 |
| Nro-1-1               | Bacteria | Proteobacteria | Gammaproteobacteria | Pasteurellales | Pasteurellaceae | <i>Necropsobacter rosorum</i>                           |
| Pbe-2-1               | Bacteria | Proteobacteria | Gammaproteobacteria | Pasteurellales | Pasteurellaceae | <i>Pasteurella bettyae</i> CCUG 2042                    |
| Pda-1-1               | Bacteria | Proteobacteria | Gammaproteobacteria | Pasteurellales | Pasteurellaceae | <i>Pasteurella dagmatis</i> ATCC 43325                  |
| Pmu-1-1               | Bacteria | Proteobacteria | Gammaproteobacteria | Pasteurellales | Pasteurellaceae | <i>Pasteurella multocida</i>                            |
| Pmu-2-1               | Bacteria | Proteobacteria | Gammaproteobacteria | Pasteurellales | Pasteurellaceae | <i>Pasteurella multocida</i> 1500C                      |
| Pmu-3-1               | Bacteria | Proteobacteria | Gammaproteobacteria | Pasteurellales | Pasteurellaceae | <i>Pasteurella multocida</i> 1500E                      |
| Pmu-4-1               | Bacteria | Proteobacteria | Gammaproteobacteria | Pasteurellales | Pasteurellaceae | <i>Pasteurella multocida</i> 2000                       |
| Pmu-5-1               | Bacteria | Proteobacteria | Gammaproteobacteria | Pasteurellales | Pasteurellaceae | <i>Pasteurella multocida</i> 36950                      |
| Pmu-6-1               | Bacteria | Proteobacteria | Gammaproteobacteria | Pasteurellales | Pasteurellaceae | <i>Pasteurella multocida</i> 671/90                     |
| Pmu-7-1               | Bacteria | Proteobacteria | Gammaproteobacteria | Pasteurellales | Pasteurellaceae | <i>Pasteurella multocida</i> 93002                      |
| Pmu-8-1               | Bacteria | Proteobacteria | Gammaproteobacteria | Pasteurellales | Pasteurellaceae | <i>Pasteurella multocida</i> OH1905                     |
| Pmu-9-1               | Bacteria | Proteobacteria | Gammaproteobacteria | Pasteurellales | Pasteurellaceae | <i>Pasteurella multocida</i> P1933                      |
| Pmu-10-1              | Bacteria | Proteobacteria | Gammaproteobacteria | Pasteurellales | Pasteurellaceae | <i>Pasteurella multocida</i> R1IF                       |
| Pmu-11-1              | Bacteria | Proteobacteria | Gammaproteobacteria | Pasteurellales | Pasteurellaceae | <i>Pasteurella multocida subsp. gallicida</i> P1059     |
| Pmu-12-1              | Bacteria | Proteobacteria | Gammaproteobacteria | Pasteurellales | Pasteurellaceae | <i>Pasteurella multocida subsp. gallicida</i> X73       |
| Pmu-13-1 to Pmu-13-12 | Bacteria | Proteobacteria | Gammaproteobacteria | Pasteurellales | Pasteurellaceae | <i>Pasteurella multocida subsp. multocida</i>           |
| Pmu-14-1              | Bacteria | Proteobacteria | Gammaproteobacteria | Pasteurellales | Pasteurellaceae | <i>Pasteurella multocida subsp. multocida</i> OH4807    |
| Pmu-15-1              | Bacteria | Proteobacteria | Gammaproteobacteria | Pasteurellales | Pasteurellaceae | <i>Pasteurella multocida subsp. multocida</i> P1062     |
| Pmu-17-1              | Bacteria | Proteobacteria | Gammaproteobacteria | Pasteurellales | Pasteurellaceae | <i>Pasteurella multocida subsp. multocida str.</i> 3480 |
| Pmu-18-1              | Bacteria | Proteobacteria | Gammaproteobacteria | Pasteurellales | Pasteurellaceae | <i>Pasteurella multocida subsp. multocida str.</i> HB03 |

|                       |          |                |                     |                |                          |                                                                       |
|-----------------------|----------|----------------|---------------------|----------------|--------------------------|-----------------------------------------------------------------------|
| Pmu-19-1              | Bacteria | Proteobacteria | Gammaproteobacteria | Pasteurellales | Pasteurellaceae          | <i>Pasteurella multocida subsp. multocida str.</i> HN06               |
| Pmu-21-1              | Bacteria | Proteobacteria | Gammaproteobacteria | Pasteurellales | Pasteurellaceae          | <i>Pasteurella multocida subsp. multocida str.</i> Pm70               |
| Pmu-20-1              | Bacteria | Proteobacteria | Gammaproteobacteria | Pasteurellales | Pasteurellaceae          | <i>Pasteurella multocida subsp. multocida str.</i> PMTB               |
| Pmu-16-1              | Bacteria | Proteobacteria | Gammaproteobacteria | Pasteurellales | Pasteurellaceae          | <i>Pasteurella multocida subsp. multocida</i> VTCCBAA264              |
| Ppn-1-1               | Bacteria | Proteobacteria | Gammaproteobacteria | Pasteurellales | Pasteurellaceae          | <i>Pasteurella pneumotropica</i> DSM 21403                            |
| Psp-56-1 to Psp-56-3  | Bacteria | Proteobacteria | Gammaproteobacteria | Pasteurellales | Pasteurellaceae          | <i>Pasteurella sp.</i> FF6                                            |
| Rpn-1-1 to Rpn-1-2    | Bacteria | Proteobacteria | Gammaproteobacteria | Pasteurellales | Pasteurellaceae          | <i>Rodentibacter pneumotropicus</i>                                   |
| Vba-1-1               | Bacteria | Proteobacteria | Gammaproteobacteria | Vibrionales    | unclassified Vibrionales | <i>Vibrionales bacterium</i> SWAT-3                                   |
| Afi-2-1               | Bacteria | Proteobacteria | Gammaproteobacteria | Vibrionales    | Vibrionaceae             | <i>Aliivibrio fischeri</i>                                            |
| Afi-3-1               | Bacteria | Proteobacteria | Gammaproteobacteria | Vibrionales    | Vibrionaceae             | <i>Aliivibrio fischeri</i> ZF-211                                     |
| Alo-1-1               | Bacteria | Proteobacteria | Gammaproteobacteria | Vibrionales    | Vibrionaceae             | <i>Aliivibrio logei</i> 5S-186                                        |
| Alo-2-1               | Bacteria | Proteobacteria | Gammaproteobacteria | Vibrionales    | Vibrionaceae             | <i>Aliivibrio logei</i> ATCC 35077                                    |
| Asa-11-1              | Bacteria | Proteobacteria | Gammaproteobacteria | Vibrionales    | Vibrionaceae             | <i>Aliivibrio salmonicida</i> LFI1238                                 |
| Awo-1-1               | Bacteria | Proteobacteria | Gammaproteobacteria | Vibrionales    | Vibrionaceae             | <i>Aliivibrio wodanis</i>                                             |
| Vfi-1-1               | Bacteria | Proteobacteria | Gammaproteobacteria | Vibrionales    | Vibrionaceae             | <i>Aliivibrio Vibrio fischeri</i> ES114                               |
| Vfi-2-1               | Bacteria | Proteobacteria | Gammaproteobacteria | Vibrionales    | Vibrionaceae             | <i>Aliivibrio Vibrio fischeri</i> MJ11                                |
| Vfi-3-1               | Bacteria | Proteobacteria | Gammaproteobacteria | Vibrionales    | Vibrionaceae             | <i>Aliivibrio Vibrio fischeri</i> SR5                                 |
| Eca-4-1               | Bacteria | Proteobacteria | Gammaproteobacteria | Vibrionales    | Vibrionaceae             | <i>Enterovibrio calviensis</i> 1F-211                                 |
| Eca-5-1               | Bacteria | Proteobacteria | Gammaproteobacteria | Vibrionales    | Vibrionaceae             | <i>Enterovibrio calviensis</i> 1F-230                                 |
| Eca-6-1               | Bacteria | Proteobacteria | Gammaproteobacteria | Vibrionales    | Vibrionaceae             | <i>Enterovibrio calviensis</i> DSM 14347                              |
| Eca-7-1               | Bacteria | Proteobacteria | Gammaproteobacteria | Vibrionales    | Vibrionaceae             | <i>Enterovibrio calviensis</i> FF-85                                  |
| Eno-1-1               | Bacteria | Proteobacteria | Gammaproteobacteria | Vibrionales    | Vibrionaceae             | <i>Enterovibrio norvegicus</i> FF-162                                 |
| Eno-2-1               | Bacteria | Proteobacteria | Gammaproteobacteria | Vibrionales    | Vibrionaceae             | <i>Enterovibrio norvegicus</i> FF-33                                  |
| Eno-3-1               | Bacteria | Proteobacteria | Gammaproteobacteria | Vibrionales    | Vibrionaceae             | <i>Enterovibrio norvegicus</i> FF-454                                 |
| Gho-1-1               | Bacteria | Proteobacteria | Gammaproteobacteria | Vibrionales    | Vibrionaceae             | <i>Grimontia hollisae</i> CIP 101886                                  |
| Gsp-3-1               | Bacteria | Proteobacteria | Gammaproteobacteria | Vibrionales    | Vibrionaceae             | <i>Grimontia sp.</i> AD028                                            |
| Gsp-4-1               | Bacteria | Proteobacteria | Gammaproteobacteria | Vibrionales    | Vibrionaceae             | <i>Grimontia sp.</i> AK16                                             |
| Pan-11-1 to Pan-11-12 | Bacteria | Proteobacteria | Gammaproteobacteria | Vibrionales    | Vibrionaceae             | <i>Photobacterium angustum</i>                                        |
| Pan-12-1              | Bacteria | Proteobacteria | Gammaproteobacteria | Vibrionales    | Vibrionaceae             | <i>Photobacterium angustum</i> S14                                    |
| Pap-1-1               | Bacteria | Proteobacteria | Gammaproteobacteria | Vibrionales    | Vibrionaceae             | <i>Photobacterium aphoticum</i>                                       |
| Paq-2-1               | Bacteria | Proteobacteria | Gammaproteobacteria | Vibrionales    | Vibrionaceae             | <i>Photobacterium aquae</i>                                           |
| Pda-2-1               | Bacteria | Proteobacteria | Gammaproteobacteria | Vibrionales    | Vibrionaceae             | <i>Photobacterium damsela subsp. damsela</i>                          |
| Pda-3-1               | Bacteria | Proteobacteria | Gammaproteobacteria | Vibrionales    | Vibrionaceae             | <i>Photobacterium damsela subsp. damsela</i> CIP 102761               |
| Pda-4-1               | Bacteria | Proteobacteria | Gammaproteobacteria | Vibrionales    | Vibrionaceae             | <i>Photobacterium damsela subsp. piscicida</i> DI21                   |
| Pga-1-1               | Bacteria | Proteobacteria | Gammaproteobacteria | Vibrionales    | Vibrionaceae             | <i>Photobacterium gaetbulicola</i>                                    |
| Pga-2-1               | Bacteria | Proteobacteria | Gammaproteobacteria | Vibrionales    | Vibrionaceae             | <i>Photobacterium gaetbulicola</i> Gung47                             |
| Pga-3-1               | Bacteria | Proteobacteria | Gammaproteobacteria | Vibrionales    | Vibrionaceae             | <i>Photobacterium galathea</i>                                        |
| Pga-4-1               | Bacteria | Proteobacteria | Gammaproteobacteria | Vibrionales    | Vibrionaceae             | <i>Photobacterium ganghwense</i>                                      |
| Pha-6-1               | Bacteria | Proteobacteria | Gammaproteobacteria | Vibrionales    | Vibrionaceae             | <i>Photobacterium halotolerans</i>                                    |
| Pha-7-1               | Bacteria | Proteobacteria | Gammaproteobacteria | Vibrionales    | Vibrionaceae             | <i>Photobacterium halotolerans</i> DSM 18316                          |
| Pil-1-1 to Pil-1-2    | Bacteria | Proteobacteria | Gammaproteobacteria | Vibrionales    | Vibrionaceae             | <i>Photobacterium iliopiscarium</i>                                   |
| Pki-1-1 to Pki-1-5    | Bacteria | Proteobacteria | Gammaproteobacteria | Vibrionales    | Vibrionaceae             | <i>Photobacterium kishitanii</i>                                      |
| Ple-1-1 to Ple-1-2    | Bacteria | Proteobacteria | Gammaproteobacteria | Vibrionales    | Vibrionaceae             | <i>Photobacterium leiognathi</i>                                      |
| Ple-2-1               | Bacteria | Proteobacteria | Gammaproteobacteria | Vibrionales    | Vibrionaceae             | <i>Photobacterium leiognathi lriyu.4.1</i>                            |
| Ple-3-1               | Bacteria | Proteobacteria | Gammaproteobacteria | Vibrionales    | Vibrionaceae             | <i>Photobacterium leiognathi subsp. mandapamensis svers.1.1</i>       |
| Pph-1-1               | Bacteria | Proteobacteria | Gammaproteobacteria | Vibrionales    | Vibrionaceae             | <i>Photobacterium phosphoreum</i>                                     |
| Ppr-1-1               | Bacteria | Proteobacteria | Gammaproteobacteria | Vibrionales    | Vibrionaceae             | <i>Photobacterium profundum</i> 3TCK                                  |
| Ppr-2-1               | Bacteria | Proteobacteria | Gammaproteobacteria | Vibrionales    | Vibrionaceae             | <i>Photobacterium profundum</i> SS9                                   |
| Psa-1-1               | Bacteria | Proteobacteria | Gammaproteobacteria | Vibrionales    | Vibrionaceae             | <i>Photobacterium sanctipauli</i>                                     |
| Psp-57-1              | Bacteria | Proteobacteria | Gammaproteobacteria | Vibrionales    | Vibrionaceae             | <i>Photobacterium sp.</i> AK15                                        |
| Psp-58-1              | Bacteria | Proteobacteria | Gammaproteobacteria | Vibrionales    | Vibrionaceae             | <i>Photobacterium sp.</i> SKA34                                       |
| Psw-1-1               | Bacteria | Proteobacteria | Gammaproteobacteria | Vibrionales    | Vibrionaceae             | <i>Photobacterium swingsii</i>                                        |
| Sco-3-1               | Bacteria | Proteobacteria | Gammaproteobacteria | Vibrionales    | Vibrionaceae             | <i>Salinivibrio costicola subsp. costicola</i> ATCC 33508 = LMG 11651 |
| Sso-14-1              | Bacteria | Proteobacteria | Gammaproteobacteria | Vibrionales    | Vibrionaceae             | <i>Salinivibrio socompensis</i> S10B                                  |
| Sso-15-1              | Bacteria | Proteobacteria | Gammaproteobacteria | Vibrionales    | Vibrionaceae             | <i>Salinivibrio socompensis</i> S35                                   |
| Ssp-27-1              | Bacteria | Proteobacteria | Gammaproteobacteria | Vibrionales    | Vibrionaceae             | <i>Salinivibrio sp.</i> KP-1                                          |
| Lan-1-1               | Bacteria | Proteobacteria | Gammaproteobacteria | Vibrionales    | Vibrionaceae             | <i>Vibrio Listonella anguillarum</i> M3                               |
| Val-1-1               | Bacteria | Proteobacteria | Gammaproteobacteria | Vibrionales    | Vibrionaceae             | <i>Vibrio albensis</i> ATCC 14547                                     |
| Val-2-1 to Val-2-9    | Bacteria | Proteobacteria | Gammaproteobacteria | Vibrionales    | Vibrionaceae             | <i>Vibrio alginolyticus</i>                                           |
| Val-3-1               | Bacteria | Proteobacteria | Gammaproteobacteria | Vibrionales    | Vibrionaceae             | <i>Vibrio alginolyticus</i> 12G01                                     |
| Val-4-1               | Bacteria | Proteobacteria | Gammaproteobacteria | Vibrionales    | Vibrionaceae             | <i>Vibrio alginolyticus</i> 40B                                       |
| Val-5-1               | Bacteria | Proteobacteria | Gammaproteobacteria | Vibrionales    | Vibrionaceae             | <i>Vibrio alginolyticus</i> E0666                                     |
| Val-6-1               | Bacteria | Proteobacteria | Gammaproteobacteria | Vibrionales    | Vibrionaceae             | <i>Vibrio alginolyticus</i> NBRC 15630 = ATCC 17749                   |
| Van-1-1               | Bacteria | Proteobacteria | Gammaproteobacteria | Vibrionales    | Vibrionaceae             | <i>Vibrio anguillarum</i>                                             |
| Van-2-1               | Bacteria | Proteobacteria | Gammaproteobacteria | Vibrionales    | Vibrionaceae             | <i>Vibrio anguillarum</i> 775                                         |

|                     |          |                |                     |             |              |                                                  |
|---------------------|----------|----------------|---------------------|-------------|--------------|--------------------------------------------------|
| Van-3-1             | Bacteria | Proteobacteria | Gammaproteobacteria | Vibrionales | Vibrionaceae | <i>Vibrio anguillarum</i> 96F                    |
| Van-4-1             | Bacteria | Proteobacteria | Gammaproteobacteria | Vibrionales | Vibrionaceae | <i>Vibrio anguillarum</i> RV22                   |
| Vaz-1-1 to Vaz-1-2  | Bacteria | Proteobacteria | Gammaproteobacteria | Vibrionales | Vibrionaceae | <i>Vibrio azureus</i> NBRC 104587                |
| Vbr-1-1             | Bacteria | Proteobacteria | Gammaproteobacteria | Vibrionales | Vibrionaceae | <i>Vibrio brasiliensis</i> LMG 20546             |
| Vbr-2-1             | Bacteria | Proteobacteria | Gammaproteobacteria | Vibrionales | Vibrionaceae | <i>Vibrio breoganii</i> 1C10                     |
| Vbr-3-1             | Bacteria | Proteobacteria | Gammaproteobacteria | Vibrionales | Vibrionaceae | <i>Vibrio breoganii</i> ZF-29                    |
| Vbr-4-1             | Bacteria | Proteobacteria | Gammaproteobacteria | Vibrionales | Vibrionaceae | <i>Vibrio breoganii</i> ZF-55                    |
| Vca-1-1 to Vca-1-10 | Bacteria | Proteobacteria | Gammaproteobacteria | Vibrionales | Vibrionaceae | <i>Vibrio campbellii</i>                         |
| Vca-2-1             | Bacteria | Proteobacteria | Gammaproteobacteria | Vibrionales | Vibrionaceae | <i>Vibrio campbellii</i> 200612B                 |
| Vca-3-1             | Bacteria | Proteobacteria | Gammaproteobacteria | Vibrionales | Vibrionaceae | <i>Vibrio campbellii</i> ATCC BAA-1116           |
| Vca-4-1 to Vca-4-2  | Bacteria | Proteobacteria | Gammaproteobacteria | Vibrionales | Vibrionaceae | <i>Vibrio campbellii</i> CAIM 519 = NBRC 15631   |
| Vca-5-1             | Bacteria | Proteobacteria | Gammaproteobacteria | Vibrionales | Vibrionaceae | <i>Vibrio campbellii</i> DS40M4                  |
| Vca-6-1             | Bacteria | Proteobacteria | Gammaproteobacteria | Vibrionales | Vibrionaceae | <i>Vibrio caribbeanicus</i>                      |
| Vca-7-1             | Bacteria | Proteobacteria | Gammaproteobacteria | Vibrionales | Vibrionaceae | <i>Vibrio caribbenthicus</i> ATCC BAA-2122       |
| Vch-1-1             | Bacteria | Proteobacteria | Gammaproteobacteria | Vibrionales | Vibrionaceae | <i>Vibrio cholera</i> CIRS 101                   |
| Vch-2-1 to Vch-2-4  | Bacteria | Proteobacteria | Gammaproteobacteria | Vibrionales | Vibrionaceae | <i>Vibrio cholerae</i>                           |
| Vch-3-1             | Bacteria | Proteobacteria | Gammaproteobacteria | Vibrionales | Vibrionaceae | <i>Vibrio cholerae</i> 12129(1)                  |
| Vch-4-1             | Bacteria | Proteobacteria | Gammaproteobacteria | Vibrionales | Vibrionaceae | <i>Vibrio cholerae</i> 1587                      |
| Vch-5-1             | Bacteria | Proteobacteria | Gammaproteobacteria | Vibrionales | Vibrionaceae | <i>Vibrio cholerae</i> 2011EL-301                |
| Vch-6-1             | Bacteria | Proteobacteria | Gammaproteobacteria | Vibrionales | Vibrionaceae | <i>Vibrio cholerae</i> 2012EL-1759               |
| Vch-7-1             | Bacteria | Proteobacteria | Gammaproteobacteria | Vibrionales | Vibrionaceae | <i>Vibrio cholerae</i> 2740-80                   |
| Vch-8-1             | Bacteria | Proteobacteria | Gammaproteobacteria | Vibrionales | Vibrionaceae | <i>Vibrio cholerae</i> 4260B                     |
| Vch-9-1             | Bacteria | Proteobacteria | Gammaproteobacteria | Vibrionales | Vibrionaceae | <i>Vibrio cholerae</i> 623-39                    |
| Vch-10-1            | Bacteria | Proteobacteria | Gammaproteobacteria | Vibrionales | Vibrionaceae | <i>Vibrio cholerae</i> AM-19226                  |
| Vch-11-1            | Bacteria | Proteobacteria | Gammaproteobacteria | Vibrionales | Vibrionaceae | <i>Vibrio cholerae</i> ATCC 14035                |
| Vch-12-1            | Bacteria | Proteobacteria | Gammaproteobacteria | Vibrionales | Vibrionaceae | <i>Vibrio cholerae</i> B33                       |
| Vch-13-1            | Bacteria | Proteobacteria | Gammaproteobacteria | Vibrionales | Vibrionaceae | <i>Vibrio cholerae</i> BJG-01                    |
| Vch-197-1           | Bacteria | Proteobacteria | Gammaproteobacteria | Vibrionales | Vibrionaceae | <i>Vibrio cholerae</i> bv. <i>albensis</i> VL426 |
| Vch-14-1            | Bacteria | Proteobacteria | Gammaproteobacteria | Vibrionales | Vibrionaceae | <i>Vibrio cholerae</i> BX 330286                 |
| Vch-15-1            | Bacteria | Proteobacteria | Gammaproteobacteria | Vibrionales | Vibrionaceae | <i>Vibrio cholerae</i> CP1030(3)                 |
| Vch-16-1            | Bacteria | Proteobacteria | Gammaproteobacteria | Vibrionales | Vibrionaceae | <i>Vibrio cholerae</i> CP1032(5)                 |
| Vch-17-1            | Bacteria | Proteobacteria | Gammaproteobacteria | Vibrionales | Vibrionaceae | <i>Vibrio cholerae</i> CP1033(6)                 |
| Vch-18-1            | Bacteria | Proteobacteria | Gammaproteobacteria | Vibrionales | Vibrionaceae | <i>Vibrio cholerae</i> CP1035(8)                 |
| Vch-19-1            | Bacteria | Proteobacteria | Gammaproteobacteria | Vibrionales | Vibrionaceae | <i>Vibrio cholerae</i> CP1037(10)                |
| Vch-20-1            | Bacteria | Proteobacteria | Gammaproteobacteria | Vibrionales | Vibrionaceae | <i>Vibrio cholerae</i> CP1038(11)                |
| Vch-21-1            | Bacteria | Proteobacteria | Gammaproteobacteria | Vibrionales | Vibrionaceae | <i>Vibrio cholerae</i> CP1040(13)                |
| Vch-22-1            | Bacteria | Proteobacteria | Gammaproteobacteria | Vibrionales | Vibrionaceae | <i>Vibrio cholerae</i> CP1041(14)                |
| Vch-23-1            | Bacteria | Proteobacteria | Gammaproteobacteria | Vibrionales | Vibrionaceae | <i>Vibrio cholerae</i> CP1042(15)                |
| Vch-24-1            | Bacteria | Proteobacteria | Gammaproteobacteria | Vibrionales | Vibrionaceae | <i>Vibrio cholerae</i> CP1044(17)                |
| Vch-25-1            | Bacteria | Proteobacteria | Gammaproteobacteria | Vibrionales | Vibrionaceae | <i>Vibrio cholerae</i> CP1046(19)                |
| Vch-26-1            | Bacteria | Proteobacteria | Gammaproteobacteria | Vibrionales | Vibrionaceae | <i>Vibrio cholerae</i> CP1047(20)                |
| Vch-27-1            | Bacteria | Proteobacteria | Gammaproteobacteria | Vibrionales | Vibrionaceae | <i>Vibrio cholerae</i> CP1048(21)                |
| Vch-28-1            | Bacteria | Proteobacteria | Gammaproteobacteria | Vibrionales | Vibrionaceae | <i>Vibrio cholerae</i> CP1050(23)                |
| Vch-29-1            | Bacteria | Proteobacteria | Gammaproteobacteria | Vibrionales | Vibrionaceae | <i>Vibrio cholerae</i> CP1110                    |
| Vch-30-1            | Bacteria | Proteobacteria | Gammaproteobacteria | Vibrionales | Vibrionaceae | <i>Vibrio cholerae</i> CP1111                    |
| Vch-31-1            | Bacteria | Proteobacteria | Gammaproteobacteria | Vibrionales | Vibrionaceae | <i>Vibrio cholerae</i> CP1112                    |
| Vch-32-1            | Bacteria | Proteobacteria | Gammaproteobacteria | Vibrionales | Vibrionaceae | <i>Vibrio cholerae</i> CP1113                    |
| Vch-33-1            | Bacteria | Proteobacteria | Gammaproteobacteria | Vibrionales | Vibrionaceae | <i>Vibrio cholerae</i> CP1114                    |
| Vch-34-1            | Bacteria | Proteobacteria | Gammaproteobacteria | Vibrionales | Vibrionaceae | <i>Vibrio cholerae</i> CP1115                    |
| Vch-35-1            | Bacteria | Proteobacteria | Gammaproteobacteria | Vibrionales | Vibrionaceae | <i>Vibrio cholerae</i> CP1116                    |
| Vch-36-1            | Bacteria | Proteobacteria | Gammaproteobacteria | Vibrionales | Vibrionaceae | <i>Vibrio cholerae</i> CP1117                    |
| Vch-37-1            | Bacteria | Proteobacteria | Gammaproteobacteria | Vibrionales | Vibrionaceae | <i>Vibrio cholerae</i> CT 5369-93                |
| Vch-38-1            | Bacteria | Proteobacteria | Gammaproteobacteria | Vibrionales | Vibrionaceae | <i>Vibrio cholerae</i> E306                      |
| Vch-39-1            | Bacteria | Proteobacteria | Gammaproteobacteria | Vibrionales | Vibrionaceae | <i>Vibrio cholerae</i> H1                        |
| Vch-40-1            | Bacteria | Proteobacteria | Gammaproteobacteria | Vibrionales | Vibrionaceae | <i>Vibrio cholerae</i> HC-02A1                   |
| Vch-41-1            | Bacteria | Proteobacteria | Gammaproteobacteria | Vibrionales | Vibrionaceae | <i>Vibrio cholerae</i> HC-02C1                   |
| Vch-42-1            | Bacteria | Proteobacteria | Gammaproteobacteria | Vibrionales | Vibrionaceae | <i>Vibrio cholerae</i> HC-06A1                   |
| Vch-43-1            | Bacteria | Proteobacteria | Gammaproteobacteria | Vibrionales | Vibrionaceae | <i>Vibrio cholerae</i> HC-17A1                   |
| Vch-44-1            | Bacteria | Proteobacteria | Gammaproteobacteria | Vibrionales | Vibrionaceae | <i>Vibrio cholerae</i> HC-17A2                   |
| Vch-45-1            | Bacteria | Proteobacteria | Gammaproteobacteria | Vibrionales | Vibrionaceae | <i>Vibrio cholerae</i> HC-19A1                   |
| Vch-46-1            | Bacteria | Proteobacteria | Gammaproteobacteria | Vibrionales | Vibrionaceae | <i>Vibrio cholerae</i> HC-1A2                    |
| Vch-47-1            | Bacteria | Proteobacteria | Gammaproteobacteria | Vibrionales | Vibrionaceae | <i>Vibrio cholerae</i> HC-20A2                   |
| Vch-48-1            | Bacteria | Proteobacteria | Gammaproteobacteria | Vibrionales | Vibrionaceae | <i>Vibrio cholerae</i> HC-21A1                   |
| Vch-49-1            | Bacteria | Proteobacteria | Gammaproteobacteria | Vibrionales | Vibrionaceae | <i>Vibrio cholerae</i> HC-22A1                   |
| Vch-50-1            | Bacteria | Proteobacteria | Gammaproteobacteria | Vibrionales | Vibrionaceae | <i>Vibrio cholerae</i> HC-23A1                   |







|                    |          |                |                     |             |              |                                            |
|--------------------|----------|----------------|---------------------|-------------|--------------|--------------------------------------------|
| Vch-182-1          | Bacteria | Proteobacteria | Gammaproteobacteria | Vibrionales | Vibrionaceae | <i>Vibrio cholerae</i> PhVC-311            |
| Vch-183-1          | Bacteria | Proteobacteria | Gammaproteobacteria | Vibrionales | Vibrionaceae | <i>Vibrio cholerae</i> PhVC-326            |
| Vch-184-1          | Bacteria | Proteobacteria | Gammaproteobacteria | Vibrionales | Vibrionaceae | <i>Vibrio cholerae</i> PhVE-5              |
| Vch-181-1          | Bacteria | Proteobacteria | Gammaproteobacteria | Vibrionales | Vibrionaceae | <i>Vibrio cholerae</i> PS15                |
| Vch-185-1          | Bacteria | Proteobacteria | Gammaproteobacteria | Vibrionales | Vibrionaceae | <i>Vibrio cholerae</i> RC27                |
| Vch-186-1          | Bacteria | Proteobacteria | Gammaproteobacteria | Vibrionales | Vibrionaceae | <i>Vibrio cholerae</i> RC385               |
| Vch-187-1          | Bacteria | Proteobacteria | Gammaproteobacteria | Vibrionales | Vibrionaceae | <i>Vibrio cholerae</i> RC9                 |
| Vch-188-1          | Bacteria | Proteobacteria | Gammaproteobacteria | Vibrionales | Vibrionaceae | <i>Vibrio cholerae</i> TM 11079-80         |
| Vch-189-1          | Bacteria | Proteobacteria | Gammaproteobacteria | Vibrionales | Vibrionaceae | <i>Vibrio cholerae</i> TMA 21              |
| Vch-190-1          | Bacteria | Proteobacteria | Gammaproteobacteria | Vibrionales | Vibrionaceae | <i>Vibrio cholerae</i> V51                 |
| Vch-191-1          | Bacteria | Proteobacteria | Gammaproteobacteria | Vibrionales | Vibrionaceae | <i>Vibrio cholerae</i> V52                 |
| Vch-192-1          | Bacteria | Proteobacteria | Gammaproteobacteria | Vibrionales | Vibrionaceae | <i>Vibrio cholerae</i> VC1761              |
| Vch-193-1          | Bacteria | Proteobacteria | Gammaproteobacteria | Vibrionales | Vibrionaceae | <i>Vibrio cholerae</i> VC35                |
| Vch-194-1          | Bacteria | Proteobacteria | Gammaproteobacteria | Vibrionales | Vibrionaceae | <i>Vibrio cholerae</i> VC4370              |
| Vch-195-1          | Bacteria | Proteobacteria | Gammaproteobacteria | Vibrionales | Vibrionaceae | <i>Vibrio cholerae</i> VCC19               |
| Vch-196-1          | Bacteria | Proteobacteria | Gammaproteobacteria | Vibrionales | Vibrionaceae | <i>Vibrio cholerae</i> ZWU0020             |
| Vco-1-1 to Vco-1-2 | Bacteria | Proteobacteria | Gammaproteobacteria | Vibrionales | Vibrionaceae | <i>Vibrio coralliilyticus</i>              |
| Vco-2-1            | Bacteria | Proteobacteria | Gammaproteobacteria | Vibrionales | Vibrionaceae | <i>Vibrio coralliilyticus</i> ATCC BAA-450 |
| Vco-3-1            | Bacteria | Proteobacteria | Gammaproteobacteria | Vibrionales | Vibrionaceae | <i>Vibrio coralliilyticus</i> P1           |
| Vcr-1-1 to Vcr-1-6 | Bacteria | Proteobacteria | Gammaproteobacteria | Vibrionales | Vibrionaceae | <i>Vibrio crassostreae</i>                 |
| Vcr-2-1            | Bacteria | Proteobacteria | Gammaproteobacteria | Vibrionales | Vibrionaceae | <i>Vibrio crassostreae</i> 9CS106          |
| Vcr-3-1            | Bacteria | Proteobacteria | Gammaproteobacteria | Vibrionales | Vibrionaceae | <i>Vibrio crassostreae</i> 9ZC13           |
| Vcr-4-1            | Bacteria | Proteobacteria | Gammaproteobacteria | Vibrionales | Vibrionaceae | <i>Vibrio crassostreae</i> 9ZC77           |
| Vcr-5-1            | Bacteria | Proteobacteria | Gammaproteobacteria | Vibrionales | Vibrionaceae | <i>Vibrio crassostreae</i> 9ZC88           |
| Vcr-6-1            | Bacteria | Proteobacteria | Gammaproteobacteria | Vibrionales | Vibrionaceae | <i>Vibrio crassostreae</i> ZF-91           |
| Vcy-1-1            | Bacteria | Proteobacteria | Gammaproteobacteria | Vibrionales | Vibrionaceae | <i>Vibrio cyclitrophicus</i> 1F111         |
| Vcy-2-1            | Bacteria | Proteobacteria | Gammaproteobacteria | Vibrionales | Vibrionaceae | <i>Vibrio cyclitrophicus</i> 1F175         |
| Vcy-3-1            | Bacteria | Proteobacteria | Gammaproteobacteria | Vibrionales | Vibrionaceae | <i>Vibrio cyclitrophicus</i> 1F273         |
| Vcy-4-1            | Bacteria | Proteobacteria | Gammaproteobacteria | Vibrionales | Vibrionaceae | <i>Vibrio cyclitrophicus</i> 1F289         |
| Vcy-5-1            | Bacteria | Proteobacteria | Gammaproteobacteria | Vibrionales | Vibrionaceae | <i>Vibrio cyclitrophicus</i> 1F53          |
| Vcy-6-1            | Bacteria | Proteobacteria | Gammaproteobacteria | Vibrionales | Vibrionaceae | <i>Vibrio cyclitrophicus</i> 1F97          |
| Vcy-7-1            | Bacteria | Proteobacteria | Gammaproteobacteria | Vibrionales | Vibrionaceae | <i>Vibrio cyclitrophicus</i> FF160         |
| Vcy-8-1            | Bacteria | Proteobacteria | Gammaproteobacteria | Vibrionales | Vibrionaceae | <i>Vibrio cyclitrophicus</i> FF274         |
| Vcy-9-1            | Bacteria | Proteobacteria | Gammaproteobacteria | Vibrionales | Vibrionaceae | <i>Vibrio cyclitrophicus</i> FF75          |
| Vcy-10-1           | Bacteria | Proteobacteria | Gammaproteobacteria | Vibrionales | Vibrionaceae | <i>Vibrio cyclitrophicus</i> ZF14          |
| Vcy-11-1           | Bacteria | Proteobacteria | Gammaproteobacteria | Vibrionales | Vibrionaceae | <i>Vibrio cyclitrophicus</i> ZF170         |
| Vcy-12-1           | Bacteria | Proteobacteria | Gammaproteobacteria | Vibrionales | Vibrionaceae | <i>Vibrio cyclitrophicus</i> ZF205         |
| Vcy-13-1           | Bacteria | Proteobacteria | Gammaproteobacteria | Vibrionales | Vibrionaceae | <i>Vibrio cyclitrophicus</i> ZF207         |
| Vcy-14-1           | Bacteria | Proteobacteria | Gammaproteobacteria | Vibrionales | Vibrionaceae | <i>Vibrio cyclitrophicus</i> ZF255         |
| Vcy-15-1           | Bacteria | Proteobacteria | Gammaproteobacteria | Vibrionales | Vibrionaceae | <i>Vibrio cyclitrophicus</i> ZF264         |
| Vcy-16-1           | Bacteria | Proteobacteria | Gammaproteobacteria | Vibrionales | Vibrionaceae | <i>Vibrio cyclitrophicus</i> ZF270         |
| Vcy-17-1           | Bacteria | Proteobacteria | Gammaproteobacteria | Vibrionales | Vibrionaceae | <i>Vibrio cyclitrophicus</i> ZF28          |
| Vcy-18-1           | Bacteria | Proteobacteria | Gammaproteobacteria | Vibrionales | Vibrionaceae | <i>Vibrio cyclitrophicus</i> ZF30          |
| Vcy-19-1           | Bacteria | Proteobacteria | Gammaproteobacteria | Vibrionales | Vibrionaceae | <i>Vibrio cyclitrophicus</i> ZF65          |
| Vcy-20-1           | Bacteria | Proteobacteria | Gammaproteobacteria | Vibrionales | Vibrionaceae | <i>Vibrio cyclitrophicus</i> ZF99          |
| Vdi-1-1            | Bacteria | Proteobacteria | Gammaproteobacteria | Vibrionales | Vibrionaceae | <i>Vibrio diabolicus</i>                   |
| Vdi-2-1            | Bacteria | Proteobacteria | Gammaproteobacteria | Vibrionales | Vibrionaceae | <i>Vibrio diazotrophicus</i> NBRC 103148   |
| Ve-1-1             | Bacteria | Proteobacteria | Gammaproteobacteria | Vibrionales | Vibrionaceae | <i>Vibrio ezurae</i> NBRC 102218           |
| Vfl-1-1            | Bacteria | Proteobacteria | Gammaproteobacteria | Vibrionales | Vibrionaceae | <i>Vibrio fluvialis</i>                    |
| Vfl-2-1            | Bacteria | Proteobacteria | Gammaproteobacteria | Vibrionales | Vibrionaceae | <i>Vibrio fluvialis</i> 539                |
| Vfl-3-1            | Bacteria | Proteobacteria | Gammaproteobacteria | Vibrionales | Vibrionaceae | <i>Vibrio fluvialis</i> 560                |
| Vfl-4-1            | Bacteria | Proteobacteria | Gammaproteobacteria | Vibrionales | Vibrionaceae | <i>Vibrio fluvialis</i> I21563             |
| Vfl-5-1            | Bacteria | Proteobacteria | Gammaproteobacteria | Vibrionales | Vibrionaceae | <i>Vibrio fluvialis</i> PG41               |
| Vfo-1-1            | Bacteria | Proteobacteria | Gammaproteobacteria | Vibrionales | Vibrionaceae | <i>Vibrio fortis</i>                       |
| Vfu-1-1            | Bacteria | Proteobacteria | Gammaproteobacteria | Vibrionales | Vibrionaceae | <i>Vibrio furnissii</i> CIP 102972         |
| Vfu-2-1            | Bacteria | Proteobacteria | Gammaproteobacteria | Vibrionales | Vibrionaceae | <i>Vibrio furnissii</i> NCTC 11218         |
| Vfu-3-1            | Bacteria | Proteobacteria | Gammaproteobacteria | Vibrionales | Vibrionaceae | <i>Vibrio furnissii</i> ZOR0035            |
| Vga-1-1            | Bacteria | Proteobacteria | Gammaproteobacteria | Vibrionales | Vibrionaceae | <i>Vibrio galathea</i>                     |
| Vge-1-1            | Bacteria | Proteobacteria | Gammaproteobacteria | Vibrionales | Vibrionaceae | <i>Vibrio genomosp.</i> F10 str. 9ZB36     |
| Vge-2-1            | Bacteria | Proteobacteria | Gammaproteobacteria | Vibrionales | Vibrionaceae | <i>Vibrio genomosp.</i> F10 str. 9ZC157    |
| Vge-3-1            | Bacteria | Proteobacteria | Gammaproteobacteria | Vibrionales | Vibrionaceae | <i>Vibrio genomosp.</i> F10 str. 9ZD137    |
| Vge-4-1            | Bacteria | Proteobacteria | Gammaproteobacteria | Vibrionales | Vibrionaceae | <i>Vibrio genomosp.</i> F10 str. ZF-129    |
| Vge-5-1            | Bacteria | Proteobacteria | Gammaproteobacteria | Vibrionales | Vibrionaceae | <i>Vibrio genomosp.</i> F6 str. FF-238     |
| Vha-1-1            | Bacteria | Proteobacteria | Gammaproteobacteria | Vibrionales | Vibrionaceae | <i>Vibrio haliotocoli</i> NBRC 102217      |
| Vha-2-1            | Bacteria | Proteobacteria | Gammaproteobacteria | Vibrionales | Vibrionaceae | <i>Vibrio harveyi</i>                      |

|                    |          |                |                     |             |              |                                                                   |
|--------------------|----------|----------------|---------------------|-------------|--------------|-------------------------------------------------------------------|
| Vha-3-1            | Bacteria | Proteobacteria | Gammaproteobacteria | Vibrionales | Vibrionaceae | <i>Vibrio harveyi</i> 1DA3                                        |
| Vha-4-1            | Bacteria | Proteobacteria | Gammaproteobacteria | Vibrionales | Vibrionaceae | <i>Vibrio harveyi</i> AOD131                                      |
| Vha-5-1            | Bacteria | Proteobacteria | Gammaproteobacteria | Vibrionales | Vibrionaceae | <i>Vibrio harveyi</i> ATCC BAA-1116                               |
| Vha-6-1            | Bacteria | Proteobacteria | Gammaproteobacteria | Vibrionales | Vibrionaceae | <i>Vibrio harveyi</i> CAIM 1792                                   |
| Vha-7-1            | Bacteria | Proteobacteria | Gammaproteobacteria | Vibrionales | Vibrionaceae | <i>Vibrio harveyi</i> E385                                        |
| Vha-8-1            | Bacteria | Proteobacteria | Gammaproteobacteria | Vibrionales | Vibrionaceae | <i>Vibrio harveyi</i> HY01                                        |
| Vha-9-1 to Vha-9-2 | Bacteria | Proteobacteria | Gammaproteobacteria | Vibrionales | Vibrionaceae | <i>Vibrio harveyi</i> NBRC 15634 = ATCC 14126                     |
| Vha-10-1           | Bacteria | Proteobacteria | Gammaproteobacteria | Vibrionales | Vibrionaceae | <i>Vibrio harveyi</i> VHJR4                                       |
| Vha-11-1           | Bacteria | Proteobacteria | Gammaproteobacteria | Vibrionales | Vibrionaceae | <i>Vibrio harveyi</i> VHJR7                                       |
| Vha-12-1           | Bacteria | Proteobacteria | Gammaproteobacteria | Vibrionales | Vibrionaceae | <i>Vibrio harveyi</i> ZJ0603                                      |
| Vhy-1-1 to Vhy-1-3 | Bacteria | Proteobacteria | Gammaproteobacteria | Vibrionales | Vibrionaceae | <i>Vibrio hyugaensis</i>                                          |
| Vic-1-1            | Bacteria | Proteobacteria | Gammaproteobacteria | Vibrionales | Vibrionaceae | <i>Vibrio ichthyenteri</i> ATCC 700023                            |
| Vja-1-1 to Vja-1-2 | Bacteria | Proteobacteria | Gammaproteobacteria | Vibrionales | Vibrionaceae | <i>Vibrio jasicida</i>                                            |
| Vja-2-1            | Bacteria | Proteobacteria | Gammaproteobacteria | Vibrionales | Vibrionaceae | <i>Vibrio jasicida</i> 090810c                                    |
| Vja-3-1            | Bacteria | Proteobacteria | Gammaproteobacteria | Vibrionales | Vibrionaceae | <i>Vibrio jasicida</i> CAIM 1864 = LMG 25398                      |
| Vja-4-1            | Bacteria | Proteobacteria | Gammaproteobacteria | Vibrionales | Vibrionaceae | <i>Vibrio jasicida</i> MWB 21                                     |
| Vka-1-1            | Bacteria | Proteobacteria | Gammaproteobacteria | Vibrionales | Vibrionaceae | <i>Vibrio kanaloe</i> 5S-149                                      |
| Vle-1-1            | Bacteria | Proteobacteria | Gammaproteobacteria | Vibrionales | Vibrionaceae | <i>Vibrio lentus</i>                                              |
| Vli-1-1            | Bacteria | Proteobacteria | Gammaproteobacteria | Vibrionales | Vibrionaceae | <i>Vibrio litoralis</i> DSM 17657                                 |
| Vma-1-1 to Vma-1-2 | Bacteria | Proteobacteria | Gammaproteobacteria | Vibrionales | Vibrionaceae | <i>Vibrio maritimus</i>                                           |
| Vme-1-1            | Bacteria | Proteobacteria | Gammaproteobacteria | Vibrionales | Vibrionaceae | <i>Vibrio metschnikovii</i> CIP 69.14                             |
| Vme-2-1            | Bacteria | Proteobacteria | Gammaproteobacteria | Vibrionales | Vibrionaceae | <i>Vibrio mexicanus</i>                                           |
| Vmi-1-1            | Bacteria | Proteobacteria | Gammaproteobacteria | Vibrionales | Vibrionaceae | <i>Vibrio mimicus</i> CAIM 1883                                   |
| Vmi-2-1            | Bacteria | Proteobacteria | Gammaproteobacteria | Vibrionales | Vibrionaceae | <i>Vibrio mimicus</i> CAIM 602                                    |
| Vmi-3-1            | Bacteria | Proteobacteria | Gammaproteobacteria | Vibrionales | Vibrionaceae | <i>Vibrio mimicus</i> MB-451                                      |
| Vmi-4-1            | Bacteria | Proteobacteria | Gammaproteobacteria | Vibrionales | Vibrionaceae | <i>Vibrio mimicus</i> SX-4                                        |
| Vmi-5-1            | Bacteria | Proteobacteria | Gammaproteobacteria | Vibrionales | Vibrionaceae | <i>Vibrio mimicus</i> VM223                                       |
| Vmi-6-1            | Bacteria | Proteobacteria | Gammaproteobacteria | Vibrionales | Vibrionaceae | <i>Vibrio mimicus</i> VM573                                       |
| Vmi-7-1            | Bacteria | Proteobacteria | Gammaproteobacteria | Vibrionales | Vibrionaceae | <i>Vibrio mimicus</i> VM603                                       |
| Vmy-1-1            | Bacteria | Proteobacteria | Gammaproteobacteria | Vibrionales | Vibrionaceae | <i>Vibrio mytili</i>                                              |
| Vna-1-1 to Vna-1-2 | Bacteria | Proteobacteria | Gammaproteobacteria | Vibrionales | Vibrionaceae | <i>Vibrio natriegens</i> NBRC 15636 = ATCC 14048 = DSM 759        |
| Vna-2-1 to Vna-2-4 | Bacteria | Proteobacteria | Gammaproteobacteria | Vibrionales | Vibrionaceae | <i>Vibrio navarrensis</i>                                         |
| Vne-1-1            | Bacteria | Proteobacteria | Gammaproteobacteria | Vibrionales | Vibrionaceae | <i>Vibrio neptunius</i>                                           |
| Vne-2-1            | Bacteria | Proteobacteria | Gammaproteobacteria | Vibrionales | Vibrionaceae | <i>Vibrio nereis</i>                                              |
| Vni-1-1            | Bacteria | Proteobacteria | Gammaproteobacteria | Vibrionales | Vibrionaceae | <i>Vibrio nigripulchritudo</i>                                    |
| Vni-2-1            | Bacteria | Proteobacteria | Gammaproteobacteria | Vibrionales | Vibrionaceae | <i>Vibrio nigripulchritudo</i> AM115                              |
| Vni-3-1            | Bacteria | Proteobacteria | Gammaproteobacteria | Vibrionales | Vibrionaceae | <i>Vibrio nigripulchritudo</i> ATCC 27043                         |
| Vni-4-1            | Bacteria | Proteobacteria | Gammaproteobacteria | Vibrionales | Vibrionaceae | <i>Vibrio nigripulchritudo</i> BLFn1                              |
| Vni-5-1            | Bacteria | Proteobacteria | Gammaproteobacteria | Vibrionales | Vibrionaceae | <i>Vibrio nigripulchritudo</i> ENn2                               |
| Vni-6-1            | Bacteria | Proteobacteria | Gammaproteobacteria | Vibrionales | Vibrionaceae | <i>Vibrio nigripulchritudo</i> FTn2                               |
| Vni-7-1            | Bacteria | Proteobacteria | Gammaproteobacteria | Vibrionales | Vibrionaceae | <i>Vibrio nigripulchritudo</i> MADA3029                           |
| Vni-8-1            | Bacteria | Proteobacteria | Gammaproteobacteria | Vibrionales | Vibrionaceae | <i>Vibrio nigripulchritudo</i> Pon4                               |
| Vni-9-1            | Bacteria | Proteobacteria | Gammaproteobacteria | Vibrionales | Vibrionaceae | <i>Vibrio nigripulchritudo</i> SFn118                             |
| Vni-10-1           | Bacteria | Proteobacteria | Gammaproteobacteria | Vibrionales | Vibrionaceae | <i>Vibrio nigripulchritudo</i> SFn135                             |
| Vni-11-1           | Bacteria | Proteobacteria | Gammaproteobacteria | Vibrionales | Vibrionaceae | <i>Vibrio nigripulchritudo</i> SFn27                              |
| Vni-12-1           | Bacteria | Proteobacteria | Gammaproteobacteria | Vibrionales | Vibrionaceae | <i>Vibrio nigripulchritudo</i> SO65                               |
| Vni-13-1           | Bacteria | Proteobacteria | Gammaproteobacteria | Vibrionales | Vibrionaceae | <i>Vibrio nigripulchritudo</i> SOn1                               |
| Vni-14-1           | Bacteria | Proteobacteria | Gammaproteobacteria | Vibrionales | Vibrionaceae | <i>Vibrio nigripulchritudo</i> Wn13                               |
| Vor-1-1            | Bacteria | Proteobacteria | Gammaproteobacteria | Vibrionales | Vibrionaceae | <i>Vibrio ordalii</i> 12B09                                       |
| Vor-2-1            | Bacteria | Proteobacteria | Gammaproteobacteria | Vibrionales | Vibrionaceae | <i>Vibrio ordalii</i> ATCC 33509                                  |
| Vor-3-1            | Bacteria | Proteobacteria | Gammaproteobacteria | Vibrionales | Vibrionaceae | <i>Vibrio ordalii</i> FF-167                                      |
| Vor-4-1            | Bacteria | Proteobacteria | Gammaproteobacteria | Vibrionales | Vibrionaceae | <i>Vibrio ordalii</i> FF-93                                       |
| Vor-5-1            | Bacteria | Proteobacteria | Gammaproteobacteria | Vibrionales | Vibrionaceae | <i>Vibrio ordalii</i> FS-144                                      |
| Vor-6-1            | Bacteria | Proteobacteria | Gammaproteobacteria | Vibrionales | Vibrionaceae | <i>Vibrio ordalii</i> FS-238                                      |
| Vhe-1-1            | Bacteria | Proteobacteria | Gammaproteobacteria | Vibrionales | Vibrionaceae | <i>Vibrio oreintalis</i> group <i>Vibrio hepatarius</i>           |
| Vsi-1-1 to Vsi-1-4 | Bacteria | Proteobacteria | Gammaproteobacteria | Vibrionales | Vibrionaceae | <i>Vibrio oreintalis</i> group <i>Vibrio sinaloensis</i>          |
| Vtu-1-1            | Bacteria | Proteobacteria | Gammaproteobacteria | Vibrionales | Vibrionaceae | <i>Vibrio oreintalis</i> group <i>Vibrio tubiashii</i>            |
| Vtu-2-1 to Vtu-2-2 | Bacteria | Proteobacteria | Gammaproteobacteria | Vibrionales | Vibrionaceae | <i>Vibrio oreintalis</i> group <i>Vibrio tubiashii</i> ATCC 19109 |
| Vor-7-1            | Bacteria | Proteobacteria | Gammaproteobacteria | Vibrionales | Vibrionaceae | <i>Vibrio orientalis</i> CIP 102891                               |
| Vor-8-1            | Bacteria | Proteobacteria | Gammaproteobacteria | Vibrionales | Vibrionaceae | <i>Vibrio orientalis</i> CIP 102891 = ATCC 33934                  |
| Vow-2-1 to Vow-2-4 | Bacteria | Proteobacteria | Gammaproteobacteria | Vibrionales | Vibrionaceae | <i>Vibrio owensii</i>                                             |
| Vow-3-1            | Bacteria | Proteobacteria | Gammaproteobacteria | Vibrionales | Vibrionaceae | <i>Vibrio owensii</i> 47666-1                                     |
| Vow-4-1            | Bacteria | Proteobacteria | Gammaproteobacteria | Vibrionales | Vibrionaceae | <i>Vibrio owensii</i> ATCC 25919                                  |
| Vow-5-1            | Bacteria | Proteobacteria | Gammaproteobacteria | Vibrionales | Vibrionaceae | <i>Vibrio owensii</i> CAIM 1854 = LMG 25443                       |
| Vow-1-1            | Bacteria | Proteobacteria | Gammaproteobacteria | Vibrionales | Vibrionaceae | <i>Vibrio owensii</i> CAIM 1854 = LMG 25443                       |











|                    |            |                |                     |                     |                   |                            |                                 |
|--------------------|------------|----------------|---------------------|---------------------|-------------------|----------------------------|---------------------------------|
| Vsp-2-1            | Bacteria   | Proteobacteria | Gammaproteobacteria | Vibrionales         | Vibrionaceae      | <i>Vibrio sp.</i>          | AND4                            |
| Vsp-3-1            | Bacteria   | Proteobacteria | Gammaproteobacteria | Vibrionales         | Vibrionaceae      | <i>Vibrio sp.</i>          | B183                            |
| Vsp-4-1            | Bacteria   | Proteobacteria | Gammaproteobacteria | Vibrionales         | Vibrionaceae      | <i>Vibrio sp.</i>          | ECSMB14105                      |
| Vsp-5-1            | Bacteria   | Proteobacteria | Gammaproteobacteria | Vibrionales         | Vibrionaceae      | <i>Vibrio sp.</i>          | ECSMB14106                      |
| Vsp-6-1            | Bacteria   | Proteobacteria | Gammaproteobacteria | Vibrionales         | Vibrionaceae      | <i>Vibrio sp.</i>          | EJY3                            |
| Vsp-7-1            | Bacteria   | Proteobacteria | Gammaproteobacteria | Vibrionales         | Vibrionaceae      | <i>Vibrio sp.</i>          | ER1A                            |
| Vsp-8-1            | Bacteria   | Proteobacteria | Gammaproteobacteria | Vibrionales         | Vibrionaceae      | <i>Vibrio sp.</i>          | Ex25                            |
| Vsp-9-1            | Bacteria   | Proteobacteria | Gammaproteobacteria | Vibrionales         | Vibrionaceae      | <i>Vibrio sp.</i>          | HENC-01                         |
| Vsp-10-1           | Bacteria   | Proteobacteria | Gammaproteobacteria | Vibrionales         | Vibrionaceae      | <i>Vibrio sp.</i>          | HENC-03                         |
| Vsp-11-1           | Bacteria   | Proteobacteria | Gammaproteobacteria | Vibrionales         | Vibrionaceae      | <i>Vibrio sp.</i>          | J2-1                            |
| Vsp-12-1           | Bacteria   | Proteobacteria | Gammaproteobacteria | Vibrionales         | Vibrionaceae      | <i>Vibrio sp.</i>          | J2-12                           |
| Vsp-13-1           | Bacteria   | Proteobacteria | Gammaproteobacteria | Vibrionales         | Vibrionaceae      | <i>Vibrio sp.</i>          | J2-15                           |
| Vsp-14-1           | Bacteria   | Proteobacteria | Gammaproteobacteria | Vibrionales         | Vibrionaceae      | <i>Vibrio sp.</i>          | J2-17                           |
| Vsp-15-1           | Bacteria   | Proteobacteria | Gammaproteobacteria | Vibrionales         | Vibrionaceae      | <i>Vibrio sp.</i>          | J2-26                           |
| Vsp-16-1           | Bacteria   | Proteobacteria | Gammaproteobacteria | Vibrionales         | Vibrionaceae      | <i>Vibrio sp.</i>          | J2-29                           |
| Vsp-17-1           | Bacteria   | Proteobacteria | Gammaproteobacteria | Vibrionales         | Vibrionaceae      | <i>Vibrio sp.</i>          | J2-3                            |
| Vsp-18-1           | Bacteria   | Proteobacteria | Gammaproteobacteria | Vibrionales         | Vibrionaceae      | <i>Vibrio sp.</i>          | J2-31                           |
| Vsp-19-1           | Bacteria   | Proteobacteria | Gammaproteobacteria | Vibrionales         | Vibrionaceae      | <i>Vibrio sp.</i>          | J2-4                            |
| Vsp-20-1           | Bacteria   | Proteobacteria | Gammaproteobacteria | Vibrionales         | Vibrionaceae      | <i>Vibrio sp.</i>          | J2-6                            |
| Vsp-21-1           | Bacteria   | Proteobacteria | Gammaproteobacteria | Vibrionales         | Vibrionaceae      | <i>Vibrio sp.</i>          | J2-8                            |
| Vsp-22-1           | Bacteria   | Proteobacteria | Gammaproteobacteria | Vibrionales         | Vibrionaceae      | <i>Vibrio sp.</i>          | MED222                          |
| Vsp-23-1           | Bacteria   | Proteobacteria | Gammaproteobacteria | Vibrionales         | Vibrionaceae      | <i>Vibrio sp.</i>          | N418                            |
| Vsp-24-1           | Bacteria   | Proteobacteria | Gammaproteobacteria | Vibrionales         | Vibrionaceae      | <i>Vibrio sp.</i>          | OY15                            |
| Vsp-25-1           | Bacteria   | Proteobacteria | Gammaproteobacteria | Vibrionales         | Vibrionaceae      | <i>Vibrio sp.</i>          | RC341                           |
| Vsp-26-1           | Bacteria   | Proteobacteria | Gammaproteobacteria | Vibrionales         | Vibrionaceae      | <i>Vibrio sp.</i>          | RC586                           |
| Vsp-27-1           | Bacteria   | Proteobacteria | Gammaproteobacteria | Vibrionales         | Vibrionaceae      | <i>Vibrio sp.</i>          | S234-5                          |
| Vsp-28-1           | Bacteria   | Proteobacteria | Gammaproteobacteria | Vibrionales         | Vibrionaceae      | <i>Vibrio sp.</i>          | S457-15                         |
| Vsp-29-1           | Bacteria   | Proteobacteria | Gammaproteobacteria | Vibrionales         | Vibrionaceae      | <i>Vibrio sp.</i>          | S512-13                         |
| Vsp-31-1           | Bacteria   | Proteobacteria | Gammaproteobacteria | Vibrionales         | Vibrionaceae      | <i>Vibrio sp.</i>          | Vb278                           |
| Vsp-30-1           | Bacteria   | Proteobacteria | Gammaproteobacteria | Vibrionales         | Vibrionaceae      | <i>Vibrio sp.</i>          | VPAP30                          |
| Vsp-32-1           | Bacteria   | Proteobacteria | Gammaproteobacteria | Vibrionales         | Vibrionaceae      | <i>Vibrio sp.</i>          | ZOR0018                         |
| Vsp-33-1           | Bacteria   | Proteobacteria | Gammaproteobacteria | Vibrionales         | Vibrionaceae      | <i>Vibrio splendidus</i>   | 0407ZC148                       |
| Vsp-34-1           | Bacteria   | Proteobacteria | Gammaproteobacteria | Vibrionales         | Vibrionaceae      | <i>Vibrio splendidus</i>   | 12B01                           |
| Vsp-35-1           | Bacteria   | Proteobacteria | Gammaproteobacteria | Vibrionales         | Vibrionaceae      | <i>Vibrio splendidus</i>   | 12E03                           |
| Vsp-36-1           | Bacteria   | Proteobacteria | Gammaproteobacteria | Vibrionales         | Vibrionaceae      | <i>Vibrio splendidus</i>   | 12F01                           |
| Vsp-37-1           | Bacteria   | Proteobacteria | Gammaproteobacteria | Vibrionales         | Vibrionaceae      | <i>Vibrio splendidus</i>   | 1F-157                          |
| Vsp-38-1           | Bacteria   | Proteobacteria | Gammaproteobacteria | Vibrionales         | Vibrionaceae      | <i>Vibrio splendidus</i>   | 1S-124                          |
| Vsp-39-1           | Bacteria   | Proteobacteria | Gammaproteobacteria | Vibrionales         | Vibrionaceae      | <i>Vibrio splendidus</i>   | 5S-101                          |
| Vsp-40-1           | Bacteria   | Proteobacteria | Gammaproteobacteria | Vibrionales         | Vibrionaceae      | <i>Vibrio splendidus</i>   | ATCC 33789                      |
| Vsp-41-1           | Bacteria   | Proteobacteria | Gammaproteobacteria | Vibrionales         | Vibrionaceae      | <i>Vibrio splendidus</i>   | FF-500                          |
| Vsp-42-1           | Bacteria   | Proteobacteria | Gammaproteobacteria | Vibrionales         | Vibrionaceae      | <i>Vibrio splendidus</i>   | FF-6                            |
| Vsp-43-1           | Bacteria   | Proteobacteria | Gammaproteobacteria | Vibrionales         | Vibrionaceae      | <i>Vibrio splendidus</i>   | LGP32                           |
| Vsp-44-1           | Bacteria   | Proteobacteria | Gammaproteobacteria | Vibrionales         | Vibrionaceae      | <i>Vibrio splendidus</i>   | ZF-90                           |
| Vsp-45-1           | Bacteria   | Proteobacteria | Gammaproteobacteria | Vibrionales         | Vibrionaceae      | <i>Vibrio splendidus</i>   | ZS-139                          |
| Vta-1-1            | Bacteria   | Proteobacteria | Gammaproteobacteria | Vibrionales         | Vibrionaceae      | <i>Vibrio tasmaniensis</i> | 1F-155                          |
| Vta-2-1            | Bacteria   | Proteobacteria | Gammaproteobacteria | Vibrionales         | Vibrionaceae      | <i>Vibrio tasmaniensis</i> | 1F-187                          |
| Vta-3-1            | Bacteria   | Proteobacteria | Gammaproteobacteria | Vibrionales         | Vibrionaceae      | <i>Vibrio tasmaniensis</i> | 1F-267                          |
| Vtu-2-1 to Vtu-2-2 | Bacteria   | Proteobacteria | Gammaproteobacteria | Vibrionales         | Vibrionaceae      | <i>Vibrio tubiashii</i>    | ATCC 19109                      |
| Vtu-3-1            | Bacteria   | Proteobacteria | Gammaproteobacteria | Vibrionales         | Vibrionaceae      | <i>Vibrio tubiashii</i>    | NCIMB 1337 = ATCC 19106         |
| Vva-1-1            | Bacteria   | Proteobacteria | Gammaproteobacteria | Vibrionales         | Vibrionaceae      | <i>Vibrio variabilis</i>   |                                 |
| Vvu-1-1            | Bacteria   | Proteobacteria | Gammaproteobacteria | Vibrionales         | Vibrionaceae      | <i>Vibrio vulnificus</i>   |                                 |
| Vvu-2-1            | Bacteria   | Proteobacteria | Gammaproteobacteria | Vibrionales         | Vibrionaceae      | <i>Vibrio vulnificus</i>   | B2                              |
| Vvu-3-1            | Bacteria   | Proteobacteria | Gammaproteobacteria | Vibrionales         | Vibrionaceae      | <i>Vibrio vulnificus</i>   | BAA87                           |
| Vvu-5-1            | Bacteria   | Proteobacteria | Gammaproteobacteria | Vibrionales         | Vibrionaceae      | <i>Vibrio vulnificus</i>   | CladeA-yb158                    |
| Vvu-4-1            | Bacteria   | Proteobacteria | Gammaproteobacteria | Vibrionales         | Vibrionaceae      | <i>Vibrio vulnificus</i>   | CMCP6                           |
| Vvu-6-1            | Bacteria   | Proteobacteria | Gammaproteobacteria | Vibrionales         | Vibrionaceae      | <i>Vibrio vulnificus</i>   | E64MW                           |
| Vvu-7-1            | Bacteria   | Proteobacteria | Gammaproteobacteria | Vibrionales         | Vibrionaceae      | <i>Vibrio vulnificus</i>   | JY1305                          |
| Vvu-8-1            | Bacteria   | Proteobacteria | Gammaproteobacteria | Vibrionales         | Vibrionaceae      | <i>Vibrio vulnificus</i>   | MO6-24/O                        |
| Vvu-9-1            | Bacteria   | Proteobacteria | Gammaproteobacteria | Vibrionales         | Vibrionaceae      | <i>Vibrio vulnificus</i>   | NBRC 15645 = ATCC 27562         |
| Vvu-10-1           | Bacteria   | Proteobacteria | Gammaproteobacteria | Vibrionales         | Vibrionaceae      | <i>Vibrio vulnificus</i>   | VVyb1(BT3)                      |
| Vvu-11-1           | Bacteria   | Proteobacteria | Gammaproteobacteria | Vibrionales         | Vibrionaceae      | <i>Vibrio vulnificus</i>   | YJ016                           |
| Sen-1026-1         | CDC07-0191 | Bacteria       | Proteobacteria      | Gammaproteobacteria | Enterobacteriales | Enterobacteriaceae         | Salmonella                      |
|                    |            |                |                     |                     |                   | Salmonella                 | enterica subsp. entericaserovar |

Tennessee *Salmonella enterica subsp. enterica serovar* Tennessee str

|                                               |                                                                                                                                                                                                                              |
|-----------------------------------------------|------------------------------------------------------------------------------------------------------------------------------------------------------------------------------------------------------------------------------|
| Sen-1027-1 to Sen-1027-2                      | CVM19633Bacteria Proteobacteria Gammaproteobacteria Enterobacteriales Enterobacteriaceae <i>Salmonella enterica subsp. enterica serovar</i> Schwarzengrund str                                                               |
| Sen-1028-1                                    | CVM23701Bacteria Proteobacteria Gammaproteobacteria Enterobacteriales Enterobacteriaceae <i>Salmonella enterica subsp. enterica serovar</i> 4,[5],12:i:- <i>Salmonella enterica subsp. enterica serovar</i> 4,[5],12:i:- str |
| Sen-1029-1                                    | GA_MM04042433Bacteria Proteobacteria Gammaproteobacteria Enterobacteriales Enterobacteriaceae <i>Salmonella enterica subsp. enterica serovar</i> Javiana str                                                                 |
| Sen-1030-1                                    | HLN05-537Bacteria Proteobacteria Gammaproteobacteria Enterobacteriales Enterobacteriaceae <i>Salmonella enterica subsp. enterica serovar</i> Weltevreden <i>Salmonella enterica subsp. enterica serovar</i> Weltevreden str  |
| Sen-1031-1                                    | P125109Bacteria Proteobacteria Gammaproteobacteria Enterobacteriales Enterobacteriaceae <i>Salmonella enterica subsp. enterica serovar</i> Enteritidis <i>Salmonella enterica subsp. enterica serovar</i> Enteritidis str    |
| Sen-1032-1                                    | RKS4594Bacteria Proteobacteria Gammaproteobacteria Enterobacteriales Enterobacteriaceae <i>Salmonella enterica subsp. enterica serovar</i> Paratyphi C <i>Salmonella enterica subsp. enterica serovar</i> Paratyphi C strain |
| Sen-1033-1                                    | SC-B67Bacteria Proteobacteria Gammaproteobacteria Enterobacteriales Enterobacteriaceae <i>Salmonella enterica subsp. enterica serovar</i> Choleraesuis <i>Salmonella enterica subsp. enterica serovar</i> Choleraesuis str   |
| Sen-1027-1 to Sen-1027-2<br>env-1 to env-1113 | SL480Bacteria Proteobacteria Gammaproteobacteria Enterobacteriales Enterobacteriaceae <i>Salmonella enterica subsp. enterica serovar</i> Schwarzengrund str environmental samples                                            |

## 12.2 Gene contexts

Each L31-Gammaproteobacteria RNA (indicated by “RNA→”) is listed. For each hit, the downstream genes predicted to reside in a regulated operon are listed. If the nearest downstream gene is encoding in the opposite strand (and therefore presumed to not be a part of a regulated operon), then that gene is still depicted. Some environmental sequences and some RefSeq entries lack gene annotations, and so no genes are available for such sequences. The direction of each gene is indicated with an arrow (→), and each predicted conserved domain in the gene is named. Conserved domains associated with more than one L31-Gammaproteobacteria RNA are assigned a color; other domains are gray. Infor-

mation about these conserved domains is given in Section 12.3. The accession of the sequence containing each L31-Gammaproteobacteria RNA is given in the column named “Seq. accession”. Accessions beginning with “NC\_”, “NS\_”, “NW\_” or “NZ\_” are contained in RefSeq. Other accession refer to environmental samples. Nucleotide coordinates are given for the 5′ and 3′ boundaries of each L31-Gammaproteobacteria RNA. If the 5′ coordinate is greater than the 3′ coordinate, the RNA is present on the reverse-complement strand of the containing genomic DNA sequence. Each hit is denoted by an abbreviation (like “Eco-1-1”) that refers to a taxonomy given in Section 12.1.

| abbrev.  | Seq. accession    | 5′ at | 3′ at   | genes                                                                                            |
|----------|-------------------|-------|---------|--------------------------------------------------------------------------------------------------|
| CBa-1-1  | NZ_CP008985.1     | -     | 204157  | 204106 RNA→ rpmE (PRK00019)Ribosomal_L31 (pfam01197) →                                           |
| Apl-1-1  | NZ_JSVY01000012.1 | -     | 77506   | 77438 RNA→ rpmE (PRK00019)Ribosomal_L31 (pfam01197) →                                            |
| Apl-1-2  | NZ_JSVG01000014.1 | -     | 77621   | 77553 RNA→ rpmE (PRK00019)Ribosomal_L31 (pfam01197) →                                            |
| Apl-1-3  | NZ_JSVV01000016.1 | -     | 77506   | 77438 RNA→ rpmE (PRK00019)Ribosomal_L31 (pfam01197) →                                            |
| Apl-1-4  | NZ_JSVF01000014.1 | -     | 77502   | 77434 RNA→ rpmE (PRK00019)Ribosomal_L31 (pfam01197) →                                            |
| Apl-1-5  | NZ_JSVZ01000012.1 | -     | 77500   | 77432 RNA→ rpmE (PRK00019)Ribosomal_L31 (pfam01197) →                                            |
| Apl-1-6  | NZ_JSVX01000015.1 | -     | 77504   | 77436 RNA→ rpmE (PRK00019)Ribosomal_L31 (pfam01197) →                                            |
| Apl-7-1  | NZ_ADOL01000025.1 | -     | 39997   | 39929 RNA→ rpmE (PRK00019)Ribosomal_L31 (pfam01197) → rpmE (PRK00019)Ribosomal_L31 (pfam01197) → |
| Apl-9-1  | NZ_ADXN01000034.1 | -     | 46762   | 46694 RNA→ rpmE (PRK00019)Ribosomal_L31 (pfam01197) → rpmE (PRK00019)Ribosomal_L31 (pfam01197) → |
| Apl-12-1 | NZ_ADOF01000042.1 | -     | 41201   | 41133 RNA→ rpmE (PRK00019)Ribosomal_L31 (pfam01197) → rpmE (PRK00019)Ribosomal_L31 (pfam01197) → |
| Apl-10-1 | NZ_ADOE01000024.1 | -     | 29041   | 28973 RNA→ rpmE (PRK00019)Ribosomal_L31 (pfam01197) → rpmE (PRK00019)Ribosomal_L31 (pfam01197) → |
| Apl-5-1  | NZ_ADOJ01000013.1 | -     | 61583   | 61515 RNA→ rpmE (PRK00019)Ribosomal_L31 (pfam01197) → rpmE (PRK00019)Ribosomal_L31 (pfam01197) → |
| Apl-4-1  | NZ_AACK01000007.1 | +     | 70556   | 70624 RNA→ rpmE (PRK00019)Ribosomal_L31 (pfam01197) → rpmE (PRK00019)Ribosomal_L31 (pfam01197) → |
| Apl-2-1  | NC_009053.1       | -     | 1135896 | 1135828 RNA→ rpmE (PRK00019)Ribosomal_L31 (pfam01197) →                                          |
| Apl-11-1 | NC_010278.1       | -     | 1103179 | 1103111 RNA→ rpmE (PRK00019)Ribosomal_L31 (pfam01197) →                                          |
| Apl-6-1  | NZ_ADOK01000015.1 | -     | 71511   | 71443 RNA→ rpmE (PRK00019)Ribosomal_L31 (pfam01197) → rpmE (PRK00019)Ribosomal_L31 (pfam01197) → |

|          |                    |   |         |         |                                                                                                                                                                                                                                                                                                                                                                                                                                                                                                                                                                                                                                                              |
|----------|--------------------|---|---------|---------|--------------------------------------------------------------------------------------------------------------------------------------------------------------------------------------------------------------------------------------------------------------------------------------------------------------------------------------------------------------------------------------------------------------------------------------------------------------------------------------------------------------------------------------------------------------------------------------------------------------------------------------------------------------|
| Apl-15-1 | NZ_ADOI01000029.1  | - | 71436   | 71368   | RNA → rpmE (PRK00019) Ribosomal_L31 (pfam01197) → rpmE (PRK00019) Ribosomal_L31 (pfam01197) →                                                                                                                                                                                                                                                                                                                                                                                                                                                                                                                                                                |
| Apl-4-2  | NZ_ADOD01000015.1  | - | 71510   | 71442   | RNA → rpmE (PRK00019) Ribosomal_L31 (pfam01197) → rpmE (PRK00019) Ribosomal_L31 (pfam01197) →<br>Glyco_transf_4 (pfam13439) Glyco_trans_1.4 (pfam13692) GT1_WabH_like (cd03811) →<br>Glyco_transf_4 (pfam13439) Glyco_trans_1.4 (pfam13692) GT1_WabH_like (cd03811) →<br>RfaB (COG0438) Glyco_trans_1.4 (pfam13692) → RfaB (COG0438) Glyco_trans_1.4 (pfam13692) →<br>Glyco_transf_25 (pfam01755) → Glyco_transf_25 (pfam01755) → heptsyl_trn_III (TIGR02201) RfaF (COG0859) →<br>heptsyl_trn_III (TIGR02201) RfaF (COG0859) →<br>PBP2_IIvY (cd08430) PRK11716 (PRK11716) HTH_1 (pfam00126) →<br>PBP2_IIvY (cd08430) PRK11716 (PRK11716) HTH_1 (pfam00126) → |
| Apl-13-1 | NZ_ADXO01000023.1  | + | 90529   | 90597   | RNA → rpmE (PRK00019) Ribosomal_L31 (pfam01197) → rpmE (PRK00019) Ribosomal_L31 (pfam01197) →<br>Glyco_transf_4 (pfam13439) Glyco_trans_1.4 (pfam13692) GT1_WabH_like (cd03811) →<br>Glyco_transf_4 (pfam13439) Glyco_trans_1.4 (pfam13692) GT1_WabH_like (cd03811) →<br>RfaB (COG0438) Glyco_trans_1.4 (pfam13692) → RfaB (COG0438) Glyco_trans_1.4 (pfam13692) →<br>Glyco_transf_25 (pfam01755) → Glyco_transf_25 (pfam01755) → heptsyl_trn_III (TIGR02201) RfaF (COG0859) →<br>heptsyl_trn_III (TIGR02201) RfaF (COG0859) →<br>PBP2_IIvY (cd08430) PRK11716 (PRK11716) HTH_1 (pfam00126) →<br>PBP2_IIvY (cd08430) PRK11716 (PRK11716) HTH_1 (pfam00126) → |
| Apl-13-2 | NZ_ADOG01000014.1  | - | 47926   | 47858   | RNA → rpmE (PRK00019) Ribosomal_L31 (pfam01197) → rpmE (PRK00019) Ribosomal_L31 (pfam01197) →<br>Glyco_transf_4 (pfam13439) Glyco_trans_1.4 (pfam13692) GT1_WabH_like (cd03811) →<br>Glyco_transf_4 (pfam13439) Glyco_trans_1.4 (pfam13692) GT1_WabH_like (cd03811) →<br>RfaB (COG0438) Glyco_trans_1.4 (pfam13692) → RfaB (COG0438) Glyco_trans_1.4 (pfam13692) →<br>Glyco_transf_25 (pfam01755) → Glyco_transf_25 (pfam01755) → heptsyl_trn_III (TIGR02201) RfaF (COG0859) →<br>heptsyl_trn_III (TIGR02201) RfaF (COG0859) →<br>PBP2_IIvY (cd08430) PRK11716 (PRK11716) HTH_1 (pfam00126) →<br>PBP2_IIvY (cd08430) PRK11716 (PRK11716) HTH_1 (pfam00126) → |
| Apl-8-1  | NZ_ADOM01000021.1  | - | 33413   | 33345   | RNA → rpmE (PRK00019) Ribosomal_L31 (pfam01197) → rpmE (PRK00019) Ribosomal_L31 (pfam01197) →<br>rpmE (PRK00019) Ribosomal_L31 (pfam01197) →                                                                                                                                                                                                                                                                                                                                                                                                                                                                                                                 |
| Apl-3-1  | NZ_ALYN01000041.1  | + | 3861    | 3929    | RNA → rpmE (PRK00019) Ribosomal_L31 (pfam01197) →                                                                                                                                                                                                                                                                                                                                                                                                                                                                                                                                                                                                            |
| Apl-14-1 | NC_010939.1        | - | 1164688 | 1164620 | RNA → rpmE (PRK00019) Ribosomal_L31 (pfam01197) →                                                                                                                                                                                                                                                                                                                                                                                                                                                                                                                                                                                                            |
| Aur-1-1  | NZ_GL831080.1      | - | 1453322 | 1453254 | RNA → rpmE (PRK00019) Ribosomal_L31 (pfam01197) → COG3306 (COG3306) →                                                                                                                                                                                                                                                                                                                                                                                                                                                                                                                                                                                        |
| Aca-3-1  | NZ_KB893948.1      | - | 16328   | 16260   | RNA → rpmE (PRK00019) Ribosomal_L31 (pfam01197) →                                                                                                                                                                                                                                                                                                                                                                                                                                                                                                                                                                                                            |
| Aeq-1-1  | NZ_CP007715.1      | + | 402750  | 402818  | RNA → rpmE (PRK00019) Ribosomal_L31 (pfam01197) → PRK11560 (PRK11560) OpgE (COG2194) →<br>PRK11560 (PRK11560) OpgE (COG2194) → PBP2_IIvY (cd08430) PRK11716 (PRK11716) HTH_1 (pfam00126) →                                                                                                                                                                                                                                                                                                                                                                                                                                                                   |
| Asu-3-1  | NC_018690.1        | + | 390402  | 390470  | RNA → rpmE (PRK00019) Ribosomal_L31 (pfam01197) →                                                                                                                                                                                                                                                                                                                                                                                                                                                                                                                                                                                                            |
| Asu-2-1  | NZ_CP009159.1      | + | 393106  | 393174  | RNA → rpmE (PRK00019) Ribosomal_L31 (pfam01197) →                                                                                                                                                                                                                                                                                                                                                                                                                                                                                                                                                                                                            |
| Mgr-1-1  | NZ_KK211212.1      | + | 396749  | 396813  | RNA → rpmE (PRK00019) Ribosomal_L31 (pfam01197) → NT_Rel-Spo_like (cd05399) RelA_SpoT (smart00954)<br>Glyco_trans_1.4 (pfam13692) GT1_WabH_like (cd03811) → RfaB (COG0438) Glyco_trans_1.4 (pfam13692) →<br>COG3306 (COG3306) → Glyco_transf_25 (pfam01755) → hypo → RfaF (COG0859) heptsyl_trn_I (TIGR02193) →<br>heptsyl_trn_III (TIGR02201) RfaF (COG0859) →<br>PBP2_IIvY (cd08430) PRK11716 (PRK11716) HTH_1 (pfam00126) →                                                                                                                                                                                                                               |
| Mha-1-1  | NZ_JANJ01000001.1  | - | 79621   | 79557   | RNA → rpmE (PRK00019) Ribosomal_L31 (pfam01197) → hypo → hypo →<br>Glyco_trans_1.4 (pfam13692) GT1_WabH_like (cd03811) → RfaB (COG0438) Glyco_trans_1.4 (pfam13692) →<br>Glyco_transf_25 (pfam01755) → hypo → RfaF (COG0859) heptsyl_trn_I (TIGR02193) →<br>heptsyl_trn_III (TIGR02201) RfaF (COG0859) →<br>PBP2_IIvY (cd08430) PRK11716 (PRK11716) HTH_1 (pfam00126) →                                                                                                                                                                                                                                                                                      |
| Ami-1-1  | NZ_ACFT01000084.1  | - | 10282   | 10218   | RNA → rpmE (PRK00019) Ribosomal_L31 (pfam01197) → rpmE (PRK00019) Ribosomal_L31 (pfam01197) →                                                                                                                                                                                                                                                                                                                                                                                                                                                                                                                                                                |
| env-1    | SRS015985_C1526570 | + | 287     | 362     | RNA → rpmE (PRK00528) rpmE (PRK00019) rpmE2 (PRK01678) Ribosomal_L31 (pfam01197) →                                                                                                                                                                                                                                                                                                                                                                                                                                                                                                                                                                           |
| env-2    | SRS023930_C2176577 | + | 466     | 541     | RNA → rpmE (PRK00019) Ribosomal_L31 (pfam01197) →                                                                                                                                                                                                                                                                                                                                                                                                                                                                                                                                                                                                            |
| env-3    | SRS018157_C4602690 | - | 233     | 158     | RNA → rpmE (PRK00019) Ribosomal_L31 (pfam01197) →                                                                                                                                                                                                                                                                                                                                                                                                                                                                                                                                                                                                            |
| env-4    | SRS047634_C4407474 | - | 233     | 158     | RNA → rpmE (PRK00019) Ribosomal_L31 (pfam01197) →                                                                                                                                                                                                                                                                                                                                                                                                                                                                                                                                                                                                            |
| env-5    | SRS054569_C1471628 | - | 107     | 32      | RNA → ←hypo                                                                                                                                                                                                                                                                                                                                                                                                                                                                                                                                                                                                                                                  |
| env-6    | SRS054776_C1595061 | + | 330     | 405     | RNA → rpmE (PRK00019) Ribosomal_L31 (pfam01197) →                                                                                                                                                                                                                                                                                                                                                                                                                                                                                                                                                                                                            |
| env-7    | SRS057692_C2665711 | - | 233     | 158     | RNA → rpmE (PRK00019) Ribosomal_L31 (pfam01197) →                                                                                                                                                                                                                                                                                                                                                                                                                                                                                                                                                                                                            |
| Hpa-7-1  | NZ_AJMU01000049.1  | + | 103223  | 103298  | RNA → rpmE (PRK00019) Ribosomal_L31 (pfam01197) → rpmE (PRK00019) Ribosomal_L31 (pfam01197) →<br>GT8_A4GalT_like (cd04194) PRK15171 (PRK15171) → GT8_A4GalT_like (cd04194) PRK15171 (PRK15171) →                                                                                                                                                                                                                                                                                                                                                                                                                                                             |

|         |                                 |   |        |        |       |                                                                                            |
|---------|---------------------------------|---|--------|--------|-------|--------------------------------------------------------------------------------------------|
| env-8   | SRS016746_Baylor_scaffold_40224 | + | 146    | 221    | RNA→  | rpmE (PRK00019)Ribosomal_L31 (pfam01197)→                                                  |
| env-9   | SRS054569_LANL_scaffold_25218   | - | 94     | 31     | RNA→  |                                                                                            |
| env-10  | SRS063288_LANL_scaffold_2530    | + | 1047   | 1110   | RNA→  | rpmE (PRK00019)Ribosomal_L31 (pfam01197)→                                                  |
| Hsp-3-1 | NZ_AFNK01000053.1               | + | 171491 | 171554 | RNA→  | rpmE (PRK00019)Ribosomal_L31 (pfam01197)→ rpmE (PRK00019)Ribosomal_L31 (pfam01197)→        |
| Hsp-4-1 | NZ_ALJP01000009.1               | - | 558292 | 558229 | RNA→  | rpmE (PRK00019)Ribosomal_L31 (pfam01197)→ rpmE (PRK00019)Ribosomal_L31 (pfam01197)→        |
| Ami-2-1 | NZ_ACQL01000101.1               | + | 2353   | 2417   | RNA→  | rpmE (PRK00019)Ribosomal_L31 (pfam01197)→ rpmE (PRK00019)Ribosomal_L31 (pfam01197)→        |
|         |                                 |   |        |        | hypo→ | hypo→ heptsyl_trn_III (TIGR02201)RfaF (COG0859)→ heptsyl_trn_III (TIGR02201)RfaF (COG0859) |
|         |                                 |   |        |        |       | PBP2_IIvY (cd08430)PRK11716 (PRK11716)HTH_1 (pfam00126)→                                   |
|         |                                 |   |        |        |       | PBP2_IIvY (cd08430)PRK11716 (PRK11716)HTH_1 (pfam00126)→                                   |
| Lgr-1-1 | NZ_AUUA01000002.1               | - | 220470 | 220418 | RNA→  | rpmE (PRK00019)Ribosomal_L31 (pfam01197)→                                                  |
| Lgr-1-2 | NZ_JMPN01000025.1               | + | 293044 | 293096 | RNA→  | rpmE (PRK00019)Ribosomal_L31 (pfam01197)→                                                  |
| Asu-1-1 | NC_009655.1                     | - | 577302 | 577244 | RNA→  | rpmE (PRK00019)Ribosomal_L31 (pfam01197)→                                                  |
|         |                                 |   |        |        |       | RfaB (COG0438)Glyco_transf.4 (pfam13439)Glyco_trans.1.4 (pfam13692)→                       |
| env-11  | CXWF01061925.1                  | - | 3308   | 3247   | RNA→  | rpmE (PRK00019)Ribosomal_L31 (pfam01197)→                                                  |
| env-12  | SS_2KS_010_SOIL_10275784        | - | 131    | 83     | RNA→  | rpmE (PRK00019)Ribosomal_L31 (pfam01197)→                                                  |
| env-13  | SS_3KL_010_SOIL_10001691        | - | 7887   | 7839   | RNA→  | rpmE (PRK00019)Ribosomal_L31 (pfam01197)→                                                  |
| env-14  | JGI24723J26617_10758127         | - | 170    | 102    | RNA→  | ←hypo                                                                                      |
| env-15  | CESC01038687.1                  | - | 729    | 663    | RNA→  | rpmE (PRK00019)Ribosomal_L31 (pfam01197)→                                                  |
| env-16  | CEQH01042505.1                  | - | 385    | 318    | RNA→  | rpmE (PRK00019)Ribosomal_L31 (pfam01197)→                                                  |
| env-17  | CETW01364038.1                  | + | 629    | 696    | RNA→  | rpmE (PRK00019)Ribosomal_L31 (pfam01197)→                                                  |
| env-18  | CETX01048977.1                  | - | 408    | 341    | RNA→  | rpmE (PRK00019)Ribosomal_L31 (pfam01197)→                                                  |
| env-19  | CERF01019127.1                  | - | 162    | 95     | RNA→  | rpmE (PRK00019)Ribosomal_L31 (pfam01197)→                                                  |
| env-20  | CEQG01074012.1                  | - | 409    | 342    | RNA→  | ←hypo                                                                                      |
| env-21  | CETV01128562.1                  | + | 13281  | 13348  | RNA→  | rpmE (PRK00019)Ribosomal_L31 (pfam01197)→                                                  |
| env-22  | CEUN01426188.1                  | + | 2011   | 2078   | RNA→  |                                                                                            |
| Msu-1-1 | NZ_LFBU01000002.1               | + | 848270 | 848337 | RNA→  | rpmE (PRK00019)Ribosomal_L31 (pfam01197)→                                                  |
| env-23  | CEPO01041841.1                  | + | 302    | 369    | RNA→  | rpmE (PRK00019)Ribosomal_L31 (pfam01197)→                                                  |
| env-24  | JCVI_SCAF_1096626511506         | + | 1121   | 1188   | RNA→  | ←hypo                                                                                      |
| env-25  | CEQG01020404.1                  | - | 227    | 160    | RNA→  | rpmE (PRK00019)Ribosomal_L31 (pfam01197)→                                                  |
| env-26  | CEQI01049741.1                  | - | 226    | 159    | RNA→  | rpmE (PRK00019)Ribosomal_L31 (pfam01197)→                                                  |
| env-27  | CESF01207655.1                  | - | 224    | 157    | RNA→  | rpmE (PRK00019)Ribosomal_L31 (pfam01197)→                                                  |
| env-28  | CESL01139457.1                  | - | 5587   | 5520   | RNA→  | rpmE (PRK00019)Ribosomal_L31 (pfam01197)→                                                  |
| env-29  | CESZ01134189.1                  | - | 245    | 178    | RNA→  | rpmE (PRK00019)Ribosomal_L31 (pfam01197)→                                                  |
| env-30  | CETE01075107.1                  | - | 140    | 73     | RNA→  | rpmE (PRK00019)Ribosomal_L31 (pfam01197)→                                                  |
| env-31  | CETO01087919.1                  | - | 2899   | 2832   | RNA→  | rpmE (PRK00019)Ribosomal_L31 (pfam01197)→                                                  |
| env-32  | CEUD01163365.1                  | - | 87     | 20     | RNA→  |                                                                                            |
| env-33  | CEUK01041327.1                  | + | 883    | 950    | RNA→  | rpmE (PRK00019)Ribosomal_L31 (pfam01197)→                                                  |
| env-34  | CEUN01036455.1                  | + | 243    | 310    | RNA→  | rpmE (PRK00019)Ribosomal_L31 (pfam01197)→                                                  |
| env-35  | CEUO01155056.1                  | - | 244    | 177    | RNA→  | rpmE (PRK00019)Ribosomal_L31 (pfam01197)→                                                  |
| env-36  | CEUP01002300.1                  | - | 807    | 740    | RNA→  | rpmE (PRK00019)Ribosomal_L31 (pfam01197)→                                                  |
| env-37  | CEUY01458679.1                  | + | 707    | 774    | RNA→  | rpmE (PRK00019)Ribosomal_L31 (pfam01197)→                                                  |
| env-38  | CEVA01074234.1                  | + | 2215   | 2282   | RNA→  | rpmE (PRK00019)Ribosomal_L31 (pfam01197)→                                                  |
| env-39  | CEVF01240641.1                  | + | 177    | 244    | RNA→  | rpmE (PRK00019)Ribosomal_L31 (pfam01197)→                                                  |
| Maq-1-1 | NC_008740.1                     | + | 934053 | 934120 | RNA→  | rpmE (PRK00019)Ribosomal_L31 (pfam01197)→                                                  |
| Mhy-1-1 | NC_017067.1                     | + | 725999 | 726066 | RNA→  | rpmE (PRK00019)Ribosomal_L31 (pfam01197)→                                                  |
| env-40  | CEOQ01442252.1                  | + | 97     | 164    | RNA→  | rpmE (PRK00019)Ribosomal_L31 (pfam01197)→                                                  |
| env-41  | CESC01020679.1                  | + | 177    | 244    | RNA→  | rpmE (PRK00019)Ribosomal_L31 (pfam01197)→                                                  |
| env-42  | CESG01154223.1                  | + | 103    | 170    | RNA→  | rpmE (PRK00019)Ribosomal_L31 (pfam01197)→                                                  |
| env-43  | CETV01059046.1                  | + | 2077   | 2144   | RNA→  |                                                                                            |
| env-44  | CETX01171622.1                  | - | 76     | 9      | RNA→  |                                                                                            |
| Msp-3-1 | NZ_AXCB01000001.1               | + | 105151 | 105218 | RNA→  | rpmE (PRK00019)Ribosomal_L31 (pfam01197)→                                                  |
| Msp-2-1 | NZ_AXCC01000018.1               | + | 77998  | 78065  | RNA→  | rpmE (PRK00019)Ribosomal_L31 (pfam01197)→                                                  |
| Msp-1-1 | NZ_AXBW01000028.1               | + | 103644 | 103711 | RNA→  | rpmE (PRK00019)Ribosomal_L31 (pfam01197)→                                                  |



|          |                                 |   |         |         |                                                                                                                                                                                                                          |
|----------|---------------------------------|---|---------|---------|--------------------------------------------------------------------------------------------------------------------------------------------------------------------------------------------------------------------------|
| Vli-1-1  | NZ_AUFZ01000019.1               | + | 108185  | 108264  | RNA → rpmE (PRK00019)Ribosomal_L31 (pfam01197) →                                                                                                                                                                         |
| Mma-1-1  | NZ_KB907177.1                   | + | 14551   | 14600   | RNA → rpmE (PRK00019)Ribosomal_L31 (pfam01197) →                                                                                                                                                                         |
| env-45   | SRS012285_C2873870              | - | 78      | 16      | RNA → ←-hypo                                                                                                                                                                                                             |
| Ase-1-1  | NZ_JUNA01000018.1               | + | 111392  | 111454  | RNA → rpmE (PRK00019)Ribosomal_L31 (pfam01197) → PRK11204 (PRK11204)Glycos_transf_2 (pfam00535) → Glyco_transf_25 (pfam01755) → PRK10422 (PRK10422)RfaF (COG0859)heptsyl_trn_I (TIGR02193) →                             |
| env-46   | SRS018665_C3795409              | + | 2089    | 2151    | RNA →                                                                                                                                                                                                                    |
| env-47   | SRS013252_Baylor_scaffold_62500 | - | 785     | 723     | RNA → rpmE (PRK00019)Ribosomal_L31 (pfam01197) →                                                                                                                                                                         |
| env-48   | SRS024561_LANL_scaffold_41247   | + | 465     | 527     | RNA →                                                                                                                                                                                                                    |
| env-49   | SRS054653_C2095882              | + | 4516    | 4578    | RNA → rpmE (PRK00019)Ribosomal_L31 (pfam01197) →                                                                                                                                                                         |
| env-50   | SRS019980_C2847671              | + | 273     | 335     | RNA →                                                                                                                                                                                                                    |
| Asp-10-1 | NZ_KE952614.1                   | + | 72182   | 72244   | RNA → rpmE (PRK00019)Ribosomal_L31 (pfam01197) →                                                                                                                                                                         |
| env-51   | SRS020340_C2956907              | + | 757     | 819     | RNA →                                                                                                                                                                                                                    |
| env-52   | SRS012285_Baylor_scaffold_9025  | - | 2205    | 2143    | RNA → rpmE (PRK00019)Ribosomal_L31 (pfam01197) →                                                                                                                                                                         |
| env-53   | SRS022083_Baylor_scaffold_5040  | - | 9430    | 9368    | RNA → rpmE (PRK00019)Ribosomal_L31 (pfam01197) →                                                                                                                                                                         |
| env-54   | SRS024021_C2036330              | + | 1818    | 1880    | RNA →                                                                                                                                                                                                                    |
| env-55   | SRS063999_LANL_scaffold_32076   | + | 1170    | 1232    | RNA →                                                                                                                                                                                                                    |
| env-56   | SRS015470_WUGC_scaffold_58201   | - | 80      | 18      | RNA → ←-hypo                                                                                                                                                                                                             |
| env-57   | SRS022625_C2179389              | + | 516     | 578     | RNA →                                                                                                                                                                                                                    |
| env-58   | SRS016360_Baylor_scaffold_18492 | + | 21485   | 21547   | RNA → rpmE (PRK00019)Ribosomal_L31 (pfam01197) →                                                                                                                                                                         |
| env-59   | SRS015989_C2159326              | - | 78      | 16      | RNA → ←-hypo                                                                                                                                                                                                             |
| env-60   | SRS018573_WUGC_scaffold_22344   | + | 439     | 501     | RNA → rpmE (PRK00019)Ribosomal_L31 (pfam01197) → Glyco_tranf_GTA_type (cd00761)PgaC_IcaA (TIGR03937) → Glyco_transf_25 (cd06532) → heptsyl_trn_III (TIGR02201)RfaF (COG0859) → RfaF (COG0859)heptsyl_trn_I (TIGR02193) → |
| env-61   | SRS017025_Baylor_scaffold_27584 | + | 2458    | 2520    | RNA → rpmE (PRK00019)Ribosomal_L31 (pfam01197) → Glyco_transf_25 (cd06532) →                                                                                                                                             |
| env-62   | SRS024381_LANL_scaffold_67893   | + | 1708    | 1770    | RNA →                                                                                                                                                                                                                    |
| env-63   | SRS014894_WUGC_scaffold_36672   | - | 4155    | 4093    | RNA → rpmE (PRK00019)Ribosomal_L31 (pfam01197) → Glyco_transf_25 (cd06532) → RfaF (COG0859) → RfaF (COG0859)heptsyl_trn_I (TIGR02193) →                                                                                  |
| env-64   | SRS015215_C2600664              | - | 78      | 16      | RNA → ←-hypo                                                                                                                                                                                                             |
| env-65   | SRS015899_WUGC_scaffold_3106    | + | 46064   | 46126   | RNA → rpmE (PRK00019)Ribosomal_L31 (pfam01197) → Glyco_transf_25 (cd06532) → RfaF (COG0859) → RfaF (COG0859)heptsyl_trn_I (TIGR02193) →                                                                                  |
| env-66   | SRS017227_Baylor_scaffold_61342 | + | 554     | 616     | RNA → rpmE (PRK00019)Ribosomal_L31 (pfam01197) → Glyco_transf_25 (cd06532) → RfaF (COG0859) → RfaF (COG0859)heptsyl_trn_I (TIGR02193) →                                                                                  |
| env-67   | SRS017304_Baylor_scaffold_19757 | - | 78      | 16      | RNA → ←-hypo                                                                                                                                                                                                             |
| env-68   | SRS019387_WUGC_scaffold_24141   | + | 6275    | 6337    | RNA → rpmE (PRK00019)Ribosomal_L31 (pfam01197) → Glyco_transf_25 (cd06532) → RfaF (COG0859) → RfaF (COG0859)heptsyl_trn_I (TIGR02193) →                                                                                  |
| env-69   | SRS047113_LANL_scaffold_23525   | - | 321     | 259     | RNA → rpmE (PRK00019)Ribosomal_L31 (pfam01197) →                                                                                                                                                                         |
| env-70   | SRS051930_LANL_scaffold_27228   | - | 252     | 190     | RNA → rpmE (PRK00019)Ribosomal_L31 (pfam01197) →                                                                                                                                                                         |
| Aap-1-1  | NZ_CP012067.1                   | - | 796610  | 796548  | RNA → rpmE (PRK00019)Ribosomal_L31 (pfam01197) → Glyco_transf_25 (cd06532) → RfaF (COG0859) → RfaF (COG0859)heptsyl_trn_I (TIGR02193) →                                                                                  |
| env-71   | SRS016541_C1538931              | + | 423     | 485     | RNA →                                                                                                                                                                                                                    |
| env-72   | SRS022602_Baylor_scaffold_61937 | - | 1250    | 1188    | RNA → rpmE (PRK00019)Ribosomal_L31 (pfam01197) → Glyco_transf_25 (pfam01755) → RfaF (COG0859) →                                                                                                                          |
| Aap-2-1  | NZ_AEWB02000018.1               | - | 85143   | 85081   | RNA → rpmE (PRK00019)Ribosomal_L31 (pfam01197) → Glyco_transf_25 (pfam01755) → heptsyl_trn_III (TIGR02201)RfaF (COG0859) → hypo → RfaF (COG0859)heptsyl_trn_I (TIGR02193) → hypo →                                       |
| Aap-4-1  | NC_012913.1                     | - | 2198554 | 2198492 | RNA → rpmE (PRK00019)Ribosomal_L31 (pfam01197) → Glyco_transf_25 (pfam01755) → heptsyl_trn_III (TIGR02201)RfaF (COG0859) → RfaF (COG0859)heptsyl_trn_I (TIGR02193) →                                                     |
| Aap-3-1  | NZ_JH370360.1                   | + | 401206  | 401268  | RNA → rpmE (PRK00019)Ribosomal_L31 (pfam01197) → Glyco_transf_25 (pfam01755) → heptsyl_trn_III (TIGR02201)RfaF (COG0859) → RfaF (COG0859)heptsyl_trn_I (TIGR02193) →                                                     |
| env-73   | SRS043772_C1670834              | + | 6       | 68      | RNA → rpmE (PRK00019)Ribosomal_L31 (pfam01197) →                                                                                                                                                                         |
| Aac-6-1  | NZ_AHGR01000004.1               | - | 184068  | 184006  | RNA → rpmE (PRK00019)Ribosomal_L31 (pfam01197) → Glyco_transf_25 (cd06532) → RfaF (COG0859)heptsyl_trn_II (TIGR02195) → RfaF (COG0859)heptsyl_trn_I (TIGR02193) →                                                        |
| Aac-6-2  | NZ_JPZI01000004.1               | - | 184068  | 184006  | RNA → rpmE (PRK00019)Ribosomal_L31 (pfam01197) → Glyco_transf_25 (cd06532) → RfaF (COG0859)heptsyl_trn_I (TIGR02193) →                                                                                                   |
| Aac-18-1 | NZ_AEJM01000001.1               | - | 87551   | 87489   | RNA → rpmE (PRK00019)Ribosomal_L31 (pfam01197) → Glyco_transf_25 (cd06532) → heptsyl_trn_III (TIGR02201)RfaF (COG0859) → RfaF (COG0859)heptsyl_trn_I (TIGR02193) →                                                       |

|          |                                 |   |         |         |                                                                                                                                                                                         |
|----------|---------------------------------|---|---------|---------|-----------------------------------------------------------------------------------------------------------------------------------------------------------------------------------------|
| env-74   | SRS015440_WUGC_scaffold.6417    | - | 4077    | 4015    | RNA → rpmE (PRK00019) Ribosomal_L31 (pfam01197) → Glyco_transf_25 (pfam01755) → RfaF (COG0859) heptsyl_trn_I (TIGR02193) → RfaF (COG0859) heptsyl_trn_I (TIGR02193) →                   |
| env-75   | SRS015470_WUGC_scaffold.59811   | + | 5208    | 5270    | RNA → ←-hypo                                                                                                                                                                            |
| Aac-11-1 | NZ_AJMH02000011.1               | - | 24012   | 23950   | RNA → rpmE (PRK00019) Ribosomal_L31 (pfam01197) → Glyco_transf_25 (pfam01755) → heptsyl_trn_III (TIGR02201) RfaF (COG0859) → RfaF (COG0859) heptsyl_trn_I (TIGR02193) →                 |
| Aac-13-1 | NZ_AJMF02000017.1               | + | 70410   | 70472   | RNA → rpmE (PRK00019) Ribosomal_L31 (pfam01197) → Glyco_transf_25 (pfam01755) → RfaF (COG0859) heptsyl_trn_II (TIGR02195) → RfaF (COG0859) heptsyl_trn_I (TIGR02193) →                  |
| Aac-10-1 | NZ_AEJQ02000005.1               | + | 70473   | 70535   | RNA → rpmE (PRK00019) Ribosomal_L31 (pfam01197) → Glyco_transf_25 (pfam01755) → RfaF (COG0859) heptsyl_trn_II (TIGR02195) → RfaF (COG0859) heptsyl_trn_I (TIGR02193) →                  |
| Aac-5-1  | NZ_CP008984.1                   | - | 898809  | 898747  | RNA → rpmE (PRK00019) Ribosomal_L31 (pfam01197) → Glyco_transf_25 (pfam01755) → RfaF (COG0859) heptsyl_trn_II (TIGR02195) → RfaF (COG0859) heptsyl_trn_I (TIGR02193) →                  |
| Aac-12-1 | NZ_AEJP02000020.1               | + | 70468   | 70530   | RNA → rpmE (PRK00019) Ribosomal_L31 (pfam01197) → Glyco_transf_25 (pfam01755) → RfaF (COG0859) heptsyl_trn_II (TIGR02195) → RfaF (COG0859) heptsyl_trn_I (TIGR02193) →                  |
| Aac-5-2  | NZ_CP007502.1                   | - | 898825  | 898763  | RNA → rpmE (PRK00019) Ribosomal_L31 (pfam01197) → Glyco_transf_25 (pfam01755) → RfaF (COG0859) heptsyl_trn_II (TIGR02195) → RfaF (COG0859) heptsyl_trn_I (TIGR02193) →                  |
| env-76   | SRS014578_WUGC_scaffold.38482   | - | 78      | 16      | RNA → ←-hypo                                                                                                                                                                            |
| Aac-17-1 | NZ_AEJL02000024.1               | + | 13375   | 13437   | RNA → rpmE (PRK00019) Ribosomal_L31 (pfam01197) → Glyco_transf_25 (pfam01755) → heptsyl_trn_III (TIGR02201) RfaF (COG0859) → RfaF (COG0859) heptsyl_trn_I (TIGR02193) →                 |
| Aac-8-1  | NZ_AJME02000090.1               | + | 106908  | 106970  | RNA → rpmE (PRK00019) Ribosomal_L31 (pfam01197) → Glyco_transf_25 (pfam01755) → heptsyl_trn_III (TIGR02201) RfaF (COG0859) → RfaF (COG0859) heptsyl_trn_I (TIGR02193) →                 |
| Aac-19-1 | NZ_AEJN02000055.1               | - | 25976   | 25914   | RNA → rpmE (PRK00019) Ribosomal_L31 (pfam01197) → Glyco_transf_25 (pfam01755) → heptsyl_trn_III (TIGR02201) RfaF (COG0859) → RfaF (COG0859) heptsyl_trn_I (TIGR02193) →                 |
| Aac-20-1 | NZ_AEJO02000018.1               | - | 44504   | 44442   | RNA → rpmE (PRK00019) Ribosomal_L31 (pfam01197) → Glyco_transf_25 (pfam01755) → heptsyl_trn_III (TIGR02201) RfaF (COG0859) → RfaF (COG0859) heptsyl_trn_I (TIGR02193) →                 |
| Aac-2-1  | NZ_ADOA02000047.1               | - | 30641   | 30579   | RNA → rpmE (PRK00019) Ribosomal_L31 (pfam01197) → Glyco_transf_25 (pfam01755) → heptsyl_trn_III (TIGR02201) RfaF (COG0859) → RfaF (COG0859) heptsyl_trn_I (TIGR02193) →                 |
| Aac-7-1  | NZ_KB290891.1                   | - | 30592   | 30530   | RNA → rpmE (PRK00019) Ribosomal_L31 (pfam01197) → Glyco_transf_25 (pfam01755) → heptsyl_trn_III (TIGR02201) RfaF (COG0859) → RfaF (COG0859) heptsyl_trn_I (TIGR02193) →                 |
| Aac-3-1  | NC_017846.1                     | + | 1029004 | 1029066 | RNA → rpmE (PRK00019) Ribosomal_L31 (pfam01197) → Glyco_transf_25 (pfam01755) → heptsyl_trn_III (TIGR02201) RfaF (COG0859) → RfaF (COG0859) heptsyl_trn_I (TIGR02193) →                 |
| Aac-9-1  | NZ_AEJK02000020.1               | + | 101509  | 101571  | RNA → rpmE (PRK00019) Ribosomal_L31 (pfam01197) → Glyco_transf_25 (pfam01755) → heptsyl_trn_III (TIGR02201) RfaF (COG0859) → RfaF (COG0859) heptsyl_trn_I (TIGR02193) →                 |
| Aac-1-1  | NC_016513.1                     | + | 697940  | 698002  | RNA → rpmE (PRK00019) Ribosomal_L31 (pfam01197) → Glyco_transf_25 (pfam01755) → RfaF (COG0859) heptsyl_trn_II (TIGR02195) → RfaF (COG0859) → RfaF (COG0859) heptsyl_trn_I (TIGR02193) → |
| Aac-14-1 | NZ_AJMG02000014.1               | - | 113578  | 113516  | RNA → rpmE (PRK00019) Ribosomal_L31 (pfam01197) → Glyco_transf_25 (cd06532) → heptsyl_trn_III (TIGR02201) RfaF (COG0859) → RfaF (COG0859) heptsyl_trn_I (TIGR02193) →                   |
| Aac-15-1 | NZ_ADOB02000039.1               | - | 112687  | 112625  | RNA → rpmE (PRK00019) Ribosomal_L31 (pfam01197) → Glyco_transf_25 (cd06532) → heptsyl_trn_III (TIGR02201) RfaF (COG0859) → RfaF (COG0859) heptsyl_trn_I (TIGR02193) →                   |
| Aac-16-1 | NZ_AEJR02000001.1               | - | 113506  | 113444  | RNA → rpmE (PRK00019) Ribosomal_L31 (pfam01197) → Glyco_transf_25 (cd06532) → heptsyl_trn_III (TIGR02201) RfaF (COG0859) → RfaF (COG0859) heptsyl_trn_I (TIGR02193) →                   |
| Aac-4-1  | NZ_AQUU01000002.1               | - | 112901  | 112839  | RNA → rpmE (PRK00019) Ribosomal_L31 (pfam01197) → Glyco_transf_25 (cd06532) → heptsyl_trn_III (TIGR02201) RfaF (COG0859) →                                                              |
| env-77   | SRS023841_C1659419              | - | 2614    | 2552    | RNA → rpmE (PRK00019) Ribosomal_L31 (pfam01197) → Glyco_transf_25 (pfam01755) → RfaF (COG0859) heptsyl_trn_I (TIGR02193) →                                                              |
| env-78   | SRS015755_WUGC_scaffold.22028   | + | 65      | 127     | RNA → MdoB (COG1368) →                                                                                                                                                                  |
| env-79   | SRS018337_C2327845              | - | 78      | 16      | RNA → ←-hypo                                                                                                                                                                            |
| env-80   | SRS021960_Baylor_scaffold.32245 | + | 12294   | 12356   | RNA →                                                                                                                                                                                   |
| env-81   | SRS023358_LANL_scaffold.27865   | + | 1270    | 1332    | RNA →                                                                                                                                                                                   |
| env-82   | SRS023964_Baylor_scaffold.14591 | - | 354     | 292     | RNA → rpmE (PRK00019) Ribosomal_L31 (pfam01197) →                                                                                                                                       |
| env-83   | SRS024649_C3591928              | - | 72      | 10      | RNA → ←-hypo                                                                                                                                                                            |
| env-84   | SRS043018_C3857017              | + | 957     | 1019    | RNA → ←-hypo                                                                                                                                                                            |
| env-85   | SRS051378_C1863951              | + | 1282    | 1344    | RNA →                                                                                                                                                                                   |
| env-86   | SRS013170_Baylor_scaffold.88653 | - | 228     | 166     | RNA → rpmE (PRK00019) Ribosomal_L31 (pfam01197) →                                                                                                                                       |
| env-87   | SRS015044_WUGC_scaffold.71804   | + | 4985    | 5047    | RNA →                                                                                                                                                                                   |
| env-88   | SRS017227_Baylor_scaffold.62075 | - | 78      | 16      | RNA → ←-hypo                                                                                                                                                                            |

|           |                                 |   |         |         |                                                                                                                                                                                                                                      |
|-----------|---------------------------------|---|---------|---------|--------------------------------------------------------------------------------------------------------------------------------------------------------------------------------------------------------------------------------------|
| env-89    | SRS042984_LANL_scaffold.10671   | + | 2469    | 2531    | RNA → rpmE (PRK00019) Ribosomal_L31 (pfam01197) → Glyco_tranf_GTA_type (cd00761) PgaC_IcaA (TIGR03937) → Glyco_transf_25 (cd06532) → heptsyl_trn_III (TIGR02201) RfaF (COG0859) → RfaF (COG0859) heptsyl_trn_I (TIGR02193) →         |
| env-90    | SRS016575_Baylor_scaffold.17318 | - | 78      | 16      | RNA → ← hypō                                                                                                                                                                                                                         |
| env-91    | SRS019028_WUGC_scaffold.5331    | + | 1625    | 1687    | RNA → Glyco_trans_1.4 (pfam13692) GT1_WabH_like (cd03811) → RfaB (COG0438) Glyco_trans_1.4 (pfam136) Glyco_transf_25 (pfam01755) → heptsyl_trn_III (TIGR02201) RfaF (COG0859) → Glyco_tranf_GTA_type (cd00761) PRK10073 (PRK10073) → |
| env-92    | SRS022621_C4052712              | - | 78      | 16      | RNA → ← hypō                                                                                                                                                                                                                         |
| Ase-2-1   | NZ_GL622200.1                   | - | 217473  | 217411  | RNA → rpmE (PRK00019) Ribosomal_L31 (pfam01197) →                                                                                                                                                                                    |
| env-93    | SRS019980_Baylor_scaffold.31063 | - | 78      | 16      | RNA → ← hypō                                                                                                                                                                                                                         |
| env-94    | SRS063999_C3424258              | - | 78      | 16      | RNA → ← hypō                                                                                                                                                                                                                         |
| env-95    | SRS049318_LANL_scaffold.14633   | + | 1589    | 1651    | RNA →                                                                                                                                                                                                                                |
| Pda-1-1   | NZ_GG704815.1                   | - | 133177  | 133128  | RNA → rpmE (PRK00019) Ribosomal_L31 (pfam01197) → Glyco_transf_25 (pfam01755) → heptsyl_trn_III (TIGR02201) RfaF (COG0859) →                                                                                                         |
| Pmu-14-1  | NZ_CP004391.1                   | + | 1445051 | 1445101 | RNA → rpmE (PRK00019) Ribosomal_L31 (pfam01197) → GT8_A4GalT_like (cd04194) PRK15171 (PRK15171) →                                                                                                                                    |
| Pmu-2-1   | NZ_AROA01000259.1               | + | 533     | 586     | RNA → rpmE (PRK00019) Ribosomal_L31 (pfam01197) → Glyco_tranf_GTA_type (cd00761) Glyco_tranf_2.3 (pfam13641) → hypō →                                                                                                                |
| Pmu-20-1  | NZ_AWTD01000005.1               | + | 291403  | 291456  | RNA → rpmE (PRK00019) Ribosomal_L31 (pfam01197) → Glyco_tranf_GTA_type (cd00761) Glyco_tranf_2.3 (pfam13641) → hypō → RfaF (COG0859) heptsyl_trn_I (TIGR02193) → heptsyl_trn_III (TIGR02201) RfaF (COG0859) →                        |
| Pmu-13-1  | NZ_JQAF01000008.1               | + | 291632  | 291685  | RNA → rpmE (PRK00019) Ribosomal_L31 (pfam01197) → Glyco_tranf_GTA_type (cd00761) Glyco_tranf_2.3 (pfam13641) → hypō → RfaF (COG0859) heptsyl_trn_I (TIGR02193) → heptsyl_trn_III (TIGR02201) RfaF (COG0859) →                        |
| Pmu-13-2  | NZ_JQAC01000008.1               | + | 291094  | 291147  | RNA → rpmE (PRK00019) Ribosomal_L31 (pfam01197) → Glyco_tranf_GTA_type (cd00761) Glyco_tranf_2.3 (pfam13641) → hypō → RfaF (COG0859) heptsyl_trn_I (TIGR02193) → heptsyl_trn_III (TIGR02201) RfaF (COG0859) →                        |
| Pmu-13-3  | NZ_JQAB01000008.1               | + | 291094  | 291147  | RNA → rpmE (PRK00019) Ribosomal_L31 (pfam01197) → Glyco_tranf_GTA_type (cd00761) Glyco_tranf_2.3 (pfam13641) → hypō → RfaF (COG0859) heptsyl_trn_I (TIGR02193) → heptsyl_trn_III (TIGR02201) RfaF (COG0859) →                        |
| Pmu-13-4  | NZ_JQAE01000008.1               | + | 292160  | 292213  | RNA → rpmE (PRK00019) Ribosomal_L31 (pfam01197) → Glyco_tranf_GTA_type (cd00761) Glyco_tranf_2.3 (pfam13641) → hypō → RfaF (COG0859) heptsyl_trn_I (TIGR02193) → heptsyl_trn_III (TIGR02201) RfaF (COG0859) →                        |
| Pmu-13-5  | NZ_JQAH01000009.1               | + | 223095  | 223148  | RNA → rpmE (PRK00019) Ribosomal_L31 (pfam01197) → Glyco_tranf_GTA_type (cd00761) Glyco_tranf_2.3 (pfam13641) → hypō → RfaF (COG0859) heptsyl_trn_I (TIGR02193) → heptsyl_trn_III (TIGR02201) RfaF (COG0859) →                        |
| Pmu-13-6  | NZ_JPHI01000008.1               | + | 291065  | 291118  | RNA → rpmE (PRK00019) Ribosomal_L31 (pfam01197) → Glyco_tranf_GTA_type (cd00761) Glyco_tranf_2.3 (pfam13641) → hypō → RfaF (COG0859) heptsyl_trn_I (TIGR02193) → heptsyl_trn_III (TIGR02201) RfaF (COG0859) →                        |
| Pmu-13-7  | NZ_JQAG01000008.1               | + | 291632  | 291685  | RNA → rpmE (PRK00019) Ribosomal_L31 (pfam01197) → Glyco_tranf_GTA_type (cd00761) Glyco_tranf_2.3 (pfam13641) → hypō → RfaF (COG0859) heptsyl_trn_I (TIGR02193) → heptsyl_trn_III (TIGR02201) RfaF (COG0859) →                        |
| Pmu-13-8  | NZ_JQEB01000010.1               | + | 291109  | 291162  | RNA → rpmE (PRK00019) Ribosomal_L31 (pfam01197) → Glyco_tranf_GTA_type (cd00761) Glyco_tranf_2.3 (pfam13641) → hypō → RfaF (COG0859) heptsyl_trn_I (TIGR02193) → heptsyl_trn_III (TIGR02201) RfaF (COG0859) →                        |
| Pmu-13-9  | NZ_JQEA01000012.1               | + | 290579  | 290632  | RNA → rpmE (PRK00019) Ribosomal_L31 (pfam01197) → Glyco_tranf_GTA_type (cd00761) Glyco_tranf_2.3 (pfam13641) → hypō → RfaF (COG0859) heptsyl_trn_I (TIGR02193) → heptsyl_trn_III (TIGR02201) RfaF (COG0859) →                        |
| Pmu-13-10 | NZ_JQAD01000008.1               | + | 291094  | 291147  | RNA → rpmE (PRK00019) Ribosomal_L31 (pfam01197) → Glyco_tranf_GTA_type (cd00761) Glyco_tranf_2.3 (pfam13641) → hypō → RfaF (COG0859) heptsyl_trn_I (TIGR02193) → heptsyl_trn_III (TIGR02201) RfaF (COG0859) →                        |
| Pmu-13-11 | NZ_JQAO01000009.1               | + | 223226  | 223279  | RNA → rpmE (PRK00019) Ribosomal_L31 (pfam01197) → Glyco_tranf_GTA_type (cd00761) Glyco_tranf_2.3 (pfam13641) → hypō → RfaF (COG0859) heptsyl_trn_I (TIGR02193) → heptsyl_trn_III (TIGR02201) RfaF (COG0859) →                        |
| Pmu-13-12 | NZ_JQAI01000008.1               | + | 291094  | 291147  | RNA → rpmE (PRK00019) Ribosomal_L31 (pfam01197) → Glyco_tranf_GTA_type (cd00761) Glyco_tranf_2.3 (pfam13641) → hypō → RfaF (COG0859) heptsyl_trn_I (TIGR02193) → heptsyl_trn_III (TIGR02201) RfaF (COG0859) →                        |
| Pmu-16-1  | NZ_ALYC02000068.1               | - | 827     | 774     | RNA → rpmE (PRK00019) Ribosomal_L31 (pfam01197) → hypō → hypō →                                                                                                                                                                      |



|          |                                |   |         |         |                                                                                                                                                                                                                                    |
|----------|--------------------------------|---|---------|---------|------------------------------------------------------------------------------------------------------------------------------------------------------------------------------------------------------------------------------------|
| Pmu-8-1  | NZ_CP004392.1                  | - | 1820422 | 1820372 | RNA → rpmE (PRK00019) Ribosomal_L31 (pfam01197) → Glyco_transf_25 (cd06532) → Glyco_transf_25 (pfam01755) → CgtA (pfam06306) → CgtA (pfam06306) → Glyco_transf_4 (pfam13439) Glyco_trans_1.4 (pfam13692) GT1_WabH_like (cd03811) → |
| Pmu-12-1 | NZ_CM001580.1                  | + | 1329398 | 1329448 | RNA → rpmE (PRK00019) Ribosomal_L31 (pfam01197) →                                                                                                                                                                                  |
| Pmu-3-1  | NZ_AQTL01000106.1              | - | 3016    | 2966    | RNA → rpmE (PRK00019) Ribosomal_L31 (pfam01197) → Glyco_transf_25 (pfam01755) → heptsyl_trn_III (TIGR02201) RfaF (COG0859) →                                                                                                       |
| Pmu-10-1 | NZ_ARNZ01000104.1              | + | 1190    | 1240    | RNA → rpmE (PRK00019) Ribosomal_L31 (pfam01197) → Glyco_transf_25 (pfam01755) → heptsyl_trn_III (TIGR02201) RfaF (COG0859) →                                                                                                       |
| Pmu-4-1  | NZ_ARNW01000018.1              | + | 4332    | 4382    | RNA → rpmE (PRK00019) Ribosomal_L31 (pfam01197) → Glyco_transf_25 (pfam01755) → heptsyl_trn_III (TIGR02201) RfaF (COG0859) →                                                                                                       |
| Pmu-7-1  | NZ_ARNX01000001.1              | - | 43763   | 43713   | RNA → rpmE (PRK00019) Ribosomal_L31 (pfam01197) → Glyco_transf_25 (pfam01755) → heptsyl_trn_III (TIGR02201) RfaF (COG0859) →                                                                                                       |
| Pmu-21-1 | NC_002663.1                    | + | 1342547 | 1342597 | RNA → rpmE (PRK00019) Ribosomal_L31 (pfam01197) → Glyco_transf_25 (pfam01755) → heptsyl_trn_III (TIGR02201) RfaF (COG0859) →                                                                                                       |
| Pmu-11-1 | NZ_CM001581.1                  | + | 1417199 | 1417249 | RNA → rpmE (PRK00019) Ribosomal_L31 (pfam01197) → Glyco_transf_25 (pfam01755) → heptsyl_trn_III (TIGR02201) RfaF (COG0859) → heptsyl_trn_III (TIGR02201) RfaF (COG0859) →                                                          |
| Pmu-5-1  | NC_016808.1                    | - | 12183   | 12133   | RNA → rpmE (PRK00019) Ribosomal_L31 (pfam01197) → Glyco_transf_25 (pfam01755) → heptsyl_trn_III (TIGR02201) RfaF (COG0859) →                                                                                                       |
| Pmu-18-1 | NZ_CP003328.1                  | - | 12083   | 12033   | RNA → rpmE (PRK00019) Ribosomal_L31 (pfam01197) → Glyco_transf_25 (pfam01755) → heptsyl_trn_III (TIGR02201) RfaF (COG0859) →                                                                                                       |
| Pmu-15-1 | NZ_CM002276.1                  | + | 23245   | 23295   | RNA → rpmE (PRK00019) Ribosomal_L31 (pfam01197) → Glyco_transf_25 (pfam01755) → heptsyl_trn_III (TIGR02201) RfaF (COG0859) →                                                                                                       |
| Pmu-1-1  | NZ_CP008918.1                  | - | 823037  | 822987  | RNA → rpmE (PRK00019) Ribosomal_L31 (pfam01197) → Glyco_transf_25 (pfam01755) → heptsyl_trn_III (TIGR02201) RfaF (COG0859) →                                                                                                       |
| Pmu-9-1  | NZ_ARNY01000003.1              | - | 60597   | 60547   | RNA → rpmE (PRK00019) Ribosomal_L31 (pfam01197) → Glyco_transf_25 (pfam01755) → heptsyl_trn_III (TIGR02201) RfaF (COG0859) →                                                                                                       |
| Pmu-6-1  | NZ_ARWR01000002.1              | + | 265889  | 265939  | RNA → rpmE (PRK00019) Ribosomal_L31 (pfam01197) → Glyco_transf_25 (pfam01755) → heptsyl_trn_III (TIGR02201) RfaF (COG0859) →                                                                                                       |
| Pmu-19-1 | NC_017027.1                    | - | 15811   | 15761   | RNA → rpmE (PRK00019) Ribosomal_L31 (pfam01197) → Glyco_transf_25 (pfam01755) → heptsyl_trn_III (TIGR02201) RfaF (COG0859) →                                                                                                       |
| Pmu-17-1 | NC_017764.1                    | - | 15831   | 15781   | RNA → rpmE (PRK00019) Ribosomal_L31 (pfam01197) → Glyco_transf_25 (pfam01755) → heptsyl_trn_III (TIGR02201) RfaF (COG0859) →                                                                                                       |
| Mma-3-1  | NZ_CDQL01000004.1              | - | 255958  | 255897  | RNA → rpmE (PRK00019) Ribosomal_L31 (pfam01197) →                                                                                                                                                                                  |
| Pbe-2-1  | NZ_AJSX01000004.1              | + | 13647   | 13708   | RNA → rpmE (PRK00019) Ribosomal_L31 (pfam01197) → rpmE (PRK00019) Ribosomal_L31 (pfam01197) →                                                                                                                                      |
| Msu-2-1  | NC_006300.1                    | - | 416530  | 416470  | RNA → rpmE (PRK00019) Ribosomal_L31 (pfam01197) → GT8_A4GalT_like (cd04194) PRK15171 (PRK15171) Glyco_transf_25 (pfam01755) → heptsyl_trn_III (TIGR02201) RfaF (COG0859) → hypo →                                                  |
| env-96   | SRS023958_Baylor_scaffold_5426 | - | 392     | 342     | RNA → hypo →                                                                                                                                                                                                                       |
| env-97   | SRS011271_C3031949             | + | 247     | 297     | RNA → rpmE (PRK00019) Ribosomal_L31 (pfam01197) →                                                                                                                                                                                  |
| env-98   | SRS018969_WUGC_scaffold_19392  | - | 1477    | 1427    | RNA → rpmE (PRK00019) Ribosomal_L31 (pfam01197) →                                                                                                                                                                                  |
| env-99   | SRS023526_C3187054             | - | 873     | 823     | RNA → rpmE (PRK00019) Ribosomal_L31 (pfam01197) →                                                                                                                                                                                  |
| env-100  | SRS024277_LANL_scaffold_49966  | + | 339     | 389     | RNA → rpmE (PRK00019) Ribosomal_L31 (pfam01197) →                                                                                                                                                                                  |
| Hpa-2-1  | NZ_JVSL01000025.1              | + | 13438   | 13488   | RNA → rpmE (PRK00019) Ribosomal_L31 (pfam01197) →                                                                                                                                                                                  |
| Hpa-2-2  | NZ_JVHG01000004.1              | - | 10892   | 10842   | RNA → rpmE (PRK00019) Ribosomal_L31 (pfam01197) →                                                                                                                                                                                  |
| env-101  | SRS016225_WUGC_scaffold_2971   | + | 183     | 233     | RNA → rpmE (PRK00019) Ribosomal_L31 (pfam01197) →                                                                                                                                                                                  |
| env-102  | SRS019071_WUGC_scaffold_37000  | - | 305     | 255     | RNA → rpmE (PRK00019) Ribosomal_L31 (pfam01197) →                                                                                                                                                                                  |
| env-103  | SRS024087_C3536836             | + | 1002    | 1052    | RNA →                                                                                                                                                                                                                              |
| env-104  | SRS063932_LANL_scaffold_93582  | - | 66      | 16      | RNA →                                                                                                                                                                                                                              |
| env-105  | SRS024021_Baylor_scaffold_3567 | + | 655     | 705     | RNA →                                                                                                                                                                                                                              |
| env-106  | SRS014473_WUGC_scaffold_5102   | + | 2802    | 2852    | RNA → rpmE (PRK00019) Ribosomal_L31 (pfam01197) →                                                                                                                                                                                  |
| env-107  | SRS015060_WUGC_scaffold_6035   | - | 267     | 217     | RNA → rpmE (PRK00019) Ribosomal_L31 (pfam01197) →                                                                                                                                                                                  |
| env-108  | SRS023534_C140704              | + | 184     | 234     | RNA → rpmE (PRK00019) Ribosomal_L31 (pfam01197) →                                                                                                                                                                                  |
| env-109  | scaffold9440_1_MH0072          | + | 805     | 855     | RNA → rpmE (PRK00019) Ribosomal_L31 (pfam01197) →                                                                                                                                                                                  |
| env-110  | SRS014468_C479594              | + | 50      | 100     | RNA → rpmE (PRK00019) Ribosomal_L31 (pfam01197) →                                                                                                                                                                                  |
| env-111  | SRS012902_C495709              | + | 47      | 97      | RNA → rpmE (PRK00019) Ribosomal_L31 (pfam01197) →                                                                                                                                                                                  |
| env-112  | SRS014107_C1310462             | + | 78      | 128     | RNA → rpmE (PRK00019) Ribosomal_L31 (pfam01197) →                                                                                                                                                                                  |
| env-113  | SRS014470_C3580284             | + | 17      | 67      | RNA → rpmE (PRK00019) Ribosomal_L31 (pfam01197) →                                                                                                                                                                                  |

|         |                                 |   |        |        |      |                                                           |
|---------|---------------------------------|---|--------|--------|------|-----------------------------------------------------------|
| env-114 | SRS014684_C3226119              | - | 425    | 375    | RNA→ | rpmE (PRK00019)Ribosomal_L31 (pfam01197)→                 |
| env-115 | SRS015154_WUGC_scaffold.4241    | + | 17     | 67     | RNA→ | rpmE (PRK00019)Ribosomal_L31 (pfam01197)→                 |
| env-116 | SRS015650_WUGC_scaffold.11302   | + | 60     | 110    | RNA→ | rpmE (PRK00019)Ribosomal_L31 (pfam01197)→                 |
| env-117 | SRS016200_WUGC_scaffold.15359   | + | 2090   | 2140   | RNA→ | rpmE (PRK00019)Ribosomal_L31 (pfam01197)→                 |
| env-118 | SRS016342_Baylor_scaffold.20824 | + | 57     | 107    | RNA→ | rpmE (PRK00019)Ribosomal_L31 (pfam01197)→                 |
| env-119 | SRS016503_LANL_scaffold.2981    | + | 71     | 121    | RNA→ | rpmE (PRK00019)Ribosomal_L31 (pfam01197)→                 |
| env-120 | SRS016533_C471857               | + | 71     | 121    | RNA→ | rpmE (PRK00019)Ribosomal_L31 (pfam01197)→                 |
| env-121 | SRS016575_Baylor_scaffold.14305 | + | 208    | 258    | RNA→ | rpmE (PRK00019)Ribosomal_L31 (pfam01197)→                 |
| env-122 | SRS017445_Baylor_scaffold.14093 | + | 48     | 98     | RNA→ | ←TonB-siderophor (TIGR01783)TonB_dep_Rec (pfam00593)      |
| env-123 | SRS018665_WUGC_scaffold.24884   | + | 71     | 121    | RNA→ | ←PRK13524 (PRK13524)ligand_gated_channel (cd01347)        |
| env-124 | SRS018791_WUGC_scaffold.50431   | + | 17     | 67     | RNA→ | rpmE (PRK00019)Ribosomal_L31 (pfam01197)→                 |
| env-125 | SRS022621_Baylor_scaffold.64879 | + | 117    | 167    | RNA→ | rpmE (PRK00019)Ribosomal_L31 (pfam01197)→                 |
| env-126 | SRS022625_Baylor_scaffold.7805  | - | 66     | 16     | RNA→ |                                                           |
| env-127 | SRS022721_C501186               | - | 318    | 268    | RNA→ | rpmE (PRK00019)Ribosomal_L31 (pfam01197)→                 |
| env-128 | SRS023617_Baylor_scaffold.71993 | + | 48     | 98     | RNA→ | rpmE (PRK00019)Ribosomal_L31 (pfam01197)→                 |
| env-129 | SRS023835_Baylor_scaffold.11069 | - | 295    | 245    | RNA→ | rpmE (PRK00019)Ribosomal_L31 (pfam01197)→                 |
| env-130 | SRS023926_Baylor_scaffold.35367 | + | 75     | 125    | RNA→ | rpmE (PRK00019)Ribosomal_L31 (pfam01197)→                 |
| env-131 | SRS024318_LANL_scaffold.16452   | + | 48     | 98     | RNA→ | rpmE (PRK00019)Ribosomal_L31 (pfam01197)→                 |
| env-132 | SRS024381_LANL_scaffold.28820   | + | 71     | 121    | RNA→ | rpmE (PRK00019)Ribosomal_L31 (pfam01197)→                 |
| env-133 | SRS024557_C267439               | + | 71     | 121    | RNA→ | rpmE (PRK00019)Ribosomal_L31 (pfam01197)→                 |
| env-134 | SRS042131_WUGC_scaffold.18379   | + | 1363   | 1413   | RNA→ | rpmE (PRK00019)Ribosomal_L31 (pfam01197)→                 |
| env-135 | SRS048719_WUGC_scaffold.10207   | + | 648    | 698    | RNA→ | rpmE (PRK00019)Ribosomal_L31 (pfam01197)→                 |
| env-136 | SRS052874_LANL_scaffold.13398   | + | 539    | 589    | RNA→ | rpmE (PRK00019)Ribosomal_L31 (pfam01197)→                 |
| env-137 | SRS054956_LANL_scaffold.30996   | + | 2601   | 2651   | RNA→ | rpmE (PRK00019)Ribosomal_L31 (pfam01197)→                 |
| env-138 | SRS064449_LANL_scaffold.6703    | + | 601    | 651    | RNA→ | rpmE (PRK00019)Ribosomal_L31 (pfam01197)→                 |
| Hpa-2-3 | NZ_JVPX01000007.1               | - | 10911  | 10861  | RNA→ | rpmE (PRK00019)Ribosomal_L31 (pfam01197)→                 |
| env-139 | 3300001196.1009759              | + | 160    | 210    | RNA→ | rpmE (PRK00019)Ribosomal_L31 (pfam01197)→                 |
| env-140 | scaffold25950.1_MH0073          | + | 515    | 565    | RNA→ | rpmE (PRK00019)Ribosomal_L31 (pfam01197)→                 |
| env-141 | SRS011086_WUGC_scaffold.33563   | - | 474    | 424    | RNA→ | rpmE (PRK00019)Ribosomal_L31 (pfam01197)→                 |
| env-142 | SRS014692_WUGC_scaffold.12598   | + | 345    | 395    | RNA→ | rpmE (PRK00019)Ribosomal_L31 (pfam01197)→                 |
| env-143 | SRS017088_C1144155              | - | 81     | 31     | RNA→ |                                                           |
| env-144 | SRS018774_WUGC_scaffold.1636    | - | 68     | 18     | RNA→ |                                                           |
| env-145 | SRS021986_C925803               | - | 129    | 79     | RNA→ | rpmE (PRK00019)rpmE2 (PRK01678)Ribosomal_L31 (pfam01197)→ |
| env-146 | SRS043239_C1968841              | + | 117    | 167    | RNA→ | rpmE (PRK00019)Ribosomal_L31 (pfam01197)→                 |
| env-147 | SRS044366_C951592               | + | 2864   | 2914   | RNA→ | rpmE (PRK00019)Ribosomal_L31 (pfam01197)→                 |
| env-148 | SRS053630_LANL_scaffold.5204    | + | 273260 | 273310 | RNA→ | rpmE (PRK00019)Ribosomal_L31 (pfam01197)→                 |
| env-149 | SRS053917_C3768051              | + | 554    | 604    | RNA→ |                                                           |
| env-150 | SRS064329_LANL_scaffold.3760    | + | 358    | 408    | RNA→ | rpmE (PRK00019)Ribosomal_L31 (pfam01197)→                 |
| env-151 | SRS075404_C3577072              | - | 300    | 250    | RNA→ | rpmE (PRK00019)Ribosomal_L31 (pfam01197)→                 |
| env-152 | Saliva_LANL.C141248             | + | 159    | 209    | RNA→ | rpmE (PRK00019)Ribosomal_L31 (pfam01197)→                 |
| env-153 | Throat_LANL.C5774541            | + | 179    | 229    | RNA→ | rpmE (PRK00019)Ribosomal_L31 (pfam01197)→                 |
| env-154 | UnmappedStool_Broad.C252872408  | + | 329    | 279    | RNA→ | rpmE (PRK00019)Ribosomal_L31 (pfam01197)→                 |
| env-155 | SRS011247_Baylor_scaffold.2642  | - | 68     | 18     | RNA→ |                                                           |
| env-156 | SRS011529_C4573705              | + | 205    | 255    | RNA→ | rpmE (PRK00019)Ribosomal_L31 (pfam01197)→                 |
| env-157 | SRS012279_Baylor_scaffold.42064 | - | 295    | 245    | RNA→ | rpmE (PRK00019)Ribosomal_L31 (pfam01197)→                 |
| env-158 | SRS013234_Baylor_scaffold.25561 | - | 434    | 384    | RNA→ | rpmE (PRK00019)Ribosomal_L31 (pfam01197)→                 |
| env-159 | SRS013502_Baylor_scaffold.15687 | - | 357    | 307    | RNA→ | rpmE (PRK00019)Ribosomal_L31 (pfam01197)→                 |
| env-160 | SRS013705_Baylor_scaffold.9676  | - | 304    | 254    | RNA→ | rpmE (PRK00019)Ribosomal_L31 (pfam01197)→                 |
| env-161 | SRS013711_C1736629              | - | 324    | 274    | RNA→ | rpmE (PRK00019)Ribosomal_L31 (pfam01197)→                 |
| env-162 | SRS013723_Baylor_scaffold.21329 | - | 159    | 109    | RNA→ | rpmE (PRK00019)Ribosomal_L31 (pfam01197)→                 |
| env-163 | SRS013818_Baylor_scaffold.39426 | - | 207    | 157    | RNA→ | rpmE (PRK00019)Ribosomal_L31 (pfam01197)→                 |
| env-164 | SRS013825_Baylor_scaffold.3706  | + | 131    | 181    | RNA→ | rpmE (PRK00019)Ribosomal_L31 (pfam01197)→                 |



|         |                                 |   |      |      |      |                                                                          |
|---------|---------------------------------|---|------|------|------|--------------------------------------------------------------------------|
| env-165 | SRS013836_C4728831              | + | 152  | 202  | RNA→ | rpmE (PRK00019)Ribosomal_L31 (pfam01197)→                                |
| env-166 | SRS013881_WUGC_scaffold.7653    | - | 253  | 203  | RNA→ | rpmE (PRK00019)Ribosomal_L31 (pfam01197)→                                |
| env-167 | SRS013945_WUGC_scaffold.15499   | - | 346  | 296  | RNA→ | rpmE (PRK00019)Ribosomal_L31 (pfam01197)→                                |
| env-168 | SRS013947_WUGC_scaffold.18108   | - | 207  | 157  | RNA→ | rpmE (PRK00019)Ribosomal_L31 (pfam01197)→                                |
| env-169 | SRS013948_WUGC_scaffold.4756    | + | 610  | 660  | RNA→ | rpmE (PRK00019)Ribosomal_L31 (pfam01197)→                                |
| env-170 | SRS013950_C2184733              | + | 2868 | 2918 | RNA→ | rpmE (PRK00528)rpmE (PRK00019)rpmE2 (PRK01678)Ribosomal_L31 (pfam01197)→ |
| env-171 | SRS014126_C559458               | + | 145  | 195  | RNA→ | rpmE (PRK00019)Ribosomal_L31 (pfam01197)→                                |
| env-172 | SRS014271_WUGC_scaffold.41463   | + | 179  | 229  | RNA→ | rpmE (PRK00019)Ribosomal_L31 (pfam01197)→                                |
| env-173 | SRS014575_C476087               | + | 226  | 276  | RNA→ | rpmE (PRK00019)Ribosomal_L31 (pfam01197)→                                |
| env-174 | SRS014686_C892496               | + | 364  | 414  | RNA→ | rpmE (PRK00019)Ribosomal_L31 (pfam01197)→                                |
| env-175 | SRS014890_C397523               | - | 260  | 210  | RNA→ | rpmE (PRK00019)Ribosomal_L31 (pfam01197)→                                |
| env-176 | SRS015057_C3383085              | + | 266  | 316  | RNA→ | rpmE (PRK00019)Ribosomal_L31 (pfam01197)→                                |
| env-177 | SRS015209_WUGC_scaffold.13430   | - | 873  | 823  | RNA→ | rpmE (PRK00019)Ribosomal_L31 (pfam01197)→                                |
| env-178 | SRS015272_C3511097              | - | 79   | 29   | RNA→ |                                                                          |
| env-179 | SRS015395_C2368773              | - | 127  | 77   | RNA→ | rpmE (PRK00528)rpmE (PRK00019)rpmE2 (PRK01678)Ribosomal_L31 (pfam01197)→ |
| env-180 | SRS015434_WUGC_scaffold.16743   | - | 64   | 14   | RNA→ |                                                                          |
| env-181 | SRS015578_WUGC_scaffold.34785   | - | 689  | 639  | RNA→ | rpmE (PRK00019)Ribosomal_L31 (pfam01197)→                                |
| env-182 | SRS015745_WUGC_scaffold.1107    | - | 148  | 98   | RNA→ | rpmE (PRK00019)Ribosomal_L31 (pfam01197)→                                |
| env-183 | SRS015797_WUGC_scaffold.3481    | + | 265  | 315  | RNA→ | rpmE (PRK00019)Ribosomal_L31 (pfam01197)→                                |
| env-184 | SRS015893_C2295370              | - | 293  | 243  | RNA→ | rpmE (PRK00019)Ribosomal_L31 (pfam01197)→                                |
| env-185 | SRS015895_WUGC_scaffold.997     | - | 4030 | 3980 | RNA→ | rpmE (PRK00019)Ribosomal_L31 (pfam01197)→                                |
| env-186 | SRS015899_WUGC_scaffold.31920   | + | 1115 | 1165 | RNA→ |                                                                          |
| env-187 | SRS015921_WUGC_scaffold.8625    | - | 2466 | 2416 | RNA→ | rpmE (PRK00019)Ribosomal_L31 (pfam01197)→                                |
| env-188 | SRS015941_WUGC_scaffold.8499    | + | 674  | 724  | RNA→ | rpmE (PRK00019)Ribosomal_L31 (pfam01197)→                                |
| env-189 | SRS015989_WUGC_scaffold.6985    | - | 66   | 16   | RNA→ |                                                                          |
| env-190 | SRS016319_WUGC_scaffold.52031   | + | 117  | 167  | RNA→ | rpmE (PRK00019)Ribosomal_L31 (pfam01197)→                                |
| env-191 | SRS016501_LANL_scaffold.19928   | + | 109  | 159  | RNA→ | rpmE (PRK00019)Ribosomal_L31 (pfam01197)→                                |
| env-192 | SRS016600_Baylor_scaffold.790   | - | 153  | 103  | RNA→ | rpmE (PRK00019)Ribosomal_L31 (pfam01197)→                                |
| env-193 | SRS017080_C1218701              | - | 375  | 325  | RNA→ | rpmE (PRK00019)Ribosomal_L31 (pfam01197)→                                |
| env-194 | SRS017120_Baylor_scaffold.43405 | - | 677  | 627  | RNA→ | rpmE (PRK00019)Ribosomal_L31 (pfam01197)→                                |
| env-195 | SRS017209_C2427531              | + | 266  | 316  | RNA→ |                                                                          |
| env-196 | SRS017713_Baylor_scaffold.3587  | - | 374  | 324  | RNA→ | rpmE (PRK00019)Ribosomal_L31 (pfam01197)→                                |
| env-197 | SRS018145_Baylor_scaffold.10947 | - | 73   | 23   | RNA→ |                                                                          |
| env-198 | SRS018300_Baylor_scaffold.30    | + | 260  | 310  | RNA→ |                                                                          |
| env-199 | SRS018359_Baylor_scaffold.4860  | - | 257  | 207  | RNA→ | rpmE (PRK00019)Ribosomal_L31 (pfam01197)→                                |
| env-200 | SRS018439_Baylor_scaffold.16838 | + | 239  | 289  | RNA→ |                                                                          |
| env-201 | SRS018573_C2361858              | - | 65   | 15   | RNA→ |                                                                          |
| env-202 | SRS018591_WUGC_scaffold.44156   | - | 226  | 176  | RNA→ | rpmE (PRK00019)Ribosomal_L31 (pfam01197)→                                |
| env-203 | SRS018661_WUGC_scaffold.2690    | - | 953  | 903  | RNA→ | rpmE (PRK00019)Ribosomal_L31 (pfam01197)→                                |
| env-204 | SRS018739_C3611004              | - | 374  | 324  | RNA→ | rpmE (PRK00019)Ribosomal_L31 (pfam01197)→                                |
| env-205 | SRS018971_WUGC_scaffold.6404    | + | 266  | 316  | RNA→ | ←PRK13524 (PRK13524)ligand_gated_channel (cd01347)                       |
| env-206 | SRS018975_WUGC_scaffold.41000   | - | 368  | 318  | RNA→ | rpmE (PRK00019)Ribosomal_L31 (pfam01197)→                                |
| env-207 | SRS019022_WUGC_scaffold.65126   | + | 326  | 376  | RNA→ | rpmE (PRK00019)Ribosomal_L31 (pfam01197)→                                |
| env-208 | SRS019026_C1969885              | + | 607  | 657  | RNA→ | rpmE (PRK00019)Ribosomal_L31 (pfam01197)→                                |
| env-209 | SRS019027_WUGC_scaffold.18155   | - | 713  | 663  | RNA→ | rpmE (PRK00019)Ribosomal_L31 (pfam01197)→                                |
| env-210 | SRS019045_WUGC_scaffold.19548   | + | 272  | 322  | RNA→ | rpmE (PRK00019)Ribosomal_L31 (pfam01197)→                                |
| env-211 | SRS019120_C1279990              | + | 248  | 298  | RNA→ |                                                                          |
| env-212 | SRS019122_WUGC_scaffold.7081    | - | 561  | 511  | RNA→ | rpmE (PRK00019)Ribosomal_L31 (pfam01197)→                                |
| env-213 | SRS019124_WUGC_scaffold.7080    | - | 180  | 130  | RNA→ | rpmE (PRK00019)Ribosomal_L31 (pfam01197)→                                |
| env-214 | SRS019126_WUGC_scaffold.8147    | + | 629  | 679  | RNA→ | rpmE (PRK00019)Ribosomal_L31 (pfam01197)→                                |
| env-215 | SRS019127_C1598465              | - | 374  | 324  | RNA→ | rpmE (PRK00019)Ribosomal_L31 (pfam01197)→                                |
| env-216 | SRS019129_C1955039              | - | 253  | 203  | RNA→ | rpmE (PRK00019)Ribosomal_L31 (pfam01197)→                                |

|         |                                 |   |       |       |      |                                                    |
|---------|---------------------------------|---|-------|-------|------|----------------------------------------------------|
| env-217 | SRS019219_C2807201              | + | 89    | 139   | RNA→ | rpmE (PRK00019)Ribosomal_L31 (pfam01197)→          |
| env-218 | SRS019327_C2615848              | + | 281   | 331   | RNA→ |                                                    |
| env-219 | SRS019389_C2178886              | - | 330   | 280   | RNA→ | rpmE (PRK00019)Ribosomal_L31 (pfam01197)→          |
| env-220 | SRS019391_WUGC_scaffold.1544    | - | 264   | 214   | RNA→ |                                                    |
| env-221 | SRS019397_C1439804              | - | 920   | 870   | RNA→ | rpmE (PRK00019)Ribosomal_L31 (pfam01197)→          |
| env-222 | SRS019607_WUGC_scaffold.1072    | + | 1281  | 1331  | RNA→ | rpmE (PRK00019)Ribosomal_L31 (pfam01197)→          |
| env-223 | SRS019872_C622759               | + | 365   | 415   | RNA→ | rpmE (PRK00019)Ribosomal_L31 (pfam01197)→          |
| env-224 | SRS019894_WUGC_scaffold.40693   | - | 460   | 410   | RNA→ | ←PRK13524 (PRK13524)TonB_dep_Rec (pfam00593)       |
| env-225 | SRS020334_Baylor_scaffold.37850 | - | 778   | 728   | RNA→ | rpmE (PRK00019)Ribosomal_L31 (pfam01197)→          |
| env-226 | SRS021477_Baylor_scaffold.70117 | + | 470   | 520   | RNA→ | rpmE (PRK00019)Ribosomal_L31 (pfam01197)→          |
| env-227 | SRS021496_Baylor_scaffold.549   | - | 394   | 344   | RNA→ | rpmE (PRK00019)Ribosomal_L31 (pfam01197)→          |
| env-228 | SRS021948_C2754471              | - | 240   | 190   | RNA→ | rpmE (PRK00019)Ribosomal_L31 (pfam01197)→          |
| env-229 | SRS021954_Baylor_scaffold.5062  | - | 148   | 98    | RNA→ | rpmE (PRK00019)Ribosomal_L31 (pfam01197)→          |
| env-230 | SRS022077_C2432114              | + | 107   | 157   | RNA→ | rpmE (PRK00019)Ribosomal_L31 (pfam01197)→          |
| env-231 | SRS022079_Baylor_scaffold.515   | - | 15255 | 15205 | RNA→ | rpmE (PRK00019)Ribosomal_L31 (pfam01197)→          |
| env-232 | SRS022083_Baylor_scaffold.4111  | + | 1531  | 1581  | RNA→ | rpmE (PRK00019)Ribosomal_L31 (pfam01197)→          |
| env-233 | SRS022143_WUGC_scaffold.83552   | - | 318   | 268   | RNA→ | rpmE (PRK00019)Ribosomal_L31 (pfam01197)→          |
| env-234 | SRS022532_LANL_scaffold.10532   | + | 671   | 721   | RNA→ | ←hypo                                              |
| env-235 | SRS023837_C582069               | + | 172   | 222   | RNA→ | rpmE (PRK00019)Ribosomal_L31 (pfam01197)→          |
| env-236 | SRS023964_Baylor_scaffold.37730 | - | 207   | 157   | RNA→ | rpmE (PRK00019)Ribosomal_L31 (pfam01197)→          |
| env-237 | SRS024081_LANL_scaffold.839     | + | 386   | 436   | RNA→ | rpmE (PRK00019)Ribosomal_L31 (pfam01197)→          |
| env-238 | SRS024375_LANL_scaffold.34090   | - | 295   | 245   | RNA→ | rpmE (PRK00019)Ribosomal_L31 (pfam01197)→          |
| env-239 | SRS024470_LANL_scaffold.1444    | + | 270   | 320   | RNA→ | rpmE (PRK00019)Ribosomal_L31 (pfam01197)→          |
| env-240 | SRS043676_WUGC_scaffold.7680    | - | 68    | 18    | RNA→ |                                                    |
| env-241 | SRS043701_C1745554              | - | 295   | 245   | RNA→ | rpmE (PRK00019)Ribosomal_L31 (pfam01197)→          |
| env-242 | SRS044373_C2721994              | - | 67    | 17    | RNA→ |                                                    |
| env-243 | SRS044486_WUGC_scaffold.2702    | + | 290   | 340   | RNA→ | rpmE (PRK00019)Ribosomal_L31 (pfam01197)→          |
| env-244 | SRS045127_LANL_scaffold.25629   | - | 213   | 163   | RNA→ | rpmE (PRK00019)Ribosomal_L31 (pfam01197)→          |
| env-245 | SRS045645_C1878673              | + | 83    | 133   | RNA→ | rpmE (PRK00019)Ribosomal_L31 (pfam01197)→          |
| env-246 | SRS045715_C4716689              | - | 253   | 203   | RNA→ | rpmE (PRK00019)Ribosomal_L31 (pfam01197)→          |
| env-247 | SRS045978_C962638               | - | 76    | 26    | RNA→ |                                                    |
| env-248 | SRS047210_WUGC_scaffold.43713   | - | 305   | 255   | RNA→ | rpmE (PRK00019)Ribosomal_L31 (pfam01197)→          |
| env-249 | SRS047219_WUGC_scaffold.2120    | + | 278   | 328   | RNA→ | rpmE (PRK00019)Ribosomal_L31 (pfam01197)→          |
| env-250 | SRS047824_WUGC_scaffold.42445   | + | 423   | 473   | RNA→ | rpmE (PRK00019)Ribosomal_L31 (pfam01197)→          |
| env-251 | SRS048411_C6924320              | - | 360   | 310   | RNA→ | rpmE (PRK00019)Ribosomal_L31 (pfam01197)→          |
| env-252 | SRS048791_LANL_scaffold.60240   | - | 253   | 203   | RNA→ | rpmE (PRK00019)Ribosomal_L31 (pfam01197)→          |
| env-253 | SRS049147_LANL_scaffold.50458   | - | 171   | 121   | RNA→ | rpmE (PRK00019)Ribosomal_L31 (pfam01197)→          |
| env-254 | SRS050029_C660889               | + | 260   | 310   | RNA→ |                                                    |
| env-255 | SRS051244_LANL_scaffold.49385   | + | 361   | 411   | RNA→ |                                                    |
| env-256 | SRS051791_LANL_scaffold.5910    | + | 208   | 258   | RNA→ | rpmE (PRK00019)Ribosomal_L31 (pfam01197)→          |
| env-257 | SRS052027_C1805428              | - | 348   | 298   | RNA→ | rpmE (PRK00019)Ribosomal_L31 (pfam01197)→          |
| env-258 | SRS052227_LANL_scaffold.41974   | - | 295   | 245   | RNA→ | rpmE (PRK00019)Ribosomal_L31 (pfam01197)→          |
| env-259 | SRS052604_C1681687              | + | 239   | 289   | RNA→ |                                                    |
| env-260 | SRS053603_C3252729              | + | 266   | 316   | RNA→ | rpmE (PRK00019)Ribosomal_L31 (pfam01197)→          |
| env-261 | SRS054430_LANL_scaffold.5925    | - | 66    | 16    | RNA→ |                                                    |
| env-262 | SRS054590_C647943               | - | 247   | 197   | RNA→ | rpmE (PRK00019)Ribosomal_L31 (pfam01197)→          |
| env-263 | SRS054687_C3379381              | - | 302   | 252   | RNA→ | rpmE (PRK00019)Ribosomal_L31 (pfam01197)→          |
| env-264 | SRS055401_LANL_scaffold.32442   | - | 252   | 202   | RNA→ | rpmE (PRK00019)Ribosomal_L31 (pfam01197)→          |
| env-265 | SRS055426_LANL_scaffold.18857   | - | 951   | 901   | RNA→ | ←PRK13528 (PRK13528)TonB_dep_Rec (pfam00593)       |
| env-266 | SRS056323_C2564669              | - | 291   | 241   | RNA→ | rpmE (PRK00019)Ribosomal_L31 (pfam01197)→          |
| env-267 | SRS056622_LANL_scaffold.38163   | + | 117   | 167   | RNA→ | rpmE (PRK00019)Ribosomal_L31 (pfam01197)→          |
| env-268 | SRS056892_LANL_scaffold.6433    | + | 339   | 389   | RNA→ | ←PRK13528 (PRK13528)ligand_gated_channel (cd01347) |

|         |                                        |   |        |        |                                                                              |
|---------|----------------------------------------|---|--------|--------|------------------------------------------------------------------------------|
| env-269 | SRS057539_LANL_scaffold_29320          | + | 406    | 456    | RNA→←PRK13528 (PRK13528)ligand_gated_channel (cd01347)                       |
| env-270 | SRS057692_LANL_scaffold_16818          | + | 97     | 147    | RNA→rpmE (PRK00019)Ribosomal_L31 (pfam01197)→                                |
| env-271 | SRS057791_C3589113                     | + | 145    | 195    | RNA→rpmE (PRK00019)Ribosomal_L31 (pfam01197)→                                |
| env-272 | SRS058336_C2100928                     | + | 217    | 267    | RNA→rpmE (PRK00019)Ribosomal_L31 (pfam01197)→                                |
| env-273 | SRS058723_C6753173                     | + | 271    | 321    | RNA→rpmE (PRK00019)Ribosomal_L31 (pfam01197)→                                |
| env-274 | SRS062540_LANL_scaffold_77508          | - | 354    | 304    | RNA→rpmE (PRK00019)Ribosomal_L31 (pfam01197)→                                |
| env-275 | SRS062544_C2913519                     | + | 260    | 310    | RNA→rpmE (PRK00019)Ribosomal_L31 (pfam01197)→                                |
| env-276 | SRS063478_C532042                      | + | 109    | 159    | RNA→rpmE (PRK00019)Ribosomal_L31 (pfam01197)→                                |
| env-277 | SRS064423_LANL_scaffold_7733           | - | 403    | 353    | RNA→rpmE (PRK00019)Ribosomal_L31 (pfam01197)→                                |
| env-278 | SRS064774_C2757027                     | - | 295    | 245    | RNA→rpmE (PRK00019)Ribosomal_L31 (pfam01197)→                                |
| env-279 | SRS065278_LANL_scaffold_48090          | - | 535    | 485    | RNA→rpmE (PRK00019)Ribosomal_L31 (pfam01197)→                                |
| env-280 | SRS065335_C936123                      | - | 321    | 271    | RNA→rpmE (PRK00019)Ribosomal_L31 (pfam01197)→                                |
| env-281 | SRS075406_C811674                      | + | 97     | 147    | RNA→rpmE (PRK00019)Ribosomal_L31 (pfam01197)→                                |
| env-282 | SRS075410_LANL_scaffold_13122          | + | 361    | 411    | RNA→rpmE (PRK00019)Ribosomal_L31 (pfam01197)→                                |
| env-283 | SRS077736_LANL_scaffold_33263          | - | 287    | 237    | RNA→rpmE (PRK00019)Ribosomal_L31 (pfam01197)→                                |
| Hpa-2-4 | NZ_JUOR01000021.1                      | - | 10901  | 10851  | RNA→rpmE (PRK00019)Ribosomal_L31 (pfam01197)→                                |
| Hpa-6-1 | NC_015964.1                            | - | 912647 | 912597 | RNA→rpmE (PRK00019)Ribosomal_L31 (pfam01197)→                                |
| env-284 | 4491485.3.NODE_13737                   | + | 3635   | 3685   | RNA→rpmE (PRK00019)Ribosomal_L31 (pfam01197)→                                |
| env-285 | Keratinized_gingiva_LANL_scaffold_2331 | + | 325    | 375    | RNA→rpmE (PRK00019)Ribosomal_L31 (pfam01197)→                                |
| env-286 | SRS015540_C1078977                     | + | 208    | 258    | RNA→                                                                         |
| env-287 | SRS016541_Baylor_scaffold_18251        | - | 14291  | 14241  | RNA→rpmE (PRK00019)Ribosomal_L31 (pfam01197)→                                |
| env-288 | SRS023841_Baylor_scaffold_26182        | + | 952    | 1002   | RNA→rpmE (PRK00019)Ribosomal_L31 (pfam01197)→                                |
| env-289 | SRS056157_C273441                      | + | 153    | 203    | RNA→rpmE (PRK00019)Ribosomal_L31 (pfam01197)→                                |
| env-290 | NLM007_scaffold6885_2                  | - | 257    | 207    | RNA→rpmE (PRK00019)Ribosomal_L31 (pfam01197)→                                |
| env-291 | NOM018_scaffold11447_1                 | + | 1091   | 1141   | RNA→rpmE (PRK00019)Ribosomal_L31 (pfam01197)→                                |
| env-292 | SRS011098_Baylor_scaffold_8386         | - | 2267   | 2217   | RNA→rpmE (PRK00019)Ribosomal_L31 (pfam01197)→                                |
| env-293 | SRS011310_Baylor_scaffold_12329        | - | 240    | 190    | RNA→rpmE (PRK00019)Ribosomal_L31 (pfam01197)→                                |
| env-294 | SRS011343_Baylor_scaffold_2577         | + | 789    | 839    | RNA→rpmE (PRK00019)Ribosomal_L31 (pfam01197)→                                |
| env-295 | SRS013164_Baylor_scaffold_6398         | + | 1941   | 1991   | RNA→hypo→                                                                    |
| env-296 | SRS013533_PGA_scaffold_83577           | - | 4677   | 4627   | RNA→rpmE (PRK00019)Ribosomal_L31 (pfam01197)→                                |
| env-297 | SRS014477_C1618804                     | + | 520    | 570    | RNA→rpmE (PRK00019)rpmE2 (PRK01678)Ribosomal_L31 (pfam01197)→                |
| env-298 | SRS014690_WUGC_scaffold_24846          | + | 2301   | 2351   | RNA→rpmE (PRK00019)Ribosomal_L31 (pfam01197)→                                |
| env-299 | SRS014894_WUGC_scaffold_15243          | + | 3458   | 3508   | RNA→rpmE (PRK00019)Ribosomal_L31 (pfam01197)→                                |
| env-300 | SRS015040_WUGC_scaffold_3662           | - | 66     | 16     | RNA→                                                                         |
| env-301 | SRS015044_WUGC_scaffold_680            | - | 16214  | 16164  | RNA→←PRK13524 (PRK13524)ligand_gated_channel (cd01347)                       |
| env-302 | SRS015063_WUGC_scaffold_20082          | - | 483    | 433    | RNA→rpmE (PRK00019)Ribosomal_L31 (pfam01197)→                                |
| env-303 | SRS015215_WUGC_scaffold_46212          | - | 4914   | 4864   | RNA→rpmE (PRK00019)Ribosomal_L31 (pfam01197)→                                |
| env-304 | SRS015374_WUGC_scaffold_2905           | + | 23086  | 23136  | RNA→rpmE (PRK00019)Ribosomal_L31 (pfam01197)→                                |
| env-305 | SRS015378_WUGC_scaffold_12166          | + | 554    | 604    | RNA→rpmE (PRK00019)Ribosomal_L31 (pfam01197)→                                |
| env-306 | SRS015440_WUGC_scaffold_25622          | + | 512    | 562    | RNA→rpmE (PRK00019)Ribosomal_L31 (pfam01197)→                                |
| env-307 | SRS015755_C1590475                     | + | 281    | 331    | RNA→                                                                         |
| env-308 | SRS016043_WUGC_scaffold_17944          | + | 1164   | 1214   | RNA→rpmE (PRK00528)rpmE (PRK00019)rpmE2 (PRK01678)Ribosomal_L31 (pfam01197)→ |
| env-309 | SRS016092_WUGC_scaffold_1540           | - | 14964  | 14914  | RNA→rpmE (PRK00019)Ribosomal_L31 (pfam01197)→                                |
| env-310 | SRS016196_C485265                      | + | 1027   | 1077   | RNA→                                                                         |
| env-311 | SRS016331_C4184433                     | + | 888    | 938    | RNA→rpmE (PRK00019)Ribosomal_L31 (pfam01197)→                                |
| env-312 | SRS016360_Baylor_scaffold_42110        | + | 1164   | 1214   | RNA→                                                                         |
| env-313 | SRS017227_Baylor_scaffold_17966        | - | 2211   | 2161   | RNA→rpmE (PRK00019)Ribosomal_L31 (pfam01197)→                                |
| env-314 | SRS017441_C716525                      | - | 122    | 72     | RNA→rpmE (PRK00528)rpmE (PRK00019)rpmE2 (PRK01678)Ribosomal_L31 (pfam01197)→ |
| env-315 | SRS017691_Baylor_scaffold_71029        | + | 1502   | 1552   | RNA→                                                                         |
| env-316 | SRS018149_Baylor_scaffold_8518         | - | 67     | 17     | RNA→                                                                         |
| env-317 | SRS018337_Baylor_scaffold_3991         | - | 160    | 110    | RNA→rpmE (PRK00019)Ribosomal_L31 (pfam01197)→                                |
| env-318 | SRS018394_Baylor_scaffold_31222        | - | 1643   | 1593   | RNA→rpmE (PRK00019)Ribosomal_L31 (pfam01197)→                                |

|          |                                 |   |         |         |                                                                                                                   |
|----------|---------------------------------|---|---------|---------|-------------------------------------------------------------------------------------------------------------------|
| env-319  | SRS019029_WUGC_scaffold.48805   | - | 66      | 16      | RNA→                                                                                                              |
| env-320  | SRS019333_WUGC_scaffold.15291   | + | 2869    | 2919    | RNA→ rpmE (PRK00019)Ribosomal_L31 (pfam01197)→                                                                    |
| env-321  | SRS019976_Baylor_scaffold.6230  | - | 243     | 193     | RNA→ rpmE (PRK00019)Ribosomal_L31 (pfam01197)→                                                                    |
| env-322  | SRS019980_Baylor_scaffold.31327 | + | 562     | 612     | RNA→                                                                                                              |
| env-323  | SRS020226_Baylor_scaffold.32347 | - | 213     | 163     | RNA→ rpmE (PRK00019)Ribosomal_L31 (pfam01197)→                                                                    |
| env-324  | SRS020340_Baylor_scaffold.20184 | + | 496     | 546     | RNA→ rpmE (PRK00019)Ribosomal_L31 (pfam01197)→                                                                    |
| env-325  | SRS020858_C769095               | - | 68      | 18      | RNA→                                                                                                              |
| env-326  | SRS020862_Baylor_scaffold.23178 | - | 1984    | 1934    | RNA→ rpmE (PRK00019)Ribosomal_L31 (pfam01197)→                                                                    |
| env-327  | SRS021960_Baylor_scaffold.7710  | - | 174     | 124     | RNA→ rpmE (PRK00019)Ribosomal_L31 (pfam01197)→                                                                    |
| env-328  | SRS022149_LANL_scaffold.6234    | - | 68      | 18      | RNA→                                                                                                              |
| env-329  | SRS023358_C3482659              | - | 66      | 16      | RNA→                                                                                                              |
| env-330  | SRS023538_Baylor_scaffold.23152 | - | 66      | 16      | RNA→                                                                                                              |
| env-331  | SRS023595_Baylor_scaffold.91416 | - | 66      | 16      | RNA→                                                                                                              |
| env-332  | SRS023987_Baylor_scaffold.1631  | + | 1076    | 1126    | RNA→ rpmE (PRK00019)Ribosomal_L31 (pfam01197)→                                                                    |
| env-333  | SRS024017_Baylor_scaffold.15613 | - | 68      | 18      | RNA→                                                                                                              |
| env-334  | SRS024144_LANL_scaffold.20602   | + | 916     | 966     | RNA→                                                                                                              |
| env-335  | SRS024561_C2824542              | - | 66      | 16      | RNA→                                                                                                              |
| env-336  | SRS042457_LANL_scaffold.4939    | + | 713     | 763     | RNA→                                                                                                              |
| env-337  | SRS042984_LANL_scaffold.74580   | + | 421     | 471     | RNA→                                                                                                              |
| env-338  | SRS045313_LANL_scaffold.12892   | - | 1373    | 1323    | RNA→ rpmE (PRK00019)Ribosomal_L31 (pfam01197)→ Glyco_transf_25 (pfam01755)→<br>PRK10422 (PRK10422)RfaF (COG0859)→ |
| env-339  | SRS047634_LANL_scaffold.115926  | - | 66      | 16      | RNA→                                                                                                              |
| env-340  | SRS049268_C4184946              | + | 288     | 338     | RNA→                                                                                                              |
| env-341  | SRS049318_C6295479              | - | 66      | 16      | RNA→                                                                                                              |
| env-342  | SRS050244_C4383723              | + | 117     | 167     | RNA→ rpmE (PRK00019)Ribosomal_L31 (pfam01197)→                                                                    |
| env-343  | SRS050628_LANL_scaffold.4839    | - | 68      | 18      | RNA→                                                                                                              |
| env-344  | SRS052876_LANL_scaffold.39738   | + | 595     | 645     | RNA→                                                                                                              |
| env-345  | SRS053584_LANL_scaffold.42738   | + | 163     | 213     | RNA→ rpmE (PRK00019)Ribosomal_L31 (pfam01197)→                                                                    |
| env-346  | SRS054653_C2080848              | - | 159     | 109     | RNA→ rpmE (PRK00019)Ribosomal_L31 (pfam01197)→                                                                    |
| env-347  | SRS055450_LANL_scaffold.67168   | + | 1178    | 1228    | RNA→                                                                                                              |
| env-348  | SRS058808_LANL_scaffold.12344   | + | 2015    | 2065    | RNA→                                                                                                              |
| env-349  | SRS063287_LANL_scaffold.6852    | + | 404     | 454     | RNA→ rpmE (PRK00019)Ribosomal_L31 (pfam01197)→                                                                    |
| env-350  | SRS064809_LANL_scaffold.5427    | + | 157     | 207     | RNA→ rpmE (PRK00019)Ribosomal_L31 (pfam01197)→                                                                    |
| env-351  | SRS065310_C1245580              | - | 68      | 18      | RNA→                                                                                                              |
| Hpa-2-5  | NZ_JVSU01000025.1               | + | 2976    | 3026    | RNA→ rpmE (PRK00019)Ribosomal_L31 (pfam01197)→                                                                    |
| Hpa-2-6  | NZ_JWCE01000018.1               | - | 105224  | 105174  | RNA→ rpmE (PRK00019)Ribosomal_L31 (pfam01197)→                                                                    |
| Hpa-2-7  | NZ_JVSB01000011.1               | + | 2976    | 3026    | RNA→ rpmE (PRK00019)Ribosomal_L31 (pfam01197)→                                                                    |
| Hpa-2-8  | NZ_JVRH01000079.1               | - | 114460  | 114410  | RNA→ rpmE (PRK00019)Ribosomal_L31 (pfam01197)→                                                                    |
| Hpa-2-9  | NZ_JUTJ01000002.1               | - | 24649   | 24599   | RNA→ rpmE (PRK00019)Ribosomal_L31 (pfam01197)→                                                                    |
| Hpa-2-10 | NZ_JVFE01000001.1               | - | 48872   | 48822   | RNA→ rpmE (PRK00019)Ribosomal_L31 (pfam01197)→                                                                    |
| Hpa-5-1  | NZ_LAJMW01000057.1              | - | 27592   | 27542   | RNA→ rpmE (PRK00019)Ribosomal_L31 (pfam01197)→                                                                    |
| Hpa-4-1  | NZ_AJTC01000031.1               | - | 50368   | 50318   | RNA→ rpmE (PRK00019)Ribosomal_L31 (pfam01197)→                                                                    |
| Hpa-3-1  | NZ_GL872339.1                   | + | 1999941 | 1999991 | RNA→ rpmE (PRK00019)Ribosomal_L31 (pfam01197)→                                                                    |
| env-352  | SRS017076_Baylor_scaffold.26623 | - | 284     | 234     | RNA→ rpmE (PRK00019)Ribosomal_L31 (pfam01197)→                                                                    |
| env-353  | SRS015038_C1823634              | + | 113     | 163     | RNA→ rpmE (PRK00019)Ribosomal_L31 (pfam01197)→                                                                    |
| env-354  | SRS024637_C2357778              | - | 307     | 257     | RNA→ rpmE (PRK00019)Ribosomal_L31 (pfam01197)→                                                                    |
| env-355  | SRS053854_LANL_scaffold.40299   | + | 271     | 321     | RNA→ rpmE (PRK00019)Ribosomal_L31 (pfam01197)→                                                                    |
| env-356  | SRS022602_Baylor_scaffold.39274 | - | 1217    | 1167    | RNA→ rpmE (PRK00019)Ribosomal_L31 (pfam01197)→                                                                    |
| env-357  | SRS015470_WUGC_scaffold.7219    | + | 442     | 492     | RNA→ rpmE (PRK00019)Ribosomal_L31 (pfam01197)→                                                                    |
| env-358  | SRS014578_WUGC_scaffold.4249    | - | 4087    | 4037    | RNA→ rpmE (PRK00019)Ribosomal_L31 (pfam01197)→                                                                    |
| env-359  | SRS014474_C733884               | + | 2001    | 2051    | RNA→ rpmE (PRK00019)Ribosomal_L31 (pfam01197)→                                                                    |
| env-360  | SRS020220_Baylor_scaffold.39783 | - | 240     | 190     | RNA→ rpmE (PRK00019)Ribosomal_L31 (pfam01197)→                                                                    |



|          |                                 |   |        |        |                                                                                                                                                                                                                                                              |
|----------|---------------------------------|---|--------|--------|--------------------------------------------------------------------------------------------------------------------------------------------------------------------------------------------------------------------------------------------------------------|
| env-361  | SRS022145_C596044               | + | 247    | 297    | RNA→                                                                                                                                                                                                                                                         |
| env-362  | SRS042643_WUGC_scaffold.30660   | + | 182    | 232    | RNA→ rpmE (PRK00019)Ribosomal_L31 (pfam01197)→                                                                                                                                                                                                               |
| Hpa-2-11 | NZ_JVYT01000034.1               | + | 2978   | 3028   | RNA→ rpmE (PRK00019)Ribosomal_L31 (pfam01197)→                                                                                                                                                                                                               |
| Rpn-1-1  | NZ_BBIX01000005.1               | - | 3001   | 2951   | RNA→ rpmE (PRK00019)Ribosomal_L31 (pfam01197)→                                                                                                                                                                                                               |
| Rpn-1-2  | NZ_BBIX01000009.1               | - | 658570 | 658520 | RNA→ rpmE (PRK00019)Ribosomal_L31 (pfam01197)→                                                                                                                                                                                                               |
| Ppn-1-1  | NZ_KB904052.1                   | + | 167149 | 167199 | RNA→ rpmE (PRK00019)Ribosomal_L31 (pfam01197)→                                                                                                                                                                                                               |
| env-363  | SRS014692_C1497409              | + | 379    | 429    | RNA→ rpmE (PRK00019)Ribosomal_L31 (pfam01197)→                                                                                                                                                                                                               |
| env-364  | SRS014126_C565578               | - | 84     | 34     | RNA→                                                                                                                                                                                                                                                         |
| env-365  | SRS014687_WUGC_scaffold.2169    | - | 3350   | 3300   | RNA→ rpmE (PRK00019)Ribosomal_L31 (pfam01197)→ PRK11204 (PRK11204)Glycos.transf.2 (pfam00535)→<br>GT8_A4GalT_like (cd04194)PRK15171 (PRK15171)→ Glyco.transf.25 (pfam01755)→ Glyco.transf.25 (cd06532)→                                                      |
| env-366  | SRS018978_C1739365              | - | 62     | 12     | RNA→                                                                                                                                                                                                                                                         |
| env-367  | SRS048719_C812527               | + | 2851   | 2901   | RNA→ rpmE (PRK00019)Ribosomal_L31 (pfam01197)→                                                                                                                                                                                                               |
| env-368  | SRS016196_C475885               | + | 466    | 516    | RNA→                                                                                                                                                                                                                                                         |
| env-369  | SRS021986_C944337               | - | 84     | 34     | RNA→                                                                                                                                                                                                                                                         |
| env-370  | SRS011090_Baylor_scaffold.4448  | - | 1061   | 1011   | RNA→ rpmE (PRK00019)Ribosomal_L31 (pfam01197)→ Glyco.transf.25 (pfam01755)POX (pfam07526)→                                                                                                                                                                   |
| env-371  | SRS014472_C402330               | - | 548    | 498    | RNA→ rpmE (PRK00019)Ribosomal_L31 (pfam01197)→ Glyco.transf.25 (pfam01755)→                                                                                                                                                                                  |
| env-372  | SRS016039_WUGC_scaffold.8838    | - | 2881   | 2831   | RNA→ rpmE (PRK00019)Ribosomal_L31 (pfam01197)→ Glyco.transf.25 (pfam01755)POX (pfam07526)→<br>GT8_A4GalT_like (cd04194)PRK15171 (PRK15171)→ Glyco.transf.25 (pfam01755)→                                                                                     |
| env-373  | SRS017013_Baylor_scaffold.22515 | + | 291    | 341    | RNA→ Glyco.transf.25 (pfam01755)POX (pfam07526)→                                                                                                                                                                                                             |
| env-374  | SRS017810_Baylor_scaffold.7758  | + | 2802   | 2852   | RNA→ rpmE (PRK00019)Ribosomal_L31 (pfam01197)→ Glyco.transf.25 (pfam01755)POX (pfam07526)→                                                                                                                                                                   |
| env-375  | SRS018329_Baylor_scaffold.7486  | + | 448    | 498    | RNA→ rpmE (PRK00019)rpmE2 (PRK01678)Ribosomal_L31 (pfam01197)→                                                                                                                                                                                               |
| env-376  | SRS018359_C1229806              | + | 1424   | 1474   | RNA→                                                                                                                                                                                                                                                         |
| env-377  | SRS019329_C786673               | - | 68     | 18     | RNA→                                                                                                                                                                                                                                                         |
| env-378  | SRS019587_C1052142              | + | 652    | 702    | RNA→                                                                                                                                                                                                                                                         |
| env-379  | SRS021473_Baylor_scaffold.4924  | + | 2802   | 2852   | RNA→ rpmE (PRK00019)Ribosomal_L31 (pfam01197)→ Glyco.transf.25 (pfam01755)POX (pfam07526)→                                                                                                                                                                   |
| env-380  | SRS023534_C139914               | - | 324    | 274    | RNA→ rpmE (PRK00019)Ribosomal_L31 (pfam01197)→                                                                                                                                                                                                               |
| env-381  | SRS023538_Baylor_scaffold.23260 | + | 216    | 266    | RNA→ rpmE (PRK00019)rpmE2 (PRK01678)Ribosomal_L31 (pfam01197)→                                                                                                                                                                                               |
| env-382  | SRS024377_LANL_scaffold.33      | - | 23058  | 23008  | RNA→ rpmE (PRK00019)Ribosomal_L31 (pfam01197)→ Glyco.transf.25 (pfam01755)POX (pfam07526)→<br>GT8_A4GalT_like (cd04194)PRK15171 (PRK15171)→ Glyco.transf.25 (pfam01755)→                                                                                     |
| env-383  | SRS024381_LANL_scaffold.54075   | - | 559    | 509    | RNA→ rpmE (PRK00019)Ribosomal_L31 (pfam01197)→ Glyco.transf.25 (pfam01755)→                                                                                                                                                                                  |
| env-384  | SRS052668_C1028805              | + | 444    | 494    | RNA→                                                                                                                                                                                                                                                         |
| env-385  | SRS015985_WUGC_scaffold.5736    | + | 8804   | 8854   | RNA→ rpmE (PRK00019)Ribosomal_L31 (pfam01197)→ RfaB (COG0438)Glyco.transf.1.4 (pfam13692)→<br>GT8_A4GalT_like (cd04194)PRK15171 (PRK15171)→ Glyco.transf.25 (pfam01755)→<br>Glyco.transf.25 (pfam01755)→ Glyco.transf.GTA_type (cd00761)PRK10073 (PRK10073)→ |
| env-386  | SRS011098_Baylor_scaffold.48474 | - | 745    | 695    | RNA→ rpmE (PRK00019)Ribosomal_L31 (pfam01197)→ hypo→                                                                                                                                                                                                         |
| env-387  | SRS011144_C527765               | - | 148    | 98     | RNA→ rpmE (PRK00019)Ribosomal_L31 (pfam01197)→                                                                                                                                                                                                               |
| env-388  | SRS016088_C183306               | - | 94     | 44     | RNA→                                                                                                                                                                                                                                                         |
| env-389  | SRS017127_Baylor_scaffold.6911  | + | 2934   | 2984   | RNA→ rpmE (PRK00019)Ribosomal_L31 (pfam01197)→ Glyco.transf.25 (pfam01755)POX (pfam07526)→<br>GT8_A4GalT_like (cd04194)PRK15171 (PRK15171)→ Glyco.transf.25 (pfam01755)→                                                                                     |
| env-390  | SRS017139_C3563542              | + | 262    | 312    | RNA→                                                                                                                                                                                                                                                         |
| env-391  | SRS017441_C719147               | + | 344    | 394    | RNA→ rpmE (PRK00528)rpmE (PRK00019)rpmE2 (PRK01678)Ribosomal_L31 (pfam01197)→                                                                                                                                                                                |
| env-392  | SRS022145_C605259               | - | 68     | 18     | RNA→                                                                                                                                                                                                                                                         |
| env-393  | SRS051116_LANL_scaffold.1628    | + | 2934   | 2984   | RNA→ rpmE (PRK00019)Ribosomal_L31 (pfam01197)→ Glyco.transf.25 (pfam01755)POX (pfam07526)→<br>GT8_A4GalT_like (cd04194)PRK15171 (PRK15171)→ Glyco.transf.25 (pfam01755)→                                                                                     |
| env-394  | SRS011343_Baylor_scaffold.11773 | - | 68     | 18     | RNA→                                                                                                                                                                                                                                                         |
| env-395  | SRS019387_C1774500              | + | 1449   | 1499   | RNA→ rpmE (PRK00019)Ribosomal_L31 (pfam01197)→                                                                                                                                                                                                               |
| env-396  | SRS020858_C776329               | + | 1031   | 1081   | RNA→                                                                                                                                                                                                                                                         |
| env-397  | SRS020862_Baylor_scaffold.28830 | - | 1159   | 1109   | RNA→ rpmE (PRK00019)Ribosomal_L31 (pfam01197)→ Glyco.transf.25 (pfam01755)→                                                                                                                                                                                  |
| env-398  | SRS022532_LANL_scaffold.11832   | + | 8865   | 8915   | RNA→ Glyco.transf.25 (pfam01755)→                                                                                                                                                                                                                            |
| env-399  | SRS024281_C986018               | + | 1138   | 1188   | RNA→                                                                                                                                                                                                                                                         |
| env-400  | SRS024289_LANL_scaffold.11530   | - | 68     | 18     | RNA→                                                                                                                                                                                                                                                         |
| env-401  | SRS013164_C2241878              | + | 310    | 360    | RNA→                                                                                                                                                                                                                                                         |
| env-402  | SRS022625_C2147320              | + | 68     | 18     | RNA→                                                                                                                                                                                                                                                         |
| env-403  | SRS023987_C1180207              | - | 68     | 18     | RNA→                                                                                                                                                                                                                                                         |



|          |                                 |   |         |         |                                                                                                                                                         |
|----------|---------------------------------|---|---------|---------|---------------------------------------------------------------------------------------------------------------------------------------------------------|
| env-404  | SRS017080_Baylor_scaffold_3076  | - | 1935    | 1885    | RNA → rpmE (PRK00019)Ribosomal_L31 (pfam01197) → Glyco_transf_25 (pfam01755)POX (pfam07526) → GT8_A4GalT_like (cd04194)PRK15171 (PRK15171) →            |
| env-405  | SRS024318_LANL_scaffold_15937   | - | 68      | 18      | RNA →                                                                                                                                                   |
| env-406  | SRS050628_LANL_scaffold_21056   | + | 835     | 885     | RNA → rpmE (PRK00019)rpmE2 (PRK01678)Ribosomal_L31 (pfam01197) →                                                                                        |
| env-407  | SRS045262_WUGC_scaffold_11350   | + | 1338    | 1388    | RNA → ← hyp0                                                                                                                                            |
| env-408  | SRS045049_WUGC_scaffold_4937    | - | 259     | 209     | RNA → rpmE (PRK00019)Ribosomal_L31 (pfam01197) →                                                                                                        |
| env-409  | SRS013239_Baylor_scaffold_8305  | + | 2802    | 2852    | RNA →                                                                                                                                                   |
| env-410  | SRS024017_C890428               | - | 68      | 18      | RNA →                                                                                                                                                   |
| env-411  | SRS013818_Baylor_scaffold_30131 | - | 190     | 140     | RNA → rpmE (PRK00019)Ribosomal_L31 (pfam01197) →                                                                                                        |
| env-412  | SRS018300_Baylor_scaffold_30376 | - | 198     | 148     | RNA → rpmE (PRK00019)Ribosomal_L31 (pfam01197) →                                                                                                        |
| env-413  | SRS020856_C2499523              | + | 297     | 347     | RNA →                                                                                                                                                   |
| env-414  | SRS024441_LANL_scaffold_23848   | + | 1393    | 1443    | RNA → rpmE (PRK00019)Ribosomal_L31 (pfam01197) →                                                                                                        |
| env-415  | SRS043701_C1809232              | + | 527     | 577     | RNA → rpmE (PRK00019)Ribosomal_L31 (pfam01197) →                                                                                                        |
| env-416  | SRS049389_C4590327              | + | 399     | 449     | RNA →                                                                                                                                                   |
| env-417  | SRS017215_Baylor_scaffold_5416  | + | 724     | 774     | RNA →                                                                                                                                                   |
| Hha-1-1  | NZ_LCTK01000024.1               | + | 36220   | 36270   | RNA → rpmE (PRK00019)Ribosomal_L31 (pfam01197) →                                                                                                        |
| env-418  | SRS011247_C1322309              | + | 307     | 357     | RNA →                                                                                                                                                   |
| env-419  | SRS015574_C3331718              | + | 437     | 487     | RNA →                                                                                                                                                   |
| Hha-1-2  | NZ_LCTI01000049.1               | - | 6537    | 6487    | RNA → rpmE (PRK00019)Ribosomal_L31 (pfam01197) →                                                                                                        |
| env-420  | SRS019028_C2927759              | - | 68      | 18      | RNA →                                                                                                                                                   |
| env-421  | SRS024087_LANL_scaffold_49246   | - | 237     | 187     | RNA → rpmE (PRK00019)Ribosomal_L31 (pfam01197) →                                                                                                        |
| Hha-1-3  | NZ_LCTH01000053.1               | - | 9141    | 9091    | RNA → rpmE (PRK00019)Ribosomal_L31 (pfam01197) → CgtA (pfam06306) → Glyco_transf_25 (pfam01755) → Glyco_transf_1_4 (pfam13692)GT1_WabH_like (cd03811) → |
| Hha-1-4  | NZ_LCTJ01000055.1               | - | 6545    | 6495    | RNA → rpmE (PRK00019)Ribosomal_L31 (pfam01197) →                                                                                                        |
| env-422  | SRS023930_Baylor_scaffold_6246  | + | 2806    | 2856    | RNA → ← hyp0                                                                                                                                            |
| env-423  | SRS043422_LANL_scaffold_13569   | + | 103     | 153     | RNA → rpmE (PRK00019)Ribosomal_L31 (pfam01197) →                                                                                                        |
| env-424  | SRS017127_C1115545              | + | 1102    | 1152    | RNA → rpmE (PRK00019)Ribosomal_L31 (pfam01197) →                                                                                                        |
| env-425  | SRS019125_WUGC_scaffold_9446    | + | 973     | 1023    | RNA → rpmE (PRK00019)Ribosomal_L31 (pfam01197) →                                                                                                        |
| env-426  | SRS019221_WUGC_scaffold_2235    | - | 213     | 163     | RNA → rpmE (PRK00019)Ribosomal_L31 (pfam01197) →                                                                                                        |
| env-427  | SRS062761_C4146270              | + | 274     | 324     | RNA →                                                                                                                                                   |
| Hha-4-1  | NZ_AFPQ01000010.1               | + | 312767  | 312817  | RNA → rpmE (PRK00019)Ribosomal_L31 (pfam01197) →                                                                                                        |
| Hha-2-1  | NZ_AJSV01000029.1               | - | 6279    | 6229    | RNA → rpmE (PRK00019)Ribosomal_L31 (pfam01197) →                                                                                                        |
| env-428  | Saliva_LANL_C126650             | + | 119     | 169     | RNA → rpmE (PRK00019)Ribosomal_L31 (pfam01197) →                                                                                                        |
| env-429  | SRS015803_C2530019              | + | 300     | 350     | RNA →                                                                                                                                                   |
| Hha-3-1  | NZ_AFQO01000007.1               | - | 7110    | 7060    | RNA → rpmE (PRK00019)Ribosomal_L31 (pfam01197) →                                                                                                        |
| Hsp-2-1  | NZ_JH591072.1                   | + | 167214  | 167264  | RNA → rpmE (PRK00019)Ribosomal_L31 (pfam01197) →                                                                                                        |
| env-430  | SRS015436_WUGC_scaffold_10632   | - | 502     | 452     | RNA → rpmE (PRK00019)Ribosomal_L31 (pfam01197) →                                                                                                        |
| Hha-5-1  | NZ_AFQQ01000021.1               | - | 6823    | 6773    | RNA → rpmE (PRK00019)Ribosomal_L31 (pfam01197) → rpmE (PRK00019)Ribosomal_L31 (pfam01197) →                                                             |
| Hha-6-1  | NZ_AFQR01000017.1               | - | 23162   | 23112   | RNA → rpmE (PRK00019)Ribosomal_L31 (pfam01197) →                                                                                                        |
| Hin-17-1 | NZ_AAZI01000001.1               | + | 341323  | 341373  | RNA → rpmE (PRK00019)Ribosomal_L31 (pfam01197) → rpmE (PRK00019)Ribosomal_L31 (pfam01197) →                                                             |
| Hin-19-1 | NC_017451.1                     | + | 1667269 | 1667319 | RNA → rpmE (PRK00019)Ribosomal_L31 (pfam01197) →                                                                                                        |
| env-431  | SRS014475_C164765               | + | 539     | 589     | RNA → rpmE (PRK00019)Ribosomal_L31 (pfam01197) →                                                                                                        |
| Hin-5-1  | NZ_JXC01000014.1                | - | 45598   | 45548   | RNA → rpmE (PRK00019)Ribosomal_L31 (pfam01197) →                                                                                                        |
| Hin-7-1  | NZ_ABVV01000001.1               | - | 45931   | 45881   | RNA → rpmE (PRK00019)Ribosomal_L31 (pfam01197) → rpmE (PRK00019)Ribosomal_L31 (pfam01197) →                                                             |
| Hin-21-1 | NZ_ACSM01000001.1               | - | 45997   | 45947   | RNA → rpmE (PRK00019)Ribosomal_L31 (pfam01197) → rpmE (PRK00019)Ribosomal_L31 (pfam01197) →                                                             |
| Hin-16-1 | NZ_AAZH01000004.1               | + | 87662   | 87712   | RNA → rpmE (PRK00019)Ribosomal_L31 (pfam01197) → rpmE (PRK00019)Ribosomal_L31 (pfam01197) →                                                             |
| Hin-20-1 | NC_000907.1                     | - | 822480  | 822430  | RNA → rpmE (PRK00019)Ribosomal_L31 (pfam01197) →                                                                                                        |
| Hin-15-1 | NC_009566.1                     | + | 1630832 | 1630882 | RNA → rpmE (PRK00019)Ribosomal_L31 (pfam01197) →                                                                                                        |
| Hin-8-1  | NC_007146.2                     | - | 887870  | 887820  | RNA → rpmE (PRK00019)Ribosomal_L31 (pfam01197) →                                                                                                        |
| Hin-18-1 | NC_017452.1                     | + | 1629437 | 1629487 | RNA → rpmE (PRK00019)Ribosomal_L31 (pfam01197) →                                                                                                        |
| Hin-10-1 | NC_014920.1                     | + | 1454654 | 1454704 | RNA → rpmE (PRK00019)Ribosomal_L31 (pfam01197) →                                                                                                        |
| Hae-1-1  | NZ_GL878526.1                   | - | 481719  | 481669  | RNA → rpmE (PRK00019)Ribosomal_L31 (pfam01197) →                                                                                                        |
| Hin-2-1  | NC_016809.1                     | - | 927122  | 927072  | RNA → rpmE (PRK00019)Ribosomal_L31 (pfam01197) →                                                                                                        |

|          |                                  |   |         |         |                                                                                                                                                                                                                                                           |
|----------|----------------------------------|---|---------|---------|-----------------------------------------------------------------------------------------------------------------------------------------------------------------------------------------------------------------------------------------------------------|
| Hin-1-1  | NZ_CP007472.1                    | + | 866657  | 866707  | RNA → rpmE (PRK00019) Ribosomal_L31 (pfam01197) →                                                                                                                                                                                                         |
| Hin-9-1  | NZ_CP007805.1                    | + | 1761399 | 1761449 | RNA → rpmE (PRK00019) Ribosomal_L31 (pfam01197) →                                                                                                                                                                                                         |
| Hin-1-2  | NZ_CP009610.1                    | + | 226803  | 226853  | RNA → rpmE (PRK00019) Ribosomal_L31 (pfam01197) →                                                                                                                                                                                                         |
| Apa-1-1  | NZ_LAEO01000011.1                | + | 134437  | 134487  | RNA → rpmE (PRK00019) Ribosomal_L31 (pfam01197) →                                                                                                                                                                                                         |
| Apa-2-1  | NZ_AOGF01000002.1                | + | 91207   | 91257   | RNA → rpmE (PRK00019) Ribosomal_L31 (pfam01197) →                                                                                                                                                                                                         |
| Apa-3-1  | NZ_AFFP02000002.1                | + | 105702  | 105752  | RNA → rpmE (PRK00019) Ribosomal_L31 (pfam01197) →                                                                                                                                                                                                         |
| Apa-4-1  | NZ_CBMK010000011.1               | - | 233267  | 233217  | RNA → rpmE (PRK00019) Ribosomal_L31 (pfam01197) →                                                                                                                                                                                                         |
| Apa-1-2  | NZ_LAEN01000032.1                | + | 12136   | 12186   | RNA → rpmE (PRK00019) Ribosomal_L31 (pfam01197) →                                                                                                                                                                                                         |
| Nro-1-1  | NZ_CCMQ01000009.1                | - | 101998  | 101948  | RNA → rpmE (PRK00019) Ribosomal_L31 (pfam01197) →                                                                                                                                                                                                         |
| Hma-1-1  | NZ_CCFL01000036.1                | - | 64728   | 64678   | RNA → rpmE (PRK00019) Ribosomal_L31 (pfam01197) →                                                                                                                                                                                                         |
| Hsp-1-1  | NZ_CCNK01000036.1                | - | 64728   | 64678   | RNA → rpmE (PRK00019) Ribosomal_L31 (pfam01197) →                                                                                                                                                                                                         |
| Psp-56-1 | NZ_CDON01000014.1                | - | 178969  | 178919  | RNA → rpmE (PRK00019) Ribosomal_L31 (pfam01197) →                                                                                                                                                                                                         |
| Psp-56-2 | NZ_CDNG01000014.1                | - | 178969  | 178919  | RNA → rpmE (PRK00019) Ribosomal_L31 (pfam01197) →                                                                                                                                                                                                         |
| Psp-56-3 | NZ_CDEX01000018.1                | - | 178969  | 178919  | RNA → rpmE (PRK00019) Ribosomal_L31 (pfam01197) →                                                                                                                                                                                                         |
| Hin-17-2 | NZ_AAIZ01000001.1                | + | 243123  | 243173  | RNA → hypo → Glyco_transf_25 (pfam01755) → Glyco_transf_25 (pfam01755) → heptsyl_trn_III (TIGR02201) RfaF (COG0859) → heptsyl_trn_III (TIGR02201) RfaF (COG0859) →                                                                                        |
| Hin-19-2 | NC_017451.1                      | + | 1569026 | 1569076 | RNA → hypo → hypo → hypo → Glyco_transf_25 (pfam01755) → heptsyl_trn_III (TIGR02201) RfaF (COG0859) →                                                                                                                                                     |
| env-432  | IMNBL1_c0005061                  | + | 1709    | 1758    | RNA → rpmE (PRK00019) Ribosomal_L31 (pfam01197) →                                                                                                                                                                                                         |
| Mmu-1-1  | NZ_JWIZ01000037.1                | - | 22959   | 22904   | RNA → rpmE (PRK00019) Ribosomal_L31 (pfam01197) → Glyco_transf_25 (cd06532) → Glyco_transf_4 (pfam13439) Glyco_trans_1_4 (pfam13692) GT1_WabH_like (cd03811) → PBP2_IIvY (cd08430) PRK11716 (PRK11716) HTH_1 (pfam00126) → Upp (COG0035) upp (PRK00129) → |
| Cor-1-1  | NZ_JSUM01000010.1                | + | 3479    | 3528    | RNA → rpmE (PRK00019) Ribosomal_L31 (pfam01197) → NTP-PPase_MazG_Nterm (cd11528) NTP-PPase_MazG_Cterm (cd11529) mazG (PRK09562) →                                                                                                                         |
| Baq-1-1  | NZ_ATYS01000043.1                | - | 32716   | 32666   | RNA → rpmE (PRK00019) Ribosomal_L31 (pfam01197) →                                                                                                                                                                                                         |
| Pfo-1-1  | NZ_CP010423.1                    | - | 3853120 | 3853071 | RNA → rpmE (PRK00019) Ribosomal_L31 (pfam01197) →                                                                                                                                                                                                         |
| env-433  | CEPZ01031768.1                   | - | 3598    | 3538    | RNA → rpmE (PRK00019) Ribosomal_L31 (pfam01197) →                                                                                                                                                                                                         |
| env-434  | CESI01260480.1                   | - | 92      | 32      | RNA →                                                                                                                                                                                                                                                     |
| env-435  | SRS018157_Baylor_scaffold_12494  | - | 682     | 619     | RNA → rpmE (PRK00019) Ribosomal_L31 (pfam01197) →                                                                                                                                                                                                         |
| env-436  | SRS047634_LANL_scaffold_94015    | - | 848     | 785     | RNA → ← RfaF (COG0859) heptsyl_trn_I (TIGR02193)                                                                                                                                                                                                          |
| env-437  | SRS015440_WUGC_scaffold_33201    | + | 172     | 235     | RNA → rpmE (PRK00019) Ribosomal_L31 (pfam01197) →                                                                                                                                                                                                         |
| env-438  | SRS013949_WUGC_scaffold_20645    | + | 1423    | 1486    | RNA → rpmE (PRK00019) Ribosomal_L31 (pfam01197) →                                                                                                                                                                                                         |
| env-439  | SRS013950_C2020939               | + | 249     | 312     | RNA →                                                                                                                                                                                                                                                     |
| env-440  | SRS019129_WUGC_scaffold_8522     | + | 436     | 499     | RNA → rpmE (PRK00019) Ribosomal_L31 (pfam01197) →                                                                                                                                                                                                         |
| env-441  | SRS053917_LANL_scaffold_40839    | - | 230     | 167     | RNA → rpmE (PRK00019) Ribosomal_L31 (pfam01197) →                                                                                                                                                                                                         |
| env-442  | SRS017445_C2959731               | + | 208     | 271     | RNA →                                                                                                                                                                                                                                                     |
| env-443  | SRS018394_C3997563               | + | 368     | 431     | RNA → rpmE (PRK00019) Ribosomal_L31 (pfam01197) →                                                                                                                                                                                                         |
| env-444  | SRS045197_C3344225               | + | 229     | 292     | RNA →                                                                                                                                                                                                                                                     |
| env-445  | SRS013170_Baylor_scaffold_137087 | + | 944     | 1007    | RNA → rpmE (PRK00019) Ribosomal_L31 (pfam01197) →                                                                                                                                                                                                         |
| env-446  | SRS024087_LANL_scaffold_38158    | + | 3632    | 3695    | RNA → rpmE (PRK00019) Ribosomal_L31 (pfam01197) →                                                                                                                                                                                                         |
| env-447  | SRS055378_C3854289               | + | 246     | 309     | RNA →                                                                                                                                                                                                                                                     |
| env-448  | SRS055401_C2303800               | + | 358     | 421     | RNA → rpmE (PRK00019) Ribosomal_L31 (pfam01197) →                                                                                                                                                                                                         |
| env-449  | SRS064449_C4092018               | - | 272     | 209     | RNA → rpmE (PRK00019) Ribosomal_L31 (pfam01197) →                                                                                                                                                                                                         |
| Tvi-1-1  | NZ_JYNJ01000035.1                | - | 80853   | 80804   | RNA → rpmE (PRK00019) Ribosomal_L31 (pfam01197) → rpmE (PRK00019) Ribosomal_L31 (pfam01197) →                                                                                                                                                             |
| Tac-1-1  | NZ_JYNI01000086.1                | + | 37893   | 37942   | RNA → rpmE (PRK00019) Ribosomal_L31 (pfam01197) →                                                                                                                                                                                                         |
| env-450  | JGI24723J26617_10002644          | + | 13634   | 13692   | RNA → rpmE (PRK00019) Ribosomal_L31 (pfam01197) →                                                                                                                                                                                                         |
| env-451  | JGI24723J26617_10002693          | + | 13459   | 13517   | RNA → rpmE (PRK00019) Ribosomal_L31 (pfam01197) →                                                                                                                                                                                                         |
| env-452  | KGLS2_ANT06_2345m.c1007050       | + | 3448    | 3506    | RNA →                                                                                                                                                                                                                                                     |
| env-453  | CEWQ01046878.1                   | + | 431     | 489     | RNA → rpmE (PRK00019) Ribosomal_L31 (pfam01197) →                                                                                                                                                                                                         |
| env-454  | KGLS1_ANT01_95m.c10073717        | + | 821     | 879     | RNA → rpmE (PRK00019) Ribosomal_L31 (pfam01197) →                                                                                                                                                                                                         |
| env-455  | KGLS2_ANT04_2345m.c1000317       | + | 1025    | 1083    | RNA → rpmE (PRK00019) Ribosomal_L31 (pfam01197) →                                                                                                                                                                                                         |
| env-456  | KGLS1_ANT02_95m.c10008266        | + | 756     | 814     | RNA → rpmE (PRK00019) Ribosomal_L31 (pfam01197) →                                                                                                                                                                                                         |
| env-457  | CESO01253667.1                   | + | 628     | 686     | RNA → rpmE (PRK00019) Ribosomal_L31 (pfam01197) →                                                                                                                                                                                                         |
| env-458  | JGI24724J26744_10001006          | + | 3321    | 3379    | RNA → rpmE (PRK00019) Ribosomal_L31 (pfam01197) →                                                                                                                                                                                                         |

|          |                            |   |         |         |      |                                                                                     |
|----------|----------------------------|---|---------|---------|------|-------------------------------------------------------------------------------------|
| env-459  | KGLS2_ANT04_2345m_c1002142 | + | 7997    | 8055    | RNA→ |                                                                                     |
| env-460  | KGLS1_ANT01_95m_c10018623  | + | 2892    | 2950    | RNA→ | ←hypo                                                                               |
| env-461  | KGLS1_ANT01_95m_c10184467  | - | 71      | 13      | RNA→ | ←hypo                                                                               |
| env-462  | JCVI_SCAF_1101668217967    | + | 711     | 759     | RNA→ | rpmE (PRK00019)Ribosomal_L31 (pfam01197)→                                           |
| env-463  | CETA01009654.1             | - | 3746    | 3690    | RNA→ | rpmE (PRK00019)Ribosomal_L31 (pfam01197)→                                           |
| env-464  | CETX01104058.1             | - | 71      | 15      | RNA→ |                                                                                     |
| env-465  | CEUK01157528.1             | + | 2126    | 2182    | RNA→ | rpmE (PRK00019)Ribosomal_L31 (pfam01197)→                                           |
| Iba-1-1  | NZ_CH672403.1              | + | 337077  | 337133  | RNA→ | rpmE (PRK00019)Ribosomal_L31 (pfam01197)→                                           |
| env-466  | CETM01039028.1             | + | 1422    | 1478    | RNA→ | rpmE (PRK00019)Ribosomal_L31 (pfam01197)→                                           |
| env-467  | CESO01134195.1             | - | 3172    | 3116    | RNA→ | rpmE (PRK00019)Ribosomal_L31 (pfam01197)→                                           |
| env-468  | CETM01039027.1             | + | 30      | 86      | RNA→ | rpmE (PRK00019)Ribosomal_L31 (pfam01197)→                                           |
| env-469  | JGI11881J13070_1002314     | + | 722     | 772     | RNA→ | rpmE (PRK00019)Ribosomal_L31 (pfam01197)→                                           |
| env-470  | CEQC01048050.1             | - | 211     | 161     | RNA→ | rpmE (PRK00019)Ribosomal_L31 (pfam01197)→                                           |
| env-471  | CEQH01152759.1             | + | 421     | 471     | RNA→ |                                                                                     |
| env-472  | CEQK01044707.1             | - | 2989    | 2939    | RNA→ | rpmE (PRK00019)Ribosomal_L31 (pfam01197)→                                           |
| env-473  | CESK01005100.1             | - | 13926   | 13876   | RNA→ | rpmE (PRK00019)Ribosomal_L31 (pfam01197)→                                           |
| env-474  | CEVG01126604.1             | - | 447     | 397     | RNA→ | rpmE (PRK00019)Ribosomal_L31 (pfam01197)→                                           |
| env-475  | CERU01038670.1             | - | 1641    | 1591    | RNA→ | rpmE (PRK00019)Ribosomal_L31 (pfam01197)→                                           |
| env-476  | CETF01102798.1             | + | 365     | 415     | RNA→ | rpmE (PRK00019)Ribosomal_L31 (pfam01197)→                                           |
| env-477  | CENV01129508.1             | + | 828     | 878     | RNA→ | rpmE (PRK00019)Ribosomal_L31 (pfam01197)→                                           |
| env-478  | CESO01310600.1             | + | 1303    | 1353    | RNA→ | rpmE (PRK00019)Ribosomal_L31 (pfam01197)→                                           |
| Isp-1-1  | NZ_BANL01000034.1          | + | 133074  | 133124  | RNA→ | rpmE (PRK00019)Ribosomal_L31 (pfam01197)→                                           |
| env-479  | CETA01011209.1             | + | 242     | 292     | RNA→ | rpmE (PRK00019)Ribosomal_L31 (pfam01197)→                                           |
| Ilo-2-1  | NC_006512.1                | + | 2636814 | 2636864 | RNA→ | rpmE (PRK00019)Ribosomal_L31 (pfam01197)→                                           |
| Ilo-1-1  | NC_021286.1                | + | 2636929 | 2636979 | RNA→ | rpmE (PRK00019)Ribosomal_L31 (pfam01197)→                                           |
| env-480  | JGI24724J26744_10119556    | + | 251     | 301     | RNA→ | ←hypo                                                                               |
| env-481  | CEGE01001000.1             | - | 1200    | 1150    | RNA→ | rpmE (PRK00019)Ribosomal_L31 (pfam01197)→                                           |
| Vru-1-1  | NZ_AJYK01000068.1          | + | 61091   | 61172   | RNA→ | rpmE (PRK00019)Ribosomal_L31 (pfam01197)→                                           |
| env-482  | AUXO015586256.1            | - | 5177    | 5128    | RNA→ | rpmE (PRK00019)Ribosomal_L31 (pfam01197)→                                           |
| env-483  | CEUX01028586.1             | + | 276     | 324     | RNA→ | rpmE (PRK00019)Ribosomal_L31 (pfam01197)→                                           |
| Ama-1-1  | NZ_AUBY01000009.1          | + | 261972  | 262030  | RNA→ | rpmE (PRK00019)Ribosomal_L31 (pfam01197)→                                           |
| Ata-2-1  | NZ_AUBZ01000002.1          | + | 259960  | 260018  | RNA→ | rpmE (PRK00019)Ribosomal_L31 (pfam01197)→                                           |
| env-484  | topACOD_F95O9CU02IUQBW     | + | 144     | 205     | RNA→ | rpmE (PRK00019)Ribosomal_L31 (pfam01197)→                                           |
| env-485  | JGI24739J22299_10000025    | + | 17932   | 17991   | RNA→ | rpmE (PRK00019)Ribosomal_L31 (pfam01197)→                                           |
| env-486  | JGI24737J22298_10026474    | + | 1377    | 1436    | RNA→ | rpmE (PRK00019)Ribosomal_L31 (pfam01197)→                                           |
| Pan-2-1  | NZ_JMJL01000007.1          | - | 24847   | 24788   | RNA→ | rpmE (PRK00019)Ribosomal_L31 (pfam01197)→                                           |
| Pan-1-1  | NZ_JMJK01000008.1          | - | 22834   | 22775   | RNA→ | rpmE (PRK00019)Ribosomal_L31 (pfam01197)→                                           |
| Pan-3-1  | NZ_JMJJ01000008.1          | - | 24828   | 24769   | RNA→ | rpmE (PRK00019)Ribosomal_L31 (pfam01197)→                                           |
| Pan-3-2  | NZ_JFZU01000018.1          | - | 25163   | 25104   | RNA→ | rpmE (PRK00019)Ribosomal_L31 (pfam01197)→                                           |
| Pan-1-4  | NZ_CAEI01000100.1          | + | 94980   | 95039   | RNA→ | rpmE (PRK00019)Ribosomal_L31 (pfam01197)→                                           |
| Pan-1-5  | NZ_CAEJ01000213.1          | + | 94965   | 95024   | RNA→ | rpmE (PRK00019)Ribosomal_L31 (pfam01197)→                                           |
| Pan-4-1  | NZ_AZTE01000093.1          | - | 24860   | 24801   | RNA→ | rpmE (PRK00019)Ribosomal_L31 (pfam01197)→                                           |
| Pan-8-1  | NC_013956.2                | - | 4273458 | 4273399 | RNA→ | rpmE (PRK00019)Ribosomal_L31 (pfam01197)→                                           |
| Pan-10-1 | NC_017554.1                | + | 198388  | 198447  | RNA→ | rpmE (PRK00019)Ribosomal_L31 (pfam01197)→                                           |
| Pan-6-1  | NC_017531.1                | - | 3680829 | 3680770 | RNA→ | rpmE (PRK00019)Ribosomal_L31 (pfam01197)→                                           |
| Pan-7-1  | NZ_KI440898.1              | - | 25142   | 25083   | RNA→ | rpmE (PRK00019)Ribosomal_L31 (pfam01197)→                                           |
| Pan-9-1  | NC_016816.1                | + | 197910  | 197969  | RNA→ | rpmE (PRK00019)Ribosomal_L31 (pfam01197)→                                           |
| Pan-1-2  | NZ_JQZZ01000153.1          | + | 20373   | 20432   | RNA→ | rpmE (PRK00019)Ribosomal_L31 (pfam01197)→                                           |
| Psp-49-1 | NC_014837.1                | - | 4221521 | 4221464 | RNA→ | rpmE (PRK00019)Ribosomal_L31 (pfam01197)→                                           |
| Psp-45-1 | NZ_LGIS01000015.1          | + | 106087  | 106144  | RNA→ | rpmE (PRK00019)Ribosomal_L31 (pfam01197)→                                           |
| Psp-50-1 | NZ_AKIU01000004.1          | + | 105774  | 105831  | RNA→ | rpmE (PRK00019)Ribosomal_L31 (pfam01197)→ rpmE (PRK00019)Ribosomal_L31 (pfam01197)→ |
| Psp-53-1 | NZ_AKIT01000110.1          | - | 22761   | 22704   | RNA→ | rpmE (PRK00019)Ribosomal_L31 (pfam01197)→ rpmE (PRK00019)Ribosomal_L31 (pfam01197)→ |

|          |                        |   |         |         |                                                                                             |
|----------|------------------------|---|---------|---------|---------------------------------------------------------------------------------------------|
| env-487  | JGI26055J44792.1011881 | + | 746     | 804     | RNA → rpmE (PRK00019)Ribosomal_L31 (pfam01197) →                                            |
| env-488  | JGI25162J39368.1004374 | + | 567     | 625     | RNA → rpmE (PRK00019)Ribosomal_L31 (pfam01197) →                                            |
| env-489  | JGI26052J44787.1009334 | + | 340     | 398     | RNA → rpmE (PRK00019)Ribosomal_L31 (pfam01197) →                                            |
| env-490  | JGI26053J44789.1014726 | - | 757     | 699     | RNA → rpmE (PRK00019)Ribosomal_L31 (pfam01197) →                                            |
| env-491  | JGI26057J44791.1022320 | + | 76      | 134     | RNA → rpmE (PRK00019)Ribosomal_L31 (pfam01197) →                                            |
| env-492  | JGI26054J46599.1001267 | - | 4935    | 4877    | RNA → rpmE (PRK00019)Ribosomal_L31 (pfam01197) →                                            |
| Psp-41-1 | NZ.JSUT01000007.1      | + | 90918   | 90976   | RNA → rpmE (PRK00019)Ribosomal_L31 (pfam01197) →                                            |
| Pag-4-1  | NZ.ANKX01000043.1      | - | 23467   | 23409   | RNA → rpmE (PRK00019)Ribosomal_L31 (pfam01197) →                                            |
| Psp-54-1 | NZ.AEDL01000016.1      | - | 22943   | 22885   | RNA → rpmE (PRK00019)Ribosomal_L31 (pfam01197) → rpmE (PRK00019)Ribosomal_L31 (pfam01197) → |
| Pst-4-1  | NZ.AHIE01000032.1      | + | 133115  | 133173  | RNA → rpmE (PRK00019)Ribosomal_L31 (pfam01197) → rpmE (PRK00019)Ribosomal_L31 (pfam01197) → |
| Pst-3-1  | NZ.JPKO01000013.1      | + | 92601   | 92659   | RNA → rpmE (PRK00019)Ribosomal_L31 (pfam01197) →                                            |
| Pst-1-1  | NZ.JRWI01000025.1      | - | 22125   | 22067   | RNA → rpmE (PRK00019)Ribosomal_L31 (pfam01197) →                                            |
| Pst-1-2  | NZ.JSXF01000016.1      | + | 100240  | 100298  | RNA → rpmE (PRK00019)Ribosomal_L31 (pfam01197) →                                            |
| Psp-36-1 | NZ.JMRT02000009.1      | + | 90963   | 91021   | RNA → rpmE (PRK00019)Ribosomal_L31 (pfam01197) →                                            |
| Pva-1-1  | NZ.JPKP01000004.1      | - | 524677  | 524619  | RNA → rpmE (PRK00019)Ribosomal_L31 (pfam01197) →                                            |
| Pva-2-1  | NC.014562.1            | - | 3321901 | 3321843 | RNA → rpmE (PRK00019)Ribosomal_L31 (pfam01197) →                                            |
| Psp-37-1 | NZ.JQNO01000001.1      | - | 3712474 | 3712416 | RNA → rpmE (PRK00019)Ribosomal_L31 (pfam01197) →                                            |
| env-493  | TrFG_G006Z1102HIXED    | + | 45      | 103     | RNA → rpmE (PRK00019)Ribosomal_L31 (pfam01197) →                                            |
| Pan-5-1  | NZ.JXXL01000002.1      | - | 24189   | 24131   | RNA → rpmE (PRK00019)Ribosomal_L31 (pfam01197) →                                            |
| Psp-52-1 | NZ.AJFP01000001.1      | - | 750284  | 750226  | RNA → rpmE (PRK00019)Ribosomal_L31 (pfam01197) → rpmE (PRK00019)Ribosomal_L31 (pfam01197) → |
| Psp-43-1 | NZ.CP009880.1          | - | 1060052 | 1059996 | RNA → rpmE (PRK00019)Ribosomal_L31 (pfam01197) →                                            |
| env-494  | JGI26051J44788.1011887 | + | 355     | 411     | RNA → rpmE (PRK00019)Ribosomal_L31 (pfam01197) →                                            |
| env-495  | JGI26053J44789.1003248 | - | 1683    | 1627    | RNA → rpmE (PRK00019)Ribosomal_L31 (pfam01197) →                                            |
| env-496  | JGI26052J44787.1008131 | + | 177     | 233     | RNA → rpmE (PRK00019)Ribosomal_L31 (pfam01197) →                                            |
| env-497  | JGI26055J44792.1005306 | - | 1251    | 1195    | RNA → rpmE (PRK00019)Ribosomal_L31 (pfam01197) →                                            |
| env-498  | JGI26057J44791.1000727 | + | 3248    | 3304    | RNA → rpmE (PRK00019)Ribosomal_L31 (pfam01197) →                                            |
| env-499  | JGI26054J46599.1000150 | - | 5814    | 5758    | RNA → rpmE (PRK00019)Ribosomal_L31 (pfam01197) →                                            |
| Pva-1-2  | NZ.JUQR01000121.1      | + | 95265   | 95324   | RNA → rpmE (PRK00019)Ribosomal_L31 (pfam01197) →                                            |
| Pse-1-1  | NZ.CCAQ010000025.1     | - | 34969   | 34910   | RNA → rpmE (PRK00019)Ribosomal_L31 (pfam01197) → rpmE (PRK00019)Ribosomal_L31 (pfam01197) → |
| Psp-42-1 | NZ.JPQA01000010.1      | + | 91852   | 91911   | RNA → rpmE (PRK00019)Ribosomal_L31 (pfam01197) →                                            |
| Pro-1-1  | NZ.JTJJ01000012.1      | + | 100019  | 100075  | RNA → rpmE (PRK00019)Ribosomal_L31 (pfam01197) →                                            |
| Psp-46-1 | NZ.JZRD01000022.1      | - | 22790   | 22734   | RNA → rpmE (PRK00019)Ribosomal_L31 (pfam01197) →                                            |
| Prw-1-1  | NZ.CP009454.1          | + | 660150  | 660206  | RNA → rpmE (PRK00019)Ribosomal_L31 (pfam01197) →                                            |
| env-500  | AECF_contig08144       | + | 2575    | 2631    | RNA → rpmE (PRK00019)Ribosomal_L31 (pfam01197) →                                            |
| Psp-38-1 | NZ.JZRH01000036.1      | - | 22821   | 22765   | RNA → rpmE (PRK00019)Ribosomal_L31 (pfam01197) →                                            |
| env-501  | APTF_contig25596       | + | 28      | 84      | RNA → rpmE (PRK00019)Ribosomal_L31 (pfam01197) →                                            |
| env-502  | CLOF_contig32609       | + | 188     | 244     | RNA → rpmE (PRK00019)Ribosomal_L31 (pfam01197) →                                            |
| Eca-1-1  | NZ.JRUP01000012.1      | - | 22784   | 22728   | RNA → rpmE (PRK00019)Ribosomal_L31 (pfam01197) →                                            |
| env-503  | ACEF_contig13072       | + | 4745    | 4801    | RNA → rpmE (PRK00019)Ribosomal_L31 (pfam01197) →                                            |
| env-504  | ACOFG987_contig06308   | - | 345     | 289     | RNA → rpmE (PRK00019)Ribosomal_L31 (pfam01197) →                                            |
| env-505  | ACOFG988_contig23352   | - | 761     | 705     | RNA → rpmE (PRK00019)Ribosomal_L31 (pfam01197) →                                            |
| env-506  | CLOF_contig29606       | - | 3568    | 3512    | RNA → rpmE (PRK00019)Ribosomal_L31 (pfam01197) →                                            |
| Pst-5-1  | NC.022546.1            | + | 2480650 | 2480706 | RNA → rpmE (PRK00019)Ribosomal_L31 (pfam01197) →                                            |
| Pdi-2-1  | NZ.AVSS01000005.1      | - | 23665   | 23609   | RNA → rpmE (PRK00019)Ribosomal_L31 (pfam01197) →                                            |
| env-507  | AECF_contig21769       | - | 377     | 320     | RNA → rpmE (PRK00019)Ribosomal_L31 (pfam01197) →                                            |
| Tmo-1-1  | NZ.JPKR02000005.1      | - | 545319  | 545262  | RNA → rpmE (PRK00019)Ribosomal_L31 (pfam01197) →                                            |
| Tsp-2-1  | NZ.JFJX01000045.1      | - | 21515   | 21458   | RNA → rpmE (PRK00019)Ribosomal_L31 (pfam01197) →                                            |
| Tsa-1-1  | NZ.ATMI01000006.1      | + | 58800   | 58857   | RNA → rpmE (PRK00019)Ribosomal_L31 (pfam01197) → rpmE (PRK00019)Ribosomal_L31 (pfam01197) → |
| Tpt-1-1  | NZ.ATMJ01000077.1      | + | 69932   | 69989   | RNA → rpmE (PRK00019)Ribosomal_L31 (pfam01197) →                                            |
| Tpt-1-2  | NZ.JMPR01000011.1      | + | 71180   | 71237   | RNA → rpmE (PRK00019)Ribosomal_L31 (pfam01197) →                                            |
| env-508  | FGTFG_contig02879      | + | 93249   | 93307   | RNA → rpmE (PRK00019)Ribosomal_L31 (pfam01197) →                                            |
| Pag-2-1  | NZ.JPKQ01000009.1      | - | 95475   | 95417   | RNA → rpmE (PRK00019)Ribosomal_L31 (pfam01197) →                                            |



|          |                          |   |         |         |                                                                                             |
|----------|--------------------------|---|---------|---------|---------------------------------------------------------------------------------------------|
| Pag-5-1  | NZ_BAEF01000013.1        | - | 23435   | 23377   | RNA → rpmE (PRK00019)Ribosomal_L31 (pfam01197) → rpmE (PRK00019)Ribosomal_L31 (pfam01197) → |
| Psp-39-1 | NZ_LGYX01000019.1        | + | 92817   | 92875   | RNA → rpmE (PRK00019)Ribosomal_L31 (pfam01197) →                                            |
| Pan-1-3  | NZ_JYGW01000002.1        | + | 93322   | 93380   | RNA → rpmE (PRK00019)Ribosomal_L31 (pfam01197) →                                            |
| Psp-51-1 | NZ_ADWZ01000015.1        | - | 23434   | 23376   | RNA → rpmE (PRK00019)Ribosomal_L31 (pfam01197) → rpmE (PRK00019)Ribosomal_L31 (pfam01197) → |
| Pag-2-2  | NZ_JFOK01000007.1        | - | 23564   | 23506   | RNA → rpmE (PRK00019)Ribosomal_L31 (pfam01197) →                                            |
| Pag-2-6  | NZ_JPOT01000008.1        | + | 93015   | 93073   | RNA → rpmE (PRK00019)Ribosomal_L31 (pfam01197) →                                            |
| Pag-2-3  | NZ_JNVA01000019.1        | - | 24939   | 24881   | RNA → rpmE (PRK00019)Ribosomal_L31 (pfam01197) →                                            |
| Pag-2-4  | NZ_JNGC01000002.1        | - | 294027  | 293969  | RNA → rpmE (PRK00019)Ribosomal_L31 (pfam01197) →                                            |
| Pva-1-3  | NZ_LFQL01000031.1        | + | 91121   | 91179   | RNA → rpmE (PRK00019)Ribosomal_L31 (pfam01197) →                                            |
| Pag-3-1  | NZ_KK403334.1            | + | 94095   | 94153   | RNA → rpmE (PRK00019)Ribosomal_L31 (pfam01197) →                                            |
| Pag-6-1  | NZ_KI440944.1            | + | 94622   | 94680   | RNA → rpmE (PRK00019)Ribosomal_L31 (pfam01197) →                                            |
| Pag-2-5  | NZ_JWLQ01000007.1        | + | 134357  | 134415  | RNA → rpmE (PRK00019)Ribosomal_L31 (pfam01197) →                                            |
| env-509  | ACOFG987.contig03760     | - | 311     | 253     | RNA → rpmE (PRK00019)Ribosomal_L31 (pfam01197) →                                            |
| env-510  | ACOFG988.F31SS7V02FQ5RM  | + | 210     | 268     | RNA → rpmE (PRK00019)Ribosomal_L31 (pfam01197) →                                            |
| Psp-48-1 | NZ_ALXE01000044.1        | - | 21482   | 21425   | RNA → rpmE (PRK00019)Ribosomal_L31 (pfam01197) →                                            |
| env-511  | AUXO014079757.1          | + | 108     | 157     | RNA → ←hypo                                                                                 |
| env-512  | HLNC_1000009             | - | 72348   | 72298   | RNA → rpmE (PRK00019)Ribosomal_L31 (pfam01197) →                                            |
| env-513  | SR_TP_S2_1000441         | + | 2919    | 2968    | RNA → rpmE (PRK00019)Ribosomal_L31 (pfam01197) →                                            |
| env-514  | SR_TTP_S3_1000590        | + | 2911    | 2960    | RNA → rpmE (PRK00019)Ribosomal_L31 (pfam01197) →                                            |
| env-515  | SS_2KS_010_SOIL_10367424 | + | 142     | 192     | RNA → rpmE (PRK00019)Ribosomal_L31 (pfam01197) →                                            |
| env-516  | SR_TP_S13sol_1000025     | - | 70388   | 70338   | RNA → rpmE (PRK00019)Ribosomal_L31 (pfam01197) →                                            |
| Isp-2-1  | NZ_AFPO01000012.1        | + | 277955  | 278005  | RNA → rpmE (PRK00019)Ribosomal_L31 (pfam01197) → rpmE (PRK00019)Ribosomal_L31 (pfam01197) → |
| env-517  | SS_3KL_010_SOIL_10380658 | + | 208     | 258     | RNA → ←hypo                                                                                 |
| env-518  | PML.READ_00685738        | + | 151     | 202     | RNA →                                                                                       |
| Asp-8-1  | NC_015554.1              | + | 4361206 | 4361257 | RNA → rpmE (PRK00019)Ribosomal_L31 (pfam01197) →                                            |
| env-519  | CESF01238860.1           | + | 483     | 534     | RNA → rpmE (PRK00019)Ribosomal_L31 (pfam01197) →                                            |
| env-520  | TahiMoana_1000136        | - | 193     | 142     | RNA → rpmE (PRK00019)Ribosomal_L31 (pfam01197) →                                            |
| Vrh-1-1  | NZ_JONG01000015.1        | + | 19747   | 19798   | RNA → rpmE (PRK00019)Ribosomal_L31 (pfam01197) →                                            |
| env-521  | BMHBC_125854             | - | 1492    | 1439    | RNA → rpmE (PRK00019)Ribosomal_L31 (pfam01197) →                                            |
| env-522  | BMHBC_2_2794853          | + | 48      | 101     | RNA →                                                                                       |
| env-523  | BMHBC_2_1493885          | + | 48      | 101     | RNA →                                                                                       |
| env-524  | BMHBC_2_2089384          | + | 48      | 101     | RNA →                                                                                       |
| env-525  | BMHBC_2_884118           | - | 73      | 20      | RNA → hypo →                                                                                |
| env-526  | BMHBC_2_3380210          | + | 48      | 101     | RNA →                                                                                       |
| Spu-2-1  | NC_009438.1              | + | 601661  | 601714  | RNA → rpmE (PRK00019)Ribosomal_L31 (pfam01197) → rpmE (PRK00019)Ribosomal_L31 (pfam01197) → |
| Spu-1-1  | NC_017566.1              | + | 532157  | 532210  | RNA → rpmE (PRK00019)Ribosomal_L31 (pfam01197) →                                            |
| Ssp-9-1  | NC_008750.1              | - | 4138866 | 4138813 | RNA → rpmE (PRK00019)Ribosomal_L31 (pfam01197) → rpmE (PRK00019)Ribosomal_L31 (pfam01197) → |
| Ssp-5-1  | NZ_AFOZ01000042.1        | - | 15569   | 15516   | RNA → rpmE (PRK00019)Ribosomal_L31 (pfam01197) → rpmE (PRK00019)Ribosomal_L31 (pfam01197) → |
| Sba-3-1  | NC_009052.1              | - | 4515864 | 4515810 | rpmE (PRK00019)Ribosomal_L31 (pfam01197) →                                                  |
| Sba-7-1  | NC_011663.1              | + | 571662  | 571716  | RNA → rpmE (PRK00019)Ribosomal_L31 (pfam01197) →                                            |
| Sba-5-1  | NC_009665.1              | + | 541101  | 541155  | RNA → rpmE (PRK00019)Ribosomal_L31 (pfam01197) →                                            |
| Sba-2-1  | NC_017579.1              | - | 4615835 | 4615781 | RNA → rpmE (PRK00019)Ribosomal_L31 (pfam01197) →                                            |
| Sba-1-1  | NC_017571.1              | + | 651813  | 651867  | RNA → rpmE (PRK00019)Ribosomal_L31 (pfam01197) →                                            |
| Sba-4-1  | NZ_CM001435.1            | - | 4392352 | 4392298 | RNA → rpmE (PRK00019)Ribosomal_L31 (pfam01197) → rpmE (PRK00019)Ribosomal_L31 (pfam01197) → |
| Sba-6-1  | NC_009997.1              | + | 570132  | 570186  | RNA → rpmE (PRK00019)Ribosomal_L31 (pfam01197) →                                            |
| Sba-9-1  | NC_016901.1              | + | 566504  | 566558  | RNA → rpmE (PRK00019)Ribosomal_L31 (pfam01197) →                                            |
| Sba-8-1  | NZ_AGEX01000011.1        | - | 113918  | 113864  | RNA → rpmE (PRK00019)Ribosomal_L31 (pfam01197) →                                            |
| env-527  | 3300001239_10036133      | - | 345     | 291     | RNA → rpmE (PRK00019)Ribosomal_L31 (pfam01197) →                                            |
| env-528  | 3300001605_10743065      | - | 345     | 291     | RNA → rpmE (PRK00019)Ribosomal_L31 (pfam01197) →                                            |
| Sma-1-1  | NZ_JPEO01000004.1        | + | 103613  | 103665  | RNA → rpmE (PRK00019)Ribosomal_L31 (pfam01197) →                                            |
| Sco-1-1  | NZ_JAEC01000006.1        | + | 43528   | 43580   | RNA → rpmE (PRK00019)Ribosomal_L31 (pfam01197) →                                            |



|          |                           |   |         |         |                                                                                                    |
|----------|---------------------------|---|---------|---------|----------------------------------------------------------------------------------------------------|
| Ssp-4-1  | NZ_JWGX01000031.1         | - | 43326   | 43275   | RNA → rpmE (PRK00019) Ribosomal_L31 (pfam01197) →                                                  |
| Sam-2-1  | NC_008700.1               | + | 552817  | 552869  | RNA → ←-hypo                                                                                       |
| Son-1-1  | NC_004347.2               | - | 4279346 | 4279296 | RNA → rpmE (PRK00019) Ribosomal_L31 (pfam01197) →                                                  |
| Ssp-10-1 | NZ_JTLE01000094.1         | + | 2661313 | 2661363 | RNA → rpmE (PRK00019) Ribosomal_L31 (pfam01197) →                                                  |
| env-529  | KGLS1_ANT02_95m_c10000044 | + | 8538    | 8592    | RNA → rpmE (PRK00019) Ribosomal_L31 (pfam01197) →                                                  |
| Swo-1-1  | NC_010506.1               | - | 5359927 | 5359875 | RNA → rpmE (PRK00019) Ribosomal_L31 (pfam01197) →                                                  |
| Sse-1-1  | NC_009831.1               | + | 655635  | 655687  | RNA → rpmE (PRK00019) Ribosomal_L31 (pfam01197) →                                                  |
| Sbe-1-1  | NZ_ABIC01000023.1         | + | 45676   | 45728   | RNA → rpmE (PRK00019) Ribosomal_L31 (pfam01197) → rpmE (PRK00019) Ribosomal_L31 (pfam01197) →      |
| Svi-1-1  | NC_014012.1               | + | 337588  | 337640  | RNA → rpmE (PRK00019) Ribosomal_L31 (pfam01197) →                                                  |
| env-530  | JCVL_SCAF_1096627387720   | - | 14506   | 14454   | RNA → rpmE (PRK00019) Ribosomal_L31 (pfam01197) → hypo →                                           |
| env-531  | GO4KUYH01CXCC6            | + | 142     | 194     | RNA →                                                                                              |
| env-532  | GO4KUYH01C3ZKW            | + | 141     | 193     | RNA → rpmE (PRK00019) Ribosomal_L31 (pfam01197) →                                                  |
| env-533  | GooDraft_1002869          | + | 3149    | 3201    | RNA → rpmE (PRK00019) Ribosomal_L31 (pfam01197) →                                                  |
| Ssp-8-1  | NZ_AKZL01000033.1         | - | 34459   | 34407   | RNA → rpmE (PRK00019) Ribosomal_L31 (pfam01197) →                                                  |
| Sxi-1-1  | NZ_JGVI01000084.1         | + | 35320   | 35372   | RNA → rpmE (PRK00019) Ribosomal_L31 (pfam01197) →                                                  |
| Ssp-7-1  | NC_008322.1               | + | 522940  | 522992  | RNA → rpmE (PRK00019) Ribosomal_L31 (pfam01197) →                                                  |
| Sde-1-1  | NZ_AXZL01000063.1         | + | 70809   | 70861   | RNA → rpmE (PRK00019) Ribosomal_L31 (pfam01197) →                                                  |
| env-534  | JCVL_SCAF_1096627387716   | - | 23316   | 23264   | RNA → rpmE (PRK00019) Ribosomal_L31 (pfam01197) → hypo →                                           |
| Ssp-2-1  | NC_008577.1               | - | 4408636 | 4408584 | RNA → rpmE (PRK00019) Ribosomal_L31 (pfam01197) →                                                  |
| Ssp-6-1  | NC_008321.1               | - | 4178394 | 4178342 | RNA → rpmE (PRK00019) Ribosomal_L31 (pfam01197) →                                                  |
| Sma-2-1  | NZ_BALM01000013.1         | + | 59899   | 59951   | RNA → rpmE (PRK00019) Ribosomal_L31 (pfam01197) →                                                  |
| Spi-1-1  | NC_011566.1               | + | 499660  | 499712  | RNA → rpmE (PRK00019) Ribosomal_L31 (pfam01197) → rpmE (PRK00019) Ribosomal_L31 (pfam01197) →      |
| Ssp-3-1  | NZ_JSFF01000009.1         | - | 106570  | 106518  | RNA → rpmE (PRK00019) Ribosomal_L31 (pfam01197) →                                                  |
| Ssp-11-1 | NZ_JPII01000042.1         | + | 12098   | 12150   | RNA → rpmE (PRK00019) Ribosomal_L31 (pfam01197) → rpmE (PRK00019) Ribosomal_L31 (pfam01197) →      |
| Slo-1-1  | NC_009092.1               | + | 431236  | 431288  | RNA → rpmE (PRK00019) Ribosomal_L31 (pfam01197) → rpmE (PRK00019) Ribosomal_L31 (pfam01197) →      |
| Swa-1-1  | NZ_KI912497.1             | - | 254535  | 254484  | RNA → rpmE (PRK00019) Ribosomal_L31 (pfam01197) →                                                  |
| Sde-2-1  | NC_007954.1               | - | 3997631 | 3997580 | RNA → rpmE (PRK00019) Ribosomal_L31 (pfam01197) →                                                  |
| env-535  | KGLS1_ANT01_95m_c10083218 | - | 640     | 588     | RNA → rpmE (PRK00019) Ribosomal_L31 (pfam01197) →                                                  |
| Sha-1-1  | NC_010334.1               | - | 4683887 | 4683836 | RNA → rpmE (PRK00019) Ribosomal_L31 (pfam01197) →                                                  |
| Spe-1-1  | NC_009901.1               | - | 4591286 | 4591235 | RNA → rpmE (PRK00019) Ribosomal_L31 (pfam01197) →                                                  |
| Sfi-1-1  | NZ_JADX01000010.1         | - | 251293  | 251242  | RNA → rpmE (PRK00019) Ribosomal_L31 (pfam01197) →                                                  |
| Sfr-1-1  | NC_008345.1               | - | 4467060 | 4467008 | RNA → rpmE (PRK00019) Ribosomal_L31 (pfam01197) →                                                  |
| CR-1-1   | NZ_GL379589.1             | - | 502536  | 502482  | RNA → rpmE (PRK00019) Ribosomal_L31 (pfam01197) → rpmE (PRK00019) Ribosomal_L31 (pfam01197) →      |
| Eba-2-1  | NZ_DF158888.1             | + | 91727   | 91780   | RNA → rpmE (PRK00019) Ribosomal_L31 (pfam01197) →                                                  |
| Sgl-1-1  | NC_007712.1               | - | 3774802 | 3774749 | RNA → rpmE (PRK00019) Ribosomal_L31 (pfam01197) →                                                  |
| CSO-1-1  | NZ_CP006568.1             | + | 939488  | 939543  | RNA → rpmE (PRK00019) Ribosomal_L31 (pfam01197) →                                                  |
| env-536  | XAGC_contig20879          | - | 400     | 347     | RNA → rpmE (PRK00019) Ribosomal_L31 (pfam01197) →                                                  |
| Spr-1-1  | NZ_CP006569.1             | - | 4560293 | 4560240 | RNA → rpmE (PRK00019) Ribosomal_L31 (pfam01197) →                                                  |
| Psp-47-1 | NZ_JRKB01000114.1         | - | 29350   | 29291   | RNA → rpmE (PRK00019) Ribosomal_L31 (pfam01197) →                                                  |
| Psh-1-1  | NZ_JWHQ01000025.1         | - | 1797    | 1738    | RNA → rpmE (PRK00019) Ribosomal_L31 (pfam01197) →                                                  |
| Psh-2-1  | NZ_KB944511.1             | - | 1649396 | 1649337 | RNA → rpmE (PRK00019) Ribosomal_L31 (pfam01197) →                                                  |
| Aal-2-1  | NZ_BARX01000001.1         | - | 16360   | 16301   | RNA → rpmE (PRK00019) Ribosomal_L31 (pfam01197) →                                                  |
| env-537  | GO4KUYH02HSOZH            | - | 181     | 129     | RNA → hypo →                                                                                       |
| Pte-1-1  | NZ_JONU01000008.1         | + | 256804  | 256856  | RNA → rpmE (PRK00019) Ribosomal_L31 (pfam01197) → rpmE (PRK00019) Ribosomal_L31 (pfam01197) → hypo |
| env-538  | 3300000052_491248         | + | 102     | 154     | RNA → rpmE (PRK00019) Ribosomal_L31 (pfam01197) →                                                  |
| env-539  | 3300000052_373220         | - | 197     | 145     | RNA → rpmE (PRK00019) Ribosomal_L31 (pfam01197) →                                                  |
| Tli-1-1  | NZ_AZUK01000001.1         | + | 2305027 | 2305077 | RNA → rpmE (PRK00019) Ribosomal_L31 (pfam01197) →                                                  |
| Tau-1-1  | NC_012691.1               | + | 541965  | 542015  | RNA → rpmE (PRK00019) Ribosomal_L31 (pfam01197) →                                                  |
| Ana-1-1  | NZ_AUCC01000060.1         | - | 4940    | 4890    | RNA → rpmE (PRK00019) Ribosomal_L31 (pfam01197) →                                                  |
| Aen-3-1  | NZ_JRLH01000010.1         | + | 51375   | 51425   | RNA → rpmE (PRK00019) Ribosomal_L31 (pfam01197) →                                                  |
| Asa-10-1 | NZ_KB894494.1             | - | 58337   | 58287   | RNA → rpmE (PRK00019) Ribosomal_L31 (pfam01197) →                                                  |
| Iat-1-1  | NZ_JPIN01000002.1         | - | 98575   | 98527   | RNA → rpmE (PRK00019) Ribosomal_L31 (pfam01197) →                                                  |

|          |                        |   |         |         |                                                                                                  |
|----------|------------------------|---|---------|---------|--------------------------------------------------------------------------------------------------|
| Ise-1-1  | NZ_AUHL01000006.1      | - | 66251   | 66203   | RNA → rpmE (PRK00019) Ribosomal_L31 (pfam01197) → rpmE (PRK00019) Ribosomal_L31 (pfam01197) →    |
| Isa-1-1  | NZ_JPER01000004.1      | + | 235268  | 235316  | RNA → rpmE (PRK00019) Ribosomal_L31 (pfam01197) →                                                |
| Ixi-1-1  | NZ_AMRG01000014.1      | - | 30706   | 30654   | RNA → rpmE (PRK00019) Ribosomal_L31 (pfam01197) → rpmE (PRK00019) Ribosomal_L31 (pfam01197) →    |
| env-540  | AYRE01004792.1         | - | 218     | 167     | RNA → rpmE (PRK00019) Ribosomal_L31 (pfam01197) →                                                |
| Osm-1-1  | NZ_KB908459.1          | + | 180853  | 180904  | RNA → rpmE (PRK00019) Ribosomal_L31 (pfam01197) →                                                |
| Osp-1-1  | NC_016745.1            | + | 726676  | 726727  | RNA → rpmE (PRK00019) Ribosomal_L31 (pfam01197) →                                                |
| env-541  | 2231941556             | + | 4       | 58      | RNA →                                                                                            |
| Ema-2-1  | NZ_JFHN01000029.1      | + | 87873   | 87932   | RNA → rpmE (PRK00019) Ribosomal_L31 (pfam01197) →                                                |
| Etr-1-1  | NZ_JXNU01000003.1      | + | 3289663 | 3289722 | RNA → rpmE (PRK00019) Ribosomal_L31 (pfam01197) →                                                |
| Etr-2-1  | NZ_KE136311.1          | - | 127906  | 127847  | RNA → rpmE (PRK00019) Ribosomal_L31 (pfam01197) →                                                |
| Psp-40-1 | NZ_JFGT01000004.1      | - | 137795  | 137735  | RNA → rpmE (PRK00019) Ribosomal_L31 (pfam01197) →                                                |
| Ein-1-1  | NZ_JRFX01000015.1      | - | 23356   | 23296   | RNA → rpmE (PRK00019) Ribosomal_L31 (pfam01197) →                                                |
| Ein-1-2  | NZ_JRXE01000029.1      | - | 23448   | 23388   | RNA → rpmE (PRK00019) Ribosomal_L31 (pfam01197) →                                                |
| env-542  | JGI26052J44787_1013371 | + | 333     | 393     | RNA → rpmE (PRK00019) Ribosomal_L31 (pfam01197) →                                                |
| env-543  | JGI26055J44792_1089657 | + | 258     | 318     | RNA →                                                                                            |
| env-544  | JGI26057J44791_1023823 | - | 676     | 616     | RNA → rpmE (PRK00019) Ribosomal_L31 (pfam01197) →                                                |
| env-545  | JGI26054J46599_1079959 | + | 92      | 152     | RNA → rpmE (PRK00019) Ribosomal_L31 (pfam01197) →                                                |
| Eto-1-1  | NZ_KB372804.1          | - | 1363173 | 1363113 | RNA → ←-hypo                                                                                     |
| Esp-55-1 | NZ_JQNE01000001.1      | + | 4128718 | 4128777 | RNA → rpmE (PRK00019) Ribosomal_L31 (pfam01197) →                                                |
| Eol-1-1  | NZ_JNVB01000002.1      | + | 112156  | 112215  | RNA → rpmE (PRK00019) Ribosomal_L31 (pfam01197) →                                                |
| Ebi-2-1  | NC_014306.1            | + | 171661  | 171721  | RNA → rpmE (PRK00019) Ribosomal_L31 (pfam01197) →                                                |
| Ebi-1-1  | NZ_LHXI01000018.1      | + | 107630  | 107690  | RNA → rpmE (PRK00019) Ribosomal_L31 (pfam01197) →                                                |
| bsy-1-1  | NZ_JMSO01000006.1      | + | 18997   | 19057   | RNA → rpmE (PRK00019) Ribosomal_L31 (pfam01197) →                                                |
| Epy-2-1  | NC_012214.1            | + | 161194  | 161254  | RNA → rpmE (PRK00019) Ribosomal_L31 (pfam01197) →                                                |
| Epy-1-1  | NC_017390.1            | + | 161200  | 161260  | RNA → rpmE (PRK00019) Ribosomal_L31 (pfam01197) →                                                |
| Esp-74-1 | NC_017445.1            | + | 1434028 | 1434088 | RNA → rpmE (PRK00019) Ribosomal_L31 (pfam01197) →                                                |
| Eta-9-1  | NC_010694.1            | + | 140209  | 140269  | RNA → rpmE (PRK00019) Ribosomal_L31 (pfam01197) →                                                |
| Epi-2-1  | NZ_CAHS01000002.1      | + | 113089  | 113149  | RNA → rpmE (PRK00019) Ribosomal_L31 (pfam01197) → hypo →                                         |
| Eam-1-1  | NZ_BAYW01000017.1      | - | 21692   | 21632   | RNA → rpmE (PRK00019) Ribosomal_L31 (pfam01197) →                                                |
| Eam-10-1 | NZ_CAOX01000002.1      | + | 109737  | 109797  | RNA → rpmE (PRK00019) Ribosomal_L31 (pfam01197) →                                                |
| Eam-8-1  | NC_013961.1            | + | 156303  | 156363  | RNA → rpmE (PRK00019) Ribosomal_L31 (pfam01197) →                                                |
| Eam-5-1  | NC_013971.1            | + | 156303  | 156363  | RNA → rpmE (PRK00019) Ribosomal_L31 (pfam01197) → hypo → hypo → hypo → hypo →                    |
| Eam-4-1  | NZ_AFH01000002.1       | + | 109783  | 109843  | RNA → rpmE (PRK00019) Ribosomal_L31 (pfam01197) →                                                |
| Eam-15-1 | NZ_CAPC01000002.1      | + | 109783  | 109843  | RNA → rpmE (PRK00019) Ribosomal_L31 (pfam01197) →                                                |
| Eam-11-1 | NZ_CAPD01000002.1      | + | 97809   | 97869   | RNA → rpmE (PRK00019) Ribosomal_L31 (pfam01197) →                                                |
| Eam-9-1  | NZ_CAOY01000002.1      | + | 109776  | 109836  | RNA → rpmE (PRK00019) Ribosomal_L31 (pfam01197) →                                                |
| Eam-6-1  | NZ_CAPB01000002.1      | + | 109783  | 109843  | RNA → rpmE (PRK00019) Ribosomal_L31 (pfam01197) →                                                |
| Eam-7-1  | NZ_CAOZ01000002.1      | + | 109749  | 109809  | RNA → rpmE (PRK00019) Ribosomal_L31 (pfam01197) →                                                |
| Eam-3-1  | NZ_CAPA01000002.1      | + | 109783  | 109843  | RNA → rpmE (PRK00019) Ribosomal_L31 (pfam01197) →                                                |
| Eam-13-1 | NZ_CBVT010000002.1     | + | 109584  | 109644  | RNA → rpmE (PRK00019) Ribosomal_L31 (pfam01197) →                                                |
| Eam-14-1 | NZ_CBVU010000002.1     | + | 109584  | 109644  | RNA → rpmE (PRK00019) Ribosomal_L31 (pfam01197) →                                                |
| Eam-12-1 | NZ_CBVS010000002.1     | + | 109584  | 109644  | RNA → rpmE (PRK00019) Ribosomal_L31 (pfam01197) →                                                |
| Ety-1-1  | NZ_JRUQ01000016.1      | + | 133327  | 133387  | RNA → rpmE (PRK00019) Ribosomal_L31 (pfam01197) →                                                |
| env-546  | XAGC_contig27338       | + | 221     | 281     | RNA → ←-hypo                                                                                     |
| Psp-44-1 | NZ_CP009866.1          | - | 3634114 | 3634055 | RNA → rpmE (PRK00019) Ribosomal_L31 (pfam01197) →                                                |
| env-547  | CETM01121351.1         | - | 624     | 574     | RNA → rpmE (PRK00019) Ribosomal_L31 (pfam01197) →                                                |
| env-548  | CEVA01063086.1         | - | 14576   | 14526   | RNA → rpmE (PRK00019) Ribosomal_L31 (pfam01197) →                                                |
| Pru-3-1  | NZ_JXXY01000018.1      | - | 149896  | 149846  | RNA → rpmE (PRK00019) Ribosomal_L31 (pfam01197) → rpmE (PRK00019) Ribosomal_L31 (pfam01197) →    |
| Pru-3-2  | NZ_JXXZ01000010.1      | - | 626883  | 626833  | RNA → rpmE (PRK00019) Ribosomal_L31 (pfam01197) → rpmE (PRK00019) Ribosomal_L31 (pfam01197) →    |
| Pru-4-1  | NZ_AOPM01000105.1      | + | 40951   | 41001   | RNA → rpmE (PRK00019) Ribosomal_L31 (pfam01197) → rpmE (PRK00019) Ribosomal_L31 (pfam01197) →    |
| env-549  | CEPZ01177373.1         | + | 388     | 438     | rpmE (PRK00019) Ribosomal_L31 (pfam01197) →<br>RNA → rpmE (PRK00019) Ribosomal_L31 (pfam01197) → |

|          |                        |   |        |        |                                                                                                                                           |
|----------|------------------------|---|--------|--------|-------------------------------------------------------------------------------------------------------------------------------------------|
| Psp-33-1 | NZ_AHCE02000021.1      | + | 18594  | 18644  | RNA → rpmE (PRK00019)Ribosomal_L31 (pfam01197) →                                                                                          |
| Ppi-1-1  | NZ_CP009888.1          | - | 346889 | 346839 | RNA → rpmE (PRK00019)Ribosomal_L31 (pfam01197) →                                                                                          |
| Pci-1-1  | NZ_AHBZ02000178.1      | - | 16984  | 16934  | RNA → rpmE (PRK00019)Ribosomal_L31 (pfam01197) →                                                                                          |
| Plu-2-1  | NZ_AUSV01000022.1      | - | 2218   | 2166   | RNA → rpmE (PRK00019)Ribosomal_L31 (pfam01197) → rpmE (PRK00019)Ribosomal_L31 (pfam01197) →                                               |
| Plu-3-1  | NZ_CAPN01000031.1      | - | 44749  | 44698  | RNA → rpmE (PRK00019)Ribosomal_L31 (pfam01197) →                                                                                          |
| env-550  | CERC01133101.1         | - | 82     | 31     | RNA →                                                                                                                                     |
| Ppi-3-1  | NZ_KB907371.1          | - | 399235 | 399184 | RNA → rpmE (PRK00019)Ribosomal_L31 (pfam01197) → rpmE (PRK00019)Ribosomal_L31 (pfam01197) →<br>rpmE (PRK00019)Ribosomal_L31 (pfam01197) → |
| Ppi-4-1  | NZ_AHCC02000195.1      | + | 23369  | 23420  | RNA → rpmE (PRK00019)Ribosomal_L31 (pfam01197) → rpmE (PRK00019)Ribosomal_L31 (pfam01197) →                                               |
| Ppi-2-1  | NZ_JXXX01000108.1      | - | 44988  | 44937  | RNA → rpmE (PRK00019)Ribosomal_L31 (pfam01197) → rpmE (PRK00019)Ribosomal_L31 (pfam01197) →                                               |
| Pfi-1-1  | NZ_JH650748.1          | + | 23482  | 23533  | RNA → rpmE (PRK00019)Ribosomal_L31 (pfam01197) →                                                                                          |
| Pel-1-1  | NZ_JWIH01000018.1      | + | 24597  | 24648  | RNA → rpmE (PRK00019)Ribosomal_L31 (pfam01197) → rpmE (PRK00019)Ribosomal_L31 (pfam01197) →                                               |
| Ppi-2-2  | NZ_JXXW0100011.1       | + | 23330  | 23381  | RNA → rpmE (PRK00019)Ribosomal_L31 (pfam01197) → rpmE (PRK00019)Ribosomal_L31 (pfam01197) →                                               |
| Psp-15-1 | NZ_AKXJ01000003.1      | - | 426568 | 426517 | RNA → rpmE (PRK00019)Ribosomal_L31 (pfam01197) → rpmE (PRK00019)Ribosomal_L31 (pfam01197) →<br>rpmE (PRK00019)Ribosomal_L31 (pfam01197) → |
| env-551  | CEPQ01102968.1         | - | 435    | 384    | RNA → rpmE (PRK00019)Ribosomal_L31 (pfam01197) →                                                                                          |
| env-552  | JGI11829J13087.107135  | - | 139    | 88     | RNA → rpmE (PRK00019)Ribosomal_L31 (pfam01197) →                                                                                          |
| env-553  | JGI12020J13220.1000475 | - | 5069   | 5018   | RNA → rpmE (PRK00019)Ribosomal_L31 (pfam01197) →                                                                                          |
| env-554  | CEPV01195072.1         | + | 400    | 451    | RNA → rpmE (PRK00019)Ribosomal_L31 (pfam01197) →                                                                                          |
| env-555  | CEPZ01204578.1         | + | 666    | 717    | RNA → rpmE (PRK00019)Ribosomal_L31 (pfam01197) →                                                                                          |
| env-556  | CEQE01276759.1         | + | 560    | 611    | RNA → rpmE (PRK00019)Ribosomal_L31 (pfam01197) →                                                                                          |
| env-557  | CETV01108507.1         | + | 476    | 527    | RNA → rpmE (PRK00019)Ribosomal_L31 (pfam01197) →                                                                                          |
| env-558  | CEUK01292042.1         | + | 691    | 742    | RNA →                                                                                                                                     |
| env-559  | CEQG01236191.1         | + | 694    | 745    | RNA →                                                                                                                                     |
| env-560  | CERC01031317.1         | - | 852    | 801    | RNA → rpmE (PRK00019)Ribosomal_L31 (pfam01197) →                                                                                          |
| env-561  | CERD01031679.1         | + | 5331   | 5382   | RNA → rpmE (PRK00019)Ribosomal_L31 (pfam01197) →                                                                                          |
| env-562  | CERL01075421.1         | + | 216    | 267    | RNA → rpmE (PRK00019)Ribosomal_L31 (pfam01197) →                                                                                          |
| env-563  | CETA01065829.1         | - | 448    | 397    | RNA → rpmE (PRK00019)Ribosomal_L31 (pfam01197) →                                                                                          |
| env-564  | CEUX01031767.1         | + | 2189   | 2240   | RNA → rpmE (PRK00019)Ribosomal_L31 (pfam01197) →                                                                                          |
| env-565  | CEWB01087664.1         | - | 382    | 331    | RNA → rpmE (PRK00019)Ribosomal_L31 (pfam01197) →                                                                                          |
| env-566  | JGI11949J13268.1006774 | + | 325    | 376    | RNA → rpmE (PRK00019)Ribosomal_L31 (pfam01197) →                                                                                          |
| env-567  | CESF01139237.1         | - | 14048  | 13997  | RNA → rpmE (PRK00019)Ribosomal_L31 (pfam01197) →                                                                                          |
| env-568  | CEUD01330189.1         | + | 1588   | 1639   | RNA → rpmE (PRK00019)Ribosomal_L31 (pfam01197) →                                                                                          |
| env-569  | CEUO01029621.1         | + | 332    | 383    | RNA → rpmE (PRK00019)Ribosomal_L31 (pfam01197) →                                                                                          |
| env-570  | CEWI01244144.1         | - | 323    | 272    | RNA → rpmE (PRK00019)Ribosomal_L31 (pfam01197) →                                                                                          |
| env-571  | _GX4VOVV01DM434        | - | 83     | 32     | RNA → hypo →                                                                                                                              |
| Psp-17-1 | NZ_AJTK01000019.1      | - | 4461   | 4410   | RNA → rpmE (PRK00019)Ribosomal_L31 (pfam01197) →                                                                                          |
| Csp-1-1  | NZ_JONX01000008.1      | + | 64919  | 64970  | RNA → rpmE (PRK00019)Ribosomal_L31 (pfam01197) →                                                                                          |
| Psp-14-1 | NZ_JQFL01000080.1      | - | 131090 | 131039 | RNA → rpmE (PRK00019)Ribosomal_L31 (pfam01197) →                                                                                          |
| env-572  | CENU01396304.1         | + | 1029   | 1080   | RNA → rpmE (PRK00019)Ribosomal_L31 (pfam01197) →                                                                                          |
| Psp-8-1  | NZ_BADW01000079.1      | + | 29656  | 29707  | RNA → rpmE (PRK00019)Ribosomal_L31 (pfam01197) → rpmE (PRK00019)Ribosomal_L31 (pfam01197) →                                               |
| env-573  | JGI11838J13071.130222  | - | 91     | 40     | RNA → hypo →                                                                                                                              |
| env-574  | JGI11906J13219.100106  | + | 2033   | 2084   | RNA → rpmE (PRK00019)Ribosomal_L31 (pfam01197) →                                                                                          |
| env-575  | JGI12020J13220.1008982 | - | 426    | 375    | RNA → rpmE (PRK00019)Ribosomal_L31 (pfam01197) →                                                                                          |
| env-576  | JGI11754J13217.1001331 | - | 2564   | 2513   | RNA → rpmE (PRK00019)Ribosomal_L31 (pfam01197) →                                                                                          |
| env-577  | JGI12218J13221.1000027 | - | 540    | 489    | RNA → rpmE (PRK00019)Ribosomal_L31 (pfam01197) →                                                                                          |
| env-578  | JGI12218J13221.1000194 | + | 1789   | 1840   | RNA → rpmE (PRK00019)Ribosomal_L31 (pfam01197) →                                                                                          |
| env-579  | JGI11931J13222.1012993 | - | 124    | 73     | RNA → rpmE (PRK00019)Ribosomal_L31 (pfam01197) →                                                                                          |
| env-580  | JGI12156J13080.113928  | + | 216    | 267    | RNA → rpmE (PRK00019)Ribosomal_L31 (pfam01197) →                                                                                          |
| env-581  | CENZ01163183.1         | + | 102    | 153    | RNA → rpmE (PRK00019)Ribosomal_L31 (pfam01197) →                                                                                          |
| env-582  | CEQS01011751.1         | - | 21184  | 21133  | RNA → rpmE (PRK00019)Ribosomal_L31 (pfam01197) →                                                                                          |
| env-583  | CERC01016695.1         | - | 2342   | 2291   | RNA → rpmE (PRK00019)Ribosomal_L31 (pfam01197) →                                                                                          |
| env-584  | CERD01038299.1         | + | 663    | 714    | RNA → rpmE (PRK00019)Ribosomal_L31 (pfam01197) →                                                                                          |



|          |                                |   |         |         |                                                                                                                                              |
|----------|--------------------------------|---|---------|---------|----------------------------------------------------------------------------------------------------------------------------------------------|
| env-585  | CERE01031172.1                 | + | 6395    | 6446    | RNA → rpmE (PRK00019) Ribosomal_L31 (pfam01197) →                                                                                            |
| env-586  | CESS01027590.1                 | - | 156     | 105     | RNA → rpmE (PRK00019) Ribosomal_L31 (pfam01197) →                                                                                            |
| env-587  | CETM01162887.1                 | + | 1686    | 1737    | RNA → rpmE (PRK00019) Ribosomal_L31 (pfam01197) →                                                                                            |
| env-588  | JGI24025J20009.10001015        | + | 10992   | 11043   | RNA → rpmE (PRK00019) Ribosomal_L31 (pfam01197) →                                                                                            |
| Pag-1-1  | NZ_APME01000074.1              | + | 65874   | 65925   | RNA → rpmE (PRK00019) Ribosomal_L31 (pfam01197) → rpmE (PRK00019) Ribosomal_L31 (pfam01197) →                                                |
| Psp-16-1 | NZ_AZIO01000115.1              | - | 148851  | 148800  | RNA → rpmE (PRK00019) Ribosomal_L31 (pfam01197) → rpmE (PRK00019) Ribosomal_L31 (pfam01197) →<br>rpmE (PRK00019) Ribosomal_L31 (pfam01197) → |
| env-589  | CERE01032072.1                 | - | 203     | 152     | RNA → rpmE (PRK00019) Ribosomal_L31 (pfam01197) →                                                                                            |
| env-590  | CERL01102156.1                 | + | 104     | 155     | RNA → rpmE (PRK00019) Ribosomal_L31 (pfam01197) →                                                                                            |
| Psp-24-1 | NC_014803.1                    | + | 329863  | 329914  | RNA → rpmE (PRK00019) Ribosomal_L31 (pfam01197) →                                                                                            |
| Psp-23-1 | NZ_KK070023.1                  | + | 1202960 | 1203011 | RNA → rpmE (PRK00019) Ribosomal_L31 (pfam01197) →                                                                                            |
| Psp-31-1 | NZ_AUTH01000084.1              | + | 64821   | 64872   | RNA → rpmE (PRK00019) Ribosomal_L31 (pfam01197) →                                                                                            |
| Psp-2-1  | NZ_JADO01000011.1              | + | 64319   | 64370   | RNA → rpmE (PRK00019) Ribosomal_L31 (pfam01197) →                                                                                            |
| Psp-3-1  | NZ_JIAM01000011.1              | + | 64044   | 64095   | RNA → rpmE (PRK00019) Ribosomal_L31 (pfam01197) →                                                                                            |
| Psp-4-1  | NZ_JPMC01000016.1              | + | 210417  | 210468  | RNA → rpmE (PRK00019) Ribosomal_L31 (pfam01197) →                                                                                            |
| env-591  | CEQG01078170.1                 | + | 93      | 144     | RNA → rpmE (PRK00019) Ribosomal_L31 (pfam01197) →                                                                                            |
| env-592  | CETF01103377.1                 | - | 841     | 790     | RNA → rpmE (PRK00019) Ribosomal_L31 (pfam01197) →                                                                                            |
| Pli-1-1  | NZ_KK070036.1                  | - | 168509  | 168458  | RNA → rpmE (PRK00019) Ribosomal_L31 (pfam01197) →                                                                                            |
| Psp-6-1  | NZ_BADU01000157.1              | + | 29544   | 29595   | RNA → rpmE (PRK00019) Ribosomal_L31 (pfam01197) → rpmE (PRK00019) Ribosomal_L31 (pfam01197) →                                                |
| env-593  | LAZR01004165.1                 | - | 5394    | 5343    | RNA → rpmE (PRK00019) Ribosomal_L31 (pfam01197) →                                                                                            |
| Pdi-1-1  | NZ_JWIG01000001.1              | - | 843923  | 843872  | RNA → rpmE (PRK00019) Ribosomal_L31 (pfam01197) →                                                                                            |
| Pha-1-1  | NZ_ADOP01000005.1              | + | 8477    | 8528    | RNA → rpmE (PRK00019) Ribosomal_L31 (pfam01197) → rpmE (PRK00019) Ribosomal_L31 (pfam01197) →                                                |
| Psp-5-1  | NZ_AUTK01000406.1              | + | 27446   | 27497   | RNA → rpmE (PRK00019) Ribosomal_L31 (pfam01197) →                                                                                            |
| Psp-30-1 | NZ_AUTOI01000314.1             | - | 2912    | 2861    | RNA → rpmE (PRK00019) Ribosomal_L31 (pfam01197) →                                                                                            |
| Pfl-2-1  | NZ_JTDZ01000012.1              | - | 588159  | 588108  | RNA → rpmE (PRK00019) Ribosomal_L31 (pfam01197) →                                                                                            |
| Psp-26-1 | NZ_AUTN01000149.1              | + | 65662   | 65713   | RNA → rpmE (PRK00019) Ribosomal_L31 (pfam01197) →                                                                                            |
| Psp-27-1 | NZ_AUTL01000176.1              | - | 12649   | 12598   | RNA → rpmE (PRK00019) Ribosomal_L31 (pfam01197) →                                                                                            |
| Psp-28-1 | NZ_AUTM01000342.1              | - | 54996   | 54945   | RNA → rpmE (PRK00019) Ribosomal_L31 (pfam01197) →                                                                                            |
| env-594  | JGI24025J20009.10000510        | + | 30088   | 30139   | RNA →                                                                                                                                        |
| Pun-1-1  | NZ_AHCF02000035.1              | - | 124891  | 124840  | RNA → rpmE (PRK00019) Ribosomal_L31 (pfam01197) →                                                                                            |
| Aba-1-1  | NZ_AAVS01000013.1              | + | 62431   | 62482   | RNA → rpmE (PRK00019) Ribosomal_L31 (pfam01197) → rpmE (PRK00019) Ribosomal_L31 (pfam01197) →                                                |
| env-595  | JCVL_SCAF_1096626478483        | - | 754     | 703     | RNA → rpmE (PRK00019) Ribosomal_L31 (pfam01197) →                                                                                            |
| env-596  | JGI11906J13219.116351          | + | 271     | 322     | RNA →                                                                                                                                        |
| env-597  | CESU01212683.1                 | + | 608     | 659     | RNA → rpmE (PRK00019) Ribosomal_L31 (pfam01197) →                                                                                            |
| env-598  | A09P201000a_Sequence0000002282 | - | 1478    | 1427    | RNA → rpmE (PRK00019) Ribosomal_L31 (pfam01197) →                                                                                            |
| Pma-1-1  | NZ_AHCB02000038.1              | + | 62021   | 62072   | RNA → rpmE (PRK00019) Ribosomal_L31 (pfam01197) →                                                                                            |
| Psp-13-1 | NZ_JWGY01000001.1              | + | 61985   | 62036   | RNA → rpmE (PRK00019) Ribosomal_L31 (pfam01197) →                                                                                            |
| Psp-9-1  | NZ_BADX01000055.1              | + | 23372   | 23423   | RNA → rpmE (PRK00019) Ribosomal_L31 (pfam01197) → rpmE (PRK00019) Ribosomal_L31 (pfam01197) →                                                |
| Pha-2-1  | NZ_AHCA01000009.1              | - | 150446  | 150395  | RNA → rpmE (PRK00019) Ribosomal_L31 (pfam01197) →                                                                                            |
| Psp-11-1 | NZ_BADT01000142.1              | + | 28576   | 28627   | RNA → rpmE (PRK00019) Ribosomal_L31 (pfam01197) → rpmE (PRK00019) Ribosomal_L31 (pfam01197) →                                                |
| Psp-32-1 | NZ_AUTQ01000186.1              | - | 26876   | 26825   | RNA → rpmE (PRK00019) Ribosomal_L31 (pfam01197) →                                                                                            |
| Psp-19-1 | NZ_JXYD01000037.1              | - | 57348   | 57297   | RNA → rpmE (PRK00019) Ribosomal_L31 (pfam01197) →                                                                                            |
| Psp-12-1 | NZ_AMYA01000022.1              | - | 2067    | 2016    | RNA → rpmE (PRK00019) Ribosomal_L31 (pfam01197) →                                                                                            |
| Psp-20-1 | NZ_JJNY01000024.1              | - | 36149   | 36098   | RNA → rpmE (PRK00019) Ribosomal_L31 (pfam01197) →                                                                                            |
| Psp-10-1 | NZ_BADY01000117.1              | - | 2048    | 1997    | RNA → rpmE (PRK00019) Ribosomal_L31 (pfam01197) → rpmE (PRK00019) Ribosomal_L31 (pfam01197) →                                                |
| Pfu-1-1  | NZ_JJNZ01000017.1              | + | 69496   | 69547   | RNA → rpmE (PRK00019) Ribosomal_L31 (pfam01197) →                                                                                            |
| env-599  | wf3_Contig4170                 | + | 986     | 1037    | RNA →                                                                                                                                        |
| env-600  | LV_Brine_h2_0102_1000031       | + | 5692    | 5743    | RNA → rpmE (PRK00019) Ribosomal_L31 (pfam01197) →                                                                                            |
| Pha-3-1  | NC_007481.1                    | - | 2892806 | 2892755 | RNA → rpmE (PRK00019) Ribosomal_L31 (pfam01197) → rpmE (PRK00019) Ribosomal_L31 (pfam01197) →                                                |
| Pru-1-1  | NZ_JXYA01000021.1              | + | 73438   | 73489   | RNA → rpmE (PRK00019) Ribosomal_L31 (pfam01197) → rpmE (PRK00019) Ribosomal_L31 (pfam01197) →                                                |
| Pru-1-2  | NZ_LFZX01000030.1              | + | 37188   | 37239   | RNA → rpmE (PRK00019) Ribosomal_L31 (pfam01197) → rpmE (PRK00019) Ribosomal_L31 (pfam01197) →                                                |
| Pru-2-1  | NZ_AHCD02000031.1              | + | 22677   | 22728   | RNA → rpmE (PRK00019) Ribosomal_L31 (pfam01197) → rpmE (PRK00019) Ribosomal_L31 (pfam01197) →                                                |

|          |                         |   |         |         |                                                                                                                                                              |
|----------|-------------------------|---|---------|---------|--------------------------------------------------------------------------------------------------------------------------------------------------------------|
| Plu-4-1  | NZ_AUXW01000198.1       | - | 44235   | 44184   | RNA → rpmE (PRK00019) Ribosomal_L31 (pfam01197) →                                                                                                            |
| Plu-1-1  | NZ_JWIC01000001.1       | + | 71814   | 71865   | RNA → rpmE (PRK00019) Ribosomal_L31 (pfam01197) →                                                                                                            |
| Par-1-1  | NZ_AHBY02000081.1       | - | 369     | 318     | RNA → rpmE (PRK00019) Ribosomal_L31 (pfam01197) →                                                                                                            |
| Psp-21-1 | NZ_AUTS01000045.1       | + | 48461   | 48512   | RNA → rpmE (PRK00019) Ribosomal_L31 (pfam01197) →                                                                                                            |
| Psp-22-1 | NZ_AUTR01000020.1       | - | 193290  | 193239  | RNA → rpmE (PRK00019) Ribosomal_L31 (pfam01197) →                                                                                                            |
| Psp-29-1 | NZ_AUTJ01000247.1       | + | 71641   | 71692   | RNA → rpmE (PRK00019) Ribosomal_L31 (pfam01197) → hypo →                                                                                                     |
| Psp-25-1 | NZ_AUTP01000215.1       | + | 15068   | 15119   | RNA → rpmE (PRK00019) Ribosomal_L31 (pfam01197) →                                                                                                            |
| Psp-7-1  | NZ_BADV01000031.1       | - | 2245    | 2194    | RNA → rpmE (PRK00019) Ribosomal_L31 (pfam01197) → rpmE (PRK00019) Ribosomal_L31 (pfam01197) →                                                                |
| env-601  | CEUP01039342.1          | - | 391     | 340     | RNA → rpmE (PRK00019) Ribosomal_L31 (pfam01197) →                                                                                                            |
| env-602  | CEVA01501963.1          | - | 276     | 225     | RNA → rpmE (PRK00019) Ribosomal_L31 (pfam01197) →                                                                                                            |
| env-603  | CEPZ01051150.1          | - | 473     | 422     | RNA → rpmE (PRK00019) Ribosomal_L31 (pfam01197) →                                                                                                            |
| env-604  | CEQS01116987.1          | + | 480     | 531     | RNA →                                                                                                                                                        |
| env-605  | TCCM_contig09952        | - | 265     | 214     | RNA → rpmE (PRK00019) Ribosomal_L31 (pfam01197) →                                                                                                            |
| Psp-1-1  | NZ_BBIN01000213.1       | - | 19009   | 18959   | RNA → rpmE (PRK00019) Ribosomal_L31 (pfam01197) →                                                                                                            |
| Ptu-1-1  | NZ_AA0H01000003.1       | + | 284768  | 284818  | RNA → rpmE (PRK00019) Ribosomal_L31 (pfam01197) → rpmE (PRK00019) Ribosomal_L31 (pfam01197) →                                                                |
| env-606  | ABM01022972.1           | + | 23      | 75      | RNA →                                                                                                                                                        |
| Eca-5-1  | NZ_AJYH01000066.1       | - | 21608   | 21558   | RNA → rpmE (PRK00019) Ribosomal_L31 (pfam01197) →                                                                                                            |
| Eca-7-1  | NZ_AJYF01000130.1       | + | 138107  | 138157  | RNA → rpmE (PRK00019) Ribosomal_L31 (pfam01197) →                                                                                                            |
| Eca-4-1  | NZ_AJYG01000029.1       | + | 139048  | 139098  | RNA → rpmE (PRK00019) Ribosomal_L31 (pfam01197) →                                                                                                            |
| Eca-6-1  | NZ_KK211219.1           | + | 164382  | 164432  | RNA → rpmE (PRK00019) Ribosomal_L31 (pfam01197) →                                                                                                            |
| Gho-1-1  | NZ_ADAQ01000008.1       | - | 84673   | 84623   | RNA → rpmE (PRK00019) Ribosomal_L31 (pfam01197) → rpmE (PRK00019) Ribosomal_L31 (pfam01197) →                                                                |
| Gsp-4-1  | NZ_ANFM02000002.1       | - | 72505   | 72455   | RNA → rpmE (PRK00019) Ribosomal_L31 (pfam01197) →                                                                                                            |
| Gsp-3-1  | NZ_LASY01000133.1       | + | 6375    | 6425    | RNA → rpmE (PRK00019) Ribosomal_L31 (pfam01197) →                                                                                                            |
| Eno-3-1  | NZ_AJWN01000101.1       | + | 97798   | 97847   | RNA → rpmE (PRK00019) Ribosomal_L31 (pfam01197) →                                                                                                            |
| Eno-2-1  | NZ_AJYD01000004.1       | + | 100008  | 100057  | RNA → rpmE (PRK00019) Ribosomal_L31 (pfam01197) →                                                                                                            |
| Eno-1-1  | NZ_AJYE01000099.1       | + | 19319   | 19368   | RNA → rpmE (PRK00019) Ribosomal_L31 (pfam01197) →                                                                                                            |
| env-607  | JGI24724J26744.10298770 | - | 465     | 419     | RNA → rpmE (PRK00019) Ribosomal_L31 (pfam01197) →                                                                                                            |
| env-608  | 3300000513.101996       | - | 1403    | 1355    | RNA → rpmE (PRK00019) Ribosomal_L31 (pfam01197) →                                                                                                            |
| env-609  | 3300001239.10010964     | - | 1403    | 1355    | RNA → rpmE (PRK00019) Ribosomal_L31 (pfam01197) →                                                                                                            |
| env-610  | 3300001605.10069366     | - | 1992    | 1944    | RNA → rpmE (PRK00019) Ribosomal_L31 (pfam01197) →                                                                                                            |
| Tsp-1-1  | NZ_JQDZ01000010.1       | - | 1358    | 1309    | RNA → ← hypō                                                                                                                                                 |
| Pha-5-1  | NZ_AWXP01000020.1       | + | 164833  | 164882  | RNA → rpmE (PRK00019) Ribosomal_L31 (pfam01197) → rpmE (PRK00019) Ribosomal_L31 (pfam01197) → hypo → HipA (COG3550) PRK09775 (PRK09775) HTH_ARSR (cd00090) → |
| Pvu-2-1  | NZ_KN150745.1           | - | 686197  | 686148  | RNA → rpmE (PRK00019) Ribosomal_L31 (pfam01197) →                                                                                                            |
| Pmi-3-1  | NC_022000.1             | + | 3534400 | 3534449 | RNA → rpmE (PRK00019) Ribosomal_L31 (pfam01197) → rpmE (PRK00019) Ribosomal_L31 (pfam01197) →                                                                |
| env-611  | JGI24707J26582.10420588 | + | 135     | 189     | RNA → rpmE (PRK00019) Ribosomal_L31 (pfam01197) →                                                                                                            |
| Ffu-1-1  | NZ_AUGL01000001.1       | - | 147568  | 147519  | RNA → rpmE (PRK00019) Ribosomal_L31 (pfam01197) →                                                                                                            |
| Fky-1-1  | NZ_AUDJ01000001.1       | + | 302704  | 302753  | RNA → ← hypō                                                                                                                                                 |
| Asi-1-1  | NZ_CDBY01000035.1       | + | 3638    | 3691    | RNA → rpmE (PRK00019) Ribosomal_L31 (pfam01197) → SRPBCC (cd07812) YbjT (COG0702) DUF2867 (pfam11066) NAD_binding_10 (pfam13460) →                           |
| Afi-1-1  | NZ_JRGK01000350.1       | - | 15755   | 15703   | RNA → rpmE (PRK00019) Ribosomal_L31 (pfam01197) →                                                                                                            |
| Aja-1-1  | NZ_JWJR01000011.1       | - | 124061  | 124009  | RNA → rpmE (PRK00019) Ribosomal_L31 (pfam01197) →                                                                                                            |
| Adh-1-1  | NZ_CDBP01000004.1       | + | 72490   | 72542   | RNA → rpmE (PRK00019) Ribosomal_L31 (pfam01197) →                                                                                                            |
| Adh-1-2  | NZ_CDBH01000029.1       | + | 72699   | 72751   | RNA → rpmE (PRK00019) Ribosomal_L31 (pfam01197) →                                                                                                            |
| Aen-2-1  | NZ_LDWG01000014.1       | - | 162402  | 162350  | RNA → rpmE (PRK00019) Ribosomal_L31 (pfam01197) →                                                                                                            |
| Adh-1-3  | NZ_JDWD01000154.1       | + | 20498   | 20550   | RNA → rpmE (PRK00019) Ribosomal_L31 (pfam01197) →                                                                                                            |
| Ahy-4-1  | NZ_JEMK01000035.1       | + | 72881   | 72933   | RNA → rpmE (PRK00019) Ribosomal_L31 (pfam01197) →                                                                                                            |
| Ahy-18-1 | NZ_CP007518.1           | + | 4401696 | 4401748 | RNA → rpmE (PRK00019) Ribosomal_L31 (pfam01197) →                                                                                                            |
| Ahy-17-1 | NZ_JH815591.1           | - | 3833332 | 3833280 | RNA → rpmE (PRK00019) Ribosomal_L31 (pfam01197) →                                                                                                            |
| Ahy-2-1  | NZ_ANPN01000010.1       | - | 162590  | 162538  | RNA → rpmE (PRK00019) Ribosomal_L31 (pfam01197) →                                                                                                            |
| Ahy-9-1  | NZ_AOBQ01000006.1       | + | 72707   | 72759   | RNA → rpmE (PRK00019) Ribosomal_L31 (pfam01197) →                                                                                                            |
| Ahy-8-1  | NZ_AOBP01000008.1       | - | 131017  | 130965  | RNA → rpmE (PRK00019) Ribosomal_L31 (pfam01197) →                                                                                                            |
| Ahy-6-1  | NZ_AOBO01000002.1       | - | 186283  | 186231  | RNA → rpmE (PRK00019) Ribosomal_L31 (pfam01197) →                                                                                                            |



|          |                         |   |         |         |                                                                                                                   |
|----------|-------------------------|---|---------|---------|-------------------------------------------------------------------------------------------------------------------|
| Ahy-3-1  | NZ_AOBM01000003.1       | - | 130263  | 130211  | RNA → rpmE (PRK00019)Ribosomal_L31 (pfam01197) →                                                                  |
| Ahy-5-1  | NZ_AOBN01000020.1       | + | 72684   | 72736   | RNA → rpmE (PRK00019)Ribosomal_L31 (pfam01197) →                                                                  |
| Aaq-1-1  | NZ_BAFL01000026.1       | + | 72708   | 72760   | RNA → rpmE (PRK00019)Ribosomal_L31 (pfam01197) → rpmE (PRK00019)Ribosomal_L31 (pfam01197) →                       |
| Aja-1-2  | NZ_CDBV01000003.1       | + | 54015   | 54067   | RNA → rpmE (PRK00019)Ribosomal_L31 (pfam01197) →                                                                  |
| Asp-2-1  | NZ_JXIR01000034.1       | - | 113264  | 113212  | RNA → rpmE (PRK00019)Ribosomal_L31 (pfam01197) →                                                                  |
| Ala-1-1  | NZ_JRGM01000150.1       | + | 53033   | 53085   | RNA → rpmE (PRK00019)Ribosomal_L31 (pfam01197) →                                                                  |
| Aja-2-1  | NZ_JFDL01000010.1       | + | 54457   | 54509   | RNA → rpmE (PRK00019)Ribosomal_L31 (pfam01197) →                                                                  |
| Aau-1-1  | NZ_CDDH01000054.1       | - | 10218   | 10166   | RNA → rpmE (PRK00019)Ribosomal_L31 (pfam01197) →                                                                  |
| Amo-1-1  | NZ_AQGQ01000086.1       | - | 10566   | 10515   | RNA → rpmE (PRK00019)Ribosomal_L31 (pfam01197) →                                                                  |
| Api-1-1  | NZ_CDBL01000057.1       | - | 131319  | 131268  | RNA → rpmE (PRK00019)Ribosomal_L31 (pfam01197) →                                                                  |
| Asa-5-1  | NZ_CDDW01000113.1       | - | 28277   | 28226   | RNA → rpmE (PRK00019)Ribosomal_L31 (pfam01197) →                                                                  |
| Apo-1-1  | NZ_CDBI01000047.1       | + | 73787   | 73838   | RNA → rpmE (PRK00019)Ribosomal_L31 (pfam01197) →                                                                  |
| Asa-5-2  | NZ_JXTA01000018.1       | + | 52404   | 52455   | RNA → rpmE (PRK00019)Ribosomal_L31 (pfam01197) →                                                                  |
| Asa-3-1  | NZ_BAWQ01000020.1       | - | 14307   | 14256   | RNA → rpmE (PRK00019)Ribosomal_L31 (pfam01197) →                                                                  |
| Asa-4-1  | NZ_ARYZ02000006.1       | - | 52708   | 52657   | RNA → rpmE (PRK00019)Ribosomal_L31 (pfam01197) →                                                                  |
| Ahy-16-1 | NZ_AMQA01000007.1       | + | 48674   | 48725   | RNA → rpmE (PRK00019)Ribosomal_L31 (pfam01197) →                                                                  |
| Asa-6-1  | NZ_AGVO01000060.1       | + | 52105   | 52156   | RNA → rpmE (PRK00019)Ribosomal_L31 (pfam01197) →                                                                  |
| Asa-7-1  | NC_009348.1             | + | 140845  | 140896  | RNA → rpmE (PRK00019)Ribosomal_L31 (pfam01197) →                                                                  |
| Asa-2-1  | NZ_AMQG02000058.1       | - | 13927   | 13876   | RNA → rpmE (PRK00019)Ribosomal_L31 (pfam01197) →                                                                  |
| Asa-5-3  | NZ_JRYW01000019.1       | + | 52405   | 52456   | RNA → rpmE (PRK00019)Ribosomal_L31 (pfam01197) →                                                                  |
| Asa-5-4  | NZ_JRYV01000091.1       | - | 17030   | 16979   | RNA → rpmE (PRK00019)Ribosomal_L31 (pfam01197) →                                                                  |
| env-612  | JCVI_SCAF_1096627194609 | - | 4672    | 4621    | RNA → rpmE (PRK00019)Ribosomal_L31 (pfam01197) →<br>YbjT (COG0702)DUF2867 (pfam11066)NAD_binding_10 (pfam13460) → |
| Ahy-21-1 | NZ_CDDC01000091.1       | - | 122529  | 122478  | RNA → rpmE (PRK00019)Ribosomal_L31 (pfam01197) →                                                                  |
| Ahy-11-1 | NZ_JFJO01000068.1       | - | 10099   | 10048   | RNA → rpmE (PRK00019)Ribosomal_L31 (pfam01197) →                                                                  |
| Ahy-20-1 | NC_008570.1             | - | 4646089 | 4646038 | RNA → rpmE (PRK00019)Ribosomal_L31 (pfam01197) →                                                                  |
| Ahy-14-1 | NC_021290.1             | - | 4925796 | 4925745 | RNA → rpmE (PRK00019)Ribosomal_L31 (pfam01197) →                                                                  |
| Ahy-12-1 | NZ_CP007566.1           | - | 4925161 | 4925110 | RNA → rpmE (PRK00019)Ribosomal_L31 (pfam01197) →                                                                  |
| Ahy-19-1 | NZ_CP007576.1           | - | 4925129 | 4925078 | RNA → rpmE (PRK00019)Ribosomal_L31 (pfam01197) →                                                                  |
| Ahy-13-1 | NZ_CP006883.1           | + | 142305  | 142356  | RNA → rpmE (PRK00019)Ribosomal_L31 (pfam01197) →                                                                  |
| Ahy-1-1  | NZ_CP010947.1           | - | 4784963 | 4784912 | RNA → rpmE (PRK00019)Ribosomal_L31 (pfam01197) →                                                                  |
| Ahy-1-2  | NZ_CP011100.1           | + | 204318  | 204369  | RNA → rpmE (PRK00019)Ribosomal_L31 (pfam01197) →                                                                  |
| Ahy-15-1 | NZ_CP006870.1           | + | 142342  | 142393  | RNA → rpmE (PRK00019)Ribosomal_L31 (pfam01197) →                                                                  |
| Ahy-7-1  | NZ_JEML01000047.1       | + | 52150   | 52201   | RNA → rpmE (PRK00019)Ribosomal_L31 (pfam01197) →                                                                  |
| Abi-1-1  | NZ_CDBT01000035.1       | - | 149827  | 149776  | RNA → rpmE (PRK00019)Ribosomal_L31 (pfam01197) →                                                                  |
| env-613  | GooDraft_1010177        | + | 247     | 298     | RNA → rpmE (PRK00019)Ribosomal_L31 (pfam01197) →                                                                  |
| Aso-1-1  | NZ_CDBW01000004.1       | + | 44945   | 44996   | RNA → rpmE (PRK00019)Ribosomal_L31 (pfam01197) →                                                                  |
| Aen-2-2  | NZ_CDDE01000010.1       | + | 51645   | 51696   | RNA → rpmE (PRK00019)Ribosomal_L31 (pfam01197) →                                                                  |
| Afl-1-1  | NZ_CDBO01000009.1       | + | 51638   | 51689   | RNA → rpmE (PRK00019)Ribosomal_L31 (pfam01197) →                                                                  |
| Ave-1-1  | NZ_CDDU01000053.1       | + | 54632   | 54683   | RNA → rpmE (PRK00019)Ribosomal_L31 (pfam01197) →                                                                  |
| Aen-2-3  | NZ_CDCG01000034.1       | - | 93277   | 93226   | RNA → rpmE (PRK00019)Ribosomal_L31 (pfam01197) →                                                                  |
| Ave-9-1  | NZ_CDDK01000028.1       | + | 53357   | 53408   | RNA → rpmE (PRK00019)Ribosomal_L31 (pfam01197) →                                                                  |
| Ave-1-2  | NZ_CDBU01000031.1       | + | 53055   | 53106   | RNA → rpmE (PRK00019)Ribosomal_L31 (pfam01197) →                                                                  |
| Ave-7-1  | NZ_ATFB01000030.1       | - | 126444  | 126393  | RNA → rpmE (PRK00019)Ribosomal_L31 (pfam01197) →                                                                  |
| Ave-1-3  | NZ_JRBE01000009.1       | - | 111575  | 111524  | RNA → rpmE (PRK00019)Ribosomal_L31 (pfam01197) →                                                                  |
| Ave-6-1  | NC_015424.1             | - | 171080  | 171029  | RNA → rpmE (PRK00019)Ribosomal_L31 (pfam01197) →                                                                  |
| Ave-3-1  | NZ_JH815586.1           | + | 52965   | 53016   | RNA → rpmE (PRK00019)Ribosomal_L31 (pfam01197) →                                                                  |
| Ave-2-1  | NZ_JH815583.1           | + | 55914   | 55965   | RNA → rpmE (PRK00019)Ribosomal_L31 (pfam01197) →                                                                  |
| Ave-4-1  | NZ_JH823256.1           | - | 1129313 | 1129262 | RNA → rpmE (PRK00019)Ribosomal_L31 (pfam01197) →                                                                  |
| Ave-5-1  | NZ_JH815589.1           | + | 321999  | 322050  | RNA → rpmE (PRK00019)Ribosomal_L31 (pfam01197) →                                                                  |
| Ave-8-1  | NZ_CDBQ01000036.1       | + | 53773   | 53824   | RNA → rpmE (PRK00019)Ribosomal_L31 (pfam01197) →                                                                  |
| Asp-3-1  | NZ_JRJV01000041.1       | - | 59091   | 59040   | RNA → rpmE (PRK00019)Ribosomal_L31 (pfam01197) →                                                                  |

|          |                         |   |         |         |                                                                                                                                                        |
|----------|-------------------------|---|---------|---------|--------------------------------------------------------------------------------------------------------------------------------------------------------|
| Aal-1-1  | NZ.CDCB01000029.1       | + | 53445   | 53496   | RNA→ rpmE (PRK00019)Ribosomal_L31 (pfam01197)→                                                                                                         |
| Aal-1-2  | NZ.CDBR01000043.1       | + | 32916   | 32967   | RNA→ rpmE (PRK00019)Ribosomal_L31 (pfam01197)→                                                                                                         |
| env-614  | GO4KUYH01ENIZ1          | + | 340     | 391     | RNA→ rpmE (PRK00528)rpmE (PRK00019)rpmE2 (PRK01678)Ribosomal_L31 (pfam01197)→                                                                          |
| env-615  | JGI11944J13513.1007729  | + | 807     | 858     | RNA→ rpmE (PRK00019)Ribosomal_L31 (pfam01197)→                                                                                                         |
| Aen-1-1  | NZ.CDDI01000023.1       | - | 131318  | 131267  | RNA→ rpmE (PRK00019)Ribosomal_L31 (pfam01197)→                                                                                                         |
| Ahy-10-1 | NZ.CP006579.1           | - | 4352087 | 4352036 | RNA→ rpmE (PRK00019)Ribosomal_L31 (pfam01197)→                                                                                                         |
| env-616  | JGI26532J50257.10010618 | - | 2542    | 2491    | RNA→ rpmE (PRK00019)Ribosomal_L31 (pfam01197)→                                                                                                         |
| env-617  | JGI26536J50258.1000749  | + | 19423   | 19474   | RNA→ rpmE (PRK00019)Ribosomal_L31 (pfam01197)→                                                                                                         |
| env-618  | JGI26540J51217.10020906 | + | 793     | 844     | RNA→ rpmE (PRK00019)Ribosomal_L31 (pfam01197)→                                                                                                         |
| Asa-8-1  | NZ.CDBN01000071.1       | - | 4965    | 4914    | RNA→ rpmE (PRK00019)Ribosomal_L31 (pfam01197)→                                                                                                         |
| Aca-2-1  | NZ.CACP01000112.1       | - | 130878  | 130827  | RNA→ rpmE (PRK00019)Ribosomal_L31 (pfam01197)→ rpmE (PRK00019)Ribosomal_L31 (pfam01197)→                                                               |
| Asp-1-1  | NZ.JEMQ01000008.1       | + | 76191   | 76242   | RNA→ rpmE (PRK00019)Ribosomal_L31 (pfam01197)→                                                                                                         |
| Aca-1-1  | NZ.KQ087569.1           | - | 134377  | 134326  | RNA→ rpmE (PRK00019)Ribosomal_L31 (pfam01197)→                                                                                                         |
| Asp-4-1  | NZ.JRQJ01000349.1       | - | 10593   | 10542   | RNA→ rpmE (PRK00019)Ribosomal_L31 (pfam01197)→                                                                                                         |
| Ata-1-1  | NZ.BAWK01000091.1       | - | 20016   | 19965   | RNA→ rpmE (PRK00019)Ribosomal_L31 (pfam01197)→                                                                                                         |
| Ata-1-2  | NZ.CDDD01000058.1       | - | 134875  | 134824  | SRPBCC (cd07812)YbjT (COG0702)DUF2867 (pfam11066)NAD_binding_10 (pfam13460)→<br>RNA→ rpmE (PRK00019)Ribosomal_L31 (pfam01197)→                         |
| Ari-1-1  | NZ.CDBJ01000055.1       | + | 6337    | 6388    | SRPBCC (cd07812)YbjT (COG0702)DUF2867 (pfam11066)NAD_binding_10 (pfam13460)→<br>RNA→ rpmE (PRK00019)Ribosomal_L31 (pfam01197)→                         |
| Ate-1-1  | NZ.CDCA01000034.1       | + | 49892   | 49942   | RNA→ rpmE (PRK00019)Ribosomal_L31 (pfam01197)→                                                                                                         |
| Ame-1-1  | NZ.CDBZ01000101.1       | - | 64689   | 64639   | RNA→ rpmE (PRK00019)Ribosomal_L31 (pfam01197)→                                                                                                         |
| Ame-1-2  | NZ.JRBF01000002.1       | - | 94963   | 94913   | RNA→ rpmE (PRK00019)Ribosomal_L31 (pfam01197)→                                                                                                         |
| Ame-2-1  | NZ.CP007567.1           | - | 4055949 | 4055899 | RNA→ rpmE (PRK00019)Ribosomal_L31 (pfam01197)→                                                                                                         |
| Ame-1-3  | NZ.JRBG01000006.1       | - | 70612   | 70562   | RNA→ rpmE (PRK00019)Ribosomal_L31 (pfam01197)→                                                                                                         |
| Aaq-2-1  | NZ.JRGL01000008.1       | - | 78368   | 78318   | RNA→ rpmE (PRK00019)Ribosomal_L31 (pfam01197)→                                                                                                         |
| env-619  | XAGC.contig09808        | - | 443     | 393     | RNA→ rpmE (PRK00019)Ribosomal_L31 (pfam01197)→                                                                                                         |
| Abe-1-1  | NZ.CDDA01000005.1       | - | 159579  | 159529  | RNA→ rpmE (PRK00019)Ribosomal_L31 (pfam01197)→                                                                                                         |
| Asa-1-1  | NZ.JPWL01000105.1       | - | 218920  | 218870  | RNA→ rpmE (PRK00019)Ribosomal_L31 (pfam01197)→                                                                                                         |
| Aeu-1-1  | NZ.CDDF01000018.1       | - | 151708  | 151658  | RNA→ rpmE (PRK00019)Ribosomal_L31 (pfam01197)→                                                                                                         |
| Asc-1-1  | NZ.Cddb01000021.1       | + | 125280  | 125333  | RNA→ rpmE (PRK00019)Ribosomal_L31 (pfam01197)→                                                                                                         |
| Adi-2-1  | NZ.CDCE01000027.1       | - | 19201   | 19148   | SRPBCC (cd07812)YbjT (COG0702)DUF2867 (pfam11066)NAD_binding_10 (pfam13460)→<br>RNA→ rpmE (PRK00019)Ribosomal_L31 (pfam01197)→                         |
| Adi-1-1  | NZ.APVG01000009.1       | + | 71044   | 71097   | SRPBCC_CalC_Aha1-like_GntR-HTH (cd08893)YbjT (COG0702)DUF2867 (pfam11066)NAD_binding_10 (pfam13460)→<br>RNA→ rpmE (PRK00019)Ribosomal_L31 (pfam01197)→ |
| env-620  | GSLASAS_contig00578     | - | 2300    | 2248    | SRPBCC_CalC_Aha1-like_GntR-HTH (cd08893)YbjT (COG0702)DUF2867 (pfam11066)NAD_binding_10 (pfam13460)→<br>RNA→ rpmE (PRK00019)Ribosomal_L31 (pfam01197)→ |
| Sso-15-1 | NZ.AQOD01000036.1       | - | 8278    | 8226    | RNA→ rpmE (PRK00019)Ribosomal_L31 (pfam01197)→                                                                                                         |
| Sso-14-1 | NZ.AQOE01000001.1       | - | 17831   | 17779   | RNA→ rpmE (PRK00019)Ribosomal_L31 (pfam01197)→                                                                                                         |
| env-621  | CEGE01004975.1          | - | 1222    | 1170    | RNA→ rpmE (PRK00019)Ribosomal_L31 (pfam01197)→                                                                                                         |
| env-622  | GSLASAS_contig00020     | + | 11479   | 11531   | RNA→ rpmE (PRK00019)Ribosomal_L31 (pfam01197)→                                                                                                         |
| Sco-3-1  | NZ.AQOF01000004.1       | + | 41661   | 41713   | RNA→ rpmE (PRK00019)Ribosomal_L31 (pfam01197)→                                                                                                         |
| env-623  | GSLASAS_contig02665     | + | 1265    | 1317    | RNA→ rpmE (PRK00019)Ribosomal_L31 (pfam01197)→                                                                                                         |
| Ssp-27-1 | NZ.LAQR01000036.1       | + | 121364  | 121416  | RNA→ rpmE (PRK00019)Ribosomal_L31 (pfam01197)→                                                                                                         |
| Psp-57-1 | NZ.AMZO01000033.1       | - | 59095   | 59042   | RNA→ rpmE (PRK00019)Ribosomal_L31 (pfam01197)→                                                                                                         |
| Pan-11-1 | NZ.JZSW01000011.1       | + | 88087   | 88139   | RNA→ rpmE (PRK00019)Ribosomal_L31 (pfam01197)→                                                                                                         |
| Pan-12-1 | NZ.CH902603.1           | - | 60950   | 60898   | RNA→ rpmE (PRK00019)Ribosomal_L31 (pfam01197)→                                                                                                         |
| Pan-11-2 | NZ.JZSO01000016.1       | + | 86032   | 86084   | RNA→ rpmE (PRK00019)Ribosomal_L31 (pfam01197)→                                                                                                         |
| Pan-11-3 | NZ.JZSN01000009.1       | - | 60994   | 60942   | RNA→ rpmE (PRK00019)Ribosomal_L31 (pfam01197)→                                                                                                         |
| Pan-11-4 | NZ.JZSS01000006.1       | + | 115493  | 115545  | RNA→ rpmE (PRK00019)Ribosomal_L31 (pfam01197)→                                                                                                         |
| Pan-11-5 | NZ.JZSY01000010.1       | + | 90276   | 90328   | RNA→ rpmE (PRK00019)Ribosomal_L31 (pfam01197)→                                                                                                         |
| Pan-11-6 | NZ.JZSZ01000011.1       | + | 90260   | 90312   | RNA→ rpmE (PRK00019)Ribosomal_L31 (pfam01197)→                                                                                                         |
| Pan-11-7 | NZ.JZSU01000008.1       | - | 60993   | 60941   | RNA→ rpmE (PRK00019)Ribosomal_L31 (pfam01197)→                                                                                                         |
| Pan-11-8 | NZ.JZST01000009.1       | + | 115491  | 115543  | RNA→ rpmE (PRK00019)Ribosomal_L31 (pfam01197)→                                                                                                         |

|           |                           |   |         |         |                                                                                             |
|-----------|---------------------------|---|---------|---------|---------------------------------------------------------------------------------------------|
| Pan-11-9  | NZ_JZSM01000004.1         | - | 135032  | 134980  | RNA → rpmE (PRK00019)Ribosomal_L31 (pfam01197) →                                            |
| Pda-2-1   | NZ_JZSI01000010.1         | + | 90276   | 90328   | RNA → rpmE (PRK00019)Ribosomal_L31 (pfam01197) →                                            |
| Pan-11-10 | NZ_JZSV01000008.1         | - | 60990   | 60938   | RNA → rpmE (PRK00019)Ribosomal_L31 (pfam01197) →                                            |
| Pan-11-11 | NZ_JZSX01000009.1         | + | 90266   | 90318   | RNA → rpmE (PRK00019)Ribosomal_L31 (pfam01197) →                                            |
| Pan-11-12 | NZ_JZTA01000010.1         | + | 90591   | 90643   | RNA → rpmE (PRK00019)Ribosomal_L31 (pfam01197) →                                            |
| Psp-58-1  | NZ_AAOU01000028.1         | + | 15095   | 15147   | RNA → rpmE (PRK00019)Ribosomal_L31 (pfam01197) → rpmE (PRK00019)Ribosomal_L31 (pfam01197) → |
| Pap-1-1   | NZ_LDVO01000029.1         | - | 41563   | 41511   | RNA → rpmE (PRK00019)Ribosomal_L31 (pfam01197) →                                            |
| Psa-1-1   | NZ_JGVO01001562.1         | + | 1691    | 1743    | RNA → rpmE (PRK00019)Ribosomal_L31 (pfam01197) →                                            |
| Paq-2-1   | NZ_LDOT01000005.1         | + | 157449  | 157501  | RNA → rpmE (PRK00019)Ribosomal_L31 (pfam01197) →                                            |
| Pga-2-1   | NZ_CP005974.1             | + | 545149  | 545201  | RNA → rpmE (PRK00019)Ribosomal_L31 (pfam01197) →                                            |
| Pga-1-1   | NZ_JWLZ01000213.1         | - | 58688   | 58636   | RNA → rpmE (PRK00019)Ribosomal_L31 (pfam01197) →                                            |
| Ple-1-1   | NZ_JZSL01000002.1         | - | 60040   | 59988   | RNA → rpmE (PRK00019)Ribosomal_L31 (pfam01197) →                                            |
| Ple-1-2   | NZ_JZSK01000007.1         | - | 60039   | 59987   | RNA → rpmE (PRK00019)Ribosomal_L31 (pfam01197) →                                            |
| Ple-3-1   | NZ_DF093598.1             | - | 93166   | 93114   | RNA → rpmE (PRK00019)Ribosomal_L31 (pfam01197) → rpmE (PRK00019)Ribosomal_L31 (pfam01197) → |
| Ple-2-1   | NZ_DF196819.1             | - | 1468186 | 1468134 | RNA → rpmE (PRK00019)Ribosomal_L31 (pfam01197) →                                            |
| Pda-4-1   | NZ_KB405046.1             | + | 159586  | 159638  | RNA → rpmE (PRK00019)Ribosomal_L31 (pfam01197) →                                            |
| Pda-3-1   | NZ_ADBS01000001.1         | + | 3048450 | 3048502 | RNA → rpmE (PRK00019)Ribosomal_L31 (pfam01197) → rpmE (PRK00019)Ribosomal_L31 (pfam01197) → |
| Psw-1-1   | NZ_LELC01000008.1         | + | 114365  | 114416  | RNA → rpmE (PRK00019)Ribosomal_L31 (pfam01197) →                                            |
| Pph-1-1   | NZ_JZSJ01000013.1         | + | 34239   | 34290   | RNA → rpmE (PRK00019)Ribosomal_L31 (pfam01197) →                                            |
| Pki-1-1   | NZ_JZTD01000009.1         | - | 53868   | 53817   | RNA → rpmE (PRK00019)Ribosomal_L31 (pfam01197) →                                            |
| Pki-1-2   | NZ_JZTE01000008.1         | - | 53868   | 53817   | RNA → rpmE (PRK00019)Ribosomal_L31 (pfam01197) →                                            |
| Pki-1-3   | NZ_JZTC01000007.1         | - | 53870   | 53819   | RNA → rpmE (PRK00019)Ribosomal_L31 (pfam01197) →                                            |
| Pki-1-4   | NZ_JZTB01000007.1         | - | 53867   | 53816   | RNA → rpmE (PRK00019)Ribosomal_L31 (pfam01197) →                                            |
| Pil-1-1   | NZ_JZSQ01000007.1         | + | 107422  | 107473  | RNA → rpmE (PRK00019)Ribosomal_L31 (pfam01197) →                                            |
| Pil-1-2   | NZ_JZSR01000004.1         | + | 109269  | 109320  | RNA → rpmE (PRK00019)Ribosomal_L31 (pfam01197) →                                            |
| Pki-1-5   | NZ_JZSP01000008.1         | - | 26274   | 26223   | RNA → rpmE (PRK00019)Ribosomal_L31 (pfam01197) →                                            |
| Pha-6-1   | NZ_JWYV01000006.1         | - | 63341   | 63289   | RNA → rpmE (PRK00019)Ribosomal_L31 (pfam01197) →                                            |
| Pha-7-1   | NZ_AULG01000012.1         | + | 172893  | 172945  | RNA → rpmE (PRK00019)Ribosomal_L31 (pfam01197) →                                            |
| Pga-3-1   | NZ_JMIB01000030.1         | - | 62198   | 62146   | RNA → rpmE (PRK00019)Ribosomal_L31 (pfam01197) →                                            |
| Pga-4-1   | NZ_LDOU01000024.1         | - | 60173   | 60119   | RNA → rpmE (PRK00019)Ribosomal_L31 (pfam01197) →                                            |
| Ppr-1-1   | NZ_CH724140.1             | - | 69796   | 69744   | RNA → rpmE (PRK00019)Ribosomal_L31 (pfam01197) →                                            |
| env-624   | KGLS1_ANT01_95m_c10724678 | + | 129     | 181     | RNA → rpmE (PRK00019)rpmE2 (PRK01678)Ribosomal_L31 (pfam01197) →                            |
| Ppr-2-1   | NC_006370.1               | + | 266374  | 266426  | RNA → rpmE (PRK00019)Ribosomal_L31 (pfam01197) →                                            |
| VeZ-1-1   | NZ_BATM01000037.1         | + | 129339  | 129390  | RNA → rpmE (PRK00019)Ribosomal_L31 (pfam01197) →                                            |
| Vha-1-1   | NZ_BAUJ01000003.1         | + | 79401   | 79452   | RNA → rpmE (PRK00019)Ribosomal_L31 (pfam01197) →                                            |
| env-625   | ASRK010000687.1           | - | 597     | 548     | RNA → rpmE (PRK00019)Ribosomal_L31 (pfam01197) →                                            |
| Vpr-1-1   | NZ_BATJ01000004.1         | + | 154354  | 154404  | RNA → rpmE (PRK00019)Ribosomal_L31 (pfam01197) →                                            |
| Vbr-2-1   | NZ_AKXW01000019.1         | - | 57344   | 57294   | RNA → rpmE (PRK00019)Ribosomal_L31 (pfam01197) →                                            |
| Vbr-3-1   | NZ_AJYM01000057.1         | - | 57302   | 57252   | RNA → rpmE (PRK00019)Ribosomal_L31 (pfam01197) →                                            |
| Vbr-4-1   | NZ_AJYL01000130.1         | + | 139283  | 139333  | RNA → rpmE (PRK00019)Ribosomal_L31 (pfam01197) →                                            |
| Fse-1-1   | NZ_AUGM01000007.1         | - | 231862  | 231812  | RNA → rpmE (PRK00019)Ribosomal_L31 (pfam01197) →                                            |
| Vmy-1-1   | NZ_JXOK01000076.1         | - | 101239  | 101190  | RNA → rpmE (PRK00019)Ribosomal_L31 (pfam01197) →                                            |
| Vsp-27-1  | NZ_JZAM01000160.1         | - | 49297   | 49246   | RNA → rpmE (PRK00019)Ribosomal_L31 (pfam01197) →                                            |
| Vna-2-1   | NZ_JMCF01000037.1         | - | 19898   | 19847   | RNA → rpmE (PRK00019)Ribosomal_L31 (pfam01197) →                                            |
| Vna-2-2   | NZ_JMCI01000042.1         | + | 6951    | 7002    | RNA → rpmE (PRK00019)Ribosomal_L31 (pfam01197) →                                            |
| Vna-2-3   | NZ_JMCH01000025.1         | + | 16370   | 16421   | RNA → rpmE (PRK00019)Ribosomal_L31 (pfam01197) →                                            |
| Vna-2-4   | NZ_JMCG01000001.1         | + | 496985  | 497036  | RNA → rpmE (PRK00019)Ribosomal_L31 (pfam01197) →                                            |
| Vvu-8-1   | NC_014965.1               | + | 326873  | 326924  | RNA → rpmE (PRK00019)Ribosomal_L31 (pfam01197) →                                            |
| Vsa-1-1   | NZ_BAOJ01000037.1         | - | 34285   | 34235   | RNA → rpmE (PRK00019)Ribosomal_L31 (pfam01197) →                                            |
| Vaz-1-1   | NZ_BAOB01000011.1         | + | 28481   | 28531   | RNA → rpmE (PRK00019)Ribosomal_L31 (pfam01197) →                                            |
| Vaz-1-2   | NZ_BATL01000020.1         | - | 35437   | 35387   | RNA → rpmE (PRK00019)Ribosomal_L31 (pfam01197) →                                            |
| Vro-3-1   | NZ_AFAJ01000015.1         | + | 3027    | 3077    | RNA → rpmE (PRK00019)Ribosomal_L31 (pfam01197) → rpmE (PRK00019)Ribosomal_L31 (pfam01197) → |



|           |                      |   |        |        |                                                                                               |
|-----------|----------------------|---|--------|--------|-----------------------------------------------------------------------------------------------|
| Vro-2-1   | NZ_BAOI01000078.1    | - | 79201  | 79151  | RNA → rpmE (PRK00019) Ribosomal_L31 (pfam01197) →                                             |
| Vhy-1-1   | NZ_BBLF01000022.1    | + | 27647  | 27697  | RNA → rpmE (PRK00019) Ribosomal_L31 (pfam01197) →                                             |
| Vja-1-1   | NZ_BBKZ01000028.1    | - | 303783 | 303733 | RNA → rpmE (PRK00019) Ribosomal_L31 (pfam01197) →                                             |
| Vhy-1-2   | NZ_BBLD01000021.1    | - | 69972  | 69922  | RNA → rpmE (PRK00019) Ribosomal_L31 (pfam01197) →                                             |
| Vja-1-2   | NZ_BBLA01000033.1    | - | 289672 | 289622 | RNA → rpmE (PRK00019) Ribosomal_L31 (pfam01197) →                                             |
| Vja-3-1   | NZ_BAOG01000025.1    | - | 30346  | 30296  | RNA → rpmE (PRK00019) Ribosomal_L31 (pfam01197) →                                             |
| Vna-1-1   | NZ_ATFJ01000038.1    | + | 148901 | 148951 | RNA → rpmE (PRK00019) Ribosomal_L31 (pfam01197) →                                             |
| Vna-1-2   | NZ_ATWU01000061.1    | + | 212711 | 212761 | RNA → rpmE (PRK00019) Ribosomal_L31 (pfam01197) →                                             |
| Vsp-6-1   | NC_016613.1          | + | 288935 | 288985 | RNA → rpmE (PRK00019) Ribosomal_L31 (pfam01197) →                                             |
| Vja-4-1   | NZ_BAOA01000021.1    | + | 69740  | 69790  | RNA → rpmE (PRK00019) Ribosomal_L31 (pfam01197) →                                             |
| Vpa-87-1  | NZ_AWMB01000121.1    | - | 5724   | 5674   | RNA → rpmE (PRK00019) Ribosomal_L31 (pfam01197) →                                             |
| Vpa-88-1  | NZ_AWMA01000113.1    | + | 9881   | 9931   | RNA → rpmE (PRK00019) Ribosomal_L31 (pfam01197) →                                             |
| Vpa-156-1 | NZ_AWJK01000001.1    | + | 63708  | 63758  | RNA → rpmE (PRK00019) Ribosomal_L31 (pfam01197) →                                             |
| Val-2-1   | NZ_LFZC01000032.1    | - | 106376 | 106326 | RNA → rpmE (PRK00019) Ribosomal_L31 (pfam01197) →                                             |
| Vpa-240-1 | NZ_AVPW01000029.1    | + | 19681  | 19731  | RNA → rpmE (PRK00019) Ribosomal_L31 (pfam01197) →                                             |
| Vpa-238-1 | NZ_AOOW01000293.1    | + | 7296   | 7346   | RNA → rpmE (PRK00019) Ribosomal_L31 (pfam01197) →                                             |
| Vpa-94-1  | NZ_AWLU01000147.1    | + | 8348   | 8398   | RNA → rpmE (PRK00019) Ribosomal_L31 (pfam01197) →                                             |
| Vhy-1-3   | NZ_BBLE01000010.1    | + | 164226 | 164276 | RNA → rpmE (PRK00019) Ribosomal_L31 (pfam01197) →                                             |
| env-626   | GSLAS_GLMUJHB02HDDBS | + | 419    | 469    | RNA →                                                                                         |
| Vpa-47-1  | NZ_BBQD01000006.1    | + | 238207 | 238257 | RNA → rpmE (PRK00019) Ribosomal_L31 (pfam01197) →                                             |
| Vpa-23-1  | NZ_AOOZ01000001.1    | + | 266710 | 266760 | RNA → rpmE (PRK00019) Ribosomal_L31 (pfam01197) →                                             |
| Vpa-21-1  | NZ_AOOY01000012.1    | + | 32552  | 32602  | RNA → rpmE (PRK00019) Ribosomal_L31 (pfam01197) →                                             |
| Vpa-237-1 | NZ_AOOV01000001.1    | + | 266710 | 266760 | RNA → rpmE (PRK00019) Ribosomal_L31 (pfam01197) →                                             |
| Vpa-140-1 | NZ_AWKA01000014.1    | - | 5727   | 5677   | RNA → rpmE (PRK00019) Ribosomal_L31 (pfam01197) →                                             |
| Vpa-126-1 | NZ_AWKO01000078.1    | - | 5726   | 5676   | RNA → rpmE (PRK00019) Ribosomal_L31 (pfam01197) →                                             |
| Vpa-70-1  | NZ_AWMS01000089.1    | - | 14428  | 14378  | RNA → rpmE (PRK00019) Ribosomal_L31 (pfam01197) →                                             |
| Vpa-125-1 | NZ_AWKP01000009.1    | + | 52752  | 52802  | RNA → rpmE (PRK00019) Ribosomal_L31 (pfam01197) →                                             |
| Vpa-78-1  | NZ_AWMK01000010.1    | + | 51675  | 51725  | RNA → rpmE (PRK00019) Ribosomal_L31 (pfam01197) →                                             |
| Vpa-83-1  | NZ_AWMF01000124.1    | + | 8335   | 8385   | RNA → rpmE (PRK00019) Ribosomal_L31 (pfam01197) →                                             |
| Vpa-66-1  | NZ_AWMW01000061.1    | + | 23084  | 23134  | RNA → rpmE (PRK00019) Ribosomal_L31 (pfam01197) →                                             |
| Vpa-124-1 | NZ_AWMQ01000001.1    | + | 47328  | 47378  | RNA → rpmE (PRK00019) Ribosomal_L31 (pfam01197) →                                             |
| Vpa-127-1 | NZ_AWKN01000016.1    | + | 40862  | 40912  | RNA → rpmE (PRK00019) Ribosomal_L31 (pfam01197) →                                             |
| Vpa-24-1  | NZ_AVPV01000004.1    | + | 421744 | 421794 | RNA → rpmE (PRK00019) Ribosomal_L31 (pfam01197) →                                             |
| Vpa-33-1  | NZ_JFFP01000029.1    | + | 224759 | 224809 | RNA → rpmE (PRK00019) Ribosomal_L31 (pfam01197) →                                             |
| Vpa-45-1  | NZ_ACKB01000038.1    | - | 1783   | 1733   | RNA → rpmE (PRK00019) Ribosomal_L31 (pfam01197) → rpmE (PRK00019) Ribosomal_L31 (pfam01197) → |
| Vpa-71-1  | NZ_AWMR01000251.1    | - | 5731   | 5681   | RNA → rpmE (PRK00019) Ribosomal_L31 (pfam01197) →                                             |
| Vpa-62-1  | NZ_AWNA01000002.1    | - | 5725   | 5675   | RNA → rpmE (PRK00019) Ribosomal_L31 (pfam01197) →                                             |
| Vpa-69-1  | NZ_AWMT01000122.1    | - | 5724   | 5674   | RNA → rpmE (PRK00019) Ribosomal_L31 (pfam01197) →                                             |
| Vpa-65-1  | NZ_AWMX01000034.1    | - | 5716   | 5666   | RNA → rpmE (PRK00019) Ribosomal_L31 (pfam01197) →                                             |
| Vpa-61-1  | NZ_AWNB01000020.1    | - | 5751   | 5701   | RNA → rpmE (PRK00019) Ribosomal_L31 (pfam01197) →                                             |
| VPa-1-1   | NZ_AXNJ01000046.1    | + | 227758 | 227808 | RNA → rpmE (PRK00019) Ribosomal_L31 (pfam01197) →                                             |
| VPa-2-1   | NZ_AXNK01000046.1    | + | 264322 | 264272 | RNA → rpmE (PRK00019) Ribosomal_L31 (pfam01197) →                                             |
| Vpa-60-1  | NZ_AWNC01000013.1    | + | 26584  | 26634  | RNA → rpmE (PRK00019) Ribosomal_L31 (pfam01197) →                                             |
| Vpa-48-1  | NZ_AVOM01000003.1    | - | 321091 | 321041 | RNA → rpmE (PRK00019) Ribosomal_L31 (pfam01197) →                                             |
| Vpa-77-1  | NZ_AWML01000131.1    | + | 8341   | 8391   | RNA → rpmE (PRK00019) Ribosomal_L31 (pfam01197) →                                             |
| Vpa-63-1  | NZ_AWMZ01000037.1    | - | 5720   | 5670   | RNA → rpmE (PRK00019) Ribosomal_L31 (pfam01197) →                                             |
| Vpa-64-1  | NZ_AWMY01000005.1    | + | 66806  | 66856  | RNA → rpmE (PRK00019) Ribosomal_L31 (pfam01197) →                                             |
| Vpa-59-1  | NZ_AWND01000118.1    | - | 5744   | 5694   | RNA → rpmE (PRK00019) Ribosomal_L31 (pfam01197) →                                             |
| Vpa-27-1  | NZ_JNUE01000003.1    | + | 14971  | 15021  | RNA → rpmE (PRK00019) Ribosomal_L31 (pfam01197) →                                             |
| Vpa-55-1  | NZ_ACFM01000100.1    | - | 2781   | 2731   | RNA → rpmE (PRK00019) Ribosomal_L31 (pfam01197) → rpmE (PRK00019) Ribosomal_L31 (pfam01197) → |
| Vpa-84-1  | NZ_AWME01000007.1    | - | 9036   | 8986   | RNA → rpmE (PRK00019) Ribosomal_L31 (pfam01197) →                                             |
| Vpa-30-1  | NZ_ACFN01000016.1    | - | 2994   | 2944   | RNA → rpmE (PRK00019) Ribosomal_L31 (pfam01197) → rpmE (PRK00019) Ribosomal_L31 (pfam01197) → |

|           |                   |   |        |        |                                                   |
|-----------|-------------------|---|--------|--------|---------------------------------------------------|
| Vpa-95-1  | NZ_AWLT01000086.1 | - | 2796   | 2746   | RNA → rpmE (PRK00019) Ribosomal_L31 (pfam01197) → |
| Vpa-53-1  | NZ_AOCL01000001.1 | - | 15138  | 15088  | RNA → rpmE (PRK00019) Ribosomal_L31 (pfam01197) → |
| Vpa-224-1 | NZ_AXNM01000020.1 | - | 145227 | 145177 | RNA → rpmE (PRK00019) Ribosomal_L31 (pfam01197) → |
| Vpa-232-1 | NZ_AVON01000009.1 | + | 26500  | 26550  | RNA → rpmE (PRK00019) Ribosomal_L31 (pfam01197) → |
| Vpa-132-1 | NZ_AWKI01000110.1 | - | 15116  | 15066  | RNA → rpmE (PRK00019) Ribosomal_L31 (pfam01197) → |
| Vpa-123-1 | NZ_AWKR01000136.1 | - | 4460   | 4410   | RNA → rpmE (PRK00019) Ribosomal_L31 (pfam01197) → |
| Vpa-118-1 | NZ_AWKW01000003.1 | + | 77006  | 77056  | RNA → rpmE (PRK00019) Ribosomal_L31 (pfam01197) → |
| Vpa-113-1 | NZ_AWLB01000029.1 | + | 25233  | 25283  | RNA → rpmE (PRK00019) Ribosomal_L31 (pfam01197) → |
| Vpa-144-1 | NZ_AWJW01000077.1 | - | 5722   | 5672   | RNA → rpmE (PRK00019) Ribosomal_L31 (pfam01197) → |
| Vpa-131-1 | NZ_AWKJ01000063.1 | + | 13874  | 13924  | RNA → rpmE (PRK00019) Ribosomal_L31 (pfam01197) → |
| Vpa-121-1 | NZ_AWKT01000003.1 | + | 95261  | 95311  | RNA → rpmE (PRK00019) Ribosomal_L31 (pfam01197) → |
| Vpa-117-1 | NZ_AWKX01000001.1 | - | 5719   | 5669   | RNA → rpmE (PRK00019) Ribosomal_L31 (pfam01197) → |
| Vpa-116-1 | NZ_AWKY01000001.1 | - | 5725   | 5675   | RNA → rpmE (PRK00019) Ribosomal_L31 (pfam01197) → |
| Vpa-103-1 | NZ_AWLL01000285.1 | - | 3101   | 3051   | RNA → rpmE (PRK00019) Ribosomal_L31 (pfam01197) → |
| Vpa-138-1 | NZ_AWKC01000048.1 | + | 24625  | 24675  | RNA → rpmE (PRK00019) Ribosomal_L31 (pfam01197) → |
| Vpa-128-1 | NZ_AWKM01000125.1 | + | 8342   | 8392   | RNA → rpmE (PRK00019) Ribosomal_L31 (pfam01197) → |
| Vpa-119-1 | NZ_AWKV01000122.1 | - | 5717   | 5667   | RNA → rpmE (PRK00019) Ribosomal_L31 (pfam01197) → |
| Vpa-114-1 | NZ_AWLA01000080.1 | + | 14625  | 14675  | RNA → rpmE (PRK00019) Ribosomal_L31 (pfam01197) → |
| Vpa-101-1 | NZ_AWLN01000126.1 | + | 8426   | 8476   | RNA → rpmE (PRK00019) Ribosomal_L31 (pfam01197) → |
| Vpa-143-1 | NZ_AWJX01000108.1 | + | 10341  | 10391  | RNA → rpmE (PRK00019) Ribosomal_L31 (pfam01197) → |
| Vpa-139-1 | NZ_AWKB01000002.1 | + | 88686  | 88736  | RNA → rpmE (PRK00019) Ribosomal_L31 (pfam01197) → |
| Vpa-130-1 | NZ_AWKK01000008.1 | + | 45640  | 45690  | RNA → rpmE (PRK00019) Ribosomal_L31 (pfam01197) → |
| Vpa-129-1 | NZ_AWKL01000001.1 | + | 92746  | 92796  | RNA → rpmE (PRK00019) Ribosomal_L31 (pfam01197) → |
| Vpa-120-1 | NZ_AWKU01000205.1 | + | 16     | 66     | RNA → rpmE (PRK00019) Ribosomal_L31 (pfam01197) → |
| Vpa-115-1 | NZ_AWKZ01000276.1 | + | 16     | 66     | RNA → rpmE (PRK00019) Ribosomal_L31 (pfam01197) → |
| Vpa-111-1 | NZ_AWLD01000121.1 | + | 10001  | 10051  | RNA → rpmE (PRK00019) Ribosomal_L31 (pfam01197) → |
| Vpa-154-1 | NZ_AWJM01000096.1 | - | 2751   | 2701   | RNA → rpmE (PRK00019) Ribosomal_L31 (pfam01197) → |
| Vpa-141-1 | NZ_AWJZ01000006.1 | - | 4398   | 4348   | RNA → rpmE (PRK00019) Ribosomal_L31 (pfam01197) → |
| Vpa-155-1 | NZ_AWJL01000004.1 | + | 42147  | 42197  | RNA → rpmE (PRK00019) Ribosomal_L31 (pfam01197) → |
| Vpa-151-1 | NZ_AWJP01000158.1 | - | 5710   | 5660   | RNA → rpmE (PRK00019) Ribosomal_L31 (pfam01197) → |
| Vpa-137-1 | NZ_AWKD01000009.1 | + | 41289  | 41339  | RNA → rpmE (PRK00019) Ribosomal_L31 (pfam01197) → |
| Vpa-153-1 | NZ_AWJN01000089.1 | - | 5718   | 5668   | RNA → rpmE (PRK00019) Ribosomal_L31 (pfam01197) → |
| Vpa-98-1  | NZ_AWLQ01000252.1 | + | 22     | 72     | RNA → rpmE (PRK00019) Ribosomal_L31 (pfam01197) → |
| Vpa-152-1 | NZ_AWJO01000079.1 | + | 13233  | 13283  | RNA → rpmE (PRK00019) Ribosomal_L31 (pfam01197) → |
| Vpa-212-1 | NZ_AWHG01000024.1 | + | 37943  | 37993  | RNA → rpmE (PRK00019) Ribosomal_L31 (pfam01197) → |
| Vpa-178-1 | NZ_AWIO01000008.1 | - | 5716   | 5666   | RNA → rpmE (PRK00019) Ribosomal_L31 (pfam01197) → |
| Vpa-177-1 | NZ_AWIP01000091.1 | - | 2793   | 2743   | RNA → rpmE (PRK00019) Ribosomal_L31 (pfam01197) → |
| Vpa-173-1 | NZ_AWIT01000001.1 | - | 5739   | 5689   | RNA → rpmE (PRK00019) Ribosomal_L31 (pfam01197) → |
| Vpa-198-1 | NZ_AWHU01000008.1 | + | 37741  | 37791  | RNA → rpmE (PRK00019) Ribosomal_L31 (pfam01197) → |
| Vpa-180-1 | NZ_AWIM01000008.1 | - | 5714   | 5664   | RNA → rpmE (PRK00019) Ribosomal_L31 (pfam01197) → |
| Vpa-175-1 | NZ_AWIR01000001.1 | + | 88686  | 88736  | RNA → rpmE (PRK00019) Ribosomal_L31 (pfam01197) → |
| Vpa-196-1 | NZ_AWHW01000005.1 | + | 37727  | 37777  | RNA → rpmE (PRK00019) Ribosomal_L31 (pfam01197) → |
| Vpa-176-1 | NZ_AWIQ01000002.1 | + | 95269  | 95319  | RNA → rpmE (PRK00019) Ribosomal_L31 (pfam01197) → |
| Vpa-171-1 | NZ_AWIV01000001.1 | - | 5726   | 5676   | RNA → rpmE (PRK00019) Ribosomal_L31 (pfam01197) → |
| Vpa-164-1 | NZ_AWJC01000010.1 | - | 5713   | 5663   | RNA → rpmE (PRK00019) Ribosomal_L31 (pfam01197) → |
| Vpa-167-1 | NZ_AWIZ01000002.1 | - | 5741   | 5691   | RNA → rpmE (PRK00019) Ribosomal_L31 (pfam01197) → |
| Vpa-163-1 | NZ_AWJD01000006.1 | - | 5709   | 5659   | RNA → rpmE (PRK00019) Ribosomal_L31 (pfam01197) → |
| Vpa-162-1 | NZ_AWJE01000001.1 | + | 50993  | 51043  | RNA → rpmE (PRK00019) Ribosomal_L31 (pfam01197) → |
| Vpa-56-1  | NC_004603.1       | + | 266709 | 266759 | RNA → rpmE (PRK00019) Ribosomal_L31 (pfam01197) → |
| Vpa-18-1  | NZ_KI912682.1     | - | 314852 | 314802 | RNA → rpmE (PRK00019) Ribosomal_L31 (pfam01197) → |
| Vpa-44-1  | NZ_KI929149.1     | - | 315229 | 315179 | RNA → rpmE (PRK00019) Ribosomal_L31 (pfam01197) → |
| Vpa-54-1  | NZ_KI929565.1     | + | 25058  | 25108  | RNA → rpmE (PRK00019) Ribosomal_L31 (pfam01197) → |



|           |                   |   |         |         |                                                                                               |
|-----------|-------------------|---|---------|---------|-----------------------------------------------------------------------------------------------|
| Vpa-31-1  | NZ_KI911857.1     | - | 314830  | 314780  | RNA → rpmE (PRK00019) Ribosomal_L31 (pfam01197) →                                             |
| Vpa-43-1  | NZ_KI929393.1     | - | 315348  | 315298  | RNA → rpmE (PRK00019) Ribosomal_L31 (pfam01197) →                                             |
| Vpa-36-1  | NZ_KI965925.1     | - | 314934  | 314884  | RNA → rpmE (PRK00019) Ribosomal_L31 (pfam01197) →                                             |
| Vpa-37-1  | NZ_KI929290.1     | + | 231685  | 231735  | RNA → rpmE (PRK00019) Ribosomal_L31 (pfam01197) →                                             |
| Vpa-233-1 | NZ_KK020603.1     | + | 185410  | 185460  | RNA → rpmE (PRK00019) Ribosomal_L31 (pfam01197) →                                             |
| Vpa-222-1 | NZ_KK019419.1     | + | 227930  | 227980  | RNA → rpmE (PRK00019) Ribosomal_L31 (pfam01197) →                                             |
| Vpa-231-1 | NZ_KK081667.1     | + | 228093  | 228143  | RNA → rpmE (PRK00019) Ribosomal_L31 (pfam01197) →                                             |
| Vpa-20-1  | NZ_KI965795.1     | - | 315927  | 315877  | RNA → rpmE (PRK00019) Ribosomal_L31 (pfam01197) →                                             |
| Vpa-29-1  | NZ_KK073793.1     | - | 297930  | 297880  | RNA → rpmE (PRK00019) Ribosomal_L31 (pfam01197) →                                             |
| Vpa-32-1  | NC_019955.1       | + | 286013  | 286063  | RNA → rpmE (PRK00019) Ribosomal_L31 (pfam01197) →                                             |
| Vpa-229-1 | NZ_AXNL01000094.1 | + | 4296    | 4346    | RNA → rpmE (PRK00019) Ribosomal_L31 (pfam01197) →                                             |
| Vpa-46-1  | NZ_JALL01000115.1 | - | 98380   | 98330   | RNA → rpmE (PRK00019) Ribosomal_L31 (pfam01197) →                                             |
| Vpa-157-1 | NZ_AWJJ01000001.1 | - | 5723    | 5673    | RNA → rpmE (PRK00019) Ribosomal_L31 (pfam01197) →                                             |
| Vro-1-1   | NZ_BBLC01000048.1 | + | 223563  | 223613  | RNA → rpmE (PRK00019) Ribosomal_L31 (pfam01197) →                                             |
| Vpa-79-1  | NZ_AWMJ01000046.1 | + | 14638   | 14688   | RNA → rpmE (PRK00019) Ribosomal_L31 (pfam01197) →                                             |
| Vpa-80-1  | NZ_AWMI01000001.1 | - | 4354    | 4304    | RNA → rpmE (PRK00019) Ribosomal_L31 (pfam01197) →                                             |
| Vpa-207-1 | NZ_AWHL01000001.1 | - | 14454   | 14404   | RNA → rpmE (PRK00019) Ribosomal_L31 (pfam01197) →                                             |
| Vpa-219-1 | NZ_BAVJ01000011.1 | + | 245390  | 245440  | RNA → rpmE (PRK00019) Ribosomal_L31 (pfam01197) →                                             |
| Val-2-2   | NZ_JXIN01000014.1 | - | 106189  | 106139  | RNA → rpmE (PRK00019) Ribosomal_L31 (pfam01197) →                                             |
| Val-2-3   | NZ_JXIO01000014.1 | - | 106189  | 106139  | RNA → rpmE (PRK00019) Ribosomal_L31 (pfam01197) →                                             |
| Val-2-4   | NZ_JZWD01000003.1 | - | 319570  | 319520  | RNA → rpmE (PRK00019) Ribosomal_L31 (pfam01197) →                                             |
| Val-2-5   | NZ_LCSG01000007.1 | + | 32246   | 32296   | RNA → rpmE (PRK00019) Ribosomal_L31 (pfam01197) →                                             |
| Val-2-6   | NZ_LCUM01000005.1 | + | 16468   | 16518   | RNA → rpmE (PRK00019) Ribosomal_L31 (pfam01197) →                                             |
| Vdi-1-1   | NZ_CCKK01000023.1 | + | 38258   | 38308   | RNA → rpmE (PRK00019) Ribosomal_L31 (pfam01197) →                                             |
| Val-4-1   | NZ_ACZB01000006.1 | - | 131835  | 131785  | RNA → rpmE (PRK00019) Ribosomal_L31 (pfam01197) → rpmE (PRK00019) Ribosomal_L31 (pfam01197) → |
| Val-5-1   | NZ_AMPD01000006.1 | - | 120699  | 120649  | RNA → rpmE (PRK00019) Ribosomal_L31 (pfam01197) →                                             |
| Vsp-1-1   | NZ_ANBX01000002.1 | + | 10986   | 11036   | RNA → rpmE (PRK00019) Ribosomal_L31 (pfam01197) →                                             |
| Vsp-24-1  | NZ_JPIL01000006.1 | + | 222387  | 222437  | RNA → rpmE (PRK00019) Ribosomal_L31 (pfam01197) →                                             |
| Val-2-7   | NZ_LFWH01000029.1 | + | 40818   | 40868   | RNA → rpmE (PRK00019) Ribosomal_L31 (pfam01197) →                                             |
| Vpa-199-1 | NZ_AWHT01000012.1 | + | 37150   | 37200   | RNA → rpmE (PRK00019) Ribosomal_L31 (pfam01197) →                                             |
| Val-2-8   | NZ_JOKY01000004.1 | - | 117745  | 117695  | RNA → rpmE (PRK00019) Ribosomal_L31 (pfam01197) →                                             |
| Vsp-8-1   | NC_013456.1       | - | 130415  | 130365  | RNA → rpmE (PRK00019) Ribosomal_L31 (pfam01197) →                                             |
| Val-6-1   | NC_022349.1       | + | 2643213 | 2643263 | RNA → rpmE (PRK00019) Ribosomal_L31 (pfam01197) →                                             |
| Val-3-1   | NZ_CH902591.1     | + | 483698  | 483748  | RNA → rpmE (PRK00019) Ribosomal_L31 (pfam01197) →                                             |
| Vha-9-1   | NZ_BAOD01000009.1 | + | 112541  | 112591  | RNA → rpmE (PRK00019) Ribosomal_L31 (pfam01197) →                                             |
| Vha-9-2   | NZ_AMCT01000001.1 | + | 10582   | 10632   | RNA → rpmE (PRK00019) Ribosomal_L31 (pfam01197) →                                             |
| Vha-10-1  | NZ_CAUN01000001.1 | + | 221925  | 221975  | RNA → rpmE (PRK00019) Ribosomal_L31 (pfam01197) →                                             |
| Vow-5-1   | NZ_JPRD01000041.1 | + | 10157   | 10207   | RNA → rpmE (PRK00019) Ribosomal_L31 (pfam01197) →                                             |
| Vha-7-1   | NZ_AYKI01000011.1 | - | 258359  | 258309  | RNA → rpmE (PRK00019) Ribosomal_L31 (pfam01197) →                                             |
| Vha-6-1   | NZ_AHHQ01000061.1 | - | 135341  | 135291  | RNA → rpmE (PRK00019) Ribosomal_L31 (pfam01197) →                                             |
| Vsp-9-1   | NZ_JH976042.1     | - | 105560  | 105510  | RNA → rpmE (PRK00019) Ribosomal_L31 (pfam01197) →                                             |
| Vha-12-1  | NZ_JH720475.1     | + | 252971  | 253021  | RNA → rpmE (PRK00019) Ribosomal_L31 (pfam01197) →                                             |
| Vha-4-1   | NZ_AOMR01000019.1 | + | 237184  | 237234  | RNA → rpmE (PRK00019) Ribosomal_L31 (pfam01197) →                                             |
| Vow-1-1   | NZ_BAOH01000058.1 | + | 10195   | 10245   | RNA → rpmE (PRK00019) Ribosomal_L31 (pfam01197) →                                             |
| Vha-11-1  | NZ_CAUO01000001.1 | - | 283952  | 283902  | RNA → rpmE (PRK00019) Ribosomal_L31 (pfam01197) →                                             |
| Vca-3-1   | NC_022269.1       | - | 2006268 | 2006218 | RNA → rpmE (PRK00019) Ribosomal_L31 (pfam01197) →                                             |
| Vha-5-1   | NC_009783.1       | + | 721255  | 721305  | RNA → rpmE (PRK00019) Ribosomal_L31 (pfam01197) →                                             |
| Vow-3-1   | NZ_JPRC01000010.1 | + | 104312  | 104362  | RNA → rpmE (PRK00019) Ribosomal_L31 (pfam01197) →                                             |
| Vow-2-1   | NZ_BBKN01000104.1 | + | 104573  | 104623  | RNA → rpmE (PRK00019) Ribosomal_L31 (pfam01197) →                                             |
| Vow-2-2   | NZ_BBKO01000049.1 | + | 27652   | 27702   | RNA → rpmE (PRK00019) Ribosomal_L31 (pfam01197) →                                             |
| Vow-2-3   | NZ_BBPJ01000004.1 | + | 221575  | 221625  | RNA → rpmE (PRK00019) Ribosomal_L31 (pfam01197) →                                             |
| Vow-2-4   | NZ_BBLB01000056.1 | - | 63133   | 63083   | RNA → rpmE (PRK00019) Ribosomal_L31 (pfam01197) →                                             |

|          |                   |   |        |        |                                                                                               |
|----------|-------------------|---|--------|--------|-----------------------------------------------------------------------------------------------|
| Vow-6-1  | NZ_BAOE01000009.1 | - | 159659 | 159609 | RNA → rpmE (PRK00019) Ribosomal_L31 (pfam01197) →                                             |
| Vow-4-1  | NZ_BANZ01000007.1 | + | 221354 | 221404 | RNA → rpmE (PRK00019) Ribosomal_L31 (pfam01197) →                                             |
| Vha-3-1  | NZ_ACZC01000005.1 | + | 75147  | 75197  | RNA → rpmE (PRK00019) Ribosomal_L31 (pfam01197) → rpmE (PRK00019) Ribosomal_L31 (pfam01197) → |
| Vsp-10-1 | NZ_JH976131.1     | - | 290388 | 290338 | RNA → rpmE (PRK00019) Ribosomal_L31 (pfam01197) →                                             |
| env-627  | CEUP01099403.1    | + | 1243   | 1293   | RNA →                                                                                         |
| env-628  | CEUY01075272.1    | + | 1198   | 1248   | RNA → rpmE (PRK00019) Ribosomal_L31 (pfam01197) →                                             |
| env-629  | CEVA01026273.1    | + | 584    | 634    | RNA → rpmE (PRK00019) Ribosomal_L31 (pfam01197) →                                             |
| Vca-1-1  | NZ_BBKU01000066.1 | - | 291589 | 291539 | RNA → rpmE (PRK00019) Ribosomal_L31 (pfam01197) →                                             |
| Vca-1-2  | NZ_BBKX01000044.1 | + | 229368 | 229418 | RNA → rpmE (PRK00019) Ribosomal_L31 (pfam01197) →                                             |
| Vca-1-3  | NZ_BBKG01000111.1 | - | 228720 | 228670 | RNA → rpmE (PRK00019) Ribosomal_L31 (pfam01197) →                                             |
| Vca-1-4  | NZ_BBKW01000020.1 | + | 122219 | 122269 | RNA → rpmE (PRK00019) Ribosomal_L31 (pfam01197) →                                             |
| Vca-1-5  | NZ_BBKV01000034.1 | - | 289838 | 289788 | RNA → rpmE (PRK00019) Ribosomal_L31 (pfam01197) →                                             |
| Vca-4-1  | NZ_BAOF01000005.1 | - | 213680 | 213630 | RNA → rpmE (PRK00019) Ribosomal_L31 (pfam01197) →                                             |
| Vca-2-1  | NZ_BANY01000042.1 | - | 156590 | 156540 | RNA → rpmE (PRK00019) Ribosomal_L31 (pfam01197) →                                             |
| Vca-5-1  | NZ_AGIE01000044.1 | + | 24998  | 25048  | RNA → rpmE (PRK00019) Ribosomal_L31 (pfam01197) → rpmE (PRK00019) Ribosomal_L31 (pfam01197) → |
| Vca-1-6  | NZ_JPTJ01000344.1 | - | 60557  | 60507  | RNA → rpmE (PRK00019) Ribosomal_L31 (pfam01197) →                                             |
| Vca-1-7  | NZ_JPTF01000271.1 | + | 6528   | 6578   | RNA → rpmE (PRK00019) Ribosomal_L31 (pfam01197) →                                             |
| Vca-1-8  | NZ_JPTG01000526.1 | - | 34186  | 34136  | RNA → rpmE (PRK00019) Ribosomal_L31 (pfam01197) →                                             |
| Vca-4-2  | NZ_AMDG01000002.1 | + | 21188  | 21238  | RNA → rpmE (PRK00019) Ribosomal_L31 (pfam01197) →                                             |
| Vha-8-1  | NZ_DS179523.1     | - | 1250   | 1200   | RNA → rpmE (PRK00019) Ribosomal_L31 (pfam01197) →                                             |
| Vha-2-1  | NZ_DF967934.1     | + | 223234 | 223284 | RNA → rpmE (PRK00019) Ribosomal_L31 (pfam01197) →                                             |
| Vca-1-9  | NZ_JPTH01000426.1 | + | 2525   | 2575   | RNA → rpmE (PRK00019) Ribosomal_L31 (pfam01197) →                                             |
| Vca-1-10 | NZ_JSFE01000004.1 | + | 218917 | 218967 | RNA → rpmE (PRK00019) Ribosomal_L31 (pfam01197) →                                             |
| Vsp-2-1  | NZ_ABGR01000076.1 | + | 1750   | 1800   | RNA → rpmE (PRK00019) Ribosomal_L31 (pfam01197) → rpmE (PRK00019) Ribosomal_L31 (pfam01197) → |
| Vsp-44-1 | NZ_AJZF01000019.1 | + | 83395  | 83443  | RNA → rpmE (PRK00019) Ribosomal_L31 (pfam01197) →                                             |
| Vsp-39-1 | NZ_AJZG01000004.1 | + | 88039  | 88087  | RNA → rpmE (PRK00019) Ribosomal_L31 (pfam01197) →                                             |
| Vsp-42-1 | NZ_AJZI01000104.1 | + | 130365 | 130413 | RNA → rpmE (PRK00019) Ribosomal_L31 (pfam01197) →                                             |
| Vsp-37-1 | NZ_AJZJ01000171.1 | - | 55509  | 55461  | RNA → rpmE (PRK00019) Ribosomal_L31 (pfam01197) →                                             |
| Vsp-36-1 | NZ_AIDS01000064.1 | + | 80876  | 80924  | RNA → rpmE (PRK00019) Ribosomal_L31 (pfam01197) →                                             |
| Vsp-41-1 | NZ_AJZH01000106.1 | - | 157442 | 157394 | RNA → rpmE (PRK00019) Ribosomal_L31 (pfam01197) →                                             |
| Vsp-34-1 | NZ_AAMR01000027.1 | - | 57919  | 57871  | RNA → rpmE (PRK00019) Ribosomal_L31 (pfam01197) → rpmE (PRK00019) Ribosomal_L31 (pfam01197) → |
| Vsp-33-1 | NZ_AJZK01000123.1 | - | 5581   | 5533   | RNA → rpmE (PRK00019) Ribosomal_L31 (pfam01197) →                                             |
| Vcy-2-1  | NZ_AIDB01000019.1 | - | 153914 | 153866 | RNA → rpmE (PRK00019) Ribosomal_L31 (pfam01197) →                                             |
| Vcy-5-1  | NZ_AICZ01000040.1 | + | 82209  | 82257  | RNA → rpmE (PRK00019) Ribosomal_L31 (pfam01197) →                                             |
| Vcy-15-1 | NZ_AIDQ01000003.1 | - | 64827  | 64779  | RNA → rpmE (PRK00019) Ribosomal_L31 (pfam01197) →                                             |
| Vsp-45-1 | NZ_AJZE01000045.1 | - | 868    | 820    | RNA → rpmE (PRK00019) Ribosomal_L31 (pfam01197) →                                             |
| Vcy-13-1 | NZ_AIDN01000109.1 | - | 154821 | 154773 | RNA → rpmE (PRK00019) Ribosomal_L31 (pfam01197) →                                             |
| Vcy-18-1 | NZ_JH636802.1     | - | 154566 | 154518 | RNA → rpmE (PRK00019) Ribosomal_L31 (pfam01197) →                                             |
| Vsp-5-1  | NZ_LAUM01000025.1 | - | 7503   | 7455   | RNA → rpmE (PRK00019) Ribosomal_L31 (pfam01197) →                                             |
| Vcr-1-1  | NZ_CCKB01000054.1 | - | 64767  | 64719  | RNA → rpmE (PRK00019) Ribosomal_L31 (pfam01197) →                                             |
| Vcr-1-2  | NZ_CCKC01000053.1 | - | 64768  | 64720  | RNA → rpmE (PRK00019) Ribosomal_L31 (pfam01197) →                                             |
| Vcr-1-3  | NZ_CCJW01000071.1 | - | 64767  | 64719  | RNA → rpmE (PRK00019) Ribosomal_L31 (pfam01197) →                                             |
| Vcr-1-4  | NZ_CCKE01000137.1 | - | 64767  | 64719  | RNA → rpmE (PRK00019) Ribosomal_L31 (pfam01197) →                                             |
| Vcr-1-5  | NZ_CCKD01000003.1 | + | 80738  | 80786  | RNA → rpmE (PRK00019) Ribosomal_L31 (pfam01197) →                                             |
| Vcr-1-6  | NZ_CCJU01000033.1 | - | 64791  | 64743  | RNA → rpmE (PRK00019) Ribosomal_L31 (pfam01197) →                                             |
| Vcr-2-1  | NZ_AJYY01000105.1 | - | 64875  | 64827  | RNA → rpmE (PRK00019) Ribosomal_L31 (pfam01197) →                                             |
| Vba-1-1  | NZ_AAZW01000016.1 | + | 72717  | 72765  | RNA → rpmE (PRK00019) Ribosomal_L31 (pfam01197) → rpmE (PRK00019) Ribosomal_L31 (pfam01197) → |
| Vsp-21-1 | NZ_CCKL01000023.1 | - | 71200  | 71152  | RNA → rpmE (PRK00019) Ribosomal_L31 (pfam01197) →                                             |
| Vsp-16-1 | NZ_CCKH01000049.1 | - | 65057  | 65009  | RNA → rpmE (PRK00019) Ribosomal_L31 (pfam01197) →                                             |
| Vsp-11-1 | NZ_CCJZ01000014.1 | + | 80837  | 80885  | RNA → rpmE (PRK00019) Ribosomal_L31 (pfam01197) →                                             |
| Vcr-3-1  | NZ_AJYZ01000064.1 | + | 82711  | 82759  | RNA → rpmE (PRK00019) Ribosomal_L31 (pfam01197) →                                             |
| Vcr-4-1  | NZ_AJZA01000103.1 | + | 8727   | 8775   | RNA → rpmE (PRK00019) Ribosomal_L31 (pfam01197) →                                             |

|          |                         |   |         |         |                                                                                             |
|----------|-------------------------|---|---------|---------|---------------------------------------------------------------------------------------------|
| Vcr-5-1  | NZ_AJZB01000073.1       | - | 64832   | 64784   | RNA → rpmE (PRK00019)Ribosomal_L31 (pfam01197) →                                            |
| Vcr-6-1  | NZ_AJZC01000134.1       | - | 154849  | 154801  | RNA → rpmE (PRK00019)Ribosomal_L31 (pfam01197) →                                            |
| Vsp-17-1 | NZ_LK934107.1           | - | 64903   | 64855   | RNA → rpmE (PRK00019)Ribosomal_L31 (pfam01197) →                                            |
| Vsp-13-1 | NZ_LK934399.1           | - | 64965   | 64917   | RNA → rpmE (PRK00019)Ribosomal_L31 (pfam01197) →                                            |
| Vsp-12-1 | NZ_LK933700.1           | + | 80899   | 80947   | RNA → rpmE (PRK00019)Ribosomal_L31 (pfam01197) →                                            |
| Vsp-20-1 | NZ_LK933651.1           | + | 80775   | 80823   | RNA → rpmE (PRK00019)Ribosomal_L31 (pfam01197) →                                            |
| Vsp-19-1 | NZ_LK933553.1           | + | 81252   | 81300   | RNA → rpmE (PRK00019)Ribosomal_L31 (pfam01197) →                                            |
| Vsp-18-1 | NZ_LK933855.1           | - | 65082   | 65034   | RNA → rpmE (PRK00019)Ribosomal_L31 (pfam01197) →                                            |
| Vsp-14-1 | NZ_LK934544.1           | + | 80994   | 81042   | RNA → rpmE (PRK00019)Ribosomal_L31 (pfam01197) →                                            |
| Vsp-15-1 | NZ_LK934195.1           | - | 52838   | 52790   | RNA → rpmE (PRK00019)Ribosomal_L31 (pfam01197) →                                            |
| env-630  | CEUP01012127.1          | - | 372     | 324     | RNA → rpmE (PRK00019)Ribosomal_L31 (pfam01197) →                                            |
| env-631  | CEUY01376693.1          | + | 406     | 454     | RNA → rpmE (PRK00019)Ribosomal_L31 (pfam01197) →                                            |
| env-632  | CEVA01031311.1          | + | 1334    | 1382    | RNA → rpmE (PRK00019)Ribosomal_L31 (pfam01197) →                                            |
| Vsp-40-1 | NZ_AFWG01000002.1       | + | 80636   | 80684   | RNA → rpmE (PRK00019)Ribosomal_L31 (pfam01197) →                                            |
| Vsp-35-1 | NZ_AJZD01000142.1       | - | 7513    | 7465    | RNA → rpmE (PRK00019)Ribosomal_L31 (pfam01197) →                                            |
| Vka-1-1  | NZ_AJYX01000051.1       | - | 64615   | 64567   | RNA → rpmE (PRK00019)Ribosomal_L31 (pfam01197) →                                            |
| env-633  | JGI24025J20009_10090133 | - | 649     | 601     | RNA → rpmE (PRK00019)Ribosomal_L31 (pfam01197) →                                            |
| Vsp-4-1  | NZ_LAUL01000014.1       | - | 65430   | 65382   | RNA → rpmE (PRK00019)Ribosomal_L31 (pfam01197) →                                            |
| Vcy-11-1 | NZ_AIDM01000034.1       | + | 88163   | 88211   | RNA → rpmE (PRK00019)Ribosomal_L31 (pfam01197) →                                            |
| Vcy-14-1 | NZ_AIDP01000054.1       | - | 71422   | 71374   | RNA → rpmE (PRK00019)Ribosomal_L31 (pfam01197) →                                            |
| Vcy-19-1 | NZ_AIDK01000001.1       | - | 102003  | 101955  | RNA → rpmE (PRK00019)Ribosomal_L31 (pfam01197) →                                            |
| Vcy-4-1  | NZ_AIDD01000066.1       | + | 8925    | 8973    | RNA → rpmE (PRK00019)Ribosomal_L31 (pfam01197) →                                            |
| Vcy-20-1 | NZ_AIDL01000041.1       | + | 19770   | 19818   | RNA → rpmE (PRK00019)Ribosomal_L31 (pfam01197) →                                            |
| Vcy-17-1 | NZ_AIDI01000041.1       | + | 52335   | 52383   | RNA → rpmE (PRK00019)Ribosomal_L31 (pfam01197) →                                            |
| Vcy-8-1  | NZ_AIDG01000061.1       | - | 154606  | 154558  | RNA → rpmE (PRK00019)Ribosomal_L31 (pfam01197) →                                            |
| Vcy-10-1 | NZ_AIDH01000094.1       | - | 1744    | 1696    | RNA → rpmE (PRK00019)Ribosomal_L31 (pfam01197) → rpmE (PRK00019)Ribosomal_L31 (pfam01197) → |
| Vcy-1-1  | NZ_AHTI01000209.1       | + | 27717   | 27765   | RNA → rpmE (PRK00019)Ribosomal_L31 (pfam01197) →                                            |
| Vcy-3-1  | NZ_AIDC01000227.1       | + | 87986   | 88034   | RNA → rpmE (PRK00019)Ribosomal_L31 (pfam01197) →                                            |
| Vle-1-1  | NZ_LFQI01000004.1       | + | 80855   | 80903   | RNA → rpmE (PRK00019)Ribosomal_L31 (pfam01197) →                                            |
| Vcy-7-1  | NZ_JH636741.1           | + | 180960  | 181008  | RNA → rpmE (PRK00019)Ribosomal_L31 (pfam01197) →                                            |
| Vcy-16-1 | NZ_JH636876.1           | + | 82223   | 82271   | RNA → rpmE (PRK00019)Ribosomal_L31 (pfam01197) →                                            |
| Vcy-12-1 | NZ_JH636836.1           | + | 88238   | 88286   | RNA → rpmE (PRK00019)Ribosomal_L31 (pfam01197) →                                            |
| Vcy-9-1  | NZ_JH636656.1           | - | 256575  | 256527  | RNA → rpmE (PRK00019)Ribosomal_L31 (pfam01197) →                                            |
| Vcy-6-1  | NZ_JH636615.1           | - | 154644  | 154596  | RNA → rpmE (PRK00019)Ribosomal_L31 (pfam01197) →                                            |
| Vsp-31-1 | NZ_CVNE01000009.1       | + | 88422   | 88470   | RNA → rpmE (PRK00019)Ribosomal_L31 (pfam01197) →                                            |
| env-634  | AYRE01002890.1          | + | 135     | 183     | RNA → rpmE (PRK00019)Ribosomal_L31 (pfam01197) →                                            |
| env-635  | AYRF01043169.1          | + | 149     | 197     | RNA →                                                                                       |
| Vsp-38-1 | NZ_AJZL01000194.1       | + | 19737   | 19785   | RNA → rpmE (PRK00019)Ribosomal_L31 (pfam01197) →                                            |
| Afi-2-1  | NZ_LCYF01000005.1       | + | 152582  | 152635  | RNA → rpmE (PRK00019)Ribosomal_L31 (pfam01197) →                                            |
| Vfi-1-1  | NC_006840.2             | - | 2555303 | 2555250 | RNA → rpmE (PRK00019)Ribosomal_L31 (pfam01197) →                                            |
| Vfi-2-1  | NC_011184.1             | - | 2565485 | 2565432 | RNA → rpmE (PRK00019)Ribosomal_L31 (pfam01197) →                                            |
| Vfi-3-1  | NZ_CM001400.1           | - | 2527750 | 2527697 | RNA → rpmE (PRK00019)Ribosomal_L31 (pfam01197) →                                            |
| Afi-3-1  | NZ_AJYI01000167.1       | + | 62506   | 62559   | RNA → rpmE (PRK00019)Ribosomal_L31 (pfam01197) →                                            |
| Vor-1-1  | NZ_AJYV01000135.1       | + | 15084   | 15133   | RNA → rpmE (PRK00019)Ribosomal_L31 (pfam01197) → Malic_M (smart00919)SfcA (COG0281) →       |
| Vor-4-1  | NZ_AJYT01000033.1       | - | 45641   | 45592   | RNA → rpmE (PRK00019)Ribosomal_L31 (pfam01197) →                                            |
| Vor-5-1  | NZ_AJYU01000056.1       | + | 119483  | 119532  | RNA → rpmE (PRK00019)Ribosomal_L31 (pfam01197) → Malic_M (smart00919)SfcA (COG0281) →       |
| Vge-5-1  | NZ_AJYW01000134.1       | - | 56037   | 55990   | RNA → rpmE (PRK00019)Ribosomal_L31 (pfam01197) →                                            |
| Vca-7-1  | NZ_AEIU01000066.1       | - | 8794    | 8742    | RNA → rpmE (PRK00019)Ribosomal_L31 (pfam01197) → rpmE (PRK00019)Ribosomal_L31 (pfam01197) → |
| Vne-1-1  | NZ_JXXU01000034.1       | + | 24784   | 24834   | RNA → rpmE (PRK00019)Ribosomal_L31 (pfam01197) →                                            |
| Vco-3-1  | NZ_AEQS01000202.1       | - | 30435   | 30385   | RNA → rpmE (PRK00019)Ribosomal_L31 (pfam01197) →                                            |
| Vsp-3-1  | NZ_JPQB01000026.1       | - | 151183  | 151133  | RNA → rpmE (PRK00019)Ribosomal_L31 (pfam01197) →                                            |



|           |                    |   |         |         |                                                                                                                                                                                     |
|-----------|--------------------|---|---------|---------|-------------------------------------------------------------------------------------------------------------------------------------------------------------------------------------|
| env-636   | JQGR01000570.1     | - | 2317    | 2267    | RNA → rpmE (PRK00019)Ribosomal_L31 (pfam01197) →                                                                                                                                    |
| env-637   | ASRM01000514.1     | + | 1915    | 1965    | RNA → rpmE (PRK00019)Ribosomal_L31 (pfam01197) →                                                                                                                                    |
| env-638   | ASRP01020733.1     | - | 74      | 24      | RNA → hypo →                                                                                                                                                                        |
| env-639   | AYRF01005860.1     | - | 150     | 100     | RNA → rpmE (PRK00019)rpmE2 (PRK01678)Ribosomal_L31 (pfam01197) →                                                                                                                    |
| Vmi-5-1   | NZ_ADAJ01000008.1  | + | 2127116 | 2127169 | RNA → rpmE (PRK00019)Ribosomal_L31 (pfam01197) → rpmE (PRK00019)Ribosomal_L31 (pfam01197) →                                                                                         |
| Vsp-25-1  | NZ_ACZT01000021.1  | + | 188396  | 188449  | RNA → rpmE (PRK00019)Ribosomal_L31 (pfam01197) → rpmE (PRK00019)Ribosomal_L31 (pfam01197) →                                                                                         |
| Vch-3-1   | NZ_ACFTQ01000008.1 | - | 82042   | 81989   | RNA → rpmE (PRK00019)Ribosomal_L31 (pfam01197) → rpmE (PRK00019)Ribosomal_L31 (pfam01197) →                                                                                         |
| Vch-115-1 | NC_017270.1        | + | 2678381 | 2678434 | RNA → rpmE (PRK00019)Ribosomal_L31 (pfam01197) → RpmE (COG0254)rpmE (PRK00019) → hypo → hypo → hypo →                                                                               |
| Vmi-1-1   | NZ_AWWL01000147.1  | + | 15291   | 15344   | RNA → rpmE (PRK00019)Ribosomal_L31 (pfam01197) →                                                                                                                                    |
| Vmi-2-1   | NZ_AOM01000029.1   | - | 84099   | 84046   | RNA → rpmE (PRK00019)Ribosomal_L31 (pfam01197) →                                                                                                                                    |
| Vch-7-1   | NZ_AAUT01000067.1  | - | 679     | 626     | RNA → rpmE (PRK00019)Ribosomal_L31 (pfam01197) → rpmE (PRK00019)Ribosomal_L31 (pfam01197) → hypo → hypo →                                                                           |
| Vch-196-1 | NZ_JRXX01000170.1  | + | 166028  | 166081  | RNA → rpmE (PRK00019)Ribosomal_L31 (pfam01197) →                                                                                                                                    |
| Vch-185-1 | NZ_ADAI01000043.1  | - | 82275   | 82222   | RNA → rpmE (PRK00019)Ribosomal_L31 (pfam01197) → rpmE (PRK00019)Ribosomal_L31 (pfam01197) → hypo → hypo → Malic_M (smart00919)SfcA (COG0281) → Malic_M (smart00919)SfcA (COG0281) → |
| Vch-37-1  | NZ_ADAL01000222.1  | - | 11533   | 11480   | RNA → rpmE (PRK00019)Ribosomal_L31 (pfam01197) → rpmE (PRK00019)Ribosomal_L31 (pfam01197) → hypo → hypo → Malic_M (smart00919)SfcA (COG0281) → Malic_M (smart00919)SfcA (COG0281) → |
| Vch-114-1 | NZ_ADAK01000050.1  | + | 83945   | 83998   | RNA → rpmE (PRK00019)Ribosomal_L31 (pfam01197) → rpmE (PRK00019)Ribosomal_L31 (pfam01197) → hypo → hypo → Malic_M (smart00919)SfcA (COG0281) → Malic_M (smart00919)SfcA (COG0281) → |
| Vch-35-1  | NZ_ANNM01000107.1  | + | 15189   | 15242   | RNA → rpmE (PRK00019)Ribosomal_L31 (pfam01197) →                                                                                                                                    |
| Vch-32-1  | NZ_AMWU01000165.1  | - | 24184   | 24131   | RNA → rpmE (PRK00019)Ribosomal_L31 (pfam01197) →                                                                                                                                    |
| Vch-33-1  | NZ_AMWV01000181.1  | - | 24184   | 24131   | RNA → rpmE (PRK00019)Ribosomal_L31 (pfam01197) →                                                                                                                                    |
| Vch-34-1  | NZ_AMWR01000112.1  | - | 24184   | 24131   | RNA → rpmE (PRK00019)Ribosomal_L31 (pfam01197) →                                                                                                                                    |
| Vch-36-1  | NZ_AMWW01000167.1  | - | 24184   | 24131   | RNA → rpmE (PRK00019)Ribosomal_L31 (pfam01197) →                                                                                                                                    |
| Vch-30-1  | NZ_AMWS01000172.1  | - | 24184   | 24131   | RNA → rpmE (PRK00019)Ribosomal_L31 (pfam01197) →                                                                                                                                    |
| Vch-29-1  | NZ_AMWF01000174.1  | - | 24184   | 24131   | RNA → rpmE (PRK00019)Ribosomal_L31 (pfam01197) →                                                                                                                                    |
| Vch-31-1  | NZ_AMWT01000032.1  | - | 24184   | 24131   | RNA → rpmE (PRK00019)Ribosomal_L31 (pfam01197) →                                                                                                                                    |
| Vch-184-1 | NZ_AWWF01000005.1  | - | 80007   | 79954   | RNA → rpmE (PRK00019)Ribosomal_L31 (pfam01197) →                                                                                                                                    |
| Vch-183-1 | NZ_AWWE01000005.1  | - | 80008   | 79955   | RNA → rpmE (PRK00019)Ribosomal_L31 (pfam01197) →                                                                                                                                    |
| Vch-182-1 | NZ_AWWD01000005.1  | - | 80007   | 79954   | RNA → rpmE (PRK00019)Ribosomal_L31 (pfam01197) →                                                                                                                                    |
| Vch-54-1  | NZ_AXDR01000012.1  | + | 65426   | 65479   | RNA → rpmE (PRK00019)Ribosomal_L31 (pfam01197) → RpmE (COG0254)rpmE (PRK00019) → hypo → Malic_M (smart00919)SfcA (COG0281) →                                                        |
| Vch-126-1 | NZ_AYNN01000014.1  | + | 166095  | 166148  | RNA → rpmE (PRK00019)Ribosomal_L31 (pfam01197) →                                                                                                                                    |
| Vch-129-1 | NZ_AYNM01000035.1  | - | 37698   | 37645   | RNA → rpmE (PRK00019)Ribosomal_L31 (pfam01197) →                                                                                                                                    |
| Vch-130-1 | NZ_AYNL01000117.1  | - | 37688   | 37635   | RNA → rpmE (PRK00019)Ribosomal_L31 (pfam01197) →                                                                                                                                    |
| Vch-125-1 | NZ_AYOM01000167.1  | + | 140313  | 140366  | RNA → rpmE (PRK00019)Ribosomal_L31 (pfam01197) →                                                                                                                                    |
| Val-1-1   | NZ_JADA01000005.1  | - | 80513   | 80460   | RNA → rpmE (PRK00019)Ribosomal_L31 (pfam01197) →                                                                                                                                    |
| Vch-14-1  | NZ_ACIA01000006.1  | - | 83502   | 83449   | RNA → rpmE (PRK00019)Ribosomal_L31 (pfam01197) → rpmE (PRK00019)Ribosomal_L31 (pfam01197) →                                                                                         |
| Vch-111-1 | NZ_AFOR01000017.1  | + | 23142   | 23195   | RNA → rpmE (PRK00019)Ribosomal_L31 (pfam01197) → RpmE (COG0254)rpmE (PRK00019) →                                                                                                    |
| Vch-47-1  | NZ_ALDL01000016.1  | + | 169034  | 169087  | RNA → rpmE (PRK00019)Ribosomal_L31 (pfam01197) → RpmE (COG0254)rpmE (PRK00019) → hypo → Malic_M (smart00919)SfcA (COG0281) →                                                        |
| Vch-108-1 | NZ_ALED01000028.1  | + | 174043  | 174096  | RNA → rpmE (PRK00019)Ribosomal_L31 (pfam01197) → RpmE (COG0254)rpmE (PRK00019) →                                                                                                    |
| Vch-39-1  | NZ_AKGH01000001.1  | + | 2527089 | 2527142 | RNA → rpmE (PRK00019)Ribosomal_L31 (pfam01197) →                                                                                                                                    |
| Vch-1-1   | NZ_ACVW01000009.1  | - | 64807   | 64754   | RNA → rpmE (PRK00019)Ribosomal_L31 (pfam01197) → rpmE (PRK00019)Ribosomal_L31 (pfam01197) → hypo → hypo → Malic_M (smart00919)SfcA (COG0281) → Malic_M (smart00919)SfcA (COG0281) → |
| Vch-51-1  | NZ_AGUN01000136.1  | + | 166224  | 166277  | RNA → rpmE (PRK00019)Ribosomal_L31 (pfam01197) → RpmE (COG0254)rpmE (PRK00019) → hypo → Malic_M (smart00919)SfcA (COG0281) →                                                        |
| Vch-65-1  | NZ_ALDQ01000022.1  | + | 171464  | 171517  | RNA → rpmE (PRK00019)Ribosomal_L31 (pfam01197) → hypo → Malic_M (smart00919)SfcA (COG0281) →                                                                                        |
| Vch-63-1  | NZ_ALDP01000017.1  | + | 170302  | 170355  | RNA → rpmE (PRK00019)Ribosomal_L31 (pfam01197) → RpmE (COG0254)rpmE (PRK00019) →                                                                                                    |
| Vch-16-1  | NZ_ALDA01000016.1  | + | 167150  | 167203  | RNA → rpmE (PRK00019)Ribosomal_L31 (pfam01197) → RpmE (COG0254)rpmE (PRK00019) → hypo → Malic_M (smart00919)SfcA (COG0281) →                                                        |
| Vch-133-1 | NZ_AHFX01000066.1  | + | 166303  | 166356  | RNA → rpmE (PRK00019)Ribosomal_L31 (pfam01197) →                                                                                                                                    |
| Vch-12-1  | NZ_ACHZ01000015.1  | + | 166071  | 166124  | RNA → rpmE (PRK00019)Ribosomal_L31 (pfam01197) → rpmE (PRK00019)Ribosomal_L31 (pfam01197) → hypo → hypo → Malic_M (smart00919)SfcA (COG0281) → Malic_M (smart00919)SfcA (COG0281) → |

|           |                    |   |         |         |                                                                                                                                         |
|-----------|--------------------|---|---------|---------|-----------------------------------------------------------------------------------------------------------------------------------------|
| Vch-62-1  | NZ_AGUQ01000019.1  | + | 167891  | 167944  | RNA → rpmE (PRK00019)Ribosomal_L31 (pfam01197) → hypo → Malic_M (smart00919)SfcA (COG0281) →                                            |
| Vch-20-1  | NZ_ALDC01000014.1  | + | 167366  | 167419  | RNA → rpmE (PRK00019)Ribosomal_L31 (pfam01197) → RpmE (COG0254)rpmE (PRK00019) → hypo → Malic_M (smart00919)SfcA (COG0281) →            |
| Vch-22-1  | NZ_ALDE01000023.1  | + | 167278  | 167331  | RNA → rpmE (PRK00019)Ribosomal_L31 (pfam01197) → hypo → Malic_M (smart00919)SfcA (COG0281) →                                            |
| Vch-23-1  | NZ_ALDF01000013.1  | + | 167122  | 167175  | RNA → rpmE (PRK00019)Ribosomal_L31 (pfam01197) → RpmE (COG0254)rpmE (PRK00019) → hypo → Malic_M (smart00919)SfcA (COG0281) →            |
| Vch-70-1  | NZ_AFOM01000019.1  | + | 168579  | 168632  | RNA → rpmE (PRK00019)Ribosomal_L31 (pfam01197) → hypo → Malic_M (smart00919)SfcA (COG0281) →                                            |
| Vch-110-1 | NZ_AFOQ01000010.1  | + | 171737  | 171790  | RNA → rpmE (PRK00019)Ribosomal_L31 (pfam01197) → RpmE (COG0254)rpmE (PRK00019) → hypo → hypo → Malic_M (smart00919)SfcA (COG0281) →     |
| Vch-27-1  | NZ_ALDJ01000015.1  | + | 169778  | 169831  | RNA → rpmE (PRK00019)Ribosomal_L31 (pfam01197) → RpmE (COG0254)rpmE (PRK00019) → hypo → Malic_M (smart00919)SfcA (COG0281) →            |
| Vch-86-1  | NZ_AJRU01000023.1  | + | 172852  | 172905  | RNA → rpmE (PRK00019)Ribosomal_L31 (pfam01197) → RpmE (COG0254)rpmE (PRK00019) → hypo → Malic_M (smart00919)SfcA (COG0281) →            |
| Vch-50-1  | NZ_AGUM01000012.1  | + | 169488  | 169541  | RNA → rpmE (PRK00019)Ribosomal_L31 (pfam01197) → RpmE (COG0254)rpmE (PRK00019) → hypo → Malic_M (smart00919)SfcA (COG0281) →            |
| Vch-106-1 | NZ_ALEC01000008.1  | + | 171021  | 171074  | RNA → rpmE (PRK00019)Ribosomal_L31 (pfam01197) → rpmE (PRK00019)Ribosomal_L31 (pfam01197) → hypo → Malic_M (smart00919)SfcA (COG0281) → |
| Vch-25-1  | NZ_ALDH01000025.1  | + | 168608  | 168661  | RNA → rpmE (PRK00019)Ribosomal_L31 (pfam01197) → RpmE (COG0254)rpmE (PRK00019) → hypo → Malic_M (smart00919)SfcA (COG0281) →            |
| Vch-103-1 | NZ_AFOO01000020.1  | + | 167567  | 167620  | RNA → rpmE (PRK00019)Ribosomal_L31 (pfam01197) → RpmE (COG0254)rpmE (PRK00019) → hypo → Malic_M (smart00919)SfcA (COG0281) →            |
| Vch-85-1  | NZ_AGUS01000011.1  | + | 167472  | 167525  | RNA → rpmE (PRK00019)Ribosomal_L31 (pfam01197) → RpmE (COG0254)rpmE (PRK00019) → hypo → Malic_M (smart00919)SfcA (COG0281) →            |
| Vch-6-1   | NZ_JNEW01000014.1  | + | 97535   | 97588   | RNA → rpmE (PRK00019)Ribosomal_L31 (pfam01197) →                                                                                        |
| Vch-17-1  | NZ_AJRL01000032.1  | + | 166987  | 167040  | RNA → rpmE (PRK00019)Ribosomal_L31 (pfam01197) → RpmE (COG0254)rpmE (PRK00019) → hypo → Malic_M (smart00919)SfcA (COG0281) →            |
| Vch-11-1  | NZ_JHXR01000011.1  | - | 80293   | 80240   | RNA → rpmE (PRK00019)Ribosomal_L31 (pfam01197) →                                                                                        |
| Vch-42-1  | NZ_AGUI01000126.1  | + | 166151  | 166204  | RNA → rpmE (PRK00019)Ribosomal_L31 (pfam01197) → hypo → Malic_M (smart00919)SfcA (COG0281) →                                            |
| Vch-134-1 | NZ_AHFY01000032.1  | - | 1904    | 1851    | RNA → rpmE (PRK00019)Ribosomal_L31 (pfam01197) →                                                                                        |
| Vch-195-1 | NZ_ATEV02000004.1  | + | 164199  | 164252  | RNA → rpmE (PRK00019)Ribosomal_L31 (pfam01197) →                                                                                        |
| Vch-138-1 | NZ_AHGC01000053.1  | + | 4310    | 4363    | RNA → rpmE (PRK00019)Ribosomal_L31 (pfam01197) →                                                                                        |
| Vch-152-1 | NZ_AHGP01000035.1  | - | 1904    | 1851    | RNA → rpmE (PRK00019)Ribosomal_L31 (pfam01197) →                                                                                        |
| Vch-192-1 | NZ_AMBS01000018.1  | - | 80028   | 79975   | RNA → rpmE (PRK00019)Ribosomal_L31 (pfam01197) →                                                                                        |
| Vch-197-1 | NZ_ACHV01000001.1  | + | 1368480 | 1368533 | RNA → rpmE (PRK00019)Ribosomal_L31 (pfam01197) → rpmE (PRK00019)Ribosomal_L31 (pfam01197) →                                             |
| Vch-194-1 | NZ_AMBT01000021.1  | + | 166169  | 166222  | RNA → rpmE (PRK00019)Ribosomal_L31 (pfam01197) →                                                                                        |
| Vch-158-1 | NZ_AHGG01000033.1  | + | 166151  | 166204  | RNA → rpmE (PRK00019)Ribosomal_L31 (pfam01197) →                                                                                        |
| Vch-157-1 | NZ_AFSV01000006.1  | + | 72274   | 72327   | RNA → rpmE (PRK00019)Ribosomal_L31 (pfam01197) →                                                                                        |
| Vch-148-1 | NZ_AH GK01000006.1 | + | 166158  | 166211  | RNA → rpmE (PRK00019)Ribosomal_L31 (pfam01197) →                                                                                        |
| Vch-181-1 | NZ_AIJR01000043.1  | + | 141625  | 141678  | RNA → rpmE (PRK00019)Ribosomal_L31 (pfam01197) → RpmE (COG0254)rpmE (PRK00019) → hypo → Malic_M (smart00919)SfcA (COG0281) →            |
| Vch-137-1 | NZ_AHGB01000061.1  | - | 80003   | 79950   | RNA → rpmE (PRK00019)Ribosomal_L31 (pfam01197) →                                                                                        |
| Vch-141-1 | NZ_AELI01000040.1  | - | 1908    | 1855    | RNA → rpmE (PRK00019)Ribosomal_L31 (pfam01197) →                                                                                        |
| Vch-188-1 | NZ_ACHW01000024.1  | + | 173500  | 173553  | RNA → rpmE (PRK00019)Ribosomal_L31 (pfam01197) → rpmE (PRK00019)Ribosomal_L31 (pfam01197) →                                             |
| Vch-150-1 | NZ_AHGM01000040.1  | - | 1911    | 1858    | RNA → rpmE (PRK00019)Ribosomal_L31 (pfam01197) →                                                                                        |
| Vch-149-1 | NZ_AHGL01000070.1  | + | 166303  | 166356  | RNA → rpmE (PRK00019)Ribosomal_L31 (pfam01197) →                                                                                        |
| Vch-142-1 | NZ_AHGD01000007.1  | - | 1904    | 1851    | RNA → rpmE (PRK00019)Ribosomal_L31 (pfam01197) →                                                                                        |
| Vch-147-1 | NZ_AHGJ01000008.1  | - | 1906    | 1853    | RNA → rpmE (PRK00019)Ribosomal_L31 (pfam01197) →                                                                                        |
| Vch-193-1 | NZ_AMBR01000002.1  | + | 166162  | 166215  | RNA → rpmE (PRK00019)Ribosomal_L31 (pfam01197) →                                                                                        |
| Vch-146-1 | NZ_AHGH01000007.1  | - | 1908    | 1855    | RNA → rpmE (PRK00019)Ribosomal_L31 (pfam01197) →                                                                                        |
| Vch-151-1 | NZ_AHGN01000009.1  | - | 1903    | 1850    | RNA → rpmE (PRK00019)Ribosomal_L31 (pfam01197) →                                                                                        |
| Vch-144-1 | NZ_AHGF01000007.1  | - | 1906    | 1853    | RNA → rpmE (PRK00019)Ribosomal_L31 (pfam01197) →                                                                                        |
| Vch-136-1 | NZ_AHGA01000061.1  | + | 166303  | 166356  | RNA → rpmE (PRK00019)Ribosomal_L31 (pfam01197) →                                                                                        |
| Vch-145-1 | NZ_AHGG01000060.1  | + | 88775   | 88828   | RNA → rpmE (PRK00019)Ribosomal_L31 (pfam01197) →                                                                                        |
| Vch-135-1 | NZ_AHFZ01000034.1  | - | 1919    | 1866    | RNA → rpmE (PRK00019)Ribosomal_L31 (pfam01197) →                                                                                        |
| Vch-143-1 | NZ_AHGE01000007.1  | + | 166319  | 166372  | RNA → rpmE (PRK00019)Ribosomal_L31 (pfam01197) →                                                                                        |



|           |                    |   |         |         |                                                                                                                                                                                     |
|-----------|--------------------|---|---------|---------|-------------------------------------------------------------------------------------------------------------------------------------------------------------------------------------|
| Vch-140-1 | NZ_AELJ01000042.1  | - | 1903    | 1850    | RNA → rpmE (PRK00019)Ribosomal_L31 (pfam01197) →                                                                                                                                    |
| Vmi-6-1   | NZ_ACYV01000004.1  | - | 168966  | 168913  | RNA → rpmE (PRK00019)Ribosomal_L31 (pfam01197) → rpmE (PRK00019)Ribosomal_L31 (pfam01197) → hypo → Malic_M (smart00919)SfcA (COG0281) → Malic_M (smart00919)SfcA (COG0281) →        |
| Vmi-3-1   | NZ_ADADF01000001.1 | - | 86644   | 86591   | RNA → rpmE (PRK00019)Ribosomal_L31 (pfam01197) → rpmE (PRK00019)Ribosomal_L31 (pfam01197) → hypo → Malic_M (smart00919)SfcA (COG0281) → Malic_M (smart00919)SfcA (COG0281) →        |
| Vmi-7-1   | NZ_ACYU01000088.1  | - | 21850   | 21797   | RNA → rpmE (PRK00019)Ribosomal_L31 (pfam01197) → rpmE (PRK00019)Ribosomal_L31 (pfam01197) → hypo → Malic_M (smart00919)SfcA (COG0281) → Malic_M (smart00919)SfcA (COG0281) →        |
| Vch-128-1 | NC_002505.1        | + | 2847750 | 2847803 | RNA → rpmE (PRK00019)Ribosomal_L31 (pfam01197) → hypo → Malic_M (smart00919)SfcA (COG0281) →                                                                                        |
| Vch-121-1 | NZ_DS178186.1      | + | 88174   | 88227   | RNA → rpmE (PRK00019)Ribosomal_L31 (pfam01197) → hypo → Malic_M (smart00919)SfcA (COG0281) →                                                                                        |
| Vch-10-1  | NZ_DS265229.1      | + | 74064   | 74117   | RNA → rpmE (PRK00019)Ribosomal_L31 (pfam01197) → rpmE (PRK00019)Ribosomal_L31 (pfam01197) →                                                                                         |
| Vch-179-1 | NC_012582.1        | + | 2933043 | 2933096 | RNA → rpmE (PRK00019)Ribosomal_L31 (pfam01197) → hypo → Malic_M (smart00919)SfcA (COG0281) →                                                                                        |
| Vch-101-1 | NZ_AGVC02000009.1  | + | 168641  | 168694  | RNA → rpmE (PRK00019)Ribosomal_L31 (pfam01197) → RpmE (COG0254)rpmE (PRK00019) → hypo → Malic_M (smart00919)SfcA (COG0281) →                                                        |
| Vch-8-1   | NZ_AMVL01000016.1  | + | 167875  | 167928  | RNA → rpmE (PRK00019)Ribosomal_L31 (pfam01197) → RpmE (COG0254)rpmE (PRK00019) → hypo → Malic_M (smart00919)SfcA (COG0281) →                                                        |
| Vch-187-1 | NZ_ACHX01000008.1  | + | 168810  | 168863  | RNA → rpmE (PRK00019)Ribosomal_L31 (pfam01197) → rpmE (PRK00019)Ribosomal_L31 (pfam01197) →                                                                                         |
| Vch-189-1 | NZ_ACHY01000014.1  | + | 164082  | 164135  | RNA → rpmE (PRK00019)Ribosomal_L31 (pfam01197) → rpmE (PRK00019)Ribosomal_L31 (pfam01197) →                                                                                         |
| Vch-186-1 | NZ_GG774560.1      | + | 167617  | 167670  | RNA → rpmE (PRK00019)Ribosomal_L31 (pfam01197) → hypo →                                                                                                                             |
| Vch-117-1 | NZ_GG774581.1      | - | 79982   | 79929   | RNA → hypo → rpmE (PRK00019)Ribosomal_L31 (pfam01197) →                                                                                                                             |
| Vch-119-1 | NZ_DS990139.1      | + | 166078  | 166131  | RNA → rpmE (PRK00019)Ribosomal_L31 (pfam01197) → rpmE (PRK00019)Ribosomal_L31 (pfam01197) → hypo → hypo → Malic_M (smart00919)SfcA (COG0281) → Malic_M (smart00919)SfcA (COG0281) → |
| Vmi-4-1   | NZ_GL989611.1      | - | 83946   | 83893   | RNA → rpmE (PRK00019)Ribosomal_L31 (pfam01197) → hypo → Malic_M (smart00919)SfcA (COG0281) →                                                                                        |
| Vch-56-1  | NZ_GL989441.1      | + | 140393  | 140446  | RNA → rpmE (PRK00019)Ribosomal_L31 (pfam01197) → RpmE (COG0254)rpmE (PRK00019) → hypo → Malic_M (smart00919)SfcA (COG0281) →                                                        |
| Vch-68-1  | NZ_GL988459.1      | + | 96678   | 96731   | RNA → rpmE (PRK00019)Ribosomal_L31 (pfam01197) → RpmE (COG0254)rpmE (PRK00019) → hypo → Malic_M (smart00919)SfcA (COG0281) →                                                        |
| Vch-104-1 | NZ_GL988785.1      | + | 94619   | 94672   | RNA → rpmE (PRK00019)Ribosomal_L31 (pfam01197) → RpmE (COG0254)rpmE (PRK00019) →                                                                                                    |
| Vch-13-1  | NZ_GL989317.1      | + | 88093   | 88146   | RNA → rpmE (PRK00019)Ribosomal_L31 (pfam01197) → RpmE (COG0254)rpmE (PRK00019) → hypo → Malic_M (smart00919)SfcA (COG0281) →                                                        |
| Vch-112-1 | NZ_GL988901.1      | + | 166145  | 166198  | RNA → rpmE (PRK00019)Ribosomal_L31 (pfam01197) → RpmE (COG0254)rpmE (PRK00019) → hypo → Malic_M (smart00919)SfcA (COG0281) →                                                        |
| Vch-94-1  | NZ_GL988622.1      | + | 166218  | 166271  | RNA → rpmE (PRK00019)Ribosomal_L31 (pfam01197) → RpmE (COG0254)rpmE (PRK00019) → hypo → Malic_M (smart00919)SfcA (COG0281) →                                                        |
| Vch-45-1  | NZ_JH377912.1      | + | 166228  | 166281  | RNA → rpmE (PRK00019)Ribosomal_L31 (pfam01197) → RpmE (COG0254)rpmE (PRK00019) → hypo → Malic_M (smart00919)SfcA (COG0281) →                                                        |
| Vch-52-1  | NZ_JH377642.1      | + | 166224  | 166277  | RNA → rpmE (PRK00019)Ribosomal_L31 (pfam01197) → RpmE (COG0254)rpmE (PRK00019) → hypo → Malic_M (smart00919)SfcA (COG0281) →                                                        |
| Vch-49-1  | NZ_JH377763.1      | + | 166391  | 166444  | RNA → rpmE (PRK00019)Ribosomal_L31 (pfam01197) → RpmE (COG0254)rpmE (PRK00019) → hypo → Malic_M (smart00919)SfcA (COG0281) →                                                        |
| Vch-48-1  | NZ_JH377867.1      | + | 166149  | 166202  | RNA → rpmE (PRK00019)Ribosomal_L31 (pfam01197) → RpmE (COG0254)rpmE (PRK00019) → hypo → Malic_M (smart00919)SfcA (COG0281) →                                                        |
| Vch-53-1  | NZ_JH377415.1      | + | 166220  | 166273  | RNA → rpmE (PRK00019)Ribosomal_L31 (pfam01197) → RpmE (COG0254)rpmE (PRK00019) → hypo → Malic_M (smart00919)SfcA (COG0281) →                                                        |
| Vch-69-1  | NZ_JH377599.1      | + | 96678   | 96731   | RNA → rpmE (PRK00019)Ribosomal_L31 (pfam01197) → RpmE (COG0254)rpmE (PRK00019) → hypo → Malic_M (smart00919)SfcA (COG0281) →                                                        |
| Vch-15-1  | NZ_JH724675.1      | + | 166163  | 166216  | RNA → rpmE (PRK00019)Ribosomal_L31 (pfam01197) → RpmE (COG0254)rpmE (PRK00019) → hypo → Malic_M (smart00919)SfcA (COG0281) →                                                        |
| Vch-79-1  | NZ_JH724533.1      | + | 166212  | 166265  | RNA → rpmE (PRK00019)Ribosomal_L31 (pfam01197) → RpmE (COG0254)rpmE (PRK00019) → hypo → Malic_M (smart00919)SfcA (COG0281) →                                                        |
| Vch-67-1  | NZ_JH724981.1      | + | 166199  | 166252  | RNA → rpmE (PRK00019)Ribosomal_L31 (pfam01197) → RpmE (COG0254)rpmE (PRK00019) → hypo → Malic_M (smart00919)SfcA (COG0281) →                                                        |
| Vch-61-1  | NZ_JH724365.1      | + | 166237  | 166290  | RNA → rpmE (PRK00019)Ribosomal_L31 (pfam01197) → RpmE (COG0254)rpmE (PRK00019) → hypo → Malic_M (smart00919)SfcA (COG0281) →                                                        |
| Vch-81-1  | NZ_JH724637.1      | + | 166235  | 166288  | RNA → rpmE (PRK00019)Ribosomal_L31 (pfam01197) → RpmE (COG0254)rpmE (PRK00019) → hypo → Malic_M (smart00919)SfcA (COG0281) →                                                        |
| Vch-26-1  | NZ_JH724792.1      | + | 166090  | 166143  | RNA → rpmE (PRK00019)Ribosomal_L31 (pfam01197) → RpmE (COG0254)rpmE (PRK00019) → hypo → Malic_M (smart00919)SfcA (COG0281) →                                                        |

|           |               |   |        |        |                                                                                                                                     |
|-----------|---------------|---|--------|--------|-------------------------------------------------------------------------------------------------------------------------------------|
| Vch-57-1  | NZ_JH942113.1 | + | 166129 | 166182 | RNA → rpmE (PRK00019)Ribosomal_L31 (pfam01197) → RpmE (COG0254)rpmE (PRK00019) → hypo → Malic_M (smart00919)SfcA (COG0281) →        |
| Vch-102-1 | NZ_JH941267.1 | + | 166210 | 166263 | RNA → rpmE (PRK00019)Ribosomal_L31 (pfam01197) → RpmE (COG0254)rpmE (PRK00019) → hypo → Malic_M (smart00919)SfcA (COG0281) →        |
| Vch-64-1  | NZ_JH973832.1 | + | 15199  | 15252  | RNA → rpmE (PRK00019)Ribosomal_L31 (pfam01197) → RpmE (COG0254)rpmE (PRK00019) →                                                    |
| Vch-28-1  | NZ_JH941761.1 | + | 166181 | 166234 | RNA → rpmE (PRK00019)Ribosomal_L31 (pfam01197) → RpmE (COG0254)rpmE (PRK00019) → hypo → Malic_M (smart00919)SfcA (COG0281) →        |
| Vch-21-1  | NZ_JH942554.1 | + | 166156 | 166209 | RNA → rpmE (PRK00019)Ribosomal_L31 (pfam01197) → RpmE (COG0254)rpmE (PRK00019) → hypo → Malic_M (smart00919)SfcA (COG0281) →        |
| Vch-76-1  | NZ_JH973997.1 | + | 64867  | 64920  | RNA → rpmE (PRK00019)Ribosomal_L31 (pfam01197) → RpmE (COG0254)rpmE (PRK00019) → hypo → Malic_M (smart00919)SfcA (COG0281) →        |
| Vch-75-1  | NZ_JH942782.1 | + | 64906  | 64959  | RNA → rpmE (PRK00019)Ribosomal_L31 (pfam01197) → RpmE (COG0254)rpmE (PRK00019) → hypo → Malic_M (smart00919)SfcA (COG0281) →        |
| Vch-73-1  | NZ_JH941360.1 | + | 64867  | 64920  | RNA → rpmE (PRK00019)Ribosomal_L31 (pfam01197) → RpmE (COG0254)rpmE (PRK00019) → hypo → Malic_M (smart00919)SfcA (COG0281) →        |
| Vch-105-1 | NZ_JH941443.1 | + | 164229 | 164282 | RNA → rpmE (PRK00019)Ribosomal_L31 (pfam01197) →                                                                                    |
| Vch-80-1  | NZ_JH941836.1 | + | 64865  | 64918  | RNA → rpmE (PRK00019)Ribosomal_L31 (pfam01197) → RpmE (COG0254)rpmE (PRK00019) → hypo → Malic_M (smart00919)SfcA (COG0281) →        |
| Vch-59-1  | NZ_JH941105.1 | + | 166233 | 166286 | RNA → rpmE (PRK00019)Ribosomal_L31 (pfam01197) → RpmE (COG0254)rpmE (PRK00019) → hypo → Malic_M (smart00919)SfcA (COG0281) →        |
| Vch-41-1  | NZ_JH973434.1 | + | 64873  | 64926  | RNA → rpmE (PRK00019)Ribosomal_L31 (pfam01197) → RpmE (COG0254)rpmE (PRK00019) → hypo → Malic_M (smart00919)SfcA (COG0281) →        |
| Vch-74-1  | NZ_JH942250.1 | + | 64867  | 64920  | RNA → rpmE (PRK00019)Ribosomal_L31 (pfam01197) → RpmE (COG0254)rpmE (PRK00019) → hypo → Malic_M (smart00919)SfcA (COG0281) →        |
| Vch-78-1  | NZ_JH942415.1 | + | 64859  | 64912  | RNA → rpmE (PRK00019)Ribosomal_L31 (pfam01197) → RpmE (COG0254)rpmE (PRK00019) → hypo → Malic_M (smart00919)SfcA (COG0281) →        |
| Vch-19-1  | NZ_JH942327.1 | + | 97406  | 97459  | RNA → rpmE (PRK00019)Ribosomal_L31 (pfam01197) → RpmE (COG0254)rpmE (PRK00019) → hypo → Malic_M (smart00919)SfcA (COG0281) →        |
| Vch-77-1  | NZ_JH967247.1 | + | 64887  | 64940  | RNA → rpmE (PRK00019)Ribosomal_L31 (pfam01197) → RpmE (COG0254)rpmE (PRK00019) → hypo → Malic_M (smart00919)SfcA (COG0281) →        |
| Vch-93-1  | NZ_JH974133.1 | + | 166143 | 166196 | RNA → rpmE (PRK00019)Ribosomal_L31 (pfam01197) → hypo → Malic_M (smart00919)SfcA (COG0281) →                                        |
| Vch-18-1  | NZ_JH966256.1 | + | 131489 | 131542 | RNA → rpmE (PRK00019)Ribosomal_L31 (pfam01197) → RpmE (COG0254)rpmE (PRK00019) →                                                    |
| Vch-71-1  | NZ_JH941925.1 | + | 64869  | 64922  | RNA → rpmE (PRK00019)Ribosomal_L31 (pfam01197) → RpmE (COG0254)rpmE (PRK00019) → hypo → Malic_M (smart00919)SfcA (COG0281) →        |
| Vch-24-1  | NZ_JH942693.1 | + | 166218 | 166271 | RNA → rpmE (PRK00019)Ribosomal_L31 (pfam01197) → RpmE (COG0254)rpmE (PRK00019) → hypo → Malic_M (smart00919)SfcA (COG0281) →        |
| Vch-83-1  | NZ_JH973563.1 | + | 64871  | 64924  | RNA → rpmE (PRK00019)Ribosomal_L31 (pfam01197) → RpmE (COG0254)rpmE (PRK00019) → hypo → Malic_M (smart00919)SfcA (COG0281) →        |
| Vch-72-1  | NZ_JH967136.1 | + | 26466  | 26519  | RNA → rpmE (PRK00019)Ribosomal_L31 (pfam01197) → RpmE (COG0254)rpmE (PRK00019) → hypo → Malic_M (smart00919)SfcA (COG0281) →        |
| Vch-82-1  | NZ_JH967405.1 | + | 64871  | 64924  | RNA → rpmE (PRK00019)Ribosomal_L31 (pfam01197) → RpmE (COG0254)rpmE (PRK00019) → hypo → Malic_M (smart00919)SfcA (COG0281) →        |
| Vch-55-1  | NZ_JH973724.1 | + | 166137 | 166190 | RNA → rpmE (PRK00019)Ribosomal_L31 (pfam01197) → RpmE (COG0254)rpmE (PRK00019) → hypo → Malic_M (smart00919)SfcA (COG0281) →        |
| Vch-88-1  | NZ_JH976196.1 | + | 166222 | 166275 | RNA → rpmE (PRK00019)Ribosomal_L31 (pfam01197) → RpmE (COG0254)rpmE (PRK00019) → hypo → Malic_M (smart00919)SfcA (COG0281) →        |
| Vch-60-1  | NZ_JH966759.1 | + | 15217  | 15270  | RNA → rpmE (PRK00019)Ribosomal_L31 (pfam01197) → RpmE (COG0254)rpmE (PRK00019) →                                                    |
| Vch-107-1 | NZ_JH967832.1 | + | 39583  | 39636  | RNA → rpmE (PRK00019)Ribosomal_L31 (pfam01197) → RpmE (COG0254)rpmE (PRK00019) → hypo → Malic_M (smart00919)SfcA (COG0281) →        |
| Vch-109-1 | NZ_JH967937.1 | + | 39583  | 39636  | RNA → rpmE (PRK00019)Ribosomal_L31 (pfam01197) → RpmE (COG0254)rpmE (PRK00019) → hypo → hypo → Malic_M (smart00919)SfcA (COG0281) → |
| Vch-87-1  | NZ_JH967583.1 | + | 166149 | 166202 | RNA → rpmE (PRK00019)Ribosomal_L31 (pfam01197) → hypo → Malic_M (smart00919)SfcA (COG0281) →                                        |
| Vch-44-1  | NZ_JH974086.1 | + | 166208 | 166261 | RNA → rpmE (PRK00019)Ribosomal_L31 (pfam01197) → RpmE (COG0254)rpmE (PRK00019) → hypo → Malic_M (smart00919)SfcA (COG0281) →        |
| Vch-84-1  | NZ_JH967537.1 | + | 64883  | 64936  | RNA → rpmE (PRK00019)Ribosomal_L31 (pfam01197) → hypo → Malic_M (smart00919)SfcA (COG0281) →                                        |
| Vch-97-1  | NZ_JH967742.1 | + | 166214 | 166267 | RNA → rpmE (PRK00019)Ribosomal_L31 (pfam01197) → RpmE (COG0254)rpmE (PRK00019) → hypo → Malic_M (smart00919)SfcA (COG0281) →        |

|           |               |   |        |        |                                                                                                                              |
|-----------|---------------|---|--------|--------|------------------------------------------------------------------------------------------------------------------------------|
| Vch-91-1  | NZ_KB454392.1 | + | 166145 | 166198 | RNA → rpmE (PRK00019)Ribosomal_L31 (pfam01197) → RpmE (COG0254)rpmE (PRK00019) → hypo → Malic_M (smart00919)SfcA (COG0281) → |
| Vch-100-1 | NZ_KB453749.1 | + | 166261 | 166314 | RNA → rpmE (PRK00019)Ribosomal_L31 (pfam01197) → RpmE (COG0254)rpmE (PRK00019) → hypo → Malic_M (smart00919)SfcA (COG0281) → |
| Vch-89-1  | NZ_KB454200.1 | + | 166220 | 166273 | RNA → rpmE (PRK00019)Ribosomal_L31 (pfam01197) → RpmE (COG0254)rpmE (PRK00019) → hypo → Malic_M (smart00919)SfcA (COG0281) → |
| Vch-96-1  | NZ_KB453977.1 | + | 96717  | 96770  | RNA → rpmE (PRK00019)Ribosomal_L31 (pfam01197) → RpmE (COG0254)rpmE (PRK00019) → hypo → Malic_M (smart00919)SfcA (COG0281) → |
| Vch-90-1  | NZ_KB454302.1 | + | 166149 | 166202 | RNA → rpmE (PRK00019)Ribosomal_L31 (pfam01197) → RpmE (COG0254)rpmE (PRK00019) → hypo → Malic_M (smart00919)SfcA (COG0281) → |
| Vch-95-1  | NZ_KB454023.1 | + | 166216 | 166269 | RNA → rpmE (PRK00019)Ribosomal_L31 (pfam01197) → RpmE (COG0254)rpmE (PRK00019) → hypo → Malic_M (smart00919)SfcA (COG0281) → |
| Vch-92-1  | NZ_KB454115.1 | + | 166145 | 166198 | RNA → rpmE (PRK00019)Ribosomal_L31 (pfam01197) → RpmE (COG0254)rpmE (PRK00019) → hypo → Malic_M (smart00919)SfcA (COG0281) → |
| Vch-98-1  | NZ_KB453880.1 | + | 64873  | 64926  | RNA → rpmE (PRK00019)Ribosomal_L31 (pfam01197) → RpmE (COG0254)rpmE (PRK00019) → hypo → Malic_M (smart00919)SfcA (COG0281) → |
| Vch-153-1 | NZ_KB661509.1 | + | 164143 | 164196 | RNA → rpmE (PRK00019)Ribosomal_L31 (pfam01197) → RpmE (COG0254)rpmE (PRK00019) →                                             |
| Vch-171-1 | NZ_KB662560.1 | + | 166228 | 166281 | RNA → rpmE (PRK00019)Ribosomal_L31 (pfam01197) → RpmE (COG0254)rpmE (PRK00019) → hypo → Malic_M (smart00919)SfcA (COG0281) → |
| Vch-38-1  | NZ_KI530559.1 | + | 166138 | 166191 | RNA → rpmE (PRK00019)Ribosomal_L31 (pfam01197) →                                                                             |
| Vch-177-1 | NZ_KK037977.1 | + | 166271 | 166324 | RNA → rpmE (PRK00019)Ribosomal_L31 (pfam01197) →                                                                             |
| Vch-163-1 | NZ_KB663382.1 | + | 166153 | 166206 | RNA → rpmE (PRK00019)Ribosomal_L31 (pfam01197) → hypo → Malic_M (smart00919)SfcA (COG0281) →                                 |
| Vch-160-1 | NZ_KB661766.1 | + | 166232 | 166285 | RNA → rpmE (PRK00019)Ribosomal_L31 (pfam01197) → RpmE (COG0254)rpmE (PRK00019) → hypo → Malic_M (smart00919)SfcA (COG0281) → |
| Vch-165-1 | NZ_KB662943.1 | + | 166233 | 166286 | RNA → rpmE (PRK00019)Ribosomal_L31 (pfam01197) → RpmE (COG0254)rpmE (PRK00019) → hypo → Malic_M (smart00919)SfcA (COG0281) → |
| Vch-155-1 | NZ_KB662662.1 | + | 166230 | 166283 | RNA → rpmE (PRK00019)Ribosomal_L31 (pfam01197) → RpmE (COG0254)rpmE (PRK00019) → hypo → Malic_M (smart00919)SfcA (COG0281) → |
| Vch-173-1 | NZ_KB661868.1 | + | 284370 | 284423 | RNA → rpmE (PRK00019)Ribosomal_L31 (pfam01197) → RpmE (COG0254)rpmE (PRK00019) → hypo → Malic_M (smart00919)SfcA (COG0281) → |
| Vch-162-1 | NZ_KB661631.1 | + | 166230 | 166283 | RNA → rpmE (PRK00019)Ribosomal_L31 (pfam01197) → RpmE (COG0254)rpmE (PRK00019) → hypo → Malic_M (smart00919)SfcA (COG0281) → |
| Vch-167-1 | NZ_KB662883.1 | + | 166226 | 166279 | RNA → rpmE (PRK00019)Ribosomal_L31 (pfam01197) → RpmE (COG0254)rpmE (PRK00019) → hypo → Malic_M (smart00919)SfcA (COG0281) → |
| Vch-161-1 | NZ_KB663436.1 | + | 166222 | 166275 | RNA → rpmE (PRK00019)Ribosomal_L31 (pfam01197) → RpmE (COG0254)rpmE (PRK00019) → hypo → Malic_M (smart00919)SfcA (COG0281) → |
| Vch-164-1 | NZ_KB663305.1 | + | 166229 | 166282 | RNA → rpmE (PRK00019)Ribosomal_L31 (pfam01197) → RpmE (COG0254)rpmE (PRK00019) → hypo → Malic_M (smart00919)SfcA (COG0281) → |
| Vch-156-1 | NZ_KB663101.1 | + | 166157 | 166210 | RNA → rpmE (PRK00019)Ribosomal_L31 (pfam01197) → RpmE (COG0254)rpmE (PRK00019) → hypo → Malic_M (smart00919)SfcA (COG0281) → |
| Vch-172-1 | NZ_KB662607.1 | + | 166153 | 166206 | RNA → rpmE (PRK00019)Ribosomal_L31 (pfam01197) → RpmE (COG0254)rpmE (PRK00019) → hypo → Malic_M (smart00919)SfcA (COG0281) → |
| Vch-132-1 | NZ_KB661281.1 | + | 68216  | 68269  | RNA → rpmE (PRK00019)Ribosomal_L31 (pfam01197) →                                                                             |
| Vch-176-1 | NZ_KB662149.1 | + | 166222 | 166275 | RNA → rpmE (PRK00019)Ribosomal_L31 (pfam01197) → RpmE (COG0254)rpmE (PRK00019) → hypo → Malic_M (smart00919)SfcA (COG0281) → |
| Vch-131-1 | NZ_KB661126.1 | + | 166230 | 166283 | RNA → rpmE (PRK00019)Ribosomal_L31 (pfam01197) → RpmE (COG0254)rpmE (PRK00019) → hypo → Malic_M (smart00919)SfcA (COG0281) → |
| Vch-178-1 | NZ_KB661943.1 | + | 258269 | 258322 | RNA → rpmE (PRK00019)Ribosomal_L31 (pfam01197) → hypo → Malic_M (smart00919)SfcA (COG0281) →                                 |
| Vch-168-1 | NZ_KB662761.1 | + | 176840 | 176893 | RNA → rpmE (PRK00019)Ribosomal_L31 (pfam01197) → RpmE (COG0254)rpmE (PRK00019) → hypo → Malic_M (smart00919)SfcA (COG0281) → |
| Vch-174-1 | NZ_KB662328.1 | + | 166153 | 166206 | RNA → rpmE (PRK00019)Ribosomal_L31 (pfam01197) → RpmE (COG0254)rpmE (PRK00019) → hypo → Malic_M (smart00919)SfcA (COG0281) → |
| Vch-166-1 | NZ_KB663195.1 | + | 166153 | 166206 | RNA → rpmE (PRK00019)Ribosomal_L31 (pfam01197) → hypo → Malic_M (smart00919)SfcA (COG0281) →                                 |
| Vch-169-1 | NZ_KB662391.1 | + | 166157 | 166210 | RNA → rpmE (PRK00019)Ribosomal_L31 (pfam01197) → RpmE (COG0254)rpmE (PRK00019) → hypo → Malic_M (smart00919)SfcA (COG0281) → |
| Vch-175-1 | NZ_KB661618.1 | + | 166149 | 166202 | RNA → rpmE (PRK00019)Ribosomal_L31 (pfam01197) → RpmE (COG0254)rpmE (PRK00019) → hypo → Malic_M (smart00919)SfcA (COG0281) → |



|            |                    |   |         |         |                                                                                                                                 |
|------------|--------------------|---|---------|---------|---------------------------------------------------------------------------------------------------------------------------------|
| Vch-159-1  | NZ_KB663522.1      | + | 166151  | 166204  | RNA → rpmE (PRK00019) Ribosomal_L31 (pfam01197) → RpmE (COG0254) rpmE (PRK00019) → hypo → Malic_M (smart00919) SfcA (COG0281) → |
| Vch-154-1  | NZ_KB662046.1      | + | 97478   | 97531   | RNA → rpmE (PRK00019) Ribosomal_L31 (pfam01197) → RpmE (COG0254) rpmE (PRK00019) → hypo → Malic_M (smart00919) SfcA (COG0281) → |
| Vch-116-1  | NC_012578.1        | + | 2784875 | 2784928 | RNA → rpmE (PRK00019) Ribosomal_L31 (pfam01197) → hypo → Malic_M (smart00919) SfcA (COG0281) →                                  |
| Vch-179-2  | NC_009457.1        | + | 2401623 | 2401676 | RNA → rpmE (PRK00019) Ribosomal_L31 (pfam01197) → hypo → Malic_M (smart00919) SfcA (COG0281) →                                  |
| Vch-118-1  | NC_012668.1        | - | 746911  | 746858  | RNA → rpmE (PRK00019) Ribosomal_L31 (pfam01197) →                                                                               |
| Vch-40-1   | NZ_GL989090.1      | + | 64879   | 64932   | RNA → rpmE (PRK00019) Ribosomal_L31 (pfam01197) → RpmE (COG0254) rpmE (PRK00019) → hypo → Malic_M (smart00919) SfcA (COG0281) → |
| Vch-139-1  | NC_016445.1        | + | 2317908 | 2317961 | RNA → rpmE (PRK00019) Ribosomal_L31 (pfam01197) → hypo → Malic_M (smart00919) SfcA (COG0281) →                                  |
| Vch-190-1  | NZ_KQ257374.1      | - | 83622   | 83569   | RNA → rpmE (PRK00019) Ribosomal_L31 (pfam01197) →                                                                               |
| Vch-123-1  | NZ_LGNW01000019.1  | - | 80238   | 80185   | RNA → rpmE (PRK00019) Ribosomal_L31 (pfam01197) →                                                                               |
| Vch-123-2  | NZ_LGNN01000069.1  | + | 166375  | 166428  | RNA → rpmE (PRK00019) Ribosomal_L31 (pfam01197) →                                                                               |
| Vch-123-3  | NZ_LGNQ01000044.1  | + | 166376  | 166429  | RNA → rpmE (PRK00019) Ribosomal_L31 (pfam01197) →                                                                               |
| Vch-123-4  | NZ_LGOB01000007.1  | + | 166374  | 166427  | RNA → rpmE (PRK00019) Ribosomal_L31 (pfam01197) →                                                                               |
| Vch-123-5  | NZ_LGOJ01000066.1  | + | 166366  | 166419  | RNA → rpmE (PRK00019) Ribosomal_L31 (pfam01197) →                                                                               |
| Vch-123-6  | NZ_LGOT01000059.1  | + | 166378  | 166431  | RNA → rpmE (PRK00019) Ribosomal_L31 (pfam01197) →                                                                               |
| Vch-123-7  | NZ_LGNZ01000002.1  | - | 80248   | 80195   | RNA → rpmE (PRK00019) Ribosomal_L31 (pfam01197) →                                                                               |
| Vch-123-8  | NZ_LGON01000072.1  | - | 80254   | 80201   | RNA → rpmE (PRK00019) Ribosomal_L31 (pfam01197) →                                                                               |
| Vch-123-9  | NZ_LGOM01000082.1  | + | 166376  | 166429  | RNA → rpmE (PRK00019) Ribosomal_L31 (pfam01197) →                                                                               |
| Vch-123-10 | NZ_LGNI01000064.1  | + | 166378  | 166431  | RNA → rpmE (PRK00019) Ribosomal_L31 (pfam01197) →                                                                               |
| Vch-123-11 | NZ_LGNL01000021.1  | + | 166350  | 166403  | RNA → rpmE (PRK00019) Ribosomal_L31 (pfam01197) →                                                                               |
| Vch-123-12 | NZ_LGNO01000044.1  | + | 166376  | 166429  | RNA → rpmE (PRK00019) Ribosomal_L31 (pfam01197) →                                                                               |
| Vch-123-13 | NZ_LGOG01000113.1  | - | 80230   | 80177   | RNA → rpmE (PRK00019) Ribosomal_L31 (pfam01197) →                                                                               |
| Vch-123-14 | NZ_LGOH01000029.1  | + | 166376  | 166429  | RNA → rpmE (PRK00019) Ribosomal_L31 (pfam01197) →                                                                               |
| Vch-123-15 | NZ_LGOP01000049.1  | - | 80210   | 80157   | RNA → rpmE (PRK00019) Ribosomal_L31 (pfam01197) →                                                                               |
| Vch-123-16 | NZ_LGOS01000062.1  | - | 80228   | 80175   | RNA → rpmE (PRK00019) Ribosomal_L31 (pfam01197) →                                                                               |
| Vch-123-17 | NZ_LGOE01000049.1  | + | 166376  | 166429  | RNA → rpmE (PRK00019) Ribosomal_L31 (pfam01197) →                                                                               |
| Vch-123-18 | NZ_LGOK01000130.1  | + | 166173  | 166226  | RNA → rpmE (PRK00019) Ribosomal_L31 (pfam01197) →                                                                               |
| Vch-123-19 | NZ_LGNG01000064.1  | - | 80274   | 80221   | RNA → rpmE (PRK00019) Ribosomal_L31 (pfam01197) →                                                                               |
| Vch-123-20 | NZ_LGNK01000118.1  | + | 166342  | 166395  | RNA → rpmE (PRK00019) Ribosomal_L31 (pfam01197) →                                                                               |
| Vch-123-21 | NZ_LGNM01000071.1  | + | 166376  | 166429  | RNA → rpmE (PRK00019) Ribosomal_L31 (pfam01197) →                                                                               |
| Vch-123-22 | NZ_LGNU01000074.1  | - | 80274   | 80221   | RNA → rpmE (PRK00019) Ribosomal_L31 (pfam01197) →                                                                               |
| Vch-123-23 | NZ_LGNS01000082.1  | - | 80264   | 80211   | RNA → rpmE (PRK00019) Ribosomal_L31 (pfam01197) →                                                                               |
| Vch-123-24 | NZ_LGNR01000046.1  | - | 37719   | 37666   | RNA → rpmE (PRK00019) Ribosomal_L31 (pfam01197) →                                                                               |
| Vch-123-25 | NZ_LGOO01000098.1  | - | 80234   | 80181   | RNA → rpmE (PRK00019) Ribosomal_L31 (pfam01197) →                                                                               |
| Vch-123-26 | NZ_LGNV01000021.1  | + | 166350  | 166403  | RNA → rpmE (PRK00019) Ribosomal_L31 (pfam01197) →                                                                               |
| Vch-99-1   | NZ_LAGVA02000012.1 | + | 168790  | 168843  | RNA → rpmE (PRK00019) Ribosomal_L31 (pfam01197) → hypo → Malic_M (smart00919) SfcA (COG0281) →                                  |
| Vch-180-1  | NZ_LANHS01000115.1 | - | 37694   | 37641   | RNA → rpmE (PRK00019) Ribosomal_L31 (pfam01197) →                                                                               |
| Vch-123-27 | NZ_LGNX01000040.1  | - | 80274   | 80221   | RNA → rpmE (PRK00019) Ribosomal_L31 (pfam01197) →                                                                               |
| Vch-123-28 | NZ_LGNY01000087.1  | - | 80232   | 80179   | RNA → rpmE (PRK00019) Ribosomal_L31 (pfam01197) →                                                                               |
| Vch-123-29 | NZ_LGOL01000001.1  | + | 166376  | 166429  | RNA → rpmE (PRK00019) Ribosomal_L31 (pfam01197) →                                                                               |
| Vch-123-30 | NZ_LGOQ01000030.1  | - | 80264   | 80211   | RNA → rpmE (PRK00019) Ribosomal_L31 (pfam01197) →                                                                               |
| Vch-123-31 | NZ_LGOR01000066.1  | + | 166378  | 166431  | RNA → rpmE (PRK00019) Ribosomal_L31 (pfam01197) →                                                                               |
| Vch-123-32 | NZ_LGNH01000051.1  | - | 80268   | 80215   | RNA → rpmE (PRK00019) Ribosomal_L31 (pfam01197) →                                                                               |
| Vch-123-33 | NZ_LGNJ01000075.1  | + | 166368  | 166421  | RNA → rpmE (PRK00019) Ribosomal_L31 (pfam01197) →                                                                               |
| Vch-123-34 | NZ_LGNP01000076.1  | + | 166335  | 166388  | RNA → rpmE (PRK00019) Ribosomal_L31 (pfam01197) →                                                                               |
| Vch-123-35 | NZ_LGNT01000064.1  | - | 80274   | 80221   | RNA → rpmE (PRK00019) Ribosomal_L31 (pfam01197) →                                                                               |
| Vch-123-36 | NZ_LGOA01000065.1  | - | 80266   | 80213   | RNA → rpmE (PRK00019) Ribosomal_L31 (pfam01197) →                                                                               |
| Vch-123-37 | NZ_LGOD01000058.1  | + | 166368  | 166421  | RNA → rpmE (PRK00019) Ribosomal_L31 (pfam01197) →                                                                               |
| Vch-123-38 | NZ_LGOF01000063.1  | - | 80252   | 80199   | RNA → rpmE (PRK00019) Ribosomal_L31 (pfam01197) →                                                                               |
| Vch-123-39 | NZ_LGOI01000018.1  | - | 80230   | 80177   | RNA → rpmE (PRK00019) Ribosomal_L31 (pfam01197) →                                                                               |
| Vch-123-40 | NZ_LGOU01000021.1  | - | 80264   | 80211   | RNA → rpmE (PRK00019) Ribosomal_L31 (pfam01197) →                                                                               |

|            |                   |   |         |         |                                                                                                                              |
|------------|-------------------|---|---------|---------|------------------------------------------------------------------------------------------------------------------------------|
| Vch-122-1  | NZ_DS177959.1     | + | 45142   | 45195   | RNA → rpmE (PRK00019)Ribosomal_L31 (pfam01197) → hypo → Malic_M (smart00919)SfcA (COG0281) →                                 |
| Vch-43-1   | NZ_JH966648.1     | + | 166215  | 166268  | RNA → rpmE (PRK00019)Ribosomal_L31 (pfam01197) → RpmE (COG0254)rpmE (PRK00019) → hypo → Malic_M (smart00919)SfcA (COG0281) → |
| Vch-120-1  | NZ_AP014524.1     | + | 2708026 | 2708079 | RNA → rpmE (PRK00019)Ribosomal_L31 (pfam01197) →                                                                             |
| Vch-2-1    | NZ_CP007634.1     | + | 2318308 | 2318361 | RNA → rpmE (PRK00019)Ribosomal_L31 (pfam01197) →                                                                             |
| Vch-124-1  | NZ_CP009042.1     | + | 2932367 | 2932420 | RNA → rpmE (PRK00019)Ribosomal_L31 (pfam01197) →                                                                             |
| Vch-2-2    | NZ_CP010811.1     | - | 245075  | 245022  | RNA → rpmE (PRK00019)Ribosomal_L31 (pfam01197) →                                                                             |
| Vch-2-3    | NZ_CP010812.1     | - | 232393  | 232340  | RNA → rpmE (PRK00019)Ribosomal_L31 (pfam01197) →                                                                             |
| Vch-4-1    | NZ_KQ410628.1     | - | 89751   | 89698   | RNA → rpmE (PRK00019)Ribosomal_L31 (pfam01197) →                                                                             |
| Vch-191-1  | NZ_KQ410502.1     | - | 81251   | 81198   | RNA → rpmE (PRK00019)Ribosomal_L31 (pfam01197) →                                                                             |
| Vch-9-1    | NZ_KQ410586.1     | + | 511976  | 512029  | RNA → rpmE (PRK00019)Ribosomal_L31 (pfam01197) →                                                                             |
| Vch-2-4    | NZ_CP007653.1     | + | 2824210 | 2824263 | RNA → rpmE (PRK00019)Ribosomal_L31 (pfam01197) →                                                                             |
| Vch-170-1  | NZ_CM001785.1     | - | 1052063 | 1052010 | RNA → RpmE (COG0254)rpmE (PRK00019) → rpmE (PRK00019)Ribosomal_L31 (pfam01197) → hypo → Malic_M (smart00919)SfcA (COG0281) → |
| Vch-58-1   | NZ_GL988242.1     | + | 96693   | 96746   | RNA → rpmE (PRK00019)Ribosomal_L31 (pfam01197) → RpmE (COG0254)rpmE (PRK00019) → hypo → Malic_M (smart00919)SfcA (COG0281) → |
| Vch-113-1  | NC_016944.1       | + | 2894052 | 2894105 | RNA → rpmE (PRK00019)Ribosomal_L31 (pfam01197) →                                                                             |
| Vch-5-1    | NZ_AJFN02000034.1 | - | 37684   | 37631   | RNA → rpmE (PRK00019)Ribosomal_L31 (pfam01197) →                                                                             |
| Vch-123-41 | NZ_LGOC01000036.1 | + | 166343  | 166396  | RNA → rpmE (PRK00019)Ribosomal_L31 (pfam01197) →                                                                             |
| Vch-127-1  | NZ_JDVX01000004.1 | + | 166061  | 166114  | RNA → rpmE (PRK00019)Ribosomal_L31 (pfam01197) →                                                                             |
| Vch-46-1   | NZ_AJRO01000013.1 | + | 65177   | 65230   | RNA → rpmE (PRK00019)Ribosomal_L31 (pfam01197) → RpmE (COG0254)rpmE (PRK00019) → hypo → Malic_M (smart00919)SfcA (COG0281) → |
| Vch-66-1   | NZ_AJSL01000015.1 | + | 15488   | 15541   | RNA → rpmE (PRK00019)Ribosomal_L31 (pfam01197) → RpmE (COG0254)rpmE (PRK00019) →                                             |
| Fba-1-1    | NC_014541.1       | - | 3979465 | 3979416 | RNA → rpmE (PRK00019)Ribosomal_L31 (pfam01197) →                                                                             |
| Vsi-2-1    | NZ_AEVT01000072.1 | - | 1849    | 1800    | RNA → rpmE (PRK00019)Ribosomal_L31 (pfam01197) → rpmE (PRK00019)Ribosomal_L31 (pfam01197) →                                  |
| Val-2-9    | NZ_LFWL01000062.1 | + | 184291  | 184340  | RNA → rpmE (PRK00019)Ribosomal_L31 (pfam01197) →                                                                             |
| Vor-7-1    | NZ_ACZV01000005.1 | + | 2348491 | 2348540 | RNA → rpmE (PRK00019)Ribosomal_L31 (pfam01197) → rpmE (PRK00019)Ribosomal_L31 (pfam01197) →                                  |
| Vor-8-1    | NZ_AFWH01000025.1 | - | 8828    | 8779    | RNA → rpmE (PRK00019)Ribosomal_L31 (pfam01197) →                                                                             |
| Vdi-2-1    | NZ_BBJY01000009.1 | - | 86132   | 86083   | RNA → rpmE (PRK00019)Ribosomal_L31 (pfam01197) →                                                                             |
| env-640    | CEGC01006263.1    | - | 190     | 141     | RNA →                                                                                                                        |
| Vsp-32-1   | NZ_JTLH01000041.1 | + | 156463  | 156512  | RNA → rpmE (PRK00019)Ribosomal_L31 (pfam01197) →                                                                             |
| Van-2-1    | NC_015633.1       | - | 544299  | 544250  | RNA → rpmE (PRK00019)Ribosomal_L31 (pfam01197) → Malic_M (smart00919)SfcA (COG0281) → Malic_M (smart00919)SfcA (COG0281) →   |
| Lan-1-1    | NC_022223.1       | - | 544215  | 544166  | RNA → rpmE (PRK00019)Ribosomal_L31 (pfam01197) → Malic_M (smart00919)SfcA (COG0281) → Malic_M (smart00919)SfcA (COG0281) →   |
| Van-3-1    | NZ_AEZA01000180.1 | + | 175711  | 175760  | RNA → rpmE (PRK00019)Ribosomal_L31 (pfam01197) → Malic_M (smart00919)SfcA (COG0281) → Malic_M (smart00919)SfcA (COG0281) →   |
| Van-4-1    | NZ_AEZB01000141.1 | + | 8300    | 8349    | RNA → rpmE (PRK00019)Ribosomal_L31 (pfam01197) → Malic_M (smart00919)SfcA (COG0281) → Malic_M (smart00919)SfcA (COG0281) →   |
| Vor-2-1    | NZ_AEZO01000054.1 | - | 18796   | 18747   | RNA → rpmE (PRK00019)Ribosomal_L31 (pfam01197) → rpmE (PRK00019)Ribosomal_L31 (pfam01197) →                                  |
| Van-1-1    | NZ_LK021130.1     | + | 2795609 | 2795658 | RNA → rpmE (PRK00019)Ribosomal_L31 (pfam01197) →                                                                             |
| Vor-3-1    | NZ_AJYR01000120.1 | - | 13360   | 13311   | RNA → rpmE (PRK00019)Ribosomal_L31 (pfam01197) →                                                                             |
| Vor-6-1    | NZ_AJYS01000220.1 | + | 119473  | 119522  | RNA → rpmE (PRK00019)Ribosomal_L31 (pfam01197) → Malic_M (smart00919)SfcA (COG0281) → Malic_M (smart00919)SfcA (COG0281) →   |
| Vge-3-1    | NZ_AJYO01000176.1 | + | 32585   | 32634   | RNA → rpmE (PRK00019)Ribosomal_L31 (pfam01197) →                                                                             |
| Vge-1-1    | NZ_AJYN01000189.1 | + | 32671   | 32720   | RNA → rpmE (PRK00019)Ribosomal_L31 (pfam01197) →                                                                             |
| Vge-4-1    | NZ_AJYQ01000004.1 | - | 155012  | 154963  | RNA → rpmE (PRK00019)Ribosomal_L31 (pfam01197) →                                                                             |
| Vge-2-1    | NZ_AJYP01000253.1 | - | 8489    | 8440    | RNA → rpmE (PRK00019)Ribosomal_L31 (pfam01197) →                                                                             |
| Vni-9-1    | NZ_CAOC01000112.1 | + | 87830   | 87879   | RNA → rpmE (PRK00019)Ribosomal_L31 (pfam01197) →                                                                             |
| Vme-2-1    | NZ_JYJP01000116.1 | - | 87552   | 87503   | RNA → rpmE (PRK00019)Ribosomal_L31 (pfam01197) →                                                                             |
| Vsi-1-1    | NZ_JXB01000020.1  | + | 64370   | 64420   | RNA → rpmE (PRK00019)Ribosomal_L31 (pfam01197) →                                                                             |
| Vpa-8-1    | NZ_DS999347.1     | + | 49201   | 49251   | RNA → rpmE (PRK00019)Ribosomal_L31 (pfam01197) → rpmE (PRK00019)Ribosomal_L31 (pfam01197) →                                  |
| Vsi-1-2    | NZ_JRWP01000001.1 | - | 9440    | 9390    | RNA → rpmE (PRK00019)Ribosomal_L31 (pfam01197) →                                                                             |
| Vca-6-1    | NZ_JRWR01000026.1 | - | 9377    | 9327    | RNA → rpmE (PRK00019)Ribosomal_L31 (pfam01197) →                                                                             |



|          |                   |   |         |         |                                                                                               |
|----------|-------------------|---|---------|---------|-----------------------------------------------------------------------------------------------|
| Vsi-1-3  | NZ_JWLV01000015.1 | + | 63119   | 63169   | RNA → rpmE (PRK00019) Ribosomal_L31 (pfam01197) →                                             |
| Vsi-1-4  | NZ_JWLU01000041.1 | - | 9417    | 9367    | RNA → rpmE (PRK00019) Ribosomal_L31 (pfam01197) →                                             |
| Vva-1-1  | NZ_JRWM01000039.1 | + | 63092   | 63142   | RNA → rpmE (PRK00019) Ribosomal_L31 (pfam01197) →                                             |
| Vne-2-1  | NZ_LHPJ01000014.1 | - | 9210    | 9160    | RNA → rpmE (PRK00019) Ribosomal_L31 (pfam01197) →                                             |
| Vga-1-1  | NZ_JXXV01000019.1 | - | 9082    | 9031    | RNA → rpmE (PRK00019) Ribosomal_L31 (pfam01197) →                                             |
| Vbr-1-1  | NZ_AEVS01000038.1 | + | 4830    | 4881    | RNA → rpmE (PRK00019) Ribosomal_L31 (pfam01197) → rpmE (PRK00019) Ribosomal_L31 (pfam01197) → |
| Vpa-1-1  | NZ_JONH01000021.1 | + | 58049   | 58100   | RNA → rpmE (PRK00019) Ribosomal_L31 (pfam01197) →                                             |
| Vsp-30-1 | NZ_LBLS01000010.1 | - | 9548    | 9497    | RNA → rpmE (PRK00019) Ribosomal_L31 (pfam01197) →                                             |
| Vtu-2-2  | NZ_AFWI01000035.1 | - | 9169    | 9118    | RNA → rpmE (PRK00019) Ribosomal_L31 (pfam01197) → rpmE (PRK00019) Ribosomal_L31 (pfam01197) → |
| Vtu-2-1  | NZ_CP009354.1     | + | 3076212 | 3076263 | RNA → rpmE (PRK00019) Ribosomal_L31 (pfam01197) →                                             |
| Vtu-3-1  | NZ_AHHF01000012.1 | - | 9134    | 9083    | RNA → rpmE (PRK00019) Ribosomal_L31 (pfam01197) →                                             |
| Vtu-1-1  | NZ_LRWQ01000006.1 | - | 11627   | 11576   | RNA → rpmE (PRK00019) Ribosomal_L31 (pfam01197) →                                             |
| Vhe-1-1  | NZ_LHPJ01000017.1 | + | 58937   | 58988   | RNA → rpmE (PRK00019) Ribosomal_L31 (pfam01197) →                                             |
| env-641  | 2231812703        | - | 323     | 274     | RNA → rpmE (PRK00019) Ribosomal_L31 (pfam01197) →                                             |
| Vfu-3-1  | NZ_JTLJ01000033.1 | + | 28258   | 28307   | RNA → rpmE (PRK00019) Ribosomal_L31 (pfam01197) →                                             |
| Vfi-1-1  | NZ_JXXQ01000009.1 | - | 5247    | 5198    | RNA → rpmE (PRK00019) Ribosomal_L31 (pfam01197) →                                             |
| Vfi-5-1  | NZ_ASXS01000007.1 | - | 93784   | 93735   | RNA → rpmE (PRK00019) Ribosomal_L31 (pfam01197) →                                             |
| Vfi-3-1  | NZ_JQHW01000024.1 | - | 1142    | 1093    | RNA → rpmE (PRK00019) Ribosomal_L31 (pfam01197) →                                             |
| Vfi-2-1  | NZ_JQHX01000023.1 | - | 82414   | 82365   | RNA → rpmE (PRK00019) Ribosomal_L31 (pfam01197) →                                             |
| Vfi-4-1  | NZ_ASXT01000003.1 | + | 178429  | 178478  | RNA → rpmE (PRK00019) Ribosomal_L31 (pfam01197) →                                             |
| Vfu-2-1  | NC_016602.1       | - | 611055  | 611006  | RNA → rpmE (PRK00019) Ribosomal_L31 (pfam01197) →                                             |
| Vfu-1-1  | NZ_ACZP01000018.1 | - | 103722  | 103673  | RNA → rpmE (PRK00019) Ribosomal_L31 (pfam01197) → rpmE (PRK00019) Ribosomal_L31 (pfam01197) → |
| Vsp-26-1 | NZ_ADBD01000005.1 | + | 179408  | 179459  | RNA → rpmE (PRK00019) Ribosomal_L31 (pfam01197) → rpmE (PRK00019) Ribosomal_L31 (pfam01197) → |
| Vre-1-1  | NZ_JTKI01000012.1 | + | 137514  | 137562  | RNA → rpmE (PRK00019) Ribosomal_L31 (pfam01197) →                                             |
| Vre-1-2  | NZ_JTKH01000005.1 | + | 9661    | 9709    | RNA → rpmE (PRK00019) Ribosomal_L31 (pfam01197) →                                             |
| Vsc-1-1  | NZ_AFWE01000063.1 | - | 23847   | 23799   | RNA → rpmE (PRK00019) Ribosomal_L31 (pfam01197) → rpmE (PRK00019) Ribosomal_L31 (pfam01197) → |
| Vsp-23-1 | NZ_AFWD01000056.1 | + | 110632  | 110680  | RNA → rpmE (PRK00019) Ribosomal_L31 (pfam01197) → rpmE (PRK00019) Ribosomal_L31 (pfam01197) → |
| Vic-1-1  | NZ_AFWF01000319.1 | - | 14236   | 14188   | RNA → rpmE (PRK00019) Ribosomal_L31 (pfam01197) → rpmE (PRK00019) Ribosomal_L31 (pfam01197) → |
| Awo-1-1  | NZ_LN554846.1     | + | 373049  | 373100  | RNA → rpmE (PRK00019) Ribosomal_L31 (pfam01197) →                                             |
| Asa-11-1 | NC_011312.1       | + | 2970876 | 2970927 | RNA → rpmE (PRK00019) Ribosomal_L31 (pfam01197) →                                             |
| Alo-1-1  | NZ_AJYJ01000097.1 | + | 40923   | 40974   | RNA → rpmE (PRK00019) Ribosomal_L31 (pfam01197) →                                             |
| Alo-2-1  | NZ_ASAH01000010.1 | + | 62670   | 62721   | RNA → rpmE (PRK00019) Ribosomal_L31 (pfam01197) →                                             |
| env-642  | CEPX01402402.1    | + | 28      | 76      | RNA → rpmE (PRK00019) Ribosomal_L31 (pfam01197) →                                             |
| Vta-2-1  | NZ_AJZM01000039.1 | + | 89281   | 89329   | RNA → rpmE (PRK00019) Ribosomal_L31 (pfam01197) →                                             |
| Vsp-22-1 | NZ_CH902613.1     | + | 16168   | 16216   | RNA → rpmE (PRK00019) Ribosomal_L31 (pfam01197) →                                             |
| env-643  | CEUP01013542.1    | + | 1403    | 1451    | RNA → rpmE (PRK00019) Ribosomal_L31 (pfam01197) →                                             |
| env-644  | CEUY01108946.1    | - | 745     | 697     | RNA → rpmE (PRK00019) Ribosomal_L31 (pfam01197) →                                             |
| env-645  | CEVA01131518.1    | - | 743     | 695     | RNA → rpmE (PRK00019) Ribosomal_L31 (pfam01197) →                                             |
| Vfo-1-1  | NZ_JFFR01000005.1 | + | 71657   | 71705   | RNA → rpmE (PRK00019) Ribosomal_L31 (pfam01197) →                                             |
| Vta-3-1  | NZ_AJZO01000189.1 | - | 107060  | 107012  | RNA → rpmE (PRK00019) Ribosomal_L31 (pfam01197) →                                             |
| Vta-1-1  | NZ_AJZN01000372.1 | - | 1937    | 1889    | RNA → rpmE (PRK00019) Ribosomal_L31 (pfam01197) →                                             |
| Vsp-43-1 | NC_011753.2       | - | 3051148 | 3051100 | RNA → rpmE (PRK00019) Ribosomal_L31 (pfam01197) →                                             |
| env-646  | CEUP01002391.1    | + | 3518    | 3569    | RNA → rpmE (PRK00019) Ribosomal_L31 (pfam01197) →                                             |
| Vsh-2-1  | NZ_ABCH01000012.1 | - | 28236   | 28185   | RNA → rpmE (PRK00019) Ribosomal_L31 (pfam01197) → rpmE (PRK00019) Ribosomal_L31 (pfam01197) → |
| Vsh-1-1  | NZ_ASHJ01000339.1 | + | 4607    | 4658    | RNA → rpmE (PRK00019) Ribosomal_L31 (pfam01197) →                                             |
| Vsp-7-1  | NZ_JPJA01000096.1 | - | 67831   | 67780   | RNA → rpmE (PRK00019) Ribosomal_L31 (pfam01197) →                                             |
| Vma-1-1  | NZ_BBMR01000011.1 | + | 93746   | 93798   | RNA → rpmE (PRK00019) Ribosomal_L31 (pfam01197) →                                             |
| Vma-1-2  | NZ_BBMT01000020.1 | + | 8867    | 8919    | RNA → rpmE (PRK00019) Ribosomal_L31 (pfam01197) →                                             |
| Vme-1-1  | NZ_ACZO01000005.1 | - | 90681   | 90631   | RNA → rpmE (PRK00019) Ribosomal_L31 (pfam01197) → rpmE (PRK00019) Ribosomal_L31 (pfam01197) → |
| Ymo-1-1  | NZ_CQDS01000022.1 | + | 45976   | 46030   | RNA → rpmE (PRK00019) Ribosomal_L31 (pfam01197) →                                             |
| Ymo-1-2  | NZ_CPYJ01000009.1 | + | 45908   | 45962   | RNA → rpmE (PRK00019) Ribosomal_L31 (pfam01197) →                                             |

|          |                    |   |         |         |                                                                                                                                              |
|----------|--------------------|---|---------|---------|----------------------------------------------------------------------------------------------------------------------------------------------|
| Ymo-1-3  | NZ_CQBM01000006.1  | - | 164691  | 164637  | RNA → rpmE (PRK00019) Ribosomal_L31 (pfam01197) →                                                                                            |
| Ymo-1-4  | NZ_CTIO01000059.1  | - | 9110    | 9056    | RNA → rpmE (PRK00019) Ribosomal_L31 (pfam01197) →                                                                                            |
| Ymo-1-5  | NZ_CTKJ01000023.1  | + | 45799   | 45853   | RNA → rpmE (PRK00019) Ribosomal_L31 (pfam01197) →                                                                                            |
| Ymo-1-6  | NZ_CTRC01000025.1  | + | 46524   | 46578   | RNA → rpmE (PRK00019) Ribosomal_L31 (pfam01197) →                                                                                            |
| Ymo-2-1  | NZ_AALD02000032.1  | - | 9725    | 9671    | RNA → rpmE (PRK00019) Ribosomal_L31 (pfam01197) → rpmE (PRK00019) Ribosomal_L31 (pfam01197) →                                                |
| Ymo-1-7  | NZ_CTEP01000029.1  | + | 23903   | 23957   | RNA → rpmE (PRK00019) Ribosomal_L31 (pfam01197) →                                                                                            |
| Ybe-1-1  | NZ_CQBU01000019.1  | - | 10230   | 10176   | RNA → rpmE (PRK00019) Ribosomal_L31 (pfam01197) →                                                                                            |
| Ybe-2-1  | NZ_AALC02000088.1  | + | 2405    | 2459    | RNA → rpmE (PRK00019) Ribosomal_L31 (pfam01197) → rpmE (PRK00019) Ribosomal_L31 (pfam01197) →<br>rpmE (PRK00019) Ribosomal_L31 (pfam01197) → |
| Yma-2-1  | NZ_HE997650.1      | + | 43162   | 43216   | RNA → rpmE (PRK00019) Ribosomal_L31 (pfam01197) →                                                                                            |
| Yfr-1-1  | NZ_CHEEN01000012.1 | - | 112641  | 112587  | RNA → rpmE (PRK00019) Ribosomal_L31 (pfam01197) →                                                                                            |
| Yfr-1-2  | NZ_CTJA01000014.1  | + | 44765   | 44819   | RNA → rpmE (PRK00019) Ribosomal_L31 (pfam01197) →                                                                                            |
| Yma-1-1  | NZ_CQBH01000009.1  | + | 43447   | 43501   | RNA → rpmE (PRK00019) Ribosomal_L31 (pfam01197) →                                                                                            |
| Yfr-1-3  | NZ_CPZP01000012.1  | - | 112412  | 112358  | RNA → rpmE (PRK00019) Ribosomal_L31 (pfam01197) →                                                                                            |
| Yfr-1-4  | NZ_CTKH01000009.1  | + | 42513   | 42567   | RNA → rpmE (PRK00019) Ribosomal_L31 (pfam01197) →                                                                                            |
| Yfr-1-5  | NZ_CPY01000014.1   | - | 33557   | 33503   | RNA → rpmE (PRK00019) Ribosomal_L31 (pfam01197) →                                                                                            |
| Yfr-1-6  | NZ_CPVN01000012.1  | + | 100741  | 100795  | RNA → rpmE (PRK00019) Ribosomal_L31 (pfam01197) →                                                                                            |
| Ype-1-1  | NZ_CQAZ01000031.1  | + | 21873   | 21927   | RNA → rpmE (PRK00019) Ribosomal_L31 (pfam01197) →                                                                                            |
| Ype-1-2  | NZ_CWJL01000021.1  | + | 57627   | 57681   | RNA → rpmE (PRK00019) Ribosomal_L31 (pfam01197) →                                                                                            |
| Yfr-1-7  | NZ_CQDT01000005.1  | - | 35538   | 35484   | RNA → rpmE (PRK00019) Ribosomal_L31 (pfam01197) →                                                                                            |
| Yfr-1-8  | NZ_CPWN01000012.1  | - | 35062   | 35008   | RNA → rpmE (PRK00019) Ribosomal_L31 (pfam01197) →                                                                                            |
| Yfr-1-9  | NZ_CQBR01000013.1  | - | 34560   | 34506   | RNA → rpmE (PRK00019) Ribosomal_L31 (pfam01197) →                                                                                            |
| Yfr-1-10 | NZ_CQBF01000012.1  | + | 107426  | 107480  | RNA → rpmE (PRK00019) Ribosomal_L31 (pfam01197) →                                                                                            |
| Yfr-1-11 | NZ_CQEC01000013.1  | + | 114411  | 114465  | RNA → rpmE (PRK00019) Ribosomal_L31 (pfam01197) →                                                                                            |
| Yfr-1-12 | NZ_CQEP01000014.1  | - | 25751   | 25697   | RNA → rpmE (PRK00019) Ribosomal_L31 (pfam01197) →                                                                                            |
| Yfr-1-13 | NZ_CQBO01000025.1  | + | 44190   | 44244   | RNA → rpmE (PRK00019) Ribosomal_L31 (pfam01197) →                                                                                            |
| Yfr-2-2  | NZ_AALE02000018.1  | + | 75774   | 75828   | RNA → rpmE (PRK00019) Ribosomal_L31 (pfam01197) → rpmE (PRK00019) Ribosomal_L31 (pfam01197) →                                                |
| Yfr-2-1  | NZ_KN150731.1      | + | 3005078 | 3005132 | RNA → rpmE (PRK00019) Ribosomal_L31 (pfam01197) →                                                                                            |
| Yfr-1-14 | NZ_CQBG01000011.1  | - | 36689   | 36635   | RNA → rpmE (PRK00019) Ribosomal_L31 (pfam01197) →                                                                                            |
| Yfr-1-15 | NZ_CQBX01000015.1  | + | 103415  | 103469  | RNA → rpmE (PRK00019) Ribosomal_L31 (pfam01197) →                                                                                            |
| Yfr-1-16 | NZ_CQDU01000015.1  | + | 94102   | 94156   | RNA → rpmE (PRK00019) Ribosomal_L31 (pfam01197) →                                                                                            |
| Yfr-1-17 | NZ_CQBW01000011.1  | - | 34252   | 34198   | RNA → rpmE (PRK00019) Ribosomal_L31 (pfam01197) →                                                                                            |
| Epi-1-1  | NZ_BAYT01000033.1  | + | 32851   | 32903   | RNA → rpmE (PRK00019) Ribosomal_L31 (pfam01197) →                                                                                            |
| Eta-6-1  | NC_013508.1        | - | 3620131 | 3620079 | RNA → rpmE (PRK00019) Ribosomal_L31 (pfam01197) →                                                                                            |
| Eta-7-1  | NC_017309.1        | - | 3544275 | 3544223 | RNA → rpmE (PRK00019) Ribosomal_L31 (pfam01197) →                                                                                            |
| Eta-5-1  | NC_020796.1        | - | 3687618 | 3687566 | RNA → rpmE (PRK00019) Ribosomal_L31 (pfam01197) →                                                                                            |
| Epi-1-2  | NZ_BAYU01000006.1  | + | 32953   | 33005   | RNA → rpmE (PRK00019) Ribosomal_L31 (pfam01197) →                                                                                            |
| Ean-3-1  | NZ_CP006664.1      | - | 1629414 | 1629362 | RNA → rpmE (PRK00019) Ribosomal_L31 (pfam01197) →                                                                                            |
| Esp-56-1 | NZ_CP011364.1      | + | 751576  | 751628  | RNA → rpmE (PRK00019) Ribosomal_L31 (pfam01197) →                                                                                            |
| Ean-1-1  | NZ_JABY01000008.1  | + | 32857   | 32909   | RNA → rpmE (PRK00019) Ribosomal_L31 (pfam01197) →                                                                                            |
| Ean-4-1  | NZ_JACP01000017.1  | + | 32830   | 32882   | RNA → rpmE (PRK00019) Ribosomal_L31 (pfam01197) →                                                                                            |
| Ean-2-1  | NZ_JABS01000011.1  | - | 207016  | 206964  | RNA → rpmE (PRK00019) Ribosomal_L31 (pfam01197) →                                                                                            |
| Eic-2-1  | NC_012779.2        | + | 3684424 | 3684476 | RNA → rpmE (PRK00019) Ribosomal_L31 (pfam01197) →                                                                                            |
| Eic-1-1  | NZ_AFJ01000056.1   | - | 19577   | 19525   | RNA → rpmE (PRK00019) Ribosomal_L31 (pfam01197) →                                                                                            |
| Eta-2-1  | NZ_AFJG01000032.1  | + | 21708   | 21760   | RNA → rpmE (PRK00019) Ribosomal_L31 (pfam01197) →                                                                                            |
| Eho-5-1  | NZ_BAUC01000010.1  | - | 117607  | 117555  | RNA → rpmE (PRK00019) Ribosomal_L31 (pfam01197) →                                                                                            |
| Eta-4-1  | NZ_GG739637.1      | - | 235527  | 235475  | RNA → rpmE (PRK00019) Ribosomal_L31 (pfam01197) →                                                                                            |
| Eta-1-1  | NZ_CP011359.1      | + | 64883   | 64935   | RNA → rpmE (PRK00019) Ribosomal_L31 (pfam01197) →                                                                                            |
| Eta-3-1  | NZ_AFJJ01000018.1  | + | 109310  | 109362  | RNA → rpmE (PRK00019) Ribosomal_L31 (pfam01197) →                                                                                            |
| Eta-8-1  | NZ_BANW01000013.1  | - | 156383  | 156331  | RNA → rpmE (PRK00019) Ribosomal_L31 (pfam01197) →                                                                                            |
| Yal-1-1  | NZ_CQEH01000017.1  | - | 39180   | 39127   | RNA → rpmE (PRK00019) Ribosomal_L31 (pfam01197) →                                                                                            |
| Yal-1-2  | NZ_CQEJ01000021.1  | - | 38832   | 38779   | RNA → rpmE (PRK00019) Ribosomal_L31 (pfam01197) →                                                                                            |

|           |                    |   |         |         |                                                                                                                                        |
|-----------|--------------------|---|---------|---------|----------------------------------------------------------------------------------------------------------------------------------------|
| Yal-1-3   | NZ_CQCP01000020.1  | + | 47144   | 47197   | RNA → rpmE (PRK00019)Ribosomal_L31 (pfam01197) →                                                                                       |
| Yal-4-1   | NZ_ACCB01000047.1  | - | 1909    | 1856    | RNA → rpmE (PRK00019)Ribosomal_L31 (pfam01197) → rpmE (PRK00019)Ribosomal_L31 (pfam01197) →                                            |
| Yen-14-1  | NC_008800.1        | + | 120155  | 120208  | RNA → rpmE (PRK00019)Ribosomal_L31 (pfam01197) →                                                                                       |
| Yen-1-1   | NZ_CP009846.1      | + | 4065802 | 4065855 | RNA → rpmE (PRK00019)Ribosomal_L31 (pfam01197) →                                                                                       |
| Yal-1-4   | NZ_CQAX01000010.1  | + | 122176  | 122229  | RNA → rpmE (PRK00019)Ribosomal_L31 (pfam01197) →                                                                                       |
| Yen-21-1  | NZ_ASHT01000043.1  | - | 36650   | 36597   | RNA → rpmE (PRK00019)Ribosomal_L31 (pfam01197) →                                                                                       |
| Yen-22-1  | NZ_ASHU01000055.1  | - | 36354   | 36301   | RNA → rpmE (PRK00019)Ribosomal_L31 (pfam01197) →                                                                                       |
| Yen-19-1  | NZ_ASHV01000059.1  | - | 36237   | 36184   | RNA → rpmE (PRK00019)Ribosomal_L31 (pfam01197) →                                                                                       |
| Yen-20-1  | NZ_ASHW01000053.1  | - | 36469   | 36416   | RNA → rpmE (PRK00019)Ribosomal_L31 (pfam01197) →                                                                                       |
| Yen-11-1  | NZ_CAOV01000011.1  | + | 83723   | 83776   | RNA → rpmE (PRK00019)Ribosomal_L31 (pfam01197) →                                                                                       |
| Yen-17-1  | NZ_AGQO01000036.1  | - | 35756   | 35703   | RNA → rpmE (PRK00019)Ribosomal_L31 (pfam01197) →                                                                                       |
| Yen-5-1   | NZ_CACU01000005.1  | + | 132412  | 132465  | RNA → rpmE (PRK00019)Ribosomal_L31 (pfam01197) →                                                                                       |
| Yen-15-1  | NZ_AKKR01000116.1  | - | 27907   | 27854   | RNA → rpmE (PRK00019)Ribosomal_L31 (pfam01197) →                                                                                       |
| Yen-7-1   | NZ_CACW01000016.1  | - | 5952    | 5899    | RNA → rpmE (PRK00019)Ribosomal_L31 (pfam01197) →                                                                                       |
| Yen-6-1   | NZ_CACV01000011.1  | - | 200350  | 200297  | RNA → rpmE (PRK00019)Ribosomal_L31 (pfam01197) →                                                                                       |
| Yen-16-1  | NC_015224.1        | + | 131163  | 131216  | RNA → rpmE (PRK00019)Ribosomal_L31 (pfam01197) →                                                                                       |
| Yen-18-1  | NC_017564.1        | - | 2886749 | 2886696 | RNA → rpmE (PRK00019)Ribosomal_L31 (pfam01197) →                                                                                       |
| Yen-1-2   | NZ_CP009367.1      | - | 3690254 | 3690201 | RNA → rpmE (PRK00019)Ribosomal_L31 (pfam01197) →                                                                                       |
| Yen-1-3   | NZ_CP009838.1      | + | 2005651 | 2005704 | RNA → rpmE (PRK00019)Ribosomal_L31 (pfam01197) →                                                                                       |
| Yen-9-1   | NZ_HF933424.1      | + | 128752  | 128805  | RNA → rpmE (PRK00019)Ribosomal_L31 (pfam01197) →                                                                                       |
| Yen-4-1   | NZ_HF933423.1      | + | 127495  | 127548  | RNA → rpmE (PRK00019)Ribosomal_L31 (pfam01197) →                                                                                       |
| Yen-2-1   | NZ_HF933426.1      | - | 4598604 | 4598551 | RNA → rpmE (PRK00019)Ribosomal_L31 (pfam01197) →                                                                                       |
| Yen-8-1   | NZ_HF933425.1      | + | 157671  | 157724  | RNA → rpmE (PRK00019)Ribosomal_L31 (pfam01197) →                                                                                       |
| Yen-10-1  | NZ_HF933206.1      | + | 132388  | 132441  | RNA → rpmE (PRK00019)Ribosomal_L31 (pfam01197) →                                                                                       |
| Ype-127-1 | NZ_ADPS010000326.1 | + | 13715   | 13768   | RNA → rpmE (PRK00019)Ribosomal_L31 (pfam01197) →                                                                                       |
| Ype-132-1 | NZ_ABCD01000004.1  | + | 834679  | 834732  | RNA → rpmE (PRK00019)Ribosomal_L31 (pfam01197) → rpmE (PRK00019)Ribosomal_L31 (pfam01197) →                                            |
| Ype-76-1  | NZ_AOSA01000185.1  | + | 13890   | 13943   | RNA → rpmE (PRK00019)Ribosomal_L31 (pfam01197) →                                                                                       |
| Ype-77-1  | NZ_AOMY01000087.1  | - | 7151    | 7098    | RNA → rpmE (PRK00019)Ribosomal_L31 (pfam01197) →                                                                                       |
| Ype-227-1 | NZ_AAYS01000001.1  | - | 719404  | 719351  | RNA → rpmE (PRK00019)Ribosomal_L31 (pfam01197) → rpmE (PRK00019)Ribosomal_L31 (pfam01197) → rpmE (PRK00019)Ribosomal_L31 (pfam01197) → |
| Ype-221-1 | NZ_AAYT01000010.1  | + | 29809   | 29862   | RNA → rpmE (PRK00019)Ribosomal_L31 (pfam01197) → rpmE (PRK00019)Ribosomal_L31 (pfam01197) →                                            |
| Ype-224-1 | NZ_ABAT01000037.1  | - | 8040    | 7987    | RNA → rpmE (PRK00019)Ribosomal_L31 (pfam01197) →                                                                                       |
| Ype-228-1 | NZ_ACNS01000001.1  | + | 2230658 | 2230711 | RNA → rpmE (PRK00019)Ribosomal_L31 (pfam01197) → rpmE (PRK00019)Ribosomal_L31 (pfam01197) →                                            |
| Ype-225-1 | NZ_AAOS02000002.1  | - | 191563  | 191510  | RNA → rpmE (PRK00019)Ribosomal_L31 (pfam01197) → rpmE (PRK00019)Ribosomal_L31 (pfam01197) → rpmE (PRK00019)Ribosomal_L31 (pfam01197) → |
| Ype-226-1 | NZ_ACNR01000002.1  | + | 105009  | 105062  | RNA → rpmE (PRK00019)Ribosomal_L31 (pfam01197) → rpmE (PRK00019)Ribosomal_L31 (pfam01197) →                                            |
| Ype-73-1  | NZ_ADSB01001145.1  | - | 769     | 716     | RNA → rpmE (PRK00019)Ribosomal_L31 (pfam01197) →                                                                                       |
| Ype-114-1 | NZ_JYJW01000062.1  | + | 13935   | 13988   | RNA → rpmE (PRK00019)Ribosomal_L31 (pfam01197) →                                                                                       |
| Ype-114-2 | NZ_JYJX01000087.1  | + | 13930   | 13983   | RNA → rpmE (PRK00019)Ribosomal_L31 (pfam01197) →                                                                                       |
| Ype-115-1 | NZ_LBFJ01000039.1  | + | 79507   | 79560   | RNA → rpmE (PRK00019)Ribosomal_L31 (pfam01197) →                                                                                       |
| Ype-218-1 | NZ_AAYU01000010.1  | - | 36730   | 36677   | RNA → rpmE (PRK00019)Ribosomal_L31 (pfam01197) → rpmE (PRK00019)Ribosomal_L31 (pfam01197) →                                            |
| Ype-219-1 | NZ_ADRZ01000574.1  | - | 769     | 716     | RNA → rpmE (PRK00019)Ribosomal_L31 (pfam01197) →                                                                                       |
| Ype-219-2 | NZ_AAYV01000014.1  | - | 8610    | 8557    | RNA → rpmE (PRK00019)Ribosomal_L31 (pfam01197) → rpmE (PRK00019)Ribosomal_L31 (pfam01197) →                                            |
| Ype-105-1 | NZ_AGJZ01000163.1  | - | 7134    | 7081    | RNA → rpmE (PRK00019)Ribosomal_L31 (pfam01197) →                                                                                       |
| Ype-106-1 | NZ_AGKA01000038.1  | - | 7176    | 7123    | RNA → rpmE (PRK00019)Ribosomal_L31 (pfam01197) →                                                                                       |
| Ype-109-1 | NZ_AGJV01000211.1  | + | 12389   | 12442   | RNA → rpmE (PRK00019)Ribosomal_L31 (pfam01197) →                                                                                       |
| Ype-104-1 | NZ_AGJU01000166.1  | - | 7123    | 7070    | RNA → rpmE (PRK00019)Ribosomal_L31 (pfam01197) →                                                                                       |
| Ype-108-1 | NZ_AGJY01000045.1  | - | 7176    | 7123    | RNA → rpmE (PRK00019)Ribosomal_L31 (pfam01197) →                                                                                       |
| Ype-107-1 | NZ_AGJT01000136.1  | - | 7132    | 7079    | RNA → rpmE (PRK00019)Ribosomal_L31 (pfam01197) →                                                                                       |
| Ype-110-1 | NZ_AGJS01000160.1  | - | 7177    | 7124    | RNA → rpmE (PRK00019)Ribosomal_L31 (pfam01197) →                                                                                       |
| Ype-111-1 | NZ_AGJW01000073.1  | - | 7101    | 7048    | RNA → rpmE (PRK00019)Ribosomal_L31 (pfam01197) →                                                                                       |
| Ype-112-1 | NZ_AGJX01000102.1  | - | 7175    | 7122    | RNA → rpmE (PRK00019)Ribosomal_L31 (pfam01197) →                                                                                       |
| Ype-174-1 | NZ_AKRZ01000067.1  | + | 10124   | 10177   | RNA → rpmE (PRK00019)Ribosomal_L31 (pfam01197) →                                                                                       |



|           |                   |   |       |       |                                                                                               |
|-----------|-------------------|---|-------|-------|-----------------------------------------------------------------------------------------------|
| Ype-117-1 | NZ_ADOY01000335.1 | - | 769   | 716   | RNA → rpmE (PRK00019) Ribosomal_L31 (pfam01197) →                                             |
| Ype-170-1 | NZ_AKRW01000074.1 | + | 8810  | 8863  | RNA → rpmE (PRK00019) Ribosomal_L31 (pfam01197) →                                             |
| Ype-9-1   | NZ_ADOW01000210.1 | - | 335   | 282   | RNA → rpmE (PRK00019) Ribosomal_L31 (pfam01197) →                                             |
| Ype-175-1 | NZ_AKSA01000062.1 | + | 12442 | 12495 | RNA → rpmE (PRK00019) Ribosomal_L31 (pfam01197) →                                             |
| Ype-179-1 | NZ_AKSE01000056.1 | + | 8851  | 8904  | RNA → rpmE (PRK00019) Ribosomal_L31 (pfam01197) →                                             |
| Ype-14-1  | NZ_ADPD01000556.1 | + | 10503 | 10556 | RNA → rpmE (PRK00019) Ribosomal_L31 (pfam01197) →                                             |
| Ype-189-1 | NZ_AKSO01000061.1 | + | 8798  | 8851  | RNA → rpmE (PRK00019) Ribosomal_L31 (pfam01197) →                                             |
| Ype-123-1 | NZ_ADPI01000278.1 | + | 13715 | 13768 | RNA → rpmE (PRK00019) Ribosomal_L31 (pfam01197) →                                             |
| Ype-194-1 | NZ_AKST01000031.1 | + | 8772  | 8825  | RNA → rpmE (PRK00019) Ribosomal_L31 (pfam01197) →                                             |
| Ype-20-1  | NZ_ADPM01000236.1 | - | 7093  | 7040  | RNA → rpmE (PRK00019) Ribosomal_L31 (pfam01197) →                                             |
| Ype-201-1 | NZ_AKTA01000022.1 | + | 12445 | 12498 | RNA → rpmE (PRK00019) Ribosomal_L31 (pfam01197) →                                             |
| Ype-207-1 | NZ_AKTG01000058.1 | + | 8844  | 8897  | RNA → rpmE (PRK00019) Ribosomal_L31 (pfam01197) →                                             |
| Ype-42-1  | NZ_AKQL01000708.1 | - | 769   | 716   | RNA → rpmE (PRK00019) Ribosomal_L31 (pfam01197) →                                             |
| Ype-208-1 | NZ_AKTH01000039.1 | + | 12442 | 12495 | RNA → rpmE (PRK00019) Ribosomal_L31 (pfam01197) →                                             |
| Ype-214-1 | NZ_AKTN01000075.1 | + | 5074  | 5127  | RNA → rpmE (PRK00019) Ribosomal_L31 (pfam01197) →                                             |
| Ype-166-1 | NZ_AKTO01000032.1 | + | 8856  | 8909  | RNA → rpmE (PRK00019) Ribosomal_L31 (pfam01197) →                                             |
| Ype-53-1  | NZ_ADRA01001343.1 | + | 9993  | 10046 | RNA → rpmE (PRK00019) Ribosomal_L31 (pfam01197) →                                             |
| Ype-183-1 | NZ_AKSI01000056.1 | + | 8820  | 8873  | RNA → rpmE (PRK00019) Ribosomal_L31 (pfam01197) →                                             |
| Ype-159-1 | NZ_AKRP01000066.1 | + | 8787  | 8840  | RNA → rpmE (PRK00019) Ribosomal_L31 (pfam01197) →                                             |
| Ype-185-1 | NZ_AKSK01000024.1 | + | 8853  | 8906  | RNA → rpmE (PRK00019) Ribosomal_L31 (pfam01197) →                                             |
| Ype-188-1 | NZ_AKSN01000036.1 | + | 8837  | 8890  | RNA → rpmE (PRK00019) Ribosomal_L31 (pfam01197) →                                             |
| Ype-15-1  | NZ_ADPE01000834.1 | + | 5067  | 5120  | RNA → rpmE (PRK00019) Ribosomal_L31 (pfam01197) →                                             |
| Ype-211-1 | NZ_AKTK01000059.1 | + | 8826  | 8879  | RNA → rpmE (PRK00019) Ribosomal_L31 (pfam01197) →                                             |
| Ype-169-1 | NZ_AKTR01000071.1 | + | 8836  | 8889  | RNA → rpmE (PRK00019) Ribosomal_L31 (pfam01197) →                                             |
| Ype-21-1  | NZ_ADPO01001311.1 | + | 5067  | 5120  | RNA → rpmE (PRK00019) Ribosomal_L31 (pfam01197) →                                             |
| Ype-215-1 | NZ_ACNT01000002.1 | + | 99358 | 99411 | RNA → rpmE (PRK00019) Ribosomal_L31 (pfam01197) → rpmE (PRK00019) Ribosomal_L31 (pfam01197) → |
| Ype-176-1 | NZ_AKSB01000035.1 | + | 8780  | 8833  | RNA → rpmE (PRK00019) Ribosomal_L31 (pfam01197) →                                             |
| Ype-172-1 | NZ_AKRX01000066.1 | + | 8773  | 8826  | RNA → rpmE (PRK00019) Ribosomal_L31 (pfam01197) →                                             |
| Ype-162-1 | NZ_AKRS01000057.1 | + | 8792  | 8845  | RNA → rpmE (PRK00019) Ribosomal_L31 (pfam01197) →                                             |
| Ype-180-1 | NZ_AKSF01000045.1 | + | 12446 | 12499 | RNA → rpmE (PRK00019) Ribosomal_L31 (pfam01197) →                                             |
| Ype-164-1 | NZ_AKRU01000036.1 | + | 5005  | 5058  | RNA → rpmE (PRK00019) Ribosomal_L31 (pfam01197) →                                             |
| Ype-190-1 | NZ_AKSP01000050.1 | + | 9378  | 9431  | RNA → rpmE (PRK00019) Ribosomal_L31 (pfam01197) →                                             |
| Ype-165-1 | NZ_AKRV01000028.1 | + | 12442 | 12495 | RNA → rpmE (PRK00019) Ribosomal_L31 (pfam01197) →                                             |
| Ype-191-1 | NZ_AKSQ01000022.1 | + | 9219  | 9272  | RNA → rpmE (PRK00019) Ribosomal_L31 (pfam01197) →                                             |
| Ype-156-1 | NZ_AKRM01000069.1 | + | 12432 | 12485 | RNA → rpmE (PRK00019) Ribosomal_L31 (pfam01197) →                                             |
| Ype-195-1 | NZ_AKSU01000058.1 | + | 8770  | 8823  | RNA → rpmE (PRK00019) Ribosomal_L31 (pfam01197) →                                             |
| Ype-197-1 | NZ_AKSW01000057.1 | + | 12440 | 12493 | RNA → rpmE (PRK00019) Ribosomal_L31 (pfam01197) →                                             |
| Ype-4-1   | NZ_ADOV01000797.1 | + | 10642 | 10695 | RNA → rpmE (PRK00019) Ribosomal_L31 (pfam01197) →                                             |
| Ype-202-1 | NZ_AKTB01000030.1 | + | 6451  | 6504  | RNA → rpmE (PRK00019) Ribosomal_L31 (pfam01197) →                                             |
| Ype-203-1 | NZ_AKTC01000019.1 | + | 8778  | 8831  | RNA → rpmE (PRK00019) Ribosomal_L31 (pfam01197) →                                             |
| Ype-11-1  | NZ_ADOX01001006.1 | + | 623   | 676   | RNA → rpmE (PRK00019) Ribosomal_L31 (pfam01197) →                                             |
| Ype-209-1 | NZ_AKTI01000030.1 | + | 12442 | 12495 | RNA → rpmE (PRK00019) Ribosomal_L31 (pfam01197) →                                             |
| Ype-168-1 | NZ_AKTQ01000048.1 | + | 8785  | 8838  | RNA → rpmE (PRK00019) Ribosomal_L31 (pfam01197) →                                             |
| Ype-122-1 | NZ_ADPG01000719.1 | - | 798   | 745   | RNA → rpmE (PRK00019) Ribosomal_L31 (pfam01197) →                                             |
| Ype-186-1 | NZ_AKSL01000056.1 | + | 12446 | 12499 | RNA → rpmE (PRK00019) Ribosomal_L31 (pfam01197) →                                             |
| Ype-124-1 | NZ_ADPL01000265.1 | + | 62    | 115   | RNA → rpmE (PRK00019) Ribosomal_L31 (pfam01197) →                                             |
| Ype-196-1 | NZ_AKSV01000044.1 | + | 8842  | 8895  | RNA → rpmE (PRK00019) Ribosomal_L31 (pfam01197) →                                             |
| Ype-23-1  | NZ_ADPQ01000548.1 | - | 798   | 745   | RNA → rpmE (PRK00019) Ribosomal_L31 (pfam01197) →                                             |
| Ype-173-1 | NZ_AKRY01000059.1 | + | 8848  | 8901  | RNA → rpmE (PRK00019) Ribosomal_L31 (pfam01197) →                                             |
| Ype-178-1 | NZ_AKSD01000032.1 | + | 8843  | 8896  | RNA → rpmE (PRK00019) Ribosomal_L31 (pfam01197) →                                             |
| Ype-128-1 | NZ_ADPU01000583.1 | - | 798   | 745   | RNA → rpmE (PRK00019) Ribosomal_L31 (pfam01197) →                                             |
| Ype-187-1 | NZ_AKSM01000049.1 | + | 12444 | 12497 | RNA → rpmE (PRK00019) Ribosomal_L31 (pfam01197) →                                             |

|           |                   |   |        |        |                                                   |
|-----------|-------------------|---|--------|--------|---------------------------------------------------|
| Ype-193-1 | NZ_AKSS01000018.1 | + | 9267   | 9320   | RNA → rpmE (PRK00019) Ribosomal_L31 (pfam01197) → |
| Ype-130-1 | NZ_ADQA01000477.1 | - | 412    | 359    | RNA → rpmE (PRK00019) Ribosomal_L31 (pfam01197) → |
| Ype-199-1 | NZ_AKSY01000055.1 | + | 12442  | 12495  | RNA → rpmE (PRK00019) Ribosomal_L31 (pfam01197) → |
| Ype-160-1 | NZ_AKRQ01000033.1 | + | 12432  | 12485  | RNA → rpmE (PRK00019) Ribosomal_L31 (pfam01197) → |
| Ype-206-1 | NZ_AKTF01000032.1 | + | 12436  | 12489  | RNA → rpmE (PRK00019) Ribosomal_L31 (pfam01197) → |
| Ype-163-1 | NZ_AKRT01000060.1 | + | 8826   | 8879   | RNA → rpmE (PRK00019) Ribosomal_L31 (pfam01197) → |
| Ype-213-1 | NZ_AKTM01000034.1 | + | 12438  | 12491  | RNA → rpmE (PRK00019) Ribosomal_L31 (pfam01197) → |
| Ype-151-1 | NZ_AMQL01000001.1 | + | 119897 | 119950 | RNA → rpmE (PRK00019) Ribosomal_L31 (pfam01197) → |
| Ype-182-1 | NZ_AKSH01000070.1 | + | 8780   | 8833   | RNA → rpmE (PRK00019) Ribosomal_L31 (pfam01197) → |
| Ype-158-1 | NZ_AKRO01000081.1 | + | 6527   | 6580   | RNA → rpmE (PRK00019) Ribosomal_L31 (pfam01197) → |
| Ype-204-1 | NZ_AKTD01000072.1 | + | 8776   | 8829   | RNA → rpmE (PRK00019) Ribosomal_L31 (pfam01197) → |
| Ype-118-1 | NZ_AKVQ01000089.1 | - | 7230   | 7177   | RNA → rpmE (PRK00019) Ribosomal_L31 (pfam01197) → |
| Ype-210-1 | NZ_AKTJ01000027.1 | + | 8752   | 8805   | RNA → rpmE (PRK00019) Ribosomal_L31 (pfam01197) → |
| Ype-120-1 | NZ_ADPA01000150.1 | + | 13715  | 13768  | RNA → rpmE (PRK00019) Ribosomal_L31 (pfam01197) → |
| Ype-167-1 | NZ_AKTP01000020.1 | + | 8836   | 8889   | RNA → rpmE (PRK00019) Ribosomal_L31 (pfam01197) → |
| Ype-16-1  | NZ_ADPF01000098.1 | - | 798    | 745    | RNA → rpmE (PRK00019) Ribosomal_L31 (pfam01197) → |
| Ype-177-1 | NZ_AKSC01000026.1 | + | 8781   | 8834   | RNA → rpmE (PRK00019) Ribosomal_L31 (pfam01197) → |
| Ype-181-1 | NZ_AKSG01000061.1 | + | 12440  | 12493  | RNA → rpmE (PRK00019) Ribosomal_L31 (pfam01197) → |
| Ype-184-1 | NZ_AKSJ01000016.1 | + | 12444  | 12497  | RNA → rpmE (PRK00019) Ribosomal_L31 (pfam01197) → |
| Ype-134-1 | NZ_ADQT01000515.1 | - | 798    | 745    | RNA → rpmE (PRK00019) Ribosomal_L31 (pfam01197) → |
| Ype-192-1 | NZ_AKSR01000032.1 | + | 6522   | 6575   | RNA → rpmE (PRK00019) Ribosomal_L31 (pfam01197) → |
| Ype-198-1 | NZ_AKSX01000076.1 | + | 8836   | 8889   | RNA → rpmE (PRK00019) Ribosomal_L31 (pfam01197) → |
| Ype-40-1  | NZ_ADQI01001024.1 | - | 798    | 745    | RNA → rpmE (PRK00019) Ribosomal_L31 (pfam01197) → |
| Ype-205-1 | NZ_AKTE01000056.1 | + | 8828   | 8881   | RNA → rpmE (PRK00019) Ribosomal_L31 (pfam01197) → |
| Ype-161-1 | NZ_AKRR01000069.1 | + | 8837   | 8890   | RNA → rpmE (PRK00019) Ribosomal_L31 (pfam01197) → |
| Ype-38-1  | NZ_ADQG01000238.1 | - | 769    | 716    | RNA → rpmE (PRK00019) Ribosomal_L31 (pfam01197) → |
| Ype-212-1 | NZ_AKTL01000068.1 | + | 8860   | 8913   | RNA → rpmE (PRK00019) Ribosomal_L31 (pfam01197) → |
| Ype-171-1 | NZ_AKTS01000032.1 | + | 8838   | 8891   | RNA → rpmE (PRK00019) Ribosomal_L31 (pfam01197) → |
| Ype-200-1 | NZ_AKSZ01000056.1 | + | 6521   | 6574   | RNA → rpmE (PRK00019) Ribosomal_L31 (pfam01197) → |
| Ype-72-1  | NZ_ADSA02000142.1 | - | 7075   | 7022   | RNA → rpmE (PRK00019) Ribosomal_L31 (pfam01197) → |
| Ype-28-1  | NZ_ADPW01000087.1 | + | 10482  | 10535  | RNA → rpmE (PRK00019) Ribosomal_L31 (pfam01197) → |
| Ype-131-1 | NZ_ADQB01000681.1 | + | 13715  | 13768  | RNA → rpmE (PRK00019) Ribosomal_L31 (pfam01197) → |
| Ype-57-1  | NZ_ADRG01000150.1 | - | 769    | 716    | RNA → rpmE (PRK00019) Ribosomal_L31 (pfam01197) → |
| Ype-63-1  | NZ_ADRQ01000346.1 | - | 543    | 490    | RNA → rpmE (PRK00019) Ribosomal_L31 (pfam01197) → |
| Ype-67-1  | NZ_ADRU01000229.1 | - | 769    | 716    | RNA → rpmE (PRK00019) Ribosomal_L31 (pfam01197) → |
| Ype-148-1 | NZ_ADSF01000103.1 | + | 13920  | 13973  | RNA → rpmE (PRK00019) Ribosomal_L31 (pfam01197) → |
| Ype-80-1  | NZ_ADSK01000857.1 | + | 5067   | 5120   | RNA → rpmE (PRK00019) Ribosomal_L31 (pfam01197) → |
| Ype-126-1 | NZ_ADPR01000439.1 | - | 798    | 745    | RNA → rpmE (PRK00019) Ribosomal_L31 (pfam01197) → |
| Ype-27-1  | NZ_ADPV01000112.1 | - | 335    | 282    | RNA → rpmE (PRK00019) Ribosomal_L31 (pfam01197) → |
| Ype-136-1 | NZ_ADQZ01000375.1 | - | 480    | 427    | RNA → rpmE (PRK00019) Ribosomal_L31 (pfam01197) → |
| Ype-70-1  | NZ_ADRY01000109.1 | - | 769    | 716    | RNA → rpmE (PRK00019) Ribosomal_L31 (pfam01197) → |
| Ype-47-1  | NZ_ADQR01000100.1 | - | 769    | 716    | RNA → rpmE (PRK00019) Ribosomal_L31 (pfam01197) → |
| Ype-135-1 | NZ_ADQX01000781.1 | - | 798    | 745    | RNA → rpmE (PRK00019) Ribosomal_L31 (pfam01197) → |
| Ype-140-1 | NZ_ADRM01000463.1 | - | 769    | 716    | RNA → rpmE (PRK00019) Ribosomal_L31 (pfam01197) → |
| Ype-97-1  | NZ_ADTB01000365.1 | + | 5079   | 5132   | RNA → rpmE (PRK00019) Ribosomal_L31 (pfam01197) → |
| Ype-26-1  | NZ_ADPT01000656.1 | + | 5077   | 5130   | RNA → rpmE (PRK00019) Ribosomal_L31 (pfam01197) → |
| Ype-35-1  | NZ_ADQD01000442.1 | + | 13715  | 13768  | RNA → rpmE (PRK00019) Ribosomal_L31 (pfam01197) → |
| Ype-137-1 | NZ_ADRD01000263.1 | + | 13715  | 13768  | RNA → rpmE (PRK00019) Ribosomal_L31 (pfam01197) → |
| Ype-61-1  | NZ_ADRN01000955.1 | + | 10028  | 10081  | RNA → rpmE (PRK00019) Ribosomal_L31 (pfam01197) → |
| Ype-91-1  | NZ_ADSX01000354.1 | - | 798    | 745    | RNA → rpmE (PRK00019) Ribosomal_L31 (pfam01197) → |
| Ype-46-1  | NZ_ADQQ01000130.1 | - | 769    | 716    | RNA → rpmE (PRK00019) Ribosomal_L31 (pfam01197) → |
| Ype-60-1  | NZ_ADRL01000403.1 | - | 798    | 745    | RNA → rpmE (PRK00019) Ribosomal_L31 (pfam01197) → |



|           |                   |   |         |         |                                                                                               |
|-----------|-------------------|---|---------|---------|-----------------------------------------------------------------------------------------------|
| Ype-62-1  | NZ_ADRP01000734.1 | - | 325     | 272     | RNA → rpmE (PRK00019) Ribosomal_L31 (pfam01197) →                                             |
| Ype-103-1 | NZ_ADTI01001185.1 | + | 9163    | 9216    | RNA → rpmE (PRK00019) Ribosomal_L31 (pfam01197) →                                             |
| Ype-68-1  | NZ_ADRV01000666.1 | - | 769     | 716     | RNA → rpmE (PRK00019) Ribosomal_L31 (pfam01197) →                                             |
| Ype-154-1 | NZ_ADSU01000714.1 | + | 13716   | 13769   | RNA → rpmE (PRK00019) Ribosomal_L31 (pfam01197) →                                             |
| Ype-41-1  | NZ_ADQK01000507.1 | - | 769     | 716     | RNA → rpmE (PRK00019) Ribosomal_L31 (pfam01197) →                                             |
| Ype-49-1  | NZ_ADQU01000137.1 | - | 769     | 716     | RNA → rpmE (PRK00019) Ribosomal_L31 (pfam01197) →                                             |
| Ype-139-1 | NZ_ADRJ01000349.1 | - | 769     | 716     | RNA → rpmE (PRK00019) Ribosomal_L31 (pfam01197) →                                             |
| Ype-75-1  | NZ_ADSD01001379.1 | + | 9545    | 9598    | RNA → rpmE (PRK00019) Ribosomal_L31 (pfam01197) →                                             |
| Ype-92-1  | NZ_ADSY01001236.1 | + | 8207    | 8260    | RNA → rpmE (PRK00019) Ribosomal_L31 (pfam01197) →                                             |
| Ype-133-1 | NZ_ADQN01000513.1 | + | 13920   | 13973   | RNA → rpmE (PRK00019) Ribosomal_L31 (pfam01197) →                                             |
| Ype-44-1  | NZ_ADQO01000836.1 | - | 7070    | 7017    | RNA → rpmE (PRK00019) Ribosomal_L31 (pfam01197) →                                             |
| Ype-58-1  | NZ_ADRI01000395.1 | - | 798     | 745     | RNA → rpmE (PRK00019) Ribosomal_L31 (pfam01197) →                                             |
| Ype-65-1  | NZ_ADRS01001043.1 | + | 9838    | 9891    | RNA → rpmE (PRK00019) Ribosomal_L31 (pfam01197) →                                             |
| Ype-87-1  | NZ_ADSS01000896.1 | - | 769     | 716     | RNA → rpmE (PRK00019) Ribosomal_L31 (pfam01197) →                                             |
| Ype-98-1  | NZ_ADTC01000594.1 | - | 769     | 716     | RNA → rpmE (PRK00019) Ribosomal_L31 (pfam01197) →                                             |
| Ype-129-1 | NZ_ADPX01000345.1 | + | 13715   | 13768   | RNA → rpmE (PRK00019) Ribosomal_L31 (pfam01197) →                                             |
| Ype-119-1 | NZ_ADOZ01000454.1 | - | 798     | 745     | RNA → rpmE (PRK00019) Ribosomal_L31 (pfam01197) →                                             |
| Ype-18-1  | NZ_ADPJ01000086.1 | - | 335     | 282     | RNA → rpmE (PRK00019) Ribosomal_L31 (pfam01197) →                                             |
| Ype-51-1  | NZ_ADQW01000954.1 | + | 5067    | 5120    | RNA → rpmE (PRK00019) Ribosomal_L31 (pfam01197) →                                             |
| Ype-54-1  | NZ_ADRB0100030.1  | - | 798     | 745     | RNA → rpmE (PRK00019) Ribosomal_L31 (pfam01197) →                                             |
| Ype-34-1  | NZ_ADQC01000685.1 | + | 5067    | 5120    | RNA → rpmE (PRK00019) Ribosomal_L31 (pfam01197) →                                             |
| Ype-43-1  | NZ_ADQM01000370.1 | - | 781     | 728     | RNA → rpmE (PRK00019) Ribosomal_L31 (pfam01197) →                                             |
| Ype-55-1  | NZ_ADRC01000710.1 | - | 798     | 745     | RNA → rpmE (PRK00019) Ribosomal_L31 (pfam01197) →                                             |
| Ype-138-1 | NZ_ADRH01000811.1 | + | 12403   | 12456   | RNA → rpmE (PRK00019) Ribosomal_L31 (pfam01197) →                                             |
| Ype-48-1  | NZ_ADSH01000710.1 | + | 13920   | 13973   | RNA → rpmE (PRK00019) Ribosomal_L31 (pfam01197) →                                             |
| Ype-64-1  | NZ_ADRR01001210.1 | + | 62      | 115     | RNA → rpmE (PRK00019) Ribosomal_L31 (pfam01197) →                                             |
| Ype-145-1 | NZ_ADRW01000267.1 | + | 12028   | 12081   | RNA → rpmE (PRK00019) Ribosomal_L31 (pfam01197) →                                             |
| Ype-89-1  | NZ_ADSV01001085.1 | - | 769     | 716     | RNA → rpmE (PRK00019) Ribosomal_L31 (pfam01197) →                                             |
| Ype-149-1 | NZ_ADSG01000304.1 | - | 752     | 699     | RNA → rpmE (PRK00019) Ribosomal_L31 (pfam01197) →                                             |
| Ype-81-1  | NZ_ADSL01000341.1 | + | 62      | 115     | RNA → rpmE (PRK00019) Ribosomal_L31 (pfam01197) →                                             |
| Ype-220-1 | NZ_AAYR01000027.1 | - | 8565    | 8512    | RNA → rpmE (PRK00019) Ribosomal_L31 (pfam01197) → rpmE (PRK00019) Ribosomal_L31 (pfam01197) → |
| Yps-15-1  | NZ_BAUR01000075.1 | + | 71087   | 71140   | RNA → rpmE (PRK00019) Ribosomal_L31 (pfam01197) →                                             |
| Ype-146-1 | NZ_AAUB01000173.1 | + | 6501    | 6554    | RNA → rpmE (PRK00019) Ribosomal_L31 (pfam01197) → rpmE (PRK00019) Ribosomal_L31 (pfam01197) → |
| Ype-69-1  | NZ_ADRX01000324.1 | - | 769     | 716     | RNA → rpmE (PRK00019) Ribosomal_L31 (pfam01197) →                                             |
| Ype-74-1  | NZ_ADSC01000669.1 | + | 4245    | 4298    | RNA → rpmE (PRK00019) Ribosomal_L31 (pfam01197) →                                             |
| Ype-78-1  | NZ_ADSH01000912.1 | + | 9300    | 9353    | RNA → rpmE (PRK00019) Ribosomal_L31 (pfam01197) →                                             |
| Ype-82-1  | NZ_ADSM01000470.1 | + | 5067    | 5120    | RNA → rpmE (PRK00019) Ribosomal_L31 (pfam01197) →                                             |
| Ype-147-1 | NZ_ADSE01000689.1 | + | 13920   | 13973   | RNA → rpmE (PRK00019) Ribosomal_L31 (pfam01197) →                                             |
| Ype-71-1  | NZ_ATW01000295.1  | - | 2939    | 2886    | RNA → rpmE (PRK00019) Ribosomal_L31 (pfam01197) →                                             |
| Ype-88-1  | NZ_ADST01000002.1 | + | 13725   | 13778   | RNA → rpmE (PRK00019) Ribosomal_L31 (pfam01197) →                                             |
| Ype-100-1 | NZ_ADTE01000181.1 | + | 9873    | 9926    | RNA → rpmE (PRK00019) Ribosomal_L31 (pfam01197) →                                             |
| Ype-93-1  | NZ_ADSZ01000320.1 | + | 10485   | 10538   | RNA → rpmE (PRK00019) Ribosomal_L31 (pfam01197) →                                             |
| Ype-142-1 | NC_003143.1       | + | 119914  | 119967  | RNA → rpmE (PRK00019) Ribosomal_L31 (pfam01197) → rpmE (PRK00019) Ribosomal_L31 (pfam01197) → |
| Yps-14-1  | NC_009708.1       | + | 124888  | 124941  | RNA → rpmE (PRK00019) Ribosomal_L31 (pfam01197) →                                             |
| Ype-94-2  | NC_009381.1       | - | 4365187 | 4365134 | RNA → rpmE (PRK00019) Ribosomal_L31 (pfam01197) →                                             |
| Yps-11-2  | NC_010634.1       | + | 110418  | 110471  | RNA → rpmE (PRK00019) Ribosomal_L31 (pfam01197) →                                             |
| Ype-86-1  | NZ_ADSQ01000035.1 | - | 798     | 745     | RNA → rpmE (PRK00019) Ribosomal_L31 (pfam01197) →                                             |
| Ype-101-1 | NZ_ADTG01000548.1 | - | 751     | 698     | RNA → rpmE (PRK00019) Ribosomal_L31 (pfam01197) →                                             |
| Ype-19-1  | NZ_ADPK01000243.1 | + | 5067    | 5120    | RNA → rpmE (PRK00019) Ribosomal_L31 (pfam01197) →                                             |
| Ype-22-1  | NZ_ADPP01000198.1 | + | 13715   | 13768   | RNA → rpmE (PRK00019) Ribosomal_L31 (pfam01197) →                                             |
| Ype-30-1  | NZ_ADPY01001373.1 | + | 13715   | 13768   | RNA → rpmE (PRK00019) Ribosomal_L31 (pfam01197) →                                             |
| Ype-52-1  | NZ_ADQY01000753.1 | - | 798     | 745     | RNA → rpmE (PRK00019) Ribosomal_L31 (pfam01197) →                                             |

|           |                   |   |         |         |                                                                                               |
|-----------|-------------------|---|---------|---------|-----------------------------------------------------------------------------------------------|
| Ype-83-1  | NZ_ADSN01000864.1 | + | 5067    | 5120    | RNA → rpmE (PRK00019) Ribosomal_L31 (pfam01197) →                                             |
| Ype-90-1  | NZ_ADSW01000343.1 | + | 62      | 115     | RNA → rpmE (PRK00019) Ribosomal_L31 (pfam01197) →                                             |
| Ype-102-1 | NZ_ADTH01000245.1 | + | 6953    | 7006    | RNA → rpmE (PRK00019) Ribosomal_L31 (pfam01197) →                                             |
| Ype-121-1 | NZ_ADPC01000333.1 | - | 769     | 716     | RNA → rpmE (PRK00019) Ribosomal_L31 (pfam01197) →                                             |
| Ype-125-1 | NZ_ADPN01000484.1 | - | 798     | 745     | RNA → rpmE (PRK00019) Ribosomal_L31 (pfam01197) →                                             |
| Ype-59-1  | NZ_ADRK01001149.1 | - | 549     | 496     | RNA → rpmE (PRK00019) Ribosomal_L31 (pfam01197) →                                             |
| Ype-85-1  | NZ_AYLR01001051.1 | + | 5067    | 5120    | RNA → rpmE (PRK00019) Ribosomal_L31 (pfam01197) →                                             |
| Ype-33-1  | NZ_ADPZ01000150.1 | - | 769     | 716     | RNA → rpmE (PRK00019) Ribosomal_L31 (pfam01197) →                                             |
| Ype-37-1  | NZ_ADQF01000591.1 | - | 769     | 716     | RNA → rpmE (PRK00019) Ribosomal_L31 (pfam01197) →                                             |
| Ype-56-1  | NZ_ADRE01000062.1 | + | 12515   | 12568   | RNA → rpmE (PRK00019) Ribosomal_L31 (pfam01197) →                                             |
| Ype-141-1 | NZ_ADRO01000211.1 | + | 13735   | 13788   | RNA → rpmE (PRK00019) Ribosomal_L31 (pfam01197) →                                             |
| Ype-66-1  | NZ_ADRT01000420.1 | - | 7070    | 7017    | RNA → rpmE (PRK00019) Ribosomal_L31 (pfam01197) →                                             |
| Ype-79-1  | NZ_ADSJ01000717.1 | + | 5067    | 5120    | RNA → rpmE (PRK00019) Ribosomal_L31 (pfam01197) →                                             |
| Ype-84-1  | NZ_ADSO01000781.1 | - | 798     | 745     | RNA → rpmE (PRK00019) Ribosomal_L31 (pfam01197) →                                             |
| Ype-216-1 | NZ_ADTF01000446.1 | + | 12403   | 12456   | RNA → rpmE (PRK00019) Ribosomal_L31 (pfam01197) →                                             |
| Yps-10-2  | NC_006155.1       | + | 115862  | 115915  | RNA → rpmE (PRK00019) Ribosomal_L31 (pfam01197) →                                             |
| Ype-153-1 | NC_004088.1       | + | 319573  | 319626  | RNA → rpmE (PRK00019) Ribosomal_L31 (pfam01197) → rpmE (PRK00019) Ribosomal_L31 (pfam01197) → |
| Ype-7-1   | NZ_AYLS01000023.1 | + | 99382   | 99435   | RNA → rpmE (PRK00019) Ribosomal_L31 (pfam01197) →                                             |
| Ype-10-1  | NZ_AYLR01000006.1 | - | 2608204 | 2608151 | RNA → rpmE (PRK00019) Ribosomal_L31 (pfam01197) →                                             |
| Yps-12-2  | NC_010465.1       | - | 4530451 | 4530398 | RNA → rpmE (PRK00019) Ribosomal_L31 (pfam01197) →                                             |
| Ype-31-2  | NC_010159.1       | - | 4044329 | 4044276 | RNA → rpmE (PRK00019) Ribosomal_L31 (pfam01197) → hypo → RAYT (COG1943) → RAYT (COG1943) →    |
| Ype-217-1 | NC_014029.1       | + | 118900  | 118953  | RNA → rpmE (PRK00019) Ribosomal_L31 (pfam01197) → rpmE (PRK00019) Ribosomal_L31 (pfam01197) → |
| Ype-29-2  | NC_017168.1       | - | 985179  | 985126  | rpmE (PRK00019) Ribosomal_L31 (pfam01197) →                                                   |
| Ype-5-1   | NZ_CP006783.1     | + | 3932284 | 3932337 | RNA → rpmE (PRK00019) Ribosomal_L31 (pfam01197) →                                             |
| Ype-13-1  | NZ_CP006754.1     | - | 1018418 | 1018365 | RNA → rpmE (PRK00019) Ribosomal_L31 (pfam01197) →                                             |
| Ype-6-1   | NZ_CP006762.1     | - | 1856755 | 1856702 | RNA → rpmE (PRK00019) Ribosomal_L31 (pfam01197) →                                             |
| Ype-8-1   | NZ_CP006758.1     | - | 626171  | 626118  | RNA → rpmE (PRK00019) Ribosomal_L31 (pfam01197) →                                             |
| Ype-3-1   | NZ_CP006794.1     | - | 1252367 | 1252314 | RNA → rpmE (PRK00019) Ribosomal_L31 (pfam01197) →                                             |
| Ype-12-1  | NZ_CP006792.1     | - | 3098142 | 3098089 | RNA → rpmE (PRK00019) Ribosomal_L31 (pfam01197) →                                             |
| Ype-24-1  | NZ_CP006806.1     | + | 163420  | 163473  | RNA → rpmE (PRK00019) Ribosomal_L31 (pfam01197) →                                             |
| Ype-17-1  | NZ_CP006751.1     | - | 1158455 | 1158402 | RNA → rpmE (PRK00019) Ribosomal_L31 (pfam01197) →                                             |
| Ype-25-1  | NZ_CP006748.1     | + | 3470401 | 3470454 | RNA → rpmE (PRK00019) Ribosomal_L31 (pfam01197) →                                             |
| Ype-152-1 | NZ_ADSR01000499.1 | + | 13715   | 13768   | RNA → rpmE (PRK00019) Ribosomal_L31 (pfam01197) →                                             |
| Ype-45-1  | NZ_ADQP01000988.1 | + | 4329    | 4382    | RNA → rpmE (PRK00019) Ribosomal_L31 (pfam01197) →                                             |
| Ype-150-1 | NZ_ADSI01000634.1 | - | 798     | 745     | RNA → rpmE (PRK00019) Ribosomal_L31 (pfam01197) →                                             |
| Ype-39-1  | NZ_ADQH01001213.1 | + | 5067    | 5120    | RNA → rpmE (PRK00019) Ribosomal_L31 (pfam01197) →                                             |
| Ype-96-1  | NZ_ADTA01000354.1 | + | 9546    | 9599    | RNA → rpmE (PRK00019) Ribosomal_L31 (pfam01197) →                                             |
| Ype-50-1  | NZ_ADQV01000561.1 | + | 5067    | 5120    | RNA → rpmE (PRK00019) Ribosomal_L31 (pfam01197) →                                             |
| Ype-155-1 | NC_008149.1       | - | 4294903 | 4294850 | RNA → rpmE (PRK00019) Ribosomal_L31 (pfam01197) →                                             |
| Ype-32-2  | NC_008150.1       | + | 302083  | 302136  | RNA → rpmE (PRK00019) Ribosomal_L31 (pfam01197) →                                             |
| Ype-143-1 | NC_017154.1       | + | 118900  | 118953  | RNA → rpmE (PRK00019) Ribosomal_L31 (pfam01197) → rpmE (PRK00019) Ribosomal_L31 (pfam01197) → |
| Ype-144-1 | NC_017160.1       | + | 118961  | 119014  | rpmE (PRK00019) Ribosomal_L31 (pfam01197) →                                                   |
| Ype-2-1   | NZ_CP009492.1     | + | 2504726 | 2504779 | RNA → rpmE (PRK00019) Ribosomal_L31 (pfam01197) →                                             |
| Yps-11-1  | NZ_CP009780.1     | + | 4050379 | 4050432 | RNA → rpmE (PRK00019) Ribosomal_L31 (pfam01197) →                                             |
| Ype-2-2   | NZ_CP009844.1     | - | 4507031 | 4506978 | RNA → rpmE (PRK00019) Ribosomal_L31 (pfam01197) →                                             |
| Ype-32-1  | NZ_CP009906.1     | + | 3397336 | 3397389 | RNA → rpmE (PRK00019) Ribosomal_L31 (pfam01197) →                                             |
| Ype-31-1  | NZ_CP009935.1     | - | 536663  | 536610  | RNA → rpmE (PRK00019) Ribosomal_L31 (pfam01197) → hypo → RAYT (COG1943) →                     |
| Yps-13-1  | NZ_CP010067.1     | + | 4077636 | 4077689 | RNA → rpmE (PRK00019) Ribosomal_L31 (pfam01197) →                                             |
| Ype-2-3   | NZ_CP010293.1     | + | 484831  | 484884  | RNA → rpmE (PRK00019) Ribosomal_L31 (pfam01197) →                                             |
| Yps-1-1   | NZ_CP009757.1     | + | 3889992 | 3890045 | RNA → rpmE (PRK00019) Ribosomal_L31 (pfam01197) →                                             |

|           |                    |   |         |         |     |   |                 |                           |   |
|-----------|--------------------|---|---------|---------|-----|---|-----------------|---------------------------|---|
| Ype-2-4   | NZ_CP009704.1      | + | 3323809 | 3323862 | RNA | → | rpmE (PRK00019) | Ribosomal_L31 (pfam01197) | → |
| Yps-10-1  | NZ_CP009712.1      | - | 2780604 | 2780551 | RNA | → | rpmE (PRK00019) | Ribosomal_L31 (pfam01197) | → |
| Ype-2-5   | NZ_CP009785.1      | - | 886875  | 886822  | RNA | → | rpmE (PRK00019) | Ribosomal_L31 (pfam01197) | → |
| Ype-113-1 | NZ_CP010023.1      | + | 4500934 | 4500987 | RNA | → | rpmE (PRK00019) | Ribosomal_L31 (pfam01197) | → |
| Ype-2-6   | NZ_CP009723.1      | - | 3814528 | 3814475 | RNA | → | rpmE (PRK00019) | Ribosomal_L31 (pfam01197) | → |
| Yps-1-2   | NZ_CP009786.1      | + | 4234015 | 4234068 | RNA | → | rpmE (PRK00019) | Ribosomal_L31 (pfam01197) | → |
| Ype-2-7   | NZ_CP009991.1      | - | 1952990 | 1952937 | RNA | → | rpmE (PRK00019) | Ribosomal_L31 (pfam01197) | → |
| Yps-12-1  | NZ_CP009792.1      | - | 490330  | 490277  | RNA | → | rpmE (PRK00019) | Ribosomal_L31 (pfam01197) | → |
| Ype-29-1  | NZ_CP009840.1      | + | 2556450 | 2556503 | RNA | → | rpmE (PRK00019) | Ribosomal_L31 (pfam01197) | → |
| Ype-2-8   | NZ_CP009996.1      | - | 323257  | 323204  | RNA | → | rpmE (PRK00019) | Ribosomal_L31 (pfam01197) | → |
| Ype-95-1  | NZ_CP010247.1      | - | 579933  | 579880  | RNA | → | rpmE (PRK00019) | Ribosomal_L31 (pfam01197) | → |
| Ype-94-1  | NZ_CP009715.1      | + | 758495  | 758548  | RNA | → | rpmE (PRK00019) | Ribosomal_L31 (pfam01197) | → |
| Ype-222-1 | NC_017265.1        | + | 253058  | 253111  | RNA | → | rpmE (PRK00019) | Ribosomal_L31 (pfam01197) | → |
| Ype-223-1 | NC_005810.1        | + | 120657  | 120710  | RNA | → | rpmE (PRK00019) | Ribosomal_L31 (pfam01197) | → |
| Ype-2-9   | NZ_CP009836.1      | - | 1128920 | 1128867 | RNA | → | rpmE (PRK00019) | Ribosomal_L31 (pfam01197) | → |
| Ype-36-1  | NZ_ADQE01000355.1  | + | 62      | 115     | RNA | → | rpmE (PRK00019) | Ribosomal_L31 (pfam01197) | → |
| Ype-99-1  | NZ_ADTD01000838.1  | - | 769     | 716     | RNA | → | rpmE (PRK00019) | Ribosomal_L31 (pfam01197) | → |
| Yps-9-1   | NZ_CBKR010000111.1 | - | 7080    | 7027    | RNA | → | rpmE (PRK00019) | Ribosomal_L31 (pfam01197) | → |
| Yps-8-1   | NZ_CBKS010000081.1 | + | 71103   | 71156   | RNA | → | rpmE (PRK00019) | Ribosomal_L31 (pfam01197) | → |
| Ype-116-1 | NZ_AXDG01000093.1  | + | 12398   | 12451   | RNA | → | rpmE (PRK00019) | Ribosomal_L31 (pfam01197) | → |
| Ype-157-1 | NZ_AKRN01000061.1  | + | 12430   | 12483   | RNA | → | rpmE (PRK00019) | Ribosomal_L31 (pfam01197) | → |
| Yal-2-1   | NZ_CP009781.1      | - | 2568066 | 2568013 | RNA | → | rpmE (PRK00019) | Ribosomal_L31 (pfam01197) | → |
| Ynu-1-1   | NZ_CPYD01000015.1  | + | 93996   | 94049   | RNA | → | rpmE (PRK00019) | Ribosomal_L31 (pfam01197) | → |
| Yru-1-1   | NZ_CP009539.1      | - | 2020716 | 2020663 | RNA | → | rpmE (PRK00019) | Ribosomal_L31 (pfam01197) | → |
| Dze-2-1   | NZ_APMV01000013.1  | + | 179089  | 179142  | RNA | → | rpmE (PRK00019) | Ribosomal_L31 (pfam01197) | → |
| Dsp-1-1   | NZ_JSYG01000017.1  | + | 181093  | 181146  | RNA | → | rpmE (PRK00019) | Ribosomal_L31 (pfam01197) | → |
| Ssp-23-1  | NZ_AWXH01000002.1  | - | 14589   | 14536   | RNA | → | rpmE (PRK00019) | Ribosomal_L31 (pfam01197) | → |
| env-647   | HBC_scaff_10311262 | - | 789     | 736     | RNA | → | hypo            | →                         |   |
| env-648   | HBC_scaff_10330317 | + | 27      | 80      | RNA | → | metL (PRK09466) | Homoserine_dh (pfam00742) | → |
| env-649   | HBC_ctgs_1043907   | - | 789     | 736     | RNA | → | hypo            | →                         |   |
| env-650   | HBC_ctgs_1006921   | + | 27      | 80      | RNA | → | metL (PRK09466) | Homoserine_dh (pfam00742) | → |
| Lqu-1-1   | NZ_JIBP01000021.1  | + | 129696  | 129749  | RNA | → | rpmE (PRK00019) | Ribosomal_L31 (pfam01197) | → |
| Lqu-1-2   | NZ_JIBO01000012.1  | - | 15246   | 15193   | RNA | → | rpmE (PRK00019) | Ribosomal_L31 (pfam01197) | → |
| Lqu-1-3   | NZ_JIBQ01000013.1  | + | 129634  | 129687  | RNA | → | rpmE (PRK00019) | Ribosomal_L31 (pfam01197) | → |
| Dsp-2-1   | NZ_JXBN01000033.1  | + | 48158   | 48211   | RNA | → | rpmE (PRK00019) | Ribosomal_L31 (pfam01197) | → |
| Dch-1-1   | NZ_JRWY01000048.1  | + | 61153   | 61206   | RNA | → | rpmE (PRK00019) | Ribosomal_L31 (pfam01197) | → |
| Dsp-6-1   | NZ_JXBO01000013.1  | - | 15193   | 15140   | RNA | → | rpmE (PRK00019) | Ribosomal_L31 (pfam01197) | → |
| Dso-1-1   | NZ_CP009460.1      | + | 3086245 | 3086298 | RNA | → | rpmE (PRK00019) | Ribosomal_L31 (pfam01197) | → |
| Dsp-5-1   | NZ_CM001979.1      | + | 218165  | 218218  | RNA | → | rpmE (PRK00019) | Ribosomal_L31 (pfam01197) | → |
| Dsp-4-1   | NZ_CM001984.1      | + | 228039  | 228092  | RNA | → | rpmE (PRK00019) | Ribosomal_L31 (pfam01197) | → |
| Dze-7-1   | NZ_APWM01000030.1  | + | 26292   | 26345   | RNA | → | rpmE (PRK00019) | Ribosomal_L31 (pfam01197) | → |
| Dze-9-1   | NZ_AJVN01000010.1  | + | 188349  | 188402  | RNA | → | rpmE (PRK00019) | Ribosomal_L31 (pfam01197) | → |
| Dda-5-1   | NC_013592.1        | - | 4501180 | 4501127 | RNA | → | rpmE (PRK00019) | Ribosomal_L31 (pfam01197) | → |
| Dze-8-1   | NZ_CM001858.1      | - | 4245021 | 4244968 | RNA | → | rpmE (PRK00019) | Ribosomal_L31 (pfam01197) | → |
| Dze-5-1   | NZ_CM001977.1      | - | 4240558 | 4240505 | RNA | → | rpmE (PRK00019) | Ribosomal_L31 (pfam01197) | → |
| Dze-1-1   | NZ_CM001972.1      | - | 4399809 | 4399756 | RNA | → | rpmE (PRK00019) | Ribosomal_L31 (pfam01197) | → |
| Dze-6-1   | NZ_CM001980.1      | - | 4317617 | 4317564 | RNA | → | rpmE (PRK00019) | Ribosomal_L31 (pfam01197) | → |
| Dze-4-1   | NZ_CM001985.1      | - | 4353927 | 4353874 | RNA | → | rpmE (PRK00019) | Ribosomal_L31 (pfam01197) | → |
| Dze-3-1   | NZ_CP006929.1      | - | 4276325 | 4276272 | RNA | → | rpmE (PRK00019) | Ribosomal_L31 (pfam01197) | → |
| Dch-3-1   | NZ_CM001974.1      | + | 156157  | 156210  | RNA | → | rpmE (PRK00019) | Ribosomal_L31 (pfam01197) | → |
| Dch-2-1   | NZ_CM001981.1      | + | 138095  | 138148  | RNA | → | rpmE (PRK00019) | Ribosomal_L31 (pfam01197) | → |
| Dda-1-1   | NZ_CM001982.1      | + | 212261  | 212314  | RNA | → | rpmE (PRK00019) | Ribosomal_L31 (pfam01197) | → |



|          |                    |   |         |         |                                                                                             |
|----------|--------------------|---|---------|---------|---------------------------------------------------------------------------------------------|
| Dda-3-1  | NZ_CM001978.1      | + | 204493  | 204546  | RNA → rpmE (PRK00019)Ribosomal_L31 (pfam01197) →                                            |
| Dda-4-1  | NC_014500.1        | + | 216804  | 216857  | RNA → rpmE (PRK00019)Ribosomal_L31 (pfam01197) →                                            |
| Dda-2-1  | NZ_CM001976.1      | + | 246468  | 246521  | RNA → rpmE (PRK00019)Ribosomal_L31 (pfam01197) →                                            |
| Dch-1-2  | NZ_JSYH01000045.1  | + | 149402  | 149455  | RNA → rpmE (PRK00019)Ribosomal_L31 (pfam01197) →                                            |
| Dch-4-1  | NZ_CM001904.1      | + | 133855  | 133908  | RNA → rpmE (PRK00019)Ribosomal_L31 (pfam01197) →                                            |
| Dsp-9-1  | NZ_CM001975.1      | + | 190423  | 190476  | RNA → rpmE (PRK00019)Ribosomal_L31 (pfam01197) →                                            |
| Xdo-1-1  | NZ_FO704550.1      | + | 206252  | 206305  | RNA → rpmE (PRK00019)Ribosomal_L31 (pfam01197) →                                            |
| Xpo-1-1  | NZ_FO704551.1      | - | 3528869 | 3528816 | RNA → rpmE (PRK00019)Ribosomal_L31 (pfam01197) →                                            |
| Xbo-11-1 | NC_013892.1        | - | 4104240 | 4104187 | RNA → rpmE (PRK00019)Ribosomal_L31 (pfam01197) → rpmE (PRK00019)Ribosomal_L31 (pfam01197) → |
| Xbo-3-1  | NZ_HG428366.1      | - | 23364   | 23311   | RNA → rpmE (PRK00019)Ribosomal_L31 (pfam01197) →                                            |
| Xbo-8-1  | NZ_HG427595.1      | + | 21398   | 21451   | RNA → rpmE (PRK00019)Ribosomal_L31 (pfam01197) →                                            |
| Xbo-2-1  | NZ_HG428558.1      | + | 25827   | 25880   | RNA → rpmE (PRK00019)Ribosomal_L31 (pfam01197) →                                            |
| Xbo-6-1  | NZ_HG427126.1      | - | 7746    | 7693    | RNA → rpmE (PRK00019)Ribosomal_L31 (pfam01197) →                                            |
| Xbo-5-1  | NZ_HG426603.1      | - | 23994   | 23941   | RNA → rpmE (PRK00019)Ribosomal_L31 (pfam01197) →                                            |
| Xbo-10-1 | NZ_HG779933.1      | - | 23971   | 23918   | RNA → rpmE (PRK00019)Ribosomal_L31 (pfam01197) →                                            |
| Xbo-4-1  | NZ_HG426761.1      | - | 24006   | 23953   | RNA → rpmE (PRK00019)Ribosomal_L31 (pfam01197) →                                            |
| Xbo-7-1  | NZ_HG428161.1      | - | 23817   | 23764   | RNA → rpmE (PRK00019)Ribosomal_L31 (pfam01197) →                                            |
| Xbo-9-1  | NZ_HG427430.1      | + | 93568   | 93621   | RNA → rpmE (PRK00019)Ribosomal_L31 (pfam01197) →                                            |
| Xbo-1-1  | NZ_FO818637.1      | - | 4500575 | 4500522 | RNA → rpmE (PRK00019)Ribosomal_L31 (pfam01197) →                                            |
| Xsz-1-1  | NZ_CBXF010000099.1 | + | 173156  | 173209  | RNA → rpmE (PRK00019)Ribosomal_L31 (pfam01197) →                                            |
| Xca-1-1  | NZ_CBXE010000012.1 | - | 24443   | 24390   | RNA → rpmE (PRK00019)Ribosomal_L31 (pfam01197) →                                            |
| Xkh-1-1  | NZ_LFCV01000027.1  | - | 4729    | 4676    | RNA → ←-hypo                                                                                |
| Xsp-1-1  | NZ_JTHK01000060.1  | - | 23322   | 23269   | RNA → rpmE (PRK00019)Ribosomal_L31 (pfam01197) →                                            |
| Xne-5-1  | NZ_CCWM01000116.1  | + | 16700   | 16753   | RNA → rpmE (PRK00019)Ribosomal_L31 (pfam01197) →                                            |
| Xne-5-2  | NZ_CCWM01000334.1  | + | 16700   | 16753   | RNA → rpmE (PRK00019)Ribosomal_L31 (pfam01197) →                                            |
| Xne-6-1  | NZ_CCWW01000414.1  | - | 7580    | 7527    | RNA → rpmE (PRK00019)Ribosomal_L31 (pfam01197) →                                            |
| Xne-3-1  | NC_014228.1        | + | 198616  | 198669  | RNA → rpmE (PRK00019)Ribosomal_L31 (pfam01197) →                                            |
| Xne-4-1  | NZ_HF952048.1      | + | 184374  | 184427  | RNA → rpmE (PRK00019)Ribosomal_L31 (pfam01197) →                                            |
| Xne-2-1  | NZ_LN681227.1      | + | 198617  | 198670  | RNA → rpmE (PRK00019)Ribosomal_L31 (pfam01197) →                                            |
| Xne-1-1  | NZ_JRV01000010.1   | - | 42870   | 42817   | RNA → rpmE (PRK00019)Ribosomal_L31 (pfam01197) →                                            |
| Plu-5-1  | NZ_JQOC01000024.1  | - | 35411   | 35358   | RNA → rpmE (PRK00019)Ribosomal_L31 (pfam01197) →                                            |
| Plu-9-1  | NZ_JXSK01000009.1  | - | 70770   | 70717   | RNA → rpmE (PRK00019)Ribosomal_L31 (pfam01197) →                                            |
| Plu-7-1  | NZ_AZAB02000203.1  | - | 35364   | 35311   | RNA → rpmE (PRK00019)Ribosomal_L31 (pfam01197) →                                            |
| Plu-8-1  | NZ_JTHJ02000138.1  | + | 22410   | 22463   | RNA → rpmE (PRK00019)Ribosomal_L31 (pfam01197) →                                            |
| Plu-5-2  | NZ_JXUR02000066.1  | + | 22410   | 22463   | RNA → rpmE (PRK00019)Ribosomal_L31 (pfam01197) →                                            |
| Plu-6-1  | NZ_JFGV01000042.1  | - | 14184   | 14131   | RNA → rpmE (PRK00019)Ribosomal_L31 (pfam01197) →                                            |
| Pte-4-1  | NZ_CP011104.1      | - | 1726439 | 1726386 | RNA → rpmE (PRK00019)Ribosomal_L31 (pfam01197) →                                            |
| Pte-6-1  | NZ_AUXQ01000046.1  | + | 22142   | 22195   | RNA → hypo → rpmE (PRK00019)Ribosomal_L31 (pfam01197) →                                     |
| Pte-5-1  | NZ_AXDT01000086.1  | + | 18583   | 18636   | RNA → rpmE (PRK00019)Ribosomal_L31 (pfam01197) →                                            |
| Pte-3-1  | NZ_JGVH01000076.1  | - | 10895   | 10842   | RNA → rpmE (PRK00019)Ribosomal_L31 (pfam01197) →                                            |
| Plu-10-1 | NC_005126.1        | - | 5539908 | 5539855 | RNA → rpmE (PRK00019)Ribosomal_L31 (pfam01197) →                                            |
| Pte-2-1  | NZ_LAYSJ01000007.1 | + | 43299   | 43352   | RNA → rpmE (PRK00019)Ribosomal_L31 (pfam01197) →                                            |
| Ssp-15-1 | NZ_AYKS02000100.1  | - | 30017   | 29965   | RNA → rpmE (PRK00019)Ribosomal_L31 (pfam01197) →                                            |
| Pca-2-1  | NZ_JRMH01000002.1  | - | 333539  | 333487  | RNA → rpmE (PRK00019)Ribosomal_L31 (pfam01197) →                                            |
| Pca-1-1  | NZ_JSXC01000044.1  | - | 17660   | 17608   | RNA → rpmE (PRK00019)Ribosomal_L31 (pfam01197) →                                            |
| Ddi-5-1  | NZ_CM001841.1      | + | 187089  | 187141  | RNA → rpmE (PRK00019)Ribosomal_L31 (pfam01197) →                                            |
| Ddi-3-1  | NZ_CM001838.1      | + | 162116  | 162168  | RNA → rpmE (PRK00019)Ribosomal_L31 (pfam01197) →                                            |
| Ddi-4-1  | NZ_CM001840.1      | + | 170048  | 170100  | RNA → rpmE (PRK00019)Ribosomal_L31 (pfam01197) →                                            |
| Dsp-7-1  | NZ_CM001973.1      | + | 162116  | 162168  | RNA → rpmE (PRK00019)Ribosomal_L31 (pfam01197) →                                            |
| Ddi-1-1  | NZ_CM002023.1      | + | 192156  | 192208  | RNA → rpmE (PRK00019)Ribosomal_L31 (pfam01197) →                                            |
| Ddi-2-1  | NZ_KQ046817.1      | - | 4180925 | 4180873 | RNA → rpmE (PRK00019)Ribosomal_L31 (pfam01197) →                                            |
| Ssp-13-1 | NZ_JQEI01000010.1  | + | 16683   | 16735   | RNA → rpmE (PRK00019)Ribosomal_L31 (pfam01197) →                                            |

|          |                        |   |         |         |                                                                                                |
|----------|------------------------|---|---------|---------|------------------------------------------------------------------------------------------------|
| Ssp-14-1 | NZ_LQJEJ01000064.1     | + | 16684   | 16736   | RNA → rpmE (PRK00019)Ribosomal_L31 (pfam01197) →                                               |
| Dpa-1-1  | NZ_CM001857.1          | - | 4364511 | 4364459 | RNA → rpmE (PRK00019)Ribosomal_L31 (pfam01197) →                                               |
| Sfo-1-1  | NZ_CP011254.1          | - | 1590388 | 1590336 | RNA → rpmE (PRK00019)Ribosomal_L31 (pfam01197) →                                               |
| Sfo-2-1  | NZ_AVAH01000002.1      | - | 32669   | 32617   | RNA → rpmE (PRK00019)Ribosomal_L31 (pfam01197) →                                               |
| Sfo-5-1  | NZ_ASZB01000023.1      | + | 61525   | 61577   | RNA → rpmE (PRK00019)Ribosomal_L31 (pfam01197) →                                               |
| Sfo-4-1  | NZ_ASZA01000012.1      | - | 28374   | 28322   | RNA → rpmE (PRK00019)Ribosomal_L31 (pfam01197) →                                               |
| Sfo-3-1  | NZ_AUZV01000007.1      | + | 146615  | 146667  | RNA → rpmE (PRK00019)Ribosomal_L31 (pfam01197) →                                               |
| Pca-7-1  | NZ_AODU01000021.1      | - | 23353   | 23301   | RNA → rpmE (PRK00019)Ribosomal_L31 (pfam01197) →                                               |
| Ppa-2-1  | NZ_JENG01000020.1      | + | 33412   | 33464   | RNA → rpmE (PRK00019)Ribosomal_L31 (pfam01197) →                                               |
| Pwa-3-1  | NC_013421.1            | + | 198446  | 198498  | RNA → rpmE (PRK00019)Ribosomal_L31 (pfam01197) →                                               |
| Ppa-1-1  | NZ_KN151108.1          | - | 181617  | 181565  | RNA → rpmE (PRK00019)Ribosomal_L31 (pfam01197) →                                               |
| Pat-3-1  | NZ_KB933471.1          | + | 739413  | 739465  | RNA → rpmE (PRK00019)Ribosomal_L31 (pfam01197) →                                               |
| Pat-4-1  | NC_004547.2            | - | 4770742 | 4770690 | RNA → rpmE (PRK00019)Ribosomal_L31 (pfam01197) →                                               |
| Pat-2-1  | NZ_CP007744.1          | - | 4721893 | 4721841 | RNA → rpmE (PRK00019)Ribosomal_L31 (pfam01197) →                                               |
| Pat-2-2  | NZ_CP009125.1          | - | 4676226 | 4676174 | RNA → rpmE (PRK00019)Ribosomal_L31 (pfam01197) →                                               |
| Psp-55-1 | NC_017845.1            | + | 210989  | 211041  | RNA → rpmE (PRK00019)Ribosomal_L31 (pfam01197) →                                               |
| Pwa-2-1  | NZ_AKVS01000042.1      | + | 29133   | 29185   | RNA → rpmE (PRK00019)Ribosomal_L31 (pfam01197) →                                               |
| Pwa-1-1  | NZ_JQHP01000018.1      | - | 24420   | 24368   | RNA → rpmE (PRK00019)Ribosomal_L31 (pfam01197) →                                               |
| Pwa-1-2  | NZ_JQOH01000017.1      | + | 30041   | 30093   | RNA → rpmE (PRK00019)Ribosomal_L31 (pfam01197) →                                               |
| Pca-8-1  | NZ_JQOF01000004.1      | + | 276707  | 276759  | RNA → rpmE (PRK00019)Ribosomal_L31 (pfam01197) →                                               |
| Pca-8-2  | NZ_JQOG01000006.1      | - | 24482   | 24430   | RNA → rpmE (PRK00019)Ribosomal_L31 (pfam01197) →                                               |
| Bgo-1-1  | NZ_CGIG01000001.1      | - | 1386796 | 1386744 | RNA → rpmE (PRK00019)Ribosomal_L31 (pfam01197) →                                               |
| Bsp-1-1  | NZ_CM001230.1          | - | 4603649 | 4603597 | RNA → rpmE (PRK00019)Ribosomal_L31 (pfam01197) → rpmE (PRK00019)Ribosomal_L31 (pfam01197) →    |
| Dsp-3-1  | NZ_CM001983.1          | + | 176356  | 176408  | rpmE (PRK00019)Ribosomal_L31 (pfam01197) →<br>RNA → rpmE (PRK00019)Ribosomal_L31 (pfam01197) → |
| Pbe-1-1  | NZ_JQHM01000017.1      | + | 44048   | 44100   | RNA → rpmE (PRK00019)Ribosomal_L31 (pfam01197) →                                               |
| Pbe-1-2  | NZ_JQHL01000014.1      | - | 18376   | 18324   | RNA → rpmE (PRK00019)Ribosomal_L31 (pfam01197) →                                               |
| Pca-5-11 | NZ_JUJI01000017.1      | - | 23832   | 23780   | RNA → rpmE (PRK00019)Ribosomal_L31 (pfam01197) →                                               |
| Ppo-1-1  | NZ_JQHN01000020.1      | + | 52227   | 52279   | RNA → rpmE (PRK00019)Ribosomal_L31 (pfam01197) →                                               |
| env-651  | JGI26054J46599_1244098 | + | 95      | 147     | RNA → ←-hypo                                                                                   |
| env-652  | SPBFG_contig14881      | - | 539     | 487     | RNA → rpmE (PRK00019)Ribosomal_L31 (pfam01197) →                                               |
| Sma-27-1 | NZ_ALOV01000001.1      | + | 94626   | 94678   | RNA → rpmE (PRK00019)Ribosomal_L31 (pfam01197) →                                               |
| Sma-23-1 | NZ_AVSR01000009.1      | - | 25295   | 25243   | RNA → rpmE (PRK00019)Ribosomal_L31 (pfam01197) →                                               |
| Sma-20-1 | NZ_JVCS01000035.1      | - | 25362   | 25310   | RNA → rpmE (PRK00019)Ribosomal_L31 (pfam01197) →                                               |
| Sso-1-1  | NZ_JUSZ01000089.1      | + | 94274   | 94326   | RNA → rpmE (PRK00019)Ribosomal_L31 (pfam01197) →                                               |
| Sma-9-1  | NZ_AYMO01000018.1      | - | 25741   | 25689   | RNA → rpmE (PRK00019)Ribosomal_L31 (pfam01197) →                                               |
| Sma-28-1 | NC_020211.1            | - | 5122946 | 5122894 | RNA → rpmE (PRK00019)Ribosomal_L31 (pfam01197) → rpmE (PRK00019)Ribosomal_L31 (pfam01197) →    |
| Sma-7-1  | NZ_KK214336.1          | + | 24122   | 24174   | RNA → rpmE (PRK00019)Ribosomal_L31 (pfam01197) → rpmE (PRK00019)Ribosomal_L31 (pfam01197) →    |
| Sma-5-1  | NZ_KI929263.1          | - | 2697435 | 2697383 | RNA → rpmE (PRK00019)Ribosomal_L31 (pfam01197) → rpmE (PRK00019)Ribosomal_L31 (pfam01197) →    |
| Sma-19-1 | NZ_AP013063.1          | + | 4816609 | 4816661 | RNA → rpmE (PRK00019)Ribosomal_L31 (pfam01197) → rpmE (PRK00019)Ribosomal_L31 (pfam01197) →    |
| Sma-18-1 | NZ_LAYMT01000027.1     | - | 25712   | 25660   | RNA → rpmE (PRK00019)Ribosomal_L31 (pfam01197) →                                               |
| Sma-3-2  | NZ_JTBR01000001.1      | + | 3163415 | 3163467 | RNA → rpmE (PRK00019)Ribosomal_L31 (pfam01197) →                                               |
| env-653  | AEQT01000902.1         | - | 25741   | 25689   | RNA → rpmE (PRK00019)Ribosomal_L31 (pfam01197) →                                               |
| env-654  | APTF_contig00062       | + | 84678   | 84730   | RNA → rpmE (PRK00019)Ribosomal_L31 (pfam01197) →                                               |
| Sur-1-1  | NZ_JSFB01000001.1      | - | 3972705 | 3972653 | RNA → rpmE (PRK00019)Ribosomal_L31 (pfam01197) →                                               |
| Ssp-20-1 | NZ_LDEG01000010.1      | - | 25885   | 25833   | RNA → rpmE (PRK00019)Ribosomal_L31 (pfam01197) →                                               |
| Sma-3-3  | NZ_JVEJ01000246.1      | - | 25311   | 25259   | RNA → rpmE (PRK00019)Ribosomal_L31 (pfam01197) →                                               |
| Ssp-12-1 | NZ_JVEL01000457.1      | - | 8014    | 7962    | RNA → rpmE (PRK00019)Ribosomal_L31 (pfam01197) → rpmE (PRK00019)Ribosomal_L31 (pfam01197) →    |
| Sma-21-1 | NZ_JMPQ01000029.1      | + | 94339   | 94391   | RNA → rpmE (PRK00019)Ribosomal_L31 (pfam01197) →                                               |
| Sne-1-1  | NZ_JPUX01000001.1      | - | 29493   | 29441   | RNA → rpmE (PRK00019)Ribosomal_L31 (pfam01197) → rpmE (PRK00019)Ribosomal_L31 (pfam01197) →    |
| Ssp-19-1 | NZ_CP003424.1          | - | 4914868 | 4914816 | RNA → rpmE (PRK00019)Ribosomal_L31 (pfam01197) → rpmE (PRK00019)Ribosomal_L31 (pfam01197) →    |
| Ssp-16-1 | NZ_CP005927.1          | - | 849700  | 849648  | RNA → rpmE (PRK00019)Ribosomal_L31 (pfam01197) → rpmE (PRK00019)Ribosomal_L31 (pfam01197) →    |



|          |                         |   |         |         |                                                                                             |
|----------|-------------------------|---|---------|---------|---------------------------------------------------------------------------------------------|
| Sma-8-1  | NZ_KK214298.1           | - | 25945   | 25893   | RNA → rpmE (PRK00019)Ribosomal_L31 (pfam01197) → rpmE (PRK00019)Ribosomal_L31 (pfam01197) → |
| Sma-6-1  | NZ_KI929261.1           | + | 420108  | 420160  | RNA → rpmE (PRK00019)Ribosomal_L31 (pfam01197) → rpmE (PRK00019)Ribosomal_L31 (pfam01197) → |
| Sma-26-1 | NZ_AORJ01000046.1       | - | 25636   | 25584   | RNA → rpmE (PRK00019)Ribosomal_L31 (pfam01197) →                                            |
| Sma-3-4  | NZ_JTBU01000001.1       | + | 2106852 | 2106904 | RNA → rpmE (PRK00019)Ribosomal_L31 (pfam01197) →                                            |
| env-655  | F76GVBA01EWCUB          | + | 406     | 458     | RNA → hypo →                                                                                |
| env-656  | CLOF_contig22543        | + | 3049    | 3101    | RNA →                                                                                       |
| Sma-20-2 | NZ_LFJS01000008.1       | - | 181443  | 181391  | RNA → rpmE (PRK00019)Ribosomal_L31 (pfam01197) →                                            |
| Sbo-2-1  | NZ_JWAE01000021.1       | - | 25579   | 25527   | RNA → rpmE (PRK00019)Ribosomal_L31 (pfam01197) →                                            |
| Sbo-2-2  | NZ_JWBK01000133.1       | + | 17268   | 17320   | RNA → rpmE (PRK00019)Ribosomal_L31 (pfam01197) →                                            |
| Sbo-2-3  | NZ_JVWX01000015.1       | - | 25565   | 25513   | RNA → rpmE (PRK00019)Ribosomal_L31 (pfam01197) →                                            |
| Sma-22-1 | NZ_HG326223.1           | - | 4286664 | 4286612 | RNA → rpmE (PRK00019)Ribosomal_L31 (pfam01197) → rpmE (PRK00019)Ribosomal_L31 (pfam01197) → |
| Spl-5-1  | NZ_AJTB01000062.1       | + | 34460   | 34512   | RNA → rpmE (PRK00019)Ribosomal_L31 (pfam01197) → rpmE (PRK00019)Ribosomal_L31 (pfam01197) → |
| Ssy-1-1  | NZ_CCES01000004.1       | - | 27914   | 27862   | RNA → rpmE (PRK00019)Ribosomal_L31 (pfam01197) →                                            |
| Ssy-2-1  | NZ_GL636109.1           | - | 16479   | 16427   | RNA → rpmE (PRK00019)Ribosomal_L31 (pfam01197) → rpmE (PRK00019)Ribosomal_L31 (pfam01197) → |
| Sgr-1-1  | NZ_JGVP01000045.1       | - | 1623    | 1571    | RNA → rpmE (PRK00019)Ribosomal_L31 (pfam01197) →                                            |
| Sod-1-1  | NZ_GG753567.1           | - | 1210885 | 1210833 | RNA → rpmE (PRK00019)Ribosomal_L31 (pfam01197) → rpmE (PRK00019)Ribosomal_L31 (pfam01197) → |
| Spl-1-1  | NZ_ARWD01000001.1       | - | 5361904 | 5361852 | RNA → rpmE (PRK00019)Ribosomal_L31 (pfam01197) →                                            |
| Spl-2-1  | NC_021591.1             | - | 5175142 | 5175090 | RNA → rpmE (PRK00019)Ribosomal_L31 (pfam01197) →                                            |
| Spl-6-1  | NC_021659.1             | - | 5314607 | 5314555 | RNA → rpmE (PRK00019)Ribosomal_L31 (pfam01197) →                                            |
| Spl-3-1  | NZ_AMSV01000076.1       | - | 19552   | 19500   | RNA → rpmE (PRK00019)Ribosomal_L31 (pfam01197) →                                            |
| Spr-2-1  | NC_009832.1             | - | 5307340 | 5307288 | RNA → rpmE (PRK00019)Ribosomal_L31 (pfam01197) →                                            |
| Ssp-25-1 | NZ_KB661120.1           | - | 5154241 | 5154189 | RNA → rpmE (PRK00019)Ribosomal_L31 (pfam01197) →                                            |
| env-657  | JGI24735J21928_10403343 | - | 113     | 61      | RNA →                                                                                       |
| env-658  | DPOL_contig07438        | - | 12704   | 12652   | RNA → rpmE (PRK00019)Ribosomal_L31 (pfam01197) →                                            |
| env-659  | SWWA_contig25429        | - | 3135    | 3083    | RNA → ← PRK05264 (PRK05264)MetJ (COG3060)                                                   |
| Sli-3-1  | NC_021741.1             | - | 5069699 | 5069647 | RNA → rpmE (PRK00019)Ribosomal_L31 (pfam01197) →                                            |
| Sli-1-1  | NZ_CP011303.1           | + | 5203476 | 5203528 | RNA → rpmE (PRK00019)Ribosomal_L31 (pfam01197) →                                            |
| Sli-2-1  | NZ_DF820433.1           | + | 97289   | 97341   | RNA → rpmE (PRK00019)Ribosomal_L31 (pfam01197) →                                            |
| Sma-16-1 | NZ_ATOH01000018.1       | + | 95385   | 95437   | RNA → rpmE (PRK00019)Ribosomal_L31 (pfam01197) →                                            |
| Sma-13-1 | NZ_ATOK01000032.1       | + | 95385   | 95437   | RNA → rpmE (PRK00019)Ribosomal_L31 (pfam01197) →                                            |
| Sma-12-1 | NZ_ATOL01000045.1       | - | 25725   | 25673   | RNA → rpmE (PRK00019)Ribosomal_L31 (pfam01197) → rpmE (PRK00019)Ribosomal_L31 (pfam01197) → |
| Sma-4-1  | NZ_ATOM01000026.1       | - | 25727   | 25675   | RNA → rpmE (PRK00019)Ribosomal_L31 (pfam01197) → rpmE (PRK00019)Ribosomal_L31 (pfam01197) → |
| Sma-17-1 | NZ_ATOG01000076.1       | - | 25572   | 25520   | RNA → rpmE (PRK00019)Ribosomal_L31 (pfam01197) →                                            |
| Sma-15-1 | NZ_KE375711.1           | + | 95619   | 95671   | RNA → rpmE (PRK00019)Ribosomal_L31 (pfam01197) →                                            |
| Sma-14-1 | NZ_KE375758.1           | + | 95401   | 95453   | RNA → rpmE (PRK00019)Ribosomal_L31 (pfam01197) → rpmE (PRK00019)Ribosomal_L31 (pfam01197) → |
| Ssp-21-1 | NC_015566.1             | - | 5290302 | 5290250 | RNA → rpmE (PRK00019)Ribosomal_L31 (pfam01197) →                                            |
| Ssp-22-1 | NC_017573.1             | - | 5289850 | 5289798 | RNA → rpmE (PRK00019)Ribosomal_L31 (pfam01197) →                                            |
| Spl-4-1  | NC_015567.1             | - | 5290173 | 5290121 | RNA → rpmE (PRK00019)Ribosomal_L31 (pfam01197) →                                            |
| Sma-24-1 | NC_020064.1             | - | 4697421 | 4697369 | RNA → rpmE (PRK00019)Ribosomal_L31 (pfam01197) → rpmE (PRK00019)Ribosomal_L31 (pfam01197) → |
| Sma-3-1  | NZ_CP011642.1           | + | 2708667 | 2708719 | RNA → rpmE (PRK00019)Ribosomal_L31 (pfam01197) →                                            |
| Pca-3-1  | NZ_JPSO01000025.1       | - | 24470   | 24418   | RNA → rpmE (PRK00019)Ribosomal_L31 (pfam01197) →                                            |
| Pca-6-1  | NZ_AODT01000022.1       | - | 23586   | 23534   | RNA → rpmE (PRK00019)Ribosomal_L31 (pfam01197) →                                            |
| Pca-5-1  | NZ_JQHJ01000008.1       | + | 136473  | 136525  | RNA → rpmE (PRK00019)Ribosomal_L31 (pfam01197) →                                            |
| Pca-5-2  | NZ_JUJR01000004.1       | - | 26044   | 25992   | RNA → rpmE (PRK00019)Ribosomal_L31 (pfam01197) →                                            |
| Pca-5-3  | NZ_JUJG01000011.1       | - | 26099   | 26047   | RNA → rpmE (PRK00019)Ribosomal_L31 (pfam01197) →                                            |
| Pca-5-4  | NZ_JUJS01000003.1       | - | 792139  | 792087  | RNA → rpmE (PRK00019)Ribosomal_L31 (pfam01197) →                                            |
| Pca-10-1 | NC_012917.1             | + | 199661  | 199713  | RNA → rpmE (PRK00019)Ribosomal_L31 (pfam01197) →                                            |
| Pca-3-2  | NZ_JPSM01000001.1       | - | 24461   | 24409   | RNA → rpmE (PRK00019)Ribosomal_L31 (pfam01197) →                                            |
| Pca-3-3  | NZ_JUJJ01000011.1       | - | 24104   | 24052   | RNA → rpmE (PRK00019)Ribosomal_L31 (pfam01197) →                                            |
| Pca-5-5  | NZ_JUJT01000020.1       | - | 24009   | 23957   | RNA → rpmE (PRK00019)Ribosomal_L31 (pfam01197) →                                            |
| Pca-3-4  | NZ_JUJE01000005.1       | - | 28337   | 28285   | RNA → rpmE (PRK00019)Ribosomal_L31 (pfam01197) →                                            |
| Pca-3-5  | NZ_JUJL01000007.1       | - | 24410   | 24358   | RNA → rpmE (PRK00019)Ribosomal_L31 (pfam01197) →                                            |

|          |                        |   |         |         |                                                                                             |
|----------|------------------------|---|---------|---------|---------------------------------------------------------------------------------------------|
| Pca-12-1 | NZ_ABVY01000037.1      | - | 14362   | 14310   | RNA → rpmE (PRK00019)Ribosomal_L31 (pfam01197) → rpmE (PRK00019)Ribosomal_L31 (pfam01197) → |
| Cmu-2-1  | NZ_CP007044.2          | + | 1090545 | 1090597 | RNA → rpmE (PRK00019)Ribosomal_L31 (pfam01197) →                                            |
| Pca-5-6  | NZ_JUJO01000019.1      | - | 24319   | 24267   | RNA → rpmE (PRK00019)Ribosomal_L31 (pfam01197) →                                            |
| Pca-5-7  | NZ_JUJQ01000006.1      | - | 26072   | 26020   | RNA → rpmE (PRK00019)Ribosomal_L31 (pfam01197) →                                            |
| Pca-5-8  | NZ_JUJP01000007.1      | - | 25212   | 25160   | RNA → rpmE (PRK00019)Ribosomal_L31 (pfam01197) →                                            |
| Pca-5-9  | NZ_JUJF01000020.1      | - | 24130   | 24078   | RNA → rpmE (PRK00019)Ribosomal_L31 (pfam01197) →                                            |
| Pca-3-6  | NZ_JUJD01000003.1      | - | 24283   | 24231   | RNA → rpmE (PRK00019)Ribosomal_L31 (pfam01197) →                                            |
| Pca-3-7  | NZ_JUJB01000021.1      | - | 24944   | 24892   | RNA → rpmE (PRK00019)Ribosomal_L31 (pfam01197) →                                            |
| Pca-5-10 | NZ_JUJH01000022.1      | - | 26713   | 26661   | RNA → rpmE (PRK00019)Ribosomal_L31 (pfam01197) →                                            |
| Pca-3-8  | NZ_JUJC01000010.1      | - | 23496   | 23444   | RNA → rpmE (PRK00019)Ribosomal_L31 (pfam01197) →                                            |
| Pca-9-1  | NZ_ABVX01000016.1      | - | 18047   | 17995   | RNA → rpmE (PRK00019)Ribosomal_L31 (pfam01197) → rpmE (PRK00019)Ribosomal_L31 (pfam01197) → |
| Pca-3-9  | NZ_JUJK01000006.1      | - | 1101    | 1049    | RNA → rpmE (PRK00019)Ribosomal_L31 (pfam01197) →                                            |
| Pca-3-10 | NZ_JUJN01000013.1      | - | 25803   | 25751   | RNA → rpmE (PRK00019)Ribosomal_L31 (pfam01197) →                                            |
| Pca-3-11 | NZ_JUJM01000006.1      | - | 23692   | 23640   | RNA → rpmE (PRK00019)Ribosomal_L31 (pfam01197) →                                            |
| Pca-3-12 | NZ_LGRF01000008.1      | + | 135274  | 135326  | RNA → rpmE (PRK00019)Ribosomal_L31 (pfam01197) →                                            |
| Pca-4-1  | NZ_ALIU01000001.1      | - | 18504   | 18452   | RNA → rpmE (PRK00019)Ribosomal_L31 (pfam01197) →                                            |
| Pca-11-1 | NC_018525.1            | - | 4586906 | 4586854 | RNA → rpmE (PRK00019)Ribosomal_L31 (pfam01197) →                                            |
| Pca-3-13 | NZ_JPSN01000031.1      | - | 107877  | 107825  | RNA → rpmE (PRK00019)Ribosomal_L31 (pfam01197) →                                            |
| Pca-3-14 | NZ_JQOE01000006.1      | + | 275251  | 275303  | RNA → rpmE (PRK00019)Ribosomal_L31 (pfam01197) →                                            |
| Pca-3-15 | NZ_JQOD01000007.1      | - | 18268   | 18216   | RNA → rpmE (PRK00019)Ribosomal_L31 (pfam01197) →                                            |
| Ssp-17-1 | NZ_AYMN01000039.1      | + | 151302  | 151354  | RNA → rpmE (PRK00019)Ribosomal_L31 (pfam01197) →                                            |
| Ssp-18-1 | NZ_AYMQ01000065.1      | + | 114568  | 114620  | RNA → rpmE (PRK00019)Ribosomal_L31 (pfam01197) →                                            |
| Pas-2-1  | NC_012962.1            | - | 4916832 | 4916778 | RNA → rpmE (PRK00019)Ribosomal_L31 (pfam01197) → rpmE (PRK00019)Ribosomal_L31 (pfam01197) → |
| Pas-1-1  | NZ_JONO01000042.1      | + | 23154   | 23208   | RNA → rpmE (PRK00019)Ribosomal_L31 (pfam01197) →                                            |
| Xgr-1-1  | NZ_LDNM01000030.1      | - | 22309   | 22254   | RNA → rpmE (PRK00019)Ribosomal_L31 (pfam01197) →                                            |
| Hpa-1-1  | NZ_JWZ01000009.1       | + | 170462  | 170514  | RNA → rpmE (PRK00019)Ribosomal_L31 (pfam01197) →                                            |
| Hal-1-1  | NZ_JTET01000010.1      | - | 22434   | 22382   | RNA → rpmE (PRK00019)Ribosomal_L31 (pfam01197) →                                            |
| Hal-1-2  | NZ_JTEU02000022.1      | + | 113408  | 113460  | RNA → rpmE (PRK00019)Ribosomal_L31 (pfam01197) →                                            |
| Hal-1-3  | NZ_LAZF01000026.1      | + | 11854   | 11906   | RNA → rpmE (PRK00019)Ribosomal_L31 (pfam01197) →                                            |
| Hal-1-4  | NZ_LAZG01000008.1      | - | 21781   | 21729   | RNA → rpmE (PRK00019)Ribosomal_L31 (pfam01197) →                                            |
| Hal-2-1  | NZ_JMPK01000018.1      | + | 58626   | 58678   | RNA → rpmE (PRK00019)Ribosomal_L31 (pfam01197) →                                            |
| env-660  | DPOL_F64H56M02IXVBN    | + | 28      | 80      | RNA → rpmE (PRK00019)Ribosomal_L31 (pfam01197) →                                            |
| Hpa-1-2  | NZ_JWBZ01000059.1      | - | 434     | 382     | RNA → rpmE (PRK00019)Ribosomal_L31 (pfam01197) →                                            |
| Hal-4-1  | NZ_JH417535.1          | + | 157332  | 157384  | RNA → rpmE (PRK00019)Ribosomal_L31 (pfam01197) →                                            |
| Eba-3-1  | NZ_ADCU02000001.1      | + | 4449192 | 4449244 | RNA → rpmE (PRK00019)Ribosomal_L31 (pfam01197) →                                            |
| Hal-3-1  | NZ_CP009706.1          | + | 299355  | 299407  | RNA → rpmE (PRK00019)Ribosomal_L31 (pfam01197) →                                            |
| env-661  | SPBFG_contig15870      | - | 5793    | 5739    | RNA → rpmE (PRK00019)Ribosomal_L31 (pfam01197) →                                            |
| gpr-1-1  | NZ_AMYV01000018.1      | + | 32852   | 32905   | RNA → rpmE (PRK00019)Ribosomal_L31 (pfam01197) →                                            |
| Ssp-24-1 | NZ_AJHJ01000020.1      | + | 52512   | 52565   | RNA → rpmE (PRK00019)Ribosomal_L31 (pfam01197) → rpmE (PRK00019)Ribosomal_L31 (pfam01197) → |
| Rch-1-1  | NZ_JRWU01000009.1      | - | 26174   | 26121   | RNA → rpmE (PRK00019)Ribosomal_L31 (pfam01197) → rpmE (PRK00019)Ribosomal_L31 (pfam01197) → |
| Eam-2-1  | NZ_JMPJ01000068.1      | + | 95292   | 95345   | RNA → rpmE (PRK00019)Ribosomal_L31 (pfam01197) →                                            |
| env-662  | DPOF_contig09155       | - | 2266    | 2213    | RNA → rpmE (PRK00019)Ribosomal_L31 (pfam01197) →                                            |
| env-663  | DPOLF_contig09092      | - | 6580    | 6527    | RNA → rpmE (PRK00019)Ribosomal_L31 (pfam01197) →                                            |
| env-664  | DPOL_contig00038       | + | 36878   | 36931   | RNA → rpmE (PRK00019)Ribosomal_L31 (pfam01197) →                                            |
| env-665  | SPBFG_GA1E3IJ02I46OL   | + | 306     | 359     | RNA →                                                                                       |
| env-666  | FGTW_contig30418       | - | 31336   | 31283   | RNA → rpmE (PRK00019)Ribosomal_L31 (pfam01197) →                                            |
| env-667  | FGTFG_contig02103      | + | 85330   | 85383   | RNA → rpmE (PRK00019)Ribosomal_L31 (pfam01197) →                                            |
| env-668  | JGI25162J39368_1000075 | - | 25553   | 25500   | RNA → ← hypō                                                                                |
| env-669  | JGI25163J39215_1000213 | - | 4721    | 4668    | RNA → ← hypō                                                                                |
| env-670  | JGI25164J39214_1000053 | - | 25553   | 25500   | RNA → ← hypō                                                                                |
| env-671  | SwRhRL2b_contig_56033  | + | 517     | 570     | RNA → rpmE (PRK00019)Ribosomal_L31 (pfam01197) →                                            |
| Raq-3-1  | NC_017047.1            | - | 4814745 | 4814692 | RNA → rpmE (PRK00019)Ribosomal_L31 (pfam01197) → rpmE (PRK00019)Ribosomal_L31 (pfam01197) → |

|          |                     |   |         |         |                                                                                               |
|----------|---------------------|---|---------|---------|-----------------------------------------------------------------------------------------------|
| Rsp-4-1  | NC_015061.1         | - | 4716764 | 4716711 | RNA → rpmE (PRK00019) Ribosomal_L31 (pfam01197) → rpmE (PRK00019) Ribosomal_L31 (pfam01197) → |
| Rsp-3-1  | NZ_JQJR01000015.1   | - | 25545   | 25492   | RNA → rpmE (PRK00019) Ribosomal_L31 (pfam01197) → rpmE (PRK00019) Ribosomal_L31 (pfam01197) → |
| Raq-1-1  | NZ_JUHL01000031.1   | + | 18582   | 18635   | RNA → rpmE (PRK00019) Ribosomal_L31 (pfam01197) →                                             |
| Raq-1-2  | NZ_JUHM01000047.1   | - | 5015    | 4962    | RNA → rpmE (PRK00019) Ribosomal_L31 (pfam01197) →                                             |
| Raq-2-2  | NC_016818.1         | - | 4714466 | 4714413 | RNA → rpmE (PRK00019) Ribosomal_L31 (pfam01197) →                                             |
| Raq-2-1  | NZ_JMPO01000146.1   | + | 95132   | 95185   | RNA → rpmE (PRK00019) Ribosomal_L31 (pfam01197) →                                             |
| env-672  | XylAfBL_contig05016 | + | 910     | 963     | RNA → rpmE (PRK00019) Ribosomal_L31 (pfam01197) →                                             |
| env-673  | XAGC_contig03916    | + | 8510    | 8563    | RNA → ←-hypo                                                                                  |
| env-674  | XylAfBA_contig26731 | + | 2773    | 2826    | RNA → rpmE (PRK00019) Ribosomal_L31 (pfam01197) →                                             |
| Mmo-1-1  | NZ_LGYC01000001.1   | - | 31789   | 31738   | RNA → rpmE (PRK00019) Ribosomal_L31 (pfam01197) →                                             |
| Mmo-1-2  | NZ_JSWU01000006.1   | + | 171759  | 171810  | RNA → rpmE (PRK00019) Ribosomal_L31 (pfam01197) →                                             |
| Mmo-3-1  | NZ_AYMP01000005.1   | - | 32378   | 32327   | RNA → rpmE (PRK00019) Ribosomal_L31 (pfam01197) →                                             |
| Mmo-2-1  | NZ_CCFB01000001.1   | + | 198262  | 198313  | RNA → rpmE (PRK00019) Ribosomal_L31 (pfam01197) →                                             |
| Mmo-1-3  | NZ_LAGC01000010.1   | - | 143210  | 143159  | RNA → rpmE (PRK00019) Ribosomal_L31 (pfam01197) →                                             |
| Mmo-1-4  | NZ_JUYZ01000051.1   | - | 52099   | 52048   | RNA → rpmE (PRK00019) Ribosomal_L31 (pfam01197) →                                             |
| Mmo-6-1  | NC_020418.1         | + | 647912  | 647963  | RNA → rpmE (PRK00019) Ribosomal_L31 (pfam01197) →                                             |
| Mmo-4-1  | NZ_CBWE010000048.1  | + | 118052  | 118103  | RNA → rpmE (PRK00019) Ribosomal_L31 (pfam01197) →                                             |
| Msp-5-1  | NZ_AZRH01000004.1   | - | 103144  | 103093  | RNA → rpmE (PRK00019) Ribosomal_L31 (pfam01197) →                                             |
| Mmo-5-1  | NZ_AMWL02000012.1   | - | 105828  | 105777  | RNA → rpmE (PRK00019) Ribosomal_L31 (pfam01197) → rpmE (PRK00019) Ribosomal_L31 (pfam01197) → |
| Mmo-1-5  | NZ_JQGP01000003.1   | - | 77455   | 77404   | RNA → rpmE (PRK00019) Ribosomal_L31 (pfam01197) →                                             |
| Mmo-1-6  | NZ_JRKW01000009.1   | + | 165680  | 165731  | RNA → rpmE (PRK00019) Ribosomal_L31 (pfam01197) →                                             |
| Mmo-1-8  | NZ_JTBT01000001.1   | + | 1238015 | 1238066 | RNA → rpmE (PRK00019) Ribosomal_L31 (pfam01197) →                                             |
| Mmo-1-7  | NZ_JUVX01000049.1   | + | 20761   | 20813   | RNA → rpmE (PRK00019) Ribosomal_L31 (pfam01197) →                                             |
| Mwi-1-1  | NZ_LD0F01000037.1   | - | 16081   | 16031   | RNA → rpmE (PRK00019) Ribosomal_L31 (pfam01197) →                                             |
| Psn-1-1  | NZ_CM001773.1       | - | 286368  | 286317  | RNA → rpmE (PRK00019) Ribosomal_L31 (pfam01197) →                                             |
| Pbu-1-1  | NZ_KB233226.1       | - | 31250   | 31199   | RNA → rpmE (PRK00019) Ribosomal_L31 (pfam01197) →                                             |
| Pal-5-1  | NZ_AZYZ01000023.1   | + | 170468  | 170519  | RNA → rpmE (PRK00019) Ribosomal_L31 (pfam01197) →                                             |
| Pal-3-1  | NZ_JALA01000018.1   | - | 30690   | 30639   | RNA → rpmE (PRK00019) Ribosomal_L31 (pfam01197) →                                             |
| Pre-3-1  | NZ_CM001774.1       | + | 548141  | 548192  | RNA → rpmE (PRK00019) Ribosomal_L31 (pfam01197) →                                             |
| Pre-1-1  | NZ_CVLT01000011.1   | + | 8877    | 8928    | RNA → rpmE (PRK00019) Ribosomal_L31 (pfam01197) →                                             |
| Pre-1-2  | NZ_JSEQ01000006.1   | - | 32695   | 32644   | RNA → rpmE (PRK00019) Ribosomal_L31 (pfam01197) →                                             |
| Pre-2-1  | NZ_GG705271.1       | + | 112866  | 112917  | RNA → rpmE (PRK00019) Ribosomal_L31 (pfam01197) →                                             |
| Pru-5-1  | NZ_GG703823.1       | - | 35067   | 35016   | RNA → rpmE (PRK00019) Ribosomal_L31 (pfam01197) →                                             |
| Pal-8-1  | NZ_ABXW01000070.1   | - | 30334   | 30283   | RNA → rpmE (PRK00019) Ribosomal_L31 (pfam01197) → rpmE (PRK00019) Ribosomal_L31 (pfam01197) → |
| Pal-9-1  | NZ_KB233235.1       | - | 30888   | 30837   | RNA → rpmE (PRK00019) Ribosomal_L31 (pfam01197) →                                             |
| Pal-2-1  | NZ_JACS01000017.1   | - | 31209   | 31158   | RNA → rpmE (PRK00019) Ribosomal_L31 (pfam01197) →                                             |
| Pal-4-1  | NZ_JAKZ01000057.1   | + | 50253   | 50304   | RNA → rpmE (PRK00019) Ribosomal_L31 (pfam01197) →                                             |
| Pal-7-1  | NZ_JALB01000006.1   | - | 30356   | 30305   | RNA → rpmE (PRK00019) Ribosomal_L31 (pfam01197) →                                             |
| Pal-6-1  | NZ_JALC01000028.1   | + | 173522  | 173573  | RNA → rpmE (PRK00019) Ribosomal_L31 (pfam01197) →                                             |
| Pal-1-1  | NZ_JALD01000049.1   | + | 172466  | 172517  | RNA → rpmE (PRK00019) Ribosomal_L31 (pfam01197) →                                             |
| Eba-4-1  | NZ_AMFN01000021.1   | + | 169629  | 169682  | RNA → rpmE (PRK00019) Ribosomal_L31 (pfam01197) →                                             |
| Msp-4-1  | NZ_JJMI01000052.1   | + | 104126  | 104179  | RNA → rpmE (PRK00019) Ribosomal_L31 (pfam01197) →                                             |
| env-675  | HBC_scaff_10000440  | + | 5214    | 5266    | RNA → ←-hypo                                                                                  |
| env-676  | HBC_ctgs_1005247    | + | 2966    | 3018    | RNA → ←-hypo                                                                                  |
| env-677  | CLOF_contig24321    | - | 704     | 652     | RNA → rpmE (PRK00019) Ribosomal_L31 (pfam01197) →                                             |
| env-678  | ACEF_contig00049    | - | 523     | 472     | RNA → rpmE (PRK00019) Ribosomal_L31 (pfam01197) →                                             |
| Cmu-1-1  | NZ_AJKU01000051.1   | - | 3469    | 3418    | RNA → rpmE (PRK00019) Ribosomal_L31 (pfam01197) →                                             |
| Csa-13-1 | NC_023032.1         | + | 149771  | 149822  | RNA → rpmE (PRK00019) Ribosomal_L31 (pfam01197) →                                             |
| Csa-10-1 | NZ_CALF01000071.1   | + | 4097945 | 4097996 | RNA → rpmE (PRK00019) Ribosomal_L31 (pfam01197) →                                             |
| Csa-3-1  | NZ_AWSP01000023.1   | + | 208400  | 208451  | RNA → rpmE (PRK00019) Ribosomal_L31 (pfam01197) →                                             |
| Csa-11-1 | NZ_CALE01000616.1   | + | 4090594 | 4090645 | RNA → rpmE (PRK00019) Ribosomal_L31 (pfam01197) → hypo →                                      |
| Csa-6-1  | NZ_AJLB01000065.1   | - | 2039    | 1988    | RNA → rpmE (PRK00019) Ribosomal_L31 (pfam01197) →                                             |



|          |                        |   |         |         |                                                                  |
|----------|------------------------|---|---------|---------|------------------------------------------------------------------|
| Csa-4-1  | NZ_AJLA01000020.1      | - | 36481   | 36430   | RNA → rpmE (PRK00019)Ribosomal_L31 (pfam01197) →                 |
| Csa-2-1  | NZ_AJKT01000018.1      | + | 66704   | 66755   | RNA → rpmE (PRK00019)Ribosomal_L31 (pfam01197) →                 |
| Cdu-3-1  | NZ_AJKY01000079.1      | + | 62855   | 62906   | RNA → rpmE (PRK00019)Ribosomal_L31 (pfam01197) →                 |
| Cdu-1-1  | NZ_AJKZ01000025.1      | - | 32358   | 32307   | RNA → rpmE (PRK00019)Ribosomal_L31 (pfam01197) →                 |
| Cdu-2-1  | NZ_AJXX01000093.1      | - | 35818   | 35767   | RNA → rpmE (PRK00019)Ribosomal_L31 (pfam01197) →                 |
| Csa-8-1  | NZ_AWFW01000041.1      | - | 32602   | 32551   | RNA → rpmE (PRK00019)Ribosomal_L31 (pfam01197) →                 |
| Cdu-4-1  | NZ_CAKV01000164.1      | + | 29188   | 29239   | RNA → rpmE (PRK00019)Ribosomal_L31 (pfam01197) →                 |
| Ctu-3-1  | NZ_CALB01000097.1      | + | 3916369 | 3916420 | RNA → rpmE (PRK00019)Ribosomal_L31 (pfam01197) →                 |
| Csa-14-1 | NZ_AFMO01000075.1      | - | 17965   | 17914   | RNA → rpmE (PRK00019)Ribosomal_L31 (pfam01197) →                 |
| Cdu-5-1  | NZ_CALA01000393.1      | + | 4235981 | 4236032 | RNA → rpmE (PRK00019)Ribosomal_L31 (pfam01197) →                 |
| Cco-1-1  | NZ_CAKW01000043.1      | + | 51829   | 51880   | RNA → rpmE (PRK00019)Ribosomal_L31 (pfam01197) →                 |
| Ctu-4-1  | NC_013282.2            | + | 183302  | 183353  | RNA → rpmE (PRK00019)Ribosomal_L31 (pfam01197) →                 |
| Csa-16-1 | NC_020260.1            | - | 3781421 | 3781370 | RNA → rpmE (PRK00019)Ribosomal_L31 (pfam01197) →                 |
| Cun-1-1  | NZ_AJKW01000018.1      | - | 32659   | 32608   | RNA → rpmE (PRK00019)Ribosomal_L31 (pfam01197) →                 |
| Cun-1-2  | NZ_CAKX01000221.1      | + | 3809092 | 3809143 | RNA → rpmE (PRK00019)Ribosomal_L31 (pfam01197) →                 |
| Csa-7-1  | NZ_BAWU01000020.1      | + | 2500    | 2551    | RNA → rpmE (PRK00019)Ribosomal_L31 (pfam01197) →                 |
| Csa-5-1  | NZ_AJLC01000180.1      | + | 62760   | 62811   | RNA → rpmE (PRK00019)Ribosomal_L31 (pfam01197) →                 |
| Cma-2-1  | NZ_JXTD01000005.1      | + | 64019   | 64070   | RNA → rpmE (PRK00019)Ribosomal_L31 (pfam01197) →                 |
| Cma-3-1  | NZ_AJKV01000030.1      | + | 59963   | 60014   | RNA → rpmE (PRK00019)Ribosomal_L31 (pfam01197) →                 |
| Cma-1-1  | NZ_JPZE01000012.1      | + | 76282   | 76333   | RNA → rpmE (PRK00019)Ribosomal_L31 (pfam01197) →                 |
| Cma-1-2  | NZ_JPZG01000177.1      | - | 6258    | 6207    | RNA → rpmE (PRK00019)Ribosomal_L31 (pfam01197) →                 |
| Cma-1-3  | NZ_JPZH01000130.1      | - | 44040   | 43989   | RNA → rpmE (PRK00019)Ribosomal_L31 (pfam01197) →                 |
| Cma-4-1  | NZ_CALD01000014.1      | + | 4023113 | 4023164 | RNA → rpmE (PRK00019)Ribosomal_L31 (pfam01197) →                 |
| Csa-9-1  | NZ_CALG01000065.1      | + | 30206   | 30257   | RNA → rpmE (PRK00019)Ribosomal_L31 (pfam01197) →                 |
| Cma-1-4  | NZ_JPZD01000152.1      | + | 5905    | 5956    | RNA → rpmE (PRK00019)Ribosomal_L31 (pfam01197) →                 |
| Cma-1-5  | NZ_JPZF01000101.1      | - | 6338    | 6287    | RNA → rpmE (PRK00019)Ribosomal_L31 (pfam01197) →                 |
| Cma-5-1  | NZ_CALC01000087.1      | - | 3657473 | 3657422 | RNA → rpmE (PRK00019)Ribosomal_L31 (pfam01197) →                 |
| Csa-12-1 | NC_009778.1            | - | 3776784 | 3776733 | RNA → rpmE (PRK00019)Ribosomal_L31 (pfam01197) →                 |
| Csa-15-1 | NC_017933.1            | - | 4083623 | 4083572 | RNA → rpmE (PRK00019)Ribosomal_L31 (pfam01197) →                 |
| Csa-1-1  | NZ_CP011047.1          | - | 827969  | 827918  | RNA → rpmE (PRK00019)Ribosomal_L31 (pfam01197) →                 |
| env-679  | FGTW_contig20460       | - | 365     | 314     | RNA → rpmE (PRK00019)Ribosomal_L31 (pfam01197) →                 |
| Tod-1-1  | NZ_JNGH01000037.1      | - | 69319   | 69268   | RNA → rpmE (PRK00019)Ribosomal_L31 (pfam01197) →                 |
| Tod-1-2  | NZ_JNGI01000158.1      | - | 23681   | 23630   | RNA → rpmE (PRK00019)Ribosomal_L31 (pfam01197) →                 |
| env-680  | 2227358547             | + | 86186   | 86237   | RNA → rpmE (PRK00019)Ribosomal_L31 (pfam01197) →                 |
| env-681  | TrFG_GO06Z1101E2O72    | + | 74      | 125     | RNA → rpmE (PRK00019)Ribosomal_L31 (pfam01197) →                 |
| env-682  | ACOFG987_contig24115   | + | 393     | 444     | RNA → rpmE (PRK00019)rpmE2 (PRK01678)Ribosomal_L31 (pfam01197) → |
| env-683  | APTF_contig08800       | + | 1648    | 1699    | RNA → rpmE (PRK00019)Ribosomal_L31 (pfam01197) →                 |
| env-684  | ACOFG987_contig23961   | - | 394     | 343     | RNA → rpmE (PRK00019)Ribosomal_L31 (pfam01197) →                 |
| Eba-5-1  | NC_020063.1            | - | 4635348 | 4635297 | RNA → rpmE (PRK00019)Ribosomal_L31 (pfam01197) →                 |
| env-685  | FGTW_GHRKC7402FUCRI    | - | 60      | 9       | RNA →                                                            |
| Tgu-1-1  | NZ_JMTB01000106.1      | + | 15805   | 15856   | RNA → rpmE (PRK00019)Ribosomal_L31 (pfam01197) →                 |
| env-686  | JGI26055J44792_1031982 | - | 374     | 323     | RNA → rpmE (PRK00019)Ribosomal_L31 (pfam01197) →                 |
| env-687  | TrFG_contig00049       | - | 5566    | 5515    | RNA → rpmE (PRK00019)Ribosomal_L31 (pfam01197) →                 |
| env-688  | ACOFG987_contig40025   | + | 6347    | 6398    | RNA → rpmE (PRK00019)Ribosomal_L31 (pfam01197) →                 |
| env-689  | ACOFG988_contig25298   | - | 1504    | 1453    | RNA → rpmE (PRK00019)Ribosomal_L31 (pfam01197) →                 |
| env-690  | scaffold610_9_V1_UC-21 | + | 568     | 619     | RNA → rpmE (PRK00019)Ribosomal_L31 (pfam01197) →                 |
| env-691  | DOF008_scaffold12770_1 | - | 3518    | 3467    | RNA → rpmE (PRK00019)Ribosomal_L31 (pfam01197) →                 |
| env-692  | PaFGMunAill.c011219    | + | 225     | 276     | RNA → rpmE (PRK00019)Ribosomal_L31 (pfam01197) →                 |
| env-693  | JGI26057J44791_1008390 | - | 1105    | 1054    | RNA → rpmE (PRK00019)Ribosomal_L31 (pfam01197) →                 |
| env-694  | APTF_contig04656       | - | 272     | 221     | RNA → rpmE (PRK00019)Ribosomal_L31 (pfam01197) →                 |
| env-695  | ACEF_contig16949       | + | 52822   | 52873   | RNA → rpmE (PRK00019)Ribosomal_L31 (pfam01197) →                 |
| env-696  | ACOFG987_contig47692   | + | 281     | 332     | RNA → rpmE (PRK00019)Ribosomal_L31 (pfam01197) →                 |

|          |                      |   |         |         |                                                   |
|----------|----------------------|---|---------|---------|---------------------------------------------------|
| env-697  | ACOFG988_contig32966 | + | 7759    | 7810    | RNA → rpmE (PRK00019) Ribosomal_L31 (pfam01197) → |
| env-698  | CLOF_contig00503     | + | 11843   | 11894   | RNA → rpmE (PRK00019) Ribosomal_L31 (pfam01197) → |
| env-699  | AECF_contig10395     | + | 1675    | 1726    | RNA → rpmE (PRK00019) Ribosomal_L31 (pfam01197) → |
| Esp-71-1 | NZ.LEDV01000005.1    | - | 25147   | 25096   | RNA → rpmE (PRK00019) Ribosomal_L31 (pfam01197) → |
| Eho-7-1  | NZ.ANIA01000010.1    | + | 18731   | 18782   | RNA → rpmE (PRK00019) Ribosomal_L31 (pfam01197) → |
| Ecl-67-1 | NZ.AMGJ01000018.1    | + | 18729   | 18780   | RNA → rpmE (PRK00019) Ribosomal_L31 (pfam01197) → |
| Ecl-9-1  | NZ.CP008823.1        | - | 4756273 | 4756222 | RNA → rpmE (PRK00019) Ribosomal_L31 (pfam01197) → |
| Ecl-15-1 | NZ.KK736253.1        | - | 4808834 | 4808783 | RNA → rpmE (PRK00019) Ribosomal_L31 (pfam01197) → |
| Ecl-61-1 | NZ.KI535482.1        | - | 1900916 | 1900865 | RNA → rpmE (PRK00019) Ribosomal_L31 (pfam01197) → |
| Ecl-64-1 | NZ.KI535506.1        | - | 4967519 | 4967468 | RNA → rpmE (PRK00019) Ribosomal_L31 (pfam01197) → |
| Esp-65-1 | NZ.KI535607.1        | - | 1051094 | 1051043 | RNA → rpmE (PRK00019) Ribosomal_L31 (pfam01197) → |
| Ecl-55-1 | NZ.KI535567.1        | - | 2547796 | 2547745 | RNA → rpmE (PRK00019) Ribosomal_L31 (pfam01197) → |
| Ecl-18-1 | NZ.KI973154.1        | + | 546623  | 546674  | RNA → rpmE (PRK00019) Ribosomal_L31 (pfam01197) → |
| Esp-4-1  | NZ.KI973172.1        | - | 1856201 | 1856150 | RNA → rpmE (PRK00019) Ribosomal_L31 (pfam01197) → |
| Ecl-21-1 | NZ.KI973143.1        | - | 25734   | 25683   | RNA → rpmE (PRK00019) Ribosomal_L31 (pfam01197) → |
| Ecl-22-1 | NZ.KI973132.1        | + | 2398583 | 2398634 | RNA → rpmE (PRK00019) Ribosomal_L31 (pfam01197) → |
| Esp-20-1 | NZ.KI973336.1        | - | 25242   | 25191   | RNA → rpmE (PRK00019) Ribosomal_L31 (pfam01197) → |
| Esp-31-1 | NZ.KI973278.1        | - | 109546  | 109495  | RNA → rpmE (PRK00019) Ribosomal_L31 (pfam01197) → |
| Esp-3-1  | NZ.KI973178.1        | - | 690446  | 690395  | RNA → rpmE (PRK00019) Ribosomal_L31 (pfam01197) → |
| Esp-14-1 | NZ.KI973197.1        | - | 1835108 | 1835057 | RNA → rpmE (PRK00019) Ribosomal_L31 (pfam01197) → |
| Esp-32-1 | NZ.KI973270.1        | - | 581090  | 581039  | RNA → rpmE (PRK00019) Ribosomal_L31 (pfam01197) → |
| Ecl-6-1  | NZ.KI973186.1        | - | 3623723 | 3623672 | RNA → rpmE (PRK00019) Ribosomal_L31 (pfam01197) → |
| Esp-27-1 | NZ.KI973212.1        | - | 103050  | 102999  | RNA → rpmE (PRK00019) Ribosomal_L31 (pfam01197) → |
| Ecl-23-1 | NZ.KI973128.1        | - | 95766   | 95715   | RNA → rpmE (PRK00019) Ribosomal_L31 (pfam01197) → |
| Esp-21-1 | NZ.KI973257.1        | - | 383611  | 383560  | RNA → rpmE (PRK00019) Ribosomal_L31 (pfam01197) → |
| Esp-26-1 | NZ.KI973320.1        | - | 27166   | 27115   | RNA → rpmE (PRK00019) Ribosomal_L31 (pfam01197) → |
| Esp-24-1 | NZ.KI973217.1        | - | 3681096 | 3681045 | RNA → rpmE (PRK00019) Ribosomal_L31 (pfam01197) → |
| Eho-6-1  | NZ.GL892086.1        | - | 148706  | 148655  | RNA → rpmE (PRK00019) Ribosomal_L31 (pfam01197) → |
| Eho-2-1  | NZ.CP010377.1        | - | 4491382 | 4491331 | RNA → rpmE (PRK00019) Ribosomal_L31 (pfam01197) → |
| Eho-3-1  | NZ.CP010384.1        | - | 4645020 | 4644969 | RNA → rpmE (PRK00019) Ribosomal_L31 (pfam01197) → |
| Ecl-4-1  | NZ.KK736218.1        | - | 27669   | 27618   | RNA → rpmE (PRK00019) Ribosomal_L31 (pfam01197) → |
| Ecl-3-1  | NZ.KN912611.1        | - | 181038  | 180987  | RNA → rpmE (PRK00019) Ribosomal_L31 (pfam01197) → |
| Eho-4-1  | NZ.CP010376.2        | - | 4745095 | 4745044 | RNA → rpmE (PRK00019) Ribosomal_L31 (pfam01197) → |
| Ecl-1-1  | NZ.CP011584.1        | - | 3888938 | 3888887 | RNA → rpmE (PRK00019) Ribosomal_L31 (pfam01197) → |
| Ecl-1-2  | NZ.CP011650.1        | - | 3861467 | 3861416 | RNA → rpmE (PRK00019) Ribosomal_L31 (pfam01197) → |
| Ecl-1-3  | NZ.CP011572.1        | + | 2928705 | 2928756 | RNA → rpmE (PRK00019) Ribosomal_L31 (pfam01197) → |
| Ecl-1-4  | NZ.CP011581.1        | + | 1042420 | 1042471 | RNA → rpmE (PRK00019) Ribosomal_L31 (pfam01197) → |
| Esp-12-1 | NZ.KQ089963.1        | - | 1910866 | 1910815 | RNA → rpmE (PRK00019) Ribosomal_L31 (pfam01197) → |
| Esp-35-1 | NZ.KQ089940.1        | + | 544460  | 544511  | RNA → rpmE (PRK00019) Ribosomal_L31 (pfam01197) → |
| Esp-34-1 | NZ.KQ089934.1        | - | 36906   | 36855   | RNA → rpmE (PRK00019) Ribosomal_L31 (pfam01197) → |
| Esp-9-1  | NZ.KQ089956.1        | - | 370660  | 370609  | RNA → rpmE (PRK00019) Ribosomal_L31 (pfam01197) → |
| Esp-10-1 | NZ.KQ089962.1        | + | 561134  | 561185  | RNA → rpmE (PRK00019) Ribosomal_L31 (pfam01197) → |
| Esp-18-1 | NZ.KQ089922.1        | + | 443512  | 443563  | RNA → rpmE (PRK00019) Ribosomal_L31 (pfam01197) → |
| Esp-37-1 | NZ.KQ089949.1        | + | 3599004 | 3599055 | RNA → rpmE (PRK00019) Ribosomal_L31 (pfam01197) → |
| Esp-16-1 | NZ.KQ089855.1        | - | 35241   | 35190   | RNA → rpmE (PRK00019) Ribosomal_L31 (pfam01197) → |
| Esp-8-1  | NZ.KQ090002.1        | - | 4088043 | 4087992 | RNA → rpmE (PRK00019) Ribosomal_L31 (pfam01197) → |
| Esp-17-1 | NZ.KQ089884.1        | - | 31776   | 31725   | RNA → rpmE (PRK00019) Ribosomal_L31 (pfam01197) → |
| Esp-11-1 | NZ.KQ089967.1        | + | 1947798 | 1947849 | RNA → rpmE (PRK00019) Ribosomal_L31 (pfam01197) → |
| Esp-7-1  | NZ.KQ089989.1        | + | 4391029 | 4391080 | RNA → rpmE (PRK00019) Ribosomal_L31 (pfam01197) → |
| Esp-39-1 | NZ.KQ089891.1        | - | 25347   | 25296   | RNA → rpmE (PRK00019) Ribosomal_L31 (pfam01197) → |
| Eho-4-2  | NZ.CP012167.1        | - | 4548238 | 4548187 | RNA → rpmE (PRK00019) Ribosomal_L31 (pfam01197) → |
| Eho-3-2  | NZ.CP012165.1        | - | 4790402 | 4790351 | RNA → rpmE (PRK00019) Ribosomal_L31 (pfam01197) → |



|          |                         |   |         |         |                                                                                             |
|----------|-------------------------|---|---------|---------|---------------------------------------------------------------------------------------------|
| Eho-8-1  | NZ_ANID01000005.1       | + | 18734   | 18785   | RNA → rpmE (PRK00019)Ribosomal_L31 (pfam01197) →                                            |
| Esp-57-1 | NZ_AXLK01000002.1       | - | 662290  | 662239  | RNA → rpmE (PRK00019)Ribosomal_L31 (pfam01197) →                                            |
| Eca-2-1  | NZ_ANIC01000004.1       | - | 513413  | 513362  | RNA → rpmE (PRK00019)Ribosomal_L31 (pfam01197) →                                            |
| Ecl-1-9  | NZ_JTBO01000001.1       | + | 4527233 | 4527284 | RNA → rpmE (PRK00019)Ribosomal_L31 (pfam01197) →                                            |
| Ecl-1-10 | NZ_JTBN01000004.1       | + | 1394084 | 1394135 | RNA → rpmE (PRK00019)Ribosomal_L31 (pfam01197) →                                            |
| env-700  | FGTW_contig23348        | + | 302     | 353     | RNA → rpmE (PRK00019)Ribosomal_L31 (pfam01197) →                                            |
| env-701  | TrFG_GO06Z1101EGFU2     | - | 143     | 92      | RNA → rpmE (PRK00019)Ribosomal_L31 (pfam01197) →                                            |
| env-702  | JGI26532J50257_10015026 | + | 2407    | 2458    | RNA → rpmE (PRK00019)Ribosomal_L31 (pfam01197) →                                            |
| env-703  | JGI26540J51217_10040168 | + | 700     | 751     | RNA → rpmE (PRK00019)Ribosomal_L31 (pfam01197) →                                            |
| env-704  | FGTW_contig31546        | + | 3921    | 3972    | RNA →                                                                                       |
| env-705  | FGTW_contig33102        | + | 679     | 730     | RNA → rpmE (PRK00019)Ribosomal_L31 (pfam01197) →                                            |
| Esp-19-1 | NZ_JSZC01000008.1       | + | 81942   | 81993   | RNA → rpmE (PRK00019)Ribosomal_L31 (pfam01197) →                                            |
| Ecl-31-1 | NZ_JZZI01000030.1       | + | 11753   | 11804   | RNA → rpmE (PRK00019)Ribosomal_L31 (pfam01197) →                                            |
| Ecl-29-1 | NZ_LABD01000016.1       | + | 76834   | 76885   | RNA → rpmE (PRK00019)Ribosomal_L31 (pfam01197) →                                            |
| Ecl-38-1 | NZ_JZYC01000011.1       | + | 76772   | 76823   | RNA → rpmE (PRK00019)Ribosomal_L31 (pfam01197) →                                            |
| Ecl-32-1 | NZ_JZZF01000011.1       | + | 76674   | 76725   | RNA → rpmE (PRK00019)Ribosomal_L31 (pfam01197) →                                            |
| Ecl-30-1 | NZ_JZZX01000013.1       | + | 71383   | 71434   | RNA → rpmE (PRK00019)Ribosomal_L31 (pfam01197) →                                            |
| Ecl-34-1 | NZ_JZYX01000023.1       | + | 66329   | 66380   | RNA → rpmE (PRK00019)Ribosomal_L31 (pfam01197) →                                            |
| Ecl-35-1 | NZ_JZYR01000012.1       | + | 76673   | 76724   | RNA → rpmE (PRK00019)Ribosomal_L31 (pfam01197) →                                            |
| Ecl-37-1 | NZ_JZYJ01000013.1       | - | 34145   | 34094   | RNA → rpmE (PRK00019)Ribosomal_L31 (pfam01197) →                                            |
| Ecl-41-1 | NZ_JZKL01000011.1       | + | 77056   | 77107   | RNA → rpmE (PRK00019)Ribosomal_L31 (pfam01197) →                                            |
| Ecl-46-1 | NZ_LEET01000001.1       | + | 76857   | 76908   | RNA → rpmE (PRK00019)Ribosomal_L31 (pfam01197) →                                            |
| Ecl-51-1 | NZ_LECZ01000019.1       | - | 26537   | 26486   | RNA → rpmE (PRK00019)Ribosomal_L31 (pfam01197) →                                            |
| Ecl-48-1 | NZ_LEES01000015.1       | - | 26503   | 26452   | RNA → rpmE (PRK00019)Ribosomal_L31 (pfam01197) →                                            |
| Ecl-50-1 | NZ_LEDI01000013.1       | - | 8101    | 8050    | RNA → rpmE (PRK00019)Ribosomal_L31 (pfam01197) →                                            |
| Ecl-43-1 | NZ_LEEP01000004.1       | - | 34305   | 34254   | RNA → rpmE (PRK00019)Ribosomal_L31 (pfam01197) →                                            |
| Ecl-52-5 | NZ_LFDQ01000011.1       | + | 75190   | 75241   | RNA → rpmE (PRK00019)Ribosomal_L31 (pfam01197) →                                            |
| Lsp-1-1  | NZ_LDUO01000006.1       | + | 85683   | 85734   | RNA → rpmE (PRK00019)Ribosomal_L31 (pfam01197) →                                            |
| Lad-1-1  | NZ_LDWM01000006.1       | + | 85682   | 85733   | RNA → rpmE (PRK00019)Ribosomal_L31 (pfam01197) →                                            |
| Ecl-28-1 | NZ_JWGU01000218.1       | + | 34093   | 34144   | RNA → rpmE (PRK00019)Ribosomal_L31 (pfam01197) →                                            |
| Ecl-28-2 | NZ_JWGT01000199.1       | + | 34093   | 34144   | RNA → rpmE (PRK00019)Ribosomal_L31 (pfam01197) →                                            |
| Ecl-28-3 | NZ_JWAF01000124.1       | - | 26447   | 26396   | RNA → rpmE (PRK00019)Ribosomal_L31 (pfam01197) →                                            |
| Ecl-28-4 | NZ_JVMT01000150.1       | - | 26451   | 26400   | RNA → rpmE (PRK00019)Ribosomal_L31 (pfam01197) →                                            |
| Ecl-28-5 | NZ_JVND01000119.1       | + | 71438   | 71489   | RNA → rpmE (PRK00019)Ribosomal_L31 (pfam01197) →                                            |
| Esp-40-1 | NZ_JUMS01000116.1       | - | 34207   | 34156   | RNA → rpmE (PRK00019)Ribosomal_L31 (pfam01197) →                                            |
| Ecl-28-6 | NZ_JVWV01000106.1       | + | 11834   | 11885   | RNA → rpmE (PRK00019)Ribosomal_L31 (pfam01197) →                                            |
| Ecl-1-11 | NZ_JUOF01000010.1       | + | 42106   | 42157   | RNA → rpmE (PRK00019)Ribosomal_L31 (pfam01197) →                                            |
| Ecl-57-1 | NZ_ATHX01000018.1       | + | 76731   | 76782   | RNA → rpmE (PRK00019)Ribosomal_L31 (pfam01197) →                                            |
| Esp-1-1  | NZ_JFHW01000016.1       | - | 26463   | 26412   | RNA → rpmE (PRK00019)Ribosomal_L31 (pfam01197) →                                            |
| Ecl-14-1 | NZ_JDWG01000020.1       | - | 34120   | 34069   | RNA → rpmE (PRK00019)Ribosomal_L31 (pfam01197) →                                            |
| Esp-73-1 | NZ_ALNS01000021.1       | - | 26409   | 26358   | RNA → rpmE (PRK00019)Ribosomal_L31 (pfam01197) → rpmE (PRK00019)Ribosomal_L31 (pfam01197) → |
| Ecl-53-1 | NZ_JALR01000031.1       | + | 24192   | 24243   | RNA → rpmE (PRK00019)Ribosomal_L31 (pfam01197) →                                            |
| Esp-46-1 | NZ_AZUB01000011.1       | + | 64891   | 64942   | RNA → rpmE (PRK00019)Ribosomal_L31 (pfam01197) →                                            |
| Esp-44-1 | NZ_AZUA01000011.1       | + | 71526   | 71577   | RNA → rpmE (PRK00019)Ribosomal_L31 (pfam01197) →                                            |
| Eas-2-1  | NZ_JACW01000036.1       | - | 26054   | 26003   | RNA → rpmE (PRK00019)Ribosomal_L31 (pfam01197) →                                            |
| Esp-45-1 | NZ_AZXZ01000015.1       | + | 64891   | 64942   | RNA → rpmE (PRK00019)Ribosomal_L31 (pfam01197) →                                            |
| Ecl-8-1  | NZ_KK736240.1           | - | 3203895 | 3203844 | RNA → rpmE (PRK00019)Ribosomal_L31 (pfam01197) →                                            |
| Ecl-16-1 | NZ_KK736266.1           | - | 37488   | 37437   | RNA → rpmE (PRK00019)Ribosomal_L31 (pfam01197) →                                            |
| Esp-64-1 | NZ_KI535616.1           | - | 2057472 | 2057421 | RNA → rpmE (PRK00019)Ribosomal_L31 (pfam01197) →                                            |
| Ecl-62-1 | NZ_KI535461.1           | - | 2643968 | 2643917 | RNA → rpmE (PRK00019)Ribosomal_L31 (pfam01197) →                                            |
| Ecl-56-1 | NZ_KI535548.1           | - | 1326474 | 1326423 | RNA → rpmE (PRK00019)Ribosomal_L31 (pfam01197) →                                            |
| Esp-58-1 | NZ_KI535695.1           | - | 3774199 | 3774148 | RNA → rpmE (PRK00019)Ribosomal_L31 (pfam01197) →                                            |

|          |                               |   |         |         |                                                                                             |
|----------|-------------------------------|---|---------|---------|---------------------------------------------------------------------------------------------|
| Ecl-25-1 | NZ_KI973093.1                 | - | 738284  | 738233  | RNA → rpmE (PRK00019)Ribosomal_L31 (pfam01197) →                                            |
| Ecl-24-1 | NZ_KI973119.1                 | - | 3729528 | 3729477 | RNA → rpmE (PRK00019)Ribosomal_L31 (pfam01197) →                                            |
| Eas-3-1  | NZ_CP007546.1                 | + | 4028910 | 4028961 | RNA → rpmE (PRK00019)Ribosomal_L31 (pfam01197) →                                            |
| Eas-1-1  | NZ_CP011591.1                 | + | 3197317 | 3197368 | RNA → rpmE (PRK00019)Ribosomal_L31 (pfam01197) →                                            |
| Esp-41-1 | NZ_KQ087598.1                 | - | 4674371 | 4674320 | RNA → rpmE (PRK00019)Ribosomal_L31 (pfam01197) →                                            |
| Ecl-36-1 | NZ_CP012162.1                 | - | 4845841 | 4845790 | RNA → rpmE (PRK00019)Ribosomal_L31 (pfam01197) →                                            |
| Ecl-13-1 | NZ_JDWH01000014.1             | - | 34223   | 34172   | RNA → rpmE (PRK00019)Ribosomal_L31 (pfam01197) →                                            |
| Esp-50-1 | NZ_JRJC01000045.1             | + | 72599   | 72650   | RNA → rpmE (PRK00019)Ribosomal_L31 (pfam01197) →                                            |
| Esp-69-1 | NZ_JRUR01000040.1             | + | 75694   | 75745   | RNA → rpmE (PRK00019)Ribosomal_L31 (pfam01197) →                                            |
| Ksp-8-1  | NZ_ALNJ01000088.1             | - | 7833    | 7782    | RNA → rpmE (PRK00019)Ribosomal_L31 (pfam01197) → rpmE (PRK00019)Ribosomal_L31 (pfam01197) → |
| Ecl-52-1 | NZ_LDCI01000017.1             | - | 26551   | 26500   | RNA → rpmE (PRK00019)Ribosomal_L31 (pfam01197) →                                            |
| env-706  | bisonPool14jan08_C4751        | + | 678     | 729     | RNA →                                                                                       |
| env-707  | bisonPool05dec07_BXBC29500_b1 | + | 542     | 593     | RNA → ←-hypo                                                                                |
| env-708  | BISONP_C3973                  | - | 751     | 700     | RNA → rpmE (PRK00019)Ribosomal_L31 (pfam01197) →                                            |
| env-709  | DOM005_scaffold1784_4         | - | 8533    | 8482    | RNA → rpmE (PRK00019)Ribosomal_L31 (pfam01197) →                                            |
| Eho-1-1  | NZ_JZYQ01000016.1             | - | 26597   | 26546   | RNA → rpmE (PRK00019)Ribosomal_L31 (pfam01197) →                                            |
| Ecl-33-1 | NZ_JZZB01000010.1             | + | 86850   | 86901   | RNA → rpmE (PRK00019)Ribosomal_L31 (pfam01197) →                                            |
| Eho-1-2  | NZ_JJZN01000011.1             | - | 26606   | 26555   | RNA → rpmE (PRK00019)Ribosomal_L31 (pfam01197) →                                            |
| Eho-1-3  | NZ_JZYY01000014.1             | + | 86140   | 86191   | RNA → rpmE (PRK00019)Ribosomal_L31 (pfam01197) →                                            |
| Eho-1-4  | NZ_JZZQ01000016.1             | + | 86140   | 86191   | RNA → rpmE (PRK00019)Ribosomal_L31 (pfam01197) →                                            |
| Eho-1-5  | NZ_JZZO01000011.1             | + | 86145   | 86196   | RNA → rpmE (PRK00019)Ribosomal_L31 (pfam01197) →                                            |
| Eho-1-6  | NZ_JZZT01000013.1             | + | 86145   | 86196   | RNA → rpmE (PRK00019)Ribosomal_L31 (pfam01197) →                                            |
| Ecl-45-1 | NZ_LEEJ01000002.1             | + | 80227   | 80278   | RNA → rpmE (PRK00019)Ribosomal_L31 (pfam01197) →                                            |
| Ecl-47-1 | NZ_LEDQ01000007.1             | + | 84661   | 84712   | RNA → rpmE (PRK00019)Ribosomal_L31 (pfam01197) →                                            |
| Eho-1-7  | NZ_LEDF01000011.1             | - | 26773   | 26722   | RNA → rpmE (PRK00019)Ribosomal_L31 (pfam01197) →                                            |
| Eho-1-8  | NZ_LEED01000021.1             | - | 26771   | 26720   | RNA → rpmE (PRK00019)Ribosomal_L31 (pfam01197) →                                            |
| Esp-66-1 | NZ_AXLJ01000001.1             | - | 4555433 | 4555382 | RNA → rpmE (PRK00019)Ribosomal_L31 (pfam01197) →                                            |
| Ecl-27-1 | NZ_JVNW01000148.1             | + | 11730   | 11781   | RNA → rpmE (PRK00019)Ribosomal_L31 (pfam01197) →                                            |
| Lam-1-1  | NZ_KK737778.1                 | - | 749896  | 749845  | RNA → rpmE (PRK00019)Ribosomal_L31 (pfam01197) →                                            |
| Ecl-65-1 | NZ_KI535486.1                 | - | 1069309 | 1069258 | RNA → rpmE (PRK00019)Ribosomal_L31 (pfam01197) →                                            |
| Esp-63-1 | NZ_KI535633.1                 | - | 97928   | 97877   | RNA → rpmE (PRK00019)Ribosomal_L31 (pfam01197) →                                            |
| Ecl-63-1 | NZ_KI535513.1                 | - | 26618   | 26567   | RNA → rpmE (PRK00019)Ribosomal_L31 (pfam01197) →                                            |
| Ecl-12-1 | NZ_KI911561.1                 | - | 3608360 | 3608309 | RNA → rpmE (PRK00019)Ribosomal_L31 (pfam01197) →                                            |
| Ecl-26-1 | NZ_KI973090.1                 | - | 30534   | 30483   | RNA → rpmE (PRK00019)Ribosomal_L31 (pfam01197) →                                            |
| Esp-22-1 | NZ_KI973240.1                 | + | 4664452 | 4664503 | RNA → rpmE (PRK00019)Ribosomal_L31 (pfam01197) →                                            |
| Esp-15-1 | NZ_KI973191.1                 | - | 26615   | 26564   | RNA → rpmE (PRK00019)Ribosomal_L31 (pfam01197) →                                            |
| Esp-23-1 | NZ_KI973229.1                 | + | 3189653 | 3189704 | RNA → rpmE (PRK00019)Ribosomal_L31 (pfam01197) →                                            |
| Esp-33-1 | NZ_KI973265.1                 | + | 3567038 | 3567089 | RNA → rpmE (PRK00019)Ribosomal_L31 (pfam01197) →                                            |
| Esp-30-1 | NZ_KI973283.1                 | + | 3569631 | 3569682 | RNA → rpmE (PRK00019)Ribosomal_L31 (pfam01197) →                                            |
| Ecl-1-5  | NZ_CP009854.1                 | - | 4534500 | 4534449 | RNA → rpmE (PRK00019)Ribosomal_L31 (pfam01197) →                                            |
| Esp-25-1 | NZ_KI973322.1                 | + | 86166   | 86217   | RNA → rpmE (PRK00019)Ribosomal_L31 (pfam01197) →                                            |
| Esp-5-1  | NZ_KI973170.1                 | + | 4660747 | 4660798 | RNA → rpmE (PRK00019)Ribosomal_L31 (pfam01197) →                                            |
| Esp-13-1 | NZ_KK214763.1                 | + | 100101  | 100152  | RNA → rpmE (PRK00019)Ribosomal_L31 (pfam01197) →                                            |
| Ecl-10-1 | NZ_CP008897.1                 | - | 4541025 | 4540974 | RNA → rpmE (PRK00019)Ribosomal_L31 (pfam01197) →                                            |
| Ecl-11-1 | NZ_CP008905.1                 | - | 4529003 | 4528952 | RNA → rpmE (PRK00019)Ribosomal_L31 (pfam01197) →                                            |
| Esp-36-1 | NZ_KQ089941.1                 | + | 4327417 | 4327468 | RNA → rpmE (PRK00019)Ribosomal_L31 (pfam01197) →                                            |
| Esp-38-1 | NZ_KQ089925.1                 | + | 1012995 | 1013046 | RNA → rpmE (PRK00019)Ribosomal_L31 (pfam01197) →                                            |
| env-710  | BAAW01000972.1                | - | 3278    | 3227    | RNA → rpmE (PRK00019)Ribosomal_L31 (pfam01197) →                                            |
| Kox-15-1 | NZ_JH603150.1                 | + | 3606885 | 3606936 | RNA → rpmE (PRK00019)Ribosomal_L31 (pfam01197) →                                            |
| Kva-1-1  | NZ_KK736636.1                 | + | 72250   | 72301   | RNA → rpmE (PRK00019)Ribosomal_L31 (pfam01197) →                                            |
| env-711  | ACOFG988_contig05406          | + | 809     | 860     | RNA → rpmE (PRK00019)Ribosomal_L31 (pfam01197) →                                            |
| Emo-1-1  | NZ_GL890783.1                 | + | 74375   | 74426   | RNA → rpmE (PRK00019)Ribosomal_L31 (pfam01197) →                                            |

|          |                         |   |         |         |                                                   |
|----------|-------------------------|---|---------|---------|---------------------------------------------------|
| env-712  | ACOFG987_contig12924    | + | 6742    | 6793    | RNA → rpmE (PRK00019) Ribosomal_L31 (pfam01197) → |
| env-713  | TrFG_GO06Z1101DZBFU     | - | 245     | 194     | RNA → ←-hypo                                      |
| Eae-3-1  | NC_015663.1             | + | 1578215 | 1578266 | RNA → rpmE (PRK00019) Ribosomal_L31 (pfam01197) → |
| Kae-2-1  | NZ_KK736189.1           | - | 26043   | 25992   | RNA → rpmE (PRK00019) Ribosomal_L31 (pfam01197) → |
| Kae-8-1  | NZ_KI973151.1           | + | 4566597 | 4566648 | RNA → rpmE (PRK00019) Ribosomal_L31 (pfam01197) → |
| Kae-10-1 | NZ_KI973115.1           | + | 4912164 | 4912215 | RNA → rpmE (PRK00019) Ribosomal_L31 (pfam01197) → |
| Eae-2-1  | NZ_KB911089.1           | + | 60962   | 61013   | RNA → rpmE (PRK00019) Ribosomal_L31 (pfam01197) → |
| Kae-9-1  | NZ_KI973149.1           | - | 26765   | 26714   | RNA → rpmE (PRK00019) Ribosomal_L31 (pfam01197) → |
| Ecl-39-1 | NZ_JZYA01000020.1       | + | 70697   | 70748   | RNA → rpmE (PRK00019) Ribosomal_L31 (pfam01197) → |
| Ecl-40-1 | NZ_JZXZ01000015.1       | + | 70697   | 70748   | RNA → rpmE (PRK00019) Ribosomal_L31 (pfam01197) → |
| Ecl-49-1 | NZ_LEDN01000009.1       | - | 34047   | 33996   | RNA → rpmE (PRK00019) Ribosomal_L31 (pfam01197) → |
| Eas-1-2  | NZ_LEDN01000010.1       | - | 34185   | 34134   | RNA → rpmE (PRK00019) Ribosomal_L31 (pfam01197) → |
| env-714  | JCVI_SCAF_1096628076268 | + | 1539    | 1590    | RNA → rpmE (PRK00019) Ribosomal_L31 (pfam01197) → |
| Ksp-2-1  | NZ_JAND01000018.1       | - | 27347   | 27296   | RNA → rpmE (PRK00019) Ribosomal_L31 (pfam01197) → |
| Kox-18-1 | NC_016612.1             | + | 1528968 | 1529019 | RNA → rpmE (PRK00019) Ribosomal_L31 (pfam01197) → |
| Kox-17-1 | NC_018106.1             | + | 102388  | 102439  | RNA → rpmE (PRK00019) Ribosomal_L31 (pfam01197) → |
| Kox-9-1  | NZ_CP008788.1           | + | 136463  | 136514  | RNA → rpmE (PRK00019) Ribosomal_L31 (pfam01197) → |
| Kmi-3-1  | NZ_CP004887.1           | - | 549059  | 549008  | RNA → rpmE (PRK00019) Ribosomal_L31 (pfam01197) → |
| Kox-1-4  | NZ_JTBQ01000003.1       | + | 1597391 | 1597442 | RNA → rpmE (PRK00019) Ribosomal_L31 (pfam01197) → |
| Ecl-1-6  | NZ_CP009756.1           | - | 4713790 | 4713739 | RNA → rpmE (PRK00019) Ribosomal_L31 (pfam01197) → |
| env-715  | JGI26055J44792_1064861  | - | 162     | 111     | RNA →                                             |
| env-716  | JGI26054J46599_1155624  | + | 96      | 147     | RNA → rpmE (PRK00019) Ribosomal_L31 (pfam01197) → |
| Lad-2-1  | NZ_JMPM01000080.1       | - | 5520    | 5469    | RNA → rpmE (PRK00019) Ribosomal_L31 (pfam01197) → |
| env-717  | BAAW01000278.1          | - | 9404    | 9353    | RNA → rpmE (PRK00019) Ribosomal_L31 (pfam01197) → |
| env-718  | BAAX01012058.1          | - | 967     | 916     | RNA → rpmE (PRK00019) Ribosomal_L31 (pfam01197) → |
| env-719  | DLM016_C725662.1        | - | 371     | 320     | RNA → ←-hypo                                      |
| Ror-3-1  | NZ_JNPD01000022.1       | + | 72914   | 72965   | RNA → rpmE (PRK00019) Ribosomal_L31 (pfam01197) → |
| Ror-2-1  | NZ_JNPC01000052.1       | + | 72989   | 73040   | RNA → rpmE (PRK00019) Ribosomal_L31 (pfam01197) → |
| Ror-4-2  | NC_021066.1             | - | 4009168 | 4009117 | RNA → rpmE (PRK00019) Ribosomal_L31 (pfam01197) → |
| Kox-14-1 | NZ_JH603146.1           | + | 5383932 | 5383983 | RNA → rpmE (PRK00019) Ribosomal_L31 (pfam01197) → |
| env-720  | BMHB3a_c17472           | - | 62      | 11      | RNA →                                             |
| env-721  | JGI20225J20221_1000350  | + | 59385   | 59436   | RNA → rpmE (PRK00019) Ribosomal_L31 (pfam01197) → |
| env-722  | JGI20225J20221_1000514  | - | 18991   | 18940   | RNA → rpmE (PRK00019) Ribosomal_L31 (pfam01197) → |
| env-723  | JGI2065J20421_1001533   | - | 7784    | 7733    | RNA → rpmE (PRK00019) Ribosomal_L31 (pfam01197) → |
| env-724  | JGI26051J44788_1097127  | - | 262     | 211     | RNA → rpmE (PRK00019) Ribosomal_L31 (pfam01197) → |
| env-725  | JGI26052J44787_1053593  | - | 334     | 283     | RNA → rpmE (PRK00019) Ribosomal_L31 (pfam01197) → |
| env-726  | JGI26055J44792_1036479  | - | 374     | 323     | RNA → rpmE (PRK00019) Ribosomal_L31 (pfam01197) → |
| env-727  | JGI26054J46599_1011686  | - | 900     | 849     | RNA → rpmE (PRK00019) Ribosomal_L31 (pfam01197) → |
| Esp-51-1 | NZ_JTLF01000168.1       | + | 39738   | 39789   | RNA → rpmE (PRK00019) Ribosomal_L31 (pfam01197) → |
| Elu-1-1  | NZ_JTLO01000001.1       | - | 3106148 | 3106097 | RNA → rpmE (PRK00019) Ribosomal_L31 (pfam01197) → |
| Ecl-52-2 | NZ_JZYG01000016.1       | + | 85427   | 85478   | RNA → rpmE (PRK00019) Ribosomal_L31 (pfam01197) → |
| Eko-1-1  | NZ_JZYS01000009.1       | + | 92343   | 92394   | RNA → rpmE (PRK00019) Ribosomal_L31 (pfam01197) → |
| Eko-1-2  | NZ_JZYH01000012.1       | + | 90533   | 90584   | RNA → rpmE (PRK00019) Ribosomal_L31 (pfam01197) → |
| Eko-1-3  | NZ_JZXR01000011.1       | + | 92366   | 92417   | RNA → rpmE (PRK00019) Ribosomal_L31 (pfam01197) → |
| Ecl-52-3 | NZ_JZKU01000006.1       | + | 84152   | 84203   | RNA → rpmE (PRK00019) Ribosomal_L31 (pfam01197) → |
| Ecl-44-1 | NZ_LDCK01000029.1       | + | 87672   | 87723   | RNA → rpmE (PRK00019) Ribosomal_L31 (pfam01197) → |
| Eko-1-4  | NZ_LDCJ01000023.1       | - | 26538   | 26487   | RNA → rpmE (PRK00019) Ribosomal_L31 (pfam01197) → |
| Eko-1-5  | NZ_LDCL01000005.1       | + | 90555   | 90606   | RNA → rpmE (PRK00019) Ribosomal_L31 (pfam01197) → |
| Ecl-54-1 | NZ_LEDRO1000013.1       | - | 26431   | 26380   | RNA → rpmE (PRK00019) Ribosomal_L31 (pfam01197) → |
| Ecl-1-12 | NZ_LEDX01000013.1       | - | 26457   | 26406   | RNA → rpmE (PRK00019) Ribosomal_L31 (pfam01197) → |
| Eko-1-6  | NZ_LEEC01000023.1       | - | 26443   | 26392   | RNA → rpmE (PRK00019) Ribosomal_L31 (pfam01197) → |
| Eko-1-7  | NZ_LECY01000021.1       | + | 96372   | 96423   | RNA → rpmE (PRK00019) Ribosomal_L31 (pfam01197) → |

|           |                       |   |         |         |                                                  |
|-----------|-----------------------|---|---------|---------|--------------------------------------------------|
| Esp-70-1  | NZ.LEDW01000020.1     | + | 61773   | 61824   | RNA → rpmE (PRK00019)Ribosomal_L31 (pfam01197) → |
| Elu-1-2   | NZ.LEEO01000026.1     | - | 26445   | 26394   | RNA → rpmE (PRK00019)Ribosomal_L31 (pfam01197) → |
| Ecl-52-4  | NZ.LEDL01000002.1     | - | 34294   | 34243   | RNA → rpmE (PRK00019)Ribosomal_L31 (pfam01197) → |
| Eko-1-8   | NZ.LEDC01000018.1     | + | 92385   | 92436   | RNA → rpmE (PRK00019)Ribosomal_L31 (pfam01197) → |
| Eko-1-9   | NZ.LEEK01000034.1     | + | 75795   | 75846   | RNA → rpmE (PRK00019)Ribosomal_L31 (pfam01197) → |
| Eko-1-10  | NZ.LEEL01000010.1     | - | 26539   | 26488   | RNA → rpmE (PRK00019)Ribosomal_L31 (pfam01197) → |
| Elu-1-3   | NZ.LEER01000024.1     | + | 44534   | 44585   | RNA → rpmE (PRK00019)Ribosomal_L31 (pfam01197) → |
| Eko-1-11  | NZ.LEEQ01000013.1     | + | 94220   | 94271   | RNA → rpmE (PRK00019)Ribosomal_L31 (pfam01197) → |
| Elu-1-4   | NZ.JVAG01000129.1     | - | 26272   | 26221   | RNA → rpmE (PRK00019)Ribosomal_L31 (pfam01197) → |
| Ecl-66-1  | NZ.ATCK01000043.1     | - | 26572   | 26521   | RNA → rpmE (PRK00019)Ribosomal_L31 (pfam01197) → |
| Esp-49-1  | NZ.JALW01000032.1     | - | 34139   | 34088   | RNA → rpmE (PRK00019)Ribosomal_L31 (pfam01197) → |
| Ecl-68-1  | NC.014121.1           | - | 5180845 | 5180794 | RNA → rpmE (PRK00019)Ribosomal_L31 (pfam01197) → |
| Ecl-17-1  | NZ.CP006580.1         | + | 191531  | 191582  | RNA → rpmE (PRK00019)Ribosomal_L31 (pfam01197) → |
| Elu-1-5   | NZ.LGIV01000009.1     | - | 26778   | 26727   | RNA → rpmE (PRK00019)Ribosomal_L31 (pfam01197) → |
| Ecl-5-1   | NZ.KK736229.1         | - | 126143  | 126092  | RNA → rpmE (PRK00019)Ribosomal_L31 (pfam01197) → |
| Ecl-20-1  | NZ.KK736277.1         | - | 26447   | 26396   | RNA → rpmE (PRK00019)Ribosomal_L31 (pfam01197) → |
| Esp-59-1  | NZ.KI535662.1         | - | 3665245 | 3665194 | RNA → rpmE (PRK00019)Ribosomal_L31 (pfam01197) → |
| Esp-62-1  | NZ.KI535636.1         | - | 2645376 | 2645325 | RNA → rpmE (PRK00019)Ribosomal_L31 (pfam01197) → |
| Esp-60-1  | NZ.KI535658.1         | - | 31674   | 31623   | RNA → rpmE (PRK00019)Ribosomal_L31 (pfam01197) → |
| Esp-6-1   | NZ.KI973169.1         | + | 364492  | 364543  | RNA → rpmE (PRK00019)Ribosomal_L31 (pfam01197) → |
| Ecl-19-1  | NZ.KI973153.1         | + | 4412446 | 4412497 | RNA → rpmE (PRK00019)Ribosomal_L31 (pfam01197) → |
| Esp-28-1  | NZ.KI973206.1         | - | 1100641 | 1100590 | RNA → rpmE (PRK00019)Ribosomal_L31 (pfam01197) → |
| Esp-2-1   | NZ.KI973182.1         | - | 3892522 | 3892471 | RNA → rpmE (PRK00019)Ribosomal_L31 (pfam01197) → |
| Ecl-58-1  | NC.016514.1           | - | 4606548 | 4606497 | RNA → rpmE (PRK00019)Ribosomal_L31 (pfam01197) → |
| Ecl-69-1  | NC.018405.1           | - | 4625000 | 4624949 | RNA → rpmE (PRK00019)Ribosomal_L31 (pfam01197) → |
| Ecl-1-7   | NZ.CP009850.1         | - | 4664467 | 4664416 | RNA → rpmE (PRK00019)Ribosomal_L31 (pfam01197) → |
| Ecl-70-1  | NC.018079.1           | - | 4844043 | 4843992 | RNA → rpmE (PRK00019)Ribosomal_L31 (pfam01197) → |
| Ecl-1-8   | NZ.CP011798.1         | - | 327444  | 327393  | RNA → rpmE (PRK00019)Ribosomal_L31 (pfam01197) → |
| env-728   | ACEF_contig00957      | - | 2301    | 2250    | RNA → rpmE (PRK00019)Ribosomal_L31 (pfam01197) → |
| env-729   | AECF_contig26314      | - | 81      | 30      | RNA →                                            |
| Kae-3-1   | NZ.KK736200.1         | + | 3717888 | 3717939 | RNA → rpmE (PRK00019)Ribosomal_L31 (pfam01197) → |
| Kae-1-1   | NZ.CP011574.1         | - | 3117235 | 3117184 | RNA → rpmE (PRK00019)Ribosomal_L31 (pfam01197) → |
| env-730   | XAGC_contig23616      | - | 1010    | 959     | RNA → ← hypō                                     |
| Kmi-2-1   | NZ.AYMI01000011.1     | + | 97857   | 97908   | RNA → rpmE (PRK00019)Ribosomal_L31 (pfam01197) → |
| env-731   | TrFG_contig00373      | + | 1944    | 1995    | RNA → rpmE (PRK00019)Ribosomal_L31 (pfam01197) → |
| Eas-4-1   | NC.015968.1           | - | 4661093 | 4661042 | RNA → rpmE (PRK00019)Ribosomal_L31 (pfam01197) → |
| Lad-1-2   | NZ.JWJV01000033.1     | - | 7978    | 7927    | RNA → rpmE (PRK00019)Ribosomal_L31 (pfam01197) → |
| env-732   | 4491419.3.NODE_4719   | - | 473     | 422     | RNA → rpmE (PRK00019)Ribosomal_L31 (pfam01197) → |
| env-733   | 4491419.3.NODE_11764  | - | 474     | 423     | RNA → rpmE (PRK00019)Ribosomal_L31 (pfam01197) → |
| env-734   | DLM028_scaffold4351.7 | - | 4065    | 4014    | RNA → rpmE (PRK00019)Ribosomal_L31 (pfam01197) → |
| Kpn-326-1 | NZ.AQOC01000021.1     | - | 29376   | 29325   | RNA → rpmE (PRK00019)Ribosomal_L31 (pfam01197) → |
| Kqu-2-1   | NZ.JVQN01000176.1     | - | 1038    | 987     | RNA → rpmE (PRK00019)Ribosomal_L31 (pfam01197) → |
| Kqu-2-2   | NZ.JVJE01000086.1     | + | 33812   | 33863   | RNA → rpmE (PRK00019)Ribosomal_L31 (pfam01197) → |
| Kqu-2-3   | NZ.JVVC01000018.1     | - | 26482   | 26431   | RNA → rpmE (PRK00019)Ribosomal_L31 (pfam01197) → |
| Kqu-2-4   | NZ.CBZR010000001.1    | + | 69045   | 69096   | RNA → rpmE (PRK00019)Ribosomal_L31 (pfam01197) → |
| Kpn-275-1 | NZ.KI535595.1         | + | 3403936 | 3403987 | RNA → rpmE (PRK00019)Ribosomal_L31 (pfam01197) → |
| Kpn-237-1 | NZ.AOGO01000011.1     | + | 69040   | 69091   | RNA → rpmE (PRK00019)Ribosomal_L31 (pfam01197) → |
| env-735   | TrFG_contig13861      | - | 281     | 230     | RNA → ← hypō                                     |
| Kva-2-1   | NC.013850.1           | - | 5332563 | 5332512 | RNA → rpmE (PRK00019)Ribosomal_L31 (pfam01197) → |
| Kpn-232-1 | NC.011283.1           | - | 5516732 | 5516681 | RNA → rpmE (PRK00019)Ribosomal_L31 (pfam01197) → |
| Kva-1-6   | NZ.CP009274.1         | + | 1816499 | 1816550 | RNA → rpmE (PRK00019)Ribosomal_L31 (pfam01197) → |
| Rte-1-1   | NZ.LANE01000003.1     | - | 120401  | 120350  | RNA → rpmE (PRK00019)Ribosomal_L31 (pfam01197) → |



|           |                         |   |         |         |                                                                                             |
|-----------|-------------------------|---|---------|---------|---------------------------------------------------------------------------------------------|
| Eho-1-9   | NZ_LBLX01000029.1       | + | 85605   | 85656   | RNA → rpmE (PRK00019)Ribosomal_L31 (pfam01197) →                                            |
| env-736   | 4491419.3_NODE12924     | + | 144     | 195     | RNA →                                                                                       |
| env-737   | 4491488.3_NODE1236      | + | 328     | 379     | RNA → rpmE (PRK00019)Ribosomal_L31 (pfam01197) →                                            |
| Ksp-4-1   | NZ_GG745516.1           | - | 26527   | 26476   | RNA → rpmE (PRK00019)Ribosomal_L31 (pfam01197) → rpmE (PRK00019)Ribosomal_L31 (pfam01197) → |
| Kva-1-2   | NZ_KK737586.1           | + | 69197   | 69248   | RNA → rpmE (PRK00019)Ribosomal_L31 (pfam01197) →                                            |
| Kva-1-3   | NZ_KK737692.1           | + | 69506   | 69557   | RNA → rpmE (PRK00019)Ribosomal_L31 (pfam01197) →                                            |
| Kva-1-4   | NZ_KK737663.1           | + | 508763  | 508814  | RNA → rpmE (PRK00019)Ribosomal_L31 (pfam01197) →                                            |
| Kpn-274-1 | NZ_KI535605.1           | + | 1344252 | 1344303 | RNA → rpmE (PRK00019)Ribosomal_L31 (pfam01197) →                                            |
| Kpn-280-1 | NZ_KI535485.1           | + | 75229   | 75280   | RNA → rpmE (PRK00019)Ribosomal_L31 (pfam01197) →                                            |
| Kpn-268-1 | NZ_KI535672.1           | + | 4608393 | 4608444 | RNA → rpmE (PRK00019)Ribosomal_L31 (pfam01197) →                                            |
| Kva-1-5   | NZ_KK036667.1           | + | 1372107 | 1372158 | RNA → rpmE (PRK00019)Ribosomal_L31 (pfam01197) →                                            |
| Ksp-6-1   | NZ_KB976100.1           | + | 5373858 | 5373909 | RNA → rpmE (PRK00019)Ribosomal_L31 (pfam01197) →                                            |
| Kva-1-7   | NZ_CP010523.1           | + | 3265862 | 3265913 | RNA → rpmE (PRK00019)Ribosomal_L31 (pfam01197) →                                            |
| Kox-8-1   | NZ_JAKX01000043.1       | + | 84191   | 84242   | RNA → rpmE (PRK00019)Ribosomal_L31 (pfam01197) →                                            |
| Kox-12-1  | NZ_JH603143.1           | + | 4820997 | 4821048 | RNA → rpmE (PRK00019)Ribosomal_L31 (pfam01197) →                                            |
| Kox-2-1   | NZ_KQ235800.1           | + | 1506324 | 1506375 | RNA → rpmE (PRK00019)Ribosomal_L31 (pfam01197) →                                            |
| Esp-29-1  | NZ_KI973298.1           | + | 90849   | 90900   | RNA → rpmE (PRK00019)Ribosomal_L31 (pfam01197) →                                            |
| Ecl-2-1   | NZ_KI973222.1           | + | 1710483 | 1710534 | RNA → rpmE (PRK00019)Ribosomal_L31 (pfam01197) →                                            |
| Ror-1-1   | NZ_CP010557.1           | + | 596820  | 596871  | RNA → rpmE (PRK00019)Ribosomal_L31 (pfam01197) →                                            |
| env-738   | TrFG_GO06Z1101DX8CW     | + | 410     | 461     | RNA →                                                                                       |
| Ecl-42-1  | NZ_JZKT01000038.1       | - | 26924   | 26873   | RNA → rpmE (PRK00019)Ribosomal_L31 (pfam01197) →                                            |
| Ecl-7-1   | NZ_KK736236.1           | - | 40059   | 40008   | RNA → rpmE (PRK00019)Ribosomal_L31 (pfam01197) →                                            |
| env-739   | JCVL_SCAF_1101667396151 | - | 261     | 210     | RNA → ←PriA (COG1198)PRK05580 (PRK05580)                                                    |
| Ror-4-1   | NZ_CVRH01000021.1       | - | 26617   | 26566   | RNA → rpmE (PRK00019)Ribosomal_L31 (pfam01197) →                                            |
| Rpl-2-1   | NZ_KMPP01000013.1       | - | 26477   | 26426   | RNA → rpmE (PRK00019)Ribosomal_L31 (pfam01197) →                                            |
| Rpl-1-3   | NZ_JTBS01000001.1       | + | 1859515 | 1859566 | RNA → rpmE (PRK00019)Ribosomal_L31 (pfam01197) →                                            |
| Rpl-1-1   | NZ_JUZO01000017.1       | - | 26397   | 26346   | RNA → rpmE (PRK00019)Ribosomal_L31 (pfam01197) →                                            |
| Rpl-1-2   | NZ_JPRG01000005.1       | - | 29247   | 29196   | RNA → rpmE (PRK00019)Ribosomal_L31 (pfam01197) →                                            |
| Eca-3-1   | NZ_GG704867.1           | + | 87486   | 87537   | RNA → rpmE (PRK00019)Ribosomal_L31 (pfam01197) →                                            |
| Kqu-1-1   | NZ_KQ089430.1           | + | 80289   | 80340   | RNA → rpmE (PRK00019)Ribosomal_L31 (pfam01197) →                                            |
| Esp-67-1  | NC_009436.1             | - | 4390991 | 4390940 | RNA → rpmE (PRK00019)Ribosomal_L31 (pfam01197) →                                            |
| env-740   | BAAY01007565.1          | + | 809     | 860     | RNA → rpmE (PRK00019)Ribosomal_L31 (pfam01197) →                                            |
| env-741   | NLM027_scaffold15214_2  | - | 8262    | 8211    | RNA → rpmE (PRK00019)Ribosomal_L31 (pfam01197) →                                            |
| Kae-5-1   | NZ_KK736212.1           | + | 4447956 | 4448007 | RNA → rpmE (PRK00019)Ribosomal_L31 (pfam01197) →                                            |
| Kae-4-1   | NZ_KK736209.1           | + | 59203   | 59254   | RNA → rpmE (PRK00019)Ribosomal_L31 (pfam01197) →                                            |
| Kae-11-1  | NZ_KI973112.1           | - | 26144   | 26093   | RNA → rpmE (PRK00019)Ribosomal_L31 (pfam01197) →                                            |
| Kae-6-1   | NZ_KI973163.1           | + | 4470166 | 4470217 | RNA → rpmE (PRK00019)Ribosomal_L31 (pfam01197) →                                            |
| Kae-7-1   | NZ_KI973160.1           | - | 439123  | 439072  | RNA → rpmE (PRK00019)Ribosomal_L31 (pfam01197) →                                            |
| Kae-13-1  | NZ_KI973099.1           | - | 76517   | 76466   | RNA → rpmE (PRK00019)Ribosomal_L31 (pfam01197) →                                            |
| Kae-12-1  | NZ_KI973103.1           | + | 5175205 | 5175256 | RNA → rpmE (PRK00019)Ribosomal_L31 (pfam01197) →                                            |
| Eae-1-1   | NC_020181.1             | - | 3840695 | 3840644 | RNA → rpmE (PRK00019)Ribosomal_L31 (pfam01197) →                                            |
| env-742   | JGI26053J44789_1079225  | + | 118     | 169     | RNA → rpmE (PRK00019)Ribosomal_L31 (pfam01197) →                                            |
| env-743   | scaffold31432_4_MH0008  | - | 1152    | 1101    | RNA → rpmE (PRK00019)Ribosomal_L31 (pfam01197) →                                            |
| env-744   | scaffold66042_2_MH0028  | + | 325     | 376     | RNA → rpmE (PRK00019)Ribosomal_L31 (pfam01197) →                                            |
| env-745   | DLF010_scaffold7891_17  | - | 257     | 206     | RNA → rpmE (PRK00019)Ribosomal_L31 (pfam01197) →                                            |
| env-746   | DLM010_scaffold43772_3  | + | 3869    | 3920    | RNA → rpmE (PRK00019)Ribosomal_L31 (pfam01197) →                                            |
| env-747   | DLM013_scaffold3780_4   | - | 2536    | 2485    | RNA → rpmE (PRK00019)Ribosomal_L31 (pfam01197) →                                            |
| env-748   | DOM025_scaffold154_16   | - | 1239    | 1188    | RNA → rpmE (PRK00019)Ribosomal_L31 (pfam01197) →                                            |
| env-749   | NLM006_scaffold9282_3   | + | 1048    | 1099    | RNA → rpmE (PRK00019)Ribosomal_L31 (pfam01197) →                                            |
| env-750   | NOM005_scaffold41513_1  | - | 528     | 477     | RNA → rpmE (PRK00019)Ribosomal_L31 (pfam01197) →                                            |
| env-751   | NOM020_scaffold17044_1  | - | 530     | 479     | RNA → rpmE (PRK00019)Ribosomal_L31 (pfam01197) →                                            |
| env-752   | NOM026_scaffold17616_5  | + | 3875    | 3926    | RNA → rpmE (PRK00019)Ribosomal_L31 (pfam01197) →                                            |



|           |                    |   |         |         |                                                                                           |
|-----------|--------------------|---|---------|---------|-------------------------------------------------------------------------------------------|
| env-753   | SRS017191_C1645600 | - | 298     | 247     | RNA → ←-hypō                                                                              |
| Kpn-336-1 | NZ_AKAI01000019.1  | + | 69325   | 69376   | RNA → rpmE (PRK00019)Ribosomal_L31 (pfam01197)→                                           |
| Kpn-339-1 | NZ_AKAK01000019.1  | + | 69445   | 69496   | RNA → rpmE (PRK00019)Ribosomal_L31 (pfam01197)→                                           |
| Kpn-344-1 | NZ_AJZX01000018.1  | + | 69310   | 69361   | RNA → rpmE (PRK00019)Ribosomal_L31 (pfam01197)→                                           |
| Kpn-342-1 | NZ_AKAN01000030.1  | - | 30770   | 30719   | RNA → rpmE (PRK00019)Ribosomal_L31 (pfam01197)→                                           |
| Kpn-337-1 | NZ_AKAJ01000017.1  | + | 68885   | 68936   | RNA → rpmE (PRK00019)Ribosomal_L31 (pfam01197)→                                           |
| Kpn-341-1 | NZ_AKAM01000021.1  | + | 69493   | 69544   | RNA → rpmE (PRK00019)Ribosomal_L31 (pfam01197)→                                           |
| Kpn-346-1 | NZ_AJZZ01000020.1  | - | 30703   | 30652   | RNA → rpmE (PRK00019)Ribosomal_L31 (pfam01197)→                                           |
| Kpn-130-1 | NZ_JAPZ01000068.1  | - | 30404   | 30353   | RNA → rpmE (PRK00019)Ribosomal_L31 (pfam01197)→                                           |
| Kpn-226-1 | NZ_AFQL01000035.1  | - | 30305   | 30254   | RNA → rpmE (PRK00019)Ribosomal_L31 (pfam01197)→                                           |
| Kpn-343-1 | NZ_AJZW01000019.1  | - | 30594   | 30543   | RNA → rpmE (PRK00019)Ribosomal_L31 (pfam01197)→                                           |
| Kpn-340-1 | NZ_AKAL01000044.1  | - | 30767   | 30716   | RNA → rpmE (PRK00019)Ribosomal_L31 (pfam01197)→                                           |
| Kpn-315-1 | NZ_ANGI02000123.1  | - | 30404   | 30353   | RNA → rpmE (PRK00019)Ribosomal_L31 (pfam01197)→                                           |
| Kpn-331-1 | NZ_AKAD01000019.1  | - | 30622   | 30571   | RNA → rpmE (PRK00019)Ribosomal_L31 (pfam01197)→                                           |
| Kpn-205-4 | NZ_CDJH01000058.1  | - | 30308   | 30257   | RNA → rpmE (PRK00019)Ribosomal_L31 (pfam01197)→                                           |
| Kpn-200-1 | NZ_JNBM01000001.1  | + | 71686   | 71737   | RNA → rpmE (PRK00019)Ribosomal_L31 (pfam01197)→                                           |
| Kpn-300-1 | NZ_ARRU01000117.1  | - | 30307   | 30256   | RNA → rpmE (PRK00019)Ribosomal_L31 (pfam01197)→ rpmE (PRK00019)Ribosomal_L31 (pfam01197)→ |
| Kpn-293-1 | NZ_ARSM01000115.1  | - | 30314   | 30263   | RNA → rpmE (PRK00019)Ribosomal_L31 (pfam01197)→ rpmE (PRK00019)Ribosomal_L31 (pfam01197)→ |
| Kpn-288-1 | NZ_ARSK01000223.1  | - | 30308   | 30257   | RNA → rpmE (PRK00019)Ribosomal_L31 (pfam01197)→ rpmE (PRK00019)Ribosomal_L31 (pfam01197)→ |
| Kpn-204-1 | NZ_JMSW01000001.1  | + | 3639812 | 3639863 | RNA → rpmE (PRK00019)Ribosomal_L31 (pfam01197)→                                           |
| Kpn-203-1 | NZ_JMSX01000001.1  | + | 3139354 | 3139405 | RNA → rpmE (PRK00019)Ribosomal_L31 (pfam01197)→                                           |
| Kpn-3-1   | NZ_JMMY01000001.1  | + | 1290527 | 1290578 | RNA → rpmE (PRK00019)Ribosomal_L31 (pfam01197)→                                           |
| Kpn-10-1  | NZ_AQQH01000032.1  | - | 30385   | 30334   | RNA → rpmE (PRK00019)Ribosomal_L31 (pfam01197)→                                           |
| Kpn-128-1 | NZ_LBLV01000039.1  | + | 64047   | 64098   | RNA → rpmE (PRK00019)Ribosomal_L31 (pfam01197)→                                           |
| Kpn-166-1 | NZ_LBID01000034.1  | - | 30659   | 30608   | RNA → rpmE (PRK00019)Ribosomal_L31 (pfam01197)→                                           |
| Kpn-167-1 | NZ_LBLU01000064.1  | + | 69284   | 69335   | RNA → rpmE (PRK00019)Ribosomal_L31 (pfam01197)→                                           |
| Kpn-165-1 | NZ_LBIE01000001.1  | + | 63787   | 63838   | RNA → rpmE (PRK00019)Ribosomal_L31 (pfam01197)→                                           |
| Kpn-169-1 | NZ_AOPN02000142.1  | + | 33886   | 33937   | RNA → rpmE (PRK00019)Ribosomal_L31 (pfam01197)→                                           |
| Kpn-164-1 | NZ_LBIK01000035.1  | + | 26789   | 26840   | RNA → rpmE (PRK00019)Ribosomal_L31 (pfam01197)→                                           |
| Kpn-262-1 | NZ_LAVN01000012.1  | + | 63706   | 63757   | RNA → rpmE (PRK00019)Ribosomal_L31 (pfam01197)→ rpmE (PRK00019)Ribosomal_L31 (pfam01197)→ |
| Kpn-205-1 | NZ_JVKF01000039.1  | + | 63885   | 63936   | RNA → rpmE (PRK00019)Ribosomal_L31 (pfam01197)→                                           |
| Kpn-241-1 | NZ_AXL01000003.1   | + | 4686167 | 4686218 | RNA → rpmE (PRK00019)Ribosomal_L31 (pfam01197)→                                           |
| Kpn-240-1 | NZ_AXLG01000003.1  | + | 4750718 | 4750769 | RNA → rpmE (PRK00019)Ribosomal_L31 (pfam01197)→                                           |
| Kpn-242-1 | NZ_AXLE01000001.1  | + | 4741668 | 4741719 | RNA → rpmE (PRK00019)Ribosomal_L31 (pfam01197)→                                           |
| Kpn-209-1 | NZ_AVFC01000077.1  | + | 69005   | 69056   | RNA → rpmE (PRK00019)Ribosomal_L31 (pfam01197)→                                           |
| Kpn-205-2 | NZ_JULI01000116.1  | - | 30352   | 30301   | RNA → rpmE (PRK00019)Ribosomal_L31 (pfam01197)→                                           |
| Kpn-205-3 | NZ_JULH01000061.1  | - | 30362   | 30311   | RNA → rpmE (PRK00019)Ribosomal_L31 (pfam01197)→                                           |
| Kpn-3-2   | NZ_ARSN01000079.1  | - | 30275   | 30224   | RNA → rpmE (PRK00019)Ribosomal_L31 (pfam01197)→ rpmE (PRK00019)Ribosomal_L31 (pfam01197)→ |
| Kpn-264-1 | NZ_AQQD01000294.1  | + | 65257   | 65308   | RNA → rpmE (PRK00019)Ribosomal_L31 (pfam01197)→ rpmE (PRK00019)Ribosomal_L31 (pfam01197)→ |
| Kpn-233-1 | NZ_APWF01000076.1  | - | 30307   | 30256   | RNA → rpmE (PRK00019)Ribosomal_L31 (pfam01197)→ rpmE (PRK00019)Ribosomal_L31 (pfam01197)→ |
| Kpn-294-1 | NZ_ARSH01000011.1  | - | 30308   | 30257   | RNA → rpmE (PRK00019)Ribosomal_L31 (pfam01197)→ rpmE (PRK00019)Ribosomal_L31 (pfam01197)→ |
| Kpn-199-2 | NZ_ARVN01000047.1  | - | 30307   | 30256   | RNA → rpmE (PRK00019)Ribosomal_L31 (pfam01197)→ rpmE (PRK00019)Ribosomal_L31 (pfam01197)→ |
| Kpn-236-1 | NZ_APWJ01000011.1  | + | 22829   | 22880   | RNA → rpmE (PRK00019)Ribosomal_L31 (pfam01197)→ rpmE (PRK00019)Ribosomal_L31 (pfam01197)→ |
| Kpn-319-1 | NZ_APWA01000100.1  | - | 30308   | 30257   | RNA → rpmE (PRK00019)Ribosomal_L31 (pfam01197)→ rpmE (PRK00019)Ribosomal_L31 (pfam01197)→ |
| Kpn-295-1 | NZ_APVU01000051.1  | - | 30307   | 30256   | RNA → rpmE (PRK00019)Ribosomal_L31 (pfam01197)→ rpmE (PRK00019)Ribosomal_L31 (pfam01197)→ |
| Kpn-308-1 | NZ_ARSE01000152.1  | - | 30308   | 30257   | RNA → rpmE (PRK00019)Ribosomal_L31 (pfam01197)→ rpmE (PRK00019)Ribosomal_L31 (pfam01197)→ |
| Kpn-306-1 | NZ_ARPP01000028.1  | - | 30307   | 30256   | RNA → rpmE (PRK00019)Ribosomal_L31 (pfam01197)→ rpmE (PRK00019)Ribosomal_L31 (pfam01197)→ |
| Kpn-235-1 | NZ_APWI01000146.1  | - | 30307   | 30256   | RNA → rpmE (PRK00019)Ribosomal_L31 (pfam01197)→ rpmE (PRK00019)Ribosomal_L31 (pfam01197)→ |
| Kpn-321-1 | NZ_APVZ01000120.1  | - | 30307   | 30256   | RNA → rpmE (PRK00019)Ribosomal_L31 (pfam01197)→ rpmE (PRK00019)Ribosomal_L31 (pfam01197)→ |
| Kpn-231-1 | NZ_AVAN01000034.1  | + | 64640   | 64691   | RNA → rpmE (PRK00019)Ribosomal_L31 (pfam01197)→                                           |
| Kpn-255-1 | NZ_ARPO01000036.1  | - | 30308   | 30257   | RNA → rpmE (PRK00019)Ribosomal_L31 (pfam01197)→ rpmE (PRK00019)Ribosomal_L31 (pfam01197)→ |
| Kpn-298-1 | NZ_APVT01000051.1  | - | 30307   | 30256   | RNA → rpmE (PRK00019)Ribosomal_L31 (pfam01197)→ rpmE (PRK00019)Ribosomal_L31 (pfam01197)→ |

|           |                   |   |         |         |                                                                                               |
|-----------|-------------------|---|---------|---------|-----------------------------------------------------------------------------------------------|
| Kpn-200-2 | NZ_ARVM01000045.1 | - | 30308   | 30257   | RNA → rpmE (PRK00019) Ribosomal_L31 (pfam01197) → rpmE (PRK00019) Ribosomal_L31 (pfam01197) → |
| Kpn-310-1 | NZ_ARSL01000131.1 | + | 68924   | 68975   | RNA → rpmE (PRK00019) Ribosomal_L31 (pfam01197) → rpmE (PRK00019) Ribosomal_L31 (pfam01197) → |
| Kpn-257-1 | NZ_ARSB01000142.1 | - | 30314   | 30263   | RNA → rpmE (PRK00019) Ribosomal_L31 (pfam01197) → rpmE (PRK00019) Ribosomal_L31 (pfam01197) → |
| Kpn-314-1 | NZ_ARRY01000131.1 | - | 30308   | 30257   | RNA → rpmE (PRK00019) Ribosomal_L31 (pfam01197) → rpmE (PRK00019) Ribosomal_L31 (pfam01197) → |
| Kpn-287-1 | NZ_APVP01000044.1 | - | 30308   | 30257   | RNA → rpmE (PRK00019) Ribosomal_L31 (pfam01197) → rpmE (PRK00019) Ribosomal_L31 (pfam01197) → |
| Kpn-299-1 | NZ_APVR01000150.1 | + | 22831   | 22882   | RNA → rpmE (PRK00019) Ribosomal_L31 (pfam01197) → rpmE (PRK00019) Ribosomal_L31 (pfam01197) → |
| Kpn-291-1 | NZ_APVO01000145.1 | - | 30307   | 30256   | RNA → rpmE (PRK00019) Ribosomal_L31 (pfam01197) → rpmE (PRK00019) Ribosomal_L31 (pfam01197) → |
| Kpn-305-1 | NZ_ARRV01000085.1 | - | 30307   | 30256   | RNA → rpmE (PRK00019) Ribosomal_L31 (pfam01197) → rpmE (PRK00019) Ribosomal_L31 (pfam01197) → |
| Kpn-292-1 | NZ_ARSG01000160.1 | - | 30308   | 30257   | RNA → rpmE (PRK00019) Ribosomal_L31 (pfam01197) → rpmE (PRK00019) Ribosomal_L31 (pfam01197) → |
| Kpn-296-1 | NZ_AQQA01000109.1 | - | 30307   | 30256   | RNA → rpmE (PRK00019) Ribosomal_L31 (pfam01197) → rpmE (PRK00019) Ribosomal_L31 (pfam01197) → |
| Kpn-127-1 | NZ_AQQI01000044.1 | - | 30387   | 30336   | RNA → rpmE (PRK00019) Ribosomal_L31 (pfam01197) →                                             |
| Kpn-357-1 | NZ_ATEZ01000131.1 | + | 68945   | 68996   | RNA → rpmE (PRK00019) Ribosomal_L31 (pfam01197) → rpmE (PRK00019) Ribosomal_L31 (pfam01197) → |
| Kpn-234-1 | NZ_APWG01000108.1 | - | 30318   | 30267   | RNA → rpmE (PRK00019) Ribosomal_L31 (pfam01197) → rpmE (PRK00019) Ribosomal_L31 (pfam01197) → |
| Kpn-230-1 | NZ_ARSQ01000036.1 | + | 22838   | 22889   | RNA → rpmE (PRK00019) Ribosomal_L31 (pfam01197) → rpmE (PRK00019) Ribosomal_L31 (pfam01197) → |
| Kpn-229-1 | NZ_ARSP01000052.1 | - | 30307   | 30256   | RNA → rpmE (PRK00019) Ribosomal_L31 (pfam01197) → rpmE (PRK00019) Ribosomal_L31 (pfam01197) → |
| Kpn-263-1 | NZ_APWE01000184.1 | - | 30309   | 30258   | RNA → rpmE (PRK00019) Ribosomal_L31 (pfam01197) →                                             |
| Kpn-228-1 | NZ_ARSO01000057.1 | - | 30308   | 30257   | RNA → rpmE (PRK00019) Ribosomal_L31 (pfam01197) → rpmE (PRK00019) Ribosomal_L31 (pfam01197) → |
| Kpn-290-1 | NZ_ARSJ01000101.1 | - | 30307   | 30256   | RNA → rpmE (PRK00019) Ribosomal_L31 (pfam01197) → rpmE (PRK00019) Ribosomal_L31 (pfam01197) → |
| Kpn-258-1 | NZ_AFQK01000005.1 | - | 30326   | 30275   | RNA → rpmE (PRK00019) Ribosomal_L31 (pfam01197) →                                             |
| Kpn-332-1 | NZ_AKAE01000020.1 | - | 30565   | 30514   | RNA → rpmE (PRK00019) Ribosomal_L31 (pfam01197) →                                             |
| Kpn-355-1 | NZ_CANS01000126.1 | + | 69343   | 69394   | RNA → rpmE (PRK00019) Ribosomal_L31 (pfam01197) → rpmE (PRK00019) Ribosomal_L31 (pfam01197) → |
| Kpn-328-1 | NZ_AJJI01000017.1 | + | 68833   | 68884   | RNA → rpmE (PRK00019) Ribosomal_L31 (pfam01197) → rpmE (PRK00019) Ribosomal_L31 (pfam01197) → |
| Kpn-194-1 | NZ_JJNI01000022.1 | + | 60242   | 60293   | RNA → rpmE (PRK00019) Ribosomal_L31 (pfam01197) →                                             |
| Kpn-190-1 | NZ_JJNJ01000018.1 | + | 70166   | 70217   | RNA → rpmE (PRK00019) Ribosomal_L31 (pfam01197) →                                             |
| Kpn-161-1 | NZ_JJNK01000022.1 | + | 63710   | 63761   | RNA → rpmE (PRK00019) Ribosomal_L31 (pfam01197) →                                             |
| Kpn-199-1 | NZ_JMSY01000001.1 | + | 3417357 | 3417408 | RNA → rpmE (PRK00019) Ribosomal_L31 (pfam01197) →                                             |
| Kpn-211-1 | NZ_AYOV01000023.1 | + | 69005   | 69056   | RNA → rpmE (PRK00019) Ribosomal_L31 (pfam01197) →                                             |
| Kpn-212-1 | NZ_AYOW01000027.1 | + | 69005   | 69056   | RNA → rpmE (PRK00019) Ribosomal_L31 (pfam01197) →                                             |
| Kpn-348-1 | NZ_AKAB01000020.1 | + | 69393   | 69444   | RNA → rpmE (PRK00019) Ribosomal_L31 (pfam01197) →                                             |
| Kpn-345-1 | NZ_AJZY01000021.1 | - | 30650   | 30599   | RNA → rpmE (PRK00019) Ribosomal_L31 (pfam01197) →                                             |
| Kpn-354-1 | NZ_CANR01000136.1 | + | 69501   | 69552   | RNA → rpmE (PRK00019) Ribosomal_L31 (pfam01197) → rpmE (PRK00019) Ribosomal_L31 (pfam01197) → |
| Kpn-350-1 | NZ_AJVY01000169.1 | + | 64800   | 64851   | RNA → rpmE (PRK00019) Ribosomal_L31 (pfam01197) →                                             |
| Kpn-347-1 | NZ_AKAA01000020.1 | - | 30633   | 30582   | RNA → rpmE (PRK00019) Ribosomal_L31 (pfam01197) →                                             |
| Kpn-356-1 | NZ_CAJM02000254.1 | + | 69080   | 69131   | RNA → rpmE (PRK00019) Ribosomal_L31 (pfam01197) → rpmE (PRK00019) Ribosomal_L31 (pfam01197) → |
| Kpn-353-1 | NZ_ALIS01000023.1 | - | 30146   | 30095   | RNA → rpmE (PRK00019) Ribosomal_L31 (pfam01197) →                                             |
| Kpn-289-1 | NZ_APVV01000006.1 | + | 68928   | 68979   | RNA → rpmE (PRK00019) Ribosomal_L31 (pfam01197) → rpmE (PRK00019) Ribosomal_L31 (pfam01197) → |
| Kpn-322-1 | NZ_APWC01000036.1 | + | 68928   | 68979   | RNA → rpmE (PRK00019) Ribosomal_L31 (pfam01197) → rpmE (PRK00019) Ribosomal_L31 (pfam01197) → |
| Kpn-323-1 | NZ_APWD01000119.1 | + | 22834   | 22885   | RNA → rpmE (PRK00019) Ribosomal_L31 (pfam01197) → rpmE (PRK00019) Ribosomal_L31 (pfam01197) → |
| Kpn-352-1 | NZ_ATAK01000075.1 | + | 68887   | 68938   | RNA → rpmE (PRK00019) Ribosomal_L31 (pfam01197) → rpmE (PRK00019) Ribosomal_L31 (pfam01197) → |
| Kpn-301-1 | NZ_ARVQ01000045.1 | + | 68928   | 68979   | RNA → rpmE (PRK00019) Ribosomal_L31 (pfam01197) → rpmE (PRK00019) Ribosomal_L31 (pfam01197) → |
| Kpn-318-1 | NZ_APVY01000110.1 | - | 30307   | 30256   | RNA → rpmE (PRK00019) Ribosomal_L31 (pfam01197) → rpmE (PRK00019) Ribosomal_L31 (pfam01197) → |
| Kpn-312-1 | NZ_ARRX01000168.1 | - | 30308   | 30257   | RNA → rpmE (PRK00019) Ribosomal_L31 (pfam01197) → rpmE (PRK00019) Ribosomal_L31 (pfam01197) → |
| Kpn-138-1 | NZ_AYQE01000011.1 | - | 29562   | 29511   | RNA → rpmE (PRK00019) Ribosomal_L31 (pfam01197) →                                             |
| Kpn-317-1 | NZ_APVX01000016.1 | - | 30308   | 30257   | RNA → rpmE (PRK00019) Ribosomal_L31 (pfam01197) → rpmE (PRK00019) Ribosomal_L31 (pfam01197) → |
| Kpn-316-1 | NZ_APVW01000045.1 | + | 68928   | 68979   | RNA → rpmE (PRK00019) Ribosomal_L31 (pfam01197) → rpmE (PRK00019) Ribosomal_L31 (pfam01197) → |
| Kpn-297-1 | NZ_APVS01000015.1 | - | 30307   | 30256   | RNA → rpmE (PRK00019) Ribosomal_L31 (pfam01197) → rpmE (PRK00019) Ribosomal_L31 (pfam01197) → |
| Kpn-311-1 | NZ_ARRW01000042.1 | - | 30307   | 30256   | RNA → rpmE (PRK00019) Ribosomal_L31 (pfam01197) → rpmE (PRK00019) Ribosomal_L31 (pfam01197) → |
| Kpn-320-1 | NZ_APWB01000051.1 | - | 30308   | 30257   | RNA → rpmE (PRK00019) Ribosomal_L31 (pfam01197) → rpmE (PRK00019) Ribosomal_L31 (pfam01197) → |
| Kpn-313-1 | NZ_APVQ01000201.1 | - | 30314   | 30263   | RNA → rpmE (PRK00019) Ribosomal_L31 (pfam01197) → rpmE (PRK00019) Ribosomal_L31 (pfam01197) → |
| Kpn-302-1 | NZ_ARSJ01000095.1 | - | 30307   | 30256   | RNA → rpmE (PRK00019) Ribosomal_L31 (pfam01197) → rpmE (PRK00019) Ribosomal_L31 (pfam01197) → |
| Kpn-309-1 | NZ_ARSC01000038.1 | + | 68928   | 68979   | RNA → rpmE (PRK00019) Ribosomal_L31 (pfam01197) → rpmE (PRK00019) Ribosomal_L31 (pfam01197) → |
| Kpn-304-1 | NZ_AQOT01000031.1 | + | 68928   | 68979   | RNA → rpmE (PRK00019) Ribosomal_L31 (pfam01197) → rpmE (PRK00019) Ribosomal_L31 (pfam01197) → |

|           |                   |   |         |         |                                                                                             |
|-----------|-------------------|---|---------|---------|---------------------------------------------------------------------------------------------|
| Kpn-203-2 | NZ_ARVO01000169.1 | - | 30310   | 30259   | RNA → rpmE (PRK00019)Ribosomal_L31 (pfam01197) → rpmE (PRK00019)Ribosomal_L31 (pfam01197) → |
| Kpn-303-1 | NZ_ARPQ01000202.1 | - | 30308   | 30257   | RNA → rpmE (PRK00019)Ribosomal_L31 (pfam01197) → rpmE (PRK00019)Ribosomal_L31 (pfam01197) → |
| Kpn-204-2 | NZ_ARVP01000082.1 | + | 68924   | 68975   | RNA → rpmE (PRK00019)Ribosomal_L31 (pfam01197) → rpmE (PRK00019)Ribosomal_L31 (pfam01197) → |
| Kpn-307-1 | NZ_ARPR01000083.1 | + | 22839   | 22890   | RNA → rpmE (PRK00019)Ribosomal_L31 (pfam01197) → rpmE (PRK00019)Ribosomal_L31 (pfam01197) → |
| Kpn-219-1 | NZ_AWOM01000016.1 | - | 30326   | 30275   | RNA → rpmE (PRK00019)Ribosomal_L31 (pfam01197) →                                            |
| Kpn-220-1 | NZ_AWON01000029.1 | + | 35737   | 35788   | RNA → rpmE (PRK00019)Ribosomal_L31 (pfam01197) →                                            |
| Kpn-210-1 | NZ_AVFD01000075.1 | + | 69293   | 69344   | RNA → rpmE (PRK00019)Ribosomal_L31 (pfam01197) →                                            |
| Kpn-163-1 | NZ_JSVB01000050.1 | + | 37050   | 37101   | RNA → rpmE (PRK00019)Ribosomal_L31 (pfam01197) →                                            |
| Kpn-136-1 | NZ_AQRD01000007.1 | - | 3937419 | 3937368 | RNA → rpmE (PRK00019)Ribosomal_L31 (pfam01197) →                                            |
| Kpn-150-1 | NZ_JJNB01000021.1 | + | 63818   | 63869   | RNA → rpmE (PRK00019)Ribosomal_L31 (pfam01197) →                                            |
| Kpn-65-1  | NZ_JJNG01000016.1 | + | 68967   | 69018   | RNA → rpmE (PRK00019)Ribosomal_L31 (pfam01197) →                                            |
| Kpn-59-1  | NZ_JJNH01000017.1 | + | 72322   | 72373   | RNA → rpmE (PRK00019)Ribosomal_L31 (pfam01197) →                                            |
| Kpn-6-1   | NZ_JDWP01000017.1 | - | 30401   | 30350   | RNA → rpmE (PRK00019)Ribosomal_L31 (pfam01197) →                                            |
| Kpn-9-1   | NZ_JDWM01000007.1 | - | 29721   | 29670   | RNA → rpmE (PRK00019)Ribosomal_L31 (pfam01197) →                                            |
| Kpn-7-1   | NZ_JDWO01000009.1 | - | 30401   | 30350   | RNA → rpmE (PRK00019)Ribosomal_L31 (pfam01197) →                                            |
| Kpn-227-1 | NZ_AFXH01000001.1 | - | 15574   | 15523   | RNA → rpmE (PRK00019)Ribosomal_L31 (pfam01197) →                                            |
| Kpn-2-1   | NZ_JDWN01000019.1 | + | 64235   | 64286   | RNA → rpmE (PRK00019)Ribosomal_L31 (pfam01197) →                                            |
| Kpn-134-1 | NZ_APMF01000021.1 | - | 30307   | 30256   | RNA → rpmE (PRK00019)Ribosomal_L31 (pfam01197) →                                            |
| Kpn-133-1 | NZ_AOSJ01000020.1 | - | 30307   | 30256   | RNA → rpmE (PRK00019)Ribosomal_L31 (pfam01197) →                                            |
| Kpn-135-1 | NZ_APMG01000019.1 | - | 30307   | 30256   | RNA → rpmE (PRK00019)Ribosomal_L31 (pfam01197) →                                            |
| Kpn-131-1 | NZ_AQCJ01000019.1 | - | 30310   | 30259   | RNA → rpmE (PRK00019)Ribosomal_L31 (pfam01197) →                                            |
| Kpn-132-1 | NZ_AQCI01000019.1 | + | 68968   | 69019   | RNA → rpmE (PRK00019)Ribosomal_L31 (pfam01197) →                                            |
| Kpn-330-1 | NC_016845.1       | + | 90172   | 90223   | RNA → rpmE (PRK00019)Ribosomal_L31 (pfam01197) →                                            |
| Kpn-351-1 | NC_009648.1       | + | 4632889 | 4632940 | RNA → rpmE (PRK00019)Ribosomal_L31 (pfam01197) →                                            |
| Kpn-216-1 | NZ_CP007731.1     | + | 92618   | 92669   | RNA → rpmE (PRK00019)Ribosomal_L31 (pfam01197) →                                            |
| Kpn-239-1 | NZ_CP006659.1     | + | 90175   | 90226   | RNA → rpmE (PRK00019)Ribosomal_L31 (pfam01197) →                                            |
| Kpn-126-1 | NZ_AUTW02000084.1 | - | 30242   | 30191   | RNA → rpmE (PRK00019)Ribosomal_L31 (pfam01197) →                                            |
| Kpn-1-1   | NZ_CP010361.1     | - | 5219933 | 5219882 | RNA → rpmE (PRK00019)Ribosomal_L31 (pfam01197) →                                            |
| Kpn-362-1 | NZ_GG703533.1     | + | 65601   | 65652   | RNA → rpmE (PRK00019)Ribosomal_L31 (pfam01197) → rpmE (PRK00019)Ribosomal_L31 (pfam01197) → |
| Kpn-91-1  | NZ_KK214620.1     | + | 69995   | 70046   | RNA → rpmE (PRK00019)Ribosomal_L31 (pfam01197) →                                            |
| Kpn-96-1  | NZ_KK214479.1     | + | 69063   | 69114   | RNA → rpmE (PRK00019)Ribosomal_L31 (pfam01197) →                                            |
| Kpn-109-1 | NZ_KK214372.1     | + | 69063   | 69114   | RNA → rpmE (PRK00019)Ribosomal_L31 (pfam01197) →                                            |
| Kpn-77-1  | NZ_KK736955.1     | + | 581455  | 581506  | RNA → rpmE (PRK00019)Ribosomal_L31 (pfam01197) →                                            |
| Kpn-123-1 | NZ_KK737461.1     | + | 2876697 | 2876748 | RNA → rpmE (PRK00019)Ribosomal_L31 (pfam01197) →                                            |
| Kpn-121-1 | NZ_KK737432.1     | + | 73324   | 73375   | RNA → rpmE (PRK00019)Ribosomal_L31 (pfam01197) →                                            |
| Kpn-155-1 | NZ_KK737589.1     | + | 3182677 | 3182728 | RNA → rpmE (PRK00019)Ribosomal_L31 (pfam01197) →                                            |
| Kpn-153-1 | NZ_KK737549.1     | - | 634579  | 634528  | RNA → rpmE (PRK00019)Ribosomal_L31 (pfam01197) →                                            |
| Kpn-154-1 | NZ_KK737562.1     | + | 73376   | 73427   | RNA → rpmE (PRK00019)Ribosomal_L31 (pfam01197) →                                            |
| Kpn-157-1 | NZ_KK737614.1     | + | 71967   | 72018   | RNA → rpmE (PRK00019)Ribosomal_L31 (pfam01197) →                                            |
| Kpn-152-1 | NZ_KK737538.1     | + | 63914   | 63965   | RNA → rpmE (PRK00019)Ribosomal_L31 (pfam01197) →                                            |
| Kpn-196-1 | NZ_KK737766.1     | - | 3724699 | 3724648 | RNA → rpmE (PRK00019)Ribosomal_L31 (pfam01197) →                                            |
| Kpn-162-1 | NZ_KK737679.1     | + | 68934   | 68985   | RNA → rpmE (PRK00019)Ribosomal_L31 (pfam01197) →                                            |
| Kpn-156-1 | NZ_KK737605.1     | + | 63679   | 63730   | RNA → rpmE (PRK00019)Ribosomal_L31 (pfam01197) →                                            |
| Kpn-38-1  | NZ_KK736604.1     | + | 69390   | 69441   | RNA → rpmE (PRK00019)Ribosomal_L31 (pfam01197) →                                            |
| Kpn-148-1 | NZ_KK737484.1     | + | 583791  | 583842  | RNA → rpmE (PRK00019)Ribosomal_L31 (pfam01197) →                                            |
| Kpn-278-1 | NZ_KK737503.1     | + | 4119556 | 4119607 | RNA → rpmE (PRK00019)Ribosomal_L31 (pfam01197) →                                            |
| Kpn-192-1 | NZ_KK737733.1     | + | 3278687 | 3278738 | RNA → rpmE (PRK00019)Ribosomal_L31 (pfam01197) →                                            |
| Kpn-122-1 | NZ_KK737447.1     | + | 4942116 | 4942167 | RNA → rpmE (PRK00019)Ribosomal_L31 (pfam01197) →                                            |
| Kpn-158-1 | NZ_KK737629.1     | + | 115507  | 115558  | RNA → rpmE (PRK00019)Ribosomal_L31 (pfam01197) →                                            |
| Kpn-151-1 | NZ_KK737530.1     | + | 4494417 | 4494468 | RNA → rpmE (PRK00019)Ribosomal_L31 (pfam01197) →                                            |
| Kpn-188-1 | NZ_KK737707.1     | + | 4500007 | 4500058 | RNA → rpmE (PRK00019)Ribosomal_L31 (pfam01197) →                                            |
| Kpn-195-1 | NZ_KK737755.1     | + | 1400819 | 1400870 | RNA → rpmE (PRK00019)Ribosomal_L31 (pfam01197) →                                            |



|           |               |   |         |         |                                                   |
|-----------|---------------|---|---------|---------|---------------------------------------------------|
| Kpn-160-1 | NZ_KK737646.1 | + | 63830   | 63881   | RNA → rpmE (PRK00019) Ribosomal_L31 (pfam01197) → |
| Kpn-149-1 | NZ_KK737520.1 | - | 78478   | 78427   | RNA → rpmE (PRK00019) Ribosomal_L31 (pfam01197) → |
| Kpn-187-1 | NZ_KK737696.1 | + | 4798861 | 4798912 | RNA → rpmE (PRK00019) Ribosomal_L31 (pfam01197) → |
| Kpn-193-1 | NZ_KK737742.1 | + | 4381090 | 4381141 | RNA → rpmE (PRK00019) Ribosomal_L31 (pfam01197) → |
| Kpn-159-1 | NZ_KK737636.1 | + | 3151654 | 3151705 | RNA → rpmE (PRK00019) Ribosomal_L31 (pfam01197) → |
| Kpn-120-1 | NZ_KK737419.1 | + | 2864858 | 2864909 | RNA → rpmE (PRK00019) Ribosomal_L31 (pfam01197) → |
| Kpn-40-1  | NZ_KK736624.1 | + | 3233701 | 3233752 | RNA → rpmE (PRK00019) Ribosomal_L31 (pfam01197) → |
| Kpn-42-1  | NZ_KK736658.1 | + | 577414  | 577465  | RNA → rpmE (PRK00019) Ribosomal_L31 (pfam01197) → |
| Kpn-39-1  | NZ_KK736620.1 | + | 63835   | 63886   | RNA → rpmE (PRK00019) Ribosomal_L31 (pfam01197) → |
| Kpn-110-1 | NZ_KK737334.1 | + | 69390   | 69441   | RNA → rpmE (PRK00019) Ribosomal_L31 (pfam01197) → |
| Kpn-118-1 | NZ_KK737405.1 | + | 2867900 | 2867951 | RNA → rpmE (PRK00019) Ribosomal_L31 (pfam01197) → |
| Kpn-50-1  | NZ_KK736666.1 | + | 4827133 | 4827184 | RNA → rpmE (PRK00019) Ribosomal_L31 (pfam01197) → |
| Kpn-72-1  | NZ_KK736890.1 | + | 69390   | 69441   | RNA → rpmE (PRK00019) Ribosomal_L31 (pfam01197) → |
| Kpn-97-1  | NZ_KK737177.1 | + | 4679594 | 4679645 | RNA → rpmE (PRK00019) Ribosomal_L31 (pfam01197) → |
| Kpn-76-1  | NZ_KK736937.1 | + | 3239685 | 3239736 | RNA → rpmE (PRK00019) Ribosomal_L31 (pfam01197) → |
| Kpn-41-1  | NZ_KK736641.1 | - | 123068  | 123017  | RNA → rpmE (PRK00019) Ribosomal_L31 (pfam01197) → |
| Kpn-55-1  | NZ_KK736735.1 | + | 1426606 | 1426657 | RNA → rpmE (PRK00019) Ribosomal_L31 (pfam01197) → |
| Kpn-90-1  | NZ_KK737113.1 | + | 3359104 | 3359155 | RNA → rpmE (PRK00019) Ribosomal_L31 (pfam01197) → |
| Kpn-112-1 | NZ_KK737351.1 | + | 69126   | 69177   | RNA → rpmE (PRK00019) Ribosomal_L31 (pfam01197) → |
| Kpn-51-1  | NZ_KK736683.1 | + | 72227   | 72278   | RNA → rpmE (PRK00019) Ribosomal_L31 (pfam01197) → |
| Kpn-57-1  | NZ_KK736760.1 | + | 3379575 | 3379626 | RNA → rpmE (PRK00019) Ribosomal_L31 (pfam01197) → |
| Kpn-67-1  | NZ_KK736836.1 | + | 69126   | 69177   | RNA → rpmE (PRK00019) Ribosomal_L31 (pfam01197) → |
| Kpn-73-1  | NZ_KK736899.1 | + | 73376   | 73427   | RNA → rpmE (PRK00019) Ribosomal_L31 (pfam01197) → |
| Kpn-104-1 | NZ_KK737273.1 | + | 4895637 | 4895688 | RNA → rpmE (PRK00019) Ribosomal_L31 (pfam01197) → |
| Kpn-107-1 | NZ_KK737307.1 | + | 4735918 | 4735969 | RNA → rpmE (PRK00019) Ribosomal_L31 (pfam01197) → |
| Kpn-64-1  | NZ_KK736818.1 | + | 69126   | 69177   | RNA → rpmE (PRK00019) Ribosomal_L31 (pfam01197) → |
| Kpn-85-1  | NZ_KK737050.1 | + | 4908031 | 4908082 | RNA → rpmE (PRK00019) Ribosomal_L31 (pfam01197) → |
| Kpn-94-1  | NZ_KK737157.1 | + | 1431419 | 1431470 | RNA → rpmE (PRK00019) Ribosomal_L31 (pfam01197) → |
| Kpn-115-1 | NZ_KK737382.1 | + | 64630   | 64681   | RNA → rpmE (PRK00019) Ribosomal_L31 (pfam01197) → |
| Kpn-116-1 | NZ_KK737388.1 | + | 1428472 | 1428523 | RNA → rpmE (PRK00019) Ribosomal_L31 (pfam01197) → |
| Kpn-114-1 | NZ_KK737366.1 | + | 1425775 | 1425826 | RNA → rpmE (PRK00019) Ribosomal_L31 (pfam01197) → |
| Kpn-102-1 | NZ_KK737235.1 | + | 69390   | 69441   | RNA → rpmE (PRK00019) Ribosomal_L31 (pfam01197) → |
| Kpn-92-1  | NZ_KK737128.1 | + | 69033   | 69084   | RNA → rpmE (PRK00019) Ribosomal_L31 (pfam01197) → |
| Kpn-103-1 | NZ_KK737268.1 | + | 4887246 | 4887297 | RNA → rpmE (PRK00019) Ribosomal_L31 (pfam01197) → |
| Kpn-99-1  | NZ_KK737192.1 | + | 3399123 | 3399174 | RNA → rpmE (PRK00019) Ribosomal_L31 (pfam01197) → |
| Kpn-78-1  | NZ_KK736970.1 | + | 576185  | 576236  | RNA → rpmE (PRK00019) Ribosomal_L31 (pfam01197) → |
| Kpn-71-1  | NZ_KK736871.1 | + | 582040  | 582091  | RNA → rpmE (PRK00019) Ribosomal_L31 (pfam01197) → |
| Kpn-79-1  | NZ_KK736979.1 | + | 5071703 | 5071754 | RNA → rpmE (PRK00019) Ribosomal_L31 (pfam01197) → |
| Kpn-68-1  | NZ_KK736847.1 | + | 69390   | 69441   | RNA → rpmE (PRK00019) Ribosomal_L31 (pfam01197) → |
| Kpn-87-1  | NZ_KK737072.1 | + | 2869909 | 2869960 | RNA → rpmE (PRK00019) Ribosomal_L31 (pfam01197) → |
| Kpn-88-1  | NZ_KK737090.1 | + | 3362502 | 3362553 | RNA → rpmE (PRK00019) Ribosomal_L31 (pfam01197) → |
| Kpn-106-1 | NZ_KK737291.1 | + | 583431  | 583482  | RNA → rpmE (PRK00019) Ribosomal_L31 (pfam01197) → |
| Kpn-119-1 | NZ_KK737414.1 | + | 4907268 | 4907319 | RNA → rpmE (PRK00019) Ribosomal_L31 (pfam01197) → |
| Kpn-111-1 | NZ_KK737340.1 | + | 3355062 | 3355113 | RNA → rpmE (PRK00019) Ribosomal_L31 (pfam01197) → |
| Kpn-101-1 | NZ_KK737216.1 | + | 3340842 | 3340893 | RNA → rpmE (PRK00019) Ribosomal_L31 (pfam01197) → |
| Kpn-84-1  | NZ_KK737037.1 | + | 2868328 | 2868379 | RNA → rpmE (PRK00019) Ribosomal_L31 (pfam01197) → |
| Kpn-95-1  | NZ_KK737167.1 | + | 3253271 | 3253322 | RNA → rpmE (PRK00019) Ribosomal_L31 (pfam01197) → |
| Kpn-117-1 | NZ_KK737398.1 | + | 2884275 | 2884326 | RNA → rpmE (PRK00019) Ribosomal_L31 (pfam01197) → |
| Kpn-56-1  | NZ_KK736752.1 | + | 73376   | 73427   | RNA → rpmE (PRK00019) Ribosomal_L31 (pfam01197) → |
| Kpn-75-1  | NZ_KK736922.1 | + | 3226370 | 3226421 | RNA → rpmE (PRK00019) Ribosomal_L31 (pfam01197) → |
| Kpn-66-1  | NZ_KK736824.1 | + | 2870499 | 2870550 | RNA → rpmE (PRK00019) Ribosomal_L31 (pfam01197) → |
| Kpn-83-1  | NZ_KK737028.1 | + | 4924426 | 4924477 | RNA → rpmE (PRK00019) Ribosomal_L31 (pfam01197) → |

|           |               |   |         |         |                                                   |
|-----------|---------------|---|---------|---------|---------------------------------------------------|
| Kpn-61-1  | NZ_KK736786.1 | + | 3318945 | 3318996 | RNA → rpmE (PRK00019) Ribosomal_L31 (pfam01197) → |
| Kpn-80-1  | NZ_KK736984.1 | + | 4535238 | 4535289 | RNA → rpmE (PRK00019) Ribosomal_L31 (pfam01197) → |
| Kpn-89-1  | NZ_KK737103.1 | + | 2869188 | 2869239 | RNA → rpmE (PRK00019) Ribosomal_L31 (pfam01197) → |
| Kpn-105-1 | NZ_KK737277.1 | + | 4533715 | 4533766 | RNA → rpmE (PRK00019) Ribosomal_L31 (pfam01197) → |
| Kpn-58-1  | NZ_KK736771.1 | + | 578958  | 579009  | RNA → rpmE (PRK00019) Ribosomal_L31 (pfam01197) → |
| Kpn-147-1 | NZ_KK737472.1 | + | 1117063 | 1117114 | RNA → rpmE (PRK00019) Ribosomal_L31 (pfam01197) → |
| Kpn-63-1  | NZ_KK736804.1 | + | 3369698 | 3369749 | RNA → rpmE (PRK00019) Ribosomal_L31 (pfam01197) → |
| Kpn-124-1 | NZ_KK737466.1 | + | 4912013 | 4912064 | RNA → rpmE (PRK00019) Ribosomal_L31 (pfam01197) → |
| Kpn-19-1  | NZ_KK736587.1 | + | 3144951 | 3145002 | RNA → rpmE (PRK00019) Ribosomal_L31 (pfam01197) → |
| Kpn-98-1  | NZ_KK737183.1 | + | 4638212 | 4638263 | RNA → rpmE (PRK00019) Ribosomal_L31 (pfam01197) → |
| Kpn-113-1 | NZ_KK737354.1 | + | 3354410 | 3354461 | RNA → rpmE (PRK00019) Ribosomal_L31 (pfam01197) → |
| Kpn-108-1 | NZ_KK737323.1 | + | 4751603 | 4751654 | RNA → rpmE (PRK00019) Ribosomal_L31 (pfam01197) → |
| Kpn-69-1  | NZ_KK736861.1 | + | 70162   | 70213   | RNA → rpmE (PRK00019) Ribosomal_L31 (pfam01197) → |
| Kpn-81-1  | NZ_KK737002.1 | + | 69390   | 69441   | RNA → rpmE (PRK00019) Ribosomal_L31 (pfam01197) → |
| Kpn-189-1 | NZ_KK737711.1 | + | 4562420 | 4562471 | RNA → rpmE (PRK00019) Ribosomal_L31 (pfam01197) → |
| Kpn-74-1  | NZ_KK736911.1 | + | 4523291 | 4523342 | RNA → rpmE (PRK00019) Ribosomal_L31 (pfam01197) → |
| Kpn-86-1  | NZ_KK737063.1 | + | 69126   | 69177   | RNA → rpmE (PRK00019) Ribosomal_L31 (pfam01197) → |
| Kpn-60-1  | NZ_KK736776.1 | + | 4900314 | 4900365 | RNA → rpmE (PRK00019) Ribosomal_L31 (pfam01197) → |
| Kpn-54-1  | NZ_KK736708.1 | + | 2866599 | 2866650 | RNA → rpmE (PRK00019) Ribosomal_L31 (pfam01197) → |
| Kpn-82-1  | NZ_KK737013.1 | + | 2866351 | 2866402 | RNA → rpmE (PRK00019) Ribosomal_L31 (pfam01197) → |
| Kpn-53-1  | NZ_KK736703.1 | + | 63762   | 63813   | RNA → rpmE (PRK00019) Ribosomal_L31 (pfam01197) → |
| Kpn-191-1 | NZ_KK737723.1 | + | 73376   | 73427   | RNA → rpmE (PRK00019) Ribosomal_L31 (pfam01197) → |
| Kpn-93-1  | NZ_KK737140.1 | + | 2732162 | 2732213 | RNA → rpmE (PRK00019) Ribosomal_L31 (pfam01197) → |
| Kpn-62-1  | NZ_KK736796.1 | + | 1430900 | 1430951 | RNA → rpmE (PRK00019) Ribosomal_L31 (pfam01197) → |
| Kpn-100-1 | NZ_KK737201.1 | + | 68880   | 68931   | RNA → rpmE (PRK00019) Ribosomal_L31 (pfam01197) → |
| Kpn-172-1 | NZ_KL407317.1 | + | 3279007 | 3279058 | RNA → rpmE (PRK00019) Ribosomal_L31 (pfam01197) → |
| Kpn-12-1  | NZ_KL407321.1 | + | 2250192 | 2250243 | RNA → rpmE (PRK00019) Ribosomal_L31 (pfam01197) → |
| Kpn-24-1  | NZ_KL407345.1 | + | 1374223 | 1374274 | RNA → rpmE (PRK00019) Ribosomal_L31 (pfam01197) → |
| Ksp-5-1   | NZ_JH414807.1 | - | 70580   | 70631   | RNA → rpmE (PRK00019) Ribosomal_L31 (pfam01197) → |
| Kpn-360-1 | NZ_JH930422.1 | - | 123563  | 123512  | RNA → rpmE (PRK00019) Ribosomal_L31 (pfam01197) → |
| Kpn-358-1 | NZ_JH930439.1 | - | 123670  | 123619  | RNA → rpmE (PRK00019) Ribosomal_L31 (pfam01197) → |
| Kpn-359-1 | NZ_JH930419.1 | + | 5098754 | 5098805 | RNA → rpmE (PRK00019) Ribosomal_L31 (pfam01197) → |
| Kpn-361-1 | NZ_JH930433.1 | + | 97306   | 97357   | RNA → rpmE (PRK00019) Ribosomal_L31 (pfam01197) → |
| Kpn-329-1 | NZ_HF536482.1 | + | 5149422 | 5149473 | RNA → rpmE (PRK00019) Ribosomal_L31 (pfam01197) → |
| Kpn-245-1 | NZ_KI535426.1 | + | 70377   | 70428   | RNA → rpmE (PRK00019) Ribosomal_L31 (pfam01197) → |
| Kpn-243-1 | NZ_KI535444.1 | + | 495195  | 495246  | RNA → rpmE (PRK00019) Ribosomal_L31 (pfam01197) → |
| Kpn-285-1 | NZ_KI535498.1 | + | 69087   | 69138   | RNA → rpmE (PRK00019) Ribosomal_L31 (pfam01197) → |
| Kpn-283-1 | NZ_KI535509.1 | + | 4696783 | 4696834 | RNA → rpmE (PRK00019) Ribosomal_L31 (pfam01197) → |
| Kpn-277-1 | NZ_KI535580.1 | + | 1331131 | 1331182 | RNA → rpmE (PRK00019) Ribosomal_L31 (pfam01197) → |
| Kpn-272-1 | NZ_KI535620.1 | + | 73553   | 73604   | RNA → rpmE (PRK00019) Ribosomal_L31 (pfam01197) → |
| Kpn-270-1 | NZ_KI535623.1 | - | 32015   | 31964   | RNA → rpmE (PRK00019) Ribosomal_L31 (pfam01197) → |
| Kpn-253-1 | NZ_KI535560.1 | + | 69194   | 69245   | RNA → rpmE (PRK00019) Ribosomal_L31 (pfam01197) → |
| Kpn-252-1 | NZ_KI535573.1 | - | 30634   | 30583   | RNA → rpmE (PRK00019) Ribosomal_L31 (pfam01197) → |
| Kpn-251-1 | NZ_KI535346.1 | + | 730498  | 730549  | RNA → rpmE (PRK00019) Ribosomal_L31 (pfam01197) → |
| Kpn-276-1 | NZ_KI535587.1 | + | 1356604 | 1356655 | RNA → rpmE (PRK00019) Ribosomal_L31 (pfam01197) → |
| Kpn-282-1 | NZ_KI535517.1 | - | 167340  | 167289  | RNA → rpmE (PRK00019) Ribosomal_L31 (pfam01197) → |
| Kpn-247-1 | NZ_KI535416.1 | + | 492678  | 492729  | RNA → rpmE (PRK00019) Ribosomal_L31 (pfam01197) → |
| Kpn-250-1 | NZ_KI535359.1 | + | 826395  | 826446  | RNA → rpmE (PRK00019) Ribosomal_L31 (pfam01197) → |
| Kpn-266-1 | NZ_KI535679.1 | - | 127694  | 127643  | RNA → rpmE (PRK00019) Ribosomal_L31 (pfam01197) → |
| Kpn-286-1 | NZ_KI535492.1 | + | 577955  | 578006  | RNA → rpmE (PRK00019) Ribosomal_L31 (pfam01197) → |
| Kpn-267-1 | NZ_KI535678.1 | + | 4357833 | 4357884 | RNA → rpmE (PRK00019) Ribosomal_L31 (pfam01197) → |
| Kpn-284-1 | NZ_KI535503.1 | + | 4585522 | 4585573 | RNA → rpmE (PRK00019) Ribosomal_L31 (pfam01197) → |



|           |               |   |         |         |                                                   |
|-----------|---------------|---|---------|---------|---------------------------------------------------|
| Kpn-273-1 | NZ_KI535611.1 | + | 70501   | 70552   | RNA → rpmE (PRK00019) Ribosomal_L31 (pfam01197) → |
| Kpn-249-1 | NZ_KI535412.1 | + | 4539853 | 4539904 | RNA → rpmE (PRK00019) Ribosomal_L31 (pfam01197) → |
| Kpn-246-1 | NZ_KI535420.1 | + | 4238528 | 4238579 | RNA → rpmE (PRK00019) Ribosomal_L31 (pfam01197) → |
| Kpn-269-1 | NZ_KI535663.1 | + | 4648189 | 4648240 | RNA → rpmE (PRK00019) Ribosomal_L31 (pfam01197) → |
| Kpn-265-1 | NZ_KI535689.1 | + | 68523   | 68574   | RNA → rpmE (PRK00019) Ribosomal_L31 (pfam01197) → |
| Kpn-221-1 | NZ_KI517376.1 | - | 5252285 | 5252234 | RNA → rpmE (PRK00019) Ribosomal_L31 (pfam01197) → |
| Kpn-223-1 | NZ_HG518477.1 | - | 4904955 | 4904904 | RNA → rpmE (PRK00019) Ribosomal_L31 (pfam01197) → |
| Kpn-22-1  | NZ_KI929271.1 | + | 4503228 | 4503279 | RNA → rpmE (PRK00019) Ribosomal_L31 (pfam01197) → |
| Kpn-208-1 | NZ_HG518479.1 | - | 4685746 | 4685695 | RNA → rpmE (PRK00019) Ribosomal_L31 (pfam01197) → |
| Kpn-224-1 | NZ_HG518478.1 | - | 4726590 | 4726539 | RNA → rpmE (PRK00019) Ribosomal_L31 (pfam01197) → |
| Kpn-175-1 | NZ_KK036648.1 | + | 4561960 | 4562011 | RNA → rpmE (PRK00019) Ribosomal_L31 (pfam01197) → |
| Kpn-179-1 | NZ_KK036616.1 | + | 4695172 | 4695223 | RNA → rpmE (PRK00019) Ribosomal_L31 (pfam01197) → |
| Kpn-248-1 | NZ_KK036740.1 | + | 1316016 | 1316067 | RNA → rpmE (PRK00019) Ribosomal_L31 (pfam01197) → |
| Kpn-182-1 | NZ_KK036586.1 | + | 69272   | 69323   | RNA → rpmE (PRK00019) Ribosomal_L31 (pfam01197) → |
| Kpn-45-1  | NZ_KK036932.1 | + | 66222   | 66273   | RNA → rpmE (PRK00019) Ribosomal_L31 (pfam01197) → |
| Kpn-184-1 | NZ_KK036571.1 | + | 4342385 | 4342436 | RNA → rpmE (PRK00019) Ribosomal_L31 (pfam01197) → |
| Kpn-37-1  | NZ_KK036686.1 | + | 4560269 | 4560320 | RNA → rpmE (PRK00019) Ribosomal_L31 (pfam01197) → |
| Kpn-146-1 | NZ_KK036944.1 | + | 2970777 | 2970828 | RNA → rpmE (PRK00019) Ribosomal_L31 (pfam01197) → |
| Kpn-271-1 | NZ_KK036969.1 | + | 1997125 | 1997176 | RNA → rpmE (PRK00019) Ribosomal_L31 (pfam01197) → |
| Kpn-186-1 | NZ_KK036555.1 | + | 1862408 | 1862459 | RNA → rpmE (PRK00019) Ribosomal_L31 (pfam01197) → |
| Kpn-35-1  | NZ_KK036701.1 | + | 4380641 | 4380692 | RNA → rpmE (PRK00019) Ribosomal_L31 (pfam01197) → |
| Kpn-27-1  | NZ_KK036732.1 | + | 2646020 | 2646071 | RNA → rpmE (PRK00019) Ribosomal_L31 (pfam01197) → |
| Kpn-176-1 | NZ_KK036640.1 | + | 580651  | 580702  | RNA → rpmE (PRK00019) Ribosomal_L31 (pfam01197) → |
| Kpn-183-1 | NZ_KK036575.1 | + | 4843690 | 4843741 | RNA → rpmE (PRK00019) Ribosomal_L31 (pfam01197) → |
| Kpn-180-1 | NZ_KK036610.1 | + | 1384294 | 1384345 | RNA → rpmE (PRK00019) Ribosomal_L31 (pfam01197) → |
| Kpn-36-1  | NZ_KK036697.1 | + | 69043   | 69094   | RNA → rpmE (PRK00019) Ribosomal_L31 (pfam01197) → |
| Kpn-44-1  | NZ_KK036866.1 | + | 70380   | 70431   | RNA → rpmE (PRK00019) Ribosomal_L31 (pfam01197) → |
| Kpn-26-1  | NZ_KK036882.1 | + | 68932   | 68983   | RNA → rpmE (PRK00019) Ribosomal_L31 (pfam01197) → |
| Kpn-21-1  | NZ_KK036888.1 | + | 1217538 | 1217589 | RNA → rpmE (PRK00019) Ribosomal_L31 (pfam01197) → |
| Kpn-141-1 | NZ_KK036984.1 | + | 71754   | 71805   | RNA → rpmE (PRK00019) Ribosomal_L31 (pfam01197) → |
| Kpn-177-1 | NZ_KK036634.1 | + | 694277  | 694328  | RNA → rpmE (PRK00019) Ribosomal_L31 (pfam01197) → |
| Kpn-198-1 | NZ_KK037007.1 | + | 2272584 | 2272635 | RNA → rpmE (PRK00019) Ribosomal_L31 (pfam01197) → |
| Kpn-29-1  | NZ_KK036680.1 | + | 326960  | 327011  | RNA → rpmE (PRK00019) Ribosomal_L31 (pfam01197) → |
| Kpn-185-1 | NZ_KK036563.1 | + | 4808777 | 4808828 | RNA → rpmE (PRK00019) Ribosomal_L31 (pfam01197) → |
| Kpn-23-1  | NZ_KK036758.1 | + | 1229368 | 1229419 | RNA → rpmE (PRK00019) Ribosomal_L31 (pfam01197) → |
| Kpn-30-1  | NZ_KK036718.1 | + | 4570752 | 4570803 | RNA → rpmE (PRK00019) Ribosomal_L31 (pfam01197) → |
| Kpn-18-1  | NZ_KK036784.1 | + | 1382201 | 1382252 | RNA → rpmE (PRK00019) Ribosomal_L31 (pfam01197) → |
| Kpn-13-1  | NZ_KK036863.1 | + | 66760   | 66811   | RNA → rpmE (PRK00019) Ribosomal_L31 (pfam01197) → |
| Kpn-32-1  | NZ_KK036710.1 | + | 73184   | 73235   | RNA → rpmE (PRK00019) Ribosomal_L31 (pfam01197) → |
| Kpn-181-1 | NZ_KK036593.1 | + | 4760906 | 4760957 | RNA → rpmE (PRK00019) Ribosomal_L31 (pfam01197) → |
| Kpn-197-1 | NZ_KK036901.1 | - | 655958  | 655907  | RNA → rpmE (PRK00019) Ribosomal_L31 (pfam01197) → |
| Kpn-20-1  | NZ_KK036779.1 | + | 73328   | 73379   | RNA → rpmE (PRK00019) Ribosomal_L31 (pfam01197) → |
| Kpn-43-1  | NZ_KK037004.1 | + | 69390   | 69441   | RNA → rpmE (PRK00019) Ribosomal_L31 (pfam01197) → |
| Kpn-16-1  | NZ_KK036799.1 | - | 127335  | 127284  | RNA → rpmE (PRK00019) Ribosomal_L31 (pfam01197) → |
| Kpn-11-1  | NZ_KK036895.1 | + | 580946  | 580997  | RNA → rpmE (PRK00019) Ribosomal_L31 (pfam01197) → |
| Kpn-15-1  | NZ_KK036828.1 | + | 4511150 | 4511201 | RNA → rpmE (PRK00019) Ribosomal_L31 (pfam01197) → |
| Kpn-49-1  | NZ_KK036908.1 | + | 5252304 | 5252355 | RNA → rpmE (PRK00019) Ribosomal_L31 (pfam01197) → |
| Kpn-47-1  | NZ_KK036921.1 | + | 4589468 | 4589519 | RNA → rpmE (PRK00019) Ribosomal_L31 (pfam01197) → |
| Kpn-28-1  | NZ_KK036724.1 | + | 2619848 | 2619899 | RNA → rpmE (PRK00019) Ribosomal_L31 (pfam01197) → |
| Kpn-48-1  | NZ_KK036911.1 | + | 3085051 | 3085102 | RNA → rpmE (PRK00019) Ribosomal_L31 (pfam01197) → |
| Kpn-25-1  | NZ_KK036744.1 | + | 3484063 | 3484114 | RNA → rpmE (PRK00019) Ribosomal_L31 (pfam01197) → |
| Kpn-14-1  | NZ_KK036838.1 | + | 4750317 | 4750368 | RNA → rpmE (PRK00019) Ribosomal_L31 (pfam01197) → |

|           |                   |   |         |         |                                                                                               |
|-----------|-------------------|---|---------|---------|-----------------------------------------------------------------------------------------------|
| Kpn-33-1  | NZ_KK036705.1     | + | 4723059 | 4723110 | RNA → rpmE (PRK00019) Ribosomal_L31 (pfam01197) →                                             |
| Kpn-145-1 | NZ_KK036949.1     | + | 4329695 | 4329746 | RNA → rpmE (PRK00019) Ribosomal_L31 (pfam01197) →                                             |
| Kpn-173-1 | NZ_KK036663.1     | - | 661579  | 661528  | RNA → rpmE (PRK00019) Ribosomal_L31 (pfam01197) →                                             |
| Kpn-144-1 | NZ_KK036953.1     | + | 1102473 | 1102524 | RNA → rpmE (PRK00019) Ribosomal_L31 (pfam01197) →                                             |
| Kpn-174-1 | NZ_KK036655.1     | + | 801825  | 801876  | RNA → rpmE (PRK00019) Ribosomal_L31 (pfam01197) →                                             |
| Kpn-178-1 | NZ_KK037012.1     | + | 1362262 | 1362313 | RNA → rpmE (PRK00019) Ribosomal_L31 (pfam01197) →                                             |
| Kpn-34-1  | NZ_KK037013.1     | - | 608696  | 608645  | RNA → rpmE (PRK00019) Ribosomal_L31 (pfam01197) →                                             |
| Kpn-349-1 | NZ_JH930400.1     | - | 121654  | 121603  | RNA → rpmE (PRK00019) Ribosomal_L31 (pfam01197) →                                             |
| Kpn-139-1 | NZ_KE504626.1     | - | 5255393 | 5255342 | RNA → rpmE (PRK00019) Ribosomal_L31 (pfam01197) →                                             |
| Kpn-140-1 | NZ_KE504629.1     | - | 5515152 | 5515101 | RNA → rpmE (PRK00019) Ribosomal_L31 (pfam01197) →                                             |
| Kpn-279-1 | NC_012731.1       | + | 89967   | 90018   | RNA → rpmE (PRK00019) Ribosomal_L31 (pfam01197) →                                             |
| Kpn-261-1 | NC_017540.1       | + | 5087242 | 5087293 | RNA → rpmE (PRK00019) Ribosomal_L31 (pfam01197) →                                             |
| Kpn-202-1 | NZ_CP011989.1     | - | 5205226 | 5205175 | RNA → rpmE (PRK00019) Ribosomal_L31 (pfam01197) →                                             |
| Kpn-201-1 | NZ_CP011985.1     | - | 5196465 | 5196414 | RNA → rpmE (PRK00019) Ribosomal_L31 (pfam01197) →                                             |
| Kpn-125-1 | NZ_CP011976.1     | - | 5269356 | 5269305 | RNA → rpmE (PRK00019) Ribosomal_L31 (pfam01197) →                                             |
| Kpn-325-1 | NC_018522.1       | - | 5262049 | 5261998 | RNA → rpmE (PRK00019) Ribosomal_L31 (pfam01197) → rpmE (PRK00019) Ribosomal_L31 (pfam01197) → |
| Kpn-260-1 | NC_022082.1       | - | 5183982 | 5183931 | RNA → rpmE (PRK00019) Ribosomal_L31 (pfam01197) → rpmE (PRK00019) Ribosomal_L31 (pfam01197) → |
| Kpn-254-1 | NC_022566.1       | + | 4488386 | 4488437 | RNA → rpmE (PRK00019) Ribosomal_L31 (pfam01197) →                                             |
| Kpn-1-2   | NZ_CP008929.1     | + | 1842237 | 1842288 | RNA → rpmE (PRK00019) Ribosomal_L31 (pfam01197) →                                             |
| Kpn-1-3   | NZ_CP009461.1     | - | 4775192 | 4775141 | RNA → rpmE (PRK00019) Ribosomal_L31 (pfam01197) →                                             |
| Kpn-206-1 | NZ_CP009775.1     | + | 90073   | 90124   | RNA → rpmE (PRK00019) Ribosomal_L31 (pfam01197) →                                             |
| Kpn-206-2 | NZ_CP009872.1     | + | 90073   | 90124   | RNA → rpmE (PRK00019) Ribosomal_L31 (pfam01197) →                                             |
| Kpn-206-3 | NZ_CP009771.1     | + | 90073   | 90124   | RNA → rpmE (PRK00019) Ribosomal_L31 (pfam01197) →                                             |
| Kpn-206-4 | NZ_CP009863.1     | + | 85038   | 85089   | RNA → rpmE (PRK00019) Ribosomal_L31 (pfam01197) →                                             |
| Kpn-129-1 | NZ_CP006738.1     | - | 5209835 | 5209784 | RNA → rpmE (PRK00019) Ribosomal_L31 (pfam01197) →                                             |
| Kpn-207-1 | NZ_CP006722.1     | - | 5216292 | 5216241 | RNA → rpmE (PRK00019) Ribosomal_L31 (pfam01197) →                                             |
| Kpn-1-4   | NZ_CP010392.1     | - | 5189077 | 5189026 | RNA → rpmE (PRK00019) Ribosomal_L31 (pfam01197) →                                             |
| Kpn-1-9   | NZ_LK022721.1     | + | 63891   | 63942   | RNA → rpmE (PRK00019) Ribosomal_L31 (pfam01197) →                                             |
| Kpn-222-1 | NZ_CP006798.1     | - | 3463792 | 3463741 | RNA → rpmE (PRK00019) Ribosomal_L31 (pfam01197) →                                             |
| Kpn-218-1 | NZ_CP003999.1     | - | 5187695 | 5187644 | RNA → rpmE (PRK00019) Ribosomal_L31 (pfam01197) →                                             |
| Kpn-17-1  | NZ_KK036791.1     | + | 1461115 | 1461166 | RNA → rpmE (PRK00019) Ribosomal_L31 (pfam01197) →                                             |
| Kpn-4-1   | NZ_CP006923.1     | - | 5138876 | 5138825 | RNA → rpmE (PRK00019) Ribosomal_L31 (pfam01197) →                                             |
| Kpn-5-1   | NZ_CP006918.1     | - | 5168803 | 5168752 | RNA → rpmE (PRK00019) Ribosomal_L31 (pfam01197) →                                             |
| Kpn-214-1 | NZ_CP007727.1     | + | 90073   | 90124   | RNA → rpmE (PRK00019) Ribosomal_L31 (pfam01197) →                                             |
| Kpn-52-1  | NZ_KK736687.1     | + | 69390   | 69441   | RNA → rpmE (PRK00019) Ribosomal_L31 (pfam01197) →                                             |
| Kpn-215-1 | NZ_CP008797.1     | + | 90073   | 90124   | RNA → rpmE (PRK00019) Ribosomal_L31 (pfam01197) →                                             |
| Kpn-217-1 | NZ_CP008831.1     | + | 90073   | 90124   | RNA → rpmE (PRK00019) Ribosomal_L31 (pfam01197) →                                             |
| Kpn-213-1 | NZ_CP008827.1     | + | 90073   | 90124   | RNA → rpmE (PRK00019) Ribosomal_L31 (pfam01197) →                                             |
| Kpn-1-5   | NZ_CP009114.1     | + | 3598750 | 3598801 | RNA → rpmE (PRK00019) Ribosomal_L31 (pfam01197) →                                             |
| Kpn-206-5 | NZ_CP009208.1     | - | 3330554 | 3330503 | RNA → rpmE (PRK00019) Ribosomal_L31 (pfam01197) →                                             |
| Kpn-8-1   | NZ_CP011980.1     | - | 5183712 | 5183661 | RNA → rpmE (PRK00019) Ribosomal_L31 (pfam01197) →                                             |
| Eco-902-1 | NZ_KI522728.1     | + | 10412   | 10463   | RNA → rpmE (PRK00019) Ribosomal_L31 (pfam01197) → rpmE (PRK00019) Ribosomal_L31 (pfam01197) → |
| Kpn-225-1 | NC_021232.1       | + | 194552  | 194603  | RNA → rpmE (PRK00019) Ribosomal_L31 (pfam01197) →                                             |
| Kpn-1-6   | NZ_CP011578.1     | + | 3572358 | 3572409 | RNA → rpmE (PRK00019) Ribosomal_L31 (pfam01197) →                                             |
| Kpn-1-7   | NZ_CP011647.1     | + | 1269750 | 1269801 | RNA → rpmE (PRK00019) Ribosomal_L31 (pfam01197) →                                             |
| Kpn-1-8   | NZ_CP011624.1     | - | 2090102 | 2090051 | RNA → rpmE (PRK00019) Ribosomal_L31 (pfam01197) →                                             |
| Kpn-324-1 | NZ_AOIZ01000021.1 | - | 8000    | 7949    | RNA → rpmE (PRK00019) Ribosomal_L31 (pfam01197) →                                             |
| Kpn-238-1 | NZ_AOGQ01000046.1 | + | 69011   | 69062   | RNA → rpmE (PRK00019) Ribosomal_L31 (pfam01197) →                                             |
| Kpn-327-1 | NZ_AQCG01001093.1 | + | 1849    | 1900    | RNA → rpmE (PRK00019) Ribosomal_L31 (pfam01197) →                                             |
| Ksp-1-1   | NZ_AKYX01000005.1 | + | 73137   | 73188   | RNA → rpmE (PRK00019) Ribosomal_L31 (pfam01197) →                                             |
| Kpn-137-1 | NZ_AQPG01000012.1 | + | 5338757 | 5338808 | RNA → rpmE (PRK00019) Ribosomal_L31 (pfam01197) →                                             |
| Kpn-170-1 | NZ_JAQL01000017.1 | - | 30330   | 30279   | RNA → rpmE (PRK00019) Ribosomal_L31 (pfam01197) →                                             |

|            |                        |   |         |         |                                                                                               |
|------------|------------------------|---|---------|---------|-----------------------------------------------------------------------------------------------|
| Kpn-171-1  | NZ_JAQM01000046.1      | - | 15043   | 14992   | RNA → rpmE (PRK00019) Ribosomal_L31 (pfam01197) →                                             |
| Kpn-259-1  | NZ_ANGH02000122.1      | - | 30407   | 30356   | RNA → rpmE (PRK00019) Ribosomal_L31 (pfam01197) →                                             |
| Kpn-333-1  | NZ_AKAF01000019.1      | + | 69079   | 69130   | RNA → rpmE (PRK00019) Ribosomal_L31 (pfam01197) →                                             |
| Kpn-335-1  | NZ_AKAH01000021.1      | + | 69289   | 69340   | RNA → rpmE (PRK00019) Ribosomal_L31 (pfam01197) →                                             |
| Kpn-338-1  | NZ_AJZV01000021.1      | + | 69354   | 69405   | RNA → rpmE (PRK00019) Ribosomal_L31 (pfam01197) →                                             |
| Kpn-334-1  | NZ_AKAG01000020.1      | - | 30706   | 30655   | RNA → rpmE (PRK00019) Ribosomal_L31 (pfam01197) →                                             |
| env-754    | topACOD.FV90NF401A4K61 | + | 172     | 223     | RNA → rpmE (PRK00019) Ribosomal_L31 (pfam01197) →                                             |
| env-755    | CLOF_F4EQGSL02IC6OG    | - | 459     | 408     | RNA → rpmE (PRK00019) Ribosomal_L31 (pfam01197) →                                             |
| env-756    | CLOF_F4EQGSL02FU17A    | - | 147     | 96      | RNA → rpmE (PRK00019) Ribosomal_L31 (pfam01197) →                                             |
| Kcr-1-1    | NZ_LGHZ01000022.1      | + | 77178   | 77229   | RNA → rpmE (PRK00019) Ribosomal_L31 (pfam01197) →                                             |
| Kas-1-1    | NZ_JMPL01000010.1      | + | 63578   | 63629   | RNA → rpmE (PRK00019) Ribosomal_L31 (pfam01197) →                                             |
| Fhe-1-1    | NZ_JVIC01000038.1      | + | 35499   | 35550   | RNA → rpmE (PRK00019) Ribosomal_L31 (pfam01197) →                                             |
| Fhe-4-1    | NZ_AWFX01000038.1      | - | 54843   | 54792   | RNA → rpmE (PRK00019) Ribosomal_L31 (pfam01197) →                                             |
| Fhe-2-1    | NZ_AXDL01000043.1      | - | 6798    | 6747    | RNA → rpmE (PRK00019) Ribosomal_L31 (pfam01197) →                                             |
| Fpu-1-1    | NZ_LFEJ01000010.1      | + | 152430  | 152481  | RNA → rpmE (PRK00019) Ribosomal_L31 (pfam01197) →                                             |
| Fpu-3-1    | NZ_AXSY01000052.1      | - | 32389   | 32338   | RNA → rpmE (PRK00019) Ribosomal_L31 (pfam01197) →                                             |
| Fpu-2-1    | NZ_AXSZ01000028.1      | - | 11077   | 11026   | RNA → rpmE (PRK00019) Ribosomal_L31 (pfam01197) →                                             |
| Fpu-4-1    | NZ_JHYZ01000015.1      | - | 32736   | 32685   | RNA → rpmE (PRK00019) Ribosomal_L31 (pfam01197) →                                             |
| Fhe-3-1    | NZ_AXDK01000124.1      | - | 8590    | 8539    | RNA → rpmE (PRK00019) Ribosomal_L31 (pfam01197) →                                             |
| Fpu-5-1    | NZ_AWFY01000004.1      | + | 156607  | 156658  | RNA → rpmE (PRK00019) Ribosomal_L31 (pfam01197) →                                             |
| Cne-1-1    | NZ_CP009459.1          | + | 1199721 | 1199772 | RNA → rpmE (PRK00019) Ribosomal_L31 (pfam01197) →                                             |
| Cne-1-2    | NZ_CP009458.1          | + | 1216774 | 1216825 | RNA → rpmE (PRK00019) Ribosomal_L31 (pfam01197) →                                             |
| Esp-68-1   | NZ_AKXM01000024.1      | + | 88396   | 88447   | RNA → rpmE (PRK00019) Ribosomal_L31 (pfam01197) → rpmE (PRK00019) Ribosomal_L31 (pfam01197) → |
| Cne-1-3    | NZ_CP009451.1          | - | 2536387 | 2536336 | RNA → rpmE (PRK00019) Ribosomal_L31 (pfam01197) →                                             |
| Cda-1-1    | NZ_KE161030.1          | + | 4763143 | 4763194 | RNA → rpmE (PRK00019) Ribosomal_L31 (pfam01197) →                                             |
| Sco-2-1    | NZ_JMSQ01000013.1      | + | 67335   | 67386   | RNA → rpmE (PRK00019) Ribosomal_L31 (pfam01197) →                                             |
| Bag-2-1    | NZ_JMPI01000074.1      | + | 98246   | 98298   | RNA → rpmE (PRK00019) Ribosomal_L31 (pfam01197) →                                             |
| Ebl-1-1    | NC_017910.1            | - | 3996940 | 3996888 | RNA → rpmE (PRK00019) Ribosomal_L31 (pfam01197) →                                             |
| Sbl-1-1    | NZ_BAHA01000017.1      | + | 91171   | 91223   | RNA → rpmE (PRK00019) Ribosomal_L31 (pfam01197) →                                             |
| Sen-311-1  | NC_010067.1            | - | 3496303 | 3496251 | RNA → rpmE (PRK00019) Ribosomal_L31 (pfam01197) → rpmE (PRK00019) Ribosomal_L31 (pfam01197) → |
| Sen-3-1    | NZ_CP006693.1          | - | 3463342 | 3463290 | RNA → rpmE (PRK00019) Ribosomal_L31 (pfam01197) →                                             |
| Sen-1013-1 | NZ_ABAN01000010.1      | - | 45116   | 45064   | RNA → rpmE (PRK00019) Ribosomal_L31 (pfam01197) → rpmE (PRK00019) Ribosomal_L31 (pfam01197) → |
| Sen-89-1   | NZ_JRLP01000010.1      | + | 43143   | 43195   | RNA → rpmE (PRK00019) Ribosomal_L31 (pfam01197) →                                             |
| Sen-729-1  | NZ_JSWQ01000008.1      | - | 49158   | 49106   | RNA → rpmE (PRK00019) Ribosomal_L31 (pfam01197) →                                             |
| Sen-1007-1 | NZ_ABEL01000012.1      | - | 37576   | 37524   | RNA → rpmE (PRK00019) Ribosomal_L31 (pfam01197) → rpmE (PRK00019) Ribosomal_L31 (pfam01197) → |
| Sen-1030-1 | NZ_ABF01000013.1       | - | 37462   | 37410   | RNA → rpmE (PRK00019) Ribosomal_L31 (pfam01197) → rpmE (PRK00019) Ribosomal_L31 (pfam01197) → |
| Sen-1028-1 | NZ_ABAO01000008.1      | + | 112768  | 112820  | RNA → rpmE (PRK00019) Ribosomal_L31 (pfam01197) → rpmE (PRK00019) Ribosomal_L31 (pfam01197) → |
| Sen-1008-1 | NZ_ABEI01000014.1      | + | 110111  | 110163  | RNA → rpmE (PRK00019) Ribosomal_L31 (pfam01197) → rpmE (PRK00019) Ribosomal_L31 (pfam01197) → |
| Sen-239-1  | NZ_ARYW01000006.1      | - | 45147   | 45095   | RNA → rpmE (PRK00019) Ribosomal_L31 (pfam01197) →                                             |
| Sen-940-1  | NZ_AOXX01000025.1      | + | 95096   | 95148   | RNA → rpmE (PRK00019) Ribosomal_L31 (pfam01197) → rpmE (PRK00019) Ribosomal_L31 (pfam01197) → |
| Sen-929-1  | NZ_AHUI01000026.1      | + | 42783   | 42835   | RNA → rpmE (PRK00019) Ribosomal_L31 (pfam01197) →                                             |
| Sen-58-1   | NZ_JRLS01000058.1      | + | 4123    | 4175    | RNA → rpmE (PRK00019) Ribosomal_L31 (pfam01197) →                                             |
| Sen-111-1  | NZ_JXXJ01000012.1      | - | 45085   | 45033   | RNA → rpmE (PRK00019) Ribosomal_L31 (pfam01197) →                                             |
| Sen-329-1  | NZ_CATD01000035.1      | - | 37552   | 37500   | RNA → rpmE (PRK00019) Ribosomal_L31 (pfam01197) →                                             |
| Sen-350-1  | NZ_CATW01000042.1      | - | 37552   | 37500   | RNA → rpmE (PRK00019) Ribosomal_L31 (pfam01197) →                                             |
| Sen-408-1  | NZ_CARI01000040.1      | + | 111839  | 111891  | RNA → rpmE (PRK00019) Ribosomal_L31 (pfam01197) →                                             |
| Sen-413-1  | NZ_CARD01000040.1      | - | 37553   | 37501   | RNA → rpmE (PRK00019) Ribosomal_L31 (pfam01197) →                                             |
| Sen-403-1  | NZ_CARL01000082.1      | + | 25648   | 25700   | RNA → rpmE (PRK00019) Ribosomal_L31 (pfam01197) →                                             |
| Sen-288-1  | NZ_CDLI01000125.1      | - | 39519   | 39467   | RNA → rpmE (PRK00019) Ribosomal_L31 (pfam01197) →                                             |
| Sen-1027-2 | NZ_ABEJ01000012.1      | + | 103003  | 103055  | RNA → rpmE (PRK00019) Ribosomal_L31 (pfam01197) → rpmE (PRK00019) Ribosomal_L31 (pfam01197) → |
| Sen-1009-1 | NZ_ABAK02000001.1      | + | 3619652 | 3619704 | RNA → rpmE (PRK00019) Ribosomal_L31 (pfam01197) → rpmE (PRK00019) Ribosomal_L31 (pfam01197) → |
| Sen-1010-1 | NZ_ABEW01000011.1      | + | 105665  | 105717  | RNA → rpmE (PRK00019) Ribosomal_L31 (pfam01197) → rpmE (PRK00019) Ribosomal_L31 (pfam01197) → |



|            |                   |   |        |        |                                                                                               |
|------------|-------------------|---|--------|--------|-----------------------------------------------------------------------------------------------|
| Sen-813-1  | NZ_AESY01000065.1 | - | 35204  | 35152  | RNA → rpmE (PRK00019) Ribosomal_L31 (pfam01197) → rpmE (PRK00019) Ribosomal_L31 (pfam01197) → |
| Sen-228-1  | NZ_JZWK01000010.1 | - | 45598  | 45546  | RNA → rpmE (PRK00019) Ribosomal_L31 (pfam01197) →                                             |
| Sen-756-1  | NZ_AMNZ01000014.1 | + | 44988  | 45040  | RNA → rpmE (PRK00019) Ribosomal_L31 (pfam01197) →                                             |
| Sen-188-1  | NZ_AMOF01000015.1 | + | 100319 | 100371 | RNA → rpmE (PRK00019) Ribosomal_L31 (pfam01197) →                                             |
| Sen-185-1  | NZ_AMOC01000019.1 | - | 37507  | 37455  | RNA → rpmE (PRK00019) Ribosomal_L31 (pfam01197) →                                             |
| Sen-184-1  | NZ_AMOA01000042.1 | - | 37497  | 37445  | RNA → rpmE (PRK00019) Ribosomal_L31 (pfam01197) →                                             |
| Sen-187-1  | NZ_AMOE01000058.1 | + | 100554 | 100606 | RNA → rpmE (PRK00019) Ribosomal_L31 (pfam01197) →                                             |
| Sen-189-1  | NZ_AMOG01000112.1 | + | 58896  | 58948  | RNA → rpmE (PRK00019) Ribosomal_L31 (pfam01197) →                                             |
| Sen-112-1  | NZ_JZUV01000021.1 | + | 104758 | 104810 | RNA → rpmE (PRK00019) Ribosomal_L31 (pfam01197) →                                             |
| Sen-113-1  | NZ_JZUW01000036.1 | - | 49763  | 49711  | RNA → rpmE (PRK00019) Ribosomal_L31 (pfam01197) →                                             |
| Sen-222-1  | NZ_AMLQ01000020.1 | - | 37602  | 37550  | RNA → rpmE (PRK00019) Ribosomal_L31 (pfam01197) →                                             |
| Sen-220-1  | NZ_AMLS01000127.1 | - | 14386  | 14334  | RNA → rpmE (PRK00019) Ribosomal_L31 (pfam01197) →                                             |
| Sen-186-1  | NZ_AMOD01000033.1 | + | 100556 | 100608 | RNA → rpmE (PRK00019) Ribosomal_L31 (pfam01197) →                                             |
| Sen-192-1  | NZ_AMOJ01000025.1 | - | 37710  | 37658  | RNA → rpmE (PRK00019) Ribosomal_L31 (pfam01197) →                                             |
| Sen-190-1  | NZ_AMOH01000008.1 | - | 37530  | 37478  | RNA → rpmE (PRK00019) Ribosomal_L31 (pfam01197) →                                             |
| Sen-759-1  | NZ_AMOI01000089.1 | - | 37516  | 37464  | RNA → rpmE (PRK00019) Ribosomal_L31 (pfam01197) →                                             |
| Sen-191-1  | NZ_AMOK01000144.1 | + | 100556 | 100608 | RNA → rpmE (PRK00019) Ribosomal_L31 (pfam01197) →                                             |
| Sen-232-1  | NZ_JZUW01000023.1 | + | 129364 | 129416 | RNA → rpmE (PRK00019) Ribosomal_L31 (pfam01197) →                                             |
| Sen-758-1  | NZ_AMOB01000059.1 | + | 100641 | 100693 | RNA → rpmE (PRK00019) Ribosomal_L31 (pfam01197) →                                             |
| Sen-309-1  | NZ_JXTT01000068.1 | + | 95702  | 95754  | RNA → rpmE (PRK00019) Ribosomal_L31 (pfam01197) →                                             |
| Sen-167-1  | NZ_LAPA01000017.1 | - | 45228  | 45176  | RNA → rpmE (PRK00019) Ribosomal_L31 (pfam01197) →                                             |
| Sen-170-1  | NZ_LAPK01000016.1 | - | 37548  | 37496  | RNA → rpmE (PRK00019) Ribosomal_L31 (pfam01197) →                                             |
| Sen-286-1  | NZ_LAPB01000004.1 | - | 45128  | 45076  | RNA → rpmE (PRK00019) Ribosomal_L31 (pfam01197) →                                             |
| Sen-167-2  | NZ_LAPE01000030.1 | + | 100068 | 100120 | RNA → rpmE (PRK00019) Ribosomal_L31 (pfam01197) →                                             |
| Sen-167-3  | NZ_LAOV01000025.1 | - | 45125  | 45073  | RNA → rpmE (PRK00019) Ribosomal_L31 (pfam01197) →                                             |
| Sen-170-2  | NZ_LAPI01000047.1 | + | 100376 | 100428 | RNA → rpmE (PRK00019) Ribosomal_L31 (pfam01197) →                                             |
| Sen-225-1  | NZ_LAOZ01000065.1 | - | 37573  | 37521  | RNA → rpmE (PRK00019) Ribosomal_L31 (pfam01197) →                                             |
| Sen-170-3  | NZ_LAPJ01000049.1 | - | 37548  | 37496  | RNA → rpmE (PRK00019) Ribosomal_L31 (pfam01197) →                                             |
| Sen-225-2  | NZ_LAOT01000033.1 | - | 37573  | 37521  | RNA → rpmE (PRK00019) Ribosomal_L31 (pfam01197) →                                             |
| Sen-225-3  | NZ_LAOW01000010.1 | - | 15419  | 15367  | RNA → rpmE (PRK00019) Ribosomal_L31 (pfam01197) →                                             |
| Sen-170-4  | NZ_LAOS01000078.1 | - | 17555  | 17503  | RNA → rpmE (PRK00019) Ribosomal_L31 (pfam01197) →                                             |
| Sen-225-4  | NZ_LAPL01000035.1 | + | 55787  | 55839  | RNA → rpmE (PRK00019) Ribosomal_L31 (pfam01197) →                                             |
| Sen-98-1   | NZ_JMML02000005.1 | + | 103476 | 103528 | RNA → rpmE (PRK00019) Ribosomal_L31 (pfam01197) →                                             |
| Sen-856-1  | NZ_AOYV01000096.1 | - | 45077  | 45025  | RNA → rpmE (PRK00019) Ribosomal_L31 (pfam01197) → rpmE (PRK00019) Ribosomal_L31 (pfam01197) → |
| Sen-167-4  | NZ_LHHD01000025.1 | - | 45515  | 45463  | RNA → rpmE (PRK00019) Ribosomal_L31 (pfam01197) →                                             |
| Sen-167-5  | NZ_LHIP01000011.1 | - | 45288  | 45236  | RNA → rpmE (PRK00019) Ribosomal_L31 (pfam01197) →                                             |
| Sen-167-6  | NZ_LHNA01000015.1 | + | 100286 | 100338 | RNA → rpmE (PRK00019) Ribosomal_L31 (pfam01197) →                                             |
| Sen-170-5  | NZ_LHNR01000007.1 | - | 37518  | 37466  | RNA → rpmE (PRK00019) Ribosomal_L31 (pfam01197) →                                             |
| Sen-170-6  | NZ_LHEU01000001.1 | - | 37518  | 37466  | RNA → rpmE (PRK00019) Ribosomal_L31 (pfam01197) →                                             |
| Sen-170-7  | NZ_LHFX01000020.1 | - | 37518  | 37466  | RNA → rpmE (PRK00019) Ribosomal_L31 (pfam01197) →                                             |
| Sen-170-8  | NZ_LHGB01000017.1 | - | 37518  | 37466  | RNA → rpmE (PRK00019) Ribosomal_L31 (pfam01197) →                                             |
| Sen-170-50 | NZ_LHHQ01000072.1 | - | 37518  | 37466  | RNA → rpmE (PRK00019) Ribosomal_L31 (pfam01197) →                                             |
| Sen-170-9  | NZ_LHHT01000023.1 | - | 37518  | 37466  | RNA → rpmE (PRK00019) Ribosomal_L31 (pfam01197) →                                             |
| Sen-167-7  | NZ_LHIZ01000020.1 | + | 100286 | 100338 | RNA → rpmE (PRK00019) Ribosomal_L31 (pfam01197) →                                             |
| Sen-167-8  | NZ_LHJE01000040.1 | + | 100286 | 100338 | RNA → rpmE (PRK00019) Ribosomal_L31 (pfam01197) →                                             |
| Sen-170-10 | NZ_LHKX01000011.1 | + | 43559  | 43611  | RNA → rpmE (PRK00019) Ribosomal_L31 (pfam01197) →                                             |
| Sen-771-1  | NZ_AMMK01000337.1 | - | 34305  | 34253  | RNA → rpmE (PRK00019) Ribosomal_L31 (pfam01197) →                                             |
| Sen-288-2  | NZ_CUZH01000020.1 | - | 39384  | 39332  | RNA → rpmE (PRK00019) Ribosomal_L31 (pfam01197) →                                             |
| Sen-300-1  | NZ_CTNK01000018.1 | + | 42508  | 42560  | RNA → rpmE (PRK00019) Ribosomal_L31 (pfam01197) →                                             |
| Sen-755-1  | NZ_AMMO01000064.1 | + | 1167   | 1219   | RNA → rpmE (PRK00019) Ribosomal_L31 (pfam01197) →                                             |
| Sen-196-1  | NZ_AMON01000006.1 | - | 37717  | 37665  | RNA → rpmE (PRK00019) Ribosomal_L31 (pfam01197) →                                             |
| Sen-288-3  | NZ_CUZP01000016.1 | - | 39536  | 39484  | RNA → rpmE (PRK00019) Ribosomal_L31 (pfam01197) →                                             |

|            |                   |   |        |        |                                                   |
|------------|-------------------|---|--------|--------|---------------------------------------------------|
| Sen-288-4  | NZ_CUZJ01000016.1 | + | 104156 | 104208 | RNA → rpmE (PRK00019) Ribosomal_L31 (pfam01197) → |
| Sen-194-1  | NZ_AMOL01000071.1 | - | 37527  | 37475  | RNA → rpmE (PRK00019) Ribosomal_L31 (pfam01197) → |
| Sen-288-5  | NZ_CUZY01000016.1 | - | 39534  | 39482  | RNA → rpmE (PRK00019) Ribosomal_L31 (pfam01197) → |
| Sen-170-11 | NZ_LHEG01000017.1 | - | 37518  | 37466  | RNA → rpmE (PRK00019) Ribosomal_L31 (pfam01197) → |
| Sen-170-12 | NZ_LHEK01000011.1 | + | 43461  | 43513  | RNA → rpmE (PRK00019) Ribosomal_L31 (pfam01197) → |
| Sen-170-13 | NZ_LHEL01000026.1 | + | 43461  | 43513  | RNA → rpmE (PRK00019) Ribosomal_L31 (pfam01197) → |
| Sen-170-14 | NZ_LHGF01000016.1 | - | 37788  | 37736  | RNA → rpmE (PRK00019) Ribosomal_L31 (pfam01197) → |
| Sen-170-15 | NZ_LHHU01000005.1 | - | 37758  | 37706  | RNA → rpmE (PRK00019) Ribosomal_L31 (pfam01197) → |
| Sen-130-1  | NZ_LHJK01000002.1 | - | 43074  | 43022  | RNA → rpmE (PRK00019) Ribosomal_L31 (pfam01197) → |
| Sen-225-5  | NZ_LHIA01000022.1 | + | 110618 | 110670 | RNA → rpmE (PRK00019) Ribosomal_L31 (pfam01197) → |
| Sen-225-6  | NZ_LHIU01000047.1 | - | 37837  | 37785  | RNA → rpmE (PRK00019) Ribosomal_L31 (pfam01197) → |
| Sen-12-1   | NZ_LHJT01000036.1 | - | 37541  | 37489  | RNA → rpmE (PRK00019) Ribosomal_L31 (pfam01197) → |
| Sen-170-16 | NZ_LHIY01000013.1 | + | 43461  | 43513  | RNA → rpmE (PRK00019) Ribosomal_L31 (pfam01197) → |
| Sen-129-1  | NZ_LHLL01000005.1 | - | 45297  | 45245  | RNA → rpmE (PRK00019) Ribosomal_L31 (pfam01197) → |
| Sen-14-1   | NZ_LHNN01000010.1 | + | 106822 | 106874 | RNA → rpmE (PRK00019) Ribosomal_L31 (pfam01197) → |
| Sen-170-17 | NZ_LHMK01000033.1 | - | 3250   | 3198   | RNA → rpmE (PRK00019) Ribosomal_L31 (pfam01197) → |
| Sen-170-18 | NZ_LHMM01000016.1 | + | 100688 | 100740 | RNA → rpmE (PRK00019) Ribosomal_L31 (pfam01197) → |
| Sen-137-1  | NZ_LHNP01000044.1 | + | 33072  | 33124  | RNA → rpmE (PRK00019) Ribosomal_L31 (pfam01197) → |
| Sen-5-1    | NZ_LHNO01000020.1 | - | 45358  | 45306  | RNA → rpmE (PRK00019) Ribosomal_L31 (pfam01197) → |
| Sen-225-7  | NZ_LHOC01000018.1 | + | 43745  | 43797  | RNA → rpmE (PRK00019) Ribosomal_L31 (pfam01197) → |
| Sen-14-2   | NZ_LHGC01000023.1 | - | 41667  | 41615  | RNA → rpmE (PRK00019) Ribosomal_L31 (pfam01197) → |
| Sen-170-19 | NZ_LHOD01000025.1 | + | 100688 | 100740 | RNA → rpmE (PRK00019) Ribosomal_L31 (pfam01197) → |
| Sen-138-1  | NZ_LHHP01000012.1 | - | 49389  | 49337  | RNA → rpmE (PRK00019) Ribosomal_L31 (pfam01197) → |
| Sen-5-2    | NZ_LHOM01000026.1 | + | 104489 | 104541 | RNA → rpmE (PRK00019) Ribosomal_L31 (pfam01197) → |
| Sen-170-20 | NZ_LHOW01000002.1 | - | 37758  | 37706  | RNA → rpmE (PRK00019) Ribosomal_L31 (pfam01197) → |
| Sen-137-2  | NZ_LHKI01000166.1 | + | 4122   | 4174   | RNA → rpmE (PRK00019) Ribosomal_L31 (pfam01197) → |
| Sen-225-8  | NZ_LHDM01000014.1 | - | 37858  | 37806  | RNA → rpmE (PRK00019) Ribosomal_L31 (pfam01197) → |
| Sen-138-2  | NZ_LHLY01000014.1 | + | 104581 | 104633 | RNA → rpmE (PRK00019) Ribosomal_L31 (pfam01197) → |
| Sen-225-9  | NZ_LHEN01000003.1 | - | 37859  | 37807  | RNA → rpmE (PRK00019) Ribosomal_L31 (pfam01197) → |
| Sen-138-3  | NZ_LHMB01000021.1 | - | 49457  | 49405  | RNA → rpmE (PRK00019) Ribosomal_L31 (pfam01197) → |
| Sen-225-10 | NZ_LHEZ01000010.1 | - | 37859  | 37807  | RNA → rpmE (PRK00019) Ribosomal_L31 (pfam01197) → |
| Sen-225-11 | NZ_LHFO01000006.1 | - | 37858  | 37806  | RNA → rpmE (PRK00019) Ribosomal_L31 (pfam01197) → |
| Sen-130-2  | NZ_LHMR01000007.1 | - | 43074  | 43022  | RNA → rpmE (PRK00019) Ribosomal_L31 (pfam01197) → |
| Sen-225-12 | NZ_LHHH01000031.1 | + | 110443 | 110495 | RNA → rpmE (PRK00019) Ribosomal_L31 (pfam01197) → |
| Sen-225-13 | NZ_LHJC01000006.1 | + | 110627 | 110679 | RNA → rpmE (PRK00019) Ribosomal_L31 (pfam01197) → |
| Sen-225-14 | NZ_LHKJ01000025.1 | + | 110443 | 110495 | RNA → rpmE (PRK00019) Ribosomal_L31 (pfam01197) → |
| Sen-12-2   | NZ_LHET01000013.1 | + | 80459  | 80511  | RNA → rpmE (PRK00019) Ribosomal_L31 (pfam01197) → |
| Sen-15-1   | NZ_LHFH01000010.1 | + | 98924  | 98976  | RNA → rpmE (PRK00019) Ribosomal_L31 (pfam01197) → |
| Sen-225-15 | NZ_LHLB01000016.1 | - | 37859  | 37807  | RNA → rpmE (PRK00019) Ribosomal_L31 (pfam01197) → |
| Sen-225-16 | NZ_LHLC01000015.1 | - | 38115  | 38063  | RNA → rpmE (PRK00019) Ribosomal_L31 (pfam01197) → |
| Sen-130-3  | NZ_LHHJ01000016.1 | - | 43074  | 43022  | RNA → rpmE (PRK00019) Ribosomal_L31 (pfam01197) → |
| Sen-225-17 | NZ_LHLG01000042.1 | - | 37859  | 37807  | RNA → rpmE (PRK00019) Ribosomal_L31 (pfam01197) → |
| Sen-14-3   | NZ_LHIF01000005.1 | - | 41667  | 41615  | RNA → rpmE (PRK00019) Ribosomal_L31 (pfam01197) → |
| Sen-12-3   | NZ_LHKF01000013.1 | + | 141508 | 141560 | RNA → rpmE (PRK00019) Ribosomal_L31 (pfam01197) → |
| Sen-225-18 | NZ_LHLT01000024.1 | + | 110443 | 110495 | RNA → rpmE (PRK00019) Ribosomal_L31 (pfam01197) → |
| Sen-129-2  | NZ_LHKW01000027.1 | + | 134845 | 134897 | RNA → rpmE (PRK00019) Ribosomal_L31 (pfam01197) → |
| Sen-6-1    | NZ_LHMF01000001.1 | - | 45365  | 45313  | RNA → rpmE (PRK00019) Ribosomal_L31 (pfam01197) → |
| Sen-6-2    | NZ_LHNW01000009.1 | + | 104489 | 104541 | RNA → rpmE (PRK00019) Ribosomal_L31 (pfam01197) → |
| Sen-170-21 | NZ_LHOB01000004.1 | - | 37787  | 37735  | RNA → rpmE (PRK00019) Ribosomal_L31 (pfam01197) → |
| Sen-15-2   | NZ_LHFG01000019.1 | + | 98923  | 98975  | RNA → rpmE (PRK00019) Ribosomal_L31 (pfam01197) → |
| Sen-112-2  | NZ_LHGO01000001.1 | - | 49213  | 49161  | RNA → rpmE (PRK00019) Ribosomal_L31 (pfam01197) → |
| Sen-224-1  | NZ_LHOL01000024.1 | + | 118678 | 118730 | RNA → rpmE (PRK00019) Ribosomal_L31 (pfam01197) → |



|            |                   |   |        |        |                                                   |
|------------|-------------------|---|--------|--------|---------------------------------------------------|
| Sen-112-3  | NZ.LHGP01000036.1 | - | 49493  | 49441  | RNA → rpmE (PRK00019) Ribosomal_L31 (pfam01197) → |
| Sen-225-19 | NZ.LHOT01000027.1 | - | 38140  | 38088  | RNA → rpmE (PRK00019) Ribosomal_L31 (pfam01197) → |
| Sen-5-3    | NZ.LHEA01000014.1 | + | 134515 | 134567 | RNA → rpmE (PRK00019) Ribosomal_L31 (pfam01197) → |
| Sen-137-3  | NZ.LHHE01000026.1 | + | 33061  | 33113  | RNA → rpmE (PRK00019) Ribosomal_L31 (pfam01197) → |
| Sen-137-4  | NZ.LHKH01000008.1 | + | 4122   | 4174   | RNA → rpmE (PRK00019) Ribosomal_L31 (pfam01197) → |
| Sen-138-4  | NZ.LHMP01000018.1 | - | 49457  | 49405  | RNA → rpmE (PRK00019) Ribosomal_L31 (pfam01197) → |
| Sen-224-2  | NZ.LHHX01000010.1 | - | 337    | 285    | RNA → rpmE (PRK00019) Ribosomal_L31 (pfam01197) → |
| Sen-138-5  | NZ.LHOE01000015.1 | - | 49211  | 49159  | RNA → rpmE (PRK00019) Ribosomal_L31 (pfam01197) → |
| Sen-5-4    | NZ.LHKM01000033.1 | + | 43435  | 43487  | RNA → rpmE (PRK00019) Ribosomal_L31 (pfam01197) → |
| Sen-15-3   | NZ.LHON01000004.1 | + | 98924  | 98976  | RNA → rpmE (PRK00019) Ribosomal_L31 (pfam01197) → |
| Sen-6-3    | NZ.LHMA01000017.1 | + | 104489 | 104541 | RNA → rpmE (PRK00019) Ribosomal_L31 (pfam01197) → |
| Sen-137-5  | NZ.LHJB01000007.1 | + | 95635  | 95687  | RNA → rpmE (PRK00019) Ribosomal_L31 (pfam01197) → |
| Sen-6-4    | NZ.LHLX01000040.1 | - | 45358  | 45306  | RNA → rpmE (PRK00019) Ribosomal_L31 (pfam01197) → |
| Sen-6-5    | NZ.LHLF01000017.1 | + | 104489 | 104541 | RNA → rpmE (PRK00019) Ribosomal_L31 (pfam01197) → |
| Sen-14-4   | NZ.LHKN01000021.1 | + | 106828 | 106880 | RNA → rpmE (PRK00019) Ribosomal_L31 (pfam01197) → |
| Sen-288-6  | NZ.CUYH01000014.1 | - | 41503  | 41451  | RNA → rpmE (PRK00019) Ribosomal_L31 (pfam01197) → |
| Sen-306-1  | NZ.LHFT01000001.1 | - | 45297  | 45245  | RNA → rpmE (PRK00019) Ribosomal_L31 (pfam01197) → |
| Sen-306-2  | NZ.LHFW01000015.1 | + | 104298 | 104350 | RNA → rpmE (PRK00019) Ribosomal_L31 (pfam01197) → |
| Sen-306-3  | NZ.LHGI01000004.1 | + | 104488 | 104540 | RNA → rpmE (PRK00019) Ribosomal_L31 (pfam01197) → |
| Sen-306-4  | NZ.LHHK01000013.1 | - | 45297  | 45245  | RNA → rpmE (PRK00019) Ribosomal_L31 (pfam01197) → |
| Sen-306-5  | NZ.LHIW01000004.1 | + | 104298 | 104350 | RNA → rpmE (PRK00019) Ribosomal_L31 (pfam01197) → |
| Sen-286-2  | NZ.LHEO01000040.1 | + | 4123   | 4175   | RNA → rpmE (PRK00019) Ribosomal_L31 (pfam01197) → |
| Sen-280-1  | NZ.LHOQ01000013.1 | + | 104644 | 104696 | RNA → rpmE (PRK00019) Ribosomal_L31 (pfam01197) → |
| Sen-280-2  | NZ.LHDZ01000014.1 | - | 37830  | 37778  | RNA → rpmE (PRK00019) Ribosomal_L31 (pfam01197) → |
| Sen-306-6  | NZ.LHED01000008.1 | + | 104298 | 104350 | RNA → rpmE (PRK00019) Ribosomal_L31 (pfam01197) → |
| Sen-306-7  | NZ.LHER01000039.1 | + | 104298 | 104350 | RNA → rpmE (PRK00019) Ribosomal_L31 (pfam01197) → |
| Sen-306-8  | NZ.LHEX01000022.1 | + | 104409 | 104461 | RNA → rpmE (PRK00019) Ribosomal_L31 (pfam01197) → |
| Sen-306-9  | NZ.LHFF01000003.1 | - | 45297  | 45245  | RNA → rpmE (PRK00019) Ribosomal_L31 (pfam01197) → |
| Sen-306-10 | NZ.LHFP01000006.1 | + | 43372  | 43424  | RNA → rpmE (PRK00019) Ribosomal_L31 (pfam01197) → |
| Sen-306-11 | NZ.LHGI01000015.1 | + | 104298 | 104350 | RNA → rpmE (PRK00019) Ribosomal_L31 (pfam01197) → |
| Sen-306-12 | NZ.LHGL01000067.1 | - | 45407  | 45355  | RNA → rpmE (PRK00019) Ribosomal_L31 (pfam01197) → |
| Sen-306-13 | NZ.LHHB01000046.1 | - | 45296  | 45244  | RNA → rpmE (PRK00019) Ribosomal_L31 (pfam01197) → |
| Sen-306-14 | NZ.LHID01000028.1 | - | 45297  | 45245  | RNA → rpmE (PRK00019) Ribosomal_L31 (pfam01197) → |
| Sen-306-15 | NZ.LHIQ01000056.1 | + | 43376  | 43428  | RNA → rpmE (PRK00019) Ribosomal_L31 (pfam01197) → |
| Sen-306-16 | NZ.LHIX01000050.1 | - | 45297  | 45245  | RNA → rpmE (PRK00019) Ribosomal_L31 (pfam01197) → |
| Sen-306-17 | NZ.LHJZ01000008.1 | + | 104298 | 104350 | RNA → rpmE (PRK00019) Ribosomal_L31 (pfam01197) → |
| Sen-306-18 | NZ.LHKD01000012.1 | - | 45297  | 45245  | RNA → rpmE (PRK00019) Ribosomal_L31 (pfam01197) → |
| Sen-306-19 | NZ.LHKL01000021.1 | + | 43403  | 43455  | RNA → rpmE (PRK00019) Ribosomal_L31 (pfam01197) → |
| Sen-306-20 | NZ.LHKK01000020.1 | + | 15365  | 15417  | RNA → rpmE (PRK00019) Ribosomal_L31 (pfam01197) → |
| Sen-306-21 | NZ.LHNG01000019.1 | + | 104298 | 104350 | RNA → rpmE (PRK00019) Ribosomal_L31 (pfam01197) → |
| Sen-306-22 | NZ.LHNL01000012.1 | - | 45297  | 45245  | RNA → rpmE (PRK00019) Ribosomal_L31 (pfam01197) → |
| Sen-286-3  | NZ.LHEF01000001.1 | - | 45301  | 45249  | RNA → rpmE (PRK00019) Ribosomal_L31 (pfam01197) → |
| Sen-306-23 | NZ.LHEP01000016.1 | + | 104298 | 104350 | RNA → rpmE (PRK00019) Ribosomal_L31 (pfam01197) → |
| Sen-225-20 | NZ.LHDL01000036.1 | - | 37859  | 37807  | RNA → rpmE (PRK00019) Ribosomal_L31 (pfam01197) → |
| Sen-306-24 | NZ.LHEW01000007.1 | + | 104297 | 104349 | RNA → rpmE (PRK00019) Ribosomal_L31 (pfam01197) → |
| Sen-306-25 | NZ.LHEY01000045.1 | - | 45297  | 45245  | RNA → rpmE (PRK00019) Ribosomal_L31 (pfam01197) → |
| Sen-225-21 | NZ.LHDS01000006.1 | - | 37859  | 37807  | RNA → rpmE (PRK00019) Ribosomal_L31 (pfam01197) → |
| Sen-306-26 | NZ.LHFU01000021.1 | - | 45297  | 45245  | RNA → rpmE (PRK00019) Ribosomal_L31 (pfam01197) → |
| Sen-225-22 | NZ.LHEC01000015.1 | - | 37859  | 37807  | RNA → rpmE (PRK00019) Ribosomal_L31 (pfam01197) → |
| Sen-306-27 | NZ.LHGH01000007.1 | - | 45297  | 45245  | RNA → rpmE (PRK00019) Ribosomal_L31 (pfam01197) → |
| Sen-286-4  | NZ.LHHI01000015.1 | + | 4124   | 4176   | RNA → rpmE (PRK00019) Ribosomal_L31 (pfam01197) → |
| Sen-306-28 | NZ.LHIE01000025.1 | - | 45297  | 45245  | RNA → rpmE (PRK00019) Ribosomal_L31 (pfam01197) → |

|            |                   |   |        |        |                                                   |
|------------|-------------------|---|--------|--------|---------------------------------------------------|
| Sen-226-1  | NZ_LHIM01000031.1 | - | 45095  | 45043  | RNA → rpmE (PRK00019) Ribosomal_L31 (pfam01197) → |
| Sen-306-29 | NZ_LHIK01000030.1 | - | 45297  | 45245  | RNA → rpmE (PRK00019) Ribosomal_L31 (pfam01197) → |
| Sen-225-23 | NZ_LHJO01000023.1 | + | 110443 | 110495 | RNA → rpmE (PRK00019) Ribosomal_L31 (pfam01197) → |
| Sen-306-30 | NZ_LHJJ01000014.1 | + | 104298 | 104350 | RNA → rpmE (PRK00019) Ribosomal_L31 (pfam01197) → |
| Sen-225-24 | NZ_LHLR01000018.1 | + | 110489 | 110541 | RNA → rpmE (PRK00019) Ribosomal_L31 (pfam01197) → |
| Sen-306-31 | NZ_LHLO01000017.1 | - | 45297  | 45245  | RNA → rpmE (PRK00019) Ribosomal_L31 (pfam01197) → |
| Sen-225-25 | NZ_LHMN01000017.1 | + | 110595 | 110647 | RNA → rpmE (PRK00019) Ribosomal_L31 (pfam01197) → |
| Sen-306-32 | NZ_LHLP01000013.1 | + | 104298 | 104350 | RNA → rpmE (PRK00019) Ribosomal_L31 (pfam01197) → |
| Sen-225-26 | NZ_LHMQ01000007.1 | - | 37859  | 37807  | RNA → rpmE (PRK00019) Ribosomal_L31 (pfam01197) → |
| Sen-233-1  | NZ_LHNX01000010.1 | + | 97858  | 97910  | RNA → rpmE (PRK00019) Ribosomal_L31 (pfam01197) → |
| Sen-306-33 | NZ_LHNI01000006.1 | - | 45297  | 45245  | RNA → rpmE (PRK00019) Ribosomal_L31 (pfam01197) → |
| Sen-230-1  | NZ_LHOI01000018.1 | + | 101470 | 101522 | RNA → rpmE (PRK00019) Ribosomal_L31 (pfam01197) → |
| Sen-226-2  | NZ_LHIN01000021.1 | + | 99690  | 99742  | RNA → rpmE (PRK00019) Ribosomal_L31 (pfam01197) → |
| Sen-306-34 | NZ_LHGY01000018.1 | - | 45297  | 45245  | RNA → rpmE (PRK00019) Ribosomal_L31 (pfam01197) → |
| Sen-306-35 | NZ_LHJU01000006.1 | + | 104298 | 104350 | RNA → rpmE (PRK00019) Ribosomal_L31 (pfam01197) → |
| Sen-227-1  | NZ_LHLZ01000020.1 | + | 104655 | 104707 | RNA → rpmE (PRK00019) Ribosomal_L31 (pfam01197) → |
| Sen-230-2  | NZ_LHOS01000013.1 | - | 37982  | 37930  | RNA → rpmE (PRK00019) Ribosomal_L31 (pfam01197) → |
| Sen-306-36 | NZ_LHOJ01000015.1 | + | 104298 | 104350 | RNA → rpmE (PRK00019) Ribosomal_L31 (pfam01197) → |
| Sen-225-27 | NZ_LHDO01000014.1 | + | 110443 | 110495 | RNA → rpmE (PRK00019) Ribosomal_L31 (pfam01197) → |
| Sen-286-5  | NZ_LHEH01000008.1 | + | 105522 | 105574 | RNA → rpmE (PRK00019) Ribosomal_L31 (pfam01197) → |
| Sen-225-28 | NZ_LHEB01000004.1 | - | 37858  | 37806  | RNA → rpmE (PRK00019) Ribosomal_L31 (pfam01197) → |
| Sen-306-37 | NZ_LHOH01000009.1 | - | 45297  | 45245  | RNA → rpmE (PRK00019) Ribosomal_L31 (pfam01197) → |
| Sen-225-29 | NZ_LHEI01000015.1 | - | 37858  | 37806  | RNA → rpmE (PRK00019) Ribosomal_L31 (pfam01197) → |
| Sen-237-1  | NZ_LLHS01000005.1 | - | 45233  | 45181  | RNA → rpmE (PRK00019) Ribosomal_L31 (pfam01197) → |
| Sen-226-3  | NZ_LHGE01000011.1 | - | 45335  | 45283  | RNA → rpmE (PRK00019) Ribosomal_L31 (pfam01197) → |
| Sen-306-38 | NZ_LHJF01000021.1 | + | 104297 | 104349 | RNA → rpmE (PRK00019) Ribosomal_L31 (pfam01197) → |
| Sen-225-30 | NZ_LHGN01000027.1 | - | 37859  | 37807  | RNA → rpmE (PRK00019) Ribosomal_L31 (pfam01197) → |
| Sen-306-39 | NZ_LHKA01000019.1 | + | 104298 | 104350 | RNA → rpmE (PRK00019) Ribosomal_L31 (pfam01197) → |
| Sen-306-40 | NZ_LHLK01000012.1 | - | 45428  | 45376  | RNA → rpmE (PRK00019) Ribosomal_L31 (pfam01197) → |
| Sen-226-4  | NZ_LHIG01000022.1 | + | 99667  | 99719  | RNA → rpmE (PRK00019) Ribosomal_L31 (pfam01197) → |
| Sen-306-41 | NZ_LHMT01000039.1 | + | 104298 | 104350 | RNA → rpmE (PRK00019) Ribosomal_L31 (pfam01197) → |
| Sen-237-2  | NZ_LHIJ01000001.1 | + | 105504 | 105556 | RNA → rpmE (PRK00019) Ribosomal_L31 (pfam01197) → |
| Sen-306-42 | NZ_LHOG01000039.1 | + | 104298 | 104350 | RNA → rpmE (PRK00019) Ribosomal_L31 (pfam01197) → |
| Sen-233-2  | NZ_LHKV01000011.1 | + | 129710 | 129762 | RNA → rpmE (PRK00019) Ribosomal_L31 (pfam01197) → |
| Sen-306-43 | NZ_LHEQ01000030.1 | - | 45300  | 45248  | RNA → rpmE (PRK00019) Ribosomal_L31 (pfam01197) → |
| Sen-225-31 | NZ_LHKZ01000044.1 | + | 110628 | 110680 | RNA → rpmE (PRK00019) Ribosomal_L31 (pfam01197) → |
| Sen-306-44 | NZ_LHFB01000001.1 | - | 45428  | 45376  | RNA → rpmE (PRK00019) Ribosomal_L31 (pfam01197) → |
| Sen-225-32 | NZ_LHLN01000022.1 | + | 110627 | 110679 | RNA → rpmE (PRK00019) Ribosomal_L31 (pfam01197) → |
| Sen-306-45 | NZ_LHFS01000008.1 | + | 104297 | 104349 | RNA → rpmE (PRK00019) Ribosomal_L31 (pfam01197) → |
| Sen-225-33 | NZ_LHMG01000021.1 | - | 37859  | 37807  | RNA → rpmE (PRK00019) Ribosomal_L31 (pfam01197) → |
| Sen-306-46 | NZ_LHFV01000011.1 | + | 43443  | 43495  | RNA → rpmE (PRK00019) Ribosomal_L31 (pfam01197) → |
| Sen-225-34 | NZ_LHOR01000003.1 | + | 110443 | 110495 | RNA → rpmE (PRK00019) Ribosomal_L31 (pfam01197) → |
| Sen-306-47 | NZ_LHGZ01000018.1 | - | 45557  | 45505  | RNA → rpmE (PRK00019) Ribosomal_L31 (pfam01197) → |
| Sen-237-3  | NZ_LHDR01000020.1 | - | 45233  | 45181  | RNA → rpmE (PRK00019) Ribosomal_L31 (pfam01197) → |
| Sen-308-1  | NZ_LHIL01000010.1 | - | 37811  | 37759  | RNA → rpmE (PRK00019) Ribosomal_L31 (pfam01197) → |
| Sen-233-3  | NZ_LHGG01000023.1 | - | 35466  | 35414  | RNA → rpmE (PRK00019) Ribosomal_L31 (pfam01197) → |
| Sen-306-48 | NZ_LHIR01000020.1 | + | 104298 | 104350 | RNA → rpmE (PRK00019) Ribosomal_L31 (pfam01197) → |
| Sen-225-35 | NZ_LHGX01000039.1 | + | 110443 | 110495 | RNA → rpmE (PRK00019) Ribosomal_L31 (pfam01197) → |
| Sen-306-49 | NZ_LHKC01000026.1 | - | 45297  | 45245  | RNA → rpmE (PRK00019) Ribosomal_L31 (pfam01197) → |
| Sen-225-36 | NZ_LHHC01000016.1 | - | 37859  | 37807  | RNA → rpmE (PRK00019) Ribosomal_L31 (pfam01197) → |
| Sen-306-50 | NZ_LHLA01000003.1 | + | 104298 | 104350 | RNA → rpmE (PRK00019) Ribosomal_L31 (pfam01197) → |
| Sen-230-3  | NZ_LHHR01000021.1 | - | 37982  | 37930  | RNA → rpmE (PRK00019) Ribosomal_L31 (pfam01197) → |

|            |                   |   |        |        |                                                   |
|------------|-------------------|---|--------|--------|---------------------------------------------------|
| Sen-308-2  | NZ_LHOK01000024.1 | + | 100381 | 100433 | RNA → rpmE (PRK00019) Ribosomal_L31 (pfam01197) → |
| Sen-227-2  | NZ_LHHW01000019.1 | - | 45628  | 45576  | RNA → rpmE (PRK00019) Ribosomal_L31 (pfam01197) → |
| Sen-225-37 | NZ_LHJM01000029.1 | - | 37859  | 37807  | RNA → rpmE (PRK00019) Ribosomal_L31 (pfam01197) → |
| Sen-225-38 | NZ_LHJP01000060.1 | - | 14715  | 14663  | RNA → rpmE (PRK00019) Ribosomal_L31 (pfam01197) → |
| Sen-237-4  | NZ_LHKR01000017.1 | - | 45233  | 45181  | RNA → rpmE (PRK00019) Ribosomal_L31 (pfam01197) → |
| Sen-308-3  | NZ_LHGK01000003.1 | - | 37864  | 37812  | RNA → rpmE (PRK00019) Ribosomal_L31 (pfam01197) → |
| Sen-233-4  | NZ_LHKY01000034.1 | - | 35226  | 35174  | RNA → rpmE (PRK00019) Ribosomal_L31 (pfam01197) → |
| Sen-237-5  | NZ_LHLW01000028.1 | + | 170370 | 170422 | RNA → rpmE (PRK00019) Ribosomal_L31 (pfam01197) → |
| Sen-225-39 | NZ_LHNZ01000016.1 | + | 104535 | 104587 | RNA → rpmE (PRK00019) Ribosomal_L31 (pfam01197) → |
| Sen-225-40 | NZ_LHOU01000014.1 | - | 37859  | 37807  | RNA → rpmE (PRK00019) Ribosomal_L31 (pfam01197) → |
| Sen-237-6  | NZ_LHFZ01000007.1 | - | 45233  | 45181  | RNA → rpmE (PRK00019) Ribosomal_L31 (pfam01197) → |
| Sen-228-2  | NZ_LHGD01000004.1 | - | 45717  | 45665  | RNA → rpmE (PRK00019) Ribosomal_L31 (pfam01197) → |
| Sen-225-41 | NZ_LHJQ01000014.1 | + | 110332 | 110384 | RNA → rpmE (PRK00019) Ribosomal_L31 (pfam01197) → |
| Sen-225-42 | NZ_LHLE01000029.1 | - | 38116  | 38064  | RNA → rpmE (PRK00019) Ribosomal_L31 (pfam01197) → |
| Sen-225-43 | NZ_LHNJ01000028.1 | - | 38141  | 38089  | RNA → rpmE (PRK00019) Ribosomal_L31 (pfam01197) → |
| Sen-237-7  | NZ_LHDX01000028.1 | - | 45233  | 45181  | RNA → rpmE (PRK00019) Ribosomal_L31 (pfam01197) → |
| Sen-237-8  | NZ_LHOV01000014.1 | + | 170530 | 170582 | RNA → rpmE (PRK00019) Ribosomal_L31 (pfam01197) → |
| Sen-237-9  | NZ_LHJA01000018.1 | + | 170373 | 170425 | RNA → rpmE (PRK00019) Ribosomal_L31 (pfam01197) → |
| Sen-279-1  | NZ_LHEJ01000024.1 | + | 4123   | 4175   | RNA → rpmE (PRK00019) Ribosomal_L31 (pfam01197) → |
| Sen-225-44 | NZ_LHJV01000040.1 | + | 110443 | 110495 | RNA → rpmE (PRK00019) Ribosomal_L31 (pfam01197) → |
| Sen-237-10 | NZ_LHEM01000027.1 | - | 45233  | 45181  | RNA → rpmE (PRK00019) Ribosomal_L31 (pfam01197) → |
| Sen-225-45 | NZ_LHJW01000015.1 | + | 110598 | 110650 | RNA → rpmE (PRK00019) Ribosomal_L31 (pfam01197) → |
| Sen-225-46 | NZ_LHMU01000012.1 | - | 37859  | 37807  | RNA → rpmE (PRK00019) Ribosomal_L31 (pfam01197) → |
| Sen-270-1  | NZ_LHFR01000039.1 | - | 45189  | 45137  | RNA → rpmE (PRK00019) Ribosomal_L31 (pfam01197) → |
| Sen-225-47 | NZ_LHHA01000023.1 | + | 43611  | 43663  | RNA → rpmE (PRK00019) Ribosomal_L31 (pfam01197) → |
| Sen-278-1  | NZ_LHfy01000007.1 | + | 104454 | 104506 | RNA → rpmE (PRK00019) Ribosomal_L31 (pfam01197) → |
| Sen-237-11 | NZ_LHGR01000017.1 | - | 45233  | 45181  | RNA → rpmE (PRK00019) Ribosomal_L31 (pfam01197) → |
| Sen-237-12 | NZ_LHHF01000011.1 | - | 45532  | 45480  | RNA → rpmE (PRK00019) Ribosomal_L31 (pfam01197) → |
| Sen-278-2  | NZ_LHIC01000007.1 | + | 104453 | 104505 | RNA → rpmE (PRK00019) Ribosomal_L31 (pfam01197) → |
| Sen-278-3  | NZ_LHIH01000022.1 | + | 104454 | 104506 | RNA → rpmE (PRK00019) Ribosomal_L31 (pfam01197) → |
| Sen-278-4  | NZ_LHIS01000017.1 | + | 104453 | 104505 | RNA → rpmE (PRK00019) Ribosomal_L31 (pfam01197) → |
| Sen-278-5  | NZ_LHKB01000030.1 | - | 45232  | 45180  | RNA → rpmE (PRK00019) Ribosomal_L31 (pfam01197) → |
| Sen-279-2  | NZ_LHKE01000013.1 | - | 35503  | 35451  | RNA → rpmE (PRK00019) Ribosomal_L31 (pfam01197) → |
| Sen-277-1  | NZ_LHKG01000033.1 | + | 97652  | 97704  | RNA → rpmE (PRK00019) Ribosomal_L31 (pfam01197) → |
| Sen-278-6  | NZ_LHLI01000036.1 | + | 43581  | 43633  | RNA → rpmE (PRK00019) Ribosomal_L31 (pfam01197) → |
| Sen-237-13 | NZ_LHMH01000002.1 | + | 170373 | 170425 | RNA → rpmE (PRK00019) Ribosomal_L31 (pfam01197) → |
| Sen-279-3  | NZ_LHMV01000016.1 | + | 103255 | 103307 | RNA → rpmE (PRK00019) Ribosomal_L31 (pfam01197) → |
| Sen-278-7  | NZ_LHDT01000024.1 | + | 104454 | 104506 | RNA → rpmE (PRK00019) Ribosomal_L31 (pfam01197) → |
| Sen-278-8  | NZ_LHHN01000005.1 | + | 104454 | 104506 | RNA → rpmE (PRK00019) Ribosomal_L31 (pfam01197) → |
| Sen-279-4  | NZ_LHJG01000019.1 | - | 2093   | 2041   | RNA → rpmE (PRK00019) Ribosomal_L31 (pfam01197) → |
| Sen-278-9  | NZ_LHJN01000001.1 | - | 45365  | 45313  | RNA → rpmE (PRK00019) Ribosomal_L31 (pfam01197) → |
| Sen-278-10 | NZ_LHJM01000035.1 | + | 8177   | 8229   | RNA → rpmE (PRK00019) Ribosomal_L31 (pfam01197) → |
| Sen-279-5  | NZ_LHMX01000008.1 | + | 4123   | 4175   | RNA → rpmE (PRK00019) Ribosomal_L31 (pfam01197) → |
| Sen-279-6  | NZ_LHNF01000052.1 | - | 2092   | 2040   | RNA → rpmE (PRK00019) Ribosomal_L31 (pfam01197) → |
| Sen-279-7  | NZ_LHNY01000033.1 | - | 2091   | 2039   | RNA → rpmE (PRK00019) Ribosomal_L31 (pfam01197) → |
| Sen-278-11 | NZ_LHDY01000004.1 | + | 104454 | 104506 | RNA → rpmE (PRK00019) Ribosomal_L31 (pfam01197) → |
| Sen-279-8  | NZ_LHFI01000008.1 | + | 103254 | 103306 | RNA → rpmE (PRK00019) Ribosomal_L31 (pfam01197) → |
| Sen-278-12 | NZ_LHGG01000010.1 | - | 45505  | 45453  | RNA → rpmE (PRK00019) Ribosomal_L31 (pfam01197) → |
| Sen-279-9  | NZ_LHHM01000020.1 | - | 35738  | 35686  | RNA → rpmE (PRK00019) Ribosomal_L31 (pfam01197) → |
| Sen-278-13 | NZ_LHII01000006.1 | - | 45365  | 45313  | RNA → rpmE (PRK00019) Ribosomal_L31 (pfam01197) → |
| Sen-243-1  | NZ_LHIV01000005.1 | - | 45298  | 45246  | RNA → rpmE (PRK00019) Ribosomal_L31 (pfam01197) → |
| Sen-308-4  | NZ_LHGV01000009.1 | - | 37811  | 37759  | RNA → rpmE (PRK00019) Ribosomal_L31 (pfam01197) → |



|              |                    |   |        |        |                                                   |
|--------------|--------------------|---|--------|--------|---------------------------------------------------|
| Sen-277-2    | NZ.LHJD01000020.1  | + | 97390  | 97442  | RNA → rpmE (PRK00019) Ribosomal_L31 (pfam01197) → |
| Sen-278-14   | NZ.LHJS01000013.1  | - | 45326  | 45274  | RNA → rpmE (PRK00019) Ribosomal_L31 (pfam01197) → |
| Sen-278-15   | NZ.LHKS01000005.1  | + | 19850  | 19902  | RNA → rpmE (PRK00019) Ribosomal_L31 (pfam01197) → |
| Sen-278-16   | NZ.LHKT01000094.1  | + | 19849  | 19901  | RNA → rpmE (PRK00019) Ribosomal_L31 (pfam01197) → |
| Sen-279-10   | NZ.LHLQ01000028.1  | - | 2093   | 2041   | RNA → rpmE (PRK00019) Ribosomal_L31 (pfam01197) → |
| Sen-240-1    | NZ.LHMO01000017.1  | - | 35408  | 35356  | RNA → rpmE (PRK00019) Ribosomal_L31 (pfam01197) → |
| Sen-237-14   | NZ.LHNT01000030.1  | + | 34658  | 34710  | RNA → rpmE (PRK00019) Ribosomal_L31 (pfam01197) → |
| Sen-237-15   | NZ.LHOO01000015.1  | + | 170400 | 170452 | RNA → rpmE (PRK00019) Ribosomal_L31 (pfam01197) → |
| Sen-279-11   | NZ.LHDW01000023.1  | - | 2091   | 2039   | RNA → rpmE (PRK00019) Ribosomal_L31 (pfam01197) → |
| Sen-277-3    | NZ.LHGA01000003.1  | + | 97652  | 97704  | RNA → rpmE (PRK00019) Ribosomal_L31 (pfam01197) → |
| Sen-278-17   | NZ.LHIT01000015.1  | - | 45365  | 45313  | RNA → rpmE (PRK00019) Ribosomal_L31 (pfam01197) → |
| Sen-278-18   | NZ.LLHJH01000036.1 | - | 3114   | 3062   | RNA → rpmE (PRK00019) Ribosomal_L31 (pfam01197) → |
| Sen-278-19   | NZ.LLHH01000022.1  | - | 45244  | 45192  | RNA → rpmE (PRK00019) Ribosomal_L31 (pfam01197) → |
| Sen-277-4    | NZ.LHML01000023.1  | - | 3161   | 3109   | RNA → rpmE (PRK00019) Ribosomal_L31 (pfam01197) → |
| Sen-277-5    | NZ.LHMZ01000005.1  | - | 35557  | 35505  | RNA → rpmE (PRK00019) Ribosomal_L31 (pfam01197) → |
| Sen-278-20   | NZ.LHOA01000019.1  | + | 104454 | 104506 | RNA → rpmE (PRK00019) Ribosomal_L31 (pfam01197) → |
| Sen-279-12   | NZ.LHOP01000008.1  | + | 42069  | 42121  | RNA → rpmE (PRK00019) Ribosomal_L31 (pfam01197) → |
| Sen-280-3    | NZ.LHNK01000016.1  | - | 38071  | 38019  | RNA → rpmE (PRK00019) Ribosomal_L31 (pfam01197) → |
| Sen-279-13   | NZ.LHGW01000029.1  | - | 35431  | 35379  | RNA → rpmE (PRK00019) Ribosomal_L31 (pfam01197) → |
| Sen-278-21   | NZ.LHJR01000005.1  | + | 104169 | 104221 | RNA → rpmE (PRK00019) Ribosomal_L31 (pfam01197) → |
| Sen-288-7    | NZ.CHFY01000014.1  | - | 39456  | 39404  | RNA → rpmE (PRK00019) Ribosomal_L31 (pfam01197) → |
| Sen-300-2    | NZ.CTGT01000031.1  | + | 13413  | 13465  | RNA → rpmE (PRK00019) Ribosomal_L31 (pfam01197) → |
| Sen-300-3    | NZ.CTGI01000018.1  | - | 45153  | 45101  | RNA → rpmE (PRK00019) Ribosomal_L31 (pfam01197) → |
| Sen-300-4    | NZ.CTIE01000017.1  | - | 45343  | 45291  | RNA → rpmE (PRK00019) Ribosomal_L31 (pfam01197) → |
| Sen-288-8    | NZ.CUY01000016.1   | - | 39532  | 39480  | RNA → rpmE (PRK00019) Ribosomal_L31 (pfam01197) → |
| Sen-288-9    | NZ.CUZT01000016.1  | - | 39535  | 39483  | RNA → rpmE (PRK00019) Ribosomal_L31 (pfam01197) → |
| Sen-288-10   | NZ.CUZD01000016.1  | - | 39530  | 39478  | RNA → rpmE (PRK00019) Ribosomal_L31 (pfam01197) → |
| Sen-288-11   | NZ.CUYL01000013.1  | - | 41231  | 41179  | RNA → rpmE (PRK00019) Ribosomal_L31 (pfam01197) → |
| Sen-288-12   | NZ.CUZG01000016.1  | - | 39532  | 39480  | RNA → rpmE (PRK00019) Ribosomal_L31 (pfam01197) → |
| Sen-288-13   | NZ.CUZB01000013.1  | - | 41498  | 41446  | RNA → rpmE (PRK00019) Ribosomal_L31 (pfam01197) → |
| Sen-288-14   | NZ.CUZE01000016.1  | - | 39526  | 39474  | RNA → rpmE (PRK00019) Ribosomal_L31 (pfam01197) → |
| Sen-288-15   | NZ.CUY01000016.1   | + | 104146 | 104198 | RNA → rpmE (PRK00019) Ribosomal_L31 (pfam01197) → |
| Sen-288-16   | NZ.CUZV01000016.1  | - | 39537  | 39485  | RNA → rpmE (PRK00019) Ribosomal_L31 (pfam01197) → |
| Sen-288-17   | NZ.CUZM01000016.1  | + | 103905 | 103957 | RNA → rpmE (PRK00019) Ribosomal_L31 (pfam01197) → |
| Sen-288-18   | NZ.CUZK01000016.1  | + | 104178 | 104230 | RNA → rpmE (PRK00019) Ribosomal_L31 (pfam01197) → |
| Sen-300-5    | NZ.CTMV01000010.1  | - | 37187  | 37135  | RNA → rpmE (PRK00019) Ribosomal_L31 (pfam01197) → |
| Sen-300-6    | NZ.CTJ01000017.1   | + | 42456  | 42508  | RNA → rpmE (PRK00019) Ribosomal_L31 (pfam01197) → |
| Sen-300-7    | NZ.CTHA01000017.1  | - | 45179  | 45127  | RNA → rpmE (PRK00019) Ribosomal_L31 (pfam01197) → |
| Sen-300-8    | NZ.CTLT01000019.1  | - | 45112  | 45060  | RNA → rpmE (PRK00019) Ribosomal_L31 (pfam01197) → |
| Sen-300-9    | NZ.CTHV01000017.1  | - | 45337  | 45285  | RNA → rpmE (PRK00019) Ribosomal_L31 (pfam01197) → |
| Sen-300-10   | NZ.CTQD01000017.1  | - | 45198  | 45146  | RNA → rpmE (PRK00019) Ribosomal_L31 (pfam01197) → |
| Sen-288-19   | NZ.CUYM01000016.1  | - | 39531  | 39479  | RNA → rpmE (PRK00019) Ribosomal_L31 (pfam01197) → |
| Sen-288-20   | NZ.CUZF01000016.1  | - | 39535  | 39483  | RNA → rpmE (PRK00019) Ribosomal_L31 (pfam01197) → |
| Sen-772-1    | NZ.AMME01000310.1  | + | 12820  | 12872  | RNA → rpmE (PRK00019) Ribosomal_L31 (pfam01197) → |
| Sen-288-21   | NZ.CUZA01000016.1  | + | 104133 | 104185 | RNA → rpmE (PRK00019) Ribosomal_L31 (pfam01197) → |
| Sen-288-22   | NZ.CUZN01000016.1  | - | 39532  | 39480  | RNA → rpmE (PRK00019) Ribosomal_L31 (pfam01197) → |
| Sen-288-23   | NZ.CUZO01000017.1  | + | 104197 | 104249 | RNA → rpmE (PRK00019) Ribosomal_L31 (pfam01197) → |
| Sen-751-1    | NZ.AMMI01000362.1  | + | 28318  | 28370  | RNA → rpmE (PRK00019) Ribosomal_L31 (pfam01197) → |
| Sen-288-1107 | NZ.CUZW01000016.1  | + | 104149 | 104201 | RNA → rpmE (PRK00019) Ribosomal_L31 (pfam01197) → |
| Sen-288-24   | NZ.CUYK01000016.1  | + | 104120 | 104172 | RNA → rpmE (PRK00019) Ribosomal_L31 (pfam01197) → |
| Sen-288-25   | NZ.CUYV01000016.1  | - | 39527  | 39475  | RNA → rpmE (PRK00019) Ribosomal_L31 (pfam01197) → |
| Sen-180-1    | NZ.AMMA01000024.1  | - | 37602  | 37550  | RNA → rpmE (PRK00019) Ribosomal_L31 (pfam01197) → |

|            |                   |   |        |        |                                                                 |
|------------|-------------------|---|--------|--------|-----------------------------------------------------------------|
| Sen-288-26 | NZ_CUYJ01000015.1 | - | 39535  | 39483  | RNA → rpmE (PRK00019) Ribosomal_L31 (pfam01197) →               |
| Sen-753-1  | NZ_AMMG01000052.1 | + | 100556 | 100608 | RNA → rpmE (PRK00019) Ribosomal_L31 (pfam01197) →               |
| Sen-288-27 | NZ_CUYU01000016.1 | + | 104154 | 104206 | RNA → rpmE (PRK00019) Ribosomal_L31 (pfam01197) →               |
| Sen-750-1  | NZ_AMMH01000191.1 | + | 66756  | 66808  | RNA → rpmE (PRK00019) Ribosomal_L31 (pfam01197) →               |
| Sen-754-1  | NZ_AMMN01000182.1 | - | 32704  | 32652  | RNA → rpmE (PRK00019) Ribosomal_L31 (pfam01197) →               |
| Sen-179-1  | NZ_AMMR01000082.1 | + | 100658 | 100710 | RNA → rpmE (PRK00019) Ribosomal_L31 (pfam01197) →               |
| Sen-300-11 | NZ_CTPQ01000018.1 | - | 46977  | 46925  | RNA → rpmE (PRK00019) Ribosomal_L31 (pfam01197) →               |
| Sen-182-1  | NZ_AMMU01000426.1 | + | 58961  | 59013  | RNA → rpmE (PRK00019) Ribosomal_L31 (pfam01197) →               |
| Sen-300-12 | NZ_CTGR01000022.1 | - | 45111  | 45059  | RNA → rpmE (PRK00019) Ribosomal_L31 (pfam01197) →               |
| Sen-288-28 | NZ_CUZX01000016.1 | + | 104147 | 104199 | RNA → rpmE (PRK00019) Ribosomal_L31 (pfam01197) →               |
| Sen-288-29 | NZ_CUYW01000016.1 | - | 39536  | 39484  | RNA → rpmE (PRK00019) Ribosomal_L31 (pfam01197) →               |
| Sen-288-30 | NZ_CUZS01000016.1 | + | 104156 | 104208 | RNA → rpmE (PRK00019) Ribosomal_L31 (pfam01197) →               |
| Sen-288-31 | NZ_CUYT01000016.1 | - | 39526  | 39474  | RNA → rpmE (PRK00019) Ribosomal_L31 (pfam01197) →               |
| Sen-288-32 | NZ_CUZR01000016.1 | - | 39535  | 39483  | RNA → rpmE (PRK00019) Ribosomal_L31 (pfam01197) →               |
| Sen-288-33 | NZ_CUYZ01000016.1 | - | 39534  | 39482  | RNA → rpmE (PRK00019) Ribosomal_L31 (pfam01197) →               |
| Sen-178-1  | NZ_AMLY01000042.1 | + | 100656 | 100708 | RNA → rpmE (PRK00019) Ribosomal_L31 (pfam01197) →               |
| Sen-183-1  | NZ_AMMD01000057.1 | + | 20766  | 20818  | RNA → rpmE (PRK00019) Ribosomal_L31 (pfam01197) →               |
| Sen-288-34 | NZ_CUYO01000010.1 | + | 133787 | 133839 | RNA → rpmE (PRK00019) Ribosomal_L31 (pfam01197) →               |
| Sen-288-35 | NZ_CUYS01000016.1 | + | 104149 | 104201 | RNA → rpmE (PRK00019) Ribosomal_L31 (pfam01197) →               |
| Sen-288-36 | NZ_CUYX01000016.1 | + | 104141 | 104193 | RNA → rpmE (PRK00019) Ribosomal_L31 (pfam01197) →               |
| Sen-288-37 | NZ_CUZI01000016.1 | - | 39536  | 39484  | RNA → rpmE (PRK00019) Ribosomal_L31 (pfam01197) →               |
| Sen-288-38 | NZ_CUYI01000015.1 | + | 103893 | 103945 | RNA → rpmE (PRK00019) Ribosomal_L31 (pfam01197) →               |
| Sen-195-1  | NZ_AMOM01000044.1 | - | 37502  | 37450  | RNA → rpmE (PRK00019) Ribosomal_L31 (pfam01197) →               |
| Sen-288-39 | NZ_CUZU01000016.1 | - | 39527  | 39475  | RNA → rpmE (PRK00019) Ribosomal_L31 (pfam01197) →               |
| Sen-177-1  | NZ_AMLZ01000013.1 | - | 37630  | 37578  | RNA → rpmE (PRK00019) Ribosomal_L31 (pfam01197) →               |
| Sen-752-1  | NZ_AMMF01000163.1 | - | 21720  | 21668  | RNA → rpmE (PRK00019) Ribosomal_L31 (pfam01197) →               |
| Sen-774-1  | NZ_AMMM01000001.1 | + | 9526   | 9578   | RNA → rpmE (PRK00019) Ribosomal_L31 (pfam01197) →               |
| Sen-176-1  | NZ_AMMS01000110.1 | - | 37699  | 37647  | RNA → rpmE (PRK00019) Ribosomal_L31 (pfam01197) →               |
| Sen-7-1    | NZ_LAPG01000029.1 | + | 104291 | 104343 | RNA → rpmE (PRK00019) Ribosomal_L31 (pfam01197) →               |
| Sen-7-2    | NZ_LAPH01000026.1 | - | 45127  | 45075  | RNA → rpmE (PRK00019) Ribosomal_L31 (pfam01197) →               |
| Sen-7-3    | NZ_LAPQ01000010.1 | + | 104291 | 104343 | RNA → rpmE (PRK00019) Ribosomal_L31 (pfam01197) →               |
| Sen-8-1    | NZ_LHEE01000039.1 | - | 38019  | 37967  | RNA → rpmE (PRK00019) Ribosomal_L31 (pfam01197) →               |
| Sen-288-40 | NZ_CUZQ01000017.1 | - | 39533  | 39481  | RNA → rpmE (PRK00019) Ribosomal_L31 (pfam01197) →               |
| Sen-288-41 | NZ_CUYN01000014.1 | - | 41508  | 41456  | RNA → rpmE (PRK00019) Ribosomal_L31 (pfam01197) →               |
| Sen-288-42 | NZ_CUYR01000016.1 | - | 39531  | 39479  | RNA → rpmE (PRK00019) Ribosomal_L31 (pfam01197) →               |
| Sen-216-1  | NZ_AMLW01000211.1 | - | 1474   | 1422   | RNA → rpmE (PRK00019) Ribosomal_L31 (pfam01197) →               |
| Sen-288-43 | NZ_CUZL01000015.1 | + | 103906 | 103958 | RNA → rpmE (PRK00019) Ribosomal_L31 (pfam01197) →               |
| Sen-288-44 | NZ_CUYQ01000016.1 | - | 39568  | 39516  | RNA → rpmE (PRK00019) Ribosomal_L31 (pfam01197) →               |
| Sen-288-45 | NZ_CUZC01000015.1 | - | 39558  | 39506  | RNA → rpmE (PRK00019) Ribosomal_L31 (pfam01197) →               |
| Sen-866-1  | NZ_AUQP01000004.1 | + | 105451 | 105503 | RNA → rpmE (PRK00019) Ribosomal_L31 (pfam01197) →               |
| Sen-864-1  | NZ_AUQR01000004.1 | - | 45390  | 45338  | RNA → rpmE (PRK00019) Ribosomal_L31 (pfam01197) →               |
| Sen-865-1  | NZ_AUQQ01000005.1 | - | 45390  | 45338  | RNA → rpmE (PRK00019) Ribosomal_L31 (pfam01197) →               |
| Sen-291-5  | NZ_LFDW01000010.1 | - | 588736 | 588684 | RNA → rpmE (PRK00019) Ribosomal_L31 (pfam01197) →               |
| Sen-291-6  | NZ_LFGN01000015.1 | - | 504820 | 504768 | RNA → rpmE (PRK00019) Ribosomal_L31 (pfam01197) →               |
| Sen-137-6  | NZ_LAZB01000004.1 | + | 95741  | 95793  | RNA → rpmE (PRK00019) Ribosomal_L31 (pfam01197) →               |
| Sen-133-1  | NZ_LELI01000015.1 | - | 36659  | 36607  | RNA → rpmE (PRK00019) Ribosomal_L31 (pfam01197) →               |
| Sen-242-1  | NZ_LFIH01000123.1 | - | 559    | 507    | RNA → rpmE (PRK00019) Ribosomal_L31 (pfam01197) → hypo → hypo → |
| Sen-248-1  | NZ_APGQ01000022.1 | - | 16137  | 16085  | RNA → rpmE (PRK00019) Ribosomal_L31 (pfam01197) →               |
| Sen-288-46 | NZ_CVQC01000013.1 | - | 41503  | 41451  | RNA → rpmE (PRK00019) Ribosomal_L31 (pfam01197) →               |
| Sen-249-1  | NZ_APGS01000122.1 | - | 45070  | 45018  | RNA → rpmE (PRK00019) Ribosomal_L31 (pfam01197) →               |
| Sen-288-47 | NZ_CDLH01000019.1 | - | 41652  | 41600  | RNA → rpmE (PRK00019) Ribosomal_L31 (pfam01197) →               |
| Sen-333-1  | NZ_CATY01000043.1 | + | 111327 | 111379 | RNA → rpmE (PRK00019) Ribosomal_L31 (pfam01197) →               |



|            |                   |   |        |        |                                                                                             |
|------------|-------------------|---|--------|--------|---------------------------------------------------------------------------------------------|
| Sen-245-1  | NZ_APGT01000012.1 | - | 45268  | 45216  | RNA → rpmE (PRK00019)Ribosomal_L31 (pfam01197) →                                            |
| Sen-246-1  | NZ_APGV01000022.1 | + | 105431 | 105483 | RNA → rpmE (PRK00019)Ribosomal_L31 (pfam01197) →                                            |
| Sen-244-1  | NZ_APGU01000022.1 | + | 105431 | 105483 | RNA → rpmE (PRK00019)Ribosomal_L31 (pfam01197) →                                            |
| Sen-250-1  | NZ_APGR01000135.1 | - | 6913   | 6861   | RNA → rpmE (PRK00019)Ribosomal_L31 (pfam01197) →                                            |
| Sen-247-1  | NZ_APHF01000061.1 | + | 105419 | 105471 | RNA → rpmE (PRK00019)Ribosomal_L31 (pfam01197) →                                            |
| Sen-898-1  | NZ_AYEG01000116.1 | - | 45279  | 45227  | RNA → rpmE (PRK00019)Ribosomal_L31 (pfam01197) →                                            |
| Sen-930-1  | NZ_AOYA01000083.1 | - | 35287  | 35235  | RNA → rpmE (PRK00019)Ribosomal_L31 (pfam01197) → rpmE (PRK00019)Ribosomal_L31 (pfam01197) → |
| Sen-369-1  | NZ_AYDB01000067.1 | + | 111693 | 111745 | RNA → rpmE (PRK00019)Ribosomal_L31 (pfam01197) → rpmE (PRK00019)Ribosomal_L31 (pfam01197) → |
| Sen-2-1    | NZ_LFCC01000063.1 | + | 17175  | 17227  | RNA → rpmE (PRK00019)Ribosomal_L31 (pfam01197) →                                            |
| Sen-261-1  | NZ_APHB01000016.1 | + | 105451 | 105503 | RNA → rpmE (PRK00019)Ribosomal_L31 (pfam01197) →                                            |
| Sen-288-48 | NZ_CVQF01000016.1 | + | 104155 | 104207 | RNA → rpmE (PRK00019)Ribosomal_L31 (pfam01197) →                                            |
| Sen-288-49 | NZ_CVQB01000015.1 | + | 104149 | 104201 | RNA → rpmE (PRK00019)Ribosomal_L31 (pfam01197) →                                            |
| Sen-288-50 | NZ_CVQO01000014.1 | + | 104154 | 104206 | RNA → rpmE (PRK00019)Ribosomal_L31 (pfam01197) →                                            |
| Sen-251-1  | NZ_APHC01000073.1 | + | 20125  | 20177  | RNA → rpmE (PRK00019)Ribosomal_L31 (pfam01197) →                                            |
| Sen-288-51 | NZ_CVQN01000010.1 | + | 133799 | 133851 | RNA → rpmE (PRK00019)Ribosomal_L31 (pfam01197) →                                            |
| Sen-288-52 | NZ_CVPK01000016.1 | + | 104140 | 104192 | RNA → rpmE (PRK00019)Ribosomal_L31 (pfam01197) →                                            |
| Sen-288-53 | NZ_CVPQ01000016.1 | + | 104149 | 104201 | RNA → rpmE (PRK00019)Ribosomal_L31 (pfam01197) →                                            |
| Sen-288-54 | NZ_CVQM01000016.1 | - | 39532  | 39480  | RNA → rpmE (PRK00019)Ribosomal_L31 (pfam01197) →                                            |
| Sen-288-55 | NZ_CVPS01000016.1 | - | 39588  | 39536  | RNA → rpmE (PRK00019)Ribosomal_L31 (pfam01197) →                                            |
| Sen-269-1  | NZ_APGX01000014.1 | - | 45390  | 45338  | RNA → rpmE (PRK00019)Ribosomal_L31 (pfam01197) →                                            |
| Sen-262-1  | NZ_APGY01000013.1 | + | 105451 | 105503 | RNA → rpmE (PRK00019)Ribosomal_L31 (pfam01197) →                                            |
| Sen-259-1  | NZ_APGZ01000013.1 | - | 45274  | 45222  | RNA → rpmE (PRK00019)Ribosomal_L31 (pfam01197) →                                            |
| Sen-264-1  | NZ_APHD01000133.1 | - | 2882   | 2830   | RNA → rpmE (PRK00019)Ribosomal_L31 (pfam01197) →                                            |
| Sen-265-1  | NZ_APHE01000099.1 | - | 45389  | 45337  | RNA → rpmE (PRK00019)Ribosomal_L31 (pfam01197) →                                            |
| Sen-263-1  | NZ_APHG01000048.1 | + | 105398 | 105450 | RNA → rpmE (PRK00019)Ribosomal_L31 (pfam01197) →                                            |
| Sen-268-1  | NZ_APGW01000014.1 | - | 45390  | 45338  | RNA → rpmE (PRK00019)Ribosomal_L31 (pfam01197) →                                            |
| Sen-260-1  | NZ_APHA01000015.1 | - | 45273  | 45221  | RNA → rpmE (PRK00019)Ribosomal_L31 (pfam01197) →                                            |
| Sen-170-22 | NZ_LHMI01000009.1 | + | 100687 | 100739 | RNA → rpmE (PRK00019)Ribosomal_L31 (pfam01197) →                                            |
| Sen-170-23 | NZ_LHDP01000023.1 | - | 37621  | 37569  | RNA → rpmE (PRK00019)Ribosomal_L31 (pfam01197) →                                            |
| Sen-170-24 | NZ_LHFK01000021.1 | - | 37518  | 37466  | RNA → rpmE (PRK00019)Ribosomal_L31 (pfam01197) →                                            |
| Sen-170-25 | NZ_LHFM01000003.1 | + | 100914 | 100966 | RNA → rpmE (PRK00019)Ribosomal_L31 (pfam01197) →                                            |
| Sen-170-26 | NZ_LHFN01000033.1 | - | 36158  | 36106  | RNA → rpmE (PRK00019)Ribosomal_L31 (pfam01197) →                                            |
| Sen-170-51 | NZ_LHHL01000008.1 | + | 42794  | 42846  | RNA → rpmE (PRK00019)Ribosomal_L31 (pfam01197) →                                            |
| Sen-170-27 | NZ_LHHY01000001.1 | - | 37518  | 37466  | RNA → rpmE (PRK00019)Ribosomal_L31 (pfam01197) →                                            |
| Sen-170-28 | NZ_LHIB01000026.1 | - | 37517  | 37465  | RNA → rpmE (PRK00019)Ribosomal_L31 (pfam01197) →                                            |
| Sen-170-29 | NZ_LHLM01000008.1 | + | 100688 | 100740 | RNA → rpmE (PRK00019)Ribosomal_L31 (pfam01197) →                                            |
| Sen-170-30 | NZ_LHMD01000023.1 | + | 100688 | 100740 | RNA → rpmE (PRK00019)Ribosomal_L31 (pfam01197) →                                            |
| Sen-170-31 | NZ_LHNQ01000030.1 | + | 43462  | 43514  | RNA → rpmE (PRK00019)Ribosomal_L31 (pfam01197) →                                            |
| Sen-170-32 | NZ_LHNU01000034.1 | + | 100688 | 100740 | RNA → rpmE (PRK00019)Ribosomal_L31 (pfam01197) →                                            |
| Sen-170-33 | NZ_LHFD01000017.1 | + | 100590 | 100642 | RNA → rpmE (PRK00019)Ribosomal_L31 (pfam01197) →                                            |
| Sen-170-34 | NZ_LHFE01000007.1 | + | 100590 | 100642 | RNA → rpmE (PRK00019)Ribosomal_L31 (pfam01197) →                                            |
| Sen-170-52 | NZ_LHME01000039.1 | - | 37788  | 37736  | RNA → rpmE (PRK00019)Ribosomal_L31 (pfam01197) →                                            |
| Sen-170-35 | NZ_LHGU01000033.1 | + | 42035  | 42087  | RNA → rpmE (PRK00019)Ribosomal_L31 (pfam01197) →                                            |
| Sen-170-36 | NZ_LHNV01000009.1 | + | 100688 | 100740 | RNA → rpmE (PRK00019)Ribosomal_L31 (pfam01197) →                                            |
| Sen-170-37 | NZ_LHDQ01000029.1 | + | 42035  | 42087  | RNA → rpmE (PRK00019)Ribosomal_L31 (pfam01197) →                                            |
| Sen-170-38 | NZ_LHFJ01000018.1 | + | 100688 | 100740 | RNA → rpmE (PRK00019)Ribosomal_L31 (pfam01197) →                                            |
| Sen-170-39 | NZ_LHFK01000021.1 | + | 100688 | 100740 | RNA → rpmE (PRK00019)Ribosomal_L31 (pfam01197) →                                            |
| Sen-170-40 | NZ_LHHO01000035.1 | + | 43729  | 43781  | RNA → rpmE (PRK00019)Ribosomal_L31 (pfam01197) →                                            |
| Sen-170-41 | NZ_LHJY01000010.1 | + | 100688 | 100740 | RNA → rpmE (PRK00019)Ribosomal_L31 (pfam01197) →                                            |
| Sen-167-9  | NZ_LHLD01000049.1 | - | 45288  | 45236  | RNA → rpmE (PRK00019)Ribosomal_L31 (pfam01197) →                                            |
| Sen-170-42 | NZ_LHLV01000033.1 | + | 42046  | 42098  | RNA → rpmE (PRK00019)Ribosomal_L31 (pfam01197) →                                            |
| Sen-167-10 | NZ_LHND01000022.1 | - | 45288  | 45236  | RNA → rpmE (PRK00019)Ribosomal_L31 (pfam01197) →                                            |

|              |                   |   |        |        |                                                                                             |
|--------------|-------------------|---|--------|--------|---------------------------------------------------------------------------------------------|
| Sen-167-11   | NZ.LHNO01000018.1 | - | 45288  | 45236  | RNA → rpmE (PRK00019)Ribosomal_L31 (pfam01197) →                                            |
| Sen-170-43   | NZ.LHKU01000027.1 | - | 37758  | 37706  | RNA → rpmE (PRK00019)Ribosomal_L31 (pfam01197) →                                            |
| Sen-170-44   | NZ.LHHS01000031.1 | - | 37517  | 37465  | RNA → rpmE (PRK00019)Ribosomal_L31 (pfam01197) →                                            |
| Sen-170-45   | NZ.LHJL01000038.1 | + | 100688 | 100740 | RNA → rpmE (PRK00019)Ribosomal_L31 (pfam01197) →                                            |
| Sen-288-56   | NZ.CVQG01000009.1 | + | 133788 | 133840 | RNA → rpmE (PRK00019)Ribosomal_L31 (pfam01197) →                                            |
| Sen-288-57   | NZ.CVQD01000016.1 | - | 41505  | 41453  | RNA → rpmE (PRK00019)Ribosomal_L31 (pfam01197) →                                            |
| Sen-288-58   | NZ.CVQA01000015.1 | + | 104149 | 104201 | RNA → rpmE (PRK00019)Ribosomal_L31 (pfam01197) →                                            |
| Sen-288-59   | NZ.CVPU01000016.1 | - | 39566  | 39514  | RNA → rpmE (PRK00019)Ribosomal_L31 (pfam01197) →                                            |
| Sen-288-60   | NZ.CVPR01000016.1 | + | 104157 | 104209 | RNA → rpmE (PRK00019)Ribosomal_L31 (pfam01197) →                                            |
| Sen-288-1108 | NZ.CVPY01000015.1 | - | 39536  | 39484  | RNA → rpmE (PRK00019)Ribosomal_L31 (pfam01197) →                                            |
| Sen-288-61   | NZ.CVPX01000016.1 | + | 104194 | 104246 | RNA → rpmE (PRK00019)Ribosomal_L31 (pfam01197) →                                            |
| Sen-288-62   | NZ.CVPP01000016.1 | + | 104164 | 104216 | RNA → rpmE (PRK00019)Ribosomal_L31 (pfam01197) →                                            |
| Sen-288-63   | NZ.CVQK01000016.1 | + | 104154 | 104206 | RNA → rpmE (PRK00019)Ribosomal_L31 (pfam01197) →                                            |
| Sen-288-64   | NZ.CVPZ01000016.1 | - | 39536  | 39484  | RNA → rpmE (PRK00019)Ribosomal_L31 (pfam01197) →                                            |
| Sen-288-65   | NZ.CVPM01000015.1 | - | 39556  | 39504  | RNA → rpmE (PRK00019)Ribosomal_L31 (pfam01197) →                                            |
| Sen-288-66   | NZ.CVPO01000016.1 | + | 104154 | 104206 | RNA → rpmE (PRK00019)Ribosomal_L31 (pfam01197) →                                            |
| Sen-288-1109 | NZ.CVPW01000016.1 | - | 39512  | 39460  | RNA → rpmE (PRK00019)Ribosomal_L31 (pfam01197) →                                            |
| Sen-288-67   | NZ.CVPT01000016.1 | + | 104162 | 104214 | RNA → rpmE (PRK00019)Ribosomal_L31 (pfam01197) →                                            |
| Sen-288-68   | NZ.CVPP01000016.1 | + | 103992 | 104044 | RNA → rpmE (PRK00019)Ribosomal_L31 (pfam01197) →                                            |
| Sen-288-69   | NZ.CVPL01000014.1 | - | 39534  | 39482  | RNA → rpmE (PRK00019)Ribosomal_L31 (pfam01197) →                                            |
| Sen-288-70   | NZ.CVPN01000016.1 | - | 39534  | 39482  | RNA → rpmE (PRK00019)Ribosomal_L31 (pfam01197) →                                            |
| Sen-288-71   | NZ.CVQL01000015.1 | + | 104176 | 104228 | RNA → rpmE (PRK00019)Ribosomal_L31 (pfam01197) →                                            |
| Sen-288-72   | NZ.CVQE01000015.1 | - | 39535  | 39483  | RNA → rpmE (PRK00019)Ribosomal_L31 (pfam01197) →                                            |
| Sen-288-73   | NZ.CVQJ01000016.1 | - | 39531  | 39479  | RNA → rpmE (PRK00019)Ribosomal_L31 (pfam01197) →                                            |
| Sen-167-12   | NZ.LHMY01000012.1 | + | 100286 | 100338 | RNA → rpmE (PRK00019)Ribosomal_L31 (pfam01197) →                                            |
| Sen-167-13   | NZ.LHNC01000011.1 | - | 45288  | 45236  | RNA → rpmE (PRK00019)Ribosomal_L31 (pfam01197) →                                            |
| Sen-167-14   | NZ.LHLS01000024.1 | - | 45288  | 45236  | RNA → rpmE (PRK00019)Ribosomal_L31 (pfam01197) →                                            |
| Sen-167-15   | NZ.LHFC01000001.1 | + | 100283 | 100335 | RNA → rpmE (PRK00019)Ribosomal_L31 (pfam01197) →                                            |
| Sen-167-16   | NZ.LHGM01000010.1 | + | 55519  | 55571  | RNA → rpmE (PRK00019)Ribosomal_L31 (pfam01197) →                                            |
| Sen-167-17   | NZ.LHNB01000004.1 | + | 100286 | 100338 | RNA → rpmE (PRK00019)Ribosomal_L31 (pfam01197) →                                            |
| Sen-300-13   | NZ.CTNF01000019.1 | - | 45179  | 45127  | RNA → rpmE (PRK00019)Ribosomal_L31 (pfam01197) →                                            |
| Sen-167-18   | NZ.LHFA01000003.1 | + | 100286 | 100338 | RNA → rpmE (PRK00019)Ribosomal_L31 (pfam01197) →                                            |
| Sen-288-74   | NZ.CEYU01000021.1 | + | 26787  | 26839  | RNA → rpmE (PRK00019)Ribosomal_L31 (pfam01197) →                                            |
| Sen-288-75   | NZ.CEXT01000016.1 | + | 104150 | 104202 | RNA → rpmE (PRK00019)Ribosomal_L31 (pfam01197) →                                            |
| Sen-288-76   | NZ.CJBN01000027.1 | + | 19742  | 19794  | RNA → rpmE (PRK00019)Ribosomal_L31 (pfam01197) →                                            |
| Sen-288-77   | NZ.CJTY01000007.1 | + | 190518 | 190570 | RNA → rpmE (PRK00019)Ribosomal_L31 (pfam01197) →                                            |
| Sen-288-78   | NZ.CJCM01000016.1 | - | 39535  | 39483  | RNA → rpmE (PRK00019)Ribosomal_L31 (pfam01197) →                                            |
| Sen-288-79   | NZ.CJRP01000014.1 | + | 109738 | 109790 | RNA → rpmE (PRK00019)Ribosomal_L31 (pfam01197) →                                            |
| Sen-288-80   | NZ.CJPH01000016.1 | + | 104151 | 104203 | RNA → rpmE (PRK00019)Ribosomal_L31 (pfam01197) →                                            |
| Sen-288-81   | NZ.CIZR01000016.1 | - | 39534  | 39482  | RNA → rpmE (PRK00019)Ribosomal_L31 (pfam01197) →                                            |
| Sen-906-1    | NZ.AOYL01000004.1 | + | 98734  | 98786  | RNA → rpmE (PRK00019)Ribosomal_L31 (pfam01197) → rpmE (PRK00019)Ribosomal_L31 (pfam01197) → |
| Sen-288-82   | NZ.CJIY01000016.1 | + | 104157 | 104209 | RNA → rpmE (PRK00019)Ribosomal_L31 (pfam01197) →                                            |
| Sen-288-83   | NZ.CEYF01000015.1 | + | 103788 | 103840 | RNA → rpmE (PRK00019)Ribosomal_L31 (pfam01197) →                                            |
| Sen-288-84   | NZ.CJLH01000011.1 | - | 39456  | 39404  | RNA → rpmE (PRK00019)Ribosomal_L31 (pfam01197) →                                            |
| Sen-288-85   | NZ.CIP01000004.1  | + | 104159 | 104211 | RNA → rpmE (PRK00019)Ribosomal_L31 (pfam01197) →                                            |
| Sen-288-86   | NZ.CJUT01000014.1 | + | 107995 | 108047 | RNA → rpmE (PRK00019)Ribosomal_L31 (pfam01197) →                                            |
| Sen-288-87   | NZ.CJOV01000016.1 | - | 39723  | 39671  | RNA → rpmE (PRK00019)Ribosomal_L31 (pfam01197) →                                            |
| Sen-288-88   | NZ.CEXS01000016.1 | - | 39532  | 39480  | RNA → rpmE (PRK00019)Ribosomal_L31 (pfam01197) →                                            |
| Sen-288-89   | NZ.CIZY01000011.1 | - | 39456  | 39404  | RNA → rpmE (PRK00019)Ribosomal_L31 (pfam01197) →                                            |
| Sen-288-90   | NZ.CILO01000016.1 | - | 39601  | 39549  | RNA → rpmE (PRK00019)Ribosomal_L31 (pfam01197) →                                            |
| Sen-347-1    | NZ.CASQ01000042.1 | + | 111150 | 111202 | RNA → rpmE (PRK00019)Ribosomal_L31 (pfam01197) →                                            |
| Sen-392-1    | NZ.CART01000035.1 | - | 37552  | 37500  | RNA → rpmE (PRK00019)Ribosomal_L31 (pfam01197) →                                            |

|            |                   |   |        |        |                                                                                             |
|------------|-------------------|---|--------|--------|---------------------------------------------------------------------------------------------|
| Sen-377-1  | NZ_AYCS01000004.1 | + | 111233 | 111285 | RNA → rpmE (PRK00019)Ribosomal_L31 (pfam01197) → rpmE (PRK00019)Ribosomal_L31 (pfam01197) → |
| Sen-352-1  | NZ_AYCL01000005.1 | + | 83635  | 83687  | RNA → rpmE (PRK00019)Ribosomal_L31 (pfam01197) → rpmE (PRK00019)Ribosomal_L31 (pfam01197) → |
| Sen-372-1  | NZ_AOZV01000015.1 | + | 42798  | 42850  | RNA → rpmE (PRK00019)Ribosomal_L31 (pfam01197) → rpmE (PRK00019)Ribosomal_L31 (pfam01197) → |
| Sen-344-1  | NZ_AYDI01000048.1 | + | 111595 | 111647 | RNA → rpmE (PRK00019)Ribosomal_L31 (pfam01197) → rpmE (PRK00019)Ribosomal_L31 (pfam01197) → |
| Sen-340-1  | NZ_CASS01000018.1 | + | 111225 | 111277 | RNA → rpmE (PRK00019)Ribosomal_L31 (pfam01197) →                                            |
| Sen-348-1  | NZ_CASO01000044.1 | + | 111150 | 111202 | RNA → rpmE (PRK00019)Ribosomal_L31 (pfam01197) →                                            |
| Sen-349-1  | NZ_CASO01000054.1 | - | 17553  | 17501  | RNA → rpmE (PRK00019)Ribosomal_L31 (pfam01197) →                                            |
| Sen-388-1  | NZ_CARX01000045.1 | - | 37768  | 37716  | RNA → rpmE (PRK00019)Ribosomal_L31 (pfam01197) →                                            |
| Sen-393-1  | NZ_CARS01000036.1 | - | 37552  | 37500  | RNA → rpmE (PRK00019)Ribosomal_L31 (pfam01197) →                                            |
| Sen-379-1  | NZ_AYQ01000005.1  | + | 111262 | 111314 | RNA → rpmE (PRK00019)Ribosomal_L31 (pfam01197) → rpmE (PRK00019)Ribosomal_L31 (pfam01197) → |
| Sen-355-1  | NZ_AYCM01000006.1 | - | 111260 | 111312 | RNA → rpmE (PRK00019)Ribosomal_L31 (pfam01197) → rpmE (PRK00019)Ribosomal_L31 (pfam01197) → |
| Sen-383-1  | NZ_AYCO01000001.1 | + | 37555  | 37503  | RNA → rpmE (PRK00019)Ribosomal_L31 (pfam01197) → rpmE (PRK00019)Ribosomal_L31 (pfam01197) → |
| Sen-384-1  | NZ_AYCW01000013.1 | + | 111445 | 111497 | RNA → rpmE (PRK00019)Ribosomal_L31 (pfam01197) → rpmE (PRK00019)Ribosomal_L31 (pfam01197) → |
| Sen-342-1  | NZ_AYDJ01000060.1 | + | 111622 | 111674 | RNA → rpmE (PRK00019)Ribosomal_L31 (pfam01197) → rpmE (PRK00019)Ribosomal_L31 (pfam01197) → |
| Sen-362-1  | NZ_AYDH01000066.1 | + | 111625 | 111677 | RNA → rpmE (PRK00019)Ribosomal_L31 (pfam01197) → rpmE (PRK00019)Ribosomal_L31 (pfam01197) → |
| Sen-345-1  | NZ_CATX01000012.1 | + | 112246 | 112298 | RNA → rpmE (PRK00019)Ribosomal_L31 (pfam01197) →                                            |
| Sen-390-1  | NZ_CARV01000038.1 | - | 37552  | 37500  | RNA → rpmE (PRK00019)Ribosomal_L31 (pfam01197) →                                            |
| Sen-391-1  | NZ_CARU01000036.1 | - | 37552  | 37500  | RNA → rpmE (PRK00019)Ribosomal_L31 (pfam01197) →                                            |
| Sen-346-1  | NZ_AYCY01000031.1 | + | 11826  | 11878  | RNA → rpmE (PRK00019)Ribosomal_L31 (pfam01197) →                                            |
| Sen-366-1  | NZ_AYDE01000034.1 | + | 111736 | 111788 | RNA → rpmE (PRK00019)Ribosomal_L31 (pfam01197) → rpmE (PRK00019)Ribosomal_L31 (pfam01197) → |
| Sen-365-1  | NZ_AYDF01000058.1 | + | 111692 | 111744 | RNA → rpmE (PRK00019)Ribosomal_L31 (pfam01197) → rpmE (PRK00019)Ribosomal_L31 (pfam01197) → |
| Sen-341-1  | NZ_CASR01000038.1 | + | 111200 | 111252 | RNA → rpmE (PRK00019)Ribosomal_L31 (pfam01197) →                                            |
| Sen-389-1  | NZ_CARW01000047.1 | + | 111473 | 111525 | RNA → rpmE (PRK00019)Ribosomal_L31 (pfam01197) →                                            |
| Sen-363-1  | NZ_AYDG01000035.1 | + | 111679 | 111731 | RNA → rpmE (PRK00019)Ribosomal_L31 (pfam01197) → rpmE (PRK00019)Ribosomal_L31 (pfam01197) → |
| Sen-368-1  | NZ_AYDC01000067.1 | + | 111674 | 111726 | RNA → rpmE (PRK00019)Ribosomal_L31 (pfam01197) →                                            |
| Sen-367-1  | NZ_AYDD01000027.1 | + | 111684 | 111736 | RNA → rpmE (PRK00019)Ribosomal_L31 (pfam01197) → rpmE (PRK00019)Ribosomal_L31 (pfam01197) → |
| Sen-376-1  | NZ_CASB01000116.1 | - | 17617  | 17565  | RNA → rpmE (PRK00019)Ribosomal_L31 (pfam01197) →                                            |
| Sen-370-1  | NZ_AYCT01000039.1 | - | 37612  | 37560  | RNA → rpmE (PRK00019)Ribosomal_L31 (pfam01197) → rpmE (PRK00019)Ribosomal_L31 (pfam01197) → |
| Sen-380-1  | NZ_AYCP01000055.1 | - | 37519  | 37467  | RNA → rpmE (PRK00019)Ribosomal_L31 (pfam01197) → rpmE (PRK00019)Ribosomal_L31 (pfam01197) → |
| Sen-373-1  | NZ_CASD01000056.1 | + | 111150 | 111202 | RNA → rpmE (PRK00019)Ribosomal_L31 (pfam01197) →                                            |
| Sen-374-1  | NZ_CASC01000035.1 | - | 37552  | 37500  | RNA → rpmE (PRK00019)Ribosomal_L31 (pfam01197) →                                            |
| Sen-387-1  | NZ_CATU01000036.1 | + | 55551  | 55603  | RNA → rpmE (PRK00019)Ribosomal_L31 (pfam01197) →                                            |
| Sen-385-1  | NZ_CAAD01000062.1 | + | 61209  | 61261  | RNA → rpmE (PRK00019)Ribosomal_L31 (pfam01197) →                                            |
| Sen-353-1  | NZ_CASM01000050.1 | + | 111284 | 111336 | RNA → rpmE (PRK00019)Ribosomal_L31 (pfam01197) →                                            |
| Sen-354-1  | NZ_CASL01000044.1 | - | 37552  | 37500  | RNA → rpmE (PRK00019)Ribosomal_L31 (pfam01197) →                                            |
| Sen-359-1  | NZ_CASH01000039.1 | + | 111150 | 111202 | RNA → rpmE (PRK00019)Ribosomal_L31 (pfam01197) →                                            |
| Sen-360-1  | NZ_CASG01000064.1 | + | 55563  | 55615  | RNA → rpmE (PRK00019)Ribosomal_L31 (pfam01197) →                                            |
| Sen-375-1  | NZ_AYCX01000037.1 | + | 111230 | 111282 | RNA → rpmE (PRK00019)Ribosomal_L31 (pfam01197) → rpmE (PRK00019)Ribosomal_L31 (pfam01197) → |
| Sen-356-1  | NZ_CASK01000036.1 | - | 37552  | 37500  | RNA → rpmE (PRK00019)Ribosomal_L31 (pfam01197) →                                            |
| Sen-378-1  | NZ_AYCR01000008.1 | + | 83965  | 84017  | RNA → rpmE (PRK00019)Ribosomal_L31 (pfam01197) → rpmE (PRK00019)Ribosomal_L31 (pfam01197) → |
| Sen-364-1  | NZ_CASE01000032.1 | - | 37552  | 37500  | RNA → rpmE (PRK00019)Ribosomal_L31 (pfam01197) →                                            |
| Sen-382-1  | NZ_CARZ01000055.1 | + | 61126  | 61178  | RNA → rpmE (PRK00019)Ribosomal_L31 (pfam01197) →                                            |
| Sen-386-1  | NZ_CARY01000035.1 | - | 37552  | 37500  | RNA → rpmE (PRK00019)Ribosomal_L31 (pfam01197) →                                            |
| Sen-351-1  | NZ_CASN01000036.1 | - | 37552  | 37500  | RNA → rpmE (PRK00019)Ribosomal_L31 (pfam01197) →                                            |
| Sen-358-1  | NZ_CASI01000035.1 | - | 37552  | 37500  | RNA → rpmE (PRK00019)Ribosomal_L31 (pfam01197) →                                            |
| Sen-371-1  | NZ_CASF01000145.1 | - | 17572  | 17520  | RNA → rpmE (PRK00019)Ribosomal_L31 (pfam01197) →                                            |
| Sen-381-1  | NZ_CASA01000057.1 | + | 61126  | 61178  | RNA → rpmE (PRK00019)Ribosomal_L31 (pfam01197) →                                            |
| Sen-357-1  | NZ_CASJ01000039.1 | + | 143491 | 143543 | RNA → rpmE (PRK00019)Ribosomal_L31 (pfam01197) →                                            |
| Sen-288-91 | NZ_CIXI01000014.1 | - | 39456  | 39404  | RNA → rpmE (PRK00019)Ribosomal_L31 (pfam01197) →                                            |
| Sen-288-92 | NZ_CILL01000016.1 | - | 39381  | 39329  | RNA → rpmE (PRK00019)Ribosomal_L31 (pfam01197) →                                            |
| Sen-300-14 | NZ_CQGP01000016.1 | + | 42532  | 42584  | RNA → rpmE (PRK00019)Ribosomal_L31 (pfam01197) →                                            |
| Sen-288-93 | NZ_CIVV01000012.1 | + | 107996 | 108048 | RNA → rpmE (PRK00019)Ribosomal_L31 (pfam01197) →                                            |



|             |                   |   |        |        |                                                                                             |
|-------------|-------------------|---|--------|--------|---------------------------------------------------------------------------------------------|
| Sen-288-94  | NZ.CINM01000012.1 | + | 133824 | 133876 | RNA → rpmE (PRK00019)Ribosomal_L31 (pfam01197) →                                            |
| Sen-288-95  | NZ.CILS01000015.1 | - | 39542  | 39490  | RNA → rpmE (PRK00019)Ribosomal_L31 (pfam01197) →                                            |
| Sen-288-96  | NZ.CJQE01000015.1 | - | 39601  | 39549  | RNA → rpmE (PRK00019)Ribosomal_L31 (pfam01197) →                                            |
| Sen-288-97  | NZ.CJVR01000015.1 | - | 41231  | 41179  | RNA → rpmE (PRK00019)Ribosomal_L31 (pfam01197) →                                            |
| Sen-288-98  | NZ.CJMA01000010.1 | - | 41499  | 41447  | RNA → rpmE (PRK00019)Ribosomal_L31 (pfam01197) →                                            |
| Sen-288-99  | NZ.CIWL01000015.1 | + | 103992 | 104044 | RNA → rpmE (PRK00019)Ribosomal_L31 (pfam01197) →                                            |
| Sen-288-100 | NZ.CJNY01000010.1 | + | 104137 | 104189 | RNA → rpmE (PRK00019)Ribosomal_L31 (pfam01197) →                                            |
| Sen-288-101 | NZ.CJWX01000017.1 | + | 104185 | 104237 | RNA → rpmE (PRK00019)Ribosomal_L31 (pfam01197) →                                            |
| Sen-288-102 | NZ.CJCL01000016.1 | - | 39536  | 39484  | RNA → rpmE (PRK00019)Ribosomal_L31 (pfam01197) →                                            |
| Sen-288-103 | NZ.CJG01000010.1  | + | 133795 | 133847 | RNA → rpmE (PRK00019)Ribosomal_L31 (pfam01197) →                                            |
| Sen-288-104 | NZ.CIUZ01000017.1 | + | 104176 | 104228 | RNA → rpmE (PRK00019)Ribosomal_L31 (pfam01197) →                                            |
| Sen-288-105 | NZ.CJIF01000016.1 | - | 39535  | 39483  | RNA → rpmE (PRK00019)Ribosomal_L31 (pfam01197) →                                            |
| Sen-288-106 | NZ.CJKI01000006.1 | - | 39456  | 39404  | RNA → rpmE (PRK00019)Ribosomal_L31 (pfam01197) →                                            |
| Sen-288-107 | NZ.CJMB01000015.1 | + | 104141 | 104193 | RNA → rpmE (PRK00019)Ribosomal_L31 (pfam01197) →                                            |
| Sen-288-108 | NZ.CJAS01000016.1 | + | 104148 | 104200 | RNA → rpmE (PRK00019)Ribosomal_L31 (pfam01197) →                                            |
| Sen-288-109 | NZ.CIXD01000016.1 | + | 104172 | 104224 | RNA → rpmE (PRK00019)Ribosomal_L31 (pfam01197) →                                            |
| Sen-288-110 | NZ.CJEU01000016.1 | - | 39537  | 39485  | RNA → rpmE (PRK00019)Ribosomal_L31 (pfam01197) →                                            |
| Sen-288-111 | NZ.CJUE01000003.1 | - | 216862 | 216810 | RNA → rpmE (PRK00019)Ribosomal_L31 (pfam01197) →                                            |
| Sen-288-112 | NZ.CJKA01000002.1 | + | 434934 | 434986 | RNA → rpmE (PRK00019)Ribosomal_L31 (pfam01197) →                                            |
| Sen-288-113 | NZ.CJYE01000015.1 | - | 39456  | 39404  | RNA → rpmE (PRK00019)Ribosomal_L31 (pfam01197) →                                            |
| Sen-288-114 | NZ.CIUT01000015.1 | + | 107848 | 107900 | RNA → rpmE (PRK00019)Ribosomal_L31 (pfam01197) →                                            |
| Sen-288-115 | NZ.CIWB01000015.1 | - | 39506  | 39454  | RNA → rpmE (PRK00019)Ribosomal_L31 (pfam01197) →                                            |
| Sen-288-116 | NZ.CJLA01000015.1 | - | 39535  | 39483  | RNA → rpmE (PRK00019)Ribosomal_L31 (pfam01197) →                                            |
| Sen-288-117 | NZ.CJTN01000014.1 | - | 39372  | 39320  | RNA → rpmE (PRK00019)Ribosomal_L31 (pfam01197) →                                            |
| Sen-288-118 | NZ.CJVE01000017.1 | - | 39385  | 39333  | RNA → rpmE (PRK00019)Ribosomal_L31 (pfam01197) →                                            |
| Sen-288-119 | NZ.CJZC01000014.1 | + | 107832 | 107884 | RNA → rpmE (PRK00019)Ribosomal_L31 (pfam01197) →                                            |
| Sen-288-120 | NZ.CJSE01000014.1 | + | 104161 | 104213 | RNA → rpmE (PRK00019)Ribosomal_L31 (pfam01197) →                                            |
| Sen-69-1    | NZ.JMMG01000025.1 | - | 45104  | 45052  | RNA → rpmE (PRK00019)Ribosomal_L31 (pfam01197) →                                            |
| Sen-288-121 | NZ.CJDT01000016.1 | - | 39535  | 39483  | RNA → rpmE (PRK00019)Ribosomal_L31 (pfam01197) →                                            |
| Sen-288-122 | NZ.CJVQ01000001.1 | + | 104154 | 104206 | RNA → rpmE (PRK00019)Ribosomal_L31 (pfam01197) →                                            |
| Sen-423-1   | NZ.ANOT01000041.1 | + | 116944 | 116996 | RNA → rpmE (PRK00019)Ribosomal_L31 (pfam01197) → rpmE (PRK00019)Ribosomal_L31 (pfam01197) → |
| Sen-288-123 | NZ.CJWR01000013.1 | - | 41253  | 41201  | RNA → rpmE (PRK00019)Ribosomal_L31 (pfam01197) →                                            |
| Sen-398-1   | NZ.CARP01000034.1 | - | 37552  | 37500  | RNA → rpmE (PRK00019)Ribosomal_L31 (pfam01197) →                                            |
| Sen-288-124 | NZ.CJJP01000015.1 | + | 104140 | 104192 | RNA → rpmE (PRK00019)Ribosomal_L31 (pfam01197) →                                            |
| Sen-288-125 | NZ.CJHA01000015.1 | - | 39531  | 39479  | RNA → rpmE (PRK00019)Ribosomal_L31 (pfam01197) →                                            |
| Sen-405-1   | NZ.CARK01000035.1 | - | 37552  | 37500  | RNA → rpmE (PRK00019)Ribosomal_L31 (pfam01197) →                                            |
| Sen-288-126 | NZ.CJHK01000014.1 | - | 39564  | 39512  | RNA → rpmE (PRK00019)Ribosomal_L31 (pfam01197) →                                            |
| Sen-411-1   | NZ.CARF01000053.1 | + | 40879  | 40931  | RNA → rpmE (PRK00019)Ribosomal_L31 (pfam01197) →                                            |
| Sen-288-127 | NZ.CIYT01000003.1 | - | 198399 | 198347 | RNA → rpmE (PRK00019)Ribosomal_L31 (pfam01197) →                                            |
| Sen-288-128 | NZ.CJOD01000016.1 | - | 39537  | 39485  | RNA → rpmE (PRK00019)Ribosomal_L31 (pfam01197) →                                            |
| Sen-420-1   | NZ.AYDX01000010.1 | + | 111568 | 111620 | RNA → rpmE (PRK00019)Ribosomal_L31 (pfam01197) → rpmE (PRK00019)Ribosomal_L31 (pfam01197) → |
| Sen-288-129 | NZ.CIXO01000014.1 | - | 39528  | 39476  | RNA → rpmE (PRK00019)Ribosomal_L31 (pfam01197) →                                            |
| Sen-394-1   | NZ.AYCV01000014.1 | + | 111281 | 111333 | RNA → rpmE (PRK00019)Ribosomal_L31 (pfam01197) → rpmE (PRK00019)Ribosomal_L31 (pfam01197) → |
| Sen-288-130 | NZ.CIVB01000016.1 | - | 39541  | 39489  | RNA → rpmE (PRK00019)Ribosomal_L31 (pfam01197) →                                            |
| Sen-288-131 | NZ.CJLB01000010.1 | + | 133796 | 133848 | RNA → rpmE (PRK00019)Ribosomal_L31 (pfam01197) →                                            |
| Sen-433-1   | NZ.AOZP01000119.1 | + | 95342  | 95394  | RNA → rpmE (PRK00019)Ribosomal_L31 (pfam01197) → rpmE (PRK00019)Ribosomal_L31 (pfam01197) → |
| Sen-288-132 | NZ.CJPV01000009.1 | - | 39601  | 39549  | RNA → rpmE (PRK00019)Ribosomal_L31 (pfam01197) →                                            |
| Sen-424-1   | NZ.ANOU01000032.1 | + | 111695 | 111747 | RNA → rpmE (PRK00019)Ribosomal_L31 (pfam01197) → rpmE (PRK00019)Ribosomal_L31 (pfam01197) → |
| Sen-288-133 | NZ.CIVX01000015.1 | + | 104162 | 104214 | RNA → rpmE (PRK00019)Ribosomal_L31 (pfam01197) →                                            |
| Sen-288-134 | NZ.CJQJ01000009.1 | - | 39601  | 39549  | RNA → rpmE (PRK00019)Ribosomal_L31 (pfam01197) →                                            |
| Sen-399-1   | NZ.CARO01000044.1 | + | 111371 | 111423 | RNA → rpmE (PRK00019)Ribosomal_L31 (pfam01197) →                                            |
| Sen-288-135 | NZ.CJXW01000016.1 | + | 104185 | 104237 | RNA → rpmE (PRK00019)Ribosomal_L31 (pfam01197) →                                            |

|              |                   |   |        |        |                                                                                             |
|--------------|-------------------|---|--------|--------|---------------------------------------------------------------------------------------------|
| Sen-407-1    | NZ_CARJ01000039.1 | - | 37552  | 37500  | RNA → rpmE (PRK00019)Ribosomal_L31 (pfam01197) →                                            |
| Sen-288-136  | NZ_CJAD01000016.1 | - | 39569  | 39517  | RNA → rpmE (PRK00019)Ribosomal_L31 (pfam01197) →                                            |
| Sen-419-1    | NZ_AYDW01000050.1 | + | 48948  | 49000  | RNA → rpmE (PRK00019)Ribosomal_L31 (pfam01197) → rpmE (PRK00019)Ribosomal_L31 (pfam01197) → |
| Sen-288-137  | NZ_CIVW01000016.1 | + | 104014 | 104066 | RNA → rpmE (PRK00019)Ribosomal_L31 (pfam01197) →                                            |
| Sen-417-1    | NZ_AYDN01000011.1 | - | 37792  | 37740  | RNA → rpmE (PRK00019)Ribosomal_L31 (pfam01197) → rpmE (PRK00019)Ribosomal_L31 (pfam01197) → |
| Sen-288-138  | NZ_CJNW01000013.1 | + | 107993 | 108045 | RNA → rpmE (PRK00019)Ribosomal_L31 (pfam01197) →                                            |
| Sen-438-1    | NZ_AOZQ01000041.1 | + | 103718 | 103770 | RNA → rpmE (PRK00019)Ribosomal_L31 (pfam01197) → rpmE (PRK00019)Ribosomal_L31 (pfam01197) → |
| Sen-288-1110 | NZ_CIYE01000016.1 | - | 39531  | 39479  | RNA → rpmE (PRK00019)Ribosomal_L31 (pfam01197) →                                            |
| Sen-288-139  | NZ_CJAU01000016.1 | + | 104154 | 104206 | RNA → rpmE (PRK00019)Ribosomal_L31 (pfam01197) →                                            |
| Sen-288-140  | NZ_CJGP01000015.1 | + | 104038 | 104090 | RNA → rpmE (PRK00019)Ribosomal_L31 (pfam01197) →                                            |
| Sen-288-141  | NZ_CJQA01000017.1 | + | 104151 | 104203 | RNA → rpmE (PRK00019)Ribosomal_L31 (pfam01197) →                                            |
| Sen-288-142  | NZ_CJFS01000016.1 | - | 39534  | 39482  | RNA → rpmE (PRK00019)Ribosomal_L31 (pfam01197) →                                            |
| Sen-288-143  | NZ_CJH01000014.1  | - | 41507  | 41455  | RNA → rpmE (PRK00019)Ribosomal_L31 (pfam01197) →                                            |
| Sen-288-144  | NZ_CIWD01000015.1 | + | 104162 | 104214 | RNA → rpmE (PRK00019)Ribosomal_L31 (pfam01197) →                                            |
| Sen-288-145  | NZ_CIVF01000017.1 | - | 39385  | 39333  | RNA → rpmE (PRK00019)Ribosomal_L31 (pfam01197) →                                            |
| Sen-288-146  | NZ_CJGL01000015.1 | - | 39456  | 39404  | RNA → rpmE (PRK00019)Ribosomal_L31 (pfam01197) →                                            |
| Sen-288-147  | NZ_CIVT01000016.1 | - | 39387  | 39335  | RNA → rpmE (PRK00019)Ribosomal_L31 (pfam01197) →                                            |
| Sen-288-148  | NZ_CJIM01000014.1 | + | 104149 | 104201 | RNA → rpmE (PRK00019)Ribosomal_L31 (pfam01197) →                                            |
| Sen-288-149  | NZ_CJQP01000016.1 | - | 39601  | 39549  | RNA → rpmE (PRK00019)Ribosomal_L31 (pfam01197) →                                            |
| Sen-288-150  | NZ_CIZD01000016.1 | - | 39533  | 39481  | RNA → rpmE (PRK00019)Ribosomal_L31 (pfam01197) →                                            |
| Sen-288-151  | NZ_CIXK01000015.1 | + | 103990 | 104042 | RNA → rpmE (PRK00019)Ribosomal_L31 (pfam01197) →                                            |
| Sen-288-152  | NZ_CJUD01000016.1 | + | 104141 | 104193 | RNA → rpmE (PRK00019)Ribosomal_L31 (pfam01197) →                                            |
| Sen-288-153  | NZ_CJCS01000016.1 | - | 39573  | 39521  | RNA → rpmE (PRK00019)Ribosomal_L31 (pfam01197) →                                            |
| Sen-288-154  | NZ_CJOE01000016.1 | + | 104157 | 104209 | RNA → rpmE (PRK00019)Ribosomal_L31 (pfam01197) →                                            |
| Sen-288-155  | NZ_CIYS01000014.1 | + | 107961 | 108013 | RNA → rpmE (PRK00019)Ribosomal_L31 (pfam01197) →                                            |
| Sen-288-156  | NZ_CJVA01000015.1 | + | 104154 | 104206 | RNA → rpmE (PRK00019)Ribosomal_L31 (pfam01197) →                                            |
| Sen-288-157  | NZ_CILV01000012.1 | + | 107993 | 108045 | RNA → rpmE (PRK00019)Ribosomal_L31 (pfam01197) →                                            |
| Sen-288-158  | NZ_CJBL01000016.1 | + | 104155 | 104207 | RNA → rpmE (PRK00019)Ribosomal_L31 (pfam01197) →                                            |
| Sen-288-159  | NZ_CJBS01000017.1 | + | 104148 | 104200 | RNA → rpmE (PRK00019)Ribosomal_L31 (pfam01197) →                                            |
| Sen-288-160  | NZ_CIWK01000014.1 | + | 107980 | 108032 | RNA → rpmE (PRK00019)Ribosomal_L31 (pfam01197) →                                            |
| Sen-288-161  | NZ_CIZB01000016.1 | - | 39534  | 39482  | RNA → rpmE (PRK00019)Ribosomal_L31 (pfam01197) →                                            |
| Sen-288-162  | NZ_CJEJ01000015.1 | + | 104154 | 104206 | RNA → rpmE (PRK00019)Ribosomal_L31 (pfam01197) →                                            |
| Sen-288-163  | NZ_CJLD01000014.1 | - | 39570  | 39518  | RNA → rpmE (PRK00019)Ribosomal_L31 (pfam01197) →                                            |
| Sen-288-164  | NZ_CIWI01000014.1 | + | 103990 | 104042 | RNA → rpmE (PRK00019)Ribosomal_L31 (pfam01197) →                                            |
| Sen-288-165  | NZ_CJUM01000016.1 | - | 39371  | 39319  | RNA → rpmE (PRK00019)Ribosomal_L31 (pfam01197) →                                            |
| Sen-288-166  | NZ_CJAE01000016.1 | + | 104155 | 104207 | RNA → rpmE (PRK00019)Ribosomal_L31 (pfam01197) →                                            |
| Sen-288-1111 | NZ_CJJU01000015.1 | - | 39572  | 39520  | RNA → rpmE (PRK00019)Ribosomal_L31 (pfam01197) →                                            |
| Sen-288-167  | NZ_CJUN01000016.1 | - | 39366  | 39314  | RNA → rpmE (PRK00019)Ribosomal_L31 (pfam01197) →                                            |
| Sen-288-168  | NZ_CJYM01000015.1 | - | 39372  | 39320  | RNA → rpmE (PRK00019)Ribosomal_L31 (pfam01197) →                                            |
| Sen-288-169  | NZ_CJKT01000014.1 | + | 104147 | 104199 | RNA → rpmE (PRK00019)Ribosomal_L31 (pfam01197) →                                            |
| Sen-288-170  | NZ_CIXM01000015.1 | + | 103990 | 104042 | RNA → rpmE (PRK00019)Ribosomal_L31 (pfam01197) →                                            |
| Sen-288-171  | NZ_CILK01000016.1 | - | 39379  | 39327  | RNA → rpmE (PRK00019)Ribosomal_L31 (pfam01197) →                                            |
| Sen-288-172  | NZ_CJXI01000017.1 | - | 39543  | 39491  | RNA → rpmE (PRK00019)Ribosomal_L31 (pfam01197) →                                            |
| Sen-288-173  | NZ_CJAO01000016.1 | + | 104150 | 104202 | RNA → rpmE (PRK00019)Ribosomal_L31 (pfam01197) →                                            |
| Sen-288-174  | NZ_CJTQ01000015.1 | + | 104157 | 104209 | RNA → rpmE (PRK00019)Ribosomal_L31 (pfam01197) →                                            |
| Sen-288-175  | NZ_CJUA01000016.1 | - | 39370  | 39318  | RNA → rpmE (PRK00019)Ribosomal_L31 (pfam01197) →                                            |
| Sen-288-176  | NZ_CEXO01000015.1 | + | 104143 | 104195 | RNA → rpmE (PRK00019)Ribosomal_L31 (pfam01197) →                                            |
| Sen-288-177  | NZ_CJMK01000015.1 | - | 39353  | 39301  | RNA → rpmE (PRK00019)Ribosomal_L31 (pfam01197) →                                            |
| Sen-288-178  | NZ_CJMR01000016.1 | + | 104017 | 104069 | RNA → rpmE (PRK00019)Ribosomal_L31 (pfam01197) →                                            |
| Sen-288-179  | NZ_CJTK01000015.1 | + | 104163 | 104215 | RNA → rpmE (PRK00019)Ribosomal_L31 (pfam01197) →                                            |
| Sen-288-180  | NZ_CJBR01000014.1 | + | 104148 | 104200 | RNA → rpmE (PRK00019)Ribosomal_L31 (pfam01197) →                                            |
| Sen-288-181  | NZ_CJCP01000015.1 | - | 39456  | 39404  | RNA → rpmE (PRK00019)Ribosomal_L31 (pfam01197) →                                            |



|              |                   |   |        |        |                                                   |
|--------------|-------------------|---|--------|--------|---------------------------------------------------|
| Sen-288-182  | NZ.CJGG01000016.1 | + | 104146 | 104198 | RNA → rpmE (PRK00019) Ribosomal_L31 (pfam01197) → |
| Sen-288-183  | NZ.CJNK01000014.1 | - | 41504  | 41452  | RNA → rpmE (PRK00019) Ribosomal_L31 (pfam01197) → |
| Sen-288-184  | NZ.CJIL01000012.1 | + | 135291 | 135343 | RNA → rpmE (PRK00019) Ribosomal_L31 (pfam01197) → |
| Sen-288-185  | NZ.CJNR01000015.1 | - | 41512  | 41460  | RNA → rpmE (PRK00019) Ribosomal_L31 (pfam01197) → |
| Sen-288-186  | NZ.CJHU01000015.1 | + | 104200 | 104252 | RNA → rpmE (PRK00019) Ribosomal_L31 (pfam01197) → |
| Sen-288-187  | NZ.CJAA01000015.1 | - | 39626  | 39574  | RNA → rpmE (PRK00019) Ribosomal_L31 (pfam01197) → |
| Sen-288-188  | NZ.CJDF01000008.1 | - | 39456  | 39404  | RNA → rpmE (PRK00019) Ribosomal_L31 (pfam01197) → |
| Sen-288-189  | NZ.CJVD01000013.1 | + | 104003 | 104055 | RNA → rpmE (PRK00019) Ribosomal_L31 (pfam01197) → |
| Sen-288-190  | NZ.CJRZ01000015.1 | + | 104157 | 104209 | RNA → rpmE (PRK00019) Ribosomal_L31 (pfam01197) → |
| Sen-288-191  | NZ.CJSU01000015.1 | - | 41231  | 41179  | RNA → rpmE (PRK00019) Ribosomal_L31 (pfam01197) → |
| Sen-288-192  | NZ.CJJC01000014.1 | - | 41500  | 41448  | RNA → rpmE (PRK00019) Ribosomal_L31 (pfam01197) → |
| Sen-288-193  | NZ.CJER01000016.1 | - | 39536  | 39484  | RNA → rpmE (PRK00019) Ribosomal_L31 (pfam01197) → |
| Sen-288-194  | NZ.CJKY01000009.1 | - | 39562  | 39510  | RNA → rpmE (PRK00019) Ribosomal_L31 (pfam01197) → |
| Sen-288-1112 | NZ.CIXE01000015.1 | - | 39353  | 39301  | RNA → rpmE (PRK00019) Ribosomal_L31 (pfam01197) → |
| Sen-288-195  | NZ.CJUG01000006.1 | + | 190341 | 190393 | RNA → rpmE (PRK00019) Ribosomal_L31 (pfam01197) → |
| Sen-288-196  | NZ.CJPN01000008.1 | - | 39601  | 39549  | RNA → rpmE (PRK00019) Ribosomal_L31 (pfam01197) → |
| Sen-288-197  | NZ.CJJD01000011.1 | + | 136982 | 137034 | RNA → rpmE (PRK00019) Ribosomal_L31 (pfam01197) → |
| Sen-288-1113 | NZ.CIWW01000016.1 | + | 104212 | 104264 | RNA → rpmE (PRK00019) Ribosomal_L31 (pfam01197) → |
| Sen-288-198  | NZ.CJHG01000016.1 | - | 39534  | 39482  | RNA → rpmE (PRK00019) Ribosomal_L31 (pfam01197) → |
| Sen-288-199  | NZ.CIZN01000016.1 | - | 39537  | 39485  | RNA → rpmE (PRK00019) Ribosomal_L31 (pfam01197) → |
| Sen-288-200  | NZ.CIYX01000013.1 | + | 104153 | 104205 | RNA → rpmE (PRK00019) Ribosomal_L31 (pfam01197) → |
| Sen-288-201  | NZ.CJUX01000016.1 | + | 104160 | 104212 | RNA → rpmE (PRK00019) Ribosomal_L31 (pfam01197) → |
| Sen-288-202  | NZ.CIZK01000016.1 | + | 104178 | 104230 | RNA → rpmE (PRK00019) Ribosomal_L31 (pfam01197) → |
| Sen-288-203  | NZ.CJGJ01000016.1 | + | 104143 | 104195 | RNA → rpmE (PRK00019) Ribosomal_L31 (pfam01197) → |
| Sen-288-204  | NZ.CJMH01000010.1 | + | 107983 | 108035 | RNA → rpmE (PRK00019) Ribosomal_L31 (pfam01197) → |
| Sen-288-205  | NZ.CJEM01000015.1 | - | 39537  | 39485  | RNA → rpmE (PRK00019) Ribosomal_L31 (pfam01197) → |
| Sen-288-206  | NZ.CJNF01000014.1 | - | 41507  | 41455  | RNA → rpmE (PRK00019) Ribosomal_L31 (pfam01197) → |
| Sen-288-207  | NZ.CJUV01000015.1 | - | 39368  | 39316  | RNA → rpmE (PRK00019) Ribosomal_L31 (pfam01197) → |
| Sen-288-208  | NZ.CJDU01000016.1 | + | 104148 | 104200 | RNA → rpmE (PRK00019) Ribosomal_L31 (pfam01197) → |
| Sen-288-209  | NZ.CJYQ01000013.1 | - | 39538  | 39486  | RNA → rpmE (PRK00019) Ribosomal_L31 (pfam01197) → |
| Sen-288-210  | NZ.CJJP01000019.1 | + | 43218  | 43270  | RNA → rpmE (PRK00019) Ribosomal_L31 (pfam01197) → |
| Sen-288-211  | NZ.CJHF01000015.1 | + | 103990 | 104042 | RNA → rpmE (PRK00019) Ribosomal_L31 (pfam01197) → |
| Sen-288-212  | NZ.CJTZ01000015.1 | + | 107417 | 107469 | RNA → rpmE (PRK00019) Ribosomal_L31 (pfam01197) → |
| Sen-288-213  | NZ.CJQQ01000016.1 | - | 39601  | 39549  | RNA → rpmE (PRK00019) Ribosomal_L31 (pfam01197) → |
| Sen-288-214  | NZ.CJWC01000014.1 | + | 104157 | 104209 | RNA → rpmE (PRK00019) Ribosomal_L31 (pfam01197) → |
| Sen-288-215  | NZ.CJEM01000016.1 | + | 104154 | 104206 | RNA → rpmE (PRK00019) Ribosomal_L31 (pfam01197) → |
| Sen-288-216  | NZ.CILH01000015.1 | - | 39456  | 39404  | RNA → rpmE (PRK00019) Ribosomal_L31 (pfam01197) → |
| Sen-288-217  | NZ.CJJQ01000011.1 | + | 104148 | 104200 | RNA → rpmE (PRK00019) Ribosomal_L31 (pfam01197) → |
| Sen-288-218  | NZ.CJBW01000017.1 | - | 39537  | 39485  | RNA → rpmE (PRK00019) Ribosomal_L31 (pfam01197) → |
| Sen-288-219  | NZ.CJAZ01000015.1 | + | 103986 | 104038 | RNA → rpmE (PRK00019) Ribosomal_L31 (pfam01197) → |
| Sen-288-220  | NZ.CEYB01000016.1 | - | 39569  | 39517  | RNA → rpmE (PRK00019) Ribosomal_L31 (pfam01197) → |
| Sen-288-221  | NZ.CIXT01000015.1 | + | 103990 | 104042 | RNA → rpmE (PRK00019) Ribosomal_L31 (pfam01197) → |
| Sen-288-222  | NZ.CJWE01000015.1 | - | 41258  | 41206  | RNA → rpmE (PRK00019) Ribosomal_L31 (pfam01197) → |
| Sen-288-223  | NZ.CJAC01000016.1 | - | 39524  | 39472  | RNA → rpmE (PRK00019) Ribosomal_L31 (pfam01197) → |
| Sen-288-224  | NZ.CIYD01000011.1 | - | 39456  | 39404  | RNA → rpmE (PRK00019) Ribosomal_L31 (pfam01197) → |
| Sen-288-225  | NZ.CJDQ01000016.1 | - | 39538  | 39486  | RNA → rpmE (PRK00019) Ribosomal_L31 (pfam01197) → |
| Sen-288-226  | NZ.CJEY01000003.1 | + | 104147 | 104199 | RNA → rpmE (PRK00019) Ribosomal_L31 (pfam01197) → |
| Sen-288-227  | NZ.CJEV01000016.1 | - | 39535  | 39483  | RNA → rpmE (PRK00019) Ribosomal_L31 (pfam01197) → |
| Sen-288-228  | NZ.CJFU01000014.1 | + | 104165 | 104217 | RNA → rpmE (PRK00019) Ribosomal_L31 (pfam01197) → |
| Sen-288-229  | NZ.CJFQ01000015.1 | - | 39536  | 39484  | RNA → rpmE (PRK00019) Ribosomal_L31 (pfam01197) → |
| Sen-288-230  | NZ.CJPT01000015.1 | - | 39601  | 39549  | RNA → rpmE (PRK00019) Ribosomal_L31 (pfam01197) → |
| Sen-288-231  | NZ.CJHZ01000015.1 | - | 39534  | 39482  | RNA → rpmE (PRK00019) Ribosomal_L31 (pfam01197) → |

|              |                   |   |        |        |                                                  |
|--------------|-------------------|---|--------|--------|--------------------------------------------------|
| Sen-288-232  | NZ.CILT01000015.1 | - | 41673  | 41621  | RNA → rpmE (PRK00019)Ribosomal_L31 (pfam01197) → |
| Sen-288-233  | NZ.CJTS01000014.1 | + | 104157 | 104209 | RNA → rpmE (PRK00019)Ribosomal_L31 (pfam01197) → |
| Sen-288-234  | NZ.CJBY01000016.1 | + | 104160 | 104212 | RNA → rpmE (PRK00019)Ribosomal_L31 (pfam01197) → |
| Sen-288-235  | NZ.CJKS01000015.1 | - | 39478  | 39426  | RNA → rpmE (PRK00019)Ribosomal_L31 (pfam01197) → |
| Sen-288-236  | NZ.CJYU01000015.1 | - | 44803  | 44751  | RNA → rpmE (PRK00019)Ribosomal_L31 (pfam01197) → |
| Sen-288-237  | NZ.CJXE01000011.1 | + | 163323 | 163375 | RNA → rpmE (PRK00019)Ribosomal_L31 (pfam01197) → |
| Sen-288-238  | NZ.CIWA01000016.1 | - | 39514  | 39462  | RNA → rpmE (PRK00019)Ribosomal_L31 (pfam01197) → |
| Sen-288-239  | NZ.CJVL01000014.1 | - | 41231  | 41179  | RNA → rpmE (PRK00019)Ribosomal_L31 (pfam01197) → |
| Sen-288-240  | NZ.CIZP01000016.1 | + | 104152 | 104204 | RNA → rpmE (PRK00019)Ribosomal_L31 (pfam01197) → |
| Sen-288-241  | NZ.CJQ01000017.1  | + | 106102 | 106154 | RNA → rpmE (PRK00019)Ribosomal_L31 (pfam01197) → |
| Sen-288-242  | NZ.CJEE01000016.1 | - | 39723  | 39671  | RNA → rpmE (PRK00019)Ribosomal_L31 (pfam01197) → |
| Sen-288-243  | NZ.CJVY01000015.1 | + | 104146 | 104198 | RNA → rpmE (PRK00019)Ribosomal_L31 (pfam01197) → |
| Sen-288-244  | NZ.CJQM01000014.1 | + | 107413 | 107465 | RNA → rpmE (PRK00019)Ribosomal_L31 (pfam01197) → |
| Sen-288-245  | NZ.CEZA01000017.1 | + | 104146 | 104198 | RNA → rpmE (PRK00019)Ribosomal_L31 (pfam01197) → |
| Sen-288-246  | NZ.CJPZ01000009.1 | - | 39601  | 39549  | RNA → rpmE (PRK00019)Ribosomal_L31 (pfam01197) → |
| Sen-288-247  | NZ.CIVH01000013.1 | + | 104201 | 104253 | RNA → rpmE (PRK00019)Ribosomal_L31 (pfam01197) → |
| Sen-288-248  | NZ.CJEX01000016.1 | + | 104156 | 104208 | RNA → rpmE (PRK00019)Ribosomal_L31 (pfam01197) → |
| Sen-288-249  | NZ.CJIS01000019.1 | + | 43848  | 43900  | RNA → rpmE (PRK00019)Ribosomal_L31 (pfam01197) → |
| Sen-288-250  | NZ.CJQA01000008.1 | - | 39601  | 39549  | RNA → rpmE (PRK00019)Ribosomal_L31 (pfam01197) → |
| Sen-288-251  | NZ.CJNG01000014.1 | - | 41511  | 41459  | RNA → rpmE (PRK00019)Ribosomal_L31 (pfam01197) → |
| Sen-288-252  | NZ.CJGM01000010.1 | - | 39456  | 39404  | RNA → rpmE (PRK00019)Ribosomal_L31 (pfam01197) → |
| Sen-288-253  | NZ.CJKD01000010.1 | - | 39361  | 39309  | RNA → rpmE (PRK00019)Ribosomal_L31 (pfam01197) → |
| Sen-288-254  | NZ.CJWL01000015.1 | - | 39531  | 39479  | RNA → rpmE (PRK00019)Ribosomal_L31 (pfam01197) → |
| Sen-288-255  | NZ.CJUQ01000015.1 | + | 104156 | 104208 | RNA → rpmE (PRK00019)Ribosomal_L31 (pfam01197) → |
| Sen-288-256  | NZ.CJMW01000013.1 | + | 104152 | 104204 | RNA → rpmE (PRK00019)Ribosomal_L31 (pfam01197) → |
| Sen-288-257  | NZ.CILN01000016.1 | + | 104151 | 104203 | RNA → rpmE (PRK00019)Ribosomal_L31 (pfam01197) → |
| Sen-288-258  | NZ.CJBJ01000016.1 | + | 104162 | 104214 | RNA → rpmE (PRK00019)Ribosomal_L31 (pfam01197) → |
| Sen-288-1114 | NZ.CIWU01000015.1 | + | 104119 | 104171 | RNA → rpmE (PRK00019)Ribosomal_L31 (pfam01197) → |
| Sen-288-259  | NZ.CJGQ01000015.1 | + | 104149 | 104201 | RNA → rpmE (PRK00019)Ribosomal_L31 (pfam01197) → |
| Sen-288-260  | NZ.CJMC01000015.1 | - | 41499  | 41447  | RNA → rpmE (PRK00019)Ribosomal_L31 (pfam01197) → |
| Sen-288-261  | NZ.CIUN01000015.1 | + | 104162 | 104214 | RNA → rpmE (PRK00019)Ribosomal_L31 (pfam01197) → |
| Sen-288-262  | NZ.CIWR01000015.1 | + | 104111 | 104163 | RNA → rpmE (PRK00019)Ribosomal_L31 (pfam01197) → |
| Sen-288-263  | NZ.CIUL01000014.1 | - | 41231  | 41179  | RNA → rpmE (PRK00019)Ribosomal_L31 (pfam01197) → |
| Sen-288-264  | NZ.CJCG01000016.1 | - | 39537  | 39485  | RNA → rpmE (PRK00019)Ribosomal_L31 (pfam01197) → |
| Sen-288-265  | NZ.CJMO01000013.1 | - | 41484  | 41432  | RNA → rpmE (PRK00019)Ribosomal_L31 (pfam01197) → |
| Sen-288-1115 | NZ.CIVO01000015.1 | - | 41516  | 41464  | RNA → rpmE (PRK00019)Ribosomal_L31 (pfam01197) → |
| Sen-288-266  | NZ.CJU01000015.1  | + | 104153 | 104205 | RNA → rpmE (PRK00019)Ribosomal_L31 (pfam01197) → |
| Sen-288-267  | NZ.CJOM01000013.1 | + | 104141 | 104193 | RNA → rpmE (PRK00019)Ribosomal_L31 (pfam01197) → |
| Sen-288-268  | NZ.CJXC01000017.1 | - | 39381  | 39329  | RNA → rpmE (PRK00019)Ribosomal_L31 (pfam01197) → |
| Sen-288-269  | NZ.CIYC01000016.1 | + | 104218 | 104270 | RNA → rpmE (PRK00019)Ribosomal_L31 (pfam01197) → |
| Sen-288-270  | NZ.CIUJ01000015.1 | - | 39505  | 39453  | RNA → rpmE (PRK00019)Ribosomal_L31 (pfam01197) → |
| Sen-288-271  | NZ.CJSA01000015.1 | + | 104163 | 104215 | RNA → rpmE (PRK00019)Ribosomal_L31 (pfam01197) → |
| Sen-288-272  | NZ.CIWF01000016.1 | - | 39601  | 39549  | RNA → rpmE (PRK00019)Ribosomal_L31 (pfam01197) → |
| Sen-288-273  | NZ.CJOK01000016.1 | + | 104162 | 104214 | RNA → rpmE (PRK00019)Ribosomal_L31 (pfam01197) → |
| Sen-288-274  | NZ.CJGV01000016.1 | - | 39536  | 39484  | RNA → rpmE (PRK00019)Ribosomal_L31 (pfam01197) → |
| Sen-288-275  | NZ.CILE01000015.1 | + | 104154 | 104206 | RNA → rpmE (PRK00019)Ribosomal_L31 (pfam01197) → |
| Sen-288-276  | NZ.CJYX01000015.1 | + | 104158 | 104210 | RNA → rpmE (PRK00019)Ribosomal_L31 (pfam01197) → |
| Sen-288-277  | NZ.CJLF01000009.1 | + | 152651 | 152703 | RNA → rpmE (PRK00019)Ribosomal_L31 (pfam01197) → |
| Sen-848-1    | NZ.AETN01000013.1 | - | 35207  | 35155  | RNA → rpmE (PRK00019)Ribosomal_L31 (pfam01197) → |
| Sen-288-278  | NZ.CJWF01000015.1 | + | 104158 | 104210 | RNA → rpmE (PRK00019)Ribosomal_L31 (pfam01197) → |
| Sen-288-279  | NZ.CJNS01000014.1 | - | 39702  | 39650  | RNA → rpmE (PRK00019)Ribosomal_L31 (pfam01197) → |
| Sen-288-280  | NZ.CJAY01000015.1 | + | 104150 | 104202 | RNA → rpmE (PRK00019)Ribosomal_L31 (pfam01197) → |

|             |                   |   |        |        |                                                                                             |
|-------------|-------------------|---|--------|--------|---------------------------------------------------------------------------------------------|
| Sen-288-281 | NZ.CJIV01000012.1 | - | 41499  | 41447  | RNA → rpmE (PRK00019)Ribosomal_L31 (pfam01197) →                                            |
| Sen-852-1   | NZ.AESU01000031.1 | - | 42784  | 42732  | RNA → rpmE (PRK00019)Ribosomal_L31 (pfam01197) → rpmE (PRK00019)Ribosomal_L31 (pfam01197) → |
| Sen-288-282 | NZ.CJVH01000013.1 | - | 41231  | 41179  | RNA → rpmE (PRK00019)Ribosomal_L31 (pfam01197) →                                            |
| Sen-288-283 | NZ.CIWH01000015.1 | + | 107416 | 107468 | RNA → rpmE (PRK00019)Ribosomal_L31 (pfam01197) →                                            |
| Sen-288-284 | NZ.CJFL01000015.1 | - | 39560  | 39508  | RNA → rpmE (PRK00019)Ribosomal_L31 (pfam01197) →                                            |
| Sen-884-1   | NZ.AHUG01000050.1 | + | 100567 | 100619 | RNA → rpmE (PRK00019)Ribosomal_L31 (pfam01197) → rpmE (PRK00019)Ribosomal_L31 (pfam01197) → |
| Sen-288-285 | NZ.CJSY01000015.1 | - | 41516  | 41464  | RNA → rpmE (PRK00019)Ribosomal_L31 (pfam01197) →                                            |
| Sen-288-286 | NZ.CJXS01000009.1 | - | 39558  | 39506  | RNA → rpmE (PRK00019)Ribosomal_L31 (pfam01197) →                                            |
| Sen-288-287 | NZ.CJAL01000014.1 | + | 104209 | 104261 | RNA → rpmE (PRK00019)Ribosomal_L31 (pfam01197) →                                            |
| Sen-288-288 | NZ.CJAI01000016.1 | + | 104143 | 104195 | RNA → rpmE (PRK00019)Ribosomal_L31 (pfam01197) →                                            |
| Sen-872-1   | NZ.AHUE01000073.1 | - | 45277  | 45225  | RNA → rpmE (PRK00019)Ribosomal_L31 (pfam01197) →                                            |
| Sen-288-289 | NZ.CJW01000015.1  | - | 44769  | 44717  | RNA → rpmE (PRK00019)Ribosomal_L31 (pfam01197) →                                            |
| Sen-288-290 | NZ.CJRX01000010.1 | + | 141198 | 141250 | RNA → rpmE (PRK00019)Ribosomal_L31 (pfam01197) →                                            |
| Sen-288-291 | NZ.CJVN01000014.1 | - | 41231  | 41179  | RNA → rpmE (PRK00019)Ribosomal_L31 (pfam01197) →                                            |
| Sen-288-292 | NZ.CJEL01000016.1 | - | 39723  | 39671  | RNA → rpmE (PRK00019)Ribosomal_L31 (pfam01197) →                                            |
| Sen-862-1   | NZ.APAE01000207.1 | - | 3173   | 3121   | RNA → rpmE (PRK00019)Ribosomal_L31 (pfam01197) → rpmE (PRK00019)Ribosomal_L31 (pfam01197) → |
| Sen-288-293 | NZ.CJCV01000014.1 | - | 39539  | 39487  | RNA → rpmE (PRK00019)Ribosomal_L31 (pfam01197) →                                            |
| Sen-288-294 | NZ.CJKQ01000015.1 | + | 104149 | 104201 | RNA → rpmE (PRK00019)Ribosomal_L31 (pfam01197) →                                            |
| Sen-288-295 | NZ.CJYN01000014.1 | + | 107792 | 107844 | RNA → rpmE (PRK00019)Ribosomal_L31 (pfam01197) →                                            |
| Sen-288-296 | NZ.CJUY01000015.1 | + | 104009 | 104061 | RNA → rpmE (PRK00019)Ribosomal_L31 (pfam01197) →                                            |
| Sen-842-1   | NZ.AHIK01000014.1 | - | 35207  | 35155  | RNA → rpmE (PRK00019)Ribosomal_L31 (pfam01197) →                                            |
| Sen-288-297 | NZ.CJLE01000002.1 | - | 39456  | 39404  | RNA → rpmE (PRK00019)Ribosomal_L31 (pfam01197) →                                            |
| Sen-288-298 | NZ.CJNN01000003.1 | - | 68376  | 68324  | RNA → rpmE (PRK00019)Ribosomal_L31 (pfam01197) →                                            |
| Sen-869-1   | NZ.AHUB01000025.1 | - | 4720   | 4668   | RNA → rpmE (PRK00019)Ribosomal_L31 (pfam01197) →                                            |
| Sen-288-299 | NZ.CJOL01000016.1 | - | 39377  | 39325  | RNA → rpmE (PRK00019)Ribosomal_L31 (pfam01197) →                                            |
| Sen-288-300 | NZ.CIZJ01000015.1 | - | 39537  | 39485  | RNA → rpmE (PRK00019)Ribosomal_L31 (pfam01197) →                                            |
| Sen-288-301 | NZ.CJVB01000016.1 | + | 104163 | 104215 | RNA → rpmE (PRK00019)Ribosomal_L31 (pfam01197) →                                            |
| Sen-892-1   | NZ.AYDY01000049.1 | + | 100567 | 100619 | RNA → rpmE (PRK00019)Ribosomal_L31 (pfam01197) → rpmE (PRK00019)Ribosomal_L31 (pfam01197) → |
| Sen-288-302 | NZ.CJXO01000011.1 | + | 133824 | 133876 | RNA → rpmE (PRK00019)Ribosomal_L31 (pfam01197) →                                            |
| Sen-288-303 | NZ.CEXQ01000013.1 | + | 104163 | 104215 | RNA → rpmE (PRK00019)Ribosomal_L31 (pfam01197) →                                            |
| Sen-851-1   | NZ.AESQ01000050.1 | + | 97839  | 97891  | RNA → rpmE (PRK00019)Ribosomal_L31 (pfam01197) →                                            |
| Sen-288-304 | NZ.CIWW01000015.1 | - | 39620  | 39568  | RNA → rpmE (PRK00019)Ribosomal_L31 (pfam01197) →                                            |
| Sen-288-305 | NZ.CIWT01000016.1 | - | 39601  | 39549  | RNA → rpmE (PRK00019)Ribosomal_L31 (pfam01197) →                                            |
| Sen-888-1   | NZ.AJMO01000028.1 | - | 45069  | 45017  | RNA → rpmE (PRK00019)Ribosomal_L31 (pfam01197) →                                            |
| Sen-288-306 | NZ.CJCO01000015.1 | - | 39570  | 39518  | RNA → rpmE (PRK00019)Ribosomal_L31 (pfam01197) →                                            |
| Sen-288-307 | NZ.CJHW01000016.1 | + | 104154 | 104206 | RNA → rpmE (PRK00019)Ribosomal_L31 (pfam01197) →                                            |
| Sen-288-308 | NZ.CJVV01000013.1 | - | 41510  | 41458  | RNA → rpmE (PRK00019)Ribosomal_L31 (pfam01197) →                                            |
| Sen-873-1   | NZ.AHUF01000060.1 | - | 36249  | 36197  | RNA → rpmE (PRK00019)Ribosomal_L31 (pfam01197) →                                            |
| Sen-288-309 | NZ.CJMG01000014.1 | - | 41503  | 41451  | RNA → rpmE (PRK00019)Ribosomal_L31 (pfam01197) →                                            |
| Sen-875-1   | NZ.AHUD01000038.1 | + | 100524 | 100576 | RNA → rpmE (PRK00019)Ribosomal_L31 (pfam01197) →                                            |
| Sen-288-310 | NZ.CJCI01000015.1 | - | 39537  | 39485  | RNA → rpmE (PRK00019)Ribosomal_L31 (pfam01197) →                                            |
| Sen-288-311 | NZ.CJJC01000015.1 | - | 39534  | 39482  | RNA → rpmE (PRK00019)Ribosomal_L31 (pfam01197) →                                            |
| Sen-890-1   | NZ.AYEA01000016.1 | - | 45273  | 45221  | RNA → rpmE (PRK00019)Ribosomal_L31 (pfam01197) → rpmE (PRK00019)Ribosomal_L31 (pfam01197) → |
| Sen-288-312 | NZ.CJLL01000015.1 | + | 104153 | 104205 | RNA → rpmE (PRK00019)Ribosomal_L31 (pfam01197) →                                            |
| Sen-288-313 | NZ.CIZA01000016.1 | + | 104178 | 104230 | RNA → rpmE (PRK00019)Ribosomal_L31 (pfam01197) →                                            |
| Sen-867-1   | NZ.AYDM01000074.1 | + | 100113 | 100165 | RNA → rpmE (PRK00019)Ribosomal_L31 (pfam01197) →                                            |
| Sen-288-314 | NZ.CJKP01000013.1 | + | 107998 | 108050 | RNA → rpmE (PRK00019)Ribosomal_L31 (pfam01197) →                                            |
| Sen-288-315 | NZ.CJXY01000015.1 | + | 104164 | 104216 | RNA → rpmE (PRK00019)Ribosomal_L31 (pfam01197) →                                            |
| Sen-855-1   | NZ.AOXN01000002.1 | - | 45077  | 45025  | RNA → rpmE (PRK00019)Ribosomal_L31 (pfam01197) → rpmE (PRK00019)Ribosomal_L31 (pfam01197) → |
| Sen-288-316 | NZ.CJPU01000015.1 | - | 39601  | 39549  | RNA → rpmE (PRK00019)Ribosomal_L31 (pfam01197) →                                            |
| Sen-288-317 | NZ.CJHR01000017.1 | - | 39535  | 39483  | RNA → rpmE (PRK00019)Ribosomal_L31 (pfam01197) →                                            |
| Sen-288-318 | NZ.CJMD01000013.1 | + | 107990 | 108042 | RNA → rpmE (PRK00019)Ribosomal_L31 (pfam01197) →                                            |



|              |                    |   |        |        |                                                                                             |
|--------------|--------------------|---|--------|--------|---------------------------------------------------------------------------------------------|
| Sen-863-1    | NZ.APAD01000053.1  | - | 3017   | 2965   | RNA → rpmE (PRK00019)Ribosomal_L31 (pfam01197) → rpmE (PRK00019)Ribosomal_L31 (pfam01197) → |
| Sen-288-319  | NZ.CJBX01000015.1  | - | 39589  | 39537  | RNA → rpmE (PRK00019)Ribosomal_L31 (pfam01197) →                                            |
| Sen-288-320  | NZ.CJBK01000015.1  | + | 104149 | 104201 | RNA → rpmE (PRK00019)Ribosomal_L31 (pfam01197) →                                            |
| Sen-288-321  | NZ.CJCK01000016.1  | + | 104153 | 104205 | RNA → rpmE (PRK00019)Ribosomal_L31 (pfam01197) →                                            |
| Sen-845-1    | NZ.AETK01000003.1  | + | 97841  | 97893  | RNA → rpmE (PRK00019)Ribosomal_L31 (pfam01197) →                                            |
| Sen-288-1116 | NZ.CIY01000014.1   | + | 104286 | 104338 | RNA → rpmE (PRK00019)Ribosomal_L31 (pfam01197) →                                            |
| Sen-844-1    | NZ.AEST01000030.1  | + | 97733  | 97785  | RNA → rpmE (PRK00019)Ribosomal_L31 (pfam01197) → rpmE (PRK00019)Ribosomal_L31 (pfam01197) → |
| Sen-288-322  | NZ.CJLJ01000016.1  | + | 104043 | 104095 | RNA → rpmE (PRK00019)Ribosomal_L31 (pfam01197) →                                            |
| Sen-288-323  | NZ.CILP01000015.1  | + | 107794 | 107846 | RNA → rpmE (PRK00019)Ribosomal_L31 (pfam01197) →                                            |
| Sen-843-1    | NZ.AETW01000044.1  | - | 35207  | 35155  | RNA → rpmE (PRK00019)Ribosomal_L31 (pfam01197) →                                            |
| Sen-288-324  | NZ.CIYU01000012.1  | - | 39456  | 39404  | RNA → rpmE (PRK00019)Ribosomal_L31 (pfam01197) →                                            |
| Sen-850-1    | NZ.AESOU01000043.1 | - | 35285  | 35233  | RNA → rpmE (PRK00019)Ribosomal_L31 (pfam01197) →                                            |
| Sen-288-325  | NZ.CJVC01000015.1  | - | 41231  | 41179  | RNA → rpmE (PRK00019)Ribosomal_L31 (pfam01197) →                                            |
| Sen-887-1    | NZ.AJMN01000011.1  | - | 45390  | 45338  | RNA → rpmE (PRK00019)Ribosomal_L31 (pfam01197) →                                            |
| Sen-288-326  | NZ.CIWO01000015.1  | + | 107983 | 108035 | RNA → rpmE (PRK00019)Ribosomal_L31 (pfam01197) →                                            |
| Sen-883-1    | NZ.AHUC01000010.1  | + | 100542 | 100594 | RNA → rpmE (PRK00019)Ribosomal_L31 (pfam01197) →                                            |
| Sen-288-327  | NZ.CJFW01000015.1  | + | 103990 | 104042 | RNA → rpmE (PRK00019)Ribosomal_L31 (pfam01197) →                                            |
| Sen-891-1    | NZ.AYDZ01000001.1  | - | 45273  | 45221  | RNA → rpmE (PRK00019)Ribosomal_L31 (pfam01197) →                                            |
| Sen-860-1    | NZ.AYCZ01000097.1  | + | 97435  | 97487  | RNA → rpmE (PRK00019)Ribosomal_L31 (pfam01197) → rpmE (PRK00019)Ribosomal_L31 (pfam01197) → |
| Sen-889-1    | NZ.AYEB01000069.1  | + | 93391  | 93443  | RNA → rpmE (PRK00019)Ribosomal_L31 (pfam01197) →                                            |
| Sen-896-1    | NZ.AYEI01000076.1  | + | 16984  | 17036  | RNA → rpmE (PRK00019)Ribosomal_L31 (pfam01197) →                                            |
| Sen-847-1    | NZ.AETM01000086.1  | + | 2601   | 2653   | RNA → rpmE (PRK00019)Ribosomal_L31 (pfam01197) →                                            |
| Sen-874-1    | NZ.AHTR01000033.1  | - | 45077  | 45025  | RNA → rpmE (PRK00019)Ribosomal_L31 (pfam01197) →                                            |
| Sen-871-1    | NZ.AHTQ01000033.1  | + | 100304 | 100356 | RNA → rpmE (PRK00019)Ribosomal_L31 (pfam01197) → rpmE (PRK00019)Ribosomal_L31 (pfam01197) → |
| Sen-886-1    | NZ.AOGG01000035.1  | + | 42041  | 42093  | RNA → rpmE (PRK00019)Ribosomal_L31 (pfam01197) →                                            |
| Sen-858-1    | NZ.AOYX01000026.1  | + | 42042  | 42094  | RNA → rpmE (PRK00019)Ribosomal_L31 (pfam01197) → rpmE (PRK00019)Ribosomal_L31 (pfam01197) → |
| Sen-870-1    | NZ.AHTP01000001.1  | + | 100541 | 100593 | RNA → rpmE (PRK00019)Ribosomal_L31 (pfam01197) →                                            |
| Sen-878-1    | NZ.AHTM01000018.1  | + | 105423 | 105475 | RNA → rpmE (PRK00019)Ribosomal_L31 (pfam01197) →                                            |
| Sen-894-1    | NZ.AOGI01000026.1  | + | 100031 | 100083 | RNA → rpmE (PRK00019)Ribosomal_L31 (pfam01197) →                                            |
| Sen-859-1    | NZ.AOYW01000025.1  | - | 35385  | 35333  | RNA → rpmE (PRK00019)Ribosomal_L31 (pfam01197) → rpmE (PRK00019)Ribosomal_L31 (pfam01197) → |
| Sen-841-1    | NZ.AETV01000024.1  | - | 35284  | 35232  | RNA → rpmE (PRK00019)Ribosomal_L31 (pfam01197) →                                            |
| Sen-846-1    | NZ.AETL01000105.1  | - | 35284  | 35232  | RNA → rpmE (PRK00019)Ribosomal_L31 (pfam01197) →                                            |
| Sen-861-1    | NZ.AYUP01000215.1  | - | 9770   | 9718   | RNA → rpmE (PRK00019)Ribosomal_L31 (pfam01197) →                                            |
| Sen-849-1    | NZ.AETA01000041.1  | - | 23926  | 23874  | RNA → rpmE (PRK00019)Ribosomal_L31 (pfam01197) →                                            |
| Sen-876-1    | NZ.AHTL01000005.1  | + | 105413 | 105465 | RNA → rpmE (PRK00019)Ribosomal_L31 (pfam01197) →                                            |
| Sen-893-1    | NZ.AOGJ01000036.1  | - | 45120  | 45068  | RNA → rpmE (PRK00019)Ribosomal_L31 (pfam01197) →                                            |
| Sen-266-1    | NZ.CCMR01000001.1  | + | 277430 | 277482 | RNA → rpmE (PRK00019)Ribosomal_L31 (pfam01197) →                                            |
| Sen-880-1    | NZ.AHTN01000018.1  | - | 45387  | 45335  | RNA → rpmE (PRK00019)Ribosomal_L31 (pfam01197) →                                            |
| Sen-877-1    | NZ.AHTO01000001.1  | - | 45075  | 45023  | RNA → rpmE (PRK00019)Ribosomal_L31 (pfam01197) →                                            |
| Sen-882-1    | NZ.AHTS01000001.1  | + | 105415 | 105467 | RNA → rpmE (PRK00019)Ribosomal_L31 (pfam01197) →                                            |
| Sen-881-1    | NZ.AHTK01000004.1  | + | 105417 | 105469 | RNA → rpmE (PRK00019)Ribosomal_L31 (pfam01197) →                                            |
| Sen-885-1    | NZ.AOGH01000031.1  | + | 100387 | 100439 | RNA → rpmE (PRK00019)Ribosomal_L31 (pfam01197) →                                            |
| Sen-288-328  | NZ.CJVG01000014.1  | - | 44930  | 44878  | RNA → rpmE (PRK00019)Ribosomal_L31 (pfam01197) →                                            |
| Sen-288-329  | NZ.CJMP01000015.1  | - | 41498  | 41446  | RNA → rpmE (PRK00019)Ribosomal_L31 (pfam01197) →                                            |
| Sen-288-330  | NZ.CJSO01000015.1  | - | 41513  | 41461  | RNA → rpmE (PRK00019)Ribosomal_L31 (pfam01197) →                                            |
| Sen-288-331  | NZ.CJIO01000014.1  | + | 105490 | 105542 | RNA → rpmE (PRK00019)Ribosomal_L31 (pfam01197) →                                            |
| Sen-853-1    | NZ.AESR01000011.1  | - | 35207  | 35155  | RNA → rpmE (PRK00019)Ribosomal_L31 (pfam01197) → rpmE (PRK00019)Ribosomal_L31 (pfam01197) → |
| Sen-879-1    | NZ.AHTJ01000074.1  | - | 45390  | 45338  | RNA → rpmE (PRK00019)Ribosomal_L31 (pfam01197) →                                            |
| Sen-857-1    | NZ.AOYT01000022.1  | - | 45150  | 45098  | RNA → rpmE (PRK00019)Ribosomal_L31 (pfam01197) → rpmE (PRK00019)Ribosomal_L31 (pfam01197) → |
| Sen-288-332  | NZ.CJOB01000016.1  | + | 104145 | 104197 | RNA → rpmE (PRK00019)Ribosomal_L31 (pfam01197) →                                            |
| Sen-288-333  | NZ.CJIE01000017.1  | + | 104161 | 104213 | RNA → rpmE (PRK00019)Ribosomal_L31 (pfam01197) →                                            |
| Sen-288-334  | NZ.CJIH01000014.1  | + | 104152 | 104204 | RNA → rpmE (PRK00019)Ribosomal_L31 (pfam01197) →                                            |

|              |                    |   |        |        |                                                  |
|--------------|--------------------|---|--------|--------|--------------------------------------------------|
| Sen-288-335  | NZ_CJMJ01000009.1  | - | 39534  | 39482  | RNA → rpmE (PRK00019)Ribosomal_L31 (pfam01197) → |
| Sen-288-336  | NZ_CIXA01000011.1  | - | 39556  | 39504  | RNA → rpmE (PRK00019)Ribosomal_L31 (pfam01197) → |
| Sen-288-337  | NZ_CIXR01000016.1  | - | 39529  | 39477  | RNA → rpmE (PRK00019)Ribosomal_L31 (pfam01197) → |
| Sen-288-338  | NZ_CJXK01000010.1  | - | 39378  | 39326  | RNA → rpmE (PRK00019)Ribosomal_L31 (pfam01197) → |
| Sen-288-339  | NZ_CJDM01000016.1  | + | 104156 | 104208 | RNA → rpmE (PRK00019)Ribosomal_L31 (pfam01197) → |
| Sen-288-340  | NZ_CJMJ01000015.1  | + | 104156 | 104208 | RNA → rpmE (PRK00019)Ribosomal_L31 (pfam01197) → |
| Sen-288-341  | NZ_CJAG01000017.1  | - | 39532  | 39480  | RNA → rpmE (PRK00019)Ribosomal_L31 (pfam01197) → |
| Sen-288-342  | NZ_CJIA01000015.1  | + | 104146 | 104198 | RNA → rpmE (PRK00019)Ribosomal_L31 (pfam01197) → |
| Sen-288-343  | NZ_CJIB01000016.1  | - | 39535  | 39483  | RNA → rpmE (PRK00019)Ribosomal_L31 (pfam01197) → |
| Sen-288-344  | NZ_CJLV01000015.1  | - | 41505  | 41453  | RNA → rpmE (PRK00019)Ribosomal_L31 (pfam01197) → |
| Sen-288-345  | NZ_CJFN01000016.1  | - | 39558  | 39506  | RNA → rpmE (PRK00019)Ribosomal_L31 (pfam01197) → |
| Sen-288-346  | NZ_CJDC0100002.1   | - | 198555 | 198503 | RNA → rpmE (PRK00019)Ribosomal_L31 (pfam01197) → |
| Sen-288-347  | NZ_CJSB01000016.1  | + | 104174 | 104226 | RNA → rpmE (PRK00019)Ribosomal_L31 (pfam01197) → |
| Sen-288-348  | NZ_CJGZ01000016.1  | + | 104153 | 104205 | RNA → rpmE (PRK00019)Ribosomal_L31 (pfam01197) → |
| Sen-288-349  | NZ_CJPL01000015.1  | - | 39601  | 39549  | RNA → rpmE (PRK00019)Ribosomal_L31 (pfam01197) → |
| Sen-288-1117 | NZ_CIWJ01000014.1  | - | 41502  | 41450  | RNA → rpmE (PRK00019)Ribosomal_L31 (pfam01197) → |
| Sen-288-350  | NZ_CJZD01000016.1  | + | 104156 | 104208 | RNA → rpmE (PRK00019)Ribosomal_L31 (pfam01197) → |
| Sen-288-351  | NZ_CJW01000014.1   | - | 39586  | 39534  | RNA → rpmE (PRK00019)Ribosomal_L31 (pfam01197) → |
| Sen-288-352  | NZ_CJTF01000015.1  | - | 39367  | 39315  | RNA → rpmE (PRK00019)Ribosomal_L31 (pfam01197) → |
| Sen-288-353  | NZ_CIVP01000016.1  | + | 104175 | 104227 | RNA → rpmE (PRK00019)Ribosomal_L31 (pfam01197) → |
| Sen-288-354  | NZ_CJEH01000016.1  | + | 104155 | 104207 | RNA → rpmE (PRK00019)Ribosomal_L31 (pfam01197) → |
| Sen-288-355  | NZ_CIYM01000016.1  | + | 104162 | 104214 | RNA → rpmE (PRK00019)Ribosomal_L31 (pfam01197) → |
| Sen-288-356  | NZ_CJDK01000011.1  | + | 104148 | 104200 | RNA → rpmE (PRK00019)Ribosomal_L31 (pfam01197) → |
| Sen-288-357  | NZ_CIZL01000011.1  | + | 137065 | 137117 | RNA → rpmE (PRK00019)Ribosomal_L31 (pfam01197) → |
| Sen-288-358  | NZ_CJWI01000014.1  | + | 104153 | 104205 | RNA → rpmE (PRK00019)Ribosomal_L31 (pfam01197) → |
| Sen-288-359  | NZ_CJDN01000015.1  | - | 39372  | 39320  | RNA → rpmE (PRK00019)Ribosomal_L31 (pfam01197) → |
| Sen-288-360  | NZ_CJMU01000015.1  | + | 104152 | 104204 | RNA → rpmE (PRK00019)Ribosomal_L31 (pfam01197) → |
| Sen-288-361  | NZ_CJHB01000016.1  | - | 39535  | 39483  | RNA → rpmE (PRK00019)Ribosomal_L31 (pfam01197) → |
| Sen-288-362  | NZ_CJTU01000016.1  | + | 104163 | 104215 | RNA → rpmE (PRK00019)Ribosomal_L31 (pfam01197) → |
| Sen-288-363  | NZ_CJDW01000017.1  | + | 104153 | 104205 | RNA → rpmE (PRK00019)Ribosomal_L31 (pfam01197) → |
| Sen-288-364  | NZ_CJSW01000016.1  | + | 104153 | 104205 | RNA → rpmE (PRK00019)Ribosomal_L31 (pfam01197) → |
| Sen-288-365  | NZ_CJQN01000015.1  | + | 107846 | 107898 | RNA → rpmE (PRK00019)Ribosomal_L31 (pfam01197) → |
| Sen-305-1    | NZ_AUXE01000010.1  | - | 45181  | 45129  | RNA → rpmE (PRK00019)Ribosomal_L31 (pfam01197) → |
| Sen-288-366  | NZ_CJPR01000016.1  | + | 104151 | 104203 | RNA → rpmE (PRK00019)Ribosomal_L31 (pfam01197) → |
| Sen-288-367  | NZ_CJRO01000014.1  | - | 39552  | 39500  | RNA → rpmE (PRK00019)Ribosomal_L31 (pfam01197) → |
| Sen-288-368  | NZ_CILG01000015.1  | - | 39576  | 39524  | RNA → rpmE (PRK00019)Ribosomal_L31 (pfam01197) → |
| Sen-288-369  | NZ_CJOO01000015.1  | + | 107413 | 107465 | RNA → rpmE (PRK00019)Ribosomal_L31 (pfam01197) → |
| Sen-986-1    | NZ_AMDZ02000070.1  | + | 104391 | 104443 | RNA → rpmE (PRK00019)Ribosomal_L31 (pfam01197) → |
| Sen-288-370  | NZ_CJSG01000015.1  | - | 39539  | 39487  | RNA → rpmE (PRK00019)Ribosomal_L31 (pfam01197) → |
| Sen-984-1    | NZ_AMED02000023.1  | - | 45415  | 45363  | RNA → rpmE (PRK00019)Ribosomal_L31 (pfam01197) → |
| Sen-288-371  | NZ_CJQS01000015.1  | - | 39556  | 39504  | RNA → rpmE (PRK00019)Ribosomal_L31 (pfam01197) → |
| Sen-995-1    | NZ_AYVJ010000205.1 | + | 27408  | 27460  | RNA → rpmE (PRK00019)Ribosomal_L31 (pfam01197) → |
| Sen-288-372  | NZ_CJKN01000015.1  | + | 107411 | 107463 | RNA → rpmE (PRK00019)Ribosomal_L31 (pfam01197) → |
| Sen-288-373  | NZ_CJDD01000012.1  | + | 109398 | 109450 | RNA → rpmE (PRK00019)Ribosomal_L31 (pfam01197) → |
| Sen-970-1    | NZ_AOXO01000023.1  | + | 104435 | 104487 | RNA → rpmE (PRK00019)Ribosomal_L31 (pfam01197) → |
| Sen-288-374  | NZ_CJCD01000016.1  | + | 104152 | 104204 | RNA → rpmE (PRK00019)Ribosomal_L31 (pfam01197) → |
| Sen-972-1    | NZ_AJTU01000006.1  | + | 145115 | 145167 | RNA → rpmE (PRK00019)Ribosomal_L31 (pfam01197) → |
| Sen-288-375  | NZ_CJHD01000016.1  | - | 39723  | 39671  | RNA → rpmE (PRK00019)Ribosomal_L31 (pfam01197) → |
| Sen-987-1    | NZ_AMEA02000019.1  | - | 45415  | 45363  | RNA → rpmE (PRK00019)Ribosomal_L31 (pfam01197) → |
| Sen-288-376  | NZ_CJIX01000014.1  | - | 41505  | 41453  | RNA → rpmE (PRK00019)Ribosomal_L31 (pfam01197) → |
| Sen-977-1    | NZ_AMEE02000078.1  | + | 106171 | 106223 | RNA → rpmE (PRK00019)Ribosomal_L31 (pfam01197) → |
| Sen-288-377  | NZ_CJDA01000014.1  | + | 104149 | 104201 | RNA → rpmE (PRK00019)Ribosomal_L31 (pfam01197) → |



|             |                   |   |        |        |                                                                                             |
|-------------|-------------------|---|--------|--------|---------------------------------------------------------------------------------------------|
| Sen-978-1   | NZ_AMEF02000109.1 | - | 45424  | 45372  | RNA → rpmE (PRK00019)Ribosomal_L31 (pfam01197) →                                            |
| Sen-989-1   | NZ_AERV01000009.1 | + | 104113 | 104165 | RNA → rpmE (PRK00019)Ribosomal_L31 (pfam01197) → rpmE (PRK00019)Ribosomal_L31 (pfam01197) → |
| Sen-288-378 | NZ_CJKU01000014.1 | + | 107993 | 108045 | RNA → rpmE (PRK00019)Ribosomal_L31 (pfam01197) →                                            |
| Sen-288-379 | NZ_CJCC01000015.1 | + | 104226 | 104278 | RNA → rpmE (PRK00019)Ribosomal_L31 (pfam01197) →                                            |
| Sen-980-1   | NZ_AMDY01000201.1 | + | 104301 | 104353 | RNA → rpmE (PRK00019)Ribosomal_L31 (pfam01197) →                                            |
| Sen-288-380 | NZ_CJGS01000015.1 | - | 39567  | 39515  | RNA → rpmE (PRK00019)Ribosomal_L31 (pfam01197) →                                            |
| Sen-998-1   | NZ_AOXX01000345.1 | - | 38141  | 38089  | RNA → rpmE (PRK00019)Ribosomal_L31 (pfam01197) → rpmE (PRK00019)Ribosomal_L31 (pfam01197) → |
| Sen-976-1   | NZ_AMDX02000028.1 | - | 45307  | 45255  | RNA → rpmE (PRK00019)Ribosomal_L31 (pfam01197) →                                            |
| Sen-982-1   | NZ_AMEC02000007.1 | + | 104391 | 104443 | RNA → rpmE (PRK00019)Ribosomal_L31 (pfam01197) →                                            |
| Sen-983-1   | NZ_AMEH02000005.1 | + | 2211   | 2263   | RNA → rpmE (PRK00019)Ribosomal_L31 (pfam01197) →                                            |
| Sen-974-1   | NZ_AOXD01000071.1 | + | 69832  | 69884  | RNA → rpmE (PRK00019)Ribosomal_L31 (pfam01197) →                                            |
| Sen-1023-1  | NZ_AOXM01000017.1 | + | 17636  | 17688  | RNA → rpmE (PRK00019)Ribosomal_L31 (pfam01197) →                                            |
| Sen-997-1   | NZ_AOXM01000219.1 | - | 37004  | 36952  | RNA → rpmE (PRK00019)Ribosomal_L31 (pfam01197) →                                            |
| Sen-981-1   | NZ_AMEB02000038.1 | + | 106171 | 106223 | RNA → rpmE (PRK00019)Ribosomal_L31 (pfam01197) →                                            |
| Sen-979-1   | NZ_AMEG02000182.1 | - | 45307  | 45255  | RNA → rpmE (PRK00019)Ribosomal_L31 (pfam01197) →                                            |
| Sen-300-15  | NZ_CQGX01000017.1 | - | 45178  | 45126  | RNA → rpmE (PRK00019)Ribosomal_L31 (pfam01197) →                                            |
| Sen-300-16  | NZ_CQHG01000017.1 | - | 45269  | 45217  | RNA → rpmE (PRK00019)Ribosomal_L31 (pfam01197) →                                            |
| Sen-300-17  | NZ_CQHN01000015.1 | - | 47295  | 47243  | RNA → rpmE (PRK00019)Ribosomal_L31 (pfam01197) →                                            |
| Sen-975-1   | NZ_AUVE01000010.1 | - | 45181  | 45129  | RNA → rpmE (PRK00019)Ribosomal_L31 (pfam01197) →                                            |
| Sen-304-1   | NZ_AUVD01000058.1 | - | 45077  | 45025  | RNA → rpmE (PRK00019)Ribosomal_L31 (pfam01197) →                                            |
| Sen-994-1   | NZ_AYUO01000004.1 | + | 57838  | 57890  | RNA → rpmE (PRK00019)Ribosomal_L31 (pfam01197) →                                            |
| Sen-300-18  | NZ_CQGT01000017.1 | + | 42541  | 42593  | RNA → rpmE (PRK00019)Ribosomal_L31 (pfam01197) →                                            |
| Sen-300-19  | NZ_CQHH01000015.1 | - | 45254  | 45202  | RNA → rpmE (PRK00019)Ribosomal_L31 (pfam01197) →                                            |
| Sen-300-20  | NZ_CQGZ01000017.1 | + | 42532  | 42584  | RNA → rpmE (PRK00019)Ribosomal_L31 (pfam01197) →                                            |
| Sen-300-21  | NZ_CQHR01000015.1 | - | 45343  | 45291  | RNA → rpmE (PRK00019)Ribosomal_L31 (pfam01197) →                                            |
| Sen-300-22  | NZ_CQJ01000016.1  | - | 45252  | 45200  | RNA → rpmE (PRK00019)Ribosomal_L31 (pfam01197) →                                            |
| Sen-300-23  | NZ_CQHD01000016.1 | - | 45196  | 45144  | RNA → rpmE (PRK00019)Ribosomal_L31 (pfam01197) →                                            |
| Sen-300-24  | NZ_CQGM01000018.1 | - | 45252  | 45200  | RNA → rpmE (PRK00019)Ribosomal_L31 (pfam01197) →                                            |
| Sen-300-25  | NZ_CQGO01000016.1 | + | 42519  | 42571  | RNA → rpmE (PRK00019)Ribosomal_L31 (pfam01197) →                                            |
| Sen-300-26  | NZ_CQHW01000017.1 | - | 45178  | 45126  | RNA → rpmE (PRK00019)Ribosomal_L31 (pfam01197) →                                            |
| Sen-302-1   | NZ_AHVA01000016.1 | + | 104730 | 104782 | RNA → rpmE (PRK00019)Ribosomal_L31 (pfam01197) →                                            |
| Sen-985-1   | NZ_ATWR01000081.1 | + | 107605 | 107657 | RNA → rpmE (PRK00019)Ribosomal_L31 (pfam01197) →                                            |
| Sen-300-27  | NZ_CQHC01000015.1 | + | 42549  | 42601  | RNA → rpmE (PRK00019)Ribosomal_L31 (pfam01197) →                                            |
| Sen-300-28  | NZ_CQGG01000019.1 | - | 45254  | 45202  | RNA → rpmE (PRK00019)Ribosomal_L31 (pfam01197) →                                            |
| Sen-300-29  | NZ_CQHA01000015.1 | + | 42549  | 42601  | RNA → rpmE (PRK00019)Ribosomal_L31 (pfam01197) →                                            |
| Sen-303-1   | NZ_AHUZ01000016.1 | + | 104759 | 104811 | RNA → rpmE (PRK00019)Ribosomal_L31 (pfam01197) →                                            |
| Sen-288-381 | NZ_CIVR01000009.1 | - | 39382  | 39330  | RNA → rpmE (PRK00019)Ribosomal_L31 (pfam01197) →                                            |
| Sen-288-382 | NZ_CJNX01000014.1 | - | 41232  | 41180  | RNA → rpmE (PRK00019)Ribosomal_L31 (pfam01197) →                                            |
| Sen-288-383 | NZ_CJLY01000015.1 | + | 104151 | 104203 | RNA → rpmE (PRK00019)Ribosomal_L31 (pfam01197) →                                            |
| Sen-288-384 | NZ_CJPW01000010.1 | - | 39601  | 39549  | RNA → rpmE (PRK00019)Ribosomal_L31 (pfam01197) →                                            |
| Sen-288-385 | NZ_CEZM01000016.1 | - | 39537  | 39485  | RNA → rpmE (PRK00019)Ribosomal_L31 (pfam01197) →                                            |
| Sen-288-386 | NZ_CJHQ01000017.1 | - | 39537  | 39485  | RNA → rpmE (PRK00019)Ribosomal_L31 (pfam01197) →                                            |
| Sen-288-387 | NZ_CEXK01000015.1 | - | 39680  | 39628  | RNA → rpmE (PRK00019)Ribosomal_L31 (pfam01197) →                                            |
| Sen-288-388 | NZ_CIWG01000014.1 | + | 104159 | 104211 | RNA → rpmE (PRK00019)Ribosomal_L31 (pfam01197) →                                            |
| Sen-288-389 | NZ_CINK01000011.1 | - | 44769  | 44717  | RNA → rpmE (PRK00019)Ribosomal_L31 (pfam01197) →                                            |
| Sen-288-390 | NZ_CJOT01000015.1 | + | 104156 | 104208 | RNA → rpmE (PRK00019)Ribosomal_L31 (pfam01197) →                                            |
| Sen-288-391 | NZ_CJIT01000010.1 | - | 39562  | 39510  | RNA → rpmE (PRK00019)Ribosomal_L31 (pfam01197) →                                            |
| Sen-288-392 | NZ_CJFD01000013.1 | - | 39574  | 39522  | RNA → rpmE (PRK00019)Ribosomal_L31 (pfam01197) →                                            |
| Sen-288-393 | NZ_CJYH01000004.1 | - | 216848 | 216796 | RNA → rpmE (PRK00019)Ribosomal_L31 (pfam01197) →                                            |
| Sen-288-394 | NZ_CJCT01000016.1 | + | 104146 | 104198 | RNA → rpmE (PRK00019)Ribosomal_L31 (pfam01197) →                                            |
| Sen-288-395 | NZ_CJFK01000013.1 | + | 104153 | 104205 | RNA → rpmE (PRK00019)Ribosomal_L31 (pfam01197) →                                            |
| Sen-288-396 | NZ_CJKF01000007.1 | + | 189409 | 189461 | RNA → rpmE (PRK00019)Ribosomal_L31 (pfam01197) →                                            |

|             |                   |   |        |        |                                                  |
|-------------|-------------------|---|--------|--------|--------------------------------------------------|
| Sen-288-397 | NZ_CILW01000010.1 | - | 39540  | 39488  | RNA → rpmE (PRK00019)Ribosomal_L31 (pfam01197) → |
| Sen-288-398 | NZ_CIYJ01000011.1 | + | 137633 | 137685 | RNA → rpmE (PRK00019)Ribosomal_L31 (pfam01197) → |
| Sen-288-399 | NZ_CJBA01000015.1 | - | 39566  | 39514  | RNA → rpmE (PRK00019)Ribosomal_L31 (pfam01197) → |
| Sen-288-400 | NZ_CIVL01000015.1 | - | 39544  | 39492  | RNA → rpmE (PRK00019)Ribosomal_L31 (pfam01197) → |
| Sen-288-401 | NZ_CJDV01000016.1 | - | 39534  | 39482  | RNA → rpmE (PRK00019)Ribosomal_L31 (pfam01197) → |
| Sen-288-402 | NZ_CJVE01000015.1 | + | 104132 | 104184 | RNA → rpmE (PRK00019)Ribosomal_L31 (pfam01197) → |
| Sen-288-403 | NZ_CJYL01000014.1 | - | 41510  | 41458  | RNA → rpmE (PRK00019)Ribosomal_L31 (pfam01197) → |
| Sen-288-404 | NZ_CJIZ01000020.1 | - | 39374  | 39322  | RNA → rpmE (PRK00019)Ribosomal_L31 (pfam01197) → |
| Sen-288-405 | NZ_CJFX01000013.1 | - | 39536  | 39484  | RNA → rpmE (PRK00019)Ribosomal_L31 (pfam01197) → |
| Sen-288-406 | NZ_CIXL01000015.1 | - | 39556  | 39504  | RNA → rpmE (PRK00019)Ribosomal_L31 (pfam01197) → |
| Sen-288-407 | NZ_CZXC01000016.1 | + | 104161 | 104213 | RNA → rpmE (PRK00019)Ribosomal_L31 (pfam01197) → |
| Sen-288-408 | NZ_CEXH01000014.1 | + | 103992 | 104044 | RNA → rpmE (PRK00019)Ribosomal_L31 (pfam01197) → |
| Sen-288-409 | NZ_CJEG01000016.1 | - | 39652  | 39600  | RNA → rpmE (PRK00019)Ribosomal_L31 (pfam01197) → |
| Sen-288-410 | NZ_CJUB01000015.1 | - | 41231  | 41179  | RNA → rpmE (PRK00019)Ribosomal_L31 (pfam01197) → |
| Sen-288-411 | NZ_CJUV01000015.1 | - | 41231  | 41179  | RNA → rpmE (PRK00019)Ribosomal_L31 (pfam01197) → |
| Sen-288-412 | NZ_CIWP01000016.1 | + | 104141 | 104193 | RNA → rpmE (PRK00019)Ribosomal_L31 (pfam01197) → |
| Sen-288-413 | NZ_CJVJ01000017.1 | - | 39377  | 39325  | RNA → rpmE (PRK00019)Ribosomal_L31 (pfam01197) → |
| Sen-288-414 | NZ_CJUW01000012.1 | - | 39355  | 39303  | RNA → rpmE (PRK00019)Ribosomal_L31 (pfam01197) → |
| Sen-288-415 | NZ_CJPE01000016.1 | - | 39601  | 39549  | RNA → rpmE (PRK00019)Ribosomal_L31 (pfam01197) → |
| Sen-288-416 | NZ_CIWE01000016.1 | + | 103936 | 103988 | RNA → rpmE (PRK00019)Ribosomal_L31 (pfam01197) → |
| Sen-288-417 | NZ_CIYW01000008.1 | + | 170860 | 170912 | RNA → rpmE (PRK00019)Ribosomal_L31 (pfam01197) → |
| Sen-288-418 | NZ_CJXX01000017.1 | - | 39362  | 39310  | RNA → rpmE (PRK00019)Ribosomal_L31 (pfam01197) → |
| Sen-288-419 | NZ_CIUM01000014.1 | - | 39585  | 39533  | RNA → rpmE (PRK00019)Ribosomal_L31 (pfam01197) → |
| Sen-288-420 | NZ_CJOC01000016.1 | - | 39536  | 39484  | RNA → rpmE (PRK00019)Ribosomal_L31 (pfam01197) → |
| Sen-288-421 | NZ_CJGD01000016.1 | - | 39535  | 39483  | RNA → rpmE (PRK00019)Ribosomal_L31 (pfam01197) → |
| Sen-288-422 | NZ_CIVM01000016.1 | - | 39382  | 39330  | RNA → rpmE (PRK00019)Ribosomal_L31 (pfam01197) → |
| Sen-288-423 | NZ_CJTR01000016.1 | + | 104150 | 104202 | RNA → rpmE (PRK00019)Ribosomal_L31 (pfam01197) → |
| Sen-288-424 | NZ_CIUW01000015.1 | + | 107419 | 107471 | RNA → rpmE (PRK00019)Ribosomal_L31 (pfam01197) → |
| Sen-288-425 | NZ_CJND01000015.1 | + | 107419 | 107471 | RNA → rpmE (PRK00019)Ribosomal_L31 (pfam01197) → |
| Sen-288-426 | NZ_CJKL01000011.1 | - | 39456  | 39404  | RNA → rpmE (PRK00019)Ribosomal_L31 (pfam01197) → |
| Sen-288-427 | NZ_CIWS01000015.1 | + | 104216 | 104268 | RNA → rpmE (PRK00019)Ribosomal_L31 (pfam01197) → |
| Sen-288-428 | NZ_CJRT01000016.1 | + | 104154 | 104206 | RNA → rpmE (PRK00019)Ribosomal_L31 (pfam01197) → |
| Sen-288-429 | NZ_CJPD01000014.1 | - | 41228  | 41176  | RNA → rpmE (PRK00019)Ribosomal_L31 (pfam01197) → |
| Sen-288-430 | NZ_CIXX01000022.1 | + | 43222  | 43274  | RNA → rpmE (PRK00019)Ribosomal_L31 (pfam01197) → |
| Sen-288-431 | NZ_CIWX01000016.1 | - | 39527  | 39475  | RNA → rpmE (PRK00019)Ribosomal_L31 (pfam01197) → |
| Sen-288-432 | NZ_CJLS01000016.1 | - | 39536  | 39484  | RNA → rpmE (PRK00019)Ribosomal_L31 (pfam01197) → |
| Sen-288-433 | NZ_CJBM01000016.1 | + | 104179 | 104231 | RNA → rpmE (PRK00019)Ribosomal_L31 (pfam01197) → |
| Sen-288-434 | NZ_CJTA01000015.1 | - | 39577  | 39525  | RNA → rpmE (PRK00019)Ribosomal_L31 (pfam01197) → |
| Sen-288-435 | NZ_CJJT01000014.1 | + | 104154 | 104206 | RNA → rpmE (PRK00019)Ribosomal_L31 (pfam01197) → |
| Sen-288-436 | NZ_CJPM01000016.1 | - | 39383  | 39331  | RNA → rpmE (PRK00019)Ribosomal_L31 (pfam01197) → |
| Sen-288-437 | NZ_CJBF01000011.1 | + | 141125 | 141177 | RNA → rpmE (PRK00019)Ribosomal_L31 (pfam01197) → |
| Sen-288-438 | NZ_CJJI01000002.1 | + | 405136 | 405188 | RNA → rpmE (PRK00019)Ribosomal_L31 (pfam01197) → |
| Sen-288-439 | NZ_CJIU01000013.1 | - | 41231  | 41179  | RNA → rpmE (PRK00019)Ribosomal_L31 (pfam01197) → |
| Sen-288-440 | NZ_CJJM01000014.1 | - | 41506  | 41454  | RNA → rpmE (PRK00019)Ribosomal_L31 (pfam01197) → |
| Sen-288-441 | NZ_CJEF01000016.1 | + | 104145 | 104197 | RNA → rpmE (PRK00019)Ribosomal_L31 (pfam01197) → |
| Sen-288-442 | NZ_CJAW01000016.1 | - | 39536  | 39484  | RNA → rpmE (PRK00019)Ribosomal_L31 (pfam01197) → |
| Sen-288-443 | NZ_CJYK01000014.1 | - | 39370  | 39318  | RNA → rpmE (PRK00019)Ribosomal_L31 (pfam01197) → |
| Sen-288-444 | NZ_CJWN01000016.1 | + | 104145 | 104197 | RNA → rpmE (PRK00019)Ribosomal_L31 (pfam01197) → |
| Sen-288-445 | NZ_CJSF01000017.1 | - | 39601  | 39549  | RNA → rpmE (PRK00019)Ribosomal_L31 (pfam01197) → |
| Sen-288-446 | NZ_CJHO01000016.1 | + | 104160 | 104212 | RNA → rpmE (PRK00019)Ribosomal_L31 (pfam01197) → |
| Sen-288-447 | NZ_CJYG01000015.1 | - | 41672  | 41620  | RNA → rpmE (PRK00019)Ribosomal_L31 (pfam01197) → |
| Sen-288-448 | NZ_CJDX01000017.1 | - | 39584  | 39532  | RNA → rpmE (PRK00019)Ribosomal_L31 (pfam01197) → |

|             |                   |   |        |        |                                                                                             |
|-------------|-------------------|---|--------|--------|---------------------------------------------------------------------------------------------|
| Sen-288-449 | NZ.CJLM01000015.1 | + | 103992 | 104044 | RNA → rpmE (PRK00019)Ribosomal_L31 (pfam01197) →                                            |
| Sen-288-450 | NZ.CJXR01000015.1 | - | 39382  | 39330  | RNA → rpmE (PRK00019)Ribosomal_L31 (pfam01197) →                                            |
| Sen-288-451 | NZ.CILF01000016.1 | - | 39530  | 39478  | RNA → rpmE (PRK00019)Ribosomal_L31 (pfam01197) →                                            |
| Sen-288-452 | NZ.CJSC01000016.1 | - | 39549  | 39497  | RNA → rpmE (PRK00019)Ribosomal_L31 (pfam01197) →                                            |
| Sen-288-453 | NZ.CJJV01000011.1 | - | 39456  | 39404  | RNA → rpmE (PRK00019)Ribosomal_L31 (pfam01197) →                                            |
| Sen-288-454 | NZ.CIUO01000015.1 | - | 41231  | 41179  | RNA → rpmE (PRK00019)Ribosomal_L31 (pfam01197) →                                            |
| Sen-288-455 | NZ.CIVD01000014.1 | - | 41227  | 41175  | RNA → rpmE (PRK00019)Ribosomal_L31 (pfam01197) →                                            |
| Sen-288-456 | NZ.CJVZ01000016.1 | - | 39363  | 39311  | RNA → rpmE (PRK00019)Ribosomal_L31 (pfam01197) →                                            |
| Sen-288-457 | NZ.CJQH01000016.1 | + | 104156 | 104208 | RNA → rpmE (PRK00019)Ribosomal_L31 (pfam01197) →                                            |
| Sen-288-458 | NZ.CJGB01000016.1 | + | 104179 | 104231 | RNA → rpmE (PRK00019)Ribosomal_L31 (pfam01197) →                                            |
| Sen-288-459 | NZ.CJUZ01000013.1 | + | 107861 | 107913 | RNA → rpmE (PRK00019)Ribosomal_L31 (pfam01197) →                                            |
| Sen-288-460 | NZ.CIZF01000016.1 | - | 39534  | 39482  | RNA → rpmE (PRK00019)Ribosomal_L31 (pfam01197) →                                            |
| Sen-288-461 | NZ.CJFH01000017.1 | - | 39663  | 39611  | RNA → rpmE (PRK00019)Ribosomal_L31 (pfam01197) →                                            |
| Sen-288-462 | NZ.CJVU01000016.1 | + | 104011 | 104063 | RNA → rpmE (PRK00019)Ribosomal_L31 (pfam01197) →                                            |
| Sen-288-463 | NZ.CJIC01000016.1 | + | 104142 | 104194 | RNA → rpmE (PRK00019)Ribosomal_L31 (pfam01197) →                                            |
| Sen-288-464 | NZ.CJQ01000013.1  | + | 107705 | 107757 | RNA → rpmE (PRK00019)Ribosomal_L31 (pfam01197) →                                            |
| Sen-288-465 | NZ.CJFT01000016.1 | + | 104156 | 104208 | RNA → rpmE (PRK00019)Ribosomal_L31 (pfam01197) →                                            |
| Sen-288-466 | NZ.CJGF01000016.1 | - | 39538  | 39486  | RNA → rpmE (PRK00019)Ribosomal_L31 (pfam01197) →                                            |
| Sen-288-467 | NZ.CJSP01000016.1 | + | 104164 | 104216 | RNA → rpmE (PRK00019)Ribosomal_L31 (pfam01197) →                                            |
| Sen-288-468 | NZ.CIWY01000011.1 | - | 39583  | 39531  | RNA → rpmE (PRK00019)Ribosomal_L31 (pfam01197) →                                            |
| Sen-288-469 | NZ.CIXJ01000016.1 | - | 39527  | 39475  | RNA → rpmE (PRK00019)Ribosomal_L31 (pfam01197) →                                            |
| Sen-426-1   | NZ.AOZW01000064.1 | + | 84250  | 84302  | RNA → rpmE (PRK00019)Ribosomal_L31 (pfam01197) →                                            |
| Sen-288-470 | NZ.CJSS01000016.1 | - | 39373  | 39321  | RNA → rpmE (PRK00019)Ribosomal_L31 (pfam01197) →                                            |
| Sen-288-471 | NZ.CJXZ01000017.1 | - | 39540  | 39488  | RNA → rpmE (PRK00019)Ribosomal_L31 (pfam01197) →                                            |
| Sen-428-1   | NZ.APAA01000073.1 | + | 98899  | 98951  | RNA → rpmE (PRK00019)Ribosomal_L31 (pfam01197) →                                            |
| Sen-288-472 | NZ.CJHC01000016.1 | + | 104148 | 104200 | RNA → rpmE (PRK00019)Ribosomal_L31 (pfam01197) →                                            |
| Sen-18-1    | NZ.AUXR01000014.1 | + | 105391 | 105443 | RNA → rpmE (PRK00019)Ribosomal_L31 (pfam01197) →                                            |
| Sen-288-473 | NZ.CJAV01000016.1 | - | 39534  | 39482  | RNA → rpmE (PRK00019)Ribosomal_L31 (pfam01197) →                                            |
| Sen-95-1    | NZ.JMMF01000016.1 | + | 103451 | 103503 | RNA → rpmE (PRK00019)Ribosomal_L31 (pfam01197) →                                            |
| Sen-288-474 | NZ.CJSN01000016.1 | + | 104157 | 104209 | RNA → rpmE (PRK00019)Ribosomal_L31 (pfam01197) →                                            |
| Sen-288-475 | NZ.CJN01000016.1  | + | 104130 | 104182 | RNA → rpmE (PRK00019)Ribosomal_L31 (pfam01197) →                                            |
| Sen-41-1    | NZ.JMMI01000001.1 | + | 55530  | 55582  | RNA → rpmE (PRK00019)Ribosomal_L31 (pfam01197) →                                            |
| Sen-288-476 | NZ.CJHV01000015.1 | + | 103986 | 104038 | RNA → rpmE (PRK00019)Ribosomal_L31 (pfam01197) →                                            |
| Sen-397-1   | NZ.CARQ01000039.1 | - | 37552  | 37500  | RNA → rpmE (PRK00019)Ribosomal_L31 (pfam01197) →                                            |
| Sen-288-477 | NZ.CJTG01000016.1 | + | 104155 | 104207 | RNA → rpmE (PRK00019)Ribosomal_L31 (pfam01197) →                                            |
| Sen-288-478 | NZ.CJFG01000016.1 | - | 39536  | 39484  | RNA → rpmE (PRK00019)Ribosomal_L31 (pfam01197) →                                            |
| Sen-410-1   | NZ.CARG01000040.1 | - | 37550  | 37498  | RNA → rpmE (PRK00019)Ribosomal_L31 (pfam01197) →                                            |
| Sen-288-479 | NZ.CJGT01000015.1 | - | 39574  | 39522  | RNA → rpmE (PRK00019)Ribosomal_L31 (pfam01197) →                                            |
| Sen-415-1   | NZ.CARB01000036.1 | - | 37553  | 37501  | RNA → rpmE (PRK00019)Ribosomal_L31 (pfam01197) →                                            |
| Sen-288-480 | NZ.CJFR01000016.1 | - | 39536  | 39484  | RNA → rpmE (PRK00019)Ribosomal_L31 (pfam01197) →                                            |
| Sen-422-1   | NZ.AYDL01000045.1 | + | 111493 | 111545 | RNA → rpmE (PRK00019)Ribosomal_L31 (pfam01197) → rpmE (PRK00019)Ribosomal_L31 (pfam01197) → |
| Sen-288-481 | NZ.CJSZ01000014.1 | + | 107858 | 107910 | RNA → rpmE (PRK00019)Ribosomal_L31 (pfam01197) →                                            |
| Sen-288-482 | NZ.CJXM01000010.1 | - | 39370  | 39318  | RNA → rpmE (PRK00019)Ribosomal_L31 (pfam01197) →                                            |
| Sen-418-1   | NZ.AYDV01000082.1 | + | 111737 | 111789 | RNA → rpmE (PRK00019)Ribosomal_L31 (pfam01197) → rpmE (PRK00019)Ribosomal_L31 (pfam01197) → |
| Sen-434-1   | NZ.AOZN01000010.1 | + | 40589  | 40641  | RNA → rpmE (PRK00019)Ribosomal_L31 (pfam01197) → rpmE (PRK00019)Ribosomal_L31 (pfam01197) → |
| Sen-288-483 | NZ.CJDH01000017.1 | - | 39536  | 39484  | RNA → rpmE (PRK00019)Ribosomal_L31 (pfam01197) →                                            |
| Sen-288-484 | NZ.CJNO01000014.1 | - | 41507  | 41455  | RNA → rpmE (PRK00019)Ribosomal_L31 (pfam01197) →                                            |
| Sen-113-2   | NZ.AOZO01000047.1 | + | 104627 | 104679 | RNA → rpmE (PRK00019)Ribosomal_L31 (pfam01197) →                                            |
| Sen-288-485 | NZ.CJME01000017.1 | + | 107419 | 107471 | RNA → rpmE (PRK00019)Ribosomal_L31 (pfam01197) →                                            |
| Sen-435-1   | NZ.AOZT01000071.1 | + | 104272 | 104324 | RNA → rpmE (PRK00019)Ribosomal_L31 (pfam01197) → rpmE (PRK00019)Ribosomal_L31 (pfam01197) → |
| Sen-288-486 | NZ.CJNB01000013.1 | - | 41505  | 41453  | RNA → rpmE (PRK00019)Ribosomal_L31 (pfam01197) →                                            |
| Sen-406-1   | NZ.AOZU01000014.1 | - | 37534  | 37482  | RNA → rpmE (PRK00019)Ribosomal_L31 (pfam01197) → rpmE (PRK00019)Ribosomal_L31 (pfam01197) → |



|              |                   |   |        |        |                                                                                             |
|--------------|-------------------|---|--------|--------|---------------------------------------------------------------------------------------------|
| Sen-288-487  | NZ_CIVQ01000014.1 | + | 108011 | 108063 | RNA → rpmE (PRK00019)Ribosomal_L31 (pfam01197) →                                            |
| Sen-404-1    | NZ_AOZY01000035.1 | + | 101428 | 101480 | RNA → rpmE (PRK00019)Ribosomal_L31 (pfam01197) → rpmE (PRK00019)Ribosomal_L31 (pfam01197) → |
| Sen-288-488  | NZ_CJJO01000016.1 | + | 104159 | 104211 | RNA → rpmE (PRK00019)Ribosomal_L31 (pfam01197) →                                            |
| Sen-288-1118 | NZ_CIXY01000014.1 | - | 39556  | 39504  | RNA → rpmE (PRK00019)Ribosomal_L31 (pfam01197) →                                            |
| Sen-432-1    | NZ_ALPN01000011.1 | - | 45077  | 45025  | RNA → rpmE (PRK00019)Ribosomal_L31 (pfam01197) →                                            |
| Sen-288-489  | NZ_CJXP01000009.1 | - | 39601  | 39549  | RNA → rpmE (PRK00019)Ribosomal_L31 (pfam01197) →                                            |
| Sen-425-1    | NZ_ANOS01000058.1 | + | 37363  | 37415  | RNA → rpmE (PRK00019)Ribosomal_L31 (pfam01197) → rpmE (PRK00019)Ribosomal_L31 (pfam01197) → |
| Sen-288-490  | NZ_CJZF01000016.1 | - | 39578  | 39526  | RNA → rpmE (PRK00019)Ribosomal_L31 (pfam01197) →                                            |
| Sen-288-491  | NZ_CIYG01000016.1 | + | 104148 | 104200 | RNA → rpmE (PRK00019)Ribosomal_L31 (pfam01197) →                                            |
| Sen-395-1    | NZ_CARR01000042.1 | - | 37552  | 37500  | RNA → rpmE (PRK00019)Ribosomal_L31 (pfam01197) →                                            |
| Sen-288-492  | NZ_CJOW01000016.1 | - | 39706  | 39654  | RNA → rpmE (PRK00019)Ribosomal_L31 (pfam01197) →                                            |
| Sen-400-1    | NZ_CARN01000056.1 | + | 61476  | 61528  | RNA → rpmE (PRK00019)Ribosomal_L31 (pfam01197) →                                            |
| Sen-401-1    | NZ_CARM01000014.1 | - | 37552  | 37500  | RNA → rpmE (PRK00019)Ribosomal_L31 (pfam01197) →                                            |
| Sen-409-1    | NZ_CATS01000038.1 | - | 37552  | 37500  | RNA → rpmE (PRK00019)Ribosomal_L31 (pfam01197) →                                            |
| Sen-414-1    | NZ_CARCO1000038.1 | + | 110915 | 110967 | RNA → rpmE (PRK00019)Ribosomal_L31 (pfam01197) →                                            |
| Sen-421-1    | NZ_AYDK01000018.1 | + | 47113  | 47165  | RNA → rpmE (PRK00019)Ribosomal_L31 (pfam01197) → rpmE (PRK00019)Ribosomal_L31 (pfam01197) → |
| Sen-402-1    | NZ_AYCU01000016.1 | - | 37792  | 37740  | RNA → rpmE (PRK00019)Ribosomal_L31 (pfam01197) → rpmE (PRK00019)Ribosomal_L31 (pfam01197) → |
| Sen-437-1    | NZ_AOZR01000102.1 | - | 45537  | 45485  | RNA → rpmE (PRK00019)Ribosomal_L31 (pfam01197) → rpmE (PRK00019)Ribosomal_L31 (pfam01197) → |
| Sen-416-1    | NZ_AOZX01000052.1 | + | 111713 | 111765 | RNA → rpmE (PRK00019)Ribosomal_L31 (pfam01197) → rpmE (PRK00019)Ribosomal_L31 (pfam01197) → |
| Sen-439-1    | NZ_CQPO01000009.1 | + | 138562 | 138614 | RNA → rpmE (PRK00019)Ribosomal_L31 (pfam01197) →                                            |
| Sen-439-2    | NZ_CQPH01000012.1 | - | 45285  | 45233  | RNA → rpmE (PRK00019)Ribosomal_L31 (pfam01197) →                                            |
| Sen-439-3    | NZ_CQPJ01000008.1 | + | 138584 | 138636 | RNA → rpmE (PRK00019)Ribosomal_L31 (pfam01197) →                                            |
| Sen-16-1     | NZ_ARYP01000011.1 | + | 98887  | 98939  | RNA → rpmE (PRK00019)Ribosomal_L31 (pfam01197) →                                            |
| Sen-19-1     | NZ_ARYO01000080.1 | - | 45140  | 45088  | RNA → rpmE (PRK00019)Ribosomal_L31 (pfam01197) →                                            |
| Sen-49-1     | NZ_JMMM01000017.1 | + | 103448 | 103500 | RNA → rpmE (PRK00019)Ribosomal_L31 (pfam01197) →                                            |
| Sen-439-4    | NZ_CQPB01000009.1 | + | 106471 | 106523 | RNA → rpmE (PRK00019)Ribosomal_L31 (pfam01197) →                                            |
| Sen-439-5    | NZ_CQPG01000014.1 | - | 45583  | 45531  | RNA → rpmE (PRK00019)Ribosomal_L31 (pfam01197) →                                            |
| Sen-21-1     | NZ_JMMK01000030.1 | + | 103456 | 103508 | RNA → rpmE (PRK00019)Ribosomal_L31 (pfam01197) →                                            |
| Sen-31-1     | NZ_JMMH01000008.1 | - | 45105  | 45053  | RNA → rpmE (PRK00019)Ribosomal_L31 (pfam01197) →                                            |
| Sen-288-493  | NZ_CJHN01000016.1 | + | 104144 | 104196 | RNA → rpmE (PRK00019)Ribosomal_L31 (pfam01197) →                                            |
| Sen-288-494  | NZ_CJOZ01000016.1 | + | 104156 | 104208 | RNA → rpmE (PRK00019)Ribosomal_L31 (pfam01197) →                                            |
| Sen-288-495  | NZ_CJYV01000015.1 | - | 41680  | 41628  | RNA → rpmE (PRK00019)Ribosomal_L31 (pfam01197) →                                            |
| Sen-288-496  | NZ_CJW01000014.1  | + | 104151 | 104203 | RNA → rpmE (PRK00019)Ribosomal_L31 (pfam01197) →                                            |
| Sen-288-497  | NZ_CELU01000016.1 | + | 104133 | 104185 | RNA → rpmE (PRK00019)Ribosomal_L31 (pfam01197) →                                            |
| Sen-288-498  | NZ_CEYE01000016.1 | - | 39723  | 39671  | RNA → rpmE (PRK00019)Ribosomal_L31 (pfam01197) →                                            |
| Sen-288-499  | NZ_CEXO01000017.1 | - | 39595  | 39543  | RNA → rpmE (PRK00019)Ribosomal_L31 (pfam01197) →                                            |
| Sen-288-500  | NZ_CITF01000015.1 | + | 104157 | 104209 | RNA → rpmE (PRK00019)Ribosomal_L31 (pfam01197) →                                            |
| Sen-288-501  | NZ_CIRA01000016.1 | - | 39572  | 39520  | RNA → rpmE (PRK00019)Ribosomal_L31 (pfam01197) →                                            |
| Sen-288-502  | NZ_CIUE0100002.1  | + | 404999 | 405051 | RNA → rpmE (PRK00019)Ribosomal_L31 (pfam01197) →                                            |
| Sen-288-503  | NZ_CIPP01000016.1 | + | 104162 | 104214 | RNA → rpmE (PRK00019)Ribosomal_L31 (pfam01197) →                                            |
| Sen-288-504  | NZ_CIOU01000014.1 | - | 41231  | 41179  | RNA → rpmE (PRK00019)Ribosomal_L31 (pfam01197) →                                            |
| Sen-288-505  | NZ_CIPY01000009.1 | - | 39541  | 39489  | RNA → rpmE (PRK00019)Ribosomal_L31 (pfam01197) →                                            |
| Sen-288-506  | NZ_CIRH01000015.1 | + | 104027 | 104079 | RNA → rpmE (PRK00019)Ribosomal_L31 (pfam01197) →                                            |
| Sen-288-507  | NZ_CIOJ01000016.1 | - | 39368  | 39316  | RNA → rpmE (PRK00019)Ribosomal_L31 (pfam01197) →                                            |
| Sen-288-508  | NZ_CIRB01000014.1 | + | 104160 | 104212 | RNA → rpmE (PRK00019)Ribosomal_L31 (pfam01197) →                                            |
| Sen-288-509  | NZ_CIST01000013.1 | - | 41228  | 41176  | RNA → rpmE (PRK00019)Ribosomal_L31 (pfam01197) →                                            |
| Sen-288-510  | NZ_CIQL01000015.1 | + | 104145 | 104197 | RNA → rpmE (PRK00019)Ribosomal_L31 (pfam01197) →                                            |
| Sen-288-511  | NZ_CIQU01000004.1 | + | 104154 | 104206 | RNA → rpmE (PRK00019)Ribosomal_L31 (pfam01197) →                                            |
| Sen-288-512  | NZ_CITE01000014.1 | + | 103992 | 104044 | RNA → rpmE (PRK00019)Ribosomal_L31 (pfam01197) →                                            |
| Sen-288-513  | NZ_CITH01000016.1 | - | 39543  | 39491  | RNA → rpmE (PRK00019)Ribosomal_L31 (pfam01197) →                                            |
| Sen-288-514  | NZ_CJBV01000015.1 | + | 104159 | 104211 | RNA → rpmE (PRK00019)Ribosomal_L31 (pfam01197) →                                            |
| Sen-288-515  | NZ_CITO01000014.1 | - | 39380  | 39328  | RNA → rpmE (PRK00019)Ribosomal_L31 (pfam01197) →                                            |

|             |                   |   |        |        |                                                   |
|-------------|-------------------|---|--------|--------|---------------------------------------------------|
| Sen-288-516 | NZ.CJLW01000014.1 | + | 104151 | 104203 | RNA → rpmE (PRK00019) Ribosomal_L31 (pfam01197) → |
| Sen-288-517 | NZ.CISW01000015.1 | + | 104138 | 104190 | RNA → rpmE (PRK00019) Ribosomal_L31 (pfam01197) → |
| Sen-288-518 | NZ.CIYO01000014.1 | + | 107981 | 108033 | RNA → rpmE (PRK00019) Ribosomal_L31 (pfam01197) → |
| Sen-288-519 | NZ.CIRU01000011.1 | - | 39576  | 39524  | RNA → rpmE (PRK00019) Ribosomal_L31 (pfam01197) → |
| Sen-288-520 | NZ.CJTB01000016.1 | + | 104163 | 104215 | RNA → rpmE (PRK00019) Ribosomal_L31 (pfam01197) → |
| Sen-288-521 | NZ.CITL01000016.1 | + | 103986 | 104038 | RNA → rpmE (PRK00019) Ribosomal_L31 (pfam01197) → |
| Sen-288-522 | NZ.CIXC01000010.1 | - | 39454  | 39402  | RNA → rpmE (PRK00019) Ribosomal_L31 (pfam01197) → |
| Sen-288-523 | NZ.CIPR01000014.1 | + | 109634 | 109686 | RNA → rpmE (PRK00019) Ribosomal_L31 (pfam01197) → |
| Sen-288-524 | NZ.CJID01000016.1 | + | 104149 | 104201 | RNA → rpmE (PRK00019) Ribosomal_L31 (pfam01197) → |
| Sen-288-525 | NZ.CITK01000013.1 | - | 41230  | 41178  | RNA → rpmE (PRK00019) Ribosomal_L31 (pfam01197) → |
| Sen-288-526 | NZ.CINW01000014.1 | + | 104151 | 104203 | RNA → rpmE (PRK00019) Ribosomal_L31 (pfam01197) → |
| Sen-288-527 | NZ.CJZB01000016.1 | - | 39372  | 39320  | RNA → rpmE (PRK00019) Ribosomal_L31 (pfam01197) → |
| Sen-288-528 | NZ.CIRT01000010.1 | - | 39560  | 39508  | RNA → rpmE (PRK00019) Ribosomal_L31 (pfam01197) → |
| Sen-288-529 | NZ.CJCU01000016.1 | - | 39534  | 39482  | RNA → rpmE (PRK00019) Ribosomal_L31 (pfam01197) → |
| Sen-288-530 | NZ.CITT01000013.1 | + | 107996 | 108048 | RNA → rpmE (PRK00019) Ribosomal_L31 (pfam01197) → |
| Sen-288-531 | NZ.CIVN01000015.1 | - | 39383  | 39331  | RNA → rpmE (PRK00019) Ribosomal_L31 (pfam01197) → |
| Sen-288-532 | NZ.CIQA01000015.1 | + | 104162 | 104214 | RNA → rpmE (PRK00019) Ribosomal_L31 (pfam01197) → |
| Sen-288-533 | NZ.CJFF01000015.1 | + | 103990 | 104042 | RNA → rpmE (PRK00019) Ribosomal_L31 (pfam01197) → |
| Sen-288-534 | NZ.CIMW01000015.1 | - | 41230  | 41178  | RNA → rpmE (PRK00019) Ribosomal_L31 (pfam01197) → |
| Sen-288-535 | NZ.CIYV01000016.1 | + | 104156 | 104208 | RNA → rpmE (PRK00019) Ribosomal_L31 (pfam01197) → |
| Sen-288-536 | NZ.CISA01000015.1 | - | 39573  | 39521  | RNA → rpmE (PRK00019) Ribosomal_L31 (pfam01197) → |
| Sen-288-537 | NZ.CJUL01000015.1 | + | 104157 | 104209 | RNA → rpmE (PRK00019) Ribosomal_L31 (pfam01197) → |
| Sen-288-538 | NZ.CITS01000016.1 | - | 39579  | 39527  | RNA → rpmE (PRK00019) Ribosomal_L31 (pfam01197) → |
| Sen-288-539 | NZ.CITW01000013.1 | - | 41231  | 41179  | RNA → rpmE (PRK00019) Ribosomal_L31 (pfam01197) → |
| Sen-288-540 | NZ.CJMY01000013.1 | + | 107986 | 108038 | RNA → rpmE (PRK00019) Ribosomal_L31 (pfam01197) → |
| Sen-288-541 | NZ.CEXI01000016.1 | - | 39535  | 39483  | RNA → rpmE (PRK00019) Ribosomal_L31 (pfam01197) → |
| Sen-288-542 | NZ.CJNJ01000013.1 | - | 39536  | 39484  | RNA → rpmE (PRK00019) Ribosomal_L31 (pfam01197) → |
| Sen-288-543 | NZ.CIOL01000015.1 | + | 104163 | 104215 | RNA → rpmE (PRK00019) Ribosomal_L31 (pfam01197) → |
| Sen-288-544 | NZ.CJJJ01000004.1 | - | 194650 | 194598 | RNA → rpmE (PRK00019) Ribosomal_L31 (pfam01197) → |
| Sen-288-545 | NZ.CIRQ01000015.1 | - | 39584  | 39532  | RNA → rpmE (PRK00019) Ribosomal_L31 (pfam01197) → |
| Sen-288-546 | NZ.CJYJ01000013.1 | + | 107698 | 107750 | RNA → rpmE (PRK00019) Ribosomal_L31 (pfam01197) → |
| Sen-288-547 | NZ.CIPF01000015.1 | - | 39379  | 39327  | RNA → rpmE (PRK00019) Ribosomal_L31 (pfam01197) → |
| Sen-288-548 | NZ.CIXQ01000016.1 | + | 104148 | 104200 | RNA → rpmE (PRK00019) Ribosomal_L31 (pfam01197) → |
| Sen-288-549 | NZ.CIQG01000006.1 | + | 190326 | 190378 | RNA → rpmE (PRK00019) Ribosomal_L31 (pfam01197) → |
| Sen-288-550 | NZ.CJWO01000014.1 | + | 104155 | 104207 | RNA → rpmE (PRK00019) Ribosomal_L31 (pfam01197) → |
| Sen-288-551 | NZ.CIUB01000015.1 | + | 104161 | 104213 | RNA → rpmE (PRK00019) Ribosomal_L31 (pfam01197) → |
| Sen-288-552 | NZ.CIZQ01000010.1 | - | 41508  | 41456  | RNA → rpmE (PRK00019) Ribosomal_L31 (pfam01197) → |
| Sen-288-553 | NZ.CIPU01000003.1 | - | 198388 | 198336 | RNA → rpmE (PRK00019) Ribosomal_L31 (pfam01197) → |
| Sen-288-554 | NZ.CIYK01000016.1 | - | 39723  | 39671  | RNA → rpmE (PRK00019) Ribosomal_L31 (pfam01197) → |
| Sen-288-555 | NZ.CINV01000016.1 | - | 39601  | 39549  | RNA → rpmE (PRK00019) Ribosomal_L31 (pfam01197) → |
| Sen-288-556 | NZ.CJOQ01000014.1 | + | 107408 | 107460 | RNA → rpmE (PRK00019) Ribosomal_L31 (pfam01197) → |
| Sen-288-557 | NZ.CISJ01000014.1 | + | 103990 | 104042 | RNA → rpmE (PRK00019) Ribosomal_L31 (pfam01197) → |
| Sen-288-558 | NZ.CEYC01000016.1 | + | 104161 | 104213 | RNA → rpmE (PRK00019) Ribosomal_L31 (pfam01197) → |
| Sen-288-559 | NZ.CIVG01000015.1 | - | 41690  | 41638  | RNA → rpmE (PRK00019) Ribosomal_L31 (pfam01197) → |
| Sen-288-560 | NZ.CIOK01000016.1 | + | 104161 | 104213 | RNA → rpmE (PRK00019) Ribosomal_L31 (pfam01197) → |
| Sen-288-561 | NZ.CJHL01000016.1 | + | 104140 | 104192 | RNA → rpmE (PRK00019) Ribosomal_L31 (pfam01197) → |
| Sen-288-562 | NZ.CINF01000015.1 | - | 39370  | 39318  | RNA → rpmE (PRK00019) Ribosomal_L31 (pfam01197) → |
| Sen-288-563 | NZ.CJXQ01000011.1 | - | 39540  | 39488  | RNA → rpmE (PRK00019) Ribosomal_L31 (pfam01197) → |
| Sen-288-564 | NZ.CIRD01000016.1 | - | 39569  | 39517  | RNA → rpmE (PRK00019) Ribosomal_L31 (pfam01197) → |
| Sen-288-565 | NZ.CIPQ01000013.1 | + | 107862 | 107914 | RNA → rpmE (PRK00019) Ribosomal_L31 (pfam01197) → |
| Sen-288-566 | NZ.CISQ01000015.1 | - | 39591  | 39539  | RNA → rpmE (PRK00019) Ribosomal_L31 (pfam01197) → |
| Sen-288-567 | NZ.CIQV01000016.1 | + | 104145 | 104197 | RNA → rpmE (PRK00019) Ribosomal_L31 (pfam01197) → |



|             |                    |   |        |        |                                                                                             |
|-------------|--------------------|---|--------|--------|---------------------------------------------------------------------------------------------|
| Sen-288-568 | NZ.CIQR01000015.1  | - | 39361  | 39309  | RNA → rpmE (PRK00019)Ribosomal_L31 (pfam01197) →                                            |
| Sen-288-569 | NZ.CIPT01000015.1  | + | 104157 | 104209 | RNA → rpmE (PRK00019)Ribosomal_L31 (pfam01197) →                                            |
| Sen-288-570 | NZ.CISD01000015.1  | + | 103990 | 104042 | RNA → rpmE (PRK00019)Ribosomal_L31 (pfam01197) →                                            |
| Sen-288-571 | NZ.CINU01000015.1  | - | 39376  | 39324  | RNA → rpmE (PRK00019)Ribosomal_L31 (pfam01197) →                                            |
| Sen-288-572 | NZ.CIPC01000014.1  | + | 104163 | 104215 | RNA → rpmE (PRK00019)Ribosomal_L31 (pfam01197) →                                            |
| Sen-288-573 | NZ.CIOT01000015.1  | + | 107419 | 107471 | RNA → rpmE (PRK00019)Ribosomal_L31 (pfam01197) →                                            |
| Sen-288-574 | NZ.CITA01000014.1  | + | 103990 | 104042 | RNA → rpmE (PRK00019)Ribosomal_L31 (pfam01197) →                                            |
| Sen-288-575 | NZ.CISH01000015.1  | - | 39585  | 39533  | RNA → rpmE (PRK00019)Ribosomal_L31 (pfam01197) →                                            |
| Sen-288-576 | NZ.CIQB01000016.1  | - | 39591  | 39539  | RNA → rpmE (PRK00019)Ribosomal_L31 (pfam01197) →                                            |
| Sen-288-577 | NZ.CISF01000015.1  | + | 103990 | 104042 | RNA → rpmE (PRK00019)Ribosomal_L31 (pfam01197) →                                            |
| Sen-288-578 | NZ.CISS01000014.1  | + | 103990 | 104042 | RNA → rpmE (PRK00019)Ribosomal_L31 (pfam01197) →                                            |
| Sen-288-579 | NZ.CIPA01000016.1  | - | 39584  | 39532  | RNA → rpmE (PRK00019)Ribosomal_L31 (pfam01197) →                                            |
| Sen-288-580 | NZ.CIUA01000014.1  | - | 39588  | 39536  | RNA → rpmE (PRK00019)Ribosomal_L31 (pfam01197) →                                            |
| Sen-288-581 | NZ.CIPV01000004.1  | + | 104146 | 104198 | RNA → rpmE (PRK00019)Ribosomal_L31 (pfam01197) →                                            |
| Sen-288-582 | NZ.CION01000015.1  | - | 41231  | 41179  | RNA → rpmE (PRK00019)Ribosomal_L31 (pfam01197) →                                            |
| Sen-288-583 | NZ.CIPW01000013.1  | - | 41509  | 41457  | RNA → rpmE (PRK00019)Ribosomal_L31 (pfam01197) →                                            |
| Sen-288-584 | NZ.CIOX01000006.1  | - | 39373  | 39321  | RNA → rpmE (PRK00019)Ribosomal_L31 (pfam01197) →                                            |
| Sen-288-585 | NZ.CINQ01000018.1  | - | 39456  | 39404  | RNA → rpmE (PRK00019)Ribosomal_L31 (pfam01197) →                                            |
| Sen-288-586 | NZ.CIQK01000016.1  | + | 104142 | 104194 | RNA → rpmE (PRK00019)Ribosomal_L31 (pfam01197) →                                            |
| Sen-288-587 | NZ.CIQY01000014.1  | + | 107419 | 107471 | RNA → rpmE (PRK00019)Ribosomal_L31 (pfam01197) →                                            |
| Sen-288-588 | NZ.CIOG01000003.1  | + | 103986 | 104038 | RNA → rpmE (PRK00019)Ribosomal_L31 (pfam01197) →                                            |
| Sen-288-589 | NZ.CITX01000013.1  | - | 41509  | 41457  | RNA → rpmE (PRK00019)Ribosomal_L31 (pfam01197) →                                            |
| Sen-288-590 | NZ.CIRZ01000014.1  | + | 103989 | 104041 | RNA → rpmE (PRK00019)Ribosomal_L31 (pfam01197) →                                            |
| Sen-288-591 | NZ.CIQM01000016.1  | - | 39503  | 39451  | RNA → rpmE (PRK00019)Ribosomal_L31 (pfam01197) →                                            |
| Sen-288-592 | NZ.CITZ01000012.1  | - | 41231  | 41179  | RNA → rpmE (PRK00019)Ribosomal_L31 (pfam01197) →                                            |
| Sen-811-1   | NZ.AETB01000027.1  | - | 35284  | 35232  | RNA → rpmE (PRK00019)Ribosomal_L31 (pfam01197) →                                            |
| Sen-814-1   | NZ.AETE01000046.1  | - | 35284  | 35232  | RNA → rpmE (PRK00019)Ribosomal_L31 (pfam01197) →                                            |
| Sen-838-1   | NZ.AETS01000077.1  | - | 35207  | 35155  | RNA → rpmE (PRK00019)Ribosomal_L31 (pfam01197) →                                            |
| Sen-831-1   | NZ.AHHS01000107.1  | + | 97829  | 97881  | RNA → rpmE (PRK00019)Ribosomal_L31 (pfam01197) →                                            |
| Sen-231-1   | NZ.LARYT01000025.1 | + | 101525 | 101577 | RNA → rpmE (PRK00019)Ribosomal_L31 (pfam01197) →                                            |
| Sen-803-1   | NZ.AESV01000060.1  | + | 97648  | 97700  | RNA → rpmE (PRK00019)Ribosomal_L31 (pfam01197) →                                            |
| Sen-821-1   | NZ.AETG01000061.1  | - | 35207  | 35155  | RNA → rpmE (PRK00019)Ribosomal_L31 (pfam01197) →                                            |
| Sen-801-1   | NZ.AL PQ01000042.1 | + | 8188   | 8240   | RNA → rpmE (PRK00019)Ribosomal_L31 (pfam01197) →                                            |
| Sen-826-1   | NZ.AESZ01000035.1  | - | 35284  | 35232  | RNA → rpmE (PRK00019)Ribosomal_L31 (pfam01197) →                                            |
| Sen-807-1   | NZ.AETQ01000019.1  | + | 97839  | 97891  | RNA → rpmE (PRK00019)Ribosomal_L31 (pfam01197) →                                            |
| Sen-829-1   | NZ.AESQ01000056.1  | + | 97651  | 97703  | RNA → rpmE (PRK00019)Ribosomal_L31 (pfam01197) →                                            |
| Sen-824-1   | NZ.AETH01000095.1  | + | 97835  | 97887  | RNA → rpmE (PRK00019)Ribosomal_L31 (pfam01197) →                                            |
| Sen-800-1   | NZ.AOYO01000024.1  | - | 35210  | 35158  | RNA → rpmE (PRK00019)Ribosomal_L31 (pfam01197) → rpmE (PRK00019)Ribosomal_L31 (pfam01197) → |
| Sen-819-1   | NZ.AESM01000030.1  | - | 35648  | 35596  | RNA → rpmE (PRK00019)Ribosomal_L31 (pfam01197) →                                            |
| Sen-808-1   | NZ.AESH01000041.1  | - | 35284  | 35232  | RNA → rpmE (PRK00019)Ribosomal_L31 (pfam01197) →                                            |
| Sen-815-1   | NZ.AESI01000032.1  | + | 97839  | 97891  | RNA → rpmE (PRK00019)Ribosomal_L31 (pfam01197) →                                            |
| Sen-234-1   | NZ.LAHUX01000027.1 | + | 97706  | 97758  | RNA → rpmE (PRK00019)Ribosomal_L31 (pfam01197) →                                            |
| Sen-827-1   | NZ.AOYQ01000006.1  | + | 97727  | 97779  | RNA → rpmE (PRK00019)Ribosomal_L31 (pfam01197) → rpmE (PRK00019)Ribosomal_L31 (pfam01197) → |
| Sen-804-1   | NZ.AETO01000003.1  | - | 35284  | 35232  | RNA → rpmE (PRK00019)Ribosomal_L31 (pfam01197) →                                            |
| Sen-288-593 | NZ.CINB01000016.1  | - | 39380  | 39328  | RNA → rpmE (PRK00019)Ribosomal_L31 (pfam01197) →                                            |
| Sen-812-1   | NZ.AESX01000043.1  | + | 98859  | 98911  | RNA → rpmE (PRK00019)Ribosomal_L31 (pfam01197) → rpmE (PRK00019)Ribosomal_L31 (pfam01197) → |
| Sen-288-594 | NZ.CIRJ01000011.1  | - | 39370  | 39318  | RNA → rpmE (PRK00019)Ribosomal_L31 (pfam01197) →                                            |
| Sen-793-1   | NZ.AUQI01000090.1  | - | 37855  | 37803  | RNA → rpmE (PRK00019)Ribosomal_L31 (pfam01197) →                                            |
| Sen-288-595 | NZ.CJYW01000015.1  | - | 39580  | 39528  | RNA → rpmE (PRK00019)Ribosomal_L31 (pfam01197) →                                            |
| Sen-809-1   | NZ.AETC01000022.1  | - | 35310  | 35258  | RNA → rpmE (PRK00019)Ribosomal_L31 (pfam01197) →                                            |
| Sen-288-596 | NZ.CIWN01000014.1  | + | 104144 | 104196 | RNA → rpmE (PRK00019)Ribosomal_L31 (pfam01197) →                                            |
| Sen-818-1   | NZ.AESL01000022.1  | + | 97839  | 97891  | RNA → rpmE (PRK00019)Ribosomal_L31 (pfam01197) →                                            |

|             |                   |   |        |        |                                                                                             |
|-------------|-------------------|---|--------|--------|---------------------------------------------------------------------------------------------|
| Sen-288-597 | NZ_CJCA01000015.1 | + | 104180 | 104232 | RNA → rpmE (PRK00019)Ribosomal_L31 (pfam01197) →                                            |
| Sen-825-1   | NZ_AHHR01000028.1 | - | 35284  | 35232  | RNA → rpmE (PRK00019)Ribosomal_L31 (pfam01197) →                                            |
| Sen-288-598 | NZ_CJWH01000016.1 | + | 104162 | 104214 | RNA → rpmE (PRK00019)Ribosomal_L31 (pfam01197) →                                            |
| Sen-832-1   | NZ_AHHT01000024.1 | - | 35284  | 35232  | RNA → rpmE (PRK00019)Ribosomal_L31 (pfam01197) →                                            |
| Sen-288-599 | NZ_CJST01000016.1 | + | 104158 | 104210 | RNA → rpmE (PRK00019)Ribosomal_L31 (pfam01197) →                                            |
| Sen-823-1   | NZ_AETF01000059.1 | - | 35284  | 35232  | RNA → rpmE (PRK00019)Ribosomal_L31 (pfam01197) →                                            |
| Sen-288-600 | NZ_CJGA01000013.1 | + | 104148 | 104200 | RNA → rpmE (PRK00019)Ribosomal_L31 (pfam01197) →                                            |
| Sen-840-1   | NZ_AETU01000084.1 | - | 35207  | 35155  | RNA → rpmE (PRK00019)Ribosomal_L31 (pfam01197) →                                            |
| Sen-288-601 | NZ_CJNP01000015.1 | + | 104157 | 104209 | RNA → rpmE (PRK00019)Ribosomal_L31 (pfam01197) →                                            |
| Sen-839-1   | NZ_AETT01000012.1 | - | 35208  | 35156  | RNA → rpmE (PRK00019)Ribosomal_L31 (pfam01197) →                                            |
| Sen-288-602 | NZ_CJGY01000016.1 | + | 104142 | 104194 | RNA → rpmE (PRK00019)Ribosomal_L31 (pfam01197) →                                            |
| Sen-288-603 | NZ_CINP01000009.1 | - | 39456  | 39404  | RNA → rpmE (PRK00019)Ribosomal_L31 (pfam01197) →                                            |
| Sen-798-1   | NZ_AOYN01000139.1 | - | 45480  | 45428  | RNA → rpmE (PRK00019)Ribosomal_L31 (pfam01197) →                                            |
| Sen-288-604 | NZ_CIQH01000013.1 | + | 107423 | 107475 | RNA → rpmE (PRK00019)Ribosomal_L31 (pfam01197) →                                            |
| Sen-799-1   | NZ_AOYS01000026.1 | - | 40814  | 40762  | RNA → rpmE (PRK00019)Ribosomal_L31 (pfam01197) →                                            |
| Sen-288-605 | NZ_CJIN01000016.1 | + | 104146 | 104198 | RNA → rpmE (PRK00019)Ribosomal_L31 (pfam01197) →                                            |
| Sen-288-606 | NZ_CILJ01000015.1 | - | 39365  | 39313  | RNA → rpmE (PRK00019)Ribosomal_L31 (pfam01197) →                                            |
| Sen-794-1   | NZ_APAN01000075.1 | + | 100234 | 100286 | RNA → rpmE (PRK00019)Ribosomal_L31 (pfam01197) →                                            |
| Sen-288-607 | NZ_CJXX01000014.1 | - | 39456  | 39404  | RNA → rpmE (PRK00019)Ribosomal_L31 (pfam01197) →                                            |
| Sen-805-1   | NZ_AETP01000016.1 | - | 35207  | 35155  | RNA → rpmE (PRK00019)Ribosomal_L31 (pfam01197) →                                            |
| Sen-288-608 | NZ_CJTV01000016.1 | + | 104157 | 104209 | RNA → rpmE (PRK00019)Ribosomal_L31 (pfam01197) →                                            |
| Sen-810-1   | NZ_AETD01000015.1 | + | 97636  | 97688  | RNA → rpmE (PRK00019)Ribosomal_L31 (pfam01197) →                                            |
| Sen-288-609 | NZ_CJFM01000016.1 | + | 104015 | 104067 | RNA → rpmE (PRK00019)Ribosomal_L31 (pfam01197) →                                            |
| Sen-816-1   | NZ_AESJ01000001.1 | + | 97835  | 97887  | RNA → rpmE (PRK00019)Ribosomal_L31 (pfam01197) →                                            |
| Sen-288-610 | NZ_CJDL01000016.1 | + | 104150 | 104202 | RNA → rpmE (PRK00019)Ribosomal_L31 (pfam01197) →                                            |
| Sen-822-1   | NZ_AETJ01000084.1 | - | 35207  | 35155  | RNA → rpmE (PRK00019)Ribosomal_L31 (pfam01197) →                                            |
| Sen-288-611 | NZ_CJGW01000016.1 | - | 39535  | 39483  | RNA → rpmE (PRK00019)Ribosomal_L31 (pfam01197) →                                            |
| Sen-797-1   | NZ_AOYR01000043.1 | - | 37499  | 37447  | RNA → rpmE (PRK00019)Ribosomal_L31 (pfam01197) →                                            |
| Sen-288-612 | NZ_CJXX01000016.1 | - | 39711  | 39659  | RNA → rpmE (PRK00019)Ribosomal_L31 (pfam01197) →                                            |
| Sen-288-613 | NZ_CIWC01000015.1 | - | 39456  | 39404  | RNA → rpmE (PRK00019)Ribosomal_L31 (pfam01197) →                                            |
| Sen-288-614 | NZ_CJPI01000016.1 | + | 104156 | 104208 | RNA → rpmE (PRK00019)Ribosomal_L31 (pfam01197) →                                            |
| Sen-795-1   | NZ_APAL01000294.1 | - | 2980   | 2928   | RNA → rpmE (PRK00019)Ribosomal_L31 (pfam01197) → rpmE (PRK00019)Ribosomal_L31 (pfam01197) → |
| Sen-288-615 | NZ_CJPC01000016.1 | + | 104162 | 104214 | RNA → rpmE (PRK00019)Ribosomal_L31 (pfam01197) →                                            |
| Sen-288-616 | NZ_CJPQ01000015.1 | + | 104156 | 104208 | RNA → rpmE (PRK00019)Ribosomal_L31 (pfam01197) →                                            |
| Sen-830-1   | NZ_AYUN01000226.1 | - | 4846   | 4794   | RNA → rpmE (PRK00019)Ribosomal_L31 (pfam01197) →                                            |
| Sen-288-617 | NZ_CJJA01000014.1 | - | 41503  | 41451  | RNA → rpmE (PRK00019)Ribosomal_L31 (pfam01197) →                                            |
| Sen-820-1   | NZ_AESN01000032.1 | + | 79699  | 79751  | RNA → rpmE (PRK00019)Ribosomal_L31 (pfam01197) →                                            |
| Sen-288-618 | NZ_CIVY01000014.1 | - | 41526  | 41474  | RNA → rpmE (PRK00019)Ribosomal_L31 (pfam01197) →                                            |
| Sen-288-619 | NZ_CIKZ01000013.1 | + | 104165 | 104217 | RNA → rpmE (PRK00019)Ribosomal_L31 (pfam01197) →                                            |
| Sen-796-1   | NZ_AMRS01000013.1 | - | 37964  | 37912  | RNA → rpmE (PRK00019)Ribosomal_L31 (pfam01197) →                                            |
| Sen-835-1   | NZ_AHHW01000009.1 | + | 95080  | 95132  | RNA → rpmE (PRK00019)Ribosomal_L31 (pfam01197) →                                            |
| Sen-288-620 | NZ_CISK01000005.1 | - | 198400 | 198348 | RNA → rpmE (PRK00019)Ribosomal_L31 (pfam01197) →                                            |
| Sen-288-621 | NZ_CIQC01000013.1 | + | 104161 | 104213 | RNA → rpmE (PRK00019)Ribosomal_L31 (pfam01197) →                                            |
| Sen-837-1   | NZ_AETR01000029.1 | + | 97844  | 97896  | RNA → rpmE (PRK00019)Ribosomal_L31 (pfam01197) →                                            |
| Sen-288-622 | NZ_CIPM01000001.1 | - | 39375  | 39323  | RNA → rpmE (PRK00019)Ribosomal_L31 (pfam01197) →                                            |
| Sen-836-1   | NZ_JMMJ01000005.1 | - | 28770  | 28718  | RNA → rpmE (PRK00019)Ribosomal_L31 (pfam01197) →                                            |
| Sen-288-623 | NZ_CEWV01000016.1 | - | 39533  | 39481  | RNA → rpmE (PRK00019)Ribosomal_L31 (pfam01197) →                                            |
| Sen-288-624 | NZ_CILD01000015.1 | + | 104049 | 104101 | RNA → rpmE (PRK00019)Ribosomal_L31 (pfam01197) →                                            |
| Sen-288-625 | NZ_CJRV01000010.1 | - | 39557  | 39505  | RNA → rpmE (PRK00019)Ribosomal_L31 (pfam01197) →                                            |
| Sen-828-1   | NZ_AESS01000101.1 | + | 73609  | 73661  | RNA → rpmE (PRK00019)Ribosomal_L31 (pfam01197) → rpmE (PRK00019)Ribosomal_L31 (pfam01197) → |
| Sen-806-1   | NZ_AESW01000001.1 | + | 97696  | 97748  | RNA → rpmE (PRK00019)Ribosomal_L31 (pfam01197) → rpmE (PRK00019)Ribosomal_L31 (pfam01197) → |
| Sen-288-626 | NZ_CJNA01000014.1 | - | 41509  | 41457  | RNA → rpmE (PRK00019)Ribosomal_L31 (pfam01197) →                                            |

|             |                   |   |        |        |                                                  |
|-------------|-------------------|---|--------|--------|--------------------------------------------------|
| Sen-288-627 | NZ_CING01000015.1 | + | 104008 | 104060 | RNA → rpmE (PRK00019)Ribosomal_L31 (pfam01197) → |
| Sen-792-1   | NZ_AOYZ01000072.1 | - | 37522  | 37470  | RNA → rpmE (PRK00019)Ribosomal_L31 (pfam01197) → |
| Sen-288-628 | NZ_CIUQ01000016.1 | - | 39541  | 39489  | RNA → rpmE (PRK00019)Ribosomal_L31 (pfam01197) → |
| Sen-834-1   | NZ_AHHV01000035.1 | + | 97838  | 97890  | RNA → rpmE (PRK00019)Ribosomal_L31 (pfam01197) → |
| Sen-288-629 | NZ_CIUP01000015.1 | + | 108000 | 108052 | RNA → rpmE (PRK00019)Ribosomal_L31 (pfam01197) → |
| Sen-791-1   | NZ_AHUU01000022.1 | + | 110824 | 110876 | RNA → rpmE (PRK00019)Ribosomal_L31 (pfam01197) → |
| Sen-288-630 | NZ_CJBC01000016.1 | - | 39766  | 39714  | RNA → rpmE (PRK00019)Ribosomal_L31 (pfam01197) → |
| Sen-288-631 | NZ_CJRS01000015.1 | - | 39549  | 39497  | RNA → rpmE (PRK00019)Ribosomal_L31 (pfam01197) → |
| Sen-817-1   | NZ_AESK01000040.1 | - | 35284  | 35232  | RNA → rpmE (PRK00019)Ribosomal_L31 (pfam01197) → |
| Sen-833-1   | NZ_AHHU01000014.1 | + | 97835  | 97887  | RNA → rpmE (PRK00019)Ribosomal_L31 (pfam01197) → |
| Sen-288-632 | NZ_CJUF01000016.1 | - | 39702  | 39650  | RNA → rpmE (PRK00019)Ribosomal_L31 (pfam01197) → |
| Sen-288-633 | NZ_CITD01000015.1 | - | 39586  | 39534  | RNA → rpmE (PRK00019)Ribosomal_L31 (pfam01197) → |
| Sen-288-634 | NZ_CIQI01000003.1 | + | 104147 | 104199 | RNA → rpmE (PRK00019)Ribosomal_L31 (pfam01197) → |
| Sen-288-635 | NZ_CJXU01000016.1 | - | 39456  | 39404  | RNA → rpmE (PRK00019)Ribosomal_L31 (pfam01197) → |
| Sen-288-636 | NZ_CJCB01000014.1 | - | 39572  | 39520  | RNA → rpmE (PRK00019)Ribosomal_L31 (pfam01197) → |
| Sen-288-637 | NZ_CJSI01000014.1 | + | 107419 | 107471 | RNA → rpmE (PRK00019)Ribosomal_L31 (pfam01197) → |
| Sen-288-638 | NZ_CJEN01000016.1 | + | 104147 | 104199 | RNA → rpmE (PRK00019)Ribosomal_L31 (pfam01197) → |
| Sen-288-639 | NZ_CIZT01000016.1 | + | 104159 | 104211 | RNA → rpmE (PRK00019)Ribosomal_L31 (pfam01197) → |
| Sen-288-640 | NZ_CJWB01000014.1 | - | 41231  | 41179  | RNA → rpmE (PRK00019)Ribosomal_L31 (pfam01197) → |
| Sen-288-641 | NZ_CJFZ01000016.1 | - | 39537  | 39485  | RNA → rpmE (PRK00019)Ribosomal_L31 (pfam01197) → |
| Sen-288-642 | NZ_CJL01000015.1  | - | 39562  | 39510  | RNA → rpmE (PRK00019)Ribosomal_L31 (pfam01197) → |
| Sen-288-643 | NZ_CIXB01000015.1 | - | 39614  | 39562  | RNA → rpmE (PRK00019)Ribosomal_L31 (pfam01197) → |
| Sen-288-644 | NZ_CJWY01000016.1 | + | 104160 | 104212 | RNA → rpmE (PRK00019)Ribosomal_L31 (pfam01197) → |
| Sen-288-645 | NZ_CJTC01000016.1 | - | 39383  | 39331  | RNA → rpmE (PRK00019)Ribosomal_L31 (pfam01197) → |
| Sen-288-646 | NZ_CJWJ01000015.1 | - | 39363  | 39311  | RNA → rpmE (PRK00019)Ribosomal_L31 (pfam01197) → |
| Sen-288-647 | NZ_CJNT01000013.1 | + | 107992 | 108044 | RNA → rpmE (PRK00019)Ribosomal_L31 (pfam01197) → |
| Sen-288-648 | NZ_CJGX01000014.1 | - | 39575  | 39523  | RNA → rpmE (PRK00019)Ribosomal_L31 (pfam01197) → |
| Sen-288-649 | NZ_CILR01000015.1 | + | 109294 | 109346 | RNA → rpmE (PRK00019)Ribosomal_L31 (pfam01197) → |
| Sen-288-650 | NZ_CJCH01000015.1 | - | 39573  | 39521  | RNA → rpmE (PRK00019)Ribosomal_L31 (pfam01197) → |
| Sen-288-651 | NZ_CIZW01000016.1 | + | 104148 | 104200 | RNA → rpmE (PRK00019)Ribosomal_L31 (pfam01197) → |
| Sen-288-652 | NZ_CJRU01000015.1 | + | 104162 | 104214 | RNA → rpmE (PRK00019)Ribosomal_L31 (pfam01197) → |
| Sen-288-653 | NZ_CJFE01000016.1 | + | 104137 | 104189 | RNA → rpmE (PRK00019)Ribosomal_L31 (pfam01197) → |
| Sen-288-654 | NZ_CJAP01000017.1 | - | 39539  | 39487  | RNA → rpmE (PRK00019)Ribosomal_L31 (pfam01197) → |
| Sen-288-655 | NZ_CJKO01000009.1 | + | 133799 | 133851 | RNA → rpmE (PRK00019)Ribosomal_L31 (pfam01197) → |
| Sen-288-656 | NZ_CJJS01000013.1 | - | 41505  | 41453  | RNA → rpmE (PRK00019)Ribosomal_L31 (pfam01197) → |
| Sen-288-657 | NZ_CJAJ01000016.1 | + | 104153 | 104205 | RNA → rpmE (PRK00019)Ribosomal_L31 (pfam01197) → |
| Sen-288-658 | NZ_CJTW01000015.1 | - | 41512  | 41460  | RNA → rpmE (PRK00019)Ribosomal_L31 (pfam01197) → |
| Sen-288-659 | NZ_CJNL01000015.1 | + | 104158 | 104210 | RNA → rpmE (PRK00019)Ribosomal_L31 (pfam01197) → |
| Sen-288-660 | NZ_CJNU01000016.1 | - | 39708  | 39656  | RNA → rpmE (PRK00019)Ribosomal_L31 (pfam01197) → |
| Sen-288-661 | NZ_CJHH01000013.1 | - | 39563  | 39511  | RNA → rpmE (PRK00019)Ribosomal_L31 (pfam01197) → |
| Sen-288-662 | NZ_CJDO01000014.1 | - | 39535  | 39483  | RNA → rpmE (PRK00019)Ribosomal_L31 (pfam01197) → |
| Sen-288-663 | NZ_CJSQ01000016.1 | - | 39361  | 39309  | RNA → rpmE (PRK00019)Ribosomal_L31 (pfam01197) → |
| Sen-288-664 | NZ_CJDE01000014.1 | + | 107811 | 107863 | RNA → rpmE (PRK00019)Ribosomal_L31 (pfam01197) → |
| Sen-288-665 | NZ_CIXS01000016.1 | + | 104124 | 104176 | RNA → rpmE (PRK00019)Ribosomal_L31 (pfam01197) → |
| Sen-288-666 | NZ_CIXH01000014.1 | + | 104249 | 104301 | RNA → rpmE (PRK00019)Ribosomal_L31 (pfam01197) → |
| Sen-288-667 | NZ_CJHX01000015.1 | - | 39530  | 39478  | RNA → rpmE (PRK00019)Ribosomal_L31 (pfam01197) → |
| Sen-288-668 | NZ_CJEA01000016.1 | + | 104151 | 104203 | RNA → rpmE (PRK00019)Ribosomal_L31 (pfam01197) → |
| Sen-288-669 | NZ_CJFI01000015.1 | - | 39532  | 39480  | RNA → rpmE (PRK00019)Ribosomal_L31 (pfam01197) → |
| Sen-288-670 | NZ_CJQL01000016.1 | + | 104172 | 104224 | RNA → rpmE (PRK00019)Ribosomal_L31 (pfam01197) → |
| Sen-288-671 | NZ_CJKR01000015.1 | + | 104124 | 104176 | RNA → rpmE (PRK00019)Ribosomal_L31 (pfam01197) → |
| Sen-288-672 | NZ_CJHS01000016.1 | + | 104160 | 104212 | RNA → rpmE (PRK00019)Ribosomal_L31 (pfam01197) → |
| Sen-288-673 | NZ_CJKC01000013.1 | + | 104143 | 104195 | RNA → rpmE (PRK00019)Ribosomal_L31 (pfam01197) → |



|             |                   |   |        |        |                                                  |
|-------------|-------------------|---|--------|--------|--------------------------------------------------|
| Sen-288-674 | NZ.CIVA01000015.1 | - | 39386  | 39334  | RNA → rpmE (PRK00019)Ribosomal_L31 (pfam01197) → |
| Sen-288-675 | NZ.CJPG01000008.1 | + | 159488 | 159540 | RNA → rpmE (PRK00019)Ribosomal_L31 (pfam01197) → |
| Sen-288-676 | NZ.CJTX01000015.1 | - | 39371  | 39319  | RNA → rpmE (PRK00019)Ribosomal_L31 (pfam01197) → |
| Sen-288-677 | NZ.CJOA01000016.1 | + | 104153 | 104205 | RNA → rpmE (PRK00019)Ribosomal_L31 (pfam01197) → |
| Sen-288-678 | NZ.CJEW01000016.1 | - | 39532  | 39480  | RNA → rpmE (PRK00019)Ribosomal_L31 (pfam01197) → |
| Sen-288-679 | NZ.CJZA01000016.1 | - | 39540  | 39488  | RNA → rpmE (PRK00019)Ribosomal_L31 (pfam01197) → |
| Sen-288-680 | NZ.CJXN01000015.1 | + | 103986 | 104038 | RNA → rpmE (PRK00019)Ribosomal_L31 (pfam01197) → |
| Sen-288-681 | NZ.CJWM01000014.1 | + | 104141 | 104193 | RNA → rpmE (PRK00019)Ribosomal_L31 (pfam01197) → |
| Sen-288-682 | NZ.CJEC01000016.1 | - | 39536  | 39484  | RNA → rpmE (PRK00019)Ribosomal_L31 (pfam01197) → |
| Sen-288-683 | NZ.CJCN01000015.1 | - | 39538  | 39486  | RNA → rpmE (PRK00019)Ribosomal_L31 (pfam01197) → |
| Sen-288-684 | NZ.CJOU01000016.1 | + | 104172 | 104224 | RNA → rpmE (PRK00019)Ribosomal_L31 (pfam01197) → |
| Sen-288-685 | NZ.CJKW01000011.1 | - | 39456  | 39404  | RNA → rpmE (PRK00019)Ribosomal_L31 (pfam01197) → |
| Sen-288-686 | NZ.CJCR01000016.1 | - | 39597  | 39545  | RNA → rpmE (PRK00019)Ribosomal_L31 (pfam01197) → |
| Sen-288-687 | NZ.CJVS01000016.1 | - | 39366  | 39314  | RNA → rpmE (PRK00019)Ribosomal_L31 (pfam01197) → |
| Sen-288-688 | NZ.CJES01000016.1 | + | 104133 | 104185 | RNA → rpmE (PRK00019)Ribosomal_L31 (pfam01197) → |
| Sen-288-689 | NZ.CJXN01000017.1 | + | 104165 | 104217 | RNA → rpmE (PRK00019)Ribosomal_L31 (pfam01197) → |
| Sen-288-690 | NZ.CIZG01000016.1 | + | 104156 | 104208 | RNA → rpmE (PRK00019)Ribosomal_L31 (pfam01197) → |
| Sen-288-691 | NZ.CJCY01000013.1 | - | 39535  | 39483  | RNA → rpmE (PRK00019)Ribosomal_L31 (pfam01197) → |
| Sen-288-692 | NZ.CJNM01000012.1 | - | 41512  | 41460  | RNA → rpmE (PRK00019)Ribosomal_L31 (pfam01197) → |
| Sen-288-693 | NZ.CIOP01000015.1 | + | 104153 | 104205 | RNA → rpmE (PRK00019)Ribosomal_L31 (pfam01197) → |
| Sen-288-694 | NZ.CITB01000013.1 | - | 39583  | 39531  | RNA → rpmE (PRK00019)Ribosomal_L31 (pfam01197) → |
| Sen-288-695 | NZ.CIRE01000014.1 | - | 41231  | 41179  | RNA → rpmE (PRK00019)Ribosomal_L31 (pfam01197) → |
| Sen-288-696 | NZ.CIRP01000016.1 | + | 104151 | 104203 | RNA → rpmE (PRK00019)Ribosomal_L31 (pfam01197) → |
| Sen-288-697 | NZ.CIQQ01000014.1 | + | 104157 | 104209 | RNA → rpmE (PRK00019)Ribosomal_L31 (pfam01197) → |
| Sen-288-698 | NZ.CIRY01000014.1 | + | 103989 | 104041 | RNA → rpmE (PRK00019)Ribosomal_L31 (pfam01197) → |
| Sen-288-699 | NZ.CITG01000015.1 | + | 103990 | 104042 | RNA → rpmE (PRK00019)Ribosomal_L31 (pfam01197) → |
| Sen-288-700 | NZ.CIPO01000007.1 | + | 170843 | 170895 | RNA → rpmE (PRK00019)Ribosomal_L31 (pfam01197) → |
| Sen-288-701 | NZ.CIPX01000015.1 | + | 104162 | 104214 | RNA → rpmE (PRK00019)Ribosomal_L31 (pfam01197) → |
| Sen-288-702 | NZ.CITY01000015.1 | + | 104162 | 104214 | RNA → rpmE (PRK00019)Ribosomal_L31 (pfam01197) → |
| Sen-288-703 | NZ.CIRG01000002.1 | - | 198392 | 198340 | RNA → rpmE (PRK00019)Ribosomal_L31 (pfam01197) → |
| Sen-288-704 | NZ.CINL01000015.1 | - | 39382  | 39330  | RNA → rpmE (PRK00019)Ribosomal_L31 (pfam01197) → |
| Sen-288-705 | NZ.CITV01000013.1 | + | 107862 | 107914 | RNA → rpmE (PRK00019)Ribosomal_L31 (pfam01197) → |
| Sen-288-706 | NZ.CIOV01000014.1 | + | 104206 | 104258 | RNA → rpmE (PRK00019)Ribosomal_L31 (pfam01197) → |
| Sen-288-707 | NZ.CIOI01000016.1 | + | 104160 | 104212 | RNA → rpmE (PRK00019)Ribosomal_L31 (pfam01197) → |
| Sen-288-708 | NZ.CISM01000014.1 | + | 103990 | 104042 | RNA → rpmE (PRK00019)Ribosomal_L31 (pfam01197) → |
| Sen-288-709 | NZ.CIRR01000008.1 | + | 152660 | 152712 | RNA → rpmE (PRK00019)Ribosomal_L31 (pfam01197) → |
| Sen-288-710 | NZ.CISE01000014.1 | + | 104134 | 104186 | RNA → rpmE (PRK00019)Ribosomal_L31 (pfam01197) → |
| Sen-288-711 | NZ.CIPB01000016.1 | + | 104163 | 104215 | RNA → rpmE (PRK00019)Ribosomal_L31 (pfam01197) → |
| Sen-288-712 | NZ.CILB01000015.1 | + | 104166 | 104218 | RNA → rpmE (PRK00019)Ribosomal_L31 (pfam01197) → |
| Sen-288-713 | NZ.CIQD01000016.1 | + | 104150 | 104202 | RNA → rpmE (PRK00019)Ribosomal_L31 (pfam01197) → |
| Sen-288-714 | NZ.CITC01000015.1 | - | 39574  | 39522  | RNA → rpmE (PRK00019)Ribosomal_L31 (pfam01197) → |
| Sen-288-715 | NZ.CISO01000015.1 | + | 103990 | 104042 | RNA → rpmE (PRK00019)Ribosomal_L31 (pfam01197) → |
| Sen-288-716 | NZ.CIQN01000016.1 | + | 104152 | 104204 | RNA → rpmE (PRK00019)Ribosomal_L31 (pfam01197) → |
| Sen-288-717 | NZ.CIQX01000015.1 | - | 39367  | 39315  | RNA → rpmE (PRK00019)Ribosomal_L31 (pfam01197) → |
| Sen-288-718 | NZ.CIRF01000016.1 | - | 39361  | 39309  | RNA → rpmE (PRK00019)Ribosomal_L31 (pfam01197) → |
| Sen-288-719 | NZ.CIOF01000014.1 | - | 41231  | 41179  | RNA → rpmE (PRK00019)Ribosomal_L31 (pfam01197) → |
| Sen-288-720 | NZ.CIUG01000016.1 | + | 104161 | 104213 | RNA → rpmE (PRK00019)Ribosomal_L31 (pfam01197) → |
| Sen-288-721 | NZ.CISX01000014.1 | + | 103990 | 104042 | RNA → rpmE (PRK00019)Ribosomal_L31 (pfam01197) → |
| Sen-288-722 | NZ.CITJ01000014.1 | - | 39374  | 39322  | RNA → rpmE (PRK00019)Ribosomal_L31 (pfam01197) → |
| Sen-288-723 | NZ.CIOR01000014.1 | + | 104163 | 104215 | RNA → rpmE (PRK00019)Ribosomal_L31 (pfam01197) → |
| Sen-288-724 | NZ.CILA01000011.1 | - | 39571  | 39519  | RNA → rpmE (PRK00019)Ribosomal_L31 (pfam01197) → |
| Sen-288-725 | NZ.CIRW01000015.1 | + | 104133 | 104185 | RNA → rpmE (PRK00019)Ribosomal_L31 (pfam01197) → |

|             |                    |   |        |        |                                                  |
|-------------|--------------------|---|--------|--------|--------------------------------------------------|
| Sen-288-726 | NZ_CIRL01000015.1  | - | 39588  | 39536  | RNA → rpmE (PRK00019)Ribosomal_L31 (pfam01197) → |
| Sen-288-727 | NZ_CISV01000015.1  | + | 103990 | 104042 | RNA → rpmE (PRK00019)Ribosomal_L31 (pfam01197) → |
| Sen-288-728 | NZ_CINO01000016.1  | + | 104157 | 104209 | RNA → rpmE (PRK00019)Ribosomal_L31 (pfam01197) → |
| Sen-288-729 | NZ_CINT01000015.1  | - | 39589  | 39537  | RNA → rpmE (PRK00019)Ribosomal_L31 (pfam01197) → |
| Sen-288-730 | NZ_CIZU01000016.1  | - | 39536  | 39484  | RNA → rpmE (PRK00019)Ribosomal_L31 (pfam01197) → |
| Sen-288-731 | NZ_CIUFO1000015.1  | + | 104167 | 104219 | RNA → rpmE (PRK00019)Ribosomal_L31 (pfam01197) → |
| Sen-288-732 | NZ_CJQC01000008.1  | + | 152693 | 152745 | RNA → rpmE (PRK00019)Ribosomal_L31 (pfam01197) → |
| Sen-288-733 | NZ_CJON01000014.1  | - | 39844  | 39792  | RNA → rpmE (PRK00019)Ribosomal_L31 (pfam01197) → |
| Sen-288-734 | NZ_CJZE01000016.1  | - | 39361  | 39309  | RNA → rpmE (PRK00019)Ribosomal_L31 (pfam01197) → |
| Sen-288-735 | NZ_CJUR01000016.1  | - | 39365  | 39313  | RNA → rpmE (PRK00019)Ribosomal_L31 (pfam01197) → |
| Sen-288-736 | NZ_CJSR01000015.1  | + | 104161 | 104213 | RNA → rpmE (PRK00019)Ribosomal_L31 (pfam01197) → |
| Sen-288-737 | NZ_CJTT01000014.1  | + | 107817 | 107869 | RNA → rpmE (PRK00019)Ribosomal_L31 (pfam01197) → |
| Sen-288-738 | NZ_CJUC01000015.1  | + | 104153 | 104205 | RNA → rpmE (PRK00019)Ribosomal_L31 (pfam01197) → |
| Sen-288-739 | NZ_CIVZ01000016.1  | - | 39549  | 39497  | RNA → rpmE (PRK00019)Ribosomal_L31 (pfam01197) → |
| Sen-288-740 | NZ_CJMM01000014.1  | + | 107827 | 107879 | RNA → rpmE (PRK00019)Ribosomal_L31 (pfam01197) → |
| Sen-288-741 | NZ_CIVJ01000014.1  | - | 41231  | 41179  | RNA → rpmE (PRK00019)Ribosomal_L31 (pfam01197) → |
| Sen-288-742 | NZ_CJCX01000016.1  | + | 104152 | 104204 | RNA → rpmE (PRK00019)Ribosomal_L31 (pfam01197) → |
| Sen-288-743 | NZ_CJYJ01000015.1  | + | 104154 | 104206 | RNA → rpmE (PRK00019)Ribosomal_L31 (pfam01197) → |
| Sen-288-744 | NZ_CJJB01000015.1  | + | 107662 | 107714 | RNA → rpmE (PRK00019)Ribosomal_L31 (pfam01197) → |
| Sen-288-745 | NZ_CJOG01000016.1  | - | 39541  | 39489  | RNA → rpmE (PRK00019)Ribosomal_L31 (pfam01197) → |
| Sen-288-746 | NZ_CJGN01000016.1  | - | 39537  | 39485  | RNA → rpmE (PRK00019)Ribosomal_L31 (pfam01197) → |
| Sen-288-747 | NZ_CJGI01000002.1  | + | 405531 | 405583 | RNA → rpmE (PRK00019)Ribosomal_L31 (pfam01197) → |
| Sen-288-748 | NZ_CJMV01000003.1  | - | 216953 | 216901 | RNA → rpmE (PRK00019)Ribosomal_L31 (pfam01197) → |
| Sen-288-749 | NZ_CJTP01000015.1  | + | 107862 | 107914 | RNA → rpmE (PRK00019)Ribosomal_L31 (pfam01197) → |
| Sen-288-750 | NZ_CJOF01000016.1  | + | 104155 | 104207 | RNA → rpmE (PRK00019)Ribosomal_L31 (pfam01197) → |
| Sen-288-751 | NZ_CJLR01000015.1  | + | 104138 | 104190 | RNA → rpmE (PRK00019)Ribosomal_L31 (pfam01197) → |
| Sen-288-752 | NZ_CJHJ01000016.1  | - | 39532  | 39480  | RNA → rpmE (PRK00019)Ribosomal_L31 (pfam01197) → |
| Sen-288-753 | NZ_CJHP01000015.1  | - | 39723  | 39671  | RNA → rpmE (PRK00019)Ribosomal_L31 (pfam01197) → |
| Sen-288-754 | NZ_CIXZ01000015.1  | + | 104219 | 104271 | RNA → rpmE (PRK00019)Ribosomal_L31 (pfam01197) → |
| Sen-288-755 | NZ_CJJZ01000016.1  | + | 104142 | 104194 | RNA → rpmE (PRK00019)Ribosomal_L31 (pfam01197) → |
| Sen-288-756 | NZ_CJCE01000015.1  | + | 103986 | 104038 | RNA → rpmE (PRK00019)Ribosomal_L31 (pfam01197) → |
| Sen-288-757 | NZ_CIVC01000015.1  | + | 104178 | 104230 | RNA → rpmE (PRK00019)Ribosomal_L31 (pfam01197) → |
| Sen-288-758 | NZ_CJFO01000016.1  | + | 104149 | 104201 | RNA → rpmE (PRK00019)Ribosomal_L31 (pfam01197) → |
| Sen-288-759 | NZ_CIZV01000016.1  | + | 104157 | 104209 | RNA → rpmE (PRK00019)Ribosomal_L31 (pfam01197) → |
| Sen-288-760 | NZ_CJYD01000009.1  | + | 163325 | 163377 | RNA → rpmE (PRK00019)Ribosomal_L31 (pfam01197) → |
| Sen-288-761 | NZ_CJRR01000014.1  | + | 108666 | 108718 | RNA → rpmE (PRK00019)Ribosomal_L31 (pfam01197) → |
| Sen-288-762 | NZ_CIUUV01000016.1 | + | 104162 | 104214 | RNA → rpmE (PRK00019)Ribosomal_L31 (pfam01197) → |
| Sen-288-763 | NZ_CJNI01000015.1  | + | 104158 | 104210 | RNA → rpmE (PRK00019)Ribosomal_L31 (pfam01197) → |
| Sen-288-764 | NZ_CJJK01000003.1  | + | 103208 | 103260 | RNA → rpmE (PRK00019)Ribosomal_L31 (pfam01197) → |
| Sen-288-765 | NZ_CJXP01000016.1  | + | 104184 | 104236 | RNA → rpmE (PRK00019)Ribosomal_L31 (pfam01197) → |
| Sen-288-766 | NZ_CJJD01000014.1  | + | 108006 | 108058 | RNA → rpmE (PRK00019)Ribosomal_L31 (pfam01197) → |
| Sen-288-767 | NZ_CJEQ01000016.1  | + | 104150 | 104202 | RNA → rpmE (PRK00019)Ribosomal_L31 (pfam01197) → |
| Sen-288-768 | NZ_CJKZ01000014.1  | - | 41231  | 41179  | RNA → rpmE (PRK00019)Ribosomal_L31 (pfam01197) → |
| Sen-288-769 | NZ_CJYS01000016.1  | + | 104159 | 104211 | RNA → rpmE (PRK00019)Ribosomal_L31 (pfam01197) → |
| Sen-288-770 | NZ_CJSX01000016.1  | + | 104016 | 104068 | RNA → rpmE (PRK00019)Ribosomal_L31 (pfam01197) → |
| Sen-288-771 | NZ_CJBZ01000016.1  | + | 104158 | 104210 | RNA → rpmE (PRK00019)Ribosomal_L31 (pfam01197) → |
| Sen-288-772 | NZ_CJOX01000015.1  | + | 104151 | 104203 | RNA → rpmE (PRK00019)Ribosomal_L31 (pfam01197) → |
| Sen-288-773 | NZ_CJFA01000015.1  | - | 39536  | 39484  | RNA → rpmE (PRK00019)Ribosomal_L31 (pfam01197) → |
| Sen-288-774 | NZ_CIYH01000015.1  | + | 104203 | 104255 | RNA → rpmE (PRK00019)Ribosomal_L31 (pfam01197) → |
| Sen-288-775 | NZ_CJTL01000016.1  | - | 39371  | 39319  | RNA → rpmE (PRK00019)Ribosomal_L31 (pfam01197) → |
| Sen-288-776 | NZ_CJWA01000015.1  | + | 104148 | 104200 | RNA → rpmE (PRK00019)Ribosomal_L31 (pfam01197) → |
| Sen-288-777 | NZ_CJUO01000016.1  | + | 104155 | 104207 | RNA → rpmE (PRK00019)Ribosomal_L31 (pfam01197) → |



|              |                   |   |        |        |                                                  |
|--------------|-------------------|---|--------|--------|--------------------------------------------------|
| Sen-288-778  | NZ.CJPB01000015.1 | - | 39706  | 39654  | RNA → rpmE (PRK00019)Ribosomal_L31 (pfam01197) → |
| Sen-288-779  | NZ.CIWQ01000015.1 | + | 103990 | 104042 | RNA → rpmE (PRK00019)Ribosomal_L31 (pfam01197) → |
| Sen-288-780  | NZ.CJKH01000010.1 | + | 152666 | 152718 | RNA → rpmE (PRK00019)Ribosomal_L31 (pfam01197) → |
| Sen-288-781  | NZ.CJFP01000015.1 | - | 39531  | 39479  | RNA → rpmE (PRK00019)Ribosomal_L31 (pfam01197) → |
| Sen-288-782  | NZ.CEYH01000016.1 | + | 104151 | 104203 | RNA → rpmE (PRK00019)Ribosomal_L31 (pfam01197) → |
| Sen-288-783  | NZ.CEZU01000016.1 | + | 104138 | 104190 | RNA → rpmE (PRK00019)Ribosomal_L31 (pfam01197) → |
| Sen-288-784  | NZ.CEXJ01000016.1 | - | 39536  | 39484  | RNA → rpmE (PRK00019)Ribosomal_L31 (pfam01197) → |
| Sen-288-785  | NZ.CIZC01000015.1 | + | 104148 | 104200 | RNA → rpmE (PRK00019)Ribosomal_L31 (pfam01197) → |
| Sen-288-786  | NZ.CJYO01000012.1 | + | 107743 | 107795 | RNA → rpmE (PRK00019)Ribosomal_L31 (pfam01197) → |
| Sen-288-787  | NZ.CJQW01000015.1 | - | 39388  | 39336  | RNA → rpmE (PRK00019)Ribosomal_L31 (pfam01197) → |
| Sen-288-788  | NZ.CJTM01000016.1 | + | 104157 | 104209 | RNA → rpmE (PRK00019)Ribosomal_L31 (pfam01197) → |
| Sen-288-789  | NZ.CJPP01000015.1 | - | 39601  | 39549  | RNA → rpmE (PRK00019)Ribosomal_L31 (pfam01197) → |
| Sen-288-790  | NZ.CJMS01000003.1 | - | 200080 | 200028 | RNA → rpmE (PRK00019)Ribosomal_L31 (pfam01197) → |
| Sen-288-791  | NZ.CJVO01000016.1 | - | 39365  | 39313  | RNA → rpmE (PRK00019)Ribosomal_L31 (pfam01197) → |
| Sen-288-792  | NZ.CILIO1000008.1 | - | 39456  | 39404  | RNA → rpmE (PRK00019)Ribosomal_L31 (pfam01197) → |
| Sen-288-793  | NZ.CJLN01000002.1 | + | 405306 | 405358 | RNA → rpmE (PRK00019)Ribosomal_L31 (pfam01197) → |
| Sen-288-794  | NZ.CIYZ01000016.1 | - | 39535  | 39483  | RNA → rpmE (PRK00019)Ribosomal_L31 (pfam01197) → |
| Sen-288-795  | NZ.CJRQ01000008.1 | - | 39557  | 39505  | RNA → rpmE (PRK00019)Ribosomal_L31 (pfam01197) → |
| Sen-288-796  | NZ.CIYZ01000015.1 | + | 104053 | 104105 | RNA → rpmE (PRK00019)Ribosomal_L31 (pfam01197) → |
| Sen-288-797  | NZ.CJGH01000014.1 | - | 39583  | 39531  | RNA → rpmE (PRK00019)Ribosomal_L31 (pfam01197) → |
| Sen-288-798  | NZ.CJKG01000006.1 | + | 182313 | 182365 | RNA → rpmE (PRK00019)Ribosomal_L31 (pfam01197) → |
| Sen-288-799  | NZ.CJKM01000010.1 | - | 39456  | 39404  | RNA → rpmE (PRK00019)Ribosomal_L31 (pfam01197) → |
| Sen-288-800  | NZ.CIXG01000015.1 | - | 39565  | 39513  | RNA → rpmE (PRK00019)Ribosomal_L31 (pfam01197) → |
| Sen-288-801  | NZ.CJIR01000019.1 | - | 39361  | 39309  | RNA → rpmE (PRK00019)Ribosomal_L31 (pfam01197) → |
| Sen-288-802  | NZ.CJDS01000012.1 | + | 107993 | 108045 | RNA → rpmE (PRK00019)Ribosomal_L31 (pfam01197) → |
| Sen-288-803  | NZ.CJAT01000015.1 | + | 104153 | 104205 | RNA → rpmE (PRK00019)Ribosomal_L31 (pfam01197) → |
| Sen-288-804  | NZ.CJJP01000002.1 | - | 198048 | 197996 | RNA → rpmE (PRK00019)Ribosomal_L31 (pfam01197) → |
| Sen-288-805  | NZ.CJTH01000015.1 | - | 41512  | 41460  | RNA → rpmE (PRK00019)Ribosomal_L31 (pfam01197) → |
| Sen-288-806  | NZ.CJBG01000015.1 | - | 39456  | 39404  | RNA → rpmE (PRK00019)Ribosomal_L31 (pfam01197) → |
| Sen-288-807  | NZ.CJRY01000016.1 | - | 39506  | 39454  | RNA → rpmE (PRK00019)Ribosomal_L31 (pfam01197) → |
| Sen-288-1119 | NZ.CILC01000016.1 | + | 104213 | 104265 | RNA → rpmE (PRK00019)Ribosomal_L31 (pfam01197) → |
| Sen-288-808  | NZ.CJDJ01000015.1 | - | 39456  | 39404  | RNA → rpmE (PRK00019)Ribosomal_L31 (pfam01197) → |
| Sen-288-809  | NZ.CIZI01000015.1 | - | 39534  | 39482  | RNA → rpmE (PRK00019)Ribosomal_L31 (pfam01197) → |
| Sen-288-810  | NZ.CJYB01000016.1 | - | 39456  | 39404  | RNA → rpmE (PRK00019)Ribosomal_L31 (pfam01197) → |
| Sen-288-811  | NZ.CIVIO1000014.1 | + | 104162 | 104214 | RNA → rpmE (PRK00019)Ribosomal_L31 (pfam01197) → |
| Sen-288-812  | NZ.CJAM01000016.1 | - | 39456  | 39404  | RNA → rpmE (PRK00019)Ribosomal_L31 (pfam01197) → |
| Sen-288-813  | NZ.CJOP01000016.1 | - | 39383  | 39331  | RNA → rpmE (PRK00019)Ribosomal_L31 (pfam01197) → |
| Sen-288-814  | NZ.CJPJ01000017.1 | - | 39601  | 39549  | RNA → rpmE (PRK00019)Ribosomal_L31 (pfam01197) → |
| Sen-288-815  | NZ.CJQR01000015.1 | - | 39561  | 39509  | RNA → rpmE (PRK00019)Ribosomal_L31 (pfam01197) → |
| Sen-288-816  | NZ.CJTO01000016.1 | - | 39371  | 39319  | RNA → rpmE (PRK00019)Ribosomal_L31 (pfam01197) → |
| Sen-288-817  | NZ.CJMF01000013.1 | - | 41498  | 41446  | RNA → rpmE (PRK00019)Ribosomal_L31 (pfam01197) → |
| Sen-288-818  | NZ.CJET01000016.1 | + | 104147 | 104199 | RNA → rpmE (PRK00019)Ribosomal_L31 (pfam01197) → |
| Sen-288-819  | NZ.CEXP01000016.1 | + | 104148 | 104200 | RNA → rpmE (PRK00019)Ribosomal_L31 (pfam01197) → |
| Sen-288-820  | NZ.CIYA01000015.1 | - | 39556  | 39504  | RNA → rpmE (PRK00019)Ribosomal_L31 (pfam01197) → |
| Sen-288-821  | NZ.CJCQ01000016.1 | - | 39540  | 39488  | RNA → rpmE (PRK00019)Ribosomal_L31 (pfam01197) → |
| Sen-288-822  | NZ.CJHI01000016.1 | - | 39537  | 39485  | RNA → rpmE (PRK00019)Ribosomal_L31 (pfam01197) → |
| Sen-288-823  | NZ.CJXL01000017.1 | - | 39552  | 39500  | RNA → rpmE (PRK00019)Ribosomal_L31 (pfam01197) → |
| Sen-288-824  | NZ.CIXW01000015.1 | + | 103990 | 104042 | RNA → rpmE (PRK00019)Ribosomal_L31 (pfam01197) → |
| Sen-288-825  | NZ.CJYR01000014.1 | + | 104157 | 104209 | RNA → rpmE (PRK00019)Ribosomal_L31 (pfam01197) → |
| Sen-288-826  | NZ.CJDI01000015.1 | - | 39582  | 39530  | RNA → rpmE (PRK00019)Ribosomal_L31 (pfam01197) → |
| Sen-288-827  | NZ.CJMT01000014.1 | - | 41231  | 41179  | RNA → rpmE (PRK00019)Ribosomal_L31 (pfam01197) → |
| Sen-288-828  | NZ.CJAK01000014.1 | + | 104156 | 104208 | RNA → rpmE (PRK00019)Ribosomal_L31 (pfam01197) → |

|             |                    |   |        |        |                                                                                             |
|-------------|--------------------|---|--------|--------|---------------------------------------------------------------------------------------------|
| Sen-288-829 | NZ_CIVK01000013.1  | - | 39506  | 39454  | RNA → rpmE (PRK00019)Ribosomal_L31 (pfam01197) →                                            |
| Sen-288-830 | NZ_CJWP01000003.1  | - | 198560 | 198508 | RNA → rpmE (PRK00019)Ribosomal_L31 (pfam01197) →                                            |
| Sen-131-1   | NZ_LIMK01000047.1  | - | 7856   | 7804   | RNA → rpmE (PRK00019)Ribosomal_L31 (pfam01197) →                                            |
| Sen-114-1   | NZ_AZKO02000007.1  | + | 14026  | 14078  | RNA → rpmE (PRK00019)Ribosomal_L31 (pfam01197) →                                            |
| Sen-119-1   | NZ_AZLA01000036.1  | - | 14715  | 14663  | RNA → rpmE (PRK00019)Ribosomal_L31 (pfam01197) →                                            |
| Sen-439-6   | NZ_CQPF01000014.1  | - | 45175  | 45123  | RNA → rpmE (PRK00019)Ribosomal_L31 (pfam01197) →                                            |
| Sen-136-1   | NZ_AYUE01000015.1  | + | 21280  | 21332  | RNA → rpmE (PRK00019)Ribosomal_L31 (pfam01197) →                                            |
| Sen-126-1   | NZ_AZLB01000007.1  | - | 37541  | 37489  | RNA → rpmE (PRK00019)Ribosomal_L31 (pfam01197) →                                            |
| Sen-439-7   | NZ_CQPI01000012.1  | - | 45367  | 45315  | RNA → rpmE (PRK00019)Ribosomal_L31 (pfam01197) →                                            |
| Sen-449-1   | NZ_AYVC01000013.1  | - | 36680  | 36628  | RNA → rpmE (PRK00019)Ribosomal_L31 (pfam01197) →                                            |
| Sen-443-1   | NZ_AYVH01000013.1  | - | 5782   | 5730   | RNA → rpmE (PRK00019)Ribosomal_L31 (pfam01197) →                                            |
| Sen-465-1   | NZ_AOZH01000025.1  | - | 19515  | 19463  | RNA → rpmE (PRK00019)Ribosomal_L31 (pfam01197) → rpmE (PRK00019)Ribosomal_L31 (pfam01197) → |
| Sen-288-831 | NZ_CIOO01000013.1  | + | 107861 | 107913 | RNA → rpmE (PRK00019)Ribosomal_L31 (pfam01197) →                                            |
| Sen-441-1   | NZ_AOZM01000038.1  | + | 34562  | 34614  | RNA → rpmE (PRK00019)Ribosomal_L31 (pfam01197) →                                            |
| Sen-288-832 | NZ_CIQJ01000015.1  | + | 104150 | 104202 | RNA → rpmE (PRK00019)Ribosomal_L31 (pfam01197) →                                            |
| Sen-288-833 | NZ_CIQW01000016.1  | - | 39536  | 39484  | RNA → rpmE (PRK00019)Ribosomal_L31 (pfam01197) →                                            |
| Sen-471-1   | NZ_APAF01000259.1  | - | 8143   | 8091   | RNA → rpmE (PRK00019)Ribosomal_L31 (pfam01197) → rpmE (PRK00019)Ribosomal_L31 (pfam01197) → |
| Sen-288-834 | NZ_CIUUK01000013.1 | - | 44930  | 44878  | RNA → rpmE (PRK00019)Ribosomal_L31 (pfam01197) →                                            |
| Sen-442-1   | NZ_APAP01000035.1  | - | 45429  | 45377  | RNA → rpmE (PRK00019)Ribosomal_L31 (pfam01197) →                                            |
| Sen-288-835 | NZ_CIMZ01000012.1  | + | 107813 | 107865 | RNA → rpmE (PRK00019)Ribosomal_L31 (pfam01197) →                                            |
| Sen-127-1   | NZ_AZKQ02000008.1  | + | 18889  | 18941  | RNA → rpmE (PRK00019)Ribosomal_L31 (pfam01197) →                                            |
| Sen-439-8   | NZ_CQPK01000013.1  | - | 15585  | 15533  | RNA → rpmE (PRK00019)Ribosomal_L31 (pfam01197) →                                            |
| Sen-288-836 | NZ_CIQF01000016.1  | - | 39576  | 39524  | RNA → rpmE (PRK00019)Ribosomal_L31 (pfam01197) →                                            |
| Sen-439-9   | NZ_CQPE01000017.1  | - | 45348  | 45296  | RNA → rpmE (PRK00019)Ribosomal_L31 (pfam01197) →                                            |
| Sen-288-837 | NZ_CIOS01000015.1  | + | 104160 | 104212 | RNA → rpmE (PRK00019)Ribosomal_L31 (pfam01197) →                                            |
| Sen-288-838 | NZ_CITN01000009.1  | - | 39370  | 39318  | RNA → rpmE (PRK00019)Ribosomal_L31 (pfam01197) →                                            |
| Sen-464-1   | NZ_ATEU01000051.1  | - | 45254  | 45202  | RNA → rpmE (PRK00019)Ribosomal_L31 (pfam01197) →                                            |
| Sen-288-839 | NZ_CINN01000015.1  | + | 104181 | 104233 | RNA → rpmE (PRK00019)Ribosomal_L31 (pfam01197) →                                            |
| Sen-448-1   | NZ_AYVD01000012.1  | + | 95202  | 95254  | RNA → rpmE (PRK00019)Ribosomal_L31 (pfam01197) →                                            |
| Sen-288-840 | NZ_CIQO01000015.1  | - | 39538  | 39486  | RNA → rpmE (PRK00019)Ribosomal_L31 (pfam01197) →                                            |
| Sen-469-1   | NZ_AHJ01000005.1   | - | 49367  | 49315  | RNA → rpmE (PRK00019)Ribosomal_L31 (pfam01197) → rpmE (PRK00019)Ribosomal_L31 (pfam01197) → |
| Sen-288-841 | NZ_CINC01000016.1  | + | 104014 | 104066 | RNA → rpmE (PRK00019)Ribosomal_L31 (pfam01197) →                                            |
| Sen-444-1   | NZ_AOZJ01000055.1  | - | 36680  | 36628  | RNA → rpmE (PRK00019)Ribosomal_L31 (pfam01197) → rpmE (PRK00019)Ribosomal_L31 (pfam01197) → |
| Sen-288-842 | NZ_CIOW01000015.1  | - | 39541  | 39489  | RNA → rpmE (PRK00019)Ribosomal_L31 (pfam01197) →                                            |
| Sen-445-1   | NZ_AYVG01000011.1  | + | 95203  | 95255  | RNA → rpmE (PRK00019)Ribosomal_L31 (pfam01197) →                                            |
| Sen-288-843 | NZ_CISP01000015.1  | - | 39580  | 39528  | RNA → rpmE (PRK00019)Ribosomal_L31 (pfam01197) →                                            |
| Sen-288-844 | NZ_CITM01000016.1  | - | 39541  | 39489  | RNA → rpmE (PRK00019)Ribosomal_L31 (pfam01197) →                                            |
| Sen-461-1   | NZ_AOZI01000030.1  | + | 97354  | 97406  | RNA → rpmE (PRK00019)Ribosomal_L31 (pfam01197) → rpmE (PRK00019)Ribosomal_L31 (pfam01197) → |
| Sen-288-845 | NZ_CIOH01000015.1  | - | 41231  | 41179  | RNA → rpmE (PRK00019)Ribosomal_L31 (pfam01197) →                                            |
| Sen-125-1   | NZ_AZKU01000012.1  | - | 14715  | 14663  | RNA → rpmE (PRK00019)Ribosomal_L31 (pfam01197) →                                            |
| Sen-124-1   | NZ_AZKT01000038.1  | - | 37597  | 37545  | RNA → rpmE (PRK00019)Ribosomal_L31 (pfam01197) →                                            |
| Sen-288-846 | NZ_CIOE01000015.1  | + | 107384 | 107436 | RNA → rpmE (PRK00019)Ribosomal_L31 (pfam01197) →                                            |
| Sen-121-1   | NZ_AZKV01000024.1  | + | 97957  | 98009  | RNA → rpmE (PRK00019)Ribosomal_L31 (pfam01197) →                                            |
| Sen-288-847 | NZ_CIRI01000016.1  | - | 39564  | 39512  | RNA → rpmE (PRK00019)Ribosomal_L31 (pfam01197) →                                            |
| Sen-288-848 | NZ_CISZ01000015.1  | + | 103990 | 104042 | RNA → rpmE (PRK00019)Ribosomal_L31 (pfam01197) →                                            |
| Sen-118-1   | NZ_AZKZ01000037.1  | + | 104477 | 104529 | RNA → rpmE (PRK00019)Ribosomal_L31 (pfam01197) →                                            |
| Sen-288-849 | NZ_CISU01000014.1  | - | 41249  | 41197  | RNA → rpmE (PRK00019)Ribosomal_L31 (pfam01197) →                                            |
| Sen-123-1   | NZ_AZKS01000081.1  | - | 11432  | 11380  | RNA → rpmE (PRK00019)Ribosomal_L31 (pfam01197) →                                            |
| Sen-288-850 | NZ_CIPL01000016.1  | + | 104154 | 104206 | RNA → rpmE (PRK00019)Ribosomal_L31 (pfam01197) →                                            |
| Sen-117-1   | NZ_AZKY01000039.1  | + | 14027  | 14079  | RNA → rpmE (PRK00019)Ribosomal_L31 (pfam01197) →                                            |
| Sen-288-851 | NZ_CIOM01000017.1  | - | 39569  | 39517  | RNA → rpmE (PRK00019)Ribosomal_L31 (pfam01197) →                                            |
| Sen-115-1   | NZ_AZKW01000008.1  | - | 45095  | 45043  | RNA → rpmE (PRK00019)Ribosomal_L31 (pfam01197) →                                            |

|             |                   |   |        |        |                                                                                             |
|-------------|-------------------|---|--------|--------|---------------------------------------------------------------------------------------------|
| Sen-288-852 | NZ_CIPG01000014.1 | - | 44758  | 44706  | RNA → rpmE (PRK00019)Ribosomal_L31 (pfam01197) →                                            |
| Sen-288-853 | NZ_CISC01000015.1 | - | 39589  | 39537  | RNA → rpmE (PRK00019)Ribosomal_L31 (pfam01197) →                                            |
| Sen-439-10  | NZ_CQPN01000012.1 | - | 45266  | 45214  | RNA → rpmE (PRK00019)Ribosomal_L31 (pfam01197) →                                            |
| Sen-288-854 | NZ_CIOB01000018.1 | + | 107995 | 108047 | RNA → rpmE (PRK00019)Ribosomal_L31 (pfam01197) → hypo →                                     |
| Sen-288-855 | NZ_CIND01000016.1 | - | 39601  | 39549  | RNA → rpmE (PRK00019)Ribosomal_L31 (pfam01197) →                                            |
| Sen-288-856 | NZ_CJRI01000013.1 | + | 104161 | 104213 | RNA → rpmE (PRK00019)Ribosomal_L31 (pfam01197) →                                            |
| Sen-288-857 | NZ_CIPK01000016.1 | + | 104157 | 104209 | RNA → rpmE (PRK00019)Ribosomal_L31 (pfam01197) →                                            |
| Sen-453-1   | NZ_AYUY01000011.1 | + | 95202  | 95254  | RNA → rpmE (PRK00019)Ribosomal_L31 (pfam01197) →                                            |
| Sen-288-858 | NZ_CIPZ01000010.1 | + | 104165 | 104217 | RNA → rpmE (PRK00019)Ribosomal_L31 (pfam01197) →                                            |
| Sen-128-1   | NZ_AZKP01000048.1 | - | 11305  | 11253  | RNA → rpmE (PRK00019)Ribosomal_L31 (pfam01197) →                                            |
| Sen-447-1   | NZ_AYVE01000011.1 | + | 95203  | 95255  | RNA → rpmE (PRK00019)Ribosomal_L31 (pfam01197) →                                            |
| Sen-288-859 | NZ_CIRC01000015.1 | + | 104144 | 104196 | RNA → rpmE (PRK00019)Ribosomal_L31 (pfam01197) →                                            |
| Sen-450-1   | NZ_AYVB01000014.1 | - | 36680  | 36628  | RNA → rpmE (PRK00019)Ribosomal_L31 (pfam01197) →                                            |
| Sen-288-860 | NZ_CIOD01000015.1 | - | 41231  | 41179  | RNA → rpmE (PRK00019)Ribosomal_L31 (pfam01197) →                                            |
| Sen-288-861 | NZ_CINA01000016.1 | - | 39601  | 39549  | RNA → rpmE (PRK00019)Ribosomal_L31 (pfam01197) →                                            |
| Sen-288-862 | NZ_CJRC01000015.1 | - | 41510  | 41458  | RNA → rpmE (PRK00019)Ribosomal_L31 (pfam01197) →                                            |
| Sen-288-863 | NZ_CIOY01000014.1 | - | 41231  | 41179  | RNA → rpmE (PRK00019)Ribosomal_L31 (pfam01197) →                                            |
| Sen-120-1   | NZ_AZLC01000015.1 | + | 104477 | 104529 | RNA → rpmE (PRK00019)Ribosomal_L31 (pfam01197) →                                            |
| Sen-288-864 | NZ_CIOZ01000018.1 | + | 104178 | 104230 | RNA → rpmE (PRK00019)Ribosomal_L31 (pfam01197) →                                            |
| Sen-122-1   | NZ_AZKR01000018.1 | + | 18897  | 18949  | RNA → rpmE (PRK00019)Ribosomal_L31 (pfam01197) →                                            |
| Sen-288-865 | NZ_CISN01000015.1 | - | 39576  | 39524  | RNA → rpmE (PRK00019)Ribosomal_L31 (pfam01197) →                                            |
| Sen-116-1   | NZ_AZKX01000030.1 | + | 104479 | 104531 | RNA → rpmE (PRK00019)Ribosomal_L31 (pfam01197) →                                            |
| Sen-288-866 | NZ_CIRV01000014.1 | - | 39588  | 39536  | RNA → rpmE (PRK00019)Ribosomal_L31 (pfam01197) →                                            |
| Sen-451-1   | NZ_AYVA01000013.1 | - | 36680  | 36628  | RNA → rpmE (PRK00019)Ribosomal_L31 (pfam01197) →                                            |
| Sen-288-867 | NZ_CITQ01000016.1 | - | 39374  | 39322  | RNA → rpmE (PRK00019)Ribosomal_L31 (pfam01197) →                                            |
| Sen-456-1   | NZ_AYUV01000014.1 | - | 36603  | 36551  | RNA → rpmE (PRK00019)Ribosomal_L31 (pfam01197) →                                            |
| Sen-288-868 | NZ_CIQT01000016.1 | - | 39518  | 39466  | RNA → rpmE (PRK00019)Ribosomal_L31 (pfam01197) →                                            |
| Sen-457-1   | NZ_AYUU01000011.1 | - | 36680  | 36628  | RNA → rpmE (PRK00019)Ribosomal_L31 (pfam01197) →                                            |
| Sen-288-869 | NZ_CIUD01000012.1 | + | 107998 | 108050 | RNA → rpmE (PRK00019)Ribosomal_L31 (pfam01197) →                                            |
| Sen-288-870 | NZ_CIPH01000014.1 | - | 39541  | 39489  | RNA → rpmE (PRK00019)Ribosomal_L31 (pfam01197) →                                            |
| Sen-467-1   | NZ_AHUK01000056.1 | - | 49403  | 49351  | RNA → rpmE (PRK00019)Ribosomal_L31 (pfam01197) → rpmE (PRK00019)Ribosomal_L31 (pfam01197) → |
| Sen-288-871 | NZ_CISI01000014.1 | + | 103990 | 104042 | RNA → rpmE (PRK00019)Ribosomal_L31 (pfam01197) →                                            |
| Sen-452-1   | NZ_AYUZ01000012.1 | - | 36680  | 36628  | RNA → rpmE (PRK00019)Ribosomal_L31 (pfam01197) →                                            |
| Sen-288-872 | NZ_CIKY01000015.1 | + | 107851 | 107903 | RNA → rpmE (PRK00019)Ribosomal_L31 (pfam01197) →                                            |
| Sen-459-1   | NZ_AYUS01000043.1 | - | 268    | 216    | RNA → rpmE (PRK00019)Ribosomal_L31 (pfam01197) →                                            |
| Sen-288-873 | NZ_CIOA01000015.1 | + | 104165 | 104217 | RNA → rpmE (PRK00019)Ribosomal_L31 (pfam01197) →                                            |
| Sen-288-874 | NZ_CJRL01000015.1 | + | 104152 | 104204 | RNA → rpmE (PRK00019)Ribosomal_L31 (pfam01197) →                                            |
| Sen-455-1   | NZ_AYUW01000012.1 | + | 95203  | 95255  | RNA → rpmE (PRK00019)Ribosomal_L31 (pfam01197) →                                            |
| Sen-288-875 | NZ_CIMY01000014.1 | + | 104030 | 104082 | RNA → rpmE (PRK00019)Ribosomal_L31 (pfam01197) →                                            |
| Sen-446-1   | NZ_AYVF01000014.1 | - | 36680  | 36628  | RNA → rpmE (PRK00019)Ribosomal_L31 (pfam01197) →                                            |
| Sen-288-876 | NZ_CIQS01000015.1 | + | 104012 | 104064 | RNA → rpmE (PRK00019)Ribosomal_L31 (pfam01197) →                                            |
| Sen-458-1   | NZ_AYUT01000012.1 | - | 36680  | 36628  | RNA → rpmE (PRK00019)Ribosomal_L31 (pfam01197) →                                            |
| Sen-288-877 | NZ_CIRM01000008.1 | + | 133807 | 133859 | RNA → rpmE (PRK00019)Ribosomal_L31 (pfam01197) →                                            |
| Sen-454-1   | NZ_AYUX01000013.1 | + | 70771  | 70823  | RNA → rpmE (PRK00019)Ribosomal_L31 (pfam01197) →                                            |
| Sen-288-878 | NZ_CIPF01000015.1 | - | 39501  | 39449  | RNA → rpmE (PRK00019)Ribosomal_L31 (pfam01197) →                                            |
| Sen-460-1   | NZ_AYUR01000011.1 | + | 95203  | 95255  | RNA → rpmE (PRK00019)Ribosomal_L31 (pfam01197) →                                            |
| Sen-288-879 | NZ_CINR01000014.1 | + | 104181 | 104233 | RNA → rpmE (PRK00019)Ribosomal_L31 (pfam01197) →                                            |
| Sen-288-880 | NZ_CINE01000015.1 | - | 41673  | 41621  | RNA → rpmE (PRK00019)Ribosomal_L31 (pfam01197) →                                            |
| Sen-288-881 | NZ_CIPJ01000014.1 | - | 39537  | 39485  | RNA → rpmE (PRK00019)Ribosomal_L31 (pfam01197) →                                            |
| Sen-288-882 | NZ_CIRK01000012.1 | + | 107987 | 108039 | RNA → rpmE (PRK00019)Ribosomal_L31 (pfam01197) →                                            |
| Sen-288-883 | NZ_CJXD01000017.1 | + | 104163 | 104215 | RNA → rpmE (PRK00019)Ribosomal_L31 (pfam01197) →                                            |
| Sen-288-884 | NZ_CINX01000016.1 | - | 39596  | 39544  | RNA → rpmE (PRK00019)Ribosomal_L31 (pfam01197) →                                            |



|              |                   |   |        |        |                                                  |
|--------------|-------------------|---|--------|--------|--------------------------------------------------|
| Sen-288-885  | NZ.CJCW01000016.1 | - | 39532  | 39480  | RNA → rpmE (PRK00019)Ribosomal_L31 (pfam01197) → |
| Sen-288-886  | NZ.CIUY01000006.1 | - | 39383  | 39331  | RNA → rpmE (PRK00019)Ribosomal_L31 (pfam01197) → |
| Sen-288-1120 | NZ.CIYL01000011.1 | - | 39456  | 39404  | RNA → rpmE (PRK00019)Ribosomal_L31 (pfam01197) → |
| Sen-288-887  | NZ.CJPO01000007.1 | + | 152696 | 152748 | RNA → rpmE (PRK00019)Ribosomal_L31 (pfam01197) → |
| Sen-288-888  | NZ.CJHT01000016.1 | + | 104150 | 104202 | RNA → rpmE (PRK00019)Ribosomal_L31 (pfam01197) → |
| Sen-288-889  | NZ.CJGC01000012.1 | + | 104169 | 104221 | RNA → rpmE (PRK00019)Ribosomal_L31 (pfam01197) → |
| Sen-288-1121 | NZ.CIOC01000014.1 | - | 41512  | 41460  | RNA → rpmE (PRK00019)Ribosomal_L31 (pfam01197) → |
| Sen-288-890  | NZ.CIUI01000014.1 | + | 103989 | 104041 | RNA → rpmE (PRK00019)Ribosomal_L31 (pfam01197) → |
| Sen-288-891  | NZ.CISL01000014.1 | + | 103990 | 104042 | RNA → rpmE (PRK00019)Ribosomal_L31 (pfam01197) → |
| Sen-288-892  | NZ.CIQP01000015.1 | - | 41231  | 41179  | RNA → rpmE (PRK00019)Ribosomal_L31 (pfam01197) → |
| Sen-288-893  | NZ.CITU01000014.1 | + | 107894 | 107946 | RNA → rpmE (PRK00019)Ribosomal_L31 (pfam01197) → |
| Sen-288-894  | NZ.CIUH01000013.1 | + | 104149 | 104201 | RNA → rpmE (PRK00019)Ribosomal_L31 (pfam01197) → |
| Sen-288-895  | NZ.CITI01000014.1 | - | 39588  | 39536  | RNA → rpmE (PRK00019)Ribosomal_L31 (pfam01197) → |
| Sen-288-896  | NZ.CINZ01000016.1 | - | 39601  | 39549  | RNA → rpmE (PRK00019)Ribosomal_L31 (pfam01197) → |
| Sen-288-897  | NZ.CINS01000015.1 | + | 104164 | 104216 | RNA → rpmE (PRK00019)Ribosomal_L31 (pfam01197) → |
| Sen-288-898  | NZ.CINH01000015.1 | + | 104148 | 104200 | RNA → rpmE (PRK00019)Ribosomal_L31 (pfam01197) → |
| Sen-288-899  | NZ.CIQE01000016.1 | + | 104151 | 104203 | RNA → rpmE (PRK00019)Ribosomal_L31 (pfam01197) → |
| Sen-288-900  | NZ.CIRX01000010.1 | + | 133852 | 133904 | RNA → rpmE (PRK00019)Ribosomal_L31 (pfam01197) → |
| Sen-288-901  | NZ.CIQZ01000006.1 | - | 39370  | 39318  | RNA → rpmE (PRK00019)Ribosomal_L31 (pfam01197) → |
| Sen-288-902  | NZ.CIRO01000014.1 | + | 104138 | 104190 | RNA → rpmE (PRK00019)Ribosomal_L31 (pfam01197) → |
| Sen-288-903  | NZ.CISB01000014.1 | - | 39586  | 39534  | RNA → rpmE (PRK00019)Ribosomal_L31 (pfam01197) → |
| Sen-288-904  | NZ.CITP01000015.1 | - | 39549  | 39497  | RNA → rpmE (PRK00019)Ribosomal_L31 (pfam01197) → |
| Sen-288-905  | NZ.CITR01000003.1 | - | 198388 | 198336 | RNA → rpmE (PRK00019)Ribosomal_L31 (pfam01197) → |
| Sen-288-906  | NZ.CINI01000016.1 | - | 39379  | 39327  | RNA → rpmE (PRK00019)Ribosomal_L31 (pfam01197) → |
| Sen-288-907  | NZ.CIRS01000017.1 | + | 104157 | 104209 | RNA → rpmE (PRK00019)Ribosomal_L31 (pfam01197) → |
| Sen-288-908  | NZ.CIPS01000015.1 | - | 41507  | 41455  | RNA → rpmE (PRK00019)Ribosomal_L31 (pfam01197) → |
| Sen-288-909  | NZ.CIPD01000003.1 | + | 104158 | 104210 | RNA → rpmE (PRK00019)Ribosomal_L31 (pfam01197) → |
| Sen-288-910  | NZ.CISY01000013.1 | - | 39584  | 39532  | RNA → rpmE (PRK00019)Ribosomal_L31 (pfam01197) → |
| Sen-288-911  | NZ.CIUC01000015.1 | + | 104162 | 104214 | RNA → rpmE (PRK00019)Ribosomal_L31 (pfam01197) → |
| Sen-288-912  | NZ.CIKX01000016.1 | + | 104173 | 104225 | RNA → rpmE (PRK00019)Ribosomal_L31 (pfam01197) → |
| Sen-288-913  | NZ.CISG01000015.1 | + | 103989 | 104041 | RNA → rpmE (PRK00019)Ribosomal_L31 (pfam01197) → |
| Sen-288-914  | NZ.CIRN01000016.1 | - | 39588  | 39536  | RNA → rpmE (PRK00019)Ribosomal_L31 (pfam01197) → |
| Sen-288-915  | NZ.CINY01000011.1 | + | 107828 | 107880 | RNA → rpmE (PRK00019)Ribosomal_L31 (pfam01197) → |
| Sen-288-916  | NZ.CIMX01000015.1 | + | 104154 | 104206 | RNA → rpmE (PRK00019)Ribosomal_L31 (pfam01197) → |
| Sen-288-917  | NZ.CISR01000015.1 | - | 39588  | 39536  | RNA → rpmE (PRK00019)Ribosomal_L31 (pfam01197) → |
| Sen-288-918  | NZ.CIOQ01000015.1 | + | 104025 | 104077 | RNA → rpmE (PRK00019)Ribosomal_L31 (pfam01197) → |
| Sen-288-919  | NZ.CINJ01000015.1 | - | 39388  | 39336  | RNA → rpmE (PRK00019)Ribosomal_L31 (pfam01197) → |
| Sen-288-920  | NZ.CIPN01000015.1 | + | 107996 | 108048 | RNA → rpmE (PRK00019)Ribosomal_L31 (pfam01197) → |
| Sen-288-921  | NZ.CJNC01000013.1 | - | 41507  | 41455  | RNA → rpmE (PRK00019)Ribosomal_L31 (pfam01197) → |
| Sen-288-922  | NZ.CJLQ01000014.1 | + | 104151 | 104203 | RNA → rpmE (PRK00019)Ribosomal_L31 (pfam01197) → |
| Sen-288-923  | NZ.CJNV01000007.1 | - | 41508  | 41456  | RNA → rpmE (PRK00019)Ribosomal_L31 (pfam01197) → |
| Sen-288-924  | NZ.CJNH01000014.1 | + | 104156 | 104208 | RNA → rpmE (PRK00019)Ribosomal_L31 (pfam01197) → |
| Sen-288-925  | NZ.CJBB01000016.1 | - | 39541  | 39489  | RNA → rpmE (PRK00019)Ribosomal_L31 (pfam01197) → |
| Sen-288-926  | NZ.CJDY01000016.1 | - | 39710  | 39658  | RNA → rpmE (PRK00019)Ribosomal_L31 (pfam01197) → |
| Sen-288-927  | NZ.CJWS01000016.1 | - | 39456  | 39404  | RNA → rpmE (PRK00019)Ribosomal_L31 (pfam01197) → |
| Sen-288-928  | NZ.CIYP01000014.1 | + | 104206 | 104258 | RNA → rpmE (PRK00019)Ribosomal_L31 (pfam01197) → |
| Sen-288-929  | NZ.CILM01000016.1 | - | 39357  | 39305  | RNA → rpmE (PRK00019)Ribosomal_L31 (pfam01197) → |
| Sen-288-930  | NZ.CJNQ01000014.1 | - | 41499  | 41447  | RNA → rpmE (PRK00019)Ribosomal_L31 (pfam01197) → |
| Sen-288-1122 | NZ.CIWM01000014.1 | - | 41505  | 41453  | RNA → rpmE (PRK00019)Ribosomal_L31 (pfam01197) → |
| Sen-288-931  | NZ.CJBT01000010.1 | + | 141195 | 141247 | RNA → rpmE (PRK00019)Ribosomal_L31 (pfam01197) → |
| Sen-288-932  | NZ.CJLT01000014.1 | + | 104151 | 104203 | RNA → rpmE (PRK00019)Ribosomal_L31 (pfam01197) → |
| Sen-288-933  | NZ.CJCF01000015.1 | + | 103986 | 104038 | RNA → rpmE (PRK00019)Ribosomal_L31 (pfam01197) → |

|             |                   |   |        |        |                                                                                             |
|-------------|-------------------|---|--------|--------|---------------------------------------------------------------------------------------------|
| Sen-288-934 | NZ.CJYC01000017.1 | - | 44768  | 44716  | RNA → rpmE (PRK00019)Ribosomal_L31 (pfam01197) →                                            |
| Sen-288-935 | NZ.CIYY01000016.1 | + | 104137 | 104189 | RNA → rpmE (PRK00019)Ribosomal_L31 (pfam01197) →                                            |
| Sen-288-936 | NZ.CJWD01000016.1 | + | 104147 | 104199 | RNA → rpmE (PRK00019)Ribosomal_L31 (pfam01197) →                                            |
| Sen-288-937 | NZ.CJMI01000015.1 | - | 41231  | 41179  | RNA → rpmE (PRK00019)Ribosomal_L31 (pfam01197) →                                            |
| Sen-288-938 | NZ.CIXF01000016.1 | - | 39588  | 39536  | RNA → rpmE (PRK00019)Ribosomal_L31 (pfam01197) →                                            |
| Sen-288-939 | NZ.CJBH01000015.1 | + | 103986 | 104038 | RNA → rpmE (PRK00019)Ribosomal_L31 (pfam01197) →                                            |
| Sen-288-940 | NZ.CJLC01000016.1 | + | 104109 | 104161 | RNA → rpmE (PRK00019)Ribosomal_L31 (pfam01197) →                                            |
| Sen-288-941 | NZ.CJXA01000016.1 | - | 39378  | 39326  | RNA → rpmE (PRK00019)Ribosomal_L31 (pfam01197) →                                            |
| Sen-315-1   | NZ.AHUT01000041.1 | + | 42411  | 42463  | RNA → rpmE (PRK00019)Ribosomal_L31 (pfam01197) →                                            |
| Sen-322-1   | NZ.CATM01000040.1 | + | 111239 | 111291 | RNA → rpmE (PRK00019)Ribosomal_L31 (pfam01197) →                                            |
| Sen-327-1   | NZ.CATR01000036.1 | - | 37562  | 37510  | RNA → rpmE (PRK00019)Ribosomal_L31 (pfam01197) →                                            |
| Sen-332-1   | NZ.CATA01000042.1 | + | 42800  | 42852  | RNA → rpmE (PRK00019)Ribosomal_L31 (pfam01197) →                                            |
| Sen-338-1   | NZ.CASU01000047.1 | + | 42880  | 42932  | RNA → rpmE (PRK00019)Ribosomal_L31 (pfam01197) →                                            |
| Sen-316-1   | NZ.CATQ01000043.1 | + | 111287 | 111339 | RNA → rpmE (PRK00019)Ribosomal_L31 (pfam01197) →                                            |
| Sen-323-1   | NZ.CATL01000048.1 | + | 111226 | 111278 | RNA → rpmE (PRK00019)Ribosomal_L31 (pfam01197) →                                            |
| Sen-328-1   | NZ.CATE01000036.1 | - | 37552  | 37500  | RNA → rpmE (PRK00019)Ribosomal_L31 (pfam01197) →                                            |
| Sen-334-1   | NZ.CASY01000039.1 | + | 111202 | 111254 | RNA → rpmE (PRK00019)Ribosomal_L31 (pfam01197) →                                            |
| Sen-335-1   | NZ.CASX01000036.1 | + | 111336 | 111388 | RNA → rpmE (PRK00019)Ribosomal_L31 (pfam01197) →                                            |
| Sen-339-1   | NZ.CAST01000046.1 | + | 102302 | 102354 | RNA → rpmE (PRK00019)Ribosomal_L31 (pfam01197) →                                            |
| Sen-9-1     | NZ.JGYE01000109.1 | + | 4194   | 4246   | RNA → rpmE (PRK00019)Ribosomal_L31 (pfam01197) →                                            |
| Sen-313-1   | NZ.AHUS01000028.1 | - | 45078  | 45026  | RNA → rpmE (PRK00019)Ribosomal_L31 (pfam01197) →                                            |
| Sen-321-1   | NZ.CATN01000044.1 | + | 111197 | 111249 | RNA → rpmE (PRK00019)Ribosomal_L31 (pfam01197) →                                            |
| Sen-326-1   | NZ.CATF01000034.1 | - | 37552  | 37500  | RNA → rpmE (PRK00019)Ribosomal_L31 (pfam01197) →                                            |
| Sen-331-1   | NZ.CATB01000040.1 | - | 37552  | 37500  | RNA → rpmE (PRK00019)Ribosomal_L31 (pfam01197) →                                            |
| Sen-337-1   | NZ.CASV01000053.1 | + | 55458  | 55510  | RNA → rpmE (PRK00019)Ribosomal_L31 (pfam01197) →                                            |
| Sen-320-1   | NZ.AYDT01000147.1 | + | 111582 | 111634 | RNA → rpmE (PRK00019)Ribosomal_L31 (pfam01197) → rpmE (PRK00019)Ribosomal_L31 (pfam01197) → |
| Sen-317-1   | NZ.CATP01000025.1 | + | 111848 | 111900 | RNA → rpmE (PRK00019)Ribosomal_L31 (pfam01197) →                                            |
| Sen-319-1   | NZ.CATO01000040.1 | + | 111150 | 111202 | RNA → rpmE (PRK00019)Ribosomal_L31 (pfam01197) →                                            |
| Sen-324-1   | NZ.CATK01000043.1 | - | 37550  | 37498  | RNA → rpmE (PRK00019)Ribosomal_L31 (pfam01197) →                                            |
| Sen-325-1   | NZ.CATJ01000034.1 | - | 37552  | 37500  | RNA → rpmE (PRK00019)Ribosomal_L31 (pfam01197) →                                            |
| Sen-330-1   | NZ.CATC01000039.1 | - | 37552  | 37500  | RNA → rpmE (PRK00019)Ribosomal_L31 (pfam01197) →                                            |
| Sen-336-1   | NZ.CASW01000025.1 | + | 111111 | 111163 | RNA → rpmE (PRK00019)Ribosomal_L31 (pfam01197) →                                            |
| Sen-318-1   | NZ.AYDU01000103.1 | - | 37530  | 37478  | RNA → rpmE (PRK00019)Ribosomal_L31 (pfam01197) → rpmE (PRK00019)Ribosomal_L31 (pfam01197) → |
| Sen-288-942 | NZ.CXJ01000016.1  | + | 104162 | 104214 | RNA → rpmE (PRK00019)Ribosomal_L31 (pfam01197) →                                            |
| Sen-288-943 | NZ.CEZQ01000016.1 | + | 104159 | 104211 | RNA → rpmE (PRK00019)Ribosomal_L31 (pfam01197) →                                            |
| Sen-288-944 | NZ.CJEO01000016.1 | + | 104148 | 104200 | RNA → rpmE (PRK00019)Ribosomal_L31 (pfam01197) →                                            |
| Sen-288-945 | NZ.CILQ01000012.1 | - | 39601  | 39549  | RNA → rpmE (PRK00019)Ribosomal_L31 (pfam01197) →                                            |
| Sen-288-946 | NZ.CJNE01000014.1 | - | 41516  | 41464  | RNA → rpmE (PRK00019)Ribosomal_L31 (pfam01197) →                                            |
| Sen-288-947 | NZ.CJHM01000016.1 | + | 104139 | 104191 | RNA → rpmE (PRK00019)Ribosomal_L31 (pfam01197) →                                            |
| Sen-288-948 | NZ.CJLG01000016.1 | + | 103212 | 103264 | RNA → rpmE (PRK00019)Ribosomal_L31 (pfam01197) →                                            |
| Sen-288-949 | NZ.CJTJ01000014.1 | - | 41231  | 41179  | RNA → rpmE (PRK00019)Ribosomal_L31 (pfam01197) →                                            |
| Sen-288-950 | NZ.CIZX01000016.1 | + | 104149 | 104201 | RNA → rpmE (PRK00019)Ribosomal_L31 (pfam01197) →                                            |
| Sen-288-951 | NZ.CJAX01000016.1 | + | 104135 | 104187 | RNA → rpmE (PRK00019)Ribosomal_L31 (pfam01197) →                                            |
| Sen-288-952 | NZ.CJPF01000015.1 | - | 41228  | 41176  | RNA → rpmE (PRK00019)Ribosomal_L31 (pfam01197) →                                            |
| Sen-288-953 | NZ.CJT01000014.1  | - | 41231  | 41179  | RNA → rpmE (PRK00019)Ribosomal_L31 (pfam01197) →                                            |
| Sen-288-954 | NZ.CJFV01000016.1 | - | 39579  | 39527  | RNA → rpmE (PRK00019)Ribosomal_L31 (pfam01197) →                                            |
| Sen-288-955 | NZ.CJQT01000015.1 | + | 104170 | 104222 | RNA → rpmE (PRK00019)Ribosomal_L31 (pfam01197) →                                            |
| Sen-288-956 | NZ.CEYX01000016.1 | - | 39535  | 39483  | RNA → rpmE (PRK00019)Ribosomal_L31 (pfam01197) →                                            |
| Sen-288-957 | NZ.CIVS01000015.1 | + | 109396 | 109448 | RNA → rpmE (PRK00019)Ribosomal_L31 (pfam01197) →                                            |
| Sen-288-958 | NZ.CJJE01000015.1 | + | 104136 | 104188 | RNA → rpmE (PRK00019)Ribosomal_L31 (pfam01197) →                                            |
| Sen-288-959 | NZ.CJPK01000008.1 | - | 39601  | 39549  | RNA → rpmE (PRK00019)Ribosomal_L31 (pfam01197) →                                            |
| Sen-288-960 | NZ.CJAH01000016.1 | - | 39456  | 39404  | RNA → rpmE (PRK00019)Ribosomal_L31 (pfam01197) →                                            |



|              |                   |   |        |        |                                                   |
|--------------|-------------------|---|--------|--------|---------------------------------------------------|
| Sen-288-961  | NZ.CIYQ01000011.1 | + | 116070 | 116122 | RNA → rpmE (PRK00019) Ribosomal_L31 (pfam01197) → |
| Sen-288-962  | NZ.CIXU01000014.1 | + | 104140 | 104192 | RNA → rpmE (PRK00019) Ribosomal_L31 (pfam01197) → |
| Sen-288-963  | NZ.CJPS01000013.1 | - | 39601  | 39549  | RNA → rpmE (PRK00019) Ribosomal_L31 (pfam01197) → |
| Sen-288-964  | NZ.CJLI01000006.1 | - | 39456  | 39404  | RNA → rpmE (PRK00019) Ribosomal_L31 (pfam01197) → |
| Sen-288-965  | NZ.CJTE01000016.1 | - | 39371  | 39319  | RNA → rpmE (PRK00019) Ribosomal_L31 (pfam01197) → |
| Sen-288-966  | NZ.CIVU01000016.1 | + | 104172 | 104224 | RNA → rpmE (PRK00019) Ribosomal_L31 (pfam01197) → |
| Sen-288-967  | NZ.CJYA01000016.1 | - | 39456  | 39404  | RNA → rpmE (PRK00019) Ribosomal_L31 (pfam01197) → |
| Sen-288-968  | NZ.CJHY01000015.1 | + | 104142 | 104194 | RNA → rpmE (PRK00019) Ribosomal_L31 (pfam01197) → |
| Sen-288-969  | NZ.CIUW01000016.1 | + | 104162 | 104214 | RNA → rpmE (PRK00019) Ribosomal_L31 (pfam01197) → |
| Sen-288-970  | NZ.CIUX01000015.1 | + | 107419 | 107471 | RNA → rpmE (PRK00019) Ribosomal_L31 (pfam01197) → |
| Sen-288-971  | NZ.CIZH01000015.1 | - | 39531  | 39479  | RNA → rpmE (PRK00019) Ribosomal_L31 (pfam01197) → |
| Sen-288-972  | NZ.CJJR01000013.1 | - | 41201  | 41149  | RNA → rpmE (PRK00019) Ribosomal_L31 (pfam01197) → |
| Sen-288-973  | NZ.CJIG01000015.1 | - | 39560  | 39508  | RNA → rpmE (PRK00019) Ribosomal_L31 (pfam01197) → |
| Sen-288-974  | NZ.CJMX01000014.1 | - | 41231  | 41179  | RNA → rpmE (PRK00019) Ribosomal_L31 (pfam01197) → |
| Sen-288-975  | NZ.CJQY01000016.1 | - | 39601  | 39549  | RNA → rpmE (PRK00019) Ribosomal_L31 (pfam01197) → |
| Sen-288-976  | NZ.CJOY01000016.1 | - | 39706  | 39654  | RNA → rpmE (PRK00019) Ribosomal_L31 (pfam01197) → |
| Sen-288-977  | NZ.CILU01000016.1 | - | 39370  | 39318  | RNA → rpmE (PRK00019) Ribosomal_L31 (pfam01197) → |
| Sen-288-978  | NZ.CJXV01000017.1 | - | 39374  | 39322  | RNA → rpmE (PRK00019) Ribosomal_L31 (pfam01197) → |
| Sen-288-979  | NZ.CJAB01000016.1 | - | 39538  | 39486  | RNA → rpmE (PRK00019) Ribosomal_L31 (pfam01197) → |
| Sen-288-980  | NZ.CJXT01000016.1 | + | 104164 | 104216 | RNA → rpmE (PRK00019) Ribosomal_L31 (pfam01197) → |
| Sen-288-981  | NZ.CIXP01000022.1 | - | 39353  | 39301  | RNA → rpmE (PRK00019) Ribosomal_L31 (pfam01197) → |
| Sen-288-982  | NZ.CJTD01000014.1 | + | 107864 | 107916 | RNA → rpmE (PRK00019) Ribosomal_L31 (pfam01197) → |
| Sen-288-983  | NZ.CJLO01000014.1 | - | 41501  | 41449  | RNA → rpmE (PRK00019) Ribosomal_L31 (pfam01197) → |
| Sen-288-1123 | NZ.CIYN01000015.1 | - | 39528  | 39476  | RNA → rpmE (PRK00019) Ribosomal_L31 (pfam01197) → |
| Sen-288-984  | NZ.CJFC01000015.1 | + | 104157 | 104209 | RNA → rpmE (PRK00019) Ribosomal_L31 (pfam01197) → |
| Sen-288-985  | NZ.CJWG01000017.1 | + | 104159 | 104211 | RNA → rpmE (PRK00019) Ribosomal_L31 (pfam01197) → |
| Sen-288-986  | NZ.CJAR01000014.1 | + | 104154 | 104206 | RNA → rpmE (PRK00019) Ribosomal_L31 (pfam01197) → |
| Sen-288-987  | NZ.CJPY01000015.1 | + | 104172 | 104224 | RNA → rpmE (PRK00019) Ribosomal_L31 (pfam01197) → |
| Sen-288-988  | NZ.CJZG01000016.1 | - | 39601  | 39549  | RNA → rpmE (PRK00019) Ribosomal_L31 (pfam01197) → |
| Sen-288-989  | NZ.CJQO01000015.1 | + | 104149 | 104201 | RNA → rpmE (PRK00019) Ribosomal_L31 (pfam01197) → |
| Sen-288-990  | NZ.CJYY01000014.1 | + | 107837 | 107889 | RNA → rpmE (PRK00019) Ribosomal_L31 (pfam01197) → |
| Sen-175-1    | NZ.AMNI01000018.1 | + | 43440  | 43492  | RNA → rpmE (PRK00019) Ribosomal_L31 (pfam01197) → |
| Sen-209-1    | NZ.AMNN01000060.1 | + | 16157  | 16209  | RNA → rpmE (PRK00019) Ribosomal_L31 (pfam01197) → |
| Sen-204-1    | NZ.AMNS01000001.1 | - | 36301  | 36249  | RNA → rpmE (PRK00019) Ribosomal_L31 (pfam01197) → |
| Sen-211-1    | NZ.AMNJ01000008.1 | + | 43441  | 43493  | RNA → rpmE (PRK00019) Ribosomal_L31 (pfam01197) → |
| Sen-200-1    | NZ.AMNO01000081.1 | - | 37603  | 37551  | RNA → rpmE (PRK00019) Ribosomal_L31 (pfam01197) → |
| Sen-205-1    | NZ.AMNT01000032.1 | + | 25569  | 25621  | RNA → rpmE (PRK00019) Ribosomal_L31 (pfam01197) → |
| Sen-213-1    | NZ.AMNB01000092.1 | + | 131954 | 132006 | RNA → rpmE (PRK00019) Ribosomal_L31 (pfam01197) → |
| Sen-212-1    | NZ.AMNK01000018.1 | - | 37498  | 37446  | RNA → rpmE (PRK00019) Ribosomal_L31 (pfam01197) → |
| Sen-306-51   | NZ.LINK01000004.1 | - | 9890   | 9838   | RNA → rpmE (PRK00019) Ribosomal_L31 (pfam01197) → |
| Sen-198-1    | NZ.AMNP01000004.1 | - | 37494  | 37442  | RNA → rpmE (PRK00019) Ribosomal_L31 (pfam01197) → |
| Sen-306-52   | NZ.LINL01000061.1 | + | 42496  | 42548  | RNA → rpmE (PRK00019) Ribosomal_L31 (pfam01197) → |
| Sen-773-1    | NZ.AKYL01000049.1 | + | 100902 | 100954 | RNA → rpmE (PRK00019) Ribosomal_L31 (pfam01197) → |
| Sen-790-1    | NZ.AUQG01000125.1 | - | 37523  | 37471  | RNA → rpmE (PRK00019) Ribosomal_L31 (pfam01197) → |
| Sen-788-1    | NZ.AUQJ01000078.1 | - | 37855  | 37803  | RNA → rpmE (PRK00019) Ribosomal_L31 (pfam01197) → |
| Sen-225-48   | NZ.LINR01000022.1 | + | 61621  | 61673  | RNA → rpmE (PRK00019) Ribosomal_L31 (pfam01197) → |
| Sen-761-1    | NZ.AMBU01000035.1 | - | 37498  | 37446  | RNA → rpmE (PRK00019) Ribosomal_L31 (pfam01197) → |
| Sen-170-46   | NZ.LIMW01000021.1 | - | 37518  | 37466  | RNA → rpmE (PRK00019) Ribosomal_L31 (pfam01197) → |
| Sen-201-1    | NZ.AKYN01000107.1 | - | 37697  | 37645  | RNA → rpmE (PRK00019) Ribosomal_L31 (pfam01197) → |
| Sen-208-1    | NZ.AMMC01000016.1 | + | 42026  | 42078  | RNA → rpmE (PRK00019) Ribosomal_L31 (pfam01197) → |
| Sen-306-53   | NZ.LIOG01000018.1 | - | 45387  | 45335  | RNA → rpmE (PRK00019) Ribosomal_L31 (pfam01197) → |
| Sen-767-1    | NZ.AMMT01000186.1 | - | 37600  | 37548  | RNA → rpmE (PRK00019) Ribosomal_L31 (pfam01197) → |

|             |                   |   |        |        |                                                                                             |
|-------------|-------------------|---|--------|--------|---------------------------------------------------------------------------------------------|
| Sen-306-54  | NZ.LINM01000005.1 | - | 45297  | 45245  | RNA → rpmE (PRK00019)Ribosomal_L31 (pfam01197) →                                            |
| Sen-225-49  | NZ.LINO01000036.1 | - | 37859  | 37807  | RNA → rpmE (PRK00019)Ribosomal_L31 (pfam01197) →                                            |
| Sen-769-1   | NZ.AMMV01000445.1 | - | 37768  | 37716  | RNA → rpmE (PRK00019)Ribosomal_L31 (pfam01197) →                                            |
| Sen-207-1   | NZ.AMNC01000031.1 | + | 43443  | 43495  | RNA → rpmE (PRK00019)Ribosomal_L31 (pfam01197) →                                            |
| Sen-202-1   | NZ.AMND01000144.1 | - | 23081  | 23029  | RNA → rpmE (PRK00019)Ribosomal_L31 (pfam01197) →                                            |
| Sen-764-1   | NZ.AMBX01000018.1 | - | 37498  | 37446  | RNA → rpmE (PRK00019)Ribosomal_L31 (pfam01197) →                                            |
| Sen-221-1   | NZ.AMLR01000008.1 | + | 52031  | 52083  | RNA → rpmE (PRK00019)Ribosomal_L31 (pfam01197) →                                            |
| Sen-5-5     | NZ.LIMH01000026.1 | - | 45667  | 45615  | RNA → rpmE (PRK00019)Ribosomal_L31 (pfam01197) →                                            |
| Sen-775-1   | NZ.AMMJ01000088.1 | - | 37496  | 37444  | RNA → rpmE (PRK00019)Ribosomal_L31 (pfam01197) →                                            |
| Sen-170-47  | NZ.LIMR01000020.1 | + | 100579 | 100631 | RNA → rpmE (PRK00019)Ribosomal_L31 (pfam01197) →                                            |
| Sen-215-1   | NZ.AMMW01000224.1 | + | 1116   | 1168   | RNA → rpmE (PRK00019)Ribosomal_L31 (pfam01197) →                                            |
| Sen-306-55  | NZ.LINE01000024.1 | - | 45200  | 45148  | RNA → rpmE (PRK00019)Ribosomal_L31 (pfam01197) →                                            |
| Sen-210-1   | NZ.AMNE01000034.1 | + | 131957 | 132009 | RNA → rpmE (PRK00019)Ribosomal_L31 (pfam01197) →                                            |
| Sen-199-1   | NZ.AMNQ01000115.1 | - | 15260  | 15208  | RNA → rpmE (PRK00019)Ribosomal_L31 (pfam01197) →                                            |
| Sen-197-1   | NZ.AMNR01000090.1 | - | 37498  | 37446  | RNA → rpmE (PRK00019)Ribosomal_L31 (pfam01197) →                                            |
| Sen-217-1   | NZ.AMLX01000040.1 | + | 100589 | 100641 | RNA → rpmE (PRK00019)Ribosomal_L31 (pfam01197) →                                            |
| Sen-787-1   | NZ.AUQF01000013.1 | + | 87900  | 87952  | RNA → rpmE (PRK00019)Ribosomal_L31 (pfam01197) →                                            |
| Sen-779-1   | NZ.ATHK01000082.1 | - | 37777  | 37725  | RNA → rpmE (PRK00019)Ribosomal_L31 (pfam01197) →                                            |
| Sen-765-1   | NZ.AKYM01000112.1 | + | 100553 | 100605 | RNA → rpmE (PRK00019)Ribosomal_L31 (pfam01197) →                                            |
| Sen-218-1   | NZ.AMLV01000008.1 | - | 37697  | 37645  | RNA → rpmE (PRK00019)Ribosomal_L31 (pfam01197) →                                            |
| Sen-279-14  | NZ.LINN01000029.1 | + | 4123   | 4175   | RNA → rpmE (PRK00019)Ribosomal_L31 (pfam01197) →                                            |
| Sen-768-1   | NZ.AMMQ01000223.1 | - | 36339  | 36287  | RNA → rpmE (PRK00019)Ribosomal_L31 (pfam01197) →                                            |
| Sen-214-1   | NZ.AMNA01000068.1 | - | 34202  | 34150  | RNA → rpmE (PRK00019)Ribosomal_L31 (pfam01197) →                                            |
| Sen-306-56  | NZ.LIMZ01000035.1 | - | 45097  | 45045  | RNA → rpmE (PRK00019)Ribosomal_L31 (pfam01197) →                                            |
| Sen-789-1   | NZ.AUQH01000002.1 | + | 110425 | 110477 | RNA → rpmE (PRK00019)Ribosomal_L31 (pfam01197) →                                            |
| Sen-762-1   | NZ.AMBV01000030.1 | - | 37701  | 37649  | RNA → rpmE (PRK00019)Ribosomal_L31 (pfam01197) →                                            |
| Sen-237-16  | NZ.LINT01000029.1 | - | 9659   | 9607   | RNA → rpmE (PRK00019)Ribosomal_L31 (pfam01197) →                                            |
| Sen-776-1   | NZ.AMLT01000019.1 | + | 97303  | 97355  | RNA → rpmE (PRK00019)Ribosomal_L31 (pfam01197) →                                            |
| Sen-778-1   | NZ.ASRF01000014.1 | - | 24955  | 24903  | RNA → rpmE (PRK00019)Ribosomal_L31 (pfam01197) →                                            |
| Sen-219-1   | NZ.AMLU01000019.1 | + | 25396  | 25448  | RNA → rpmE (PRK00019)Ribosomal_L31 (pfam01197) →                                            |
| Sen-243-2   | NZ.LINY01000015.1 | + | 105471 | 105523 | RNA → rpmE (PRK00019)Ribosomal_L31 (pfam01197) →                                            |
| Sen-203-1   | NZ.AMNF01000034.1 | - | 37601  | 37549  | RNA → rpmE (PRK00019)Ribosomal_L31 (pfam01197) →                                            |
| Sen-170-48  | NZ.LIOC01000040.1 | + | 43729  | 43781  | RNA → rpmE (PRK00019)Ribosomal_L31 (pfam01197) →                                            |
| Sen-777-1   | NZ.AOZC01000026.1 | + | 95441  | 95493  | RNA → rpmE (PRK00019)Ribosomal_L31 (pfam01197) →                                            |
| Sen-306-57  | NZ.LIOB01000011.1 | + | 104279 | 104331 | RNA → rpmE (PRK00019)Ribosomal_L31 (pfam01197) →                                            |
| Sen-782-1   | NZ.AOZA01000016.1 | + | 103042 | 103094 | RNA → rpmE (PRK00019)Ribosomal_L31 (pfam01197) → rpmE (PRK00019)Ribosomal_L31 (pfam01197) → |
| Sen-770-1   | NZ.AKYK01000046.1 | + | 100992 | 101044 | RNA → rpmE (PRK00019)Ribosomal_L31 (pfam01197) →                                            |
| Sen-181-1   | NZ.AKYO01000018.1 | - | 37601  | 37549  | RNA → rpmE (PRK00019)Ribosomal_L31 (pfam01197) →                                            |
| Sen-763-1   | NZ.AMBW01000014.1 | - | 37691  | 37639  | RNA → rpmE (PRK00019)Ribosomal_L31 (pfam01197) →                                            |
| Sen-225-50  | NZ.LIMQ01000012.1 | - | 37858  | 37806  | RNA → rpmE (PRK00019)Ribosomal_L31 (pfam01197) →                                            |
| Sen-757-1   | NZ.AMMX01000038.1 | - | 23868  | 23816  | RNA → rpmE (PRK00019)Ribosomal_L31 (pfam01197) →                                            |
| Sen-781-1   | NZ.AOZD01000012.1 | - | 25990  | 25938  | RNA → rpmE (PRK00019)Ribosomal_L31 (pfam01197) → rpmE (PRK00019)Ribosomal_L31 (pfam01197) → |
| Sen-170-49  | NZ.LIOA01000019.1 | - | 37518  | 37466  | RNA → rpmE (PRK00019)Ribosomal_L31 (pfam01197) →                                            |
| Sen-206-1   | NZ.AMNU01000070.1 | - | 37496  | 37444  | RNA → rpmE (PRK00019)Ribosomal_L31 (pfam01197) →                                            |
| Sen-786-1   | NZ.AYDR01000087.1 | - | 37855  | 37803  | RNA → rpmE (PRK00019)Ribosomal_L31 (pfam01197) →                                            |
| Sen-224-3   | NZ.LINA01000049.1 | - | 337    | 285    | RNA → rpmE (PRK00019)Ribosomal_L31 (pfam01197) →                                            |
| Sen-278-22  | NZ.LING01000005.1 | - | 45365  | 45313  | RNA → rpmE (PRK00019)Ribosomal_L31 (pfam01197) →                                            |
| Sen-225-51  | NZ.LINU01000054.1 | + | 43650  | 43702  | RNA → rpmE (PRK00019)Ribosomal_L31 (pfam01197) →                                            |
| Sen-225-52  | NZ.LIOD01000004.1 | + | 110443 | 110495 | RNA → rpmE (PRK00019)Ribosomal_L31 (pfam01197) →                                            |
| Sen-230-4   | NZ.LIOE01000015.1 | - | 37726  | 37674  | RNA → rpmE (PRK00019)Ribosomal_L31 (pfam01197) →                                            |
| Sen-233-5   | NZ.LINX01000023.1 | + | 97750  | 97802  | RNA → rpmE (PRK00019)Ribosomal_L31 (pfam01197) →                                            |
| Sen-288-991 | NZ.CJPA01000016.1 | - | 39706  | 39654  | RNA → rpmE (PRK00019)Ribosomal_L31 (pfam01197) →                                            |

|              |                   |   |        |        |                                                  |
|--------------|-------------------|---|--------|--------|--------------------------------------------------|
| Sen-288-992  | NZ.CJAF01000016.1 | - | 39540  | 39488  | RNA → rpmE (PRK00019)Ribosomal_L31 (pfam01197) → |
| Sen-288-993  | NZ.CIZS01000014.1 | + | 104154 | 104206 | RNA → rpmE (PRK00019)Ribosomal_L31 (pfam01197) → |
| Sen-288-1124 | NZ.CIYB01000016.1 | + | 104158 | 104210 | RNA → rpmE (PRK00019)Ribosomal_L31 (pfam01197) → |
| Sen-288-994  | NZ.CJVP01000015.1 | + | 103906 | 103958 | RNA → rpmE (PRK00019)Ribosomal_L31 (pfam01197) → |
| Sen-288-995  | NZ.CJSJ01000015.1 | - | 41231  | 41179  | RNA → rpmE (PRK00019)Ribosomal_L31 (pfam01197) → |
| Sen-288-996  | NZ.CIYR01000014.1 | + | 107420 | 107472 | RNA → rpmE (PRK00019)Ribosomal_L31 (pfam01197) → |
| Sen-288-997  | NZ.CJXB01000011.1 | - | 39375  | 39323  | RNA → rpmE (PRK00019)Ribosomal_L31 (pfam01197) → |
| Sen-288-998  | NZ.CJOR01000016.1 | - | 39723  | 39671  | RNA → rpmE (PRK00019)Ribosomal_L31 (pfam01197) → |
| Sen-288-999  | NZ.CJXG01000016.1 | - | 39456  | 39404  | RNA → rpmE (PRK00019)Ribosomal_L31 (pfam01197) → |
| Sen-306-58   | NZ.LIMT01000017.1 | - | 45297  | 45245  | RNA → rpmE (PRK00019)Ribosomal_L31 (pfam01197) → |
| Sen-288-1000 | NZ.CJKE01000013.1 | + | 107689 | 107741 | RNA → rpmE (PRK00019)Ribosomal_L31 (pfam01197) → |
| Sen-288-1001 | NZ.CJNZ01000016.1 | - | 41231  | 41179  | RNA → rpmE (PRK00019)Ribosomal_L31 (pfam01197) → |
| Sen-288-1002 | NZ.CJDB01000010.1 | - | 39456  | 39404  | RNA → rpmE (PRK00019)Ribosomal_L31 (pfam01197) → |
| Sen-288-1003 | NZ.CJOI01000014.1 | - | 39382  | 39330  | RNA → rpmE (PRK00019)Ribosomal_L31 (pfam01197) → |
| Sen-288-1004 | NZ.CJSV01000015.1 | + | 104172 | 104224 | RNA → rpmE (PRK00019)Ribosomal_L31 (pfam01197) → |
| Sen-288-1005 | NZ.CJQV01000016.1 | + | 104162 | 104214 | RNA → rpmE (PRK00019)Ribosomal_L31 (pfam01197) → |
| Sen-288-1006 | NZ.CIXV01000015.1 | + | 104055 | 104107 | RNA → rpmE (PRK00019)Ribosomal_L31 (pfam01197) → |
| Sen-288-1007 | NZ.CJFB01000014.1 | - | 39456  | 39404  | RNA → rpmE (PRK00019)Ribosomal_L31 (pfam01197) → |
| Sen-288-1008 | NZ.CIZO01000016.1 | + | 104149 | 104201 | RNA → rpmE (PRK00019)Ribosomal_L31 (pfam01197) → |
| Sen-288-1009 | NZ.CJQD01000015.1 | + | 107622 | 107674 | RNA → rpmE (PRK00019)Ribosomal_L31 (pfam01197) → |
| Sen-288-1010 | NZ.CJML01000013.1 | + | 107971 | 108023 | RNA → rpmE (PRK00019)Ribosomal_L31 (pfam01197) → |
| Sen-288-1011 | NZ.CJQK01000014.1 | + | 104156 | 104208 | RNA → rpmE (PRK00019)Ribosomal_L31 (pfam01197) → |
| Sen-288-1012 | NZ.CJYI01000016.1 | - | 39587  | 39535  | RNA → rpmE (PRK00019)Ribosomal_L31 (pfam01197) → |
| Sen-288-1013 | NZ.CJWK01000015.1 | - | 41231  | 41179  | RNA → rpmE (PRK00019)Ribosomal_L31 (pfam01197) → |
| Sen-288-1014 | NZ.CJAN01000017.1 | - | 39533  | 39481  | RNA → rpmE (PRK00019)Ribosomal_L31 (pfam01197) → |
| Sen-288-1015 | NZ.CJBI01000011.1 | - | 39535  | 39483  | RNA → rpmE (PRK00019)Ribosomal_L31 (pfam01197) → |
| Sen-288-1016 | NZ.CJJK01000015.1 | - | 39560  | 39508  | RNA → rpmE (PRK00019)Ribosomal_L31 (pfam01197) → |
| Sen-288-1017 | NZ.CJWZ01000010.1 | - | 39382  | 39330  | RNA → rpmE (PRK00019)Ribosomal_L31 (pfam01197) → |
| Sen-288-1018 | NZ.CJUH01000016.1 | + | 104153 | 104205 | RNA → rpmE (PRK00019)Ribosomal_L31 (pfam01197) → |
| Sen-288-1019 | NZ.CJQU01000014.1 | - | 39534  | 39482  | RNA → rpmE (PRK00019)Ribosomal_L31 (pfam01197) → |
| Sen-288-1020 | NZ.CJBD01000015.1 | - | 39535  | 39483  | RNA → rpmE (PRK00019)Ribosomal_L31 (pfam01197) → |
| Sen-288-1021 | NZ.CJLK01000010.1 | - | 39456  | 39404  | RNA → rpmE (PRK00019)Ribosomal_L31 (pfam01197) → |
| Sen-288-1022 | NZ.CJJJ01000015.1 | + | 104149 | 104201 | RNA → rpmE (PRK00019)Ribosomal_L31 (pfam01197) → |
| Sen-288-1023 | NZ.CJOS01000016.1 | - | 39601  | 39549  | RNA → rpmE (PRK00019)Ribosomal_L31 (pfam01197) → |
| Sen-288-1024 | NZ.CJFY01000016.1 | + | 104150 | 104202 | RNA → rpmE (PRK00019)Ribosomal_L31 (pfam01197) → |
| Sen-288-1025 | NZ.CJJK01000012.1 | + | 107993 | 108045 | RNA → rpmE (PRK00019)Ribosomal_L31 (pfam01197) → |
| Sen-288-1026 | NZ.CJHE01000016.1 | - | 39535  | 39483  | RNA → rpmE (PRK00019)Ribosomal_L31 (pfam01197) → |
| Sen-288-1027 | NZ.CJYF01000016.1 | + | 104092 | 104144 | RNA → rpmE (PRK00019)Ribosomal_L31 (pfam01197) → |
| Sen-288-1028 | NZ.CJKV01000015.1 | - | 41231  | 41179  | RNA → rpmE (PRK00019)Ribosomal_L31 (pfam01197) → |
| Sen-288-1029 | NZ.CJSK01000014.1 | + | 107994 | 108046 | RNA → rpmE (PRK00019)Ribosomal_L31 (pfam01197) → |
| Sen-288-1030 | NZ.CJVT01000015.1 | - | 39373  | 39321  | RNA → rpmE (PRK00019)Ribosomal_L31 (pfam01197) → |
| Sen-288-1031 | NZ.CJBP01000016.1 | + | 104148 | 104200 | RNA → rpmE (PRK00019)Ribosomal_L31 (pfam01197) → |
| Sen-288-1032 | NZ.CJCZ01000022.1 | + | 43275  | 43327  | RNA → rpmE (PRK00019)Ribosomal_L31 (pfam01197) → |
| Sen-288-1033 | NZ.CJSD01000015.1 | - | 39361  | 39309  | RNA → rpmE (PRK00019)Ribosomal_L31 (pfam01197) → |
| Sen-288-1034 | NZ.CJMQ01000013.1 | + | 107855 | 107907 | RNA → rpmE (PRK00019)Ribosomal_L31 (pfam01197) → |
| Sen-288-1035 | NZ.CJVK01000013.1 | + | 104142 | 104194 | RNA → rpmE (PRK00019)Ribosomal_L31 (pfam01197) → |
| Sen-288-1036 | NZ.CJVM01000016.1 | + | 104161 | 104213 | RNA → rpmE (PRK00019)Ribosomal_L31 (pfam01197) → |
| Sen-288-1037 | NZ.CJJW01000015.1 | + | 104139 | 104191 | RNA → rpmE (PRK00019)Ribosomal_L31 (pfam01197) → |
| Sen-288-1038 | NZ.CJSL01000014.1 | + | 103996 | 104048 | RNA → rpmE (PRK00019)Ribosomal_L31 (pfam01197) → |
| Sen-288-1039 | NZ.CIYF01000014.1 | + | 104144 | 104196 | RNA → rpmE (PRK00019)Ribosomal_L31 (pfam01197) → |
| Sen-306-59   | NZ.LIMV01000003.1 | + | 104298 | 104350 | RNA → rpmE (PRK00019)Ribosomal_L31 (pfam01197) → |
| Sen-306-60   | NZ.LINF01000043.1 | + | 42428  | 42480  | RNA → rpmE (PRK00019)Ribosomal_L31 (pfam01197) → |



|              |                   |   |        |        |                                                                                             |
|--------------|-------------------|---|--------|--------|---------------------------------------------------------------------------------------------|
| Sen-306-61   | NZ_LINJ01000010.1 | + | 55677  | 55729  | RNA → rpmE (PRK00019)Ribosomal_L31 (pfam01197) →                                            |
| Sen-306-62   | NZ_LINI01000110.1 | + | 22614  | 22666  | RNA → rpmE (PRK00019)Ribosomal_L31 (pfam01197) →                                            |
| Sen-306-63   | NZ_LIMU01000037.1 | - | 45297  | 45245  | RNA → rpmE (PRK00019)Ribosomal_L31 (pfam01197) →                                            |
| Sen-293-1    | NZ_JHAH01000023.1 | - | 45098  | 45046  | RNA → rpmE (PRK00019)Ribosomal_L31 (pfam01197) →                                            |
| Sen-1015-1   | NZ_CAAR01000266.1 | - | 2721   | 2669   | RNA → rpmE (PRK00019)Ribosomal_L31 (pfam01197) → rpmE (PRK00019)Ribosomal_L31 (pfam01197) → |
| Sen-296-1    | NZ_JHAE01000047.1 | + | 42429  | 42481  | RNA → rpmE (PRK00019)Ribosomal_L31 (pfam01197) →                                            |
| Sen-297-1    | NZ_JHAF01000021.1 | - | 45098  | 45046  | RNA → rpmE (PRK00019)Ribosomal_L31 (pfam01197) →                                            |
| Sen-300-30   | NZ_CQGI01000015.1 | + | 42522  | 42574  | RNA → rpmE (PRK00019)Ribosomal_L31 (pfam01197) →                                            |
| Sen-300-31   | NZ_CQGG01000016.1 | + | 42512  | 42564  | RNA → rpmE (PRK00019)Ribosomal_L31 (pfam01197) →                                            |
| Sen-300-32   | NZ_CQHF01000017.1 | - | 45178  | 45126  | RNA → rpmE (PRK00019)Ribosomal_L31 (pfam01197) →                                            |
| Sen-294-1    | NZ_JHAI01000009.1 | - | 45098  | 45046  | RNA → rpmE (PRK00019)Ribosomal_L31 (pfam01197) →                                            |
| Sen-300-33   | NZ_CQGW01000017.1 | + | 42551  | 42603  | RNA → rpmE (PRK00019)Ribosomal_L31 (pfam01197) →                                            |
| Sen-300-34   | NZ_CQHV01000017.1 | - | 45252  | 45200  | RNA → rpmE (PRK00019)Ribosomal_L31 (pfam01197) →                                            |
| Sen-300-35   | NZ_CQGU01000016.1 | + | 42527  | 42579  | RNA → rpmE (PRK00019)Ribosomal_L31 (pfam01197) →                                            |
| Sen-951-1    | NZ_AJGK01000058.1 | - | 19387  | 19335  | RNA → rpmE (PRK00019)Ribosomal_L31 (pfam01197) →                                            |
| Sen-952-1    | NZ_AKZO01000027.1 | - | 19333  | 19281  | RNA → rpmE (PRK00019)Ribosomal_L31 (pfam01197) →                                            |
| Sen-967-1    | NZ_AUQL01000037.1 | + | 104438 | 104490 | RNA → rpmE (PRK00019)Ribosomal_L31 (pfam01197) →                                            |
| Sen-959-1    | NZ_AUQT01000002.1 | - | 45277  | 45225  | RNA → rpmE (PRK00019)Ribosomal_L31 (pfam01197) →                                            |
| Sen-966-1    | NZ_AUQN01000036.1 | + | 104414 | 104466 | RNA → rpmE (PRK00019)Ribosomal_L31 (pfam01197) →                                            |
| Sen-964-1    | NZ_AUQM01000035.1 | + | 104413 | 104465 | RNA → rpmE (PRK00019)Ribosomal_L31 (pfam01197) →                                            |
| Sen-961-1    | NZ_AUQV01000004.1 | - | 45184  | 45132  | RNA → rpmE (PRK00019)Ribosomal_L31 (pfam01197) →                                            |
| Sen-290-1    | NZ_JABZ01000035.1 | - | 39416  | 39364  | RNA → rpmE (PRK00019)Ribosomal_L31 (pfam01197) →                                            |
| Sen-300-36   | NZ_CQHE01000015.1 | - | 45235  | 45183  | RNA → rpmE (PRK00019)Ribosomal_L31 (pfam01197) →                                            |
| Sen-288-1040 | NZ_CJRN01000014.1 | - | 41512  | 41460  | RNA → rpmE (PRK00019)Ribosomal_L31 (pfam01197) →                                            |
| Sen-288-1041 | NZ_CJRJ01000014.1 | - | 39360  | 39308  | RNA → rpmE (PRK00019)Ribosomal_L31 (pfam01197) →                                            |
| Sen-288-1042 | NZ_CJRD01000011.1 | + | 157688 | 157740 | RNA → rpmE (PRK00019)Ribosomal_L31 (pfam01197) →                                            |
| Sen-300-37   | NZ_CQHU01000017.1 | + | 42532  | 42584  | RNA → rpmE (PRK00019)Ribosomal_L31 (pfam01197) →                                            |
| Sen-490-1    | NZ_AKFX01000012.1 | - | 49253  | 49201  | RNA → rpmE (PRK00019)Ribosomal_L31 (pfam01197) →                                            |
| Sen-963-1    | NZ_AOXC01000032.1 | - | 45190  | 45138  | RNA → rpmE (PRK00019)Ribosomal_L31 (pfam01197) →                                            |
| Sen-495-1    | NZ_AYVI01000129.1 | - | 34669  | 34617  | RNA → rpmE (PRK00019)Ribosomal_L31 (pfam01197) →                                            |
| Sen-300-38   | NZ_CQJH01000016.1 | + | 43122  | 43174  | RNA → rpmE (PRK00019)Ribosomal_L31 (pfam01197) →                                            |
| Sen-509-1    | NZ_ALEP01000014.1 | + | 103706 | 103758 | RNA → rpmE (PRK00019)Ribosomal_L31 (pfam01197) → rpmE (PRK00019)Ribosomal_L31 (pfam01197) → |
| Sen-300-39   | NZ_CQGS01000016.1 | - | 45260  | 45208  | RNA → rpmE (PRK00019)Ribosomal_L31 (pfam01197) →                                            |
| Sen-513-1    | NZ_ALGM01000023.1 | - | 49346  | 49294  | RNA → rpmE (PRK00019)Ribosomal_L31 (pfam01197) → rpmE (PRK00019)Ribosomal_L31 (pfam01197) → |
| Sen-300-40   | NZ_CQHS01000018.1 | - | 45164  | 45112  | RNA → rpmE (PRK00019)Ribosomal_L31 (pfam01197) →                                            |
| Sen-514-1    | NZ_ALGN01000014.1 | + | 103703 | 103755 | RNA → rpmE (PRK00019)Ribosomal_L31 (pfam01197) → rpmE (PRK00019)Ribosomal_L31 (pfam01197) → |
| Sen-300-41   | NZ_CQHQ01000017.1 | + | 42531  | 42583  | RNA → rpmE (PRK00019)Ribosomal_L31 (pfam01197) →                                            |
| Sen-288-1043 | NZ_CJRH01000015.1 | + | 104161 | 104213 | RNA → rpmE (PRK00019)Ribosomal_L31 (pfam01197) →                                            |
| Sen-288-1044 | NZ_CJUS01000013.1 | - | 41231  | 41179  | RNA → rpmE (PRK00019)Ribosomal_L31 (pfam01197) →                                            |
| Sen-484-1    | NZ_AJVD01000011.1 | - | 49252  | 49200  | RNA → rpmE (PRK00019)Ribosomal_L31 (pfam01197) →                                            |
| Sen-300-42   | NZ_CQGL01000016.1 | + | 42551  | 42603  | RNA → rpmE (PRK00019)Ribosomal_L31 (pfam01197) →                                            |
| Sen-472-1    | NZ_AKFY01000012.1 | + | 96338  | 96390  | RNA → rpmE (PRK00019)Ribosomal_L31 (pfam01197) →                                            |
| Sen-300-43   | NZ_CQGY01000016.1 | + | 42551  | 42603  | RNA → rpmE (PRK00019)Ribosomal_L31 (pfam01197) →                                            |
| Sen-473-1    | NZ_AKFZ01000014.1 | - | 49346  | 49294  | RNA → rpmE (PRK00019)Ribosomal_L31 (pfam01197) →                                            |
| Sen-957-1    | NZ_AJTE01000099.1 | - | 13364  | 13312  | RNA → rpmE (PRK00019)Ribosomal_L31 (pfam01197) →                                            |
| Sen-511-1    | NZ_ALGO01000040.1 | + | 103706 | 103758 | RNA → rpmE (PRK00019)Ribosomal_L31 (pfam01197) → rpmE (PRK00019)Ribosomal_L31 (pfam01197) → |
| Sen-956-1    | NZ_AJTD01000295.1 | + | 4207   | 4259   | RNA → rpmE (PRK00019)Ribosomal_L31 (pfam01197) →                                            |
| Sen-288-1045 | NZ_CJRA01000015.1 | + | 108136 | 108188 | RNA → rpmE (PRK00019)Ribosomal_L31 (pfam01197) →                                            |
| Sen-491-1    | NZ_AKFW01000012.1 | - | 49253  | 49201  | RNA → rpmE (PRK00019)Ribosomal_L31 (pfam01197) →                                            |
| Sen-954-1    | NZ_AJXA01000168.1 | + | 4121   | 4173   | RNA → rpmE (PRK00019)Ribosomal_L31 (pfam01197) →                                            |
| Sen-960-1    | NZ_AUQU01000003.1 | - | 45184  | 45132  | RNA → rpmE (PRK00019)Ribosomal_L31 (pfam01197) →                                            |
| Sen-517-1    | NZ_ALEI01000040.1 | - | 49344  | 49292  | RNA → rpmE (PRK00019)Ribosomal_L31 (pfam01197) → rpmE (PRK00019)Ribosomal_L31 (pfam01197) → |

|              |                   |   |         |         |                                                                                             |
|--------------|-------------------|---|---------|---------|---------------------------------------------------------------------------------------------|
| Sen-497-1    | NZ_ALEN01000014.1 | - | 49251   | 49199   | RNA → rpmE (PRK00019)Ribosomal_L31 (pfam01197) → rpmE (PRK00019)Ribosomal_L31 (pfam01197) → |
| Sen-965-1    | NZ_AUQO01000020.1 | - | 45183   | 45131   | RNA → rpmE (PRK00019)Ribosomal_L31 (pfam01197) →                                            |
| Sen-508-1    | NZ_ALEO01000005.1 | - | 49252   | 49200   | RNA → rpmE (PRK00019)Ribosomal_L31 (pfam01197) → rpmE (PRK00019)Ribosomal_L31 (pfam01197) → |
| Sen-300-44   | NZ_CQHI01000016.1 | + | 42508   | 42560   | RNA → rpmE (PRK00019)Ribosomal_L31 (pfam01197) →                                            |
| Sen-300-45   | NZ_CQGK01000016.1 | + | 42508   | 42560   | RNA → rpmE (PRK00019)Ribosomal_L31 (pfam01197) →                                            |
| Sen-300-46   | NZ_CQGN01000018.1 | + | 42526   | 42578   | RNA → rpmE (PRK00019)Ribosomal_L31 (pfam01197) →                                            |
| Sen-300-47   | NZ_CQGV01000017.1 | + | 42523   | 42575   | RNA → rpmE (PRK00019)Ribosomal_L31 (pfam01197) →                                            |
| Sen-478-1    | NZ_ALGV01000705.1 | + | 1026    | 1078    | RNA → rpmE (PRK00019)Ribosomal_L31 (pfam01197) → rpmE (PRK00019)Ribosomal_L31 (pfam01197) → |
| Sen-1026-1   | NZ_ACBF01000011.1 | + | 90926   | 90978   | RNA → rpmE (PRK00019)Ribosomal_L31 (pfam01197) → rpmE (PRK00019)Ribosomal_L31 (pfam01197) → |
| Sen-300-48   | NZ_CQGR01000016.1 | + | 42549   | 42601   | RNA → rpmE (PRK00019)Ribosomal_L31 (pfam01197) →                                            |
| Sen-300-49   | NZ_CQHB01000017.1 | - | 45260   | 45208   | RNA → rpmE (PRK00019)Ribosomal_L31 (pfam01197) →                                            |
| Sen-1012-1   | NZ_ABAM02000001.1 | + | 4673479 | 4673531 | RNA → rpmE (PRK00019)Ribosomal_L31 (pfam01197) → rpmE (PRK00019)Ribosomal_L31 (pfam01197) → |
| Sen-299-1    | NZ_AHUV01000040.1 | - | 45184   | 45132   | RNA → rpmE (PRK00019)Ribosomal_L31 (pfam01197) →                                            |
| Sen-479-1    | NZ_ALHB01000061.1 | - | 49392   | 49340   | RNA → rpmE (PRK00019)Ribosomal_L31 (pfam01197) → rpmE (PRK00019)Ribosomal_L31 (pfam01197) → |
| Sen-504-1    | NZ_ALHG01000001.1 | - | 49346   | 49294   | RNA → rpmE (PRK00019)Ribosomal_L31 (pfam01197) → rpmE (PRK00019)Ribosomal_L31 (pfam01197) → |
| Sen-913-1    | NZ_AFYZ01000020.1 | + | 135012  | 135064  | RNA → rpmE (PRK00019)Ribosomal_L31 (pfam01197) →                                            |
| Sen-300-50   | NZ_CQGH01000017.1 | - | 45179   | 45127   | RNA → rpmE (PRK00019)Ribosomal_L31 (pfam01197) →                                            |
| Sen-288-1046 | NZ_CJQZ01000013.1 | - | 39377   | 39325   | RNA → rpmE (PRK00019)Ribosomal_L31 (pfam01197) →                                            |
| Sen-945-1    | NZ_AOXV01000110.1 | + | 71399   | 71451   | RNA → rpmE (PRK00019)Ribosomal_L31 (pfam01197) →                                            |
| Sen-526-1    | NZ_ALEK01000010.1 | - | 49346   | 49294   | RNA → rpmE (PRK00019)Ribosomal_L31 (pfam01197) → rpmE (PRK00019)Ribosomal_L31 (pfam01197) → |
| Sen-474-1    | NZ_AKGA01000012.1 | - | 49252   | 49200   | RNA → rpmE (PRK00019)Ribosomal_L31 (pfam01197) →                                            |
| Sen-907-1    | NZ_AROZ01000014.1 | + | 3149    | 3201    | RNA → rpmE (PRK00019)Ribosomal_L31 (pfam01197) → rpmE (PRK00019)Ribosomal_L31 (pfam01197) → |
| Sen-548-1    | NZ_ALFS01000030.1 | - | 49346   | 49294   | RNA → rpmE (PRK00019)Ribosomal_L31 (pfam01197) → rpmE (PRK00019)Ribosomal_L31 (pfam01197) → |
| Sen-512-1    | NZ_ALEM01000020.1 | - | 49252   | 49200   | RNA → rpmE (PRK00019)Ribosomal_L31 (pfam01197) → rpmE (PRK00019)Ribosomal_L31 (pfam01197) → |
| Sen-554-1    | NZ_ALFX01000011.1 | + | 103706  | 103758  | RNA → rpmE (PRK00019)Ribosomal_L31 (pfam01197) → rpmE (PRK00019)Ribosomal_L31 (pfam01197) → |
| Sen-492-1    | NZ_ALEX01000033.1 | - | 49252   | 49200   | RNA → rpmE (PRK00019)Ribosomal_L31 (pfam01197) → rpmE (PRK00019)Ribosomal_L31 (pfam01197) → |
| Sen-284-1    | NZ_APWL01000003.1 | - | 82310   | 82258   | RNA → rpmE (PRK00019)Ribosomal_L31 (pfam01197) →                                            |
| Sen-550-1    | NZ_ALGD01000026.1 | + | 103707  | 103759  | RNA → rpmE (PRK00019)Ribosomal_L31 (pfam01197) → rpmE (PRK00019)Ribosomal_L31 (pfam01197) → |
| Sen-506-1    | NZ_ALGK01000023.1 | - | 49346   | 49294   | RNA → rpmE (PRK00019)Ribosomal_L31 (pfam01197) → rpmE (PRK00019)Ribosomal_L31 (pfam01197) → |
| Sen-914-1    | NZ_AFZA01000020.1 | + | 98771   | 98823   | RNA → rpmE (PRK00019)Ribosomal_L31 (pfam01197) →                                            |
| Sen-900-1    | NZ_AYEE01000002.1 | - | 45343   | 45291   | RNA → rpmE (PRK00019)Ribosomal_L31 (pfam01197) →                                            |
| Sen-527-1    | NZ_ALHH01000057.1 | + | 103704  | 103756  | RNA → rpmE (PRK00019)Ribosomal_L31 (pfam01197) → rpmE (PRK00019)Ribosomal_L31 (pfam01197) → |
| Sen-515-1    | NZ_ALGP01000021.1 | + | 103706  | 103758  | RNA → rpmE (PRK00019)Ribosomal_L31 (pfam01197) → rpmE (PRK00019)Ribosomal_L31 (pfam01197) → |
| Sen-533-1    | NZ_ALHM01000062.1 | - | 49346   | 49294   | RNA → rpmE (PRK00019)Ribosomal_L31 (pfam01197) → rpmE (PRK00019)Ribosomal_L31 (pfam01197) → |
| Sen-501-1    | NZ_ALHE01000055.1 | - | 49346   | 49294   | RNA → rpmE (PRK00019)Ribosomal_L31 (pfam01197) → rpmE (PRK00019)Ribosomal_L31 (pfam01197) → |
| Sen-937-1    | NZ_AYDP01000046.1 | - | 278     | 226     | RNA → rpmE (PRK00019)Ribosomal_L31 (pfam01197) → rpmE (PRK00019)Ribosomal_L31 (pfam01197) → |
| Sen-502-1    | NZ_ALHF01000013.1 | - | 49346   | 49294   | RNA → rpmE (PRK00019)Ribosomal_L31 (pfam01197) → rpmE (PRK00019)Ribosomal_L31 (pfam01197) → |
| Sen-543-1    | NZ_ALEL01000033.1 | - | 49252   | 49200   | RNA → rpmE (PRK00019)Ribosomal_L31 (pfam01197) → rpmE (PRK00019)Ribosomal_L31 (pfam01197) → |
| Sen-519-1    | NZ_ALEQ01000021.1 | - | 49252   | 49200   | RNA → rpmE (PRK00019)Ribosomal_L31 (pfam01197) → rpmE (PRK00019)Ribosomal_L31 (pfam01197) → |
| Sen-934-1    | NZ_AOXF01000013.1 | + | 104433  | 104485  | RNA → rpmE (PRK00019)Ribosomal_L31 (pfam01197) →                                            |
| Sen-477-1    | NZ_AHUQ01000003.1 | + | 103706  | 103758  | RNA → rpmE (PRK00019)Ribosomal_L31 (pfam01197) → rpmE (PRK00019)Ribosomal_L31 (pfam01197) → |
| Sen-544-1    | NZ_ALEV01000015.1 | - | 49252   | 49200   | RNA → rpmE (PRK00019)Ribosomal_L31 (pfam01197) → rpmE (PRK00019)Ribosomal_L31 (pfam01197) → |
| Sen-939-1    | NZ_AOXW01000036.1 | + | 104624  | 104676  | RNA → rpmE (PRK00019)Ribosomal_L31 (pfam01197) → rpmE (PRK00019)Ribosomal_L31 (pfam01197) → |
| Sen-564-1    | NZ_ALFK01000006.1 | - | 49252   | 49200   | RNA → rpmE (PRK00019)Ribosomal_L31 (pfam01197) → rpmE (PRK00019)Ribosomal_L31 (pfam01197) → |
| Sen-288-1047 | NZ_CJRK01000015.1 | - | 41507   | 41455   | RNA → rpmE (PRK00019)Ribosomal_L31 (pfam01197) →                                            |
| Sen-920-1    | NZ_AOYB01000081.1 | + | 63749   | 63801   | RNA → rpmE (PRK00019)Ribosomal_L31 (pfam01197) →                                            |
| Sen-559-1    | NZ_ALFO01000008.1 | - | 49346   | 49294   | RNA → rpmE (PRK00019)Ribosomal_L31 (pfam01197) → rpmE (PRK00019)Ribosomal_L31 (pfam01197) → |
| Sen-288-1048 | NZ_CJRB01000013.1 | + | 115815  | 115867  | RNA → rpmE (PRK00019)Ribosomal_L31 (pfam01197) →                                            |
| Sen-552-1    | NZ_ALFP01000008.1 | + | 103716  | 103768  | RNA → rpmE (PRK00019)Ribosomal_L31 (pfam01197) → rpmE (PRK00019)Ribosomal_L31 (pfam01197) → |
| Sen-288-1049 | NZ_CJQX01000014.1 | + | 104143  | 104195  | RNA → rpmE (PRK00019)Ribosomal_L31 (pfam01197) →                                            |
| Sen-915-1    | NZ_AOYF01000047.1 | - | 45153   | 45101   | RNA → rpmE (PRK00019)Ribosomal_L31 (pfam01197) → rpmE (PRK00019)Ribosomal_L31 (pfam01197) → |
| Sen-549-1    | NZ_ALFT01000006.1 | - | 49343   | 49291   | RNA → rpmE (PRK00019)Ribosomal_L31 (pfam01197) → rpmE (PRK00019)Ribosomal_L31 (pfam01197) → |



|              |                   |   |        |        |                                                                                             |
|--------------|-------------------|---|--------|--------|---------------------------------------------------------------------------------------------|
| Sen-288-1050 | NZ_CJRF01000014.1 | - | 41231  | 41179  | RNA → rpmE (PRK00019)Ribosomal_L31 (pfam01197) →                                            |
| Sen-557-1    | NZ_ALFU01000022.1 | - | 49252  | 49200  | RNA → rpmE (PRK00019)Ribosomal_L31 (pfam01197) → rpmE (PRK00019)Ribosomal_L31 (pfam01197) → |
| Sen-919-1    | NZ_AOYG01000081.1 | - | 19765  | 19713  | RNA → rpmE (PRK00019)Ribosomal_L31 (pfam01197) → rpmE (PRK00019)Ribosomal_L31 (pfam01197) → |
| Sen-555-1    | NZ_ALFY01000031.1 | - | 49343  | 49291  | RNA → rpmE (PRK00019)Ribosomal_L31 (pfam01197) → rpmE (PRK00019)Ribosomal_L31 (pfam01197) → |
| Sen-938-1    | NZ_AOYP01000063.1 | - | 10370  | 10318  | RNA → rpmE (PRK00019)Ribosomal_L31 (pfam01197) → rpmE (PRK00019)Ribosomal_L31 (pfam01197) → |
| Sen-560-1    | NZ_ALFZ01000023.1 | - | 49346  | 49294  | RNA → rpmE (PRK00019)Ribosomal_L31 (pfam01197) → rpmE (PRK00019)Ribosomal_L31 (pfam01197) → |
| Sen-499-1    | NZ_ALIA01000399.1 | + | 1803   | 1855   | RNA → rpmE (PRK00019)Ribosomal_L31 (pfam01197) → rpmE (PRK00019)Ribosomal_L31 (pfam01197) → |
| Sen-556-1    | NZ_ALGE01000038.1 | - | 49191  | 49139  | RNA → rpmE (PRK00019)Ribosomal_L31 (pfam01197) → rpmE (PRK00019)Ribosomal_L31 (pfam01197) → |
| Sen-529-1    | NZ_ALHI01000010.1 | + | 103704 | 103756 | RNA → rpmE (PRK00019)Ribosomal_L31 (pfam01197) → rpmE (PRK00019)Ribosomal_L31 (pfam01197) → |
| Sen-904-1    | NZ_APAK01000385.1 | - | 9620   | 9568   | RNA → rpmE (PRK00019)Ribosomal_L31 (pfam01197) →                                            |
| Sen-535-1    | NZ_ALHN01000022.1 | + | 103703 | 103755 | RNA → rpmE (PRK00019)Ribosomal_L31 (pfam01197) → rpmE (PRK00019)Ribosomal_L31 (pfam01197) → |
| Sen-924-1    | NZ_AHIA01000038.1 | - | 35206  | 35154  | RNA → rpmE (PRK00019)Ribosomal_L31 (pfam01197) → rpmE (PRK00019)Ribosomal_L31 (pfam01197) → |
| Sen-516-1    | NZ_ALIC01000015.1 | - | 49252  | 49200  | RNA → rpmE (PRK00019)Ribosomal_L31 (pfam01197) → rpmE (PRK00019)Ribosomal_L31 (pfam01197) → |
| Sen-523-1    | NZ_ALEJ01000020.1 | - | 49346  | 49294  | RNA → rpmE (PRK00019)Ribosomal_L31 (pfam01197) → rpmE (PRK00019)Ribosomal_L31 (pfam01197) → |
| Sen-943-1    | NZ_CAGQ01000056.1 | - | 3031   | 2979   | RNA → rpmE (PRK00019)Ribosomal_L31 (pfam01197) →                                            |
| Sen-288-1051 | NZ_CJRG01000004.1 | + | 104158 | 104210 | RNA → rpmE (PRK00019)Ribosomal_L31 (pfam01197) →                                            |
| Sen-524-1    | NZ_ALES01000011.1 | - | 49252  | 49200  | RNA → rpmE (PRK00019)Ribosomal_L31 (pfam01197) → rpmE (PRK00019)Ribosomal_L31 (pfam01197) → |
| Sen-910-1    | NZ_AFYX01000021.1 | + | 104135 | 104187 | RNA → rpmE (PRK00019)Ribosomal_L31 (pfam01197) →                                            |
| Sen-525-1    | NZ_ALET01000030.1 | + | 103705 | 103757 | RNA → rpmE (PRK00019)Ribosomal_L31 (pfam01197) → rpmE (PRK00019)Ribosomal_L31 (pfam01197) → |
| Sen-912-1    | NZ_AFYY01000022.1 | + | 135205 | 135257 | RNA → rpmE (PRK00019)Ribosomal_L31 (pfam01197) →                                            |
| Sen-493-1    | NZ_ALFD01000131.1 | + | 8328   | 8380   | RNA → rpmE (PRK00019)Ribosomal_L31 (pfam01197) → rpmE (PRK00019)Ribosomal_L31 (pfam01197) → |
| Sen-901-1    | NZ_AYED01000002.1 | - | 45156  | 45104  | RNA → rpmE (PRK00019)Ribosomal_L31 (pfam01197) → rpmE (PRK00019)Ribosomal_L31 (pfam01197) → |
| Sen-547-1    | NZ_ALEY01000030.1 | - | 49252  | 49200  | RNA → rpmE (PRK00019)Ribosomal_L31 (pfam01197) → rpmE (PRK00019)Ribosomal_L31 (pfam01197) → |
| Sen-553-1    | NZ_ALFM01000022.1 | - | 49252  | 49200  | RNA → rpmE (PRK00019)Ribosomal_L31 (pfam01197) → rpmE (PRK00019)Ribosomal_L31 (pfam01197) → |
| Sen-897-1    | NZ_AYEH01000007.1 | + | 55314  | 55366  | RNA → rpmE (PRK00019)Ribosomal_L31 (pfam01197) →                                            |
| Sen-567-1    | NZ_ALFR01000017.1 | + | 103706 | 103758 | RNA → rpmE (PRK00019)Ribosomal_L31 (pfam01197) → rpmE (PRK00019)Ribosomal_L31 (pfam01197) → |
| Sen-510-1    | NZ_ALHZ01000159.1 | - | 6062   | 6010   | RNA → rpmE (PRK00019)Ribosomal_L31 (pfam01197) → rpmE (PRK00019)Ribosomal_L31 (pfam01197) → |
| Sen-566-1    | NZ_ALGG01000006.1 | - | 49346  | 49294  | RNA → rpmE (PRK00019)Ribosomal_L31 (pfam01197) → rpmE (PRK00019)Ribosomal_L31 (pfam01197) → |
| Sen-921-1    | NZ_AOXH01000205.1 | + | 25845  | 25897  | RNA → rpmE (PRK00019)Ribosomal_L31 (pfam01197) → rpmE (PRK00019)Ribosomal_L31 (pfam01197) → |
| Sen-521-1    | NZ_ALGL01000025.1 | - | 49346  | 49294  | RNA → rpmE (PRK00019)Ribosomal_L31 (pfam01197) → rpmE (PRK00019)Ribosomal_L31 (pfam01197) → |
| Sen-941-1    | NZ_AOXU01000041.1 | - | 41814  | 41762  | RNA → rpmE (PRK00019)Ribosomal_L31 (pfam01197) → rpmE (PRK00019)Ribosomal_L31 (pfam01197) → |
| Sen-518-1    | NZ_ALGQ01000023.1 | - | 49252  | 49200  | RNA → rpmE (PRK00019)Ribosomal_L31 (pfam01197) → rpmE (PRK00019)Ribosomal_L31 (pfam01197) → |
| Sen-944-1    | NZ_AOXX01000060.1 | + | 110031 | 110083 | RNA → rpmE (PRK00019)Ribosomal_L31 (pfam01197) → rpmE (PRK00019)Ribosomal_L31 (pfam01197) → |
| Sen-522-1    | NZ_ALHA01000033.1 | - | 49346  | 49294  | RNA → rpmE (PRK00019)Ribosomal_L31 (pfam01197) → rpmE (PRK00019)Ribosomal_L31 (pfam01197) → |
| Sen-505-1    | NZ_ALHT01000042.1 | - | 49343  | 49291  | RNA → rpmE (PRK00019)Ribosomal_L31 (pfam01197) → rpmE (PRK00019)Ribosomal_L31 (pfam01197) → |
| Sen-918-1    | NZ_AOYE01000040.1 | - | 45074  | 45022  | RNA → rpmE (PRK00019)Ribosomal_L31 (pfam01197) → rpmE (PRK00019)Ribosomal_L31 (pfam01197) → |
| Sen-532-1    | NZ_ALHL01000082.1 | - | 49347  | 49295  | RNA → rpmE (PRK00019)Ribosomal_L31 (pfam01197) → rpmE (PRK00019)Ribosomal_L31 (pfam01197) → |
| Sen-927-1    | NZ_AOYI01000002.1 | - | 49162  | 49110  | RNA → rpmE (PRK00019)Ribosomal_L31 (pfam01197) →                                            |
| Sen-494-1    | NZ_ALHX01000060.1 | - | 49252  | 49200  | RNA → rpmE (PRK00019)Ribosomal_L31 (pfam01197) → rpmE (PRK00019)Ribosomal_L31 (pfam01197) → |
| Sen-520-1    | NZ_ALER01000036.1 | + | 103705 | 103757 | RNA → rpmE (PRK00019)Ribosomal_L31 (pfam01197) → rpmE (PRK00019)Ribosomal_L31 (pfam01197) → |
| Sen-545-1    | NZ_ALEW01000006.1 | - | 49252  | 49200  | RNA → rpmE (PRK00019)Ribosomal_L31 (pfam01197) → rpmE (PRK00019)Ribosomal_L31 (pfam01197) → |
| Sen-933-1    | NZ_AQFN01000034.1 | - | 36977  | 36925  | RNA → rpmE (PRK00019)Ribosomal_L31 (pfam01197) → rpmE (PRK00019)Ribosomal_L31 (pfam01197) → |
| Sen-558-1    | NZ_ALFL01000006.1 | - | 49346  | 49294  | RNA → rpmE (PRK00019)Ribosomal_L31 (pfam01197) → rpmE (PRK00019)Ribosomal_L31 (pfam01197) → |
| Sen-480-1    | NZ_AHUM01000178.1 | + | 53030  | 53082  | RNA → rpmE (PRK00019)Ribosomal_L31 (pfam01197) → rpmE (PRK00019)Ribosomal_L31 (pfam01197) → |
| Sen-911-1    | NZ_AFYW01000025.1 | + | 135019 | 135071 | RNA → rpmE (PRK00019)Ribosomal_L31 (pfam01197) →                                            |
| Sen-551-1    | NZ_ALFQ01000008.1 | + | 103705 | 103757 | RNA → rpmE (PRK00019)Ribosomal_L31 (pfam01197) → rpmE (PRK00019)Ribosomal_L31 (pfam01197) → |
| Sen-500-1    | NZ_ALID01000015.1 | - | 49400  | 49348  | RNA → rpmE (PRK00019)Ribosomal_L31 (pfam01197) → rpmE (PRK00019)Ribosomal_L31 (pfam01197) → |
| Sen-902-1    | NZ_AYEC01000105.1 | + | 100326 | 100378 | RNA → rpmE (PRK00019)Ribosomal_L31 (pfam01197) →                                            |
| Sen-561-1    | NZ_ALGA01000017.1 | - | 20301  | 20249  | RNA → rpmE (PRK00019)Ribosomal_L31 (pfam01197) → rpmE (PRK00019)Ribosomal_L31 (pfam01197) → |
| Sen-931-1    | NZ_AYDS01000004.1 | - | 45346  | 45294  | RNA → rpmE (PRK00019)Ribosomal_L31 (pfam01197) →                                            |
| Sen-288-1052 | NZ_CJRE01000016.1 | - | 39355  | 39303  | RNA → rpmE (PRK00019)Ribosomal_L31 (pfam01197) →                                            |
| Sen-563-1    | NZ_ALGF01000007.1 | - | 49252  | 49200  | RNA → rpmE (PRK00019)Ribosomal_L31 (pfam01197) → rpmE (PRK00019)Ribosomal_L31 (pfam01197) → |

|              |                   |   |        |        |                                                                                             |
|--------------|-------------------|---|--------|--------|---------------------------------------------------------------------------------------------|
| Sen-476-1    | NZ_AWOI01000031.1 | - | 49718  | 49666  | RNA → rpmE (PRK00019)Ribosomal_L31 (pfam01197) →                                            |
| Sen-922-1    | NZ_AYDQ01000012.1 | + | 111446 | 111498 | RNA → rpmE (PRK00019)Ribosomal_L31 (pfam01197) → rpmE (PRK00019)Ribosomal_L31 (pfam01197) → |
| Sen-530-1    | NZ_ALHJ01000014.1 | + | 103703 | 103755 | RNA → rpmE (PRK00019)Ribosomal_L31 (pfam01197) → rpmE (PRK00019)Ribosomal_L31 (pfam01197) → |
| Sen-926-1    | NZ_AYDA01000017.1 | - | 49162  | 49110  | RNA → rpmE (PRK00019)Ribosomal_L31 (pfam01197) →                                            |
| Sen-498-1    | NZ_ALFB01000033.1 | + | 103706 | 103758 | RNA → rpmE (PRK00019)Ribosomal_L31 (pfam01197) → rpmE (PRK00019)Ribosomal_L31 (pfam01197) → |
| Sen-531-1    | NZ_ALHK01000054.1 | + | 103704 | 103756 | RNA → rpmE (PRK00019)Ribosomal_L31 (pfam01197) → rpmE (PRK00019)Ribosomal_L31 (pfam01197) → |
| Sen-942-1    | NZ_AYEJ01000008.1 | + | 9768   | 9820   | RNA → rpmE (PRK00019)Ribosomal_L31 (pfam01197) → rpmE (PRK00019)Ribosomal_L31 (pfam01197) → |
| Sen-507-1    | NZ_ALFC01000017.1 | + | 103666 | 103718 | RNA → rpmE (PRK00019)Ribosomal_L31 (pfam01197) → rpmE (PRK00019)Ribosomal_L31 (pfam01197) → |
| Sen-537-1    | NZ_ALHO01000024.1 | - | 49346  | 49294  | RNA → rpmE (PRK00019)Ribosomal_L31 (pfam01197) → rpmE (PRK00019)Ribosomal_L31 (pfam01197) → |
| Sen-923-1    | NZ_AOXG01000019.1 | + | 110333 | 110385 | RNA → rpmE (PRK00019)Ribosomal_L31 (pfam01197) → rpmE (PRK00019)Ribosomal_L31 (pfam01197) → |
| Sen-503-1    | NZ_ALHU01000058.1 | - | 49345  | 49293  | RNA → rpmE (PRK00019)Ribosomal_L31 (pfam01197) → rpmE (PRK00019)Ribosomal_L31 (pfam01197) → |
| Sen-538-1    | NZ_ALHP01000022.1 | - | 49345  | 49293  | RNA → rpmE (PRK00019)Ribosomal_L31 (pfam01197) → rpmE (PRK00019)Ribosomal_L31 (pfam01197) → |
| Sen-948-1    | NZ_AOXQ01000190.1 | - | 18527  | 18475  | RNA → rpmE (PRK00019)Ribosomal_L31 (pfam01197) → rpmE (PRK00019)Ribosomal_L31 (pfam01197) → |
| Sen-562-1    | NZ_ALFJ01000009.1 | + | 103711 | 103763 | RNA → rpmE (PRK00019)Ribosomal_L31 (pfam01197) → rpmE (PRK00019)Ribosomal_L31 (pfam01197) → |
| Sen-496-1    | NZ_AHUU01000034.1 | + | 3317   | 3369   | RNA → rpmE (PRK00019)Ribosomal_L31 (pfam01197) → rpmE (PRK00019)Ribosomal_L31 (pfam01197) → |
| Sen-565-1    | NZ_ALFI01000001.1 | + | 103715 | 103767 | RNA → rpmE (PRK00019)Ribosomal_L31 (pfam01197) → rpmE (PRK00019)Ribosomal_L31 (pfam01197) → |
| Sen-932-1    | NZ_AOXY01000013.1 | - | 45355  | 45303  | RNA → rpmE (PRK00019)Ribosomal_L31 (pfam01197) →                                            |
| Sen-540-1    | NZ_ALEZ01000020.1 | - | 49346  | 49294  | RNA → rpmE (PRK00019)Ribosomal_L31 (pfam01197) → rpmE (PRK00019)Ribosomal_L31 (pfam01197) → |
| Sen-917-1    | NZ_AOYC01000001.1 | - | 45077  | 45025  | RNA → rpmE (PRK00019)Ribosomal_L31 (pfam01197) → rpmE (PRK00019)Ribosomal_L31 (pfam01197) → |
| Sen-541-1    | NZ_ALHR01000009.1 | + | 103734 | 103786 | RNA → rpmE (PRK00019)Ribosomal_L31 (pfam01197) → rpmE (PRK00019)Ribosomal_L31 (pfam01197) → |
| Sen-916-1    | NZ_AOYD01000029.1 | - | 45153  | 45101  | RNA → rpmE (PRK00019)Ribosomal_L31 (pfam01197) → rpmE (PRK00019)Ribosomal_L31 (pfam01197) → |
| Sen-288-1053 | NZ_CJRM01000011.1 | + | 140955 | 141007 | RNA → rpmE (PRK00019)Ribosomal_L31 (pfam01197) →                                            |
| Sen-909-1    | NZ_AOYH01000028.1 | + | 73247  | 73299  | RNA → rpmE (PRK00019)Ribosomal_L31 (pfam01197) → rpmE (PRK00019)Ribosomal_L31 (pfam01197) → |
| Sen-905-1    | NZ_AOYM01000106.1 | - | 36696  | 36644  | RNA → rpmE (PRK00019)Ribosomal_L31 (pfam01197) → rpmE (PRK00019)Ribosomal_L31 (pfam01197) → |
| Sen-542-1    | NZ_ALHW01000479.1 | + | 6260   | 6312   | RNA → rpmE (PRK00019)Ribosomal_L31 (pfam01197) → rpmE (PRK00019)Ribosomal_L31 (pfam01197) → |
| Sen-903-1    | NZ_APAM01000189.1 | + | 8581   | 8633   | RNA → rpmE (PRK00019)Ribosomal_L31 (pfam01197) →                                            |
| Sen-536-1    | NZ_ALFA01000040.1 | + | 103705 | 103757 | RNA → rpmE (PRK00019)Ribosomal_L31 (pfam01197) → rpmE (PRK00019)Ribosomal_L31 (pfam01197) → |
| Sen-528-1    | NZ_ALHS01000040.1 | + | 22613  | 22665  | RNA → rpmE (PRK00019)Ribosomal_L31 (pfam01197) → rpmE (PRK00019)Ribosomal_L31 (pfam01197) → |
| Sen-946-1    | NZ_APAR01000027.1 | - | 49439  | 49387  | RNA → rpmE (PRK00019)Ribosomal_L31 (pfam01197) → rpmE (PRK00019)Ribosomal_L31 (pfam01197) → |
| Sen-539-1    | NZ_ALHQ01000071.1 | - | 12300  | 12248  | RNA → rpmE (PRK00019)Ribosomal_L31 (pfam01197) → rpmE (PRK00019)Ribosomal_L31 (pfam01197) → |
| Sen-288-1054 | NZ_CJWV01000015.1 | + | 107860 | 107912 | RNA → rpmE (PRK00019)Ribosomal_L31 (pfam01197) →                                            |
| Sen-274-1    | NZ_ARYU01000013.1 | + | 97576  | 97628  | RNA → rpmE (PRK00019)Ribosomal_L31 (pfam01197) →                                            |
| Sen-534-1    | NZ_ALHV01000013.1 | + | 19300  | 19352  | RNA → rpmE (PRK00019)Ribosomal_L31 (pfam01197) → rpmE (PRK00019)Ribosomal_L31 (pfam01197) → |
| Sen-949-1    | NZ_AMSN01000034.1 | - | 2989   | 2937   | RNA → rpmE (PRK00019)Ribosomal_L31 (pfam01197) →                                            |
| Sen-546-1    | NZ_ALIB01000011.1 | - | 49100  | 49048  | RNA → rpmE (PRK00019)Ribosomal_L31 (pfam01197) → rpmE (PRK00019)Ribosomal_L31 (pfam01197) → |
| Sen-283-1    | NZ_ALHY01000024.1 | - | 37543  | 37491  | RNA → rpmE (PRK00019)Ribosomal_L31 (pfam01197) →                                            |
| Sen-282-1    | NZ_ARYV01000035.1 | + | 42107  | 42159  | RNA → rpmE (PRK00019)Ribosomal_L31 (pfam01197) →                                            |
| Sen-935-1    | NZ_AOYU01000078.1 | + | 104625 | 104677 | RNA → rpmE (PRK00019)Ribosomal_L31 (pfam01197) → rpmE (PRK00019)Ribosomal_L31 (pfam01197) → |
| Sen-947-1    | NZ_AOXS01000229.1 | + | 15341  | 15393  | RNA → rpmE (PRK00019)Ribosomal_L31 (pfam01197) →                                            |
| Sen-288-1055 | NZ_CIUU01000016.1 | - | 39380  | 39328  | RNA → rpmE (PRK00019)Ribosomal_L31 (pfam01197) →                                            |
| Sen-288-1056 | NZ_CJLP01000012.1 | - | 39527  | 39475  | RNA → rpmE (PRK00019)Ribosomal_L31 (pfam01197) →                                            |
| Sen-288-1057 | NZ_CJWV01000015.1 | - | 39378  | 39326  | RNA → rpmE (PRK00019)Ribosomal_L31 (pfam01197) →                                            |
| Sen-288-1058 | NZ_CJYP01000016.1 | + | 104128 | 104180 | RNA → rpmE (PRK00019)Ribosomal_L31 (pfam01197) →                                            |
| Sen-288-1059 | NZ_CJYT01000016.1 | + | 104158 | 104210 | RNA → rpmE (PRK00019)Ribosomal_L31 (pfam01197) →                                            |
| Sen-288-1060 | NZ_CJGE01000014.1 | - | 41507  | 41455  | RNA → rpmE (PRK00019)Ribosomal_L31 (pfam01197) →                                            |
| Sen-746-1    | NZ_AJGY01000070.1 | + | 20275  | 20327  | RNA → rpmE (PRK00019)Ribosomal_L31 (pfam01197) →                                            |
| Sen-288-1061 | NZ_CJQG01000016.1 | - | 39601  | 39549  | RNA → rpmE (PRK00019)Ribosomal_L31 (pfam01197) →                                            |
| Sen-288-1062 | NZ_CJUK01000016.1 | + | 104154 | 104206 | RNA → rpmE (PRK00019)Ribosomal_L31 (pfam01197) →                                            |
| Sen-573-1    | NZ_ALFN01000042.1 | - | 49346  | 49294  | RNA → rpmE (PRK00019)Ribosomal_L31 (pfam01197) → rpmE (PRK00019)Ribosomal_L31 (pfam01197) → |
| Sen-288-1063 | NZ_CJXH01000016.1 | - | 39371  | 39319  | RNA → rpmE (PRK00019)Ribosomal_L31 (pfam01197) →                                            |
| Sen-574-1    | NZ_ALGC01000047.1 | - | 49343  | 49291  | RNA → rpmE (PRK00019)Ribosomal_L31 (pfam01197) → rpmE (PRK00019)Ribosomal_L31 (pfam01197) → |
| Sen-288-1064 | NZ_CJUP01000015.1 | - | 41231  | 41179  | RNA → rpmE (PRK00019)Ribosomal_L31 (pfam01197) →                                            |

|              |                   |   |        |        |                                                                                             |
|--------------|-------------------|---|--------|--------|---------------------------------------------------------------------------------------------|
| Sen-568-1    | NZ_ALGH01000012.1 | + | 103706 | 103758 | RNA → rpmE (PRK00019)Ribosomal_L31 (pfam01197) → rpmE (PRK00019)Ribosomal_L31 (pfam01197) → |
| Sen-570-1    | NZ_ALGI01000014.1 | + | 103700 | 103752 | RNA → rpmE (PRK00019)Ribosomal_L31 (pfam01197) → rpmE (PRK00019)Ribosomal_L31 (pfam01197) → |
| Sen-288-1065 | NZ_CJLU01000013.1 | + | 107988 | 108040 | RNA → rpmE (PRK00019)Ribosomal_L31 (pfam01197) →                                            |
| Sen-583-1    | NZ_ALGS01000034.1 | + | 103661 | 103713 | RNA → rpmE (PRK00019)Ribosomal_L31 (pfam01197) → rpmE (PRK00019)Ribosomal_L31 (pfam01197) → |
| Sen-288-1066 | NZ_CJGK01000016.1 | - | 39535  | 39483  | RNA → rpmE (PRK00019)Ribosomal_L31 (pfam01197) →                                            |
| Sen-727-1    | NZ_ALGX01000047.1 | - | 49252  | 49200  | RNA → rpmE (PRK00019)Ribosomal_L31 (pfam01197) → rpmE (PRK00019)Ribosomal_L31 (pfam01197) → |
| Sen-288-1067 | NZ_CJEP01000016.1 | - | 39536  | 39484  | RNA → rpmE (PRK00019)Ribosomal_L31 (pfam01197) →                                            |
| Sen-577-1    | NZ_ALHC01000023.1 | - | 49191  | 49139  | RNA → rpmE (PRK00019)Ribosomal_L31 (pfam01197) → rpmE (PRK00019)Ribosomal_L31 (pfam01197) → |
| Sen-288-1068 | NZ_CEXR01000016.1 | - | 39537  | 39485  | RNA → rpmE (PRK00019)Ribosomal_L31 (pfam01197) →                                            |
| Sen-288-1069 | NZ_CJXF01000015.1 | + | 104154 | 104206 | RNA → rpmE (PRK00019)Ribosomal_L31 (pfam01197) →                                            |
| Sen-723-1    | NZ_AHUN01000085.1 | - | 40121  | 40069  | RNA → rpmE (PRK00019)Ribosomal_L31 (pfam01197) → rpmE (PRK00019)Ribosomal_L31 (pfam01197) → |
| Sen-288-1070 | NZ_CJQF01000016.1 | - | 39601  | 39549  | RNA → rpmE (PRK00019)Ribosomal_L31 (pfam01197) →                                            |
| Sen-733-1    | NZ_AOZG01000039.1 | + | 32849  | 32901  | RNA → rpmE (PRK00019)Ribosomal_L31 (pfam01197) → rpmE (PRK00019)Ribosomal_L31 (pfam01197) → |
| Sen-288-1071 | NZ_CIZE01000017.1 | - | 41512  | 41460  | RNA → rpmE (PRK00019)Ribosomal_L31 (pfam01197) →                                            |
| Sen-739-1    | NZ_APAO01000024.1 | + | 105311 | 105363 | RNA → rpmE (PRK00019)Ribosomal_L31 (pfam01197) → rpmE (PRK00019)Ribosomal_L31 (pfam01197) → |
| Sen-288-1072 | NZ_CJMN01000014.1 | + | 107976 | 108028 | RNA → rpmE (PRK00019)Ribosomal_L31 (pfam01197) →                                            |
| Sen-288-1073 | NZ_CJSH01000016.1 | + | 78112  | 78164  | RNA → rpmE (PRK00019)Ribosomal_L31 (pfam01197) →                                            |
| Sen-165-1    | NZ_AZRG01000037.1 | - | 14220  | 14168  | RNA → rpmE (PRK00019)Ribosomal_L31 (pfam01197) →                                            |
| Sen-288-1074 | NZ_CJSM01000016.1 | + | 104155 | 104207 | RNA → rpmE (PRK00019)Ribosomal_L31 (pfam01197) →                                            |
| Sen-738-1    | NZ_ALPO01000015.1 | - | 21962  | 21910  | RNA → rpmE (PRK00019)Ribosomal_L31 (pfam01197) →                                            |
| Sen-163-1    | NZ_CAGR02000040.1 | + | 103650 | 103702 | RNA → rpmE (PRK00019)Ribosomal_L31 (pfam01197) →                                            |
| Sen-288-1075 | NZ_CJKJ01000014.1 | - | 41511  | 41459  | RNA → rpmE (PRK00019)Ribosomal_L31 (pfam01197) →                                            |
| Sen-288-1076 | NZ_CJLZ01000002.1 | - | 198398 | 198346 | RNA → rpmE (PRK00019)Ribosomal_L31 (pfam01197) →                                            |
| Sen-166-1    | NZ_JOKK01000017.1 | + | 93924  | 93976  | RNA → rpmE (PRK00019)Ribosomal_L31 (pfam01197) →                                            |
| Sen-288-1077 | NZ_CJBE01000011.1 | - | 39456  | 39404  | RNA → rpmE (PRK00019)Ribosomal_L31 (pfam01197) →                                            |
| Sen-745-1    | NZ_AJGZ01000018.1 | - | 37514  | 37462  | RNA → rpmE (PRK00019)Ribosomal_L31 (pfam01197) →                                            |
| Sen-288-1078 | NZ_CIUR01000015.1 | + | 104168 | 104220 | RNA → rpmE (PRK00019)Ribosomal_L31 (pfam01197) →                                            |
| Sen-744-1    | NZ_AJHA01000094.1 | - | 3193   | 3141   | RNA → rpmE (PRK00019)Ribosomal_L31 (pfam01197) →                                            |
| Sen-288-1079 | NZ_CJGU01000016.1 | + | 104144 | 104196 | RNA → rpmE (PRK00019)Ribosomal_L31 (pfam01197) →                                            |
| Sen-571-1    | NZ_ALGJ01000040.1 | - | 49252  | 49200  | RNA → rpmE (PRK00019)Ribosomal_L31 (pfam01197) → rpmE (PRK00019)Ribosomal_L31 (pfam01197) → |
| Sen-288-1080 | NZ_CJQB01000016.1 | - | 39601  | 39549  | RNA → rpmE (PRK00019)Ribosomal_L31 (pfam01197) →                                            |
| Sen-579-1    | NZ_ALGT01000019.1 | - | 49252  | 49200  | RNA → rpmE (PRK00019)Ribosomal_L31 (pfam01197) → rpmE (PRK00019)Ribosomal_L31 (pfam01197) → |
| Sen-288-1081 | NZ_CJHI01000015.1 | - | 41504  | 41452  | RNA → rpmE (PRK00019)Ribosomal_L31 (pfam01197) →                                            |
| Sen-728-1    | NZ_ALGY01000015.1 | + | 103708 | 103760 | RNA → rpmE (PRK00019)Ribosomal_L31 (pfam01197) → rpmE (PRK00019)Ribosomal_L31 (pfam01197) → |
| Sen-288-1082 | NZ_CJWQ01000013.1 | + | 107425 | 107477 | RNA → rpmE (PRK00019)Ribosomal_L31 (pfam01197) →                                            |
| Sen-172-1    | NZ_APIX01000052.1 | + | 43443  | 43495  | RNA → rpmE (PRK00019)Ribosomal_L31 (pfam01197) →                                            |
| Sen-288-1083 | NZ_CJEZ01000016.1 | + | 104158 | 104210 | RNA → rpmE (PRK00019)Ribosomal_L31 (pfam01197) →                                            |
| Sen-173-1    | NZ_AMNL01000067.1 | - | 4749   | 4697   | RNA → rpmE (PRK00019)Ribosomal_L31 (pfam01197) →                                            |
| Sen-288-1084 | NZ_CJZD01000015.1 | + | 104151 | 104203 | RNA → rpmE (PRK00019)Ribosomal_L31 (pfam01197) →                                            |
| Sen-742-1    | NZ_AMNM01000007.1 | - | 37497  | 37445  | RNA → rpmE (PRK00019)Ribosomal_L31 (pfam01197) →                                            |
| Sen-288-1085 | NZ_CIZM01000016.1 | + | 104147 | 104199 | RNA → rpmE (PRK00019)Ribosomal_L31 (pfam01197) →                                            |
| Sen-736-1    | NZ_ALPP01000010.1 | - | 45323  | 45271  | RNA → rpmE (PRK00019)Ribosomal_L31 (pfam01197) →                                            |
| Sen-288-1086 | NZ_CJVI01000016.1 | + | 104157 | 104209 | RNA → rpmE (PRK00019)Ribosomal_L31 (pfam01197) →                                            |
| Sen-749-1    | NZ_AJGW01000005.1 | - | 37498  | 37446  | RNA → rpmE (PRK00019)Ribosomal_L31 (pfam01197) →                                            |
| Sen-288-1087 | NZ_CJUI01000001.1 | - | 39357  | 39305  | RNA → rpmE (PRK00019)Ribosomal_L31 (pfam01197) →                                            |
| Sen-743-1    | NZ_AJGX01000011.1 | + | 43277  | 43329  | RNA → rpmE (PRK00019)Ribosomal_L31 (pfam01197) →                                            |
| Sen-288-1088 | NZ_CJBU01000013.1 | - | 39578  | 39526  | RNA → rpmE (PRK00019)Ribosomal_L31 (pfam01197) →                                            |
| Sen-288-1089 | NZ_CJGO01000015.1 | - | 39574  | 39522  | RNA → rpmE (PRK00019)Ribosomal_L31 (pfam01197) →                                            |
| Sen-572-1    | NZ_ALGB01000053.1 | - | 49347  | 49295  | RNA → rpmE (PRK00019)Ribosomal_L31 (pfam01197) → rpmE (PRK00019)Ribosomal_L31 (pfam01197) → |
| Sen-288-1090 | NZ_CJVX01000017.1 | + | 104154 | 104206 | RNA → rpmE (PRK00019)Ribosomal_L31 (pfam01197) →                                            |
| Sen-724-1    | NZ_ALGR01000015.1 | - | 49252  | 49200  | RNA → rpmE (PRK00019)Ribosomal_L31 (pfam01197) → rpmE (PRK00019)Ribosomal_L31 (pfam01197) → |
| Sen-288-1091 | NZ_CJKB01000008.1 | - | 39361  | 39309  | RNA → rpmE (PRK00019)Ribosomal_L31 (pfam01197) →                                            |



|              |                    |   |         |         |                                                                                                              |
|--------------|--------------------|---|---------|---------|--------------------------------------------------------------------------------------------------------------|
| Sen-582-1    | NZ_ALGW01000052.1  | + | 103706  | 103758  | RNA → rpmE (PRK00019)Ribosomal_L31 (pfam01197) → rpmE (PRK00019)Ribosomal_L31 (pfam01197) →                  |
| Sen-288-1125 | NZ_CJFJ01000015.1  | - | 39564   | 39512   | RNA → rpmE (PRK00019)Ribosomal_L31 (pfam01197) →                                                             |
| Sen-737-1    | NZ_AOZE01000034.1  | - | 45179   | 45127   | RNA → rpmE (PRK00019)Ribosomal_L31 (pfam01197) →                                                             |
| Sen-288-1092 | NZ_CJLX01000013.1  | - | 41508   | 41456   | RNA → rpmE (PRK00019)Ribosomal_L31 (pfam01197) →                                                             |
| Sen-174-1    | NZ_AMNG01000040.1  | + | 43295   | 43347   | RNA → rpmE (PRK00019)Ribosomal_L31 (pfam01197) →                                                             |
| Sen-288-1093 | NZ_CJWV01000016.1  | - | 39366   | 39314   | RNA → rpmE (PRK00019)Ribosomal_L31 (pfam01197) →                                                             |
| Sen-747-1    | NZ_AMNH01000065.1  | + | 43992   | 44044   | RNA → rpmE (PRK00019)Ribosomal_L31 (pfam01197) →                                                             |
| Sen-288-1094 | NZ_CJEB01000016.1  | - | 39534   | 39482   | RNA → rpmE (PRK00019)Ribosomal_L31 (pfam01197) →                                                             |
| Sen-569-1    | NZ_ALFV01000010.1  | - | 49343   | 49291   | RNA → rpmE (PRK00019)Ribosomal_L31 (pfam01197) → rpmE (PRK00019)Ribosomal_L31 (pfam01197) →                  |
| Sen-288-1095 | NZ_CJDP01000015.1  | - | 39373   | 39321   | RNA → rpmE (PRK00019)Ribosomal_L31 (pfam01197) →                                                             |
| Sen-581-1    | NZ_ALGU01000026.1  | + | 103706  | 103758  | RNA → rpmE (PRK00019)Ribosomal_L31 (pfam01197) → rpmE (PRK00019)Ribosomal_L31 (pfam01197) →                  |
| Sen-288-1096 | NZ_CJVF01000015.1  | - | 41231   | 41179   | RNA → rpmE (PRK00019)Ribosomal_L31 (pfam01197) →                                                             |
| Sen-288-1097 | NZ_CJJO01000016.1  | - | 39387   | 39335   | RNA → rpmE (PRK00019)Ribosomal_L31 (pfam01197) →                                                             |
| Sen-580-1    | NZ_ALGZ01000049.1  | - | 49107   | 49055   | RNA → rpmE (PRK00019)Ribosomal_L31 (pfam01197) → rpmE (PRK00019)Ribosomal_L31 (pfam01197) →                  |
| Sen-288-1098 | NZ_CJOH01000016.1  | + | 104153  | 104205  | RNA → rpmE (PRK00019)Ribosomal_L31 (pfam01197) →                                                             |
| Sen-730-1    | NZ_AHUH01000066.1  | + | 104411  | 104463  | RNA → rpmE (PRK00019)Ribosomal_L31 (pfam01197) → rpmE (PRK00019)Ribosomal_L31 (pfam01197) →                  |
| Sen-288-1099 | NZ_CJDR01000016.1  | + | 104156  | 104208  | RNA → rpmE (PRK00019)Ribosomal_L31 (pfam01197) →                                                             |
| Sen-740-1    | NZ_APAH01000055.1  | - | 2949    | 2897    | RNA → rpmE (PRK00019)Ribosomal_L31 (pfam01197) →                                                             |
| Sen-288-1100 | NZ_CJGR01000016.1  | - | 39535   | 39483   | RNA → rpmE (PRK00019)Ribosomal_L31 (pfam01197) →                                                             |
| Sen-288-1101 | NZ_CJBO01000016.1  | + | 104166  | 104218  | RNA → rpmE (PRK00019)Ribosomal_L31 (pfam01197) →                                                             |
| Sen-171-1    | NZ_AMMZ01000027.1  | - | 37498   | 37446   | RNA → rpmE (PRK00019)Ribosomal_L31 (pfam01197) →                                                             |
| Sen-288-1102 | NZ_CJJE01000015.1  | + | 103986  | 104038  | RNA → rpmE (PRK00019)Ribosomal_L31 (pfam01197) →                                                             |
| Sen-288-1103 | NZ_CJED01000016.1  | + | 104139  | 104191  | RNA → rpmE (PRK00019)Ribosomal_L31 (pfam01197) →                                                             |
| Sen-725-1    | NZ_ALFE01000018.1  | - | 4666    | 4614    | RNA → rpmE (PRK00019)Ribosomal_L31 (pfam01197) → rpmE (PRK00019)Ribosomal_L31 (pfam01197) →                  |
| Sen-726-1    | NZ_AHUL01000075.1  | + | 103648  | 103700  | RNA → rpmE (PRK00019)Ribosomal_L31 (pfam01197) → rpmE (PRK00019)Ribosomal_L31 (pfam01197) →                  |
| Sen-741-1    | NZ_AMMY01000035.1  | + | 8157    | 8209    | RNA → rpmE (PRK00019)Ribosomal_L31 (pfam01197) →                                                             |
| Sen-722-1    | NZ_ALHY01000024.1  | - | 9651    | 9599    | RNA → rpmE (PRK00019)Ribosomal_L31 (pfam01197) →                                                             |
| Sen-169-1    | NZ_ARYS01000012.1  | + | 104604  | 104656  | RNA → rpmE (PRK00019)Ribosomal_L31 (pfam01197) →                                                             |
| Sen-735-1    | NZ_AYUQ01000070.1  | + | 104455  | 104507  | RNA → rpmE (PRK00019)Ribosomal_L31 (pfam01197) →                                                             |
| Sen-1004-1   | NZ_ABFG01000008.1  | - | 54519   | 54467   | RNA → rpmE (PRK00019)Ribosomal_L31 (pfam01197) → rpmE (PRK00019)Ribosomal_L31 (pfam01197) →                  |
| Sen-576-1    | NZ_ALFH01000027.1  | - | 49346   | 49294   | RNA → rpmE (PRK00019)Ribosomal_L31 (pfam01197) → rpmE (PRK00019)Ribosomal_L31 (pfam01197) →                  |
| Sen-679-1    | NZ_AHUR01000081.1  | + | 103706  | 103758  | RNA → rpmE (PRK00019)Ribosomal_L31 (pfam01197) → rpmE (PRK00019)Ribosomal_L31 (pfam01197) →                  |
| Sen-168-1    | NZ_ARYR01000001.1  | + | 100051  | 100103  | RNA → rpmE (PRK00019)Ribosomal_L31 (pfam01197) →                                                             |
| Sen-578-1    | NZ_ALFF01000033.1  | - | 26193   | 26141   | RNA → rpmE (PRK00019)Ribosomal_L31 (pfam01197) → rpmE (PRK00019)Ribosomal_L31 (pfam01197) →                  |
| Sen-575-1    | NZ_ALFG01000008.1  | - | 49346   | 49294   | RNA → rpmE (PRK00019)Ribosomal_L31 (pfam01197) → rpmE (PRK00019)Ribosomal_L31 (pfam01197) →                  |
| Sen-431-1    | NZ_AFCK010001570.1 | + | 1664    | 1716    | RNA → rpmE (PRK00019)Ribosomal_L31 (pfam01197) →                                                             |
| Sen-5-6      | NZ_LIMM01000012.1  | + | 104491  | 104543  | RNA → rpmE (PRK00019)Ribosomal_L31 (pfam01197) →                                                             |
| Sen-1014-1   | NC_003198.1        | - | 3639708 | 3639656 | RNA → rpmE (PRK00019)Ribosomal_L31 (pfam01197) →                                                             |
| Sen-1017-1   | NC_003197.1        | + | 4305705 | 4305757 | RNA → rpmE (PRK00019)Ribosomal_L31 (pfam01197) →                                                             |
| Sen-440-1    | NZ_HF969015.1      | + | 4155499 | 4155551 | RNA → rpmE (PRK00019)Ribosomal_L31 (pfam01197) →                                                             |
| Sen-731-1    | NZ_CM001153.1      | - | 3480716 | 3480664 | RNA → rpmE (PRK00019)Ribosomal_L31 (pfam01197) → rpmE (PRK00019)Ribosomal_L31 (pfam01197) →                  |
| Sen-1000-1   | NZ_CM001062.1      | + | 4224780 | 4224832 | RNA → rpmE (PRK00019)Ribosomal_L31 (pfam01197) → rpmE (PRK00019)Ribosomal_L31 (pfam01197) →                  |
| Sen-468-1    | NZ_CM001151.1      | + | 4332666 | 4332718 | hypo → hypo →<br>RNA → rpmE (PRK00019)Ribosomal_L31 (pfam01197) → rpmE (PRK00019)Ribosomal_L31 (pfam01197) → |
| Sen-953-1    | NC_016832.1        | - | 3614165 | 3614113 | rpmE (PRK00019)Ribosomal_L31 (pfam01197) →<br>RNA → rpmE (PRK00019)Ribosomal_L31 (pfam01197) →               |
| Sen-971-1    | NC_016810.1        | + | 4327143 | 4327195 | RNA → rpmE (PRK00019)Ribosomal_L31 (pfam01197) →                                                             |
| Sen-470-1    | NZ_KB731431.1      | + | 30272   | 30324   | RNA → rpmE (PRK00019)Ribosomal_L31 (pfam01197) →                                                             |
| Sen-483-1    | NZ_KE349350.1      | + | 30273   | 30325   | RNA → rpmE (PRK00019)Ribosomal_L31 (pfam01197) →                                                             |
| Sen-489-1    | NZ_KE350075.1      | + | 55984   | 56036   | RNA → rpmE (PRK00019)Ribosomal_L31 (pfam01197) →                                                             |
| Sen-485-1    | NZ_KE349599.1      | + | 30273   | 30325   | RNA → rpmE (PRK00019)Ribosomal_L31 (pfam01197) →                                                             |
| Sen-487-1    | NZ_KE349812.1      | + | 30273   | 30325   | RNA → rpmE (PRK00019)Ribosomal_L31 (pfam01197) →                                                             |
| Sen-482-1    | NZ_KE349293.1      | + | 30273   | 30325   | RNA → rpmE (PRK00019)Ribosomal_L31 (pfam01197) →                                                             |

|             |                   |   |         |         |                                                                                             |
|-------------|-------------------|---|---------|---------|---------------------------------------------------------------------------------------------|
| Sen-486-1   | NZ_KE349740.1     | + | 30273   | 30325   | RNA → rpmE (PRK00019)Ribosomal_L31 (pfam01197) →                                            |
| Sen-475-1   | NZ_KE349031.1     | + | 30273   | 30325   | RNA → rpmE (PRK00019)Ribosomal_L31 (pfam01197) →                                            |
| Sen-481-1   | NZ_KE349069.1     | + | 30273   | 30325   | RNA → rpmE (PRK00019)Ribosomal_L31 (pfam01197) →                                            |
| Sen-488-1   | NZ_KE350026.1     | + | 30274   | 30326   | RNA → rpmE (PRK00019)Ribosomal_L31 (pfam01197) →                                            |
| Sen-463-1   | NC_021818.1       | + | 364880  | 364932  | RNA → rpmE (PRK00019)Ribosomal_L31 (pfam01197) →                                            |
| Sen-307-1   | NZ_KI911915.1     | + | 3835966 | 3836018 | RNA → rpmE (PRK00019)Ribosomal_L31 (pfam01197) →                                            |
| Sen-300-330 | NC_022569.1       | + | 4382615 | 4382667 | RNA → rpmE (PRK00019)Ribosomal_L31 (pfam01197) →                                            |
| Sen-601-1   | NZ_CP007251.1     | + | 4194336 | 4194388 | RNA → rpmE (PRK00019)Ribosomal_L31 (pfam01197) →                                            |
| Sen-241-1   | NZ_KK082459.1     | - | 37622   | 37570   | RNA → rpmE (PRK00019)Ribosomal_L31 (pfam01197) →                                            |
| Sen-612-1   | NZ_CP007344.1     | + | 4173178 | 4173230 | RNA → rpmE (PRK00019)Ribosomal_L31 (pfam01197) →                                            |
| Sen-136-2   | NZ_KI635587.1     | + | 21280   | 21332   | RNA → rpmE (PRK00019)Ribosomal_L31 (pfam01197) →                                            |
| Sen-621-1   | NZ_CP007353.1     | + | 4173243 | 4173295 | RNA → rpmE (PRK00019)Ribosomal_L31 (pfam01197) →                                            |
| Sen-699-1   | NZ_CP007301.1     | + | 4173901 | 4173953 | RNA → rpmE (PRK00019)Ribosomal_L31 (pfam01197) →                                            |
| Sen-626-1   | NZ_CP007335.1     | + | 4173885 | 4173937 | RNA → rpmE (PRK00019)Ribosomal_L31 (pfam01197) →                                            |
| Sen-748-1   | NC_021810.1       | + | 1275161 | 1275213 | RNA → rpmE (PRK00019)Ribosomal_L31 (pfam01197) →                                            |
| Sen-271-1   | NZ_CP012038.1     | + | 2994691 | 2994743 | RNA → rpmE (PRK00019)Ribosomal_L31 (pfam01197) →                                            |
| Sen-1031-1  | NC_011294.1       | - | 4173886 | 4173938 | RNA → rpmE (PRK00019)Ribosomal_L31 (pfam01197) →                                            |
| Sen-1003-1  | NC_011274.1       | + | 3480716 | 3480664 | RNA → rpmE (PRK00019)Ribosomal_L31 (pfam01197) →                                            |
| Sen-908-1   | NC_006511.1       | + | 4083750 | 4083802 | RNA → rpmE (PRK00019)Ribosomal_L31 (pfam01197) →                                            |
| Sen-1027-1  | NC_011094.1       | + | 4182786 | 4182838 | RNA → rpmE (PRK00019)Ribosomal_L31 (pfam01197) →                                            |
| Sen-266-2   | NC_011080.1       | + | 4297332 | 4297384 | RNA → rpmE (PRK00019)Ribosomal_L31 (pfam01197) →                                            |
| Sen-1001-1  | NC_011205.1       | + | 4332663 | 4332715 | RNA → rpmE (PRK00019)Ribosomal_L31 (pfam01197) →                                            |
| Sen-1006-1  | NC_011083.1       | + | 4310089 | 4310141 | RNA → rpmE (PRK00019)Ribosomal_L31 (pfam01197) →                                            |
| Sen-999-1   | NC_011149.1       | + | 4232095 | 4232147 | RNA → rpmE (PRK00019)Ribosomal_L31 (pfam01197) →                                            |
| Sen-1-1     | NC_011147.1       | + | 4079434 | 4079486 | RNA → rpmE (PRK00019)Ribosomal_L31 (pfam01197) →                                            |
| Sen-1032-1  | NC_012125.1       | + | 4278107 | 4278159 | RNA → rpmE (PRK00019)Ribosomal_L31 (pfam01197) → hypo → hypo →                              |
| Sen-968-1   | NC_016854.1       | + | 4328460 | 4328512 | RNA → rpmE (PRK00019)Ribosomal_L31 (pfam01197) →                                            |
| Sen-973-1   | NC_016857.1       | + | 4327144 | 4327196 | RNA → rpmE (PRK00019)Ribosomal_L31 (pfam01197) →                                            |
| Sen-991-1   | NC_016863.1       | + | 4266896 | 4266948 | RNA → rpmE (PRK00019)Ribosomal_L31 (pfam01197) →                                            |
| Sen-139-1   | NZ_CP011791.1     | + | 4166192 | 4166244 | RNA → rpmE (PRK00019)Ribosomal_L31 (pfam01197) →                                            |
| Sen-143-1   | NZ_CP007249.2     | + | 4200339 | 4200391 | RNA → rpmE (PRK00019)Ribosomal_L31 (pfam01197) →                                            |
| Sen-1005-1  | NC_017623.1       | + | 216124  | 216176  | RNA → rpmE (PRK00019)Ribosomal_L31 (pfam01197) →                                            |
| Sen-988-1   | NC_016860.1       | + | 4410794 | 4410846 | RNA → rpmE (PRK00019)Ribosomal_L31 (pfam01197) →                                            |
| Sen-969-1   | NC_022544.1       | + | 4264269 | 4264321 | RNA → rpmE (PRK00019)Ribosomal_L31 (pfam01197) →                                            |
| Sen-990-1   | NC_021151.1       | + | 4300603 | 4300655 | RNA → rpmE (PRK00019)Ribosomal_L31 (pfam01197) →                                            |
| Sen-1002-1  | NC_016831.1       | - | 3603834 | 3603782 | RNA → rpmE (PRK00019)Ribosomal_L31 (pfam01197) →                                            |
| Sen-158-1   | NZ_CP007329.2     | + | 4167433 | 4167485 | RNA → rpmE (PRK00019)Ribosomal_L31 (pfam01197) →                                            |
| Sen-139-2   | NZ_CP011790.1     | + | 4166710 | 4166762 | RNA → rpmE (PRK00019)Ribosomal_L31 (pfam01197) →                                            |
| Sen-955-1   | NC_021176.1       | - | 3625365 | 3625313 | RNA → rpmE (PRK00019)Ribosomal_L31 (pfam01197) →                                            |
| Sen-159-1   | NZ_CP007267.2     | + | 4167317 | 4167369 | RNA → rpmE (PRK00019)Ribosomal_L31 (pfam01197) →                                            |
| Sen-314-1   | NC_021820.1       | - | 93015   | 92963   | RNA → rpmE (PRK00019)Ribosomal_L31 (pfam01197) →                                            |
| Sen-436-1   | NC_021844.1       | - | 4520505 | 4520453 | RNA → rpmE (PRK00019)Ribosomal_L31 (pfam01197) →                                            |
| Sen-466-1   | NZ_KE348840.1     | + | 30272   | 30324   | RNA → rpmE (PRK00019)Ribosomal_L31 (pfam01197) →                                            |
| Sen-732-1   | NC_022221.1       | - | 3597464 | 3597412 | RNA → rpmE (PRK00019)Ribosomal_L31 (pfam01197) →                                            |
| Sen-928-1   | NC_021984.1       | - | 3651991 | 3651939 | RNA → rpmE (PRK00019)Ribosomal_L31 (pfam01197) →                                            |
| Sen-895-1   | NC_021902.1       | - | 4667263 | 4667211 | RNA → rpmE (PRK00019)Ribosomal_L31 (pfam01197) → rpmE (PRK00019)Ribosomal_L31 (pfam01197) → |
| Sen-300-51  | NZ_CTAM01000028.1 | - | 45107   | 45055   | RNA → rpmE (PRK00019)Ribosomal_L31 (pfam01197) →                                            |
| Sen-300-52  | NZ_CTAF01000018.1 | - | 45343   | 45291   | RNA → rpmE (PRK00019)Ribosomal_L31 (pfam01197) →                                            |
| Sen-300-53  | NZ_CTCI01000019.1 | + | 42438   | 42490   | RNA → rpmE (PRK00019)Ribosomal_L31 (pfam01197) →                                            |
| Sen-300-54  | NZ_CTAS01000021.1 | + | 42473   | 42525   | RNA → rpmE (PRK00019)Ribosomal_L31 (pfam01197) →                                            |
| Sen-300-55  | NZ_CTBO01000018.1 | + | 42484   | 42536   | RNA → rpmE (PRK00019)Ribosomal_L31 (pfam01197) →                                            |
| Sen-300-56  | NZ_CTMH01000016.1 | - | 45343   | 45291   | RNA → rpmE (PRK00019)Ribosomal_L31 (pfam01197) →                                            |



|              |                   |   |         |         |                                                  |
|--------------|-------------------|---|---------|---------|--------------------------------------------------|
| Sen-300-57   | NZ_CTOK01000019.1 | - | 45129   | 45077   | RNA → rpmE (PRK00019)Ribosomal_L31 (pfam01197) → |
| Sen-300-58   | NZ_CTNR01000018.1 | - | 45179   | 45127   | RNA → rpmE (PRK00019)Ribosomal_L31 (pfam01197) → |
| Sen-300-59   | NZ_CTLF01000015.1 | - | 45343   | 45291   | RNA → rpmE (PRK00019)Ribosomal_L31 (pfam01197) → |
| Sen-300-60   | NZ_CTMD01000019.1 | - | 45179   | 45127   | RNA → rpmE (PRK00019)Ribosomal_L31 (pfam01197) → |
| Sen-300-61   | NZ_CTKB01000021.1 | - | 45179   | 45127   | RNA → rpmE (PRK00019)Ribosomal_L31 (pfam01197) → |
| Sen-300-62   | NZ_CTMP01000018.1 | + | 42525   | 42577   | RNA → rpmE (PRK00019)Ribosomal_L31 (pfam01197) → |
| Sen-300-63   | NZ_CTGQ01000015.1 | + | 42526   | 42578   | RNA → rpmE (PRK00019)Ribosomal_L31 (pfam01197) → |
| Sen-300-64   | NZ_CTHY01000018.1 | - | 45107   | 45055   | RNA → rpmE (PRK00019)Ribosomal_L31 (pfam01197) → |
| Sen-300-65   | NZ_CTMO01000028.1 | - | 32531   | 32479   | RNA → rpmE (PRK00019)Ribosomal_L31 (pfam01197) → |
| Sen-300-66   | NZ_CTPW01000017.1 | + | 42472   | 42524   | RNA → rpmE (PRK00019)Ribosomal_L31 (pfam01197) → |
| Sen-300-67   | NZ_CTNM01000018.1 | - | 45152   | 45100   | RNA → rpmE (PRK00019)Ribosomal_L31 (pfam01197) → |
| Sen-300-68   | NZ_CTME01000020.1 | + | 42484   | 42536   | RNA → rpmE (PRK00019)Ribosomal_L31 (pfam01197) → |
| Sen-300-69   | NZ_CTQE01000008.1 | + | 42483   | 42535   | RNA → rpmE (PRK00019)Ribosomal_L31 (pfam01197) → |
| Sen-300-70   | NZ_CTOJ01000017.1 | - | 45337   | 45285   | RNA → rpmE (PRK00019)Ribosomal_L31 (pfam01197) → |
| Sen-950-1    | NC_022525.1       | + | 4159260 | 4159312 | RNA → rpmE (PRK00019)Ribosomal_L31 (pfam01197) → |
| Sen-343-1    | NC_022991.1       | + | 4197585 | 4197637 | RNA → rpmE (PRK00019)Ribosomal_L31 (pfam01197) → |
| Sen-760-1    | NC_021812.2       | + | 4742642 | 4742694 | RNA → rpmE (PRK00019)Ribosomal_L31 (pfam01197) → |
| Sen-193-1    | NZ_CP005995.1     | + | 2820952 | 2821004 | RNA → rpmE (PRK00019)Ribosomal_L31 (pfam01197) → |
| Sen-273-1    | NZ_CP009559.1     | - | 1380546 | 1380494 | RNA → rpmE (PRK00019)Ribosomal_L31 (pfam01197) → |
| Sen-273-2    | NZ_CP009049.1     | + | 104123  | 104175  | RNA → rpmE (PRK00019)Ribosomal_L31 (pfam01197) → |
| Sen-1016-1   | NC_004631.1       | - | 3625368 | 3625316 | RNA → rpmE (PRK00019)Ribosomal_L31 (pfam01197) → |
| Sen-958-1    | NC_016856.1       | + | 4319290 | 4319342 | RNA → rpmE (PRK00019)Ribosomal_L31 (pfam01197) → |
| Sen-1011-1   | NC_010102.1       | + | 4247096 | 4247148 | RNA → rpmE (PRK00019)Ribosomal_L31 (pfam01197) → |
| Sen-780-1    | NZ_CM001274.1     | + | 4283628 | 4283680 | RNA → rpmE (PRK00019)Ribosomal_L31 (pfam01197) → |
| Sen-300-71   | NZ_CTJW01000019.1 | + | 42531   | 42583   | RNA → rpmE (PRK00019)Ribosomal_L31 (pfam01197) → |
| Sen-300-72   | NZ_CTOX01000017.1 | - | 45201   | 45149   | RNA → rpmE (PRK00019)Ribosomal_L31 (pfam01197) → |
| Sen-288-1104 | NZ_CJJY01000016.1 | + | 104152  | 104204  | RNA → rpmE (PRK00019)Ribosomal_L31 (pfam01197) → |
| Sen-300-73   | NZ_CTGN01000016.1 | - | 45167   | 45115   | RNA → rpmE (PRK00019)Ribosomal_L31 (pfam01197) → |
| Sen-300-74   | NZ_CTLO01000018.1 | + | 42452   | 42504   | RNA → rpmE (PRK00019)Ribosomal_L31 (pfam01197) → |
| Sen-300-75   | NZ_CTBQ01000018.1 | - | 45337   | 45285   | RNA → rpmE (PRK00019)Ribosomal_L31 (pfam01197) → |
| Sen-300-76   | NZ_CTB01000017.1  | + | 42551   | 42603   | RNA → rpmE (PRK00019)Ribosomal_L31 (pfam01197) → |
| Sen-300-77   | NZ_CTB01000017.1  | + | 42479   | 42531   | RNA → rpmE (PRK00019)Ribosomal_L31 (pfam01197) → |
| Sen-300-78   | NZ_CTHE01000019.1 | + | 42480   | 42532   | RNA → rpmE (PRK00019)Ribosomal_L31 (pfam01197) → |
| Sen-300-79   | NZ_CTHD01000017.1 | - | 45517   | 45465   | RNA → rpmE (PRK00019)Ribosomal_L31 (pfam01197) → |
| Sen-300-80   | NZ_CTF01000019.1  | - | 45344   | 45292   | RNA → rpmE (PRK00019)Ribosomal_L31 (pfam01197) → |
| Sen-300-81   | NZ_CTBQ01000019.1 | + | 42505   | 42557   | RNA → rpmE (PRK00019)Ribosomal_L31 (pfam01197) → |
| Sen-300-82   | NZ_CTNQ01000016.1 | + | 42524   | 42576   | RNA → rpmE (PRK00019)Ribosomal_L31 (pfam01197) → |
| Sen-300-83   | NZ_CTBE01000020.1 | + | 42438   | 42490   | RNA → rpmE (PRK00019)Ribosomal_L31 (pfam01197) → |
| Sen-300-84   | NZ_CTIA01000021.1 | + | 42453   | 42505   | RNA → rpmE (PRK00019)Ribosomal_L31 (pfam01197) → |
| Sen-300-85   | NZ_CTNO01000020.1 | + | 42456   | 42508   | RNA → rpmE (PRK00019)Ribosomal_L31 (pfam01197) → |
| Sen-300-86   | NZ_CTB01000011.1  | + | 104187  | 104239  | RNA → rpmE (PRK00019)Ribosomal_L31 (pfam01197) → |
| Sen-300-87   | NZ_CTB01000020.1  | - | 45107   | 45055   | RNA → rpmE (PRK00019)Ribosomal_L31 (pfam01197) → |
| Sen-300-88   | NZ_CTMX01000017.1 | + | 42531   | 42583   | RNA → rpmE (PRK00019)Ribosomal_L31 (pfam01197) → |
| Sen-300-89   | NZ_CTBX01000019.1 | - | 45107   | 45055   | RNA → rpmE (PRK00019)Ribosomal_L31 (pfam01197) → |
| Sen-300-90   | NZ_CTGF01000018.1 | - | 45179   | 45127   | RNA → rpmE (PRK00019)Ribosomal_L31 (pfam01197) → |
| Sen-300-91   | NZ_CTY01000017.1  | + | 42489   | 42541   | RNA → rpmE (PRK00019)Ribosomal_L31 (pfam01197) → |
| Sen-300-92   | NZ_CTBK01000019.1 | - | 45107   | 45055   | RNA → rpmE (PRK00019)Ribosomal_L31 (pfam01197) → |
| Sen-300-93   | NZ_CTL01000018.1  | + | 42496   | 42548   | RNA → rpmE (PRK00019)Ribosomal_L31 (pfam01197) → |
| Sen-300-94   | NZ_CTB01000018.1  | + | 42532   | 42584   | RNA → rpmE (PRK00019)Ribosomal_L31 (pfam01197) → |
| Sen-300-95   | NZ_CTNL01000017.1 | - | 46977   | 46925   | RNA → rpmE (PRK00019)Ribosomal_L31 (pfam01197) → |
| Sen-300-96   | NZ_CTCJ01000017.1 | - | 45272   | 45220   | RNA → rpmE (PRK00019)Ribosomal_L31 (pfam01197) → |
| Sen-300-97   | NZ_CTPA01000018.1 | - | 45141   | 45089   | RNA → rpmE (PRK00019)Ribosomal_L31 (pfam01197) → |

|             |                   |   |         |         |                                                   |
|-------------|-------------------|---|---------|---------|---------------------------------------------------|
| Sen-300-98  | NZ.CTAZ01000013.1 | + | 104065  | 104117  | RNA → rpmE (PRK00019) Ribosomal_L31 (pfam01197) → |
| Sen-300-99  | NZ.CTLB01000018.1 | + | 42527   | 42579   | RNA → rpmE (PRK00019) Ribosomal_L31 (pfam01197) → |
| Sen-300-100 | NZ.CTMY01000021.1 | - | 45179   | 45127   | RNA → rpmE (PRK00019) Ribosomal_L31 (pfam01197) → |
| Sen-300-101 | NZ.CTLG01000005.1 | - | 45116   | 45064   | RNA → rpmE (PRK00019) Ribosomal_L31 (pfam01197) → |
| Sen-300-102 | NZ.CTPC01000020.1 | + | 42473   | 42525   | RNA → rpmE (PRK00019) Ribosomal_L31 (pfam01197) → |
| Sen-300-103 | NZ.CTQU01000018.1 | - | 45179   | 45127   | RNA → rpmE (PRK00019) Ribosomal_L31 (pfam01197) → |
| Sen-300-104 | NZ.CTMB01000017.1 | + | 42472   | 42524   | RNA → rpmE (PRK00019) Ribosomal_L31 (pfam01197) → |
| Sen-300-105 | NZ.CTQL01000158.1 | + | 1706    | 1758    | RNA → rpmE (PRK00019) Ribosomal_L31 (pfam01197) → |
| Sen-300-106 | NZ.CTPE01000019.1 | - | 45110   | 45058   | RNA → rpmE (PRK00019) Ribosomal_L31 (pfam01197) → |
| Sen-300-107 | NZ.CTQA01000017.1 | + | 42501   | 42553   | RNA → rpmE (PRK00019) Ribosomal_L31 (pfam01197) → |
| Sen-300-108 | NZ.CTOD01000014.1 | + | 104184  | 104236  | RNA → rpmE (PRK00019) Ribosomal_L31 (pfam01197) → |
| Sen-300-109 | NZ.CTMU01000020.1 | + | 43122   | 43174   | RNA → rpmE (PRK00019) Ribosomal_L31 (pfam01197) → |
| Sen-300-110 | NZ.CTOB01000018.1 | - | 45343   | 45291   | RNA → rpmE (PRK00019) Ribosomal_L31 (pfam01197) → |
| Sen-300-111 | NZ.CTGB01000019.1 | - | 45107   | 45055   | RNA → rpmE (PRK00019) Ribosomal_L31 (pfam01197) → |
| Sen-300-112 | NZ.CTGS01000018.1 | - | 45214   | 45162   | RNA → rpmE (PRK00019) Ribosomal_L31 (pfam01197) → |
| Sen-300-113 | NZ.CTAT01000013.1 | - | 45107   | 45055   | RNA → rpmE (PRK00019) Ribosomal_L31 (pfam01197) → |
| Sen-300-114 | NZ.CTGO01000018.1 | + | 42484   | 42536   | RNA → rpmE (PRK00019) Ribosomal_L31 (pfam01197) → |
| Sen-300-115 | NZ.CTLS01000021.1 | - | 45179   | 45127   | RNA → rpmE (PRK00019) Ribosomal_L31 (pfam01197) → |
| Sen-300-116 | NZ.CTNX01000021.1 | + | 42503   | 42555   | RNA → rpmE (PRK00019) Ribosomal_L31 (pfam01197) → |
| Sen-300-117 | NZ.CTPF01000017.1 | - | 45176   | 45124   | RNA → rpmE (PRK00019) Ribosomal_L31 (pfam01197) → |
| Sen-300-118 | NZ.CTOC01000018.1 | - | 45107   | 45055   | RNA → rpmE (PRK00019) Ribosomal_L31 (pfam01197) → |
| Sen-300-119 | NZ.CTNV01000019.1 | - | 45179   | 45127   | RNA → rpmE (PRK00019) Ribosomal_L31 (pfam01197) → |
| Sen-300-120 | NZ.CTQT01000020.1 | - | 45179   | 45127   | RNA → rpmE (PRK00019) Ribosomal_L31 (pfam01197) → |
| Sen-300-121 | NZ.CTLJ01000018.1 | + | 42531   | 42583   | RNA → rpmE (PRK00019) Ribosomal_L31 (pfam01197) → |
| Sen-300-122 | NZ.CTLQ01000018.1 | + | 42485   | 42537   | RNA → rpmE (PRK00019) Ribosomal_L31 (pfam01197) → |
| Sen-300-123 | NZ.CTCD01000016.1 | - | 45343   | 45291   | RNA → rpmE (PRK00019) Ribosomal_L31 (pfam01197) → |
| Sen-300-124 | NZ.CTMA01000017.1 | - | 45179   | 45127   | RNA → rpmE (PRK00019) Ribosomal_L31 (pfam01197) → |
| Sen-300-125 | NZ.CTMI01000019.1 | - | 45107   | 45055   | RNA → rpmE (PRK00019) Ribosomal_L31 (pfam01197) → |
| Sen-300-126 | NZ.CTAH01000011.1 | - | 46977   | 46925   | RNA → rpmE (PRK00019) Ribosomal_L31 (pfam01197) → |
| Sen-300-127 | NZ.CTCF01000017.1 | - | 45271   | 45219   | RNA → rpmE (PRK00019) Ribosomal_L31 (pfam01197) → |
| Sen-300-128 | NZ.CTPG01000019.1 | - | 45179   | 45127   | RNA → rpmE (PRK00019) Ribosomal_L31 (pfam01197) → |
| Sen-300-129 | NZ.CTAK01000019.1 | - | 45108   | 45056   | RNA → rpmE (PRK00019) Ribosomal_L31 (pfam01197) → |
| Sen-300-130 | NZ.CTOQ01000019.1 | + | 42472   | 42524   | RNA → rpmE (PRK00019) Ribosomal_L31 (pfam01197) → |
| Sen-300-131 | NZ.CTCG01000017.1 | - | 45343   | 45291   | RNA → rpmE (PRK00019) Ribosomal_L31 (pfam01197) → |
| Sen-300-132 | NZ.CTAD01000017.1 | - | 46430   | 46378   | RNA → rpmE (PRK00019) Ribosomal_L31 (pfam01197) → |
| Sen-300-133 | NZ.CTAP01000017.1 | + | 42490   | 42542   | RNA → rpmE (PRK00019) Ribosomal_L31 (pfam01197) → |
| Sen-300-134 | NZ.CTAQ01000017.1 | + | 42528   | 42580   | RNA → rpmE (PRK00019) Ribosomal_L31 (pfam01197) → |
| Sen-962-1   | NC.017046.1       | + | 4325695 | 4325747 | RNA → rpmE (PRK00019) Ribosomal_L31 (pfam01197) → |
| Sen-620-1   | NZ.CP007352.1     | + | 4173893 | 4173945 | RNA → rpmE (PRK00019) Ribosomal_L31 (pfam01197) → |
| Sen-606-1   | NZ.CP007327.1     | + | 4173907 | 4173959 | RNA → rpmE (PRK00019) Ribosomal_L31 (pfam01197) → |
| Sen-160-1   | NZ.CP007245.1     | + | 4196527 | 4196579 | RNA → rpmE (PRK00019) Ribosomal_L31 (pfam01197) → |
| Sen-706-1   | NZ.CP007306.1     | + | 4173906 | 4173958 | RNA → rpmE (PRK00019) Ribosomal_L31 (pfam01197) → |
| Sen-610-1   | NZ.CP007433.1     | + | 4173880 | 4173932 | RNA → rpmE (PRK00019) Ribosomal_L31 (pfam01197) → |
| Sen-648-1   | NZ.CP007380.1     | + | 4173899 | 4173951 | RNA → rpmE (PRK00019) Ribosomal_L31 (pfam01197) → |
| Sen-663-1   | NZ.CP007382.1     | + | 4173900 | 4173952 | RNA → rpmE (PRK00019) Ribosomal_L31 (pfam01197) → |
| Sen-696-1   | NZ.CP007295.1     | + | 4173849 | 4173901 | RNA → rpmE (PRK00019) Ribosomal_L31 (pfam01197) → |
| Sen-301-1   | NZ.AP014565.1     | + | 4500867 | 4500919 | RNA → rpmE (PRK00019) Ribosomal_L31 (pfam01197) → |
| Sen-597-1   | NZ.CP007359.1     | + | 4158686 | 4158738 | RNA → rpmE (PRK00019) Ribosomal_L31 (pfam01197) → |
| Sen-595-1   | NZ.CP007358.1     | + | 4155155 | 4155207 | RNA → rpmE (PRK00019) Ribosomal_L31 (pfam01197) → |
| Sen-139-3   | NZ.CP009085.2     | + | 4167334 | 4167386 | RNA → rpmE (PRK00019) Ribosomal_L31 (pfam01197) → |
| Sen-139-4   | NZ.CP009084.2     | + | 4167333 | 4167385 | RNA → rpmE (PRK00019) Ribosomal_L31 (pfam01197) → |
| Sen-255-1   | NZ.CP010280.1     | + | 3658105 | 3658157 | RNA → rpmE (PRK00019) Ribosomal_L31 (pfam01197) → |

|           |               |   |         |         |                                                  |
|-----------|---------------|---|---------|---------|--------------------------------------------------|
| Sen-139-5 | NZ_CP007507.1 | + | 4166959 | 4167011 | RNA → rpmE (PRK00019)Ribosomal_L31 (pfam01197) → |
| Sen-600-1 | NZ_CP007266.1 | + | 4154819 | 4154871 | RNA → rpmE (PRK00019)Ribosomal_L31 (pfam01197) → |
| Sen-10-1  | NZ_CP007532.1 | + | 1359262 | 1359314 | RNA → rpmE (PRK00019)Ribosomal_L31 (pfam01197) → |
| Sen-682-1 | NZ_CP007279.1 | + | 4173886 | 4173938 | RNA → rpmE (PRK00019)Ribosomal_L31 (pfam01197) → |
| Sen-680-1 | NZ_CP007277.1 | + | 4173900 | 4173952 | RNA → rpmE (PRK00019)Ribosomal_L31 (pfam01197) → |
| Sen-704-1 | NZ_CP007304.1 | + | 4173906 | 4173958 | RNA → rpmE (PRK00019)Ribosomal_L31 (pfam01197) → |
| Sen-690-1 | NZ_CP007288.1 | + | 4173879 | 4173931 | RNA → rpmE (PRK00019)Ribosomal_L31 (pfam01197) → |
| Sen-695-1 | NZ_CP007294.1 | + | 4173888 | 4173940 | RNA → rpmE (PRK00019)Ribosomal_L31 (pfam01197) → |
| Sen-705-1 | NZ_CP007305.1 | + | 4173909 | 4173961 | RNA → rpmE (PRK00019)Ribosomal_L31 (pfam01197) → |
| Sen-701-1 | NZ_CP007274.1 | - | 4451692 | 4451640 | RNA → rpmE (PRK00019)Ribosomal_L31 (pfam01197) → |
| Sen-685-1 | NZ_CP007282.1 | + | 4173887 | 4173939 | RNA → rpmE (PRK00019)Ribosomal_L31 (pfam01197) → |
| Sen-623-1 | NZ_CP007362.1 | + | 4173904 | 4173956 | RNA → rpmE (PRK00019)Ribosomal_L31 (pfam01197) → |
| Sen-624-1 | NZ_CP007363.1 | + | 4173904 | 4173956 | RNA → rpmE (PRK00019)Ribosomal_L31 (pfam01197) → |
| Sen-617-1 | NZ_CP007349.1 | + | 4173904 | 4173956 | RNA → rpmE (PRK00019)Ribosomal_L31 (pfam01197) → |
| Sen-703-1 | NZ_CP007303.1 | + | 4173905 | 4173957 | RNA → rpmE (PRK00019)Ribosomal_L31 (pfam01197) → |
| Sen-717-1 | NZ_CP007431.1 | + | 4174081 | 4174133 | RNA → rpmE (PRK00019)Ribosomal_L31 (pfam01197) → |
| Sen-151-1 | NZ_CP007260.1 | + | 4162468 | 4162520 | RNA → rpmE (PRK00019)Ribosomal_L31 (pfam01197) → |
| Sen-720-1 | NZ_CP007372.1 | + | 4173901 | 4173953 | RNA → rpmE (PRK00019)Ribosomal_L31 (pfam01197) → |
| Sen-692-1 | NZ_CP007290.1 | + | 4173905 | 4173957 | RNA → rpmE (PRK00019)Ribosomal_L31 (pfam01197) → |
| Sen-584-1 | NZ_CP007320.1 | + | 4149921 | 4149973 | RNA → rpmE (PRK00019)Ribosomal_L31 (pfam01197) → |
| Sen-149-1 | NZ_CP007262.1 | + | 4166935 | 4166987 | RNA → rpmE (PRK00019)Ribosomal_L31 (pfam01197) → |
| Sen-585-1 | NZ_CP007321.1 | + | 4158170 | 4158222 | RNA → rpmE (PRK00019)Ribosomal_L31 (pfam01197) → |
| Sen-150-1 | NZ_CP007261.1 | + | 4171043 | 4171095 | RNA → rpmE (PRK00019)Ribosomal_L31 (pfam01197) → |
| Sen-709-1 | NZ_CP007309.1 | + | 4173904 | 4173956 | RNA → rpmE (PRK00019)Ribosomal_L31 (pfam01197) → |
| Sen-153-1 | NZ_CP007258.1 | + | 4162080 | 4162132 | RNA → rpmE (PRK00019)Ribosomal_L31 (pfam01197) → |
| Sen-654-1 | NZ_CP007373.1 | + | 4173904 | 4173956 | RNA → rpmE (PRK00019)Ribosomal_L31 (pfam01197) → |
| Sen-684-1 | NZ_CP007281.1 | + | 4173903 | 4173955 | RNA → rpmE (PRK00019)Ribosomal_L31 (pfam01197) → |
| Sen-285-1 | NZ_CP007505.1 | + | 909485  | 909537  | RNA → rpmE (PRK00019)Ribosomal_L31 (pfam01197) → |
| Sen-235-1 | NZ_CP007530.1 | + | 3875383 | 3875435 | RNA → rpmE (PRK00019)Ribosomal_L31 (pfam01197) → |
| Sen-607-1 | NZ_CP007328.1 | + | 4173904 | 4173956 | RNA → rpmE (PRK00019)Ribosomal_L31 (pfam01197) → |
| Sen-613-1 | NZ_CP007345.1 | + | 4173898 | 4173950 | RNA → rpmE (PRK00019)Ribosomal_L31 (pfam01197) → |
| Sen-132-1 | NZ_CP007533.1 | + | 3681808 | 3681860 | RNA → rpmE (PRK00019)Ribosomal_L31 (pfam01197) → |
| Sen-693-1 | NZ_CP007291.1 | + | 4173893 | 4173945 | RNA → rpmE (PRK00019)Ribosomal_L31 (pfam01197) → |
| Sen-614-1 | NZ_CP007346.1 | + | 4173899 | 4173951 | RNA → rpmE (PRK00019)Ribosomal_L31 (pfam01197) → |
| Sen-700-1 | NZ_CP007334.1 | + | 580417  | 580469  | RNA → rpmE (PRK00019)Ribosomal_L31 (pfam01197) → |
| Sen-658-1 | NZ_CP007396.1 | + | 4173900 | 4173952 | RNA → rpmE (PRK00019)Ribosomal_L31 (pfam01197) → |
| Sen-659-1 | NZ_CP007397.1 | + | 4173889 | 4173941 | RNA → rpmE (PRK00019)Ribosomal_L31 (pfam01197) → |
| Sen-660-1 | NZ_CP007398.1 | + | 4173905 | 4173957 | RNA → rpmE (PRK00019)Ribosomal_L31 (pfam01197) → |
| Sen-687-1 | NZ_CP007284.1 | + | 4173899 | 4173951 | RNA → rpmE (PRK00019)Ribosomal_L31 (pfam01197) → |
| Sen-702-1 | NZ_CP007302.1 | + | 4173892 | 4173944 | RNA → rpmE (PRK00019)Ribosomal_L31 (pfam01197) → |
| Sen-707-1 | NZ_CP007307.1 | + | 4173908 | 4173960 | RNA → rpmE (PRK00019)Ribosomal_L31 (pfam01197) → |
| Sen-657-1 | NZ_CP007395.1 | + | 4173913 | 4173965 | RNA → rpmE (PRK00019)Ribosomal_L31 (pfam01197) → |
| Sen-638-1 | NZ_CP007405.1 | + | 4173903 | 4173955 | RNA → rpmE (PRK00019)Ribosomal_L31 (pfam01197) → |
| Sen-708-1 | NZ_CP007308.1 | + | 4173906 | 4173958 | RNA → rpmE (PRK00019)Ribosomal_L31 (pfam01197) → |
| Sen-686-1 | NZ_CP007283.1 | + | 4173887 | 4173939 | RNA → rpmE (PRK00019)Ribosomal_L31 (pfam01197) → |
| Sen-619-1 | NZ_CP007351.1 | + | 4173904 | 4173956 | RNA → rpmE (PRK00019)Ribosomal_L31 (pfam01197) → |
| Sen-698-1 | NZ_CP007300.1 | + | 4173902 | 4173954 | RNA → rpmE (PRK00019)Ribosomal_L31 (pfam01197) → |
| Sen-710-1 | NZ_CP007310.1 | + | 4173912 | 4173964 | RNA → rpmE (PRK00019)Ribosomal_L31 (pfam01197) → |
| Sen-718-1 | NZ_CP007317.1 | + | 4173901 | 4173953 | RNA → rpmE (PRK00019)Ribosomal_L31 (pfam01197) → |
| Sen-716-1 | NZ_CP007316.1 | + | 4173895 | 4173947 | RNA → rpmE (PRK00019)Ribosomal_L31 (pfam01197) → |
| Sen-719-1 | NZ_CP007318.1 | + | 4173895 | 4173947 | RNA → rpmE (PRK00019)Ribosomal_L31 (pfam01197) → |
| Sen-713-1 | NZ_CP007313.1 | + | 4173907 | 4173959 | RNA → rpmE (PRK00019)Ribosomal_L31 (pfam01197) → |



|           |               |   |         |         |                                                        |
|-----------|---------------|---|---------|---------|--------------------------------------------------------|
| Sen-604-1 | NZ_CP007325.1 | + | 4173909 | 4173961 | <b>RNA</b> → rpmE (PRK00019)Ribosomal_L31 (pfam01197)→ |
| Sen-652-1 | NZ_CP007370.1 | + | 4173899 | 4173951 | <b>RNA</b> → rpmE (PRK00019)Ribosomal_L31 (pfam01197)→ |
| Sen-616-1 | NZ_CP007348.1 | + | 4173876 | 4173928 | <b>RNA</b> → rpmE (PRK00019)Ribosomal_L31 (pfam01197)→ |
| Sen-650-1 | NZ_CP007368.1 | + | 4173906 | 4173958 | <b>RNA</b> → rpmE (PRK00019)Ribosomal_L31 (pfam01197)→ |
| Sen-634-1 | NZ_CP007401.1 | + | 4173906 | 4173958 | <b>RNA</b> → rpmE (PRK00019)Ribosomal_L31 (pfam01197)→ |
| Sen-632-1 | NZ_CP007343.1 | + | 4173899 | 4173951 | <b>RNA</b> → rpmE (PRK00019)Ribosomal_L31 (pfam01197)→ |
| Sen-668-1 | NZ_CP007387.1 | + | 4173904 | 4173956 | <b>RNA</b> → rpmE (PRK00019)Ribosomal_L31 (pfam01197)→ |
| Sen-694-1 | NZ_CP007293.1 | + | 4173853 | 4173905 | <b>RNA</b> → rpmE (PRK00019)Ribosomal_L31 (pfam01197)→ |
| Sen-11-1  | NZ_CP007534.1 | + | 1393133 | 1393185 | <b>RNA</b> → rpmE (PRK00019)Ribosomal_L31 (pfam01197)→ |
| Sen-715-1 | NZ_CP007315.1 | + | 4173902 | 4173954 | <b>RNA</b> → rpmE (PRK00019)Ribosomal_L31 (pfam01197)→ |
| Sen-625-1 | NZ_CP007364.1 | + | 4173905 | 4173957 | <b>RNA</b> → rpmE (PRK00019)Ribosomal_L31 (pfam01197)→ |
| Sen-637-1 | NZ_CP007404.1 | + | 4173903 | 4173955 | <b>RNA</b> → rpmE (PRK00019)Ribosomal_L31 (pfam01197)→ |
| Sen-714-1 | NZ_CP007314.1 | + | 4173860 | 4173912 | <b>RNA</b> → rpmE (PRK00019)Ribosomal_L31 (pfam01197)→ |
| Sen-618-1 | NZ_CP007350.1 | + | 4173904 | 4173956 | <b>RNA</b> → rpmE (PRK00019)Ribosomal_L31 (pfam01197)→ |
| Sen-688-1 | NZ_CP007285.1 | + | 4173888 | 4173940 | <b>RNA</b> → rpmE (PRK00019)Ribosomal_L31 (pfam01197)→ |
| Sen-627-1 | NZ_CP007336.1 | + | 4173855 | 4173907 | <b>RNA</b> → rpmE (PRK00019)Ribosomal_L31 (pfam01197)→ |
| Sen-691-1 | NZ_CP007289.1 | + | 4173857 | 4173909 | <b>RNA</b> → rpmE (PRK00019)Ribosomal_L31 (pfam01197)→ |
| Sen-711-1 | NZ_CP007311.1 | + | 4173900 | 4173952 | <b>RNA</b> → rpmE (PRK00019)Ribosomal_L31 (pfam01197)→ |
| Sen-655-1 | NZ_CP007374.1 | + | 4173906 | 4173958 | <b>RNA</b> → rpmE (PRK00019)Ribosomal_L31 (pfam01197)→ |
| Sen-142-1 | NZ_CP007528.1 | - | 96083   | 96031   | <b>RNA</b> → rpmE (PRK00019)Ribosomal_L31 (pfam01197)→ |
| Sen-661-1 | NZ_CP007429.1 | + | 4173888 | 4173940 | <b>RNA</b> → rpmE (PRK00019)Ribosomal_L31 (pfam01197)→ |
| Sen-689-1 | NZ_CP007286.1 | + | 4173887 | 4173939 | <b>RNA</b> → rpmE (PRK00019)Ribosomal_L31 (pfam01197)→ |
| Sen-17-1  | NZ_CP007531.1 | - | 2862649 | 2862597 | <b>RNA</b> → rpmE (PRK00019)Ribosomal_L31 (pfam01197)→ |
| Sen-636-1 | NZ_CP007403.1 | + | 4173904 | 4173956 | <b>RNA</b> → rpmE (PRK00019)Ribosomal_L31 (pfam01197)→ |
| Sen-640-1 | NZ_CP007407.1 | + | 4173906 | 4173958 | <b>RNA</b> → rpmE (PRK00019)Ribosomal_L31 (pfam01197)→ |
| Sen-670-1 | NZ_CP007411.1 | + | 4173906 | 4173958 | <b>RNA</b> → rpmE (PRK00019)Ribosomal_L31 (pfam01197)→ |
| Sen-681-1 | NZ_CP007278.1 | + | 4173904 | 4173956 | <b>RNA</b> → rpmE (PRK00019)Ribosomal_L31 (pfam01197)→ |
| Sen-641-1 | NZ_CP007408.1 | + | 4173903 | 4173955 | <b>RNA</b> → rpmE (PRK00019)Ribosomal_L31 (pfam01197)→ |
| Sen-635-1 | NZ_CP007402.1 | + | 4173916 | 4173968 | <b>RNA</b> → rpmE (PRK00019)Ribosomal_L31 (pfam01197)→ |
| Sen-678-1 | NZ_CP007424.1 | + | 4173893 | 4173945 | <b>RNA</b> → rpmE (PRK00019)Ribosomal_L31 (pfam01197)→ |
| Sen-712-1 | NZ_CP007312.1 | + | 4173886 | 4173938 | <b>RNA</b> → rpmE (PRK00019)Ribosomal_L31 (pfam01197)→ |
| Sen-673-1 | NZ_CP007414.1 | + | 4173907 | 4173959 | <b>RNA</b> → rpmE (PRK00019)Ribosomal_L31 (pfam01197)→ |
| Sen-599-1 | NZ_CP007323.1 | + | 4174039 | 4174091 | <b>RNA</b> → rpmE (PRK00019)Ribosomal_L31 (pfam01197)→ |
| Sen-697-1 | NZ_CP007297.1 | + | 4173855 | 4173907 | <b>RNA</b> → rpmE (PRK00019)Ribosomal_L31 (pfam01197)→ |
| Sen-672-1 | NZ_CP007413.1 | + | 4173902 | 4173954 | <b>RNA</b> → rpmE (PRK00019)Ribosomal_L31 (pfam01197)→ |
| Sen-645-1 | NZ_CP007377.1 | + | 4173902 | 4173954 | <b>RNA</b> → rpmE (PRK00019)Ribosomal_L31 (pfam01197)→ |
| Sen-667-1 | NZ_CP007386.1 | + | 4173908 | 4173960 | <b>RNA</b> → rpmE (PRK00019)Ribosomal_L31 (pfam01197)→ |
| Sen-646-1 | NZ_CP007378.1 | + | 4173903 | 4173955 | <b>RNA</b> → rpmE (PRK00019)Ribosomal_L31 (pfam01197)→ |
| Sen-647-1 | NZ_CP007379.1 | + | 4173894 | 4173946 | <b>RNA</b> → rpmE (PRK00019)Ribosomal_L31 (pfam01197)→ |
| Sen-683-1 | NZ_CP007280.1 | + | 4173887 | 4173939 | <b>RNA</b> → rpmE (PRK00019)Ribosomal_L31 (pfam01197)→ |
| Sen-639-1 | NZ_CP007406.1 | + | 4173905 | 4173957 | <b>RNA</b> → rpmE (PRK00019)Ribosomal_L31 (pfam01197)→ |
| Sen-721-1 | NZ_CP007417.1 | + | 4173901 | 4173953 | <b>RNA</b> → rpmE (PRK00019)Ribosomal_L31 (pfam01197)→ |
| Sen-664-1 | NZ_CP007383.1 | + | 4173902 | 4173954 | <b>RNA</b> → rpmE (PRK00019)Ribosomal_L31 (pfam01197)→ |
| Sen-669-1 | NZ_CP007388.1 | + | 4173906 | 4173958 | <b>RNA</b> → rpmE (PRK00019)Ribosomal_L31 (pfam01197)→ |
| Sen-161-1 | NZ_CP007332.1 | + | 4643968 | 4644020 | <b>RNA</b> → rpmE (PRK00019)Ribosomal_L31 (pfam01197)→ |
| Sen-671-1 | NZ_CP007412.1 | + | 4173902 | 4173954 | <b>RNA</b> → rpmE (PRK00019)Ribosomal_L31 (pfam01197)→ |
| Sen-666-1 | NZ_CP007385.1 | + | 4173915 | 4173967 | <b>RNA</b> → rpmE (PRK00019)Ribosomal_L31 (pfam01197)→ |
| Sen-676-1 | NZ_CP007418.1 | + | 4174075 | 4174127 | <b>RNA</b> → rpmE (PRK00019)Ribosomal_L31 (pfam01197)→ |
| Sen-642-1 | NZ_CP007375.1 | + | 4173917 | 4173969 | <b>RNA</b> → rpmE (PRK00019)Ribosomal_L31 (pfam01197)→ |
| Sen-633-1 | NZ_CP007400.1 | + | 4173899 | 4173951 | <b>RNA</b> → rpmE (PRK00019)Ribosomal_L31 (pfam01197)→ |
| Sen-665-1 | NZ_CP007384.1 | + | 4173908 | 4173960 | <b>RNA</b> → rpmE (PRK00019)Ribosomal_L31 (pfam01197)→ |
| Sen-631-1 | NZ_CP007341.1 | + | 4173899 | 4173951 | <b>RNA</b> → rpmE (PRK00019)Ribosomal_L31 (pfam01197)→ |

|              |                   |   |         |         |                                                  |
|--------------|-------------------|---|---------|---------|--------------------------------------------------|
| Sen-674-1    | NZ_CP007415.1     | + | 4173996 | 4174048 | RNA → rpmE (PRK00019)Ribosomal_L31 (pfam01197) → |
| Sen-586-1    | NZ_CP007430.1     | + | 4173903 | 4173955 | RNA → rpmE (PRK00019)Ribosomal_L31 (pfam01197) → |
| Sen-677-1    | NZ_CP007419.1     | + | 4173986 | 4174038 | RNA → rpmE (PRK00019)Ribosomal_L31 (pfam01197) → |
| Sen-675-1    | NZ_CP007416.1     | + | 4173982 | 4174034 | RNA → rpmE (PRK00019)Ribosomal_L31 (pfam01197) → |
| Sen-154-1    | NZ_CP007263.1     | + | 4166548 | 4166600 | RNA → rpmE (PRK00019)Ribosomal_L31 (pfam01197) → |
| Sen-603-1    | NZ_CP007324.1     | + | 4173903 | 4173955 | RNA → rpmE (PRK00019)Ribosomal_L31 (pfam01197) → |
| Sen-615-1    | NZ_CP007347.1     | + | 4173902 | 4173954 | RNA → rpmE (PRK00019)Ribosomal_L31 (pfam01197) → |
| Sen-630-1    | NZ_CP007340.1     | + | 4173900 | 4173952 | RNA → rpmE (PRK00019)Ribosomal_L31 (pfam01197) → |
| Sen-656-1    | NZ_CP007464.1     | + | 4178809 | 4178861 | RNA → rpmE (PRK00019)Ribosomal_L31 (pfam01197) → |
| Sen-591-1    | NZ_CP007355.1     | + | 4173897 | 4173949 | RNA → rpmE (PRK00019)Ribosomal_L31 (pfam01197) → |
| Sen-152-1    | NZ_CP007259.1     | + | 4195383 | 4195435 | RNA → rpmE (PRK00019)Ribosomal_L31 (pfam01197) → |
| Sen-164-1    | NZ_CP007465.1     | + | 4174359 | 4174411 | RNA → rpmE (PRK00019)Ribosomal_L31 (pfam01197) → |
| Sen-587-1    | NZ_CP007322.1     | + | 4163250 | 4163302 | RNA → rpmE (PRK00019)Ribosomal_L31 (pfam01197) → |
| Sen-608-1    | NZ_CP007330.1     | + | 4120423 | 4120475 | RNA → rpmE (PRK00019)Ribosomal_L31 (pfam01197) → |
| Sen-588-1    | NZ_CP007298.1     | + | 4173899 | 4173951 | RNA → rpmE (PRK00019)Ribosomal_L31 (pfam01197) → |
| Sen-609-1    | NZ_CP007331.1     | + | 4176562 | 4176614 | RNA → rpmE (PRK00019)Ribosomal_L31 (pfam01197) → |
| Sen-629-1    | NZ_CP007338.1     | + | 4173902 | 4173954 | RNA → rpmE (PRK00019)Ribosomal_L31 (pfam01197) → |
| Sen-596-1    | NZ_CP007432.1     | + | 4173897 | 4173949 | RNA → rpmE (PRK00019)Ribosomal_L31 (pfam01197) → |
| Sen-628-1    | NZ_CP007337.1     | + | 4173902 | 4173954 | RNA → rpmE (PRK00019)Ribosomal_L31 (pfam01197) → |
| Sen-592-1    | NZ_CP007356.1     | + | 4173897 | 4173949 | RNA → rpmE (PRK00019)Ribosomal_L31 (pfam01197) → |
| Sen-605-1    | NZ_CP007326.1     | + | 4173906 | 4173958 | RNA → rpmE (PRK00019)Ribosomal_L31 (pfam01197) → |
| Sen-611-1    | NZ_CP007434.1     | + | 4173889 | 4173941 | RNA → rpmE (PRK00019)Ribosomal_L31 (pfam01197) → |
| Sen-145-1    | NZ_CP007246.1     | + | 4162763 | 4162815 | RNA → rpmE (PRK00019)Ribosomal_L31 (pfam01197) → |
| Sen-146-1    | NZ_CP007247.1     | + | 4193044 | 4193096 | RNA → rpmE (PRK00019)Ribosomal_L31 (pfam01197) → |
| Sen-157-1    | NZ_CP007252.1     | + | 4163237 | 4163289 | RNA → rpmE (PRK00019)Ribosomal_L31 (pfam01197) → |
| Sen-590-1    | NZ_CP007421.1     | + | 4152968 | 4153020 | RNA → rpmE (PRK00019)Ribosomal_L31 (pfam01197) → |
| Sen-144-1    | NZ_CP007248.1     | + | 4165166 | 4165218 | RNA → rpmE (PRK00019)Ribosomal_L31 (pfam01197) → |
| Sen-651-1    | NZ_CP007369.1     | + | 4173851 | 4173903 | RNA → rpmE (PRK00019)Ribosomal_L31 (pfam01197) → |
| Sen-147-1    | NZ_CP007175.1     | + | 4195011 | 4195063 | RNA → rpmE (PRK00019)Ribosomal_L31 (pfam01197) → |
| Sen-598-1    | NZ_CP007360.1     | + | 4173885 | 4173937 | RNA → rpmE (PRK00019)Ribosomal_L31 (pfam01197) → |
| Sen-300-135  | NZ_CTH01000018.1  | + | 42438   | 42490   | RNA → rpmE (PRK00019)Ribosomal_L31 (pfam01197) → |
| Sen-300-136  | NZ_CTBM01000029.1 | + | 13413   | 13465   | RNA → rpmE (PRK00019)Ribosomal_L31 (pfam01197) → |
| Sen-300-137  | NZ_CTBC01000018.1 | + | 42472   | 42524   | RNA → rpmE (PRK00019)Ribosomal_L31 (pfam01197) → |
| Sen-300-138  | NZ_CTOS01000016.1 | + | 42474   | 42526   | RNA → rpmE (PRK00019)Ribosomal_L31 (pfam01197) → |
| Sen-300-139  | NZ_CTAJ01000017.1 | - | 45157   | 45105   | RNA → rpmE (PRK00019)Ribosomal_L31 (pfam01197) → |
| Sen-300-140  | NZ_CTHL01000017.1 | - | 45272   | 45220   | RNA → rpmE (PRK00019)Ribosomal_L31 (pfam01197) → |
| Sen-300-141  | NZ_CTMZ01000016.1 | + | 42908   | 42960   | RNA → rpmE (PRK00019)Ribosomal_L31 (pfam01197) → |
| Sen-300-142  | NZ_CTHW01000018.1 | + | 42472   | 42524   | RNA → rpmE (PRK00019)Ribosomal_L31 (pfam01197) → |
| Sen-300-143  | NZ_CTHI01000026.1 | + | 13439   | 13491   | RNA → rpmE (PRK00019)Ribosomal_L31 (pfam01197) → |
| Sen-300-144  | NZ_CTPH01000017.1 | + | 42497   | 42549   | RNA → rpmE (PRK00019)Ribosomal_L31 (pfam01197) → |
| Sen-288-1105 | NZ_CJBQ01000016.1 | + | 104151  | 104203  | RNA → rpmE (PRK00019)Ribosomal_L31 (pfam01197) → |
| Sen-300-145  | NZ_CTPR01000021.1 | - | 45179   | 45127   | RNA → rpmE (PRK00019)Ribosomal_L31 (pfam01197) → |
| Sen-300-146  | NZ_CTMQ01000016.1 | + | 42910   | 42962   | RNA → rpmE (PRK00019)Ribosomal_L31 (pfam01197) → |
| Sen-300-147  | NZ_CTHG01000017.1 | + | 42531   | 42583   | RNA → rpmE (PRK00019)Ribosomal_L31 (pfam01197) → |
| Sen-300-148  | NZ_CTFQ01000017.1 | + | 42517   | 42569   | RNA → rpmE (PRK00019)Ribosomal_L31 (pfam01197) → |
| Sen-300-149  | NZ_CTTJ01000022.1 | + | 42437   | 42489   | RNA → rpmE (PRK00019)Ribosomal_L31 (pfam01197) → |
| Sen-300-150  | NZ_CTOLO1000019.1 | + | 42453   | 42505   | RNA → rpmE (PRK00019)Ribosomal_L31 (pfam01197) → |
| Sen-300-151  | NZ_CTPL01000021.1 | - | 45179   | 45127   | RNA → rpmE (PRK00019)Ribosomal_L31 (pfam01197) → |
| Sen-300-152  | NZ_CTPX01000020.1 | - | 45107   | 45055   | RNA → rpmE (PRK00019)Ribosomal_L31 (pfam01197) → |
| Sen-300-153  | NZ_CTNB01000021.1 | - | 35684   | 35632   | RNA → rpmE (PRK00019)Ribosomal_L31 (pfam01197) → |
| Sen-300-154  | NZ_CTHS01000020.1 | + | 42466   | 42518   | RNA → rpmE (PRK00019)Ribosomal_L31 (pfam01197) → |
| Sen-300-155  | NZ_CTQJ01000023.1 | + | 49795   | 49847   | RNA → rpmE (PRK00019)Ribosomal_L31 (pfam01197) → |



|              |                   |   |         |         |                                                   |
|--------------|-------------------|---|---------|---------|---------------------------------------------------|
| Sen-300-156  | NZ.CTQY01000017.1 | + | 42507   | 42559   | RNA → rpmE (PRK00019) Ribosomal_L31 (pfam01197) → |
| Sen-300-157  | NZ.CTIC01000016.1 | + | 42478   | 42530   | RNA → rpmE (PRK00019) Ribosomal_L31 (pfam01197) → |
| Sen-300-158  | NZ.CTMR01000018.1 | + | 42531   | 42583   | RNA → rpmE (PRK00019) Ribosomal_L31 (pfam01197) → |
| Sen-300-159  | NZ.CTJT01000018.1 | - | 45270   | 45218   | RNA → rpmE (PRK00019) Ribosomal_L31 (pfam01197) → |
| Sen-300-160  | NZ.CTPS01000016.1 | - | 45343   | 45291   | RNA → rpmE (PRK00019) Ribosomal_L31 (pfam01197) → |
| Sen-300-161  | NZ.CTMN01000019.1 | - | 45179   | 45127   | RNA → rpmE (PRK00019) Ribosomal_L31 (pfam01197) → |
| Sen-300-162  | NZ.CTNP01000017.1 | - | 45343   | 45291   | RNA → rpmE (PRK00019) Ribosomal_L31 (pfam01197) → |
| Sen-300-163  | NZ.CTLW01000018.1 | + | 42472   | 42524   | RNA → rpmE (PRK00019) Ribosomal_L31 (pfam01197) → |
| Sen-300-164  | NZ.CTLN01000018.1 | + | 42531   | 42583   | RNA → rpmE (PRK00019) Ribosomal_L31 (pfam01197) → |
| Sen-300-165  | NZ.CTHP01000017.1 | - | 45194   | 45142   | RNA → rpmE (PRK00019) Ribosomal_L31 (pfam01197) → |
| Sen-300-166  | NZ.CTNT01000016.1 | - | 45196   | 45144   | RNA → rpmE (PRK00019) Ribosomal_L31 (pfam01197) → |
| Sen-300-167  | NZ.CTBH01000027.1 | + | 13435   | 13487   | RNA → rpmE (PRK00019) Ribosomal_L31 (pfam01197) → |
| Sen-300-168  | NZ.CTGL01000018.1 | - | 45178   | 45126   | RNA → rpmE (PRK00019) Ribosomal_L31 (pfam01197) → |
| Sen-300-169  | NZ.CTAG01000019.1 | - | 45179   | 45127   | RNA → rpmE (PRK00019) Ribosomal_L31 (pfam01197) → |
| Sen-300-170  | NZ.CTQZ01000017.1 | - | 45343   | 45291   | RNA → rpmE (PRK00019) Ribosomal_L31 (pfam01197) → |
| Sen-288-1106 | NZ.CTAA01000016.1 | - | 41507   | 41455   | RNA → rpmE (PRK00019) Ribosomal_L31 (pfam01197) → |
| Sen-300-171  | NZ.CTAU01000017.1 | - | 45179   | 45127   | RNA → rpmE (PRK00019) Ribosomal_L31 (pfam01197) → |
| Sen-300-172  | NZ.CTON01000018.1 | + | 55105   | 55157   | RNA → rpmE (PRK00019) Ribosomal_L31 (pfam01197) → |
| Sen-300-173  | NZ.CTAE01000017.1 | + | 42938   | 42990   | RNA → rpmE (PRK00019) Ribosomal_L31 (pfam01197) → |
| Sen-300-174  | NZ.CTOM01000021.1 | + | 42452   | 42504   | RNA → rpmE (PRK00019) Ribosomal_L31 (pfam01197) → |
| Sen-300-175  | NZ.CTNA01000017.1 | - | 45107   | 45055   | RNA → rpmE (PRK00019) Ribosomal_L31 (pfam01197) → |
| Sen-300-176  | NZ.CTBI01000020.1 | - | 45123   | 45071   | RNA → rpmE (PRK00019) Ribosomal_L31 (pfam01197) → |
| Sen-300-177  | NZ.CTLD01000019.1 | + | 42548   | 42600   | RNA → rpmE (PRK00019) Ribosomal_L31 (pfam01197) → |
| Sen-300-178  | NZ.CTQH01000018.1 | - | 45343   | 45291   | RNA → rpmE (PRK00019) Ribosomal_L31 (pfam01197) → |
| Sen-300-179  | NZ.CTIG01000019.1 | - | 45130   | 45078   | RNA → rpmE (PRK00019) Ribosomal_L31 (pfam01197) → |
| Sen-300-180  | NZ.CTPO01000019.1 | - | 45343   | 45291   | RNA → rpmE (PRK00019) Ribosomal_L31 (pfam01197) → |
| Sen-300-181  | NZ.CTLE01000017.1 | + | 42536   | 42588   | RNA → rpmE (PRK00019) Ribosomal_L31 (pfam01197) → |
| Sen-300-182  | NZ.CTLH01000017.1 | - | 45107   | 45055   | RNA → rpmE (PRK00019) Ribosomal_L31 (pfam01197) → |
| Sen-300-183  | NZ.CTAN01000021.1 | - | 47096   | 47044   | RNA → rpmE (PRK00019) Ribosomal_L31 (pfam01197) → |
| Sen-300-184  | NZ.CTKI01000017.1 | - | 47085   | 47033   | RNA → rpmE (PRK00019) Ribosomal_L31 (pfam01197) → |
| Sen-300-185  | NZ.CTBN01000019.1 | + | 42472   | 42524   | RNA → rpmE (PRK00019) Ribosomal_L31 (pfam01197) → |
| Sen-300-186  | NZ.CTHN01000005.1 | - | 228766  | 228714  | RNA → rpmE (PRK00019) Ribosomal_L31 (pfam01197) → |
| Sen-300-187  | NZ.CTCC01000018.1 | - | 45176   | 45124   | RNA → rpmE (PRK00019) Ribosomal_L31 (pfam01197) → |
| Sen-300-188  | NZ.CTPZ01000017.1 | - | 45161   | 45109   | RNA → rpmE (PRK00019) Ribosomal_L31 (pfam01197) → |
| Sen-300-189  | NZ.CTBU01000020.1 | + | 42438   | 42490   | RNA → rpmE (PRK00019) Ribosomal_L31 (pfam01197) → |
| Sen-300-190  | NZ.CTQK01000018.1 | + | 42476   | 42528   | RNA → rpmE (PRK00019) Ribosomal_L31 (pfam01197) → |
| Sen-300-191  | NZ.CTBS01000017.1 | - | 45179   | 45127   | RNA → rpmE (PRK00019) Ribosomal_L31 (pfam01197) → |
| Sen-300-192  | NZ.CTFW01000019.1 | - | 45107   | 45055   | RNA → rpmE (PRK00019) Ribosomal_L31 (pfam01197) → |
| Sen-300-193  | NZ.CTAR01000018.1 | + | 42531   | 42583   | RNA → rpmE (PRK00019) Ribosomal_L31 (pfam01197) → |
| Sen-300-194  | NZ.CTQO01000016.1 | + | 42546   | 42598   | RNA → rpmE (PRK00019) Ribosomal_L31 (pfam01197) → |
| Sen-300-195  | NZ.CTAI01000017.1 | - | 45174   | 45122   | RNA → rpmE (PRK00019) Ribosomal_L31 (pfam01197) → |
| Sen-300-196  | NZ.CTPY01000020.1 | - | 45179   | 45127   | RNA → rpmE (PRK00019) Ribosomal_L31 (pfam01197) → |
| Sen-300-197  | NZ.CTAX01000017.1 | - | 45343   | 45291   | RNA → rpmE (PRK00019) Ribosomal_L31 (pfam01197) → |
| Sen-300-198  | NZ.CTAV01000019.1 | + | 42489   | 42541   | RNA → rpmE (PRK00019) Ribosomal_L31 (pfam01197) → |
| Sen-300-199  | NZ.CTAY01000018.1 | - | 45343   | 45291   | RNA → rpmE (PRK00019) Ribosomal_L31 (pfam01197) → |
| Sen-300-200  | NZ.CTCB01000010.1 | + | 104185  | 104237  | RNA → rpmE (PRK00019) Ribosomal_L31 (pfam01197) → |
| Sen-589-1    | NZ.CP007422.1     | + | 4123191 | 4123243 | RNA → rpmE (PRK00019) Ribosomal_L31 (pfam01197) → |
| Sen-148-1    | NZ.CP007250.1     | + | 4165607 | 4165659 | RNA → rpmE (PRK00019) Ribosomal_L31 (pfam01197) → |
| Sen-594-1    | NZ.CP007420.1     | + | 4122037 | 4122089 | RNA → rpmE (PRK00019) Ribosomal_L31 (pfam01197) → |
| Sen-602-1    | NZ.CP007498.1     | + | 4173902 | 4173954 | RNA → rpmE (PRK00019) Ribosomal_L31 (pfam01197) → |
| Sen-155-1    | NZ.CP007254.1     | + | 4163479 | 4163531 | RNA → rpmE (PRK00019) Ribosomal_L31 (pfam01197) → |
| Sen-644-1    | NZ.CP007463.1     | + | 4113654 | 4113706 | RNA → rpmE (PRK00019) Ribosomal_L31 (pfam01197) → |

|             |                   |   |         |         |                                                                                             |
|-------------|-------------------|---|---------|---------|---------------------------------------------------------------------------------------------|
| Sen-156-1   | NZ_CP007253.1     | + | 4167210 | 4167262 | RNA → rpmE (PRK00019)Ribosomal_L31 (pfam01197) →                                            |
| Sen-291-1   | NZ_CP007581.1     | + | 4382613 | 4382665 | RNA → rpmE (PRK00019)Ribosomal_L31 (pfam01197) →                                            |
| Sen-141-1   | NZ_CP007598.1     | + | 1099087 | 1099139 | RNA → rpmE (PRK00019)Ribosomal_L31 (pfam01197) →                                            |
| Sen-291-2   | NZ_CP007804.1     | + | 4212582 | 4212634 | RNA → rpmE (PRK00019)Ribosomal_L31 (pfam01197) →                                            |
| Sen-291-3   | NZ_CP009102.1     | + | 4241573 | 4241625 | RNA → rpmE (PRK00019)Ribosomal_L31 (pfam01197) →                                            |
| Sen-134-1   | NZ_CP007639.1     | + | 4197939 | 4197991 | RNA → rpmE (PRK00019)Ribosomal_L31 (pfam01197) → hypo → hypo →                              |
| Sen-139-6   | NZ_CP009083.1     | + | 4166984 | 4167036 | RNA → rpmE (PRK00019)Ribosomal_L31 (pfam01197) →                                            |
| Sen-139-7   | NZ_CP009087.1     | + | 4166622 | 4166674 | RNA → rpmE (PRK00019)Ribosomal_L31 (pfam01197) →                                            |
| Sen-139-8   | NZ_CP009091.1     | + | 4159359 | 4159411 | RNA → rpmE (PRK00019)Ribosomal_L31 (pfam01197) →                                            |
| Sen-139-9   | NZ_CP009093.1     | + | 4190780 | 4190832 | RNA → rpmE (PRK00019)Ribosomal_L31 (pfam01197) →                                            |
| Sen-139-10  | NZ_CP009088.1     | + | 4166019 | 4166071 | RNA → rpmE (PRK00019)Ribosomal_L31 (pfam01197) →                                            |
| Sen-139-11  | NZ_CP009089.1     | + | 4199181 | 4199233 | RNA → rpmE (PRK00019)Ribosomal_L31 (pfam01197) →                                            |
| Sen-139-12  | NZ_CP009092.1     | + | 4199355 | 4199407 | RNA → rpmE (PRK00019)Ribosomal_L31 (pfam01197) →                                            |
| Sen-139-13  | NZ_CP009086.1     | + | 4166667 | 4166719 | RNA → rpmE (PRK00019)Ribosomal_L31 (pfam01197) →                                            |
| Sen-139-14  | NZ_CP009090.1     | - | 3533924 | 3533872 | RNA → rpmE (PRK00019)Ribosomal_L31 (pfam01197) →                                            |
| Sen-162-1   | NZ_CP007269.1     | + | 4163479 | 4163531 | RNA → rpmE (PRK00019)Ribosomal_L31 (pfam01197) →                                            |
| Sen-139-15  | NZ_CP008928.1     | + | 2471151 | 2471203 | RNA → rpmE (PRK00019)Ribosomal_L31 (pfam01197) →                                            |
| Sen-1033-1  | NC_006905.1       | + | 4238765 | 4238817 | RNA → rpmE (PRK00019)Ribosomal_L31 (pfam01197) → rpmE (PRK00019)Ribosomal_L31 (pfam01197) → |
| Sen-649-1   | NZ_CP007272.1     | + | 2781849 | 2781901 | hypo → hypo → hypo → hypo → hypo → hypo →                                                   |
| Sen-649-2   | NZ_CP007272.1     | - | 4860128 | 4860076 | RNA → hypo → rpmE (PRK00019)Ribosomal_L31 (pfam01197) →                                     |
| Sen-662-1   | NZ_CP007381.1     | + | 4173906 | 4173958 | RNA → ←-hypo                                                                                |
| Sen-252-1   | NZ_CP010282.1     | - | 4355853 | 4355801 | RNA → rpmE (PRK00019)Ribosomal_L31 (pfam01197) →                                            |
| Sen-256-1   | NZ_CP010281.1     | - | 3676986 | 3676934 | RNA → rpmE (PRK00019)Ribosomal_L31 (pfam01197) →                                            |
| Sen-254-1   | NZ_CP010279.1     | + | 3848446 | 3848498 | RNA → rpmE (PRK00019)Ribosomal_L31 (pfam01197) →                                            |
| Sen-257-1   | NZ_CP010284.1     | - | 538801  | 538749  | RNA → rpmE (PRK00019)Ribosomal_L31 (pfam01197) →                                            |
| Sen-253-1   | NZ_CP010283.1     | - | 4242129 | 4242077 | RNA → rpmE (PRK00019)Ribosomal_L31 (pfam01197) →                                            |
| Sen-275-1   | NZ_LK931482.1     | - | 3404936 | 3404884 | RNA → rpmE (PRK00019)Ribosomal_L31 (pfam01197) →                                            |
| Sen-223-1   | NZ_LN649235.1     | + | 4201024 | 4201076 | RNA → rpmE (PRK00019)Ribosomal_L31 (pfam01197) →                                            |
| Sen-258-1   | NZ_CP009561.1     | + | 1415376 | 1415428 | RNA → rpmE (PRK00019)Ribosomal_L31 (pfam01197) →                                            |
| Sen-429-1   | NZ_CP007483.1     | - | 4514966 | 4514914 | RNA → rpmE (PRK00019)Ribosomal_L31 (pfam01197) →                                            |
| Sen-993-1   | NC_021814.1       | - | 4121916 | 4121864 | RNA → rpmE (PRK00019)Ribosomal_L31 (pfam01197) →                                            |
| Sen-13-1    | NZ_CP011259.1     | + | 1265510 | 1265562 | RNA → rpmE (PRK00019)Ribosomal_L31 (pfam01197) →                                            |
| Sen-593-1   | NZ_CP007357.1     | + | 4173901 | 4173953 | RNA → rpmE (PRK00019)Ribosomal_L31 (pfam01197) →                                            |
| Sen-298-1   | NZ_CP007523.1     | + | 221910  | 221962  | RNA → rpmE (PRK00019)Ribosomal_L31 (pfam01197) →                                            |
| Sen-854-1   | NZ_CP007540.1     | - | 4268937 | 4268885 | RNA → rpmE (PRK00019)Ribosomal_L31 (pfam01197) →                                            |
| Sen-868-1   | NZ_CP007559.1     | - | 4541938 | 4541886 | RNA → rpmE (PRK00019)Ribosomal_L31 (pfam01197) →                                            |
| Sen-430-1   | NZ_CP007584.1     | + | 4315734 | 4315786 | RNA → rpmE (PRK00019)Ribosomal_L31 (pfam01197) →                                            |
| Sen-291-4   | NZ_CP011365.1     | + | 4204324 | 4204376 | RNA → rpmE (PRK00019)Ribosomal_L31 (pfam01197) →                                            |
| Sen-4-1     | NZ_CP011428.1     | + | 4333576 | 4333628 | RNA → rpmE (PRK00019)Ribosomal_L31 (pfam01197) →                                            |
| Sen-287-1   | NZ_CP011396.1     | - | 4403134 | 4403082 | RNA → rpmE (PRK00019)Ribosomal_L31 (pfam01197) →                                            |
| Sen-140-1   | NZ_CP011394.1     | - | 4431786 | 4431734 | RNA → rpmE (PRK00019)Ribosomal_L31 (pfam01197) →                                            |
| Sen-300-201 | NZ_CTCA01000019.1 | + | 42551   | 42603   | RNA → rpmE (PRK00019)Ribosomal_L31 (pfam01197) →                                            |
| Sen-300-202 | NZ_CTAB01000019.1 | + | 42495   | 42547   | RNA → rpmE (PRK00019)Ribosomal_L31 (pfam01197) →                                            |
| Sen-300-203 | NZ_CTBA01000020.1 | - | 45179   | 45127   | RNA → rpmE (PRK00019)Ribosomal_L31 (pfam01197) →                                            |
| Sen-300-204 | NZ_CTAL01000022.1 | - | 45111   | 45059   | RNA → rpmE (PRK00019)Ribosomal_L31 (pfam01197) →                                            |
| Sen-300-205 | NZ_CTAW01000017.1 | + | 42480   | 42532   | RNA → rpmE (PRK00019)Ribosomal_L31 (pfam01197) →                                            |
| Sen-300-206 | NZ_CTBZ01000017.1 | + | 42531   | 42583   | RNA → rpmE (PRK00019)Ribosomal_L31 (pfam01197) →                                            |
| Sen-300-207 | NZ_CTFZ01000021.1 | - | 45343   | 45291   | RNA → rpmE (PRK00019)Ribosomal_L31 (pfam01197) →                                            |
| Sen-300-208 | NZ_CTBV01000027.1 | + | 13413   | 13465   | RNA → rpmE (PRK00019)Ribosomal_L31 (pfam01197) →                                            |
| Sen-300-209 | NZ_CTMW01000030.1 | + | 13443   | 13495   | RNA → rpmE (PRK00019)Ribosomal_L31 (pfam01197) →                                            |
| Sen-300-210 | NZ_CTLI01000017.1 | + | 42508   | 42560   | RNA → rpmE (PRK00019)Ribosomal_L31 (pfam01197) →                                            |
| Sen-300-211 | NZ_CTGK01000017.1 | - | 45193   | 45141   | RNA → rpmE (PRK00019)Ribosomal_L31 (pfam01197) →                                            |

|             |                   |   |        |        |                                                   |
|-------------|-------------------|---|--------|--------|---------------------------------------------------|
| Sen-300-212 | NZ.CTLK01000017.1 | - | 45343  | 45291  | RNA → rpmE (PRK00019) Ribosomal_L31 (pfam01197) → |
| Sen-300-213 | NZ.CTLM01000019.1 | + | 42551  | 42603  | RNA → rpmE (PRK00019) Ribosomal_L31 (pfam01197) → |
| Sen-300-214 | NZ.CTJO01000020.1 | + | 42453  | 42505  | RNA → rpmE (PRK00019) Ribosomal_L31 (pfam01197) → |
| Sen-300-215 | NZ.CTII01000017.1 | - | 45343  | 45291  | RNA → rpmE (PRK00019) Ribosomal_L31 (pfam01197) → |
| Sen-300-216 | NZ.CTJK01000018.1 | - | 47016  | 46964  | RNA → rpmE (PRK00019) Ribosomal_L31 (pfam01197) → |
| Sen-300-217 | NZ.CTMC01000020.1 | - | 45179  | 45127  | RNA → rpmE (PRK00019) Ribosomal_L31 (pfam01197) → |
| Sen-300-218 | NZ.CTHM01000017.1 | + | 42513  | 42565  | RNA → rpmE (PRK00019) Ribosomal_L31 (pfam01197) → |
| Sen-300-219 | NZ.CTOO01000018.1 | + | 42496  | 42548  | RNA → rpmE (PRK00019) Ribosomal_L31 (pfam01197) → |
| Sen-300-220 | NZ.CTJS01000019.1 | - | 45135  | 45083  | RNA → rpmE (PRK00019) Ribosomal_L31 (pfam01197) → |
| Sen-300-221 | NZ.CTGW01000024.1 | - | 32539  | 32487  | RNA → rpmE (PRK00019) Ribosomal_L31 (pfam01197) → |
| Sen-300-222 | NZ.CTGX01000021.1 | - | 45124  | 45072  | RNA → rpmE (PRK00019) Ribosomal_L31 (pfam01197) → |
| Sen-300-223 | NZ.CTOE01000018.1 | + | 42532  | 42584  | RNA → rpmE (PRK00019) Ribosomal_L31 (pfam01197) → |
| Sen-300-224 | NZ.CTPM01000019.1 | - | 45167  | 45115  | RNA → rpmE (PRK00019) Ribosomal_L31 (pfam01197) → |
| Sen-300-225 | NZ.CTHX01000019.1 | - | 45107  | 45055  | RNA → rpmE (PRK00019) Ribosomal_L31 (pfam01197) → |
| Sen-300-226 | NZ.CTNC01000019.1 | - | 45179  | 45127  | RNA → rpmE (PRK00019) Ribosomal_L31 (pfam01197) → |
| Sen-300-227 | NZ.CTGZ01000022.1 | + | 42532  | 42584  | RNA → rpmE (PRK00019) Ribosomal_L31 (pfam01197) → |
| Sen-300-228 | NZ.CTMG01000018.1 | - | 46977  | 46925  | RNA → rpmE (PRK00019) Ribosomal_L31 (pfam01197) → |
| Sen-300-229 | NZ.CTOY01000017.1 | + | 42548  | 42600  | RNA → rpmE (PRK00019) Ribosomal_L31 (pfam01197) → |
| Sen-300-230 | NZ.CTQP01000019.1 | + | 42536  | 42588  | RNA → rpmE (PRK00019) Ribosomal_L31 (pfam01197) → |
| Sen-300-231 | NZ.CTNY01000018.1 | - | 45125  | 45073  | RNA → rpmE (PRK00019) Ribosomal_L31 (pfam01197) → |
| Sen-300-232 | NZ.CTLY01000020.1 | - | 45179  | 45127  | RNA → rpmE (PRK00019) Ribosomal_L31 (pfam01197) → |
| Sen-300-233 | NZ.CTFY01000017.1 | - | 45179  | 45127  | RNA → rpmE (PRK00019) Ribosomal_L31 (pfam01197) → |
| Sen-300-234 | NZ.CTKG01000019.1 | - | 45179  | 45127  | RNA → rpmE (PRK00019) Ribosomal_L31 (pfam01197) → |
| Sen-300-235 | NZ.CTJU01000017.1 | - | 45120  | 45068  | RNA → rpmE (PRK00019) Ribosomal_L31 (pfam01197) → |
| Sen-300-236 | NZ.CTJQ01000018.1 | + | 42546  | 42598  | RNA → rpmE (PRK00019) Ribosomal_L31 (pfam01197) → |
| Sen-300-237 | NZ.CTJN01000020.1 | + | 42551  | 42603  | RNA → rpmE (PRK00019) Ribosomal_L31 (pfam01197) → |
| Sen-300-238 | NZ.CTPT01000017.1 | - | 46977  | 46925  | RNA → rpmE (PRK00019) Ribosomal_L31 (pfam01197) → |
| Sen-300-239 | NZ.CTHU01000018.1 | + | 42546  | 42598  | RNA → rpmE (PRK00019) Ribosomal_L31 (pfam01197) → |
| Sen-300-240 | NZ.CTNN01000019.1 | - | 45136  | 45084  | RNA → rpmE (PRK00019) Ribosomal_L31 (pfam01197) → |
| Sen-300-241 | NZ.CTND01000017.1 | - | 45343  | 45291  | RNA → rpmE (PRK00019) Ribosomal_L31 (pfam01197) → |
| Sen-300-242 | NZ.CTHJ01000018.1 | - | 45179  | 45127  | RNA → rpmE (PRK00019) Ribosomal_L31 (pfam01197) → |
| Sen-300-243 | NZ.CTOG01000010.1 | - | 37221  | 37169  | RNA → rpmE (PRK00019) Ribosomal_L31 (pfam01197) → |
| Sen-300-244 | NZ.CTLX01000011.1 | + | 104185 | 104237 | RNA → rpmE (PRK00019) Ribosomal_L31 (pfam01197) → |
| Sen-300-245 | NZ.CTQX01000021.1 | - | 45343  | 45291  | RNA → rpmE (PRK00019) Ribosomal_L31 (pfam01197) → |
| Sen-300-246 | NZ.CTNZ01000020.1 | - | 45114  | 45062  | RNA → rpmE (PRK00019) Ribosomal_L31 (pfam01197) → |
| Sen-300-247 | NZ.CTJQ01000016.1 | + | 42510  | 42562  | RNA → rpmE (PRK00019) Ribosomal_L31 (pfam01197) → |
| Sen-300-248 | NZ.CTMF01000017.1 | + | 42505  | 42557  | RNA → rpmE (PRK00019) Ribosomal_L31 (pfam01197) → |
| Sen-300-249 | NZ.CTHR01000017.1 | + | 42536  | 42588  | RNA → rpmE (PRK00019) Ribosomal_L31 (pfam01197) → |
| Sen-300-250 | NZ.CTMK01000017.1 | - | 45343  | 45291  | RNA → rpmE (PRK00019) Ribosomal_L31 (pfam01197) → |
| Sen-300-251 | NZ.CTKA01000017.1 | - | 46977  | 46925  | RNA → rpmE (PRK00019) Ribosomal_L31 (pfam01197) → |
| Sen-300-252 | NZ.CTOH01000019.1 | + | 42453  | 42505  | RNA → rpmE (PRK00019) Ribosomal_L31 (pfam01197) → |
| Sen-300-253 | NZ.CTHB01000017.1 | - | 45179  | 45127  | RNA → rpmE (PRK00019) Ribosomal_L31 (pfam01197) → |
| Sen-300-254 | NZ.CTLA01000020.1 | - | 45256  | 45204  | RNA → rpmE (PRK00019) Ribosomal_L31 (pfam01197) → |
| Sen-300-255 | NZ.CTLR01000017.1 | + | 42509  | 42561  | RNA → rpmE (PRK00019) Ribosomal_L31 (pfam01197) → |
| Sen-300-256 | NZ.CTMJ01000019.1 | - | 45107  | 45055  | RNA → rpmE (PRK00019) Ribosomal_L31 (pfam01197) → |
| Sen-300-257 | NZ.CTLV01000020.1 | - | 45179  | 45127  | RNA → rpmE (PRK00019) Ribosomal_L31 (pfam01197) → |
| Sen-300-258 | NZ.CTHO01000020.1 | + | 42484  | 42536  | RNA → rpmE (PRK00019) Ribosomal_L31 (pfam01197) → |
| Sen-300-259 | NZ.CTKD01000016.1 | + | 42478  | 42530  | RNA → rpmE (PRK00019) Ribosomal_L31 (pfam01197) → |
| Sen-300-260 | NZ.CTMQ01000017.1 | + | 42438  | 42490  | RNA → rpmE (PRK00019) Ribosomal_L31 (pfam01197) → |
| Sen-427-1   | NZ.CP007211.1     | + | 217000 | 217052 | RNA → rpmE (PRK00019) Ribosomal_L31 (pfam01197) → |
| Sen-267-1   | NZ.CP007216.1     | + | 222105 | 222157 | RNA → rpmE (PRK00019) Ribosomal_L31 (pfam01197) → |
| Sen-992-1   | NZ.CP007235.1     | + | 222015 | 222067 | RNA → rpmE (PRK00019) Ribosomal_L31 (pfam01197) → |



|             |                   |   |         |         |                                                  |
|-------------|-------------------|---|---------|---------|--------------------------------------------------|
| Sen-236-1   | NZ_CP007222.1     | + | 219817  | 219869  | RNA → rpmE (PRK00019)Ribosomal_L31 (pfam01197) → |
| Sen-273-3   | NZ_CP011967.1     | + | 4083750 | 4083802 | RNA → rpmE (PRK00019)Ribosomal_L31 (pfam01197) → |
| Sen-135-1   | NZ_CP012344.1     | - | 4536970 | 4536918 | RNA → rpmE (PRK00019)Ribosomal_L31 (pfam01197) → |
| Sen-276-1   | NZ_CP012347.1     | - | 4534664 | 4534612 | RNA → rpmE (PRK00019)Ribosomal_L31 (pfam01197) → |
| Sen-272-1   | NZ_CP012346.1     | - | 4305396 | 4305344 | RNA → rpmE (PRK00019)Ribosomal_L31 (pfam01197) → |
| Sen-281-1   | NZ_CP012349.1     | - | 4562745 | 4562693 | RNA → rpmE (PRK00019)Ribosomal_L31 (pfam01197) → |
| Sen-622-1   | NZ_CP007354.1     | + | 4173831 | 4173883 | RNA → rpmE (PRK00019)Ribosomal_L31 (pfam01197) → |
| Sen-643-1   | NZ_CP007376.1     | + | 4173841 | 4173893 | RNA → rpmE (PRK00019)Ribosomal_L31 (pfam01197) → |
| Sen-653-1   | NZ_CP007371.1     | + | 4173817 | 4173869 | RNA → rpmE (PRK00019)Ribosomal_L31 (pfam01197) → |
| Sen-300-261 | NZ_CTMM01000027.1 | - | 45179   | 45127   | RNA → rpmE (PRK00019)Ribosomal_L31 (pfam01197) → |
| Sen-300-262 | NZ_CTPV01000021.1 | + | 42473   | 42525   | RNA → rpmE (PRK00019)Ribosomal_L31 (pfam01197) → |
| Sen-300-263 | NZ_CTPB01000017.1 | - | 45179   | 45127   | RNA → rpmE (PRK00019)Ribosomal_L31 (pfam01197) → |
| Sen-300-264 | NZ_CTIJ01000012.1 | - | 45337   | 45285   | RNA → rpmE (PRK00019)Ribosomal_L31 (pfam01197) → |
| Sen-300-265 | NZ_CTGE01000016.1 | - | 45343   | 45291   | RNA → rpmE (PRK00019)Ribosomal_L31 (pfam01197) → |
| Sen-300-266 | NZ_CTGM01000017.1 | - | 45179   | 45127   | RNA → rpmE (PRK00019)Ribosomal_L31 (pfam01197) → |
| Sen-300-267 | NZ_CTQB01000021.1 | + | 42438   | 42490   | RNA → rpmE (PRK00019)Ribosomal_L31 (pfam01197) → |
| Sen-300-268 | NZ_CTFX01000018.1 | + | 42453   | 42505   | RNA → rpmE (PRK00019)Ribosomal_L31 (pfam01197) → |
| Sen-300-269 | NZ_CTGY01000018.1 | + | 42510   | 42562   | RNA → rpmE (PRK00019)Ribosomal_L31 (pfam01197) → |
| Sen-300-270 | NZ_CTPK01000017.1 | - | 45179   | 45127   | RNA → rpmE (PRK00019)Ribosomal_L31 (pfam01197) → |
| Sen-300-271 | NZ_CTOU01000017.1 | - | 45179   | 45127   | RNA → rpmE (PRK00019)Ribosomal_L31 (pfam01197) → |
| Sen-300-272 | NZ_CTLU01000018.1 | + | 42484   | 42536   | RNA → rpmE (PRK00019)Ribosomal_L31 (pfam01197) → |
| Sen-300-273 | NZ_CTNW01000020.1 | + | 42453   | 42505   | RNA → rpmE (PRK00019)Ribosomal_L31 (pfam01197) → |
| Sen-300-274 | NZ_CTNJ01000021.1 | - | 45107   | 45055   | RNA → rpmE (PRK00019)Ribosomal_L31 (pfam01197) → |
| Sen-300-275 | NZ_CTLP01000019.1 | + | 42467   | 42519   | RNA → rpmE (PRK00019)Ribosomal_L31 (pfam01197) → |
| Sen-300-276 | NZ_CTHH01000028.1 | - | 32546   | 32494   | RNA → rpmE (PRK00019)Ribosomal_L31 (pfam01197) → |
| Sen-300-277 | NZ_CTIB01000016.1 | + | 42438   | 42490   | RNA → rpmE (PRK00019)Ribosomal_L31 (pfam01197) → |
| Sen-300-278 | NZ_CTFV01000017.1 | + | 42453   | 42505   | RNA → rpmE (PRK00019)Ribosomal_L31 (pfam01197) → |
| Sen-300-279 | NZ_CTPD01000016.1 | - | 50325   | 50273   | RNA → rpmE (PRK00019)Ribosomal_L31 (pfam01197) → |
| Sen-300-280 | NZ_CTOF01000017.1 | + | 42479   | 42531   | RNA → rpmE (PRK00019)Ribosomal_L31 (pfam01197) → |
| Sen-300-281 | NZ_CTOC01000017.1 | + | 42490   | 42542   | RNA → rpmE (PRK00019)Ribosomal_L31 (pfam01197) → |
| Sen-300-282 | NZ_CTLK01000017.1 | - | 45179   | 45127   | RNA → rpmE (PRK00019)Ribosomal_L31 (pfam01197) → |
| Sen-300-283 | NZ_CTML01000016.1 | - | 45343   | 45291   | RNA → rpmE (PRK00019)Ribosomal_L31 (pfam01197) → |
| Sen-300-284 | NZ_CTPP01000019.1 | - | 45176   | 45124   | RNA → rpmE (PRK00019)Ribosomal_L31 (pfam01197) → |
| Sen-300-285 | NZ_CTNH01000018.1 | + | 42532   | 42584   | RNA → rpmE (PRK00019)Ribosomal_L31 (pfam01197) → |
| Sen-300-286 | NZ_CTJZ01000017.1 | - | 45247   | 45195   | RNA → rpmE (PRK00019)Ribosomal_L31 (pfam01197) → |
| Sen-300-287 | NZ_CTOZ01000017.1 | + | 42472   | 42524   | RNA → rpmE (PRK00019)Ribosomal_L31 (pfam01197) → |
| Sen-300-288 | NZ_CTGP01000020.1 | - | 45343   | 45291   | RNA → rpmE (PRK00019)Ribosomal_L31 (pfam01197) → |
| Sen-300-289 | NZ_CTJM01000019.1 | - | 45107   | 45055   | RNA → rpmE (PRK00019)Ribosomal_L31 (pfam01197) → |
| Sen-300-290 | NZ_CTNI01000017.1 | - | 45150   | 45098   | RNA → rpmE (PRK00019)Ribosomal_L31 (pfam01197) → |
| Sen-300-291 | NZ_CTIF01000021.1 | - | 45181   | 45129   | RNA → rpmE (PRK00019)Ribosomal_L31 (pfam01197) → |
| Sen-300-292 | NZ_CTOQ01000016.1 | + | 42508   | 42560   | RNA → rpmE (PRK00019)Ribosomal_L31 (pfam01197) → |
| Sen-300-293 | NZ_CTOC01000017.1 | - | 45179   | 45127   | RNA → rpmE (PRK00019)Ribosomal_L31 (pfam01197) → |
| Sen-300-294 | NZ_CTVJ01000019.1 | - | 45113   | 45061   | RNA → rpmE (PRK00019)Ribosomal_L31 (pfam01197) → |
| Sen-300-295 | NZ_CTNL01000027.1 | + | 22519   | 22571   | RNA → rpmE (PRK00019)Ribosomal_L31 (pfam01197) → |
| Sen-300-296 | NZ_CTJP01000007.1 | + | 175854  | 175906  | RNA → rpmE (PRK00019)Ribosomal_L31 (pfam01197) → |
| Sen-300-297 | NZ_CTNM01000020.1 | - | 45107   | 45055   | RNA → rpmE (PRK00019)Ribosomal_L31 (pfam01197) → |
| Sen-300-298 | NZ_CTPJ01000020.1 | + | 42544   | 42596   | RNA → rpmE (PRK00019)Ribosomal_L31 (pfam01197) → |
| Sen-300-299 | NZ_CTR01000017.1  | - | 45255   | 45203   | RNA → rpmE (PRK00019)Ribosomal_L31 (pfam01197) → |
| Sen-300-300 | NZ_CTOI01000017.1 | + | 43122   | 43174   | RNA → rpmE (PRK00019)Ribosomal_L31 (pfam01197) → |
| Sen-300-301 | NZ_CTPU01000020.1 | - | 45107   | 45055   | RNA → rpmE (PRK00019)Ribosomal_L31 (pfam01197) → |
| Sen-300-302 | NZ_CTKZ01000020.1 | - | 45116   | 45064   | RNA → rpmE (PRK00019)Ribosomal_L31 (pfam01197) → |
| Sen-300-303 | NZ_CTOR01000017.1 | - | 45179   | 45127   | RNA → rpmE (PRK00019)Ribosomal_L31 (pfam01197) → |

|             |                    |   |        |        |                                                                                             |
|-------------|--------------------|---|--------|--------|---------------------------------------------------------------------------------------------|
| Sen-300-304 | NZ_CTID01000016.1  | + | 42774  | 42826  | RNA → rpmE (PRK00019)Ribosomal_L31 (pfam01197) →                                            |
| Sen-300-305 | NZ_CTHC01000020.1  | - | 45179  | 45127  | RNA → rpmE (PRK00019)Ribosomal_L31 (pfam01197) →                                            |
| Sen-300-306 | NZ_CTGH01000020.1  | - | 45107  | 45055  | RNA → rpmE (PRK00019)Ribosomal_L31 (pfam01197) →                                            |
| Sen-300-307 | NZ_CTMS01000017.1  | + | 42506  | 42558  | RNA → rpmE (PRK00019)Ribosomal_L31 (pfam01197) →                                            |
| Sen-300-308 | NZ_CTHQ01000015.1  | - | 45343  | 45291  | RNA → rpmE (PRK00019)Ribosomal_L31 (pfam01197) →                                            |
| Sen-300-309 | NZ_CTM01000018.1   | - | 45107  | 45055  | RNA → rpmE (PRK00019)Ribosomal_L31 (pfam01197) →                                            |
| Sen-300-310 | NZ_CTOI01000027.1  | - | 32545  | 32493  | RNA → rpmE (PRK00019)Ribosomal_L31 (pfam01197) →                                            |
| Sen-300-311 | NZ_CTOW01000021.1  | - | 45197  | 45145  | RNA → rpmE (PRK00019)Ribosomal_L31 (pfam01197) →                                            |
| Sen-300-312 | NZ_CTLZ01000017.1  | + | 42531  | 42583  | RNA → rpmE (PRK00019)Ribosomal_L31 (pfam01197) →                                            |
| Sen-300-313 | NZ_CTKC01000017.1  | - | 45174  | 45122  | RNA → rpmE (PRK00019)Ribosomal_L31 (pfam01197) →                                            |
| Sen-300-314 | NZ_CTNU01000017.1  | + | 42517  | 42569  | RNA → rpmE (PRK00019)Ribosomal_L31 (pfam01197) →                                            |
| Sen-300-315 | NZ_CTIH01000018.1  | - | 45343  | 45291  | RNA → rpmE (PRK00019)Ribosomal_L31 (pfam01197) →                                            |
| Sen-300-316 | NZ_CTOT01000019.1  | + | 42461  | 42513  | RNA → rpmE (PRK00019)Ribosomal_L31 (pfam01197) →                                            |
| Sen-300-317 | NZ_CTGD01000017.1  | + | 42532  | 42584  | RNA → rpmE (PRK00019)Ribosomal_L31 (pfam01197) →                                            |
| Sen-300-318 | NZ_CTOP01000024.1  | + | 13413  | 13465  | RNA → rpmE (PRK00019)Ribosomal_L31 (pfam01197) →                                            |
| Sen-300-319 | NZ_CTQG01000020.1  | + | 42499  | 42551  | RNA → rpmE (PRK00019)Ribosomal_L31 (pfam01197) →                                            |
| Sen-300-320 | NZ_CTJX01000017.1  | + | 42438  | 42490  | RNA → rpmE (PRK00019)Ribosomal_L31 (pfam01197) →                                            |
| Sen-300-321 | NZ_CTP01000017.1   | - | 45199  | 45147  | RNA → rpmE (PRK00019)Ribosomal_L31 (pfam01197) →                                            |
| Sen-300-322 | NZ_CTNE01000017.1  | + | 42517  | 42569  | RNA → rpmE (PRK00019)Ribosomal_L31 (pfam01197) →                                            |
| Sen-300-323 | NZ_CTHK01000017.1  | - | 45343  | 45291  | RNA → rpmE (PRK00019)Ribosomal_L31 (pfam01197) →                                            |
| Sen-300-324 | NZ_CTHF01000019.1  | + | 42460  | 42512  | RNA → rpmE (PRK00019)Ribosomal_L31 (pfam01197) →                                            |
| Sen-300-325 | NZ_CTAO01000017.1  | - | 45255  | 45203  | RNA → rpmE (PRK00019)Ribosomal_L31 (pfam01197) →                                            |
| Sen-300-326 | NZ_CTCH01000021.1  | - | 45107  | 45055  | RNA → rpmE (PRK00019)Ribosomal_L31 (pfam01197) →                                            |
| Sen-300-327 | NZ_CTBW01000021.1  | - | 45117  | 45065  | RNA → rpmE (PRK00019)Ribosomal_L31 (pfam01197) →                                            |
| Sen-300-328 | NZ_CTCE01000019.1  | + | 42473  | 42525  | RNA → rpmE (PRK00019)Ribosomal_L31 (pfam01197) →                                            |
| Sen-300-329 | NZ_CTAC01000018.1  | - | 45179  | 45127  | RNA → rpmE (PRK00019)Ribosomal_L31 (pfam01197) →                                            |
| Sen-802-1   | NZ_AFCR01001558.1  | + | 1664   | 1716   | RNA → rpmE (PRK00019)Ribosomal_L31 (pfam01197) →                                            |
| Sen-996-1   | NZ_AFCV01001391.1  | + | 6411   | 6463   | RNA → rpmE (PRK00019)Ribosomal_L31 (pfam01197) →                                            |
| Sen-734-1   | NZ_AFCM01000234.1  | - | 1925   | 1873   | RNA → rpmE (PRK00019)Ribosomal_L31 (pfam01197) →                                            |
| Sen-289-1   | NZ_LAKIC01000146.1 | + | 3535   | 3587   | RNA → rpmE (PRK00019)Ribosomal_L31 (pfam01197) →                                            |
| Sen-1025-1  | NZ_CAFD01000090.1  | - | 1029   | 977    | RNA → rpmE (PRK00019)Ribosomal_L31 (pfam01197) →                                            |
| Sen-439-11  | NZ_CSTH01000013.1  | - | 45242  | 45190  | RNA → rpmE (PRK00019)Ribosomal_L31 (pfam01197) →                                            |
| Sen-412-1   | NZ_CARE01000039.1  | - | 37552  | 37500  | RNA → rpmE (PRK00019)Ribosomal_L31 (pfam01197) →                                            |
| Sen-229-1   | NZ_CBKW020000007.1 | + | 103767 | 103819 | RNA → rpmE (PRK00019)Ribosomal_L31 (pfam01197) →                                            |
| Sen-291-7   | NZ_LFGV01000021.1  | - | 4804   | 4752   | RNA → rpmE (PRK00019)Ribosomal_L31 (pfam01197) →                                            |
| Sen-396-1   | NZ_CATT01000048.1  | - | 37552  | 37500  | RNA → rpmE (PRK00019)Ribosomal_L31 (pfam01197) →                                            |
| Sen-361-1   | NZ_CATV01000026.1  | - | 38256  | 38204  | RNA → rpmE (PRK00019)Ribosomal_L31 (pfam01197) →                                            |
| Sen-238-1   | NZ_ARYX01000002.1  | + | 104268 | 104320 | RNA → rpmE (PRK00019)Ribosomal_L31 (pfam01197) →                                            |
| Sen-310-1   | NZ_ATFA01000012.1  | - | 37653  | 37601  | RNA → rpmE (PRK00019)Ribosomal_L31 (pfam01197) →                                            |
| Sen-1018-1  | NZ_ABFH02000001.1  | - | 831201 | 831149 | RNA → rpmE (PRK00019)Ribosomal_L31 (pfam01197) → rpmE (PRK00019)Ribosomal_L31 (pfam01197) → |
| Sen-936-1   | NZ_AYDO01000075.1  | - | 37705  | 37653  | RNA → rpmE (PRK00019)Ribosomal_L31 (pfam01197) → rpmE (PRK00019)Ribosomal_L31 (pfam01197) → |
| Sen-1024-1  | NZ_AOXE01000061.1  | + | 25782  | 25834  | RNA → rpmE (PRK00019)Ribosomal_L31 (pfam01197) → rpmE (PRK00019)Ribosomal_L31 (pfam01197) → |
| Sen-899-1   | NZ_AYEF01000033.1  | - | 45341  | 45289  | RNA → rpmE (PRK00019)Ribosomal_L31 (pfam01197) → rpmE (PRK00019)Ribosomal_L31 (pfam01197) → |
| Sen-61-1    | NZ_JRDC01000027.1  | - | 45217  | 45165  | RNA → rpmE (PRK00019)Ribosomal_L31 (pfam01197) →                                            |
| Sen-50-1    | NZ_JRDM01000013.1  | + | 103447 | 103499 | RNA → rpmE (PRK00019)Ribosomal_L31 (pfam01197) →                                            |
| Sen-102-1   | NZ_JRBQ01000021.1  | - | 45104  | 45052  | RNA → rpmE (PRK00019)Ribosomal_L31 (pfam01197) →                                            |
| Sen-77-1    | NZ_JRCK01000003.1  | + | 43610  | 43662  | RNA → rpmE (PRK00019)Ribosomal_L31 (pfam01197) →                                            |
| Sen-27-1    | NZ_JREG01000026.1  | - | 45105  | 45053  | RNA → rpmE (PRK00019)Ribosomal_L31 (pfam01197) →                                            |
| Sen-23-1    | NZ_JREK01000016.1  | - | 45182  | 45130  | RNA → rpmE (PRK00019)Ribosomal_L31 (pfam01197) →                                            |
| Sen-60-1    | NZ_JRDD01000019.1  | + | 4123   | 4175   | RNA → rpmE (PRK00019)Ribosomal_L31 (pfam01197) →                                            |
| Sen-109-1   | NZ_JRBJ01000021.1  | - | 45105  | 45053  | RNA → rpmE (PRK00019)Ribosomal_L31 (pfam01197) →                                            |
| Sen-99-1    | NZ_JRBS01000026.1  | - | 45104  | 45052  | RNA → rpmE (PRK00019)Ribosomal_L31 (pfam01197) →                                            |



|           |                    |   |        |        |                                                                                             |
|-----------|--------------------|---|--------|--------|---------------------------------------------------------------------------------------------|
| Sen-45-1  | NZ_JRDQ01000023.1  | + | 98924  | 98976  | RNA → rpmE (PRK00019)Ribosomal_L31 (pfam01197) →                                            |
| Sen-74-1  | NZ_JRCN01000001.1  | - | 45105  | 45053  | RNA → rpmE (PRK00019)Ribosomal_L31 (pfam01197) →                                            |
| Sen-75-1  | NZ_JRCM01000022.1  | - | 45105  | 45053  | RNA → rpmE (PRK00019)Ribosomal_L31 (pfam01197) →                                            |
| Sen-110-1 | NZ_JRBI01000096.1  | - | 3356   | 3304   | RNA → rpmE (PRK00019)Ribosomal_L31 (pfam01197) →                                            |
| Sen-52-1  | NZ_JRDK01000048.1  | - | 45216  | 45164  | RNA → rpmE (PRK00019)Ribosomal_L31 (pfam01197) →                                            |
| Sen-100-1 | NZ_JRBR01000031.1  | + | 4124   | 4176   | RNA → rpmE (PRK00019)Ribosomal_L31 (pfam01197) →                                            |
| Sen-70-1  | NZ_JRCR01000027.1  | - | 45104  | 45052  | RNA → rpmE (PRK00019)Ribosomal_L31 (pfam01197) →                                            |
| Sen-71-1  | NZ_JRCQ01000018.1  | - | 45105  | 45053  | RNA → rpmE (PRK00019)Ribosomal_L31 (pfam01197) →                                            |
| Sen-76-1  | NZ_JRCL01000003.1  | + | 104296 | 104348 | RNA → rpmE (PRK00019)Ribosomal_L31 (pfam01197) →                                            |
| Sen-22-1  | NZ_JREL01000019.1  | - | 45105  | 45053  | RNA → rpmE (PRK00019)Ribosomal_L31 (pfam01197) →                                            |
| Sen-59-1  | NZ_JRDE01000031.1  | + | 4122   | 4174   | RNA → rpmE (PRK00019)Ribosomal_L31 (pfam01197) →                                            |
| Sen-44-1  | NZ_JRDR01000023.1  | - | 45217  | 45165  | RNA → rpmE (PRK00019)Ribosomal_L31 (pfam01197) →                                            |
| Sen-73-1  | NZ_JRCO01000013.1  | - | 45104  | 45052  | RNA → rpmE (PRK00019)Ribosomal_L31 (pfam01197) →                                            |
| Sen-32-1  | NZ_JREC01000027.1  | + | 103206 | 103258 | RNA → rpmE (PRK00019)Ribosomal_L31 (pfam01197) →                                            |
| Sen-42-1  | NZ_JRDT01000022.1  | + | 43449  | 43501  | RNA → rpmE (PRK00019)Ribosomal_L31 (pfam01197) →                                            |
| Sen-47-1  | NZ_JRDO01000005.1  | + | 103439 | 103491 | RNA → rpmE (PRK00019)Ribosomal_L31 (pfam01197) →                                            |
| Sen-20-1  | NZ_JREM01000014.1  | - | 45104  | 45052  | RNA → rpmE (PRK00019)Ribosomal_L31 (pfam01197) →                                            |
| Sen-37-1  | NZ_JRDX01000002.1  | - | 45196  | 45144  | RNA → rpmE (PRK00019)Ribosomal_L31 (pfam01197) →                                            |
| Sen-51-1  | NZ_JRDL01000012.1  | + | 103445 | 103497 | RNA → rpmE (PRK00019)Ribosomal_L31 (pfam01197) →                                            |
| Sen-65-1  | NZ_JRCY01000019.1  | - | 45105  | 45053  | RNA → rpmE (PRK00019)Ribosomal_L31 (pfam01197) →                                            |
| Sen-57-1  | NZ_JRDF01000014.1  | - | 45217  | 45165  | RNA → rpmE (PRK00019)Ribosomal_L31 (pfam01197) →                                            |
| Sen-53-1  | NZ_JRDJ01000006.1  | + | 103457 | 103509 | RNA → rpmE (PRK00019)Ribosomal_L31 (pfam01197) →                                            |
| Sen-72-1  | NZ_JRCP01000025.1  | - | 45104  | 45052  | RNA → rpmE (PRK00019)Ribosomal_L31 (pfam01197) →                                            |
| Sen-30-1  | NZ_JRED01000031.1  | + | 43390  | 43442  | RNA → rpmE (PRK00019)Ribosomal_L31 (pfam01197) →                                            |
| Sen-39-1  | NZ_JRDV01000026.1  | - | 45217  | 45165  | RNA → rpmE (PRK00019)Ribosomal_L31 (pfam01197) →                                            |
| Sen-24-1  | NZ_JREJ01000027.1  | - | 45104  | 45052  | RNA → rpmE (PRK00019)Ribosomal_L31 (pfam01197) →                                            |
| Sen-36-1  | NZ_JRDY01000016.1  | - | 45303  | 45251  | RNA → rpmE (PRK00019)Ribosomal_L31 (pfam01197) →                                            |
| Sen-28-1  | NZ_JREF01000014.1  | - | 45216  | 45164  | RNA → rpmE (PRK00019)Ribosomal_L31 (pfam01197) →                                            |
| Sen-33-1  | NZ_JREB01000019.1  | + | 4122   | 4174   | RNA → rpmE (PRK00019)Ribosomal_L31 (pfam01197) →                                            |
| Sen-35-1  | NZ_JRDZ01000019.1  | + | 8320   | 8372   | RNA → rpmE (PRK00019)Ribosomal_L31 (pfam01197) →                                            |
| Sen-40-1  | NZ_JRDU01000022.1  | - | 45217  | 45165  | RNA → rpmE (PRK00019)Ribosomal_L31 (pfam01197) →                                            |
| Sen-26-1  | NZ_JREH01000017.1  | + | 8335   | 8387   | RNA → rpmE (PRK00019)Ribosomal_L31 (pfam01197) →                                            |
| Sen-108-1 | NZ_JRBK01000010.1  | + | 103451 | 103503 | RNA → rpmE (PRK00019)Ribosomal_L31 (pfam01197) →                                            |
| Sen-56-1  | NZ_JRDG01000018.1  | - | 45217  | 45165  | RNA → rpmE (PRK00019)Ribosomal_L31 (pfam01197) →                                            |
| Sen-105-1 | NZ_JRBN01000053.1  | - | 45105  | 45053  | RNA → rpmE (PRK00019)Ribosomal_L31 (pfam01197) →                                            |
| Sen-68-1  | NZ_JRCS01000047.1  | - | 45095  | 45043  | RNA → rpmE (PRK00019)Ribosomal_L31 (pfam01197) →                                            |
| Sen-79-1  | NZ_JRCI01000083.1  | - | 1205   | 1153   | RNA → rpmE (PRK00019)Ribosomal_L31 (pfam01197) →                                            |
| Sen-90-1  | NZ_JRBZ01000014.1  | - | 45105  | 45053  | RNA → rpmE (PRK00019)Ribosomal_L31 (pfam01197) →                                            |
| Sen-94-1  | NZ_JRBV01000025.1  | + | 103450 | 103502 | RNA → rpmE (PRK00019)Ribosomal_L31 (pfam01197) →                                            |
| Sen-96-1  | NZ_JRBU01000019.1  | - | 45105  | 45053  | RNA → rpmE (PRK00019)Ribosomal_L31 (pfam01197) →                                            |
| Sen-85-1  | NZ_JRCD01000010.1  | + | 103451 | 103503 | RNA → rpmE (PRK00019)Ribosomal_L31 (pfam01197) →                                            |
| Sen-925-1 | NZ_LAOYK01000093.1 | + | 42029  | 42081  | RNA → rpmE (PRK00019)Ribosomal_L31 (pfam01197) → rpmE (PRK00019)Ribosomal_L31 (pfam01197) → |
| Sen-107-1 | NZ_JRBL01000010.1  | - | 45105  | 45053  | RNA → rpmE (PRK00019)Ribosomal_L31 (pfam01197) →                                            |
| Sen-54-1  | NZ_JRDI01000020.1  | - | 45217  | 45165  | RNA → rpmE (PRK00019)Ribosomal_L31 (pfam01197) →                                            |
| Sen-55-1  | NZ_JRDH01000008.1  | - | 45105  | 45053  | RNA → rpmE (PRK00019)Ribosomal_L31 (pfam01197) →                                            |
| Sen-104-1 | NZ_JRBO01000052.1  | + | 15512  | 15564  | RNA → rpmE (PRK00019)Ribosomal_L31 (pfam01197) →                                            |
| Sen-67-1  | NZ_JRCT01000026.1  | - | 45173  | 45121  | RNA → rpmE (PRK00019)Ribosomal_L31 (pfam01197) →                                            |
| Sen-78-1  | NZ_JRCJ01000053.1  | - | 45105  | 45053  | RNA → rpmE (PRK00019)Ribosomal_L31 (pfam01197) →                                            |
| Sen-93-1  | NZ_JRBW01000021.1  | + | 55522  | 55574  | RNA → rpmE (PRK00019)Ribosomal_L31 (pfam01197) →                                            |
| Sen-34-1  | NZ_JREA01000027.1  | + | 103445 | 103497 | RNA → rpmE (PRK00019)Ribosomal_L31 (pfam01197) →                                            |
| Sen-43-1  | NZ_JRDS01000015.1  | + | 103420 | 103472 | RNA → rpmE (PRK00019)Ribosomal_L31 (pfam01197) →                                            |
| Sen-82-1  | NZ_JRCF01000015.1  | + | 103451 | 103503 | RNA → rpmE (PRK00019)Ribosomal_L31 (pfam01197) →                                            |

|            |                        |   |         |         |                                                                                                |
|------------|------------------------|---|---------|---------|------------------------------------------------------------------------------------------------|
| Sen-84-1   | NZ_JRCE01000022.1      | + | 103451  | 103503  | RNA → rpmE (PRK00019)Ribosomal_L31 (pfam01197) →                                               |
| Sen-48-1   | NZ_JRDN01000019.1      | - | 45217   | 45165   | RNA → rpmE (PRK00019)Ribosomal_L31 (pfam01197) →                                               |
| Sen-64-1   | NZ_JRCZ01000043.1      | + | 4122    | 4174    | RNA → rpmE (PRK00019)Ribosomal_L31 (pfam01197) →                                               |
| Sen-292-1  | NZ_JHAG01000043.1      | + | 42429   | 42481   | RNA → rpmE (PRK00019)Ribosomal_L31 (pfam01197) →                                               |
| Sen-63-1   | NZ_JRDA01000002.1      | + | 103469  | 103521  | RNA → rpmE (PRK00019)Ribosomal_L31 (pfam01197) →                                               |
| Sen-66-1   | NZ_JRCW01000065.1      | + | 4122    | 4174    | RNA → rpmE (PRK00019)Ribosomal_L31 (pfam01197) →                                               |
| Sen-103-1  | NZ_JRBP01000017.1      | + | 4123    | 4175    | RNA → rpmE (PRK00019)Ribosomal_L31 (pfam01197) →                                               |
| Sen-92-1   | NZ_JRBX01000004.1      | - | 45104   | 45052   | RNA → rpmE (PRK00019)Ribosomal_L31 (pfam01197) →                                               |
| Sen-81-1   | NZ_JRCG01000038.1      | + | 4122    | 4174    | RNA → rpmE (PRK00019)Ribosomal_L31 (pfam01197) →                                               |
| Sen-87-1   | NZ_JRCB01000003.1      | + | 103451  | 103503  | RNA → rpmE (PRK00019)Ribosomal_L31 (pfam01197) →                                               |
| Sen-88-1   | NZ_JRCA01000012.1      | + | 103451  | 103503  | RNA → rpmE (PRK00019)Ribosomal_L31 (pfam01197) →                                               |
| Sen-462-1  | NZ_APAG01000166.1      | + | 96846   | 96898   | RNA → rpmE (PRK00019)Ribosomal_L31 (pfam01197) → rpmE (PRK00019)Ribosomal_L31 (pfam01197) →    |
| Sen-766-1  | NZ_AMMP01000013.1      | + | 4125    | 4177    | RNA → rpmE (PRK00019)Ribosomal_L31 (pfam01197) →                                               |
| Sen-62-1   | NZ_JRDB01000008.1      | + | 103327  | 103379  | RNA → rpmE (PRK00019)Ribosomal_L31 (pfam01197) →                                               |
| Sen-25-1   | NZ_JREI01000009.1      | - | 45213   | 45161   | RNA → rpmE (PRK00019)Ribosomal_L31 (pfam01197) →                                               |
| Sen-38-1   | NZ_JRDW01000021.1      | + | 103444  | 103496  | RNA → rpmE (PRK00019)Ribosomal_L31 (pfam01197) →                                               |
| Sen-106-1  | NZ_JRBM01000066.1      | + | 43379   | 43431   | RNA → rpmE (PRK00019)Ribosomal_L31 (pfam01197) →                                               |
| Sen-46-1   | NZ_JRDP01000018.1      | - | 9628    | 9576    | RNA → rpmE (PRK00019)Ribosomal_L31 (pfam01197) →                                               |
| Sen-91-1   | NZ_JRBY01000004.1      | + | 103450  | 103502  | RNA → rpmE (PRK00019)Ribosomal_L31 (pfam01197) →                                               |
| Sen-29-1   | NZ_JREE01000016.1      | + | 103448  | 103500  | RNA → rpmE (PRK00019)Ribosomal_L31 (pfam01197) →                                               |
| Sen-97-1   | NZ_JRBT01000001.1      | + | 103451  | 103503  | RNA → rpmE (PRK00019)Ribosomal_L31 (pfam01197) →                                               |
| Sen-80-1   | NZ_JRCH01000029.1      | + | 103451  | 103503  | RNA → rpmE (PRK00019)Ribosomal_L31 (pfam01197) →                                               |
| Sen-86-1   | NZ_JRCC01000044.1      | + | 43272   | 43324   | RNA → rpmE (PRK00019)Ribosomal_L31 (pfam01197) →                                               |
| Sen-101-1  | NZ_JRLO01000034.1      | - | 45105   | 45053   | RNA → rpmE (PRK00019)Ribosomal_L31 (pfam01197) →                                               |
| Sen-83-1   | NZ_JRLQ01000100.1      | + | 4123    | 4175    | RNA → rpmE (PRK00019)Ribosomal_L31 (pfam01197) →                                               |
| Sen-2-2    | NZ_JTBM01000001.1      | - | 3487697 | 3487645 | RNA → rpmE (PRK00019)Ribosomal_L31 (pfam01197) →                                               |
| Sen-295-1  | NZ_JTED01000011.1      | - | 45184   | 45132   | RNA → rpmE (PRK00019)Ribosomal_L31 (pfam01197) →                                               |
| Sbo-3-1    | NC_021870.1            | + | 4124212 | 4124264 | RNA → rpmE (PRK00019)Ribosomal_L31 (pfam01197) →                                               |
| Sbo-4-1    | NC_015761.1            | + | 3964037 | 3964089 | RNA → rpmE (PRK00019)Ribosomal_L31 (pfam01197) → rpmE (PRK00019)Ribosomal_L31 (pfam01197) →    |
| Sbo-1-1    | NZ_CP006692.1          | + | 3836915 | 3836967 | rpmE (PRK00019)Ribosomal_L31 (pfam01197) →<br>RNA → rpmE (PRK00019)Ribosomal_L31 (pfam01197) → |
| Sen-1029-1 | NZ_ABEH02000008.1      | + | 207232  | 207284  | RNA → rpmE (PRK00019)Ribosomal_L31 (pfam01197) → rpmE (PRK00019)Ribosomal_L31 (pfam01197) →    |
| Sen-783-1  | NZ_AHUW01000041.1      | - | 44329   | 44277   | RNA → rpmE (PRK00019)Ribosomal_L31 (pfam01197) → rpmE (PRK00019)Ribosomal_L31 (pfam01197) →    |
| Sen-785-1  | NZ_AOZB01000105.1      | + | 102730  | 102782  | RNA → rpmE (PRK00019)Ribosomal_L31 (pfam01197) → rpmE (PRK00019)Ribosomal_L31 (pfam01197) →    |
| Sen-784-1  | NC_020307.1            | - | 2717973 | 2717921 | RNA → rpmE (PRK00019)Ribosomal_L31 (pfam01197) → rpmE (PRK00019)Ribosomal_L31 (pfam01197) →    |
| Sen-1021-1 | NZ_AOXJ01000015.1      | - | 34309   | 34257   | RNA → rpmE (PRK00019)Ribosomal_L31 (pfam01197) →                                               |
| Sen-1020-1 | NZ_ANHR01000083.1      | + | 63387   | 63439   | RNA → rpmE (PRK00019)Ribosomal_L31 (pfam01197) →                                               |
| Sen-1022-1 | NZ_CM001471.1          | + | 4136164 | 4136216 | RNA → rpmE (PRK00019)Ribosomal_L31 (pfam01197) →                                               |
| Sen-1019-1 | NZ_JWSP01000004.1      | + | 1022116 | 1022064 | RNA → rpmE (PRK00019)Ribosomal_L31 (pfam01197) →                                               |
| Sen-312-1  | NZ_APAC01000103.1      | - | 85432   | 85484   | RNA → rpmE (PRK00019)Ribosomal_L31 (pfam01197) → rpmE (PRK00019)Ribosomal_L31 (pfam01197) →    |
| Bag-1-1    | NZ_JPRU01000006.1      | - | 38990   | 38938   | RNA → rpmE (PRK00019)Ribosomal_L31 (pfam01197) →                                               |
| env-757    | JGI26054J46599_1163256 | + | 160     | 212     | RNA → rpmE (PRK00019)Ribosomal_L31 (pfam01197) →                                               |
| Stu-1-1    | NZ_AWFZ01000002.1      | + | 111257  | 111309  | RNA → rpmE (PRK00019)Ribosomal_L31 (pfam01197) →                                               |
| Ctu-2-1    | NZ_AXDM01000005.1      | - | 25734   | 25682   | RNA → rpmE (PRK00019)Ribosomal_L31 (pfam01197) →                                               |
| Ctu-1-1    | NZ_AVPP01000003.1      | + | 47207   | 47259   | RNA → rpmE (PRK00019)Ribosomal_L31 (pfam01197) →                                               |
| Cfr-3-1    | NZ_CP007557.1          | + | 1495160 | 1495212 | RNA → rpmE (PRK00019)Ribosomal_L31 (pfam01197) →                                               |
| Ksp-3-1    | NZ_LGIT01000007.1      | - | 29099   | 29047   | RNA → rpmE (PRK00019)Ribosomal_L31 (pfam01197) →                                               |
| Eco-1011-1 | NZ_AQCZ01000115.1      | + | 23399   | 23451   | RNA → rpmE (PRK00019)Ribosomal_L31 (pfam01197) →                                               |
| env-758    | BAAV01033320.1         | + | 305     | 357     | RNA → rpmE (PRK00019)Ribosomal_L31 (pfam01197) →                                               |
| env-759    | BAAW01007240.1         | - | 565     | 513     | RNA → rpmE (PRK00019)Ribosomal_L31 (pfam01197) →                                               |
| env-760    | BAAW01011360.1         | + | 754     | 806     | RNA → ← hypō                                                                                   |
| env-761    | BABF01001643.1         | - | 1445    | 1393    | RNA → rpmE (PRK00019)Ribosomal_L31 (pfam01197) →                                               |

|            |                        |   |         |         |                                                                                             |
|------------|------------------------|---|---------|---------|---------------------------------------------------------------------------------------------|
| env-762    | AEQT01000001.1         | + | 88843   | 88895   | RNA → rpmE (PRK00019)Ribosomal_L31 (pfam01197) →                                            |
| Cfr-5-1    | NZ_BBMV01000030.1      | - | 35429   | 35377   | RNA → rpmE (PRK00019)Ribosomal_L31 (pfam01197) →                                            |
| Cpa-1-1    | NZ_CDHL01000043.1      | - | 29572   | 29520   | RNA → rpmE (PRK00019)Ribosomal_L31 (pfam01197) →                                            |
| Cfr-11-1   | NZ_AOUE01000017.1      | + | 87594   | 87646   | RNA → rpmE (PRK00019)Ribosomal_L31 (pfam01197) →                                            |
| Csp-16-1   | NZ_AKTT01000023.1      | + | 87561   | 87613   | RNA → rpmE (PRK00019)Ribosomal_L31 (pfam01197) → rpmE (PRK00019)Ribosomal_L31 (pfam01197) → |
| Cfr-2-2    | NZ_ANAV01000016.1      | + | 78413   | 78465   | RNA → rpmE (PRK00019)Ribosomal_L31 (pfam01197) →                                            |
| Cfr-2-1    | NZ_JMTA01000012.1      | + | 78415   | 78467   | RNA → rpmE (PRK00019)Ribosomal_L31 (pfam01197) →                                            |
| Cfr-6-1    | NZ_JATT01000019.1      | + | 78434   | 78486   | RNA → rpmE (PRK00019)Ribosomal_L31 (pfam01197) →                                            |
| Cfr-7-1    | NZ_KI929269.1          | + | 4901833 | 4901885 | RNA → rpmE (PRK00019)Ribosomal_L31 (pfam01197) →                                            |
| Csp-18-1   | NZ_KB976057.1          | + | 90814   | 90866   | RNA → rpmE (PRK00019)Ribosomal_L31 (pfam01197) →                                            |
| Cfr-10-1   | NZ_AOMS01000029.1      | - | 35491   | 35439   | RNA → rpmE (PRK00019)Ribosomal_L31 (pfam01197) →                                            |
| Cfr-1-1    | NZ_CP011657.1          | - | 2678236 | 2678184 | RNA → rpmE (PRK00019)Ribosomal_L31 (pfam01197) →                                            |
| Cfr-1-2    | NZ_CP011612.1          | + | 3379319 | 3379371 | RNA → rpmE (PRK00019)Ribosomal_L31 (pfam01197) →                                            |
| Csp-6-1    | NZ_KQ089819.1          | - | 838497  | 838445  | RNA → rpmE (PRK00019)Ribosomal_L31 (pfam01197) →                                            |
| Csp-11-1   | NZ_KQ089794.1          | - | 242684  | 242632  | RNA → rpmE (PRK00019)Ribosomal_L31 (pfam01197) →                                            |
| Csp-5-1    | NZ_KQ089814.1          | + | 89593   | 89645   | RNA → rpmE (PRK00019)Ribosomal_L31 (pfam01197) →                                            |
| Csp-4-1    | NZ_KQ089805.1          | - | 35482   | 35430   | RNA → rpmE (PRK00019)Ribosomal_L31 (pfam01197) →                                            |
| Csp-2-1    | NZ_KQ089848.1          | - | 2277940 | 2277888 | RNA → rpmE (PRK00019)Ribosomal_L31 (pfam01197) →                                            |
| Csp-9-1    | NZ_KQ089838.1          | - | 444760  | 444708  | RNA → rpmE (PRK00019)Ribosomal_L31 (pfam01197) →                                            |
| Csp-20-1   | NZ_AMPE01000010.1      | + | 87560   | 87612   | RNA → rpmE (PRK00019)Ribosomal_L31 (pfam01197) →                                            |
| Cfr-1-3    | NZ_JTBJ01000001.1      | + | 4640958 | 4641010 | RNA → rpmE (PRK00019)Ribosomal_L31 (pfam01197) →                                            |
| Eco-1781-1 | NZ_ASHB01000053.1      | + | 32271   | 32323   | RNA → rpmE (PRK00019)Ribosomal_L31 (pfam01197) →                                            |
| Cam-1-1    | NZ_LAMY01000136.1      | + | 29848   | 29900   | RNA → rpmE (PRK00019)Ribosomal_L31 (pfam01197) →                                            |
| Esp-48-1   | NZ_LEDLM01000004.1     | - | 45562   | 45510   | RNA → rpmE (PRK00019)Ribosomal_L31 (pfam01197) →                                            |
| Cbr-1-1    | NZ_JUKU01000045.1      | + | 60235   | 60287   | RNA → rpmE (PRK00019)Ribosomal_L31 (pfam01197) →                                            |
| Cbr-1-2    | NZ_JWAG01000048.1      | + | 60248   | 60300   | RNA → rpmE (PRK00019)Ribosomal_L31 (pfam01197) →                                            |
| Cbr-1-3    | NZ_JUYY01000053.1      | + | 60968   | 61020   | RNA → rpmE (PRK00019)Ribosomal_L31 (pfam01197) →                                            |
| Cbr-1-4    | NZ_JULD01000069.1      | - | 27815   | 27763   | RNA → rpmE (PRK00019)Ribosomal_L31 (pfam01197) →                                            |
| Csp-15-1   | NZ_KI391987.1          | - | 39609   | 39557   | RNA → rpmE (PRK00019)Ribosomal_L31 (pfam01197) →                                            |
| Cfr-8-1    | NZ_KI929267.1          | + | 90664   | 90716   | RNA → rpmE (PRK00019)Ribosomal_L31 (pfam01197) →                                            |
| Csp-19-1   | NZ_KB976073.1          | + | 200071  | 200123  | RNA → rpmE (PRK00019)Ribosomal_L31 (pfam01197) →                                            |
| Csp-17-1   | NZ_KB976068.1          | + | 125011  | 125063  | RNA → rpmE (PRK00019)Ribosomal_L31 (pfam01197) →                                            |
| Csp-3-1    | NZ_KQ089873.1          | + | 62426   | 62478   | RNA → rpmE (PRK00019)Ribosomal_L31 (pfam01197) →                                            |
| Csp-10-1   | NZ_KQ089833.1          | - | 40759   | 40707   | RNA → rpmE (PRK00019)Ribosomal_L31 (pfam01197) → hypo → KdgM (pfam06178) →                  |
| Csp-7-1    | NZ_KQ089824.1          | - | 2325449 | 2325397 | MelB (COG2211)gph (TIGR00792) → rpmE (PRK00019)Ribosomal_L31 (pfam01197) →                  |
| Cbr-1-5    | NZ_JRHL01000001.1      | - | 2295239 | 2295187 | RNA → rpmE (PRK00019)Ribosomal_L31 (pfam01197) →                                            |
| Cbr-1-6    | NZ_JRHK01000001.1      | + | 107410  | 107462  | RNA → rpmE (PRK00019)Ribosomal_L31 (pfam01197) →                                            |
| Sso-1-2    | NZ_CWTS01000028.1      | + | 39051   | 39103   | RNA → rpmE (PRK00019)Ribosomal_L31 (pfam01197) →                                            |
| Sfl-70-1   | NZ_AKMW01000069.1      | - | 54097   | 54045   | RNA → rpmE (PRK00019)Ribosomal_L31 (pfam01197) → rpmE (PRK00019)Ribosomal_L31 (pfam01197) → |
| Sfl-71-1   | NZ_AERO010000112.1     | - | 1241    | 1189    | RNA → rpmE (PRK00019)Ribosomal_L31 (pfam01197) →                                            |
| Eco-390-1  | NZ_HG977162.1          | + | 91704   | 91756   | RNA → rpmE (PRK00019)Ribosomal_L31 (pfam01197) →                                            |
| Sfl-69-1   | NZ_LAJR01000096.1      | - | 1240    | 1188    | RNA → rpmE (PRK00019)Ribosomal_L31 (pfam01197) →                                            |
| Ssp-20-2   | NZ_LDEG01000011.1      | - | 34084   | 34032   | RNA → rpmE (PRK00019)Ribosomal_L31 (pfam01197) →                                            |
| Cfr-9-1    | NZ_JH414877.1          | - | 39489   | 39437   | RNA → rpmE (PRK00019)Ribosomal_L31 (pfam01197) →                                            |
| Cfr-4-1    | NZ_KK736169.1          | + | 94576   | 94628   | RNA → rpmE (PRK00019)Ribosomal_L31 (pfam01197) →                                            |
| Cfr-1-4    | NZ_JTBV01000001.1      | - | 898514  | 898462  | RNA → rpmE (PRK00019)Ribosomal_L31 (pfam01197) →                                            |
| Eco-1460-1 | NZ_KB732916.1          | + | 3520416 | 3520468 | RNA → rpmE (PRK00019)Ribosomal_L31 (pfam01197) →                                            |
| env-763    | DLM009_scaffold16386.3 | + | 718     | 770     | RNA → rpmE (PRK00019)Ribosomal_L31 (pfam01197) →                                            |
| env-764    | NLF015_scaffold22851.1 | - | 263     | 211     | RNA → rpmE (PRK00019)Ribosomal_L31 (pfam01197) →                                            |
| env-765    | NOM004_scaffold4453.6  | + | 1622    | 1674    | RNA → rpmE (PRK00019)Ribosomal_L31 (pfam01197) →                                            |
| Eco-1383-1 | NZ_CBWB010000190.1     | + | 91974   | 92026   | RNA → rpmE (PRK00019)Ribosomal_L31 (pfam01197) →                                            |



|            |                                 |   |         |         |                                                                                             |
|------------|---------------------------------|---|---------|---------|---------------------------------------------------------------------------------------------|
| Eco-325-1  | NZ_KK214157.1                   | + | 92332   | 92384   | RNA → rpmE (PRK00019)Ribosomal_L31 (pfam01197) →                                            |
| Eco-316-1  | NZ_KK736352.1                   | + | 92567   | 92619   | RNA → rpmE (PRK00019)Ribosomal_L31 (pfam01197) →                                            |
| Eco-305-1  | NZ_KI929660.1                   | + | 3035802 | 3035854 | RNA → rpmE (PRK00019)Ribosomal_L31 (pfam01197) →                                            |
| Eco-296-1  | NZ_KI929714.1                   | + | 4459892 | 4459944 | RNA → rpmE (PRK00019)Ribosomal_L31 (pfam01197) →                                            |
| Eco-302-1  | NZ_KI929774.1                   | - | 205100  | 205048  | RNA → rpmE (PRK00019)Ribosomal_L31 (pfam01197) →                                            |
| Eco-304-1  | NZ_KI929668.1                   | - | 97421   | 97369   | RNA → rpmE (PRK00019)Ribosomal_L31 (pfam01197) →                                            |
| Eco-310-1  | NZ_KI929804.1                   | + | 4463923 | 4463975 | RNA → rpmE (PRK00019)Ribosomal_L31 (pfam01197) →                                            |
| Eco-298-1  | NZ_KI929698.1                   | - | 639989  | 639937  | RNA → rpmE (PRK00019)Ribosomal_L31 (pfam01197) →                                            |
| Eco-297-1  | NZ_KI929706.1                   | - | 636775  | 636723  | RNA → rpmE (PRK00019)Ribosomal_L31 (pfam01197) →                                            |
| Eco-299-1  | NZ_KI929690.1                   | + | 1502179 | 1502231 | RNA → rpmE (PRK00019)Ribosomal_L31 (pfam01197) →                                            |
| Eco-327-1  | NZ_KI929758.1                   | + | 93576   | 93628   | RNA → rpmE (PRK00019)Ribosomal_L31 (pfam01197) →                                            |
| Eco-303-1  | NZ_KI929771.1                   | + | 92568   | 92620   | RNA → rpmE (PRK00019)Ribosomal_L31 (pfam01197) →                                            |
| Eco-295-1  | NZ_KI929738.1                   | + | 206307  | 206359  | RNA → rpmE (PRK00019)Ribosomal_L31 (pfam01197) →                                            |
| Eco-1015-1 | NZ_AXLi01000001.1               | + | 4460664 | 4460716 | RNA → rpmE (PRK00019)Ribosomal_L31 (pfam01197) →                                            |
| Eco-258-1  | NZ_AYQW01000048.1               | - | 687     | 635     | RNA → rpmE (PRK00019)Ribosomal_L31 (pfam01197) →                                            |
| Eco-1647-1 | NZ_AYNI01000026.1               | - | 938     | 886     | RNA → rpmE (PRK00019)Ribosomal_L31 (pfam01197) →                                            |
| Eco-1646-1 | NZ_AYNH01000020.1               | - | 922     | 870     | RNA → rpmE (PRK00019)Ribosomal_L31 (pfam01197) →                                            |
| Eco-428-1  | NZ_JDVF01000018.1               | - | 52260   | 52208   | RNA → rpmE (PRK00019)Ribosomal_L31 (pfam01197) →                                            |
| Cwe-1-1    | NZ_BBMW01000019.1               | - | 35233   | 35181   | RNA → rpmE (PRK00019)Ribosomal_L31 (pfam01197) →                                            |
| Sso-1-3    | NZ_CWSV01000068.1               | + | 20842   | 20894   | RNA → rpmE (PRK00019)Ribosomal_L31 (pfam01197) →                                            |
| env-766    | BABF01000073.1                  | - | 6870    | 6818    | RNA → rpmE (PRK00019)Ribosomal_L31 (pfam01197) →                                            |
| env-767    | scaffold134588.2.MH0012         | + | 210     | 262     | RNA → rpmE (PRK00019)Ribosomal_L31 (pfam01197) →                                            |
| env-768    | 4491407.3.NODE_4519             | - | 2364    | 2312    | RNA → rpmE (PRK00019)Ribosomal_L31 (pfam01197) →                                            |
| env-769    | longitudinal.136.11             | + | 77179   | 77231   | RNA → rpmE (PRK00019)Ribosomal_L31 (pfam01197) →                                            |
| env-770    | longitudinal.137.363            | + | 76993   | 77045   | RNA → rpmE (PRK00019)Ribosomal_L31 (pfam01197) →                                            |
| env-771    | longitudinal.138.145            | + | 77051   | 77103   | RNA → rpmE (PRK00019)Ribosomal_L31 (pfam01197) →                                            |
| env-772    | longitudinal.382.105            | + | 76965   | 77017   | RNA → rpmE (PRK00019)Ribosomal_L31 (pfam01197) →                                            |
| env-773    | longitudinal.383.30             | - | 52083   | 52031   | RNA → rpmE (PRK00019)Ribosomal_L31 (pfam01197) →                                            |
| env-774    | longitudinal.476.25             | - | 52085   | 52033   | RNA → rpmE (PRK00019)Ribosomal_L31 (pfam01197) →                                            |
| env-775    | longitudinal.477.11             | - | 18180   | 18128   | RNA → rpmE (PRK00019)Ribosomal_L31 (pfam01197) →                                            |
| env-776    | longitudinal.478.15             | + | 7304    | 7356    | RNA → rpmE (PRK00019)Ribosomal_L31 (pfam01197) →                                            |
| env-777    | longitudinal.479.7              | - | 52071   | 52019   | RNA → rpmE (PRK00019)Ribosomal_L31 (pfam01197) →                                            |
| env-778    | longitudinal.480.186            | + | 93226   | 93278   | RNA → rpmE (PRK00019)Ribosomal_L31 (pfam01197) →                                            |
| env-779    | longitudinal.481.108            | + | 76967   | 77019   | RNA → rpmE (PRK00019)Ribosomal_L31 (pfam01197) →                                            |
| env-780    | longitudinal.523.386            | + | 775     | 827     | RNA → rpmE (PRK00019)Ribosomal_L31 (pfam01197) →                                            |
| env-781    | SRS012273_Baylor_scaffold.27707 | - | 310     | 258     | RNA → ← hyp0                                                                                |
| env-782    | SRS013687_C2419310              | + | 106     | 158     | RNA → ← hyp0                                                                                |
| env-783    | SRS064276_LANL_scaffold.67167   | + | 192     | 244     | RNA → rpmE (PRK00019)Ribosomal_L31 (pfam01197) →                                            |
| Eco-1069-1 | NZ_AIFH01000083.1               | + | 95460   | 95512   | RNA → rpmE (PRK00019)Ribosomal_L31 (pfam01197) →                                            |
| Eco-932-1  | NZ_ANME01000140.1               | + | 91944   | 91996   | RNA → rpmE (PRK00019)Ribosomal_L31 (pfam01197) →                                            |
| Eco-1953-1 | NZ_AOEL01000099.1               | + | 92477   | 92529   | RNA → rpmE (PRK00019)Ribosomal_L31 (pfam01197) →                                            |
| Eco-1949-1 | NZ_AOEk01000130.1               | + | 91968   | 92020   | RNA → rpmE (PRK00019)Ribosomal_L31 (pfam01197) →                                            |
| Eco-943-1  | NZ_AOEq01000149.1               | + | 91698   | 91750   | RNA → rpmE (PRK00019)Ribosomal_L31 (pfam01197) →                                            |
| Eco-935-1  | NZ_AODY01000196.1               | + | 94220   | 94272   | RNA → rpmE (PRK00019)Ribosomal_L31 (pfam01197) →                                            |
| Eco-1977-1 | NZ_AOEO01000117.1               | + | 44640   | 44692   | RNA → rpmE (PRK00019)Ribosomal_L31 (pfam01197) →                                            |
| Eco-1075-1 | NZ_AIFN01000076.1               | + | 96431   | 96483   | RNA → rpmE (PRK00019)Ribosomal_L31 (pfam01197) →                                            |
| Eco-941-1  | NZ_AOER01000130.1               | + | 88384   | 88436   | RNA → rpmE (PRK00019)Ribosomal_L31 (pfam01197) →                                            |
| Eco-939-1  | NZ_AOEC01000217.1               | + | 88385   | 88437   | RNA → rpmE (PRK00019)Ribosomal_L31 (pfam01197) →                                            |
| Eco-1972-1 | NZ_AOEM01000150.1               | + | 44656   | 44708   | RNA → rpmE (PRK00019)Ribosomal_L31 (pfam01197) →                                            |
| Eco-736-1  | NZ_JWZW01000013.1               | - | 52488   | 52436   | RNA → rpmE (PRK00019)Ribosomal_L31 (pfam01197) →                                            |
| Eco-1802-1 | NZ_ABHT01000011.1               | - | 47240   | 47188   | RNA → rpmE (PRK00019)Ribosomal_L31 (pfam01197) → rpmE (PRK00019)Ribosomal_L31 (pfam01197) → |
| Eco-1800-1 | NZ_ABHR01000009.1               | + | 96825   | 96877   | RNA → rpmE (PRK00019)Ribosomal_L31 (pfam01197) → rpmE (PRK00019)Ribosomal_L31 (pfam01197) → |

|            |                   |   |         |         |                                                                                             |
|------------|-------------------|---|---------|---------|---------------------------------------------------------------------------------------------|
| Eco-1794-1 | NZ_ABHQ01000006.1 | + | 210561  | 210613  | RNA → rpmE (PRK00019)Ribosomal_L31 (pfam01197) → rpmE (PRK00019)Ribosomal_L31 (pfam01197) → |
| Eco-1795-1 | NZ_ABHP01000009.1 | - | 47048   | 46996   | RNA → rpmE (PRK00019)Ribosomal_L31 (pfam01197) → rpmE (PRK00019)Ribosomal_L31 (pfam01197) → |
| Eco-1804-1 | NZ_ABHU01000005.1 | + | 261003  | 261055  | RNA → rpmE (PRK00019)Ribosomal_L31 (pfam01197) → rpmE (PRK00019)Ribosomal_L31 (pfam01197) → |
| Eco-1803-1 | NZ_ABHW01000012.1 | - | 47087   | 47035   | RNA → rpmE (PRK00019)Ribosomal_L31 (pfam01197) → rpmE (PRK00019)Ribosomal_L31 (pfam01197) → |
| Eco-1801-1 | NZ_ABHS01000007.1 | + | 209927  | 209979  | RNA → rpmE (PRK00019)Ribosomal_L31 (pfam01197) → rpmE (PRK00019)Ribosomal_L31 (pfam01197) → |
| Eco-859-1  | NZ_AMTN01000126.1 | + | 91910   | 91962   | RNA → rpmE (PRK00019)Ribosomal_L31 (pfam01197) →                                            |
| Eco-937-1  | NZ_AOEA01000208.1 | + | 94248   | 94300   | RNA → rpmE (PRK00019)Ribosomal_L31 (pfam01197) →                                            |
| Eco-940-1  | NZ_AOED01000229.1 | + | 93715   | 93767   | RNA → rpmE (PRK00019)Ribosomal_L31 (pfam01197) →                                            |
| Eco-569-1  | NZ_ASHA01000104.1 | - | 486     | 434     | RNA → rpmE (PRK00019)Ribosomal_L31 (pfam01197) →                                            |
| Eco-1798-1 | NZ_ABHO01000013.1 | - | 49906   | 49854   | RNA → rpmE (PRK00019)Ribosomal_L31 (pfam01197) → rpmE (PRK00019)Ribosomal_L31 (pfam01197) → |
| Eco-1792-1 | NZ_ABHM02000001.1 | + | 3295143 | 3295195 | RNA → rpmE (PRK00019)Ribosomal_L31 (pfam01197) → rpmE (PRK00019)Ribosomal_L31 (pfam01197) → |
| Eco-346-1  | NZ_AIAR01000054.1 | - | 5358    | 5306    | RNA → rpmE (PRK00019)Ribosomal_L31 (pfam01197) →                                            |
| Eco-574-1  | NZ_LAZD01000064.1 | - | 557     | 505     | RNA → rpmE (PRK00019)Ribosomal_L31 (pfam01197) →                                            |
| Eco-574-2  | NZ_LCWU01000211.1 | + | 17316   | 17368   | RNA → rpmE (PRK00019)Ribosomal_L31 (pfam01197) →                                            |
| Eco-574-3  | NZ_LAYW01000197.1 | - | 556     | 504     | RNA → rpmE (PRK00019)Ribosomal_L31 (pfam01197) →                                            |
| Sso-1-4    | NZ_CWTD01000021.1 | - | 555     | 503     | RNA → rpmE (PRK00019)Ribosomal_L31 (pfam01197) →                                            |
| Eco-380-1  | NZ_AIBY01000120.1 | - | 485     | 433     | RNA → rpmE (PRK00019)Ribosomal_L31 (pfam01197) →                                            |
| Eco-351-1  | NZ_AIAW01000183.1 | - | 706     | 654     | RNA → rpmE (PRK00019)Ribosomal_L31 (pfam01197) →                                            |
| Eco-757-1  | NZ_AVRIO1000125.1 | + | 46581   | 46633   | RNA → rpmE (PRK00019)Ribosomal_L31 (pfam01197) →                                            |
| Eco-979-1  | NZ_AVQW01000112.1 | + | 91931   | 91983   | RNA → rpmE (PRK00019)Ribosomal_L31 (pfam01197) →                                            |
| Eco-984-1  | NZ_AVRA01000101.1 | + | 91696   | 91748   | RNA → rpmE (PRK00019)Ribosomal_L31 (pfam01197) →                                            |
| Eco-962-1  | NZ_AVQS01000121.1 | + | 94248   | 94300   | RNA → rpmE (PRK00019)Ribosomal_L31 (pfam01197) →                                            |
| Eco-977-1  | NZ_AVQU01000053.1 | + | 95584   | 95636   | RNA → rpmE (PRK00019)Ribosomal_L31 (pfam01197) →                                            |
| Eco-1998-1 | NZ_AVRN01000113.1 | + | 91692   | 91744   | RNA → rpmE (PRK00019)Ribosomal_L31 (pfam01197) →                                            |
| Eco-978-1  | NZ_AVQV01000003.1 | + | 96537   | 96589   | RNA → rpmE (PRK00019)Ribosomal_L31 (pfam01197) →                                            |
| Eco-967-1  | NZ_AVQT01000050.1 | + | 96695   | 96747   | RNA → rpmE (PRK00019)Ribosomal_L31 (pfam01197) →                                            |
| Eco-982-1  | NZ_AVQZ01000113.1 | + | 91945   | 91997   | RNA → rpmE (PRK00019)Ribosomal_L31 (pfam01197) →                                            |
| Eco-772-1  | NZ_AVRQ01000125.1 | + | 94905   | 94957   | RNA → rpmE (PRK00019)Ribosomal_L31 (pfam01197) →                                            |
| Eco-985-1  | NZ_AVRB01000098.1 | + | 91952   | 92004   | RNA → rpmE (PRK00019)Ribosomal_L31 (pfam01197) →                                            |
| Eco-981-1  | NZ_AVRY01000110.1 | + | 91935   | 91987   | RNA → rpmE (PRK00019)Ribosomal_L31 (pfam01197) →                                            |
| Eco-1997-1 | NZ_AVRM01000138.1 | + | 44627   | 44679   | RNA → rpmE (PRK00019)Ribosomal_L31 (pfam01197) →                                            |
| Eco-991-1  | NZ_AVRC01000046.1 | + | 94622   | 94674   | RNA → rpmE (PRK00019)Ribosomal_L31 (pfam01197) →                                            |
| Eco-1002-1 | NZ_AVRF01000049.1 | + | 96837   | 96889   | RNA → rpmE (PRK00019)Ribosomal_L31 (pfam01197) →                                            |
| Eco-995-1  | NZ_AVSH01000114.1 | + | 92149   | 92201   | RNA → rpmE (PRK00019)Ribosomal_L31 (pfam01197) →                                            |
| Eco-965-1  | NZ_AVRU01000122.1 | + | 44646   | 44698   | RNA → rpmE (PRK00019)Ribosomal_L31 (pfam01197) →                                            |
| Eco-760-1  | NZ_AVQR01000061.1 | + | 94786   | 94838   | RNA → rpmE (PRK00019)Ribosomal_L31 (pfam01197) →                                            |
| Eco-1999-1 | NZ_AVRO01000114.1 | + | 29667   | 29719   | RNA → rpmE (PRK00019)Ribosomal_L31 (pfam01197) →                                            |
| Eco-966-1  | NZ_AVRV01000107.1 | + | 92178   | 92230   | RNA → rpmE (PRK00019)Ribosomal_L31 (pfam01197) →                                            |
| Eco-990-1  | NZ_AVSG01000112.1 | + | 91949   | 92001   | RNA → rpmE (PRK00019)Ribosomal_L31 (pfam01197) →                                            |
| Eco-963-1  | NZ_AVRS01000114.1 | + | 91671   | 91723   | RNA → rpmE (PRK00019)Ribosomal_L31 (pfam01197) →                                            |
| Eco-970-1  | NZ_AVRY01000117.1 | + | 94217   | 94269   | RNA → rpmE (PRK00019)Ribosomal_L31 (pfam01197) →                                            |
| Eco-997-1  | NZ_AVSJ01000120.1 | + | 93623   | 93675   | RNA → rpmE (PRK00019)Ribosomal_L31 (pfam01197) → rpmE (PRK00019)Ribosomal_L31 (pfam01197) → |
| Eco-1003-1 | NZ_AVRG01000051.1 | + | 95891   | 95943   | RNA → rpmE (PRK00019)Ribosomal_L31 (pfam01197) →                                            |
| Eco-992-1  | NZ_AVRD01000047.1 | + | 96895   | 96947   | RNA → rpmE (PRK00019)Ribosomal_L31 (pfam01197) →                                            |
| Eco-964-1  | NZ_AVRT01000114.1 | + | 94254   | 94306   | RNA → rpmE (PRK00019)Ribosomal_L31 (pfam01197) →                                            |
| Eco-969-1  | NZ_AVRX01000111.1 | + | 92141   | 92193   | RNA → rpmE (PRK00019)Ribosomal_L31 (pfam01197) →                                            |
| Eco-972-1  | NZ_AVSA01000108.1 | + | 93637   | 93689   | RNA → rpmE (PRK00019)Ribosomal_L31 (pfam01197) →                                            |
| Eco-968-1  | NZ_AVRW01000116.1 | + | 44654   | 44706   | RNA → rpmE (PRK00019)Ribosomal_L31 (pfam01197) →                                            |
| Eco-1000-1 | NZ_AVSM01000111.1 | + | 93633   | 93685   | RNA → rpmE (PRK00019)Ribosomal_L31 (pfam01197) →                                            |
| Eco-999-1  | NZ_AVSL01000116.1 | + | 92472   | 92524   | RNA → rpmE (PRK00019)Ribosomal_L31 (pfam01197) →                                            |
| Eco-998-1  | NZ_AVSK01000131.1 | + | 91687   | 91739   | RNA → rpmE (PRK00019)Ribosomal_L31 (pfam01197) →                                            |
| Eco-987-1  | NZ_AVSE01000119.1 | + | 44642   | 44694   | RNA → rpmE (PRK00019)Ribosomal_L31 (pfam01197) →                                            |



|            |                   |   |        |        |     |   |                 |                           |                                             |
|------------|-------------------|---|--------|--------|-----|---|-----------------|---------------------------|---------------------------------------------|
| Eco-974-1  | NZ_AVSC01000008.1 | - | 4109   | 4057   | RNA | → | rpmE (PRK00019) | Ribosomal_L31 (pfam01197) | →                                           |
| Eco-758-1  | NZ_AVRJ01000121.1 | + | 94936  | 94988  | RNA | → | rpmE (PRK00019) | Ribosomal_L31 (pfam01197) | →                                           |
| Eco-448-1  | NZ_AWPR01000018.1 | + | 91639  | 91691  | RNA | → | rpmE (PRK00019) | Ribosomal_L31 (pfam01197) | →                                           |
| Eco-759-1  | NZ_AVRK01000132.1 | + | 46570  | 46622  | RNA | → | rpmE (PRK00019) | Ribosomal_L31 (pfam01197) | →                                           |
| Eco-449-1  | NZ_AWPS01000020.1 | + | 91641  | 91693  | RNA | → | rpmE (PRK00019) | Ribosomal_L31 (pfam01197) | →                                           |
| Eco-437-1  | NZ_AWQC01000422.1 | + | 91641  | 91693  | RNA | → | rpmE (PRK00019) | Ribosomal_L31 (pfam01197) | →                                           |
| Eco-1001-1 | NZ_AVRE01000043.1 | + | 94898  | 94950  | RNA | → | rpmE (PRK00019) | Ribosomal_L31 (pfam01197) | →                                           |
| Eco-447-1  | NZ_AWPQ01000136.1 | + | 91638  | 91690  | RNA | → | rpmE (PRK00019) | Ribosomal_L31 (pfam01197) | →                                           |
| Eco-438-1  | NZ_AWQD01000028.1 | + | 91639  | 91691  | RNA | → | rpmE (PRK00019) | Ribosomal_L31 (pfam01197) | →                                           |
| Eco-432-1  | NZ_AWPX01000127.1 | + | 12748  | 12800  | RNA | → | rpmE (PRK00019) | Ribosomal_L31 (pfam01197) | →                                           |
| Eco-433-1  | NZ_AWPY01000116.1 | + | 12746  | 12798  | RNA | → | rpmE (PRK00019) | Ribosomal_L31 (pfam01197) | →                                           |
| Eco-421-1  | NZ_AWQJ0100017.1  | + | 91639  | 91691  | RNA | → | rpmE (PRK00019) | Ribosomal_L31 (pfam01197) | →                                           |
| Eco-430-1  | NZ_AWPV01000015.1 | + | 12744  | 12796  | RNA | → | rpmE (PRK00019) | Ribosomal_L31 (pfam01197) | →                                           |
| Eco-451-1  | NZ_AWPU01000098.1 | + | 12748  | 12800  | RNA | → | rpmE (PRK00019) | Ribosomal_L31 (pfam01197) | →                                           |
| Eco-434-1  | NZ_AWPZ01000093.1 | + | 19850  | 19902  | RNA | → | rpmE (PRK00019) | Ribosomal_L31 (pfam01197) | →                                           |
| Eco-750-1  | NZ_AWQO01000113.1 | + | 12748  | 12800  | RNA | → | rpmE (PRK00019) | Ribosomal_L31 (pfam01197) | →                                           |
| Eco-440-1  | NZ_AWPN01000045.1 | + | 12746  | 12798  | RNA | → | rpmE (PRK00019) | Ribosomal_L31 (pfam01197) | →                                           |
| Eco-439-1  | NZ_AWQE01000031.1 | + | 91641  | 91693  | RNA | → | rpmE (PRK00019) | Ribosomal_L31 (pfam01197) | →                                           |
| Eco-444-1  | NZ_AWQI01000063.1 | + | 12748  | 12800  | RNA | → | rpmE (PRK00019) | Ribosomal_L31 (pfam01197) | →                                           |
| Eco-436-1  | NZ_AWQB01000157.1 | + | 12747  | 12799  | RNA | → | rpmE (PRK00019) | Ribosomal_L31 (pfam01197) | →                                           |
| Eco-435-1  | NZ_AWQA01000092.1 | + | 12748  | 12800  | RNA | → | rpmE (PRK00019) | Ribosomal_L31 (pfam01197) | →                                           |
| Eco-747-1  | NZ_AWQL01000099.1 | + | 12748  | 12800  | RNA | → | rpmE (PRK00019) | Ribosomal_L31 (pfam01197) | →                                           |
| Eco-749-1  | NZ_AWQN01000168.1 | + | 12746  | 12798  | RNA | → | rpmE (PRK00019) | Ribosomal_L31 (pfam01197) | →                                           |
| Eco-748-1  | NZ_AWQM01000034.1 | + | 12748  | 12800  | RNA | → | rpmE (PRK00019) | Ribosomal_L31 (pfam01197) | →                                           |
| Eco-443-1  | NZ_AWQH01000004.1 | + | 2951   | 3003   | RNA | → | rpmE (PRK00019) | Ribosomal_L31 (pfam01197) | →                                           |
| Eco-278-1  | NZ_AIAK01000020.1 | - | 1021   | 969    | RNA | → | rpmE (PRK00019) | Ribosomal_L31 (pfam01197) | →                                           |
| Eco-980-1  | NZ_AVQX01000117.1 | + | 92014  | 92066  | RNA | → | rpmE (PRK00019) | Ribosomal_L31 (pfam01197) | →                                           |
| Eco-973-1  | NZ_AVSB01000121.1 | - | 4116   | 4064   | RNA | → | rpmE (PRK00019) | Ribosomal_L31 (pfam01197) | →                                           |
| Eco-2045-1 | NZ_AVSO01000133.1 | + | 94217  | 94269  | RNA | → | rpmE (PRK00019) | Ribosomal_L31 (pfam01197) | →                                           |
| Eco-986-1  | NZ_AVSD01000125.1 | + | 92039  | 92091  | RNA | → | rpmE (PRK00019) | Ribosomal_L31 (pfam01197) | →                                           |
| Eco-996-1  | NZ_AVSI01000127.1 | + | 94242  | 94294  | RNA | → | rpmE (PRK00019) | Ribosomal_L31 (pfam01197) | → rpmE (PRK00019)Ribosomal_L31 (pfam01197)→ |
| Eco-1023-1 | NZ_AVRL01000126.1 | + | 91700  | 91752  | RNA | → | rpmE (PRK00019) | Ribosomal_L31 (pfam01197) | →                                           |
| Eco-2000-1 | NZ_AVRP01000114.1 | + | 94245  | 94297  | RNA | → | rpmE (PRK00019) | Ribosomal_L31 (pfam01197) | →                                           |
| Eco-971-1  | NZ_AVRZ01000117.1 | + | 94219  | 94271  | RNA | → | rpmE (PRK00019) | Ribosomal_L31 (pfam01197) | →                                           |
| Eco-989-1  | NZ_AVSF01000119.1 | + | 44639  | 44691  | RNA | → | rpmE (PRK00019) | Ribosomal_L31 (pfam01197) | →                                           |
| Eco-2036-1 | NZ_AKLW01000069.1 | + | 95016  | 95068  | RNA | → | rpmE (PRK00019) | Ribosomal_L31 (pfam01197) | →                                           |
| Eco-1968-1 | NZ_AKLQ01000060.1 | + | 23530  | 23582  | RNA | → | rpmE (PRK00019) | Ribosomal_L31 (pfam01197) | →                                           |
| Eco-2031-1 | NZ_AKLV01000044.1 | + | 95383  | 95435  | RNA | → | rpmE (PRK00019) | Ribosomal_L31 (pfam01197) | →                                           |
| Eco-1791-1 | NZ_ADMX01000127.1 | + | 91609  | 91661  | RNA | → | rpmE (PRK00019) | Ribosomal_L31 (pfam01197) | →                                           |
| Eco-1805-1 | NZ_ACXO01000010.1 | + | 30986  | 31038  | RNA | → | rpmE (PRK00019) | Ribosomal_L31 (pfam01197) | → rpmE (PRK00019)Ribosomal_L31 (pfam01197)→ |
| Eco-620-1  | NZ_ADVC01000558.1 | + | 91610  | 91662  | RNA | → | rpmE (PRK00019) | Ribosomal_L31 (pfam01197) | →                                           |
| Eco-1790-1 | NZ_AERQ01000011.1 | - | 879247 | 879195 | RNA | → | rpmE (PRK00019) | Ribosomal_L31 (pfam01197) | →                                           |
| Eco-1788-1 | NZ_AERP01000068.1 | - | 47614  | 47562  | RNA | → | rpmE (PRK00019) | Ribosomal_L31 (pfam01197) | →                                           |
| Eco-605-1  | NZ_JHKM01000001.1 | + | 91629  | 91681  | RNA | → | rpmE (PRK00019) | Ribosomal_L31 (pfam01197) | →                                           |
| Eco-579-1  | NZ_JHKZ01000005.1 | - | 451    | 399    | RNA | → | rpmE (PRK00019) | Ribosomal_L31 (pfam01197) | →                                           |
| Eco-598-1  | NZ_JHKT01000066.1 | + | 91629  | 91681  | RNA | → | rpmE (PRK00019) | Ribosomal_L31 (pfam01197) | →                                           |
| Eco-622-1  | NZ_JHJT01000041.1 | + | 91630  | 91682  | RNA | → | rpmE (PRK00019) | Ribosomal_L31 (pfam01197) | →                                           |
| Eco-624-1  | NZ_JHJP01000049.1 | - | 450    | 398    | RNA | → | rpmE (PRK00019) | Ribosomal_L31 (pfam01197) | →                                           |
| Eco-586-1  | NZ_JHGD01000027.1 | + | 18891  | 18943  | RNA | → | rpmE (PRK00019) | Ribosomal_L31 (pfam01197) | →                                           |
| Eco-582-1  | NZ_JHHI01000057.1 | + | 91627  | 91679  | RNA | → | rpmE (PRK00019) | Ribosomal_L31 (pfam01197) | →                                           |
| Eco-609-1  | NZ_JHKI01000039.1 | - | 451    | 399    | RNA | → | rpmE (PRK00019) | Ribosomal_L31 (pfam01197) | →                                           |
| Eco-1787-1 | NZ_JJOM01000126.1 | + | 10323  | 10375  | RNA | → | rpmE (PRK00019) | Ribosomal_L31 (pfam01197) | →                                           |

|            |                   |   |       |       |                                                                                             |
|------------|-------------------|---|-------|-------|---------------------------------------------------------------------------------------------|
| Eco-616-1  | NZ_JHKB01000029.1 | - | 450   | 398   | RNA → rpmE (PRK00019)Ribosomal_L31 (pfam01197) →                                            |
| Eco-603-1  | NZ_JHKO01000068.1 | + | 91629 | 91681 | RNA → rpmE (PRK00019)Ribosomal_L31 (pfam01197) →                                            |
| Eco-607-1  | NZ_JHKK01000018.1 | + | 91629 | 91681 | RNA → rpmE (PRK00019)Ribosomal_L31 (pfam01197) →                                            |
| Eco-580-1  | NZ_JHKY01000056.1 | - | 451   | 399   | RNA → rpmE (PRK00019)Ribosomal_L31 (pfam01197) →                                            |
| Eco-2028-1 | NZ_AKLY01000063.1 | + | 95632 | 95684 | RNA → rpmE (PRK00019)Ribosomal_L31 (pfam01197) →                                            |
| Eco-623-1  | NZ_JHJQ01000008.1 | + | 91629 | 91681 | RNA → rpmE (PRK00019)Ribosomal_L31 (pfam01197) →                                            |
| Eco-629-1  | NZ_JHJK01000015.1 | - | 450   | 398   | RNA → rpmE (PRK00019)Ribosomal_L31 (pfam01197) →                                            |
| Eco-627-1  | NZ_JHJM01000040.1 | - | 450   | 398   | RNA → rpmE (PRK00019)Ribosomal_L31 (pfam01197) →                                            |
| Eco-617-1  | NZ_JHKA01000046.1 | + | 91629 | 91681 | RNA → rpmE (PRK00019)Ribosomal_L31 (pfam01197) →                                            |
| Eco-1067-1 | NZ_AIF01000060.1  | + | 96859 | 96911 | RNA → rpmE (PRK00019)Ribosomal_L31 (pfam01197) →                                            |
| Eco-611-1  | NZ_JHKG01000053.1 | + | 91627 | 91679 | RNA → rpmE (PRK00019)Ribosomal_L31 (pfam01197) →                                            |
| Eco-626-1  | NZ_JHJN01000046.1 | - | 450   | 398   | RNA → rpmE (PRK00019)Ribosomal_L31 (pfam01197) →                                            |
| Eco-1954-1 | NZ_AKLI01000067.1 | + | 93083 | 93135 | RNA → hypo → rpmE (PRK00019)Ribosomal_L31 (pfam01197) →                                     |
| Eco-618-1  | NZ_ADUZ01000101.1 | + | 19096 | 19148 | RNA → rpmE (PRK00019)Ribosomal_L31 (pfam01197) →                                            |
| Eco-2030-1 | NZ_AKMA01000052.1 | + | 92700 | 92752 | RNA → rpmE (PRK00019)Ribosomal_L31 (pfam01197) →                                            |
| Eco-587-1  | NZ_JHGC01000018.1 | - | 889   | 837   | RNA → rpmE (PRK00019)Ribosomal_L31 (pfam01197) →                                            |
| Eco-604-1  | NZ_JHKN01000014.1 | - | 450   | 398   | RNA → rpmE (PRK00019)Ribosomal_L31 (pfam01197) →                                            |
| Eco-628-1  | NZ_JHJL01000028.1 | + | 91627 | 91679 | RNA → rpmE (PRK00019)Ribosomal_L31 (pfam01197) →                                            |
| Eco-625-1  | NZ_JHJO01000073.1 | + | 91629 | 91681 | RNA → rpmE (PRK00019)Ribosomal_L31 (pfam01197) →                                            |
| Eco-1786-1 | NZ_JJOL01000613.1 | - | 450   | 398   | RNA → rpmE (PRK00019)Ribosomal_L31 (pfam01197) →                                            |
| Eco-1797-1 | NZ_ADVA01000255.1 | - | 430   | 378   | RNA → rpmE (PRK00019)Ribosomal_L31 (pfam01197) →                                            |
| Eco-614-1  | NZ_JHKD01000047.1 | - | 450   | 398   | RNA → rpmE (PRK00019)Ribosomal_L31 (pfam01197) →                                            |
| Eco-933-1  | NZ_ANMF01000102.1 | + | 92081 | 92133 | RNA → rpmE (PRK00019)Ribosomal_L31 (pfam01197) →                                            |
| Eco-602-1  | NZ_JHKP01000022.1 | - | 450   | 398   | RNA → rpmE (PRK00019)Ribosomal_L31 (pfam01197) →                                            |
| Eco-764-1  | NZ_AMTO01000096.1 | + | 92142 | 92194 | RNA → rpmE (PRK00019)Ribosomal_L31 (pfam01197) →                                            |
| Eco-615-1  | NZ_JHKC01000036.1 | - | 450   | 398   | RNA → rpmE (PRK00019)Ribosomal_L31 (pfam01197) →                                            |
| Eco-583-1  | NZ_JHGQ01000004.1 | + | 23860 | 23912 | RNA → rpmE (PRK00019)Ribosomal_L31 (pfam01197) →                                            |
| Eco-584-1  | NZ_JHGF01000028.1 | + | 91945 | 91997 | RNA → rpmE (PRK00019)Ribosomal_L31 (pfam01197) →                                            |
| Eco-575-1  | NZ_JHNI01000046.1 | - | 450   | 398   | RNA → rpmE (PRK00019)Ribosomal_L31 (pfam01197) →                                            |
| Eco-1806-1 | NZ_ACXN01000137.1 | + | 91610 | 91662 | RNA → rpmE (PRK00019)Ribosomal_L31 (pfam01197) → rpmE (PRK00019)Ribosomal_L31 (pfam01197) → |
| Eco-1072-1 | NZ_AIF01000050.1  | + | 26780 | 26832 | RNA → rpmE (PRK00019)Ribosomal_L31 (pfam01197) →                                            |
| Eco-1077-1 | NZ_AIFP01000064.1 | + | 96827 | 96879 | RNA → rpmE (PRK00019)Ribosomal_L31 (pfam01197) →                                            |
| Eco-639-1  | NZ_JHJA01000020.1 | + | 91780 | 91832 | RNA → rpmE (PRK00019)Ribosomal_L31 (pfam01197) →                                            |
| Eco-636-1  | NZ_JHJD01000062.1 | + | 28264 | 28316 | RNA → rpmE (PRK00019)Ribosomal_L31 (pfam01197) →                                            |
| Eco-644-1  | NZ_JHIV01000025.1 | - | 385   | 333   | RNA → rpmE (PRK00019)Ribosomal_L31 (pfam01197) →                                            |
| Eco-647-1  | NZ_JHIS01000020.1 | - | 1165  | 1113  | RNA → rpmE (PRK00019)Ribosomal_L31 (pfam01197) →                                            |
| Eco-653-1  | NZ_JHIM01000108.1 | - | 1167  | 1115  | RNA → rpmE (PRK00019)Ribosomal_L31 (pfam01197) →                                            |
| Eco-660-1  | NZ_JHID01000024.1 | + | 91933 | 91985 | RNA →                                                                                       |
| Eco-665-1  | NZ_JHHY01000031.1 | + | 91851 | 91903 | RNA → rpmE (PRK00019)Ribosomal_L31 (pfam01197) →                                            |
| Eco-673-1  | NZ_JHHH01000049.1 | + | 91629 | 91681 | RNA → rpmE (PRK00019)Ribosomal_L31 (pfam01197) →                                            |
| Eco-635-1  | NZ_JHJF01000046.1 | - | 686   | 634   | RNA → rpmE (PRK00019)Ribosomal_L31 (pfam01197) →                                            |
| Eco-1115-1 | NZ_AKMN01000055.1 | + | 94670 | 94722 | RNA → rpmE (PRK00019)Ribosomal_L31 (pfam01197) →                                            |
| Eco-633-1  | NZ_JHJH01000029.1 | - | 450   | 398   | RNA → rpmE (PRK00019)Ribosomal_L31 (pfam01197) →                                            |
| Eco-640-1  | NZ_JHIZ01000031.1 | + | 90872 | 90924 | RNA → rpmE (PRK00019)Ribosomal_L31 (pfam01197) →                                            |
| Eco-641-1  | NZ_JHIY01000023.1 | + | 90756 | 90808 | RNA → rpmE (PRK00019)Ribosomal_L31 (pfam01197) →                                            |
| Eco-648-1  | NZ_JHIR01000036.1 | + | 91660 | 91712 | RNA → rpmE (PRK00019)Ribosomal_L31 (pfam01197) →                                            |
| Eco-645-1  | NZ_JHIU01000032.1 | - | 1552  | 1500  | RNA → rpmE (PRK00019)Ribosomal_L31 (pfam01197) →                                            |
| Eco-421-2  | NZ_JQFE01000162.1 | - | 5435  | 5383  | RNA → rpmE (PRK00019)Ribosomal_L31 (pfam01197) →                                            |
| Eco-655-1  | NZ_JHII01000022.1 | - | 1206  | 1154  | RNA → rpmE (PRK00019)Ribosomal_L31 (pfam01197) →                                            |
| Eco-661-1  | NZ_JHIC01000130.1 | + | 91932 | 91984 | RNA → rpmE (PRK00019)Ribosomal_L31 (pfam01197) →                                            |
| Eco-666-1  | NZ_JHHX01000127.1 | + | 80205 | 80257 | RNA → rpmE (PRK00019)Ribosomal_L31 (pfam01197) →                                            |
| Eco-667-1  | NZ_JHHW01000029.1 | + | 92008 | 92060 | RNA → rpmE (PRK00019)Ribosomal_L31 (pfam01197) →                                            |

|            |                   |   |         |         |                                                                                             |
|------------|-------------------|---|---------|---------|---------------------------------------------------------------------------------------------|
| Eco-652-1  | NZ_JHIN01000027.1 | + | 91794   | 91846   | RNA → rpmE (PRK00019)Ribosomal_L31 (pfam01197) →                                            |
| Eco-637-1  | NZ_JHJC01000021.1 | - | 1444    | 1392    | RNA → rpmE (PRK00019)Ribosomal_L31 (pfam01197) →                                            |
| Eco-1111-1 | NZ_AKMO01000049.1 | + | 92352   | 92404   | RNA → rpmE (PRK00019)Ribosomal_L31 (pfam01197) →                                            |
| Eco-642-1  | NZ_JHIX01000008.1 | + | 38907   | 38959   | RNA → rpmE (PRK00019)Ribosomal_L31 (pfam01197) →                                            |
| Eco-649-1  | NZ_JHIQ01000016.1 | + | 92060   | 92112   | RNA → rpmE (PRK00019)Ribosomal_L31 (pfam01197) →                                            |
| Eco-1074-1 | NZ_AIFM01000051.1 | + | 29971   | 30023   | RNA → rpmE (PRK00019)Ribosomal_L31 (pfam01197) →                                            |
| Eco-646-1  | NZ_JHIT01000029.1 | + | 92053   | 92105   | RNA → rpmE (PRK00019)Ribosomal_L31 (pfam01197) →                                            |
| Eco-656-1  | NZ_JHIH01000027.1 | + | 91457   | 91509   | RNA → rpmE (PRK00019)Ribosomal_L31 (pfam01197) →                                            |
| Eco-662-1  | NZ_JHIB01000019.1 | - | 617     | 565     | RNA → rpmE (PRK00019)Ribosomal_L31 (pfam01197) →                                            |
| Eco-421-3  | NZ_JQFC01000080.1 | - | 5475    | 5423    | RNA → rpmE (PRK00019)Ribosomal_L31 (pfam01197) →                                            |
| Eco-659-1  | NZ_JHIE01000023.1 | + | 92013   | 92065   | RNA → rpmE (PRK00019)Ribosomal_L31 (pfam01197) →                                            |
| Eco-669-1  | NZ_JHHK01000045.1 | + | 91704   | 91756   | RNA → rpmE (PRK00019)Ribosomal_L31 (pfam01197) →                                            |
| Eco-668-1  | NZ_JHHV01000025.1 | - | 1045    | 993     | RNA → rpmE (PRK00019)Ribosomal_L31 (pfam01197) →                                            |
| Eco-421-4  | NZ_JQFH01000455.1 | - | 9813    | 9761    | RNA → rpmE (PRK00019)Ribosomal_L31 (pfam01197) →                                            |
| Eco-631-1  | NZ_JHJI01000008.1 | - | 451     | 399     | RNA → rpmE (PRK00019)Ribosomal_L31 (pfam01197) →                                            |
| Eco-1710-1 | NZ_AJMD01000038.1 | + | 191195  | 191247  | RNA → rpmE (PRK00019)Ribosomal_L31 (pfam01197) →                                            |
| Eco-634-1  | NZ_JHJG01000006.1 | + | 91629   | 91681   | RNA → rpmE (PRK00019)Ribosomal_L31 (pfam01197) →                                            |
| Eco-638-1  | NZ_JHJB01000094.1 | + | 20677   | 20729   | RNA → hypo → rpmE (PRK00019)Ribosomal_L31 (pfam01197) →                                     |
| Eco-643-1  | NZ_JHIW01000024.1 | - | 648     | 596     | RNA → rpmE (PRK00019)Ribosomal_L31 (pfam01197) →                                            |
| Eco-650-1  | NZ_JHIP01000024.1 | - | 1458    | 1406    | RNA → rpmE (PRK00019)Ribosomal_L31 (pfam01197) →                                            |
| Eco-651-1  | NZ_JHIO01000024.1 | + | 91973   | 92025   | RNA → rpmE (PRK00019)Ribosomal_L31 (pfam01197) →                                            |
| Eco-654-1  | NZ_JHIL01000021.1 | + | 92073   | 92125   | RNA → rpmE (PRK00019)Ribosomal_L31 (pfam01197) →                                            |
| Eco-657-1  | NZ_JHIG01000029.1 | + | 91857   | 91909   | RNA → rpmE (PRK00019)Ribosomal_L31 (pfam01197) →                                            |
| Eco-658-1  | NZ_JHIF01000022.1 | - | 702     | 650     | RNA → rpmE (PRK00019)Ribosomal_L31 (pfam01197) →                                            |
| Eco-663-1  | NZ_JHIA01000018.1 | + | 30623   | 30675   | RNA → rpmE (PRK00019)Ribosomal_L31 (pfam01197) →                                            |
| Eco-1070-1 | NZ_AIFI01000086.1 | + | 95517   | 95569   | RNA → rpmE (PRK00019)Ribosomal_L31 (pfam01197) →                                            |
| Eco-1076-1 | NZ_AIFO01000059.1 | + | 96837   | 96889   | RNA → rpmE (PRK00019)Ribosomal_L31 (pfam01197) →                                            |
| Eco-672-1  | NZ_JJOK01000008.1 | - | 429     | 377     | RNA → rpmE (PRK00019)Ribosomal_L31 (pfam01197) →                                            |
| Eco-619-1  | NZ_ADUX01000057.1 | + | 91609   | 91661   | RNA → rpmE (PRK00019)Ribosomal_L31 (pfam01197) →                                            |
| Eco-1976-1 | NZ_AMTQ01000001.1 | + | 95107   | 95159   | RNA → rpmE (PRK00019)Ribosomal_L31 (pfam01197) →                                            |
| Eco-613-1  | NZ_JHKE01000012.1 | - | 450     | 398     | RNA → rpmE (PRK00019)Ribosomal_L31 (pfam01197) →                                            |
| Eco-592-1  | NZ_JHLG01000045.1 | - | 450     | 398     | RNA → rpmE (PRK00019)Ribosomal_L31 (pfam01197) →                                            |
| Eco-593-1  | NZ_JHLF01000079.1 | - | 450     | 398     | RNA → rpmE (PRK00019)Ribosomal_L31 (pfam01197) →                                            |
| Eco-595-1  | NZ_JHLD01000027.1 | - | 450     | 398     | RNA → rpmE (PRK00019)Ribosomal_L31 (pfam01197) →                                            |
| Eco-610-1  | NZ_JHKK01000027.1 | + | 91881   | 91933   | RNA → rpmE (PRK00019)Ribosomal_L31 (pfam01197) →                                            |
| Eco-597-1  | NZ_JHLB01000049.1 | - | 450     | 398     | RNA → rpmE (PRK00019)Ribosomal_L31 (pfam01197) →                                            |
| Eco-2164-1 | NZ_AEYT01000045.1 | + | 77041   | 77093   | RNA → rpmE (PRK00019)Ribosomal_L31 (pfam01197) →                                            |
| Eco-1799-1 | NZ_ABHK02000001.1 | + | 2307056 | 2307108 | RNA → rpmE (PRK00019)Ribosomal_L31 (pfam01197) → rpmE (PRK00019)Ribosomal_L31 (pfam01197) → |
| Eco-608-1  | NZ_JHKJ01000002.1 | - | 450     | 398     | RNA → rpmE (PRK00019)Ribosomal_L31 (pfam01197) →                                            |
| Eco-600-1  | NZ_JHKR01000082.1 | - | 450     | 398     | RNA → rpmE (PRK00019)Ribosomal_L31 (pfam01197) →                                            |
| Eco-594-1  | NZ_JHLE01000058.1 | - | 450     | 398     | RNA → rpmE (PRK00019)Ribosomal_L31 (pfam01197) →                                            |
| Eco-596-1  | NZ_JHLC01000006.1 | - | 450     | 398     | RNA → rpmE (PRK00019)Ribosomal_L31 (pfam01197) →                                            |
| Eco-601-1  | NZ_JHKQ01000035.1 | - | 450     | 398     | RNA → rpmE (PRK00019)Ribosomal_L31 (pfam01197) →                                            |
| Eco-591-1  | NZ_JHLH01000025.1 | - | 450     | 398     | RNA → rpmE (PRK00019)Ribosomal_L31 (pfam01197) →                                            |
| Eco-1793-1 | NZ_ABHL02000001.1 | + | 2175397 | 2175449 | RNA → rpmE (PRK00019)Ribosomal_L31 (pfam01197) → rpmE (PRK00019)Ribosomal_L31 (pfam01197) → |
| Eco-606-1  | NZ_JHKL01000031.1 | - | 450     | 398     | RNA → rpmE (PRK00019)Ribosomal_L31 (pfam01197) →                                            |
| Eco-599-1  | NZ_JHKS01000060.1 | - | 450     | 398     | RNA → rpmE (PRK00019)Ribosomal_L31 (pfam01197) →                                            |
| Eco-1789-1 | NZ_AERR01000025.1 | + | 95838   | 95890   | RNA → rpmE (PRK00019)Ribosomal_L31 (pfam01197) →                                            |
| Eco-589-1  | NZ_JHLK01000122.1 | - | 1188    | 1136    | RNA → rpmE (PRK00019)Ribosomal_L31 (pfam01197) →                                            |
| Eco-581-1  | NZ_JHKW01000036.1 | + | 91629   | 91681   | RNA → rpmE (PRK00019)Ribosomal_L31 (pfam01197) →                                            |
| Eco-231-1  | NZ_AYQU01000019.1 | - | 32637   | 32585   | RNA → rpmE (PRK00019)Ribosomal_L31 (pfam01197) →                                            |
| Eco-577-1  | NZ_JHNF01000058.1 | + | 91629   | 91681   | RNA → rpmE (PRK00019)Ribosomal_L31 (pfam01197) →                                            |



|            |                   |   |         |         |                                                                                             |
|------------|-------------------|---|---------|---------|---------------------------------------------------------------------------------------------|
| Eco-578-1  | NZ_JHNE01000052.1 | + | 91627   | 91679   | RNA → rpmE (PRK00019)Ribosomal_L31 (pfam01197) →                                            |
| Eco-570-1  | NZ_JHME01000049.1 | + | 44021   | 44073   | RNA → rpmE (PRK00019)Ribosomal_L31 (pfam01197) →                                            |
| Eco-576-1  | NZ_JHNG01000027.1 | - | 450     | 398     | RNA → rpmE (PRK00019)Ribosomal_L31 (pfam01197) →                                            |
| Eco-585-1  | NZ_JHGE01000017.1 | + | 91918   | 91970   | RNA → rpmE (PRK00019)Ribosomal_L31 (pfam01197) →                                            |
| Eco-590-1  | NZ_JHLI01000054.1 | - | 450     | 398     | RNA → rpmE (PRK00019)Ribosomal_L31 (pfam01197) →                                            |
| Eco-630-1  | NZ_AVCD01000005.1 | + | 2518806 | 2518858 | RNA → rpmE (PRK00019)Ribosomal_L31 (pfam01197) →                                            |
| Eco-293-1  | NZ_AYGW02000101.1 | + | 91627   | 91679   | RNA → rpmE (PRK00019)Ribosomal_L31 (pfam01197) →                                            |
| Eco-445-1  | NZ_AWPO01000180.1 | + | 49800   | 49852   | RNA → rpmE (PRK00019)Ribosomal_L31 (pfam01197) →                                            |
| Eco-1809-1 | NC_002695.1       | + | 4928446 | 4928498 | RNA → rpmE (PRK00019)Ribosomal_L31 (pfam01197) →                                            |
| Eco-2156-1 | NC_007946.1       | + | 4403952 | 4404004 | RNA → ←-hypō                                                                                |
| Eco-1496-1 | NZ_ANYQ01000052.1 | + | 77161   | 77213   | RNA → rpmE (PRK00019)Ribosomal_L31 (pfam01197) →                                            |
| Eco-944-1  | NZ_AOEF01000177.1 | + | 94253   | 94305   | RNA → rpmE (PRK00019)Ribosomal_L31 (pfam01197) →                                            |
| Eco-930-1  | NZ_AOEV01000127.1 | + | 46610   | 46662   | RNA → rpmE (PRK00019)Ribosomal_L31 (pfam01197) →                                            |
| Eco-1810-1 | NC_013008.1       | + | 4987619 | 4987671 | RNA → rpmE (PRK00019)Ribosomal_L31 (pfam01197) →                                            |
| Eco-1381-1 | NC_017628.1       | + | 4516074 | 4516126 | RNA → rpmE (PRK00019)Ribosomal_L31 (pfam01197) →                                            |
| Eco-2046-1 | NC_017632.1       | + | 4145232 | 4145284 | RNA → rpmE (PRK00019)Ribosomal_L31 (pfam01197) →                                            |
| Eco-1796-1 | NC_011353.1       | + | 5031559 | 5031611 | RNA → rpmE (PRK00019)Ribosomal_L31 (pfam01197) →                                            |
| Eco-2162-1 | NC_017906.1       | + | 4855185 | 4855237 | RNA → rpmE (PRK00019)Ribosomal_L31 (pfam01197) →                                            |
| Eco-950-1  | NC_008563.1       | + | 4435966 | 4436018 | RNA → rpmE (PRK00019)Ribosomal_L31 (pfam01197) → rpmE (PRK00019)Ribosomal_L31 (pfam01197) → |
| Eco-670-1  | NZ_CP008805.1     | + | 4983353 | 4983405 | rpmE (PRK00019)Ribosomal_L31 (pfam01197) →                                                  |
| Eco-1785-1 | NC_002655.2       | + | 4997210 | 4997262 | RNA → rpmE (PRK00019)Ribosomal_L31 (pfam01197) →                                            |
| Eco-1811-1 | NZ_CM000662.1     | - | 1831197 | 1831145 | RNA → rpmE (PRK00019)Ribosomal_L31 (pfam01197) →                                            |
| Eco-1679-1 | NZ_GL772990.1     | - | 52128   | 52076   | RNA → rpmE (PRK00019)Ribosomal_L31 (pfam01197) →                                            |
| Eco-913-1  | NZ_KB001687.1     | + | 91681   | 91733   | RNA → rpmE (PRK00019)Ribosomal_L31 (pfam01197) →                                            |
| Eco-912-1  | NZ_KB001158.1     | + | 91691   | 91743   | RNA → rpmE (PRK00019)Ribosomal_L31 (pfam01197) →                                            |
| Eco-916-1  | NZ_KB003763.1     | + | 91671   | 91723   | RNA → rpmE (PRK00019)Ribosomal_L31 (pfam01197) →                                            |
| Eco-868-1  | NZ_KB007262.1     | + | 91757   | 91809   | RNA → rpmE (PRK00019)Ribosomal_L31 (pfam01197) →                                            |
| Eco-906-1  | NZ_KB005335.1     | + | 91753   | 91805   | RNA → rpmE (PRK00019)Ribosomal_L31 (pfam01197) →                                            |
| Eco-872-1  | NZ_KB006068.1     | + | 88410   | 88462   | RNA → rpmE (PRK00019)Ribosomal_L31 (pfam01197) →                                            |
| Eco-870-1  | NZ_KB006781.1     | + | 91761   | 91813   | RNA → rpmE (PRK00019)Ribosomal_L31 (pfam01197) →                                            |
| Eco-910-1  | NZ_KB002140.1     | + | 88458   | 88510   | RNA → rpmE (PRK00019)Ribosomal_L31 (pfam01197) →                                            |
| Eco-922-1  | NZ_KB003073.1     | + | 91734   | 91786   | RNA → rpmE (PRK00019)Ribosomal_L31 (pfam01197) →                                            |
| Eco-314-1  | NZ_KK736334.1     | + | 79261   | 79313   | RNA → rpmE (PRK00019)Ribosomal_L31 (pfam01197) →                                            |
| Eco-1172-1 | NZ_GL871984.1     | - | 52350   | 52298   | RNA → rpmE (PRK00019)Ribosomal_L31 (pfam01197) →                                            |
| Eco-1174-1 | NZ_GL896790.1     | - | 2228748 | 2228696 | RNA → rpmE (PRK00019)Ribosomal_L31 (pfam01197) →                                            |
| Eco-1171-1 | NZ_GL871899.1     | + | 77435   | 77487   | RNA → rpmE (PRK00019)Ribosomal_L31 (pfam01197) →                                            |
| Eco-1175-1 | NZ_JH590476.1     | - | 52676   | 52624   | RNA → rpmE (PRK00019)Ribosomal_L31 (pfam01197) →                                            |
| Eco-1957-1 | NZ_JH706532.1     | + | 91681   | 91733   | RNA → rpmE (PRK00019)Ribosomal_L31 (pfam01197) →                                            |
| Eco-1160-1 | NZ_JH698273.1     | + | 91691   | 91743   | RNA → rpmE (PRK00019)Ribosomal_L31 (pfam01197) →                                            |
| Eco-1959-1 | NZ_JH711380.1     | + | 91753   | 91805   | RNA → rpmE (PRK00019)Ribosomal_L31 (pfam01197) →                                            |
| Eco-1138-1 | NZ_JH696208.1     | + | 91679   | 91731   | RNA → rpmE (PRK00019)Ribosomal_L31 (pfam01197) →                                            |
| Eco-1969-1 | NZ_JH703729.1     | + | 91757   | 91809   | RNA → rpmE (PRK00019)Ribosomal_L31 (pfam01197) →                                            |
| Eco-1975-1 | NZ_JH709966.1     | + | 91759   | 91811   | RNA → rpmE (PRK00019)Ribosomal_L31 (pfam01197) →                                            |
| Eco-1956-1 | NZ_JH707511.1     | + | 91755   | 91807   | RNA → rpmE (PRK00019)Ribosomal_L31 (pfam01197) →                                            |
| Eco-1970-1 | NZ_JH703250.1     | + | 91689   | 91741   | RNA → rpmE (PRK00019)Ribosomal_L31 (pfam01197) →                                            |
| Eco-1137-1 | NZ_JH696593.1     | + | 91681   | 91733   | RNA → rpmE (PRK00019)Ribosomal_L31 (pfam01197) →                                            |
| Eco-904-1  | NZ_JH710989.1     | + | 91681   | 91733   | RNA → rpmE (PRK00019)Ribosomal_L31 (pfam01197) →                                            |
| Eco-2026-1 | NZ_JH702793.1     | + | 91750   | 91802   | RNA → rpmE (PRK00019)Ribosomal_L31 (pfam01197) →                                            |
| Eco-1958-1 | NZ_JH706083.1     | + | 91685   | 91737   | RNA → rpmE (PRK00019)Ribosomal_L31 (pfam01197) →                                            |
| Eco-1154-1 | NZ_JH692587.1     | + | 91689   | 91741   | RNA → rpmE (PRK00019)Ribosomal_L31 (pfam01197) →                                            |
| Eco-2027-1 | NZ_JH702437.1     | + | 91680   | 91732   | RNA → rpmE (PRK00019)Ribosomal_L31 (pfam01197) →                                            |



|            |               |   |       |       |                                                   |
|------------|---------------|---|-------|-------|---------------------------------------------------|
| Eco-1960-1 | NZ_JH707064.1 | + | 91761 | 91813 | RNA → rpmE (PRK00019) Ribosomal_L31 (pfam01197) → |
| Eco-1961-1 | NZ_JH705659.1 | + | 91683 | 91735 | RNA → rpmE (PRK00019) Ribosomal_L31 (pfam01197) → |
| Eco-1962-1 | NZ_JH705097.1 | + | 91689 | 91741 | RNA → rpmE (PRK00019) Ribosomal_L31 (pfam01197) → |
| Eco-1966-1 | NZ_JH704534.1 | + | 8213  | 8265  | RNA → rpmE (PRK00019) Ribosomal_L31 (pfam01197) → |
| Eco-1124-1 | NZ_JH692963.1 | + | 91755 | 91807 | RNA → rpmE (PRK00019) Ribosomal_L31 (pfam01197) → |
| Eco-1978-1 | NZ_JH709459.1 | + | 91686 | 91738 | RNA → rpmE (PRK00019) Ribosomal_L31 (pfam01197) → |
| Eco-1132-1 | NZ_JH698686.1 | + | 91751 | 91803 | RNA → rpmE (PRK00019) Ribosomal_L31 (pfam01197) → |
| Eco-1139-1 | NZ_JH694736.1 | + | 91686 | 91738 | RNA → rpmE (PRK00019) Ribosomal_L31 (pfam01197) → |
| Eco-1135-1 | NZ_JH699668.1 | + | 91685 | 91737 | RNA → rpmE (PRK00019) Ribosomal_L31 (pfam01197) → |
| Eco-2039-1 | NZ_JH695371.1 | + | 8219  | 8271  | RNA → rpmE (PRK00019) Ribosomal_L31 (pfam01197) → |
| Eco-1116-1 | NZ_JH693435.1 | + | 91685 | 91737 | RNA → rpmE (PRK00019) Ribosomal_L31 (pfam01197) → |
| Eco-1141-1 | NZ_JH697067.1 | + | 91685 | 91737 | RNA → rpmE (PRK00019) Ribosomal_L31 (pfam01197) → |
| Eco-1140-1 | NZ_JH694330.1 | + | 91750 | 91802 | RNA → rpmE (PRK00019) Ribosomal_L31 (pfam01197) → |
| Eco-1134-1 | NZ_JH699178.1 | + | 88425 | 88477 | RNA → rpmE (PRK00019) Ribosomal_L31 (pfam01197) → |
| Eco-1963-1 | NZ_JH964280.1 | + | 91688 | 91740 | RNA → rpmE (PRK00019) Ribosomal_L31 (pfam01197) → |
| Eco-1120-1 | NZ_JH953686.1 | + | 91679 | 91731 | RNA → rpmE (PRK00019) Ribosomal_L31 (pfam01197) → |
| Eco-1713-1 | NZ_JH957915.1 | + | 91763 | 91815 | RNA → rpmE (PRK00019) Ribosomal_L31 (pfam01197) → |
| Eco-1153-1 | NZ_JH962205.1 | + | 91766 | 91818 | RNA → rpmE (PRK00019) Ribosomal_L31 (pfam01197) → |
| Eco-1967-1 | NZ_JH960930.1 | - | 90108 | 90056 | RNA → rpmE (PRK00019) Ribosomal_L31 (pfam01197) → |
| Eco-1971-1 | NZ_JH959095.1 | + | 91691 | 91743 | RNA → rpmE (PRK00019) Ribosomal_L31 (pfam01197) → |
| Eco-1657-1 | NZ_JH957193.1 | + | 87134 | 87186 | RNA → rpmE (PRK00019) Ribosomal_L31 (pfam01197) → |
| Eco-1155-1 | NZ_JH964868.1 | + | 91806 | 91858 | RNA → rpmE (PRK00019) Ribosomal_L31 (pfam01197) → |
| Eco-1025-1 | NZ_JH956755.1 | + | 86912 | 86964 | RNA → rpmE (PRK00019) Ribosomal_L31 (pfam01197) → |
| Eco-1112-1 | NZ_JH958301.1 | + | 91756 | 91808 | RNA → rpmE (PRK00019) Ribosomal_L31 (pfam01197) → |
| Eco-765-1  | NZ_JH969496.1 | + | 91753 | 91805 | RNA → rpmE (PRK00019) Ribosomal_L31 (pfam01197) → |
| Eco-1156-1 | NZ_JH963939.1 | + | 91765 | 91817 | RNA → rpmE (PRK00019) Ribosomal_L31 (pfam01197) → |
| Eco-1162-1 | NZ_JH962614.1 | + | 91689 | 91741 | RNA → rpmE (PRK00019) Ribosomal_L31 (pfam01197) → |
| Eco-1114-1 | NZ_JH963514.1 | + | 88419 | 88471 | RNA → rpmE (PRK00019) Ribosomal_L31 (pfam01197) → |
| Eco-1121-1 | NZ_JH953257.1 | + | 91761 | 91813 | RNA → rpmE (PRK00019) Ribosomal_L31 (pfam01197) → |
| Eco-847-1  | NZ_JH971373.1 | + | 91765 | 91817 | RNA → rpmE (PRK00019) Ribosomal_L31 (pfam01197) → |
| Eco-1965-1 | NZ_JH966096.1 | + | 88442 | 88494 | RNA → rpmE (PRK00019) Ribosomal_L31 (pfam01197) → |
| Eco-754-1  | NZ_JH943323.1 | + | 91763 | 91815 | RNA → rpmE (PRK00019) Ribosomal_L31 (pfam01197) → |
| Eco-1163-1 | NZ_JH961354.1 | + | 91823 | 91875 | RNA → rpmE (PRK00019) Ribosomal_L31 (pfam01197) → |
| Eco-1117-1 | NZ_JH956301.1 | + | 91755 | 91807 | RNA → rpmE (PRK00019) Ribosomal_L31 (pfam01197) → |
| Eco-838-1  | NZ_JH970961.1 | + | 91677 | 91729 | RNA → rpmE (PRK00019) Ribosomal_L31 (pfam01197) → |
| Eco-2021-1 | NZ_JH957502.1 | + | 91767 | 91819 | RNA → rpmE (PRK00019) Ribosomal_L31 (pfam01197) → |
| Eco-1119-1 | NZ_JH955815.1 | + | 91687 | 91739 | RNA → rpmE (PRK00019) Ribosomal_L31 (pfam01197) → |
| Eco-1129-1 | NZ_JH947101.1 | + | 91763 | 91815 | RNA → rpmE (PRK00019) Ribosomal_L31 (pfam01197) → |
| Eco-856-1  | NZ_JH970471.1 | + | 91687 | 91739 | RNA → rpmE (PRK00019) Ribosomal_L31 (pfam01197) → |
| Eco-1955-1 | NZ_JH959984.1 | + | 91758 | 91810 | RNA → rpmE (PRK00019) Ribosomal_L31 (pfam01197) → |
| Eco-1113-1 | NZ_JH965229.1 | + | 91684 | 91736 | RNA → rpmE (PRK00019) Ribosomal_L31 (pfam01197) → |
| Eco-1122-1 | NZ_JH952871.1 | + | 91691 | 91743 | RNA → rpmE (PRK00019) Ribosomal_L31 (pfam01197) → |
| Eco-1123-1 | NZ_JH952449.1 | + | 91753 | 91805 | RNA → rpmE (PRK00019) Ribosomal_L31 (pfam01197) → |
| Eco-1118-1 | NZ_JH963066.1 | + | 91753 | 91805 | RNA → rpmE (PRK00019) Ribosomal_L31 (pfam01197) → |
| Eco-1712-1 | NZ_JH946694.1 | + | 91677 | 91729 | RNA → rpmE (PRK00019) Ribosomal_L31 (pfam01197) → |
| Eco-865-1  | NZ_JH968340.1 | + | 91746 | 91798 | RNA → rpmE (PRK00019) Ribosomal_L31 (pfam01197) → |
| Eco-1127-1 | NZ_JH944307.1 | + | 91687 | 91739 | RNA → rpmE (PRK00019) Ribosomal_L31 (pfam01197) → |
| Eco-918-1  | NZ_KB002678.1 | + | 91681 | 91733 | RNA → rpmE (PRK00019) Ribosomal_L31 (pfam01197) → |
| Eco-866-1  | NZ_KB006465.1 | + | 91685 | 91737 | RNA → rpmE (PRK00019) Ribosomal_L31 (pfam01197) → |
| Eco-924-1  | NZ_JH999841.1 | + | 93668 | 93720 | RNA → rpmE (PRK00019) Ribosomal_L31 (pfam01197) → |
| Eco-863-1  | NZ_JH969035.1 | + | 91747 | 91799 | RNA → rpmE (PRK00019) Ribosomal_L31 (pfam01197) → |
| Eco-1125-1 | NZ_JH946246.1 | + | 88431 | 88483 | RNA → rpmE (PRK00019) Ribosomal_L31 (pfam01197) → |

|            |               |   |         |         |                                                  |
|------------|---------------|---|---------|---------|--------------------------------------------------|
| Eco-908-1  | NZ_KB005700.1 | + | 91689   | 91741   | RNA → rpmE (PRK00019)Ribosomal_L31 (pfam01197) → |
| Eco-919-1  | NZ_KB000775.1 | + | 88442   | 88494   | RNA → rpmE (PRK00019)Ribosomal_L31 (pfam01197) → |
| Eco-905-1  | NZ_KB004122.1 | + | 91687   | 91739   | RNA → rpmE (PRK00019)Ribosomal_L31 (pfam01197) → |
| Eco-929-1  | NZ_KB004465.1 | + | 5425    | 5477    | RNA → rpmE (PRK00019)Ribosomal_L31 (pfam01197) → |
| Eco-867-1  | NZ_KB000427.1 | - | 91685   | 91737   | RNA → rpmE (PRK00019)Ribosomal_L31 (pfam01197) → |
| Eco-931-1  | NZ_KB004956.1 | - | 85517   | 85465   | RNA → rpmE (PRK00019)Ribosomal_L31 (pfam01197) → |
| Eco-1589-1 | NZ_KB732234.1 | + | 199572  | 199624  | RNA → rpmE (PRK00019)Ribosomal_L31 (pfam01197) → |
| Eco-1284-1 | NZ_KE700830.1 | + | 3082190 | 3082242 | RNA → rpmE (PRK00019)Ribosomal_L31 (pfam01197) → |
| Eco-1363-1 | NZ_KE699552.1 | + | 1425559 | 1425611 | RNA → rpmE (PRK00019)Ribosomal_L31 (pfam01197) → |
| Eco-1193-1 | NZ_KE699732.1 | + | 80106   | 80158   | RNA → rpmE (PRK00019)Ribosomal_L31 (pfam01197) → |
| Eco-1215-1 | NZ_KE700025.1 | + | 3022754 | 3022806 | RNA → rpmE (PRK00019)Ribosomal_L31 (pfam01197) → |
| Eco-1299-1 | NZ_KE700948.1 | + | 80532   | 80584   | RNA → rpmE (PRK00019)Ribosomal_L31 (pfam01197) → |
| Eco-2064-1 | NZ_KE701659.1 | + | 2188141 | 2188193 | RNA → rpmE (PRK00019)Ribosomal_L31 (pfam01197) → |
| Eco-2090-1 | NZ_KE702030.1 | + | 1589080 | 1589132 | RNA → rpmE (PRK00019)Ribosomal_L31 (pfam01197) → |
| Eco-1310-1 | NZ_KE701076.1 | + | 81617   | 81669   | RNA → rpmE (PRK00019)Ribosomal_L31 (pfam01197) → |
| Eco-1265-1 | NZ_KE700589.1 | + | 80503   | 80555   | RNA → rpmE (PRK00019)Ribosomal_L31 (pfam01197) → |
| Eco-1288-1 | NZ_KE700850.1 | + | 4139451 | 4139503 | RNA → rpmE (PRK00019)Ribosomal_L31 (pfam01197) → |
| Eco-1281-1 | NZ_KE700802.1 | + | 82469   | 82521   | RNA → rpmE (PRK00019)Ribosomal_L31 (pfam01197) → |
| Eco-2132-1 | NZ_KE702477.1 | + | 721545  | 721597  | RNA → rpmE (PRK00019)Ribosomal_L31 (pfam01197) → |
| Eco-1305-1 | NZ_KE701022.1 | + | 429776  | 429828  | RNA → rpmE (PRK00019)Ribosomal_L31 (pfam01197) → |
| Eco-1398-1 | NZ_KE701238.1 | + | 81941   | 81993   | RNA → rpmE (PRK00019)Ribosomal_L31 (pfam01197) → |
| Eco-1277-1 | NZ_KE700778.1 | + | 2969295 | 2969347 | RNA → rpmE (PRK00019)Ribosomal_L31 (pfam01197) → |
| Eco-2050-1 | NZ_KE701458.1 | + | 4128279 | 4128331 | RNA → rpmE (PRK00019)Ribosomal_L31 (pfam01197) → |
| Eco-1290-1 | NZ_KE700866.1 | + | 3081361 | 3081413 | RNA → rpmE (PRK00019)Ribosomal_L31 (pfam01197) → |
| Eco-1207-1 | NZ_KE699929.1 | + | 81923   | 81975   | RNA → rpmE (PRK00019)Ribosomal_L31 (pfam01197) → |
| Eco-1276-1 | NZ_KE700763.1 | + | 40914   | 40966   | RNA → rpmE (PRK00019)Ribosomal_L31 (pfam01197) → |
| Eco-2129-1 | NZ_KE702454.1 | + | 3004717 | 3004769 | RNA → rpmE (PRK00019)Ribosomal_L31 (pfam01197) → |
| Eco-2089-1 | NZ_KE702022.1 | + | 82164   | 82216   | RNA → rpmE (PRK00019)Ribosomal_L31 (pfam01197) → |
| Eco-2145-1 | NZ_KE702629.1 | - | 52361   | 52309   | RNA → rpmE (PRK00019)Ribosomal_L31 (pfam01197) → |
| Eco-2147-1 | NZ_KE702650.1 | + | 2279303 | 2279355 | RNA → rpmE (PRK00019)Ribosomal_L31 (pfam01197) → |
| Eco-1224-1 | NZ_KE700110.1 | + | 3032185 | 3032237 | RNA → rpmE (PRK00019)Ribosomal_L31 (pfam01197) → |
| Eco-1298-1 | NZ_KE700927.1 | + | 81739   | 81791   | RNA → rpmE (PRK00019)Ribosomal_L31 (pfam01197) → |
| Eco-1256-1 | NZ_KE700501.1 | + | 1510971 | 1511023 | RNA → rpmE (PRK00019)Ribosomal_L31 (pfam01197) → |
| Eco-2074-1 | NZ_KE701779.1 | + | 81844   | 81896   | RNA → rpmE (PRK00019)Ribosomal_L31 (pfam01197) → |
| Eco-2138-1 | NZ_KE702517.1 | + | 81885   | 81937   | RNA → rpmE (PRK00019)Ribosomal_L31 (pfam01197) → |
| Eco-2109-1 | NZ_KE702295.1 | + | 202832  | 202884  | RNA → rpmE (PRK00019)Ribosomal_L31 (pfam01197) → |
| Eco-1191-1 | NZ_KE747793.1 | + | 1499856 | 1499908 | RNA → rpmE (PRK00019)Ribosomal_L31 (pfam01197) → |
| Eco-441-1  | NZ_KI303532.1 | + | 91677   | 91729   | RNA → rpmE (PRK00019)Ribosomal_L31 (pfam01197) → |
| Eco-422-1  | NZ_KI303976.1 | + | 91676   | 91728   | RNA → rpmE (PRK00019)Ribosomal_L31 (pfam01197) → |
| Eco-442-1  | NZ_KI303614.1 | + | 119771  | 119823  | RNA → rpmE (PRK00019)Ribosomal_L31 (pfam01197) → |
| Eco-446-1  | NZ_KI302222.1 | + | 91843   | 91895   | RNA → rpmE (PRK00019)Ribosomal_L31 (pfam01197) → |
| Eco-431-1  | NZ_KI302783.1 | + | 79232   | 79284   | RNA → rpmE (PRK00019)Ribosomal_L31 (pfam01197) → |
| Eco-1566-1 | NZ_KE136719.1 | + | 78966   | 79018   | RNA → rpmE (PRK00019)Ribosomal_L31 (pfam01197) → |
| Eco-1235-1 | NZ_KI538716.1 | + | 1125873 | 1125925 | RNA → rpmE (PRK00019)Ribosomal_L31 (pfam01197) → |
| Eco-1263-1 | NZ_KI538784.1 | + | 1554820 | 1554872 | RNA → rpmE (PRK00019)Ribosomal_L31 (pfam01197) → |
| Eco-1209-1 | NZ_KI538675.1 | + | 3015588 | 3015640 | RNA → rpmE (PRK00019)Ribosomal_L31 (pfam01197) → |
| Eco-1302-1 | NZ_KI669364.1 | + | 77079   | 77131   | RNA → rpmE (PRK00019)Ribosomal_L31 (pfam01197) → |
| Eco-307-1  | NZ_KI929791.1 | + | 2901756 | 2901808 | RNA → rpmE (PRK00019)Ribosomal_L31 (pfam01197) → |
| Eco-306-1  | NZ_KI929797.1 | + | 2884603 | 2884655 | RNA → rpmE (PRK00019)Ribosomal_L31 (pfam01197) → |
| Eco-761-1  | NZ_KB453217.1 | + | 91679   | 91731   | RNA → rpmE (PRK00019)Ribosomal_L31 (pfam01197) → |
| Eco-1598-1 | NZ_KB732740.1 | + | 81850   | 81902   | RNA → rpmE (PRK00019)Ribosomal_L31 (pfam01197) → |
| Eco-1599-1 | NZ_KB733044.1 | + | 202007  | 202059  | RNA → rpmE (PRK00019)Ribosomal_L31 (pfam01197) → |

|            |                   |   |         |         |                                                   |
|------------|-------------------|---|---------|---------|---------------------------------------------------|
| Eco-1595-1 | NZ_KB732701.1     | + | 77074   | 77126   | RNA → rpmE (PRK00019) Ribosomal_L31 (pfam01197) → |
| Eco-1542-1 | NZ_KB733023.1     | + | 4117024 | 4117076 | RNA → rpmE (PRK00019) Ribosomal_L31 (pfam01197) → |
| Eco-1627-1 | NZ_KB733107.1     | + | 91628   | 91680   | RNA → rpmE (PRK00019) Ribosomal_L31 (pfam01197) → |
| Eco-1552-1 | NZ_KB733235.1     | + | 3048568 | 3048620 | RNA → rpmE (PRK00019) Ribosomal_L31 (pfam01197) → |
| Eco-1603-1 | NZ_KB732751.1     | - | 1572177 | 1572125 | RNA → rpmE (PRK00019) Ribosomal_L31 (pfam01197) → |
| Eco-1606-1 | NZ_KB733066.1     | + | 3009872 | 3009924 | RNA → rpmE (PRK00019) Ribosomal_L31 (pfam01197) → |
| Eco-1433-1 | NZ_KB733111.1     | + | 201057  | 201109  | RNA → rpmE (PRK00019) Ribosomal_L31 (pfam01197) → |
| Eco-1578-1 | NZ_KB732224.1     | + | 200445  | 200497  | RNA → rpmE (PRK00019) Ribosomal_L31 (pfam01197) → |
| Eco-1439-1 | NZ_KB733071.1     | + | 1502061 | 1502113 | RNA → rpmE (PRK00019) Ribosomal_L31 (pfam01197) → |
| Eco-1550-1 | NZ_KB733358.1     | + | 391531  | 391583  | RNA → rpmE (PRK00019) Ribosomal_L31 (pfam01197) → |
| Eco-1569-1 | NZ_KE136581.1     | + | 2924005 | 2924057 | RNA → rpmE (PRK00019) Ribosomal_L31 (pfam01197) → |
| Eco-1611-1 | NZ_KE136591.1     | + | 1576213 | 1576265 | RNA → rpmE (PRK00019) Ribosomal_L31 (pfam01197) → |
| Eco-1563-1 | NZ_KE137004.1     | + | 4441094 | 4441146 | RNA → rpmE (PRK00019) Ribosomal_L31 (pfam01197) → |
| Eco-1274-1 | NZ_KE698996.1     | + | 82952   | 83004   | RNA → rpmE (PRK00019) Ribosomal_L31 (pfam01197) → |
| Eco-1341-1 | NZ_KE698838.1     | + | 202726  | 202778  | RNA → rpmE (PRK00019) Ribosomal_L31 (pfam01197) → |
| Eco-1359-1 | NZ_KE699460.1     | + | 1555547 | 1555599 | RNA → rpmE (PRK00019) Ribosomal_L31 (pfam01197) → |
| Eco-1348-1 | NZ_KE699341.1     | + | 38316   | 38368   | RNA → rpmE (PRK00019) Ribosomal_L31 (pfam01197) → |
| Eco-1357-1 | NZ_KE699437.1     | + | 1585903 | 1585955 | RNA → rpmE (PRK00019) Ribosomal_L31 (pfam01197) → |
| Eco-1188-1 | NZ_KE698778.1     | + | 746991  | 747043  | RNA → rpmE (PRK00019) Ribosomal_L31 (pfam01197) → |
| Eco-1327-1 | NZ_KE699160.1     | + | 205160  | 205212  | RNA → rpmE (PRK00019) Ribosomal_L31 (pfam01197) → |
| Eco-1325-1 | NZ_KE699137.1     | + | 196255  | 196307  | RNA → rpmE (PRK00019) Ribosomal_L31 (pfam01197) → |
| Eco-1340-1 | NZ_KE699296.1     | + | 79965   | 80017   | RNA → rpmE (PRK00019) Ribosomal_L31 (pfam01197) → |
| Eco-1322-1 | NZ_KE698817.1     | + | 223232  | 223284  | RNA → rpmE (PRK00019) Ribosomal_L31 (pfam01197) → |
| Eco-1323-1 | NZ_KE699123.1     | + | 204897  | 204949  | RNA → rpmE (PRK00019) Ribosomal_L31 (pfam01197) → |
| Eco-1335-1 | NZ_KE699242.1     | + | 741196  | 741248  | RNA → rpmE (PRK00019) Ribosomal_L31 (pfam01197) → |
| Eco-1214-1 | NZ_KE700005.1     | - | 52165   | 52113   | RNA → rpmE (PRK00019) Ribosomal_L31 (pfam01197) → |
| Eco-1951-1 | NZ_JH708009.1     | + | 91689   | 91741   | RNA → rpmE (PRK00019) Ribosomal_L31 (pfam01197) → |
| Eco-1159-1 | NZ_JH710487.1     | + | 91681   | 91733   | RNA → rpmE (PRK00019) Ribosomal_L31 (pfam01197) → |
| Eco-1947-1 | NZ_JH709052.1     | + | 91683   | 91735   | RNA → rpmE (PRK00019) Ribosomal_L31 (pfam01197) → |
| Eco-1136-1 | NZ_JH697709.1     | + | 91677   | 91729   | RNA → rpmE (PRK00019) Ribosomal_L31 (pfam01197) → |
| Eco-1142-1 | NZ_JH693924.1     | + | 91683   | 91735   | RNA → rpmE (PRK00019) Ribosomal_L31 (pfam01197) → |
| Eco-1157-1 | NZ_JH701983.1     | + | 91683   | 91735   | RNA → rpmE (PRK00019) Ribosomal_L31 (pfam01197) → |
| Eco-1950-1 | NZ_JH708588.1     | + | 91759   | 91811   | RNA → rpmE (PRK00019) Ribosomal_L31 (pfam01197) → |
| Eco-2029-1 | NZ_JH700687.1     | + | 8195    | 8247    | RNA → rpmE (PRK00019) Ribosomal_L31 (pfam01197) → |
| Eco-1130-1 | NZ_JH945202.1     | + | 91757   | 91809   | RNA → rpmE (PRK00019) Ribosomal_L31 (pfam01197) → |
| Eco-1711-1 | NZ_JH960537.1     | + | 91749   | 91801   | RNA → rpmE (PRK00019) Ribosomal_L31 (pfam01197) → |
| Eco-1128-1 | NZ_JH944742.1     | + | 88417   | 88469   | RNA → rpmE (PRK00019) Ribosomal_L31 (pfam01197) → |
| Eco-917-1  | NZ_KB009442.1     | + | 91687   | 91739   | RNA → rpmE (PRK00019) Ribosomal_L31 (pfam01197) → |
| Eco-871-1  | NZ_KB007779.1     | + | 88442   | 88494   | RNA → rpmE (PRK00019) Ribosomal_L31 (pfam01197) → |
| Eco-926-1  | NZ_KB008854.1     | + | 88429   | 88481   | RNA → rpmE (PRK00019) Ribosomal_L31 (pfam01197) → |
| Eco-1161-1 | NZ_JH961766.1     | + | 91689   | 91741   | RNA → rpmE (PRK00019) Ribosomal_L31 (pfam01197) → |
| Eco-1164-1 | NZ_JH943934.1     | + | 91767   | 91819   | RNA → rpmE (PRK00019) Ribosomal_L31 (pfam01197) → |
| Eco-862-1  | NZ_JH970100.1     | + | 91671   | 91723   | RNA → rpmE (PRK00019) Ribosomal_L31 (pfam01197) → |
| Eco-1974-1 | NZ_JH959572.1     | + | 91693   | 91745   | RNA → rpmE (PRK00019) Ribosomal_L31 (pfam01197) → |
| Eco-839-1  | NZ_AOET01000116.1 | + | 91981   | 92033   | RNA → rpmE (PRK00019) Ribosomal_L31 (pfam01197) → |
| Eco-1498-1 | NZ_ANYR01000076.1 | + | 77184   | 77236   | RNA → rpmE (PRK00019) Ribosomal_L31 (pfam01197) → |
| Eco-953-1  | NZ_AOEH01000082.1 | - | 4113    | 4061    | RNA → rpmE (PRK00019) Ribosomal_L31 (pfam01197) → |
| Eco-1493-1 | NZ_ANYO01000058.1 | + | 29022   | 29074   | RNA → rpmE (PRK00019) Ribosomal_L31 (pfam01197) → |
| Eco-938-1  | NZ_AOEB01000174.1 | + | 23013   | 23065   | RNA → rpmE (PRK00019) Ribosomal_L31 (pfam01197) → |
| Eco-1952-1 | NZ_AOEJ01000126.1 | + | 91844   | 91896   | RNA → rpmE (PRK00019) Ribosomal_L31 (pfam01197) → |
| Eco-1948-1 | NZ_AOEI01000113.1 | + | 91787   | 91839   | RNA → rpmE (PRK00019) Ribosomal_L31 (pfam01197) → |
| Eco-909-1  | NZ_AOEU01000182.1 | + | 55101   | 55153   | RNA → rpmE (PRK00019) Ribosomal_L31 (pfam01197) → |



|            |                        |   |         |         |                                                                                             |
|------------|------------------------|---|---------|---------|---------------------------------------------------------------------------------------------|
| Eco-936-1  | NZ_AODZ01000257.1      | + | 44648   | 44700   | RNA → rpmE (PRK00019)Ribosomal_L31 (pfam01197) →                                            |
| Eco-1964-1 | NZ_AOES01000010.1      | - | 4113    | 4061    | RNA → rpmE (PRK00019)Ribosomal_L31 (pfam01197) →                                            |
| Eco-671-1  | NZ_CP010304.1          | + | 4948099 | 4948151 | RNA → rpmE (PRK00019)Ribosomal_L31 (pfam01197) →                                            |
| Eco-290-1  | NZ_CP005930.1          | + | 2266617 | 2266669 | RNA → rpmE (PRK00019)Ribosomal_L31 (pfam01197) →                                            |
| Eco-1158-1 | NZ_JH701513.1          | + | 91691   | 91743   | RNA → rpmE (PRK00019)Ribosomal_L31 (pfam01197) →                                            |
| Eco-1979-1 | NC_022370.1            | + | 4435942 | 4435994 | RNA → rpmE (PRK00019)Ribosomal_L31 (pfam01197) →                                            |
| Eco-621-1  | NZ_CP008957.1          | + | 5016072 | 5016124 | RNA → rpmE (PRK00019)Ribosomal_L31 (pfam01197) →                                            |
| Eco-899-1  | NZ_KI534620.1          | + | 8157    | 8209    | RNA → rpmE (PRK00019)Ribosomal_L31 (pfam01197) →                                            |
| Esp-52-1   | NZ_KQ235739.1          | + | 77226   | 77278   | RNA → rpmE (PRK00019)Ribosomal_L31 (pfam01197) →                                            |
| Eco-393-1  | NZ_KK583188.1          | - | 330264  | 330212  | RNA → rpmE (PRK00019)Ribosomal_L31 (pfam01197) →                                            |
| Eco-1184-1 | NZ_HE572566.1          | - | 2016950 | 2016898 | RNA → rpmE (PRK00019)Ribosomal_L31 (pfam01197) →                                            |
| Eco-632-1  | NZ_CAO701000021.1      | + | 91956   | 92008   | RNA → rpmE (PRK00019)Ribosomal_L31 (pfam01197) →                                            |
| Eco-834-1  | NZ_AVRR01000119.1      | + | 44656   | 44708   | RNA → rpmE (PRK00019)Ribosomal_L31 (pfam01197) →                                            |
| Eco-429-1  | NZ_AWPM01000182.1      | + | 12739   | 12791   | RNA → rpmE (PRK00019)Ribosomal_L31 (pfam01197) →                                            |
| Eco-450-1  | NZ_AWPT01000222.1      | + | 13300   | 13352   | RNA → rpmE (PRK00019)Ribosomal_L31 (pfam01197) →                                            |
| Eco-612-1  | NZ_JHKF01000045.1      | + | 91627   | 91679   | RNA → rpmE (PRK00019)Ribosomal_L31 (pfam01197) →                                            |
| Eco-664-1  | NZ_JHHZ01000024.1      | - | 911     | 859     | RNA → rpmE (PRK00019)Ribosomal_L31 (pfam01197) →                                            |
| Eco-571-1  | NZ_JHMD01000021.1      | + | 91540   | 91592   | RNA → rpmE (PRK00019)Ribosomal_L31 (pfam01197) →                                            |
| Eco-1165-1 | NZ_AMTP01000117.1      | + | 92274   | 92326   | RNA → rpmE (PRK00019)Ribosomal_L31 (pfam01197) →                                            |
| Eco-1066-1 | NZ_AIFE01000058.1      | + | 96821   | 96873   | RNA → rpmE (PRK00019)Ribosomal_L31 (pfam01197) →                                            |
| Eco-1068-1 | NZ_AIFG01000065.1      | + | 94325   | 94377   | RNA → rpmE (PRK00019)Ribosomal_L31 (pfam01197) →                                            |
| Eco-1073-1 | NZ_AIFL01000073.1      | + | 95249   | 95301   | RNA → rpmE (PRK00019)Ribosomal_L31 (pfam01197) →                                            |
| Eco-925-1  | NZ_ANMC01000254.1      | + | 4802    | 4854    | RNA → rpmE (PRK00019)Ribosomal_L31 (pfam01197) →                                            |
| Eco-942-1  | NZ_AOEE01000236.1      | + | 7965    | 8017    | RNA → rpmE (PRK00019)Ribosomal_L31 (pfam01197) →                                            |
| env-784    | NLF014_scaffold17740_1 | + | 423     | 475     | RNA → rpmE (PRK00019)Ribosomal_L31 (pfam01197) →                                            |
| env-785    | 2222084013.827_7       | - | 639     | 587     | RNA → ←-hypo                                                                                |
| Esp-79-1   | NZ_AEME01000001.1      | + | 879790  | 879842  | RNA → rpmE (PRK00019)Ribosomal_L31 (pfam01197) → rpmE (PRK00019)Ribosomal_L31 (pfam01197) → |
| Esp-77-1   | NZ_AEJW01000018.1      | + | 15607   | 15659   | RNA → rpmE (PRK00019)Ribosomal_L31 (pfam01197) →                                            |
| Esp-53-1   | NZ_AEJZ01000171.1      | - | 17689   | 17637   | RNA → rpmE (PRK00019)Ribosomal_L31 (pfam01197) →                                            |
| Esp-78-1   | NZ_AEJV01000033.1      | + | 22157   | 22209   | RNA → rpmE (PRK00019)Ribosomal_L31 (pfam01197) →                                            |
| Eco-15-1   | NZ_JHDF01000032.1      | - | 51954   | 51902   | RNA → rpmE (PRK00019)Ribosomal_L31 (pfam01197) →                                            |
| Eco-1425-1 | NZ_KB732249.1          | + | 3306906 | 3306958 | RNA → rpmE (PRK00019)Ribosomal_L31 (pfam01197) →                                            |
| Eco-1410-1 | NZ_KE701379.1          | - | 4263807 | 4263755 | RNA → rpmE (PRK00019)Ribosomal_L31 (pfam01197) →                                            |
| Eco-1475-1 | NZ_KE137293.1          | - | 53399   | 53347   | RNA → rpmE (PRK00019)Ribosomal_L31 (pfam01197) →                                            |
| Eco-1571-1 | NZ_KB976077.1          | - | 52047   | 51995   | RNA → rpmE (PRK00019)Ribosomal_L31 (pfam01197) →                                            |
| Eco-1639-1 | NZ_KE137149.1          | - | 39308   | 39256   | RNA → rpmE (PRK00019)Ribosomal_L31 (pfam01197) →                                            |
| Eco-1429-1 | NZ_KE136626.1          | - | 1021432 | 1021380 | RNA → rpmE (PRK00019)Ribosomal_L31 (pfam01197) →                                            |
| Eco-1570-1 | NZ_KE136726.1          | - | 1008527 | 1008475 | RNA → rpmE (PRK00019)Ribosomal_L31 (pfam01197) →                                            |
| Eco-1592-1 | NZ_KE138680.1          | + | 1352301 | 1352353 | RNA → rpmE (PRK00019)Ribosomal_L31 (pfam01197) →                                            |
| Ema-1-1    | NZ_KN714332.1          | - | 33004   | 32952   | RNA → rpmE (PRK00019)Ribosomal_L31 (pfam01197) →                                            |
| Cro-2-1    | NZ_BBNA01000079.1      | + | 8219    | 8271    | RNA → rpmE (PRK00019)Ribosomal_L31 (pfam01197) →                                            |
| Cro-1-1    | NZ_JXUN01000174.1      | + | 2944    | 2996    | RNA → rpmE (PRK00019)Ribosomal_L31 (pfam01197) →                                            |
| Cro-3-1    | NC_013716.1            | - | 4016831 | 4016779 | RNA → rpmE (PRK00019)Ribosomal_L31 (pfam01197) →                                            |
| Eal-2-1    | NZ_BBM01000009.1       | - | 42980   | 42928   | RNA → rpmE (PRK00019)Ribosomal_L31 (pfam01197) →                                            |
| Eal-4-1    | NZ_AEJU01000166.1      | + | 12329   | 12381   | RNA → rpmE (PRK00019)Ribosomal_L31 (pfam01197) →                                            |
| Eal-5-1    | NZ_AEJY01000264.1      | - | 1037    | 985     | RNA → rpmE (PRK00019)Ribosomal_L31 (pfam01197) →                                            |
| Eal-1-1    | NZ_CP007025.1          | - | 2095964 | 2095912 | RNA → rpmE (PRK00019)Ribosomal_L31 (pfam01197) →                                            |
| Eal-3-1    | NZ_CH991859.1          | + | 1832703 | 1832755 | RNA → rpmE (PRK00019)Ribosomal_L31 (pfam01197) →                                            |
| Sso-1-5    | NZ_CWUD01000027.1      | + | 39075   | 39127   | RNA → rpmE (PRK00019)Ribosomal_L31 (pfam01197) →                                            |
| Eco-835-1  | NZ_AFAE02000014.1      | - | 44473   | 44421   | RNA → rpmE (PRK00019)Ribosomal_L31 (pfam01197) →                                            |
| Ban-1-1    | NZ_ABOT01000022.1      | - | 97      | 45      | RNA → hypo →                                                                                |
| Eco-1442-1 | NZ_KE137230.1          | + | 202992  | 203044  | RNA → rpmE (PRK00019)Ribosomal_L31 (pfam01197) →                                            |



|            |                               |   |         |         |                                                  |
|------------|-------------------------------|---|---------|---------|--------------------------------------------------|
| Eco-1586-1 | NZ_KB732639.1                 | + | 82570   | 82622   | RNA → rpmE (PRK00019)Ribosomal_L31 (pfam01197) → |
| Cyo-1-1    | NZ_GG730300.1                 | + | 190031  | 190083  | RNA → rpmE (PRK00019)Ribosomal_L31 (pfam01197) → |
| Eco-763-1  | NZ_AEZI02000021.1             | + | 1102773 | 1102825 | RNA → rpmE (PRK00019)Ribosomal_L31 (pfam01197) → |
| Efe-1-1    | NZ_JZWP01000017.1             | - | 45156   | 45104   | RNA → rpmE (PRK00019)Ribosomal_L31 (pfam01197) → |
| Efe-1-2    | NZ_JZWQ01000024.1             | + | 86602   | 86654   | RNA → rpmE (PRK00019)Ribosomal_L31 (pfam01197) → |
| Efe-1-3    | NZ_JZWN01000028.1             | + | 83564   | 83616   | RNA → rpmE (PRK00019)Ribosomal_L31 (pfam01197) → |
| Esp-54-1   | NZ_AEJX01000050.1             | + | 12223   | 12275   | RNA → rpmE (PRK00019)Ribosomal_L31 (pfam01197) → |
| Eco-84-1   | NZ_JNPK01000044.1             | + | 90831   | 90883   | RNA → rpmE (PRK00019)Ribosomal_L31 (pfam01197) → |
| Eco-1655-1 | NZ_GL872050.1                 | + | 91674   | 91726   | RNA → rpmE (PRK00019)Ribosomal_L31 (pfam01197) → |
| Efe-3-1    | NZ_GL870859.1                 | - | 45478   | 45426   | RNA → rpmE (PRK00019)Ribosomal_L31 (pfam01197) → |
| Eco-1989-1 | NZ_AEXD01000024.1             | + | 95154   | 95206   | RNA → rpmE (PRK00019)Ribosomal_L31 (pfam01197) → |
| Efe-2-1    | NC_011740.1                   | - | 3932957 | 3932905 | RNA → rpmE (PRK00019)Ribosomal_L31 (pfam01197) → |
| Efe-4-1    | NZ_CM001142.1                 | - | 3881886 | 3881834 | RNA → rpmE (PRK00019)Ribosomal_L31 (pfam01197) → |
| Sdy-5-1    | NZ_LAIG01000046.1             | - | 686     | 634     | RNA → rpmE (PRK00019)Ribosomal_L31 (pfam01197) → |
| Sdy-6-1    | NZ_AERM01000110.1             | + | 14260   | 14312   | RNA → rpmE (PRK00019)Ribosomal_L31 (pfam01197) → |
| env-786    | scaffold88732.1.MH0014        | + | 177     | 229     | RNA → rpmE (PRK00019)Ribosomal_L31 (pfam01197) → |
| env-787    | scaffold94036.1.MH0025        | - | 440     | 388     | RNA → rpmE (PRK00019)Ribosomal_L31 (pfam01197) → |
| env-788    | C1998588.1.MH0079             | - | 203     | 151     | RNA → ←-hypo                                     |
| env-789    | scaffold1530.9.O2.UC-18       | + | 19529   | 19581   | RNA → ←-hypo                                     |
| env-790    | scaffold8769.24.O2.UC-23      | + | 453     | 505     | RNA → rpmE (PRK00019)Ribosomal_L31 (pfam01197) → |
| env-791    | scaffold39006.2.V1.UC-17      | + | 567     | 619     | RNA → ←-hypo                                     |
| env-792    | 4491404.3.NODE_67640          | - | 319     | 267     | RNA → rpmE (PRK00019)Ribosomal_L31 (pfam01197) → |
| env-793    | 4491406.3.NODE_5404           | + | 85961   | 86013   | RNA → rpmE (PRK00019)Ribosomal_L31 (pfam01197) → |
| env-794    | 4491409.3.NODE_11159          | - | 722     | 670     | RNA → rpmE (PRK00019)Ribosomal_L31 (pfam01197) → |
| env-795    | 4491410.3.NODE_23735          | + | 163     | 215     | RNA → ←-hypo                                     |
| env-796    | 4491411.3.NODE_14623          | + | 66007   | 66059   | RNA → rpmE (PRK00019)Ribosomal_L31 (pfam01197) → |
| env-797    | 4491420.3.NODE_260            | + | 83392   | 83444   | RNA → rpmE (PRK00019)Ribosomal_L31 (pfam01197) → |
| env-798    | 4491479.3.NODE_3717           | + | 11526   | 11578   | RNA → rpmE (PRK00019)Ribosomal_L31 (pfam01197) → |
| env-799    | 4491482.3.NODE_114102         | + | 1175    | 1227    | RNA → rpmE (PRK00019)Ribosomal_L31 (pfam01197) → |
| env-800    | 4491484.3.NODE_12754          | + | 80216   | 80268   | RNA → rpmE (PRK00019)Ribosomal_L31 (pfam01197) → |
| env-801    | MC6.MG3.AS1.C42510            | + | 670     | 722     | RNA → rpmE (PRK00019)Ribosomal_L31 (pfam01197) → |
| env-802    | SRS018313.C7874553            | - | 263     | 211     | RNA → rpmE (PRK00019)Ribosomal_L31 (pfam01197) → |
| env-803    | SRS057478.LANL.scaffold.18323 | + | 764     | 816     | RNA → ←-hypo                                     |
| env-804    | DLF002.scaffold11095.3        | - | 441     | 389     | RNA → rpmE (PRK00019)Ribosomal_L31 (pfam01197) → |
| env-805    | DLF006.scaffold8915.21        | - | 999     | 947     | RNA → rpmE (PRK00019)Ribosomal_L31 (pfam01197) → |
| env-806    | DLF008.scaffold4013.1         | - | 452     | 400     | RNA → rpmE (PRK00019)Ribosomal_L31 (pfam01197) → |
| env-807    | DLF009.scaffold6274.1         | + | 32314   | 32366   | RNA → rpmE (PRK00019)Ribosomal_L31 (pfam01197) → |
| env-808    | DLF012.C220366.1              | + | 276     | 328     | RNA → rpmE (PRK00019)Ribosomal_L31 (pfam01197) → |
| env-809    | DLF013.scaffold50084.2        | + | 132     | 184     | RNA → rpmE (PRK00019)Ribosomal_L31 (pfam01197) → |
| env-810    | DLM005.scaffold10654.5        | + | 248     | 300     | RNA → rpmE (PRK00019)Ribosomal_L31 (pfam01197) → |
| env-811    | DLM011.C451971.1              | + | 271     | 323     | RNA → rpmE (PRK00019)Ribosomal_L31 (pfam01197) → |
| env-812    | DLM012.scaffold26432.1        | + | 784     | 836     | RNA → rpmE (PRK00019)Ribosomal_L31 (pfam01197) → |
| env-813    | DLM022.scaffold90450.1        | - | 6267    | 6215    | RNA → rpmE (PRK00019)Ribosomal_L31 (pfam01197) → |
| env-814    | DLM023.scaffold8878.5         | - | 933     | 881     | RNA → rpmE (PRK00019)Ribosomal_L31 (pfam01197) → |
| env-815    | DLM024.C119635.1              | - | 578     | 526     | RNA → rpmE (PRK00019)Ribosomal_L31 (pfam01197) → |
| env-816    | DLM028.scaffold4352.1         | - | 39427   | 39375   | RNA → rpmE (PRK00019)Ribosomal_L31 (pfam01197) → |
| env-817    | DOF004.scaffold50245.1        | - | 473     | 421     | RNA → rpmE (PRK00019)Ribosomal_L31 (pfam01197) → |
| env-818    | DOF006.C278658.1              | + | 276     | 328     | RNA → rpmE (PRK00019)Ribosomal_L31 (pfam01197) → |
| env-819    | DOF007.C334852.1              | - | 319     | 267     | RNA → rpmE (PRK00019)Ribosomal_L31 (pfam01197) → |
| env-820    | DOF010.scaffold4818.8         | + | 1645    | 1697    | RNA → rpmE (PRK00019)Ribosomal_L31 (pfam01197) → |
| env-821    | DOF012.scaffold101.4          | - | 364     | 312     | RNA → rpmE (PRK00019)Ribosomal_L31 (pfam01197) → |
| env-822    | DOM003.scaffold11449.1        | - | 39427   | 39375   | RNA → rpmE (PRK00019)Ribosomal_L31 (pfam01197) → |

|            |                                 |   |        |        |                                                  |
|------------|---------------------------------|---|--------|--------|--------------------------------------------------|
| env-823    | DOM008_scaffold1034.13          | + | 1472   | 1524   | RNA → rpmE (PRK00019)Ribosomal_L31 (pfam01197) → |
| env-824    | DOM016_scaffold5749.2           | + | 1289   | 1341   | RNA → rpmE (PRK00019)Ribosomal_L31 (pfam01197) → |
| env-825    | NLF008_scaffold4821.2           | - | 516    | 464    | RNA → rpmE (PRK00019)Ribosomal_L31 (pfam01197) → |
| env-826    | NLM002_C331626.1                | + | 159    | 211    | RNA → rpmE (PRK00019)Ribosomal_L31 (pfam01197) → |
| env-827    | NLM003_scaffold29307.1          | - | 621    | 569    | RNA → rpmE (PRK00019)Ribosomal_L31 (pfam01197) → |
| env-828    | NLM006_scaffold26360.2          | + | 30174  | 30226  | RNA → rpmE (PRK00019)Ribosomal_L31 (pfam01197) → |
| env-829    | NLM015_scaffold10348.11         | + | 1248   | 1300   | RNA → rpmE (PRK00019)Ribosomal_L31 (pfam01197) → |
| env-830    | NLM016_scaffold4185.1           | + | 346    | 398    | RNA → rpmE (PRK00019)Ribosomal_L31 (pfam01197) → |
| env-831    | NLM017_scaffold15483.4          | + | 491    | 543    | RNA → rpmE (PRK00019)Ribosomal_L31 (pfam01197) → |
| env-832    | NLM022_C583280.1                | + | 276    | 328    | RNA → rpmE (PRK00019)Ribosomal_L31 (pfam01197) → |
| env-833    | NLM024_C270022.1                | + | 816    | 868    | RNA → rpmE (PRK00019)Ribosomal_L31 (pfam01197) → |
| env-834    | NLM028_scaffold24732.2          | + | 337    | 389    | RNA → rpmE (PRK00019)Ribosomal_L31 (pfam01197) → |
| env-835    | NOF002_scaffold5884.5           | + | 505    | 557    | RNA → rpmE (PRK00019)Ribosomal_L31 (pfam01197) → |
| env-836    | NOF006_scaffold6742.1           | - | 452    | 400    | RNA → rpmE (PRK00019)Ribosomal_L31 (pfam01197) → |
| env-837    | NOF010_scaffold32693.2          | + | 187    | 239    | RNA → rpmE (PRK00019)Ribosomal_L31 (pfam01197) → |
| env-838    | NOM008_scaffold26361.2          | + | 421    | 473    | RNA → rpmE (PRK00019)Ribosomal_L31 (pfam01197) → |
| env-839    | NOM018_scaffold38037.2          | + | 115    | 167    | RNA → rpmE (PRK00019)Ribosomal_L31 (pfam01197) → |
| env-840    | NOM020_scaffold104.1            | - | 1043   | 991    | RNA → rpmE (PRK00019)Ribosomal_L31 (pfam01197) → |
| env-841    | NOM025_scaffold24626.1          | - | 474    | 422    | RNA → rpmE (PRK00019)Ribosomal_L31 (pfam01197) → |
| env-842    | NOM028_scaffold47489.1          | + | 23473  | 23525  | RNA → rpmE (PRK00019)Ribosomal_L31 (pfam01197) → |
| env-843    | NOM029_scaffold36166.1          | - | 466    | 414    | RNA → rpmE (PRK00019)Ribosomal_L31 (pfam01197) → |
| env-844    | longitudinal.69.558             | - | 44412  | 44360  | RNA → rpmE (PRK00019)Ribosomal_L31 (pfam01197) → |
| env-845    | longitudinal.70.173             | + | 546960 | 546908 | RNA → rpmE (PRK00019)Ribosomal_L31 (pfam01197) → |
| env-846    | longitudinal.71.356             | + | 21299  | 21351  | RNA → rpmE (PRK00019)Ribosomal_L31 (pfam01197) → |
| env-847    | longitudinal.72.263             | - | 44442  | 44390  | RNA → rpmE (PRK00019)Ribosomal_L31 (pfam01197) → |
| env-848    | longitudinal.115.82             | + | 20819  | 20871  | RNA → rpmE (PRK00019)Ribosomal_L31 (pfam01197) → |
| env-849    | longitudinal.116.26             | + | 20918  | 20970  | RNA → rpmE (PRK00019)Ribosomal_L31 (pfam01197) → |
| env-850    | longitudinal.117.29             | - | 44410  | 44358  | RNA → rpmE (PRK00019)Ribosomal_L31 (pfam01197) → |
| env-851    | longitudinal.303.178            | - | 44417  | 44365  | RNA → rpmE (PRK00019)Ribosomal_L31 (pfam01197) → |
| env-852    | longitudinal.304.63             | - | 44415  | 44363  | RNA → rpmE (PRK00019)Ribosomal_L31 (pfam01197) → |
| env-853    | longitudinal.348.423            | + | 1372   | 1424   | RNA → rpmE (PRK00019)Ribosomal_L31 (pfam01197) → |
| env-854    | longitudinal.349.45             | + | 32353  | 32405  | RNA → rpmE (PRK00019)Ribosomal_L31 (pfam01197) → |
| env-855    | PaFGMunAill_c006456             | - | 489    | 437    | RNA → rpmE (PRK00019)Ribosomal_L31 (pfam01197) → |
| env-856    | 3300001567_10000498             | - | 39514  | 39462  | RNA → rpmE (PRK00019)Ribosomal_L31 (pfam01197) → |
| env-857    | SRS017191_C1719102              | - | 442    | 390    | RNA → rpmE (PRK00019)Ribosomal_L31 (pfam01197) → |
| env-858    | SRS017521_Baylor_scaffold.53627 | + | 39694  | 39746  | RNA → rpmE (PRK00019)Ribosomal_L31 (pfam01197) → |
| env-859    | SRS019601_C1965939              | + | 486    | 538    | RNA → ← hypo                                     |
| env-860    | FGTW_contig17927                | + | 168    | 220    | RNA → rpmE (PRK00019)Ribosomal_L31 (pfam01197) → |
| Eco-1931-1 | NZ_AQBH01000074.1               | + | 34085  | 34137  | RNA → rpmE (PRK00019)Ribosomal_L31 (pfam01197) → |
| Eco-1010-1 | NZ_APXM01000157.1               | + | 11559  | 11611  | RNA → rpmE (PRK00019)Ribosomal_L31 (pfam01197) → |
| Eco-1935-1 | NZ_AQBL01000072.1               | + | 32496  | 32548  | RNA → rpmE (PRK00019)Ribosomal_L31 (pfam01197) → |
| Eco-1012-1 | NZ_APXN01000126.1               | + | 30077  | 30129  | RNA → rpmE (PRK00019)Ribosomal_L31 (pfam01197) → |
| Eco-1937-1 | NZ_AQBM01000080.1               | + | 34161  | 34213  | RNA → rpmE (PRK00019)Ribosomal_L31 (pfam01197) → |
| Eco-1007-1 | NZ_AQFJ01000025.1               | + | 86615  | 86667  | RNA → rpmE (PRK00019)Ribosomal_L31 (pfam01197) → |
| Eco-1941-1 | NZ_AQBQ01000078.1               | + | 34132  | 34184  | RNA → rpmE (PRK00019)Ribosomal_L31 (pfam01197) → |
| Eco-1006-1 | NZ_APZM01000121.1               | + | 29881  | 29933  | RNA → rpmE (PRK00019)Ribosomal_L31 (pfam01197) → |
| Eco-1942-1 | NZ_AQBR01000109.1               | + | 34119  | 34171  | RNA → rpmE (PRK00019)Ribosomal_L31 (pfam01197) → |
| Eco-1086-1 | NZ_AIGA01000058.1               | + | 91006  | 91058  | RNA → rpmE (PRK00019)Ribosomal_L31 (pfam01197) → |
| Eco-2167-1 | NZ_AQBU01000262.1               | + | 18685  | 18737  | RNA → rpmE (PRK00019)Ribosomal_L31 (pfam01197) → |
| Eco-1091-1 | NZ_AIGF01000049.1               | + | 93764  | 93816  | RNA → rpmE (PRK00019)Ribosomal_L31 (pfam01197) → |
| Eco-2174-1 | NZ_AQBZ01000220.1               | + | 18684  | 18736  | RNA → rpmE (PRK00019)Ribosomal_L31 (pfam01197) → |
| Eco-831-1  | NZ_AQDC01000103.1               | + | 87700  | 87752  | RNA → rpmE (PRK00019)Ribosomal_L31 (pfam01197) → |

|            |                   |   |        |        |                                                                                             |
|------------|-------------------|---|--------|--------|---------------------------------------------------------------------------------------------|
| Eco-1060-1 | NZ_AIEY01000064.1 | + | 90155  | 90207  | RNA → rpmE (PRK00019)Ribosomal_L31 (pfam01197) →                                            |
| Eco-1084-1 | NZ_AIFW01000046.1 | + | 91475  | 91527  | RNA → rpmE (PRK00019)Ribosomal_L31 (pfam01197) → rpmE (PRK00019)Ribosomal_L31 (pfam01197) → |
| Eco-1049-1 | NZ_AIHL01000077.1 | + | 101568 | 101620 | RNA → rpmE (PRK00019)Ribosomal_L31 (pfam01197) →                                            |
| Eco-1943-1 | NZ_AQBS01000074.1 | + | 34100  | 34152  | RNA → rpmE (PRK00019)Ribosomal_L31 (pfam01197) →                                            |
| Eco-1926-1 | NZ_AQBD01000151.1 | + | 87569  | 87621  | RNA → rpmE (PRK00019)Ribosomal_L31 (pfam01197) →                                            |
| Eco-1932-1 | NZ_AQBI01000070.1 | + | 34119  | 34171  | RNA → rpmE (PRK00019)Ribosomal_L31 (pfam01197) →                                            |
| Eco-1005-1 | NZ_AQDA01000087.1 | + | 18694  | 18746  | RNA → rpmE (PRK00019)Ribosomal_L31 (pfam01197) →                                            |
| Eco-1938-1 | NZ_AQBN01000075.1 | + | 34114  | 34166  | RNA → rpmE (PRK00019)Ribosomal_L31 (pfam01197) →                                            |
| Eco-1087-1 | NZ_AIGB01000037.1 | + | 93728  | 93780  | RNA → rpmE (PRK00019)Ribosomal_L31 (pfam01197) →                                            |
| Eco-2168-1 | NZ_AQBV01000151.1 | + | 18698  | 18750  | RNA → rpmE (PRK00019)Ribosomal_L31 (pfam01197) →                                            |
| Eco-1063-1 | NZ_AIFB01000068.1 | + | 89616  | 89668  | RNA → rpmE (PRK00019)Ribosomal_L31 (pfam01197) →                                            |
| Eco-2178-1 | NZ_AQCD01000147.1 | + | 18690  | 18742  | RNA → rpmE (PRK00019)Ribosomal_L31 (pfam01197) →                                            |
| Eco-1064-1 | NZ_AIFC01000041.1 | + | 89813  | 89865  | RNA → rpmE (PRK00019)Ribosomal_L31 (pfam01197) →                                            |
| Eco-2177-1 | NZ_AQCC01000175.1 | + | 18742  | 18794  | RNA → rpmE (PRK00019)Ribosomal_L31 (pfam01197) →                                            |
| Eco-1071-1 | NZ_AIFJ01000088.1 | + | 96866  | 96918  | RNA → rpmE (PRK00019)Ribosomal_L31 (pfam01197) →                                            |
| Eco-1050-1 | NZ_AIHM01000068.1 | + | 30233  | 30285  | RNA → rpmE (PRK00019)Ribosomal_L31 (pfam01197) →                                            |
| Eco-1927-1 | NZ_AQBE01000065.1 | + | 87685  | 87737  | RNA → rpmE (PRK00019)Ribosomal_L31 (pfam01197) →                                            |
| Eco-833-1  | NZ_APXK01000246.1 | + | 48768  | 48820  | RNA → rpmE (PRK00019)Ribosomal_L31 (pfam01197) →                                            |
| Eco-1933-1 | NZ_AQBJ01000075.1 | + | 34205  | 34257  | RNA → rpmE (PRK00019)Ribosomal_L31 (pfam01197) →                                            |
| Eco-1089-1 | NZ_AIGD01000026.1 | + | 90023  | 90075  | RNA → rpmE (PRK00019)Ribosomal_L31 (pfam01197) →                                            |
| Eco-1939-1 | NZ_AQBO01000076.1 | + | 32750  | 32802  | RNA → rpmE (PRK00019)Ribosomal_L31 (pfam01197) →                                            |
| Eco-1057-1 | NZ_AIEV01000058.1 | + | 88320  | 88372  | RNA → rpmE (PRK00019)Ribosomal_L31 (pfam01197) →                                            |
| Eco-1058-1 | NZ_AIEW01000062.1 | + | 89743  | 89795  | RNA → rpmE (PRK00019)Ribosomal_L31 (pfam01197) →                                            |
| Eco-2171-1 | NZ_AQBW01000092.1 | + | 18599  | 18651  | RNA → rpmE (PRK00019)Ribosomal_L31 (pfam01197) → rpmE (PRK00019)Ribosomal_L31 (pfam01197) → |
| Eco-1065-1 | NZ_AIFD01000051.1 | + | 91758  | 91810  | RNA → rpmE (PRK00019)Ribosomal_L31 (pfam01197) →                                            |
| Eco-418-1  | NZ_JAQA01000142.1 | - | 430    | 378    | RNA → rpmE (PRK00019)Ribosomal_L31 (pfam01197) →                                            |
| Sso-7-1    | NZ_AMKL01000066.1 | + | 88372  | 88424  | RNA → rpmE (PRK00019)Ribosomal_L31 (pfam01197) →                                            |
| Sso-3-1    | NZ_AMKH01000064.1 | + | 1250   | 1302   | RNA → rpmE (PRK00019)Ribosomal_L31 (pfam01197) →                                            |
| Sdy-7-1    | NZ_AMJS01000102.1 | + | 139660 | 139712 | RNA → rpmE (PRK00019)Ribosomal_L31 (pfam01197) →                                            |
| Sso-4-1    | NZ_AMKI01000053.1 | + | 675911 | 675963 | RNA → rpmE (PRK00019)Ribosomal_L31 (pfam01197) →                                            |
| Sbo-17-1   | NZ_AMJX01000076.1 | + | 186189 | 186241 | RNA → rpmE (PRK00019)Ribosomal_L31 (pfam01197) →                                            |
| Sso-5-1    | NZ_AMKJ01000065.1 | + | 11296  | 11348  | RNA → rpmE (PRK00019)Ribosomal_L31 (pfam01197) →                                            |
| Sbo-6-1    | NZ_AMKA01000088.1 | + | 82733  | 82785  | RNA → rpmE (PRK00019)Ribosomal_L31 (pfam01197) →                                            |
| Sbo-11-1   | NZ_AMKG01000054.1 | + | 186704 | 186756 | RNA → rpmE (PRK00019)Ribosomal_L31 (pfam01197) →                                            |
| Sbo-5-1    | NZ_AMJZ01000079.1 | + | 82295  | 82347  | RNA → rpmE (PRK00019)Ribosomal_L31 (pfam01197) →                                            |
| Sso-6-1    | NZ_AMKK01000080.1 | + | 88121  | 88173  | RNA → rpmE (PRK00019)Ribosomal_L31 (pfam01197) →                                            |
| Sbo-10-1   | NZ_AMKE01000113.1 | + | 199814 | 199866 | RNA → rpmE (PRK00019)Ribosomal_L31 (pfam01197) →                                            |
| Sbo-9-1    | NZ_AMKD01000099.1 | + | 44335  | 44387  | RNA → rpmE (PRK00019)Ribosomal_L31 (pfam01197) →                                            |
| Sfl-73-1   | NZ_AMKF01000096.1 | + | 14330  | 14382  | RNA → rpmE (PRK00019)Ribosomal_L31 (pfam01197) →                                            |
| Sso-11-1   | NZ_AMJR01000162.1 | + | 48321  | 48373  | RNA → rpmE (PRK00019)Ribosomal_L31 (pfam01197) →                                            |
| Sbo-7-1    | NZ_AMKB01000096.1 | + | 114428 | 114480 | RNA → rpmE (PRK00019)Ribosomal_L31 (pfam01197) →                                            |
| Sfl-77-1   | NZ_AMJT01000150.1 | + | 49168  | 49220  | RNA → rpmE (PRK00019)Ribosomal_L31 (pfam01197) →                                            |
| Sfl-78-1   | NZ_AMJV01000159.1 | + | 49169  | 49221  | RNA → rpmE (PRK00019)Ribosomal_L31 (pfam01197) →                                            |
| Sfl-80-1   | NZ_AMJY01000153.1 | + | 131442 | 131494 | RNA → rpmE (PRK00019)Ribosomal_L31 (pfam01197) →                                            |
| Sfl-75-1   | NZ_AMJP01000130.1 | + | 49169  | 49221  | RNA → rpmE (PRK00019)Ribosomal_L31 (pfam01197) →                                            |
| Sbo-8-1    | NZ_AMKC01000199.1 | + | 34062  | 34114  | RNA → rpmE (PRK00019)Ribosomal_L31 (pfam01197) →                                            |
| Sfl-79-1   | NZ_AMJW01000030.1 | + | 35330  | 35382  | RNA → rpmE (PRK00019)Ribosomal_L31 (pfam01197) →                                            |
| Sbo-16-1   | NZ_AMJU01000250.1 | + | 48467  | 48519  | RNA → rpmE (PRK00019)Ribosomal_L31 (pfam01197) →                                            |
| Sdy-1-1    | NZ_AMJQ01000036.1 | - | 5806   | 5754   | RNA → rpmE (PRK00019)Ribosomal_L31 (pfam01197) →                                            |
| Sfl-76-1   | NZ_ANAN01000865.1 | + | 33995  | 34047  | RNA → rpmE (PRK00019)Ribosomal_L31 (pfam01197) →                                            |
| Eco-994-1  | NZ_AAJT02000014.1 | + | 76738  | 76790  | RNA → rpmE (PRK00019)Ribosomal_L31 (pfam01197) → rpmE (PRK00019)Ribosomal_L31 (pfam01197) → |
| Eco-1152-1 | NZ_AAJU02000017.1 | + | 31540  | 31592  | RNA → rpmE (PRK00019)Ribosomal_L31 (pfam01197) → rpmE (PRK00019)Ribosomal_L31 (pfam01197) → |



|            |                   |   |         |         |                                                                                             |
|------------|-------------------|---|---------|---------|---------------------------------------------------------------------------------------------|
| Eco-1107-1 | NZ_AAJV02000012.1 | - | 49537   | 49485   | RNA → ←-hypō                                                                                |
| Eco-1103-1 | NZ_AAJW02000005.1 | + | 149007  | 149059  | RNA → rpmE (PRK00019)Ribosomal_L31 (pfam01197) → rpmE (PRK00019)Ribosomal_L31 (pfam01197) → |
| Eco-767-1  | NZ_AAMK02000013.1 | - | 39845   | 39793   | RNA → rpmE (PRK00019)Ribosomal_L31 (pfam01197) → rpmE (PRK00019)Ribosomal_L31 (pfam01197) → |
| Eco-837-1  | NZ_AFAC02000012.1 | - | 1611362 | 1611310 | RNA → rpmE (PRK00019)Ribosomal_L31 (pfam01197) →                                            |
| Eco-849-1  | NZ_AAKB02000001.1 | - | 1814208 | 1814156 | RNA → rpmE (PRK00019)Ribosomal_L31 (pfam01197) → rpmE (PRK00019)Ribosomal_L31 (pfam01197) → |
| Eco-975-1  | NZ_AAJX02000008.1 | - | 1237    | 1185    | RNA → rpmE (PRK00019)Ribosomal_L31 (pfam01197) → rpmE (PRK00019)Ribosomal_L31 (pfam01197) → |
| Eco-1768-1 | NZ_AKAX01000157.1 | - | 651     | 599     | RNA → rpmE (PRK00019)Ribosomal_L31 (pfam01197) →                                            |
| Eco-468-1  | NZ_JHLL01000039.1 | - | 605     | 553     | RNA → rpmE (PRK00019)Ribosomal_L31 (pfam01197) →                                            |
| Eco-40-1   | NZ_JOSK01000099.1 | + | 84179   | 84231   | RNA → rpmE (PRK00019)Ribosomal_L31 (pfam01197) →                                            |
| Eco-956-1  | NZ_AZBZ01000002.1 | - | 450     | 398     | RNA → rpmE (PRK00019)Ribosomal_L31 (pfam01197) →                                            |
| Eco-2172-1 | NZ_AQBX01000136.1 | + | 18739   | 18791   | RNA → rpmE (PRK00019)Ribosomal_L31 (pfam01197) →                                            |
| Eco-2179-1 | NZ_AQCE01000128.1 | + | 18671   | 18723   | RNA → rpmE (PRK00019)Ribosomal_L31 (pfam01197) →                                            |
| Eco-1082-1 | NZ_AIFU01000024.1 | + | 31669   | 31721   | RNA → rpmE (PRK00019)Ribosomal_L31 (pfam01197) →                                            |
| Eco-1924-1 | NZ_AQBB01000153.1 | + | 87690   | 87742   | RNA → rpmE (PRK00019)Ribosomal_L31 (pfam01197) →                                            |
| Eco-1037-1 | NZ_AIGZ01000027.1 | + | 125333  | 125385  | RNA → rpmE (PRK00019)Ribosomal_L31 (pfam01197) →                                            |
| Eco-873-1  | NZ_AFAI02000031.1 | + | 737717  | 737769  | RNA → rpmE (PRK00019)Ribosomal_L31 (pfam01197) →                                            |
| Eco-1973-1 | NZ_AOEN01000114.1 | + | 91791   | 91843   | RNA → rpmE (PRK00019)Ribosomal_L31 (pfam01197) →                                            |
| Eco-2169-1 | NZ_APZI01000449.1 | + | 13475   | 13527   | RNA → rpmE (PRK00019)Ribosomal_L31 (pfam01197) →                                            |
| Eco-2170-1 | NZ_APZZ01000144.1 | + | 18534   | 18586   | RNA → rpmE (PRK00019)Ribosomal_L31 (pfam01197) →                                            |
| Eco-1014-1 | NZ_AQCY01000139.1 | + | 23759   | 23811   | RNA → rpmE (PRK00019)Ribosomal_L31 (pfam01197) →                                            |
| Eco-1928-1 | NZ_AQBF01000062.1 | + | 87675   | 87727   | RNA → rpmE (PRK00019)Ribosomal_L31 (pfam01197) →                                            |
| Eco-1934-1 | NZ_AQBK01000072.1 | + | 34111   | 34163   | RNA → rpmE (PRK00019)Ribosomal_L31 (pfam01197) →                                            |
| Eco-1940-1 | NZ_AQBP01000082.1 | + | 34095   | 34147   | RNA → rpmE (PRK00019)Ribosomal_L31 (pfam01197) →                                            |
| Eco-1008-1 | NZ_APXL01000532.1 | + | 7809    | 7861    | RNA → rpmE (PRK00019)Ribosomal_L31 (pfam01197) →                                            |
| Eco-365-1  | NZ_JXBV01000104.1 | + | 79967   | 80019   | RNA → rpmE (PRK00019)Ribosomal_L31 (pfam01197) →                                            |
| Sfl-74-1   | NZ_AMWM01000231.1 | + | 43473   | 43525   | RNA → rpmE (PRK00019)Ribosomal_L31 (pfam01197) →                                            |
| Eco-282-1  | NZ_AEZO02000004.1 | - | 469851  | 469799  | RNA → rpmE (PRK00019)Ribosomal_L31 (pfam01197) →                                            |
| Eco-2166-1 | NZ_AQBT01000172.1 | + | 18701   | 18753   | RNA → rpmE (PRK00019)Ribosomal_L31 (pfam01197) →                                            |
| Eco-1085-1 | NZ_AIFZ01000036.1 | + | 91384   | 91436   | RNA → rpmE (PRK00019)Ribosomal_L31 (pfam01197) →                                            |
| Eco-2173-1 | NZ_AQBY01000146.1 | + | 18635   | 18687   | RNA → rpmE (PRK00019)Ribosomal_L31 (pfam01197) →                                            |
| Eco-1090-1 | NZ_AIGE01000037.1 | + | 90172   | 90224   | RNA → rpmE (PRK00019)Ribosomal_L31 (pfam01197) →                                            |
| Eco-1925-1 | NZ_AQBC01000182.1 | + | 87680   | 87732   | RNA → rpmE (PRK00019)Ribosomal_L31 (pfam01197) →                                            |
| Eco-2175-1 | NZ_AQCA01000232.1 | + | 18733   | 18785   | RNA → rpmE (PRK00019)Ribosomal_L31 (pfam01197) →                                            |
| Sso-13-1   | NZ_AGRD01000092.1 | + | 94585   | 94637   | RNA → rpmE (PRK00019)Ribosomal_L31 (pfam01197) →                                            |
| Eco-1185-1 | NZ_APNX01000009.1 | - | 52622   | 52570   | RNA → rpmE (PRK00019)Ribosomal_L31 (pfam01197) →                                            |
| Eco-1182-1 | NZ_APNU01000021.1 | - | 52129   | 52077   | RNA → rpmE (PRK00019)Ribosomal_L31 (pfam01197) →                                            |
| Eco-1186-1 | NZ_APNV01000024.1 | + | 64755   | 64807   | RNA → rpmE (PRK00019)Ribosomal_L31 (pfam01197) →                                            |
| Eco-2013-1 | NZ_AOQY01000020.1 | - | 57102   | 57050   | RNA → rpmE (PRK00019)Ribosomal_L31 (pfam01197) →                                            |
| Eco-2006-1 | NZ_AOQQ01000030.1 | + | 32479   | 32531   | RNA → rpmE (PRK00019)Ribosomal_L31 (pfam01197) →                                            |
| Eco-2005-1 | NZ_AORB01000013.1 | + | 32411   | 32463   | RNA → rpmE (PRK00019)Ribosomal_L31 (pfam01197) →                                            |
| Eco-2010-1 | NZ_AORA01000044.1 | - | 52396   | 52344   | RNA → rpmE (PRK00019)Ribosomal_L31 (pfam01197) →                                            |
| Eco-2015-1 | NZ_AOQC01000042.1 | - | 52225   | 52173   | RNA → rpmE (PRK00019)Ribosomal_L31 (pfam01197) →                                            |
| Eco-2018-1 | NZ_AOQM01000007.1 | - | 52226   | 52174   | RNA → rpmE (PRK00019)Ribosomal_L31 (pfam01197) →                                            |
| Eco-2019-1 | NZ_AOQN01000054.1 | - | 52224   | 52172   | RNA → rpmE (PRK00019)Ribosomal_L31 (pfam01197) →                                            |
| Eco-2011-1 | NZ_AOQW01000017.1 | - | 28856   | 28804   | RNA → rpmE (PRK00019)Ribosomal_L31 (pfam01197) →                                            |
| Eco-2012-1 | NZ_AOQX01000001.1 | - | 28848   | 28796   | RNA → rpmE (PRK00019)Ribosomal_L31 (pfam01197) →                                            |
| Eco-2017-1 | NZ_AOQE01000030.1 | - | 21619   | 21567   | RNA → rpmE (PRK00019)Ribosomal_L31 (pfam01197) →                                            |
| Eco-2020-1 | NZ_AOQO01000021.1 | + | 8155    | 8207    | RNA → rpmE (PRK00019)Ribosomal_L31 (pfam01197) →                                            |
| Eco-2005-2 | NZ_AOQP01000122.1 | + | 48352   | 48404   | RNA → rpmE (PRK00019)Ribosomal_L31 (pfam01197) →                                            |
| Eco-2009-1 | NZ_AOQU01000249.1 | - | 443     | 391     | RNA → rpmE (PRK00019)Ribosomal_L31 (pfam01197) →                                            |
| Eco-2014-1 | NZ_AOQZ01000031.1 | - | 28877   | 28825   | RNA → rpmE (PRK00019)Ribosomal_L31 (pfam01197) →                                            |
| Eco-2007-1 | NZ_AOQR01000094.1 | + | 18381   | 18433   | RNA → rpmE (PRK00019)Ribosomal_L31 (pfam01197) →                                            |



|            |                   |   |         |         |                                                                                             |
|------------|-------------------|---|---------|---------|---------------------------------------------------------------------------------------------|
| Eco-2008-1 | NZ_AOQS01000188.1 | + | 18322   | 18374   | RNA → rpmE (PRK00019)Ribosomal_L31 (pfam01197) →                                            |
| Eco-1770-1 | NZ_AJVT01000257.1 | + | 35439   | 35491   | RNA → rpmE (PRK00019)Ribosomal_L31 (pfam01197) →                                            |
| Eco-1776-1 | NZ_AKAW01000246.1 | - | 430     | 378     | RNA → rpmE (PRK00019)Ribosomal_L31 (pfam01197) →                                            |
| Eco-461-1  | NZ_JDRV01000378.1 | - | 506     | 454     | RNA → rpmE (PRK00019)Ribosomal_L31 (pfam01197) →                                            |
| Eco-920-1  | NZ_AEZQ02000013.1 | + | 1490930 | 1490982 | RNA → rpmE (PRK00019)Ribosomal_L31 (pfam01197) → rpmE (PRK00019)Ribosomal_L31 (pfam01197) → |
| Eco-923-1  | NZ_AEZW02000001.1 | + | 2765917 | 2765969 | RNA → rpmE (PRK00019)Ribosomal_L31 (pfam01197) →                                            |
| Eco-845-1  | NZ_AEZW02000026.1 | + | 2868888 | 2868940 | RNA → rpmE (PRK00019)Ribosomal_L31 (pfam01197) →                                            |
| Eco-928-1  | NZ_AEZO02000030.1 | - | 10772   | 10720   | RNA → rpmE (PRK00019)Ribosomal_L31 (pfam01197) →                                            |
| Eco-1702-1 | NZ_ADWR01000068.1 | + | 21376   | 21428   | RNA → rpmE (PRK00019)Ribosomal_L31 (pfam01197) →                                            |
| Eco-762-1  | NZ_AEZO02000020.1 | + | 311836  | 311888  | RNA → rpmE (PRK00019)Ribosomal_L31 (pfam01197) →                                            |
| Eco-843-1  | NZ_AEZO02000105.1 | - | 167468  | 167416  | RNA → rpmE (PRK00019)Ribosomal_L31 (pfam01197) → rpmE (PRK00019)Ribosomal_L31 (pfam01197) → |
| Eco-844-1  | NZ_AFAA02000008.1 | - | 253538  | 253486  | RNA → rpmE (PRK00019)Ribosomal_L31 (pfam01197) →                                            |
| Eco-934-1  | NZ_AEZR02000014.1 | - | 89280   | 89228   | RNA → rpmE (PRK00019)Ribosomal_L31 (pfam01197) →                                            |
| Eco-1684-1 | NZ_ADWT01000012.1 | + | 89502   | 89554   | RNA → rpmE (PRK00019)Ribosomal_L31 (pfam01197) → rpmE (PRK00019)Ribosomal_L31 (pfam01197) → |
| Eco-927-1  | NZ_AEZO02000011.1 | - | 47842   | 47790   | RNA → rpmE (PRK00019)Ribosomal_L31 (pfam01197) →                                            |
| Eco-2016-1 | NZ_AOQD01000036.1 | - | 57103   | 57051   | RNA → rpmE (PRK00019)Ribosomal_L31 (pfam01197) →                                            |
| Eco-728-1  | NZ_AOUQ01000152.1 | + | 41502   | 41554   | RNA → rpmE (PRK00019)Ribosomal_L31 (pfam01197) →                                            |
| Eco-381-1  | NZ_AIBZ01000106.1 | - | 52248   | 52196   | RNA → rpmE (PRK00019)Ribosomal_L31 (pfam01197) →                                            |
| Eco-291-2  | NZ_ASHD01000050.1 | + | 80292   | 80344   | RNA → rpmE (PRK00019)Ribosomal_L31 (pfam01197) →                                            |
| Eco-287-1  | NZ_ATOA01000041.1 | + | 64688   | 64740   | RNA → rpmE (PRK00019)Ribosomal_L31 (pfam01197) →                                            |
| Eco-281-1  | NZ_AEZY02000004.1 | + | 82291   | 82343   | RNA → rpmE (PRK00019)Ribosomal_L31 (pfam01197) →                                            |
| Eco-392-1  | NZ_JRYM01000024.1 | + | 86369   | 86421   | RNA → rpmE (PRK00019)Ribosomal_L31 (pfam01197) →                                            |
| Eco-1831-1 | NZ_AICG01000014.1 | + | 88929   | 88981   | RNA → rpmE (PRK00019)Ribosomal_L31 (pfam01197) →                                            |
| Eco-344-1  | NZ_AIAP01000056.1 | - | 52126   | 52074   | RNA → rpmE (PRK00019)Ribosomal_L31 (pfam01197) →                                            |
| Eco-341-1  | NZ_AIAL01000036.1 | - | 39155   | 39103   | RNA → rpmE (PRK00019)Ribosomal_L31 (pfam01197) →                                            |
| Eco-361-1  | NZ_AIBF01000024.1 | + | 80060   | 80112   | RNA → rpmE (PRK00019)Ribosomal_L31 (pfam01197) →                                            |
| Sso-1-6    | NZ_CXEQ01000019.1 | - | 645     | 593     | RNA → rpmE (PRK00019)Ribosomal_L31 (pfam01197) →                                            |
| Sso-1-7    | NZ_CXOD01000022.1 | + | 39082   | 39134   | RNA → rpmE (PRK00019)Ribosomal_L31 (pfam01197) →                                            |
| Eco-369-1  | NZ_AIBN01000020.1 | - | 505     | 453     | RNA → rpmE (PRK00019)Ribosomal_L31 (pfam01197) →                                            |
| Eco-357-1  | NZ_AIBC01000257.1 | - | 613     | 561     | RNA → rpmE (PRK00019)Ribosomal_L31 (pfam01197) →                                            |
| Eco-371-1  | NZ_AIBP01000011.1 | - | 18225   | 18173   | RNA → rpmE (PRK00019)Ribosomal_L31 (pfam01197) →                                            |
| Eco-377-1  | NZ_AIBU01000027.1 | - | 690     | 638     | RNA → rpmE (PRK00019)Ribosomal_L31 (pfam01197) →                                            |
| Eco-383-1  | NZ_AICB01000019.1 | + | 11304   | 11356   | RNA → rpmE (PRK00019)Ribosomal_L31 (pfam01197) →                                            |
| Eco-386-1  | NZ_AICE01000057.1 | + | 80383   | 80435   | RNA → rpmE (PRK00019)Ribosomal_L31 (pfam01197) →                                            |
| Eco-333-1  | NZ_AIAE01000024.1 | + | 91910   | 91962   | RNA → rpmE (PRK00019)Ribosomal_L31 (pfam01197) →                                            |
| Eco-354-1  | NZ_AIAZ01000228.1 | - | 505     | 453     | RNA → rpmE (PRK00019)Ribosomal_L31 (pfam01197) →                                            |
| Eco-342-1  | NZ_AIAN01000137.1 | + | 23487   | 23539   | RNA → rpmE (PRK00019)Ribosomal_L31 (pfam01197) →                                            |
| Eco-382-1  | NZ_AICA01000012.1 | - | 487     | 435     | RNA → rpmE (PRK00019)Ribosomal_L31 (pfam01197) →                                            |
| Eco-347-1  | NZ_AIAS01000067.1 | + | 39822   | 39874   | RNA → rpmE (PRK00019)Ribosomal_L31 (pfam01197) →                                            |
| Eco-370-1  | NZ_AIBO01000227.1 | - | 39194   | 39142   | RNA → rpmE (PRK00019)Ribosomal_L31 (pfam01197) →                                            |
| Eco-376-1  | NZ_AIBV01000160.1 | - | 486     | 434     | RNA → rpmE (PRK00019)Ribosomal_L31 (pfam01197) →                                            |
| Eco-543-1  | NZ_ASZR01000033.1 | + | 85134   | 85186   | RNA → rpmE (PRK00019)Ribosomal_L31 (pfam01197) →                                            |
| Eco-355-1  | NZ_AIBA01000470.1 | + | 46666   | 46718   | RNA → rpmE (PRK00019)Ribosomal_L31 (pfam01197) →                                            |
| Eco-340-1  | NZ_AIAM01000047.1 | - | 52250   | 52198   | RNA → rpmE (PRK00019)Ribosomal_L31 (pfam01197) →                                            |
| Eco-544-1  | NZ_ASZO01000023.1 | - | 18236   | 18184   | RNA → rpmE (PRK00019)Ribosomal_L31 (pfam01197) →                                            |
| Eco-332-1  | NZ_AIAD01000260.1 | - | 547     | 495     | RNA → rpmE (PRK00019)Ribosomal_L31 (pfam01197) →                                            |
| Eco-363-1  | NZ_AIBI01000108.1 | + | 84228   | 84280   | RNA → rpmE (PRK00019)Ribosomal_L31 (pfam01197) →                                            |
| Eco-373-1  | NZ_AIBS01000001.1 | + | 76094   | 76146   | RNA → rpmE (PRK00019)Ribosomal_L31 (pfam01197) →                                            |
| Eco-334-1  | NZ_AIAF01000014.1 | - | 486     | 434     | RNA → rpmE (PRK00019)Ribosomal_L31 (pfam01197) →                                            |
| Eco-385-1  | NZ_AICD01000096.1 | - | 52255   | 52203   | RNA → rpmE (PRK00019)Ribosomal_L31 (pfam01197) →                                            |
| Eco-360-1  | NZ_AIBG01000067.1 | - | 52126   | 52074   | RNA → rpmE (PRK00019)Ribosomal_L31 (pfam01197) →                                            |
| Eco-289-1  | NZ_CWHW01000022.1 | - | 39312   | 39260   | RNA → rpmE (PRK00019)Ribosomal_L31 (pfam01197) →                                            |

|           |                   |   |       |       |                                                          |
|-----------|-------------------|---|-------|-------|----------------------------------------------------------|
| Eco-45-1  | NZ_JHRA01000033.1 | - | 526   | 474   | RNA → rpmE (PRK00019) Ribosomal_L31 (pfam01197) →        |
| Eco-195-1 | NZ_JHRC01000049.1 | + | 8435  | 8487  | RNA → rpmE (PRK00019) Ribosomal_L31 (pfam01197) →        |
| Eco-44-1  | NZ_JHQZ01000062.1 | - | 5988  | 5936  | RNA → rpmE (PRK00019) Ribosomal_L31 (pfam01197) →        |
| Eco-196-1 | NZ_JHRG01000048.1 | + | 11856 | 11908 | RNA → rpmE (PRK00019) Ribosomal_L31 (pfam01197) →        |
| Eco-211-1 | NZ_JHRM01000023.1 | - | 39670 | 39618 | RNA → rpmE (PRK00019) Ribosomal_L31 (pfam01197) →        |
| Eco-212-1 | NZ_JHRQ01000039.1 | + | 23521 | 23573 | RNA → rpmE (PRK00019) Ribosomal_L31 (pfam01197) →        |
| Eco-43-1  | NZ_JHRT01000008.1 | - | 39527 | 39475 | RNA → rpmE (PRK00019) Ribosomal_L31 (pfam01197) →        |
| Sso-1-8   | NZ_CXLF01000021.1 | + | 39082 | 39134 | RNA → rpmE (PRK00019) Ribosomal_L31 (pfam01197) →        |
| Sso-1-9   | NZ_CXDE01000021.1 | + | 39007 | 39059 | RNA → rpmE (PRK00019) Ribosomal_L31 (pfam01197) →        |
| Sso-1-10  | NZ_CXMH01000026.1 | + | 39089 | 39141 | RNA → rpmE (PRK00019) Ribosomal_L31 (pfam01197) →        |
| Sso-1-11  | NZ_CXLA01000024.1 | + | 39089 | 39141 | RNA → rpmE (PRK00019) Ribosomal_L31 (pfam01197) →        |
| Sso-1-12  | NZ_CXDX01000024.1 | + | 39030 | 39082 | RNA → rpmE (PRK00019) Ribosomal_L31 (pfam01197) →        |
| Sso-1-13  | NZ_CXKH01000025.1 | + | 39089 | 39141 | RNA → rpmE (PRK00019) Ribosomal_L31 (pfam01197) →        |
| Sso-1-14  | NZ_CWYN01000026.1 | - | 660   | 608   | RNA → rpmE (PRK00019) Ribosomal_L31 (pfam01197) →        |
| Sso-1-15  | NZ_CXBZ01000018.1 | - | 636   | 584   | RNA → rpmE (PRK00019) Ribosomal_L31 (pfam01197) →        |
| Sso-1-16  | NZ_CXDU01000021.1 | + | 47902 | 47954 | RNA → rpmE (PRK00019) Ribosomal_L31 (pfam01197) →        |
| Sso-1-17  | NZ_CXGT01000025.1 | - | 1211  | 1159  | RNA → rpmE (PRK00019) Ribosomal_L31 (pfam01197) →        |
| Sso-1-18  | NZ_CXAN01000023.1 | + | 39089 | 39141 | RNA → rpmE (PRK00019) Ribosomal_L31 (pfam01197) →        |
| Sso-1-19  | NZ_CXJC01000027.1 | + | 39089 | 39141 | RNA → rpmE (PRK00019) Ribosomal_L31 (pfam01197) →        |
| Sso-1-20  | NZ_CXAI01000025.1 | + | 39045 | 39097 | RNA → rpmE (PRK00019) Ribosomal_L31 (pfam01197) →        |
| Sso-1-21  | NZ_CXGW01000022.1 | - | 3806  | 3754  | RNA → rpmE (PRK00019) Ribosomal_L31 (pfam01197) →        |
| Sso-1-22  | NZ_CXIW01000023.1 | + | 39104 | 39156 | RNA → rpmE (PRK00019) Ribosomal_L31 (pfam01197) →        |
| Sso-1-23  | NZ_CWYW01000026.1 | + | 39257 | 39309 | RNA → rpmE (PRK00019) Ribosomal_L31 (pfam01197) →        |
| Sso-1-24  | NZ_CXCZ01000017.1 | - | 630   | 578   | RNA → rpmE (PRK00019) Ribosomal_L31 (pfam01197) →        |
| Sso-1-25  | NZ_CXLY01000025.1 | - | 1734  | 1682  | RNA → rpmE (PRK00019) Ribosomal_L31 (pfam01197) →        |
| Sso-1-26  | NZ_CXBY01000020.1 | - | 1174  | 1122  | RNA → rpmE (PRK00019) Ribosomal_L31 (pfam01197) →        |
| Sso-1-27  | NZ_CXMR01000026.1 | - | 1627  | 1575  | RNA → rpmE (PRK00019) Ribosomal_L31 (pfam01197) →        |
| Sso-1-28  | NZ_CXID01000025.1 | - | 793   | 741   | RNA → rpmE (PRK00019) Ribosomal_L31 (pfam01197) →        |
| Sso-1-29  | NZ_CXJG01000027.1 | + | 39082 | 39134 | RNA → rpmE (PRK00019) Ribosomal_L31 (pfam01197) →        |
| Sso-1-30  | NZ_CXJN01000027.1 | + | 39082 | 39134 | RNA → rpmE (PRK00019) Ribosomal_L31 (pfam01197) →        |
| Sso-1-31  | NZ_CXFQ01000025.1 | - | 664   | 612   | RNA → rpmE (PRK00019) Ribosomal_L31 (pfam01197) →        |
| Sso-1-32  | NZ_CXOC01000023.1 | + | 39089 | 39141 | RNA → rpmE (PRK00019) Ribosomal_L31 (pfam01197) →        |
| Sso-1-33  | NZ_CWZL01000026.1 | + | 39089 | 39141 | RNA → rpmE (PRK00019) Ribosomal_L31 (pfam01197) →        |
| Sso-1-34  | NZ_CWWR01000026.1 | + | 39082 | 39134 | RNA → rpmE (PRK00019) Ribosomal_L31 (pfam01197) →        |
| Sso-1-35  | NZ_CXDO01000020.1 | + | 39023 | 39075 | RNA → rpmE (PRK00019) Ribosomal_L31 (pfam01197) →        |
| Sso-1-36  | NZ_CXLN01000027.1 | + | 39089 | 39141 | RNA → rpmE (PRK00019) Ribosomal_L31 (pfam01197) →        |
| Sso-1-37  | NZ_CXMW01000027.1 | - | 683   | 631   | RNA → rpmE (PRK00019) Ribosomal_L31 (pfam01197) →        |
| Sso-1-38  | NZ_CXEG01000022.1 | + | 39030 | 39082 | RNA → rpmE (PRK00019) Ribosomal_L31 (pfam01197) →        |
| Sso-1-39  | NZ_CXBG01000024.1 | + | 39023 | 39075 | RNA → rpmE (PRK00019) Ribosomal_L31 (pfam01197) →        |
| Sso-1-40  | NZ_CXKW01000025.1 | - | 1627  | 1575  | RNA → rpmE (PRK00019) Ribosomal_L31 (pfam01197) →        |
| Sfl-25-1  | NZ_LAIB01000061.1 | - | 31124 | 31072 | RNA → rpmE (PRK00019) Ribosomal_L31 (pfam01197) →        |
| Sfl-25-2  | NZ_LAIF01000103.1 | - | 31124 | 31072 | RNA → rpmE (PRK00019) Ribosomal_L31 (pfam01197) →        |
| Sfl-25-3  | NZ_LAHW01000133.1 | - | 31124 | 31072 | RNA → rpmE (PRK00019) Ribosomal_L31 (pfam01197) →        |
| Eco-460-1 | NZ_LBLW01000064.1 | + | 82857 | 82909 | RNA → rpmE (PRK00019) Ribosomal_L31 (pfam01197) →        |
| Sfl-25-9  | NZ_LAHX01000020.1 | - | 31124 | 31072 | RNA → rpmE (PRK00019) Ribosomal_L31 (pfam01197) →        |
| Sso-1-41  | NZ_CXEY01000021.1 | - | 1726  | 1674  | RNA → rpmE (PRK00019) Ribosomal_L31 (pfam01197) →        |
| Sso-1-42  | NZ_CXCW01000015.1 | - | 378   | 326   | RNA → rpmE (PRK00019) Ribosomal_L31 (pfam01197) →        |
| Sfl-25-4  | NZ_LAIA01000057.1 | + | 24623 | 24675 | RNA → rpmE (PRK00019) Ribosomal_L31 (pfam01197) →        |
| Sso-1-43  | NZ_CXDA01000016.1 | - | 428   | 376   | RNA → rpmE (PRK00019) Ribosomal_L31 (pfam01197) → hypo → |
| Sso-1-44  | NZ_CWZJ01000023.1 | - | 1174  | 1122  | RNA → rpmE (PRK00019) Ribosomal_L31 (pfam01197) →        |
| Sso-1-45  | NZ_CWSX01000023.1 | + | 38756 | 38808 | RNA → rpmE (PRK00019) Ribosomal_L31 (pfam01197) →        |
| Sso-1-46  | NZ_CWUJ01000026.1 | - | 660   | 608   | RNA → rpmE (PRK00019) Ribosomal_L31 (pfam01197) →        |

|          |                   |   |       |       |                                                   |
|----------|-------------------|---|-------|-------|---------------------------------------------------|
| Sfl-25-5 | NZ.LAHY01000049.1 | + | 24753 | 24805 | RNA → rpmE (PRK00019) Ribosomal_L31 (pfam01197) → |
| Sso-1-47 | NZ.CWTE01000026.1 | - | 529   | 477   | RNA → rpmE (PRK00019) Ribosomal_L31 (pfam01197) → |
| Sso-1-48 | NZ.CWVE01000028.1 | - | 800   | 748   | RNA → rpmE (PRK00019) Ribosomal_L31 (pfam01197) → |
| Sso-1-49 | NZ.CWUI01000024.1 | + | 38914 | 38966 | RNA → rpmE (PRK00019) Ribosomal_L31 (pfam01197) → |
| Sso-1-50 | NZ.CWUS01000027.1 | - | 1730  | 1678  | RNA → rpmE (PRK00019) Ribosomal_L31 (pfam01197) → |
| Sso-1-51 | NZ.CXNJ01000026.1 | + | 39089 | 39141 | RNA → rpmE (PRK00019) Ribosomal_L31 (pfam01197) → |
| Sso-1-52 | NZ.CWUR01000020.1 | - | 495   | 443   | RNA → rpmE (PRK00019) Ribosomal_L31 (pfam01197) → |
| Sso-1-53 | NZ.CWZX01000025.1 | - | 1539  | 1487  | RNA → rpmE (PRK00019) Ribosomal_L31 (pfam01197) → |
| Sso-1-54 | NZ.CWVJ01000024.1 | + | 39082 | 39134 | RNA → rpmE (PRK00019) Ribosomal_L31 (pfam01197) → |
| Sso-1-55 | NZ.CXFL01000025.1 | - | 481   | 429   | RNA → rpmE (PRK00019) Ribosomal_L31 (pfam01197) → |
| Sso-1-56 | NZ.CWSU01000026.1 | - | 529   | 477   | RNA → rpmE (PRK00019) Ribosomal_L31 (pfam01197) → |
| Sso-1-57 | NZ.CXIK01000024.1 | + | 39082 | 39134 | RNA → rpmE (PRK00019) Ribosomal_L31 (pfam01197) → |
| Sso-1-58 | NZ.CWVL01000028.1 | + | 39089 | 39141 | RNA → rpmE (PRK00019) Ribosomal_L31 (pfam01197) → |
| Sso-1-59 | NZ.CWYU01000024.1 | + | 39039 | 39091 | RNA → rpmE (PRK00019) Ribosomal_L31 (pfam01197) → |
| Sso-1-60 | NZ.CWVI01000027.1 | + | 39099 | 39151 | RNA → rpmE (PRK00019) Ribosomal_L31 (pfam01197) → |
| Sso-1-61 | NZ.CXHA01000022.1 | + | 39104 | 39156 | RNA → rpmE (PRK00019) Ribosomal_L31 (pfam01197) → |
| Sso-1-62 | NZ.CWTL01000023.1 | - | 1776  | 1724  | RNA → rpmE (PRK00019) Ribosomal_L31 (pfam01197) → |
| Sso-1-63 | NZ.CXER01000023.1 | + | 39030 | 39082 | RNA → rpmE (PRK00019) Ribosomal_L31 (pfam01197) → |
| Sso-1-64 | NZ.CWTV01000027.1 | + | 39076 | 39128 | RNA → rpmE (PRK00019) Ribosomal_L31 (pfam01197) → |
| Sso-1-65 | NZ.CXNI01000023.1 | - | 1174  | 1122  | RNA → rpmE (PRK00019) Ribosomal_L31 (pfam01197) → |
| Sso-1-66 | NZ.CWWF01000027.1 | + | 39093 | 39145 | RNA → rpmE (PRK00019) Ribosomal_L31 (pfam01197) → |
| Sso-1-67 | NZ.CXJV01000026.1 | - | 695   | 643   | RNA → rpmE (PRK00019) Ribosomal_L31 (pfam01197) → |
| Sso-1-68 | NZ.CWTG01000022.1 | - | 1137  | 1085  | RNA → rpmE (PRK00019) Ribosomal_L31 (pfam01197) → |
| Sso-1-69 | NZ.CWZQ01000026.1 | + | 39082 | 39134 | RNA → rpmE (PRK00019) Ribosomal_L31 (pfam01197) → |
| Sso-1-70 | NZ.CWXI01000025.1 | - | 1137  | 1085  | RNA → rpmE (PRK00019) Ribosomal_L31 (pfam01197) → |
| Sso-1-71 | NZ.CWWE01000028.1 | - | 662   | 610   | RNA → rpmE (PRK00019) Ribosomal_L31 (pfam01197) → |
| Sso-1-72 | NZ.CXIA01000027.1 | + | 39089 | 39141 | RNA → rpmE (PRK00019) Ribosomal_L31 (pfam01197) → |
| Sso-1-73 | NZ.CXHM01000025.1 | - | 782   | 730   | RNA → rpmE (PRK00019) Ribosomal_L31 (pfam01197) → |
| Sso-1-74 | NZ.CWVP01000027.1 | - | 1234  | 1182  | RNA → rpmE (PRK00019) Ribosomal_L31 (pfam01197) → |
| Sso-1-75 | NZ.CXGI01000026.1 | - | 668   | 616   | RNA → rpmE (PRK00019) Ribosomal_L31 (pfam01197) → |
| Sso-1-76 | NZ.CWUZ01000025.1 | - | 1627  | 1575  | RNA → rpmE (PRK00019) Ribosomal_L31 (pfam01197) → |
| Sso-1-77 | NZ.CXAE01000028.1 | - | 529   | 477   | RNA → rpmE (PRK00019) Ribosomal_L31 (pfam01197) → |
| Sso-1-78 | NZ.CXMN01000028.1 | + | 39082 | 39134 | RNA → rpmE (PRK00019) Ribosomal_L31 (pfam01197) → |
| Sso-1-79 | NZ.CXKR01000024.1 | + | 39089 | 39141 | RNA → rpmE (PRK00019) Ribosomal_L31 (pfam01197) → |
| Sso-1-80 | NZ.CXIV01000028.1 | - | 1627  | 1575  | RNA → rpmE (PRK00019) Ribosomal_L31 (pfam01197) → |
| Sso-1-81 | NZ.CXLI01000025.1 | - | 1539  | 1487  | RNA → rpmE (PRK00019) Ribosomal_L31 (pfam01197) → |
| Sso-1-82 | NZ.CWVQ01000028.1 | - | 1224  | 1172  | RNA → rpmE (PRK00019) Ribosomal_L31 (pfam01197) → |
| Sso-1-83 | NZ.CXCX01000002.1 | + | 80210 | 80262 | RNA → rpmE (PRK00019) Ribosomal_L31 (pfam01197) → |
| Sso-1-84 | NZ.CWTU01000026.1 | + | 39106 | 39158 | RNA → rpmE (PRK00019) Ribosomal_L31 (pfam01197) → |
| Sso-1-85 | NZ.CXGM01000023.1 | - | 867   | 815   | RNA → rpmE (PRK00019) Ribosomal_L31 (pfam01197) → |
| Sso-1-86 | NZ.CXHR01000027.1 | + | 39089 | 39141 | RNA → rpmE (PRK00019) Ribosomal_L31 (pfam01197) → |
| Sso-1-87 | NZ.CWTX01000029.1 | - | 660   | 608   | RNA → rpmE (PRK00019) Ribosomal_L31 (pfam01197) → |
| Sso-1-88 | NZ.CXIN01000026.1 | - | 786   | 734   | RNA → rpmE (PRK00019) Ribosomal_L31 (pfam01197) → |
| Sso-1-89 | NZ.CXDH01000024.1 | - | 632   | 580   | RNA → rpmE (PRK00019) Ribosomal_L31 (pfam01197) → |
| Sso-1-90 | NZ.CWTW01000025.1 | - | 556   | 504   | RNA → rpmE (PRK00019) Ribosomal_L31 (pfam01197) → |
| Sso-1-91 | NZ.CXAH01000027.1 | + | 39082 | 39134 | RNA → rpmE (PRK00019) Ribosomal_L31 (pfam01197) → |
| Sso-1-92 | NZ.CWXW01000022.1 | + | 39104 | 39156 | RNA → rpmE (PRK00019) Ribosomal_L31 (pfam01197) → |
| Sso-1-93 | NZ.CXMO01000027.1 | + | 39082 | 39134 | RNA → rpmE (PRK00019) Ribosomal_L31 (pfam01197) → |
| Sso-1-94 | NZ.CWUA01000024.1 | - | 1539  | 1487  | RNA → rpmE (PRK00019) Ribosomal_L31 (pfam01197) → |
| Sso-1-95 | NZ.CXAY01000023.1 | - | 1137  | 1085  | RNA → rpmE (PRK00019) Ribosomal_L31 (pfam01197) → |
| Sso-1-96 | NZ.CWYH01000026.1 | - | 664   | 612   | RNA → rpmE (PRK00019) Ribosomal_L31 (pfam01197) → |
| Sso-1-97 | NZ.CXNC01000028.1 | - | 800   | 748   | RNA → rpmE (PRK00019) Ribosomal_L31 (pfam01197) → |



|           |                    |   |       |       |                                                   |
|-----------|--------------------|---|-------|-------|---------------------------------------------------|
| Sso-1-98  | NZ.CWTT01000028.1  | + | 38880 | 38932 | RNA → rpmE (PRK00019) Ribosomal_L31 (pfam01197) → |
| Sso-1-99  | NZ.CXBA01000025.1  | - | 1137  | 1085  | RNA → rpmE (PRK00019) Ribosomal_L31 (pfam01197) → |
| Sso-1-100 | NZ.CXHG01000028.1  | - | 695   | 643   | RNA → rpmE (PRK00019) Ribosomal_L31 (pfam01197) → |
| Sso-1-101 | NZ.CXIH01000027.1  | - | 768   | 716   | RNA → rpmE (PRK00019) Ribosomal_L31 (pfam01197) → |
| Sso-1-102 | NZ.CWST01000068.1  | - | 660   | 608   | RNA → rpmE (PRK00019) Ribosomal_L31 (pfam01197) → |
| Sso-1-103 | NZ.CXGQ01000025.1  | - | 1174  | 1122  | RNA → rpmE (PRK00019) Ribosomal_L31 (pfam01197) → |
| Sso-1-104 | NZ.CWYP01000024.1  | - | 1696  | 1644  | RNA → rpmE (PRK00019) Ribosomal_L31 (pfam01197) → |
| Sso-1-105 | NZ.CWVT01000028.1  | - | 660   | 608   | RNA → rpmE (PRK00019) Ribosomal_L31 (pfam01197) → |
| Sso-1-106 | NZ.CXNR01000022.1  | - | 630   | 578   | RNA → rpmE (PRK00019) Ribosomal_L31 (pfam01197) → |
| Sso-1-107 | NZ.CXHY01000027.1  | - | 1627  | 1575  | RNA → rpmE (PRK00019) Ribosomal_L31 (pfam01197) → |
| Sso-1-108 | NZ.CXHB01000028.1  | + | 39089 | 39141 | RNA → rpmE (PRK00019) Ribosomal_L31 (pfam01197) → |
| Sso-1-109 | NZ.CWUO01000021.1  | - | 660   | 608   | RNA → rpmE (PRK00019) Ribosomal_L31 (pfam01197) → |
| Sso-1-110 | NZ.CXCC01000002.1  | + | 80327 | 80379 | RNA → rpmE (PRK00019) Ribosomal_L31 (pfam01197) → |
| Sso-1-111 | NZ.CW XK01000292.1 | + | 787   | 839   | RNA → rpmE (PRK00019) Ribosomal_L31 (pfam01197) → |
| Sso-1-112 | NZ.CWTH01000026.1  | + | 39059 | 39111 | RNA → rpmE (PRK00019) Ribosomal_L31 (pfam01197) → |
| Sso-1-113 | NZ.CXHL01000028.1  | + | 39045 | 39097 | RNA → rpmE (PRK00019) Ribosomal_L31 (pfam01197) → |
| Sso-1-114 | NZ.CXAQ01000027.1  | - | 6653  | 6601  | RNA → rpmE (PRK00019) Ribosomal_L31 (pfam01197) → |
| Sso-1-115 | NZ.CWTZ01000023.1  | + | 39040 | 39092 | RNA → rpmE (PRK00019) Ribosomal_L31 (pfam01197) → |
| Sso-1-116 | NZ.CWZU01000029.1  | - | 664   | 612   | RNA → rpmE (PRK00019) Ribosomal_L31 (pfam01197) → |
| Sso-1-117 | NZ.CWZH01000027.1  | + | 39089 | 39141 | RNA → rpmE (PRK00019) Ribosomal_L31 (pfam01197) → |
| Sso-1-118 | NZ.CWUU01000028.1  | + | 39082 | 39134 | RNA → rpmE (PRK00019) Ribosomal_L31 (pfam01197) → |
| Sso-1-119 | NZ.CWXP01000027.1  | + | 39089 | 39141 | RNA → rpmE (PRK00019) Ribosomal_L31 (pfam01197) → |
| Sso-1-120 | NZ.CXFX01000021.1  | - | 1174  | 1122  | RNA → rpmE (PRK00019) Ribosomal_L31 (pfam01197) → |
| Sso-1-121 | NZ.CWVB01000027.1  | + | 39093 | 39145 | RNA → rpmE (PRK00019) Ribosomal_L31 (pfam01197) → |
| Sso-1-122 | NZ.CXBJ01000069.1  | + | 20736 | 20788 | RNA → rpmE (PRK00019) Ribosomal_L31 (pfam01197) → |
| Sso-1-123 | NZ.CXFR01000024.1  | - | 481   | 429   | RNA → rpmE (PRK00019) Ribosomal_L31 (pfam01197) → |
| Sso-1-124 | NZ.CWVM01000027.1  | + | 39093 | 39145 | RNA → rpmE (PRK00019) Ribosomal_L31 (pfam01197) → |
| Sso-1-125 | NZ.CXDC01000015.1  | + | 47850 | 47902 | RNA → rpmE (PRK00019) Ribosomal_L31 (pfam01197) → |
| Sso-1-126 | NZ.CXLJ01000026.1  | + | 39089 | 39141 | RNA → rpmE (PRK00019) Ribosomal_L31 (pfam01197) → |
| Sso-1-127 | NZ.CWUE01000025.1  | - | 1535  | 1483  | RNA → rpmE (PRK00019) Ribosomal_L31 (pfam01197) → |
| Sso-1-128 | NZ.CXIU01000022.1  | - | 1137  | 1085  | RNA → rpmE (PRK00019) Ribosomal_L31 (pfam01197) → |
| Sso-1-129 | NZ.CXFT01000022.1  | - | 481   | 429   | RNA → rpmE (PRK00019) Ribosomal_L31 (pfam01197) → |
| Sso-1-130 | NZ.CWTO01000027.1  | - | 660   | 608   | RNA → rpmE (PRK00019) Ribosomal_L31 (pfam01197) → |
| Sso-1-131 | NZ.CXKJ01000023.1  | - | 1627  | 1575  | RNA → rpmE (PRK00019) Ribosomal_L31 (pfam01197) → |
| Sso-1-132 | NZ.CWXM01000026.1  | + | 39089 | 39141 | RNA → rpmE (PRK00019) Ribosomal_L31 (pfam01197) → |
| Sso-1-133 | NZ.CWBC01000028.1  | + | 39082 | 39134 | RNA → rpmE (PRK00019) Ribosomal_L31 (pfam01197) → |
| Sso-1-134 | NZ.CW XV01000020.1 | - | 854   | 802   | RNA → rpmE (PRK00019) Ribosomal_L31 (pfam01197) → |
| Sso-1-135 | NZ.CXGY01000028.1  | - | 529   | 477   | RNA → rpmE (PRK00019) Ribosomal_L31 (pfam01197) → |
| Sso-1-136 | NZ.CWVU01000028.1  | + | 39089 | 39141 | RNA → rpmE (PRK00019) Ribosomal_L31 (pfam01197) → |
| Sso-1-137 | NZ.CXMZ01000018.1  | - | 6792  | 6740  | RNA → rpmE (PRK00019) Ribosomal_L31 (pfam01197) → |
| Sso-1-138 | NZ.CXKS01000028.1  | - | 800   | 748   | RNA → rpmE (PRK00019) Ribosomal_L31 (pfam01197) → |
| Sso-1-139 | NZ.CWUX01000023.1  | - | 2669  | 2617  | RNA → rpmE (PRK00019) Ribosomal_L31 (pfam01197) → |
| Sso-1-140 | NZ.CWXS01000023.1  | + | 39104 | 39156 | RNA → rpmE (PRK00019) Ribosomal_L31 (pfam01197) → |
| Sso-1-141 | NZ.CXLD01000025.1  | + | 39089 | 39141 | RNA → rpmE (PRK00019) Ribosomal_L31 (pfam01197) → |
| Sso-1-142 | NZ.CWVF01000027.1  | + | 39082 | 39134 | RNA → rpmE (PRK00019) Ribosomal_L31 (pfam01197) → |
| Sso-1-143 | NZ.CXJB01000028.1  | - | 790   | 738   | RNA → rpmE (PRK00019) Ribosomal_L31 (pfam01197) → |
| Sso-1-144 | NZ.CXBF01000020.1  | + | 39023 | 39075 | RNA → rpmE (PRK00019) Ribosomal_L31 (pfam01197) → |
| Sso-1-145 | NZ.CWTF01000026.1  | - | 660   | 608   | RNA → rpmE (PRK00019) Ribosomal_L31 (pfam01197) → |
| Sso-1-146 | NZ.CXMS01000026.1  | - | 795   | 743   | RNA → rpmE (PRK00019) Ribosomal_L31 (pfam01197) → |
| Sso-1-147 | NZ.CWWT01000020.1  | - | 843   | 791   | RNA → rpmE (PRK00019) Ribosomal_L31 (pfam01197) → |
| Sso-1-148 | NZ.CWVK01000026.1  | + | 39089 | 39141 | RNA → rpmE (PRK00019) Ribosomal_L31 (pfam01197) → |
| Sso-1-149 | NZ.CWUN01000018.1  | - | 495   | 443   | RNA → rpmE (PRK00019) Ribosomal_L31 (pfam01197) → |



|           |                   |   |       |       |                                                   |
|-----------|-------------------|---|-------|-------|---------------------------------------------------|
| Sso-1-150 | NZ_CXLM01000026.1 | + | 39089 | 39141 | RNA → rpmE (PRK00019) Ribosomal_L31 (pfam01197) → |
| Sso-1-151 | NZ_CWVO01000028.1 | + | 39093 | 39145 | RNA → rpmE (PRK00019) Ribosomal_L31 (pfam01197) → |
| Sso-1-152 | NZ_CXEW01000014.1 | + | 39108 | 39160 | RNA → rpmE (PRK00019) Ribosomal_L31 (pfam01197) → |
| Sso-1-153 | NZ_CWVA01000027.1 | - | 684   | 632   | RNA → rpmE (PRK00019) Ribosomal_L31 (pfam01197) → |
| Sso-1-154 | NZ_CWUB01000022.1 | - | 555   | 503   | RNA → rpmE (PRK00019) Ribosomal_L31 (pfam01197) → |
| Sso-1-155 | NZ_CXIL01000022.1 | + | 39082 | 39134 | RNA → rpmE (PRK00019) Ribosomal_L31 (pfam01197) → |
| Sso-1-156 | NZ_CWUF01000024.1 | + | 39068 | 39120 | RNA → rpmE (PRK00019) Ribosomal_L31 (pfam01197) → |
| Sso-1-157 | NZ_CXJW01000027.1 | + | 39089 | 39141 | RNA → rpmE (PRK00019) Ribosomal_L31 (pfam01197) → |
| Sso-1-158 | NZ_CWVZ01000025.1 | - | 1223  | 1171  | RNA → rpmE (PRK00019) Ribosomal_L31 (pfam01197) → |
| Sso-1-159 | NZ_CXEJ01000023.1 | - | 644   | 592   | RNA → rpmE (PRK00019) Ribosomal_L31 (pfam01197) → |
| Sso-1-160 | NZ_CXMU01000027.1 | + | 39094 | 39146 | RNA → rpmE (PRK00019) Ribosomal_L31 (pfam01197) → |
| Sso-1-161 | NZ_CXVH01000025.1 | + | 39093 | 39145 | RNA → rpmE (PRK00019) Ribosomal_L31 (pfam01197) → |
| Sso-1-162 | NZ_CXLC01000025.1 | + | 39094 | 39146 | RNA → rpmE (PRK00019) Ribosomal_L31 (pfam01197) → |
| Sso-1-163 | NZ_CXJE01000028.1 | + | 39089 | 39141 | RNA → rpmE (PRK00019) Ribosomal_L31 (pfam01197) → |
| Sso-1-164 | NZ_CWTR01000029.1 | - | 495   | 443   | RNA → rpmE (PRK00019) Ribosomal_L31 (pfam01197) → |
| Sso-1-165 | NZ_CXDR01000004.1 | - | 630   | 578   | RNA → rpmE (PRK00019) Ribosomal_L31 (pfam01197) → |
| Sso-1-166 | NZ_CXNM01000026.1 | - | 1539  | 1487  | RNA → rpmE (PRK00019) Ribosomal_L31 (pfam01197) → |
| Sso-1-167 | NZ_CXMX01000027.1 | + | 39082 | 39134 | RNA → rpmE (PRK00019) Ribosomal_L31 (pfam01197) → |
| Sso-1-168 | NZ_CWZD01000024.1 | + | 39089 | 39141 | RNA → rpmE (PRK00019) Ribosomal_L31 (pfam01197) → |
| Sso-1-169 | NZ_CXEF01000015.1 | + | 39030 | 39082 | RNA → rpmE (PRK00019) Ribosomal_L31 (pfam01197) → |
| Sso-1-170 | NZ_CXBM01000061.1 | - | 2767  | 2715  | RNA → rpmE (PRK00019) Ribosomal_L31 (pfam01197) → |
| Sso-1-171 | NZ_CXLL01000024.1 | + | 39082 | 39134 | RNA → rpmE (PRK00019) Ribosomal_L31 (pfam01197) → |
| Sso-1-172 | NZ_CXMF01000026.1 | + | 39089 | 39141 | RNA → rpmE (PRK00019) Ribosomal_L31 (pfam01197) → |
| Sso-1-173 | NZ_CXFP01000025.1 | - | 644   | 592   | RNA → rpmE (PRK00019) Ribosomal_L31 (pfam01197) → |
| Sso-1-174 | NZ_CXKA01000026.1 | - | 662   | 610   | RNA → rpmE (PRK00019) Ribosomal_L31 (pfam01197) → |
| Sso-1-175 | NZ_CXEZ01000023.1 | + | 39123 | 39175 | RNA → rpmE (PRK00019) Ribosomal_L31 (pfam01197) → |
| Sso-1-176 | NZ_CXEM01000023.1 | + | 39031 | 39083 | RNA → rpmE (PRK00019) Ribosomal_L31 (pfam01197) → |
| Sso-1-177 | NZ_CXLS01000028.1 | + | 39082 | 39134 | RNA → rpmE (PRK00019) Ribosomal_L31 (pfam01197) → |
| Sso-1-178 | NZ_CXDT01000023.1 | - | 630   | 578   | RNA → rpmE (PRK00019) Ribosomal_L31 (pfam01197) → |
| Sso-1-179 | NZ_CXEE01000022.1 | - | 650   | 598   | RNA → rpmE (PRK00019) Ribosomal_L31 (pfam01197) → |
| Sso-1-180 | NZ_CWZR01000026.1 | + | 39041 | 39093 | RNA → rpmE (PRK00019) Ribosomal_L31 (pfam01197) → |
| Sso-1-181 | NZ_CXKY01000024.1 | - | 1137  | 1085  | RNA → rpmE (PRK00019) Ribosomal_L31 (pfam01197) → |
| Sso-1-182 | NZ_CXFI01000026.1 | - | 1174  | 1122  | RNA → rpmE (PRK00019) Ribosomal_L31 (pfam01197) → |
| Sso-1-183 | NZ_CXKO01000028.1 | - | 776   | 724   | RNA → rpmE (PRK00019) Ribosomal_L31 (pfam01197) → |
| Sso-1-184 | NZ_CXMV01000027.1 | + | 39082 | 39134 | RNA → rpmE (PRK00019) Ribosomal_L31 (pfam01197) → |
| Sso-1-185 | NZ_CXLO01000028.1 | - | 695   | 643   | RNA → rpmE (PRK00019) Ribosomal_L31 (pfam01197) → |
| Sso-1-186 | NZ_CXJM01000025.1 | + | 39082 | 39134 | RNA → rpmE (PRK00019) Ribosomal_L31 (pfam01197) → |
| Sso-1-187 | NZ_CXNG01000028.1 | - | 529   | 477   | RNA → rpmE (PRK00019) Ribosomal_L31 (pfam01197) → |
| Sso-1-188 | NZ_CXGZ01000014.1 | - | 627   | 575   | RNA → rpmE (PRK00019) Ribosomal_L31 (pfam01197) → |
| Sso-1-189 | NZ_CWWZ01000021.1 | - | 846   | 794   | RNA → rpmE (PRK00019) Ribosomal_L31 (pfam01197) → |
| Sso-1-190 | NZ_CXNB01000027.1 | + | 39089 | 39141 | RNA → rpmE (PRK00019) Ribosomal_L31 (pfam01197) → |
| Sso-1-191 | NZ_CXGO01000022.1 | - | 850   | 798   | RNA → rpmE (PRK00019) Ribosomal_L31 (pfam01197) → |
| Sso-1-192 | NZ_CWXT01000023.1 | + | 39089 | 39141 | RNA → rpmE (PRK00019) Ribosomal_L31 (pfam01197) → |
| Sso-1-193 | NZ_CXLZ01000024.1 | - | 1703  | 1651  | RNA → rpmE (PRK00019) Ribosomal_L31 (pfam01197) → |
| Sso-1-194 | NZ_CWZV01000027.1 | + | 39089 | 39141 | RNA → rpmE (PRK00019) Ribosomal_L31 (pfam01197) → |
| Sso-1-195 | NZ_CXDY01000020.1 | - | 644   | 592   | RNA → rpmE (PRK00019) Ribosomal_L31 (pfam01197) → |
| Sso-1-196 | NZ_CXCQ01000030.1 | - | 405   | 353   | RNA → rpmE (PRK00019) Ribosomal_L31 (pfam01197) → |
| Sso-1-197 | NZ_CXAM01000038.1 | - | 630   | 578   | RNA → rpmE (PRK00019) Ribosomal_L31 (pfam01197) → |
| Sso-1-198 | NZ_CXCU01000026.1 | - | 636   | 584   | RNA → rpmE (PRK00019) Ribosomal_L31 (pfam01197) → |
| Eco-353-1 | NZ_AIAY01000004.1 | + | 76542 | 76594 | RNA → rpmE (PRK00019) Ribosomal_L31 (pfam01197) → |
| Eco-343-1 | NZ_AIAO01000005.1 | - | 39155 | 39103 | RNA → rpmE (PRK00019) Ribosomal_L31 (pfam01197) → |
| Eco-348-1 | NZ_AIAT01000054.1 | + | 18409 | 18461 | RNA → rpmE (PRK00019) Ribosomal_L31 (pfam01197) → |

|           |                   |   |       |       |                                                   |
|-----------|-------------------|---|-------|-------|---------------------------------------------------|
| Eco-345-1 | NZ_AIAQ01000283.1 | + | 29275 | 29327 | RNA → rpmE (PRK00019) Ribosomal_L31 (pfam01197) → |
| Eco-384-1 | NZ_AICC01000004.1 | + | 46666 | 46718 | RNA → rpmE (PRK00019) Ribosomal_L31 (pfam01197) → |
| Eco-356-1 | NZ_AIBB01000072.1 | - | 39155 | 39103 | RNA → rpmE (PRK00019) Ribosomal_L31 (pfam01197) → |
| Eco-349-1 | NZ_AIAU01000029.1 | - | 486   | 434   | RNA → rpmE (PRK00019) Ribosomal_L31 (pfam01197) → |
| Eco-378-1 | NZ_AIBX01000062.1 | + | 47741 | 47793 | RNA → rpmE (PRK00019) Ribosomal_L31 (pfam01197) → |
| Eco-339-1 | NZ_AIAJ01000152.1 | - | 640   | 588   | RNA → rpmE (PRK00019) Ribosomal_L31 (pfam01197) → |
| Eco-336-1 | NZ_AIAH01000234.1 | - | 547   | 495   | RNA → rpmE (PRK00019) Ribosomal_L31 (pfam01197) → |
| Eco-337-1 | NZ_AIAI01000001.1 | - | 41795 | 41743 | RNA → rpmE (PRK00019) Ribosomal_L31 (pfam01197) → |
| Eco-358-1 | NZ_AIBD01000070.1 | + | 46666 | 46718 | RNA → rpmE (PRK00019) Ribosomal_L31 (pfam01197) → |
| Eco-379-1 | NZ_AIBW01000118.1 | - | 640   | 588   | RNA → rpmE (PRK00019) Ribosomal_L31 (pfam01197) → |
| Eco-50-1  | NZ_ATOE01000063.1 | + | 39109 | 39161 | RNA → rpmE (PRK00019) Ribosomal_L31 (pfam01197) → |
| Eco-366-1 | NZ_AIBK01000054.1 | + | 28476 | 28528 | RNA → rpmE (PRK00019) Ribosomal_L31 (pfam01197) → |
| Eco-338-1 | NZ_AICF01000195.1 | - | 486   | 434   | RNA → rpmE (PRK00019) Ribosomal_L31 (pfam01197) → |
| Eco-372-1 | NZ_AIBR01000067.1 | + | 47726 | 47778 | RNA → rpmE (PRK00019) Ribosomal_L31 (pfam01197) → |
| Eco-359-1 | NZ_AIBE01000033.1 | - | 52126 | 52074 | RNA → rpmE (PRK00019) Ribosomal_L31 (pfam01197) → |
| Eco-350-1 | NZ_AIAV01000087.1 | + | 60721 | 60773 | RNA → rpmE (PRK00019) Ribosomal_L31 (pfam01197) → |
| Eco-375-1 | NZ_AIBQ01000159.1 | + | 11322 | 11374 | RNA → rpmE (PRK00019) Ribosomal_L31 (pfam01197) → |
| Sso-1-199 | NZ_CXAJ01000024.1 | + | 39089 | 39141 | RNA → rpmE (PRK00019) Ribosomal_L31 (pfam01197) → |
| Sso-1-200 | NZ_CWXR01000025.1 | - | 848   | 796   | RNA → rpmE (PRK00019) Ribosomal_L31 (pfam01197) → |
| Sso-1-201 | NZ_CXML01000027.1 | + | 39089 | 39141 | RNA → rpmE (PRK00019) Ribosomal_L31 (pfam01197) → |
| Sso-1-202 | NZ_CWXU01000023.1 | - | 855   | 803   | RNA → rpmE (PRK00019) Ribosomal_L31 (pfam01197) → |
| Sso-1-203 | NZ_CXBD01000022.1 | - | 1137  | 1085  | RNA → rpmE (PRK00019) Ribosomal_L31 (pfam01197) → |
| Sfl-25-6  | NZ_LAHZ01000037.1 | + | 24424 | 24476 | RNA → rpmE (PRK00019) Ribosomal_L31 (pfam01197) → |
| Sso-1-204 | NZ_CXJT01000025.1 | + | 39089 | 39141 | RNA → rpmE (PRK00019) Ribosomal_L31 (pfam01197) → |
| Sso-1-205 | NZ_CWXZ01000023.1 | - | 865   | 813   | RNA → rpmE (PRK00019) Ribosomal_L31 (pfam01197) → |
| Sso-1-206 | NZ_CXIX01000027.1 | - | 786   | 734   | RNA → rpmE (PRK00019) Ribosomal_L31 (pfam01197) → |
| Sso-1-207 | NZ_CWXD01000025.1 | + | 39104 | 39156 | RNA → rpmE (PRK00019) Ribosomal_L31 (pfam01197) → |
| Sfl-25-10 | NZ_LAID01000111.1 | - | 31124 | 31072 | RNA → rpmE (PRK00019) Ribosomal_L31 (pfam01197) → |
| Sso-1-208 | NZ_CXFH01000026.1 | - | 1174  | 1122  | RNA → rpmE (PRK00019) Ribosomal_L31 (pfam01197) → |
| Sfl-51-1  | NZ_LAIC01000109.1 | + | 24423 | 24475 | RNA → rpmE (PRK00019) Ribosomal_L31 (pfam01197) → |
| Sso-1-209 | NZ_CXHU01000023.1 | - | 1137  | 1085  | RNA → rpmE (PRK00019) Ribosomal_L31 (pfam01197) → |
| Sso-1-210 | NZ_CXEH01000026.1 | - | 1137  | 1085  | RNA → rpmE (PRK00019) Ribosomal_L31 (pfam01197) → |
| Sfl-25-7  | NZ_LAIE01000028.1 | + | 30022 | 30074 | RNA → rpmE (PRK00019) Ribosomal_L31 (pfam01197) → |
| Sso-1-211 | NZ_CXKP01000022.1 | - | 1137  | 1085  | RNA → rpmE (PRK00019) Ribosomal_L31 (pfam01197) → |
| Sso-1-212 | NZ_CWWJ01000027.1 | + | 39093 | 39145 | RNA → rpmE (PRK00019) Ribosomal_L31 (pfam01197) → |
| Sso-1-213 | NZ_CXBI01000018.1 | + | 39023 | 39075 | RNA → rpmE (PRK00019) Ribosomal_L31 (pfam01197) → |
| Sso-1-214 | NZ_CXIY01000027.1 | - | 793   | 741   | RNA → rpmE (PRK00019) Ribosomal_L31 (pfam01197) → |
| Sso-1-215 | NZ_CXHS01000025.1 | + | 39045 | 39097 | RNA → rpmE (PRK00019) Ribosomal_L31 (pfam01197) → |
| Sso-1-216 | NZ_CWUK01000025.1 | - | 555   | 503   | RNA → rpmE (PRK00019) Ribosomal_L31 (pfam01197) → |
| Sso-1-217 | NZ_CWYX01000027.1 | + | 39115 | 39167 | RNA → rpmE (PRK00019) Ribosomal_L31 (pfam01197) → |
| Sso-1-218 | NZ_CWWW01000023.1 | + | 39099 | 39151 | RNA → rpmE (PRK00019) Ribosomal_L31 (pfam01197) → |
| Sso-1-219 | NZ_CXJH01000024.1 | + | 39082 | 39134 | RNA → rpmE (PRK00019) Ribosomal_L31 (pfam01197) → |
| Sso-1-220 | NZ_CWUL01000025.1 | + | 38789 | 38841 | RNA → rpmE (PRK00019) Ribosomal_L31 (pfam01197) → |
| Sso-1-221 | NZ_CXIM01000022.1 | + | 39082 | 39134 | RNA → rpmE (PRK00019) Ribosomal_L31 (pfam01197) → |
| Sfl-25-8  | NZ_LAHV01000005.1 | + | 24423 | 24475 | RNA → rpmE (PRK00019) Ribosomal_L31 (pfam01197) → |
| Sso-1-222 | NZ_CXGR01000027.1 | - | 695   | 643   | RNA → rpmE (PRK00019) Ribosomal_L31 (pfam01197) → |
| Sso-1-223 | NZ_CXLK01000027.1 | + | 39082 | 39134 | RNA → rpmE (PRK00019) Ribosomal_L31 (pfam01197) → |
| Sso-1-224 | NZ_CXCD01000021.1 | + | 39007 | 39059 | RNA → rpmE (PRK00019) Ribosomal_L31 (pfam01197) → |
| Sso-1-225 | NZ_CWZP01000023.1 | - | 664   | 612   | RNA → rpmE (PRK00019) Ribosomal_L31 (pfam01197) → |
| Sso-1-226 | NZ_CWZK01000029.1 | + | 39099 | 39151 | RNA → rpmE (PRK00019) Ribosomal_L31 (pfam01197) → |
| Sso-1-227 | NZ_CWYC01000025.1 | + | 39084 | 39136 | RNA → rpmE (PRK00019) Ribosomal_L31 (pfam01197) → |
| Sso-1-228 | NZ_CXCS01000004.1 | + | 76716 | 76768 | RNA → rpmE (PRK00019) Ribosomal_L31 (pfam01197) → |

|           |                   |   |       |       |                                                   |
|-----------|-------------------|---|-------|-------|---------------------------------------------------|
| Sso-1-229 | NZ_CXFO01000025.1 | - | 1174  | 1122  | RNA → rpmE (PRK00019) Ribosomal_L31 (pfam01197) → |
| Sso-1-230 | NZ_CXJF01000027.1 | - | 1539  | 1487  | RNA → rpmE (PRK00019) Ribosomal_L31 (pfam01197) → |
| Sso-1-231 | NZ_CXFF01000024.1 | + | 39045 | 39097 | RNA → rpmE (PRK00019) Ribosomal_L31 (pfam01197) → |
| Sso-1-232 | NZ_CWYB01000025.1 | + | 39089 | 39141 | RNA → rpmE (PRK00019) Ribosomal_L31 (pfam01197) → |
| Sso-1-233 | NZ_CWZY01000026.1 | + | 39082 | 39134 | RNA → rpmE (PRK00019) Ribosomal_L31 (pfam01197) → |
| Sso-1-234 | NZ_CXMG01000026.1 | - | 792   | 740   | RNA → rpmE (PRK00019) Ribosomal_L31 (pfam01197) → |
| Sso-1-235 | NZ_CXBS01000019.1 | - | 630   | 578   | RNA → rpmE (PRK00019) Ribosomal_L31 (pfam01197) → |
| Sso-1-236 | NZ_CXBX01000019.1 | + | 39027 | 39079 | RNA → rpmE (PRK00019) Ribosomal_L31 (pfam01197) → |
| Sso-1-237 | NZ_CXKF01000028.1 | + | 39089 | 39141 | RNA → rpmE (PRK00019) Ribosomal_L31 (pfam01197) → |
| Sso-1-238 | NZ_CWWP01000024.1 | + | 39099 | 39151 | RNA → rpmE (PRK00019) Ribosomal_L31 (pfam01197) → |
| Sso-1-239 | NZ_CXBW01000012.1 | + | 47420 | 47472 | RNA → rpmE (PRK00019) Ribosomal_L31 (pfam01197) → |
| Sso-1-240 | NZ_CXEI01000023.1 | - | 1137  | 1085  | RNA → rpmE (PRK00019) Ribosomal_L31 (pfam01197) → |
| Sso-1-241 | NZ_CXJZ01000027.1 | - | 695   | 643   | RNA → rpmE (PRK00019) Ribosomal_L31 (pfam01197) → |
| Sso-1-242 | NZ_CXKU01000020.1 | - | 1174  | 1122  | RNA → rpmE (PRK00019) Ribosomal_L31 (pfam01197) → |
| Sso-1-243 | NZ_CXLB01000016.1 | + | 39082 | 39134 | RNA → rpmE (PRK00019) Ribosomal_L31 (pfam01197) → |
| Sso-1-244 | NZ_CXJP01000026.1 | + | 39089 | 39141 | RNA → rpmE (PRK00019) Ribosomal_L31 (pfam01197) → |
| Sso-1-245 | NZ_CXGK01000028.1 | - | 556   | 504   | RNA → rpmE (PRK00019) Ribosomal_L31 (pfam01197) → |
| Sso-1-246 | NZ_CXEO01000018.1 | - | 644   | 592   | RNA → rpmE (PRK00019) Ribosomal_L31 (pfam01197) → |
| Sso-1-247 | NZ_CWYG01000025.1 | - | 1680  | 1628  | RNA → rpmE (PRK00019) Ribosomal_L31 (pfam01197) → |
| Sso-1-248 | NZ_CXLG01000028.1 | + | 39082 | 39134 | RNA → rpmE (PRK00019) Ribosomal_L31 (pfam01197) → |
| Sso-1-249 | NZ_CWUU01000025.1 | + | 39104 | 39156 | RNA → rpmE (PRK00019) Ribosomal_L31 (pfam01197) → |
| Sso-1-250 | NZ_CWZO01000026.1 | - | 662   | 610   | RNA → rpmE (PRK00019) Ribosomal_L31 (pfam01197) → |
| Sso-1-251 | NZ_CXGC01000028.1 | - | 1627  | 1575  | RNA → rpmE (PRK00019) Ribosomal_L31 (pfam01197) → |
| Sso-1-252 | NZ_CWUC01000026.1 | - | 660   | 608   | RNA → rpmE (PRK00019) Ribosomal_L31 (pfam01197) → |
| Sso-1-253 | NZ_CXEB01000017.1 | + | 47821 | 47873 | RNA → rpmE (PRK00019) Ribosomal_L31 (pfam01197) → |
| Sso-1-254 | NZ_CXAG01000028.1 | - | 664   | 612   | RNA → rpmE (PRK00019) Ribosomal_L31 (pfam01197) → |
| Sso-1-255 | NZ_CWWG01000023.1 | + | 39082 | 39134 | RNA → rpmE (PRK00019) Ribosomal_L31 (pfam01197) → |
| Sso-1-256 | NZ_CXES01000023.1 | + | 39030 | 39082 | RNA → rpmE (PRK00019) Ribosomal_L31 (pfam01197) → |
| Sso-1-257 | NZ_CWYR01000024.1 | + | 39089 | 39141 | RNA → rpmE (PRK00019) Ribosomal_L31 (pfam01197) → |
| Sso-1-258 | NZ_CWVN01000027.1 | - | 799   | 747   | RNA → rpmE (PRK00019) Ribosomal_L31 (pfam01197) → |
| Sso-1-259 | NZ_CWWS01000022.1 | - | 833   | 781   | RNA → rpmE (PRK00019) Ribosomal_L31 (pfam01197) → |
| Sso-1-260 | NZ_CXFD01000026.1 | - | 652   | 600   | RNA → rpmE (PRK00019) Ribosomal_L31 (pfam01197) → |
| Sso-1-261 | NZ_CWYD01000027.1 | + | 39100 | 39152 | RNA → rpmE (PRK00019) Ribosomal_L31 (pfam01197) → |
| Sso-1-262 | NZ_CWUU01000028.1 | - | 1768  | 1716  | RNA → rpmE (PRK00019) Ribosomal_L31 (pfam01197) → |
| Sso-1-263 | NZ_CXCO01000033.1 | - | 632   | 580   | RNA → rpmE (PRK00019) Ribosomal_L31 (pfam01197) → |
| Sso-1-264 | NZ_CWZB01000027.1 | - | 672   | 620   | RNA → rpmE (PRK00019) Ribosomal_L31 (pfam01197) → |
| Sso-1-265 | NZ_CWVG01000028.1 | - | 1732  | 1680  | RNA → rpmE (PRK00019) Ribosomal_L31 (pfam01197) → |
| Sso-1-266 | NZ_CXJQ01000027.1 | + | 39082 | 39134 | RNA → rpmE (PRK00019) Ribosomal_L31 (pfam01197) → |
| Sso-1-267 | NZ_CXCR01000016.1 | - | 465   | 413   | RNA → rpmE (PRK00019) Ribosomal_L31 (pfam01197) → |
| Sso-1-268 | NZ_CWTP01000028.1 | + | 39087 | 39139 | RNA → rpmE (PRK00019) Ribosomal_L31 (pfam01197) → |
| Sso-1-269 | NZ_CXAR01000002.1 | - | 1174  | 1122  | RNA → rpmE (PRK00019) Ribosomal_L31 (pfam01197) → |
| Sso-1-270 | NZ_CXIG01000026.1 | - | 1539  | 1487  | RNA → rpmE (PRK00019) Ribosomal_L31 (pfam01197) → |
| Sso-1-271 | NZ_CWTA01000027.1 | + | 39144 | 39196 | RNA → rpmE (PRK00019) Ribosomal_L31 (pfam01197) → |
| Sso-1-272 | NZ_CWXC01000024.1 | + | 39104 | 39156 | RNA → rpmE (PRK00019) Ribosomal_L31 (pfam01197) → |
| Sso-1-273 | NZ_CXBH01000062.1 | + | 20736 | 20788 | RNA → rpmE (PRK00019) Ribosomal_L31 (pfam01197) → |
| Sso-1-274 | NZ_CWTK01000015.1 | - | 660   | 608   | RNA → rpmE (PRK00019) Ribosomal_L31 (pfam01197) → |
| Sso-1-275 | NZ_CXBC01000024.1 | - | 1174  | 1122  | RNA → rpmE (PRK00019) Ribosomal_L31 (pfam01197) → |
| Sso-1-276 | NZ_CXCI01000022.1 | - | 630   | 578   | RNA → rpmE (PRK00019) Ribosomal_L31 (pfam01197) → |
| Sso-1-277 | NZ_CWWD01000024.1 | - | 1202  | 1150  | RNA → rpmE (PRK00019) Ribosomal_L31 (pfam01197) → |
| Sso-1-278 | NZ_CXDJ01000008.1 | - | 630   | 578   | RNA → rpmE (PRK00019) Ribosomal_L31 (pfam01197) → |
| Sso-1-279 | NZ_CXFS01000026.1 | + | 39031 | 39083 | RNA → rpmE (PRK00019) Ribosomal_L31 (pfam01197) → |
| Sso-1-280 | NZ_CWTI01000027.1 | + | 39109 | 39161 | RNA → rpmE (PRK00019) Ribosomal_L31 (pfam01197) → |



|           |                    |   |       |       |                                               |
|-----------|--------------------|---|-------|-------|-----------------------------------------------|
| Sso-1-281 | NZ.CXDV01000023.1  | + | 47867 | 47919 | RNA→rpmE (PRK00019)Ribosomal_L31 (pfam01197)→ |
| Sso-1-282 | NZ.CXAW01000024.1  | - | 1174  | 1122  | RNA→rpmE (PRK00019)Ribosomal_L31 (pfam01197)→ |
| Sso-1-283 | NZ.CWTC01000022.1  | + | 39082 | 39134 | RNA→rpmE (PRK00019)Ribosomal_L31 (pfam01197)→ |
| Sso-1-284 | NZ.CXLP01000026.1  | - | 794   | 742   | RNA→rpmE (PRK00019)Ribosomal_L31 (pfam01197)→ |
| Sso-1-285 | NZ.CXIQ01000021.1  | - | 2679  | 2627  | RNA→rpmE (PRK00019)Ribosomal_L31 (pfam01197)→ |
| Sso-1-286 | NZ.CWTY01000023.1  | + | 39069 | 39121 | RNA→rpmE (PRK00019)Ribosomal_L31 (pfam01197)→ |
| Sso-1-287 | NZ.CXEX01000023.1  | + | 39045 | 39097 | RNA→rpmE (PRK00019)Ribosomal_L31 (pfam01197)→ |
| Sso-1-288 | NZ.CXAV01000016.1  | + | 39007 | 39059 | RNA→rpmE (PRK00019)Ribosomal_L31 (pfam01197)→ |
| Sso-1-289 | NZ.CWUT01000025.1  | + | 39093 | 39145 | RNA→rpmE (PRK00019)Ribosomal_L31 (pfam01197)→ |
| Sso-1-290 | NZ.CXLQ01000026.1  | - | 1279  | 1227  | RNA→rpmE (PRK00019)Ribosomal_L31 (pfam01197)→ |
| Sso-1-291 | NZ.CXND01000027.1  | - | 915   | 863   | RNA→rpmE (PRK00019)Ribosomal_L31 (pfam01197)→ |
| Sso-1-292 | NZ.CWVH01000021.1  | + | 39093 | 39145 | RNA→rpmE (PRK00019)Ribosomal_L31 (pfam01197)→ |
| Sso-1-293 | NZ.CWVX01000020.1  | - | 835   | 783   | RNA→rpmE (PRK00019)Ribosomal_L31 (pfam01197)→ |
| Sso-1-294 | NZ.CXFK01000023.1  | + | 39045 | 39097 | RNA→rpmE (PRK00019)Ribosomal_L31 (pfam01197)→ |
| Sso-1-295 | NZ.CWVD01000031.1  | + | 39089 | 39141 | RNA→rpmE (PRK00019)Ribosomal_L31 (pfam01197)→ |
| Sso-1-296 | NZ.CWTN01000022.1  | - | 660   | 608   | RNA→rpmE (PRK00019)Ribosomal_L31 (pfam01197)→ |
| Sso-1-297 | NZ.CXHIO1000028.1  | - | 792   | 740   | RNA→rpmE (PRK00019)Ribosomal_L31 (pfam01197)→ |
| Sso-1-298 | NZ.CWTVQ01000027.1 | + | 38832 | 38884 | RNA→rpmE (PRK00019)Ribosomal_L31 (pfam01197)→ |
| Sso-1-299 | NZ.CWVV01000028.1  | + | 39099 | 39151 | RNA→rpmE (PRK00019)Ribosomal_L31 (pfam01197)→ |
| Sso-1-300 | NZ.CWZIO1000025.1  | - | 1692  | 1640  | RNA→rpmE (PRK00019)Ribosomal_L31 (pfam01197)→ |
| Sso-1-301 | NZ.CWTB01000024.1  | - | 660   | 608   | RNA→rpmE (PRK00019)Ribosomal_L31 (pfam01197)→ |
| Sso-1-302 | NZ.CXAB01000024.1  | - | 1174  | 1122  | RNA→rpmE (PRK00019)Ribosomal_L31 (pfam01197)→ |
| Sso-1-303 | NZ.CWUM01000015.1  | + | 39156 | 39208 | RNA→rpmE (PRK00019)Ribosomal_L31 (pfam01197)→ |
| Sso-1-304 | NZ.CWVX01000027.1  | + | 39093 | 39145 | RNA→rpmE (PRK00019)Ribosomal_L31 (pfam01197)→ |
| Sso-1-305 | NZ.CXKV01000028.1  | - | 682   | 630   | RNA→rpmE (PRK00019)Ribosomal_L31 (pfam01197)→ |
| Sso-1-306 | NZ.CWSW01000026.1  | - | 660   | 608   | RNA→rpmE (PRK00019)Ribosomal_L31 (pfam01197)→ |
| Sso-1-307 | NZ.CWWM01000029.1  | + | 39082 | 39134 | RNA→rpmE (PRK00019)Ribosomal_L31 (pfam01197)→ |
| Sso-1-308 | NZ.CXDI01000014.1  | - | 480   | 428   | RNA→rpmE (PRK00019)Ribosomal_L31 (pfam01197)→ |
| Sso-1-309 | NZ.CWVC01000026.1  | + | 39093 | 39145 | RNA→rpmE (PRK00019)Ribosomal_L31 (pfam01197)→ |
| Sso-1-310 | NZ.CWVJ01000023.1  | - | 1539  | 1487  | RNA→rpmE (PRK00019)Ribosomal_L31 (pfam01197)→ |
| Sso-1-311 | NZ.CXBL01000018.1  | + | 39135 | 39187 | RNA→rpmE (PRK00019)Ribosomal_L31 (pfam01197)→ |
| Sso-1-312 | NZ.CWVY01000029.1  | + | 39082 | 39134 | RNA→rpmE (PRK00019)Ribosomal_L31 (pfam01197)→ |
| Sso-1-313 | NZ.CXEL01000014.1  | - | 644   | 592   | RNA→rpmE (PRK00019)Ribosomal_L31 (pfam01197)→ |
| Sso-1-314 | NZ.CXHH01000027.1  | - | 695   | 643   | RNA→rpmE (PRK00019)Ribosomal_L31 (pfam01197)→ |
| Sso-1-315 | NZ.CWVW01000029.1  | - | 1397  | 1345  | RNA→rpmE (PRK00019)Ribosomal_L31 (pfam01197)→ |
| Sso-1-316 | NZ.CWZW01000026.1  | - | 559   | 507   | RNA→rpmE (PRK00019)Ribosomal_L31 (pfam01197)→ |
| Sso-1-317 | NZ.CXHJ01000027.1  | - | 695   | 643   | RNA→rpmE (PRK00019)Ribosomal_L31 (pfam01197)→ |
| Sso-1-318 | NZ.CWUH01000025.1  | + | 39104 | 39156 | RNA→rpmE (PRK00019)Ribosomal_L31 (pfam01197)→ |
| Sso-1-319 | NZ.CXNS01000027.1  | - | 1294  | 1242  | RNA→rpmE (PRK00019)Ribosomal_L31 (pfam01197)→ |
| Sso-1-320 | NZ.CXGV01000027.1  | + | 39094 | 39146 | RNA→rpmE (PRK00019)Ribosomal_L31 (pfam01197)→ |
| Sso-1-321 | NZ.CXHO01000023.1  | + | 39089 | 39141 | RNA→rpmE (PRK00019)Ribosomal_L31 (pfam01197)→ |
| Sso-1-322 | NZ.CWTM01000025.1  | + | 39158 | 39210 | RNA→rpmE (PRK00019)Ribosomal_L31 (pfam01197)→ |
| Sso-1-323 | NZ.CXMK01000027.1  | + | 39089 | 39141 | RNA→rpmE (PRK00019)Ribosomal_L31 (pfam01197)→ |
| Sso-1-324 | NZ.CXBU01000023.1  | + | 39030 | 39082 | RNA→rpmE (PRK00019)Ribosomal_L31 (pfam01197)→ |
| Sso-1-325 | NZ.CWVR01000030.1  | + | 39093 | 39145 | RNA→rpmE (PRK00019)Ribosomal_L31 (pfam01197)→ |
| Sso-1-326 | NZ.CXIF01000024.1  | - | 776   | 724   | RNA→rpmE (PRK00019)Ribosomal_L31 (pfam01197)→ |
| Sso-1-327 | NZ.CXDZ01000014.1  | - | 1137  | 1085  | RNA→rpmE (PRK00019)Ribosomal_L31 (pfam01197)→ |
| Sso-1-328 | NZ.CWWO01000025.1  | + | 39089 | 39141 | RNA→rpmE (PRK00019)Ribosomal_L31 (pfam01197)→ |
| Sso-1-329 | NZ.CWYT01000026.1  | - | 664   | 612   | RNA→rpmE (PRK00019)Ribosomal_L31 (pfam01197)→ |
| Sso-1-330 | NZ.CXHQ01000026.1  | + | 39082 | 39134 | RNA→rpmE (PRK00019)Ribosomal_L31 (pfam01197)→ |
| Sso-1-331 | NZ.CWYY01000025.1  | - | 1539  | 1487  | RNA→rpmE (PRK00019)Ribosomal_L31 (pfam01197)→ |
| Sso-1-332 | NZ.CXKM01000025.1  | - | 771   | 719   | RNA→rpmE (PRK00019)Ribosomal_L31 (pfam01197)→ |



|           |                   |   |       |       |                                                      |
|-----------|-------------------|---|-------|-------|------------------------------------------------------|
| Sso-1-333 | NZ.CWZF01000025.1 | - | 662   | 610   | RNA→ rpmE (PRK00019)Ribosomal_L31 (pfam01197)→       |
| Sso-1-334 | NZ.CWWA01000027.1 | - | 800   | 748   | RNA→ rpmE (PRK00019)Ribosomal_L31 (pfam01197)→       |
| Sso-1-335 | NZ.CXHE01000025.1 | - | 2674  | 2622  | RNA→ rpmE (PRK00019)Ribosomal_L31 (pfam01197)→       |
| Sso-1-336 | NZ.CXBN01000024.1 | + | 39023 | 39075 | RNA→ rpmE (PRK00019)Ribosomal_L31 (pfam01197)→       |
| Sso-1-337 | NZ.CXEN01000022.1 | - | 821   | 769   | RNA→ rpmE (PRK00019)Ribosomal_L31 (pfam01197)→       |
| Sso-1-338 | NZ.CXAT01000016.1 | + | 39023 | 39075 | RNA→ rpmE (PRK00019)Ribosomal_L31 (pfam01197)→       |
| Sso-1-339 | NZ.CXJA01000025.1 | + | 39089 | 39141 | RNA→ rpmE (PRK00019)Ribosomal_L31 (pfam01197)→       |
| Sso-1-340 | NZ.CWUP01000024.1 | - | 555   | 503   | RNA→ rpmE (PRK00019)Ribosomal_L31 (pfam01197)→       |
| Sso-1-341 | NZ.CXBO01000021.1 | - | 1174  | 1122  | RNA→ rpmE (PRK00019)Ribosomal_L31 (pfam01197)→       |
| Sso-1-342 | NZ.CXCY01000005.1 | + | 80319 | 80371 | RNA→ rpmE (PRK00019)Ribosomal_L31 (pfam01197)→       |
| Sso-1-343 | NZ.CWUG01000016.1 | + | 38772 | 38824 | RNA→ rpmE (PRK00019)Ribosomal_L31 (pfam01197)→       |
| Sso-1-344 | NZ.CXHW01000028.1 | + | 39089 | 39141 | RNA→ rpmE (PRK00019)Ribosomal_L31 (pfam01197)→       |
| Sso-1-345 | NZ.CXIR01000026.1 | + | 39082 | 39134 | RNA→ rpmE (PRK00019)Ribosomal_L31 (pfam01197)→       |
| Sso-1-346 | NZ.CWVB01000026.1 | - | 794   | 742   | RNA→ rpmE (PRK00019)Ribosomal_L31 (pfam01197)→       |
| Sso-1-347 | NZ.CXLR01000027.1 | + | 39089 | 39141 | RNA→ rpmE (PRK00019)Ribosomal_L31 (pfam01197)→       |
| Sso-1-348 | NZ.CXCL01000027.1 | - | 632   | 580   | RNA→ rpmE (PRK00019)Ribosomal_L31 (pfam01197)→       |
| Sso-1-349 | NZ.CWSY01000022.1 | - | 555   | 503   | RNA→ rpmE (PRK00019)Ribosomal_L31 (pfam01197)→       |
| Sso-1-350 | NZ.CXDN01000021.1 | - | 1174  | 1122  | RNA→ rpmE (PRK00019)Ribosomal_L31 (pfam01197)→       |
| Sso-1-351 | NZ.CWXB01000016.1 | + | 39104 | 39156 | RNA→ rpmE (PRK00019)Ribosomal_L31 (pfam01197)→       |
| Sso-1-352 | NZ.CWXA01000021.1 | + | 39104 | 39156 | RNA→ rpmE (PRK00019)Ribosomal_L31 (pfam01197)→       |
| Sso-1-353 | NZ.CWSZ01000022.1 | - | 660   | 608   | RNA→ rpmE (PRK00019)Ribosomal_L31 (pfam01197)→       |
| Sso-1-354 | NZ.CXAL01000025.1 | - | 676   | 624   | RNA→ rpmE (PRK00019)Ribosomal_L31 (pfam01197)→       |
| Sso-1-355 | NZ.CXLT01000025.1 | + | 39089 | 39141 | RNA→ rpmE (PRK00019)Ribosomal_L31 (pfam01197)→       |
| Sso-1-356 | NZ.CWVK01000028.1 | - | 800   | 748   | RNA→ rpmE (PRK00019)Ribosomal_L31 (pfam01197)→       |
| Sso-1-357 | NZ.CXDS01000022.1 | - | 5350  | 5298  | RNA→ rpmE (PRK00019)Ribosomal_L31 (pfam01197)→       |
| Sso-1-358 | NZ.CWUV01000023.1 | + | 39082 | 39134 | RNA→ rpmE (PRK00019)Ribosomal_L31 (pfam01197)→       |
| Sso-1-359 | NZ.CXGN01000021.1 | - | 628   | 576   | RNA→ rpmE (PRK00019)Ribosomal_L31 (pfam01197)→       |
| Sso-1-360 | NZ.CWYK01000022.1 | + | 39082 | 39134 | RNA→ rpmE (PRK00019)Ribosomal_L31 (pfam01197)→       |
| Sso-1-361 | NZ.CWUQ01000021.1 | - | 660   | 608   | RNA→ rpmE (PRK00019)Ribosomal_L31 (pfam01197)→       |
| Sso-1-362 | NZ.CXKG01000049.1 | + | 22507 | 22559 | RNA→ rpmE (PRK00019)Ribosomal_L31 (pfam01197)→       |
| Sso-1-363 | NZ.CXFC01000024.1 | - | 1701  | 1649  | RNA→ rpmE (PRK00019)Ribosomal_L31 (pfam01197)→       |
| Sso-1-364 | NZ.CWWL01000026.1 | - | 1227  | 1175  | RNA→ rpmE (PRK00019)Ribosomal_L31 (pfam01197)→       |
| Sso-1-365 | NZ.CXGH01000025.1 | + | 39045 | 39097 | RNA→ rpmE (PRK00019)Ribosomal_L31 (pfam01197)→       |
| Sso-1-366 | NZ.CXEU01000023.1 | - | 768   | 716   | RNA→ rpmE (PRK00019)Ribosomal_L31 (pfam01197)→       |
| Sso-1-367 | NZ.CWVS01000024.1 | - | 3757  | 3705  | RNA→ rpmE (PRK00019)Ribosomal_L31 (pfam01197)→       |
| Sso-1-368 | NZ.CXHD01000027.1 | + | 39082 | 39134 | RNA→ rpmE (PRK00019)Ribosomal_L31 (pfam01197)→       |
| Sso-1-369 | NZ.CXJR01000027.1 | + | 39089 | 39141 | RNA→ rpmE (PRK00019)Ribosomal_L31 (pfam01197)→       |
| Sso-1-370 | NZ.CWWI01000027.1 | - | 1221  | 1169  | RNA→ rpmE (PRK00019)Ribosomal_L31 (pfam01197)→       |
| Sso-1-371 | NZ.CXIS01000027.1 | - | 669   | 617   | RNA→ rpmE (PRK00019)Ribosomal_L31 (pfam01197)→       |
| Sso-1-372 | NZ.CXFW01000022.1 | - | 1174  | 1122  | RNA→ rpmE (PRK00019)Ribosomal_L31 (pfam01197)→       |
| Sso-1-373 | NZ.CXIC01000002.1 | + | 80379 | 80431 | RNA→ rpmE (PRK00019)Ribosomal_L31 (pfam01197)→       |
| Sso-1-374 | NZ.CWWQ01000023.1 | + | 39082 | 39134 | RNA→ rpmE (PRK00019)Ribosomal_L31 (pfam01197)→       |
| Sso-1-375 | NZ.CXMJ01000027.1 | - | 798   | 746   | RNA→ rpmE (PRK00019)Ribosomal_L31 (pfam01197)→       |
| Sso-1-376 | NZ.CXDP01000021.1 | - | 433   | 381   | RNA→ rpmE (PRK00019)Ribosomal_L31 (pfam01197)→ hypo→ |
| Sso-1-377 | NZ.CXLE01000027.1 | + | 39089 | 39141 | RNA→ rpmE (PRK00019)Ribosomal_L31 (pfam01197)→       |
| Sso-1-378 | NZ.CWZG01000025.1 | + | 39089 | 39141 | RNA→ rpmE (PRK00019)Ribosomal_L31 (pfam01197)→       |
| Sso-1-379 | NZ.CXHC01000027.1 | - | 695   | 643   | RNA→ rpmE (PRK00019)Ribosomal_L31 (pfam01197)→       |
| Sso-1-380 | NZ.CWYM01000024.1 | + | 39089 | 39141 | RNA→ rpmE (PRK00019)Ribosomal_L31 (pfam01197)→       |
| Sso-1-381 | NZ.CXDB01000009.1 | + | 33320 | 33372 | RNA→ rpmE (PRK00019)Ribosomal_L31 (pfam01197)→       |
| Sso-1-382 | NZ.CXMM01000026.1 | + | 39089 | 39141 | RNA→ rpmE (PRK00019)Ribosomal_L31 (pfam01197)→       |
| Sso-1-383 | NZ.CWYI01000029.1 | - | 664   | 612   | RNA→ rpmE (PRK00019)Ribosomal_L31 (pfam01197)→       |
| Sso-1-384 | NZ.CWXN01000026.1 | + | 39106 | 39158 | RNA→ rpmE (PRK00019)Ribosomal_L31 (pfam01197)→       |

|           |                    |   |       |       |                                                   |
|-----------|--------------------|---|-------|-------|---------------------------------------------------|
| Sso-1-385 | NZ_CXNN01000025.1  | - | 1539  | 1487  | RNA → rpmE (PRK00019) Ribosomal_L31 (pfam01197) → |
| Sso-1-386 | NZ_CXBT01000023.1  | + | 39007 | 39059 | RNA → rpmE (PRK00019) Ribosomal_L31 (pfam01197) → |
| Sso-1-387 | NZ_CXFA01000020.1  | + | 47728 | 47780 | RNA → rpmE (PRK00019) Ribosomal_L31 (pfam01197) → |
| Sso-1-388 | NZ_CXGF01000027.1  | - | 556   | 504   | RNA → rpmE (PRK00019) Ribosomal_L31 (pfam01197) → |
| Sso-1-389 | NZ_CXGD01000020.1  | + | 39045 | 39097 | RNA → rpmE (PRK00019) Ribosomal_L31 (pfam01197) → |
| Sso-1-390 | NZ_CXDGE01000045.1 | - | 488   | 436   | RNA → rpmE (PRK00019) Ribosomal_L31 (pfam01197) → |
| Sso-1-391 | NZ_CXGE01000027.1  | + | 39045 | 39097 | RNA → rpmE (PRK00019) Ribosomal_L31 (pfam01197) → |
| Sso-1-392 | NZ_CWXQ01000020.1  | - | 846   | 794   | RNA → rpmE (PRK00019) Ribosomal_L31 (pfam01197) → |
| Sso-1-393 | NZ_CXFB01000026.1  | - | 695   | 643   | RNA → rpmE (PRK00019) Ribosomal_L31 (pfam01197) → |
| Sso-1-394 | NZ_CXDK01000016.1  | + | 47867 | 47919 | RNA → rpmE (PRK00019) Ribosomal_L31 (pfam01197) → |
| Sso-1-395 | NZ_CXKI01000002.1  | + | 67788 | 67840 | RNA → rpmE (PRK00019) Ribosomal_L31 (pfam01197) → |
| Sso-1-396 | NZ_CXCT01000016.1  | - | 479   | 427   | RNA → rpmE (PRK00019) Ribosomal_L31 (pfam01197) → |
| Sso-1-397 | NZ_CXCN01000005.1  | + | 70940 | 70992 | RNA → rpmE (PRK00019) Ribosomal_L31 (pfam01197) → |
| Sso-1-398 | NZ_CXCA01000025.1  | - | 632   | 580   | RNA → rpmE (PRK00019) Ribosomal_L31 (pfam01197) → |
| Sso-1-399 | NZ_CXCE01000021.1  | - | 632   | 580   | RNA → rpmE (PRK00019) Ribosomal_L31 (pfam01197) → |
| Sso-1-400 | NZ_CXNQ01000027.1  | + | 39089 | 39141 | RNA → rpmE (PRK00019) Ribosomal_L31 (pfam01197) → |
| Sso-1-401 | NZ_CXCH01000001.1  | - | 632   | 580   | RNA → rpmE (PRK00019) Ribosomal_L31 (pfam01197) → |
| Sso-1-402 | NZ_CXAZ01000023.1  | + | 39023 | 39075 | RNA → rpmE (PRK00019) Ribosomal_L31 (pfam01197) → |
| Sso-1-403 | NZ_CXET01000019.1  | - | 646   | 594   | RNA → rpmE (PRK00019) Ribosomal_L31 (pfam01197) → |
| Sso-1-404 | NZ_CWYZ01000027.1  | - | 660   | 608   | RNA → rpmE (PRK00019) Ribosomal_L31 (pfam01197) → |
| Sso-1-405 | NZ_CXIT01000027.1  | - | 786   | 734   | RNA → rpmE (PRK00019) Ribosomal_L31 (pfam01197) → |
| Sso-1-406 | NZ_CWXG01000022.1  | + | 39104 | 39156 | RNA → rpmE (PRK00019) Ribosomal_L31 (pfam01197) → |
| Sso-1-407 | NZ_CXBP01000067.1  | - | 401   | 349   | RNA → rpmE (PRK00019) Ribosomal_L31 (pfam01197) → |
| Sso-1-408 | NZ_CXHK01000020.1  | - | 3534  | 3482  | RNA → rpmE (PRK00019) Ribosomal_L31 (pfam01197) → |
| Sso-1-409 | NZ_CXFE01000028.1  | - | 695   | 643   | RNA → rpmE (PRK00019) Ribosomal_L31 (pfam01197) → |
| Sso-1-410 | NZ_CWXY01000026.1  | - | 862   | 810   | RNA → rpmE (PRK00019) Ribosomal_L31 (pfam01197) → |
| Sso-1-411 | NZ_CXAU01000013.1  | + | 43096 | 43148 | RNA → rpmE (PRK00019) Ribosomal_L31 (pfam01197) → |
| Sso-1-412 | NZ_CXBV01000021.1  | + | 39007 | 39059 | RNA → rpmE (PRK00019) Ribosomal_L31 (pfam01197) → |
| Sso-1-413 | NZ_CXNH01000020.1  | - | 2678  | 2626  | RNA → rpmE (PRK00019) Ribosomal_L31 (pfam01197) → |
| Sso-1-414 | NZ_CXDM01000029.1  | + | 37772 | 37824 | RNA → rpmE (PRK00019) Ribosomal_L31 (pfam01197) → |
| Sso-1-415 | NZ_CXIB01000026.1  | + | 39089 | 39141 | RNA → rpmE (PRK00019) Ribosomal_L31 (pfam01197) → |
| Sso-1-416 | NZ_CXGA01000026.1  | + | 39045 | 39097 | RNA → rpmE (PRK00019) Ribosomal_L31 (pfam01197) → |
| Sso-1-417 | NZ_CXJU01000026.1  | - | 779   | 727   | RNA → rpmE (PRK00019) Ribosomal_L31 (pfam01197) → |
| Sso-1-418 | NZ_CXMA01000023.1  | + | 39089 | 39141 | RNA → rpmE (PRK00019) Ribosomal_L31 (pfam01197) → |
| Sso-1-419 | NZ_CXHF01000026.1  | - | 695   | 643   | RNA → rpmE (PRK00019) Ribosomal_L31 (pfam01197) → |
| Sso-1-420 | NZ_CWZT01000023.1  | + | 39094 | 39146 | RNA → rpmE (PRK00019) Ribosomal_L31 (pfam01197) → |
| Sso-1-421 | NZ_CXGP01000022.1  | - | 2682  | 2630  | RNA → rpmE (PRK00019) Ribosomal_L31 (pfam01197) → |
| Sso-1-422 | NZ_CXAK01000025.1  | - | 662   | 610   | RNA → rpmE (PRK00019) Ribosomal_L31 (pfam01197) → |
| Sso-1-423 | NZ_CWXL01000027.1  | - | 664   | 612   | RNA → rpmE (PRK00019) Ribosomal_L31 (pfam01197) → |
| Sso-1-424 | NZ_CXBB01000103.1  | - | 1174  | 1122  | RNA → rpmE (PRK00019) Ribosomal_L31 (pfam01197) → |
| Sso-1-425 | NZ_CXMC01000027.1  | + | 39089 | 39141 | RNA → rpmE (PRK00019) Ribosomal_L31 (pfam01197) → |
| Sso-1-426 | NZ_CXKD01000028.1  | - | 812   | 760   | RNA → rpmE (PRK00019) Ribosomal_L31 (pfam01197) → |
| Sso-1-427 | NZ_CWYL01000026.1  | - | 666   | 614   | RNA → rpmE (PRK00019) Ribosomal_L31 (pfam01197) → |
| Sso-1-428 | NZ_CXGG01000026.1  | - | 496   | 444   | RNA → rpmE (PRK00019) Ribosomal_L31 (pfam01197) → |
| Sso-1-429 | NZ_CWZM01000026.1  | - | 668   | 616   | RNA → rpmE (PRK00019) Ribosomal_L31 (pfam01197) → |
| Sso-1-430 | NZ_CXIO01000028.1  | + | 39045 | 39097 | RNA → rpmE (PRK00019) Ribosomal_L31 (pfam01197) → |
| Sso-1-431 | NZ_CXJJ01000026.1  | + | 39082 | 39134 | RNA → rpmE (PRK00019) Ribosomal_L31 (pfam01197) → |
| Sso-1-432 | NZ_CXHT01000025.1  | - | 779   | 727   | RNA → rpmE (PRK00019) Ribosomal_L31 (pfam01197) → |
| Sso-1-433 | NZ_CXIJ01000028.1  | - | 793   | 741   | RNA → rpmE (PRK00019) Ribosomal_L31 (pfam01197) → |
| Sso-1-434 | NZ_CXAD01000025.1  | - | 1137  | 1085  | RNA → rpmE (PRK00019) Ribosomal_L31 (pfam01197) → |
| Sso-1-435 | NZ_CXOH01000026.1  | + | 39089 | 39141 | RNA → rpmE (PRK00019) Ribosomal_L31 (pfam01197) → |
| Sso-1-436 | NZ_CXFJ01000027.1  | - | 637   | 585   | RNA → rpmE (PRK00019) Ribosomal_L31 (pfam01197) → |

|           |                    |   |       |       |                                                   |
|-----------|--------------------|---|-------|-------|---------------------------------------------------|
| Sso-1-437 | NZ_CXJL01000025.1  | + | 39089 | 39141 | RNA → rpmE (PRK00019) Ribosomal_L31 (pfam01197) → |
| Sso-1-438 | NZ_CXFY01000027.1  | + | 39045 | 39097 | RNA → rpmE (PRK00019) Ribosomal_L31 (pfam01197) → |
| Sso-1-439 | NZ_CXNL01000026.1  | - | 799   | 747   | RNA → rpmE (PRK00019) Ribosomal_L31 (pfam01197) → |
| Sso-1-440 | NZ_CWZS01000023.1  | + | 39089 | 39141 | RNA → rpmE (PRK00019) Ribosomal_L31 (pfam01197) → |
| Sso-1-441 | NZ_CXAC01000026.1  | - | 661   | 609   | RNA → rpmE (PRK00019) Ribosomal_L31 (pfam01197) → |
| Sso-1-442 | NZ_CXKN01000026.1  | - | 769   | 717   | RNA → rpmE (PRK00019) Ribosomal_L31 (pfam01197) → |
| Sso-1-443 | NZ_CXCP01000015.1  | + | 39185 | 39237 | RNA → rpmE (PRK00019) Ribosomal_L31 (pfam01197) → |
| Sso-1-444 | NZ_CXJS01000017.1  | - | 1137  | 1085  | RNA → rpmE (PRK00019) Ribosomal_L31 (pfam01197) → |
| Sso-1-445 | NZ_CXKC01000028.1  | + | 39082 | 39134 | RNA → rpmE (PRK00019) Ribosomal_L31 (pfam01197) → |
| Sso-1-446 | NZ_CXBK01000055.1  | + | 20736 | 20788 | RNA → rpmE (PRK00019) Ribosomal_L31 (pfam01197) → |
| Sso-1-447 | NZ_CXME01000026.1  | + | 39082 | 39134 | RNA → rpmE (PRK00019) Ribosomal_L31 (pfam01197) → |
| Sso-1-448 | NZ_CXLX01000028.1  | + | 39089 | 39141 | RNA → rpmE (PRK00019) Ribosomal_L31 (pfam01197) → |
| Sso-1-449 | NZ_CXLU01000028.1  | - | 695   | 643   | RNA → rpmE (PRK00019) Ribosomal_L31 (pfam01197) → |
| Sso-1-450 | NZ_CXHV01000025.1  | + | 39089 | 39141 | RNA → rpmE (PRK00019) Ribosomal_L31 (pfam01197) → |
| Sso-1-451 | NZ_CXHX01000026.1  | - | 1627  | 1575  | RNA → rpmE (PRK00019) Ribosomal_L31 (pfam01197) → |
| Sso-1-452 | NZ_CXNE01000028.1  | + | 39082 | 39134 | RNA → rpmE (PRK00019) Ribosomal_L31 (pfam01197) → |
| Sso-1-453 | NZ_CXAO01000026.1  | - | 529   | 477   | RNA → rpmE (PRK00019) Ribosomal_L31 (pfam01197) → |
| Sso-1-454 | NZ_CXNO01000025.1  | - | 1174  | 1122  | RNA → rpmE (PRK00019) Ribosomal_L31 (pfam01197) → |
| Sso-1-455 | NZ_CXGX01000025.1  | - | 1174  | 1122  | RNA → rpmE (PRK00019) Ribosomal_L31 (pfam01197) → |
| Sso-1-456 | NZ_CXEC01000022.1  | - | 644   | 592   | RNA → rpmE (PRK00019) Ribosomal_L31 (pfam01197) → |
| Sso-1-457 | NZ_CWZE01000026.1  | - | 664   | 612   | RNA → rpmE (PRK00019) Ribosomal_L31 (pfam01197) → |
| Sso-1-458 | NZ_CXOB01000028.1  | - | 804   | 752   | RNA → rpmE (PRK00019) Ribosomal_L31 (pfam01197) → |
| Sso-1-459 | NZ_CWXF01000027.1  | + | 39104 | 39156 | RNA → rpmE (PRK00019) Ribosomal_L31 (pfam01197) → |
| Sso-1-460 | NZ_CXCV01000008.1  | - | 27546 | 27494 | RNA → rpmE (PRK00019) Ribosomal_L31 (pfam01197) → |
| Sso-1-461 | NZ_CXEV01000018.1  | - | 2655  | 2603  | RNA → rpmE (PRK00019) Ribosomal_L31 (pfam01197) → |
| Sso-1-462 | NZ_CXGB01000025.1  | - | 695   | 643   | RNA → rpmE (PRK00019) Ribosomal_L31 (pfam01197) → |
| Sso-1-463 | NZ_CXMT01000026.1  | - | 1627  | 1575  | RNA → rpmE (PRK00019) Ribosomal_L31 (pfam01197) → |
| Sso-1-464 | NZ_CXLH01000027.1  | - | 800   | 748   | RNA → rpmE (PRK00019) Ribosomal_L31 (pfam01197) → |
| Sso-1-465 | NZ_CXDW01000020.1  | - | 2418  | 2366  | RNA → rpmE (PRK00019) Ribosomal_L31 (pfam01197) → |
| Sso-1-466 | NZ_CXAP01000022.1  | + | 80220 | 80272 | RNA → rpmE (PRK00019) Ribosomal_L31 (pfam01197) → |
| Sso-1-467 | NZ_CXNK01000026.1  | - | 812   | 760   | RNA → rpmE (PRK00019) Ribosomal_L31 (pfam01197) → |
| Sso-1-468 | NZ_CWYQ01000027.1  | + | 39041 | 39093 | RNA → rpmE (PRK00019) Ribosomal_L31 (pfam01197) → |
| Sso-1-469 | NZ_CXMY01000022.1  | + | 39089 | 39141 | RNA → rpmE (PRK00019) Ribosomal_L31 (pfam01197) → |
| Sso-1-470 | NZ_CWZC01000027.1  | - | 666   | 614   | RNA → rpmE (PRK00019) Ribosomal_L31 (pfam01197) → |
| Sso-1-471 | NZ_CXIZ01000027.1  | + | 39045 | 39097 | RNA → rpmE (PRK00019) Ribosomal_L31 (pfam01197) → |
| Sso-1-472 | NZ_CXMP01000024.1  | - | 812   | 760   | RNA → rpmE (PRK00019) Ribosomal_L31 (pfam01197) → |
| Sso-1-473 | NZ_CWYA01000024.1  | - | 853   | 801   | RNA → rpmE (PRK00019) Ribosomal_L31 (pfam01197) → |
| Sso-1-474 | NZ_CWYJ01000023.1  | - | 1174  | 1122  | RNA → rpmE (PRK00019) Ribosomal_L31 (pfam01197) → |
| Sso-1-475 | NZ_CXED01000015.1  | + | 39085 | 39137 | RNA → rpmE (PRK00019) Ribosomal_L31 (pfam01197) → |
| Sso-1-476 | NZ_CWXJ01000027.1  | - | 736   | 684   | RNA → rpmE (PRK00019) Ribosomal_L31 (pfam01197) → |
| Sso-1-477 | NZ_CXII01000026.1  | + | 39089 | 39141 | RNA → rpmE (PRK00019) Ribosomal_L31 (pfam01197) → |
| Sso-1-478 | NZ_CXHN01000027.1  | + | 39082 | 39134 | RNA → rpmE (PRK00019) Ribosomal_L31 (pfam01197) → |
| Sso-1-479 | NZ_CXKX01000025.1  | + | 39089 | 39141 | RNA → rpmE (PRK00019) Ribosomal_L31 (pfam01197) → |
| Sso-1-480 | NZ_CXKT01000026.1  | - | 1174  | 1122  | RNA → rpmE (PRK00019) Ribosomal_L31 (pfam01197) → |
| Sso-1-481 | NZ_CXJO01000026.1  | + | 39082 | 39134 | RNA → rpmE (PRK00019) Ribosomal_L31 (pfam01197) → |
| Sso-1-482 | NZ_CXJX01000030.1  | + | 39082 | 39134 | RNA → rpmE (PRK00019) Ribosomal_L31 (pfam01197) → |
| Sso-1-483 | NZ_CXLV01000031.1  | + | 39082 | 39134 | RNA → rpmE (PRK00019) Ribosomal_L31 (pfam01197) → |
| Sso-1-484 | NZ_CWYE01000019.1  | - | 4838  | 4786  | RNA → rpmE (PRK00019) Ribosomal_L31 (pfam01197) → |
| Sso-1-485 | NZ_CW XO01000026.1 | + | 39089 | 39141 | RNA → rpmE (PRK00019) Ribosomal_L31 (pfam01197) → |
| Sso-1-486 | NZ_CXFV01000025.1  | + | 39045 | 39097 | RNA → rpmE (PRK00019) Ribosomal_L31 (pfam01197) → |
| Sso-1-487 | NZ_CXIE01000027.1  | - | 1627  | 1575  | RNA → rpmE (PRK00019) Ribosomal_L31 (pfam01197) → |
| Sso-1-488 | NZ_CXKL01000026.1  | - | 662   | 610   | RNA → rpmE (PRK00019) Ribosomal_L31 (pfam01197) → |



|            |                   |   |       |       |                                                   |
|------------|-------------------|---|-------|-------|---------------------------------------------------|
| Sso-1-489  | NZ.CWXE01000031.1 | - | 855   | 803   | RNA → rpmE (PRK00019) Ribosomal_L31 (pfam01197) → |
| Sso-1-490  | NZ.CXAF01000026.1 | + | 39082 | 39134 | RNA → rpmE (PRK00019) Ribosomal_L31 (pfam01197) → |
| Sso-1-491  | NZ.CWZN01000027.1 | - | 664   | 612   | RNA → rpmE (PRK00019) Ribosomal_L31 (pfam01197) → |
| Sso-1-492  | NZ.CXEK01000014.1 | - | 644   | 592   | RNA → rpmE (PRK00019) Ribosomal_L31 (pfam01197) → |
| Sso-1-493  | NZ.CXFN01000026.1 | - | 481   | 429   | RNA → rpmE (PRK00019) Ribosomal_L31 (pfam01197) → |
| Sso-1-494  | NZ.CXFZ01000023.1 | + | 39045 | 39097 | RNA → rpmE (PRK00019) Ribosomal_L31 (pfam01197) → |
| Sso-1-495  | NZ.CXCG01000013.1 | - | 334   | 282   | RNA → rpmE (PRK00019) Ribosomal_L31 (pfam01197) → |
| Sso-1-496  | NZ.CXNF01000028.1 | + | 39089 | 39141 | RNA → rpmE (PRK00019) Ribosomal_L31 (pfam01197) → |
| Sso-1-497  | NZ.CXKQ01000026.1 | + | 39045 | 39097 | RNA → rpmE (PRK00019) Ribosomal_L31 (pfam01197) → |
| Sso-1-498  | NZ.CWYV01000027.1 | + | 39041 | 39093 | RNA → rpmE (PRK00019) Ribosomal_L31 (pfam01197) → |
| Sso-1-499  | NZ.CXCM01000057.1 | + | 20736 | 20788 | RNA → rpmE (PRK00019) Ribosomal_L31 (pfam01197) → |
| Sso-1-500  | NZ.CXAX01000027.1 | + | 39023 | 39075 | RNA → rpmE (PRK00019) Ribosomal_L31 (pfam01197) → |
| Sso-1-501  | NZ.CWXX01000025.1 | + | 39089 | 39141 | RNA → rpmE (PRK00019) Ribosomal_L31 (pfam01197) → |
| Sso-1-502  | NZ.CXMB01000026.1 | - | 773   | 721   | RNA → rpmE (PRK00019) Ribosomal_L31 (pfam01197) → |
| Sso-1-503  | NZ.CXJD01000027.1 | - | 1539  | 1487  | RNA → rpmE (PRK00019) Ribosomal_L31 (pfam01197) → |
| Sso-1-504  | NZ.CWVY01000017.1 | - | 799   | 747   | RNA → rpmE (PRK00019) Ribosomal_L31 (pfam01197) → |
| Sso-1-505  | NZ.CXNA01000027.1 | + | 39082 | 39134 | RNA → rpmE (PRK00019) Ribosomal_L31 (pfam01197) → |
| Sso-1-506  | NZ.CXGL01000026.1 | - | 855   | 803   | RNA → rpmE (PRK00019) Ribosomal_L31 (pfam01197) → |
| Sso-1-507  | NZ.CXJ01000026.1  | - | 1627  | 1575  | RNA → rpmE (PRK00019) Ribosomal_L31 (pfam01197) → |
| Sso-1-508  | NZ.CWYS01000026.1 | - | 679   | 627   | RNA → rpmE (PRK00019) Ribosomal_L31 (pfam01197) → |
| Sso-1-509  | NZ.CWVN01000026.1 | - | 751   | 699   | RNA → rpmE (PRK00019) Ribosomal_L31 (pfam01197) → |
| Sso-1-510  | NZ.CWYO01000025.1 | + | 39093 | 39145 | RNA → rpmE (PRK00019) Ribosomal_L31 (pfam01197) → |
| Sso-1-511  | NZ.CXMI01000027.1 | + | 39089 | 39141 | RNA → rpmE (PRK00019) Ribosomal_L31 (pfam01197) → |
| Sso-1-512  | NZ.CXBR01000018.1 | + | 39007 | 39059 | RNA → rpmE (PRK00019) Ribosomal_L31 (pfam01197) → |
| Sso-1-513  | NZ.CXOF01000024.1 | - | 1627  | 1575  | RNA → rpmE (PRK00019) Ribosomal_L31 (pfam01197) → |
| Sso-1-514  | NZ.CXFU01000025.1 | + | 39045 | 39097 | RNA → rpmE (PRK00019) Ribosomal_L31 (pfam01197) → |
| Sso-1-515  | NZ.CXFG01000031.1 | - | 481   | 429   | RNA → rpmE (PRK00019) Ribosomal_L31 (pfam01197) → |
| Sso-1-516  | NZ.CWYF01000025.1 | + | 39089 | 39141 | RNA → rpmE (PRK00019) Ribosomal_L31 (pfam01197) → |
| Sso-1-517  | NZ.CXBQ01000065.1 | + | 20750 | 20802 | RNA → rpmE (PRK00019) Ribosomal_L31 (pfam01197) → |
| Sso-1-518  | NZ.CXMD01000027.1 | - | 794   | 742   | RNA → rpmE (PRK00019) Ribosomal_L31 (pfam01197) → |
| Sso-1-519  | NZ.CXHZ01000022.1 | - | 2667  | 2615  | RNA → rpmE (PRK00019) Ribosomal_L31 (pfam01197) → |
| Sso-1-520  | NZ.CXGS01000026.1 | - | 867   | 815   | RNA → rpmE (PRK00019) Ribosomal_L31 (pfam01197) → |
| Sso-1-521  | NZ.CXKE01000028.1 | - | 779   | 727   | RNA → rpmE (PRK00019) Ribosomal_L31 (pfam01197) → |
| Sso-1-522  | NZ.CXHP01000025.1 | + | 39082 | 39134 | RNA → rpmE (PRK00019) Ribosomal_L31 (pfam01197) → |
| Sso-1-523  | NZ.CXLW01000026.1 | + | 39082 | 39134 | RNA → rpmE (PRK00019) Ribosomal_L31 (pfam01197) → |
| Sso-1-524  | NZ.CXEA01000023.1 | - | 646   | 594   | RNA → rpmE (PRK00019) Ribosomal_L31 (pfam01197) → |
| Sso-1-525  | NZ.CWZA01000021.1 | - | 1539  | 1487  | RNA → rpmE (PRK00019) Ribosomal_L31 (pfam01197) → |
| Sso-1-526  | NZ.CXKZ01000025.1 | + | 39089 | 39141 | RNA → rpmE (PRK00019) Ribosomal_L31 (pfam01197) → |
| Sso-1-527  | NZ.CXGJ01000025.1 | + | 39045 | 39097 | RNA → rpmE (PRK00019) Ribosomal_L31 (pfam01197) → |
| Sso-1-528  | NZ.CXOG01000062.1 | + | 23400 | 23452 | RNA → rpmE (PRK00019) Ribosomal_L31 (pfam01197) → |
| Sso-1-529  | NZ.CXDF01000021.1 | + | 39593 | 39645 | RNA → rpmE (PRK00019) Ribosomal_L31 (pfam01197) → |
| Sso-1-530  | NZ.CXDL01000052.1 | - | 634   | 582   | RNA → rpmE (PRK00019) Ribosomal_L31 (pfam01197) → |
| Sso-1-531  | NZ.CXMQ01000026.1 | + | 39089 | 39141 | RNA → rpmE (PRK00019) Ribosomal_L31 (pfam01197) → |
| Sso-1-532  | NZ.CWXH01000034.1 | - | 855   | 803   | RNA → rpmE (PRK00019) Ribosomal_L31 (pfam01197) → |
| Sso-1-533  | NZ.CXAA01000028.1 | + | 39082 | 39134 | RNA → rpmE (PRK00019) Ribosomal_L31 (pfam01197) → |
| Sso-1-534  | NZ.CWVW01000019.1 | + | 38339 | 38391 | RNA → rpmE (PRK00019) Ribosomal_L31 (pfam01197) → |
| Sso-1-535  | NZ.CXJK01000023.1 | + | 39082 | 39134 | RNA → rpmE (PRK00019) Ribosomal_L31 (pfam01197) → |
| Sso-1-536  | NZ.CXGU01000032.1 | - | 621   | 569   | RNA → rpmE (PRK00019) Ribosomal_L31 (pfam01197) → |
| Sso-1-537  | NZ.CXIP01000030.1 | + | 39045 | 39097 | RNA → rpmE (PRK00019) Ribosomal_L31 (pfam01197) → |
| Sso-1-538  | NZ.CXKB01000026.1 | + | 39089 | 39141 | RNA → rpmE (PRK00019) Ribosomal_L31 (pfam01197) → |
| Sso-1-539  | NZ.CXAS01000019.1 | - | 2634  | 2582  | RNA → rpmE (PRK00019) Ribosomal_L31 (pfam01197) → |
| Eco-2024-1 | NZ.AVRH01000067.1 | + | 46925 | 46977 | RNA → rpmE (PRK00019) Ribosomal_L31 (pfam01197) → |



|            |                   |   |         |         |                                                   |
|------------|-------------------|---|---------|---------|---------------------------------------------------|
| Sdy-2-1    | NZ_AURX01000023.1 | + | 37576   | 37628   | RNA → rpmE (PRK00019) Ribosomal_L31 (pfam01197) → |
| Eco-2044-1 | NZ_AVSN01000121.1 | + | 44651   | 44703   | RNA → rpmE (PRK00019) Ribosomal_L31 (pfam01197) → |
| Sso-2-1    | NZ_AURV01000019.1 | - | 39143   | 39091   | RNA → rpmE (PRK00019) Ribosomal_L31 (pfam01197) → |
| Eco-1983-1 | NZ_ATKA01000044.1 | - | 507     | 455     | RNA → rpmE (PRK00019) Ribosomal_L31 (pfam01197) → |
| Cmi-1-1    | NZ_AEJF01000307.1 | - | 141     | 89      | RNA → rpmE (PRK00019) Ribosomal_L31 (pfam01197) → |
| Eco-1830-1 | NZ_AGTI01000011.1 | - | 722     | 670     | RNA → rpmE (PRK00019) Ribosomal_L31 (pfam01197) → |
| Eco-1778-1 | NZ_AGTJ01000006.1 | - | 39164   | 39112   | RNA → rpmE (PRK00019) Ribosomal_L31 (pfam01197) → |
| Eco-1021-1 | NZ_AXLH01000003.1 | + | 4432498 | 4432550 | RNA → rpmE (PRK00019) Ribosomal_L31 (pfam01197) → |
| Eco-728-2  | NZ_AOUP01000502.1 | + | 305     | 357     | RNA → rpmE (PRK00019) Ribosomal_L31 (pfam01197) → |
| Eco-414-1  | NZ_ASXQ01000020.1 | - | 44445   | 44393   | RNA → rpmE (PRK00019) Ribosomal_L31 (pfam01197) → |
| Eco-1919-1 | NZ_AQAW01000068.1 | + | 87681   | 87733   | RNA → rpmE (PRK00019) Ribosomal_L31 (pfam01197) → |
| Eco-362-1  | NZ_AIBH01000033.1 | + | 107851  | 107903  | RNA → rpmE (PRK00019) Ribosomal_L31 (pfam01197) → |
| Eco-1879-1 | NZ_APYX01000072.1 | + | 118012  | 118064  | RNA → rpmE (PRK00019) Ribosomal_L31 (pfam01197) → |
| Eco-2176-1 | NZ_AQCB01000200.1 | + | 18734   | 18786   | RNA → rpmE (PRK00019) Ribosomal_L31 (pfam01197) → |
| Eco-706-1  | NZ_JHLN01000031.1 | - | 655     | 603     | RNA → rpmE (PRK00019) Ribosomal_L31 (pfam01197) → |
| Eco-914-1  | NZ_AWFJ01000105.1 | - | 1379    | 1327    | RNA → rpmE (PRK00019) Ribosomal_L31 (pfam01197) → |
| Sbo-2-4    | NZ_JWBP01000001.1 | - | 474     | 422     | RNA → rpmE (PRK00019) Ribosomal_L31 (pfam01197) → |
| Sbo-2-5    | NZ_JVYE01000206.1 | + | 32322   | 32374   | RNA → rpmE (PRK00019) Ribosomal_L31 (pfam01197) → |
| Sbo-2-6    | NZ_JVNX01000122.1 | + | 32322   | 32374   | RNA → rpmE (PRK00019) Ribosomal_L31 (pfam01197) → |
| Sbo-2-7    | NZ_JVJU01000018.1 | + | 32335   | 32387   | RNA → rpmE (PRK00019) Ribosomal_L31 (pfam01197) → |
| Sbo-2-8    | NZ_JVYF01000453.1 | - | 1032    | 980     | RNA → rpmE (PRK00019) Ribosomal_L31 (pfam01197) → |
| Sso-1-540  | NZ_JVNM01000130.1 | + | 32400   | 32452   | RNA → rpmE (PRK00019) Ribosomal_L31 (pfam01197) → |
| Sbo-2-9    | NZ_JVNL01000131.1 | + | 32406   | 32458   | RNA → rpmE (PRK00019) Ribosomal_L31 (pfam01197) → |
| Eco-1723-1 | NZ_AMVT01000005.1 | + | 85592   | 85644   | RNA → rpmE (PRK00019) Ribosomal_L31 (pfam01197) → |
| Eco-1424-1 | NZ_ANXO01000041.1 | + | 11336   | 11388   | RNA → rpmE (PRK00019) Ribosomal_L31 (pfam01197) → |
| Eco-1477-1 | NZ_ANYI01000065.1 | + | 32593   | 32645   | RNA → rpmE (PRK00019) Ribosomal_L31 (pfam01197) → |
| Eco-1491-1 | NZ_ANYN01000098.1 | + | 32501   | 32553   | RNA → rpmE (PRK00019) Ribosomal_L31 (pfam01197) → |
| Eco-1440-1 | NZ_ANXU01000077.1 | + | 32410   | 32462   | RNA → rpmE (PRK00019) Ribosomal_L31 (pfam01197) → |
| Eco-1728-1 | NZ_AMVY01000010.1 | + | 85592   | 85644   | RNA → rpmE (PRK00019) Ribosomal_L31 (pfam01197) → |
| Eco-776-1  | NZ_APWZ01000054.1 | + | 33662   | 33714   | RNA → rpmE (PRK00019) Ribosomal_L31 (pfam01197) → |
| Eco-1878-1 | NZ_APYW01000114.1 | + | 117712  | 117764  | RNA → rpmE (PRK00019) Ribosomal_L31 (pfam01197) → |
| Eco-1907-1 | NZ_AQAM01000194.1 | + | 46822   | 46874   | RNA → rpmE (PRK00019) Ribosomal_L31 (pfam01197) → |
| Eco-915-1  | NZ_AVDU01000093.1 | - | 2645    | 2593    | RNA → rpmE (PRK00019) Ribosomal_L31 (pfam01197) → |
| Eco-409-1  | NZ_AXOC01000008.1 | + | 49059   | 49111   | RNA → rpmE (PRK00019) Ribosomal_L31 (pfam01197) → |
| Eco-1982-1 | NZ_ATJZ01000076.1 | - | 954     | 902     | RNA → rpmE (PRK00019) Ribosomal_L31 (pfam01197) → |
| Eco-1144-1 | NZ_AHNN01000007.1 | + | 85918   | 85970   | RNA → rpmE (PRK00019) Ribosomal_L31 (pfam01197) → |
| Eco-410-1  | NZ_AXOD01000008.1 | + | 49059   | 49111   | RNA → rpmE (PRK00019) Ribosomal_L31 (pfam01197) → |
| Eco-1918-1 | NZ_AQAV01000071.1 | + | 87581   | 87633   | RNA → rpmE (PRK00019) Ribosomal_L31 (pfam01197) → |
| Eco-1870-1 | NZ_APYR01000172.1 | + | 87716   | 87768   | RNA → rpmE (PRK00019) Ribosomal_L31 (pfam01197) → |
| Eco-1923-1 | NZ_AQBA01000071.1 | + | 87684   | 87736   | RNA → rpmE (PRK00019) Ribosomal_L31 (pfam01197) → |
| Eco-1945-1 | NZ_AHHO01000057.1 | + | 58857   | 58909   | RNA → rpmE (PRK00019) Ribosomal_L31 (pfam01197) → |
| Eco-424-1  | NZ_LAYL01000017.1 | - | 44955   | 44903   | RNA → rpmE (PRK00019) Ribosomal_L31 (pfam01197) → |
| Eco-229-1  | NZ_AYQQ01000021.1 | + | 32271   | 32323   | RNA → rpmE (PRK00019) Ribosomal_L31 (pfam01197) → |
| Eco-526-1  | NZ_JHFC01000048.1 | + | 83133   | 83185   | RNA → rpmE (PRK00019) Ribosomal_L31 (pfam01197) → |
| Eco-555-1  | NZ_JHFW01000009.1 | + | 113689  | 113741  | RNA → rpmE (PRK00019) Ribosomal_L31 (pfam01197) → |
| Eco-523-1  | NZ_JHFM01000019.1 | - | 39110   | 39058   | RNA → rpmE (PRK00019) Ribosomal_L31 (pfam01197) → |
| Eco-480-1  | NZ_JHKU01000042.1 | - | 451     | 399     | RNA → rpmE (PRK00019) Ribosomal_L31 (pfam01197) → |
| Eco-540-1  | NZ_JHIJ01000018.1 | + | 83133   | 83185   | RNA → rpmE (PRK00019) Ribosomal_L31 (pfam01197) → |
| Eco-499-1  | NZ_JHHU01000047.1 | - | 451     | 399     | RNA → rpmE (PRK00019) Ribosomal_L31 (pfam01197) → |
| Eco-500-1  | NZ_JHHT01000020.1 | - | 655     | 603     | RNA → rpmE (PRK00019) Ribosomal_L31 (pfam01197) → |
| Eco-504-1  | NZ_JHHP01000019.1 | - | 451     | 399     | RNA → rpmE (PRK00019) Ribosomal_L31 (pfam01197) → |
| Eco-505-1  | NZ_JHHO01000094.1 | + | 88567   | 88619   | RNA → rpmE (PRK00019) Ribosomal_L31 (pfam01197) → |

|            |                   |   |         |         |                                                   |
|------------|-------------------|---|---------|---------|---------------------------------------------------|
| Eco-486-1  | NZ_JHFE01000034.1 | - | 451     | 399     | RNA → rpmE (PRK00019) Ribosomal_L31 (pfam01197) → |
| Eco-488-1  | NZ_JHMX01000046.1 | + | 93655   | 93707   | RNA → rpmE (PRK00019) Ribosomal_L31 (pfam01197) → |
| Eco-483-1  | NZ_JHFZ01000080.1 | + | 88516   | 88568   | RNA → rpmE (PRK00019) Ribosomal_L31 (pfam01197) → |
| Eco-546-1  | NZ_JASO01000010.1 | + | 2235040 | 2235092 | RNA → rpmE (PRK00019) Ribosomal_L31 (pfam01197) → |
| Eco-531-1  | NZ_JHMG01000006.1 | - | 39184   | 39132   | RNA → rpmE (PRK00019) Ribosomal_L31 (pfam01197) → |
| Eco-519-1  | NZ_JHGN01000005.1 | - | 39111   | 39059   | RNA → rpmE (PRK00019) Ribosomal_L31 (pfam01197) → |
| Eco-485-1  | NZ_JHFF01000047.1 | - | 451     | 399     | RNA → rpmE (PRK00019) Ribosomal_L31 (pfam01197) → |
| Eco-527-1  | NZ_JHMV01000020.1 | - | 39111   | 39059   | RNA → rpmE (PRK00019) Ribosomal_L31 (pfam01197) → |
| Eco-520-1  | NZ_JHGL01000022.1 | + | 83133   | 83185   | RNA → rpmE (PRK00019) Ribosomal_L31 (pfam01197) → |
| Eco-524-1  | NZ_JHFL01000061.1 | + | 83052   | 83104   | RNA → rpmE (PRK00019) Ribosomal_L31 (pfam01197) → |
| Eco-501-1  | NZ_JHHS01000028.1 | + | 7404    | 7456    | RNA → rpmE (PRK00019) Ribosomal_L31 (pfam01197) → |
| Eco-507-1  | NZ_JHHM01000024.1 | - | 723     | 671     | RNA → rpmE (PRK00019) Ribosomal_L31 (pfam01197) → |
| Eco-492-1  | NZ_JHMR01000017.1 | + | 88567   | 88619   | RNA → rpmE (PRK00019) Ribosomal_L31 (pfam01197) → |
| Eco-511-1  | NZ_JASP01000001.1 | + | 2904157 | 2904209 | RNA → rpmE (PRK00019) Ribosomal_L31 (pfam01197) → |
| Eco-1777-1 | NZ_AGTH01000174.1 | + | 20821   | 20873   | RNA → rpmE (PRK00019) Ribosomal_L31 (pfam01197) → |
| Eco-530-1  | NZ_JHMJ01000018.1 | - | 39359   | 39307   | RNA → rpmE (PRK00019) Ribosomal_L31 (pfam01197) → |
| Eco-522-1  | NZ_JHGG01000033.1 | + | 83133   | 83185   | RNA → rpmE (PRK00019) Ribosomal_L31 (pfam01197) → |
| Eco-525-1  | NZ_JHFK01000039.1 | + | 83560   | 83612   | RNA → rpmE (PRK00019) Ribosomal_L31 (pfam01197) → |
| Eco-512-1  | NZ_JHXX01000025.1 | - | 912     | 860     | RNA → rpmE (PRK00019) Ribosomal_L31 (pfam01197) → |
| Eco-489-1  | NZ_JHMW01000016.1 | - | 451     | 399     | RNA → rpmE (PRK00019) Ribosomal_L31 (pfam01197) → |
| Eco-538-1  | NZ_JHJR01000002.1 | - | 39112   | 39060   | RNA → rpmE (PRK00019) Ribosomal_L31 (pfam01197) → |
| Eco-482-1  | NZ_JHGS01000024.1 | + | 88528   | 88580   | RNA → rpmE (PRK00019) Ribosomal_L31 (pfam01197) → |
| Eco-513-1  | NZ_JHGP01000041.1 | + | 79309   | 79361   | RNA → rpmE (PRK00019) Ribosomal_L31 (pfam01197) → |
| Eco-521-1  | NZ_JHGH01000021.1 | - | 39111   | 39059   | RNA → rpmE (PRK00019) Ribosomal_L31 (pfam01197) → |
| Eco-481-1  | NZ_JHGU01000024.1 | - | 451     | 399     | RNA → rpmE (PRK00019) Ribosomal_L31 (pfam01197) → |
| Eco-502-1  | NZ_JHHR01000021.1 | - | 783     | 731     | RNA → rpmE (PRK00019) Ribosomal_L31 (pfam01197) → |
| Eco-506-1  | NZ_JHHN01000035.1 | - | 451     | 399     | RNA → rpmE (PRK00019) Ribosomal_L31 (pfam01197) → |
| Eco-97-1   | NZ_JNPZ01000021.1 | + | 85592   | 85644   | RNA → rpmE (PRK00019) Ribosomal_L31 (pfam01197) → |
| Eco-493-1  | NZ_JHMQ01000031.1 | - | 451     | 399     | RNA → rpmE (PRK00019) Ribosomal_L31 (pfam01197) → |
| Eco-537-1  | NZ_JASV01000004.1 | + | 2866260 | 2866312 | RNA → rpmE (PRK00019) Ribosomal_L31 (pfam01197) → |
| Eco-102-1  | NZ_JNQA01000020.1 | + | 33535   | 33587   | RNA → rpmE (PRK00019) Ribosomal_L31 (pfam01197) → |
| Eco-548-2  | NZ_AGTL01000019.1 | + | 67580   | 67632   | RNA → rpmE (PRK00019) Ribosomal_L31 (pfam01197) → |
| Eco-494-1  | NZ_JHMA01000070.1 | + | 88568   | 88620   | RNA → rpmE (PRK00019) Ribosomal_L31 (pfam01197) → |
| Eco-86-1   | NZ_JNJP01000150.1 | + | 28740   | 28792   | RNA → rpmE (PRK00019) Ribosomal_L31 (pfam01197) → |
| Eco-484-1  | NZ_JHFG01000005.1 | + | 88567   | 88619   | RNA → rpmE (PRK00019) Ribosomal_L31 (pfam01197) → |
| Eco-91-1   | NZ_JNPM01000070.1 | + | 87598   | 87650   | RNA → rpmE (PRK00019) Ribosomal_L31 (pfam01197) → |
| Eco-554-1  | NZ_JHKV01000042.1 | + | 113307  | 113359  | RNA → rpmE (PRK00019) Ribosomal_L31 (pfam01197) → |
| Eco-99-1   | NZ_JNPO01000013.1 | - | 27928   | 27876   | RNA → rpmE (PRK00019) Ribosomal_L31 (pfam01197) → |
| Eco-515-1  | NZ_JHNX01000006.1 | + | 83133   | 83185   | RNA → rpmE (PRK00019) Ribosomal_L31 (pfam01197) → |
| Eco-106-1  | NZ_JNQK01000038.1 | - | 3888    | 3836    | RNA → rpmE (PRK00019) Ribosomal_L31 (pfam01197) → |
| Eco-516-1  | NZ_JHNR01000001.1 | + | 83133   | 83185   | RNA → rpmE (PRK00019) Ribosomal_L31 (pfam01197) → |
| Eco-118-1  | NZ_JNQQ01000016.1 | + | 88828   | 88880   | RNA → rpmE (PRK00019) Ribosomal_L31 (pfam01197) → |
| Eco-539-1  | NZ_JHIK01000019.1 | + | 83133   | 83185   | RNA → rpmE (PRK00019) Ribosomal_L31 (pfam01197) → |
| Eco-111-1  | NZ_JNQN01000020.1 | + | 62519   | 62571   | RNA → rpmE (PRK00019) Ribosomal_L31 (pfam01197) → |
| Eco-541-1  | NZ_JHHC01000012.1 | + | 87650   | 87702   | RNA → rpmE (PRK00019) Ribosomal_L31 (pfam01197) → |
| Eco-149-1  | NZ_JNRO01000012.1 | - | 41639   | 41587   | RNA → rpmE (PRK00019) Ribosomal_L31 (pfam01197) → |
| Eco-547-1  | NZ_JHHD01000017.1 | + | 85958   | 86010   | RNA → rpmE (PRK00019) Ribosomal_L31 (pfam01197) → |
| Eco-503-1  | NZ_JHHQ01000058.1 | - | 451     | 399     | RNA → rpmE (PRK00019) Ribosomal_L31 (pfam01197) → |
| Eco-146-1  | NZ_JNRM01000006.1 | - | 129387  | 129335  | RNA → rpmE (PRK00019) Ribosomal_L31 (pfam01197) → |
| Eco-508-1  | NZ_JHHL01000028.1 | + | 88625   | 88677   | RNA → rpmE (PRK00019) Ribosomal_L31 (pfam01197) → |
| Eco-152-1  | NZ_JNRR01000018.1 | + | 86382   | 86434   | RNA → rpmE (PRK00019) Ribosomal_L31 (pfam01197) → |
| Eco-528-1  | NZ_JHMO01000008.1 | + | 83133   | 83185   | RNA → rpmE (PRK00019) Ribosomal_L31 (pfam01197) → |

|            |                   |   |        |        |                                                                                             |
|------------|-------------------|---|--------|--------|---------------------------------------------------------------------------------------------|
| Eco-155-1  | NZ_JNRS01000020.1 | + | 88027  | 88079  | RNA → rpmE (PRK00019)Ribosomal_L31 (pfam01197) →                                            |
| Eco-159-1  | NZ_JNRW01000009.1 | + | 89304  | 89356  | RNA → rpmE (PRK00019)Ribosomal_L31 (pfam01197) →                                            |
| Eco-160-1  | NZ_JNRX01000009.1 | - | 39867  | 39815  | RNA → rpmE (PRK00019)Ribosomal_L31 (pfam01197) →                                            |
| Eco-154-1  | NZ_JONC01000118.1 | + | 28684  | 28736  | RNA → rpmE (PRK00019)Ribosomal_L31 (pfam01197) →                                            |
| Eco-145-1  | NZ_JOSL01000055.1 | + | 87855  | 87907  | RNA → rpmE (PRK00019)Ribosomal_L31 (pfam01197) →                                            |
| Eco-161-1  | NZ_JNMT01000023.1 | - | 39691  | 39639  | RNA → rpmE (PRK00019)Ribosomal_L31 (pfam01197) →                                            |
| Eco-89-1   | NZ_JNPH01000081.1 | + | 88998  | 89050  | RNA → rpmE (PRK00019)Ribosomal_L31 (pfam01197) →                                            |
| Eco-82-1   | NZ_JNPE01000121.1 | + | 86220  | 86272  | RNA → rpmE (PRK00019)Ribosomal_L31 (pfam01197) →                                            |
| Eco-78-1   | NZ_JNOZ01000062.1 | + | 87039  | 87091  | RNA → rpmE (PRK00019)Ribosomal_L31 (pfam01197) →                                            |
| Eco-90-1   | NZ_JNPL01000135.1 | + | 88947  | 88999  | RNA → rpmE (PRK00019)Ribosomal_L31 (pfam01197) →                                            |
| Eco-105-1  | NZ_JNQJ01000010.1 | - | 39999  | 39947  | RNA → rpmE (PRK00019)Ribosomal_L31 (pfam01197) →                                            |
| Eco-2161-1 | NZ_AFVX01000011.1 | - | 25826  | 25774  | RNA → rpmE (PRK00019)Ribosomal_L31 (pfam01197) →                                            |
| Eco-119-1  | NZ_JNQR01000040.1 | + | 32316  | 32368  | RNA → rpmE (PRK00019)Ribosomal_L31 (pfam01197) →                                            |
| Eco-113-1  | NZ_JNQO01000012.1 | + | 89995  | 90047  | RNA → rpmE (PRK00019)Ribosomal_L31 (pfam01197) →                                            |
| Eco-147-1  | NZ_JNRN01000027.1 | + | 57743  | 57795  | RNA → rpmE (PRK00019)Ribosomal_L31 (pfam01197) →                                            |
| Eco-2035-1 | NZ_AELC01000028.1 | + | 23717  | 23769  | RNA → rpmE (PRK00019)Ribosomal_L31 (pfam01197) →                                            |
| Eco-156-1  | NZ_JNRT01000008.1 | - | 79980  | 79928  | RNA → rpmE (PRK00019)Ribosomal_L31 (pfam01197) →                                            |
| Eco-123-1  | NZ_JNQV01000020.1 | + | 88561  | 88613  | RNA → rpmE (PRK00019)Ribosomal_L31 (pfam01197) →                                            |
| Esp-80-1   | NZ_AEKA01000063.1 | + | 12224  | 12276  | RNA → rpmE (PRK00019)Ribosomal_L31 (pfam01197) →                                            |
| Eco-115-1  | NZ_JOMW01000186.1 | + | 65886  | 65938  | RNA → rpmE (PRK00019)Ribosomal_L31 (pfam01197) →                                            |
| Eco-114-1  | NZ_JOSP01000088.1 | + | 88483  | 88535  | RNA → rpmE (PRK00019)Ribosomal_L31 (pfam01197) →                                            |
| Eco-81-1   | NZ_JNPB01000106.1 | + | 38018  | 38070  | RNA → rpmE (PRK00019)Ribosomal_L31 (pfam01197) →                                            |
| Eco-2158-1 | NZ_AGIA01000015.1 | - | 39247  | 39195  | RNA → rpmE (PRK00019)Ribosomal_L31 (pfam01197) → rpmE (PRK00019)Ribosomal_L31 (pfam01197) → |
| Eco-83-1   | NZ_JNPF01000067.1 | + | 87496  | 87548  | RNA → rpmE (PRK00019)Ribosomal_L31 (pfam01197) →                                            |
| Eco-96-1   | NZ_JNPN01000049.1 | + | 29332  | 29384  | RNA → rpmE (PRK00019)Ribosomal_L31 (pfam01197) →                                            |
| Eco-98-1   | NZ_JNPV01000011.1 | - | 41495  | 41443  | RNA → rpmE (PRK00019)Ribosomal_L31 (pfam01197) →                                            |
| Eco-93-1   | NZ_JNQF01000020.1 | - | 1220   | 1168   | RNA → rpmE (PRK00019)Ribosomal_L31 (pfam01197) →                                            |
| Eco-88-1   | NZ_JNQE01000113.1 | + | 83333  | 83385  | RNA → rpmE (PRK00019)Ribosomal_L31 (pfam01197) →                                            |
| Eco-104-1  | NZ_JNQI01000008.1 | - | 41038  | 40986  | RNA → rpmE (PRK00019)Ribosomal_L31 (pfam01197) →                                            |
| Eco-100-1  | NZ_JNQH01000013.1 | - | 26588  | 26536  | RNA → rpmE (PRK00019)Ribosomal_L31 (pfam01197) →                                            |
| Eco-141-1  | NZ_JNRK01000010.1 | - | 40492  | 40440  | RNA → rpmE (PRK00019)Ribosomal_L31 (pfam01197) →                                            |
| Eco-150-1  | NZ_JNRP01000018.1 | - | 41639  | 41587  | RNA → rpmE (PRK00019)Ribosomal_L31 (pfam01197) →                                            |
| Eco-2040-1 | NZ_AELE01000001.1 | - | 107913 | 107861 | RNA → rpmE (PRK00019)Ribosomal_L31 (pfam01197) →                                            |
| Eco-157-1  | NZ_JNRU01000011.1 | + | 79676  | 79728  | RNA → rpmE (PRK00019)Ribosomal_L31 (pfam01197) →                                            |
| Eco-137-1  | NZ_JONA01000068.1 | + | 86290  | 86342  | RNA → rpmE (PRK00019)Ribosomal_L31 (pfam01197) →                                            |
| Eco-110-1  | NZ_JOSN01000103.1 | + | 61758  | 61810  | RNA → rpmE (PRK00019)Ribosomal_L31 (pfam01197) →                                            |
| Eco-131-1  | NZ_JOSS01000074.1 | + | 85558  | 85610  | RNA → rpmE (PRK00019)Ribosomal_L31 (pfam01197) →                                            |
| Eco-79-1   | NZ_JNNG01000165.1 | + | 26964  | 27016  | RNA → rpmE (PRK00019)Ribosomal_L31 (pfam01197) →                                            |
| Eco-80-1   | NZ_JNPA01000051.1 | + | 87539  | 87591  | RNA → rpmE (PRK00019)Ribosomal_L31 (pfam01197) →                                            |
| Eco-92-1   | NZ_JNPI01000134.1 | + | 88008  | 88060  | RNA → rpmE (PRK00019)Ribosomal_L31 (pfam01197) →                                            |
| Eco-85-1   | NZ_JNPG01000074.1 | + | 49989  | 50041  | RNA → rpmE (PRK00019)Ribosomal_L31 (pfam01197) →                                            |
| Eco-103-1  | NZ_JNPW01000018.1 | - | 1405   | 1353   | RNA → rpmE (PRK00019)Ribosomal_L31 (pfam01197) →                                            |
| Eco-1993-1 | NZ_AFDZ01000026.1 | + | 94461  | 94513  | RNA → rpmE (PRK00019)Ribosomal_L31 (pfam01197) →                                            |
| Eco-1990-1 | NZ_AFDQ01000030.1 | + | 120795 | 120847 | RNA → rpmE (PRK00019)Ribosomal_L31 (pfam01197) →                                            |
| Eco-1995-1 | NZ_AFEA01000021.1 | + | 89529  | 89581  | RNA → rpmE (PRK00019)Ribosomal_L31 (pfam01197) →                                            |
| Eco-2037-1 | NZ_AELD01000027.1 | - | 2133   | 2081   | RNA → rpmE (PRK00019)Ribosomal_L31 (pfam01197) →                                            |
| Eco-1826-1 | NZ_AEUB01000054.1 | + | 92443  | 92495  | RNA → rpmE (PRK00019)Ribosomal_L31 (pfam01197) →                                            |
| Eco-2042-1 | NZ_AFEB01000062.1 | + | 82453  | 82505  | RNA → rpmE (PRK00019)Ribosomal_L31 (pfam01197) →                                            |
| Eco-1817-1 | NZ_AKBA01000257.1 | + | 47707  | 47759  | RNA → rpmE (PRK00019)Ribosomal_L31 (pfam01197) →                                            |
| Eco-2025-1 | NZ_AFAG02000007.1 | + | 81627  | 81679  | RNA → rpmE (PRK00019)Ribosomal_L31 (pfam01197) →                                            |
| Eco-2023-1 | NZ_AKLT01000016.1 | - | 3775   | 3723   | RNA → rpmE (PRK00019)Ribosomal_L31 (pfam01197) →                                            |
| Eco-707-1  | NZ_JHFB01000041.1 | - | 655    | 603    | RNA → rpmE (PRK00019)Ribosomal_L31 (pfam01197) →                                            |



|            |                   |   |         |         |                                                                                             |
|------------|-------------------|---|---------|---------|---------------------------------------------------------------------------------------------|
| Eco-947-1  | NZ_AFET01000003.1 | + | 367780  | 367832  | RNA → rpmE (PRK00019)Ribosomal_L31 (pfam01197) →                                            |
| Eco-1031-1 | NZ_AIGT01000034.1 | - | 907     | 855     | RNA → rpmE (PRK00019)Ribosomal_L31 (pfam01197) →                                            |
| Eco-732-1  | NZ_JHGO01000021.1 | + | 115572  | 115624  | RNA → rpmE (PRK00019)Ribosomal_L31 (pfam01197) →                                            |
| Eco-1032-1 | NZ_AIGU01000065.1 | - | 4128    | 4076    | RNA → rpmE (PRK00019)Ribosomal_L31 (pfam01197) →                                            |
| Eco-712-1  | NZ_JHGY01000036.1 | + | 46647   | 46699   | RNA → rpmE (PRK00019)Ribosomal_L31 (pfam01197) →                                            |
| Eco-1036-1 | NZ_AIGY01000052.1 | + | 9545    | 9597    | RNA → rpmE (PRK00019)Ribosomal_L31 (pfam01197) →                                            |
| Eco-708-1  | NZ_JHMS01000030.1 | + | 47743   | 47795   | RNA → rpmE (PRK00019)Ribosomal_L31 (pfam01197) →                                            |
| Eco-1041-1 | NZ_AIHD01000074.1 | + | 106498  | 106550  | RNA → rpmE (PRK00019)Ribosomal_L31 (pfam01197) →                                            |
| Eco-698-1  | NZ_JHMP01000084.1 | - | 655     | 603     | RNA → rpmE (PRK00019)Ribosomal_L31 (pfam01197) →                                            |
| Eco-1047-1 | NZ_AIHJ01000045.1 | + | 51483   | 51535   | RNA → rpmE (PRK00019)Ribosomal_L31 (pfam01197) →                                            |
| Eco-1052-1 | NZ_AIHO01000050.1 | - | 3640    | 3588    | RNA → rpmE (PRK00019)Ribosomal_L31 (pfam01197) →                                            |
| Eco-700-1  | NZ_JHMI01000040.1 | + | 47743   | 47795   | RNA → rpmE (PRK00019)Ribosomal_L31 (pfam01197) →                                            |
| Eco-1782-1 | NZ_AGTG01000310.1 | + | 91692   | 91744   | RNA → rpmE (PRK00019)Ribosomal_L31 (pfam01197) →                                            |
| Eco-949-1  | NZ_AJPQ01000119.1 | + | 11893   | 11945   | RNA → rpmE (PRK00019)Ribosomal_L31 (pfam01197) →                                            |
| Eco-691-1  | NZ_JHGI01000054.1 | + | 47743   | 47795   | RNA → rpmE (PRK00019)Ribosomal_L31 (pfam01197) →                                            |
| Eco-1061-1 | NZ_AIEZ01000034.1 | + | 89055   | 89107   | RNA → rpmE (PRK00019)Ribosomal_L31 (pfam01197) →                                            |
| Eco-724-1  | NZ_JFBE01000009.1 | + | 23451   | 23503   | RNA → rpmE (PRK00019)Ribosomal_L31 (pfam01197) →                                            |
| Eco-1033-1 | NZ_AIGV01000053.1 | + | 90417   | 90469   | RNA → rpmE (PRK00019)Ribosomal_L31 (pfam01197) →                                            |
| Eco-715-1  | NZ_JASS01000001.1 | - | 2254243 | 2254191 | RNA → rpmE (PRK00019)Ribosomal_L31 (pfam01197) →                                            |
| Eco-1038-1 | NZ_AIHA01000041.1 | + | 93933   | 93985   | RNA → rpmE (PRK00019)Ribosomal_L31 (pfam01197) →                                            |
| Eco-1043-1 | NZ_AIHF01000032.1 | + | 18538   | 18590   | RNA → rpmE (PRK00019)Ribosomal_L31 (pfam01197) →                                            |
| Eco-727-1  | NZ_JHJX01000130.1 | - | 5325    | 5273    | RNA → rpmE (PRK00019)Ribosomal_L31 (pfam01197) →                                            |
| Eco-1048-1 | NZ_AIHK01000029.1 | - | 52984   | 52932   | RNA → rpmE (PRK00019)Ribosomal_L31 (pfam01197) →                                            |
| Eco-573-1  | NZ_JHJY01000046.1 | - | 39120   | 39068   | RNA → rpmE (PRK00019)Ribosomal_L31 (pfam01197) →                                            |
| Eco-1053-1 | NZ_AIHP01000031.1 | + | 126889  | 126941  | RNA → rpmE (PRK00019)Ribosomal_L31 (pfam01197) →                                            |
| Eco-716-1  | NZ_JHNP01000054.1 | + | 47846   | 47898   | RNA → rpmE (PRK00019)Ribosomal_L31 (pfam01197) →                                            |
| Eco-907-1  | NZ_AEZO02000041.1 | - | 3273    | 3221    | RNA → rpmE (PRK00019)Ribosomal_L31 (pfam01197) →                                            |
| Eco-720-1  | NZ_JHHA01000004.1 | - | 605     | 553     | RNA → rpmE (PRK00019)Ribosomal_L31 (pfam01197) →                                            |
| Eco-869-1  | NZ_AEZZ02000031.1 | + | 33807   | 33859   | RNA → ←-hypo                                                                                |
| Eco-733-1  | NZ_JHGW01000029.1 | + | 84488   | 84540   | RNA → rpmE (PRK00019)Ribosomal_L31 (pfam01197) →                                            |
| Eco-719-1  | NZ_JHHG01000014.1 | - | 512     | 460     | RNA → rpmE (PRK00019)Ribosomal_L31 (pfam01197) →                                            |
| Eco-242-1  | NZ_JORD01000185.1 | + | 18741   | 18793   | RNA → rpmE (PRK00019)Ribosomal_L31 (pfam01197) →                                            |
| Eco-697-1  | NZ_JHND01000051.1 | + | 47743   | 47795   | RNA → rpmE (PRK00019)Ribosomal_L31 (pfam01197) →                                            |
| Eco-253-1  | NZ_JORX01000060.1 | + | 89329   | 89381   | RNA → rpmE (PRK00019)Ribosomal_L31 (pfam01197) →                                            |
| Eco-701-1  | NZ_JHMF01000044.1 | - | 655     | 603     | RNA → rpmE (PRK00019)Ribosomal_L31 (pfam01197) →                                            |
| Eco-559-1  | NZ_JHFS01000024.1 | + | 113298  | 113350  | RNA → rpmE (PRK00019)Ribosomal_L31 (pfam01197) →                                            |
| Eco-263-1  | NZ_JORY01000190.1 | + | 32400   | 32452   | RNA → rpmE (PRK00019)Ribosomal_L31 (pfam01197) →                                            |
| Eco-1813-1 | NZ_JAST01000013.1 | + | 1682622 | 1682674 | RNA → rpmE (PRK00019)Ribosomal_L31 (pfam01197) →                                            |
| Eco-250-1  | NZ_JOSC01000067.1 | + | 77673   | 77725   | RNA → rpmE (PRK00019)Ribosomal_L31 (pfam01197) →                                            |
| Eco-737-1  | NZ_AQGP01000014.1 | + | 46642   | 46694   | RNA → rpmE (PRK00019)Ribosomal_L31 (pfam01197) →                                            |
| Eco-251-1  | NZ_JOSF01000157.1 | + | 117812  | 117864  | RNA → rpmE (PRK00019)Ribosomal_L31 (pfam01197) →                                            |
| Eco-738-1  | NZ_AQGO01000053.1 | - | 450     | 398     | RNA → rpmE (PRK00019)Ribosomal_L31 (pfam01197) →                                            |
| Eco-244-1  | NZ_JORF01000038.1 | + | 101362  | 101414  | RNA → rpmE (PRK00019)Ribosomal_L31 (pfam01197) →                                            |
| Eco-739-1  | NZ_AQGN01000068.1 | - | 469     | 417     | RNA → rpmE (PRK00019)Ribosomal_L31 (pfam01197) →                                            |
| Eco-558-1  | NZ_JHFT01000023.1 | + | 113389  | 113441  | RNA → rpmE (PRK00019)Ribosomal_L31 (pfam01197) →                                            |
| Eco-1832-1 | NZ_ADUQ01000074.1 | + | 324503  | 324555  | RNA → rpmE (PRK00019)Ribosomal_L31 (pfam01197) → rpmE (PRK00019)Ribosomal_L31 (pfam01197) → |
| Eco-269-1  | NZ_JORZ01000117.1 | + | 64110   | 64162   | RNA → rpmE (PRK00019)Ribosomal_L31 (pfam01197) →                                            |
| Eco-1833-1 | NZ_ADUR01000080.1 | + | 18632   | 18684   | RNA → rpmE (PRK00019)Ribosomal_L31 (pfam01197) →                                            |
| Eco-271-1  | NZ_JOSB01000055.1 | + | 80836   | 80888   | RNA → rpmE (PRK00019)Ribosomal_L31 (pfam01197) →                                            |
| Eco-1821-1 | NZ_AJQW01000016.1 | - | 39344   | 39292   | RNA → rpmE (PRK00019)Ribosomal_L31 (pfam01197) →                                            |
| Eco-265-1  | NZ_JOSD01000063.1 | + | 87627   | 87679   | RNA → rpmE (PRK00019)Ribosomal_L31 (pfam01197) →                                            |
| Eco-239-1  | NZ_JORC01000094.1 | + | 89119   | 89171   | RNA → rpmE (PRK00019)Ribosomal_L31 (pfam01197) →                                            |



|            |                    |   |         |         |                                                   |
|------------|--------------------|---|---------|---------|---------------------------------------------------|
| Eco-1818-1 | NZ_AKBB01000286.1  | + | 47707   | 47759   | RNA → rpmE (PRK00019) Ribosomal_L31 (pfam01197) → |
| Eco-391-1  | NZ_CCCR010000424.1 | - | 319     | 267     | RNA → rpmE (PRK00019) Ribosomal_L31 (pfam01197) → |
| Eco-1994-1 | NZ_AFEX01000042.1  | + | 24076   | 24128   | RNA → rpmE (PRK00019) Ribosomal_L31 (pfam01197) → |
| Eco-709-1  | NZ_JHNY01000076.1  | + | 42083   | 42135   | RNA → rpmE (PRK00019) Ribosomal_L31 (pfam01197) → |
| Eco-1030-1 | NZ_AJWV01000005.1  | - | 430     | 378     | RNA → rpmE (PRK00019) Ribosomal_L31 (pfam01197) → |
| Eco-556-1  | NZ_JHFV01000020.1  | - | 42199   | 42147   | RNA → rpmE (PRK00019) Ribosomal_L31 (pfam01197) → |
| Eco-710-1  | NZ_JHHJ01000123.1  | - | 470     | 418     | RNA → rpmE (PRK00019) Ribosomal_L31 (pfam01197) → |
| Eco-713-1  | NZ_JHGJ01000012.1  | - | 1410    | 1358    | RNA → rpmE (PRK00019) Ribosomal_L31 (pfam01197) → |
| Eco-1034-1 | NZ_AIGW01000044.1  | + | 124125  | 124177  | RNA → rpmE (PRK00019) Ribosomal_L31 (pfam01197) → |
| Eco-730-1  | NZ_JHHF01000016.1  | - | 470     | 418     | RNA → rpmE (PRK00019) Ribosomal_L31 (pfam01197) → |
| Eco-1039-1 | NZ_AIHB01000071.1  | + | 255720  | 255772  | RNA → rpmE (PRK00019) Ribosomal_L31 (pfam01197) → |
| Eco-696-1  | NZ_JHFD01000005.1  | + | 47743   | 47795   | RNA → rpmE (PRK00019) Ribosomal_L31 (pfam01197) → |
| Eco-1044-1 | NZ_AIHG01000032.1  | + | 124962  | 125014  | RNA → rpmE (PRK00019) Ribosomal_L31 (pfam01197) → |
| Eco-588-1  | NZ_JHMK01000020.1  | - | 470     | 418     | RNA → rpmE (PRK00019) Ribosomal_L31 (pfam01197) → |
| Eco-1054-1 | NZ_AIHQ01000029.1  | + | 28373   | 28425   | RNA → rpmE (PRK00019) Ribosomal_L31 (pfam01197) → |
| Eco-561-1  | NZ_JHFQ01000010.1  | - | 41718   | 41666   | RNA → rpmE (PRK00019) Ribosomal_L31 (pfam01197) → |
| Eco-731-1  | NZ_JASQ01000001.1  | + | 2087491 | 2087543 | RNA → rpmE (PRK00019) Ribosomal_L31 (pfam01197) → |
| Eco-289-2  | NZ_AMSK01000022.1  | - | 39312   | 39260   | RNA → rpmE (PRK00019) Ribosomal_L31 (pfam01197) → |
| Eco-1822-1 | NZ_AGTK01000047.1  | - | 658     | 606     | RNA → rpmE (PRK00019) Ribosomal_L31 (pfam01197) → |
| Eco-562-1  | NZ_JHFP01000015.1  | + | 113491  | 113543  | RNA → rpmE (PRK00019) Ribosomal_L31 (pfam01197) → |
| Eco-988-1  | NZ_AFAH02000005.1  | + | 348627  | 348679  | RNA → rpmE (PRK00019) Ribosomal_L31 (pfam01197) → |
| Eco-243-1  | NZ_JORE01000086.1  | + | 18702   | 18754   | RNA → rpmE (PRK00019) Ribosomal_L31 (pfam01197) → |
| Eco-1984-1 | NZ_AJFG01000039.1  | + | 32298   | 32350   | RNA → rpmE (PRK00019) Ribosomal_L31 (pfam01197) → |
| Eco-264-1  | NZ_JORV01000162.1  | + | 86327   | 86379   | RNA → rpmE (PRK00019) Ribosomal_L31 (pfam01197) → |
| Eco-273-1  | NZ_JOSA01000051.1  | + | 84041   | 84093   | RNA → rpmE (PRK00019) Ribosomal_L31 (pfam01197) → |
| Eco-721-1  | NZ_JHJW01000066.1  | + | 34177   | 34229   | RNA → rpmE (PRK00019) Ribosomal_L31 (pfam01197) → |
| Eco-256-1  | NZ_JOSG01000075.1  | + | 49467   | 49519   | RNA → rpmE (PRK00019) Ribosomal_L31 (pfam01197) → |
| Eco-722-1  | NZ_JHJU01000002.1  | - | 39350   | 39298   | RNA → rpmE (PRK00019) Ribosomal_L31 (pfam01197) → |
| Eco-270-1  | NZ_JOSQ01000141.1  | + | 63861   | 63913   | RNA → rpmE (PRK00019) Ribosomal_L31 (pfam01197) → |
| Eco-714-1  | NZ_JHF101000013.1  | - | 1185    | 1133    | RNA → rpmE (PRK00019) Ribosomal_L31 (pfam01197) → |
| Eco-858-1  | NZ_AJW01000023.1   | + | 86064   | 86116   | RNA → rpmE (PRK00019) Ribosomal_L31 (pfam01197) → |
| Eco-690-1  | NZ_JHGK01000050.1  | + | 47735   | 47787   | RNA → rpmE (PRK00019) Ribosomal_L31 (pfam01197) → |
| Eco-564-1  | NZ_JHFN01000056.1  | - | 42067   | 42015   | RNA → rpmE (PRK00019) Ribosomal_L31 (pfam01197) → |
| Eco-1062-1 | NZ_AFJB01000037.1  | + | 88476   | 88528   | RNA → rpmE (PRK00019) Ribosomal_L31 (pfam01197) → |
| Eco-1035-1 | NZ_AIGX01000036.1  | - | 2477    | 2425    | RNA → rpmE (PRK00019) Ribosomal_L31 (pfam01197) → |
| Eco-717-1  | NZ_JASN01000012.1  | - | 1273280 | 1273228 | RNA → rpmE (PRK00019) Ribosomal_L31 (pfam01197) → |
| Eco-1784-1 | NZ_AHZD02000014.1  | + | 121770  | 121822  | RNA → rpmE (PRK00019) Ribosomal_L31 (pfam01197) → |
| Eco-1040-1 | NZ_AIHC01000084.1  | + | 46886   | 46938   | RNA → rpmE (PRK00019) Ribosomal_L31 (pfam01197) → |
| Eco-836-1  | NZ_AEZO02000010.1  | + | 2298721 | 2298773 | RNA → rpmE (PRK00019) Ribosomal_L31 (pfam01197) → |
| Eco-1045-1 | NZ_AIHH01000059.1  | + | 123112  | 123164  | RNA → ←-hypo                                      |
| Eco-846-1  | NZ_AEZX02000008.1  | - | 166424  | 166372  | RNA → rpmE (PRK00019) Ribosomal_L31 (pfam01197) → |
| Eco-1046-1 | NZ_AIHI01000030.1  | + | 123842  | 123894  | RNA → rpmE (PRK00019) Ribosomal_L31 (pfam01197) → |
| Eco-172-1  | NZ_JNMD01000017.1  | + | 34663   | 34715   | RNA → rpmE (PRK00019) Ribosomal_L31 (pfam01197) → |
| Eco-1051-1 | NZ_AIHN01000068.1  | + | 65831   | 65883   | RNA → rpmE (PRK00019) Ribosomal_L31 (pfam01197) → |
| Eco-1055-1 | NZ_AIHR01000030.1  | + | 127087  | 127139  | RNA → rpmE (PRK00019) Ribosomal_L31 (pfam01197) → |
| Eco-181-1  | NZ_JNMI01000027.1  | + | 34751   | 34803   | RNA → rpmE (PRK00019) Ribosomal_L31 (pfam01197) → |
| Eco-1056-1 | NZ_AIHS01000050.1  | + | 28401   | 28453   | RNA → rpmE (PRK00019) Ribosomal_L31 (pfam01197) → |
| Eco-187-1  | NZ_JNMS01000012.1  | + | 85669   | 85721   | RNA → rpmE (PRK00019) Ribosomal_L31 (pfam01197) → |
| Eco-560-1  | NZ_JHFR01000019.1  | + | 113461  | 113513  | RNA → rpmE (PRK00019) Ribosomal_L31 (pfam01197) → |
| Eco-186-1  | NZ_JNMW01000014.1  | - | 40226   | 40174   | RNA → rpmE (PRK00019) Ribosomal_L31 (pfam01197) → |
| Eco-6-1    | NZ_JHDM01000084.1  | + | 28050   | 28102   | RNA → rpmE (PRK00019) Ribosomal_L31 (pfam01197) → |
| Eco-165-1  | NZ_JNSA01000020.1  | + | 34427   | 34479   | RNA → rpmE (PRK00019) Ribosomal_L31 (pfam01197) → |

|           |                   |   |        |        |                                                   |
|-----------|-------------------|---|--------|--------|---------------------------------------------------|
| Eco-3-1   | NZ_JHDP01000068.1 | + | 89417  | 89469  | RNA → rpmE (PRK00019) Ribosomal_L31 (pfam01197) → |
| Eco-178-1 | NZ_JOND01000226.1 | + | 84724  | 84776  | RNA → rpmE (PRK00019) Ribosomal_L31 (pfam01197) → |
| Eco-4-1   | NZ_JHDO01000123.1 | + | 86211  | 86263  | RNA → rpmE (PRK00019) Ribosomal_L31 (pfam01197) → |
| Eco-567-1 | NZ_JHMH01000011.1 | + | 46647  | 46699  | RNA → rpmE (PRK00019) Ribosomal_L31 (pfam01197) → |
| Eco-26-1  | NZ_JJLM01000079.1 | + | 84269  | 84321  | RNA → rpmE (PRK00019) Ribosomal_L31 (pfam01197) → |
| Eco-227-1 | NZ_JOST01000207.1 | + | 86014  | 86066  | RNA → rpmE (PRK00019) Ribosomal_L31 (pfam01197) → |
| Eco-557-1 | NZ_JHFU01000017.1 | + | 113389 | 113441 | RNA → rpmE (PRK00019) Ribosomal_L31 (pfam01197) → |
| Eco-208-1 | NZ_JOQH01000012.1 | + | 90856  | 90908  | RNA → rpmE (PRK00019) Ribosomal_L31 (pfam01197) → |
| Eco-16-1  | NZ_JJLQ01000099.1 | + | 22129  | 22181  | RNA → rpmE (PRK00019) Ribosomal_L31 (pfam01197) → |
| Eco-188-1 | NZ_JOQL01000012.1 | + | 86189  | 86241  | RNA → rpmE (PRK00019) Ribosomal_L31 (pfam01197) → |
| Eco-70-1  | NZ_JMGU01000105.1 | + | 89454  | 89506  | RNA → rpmE (PRK00019) Ribosomal_L31 (pfam01197) → |
| Eco-217-1 | NZ_JOQQ01000012.1 | + | 89454  | 89506  | RNA → rpmE (PRK00019) Ribosomal_L31 (pfam01197) → |
| Eco-66-1  | NZ_JMGQ01000119.1 | + | 100759 | 100811 | RNA → rpmE (PRK00019) Ribosomal_L31 (pfam01197) → |
| Eco-237-1 | NZ_JORA01000046.1 | + | 102409 | 102461 | RNA → rpmE (PRK00019) Ribosomal_L31 (pfam01197) → |
| Eco-75-1  | NZ_JNNE01000139.1 | + | 56087  | 56139  | RNA → rpmE (PRK00019) Ribosomal_L31 (pfam01197) → |
| Eco-38-1  | NZ_JNPP01000004.1 | - | 40299  | 40247  | RNA → rpmE (PRK00019) Ribosomal_L31 (pfam01197) → |
| Eco-175-1 | NZ_JNME01000058.1 | + | 23766  | 23818  | RNA → rpmE (PRK00019) Ribosomal_L31 (pfam01197) → |
| Eco-167-1 | NZ_JNMA01000015.1 | + | 93888  | 93940  | RNA → rpmE (PRK00019) Ribosomal_L31 (pfam01197) → |
| Eco-35-1  | NZ_JNPT01000021.1 | - | 857    | 805    | RNA → rpmE (PRK00019) Ribosomal_L31 (pfam01197) → |
| Eco-189-1 | NZ_JNMJ01000009.1 | + | 86006  | 86058  | RNA → rpmE (PRK00019) Ribosomal_L31 (pfam01197) → |
| Eco-32-1  | NZ_JOSR01000127.1 | + | 33305  | 33357  | RNA → rpmE (PRK00019) Ribosomal_L31 (pfam01197) → |
| Eco-169-1 | NZ_JNMO01000007.1 | + | 57000  | 57052  | RNA → rpmE (PRK00019) Ribosomal_L31 (pfam01197) → |
| Eco-9-1   | NZ_JHDJ01000187.1 | + | 22118  | 22170  | RNA → rpmE (PRK00019) Ribosomal_L31 (pfam01197) → |
| Eco-194-1 | NZ_JNMX01000008.1 | + | 70796  | 70848  | RNA → rpmE (PRK00019) Ribosomal_L31 (pfam01197) → |
| Eco-2-1   | NZ_JHDQ01000081.1 | + | 87608  | 87660  | RNA → rpmE (PRK00019) Ribosomal_L31 (pfam01197) → |
| Eco-203-1 | NZ_JNMY01000024.1 | + | 32464  | 32516  | RNA → rpmE (PRK00019) Ribosomal_L31 (pfam01197) → |
| Eco-18-1  | NZ_JJLI01000182.1 | + | 22109  | 22161  | RNA → rpmE (PRK00019) Ribosomal_L31 (pfam01197) → |
| Eco-166-1 | NZ_JNSB01000008.1 | + | 70954  | 71006  | RNA → rpmE (PRK00019) Ribosomal_L31 (pfam01197) → |
| Eco-31-1  | NZ_JJLU01000129.1 | + | 67734  | 67786  | RNA → rpmE (PRK00019) Ribosomal_L31 (pfam01197) → |
| Eco-23-1  | NZ_JJLT01000167.1 | + | 11783  | 11835  | RNA → rpmE (PRK00019) Ribosomal_L31 (pfam01197) → |
| Eco-190-1 | NZ_JOQC01000020.1 | - | 721    | 669    | RNA → rpmE (PRK00019) Ribosomal_L31 (pfam01197) → |
| Eco-20-1  | NZ_JMGS01000101.1 | + | 86002  | 86054  | RNA → rpmE (PRK00019) Ribosomal_L31 (pfam01197) → |
| Eco-228-1 | NZ_JOQM01000023.1 | - | 39867  | 39815  | RNA → rpmE (PRK00019) Ribosomal_L31 (pfam01197) → |
| Eco-72-1  | NZ_JNNC01000114.1 | + | 14514  | 14566  | RNA → rpmE (PRK00019) Ribosomal_L31 (pfam01197) → |
| Eco-222-1 | NZ_JOQU01000013.1 | + | 88168  | 88220  | RNA → rpmE (PRK00019) Ribosomal_L31 (pfam01197) → |
| Eco-76-1  | NZ_JJNF01000065.1 | + | 87059  | 87111  | RNA → rpmE (PRK00019) Ribosomal_L31 (pfam01197) → |
| Eco-60-1  | NZ_JNPQ01000048.1 | + | 19619  | 19671  | RNA → rpmE (PRK00019) Ribosomal_L31 (pfam01197) → |
| Eco-225-1 | NZ_JOQW01000020.1 | + | 88702  | 88754  | RNA → rpmE (PRK00019) Ribosomal_L31 (pfam01197) → |
| Eco-36-1  | NZ_JNPU01000018.1 | - | 2206   | 2154   | RNA → rpmE (PRK00019) Ribosomal_L31 (pfam01197) → |
| Eco-14-1  | NZ_JHDG01000181.1 | + | 40836  | 40888  | RNA → rpmE (PRK00019) Ribosomal_L31 (pfam01197) → |
| Eco-851-1 | NZ_AJWQ01000257.1 | - | 598    | 546    | RNA → rpmE (PRK00019) Ribosomal_L31 (pfam01197) → |
| Eco-10-1  | NZ_JHDI01000087.1 | + | 22108  | 22160  | RNA → rpmE (PRK00019) Ribosomal_L31 (pfam01197) → |
| Eco-854-1 | NZ_AJWS01000002.1 | + | 64656  | 64708  | RNA → rpmE (PRK00019) Ribosomal_L31 (pfam01197) → |
| Eco-7-1   | NZ_JHDL01000086.1 | + | 28654  | 28706  | RNA → rpmE (PRK00019) Ribosomal_L31 (pfam01197) → |
| Eco-25-1  | NZ_JJLP01000055.1 | + | 84896  | 84948  | RNA → rpmE (PRK00019) Ribosomal_L31 (pfam01197) → |
| Eco-850-1 | NZ_AJWR01000026.1 | + | 46611  | 46663  | RNA → rpmE (PRK00019) Ribosomal_L31 (pfam01197) → |
| Eco-41-1  | NZ_JJLK01000087.1 | + | 85941  | 85993  | RNA → rpmE (PRK00019) Ribosomal_L31 (pfam01197) → |
| Eco-24-1  | NZ_JJLS01000289.1 | + | 11674  | 11726  | RNA → rpmE (PRK00019) Ribosomal_L31 (pfam01197) → |
| Eco-176-1 | NZ_JNMF01000033.1 | + | 22119  | 22171  | RNA → rpmE (PRK00019) Ribosomal_L31 (pfam01197) → |
| Eco-168-1 | NZ_JNMB01000027.1 | - | 39867  | 39815  | RNA → rpmE (PRK00019) Ribosomal_L31 (pfam01197) → |
| Eco-71-1  | NZ_JMGV01000071.1 | + | 89398  | 89450  | RNA → rpmE (PRK00019) Ribosomal_L31 (pfam01197) → |
| Eco-183-1 | NZ_JNMG01000025.1 | - | 39785  | 39733  | RNA → rpmE (PRK00019) Ribosomal_L31 (pfam01197) → |

|            |                   |   |        |        |                                                                                             |
|------------|-------------------|---|--------|--------|---------------------------------------------------------------------------------------------|
| Eco-74-1   | NZ_JMGR01000079.1 | + | 88902  | 88954  | RNA → rpmE (PRK00019)Ribosomal_L31 (pfam01197) →                                            |
| Eco-193-1  | NZ_JNMK01000014.1 | - | 41267  | 41215  | RNA → rpmE (PRK00019)Ribosomal_L31 (pfam01197) →                                            |
| Eco-69-1   | NZ_JNNB01000156.1 | + | 86845  | 86897  | RNA → rpmE (PRK00019)Ribosomal_L31 (pfam01197) →                                            |
| Eco-170-1  | NZ_JNML01000017.1 | + | 87682  | 87734  | RNA → rpmE (PRK00019)Ribosomal_L31 (pfam01197) →                                            |
| Eco-73-1   | NZ_JNND01000109.1 | + | 14502  | 14554  | RNA → rpmE (PRK00019)Ribosomal_L31 (pfam01197) →                                            |
| Eco-173-1  | NZ_JNMP01000063.1 | + | 24046  | 24098  | RNA → rpmE (PRK00019)Ribosomal_L31 (pfam01197) →                                            |
| Eco-62-1   | NZ_JNPR01000049.1 | + | 19639  | 19691  | RNA → rpmE (PRK00019)Ribosomal_L31 (pfam01197) →                                            |
| Eco-184-1  | NZ_JNMQ01000015.1 | + | 86809  | 86861  | RNA → rpmE (PRK00019)Ribosomal_L31 (pfam01197) →                                            |
| Eco-182-1  | NZ_JNMU01000024.1 | + | 34648  | 34700  | RNA → rpmE (PRK00019)Ribosomal_L31 (pfam01197) →                                            |
| Eco-210-1  | NZ_JNMZ01000011.1 | + | 86362  | 86414  | RNA → rpmE (PRK00019)Ribosomal_L31 (pfam01197) →                                            |
| Eco-162-1  | NZ_JNRY01000050.1 | - | 2050   | 1998   | RNA → rpmE (PRK00019)Ribosomal_L31 (pfam01197) →                                            |
| Eco-5-1    | NZ_JHDN01000076.1 | + | 28050  | 28102  | RNA → rpmE (PRK00019)Ribosomal_L31 (pfam01197) →                                            |
| Eco-233-1  | NZ_JOMS01000137.1 | + | 91874  | 91926  | RNA → rpmE (PRK00019)Ribosomal_L31 (pfam01197) →                                            |
| Eco-206-1  | NZ_JOQJ01000013.1 | - | 27977  | 27925  | RNA → rpmE (PRK00019)Ribosomal_L31 (pfam01197) →                                            |
| Eco-11-1   | NZ_JHDH01000162.1 | + | 32464  | 32516  | RNA → rpmE (PRK00019)Ribosomal_L31 (pfam01197) →                                            |
| Eco-8-1    | NZ_JHDK01000152.1 | + | 93103  | 93155  | RNA → rpmE (PRK00019)Ribosomal_L31 (pfam01197) →                                            |
| Eco-221-1  | NZ_JOQT01000016.1 | + | 86416  | 86468  | RNA → rpmE (PRK00019)Ribosomal_L31 (pfam01197) →                                            |
| Eco-65-1   | NZ_JJLJ01000063.1 | + | 26558  | 26610  | RNA → rpmE (PRK00019)Ribosomal_L31 (pfam01197) →                                            |
| Eco-238-1  | NZ_JORB01000073.1 | + | 90314  | 90366  | RNA → rpmE (PRK00019)Ribosomal_L31 (pfam01197) →                                            |
| Eco-27-1   | NZ_JJLH01000058.1 | + | 85415  | 85467  | RNA → rpmE (PRK00019)Ribosomal_L31 (pfam01197) →                                            |
| Eco-842-1  | NZ_ADUM01000088.1 | + | 46158  | 46210  | RNA → rpmE (PRK00019)Ribosomal_L31 (pfam01197) →                                            |
| Eco-840-1  | NZ_AFAF02000002.1 | - | 554932 | 554880 | RNA → rpmE (PRK00019)Ribosomal_L31 (pfam01197) →                                            |
| Eco-64-1   | NZ_JJLN01000275.1 | + | 26565  | 26617  | RNA → rpmE (PRK00019)Ribosomal_L31 (pfam01197) →                                            |
| Eco-164-1  | NZ_JNLZ01000007.1 | - | 39917  | 39865  | RNA → rpmE (PRK00019)Ribosomal_L31 (pfam01197) →                                            |
| Eco-39-1   | NZ_JJLR01000144.1 | + | 78890  | 78942  | RNA → rpmE (PRK00019)Ribosomal_L31 (pfam01197) →                                            |
| Eco-171-1  | NZ_JNMC01000016.1 | - | 40179  | 40127  | RNA → rpmE (PRK00019)Ribosomal_L31 (pfam01197) →                                            |
| Eco-17-1   | NZ_JMGW01000087.1 | + | 22117  | 22169  | RNA → rpmE (PRK00019)Ribosomal_L31 (pfam01197) →                                            |
| Eco-185-1  | NZ_JNMH01000014.1 | + | 86284  | 86336  | RNA → rpmE (PRK00019)Ribosomal_L31 (pfam01197) →                                            |
| Eco-61-1   | NZ_JMGT01000069.1 | + | 65843  | 65895  | RNA → rpmE (PRK00019)Ribosomal_L31 (pfam01197) →                                            |
| Eco-177-1  | NZ_JNMM01000020.1 | - | 792    | 740    | RNA → rpmE (PRK00019)Ribosomal_L31 (pfam01197) →                                            |
| Eco-179-1  | NZ_JNMR01000020.1 | + | 88701  | 88753  | RNA → rpmE (PRK00019)Ribosomal_L31 (pfam01197) →                                            |
| Eco-37-1   | NZ_JNPY01000004.1 | - | 40945  | 40893  | RNA → rpmE (PRK00019)Ribosomal_L31 (pfam01197) →                                            |
| Eco-63-1   | NZ_JNPS01000013.1 | + | 89385  | 89437  | RNA → rpmE (PRK00019)Ribosomal_L31 (pfam01197) →                                            |
| Eco-180-1  | NZ_JNMV01000024.1 | + | 32368  | 32420  | RNA → rpmE (PRK00019)Ribosomal_L31 (pfam01197) →                                            |
| Eco-1759-1 | NZ_AFWP01000188.1 | + | 84134  | 84186  | RNA → rpmE (PRK00019)Ribosomal_L31 (pfam01197) →                                            |
| Eco-1707-1 | NZ_AEFA01000012.1 | - | 52072  | 52020  | RNA → rpmE (PRK00019)Ribosomal_L31 (pfam01197) → rpmE (PRK00019)Ribosomal_L31 (pfam01197) → |
| Eco-1775-1 | NZ_AKAV01000113.1 | + | 88546  | 88598  | RNA → rpmE (PRK00019)Ribosomal_L31 (pfam01197) →                                            |
| Eco-685-1  | NZ_JHOE01000044.1 | - | 821    | 769    | RNA → rpmE (PRK00019)Ribosomal_L31 (pfam01197) →                                            |
| Eco-679-1  | NZ_JHOC01000057.1 | + | 22349  | 22401  | RNA → rpmE (PRK00019)Ribosomal_L31 (pfam01197) →                                            |
| Eco-676-1  | NZ_JHJJ01000015.1 | - | 3338   | 3286   | RNA → rpmE (PRK00019)Ribosomal_L31 (pfam01197) →                                            |
| Eco-1100-1 | NZ_AIGO01000057.1 | - | 3488   | 3436   | RNA → rpmE (PRK00019)Ribosomal_L31 (pfam01197) →                                            |
| Eco-1704-1 | NZ_ADWQ01000019.1 | + | 85972  | 86024  | RNA → rpmE (PRK00019)Ribosomal_L31 (pfam01197) →                                            |
| Eco-681-1  | NZ_JHJV01000007.1 | + | 82800  | 82852  | RNA → rpmE (PRK00019)Ribosomal_L31 (pfam01197) →                                            |
| Eco-1105-1 | NZ_ADUO01000104.1 | - | 534    | 482    | RNA → rpmE (PRK00019)Ribosomal_L31 (pfam01197) →                                            |
| Eco-1717-1 | NZ_AJVQ01000020.1 | + | 3811   | 3863   | RNA → rpmE (PRK00019)Ribosomal_L31 (pfam01197) →                                            |
| Eco-1774-1 | NZ_AJVV01000390.1 | - | 417    | 365    | RNA → rpmE (PRK00019)Ribosomal_L31 (pfam01197) →                                            |
| Eco-1390-1 | NZ_AJWO01000023.1 | + | 65109  | 65161  | RNA → rpmE (PRK00019)Ribosomal_L31 (pfam01197) →                                            |
| Eco-1391-1 | NZ_AJWP01000137.1 | - | 430    | 378    | RNA → rpmE (PRK00019)Ribosomal_L31 (pfam01197) →                                            |
| Eco-1096-1 | NZ_AIGK01000064.1 | - | 794    | 742    | RNA → rpmE (PRK00019)Ribosomal_L31 (pfam01197) →                                            |
| Eco-1097-1 | NZ_AIGL01000055.1 | - | 4074   | 4022   | RNA → rpmE (PRK00019)Ribosomal_L31 (pfam01197) →                                            |
| Eco-470-1  | NZ_JHJZ01000022.1 | - | 1543   | 1491   | RNA → rpmE (PRK00019)Ribosomal_L31 (pfam01197) →                                            |
| Eco-476-1  | NZ_JHJS01000024.1 | + | 88763  | 88815  | RNA → rpmE (PRK00019)Ribosomal_L31 (pfam01197) →                                            |



|            |                    |   |        |        |                                                                                               |
|------------|--------------------|---|--------|--------|-----------------------------------------------------------------------------------------------|
| Eco-467-1  | NZ_JHNC01000043.1  | - | 1014   | 962    | RNA → rpmE (PRK00019) Ribosomal_L31 (pfam01197) →                                             |
| Eco-473-1  | NZ_JHGR01000007.1  | - | 451    | 399    | RNA → rpmE (PRK00019) Ribosomal_L31 (pfam01197) →                                             |
| Eco-477-1  | NZ_JFGU01000002.1  | - | 450    | 398    | RNA → rpmE (PRK00019) Ribosomal_L31 (pfam01197) →                                             |
| Eco-1807-1 | NZ_AETX01000108.1  | + | 33794  | 33846  | RNA → rpmE (PRK00019) Ribosomal_L31 (pfam01197) →                                             |
| Eco-678-1  | NZ_JHNW01000023.1  | + | 24132  | 24184  | RNA → rpmE (PRK00019) Ribosomal_L31 (pfam01197) →                                             |
| Eco-1683-1 | NZ_ADWU01000058.1  | - | 1253   | 1201   | RNA → rpmE (PRK00019) Ribosomal_L31 (pfam01197) → rpmE (PRK00019) Ribosomal_L31 (pfam01197) → |
| Eco-1716-1 | NZ_AJVR01000251.1  | + | 46629  | 46681  | RNA → rpmE (PRK00019) Ribosomal_L31 (pfam01197) →                                             |
| Eco-1146-1 | NZ_AKNI01000042.1  | + | 23288  | 23340  | RNA → rpmE (PRK00019) Ribosomal_L31 (pfam01197) →                                             |
| Eco-1386-1 | NZ_AEZV02000042.1  | - | 584    | 532    | RNA → rpmE (PRK00019) Ribosomal_L31 (pfam01197) →                                             |
| Eco-680-1  | NZ_JHMZ01000045.1  | - | 1193   | 1141   | RNA → rpmE (PRK00019) Ribosomal_L31 (pfam01197) →                                             |
| Eco-465-1  | NZ_JH FY01000094.1 | - | 1174   | 1122   | RNA → rpmE (PRK00019) Ribosomal_L31 (pfam01197) →                                             |
| Eco-1708-1 | NZ_AJMB01000085.1  | - | 3692   | 3640   | RNA → rpmE (PRK00019) Ribosomal_L31 (pfam01197) →                                             |
| Eco-689-1  | NZ_JHGV01000084.1  | + | 47743  | 47795  | RNA → rpmE (PRK00019) Ribosomal_L31 (pfam01197) →                                             |
| Eco-1709-1 | NZ_AJLU01000016.1  | + | 86588  | 86640  | RNA → rpmE (PRK00019) Ribosomal_L31 (pfam01197) →                                             |
| Eco-1718-1 | NZ_AGSG01000243.1  | - | 3943   | 3891   | RNA → rpmE (PRK00019) Ribosomal_L31 (pfam01197) →                                             |
| Eco-1685-1 | NZ_ADWS01000023.1  | + | 66459  | 66511  | RNA → rpmE (PRK00019) Ribosomal_L31 (pfam01197) → rpmE (PRK00019) Ribosomal_L31 (pfam01197) → |
| Eco-675-1  | NZ_JHMM01000008.1  | - | 42766  | 42714  | RNA → rpmE (PRK00019) Ribosomal_L31 (pfam01197) →                                             |
| Eco-1678-1 | NZ_ADWV01000042.1  | + | 23555  | 23607  | RNA → rpmE (PRK00019) Ribosomal_L31 (pfam01197) → rpmE (PRK00019) Ribosomal_L31 (pfam01197) → |
| Eco-1168-1 | NZ_AFDX01000043.1  | + | 38823  | 38875  | RNA → rpmE (PRK00019) Ribosomal_L31 (pfam01197) →                                             |
| Eco-684-1  | NZ_JHNT01000082.1  | - | 502    | 450    | RNA → rpmE (PRK00019) Ribosomal_L31 (pfam01197) →                                             |
| Eco-1147-1 | NZ_AKNH01000066.1  | + | 82725  | 82777  | RNA → rpmE (PRK00019) Ribosomal_L31 (pfam01197) →                                             |
| Eco-686-1  | NZ_JHNO01000045.1  | - | 512    | 460    | RNA → rpmE (PRK00019) Ribosomal_L31 (pfam01197) →                                             |
| Eco-1099-1 | NZ_AIGN01000060.1  | + | 126535 | 126587 | RNA → rpmE (PRK00019) Ribosomal_L31 (pfam01197) →                                             |
| Eco-158-1  | NZ_JNRV01000013.1  | + | 57668  | 57720  | RNA → rpmE (PRK00019) Ribosomal_L31 (pfam01197) →                                             |
| Eco-464-1  | NZ_JHOD01000035.1  | + | 86530  | 86582  | RNA → rpmE (PRK00019) Ribosomal_L31 (pfam01197) →                                             |
| Eco-479-1  | NZ_JHNS01000069.1  | + | 88567  | 88619  | RNA → rpmE (PRK00019) Ribosomal_L31 (pfam01197) →                                             |
| Eco-163-1  | NZ_JNRZ01000023.1  | - | 25355  | 25303  | RNA → rpmE (PRK00019) Ribosomal_L31 (pfam01197) →                                             |
| Eco-395-1  | NZ_JDFV01000023.1  | + | 87347  | 87399  | RNA → rpmE (PRK00019) Ribosomal_L31 (pfam01197) →                                             |
| Eco-475-1  | NZ_JHLU01000058.1  | - | 451    | 399    | RNA → rpmE (PRK00019) Ribosomal_L31 (pfam01197) →                                             |
| Eco-223-1  | NZ_JONE01000058.1  | + | 88201  | 88253  | RNA → rpmE (PRK00019) Ribosomal_L31 (pfam01197) →                                             |
| Eco-245-1  | NZ_JORG01000123.1  | + | 101921 | 101973 | RNA → rpmE (PRK00019) Ribosomal_L31 (pfam01197) →                                             |
| Eco-247-1  | NZ_JORH01000200.1  | + | 86694  | 86746  | RNA → rpmE (PRK00019) Ribosomal_L31 (pfam01197) →                                             |
| Eco-240-1  | NZ_JORK01000124.1  | + | 87639  | 87691  | RNA → rpmE (PRK00019) Ribosomal_L31 (pfam01197) →                                             |
| Eco-252-1  | NZ_JORP01000053.1  | + | 90001  | 90053  | RNA → rpmE (PRK00019) Ribosomal_L31 (pfam01197) →                                             |
| Eco-267-1  | NZ_JOSE01000067.1  | + | 87144  | 87196  | RNA → rpmE (PRK00019) Ribosomal_L31 (pfam01197) →                                             |
| Eco-272-1  | NZ_JOSH01000129.1  | + | 81087  | 81139  | RNA → rpmE (PRK00019) Ribosomal_L31 (pfam01197) →                                             |
| Eco-204-1  | NZ_JOQF01000011.1  | + | 90131  | 90183  | RNA → rpmE (PRK00019) Ribosomal_L31 (pfam01197) →                                             |
| Eco-219-1  | NZ_JOQP01000016.1  | + | 89457  | 89509  | RNA → rpmE (PRK00019) Ribosomal_L31 (pfam01197) →                                             |
| Eco-235-1  | NZ_JOQZ01000040.1  | + | 101316 | 101368 | RNA → rpmE (PRK00019) Ribosomal_L31 (pfam01197) →                                             |
| Eco-1131-1 | NZ_AMFM01000015.1  | + | 87827  | 87879  | RNA → rpmE (PRK00019) Ribosomal_L31 (pfam01197) →                                             |
| Eco-1148-1 | NZ_ADUN01000112.1  | - | 1762   | 1710   | RNA → rpmE (PRK00019) Ribosomal_L31 (pfam01197) →                                             |
| Eco-261-1  | NZ_JORU01000067.1  | + | 89179  | 89231  | RNA → rpmE (PRK00019) Ribosomal_L31 (pfam01197) →                                             |
| Eco-218-1  | NZ_JOQO01000026.1  | - | 26793  | 26741  | RNA → rpmE (PRK00019) Ribosomal_L31 (pfam01197) →                                             |
| Eco-216-1  | NZ_JOQS01000013.1  | - | 41073  | 41021  | RNA → rpmE (PRK00019) Ribosomal_L31 (pfam01197) →                                             |
| Eco-1094-1 | NZ_AIGI01000048.1  | + | 48588  | 48640  | RNA → rpmE (PRK00019) Ribosomal_L31 (pfam01197) →                                             |
| Eco-241-1  | NZ_JORT01000089.1  | + | 19614  | 19666  | RNA → rpmE (PRK00019) Ribosomal_L31 (pfam01197) →                                             |
| Eco-220-1  | NZ_JOQN01000016.1  | + | 89415  | 89467  | RNA → rpmE (PRK00019) Ribosomal_L31 (pfam01197) →                                             |
| Eco-276-1  | NZ_JOMV01000046.1  | + | 83575  | 83627  | RNA → rpmE (PRK00019) Ribosomal_L31 (pfam01197) →                                             |
| Eco-236-1  | NZ_JONF01000114.1  | + | 103257 | 103309 | RNA → rpmE (PRK00019) Ribosomal_L31 (pfam01197) →                                             |
| Eco-266-1  | NZ_JORW01000076.1  | + | 87173  | 87225  | RNA → rpmE (PRK00019) Ribosomal_L31 (pfam01197) →                                             |
| Eco-207-1  | NZ_JOQK01000011.1  | - | 35712  | 35660  | RNA → rpmE (PRK00019) Ribosomal_L31 (pfam01197) →                                             |
| Eco-1083-1 | NZ_AIFV01000036.1  | + | 89358  | 89410  | RNA → rpmE (PRK00019) Ribosomal_L31 (pfam01197) →                                             |



|            |                   |   |         |         |                                                                                             |
|------------|-------------------|---|---------|---------|---------------------------------------------------------------------------------------------|
| Eco-1088-1 | NZ_AIGC01000024.1 | + | 89715   | 89767   | RNA → rpmE (PRK00019)Ribosomal_L31 (pfam01197) →                                            |
| Eco-417-1  | NZ_CBWC01000015.1 | + | 4177    | 4229    | RNA → rpmE (PRK00019)Ribosomal_L31 (pfam01197) →                                            |
| Eco-255-1  | NZ_JORS01000088.1 | + | 49497   | 49549   | RNA → rpmE (PRK00019)Ribosomal_L31 (pfam01197) →                                            |
| Eco-192-1  | NZ_JOQE01000031.1 | - | 1379    | 1327    | RNA → rpmE (PRK00019)Ribosomal_L31 (pfam01197) →                                            |
| Eco-209-1  | NZ_JOQI01000010.1 | - | 40093   | 40041   | RNA → rpmE (PRK00019)Ribosomal_L31 (pfam01197) →                                            |
| Eco-215-1  | NZ_JDWT01000016.1 | + | 52138   | 52190   | RNA → rpmE (PRK00019)Ribosomal_L31 (pfam01197) →                                            |
| Eco-215-2  | NZ_JDWT01000047.1 | - | 39821   | 39769   | RNA → rpmE (PRK00019)Ribosomal_L31 (pfam01197) →                                            |
| Eco-246-1  | NZ_JORM01000046.1 | + | 101824  | 101876  | RNA → rpmE (PRK00019)Ribosomal_L31 (pfam01197) →                                            |
| Eco-394-1  | NZ_JDFU02000010.1 | + | 2149849 | 2149901 | RNA → rpmE (PRK00019)Ribosomal_L31 (pfam01197) →                                            |
| Eco-268-1  | NZ_JDWS01000004.1 | - | 53977   | 53925   | RNA → rpmE (PRK00019)Ribosomal_L31 (pfam01197) →                                            |
| Eco-1133-1 | NZ_AERU01000031.1 | - | 830     | 778     | RNA → rpmE (PRK00019)Ribosomal_L31 (pfam01197) →                                            |
| Eco-1081-1 | NZ_AIFT01000041.1 | + | 95082   | 95134   | RNA → rpmE (PRK00019)Ribosomal_L31 (pfam01197) → rpmE (PRK00019)Ribosomal_L31 (pfam01197) → |
| Eco-248-1  | NZ_JORJ01000139.1 | + | 86559   | 86611   | RNA → rpmE (PRK00019)Ribosomal_L31 (pfam01197) →                                            |
| Eco-262-1  | NZ_JORO01000129.1 | + | 89396   | 89448   | RNA → rpmE (PRK00019)Ribosomal_L31 (pfam01197) →                                            |
| Eco-191-1  | NZ_JOQD01000045.1 | + | 30376   | 30428   | RNA → rpmE (PRK00019)Ribosomal_L31 (pfam01197) →                                            |
| Eco-214-1  | NZ_JDWU01000026.1 | - | 39906   | 39854   | RNA → rpmE (PRK00019)Ribosomal_L31 (pfam01197) →                                            |
| Eco-677-1  | NZ_APWX01000006.1 | - | 577     | 525     | RNA → rpmE (PRK00019)Ribosomal_L31 (pfam01197) →                                            |
| Eco-274-1  | NZ_JOMT01000130.1 | + | 83847   | 83899   | RNA → rpmE (PRK00019)Ribosomal_L31 (pfam01197) →                                            |
| Eco-254-1  | NZ_JORQ01000056.1 | + | 89943   | 89995   | RNA → rpmE (PRK00019)Ribosomal_L31 (pfam01197) →                                            |
| Eco-232-1  | NZ_JOQR01000016.1 | - | 19180   | 19128   | RNA → rpmE (PRK00019)Ribosomal_L31 (pfam01197) →                                            |
| Eco-1079-1 | NZ_AIFR01000051.1 | + | 95532   | 95584   | RNA → rpmE (PRK00019)Ribosomal_L31 (pfam01197) →                                            |
| Eco-275-1  | NZ_JOMU01000122.1 | + | 80876   | 80928   | RNA → rpmE (PRK00019)Ribosomal_L31 (pfam01197) →                                            |
| Eco-249-1  | NZ_JORI01000142.1 | + | 119549  | 119601  | RNA → rpmE (PRK00019)Ribosomal_L31 (pfam01197) →                                            |
| Eco-260-1  | NZ_JORN01000052.1 | + | 89277   | 89329   | RNA → rpmE (PRK00019)Ribosomal_L31 (pfam01197) →                                            |
| Eco-205-1  | NZ_JOQG01000029.1 | + | 32464   | 32516   | RNA → rpmE (PRK00019)Ribosomal_L31 (pfam01197) →                                            |
| Eco-687-1  | NZ_JHGZ01000099.1 | - | 578     | 526     | RNA → rpmE (PRK00019)Ribosomal_L31 (pfam01197) →                                            |
| Eco-2033-1 | NZ_AELA01000036.1 | + | 35234   | 35286   | RNA → rpmE (PRK00019)Ribosomal_L31 (pfam01197) →                                            |
| Eco-718-1  | NZ_JHLA01000019.1 | - | 579     | 527     | RNA → rpmE (PRK00019)Ribosomal_L31 (pfam01197) →                                            |
| Eco-726-1  | NZ_JHNZ01000062.1 | + | 26430   | 26482   | RNA → rpmE (PRK00019)Ribosomal_L31 (pfam01197) →                                            |
| Eco-711-1  | NZ_JHOA01000076.1 | + | 46647   | 46699   | RNA → rpmE (PRK00019)Ribosomal_L31 (pfam01197) →                                            |
| Eco-683-1  | NZ_JHGM01000054.1 | - | 606     | 554     | RNA → rpmE (PRK00019)Ribosomal_L31 (pfam01197) →                                            |
| Eco-1823-1 | NZ_AEUA01000081.1 | + | 92414   | 92466   | RNA → rpmE (PRK00019)Ribosomal_L31 (pfam01197) →                                            |
| Eco-2154-1 | NZ_AGTD01000001.1 | + | 4670150 | 4670202 | RNA → rpmE (PRK00019)Ribosomal_L31 (pfam01197) →                                            |
| Eco-2159-1 | NZ_AERT01000012.1 | - | 53530   | 53478   | RNA → rpmE (PRK00019)Ribosomal_L31 (pfam01197) →                                            |
| Eco-1992-1 | NZ_AFDW01000036.1 | + | 90212   | 90264   | RNA → rpmE (PRK00019)Ribosomal_L31 (pfam01197) →                                            |
| Eco-1980-1 | NZ_ADUS01000024.1 | - | 43866   | 43814   | RNA → rpmE (PRK00019)Ribosomal_L31 (pfam01197) →                                            |
| Eco-729-1  | NZ_JHNJ01000021.1 | - | 736     | 684     | RNA → rpmE (PRK00019)Ribosomal_L31 (pfam01197) →                                            |
| Eco-695-1  | NZ_JHFH01000073.1 | + | 47743   | 47795   | RNA → rpmE (PRK00019)Ribosomal_L31 (pfam01197) →                                            |
| Eco-705-1  | NZ_JHLS01000064.1 | - | 1472    | 1420    | RNA → rpmE (PRK00019)Ribosomal_L31 (pfam01197) →                                            |
| Eco-699-1  | NZ_JHMN01000069.1 | - | 583     | 531     | RNA → rpmE (PRK00019)Ribosomal_L31 (pfam01197) →                                            |
| Eco-688-1  | NZ_JHGX01000054.1 | - | 576     | 524     | RNA → rpmE (PRK00019)Ribosomal_L31 (pfam01197) →                                            |
| Eco-702-1  | NZ_JHLY01000043.1 | - | 1068    | 1016    | RNA → rpmE (PRK00019)Ribosomal_L31 (pfam01197) →                                            |
| Eco-1808-1 | NZ_AEUC01000085.1 | + | 33893   | 33945   | RNA → rpmE (PRK00019)Ribosomal_L31 (pfam01197) →                                            |
| Eco-101-1  | NZ_JNPX01000067.1 | - | 682     | 630     | RNA → rpmE (PRK00019)Ribosomal_L31 (pfam01197) →                                            |
| Eco-725-1  | NZ_JHNM01000060.1 | + | 23451   | 23503   | RNA → rpmE (PRK00019)Ribosomal_L31 (pfam01197) →                                            |
| Eco-87-1   | NZ_JNQD01000204.1 | + | 80611   | 80663   | RNA → rpmE (PRK00019)Ribosomal_L31 (pfam01197) →                                            |
| Eco-694-1  | NZ_JHFJ01000058.1 | - | 533     | 481     | RNA → rpmE (PRK00019)Ribosomal_L31 (pfam01197) →                                            |
| Eco-117-1  | NZ_JNQP01000014.1 | - | 27805   | 27753   | RNA → rpmE (PRK00019)Ribosomal_L31 (pfam01197) →                                            |
| Eco-2160-1 | NZ_AFYG01000012.1 | - | 39376   | 39324   | RNA → rpmE (PRK00019)Ribosomal_L31 (pfam01197) →                                            |
| Eco-107-1  | NZ_JNQL01000039.1 | - | 855     | 803     | RNA → rpmE (PRK00019)Ribosomal_L31 (pfam01197) →                                            |
| Eco-692-1  | NZ_JHGA01000065.1 | + | 47743   | 47795   | RNA → rpmE (PRK00019)Ribosomal_L31 (pfam01197) →                                            |
| Eco-144-1  | NZ_JNRL01000006.1 | + | 89192   | 89244   | RNA → rpmE (PRK00019)Ribosomal_L31 (pfam01197) →                                            |

|            |                    |   |        |        |                                                                                             |
|------------|--------------------|---|--------|--------|---------------------------------------------------------------------------------------------|
| Eco-693-1  | NZ_JHFX01000110.1  | + | 47743  | 47795  | RNA → rpmE (PRK00019)Ribosomal_L31 (pfam01197) →                                            |
| Eco-151-1  | NZ_JNRQ01000020.1  | + | 39986  | 40038  | RNA → rpmE (PRK00019)Ribosomal_L31 (pfam01197) →                                            |
| Eco-703-1  | NZ_JHLX01000056.1  | + | 47743  | 47795  | RNA → rpmE (PRK00019)Ribosomal_L31 (pfam01197) →                                            |
| Eco-77-1   | NZ_JOSJ01000091.1  | + | 87648  | 87700  | RNA → rpmE (PRK00019)Ribosomal_L31 (pfam01197) →                                            |
| Eco-109-1  | NZ_JOSM01000256.1  | + | 61749  | 61801  | RNA → rpmE (PRK00019)Ribosomal_L31 (pfam01197) →                                            |
| Eco-94-1   | NZ_JOSO01000082.1  | + | 87720  | 87772  | RNA → rpmE (PRK00019)Ribosomal_L31 (pfam01197) →                                            |
| Eco-19-1   | NZ_JJMD01000081.1  | + | 88208  | 88260  | RNA → rpmE (PRK00019)Ribosomal_L31 (pfam01197) →                                            |
| Eco-22-1   | NZ_JJLV01000287.1  | + | 11761  | 11813  | RNA → rpmE (PRK00019)Ribosomal_L31 (pfam01197) →                                            |
| Eco-129-1  | NZ_JNRA01000017.1  | - | 46298  | 46246  | RNA → rpmE (PRK00019)Ribosomal_L31 (pfam01197) →                                            |
| Eco-138-1  | NZ_JNRE01000016.1  | + | 86382  | 86434  | RNA → rpmE (PRK00019)Ribosomal_L31 (pfam01197) →                                            |
| Eco-139-1  | NZ_JNRF01000030.1  | + | 21849  | 21901  | RNA → rpmE (PRK00019)Ribosomal_L31 (pfam01197) →                                            |
| Eco-59-1   | NZ_JJLZ01000070.1  | + | 85773  | 85825  | RNA → rpmE (PRK00019)Ribosomal_L31 (pfam01197) →                                            |
| Eco-13-1   | NZ_JJLY01000090.1  | + | 89272  | 89324  | RNA → rpmE (PRK00019)Ribosomal_L31 (pfam01197) →                                            |
| Eco-136-1  | NZ_JNRD01000020.1  | + | 34619  | 34671  | RNA → rpmE (PRK00019)Ribosomal_L31 (pfam01197) →                                            |
| Eco-143-1  | NZ_JNRI01000010.1  | + | 89453  | 89505  | RNA → rpmE (PRK00019)Ribosomal_L31 (pfam01197) →                                            |
| Eco-116-1  | NZ_JOMX01000149.1  | + | 65251  | 65303  | RNA → rpmE (PRK00019)Ribosomal_L31 (pfam01197) →                                            |
| Eco-12-1   | NZ_JJMA01000084.1  | + | 86866  | 86918  | RNA → rpmE (PRK00019)Ribosomal_L31 (pfam01197) →                                            |
| Eco-135-1  | NZ_JNRC01000019.1  | + | 34683  | 34735  | RNA → rpmE (PRK00019)Ribosomal_L31 (pfam01197) →                                            |
| Eco-142-1  | NZ_JNRH01000010.1  | - | 34510  | 34458  | RNA → rpmE (PRK00019)Ribosomal_L31 (pfam01197) →                                            |
| Eco-133-1  | NZ_JOMZ01000112.1  | + | 82463  | 82515  | RNA → rpmE (PRK00019)Ribosomal_L31 (pfam01197) →                                            |
| Eco-125-1  | NZ_JNRJ01000025.1  | - | 1790   | 1738   | RNA → rpmE (PRK00019)Ribosomal_L31 (pfam01197) →                                            |
| Eco-112-1  | NZ_JORR01000098.1  | + | 83115  | 83167  | RNA → rpmE (PRK00019)Ribosomal_L31 (pfam01197) →                                            |
| Eco-48-1   | NZ_JDWR01000004.1  | + | 79506  | 79558  | RNA → rpmE (PRK00019)Ribosomal_L31 (pfam01197) →                                            |
| Eco-57-1   | NZ_JJME01000073.1  | + | 85793  | 85845  | RNA → rpmE (PRK00019)Ribosomal_L31 (pfam01197) →                                            |
| Eco-121-1  | NZ_JNQY01000021.1  | - | 40206  | 40154  | RNA → rpmE (PRK00019)Ribosomal_L31 (pfam01197) →                                            |
| Eco-127-1  | NZ_JNQY01000020.1  | + | 85463  | 85515  | RNA → rpmE (PRK00019)Ribosomal_L31 (pfam01197) →                                            |
| Eco-67-1   | NZ_JJMB01000084.1  | + | 90394  | 90446  | RNA → rpmE (PRK00019)Ribosomal_L31 (pfam01197) →                                            |
| Eco-58-1   | NZ_JJMC01000070.1  | + | 88903  | 88955  | RNA → rpmE (PRK00019)Ribosomal_L31 (pfam01197) →                                            |
| Eco-128-1  | NZ_JNQZ01000017.1  | - | 39492  | 39440  | RNA → rpmE (PRK00019)Ribosomal_L31 (pfam01197) →                                            |
| Eco-132-1  | NZ_JOSU01000161.1  | + | 79731  | 79783  | RNA → rpmE (PRK00019)Ribosomal_L31 (pfam01197) →                                            |
| Eco-47-1   | NZ_JDWW01000542.1  | + | 14061  | 14113  | RNA → rpmE (PRK00019)Ribosomal_L31 (pfam01197) →                                            |
| Eco-788-1  | NZ_AFDS01000072.1  | + | 396474 | 396526 | RNA → rpmE (PRK00019)Ribosomal_L31 (pfam01197) → rpmE (PRK00019)Ribosomal_L31 (pfam01197) → |
| Eco-21-1   | NZ_JJLX01000084.1  | + | 87592  | 87644  | RNA → rpmE (PRK00019)Ribosomal_L31 (pfam01197) →                                            |
| Eco-126-1  | NZ_JNQX01000020.1  | + | 84700  | 84752  | RNA → rpmE (PRK00019)Ribosomal_L31 (pfam01197) →                                            |
| Eco-134-1  | NZ_JNRB01000021.1  | - | 40829  | 40777  | RNA → rpmE (PRK00019)Ribosomal_L31 (pfam01197) →                                            |
| Eco-140-1  | NZ_JNRG01000015.1  | + | 56974  | 57026  | RNA → rpmE (PRK00019)Ribosomal_L31 (pfam01197) →                                            |
| Eco-787-1  | NZ_ADUL01000081.1  | - | 7831   | 7779   | RNA → rpmE (PRK00019)Ribosomal_L31 (pfam01197) → rpmE (PRK00019)Ribosomal_L31 (pfam01197) → |
| Eco-108-1  | NZ_JNQM01000040.1  | + | 22863  | 22915  | RNA → rpmE (PRK00019)Ribosomal_L31 (pfam01197) →                                            |
| Eco-124-1  | NZ_JNQW01000036.1  | - | 713    | 661    | RNA → rpmE (PRK00019)Ribosomal_L31 (pfam01197) →                                            |
| Eco-130-1  | NZ_JOMY01000091.1  | + | 84423  | 84475  | RNA → rpmE (PRK00019)Ribosomal_L31 (pfam01197) →                                            |
| Eco-1761-1 | NZ_AFSO01000036.1  | + | 85014  | 85066  | RNA → rpmE (PRK00019)Ribosomal_L31 (pfam01197) →                                            |
| Eco-1782-2 | NZ_LAETY01000099.1 | + | 33905  | 33957  | RNA → rpmE (PRK00019)Ribosomal_L31 (pfam01197) →                                            |
| Eco-1725-1 | NZ_AMVV01000014.1  | + | 85592  | 85644  | RNA → rpmE (PRK00019)Ribosomal_L31 (pfam01197) →                                            |
| Eco-201-1  | NZ_AYQP01000023.1  | + | 21352  | 21404  | RNA → rpmE (PRK00019)Ribosomal_L31 (pfam01197) →                                            |
| Eco-1946-1 | NZ_AHHP01000059.1  | - | 430    | 378    | RNA → rpmE (PRK00019)Ribosomal_L31 (pfam01197) →                                            |
| Eco-412-1  | NZ_AXOA01000007.1  | + | 49060  | 49112  | RNA → rpmE (PRK00019)Ribosomal_L31 (pfam01197) →                                            |
| Eco-51-1   | NZ_AYQI01000015.1  | - | 487    | 435    | RNA → rpmE (PRK00019)Ribosomal_L31 (pfam01197) →                                            |
| Eco-56-1   | NZ_AYQX01000041.1  | - | 449    | 397    | RNA → rpmE (PRK00019)Ribosomal_L31 (pfam01197) →                                            |
| Eco-1783-1 | NZ_AETZ01000105.1  | + | 33906  | 33958  | RNA → rpmE (PRK00019)Ribosomal_L31 (pfam01197) →                                            |
| Eco-1724-1 | NZ_AMVU01000007.1  | + | 85592  | 85644  | RNA → rpmE (PRK00019)Ribosomal_L31 (pfam01197) →                                            |
| Eco-1730-1 | NZ_AMVZ01000013.1  | + | 85592  | 85644  | RNA → rpmE (PRK00019)Ribosomal_L31 (pfam01197) →                                            |
| Eco-487-1  | NZ_JHMY01000014.1  | - | 451    | 399    | RNA → rpmE (PRK00019)Ribosomal_L31 (pfam01197) →                                            |

|            |                   |   |        |        |                                                   |
|------------|-------------------|---|--------|--------|---------------------------------------------------|
| Eco-474-1  | NZ_JHGB01000047.1 | - | 451    | 399    | RNA → rpmE (PRK00019) Ribosomal_L31 (pfam01197) → |
| Eco-1758-1 | NZ_AFWO01000116.1 | - | 450    | 398    | RNA → rpmE (PRK00019) Ribosomal_L31 (pfam01197) → |
| Eco-1729-1 | NZ_AMWA01000009.1 | + | 85592  | 85644  | RNA → rpmE (PRK00019) Ribosomal_L31 (pfam01197) → |
| Eco-471-1  | NZ_JHLJ01000007.1 | - | 470    | 418    | RNA → rpmE (PRK00019) Ribosomal_L31 (pfam01197) → |
| Eco-565-1  | NZ_JHNA01000056.1 | - | 42099  | 42047  | RNA → rpmE (PRK00019) Ribosomal_L31 (pfam01197) → |
| Eco-497-1  | NZ_JHLO01000076.1 | + | 88545  | 88597  | RNA → rpmE (PRK00019) Ribosomal_L31 (pfam01197) → |
| Eco-466-1  | NZ_JHHE01000034.1 | - | 605    | 553    | RNA → rpmE (PRK00019) Ribosomal_L31 (pfam01197) → |
| Eco-568-1  | NZ_JHLP01000031.1 | + | 47300  | 47352  | RNA → rpmE (PRK00019) Ribosomal_L31 (pfam01197) → |
| Eco-498-1  | NZ_JHLM01000051.1 | + | 88567  | 88619  | RNA → rpmE (PRK00019) Ribosomal_L31 (pfam01197) → |
| Eco-1722-1 | NZ_AMVS01000017.1 | + | 85592  | 85644  | RNA → rpmE (PRK00019) Ribosomal_L31 (pfam01197) → |
| Eco-1727-1 | NZ_AMVX01000007.1 | + | 85592  | 85644  | RNA → rpmE (PRK00019) Ribosomal_L31 (pfam01197) → |
| Eco-533-1  | NZ_JHMB01000009.1 | - | 39184  | 39132  | RNA → rpmE (PRK00019) Ribosomal_L31 (pfam01197) → |
| Eco-469-1  | NZ_JHNB01000020.1 | - | 1265   | 1213   | RNA → rpmE (PRK00019) Ribosomal_L31 (pfam01197) → |
| Eco-532-1  | NZ_JHMC01000004.1 | - | 39111  | 39059  | RNA → rpmE (PRK00019) Ribosomal_L31 (pfam01197) → |
| Eco-478-1  | NZ_JHNU01000036.1 | + | 88567  | 88619  | RNA → rpmE (PRK00019) Ribosomal_L31 (pfam01197) → |
| Eco-534-1  | NZ_JHLZ01000024.1 | + | 83133  | 83185  | RNA → rpmE (PRK00019) Ribosomal_L31 (pfam01197) → |
| Eco-495-1  | NZ_JHLW01000035.1 | + | 88567  | 88619  | RNA → rpmE (PRK00019) Ribosomal_L31 (pfam01197) → |
| Eco-490-1  | NZ_JHMU01000039.1 | + | 88567  | 88619  | RNA → rpmE (PRK00019) Ribosomal_L31 (pfam01197) → |
| Eco-1384-1 | NZ_AICK01000040.1 | - | 39344  | 39292  | RNA → rpmE (PRK00019) Ribosomal_L31 (pfam01197) → |
| Eco-1432-1 | NZ_ANXR01000072.1 | + | 32531  | 32583  | RNA → rpmE (PRK00019) Ribosomal_L31 (pfam01197) → |
| Eco-536-1  | NZ_JHLR01000009.1 | - | 39111  | 39059  | RNA → rpmE (PRK00019) Ribosomal_L31 (pfam01197) → |
| Eco-510-1  | NZ_JHNC01000139.1 | + | 28051  | 28103  | RNA → rpmE (PRK00019) Ribosomal_L31 (pfam01197) → |
| Eco-529-1  | NZ_JHML01000050.1 | + | 83085  | 83137  | RNA → rpmE (PRK00019) Ribosomal_L31 (pfam01197) → |
| Eco-517-1  | NZ_JHNN01000023.1 | - | 39183  | 39131  | RNA → rpmE (PRK00019) Ribosomal_L31 (pfam01197) → |
| Eco-518-1  | NZ_JHGT01000031.1 | - | 39111  | 39059  | RNA → rpmE (PRK00019) Ribosomal_L31 (pfam01197) → |
| Eco-496-1  | NZ_JHLQ01000067.1 | - | 450    | 398    | RNA → rpmE (PRK00019) Ribosomal_L31 (pfam01197) → |
| Eco-548-1  | NZ_JHEY01000018.1 | + | 113832 | 113884 | RNA → rpmE (PRK00019) Ribosomal_L31 (pfam01197) → |
| Eco-535-1  | NZ_JHLT01000018.1 | - | 39183  | 39131  | RNA → rpmE (PRK00019) Ribosomal_L31 (pfam01197) → |
| Eco-553-1  | NZ_JHNN01000013.1 | + | 113307 | 113359 | RNA → rpmE (PRK00019) Ribosomal_L31 (pfam01197) → |
| Eco-491-1  | NZ_JHMT01000080.1 | - | 451    | 399    | RNA → rpmE (PRK00019) Ribosomal_L31 (pfam01197) → |
| Eco-404-1  | NZ_AYRC01000021.1 | + | 87436  | 87488  | RNA → rpmE (PRK00019) Ribosomal_L31 (pfam01197) → |
| Eco-425-1  | NZ_AYOO01000016.1 | - | 44972  | 44920  | RNA → rpmE (PRK00019) Ribosomal_L31 (pfam01197) → |
| Eco-413-1  | NZ_AXOB01000006.1 | + | 49060  | 49112  | RNA → rpmE (PRK00019) Ribosomal_L31 (pfam01197) → |
| Eco-197-1  | NZ_AYQM01000023.1 | - | 26396  | 26344  | RNA → rpmE (PRK00019) Ribosomal_L31 (pfam01197) → |
| Eco-277-1  | NZ_AYQR01000023.1 | + | 20893  | 20945  | RNA → rpmE (PRK00019) Ribosomal_L31 (pfam01197) → |
| Eco-53-1   | NZ_AYQJ01000020.1 | - | 711    | 659    | RNA → rpmE (PRK00019) Ribosomal_L31 (pfam01197) → |
| Eco-54-1   | NZ_AYQK01000016.1 | + | 82842  | 82894  | RNA → rpmE (PRK00019) Ribosomal_L31 (pfam01197) → |
| Eco-199-1  | NZ_AYQL01000015.1 | - | 491    | 439    | RNA → rpmE (PRK00019) Ribosomal_L31 (pfam01197) → |
| Eco-257-1  | NZ_AYQV01000040.1 | + | 41491  | 41543  | RNA → rpmE (PRK00019) Ribosomal_L31 (pfam01197) → |
| Eco-1645-1 | NZ_AYNG01000007.1 | - | 46298  | 46246  | RNA → rpmE (PRK00019) Ribosomal_L31 (pfam01197) → |
| Eco-1644-1 | NZ_AYNF01000011.1 | - | 52703  | 52651  | RNA → rpmE (PRK00019) Ribosomal_L31 (pfam01197) → |
| Eco-200-1  | NZ_AYQO01000044.1 | + | 32235  | 32287  | RNA → rpmE (PRK00019) Ribosomal_L31 (pfam01197) → |
| Eco-148-1  | NZ_AYQZ01000048.1 | - | 449    | 397    | RNA → rpmE (PRK00019) Ribosomal_L31 (pfam01197) → |
| Eco-213-1  | NZ_AYQT01000039.1 | - | 417    | 365    | RNA → rpmE (PRK00019) Ribosomal_L31 (pfam01197) → |
| Eco-411-1  | NZ_AXOE01000008.1 | + | 49059  | 49111  | RNA → rpmE (PRK00019) Ribosomal_L31 (pfam01197) → |
| Eco-283-1  | NZ_AYQY01000014.1 | + | 43050  | 43102  | RNA → rpmE (PRK00019) Ribosomal_L31 (pfam01197) → |
| Eco-294-1  | NZ_AYMX02000444.1 | + | 47725  | 47777  | RNA → rpmE (PRK00019) Ribosomal_L31 (pfam01197) → |
| Eco-958-1  | NZ_AYRW01000368.1 | - | 39239  | 39187  | RNA → rpmE (PRK00019) Ribosomal_L31 (pfam01197) → |
| Eco-259-1  | NZ_AYQN01000026.1 | + | 32272  | 32324  | RNA → rpmE (PRK00019) Ribosomal_L31 (pfam01197) → |
| Eco-1643-1 | NZ_AYNJ01000061.1 | + | 92332  | 92384  | RNA → rpmE (PRK00019) Ribosomal_L31 (pfam01197) → |
| Eco-401-1  | NZ_AYJY01000016.1 | + | 113253 | 113305 | RNA → rpmE (PRK00019) Ribosomal_L31 (pfam01197) → |
| Sfl-85-1   | NZ_AFGW01000061.1 | - | 44611  | 44559  | RNA → rpmE (PRK00019) Ribosomal_L31 (pfam01197) → |



|            |                    |   |        |        |                                                                                               |
|------------|--------------------|---|--------|--------|-----------------------------------------------------------------------------------------------|
| Sbo-12-1   | NZ_AKNB01000294.1  | + | 56283  | 56335  | RNA → rpmE (PRK00019) Ribosomal_L31 (pfam01197) →                                             |
| Sfl-61-1   | NZ_AFHD01000041.1  | - | 49743  | 49691  | RNA → rpmE (PRK00019) Ribosomal_L31 (pfam01197) →                                             |
| Sfl-65-1   | NZ_AFHC01000055.1  | - | 49661  | 49609  | RNA → rpmE (PRK00019) Ribosomal_L31 (pfam01197) →                                             |
| Sbo-14-1   | NZ_AERN01000044.1  | - | 696    | 644    | RNA → rpmE (PRK00019) Ribosomal_L31 (pfam01197) →                                             |
| Sso-8-1    | NZ_AKND01000057.1  | + | 87100  | 87152  | RNA → rpmE (PRK00019) Ribosomal_L31 (pfam01197) → rpmE (PRK00019) Ribosomal_L31 (pfam01197) → |
| Sdy-4-1    | NZ_AKNG01000073.1  | + | 16736  | 16788  | RNA → rpmE (PRK00019) Ribosomal_L31 (pfam01197) →                                             |
| Sso-9-1    | NZ_AKNE01000079.1  | + | 32321  | 32373  | RNA → rpmE (PRK00019) Ribosomal_L31 (pfam01197) →                                             |
| Sfl-25-11  | NZ_CELV01000020.1  | - | 31220  | 31168  | RNA → rpmE (PRK00019) Ribosomal_L31 (pfam01197) →                                             |
| Sbo-13-1   | NZ_AFGE01000068.1  | + | 90513  | 90565  | RNA → rpmE (PRK00019) Ribosomal_L31 (pfam01197) →                                             |
| Eco-403-1  | NZ_AYKB01000016.1  | + | 113255 | 113307 | RNA → rpmE (PRK00019) Ribosomal_L31 (pfam01197) →                                             |
| Eco-405-1  | NZ_AYKC01000030.1  | - | 39439  | 39387  | RNA → rpmE (PRK00019) Ribosomal_L31 (pfam01197) →                                             |
| Eco-400-1  | NZ_AYJZ01000015.1  | + | 113245 | 113297 | RNA → rpmE (PRK00019) Ribosomal_L31 (pfam01197) →                                             |
| Eco-407-1  | NZ_AYKE01000042.1  | - | 919    | 867    | RNA → rpmE (PRK00019) Ribosomal_L31 (pfam01197) →                                             |
| Eco-198-1  | NZ_AYQS01000013.1  | - | 28061  | 28009  | RNA → rpmE (PRK00019) Ribosomal_L31 (pfam01197) →                                             |
| Eco-55-1   | NZ_AYJX01000022.1  | + | 32282  | 32334  | RNA → rpmE (PRK00019) Ribosomal_L31 (pfam01197) →                                             |
| Eco-406-1  | NZ_AYKD01000019.1  | - | 489    | 437    | RNA → rpmE (PRK00019) Ribosomal_L31 (pfam01197) →                                             |
| Eco-957-1  | NZ_AZCA01000201.1  | + | 46647  | 46699  | RNA → rpmE (PRK00019) Ribosomal_L31 (pfam01197) →                                             |
| Eco-279-1  | NZ_AYRB01000533.1  | + | 1654   | 1706   | RNA → rpmE (PRK00019) Ribosomal_L31 (pfam01197) →                                             |
| Eco-292-1  | NZ_AWXM02000304.1  | + | 113311 | 113363 | RNA → rpmE (PRK00019) Ribosomal_L31 (pfam01197) →                                             |
| Eco-1382-1 | NZ_CBWH01000046.1  | + | 79652  | 79704  | RNA → rpmE (PRK00019) Ribosomal_L31 (pfam01197) →                                             |
| Eco-416-1  | NZ_CBWG010000182.1 | + | 65101  | 65153  | RNA → rpmE (PRK00019) Ribosomal_L31 (pfam01197) →                                             |
| Sfl-32-1   | NZ_AZIO01000027.1  | - | 31127  | 31075  | RNA → rpmE (PRK00019) Ribosomal_L31 (pfam01197) →                                             |
| Sfl-30-1   | NZ_AZOS01000026.1  | + | 24428  | 24480  | RNA → rpmE (PRK00019) Ribosomal_L31 (pfam01197) →                                             |
| Sfl-22-1   | NZ_AZPX01000049.1  | + | 24428  | 24480  | RNA → rpmE (PRK00019) Ribosomal_L31 (pfam01197) →                                             |
| Sfl-67-1   | NZ_AZPG01000200.1  | - | 27825  | 27773  | RNA → rpmE (PRK00019) Ribosomal_L31 (pfam01197) →                                             |
| Sfl-59-1   | NZ_AZPW01000280.1  | - | 31364  | 31312  | RNA → rpmE (PRK00019) Ribosomal_L31 (pfam01197) →                                             |
| Sfl-34-1   | NZ_AZOO01000003.1  | - | 31133  | 31081  | RNA → rpmE (PRK00019) Ribosomal_L31 (pfam01197) →                                             |
| Sfl-48-1   | NZ_AZOP01000079.1  | - | 31135  | 31083  | RNA → rpmE (PRK00019) Ribosomal_L31 (pfam01197) →                                             |
| Sfl-37-1   | NZ_AZOU01000070.1  | + | 24432  | 24484  | RNA → rpmE (PRK00019) Ribosomal_L31 (pfam01197) →                                             |
| Sfl-49-1   | NZ_AZOY01000093.1  | - | 31123  | 31071  | RNA → rpmE (PRK00019) Ribosomal_L31 (pfam01197) →                                             |
| Sfl-27-1   | NZ_AZPE01000102.1  | - | 31292  | 31240  | RNA → rpmE (PRK00019) Ribosomal_L31 (pfam01197) →                                             |
| Sfl-60-1   | NZ_AZPY01000287.1  | - | 31486  | 31434  | RNA → rpmE (PRK00019) Ribosomal_L31 (pfam01197) →                                             |
| Sfl-84-1   | NZ_AZQD01000281.1  | - | 31338  | 31286  | RNA → rpmE (PRK00019) Ribosomal_L31 (pfam01197) →                                             |
| Sfl-41-1   | NZ_AZQO01000079.1  | + | 24434  | 24486  | RNA → rpmE (PRK00019) Ribosomal_L31 (pfam01197) →                                             |
| Sfl-21-1   | NZ_AZOV01000067.1  | + | 24434  | 24486  | RNA → rpmE (PRK00019) Ribosomal_L31 (pfam01197) →                                             |
| Sfl-13-1   | NZ_AZPP01000004.1  | - | 31121  | 31069  | RNA → rpmE (PRK00019) Ribosomal_L31 (pfam01197) →                                             |
| Sfl-36-1   | NZ_AZJO01000046.1  | + | 24432  | 24484  | RNA → rpmE (PRK00019) Ribosomal_L31 (pfam01197) →                                             |
| Sfl-4-1    | NZ_AZPK01000077.1  | + | 24436  | 24488  | RNA → rpmE (PRK00019) Ribosomal_L31 (pfam01197) →                                             |
| Sfl-43-1   | NZ_AZQE01000091.1  | + | 24436  | 24488  | RNA → rpmE (PRK00019) Ribosomal_L31 (pfam01197) →                                             |
| Sfl-24-1   | NZ_AZPZ01000091.1  | - | 31117  | 31065  | RNA → rpmE (PRK00019) Ribosomal_L31 (pfam01197) →                                             |
| Sfl-2-1    | NZ_AZPH01000073.1  | + | 24422  | 24474  | RNA → rpmE (PRK00019) Ribosomal_L31 (pfam01197) →                                             |
| Sfl-83-1   | NZ_AZQC01000174.1  | - | 31492  | 31440  | RNA → rpmE (PRK00019) Ribosomal_L31 (pfam01197) →                                             |
| Sfl-15-1   | NZ_AZOZ01000072.1  | - | 31133  | 31081  | RNA → rpmE (PRK00019) Ribosomal_L31 (pfam01197) →                                             |
| Sfl-23-1   | NZ_AZON01000035.1  | - | 31133  | 31081  | RNA → rpmE (PRK00019) Ribosomal_L31 (pfam01197) →                                             |
| Sfl-7-1    | NZ_AZPL01000292.1  | + | 24472  | 24524  | RNA → rpmE (PRK00019) Ribosomal_L31 (pfam01197) →                                             |
| Sfl-28-1   | NZ_AZPF01000209.1  | + | 24439  | 24491  | RNA → rpmE (PRK00019) Ribosomal_L31 (pfam01197) →                                             |
| Sfl-16-1   | NZ_AZPS01000215.1  | - | 31471  | 31419  | RNA → rpmE (PRK00019) Ribosomal_L31 (pfam01197) →                                             |
| Sfl-40-1   | NZ_AZOX01000009.1  | - | 31131  | 31079  | RNA → rpmE (PRK00019) Ribosomal_L31 (pfam01197) →                                             |
| Sfl-10-1   | NZ_AZPC01000017.1  | - | 31131  | 31079  | RNA → rpmE (PRK00019) Ribosomal_L31 (pfam01197) →                                             |
| Sfl-8-1    | NZ_AZPM01000105.1  | + | 24432  | 24484  | RNA → rpmE (PRK00019) Ribosomal_L31 (pfam01197) →                                             |
| Sfl-11-1   | NZ_AZPN01000265.1  | - | 31305  | 31253  | RNA → rpmE (PRK00019) Ribosomal_L31 (pfam01197) →                                             |
| Sfl-6-1    | NZ_AZQH01000008.1  | + | 24424  | 24476  | RNA → rpmE (PRK00019) Ribosomal_L31 (pfam01197) →                                             |



|            |                   |   |         |         |                                                                                             |
|------------|-------------------|---|---------|---------|---------------------------------------------------------------------------------------------|
| Sfl-54-1   | NZ_AZPO01000232.1 | + | 24480   | 24532   | RNA → rpmE (PRK00019)Ribosomal_L31 (pfam01197) →                                            |
| Sfl-18-1   | NZ_AZPT01000020.1 | + | 24494   | 24546   | RNA → rpmE (PRK00019)Ribosomal_L31 (pfam01197) →                                            |
| Sfl-9-1    | NZ_AZQI01000099.1 | + | 24519   | 24571   | RNA → rpmE (PRK00019)Ribosomal_L31 (pfam01197) →                                            |
| Sfl-42-1   | NZ_AZOM01000009.1 | - | 31135   | 31083   | RNA → rpmE (PRK00019)Ribosomal_L31 (pfam01197) →                                            |
| Sfl-50-1   | NZ_AZPB01000027.1 | - | 31121   | 31069   | RNA → rpmE (PRK00019)Ribosomal_L31 (pfam01197) →                                            |
| Sfl-14-1   | NZ_AZPQ01000273.1 | - | 31360   | 31308   | RNA → rpmE (PRK00019)Ribosomal_L31 (pfam01197) →                                            |
| Sfl-5-1    | NZ_AZQG01000007.1 | + | 24424   | 24476   | RNA → rpmE (PRK00019)Ribosomal_L31 (pfam01197) →                                            |
| Sfl-58-1   | NZ_AZPV01000133.1 | + | 24550   | 24602   | RNA → rpmE (PRK00019)Ribosomal_L31 (pfam01197) →                                            |
| Sfl-81-1   | NZ_AZQA01000184.1 | - | 31349   | 31297   | RNA → rpmE (PRK00019)Ribosomal_L31 (pfam01197) →                                            |
| Sfl-35-1   | NZ_AZOG01000027.1 | - | 31129   | 31077   | RNA → rpmE (PRK00019)Ribosomal_L31 (pfam01197) →                                            |
| Sfl-47-1   | NZ_AZOR01000045.1 | + | 24434   | 24486   | RNA → rpmE (PRK00019)Ribosomal_L31 (pfam01197) →                                            |
| Sfl-29-1   | NZ_AZPA01000041.1 | - | 31191   | 31139   | RNA → rpmE (PRK00019)Ribosomal_L31 (pfam01197) →                                            |
| Sfl-33-1   | NZ_AZOW01000075.1 | + | 24434   | 24486   | RNA → rpmE (PRK00019)Ribosomal_L31 (pfam01197) →                                            |
| Sfl-31-1   | NZ_AZQF01000166.1 | - | 31137   | 31085   | RNA → rpmE (PRK00019)Ribosomal_L31 (pfam01197) →                                            |
| Sfl-12-1   | NZ_AZQJ01000145.1 | + | 24571   | 24623   | RNA → rpmE (PRK00019)Ribosomal_L31 (pfam01197) →                                            |
| Eco-397-1  | NZ_AONF01000012.1 | - | 41676   | 41624   | RNA → rpmE (PRK00019)Ribosomal_L31 (pfam01197) →                                            |
| Sfl-56-1   | NZ_AZPU01000275.1 | + | 24653   | 24705   | RNA → rpmE (PRK00019)Ribosomal_L31 (pfam01197) →                                            |
| Sfl-52-1   | NZ_AZPJ01000292.1 | - | 31282   | 31230   | RNA → rpmE (PRK00019)Ribosomal_L31 (pfam01197) →                                            |
| Sfl-38-1   | NZ_AZOH01000090.1 | + | 24430   | 24482   | RNA → rpmE (PRK00019)Ribosomal_L31 (pfam01197) →                                            |
| Sfl-39-1   | NZ_AZOK01000053.1 | + | 24432   | 24484   | RNA → rpmE (PRK00019)Ribosomal_L31 (pfam01197) →                                            |
| Sfl-3-1    | NZ_AZPI01000293.1 | + | 24420   | 24472   | RNA → rpmE (PRK00019)Ribosomal_L31 (pfam01197) →                                            |
| Sfl-46-1   | NZ_AZOT01000006.1 | + | 24434   | 24486   | RNA → rpmE (PRK00019)Ribosomal_L31 (pfam01197) →                                            |
| Sfl-44-1   | NZ_AZOL01000016.1 | - | 31123   | 31071   | RNA → rpmE (PRK00019)Ribosomal_L31 (pfam01197) →                                            |
| Sfl-19-1   | NZ_AZQL01000102.1 | + | 24428   | 24480   | RNA → rpmE (PRK00019)Ribosomal_L31 (pfam01197) →                                            |
| Sfl-45-1   | NZ_AZQB01000275.1 | - | 31288   | 31236   | RNA → rpmE (PRK00019)Ribosomal_L31 (pfam01197) →                                            |
| Sfl-26-1   | NZ_AZPD01000034.1 | - | 31130   | 31078   | RNA → rpmE (PRK00019)Ribosomal_L31 (pfam01197) →                                            |
| Sfl-20-1   | NZ_AZQM01000042.1 | + | 24424   | 24476   | RNA → rpmE (PRK00019)Ribosomal_L31 (pfam01197) →                                            |
| Eco-459-1  | NZ_JEM01000046.1  | - | 52620   | 52568   | RNA → rpmE (PRK00019)Ribosomal_L31 (pfam01197) →                                            |
| Sfl-17-1   | NZ_AZK01000022.1  | - | 31129   | 31077   | RNA → rpmE (PRK00019)Ribosomal_L31 (pfam01197) →                                            |
| Sfl-55-1   | NZ_AZPR01000289.1 | + | 24486   | 24538   | RNA → rpmE (PRK00019)Ribosomal_L31 (pfam01197) →                                            |
| Sso-1-541  | NZ_CXFM01000027.1 | + | 39045   | 39097   | RNA → rpmE (PRK00019)Ribosomal_L31 (pfam01197) →                                            |
| Sso-1-542  | NZ_CXKK01000025.1 | - | 790     | 738     | RNA → rpmE (PRK00019)Ribosomal_L31 (pfam01197) →                                            |
| Sso-1-543  | NZ_CXBE01000023.1 | + | 39030   | 39082   | RNA → rpmE (PRK00019)Ribosomal_L31 (pfam01197) →                                            |
| Sso-1-544  | NZ_CXJY01000028.1 | + | 39089   | 39141   | RNA → rpmE (PRK00019)Ribosomal_L31 (pfam01197) →                                            |
| Sdy-3-1    | NZ_AAMJ02000013.1 | - | 49902   | 49850   | RNA → rpmE (PRK00019)Ribosomal_L31 (pfam01197) → rpmE (PRK00019)Ribosomal_L31 (pfam01197) → |
| Eco-752-2  | NC_000913.3       | + | 4126954 | 4127006 | RNA → rpmE (PRK00019)Ribosomal_L31 (pfam01197) →                                            |
| Eco-2153-1 | NC_011751.1       | + | 4613769 | 4613821 | RNA → rpmE (PRK00019)Ribosomal_L31 (pfam01197) →                                            |
| Eco-1829-1 | NC_017634.1       | + | 4166613 | 4166665 | RNA → rpmE (PRK00019)Ribosomal_L31 (pfam01197) →                                            |
| Eco-1380-1 | NC_011750.1       | - | 3185961 | 3185909 | RNA → rpmE (PRK00019)Ribosomal_L31 (pfam01197) →                                            |
| Eco-1742-1 | NC_018658.1       | - | 5023166 | 5023114 | RNA → rpmE (PRK00019)Ribosomal_L31 (pfam01197) →                                            |
| Sdy-8-1    | NC_007606.1       | - | 3539800 | 3539748 | RNA → rpmE (PRK00019)Ribosomal_L31 (pfam01197) →                                            |
| Sfl-63-1   | NC_004337.2       | + | 4142031 | 4142083 | RNA → rpmE (PRK00019)Ribosomal_L31 (pfam01197) →                                            |
| Sfl-66-1   | NC_008258.1       | + | 4113206 | 4113258 | RNA → rpmE (PRK00019)Ribosomal_L31 (pfam01197) → rpmE (PRK00019)Ribosomal_L31 (pfam01197) → |
| Sbo-18-1   | NC_007613.1       | + | 3980530 | 3980582 | RNA → rpmE (PRK00019)Ribosomal_L31 (pfam01197) →                                            |
| Eco-1986-1 | NC_013654.1       | + | 4115387 | 4115439 | RNA → rpmE (PRK00019)Ribosomal_L31 (pfam01197) →                                            |
| Eco-1985-1 | NC_011415.1       | + | 4388453 | 4388505 | RNA → rpmE (PRK00019)Ribosomal_L31 (pfam01197) →                                            |
| Eco-1020-1 | NC_012759.1       | + | 4014646 | 4014698 | RNA → rpmE (PRK00019)Ribosomal_L31 (pfam01197) →                                            |
| Sfl-53-1   | NC_017328.1       | + | 4181705 | 4181757 | RNA → rpmE (PRK00019)Ribosomal_L31 (pfam01197) →                                            |
| Eco-1988-1 | NC_010498.1       | + | 4465819 | 4465871 | RNA → rpmE (PRK00019)Ribosomal_L31 (pfam01197) →                                            |
| Eco-1019-1 | NC_012947.1       | - | 4307595 | 4307543 | RNA → rpmE (PRK00019)Ribosomal_L31 (pfam01197) →                                            |
| Eco-1445-1 | NZ_ANXX01000089.1 | + | 65724   | 65776   | RNA → rpmE (PRK00019)Ribosomal_L31 (pfam01197) →                                            |

|            |                   |   |         |         |                                                                                             |
|------------|-------------------|---|---------|---------|---------------------------------------------------------------------------------------------|
| Eco-1448-1 | NZ_ANXY01000069.1 | + | 80032   | 80084   | RNA → rpmE (PRK00019)Ribosomal_L31 (pfam01197) →                                            |
| Eco-1466-1 | NZ_ANYE01000075.1 | + | 93209   | 93261   | RNA → rpmE (PRK00019)Ribosomal_L31 (pfam01197) →                                            |
| Eco-1455-1 | NZ_ANYB01000068.1 | + | 87346   | 87398   | RNA → rpmE (PRK00019)Ribosomal_L31 (pfam01197) →                                            |
| Eco-1444-1 | NZ_ANXW01000101.1 | + | 98443   | 98495   | RNA → rpmE (PRK00019)Ribosomal_L31 (pfam01197) →                                            |
| Eco-1642-1 | NZ_ANZA01000057.1 | + | 32586   | 32638   | RNA → rpmE (PRK00019)Ribosomal_L31 (pfam01197) →                                            |
| Eco-1637-1 | NZ_ANYX01000066.1 | + | 32374   | 32426   | RNA → rpmE (PRK00019)Ribosomal_L31 (pfam01197) →                                            |
| Eco-1468-1 | NZ_ANYF01000041.1 | + | 32366   | 32418   | RNA → rpmE (PRK00019)Ribosomal_L31 (pfam01197) →                                            |
| Eco-1463-1 | NZ_ANYD01000058.1 | + | 32368   | 32420   | RNA → rpmE (PRK00019)Ribosomal_L31 (pfam01197) →                                            |
| Eco-1494-1 | NZ_ANYP01000077.1 | + | 65180   | 65232   | RNA → rpmE (PRK00019)Ribosomal_L31 (pfam01197) →                                            |
| Eco-1480-1 | NZ_ANYJ01000072.1 | + | 85888   | 85940   | RNA → rpmE (PRK00019)Ribosomal_L31 (pfam01197) →                                            |
| Eco-1631-1 | NZ_ANYV01000057.1 | + | 77047   | 77099   | RNA → rpmE (PRK00019)Ribosomal_L31 (pfam01197) →                                            |
| Eco-1556-1 | NZ_ANYS01000075.1 | + | 27826   | 27878   | RNA → rpmE (PRK00019)Ribosomal_L31 (pfam01197) →                                            |
| Eco-1019-2 | NC_012971.2       | + | 4034877 | 4034929 | RNA → rpmE (PRK00019)Ribosomal_L31 (pfam01197) →                                            |
| Eco-948-1  | NC_017631.1       | + | 4515506 | 4515558 | RNA → ←-hypo                                                                                |
| Eco-1019-3 | NC_012892.2       | + | 4034871 | 4034923 | RNA → rpmE (PRK00019)Ribosomal_L31 (pfam01197) →                                            |
| Eco-2157-1 | NC_017635.1       | + | 4385130 | 4385182 | RNA → rpmE (PRK00019)Ribosomal_L31 (pfam01197) →                                            |
| Sso-12-1   | NC_007384.1       | + | 4340994 | 4341046 | RNA → rpmE (PRK00019)Ribosomal_L31 (pfam01197) →                                            |
| Eco-755-1  | NC_017626.1       | + | 4599214 | 4599266 | RNA → rpmE (PRK00019)Ribosomal_L31 (pfam01197) →                                            |
| Eco-1392-1 | NC_016902.1       | - | 4641114 | 4641062 | RNA → rpmE (PRK00019)Ribosomal_L31 (pfam01197) →                                            |
| Eco-2180-1 | NC_017652.1       | + | 4468480 | 4468532 | RNA → ←-hypo                                                                                |
| Eco-2181-1 | NC_017651.1       | + | 4468480 | 4468532 | RNA → ←-hypo                                                                                |
| Sso-10-1   | NC_016822.1       | + | 4496466 | 4496518 | RNA → rpmE (PRK00019)Ribosomal_L31 (pfam01197) →                                            |
| Eco-1944-1 | NC_017663.1       | + | 4432216 | 4432268 | RNA → rpmE (PRK00019)Ribosomal_L31 (pfam01197) →                                            |
| Eco-2157-2 | NC_017664.1       | + | 4381611 | 4381663 | RNA → rpmE (PRK00019)Ribosomal_L31 (pfam01197) →                                            |
| Eco-1706-1 | NC_017644.1       | + | 4189500 | 4189552 | RNA → rpmE (PRK00019)Ribosomal_L31 (pfam01197) →                                            |
| Eco-1825-1 | NC_017656.1       | + | 4724417 | 4724469 | RNA → rpmE (PRK00019)Ribosomal_L31 (pfam01197) →                                            |
| Eco-1740-1 | NC_018650.1       | - | 5003301 | 5003249 | RNA → rpmE (PRK00019)Ribosomal_L31 (pfam01197) →                                            |
| Eco-1392-2 | NC_017660.1       | - | 593611  | 593559  | RNA → rpmE (PRK00019)Ribosomal_L31 (pfam01197) →                                            |
| Eco-1741-1 | NC_018661.1       | - | 5062731 | 5062679 | RNA → rpmE (PRK00019)Ribosomal_L31 (pfam01197) →                                            |
| Eco-951-1  | NC_020163.1       | + | 85695   | 85747   | RNA → rpmE (PRK00019)Ribosomal_L31 (pfam01197) →                                            |
| Eco-1101-1 | NC_017625.1       | - | 4387516 | 4387464 | RNA → rpmE (PRK00019)Ribosomal_L31 (pfam01197) →                                            |
| Eco-1652-1 | NC_022364.1       | + | 4304568 | 4304620 | RNA → rpmE (PRK00019)Ribosomal_L31 (pfam01197) →                                            |
| Eco-1109-1 | NC_009801.1       | + | 4454628 | 4454680 | RNA → rpmE (PRK00019)Ribosomal_L31 (pfam01197) →                                            |
| Eco-1387-1 | NC_022648.1       | + | 4479116 | 4479168 | RNA → rpmE (PRK00019)Ribosomal_L31 (pfam01197) →                                            |
| Eco-723-1  | NZ_AUZO01000108.1 | + | 34252   | 34304   | RNA → rpmE (PRK00019)Ribosomal_L31 (pfam01197) →                                            |
| Sfl-68-1   | NZ_CM001474.1     | + | 4119177 | 4119229 | RNA → rpmE (PRK00019)Ribosomal_L31 (pfam01197) → rpmE (PRK00019)Ribosomal_L31 (pfam01197) → |
| Eco-2155-1 | NC_017641.1       | + | 4645410 | 4645462 | RNA → rpmE (PRK00019)Ribosomal_L31 (pfam01197) →                                            |
| Eco-2184-1 | NZ_CM000960.1     | + | 4124944 | 4124996 | RNA → rpmE (PRK00019)Ribosomal_L31 (pfam01197) →                                            |
| Eco-983-1  | NZ_GG749342.1     | + | 87874   | 87926   | RNA → rpmE (PRK00019)Ribosomal_L31 (pfam01197) → rpmE (PRK00019)Ribosomal_L31 (pfam01197) → |
| Eco-976-1  | NZ_GG749188.1     | + | 127059  | 127111  | RNA → rpmE (PRK00019)Ribosomal_L31 (pfam01197) → rpmE (PRK00019)Ribosomal_L31 (pfam01197) → |
| Eco-1699-1 | NZ_GG774371.1     | + | 80684   | 80736   | RNA → rpmE (PRK00019)Ribosomal_L31 (pfam01197) →                                            |
| Ssp-26-1   | NZ_GG657392.1     | + | 88633   | 88685   | RNA → rpmE (PRK00019)Ribosomal_L31 (pfam01197) → rpmE (PRK00019)Ribosomal_L31 (pfam01197) → |
| Eco-1166-1 | NZ_GG774918.1     | + | 89061   | 89113   | RNA → rpmE (PRK00019)Ribosomal_L31 (pfam01197) → rpmE (PRK00019)Ribosomal_L31 (pfam01197) → |
| Eco-1691-1 | NZ_GG774248.1     | - | 52196   | 52144   | RNA → rpmE (PRK00019)Ribosomal_L31 (pfam01197) →                                            |
| Eco-1698-1 | NZ_GG774461.1     | + | 64498   | 64550   | RNA → rpmE (PRK00019)Ribosomal_L31 (pfam01197) →                                            |
| Eco-1694-1 | NZ_GG771479.1     | + | 22528   | 22580   | RNA → rpmE (PRK00019)Ribosomal_L31 (pfam01197) →                                            |
| Eco-960-1  | NZ_GG749150.1     | + | 85259   | 85311   | RNA → rpmE (PRK00019)Ribosomal_L31 (pfam01197) → rpmE (PRK00019)Ribosomal_L31 (pfam01197) → |
| Eco-1682-1 | NZ_GG772852.1     | - | 462     | 410     | RNA → rpmE (PRK00019)Ribosomal_L31 (pfam01197) →                                            |
| Eco-1703-1 | NZ_GG771679.1     | + | 85822   | 85874   | RNA → rpmE (PRK00019)Ribosomal_L31 (pfam01197) →                                            |
| Eco-1697-1 | NZ_GG772206.1     | + | 32504   | 32556   | RNA → rpmE (PRK00019)Ribosomal_L31 (pfam01197) →                                            |
| Eco-1700-1 | NZ_GG772413.1     | + | 25779   | 25831   | RNA → rpmE (PRK00019)Ribosomal_L31 (pfam01197) →                                            |
| Eco-864-1  | NZ_GG669103.1     | - | 52064   | 52012   | RNA → rpmE (PRK00019)Ribosomal_L31 (pfam01197) →                                            |

|            |               |   |         |         |                                                                                             |
|------------|---------------|---|---------|---------|---------------------------------------------------------------------------------------------|
| Eco-1167-1 | NZ_GG749232.1 | + | 86937   | 86989   | RNA → rpmE (PRK00019)Ribosomal_L31 (pfam01197) → rpmE (PRK00019)Ribosomal_L31 (pfam01197) → |
| Eco-1689-1 | NZ_GG773609.1 | + | 32438   | 32490   | RNA → rpmE (PRK00019)Ribosomal_L31 (pfam01197) →                                            |
| Eco-1695-1 | NZ_GG773824.1 | + | 80487   | 80539   | RNA → rpmE (PRK00019)Ribosomal_L31 (pfam01197) →                                            |
| Eco-1680-1 | NZ_GG771822.1 | + | 86729   | 86781   | RNA → rpmE (PRK00019)Ribosomal_L31 (pfam01197) →                                            |
| Eco-1696-1 | NZ_GG772729.1 | - | 13634   | 13582   | RNA → rpmE (PRK00019)Ribosomal_L31 (pfam01197) →                                            |
| Eco-1687-1 | NZ_GG773153.1 | + | 81002   | 81054   | RNA → rpmE (PRK00019)Ribosomal_L31 (pfam01197) →                                            |
| Eco-1701-1 | NZ_GG773309.1 | + | 104840  | 104892  | RNA → rpmE (PRK00019)Ribosomal_L31 (pfam01197) →                                            |
| Eco-1690-1 | NZ_GG771886.1 | - | 460     | 408     | RNA → rpmE (PRK00019)Ribosomal_L31 (pfam01197) →                                            |
| Eco-1686-1 | NZ_GG772092.1 | + | 44158   | 44210   | RNA → rpmE (PRK00019)Ribosomal_L31 (pfam01197) →                                            |
| Eco-1692-1 | NZ_GG772571.1 | - | 108651  | 108599  | RNA → rpmE (PRK00019)Ribosomal_L31 (pfam01197) →                                            |
| Eco-420-1  | NZ_KK097726.1 | + | 80911   | 80963   | RNA → rpmE (PRK00019)Ribosomal_L31 (pfam01197) →                                            |
| Eco-326-1  | NZ_KK214059.1 | + | 80697   | 80749   | RNA → rpmE (PRK00019)Ribosomal_L31 (pfam01197) →                                            |
| Eco-1027-1 | NZ_KI543994.1 | + | 87495   | 87547   | RNA → rpmE (PRK00019)Ribosomal_L31 (pfam01197) →                                            |
| Eco-1026-1 | NZ_KI543649.1 | + | 4300    | 4352    | RNA → rpmE (PRK00019)Ribosomal_L31 (pfam01197) →                                            |
| Eco-1028-1 | NZ_KI544375.1 | + | 34333   | 34385   | RNA → rpmE (PRK00019)Ribosomal_L31 (pfam01197) →                                            |
| Eco-1746-1 | NZ_KB021558.1 | + | 84299   | 84351   | RNA → rpmE (PRK00019)Ribosomal_L31 (pfam01197) →                                            |
| Eco-921-1  | NZ_KB003425.1 | + | 91671   | 91723   | RNA → rpmE (PRK00019)Ribosomal_L31 (pfam01197) →                                            |
| Eco-1747-1 | NZ_KB021571.1 | + | 180804  | 180856  | RNA → rpmE (PRK00019)Ribosomal_L31 (pfam01197) →                                            |
| Eco-1752-1 | NZ_KB021472.1 | + | 181474  | 181526  | RNA → rpmE (PRK00019)Ribosomal_L31 (pfam01197) →                                            |
| Eco-1649-1 | NZ_KB223477.1 | + | 2193206 | 2193258 | RNA → rpmE (PRK00019)Ribosomal_L31 (pfam01197) →                                            |
| Eco-1756-1 | NZ_KB021464.1 | + | 85592   | 85644   | RNA → rpmE (PRK00019)Ribosomal_L31 (pfam01197) →                                            |
| Eco-1750-1 | NZ_KB021485.1 | + | 184834  | 184886  | RNA → rpmE (PRK00019)Ribosomal_L31 (pfam01197) →                                            |
| Eco-308-1  | NZ_KK736286.1 | + | 196918  | 196970  | RNA → rpmE (PRK00019)Ribosomal_L31 (pfam01197) →                                            |
| Eco-458-1  | NZ_KK736506.1 | + | 3269686 | 3269738 | RNA → rpmE (PRK00019)Ribosomal_L31 (pfam01197) →                                            |
| Eco-315-1  | NZ_KK736338.1 | + | 4058460 | 4058512 | RNA → rpmE (PRK00019)Ribosomal_L31 (pfam01197) →                                            |
| Eco-389-1  | NZ_KK736486.1 | + | 209675  | 209727  | RNA → rpmE (PRK00019)Ribosomal_L31 (pfam01197) →                                            |
| Eco-322-1  | NZ_KK736423.1 | + | 93266   | 93318   | RNA → rpmE (PRK00019)Ribosomal_L31 (pfam01197) →                                            |
| Eco-321-1  | NZ_KK736416.1 | + | 82463   | 82515   | RNA → rpmE (PRK00019)Ribosomal_L31 (pfam01197) →                                            |
| Eco-741-1  | NZ_KK736534.1 | + | 86741   | 86793   | RNA → rpmE (PRK00019)Ribosomal_L31 (pfam01197) →                                            |
| Eco-323-1  | NZ_KK736437.1 | + | 2266431 | 2266483 | RNA → rpmE (PRK00019)Ribosomal_L31 (pfam01197) →                                            |
| Eco-313-1  | NZ_KK736322.1 | + | 80906   | 80958   | RNA → rpmE (PRK00019)Ribosomal_L31 (pfam01197) →                                            |
| Eco-740-1  | NZ_KK736517.1 | + | 486722  | 486774  | RNA → rpmE (PRK00019)Ribosomal_L31 (pfam01197) →                                            |
| Eco-319-1  | NZ_KK736385.1 | + | 87501   | 87553   | RNA → rpmE (PRK00019)Ribosomal_L31 (pfam01197) →                                            |
| Eco-324-1  | NZ_KK736448.1 | + | 115918  | 115970  | RNA → rpmE (PRK00019)Ribosomal_L31 (pfam01197) →                                            |
| Eco-318-1  | NZ_KK736372.1 | + | 2909588 | 2909640 | RNA → rpmE (PRK00019)Ribosomal_L31 (pfam01197) →                                            |
| Eco-744-1  | NZ_KK736563.1 | + | 1241877 | 1241929 | RNA → rpmE (PRK00019)Ribosomal_L31 (pfam01197) →                                            |
| Eco-457-1  | NZ_KK736497.1 | + | 90449   | 90501   | RNA → rpmE (PRK00019)Ribosomal_L31 (pfam01197) →                                            |
| Eco-387-1  | NZ_KK736462.1 | + | 115174  | 115226  | RNA → rpmE (PRK00019)Ribosomal_L31 (pfam01197) →                                            |
| Eco-311-1  | NZ_KK736301.1 | + | 195414  | 195466  | RNA → rpmE (PRK00019)Ribosomal_L31 (pfam01197) →                                            |
| Eco-742-1  | NZ_KK736542.1 | + | 4150583 | 4150635 | RNA → rpmE (PRK00019)Ribosomal_L31 (pfam01197) →                                            |
| Eco-743-1  | NZ_KK736552.1 | + | 132495  | 132547  | RNA → rpmE (PRK00019)Ribosomal_L31 (pfam01197) →                                            |
| Eco-309-1  | NZ_KK736297.1 | + | 87560   | 87612   | RNA → rpmE (PRK00019)Ribosomal_L31 (pfam01197) →                                            |
| Eco-745-1  | NZ_KK736578.1 | + | 88541   | 88593   | RNA → rpmE (PRK00019)Ribosomal_L31 (pfam01197) →                                            |
| Eco-388-1  | NZ_KK736473.1 | + | 2466433 | 2466485 | RNA → rpmE (PRK00019)Ribosomal_L31 (pfam01197) →                                            |
| Eco-320-1  | NZ_KK736404.1 | + | 81196   | 81248   | RNA → rpmE (PRK00019)Ribosomal_L31 (pfam01197) →                                            |
| Eco-312-1  | NZ_KK736313.1 | + | 194713  | 194765  | RNA → rpmE (PRK00019)Ribosomal_L31 (pfam01197) →                                            |
| Eco-317-1  | NZ_KK736365.1 | + | 88105   | 88157   | RNA → rpmE (PRK00019)Ribosomal_L31 (pfam01197) →                                            |
| Eco-1170-1 | NZ_GL871851.1 | + | 43112   | 43164   | RNA → rpmE (PRK00019)Ribosomal_L31 (pfam01197) →                                            |
| Eco-911-1  | NZ_GL878028.1 | + | 724541  | 724593  | RNA → rpmE (PRK00019)Ribosomal_L31 (pfam01197) →                                            |
| Eco-1180-1 | NZ_GL883798.1 | + | 86450   | 86502   | RNA → rpmE (PRK00019)Ribosomal_L31 (pfam01197) → rpmE (PRK00019)Ribosomal_L31 (pfam01197) → |
| Eco-1176-1 | NZ_GL872255.1 | - | 40223   | 40171   | RNA → rpmE (PRK00019)Ribosomal_L31 (pfam01197) →                                            |
| Eco-1178-1 | NZ_GL884468.1 | + | 87820   | 87872   | RNA → rpmE (PRK00019)Ribosomal_L31 (pfam01197) → rpmE (PRK00019)Ribosomal_L31 (pfam01197) → |



|            |               |   |         |         |                                                                                             |
|------------|---------------|---|---------|---------|---------------------------------------------------------------------------------------------|
| Eco-1110-1 | NZ_GL871816.1 | + | 87804   | 87856   | RNA → rpmE (PRK00019)Ribosomal_L31 (pfam01197) →                                            |
| Eco-1653-1 | NZ_GL883924.1 | + | 84931   | 84983   | RNA → rpmE (PRK00019)Ribosomal_L31 (pfam01197) → rpmE (PRK00019)Ribosomal_L31 (pfam01197) → |
| Eco-1104-1 | NZ_GL871751.1 | - | 651     | 599     | RNA → rpmE (PRK00019)Ribosomal_L31 (pfam01197) →                                            |
| Eco-2032-1 | NZ_GL872210.1 | + | 93460   | 93512   | RNA → rpmE (PRK00019)Ribosomal_L31 (pfam01197) →                                            |
| Eco-2004-1 | NZ_GL884294.1 | + | 87814   | 87866   | RNA → rpmE (PRK00019)Ribosomal_L31 (pfam01197) → rpmE (PRK00019)Ribosomal_L31 (pfam01197) → |
| Eco-1764-1 | NZ_GL989523.1 | + | 84226   | 84278   | RNA → rpmE (PRK00019)Ribosomal_L31 (pfam01197) →                                            |
| Eco-2002-1 | NZ_GL884232.1 | + | 83146   | 83198   | RNA → rpmE (PRK00019)Ribosomal_L31 (pfam01197) → rpmE (PRK00019)Ribosomal_L31 (pfam01197) → |
| Eco-1106-1 | NZ_GL871776.1 | + | 87176   | 87228   | RNA → rpmE (PRK00019)Ribosomal_L31 (pfam01197) →                                            |
| Eco-1654-1 | NZ_GL884138.1 | + | 94025   | 94077   | RNA → rpmE (PRK00019)Ribosomal_L31 (pfam01197) → rpmE (PRK00019)Ribosomal_L31 (pfam01197) → |
| Eco-2003-1 | NZ_GL884196.1 | + | 81379   | 81431   | RNA → rpmE (PRK00019)Ribosomal_L31 (pfam01197) → rpmE (PRK00019)Ribosomal_L31 (pfam01197) → |
| Eco-2001-1 | NZ_JH590773.1 | - | 42161   | 42109   | RNA → rpmE (PRK00019)Ribosomal_L31 (pfam01197) →                                            |
| Eco-1177-1 | NZ_JH590617.1 | + | 88767   | 88819   | RNA → rpmE (PRK00019)Ribosomal_L31 (pfam01197) →                                            |
| Eco-1102-1 | NZ_JH590524.1 | + | 92133   | 92185   | RNA → rpmE (PRK00019)Ribosomal_L31 (pfam01197) →                                            |
| Eco-961-1  | NZ_JH590664.1 | - | 9874    | 9822    | RNA → rpmE (PRK00019)Ribosomal_L31 (pfam01197) →                                            |
| Eco-1656-1 | NZ_JH659572.1 | + | 695309  | 695361  | RNA → rpmE (PRK00019)Ribosomal_L31 (pfam01197) →                                            |
| Eco-2038-1 | NZ_JH695848.1 | + | 91681   | 91733   | RNA → rpmE (PRK00019)Ribosomal_L31 (pfam01197) →                                            |
| Esp-76-1   | NZ_JH660542.1 | - | 40026   | 39974   | RNA → rpmE (PRK00019)Ribosomal_L31 (pfam01197) →                                            |
| Eco-993-1  | NZ_JH768572.1 | + | 1165956 | 1166008 | RNA → rpmE (PRK00019)Ribosomal_L31 (pfam01197) →                                            |
| Eco-1179-1 | NZ_JH768585.1 | + | 1121171 | 1121223 | RNA → rpmE (PRK00019)Ribosomal_L31 (pfam01197) →                                            |
| Esp-75-1   | NZ_JH815282.1 | + | 114130  | 114182  | RNA → rpmE (PRK00019)Ribosomal_L31 (pfam01197) →                                            |
| Eco-2022-1 | NZ_JH954133.1 | + | 32834   | 32886   | RNA → rpmE (PRK00019)Ribosomal_L31 (pfam01197) →                                            |
| Eco-841-1  | NZ_JH953850.1 | + | 85845   | 85897   | RNA → rpmE (PRK00019)Ribosomal_L31 (pfam01197) →                                            |
| Eco-952-1  | NZ_JH954331.1 | + | 76681   | 76733   | RNA → rpmE (PRK00019)Ribosomal_L31 (pfam01197) →                                            |
| Eco-1143-1 | NZ_JH955422.1 | + | 91755   | 91807   | RNA → rpmE (PRK00019)Ribosomal_L31 (pfam01197) →                                            |
| Eco-1705-1 | NZ_JH965420.1 | + | 47331   | 47383   | RNA → rpmE (PRK00019)Ribosomal_L31 (pfam01197) →                                            |
| Eco-860-1  | NZ_JH970602.1 | + | 81850   | 81902   | RNA → rpmE (PRK00019)Ribosomal_L31 (pfam01197) →                                            |
| Eco-852-1  | NZ_JH954938.1 | + | 91698   | 91750   | RNA → rpmE (PRK00019)Ribosomal_L31 (pfam01197) →                                            |
| Eco-756-1  | NZ_JH964479.1 | + | 22701   | 22753   | RNA → rpmE (PRK00019)Ribosomal_L31 (pfam01197) →                                            |
| Eco-766-1  | NZ_JH968717.1 | + | 91759   | 91811   | RNA → rpmE (PRK00019)Ribosomal_L31 (pfam01197) →                                            |
| Eco-861-1  | NZ_JH969598.1 | + | 81857   | 81909   | RNA → rpmE (PRK00019)Ribosomal_L31 (pfam01197) →                                            |
| Eco-2041-1 | NZ_JH954585.1 | + | 47568   | 47620   | RNA → rpmE (PRK00019)Ribosomal_L31 (pfam01197) →                                            |
| Eco-753-1  | NZ_JH943432.1 | + | 46671   | 46723   | RNA → rpmE (PRK00019)Ribosomal_L31 (pfam01197) →                                            |
| Eco-855-1  | NZ_JH958335.1 | - | 512     | 460     | RNA → rpmE (PRK00019)Ribosomal_L31 (pfam01197) →                                            |
| Eco-1755-1 | NZ_KB021584.1 | + | 87738   | 87790   | RNA → rpmE (PRK00019)Ribosomal_L31 (pfam01197) →                                            |
| Eco-2163-1 | NZ_HE962388.1 | + | 4198777 | 4198829 | RNA → rpmE (PRK00019)Ribosomal_L31 (pfam01197) →                                            |
| Eco-1726-1 | NZ_KB021620.1 | + | 85592   | 85644   | RNA → rpmE (PRK00019)Ribosomal_L31 (pfam01197) →                                            |
| Eco-1754-1 | NZ_KB021513.1 | + | 85592   | 85644   | RNA → rpmE (PRK00019)Ribosomal_L31 (pfam01197) →                                            |
| Eco-1757-1 | NZ_KB021454.1 | + | 1171507 | 1171559 | RNA → rpmE (PRK00019)Ribosomal_L31 (pfam01197) →                                            |
| Eco-1749-1 | NZ_KB021497.1 | + | 1170984 | 1171036 | RNA → rpmE (PRK00019)Ribosomal_L31 (pfam01197) →                                            |
| Eco-1748-1 | NZ_KB021525.1 | + | 427364  | 427416  | RNA → rpmE (PRK00019)Ribosomal_L31 (pfam01197) →                                            |
| Eco-1751-1 | NZ_KB021544.1 | + | 85116   | 85168   | RNA → rpmE (PRK00019)Ribosomal_L31 (pfam01197) →                                            |
| Eco-1567-1 | NZ_KB732351.1 | + | 97932   | 97984   | RNA → rpmE (PRK00019)Ribosomal_L31 (pfam01197) →                                            |
| Eco-1505-1 | NZ_KB732415.1 | + | 113044  | 113096  | RNA → rpmE (PRK00019)Ribosomal_L31 (pfam01197) →                                            |
| Eco-1522-1 | NZ_KB732473.1 | + | 743128  | 743180  | RNA → rpmE (PRK00019)Ribosomal_L31 (pfam01197) →                                            |
| Eco-1414-1 | NZ_KB732238.1 | + | 1437519 | 1437571 | RNA → rpmE (PRK00019)Ribosomal_L31 (pfam01197) →                                            |
| Eco-1436-1 | NZ_KB731785.1 | + | 32367   | 32419   | RNA → rpmE (PRK00019)Ribosomal_L31 (pfam01197) →                                            |
| Eco-1441-1 | NZ_KB732177.1 | + | 84318   | 84370   | RNA → rpmE (PRK00019)Ribosomal_L31 (pfam01197) →                                            |
| Eco-1476-1 | NZ_KB732283.1 | + | 81703   | 81755   | RNA → rpmE (PRK00019)Ribosomal_L31 (pfam01197) →                                            |
| Eco-1564-1 | NZ_KB732326.1 | + | 87030   | 87082   | RNA → rpmE (PRK00019)Ribosomal_L31 (pfam01197) →                                            |
| Eco-1577-1 | NZ_KB732362.1 | + | 80466   | 80518   | RNA → rpmE (PRK00019)Ribosomal_L31 (pfam01197) →                                            |
| Eco-1495-1 | NZ_KB732396.1 | + | 195853  | 195905  | RNA → rpmE (PRK00019)Ribosomal_L31 (pfam01197) →                                            |
| Eco-1510-1 | NZ_KB732448.1 | + | 782725  | 782777  | RNA → rpmE (PRK00019)Ribosomal_L31 (pfam01197) →                                            |



|            |               |   |         |         |                                                  |
|------------|---------------|---|---------|---------|--------------------------------------------------|
| Eco-1527-1 | NZ_KB732498.1 | + | 193073  | 193125  | RNA → rpmE (PRK00019)Ribosomal_L31 (pfam01197) → |
| Eco-1554-1 | NZ_KB732596.1 | + | 199313  | 199365  | RNA → rpmE (PRK00019)Ribosomal_L31 (pfam01197) → |
| Eco-1561-1 | NZ_KB733385.1 | + | 2566546 | 2566598 | RNA → rpmE (PRK00019)Ribosomal_L31 (pfam01197) → |
| Eco-1479-1 | NZ_KB732953.1 | + | 2179276 | 2179328 | RNA → rpmE (PRK00019)Ribosomal_L31 (pfam01197) → |
| Eco-1483-1 | NZ_KB731709.1 | + | 32524   | 32576   | RNA → rpmE (PRK00019)Ribosomal_L31 (pfam01197) → |
| Eco-2106-1 | NZ_KE702260.1 | + | 90983   | 91035   | RNA → rpmE (PRK00019)Ribosomal_L31 (pfam01197) → |
| Eco-2131-1 | NZ_KE702466.1 | - | 52307   | 52255   | RNA → rpmE (PRK00019)Ribosomal_L31 (pfam01197) → |
| Eco-2104-1 | NZ_KE702230.1 | + | 115511  | 115563  | RNA → rpmE (PRK00019)Ribosomal_L31 (pfam01197) → |
| Eco-2113-1 | NZ_KE702352.1 | + | 89164   | 89216   | RNA → rpmE (PRK00019)Ribosomal_L31 (pfam01197) → |
| Eco-1270-1 | NZ_KE700660.1 | + | 403149  | 403201  | RNA → rpmE (PRK00019)Ribosomal_L31 (pfam01197) → |
| Eco-1336-1 | NZ_KE699249.1 | + | 188168  | 188220  | RNA → rpmE (PRK00019)Ribosomal_L31 (pfam01197) → |
| Eco-2121-1 | NZ_KE702395.1 | + | 1075165 | 1075217 | RNA → rpmE (PRK00019)Ribosomal_L31 (pfam01197) → |
| Eco-1199-1 | NZ_KE699807.1 | + | 1128823 | 1128875 | RNA → rpmE (PRK00019)Ribosomal_L31 (pfam01197) → |
| Eco-1297-1 | NZ_KE699028.1 | + | 79986   | 80038   | RNA → rpmE (PRK00019)Ribosomal_L31 (pfam01197) → |
| Eco-1345-1 | NZ_KE699321.1 | + | 4351742 | 4351794 | RNA → rpmE (PRK00019)Ribosomal_L31 (pfam01197) → |
| Eco-1243-1 | NZ_KE700363.1 | + | 85160   | 85212   | RNA → rpmE (PRK00019)Ribosomal_L31 (pfam01197) → |
| Eco-1369-1 | NZ_KE699618.1 | + | 84335   | 84387   | RNA → rpmE (PRK00019)Ribosomal_L31 (pfam01197) → |
| Eco-1280-1 | NZ_KE700796.1 | + | 4000295 | 4000347 | RNA → rpmE (PRK00019)Ribosomal_L31 (pfam01197) → |
| Eco-1337-1 | NZ_KE699258.1 | + | 743182  | 743234  | RNA → rpmE (PRK00019)Ribosomal_L31 (pfam01197) → |
| Eco-1220-1 | NZ_KE700087.1 | + | 3167873 | 3167925 | RNA → rpmE (PRK00019)Ribosomal_L31 (pfam01197) → |
| Eco-1234-1 | NZ_KE700242.1 | + | 2622626 | 2622678 | RNA → rpmE (PRK00019)Ribosomal_L31 (pfam01197) → |
| Eco-1233-1 | NZ_KE700237.1 | + | 1196136 | 1196188 | RNA → rpmE (PRK00019)Ribosomal_L31 (pfam01197) → |
| Eco-1253-1 | NZ_KE700478.1 | + | 4545085 | 4545137 | RNA → rpmE (PRK00019)Ribosomal_L31 (pfam01197) → |
| Eco-1344-1 | NZ_KE699313.1 | + | 97329   | 97381   | RNA → rpmE (PRK00019)Ribosomal_L31 (pfam01197) → |
| Eco-1249-1 | NZ_KE700419.1 | + | 742045  | 742097  | RNA → rpmE (PRK00019)Ribosomal_L31 (pfam01197) → |
| Eco-1296-1 | NZ_KE700922.1 | - | 41764   | 41712   | RNA → rpmE (PRK00019)Ribosomal_L31 (pfam01197) → |
| Eco-1197-1 | NZ_KE699787.1 | + | 349152  | 349204  | RNA → rpmE (PRK00019)Ribosomal_L31 (pfam01197) → |
| Eco-1221-1 | NZ_KE700096.1 | + | 88104   | 88156   | RNA → rpmE (PRK00019)Ribosomal_L31 (pfam01197) → |
| Eco-1373-1 | NZ_KE699643.1 | + | 3534137 | 3534189 | RNA → rpmE (PRK00019)Ribosomal_L31 (pfam01197) → |
| Eco-1222-1 | NZ_KE700100.1 | + | 4500805 | 4500857 | RNA → rpmE (PRK00019)Ribosomal_L31 (pfam01197) → |
| Eco-1291-1 | NZ_KE700872.1 | + | 80483   | 80535   | RNA → rpmE (PRK00019)Ribosomal_L31 (pfam01197) → |
| Eco-1248-1 | NZ_KE700414.1 | + | 199577  | 199629  | RNA → rpmE (PRK00019)Ribosomal_L31 (pfam01197) → |
| Eco-2094-1 | NZ_KE702091.1 | + | 85614   | 85666   | RNA → rpmE (PRK00019)Ribosomal_L31 (pfam01197) → |
| Eco-1229-1 | NZ_KE700205.1 | + | 1104705 | 1104757 | RNA → rpmE (PRK00019)Ribosomal_L31 (pfam01197) → |
| Eco-1321-1 | NZ_KE699105.1 | + | 2180086 | 2180138 | RNA → rpmE (PRK00019)Ribosomal_L31 (pfam01197) → |
| Eco-1208-1 | NZ_KE699939.1 | + | 88102   | 88154   | RNA → rpmE (PRK00019)Ribosomal_L31 (pfam01197) → |
| Eco-1202-1 | NZ_KE699849.1 | + | 1590970 | 1591022 | RNA → rpmE (PRK00019)Ribosomal_L31 (pfam01197) → |
| Eco-1301-1 | NZ_KE700974.1 | + | 245573  | 245625  | RNA → rpmE (PRK00019)Ribosomal_L31 (pfam01197) → |
| Eco-1269-1 | NZ_KE700653.1 | + | 325873  | 325925  | RNA → rpmE (PRK00019)Ribosomal_L31 (pfam01197) → |
| Eco-2061-1 | NZ_KE701627.1 | + | 121771  | 121823  | RNA → rpmE (PRK00019)Ribosomal_L31 (pfam01197) → |
| Eco-1356-1 | NZ_KE699409.1 | + | 204658  | 204710  | RNA → rpmE (PRK00019)Ribosomal_L31 (pfam01197) → |
| Eco-1210-1 | NZ_KE699949.1 | + | 742245  | 742297  | RNA → rpmE (PRK00019)Ribosomal_L31 (pfam01197) → |
| Eco-1308-1 | NZ_KE701068.1 | + | 83463   | 83515   | RNA → rpmE (PRK00019)Ribosomal_L31 (pfam01197) → |
| Eco-1266-1 | NZ_KE700607.1 | + | 185536  | 185588  | RNA → rpmE (PRK00019)Ribosomal_L31 (pfam01197) → |
| Eco-1405-1 | NZ_KE701348.1 | + | 85496   | 85548   | RNA → rpmE (PRK00019)Ribosomal_L31 (pfam01197) → |
| Eco-1260-1 | NZ_KE700567.1 | + | 85985   | 86037   | RNA → rpmE (PRK00019)Ribosomal_L31 (pfam01197) → |
| Eco-2047-1 | NZ_KE701430.1 | + | 85390   | 85442   | RNA → rpmE (PRK00019)Ribosomal_L31 (pfam01197) → |
| Eco-1227-1 | NZ_KE700176.1 | + | 2293232 | 2293284 | RNA → rpmE (PRK00019)Ribosomal_L31 (pfam01197) → |
| Eco-1190-1 | NZ_KE699700.1 | + | 467270  | 467322  | RNA → rpmE (PRK00019)Ribosomal_L31 (pfam01197) → |
| Eco-1371-1 | NZ_KE699635.1 | + | 2173713 | 2173765 | RNA → rpmE (PRK00019)Ribosomal_L31 (pfam01197) → |
| Eco-1254-1 | NZ_KE700490.1 | + | 2177479 | 2177531 | RNA → rpmE (PRK00019)Ribosomal_L31 (pfam01197) → |
| Eco-1295-1 | NZ_KE700916.1 | + | 86774   | 86826   | RNA → rpmE (PRK00019)Ribosomal_L31 (pfam01197) → |

|            |               |   |         |         |                                                  |
|------------|---------------|---|---------|---------|--------------------------------------------------|
| Eco-1300-1 | NZ_KE700953.1 | + | 84308   | 84360   | RNA → rpmE (PRK00019)Ribosomal_L31 (pfam01197) → |
| Eco-1194-1 | NZ_KE699743.1 | + | 181707  | 181759  | RNA → rpmE (PRK00019)Ribosomal_L31 (pfam01197) → |
| Eco-2055-1 | NZ_KE701518.1 | + | 92772   | 92824   | RNA → rpmE (PRK00019)Ribosomal_L31 (pfam01197) → |
| Eco-1201-1 | NZ_KE699839.1 | + | 87380   | 87432   | RNA → rpmE (PRK00019)Ribosomal_L31 (pfam01197) → |
| Eco-1370-1 | NZ_KE699628.1 | + | 319058  | 319110  | RNA → rpmE (PRK00019)Ribosomal_L31 (pfam01197) → |
| Eco-2069-1 | NZ_KE701708.1 | + | 227760  | 227812  | RNA → rpmE (PRK00019)Ribosomal_L31 (pfam01197) → |
| Eco-1397-1 | NZ_KE701232.1 | + | 79950   | 80002   | RNA → rpmE (PRK00019)Ribosomal_L31 (pfam01197) → |
| Eco-1230-1 | NZ_KE700212.1 | + | 80100   | 80152   | RNA → rpmE (PRK00019)Ribosomal_L31 (pfam01197) → |
| Eco-1231-1 | NZ_KE700228.1 | + | 85258   | 85310   | RNA → rpmE (PRK00019)Ribosomal_L31 (pfam01197) → |
| Eco-1394-1 | NZ_KE701414.1 | + | 192950  | 193002  | RNA → rpmE (PRK00019)Ribosomal_L31 (pfam01197) → |
| Eco-1232-1 | NZ_KE700230.1 | - | 42749   | 42697   | RNA → rpmE (PRK00019)Ribosomal_L31 (pfam01197) → |
| Eco-2057-1 | NZ_KE701560.1 | - | 44526   | 44474   | RNA → rpmE (PRK00019)Ribosomal_L31 (pfam01197) → |
| Eco-1237-1 | NZ_KE700264.1 | + | 2639992 | 2640044 | RNA → rpmE (PRK00019)Ribosomal_L31 (pfam01197) → |
| Eco-1268-1 | NZ_KE700644.1 | + | 80782   | 80834   | RNA → rpmE (PRK00019)Ribosomal_L31 (pfam01197) → |
| Eco-2068-1 | NZ_KE701687.1 | + | 85680   | 85732   | RNA → rpmE (PRK00019)Ribosomal_L31 (pfam01197) → |
| Eco-1198-1 | NZ_KE699798.1 | + | 1589000 | 1589052 | RNA → rpmE (PRK00019)Ribosomal_L31 (pfam01197) → |
| Eco-2081-1 | NZ_KE701872.1 | + | 85305   | 85357   | RNA → rpmE (PRK00019)Ribosomal_L31 (pfam01197) → |
| Eco-1278-1 | NZ_KE700785.1 | + | 204693  | 204745  | RNA → rpmE (PRK00019)Ribosomal_L31 (pfam01197) → |
| Eco-1292-1 | NZ_KE700883.1 | + | 117631  | 117683  | RNA → rpmE (PRK00019)Ribosomal_L31 (pfam01197) → |
| Eco-1283-1 | NZ_KE700822.1 | + | 1471785 | 1471837 | RNA → rpmE (PRK00019)Ribosomal_L31 (pfam01197) → |
| Eco-1396-1 | NZ_KE701181.1 | + | 281387  | 281439  | RNA → rpmE (PRK00019)Ribosomal_L31 (pfam01197) → |
| Eco-1242-1 | NZ_KE700346.1 | + | 87380   | 87432   | RNA → rpmE (PRK00019)Ribosomal_L31 (pfam01197) → |
| Eco-1211-1 | NZ_KE699962.1 | + | 179632  | 179684  | RNA → rpmE (PRK00019)Ribosomal_L31 (pfam01197) → |
| Eco-1216-1 | NZ_KE700044.1 | + | 91616   | 91668   | RNA → rpmE (PRK00019)Ribosomal_L31 (pfam01197) → |
| Eco-1403-1 | NZ_KE701325.1 | + | 81714   | 81766   | RNA → rpmE (PRK00019)Ribosomal_L31 (pfam01197) → |
| Eco-1271-1 | NZ_KE700720.1 | - | 747529  | 747477  | RNA → rpmE (PRK00019)Ribosomal_L31 (pfam01197) → |
| Eco-2052-1 | NZ_KE701490.1 | + | 743787  | 743839  | RNA → rpmE (PRK00019)Ribosomal_L31 (pfam01197) → |
| Eco-1273-1 | NZ_KE700745.1 | + | 99117   | 99169   | RNA → rpmE (PRK00019)Ribosomal_L31 (pfam01197) → |
| Eco-1294-1 | NZ_KE700903.1 | + | 748033  | 748085  | RNA → rpmE (PRK00019)Ribosomal_L31 (pfam01197) → |
| Eco-1313-1 | NZ_KE701161.1 | - | 495077  | 495025  | RNA → rpmE (PRK00019)Ribosomal_L31 (pfam01197) → |
| Eco-1204-1 | NZ_KE699870.1 | + | 21397   | 21449   | RNA → rpmE (PRK00019)Ribosomal_L31 (pfam01197) → |
| Eco-2082-1 | NZ_KE701899.1 | + | 1059289 | 1059341 | RNA → rpmE (PRK00019)Ribosomal_L31 (pfam01197) → |
| Eco-1226-1 | NZ_KE700140.1 | + | 194311  | 194363  | RNA → rpmE (PRK00019)Ribosomal_L31 (pfam01197) → |
| Eco-2071-1 | NZ_KE701737.1 | + | 84955   | 85007   | RNA → rpmE (PRK00019)Ribosomal_L31 (pfam01197) → |
| Eco-1206-1 | NZ_KE699898.1 | + | 84775   | 84827   | RNA → rpmE (PRK00019)Ribosomal_L31 (pfam01197) → |
| Eco-1212-1 | NZ_KE699972.1 | + | 118706  | 118758  | RNA → rpmE (PRK00019)Ribosomal_L31 (pfam01197) → |
| Eco-1406-1 | NZ_KE701351.1 | + | 1610660 | 1610712 | RNA → rpmE (PRK00019)Ribosomal_L31 (pfam01197) → |
| Eco-1309-1 | NZ_KE701070.1 | + | 739347  | 739399  | RNA → rpmE (PRK00019)Ribosomal_L31 (pfam01197) → |
| Eco-2093-1 | NZ_KE702074.1 | + | 774010  | 774062  | RNA → rpmE (PRK00019)Ribosomal_L31 (pfam01197) → |
| Eco-1213-1 | NZ_KE699994.1 | + | 85300   | 85352   | RNA → rpmE (PRK00019)Ribosomal_L31 (pfam01197) → |
| Eco-1311-1 | NZ_KE701117.1 | + | 27360   | 27412   | RNA → rpmE (PRK00019)Ribosomal_L31 (pfam01197) → |
| Eco-1312-1 | NZ_KE701119.1 | + | 91804   | 91856   | RNA → rpmE (PRK00019)Ribosomal_L31 (pfam01197) → |
| Eco-1393-1 | NZ_KE701223.1 | + | 202372  | 202424  | RNA → rpmE (PRK00019)Ribosomal_L31 (pfam01197) → |
| Eco-2059-1 | NZ_KE701583.1 | + | 199908  | 199960  | RNA → rpmE (PRK00019)Ribosomal_L31 (pfam01197) → |
| Eco-1267-1 | NZ_KE700619.1 | + | 3121410 | 3121462 | RNA → rpmE (PRK00019)Ribosomal_L31 (pfam01197) → |
| Eco-1404-1 | NZ_KE701335.1 | + | 318980  | 319032  | RNA → rpmE (PRK00019)Ribosomal_L31 (pfam01197) → |
| Eco-2150-1 | NZ_KE702713.1 | + | 199335  | 199387  | RNA → rpmE (PRK00019)Ribosomal_L31 (pfam01197) → |
| Eco-2125-1 | NZ_KE702411.1 | + | 1536533 | 1536585 | RNA → rpmE (PRK00019)Ribosomal_L31 (pfam01197) → |
| Eco-2048-1 | NZ_KE701438.1 | + | 1586317 | 1586369 | RNA → rpmE (PRK00019)Ribosomal_L31 (pfam01197) → |
| Eco-1408-1 | NZ_KE701207.1 | + | 121266  | 121318  | RNA → rpmE (PRK00019)Ribosomal_L31 (pfam01197) → |
| Eco-1261-1 | NZ_KE700575.1 | + | 83633   | 83685   | RNA → rpmE (PRK00019)Ribosomal_L31 (pfam01197) → |
| Eco-2065-1 | NZ_KE701670.1 | + | 2925945 | 2925997 | RNA → rpmE (PRK00019)Ribosomal_L31 (pfam01197) → |

|            |               |   |         |         |                                                  |
|------------|---------------|---|---------|---------|--------------------------------------------------|
| Eco-1293-1 | NZ_KE700892.1 | + | 1709668 | 1709720 | RNA → rpmE (PRK00019)Ribosomal_L31 (pfam01197) → |
| Eco-2067-1 | NZ_KE701675.1 | + | 192386  | 192438  | RNA → rpmE (PRK00019)Ribosomal_L31 (pfam01197) → |
| Eco-2139-1 | NZ_KE702536.1 | + | 29590   | 29642   | RNA → rpmE (PRK00019)Ribosomal_L31 (pfam01197) → |
| Eco-2053-1 | NZ_KE701494.1 | + | 3675398 | 3675450 | RNA → rpmE (PRK00019)Ribosomal_L31 (pfam01197) → |
| Eco-1400-1 | NZ_KE701267.1 | + | 213951  | 214003  | RNA → rpmE (PRK00019)Ribosomal_L31 (pfam01197) → |
| Eco-1258-1 | NZ_KE700536.1 | + | 1137068 | 1137120 | RNA → rpmE (PRK00019)Ribosomal_L31 (pfam01197) → |
| Eco-2084-1 | NZ_KE701945.1 | + | 84267   | 84319   | RNA → rpmE (PRK00019)Ribosomal_L31 (pfam01197) → |
| Eco-2099-1 | NZ_KE702161.1 | + | 85444   | 85496   | RNA → rpmE (PRK00019)Ribosomal_L31 (pfam01197) → |
| Eco-2085-1 | NZ_KE701948.1 | + | 78493   | 78545   | RNA → rpmE (PRK00019)Ribosomal_L31 (pfam01197) → |
| Eco-1395-1 | NZ_KE701420.1 | + | 88540   | 88592   | RNA → rpmE (PRK00019)Ribosomal_L31 (pfam01197) → |
| Eco-2143-1 | NZ_KE702605.1 | + | 25421   | 25473   | RNA → rpmE (PRK00019)Ribosomal_L31 (pfam01197) → |
| Eco-2112-1 | NZ_KE702337.1 | + | 88193   | 88245   | RNA → rpmE (PRK00019)Ribosomal_L31 (pfam01197) → |
| Eco-1240-1 | NZ_KE700291.1 | + | 117994  | 118046  | RNA → rpmE (PRK00019)Ribosomal_L31 (pfam01197) → |
| Eco-2063-1 | NZ_KE701654.1 | + | 185838  | 185890  | RNA → rpmE (PRK00019)Ribosomal_L31 (pfam01197) → |
| Eco-1246-1 | NZ_KE700403.1 | + | 85286   | 85338   | RNA → rpmE (PRK00019)Ribosomal_L31 (pfam01197) → |
| Eco-2100-1 | NZ_KE702175.1 | + | 80475   | 80527   | RNA → rpmE (PRK00019)Ribosomal_L31 (pfam01197) → |
| Eco-1289-1 | NZ_KE700861.1 | + | 85906   | 85958   | RNA → rpmE (PRK00019)Ribosomal_L31 (pfam01197) → |
| Eco-2056-1 | NZ_KE701523.1 | + | 2947159 | 2947211 | RNA → rpmE (PRK00019)Ribosomal_L31 (pfam01197) → |
| Eco-1306-1 | NZ_KE701027.1 | + | 85359   | 85411   | RNA → rpmE (PRK00019)Ribosomal_L31 (pfam01197) → |
| Eco-1402-1 | NZ_KE701300.1 | + | 85206   | 85258   | RNA → rpmE (PRK00019)Ribosomal_L31 (pfam01197) → |
| Eco-2108-1 | NZ_KE702265.1 | + | 93283   | 93335   | RNA → rpmE (PRK00019)Ribosomal_L31 (pfam01197) → |
| Eco-2151-1 | NZ_KE702724.1 | + | 83451   | 83503   | RNA → rpmE (PRK00019)Ribosomal_L31 (pfam01197) → |
| Eco-2095-1 | NZ_KE702095.1 | - | 52165   | 52113   | RNA → rpmE (PRK00019)Ribosomal_L31 (pfam01197) → |
| Eco-1314-1 | NZ_KE701170.1 | + | 196467  | 196519  | RNA → rpmE (PRK00019)Ribosomal_L31 (pfam01197) → |
| Eco-2092-1 | NZ_KE702067.1 | + | 92478   | 92530   | RNA → rpmE (PRK00019)Ribosomal_L31 (pfam01197) → |
| Eco-2133-1 | NZ_KE702487.1 | + | 95092   | 95144   | RNA → rpmE (PRK00019)Ribosomal_L31 (pfam01197) → |
| Eco-1401-1 | NZ_KE701274.1 | + | 85390   | 85442   | RNA → rpmE (PRK00019)Ribosomal_L31 (pfam01197) → |
| Eco-2149-1 | NZ_KE702705.1 | + | 78536   | 78588   | RNA → rpmE (PRK00019)Ribosomal_L31 (pfam01197) → |
| Eco-2078-1 | NZ_KE701848.1 | + | 119686  | 119738  | RNA → rpmE (PRK00019)Ribosomal_L31 (pfam01197) → |
| Eco-2058-1 | NZ_KE701578.1 | + | 196466  | 196518  | RNA → rpmE (PRK00019)Ribosomal_L31 (pfam01197) → |
| Eco-2135-1 | NZ_KE702499.1 | + | 204063  | 204115  | RNA → rpmE (PRK00019)Ribosomal_L31 (pfam01197) → |
| Eco-2117-1 | NZ_KE702369.1 | + | 199988  | 200040  | RNA → rpmE (PRK00019)Ribosomal_L31 (pfam01197) → |
| Eco-2137-1 | NZ_KE702509.1 | + | 81443   | 81495   | RNA → rpmE (PRK00019)Ribosomal_L31 (pfam01197) → |
| Eco-1304-1 | NZ_KE701008.1 | + | 741430  | 741482  | RNA → rpmE (PRK00019)Ribosomal_L31 (pfam01197) → |
| Eco-2049-1 | NZ_KE701450.1 | + | 329620  | 329672  | RNA → rpmE (PRK00019)Ribosomal_L31 (pfam01197) → |
| Eco-1303-1 | NZ_KE700987.1 | + | 4378097 | 4378149 | RNA → rpmE (PRK00019)Ribosomal_L31 (pfam01197) → |
| Eco-2070-1 | NZ_KE701712.1 | + | 766321  | 766373  | RNA → rpmE (PRK00019)Ribosomal_L31 (pfam01197) → |
| Eco-1219-1 | NZ_KE700086.1 | + | 83699   | 83751   | RNA → rpmE (PRK00019)Ribosomal_L31 (pfam01197) → |
| Eco-2080-1 | NZ_KE701868.1 | + | 90346   | 90398   | RNA → rpmE (PRK00019)Ribosomal_L31 (pfam01197) → |
| Eco-1409-1 | NZ_KE701377.1 | + | 200139  | 200191  | RNA → rpmE (PRK00019)Ribosomal_L31 (pfam01197) → |
| Eco-1287-1 | NZ_KE700845.1 | + | 299546  | 299598  | RNA → rpmE (PRK00019)Ribosomal_L31 (pfam01197) → |
| Eco-2062-1 | NZ_KE701633.1 | + | 192993  | 193045  | RNA → rpmE (PRK00019)Ribosomal_L31 (pfam01197) → |
| Eco-2083-1 | NZ_KE701910.1 | + | 317539  | 317591  | RNA → rpmE (PRK00019)Ribosomal_L31 (pfam01197) → |
| Eco-2103-1 | NZ_KE702202.1 | + | 81678   | 81730   | RNA → rpmE (PRK00019)Ribosomal_L31 (pfam01197) → |
| Eco-1195-1 | NZ_KE699763.1 | + | 91882   | 91934   | RNA → rpmE (PRK00019)Ribosomal_L31 (pfam01197) → |
| Eco-2118-1 | NZ_KE702382.1 | + | 82835   | 82887   | RNA → rpmE (PRK00019)Ribosomal_L31 (pfam01197) → |
| Eco-1251-1 | NZ_KE700461.1 | - | 43511   | 43459   | RNA → rpmE (PRK00019)Ribosomal_L31 (pfam01197) → |
| Eco-1412-1 | NZ_KE701406.1 | + | 1581102 | 1581154 | RNA → rpmE (PRK00019)Ribosomal_L31 (pfam01197) → |
| Eco-2142-1 | NZ_KE702584.1 | + | 2386278 | 2386330 | RNA → rpmE (PRK00019)Ribosomal_L31 (pfam01197) → |
| Eco-1411-1 | NZ_KE701395.1 | + | 3203329 | 3203381 | RNA → rpmE (PRK00019)Ribosomal_L31 (pfam01197) → |
| Eco-1244-1 | NZ_KE700366.1 | + | 83391   | 83443   | RNA → rpmE (PRK00019)Ribosomal_L31 (pfam01197) → |
| Eco-2126-1 | NZ_KE702423.1 | + | 86433   | 86485   | RNA → rpmE (PRK00019)Ribosomal_L31 (pfam01197) → |



|            |               |   |         |         |                                                  |
|------------|---------------|---|---------|---------|--------------------------------------------------|
| Eco-2054-1 | NZ_KE701500.1 | + | 32308   | 32360   | RNA → rpmE (PRK00019)Ribosomal_L31 (pfam01197) → |
| Eco-1282-1 | NZ_KE700813.1 | + | 197775  | 197827  | RNA → rpmE (PRK00019)Ribosomal_L31 (pfam01197) → |
| Eco-2128-1 | NZ_KE702432.1 | + | 79824   | 79876   | RNA → rpmE (PRK00019)Ribosomal_L31 (pfam01197) → |
| Eco-2096-1 | NZ_KE702100.1 | + | 85155   | 85207   | RNA → rpmE (PRK00019)Ribosomal_L31 (pfam01197) → |
| Eco-1259-1 | NZ_KE700541.1 | - | 376622  | 376570  | RNA → rpmE (PRK00019)Ribosomal_L31 (pfam01197) → |
| Eco-2140-1 | NZ_KE702556.1 | + | 204424  | 204476  | RNA → rpmE (PRK00019)Ribosomal_L31 (pfam01197) → |
| Eco-2088-1 | NZ_KE701999.1 | + | 305573  | 305625  | RNA → rpmE (PRK00019)Ribosomal_L31 (pfam01197) → |
| Eco-2073-1 | NZ_KE701764.1 | + | 85198   | 85250   | RNA → rpmE (PRK00019)Ribosomal_L31 (pfam01197) → |
| Eco-1399-1 | NZ_KE701264.1 | + | 90963   | 91015   | RNA → rpmE (PRK00019)Ribosomal_L31 (pfam01197) → |
| Eco-2115-1 | NZ_KE702359.1 | + | 89025   | 89077   | RNA → rpmE (PRK00019)Ribosomal_L31 (pfam01197) → |
| Eco-2060-1 | NZ_KE701597.1 | + | 798535  | 798587  | RNA → rpmE (PRK00019)Ribosomal_L31 (pfam01197) → |
| Eco-2152-1 | NZ_KE702739.1 | + | 85432   | 85484   | RNA → rpmE (PRK00019)Ribosomal_L31 (pfam01197) → |
| Eco-1407-1 | NZ_KE701357.1 | + | 3796106 | 3796158 | RNA → rpmE (PRK00019)Ribosomal_L31 (pfam01197) → |
| Eco-2051-1 | NZ_KE701474.1 | + | 183061  | 183113  | RNA → rpmE (PRK00019)Ribosomal_L31 (pfam01197) → |
| Eco-2087-1 | NZ_KE701982.1 | + | 191708  | 191760  | RNA → rpmE (PRK00019)Ribosomal_L31 (pfam01197) → |
| Eco-2097-1 | NZ_KE702123.1 | + | 198791  | 198843  | RNA → rpmE (PRK00019)Ribosomal_L31 (pfam01197) → |
| Eco-2072-1 | NZ_KE701745.1 | + | 90258   | 90310   | RNA → rpmE (PRK00019)Ribosomal_L31 (pfam01197) → |
| Eco-2111-1 | NZ_KE702333.1 | + | 184802  | 184854  | RNA → rpmE (PRK00019)Ribosomal_L31 (pfam01197) → |
| Eco-2098-1 | NZ_KE702128.1 | + | 81858   | 81910   | RNA → rpmE (PRK00019)Ribosomal_L31 (pfam01197) → |
| Eco-2110-1 | NZ_KE702301.1 | + | 87657   | 87709   | RNA → rpmE (PRK00019)Ribosomal_L31 (pfam01197) → |
| Eco-2076-1 | NZ_KE701799.1 | + | 85001   | 85053   | RNA → rpmE (PRK00019)Ribosomal_L31 (pfam01197) → |
| Eco-2077-1 | NZ_KE701803.1 | + | 85072   | 85124   | RNA → rpmE (PRK00019)Ribosomal_L31 (pfam01197) → |
| Eco-2091-1 | NZ_KE702043.1 | + | 203223  | 203275  | RNA → rpmE (PRK00019)Ribosomal_L31 (pfam01197) → |
| Eco-2134-1 | NZ_KE702490.1 | + | 4289533 | 4289585 | RNA → rpmE (PRK00019)Ribosomal_L31 (pfam01197) → |
| Eco-2086-1 | NZ_KE701969.1 | + | 712304  | 712356  | RNA → rpmE (PRK00019)Ribosomal_L31 (pfam01197) → |
| Eco-2120-1 | NZ_KE702386.1 | + | 3870113 | 3870165 | RNA → rpmE (PRK00019)Ribosomal_L31 (pfam01197) → |
| Eco-2075-1 | NZ_KE701784.1 | + | 94679   | 94731   | RNA → rpmE (PRK00019)Ribosomal_L31 (pfam01197) → |
| Eco-2079-1 | NZ_KE701857.1 | + | 763071  | 763123  | RNA → rpmE (PRK00019)Ribosomal_L31 (pfam01197) → |
| Eco-2124-1 | NZ_KE702407.1 | + | 2192167 | 2192219 | RNA → rpmE (PRK00019)Ribosomal_L31 (pfam01197) → |
| Eco-2127-1 | NZ_KE702425.1 | + | 3699233 | 3699285 | RNA → rpmE (PRK00019)Ribosomal_L31 (pfam01197) → |
| Eco-2146-1 | NZ_KE702642.1 | + | 185296  | 185348  | RNA → rpmE (PRK00019)Ribosomal_L31 (pfam01197) → |
| Eco-2148-1 | NZ_KE702686.1 | + | 818241  | 818293  | RNA → rpmE (PRK00019)Ribosomal_L31 (pfam01197) → |
| Eco-2144-1 | NZ_KE702621.1 | + | 80610   | 80662   | RNA → rpmE (PRK00019)Ribosomal_L31 (pfam01197) → |
| Eco-2141-1 | NZ_KE702572.1 | + | 83823   | 83875   | RNA → rpmE (PRK00019)Ribosomal_L31 (pfam01197) → |
| Eco-1275-1 | NZ_KE747799.1 | + | 206535  | 206587  | RNA → rpmE (PRK00019)Ribosomal_L31 (pfam01197) → |
| Eco-2130-1 | NZ_KE705271.1 | + | 3310513 | 3310565 | RNA → rpmE (PRK00019)Ribosomal_L31 (pfam01197) → |
| Eco-1374-1 | NZ_KE705265.1 | + | 175598  | 175650  | RNA → rpmE (PRK00019)Ribosomal_L31 (pfam01197) → |
| Eco-771-1  | NZ_KI521938.1 | + | 26072   | 26124   | RNA → rpmE (PRK00019)Ribosomal_L31 (pfam01197) → |
| Eco-874-1  | NZ_KI522050.1 | - | 2343    | 2291    | RNA → rpmE (PRK00019)Ribosomal_L31 (pfam01197) → |
| Eco-1375-1 | NZ_KE705252.1 | + | 1104995 | 1105047 | RNA → rpmE (PRK00019)Ribosomal_L31 (pfam01197) → |
| Eco-883-1  | NZ_KI522363.1 | + | 79390   | 79442   | RNA → rpmE (PRK00019)Ribosomal_L31 (pfam01197) → |
| Eco-901-1  | NZ_KI522509.1 | + | 32268   | 32320   | RNA → rpmE (PRK00019)Ribosomal_L31 (pfam01197) → |
| Eco-2107-1 | NZ_KI530646.1 | + | 1159405 | 1159457 | RNA → rpmE (PRK00019)Ribosomal_L31 (pfam01197) → |
| Eco-769-1  | NZ_KI521734.1 | - | 41852   | 41800   | RNA → rpmE (PRK00019)Ribosomal_L31 (pfam01197) → |
| Eco-894-1  | NZ_KI533778.1 | + | 64774   | 64826   | RNA → rpmE (PRK00019)Ribosomal_L31 (pfam01197) → |
| Eco-1342-1 | NZ_KI530595.1 | - | 145459  | 145407  | RNA → rpmE (PRK00019)Ribosomal_L31 (pfam01197) → |
| Eco-881-1  | NZ_KI522310.1 | + | 60402   | 60454   | RNA → rpmE (PRK00019)Ribosomal_L31 (pfam01197) → |
| Eco-768-1  | NZ_KI521711.1 | - | 2401    | 2349    | RNA → rpmE (PRK00019)Ribosomal_L31 (pfam01197) → |
| Eco-903-1  | NZ_KI535003.1 | - | 52232   | 52180   | RNA → rpmE (PRK00019)Ribosomal_L31 (pfam01197) → |
| Eco-1378-1 | NZ_KI530619.1 | + | 85133   | 85185   | RNA → rpmE (PRK00019)Ribosomal_L31 (pfam01197) → |
| Eco-889-1  | NZ_KI532955.1 | + | 79292   | 79344   | RNA → rpmE (PRK00019)Ribosomal_L31 (pfam01197) → |
| Eco-880-1  | NZ_KI531695.1 | + | 148651  | 148703  | RNA → rpmE (PRK00019)Ribosomal_L31 (pfam01197) → |



|            |                |   |         |         |                                                  |
|------------|----------------|---|---------|---------|--------------------------------------------------|
| Eco-895-1  | NZ_KI534085.1  | + | 64817   | 64869   | RNA → rpmE (PRK00019)Ribosomal_L31 (pfam01197) → |
| Eco-2119-1 | NZ_KI530691.1  | + | 742265  | 742317  | RNA → rpmE (PRK00019)Ribosomal_L31 (pfam01197) → |
| Eco-2122-1 | NZ_KI530639.1  | + | 84693   | 84745   | RNA → rpmE (PRK00019)Ribosomal_L31 (pfam01197) → |
| Eco-1016-1 | NZ_KI535409.1  | + | 2483096 | 2483148 | RNA → rpmE (PRK00019)Ribosomal_L31 (pfam01197) → |
| Eco-2136-1 | NZ_KI530662.1  | + | 1099626 | 1099678 | RNA → rpmE (PRK00019)Ribosomal_L31 (pfam01197) → |
| Eco-875-1  | NZ_KI530989.1  | + | 32307   | 32359   | RNA → rpmE (PRK00019)Ribosomal_L31 (pfam01197) → |
| Eco-2116-1 | NZ_KI530626.1  | + | 87523   | 87575   | RNA → rpmE (PRK00019)Ribosomal_L31 (pfam01197) → |
| Eco-882-1  | NZ_KI531752.1  | + | 64690   | 64742   | RNA → rpmE (PRK00019)Ribosomal_L31 (pfam01197) → |
| Eco-898-1  | NZ_KI534543.1  | + | 28730   | 28782   | RNA → rpmE (PRK00019)Ribosomal_L31 (pfam01197) → |
| Eco-946-1  | NZ_KI535243.1  | + | 80068   | 80120   | RNA → rpmE (PRK00019)Ribosomal_L31 (pfam01197) → |
| Eco-879-1  | NZ_KI531489.1  | - | 44412   | 44360   | RNA → rpmE (PRK00019)Ribosomal_L31 (pfam01197) → |
| Eco-1423-1 | NZ_KI5317211.1 | + | 1128617 | 1128669 | RNA → rpmE (PRK00019)Ribosomal_L31 (pfam01197) → |
| Eco-1613-1 | NZ_KE137107.1  | + | 1403747 | 1403799 | RNA → rpmE (PRK00019)Ribosomal_L31 (pfam01197) → |
| Eco-1449-1 | NZ_KE137273.1  | + | 87029   | 87081   | RNA → rpmE (PRK00019)Ribosomal_L31 (pfam01197) → |
| Eco-1489-1 | NZ_KE137316.1  | + | 3244486 | 3244538 | RNA → rpmE (PRK00019)Ribosomal_L31 (pfam01197) → |
| Eco-1641-1 | NZ_KE137153.1  | - | 88837   | 88785   | RNA → rpmE (PRK00019)Ribosomal_L31 (pfam01197) → |
| Eco-900-1  | NZ_KI534784.1  | + | 79620   | 79672   | RNA → rpmE (PRK00019)Ribosomal_L31 (pfam01197) → |
| Eco-1017-1 | NZ_KI535398.1  | + | 309573  | 309625  | RNA → rpmE (PRK00019)Ribosomal_L31 (pfam01197) → |
| Eco-1555-1 | NZ_KE136642.1  | + | 179829  | 179881  | RNA → rpmE (PRK00019)Ribosomal_L31 (pfam01197) → |
| Eco-1541-1 | NZ_KE136951.1  | + | 2950291 | 2950343 | RNA → rpmE (PRK00019)Ribosomal_L31 (pfam01197) → |
| Eco-1544-1 | NZ_KE136956.1  | + | 180294  | 180346  | RNA → rpmE (PRK00019)Ribosomal_L31 (pfam01197) → |
| Eco-1504-1 | NZ_KE136876.1  | + | 2069968 | 2070020 | RNA → rpmE (PRK00019)Ribosomal_L31 (pfam01197) → |
| Eco-1514-1 | NZ_KE136897.1  | + | 314032  | 314084  | RNA → rpmE (PRK00019)Ribosomal_L31 (pfam01197) → |
| Eco-876-1  | NZ_KI531098.1  | - | 44414   | 44362   | RNA → rpmE (PRK00019)Ribosomal_L31 (pfam01197) → |
| Eco-1579-1 | NZ_KE136820.1  | + | 1390963 | 1391015 | RNA → rpmE (PRK00019)Ribosomal_L31 (pfam01197) → |
| Eco-1413-1 | NZ_KE136565.1  | + | 183210  | 183262  | RNA → rpmE (PRK00019)Ribosomal_L31 (pfam01197) → |
| Eco-1562-1 | NZ_KE136702.1  | + | 123684  | 123736  | RNA → rpmE (PRK00019)Ribosomal_L31 (pfam01197) → |
| Eco-1521-1 | NZ_KE136944.1  | + | 743534  | 743586  | RNA → rpmE (PRK00019)Ribosomal_L31 (pfam01197) → |
| Eco-1575-1 | NZ_KE136772.1  | + | 84349   | 84401   | RNA → rpmE (PRK00019)Ribosomal_L31 (pfam01197) → |
| Eco-1503-1 | NZ_KE136872.1  | - | 345466  | 345414  | RNA → rpmE (PRK00019)Ribosomal_L31 (pfam01197) → |
| Eco-1548-1 | NZ_KE136980.1  | + | 750943  | 750995  | RNA → rpmE (PRK00019)Ribosomal_L31 (pfam01197) → |
| Eco-1417-1 | NZ_KE137162.1  | + | 713495  | 713547  | RNA → rpmE (PRK00019)Ribosomal_L31 (pfam01197) → |
| Eco-1610-1 | NZ_KE137068.1  | + | 1539326 | 1539378 | RNA → rpmE (PRK00019)Ribosomal_L31 (pfam01197) → |
| Eco-1612-1 | NZ_KE137074.1  | + | 222135  | 222187  | RNA → rpmE (PRK00019)Ribosomal_L31 (pfam01197) → |
| Eco-1418-1 | NZ_KE137186.1  | + | 26461   | 26513   | RNA → rpmE (PRK00019)Ribosomal_L31 (pfam01197) → |
| Eco-1443-1 | NZ_KE137233.1  | + | 216568  | 216620  | RNA → rpmE (PRK00019)Ribosomal_L31 (pfam01197) → |
| Eco-2114-1 | NZ_KI530681.1  | + | 1627520 | 1627572 | RNA → rpmE (PRK00019)Ribosomal_L31 (pfam01197) → |
| Eco-1018-1 | NZ_KI535383.1  | + | 3646346 | 3646398 | RNA → rpmE (PRK00019)Ribosomal_L31 (pfam01197) → |
| Eco-1520-1 | NZ_KE136683.1  | + | 92806   | 92858   | RNA → rpmE (PRK00019)Ribosomal_L31 (pfam01197) → |
| Eco-1574-1 | NZ_KE136752.1  | + | 116804  | 116856  | RNA → rpmE (PRK00019)Ribosomal_L31 (pfam01197) → |
| Eco-1518-1 | NZ_KE136939.1  | + | 827982  | 828034  | RNA → rpmE (PRK00019)Ribosomal_L31 (pfam01197) → |
| Eco-1457-1 | NZ_KE136655.1  | + | 1741425 | 1741477 | RNA → rpmE (PRK00019)Ribosomal_L31 (pfam01197) → |
| Eco-1572-1 | NZ_KE136745.1  | - | 62476   | 62424   | RNA → rpmE (PRK00019)Ribosomal_L31 (pfam01197) → |
| Eco-1517-1 | NZ_KE136913.1  | + | 2263750 | 2263802 | RNA → rpmE (PRK00019)Ribosomal_L31 (pfam01197) → |
| Eco-1609-1 | NZ_KE137053.1  | + | 1171162 | 1171214 | RNA → rpmE (PRK00019)Ribosomal_L31 (pfam01197) → |
| Eco-1328-1 | NZ_KI538668.1  | + | 125792  | 125844  | RNA → rpmE (PRK00019)Ribosomal_L31 (pfam01197) → |
| Eco-1616-1 | NZ_KE137133.1  | + | 84349   | 84401   | RNA → rpmE (PRK00019)Ribosomal_L31 (pfam01197) → |
| Eco-1239-1 | NZ_KI538738.1  | + | 93530   | 93582   | RNA → rpmE (PRK00019)Ribosomal_L31 (pfam01197) → |
| Eco-2066-1 | NZ_KI538796.1  | + | 717176  | 717228  | RNA → rpmE (PRK00019)Ribosomal_L31 (pfam01197) → |
| Eco-1022-1 | NZ_KI535541.1  | + | 768557  | 768609  | RNA → rpmE (PRK00019)Ribosomal_L31 (pfam01197) → |
| Eco-1368-1 | NZ_KI538698.1  | + | 356734  | 356786  | RNA → rpmE (PRK00019)Ribosomal_L31 (pfam01197) → |
| Eco-1615-1 | NZ_KE137109.1  | + | 1090822 | 1090874 | RNA → rpmE (PRK00019)Ribosomal_L31 (pfam01197) → |

|            |                   |   |         |         |                                                  |
|------------|-------------------|---|---------|---------|--------------------------------------------------|
| Eco-1223-1 | NZ_KI538713.1     | + | 84208   | 84260   | RNA → rpmE (PRK00019)Ribosomal_L31 (pfam01197) → |
| Eco-1196-1 | NZ_KI538815.1     | + | 3031145 | 3031197 | RNA → rpmE (PRK00019)Ribosomal_L31 (pfam01197) → |
| Eco-896-1  | NZ_KI534157.1     | + | 79484   | 79536   | RNA → rpmE (PRK00019)Ribosomal_L31 (pfam01197) → |
| Eco-888-1  | NZ_KI532739.1     | - | 42075   | 42023   | RNA → rpmE (PRK00019)Ribosomal_L31 (pfam01197) → |
| Eco-892-1  | NZ_KI533438.1     | - | 479     | 427     | RNA → rpmE (PRK00019)Ribosomal_L31 (pfam01197) → |
| Eco-897-1  | NZ_KI534353.1     | - | 44556   | 44504   | RNA → rpmE (PRK00019)Ribosomal_L31 (pfam01197) → |
| Eco-945-1  | NZ_KI535081.1     | - | 52219   | 52167   | RNA → rpmE (PRK00019)Ribosomal_L31 (pfam01197) → |
| Eco-887-1  | NZ_KI532548.1     | + | 64822   | 64874   | RNA → rpmE (PRK00019)Ribosomal_L31 (pfam01197) → |
| Eco-1365-1 | NZ_KI669338.1     | + | 85482   | 85534   | RNA → rpmE (PRK00019)Ribosomal_L31 (pfam01197) → |
| Eco-752-1  | NZ_KI912161.1     | + | 85941   | 85993   | RNA → rpmE (PRK00019)Ribosomal_L31 (pfam01197) → |
| Eco-1315-1 | NZ_KI669335.1     | + | 81184   | 81236   | RNA → rpmE (PRK00019)Ribosomal_L31 (pfam01197) → |
| Eco-2123-1 | NZ_KI669372.1     | + | 3497209 | 3497261 | RNA → rpmE (PRK00019)Ribosomal_L31 (pfam01197) → |
| Eco-1262-1 | NZ_KI669356.1     | + | 1449482 | 1449534 | RNA → rpmE (PRK00019)Ribosomal_L31 (pfam01197) → |
| Eco-300-1  | NZ_KI929682.1     | + | 4436190 | 4436242 | RNA → rpmE (PRK00019)Ribosomal_L31 (pfam01197) → |
| Eco-329-1  | NZ_KI929787.1     | + | 4431189 | 4431241 | RNA → rpmE (PRK00019)Ribosomal_L31 (pfam01197) → |
| Eco-396-1  | NZ_KI894099.1     | + | 18404   | 18456   | RNA → rpmE (PRK00019)Ribosomal_L31 (pfam01197) → |
| Eco-301-1  | NZ_KI929678.1     | + | 708660  | 708712  | RNA → rpmE (PRK00019)Ribosomal_L31 (pfam01197) → |
| Eco-330-1  | NZ_KI929782.1     | + | 4994418 | 4994470 | RNA → rpmE (PRK00019)Ribosomal_L31 (pfam01197) → |
| Eco-2034-1 | NZ_AELB01000053.1 | + | 19626   | 19678   | RNA → rpmE (PRK00019)Ribosomal_L31 (pfam01197) → |
| Eco-1467-1 | NZ_KB732280.1     | + | 715829  | 715881  | RNA → rpmE (PRK00019)Ribosomal_L31 (pfam01197) → |
| Eco-1532-1 | NZ_KB732523.1     | + | 91133   | 91185   | RNA → rpmE (PRK00019)Ribosomal_L31 (pfam01197) → |
| Eco-1543-1 | NZ_KB733374.1     | + | 739997  | 740049  | RNA → rpmE (PRK00019)Ribosomal_L31 (pfam01197) → |
| Eco-1597-1 | NZ_KB732717.1     | + | 126864  | 126916  | RNA → rpmE (PRK00019)Ribosomal_L31 (pfam01197) → |
| Eco-1608-1 | NZ_KB732770.1     | + | 390084  | 390136  | RNA → rpmE (PRK00019)Ribosomal_L31 (pfam01197) → |
| Eco-1519-1 | NZ_KB732206.1     | + | 87364   | 87416   | RNA → rpmE (PRK00019)Ribosomal_L31 (pfam01197) → |
| Eco-1435-1 | NZ_KB732269.1     | + | 769148  | 769200  | RNA → rpmE (PRK00019)Ribosomal_L31 (pfam01197) → |
| Eco-1499-1 | NZ_KB732407.1     | + | 185493  | 185545  | RNA → rpmE (PRK00019)Ribosomal_L31 (pfam01197) → |
| Eco-1506-1 | NZ_KB732426.1     | + | 386694  | 386746  | RNA → rpmE (PRK00019)Ribosomal_L31 (pfam01197) → |
| Eco-1512-1 | NZ_KB732454.1     | + | 2967821 | 2967873 | RNA → rpmE (PRK00019)Ribosomal_L31 (pfam01197) → |
| Eco-1525-1 | NZ_KB732469.1     | + | 217122  | 217174  | RNA → rpmE (PRK00019)Ribosomal_L31 (pfam01197) → |
| Eco-1529-1 | NZ_KB732511.1     | + | 2112749 | 2112801 | RNA → rpmE (PRK00019)Ribosomal_L31 (pfam01197) → |
| Eco-1534-1 | NZ_KB732530.1     | + | 4480523 | 4480575 | RNA → rpmE (PRK00019)Ribosomal_L31 (pfam01197) → |
| Eco-1547-1 | NZ_KB732561.1     | + | 81703   | 81755   | RNA → rpmE (PRK00019)Ribosomal_L31 (pfam01197) → |
| Eco-1591-1 | NZ_KB732652.1     | + | 89385   | 89437   | RNA → rpmE (PRK00019)Ribosomal_L31 (pfam01197) → |
| Eco-1531-1 | NZ_KB732305.1     | + | 92502   | 92554   | RNA → rpmE (PRK00019)Ribosomal_L31 (pfam01197) → |
| Eco-1583-1 | NZ_KB732388.1     | + | 93133   | 93185   | RNA → rpmE (PRK00019)Ribosomal_L31 (pfam01197) → |
| Eco-1507-1 | NZ_KB732429.1     | + | 37417   | 37469   | RNA → rpmE (PRK00019)Ribosomal_L31 (pfam01197) → |
| Eco-1526-1 | NZ_KB732489.1     | + | 247369  | 247421  | RNA → rpmE (PRK00019)Ribosomal_L31 (pfam01197) → |
| Eco-1535-1 | NZ_KB732535.1     | + | 3871288 | 3871340 | RNA → rpmE (PRK00019)Ribosomal_L31 (pfam01197) → |
| Eco-1601-1 | NZ_KB732723.1     | + | 80818   | 80870   | RNA → rpmE (PRK00019)Ribosomal_L31 (pfam01197) → |
| Eco-1565-1 | NZ_KB732337.1     | + | 1098559 | 1098611 | RNA → rpmE (PRK00019)Ribosomal_L31 (pfam01197) → |
| Eco-1538-1 | NZ_KB732546.1     | + | 210180  | 210232  | RNA → rpmE (PRK00019)Ribosomal_L31 (pfam01197) → |
| Eco-1614-1 | NZ_KB733402.1     | + | 81830   | 81882   | RNA → rpmE (PRK00019)Ribosomal_L31 (pfam01197) → |
| Eco-1426-1 | NZ_KB732931.1     | + | 4693303 | 4693355 | RNA → rpmE (PRK00019)Ribosomal_L31 (pfam01197) → |
| Eco-1472-1 | NZ_KB733424.1     | + | 88823   | 88875   | RNA → rpmE (PRK00019)Ribosomal_L31 (pfam01197) → |
| Eco-1462-1 | NZ_KB733119.1     | + | 748025  | 748077  | RNA → rpmE (PRK00019)Ribosomal_L31 (pfam01197) → |
| Eco-1536-1 | NZ_KB732539.1     | + | 203898  | 203950  | RNA → rpmE (PRK00019)Ribosomal_L31 (pfam01197) → |
| Eco-1629-1 | NZ_KB732876.1     | + | 79585   | 79637   | RNA → rpmE (PRK00019)Ribosomal_L31 (pfam01197) → |
| Eco-1633-1 | NZ_KB732995.1     | + | 192553  | 192605  | RNA → rpmE (PRK00019)Ribosomal_L31 (pfam01197) → |
| Eco-1587-1 | NZ_KB733034.1     | + | 217425  | 217477  | RNA → rpmE (PRK00019)Ribosomal_L31 (pfam01197) → |
| Eco-1438-1 | NZ_KB731947.1     | + | 64751   | 64803   | RNA → rpmE (PRK00019)Ribosomal_L31 (pfam01197) → |
| Eco-1551-1 | NZ_KB732574.1     | + | 3169698 | 3169750 | RNA → rpmE (PRK00019)Ribosomal_L31 (pfam01197) → |

|            |               |   |         |         |                                                   |
|------------|---------------|---|---------|---------|---------------------------------------------------|
| Eco-1593-1 | NZ_KB732678.1 | + | 80428   | 80480   | RNA → rpmE (PRK00019) Ribosomal_L31 (pfam01197) → |
| Eco-1607-1 | NZ_KB732766.1 | + | 1078458 | 1078510 | RNA → rpmE (PRK00019) Ribosomal_L31 (pfam01197) → |
| Eco-1619-1 | NZ_KB732824.1 | + | 86495   | 86547   | RNA → rpmE (PRK00019) Ribosomal_L31 (pfam01197) → |
| Eco-1630-1 | NZ_KB732885.1 | + | 312298  | 312350  | RNA → rpmE (PRK00019) Ribosomal_L31 (pfam01197) → |
| Eco-1478-1 | NZ_KB732934.1 | + | 1549529 | 1549581 | RNA → rpmE (PRK00019) Ribosomal_L31 (pfam01197) → |
| Eco-1485-1 | NZ_KB732981.1 | + | 79252   | 79304   | RNA → rpmE (PRK00019) Ribosomal_L31 (pfam01197) → |
| Eco-1620-1 | NZ_KB733059.1 | + | 89746   | 89798   | RNA → rpmE (PRK00019) Ribosomal_L31 (pfam01197) → |
| Eco-1515-1 | NZ_KB733178.1 | + | 185235  | 185287  | RNA → rpmE (PRK00019) Ribosomal_L31 (pfam01197) → |
| Eco-1588-1 | NZ_KB732644.1 | + | 117671  | 117723  | RNA → rpmE (PRK00019) Ribosomal_L31 (pfam01197) → |
| Eco-1623-1 | NZ_KB732835.1 | + | 90079   | 90131   | RNA → rpmE (PRK00019) Ribosomal_L31 (pfam01197) → |
| Eco-1636-1 | NZ_KB732900.1 | + | 81758   | 81810   | RNA → rpmE (PRK00019) Ribosomal_L31 (pfam01197) → |
| Eco-1621-1 | NZ_KB733069.1 | + | 1528753 | 1528805 | RNA → rpmE (PRK00019) Ribosomal_L31 (pfam01197) → |
| Eco-1635-1 | NZ_KB733085.1 | + | 90282   | 90334   | RNA → rpmE (PRK00019) Ribosomal_L31 (pfam01197) → |
| Eco-1474-1 | NZ_KB733136.1 | + | 89188   | 89240   | RNA → rpmE (PRK00019) Ribosomal_L31 (pfam01197) → |
| Eco-1511-1 | NZ_KB733148.1 | + | 201599  | 201651  | RNA → rpmE (PRK00019) Ribosomal_L31 (pfam01197) → |
| Eco-1557-1 | NZ_KB732580.1 | + | 2122614 | 2122666 | RNA → rpmE (PRK00019) Ribosomal_L31 (pfam01197) → |
| Eco-1492-1 | NZ_KB733163.1 | + | 215587  | 215639  | RNA → rpmE (PRK00019) Ribosomal_L31 (pfam01197) → |
| Eco-1624-1 | NZ_KB732854.1 | + | 179054  | 179106  | RNA → rpmE (PRK00019) Ribosomal_L31 (pfam01197) → |
| Eco-1523-1 | NZ_KB733190.1 | + | 84884   | 84936   | RNA → rpmE (PRK00019) Ribosomal_L31 (pfam01197) → |
| Eco-1600-1 | NZ_KB732993.1 | + | 1144242 | 1144294 | RNA → rpmE (PRK00019) Ribosomal_L31 (pfam01197) → |
| Eco-1584-1 | NZ_KB733366.1 | + | 85959   | 86011   | RNA → rpmE (PRK00019) Ribosomal_L31 (pfam01197) → |
| Eco-1431-1 | NZ_KB732889.1 | + | 87725   | 87777   | RNA → rpmE (PRK00019) Ribosomal_L31 (pfam01197) → |
| Eco-1537-1 | NZ_KB733209.1 | + | 1116317 | 1116369 | RNA → rpmE (PRK00019) Ribosomal_L31 (pfam01197) → |
| Eco-1430-1 | NZ_KB733437.1 | + | 194575  | 194627  | RNA → rpmE (PRK00019) Ribosomal_L31 (pfam01197) → |
| Eco-1509-1 | NZ_KB733164.1 | + | 4861972 | 4862024 | RNA → rpmE (PRK00019) Ribosomal_L31 (pfam01197) → |
| Eco-1530-1 | NZ_KB733361.1 | + | 2206480 | 2206532 | RNA → rpmE (PRK00019) Ribosomal_L31 (pfam01197) → |
| Eco-1560-1 | NZ_KB732614.1 | + | 95899   | 95951   | RNA → rpmE (PRK00019) Ribosomal_L31 (pfam01197) → |
| Eco-1622-1 | NZ_KB732987.1 | + | 728728  | 728780  | RNA → rpmE (PRK00019) Ribosomal_L31 (pfam01197) → |
| Eco-1434-1 | NZ_KB732923.1 | + | 4068090 | 4068142 | RNA → rpmE (PRK00019) Ribosomal_L31 (pfam01197) → |
| Eco-1590-1 | NZ_KB733431.1 | + | 1094753 | 1094805 | RNA → rpmE (PRK00019) Ribosomal_L31 (pfam01197) → |
| Eco-1416-1 | NZ_KB733078.1 | + | 2993520 | 2993572 | RNA → rpmE (PRK00019) Ribosomal_L31 (pfam01197) → |
| Eco-1546-1 | NZ_KB733355.1 | + | 80038   | 80090   | RNA → rpmE (PRK00019) Ribosomal_L31 (pfam01197) → |
| Eco-1453-1 | NZ_KB733095.1 | + | 123923  | 123975  | RNA → rpmE (PRK00019) Ribosomal_L31 (pfam01197) → |
| Eco-1513-1 | NZ_KB733153.1 | + | 196949  | 197001  | RNA → rpmE (PRK00019) Ribosomal_L31 (pfam01197) → |
| Eco-1490-1 | NZ_KB733443.1 | + | 729974  | 730026  | RNA → rpmE (PRK00019) Ribosomal_L31 (pfam01197) → |
| Eco-1501-1 | NZ_KB733173.1 | + | 3320254 | 3320306 | RNA → rpmE (PRK00019) Ribosomal_L31 (pfam01197) → |
| Eco-1618-1 | NZ_KB732816.1 | + | 95428   | 95480   | RNA → rpmE (PRK00019) Ribosomal_L31 (pfam01197) → |
| Eco-1516-1 | NZ_KB733185.1 | + | 182340  | 182392  | RNA → rpmE (PRK00019) Ribosomal_L31 (pfam01197) → |
| Eco-1553-1 | NZ_KB733021.1 | + | 88442   | 88494   | RNA → rpmE (PRK00019) Ribosomal_L31 (pfam01197) → |
| Eco-1528-1 | NZ_KB733194.1 | + | 81745   | 81797   | RNA → rpmE (PRK00019) Ribosomal_L31 (pfam01197) → |
| Eco-1533-1 | NZ_KB733226.1 | + | 97399   | 97451   | RNA → rpmE (PRK00019) Ribosomal_L31 (pfam01197) → |
| Eco-1540-1 | NZ_KB733215.1 | + | 81328   | 81380   | RNA → rpmE (PRK00019) Ribosomal_L31 (pfam01197) → |
| Eco-1461-1 | NZ_KB732947.1 | + | 1431844 | 1431896 | RNA → rpmE (PRK00019) Ribosomal_L31 (pfam01197) → |
| Eco-1488-1 | NZ_KB732965.1 | + | 89272   | 89324   | RNA → rpmE (PRK00019) Ribosomal_L31 (pfam01197) → |
| Eco-1497-1 | NZ_KB733007.1 | + | 87248   | 87300   | RNA → rpmE (PRK00019) Ribosomal_L31 (pfam01197) → |
| Eco-1452-1 | NZ_KB733086.1 | + | 1415738 | 1415790 | RNA → rpmE (PRK00019) Ribosomal_L31 (pfam01197) → |
| Eco-1459-1 | NZ_KB733104.1 | + | 118416  | 118468  | RNA → rpmE (PRK00019) Ribosomal_L31 (pfam01197) → |
| Eco-1502-1 | NZ_KB733172.1 | + | 700985  | 701037  | RNA → rpmE (PRK00019) Ribosomal_L31 (pfam01197) → |
| Eco-1558-1 | NZ_KB732598.1 | + | 181845  | 181897  | RNA → rpmE (PRK00019) Ribosomal_L31 (pfam01197) → |
| Eco-1524-1 | NZ_KB733201.1 | + | 697684  | 697736  | RNA → rpmE (PRK00019) Ribosomal_L31 (pfam01197) → |
| Eco-1568-1 | NZ_KB733016.1 | + | 701071  | 701123  | RNA → rpmE (PRK00019) Ribosomal_L31 (pfam01197) → |
| Eco-1585-1 | NZ_KB733032.1 | + | 1465991 | 1466043 | RNA → rpmE (PRK00019) Ribosomal_L31 (pfam01197) → |



|            |               |   |         |         |                                                  |
|------------|---------------|---|---------|---------|--------------------------------------------------|
| Eco-1594-1 | NZ_KB733040.1 | + | 738674  | 738726  | RNA → rpmE (PRK00019)Ribosomal_L31 (pfam01197) → |
| Eco-1604-1 | NZ_KB733048.1 | + | 85198   | 85250   | RNA → rpmE (PRK00019)Ribosomal_L31 (pfam01197) → |
| Eco-1539-1 | NZ_KB733228.1 | + | 206290  | 206342  | RNA → rpmE (PRK00019)Ribosomal_L31 (pfam01197) → |
| Eco-1465-1 | NZ_KB733135.1 | + | 2714412 | 2714464 | RNA → rpmE (PRK00019)Ribosomal_L31 (pfam01197) → |
| Eco-1481-1 | NZ_KB733141.1 | + | 1453826 | 1453878 | RNA → rpmE (PRK00019)Ribosomal_L31 (pfam01197) → |
| Eco-1628-1 | NZ_KB731625.1 | + | 65760   | 65812   | RNA → rpmE (PRK00019)Ribosomal_L31 (pfam01197) → |
| Eco-1559-1 | NZ_KB732610.1 | + | 3217660 | 3217712 | RNA → rpmE (PRK00019)Ribosomal_L31 (pfam01197) → |
| Eco-1486-1 | NZ_KB733000.1 | + | 4628049 | 4628101 | RNA → rpmE (PRK00019)Ribosomal_L31 (pfam01197) → |
| Eco-1596-1 | NZ_KB732702.1 | + | 2093565 | 2093617 | RNA → rpmE (PRK00019)Ribosomal_L31 (pfam01197) → |
| Eco-1458-1 | NZ_KB733090.1 | + | 345664  | 345716  | RNA → rpmE (PRK00019)Ribosomal_L31 (pfam01197) → |
| Eco-1582-1 | NZ_KB733426.1 | + | 3687548 | 3687600 | RNA → rpmE (PRK00019)Ribosomal_L31 (pfam01197) → |
| Eco-1464-1 | NZ_KB733128.1 | + | 185480  | 185532  | RNA → rpmE (PRK00019)Ribosomal_L31 (pfam01197) → |
| Eco-1419-1 | NZ_KB733317.1 | + | 21535   | 21587   | RNA → rpmE (PRK00019)Ribosomal_L31 (pfam01197) → |
| Eco-1581-1 | NZ_KB733011.1 | + | 86410   | 86462   | RNA → rpmE (PRK00019)Ribosomal_L31 (pfam01197) → |
| Eco-1996-1 | NZ_KB822529.1 | - | 52192   | 52140   | RNA → rpmE (PRK00019)Ribosomal_L31 (pfam01197) → |
| Eco-1602-1 | NZ_KE137015.1 | + | 1385265 | 1385317 | RNA → rpmE (PRK00019)Ribosomal_L31 (pfam01197) → |
| Eco-1580-1 | NZ_KE136843.1 | + | 716940  | 716992  | RNA → rpmE (PRK00019)Ribosomal_L31 (pfam01197) → |
| Eco-1471-1 | NZ_KE137290.1 | + | 178813  | 178865  | RNA → rpmE (PRK00019)Ribosomal_L31 (pfam01197) → |
| Eco-1573-1 | NZ_KE136621.1 | - | 63621   | 63569   | RNA → rpmE (PRK00019)Ribosomal_L31 (pfam01197) → |
| Eco-1415-1 | NZ_KE137155.1 | + | 114384  | 114436  | RNA → rpmE (PRK00019)Ribosomal_L31 (pfam01197) → |
| Eco-1605-1 | NZ_KE137028.1 | + | 4278970 | 4279022 | RNA → rpmE (PRK00019)Ribosomal_L31 (pfam01197) → |
| Eco-1437-1 | NZ_KE137222.1 | + | 1659902 | 1659954 | RNA → rpmE (PRK00019)Ribosomal_L31 (pfam01197) → |
| Eco-1451-1 | NZ_KE137276.1 | - | 548492  | 548440  | RNA → rpmE (PRK00019)Ribosomal_L31 (pfam01197) → |
| Eco-1626-1 | NZ_KB733418.1 | + | 88751   | 88803   | RNA → rpmE (PRK00019)Ribosomal_L31 (pfam01197) → |
| Eco-1545-1 | NZ_KE136972.1 | + | 1439611 | 1439663 | RNA → rpmE (PRK00019)Ribosomal_L31 (pfam01197) → |
| Eco-1446-1 | NZ_KE136600.1 | + | 2913667 | 2913719 | RNA → rpmE (PRK00019)Ribosomal_L31 (pfam01197) → |
| Eco-1549-1 | NZ_KE136988.1 | + | 80699   | 80751   | RNA → rpmE (PRK00019)Ribosomal_L31 (pfam01197) → |
| Eco-1508-1 | NZ_KE136675.1 | + | 2773214 | 2773266 | RNA → rpmE (PRK00019)Ribosomal_L31 (pfam01197) → |
| Eco-1632-1 | NZ_KE137143.1 | + | 1102318 | 1102370 | RNA → rpmE (PRK00019)Ribosomal_L31 (pfam01197) → |
| Eco-1422-1 | NZ_KE137205.1 | + | 191756  | 191808  | RNA → rpmE (PRK00019)Ribosomal_L31 (pfam01197) → |
| Eco-1447-1 | NZ_KE137259.1 | + | 537843  | 537895  | RNA → rpmE (PRK00019)Ribosomal_L31 (pfam01197) → |
| Eco-455-1  | NZ_KE375261.1 | - | 41954   | 41902   | RNA → rpmE (PRK00019)Ribosomal_L31 (pfam01197) → |
| Eco-454-1  | NZ_KE375303.1 | + | 64690   | 64742   | RNA → rpmE (PRK00019)Ribosomal_L31 (pfam01197) → |
| Eco-456-1  | NZ_KE375225.1 | - | 44622   | 44570   | RNA → rpmE (PRK00019)Ribosomal_L31 (pfam01197) → |
| Eco-453-1  | NZ_KE375333.1 | - | 42079   | 42027   | RNA → rpmE (PRK00019)Ribosomal_L31 (pfam01197) → |
| Eco-284-1  | NZ_KE375526.1 | - | 44499   | 44447   | RNA → rpmE (PRK00019)Ribosomal_L31 (pfam01197) → |
| Eco-49-1   | NZ_KE375613.1 | + | 24839   | 24891   | RNA → rpmE (PRK00019)Ribosomal_L31 (pfam01197) → |
| Eco-1576-1 | NZ_KE136794.1 | + | 89196   | 89248   | RNA → rpmE (PRK00019)Ribosomal_L31 (pfam01197) → |
| Eco-1487-1 | NZ_KE137305.1 | + | 2743351 | 2743403 | RNA → rpmE (PRK00019)Ribosomal_L31 (pfam01197) → |
| Eco-1500-1 | NZ_KE136847.1 | + | 123541  | 123593  | RNA → rpmE (PRK00019)Ribosomal_L31 (pfam01197) → |
| Eco-452-1  | NZ_KE375397.1 | + | 24841   | 24893   | RNA → rpmE (PRK00019)Ribosomal_L31 (pfam01197) → |
| Eco-1285-1 | NZ_KE698801.1 | + | 2222813 | 2222865 | RNA → rpmE (PRK00019)Ribosomal_L31 (pfam01197) → |
| Eco-285-1  | NZ_KE375504.1 | - | 44622   | 44570   | RNA → rpmE (PRK00019)Ribosomal_L31 (pfam01197) → |
| Eco-1108-1 | NZ_KE353061.1 | - | 469     | 417     | RNA → rpmE (PRK00019)Ribosomal_L31 (pfam01197) → |
| Eco-1333-1 | NZ_KE699213.1 | + | 2261174 | 2261226 | RNA → rpmE (PRK00019)Ribosomal_L31 (pfam01197) → |
| Eco-1350-1 | NZ_KE699361.1 | + | 85199   | 85251   | RNA → rpmE (PRK00019)Ribosomal_L31 (pfam01197) → |
| Eco-1372-1 | NZ_KE698882.1 | + | 3962636 | 3962688 | RNA → rpmE (PRK00019)Ribosomal_L31 (pfam01197) → |
| Eco-1346-1 | NZ_KE699328.1 | + | 765355  | 765407  | RNA → rpmE (PRK00019)Ribosomal_L31 (pfam01197) → |
| Eco-1247-1 | NZ_KE698925.1 | + | 741829  | 741881  | RNA → rpmE (PRK00019)Ribosomal_L31 (pfam01197) → |
| Eco-1332-1 | NZ_KE698833.1 | + | 1212504 | 1212556 | RNA → rpmE (PRK00019)Ribosomal_L31 (pfam01197) → |
| Eco-1339-1 | NZ_KE699290.1 | + | 203429  | 203481  | RNA → rpmE (PRK00019)Ribosomal_L31 (pfam01197) → |
| Eco-1351-1 | NZ_KE699371.1 | + | 1139517 | 1139569 | RNA → rpmE (PRK00019)Ribosomal_L31 (pfam01197) → |



|            |               |   |         |         |                                                  |
|------------|---------------|---|---------|---------|--------------------------------------------------|
| Eco-1354-1 | NZ_KE699399.1 | - | 46140   | 46088   | RNA → rpmE (PRK00019)Ribosomal_L31 (pfam01197) → |
| Eco-1355-1 | NZ_KE698860.1 | + | 85312   | 85364   | RNA → rpmE (PRK00019)Ribosomal_L31 (pfam01197) → |
| Eco-1352-1 | NZ_KE699379.1 | + | 3129427 | 3129479 | RNA → rpmE (PRK00019)Ribosomal_L31 (pfam01197) → |
| Eco-1349-1 | NZ_KE698854.1 | + | 87029   | 87081   | RNA → rpmE (PRK00019)Ribosomal_L31 (pfam01197) → |
| Eco-1347-1 | NZ_KE699336.1 | - | 2182479 | 2182531 | RNA → rpmE (PRK00019)Ribosomal_L31 (pfam01197) → |
| Eco-1364-1 | NZ_KE699566.1 | - | 582415  | 582363  | RNA → rpmE (PRK00019)Ribosomal_L31 (pfam01197) → |
| Eco-1330-1 | NZ_KE699189.1 | + | 197919  | 197971  | RNA → rpmE (PRK00019)Ribosomal_L31 (pfam01197) → |
| Eco-1361-1 | NZ_KE699534.1 | + | 78550   | 78602   | RNA → rpmE (PRK00019)Ribosomal_L31 (pfam01197) → |
| Eco-1316-1 | NZ_KE699037.1 | + | 2979691 | 2979743 | RNA → rpmE (PRK00019)Ribosomal_L31 (pfam01197) → |
| Eco-1367-1 | NZ_KE699590.1 | + | 2993670 | 2993722 | RNA → rpmE (PRK00019)Ribosomal_L31 (pfam01197) → |
| Eco-1358-1 | NZ_KE699456.1 | + | 85185   | 85237   | RNA → rpmE (PRK00019)Ribosomal_L31 (pfam01197) → |
| Eco-1317-1 | NZ_KE699041.1 | + | 92815   | 92867   | RNA → rpmE (PRK00019)Ribosomal_L31 (pfam01197) → |
| Eco-1376-1 | NZ_KE699686.1 | + | 204988  | 205040  | RNA → rpmE (PRK00019)Ribosomal_L31 (pfam01197) → |
| Eco-1331-1 | NZ_KE699194.1 | + | 85115   | 85167   | RNA → rpmE (PRK00019)Ribosomal_L31 (pfam01197) → |
| Eco-1326-1 | NZ_KE699142.1 | + | 90612   | 90664   | RNA → rpmE (PRK00019)Ribosomal_L31 (pfam01197) → |
| Eco-1366-1 | NZ_KE699581.1 | + | 1099205 | 1099257 | RNA → rpmE (PRK00019)Ribosomal_L31 (pfam01197) → |
| Eco-1324-1 | NZ_KE699129.1 | + | 204686  | 204738  | RNA → rpmE (PRK00019)Ribosomal_L31 (pfam01197) → |
| Eco-1353-1 | NZ_KE699395.1 | + | 745950  | 746002  | RNA → rpmE (PRK00019)Ribosomal_L31 (pfam01197) → |
| Eco-1255-1 | NZ_KE698942.1 | + | 83897   | 83949   | RNA → rpmE (PRK00019)Ribosomal_L31 (pfam01197) → |
| Eco-1360-1 | NZ_KE699480.1 | + | 298169  | 298221  | RNA → rpmE (PRK00019)Ribosomal_L31 (pfam01197) → |
| Eco-1377-1 | NZ_KE699698.1 | + | 203590  | 203642  | RNA → rpmE (PRK00019)Ribosomal_L31 (pfam01197) → |
| Eco-1205-1 | NZ_KE699895.1 | + | 84426   | 84478   | RNA → rpmE (PRK00019)Ribosomal_L31 (pfam01197) → |
| Eco-1318-1 | NZ_KE699079.1 | + | 24904   | 24956   | RNA → rpmE (PRK00019)Ribosomal_L31 (pfam01197) → |
| Eco-1320-1 | NZ_KE699099.1 | + | 1146447 | 1146499 | RNA → rpmE (PRK00019)Ribosomal_L31 (pfam01197) → |
| Eco-1307-1 | NZ_KE699031.1 | + | 181978  | 182030  | RNA → rpmE (PRK00019)Ribosomal_L31 (pfam01197) → |
| Eco-1189-1 | NZ_KE698890.1 | + | 88102   | 88154   | RNA → rpmE (PRK00019)Ribosomal_L31 (pfam01197) → |
| Eco-1319-1 | NZ_KE699094.1 | + | 85356   | 85408   | RNA → rpmE (PRK00019)Ribosomal_L31 (pfam01197) → |
| Eco-1264-1 | NZ_KE698975.1 | + | 86763   | 86815   | RNA → rpmE (PRK00019)Ribosomal_L31 (pfam01197) → |
| Eco-1217-1 | NZ_KE698897.1 | + | 125488  | 125540  | RNA → rpmE (PRK00019)Ribosomal_L31 (pfam01197) → |
| Eco-1250-1 | NZ_KE700457.1 | + | 935564  | 935616  | RNA → rpmE (PRK00019)Ribosomal_L31 (pfam01197) → |
| Eco-1334-1 | NZ_KE699236.1 | + | 329829  | 329881  | RNA → rpmE (PRK00019)Ribosomal_L31 (pfam01197) → |
| Eco-1245-1 | NZ_KE700389.1 | + | 1530219 | 1530271 | RNA → rpmE (PRK00019)Ribosomal_L31 (pfam01197) → |
| Eco-1329-1 | NZ_KE699173.1 | + | 769817  | 769869  | RNA → rpmE (PRK00019)Ribosomal_L31 (pfam01197) → |
| Eco-1228-1 | NZ_KE700182.1 | + | 196885  | 196937  | RNA → rpmE (PRK00019)Ribosomal_L31 (pfam01197) → |
| Eco-1225-1 | NZ_KE700123.1 | + | 78535   | 78587   | RNA → rpmE (PRK00019)Ribosomal_L31 (pfam01197) → |
| Eco-1286-1 | NZ_KE699009.1 | + | 201650  | 201702  | RNA → rpmE (PRK00019)Ribosomal_L31 (pfam01197) → |
| Eco-1238-1 | NZ_KE700271.1 | + | 121843  | 121895  | RNA → rpmE (PRK00019)Ribosomal_L31 (pfam01197) → |
| Eco-1343-1 | NZ_KE699306.1 | + | 1570515 | 1570567 | RNA → rpmE (PRK00019)Ribosomal_L31 (pfam01197) → |
| Eco-1257-1 | NZ_KE700520.1 | + | 318247  | 318299  | RNA → rpmE (PRK00019)Ribosomal_L31 (pfam01197) → |
| Eco-1203-1 | NZ_KE699873.1 | + | 35069   | 35121   | RNA → rpmE (PRK00019)Ribosomal_L31 (pfam01197) → |
| Eco-1338-1 | NZ_KE699267.1 | + | 3281857 | 3281909 | RNA → rpmE (PRK00019)Ribosomal_L31 (pfam01197) → |
| Eco-1279-1 | NZ_KE700788.1 | + | 1208073 | 1208125 | RNA → rpmE (PRK00019)Ribosomal_L31 (pfam01197) → |
| Eco-1192-1 | NZ_KE699721.1 | + | 84995   | 85047   | RNA → rpmE (PRK00019)Ribosomal_L31 (pfam01197) → |
| Eco-1252-1 | NZ_KE700471.1 | + | 728585  | 728637  | RNA → rpmE (PRK00019)Ribosomal_L31 (pfam01197) → |
| Eco-1236-1 | NZ_KE700249.1 | - | 53043   | 52991   | RNA → rpmE (PRK00019)Ribosomal_L31 (pfam01197) → |
| Eco-1200-1 | NZ_KE699826.1 | + | 194261  | 194313  | RNA → rpmE (PRK00019)Ribosomal_L31 (pfam01197) → |
| Eco-1218-1 | NZ_KE700049.1 | + | 122728  | 122780  | RNA → rpmE (PRK00019)Ribosomal_L31 (pfam01197) → |
| Eco-1241-1 | NZ_KE700299.1 | + | 53857   | 53909   | RNA → rpmE (PRK00019)Ribosomal_L31 (pfam01197) → |
| Eco-2105-1 | NZ_KE702238.1 | + | 772837  | 772889  | RNA → rpmE (PRK00019)Ribosomal_L31 (pfam01197) → |
| Eco-2102-1 | NZ_KE702186.1 | + | 83352   | 83404   | RNA → rpmE (PRK00019)Ribosomal_L31 (pfam01197) → |
| Eco-2101-1 | NZ_KE702179.1 | + | 486494  | 486546  | RNA → rpmE (PRK00019)Ribosomal_L31 (pfam01197) → |
| Eco-848-1  | NC_008253.1   | + | 4326358 | 4326410 | RNA → rpmE (PRK00019)Ribosomal_L31 (pfam01197) → |

|            |                   |   |         |         |                                                   |
|------------|-------------------|---|---------|---------|---------------------------------------------------|
| Sfl-25-12  | NZ.LAJS01000047.1 | + | 24423   | 24475   | RNA → rpmE (PRK00019) Ribosomal_L31 (pfam01197) → |
| Sfl-25-13  | NZ.LAJU01000056.1 | + | 24788   | 24840   | RNA → rpmE (PRK00019) Ribosomal_L31 (pfam01197) → |
| Sso-1-545  | NZ.LAJT01000097.1 | + | 39222   | 39274   | RNA → rpmE (PRK00019) Ribosomal_L31 (pfam01197) → |
| Sfl-64-1   | NZ.LAJW01000048.1 | + | 34707   | 34759   | RNA → rpmE (PRK00019) Ribosomal_L31 (pfam01197) → |
| Sfl-64-2   | NZ.LAJP01000066.1 | + | 34638   | 34690   | RNA → rpmE (PRK00019) Ribosomal_L31 (pfam01197) → |
| Sfl-51-2   | NZ.LAJV01000117.1 | - | 31124   | 31072   | RNA → rpmE (PRK00019) Ribosomal_L31 (pfam01197) → |
| Eco-1991-1 | NZ.AFDR01000029.1 | + | 123981  | 124033  | RNA → rpmE (PRK00019) Ribosomal_L31 (pfam01197) → |
| Eco-1126-1 | NZ.JH945811.1     | + | 47754   | 47806   | RNA → rpmE (PRK00019) Ribosomal_L31 (pfam01197) → |
| Eco-1470-1 | NZ.KB733130.1     | + | 2157129 | 2157181 | RNA → rpmE (PRK00019) Ribosomal_L31 (pfam01197) → |
| Eco-286-1  | NZ.KE375480.1     | - | 44497   | 44445   | RNA → rpmE (PRK00019) Ribosomal_L31 (pfam01197) → |
| Eco-1450-1 | NZ.ANXZ01000039.1 | + | 77024   | 77076   | RNA → rpmE (PRK00019) Ribosomal_L31 (pfam01197) → |
| Eco-1625-1 | NZ.ANYT01000117.1 | + | 64751   | 64803   | RNA → rpmE (PRK00019) Ribosomal_L31 (pfam01197) → |
| Eco-1827-1 | NZ.CAPL01000021.1 | - | 39907   | 39855   | RNA → rpmE (PRK00019) Ribosomal_L31 (pfam01197) → |
| Eco-1721-1 | NZ.AMVR01000013.1 | + | 85592   | 85644   | RNA → rpmE (PRK00019) Ribosomal_L31 (pfam01197) → |
| Eco-1421-1 | NZ.ANXN01000074.1 | + | 78602   | 78654   | RNA → rpmE (PRK00019) Ribosomal_L31 (pfam01197) → |
| Eco-1469-1 | NZ.ANYG01000054.1 | + | 32597   | 32649   | RNA → rpmE (PRK00019) Ribosomal_L31 (pfam01197) → |
| Eco-1428-1 | NZ.ANXQ01000047.1 | + | 79108   | 79160   | RNA → rpmE (PRK00019) Ribosomal_L31 (pfam01197) → |
| Eco-1765-1 | NZ.CAPK01000190.1 | - | 39191   | 39139   | RNA → rpmE (PRK00019) Ribosomal_L31 (pfam01197) → |
| Eco-1420-1 | NZ.ANXM01000069.1 | + | 64751   | 64803   | RNA → rpmE (PRK00019) Ribosomal_L31 (pfam01197) → |
| Eco-1456-1 | NZ.ANYC01000070.1 | + | 41451   | 41503   | RNA → rpmE (PRK00019) Ribosomal_L31 (pfam01197) → |
| Eco-1484-1 | NZ.ANYM01000060.1 | + | 77056   | 77108   | RNA → rpmE (PRK00019) Ribosomal_L31 (pfam01197) → |
| Eco-1640-1 | NZ.ANYZ01000053.1 | + | 65240   | 65292   | RNA → rpmE (PRK00019) Ribosomal_L31 (pfam01197) → |
| Eco-1634-1 | NZ.ANYW01000072.1 | + | 18519   | 18571   | RNA → rpmE (PRK00019) Ribosomal_L31 (pfam01197) → |
| Eco-1473-1 | NZ.ANYH01000078.1 | + | 66273   | 66325   | RNA → rpmE (PRK00019) Ribosomal_L31 (pfam01197) → |
| Eco-1482-1 | NZ.ANYK01000069.1 | + | 85888   | 85940   | RNA → rpmE (PRK00019) Ribosomal_L31 (pfam01197) → |
| Eco-463-4  | NZ.CAPM01000059.1 | - | 52489   | 52437   | RNA → rpmE (PRK00019) Ribosomal_L31 (pfam01197) → |
| Eco-857-1  | NZ.AOEP01000134.1 | + | 94220   | 94272   | RNA → rpmE (PRK00019) Ribosomal_L31 (pfam01197) → |
| Eco-1454-1 | NZ.ANYA01000061.1 | + | 32592   | 32644   | RNA → rpmE (PRK00019) Ribosomal_L31 (pfam01197) → |
| Eco-1427-1 | NZ.ANXP01000124.1 | + | 34000   | 34052   | RNA → rpmE (PRK00019) Ribosomal_L31 (pfam01197) → |
| Eco-1638-1 | NZ.ANYY01000082.1 | + | 65676   | 65728   | RNA → rpmE (PRK00019) Ribosomal_L31 (pfam01197) → |
| Eco-751-1  | NZ.HG738867.1     | - | 2653144 | 2653092 | RNA → rpmE (PRK00019) Ribosomal_L31 (pfam01197) → |
| Eco-402-1  | NZ.CP009578.1     | + | 4817517 | 4817569 | RNA → rpmE (PRK00019) Ribosomal_L31 (pfam01197) → |
| Eco-399-1  | NZ.CP009644.1     | + | 4098610 | 4098662 | RNA → rpmE (PRK00019) Ribosomal_L31 (pfam01197) → |
| Sfl-62-1   | NC.004741.1       | - | 3631186 | 3631134 | RNA → rpmE (PRK00019) Ribosomal_L31 (pfam01197) → |
| Eco-1029-1 | NC.004431.1       | + | 4646648 | 4646700 | RNA → ←-hypo                                      |
| Eco-2185-1 | NC.007779.1       | - | 3509727 | 3509675 | RNA → rpmE (PRK00019) Ribosomal_L31 (pfam01197) → |
| Eco-1715-1 | NC.013353.1       | - | 4722457 | 4722405 | RNA → rpmE (PRK00019) Ribosomal_L31 (pfam01197) → |
| Eco-1766-1 | NC.013364.1       | + | 4809048 | 4809100 | RNA → rpmE (PRK00019) Ribosomal_L31 (pfam01197) → |
| Eco-959-1  | NC.012967.1       | + | 4106437 | 4106489 | RNA → rpmE (PRK00019) Ribosomal_L31 (pfam01197) → |
| Eco-954-1  | NC.010468.1       | - | 4508346 | 4508294 | RNA → rpmE (PRK00019) Ribosomal_L31 (pfam01197) → |
| Sbo-15-1   | NC.010658.1       | + | 4123060 | 4123112 | RNA → rpmE (PRK00019) Ribosomal_L31 (pfam01197) → |
| Eco-1379-1 | NC.011741.1       | + | 4208059 | 4208111 | RNA → rpmE (PRK00019) Ribosomal_L31 (pfam01197) → |
| Eco-1812-1 | NC.013361.1       | - | 4648170 | 4648118 | RNA → rpmE (PRK00019) Ribosomal_L31 (pfam01197) → |
| Eco-2182-1 | NC.010473.1       | + | 4224674 | 4224726 | RNA → rpmE (PRK00019) Ribosomal_L31 (pfam01197) → |
| Eco-1145-1 | NC.011745.1       | + | 4578369 | 4578421 | RNA → rpmE (PRK00019) Ribosomal_L31 (pfam01197) → |
| Eco-853-1  | NC.011748.1       | + | 4508708 | 4508760 | RNA → rpmE (PRK00019) Ribosomal_L31 (pfam01197) → |
| Eco-1187-1 | NC.009800.1       | + | 4154963 | 4155015 | RNA → rpmE (PRK00019) Ribosomal_L31 (pfam01197) → |
| Eco-1780-1 | NC.011601.1       | + | 4442040 | 4442092 | RNA → rpmE (PRK00019) Ribosomal_L31 (pfam01197) → |
| Eco-1735-1 | NZ.JH378015.1     | + | 84387   | 84439   | RNA → rpmE (PRK00019) Ribosomal_L31 (pfam01197) → |
| Eco-1824-1 | NC.013941.1       | + | 4816088 | 4816140 | RNA → rpmE (PRK00019) Ribosomal_L31 (pfam01197) → |
| Eco-1743-1 | NZ.JH378081.1     | + | 329552  | 329604  | RNA → rpmE (PRK00019) Ribosomal_L31 (pfam01197) → |
| Eco-1719-1 | NZ.JH378073.1     | + | 1107751 | 1107803 | RNA → rpmE (PRK00019) Ribosomal_L31 (pfam01197) → |

|            |               |   |         |         |                                                                                                                                                                |
|------------|---------------|---|---------|---------|----------------------------------------------------------------------------------------------------------------------------------------------------------------|
| Eco-1739-1 | NZ_JH377982.1 | + | 84391   | 84443   | RNA → rpmE (PRK00019)Ribosomal_L31 (pfam01197) →                                                                                                               |
| Eco-472-2  | NZ_JH378089.1 | + | 1162708 | 1162760 | RNA → rpmE (PRK00019)Ribosomal_L31 (pfam01197) →                                                                                                               |
| Eco-1720-1 | NZ_JH378068.1 | + | 84396   | 84448   | RNA → rpmE (PRK00019)Ribosomal_L31 (pfam01197) →                                                                                                               |
| Eco-1736-1 | NZ_JH378006.1 | + | 84397   | 84449   | RNA → rpmE (PRK00019)Ribosomal_L31 (pfam01197) →                                                                                                               |
| Eco-1737-1 | NZ_JH377999.1 | + | 88840   | 88892   | RNA → rpmE (PRK00019)Ribosomal_L31 (pfam01197) →                                                                                                               |
| Eco-1828-1 | NC_017646.1   | + | 4694260 | 4694312 | RNA → rpmE (PRK00019)Ribosomal_L31 (pfam01197) →                                                                                                               |
| Eco-1733-1 | NZ_JH378032.1 | + | 183333  | 183385  | RNA → rpmE (PRK00019)Ribosomal_L31 (pfam01197) →                                                                                                               |
| Eco-1738-1 | NZ_JH377991.1 | + | 1168004 | 1168056 | RNA → rpmE (PRK00019)Ribosomal_L31 (pfam01197) →                                                                                                               |
| Eco-1731-1 | NZ_JH378054.1 | + | 775608  | 775660  | RNA → rpmE (PRK00019)Ribosomal_L31 (pfam01197) →                                                                                                               |
| Eco-1732-1 | NZ_JH378041.1 | + | 181741  | 181793  | RNA → rpmE (PRK00019)Ribosomal_L31 (pfam01197) →                                                                                                               |
| Eco-1734-1 | NZ_JH378023.1 | + | 1163099 | 1163151 | RNA → rpmE (PRK00019)Ribosomal_L31 (pfam01197) →                                                                                                               |
| Eco-1101-2 | NC_017638.1   | + | 4106059 | 4106111 | RNA → rpmE (PRK00019)Ribosomal_L31 (pfam01197) →                                                                                                               |
| Eco-2183-1 | NC_020518.1   | + | 3556167 | 3556219 | RNA → rpmE (PRK00019)Ribosomal_L31 (pfam01197) →                                                                                                               |
| Eco-1651-1 | NC_011993.1   | + | 4191555 | 4191607 | RNA → rpmE (PRK00019)Ribosomal_L31 (pfam01197) →                                                                                                               |
| Eco-1753-1 | NZ_KB021597.1 | + | 86049   | 86101   | RNA → rpmE (PRK00019)Ribosomal_L31 (pfam01197) →                                                                                                               |
| Eco-551-1  | NZ_CP006027.1 | + | 4927607 | 4927659 | RNA → rpmE (PRK00019)Ribosomal_L31 (pfam01197) →                                                                                                               |
| Eco-572-1  | NZ_CP007592.1 | + | 4700635 | 4700687 | RNA → rpmE (PRK00019)Ribosomal_L31 (pfam01197) →                                                                                                               |
| Eco-52-1   | NZ_CP009166.1 | + | 4408327 | 4408379 | RNA → rpmE (PRK00019)Ribosomal_L31 (pfam01197) →                                                                                                               |
| Eco-398-1  | NZ_CP010344.1 | + | 4283291 | 4283343 | RNA → rpmE (PRK00019)Ribosomal_L31 (pfam01197) →                                                                                                               |
| Eco-552-1  | NZ_CP006262.1 | + | 4745473 | 4745525 | RNA → rpmE (PRK00019)Ribosomal_L31 (pfam01197) →                                                                                                               |
| Eco-549-1  | NZ_CP007136.1 | + | 4927604 | 4927656 | RNA → rpmE (PRK00019)Ribosomal_L31 (pfam01197) →                                                                                                               |
| Eco-550-1  | NZ_CP007133.1 | + | 4745477 | 4745529 | RNA → rpmE (PRK00019)Ribosomal_L31 (pfam01197) →                                                                                                               |
| Eco-463-1  | NZ_CP007799.1 | + | 4549787 | 4549839 | RNA → hypo → hypo → hypo → rpmE (PRK00019)Ribosomal_L31 (pfam01197) →<br>rpmE (PRK00019)Ribosomal_L31 (pfam01197) → rpmE (PRK00019)Ribosomal_L31 (pfam01197) → |
| Eco-463-2  | NZ_CP007799.1 | + | 4552090 | 4552142 | RNA → hypo → hypo → hypo → rpmE (PRK00019)Ribosomal_L31 (pfam01197) →<br>rpmE (PRK00019)Ribosomal_L31 (pfam01197) → rpmE (PRK00019)Ribosomal_L31 (pfam01197) → |
| Eco-463-3  | NZ_CP007799.1 | + | 4554393 | 4554445 | RNA → hypo → hypo → hypo → rpmE (PRK00019)Ribosomal_L31 (pfam01197) →<br>rpmE (PRK00019)Ribosomal_L31 (pfam01197) → rpmE (PRK00019)Ribosomal_L31 (pfam01197) → |
| Eco-423-1  | NZ_CP008801.1 | + | 4203810 | 4203862 | RNA → rpmE (PRK00019)Ribosomal_L31 (pfam01197) →                                                                                                               |
| Sfl-57-1   | NZ_CP004056.1 | + | 4130700 | 4130752 | RNA → rpmE (PRK00019)Ribosomal_L31 (pfam01197) →                                                                                                               |
| Sfl-82-1   | NZ_CP004057.1 | + | 4155779 | 4155831 | RNA → rpmE (PRK00019)Ribosomal_L31 (pfam01197) →                                                                                                               |
| Eco-291-1  | NZ_CP009072.1 | - | 587468  | 587416  | RNA → rpmE (PRK00019)Ribosomal_L31 (pfam01197) →                                                                                                               |
| Eco-328-1  | NZ_CP009273.1 | + | 4116882 | 4116934 | RNA → rpmE (PRK00019)Ribosomal_L31 (pfam01197) →                                                                                                               |
| Eco-893-1  | NZ_KI533530.1 | + | 25625   | 25677   | RNA → rpmE (PRK00019)Ribosomal_L31 (pfam01197) →                                                                                                               |
| Eco-1693-1 | NZ_GG774009.1 | + | 32525   | 32577   | RNA → rpmE (PRK00019)Ribosomal_L31 (pfam01197) →                                                                                                               |
| Eco-878-1  | NZ_KI531365.1 | + | 79602   | 79654   | RNA → rpmE (PRK00019)Ribosomal_L31 (pfam01197) →                                                                                                               |
| Eco-885-1  | NZ_KI532294.1 | + | 32305   | 32357   | RNA → rpmE (PRK00019)Ribosomal_L31 (pfam01197) →                                                                                                               |
| Eco-890-1  | NZ_KI533169.1 | + | 22217   | 22269   | RNA → rpmE (PRK00019)Ribosomal_L31 (pfam01197) →                                                                                                               |
| Eco-1688-1 | NZ_GG773540.1 | - | 52256   | 52204   | RNA → rpmE (PRK00019)Ribosomal_L31 (pfam01197) →                                                                                                               |
| Eco-770-1  | NZ_KI530777.1 | + | 119139  | 119191  | RNA → rpmE (PRK00019)Ribosomal_L31 (pfam01197) →                                                                                                               |
| Eco-886-1  | NZ_KI532500.1 | - | 52076   | 52024   | RNA → rpmE (PRK00019)Ribosomal_L31 (pfam01197) →                                                                                                               |
| Eco-891-1  | NZ_KI533323.1 | + | 82900   | 82952   | RNA → rpmE (PRK00019)Ribosomal_L31 (pfam01197) →                                                                                                               |
| Eco-1149-1 | NC_017633.1   | + | 4549461 | 4549513 | RNA → rpmE (PRK00019)Ribosomal_L31 (pfam01197) →                                                                                                               |
| Eco-877-1  | NZ_KI531308.1 | + | 126494  | 126546  | RNA → rpmE (PRK00019)Ribosomal_L31 (pfam01197) →                                                                                                               |
| Eco-884-1  | NZ_KI532131.1 | - | 549     | 497     | RNA → rpmE (PRK00019)Ribosomal_L31 (pfam01197) →                                                                                                               |
| Eco-1681-1 | NZ_GG773415.1 | - | 39384   | 39332   | RNA → rpmE (PRK00019)Ribosomal_L31 (pfam01197) →                                                                                                               |
| Eco-1-4    | NZ_LK931544.1 | - | 47804   | 47752   | RNA → rpmE (PRK00019)Ribosomal_L31 (pfam01197) →                                                                                                               |
| Sfl-1-2    | NZ_LM651928.1 | + | 4058590 | 4058642 | RNA → rpmE (PRK00019)Ribosomal_L31 (pfam01197) →                                                                                                               |
| Eco-1-1    | NZ_LK985426.1 | + | 27751   | 27803   | RNA → rpmE (PRK00019)Ribosomal_L31 (pfam01197) →                                                                                                               |
| Eco-746-1  | NZ_CP011134.1 | + | 4469729 | 4469781 | RNA → rpmE (PRK00019)Ribosomal_L31 (pfam01197) →                                                                                                               |
| Eco-682-1  | NZ_HG941718.1 | + | 4499005 | 4499057 | RNA → rpmE (PRK00019)Ribosomal_L31 (pfam01197) →                                                                                                               |
| Eco-419-1  | NZ_LN832404.1 | + | 4123427 | 4123479 | RNA → rpmE (PRK00019)Ribosomal_L31 (pfam01197) →                                                                                                               |
| Eco-472-1  | NZ_CP011331.1 | - | 4330723 | 4330671 | RNA → rpmE (PRK00019)Ribosomal_L31 (pfam01197) →                                                                                                               |



|            |                    |   |         |         |                                                   |
|------------|--------------------|---|---------|---------|---------------------------------------------------|
| Sso-1-547  | NZ_CP011422.1      | + | 966341  | 966393  | RNA → rpmE (PRK00019) Ribosomal_L31 (pfam01197) → |
| Eco-1-2    | NZ_LK999974.1      | - | 48085   | 48033   | RNA → rpmE (PRK00019) Ribosomal_L31 (pfam01197) → |
| Eco-1-3    | NZ_LK999940.1      | - | 49482   | 49430   | RNA → rpmE (PRK00019) Ribosomal_L31 (pfam01197) → |
| Eco-1169-1 | NZ_CP011343.1      | + | 365674  | 365726  | RNA → rpmE (PRK00019) Ribosomal_L31 (pfam01197) → |
| Eco-1169-2 | NZ_CP011342.1      | - | 2842199 | 2842147 | RNA → rpmE (PRK00019) Ribosomal_L31 (pfam01197) → |
| Sfl-72-1   | NZ_CP007037.1      | + | 4126943 | 4126995 | RNA → rpmE (PRK00019) Ribosomal_L31 (pfam01197) → |
| Sbo-2-10   | NZ_CP011511.1      | + | 4030216 | 4030268 | RNA → rpmE (PRK00019) Ribosomal_L31 (pfam01197) → |
| Eco-735-1  | NZ_CP006636.1      | + | 4090689 | 4090741 | RNA → rpmE (PRK00019) Ribosomal_L31 (pfam01197) → |
| Eco-734-1  | NZ_CP006632.1      | + | 4399932 | 4399984 | RNA → rpmE (PRK00019) Ribosomal_L31 (pfam01197) → |
| Eco-288-1  | NZ_CP007442.1      | + | 4329255 | 4329307 | RNA → rpmE (PRK00019) Ribosomal_L31 (pfam01197) → |
| Eco-1760-1 | NZ_GL988050.1      | + | 4993697 | 4993749 | RNA → rpmE (PRK00019) Ribosomal_L31 (pfam01197) → |
| Eco-1648-1 | NZ_JH650819.1      | + | 699275  | 699327  | RNA → rpmE (PRK00019) Ribosomal_L31 (pfam01197) → |
| Eco-1763-1 | NZ_JH648168.1      | + | 1166678 | 1166730 | RNA → rpmE (PRK00019) Ribosomal_L31 (pfam01197) → |
| Eco-1650-1 | NZ_KB000001.1      | + | 2277793 | 2277845 | RNA → rpmE (PRK00019) Ribosomal_L31 (pfam01197) → |
| Eco-1762-1 | NZ_JH648165.1      | + | 4457835 | 4457887 | RNA → rpmE (PRK00019) Ribosomal_L31 (pfam01197) → |
| Sfl-1-1    | NZ_KL503838.1      | - | 31116   | 31064   | RNA → rpmE (PRK00019) Ribosomal_L31 (pfam01197) → |
| Eco-1981-1 | NZ_AOGN01000115.1  | + | 13965   | 14017   | RNA → rpmE (PRK00019) Ribosomal_L31 (pfam01197) → |
| Eco-1714-1 | NZ_AOGM01000086.1  | + | 28059   | 28111   | RNA → rpmE (PRK00019) Ribosomal_L31 (pfam01197) → |
| Eco-1744-1 | NZ_AHAV01000106.1  | + | 32410   | 32462   | RNA → rpmE (PRK00019) Ribosomal_L31 (pfam01197) → |
| Eco-1834-1 | NZ_AHAX01000061.1  | + | 86405   | 86457   | RNA → rpmE (PRK00019) Ribosomal_L31 (pfam01197) → |
| Eco-1745-1 | NZ_AHAU01000082.1  | + | 84181   | 84233   | RNA → rpmE (PRK00019) Ribosomal_L31 (pfam01197) → |
| Eco-1389-1 | NZ_AQFA01000051.1  | + | 88710   | 88762   | RNA → rpmE (PRK00019) Ribosomal_L31 (pfam01197) → |
| Eco-1388-1 | NZ_AQFB01000026.1  | + | 46854   | 46906   | RNA → rpmE (PRK00019) Ribosomal_L31 (pfam01197) → |
| Eco-774-1  | NZ_AQGI01000087.1  | + | 88674   | 88726   | RNA → rpmE (PRK00019) Ribosomal_L31 (pfam01197) → |
| Eco-1093-1 | NZ_AIGH01000071.1  | + | 97778   | 97830   | RNA → rpmE (PRK00019) Ribosomal_L31 (pfam01197) → |
| Eco-1183-1 | NZ_APNY01000014.1  | + | 87903   | 87955   | RNA → rpmE (PRK00019) Ribosomal_L31 (pfam01197) → |
| Sfl-25-14  | NZ_LAJQ01000116.1  | - | 31124   | 31072   | RNA → rpmE (PRK00019) Ribosomal_L31 (pfam01197) → |
| Eco-1181-1 | NZ_APNW01000010.1  | + | 91909   | 91961   | RNA → rpmE (PRK00019) Ribosomal_L31 (pfam01197) → |
| Eco-2010-2 | NZ_AOQV01000032.1  | - | 52231   | 52179   | RNA → rpmE (PRK00019) Ribosomal_L31 (pfam01197) → |
| Eco-1042-1 | NZ_LAIHE01000043.1 | + | 47119   | 47171   | RNA → rpmE (PRK00019) Ribosomal_L31 (pfam01197) → |
| Eco-784-1  | NZ_AFAB02000228.1  | + | 211717  | 211769  | RNA → rpmE (PRK00019) Ribosomal_L31 (pfam01197) → |
| Eco-368-1  | NZ_AIBM01000066.1  | - | 39338   | 39286   | RNA → rpmE (PRK00019) Ribosomal_L31 (pfam01197) → |
| Eco-1675-1 | NZ_AQEV01000020.1  | + | 89153   | 89205   | RNA → rpmE (PRK00019) Ribosomal_L31 (pfam01197) → |
| Eco-790-1  | NZ_AQFF01000029.1  | + | 24026   | 24078   | RNA → rpmE (PRK00019) Ribosomal_L31 (pfam01197) → |
| Eco-2043-1 | NZ_AQEJ01000024.1  | + | 119619  | 119671  | RNA → rpmE (PRK00019) Ribosomal_L31 (pfam01197) → |
| Eco-1004-1 | NZ_AQFK01000021.1  | + | 91846   | 91898   | RNA → rpmE (PRK00019) Ribosomal_L31 (pfam01197) → |
| Eco-1660-1 | NZ_AQFY01000025.1  | + | 21685   | 21737   | RNA → rpmE (PRK00019) Ribosomal_L31 (pfam01197) → |
| Eco-1009-1 | NZ_AQFI01000025.1  | + | 90459   | 90511   | RNA → rpmE (PRK00019) Ribosomal_L31 (pfam01197) → |
| Eco-1915-1 | NZ_AQEM01000049.1  | + | 91353   | 91405   | RNA → rpmE (PRK00019) Ribosomal_L31 (pfam01197) → |
| Eco-1674-1 | NZ_AQEW01000025.1  | + | 121217  | 121269  | RNA → rpmE (PRK00019) Ribosomal_L31 (pfam01197) → |
| Eco-1677-1 | NZ_AQEU01000023.1  | + | 86825   | 86877   | RNA → rpmE (PRK00019) Ribosomal_L31 (pfam01197) → |
| Eco-789-1  | NZ_AQFG01000030.1  | + | 117781  | 117833  | RNA → rpmE (PRK00019) Ribosomal_L31 (pfam01197) → |
| Eco-1930-1 | NZ_AQEL01000014.1  | + | 89670   | 89722   | RNA → rpmE (PRK00019) Ribosomal_L31 (pfam01197) → |
| Eco-1900-1 | NZ_AQEN01000035.1  | + | 90256   | 90308   | RNA → rpmE (PRK00019) Ribosomal_L31 (pfam01197) → |
| Eco-1150-1 | NZ_AQFD01000047.1  | + | 91814   | 91866   | RNA → rpmE (PRK00019) Ribosomal_L31 (pfam01197) → |
| Eco-1872-1 | NZ_AQEQ01000029.1  | + | 121013  | 121065  | RNA → rpmE (PRK00019) Ribosomal_L31 (pfam01197) → |
| Eco-1661-1 | NZ_AQEX01000030.1  | + | 90110   | 90162   | RNA → rpmE (PRK00019) Ribosomal_L31 (pfam01197) → |
| Eco-2165-1 | NZ_AQEK01000042.1  | + | 27965   | 28017   | RNA → rpmE (PRK00019) Ribosomal_L31 (pfam01197) → |
| Eco-1837-1 | NZ_APXR01000184.1  | + | 23817   | 23869   | RNA → rpmE (PRK00019) Ribosomal_L31 (pfam01197) → |
| Eco-786-1  | NZ_AQFH01000031.1  | + | 29182   | 29234   | RNA → rpmE (PRK00019) Ribosomal_L31 (pfam01197) → |
| Eco-822-1  | NZ_APXI01000107.1  | + | 87655   | 87707   | RNA → rpmE (PRK00019) Ribosomal_L31 (pfam01197) → |
| Eco-1151-1 | NZ_AQFC01000057.1  | + | 92055   | 92107   | RNA → rpmE (PRK00019) Ribosomal_L31 (pfam01197) → |



|            |                    |   |         |         |                                                 |
|------------|--------------------|---|---------|---------|-------------------------------------------------|
| Eco-1013-1 | NZ_APXO01000114.1  | + | 30089   | 30141   | RNA → ←-hypō                                    |
| Eco-1850-1 | NZ_AQES01000017.1  | + | 91820   | 91872   | RNA → rpmE (PRK00019)Ribosomal_L31 (pfam01197)→ |
| Eco-367-1  | NZ_AIBL01000107.1  | - | 690     | 638     | RNA → rpmE (PRK00019)Ribosomal_L31 (pfam01197)→ |
| Eco-335-1  | NZ_AIAG01000120.1  | + | 841     | 893     | RNA → rpmE (PRK00019)Ribosomal_L31 (pfam01197)→ |
| Eco-352-1  | NZ_AIAX01000027.1  | + | 85782   | 85834   | RNA → rpmE (PRK00019)Ribosomal_L31 (pfam01197)→ |
| Eco-364-1  | NZ_AIBJ01000226.1  | + | 53110   | 53162   | RNA → rpmE (PRK00019)Ribosomal_L31 (pfam01197)→ |
| Eco-331-1  | NZ_AIAC01000054.1  | + | 88135   | 88187   | RNA → rpmE (PRK00019)Ribosomal_L31 (pfam01197)→ |
| Eco-374-1  | NZ_AIBT01000104.1  | - | 486     | 434     | RNA → rpmE (PRK00019)Ribosomal_L31 (pfam01197)→ |
| Eco-427-1  | NZ_AYOG01000027.1  | + | 72663   | 72715   | RNA → rpmE (PRK00019)Ribosomal_L31 (pfam01197)→ |
| Sdy-10-1   | NZ_AXUU01000203.1  | - | 464     | 412     | RNA → rpmE (PRK00019)Ribosomal_L31 (pfam01197)→ |
| Sdy-9-1    | NZ_AXUT01000390.1  | + | 8180    | 8232    | RNA → rpmE (PRK00019)Ribosomal_L31 (pfam01197)→ |
| Eco-426-1  | NZ_AYOF01000027.1  | + | 72663   | 72715   | RNA → rpmE (PRK00019)Ribosomal_L31 (pfam01197)→ |
| Eco-955-1  | NZ_AYOF01000070.1  | - | 556     | 504     | RNA → rpmE (PRK00019)Ribosomal_L31 (pfam01197)→ |
| Eco-415-1  | NZ_CBWA010000372.1 | + | 4180    | 4232    | RNA → rpmE (PRK00019)Ribosomal_L31 (pfam01197)→ |
| Eco-674-1  | NZ_JHJE01000048.1  | - | 42020   | 41968   | RNA → rpmE (PRK00019)Ribosomal_L31 (pfam01197)→ |
| Eco-563-1  | NZ_JHFO01000028.1  | + | 113553  | 113605  | RNA → rpmE (PRK00019)Ribosomal_L31 (pfam01197)→ |
| Eco-34-1   | NZ_JJLL01000159.1  | + | 83742   | 83794   | RNA → rpmE (PRK00019)Ribosomal_L31 (pfam01197)→ |
| Eco-801-1  | NZ_AQEA01000073.1  | + | 18586   | 18638   | RNA → rpmE (PRK00019)Ribosomal_L31 (pfam01197)→ |
| Eco-802-1  | NZ_AQDZ01000090.1  | + | 18323   | 18375   | RNA → rpmE (PRK00019)Ribosomal_L31 (pfam01197)→ |
| Eco-823-1  | NZ_AQDJ01000065.1  | + | 87862   | 87914   | RNA → rpmE (PRK00019)Ribosomal_L31 (pfam01197)→ |
| Eco-812-1  | NZ_AQDQ01000090.1  | + | 32876   | 32928   | RNA → rpmE (PRK00019)Ribosomal_L31 (pfam01197)→ |
| Eco-807-1  | NZ_AQDU01000131.1  | + | 66030   | 66082   | RNA → rpmE (PRK00019)Ribosomal_L31 (pfam01197)→ |
| Eco-1890-1 | NZ_AQEO01000037.1  | + | 87406   | 87458   | RNA → rpmE (PRK00019)Ribosomal_L31 (pfam01197)→ |
| Eco-808-1  | NZ_AQDT01000070.1  | + | 18684   | 18736   | RNA → rpmE (PRK00019)Ribosomal_L31 (pfam01197)→ |
| Eco-1885-1 | NZ_AQAC01000120.1  | + | 87618   | 87670   | RNA → rpmE (PRK00019)Ribosomal_L31 (pfam01197)→ |
| Eco-799-1  | NZ_AQGH01000063.1  | + | 119118  | 119170  | RNA → rpmE (PRK00019)Ribosomal_L31 (pfam01197)→ |
| Eco-1884-1 | NZ_AQAB01000058.1  | + | 87798   | 87850   | RNA → rpmE (PRK00019)Ribosomal_L31 (pfam01197)→ |
| Eco-791-1  | NZ_AQEE01000140.1  | + | 11616   | 11668   | RNA → rpmE (PRK00019)Ribosomal_L31 (pfam01197)→ |
| Eco-1865-1 | NZ_APYM01000235.1  | + | 33620   | 33672   | RNA → rpmE (PRK00019)Ribosomal_L31 (pfam01197)→ |
| Eco-811-1  | NZ_AQGG01000114.1  | + | 46224   | 46276   | RNA → rpmE (PRK00019)Ribosomal_L31 (pfam01197)→ |
| Eco-1866-1 | NZ_AQYN01000077.1  | + | 41465   | 41517   | RNA → rpmE (PRK00019)Ribosomal_L31 (pfam01197)→ |
| Eco-778-1  | NZ_APZJ01000082.1  | + | 31396   | 31448   | RNA → rpmE (PRK00019)Ribosomal_L31 (pfam01197)→ |
| Eco-1871-1 | NZ_APYS01000184.1  | + | 87770   | 87822   | RNA → rpmE (PRK00019)Ribosomal_L31 (pfam01197)→ |
| Eco-797-1  | NZ_AQEB01000177.1  | + | 82811   | 82863   | RNA → rpmE (PRK00019)Ribosomal_L31 (pfam01197)→ |
| Eco-1892-1 | NZ_APZA01000064.1  | + | 84354   | 84406   | RNA → rpmE (PRK00019)Ribosomal_L31 (pfam01197)→ |
| Eco-818-1  | NZ_AQDL01000080.1  | + | 18684   | 18736   | RNA → rpmE (PRK00019)Ribosomal_L31 (pfam01197)→ |
| Eco-1898-1 | NZ_APZG01000363.1  | + | 80717   | 80769   | RNA → rpmE (PRK00019)Ribosomal_L31 (pfam01197)→ |
| Eco-803-1  | NZ_AQDY01000177.1  | + | 74715   | 74767   | RNA → rpmE (PRK00019)Ribosomal_L31 (pfam01197)→ |
| Eco-33-1   | NZ_JJLO01000155.1  | + | 60700   | 60752   | RNA → rpmE (PRK00019)Ribosomal_L31 (pfam01197)→ |
| Eco-30-1   | NZ_JJLW01000160.1  | + | 84245   | 84297   | RNA → rpmE (PRK00019)Ribosomal_L31 (pfam01197)→ |
| Eco-704-1  | NZ_JHLV01000044.1  | - | 835     | 783     | RNA → rpmE (PRK00019)Ribosomal_L31 (pfam01197)→ |
| Eco-542-1  | NZ_JHHB01000007.1  | - | 605     | 553     | RNA → rpmE (PRK00019)Ribosomal_L31 (pfam01197)→ |
| Eco-509-1  | NZ_JHNQ01000014.1  | + | 28051   | 28103   | RNA → rpmE (PRK00019)Ribosomal_L31 (pfam01197)→ |
| Eco-122-1  | NZ_JNQU01000023.1  | - | 46318   | 46266   | RNA → rpmE (PRK00019)Ribosomal_L31 (pfam01197)→ |
| Eco-174-1  | NZ_JNMN01000019.1  | + | 85263   | 85315   | RNA → rpmE (PRK00019)Ribosomal_L31 (pfam01197)→ |
| Eco-29-1   | NZ_JNQC01000014.1  | + | 85569   | 85621   | RNA → rpmE (PRK00019)Ribosomal_L31 (pfam01197)→ |
| Eco-120-1  | NZ_JNQS01000019.1  | - | 29219   | 29167   | RNA → rpmE (PRK00019)Ribosomal_L31 (pfam01197)→ |
| Eco-68-1   | NZ_JNNA01000147.1  | + | 11560   | 11612   | RNA → rpmE (PRK00019)Ribosomal_L31 (pfam01197)→ |
| Eco-545-1  | NZ_JASU01000001.1  | - | 1459090 | 1459038 | RNA → rpmE (PRK00019)Ribosomal_L31 (pfam01197)→ |
| Eco-28-1   | NZ_JNQB01000014.1  | - | 43513   | 43461   | RNA → rpmE (PRK00019)Ribosomal_L31 (pfam01197)→ |
| Eco-566-1  | NZ_JASR01000001.1  | - | 2462015 | 2461963 | RNA → rpmE (PRK00019)Ribosomal_L31 (pfam01197)→ |
| Eco-226-1  | NZ_JOQV01000010.1  | + | 124927  | 124979  | RNA → rpmE (PRK00019)Ribosomal_L31 (pfam01197)→ |

|            |                   |   |        |        |                                                                                             |
|------------|-------------------|---|--------|--------|---------------------------------------------------------------------------------------------|
| Eco-224-1  | NZ_JOQY01000010.1 | - | 43045  | 42993  | RNA → rpmE (PRK00019)Ribosomal_L31 (pfam01197) →                                            |
| Eco-234-1  | NZ_JORL01000069.1 | + | 93206  | 93258  | RNA → rpmE (PRK00019)Ribosomal_L31 (pfam01197) →                                            |
| Eco-153-1  | NZ_JONB01000076.1 | + | 87678  | 87730  | RNA → rpmE (PRK00019)Ribosomal_L31 (pfam01197) →                                            |
| Eco-42-1   | NZ_JOSH01000256.1 | + | 86293  | 86345  | RNA → rpmE (PRK00019)Ribosomal_L31 (pfam01197) →                                            |
| Eco-1902-1 | NZ_AQAH01000120.1 | + | 46756  | 46808  | RNA → rpmE (PRK00019)Ribosomal_L31 (pfam01197) →                                            |
| Eco-809-1  | NZ_AQDS01000152.1 | + | 89137  | 89189  | RNA → rpmE (PRK00019)Ribosomal_L31 (pfam01197) →                                            |
| Eco-805-1  | NZ_AQDW01000073.1 | + | 18711  | 18763  | RNA → rpmE (PRK00019)Ribosomal_L31 (pfam01197) →                                            |
| Eco-1903-1 | NZ_AQAI01000051.1 | + | 46814  | 46866  | RNA → rpmE (PRK00019)Ribosomal_L31 (pfam01197) →                                            |
| Eco-796-1  | NZ_APXE01000196.1 | + | 29919  | 29971  | RNA → rpmE (PRK00019)Ribosomal_L31 (pfam01197) →                                            |
| Eco-1905-1 | NZ_AQAK01000105.1 | + | 46790  | 46842  | RNA → rpmE (PRK00019)Ribosomal_L31 (pfam01197) →                                            |
| Eco-1911-1 | NZ_AQAC01000051.1 | + | 46776  | 46828  | RNA → rpmE (PRK00019)Ribosomal_L31 (pfam01197) →                                            |
| Eco-781-1  | NZ_APXQ01000307.1 | + | 18755  | 18807  | RNA → rpmE (PRK00019)Ribosomal_L31 (pfam01197) →                                            |
| Eco-824-1  | NZ_APXJ01000122.1 | + | 18695  | 18747  | RNA → rpmE (PRK00019)Ribosomal_L31 (pfam01197) → rpmE (PRK00019)Ribosomal_L31 (pfam01197) → |
| Eco-1891-1 | NZ_APYZ01000056.1 | + | 84492  | 84544  | RNA → rpmE (PRK00019)Ribosomal_L31 (pfam01197) →                                            |
| Eco-792-1  | NZ_AQFE01000042.1 | + | 88874  | 88926  | RNA → rpmE (PRK00019)Ribosomal_L31 (pfam01197) → rpmE (PRK00019)Ribosomal_L31 (pfam01197) → |
| Eco-1814-1 | NZ_AMXO01000238.1 | - | 638    | 586    | RNA → rpmE (PRK00019)Ribosomal_L31 (pfam01197) →                                            |
| Eco-1894-1 | NZ_APZC01000326.1 | + | 84351  | 84403  | RNA → rpmE (PRK00019)Ribosomal_L31 (pfam01197) →                                            |
| Eco-798-1  | NZ_APZK01000191.1 | + | 23771  | 23823  | RNA → rpmE (PRK00019)Ribosomal_L31 (pfam01197) →                                            |
| Eco-1779-1 | NZ_AHAW01000062.1 | + | 86201  | 86253  | RNA → rpmE (PRK00019)Ribosomal_L31 (pfam01197) →                                            |
| Eco-1877-1 | NZ_APYV01000111.1 | + | 117684 | 117736 | RNA → rpmE (PRK00019)Ribosomal_L31 (pfam01197) →                                            |
| Eco-775-1  | NZ_APWY01000309.1 | + | 14050  | 14102  | RNA → rpmE (PRK00019)Ribosomal_L31 (pfam01197) →                                            |
| Eco-785-1  | NZ_AFAD02000007.1 | + | 29056  | 29108  | RNA → rpmE (PRK00019)Ribosomal_L31 (pfam01197) →                                            |
| Eco-1867-1 | NZ_APYO01000081.1 | + | 87500  | 87552  | RNA → rpmE (PRK00019)Ribosomal_L31 (pfam01197) →                                            |
| Eco-1662-1 | NZ_AQCW01000153.1 | + | 7794   | 7846   | RNA → rpmE (PRK00019)Ribosomal_L31 (pfam01197) →                                            |
| Eco-828-1  | NZ_AQDF01000073.1 | + | 87908  | 87960  | RNA → rpmE (PRK00019)Ribosomal_L31 (pfam01197) →                                            |
| Eco-1658-1 | NZ_AQEZ01000029.1 | + | 87870  | 87922  | RNA → rpmE (PRK00019)Ribosomal_L31 (pfam01197) →                                            |
| Eco-1873-1 | NZ_APYT01000068.1 | + | 52672  | 52724  | RNA → rpmE (PRK00019)Ribosomal_L31 (pfam01197) →                                            |
| Eco-1874-1 | NZ_APZT01000083.1 | + | 30333  | 30385  | RNA → rpmE (PRK00019)Ribosomal_L31 (pfam01197) →                                            |
| Eco-1849-1 | NZ_APYB01000069.1 | + | 12751  | 12803  | RNA → rpmE (PRK00019)Ribosomal_L31 (pfam01197) →                                            |
| Eco-782-1  | NZ_AQEG01000132.1 | + | 46739  | 46791  | RNA → rpmE (PRK00019)Ribosomal_L31 (pfam01197) →                                            |
| Eco-1881-1 | NZ_APZV01000166.1 | + | 33953  | 34005  | RNA → rpmE (PRK00019)Ribosomal_L31 (pfam01197) →                                            |
| Eco-1841-1 | NZ_APXV01000269.1 | + | 23763  | 23815  | RNA → rpmE (PRK00019)Ribosomal_L31 (pfam01197) →                                            |
| Eco-1899-1 | NZ_APZH01000117.1 | + | 84317  | 84369  | RNA → rpmE (PRK00019)Ribosomal_L31 (pfam01197) →                                            |
| Eco-773-1  | NZ_AQEI01000288.1 | + | 2100   | 2152   | RNA → rpmE (PRK00019)Ribosomal_L31 (pfam01197) →                                            |
| Eco-1092-1 | NZ_AIGG01000081.1 | + | 93774  | 93826  | RNA → rpmE (PRK00019)Ribosomal_L31 (pfam01197) →                                            |
| Eco-1904-1 | NZ_AQAJ01000054.1 | + | 46831  | 46883  | RNA → rpmE (PRK00019)Ribosomal_L31 (pfam01197) →                                            |
| Eco-825-1  | NZ_AQDI01000113.1 | + | 87539  | 87591  | RNA → rpmE (PRK00019)Ribosomal_L31 (pfam01197) →                                            |
| Eco-1666-1 | NZ_AQCS01000124.1 | + | 7818   | 7870   | RNA → rpmE (PRK00019)Ribosomal_L31 (pfam01197) →                                            |
| Eco-1906-1 | NZ_AQAL01000124.1 | + | 46820  | 46872  | RNA → rpmE (PRK00019)Ribosomal_L31 (pfam01197) →                                            |
| Eco-1671-1 | NZ_AQCN01000186.1 | + | 47879  | 47931  | RNA → rpmE (PRK00019)Ribosomal_L31 (pfam01197) →                                            |
| Eco-815-1  | NZ_AQDN01000103.1 | + | 119323 | 119375 | RNA → rpmE (PRK00019)Ribosomal_L31 (pfam01197) →                                            |
| Eco-1912-1 | NZ_AQAR01000135.1 | + | 46818  | 46870  | RNA → rpmE (PRK00019)Ribosomal_L31 (pfam01197) →                                            |
| Eco-1851-1 | NZ_APYC01000065.1 | + | 78035  | 78087  | RNA → rpmE (PRK00019)Ribosomal_L31 (pfam01197) →                                            |
| Eco-820-1  | NZ_AQDK01000143.1 | + | 7833   | 7885   | RNA → rpmE (PRK00019)Ribosomal_L31 (pfam01197) →                                            |
| Eco-1920-1 | NZ_AQAX01000145.1 | + | 87587  | 87639  | RNA → rpmE (PRK00019)Ribosomal_L31 (pfam01197) →                                            |
| Eco-1859-1 | NZ_APZR01000088.1 | + | 84547  | 84599  | RNA → rpmE (PRK00019)Ribosomal_L31 (pfam01197) →                                            |
| Eco-1875-1 | NZ_APZU01000076.1 | + | 30357  | 30409  | RNA → rpmE (PRK00019)Ribosomal_L31 (pfam01197) →                                            |
| Eco-814-1  | NZ_AQDO01000114.1 | + | 87792  | 87844  | RNA → rpmE (PRK00019)Ribosomal_L31 (pfam01197) →                                            |
| Eco-1820-1 | NZ_AKBC01000335.1 | - | 584    | 532    | RNA → rpmE (PRK00019)Ribosomal_L31 (pfam01197) →                                            |
| Eco-1883-1 | NZ_AQEP01000022.1 | + | 90682  | 90734  | RNA → rpmE (PRK00019)Ribosomal_L31 (pfam01197) →                                            |
| Eco-810-1  | NZ_AQDR01000106.1 | + | 122355 | 122407 | RNA → rpmE (PRK00019)Ribosomal_L31 (pfam01197) →                                            |
| Eco-1886-1 | NZ_AQAD01000068.1 | + | 87873  | 87925  | RNA → rpmE (PRK00019)Ribosomal_L31 (pfam01197) →                                            |

|            |                   |   |        |        |                                                                                             |
|------------|-------------------|---|--------|--------|---------------------------------------------------------------------------------------------|
| Eco-1098-1 | NZ_AIGM01000052.1 | - | 51199  | 51147  | RNA → rpmE (PRK00019)Ribosomal_L31 (pfam01197) →                                            |
| Eco-1868-1 | NZ_APYP01000074.1 | + | 87717  | 87769  | RNA → rpmE (PRK00019)Ribosomal_L31 (pfam01197) →                                            |
| Eco-804-1  | NZ_AQDX01000116.1 | + | 82883  | 82935  | RNA → rpmE (PRK00019)Ribosomal_L31 (pfam01197) →                                            |
| Eco-1664-1 | NZ_AQCU01000277.1 | + | 7814   | 7866   | RNA → rpmE (PRK00019)Ribosomal_L31 (pfam01197) →                                            |
| Eco-1869-1 | NZ_APYQ01000075.1 | + | 23398  | 23450  | RNA → rpmE (PRK00019)Ribosomal_L31 (pfam01197) →                                            |
| Eco-1672-1 | NZ_AQCM01000086.1 | + | 85975  | 86027  | RNA → rpmE (PRK00019)Ribosomal_L31 (pfam01197) →                                            |
| Eco-783-1  | NZ_AQEF01000111.1 | + | 46744  | 46796  | RNA → ←-hypo                                                                                |
| Eco-1887-1 | NZ_APZW01000065.1 | + | 87850  | 87902  | RNA → rpmE (PRK00019)Ribosomal_L31 (pfam01197) →                                            |
| Eco-1676-1 | NZ_APXP01000199.1 | + | 89949  | 90001  | RNA → rpmE (PRK00019)Ribosomal_L31 (pfam01197) →                                            |
| Eco-1896-1 | NZ_APZE01000057.1 | + | 84083  | 84135  | RNA → rpmE (PRK00019)Ribosomal_L31 (pfam01197) → rpmE (PRK00019)Ribosomal_L31 (pfam01197) → |
| Eco-793-1  | NZ_AQED01000166.1 | + | 32326  | 32378  | RNA → rpmE (PRK00019)Ribosomal_L31 (pfam01197) → rpmE (PRK00019)Ribosomal_L31 (pfam01197) → |
| Eco-1836-1 | NZ_APXQ01000157.1 | + | 23781  | 23833  | RNA → rpmE (PRK00019)Ribosomal_L31 (pfam01197) →                                            |
| Eco-1889-1 | NZ_AQAF01000060.1 | + | 87791  | 87843  | RNA → rpmE (PRK00019)Ribosomal_L31 (pfam01197) →                                            |
| Eco-800-1  | NZ_APXF01000193.1 | + | 29965  | 30017  | RNA → rpmE (PRK00019)Ribosomal_L31 (pfam01197) →                                            |
| Eco-1854-1 | NZ_APYF01000071.1 | + | 78099  | 78151  | RNA → rpmE (PRK00019)Ribosomal_L31 (pfam01197) →                                            |
| Eco-1908-1 | NZ_AQAN01000124.1 | + | 46749  | 46801  | RNA → rpmE (PRK00019)Ribosomal_L31 (pfam01197) →                                            |
| Eco-795-1  | NZ_APXD01000154.1 | + | 28153  | 28205  | RNA → rpmE (PRK00019)Ribosomal_L31 (pfam01197) →                                            |
| Eco-1844-1 | NZ_APXW01000179.1 | + | 23741  | 23793  | RNA → rpmE (PRK00019)Ribosomal_L31 (pfam01197) →                                            |
| Eco-1913-1 | NZ_AQAS01000085.1 | + | 46815  | 46867  | RNA → rpmE (PRK00019)Ribosomal_L31 (pfam01197) →                                            |
| Eco-1847-1 | NZ_APXZ01000347.1 | + | 23890  | 23942  | RNA → rpmE (PRK00019)Ribosomal_L31 (pfam01197) →                                            |
| Eco-1921-1 | NZ_AQAY01000065.1 | + | 87679  | 87731  | RNA → rpmE (PRK00019)Ribosomal_L31 (pfam01197) →                                            |
| Eco-777-1  | NZ_APXA01000319.1 | + | 44177  | 44229  | RNA → rpmE (PRK00019)Ribosomal_L31 (pfam01197) → rpmE (PRK00019)Ribosomal_L31 (pfam01197) → |
| Eco-1659-1 | NZ_APZN01000151.1 | + | 20924  | 20976  | RNA → rpmE (PRK00019)Ribosomal_L31 (pfam01197) →                                            |
| Eco-1922-1 | NZ_AQAZ01000159.1 | + | 75652  | 75704  | RNA → rpmE (PRK00019)Ribosomal_L31 (pfam01197) →                                            |
| Eco-1838-1 | NZ_APXS01000116.1 | + | 23729  | 23781  | RNA → rpmE (PRK00019)Ribosomal_L31 (pfam01197) →                                            |
| Eco-1893-1 | NZ_APZB01000101.1 | + | 84367  | 84419  | RNA → rpmE (PRK00019)Ribosomal_L31 (pfam01197) →                                            |
| Eco-1667-1 | NZ_AQCR01000138.1 | + | 7883   | 7935   | RNA → rpmE (PRK00019)Ribosomal_L31 (pfam01197) →                                            |
| Eco-1773-1 | NZ_AJVU01000157.1 | - | 430    | 378    | RNA → rpmE (PRK00019)Ribosomal_L31 (pfam01197) →                                            |
| Eco-462-1  | NZ_ASRI01000044.1 | - | 39367  | 39315  | RNA → rpmE (PRK00019)Ribosomal_L31 (pfam01197) →                                            |
| Eco-408-1  | NZ_JPKI01000004.1 | - | 820306 | 820254 | RNA → rpmE (PRK00019)Ribosomal_L31 (pfam01197) →                                            |
| Eco-1876-1 | NZ_APYU01000063.1 | + | 117681 | 117733 | RNA → rpmE (PRK00019)Ribosomal_L31 (pfam01197) →                                            |
| Eco-819-1  | NZ_APXG01000161.1 | + | 18777  | 18829  | RNA → rpmE (PRK00019)Ribosomal_L31 (pfam01197) →                                            |
| Eco-1852-1 | NZ_APYD01000069.1 | + | 88151  | 88203  | RNA → rpmE (PRK00019)Ribosomal_L31 (pfam01197) →                                            |
| Eco-1895-1 | NZ_APZD01000070.1 | + | 80732  | 80784  | RNA → rpmE (PRK00019)Ribosomal_L31 (pfam01197) →                                            |
| Eco-1860-1 | NZ_APZS01000115.1 | + | 84337  | 84389  | RNA → rpmE (PRK00019)Ribosomal_L31 (pfam01197) →                                            |
| Eco-817-1  | NZ_APZL01000142.1 | + | 46914  | 46966  | RNA → rpmE (PRK00019)Ribosomal_L31 (pfam01197) → rpmE (PRK00019)Ribosomal_L31 (pfam01197) → |
| Eco-1882-1 | NZ_AQAA01000396.1 | + | 47121  | 47173  | RNA → rpmE (PRK00019)Ribosomal_L31 (pfam01197) →                                            |
| Eco-827-1  | NZ_AQDG01000067.1 | + | 87789  | 87841  | RNA → rpmE (PRK00019)Ribosomal_L31 (pfam01197) →                                            |
| Eco-1772-1 | NZ_AMXQ01000200.1 | + | 58855  | 58907  | RNA → rpmE (PRK00019)Ribosomal_L31 (pfam01197) →                                            |
| Eco-1888-1 | NZ_AQAE01000110.1 | + | 75775  | 75827  | RNA → rpmE (PRK00019)Ribosomal_L31 (pfam01197) → rpmE (PRK00019)Ribosomal_L31 (pfam01197) → |
| Eco-826-1  | NZ_AQDH01000122.1 | + | 87807  | 87859  | RNA → rpmE (PRK00019)Ribosomal_L31 (pfam01197) →                                            |
| Eco-1385-1 | NZ_ALIN02000018.1 | - | 54267  | 54215  | RNA → rpmE (PRK00019)Ribosomal_L31 (pfam01197) →                                            |
| Eco-813-1  | NZ_AQDP01000060.1 | + | 87872  | 87924  | RNA → rpmE (PRK00019)Ribosomal_L31 (pfam01197) →                                            |
| Eco-1914-1 | NZ_APZX01000452.1 | + | 87677  | 87729  | RNA → rpmE (PRK00019)Ribosomal_L31 (pfam01197) →                                            |
| Eco-1673-1 | NZ_AQCL01000237.1 | + | 86159  | 86211  | RNA → rpmE (PRK00019)Ribosomal_L31 (pfam01197) →                                            |
| Eco-816-1  | NZ_AQDM01000074.1 | + | 87795  | 87847  | RNA → rpmE (PRK00019)Ribosomal_L31 (pfam01197) →                                            |
| Eco-1897-1 | NZ_APZF01000116.1 | + | 84315  | 84367  | RNA → rpmE (PRK00019)Ribosomal_L31 (pfam01197) →                                            |
| Eco-1855-1 | NZ_APYG01000106.1 | + | 78045  | 78097  | RNA → rpmE (PRK00019)Ribosomal_L31 (pfam01197) →                                            |
| Eco-1901-1 | NZ_AQAG01000128.1 | + | 46798  | 46850  | RNA → ←-hypo                                                                                |
| Eco-829-1  | NZ_AQDE01000110.1 | + | 34384  | 34436  | RNA → rpmE (PRK00019)Ribosomal_L31 (pfam01197) →                                            |
| Eco-1842-1 | NZ_APZO01000122.1 | + | 23706  | 23758  | RNA → rpmE (PRK00019)Ribosomal_L31 (pfam01197) →                                            |
| Eco-806-1  | NZ_AQDV01000047.1 | + | 87714  | 87766  | RNA → rpmE (PRK00019)Ribosomal_L31 (pfam01197) →                                            |



|            |                    |   |         |         |                                                                                             |
|------------|--------------------|---|---------|---------|---------------------------------------------------------------------------------------------|
| Eco-1858-1 | NZ_APZQ01000074.1  | + | 84729   | 84781   | RNA → rpmE (PRK00019)Ribosomal_L31 (pfam01197) →                                            |
| Eco-1910-1 | NZ_AQAP01000479.1  | + | 46858   | 46910   | RNA → rpmE (PRK00019)Ribosomal_L31 (pfam01197) → rpmE (PRK00019)Ribosomal_L31 (pfam01197) → |
| Eco-1845-1 | NZ_APXX01000117.1  | + | 23667   | 23719   | RNA → rpmE (PRK00019)Ribosomal_L31 (pfam01197) →                                            |
| Eco-1909-1 | NZ_AQAO01000051.1  | + | 46817   | 46869   | RNA → rpmE (PRK00019)Ribosomal_L31 (pfam01197) →                                            |
| Eco-780-1  | NZ_AQEH01000121.1  | + | 88400   | 88452   | RNA → rpmE (PRK00019)Ribosomal_L31 (pfam01197) →                                            |
| Eco-1909-2 | NZ_AQAO01000113.1  | - | 589     | 537     | RNA → rpmE (PRK00019)Ribosomal_L31 (pfam01197) →                                            |
| Eco-1916-1 | NZ_AQAT01000072.1  | + | 87698   | 87750   | RNA → rpmE (PRK00019)Ribosomal_L31 (pfam01197) →                                            |
| Eco-794-1  | NZ_AQEC01000081.1  | + | 18602   | 18654   | RNA → rpmE (PRK00019)Ribosomal_L31 (pfam01197) →                                            |
| Eco-1846-1 | NZ_APXY01000411.1  | + | 23795   | 23847   | RNA → rpmE (PRK00019)Ribosomal_L31 (pfam01197) →                                            |
| Eco-1917-1 | NZ_AQAU01000164.1  | + | 87687   | 87739   | RNA → rpmE (PRK00019)Ribosomal_L31 (pfam01197) →                                            |
| Eco-1839-1 | NZ_APXT01000186.1  | + | 18324   | 18376   | RNA → rpmE (PRK00019)Ribosomal_L31 (pfam01197) →                                            |
| Eco-779-1  | NZ_APXB01000350.1  | + | 58819   | 58871   | RNA → rpmE (PRK00019)Ribosomal_L31 (pfam01197) →                                            |
| Eco-1663-1 | NZ_AQCV01000086.1  | + | 7832    | 7884    | RNA → rpmE (PRK00019)Ribosomal_L31 (pfam01197) →                                            |
| Eco-1880-1 | NZ_APYY01000581.1  | + | 14000   | 14052   | RNA → rpmE (PRK00019)Ribosomal_L31 (pfam01197) → rpmE (PRK00019)Ribosomal_L31 (pfam01197) → |
| Eco-1668-1 | NZ_AQCQ01000084.1  | + | 7879    | 7931    | RNA → rpmE (PRK00019)Ribosomal_L31 (pfam01197) →                                            |
| Eco-821-1  | NZ_APXH01000145.1  | + | 23860   | 23912   | RNA → rpmE (PRK00019)Ribosomal_L31 (pfam01197) →                                            |
| Eco-1864-1 | NZ_APYL01000074.1  | + | 87767   | 87819   | RNA → rpmE (PRK00019)Ribosomal_L31 (pfam01197) →                                            |
| Eco-1853-1 | NZ_APYE01000072.1  | + | 78009   | 78061   | RNA → rpmE (PRK00019)Ribosomal_L31 (pfam01197) → rpmE (PRK00019)Ribosomal_L31 (pfam01197) → |
| Eco-1815-1 | NZ_AKAZ01000268.1  | - | 584     | 532     | RNA → rpmE (PRK00019)Ribosomal_L31 (pfam01197) →                                            |
| Eco-1095-1 | NZ_AIGJ01000066.1  | + | 92486   | 92538   | RNA → rpmE (PRK00019)Ribosomal_L31 (pfam01197) →                                            |
| Eco-1835-1 | NZ_AQET01000058.1  | + | 61158   | 61210   | RNA → rpmE (PRK00019)Ribosomal_L31 (pfam01197) →                                            |
| Eco-1059-1 | NZ_AIEX01000073.1  | + | 23889   | 23941   | RNA → rpmE (PRK00019)Ribosomal_L31 (pfam01197) →                                            |
| Eco-1856-1 | NZ_APYH01000109.1  | + | 78061   | 78113   | RNA → rpmE (PRK00019)Ribosomal_L31 (pfam01197) →                                            |
| Eco-1857-1 | NZ_APYI01000070.1  | + | 34181   | 34233   | RNA → rpmE (PRK00019)Ribosomal_L31 (pfam01197) →                                            |
| Eco-1840-1 | NZ_APXU01000193.1  | + | 23762   | 23814   | RNA → rpmE (PRK00019)Ribosomal_L31 (pfam01197) →                                            |
| Eco-1848-1 | NZ_APYA01000065.1  | + | 87764   | 87816   | RNA → rpmE (PRK00019)Ribosomal_L31 (pfam01197) →                                            |
| Eco-1665-1 | NZ_AQCT01000137.1  | + | 7887    | 7939    | RNA → rpmE (PRK00019)Ribosomal_L31 (pfam01197) →                                            |
| Eco-1669-1 | NZ_AQCP01000088.1  | + | 7856    | 7908    | RNA → rpmE (PRK00019)Ribosomal_L31 (pfam01197) →                                            |
| Eco-1670-1 | NZ_AQCO01000090.1  | + | 7829    | 7881    | RNA → rpmE (PRK00019)Ribosomal_L31 (pfam01197) →                                            |
| Eco-1078-1 | NZ_AIFQ01000032.1  | + | 93309   | 93361   | RNA → rpmE (PRK00019)Ribosomal_L31 (pfam01197) →                                            |
| Eco-1843-1 | NZ_APZP01000199.1  | + | 23764   | 23816   | RNA → rpmE (PRK00019)Ribosomal_L31 (pfam01197) → rpmE (PRK00019)Ribosomal_L31 (pfam01197) → |
| Eco-1863-1 | NZ_APYK01000175.1  | + | 87879   | 87931   | RNA → rpmE (PRK00019)Ribosomal_L31 (pfam01197) →                                            |
| Eco-832-1  | NZ_AQDB01000114.1  | + | 87811   | 87863   | RNA → rpmE (PRK00019)Ribosomal_L31 (pfam01197) →                                            |
| Eco-1024-1 | NZ_AQCX01000178.1  | + | 86186   | 86238   | RNA → rpmE (PRK00019)Ribosomal_L31 (pfam01197) →                                            |
| Eco-1936-1 | NZ_APZY01000103.1  | + | 34233   | 34285   | RNA → rpmE (PRK00019)Ribosomal_L31 (pfam01197) →                                            |
| Eco-830-1  | NZ_AQDD01000104.1  | + | 34455   | 34507   | RNA → rpmE (PRK00019)Ribosomal_L31 (pfam01197) →                                            |
| Eco-1929-1 | NZ_AQBG01000072.1  | + | 87685   | 87737   | RNA → rpmE (PRK00019)Ribosomal_L31 (pfam01197) →                                            |
| Eco-1769-1 | NZ_AJVS01000201.1  | + | 47721   | 47773   | RNA → rpmE (PRK00019)Ribosomal_L31 (pfam01197) →                                            |
| Eco-1816-1 | NZ_AJVX01000290.1  | - | 585     | 533     | RNA → rpmE (PRK00019)Ribosomal_L31 (pfam01197) →                                            |
| Eco-1771-1 | NZ_AKAY01000190.1  | + | 47720   | 47772   | RNA → rpmE (PRK00019)Ribosomal_L31 (pfam01197) →                                            |
| Eco-1819-1 | NZ_AJVV01000268.1  | + | 47709   | 47761   | RNA → rpmE (PRK00019)Ribosomal_L31 (pfam01197) →                                            |
| Eco-1080-1 | NZ_AIFS01000049.1  | + | 28249   | 28301   | RNA → rpmE (PRK00019)Ribosomal_L31 (pfam01197) →                                            |
| Eco-1767-1 | NZ_AMXP01000360.1  | - | 492     | 440     | RNA → rpmE (PRK00019)Ribosomal_L31 (pfam01197) →                                            |
| Eco-1862-1 | NZ_AQER01000021.1  | + | 90838   | 90890   | RNA → ←-hypo                                                                                |
| Eco-1861-1 | NZ_APYJ01000184.1  | + | 87723   | 87775   | RNA → ←-hypo                                                                                |
| env-861    | TrFG_contig04772   | + | 590     | 642     | RNA → rpmE (PRK00019)Ribosomal_L31 (pfam01197) →                                            |
| Cko-1-2    | NZ_JTAV01000001.1  | - | 2039494 | 2039442 | RNA → rpmE (PRK00019)Ribosomal_L31 (pfam01197) →                                            |
| Cko-1-1    | NZ_JUYC01000147.1  | - | 1421    | 1369    | RNA → rpmE (PRK00019)Ribosomal_L31 (pfam01197) →                                            |
| Cko-2-1    | NC_009792.1        | - | 2839161 | 2839109 | RNA → ←-hypo                                                                                |
| Csp-14-1   | NZ_DF830265.1      | + | 5041211 | 5041263 | RNA → rpmE (PRK00019)Ribosomal_L31 (pfam01197) →                                            |
| Csp-8-1    | NZ_KQ089823.1      | + | 657952  | 658004  | RNA → rpmE (PRK00019)Ribosomal_L31 (pfam01197) →                                            |
| env-862    | HBC_scaff_10316882 | - | 972     | 920     | RNA → rpmE (PRK00019)Ribosomal_L31 (pfam01197) →                                            |



|          |                         |   |         |         |                                                                                                                                                                             |
|----------|-------------------------|---|---------|---------|-----------------------------------------------------------------------------------------------------------------------------------------------------------------------------|
| env-863  | HBC.ctgs_1033478        | - | 972     | 920     | RNA → rpmE (PRK00019)Ribosomal_L31 (pfam01197) →                                                                                                                            |
| env-864  | JGI25152J39213_1000244  | - | 11208   | 11156   | RNA → rpmE (PRK00019)Ribosomal_L31 (pfam01197) → PRK14515 (PRK14515) →                                                                                                      |
| env-865  | JGI26052J44787_1048675  | + | 102     | 154     | RNA → rpmE (PRK00019)Ribosomal_L31 (pfam01197) →                                                                                                                            |
| env-866  | JGI26055J44792_1064428  | + | 109     | 161     | RNA → rpmE (PRK00019)Ribosomal_L31 (pfam01197) →                                                                                                                            |
| Ecl-59-1 | NZ_AXOM01000028.1       | + | 73061   | 73113   | RNA → ←hypo                                                                                                                                                                 |
| Cam-2-1  | NZ_CP011132.1           | + | 4667907 | 4667959 | RNA → rpmE (PRK00019)Ribosomal_L31 (pfam01197) →                                                                                                                            |
| env-867  | GoDraft_1000552         | - | 4465    | 4413    | RNA → rpmE (PRK00019)Ribosomal_L31 (pfam01197) →                                                                                                                            |
| Cse-1-1  | NZ_BBNB01000017.1       | + | 87854   | 87906   | RNA → rpmE (PRK00019)Ribosomal_L31 (pfam01197) →                                                                                                                            |
| env-868  | RicEn_C1233             | - | 705     | 653     | RNA → ←PRK05264 (PRK05264)MetJ (COG3060)                                                                                                                                    |
| Esp-43-1 | NZ_JXAF01000019.1       | - | 42097   | 42045   | RNA → rpmE (PRK00019)Ribosomal_L31 (pfam01197) →                                                                                                                            |
| Kor-1-1  | NZ_JZLI01000016.1       | - | 25625   | 25573   | RNA → rpmE (PRK00019)Ribosomal_L31 (pfam01197) →                                                                                                                            |
| Esp-72-1 | NC_021500.1             | + | 3129679 | 3129731 | RNA → rpmE (PRK00019)Ribosomal_L31 (pfam01197) →                                                                                                                            |
| Ksa-1-1  | NZ_CP007215.1           | - | 2992737 | 2992685 | RNA → rpmE (PRK00019)Ribosomal_L31 (pfam01197) →                                                                                                                            |
| Mma-2-1  | NZ_HE578950.1           | + | 83372   | 83424   | RNA → rpmE (PRK00019)Ribosomal_L31 (pfam01197) →                                                                                                                            |
| Pur-1-1  | NZ_CP011602.1           | - | 4453563 | 4453511 | RNA → rpmE (PRK00019)Ribosomal_L31 (pfam01197) →                                                                                                                            |
| Cfa-1-1  | NZ_BBMX01000021.1       | + | 105611  | 105663  | RNA → rpmE (PRK00019)Ribosomal_L31 (pfam01197) →                                                                                                                            |
| env-869  | GO4KUYH01D3UFU          | + | 163     | 215     | RNA → ←hypo                                                                                                                                                                 |
| env-870  | JGI26054J46599_1125534  | + | 31      | 83      | RNA → ←hypo                                                                                                                                                                 |
| Kcf-1-1  | NZ_BADH01000654.1       | + | 6305    | 6357    | RNA → ←hypo                                                                                                                                                                 |
| env-871  | AECF.contig04828        | - | 82      | 30      | RNA →                                                                                                                                                                       |
| Esp-42-1 | NZ_JXAG01000025.1       | - | 24558   | 24506   | RNA → rpmE (PRK00019)Ribosomal_L31 (pfam01197) →                                                                                                                            |
| Era-1-1  | NZ_JH725435.1           | - | 117259  | 117207  | RNA → rpmE (PRK00019)Ribosomal_L31 (pfam01197) → hypo →                                                                                                                     |
| Kra-1-1  | NZ_JDYJ01000019.1       | + | 81305   | 81357   | RNA → rpmE (PRK00019)Ribosomal_L31 (pfam01197) →                                                                                                                            |
| Kra-2-1  | NZ_JSFC01000001.1       | - | 4090078 | 4090026 | RNA → rpmE (PRK00019)Ribosomal_L31 (pfam01197) →                                                                                                                            |
| Csp-12-1 | NZ_JAQB01000052.1       | + | 46953   | 47005   | RNA → rpmE (PRK00019)Ribosomal_L31 (pfam01197) →                                                                                                                            |
| Cam-1-2  | NZ_JMQQ01000019.1       | + | 108204  | 108256  | RNA → rpmE (PRK00019)Ribosomal_L31 (pfam01197) →                                                                                                                            |
| Cam-1-3  | NZ_CDQV01000565.1       | - | 351     | 299     | RNA → rpmE (PRK00019)Ribosomal_L31 (pfam01197) →                                                                                                                            |
| Csp-13-1 | NZ_KK736183.1           | + | 1511889 | 1511941 | RNA → rpmE (PRK00019)Ribosomal_L31 (pfam01197) →                                                                                                                            |
| Ecl-60-1 | NC_014618.1             | - | 4692425 | 4692373 | RNA → rpmE (PRK00019)Ribosomal_L31 (pfam01197) →                                                                                                                            |
| env-872  | ACOFG988.contig03604    | - | 434     | 382     | RNA → rpmE (PRK00019)Ribosomal_L31 (pfam01197) →                                                                                                                            |
| env-873  | CLOF.contig01917        | - | 175     | 123     | RNA → rpmE (PRK00019)Ribosomal_L31 (pfam01197) →                                                                                                                            |
| env-874  | DPOLF_F46JATG01CXPZU    | + | 132     | 184     | RNA → hypo →                                                                                                                                                                |
| env-875  | TrFG_GO06Z1101D3LWN     | - | 296     | 244     | RNA → ←hypo                                                                                                                                                                 |
| Pvu-1-1  | NZ_BBMZ01000025.1       | + | 73082   | 73133   | RNA → rpmE (PRK00019)Ribosomal_L31 (pfam01197) →                                                                                                                            |
| Gpe-1-1  | NZ_LFWC01000015.1       | + | 70062   | 70109   | RNA → ←PriA (COG1198)PRK05580 (PRK05580)                                                                                                                                    |
| Gxi-1-1  | NZ_AMRI01000052.1       | + | 50253   | 50300   | RNA → ←PriA (COG1198)PRK05580 (PRK05580)                                                                                                                                    |
| env-876  | CEPH01076795.1          | - | 934     | 882     | RNA → rpmE (PRK00019)Ribosomal_L31 (pfam01197) →                                                                                                                            |
| env-877  | CEUT01138684.1          | + | 360     | 412     | RNA → rpmE (PRK00019)Ribosomal_L31 (pfam01197) →                                                                                                                            |
| env-878  | CEUX01102889.1          | + | 2080    | 2132    | RNA → rpmE (PRK00019)Ribosomal_L31 (pfam01197) →                                                                                                                            |
| env-879  | CEVB01010953.1          | + | 2587    | 2639    | RNA → rpmE (PRK00019)Ribosomal_L31 (pfam01197) →                                                                                                                            |
| env-880  | 3300000053_316318       | - | 326     | 276     | RNA → rpmE (PRK00019)Ribosomal_L31 (pfam01197) →                                                                                                                            |
| Pme-1-1  | NZ_LAVS01000089.1       | - | 2227    | 2177    | RNA → rpmE (PRK00019)Ribosomal_L31 (pfam01197) → rpmE (PRK00019)Ribosomal_L31 (pfam01197) →                                                                                 |
| Rsp-2-1  | NZ_LAMX01000027.1       | + | 22231   | 22281   | RNA → rpmE (PRK00019)Ribosomal_L31 (pfam01197) → rpmE (PRK00019)Ribosomal_L31 (pfam01197) →                                                                                 |
| env-881  | JCVL_SCAF_1096627203505 | + | 760     | 810     | RNA → rpmE (PRK00019)Ribosomal_L31 (pfam01197) →                                                                                                                            |
| Rsp-1-1  | NZ_AFHIO1000019.1       | + | 59978   | 60028   | RNA → rpmE (PRK00019)Ribosomal_L31 (pfam01197) → rpmE (PRK00019)Ribosomal_L31 (pfam01197) →                                                                                 |
| Aag-1-1  | NZ_AKKU01000026.1       | + | 135962  | 136016  | rpmE (PRK00019)Ribosomal_L31 (pfam01197) → hypo → rpmE (PRK00019)Ribosomal_L31 (pfam01197) → rpmE (PRK00019)Ribosomal_L31 (pfam01197) →                                     |
| Aae-1-1  | NZ_ALAB01000027.1       | - | 258817  | 258762  | rpmE (PRK00019)Ribosomal_L31 (pfam01197) → rpmE (PRK00019)Ribosomal_L31 (pfam01197) → rpmE (PRK00019)Ribosomal_L31 (pfam01197) → rpmE (PRK00019)Ribosomal_L31 (pfam01197) → |
| env-882  | 3300000053_006648       | + | 1670    | 1725    | RNA → rpmE (PRK00019)Ribosomal_L31 (pfam01197) →                                                                                                                            |
| env-883  | 3300000052_128519       | - | 369     | 314     | RNA → rpmE (PRK00019)Ribosomal_L31 (pfam01197) →                                                                                                                            |

|         |                          |   |         |         |                                                                                                                                                                                       |
|---------|--------------------------|---|---------|---------|---------------------------------------------------------------------------------------------------------------------------------------------------------------------------------------|
| Aje-1-1 | NZ_AH01000040.1          | + | 47811   | 47866   | RNA → rpmE (PRK00019) Ribosomal_L31 (pfam01197) → rpmE (PRK00019) Ribosomal_L31 (pfam01197) → rpmE (PRK00019) Ribosomal_L31 (pfam01197) →                                             |
| Aik-1-1 | NZ_LAHO01000004.1        | + | 191768  | 191818  | RNA → rpmE (PRK00019) Ribosomal_L31 (pfam01197) → rpmE (PRK00019) Ribosomal_L31 (pfam01197) →                                                                                         |
| env-884 | CEWF01130100.1           | - | 390     | 340     | RNA → rpmE (PRK00019) Ribosomal_L31 (pfam01197) →                                                                                                                                     |
| env-885 | CESO01326287.1           | + | 25250   | 25300   | RNA → rpmE (PRK00019) Ribosomal_L31 (pfam01197) →                                                                                                                                     |
| Asp-9-1 | NZ_LAHP01000005.1        | + | 145176  | 145226  | RNA → rpmE (PRK00019) Ribosomal_L31 (pfam01197) → rpmE (PRK00019) Ribosomal_L31 (pfam01197) →                                                                                         |
| Rpe-1-1 | NZ_KB907708.1            | - | 105042  | 104992  | RNA → rpmE (PRK00019) Ribosomal_L31 (pfam01197) →                                                                                                                                     |
| Rba-1-1 | NZ_AUDG01000008.1        | + | 95570   | 95622   | RNA → rpmE (PRK00019) Ribosomal_L31 (pfam01197) →                                                                                                                                     |
| Rna-1-1 | NZ_BAFK01000001.1        | + | 221629  | 221679  | RNA → rpmE (PRK00019) Ribosomal_L31 (pfam01197) → rpmE (PRK00019) Ribosomal_L31 (pfam01197) → rpmE (PRK00019) Ribosomal_L31 (pfam01197) →                                             |
| env-886 | P_2C_Liq_3_UnCty_100070  | + | 17818   | 17869   | RNA → rpmE (PRK00019) Ribosomal_L31 (pfam01197) →                                                                                                                                     |
| env-887 | P_2C_Liq_1_UnCty_1000092 | + | 12358   | 12409   | RNA → rpmE (PRK00019) Ribosomal_L31 (pfam01197) →                                                                                                                                     |
| env-888 | P_2C_Liq_2_UnCty_1000391 | - | 4101    | 4050    | RNA → rpmE (PRK00019) Ribosomal_L31 (pfam01197) →                                                                                                                                     |
| Asa-9-1 | NZ_AUBH01000006.1        | + | 241719  | 241770  | RNA → rpmE (PRK00019) Ribosomal_L31 (pfam01197) →                                                                                                                                     |
| Gli-1-1 | NZ_BAEN01000076.1        | - | 267505  | 267455  | RNA → rpmE (PRK00019) Ribosomal_L31 (pfam01197) → rpmE (PRK00019) Ribosomal_L31 (pfam01197) →                                                                                         |
| Gpu-1-1 | NZ_BAET01000031.1        | + | 85003   | 85056   | RNA → rpmE (PRK00019) Ribosomal_L31 (pfam01197) → rpmE (PRK00019) Ribosomal_L31 (pfam01197) →                                                                                         |
| env-889 | P_2C_Liq_1_UnCty_1151257 | + | 164     | 215     | RNA → rpmE (PRK00019) Ribosomal_L31 (pfam01197) →                                                                                                                                     |
| Gsp-2-1 | NZ_DS989813.1            | - | 29050   | 28999   | RNA → rpmE (PRK00019) Ribosomal_L31 (pfam01197) →                                                                                                                                     |
| env-890 | JGI20152J14361_10002432  | - | 5019    | 4967    | RNA → rpmE (PRK00019) Ribosomal_L31 (pfam01197) →                                                                                                                                     |
| env-891 | JGI20151J14362_10056971  | + | 509     | 561     | RNA → rpmE (PRK00019) Ribosomal_L31 (pfam01197) →                                                                                                                                     |
| env-892 | JGI20153J14295_10036242  | - | 781     | 729     | RNA → rpmE (PRK00019) Ribosomal_L31 (pfam01197) →                                                                                                                                     |
| env-893 | JGI20153J14318_10036242  | - | 781     | 729     | RNA → rpmE (PRK00019) Ribosomal_L31 (pfam01197) →                                                                                                                                     |
| Gni-1-1 | NC_016041.1              | + | 3221564 | 3221615 | RNA → rpmE (PRK00019) Ribosomal_L31 (pfam01197) →                                                                                                                                     |
| Gpa-1-1 | NZ_KE386814.1            | - | 95601   | 95549   | RNA → rpmE (PRK00019) Ribosomal_L31 (pfam01197) →                                                                                                                                     |
| env-894 | _GX4VOVV01EZ7Q7          | - | 122     | 71      | RNA → hypo →                                                                                                                                                                          |
| Gpo-1-1 | NZ_BAER01000045.1        | + | 100823  | 100873  | RNA → rpmE (PRK00019) Ribosomal_L31 (pfam01197) → |
| env-895 | JGI20157J14317_10084041  | - | 798     | 748     | RNA → rpmE (PRK00019) Ribosomal_L31 (pfam01197) →                                                                                                                                     |
| Gar-1-1 | NZ_BAEO01000065.1        | - | 149160  | 149110  | RNA → rpmE (PRK00019) Ribosomal_L31 (pfam01197) → rpmE (PRK00019) Ribosomal_L31 (pfam01197) →                                                                                         |
| env-896 | JGI20153J14295_10040431  | - | 589     | 539     | RNA → rpmE (PRK00019) Ribosomal_L31 (pfam01197) →                                                                                                                                     |
| env-897 | JGI20153J14318_10040431  | - | 589     | 539     | RNA → rpmE (PRK00019) Ribosomal_L31 (pfam01197) →                                                                                                                                     |
| Gps-1-1 | NC_020514.1              | + | 218373  | 218423  | RNA → ← hypo                                                                                                                                                                          |
| env-898 | CEWJ01088929.1           | - | 6335    | 6285    | RNA → rpmE (PRK00019) Ribosomal_L31 (pfam01197) →                                                                                                                                     |
| env-899 | CERD01001178.1           | + | 488     | 538     | RNA → rpmE (PRK00019) Ribosomal_L31 (pfam01197) →                                                                                                                                     |
| env-900 | JGI12097J13213_1000038   | - | 8918    | 8868    | RNA → rpmE (PRK00019) Ribosomal_L31 (pfam01197) →                                                                                                                                     |
| env-901 | CEUB01117245.1           | + | 201     | 251     | RNA → rpmE (PRK00019) Ribosomal_L31 (pfam01197) →                                                                                                                                     |
| env-902 | CENJ01188181.1           | + | 311     | 361     | RNA → rpmE (PRK00019) Ribosomal_L31 (pfam01197) →                                                                                                                                     |
| env-903 | CEQI01175305.1           | - | 182     | 132     | RNA → rpmE (PRK00019) Ribosomal_L31 (pfam01197) →                                                                                                                                     |
| env-904 | CEQJ01016256.1           | - | 1813    | 1763    | RNA → rpmE (PRK00019) Ribosomal_L31 (pfam01197) →                                                                                                                                     |
| env-905 | CEQQ01064592.1           | + | 268     | 318     | RNA → rpmE (PRK00019) Ribosomal_L31 (pfam01197) →                                                                                                                                     |
| env-906 | CEQU01072249.1           | + | 4389    | 4439    | RNA → rpmE (PRK00019) Ribosomal_L31 (pfam01197) →                                                                                                                                     |
| env-907 | CESF01168137.1           | + | 311     | 361     | RNA → rpmE (PRK00019) Ribosomal_L31 (pfam01197) →                                                                                                                                     |
| env-908 | CESJ01134068.1           | + | 721     | 771     | RNA → rpmE (PRK00019) Ribosomal_L31 (pfam01197) →                                                                                                                                     |
| env-909 | CESL01022392.1           | + | 8352    | 8402    | RNA → rpmE (PRK00019) Ribosomal_L31 (pfam01197) →                                                                                                                                     |
| env-910 | CESM01050812.1           | + | 387     | 437     | RNA → rpmE (PRK00019) Ribosomal_L31 (pfam01197) →                                                                                                                                     |
| env-911 | CESR01320609.1           | - | 725     | 675     | RNA → rpmE (PRK00019) Ribosomal_L31 (pfam01197) →                                                                                                                                     |
| env-912 | CETH01013924.1           | + | 3079    | 3129    | RNA → rpmE (PRK00019) Ribosomal_L31 (pfam01197) →                                                                                                                                     |
| env-913 | CETJ01046849.1           | + | 3068    | 3118    | RNA → rpmE (PRK00019) Ribosomal_L31 (pfam01197) →                                                                                                                                     |
| env-914 | CETO01002955.1           | + | 1403    | 1453    | RNA → rpmE (PRK00019) Ribosomal_L31 (pfam01197) →                                                                                                                                     |
| env-915 | CETQ01029354.1           | - | 3342    | 3292    | RNA → rpmE (PRK00019) Ribosomal_L31 (pfam01197) →                                                                                                                                     |
| env-916 | CETS01286873.1           | - | 271     | 221     | RNA → rpmE (PRK00019) Ribosomal_L31 (pfam01197) →                                                                                                                                     |
| env-917 | CETT01166069.1           | + | 280     | 330     | RNA → rpmE (PRK00019) Ribosomal_L31 (pfam01197) →                                                                                                                                     |

|          |                        |   |         |         |                                                                                             |
|----------|------------------------|---|---------|---------|---------------------------------------------------------------------------------------------|
| env-918  | CETZ01011127.1         | - | 189     | 139     | RNA → rpmE (PRK00019)Ribosomal_L31 (pfam01197) →                                            |
| env-919  | CEUC01278456.1         | - | 212     | 162     | RNA → rpmE (PRK00019)Ribosomal_L31 (pfam01197) →                                            |
| env-920  | CEUL01103588.1         | - | 129     | 79      | RNA → rpmE (PRK00528)rpmE (PRK00019)Ribosomal_L31 (pfam01197) →                             |
| env-921  | CEUM01053021.1         | - | 9973    | 9923    | RNA → rpmE (PRK00019)Ribosomal_L31 (pfam01197) →                                            |
| env-922  | CEUQ01106239.1         | + | 1010    | 1060    | RNA → rpmE (PRK00019)Ribosomal_L31 (pfam01197) →                                            |
| env-923  | CEUU01007342.1         | + | 10738   | 10788   | RNA → rpmE (PRK00019)Ribosomal_L31 (pfam01197) →                                            |
| env-924  | CEUW01253280.1         | + | 3470    | 3520    | RNA → rpmE (PRK00019)Ribosomal_L31 (pfam01197) →                                            |
| env-925  | CEUX01014635.1         | + | 306     | 356     | RNA → rpmE (PRK00019)Ribosomal_L31 (pfam01197) →                                            |
| env-926  | CEUY01025164.1         | - | 498     | 448     | RNA → rpmE (PRK00019)Ribosomal_L31 (pfam01197) →                                            |
| env-927  | CEVF01153062.1         | - | 1235    | 1185    | RNA → rpmE (PRK00019)Ribosomal_L31 (pfam01197) →                                            |
| env-928  | CEWF01048426.1         | + | 795     | 845     | RNA → rpmE (PRK00019)Ribosomal_L31 (pfam01197) →                                            |
| env-929  | CEWI01078971.1         | + | 376     | 426     | RNA → rpmE (PRK00019)Ribosomal_L31 (pfam01197) →                                            |
| env-930  | CEQS01114527.1         | + | 267     | 317     | RNA → rpmE (PRK00019)Ribosomal_L31 (pfam01197) →                                            |
| env-931  | CERB01320821.1         | - | 434     | 384     | RNA → rpmE (PRK00019)Ribosomal_L31 (pfam01197) →                                            |
| env-932  | CESW01183859.1         | - | 333     | 283     | RNA → rpmE (PRK00019)Ribosomal_L31 (pfam01197) →                                            |
| env-933  | CENT01094743.1         | - | 7856    | 7806    | RNA → rpmE (PRK00019)Ribosomal_L31 (pfam01197) →                                            |
| env-934  | CETX01054649.1         | + | 40      | 90      | RNA → hypo → rpmE (PRK00019)Ribosomal_L31 (pfam01197) →                                     |
| Pat-1-1  | NC.008228.1            | - | 5045228 | 5045178 | RNA → rpmE (PRK00019)Ribosomal_L31 (pfam01197) →                                            |
| Gsp-1-1  | NC.015497.1            | - | 4815194 | 4815144 | RNA → rpmE (PRK00019)Ribosomal_L31 (pfam01197) → rpmE (PRK00019)Ribosomal_L31 (pfam01197) → |
| Gme-1-1  | NZ.BAEP01000006.1      | + | 5181    | 5231    | RNA → ←-hypo                                                                                |
| Gch-1-1  | NZ.BAEM01000019.1      | - | 23453   | 23403   | RNA → rpmE (PRK00019)Ribosomal_L31 (pfam01197) → rpmE (PRK00019)Ribosomal_L31 (pfam01197) → |
| Psp-18-1 | NZ.JRKG01000003.1      | - | 204430  | 204380  | RNA → rpmE (PRK00019)Ribosomal_L31 (pfam01197) → rpmE (PRK00019)Ribosomal_L31 (pfam01197) → |
| Gag-1-1  | NZ.BAEK01000035.1      | - | 25147   | 25097   | RNA → rpmE (PRK00019)Ribosomal_L31 (pfam01197) → rpmE (PRK00019)Ribosomal_L31 (pfam01197) → |
| env-935  | CENT01097505.1         | - | 7154    | 7104    | RNA → rpmE (PRK00019)Ribosomal_L31 (pfam01197) →                                            |
| Asp-7-1  | NZ.JQHG01000007.1      | + | 134541  | 134591  | RNA → rpmE (PRK00019)Ribosomal_L31 (pfam01197) →                                            |
| Asp-6-1  | NZ.JQFW01000050.1      | + | 134541  | 134591  | RNA → rpmE (PRK00019)Ribosomal_L31 (pfam01197) →                                            |
| env-936  | CEPZ01032191.1         | - | 667     | 617     | RNA → rpmE (PRK00019)Ribosomal_L31 (pfam01197) →                                            |
| env-937  | CEPV01037448.1         | + | 598     | 648     | RNA → rpmE (PRK00019)Ribosomal_L31 (pfam01197) →                                            |
| env-938  | CEQH01105122.1         | + | 558     | 608     | RNA →                                                                                       |
| env-939  | CERD01127562.1         | - | 11742   | 11692   | RNA → rpmE (PRK00019)Ribosomal_L31 (pfam01197) →                                            |
| env-940  | CERQ01120834.1         | + | 1165    | 1215    | RNA → rpmE (PRK00019)Ribosomal_L31 (pfam01197) →                                            |
| env-941  | CESC01037646.1         | - | 1488    | 1438    | RNA → rpmE (PRK00019)Ribosomal_L31 (pfam01197) →                                            |
| env-942  | CESQ01222567.1         | + | 1419    | 1469    | RNA → rpmE (PRK00019)Ribosomal_L31 (pfam01197) →                                            |
| env-943  | CETH01076277.1         | - | 632     | 582     | RNA → rpmE (PRK00019)Ribosomal_L31 (pfam01197) →                                            |
| env-944  | CETO01078733.1         | + | 15481   | 15531   | RNA → rpmE (PRK00019)Ribosomal_L31 (pfam01197) →                                            |
| env-945  | CETZ01121052.1         | + | 1200    | 1250    | RNA → rpmE (PRK00019)Ribosomal_L31 (pfam01197) →                                            |
| env-946  | CEUK01183503.1         | + | 5639    | 5689    | RNA → rpmE (PRK00019)Ribosomal_L31 (pfam01197) →                                            |
| env-947  | CEUL01119818.1         | + | 637     | 687     | RNA → rpmE (PRK00019)Ribosomal_L31 (pfam01197) →                                            |
| env-948  | CEUN01029593.1         | + | 2483    | 2533    | RNA → rpmE (PRK00019)Ribosomal_L31 (pfam01197) →                                            |
| env-949  | CEUP01063689.1         | + | 379     | 429     | RNA → rpmE (PRK00019)Ribosomal_L31 (pfam01197) →                                            |
| env-950  | CEUQ01293793.1         | - | 193     | 143     | RNA → rpmE (PRK00019)Ribosomal_L31 (pfam01197) →                                            |
| env-951  | CEUS01268477.1         | + | 379     | 429     | RNA → rpmE (PRK00019)Ribosomal_L31 (pfam01197) →                                            |
| env-952  | CEUY01052883.1         | + | 4169    | 4219    | RNA → rpmE (PRK00019)Ribosomal_L31 (pfam01197) →                                            |
| env-953  | CEVA01307699.1         | - | 183     | 133     | RNA → rpmE (PRK00019)Ribosomal_L31 (pfam01197) →                                            |
| Sch-1-1  | NZ.KB899393.1          | - | 40924   | 40874   | RNA → rpmE (PRK00019)Ribosomal_L31 (pfam01197) →                                            |
| env-954  | CETX01177667.1         | + | 221     | 272     | RNA → rpmE (PRK00019)Ribosomal_L31 (pfam01197) →                                            |
| env-955  | JGI12097J13213.1001517 | - | 1180    | 1129    | RNA → rpmE (PRK00019)Ribosomal_L31 (pfam01197) →                                            |
| Asp-5-1  | NZ.JFBK01000001.1      | - | 4465586 | 4465534 | RNA → rpmE (PRK00019)Ribosomal_L31 (pfam01197) →                                            |
| env-956  | CESM01022288.1         | + | 175     | 227     | RNA → rpmE (PRK00019)Ribosomal_L31 (pfam01197) →                                            |
| Ama-14-1 | NZ.JWLW01000010.1      | + | 95215   | 95267   | RNA → rpmE (PRK00019)Ribosomal_L31 (pfam01197) → hypo →                                     |
| env-957  | JGI12120J13076.102920  | - | 400     | 348     | RNA → rpmE (PRK00019)Ribosomal_L31 (pfam01197) →                                            |
| env-958  | JGI12020J13220.1000023 | + | 611     | 663     | RNA → rpmE (PRK00019)Ribosomal_L31 (pfam01197) →                                            |

|          |                        |   |        |        |                                                |
|----------|------------------------|---|--------|--------|------------------------------------------------|
| env-959  | JGI11800J13271_1000309 | + | 1785   | 1837   | RNA→ rpmE (PRK00019)Ribosomal_L31 (pfam01197)→ |
| env-960  | CENO01130258.1         | + | 217    | 269    | RNA→ rpmE (PRK00019)Ribosomal_L31 (pfam01197)→ |
| env-961  | CENX01098222.1         | + | 441    | 493    | RNA→ rpmE (PRK00019)Ribosomal_L31 (pfam01197)→ |
| env-962  | CEOC01158531.1         | + | 359    | 411    | RNA→ rpmE (PRK00019)Ribosomal_L31 (pfam01197)→ |
| env-963  | CEPA01172521.1         | - | 2899   | 2847   | RNA→ rpmE (PRK00019)Ribosomal_L31 (pfam01197)→ |
| env-964  | CEPH01005174.1         | - | 133    | 81     | RNA→                                           |
| env-965  | CEPK01169822.1         | - | 3662   | 3610   | RNA→ rpmE (PRK00019)Ribosomal_L31 (pfam01197)→ |
| env-966  | CEPU01151402.1         | + | 251    | 303    | RNA→ rpmE (PRK00019)Ribosomal_L31 (pfam01197)→ |
| env-967  | CEPV01200560.1         | + | 250    | 302    | RNA→ rpmE (PRK00019)Ribosomal_L31 (pfam01197)→ |
| env-968  | CEPW01224637.1         | - | 461    | 409    | RNA→ rpmE (PRK00019)Ribosomal_L31 (pfam01197)→ |
| env-969  | CEPY01054066.1         | + | 243    | 295    | RNA→ rpmE (PRK00019)Ribosomal_L31 (pfam01197)→ |
| env-970  | CERS01171998.1         | + | 621    | 673    | RNA→ rpmE (PRK00019)Ribosomal_L31 (pfam01197)→ |
| env-971  | CETB01056501.1         | - | 13247  | 13195  | RNA→ rpmE (PRK00019)Ribosomal_L31 (pfam01197)→ |
| env-972  | CETI01039859.1         | - | 2772   | 2720   | RNA→ rpmE (PRK00019)Ribosomal_L31 (pfam01197)→ |
| env-973  | CETR01033810.1         | - | 294    | 242    | RNA→ rpmE (PRK00019)Ribosomal_L31 (pfam01197)→ |
| env-974  | CEVK01195631.1         | - | 373    | 321    | RNA→ rpmE (PRK00019)Ribosomal_L31 (pfam01197)→ |
| env-975  | CEVM01241445.1         | + | 721    | 773    | RNA→ ←-hypo                                    |
| env-976  | CEVQ01117480.1         | + | 28172  | 28224  | RNA→ rpmE (PRK00019)Ribosomal_L31 (pfam01197)→ |
| env-977  | CEVZ01044906.1         | - | 3231   | 3179   | RNA→ rpmE (PRK00019)Ribosomal_L31 (pfam01197)→ |
| env-978  | CEWI01013184.1         | - | 2889   | 2837   | RNA→ rpmE (PRK00019)Ribosomal_L31 (pfam01197)→ |
| env-979  | CEWJ01032880.1         | + | 1770   | 1822   | RNA→ rpmE (PRK00019)Ribosomal_L31 (pfam01197)→ |
| env-980  | Mariner_1003560        | + | 602    | 654    | RNA→ rpmE (PRK00019)Ribosomal_L31 (pfam01197)→ |
| env-981  | TahiMoana_1000279      | + | 110727 | 110779 | RNA→ rpmE (PRK00019)Ribosomal_L31 (pfam01197)→ |
| env-982  | CEQG01016892.1         | - | 90     | 38     | RNA→                                           |
| env-983  | CEQH01004879.1         | - | 232    | 180    | RNA→ rpmE (PRK00019)Ribosomal_L31 (pfam01197)→ |
| env-984  | CEQM01102687.1         | - | 3030   | 2978   | RNA→ rpmE (PRK00019)Ribosomal_L31 (pfam01197)→ |
| env-985  | CESC01010137.1         | - | 90     | 38     | RNA→                                           |
| env-986  | CERG01114847.1         | + | 251    | 303    | RNA→ rpmE (PRK00019)Ribosomal_L31 (pfam01197)→ |
| env-987  | CERR01251468.1         | + | 128    | 180    | RNA→ rpmE (PRK00019)Ribosomal_L31 (pfam01197)→ |
| env-988  | CERV01054361.1         | - | 2998   | 2946   | RNA→ rpmE (PRK00019)Ribosomal_L31 (pfam01197)→ |
| env-989  | CESI01008217.1         | + | 5871   | 5923   | RNA→ rpmE (PRK00019)Ribosomal_L31 (pfam01197)→ |
| env-990  | CETE01023379.1         | + | 39511  | 39563  | RNA→ rpmE (PRK00019)Ribosomal_L31 (pfam01197)→ |
| env-991  | CETQ01016815.1         | + | 345    | 397    | RNA→ rpmE (PRK00019)Ribosomal_L31 (pfam01197)→ |
| env-992  | JGI11881J13070_1018350 | - | 364    | 312    | RNA→ rpmE (PRK00019)Ribosomal_L31 (pfam01197)→ |
| env-993  | JGI12025J13092_100507  | + | 516    | 568    | RNA→ rpmE (PRK00019)Ribosomal_L31 (pfam01197)→ |
| env-994  | JGI12107J13081_100823  | + | 1838   | 1890   | RNA→ rpmE (PRK00019)Ribosomal_L31 (pfam01197)→ |
| env-995  | JGI11755J13075_102346  | - | 67     | 15     | RNA→                                           |
| env-996  | JGI11765J13083_105572  | + | 198    | 250    | RNA→ rpmE (PRK00019)Ribosomal_L31 (pfam01197)→ |
| env-997  | JGI11805J13103_105660  | + | 220    | 272    | RNA→ rpmE (PRK00019)Ribosomal_L31 (pfam01197)→ |
| env-998  | JGI11754J13217_1010636 | + | 234    | 286    | RNA→ rpmE (PRK00019)Ribosomal_L31 (pfam01197)→ |
| env-999  | JGI12207J13218_1017989 | + | 147    | 199    | RNA→ rpmE (PRK00019)Ribosomal_L31 (pfam01197)→ |
| env-1000 | JGI12218J13221_1001289 | - | 3331   | 3279   | RNA→ rpmE (PRK00019)Ribosomal_L31 (pfam01197)→ |
| env-1001 | JGI11978J13257_1000948 | - | 2287   | 2235   | RNA→ rpmE (PRK00019)Ribosomal_L31 (pfam01197)→ |
| env-1002 | JGI12148J13107_102525  | + | 1320   | 1372   | RNA→ rpmE (PRK00019)Ribosomal_L31 (pfam01197)→ |
| env-1003 | JGI11949J13268_1023255 | + | 99     | 151    | RNA→ rpmE (PRK00019)Ribosomal_L31 (pfam01197)→ |
| env-1004 | JGI11931J13222_1000347 | + | 5042   | 5094   | RNA→ rpmE (PRK00019)Ribosomal_L31 (pfam01197)→ |
| env-1005 | JGI12156J13080_107206  | + | 180    | 232    | RNA→ rpmE (PRK00019)Ribosomal_L31 (pfam01197)→ |
| env-1006 | CEOW01017245.1         | - | 1797   | 1745   | RNA→ rpmE (PRK00019)Ribosomal_L31 (pfam01197)→ |
| env-1007 | CEPC01258783.1         | - | 681    | 629    | RNA→ rpmE (PRK00019)Ribosomal_L31 (pfam01197)→ |
| env-1008 | CEPD01089067.1         | + | 250    | 302    | RNA→ rpmE (PRK00019)Ribosomal_L31 (pfam01197)→ |
| env-1009 | CEPM01022322.1         | - | 136    | 84     | RNA→                                           |
| env-1010 | CEQL01158694.1         | + | 267    | 319    | RNA→ rpmE (PRK00019)Ribosomal_L31 (pfam01197)→ |



|          |                        |   |         |         |                                                                        |
|----------|------------------------|---|---------|---------|------------------------------------------------------------------------|
| env-1011 | CEQP01301609.1         | - | 558     | 506     | RNA → rpmE (PRK00019) Ribosomal_L31 (pfam01197) →                      |
| env-1012 | CEQX01011574.1         | + | 291     | 343     | RNA → rpmE (PRK00019) Ribosomal_L31 (pfam01197) →                      |
| env-1013 | CERL01235058.1         | - | 936     | 884     | RNA → rpmE (PRK00019) Ribosomal_L31 (pfam01197) →                      |
| env-1014 | CESG01011657.1         | + | 212     | 264     | RNA → rpmE (PRK00019) Ribosomal_L31 (pfam01197) →                      |
| env-1015 | CESR01104947.1         | + | 324     | 376     | RNA → rpmE (PRK00019) Ribosomal_L31 (pfam01197) →                      |
| env-1016 | CESX01007994.1         | - | 514     | 462     | RNA → rpmE (PRK00019) Ribosomal_L31 (pfam01197) →                      |
| env-1017 | CESZ01006041.1         | - | 1040    | 988     | RNA → rpmE (PRK00019) Ribosomal_L31 (pfam01197) →                      |
| env-1018 | CETH01095267.1         | - | 295     | 243     | RNA → rpmE (PRK00019) Ribosomal_L31 (pfam01197) →                      |
| env-1019 | CETM01005225.1         | - | 232     | 180     | RNA → rpmE (PRK00019) Ribosomal_L31 (pfam01197) →                      |
| env-1020 | CETV01018356.1         | - | 1037    | 985     | RNA → rpmE (PRK00019) Ribosomal_L31 (pfam01197) →                      |
| env-1021 | CEUC01310578.1         | + | 502     | 554     | RNA → rpmE (PRK00019) Ribosomal_L31 (pfam01197) →                      |
| env-1022 | CEUK01103776.1         | - | 854     | 802     | RNA → rpmE (PRK00019) Ribosomal_L31 (pfam01197) →                      |
| env-1023 | CEUS01001549.1         | + | 1749    | 1801    | RNA → rpmE (PRK00019) Ribosomal_L31 (pfam01197) →                      |
| env-1024 | PRT_FXEMIOB02I0Y6Q     | + | 336     | 388     | RNA →                                                                  |
| Ama-2-1  | NZ_JWLY01000014.1      | + | 124090  | 124142  | RNA → rpmE (PRK00019) Ribosomal_L31 (pfam01197) → hypo →               |
| Ama-2-2  | NZ_JWLX01000009.1      | + | 137955  | 138007  | RNA → rpmE (PRK00019) Ribosomal_L31 (pfam01197) → hypo →               |
| Ama-2-3  | NZ_JXRW01000067.1      | + | 4135    | 4187    | RNA → rpmE (PRK00019) Ribosomal_L31 (pfam01197) → hypo →               |
| Ama-6-1  | NC_018679.1            | + | 4142089 | 4142141 | RNA → rpmE (PRK00019) Ribosomal_L31 (pfam01197) → hypo →               |
| Ama-3-1  | NC_018632.1            | + | 4038733 | 4038785 | RNA → rpmE (PRK00019) Ribosomal_L31 (pfam01197) → hypo →               |
| Ama-9-1  | NC_018678.1            | + | 4082894 | 4082946 | RNA → rpmE (PRK00019) Ribosomal_L31 (pfam01197) → hypo → hypo → hypo → |
| env-1025 | JGI12097J13213_1002839 | + | 279     | 331     | RNA → rpmE (PRK00019) Ribosomal_L31 (pfam01197) →                      |
| env-1026 | CESQ01018836.1         | - | 3232    | 3180    | RNA → rpmE (PRK00019) Ribosomal_L31 (pfam01197) →                      |
| env-1027 | CENU01132442.1         | - | 183     | 131     | RNA →                                                                  |
| env-1028 | CESS01183283.1         | - | 394     | 342     | RNA → rpmE (PRK00019) Ribosomal_L31 (pfam01197) →                      |
| env-1029 | CENY01193254.1         | - | 408     | 356     | RNA → rpmE (PRK00019) Ribosomal_L31 (pfam01197) →                      |
| env-1030 | CEVI01152444.1         | - | 189     | 138     | RNA → rpmE (PRK00019) Ribosomal_L31 (pfam01197) →                      |
| env-1031 | CENG01015084.1         | - | 330     | 278     | RNA → rpmE (PRK00019) Ribosomal_L31 (pfam01197) →                      |
| Ama-7-1  | NC_018692.1            | + | 3943384 | 3943436 | RNA → rpmE (PRK00019) Ribosomal_L31 (pfam01197) →                      |
| env-1032 | CENH01017879.1         | + | 4473    | 4525    | RNA → rpmE (PRK00019) Ribosomal_L31 (pfam01197) →                      |
| env-1033 | CENT01009082.1         | + | 1961    | 2013    | RNA → rpmE (PRK00019) Ribosomal_L31 (pfam01197) →                      |
| env-1034 | CEOF01054473.1         | + | 162     | 214     | RNA → rpmE (PRK00019) Ribosomal_L31 (pfam01197) →                      |
| Ama-4-1  | NC_019393.1            | + | 4144827 | 4144879 | RNA → rpmE (PRK00019) Ribosomal_L31 (pfam01197) →                      |
| Ama-8-1  | NC_011138.3            | + | 4003832 | 4003884 | RNA → rpmE (PRK00019) Ribosomal_L31 (pfam01197) →                      |
| Ama-12-1 | NC_021714.1            | + | 3960995 | 3961047 | RNA → rpmE (PRK00019) Ribosomal_L31 (pfam01197) →                      |
| Ama-11-1 | NC_021712.1            | + | 3975520 | 3975572 | RNA → rpmE (PRK00019) Ribosomal_L31 (pfam01197) →                      |
| Ama-5-1  | NC_023045.1            | + | 3921718 | 3921770 | RNA → rpmE (PRK00019) Ribosomal_L31 (pfam01197) →                      |
| Ama-13-1 | NC_021713.1            | + | 4126897 | 4126949 | RNA → rpmE (PRK00019) Ribosomal_L31 (pfam01197) →                      |
| Ama-10-1 | NC_021717.1            | + | 4004559 | 4004611 | RNA → rpmE (PRK00019) Ribosomal_L31 (pfam01197) →                      |
| env-1035 | CEQI01061962.1         | - | 175     | 123     | RNA → rpmE (PRK00019) Ribosomal_L31 (pfam01197) →                      |
| env-1036 | CEPQ01008655.1         | - | 175     | 123     | RNA → rpmE (PRK00019) Ribosomal_L31 (pfam01197) →                      |
| env-1037 | CENH01008023.1         | - | 1725    | 1674    | RNA → rpmE (PRK00019) Ribosomal_L31 (pfam01197) →                      |
| env-1038 | CEPO01000325.1         | - | 741     | 690     | RNA → rpmE (PRK00019) Ribosomal_L31 (pfam01197) →                      |
| env-1039 | CEPX01405457.1         | - | 564     | 513     | RNA → rpmE (PRK00019) Ribosomal_L31 (pfam01197) →                      |
| env-1040 | CEPY01060952.1         | - | 1146    | 1095    | RNA → rpmE (PRK00019) Ribosomal_L31 (pfam01197) →                      |
| env-1041 | CEQF011170735.1        | - | 268     | 217     | RNA → rpmE (PRK00019) Ribosomal_L31 (pfam01197) →                      |
| env-1042 | CEQG01249219.1         | - | 343     | 292     | RNA → rpmE (PRK00019) Ribosomal_L31 (pfam01197) →                      |
| env-1043 | CEQH01275712.1         | - | 508     | 457     | RNA → rpmE (PRK00019) Ribosomal_L31 (pfam01197) →                      |
| env-1044 | CEQI01021998.1         | - | 423     | 372     | RNA → rpmE (PRK00019) Ribosomal_L31 (pfam01197) →                      |
| env-1045 | CEQQ01141891.1         | + | 1236    | 1287    | RNA → rpmE (PRK00019) Ribosomal_L31 (pfam01197) →                      |
| env-1046 | CEQS01013898.1         | + | 914     | 965     | RNA → rpmE (PRK00019) Ribosomal_L31 (pfam01197) →                      |
| env-1047 | CEQU01246787.1         | - | 692     | 641     | RNA → rpmE (PRK00019) Ribosomal_L31 (pfam01197) →                      |
| env-1048 | CEQW01065128.1         | + | 15681   | 15732   | RNA → rpmE (PRK00019) Ribosomal_L31 (pfam01197) →                      |

|          |                            |   |         |         |                                                                  |
|----------|----------------------------|---|---------|---------|------------------------------------------------------------------|
| env-1049 | CEQX01342402.1             | + | 853     | 904     | RNA → rpmE (PRK00019)Ribosomal_L31 (pfam01197) →                 |
| env-1050 | CERB01035857.1             | + | 914     | 965     | RNA → rpmE (PRK00019)Ribosomal_L31 (pfam01197) →                 |
| env-1051 | CERC01009557.1             | + | 9311    | 9362    | RNA → rpmE (PRK00019)Ribosomal_L31 (pfam01197) →                 |
| env-1052 | CERD01017474.1             | - | 551     | 500     | RNA → rpmE (PRK00019)Ribosomal_L31 (pfam01197) →                 |
| env-1053 | CERE01022366.1             | - | 692     | 641     | RNA → rpmE (PRK00019)Ribosomal_L31 (pfam01197) →                 |
| env-1054 | CERG01021368.1             | + | 2982    | 3033    | RNA → rpmE (PRK00019)Ribosomal_L31 (pfam01197) →                 |
| env-1055 | CERL01022088.1             | - | 6990    | 6939    | RNA → rpmE (PRK00019)Ribosomal_L31 (pfam01197) →                 |
| env-1056 | CERQ01243698.1             | - | 1660    | 1609    | RNA → rpmE (PRK00019)Ribosomal_L31 (pfam01197) →                 |
| env-1057 | CERR01097688.1             | - | 14701   | 14650   | RNA → rpmE (PRK00019)Ribosomal_L31 (pfam01197) →                 |
| env-1058 | CERS01310048.1             | + | 853     | 904     | RNA → rpmE (PRK00019)Ribosomal_L31 (pfam01197) →                 |
| env-1059 | CERV01201358.1             | - | 463     | 412     | RNA → rpmE (PRK00019)Ribosomal_L31 (pfam01197) →                 |
| env-1060 | CERX01037102.1             | + | 914     | 965     | RNA → rpmE (PRK00019)Ribosomal_L31 (pfam01197) →                 |
| env-1061 | CESC01002520.1             | + | 28189   | 28240   | RNA → rpmE (PRK00019)Ribosomal_L31 (pfam01197) →                 |
| env-1062 | CESL01235759.1             | + | 660     | 711     | RNA → rpmE (PRK00019)Ribosomal_L31 (pfam01197) →                 |
| env-1063 | CESM01253004.1             | + | 346     | 397     | RNA → rpmE (PRK00019)rpmE2 (PRK01678)Ribosomal_L31 (pfam01197) → |
| env-1064 | CESQ01220634.1             | + | 374     | 425     | RNA → rpmE (PRK00019)Ribosomal_L31 (pfam01197) →                 |
| env-1065 | CESQ01033314.1             | - | 39300   | 39249   | RNA → rpmE (PRK00019)Ribosomal_L31 (pfam01197) →                 |
| env-1066 | CESR01169867.1             | + | 15683   | 15734   | RNA → rpmE (PRK00019)Ribosomal_L31 (pfam01197) →                 |
| env-1067 | CESY01007781.1             | - | 786     | 735     | RNA → rpmE (PRK00019)Ribosomal_L31 (pfam01197) →                 |
| env-1068 | CETG01034723.1             | - | 509     | 458     | RNA → rpmE (PRK00019)Ribosomal_L31 (pfam01197) →                 |
| env-1069 | CETH01358830.1             | + | 328     | 379     | RNA → rpmE (PRK00019)Ribosomal_L31 (pfam01197) →                 |
| env-1070 | CETJ01151418.1             | + | 432     | 483     | RNA → rpmE (PRK00019)Ribosomal_L31 (pfam01197) →                 |
| env-1071 | CETM01434228.1             | - | 509     | 458     | RNA → rpmE (PRK00019)Ribosomal_L31 (pfam01197) →                 |
| env-1072 | CETN01152556.1             | + | 995     | 1046    | RNA → rpmE (PRK00019)Ribosomal_L31 (pfam01197) →                 |
| env-1073 | CETO01022433.1             | + | 15683   | 15734   | RNA → rpmE (PRK00019)Ribosomal_L31 (pfam01197) →                 |
| env-1074 | CETR01195172.1             | - | 320     | 269     | RNA → rpmE (PRK00019)Ribosomal_L31 (pfam01197) →                 |
| env-1075 | CETS01064668.1             | + | 666     | 717     | RNA → rpmE (PRK00019)Ribosomal_L31 (pfam01197) →                 |
| env-1076 | CETV01229244.1             | + | 266     | 317     | RNA → rpmE (PRK00019)Ribosomal_L31 (pfam01197) →                 |
| env-1077 | CETY01197886.1             | + | 15683   | 15734   | RNA → rpmE (PRK00019)Ribosomal_L31 (pfam01197) →                 |
| env-1078 | CEUC01145376.1             | - | 2776    | 2725    | RNA → rpmE (PRK00019)Ribosomal_L31 (pfam01197) →                 |
| env-1079 | CEUD01121151.1             | + | 15683   | 15734   | RNA → rpmE (PRK00019)Ribosomal_L31 (pfam01197) →                 |
| env-1080 | CEUM01133227.1             | - | 1141    | 1090    | RNA → rpmE (PRK00019)Ribosomal_L31 (pfam01197) →                 |
| env-1081 | CEUN01034438.1             | - | 509     | 458     | RNA → rpmE (PRK00019)Ribosomal_L31 (pfam01197) →                 |
| env-1082 | CEUP01008540.1             | + | 914     | 965     | RNA → rpmE (PRK00019)Ribosomal_L31 (pfam01197) →                 |
| env-1083 | CEUS01321896.1             | - | 272     | 221     | RNA → rpmE (PRK00019)Ribosomal_L31 (pfam01197) →                 |
| env-1084 | CEUY01032768.1             | - | 2465    | 2414    | RNA → rpmE (PRK00019)Ribosomal_L31 (pfam01197) →                 |
| env-1085 | CEVA01041336.1             | + | 14542   | 14593   | RNA → rpmE (PRK00019)Ribosomal_L31 (pfam01197) →                 |
| env-1086 | CEVG01310261.1             | + | 713     | 764     | RNA → rpmE (PRK00019)Ribosomal_L31 (pfam01197) →                 |
| env-1087 | CEVI01003491.1             | - | 39966   | 39915   | RNA → rpmE (PRK00019)Ribosomal_L31 (pfam01197) →                 |
| env-1088 | CEVK01179875.1             | - | 373     | 322     | RNA → rpmE (PRK00019)Ribosomal_L31 (pfam01197) →                 |
| env-1089 | CEVZ01370195.1             | - | 341     | 290     | RNA → rpmE (PRK00019)Ribosomal_L31 (pfam01197) →                 |
| env-1090 | CEWB01191093.1             | + | 853     | 904     | RNA → rpmE (PRK00019)Ribosomal_L31 (pfam01197) →                 |
| env-1091 | CEWI01259732.1             | + | 1163    | 1214    | RNA → rpmE (PRK00019)Ribosomal_L31 (pfam01197) →                 |
| env-1092 | CEWJ01143993.1             | + | 15683   | 15734   | RNA → rpmE (PRK00019)Ribosomal_L31 (pfam01197) →                 |
| Aau-2-1  | NZ_CP008849.1              | + | 3814040 | 3814091 | RNA → rpmE (PRK00019)Ribosomal_L31 (pfam01197) →                 |
| Aau-2-2  | NZ_CP010912.1              | + | 3941841 | 3941892 | RNA → rpmE (PRK00019)Ribosomal_L31 (pfam01197) →                 |
| Pha-4-1  | NZ_ATUO01000067.1          | + | 19196   | 19259   | RNA → rpmE (PRK00019)Ribosomal_L31 (pfam01197) →                 |
| env-1093 | BS_KBA.SWE02.21m.10551754  | + | 152     | 216     | RNA → rpmE (PRK00019)Ribosomal_L31 (pfam01197) →                 |
| env-1094 | KGLS1_ANT01_95m.c10012892  | - | 141     | 77      | RNA → rpmE (PRK00019)Ribosomal_L31 (pfam01197) →                 |
| env-1095 | KGLS2_ANT05_2345m.c1007829 | + | 2549    | 2613    | RNA → rpmE (PRK00019)Ribosomal_L31 (pfam01197) →                 |
| env-1096 | KGLS1_ANT01_95m.c10008728  | - | 288     | 224     | RNA → rpmE (PRK00019)Ribosomal_L31 (pfam01197) →                 |
| env-1097 | KGLS2_ANT04_2345m.c1009121 | - | 1653    | 1589    | RNA → rpmE (PRK00019)Ribosomal_L31 (pfam01197) →                 |

|           |                            |   |         |         |                                                                                             |
|-----------|----------------------------|---|---------|---------|---------------------------------------------------------------------------------------------|
| env-1098  | KGLS2_ANT05_2345m.c1003874 | + | 4157    | 4221    | RNA → rpmE (PRK00019)Ribosomal_L31 (pfam01197) →                                            |
| Pin-1-1   | NC_008709.1                | - | 3538323 | 3538259 | RNA → rpmE (PRK00019)Ribosomal_L31 (pfam01197) →                                            |
| env-1099  | SA_S2_NOR13_50m.c1137819   | + | 116     | 180     | RNA → rpmE (PRK00019)Ribosomal_L31 (pfam01197) →                                            |
| env-1100  | SA_S1_NOR05_45m.c10035075  | + | 932     | 996     | RNA → rpmE (PRK00019)Ribosomal_L31 (pfam01197) →                                            |
| env-1101  | SA_S1_NOR08_45m.c10037975  | - | 506     | 442     | RNA → rpmE (PRK00019)Ribosomal_L31 (pfam01197) →                                            |
| env-1102  | SA_S2_NOR15_50m.c10183128  | + | 221     | 285     | RNA → rpmE (PRK00019)Ribosomal_L31 (pfam01197) →                                            |
| env-1103  | SA_S1_NOR05_45m.c10141124  | - | 371     | 307     | RNA → rpmE (PRK00019)Ribosomal_L31 (pfam01197) →                                            |
| env-1104  | ASRP01007864.1             | - | 203     | 139     | RNA → rpmE (PRK00019)Ribosomal_L31 (pfam01197) →                                            |
| Par-2-1   | NZ_AXWP01000041.1          | - | 63330   | 63266   | RNA → rpmE (PRK00019)Ribosomal_L31 (pfam01197) →                                            |
| Paq-1-1   | NZ_AUAM01000062.1          | - | 1573    | 1509    | RNA → rpmE (PRK00019)Ribosomal_L31 (pfam01197) →                                            |
| Pos-1-1   | NZ_KB907022.1              | + | 11035   | 11099   | RNA → rpmE (PRK00019)Ribosomal_L31 (pfam01197) → rpmE (PRK00019)Ribosomal_L31 (pfam01197) → |
| Psp-35-1  | NZ_CBRF010000116.1         | - | 14588   | 14523   | rpmE (PRK00019)Ribosomal_L31 (pfam01197) → hypo →                                           |
| env-1105  | KGLS1_ANT01_95m.c10000182  | - | 2970    | 2905    | RNA → rpmE (PRK00019)Ribosomal_L31 (pfam01197) →                                            |
| env-1106  | KGLS2_ANT05_2345m.c1036643 | - | 656     | 591     | RNA → rpmE (PRK00019)Ribosomal_L31 (pfam01197) →                                            |
| env-1107  | KGLS1_ANT03_95m.c1000085   | + | 397     | 462     | RNA → rpmE (PRK00019)Ribosomal_L31 (pfam01197) →                                            |
| env-1108  | KGLS1_ANT02_95m.c10004749  | - | 2245    | 2180    | RNA → rpmE (PRK00019)Ribosomal_L31 (pfam01197) →                                            |
| env-1109  | KGLS2_ANT04_2345m.c1001133 | + | 149     | 214     | RNA → rpmE (PRK00019)Ribosomal_L31 (pfam01197) →                                            |
| env-1110  | SA_S1_NOR05_45m.c10067223  | - | 515     | 451     | RNA → rpmE (PRK00019)Ribosomal_L31 (pfam01197) →                                            |
| env-1111  | SA_S1_NOR08_45m.c10078152  | - | 527     | 463     | RNA → rpmE (PRK00019)Ribosomal_L31 (pfam01197) →                                            |
| env-1112  | SA_S2_NOR15_50m.c10042781  | + | 1628    | 1692    | RNA → rpmE (PRK00019)Ribosomal_L31 (pfam01197) →                                            |
| Psp-34-1  | NC_020802.1                | - | 2578482 | 2578419 | RNA → rpmE (PRK00019)Ribosomal_L31 (pfam01197) →                                            |
| Sam-1-1   | NZ_KB899636.1              | + | 535889  | 535941  | RNA → rpmE (PRK00019)Ribosomal_L31 (pfam01197) →                                            |
| env-1113  | CETY01166192.1             | + | 4690    | 4742    | RNA → rpmE (PRK00019)Ribosomal_L31 (pfam01197) →                                            |
| Pfl-3-1   | NZ_JAEE01000006.1          | - | 27868   | 27808   | RNA → rpmE (PRK00019)Ribosomal_L31 (pfam01197) → rpmE (PRK00019)Ribosomal_L31 (pfam01197) → |
| Ykr-2-1   | NZ_ACCA01000030.1          | + | 28292   | 28346   | RNA → rpmE (PRK00019)Ribosomal_L31 (pfam01197) → rpmE (PRK00019)Ribosomal_L31 (pfam01197) → |
| Pge-1-1   | NZ_CP009450.1              | + | 982043  | 982094  | RNA → rpmE (PRK00019)Ribosomal_L31 (pfam01197) →                                            |
| Kpn-281-1 | NZ_KI535451.1              | + | 4373213 | 4373264 | RNA → rpmE (PRK00019)Ribosomal_L31 (pfam01197) →                                            |
| Vja-2-1   | NZ_BAOC01000004.1          | + | 79462   | 79512   | RNA → rpmE (PRK00019)Ribosomal_L31 (pfam01197) →                                            |
| Kpn-256-1 | NZ_ARRZ01000059.1          | + | 70097   | 70148   | RNA → rpmE (PRK00019)Ribosomal_L31 (pfam01197) → rpmE (PRK00019)Ribosomal_L31 (pfam01197) → |
| Kpn-70-1  | NZ_JJNF01000020.1          | + | 68880   | 68931   | RNA → rpmE (PRK00019)Ribosomal_L31 (pfam01197) →                                            |
| Ksp-7-1   | NZ_GL882802.1              | - | 7317    | 7266    | RNA → rpmE (PRK00019)Ribosomal_L31 (pfam01197) → rpmE (PRK00019)Ribosomal_L31 (pfam01197) → |
| Kpn-244-1 | NZ_KI535433.1              | + | 4551638 | 4551689 | RNA → rpmE (PRK00019)Ribosomal_L31 (pfam01197) →                                            |
| Kpn-31-1  | NZ_KK036716.1              | + | 4570872 | 4570923 | RNA → rpmE (PRK00019)Ribosomal_L31 (pfam01197) →                                            |
| Kpn-143-1 | NZ_KK036961.1              | + | 1586585 | 1586636 | RNA → rpmE (PRK00019)Ribosomal_L31 (pfam01197) →                                            |
| Kpn-142-1 | NZ_KK036965.1              | + | 4373208 | 4373259 | RNA → rpmE (PRK00019)Ribosomal_L31 (pfam01197) →                                            |
| Kpn-206-6 | NZ_CP009876.1              | + | 90246   | 90297   | RNA → rpmE (PRK00019)Ribosomal_L31 (pfam01197) →                                            |
| Hin-6-1   | NZ_ABWW01000003.1          | - | 44774   | 44724   | RNA → rpmE (PRK00019)Ribosomal_L31 (pfam01197) → rpmE (PRK00019)Ribosomal_L31 (pfam01197) → |
| Hin-11-1  | NC_014922.1                | + | 379270  | 379320  | RNA → rpmE (PRK00019)Ribosomal_L31 (pfam01197) →                                            |
| Eba-1-1   | NZ_KN150796.1              | + | 4226043 | 4226094 | RNA → rpmE (PRK00019)Ribosomal_L31 (pfam01197) →                                            |
| Ysi-1-1   | NZ_CP007230.1              | + | 1742261 | 1742314 | RNA → rpmE (PRK00019)Ribosomal_L31 (pfam01197) →                                            |
| Hin-1-3   | NZ_CP007470.1              | + | 969362  | 969412  | RNA → rpmE (PRK00019)Ribosomal_L31 (pfam01197) →                                            |
| Kox-4-2   | NZ_AKCF01000001.1          | - | 987481  | 987430  | RNA → rpmE (PRK00019)Ribosomal_L31 (pfam01197) →                                            |
| Kox-6-1   | NZ_ARVT01000001.1          | + | 5597804 | 5597855 | RNA → rpmE (PRK00019)Ribosomal_L31 (pfam01197) →                                            |
| Kox-10-1  | NZ_JAKY01000077.1          | + | 76452   | 76503   | RNA → rpmE (PRK00019)Ribosomal_L31 (pfam01197) →                                            |
| Kox-7-1   | NZ_KK097713.1              | + | 287765  | 287816  | RNA → rpmE (PRK00019)Ribosomal_L31 (pfam01197) →                                            |
| Kox-13-1  | NZ_JH603137.1              | + | 5368788 | 5368839 | RNA → rpmE (PRK00019)Ribosomal_L31 (pfam01197) →                                            |
| Kox-19-1  | NZ_KI535631.1              | + | 608704  | 608755  | RNA → rpmE (PRK00019)Ribosomal_L31 (pfam01197) →                                            |
| Kox-20-1  | NZ_KI535598.1              | + | 3002323 | 3002374 | RNA → rpmE (PRK00019)Ribosomal_L31 (pfam01197) →                                            |
| Kox-1-1   | NZ_CP011618.1              | - | 3481846 | 3481795 | RNA → rpmE (PRK00019)Ribosomal_L31 (pfam01197) →                                            |
| Kox-1-2   | NZ_CP011597.1              | - | 3460832 | 3460781 | RNA → rpmE (PRK00019)Ribosomal_L31 (pfam01197) →                                            |
| Kox-5-1   | NZ_KQ235791.1              | + | 607562  | 607613  | RNA → rpmE (PRK00019)Ribosomal_L31 (pfam01197) →                                            |



|           |                    |   |         |         |                                                                                             |
|-----------|--------------------|---|---------|---------|---------------------------------------------------------------------------------------------|
| Kox-4-1   | NZ_KQ235784.1      | - | 5111984 | 5111933 | RNA → rpmE (PRK00019)Ribosomal_L31 (pfam01197) →                                            |
| Kox-3-1   | NZ_KQ235774.1      | - | 2026518 | 2026467 | RNA → rpmE (PRK00019)Ribosomal_L31 (pfam01197) →                                            |
| Kox-16-1  | NZ_AIEM01000124.1  | + | 33854   | 33905   | RNA → rpmE (PRK00019)Ribosomal_L31 (pfam01197) →                                            |
| Hin-13-1  | NZ_ACSL01000001.1  | - | 4352    | 4302    | RNA → rpmE (PRK00019)Ribosomal_L31 (pfam01197) → rpmE (PRK00019)Ribosomal_L31 (pfam01197) → |
| Hin-1-4   | NZ_CP007471.1      | + | 209664  | 209714  | RNA → rpmE (PRK00019)Ribosomal_L31 (pfam01197) →                                            |
| Sma-10-1  | NZ_KE560346.1      | + | 418205  | 418257  | RNA → rpmE (PRK00019)Ribosomal_L31 (pfam01197) → rpmE (PRK00019)Ribosomal_L31 (pfam01197) → |
| Sma-11-1  | NZ_KE560341.1      | + | 214674  | 214726  | RNA → rpmE (PRK00019)Ribosomal_L31 (pfam01197) →                                            |
| Sma-25-1  | NZ_JH670250.1      | + | 3952174 | 3952226 | RNA → rpmE (PRK00019)Ribosomal_L31 (pfam01197) → rpmE (PRK00019)Ribosomal_L31 (pfam01197) → |
| Yru-2-2   | NZ_ACCC01000012.1  | - | 37748   | 37695   | rpmE (PRK00019)Ribosomal_L31 (pfam01197) →                                                  |
| Yru-2-1   | NZ_LKN150747.1     | - | 419490  | 419437  | RNA → rpmE (PRK00019)Ribosomal_L31 (pfam01197) → rpmE (PRK00019)Ribosomal_L31 (pfam01197) → |
| Yru-1-2   | NZ_CP011078.1      | - | 2139842 | 2139789 | RNA → rpmE (PRK00019)Ribosomal_L31 (pfam01197) →                                            |
| Yru-1-3   | NZ_JRWX01000001.1  | + | 89041   | 89094   | RNA → rpmE (PRK00019)Ribosomal_L31 (pfam01197) →                                            |
| Vni-11-1  | NZ_CAOB01000008.1  | - | 6262    | 6213    | RNA → rpmE (PRK00019)Ribosomal_L31 (pfam01197) →                                            |
| Vni-8-1   | NZ_CAOA01000077.1  | + | 57549   | 57598   | RNA → rpmE (PRK00019)Ribosomal_L31 (pfam01197) →                                            |
| Vni-10-1  | NZ_CAOD01000077.1  | + | 4423    | 4472    | RNA → rpmE (PRK00019)Ribosomal_L31 (pfam01197) →                                            |
| Vni-6-1   | NZ_CANW01000076.1  | + | 57549   | 57598   | RNA → rpmE (PRK00019)Ribosomal_L31 (pfam01197) →                                            |
| Vni-4-1   | NZ_CANU01000076.1  | - | 6171    | 6122    | RNA → rpmE (PRK00019)Ribosomal_L31 (pfam01197) →                                            |
| Vni-5-1   | NZ_CANV01000028.1  | - | 6171    | 6122    | RNA → rpmE (PRK00019)Ribosomal_L31 (pfam01197) →                                            |
| Vni-2-1   | NZ_CANT01000080.1  | + | 44452   | 44501   | RNA → rpmE (PRK00019)Ribosomal_L31 (pfam01197) →                                            |
| Vni-3-1   | NZ_AFWJ01000267.1  | - | 88872   | 88823   | RNA → rpmE (PRK00019)Ribosomal_L31 (pfam01197) → rpmE (PRK00019)Ribosomal_L31 (pfam01197) → |
| Vni-13-1  | NZ_LK391965.1      | + | 1712210 | 1712259 | RNA → rpmE (PRK00019)Ribosomal_L31 (pfam01197) →                                            |
| Vni-1-1   | NC_022528.1        | - | 3799901 | 3799852 | RNA → rpmE (PRK00019)Ribosomal_L31 (pfam01197) →                                            |
| Vni-14-1  | NZ_LK391967.1      | - | 747727  | 747678  | RNA → rpmE (PRK00019)Ribosomal_L31 (pfam01197) →                                            |
| Vni-12-1  | NZ_LK391963.1      | - | 4084011 | 4083962 | RNA → rpmE (PRK00019)Ribosomal_L31 (pfam01197) →                                            |
| Vni-7-1   | NZ_LK054223.1      | + | 2036267 | 2036316 | RNA → rpmE (PRK00019)Ribosomal_L31 (pfam01197) →                                            |
| Yin-2-1   | NZ_AALF02000041.1  | - | 35133   | 35079   | RNA → rpmE (PRK00019)Ribosomal_L31 (pfam01197) →                                            |
| Yin-1-1   | NZ_CP009801.1      | + | 2155185 | 2155239 | RNA → rpmE (PRK00019)Ribosomal_L31 (pfam01197) →                                            |
| Hin-18-2  | NC_017452.1        | + | 1536435 | 1536485 | RNA → hypo → hypo → hypo → hypo → COG3306 (COG3306) → COG3306 (COG3306) →                   |
| Hin-14-1  | NZ_AAZG01000004.1  | + | 103226  | 103276  | heptsyl_trn_III (TIGR02201)RfaF (COG0859) →                                                 |
| Hin-4-1   | NZ_AAZF01000001.1  | - | 45759   | 45709   | RNA → rpmE (PRK00019)Ribosomal_L31 (pfam01197) → rpmE (PRK00019)Ribosomal_L31 (pfam01197) → |
| Hin-3-1   | NZ_CP008740.1      | - | 919236  | 919186  | RNA → rpmE (PRK00019)Ribosomal_L31 (pfam01197) →                                            |
| Vvu-10-1  | NZ_CM001799.1      | + | 1209887 | 1209938 | RNA → rpmE (PRK00019)Ribosomal_L31 (pfam01197) →                                            |
| Vvu-3-1   | NZ_JDSE01000046.1  | + | 2549    | 2600    | RNA → rpmE (PRK00019)Ribosomal_L31 (pfam01197) →                                            |
| Ywa-1-1   | NZ_CBLI010000383.1 | - | 346     | 293     | RNA → rpmE (PRK00019)Ribosomal_L31 (pfam01197) →                                            |
| Ywa-1-2   | NZ_CBLG010000169.1 | + | 14348   | 14401   | RNA → rpmE (PRK00019)Ribosomal_L31 (pfam01197) →                                            |
| Dso-4-1   | NZ_CM001839.1      | + | 191962  | 192015  | RNA → rpmE (PRK00019)Ribosomal_L31 (pfam01197) →                                            |
| Dso-3-1   | NZ_CM001859.1      | + | 192153  | 192206  | RNA → rpmE (PRK00019)Ribosomal_L31 (pfam01197) →                                            |
| Dso-5-1   | NZ_CM001842.1      | + | 191961  | 192014  | RNA → rpmE (PRK00019)Ribosomal_L31 (pfam01197) →                                            |
| Dso-2-1   | NZ_CM001860.1      | + | 192284  | 192337  | RNA → rpmE (PRK00019)Ribosomal_L31 (pfam01197) →                                            |
| Dso-6-1   | NZ_KI866531.1      | - | 2542514 | 2542461 | RNA → rpmE (PRK00019)Ribosomal_L31 (pfam01197) →                                            |
| Dsp-8-1   | NZ_AMWE01000004.1  | - | 1998925 | 1998872 | RNA → rpmE (PRK00019)Ribosomal_L31 (pfam01197) →                                            |
| Yps-1-3   | NZ_CP008943.1      | - | 2566211 | 2566158 | RNA → rpmE (PRK00019)Ribosomal_L31 (pfam01197) →                                            |
| Yps-1-4   | NZ_CP009759.1      | - | 2277500 | 2277447 | RNA → rpmE (PRK00019)Ribosomal_L31 (pfam01197) →                                            |
| Yps-5-1   | NZ_CAQW01000045.1  | + | 24851   | 24904   | RNA → rpmE (PRK00019)Ribosomal_L31 (pfam01197) →                                            |
| Yps-2-1   | NZ_CAQT01000042.1  | - | 7087    | 7034    | RNA → rpmE (PRK00019)Ribosomal_L31 (pfam01197) →                                            |
| Yps-7-1   | NZ_CAQY01000083.1  | + | 13728   | 13781   | RNA → rpmE (PRK00019)Ribosomal_L31 (pfam01197) →                                            |
| Yps-3-1   | NZ_CAAQ01000109.1  | - | 7077    | 7024    | RNA → rpmE (PRK00019)Ribosomal_L31 (pfam01197) →                                            |
| Yps-4-1   | NZ_CAAQV01000017.1 | + | 71002   | 71055   | RNA → rpmE (PRK00019)Ribosomal_L31 (pfam01197) →                                            |
| Yps-6-1   | NZ_CAAQX01000032.1 | + | 13731   | 13784   | RNA → rpmE (PRK00019)Ribosomal_L31 (pfam01197) →                                            |
| Sso-1-546 | NZ_CXJA01000293.1  | + | 448     | 499     | RNA → rpmE (PRK00019)Ribosomal_L31 (pfam01197) →                                            |
| Yal-3-1   | NZ_CP011975.1      | - | 2144109 | 2144055 | RNA → rpmE (PRK00019)Ribosomal_L31 (pfam01197) →                                            |



|           |                   |   |         |         |                                                                                             |
|-----------|-------------------|---|---------|---------|---------------------------------------------------------------------------------------------|
| Sal-1-1   | NZ.LN810019.1     | + | 59430   | 59481   | RNA → rpmE (PRK00019)Ribosomal_L31 (pfam01197) →                                            |
| Ssp-1-1   | NZ.JADP01000004.1 | + | 57303   | 57354   | RNA → rpmE (PRK00019)Ribosomal_L31 (pfam01197) →                                            |
| Sha-2-1   | NZ.BALL01000002.1 | + | 56991   | 57042   | RNA → rpmE (PRK00019)Ribosomal_L31 (pfam01197) →                                            |
| Sal-2-1   | NZ.BALO01000003.1 | + | 42263   | 42314   | RNA → rpmE (PRK00019)Ribosomal_L31 (pfam01197) →                                            |
| Kpn-168-1 | NZ.AZAP01000001.1 | + | 69358   | 69409   | RNA → rpmE (PRK00019)Ribosomal_L31 (pfam01197) →                                            |
| Kpn-46-1  | NZ.KK036936.1     | - | 673181  | 673130  | RNA → rpmE (PRK00019)Ribosomal_L31 (pfam01197) →                                            |
| Kpn-206-7 | NZ.CP0111313.1    | - | 5158789 | 5158738 | RNA → rpmE (PRK00019)Ribosomal_L31 (pfam01197) →                                            |
| Vvu-9-1   | NZ.AMQV01000002.1 | - | 49207   | 49156   | RNA → rpmE (PRK00019)Ribosomal_L31 (pfam01197) →                                            |
| Vvu-2-1   | NZ.AMQR01000003.1 | + | 15395   | 15446   | RNA → rpmE (PRK00019)Ribosomal_L31 (pfam01197) →                                            |
| Vvu-7-1   | NZ.AFSW01000084.1 | + | 15849   | 15900   | RNA → rpmE (PRK00019)Ribosomal_L31 (pfam01197) →                                            |
| Vvu-6-1   | NZ.AFSX01000029.1 | - | 40054   | 40003   | RNA → rpmE (PRK00019)Ribosomal_L31 (pfam01197) →                                            |
| Yro-2-1   | NZ.ACCD01000008.1 | + | 93813   | 93867   | RNA → rpmE (PRK00019)Ribosomal_L31 (pfam01197) → rpmE (PRK00019)Ribosomal_L31 (pfam01197) → |
| Yro-1-1   | NZ.CP009787.1     | + | 3005532 | 3005586 | RNA → rpmE (PRK00019)Ribosomal_L31 (pfam01197) →                                            |
| Yen-13-1  | NZ.CACY01000042.1 | - | 36129   | 36075   | RNA → rpmE (PRK00019)Ribosomal_L31 (pfam01197) →                                            |
| Yen-12-1  | NZ.CACZ01000062.1 | + | 13330   | 13384   | RNA → rpmE (PRK00019)Ribosomal_L31 (pfam01197) →                                            |
| Yen-3-1   | NZ.HF571988.1     | + | 128432  | 128486  | RNA → rpmE (PRK00019)Ribosomal_L31 (pfam01197) →                                            |
| Yen-1-4   | NZ.CP011118.1     | - | 4578762 | 4578708 | RNA → rpmE (PRK00019)Ribosomal_L31 (pfam01197) →                                            |
| Pmi-2-1   | NZ.GG668582.1     | - | 34951   | 34902   | RNA → rpmE (PRK00019)Ribosomal_L31 (pfam01197) →                                            |
| Pmi-5-1   | NC.010554.1       | + | 3535542 | 3535591 | RNA → rpmE (PRK00019)Ribosomal_L31 (pfam01197) →                                            |
| Pmi-8-1   | NZ.JH815508.1     | - | 34281   | 34232   | RNA → rpmE (PRK00019)Ribosomal_L31 (pfam01197) →                                            |
| Pmi-7-1   | NZ.JH815533.1     | - | 71312   | 71263   | RNA → rpmE (PRK00019)Ribosomal_L31 (pfam01197) →                                            |
| Pmi-4-1   | NZ.KB206032.1     | - | 37018   | 36969   | RNA → rpmE (PRK00019)Ribosomal_L31 (pfam01197) →                                            |
| Pmi-1-1   | NZ.KN150749.1     | - | 3010571 | 3010522 | RNA → rpmE (PRK00019)Ribosomal_L31 (pfam01197) →                                            |
| Pmi-6-1   | NZ.AORN01000002.1 | + | 155202  | 155251  | RNA → rpmE (PRK00019)Ribosomal_L31 (pfam01197) →                                            |
| Pmi-1-2   | NZ.JTBA01000001.1 | + | 4050178 | 4050227 | RNA → rpmE (PRK00019)Ribosomal_L31 (pfam01197) →                                            |
| Pmi-1-3   | NZ.JTBP01000001.1 | + | 2513335 | 2513384 | RNA → rpmE (PRK00019)Ribosomal_L31 (pfam01197) →                                            |
| Pmi-1-4   | NZ.JTBW01000001.1 | + | 3605112 | 3605063 | RNA → rpmE (PRK00019)Ribosomal_L31 (pfam01197) →                                            |
| Pmi-1-5   | NZ.JTBB01000001.1 | + | 3920452 | 3920501 | RNA → rpmE (PRK00019)Ribosomal_L31 (pfam01197) →                                            |
| Pmi-1-6   | NZ.JTAW01000004.1 | + | 2330106 | 2330155 | RNA → rpmE (PRK00019)Ribosomal_L31 (pfam01197) →                                            |
| Vpa-183-1 | NZ.AWIJ01000088.1 | - | 5725    | 5675    | RNA → rpmE (PRK00019)Ribosomal_L31 (pfam01197) →                                            |
| Vpa-182-1 | NZ.AWIK01000006.1 | - | 14426   | 14376   | RNA → rpmE (PRK00019)Ribosomal_L31 (pfam01197) →                                            |
| Vpa-217-1 | NZ.BAVG01000031.1 | + | 252975  | 253025  | RNA → rpmE (PRK00019)Ribosomal_L31 (pfam01197) →                                            |
| Vpa-7-1   | NZ.AOPF01000052.1 | + | 256268  | 256318  | RNA → rpmE (PRK00019)Ribosomal_L31 (pfam01197) →                                            |
| Vpa-19-1  | NZ.AOOX01000058.1 | + | 213943  | 213993  | RNA → rpmE (PRK00019)Ribosomal_L31 (pfam01197) →                                            |
| Vpa-25-1  | NZ.AOOU01000022.1 | + | 256268  | 256318  | RNA → rpmE (PRK00019)Ribosomal_L31 (pfam01197) →                                            |
| Vpa-38-1  | NZ.AOPH01000018.1 | + | 256269  | 256319  | RNA → rpmE (PRK00019)Ribosomal_L31 (pfam01197) →                                            |
| Vpa-11-1  | NZ.AOPA01000042.1 | + | 256268  | 256318  | RNA → rpmE (PRK00019)Ribosomal_L31 (pfam01197) →                                            |
| Vpa-41-1  | NZ.AOPK01000019.1 | + | 256269  | 256319  | RNA → rpmE (PRK00019)Ribosomal_L31 (pfam01197) →                                            |
| Vpa-42-1  | NZ.AOPL01000021.1 | + | 256268  | 256318  | RNA → rpmE (PRK00019)Ribosomal_L31 (pfam01197) →                                            |
| Vpa-14-1  | NZ.AOPD01000389.1 | - | 14501   | 14451   | RNA → rpmE (PRK00019)Ribosomal_L31 (pfam01197) →                                            |
| Vpa-39-1  | NZ.AOPI01000388.1 | + | 10709   | 10759   | RNA → rpmE (PRK00019)Ribosomal_L31 (pfam01197) →                                            |
| Vpa-12-1  | NZ.AOPB01000323.1 | + | 40203   | 40253   | RNA → rpmE (PRK00019)Ribosomal_L31 (pfam01197) →                                            |
| Vpa-40-1  | NZ.AOPJ01000367.1 | - | 86970   | 86920   | RNA → rpmE (PRK00019)Ribosomal_L31 (pfam01197) →                                            |
| Vpa-16-1  | NZ.AONA01000310.1 | - | 14503   | 14453   | RNA → rpmE (PRK00019)Ribosomal_L31 (pfam01197) →                                            |
| Vpa-22-1  | NZ.AOPG01000006.1 | + | 43335   | 43385   | RNA → rpmE (PRK00019)Ribosomal_L31 (pfam01197) →                                            |
| Vpa-15-1  | NZ.AOPE01000363.1 | - | 33905   | 33855   | RNA → rpmE (PRK00019)Ribosomal_L31 (pfam01197) →                                            |
| Vpa-13-1  | NZ.AOPC01000423.1 | - | 12383   | 12333   | RNA → rpmE (PRK00019)Ribosomal_L31 (pfam01197) →                                            |
| Vsp-28-1  | NZ.JYOQ01000177.1 | + | 238961  | 239011  | RNA → rpmE (PRK00019)Ribosomal_L31 (pfam01197) →                                            |
| Vsp-29-1  | NZ.JYOR01000005.1 | + | 238961  | 239011  | RNA → rpmE (PRK00019)Ribosomal_L31 (pfam01197) →                                            |
| Vpa-234-1 | NZ.AVOI01000008.1 | - | 16042   | 15992   | RNA → rpmE (PRK00019)Ribosomal_L31 (pfam01197) →                                            |
| Vpa-174-1 | NZ.AWIS01000006.1 | + | 25917   | 25967   | RNA → rpmE (PRK00019)Ribosomal_L31 (pfam01197) →                                            |

|           |                   |   |         |         |                                                                                             |
|-----------|-------------------|---|---------|---------|---------------------------------------------------------------------------------------------|
| Vpa-108-1 | NZ_AWLG01000122.1 | - | 5118    | 5068    | RNA → rpmE (PRK00019)Ribosomal_L31 (pfam01197) →                                            |
| Vpa-68-1  | NZ_AWMU01000003.1 | - | 5712    | 5662    | RNA → rpmE (PRK00019)Ribosomal_L31 (pfam01197) →                                            |
| Vpa-209-1 | NZ_AWHJ01000001.1 | - | 14442   | 14392   | RNA → rpmE (PRK00019)Ribosomal_L31 (pfam01197) →                                            |
| Vpa-203-1 | NZ_AWHP01000127.1 | + | 9049    | 9099    | RNA → rpmE (PRK00019)Ribosomal_L31 (pfam01197) →                                            |
| Vpa-170-1 | NZ_AWIW01000029.1 | + | 31633   | 31683   | RNA → rpmE (PRK00019)Ribosomal_L31 (pfam01197) →                                            |
| Vpa-106-1 | NZ_AWLJ01000091.1 | + | 13347   | 13397   | RNA → rpmE (PRK00019)Ribosomal_L31 (pfam01197) →                                            |
| Vpa-146-1 | NZ_AWJU01000061.1 | + | 14639   | 14689   | RNA → rpmE (PRK00019)Ribosomal_L31 (pfam01197) →                                            |
| Vpa-205-1 | NZ_AWHN01000015.1 | - | 5723    | 5673    | RNA → rpmE (PRK00019)Ribosomal_L31 (pfam01197) →                                            |
| Vpa-49-1  | NZ_AVPX01000004.1 | - | 2971905 | 2971855 | RNA → rpmE (PRK00019)Ribosomal_L31 (pfam01197) →                                            |
| Vpa-3-1   | NZ_AVOH01000008.1 | + | 32867   | 32917   | RNA → rpmE (PRK00019)Ribosomal_L31 (pfam01197) →                                            |
| Vpa-76-1  | NZ_AWMM01000015.1 | - | 5718    | 5668    | RNA → rpmE (PRK00019)Ribosomal_L31 (pfam01197) →                                            |
| Vpa-57-1  | NZ_AWNF01000119.1 | - | 5725    | 5675    | RNA → rpmE (PRK00019)Ribosomal_L31 (pfam01197) →                                            |
| Vpa-75-1  | NZ_AWMN01000075.1 | + | 9602    | 9652    | RNA → rpmE (PRK00019)Ribosomal_L31 (pfam01197) →                                            |
| Vpa-10-1  | NZ_AVOL01000005.1 | - | 2951504 | 2951454 | RNA → rpmE (PRK00019)Ribosomal_L31 (pfam01197) →                                            |
| Vpa-72-1  | NZ_AWMQ01000039.1 | + | 27138   | 27188   | RNA → rpmE (PRK00019)Ribosomal_L31 (pfam01197) →                                            |
| Vpa-67-1  | NZ_AWMV01000005.1 | + | 45007   | 45057   | RNA → rpmE (PRK00019)Ribosomal_L31 (pfam01197) →                                            |
| Vpa-58-1  | NZ_AWNE01000131.1 | - | 5731    | 5681    | RNA → rpmE (PRK00019)Ribosomal_L31 (pfam01197) →                                            |
| Vpa-74-1  | NZ_AWMO01000129.1 | + | 8347    | 8397    | RNA → rpmE (PRK00019)Ribosomal_L31 (pfam01197) →                                            |
| Vpa-73-1  | NZ_AWMP01000001.1 | + | 105903  | 105953  | RNA → rpmE (PRK00019)Ribosomal_L31 (pfam01197) →                                            |
| Vpa-85-1  | NZ_AWMD01000134.1 | - | 3102    | 3052    | RNA → rpmE (PRK00019)Ribosomal_L31 (pfam01197) →                                            |
| Vpa-52-1  | NZ_JNVD01000062.1 | + | 94002   | 94052   | RNA → rpmE (PRK00019)Ribosomal_L31 (pfam01197) →                                            |
| Vpa-28-1  | NZ_ACFO01000016.1 | + | 250127  | 250177  | RNA → rpmE (PRK00019)Ribosomal_L31 (pfam01197) → rpmE (PRK00019)Ribosomal_L31 (pfam01197) → |
| Vpa-86-1  | NZ_AWMC01000105.1 | - | 5744    | 5694    | RNA → rpmE (PRK00019)Ribosomal_L31 (pfam01197) →                                            |
| Vpa-81-1  | NZ_AWMH01000023.1 | - | 41439   | 41389   | RNA → rpmE (PRK00019)Ribosomal_L31 (pfam01197) →                                            |
| Vpa-89-1  | NZ_AWLZ01000119.1 | + | 9880    | 9930    | RNA → rpmE (PRK00019)Ribosomal_L31 (pfam01197) →                                            |
| Vpa-235-1 | NZ_AVOJ01000007.1 | - | 62093   | 62043   | RNA → rpmE (PRK00019)Ribosomal_L31 (pfam01197) →                                            |
| Vpa-90-1  | NZ_AWLY01000125.1 | - | 2796    | 2746    | RNA → rpmE (PRK00019)Ribosomal_L31 (pfam01197) →                                            |
| Vpa-93-1  | NZ_AWLV01000109.1 | - | 5719    | 5669    | RNA → rpmE (PRK00019)Ribosomal_L31 (pfam01197) →                                            |
| Vpa-96-1  | NZ_AWLS01000176.1 | - | 2590    | 2540    | RNA → rpmE (PRK00019)Ribosomal_L31 (pfam01197) →                                            |
| Vpa-92-1  | NZ_AWLW01000157.1 | + | 8341    | 8391    | RNA → rpmE (PRK00019)Ribosomal_L31 (pfam01197) →                                            |
| Vpa-91-1  | NZ_AWLX01000155.1 | + | 8339    | 8389    | RNA → rpmE (PRK00019)Ribosomal_L31 (pfam01197) →                                            |
| Vpa-82-1  | NZ_AWMG01000090.1 | - | 5722    | 5672    | RNA → rpmE (PRK00019)Ribosomal_L31 (pfam01197) →                                            |
| Vpa-227-1 | NZ_AXNP01000089.1 | + | 9009    | 9059    | RNA → rpmE (PRK00019)Ribosomal_L31 (pfam01197) →                                            |
| Vpa-228-1 | NZ_AXNR01000069.1 | - | 232409  | 232359  | RNA → rpmE (PRK00019)Ribosomal_L31 (pfam01197) →                                            |
| Vpa-223-1 | NZ_AXNQ01000037.1 | - | 114511  | 114461  | RNA → rpmE (PRK00019)Ribosomal_L31 (pfam01197) →                                            |
| Vpa-236-1 | NZ_AVOK01000001.1 | - | 2881819 | 2881769 | RNA → rpmE (PRK00019)Ribosomal_L31 (pfam01197) →                                            |
| Vpa-220-1 | NZ_BAVK01000001.1 | - | 282471  | 282421  | RNA → rpmE (PRK00019)Ribosomal_L31 (pfam01197) →                                            |
| Vpa-226-1 | NZ_AXNN01000032.1 | - | 232504  | 232454  | RNA → rpmE (PRK00019)Ribosomal_L31 (pfam01197) →                                            |
| Vpa-214-1 | NZ_AMRZ01000013.1 | + | 20471   | 20521   | RNA → rpmE (PRK00019)Ribosomal_L31 (pfam01197) →                                            |
| Vpa-149-1 | NZ_AWJR01000059.1 | + | 15133   | 15183   | RNA → rpmE (PRK00019)Ribosomal_L31 (pfam01197) →                                            |
| Vpa-145-1 | NZ_AWJV01000051.1 | + | 19667   | 19717   | RNA → rpmE (PRK00019)Ribosomal_L31 (pfam01197) →                                            |
| Vpa-136-1 | NZ_AWKE01000259.1 | - | 3103    | 3053    | RNA → rpmE (PRK00019)Ribosomal_L31 (pfam01197) →                                            |
| Vpa-109-1 | NZ_AWLF01000108.1 | + | 338     | 388     | RNA → rpmE (PRK00019)Ribosomal_L31 (pfam01197) →                                            |
| Vpa-105-1 | NZ_AWLJ01000343.1 | + | 1646    | 1696    | RNA → rpmE (PRK00019)Ribosomal_L31 (pfam01197) →                                            |
| Vpa-104-1 | NZ_AWLK01000105.1 | - | 2793    | 2743    | RNA → rpmE (PRK00019)Ribosomal_L31 (pfam01197) →                                            |
| Vpa-99-1  | NZ_AWLP01000087.1 | + | 9324    | 9374    | RNA → rpmE (PRK00019)Ribosomal_L31 (pfam01197) →                                            |
| Vpa-148-1 | NZ_AWJS01000117.1 | - | 5712    | 5662    | RNA → rpmE (PRK00019)Ribosomal_L31 (pfam01197) →                                            |
| Vpa-135-1 | NZ_AWKF01000118.1 | + | 11247   | 11297   | RNA → rpmE (PRK00019)Ribosomal_L31 (pfam01197) →                                            |
| Vpa-122-1 | NZ_AWKS01000010.1 | + | 46837   | 46887   | RNA → rpmE (PRK00019)Ribosomal_L31 (pfam01197) →                                            |
| Vpa-112-1 | NZ_AWLC01000077.1 | + | 16312   | 16362   | RNA → rpmE (PRK00019)Ribosomal_L31 (pfam01197) →                                            |
| Vpa-142-1 | NZ_AWJY01000001.1 | - | 5717    | 5667    | RNA → rpmE (PRK00019)Ribosomal_L31 (pfam01197) →                                            |
| Vpa-133-1 | NZ_AWKH01000066.1 | + | 16328   | 16378   | RNA → rpmE (PRK00019)Ribosomal_L31 (pfam01197) →                                            |

|           |                   |   |        |        |                                                   |
|-----------|-------------------|---|--------|--------|---------------------------------------------------|
| Vpa-110-1 | NZ_AWLE01000231.1 | + | 1597   | 1647   | RNA → rpmE (PRK00019) Ribosomal_L31 (pfam01197) → |
| Vpa-100-1 | NZ_AWLO01000088.1 | - | 5717   | 5667   | RNA → rpmE (PRK00019) Ribosomal_L31 (pfam01197) → |
| Vpa-147-1 | NZ_AWJT01000151.1 | + | 6962   | 7012   | RNA → rpmE (PRK00019) Ribosomal_L31 (pfam01197) → |
| Vpa-134-1 | NZ_AWKG01000077.1 | - | 5725   | 5675   | RNA → rpmE (PRK00019) Ribosomal_L31 (pfam01197) → |
| Vpa-102-1 | NZ_AWLM01000036.1 | + | 11274  | 11324  | RNA → rpmE (PRK00019) Ribosomal_L31 (pfam01197) → |
| Vpa-150-1 | NZ_AWJQ01000056.1 | - | 5722   | 5672   | RNA → rpmE (PRK00019) Ribosomal_L31 (pfam01197) → |
| Vpa-97-1  | NZ_AWLR01000092.1 | + | 12388  | 12438  | RNA → rpmE (PRK00019) Ribosomal_L31 (pfam01197) → |
| Vpa-218-1 | NZ_BAVI01000019.1 | - | 18992  | 18942  | RNA → rpmE (PRK00019) Ribosomal_L31 (pfam01197) → |
| Vpa-215-1 | NZ_BAVH01000008.1 | + | 253593 | 253643 | RNA → rpmE (PRK00019) Ribosomal_L31 (pfam01197) → |
| Vpa-206-1 | NZ_AWHM01000082.1 | - | 5734   | 5684   | RNA → rpmE (PRK00019) Ribosomal_L31 (pfam01197) → |
| Vpa-201-1 | NZ_AWHR01000011.1 | - | 5725   | 5675   | RNA → rpmE (PRK00019) Ribosomal_L31 (pfam01197) → |
| Vpa-193-1 | NZ_AWHZ01000070.1 | - | 5709   | 5659   | RNA → rpmE (PRK00019) Ribosomal_L31 (pfam01197) → |
| Vpa-192-1 | NZ_AWIA01000080.1 | + | 13363  | 13413  | RNA → rpmE (PRK00019) Ribosomal_L31 (pfam01197) → |
| Vpa-188-1 | NZ_AWIE01000003.1 | + | 51026  | 51076  | RNA → rpmE (PRK00019) Ribosomal_L31 (pfam01197) → |
| Vpa-179-1 | NZ_AWIN01000218.1 | - | 5712   | 5662   | RNA → rpmE (PRK00019) Ribosomal_L31 (pfam01197) → |
| Vpa-169-1 | NZ_AWIX01000099.1 | + | 11334  | 11384  | RNA → rpmE (PRK00019) Ribosomal_L31 (pfam01197) → |
| Vpa-187-1 | NZ_AWIF01000009.1 | - | 5723   | 5673   | RNA → rpmE (PRK00019) Ribosomal_L31 (pfam01197) → |
| Vpa-172-1 | NZ_AWIU01000005.1 | - | 14448  | 14398  | RNA → rpmE (PRK00019) Ribosomal_L31 (pfam01197) → |
| Vpa-210-1 | NZ_AWHI01000010.1 | + | 37406  | 37456  | RNA → rpmE (PRK00019) Ribosomal_L31 (pfam01197) → |
| Vpa-208-1 | NZ_AWHK01000122.1 | + | 13363  | 13413  | RNA → rpmE (PRK00019) Ribosomal_L31 (pfam01197) → |
| Vpa-202-1 | NZ_AWHQ01000003.1 | - | 5715   | 5665   | RNA → rpmE (PRK00019) Ribosomal_L31 (pfam01197) → |
| Vpa-194-1 | NZ_AWHY01000088.1 | - | 5707   | 5657   | RNA → rpmE (PRK00019) Ribosomal_L31 (pfam01197) → |
| Vpa-189-1 | NZ_AWID01000085.1 | - | 5723   | 5673   | RNA → rpmE (PRK00019) Ribosomal_L31 (pfam01197) → |
| Vpa-184-1 | NZ_AWII01000060.1 | + | 13360  | 13410  | RNA → rpmE (PRK00019) Ribosomal_L31 (pfam01197) → |
| Vpa-211-1 | NZ_AWHH01000001.1 | + | 114662 | 114712 | RNA → rpmE (PRK00019) Ribosomal_L31 (pfam01197) → |
| Vpa-204-1 | NZ_AWHO01000125.1 | + | 8341   | 8391   | RNA → rpmE (PRK00019) Ribosomal_L31 (pfam01197) → |
| Vpa-195-1 | NZ_AWHX01000081.1 | - | 5710   | 5660   | RNA → rpmE (PRK00019) Ribosomal_L31 (pfam01197) → |
| Vpa-191-1 | NZ_AWIB01000016.1 | - | 5711   | 5661   | RNA → rpmE (PRK00019) Ribosomal_L31 (pfam01197) → |
| Vpa-190-1 | NZ_AWIC01000085.1 | - | 5710   | 5660   | RNA → rpmE (PRK00019) Ribosomal_L31 (pfam01197) → |
| Vpa-186-1 | NZ_AWIG01000001.1 | - | 5744   | 5694   | RNA → rpmE (PRK00019) Ribosomal_L31 (pfam01197) → |
| Vpa-185-1 | NZ_AWIH01000001.1 | - | 5711   | 5661   | RNA → rpmE (PRK00019) Ribosomal_L31 (pfam01197) → |
| Vpa-181-1 | NZ_AWIL01000049.1 | + | 14828  | 14878  | RNA → rpmE (PRK00019) Ribosomal_L31 (pfam01197) → |
| Vpa-159-1 | NZ_AWJH01000003.1 | - | 5713   | 5663   | RNA → rpmE (PRK00019) Ribosomal_L31 (pfam01197) → |
| Vpa-158-1 | NZ_AWJI01000003.1 | - | 5708   | 5658   | RNA → rpmE (PRK00019) Ribosomal_L31 (pfam01197) → |
| Vpa-168-1 | NZ_AWIY01000019.1 | + | 31982  | 32032  | RNA → rpmE (PRK00019) Ribosomal_L31 (pfam01197) → |
| Vpa-160-1 | NZ_AWJG01000249.1 | - | 396    | 346    | RNA → rpmE (PRK00019) Ribosomal_L31 (pfam01197) → |
| Vpa-200-1 | NZ_AWHS01000092.1 | - | 5726   | 5676   | RNA → rpmE (PRK00019) Ribosomal_L31 (pfam01197) → |
| Vpa-165-1 | NZ_AWJB01000007.1 | - | 396    | 346    | RNA → rpmE (PRK00019) Ribosomal_L31 (pfam01197) → |
| Vpa-161-1 | NZ_AWJF01000049.1 | - | 5721   | 5671   | RNA → rpmE (PRK00019) Ribosomal_L31 (pfam01197) → |
| Vpa-197-1 | NZ_AWHV01000125.1 | - | 396    | 346    | RNA → rpmE (PRK00019) Ribosomal_L31 (pfam01197) → |
| Vpa-166-1 | NZ_AWJA01000056.1 | - | 14431  | 14381  | RNA → rpmE (PRK00019) Ribosomal_L31 (pfam01197) → |
| Vpa-4-1   | NZ_KI549257.1     | - | 292241 | 292191 | RNA → rpmE (PRK00019) Ribosomal_L31 (pfam01197) → |
| Vpa-9-1   | NZ_KI912894.1     | + | 256465 | 256515 | RNA → rpmE (PRK00019) Ribosomal_L31 (pfam01197) → |
| Vpa-6-1   | NZ_KI601405.1     | - | 292231 | 292181 | RNA → rpmE (PRK00019) Ribosomal_L31 (pfam01197) → |
| Vpa-213-1 | NZ_KI929493.1     | - | 292480 | 292430 | RNA → rpmE (PRK00019) Ribosomal_L31 (pfam01197) → |
| Vpa-34-1  | NZ_KI783133.1     | - | 291972 | 291922 | RNA → rpmE (PRK00019) Ribosomal_L31 (pfam01197) → |
| Vpa-17-1  | NZ_KI912778.1     | + | 236877 | 236927 | RNA → rpmE (PRK00019) Ribosomal_L31 (pfam01197) → |
| Vpa-26-1  | NZ_KI783213.1     | - | 196217 | 196167 | RNA → rpmE (PRK00019) Ribosomal_L31 (pfam01197) → |
| Vpa-35-1  | NZ_KK042409.1     | + | 247870 | 247920 | RNA → rpmE (PRK00019) Ribosomal_L31 (pfam01197) → |
| Vpa-5-1   | NZ_AFBW01000018.1 | + | 256269 | 256319 | RNA → rpmE (PRK00019) Ribosomal_L31 (pfam01197) → |
| Vpa-241-1 | NZ_KK081893.1     | + | 21893  | 21943  | RNA → rpmE (PRK00019) Ribosomal_L31 (pfam01197) → |
| Vpa-239-1 | NZ_KK081837.1     | - | 103889 | 103839 | RNA → rpmE (PRK00019) Ribosomal_L31 (pfam01197) → |

|            |                   |   |         |         |                                                                                             |
|------------|-------------------|---|---------|---------|---------------------------------------------------------------------------------------------|
| Vpa-243-1  | NZ.KK082063.1     | - | 295164  | 295114  | RNA → rpmE (PRK00019)Ribosomal_L31 (pfam01197) →                                            |
| Vpa-242-1  | NZ.KK081954.1     | + | 246629  | 246679  | RNA → rpmE (PRK00019)Ribosomal_L31 (pfam01197) →                                            |
| Vpa-244-1  | NZ.KB932197.1     | - | 292184  | 292134  | RNA → hypo →                                                                                |
| Vpa-50-1   | NC.021848.1       | - | 2637243 | 2637193 | RNA → rpmE (PRK00019)Ribosomal_L31 (pfam01197) →                                            |
| Vpa-51-1   | NC.021847.1       | + | 655200  | 655250  | RNA → rpmE (PRK00019)Ribosomal_L31 (pfam01197) →                                            |
| Vpa-221-1  | NZ.CP007004.1     | + | 305279  | 305329  | RNA → rpmE (PRK00019)Ribosomal_L31 (pfam01197) →                                            |
| Vpa-2-1    | NZ.CP009982.1     | - | 2981797 | 2981747 | RNA → rpmE (PRK00019)Ribosomal_L31 (pfam01197) →                                            |
| Vpa-107-1  | NZ.AWLH01000247.1 | + | 1797    | 1847    | RNA → rpmE (PRK00019)Ribosomal_L31 (pfam01197) →                                            |
| Vpa-230-1  | NZ.AXNS01000054.1 | - | 232477  | 232427  | RNA → rpmE (PRK00019)Ribosomal_L31 (pfam01197) →                                            |
| Vpa-225-1  | NZ.AXNO01000047.1 | + | 185816  | 185866  | RNA → rpmE (PRK00019)Ribosomal_L31 (pfam01197) →                                            |
| Vpa-216-1  | NZ.BAVF01000010.1 | + | 243480  | 243530  | RNA → rpmE (PRK00019)Ribosomal_L31 (pfam01197) →                                            |
| Ehe-1-1    | NZ.BAFF01000008.1 | + | 130616  | 130667  | RNA → rpmE (PRK00019)Ribosomal_L31 (pfam01197) → rpmE (PRK00019)Ribosomal_L31 (pfam01197) → |
| Eco-230-1  | NZ.JXMX01000003.1 | - | 847619  | 847567  | RNA → rpmE (PRK00019)Ribosomal_L31 (pfam01197) →                                            |
| Eco-95-1   | NZ.JNQG01000012.1 | + | 113897  | 113949  | RNA → rpmE (PRK00019)Ribosomal_L31 (pfam01197) →                                            |
| Eco-202-1  | NZ.AYQH01000026.1 | - | 32643   | 32591   | RNA → rpmE (PRK00019)Ribosomal_L31 (pfam01197) →                                            |
| Eco-514-1  | NZ.JHNV01000011.1 | - | 49699   | 49647   | RNA → rpmE (PRK00019)Ribosomal_L31 (pfam01197) →                                            |
| Eco-46-1   | NZ.AYQG01000014.1 | - | 32634   | 32582   | RNA → rpmE (PRK00019)Ribosomal_L31 (pfam01197) →                                            |
| Eco-230-2  | NZ.AYRA01000032.1 | - | 32648   | 32596   | RNA → rpmE (PRK00019)Ribosomal_L31 (pfam01197) →                                            |
| Eco-280-1  | NZ.AYQF01000011.1 | - | 32645   | 32593   | RNA → rpmE (PRK00019)Ribosomal_L31 (pfam01197) →                                            |
| Eco-1173-1 | NZ.GL884547.1     | + | 79856   | 79908   | RNA → rpmE (PRK00019)Ribosomal_L31 (pfam01197) → rpmE (PRK00019)Ribosomal_L31 (pfam01197) → |
| Eco-1617-1 | NZ.KB732779.1     | + | 1174695 | 1174747 | RNA → rpmE (PRK00019)Ribosomal_L31 (pfam01197) →                                            |
| Eco-1362-1 | NZ.KE699546.1     | + | 733437  | 733489  | RNA → rpmE (PRK00019)Ribosomal_L31 (pfam01197) →                                            |
| Eco-1272-1 | NZ.KE700731.1     | + | 4435409 | 4435461 | RNA → rpmE (PRK00019)Ribosomal_L31 (pfam01197) →                                            |
| Eco-1987-1 | NZ.AOGL01000074.1 | + | 21073   | 21125   | RNA → rpmE (PRK00019)Ribosomal_L31 (pfam01197) →                                            |
| Vvu-5-1    | NZ.LBNN01000028.1 | + | 15413   | 15464   | RNA → rpmE (PRK00019)Ribosomal_L31 (pfam01197) →                                            |
| Vvu-11-1   | NC.005139.1       | - | 3092393 | 3092342 | RNA → rpmE (PRK00019)Ribosomal_L31 (pfam01197) →                                            |
| Vvu-4-1    | NC.004459.3       | + | 1340353 | 1340404 | RNA → rpmE (PRK00019)Ribosomal_L31 (pfam01197) →                                            |
| Vvu-1-1    | NZ.CP009261.1     | - | 3027015 | 3026964 | RNA → rpmE (PRK00019)Ribosomal_L31 (pfam01197) →                                            |
| Cbr-1-7    | NZ.JUYY01000023.1 | + | 59204   | 59254   | RNA → rpmE (PRK00019)Ribosomal_L31 (pfam01197) →                                            |
| Esp-47-1   | NZ.AVOP01000007.1 | + | 72571   | 72622   | RNA → rpmE (PRK00019)Ribosomal_L31 (pfam01197) →                                            |
| Esp-61-1   | NZ.KI535657.1     | - | 1293528 | 1293477 | RNA → rpmE (PRK00019)Ribosomal_L31 (pfam01197) →                                            |
| Hin-12-1   | NC.022356.1       | - | 434942  | 434892  | RNA → rpmE (PRK00019)Ribosomal_L31 (pfam01197) →                                            |
| Kox-11-1   | NZ.JH603153.1     | + | 4689088 | 4689139 | RNA → rpmE (PRK00019)Ribosomal_L31 (pfam01197) →                                            |
| Kmi-1-1    | NZ.KK036986.1     | + | 403430  | 403481  | RNA → rpmE (PRK00019)Ribosomal_L31 (pfam01197) →                                            |
| Pst-7-1    | NC.017731.1       | + | 2402863 | 2402914 | RNA → rpmE (PRK00019)Ribosomal_L31 (pfam01197) →                                            |
| Pst-6-1    | NZ.DS607672.1     | - | 59943   | 59892   | RNA → rpmE (PRK00019)Ribosomal_L31 (pfam01197) →                                            |
| Pst-2-1    | NZ.CP008920.1     | - | 1023294 | 1023243 | RNA → rpmE (PRK00019)Ribosomal_L31 (pfam01197) →                                            |
| Vco-2-1    | NZ.ACZN01000020.1 | + | 156744  | 156794  | RNA → rpmE (PRK00019)Ribosomal_L31 (pfam01197) → rpmE (PRK00019)Ribosomal_L31 (pfam01197) → |
| Vco-1-1    | NZ.CP009617.1     | + | 3234588 | 3234638 | RNA → rpmE (PRK00019)Ribosomal_L31 (pfam01197) →                                            |
| Vco-1-2    | NZ.CP009264.1     | + | 3063229 | 3063279 | RNA → rpmE (PRK00019)Ribosomal_L31 (pfam01197) →                                            |
| Yfr-3-1    | NZ.CP009364.1     | - | 3370416 | 3370362 | RNA → rpmE (PRK00019)Ribosomal_L31 (pfam01197) →                                            |
| Ykr-1-1    | NZ.CP009997.1     | + | 2908986 | 2909040 | RNA → rpmE (PRK00019)Ribosomal_L31 (pfam01197) →                                            |
| Ykr-1-2    | NZ.CP008955.1     | + | 3824913 | 3824967 | RNA → rpmE (PRK00019)Ribosomal_L31 (pfam01197) →                                            |
| Kmi-1-2    | NZ.KK036954.1     | + | 23422   | 23473   | RNA → rpmE (PRK00019)Ribosomal_L31 (pfam01197) →                                            |
| Kox-1-3    | NZ.CP011636.1     | - | 259495  | 259444  | RNA → rpmE (PRK00019)Ribosomal_L31 (pfam01197) →                                            |

## 12.3 Conserved domains



Conserved domains found in protein-coding genes listed in Section 12.2 are shown below, with the first sentence in their description from the Conserved Domain Database (if any). Conserved domains associated with more than one L31-

**cd00090** (1) Arsenical Resistance Operon Repressor and similar prokaryotic, metal regulated homodimeric repressors.

**cd00761** (18) Glycosyltransferase family A (GT-A) includes diverse families of glycosyl transferases with a common GT-A type structural fold.

**cd01347** (5) TonB dependent/Ligand-Gated channels are created by a monomeric 22 strand (22,24) anti-parallel beta-barrel.

**cd03811** (12) This family is most closely related to the GT1 family of glycosyltransferases.

**cd04194** (11) A4GalT-like proteins catalyze the addition of galactose or glucose residues to the lipooligosaccharide (LOS) or lipopolysaccharide (LPS) of the bacterial cell surface.

**cd05399** (1) Nucleotidyltransferase (NT) domain of RelA- and SpoT-like ppGpp synthetases and hydrolases. [D/E]

**cd06532** (18) Glycosyltransferase family 25 [lipooligosaccharide (LOS) biosynthesis protein]

**cd07812** (4) START/RHO\_alpha\_C/PITP/Bet\_v1/CoxG/CalC (SRPBCC) ligand-binding domain superfamily.

**cd08430** (12) The C-terminal substrate binding of LysR-type transcriptional regulator IlvY, which activates the expression of ilvC gene that encoding acetohydroxy acid isomeroreductase for the biosynthesis of branched amino acids; contains the type 2 periplasmic binding fold.

**cd08893** (2) Putative hydrophobic ligand-binding SRPBCC domain of an uncharacterized subgroup of CalC- and Aha1-like proteins; some contain an N-terminal GntR family winged HTH DNA-binding domain.

**cd11528** (1) Nucleoside Triphosphate Pyrophosphohydrolase (EC 3).

**cd11529** (1) Nucleoside Triphosphate Pyrophosphohydrolase (EC 3).

**COG0035** (1) Uracil phosphoribosyltransferase [Nucleotide transport and metabolism]

**COG0254** (101) Ribosomal protein L31 [Translation, ribosomal structure and biogenesis]

**COG0281** (144) Malic enzyme [Energy production and conversion]

**COG0438** (11) Glycosyltransferase involved in cell wall bisynthesis [Cell wall/membrane/envelope biogenesis]

**COG0702** (7) Uncharacterized conserved protein YbjT, contains NAD(P)-binding and DUF2867 domains [General function prediction only]

**COG0859** (133) ADP-heptose:LPS heptosyltransferase [Cell wall/membrane/envelope biogenesis]

**COG1198** (3) Primosomal protein N' (replication factor Y) - superfamily II helicase [Replication, recombination and repair]

**COG1368** (1) Phosphoglycerol transferase MdoB or a related enzyme of AlkP superfamily [Cell wall/membrane/envelope biogenesis]

**COG1943** (3) REP element-mobilizing transposase RayT [Mobilome: prophages, transposons]

**COG2194** (2) Phosphoethanolamine transferase for periplasmic glucans (OPG), alkaline phosphatase superfamily [Cell wall/membrane/envelope biogenesis]

**COG2211** (1) Na<sup>+</sup>/melibiose symporter or related transporter [Carbohydrate transport and metabolism]

**COG3060** (2) Transcriptional regulator of met regulon [Transcription, Amino acid transport and metabolism]

**COG3306** (4) Glycosyltransferase involved in LPS biosynthesis, GR25 family [Cell wall/membrane/envelope biogenesis]

**COG3550** (1) Serine/threonine protein kinase HipA, toxin component of the HipAB toxin-

Gammaproteobacteria RNA are assigned a color, while others are shown in gray. The number in parentheses after the colored domain name is the number of occurrences in Section 12.2.

antitoxin module [Signal transduction mechanisms]

**pfam00126** (12) Bacterial regulatory helix-turn-helix protein, lysR family.

**pfam00535** (2) Glycosyl transferase family 2.

**pfam00593** (3) TonB dependent receptor.

**pfam00742** (2) Homoserine dehydrogenase.

**pfam01197** (10003) Ribosomal protein L31.

**pfam01755** (73) Glycosyltransferase family 25 (LPS biosynthesis protein).

**pfam06178** (1) Oligogalacturonate-specific porin protein (KdGM).

**pfam06306** (3) Beta-1,4-N-acetylgalactosaminyltransferase (CgtA).

**pfam07526** (9) Associated with HOX.

**pfam11066** (7) Protein of unknown function (DUF2867).

**pfam13439** (9) Glycosyltransferase Family 4.

**pfam13460** (7) NAD(P)H-binding.

**pfam13641** (14) Glycosyltransferase like family 2.

**pfam13692** (23) Glycosyl transferases group 1.

**PRK00019** (10104) 50S ribosomal protein L31; Reviewed

**PRK00129** (1) uracil phosphoribosyltransferase; Reviewed

**PRK00528** (8) 50S ribosomal protein L31; Reviewed

**PRK01678** (16) 50S ribosomal protein L31 type B; Reviewed

**PRK05269** (2) transcriptional repressor protein MetJ; Provisional

**PRK05580** (3) primosome assembly protein PriA; Validated

**PRK09466** (2) bifunctional aspartate kinase II/homoserine dehydrogenase II; Provisional

**PRK09562** (1) nucleoside triphosphate pyrophosphohydrolase; Reviewed

**PRK09775** (1) putative DNA-binding transcriptional regulator; Provisional

**PRK10073** (2) putative glycosyl transferase; Provisional

**PRK10792** (2) lipopolysaccharide core biosynthesis protein; Provisional

**PRK11204** (2) N-glycosyltransferase; Provisional

**PRK11560** (2) phosphoethanolamine transferase; Provisional

**PRK11716** (12) DNA-binding transcriptional regulator IlvY; Provisional

**PRK13524** (4) outer membrane receptor FepA; Provisional

**PRK13528** (3) outer membrane receptor FepA; Provisional

**PRK14515** (1) aspartate ammonia-lyase; Provisional

**PRK15171** (11) lipopolysaccharide 1,3-galactosyltransferase; Provisional

**smart00919** (144) Malic enzyme, NAD binding domain.

**smart00954** (1) Region found in RelA / SpoT proteins.

**TIGR00792** (1) sugar (Glycoside-Pentoside-Hexuronide) transporter. [Transport and binding proteins, Carbohydrates, organic alcohols, and acids]

**TIGR01783** (1) TonB-dependent siderophore receptor. [Transport and binding proteins, Cations and iron carrying compounds, Transport and binding proteins, Porins]

**TIGR02193** (53) lipopolysaccharide heptosyltransferase I. [Cell envelope, Biosynthesis and degradation of surface polysaccharides and lipopolysaccharides]

**TIGR02195** (9) lipopolysaccharide heptosyltransferase II. [Cell envelope, Biosynthesis and degradation of surface polysaccharides and lipopolysaccharides]

**TIGR02201** (63) lipopolysaccharide heptosyltransferase III, putative. [Cell envelope, Biosynthesis and degradation of surface polysaccharides and lipopolysaccharides]

**TIGR03937** (2) poly-beta-1,6 N-acetyl-D-glucosamine synthase.

## 12.4 Multiple-sequence alignment

Each L31-Gammaproteobacteria RNA is denoted by an abbreviation (like “Eco-1-1”) that refers to a taxonomy given in Section 12.1. The alignment may include sequences containing the RNA motif, as well as flanking sequence. The L31-Gammaproteobacteria RNA itself is denoted by the line underneath marked 5' and 3' on either end. Nucleotides in flanking sequences (i.e., not part of the motif) are written in gray letters. Stems of predicted rho-independent transcription terminators, if any, are shaded yellow. (Note: terminator predictions have not been analyzed manually, and many are likely to be false positives. Terminator predictions are those of the RNIE software.) Nucleotides predicted to function (as DNA) as transcription-factor binding sites, if any, are shaded in green. (But note: these predictions are manually annotated, so they might be under-predicted.) Annotated start codons, if any, are shaded green. (Note: start codons are frequently misannotated, especially in environmental samples.) Nucleotides proposed to basepair as part of the consensus structure are shaded in color when they comprise Watson-

Crick or G-U pairs. Otherwise they are shaded gray. Conserved stems are also indicated at the bottom of the alignment by angle brackets, where matching < and > denote base-paired columns. Below these angle brackets, the symbol “2” denotes base pairs exhibiting covariation according to the statistically well-founded R-scape method. “1” denotes base pairs exhibiting covariation according to R2R’s simplistic method. “0” denotes base pairs that are not observed to mutate and “?” denotes base pairs that have a significant frequency of non-canonical nucleotides for Watson-Crick or G-U pairs (> 5%). Below these base pair annotation is the consensus sequence: “R” = “A” or “G”, “Y” = “C” or “U”, red nucleotides: nucleotide identity conserved more than 97% of the time, black nucleotides: 90%, gray nucleotides: 75%, red circle (◐): nucleotide is present 97% of the time, black circle (◑): 90%, gray circle (◒): 75%, white circle (◓): 50%. All percentages of sequences just described (e.g. 97% conserved) assume that sequences have been weighted by the GSC algorithm implemented by the Infernal software package.

Duplicate sequences: the following putative homologs are not shown in the alignment because their sequences are identical to a homolog already shown: Aac-10-1, Aac-12-1, Aac-13-1, Aac-15-1, Aac-16-1, Aac-19-1, Aac-2-1, Aac-20-1, Aac-3-1, Aac-4-1, Aac-5-1, Aac-5-2, Aac-6-2, Aac-7-1, Aac-8-1, Aac-9-1, Aal-1-2, Aap-1-1, Aap-2-1, Aap-3-1, Aap-4-1, Aaq-1-1, Aau-2-1, Aau-2-2, Abe-1-1, Aca-1-1, Aca-2-1, Adh-1-1, Adh-1-2, Adh-1-3, Adi-1-1, Aen-1-1, Aen-2-1, Aen-2-2, Aen-2-3, Afi-3-1, Afl-1-1, Ahy-1-1, Ahy-1-2, Ahy-10-1, Ahy-11-1, Ahy-12-1, Ahy-13-1, Ahy-14-1, Ahy-15-1, Ahy-16-1, Ahy-17-1, Ahy-18-1, Ahy-19-1, Ahy-2-1, Ahy-20-1, Ahy-21-1, Ahy-3-1, Ahy-4-1, Ahy-5-1, Ahy-6-1, Ahy-7-1, Ahy-8-1, Ahy-9-1, Aja-2-1, Aje-1-1, Ala-1-1, Alo-1-1, Alo-2-1, Ama-10-1, Ama-11-1, Ama-12-1, Ama-13-1, Ama-2-1, Ama-2-2, Ama-2-3, Ama-3-1, Ama-4-1, Ama-5-1, Ama-6-1, Ama-8-1, Ama-9-1, Ame-1-2, Ame-1-3, Ame-2-1, Apa-2-1, Apa-3-1, Apa-4-1, Apl-1-2, Apl-1-3, Apl-1-4, Apl-1-5, Apl-1-6, Apl-10-1, Apl-11-1, Apl-12-1, Apl-13-2, Apl-14-1, Apl-15-1, Apl-2-1, Apl-3-1, Apl-4-1, Apl-4-2, Apl-5-1, Apl-7-1, Apl-9-1, Apo-1-1, Asa-1-1, Asa-2-1, Asa-3-1, Asa-4-1, Asa-5-1, Asa-5-2, Asa-5-3, Asa-5-4, Asa-6-1, Asa-7-1, Asa-8-1, Ase-1-1, Ase-2-1, Aso-1-1, Asp-1-1, Asp-2-1, Asp-3-1, Asp-4-1, Asp-6-1, Asu-2-1, Ata-1-2, Ave-1-1, Ave-1-2, Ave-1-3, Ave-2-1, Ave-3-1, Ave-4-1, Ave-5-1, Ave-6-1, Ave-7-1, Ave-9-1, Cam-1-2, Cam-1-3, Cbr-1-1, Cbr-1-2, Cbr-1-3, Cbr-1-4, Cbr-1-5, Cbr-1-6, Cco-1-1, Cdu-1-1, Cdu-2-1, Cdu-3-1, Cdu-4-1, Cdu-5-1, Cfr-1-1, Cfr-1-2, Cfr-1-3, Cfr-1-4, Cfr-10-1, Cfr-11-1, Cfr-2-1, Cfr-2-2, Cfr-4-1, Cfr-5-1, Cfr-6-1, Cfr-7-1, Cfr-8-1, Cfr-9-1, Cko-1-1, Cko-1-2, Cma-1-1, Cma-1-2, Cma-1-3, Cma-1-4, Cma-1-5, Cma-2-1, Cma-3-1, Cma-4-1, Cma-5-1, Cmi-1-1, Cne-1-2, Cpa-1-1, Cro-1-1, Cro-3-1, Csa-1-1, Csa-11-1, Csa-12-1, Csa-14-1, Csa-15-1, Csa-16-1, Csa-2-1, Csa-3-1, Csa-4-1, Csa-5-1, Csa-6-1, Csa-8-1, Csa-9-1, Csp-1-1, Csp-10-1, Csp-11-1, Csp-13-1, Csp-15-1, Csp-16-1, Csp-17-1, Csp-18-1, Csp-19-1, Csp-2-1, Csp-20-1, Csp-3-1, Csp-4-1, Csp-5-1, Csp-6-1, Csp-7-1, Csp-8-1, Csp-9-1, Ctu-1-1, Ctu-2-1, Ctu-3-1, Ctu-4-1, Cun-1-2, Dch-1-1, Dch-4-1, Dda-3-1, Dda-4-1, Dda-5-1, Ddi-1-1, Ddi-2-1, Ddi-3-1, Ddi-4-1, Dso-1-1, Dso-2-1, Dso-3-1, Dso-5-1, Dso-6-1, Dsp-4-1, Dsp-5-1, Dsp-6-1, Dsp-7-1, Dsp-8-1, Dze-1-1, Dze-3-1, Dze-4-1, Dze-5-1, Dze-6-1, Dze-8-1, Dze-9-1, Eae-1-1, Eae-2-1, Eae-3-1, Eal-1-1, Eal-3-1, Eal-4-1, Eal-5-1, Eam-10-1, Eam-11-1, Eam-12-1, Eam-13-1, Eam-14-1, Eam-15-1, Eam-3-1, Eam-4-1, Eam-5-1, Eam-6-1, Eam-7-1, Eam-8-1, Eam-9-1, Ean-1-1, Ean-2-1, Ean-3-1, Ean-4-1, Eas-1-1, Eas-1-2, Eas-2-1, Eas-3-1, Eas-4-1, Eba-3-1, Eba-5-1, Eca-1-1, Eca-2-1, Eca-4-1, Eca-7-1, Ecl-1-1, Ecl-1-10, Ecl-1-11, Ecl-1-12, Ecl-1-2, Ecl-1-3, Ecl-1-4, Ecl-1-5, Ecl-1-7, Ecl-1-8, Ecl-1-9, Ecl-10-1, Ecl-11-1, Ecl-12-1, Ecl-13-1, Ecl-14-1, Ecl-15-1, Ecl-16-1, Ecl-17-1, Ecl-18-1, Ecl-19-1, Ecl-2-1, Ecl-20-1, Ecl-21-1, Ecl-22-1, Ecl-23-1, Ecl-24-1, Ecl-25-1, Ecl-26-1, Ecl-27-1, Ecl-28-1, Ecl-28-2, Ecl-28-3, Ecl-28-4, Ecl-28-5, Ecl-28-6, Ecl-29-1, Ecl-3-1, Ecl-30-1, Ecl-31-1, Ecl-32-1, Ecl-33-1, Ecl-34-1, Ecl-35-1, Ecl-36-1, Ecl-37-1, Ecl-38-1, Ecl-4-1, Ecl-40-1, Ecl-41-1, Ecl-43-1, Ecl-44-1, Ecl-45-1, Ecl-46-1, Ecl-47-1, Ecl-48-1, Ecl-49-1, Ecl-5-1, Ecl-50-1, Ecl-51-1, Ecl-52-2, Ecl-52-3, Ecl-52-4, Ecl-52-5, Ecl-53-1, Ecl-54-1, Ecl-55-1, Ecl-56-1, Ecl-57-1, Ecl-58-1, Ecl-59-1, Ecl-6-1, Ecl-61-1, Ecl-62-1, Ecl-63-1, Ecl-64-1, Ecl-65-1, Ecl-66-1, Ecl-67-1, Ecl-68-1, Ecl-69-1, Ecl-7-1, Ecl-70-1, Ecl-8-1, Ecl-9-1, Eco-1-1, Eco-1-2, Eco-1-3, Eco-1-4, Eco-10-1, Eco-100-1, Eco-1000-1, Eco-1001-1, Eco-1002-1, Eco-1003-1, Eco-1004-1, Eco-1005-1, Eco-1006-1, Eco-1007-1, Eco-1008-1, Eco-1009-1, Eco-101-1, Eco-1010-1, Eco-1012-1, Eco-1013-1, Eco-1014-1, Eco-1015-1, Eco-1016-1, Eco-1017-1, Eco-1018-1, Eco-1019-1, Eco-1019-2, Eco-1019-3, Eco-102-1, Eco-1020-1, Eco-1021-1, Eco-1022-1, Eco-1023-1, Eco-1024-1, Eco-1025-1, Eco-1026-1, Eco-1027-1, Eco-1028-1, Eco-1029-1, Eco-103-1, Eco-1030-1, Eco-1031-1, Eco-1032-1, Eco-1033-1, Eco-1034-1, Eco-1035-1, Eco-1036-1, Eco-1037-1, Eco-1038-1, Eco-1039-1, Eco-104-1, Eco-1040-1, Eco-1041-1, Eco-1042-1, Eco-1043-1, Eco-1044-1, Eco-1045-1, Eco-1046-1, Eco-1047-1, Eco-1048-1, Eco-1049-1, Eco-105-1, Eco-1050-1,









Eco-726-1, Eco-727-1, Eco-728-1, Eco-728-2, Eco-729-1, Eco-73-1, Eco-730-1, Eco-731-1, Eco-732-1, Eco-733-1, Eco-734-1, Eco-735-1, Eco-736-1, Eco-737-1, Eco-738-1, Eco-739-1, Eco-74-1, Eco-740-1, Eco-741-1, Eco-742-1, Eco-743-1, Eco-744-1, Eco-745-1, Eco-746-1, Eco-747-1, Eco-748-1, Eco-749-1, Eco-75-1, Eco-750-1, Eco-751-1, Eco-752-1, Eco-752-2, Eco-753-1, Eco-754-1, Eco-755-1, Eco-756-1, Eco-757-1, Eco-758-1, Eco-759-1, Eco-76-1, Eco-760-1, Eco-761-1, Eco-762-1, Eco-764-1, Eco-765-1, Eco-766-1, Eco-767-1, Eco-768-1, Eco-769-1, Eco-77-1, Eco-770-1, Eco-771-1, Eco-772-1, Eco-773-1, Eco-774-1, Eco-775-1, Eco-776-1, Eco-777-1, Eco-778-1, Eco-779-1, Eco-78-1, Eco-780-1, Eco-781-1, Eco-782-1, Eco-783-1, Eco-784-1, Eco-785-1, Eco-786-1, Eco-787-1, Eco-788-1, Eco-789-1, Eco-79-1, Eco-790-1, Eco-791-1, Eco-792-1, Eco-793-1, Eco-794-1, Eco-795-1, Eco-796-1, Eco-797-1, Eco-798-1, Eco-799-1, Eco-8-1, Eco-80-1, Eco-800-1, Eco-801-1, Eco-802-1, Eco-803-1, Eco-804-1, Eco-805-1, Eco-806-1, Eco-807-1, Eco-808-1, Eco-809-1, Eco-81-1, Eco-810-1, Eco-811-1, Eco-812-1, Eco-813-1, Eco-814-1, Eco-815-1, Eco-816-1, Eco-817-1, Eco-818-1, Eco-819-1, Eco-82-1, Eco-820-1, Eco-821-1, Eco-822-1, Eco-823-1, Eco-824-1, Eco-825-1, Eco-826-1, Eco-827-1, Eco-828-1, Eco-829-1, Eco-83-1, Eco-830-1, Eco-831-1, Eco-832-1, Eco-833-1, Eco-834-1, Eco-836-1, Eco-837-1, Eco-838-1, Eco-839-1, Eco-84-1, Eco-840-1, Eco-841-1, Eco-842-1, Eco-843-1, Eco-844-1, Eco-845-1, Eco-846-1, Eco-847-1, Eco-848-1, Eco-849-1, Eco-85-1, Eco-850-1, Eco-851-1, Eco-852-1, Eco-853-1, Eco-854-1, Eco-855-1, Eco-856-1, Eco-857-1, Eco-858-1, Eco-859-1, Eco-86-1, Eco-860-1, Eco-861-1, Eco-862-1, Eco-863-1, Eco-864-1, Eco-865-1, Eco-866-1, Eco-867-1, Eco-868-1, Eco-869-1, Eco-87-1, Eco-870-1, Eco-871-1, Eco-872-1, Eco-873-1, Eco-874-1, Eco-875-1, Eco-876-1, Eco-877-1, Eco-878-1, Eco-879-1, Eco-88-1, Eco-880-1, Eco-881-1, Eco-882-1, Eco-883-1, Eco-884-1, Eco-885-1, Eco-886-1, Eco-887-1, Eco-888-1, Eco-889-1, Eco-89-1, Eco-890-1, Eco-891-1, Eco-892-1, Eco-893-1, Eco-894-1, Eco-895-1, Eco-896-1, Eco-897-1, Eco-898-1, Eco-899-1, Eco-9-1, Eco-90-1, Eco-900-1, Eco-901-1, Eco-902-1, Eco-903-1, Eco-904-1, Eco-905-1, Eco-906-1, Eco-907-1, Eco-908-1, Eco-909-1, Eco-91-1, Eco-910-1, Eco-911-1, Eco-912-1, Eco-913-1, Eco-914-1, Eco-915-1, Eco-916-1, Eco-917-1, Eco-918-1, Eco-919-1, Eco-92-1, Eco-920-1, Eco-921-1, Eco-922-1, Eco-923-1, Eco-924-1, Eco-925-1, Eco-926-1, Eco-927-1, Eco-928-1, Eco-929-1, Eco-93-1, Eco-930-1, Eco-931-1, Eco-932-1, Eco-933-1, Eco-934-1, Eco-935-1, Eco-936-1, Eco-937-1, Eco-938-1, Eco-939-1, Eco-94-1, Eco-940-1, Eco-941-1, Eco-942-1, Eco-943-1, Eco-944-1, Eco-945-1, Eco-946-1, Eco-947-1, Eco-948-1, Eco-949-1, Eco-95-1, Eco-950-1, Eco-951-1, Eco-952-1, Eco-953-1, Eco-954-1, Eco-955-1, Eco-956-1, Eco-957-1, Eco-958-1, Eco-959-1, Eco-96-1, Eco-960-1, Eco-961-1, Eco-962-1, Eco-963-1, Eco-964-1, Eco-965-1, Eco-966-1, Eco-967-1, Eco-968-1, Eco-969-1, Eco-97-1, Eco-970-1, Eco-971-1, Eco-972-1, Eco-973-1, Eco-974-1, Eco-975-1, Eco-976-1, Eco-977-1, Eco-978-1, Eco-979-1, Eco-98-1, Eco-980-1, Eco-981-1, Eco-982-1, Eco-983-1, Eco-984-1, Eco-985-1, Eco-986-1, Eco-987-1, Eco-988-1, Eco-989-1, Eco-99-1, Eco-990-1, Eco-991-1, Eco-992-1, Eco-993-1, Eco-994-1, Eco-995-1, Eco-996-1, Eco-997-1, Eco-998-1, Eco-999-1, Efe-1-1, Efe-1-2, Efe-1-3, Efe-2-1, Efe-3-1, Efe-4-1, Eho-1-1, Eho-1-2, Eho-1-3, Eho-1-4, Eho-1-5, Eho-1-6, Eho-1-7, Eho-1-8, Eho-2-1, Eho-3-1, Eho-3-2, Eho-4-1, Eho-4-2, Eho-6-1, Eho-7-1, Eho-8-1, Eic-1-1, Ein-1-2, Eko-1-1, Eko-1-10, Eko-1-11, Eko-1-2, Eko-1-3, Eko-1-4, Eko-1-5, Eko-1-6, Eko-1-7, Eko-1-8, Eko-1-9, Elu-1-1, Elu-1-2, Elu-1-3, Elu-1-4, Elu-1-5, Ema-1-1, Emo-1-1, Eno-1-1, Eno-2-1, Epy-1-1, Esp-1-1, Esp-10-1, Esp-11-1, Esp-12-1, Esp-13-1, Esp-14-1, Esp-15-1, Esp-16-1, Esp-17-1, Esp-18-1, Esp-19-1, Esp-2-1, Esp-20-1, Esp-21-1, Esp-22-1, Esp-23-1, Esp-24-1, Esp-25-1, Esp-26-1, Esp-27-1, Esp-28-1, Esp-3-1, Esp-30-1, Esp-31-1, Esp-32-1, Esp-33-1, Esp-34-1, Esp-35-1, Esp-36-1, Esp-37-1, Esp-38-1, Esp-39-1, Esp-4-1, Esp-40-1, Esp-41-1, Esp-44-1, Esp-45-1, Esp-46-1, Esp-48-1, Esp-49-1, Esp-5-1, Esp-50-1, Esp-51-1, Esp-52-1, Esp-53-1, Esp-54-1, Esp-56-1, Esp-57-1, Esp-58-1, Esp-59-1, Esp-6-1, Esp-60-1, Esp-61-1, Esp-62-1, Esp-63-1, Esp-64-1, Esp-65-1, Esp-66-1, Esp-68-1, Esp-69-1, Esp-7-1, Esp-70-1, Esp-71-1, Esp-72-1, Esp-73-1, Esp-75-1, Esp-76-1, Esp-77-1, Esp-78-1, Esp-79-1, Esp-8-1, Esp-80-1, Esp-9-1, Eta-1-1, Eta-3-1, Eta-5-1, Eta-6-1, Eta-7-1, Eta-8-1, Etr-2-1, Fhe-4-1, Fpu-2-1, Fpu-3-1, Fpu-4-1, Gag-1-1, Gch-1-1, Gme-1-1, Gsp-1-1, Gsp-2-1, Hae-1-1, Hal-1-2, Hal-1-3, Hal-1-4, Hal-2-1, Hal-4-1, Hha-2-1, Hha-3-1, Hha-4-1, Hha-5-1, Hin-1-1, Hin-1-2, Hin-1-4, Hin-10-1, Hin-11-1, Hin-15-1, Hin-16-1, Hin-18-1, Hin-19-1, Hin-19-2, Hin-2-1, Hin-20-1, Hin-21-1, Hin-3-1, Hin-4-1, Hin-5-1, Hin-7-1, Hin-8-1, Hin-9-1, Hpa-1-2, Hpa-2-1, Hpa-2-10, Hpa-2-3, Hpa-2-4, Hpa-2-5, Hpa-2-6, Hpa-2-7, Hpa-2-8, Hpa-2-9, Hpa-3-1, Hpa-4-1, Hpa-5-1, Hpa-6-1, Hpa-7-1, Hsp-1-1, Hsp-2-1, Hsp-4-1, Iba-1-1, Ilo-1-1, Ilo-2-1, Isp-1-1, Kae-1-1, Kae-10-1, Kae-11-1, Kae-12-1, Kae-13-1, Kae-2-1, Kae-3-1, Kae-4-1, Kae-5-1, Kae-6-1, Kae-7-1, Kae-8-1, Kae-9-1, Kmi-1-1, Kmi-2-1, Kmi-3-1, Kox-1-1, Kox-1-2, Kox-1-3, Kox-1-4, Kox-10-1, Kox-12-1, Kox-13-1, Kox-14-1, Kox-15-1, Kox-16-1, Kox-17-1, Kox-18-1, Kox-19-1, Kox-2-1, Kox-20-1, Kox-3-1, Kox-4-1, Kox-5-1, Kox-6-1, Kox-7-1, Kox-9-1, Kpn-1-1, Kpn-1-2, Kpn-1-3, Kpn-1-4, Kpn-1-5, Kpn-1-6, Kpn-1-7, Kpn-1-8, Kpn-1-9, Kpn-10-1, Kpn-100-1, Kpn-101-1, Kpn-102-1, Kpn-103-1, Kpn-104-1, Kpn-105-1, Kpn-106-1, Kpn-107-1, Kpn-108-1, Kpn-109-1, Kpn-11-1, Kpn-110-1, Kpn-111-1, Kpn-112-1, Kpn-113-1, Kpn-114-1, Kpn-115-1, Kpn-116-1, Kpn-117-1, Kpn-118-1, Kpn-119-1, Kpn-12-1, Kpn-120-1, Kpn-121-1, Kpn-122-1, Kpn-123-1, Kpn-124-1, Kpn-125-1, Kpn-126-1, Kpn-127-1, Kpn-128-1, Kpn-129-1, Kpn-13-1, Kpn-130-1, Kpn-131-1, Kpn-132-1, Kpn-133-1, Kpn-134-1, Kpn-135-1, Kpn-136-1, Kpn-137-1, Kpn-138-1, Kpn-139-1, Kpn-14-1, Kpn-140-1, Kpn-141-1, Kpn-142-1, Kpn-143-1, Kpn-144-1, Kpn-145-1, Kpn-146-1, Kpn-147-1, Kpn-148-1, Kpn-149-1, Kpn-15-1, Kpn-150-1, Kpn-151-1, Kpn-152-1, Kpn-153-1, Kpn-154-1, Kpn-155-1, Kpn-156-1, Kpn-157-1, Kpn-158-1, Kpn-159-1, Kpn-16-1, Kpn-160-1, Kpn-161-1, Kpn-162-1, Kpn-163-1, Kpn-164-1, Kpn-165-1, Kpn-166-1, Kpn-167-1, Kpn-169-1, Kpn-17-1, Kpn-170-1, Kpn-171-1, Kpn-172-1, Kpn-173-1, Kpn-174-1, Kpn-175-1, Kpn-176-1, Kpn-177-1, Kpn-178-1, Kpn-179-1, Kpn-18-1, Kpn-180-1, Kpn-181-1, Kpn-182-1, Kpn-183-1, Kpn-184-1, Kpn-185-1, Kpn-186-1, Kpn-187-1, Kpn-188-1, Kpn-189-1, Kpn-19-1, Kpn-190-1, Kpn-191-1, Kpn-192-1, Kpn-193-1, Kpn-194-1, Kpn-195-1, Kpn-196-1, Kpn-197-1, Kpn-198-1, Kpn-199-1, Kpn-199-2, Kpn-2-1, Kpn-20-1, Kpn-200-1, Kpn-200-2, Kpn-201-1, Kpn-202-1, Kpn-203-1, Kpn-203-2, Kpn-204-1, Kpn-204-2, Kpn-205-1, Kpn-205-2, Kpn-205-3, Kpn-205-4, Kpn-206-1, Kpn-206-2, Kpn-206-3, Kpn-206-4, Kpn-206-5, Kpn-206-6, Kpn-206-7, Kpn-207-1, Kpn-208-1, Kpn-209-1, Kpn-21-1, Kpn-210-1, Kpn-211-1, Kpn-212-1, Kpn-213-1, Kpn-214-1, Kpn-215-1, Kpn-216-1, Kpn-217-1, Kpn-218-1, Kpn-219-1, Kpn-22-1, Kpn-220-1, Kpn-221-1,

Kpn-222-1, Kpn-223-1, Kpn-224-1, Kpn-225-1, Kpn-226-1, Kpn-227-1, Kpn-228-1, Kpn-229-1, Kpn-23-1, Kpn-230-1, Kpn-231-1, Kpn-232-1, Kpn-233-1, Kpn-234-1, Kpn-235-1, Kpn-236-1, Kpn-237-1, Kpn-238-1, Kpn-239-1, Kpn-24-1, Kpn-240-1, Kpn-241-1, Kpn-242-1, Kpn-243-1, Kpn-244-1, Kpn-245-1, Kpn-246-1, Kpn-247-1, Kpn-248-1, Kpn-249-1, Kpn-25-1, Kpn-250-1, Kpn-251-1, Kpn-252-1, Kpn-253-1, Kpn-254-1, Kpn-255-1, Kpn-257-1, Kpn-258-1, Kpn-259-1, Kpn-26-1, Kpn-260-1, Kpn-261-1, Kpn-262-1, Kpn-263-1, Kpn-264-1, Kpn-265-1, Kpn-266-1, Kpn-267-1, Kpn-268-1, Kpn-269-1, Kpn-27-1, Kpn-270-1, Kpn-271-1, Kpn-272-1, Kpn-273-1, Kpn-274-1, Kpn-275-1, Kpn-276-1, Kpn-277-1, Kpn-278-1, Kpn-279-1, Kpn-28-1, Kpn-280-1, Kpn-282-1, Kpn-283-1, Kpn-284-1, Kpn-285-1, Kpn-286-1, Kpn-287-1, Kpn-288-1, Kpn-289-1, Kpn-29-1, Kpn-290-1, Kpn-291-1, Kpn-292-1, Kpn-293-1, Kpn-294-1, Kpn-295-1, Kpn-296-1, Kpn-297-1, Kpn-298-1, Kpn-299-1, Kpn-3-1, Kpn-3-2, Kpn-30-1, Kpn-300-1, Kpn-301-1, Kpn-302-1, Kpn-303-1, Kpn-304-1, Kpn-305-1, Kpn-306-1, Kpn-307-1, Kpn-308-1, Kpn-309-1, Kpn-31-1, Kpn-310-1, Kpn-311-1, Kpn-312-1, Kpn-313-1, Kpn-314-1, Kpn-315-1, Kpn-316-1, Kpn-317-1, Kpn-318-1, Kpn-319-1, Kpn-32-1, Kpn-320-1, Kpn-321-1, Kpn-322-1, Kpn-323-1, Kpn-324-1, Kpn-325-1, Kpn-326-1, Kpn-327-1, Kpn-328-1, Kpn-329-1, Kpn-33-1, Kpn-330-1, Kpn-331-1, Kpn-332-1, Kpn-333-1, Kpn-334-1, Kpn-335-1, Kpn-336-1, Kpn-337-1, Kpn-338-1, Kpn-339-1, Kpn-34-1, Kpn-340-1, Kpn-341-1, Kpn-342-1, Kpn-343-1, Kpn-344-1, Kpn-345-1, Kpn-346-1, Kpn-347-1, Kpn-348-1, Kpn-349-1, Kpn-35-1, Kpn-350-1, Kpn-351-1, Kpn-352-1, Kpn-353-1, Kpn-354-1, Kpn-355-1, Kpn-356-1, Kpn-357-1, Kpn-358-1, Kpn-359-1, Kpn-36-1, Kpn-360-1, Kpn-361-1, Kpn-362-1, Kpn-37-1, Kpn-38-1, Kpn-39-1, Kpn-4-1, Kpn-40-1, Kpn-41-1, Kpn-42-1, Kpn-43-1, Kpn-44-1, Kpn-45-1, Kpn-46-1, Kpn-47-1, Kpn-48-1, Kpn-49-1, Kpn-5-1, Kpn-50-1, Kpn-51-1, Kpn-52-1, Kpn-53-1, Kpn-54-1, Kpn-55-1, Kpn-56-1, Kpn-57-1, Kpn-58-1, Kpn-59-1, Kpn-6-1, Kpn-60-1, Kpn-61-1, Kpn-62-1, Kpn-63-1, Kpn-64-1, Kpn-65-1, Kpn-66-1, Kpn-67-1, Kpn-68-1, Kpn-69-1, Kpn-7-1, Kpn-70-1, Kpn-71-1, Kpn-72-1, Kpn-73-1, Kpn-74-1, Kpn-75-1, Kpn-76-1, Kpn-77-1, Kpn-78-1, Kpn-79-1, Kpn-8-1, Kpn-80-1, Kpn-81-1, Kpn-82-1, Kpn-83-1, Kpn-84-1, Kpn-85-1, Kpn-86-1, Kpn-87-1, Kpn-88-1, Kpn-89-1, Kpn-9-1, Kpn-90-1, Kpn-91-1, Kpn-92-1, Kpn-93-1, Kpn-94-1, Kpn-95-1, Kpn-96-1, Kpn-97-1, Kpn-98-1, Kpn-99-1, Kqu-2-1, Kqu-2-2, Kqu-2-3, Kqu-2-4, Kra-1-1, Ksp-1-1, Ksp-2-1, Ksp-4-1, Ksp-5-1, Ksp-6-1, Ksp-7-1, Kva-1-2, Kva-1-3, Kva-1-4, Kva-1-5, Kva-1-6, Kva-1-7, Kva-2-1, Lad-1-1, Lad-2-1, Lam-1-1, Lan-1-1, Lgr-1-2, Lqu-1-1, Lqu-1-2, Lsp-1-1, Maq-1-1, Mhy-1-1, Mmo-1-2, Mmo-1-3, Mmo-1-4, Mmo-1-5, Mmo-1-6, Mmo-1-8, Mmo-4-1, Mmo-5-1, Mmo-6-1, Msp-2-1, Msp-3-1, Msp-5-1, Pag-1-1, Pag-2-1, Pag-2-2, Pag-2-3, Pag-2-4, Pag-2-6, Pag-3-1, Pag-4-1, Pag-6-1, Pal-1-1, Pal-2-1, Pal-3-1, Pal-4-1, Pal-6-1, Pal-7-1, Pal-9-1, Pan-1-1, Pan-1-2, Pan-1-3, Pan-1-4, Pan-1-5, Pan-10-1, Pan-11-10, Pan-11-11, Pan-11-12, Pan-11-3, Pan-11-4, Pan-11-5, Pan-11-6, Pan-11-7, Pan-11-8, Pan-11-9, Pan-2-1, Pan-3-1, Pan-3-2, Pan-4-1, Pan-6-1, Pan-7-1, Pan-8-1, Pan-9-1, Pat-2-1, Pat-2-2, Pat-4-1, Pbe-1-2, Pbe-2-1, Pca-11-1, Pca-3-10, Pca-3-11, Pca-3-12, Pca-3-13, Pca-3-14, Pca-3-15, Pca-3-4, Pca-3-5, Pca-3-6, Pca-3-7, Pca-3-8, Pca-3-9, Pca-4-1, Pca-5-1, Pca-5-10, Pca-5-3, Pca-5-5, Pca-5-7, Pca-5-9, Pca-8-2, Pca-9-1, Pda-2-1, Pda-3-1, Pdi-1-1, Pdi-2-1, Pfl-2-1, Pfu-1-1, Pha-1-1, Pha-3-1, Pha-7-1, Pil-1-2, Pki-1-2, Pki-1-3, Pki-1-4, Ple-1-2, Ple-2-1, Ple-3-1, Pli-1-1, Plu-5-2, Plu-8-1, Pma-1-1, Pmi-1-1, Pmi-1-2, Pmi-1-3, Pmi-1-4, Pmi-1-5, Pmi-1-6, Pmi-4-1, Pmi-5-1, Pmi-6-1, Pmi-7-1, Pmi-8-1, Pmu-1-1, Pmu-10-1, Pmu-11-1, Pmu-13-1, Pmu-13-10, Pmu-13-11, Pmu-13-12, Pmu-13-2, Pmu-13-3, Pmu-13-4, Pmu-13-5, Pmu-13-6, Pmu-13-7, Pmu-13-8, Pmu-13-9, Pmu-15-1, Pmu-16-1, Pmu-17-1, Pmu-18-1, Pmu-19-1, Pmu-20-1, Pmu-21-1, Pmu-4-1, Pmu-5-1, Pmu-7-1, Pmu-9-1, Ppa-1-1, Ppi-2-2, Ppi-4-1, Ppn-1-1, Ppo-1-1, Pre-1-2, Pru-3-1, Pru-3-2, Pru-4-1, Prw-1-1, Psh-1-1, Psh-2-1, Psp-10-1, Psp-12-1, Psp-13-1, Psp-14-1, Psp-15-1, Psp-16-1, Psp-18-1, Psp-2-1, Psp-20-1, Psp-21-1, Psp-22-1, Psp-23-1, Psp-24-1, Psp-25-1, Psp-27-1, Psp-28-1, Psp-29-1, Psp-3-1, Psp-30-1, Psp-31-1, Psp-33-1, Psp-37-1, Psp-4-1, Psp-41-1, Psp-42-1, Psp-5-1, Psp-50-1, Psp-51-1, Psp-52-1, Psp-54-1, Psp-56-2, Psp-56-3, Psp-7-1, Psp-8-1, Psp-9-1, Pst-1-2, Pst-2-1, Pst-5-1, Pst-6-1, Pte-3-1, Pte-5-1, Pun-1-1, Pva-1-3, Pva-2-1, Pwa-1-1, Pwa-1-2, Pwa-3-1, Raq-1-2, Raq-2-1, Raq-2-2, Raq-3-1, Ror-2-1, Ror-3-1, Ror-4-1, Ror-4-2, Rpl-1-2, Rpl-1-3, Rpl-2-1, Rpn-1-2, Rsp-3-1, Rsp-4-1, Sal-2-1, Sba-1-1, Sba-2-1, Sba-4-1, Sba-5-1, Sba-6-1, Sba-7-1, Sba-8-1, Sba-9-1, Sbl-1-1, Sbo-1-1, Sbo-10-1, Sbo-11-1, Sbo-12-1, Sbo-13-1, Sbo-14-1, Sbo-15-1, Sbo-16-1, Sbo-17-1, Sbo-18-1, Sbo-2-1, Sbo-2-10, Sbo-2-2, Sbo-2-3, Sbo-2-4, Sbo-2-5, Sbo-2-6, Sbo-2-7, Sbo-2-8, Sbo-2-9, Sbo-4-1, Sbo-5-1, Sbo-6-1, Sbo-7-1, Sbo-8-1, Sbo-9-1, Sco-3-1, Sdy-1-1, Sdy-10-1, Sdy-2-1, Sdy-3-1, Sdy-4-1, Sdy-6-1, Sdy-7-1, Sdy-8-1, Sdy-9-1, Sen-1-1, Sen-10-1, Sen-100-1, Sen-1000-1, Sen-1001-1, Sen-1002-1, Sen-1003-1, Sen-1004-1, Sen-1005-1, Sen-1006-1, Sen-1007-1, Sen-1008-1, Sen-1009-1, Sen-101-1, Sen-1010-1, Sen-1011-1, Sen-1012-1, Sen-1014-1, Sen-1015-1, Sen-1016-1, Sen-1017-1, Sen-1018-1, Sen-1019-1, Sen-102-1, Sen-1020-1, Sen-1022-1, Sen-1023-1, Sen-1024-1, Sen-1025-1, Sen-1026-1, Sen-1027-1, Sen-1027-2, Sen-1028-1, Sen-103-1, Sen-1030-1, Sen-1031-1, Sen-1032-1, Sen-1033-1, Sen-104-1, Sen-105-1, Sen-106-1, Sen-107-1, Sen-108-1, Sen-109-1, Sen-11-1, Sen-110-1, Sen-111-1, Sen-112-1, Sen-112-2, Sen-112-3, Sen-113-1, Sen-113-2, Sen-114-1, Sen-115-1, Sen-116-1, Sen-117-1, Sen-118-1, Sen-119-1, Sen-12-1, Sen-12-2, Sen-12-3, Sen-120-1, Sen-121-1, Sen-122-1, Sen-123-1, Sen-124-1, Sen-125-1, Sen-126-1, Sen-127-1, Sen-128-1, Sen-129-1, Sen-129-2, Sen-13-1, Sen-130-1, Sen-130-2, Sen-130-3, Sen-131-1, Sen-132-1, Sen-133-1, Sen-134-1, Sen-135-1, Sen-136-1, Sen-136-2, Sen-137-1, Sen-137-2, Sen-137-3, Sen-137-4, Sen-137-5, Sen-137-6, Sen-138-1, Sen-138-2, Sen-138-3, Sen-138-4, Sen-138-5, Sen-139-1, Sen-139-10, Sen-139-11, Sen-139-12, Sen-139-13, Sen-139-14, Sen-139-15, Sen-139-2, Sen-139-3, Sen-139-4, Sen-139-5, Sen-139-6, Sen-139-7, Sen-139-8, Sen-139-9, Sen-14-1, Sen-14-2, Sen-14-3, Sen-14-4, Sen-140-1, Sen-141-1, Sen-142-1, Sen-143-1, Sen-144-1, Sen-145-1, Sen-146-1, Sen-147-1, Sen-148-1, Sen-149-1, Sen-15-1, Sen-15-2, Sen-15-3, Sen-150-1, Sen-151-1, Sen-152-1, Sen-153-1, Sen-154-1, Sen-155-1, Sen-156-1, Sen-157-1, Sen-158-1, Sen-159-1, Sen-16-1, Sen-160-1, Sen-161-1, Sen-162-1, Sen-163-1, Sen-164-1, Sen-165-1, Sen-166-1, Sen-167-1, Sen-167-10, Sen-167-11, Sen-167-12, Sen-167-13, Sen-167-14, Sen-167-15, Sen-167-16, Sen-167-17, Sen-167-18, Sen-167-2, Sen-167-3, Sen-167-4, Sen-167-5, Sen-167-6, Sen-167-7, Sen-167-8, Sen-167-9, Sen-168-1, Sen-169-1, Sen-17-1, Sen-170-1, Sen-170-10, Sen-170-11, Sen-170-12, Sen-170-13, Sen-170-14, Sen-170-15, Sen-170-16, Sen-170-17, Sen-170-18, Sen-170-19, Sen-170-2, Sen-170-20, Sen-170-21, Sen-















1-327, Sso-1-328, Sso-1-329, Sso-1-33, Sso-1-330, Sso-1-331, Sso-1-332, Sso-1-333, Sso-1-334, Sso-1-335, Sso-1-336, Sso-1-337, Sso-1-338, Sso-1-339, Sso-1-34, Sso-1-340, Sso-1-341, Sso-1-342, Sso-1-343, Sso-1-344, Sso-1-345, Sso-1-346, Sso-1-347, Sso-1-348, Sso-1-349, Sso-1-35, Sso-1-350, Sso-1-351, Sso-1-352, Sso-1-353, Sso-1-354, Sso-1-355, Sso-1-356, Sso-1-357, Sso-1-358, Sso-1-359, Sso-1-36, Sso-1-360, Sso-1-361, Sso-1-362, Sso-1-363, Sso-1-364, Sso-1-365, Sso-1-366, Sso-1-367, Sso-1-368, Sso-1-369, Sso-1-37, Sso-1-370, Sso-1-371, Sso-1-372, Sso-1-373, Sso-1-374, Sso-1-375, Sso-1-376, Sso-1-377, Sso-1-378, Sso-1-379, Sso-1-38, Sso-1-380, Sso-1-381, Sso-1-382, Sso-1-383, Sso-1-384, Sso-1-385, Sso-1-386, Sso-1-387, Sso-1-388, Sso-1-389, Sso-1-39, Sso-1-390, Sso-1-391, Sso-1-392, Sso-1-393, Sso-1-394, Sso-1-395, Sso-1-396, Sso-1-397, Sso-1-398, Sso-1-399, Sso-1-4, Sso-1-40, Sso-1-400, Sso-1-401, Sso-1-402, Sso-1-403, Sso-1-404, Sso-1-405, Sso-1-406, Sso-1-407, Sso-1-408, Sso-1-409, Sso-1-41, Sso-1-410, Sso-1-411, Sso-1-412, Sso-1-413, Sso-1-414, Sso-1-415, Sso-1-416, Sso-1-417, Sso-1-418, Sso-1-419, Sso-1-42, Sso-1-420, Sso-1-421, Sso-1-422, Sso-1-423, Sso-1-424, Sso-1-425, Sso-1-426, Sso-1-427, Sso-1-428, Sso-1-429, Sso-1-43, Sso-1-430, Sso-1-431, Sso-1-432, Sso-1-433, Sso-1-434, Sso-1-435, Sso-1-436, Sso-1-437, Sso-1-438, Sso-1-439, Sso-1-44, Sso-1-440, Sso-1-441, Sso-1-442, Sso-1-443, Sso-1-444, Sso-1-445, Sso-1-446, Sso-1-447, Sso-1-448, Sso-1-449, Sso-1-45, Sso-1-450, Sso-1-451, Sso-1-452, Sso-1-453, Sso-1-454, Sso-1-455, Sso-1-456, Sso-1-457, Sso-1-458, Sso-1-459, Sso-1-46, Sso-1-460, Sso-1-461, Sso-1-462, Sso-1-463, Sso-1-464, Sso-1-465, Sso-1-466, Sso-1-467, Sso-1-468, Sso-1-469, Sso-1-47, Sso-1-470, Sso-1-471, Sso-1-472, Sso-1-473, Sso-1-474, Sso-1-475, Sso-1-476, Sso-1-477, Sso-1-478, Sso-1-479, Sso-1-48, Sso-1-480, Sso-1-481, Sso-1-482, Sso-1-483, Sso-1-484, Sso-1-485, Sso-1-486, Sso-1-487, Sso-1-488, Sso-1-489, Sso-1-49, Sso-1-490, Sso-1-491, Sso-1-492, Sso-1-493, Sso-1-494, Sso-1-495, Sso-1-496, Sso-1-497, Sso-1-498, Sso-1-499, Sso-1-50, Sso-1-500, Sso-1-501, Sso-1-502, Sso-1-503, Sso-1-504, Sso-1-505, Sso-1-506, Sso-1-507, Sso-1-508, Sso-1-509, Sso-1-51, Sso-1-510, Sso-1-511, Sso-1-512, Sso-1-513, Sso-1-514, Sso-1-515, Sso-1-516, Sso-1-517, Sso-1-518, Sso-1-519, Sso-1-52, Sso-1-520, Sso-1-521, Sso-1-522, Sso-1-523, Sso-1-524, Sso-1-525, Sso-1-526, Sso-1-527, Sso-1-528, Sso-1-529, Sso-1-53, Sso-1-530, Sso-1-531, Sso-1-532, Sso-1-533, Sso-1-534, Sso-1-535, Sso-1-536, Sso-1-537, Sso-1-538, Sso-1-539, Sso-1-54, Sso-1-540, Sso-1-541, Sso-1-542, Sso-1-543, Sso-1-544, Sso-1-545, Sso-1-547, Sso-1-55, Sso-1-56, Sso-1-57, Sso-1-58, Sso-1-59, Sso-1-6, Sso-1-60, Sso-1-61, Sso-1-62, Sso-1-63, Sso-1-64, Sso-1-65, Sso-1-66, Sso-1-67, Sso-1-68, Sso-1-69, Sso-1-7, Sso-1-70, Sso-1-71, Sso-1-72, Sso-1-73, Sso-1-74, Sso-1-75, Sso-1-76, Sso-1-77, Sso-1-78, Sso-1-79, Sso-1-8, Sso-1-80, Sso-1-81, Sso-1-82, Sso-1-83, Sso-1-84, Sso-1-85, Sso-1-86, Sso-1-87, Sso-1-88, Sso-1-89, Sso-1-9, Sso-1-90, Sso-1-91, Sso-1-92, Sso-1-93, Sso-1-94, Sso-1-95, Sso-1-96, Sso-1-97, Sso-1-98, Sso-1-99, Sso-10-1, Sso-11-1, Sso-12-1, Sso-13-1, Sso-14-1, Sso-15-1, Sso-2-1, Sso-3-1, Sso-4-1, Sso-5-1, Sso-6-1, Sso-7-1, Sso-8-1, Sso-9-1, Ssp-1-1, Ssp-12-1, Ssp-14-1, Ssp-16-1, Ssp-18-1, Ssp-19-1, Ssp-2-1, Ssp-20-1, Ssp-22-1, Ssp-25-1, Ssp-26-1, Ssp-8-1, Ssp-9-1, Stu-1-1, Sur-1-1, Sxi-1-1, Tmo-1-1, Tod-1-1, Tod-1-2, Tpt-1-2, VPa-1-1, VPa-2-1, Val-1-1, Val-2-2, Val-2-3, Val-2-4, Val-2-5, Val-2-6, Val-2-7, Val-2-8, Val-3-1, Val-4-1, Val-5-1, Val-6-1, Van-1-1, Van-2-1, Van-3-1, Van-4-1, Vaz-1-2, Vbr-3-1, Vca-1-1, Vca-1-10, Vca-1-2, Vca-1-3, Vca-1-4, Vca-1-5, Vca-1-6, Vca-1-7, Vca-1-8, Vca-1-9, Vca-2-1, Vca-4-1, Vca-4-2, Vca-5-1, Vca-6-1, Vch-1-1, Vch-10-1, Vch-100-1, Vch-101-1, Vch-102-1, Vch-103-1, Vch-104-1, Vch-105-1, Vch-106-1, Vch-107-1, Vch-108-1, Vch-109-1, Vch-11-1, Vch-110-1, Vch-111-1, Vch-112-1, Vch-113-1, Vch-114-1, Vch-115-1, Vch-116-1, Vch-117-1, Vch-118-1, Vch-119-1, Vch-12-1, Vch-120-1, Vch-121-1, Vch-122-1, Vch-123-1, Vch-123-10, Vch-123-11, Vch-123-12, Vch-123-13, Vch-123-14, Vch-123-15, Vch-123-16, Vch-123-17, Vch-123-18, Vch-123-19, Vch-123-2, Vch-123-20, Vch-123-21, Vch-123-22, Vch-123-23, Vch-123-24, Vch-123-25, Vch-123-26, Vch-123-27, Vch-123-28, Vch-123-29, Vch-123-3, Vch-123-30, Vch-123-31, Vch-123-32, Vch-123-33, Vch-123-34, Vch-123-35, Vch-123-36, Vch-123-37, Vch-123-38, Vch-123-39, Vch-123-4, Vch-123-40, Vch-123-41, Vch-123-5, Vch-123-6, Vch-123-7, Vch-123-8, Vch-123-9, Vch-124-1, Vch-125-1, Vch-126-1, Vch-127-1, Vch-128-1, Vch-129-1, Vch-13-1, Vch-130-1, Vch-131-1, Vch-132-1, Vch-133-1, Vch-134-1, Vch-135-1, Vch-136-1, Vch-137-1, Vch-138-1, Vch-139-1, Vch-14-1, Vch-140-1, Vch-141-1, Vch-142-1, Vch-143-1, Vch-144-1, Vch-145-1, Vch-146-1, Vch-147-1, Vch-148-1, Vch-149-1, Vch-15-1, Vch-150-1, Vch-151-1, Vch-152-1, Vch-153-1, Vch-154-1, Vch-155-1, Vch-156-1, Vch-157-1, Vch-158-1, Vch-159-1, Vch-16-1, Vch-160-1, Vch-161-1, Vch-162-1, Vch-163-1, Vch-164-1, Vch-165-1, Vch-166-1, Vch-167-1, Vch-168-1, Vch-169-1, Vch-17-1, Vch-170-1, Vch-171-1, Vch-172-1, Vch-173-1, Vch-174-1, Vch-175-1, Vch-176-1, Vch-177-1, Vch-178-1, Vch-179-1, Vch-179-2, Vch-18-1, Vch-180-1, Vch-181-1, Vch-182-1, Vch-183-1, Vch-184-1, Vch-185-1, Vch-186-1, Vch-187-1, Vch-188-1, Vch-189-1, Vch-19-1, Vch-190-1, Vch-191-1, Vch-192-1, Vch-193-1, Vch-194-1, Vch-195-1, Vch-196-1, Vch-197-1, Vch-2-1, Vch-2-2, Vch-2-3, Vch-2-4, Vch-20-1, Vch-21-1, Vch-22-1, Vch-23-1, Vch-24-1, Vch-25-1, Vch-26-1, Vch-27-1, Vch-28-1, Vch-29-1, Vch-30-1, Vch-31-1, Vch-32-1, Vch-33-1, Vch-34-1, Vch-35-1, Vch-36-1, Vch-37-1, Vch-38-1, Vch-39-1, Vch-4-1, Vch-40-1, Vch-41-1, Vch-42-1, Vch-43-1, Vch-44-1, Vch-45-1, Vch-46-1, Vch-47-1, Vch-48-1, Vch-49-1, Vch-5-1, Vch-50-1, Vch-51-1, Vch-52-1, Vch-53-1, Vch-54-1, Vch-55-1, Vch-56-1, Vch-57-1, Vch-58-1, Vch-59-1, Vch-6-1, Vch-60-1, Vch-61-1, Vch-62-1, Vch-63-1, Vch-64-1, Vch-65-1, Vch-66-1, Vch-67-1, Vch-68-1, Vch-69-1, Vch-70-1, Vch-71-1, Vch-72-1, Vch-73-1, Vch-74-1, Vch-75-1, Vch-76-1, Vch-77-1, Vch-78-1, Vch-79-1, Vch-8-1, Vch-80-1, Vch-81-1, Vch-82-1, Vch-83-1, Vch-84-1, Vch-85-1, Vch-86-1, Vch-87-1, Vch-88-1, Vch-89-1, Vch-9-1, Vch-90-1, Vch-91-1, Vch-92-1, Vch-93-1, Vch-94-1, Vch-95-1, Vch-96-1, Vch-97-1, Vch-98-1, Vch-99-1, Vco-1-1, Vco-1-2, Vcr-1-2, Vcr-1-3, Vcr-1-4, Vcr-1-5, Vcr-1-6, Vcr-2-1, Vcr-3-1, Vcr-4-1, Vcr-5-1, Vcr-6-1, Vcy-1-1, Vcy-10-1, Vcy-11-1, Vcy-12-1, Vcy-14-1, Vcy-16-1, Vcy-17-1, Vcy-18-1, Vcy-19-1, Vcy-20-1, Vcy-3-1, Vcy-4-1, Vcy-5-1, Vcy-6-1, Vcy-7-1, Vcy-8-1, Vcy-9-1, Vdi-1-1, Vfi-1-1, Vfi-3-1, Vfl-1-1, Vfl-2-1, Vfl-3-1, Vfl-5-1, Vfo-1-1, Vfu-1-1, Vfu-3-1, Vge-2-1, Vge-4-1, Vha-10-1, Vha-11-1, Vha-12-1, Vha-2-1, Vha-3-1, Vha-4-1, Vha-5-1, Vha-6-1, Vha-7-1, Vha-8-1, Vha-9-2, Vja-1-2, Vja-3-1, Vle-1-1, Vmi-1-1, Vmi-3-1, Vmi-4-1, Vmi-6-1, Vmi-7-1, Vna-1-2, Vna-2-2, Vna-2-4, Vni-1-1, Vni-10-1, Vni-12-1, Vni-13-1, Vni-14-1, Vni-2-1, Vni-3-1, Vni-4-1, Vni-5-1, Vni-6-1, Vni-7-1, Vni-8-1, Vor-2-1, Vor-3-1, Vor-4-1, Vor-5-1, Vor-6-1, Vor-8-1, Vow-1-1, Vow-2-1, Vow-2-2, Vow-2-3, Vow-2-4, Vow-4-1, Vow-6-1, Vpa-10-1, Vpa-100-1, Vpa-101-1, Vpa-102-1, Vpa-103-1, Vpa-104-1, Vpa-105-1, Vpa-106-1, Vpa-107-1, Vpa-108-1, Vpa-

109-1, Vpa-11-1, Vpa-110-1, Vpa-111-1, Vpa-112-1, Vpa-113-1, Vpa-114-1, Vpa-115-1, Vpa-116-1, Vpa-117-1, Vpa-118-1, Vpa-119-1, Vpa-12-1, Vpa-120-1, Vpa-121-1, Vpa-122-1, Vpa-123-1, Vpa-124-1, Vpa-125-1, Vpa-126-1, Vpa-127-1, Vpa-128-1, Vpa-129-1, Vpa-13-1, Vpa-130-1, Vpa-131-1, Vpa-132-1, Vpa-133-1, Vpa-134-1, Vpa-135-1, Vpa-136-1, Vpa-137-1, Vpa-138-1, Vpa-139-1, Vpa-14-1, Vpa-140-1, Vpa-141-1, Vpa-142-1, Vpa-143-1, Vpa-144-1, Vpa-145-1, Vpa-146-1, Vpa-147-1, Vpa-148-1, Vpa-149-1, Vpa-15-1, Vpa-150-1, Vpa-151-1, Vpa-152-1, Vpa-153-1, Vpa-154-1, Vpa-155-1, Vpa-156-1, Vpa-158-1, Vpa-159-1, Vpa-16-1, Vpa-160-1, Vpa-161-1, Vpa-162-1, Vpa-163-1, Vpa-164-1, Vpa-165-1, Vpa-166-1, Vpa-167-1, Vpa-168-1, Vpa-169-1, Vpa-17-1, Vpa-170-1, Vpa-171-1, Vpa-172-1, Vpa-173-1, Vpa-174-1, Vpa-175-1, Vpa-176-1, Vpa-177-1, Vpa-178-1, Vpa-179-1, Vpa-18-1, Vpa-180-1, Vpa-181-1, Vpa-182-1, Vpa-184-1, Vpa-185-1, Vpa-186-1, Vpa-187-1, Vpa-188-1, Vpa-189-1, Vpa-19-1, Vpa-190-1, Vpa-191-1, Vpa-192-1, Vpa-193-1, Vpa-194-1, Vpa-195-1, Vpa-196-1, Vpa-197-1, Vpa-198-1, Vpa-199-1, Vpa-2-1, Vpa-20-1, Vpa-200-1, Vpa-201-1, Vpa-202-1, Vpa-203-1, Vpa-204-1, Vpa-205-1, Vpa-206-1, Vpa-208-1, Vpa-209-1, Vpa-21-1, Vpa-210-1, Vpa-211-1, Vpa-212-1, Vpa-213-1, Vpa-214-1, Vpa-215-1, Vpa-216-1, Vpa-217-1, Vpa-218-1, Vpa-22-1, Vpa-220-1, Vpa-221-1, Vpa-222-1, Vpa-223-1, Vpa-224-1, Vpa-225-1, Vpa-226-1, Vpa-227-1, Vpa-228-1, Vpa-229-1, Vpa-23-1, Vpa-230-1, Vpa-231-1, Vpa-232-1, Vpa-233-1, Vpa-234-1, Vpa-235-1, Vpa-236-1, Vpa-237-1, Vpa-239-1, Vpa-24-1, Vpa-241-1, Vpa-242-1, Vpa-243-1, Vpa-244-1, Vpa-25-1, Vpa-26-1, Vpa-27-1, Vpa-28-1, Vpa-29-1, Vpa-3-1, Vpa-30-1, Vpa-31-1, Vpa-32-1, Vpa-33-1, Vpa-34-1, Vpa-35-1, Vpa-36-1, Vpa-37-1, Vpa-38-1, Vpa-39-1, Vpa-4-1, Vpa-40-1, Vpa-41-1, Vpa-42-1, Vpa-43-1, Vpa-44-1, Vpa-45-1, Vpa-46-1, Vpa-47-1, Vpa-48-1, Vpa-49-1, Vpa-5-1, Vpa-50-1, Vpa-51-1, Vpa-52-1, Vpa-53-1, Vpa-54-1, Vpa-55-1, Vpa-56-1, Vpa-57-1, Vpa-58-1, Vpa-59-1, Vpa-6-1, Vpa-60-1, Vpa-61-1, Vpa-62-1, Vpa-63-1, Vpa-64-1, Vpa-65-1, Vpa-66-1, Vpa-67-1, Vpa-68-1, Vpa-69-1, Vpa-7-1, Vpa-70-1, Vpa-71-1, Vpa-72-1, Vpa-73-1, Vpa-74-1, Vpa-75-1, Vpa-76-1, Vpa-77-1, Vpa-78-1, Vpa-8-1, Vpa-80-1, Vpa-81-1, Vpa-82-1, Vpa-83-1, Vpa-84-1, Vpa-85-1, Vpa-86-1, Vpa-88-1, Vpa-89-1, Vpa-9-1, Vpa-90-1, Vpa-91-1, Vpa-92-1, Vpa-93-1, Vpa-95-1, Vpa-96-1, Vpa-97-1, Vpa-98-1, Vpa-99-1, Vre-1-2, Vsh-1-1, Vsi-1-2, Vsi-1-4, Vsp-1-1, Vsp-11-1, Vsp-12-1, Vsp-13-1, Vsp-14-1, Vsp-15-1, Vsp-16-1, Vsp-17-1, Vsp-18-1, Vsp-19-1, Vsp-20-1, Vsp-22-1, Vsp-23-1, Vsp-24-1, Vsp-28-1, Vsp-29-1, Vsp-33-1, Vsp-34-1, Vsp-36-1, Vsp-37-1, Vsp-38-1, Vsp-39-1, Vsp-4-1, Vsp-40-1, Vsp-41-1, Vsp-42-1, Vsp-43-1, Vsp-6-1, Vsp-7-1, Vsp-8-1, Vsp-9-1, Vta-1-1, Vtu-2-1, Vtu-3-1, Vva-1-1, Vvu-1-1, Vvu-11-1, Vvu-2-1, Vvu-3-1, Vvu-4-1, Vvu-6-1, Vvu-7-1, Xbo-1-1, Xbo-10-1, Xbo-2-1, Xbo-3-1, Xbo-4-1, Xbo-5-1, Xbo-7-1, Xbo-9-1, Xne-1-1, Xne-2-1, Xne-3-1, Xne-4-1, Xne-5-2, Xne-6-1, Yal-1-2, Yal-1-3, Yal-4-1, Ybe-2-1, Yen-1-1, Yen-1-2, Yen-1-3, Yen-1-4, Yen-10-1, Yen-11-1, Yen-12-1, Yen-15-1, Yen-16-1, Yen-17-1, Yen-18-1, Yen-19-1, Yen-2-1, Yen-20-1, Yen-22-1, Yen-3-1, Yen-4-1, Yen-5-1, Yen-6-1, Yen-7-1, Yen-8-1, Yen-9-1, Yfr-1-10, Yfr-1-11, Yfr-1-12, Yfr-1-13, Yfr-1-16, Yfr-1-17, Yfr-1-2, Yfr-1-3, Yfr-1-4, Yfr-1-6, Yfr-1-9, Yfr-2-1, Yin-1-1, Ykr-1-1, Ykr-1-2, Ymo-1-2, Ymo-1-3, Ymo-1-4, Ymo-1-5, Ymo-1-6, Ymo-1-7, Ymo-2-1, Ype-1-2, Ype-10-1, Ype-100-1, Ype-101-1, Ype-102-1, Ype-103-1, Ype-104-1, Ype-105-1, Ype-106-1, Ype-107-1, Ype-108-1, Ype-109-1, Ype-11-1, Ype-110-1, Ype-111-1, Ype-112-1, Ype-113-1, Ype-114-1, Ype-114-2, Ype-115-1, Ype-116-1, Ype-117-1, Ype-118-1, Ype-119-1, Ype-12-1, Ype-120-1, Ype-121-1, Ype-122-1, Ype-123-1, Ype-124-1, Ype-125-1, Ype-126-1, Ype-128-1, Ype-129-1, Ype-13-1, Ype-130-1, Ype-131-1, Ype-132-1, Ype-133-1, Ype-134-1, Ype-135-1, Ype-136-1, Ype-137-1, Ype-138-1, Ype-139-1, Ype-14-1, Ype-140-1, Ype-141-1, Ype-142-1, Ype-143-1, Ype-144-1, Ype-145-1, Ype-146-1, Ype-147-1, Ype-148-1, Ype-149-1, Ype-15-1, Ype-150-1, Ype-151-1, Ype-152-1, Ype-153-1, Ype-154-1, Ype-155-1, Ype-156-1, Ype-157-1, Ype-158-1, Ype-159-1, Ype-16-1, Ype-160-1, Ype-161-1, Ype-162-1, Ype-163-1, Ype-164-1, Ype-165-1, Ype-166-1, Ype-167-1, Ype-168-1, Ype-169-1, Ype-17-1, Ype-170-1, Ype-171-1, Ype-172-1, Ype-173-1, Ype-174-1, Ype-175-1, Ype-176-1, Ype-177-1, Ype-178-1, Ype-179-1, Ype-18-1, Ype-180-1, Ype-181-1, Ype-182-1, Ype-183-1, Ype-184-1, Ype-185-1, Ype-186-1, Ype-187-1, Ype-188-1, Ype-189-1, Ype-19-1, Ype-190-1, Ype-191-1, Ype-192-1, Ype-193-1, Ype-194-1, Ype-195-1, Ype-196-1, Ype-197-1, Ype-198-1, Ype-199-1, Ype-2-1, Ype-2-2, Ype-2-3, Ype-2-4, Ype-2-5, Ype-2-6, Ype-2-7, Ype-2-8, Ype-2-9, Ype-20-1, Ype-200-1, Ype-201-1, Ype-202-1, Ype-203-1, Ype-204-1, Ype-205-1, Ype-206-1, Ype-207-1, Ype-208-1, Ype-209-1, Ype-21-1, Ype-210-1, Ype-211-1, Ype-212-1, Ype-213-1, Ype-214-1, Ype-215-1, Ype-216-1, Ype-217-1, Ype-218-1, Ype-219-1, Ype-219-2, Ype-22-1, Ype-220-1, Ype-221-1, Ype-222-1, Ype-223-1, Ype-224-1, Ype-225-1, Ype-226-1, Ype-227-1, Ype-228-1, Ype-23-1, Ype-24-1, Ype-25-1, Ype-26-1, Ype-27-1, Ype-28-1, Ype-29-1, Ype-29-2, Ype-3-1, Ype-30-1, Ype-31-1, Ype-31-2, Ype-32-1, Ype-32-2, Ype-33-1, Ype-34-1, Ype-35-1, Ype-36-1, Ype-37-1, Ype-38-1, Ype-39-1, Ype-4-1, Ype-40-1, Ype-41-1, Ype-42-1, Ype-43-1, Ype-44-1, Ype-45-1, Ype-46-1, Ype-47-1, Ype-48-1, Ype-49-1, Ype-5-1, Ype-50-1, Ype-51-1, Ype-52-1, Ype-53-1, Ype-54-1, Ype-55-1, Ype-56-1, Ype-57-1, Ype-58-1, Ype-59-1, Ype-6-1, Ype-60-1, Ype-61-1, Ype-62-1, Ype-63-1, Ype-64-1, Ype-65-1, Ype-66-1, Ype-67-1, Ype-68-1, Ype-69-1, Ype-7-1, Ype-70-1, Ype-71-1, Ype-72-1, Ype-73-1, Ype-74-1, Ype-75-1, Ype-76-1, Ype-77-1, Ype-78-1, Ype-79-1, Ype-8-1, Ype-80-1, Ype-81-1, Ype-82-1, Ype-83-1, Ype-84-1, Ype-85-1, Ype-86-1, Ype-87-1, Ype-88-1, Ype-89-1, Ype-9-1, Ype-90-1, Ype-91-1, Ype-92-1, Ype-93-1, Ype-94-1, Ype-94-2, Ype-95-1, Ype-96-1, Ype-97-1, Ype-98-1, Ype-99-1, Yps-1-1, Yps-1-2, Yps-1-4, Yps-10-1, Yps-10-2, Yps-11-1, Yps-11-2, Yps-12-1, Yps-12-2, Yps-13-1, Yps-14-1, Yps-15-1, Yps-2-1, Yps-3-1, Yps-4-1, Yps-5-1, Yps-6-1, Yps-7-1, Yps-8-1, Yps-9-1, Yro-1-1, Yru-1-2, Yru-1-3, Yru-2-1, Ywa-1-2, env-100, env-1000, env-1001, env-1002, env-1003, env-1004, env-1005, env-1006, env-1007, env-1008, env-1009, env-1010, env-1011, env-1012, env-1013, env-1014, env-1015, env-1016, env-1017, env-1018, env-1019, env-1020, env-1021, env-1022, env-1023, env-1024, env-1026, env-1028, env-1033, env-1034, env-1038, env-1039, env-104, env-1040, env-1041, env-1042, env-1043, env-1044, env-1045, env-1046, env-1047, env-1048, env-1049, env-1050, env-1051, env-1052, env-1053, env-1054, env-1055, env-1056, env-1057, env-1058, env-1059, env-1060, env-1061, env-1062, env-1063, env-1064, env-1065, env-1066, env-1067, env-1068, env-1069, env-107, env-1070, env-1071, env-1072, env-1073, env-1074, env-1075, env-1076, env-1077, env-1078, env-1079, env-108, env-1080, env-1081, env-1082, env-1083, env-1084, env-1085, env-1086, env-1087, env-1088, env-1089, env-1090,

env-1091, env-1092, env-1095, env-1098, env-110, env-1100, env-1101, env-1102, env-1106, env-1107, env-1108, env-111, env-1111, env-1112, env-112, env-113, env-114, env-115, env-116, env-117, env-118, env-119, env-120, env-121, env-122, env-123, env-124, env-125, env-126, env-127, env-128, env-129, env-130, env-131, env-132, env-133, env-134, env-135, env-136, env-137, env-138, env-141, env-142, env-143, env-144, env-145, env-146, env-147, env-148, env-149, env-150, env-151, env-152, env-153, env-154, env-155, env-156, env-157, env-158, env-159, env-160, env-161, env-162, env-163, env-164, env-165, env-166, env-167, env-168, env-169, env-17, env-170, env-171, env-172, env-173, env-174, env-175, env-176, env-177, env-178, env-179, env-18, env-180, env-181, env-182, env-183, env-184, env-185, env-186, env-187, env-188, env-189, env-190, env-191, env-192, env-193, env-194, env-195, env-196, env-197, env-198, env-199, env-2, env-200, env-201, env-202, env-203, env-204, env-205, env-206, env-207, env-208, env-209, env-210, env-211, env-212, env-213, env-214, env-215, env-216, env-217, env-218, env-219, env-22, env-220, env-221, env-222, env-223, env-224, env-225, env-226, env-227, env-228, env-229, env-230, env-231, env-232, env-233, env-234, env-235, env-236, env-237, env-238, env-239, env-240, env-241, env-242, env-243, env-244, env-245, env-246, env-247, env-248, env-249, env-25, env-250, env-251, env-252, env-253, env-254, env-255, env-256, env-257, env-258, env-259, env-26, env-260, env-261, env-262, env-263, env-264, env-265, env-266, env-267, env-268, env-269, env-27, env-270, env-271, env-272, env-273, env-274, env-275, env-276, env-277, env-278, env-279, env-28, env-280, env-281, env-282, env-283, env-285, env-286, env-287, env-288, env-289, env-29, env-290, env-291, env-292, env-293, env-294, env-295, env-296, env-297, env-298, env-299, env-3, env-30, env-300, env-301, env-302, env-303, env-304, env-305, env-306, env-307, env-308, env-309, env-31, env-310, env-311, env-312, env-313, env-314, env-315, env-316, env-317, env-318, env-319, env-32, env-320, env-321, env-322, env-323, env-324, env-325, env-326, env-327, env-328, env-329, env-33, env-330, env-331, env-332, env-333, env-334, env-335, env-336, env-337, env-338, env-339, env-34, env-340, env-341, env-342, env-343, env-344, env-345, env-346, env-347, env-348, env-349, env-35, env-350, env-351, env-353, env-354, env-355, env-36, env-364, env-365, env-366, env-367, env-37, env-370, env-371, env-372, env-373, env-374, env-375, env-376, env-377, env-378, env-379, env-38, env-380, env-381, env-382, env-383, env-384, env-386, env-387, env-388, env-389, env-39, env-390, env-391, env-392, env-393, env-395, env-396, env-397, env-398, env-4, env-400, env-402, env-403, env-405, env-406, env-41, env-412, env-413, env-414, env-415, env-416, env-42, env-421, env-424, env-425, env-426, env-427, env-429, env-43, env-436, env-439, env-44, env-440, env-442, env-444, env-446, env-447, env-448, env-449, env-451, env-455, env-456, env-464, env-465, env-468, env-470, env-471, env-472, env-473, env-474, env-476, env-478, env-48, env-491, env-492, env-495, env-496, env-497, env-498, env-499, env-5, env-502, env-505, env-506, env-510, env-514, env-523, env-524, env-525, env-526, env-528, env-53, env-531, env-532, env-533, env-54, env-543, env-544, env-545, env-548, env-55, env-553, env-554, env-555, env-556, env-557, env-558, env-560, env-561, env-562, env-563, env-564, env-565, env-567, env-568, env-569, env-570, env-571, env-574, env-575, env-576, env-577, env-578, env-579, env-580, env-581, env-582, env-583, env-584, env-585, env-586, env-587, env-588, env-590, env-592, env-596, env-597, env-598, env-6, env-600, env-602, env-604, env-605, env-609, env-610, env-615, env-617, env-618, env-62, env-622, env-628, env-629, env-631, env-632, env-635, env-638, env-639, env-64, env-644, env-645, env-648, env-649, env-65, env-650, env-652, env-654, env-659, env-66, env-663, env-664, env-665, env-666, env-667, env-669, env-67, env-670, env-671, env-673, env-676, env-68, env-684, env-689, env-69, env-691, env-692, env-693, env-694, env-695, env-696, env-697, env-698, env-699, env-7, env-70, env-703, env-704, env-705, env-707, env-708, env-709, env-716, env-718, env-719, env-72, env-721, env-722, env-723, env-727, env-733, env-734, env-737, env-744, env-745, env-746, env-747, env-748, env-749, env-75, env-750, env-751, env-752, env-753, env-759, env-760, env-761, env-762, env-764, env-765, env-767, env-768, env-769, env-770, env-771, env-772, env-773, env-774, env-775, env-776, env-777, env-778, env-779, env-78, env-780, env-781, env-782, env-783, env-787, env-788, env-789, env-79, env-790, env-791, env-792, env-793, env-794, env-795, env-796, env-797, env-798, env-799, env-80, env-800, env-801, env-802, env-803, env-804, env-805, env-806, env-807, env-808, env-809, env-81, env-810, env-811, env-812, env-813, env-814, env-815, env-816, env-817, env-818, env-819, env-82, env-820, env-821, env-822, env-823, env-824, env-825, env-826, env-827, env-828, env-829, env-83, env-830, env-831, env-832, env-833, env-834, env-835, env-836, env-837, env-838, env-839, env-84, env-840, env-841, env-842, env-843, env-844, env-845, env-846, env-847, env-848, env-849, env-85, env-850, env-851, env-852, env-853, env-854, env-855, env-856, env-857, env-858, env-859, env-860, env-863, env-864, env-865, env-866, env-873, env-877, env-878, env-879, env-887, env-888, env-891, env-892, env-893, env-897, env-901, env-903, env-904, env-905, env-906, env-907, env-908, env-909, env-910, env-911, env-912, env-913, env-914, env-915, env-916, env-917, env-918, env-919, env-92, env-920, env-921, env-922, env-923, env-924, env-925, env-926, env-927, env-928, env-929, env-931, env-932, env-938, env-939, env-940, env-941, env-942, env-943, env-944, env-945, env-946, env-947, env-948, env-949, env-950, env-951, env-952, env-953, env-958, env-959, env-960, env-961, env-962, env-963, env-964, env-965, env-966, env-967, env-968, env-969, env-970, env-971, env-972, env-973, env-974, env-975, env-976, env-977, env-978, env-979, env-98, env-980, env-983, env-984, env-985, env-987, env-988, env-989, env-99, env-990, env-991, env-993, env-994, env-995, env-996, env-997, env-998, env-999

alignment positions 1...79

CBa-1-1 UGCAUUCUGUAUUUAUCCGUCGCCUUUGAUGUCAUAUCACAUUAUCAGACGACUCAAAGUGAUGAAACCUUAACAUUUAAU  
 Apl-1-1 AUUGAUCUUCUUGCCAAAUAACCAUAAAUAACGCACUCUUUUUUGCGUCGAGUAACUGCUCGACAUUUUUUUUUUU

.....  
 .....  
 .....RY

Apl-6-1 UAUUGAUCUUUGUCCAAAUGCCGUAAGAAUACGCCACUCUUUUUUGGCGUCGAGUAAACUGCUCGGCAUUAUUUUUUUUC  
 Apl-13-1 UAUUGAUCUUUGUCCAAAUGCCGUAAGAAUACGCCAUCUUUUUUGGCGUCGAGUAAACUGCUCGGCAUUAUUUUUUUUC  
 Apl-8-1 UAUUGAUCUUUGUCCAAAUGCCGUAAGAAUACGCCAUCUUUUUUGGCGUCGAGUAAACUGCUCGGCAUUAUUUUUUUUC  
 Aur-1-1 GUUUUGAUCUUAAUGCCAAAUGCCAAUAGAAUACGCCACUCUUUUUUGGCGUCGAGCAUUAUUUUUUUUC  
 Aca-3-1 GUUUUGAUCUUAAUGCCAAAUGCCAAUAGAAUACGCCAUCUUUUUUGGCGUCGAGUAAACUGCUCGGCAUUAUUUUUUUUC  
 Aeq-1-1 AGUAUUGAUCUUAAUGCCAAAUGCCAAUAGAAUUGGUCUUUUUUGGCGUCGAGCAUUAUUUUUUUUC  
 Asu-3-1 GUUUUGAUCUUAAUGCCAAAUGCCAAUAGAAUACGCCAUCUUUUUUGGCGUCGAGUAAACUGCUCGGCAUUAUUUUUUUUC  
 Mgr-1-1 GGUUGAUCUCGGCUAACAUAUUUACUAGAAUUGCAUCUUUUUUGGCGUUGAGCAAAUUGCUCAAUUAUUUUUUUUC  
 Mha-1-1 UCUCGGCUACAUAUUUUUCUAGAAUUGCAUCUUUUUUGGCGUUGAGCAGCAAAUGCUCAAUUAUUUUUUUUC  
 Ami-1-1 CUUUUGAUCUCUGAAUAUUAUUGCCUAAAUAACGCCACUCUUUUUUGGCGUUAACAAGAUUUUAACUUAUUUUUUUUC  
 env-1 GCGGUUGAUCUUCGGCUACAUAUUUACUUUACUUAGAAUACGCCAUCUUUUUUGGCGUUAAGCUCUACAUAUUUUUUUUC  
 env-8 AAUUCUGCAUUAAUUAUGCGGUUGAUCUUCGCUACAUAUUUACUUUAGAAUACGCCAUCUUUUUUGGCGUUAAGGNCUAUC  
 env-9 UUGGUUGAUCUCCACAGGAAAUAUCAUAUUUACGCCAUCUUUUUUGGCGUUAUUUAGAUUUUAGCGUUAUUUUUUUUC  
 env-10 UUGGUUGAUCUCCACAGGAAAUAUCAUAUUUACGCCAUCUUUUUUGGCGUUAUUUAGAUUUUAGCGUUAUUUUUUUUC  
 Hsp-3-1 UUGGUUGAUCUCCACAGGAAAUAUCAUAUUUACGCCAUCUUUUUUGGCGUUAUUUAGAUUUUAGCGUUAUUUUUUUUC  
 Ami-2-1 GCUUGAUCUCUUUACUUUACUCGUCUAAAUAACGCCAUCUUUUUUGGCGUUAACAUCUUUUUUAACUUAUUUUUUUUC  
 Lgr-1-1 UGCGUGGUUAUCUCUAGCCGUAUUAAUCUGCGGCCUUUUAUCUCAAUGAGGGUCAAAACCAUCACCCAAUUUUUUUUC  
 Asu-1-1 ACAGUCUUGAAUUAUGUUAUUUUUUGGUAUUUUUUGGCGUUAUUUUCUGGUCGACCCGUGCAGCGUUAUUUUUUUUC  
 env-11 UGCGUCGGGAUGCAUUCUGAUAAGAUUCUGCGUCCAUUUAGCAGUGCAUUAUUGCAUUUUGCUUAUUUUUUUUC  
 env-12 GCUAUGGUAUCGUAUUUUUUGCGGCCGAAUACAGCAUGCGCAAGCGCAGAGUUUGCACCUGGUUGGACNACAGUAUC  
 env-13 GCUAUGGUAUCGUAUUUUUUGCGGCCGAAUACAGCAUGCGCAAGCGCAGAGUUUGCACCUGGUUGGACCCACAGUAUC  
 env-14 UGAUGCCACAUAUUGCAAGAAUUGCGGGUCUUUUUCGGCAGGGCAUGAUUGGCCCCGUCUUGCAUUUUGAUUCAA  
 env-15 .....CGCAGGGCAUGAUUGGCCCCGUCUUCUCAAUUUGAUCAA  
 env-16 UGCGACACUAUUUGCAAGUAAAGAUUCGGGUCUUUUUGGCGGGCAUGAUUGGCCCCGUCUUCUCAAUUUGAUUCAA  
 env-19 UGCGACACUAUUUGCAAGUAAAGAUUCGGGUCUUUUUGGCGGGCAUGAUUGGCCCCGUCUUCUCAAUUUGAUUCAA  
 env-20 UGCGACACUAUUUGCAAGUAAAGAUUCGGGUCUUUUUGGCGGGCAUGAUUGGCCCCGUCUUCUCAAUUUGAUUCAA  
 env-21 UGCAGCAUAUUUGCAAGUAAAGAUUCGGGUCUUUUUGGCGGGCAUGAUUGGCCCCGUCUUCUCAAUUUGAUUCAA  
 Msu-1-1 UGUGGCAUAUUUGCAAGUAAAGAUUCGGGUCUUUUUGGCGGGCAUGAUUGGCCCCGUCUUCUCAAUUUGAUUCAA  
 env-23 UGUGGUCGGGUUUGCAAGUAAAGAUUCGGGUCUUUUUGGCGGGCAUGAUUGGCAAGCGUUCUUUCAAUUUGAUUCAA  
 env-24 UGUGGUCGGGUUUGCAAGUAAAGAUUCGGGUCUUUUUGGCGGGCAUGAUUGGCAAGCGUUCUUUCAAUUUGAUUCAA  
 Vli-1-1 UGUGGUCGGGUUUGCAAGUAAAGAUUCGGGUCUUUUUGGCGGGCAUGAUUGGCAAGCGUUCUUUCAAUUUGAUUCAA  
 Mma-1-1 UGUGUUGAUCGAGGAGAGGAAUACUUAUUUACUGCGCCUUAACGAUUAUUUUUUAUUAUUUUUUUAUUAACA  
 env-45 AUGUAGUUUAUUUUGCAUCUCGUAUUGAUUUUUGGGGUAAGAUUCUUAUUUUAUCGACCCUAAAUAUUUUAUUAACU  
 env-46 CUUGAACUAACAUAUUUUUUGCUGAACAAUUCGAGCCUUAACACAAAGCGUGCAUUUUAUUUGGCUAAUUAUUUAUC  
 env-47 GUUGAAUGUCAUUUUUUGCUGUAAAUAUUCGACUCCUUAACACAAAGCGUGCAUUUUAUUUGGCUAAUUAUUUAUC  
 env-49 UUGAAUGUCAUUUUUUGCUGUAAAUAUUCGACCCUUAACACAAAGCGUGCAUUUUAUUUGGCUAAUUAUUUAUC  
 env-50 GUUGAAUGUCAUUUUUUGCUGUAAAUAUUCGACCCUUAACACAAAGCGUGCAUUUUAUUUGGCUAAUUAUUUAUC  
 Asp-10-1 GUUGAAUGUCAUUUUUUGCUGUAAAUAUUCGACCCUUAACACAAAGCGUGCAUUUUAUUUGGCUAAUUAUUUAUC  
 env-51 GUUGAAUGUCAUUUUUUGCUGUAAAUAUUCGACCCUUAACACAAAGCGUGCAUUUUAUUUGGCUAAUUAUUUAUC  
 env-52 GUUGAAUGUCAUUUUUUGCUGUAAAUAUUCGACCCUUAACACAAAGCGUGCAUUUUAUUUGGCUAAUUAUUUAUC  
 env-56 GUUGAAUGUCAUUUUUUGCUGUAAAUAUUCGACCCUUAACACAAAGCGUGCAUUUUAUUUGGCUAAUUAUUUAUC  
 env-57 GUUGAAUGUCAUUUUUUGCUGUAAAUAUUCGACCCUUAACACAAAGCGUGCAUUUUAUUUGGCUAAUUAUUUAUC  
 env-58 GUUGAAUGUCAUUUUUUGCUGUAAAUAUUCGACCCUUAACACAAAGCGUGCAUUUUAUUUGGCUAAUUAUUUAUC  
 env-59 UUGAACUACGCUAAUUUUUUGCUGUAAAUAUUCGACCCUUAACACAAAGCGUGCAUUUUAUUUGGCUAAUUAUUUAUC  
 env-61 UUGAACUACGCUAAUUUUUUGCUGUAAAUAUUCGACCCUUAACACAAAGCGUGCAUUUUAUUUGGCUAAUUAUUUAUC  
 env-63 UGAACUACACUAUUUUUUGCUGUAAAUAUUCGACCCUUAACACAAAGGGUGCAUUUUGAAUUGGCAUAAAUAUUUAUC  
 env-71 UGAACUACACUAUUUUUUGCUGUAAAUAUUCGACCCUUAACACAAAGGGUGCAUUUUGAAUUGGCAUAAAUAUUUAUC  
 env-73 .....A.....  
 Aac-6-1 UUGAAUUGCGCUUUUUUUGCUGUAAAUAUUCGACCCUUAACACAAAGCGUGCAUUUUAUUUGGCUAAUUAUUUAUC  
 Aac-18-1 UUGAAUUGCGCUUUUUUUGCUGUAAAUAUUCGACCCUUAACACAAAGCGUGCAUUUUAUUUGGCUAAUUAUUUAUC  
 env-74 UUGAACUACGCUAAUUUUUUGCUGUAAAUAUUCGACCCUUAACACAAAGCGUGCAUUUUAUUUGGCUAAUUAUUUAUC  
 Aac-11-1 UUGAAUUGCAUUUUUUGCUGUAAAUAUUCGACCCUUAACACAAAGCGUGCAUUUUAUUUGGCUAAUUAUUUAUC  
 env-76 UUGAACUACGCUAAUUUUUUGCUGUAAAUAUUCGACCCUUAACACAAAGCGUGCAUUUUAUUUGGCUAAUUAUUUAUC  
 Aac-17-1 UUGAAUUGCAUUUUUUGCUGUAAAUAUUCGACCCUUAACACAAAGCGUGCAUUUUAUUUGGCUAAUUAUUUAUC  
 Aac-1-1 CUUGAAUUGCAUUUUUUGCUGUAAAUAUUCGACCCUUAACACAAAGCGUGCAUUUUAUUUGGCUAAUUAUUUAUC  
 Aac-14-1 UUGAAUUGCGCUUUUUUUGCUGUAAAUAUUCGACCCUUAACACAAAGCGUGCAUUUUAUUUGGCUAAUUAUUUAUC  
 env-77 .....G.....CUUAACACAAAGCGUGCAUUUUAUUUGGCUAAUUAUUUAUC  
 env-86 GUUGAAUGUCAUUUUUUGCUGUAAAUAUUCGACCCUUAACACAAAGCGUGCAUUUUAUUUGGCUAAUUAUUUAUC  
 env-87 GUUGAAUGUCAUUUUUUGCUGUAAAUAUUCGACCCUUAACACAAAGCGUGCAUUUUAUUUGGCUAAUUAUUUAUC  
 env-88 CUUGAACUAACUUGGAUUUUUUGCUGUAAAUAUUCGACCCUUAACACAAAGCGUGCAUUUUAUUUGGCUAAUUAUUUAUC  
 env-89 UUGAACUACGCUAAUUUUUUGCUGUAAAUAUUCGACCCUUAACACAAAGCGUGCAUUUUAUUUGGCUAAUUAUUUAUC  
 env-90 GUUGAAUGUCAUUUUUUGCUGUAAAUAUUCGACCCUUAACACAAAGCGUGCAUUUUAUUUGGCUAAUUAUUUAUC  
 env-91 GUUGAAUGUCAUUUUUUGCUGUAAAUAUUCGACCCUUAACACAAAGCGUGCAUUUUAUUUGGCUAAUUAUUUAUC  
 env-93 CUUGAACUACUUGCAUUUUUUGCUGUAAAUAUUCGACCCUUAACACAAAGCGUGCAUUUUAUUUGGCUAAUUAUUUAUC  
 env-94 GUUGAAUGUCAUUUUUUGCUGUAAAUAUUCGACCCUUAACACAAAGCGUGCAUUUUAUUUGGCUAAUUAUUUAUC  
 env-95 CUUGAACUAACUUGGAUUUUUUGCUGUAAAUAUUCGACCCUUAACACAAAGCGUGCAUUUUAUUUGGCUAAUUAUUUAUC  
 Pda-1-1 AUCCGACUUGCAACUUUACCGCUUUUUUGCAUUUUUGGCAUUAUUAUUUUUUGGCUAAUUAUUUAUC  
 Pmu-14-1 UUUUGCUUGAAUUUUUGCAUUUUUUUGAAUUUUUGCAUUAUUAUUUUUUGGCUAAUUAUUUAUC  
 Pmu-2-1 CUUCUACUUGCAACUUUACUCGUUUUUUGCAUUUUUGGCAUUAUUAUUUUUUGGCUAAUUAUUUAUC  
 Pmu-8-1 AAAAUUGGUUAAAUAUUUUUUGAAUUUUUGAAUUCACAGCUUUAUUAUUUUUUGGCUAAUUAUUUAUC  
 Pmu-12-1 GGCUUGAAUUAUUCUGCUUUUUUUUGAAUUUUUGGCAUUAUUAUUUUUUGGCUAAUUAUUUAUC  
 Pmu-3-1 UACUUUGCAAGACUGUCCUUUUUUUGAACAAUUCGACCCUUAACAAUUAUUUUUUGGCUAAUUAUUUAUC  
 Pmu-6-1 UCUGCUUGCAACUUUUUUCUUUUUUUGAACAAUUCGACCCUUAACAAUUAUUUUUUGGCUAAUUAUUUAUC  
 Mma-3-1 AUUUUUUAAGGUUAUUUUUUGGCGUCUUAUAUUAUUUUUUGGCAUUAUUUUUUGGCUAAUUAUUUAUC  
 Msu-2-1 UUUUUUAAGGUUAUUUUUUGGCGUCUUAUAUUAUUUUUUGGCAUUAUUUUUUGGCUAAUUAUUUAUC  
 env-96 AAAGCACACCUUGAUCUAAUUUGAUUUUUUUGAUAUUUCGACGUCUUAUUUGGCGCGGAUUUGCGGCGAUUUUAAC  
 env-97 AAAGCACACCUUGAUCUAAUUUGAUUUUUUUGAUAUUUCGACGUCUUAUUUGGCGCGGAUUUGCGGCGAUUUUAAC  
 Hpa-2-2 AAAGCACACCUUGAUCUAAUUUGAUUUUUUUGAUAUUUCGACGUCUUAUUUGGCGCGGAUUUGCGGCGAUUUUAAC  
 env-101 UGUANNNNNNNNNAUCUAAUUUGAUUUUUUUGAUAUUUCGACGUCUUAUUUGGCGCGGAUUUGCGGCGAUUUUAAC  
 env-102 AAAGCACACCUUGAUCUAAUUUGAUUUUUUUGAUAUUUCGACGUCUUAUUUGGCGCGGAUUUGCGGCGAUUUUAAC  
 env-103 AAAGCACACCUUGAUCUAAUUUGAUUUUUUUGAUAUUUCGACGUCUUAUUUGGCGCGGAUUUGCGGCGAUUUUAAC

.....  
 .....RY















Vsc-1-1 UUCAUUACUUAUCUGCGCCUUAAGCACUAUGGCCUGGUGAUUUUAUCAUUAAAGCGGUGAGCGGAAUUUUUUUAUUAACC  
Vic-1-1 AUUCGUAUCUUAUCUGCGCCUUAAGCACUAUGGCCUGAUGAUUUCGUUAUCUUCGGCGGUAAGAGCGAAUUUUUUUAUUAACU  
Awo-1-1 GAUUGAUCGCGCCGGAUUAUCAUUUAUCGCGACCUUAAGUAAGUGUAUCUUGUUUACGUUUUUUUUUUUUUUAUUAACU  
Asa-11-1 GAUUGAUCGCGCCGGAUUAUCAUUUAUCGCGACCUUAAGUAAGUGUAUUUUUUUAUUAUCGUUUUUUUUUUUUUUAUUAACU  
env-642 .....CGGUGUCUUUAUCUUAUUUUUUUAACA  
Vta-2-1 UCAUUACUAUACUGCGCCUUAAGGUAUGGCCUUUAUCGCGGUAUGGUAUACAGCGGUGUCUUUUUUUUUUUUUAUUAACU  
env-643 UCAUUACUAUACUGCGCCUUAAGGUAUGGCCUUUAUCGCGGUAUGGUAUACAGCGGUGUCUUUUUUUUUUUUUAUUAACU  
Vta-3-1 UCAUUACUAUACUGCGCCUUAAGGUAUGGCCUUUAUCGCGGUAUGGUAUACAGCGGUGUCUUUUUUUUUUUUUAUUAACU  
env-646 UGGAUUCUAUUAUCUUAUCGCGCCUUAAGGUAUGGCCUUUAUCGCGGUAUGGUAUACAGCGGUAUACUUAUUUUUUUAUUAACU  
Vsh-2-1 UACUUAUACUGCGCCUUAUGGUAUGGCCUUUAUCGCGGUAUGGUAUACAGCGGUAUACUUAUUUUUUUUUUUAUUAACU  
Vma-1-1 UACUUAUACUGCGCCUUAUGGUAUGGCCUUUAUCGCGGUAUGGUAUACAGCGGUAUACUUAUUUUUUUUUUUAUUAACU  
Vma-1-2 UACUUAUACUGCGCCUUAUGGUAUGGCCUUUAUCGCGGUAUGGUAUACAGCGGUAUACUUAUUUUUUUUUUUAUUAACU  
Vme-1-1 UGCGGUGGAUUCUAUUUAUUAUCGCGCCUUAAGGUAUGGCCUUUAUCGCGGUAUGGUAUACAGCGGUAUACUUAUUUUUUUAUUAACU  
Ymo-1-1 UUCGCGCCUUUUGUAUUAUUCGUAUACAAUCCUGUUAACAGCGGUAUACUUAUUUUUUUUUUUUUAUUAACU  
Ybe-1-1 UUCGCGCCUUUUGUAUUAUUCGUAUACAAUCCUGUUAACAGCGGUAUACUUAUUUUUUUUUUUUUAUUAACU  
Yma-2-1 UUCGCGCCUUUUGUAUUAUUCGUAUACAAUCCUGUUAACAGCGGUAUACUUAUUUUUUUUUUUUUAUUAACU  
Yfr-1-1 UUCGCGCCUUUUGUAUUAUUCGUAUACAAUCCUGUUAACAGCGGUAUACUUAUUUUUUUUUUUUUAUUAACU  
Yma-1-1 UUCGCGCCUUUUGUAUUAUUCGUAUACAAUCCUGUUAACAGCGGUAUACUUAUUUUUUUUUUUUUAUUAACU  
Yfr-1-5 UUCGUAUACAAACUCUGUUAACAGCGGUAUACUUAUUUUUUUUUUUUUUUAUUAACU  
Ype-1-1 UUCGCGCCUUUUGUAUUAUUCGUAUACAAUCCUGUUAACAGCGGUAUACUUAUUUUUUUUUUUUUAUUAACU  
Yfr-1-7 UCGAUUAUCAAACUCUGUUAACAGCGGUAUACUUAUUUUUUUUUUUUUUUAUUAACU  
Yfr-1-8 UCGAUUAUCAAACUCUGUUAACAGCGGUAUACUUAUUUUUUUUUUUUUUUAUUAACU  
Yfr-2-2 UUCGUAUACAAACUCUGUUAACAGCGGUAUACUUAUUUUUUUUUUUUUUUAUUAACU  
Yfr-1-14 UUCGUAUACAAACUCUGUUAACAGCGGUAUACUUAUUUUUUUUUUUUUUUAUUAACU  
Yfr-1-15 UUCGCGCCUUUUGUAUUAUUCGUAUACAAUCCUGUUAACAGCGGUAUACUUAUUUUUUUUUUUUUAUUAACU  
Epi-1-1 GUGAUUGCGUUGGCGGUAUUUUUCUGUAUUCGCGCCUUUUGUAUUAUUUUUUUUUUUUUAUUAACU  
Epi-1-2 GUGAUUGCGUUGGCGGUAUUUUUCUGUAUUCGCGCCUUUUGUAUUAUUUUUUUUUUUUUAUUAACU  
Eic-2-1 GUGAUUGCGUUGGCGGUAUUUUUCUGUAUUCGCGCCUUUUGUAUUAUUUUUUUUUUUUUAUUAACU  
Eta-2-1 GUGAUUGCGUUGGCGGUAUUUUUCUGUAUUCGCGCCUUUUGUAUUAUUUUUUUUUUUUUAUUAACU  
Eho-5-1 GUGAUUGCGUUGGCGGUAUUUUUCUGUAUUCGCGCCUUUUGUAUUAUUUUUUUUUUUUUAUUAACU  
Eta-4-1 GUGAUUGCGUUGGCGGUAUUUUUCUGUAUUCGCGCCUUUUGUAUUAUUUUUUUUUUUUUAUUAACU  
Yal-1-1 UUCGCGCCUUUUGUAUUAUUCGUAUACAAUCCUGUUAACAGCGGUAUACUUAUUUUUUUUUUUUUAUUAACU  
Yen-14-1 UUCGCGCCUUUUGUAUUAUUCGUAUACAAUCCUGUUAACAGCGGUAUACUUAUUUUUUUUUUUUUAUUAACU  
Yal-1-4 UUCGCGCCUUUUGUAUUAUUCGUAUACAAUCCUGUUAACAGCGGUAUACUUAUUUUUUUUUUUUUAUUAACU  
Yen-21-1 UUCGCGCCUUUUGUAUUAUUCGUAUACAAUCCUGUUAACAGCGGUAUACUUAUUUUUUUUUUUUUAUUAACU  
Ype-127-1 .....UUGUAUACAAUCCUGUUAACAGCGGUAUACUUAUUUUUUUUUUUUUAUUAACU  
Yal-2-1 UUCGCGCCUUUUGUAUUAUUCGUAUACAAUCCUGUUAACAGCGGUAUACUUAUUUUUUUUUUUUUAUUAACU  
Ynu-1-1 AUUCGUAUUGCGAGGGGUGUCAAUUUCUGUAUUCGCGCCUUUUGUAUUAUUUUUUUUUUUUUAUUAACU  
Yru-1-1 AUUCGUAUUGCGAGGGGUGUCAAUUUCUGUAUUCGCGCCUUUUGUAUUAUUUUUUUUUUUUUAUUAACU  
Dze-2-1 UCCAUUUGCAUCGCGGUAUUUUUCUGUAUUCGCGCCUUUUGUAUUAUUUUUUUUUUUUUAUUAACU  
Dsp-1-1 UCCAUUUGCAUCGCGGUAUUUUUCUGUAUUCGCGCCUUUUGUAUUAUUUUUUUUUUUUUAUUAACU  
Ssp-23-1 AUGUGAUCGCAUCAGCGUACUUAUUUCUGUAUUCGCGCCUUUUGUAUUAUUUUUUUUUUUUUAUUAACU  
env-647 .....AGUAAAAAGAAUUAUUAUUUUUUUAUUAACU  
Lqu-1-3 UGCAUUGCGUGGUAUUUUUCUGUAUUCGCGCCUUUUAUACCGGUAUUAUUUUUUUUUUUUUAUUAACU  
Dsp-2-1 UCCAUUUGCAUCGCGGUAUUUUUCUGUAUUCGCGCCUUUUAUACCGGUAUUAUUUUUUUUUUUUUAUUAACU  
Dze-7-1 UCCAUUUGCAUCGCGGUAUUUUUCUGUAUUCGCGCCUUUUAUACCGGUAUUAUUUUUUUUUUUUUAUUAACU  
Dch-3-1 CCAUUUUUGCAUCAGCGGUAUUUUUCUGUAUUCGCGCCUUUUAUACCGGUAUUAUUUUUUUUUUUUUAUUAACU  
Dch-2-1 UCCAUUUGCAUCAGCGGUAUUUUUCUGUAUUCGCGCCUUUUAUACCGGUAUUAUUUUUUUUUUUUUAUUAACU  
Dda-1-1 UCCAUUUGCAUCAGCGGUAUUUUUCUGUAUUCGCGCCUUUUAUACCGGUAUUAUUUUUUUUUUUUUAUUAACU  
Dda-2-1 UCCAUUUGCAUCAGCGGUAUUUUUCUGUAUUCGCGCCUUUUAUACCGGUAUUAUUUUUUUUUUUUUAUUAACU  
Dch-1-2 UCCAUUUGCAUCAGCGGUAUUUUUCUGUAUUCGCGCCUUUUAUACCGGUAUUAUUUUUUUUUUUUUAUUAACU  
Dsp-9-1 UCUGAUUGCAUCAUAGGUAUUUUUCUGUAUUCGCGCCUUUUAUACCGGUAUUAUUUUUUUUUUUUUAUUAACU  
Xdo-1-1 CAUUGCGAAUUAACAGAUUAUCUGUAUUCGCGCCUUUUGUAUUAUUUUUUUUUUUUUAUUAACU  
Xpo-1-1 CGGCAUUAUUAACCGAUUAUCUGUAUUCGCGCCUUUUGUAUUAUUUUUUUUUUUUUAUUAACU  
Xbo-11-1 UCAUUGCGCAUUAUUAACCGAUUAUCUGUAUUCGCGCCUUUUGUAUUAUUUUUUUUUUUUUAUUAACU  
Xbo-8-1 UUAUUGCGCAUUAUUAACCGAUUAUCUGUAUUCGCGCCUUUUGUAUUAUUUUUUUUUUUUUAUUAACU  
Xbo-6-1 UCAUUGCGCAUUAUUAACCGAUUAUCUGUAUUCGCGCCUUUUGUAUUAUUUUUUUUUUUUUAUUAACU  
Xsz-1-1 CAUUGCAUUAUUAACCGAUUAUCUGUAUUCGCGCCUUUUGUAUUAUUUUUUUUUUUUUAUUAACU  
Xca-1-1 UCAUUGCGCAUUAUUAACCGAUUAUCUGUAUUCGCGCCUUUUGUAUUAUUUUUUUUUUUUUAUUAACU  
Xkh-1-1 AUUUUCUGUAUUCGCGCCUUUUGUAUUAUUUUUUUUUUUUUAUUAACU  
Xsp-1-1 UCAUUGCGCAUUAUUAACCGAUUAUCUGUAUUCGCGCCUUUUGUAUUAUUUUUUUUUUUUUAUUAACU  
Xne-5-1 CAUUGCGCAUUAUUAACCGAUUAUCUGUAUUCGCGCCUUUUGUAUUAUUUUUUUUUUUUUAUUAACU  
Plu-5-1 UCAUUGCGAGAUAGGAGAUUCUGUAUUCGCGCCUUUUGUAUUAUUUUUUUUUUUUUAUUAACU  
Plu-9-1 UUCAUUGCGGGAUAGGAGAUUCUGUAUUCGCGCCUUUUGUAUUAUUUUUUUUUUUUUAUUAACU  
Plu-7-1 UUCAUUGCGGGAUAGGAGAUUCUGUAUUCGCGCCUUUUGUAUUAUUUUUUUUUUUUUAUUAACU  
Plu-6-1 UUCAUUGCGGGAUAGGAGAUUCUGUAUUCGCGCCUUUUGUAUUAUUUUUUUUUUUUUAUUAACU  
Pte-4-1 UUCAUUGCGGGAUAGGAGAUUCUGUAUUCGCGCCUUUUGUAUUAUUUUUUUUUUUUUAUUAACU  
Pte-6-1 UUCAUUGCGGGAUAGGAGAUUCUGUAUUCGCGCCUUUUGUAUUAUUUUUUUUUUUUUAUUAACU  
Plu-10-1 UUCAUUGCGGGAUAGGAGAUUCUGUAUUCGCGCCUUUUGUAUUAUUUUUUUUUUUUUAUUAACU  
Pte-2-1 UUCAUUGCGGGAUAGGAGAUUCUGUAUUCGCGCCUUUUGUAUUAUUUUUUUUUUUUUAUUAACU  
Ssp-15-1 GAUCCGAUUGCGGGAUUAUUUUUUUCUGUAUUAUUUUUUUUUUUUUAUUAACU  
Pca-2-1 AUUCUGUAUUCGCGCCCAUUAUCUGUAUUCGCGCCUUUUGUAUUAUUUUUUUUUUUUUAUUAACU  
Pca-1-1 CUUUGUGUUCGCAAGUGAUGGUAUUUCUGUAUUCGCGCCUUUUGUAUUAUUUUUUUUUUUUUAUUAACU  
Ddi-5-1 UCCAUUUGCAUCGCGGUAUUUUUCUGUAUUCGCGCCUUUUAUACCGGUAUUAUUUUUUUUUUUUUAUUAACU  
Ssp-13-1 GCAGAUCCGUAUUGCGGGAUUAUUUUUUUCUGUAUUAUUUUUUUUUUUUUAUUAACU  
Dpa-1-1 UGAUUAUUGCAUCUUCGUAUUUUUCUGUAUUCGCGCCUUUUGUAUUAUUUUUUUUUUUUUAUUAACU  
Sfo-1-1 GAUCCGAUUGCGGGAUUAUUUUUUUCUGUAUUAUUUUUUUUUUUUUAUUAACU  
Pca-7-1 CGGAUUGCAUCGCGGUAUUAUUUUUUUCUGUAUUCGCGCCUUUUGUAUUAUUUUUUUUUUUUUAUUAACU  
Ppa-2-1 AUUCUGUAUUCGCGCCCAUUGUGUUCGCGCAAAUUAUUCGCGGUAUUAUUUUUUUUUUUUUAUUAACU  
Pat-3-1 UGUGUGCGUAAGAAUUAUCGUGUUCGCGCAAAUUAUUCGCGGUAUUAUUUUUUUUUUUUUAUUAACU  
Psp-55-1 UUCUGUAUUCGCGCCCAUUGUGUUCGCGCAAAUUAUUCGCGGUAUUAUUUUUUUUUUUUUAUUAACU  
Pwa-2-1 UUGUGUGCGUAAGAAUUAUCGUGUUCGCGCAAAUUAUUCGCGGUAUUAUUUUUUUUUUUUUAUUAACU  
Pca-8-1 UCUGUAUUCGCGCCCAUUGUGUUCGCGCAAAUUAUUCGCGGUAUUAUUUUUUUUUUUUUAUUAACU  
Bgo-1-1 GGAGAUAGUUCUGUAUUCGCGCCAUUAUUCGCGGUAUUAUUUUUUUUUUUUUAUUAACU

.....  
.....  
.....RY.....



env-700 CAUCAAACUCCAAAACCCGGGAAAUCGCUAAGCCGGUUUACGCCAGCGGGCGAAGGUCGCGGAAAUAUUUAUA  
env-701 UUUGCAUACGCAGGUCAAUUUCUGUAUGAUUCGCCGCCUUUUGAUGCGCUUUUUGCAGCGUCAAAAUAUACUAUUUAACA  
env-702 UCAGUUUGCAUACCGUUGGUCAAUUUCUGUAUGAUUCGCCGCCUUUUGGUGUAUUUACGCCAAAAGAAUAUACAUAACA  
Ksp-8-1 UUUGAUGCGCUUUGCGGCCAUCAAAUAUUUACCCGGGAUUUUGCGCUUCGCGCAAUCGACCCGGAAAUAUUUAACA  
Ecl-52-1 UCAGUUUGCAUACCGUUGGUCAAUUUCUGUAUGAUUCGCCGCCUUUUGGUGUAUUUACGCCAAAAGAAUAUACAUAACA  
env-706 UCAGUUUGCAUACCGUUGGUAAAUUUCUGUAUGAUUCGCCGCCUUUUGGUGUAUUUACGCCAAAAGAAUAUACAUAACA  
env-710 UUUGAUGCGCUUUGCGGUAUCAAAAUAUUUACCCGGCAAUUUUGCGCUUUGCGCAAUCGACCCGGAAAUAUUUAACA  
Kva-1-1 UUAUACCGCAUUGGAGGUAUGACUAUUACCGUACGCUUCGCGCUGUCAGCAGCGUGGAAAGAGCAGCGGAAAUAUUUAUA  
env-711 UCAGUUUGCAUACCGUUGGUCAAUUUCUGUAUGAUUCGCCGCCUUUUGGUGUAUUUACGCCAAAAGAAUAUACAUAACA  
env-712 CAUCAAACUCCAAAACCCGGGAAAUCGCUAAGCCGGUUUUGCGCCAGCUGUGGAAAGGUCGUGCGGAAAUAUUUAUA  
env-713 AUCAAACUCCAAAACCCGGGAAAUCGCUAAGCCGGUUUACGCCAGCGGGCGAAGGUCGUGCGGAAAUAUUUAUA  
Ecl-39-1 UCAGUUUGCAUACAGCUGUUAAAUUUCUGUAUGAUUCGCCGCCUUUUGGUGUAUUUACGCCAGAAUAUACAUAACA  
env-714 GAUUCGCCGCCUUUGAUGCGCUUUGGUGCAUCAAAAUAUUUACCCGGUAGUUAUUCGCCGGGAAAUAUUUAACA  
Ecl-1-6 UCAGUUUGCAUACGUGGUCAAAUUUCUGUAUGAUUCGCCGCCUUUUGGUGUAUUUACGCCAAAAGAAUAUACAUAACA  
env-715 UCAGUUUGCAUACCCGUGUUAAAUUUCUGUAUGAUUCGCCGCCUUUUGGUGCAUUUGCAUCAAAGAAUAUACAUAACA  
env-717 UUUGGUGCGCUUCGUGCAGCAUAGAAUAUUUACCCGGGUAUUCGCUUAGCGGAAUUCGCCGGGAAAUAUUUAACA  
env-720 UUGCAUACGGGGUCAAUUUCUGUAUGAUUCGCCGCCUUUUGAUGCGCUUUUUGCAGCGUCAAAAUAUACAUAUAACA  
env-724 .....AGANNUUAUAUACAUAACA  
env-725 .....UCAAAUUUCUGUAUGAUUCGCCGCCUUUUGGUGUAUUUACGCCAAAAGAAUAUACAUAACA  
env-726 UCAGUUUGCAUACGUGGUCAAAUUUCUGUAUGAUUCGCCGCCUUUUGGUGUAUUUACGCCAAAAGAAUAUACAUAACA  
env-728 AUCAAACUCCAAAACCCGGGAAAUCGCUAAGCCGGUUUACGCCAGCUGUGGAAAGGUCGUGCGGAAAUAUUUAUA  
env-729 AUCAAACUCCAAAACCCGGGAAAUCGCUAAGCCGGUUUACGCCAGCUGUGGAAAGGUCGUGCGGAAAUAUUUAUA  
env-730 UUUGAUGCGCUUUGCGGCCAUCAAAUAUUUACCCGGCAAUUUUGCGCUUUGCGCAAUCGACCCGGAAAUAUUUAACA  
env-731 UUGCAUACAGGGUCAUUUCUGUAUGAUUCGCCGCCUUUUGAUGCGCUUUUUGCAGCGUCAAAAUAUACAUAUAACA  
Lad-1-2 UCAGUUUGCAUACCCGUGUUAAAUUUCUGUAUGAUUCGCCGCCUUUUGGUGCAUUUGCAUCAAAGAAUAUACAUAACA  
env-732 UUAUACCGCAUUGAAGAUUGACCUAUCGUGGUCUUCAGCUGUCAGCAGCGUAGAGGGCGAGCGGAAAUAUACAUAUA  
env-735 UUAUACCGCAUUGGAGAUUGACCUAUCGUGGUCUUCAGCUGUCAGCAGCGUAGAGGCGAGCGGAAAUAUACAUAUA  
Rte-1-1 UGUGCUUCGUGCAGUGCAAAGCCUUAUAUUUACCCUAGAUUCGCCAGCGGGAAAGCUCAGCGGAAAUAUUUAACA  
Eho-1-9 UCAGUUUGCAUACGUGGUAUUAAAUUUCUGUAUGAUUCGCCGCCUUUUGGUGUAUUUACGCCAAAAGAAUAUACAUAACA  
env-736 UUAUACCGCAUUGGAGAUUGACCUAUCGUGGUCUUCAGCUGUCAGCAGCGUAGAGGCGAGCGGAAAUAUUUAUA  
Kox-8-1 GAUUCGCCGCCUUUGAUGCGCUUUCGUGUAGCAUAAAUAUUUACCCGGUAGUUAUUCGCCGGGAAAUAUUUAACA  
Esp-29-1 UCAGUUUGCAUACGUGGUAUUAAAUUUCUGUAUGAUUCGCCGCCUUUUGGUGUAUUUACGCCAAAAGAAUAUACAUAACA  
Ror-1-1 UGUGCUUCGUGCAGCAUCAAAAAGCGUAUAUAUUUACCCUAGAUUCGCCAGCGGCGAAAGCUCAGCGGAAAUAUUUAACA  
env-738 UGCAUACCGAGGUCAAUUUCUGUAUGAUUCGCCGCCUUUUGAUGCGCUUUUUGCAGCGUCAAAAUAUACAUAUAACA  
Ecl-42-1 UCAGUUUGCAUACAGCGUUAAAUUUCUGUAUGAUUCGCCGCCUUUUGGUGUAUUUACGCCAGAAUAUACAUAUAACA  
env-739 UUUGGUGCGCUUCGUGCAGCAUCAAAUAUUUACCCGGGUAUUCGCUUAGCGGAAUUCGCCGGGAAAUAUUUAACA  
Rpl-1-1 UUUGGUGCGCUUCGUGCAGCAUCAAAUAUUUACCCGGGUAUUCGCUUAGCGGAAUUCGCCGGGAAAUAUUUAACA  
Eca-3-1 UCAGUUUGCAUACCGUGUUAAAUUUCUGUAUGAUUCGCCGCCUUUUGGUGUAUUUACGCCAAAAGAAUAUACAUAACA  
Kqu-1-1 UUAUACCGCAUUGAAGAUUGACCUAUCGUGGUCUUCAGCUGUACACAGCGUAGAGGGCGAGCGGAAAUAUACAUAUA  
Esp-67-1 CAGUUUGCAUCCACCGAUGGAUUCUGUAUGAUUCGCCGCCUUUUGGUGUAUUCGCCAAAAGAAUAUACAUAUAACA  
env-740 UUUGGUGCGCUUCGUGCAGCAUCAAAUAUUUACCCGGGUAUUCGCUUAGCGGAAUUCGCCGGGAAAUAUUUAACA  
env-741 AUCAAACUCCAAAACCCGGGAAAUCGCUAAGCCGGUUUACGCCAGCUGCGGAAAGGUCGUGCGGAAAUAUUUAUA  
env-742 UCAGUUUGCAUACCGCGGUAAAUUUCUGUAUGAUUCGCCGCCUUUUGGUGUAUUUACGCCAAAAGAAUAUACAUAACA  
env-743 UUAUACCGCAUUGAAGAUUGACCUAUCGUGGUCUUCAGCUGUCAGCAGCGUAGAGGGCGAGCGGAAAUAUACAUAUA  
env-754 CAGAUUGCAUCUGCGGUAUUAAAUCUGUAUGAUUCGCCGCCUUUUGAUGUAUUUUGCAUCAUCAUUUAUAUAACA  
env-755 .....A  
env-756 UCAGUUUGCAUAGCCUGUUAAAUUUCUGUAUGAUUCGCCGCCUUUUGGUGUAUUUACGCCAGAGAAUAUACAUAUAACA  
Kcr-1-1 GUUUGCAUUCUGCGGUAUUUUCUGUAUGAUUCGCCGCCUUUUGAUGCAUUUUGGCAUAGGAAAUAUACAUAUAUAACA  
Kas-1-1 AGUUUGCAUCGUGGUAUUAAAUCUGUAUGAUUCGCCGCCUUUUGAUGCAUUUUGUAUACUAGCAUUAUAUAUAACA  
Fhe-1-1 AGUUUGCAUACGGCGUUUUUUUUUGUAUGAUUCGCCGCCUUUUGAUGGCAUUUUGCAUCAAACCUUUAUAUAUAACA  
Fhe-2-1 AGUUUGCAUACGGCGUUUUUUUUUGUAUGAUUCGCCGCCUUUUGAUGGCAUUUUGCAUCAAACCUUUAUAUAUAACA  
Fpu-1-1 GAUUUGCAUUGGGGUAUUUUUUUGUAUGAUUCGCCGCCUUUUGAUGGCAUUUUGCAUCAAACCUUUAUAUAUAACA  
Fhe-3-1 AGUUUGCAUACGGCGUUUUUUUUUGUAUGAUUCGCCGCCUUUUGAUGGCAUUUUGCAUCAAACCUUUAUAUAUAACA  
Fpu-5-1 GGUUUGCAUUGGGCGUUUUUUUUUGUAUGAUUCGCCGCCUUUUGAUGGCAUUUUGCAUCAAACCUUUAUAUAUAACA  
Cne-1-1 UGCACCGGUGAGCAUUUCUGUAUGAUUCGCCGCCUUUUGAUGCGCAGUUUUGGUAUCAAACCUUUAUUUAUAACA  
Cne-1-3 GCACCGGUGAGAAUUUCUGUAUGAUUCGCCGCCUUUUGAUGCGCAGUUUUGGUAUCAAACCUUUAUUUAUAACA  
Cda-1-1 UGCACCGGAGGUAUUUCUGUAUGAUUCGCCGCCUUUUGAUGCGCAGUUUUGGUAUCAAACCUUUAUUUAUAACA  
Sco-2-1 AUCCGGUGGUAUUUUUCUGUAUGAUUCGCCGCCUUUUGAUGCGUUAUUUUGCGUUAAGCUCACAAAUAUACAUAUAACA  
Bag-2-1 GCAUCCAUCGCCGGGUAUUUCUGUAUGAUUCGCCGCCUUUUGAUGCGCAGUUUUGGUGUAUCAAACCUUUAUUUAUAACA  
Ebl-1-1 UGCACGGGCGGAAUCUCUGUAUUUUCGCCGCCUUUUGAUGCGCAGUUUUGCGCUUUAUUAUAUACAUAUAUAACA  
Sen-311-1 UUUGCAUACAGAGGCAAAAUCUGUAUGAUUCGCCGCCUUUUGGUGGUGUUAUUGGCAUCAAACCUUUAUAUAUAACA  
Sen-1013-1 UUUGCAUACGUGGUAUUUUUCUGUAUGAUUCGCCGCCUUUUGGUGGUGUUAUUGGCAUCAAACCUUUAUAUAUAACA  
Sen-89-1 UUUGCAUACGUGGUAUUUUUCUGUAUGAUUCGCCGCCUUUUGGUGGUAUUGGCAUCAAACCUUUAUAUAUAACA  
Sbo-3-1 UUUGCAUACGUGGUAUUUUUCUGUAUGAUUCGCCGCCUUUUGGUGGUAUUGGCAUCAAACCUUUAUAUAUAACA  
Sen-1029-1 UUUGCAUACGUGGUAUUUUUCUGUAUGAUUCGCCGCCUUUUGGUGGUAUUGGCAUCAAACCUUUAUAUAUAACA  
Sen-1021-1 UUUGCAUACGUGGUAUUUUUCUGUAUGAUUCGCCGCCUUUUGGUGGUAUUGGCAUCAAACCUUUAUAUAUAACA  
Sen-312-1 UUUGCAUACGUGGUAUUUUUCUGUAUGAUUCGCCGCCUUUUGGUGGUAUUGGCAUCAAACCUUUAUAUAUAACA  
Bag-1-1 GCAUCCAACGUGGGGUUUUCUGUAUGAUUCGCCGCCUUUUGAUGCGCAGUUUUGGUAUCAAACCUUUAUUUAUAACA  
env-757 CAGGGCGUUUUUUUCUGUAUGAUUCGCCGCCUUUUGGUGGUAUUGGCAUCAAACCUUUAUAUAUAACA  
Cfr-3-1 GAUUUGGCAUAAAGACCAUUUACCCGAGAAUUUAAGCUGUUGAUGCAGUGUAAGGUGCAGGGGAAUUAUUUAACA  
Ksp-3-1 UUUGCAUUCGUGGUAUUUUUCUGUAUGAUUCGCCGCCUUUUGAUGCGUAUUCGCCGUGUAUAAAUAUACAUAUAACA  
Eco-1011-1 AGUUUGCAUACGUGUUAAAUUUCUGUAUGAUUCGCCGCCUUUUGAUGCGAUAUUGAUGAUCUUAUUUAUAACA  
env-758 AGUUUGCAUAGGCAAGGUAUUUUUCUGUAUGAUUCGCCGCCUUUUGAUAUCAAUUUUAUAUACUGACCUUAUUAUAACA  
Eco-1781-1 AGUUUGCAUACGUGUUAAAUUUCUGUAUUUUUCGCCGCCUUUUGAUGCGAUAUUGAUGAUCUUAUUUAUAACA  
Cam-1-1 GAUUUGCGCAAAAAGACCAUUUACCCGAGAUUUACCGGAGUUUACGCGUUGAUGCAGCGUAAAGGUGCAGGGGAAUUAUAUAACA  
Sso-1-2 NNNNNNNNNNNNNNNNNNNNNNNNUGAUUCGCCGCCUUUUGAUGCGAUAUUGAUGAUCUUAUUUAUAACA  
SH-70-1 AGUUUGCAUACGUGUUAAAUUUCUGUAUGAUUCGCCGCCUUUUGAUGCGUAUUGAUGAUCUUAUUUAUAACA  
Ssp-20-2 CAUAGUGAAUAGUGACAGAGUGAUGAAGCAGGCAACGCAUCAGCAGUGUAAGGUGCAGGGGAAUUAUUUAACA  
Eco-1460-1 AGUUUGCAUACGUGUUAAAUUUCUGUAUGAUUCGCCGCCUUUUGAUGCGAUAUUGAUGAUCUUAUUUAUAACA  
env-763 AGUUUGCAUUCGCCGUGUUAAAUUUCUGUAUGAUUCGCCGCCUUUUGAUGCGAUAUUGAUGAUCUUAUUUAUAACA  
Cwe-1-1 GAUUUGCGCAAAAAGACCAUUUACCCGAGAAUUUAAGCUGUUGAUGCAGUGUAAGGUGCAGGGGAAUUAUUUAACA  
Sso-1-3 NNNNNNNNNNNNNNNNNNNNNNNNNNNNNNNNCCUUCGUAUUGAUGAUCGUAUUGAUGAUCUUAUUUAUAACA  
env-766 AGUUUGCAUACGUGUUAAAUUUCUGUAUGAUUCGCCGCCUUUUGAUGCGAUAUUGAUGAUCUUAUUUAUAACA  
env-784 CAGUUUGCAUUCGCCGUGUAUUUUUCUGUAUGAUUCGCCGCCUUUUGAUGCGAUAUUGAUGAUCUUAUUUAUAACA

.....  
.....RY.....







































|                      |                       |                |                   |                   |                    |                                                                    |                                            |
|----------------------|-----------------------|----------------|-------------------|-------------------|--------------------|--------------------------------------------------------------------|--------------------------------------------|
| Cva-1-1              | Bacteria              | Actinobacteria | Actinobacteridae  | Actinomycetales   | Corynebacterineae  | Corynebacteriaceae                                                 | <i>Corynebacterium variabile</i> DSM 44702 |
| Tot-1-1              | Bacteria              | Actinobacteria | Actinobacteridae  | Actinomycetales   | Corynebacterineae  | Corynebacteriaceae                                                 | <i>Turicella otitidis</i> ATCC 51513       |
| [fl-1-1              | Bacteria              | Actinobacteria | Corynebacteriales | Corynebacteriales | Corynebacteriaceae | Corynebacterium                                                    | [ <i>Brevibacterium</i> ] flavum           |
| Cat-1-1              | Bacteria              | Actinobacteria | Corynebacteriales | Corynebacteriales | Corynebacteriaceae | <i>Corynebacterium atypicum</i>                                    |                                            |
| Cau-2-1 to Cau-2-4   | Bacteria              | Actinobacteria | Corynebacteriales | Corynebacteriales | Corynebacteriaceae | <i>Corynebacterium aurimucosum</i>                                 |                                            |
| Cau-3-1              | Bacteria              | Actinobacteria | Corynebacteriales | Corynebacteriales | Corynebacteriaceae | <i>Corynebacterium auriscanis</i>                                  |                                            |
| Cca-1-1 to Cca-1-2   | Bacteria              | Actinobacteria | Corynebacteriales | Corynebacteriales | Corynebacteriaceae | <i>Corynebacterium callunae</i> DSM 20147                          |                                            |
| Cca-5-1              | Bacteria              | Actinobacteria | Corynebacteriales | Corynebacteriales | Corynebacteriaceae | <i>Corynebacterium camporealensis</i>                              |                                            |
| Cca-6-1              | Bacteria              | Actinobacteria | Corynebacteriales | Corynebacteriales | Corynebacteriaceae | <i>Corynebacterium casei</i> LMG S-19264                           |                                            |
| Ccr-2-1              | Bacteria              | Actinobacteria | Corynebacteriales | Corynebacteriales | Corynebacteriaceae | <i>Corynebacterium crenatum</i>                                    |                                            |
| Cdi-18-1 to Cdi-18-2 | Bacteria              | Actinobacteria | Corynebacteriales | Corynebacteriales | Corynebacteriaceae | <i>Corynebacterium diphtheriae</i>                                 |                                            |
| Cdi-19-1             | Bacteria              | Actinobacteria | Corynebacteriales | Corynebacteriales | Corynebacteriaceae | <i>Corynebacterium diphtheriae</i> bv. <i>gravis</i> str. ISS 4060 |                                            |
| Cdi-20-1             | Bacteria              | Actinobacteria | Corynebacteriales | Corynebacteriales | Corynebacteriaceae | <i>Corynebacterium diphtheriae</i> bv. <i>gravis</i> str. ISS 4746 |                                            |
| Cdi-21-1             | Bacteria              | Actinobacteria | Corynebacteriales | Corynebacteriales | Corynebacteriaceae | <i>Corynebacterium diphtheriae</i> bv. <i>gravis</i> str. ISS 4749 |                                            |
| Cdi-22-1             | Bacteria              | Actinobacteria | Corynebacteriales | Corynebacteriales | Corynebacteriaceae | <i>Corynebacterium diphtheriae</i> bv. <i>mitis</i> str. ISS 3319  |                                            |
| Cdo-1-1 to Cdo-1-2   | Bacteria              | Actinobacteria | Corynebacteriales | Corynebacteriales | Corynebacteriaceae | <i>Corynebacterium doosanense</i> CAU 212 = DSM 45436              |                                            |
| Cep-1-1              | Bacteria              | Actinobacteria | Corynebacteriales | Corynebacteriales | Corynebacteriaceae | <i>Corynebacterium epidermidicanis</i>                             |                                            |
| Cfa-1-1              | Bacteria              | Actinobacteria | Corynebacteriales | Corynebacteriales | Corynebacteriaceae | <i>Corynebacterium falsenii</i>                                    |                                            |
| Cfa-2-1              | Bacteria              | Actinobacteria | Corynebacteriales | Corynebacteriales | Corynebacteriaceae | <i>Corynebacterium falsenii</i> DSM 44353                          |                                            |
| Cfr-1-1              | Bacteria              | Actinobacteria | Corynebacteriales | Corynebacteriales | Corynebacteriaceae | <i>Corynebacterium freneyi</i> DNF00450                            |                                            |
| Cgl-11-1 to Cgl-11-3 | Bacteria              | Actinobacteria | Corynebacteriales | Corynebacteriales | Corynebacteriaceae | <i>Corynebacterium glutamicum</i>                                  |                                            |
| Cgl-12-1             | Bacteria              | Actinobacteria | Corynebacteriales | Corynebacteriales | Corynebacteriaceae | <i>Corynebacterium glutamicum</i> ATCC 14067                       |                                            |
| Cgl-13-1             | Bacteria              | Actinobacteria | Corynebacteriales | Corynebacteriales | Corynebacteriaceae | <i>Corynebacterium glyciniphilum</i> AJ 3170                       |                                            |
| Cha-2-1              | Bacteria              | Actinobacteria | Corynebacteriales | Corynebacteriales | Corynebacteriaceae | <i>Corynebacterium halotolerans</i>                                |                                            |
| Cha-1-1 to Cha-1-2   | Bacteria              | Actinobacteria | Corynebacteriales | Corynebacteriales | Corynebacteriaceae | <i>Corynebacterium halotolerans</i> YIM 70093 = DSM 44683          |                                            |
| Chu-1-1              | Bacteria              | Actinobacteria | Corynebacteriales | Corynebacteriales | Corynebacteriaceae | <i>Corynebacterium humireducens</i> NBRC 106098 = DSM 45392        |                                            |
| Cih-1-1              | Bacteria              | Actinobacteria | Corynebacteriales | Corynebacteriales | Corynebacteriaceae | <i>Corynebacterium ihumii</i>                                      |                                            |
| Cim-1-1              | Bacteria              | Actinobacteria | Corynebacteriales | Corynebacteriales | Corynebacteriaceae | <i>Corynebacterium imitans</i>                                     |                                            |
| Cje-3-1              | Bacteria              | Actinobacteria | Corynebacteriales | Corynebacteriales | Corynebacteriaceae | <i>Corynebacterium jeddahense</i>                                  |                                            |
| Cje-4-1 to Cje-4-18  | Bacteria              | Actinobacteria | Corynebacteriales | Corynebacteriales | Corynebacteriaceae | <i>Corynebacterium jeikeium</i>                                    |                                            |
| Cku-1-1              | Bacteria              | Actinobacteria | Corynebacteriales | Corynebacteriales | Corynebacteriaceae | <i>Corynebacterium kutscheri</i>                                   |                                            |
| Cla-1-1              | Bacteria              | Actinobacteria | Corynebacteriales | Corynebacteriales | Corynebacteriaceae | <i>Corynebacterium lactis</i> RW2-5                                |                                            |
| Cma-6-1              | Bacteria              | Actinobacteria | Corynebacteriales | Corynebacteriales | Corynebacteriaceae | <i>Corynebacterium marinum</i> DSM 44953                           |                                            |
| Cmi-1-1 to Cmi-1-2   | Bacteria              | Actinobacteria | Corynebacteriales | Corynebacteriales | Corynebacteriaceae | <i>Corynebacterium minutissimum</i>                                |                                            |
| Cmu-1-1              | Bacteria              | Actinobacteria | Corynebacteriales | Corynebacteriales | Corynebacteriaceae | <i>Corynebacterium mustelae</i>                                    |                                            |
| Cpi-2-1              | Bacteria              | Actinobacteria | Corynebacteriales | Corynebacteriales | Corynebacteriaceae | <i>Corynebacterium pilosum</i>                                     |                                            |
| Cpr-2-1 to Cpr-2-3   | Bacteria              | Actinobacteria | Corynebacteriales | Corynebacteriales | Corynebacteriaceae | <i>Corynebacterium propinquum</i>                                  |                                            |
| Cps-16-1             | Bacteria              | Actinobacteria | Corynebacteriales | Corynebacteriales | Corynebacteriaceae | <i>Corynebacterium pseudodiphtheriticum</i> DSM 44287              |                                            |
| Cps-17-1 to Cps-17-9 | Bacteria              | Actinobacteria | Corynebacteriales | Corynebacteriales | Corynebacteriaceae | <i>Corynebacterium pseudotuberculosis</i>                          |                                            |
| Cps-18-1             | Bacteria              | Actinobacteria | Corynebacteriales | Corynebacteriales | Corynebacteriaceae | <i>Corynebacterium pseudotuberculosis</i> 258                      |                                            |
| Cps-19-1             | Bacteria              | Actinobacteria | Corynebacteriales | Corynebacteriales | Corynebacteriaceae | <i>Corynebacterium pseudotuberculosis</i> 31                       |                                            |
| Cre-2-1              | Bacteria              | Actinobacteria | Corynebacteriales | Corynebacteriales | Corynebacteriaceae | <i>Corynebacterium renale</i>                                      |                                            |
| Cri-1-1              | Bacteria              | Actinobacteria | Corynebacteriales | Corynebacteriales | Corynebacteriaceae | <i>Corynebacterium riegeli</i>                                     |                                            |
| Csi-1-1              | Bacteria              | Actinobacteria | Corynebacteriales | Corynebacteriales | Corynebacteriaceae | <i>Corynebacterium singulare</i>                                   |                                            |
| Csp-18-1             | Bacteria              | Actinobacteria | Corynebacteriales | Corynebacteriales | Corynebacteriaceae | <i>Corynebacterium</i> sp. ATCC 6931                               |                                            |
| Csp-19-1             | Bacteria              | Actinobacteria | Corynebacteriales | Corynebacteriales | Corynebacteriaceae | <i>Corynebacterium sputi</i> DSM 45148                             |                                            |
| Cst-2-1 to Cst-2-8   | Bacteria              | Actinobacteria | Corynebacteriales | Corynebacteriales | Corynebacteriaceae | <i>Corynebacterium striatum</i>                                    |                                            |
| Cte-2-1              | Bacteria              | Actinobacteria | Corynebacteriales | Corynebacteriales | Corynebacteriaceae | <i>Corynebacterium testudinoris</i>                                |                                            |
| Cti-1-1              | Bacteria              | Actinobacteria | Corynebacteriales | Corynebacteriales | Corynebacteriaceae | <i>Corynebacterium timonense</i> 5401744                           |                                            |
| Ctu-2-1              | Bacteria              | Actinobacteria | Corynebacteriales | Corynebacteriales | Corynebacteriaceae | <i>Corynebacterium tuscaniense</i> DNF00037                        |                                            |
| Cul-6-1 to Cul-6-4   | Bacteria              | Actinobacteria | Corynebacteriales | Corynebacteriales | Corynebacteriaceae | <i>Corynebacterium ulcerans</i>                                    |                                            |
| Cul-7-1              | Bacteria              | Actinobacteria | Corynebacteriales | Corynebacteriales | Corynebacteriaceae | <i>Corynebacterium ulcerans</i> FRC11                              |                                            |
| Cul-8-1              | Bacteria              | Actinobacteria | Corynebacteriales | Corynebacteriales | Corynebacteriaceae | <i>Corynebacterium ulcerans</i> FRC58                              |                                            |
| Cur-3-1              | Bacteria              | Actinobacteria | Corynebacteriales | Corynebacteriales | Corynebacteriaceae | <i>Corynebacterium urealyticum</i>                                 |                                            |
| Cur-4-1              | Bacteria              | Actinobacteria | Corynebacteriales | Corynebacteriales | Corynebacteriaceae | <i>Corynebacterium ureicelerivorans</i>                            |                                            |
| Cut-1-1              | Bacteria              | Actinobacteria | Corynebacteriales | Corynebacteriales | Corynebacteriaceae | <i>Corynebacterium uterequi</i>                                    |                                            |
| Cvi-1-1              | Bacteria              | Actinobacteria | Corynebacteriales | Corynebacteriales | Corynebacteriaceae | <i>Corynebacterium vitaeruminis</i>                                |                                            |
| Cvi-2-1              | Bacteria              | Actinobacteria | Corynebacteriales | Corynebacteriales | Corynebacteriaceae | <i>Corynebacterium vitaeruminis</i> DSM 20294                      |                                            |
| Cvi-3-1              | Bacteria              | Actinobacteria | Corynebacteriales | Corynebacteriales | Corynebacteriaceae | <i>Corynebacterium vitaeruminis</i> Ga6A13                         |                                            |
| Cxe-1-1              | Bacteria              | Actinobacteria | Corynebacteriales | Corynebacteriales | Corynebacteriaceae | <i>Corynebacterium xerosis</i>                                     |                                            |
| Tot-2-1              | Bacteria              | Actinobacteria | Corynebacteriales | Corynebacteriales | Corynebacteriaceae | <i>Turicella otitidis</i>                                          |                                            |
| env-1 to env-159     | environmental samples |                |                   |                   |                    |                                                                    |                                            |



## 13.2 Gene contexts

Each L31-Corynebacteriaceae RNA (indicated by “RNA→”) is listed. For each hit, the downstream genes predicted to reside in a regulated operon are listed. If the nearest downstream gene is encoding in the opposite strand (and therefore presumed to not be a part of a regulated operon), then that gene is still depicted. Some environmental sequences and some RefSeq entries lack gene annotations, and so no genes are available for such sequences. The direction of each gene is indicated with an arrow (→), and each predicted conserved domain in the gene is named. Conserved domains associated with more than one L31-Corynebacteriaceae RNA are assigned a color; other domains are gray. Information about these conserved

domains is given in Section 13.3. The accession of the sequence containing each L31-Corynebacteriaceae RNA is given in the column named “Seq. accession”. Accessions beginning with “NC\_”, “NS\_”, “NW\_” or “NZ\_” are contained in RefSeq. Other accession refer to environmental samples. Nucleotide coordinates are given for the 5′ and 3′ boundaries of each L31-Corynebacteriaceae RNA. If the 5′ coordinate is greater than the 3′ coordinate, the RNA is present on the reverse-complement strand of the containing genomic DNA sequence. Each hit is denoted by an abbreviation (like “Eco-1-1”) that refers to a taxonomy given in Section 13.1.

| abbrev.  | Seq. accession               |   | 5′ at   | 3′ at   | genes                                                                                                                                                                            |
|----------|------------------------------|---|---------|---------|----------------------------------------------------------------------------------------------------------------------------------------------------------------------------------|
| Cut-1-1  | NZ_CP011546.1                | + | 713235  | 713316  | RNA→ rpmE2 (PRK01678)Ribosomal_L31 (pfam01197) → rpmF (PRK01110)Ribosomal_L32p (pfam01783)→                                                                                      |
| Cfa-1-1  | NZ_JVKJ01000005.1            | - | 667570  | 667497  | RNA→ rpmE2 (PRK01678)Ribosomal_L31 (pfam01197)→ rpmF (PRK01110)Ribosomal_L32p (pfam01783)→                                                                                       |
| Cau-3-1  | NZ_JRVJ01000003.1            | + | 120589  | 120653  | RNA→ rpmE2 (PRK01678)Ribosomal_L31 (pfam01197)→ hypo→ hypo→                                                                                                                      |
| Tot-2-1  | NZ_LBNF01000055.1            | - | 8790    | 8700    | RNA→ rpmE2 (PRK01678)Ribosomal_L31 (pfam01197)→ rpmF (PRK01110)Ribosomal_L32p (pfam01783)→                                                                                       |
| Tot-1-1  | NZ_JH815193.1                | - | 531899  | 531809  | RNA→ rpmE2 (PRK01678)Ribosomal_L31 (pfam01197)→ rpmF (PRK01110)Ribosomal_L32p (pfam01783)→                                                                                       |
| Cnu-1-1  | NZ_AFIZ01000013.1            | - | 97797   | 97736   | RNA→ rpmE2 (PRK01678)Ribosomal_L31 (pfam01197)→ rpmE2 (PRK01678)Ribosomal_L31 (pfam01197)→ rpmF (PRK01110)Ribosomal_L32p (pfam01783)→ rpmF (PRK01110)Ribosomal_L32p (pfam01783)→ |
| Cgl-13-1 | NZ_CP006842.1                | + | 1057041 | 1057122 | RNA→ rpmE2 (PRK01678)Ribosomal_L31 (pfam01197)→ rpmF (PRK01110)Ribosomal_L32p (pfam01783)→                                                                                       |
| Cte-1-1  | NC_021663.1                  | - | 1923752 | 1923653 | RNA→ rpmE2 (PRK01678)Ribosomal_L31 (pfam01197)→ rpmF (PRK01110)Ribosomal_L32p (pfam01783)→                                                                                       |
| Cva-1-1  | NC_015859.1                  | - | 2360714 | 2360640 | RNA→ rpmE2 (PRK01678)Ribosomal_L31 (pfam01197)→ rpmF (PRK01110)Ribosomal_L32p (pfam01783)→                                                                                       |
| Cps-16-1 | NZ_JIAH01000006.1            | + | 56886   | 57003   | RNA→ rpmE2 (PRK01678)Ribosomal_L31 (pfam01197)→ rpmF (PRK01110)Ribosomal_L32p (pfam01783)→                                                                                       |
| Csp-14-1 | NZ_KI515715.1                | - | 2247633 | 2247516 | RNA→ rpmE2 (PRK01678)Ribosomal_L31 (pfam01197)→ rpmF (PRK01110)Ribosomal_L32p (pfam01783)→                                                                                       |
| Csp-13-1 | NZ_KI515718.1                | + | 60683   | 60800   | RNA→ rpmE2 (PRK01678)Ribosomal_L31 (pfam01197)→ rpmF (PRK01110)Ribosomal_L32p (pfam01783)→                                                                                       |
| env-1    | SRS053437_C431471            | - | 1608    | 1491    | RNA→ rpmE2 (PRK01678)Ribosomal_L31 (pfam01197)→ rpmF (PRK01110)Ribosomal_L32p (pfam01783)→                                                                                       |
| env-2    | SRS013876_WUGC_scaffold_993  | - | 41899   | 41782   | RNA→ rpmE2 (PRK01678)Ribosomal_L31 (pfam01197)→ rpmF (PRK01110)Ribosomal_L32p (pfam01783)→                                                                                       |
| Cps-1-1  | NZ_AVFF01000012.1            | - | 4417    | 4300    | RNA→ rpmE2 (PRK01678)Ribosomal_L31 (pfam01197)→ rpmF (PRK01110)Ribosomal_L32p (pfam01783)→                                                                                       |
| env-3    | SRS017044_C179127            | + | 297     | 403     | RNA→ rpmE2 (PRK01678)Ribosomal_L31 (pfam01197)→ rpmF (PRK01110)Ribosomal_L32p (pfam01783)→                                                                                       |
| Cpr-2-1  | NZ_JVVY01000068.1            | + | 69983   | 70089   | RNA→ rpmE2 (PRK01678)Ribosomal_L31 (pfam01197)→ rpmF (PRK01110)Ribosomal_L32p (pfam01783)→                                                                                       |
| Cpr-1-1  | NZ_AQXC01000010.1            | + | 64394   | 64500   | RNA→ rpmE2 (PRK01678)Ribosomal_L31 (pfam01197)→ rpmF (PRK01110)Ribosomal_L32p (pfam01783)→                                                                                       |
| env-4    | SRS047254_WUGC_scaffold_9884 | + | 208     | 314     | RNA→                                                                                                                                                                             |
| env-5    | SRS015752_C119743            | + | 276     | 382     | RNA→                                                                                                                                                                             |
| Cpr-2-2  | NZ_JVSI01000039.1            | - | 39215   | 39109   | RNA→ rpmE2 (PRK01678)Ribosomal_L31 (pfam01197)→ rpmF (PRK01110)Ribosomal_L32p (pfam01783)→                                                                                       |
| Cpr-2-3  | NZ_JVSN01000024.1            | - | 56709   | 56603   | RNA→ rpmE2 (PRK01678)Ribosomal_L31 (pfam01197)→ rpmF (PRK01110)Ribosomal_L32p (pfam01783)→                                                                                       |
| Cfa-2-1  | NZ_CP007156.1                | - | 2014629 | 2014563 | RNA→ rpmE2 (PRK01678)Ribosomal_L31 (pfam01197)→ rpmF (PRK01110)Ribosomal_L32p (pfam01783)→                                                                                       |
| Cre-1-1  | NC_015673.1                  | - | 1990937 | 1990874 | RNA→ rpmE2 (PRK01678)Ribosomal_L31 (pfam01197)→ rpmF (PRK01110)Ribosomal_L32p (pfam01783)→                                                                                       |
| Cje-2-1  | NC_007164.1                  | - | 1807476 | 1807415 | RNA→ rpmE2 (PRK01678)Ribosomal_L31 (pfam01197)→ rpmF (PRK01110)Ribosomal_L32p (pfam01783)→                                                                                       |
| Cje-4-1  | NZ_JFCM01000017.1            | - | 3528    | 3467    | RNA→ rpmE2 (PRK01678)Ribosomal_L31 (pfam01197)→ rpmF (PRK01110)Ribosomal_L32p (pfam01783)→                                                                                       |
| Cje-4-2  | NZ_JFCO01000025.1            | + | 54212   | 54273   | RNA→ rpmE2 (PRK01678)Ribosomal_L31 (pfam01197)→ rpmF (PRK01110)Ribosomal_L32p (pfam01783)→                                                                                       |
| Cje-4-3  | NZ_JFCR01000012.1            | - | 86567   | 86506   | RNA→ rpmE2 (PRK01678)Ribosomal_L31 (pfam01197)→ rpmF (PRK01110)Ribosomal_L32p (pfam01783)→                                                                                       |
| Cje-4-4  | NZ_JUNC01000013.1            | - | 142683  | 142622  | RNA→ rpmE2 (PRK01678)Ribosomal_L31 (pfam01197)→ rpmF (PRK01110)Ribosomal_L32p (pfam01783)→                                                                                       |
| Cje-1-1  | NZ_GG700814.1                | - | 359951  | 359890  | RNA→ rpmE2 (PRK01678)Ribosomal_L31 (pfam01197)→ rpmF (PRK01110)Ribosomal_L32p (pfam01783)→                                                                                       |
| Cje-4-5  | NZ_JFCH01000061.1            | + | 41014   | 41075   | RNA→ rpmE2 (PRK01678)Ribosomal_L31 (pfam01197)→ rpmF (PRK01110)Ribosomal_L32p (pfam01783)→                                                                                       |
| Cje-4-6  | NZ_JFCQ01000001.1            | - | 319495  | 319435  | RNA→ rpmE2 (PRK01678)Ribosomal_L31 (pfam01197)→ rpmF (PRK01110)Ribosomal_L32p (pfam01783)→                                                                                       |
| Cje-4-7  | NZ_JFCL01000010.1            | - | 81768   | 81708   | RNA→ rpmE2 (PRK01678)Ribosomal_L31 (pfam01197)→ rpmF (PRK01110)Ribosomal_L32p (pfam01783)→                                                                                       |
| Cje-4-8  | NZ_JFCF01000035.1            | + | 36866   | 36926   | RNA→ rpmE2 (PRK01678)Ribosomal_L31 (pfam01197)→ rpmF (PRK01110)Ribosomal_L32p (pfam01783)→                                                                                       |
| Cje-4-9  | NZ_JFCG01000013.1            | - | 140206  | 140146  | RNA→ rpmE2 (PRK01678)Ribosomal_L31 (pfam01197)→ rpmF (PRK01110)Ribosomal_L32p (pfam01783)→                                                                                       |

|          |                    |   |        |        |                                                                                                                |
|----------|--------------------|---|--------|--------|----------------------------------------------------------------------------------------------------------------|
| Cje-4-10 | NZ_JFCI01000035.1  | + | 37385  | 37445  | RNA → rpmE2 (PRK01678)Ribosomal_L31 (pfam01197) → rpmF (PRK01110)Ribosomal_L32p (pfam01783) →                  |
| Cje-4-11 | NZ_JFCJ01000077.1  | - | 132850 | 132790 | RNA → rpmE2 (PRK01678)Ribosomal_L31 (pfam01197) → rpmF (PRK01110)Ribosomal_L32p (pfam01783) →                  |
| Cje-4-12 | NZ_JFCN01000025.1  | + | 2814   | 2874   | RNA → rpmE2 (PRK01678)Ribosomal_L31 (pfam01197) → rpmF (PRK01110)Ribosomal_L32p (pfam01783) →                  |
| Cje-4-13 | NZ_JFCCK01000168.1 | - | 59670  | 59610  | RNA → rpmE2 (PRK01678)Ribosomal_L31 (pfam01197) → rpmF (PRK01110)Ribosomal_L32p (pfam01783) →                  |
| Cje-4-14 | NZ_JFCPP01000015.1 | - | 88000  | 87940  | RNA → rpmE2 (PRK01678)Ribosomal_L31 (pfam01197) → rpmF (PRK01110)Ribosomal_L32p (pfam01783) →                  |
| Cur-2-1  | NC_020230.1        | + | 634362 | 634421 | RNA → rpmE2 (PRK01678)Ribosomal_L31 (pfam01197) → rpmF (PRK01110)Ribosomal_L32p (pfam01783) →                  |
| Cur-1-1  | NC_010545.1        | + | 654798 | 654857 | RNA → rpmE2 (PRK01678)Ribosomal_L31 (pfam01197) → rpmF (PRK01110)Ribosomal_L32p (pfam01783) →                  |
| Cdi-18-1 | NZ_JRUZ01000001.1  | - | 346898 | 346839 | RNA → rpmE2 (PRK01678)Ribosomal_L31 (pfam01197) → rpmF (PRK01110)Ribosomal_L32p (pfam01783) →                  |
| Cdi-18-2 | NZ_JZUJ01000002.1  | + | 4530   | 4589   | RNA → rpmE2 (PRK01678)Ribosomal_L31 (pfam01197) → rpmF (PRK01110)Ribosomal_L32p (pfam01783) →                  |
| Cdi-19-1 | NZ_JAQN01000016.1  | + | 59508  | 59567  | RNA → hypo → rpmE2 (PRK01678)Ribosomal_L31 (pfam01197) → rpmF (PRK01110)Ribosomal_L32p (pfam01783) →           |
| Cdi-22-1 | NZ_JAQO01000007.1  | + | 59841  | 59900  | RNA → rpmE2 (PRK01678)Ribosomal_L31 (pfam01197) → rpmF (PRK01110)Ribosomal_L32p (pfam01783) →                  |
| Cdi-5-1  | NC_016785.1        | + | 776418 | 776477 | RNA → rpmE2 (PRK01678)Ribosomal_L31 (pfam01197) → rpmF (PRK01110)Ribosomal_L32p (pfam01783) →                  |
| Cdi-16-1 | NZ_AJGI01000001.1  | - | 267143 | 267084 | RNA → PriB (COG2965) → rpmE2 (PRK01678)Ribosomal_L31 (pfam01197) → rpmF (PRK01110)Ribosomal_L32p (pfam01783) → |
| Cdi-1-1  | NC_016782.1        | + | 774515 | 774574 | RNA → hypo → rpmE2 (PRK01678)Ribosomal_L31 (pfam01197) → rpmF (PRK01110)Ribosomal_L32p (pfam01783) →           |
| Cdi-9-1  | NC_016787.1        | + | 789776 | 789835 | RNA → rpmE2 (PRK01678)Ribosomal_L31 (pfam01197) → rpmF (PRK01110)Ribosomal_L32p (pfam01783) →                  |
| Cdi-2-1  | NC_016799.1        | + | 854037 | 854096 | RNA → PriB (COG2965) → rpmE2 (PRK01678)Ribosomal_L31 (pfam01197) → rpmF (PRK01110)Ribosomal_L32p (pfam01783) → |
| Cdi-11-1 | NC_016783.1        | + | 770903 | 770962 | RNA → hypo → rpmE2 (PRK01678)Ribosomal_L31 (pfam01197) → rpmF (PRK01110)Ribosomal_L32p (pfam01783) →           |
| Cdi-7-1  | NC_016786.1        | + | 774486 | 774545 | RNA → hypo → rpmE2 (PRK01678)Ribosomal_L31 (pfam01197) → rpmF (PRK01110)Ribosomal_L32p (pfam01783) →           |
| Cdi-13-1 | NC_016789.1        | + | 835204 | 835263 | RNA → rpmE2 (PRK01678)Ribosomal_L31 (pfam01197) → rpmF (PRK01110)Ribosomal_L32p (pfam01783) →                  |
| Cdi-4-1  | NC_016801.1        | + | 781925 | 781984 | RNA → rpmE2 (PRK01678)Ribosomal_L31 (pfam01197) → rpmF (PRK01110)Ribosomal_L32p (pfam01783) →                  |
| Cdi-12-1 | NC_002935.2        | + | 826926 | 826985 | RNA → rpmE2 (PRK01678)Ribosomal_L31 (pfam01197) → rpmF (PRK01110)Ribosomal_L32p (pfam01783) →                  |
| Cdi-3-1  | NC_016800.1        | + | 806019 | 806078 | RNA → hypo → rpmE2 (PRK01678)Ribosomal_L31 (pfam01197) → rpmF (PRK01110)Ribosomal_L32p (pfam01783) →           |
| Cdi-8-1  | NC_016802.1        | + | 795035 | 795094 | RNA → rpmE2 (PRK01678)Ribosomal_L31 (pfam01197) → rpmF (PRK01110)Ribosomal_L32p (pfam01783) →                  |
| Cdi-6-1  | NZ_AUZN01000046.1  | + | 17970  | 18029  | RNA → hypo → rpmE2 (PRK01678)Ribosomal_L31 (pfam01197) → rpmF (PRK01110)Ribosomal_L32p (pfam01783) →           |
| Cdi-15-1 | NZ_AJVH01000012.1  | + | 61533  | 61592  | RNA → rpmE2 (PRK01678)Ribosomal_L31 (pfam01197) → rpmF (PRK01110)Ribosomal_L32p (pfam01783) →                  |
| Cdi-20-1 | NZ_JAQP01000015.1  | + | 32179  | 32238  | RNA → hypo → rpmE2 (PRK01678)Ribosomal_L31 (pfam01197) → rpmF (PRK01110)Ribosomal_L32p (pfam01783) →           |
| Cdi-21-1 | NZ_JAQQ01000010.1  | + | 32192  | 32251  | RNA → hypo → rpmE2 (PRK01678)Ribosomal_L31 (pfam01197) → rpmF (PRK01110)Ribosomal_L32p (pfam01783) →           |
| Cdi-10-1 | NC_016788.1        | + | 799786 | 799845 | RNA → hypo → rpmE2 (PRK01678)Ribosomal_L31 (pfam01197) → rpmF (PRK01110)Ribosomal_L32p (pfam01783) →           |
| Cdi-14-1 | NC_016790.1        | + | 767184 | 767243 | RNA → hypo → rpmE2 (PRK01678)Ribosomal_L31 (pfam01197) → rpmF (PRK01110)Ribosomal_L32p (pfam01783) →           |
| Cdi-17-1 | NZ_AUZO01000012.1  | + | 32203  | 32262  | RNA → hypo → rpmE2 (PRK01678)Ribosomal_L31 (pfam01197) → rpmF (PRK01110)Ribosomal_L32p (pfam01783) →           |
| Cca-4-1  | NZ_KB903376.1      | + | 440662 | 440743 | RNA → rpmE2 (PRK01678)Ribosomal_L31 (pfam01197) → rpmF (PRK01110)Ribosomal_L32p (pfam01783) →                  |
| Cgl-2-1  | NZ_GG667130.1      | + | 67973  | 68043  | RNA → rpmE2 (PRK01678)Ribosomal_L31 (pfam01197) → rpmF (PRK01110)Ribosomal_L32p (pfam01783) →                  |
| Cgl-1-1  | NZ_GG667038.1      | + | 72480  | 72550  | RNA → rpmE2 (PRK01678)Ribosomal_L31 (pfam01197) → rpmF (PRK01110)Ribosomal_L32p (pfam01783) →                  |
| Cpy-1-1  | NZ_KE150446.1      | + | 69361  | 69419  | RNA → rpmE2 (PRK01678)Ribosomal_L31 (pfam01197) → rpmF (PRK01110)Ribosomal_L32p (pfam01783) →                  |
| Cre-2-1  | NZ_LDYE01000007.1  | + | 45841  | 45903  | RNA → rpmE2 (PRK01678)Ribosomal_L31 (pfam01197) → rpmF (PRK01110)Ribosomal_L32p (pfam01783) →                  |
| Cdo-1-2  | NZ_CP006764.1      | + | 832115 | 832176 | RNA → rpmE2 (PRK01678)Ribosomal_L31 (pfam01197) → rpmF (PRK01110)Ribosomal_L32p (pfam01783) →                  |
| Cdo-1-1  | NZ_AQUX01000004.1  | - | 131828 | 131767 | RNA → rpmE2 (PRK01678)Ribosomal_L31 (pfam01197) → rpmF (PRK01110)Ribosomal_L32p (pfam01783) →                  |
| Cca-5-1  | NZ_CP011311.1      | + | 791325 | 791385 | RNA → rpmE2 (PRK01678)Ribosomal_L31 (pfam01197) → rpmF (PRK01110)Ribosomal_L32p (pfam01783) →                  |
| Cma-3-1  | NZ_AQXB01000007.1  | - | 161751 | 161703 | RNA → rpmE2 (PRK01678)Ribosomal_L31 (pfam01197) → rpmF (PRK01110)Ribosomal_L32p (pfam01783) →                  |
| Cmi-1-1  | NZ_JSEF01000008.1  | + | 14324  | 14454  | RNA → rpmE2 (PRK01678)Ribosomal_L31 (pfam01197) → rpmF (PRK01110)Ribosomal_L32p (pfam01783) →                  |
| Cau-1-1  | NC_012590.1        | + | 901957 | 902077 | RNA → rpmE2 (PRK01678)Ribosomal_L31 (pfam01197) → rpmF (PRK01110)Ribosomal_L32p (pfam01783) →                  |
| Cmi-1-2  | NZ_LAYQ01000001.1  | - | 68637  | 68555  | RNA → rpmE2 (PRK01678)Ribosomal_L31 (pfam01197) → rpmF (PRK01110)Ribosomal_L32p (pfam01783) →                  |

|          |                                  |   |         |         |                                                                                                                                                                                       |
|----------|----------------------------------|---|---------|---------|---------------------------------------------------------------------------------------------------------------------------------------------------------------------------------------|
| Cau-2-1  | NZ_JUMN01000003.1                | + | 19608   | 19690   | RNA → rpmE2 (PRK01678)Ribosomal_L31 (pfam01197) → rpmF (PRK01110)Ribosomal_L32p (pfam01783) →                                                                                         |
| Csi-1-1  | NZ_CP010827.1                    | + | 955732  | 955835  | RNA → rpmE2 (PRK01678)Ribosomal_L31 (pfam01197) → rpmF (PRK01110)Ribosomal_L32p (pfam01783) →                                                                                         |
| Cci-1-1  | NZ_AQUW01000002.1                | - | 253907  | 253785  | RNA → rpmE2 (PRK01678)Ribosomal_L31 (pfam01197) → rpmF (PRK01110)Ribosomal_L32p (pfam01783) →                                                                                         |
| Cat-1-1  | NZ_CP008944.1                    | + | 701875  | 702000  | RNA → rpmE2 (PRK01678)Ribosomal_L31 (pfam01197) → rpmF (PRK01110)Ribosomal_L32p (pfam01783) →                                                                                         |
| Cje-4-15 | NZ_JUSD01000006.1                | + | 58418   | 58480   | RNA → rpmE2 (PRK01678)Ribosomal_L31 (pfam01197) → rpmF (PRK01110)Ribosomal_L32p (pfam01783) →                                                                                         |
| Csp-18-1 | NZ_CP008913.1                    | - | 697524  | 697462  | RNA → rpmE2 (PRK01678)Ribosomal_L31 (pfam01197) → rpmF (PRK01110)Ribosomal_L32p (pfam01783) →                                                                                         |
| Cje-4-16 | NZ_JVOW01000015.1                | - | 32940   | 32878   | RNA → rpmE2 (PRK01678)Ribosomal_L31 (pfam01197) → rpmF (PRK01110)Ribosomal_L32p (pfam01783) →                                                                                         |
| Cje-4-17 | NZ_JVIP01000011.1                | + | 50025   | 50087   | RNA → rpmE2 (PRK01678)Ribosomal_L31 (pfam01197) → rpmF (PRK01110)Ribosomal_L32p (pfam01783) →                                                                                         |
| Csp-1-1  | NZ_KE150404.1                    | - | 2427073 | 2427011 | RNA → rpmE2 (PRK01678)Ribosomal_L31 (pfam01197) → rpmF (PRK01110)Ribosomal_L32p (pfam01783) →                                                                                         |
| Cam-2-1  | NZ_ABZU01000013.1                | - | 40816   | 40754   | RNA → rpmE2 (PRK01678)Ribosomal_L31 (pfam01197) → rpmE2 (PRK01678)Ribosomal_L31 (pfam01197) → rpmF (PRK01110)Ribosomal_L32p (pfam01783) → rpmF (PRK01110)Ribosomal_L32p (pfam01783) → |
| Cur-3-1  | NZ_JWEP01000048.1                | - | 32027   | 31965   | RNA → rpmE2 (PRK01678)Ribosomal_L31 (pfam01197) → rpmF (PRK01110)Ribosomal_L32p (pfam01783) →                                                                                         |
| Cje-4-18 | NZ_JVPT01000044.1                | - | 37181   | 37119   | RNA → rpmE2 (PRK01678)Ribosomal_L31 (pfam01197) → rpmF (PRK01110)Ribosomal_L32p (pfam01783) →                                                                                         |
| Cvi-1-1  | NZ_JVVM01000020.1                | - | 305775  | 305713  | RNA → rpmE2 (PRK01678)Ribosomal_L31 (pfam01197) → rpmF (PRK01110)Ribosomal_L32p (pfam01783) →                                                                                         |
| Cla-1-1  | NZ_CP006841.1                    | - | 2125937 | 2125813 | RNA → rpmE2 (PRK01678)Ribosomal_L31 (pfam01197) → rpmF (PRK01110)Ribosomal_L32p (pfam01783) →                                                                                         |
| Csp-19-1 | NZ_ATYV01000011.1                | + | 77096   | 77159   | RNA → rpmE2 (PRK01678)Ribosomal_L31 (pfam01197) → rpmF (PRK01110)Ribosomal_L32p (pfam01783) → DUF3887 (pfam13026) →                                                                   |
| env-6    | SRS016292_C136299                | + | 434     | 503     | RNA → rpmE2 (PRK01678)Ribosomal_L31 (pfam01197) →                                                                                                                                     |
| env-7    | SRS047225_C235885                | - | 2784    | 2715    | RNA → rpmE2 (PRK01678)Ribosomal_L31 (pfam01197) → rpmF (PRK01110)Ribosomal_L32p (pfam01783) →                                                                                         |
| Csp-4-1  | NZ_KI1515760.1                   | + | 78324   | 78393   | RNA → rpmE2 (PRK01678)Ribosomal_L31 (pfam01197) → rpmF (PRK01110)Ribosomal_L32p (pfam01783) →                                                                                         |
| env-8    | SRS017451_C217497                | + | 873     | 939     | RNA → rpmE2 (PRK01678)Ribosomal_L31 (pfam01197) →                                                                                                                                     |
| env-9    | SRS015937_WUGC_scaffold_1576     | - | 2210    | 2144    | RNA → rpmE2 (PRK01678)Ribosomal_L31 (pfam01197) → rpmF (PRK01110)Ribosomal_L32p (pfam01783) →                                                                                         |
| env-10   | SRS019986_C257788                | + | 75      | 141     | RNA → rpmE2 (PRK01678)Ribosomal_L31 (pfam01197) → rpmF (PRK01110)Ribosomal_L32p (pfam01783) →                                                                                         |
| env-11   | SRS058213_LANL_scaffold_5004     | - | 2005    | 1939    | RNA → rpmE2 (PRK01678)Ribosomal_L31 (pfam01197) → rpmF (PRK01110)Ribosomal_L32p (pfam01783) →                                                                                         |
| Cac-1-1  | NZ_GG666998.1                    | + | 69464   | 69530   | RNA → rpmE2 (PRK01678)Ribosomal_L31 (pfam01197) → rpmF (PRK01110)Ribosomal_L32p (pfam01783) →                                                                                         |
| Csp-15-1 | NZ_KI1515712.1                   | + | 921794  | 921860  | RNA → rpmE2 (PRK01678)Ribosomal_L31 (pfam01197) → rpmF (PRK01110)Ribosomal_L32p (pfam01783) →                                                                                         |
| Csp-17-1 | NZ_KI1515704.1                   | + | 80492   | 80558   | RNA → rpmE2 (PRK01678)Ribosomal_L31 (pfam01197) → rpmF (PRK01110)Ribosomal_L32p (pfam01783) →                                                                                         |
| Csp-16-1 | NZ_KI1515710.1                   | - | 418615  | 418549  | RNA → rpmE2 (PRK01678)Ribosomal_L31 (pfam01197) → rpmF (PRK01110)Ribosomal_L32p (pfam01783) →                                                                                         |
| Csp-12-1 | NZ_KI1515719.1                   | + | 80492   | 80558   | RNA → rpmE2 (PRK01678)Ribosomal_L31 (pfam01197) → rpmF (PRK01110)Ribosomal_L32p (pfam01783) →                                                                                         |
| env-12   | SRS013876_WUGC_scaffold_1100     | - | 378     | 312     | RNA → rpmE2 (PRK01678)Ribosomal_L31 (pfam01197) →                                                                                                                                     |
| Cac-2-1  | NZ_GL397138.1                    | + | 875571  | 875637  | RNA → rpmE2 (PRK01678)Ribosomal_L31 (pfam01197) → rpmF (PRK01110)Ribosomal_L32p (pfam01783) →                                                                                         |
| env-13   | SRS014682_WUGC_scaffold_5134     | - | 9672    | 9606    | RNA → rpmE2 (PRK01678)Ribosomal_L31 (pfam01197) → rpmF (PRK01110)Ribosomal_L32p (pfam01783) →                                                                                         |
| env-14   | SRS014901_C267752                | + | 75      | 141     | RNA → rpmE2 (PRK01678)Ribosomal_L31 (pfam01197) → rpmF (PRK01110)Ribosomal_L32p (pfam01783) →                                                                                         |
| env-15   | SRS017820_C151105                | - | 125     | 59      | RNA → hypo →                                                                                                                                                                          |
| env-16   | SRS022006_Baylor_scaffold_3374   | - | 2342    | 2276    | RNA → rpmE2 (PRK01678)Ribosomal_L31 (pfam01197) → rpmF (PRK01110)Ribosomal_L32p (pfam01783) →                                                                                         |
| env-17   | SRS047254_WUGC_scaffold_8049     | - | 515     | 449     | RNA → rpmE2 (PRK01678)Ribosomal_L31 (pfam01197) → rpmF (PRK01110)Ribosomal_L32p (pfam01783) →                                                                                         |
| Csp-6-1  | NZ_KI1515749.1                   | + | 937901  | 937967  | RNA → rpmE2 (PRK01678)Ribosomal_L31 (pfam01197) → rpmF (PRK01110)Ribosomal_L32p (pfam01783) →                                                                                         |
| env-18   | SRS044474_LANL_scaffold_86       | + | 548     | 614     | RNA → rpmE2 (PRK01678)Ribosomal_L31 (pfam01197) → rpmF (PRK01110)Ribosomal_L32p (pfam01783) →                                                                                         |
| Csp-7-1  | NZ_KI1515742.1                   | - | 405839  | 405773  | RNA → rpmE2 (PRK01678)Ribosomal_L31 (pfam01197) → rpmF (PRK01110)Ribosomal_L32p (pfam01783) →                                                                                         |
| Csp-10-1 | NZ_KI1515730.1                   | + | 76326   | 76392   | RNA → rpmE2 (PRK01678)Ribosomal_L31 (pfam01197) → rpmF (PRK01110)Ribosomal_L32p (pfam01783) →                                                                                         |
| Csp-2-1  | NZ_KI1515775.1                   | + | 77719   | 77785   | RNA → rpmE2 (PRK01678)Ribosomal_L31 (pfam01197) → rpmF (PRK01110)Ribosomal_L32p (pfam01783) →                                                                                         |
| Cau-2-2  | NZ_JVXO01000017.1                | - | 651     | 592     | RNA → rpmE2 (PRK01678)Ribosomal_L31 (pfam01197) → rpmF (PRK01110)Ribosomal_L32p (pfam01783) →                                                                                         |
| env-19   | L_ear_crease_WUGL_scaffold_15403 | + | 353     | 412     | RNA → rpmE2 (PRK01678)Ribosomal_L31 (pfam01197) →                                                                                                                                     |
| env-20   | SRS019015_C240949                | + | 347     | 406     | RNA → rpmE2 (PRK01678)Ribosomal_L31 (pfam01197) →                                                                                                                                     |
| env-21   | SRS019063_C605280                | - | 264     | 205     | RNA → rpmE2 (PRK01678)Ribosomal_L31 (pfam01197) →                                                                                                                                     |
| env-22   | SRS019867_C148862                | - | 188     | 129     | RNA → rpmE2 (PRK01678)Ribosomal_L31 (pfam01197) →                                                                                                                                     |
| env-23   | SRS058213_LANL_scaffold_8330     | - | 1796    | 1737    | RNA → rpmE2 (PRK01678)Ribosomal_L31 (pfam01197) → rpmF (PRK01110)Ribosomal_L32p (pfam01783) →                                                                                         |
| Csp-11-1 | NZ_KI1515722.1                   | - | 400130  | 400071  | RNA → rpmE2 (PRK01678)Ribosomal_L31 (pfam01197) → rpmF (PRK01110)Ribosomal_L32p (pfam01783) →                                                                                         |
| Csp-9-1  | NZ_KI1515731.1                   | - | 2393670 | 2393611 | RNA → rpmE2 (PRK01678)Ribosomal_L31 (pfam01197) → rpmF (PRK01110)Ribosomal_L32p (pfam01783) →                                                                                         |
| Csp-5-1  | NZ_KI1515752.1                   | + | 62595   | 62654   | RNA → rpmE2 (PRK01678)Ribosomal_L31 (pfam01197) → rpmF (PRK01110)Ribosomal_L32p (pfam01783) →                                                                                         |
| Csp-8-1  | NZ_KI1515735.1                   | + | 1155727 | 1155786 | RNA → rpmE2 (PRK01678)Ribosomal_L31 (pfam01197) → rpmF (PRK01110)Ribosomal_L32p (pfam01783) →                                                                                         |
| Csp-3-1  | NZ_KI1515767.1                   | + | 58512   | 58571   | RNA → rpmE2 (PRK01678)Ribosomal_L31 (pfam01197) → rpmF (PRK01110)Ribosomal_L32p (pfam01783) →                                                                                         |
| env-24   | SRS054061_C156877                | + | 428     | 487     | RNA →                                                                                                                                                                                 |



|          |                              |   |         |         |      |                                                         |                                            |
|----------|------------------------------|---|---------|---------|------|---------------------------------------------------------|--------------------------------------------|
| env-25   | SRS056906_LANL_scaffold_9004 | - | 11347   | 11278   | RNA→ | rpmE2 (PRK01678)Ribosomal_L31 (pfam01197)→              | rpmF (PRK01110)Ribosomal_L32p (pfam01783)→ |
| env-26   | SRS014682_C298104            | + | 265     | 334     | RNA→ |                                                         |                                            |
| Cau-2-3  | NZ_JUZU01000034.1            | + | 26228   | 26285   | RNA→ | rpmE2 (PRK01678)Ribosomal_L31 (pfam01197)→              | rpmF (PRK01110)Ribosomal_L32p (pfam01783)→ |
| Cau-2-4  | NZ_JUOH01000050.1            | - | 648     | 591     | RNA→ | rpmE2 (PRK01678)Ribosomal_L31 (pfam01197)→              | rpmF (PRK01110)Ribosomal_L32p (pfam01783)→ |
| Ctu-1-1  | NZ_ACVP01000016.1            | + | 27341   | 27398   | RNA→ | rpmE2 (PRK01678)Ribosomal_L31 (pfam01197)→              | rpmE2 (PRK01678)Ribosomal_L31 (pfam01197)→ |
|          |                              |   |         |         |      | rpmF (PRK01110)Ribosomal_L32p (pfam01783)→              | rpmF (PRK01110)Ribosomal_L32p (pfam01783)→ |
| Cps-2-1  | NZ_GL542875.1                | - | 416624  | 416567  | RNA→ | rpmE2 (PRK01678)Ribosomal_L31 (pfam01197)→              | rpmF (PRK01110)Ribosomal_L32p (pfam01783)→ |
| Cst-2-1  | NZ_LAYR01000011.1            | + | 31347   | 31452   | RNA→ | rpmE2 (PRK01678)Ribosomal_L31 (pfam01197)→              | rpmF (PRK01110)Ribosomal_L32p (pfam01783)→ |
| Cst-2-2  | NZ_JVTN01000092.1            | - | 89483   | 89378   | RNA→ | rpmE2 (PRK01678)Ribosomal_L31 (pfam01197)→              | rpmF (PRK01110)Ribosomal_L32p (pfam01783)→ |
| Cst-2-3  | NZ_JVTL01000033.1            | - | 36207   | 36102   | RNA→ | rpmE2 (PRK01678)Ribosomal_L31 (pfam01197)→              | rpmF (PRK01110)Ribosomal_L32p (pfam01783)→ |
| Cst-2-4  | NZ_JVBA01000054.1            | + | 47752   | 47857   | RNA→ | rpmE2 (PRK01678)Ribosomal_L31 (pfam01197)→              | rpmF (PRK01110)Ribosomal_L32p (pfam01783)→ |
| Cst-2-5  | NZ_JULW01000062.1            | + | 47806   | 47911   | RNA→ | rpmE2 (PRK01678)Ribosomal_L31 (pfam01197)→              | rpmF (PRK01110)Ribosomal_L32p (pfam01783)→ |
| Cst-2-6  | NZ_JULV01000025.1            | + | 47803   | 47908   | RNA→ | rpmE2 (PRK01678)Ribosomal_L31 (pfam01197)→              | rpmF (PRK01110)Ribosomal_L32p (pfam01783)→ |
| Cst-2-7  | NZ_JVCW01000084.1            | + | 75365   | 75470   | RNA→ | rpmE2 (PRK01678)Ribosomal_L31 (pfam01197)→              | rpmF (PRK01110)Ribosomal_L32p (pfam01783)→ |
| Cst-1-1  | NZ_GG667522.1                | - | 145531  | 145426  | RNA→ | rpmE2 (PRK01678)Ribosomal_L31 (pfam01197)→              | rpmF (PRK01110)Ribosomal_L32p (pfam01783)→ |
| Cst-2-8  | NZ_JUSN01000092.1            | - | 950     | 845     | RNA→ | rpmE2 (PRK01678)Ribosomal_L31 (pfam01197)→              | rpmF (PRK01110)Ribosomal_L32p (pfam01783)→ |
| env-27   | AglA_G_BVDVLI01BUUUY         | - | 106     | 52      | RNA→ | hypo→                                                   |                                            |
| env-28   | AglA_G_contig04927           | - | 168     | 114     | RNA→ | rpmE2 (PRK01678)Ribosomal_L31 (pfam01197)→              |                                            |
| env-29   | AglA_G_GDN60OX02HVGVM        | + | 158     | 212     | RNA→ |                                                         |                                            |
| env-30   | AglA_G_GDN60OX02HYEDF        | - | 352     | 298     | RNA→ | rpmE2 (PRK01678)Ribosomal_L31 (pfam01197)→              |                                            |
| Cur-4-1  | NZ_CP009215.1                | + | 707148  | 707228  | RNA→ | rpmE2 (PRK01678)Ribosomal_L31 (pfam01197)→              | rpmF (PRK01110)Ribosomal_L32p (pfam01783)→ |
| Cih-1-1  | NZ_HG001322.1                | + | 57297   | 57372   | RNA→ | rpmE2 (PRK01678)Ribosomal_L31 (pfam01197)→              | rpmF (PRK01110)Ribosomal_L32p (pfam01783)→ |
| Cha-2-1  | NZ_JVMD01000015.1            | + | 131313  | 131426  | RNA→ | rpmE2 (PRK01678)Ribosomal_L31 (pfam01197)→              | rpmF (PRK01110)Ribosomal_L32p (pfam01783)→ |
| Cfr-1-1  | NZ_JRNE01000004.1            | - | 33488   | 33375   | RNA→ | rpmE2 (PRK01678)Ribosomal_L31 (pfam01197)→              | rpmF (PRK01110)Ribosomal_L32p (pfam01783)→ |
| env-31   | JGI24707J26582_10105430      | + | 592     | 705     | RNA→ | rpmE2 (PRK01678)Ribosomal_L31 (pfam01197)→              |                                            |
| Cje-3-1  | NZ_CBYN010000125.1           | - | 2960    | 2903    | RNA→ | rpmE2 (PRK01678)Ribosomal_L31 (pfam01197)→              | rpmF (PRK01110)Ribosomal_L32p (pfam01783)→ |
| Cul-6-1  | NZ_CP011095.1                | + | 738588  | 738694  | RNA→ | rpmE2 (PRK01678)Ribosomal_L31 (pfam01197)→              | rpmF (PRK01110)Ribosomal_L32p (pfam01783)→ |
| Ctu-2-1  | NZ_JRNG01000018.1            | - | 53232   | 53172   | RNA→ | rpmE2 (PRK01678)Ribosomal_L31 (pfam01197)→              | rpmF (PRK01110)Ribosomal_L32p (pfam01783)→ |
| Cim-1-1  | NZ_CP009211.1                | + | 754015  | 754070  | RNA→ | rpmE2 (PRK01678)Ribosomal_L31 (pfam01197)→              | rpmF (PRK01110)Ribosomal_L32p (pfam01783)→ |
| Cri-1-1  | NZ_CP012342.1                | - | 1228345 | 1228290 | RNA→ | rpmE2 (PRK01678)Ribosomal_L31 (pfam01197)→              | rpmF (PRK01110)Ribosomal_L32p (pfam01783)→ |
| Cge-1-1  | NZ_CM000961.1                | - | 2235924 | 2235848 | RNA→ | rpmE2 (PRK01678)Ribosomal_L31 (pfam01197)→              | rpmF (PRK01110)Ribosomal_L32p (pfam01783)→ |
| Cul-5-1  | NZ_AQUY01000002.1            | + | 105764  | 105849  | RNA→ | rpmE2 (PRK01678)Ribosomal_L31 (pfam01197)→              | rpmF (PRK01110)Ribosomal_L32p (pfam01783)→ |
| Cca-2-1  | NZ_AQUV01000003.1            | - | 337464  | 337414  | RNA→ | rpmE2 (PRK01678)Ribosomal_L31 (pfam01197)→              | rpmF (PRK01110)Ribosomal_L32p (pfam01783)→ |
|          |                              |   |         |         |      | REC (smart00448)Trans_reg_C (smart00862)OmpR (COG0745)→ | Trans_reg_C (smart00862)OmpR (COG0745)→    |
|          |                              |   |         |         |      | DegQ (COG0265)PDZ_2 (pfam13180)Trypsin_2 (pfam13365)→   |                                            |
|          |                              |   |         |         |      | DegQ (COG0265)PDZ_2 (pfam13180)Trypsin_2 (pfam13365)→   |                                            |
|          |                              |   |         |         |      | MoCF_biosynth (smart00852)MogA_MoaB (cd00886)→          |                                            |
| Cti-1-1  | NZ_HE998586.1                | - | 222294  | 222239  | RNA→ | rpmE2 (PRK01678)Ribosomal_L31 (pfam01197)→              | rpmF (PRK01110)Ribosomal_L32p (pfam01783)→ |
| Cli-1-1  | NZ_GG667196.1                | - | 108598  | 108535  | RNA→ | rpmE2 (PRK01678)Ribosomal_L31 (pfam01197)→              | rpmF (PRK01110)Ribosomal_L32p (pfam01783)→ |
| Cps-17-1 | NZ_CP012022.1                | + | 703166  | 703274  | RNA→ | rpmE2 (PRK01678)Ribosomal_L31 (pfam01197)→              | rpmF (PRK01110)Ribosomal_L32p (pfam01783)→ |
| Cps-12-1 | NC_014329.1                  | + | 696776  | 696884  | RNA→ | rpmE2 (PRK01678)Ribosomal_L31 (pfam01197)→              | rpmF (PRK01110)Ribosomal_L32p (pfam01783)→ |
| Cps-13-1 | NC_017303.1                  | + | 696588  | 696696  | RNA→ | rpmE2 (PRK01678)Ribosomal_L31 (pfam01197)→              | rpmF (PRK01110)Ribosomal_L32p (pfam01783)→ |
| Cps-15-1 | NC_017305.1                  | + | 696644  | 696752  | RNA→ | rpmE2 (PRK01678)Ribosomal_L31 (pfam01197)→              | rpmE2 (PRK01678)Ribosomal_L31 (pfam01197)→ |
|          |                              |   |         |         |      | rpmF (PRK01110)Ribosomal_L32p (pfam01783)→              |                                            |
| Cps-8-1  | NC_017306.1                  | + | 696771  | 696879  | RNA→ | rpmE2 (PRK01678)Ribosomal_L31 (pfam01197)→              | rpmF (PRK01110)Ribosomal_L32p (pfam01783)→ |
| Cps-6-1  | NC_016781.1                  | + | 696768  | 696876  | RNA→ | rpmE2 (PRK01678)Ribosomal_L31 (pfam01197)→              | rpmF (PRK01110)Ribosomal_L32p (pfam01783)→ |
| Cps-14-1 | NC_017031.1                  | + | 696696  | 696804  | RNA→ | rpmE2 (PRK01678)Ribosomal_L31 (pfam01197)→              | rpmE2 (PRK01678)Ribosomal_L31 (pfam01197)→ |
|          |                              |   |         |         |      | rpmF (PRK01110)Ribosomal_L32p (pfam01783)→              |                                            |
| Cps-5-1  | NC_017462.1                  | + | 696591  | 696699  | RNA→ | rpmE2 (PRK01678)Ribosomal_L31 (pfam01197)→              | rpmF (PRK01110)Ribosomal_L32p (pfam01783)→ |
| Cps-17-2 | NZ_CP009927.1                | + | 696736  | 696844  | RNA→ | rpmE2 (PRK01678)Ribosomal_L31 (pfam01197)→              | rpmF (PRK01110)Ribosomal_L32p (pfam01783)→ |
| Cps-9-1  | NC_017301.1                  | + | 696442  | 696550  | RNA→ | rpmE2 (PRK01678)Ribosomal_L31 (pfam01197)→              | rpmF (PRK01110)Ribosomal_L32p (pfam01783)→ |
| Cps-4-1  | NC_017300.1                  | + | 696689  | 696797  | RNA→ | rpmE2 (PRK01678)Ribosomal_L31 (pfam01197)→              | rpmF (PRK01110)Ribosomal_L32p (pfam01783)→ |
| Cps-17-3 | NZ_CP008924.1                | + | 1234105 | 1234213 | RNA→ | rpmE2 (PRK01678)Ribosomal_L31 (pfam01197)→              | rpmF (PRK01110)Ribosomal_L32p (pfam01783)→ |



|          |                                    |   |         |         |     |                                                                                                                                       |
|----------|------------------------------------|---|---------|---------|-----|---------------------------------------------------------------------------------------------------------------------------------------|
| Cps-17-4 | NZ_CP008922.1                      | + | 1250687 | 1250795 | RNA | → rpmE2 (PRK01678)Ribosomal_L31 (pfam01197) → rpmF (PRK01110)Ribosomal_L32p (pfam01783) →                                             |
| Cps-17-5 | NZ_CP008923.1                      | - | 345645  | 345537  | RNA | → rpmE2 (PRK01678)Ribosomal_L31 (pfam01197) → rpmF (PRK01110)Ribosomal_L32p (pfam01783) →                                             |
| Cps-17-6 | NZ_CP010889.1                      | + | 696683  | 696791  | RNA | → rpmE2 (PRK01678)Ribosomal_L31 (pfam01197) → rpmF (PRK01110)Ribosomal_L32p (pfam01783) →                                             |
| Cps-17-7 | NZ_CP011474.1                      | + | 696758  | 696866  | RNA | → rpmE2 (PRK01678)Ribosomal_L31 (pfam01197) → rpmF (PRK01110)Ribosomal_L32p (pfam01783) →                                             |
| Cps-17-8 | NZ_CP010795.1                      | - | 2156721 | 2156613 | RNA | → rpmE2 (PRK01678)Ribosomal_L31 (pfam01197) → rpmF (PRK01110)Ribosomal_L32p (pfam01783) →                                             |
| Cku-1-1  | NZ_CP011312.1                      | - | 1807067 | 1807007 | RNA | → rpmE2 (PRK01678)Ribosomal_L31 (pfam01197) → rpmF (PRK01110)Ribosomal_L32p (pfam01783) →                                             |
| Cam-1-1  | NZ_GG771288.1                      | - | 137801  | 137737  | RNA | → rpmE2 (PRK01678)Ribosomal_L31 (pfam01197) → rpmF (PRK01110)Ribosomal_L32p (pfam01783) →                                             |
| Cvi-2-1  | NZ_CP004353.1                      | + | 974041  | 974128  | RNA | → rpmE2 (PRK01678)Ribosomal_L31 (pfam01197) → rpmF (PRK01110)Ribosomal_L32p (pfam01783) →                                             |
| Cvi-3-1  | NZ_JNKV01000010.1                  | + | 35324   | 35411   | RNA | → rpmE2 (PRK01678)Ribosomal_L31 (pfam01197) → rpmF (PRK01110)Ribosomal_L32p (pfam01783) →                                             |
| env-32   | JGI24707J26582.10216171            | - | 482     | 418     | RNA | → rpmE2 (PRK01678)Ribosomal_L31 (pfam01197) → rpmF (PRK01110)Ribosomal_L32p (pfam01783) →                                             |
| Cmu-1-1  | NZ_CP011542.1                      | + | 1034276 | 1034329 | RNA | → rpmE2 (PRK01678)Ribosomal_L31 (pfam01197) → rpmF (PRK01110)Ribosomal_L32p (pfam01783) →                                             |
| Cca-3-1  | NZ_CAFW01000081.1                  | + | 66998   | 67062   | RNA | → rpmE2 (PRK01678)Ribosomal_L31 (pfam01197) → rpmE2 (PRK01678)Ribosomal_L31 (pfam01197) → rpmF (PRK01110)Ribosomal_L32p (pfam01783) → |
| Cca-6-1  | NZ_CP004350.1                      | - | 2180252 | 2180188 | RNA | → rpmE2 (PRK01678)Ribosomal_L31 (pfam01197) → rpmF (PRK01110)Ribosomal_L32p (pfam01783) →                                             |
| env-33   | 2205737659                         | + | 155     | 219     | RNA | → rpmE2 (PRK01678)Ribosomal_L31 (pfam01197) → rpmF (PRK01110)Ribosomal_L32p (pfam01783) →                                             |
| env-34   | 2158166148                         | + | 155     | 219     | RNA | → rpmE2 (PRK01678)Ribosomal_L31 (pfam01197) → rpmF (PRK01110)Ribosomal_L32p (pfam01783) →                                             |
| env-35   | Buccal_mucosa_LANL_scaffold.147023 | + | 1044    | 1107    | RNA | → rpmE2 (PRK01678)Ribosomal_L31 (pfam01197) → rpmF (PRK01110)Ribosomal_L32p (pfam01783) →                                             |
| env-36   | SRS015064_C1740324                 | - | 3475    | 3412    | RNA | → rpmE2 (PRK01678)Ribosomal_L31 (pfam01197) → rpmF (PRK01110)Ribosomal_L32p (pfam01783) →                                             |
| env-37   | SRS017076_C2591228                 | - | 210     | 147     | RNA | → rpmE2 (PRK01678)Ribosomal_L31 (pfam01197) →                                                                                         |
| env-38   | SRS022602_Baylor_scaffold.15996    | + | 4561    | 4624    | RNA | → rpmE2 (PRK01678)Ribosomal_L31 (pfam01197) → rpmF (PRK01110)Ribosomal_L32p (pfam01783) →                                             |
| env-39   | SRS023841_C1528757                 | - | 216     | 153     | RNA | → rpmE2 (PRK01678)Ribosomal_L31 (pfam01197) →                                                                                         |
| env-40   | SRS044366_C952506                  | + | 2004    | 2067    | RNA | → rpmE2 (PRK01678)Ribosomal_L31 (pfam01197) → rpmF (PRK01110)Ribosomal_L32p (pfam01783) →                                             |
| env-41   | SRS053630_LANL_scaffold.21375      | - | 55473   | 55410   | RNA | → rpmE2 (PRK01678)Ribosomal_L31 (pfam01197) → rpmF (PRK01110)Ribosomal_L32p (pfam01783) →                                             |
| env-42   | Subgingival_plaque_LANL_C11219698  | - | 389     | 326     | RNA | → rpmE2 (PRK01678)Ribosomal_L31 (pfam01197) →                                                                                         |
| env-43   | SRS011098_Baylor_scaffold.21411    | - | 9309    | 9246    | RNA | → rpmE2 (PRK01678)Ribosomal_L31 (pfam01197) → rpmF (PRK01110)Ribosomal_L32p (pfam01783) →                                             |
| env-44   | SRS011152_Baylor_scaffold.27991    | + | 1045    | 1108    | RNA | → rpmE2 (PRK01678)Ribosomal_L31 (pfam01197) → rpmF (PRK01110)Ribosomal_L32p (pfam01783) →                                             |
| env-45   | SRS011343_C2262393                 | + | 14035   | 14098   | RNA | → rpmE2 (PRK01678)Ribosomal_L31 (pfam01197) → rpmF (PRK01110)Ribosomal_L32p (pfam01783) →                                             |
| env-46   | SRS012285_Baylor_scaffold.4751     | + | 7940    | 8003    | RNA | → rpmE2 (PRK01678)Ribosomal_L31 (pfam01197) → rpmF (PRK01110)Ribosomal_L32p (pfam01783) →                                             |
| env-47   | SRS013170_Baylor_scaffold.53613    | - | 476     | 413     | RNA | → rpmE2 (PRK01678)Ribosomal_L31 (pfam01197) → rpmF (PRK01110)Ribosomal_L32p (pfam01783) →                                             |
| env-48   | SRS013533_C5500247                 | + | 357     | 420     | RNA | → rpmE2 (PRK01678)Ribosomal_L31 (pfam01197) → rpmF (PRK01110) →                                                                       |
| env-49   | SRS013723_Baylor_scaffold.39673    | + | 2404    | 2467    | RNA | → rpmE2 (PRK01678)Ribosomal_L31 (pfam01197) → rpmF (PRK01110)Ribosomal_L32p (pfam01783) →                                             |
| env-50   | SRS013836_C4755765                 | + | 181     | 244     | RNA | → rpmE2 (PRK01678)Ribosomal_L31 (pfam01197) →                                                                                         |
| env-51   | SRS013949_WUGC_scaffold.27456      | - | 199     | 136     | RNA | → rpmE2 (PRK01678)Ribosomal_L31 (pfam01197) →                                                                                         |
| env-52   | SRS013950_C2187510                 | + | 1205    | 1268    | RNA | → rpmE2 (PRK01678)Ribosomal_L31 (pfam01197) → rpmF (PRK01110)Ribosomal_L32p (pfam01783) →                                             |
| env-53   | SRS014107_C1342401                 | - | 235     | 172     | RNA | → rpmE2 (PRK01678)Ribosomal_L31 (pfam01197) →                                                                                         |
| env-54   | SRS014473_C1089635                 | + | 295     | 358     | RNA | → rpmE2 (PRK01678)Ribosomal_L31 (pfam01197) →                                                                                         |
| env-55   | SRS014476_WUGC_scaffold.41168      | - | 1375    | 1312    | RNA | → rpmE2 (PRK01678)Ribosomal_L31 (pfam01197) → rpmF (PRK01110)Ribosomal_L32p (pfam01783) →                                             |
| env-56   | SRS014477_C1645642                 | - | 1867    | 1804    | RNA | → rpmE2 (PRK01678)Ribosomal_L31 (pfam01197) → rpmF (PRK01110)Ribosomal_L32p (pfam01783) →                                             |
| env-57   | SRS014578_WUGC_scaffold.44820      | + | 551     | 614     | RNA | → rpmE2 (PRK01678)Ribosomal_L31 (pfam01197) →                                                                                         |
| env-58   | SRS014690_C1892883                 | - | 401     | 338     | RNA | → rpmE2 (PRK01678)Ribosomal_L31 (pfam01197) →                                                                                         |
| env-59   | SRS014691_WUGC_scaffold.10572      | + | 275     | 338     | RNA | → rpmE2 (PRK01678)Ribosomal_L31 (pfam01197) →                                                                                         |
| env-60   | SRS014894_WUGC_scaffold.28738      | + | 22786   | 22849   | RNA | → rpmE2 (PRK01678)Ribosomal_L31 (pfam01197) → rpmF (PRK01110)Ribosomal_L32p (pfam01783) →                                             |
| env-61   | SRS015044_C2942561                 | + | 357     | 420     | RNA | → rpmE2 (PRK01678)Ribosomal_L31 (pfam01197) →                                                                                         |
| env-62   | SRS015060_C1560553                 | + | 198     | 261     | RNA | → rpmE2 (PRK01678)Ribosomal_L31 (pfam01197) → rpmF (PRK01110)Ribosomal_L32p (pfam01783) →                                             |
| env-63   | SRS015063_WUGC_scaffold.11905      | + | 3939    | 4002    | RNA | → rpmE2 (PRK01678)Ribosomal_L31 (pfam01197) → rpmF (PRK01110) →                                                                       |
| env-64   | SRS015158_WUGC_scaffold.58214      | + | 860     | 923     | RNA | → rpmE2 (PRK01678)Ribosomal_L31 (pfam01197) → rpmF (PRK01110)Ribosomal_L32p (pfam01783) →                                             |
| env-65   | SRS015215_WUGC_scaffold.18972      | + | 1864    | 1927    | RNA | → rpmE2 (PRK01678)Ribosomal_L31 (pfam01197) → rpmF (PRK01110)Ribosomal_L32p (pfam01783) →                                             |
| env-66   | SRS015278_WUGC_scaffold.11862      | - | 58024   | 57961   | RNA | → rpmE2 (PRK01678)Ribosomal_L31 (pfam01197) → rpmF (PRK01110)Ribosomal_L32p (pfam01783) →                                             |
| env-67   | SRS015378_WUGC_scaffold.7793       | + | 1275    | 1338    | RNA | → rpmE2 (PRK01678)Ribosomal_L31 (pfam01197) → rpmF (PRK01110)Ribosomal_L32p (pfam01783) →                                             |
| env-68   | SRS015440_WUGC_scaffold.49340      | - | 2220    | 2157    | RNA | → rpmE2 (PRK01678)Ribosomal_L31 (pfam01197) → rpmF (PRK01110)Ribosomal_L32p (pfam01783) →                                             |
| env-69   | SRS015470_WUGC_scaffold.45392      | - | 1480    | 1417    | RNA | → rpmE2 (PRK01678)Ribosomal_L31 (pfam01197) → rpmF (PRK01110)Ribosomal_L32p (pfam01783) →                                             |
| env-70   | SRS015574_WUGC_scaffold.2816       | + | 74953   | 75016   | RNA | → rpmE2 (PRK01678)Ribosomal_L31 (pfam01197) → rpmF (PRK01110)Ribosomal_L32p (pfam01783) →                                             |

|         |                                 |   |       |       |                                                                                               |
|---------|---------------------------------|---|-------|-------|-----------------------------------------------------------------------------------------------|
| env-71  | SRS015755_WUGC_scaffold_44984   | + | 1196  | 1259  | RNA → rpmE2 (PRK01678)Ribosomal_L31 (pfam01197) → rpmF (PRK01110)Ribosomal_L32p (pfam01783) → |
| env-72  | SRS015989_WUGC_scaffold_32775   | - | 5102  | 5039  | RNA → rpmE2 (PRK01678)Ribosomal_L31 (pfam01197) → rpmF (PRK01110)Ribosomal_L32p (pfam01783) → |
| env-73  | SRS016043_WUGC_scaffold_12513   | - | 56767 | 56704 | RNA → rpmE2 (PRK01678)Ribosomal_L31 (pfam01197) → rpmF (PRK01110)Ribosomal_L32p (pfam01783) → |
| env-74  | SRS016200_WUGC_scaffold_38664   | - | 3995  | 3932  | RNA → rpmE2 (PRK01678)Ribosomal_L31 (pfam01197) → rpmF (PRK01110)Ribosomal_L32p (pfam01783) → |
| env-75  | SRS016360_Baylor_scaffold_23915 | - | 10968 | 10905 | RNA → rpmE2 (PRK01678)Ribosomal_L31 (pfam01197) → rpmF (PRK01110)Ribosomal_L32p (pfam01783) → |
| env-76  | SRS016575_Baylor_scaffold_1786  | - | 7196  | 7133  | RNA → rpmE2 (PRK01678)Ribosomal_L31 (pfam01197) → rpmF (PRK01110)Ribosomal_L32p (pfam01783) → |
| env-77  | SRS016746_Baylor_scaffold_72724 | + | 7808  | 7871  | RNA → rpmE2 (PRK01678)Ribosomal_L31 (pfam01197) → rpmF (PRK01110)Ribosomal_L32p (pfam01783) → |
| env-78  | SRS017025_Baylor_scaffold_19305 | - | 682   | 619   | RNA → rpmE2 (PRK01678)Ribosomal_L31 (pfam01197) → rpmF (PRK01110)Ribosomal_L32p (pfam01783) → |
| env-79  | SRS017227_C5283816              | + | 851   | 914   | RNA → ←-hypo                                                                                  |
| env-80  | SRS017445_Baylor_scaffold_45380 | - | 6544  | 6481  | RNA → rpmE2 (PRK01678)Ribosomal_L31 (pfam01197) → rpmF (PRK01110)Ribosomal_L32p (pfam01783) → |
| env-81  | SRS017511_Baylor_scaffold_42338 | + | 1176  | 1239  | RNA → rpmE2 (PRK01678)Ribosomal_L31 (pfam01197) → rpmF (PRK01110)Ribosomal_L32p (pfam01783) → |
| env-82  | SRS017687_C884952               | + | 126   | 189   | RNA → rpmE2 (PRK01678)Ribosomal_L31 (pfam01197) → rpmF (PRK01110)Ribosomal_L32p (pfam01783) → |
| env-83  | SRS018337_C2391064              | + | 863   | 926   | RNA → rpmE2 (PRK01678)Ribosomal_L31 (pfam01197) → rpmF (PRK01110)Ribosomal_L32p (pfam01783) → |
| env-84  | SRS018573_WUGC_scaffold_24099   | - | 238   | 175   | RNA → rpmE2 (PRK01678)Ribosomal_L31 (pfam01197) →                                             |
| env-85  | SRS018665_WUGC_scaffold_21586   | - | 2301  | 2238  | RNA → rpmE2 (PRK01678)Ribosomal_L31 (pfam01197) → rpmF (PRK01110)Ribosomal_L32p (pfam01783) → |
| env-86  | SRS019025_WUGC_scaffold_5953    | - | 310   | 247   | RNA → rpmE2 (PRK01678)Ribosomal_L31 (pfam01197) →                                             |
| env-87  | SRS019028_WUGC_scaffold_36029   | - | 523   | 460   | RNA → rpmE2 (PRK01678)Ribosomal_L31 (pfam01197) → rpmF (PRK01110)Ribosomal_L32p (pfam01783) → |
| env-88  | SRS019029_C3309553              | + | 2423  | 2486  | RNA → rpmE2 (PRK01678)Ribosomal_L31 (pfam01197) → rpmF (PRK01110)Ribosomal_L32p (pfam01783) → |
| env-89  | SRS019128_WUGC_scaffold_42508   | + | 1205  | 1268  | RNA → rpmE2 (PRK01678)Ribosomal_L31 (pfam01197) → rpmF (PRK01110)Ribosomal_L32p (pfam01783) → |
| env-90  | SRS019129_WUGC_scaffold_20241   | - | 3656  | 3593  | RNA → rpmE2 (PRK01678)Ribosomal_L31 (pfam01197) → rpmF (PRK01110)Ribosomal_L32p (pfam01783) → |
| env-91  | SRS019225_WUGC_scaffold_23108   | + | 4861  | 4924  | RNA → rpmE2 (PRK01678)Ribosomal_L31 (pfam01197) → rpmF (PRK01110)Ribosomal_L32p (pfam01783) → |
| env-92  | SRS019333_C1208867              | + | 219   | 282   | RNA →                                                                                         |
| env-93  | SRS019387_WUGC_scaffold_16046   | + | 3939  | 4002  | RNA → rpmE2 (PRK01678)Ribosomal_L31 (pfam01197) → rpmF (PRK01110)Ribosomal_L32p (pfam01783) → |
| env-94  | SRS019591_WUGC_scaffold_40585   | + | 1176  | 1239  | RNA → rpmE2 (PRK01678)Ribosomal_L31 (pfam01197) → rpmF (PRK01110)Ribosomal_L32p (pfam01783) → |
| env-95  | SRS019906_WUGC_scaffold_28644   | - | 3887  | 3824  | RNA → rpmE2 (PRK01678)Ribosomal_L31 (pfam01197) → rpmF (PRK01110)Ribosomal_L32p (pfam01783) → |
| env-96  | SRS019980_Baylor_scaffold_30280 | - | 2562  | 2499  | RNA → rpmE2 (PRK01678)Ribosomal_L31 (pfam01197) → rpmF (PRK01110)Ribosomal_L32p (pfam01783) → |
| env-97  | SRS020220_C3511826              | + | 271   | 334   | RNA → ←-hypo                                                                                  |
| env-98  | SRS020226_Baylor_scaffold_55927 | - | 3611  | 3548  | RNA → rpmE2 (PRK01678)Ribosomal_L31 (pfam01197) → rpmF (PRK01110)Ribosomal_L32p (pfam01783) → |
| env-99  | SRS020334_C2557741              | + | 249   | 312   | RNA →                                                                                         |
| env-100 | SRS020862_Baylor_scaffold_27689 | - | 8855  | 8792  | RNA → rpmE2 (PRK01678)Ribosomal_L31 (pfam01197) → rpmF (PRK01110)Ribosomal_L32p (pfam01783) → |
| env-101 | SRS021477_Baylor_scaffold_22850 | - | 15915 | 15852 | RNA → rpmE2 (PRK01678)Ribosomal_L31 (pfam01197) → rpmF (PRK01110)Ribosomal_L32p (pfam01783) → |
| env-102 | SRS021960_Baylor_scaffold_7131  | - | 2351  | 2288  | RNA → rpmE2 (PRK01678)Ribosomal_L31 (pfam01197) → rpmF (PRK01110)Ribosomal_L32p (pfam01783) → |
| env-103 | SRS022083_Baylor_scaffold_11512 | - | 55855 | 55792 | RNA → rpmE2 (PRK01678)Ribosomal_L31 (pfam01197) → rpmF (PRK01110)Ribosomal_L32p (pfam01783) → |
| env-104 | SRS022149_LANL_scaffold_20816   | + | 1063  | 1126  | RNA → rpmE2 (PRK01678)Ribosomal_L31 (pfam01197) → rpmF (PRK01110)Ribosomal_L32p (pfam01783) → |
| env-105 | SRS022536_LANL_scaffold_114388  | - | 1321  | 1258  | RNA → rpmE2 (PRK01678)Ribosomal_L31 (pfam01197) → rpmF (PRK01110)Ribosomal_L32p (pfam01783) → |
| env-106 | SRS022725_LANL_scaffold_19220   | + | 1891  | 1954  | RNA → rpmE2 (PRK01678)Ribosomal_L31 (pfam01197) →                                             |
| env-107 | SRS023358_C3452087              | - | 361   | 298   | RNA → rpmE2 (PRK01678)Ribosomal_L31 (pfam01197) →                                             |
| env-108 | SRS023538_C1310182              | - | 1371  | 1308  | RNA → rpmE2 (PRK01678)Ribosomal_L31 (pfam01197) → rpmF (PRK01110)Ribosomal_L32p (pfam01783) → |
| env-109 | SRS023595_Baylor_scaffold_84979 | + | 919   | 982   | RNA → rpmE2 (PRK01678)Ribosomal_L31 (pfam01197) → rpmF (PRK01110) →                           |
| env-110 | SRS023938_Baylor_scaffold_15844 | - | 12477 | 12414 | RNA → rpmE2 (PRK01678)Ribosomal_L31 (pfam01197) → rpmF (PRK01110)Ribosomal_L32p (pfam01783) → |
| env-111 | SRS023964_Baylor_scaffold_34977 | + | 1176  | 1239  | RNA → rpmE2 (PRK01678)Ribosomal_L31 (pfam01197) → rpmF (PRK01110)Ribosomal_L32p (pfam01783) → |
| env-112 | SRS024021_Baylor_scaffold_16881 | + | 11059 | 11122 | RNA → rpmE2 (PRK01678)Ribosomal_L31 (pfam01197) → rpmF (PRK01110)Ribosomal_L32p (pfam01783) → |
| env-113 | SRS024087_LANL_scaffold_41039   | - | 238   | 175   | RNA → rpmE2 (PRK01678)Ribosomal_L31 (pfam01197) →                                             |
| env-114 | SRS024289_LANL_scaffold_12931   | - | 91217 | 91154 | RNA → rpmE2 (PRK01678)Ribosomal_L31 (pfam01197) → rpmF (PRK01110)Ribosomal_L32p (pfam01783) → |
| env-115 | SRS024381_C2286130              | + | 294   | 357   | RNA →                                                                                         |
| env-116 | SRS024447_LANL_scaffold_37014   | - | 3896  | 3833  | RNA → rpmE2 (PRK01678)Ribosomal_L31 (pfam01197) → rpmF (PRK01110)Ribosomal_L32p (pfam01783) → |
| env-117 | SRS024561_LANL_scaffold_31049   | + | 1456  | 1519  | RNA → rpmE2 (PRK01678)Ribosomal_L31 (pfam01197) → rpmF (PRK01110)Ribosomal_L32p (pfam01783) → |
| env-118 | SRS024649_LANL_scaffold_19762   | - | 2266  | 2203  | RNA → rpmE2 (PRK01678)Ribosomal_L31 (pfam01197) → rpmF (PRK01110)Ribosomal_L32p (pfam01783) → |
| env-119 | SRS042984_LANL_scaffold_1303    | - | 1490  | 1427  | RNA → rpmE2 (PRK01678)Ribosomal_L31 (pfam01197) → rpmF (PRK01110)Ribosomal_L32p (pfam01783) → |
| env-120 | SRS043018_WUGC_scaffold_35426   | + | 991   | 1054  | RNA → rpmE2 (PRK01678)Ribosomal_L31 (pfam01197) → rpmF (PRK01110)Ribosomal_L32p (pfam01783) → |
| env-121 | SRS043772_WUGC_scaffold_25647   | + | 1553  | 1616  | RNA → rpmE2 (PRK01678)Ribosomal_L31 (pfam01197) → rpmF (PRK01110)Ribosomal_L32p (pfam01783) → |
| env-122 | SRS047100_WUGC_scaffold_20208   | + | 1176  | 1239  | RNA → rpmE2 (PRK01678)Ribosomal_L31 (pfam01197) → rpmF (PRK01110)Ribosomal_L32p (pfam01783) → |



|         |                                 |   |        |        |                                                                                                                                                                                                                                                                                                                                                                                                       |
|---------|---------------------------------|---|--------|--------|-------------------------------------------------------------------------------------------------------------------------------------------------------------------------------------------------------------------------------------------------------------------------------------------------------------------------------------------------------------------------------------------------------|
| env-123 | SRS049268.LANL_scaffold_56284   | + | 1050   | 1113   | RNA → rpmE2 (PRK01678)Ribosomal.L31 (pfam01197) → rpmF (PRK01110)Ribosomal.L32p (pfam01783) →                                                                                                                                                                                                                                                                                                         |
| env-124 | SRS049318.LANL_scaffold_74226   | + | 1275   | 1338   | RNA → ←hypo                                                                                                                                                                                                                                                                                                                                                                                           |
| env-125 | SRS051244.LANL_scaffold_15573   | - | 9216   | 9153   | RNA → rpmE2 (PRK01678)Ribosomal.L31 (pfam01197) → rpmF (PRK01110)Ribosomal.L32p (pfam01783) →                                                                                                                                                                                                                                                                                                         |
| env-126 | SRS051378.LANL_scaffold_28522   | - | 3634   | 3571   | RNA → rpmE2 (PRK01678)Ribosomal.L31 (pfam01197) → rpmF (PRK01110)Ribosomal.L32p (pfam01783) →                                                                                                                                                                                                                                                                                                         |
| env-127 | SRS051930.LANL_scaffold_9996    | - | 7943   | 7880   | RNA → rpmE2 (PRK01678)Ribosomal.L31 (pfam01197) → rpmF (PRK01110)Ribosomal.L32p (pfam01783) →                                                                                                                                                                                                                                                                                                         |
| env-128 | SRS052604.LANL_scaffold_15789   | - | 3462   | 3399   | RNA → rpmE2 (PRK01678)Ribosomal.L31 (pfam01197) → rpmF (PRK01110)Ribosomal.L32p (pfam01783) →                                                                                                                                                                                                                                                                                                         |
| env-129 | SRS052876.LANL_scaffold_11131   | - | 4560   | 4497   | RNA → rpmE2 (PRK01678)Ribosomal.L31 (pfam01197) → rpmF (PRK01110)Ribosomal.L32p (pfam01783) →                                                                                                                                                                                                                                                                                                         |
| env-130 | SRS054430.LANL_scaffold_8962    | - | 182    | 119    | RNA → ←hypo                                                                                                                                                                                                                                                                                                                                                                                           |
| env-131 | SRS054653.LANL_scaffold_17280   | - | 2173   | 2110   | RNA → rpmE2 (PRK01678)Ribosomal.L31 (pfam01197) → rpmF (PRK01110)Ribosomal.L32p (pfam01783) →                                                                                                                                                                                                                                                                                                         |
| env-132 | SRS055378.LANL_scaffold_71521   | + | 1515   | 1578   | RNA → rpmE2 (PRK01678)Ribosomal.L31 (pfam01197) → rpmF (PRK01110)Ribosomal.L32p (pfam01783) →                                                                                                                                                                                                                                                                                                         |
| env-133 | SRS055401.LANL_scaffold_40435   | + | 268    | 331    | RNA → rpmE2 (PRK01678)Ribosomal.L31 (pfam01197) → rpmF (PRK01110)Ribosomal.L32p (pfam01783) →                                                                                                                                                                                                                                                                                                         |
| env-134 | SRS055450.LANL_scaffold_48342   | - | 746    | 683    | RNA → rpmE2 (PRK01678)Ribosomal.L31 (pfam01197) → rpmF (PRK01110)Ribosomal.L32p (pfam01783) →                                                                                                                                                                                                                                                                                                         |
| env-135 | SRS058053.LANL_scaffold_20722   | - | 3271   | 3208   | RNA → rpmE2 (PRK01678)Ribosomal.L31 (pfam01197) → rpmF (PRK01110)Ribosomal.L32p (pfam01783) →                                                                                                                                                                                                                                                                                                         |
| env-136 | SRS058808.LANL_scaffold_76023   | - | 908    | 845    | RNA → rpmE2 (PRK01678)Ribosomal.L31 (pfam01197) → rpmF (PRK01110)Ribosomal.L32p (pfam01783) →                                                                                                                                                                                                                                                                                                         |
| env-137 | SRS063215.C2240857              | + | 181    | 244    | RNA → rpmE2 (PRK01678)Ribosomal.L31 (pfam01197) → rpmF (PRK01110)Ribosomal.L32p (pfam01783) →                                                                                                                                                                                                                                                                                                         |
| env-138 | SRS063932.C3715652              | - | 110    | 47     | RNA → hypo →                                                                                                                                                                                                                                                                                                                                                                                          |
| env-139 | SRS063999.C3497605              | + | 134    | 197    | RNA → rpmE2 (PRK01678)Ribosomal.L31 (pfam01197) →                                                                                                                                                                                                                                                                                                                                                     |
| env-140 | SRS065099.LANL_scaffold_2670    | + | 5358   | 5421   | RNA → rpmE2 (PRK01678)Ribosomal.L31 (pfam01197) → rpmF (PRK01110)Ribosomal.L32p (pfam01783) →                                                                                                                                                                                                                                                                                                         |
| env-141 | SRS065310.LANL_scaffold_16984   | - | 1076   | 1013   | RNA → rpmE2 (PRK01678)Ribosomal.L31 (pfam01197) → rpmF (PRK01110)Ribosomal.L32p (pfam01783) →                                                                                                                                                                                                                                                                                                         |
| Cma-4-1 | NZ_ACSH02000008.1               | - | 471190 | 471127 | RNA → rpmE2 (PRK01678)Ribosomal.L31 (pfam01197) → rpmE2 (PRK01678)Ribosomal.L31 (pfam01197) → rpmF (PRK01110)Ribosomal.L32p (pfam01783) → rpmF (PRK01110)Ribosomal.L32p (pfam01783) →                                                                                                                                                                                                                 |
| Cma-5-1 | NZ_EQ973332.1                   | - | 470329 | 470266 | RNA → rpmE2 (PRK01678)Ribosomal.L31 (pfam01197) → rpmF (PRK01110)Ribosomal.L32p (pfam01783) → hypo → REC (smart00448)Trans_reg_C (smart00862)OmpR (COG0745) → HAMP (smart00304)HATPase_c (smart00387)HisKA (smart00388)BaeS (COG0642) →                                                                                                                                                               |
| env-142 | SRS017139.Baylor_scaffold_46230 | + | 1104   | 1167   | RNA → rpmE2 (PRK01678)Ribosomal.L31 (pfam01197) → rpmF (PRK01110)Ribosomal.L32p (pfam01783) →                                                                                                                                                                                                                                                                                                         |
| env-143 | SRS024318.LANL_scaffold_64348   | - | 95     | 32     | RNA → hypo →                                                                                                                                                                                                                                                                                                                                                                                          |
| env-144 | SRS015803.WUGC_scaffold_47328   | - | 8195   | 8132   | RNA → rpmE2 (PRK01678)Ribosomal.L31 (pfam01197) → rpmF (PRK01110)Ribosomal.L32p (pfam01783) →                                                                                                                                                                                                                                                                                                         |
| env-145 | SRS018394.Baylor_scaffold_43567 | + | 1126   | 1189   | RNA → rpmE2 (PRK01678)Ribosomal.L31 (pfam01197) →                                                                                                                                                                                                                                                                                                                                                     |
| env-146 | SRS019077.C2525265              | - | 265    | 202    | RNA → rpmE2 (PRK01678)Ribosomal.L31 (pfam01197) →                                                                                                                                                                                                                                                                                                                                                     |
| env-147 | SRS022719.LANL_scaffold_10847   | - | 240    | 177    | RNA → rpmE2 (PRK01678)Ribosomal.L31 (pfam01197) →                                                                                                                                                                                                                                                                                                                                                     |
| env-148 | SRS045049.C1493001              | + | 93     | 156    | RNA → rpmE2 (PRK01678)Ribosomal.L31 (pfam01197) →                                                                                                                                                                                                                                                                                                                                                     |
| env-149 | SRS045197.C3343939              | + | 181    | 244    | RNA → rpmE (PRK00019)rpmE2 (PRK01678)Ribosomal.L31 (pfam01197) →                                                                                                                                                                                                                                                                                                                                      |
| env-150 | SRS047634.LANL_scaffold_108263  | + | 2234   | 2297   | RNA →                                                                                                                                                                                                                                                                                                                                                                                                 |
| env-151 | SRS051941.LANL_scaffold_38428   | + | 2568   | 2631   | RNA → rpmE2 (PRK01678)Ribosomal.L31 (pfam01197) → rpmF (PRK01110)Ribosomal.L32p (pfam01783) →                                                                                                                                                                                                                                                                                                         |
| env-152 | SRS053584.LANL_scaffold_32609   | + | 521    | 584    | RNA →                                                                                                                                                                                                                                                                                                                                                                                                 |
| env-153 | SRS064449.LANL_scaffold_23248   | + | 2184   | 2247   | RNA → rpmE2 (PRK01678)Ribosomal.L31 (pfam01197) → rpmF (PRK01110)Ribosomal.L32p (pfam01783) →                                                                                                                                                                                                                                                                                                         |
| env-154 | SRS017304.Baylor_scaffold_4558  | - | 5996   | 5933   | RNA → rpmE2 (PRK01678)Ribosomal.L31 (pfam01197) → rpmF (PRK01110)Ribosomal.L32p (pfam01783) →                                                                                                                                                                                                                                                                                                         |
| env-155 | SRS024144.C1817014              | - | 4955   | 4892   | RNA → rpmE2 (PRK01678)Ribosomal.L31 (pfam01197) → rpmF (PRK01110)Ribosomal.L32p (pfam01783) →                                                                                                                                                                                                                                                                                                         |
| env-156 | SRS053917.LANL_scaffold_4723    | - | 52992  | 52939  | RNA → rpmE2 (PRK01678)Ribosomal.L31 (pfam01197) → rpmF (PRK01110)Ribosomal.L32p (pfam01783) →                                                                                                                                                                                                                                                                                                         |
| Cma-1-1 | NC_021915.1                     | + | 861557 | 861618 | RNA → rpmE2 (PRK01678)Ribosomal.L31 (pfam01197) → rpmF (PRK01110)Ribosomal.L32p (pfam01783) →                                                                                                                                                                                                                                                                                                         |
| Cxe-1-1 | NZ_LAYS01000015.1               | - | 47956  | 47840  | RNA → rpmE2 (PRK01678)Ribosomal.L31 (pfam01197) → rpmF (PRK01110)Ribosomal.L32p (pfam01783) →                                                                                                                                                                                                                                                                                                         |
| Chu-1-1 | NZ_CP005286.1                   | + | 766188 | 766271 | RNA → rpmE2 (PRK01678)Ribosomal.L31 (pfam01197) → rpmF (PRK01110)Ribosomal.L32p (pfam01783) →                                                                                                                                                                                                                                                                                                         |
| env-157 | JGI24707J26582.10124387         | - | 594    | 528    | RNA → rpmE2 (PRK01678)Ribosomal.L31 (pfam01197) → rpmF (PRK01110)Ribosomal.L32p (pfam01783) →                                                                                                                                                                                                                                                                                                         |
| env-158 | JGI24708J26588.10046528         | - | 1384   | 1318   | RNA → rpmE2 (PRK01678)Ribosomal.L31 (pfam01197) → rpmF (PRK01110)Ribosomal.L32p (pfam01783) → REC (smart00448)Trans_reg_C (smart00862)OmpR (COG0745) →                                                                                                                                                                                                                                                |
| Cte-2-1 | NZ_CP011545.1                   | + | 759300 | 759365 | RNA → rpmE2 (PRK01678)Ribosomal.L31 (pfam01197) → rpmF (PRK01110)Ribosomal.L32p (pfam01783) →                                                                                                                                                                                                                                                                                                         |
| Cma-2-1 | NZ_ATVG01000004.1               | - | 122985 | 122912 | RNA → rpmE2 (PRK01678)Ribosomal.L31 (pfam01197) → rpmE2 (PRK01678)Ribosomal.L31 (pfam01197) → rpmF (PRK01110)Ribosomal.L32p (pfam01783) →                                                                                                                                                                                                                                                             |
| Cma-6-1 | NZ_CP007790.1                   | + | 691873 | 691940 | RNA → rpmE2 (PRK01678)Ribosomal.L31 (pfam01197) → rpmF (PRK01110)Ribosomal.L32p (pfam01783) → REC (smart00448)Trans_reg_C (smart00862)OmpR (COG0745) → HAMP (smart00304)HATPase_c (smart00387)HisKA (smart00388)BaeS (COG0642) → DegQ (COG0265)PDZ_2 (pfam13180)Trypsin_2 (pfam13365) → DegQ (COG0265)PDZ_2 (pfam13180)Trypsin_2 (pfam13365) → MoCF_biosynth (smart00852)MogA.MoaB (cd00886) → hypo → |

|          |                        |   |         |         |      |                                            |                                            |
|----------|------------------------|---|---------|---------|------|--------------------------------------------|--------------------------------------------|
| env-159  | JGI24499J29688_1051025 | + | 20      | 74      | RNA→ | rpmE2 (PRK01678)Ribosomal_L31 (pfam01197)→ |                                            |
| Cef-1-1  | NC_004369.1            | + | 1007841 | 1007895 | RNA→ | rpmE2 (PRK01678)Ribosomal_L31 (pfam01197)→ | rpmF (PRK01110)Ribosomal_L32p (pfam01783)→ |
| Cul-3-1  | NC_015683.1            | + | 772809  | 772915  | RNA→ | rpmE2 (PRK01678)Ribosomal_L31 (pfam01197)→ | rpmF (PRK01110)Ribosomal_L32p (pfam01783)→ |
| Cul-1-1  | NC_018101.1            | + | 844033  | 844139  | RNA→ | rpmE2 (PRK01678)Ribosomal_L31 (pfam01197)→ | rpmF (PRK01110)Ribosomal_L32p (pfam01783)→ |
| Cul-2-1  | NC_017317.1            | + | 770052  | 770158  | RNA→ | rpmE2 (PRK01678)Ribosomal_L31 (pfam01197)→ | rpmF (PRK01110)Ribosomal_L32p (pfam01783)→ |
| Cul-6-2  | NZ_CP009583.1          | + | 759297  | 759403  | RNA→ | rpmE2 (PRK01678)Ribosomal_L31 (pfam01197)→ | rpmF (PRK01110)Ribosomal_L32p (pfam01783)→ |
| Cul-6-3  | NZ_CP009500.1          | + | 756232  | 756338  | RNA→ | rpmE2 (PRK01678)Ribosomal_L31 (pfam01197)→ | rpmF (PRK01110)Ribosomal_L32p (pfam01783)→ |
| Cul-8-1  | NZ_CP011913.1          | + | 800557  | 800663  | RNA→ | rpmE2 (PRK01678)Ribosomal_L31 (pfam01197)→ | rpmF (PRK01110)Ribosomal_L32p (pfam01783)→ |
| Cul-6-4  | NZ_CP009716.1          | + | 764195  | 764301  | RNA→ | rpmE2 (PRK01678)Ribosomal_L31 (pfam01197)→ | rpmF (PRK01110)Ribosomal_L32p (pfam01783)→ |
| Cul-7-1  | NZ_CP009622.1          | + | 751173  | 751279  | RNA→ | rpmE2 (PRK01678)Ribosomal_L31 (pfam01197)→ | rpmF (PRK01110)Ribosomal_L32p (pfam01783)→ |
| Cul-4-1  | NZ_AYUJ01000003.1      | + | 75253   | 75359   | RNA→ | rpmE2 (PRK01678)Ribosomal_L31 (pfam01197)→ | rpmF (PRK01110)Ribosomal_L32p (pfam01783)→ |
| Cca-1-1  | NC_020506.1            | + | 891721  | 891777  | RNA→ | rpmE2 (PRK01678)Ribosomal_L31 (pfam01197)→ | rpmF (PRK01110)Ribosomal_L32p (pfam01783)→ |
| Cca-1-2  | NZ_ATVVF01000011.1     | + | 57211   | 57267   | RNA→ | rpmE2 (PRK01678)Ribosomal_L31 (pfam01197)→ | rpmF (PRK01110)Ribosomal_L32p (pfam01783)→ |
| Cha-1-1  | NC_020302.1            | + | 926392  | 926485  | RNA→ | rpmE2 (PRK01678)Ribosomal_L31 (pfam01197)→ | rpmF (PRK01110)Ribosomal_L32p (pfam01783)→ |
| Cha-1-2  | NZ_JIAJ01000009.1      | - | 52009   | 51916   | RNA→ | rpmE2 (PRK01678)Ribosomal_L31 (pfam01197)→ | rpmF (PRK01110)Ribosomal_L32p (pfam01783)→ |
| Cpi-2-1  | NZ_LDYD01000009.1      | + | 112150  | 112215  | RNA→ | rpmE2 (PRK01678)Ribosomal_L31 (pfam01197)→ | rpmF (PRK01110)Ribosomal_L32p (pfam01783)→ |
| Cpi-1-1  | NZ_KB892441.1          | - | 29289   | 29354   | RNA→ | rpmE2 (PRK01678)Ribosomal_L31 (pfam01197)→ | rpmF (PRK01110)Ribosomal_L32p (pfam01783)→ |
| Clu-1-1  | NZ_KB902226.1          | - | 119258  | 119193  | RNA→ | rpmE2 (PRK01678)Ribosomal_L31 (pfam01197)→ | rpmF (PRK01110)Ribosomal_L32p (pfam01783)→ |
| Cep-1-1  | NZ_CP011541.1          | + | 815491  | 815557  | RNA→ | rpmE2 (PRK01678)Ribosomal_L31 (pfam01197)→ | rpmF (PRK01110)Ribosomal_L32p (pfam01783)→ |
| Cps-10-1 | NC_017307.1            | + | 688204  | 688312  | RNA→ | rpmE2 (PRK01678)Ribosomal_L31 (pfam01197)→ | rpmF (PRK01110)Ribosomal_L32p (pfam01783)→ |
| Cps-3-1  | NC_017308.1            | + | 675056  | 675164  | RNA→ | rpmE2 (PRK01678)Ribosomal_L31 (pfam01197)→ | rpmF (PRK01110)Ribosomal_L32p (pfam01783)→ |
| Cps-7-1  | NC_016932.1            | + | 685279  | 685387  | RNA→ | rpmE2 (PRK01678)Ribosomal_L31 (pfam01197)→ | rpmF (PRK01110)Ribosomal_L32p (pfam01783)→ |
| Cps-17-9 | NZ_CP012136.1          | + | 720478  | 720586  | RNA→ | rpmE2 (PRK01678)Ribosomal_L31 (pfam01197)→ | rpmF (PRK01110)Ribosomal_L32p (pfam01783)→ |
| Cps-11-1 | NC_018019.1            | + | 680119  | 680227  | RNA→ | rpmE2 (PRK01678)Ribosomal_L31 (pfam01197)→ | rpmF (PRK01110)Ribosomal_L32p (pfam01783)→ |
| Cps-18-1 | NC_017945.2            | + | 720561  | 720669  | RNA→ | rpmE2 (PRK01678)Ribosomal_L31 (pfam01197)→ | rpmF (PRK01110)Ribosomal_L32p (pfam01783)→ |
| Cps-19-1 | NC_017730.2            | + | 745407  | 745515  | RNA→ | rpmE2 (PRK01678)Ribosomal_L31 (pfam01197)→ | rpmF (PRK01110)Ribosomal_L32p (pfam01783)→ |
| Cgl-3-1  | NC_003450.3            | + | 927407  | 927462  | RNA→ | rpmE2 (PRK01678)Ribosomal_L31 (pfam01197)→ | rpmF (PRK01110)Ribosomal_L32p (pfam01783)→ |
| Cgl-7-1  | NZ_AFYA01000024.1      | + | 65956   | 66011   | RNA→ | rpmE2 (PRK01678)Ribosomal_L31 (pfam01197)→ | rpmF (PRK01110)Ribosomal_L32p (pfam01783)→ |
| Cgl-6-1  | NC_009342.1            | + | 1091957 | 1092012 | RNA→ | rpmE2 (PRK01678)Ribosomal_L31 (pfam01197)→ | rpmF (PRK01110)Ribosomal_L32p (pfam01783)→ |
| Cgl-4-1  | NC_020519.1            | + | 927406  | 927461  | RNA→ | rpmE2 (PRK01678)Ribosomal_L31 (pfam01197)→ | rpmF (PRK01110)Ribosomal_L32p (pfam01783)→ |
| Cgl-9-1  | NC_021352.1            | + | 1128888 | 1128943 | RNA→ | rpmE2 (PRK01678)Ribosomal_L31 (pfam01197)→ | rpmF (PRK01110)Ribosomal_L32p (pfam01783)→ |
| Cgl-8-1  | NC_021351.1            | + | 1128889 | 1128944 | RNA→ | rpmE2 (PRK01678)Ribosomal_L31 (pfam01197)→ | rpmF (PRK01110)Ribosomal_L32p (pfam01783)→ |
| Cgl-5-1  | NC_022040.1            | + | 930302  | 930357  | RNA→ | rpmE2 (PRK01678)Ribosomal_L31 (pfam01197)→ | rpmF (PRK01110)Ribosomal_L32p (pfam01783)→ |
| Cgl-11-1 | NZ_CP010451.1          | + | 991151  | 991206  | RNA→ | rpmE2 (PRK01678)Ribosomal_L31 (pfam01197)→ | rpmF (PRK01110)Ribosomal_L32p (pfam01783)→ |
| Cgl-11-2 | NZ_CP007722.1          | + | 1016675 | 1016730 | RNA→ | rpmE2 (PRK01678)Ribosomal_L31 (pfam01197)→ | rpmF (PRK01110)Ribosomal_L32p (pfam01783)→ |
| Cgl-11-3 | NZ_CP007724.1          | + | 985858  | 985913  | RNA→ | rpmE2 (PRK01678)Ribosomal_L31 (pfam01197)→ | rpmF (PRK01110)Ribosomal_L32p (pfam01783)→ |
| Cgl-3-2  | NC_006958.1            | + | 928877  | 928932  | RNA→ | rpmE2 (PRK01678)Ribosomal_L31 (pfam01197)→ | rpmF (PRK01110)Ribosomal_L32p (pfam01783)→ |
| [fl-1-1  | NZ_CP011309.1          | + | 983067  | 983122  | RNA→ | rpmE2 (PRK01678)Ribosomal_L31 (pfam01197)→ | rpmF (PRK01110)Ribosomal_L32p (pfam01783)→ |
| Cgl-10-1 | NZ_AKXP01000016.1      | + | 65984   | 66039   | RNA→ | rpmE2 (PRK01678)Ribosomal_L31 (pfam01197)→ | rpmF (PRK01110)Ribosomal_L32p (pfam01783)→ |
| Cgl-12-1 | NZ_AGQQ02000002.1      | + | 1168400 | 1168455 | RNA→ | rpmE2 (PRK01678)Ribosomal_L31 (pfam01197)→ | rpmF (PRK01110)Ribosomal_L32p (pfam01783)→ |
| Ccr-2-1  | NZ_JPDH01000040.1      | - | 9017    | 8962    | RNA→ | rpmE2 (PRK01678)Ribosomal_L31 (pfam01197)→ | rpmF (PRK01110)Ribosomal_L32p (pfam01783)→ |
| Ccr-1-1  | NZ_AQPS01000045.1      | + | 65984   | 66039   | RNA→ | rpmE2 (PRK01678)Ribosomal_L31 (pfam01197)→ | rpmF (PRK01110)Ribosomal_L32p (pfam01783)→ |

### 13.3 Conserved domains

Conserved domains found in protein-coding genes listed in Section 13.2 are shown below, with the first sentence in their description from the Conserved Domain Database (if any). Conserved domains associated with more than one L31-

Corynebacteriaceae RNA are assigned a color, while others are shown in gray. The number in parentheses after the colored domain name is the number of occurrences in Section 13.2.



cd00886 (2) MogA\_MoaB family.  
**COG0265** (4) Periplasmic serine protease, S1-C subfamily, contain C-terminal PDZ domain [Posttranslational modification, protein turnover, chaperones]  
**COG0642** (2) Signal transduction histidine kinase [Signal transduction mechanisms]  
**COG0745** (5) DNA-binding response regulator, OmpR family, contains REC and winged-helix (wHTH) domain [Signal transduction mechanisms, Transcription]  
**COG2965** (2) Primosomal replication protein N [Replication, recombination and repair]  
**pfam01197** (353) Ribosomal protein L31.  
**pfam01783** (313) Ribosomal L32p protein family.  
**pfam13026** (1) Protein of unknown function (DUF3887).  
**pfam13180** (4) PDZ domain.

**pfam13365** (4) Trypsin-like peptidase domain.  
**PRK00019** (1) 50S ribosomal protein L31; Reviewed  
**PRK01110** (316) 50S ribosomal protein L32; Validated  
**PRK01678** (353) 50S ribosomal protein L31 type B; Reviewed  
**smart00304** (2) HAMP (Histidine kinases, Adenylyl cyclases, Methyl binding proteins, Phosphatases) domain.  
**smart00357** (2) Histidine kinase-like ATPases.  
**smart00383** (2) His Kinase A (phosphoacceptor) domain.  
**smart00448** (4) cheY-homologous receiver domain.  
**smart00852** (2) Probable molybdopterin binding domain.  
**smart00862** (5) Transcriptional regulatory protein, C terminal.

### 13.4 Multiple-sequence alignment

Each L31-Corynebacteriaceae RNA is denoted by an abbreviation (like “Eco-1-1”) that refers to a taxonomy given in Section 13.1. The alignment may include sequences containing the RNA motif, as well as flanking sequence. The L31-Corynebacteriaceae RNA itself is denoted by the line underneath marked 5’ and 3’ on either end. Nucleotides in flanking sequences (i.e., not part of the motif) are written in gray letters. Stems of predicted rho-independent transcription terminators, if any, are shaded yellow. (Note: terminator predictions have not been analyzed manually, and many are likely to be false positives. Terminator predictions are those of the RNIE software.) Nucleotides predicted to function (as DNA) as transcription-factor binding sites, if any, are shaded in green. (But note: these predictions are manually annotated, so they might be under-predicted.) Annotated start codons, if any, are shaded green. (Note: start codons are frequently misannotated, especially in environmental samples.) Nucleotides proposed to basepair as part of the consensus structure are shaded in color when they comprise Watson-

Crick or G-U pairs. Otherwise they are shaded gray. Conserved stems are also indicated at the bottom of the alignment by angle brackets, where matching < and > denote base-paired columns. Below these angle brackets, the symbol “2” denotes base pairs exhibiting covariation according to the statistically well-founded R-scape method. “1” denotes base pairs exhibiting covariation according to R2R’s simplistic method. “0” denotes base pairs that are not observed to mutate and “?” denotes base pairs that have a significant frequency of non-canonical nucleotides for Watson-Crick or G-U pairs (> 5%). Below these base pair annotation is the consensus sequence: “R” = “A” or “G”, “Y” = “C” or “U”, red nucleotides: nucleotide identity conserved more than 97% of the time, black nucleotides: 90%, gray nucleotides: 75%, red circle (◉): nucleotide is present 97% of the time, black circle (◐): 90%, gray circle (◑): 75%, white circle (◒): 50%. All percentages of sequences just described (e.g. 97% conserved) assume that sequences have been weighted by the GSC algorithm implemented by the Infernal software package.

Duplicate sequences: the following putative homologs are not shown in the alignment because their sequences are identical to a homolog already shown: Cac-1-1, Cac-2-1, Cau-2-4, Cca-1-2, Ccr-1-1, Ccr-2-1, Cdi-1-1, Cdi-10-1, Cdi-11-1, Cdi-12-1, Cdi-13-1, Cdi-14-1, Cdi-16-1, Cdi-17-1, Cdi-18-2, Cdi-19-1, Cdi-2-1, Cdi-21-1, Cdi-22-1, Cdi-3-1, Cdi-4-1, Cdi-5-1, Cdi-6-1, Cdi-7-1, Cdi-8-1, Cdi-9-1, Cdo-1-1, Cgl-10-1, Cgl-11-1, Cgl-11-2, Cgl-11-3, Cgl-12-1, Cgl-3-2, Cgl-4-1, Cgl-5-1, Cgl-6-1, Cgl-7-1, Cgl-8-1, Cgl-9-1, Cha-1-2, Cje-4-1, Cje-4-10, Cje-4-12, Cje-4-14, Cje-4-17, Cje-4-18, Cje-4-2, Cje-4-7, Cje-4-9, Cma-4-1, Cma-5-1, Cpi-1-1, Cpr-1-1, Cpr-2-1, Cpr-2-3, Cps-1-1, Cps-11-1, Cps-13-1, Cps-14-1, Cps-15-1, Cps-17-2, Cps-17-3, Cps-17-4, Cps-17-5, Cps-17-6, Cps-17-7, Cps-17-8, Cps-17-9, Cps-18-1, Cps-19-1, Cps-2-1, Cps-3-1, Cps-4-1, Cps-5-1, Cps-6-1, Cps-7-1, Cps-8-1, Cps-9-1, Csp-1-1, Csp-10-1, Csp-11-1, Csp-12-1, Csp-13-1, Csp-15-1, Csp-16-1, Csp-17-1, Csp-18-1, Csp-2-1, Csp-3-1, Csp-4-1, Csp-5-1, Csp-9-1, Cst-1-1, Cst-2-2, Cst-2-3, Cst-2-4, Cst-2-5, Cst-2-6, Cst-2-7, Cul-1-1, Cul-4-1, Cul-6-3, Cul-8-1, Cvi-3-1, Tot-1-1, [fl-1-1, env-10, env-100, env-101, env-102, env-103, env-104, env-105, env-106, env-107, env-108, env-109, env-11, env-110, env-111, env-112, env-113, env-114, env-115, env-116, env-117, env-118, env-119, env-120, env-121, env-122, env-123, env-124, env-125, env-126, env-127, env-128, env-129, env-130, env-131, env-132, env-133, env-134, env-135, env-136, env-137, env-138, env-139, env-140, env-141, env-143, env-145, env-146, env-147, env-148, env-149, env-15, env-150, env-151, env-152, env-153, env-155, env-158, env-16, env-20, env-21, env-22, env-23, env-26, env-28, env-34, env-36, env-37, env-38, env-39, env-40, env-41, env-42, env-43, env-44, env-45, env-46, env-47, env-48, env-49, env-50, env-51, env-52, env-53, env-54, env-55, env-56, env-57, env-58, env-59, env-60, env-61, env-62, env-63, env-64, env-65, env-66, env-67, env-68, env-69, env-7, env-70, env-71, env-72, env-73, env-74, env-75, env-76, env-77, env-78, env-79, env-80, env-81, env-82, env-83, env-84, env-85, env-86, env-87, env-88, env-89, env-90, env-91, env-92, env-93, env-94, env-95, env-96, env-97, env-98, env-99











|                  |                                                                     |                                                    |
|------------------|---------------------------------------------------------------------|----------------------------------------------------|
| Pgu-2-1          | Bacteria Bacteroidetes Bacteroidia Bacteroidales Porphyromonadaceae | <i>Porphyromonas gulae</i> DSM 15663               |
| Psp-1-1          | Bacteria Bacteroidetes Bacteroidia Bacteroidales Porphyromonadaceae | <i>Porphyromonas</i> sp. COT-239 OH1446            |
| Psp-2-1          | Bacteria Bacteroidetes Bacteroidia Bacteroidales Porphyromonadaceae | <i>Porphyromonas</i> sp. COT-290 OH860             |
| Psp-3-1          | Bacteria Bacteroidetes Bacteroidia Bacteroidales Porphyromonadaceae | <i>Porphyromonas</i> sp. oral taxon 278 str. W7784 |
| Pac-1-1          | Bacteria Bacteroidetes Bacteroidia Bacteroidales Porphyromonadaceae | <i>Proteiniphilum acetatigenes</i> DSM 18083       |
| Pxy-1-1          | Bacteria Bacteroidetes Bacteroidia Bacteroidales Prevotellaceae     | <i>Paraprevotella xyliniphila</i> YIT 11841        |
| Psp-4-1          | Bacteria Bacteroidetes Bacteroidia Bacteroidales Prevotellaceae     | <i>Prevotella</i> sp. 10(H)                        |
| env-1 to env-517 | environmental samples                                               |                                                    |

## 14.2 Gene contexts

Each S4-Bacteroidia RNA (indicated by “RNA→”) is listed. For each hit, the downstream genes predicted to reside in a regulated operon are listed. If the nearest downstream gene is encoding in the opposite strand (and therefore presumed to not be a part of a regulated operon), then that gene is still depicted. Some environmental sequences and some RefSeq entries lack gene annotations, and so no genes are available for such sequences. The direction of each gene is indicated with an arrow (→), and each predicted conserved domain in the gene is named. Conserved domains associated with more than one S4-Bacteroidia RNA are assigned a color; other domains are gray. Information about these conserved

domains is given in Section 14.3. The accession of the sequence containing each S4-Bacteroidia RNA is given in the column named “Seq. accession”. Accessions beginning with “NC\_”, “NS\_”, “NW\_” or “NZ\_” are contained in RefSeq. Other accession refer to environmental samples. Nucleotide coordinates are given for the 5′ and 3′ boundaries of each S4-Bacteroidia RNA. If the 5′ coordinate is greater than the 3′ coordinate, the RNA is present on the reverse-complement strand of the containing genomic DNA sequence. Each hit is denoted by an abbreviation (like “Eco-1-1”) that refers to a taxonomy given in Section 14.1.

| abbrev. | Seq. accession                    | 5′ at | 3′ at | genes |                                                                                                                                                |
|---------|-----------------------------------|-------|-------|-------|------------------------------------------------------------------------------------------------------------------------------------------------|
| env-1   | SRS023468_C1206091                | +     | 582   | 641   | RNA→ RpsD (COG0522)rpsD (PRK05327)→                                                                                                            |
| env-2   | DLM014_scaffold9702_6             | -     | 4201  | 4154  | RNA→ RpsD (COG0522)rpsD (PRK05327)→ RpoA (COG0202)PRK05182 (PRK05182)→<br>rplQ (PRK05591)Ribosomal_L17 (pfam01196)→                            |
| env-3   | Buccal_mucosa_LANL_scaffold_41001 | -     | 950   | 892   | RNA→ RpsD (COG0522)rpsD (PRK05327)→ PRK05182 (PRK05182)RNA_pol_L (pfam01193)→                                                                  |
| env-4   | SRS017127_Baylor_scaffold.6196    | +     | 1625  | 1683  | RNA→ RpsD (COG0522)rpsD (PRK05327)→                                                                                                            |
| env-5   | SRS018149_Baylor_scaffold.12321   | -     | 2101  | 2043  | RNA→ RpsD (COG0522)rpsD (PRK05327)→ RNAP_alpha_NTD (cd06928)PRK05182 (PRK05182)→<br>RplQ (COG0203)rplQ (PRK05591)→                             |
| env-6   | SRS023964_C2539807                | -     | 564   | 506   | RNA→ RpsD (COG0522)rpsD (PRK05327)→                                                                                                            |
| env-7   | SRS011310_Baylor_scaffold.16376   | -     | 5774  | 5716  | RNA→ RpsD (COG0522)rpsD (PRK05327)→<br>RNAP_alpha_NTD (cd06928)PRK05182 (PRK05182)RNA_pol_A_CTD (pfam03118)→<br>RplQ (COG0203)rplQ (PRK05591)→ |
| env-8   | SRS065310_C1361795                | +     | 968   | 1026  | RNA→ RpsD (COG0522)rpsD (PRK05327)→ PRK05182 (PRK05182)RNA_pol_L (pfam01193)→                                                                  |
| env-9   | SRS055378_LANL_scaffold_29718     | +     | 311   | 362   | RNA→ ←-hypo                                                                                                                                    |
| env-10  | SRS075410_LANL_scaffold_50382     | +     | 626   | 687   | RNA→ RpsD (COG0522)rpsD (PRK05327)→ RNAP_alpha_NTD (cd06928)PRK05182 (PRK05182)→                                                               |
| env-11  | SRS016043_WUGC_scaffold.3810      | +     | 4122  | 4183  | RNA→ RpsD (COG0522)rpsD (PRK05327)→ PRK05182 (PRK05182)RNA_pol_L (pfam01193)→                                                                  |
| env-12  | SRS017227_Baylor_scaffold.151231  | +     | 598   | 656   | RNA→ ←-hypo                                                                                                                                    |
| Pca-1-1 | NZ_JDF01000008.1                  | +     | 98648 | 98709 | RNA→ RpsD (COG0522)rpsD (PRK05327)→<br>RNAP_alpha_NTD (cd06928)PRK05182 (PRK05182)RNA_pol_A_CTD (pfam03118)→<br>RplQ (COG0203)rplQ (PRK05591)→ |
| env-13  | SRS023841_C1551522                | -     | 144   | 93    | RNA→ ←-hypo                                                                                                                                    |
| env-14  | SRS011255_Baylor_scaffold.64659   | +     | 946   | 1007  | RNA→ RpsD (COG0522)rpsD (PRK05327)→<br>RNAP_alpha_NTD (cd06928)PRK05182 (PRK05182)RNA_pol_A_CTD (pfam03118)→<br>RplQ (COG0203)rplQ (PRK05591)→ |
| env-15  | SRS022602_Baylor_scaffold.70156   | +     | 694   | 755   | RNA→ RpsD (COG0522)rpsD (PRK05327)→<br>RNAP_alpha_NTD (cd06928)PRK05182 (PRK05182)RNA_pol_A_CTD (pfam03118)→<br>RplQ (COG0203)rplQ (PRK05591)→ |
| env-16  | SRS011343_Baylor_scaffold.39133   | +     | 5921  | 5982  | RNA→ RpsD (COG0522)rpsD (PRK05327)→<br>RNAP_alpha_NTD (cd06928)PRK05182 (PRK05182)RNA_pol_A_CTD (pfam03118)→<br>RplQ (COG0203)rplQ (PRK05591)→ |

|         |                                 |   |        |        |                                                                                                                                                              |
|---------|---------------------------------|---|--------|--------|--------------------------------------------------------------------------------------------------------------------------------------------------------------|
| env-17  | SRS011126_Baylor_scaffold_62966 | + | 893    | 954    | RNA → ←hypo                                                                                                                                                  |
| env-18  | SRS020226_Baylor_scaffold_54603 | + | 798    | 857    | RNA → ←hypo                                                                                                                                                  |
| env-19  | SRS015574_WUGC_scaffold_12528   | - | 913    | 852    | RNA → RpsD (COG0522)rpsD (PRK05327) → PRK05182 (PRK05182)RNA_poLL (pfam01193) →                                                                              |
| env-20  | SRS015989_C2177697              | + | 1102   | 1163   | RNA → RpsD (COG0522)rpsD (PRK05327) →<br>RNAP_alpha_NTD (cd06928)PRK05182 (PRK05182)RNA_poLA_CTD (pfam03118) →<br>RplQ (COG0203)rplQ (PRK05591) →            |
| env-21  | SRS017511_Baylor_scaffold_65931 | + | 476    | 535    | RNA → ←hypo                                                                                                                                                  |
| env-22  | SRS015899_C1784559              | - | 159    | 98     | RNA → ←hypo                                                                                                                                                  |
| env-23  | SRS063999_LANL_scaffold_63196   | - | 141    | 90     | RNA → ←hypo                                                                                                                                                  |
| env-24  | SRS023964_C2553979              | - | 311    | 250    | RNA → rpsD (PRK05327)Ribosomal_S4 (pfam00163) →                                                                                                              |
| env-25  | SRS049389_WUGC_scaffold_5829    | - | 2425   | 2364   | RNA → RpsD (COG0522)rpsD (PRK05327) →<br>RNAP_alpha_NTD (cd06928)PRK05182 (PRK05182)RNA_poLA_CTD (pfam03118) →<br>RplQ (COG0203)rplQ (PRK05591) →            |
| env-26  | SRS049268_LANL_scaffold_58337   | + | 435    | 493    | RNA →                                                                                                                                                        |
| env-27  | SRS050029_WUGC_scaffold_1469    | + | 6482   | 6543   | RNA → ←hypo                                                                                                                                                  |
| env-28  | SRS050628_C1841465              | - | 367    | 306    | RNA → ←hypo                                                                                                                                                  |
| Psp-3-1 | NZ_KI259258.1                   | + | 268982 | 269043 | RNA → RpsD (COG0522)rpsD (PRK05327) →<br>RNAP_alpha_NTD (cd06928)PRK05182 (PRK05182)RNA_poLA_CTD (pfam03118) →<br>RplQ (COG0203)rplQ (PRK05591) →            |
| env-29  | SRS017808_C3810014              | + | 216    | 277    | RNA → ←hypo                                                                                                                                                  |
| env-30  | SRS017810_C1297543              | - | 2305   | 2244   | RNA → RpsD (COG0522)rpsD (PRK05327) →<br>RNAP_alpha_NTD (cd06928)PRK05182 (PRK05182)RNA_poLA_CTD (pfam03118) →<br>RplQ (COG0203)rplQ (PRK05591) →            |
| env-31  | SRS022719_C2873881              | + | 69     | 130    | RNA → rpsD (PRK05327)Ribosomal_S4 (pfam00163) →                                                                                                              |
| env-32  | SRS018157_Baylor_scaffold_50143 | + | 336    | 394    | RNA →                                                                                                                                                        |
| env-33  | SRS022077_Baylor_scaffold_39462 | + | 1738   | 1799   | RNA → ←hypo                                                                                                                                                  |
| env-34  | SRS019980_Baylor_scaffold_49109 | + | 185    | 246    | RNA → ←hypo                                                                                                                                                  |
| env-35  | SRS019122_C5826086              | + | 224    | 285    | RNA → ←hypo                                                                                                                                                  |
| env-36  | SRS011098_Baylor_scaffold_35155 | + | 393    | 454    | RNA →                                                                                                                                                        |
| env-37  | SRS064329_LANL_scaffold_22656   | - | 2368   | 2307   | RNA → RpsD (COG0522)rpsD (PRK05327) →<br>RNAP_alpha_NTD (cd06928)PRK05182 (PRK05182)RNA_poLA_CTD (pfam03118) →<br>RplQ (COG0203)rplQ (PRK05591) →            |
| env-38  | SRS011243_Baylor_scaffold_40900 | + | 7069   | 7130   | RNA → rpsD (PRK05327)Ribosomal_S4 (pfam00163) →                                                                                                              |
| env-39  | SRS023938_Baylor_scaffold_61057 | + | 322    | 380    | RNA →                                                                                                                                                        |
| env-40  | SRS013711_C1768261              | - | 1026   | 965    | RNA → RpsD (COG0522)rpsD (PRK05327) → PRK05182 (PRK05182)RNA_poLL (pfam01193) →                                                                              |
| env-41  | SRS047100_C2068538              | + | 529    | 590    | RNA →                                                                                                                                                        |
| env-42  | SRS016575_Baylor_scaffold_31788 | + | 726    | 784    | RNA →                                                                                                                                                        |
| env-43  | SRS017227_Baylor_scaffold_36455 | - | 153    | 95     | RNA → hypo →                                                                                                                                                 |
| env-44  | SRS054569_LANL_scaffold_25042   | + | 6465   | 6526   | RNA → RpsD (COG0522)rpsD (PRK05327) →<br>RNAP_alpha_NTD (cd06928)PRK05182 (PRK05182)RNA_poLA_CTD (pfam03118) →<br>rplQ (PRK05591)Ribosomal_L17 (pfam01196) → |
| env-45  | SRS015985_WUGC_scaffold_33109   | + | 1425   | 1486   | RNA → RpsD (COG0522)rpsD (PRK05327) →<br>RNAP_alpha_NTD (cd06928)PRK05182 (PRK05182)RNA_poLA_CTD (pfam03118) →<br>RplQ (COG0203)rplQ (PRK05591) →            |
| env-46  | SRS016569_Baylor_scaffold_10142 | + | 7054   | 7115   | RNA → RpsD (COG0522)rpsD (PRK05327) →<br>RNAP_alpha_NTD (cd06928)PRK05182 (PRK05182)RNA_poLA_CTD (pfam03118) →<br>RplQ (COG0203)rplQ (PRK05591) →            |
| env-47  | SRS062878_LANL_scaffold_84002   | + | 2264   | 2325   | RNA → RpsD (COG0522)rpsD (PRK05327) →<br>RNAP_alpha_NTD (cd06928)PRK05182 (PRK05182)RNA_poLA_CTD (pfam03118) →<br>rplQ (PRK05591)Ribosomal_L17 (pfam01196) → |
| env-48  | SRS043663_LANL_scaffold_33609   | + | 3838   | 3899   | RNA → RpsD (COG0522)rpsD (PRK05327) →<br>RNAP_alpha_NTD (cd06928)PRK05182 (PRK05182)RNA_poLA_CTD (pfam03118) →<br>RplQ (COG0203)rplQ (PRK05591) →            |

|        |                                 |   |       |       |                                                                                                                                                               |
|--------|---------------------------------|---|-------|-------|---------------------------------------------------------------------------------------------------------------------------------------------------------------|
| env-49 | SRS017814_Baylor_scaffold_28373 | + | 1124  | 1185  | RNA → RpsD (COG0522)rpsD (PRK05327) →<br>RNAP_alpha_NTD (cd06928)PRK05182 (PRK05182)RNA_poL_A_CTD (pfam03118) →<br>RplQ (COG0203)rplQ (PRK05591) →            |
| env-50 | SRS022725_LANL_scaffold_46531   | + | 399   | 460   | RNA → ←-hypo                                                                                                                                                  |
| env-51 | SRS016200_WUGC_scaffold_48533   | + | 1527  | 1588  | RNA → RpsD (COG0522)rpsD (PRK05327) →<br>RNAP_alpha_NTD (cd06928)PRK05182 (PRK05182)RNA_poL_A_CTD (pfam03118) →<br>RplQ (COG0203)rplQ (PRK05591) →            |
| env-52 | Palatine_Tonsils_LANL_C6173648  | + | 416   | 469   | RNA →                                                                                                                                                         |
| env-53 | SRS063932_LANL_scaffold_17762   | - | 154   | 95    | RNA →                                                                                                                                                         |
| env-54 | SRS048411_C6928200              | - | 302   | 241   | RNA → rpsD (PRK05327)Ribosomal_S4 (pfam00163) →                                                                                                               |
| env-55 | SRS013164_Baylor_scaffold_10065 | + | 5429  | 5490  | RNA → RpsD (COG0522)rpsD (PRK05327) → PRK05182 (PRK05182)RNA_poL_L (pfam01193) →                                                                              |
| env-56 | SRS015941_C3521747              | - | 131   | 80    | RNA →                                                                                                                                                         |
| env-57 | SRS017139_Baylor_scaffold_54946 | - | 310   | 249   | RNA → rpsD (PRK05327)Ribosomal_S4 (pfam00163) →                                                                                                               |
| env-58 | SRS016600_C812171               | + | 234   | 295   | RNA → RpsD (COG0522)rpsD (PRK05327) → RpoA (COG0202)PRK05182 (PRK05182) →                                                                                     |
| env-59 | SRS016746_Baylor_scaffold_51447 | - | 792   | 731   | RNA → RpsD (COG0522)rpsD (PRK05327) →                                                                                                                         |
| env-60 | SRS055378_LANL_scaffold_10432   | - | 143   | 92    | RNA →                                                                                                                                                         |
| env-61 | SRS017439_Baylor_scaffold_45491 | + | 416   | 477   | RNA → ←-hypo                                                                                                                                                  |
| env-62 | SRS049147_LANL_scaffold_12273   | - | 2261  | 2200  | RNA → RpsD (COG0522)rpsD (PRK05327) →<br>RNAP_alpha_NTD (cd06928)PRK05182 (PRK05182)RNA_poL_A_CTD (pfam03118) →<br>RplQ (COG0203)rplQ (PRK05591) →            |
| env-63 | SRS013881_WUGC_scaffold_12223   | - | 5093  | 5032  | RNA → RpsD (COG0522)rpsD (PRK05327) →<br>RNAP_alpha_NTD (cd06928)PRK05182 (PRK05182)RNA_poL_A_CTD (pfam03118) →<br>RplQ (COG0203)rplQ (PRK05591) →            |
| env-64 | SRS012279_Baylor_scaffold_38188 | + | 6346  | 6407  | RNA → ←-hypo                                                                                                                                                  |
| env-65 | SRS044662_C1620928              | + | 41    | 102   | RNA → rpsD (PRK05327)Ribosomal_S4 (pfam00163) →                                                                                                               |
| env-66 | SRS011310_Baylor_scaffold_13983 | + | 2829  | 2890  | RNA → RpsD (COG0522)rpsD (PRK05327) →<br>RNAP_alpha_NTD (cd06928)PRK05182 (PRK05182)RNA_poL_A_CTD (pfam03118) →<br>RplQ (COG0203)rplQ (PRK05591) →            |
| env-67 | SRS024355_LANL_scaffold_34750   | - | 442   | 381   | RNA → S4 (smart00363)RpsD (COG0522) →                                                                                                                         |
| env-68 | SRS024381_C2388111              | - | 313   | 252   | RNA → rpsD (PRK05327)Ribosomal_S4 (pfam00163) →                                                                                                               |
| env-69 | SRS042131_WUGC_scaffold_5469    | - | 6250  | 6189  | RNA → RpsD (COG0522)rpsD (PRK05327) →<br>RNAP_alpha_NTD (cd06928)PRK05182 (PRK05182)RNA_poL_A_CTD (pfam03118) →<br>RplQ (COG0203)rplQ (PRK05591) →            |
| env-70 | SRS011306_Baylor_scaffold_188   | - | 2407  | 2346  | RNA → RpsD (COG0522)rpsD (PRK05327) →<br>RNAP_alpha_NTD (cd06928)PRK05182 (PRK05182)RNA_poL_A_CTD (pfam03118) →<br>RplQ (COG0203)rplQ (PRK05591) →            |
| env-71 | SRS011126_Baylor_scaffold_20302 | - | 154   | 95    | RNA →                                                                                                                                                         |
| env-72 | SRS011140_Baylor_scaffold_48076 | - | 341   | 280   | RNA → rpsD (PRK05327)Ribosomal_S4 (pfam00163) →                                                                                                               |
| env-73 | SRS013947_WUGC_scaffold_13455   | - | 2590  | 2529  | RNA → RpsD (COG0522)rpsD (PRK05327) →<br>RNAP_alpha_NTD (cd06928)PRK05182 (PRK05182)RNA_poL_A_CTD (pfam03118) →<br>RplQ (COG0203)rplQ (PRK05591) →            |
| env-74 | SRS075404_C3684462              | + | 624   | 685   | RNA → RpsD (COG0522)rpsD (PRK05327) →<br>RNAP_alpha_NTD (cd06928)PRK05182 (PRK05182)RNA_poL_A_CTD (pfam03118) →<br>RplQ (COG0203)rplQ (PRK05591) →            |
| env-75 | SRS013946_WUGC_scaffold_140     | - | 21413 | 21352 | RNA → RpsD (COG0522)rpsD (PRK05327) →<br>RNAP_alpha_NTD (cd06928)PRK05182 (PRK05182)RNA_poL_A_CTD (pfam03118) →<br>RplQ (COG0203)rplQ (PRK05591) →            |
| env-76 | SRS014124_WUGC_scaffold_61000   | + | 4884  | 4945  | RNA → RpsD (COG0522)rpsD (PRK05327) →<br>RNAP_alpha_NTD (cd06928)PRK05182 (PRK05182)RNA_poL_A_CTD (pfam03118) →<br>RplQ (COG0203)rplQ (PRK05591) →            |
| env-77 | SRS022602_Baylor_scaffold_69535 | + | 758   | 816   | RNA →                                                                                                                                                         |
| env-78 | SRS043422_C2652059              | - | 166   | 104   | RNA →                                                                                                                                                         |
| env-79 | SRS014573_WUGC_scaffold_53341   | - | 2102  | 2041  | RNA → RpsD (COG0522)rpsD (PRK05327) →<br>RNAP_alpha_NTD (cd06928)PRK05182 (PRK05182)RNA_poL_A_CTD (pfam03118) →<br>rplQ (PRK05591)Ribosomal_L17 (pfam01196) → |



|         |                                 |   |        |        |                                                                                                                                               |
|---------|---------------------------------|---|--------|--------|-----------------------------------------------------------------------------------------------------------------------------------------------|
| env-80  | SRS013836_C4764451              | - | 172    | 111    | RNA→                                                                                                                                          |
| env-81  | SRS013879_WUGC_scaffold_28433   | - | 386    | 325    | RNA→ rpsD (PRK05327)Ribosomal_S4 (pfam00163)→                                                                                                 |
| env-82  | SRS022621_Baylor_scaffold_21872 | - | 2177   | 2116   | RNA→ RpsD (COG0522)rpsD (PRK05327)→<br>RNAP_alpha_NTD (cd06928)PRK05182 (PRK05182)RNA_poLA_CTD (pfam03118)→<br>RplQ (COG0203)rplQ (PRK05591)→ |
| env-83  | SRS018439_Baylor_scaffold_23532 | + | 9031   | 9092   | RNA→ RpsD (COG0522)rpsD (PRK05327)→<br>RNAP_alpha_NTD (cd06928)PRK05182 (PRK05182)RNA_poLA_CTD (pfam03118)→                                   |
| env-84  | SRS017533_Baylor_scaffold_41553 | + | 217    | 278    | RNA→ RpsD (COG0522)rpsD (PRK05327)→<br>RNAP_alpha_NTD (cd06928)PRK05182 (PRK05182)RNA_poLA_CTD (pfam03118)→                                   |
| env-85  | SRS019126_WUGC_scaffold_4619    | - | 2437   | 2376   | RNA→ RpsD (COG0522)rpsD (PRK05327)→<br>RNAP_alpha_NTD (cd06928)PRK05182 (PRK05182)RNA_poLA_CTD (pfam03118)→<br>RplQ (COG0203)rplQ (PRK05591)→ |
| env-86  | SRS023926_Baylor_scaffold_26039 | + | 6277   | 6338   | RNA→ RpsD (COG0522)rpsD (PRK05327)→<br>RNAP_alpha_NTD (cd06928)PRK05182 (PRK05182)RNA_poLA_CTD (pfam03118)→<br>RplQ (COG0203)rplQ (PRK05591)→ |
| env-87  | SRS043772_WUGC_scaffold_22755   | + | 281    | 342    | RNA→ RpsD (COG0522)rpsD (PRK05327)→<br>RNAP_alpha_NTD (cd06928)PRK05182 (PRK05182)RNA_poLA_CTD (pfam03118)→                                   |
| env-88  | SRS024375_LANL_scaffold_10736   | - | 3452   | 3391   | RNA→ RpsD (COG0522)rpsD (PRK05327)→<br>RNAP_alpha_NTD (cd06928)PRK05182 (PRK05182)RNA_poLA_CTD (pfam03118)→<br>RplQ (COG0203)rplQ (PRK05591)→ |
| env-89  | SRS024441_LANL_scaffold_44794   | + | 3740   | 3801   | RNA→ RpsD (COG0522)rpsD (PRK05327)→<br>RNAP_alpha_NTD (cd06928)PRK05182 (PRK05182)RNA_poLA_CTD (pfam03118)→<br>RplQ (COG0203)rplQ (PRK05591)→ |
| env-90  | SRS049318_LANL_scaffold_50729   | - | 142    | 91     | RNA→                                                                                                                                          |
| env-91  | SRS052876_LANL_scaffold_40470   | + | 1404   | 1465   | RNA→ RpsD (COG0522)rpsD (PRK05327)→<br>RNAP_alpha_NTD (cd06928)PRK05182 (PRK05182)RNA_poLA_CTD (pfam03118)→<br>RplQ (COG0203)rplQ (PRK05591)→ |
| env-92  | SRS063272_C748000               | - | 2302   | 2241   | RNA→ RpsD (COG0522)rpsD (PRK05327)→<br>RNAP_alpha_NTD (cd06928)PRK05182 (PRK05182)RNA_poLA_CTD (pfam03118)→<br>RplQ (COG0203)rplQ (PRK05591)→ |
| Psp-2-1 | NZ_JRAR01000001.1               | + | 21162  | 21223  | RNA→ RpsD (COG0522)rpsD (PRK05327)→ RpoA (COG0202)PRK05182 (PRK05182)→<br>RplQ (COG0203)rplQ (PRK05591)→                                      |
| Psp-1-1 | NZ_JRAO01000015.1               | - | 141435 | 141374 | RNA→ RpsD (COG0522)rpsD (PRK05327)→ RpoA (COG0202)PRK05182 (PRK05182)→<br>RplQ (COG0203)rplQ (PRK05591)→                                      |
| env-93  | SRS065099_LANL_scaffold_75481   | + | 444    | 494    | RNA→                                                                                                                                          |
| env-94  | SRS024087_LANL_scaffold_10975   | - | 146    | 89     | RNA→ ←hypo                                                                                                                                    |
| env-95  | SRS051941_C4050112              | + | 680    | 740    | RNA→                                                                                                                                          |
| env-96  | SRS013252_C3518045              | - | 147    | 89     | RNA→ ←hypo                                                                                                                                    |
| env-97  | SRS020340_C2851743              | + | 298    | 348    | RNA→                                                                                                                                          |
| env-98  | SRS022602_Baylor_scaffold_25508 | + | 442    | 502    | RNA→ RpsD (COG0522)rpsD (PRK05327)→ RpoA (COG0202)PRK05182 (PRK05182)→<br>RplQ (COG0203)rplQ (PRK05591)→                                      |
| env-99  | SRS013533_C5285183              | - | 174    | 114    | RNA→ hypo→                                                                                                                                    |
| env-100 | SRS064449_LANL_scaffold_59809   | + | 901    | 951    | RNA→                                                                                                                                          |
| env-101 | SRS018394_Baylor_scaffold_53532 | + | 485    | 543    | RNA→                                                                                                                                          |
| env-102 | SRS018443_C3747335              | - | 147    | 89     | RNA→                                                                                                                                          |
| env-103 | SRS055378_LANL_scaffold_13183   | - | 302    | 242    | RNA→ rpsD (PRK05327)Ribosomal_S4 (pfam00163)→                                                                                                 |
| env-104 | SRS011343_Baylor_scaffold_40465 | + | 3459   | 3519   | RNA→ RpsD (COG0522)rpsD (PRK05327)→ RpoA (COG0202)PRK05182 (PRK05182)→<br>RplQ (COG0203)rplQ (PRK05591)→                                      |
| env-105 | SRS022536_LANL_scaffold_94018   | + | 614    | 674    | RNA→ rpsD (PRK05327)Ribosomal_S4 (pfam00163)→                                                                                                 |
| env-106 | SRS018394_Baylor_scaffold_31406 | - | 141    | 81     | RNA→                                                                                                                                          |
| env-107 | SRS063932_LANL_scaffold_4135    | + | 370    | 430    | RNA→ rpsD (PRK05327)Ribosomal_S4 (pfam00163)→                                                                                                 |
| env-108 | SRS021484_C2188525              | + | 543    | 588    | RNA→ RpsD (COG0522)rpsD (PRK05327)→ RpoA (COG0202)PRK05182 (PRK05182)→                                                                        |
| env-109 | 4491423.3_NODE_109420           | - | 5213   | 5168   | RNA→ RpsD (COG0522)rpsD (PRK05327)→ RNAP_alpha_NTD (cd06928)PRK05182 (PRK05182)→                                                              |
| env-110 | 07_22_CONTROL_DNA_scaffold544_5 | - | 2208   | 2162   | RNA→ RpsD (COG0522)rpsD (PRK05327)→ RpoA (COG0202)PRK05182 (PRK05182)→<br>rplQ (PRK05591)Ribosomal_L17 (pfam01196)→                           |

|         |                                      |   |        |        |                                                                                                                                                         |
|---------|--------------------------------------|---|--------|--------|---------------------------------------------------------------------------------------------------------------------------------------------------------|
| env-111 | DLM014_scaffold16166_1               | - | 2097   | 2051   | RNA → RpsD (COG0522)rpsD (PRK05327) → RpoA (COG0202)PRK05182 (PRK05182) → RplQ (COG0203)rplQ (PRK05591) →                                               |
| env-112 | SRS011134_C4924861                   | - | 107    | 61     | RNA →                                                                                                                                                   |
| env-113 | 08_07_CONTROL_DNA_scaffold19619_1    | + | 164    | 212    | RNA → RpsD (COG0522)rpsD (PRK05327) →                                                                                                                   |
| env-114 | 4491417.3_NODE.65482                 | + | 43644  | 43690  | RNA → RpsD (COG0522)rpsD (PRK05327) → RNAP_alpha_NTD (cd06928)PRK05182 (PRK05182) → PRK05182 (PRK05182)RNA_poL_A_CTD (pfam03118) →                      |
| env-115 | UnmappedStool_Broad_scaffold_480295  | + | 268    | 314    | RNA →                                                                                                                                                   |
| env-116 | scaffold5632_5_MH0082                | + | 533    | 579    | RNA → RpsD (COG0522)rpsD (PRK05327) → RNAP_alpha_NTD (cd06928)PRK05182 (PRK05182)RNA_poL_A_CTD (pfam03118) →                                            |
| env-117 | SRS011134_C4984436                   | - | 407    | 361    | RNA → RpsD (COG0522)rpsD (PRK05327) →                                                                                                                   |
| env-118 | SRS013476_C3097759                   | - | 391    | 347    | RNA → RpsD (COG0522)rpsD (PRK05327) →                                                                                                                   |
| env-119 | 08_07_GOS_DNA_scaffold4617_3         | - | 1220   | 1172   | RNA → RpsD (COG0522)rpsD (PRK05327) → RNAP_alpha_NTD (cd06928)PRK05182 (PRK05182) →                                                                     |
| env-120 | 2227505183                           | - | 3361   | 3319   | RNA → RpsD (COG0522)rpsD (PRK05327) → RNAP_alpha_NTD (cd06928)PRK05182 (PRK05182)RNA_poL_A_CTD (pfam03118) → RplQ (COG0203)rplQ (PRK05591) →            |
| env-121 | AUXO013899695.1                      | - | 2595   | 2553   | RNA → RpsD (COG0522)rpsD (PRK05327) → RpoA (COG0202)PRK05182 (PRK05182) → RplQ (COG0203)rplQ (PRK05591) →                                               |
| env-122 | SRMUA_GNVGR9Q01B8SVR                 | - | 224    | 182    | RNA → hypo →                                                                                                                                            |
| env-123 | UnmappedStool_Broad_C252248201       | + | 129    | 180    | RNA → rpsD (PRK05327)Ribosomal_S4 (pfam00163) →                                                                                                         |
| env-124 | scaffold47652_4_V1.CD-9              | - | 200    | 152    | RNA → rpsD (PRK05327)Ribosomal_S4 (pfam00163) →                                                                                                         |
| env-125 | scaffold45765_1_V1.CD-14             | - | 234    | 186    | RNA → rpsD (PRK05327)Ribosomal_S4 (pfam00163) →                                                                                                         |
| env-126 | TB_AS07_7DRAFT_10003506              | - | 9850   | 9788   | RNA → AAA (smart00382)COG4185 (COG4185) → hypo →                                                                                                        |
| env-127 | AUXO012589404.1                      | - | 241    | 195    | RNA → rpsD (PRK05327)Ribosomal_S4 (pfam00163) →                                                                                                         |
| Pgu-2-1 | NZ_KB899151.1                        | + | 86853  | 86906  | RNA → RpsD (COG0522)rpsD (PRK05327) → RpoA (COG0202)PRK05182 (PRK05182) → RplQ (COG0203)rplQ (PRK05591) →                                               |
| env-128 | SRS015650_WUGC_scaffold_28866        | - | 104    | 54     | RNA → ← hypo →                                                                                                                                          |
| Pgi-3-1 | NC_015571.1                          | - | 203700 | 203647 | RNA → RpsD (COG0522)rpsD (PRK05327) → RpoA (COG0202)PRK05182 (PRK05182) → RplQ (COG0203)rplQ (PRK05591) →                                               |
| Pgu-1-1 | NZ_KN294118.1                        | - | 191559 | 191506 | RNA → RpsD (COG0522)rpsD (PRK05327) → RpoA (COG0202)PRK05182 (PRK05182) → RplQ (COG0203)rplQ (PRK05591) →                                               |
| env-129 | Supragingival_plaque_LANL_C182748641 | + | 464    | 517    | RNA → rpsD (PRK05327)Ribosomal_S4 (pfam00163) →                                                                                                         |
| Pgi-2-1 | NZ_KI629949.1                        | - | 30096  | 30043  | RNA → RpsD (COG0522)rpsD (PRK05327) → RpoA (COG0202)PRK05182 (PRK05182) → RplQ (COG0203)rplQ (PRK05591) → hypo → DUF1661 (pfam07877) → hypo →           |
| Pgu-1-2 | NZ_KN300353.1                        | - | 26757  | 26704  | RNA → RpsD (COG0522)rpsD (PRK05327) → RpoA (COG0202)PRK05182 (PRK05182) → RplQ (COG0203)rplQ (PRK05591) →                                               |
| Pgi-1-1 | NZ_KI260120.1                        | + | 16050  | 16103  | RNA → RpsD (COG0522)rpsD (PRK05327) → RpoA (COG0202)PRK05182 (PRK05182) → RplQ (COG0203)rplQ (PRK05591) → hypo →                                        |
| env-130 | IMNBL1_c0170688                      | - | 319    | 279    | RNA → rpsD (PRK05327)Ribosomal_S4 (pfam00163) →                                                                                                         |
| env-131 | scaffold5422_1_MH0052                | - | 2264   | 2218   | RNA → RpsD (COG0522)rpsD (PRK05327) → RpoA (COG0202)PRK05182 (PRK05182) → rplQ (PRK05591)Ribosomal_L17 (pfam01196) →                                    |
| env-132 | 4491404.3_NODE_83097                 | + | 488    | 534    | RNA → rpsD (PRK05327)Ribosomal_S4 (pfam00163) → S4 (smart00363)RpsD (COG0522) →                                                                         |
| env-133 | scaffold41480_1_MH0050               | + | 576    | 622    | RNA → RpsD (COG0522)rpsD (PRK05327) → RNAP_alpha_NTD (cd06928)PRK05182 (PRK05182) →                                                                     |
| env-134 | scaffold60668_1_V1.CD-4              | - | 2185   | 2139   | RNA → RpsD (COG0522)rpsD (PRK05327) → RpoA (COG0202)PRK05182 (PRK05182) → rplQ (PRK05591)Ribosomal_L17 (pfam01196) →                                    |
| env-135 | scaffold2465_4_MH0009                | + | 398    | 444    | RNA → RpsD (COG0522)rpsD (PRK05327) → RpoA (COG0202)PRK05182 (PRK05182) → rplQ (PRK05591)Ribosomal_L17 (pfam01196) →                                    |
| env-136 | scaffold8235_1_O2.UC-1               | + | 66     | 112    | RNA → RpsD (COG0522)rpsD (PRK05327) → RNAP_alpha_NTD (cd06928)PRK05182 (PRK05182)RNA_poL_A_CTD (pfam03118) → rplQ (PRK05591)Ribosomal_L17 (pfam01196) → |
| env-137 | RUMENNODE_2120037_111501             | - | 19738  | 19691  | RNA → rpsD (PRK05327)Ribosomal_S4 (pfam00163) →                                                                                                         |
| env-138 | 2226980356                           | + | 42770  | 42818  | RNA → RpsD (COG0522)rpsD (PRK05327) → RpoA (COG0202)PRK05182 (PRK05182) → RplQ (COG0203)rplQ (PRK05591) →                                               |
| env-139 | 2226950443                           | - | 4600   | 4552   | RNA → RpsD (COG0522)rpsD (PRK05327) → RpoA (COG0202)PRK05182 (PRK05182) → RplQ (COG0203)rplQ (PRK05591) →                                               |
| env-140 | AUXO015494899.1                      | - | 713    | 671    | RNA → hypo → RpsD (COG0522)rpsD (PRK05327) →                                                                                                            |
| env-141 | AUXO012655293.1                      | - | 833    | 792    | RNA → RpsD (COG0522)rpsD (PRK05327) → PRK05182 (PRK05182)RNA_poL (pfam01193) →                                                                          |

|         |                                 |   |       |       |                                                                                                                                                      |
|---------|---------------------------------|---|-------|-------|------------------------------------------------------------------------------------------------------------------------------------------------------|
| env-142 | RUMENNODE.3549585_6500          | + | 14797 | 14838 | RNA → RpsD (COG0522)rpsD (PRK05327) → RpoA (COG0202)PRK05182 (PRK05182) → rplQ (PRK05591)Ribosomal_L17 (pfam01196) →                                 |
| env-143 | IMNBL1.c0000682                 | - | 10946 | 10899 | RNA → RpsD (COG0522)rpsD (PRK05327) → RpoA (COG0202)PRK05182 (PRK05182) → RplQ (COG0203)rplQ (PRK05591) →                                            |
| env-144 | BABD01035948.1                  | + | 534   | 582   | RNA → rpsD (PRK05327)Ribosomal_S4 (pfam00163) →                                                                                                      |
| env-145 | IMNBL1.c0200996                 | + | 120   | 168   | RNA → rpsD (PRK05327)Ribosomal_S4 (pfam00163) →                                                                                                      |
| env-146 | 4491423.3_NODE.100943           | + | 2001  | 2049  | RNA → PRK05309 (PRK05309)RpsK (COG0100) → RpsD (COG0522)rpsD (PRK05327) → PRK05182 (PRK05182)RNA_pol.L (pfam01193) →                                 |
| env-147 | scaffold61064_2_MH0006          | + | 191   | 239   | RNA → RpsD (COG0522)rpsD (PRK05327) →                                                                                                                |
| env-148 | SRS049900.LANL.scaffold.12941   | + | 867   | 915   | RNA → rpsD (PRK05327)Ribosomal_S4 (pfam00163) → S4 (smart00363)RpsD (COG0522) → RpoA (COG0202)PRK05182 (PRK05182) → RplQ (COG0203)rplQ (PRK05591) →  |
| env-149 | scaffold72032_1_V1.CD-14        | + | 421   | 469   | RNA → rpsD (PRK05327)Ribosomal_S4 (pfam00163) →                                                                                                      |
| env-150 | ADJT01001361.1                  | + | 384   | 432   | RNA → RpsD (COG0522)rpsD (PRK05327) → RpoA (COG0202)PRK05182 (PRK05182) → RplQ (COG0203)rplQ (PRK05591) →                                            |
| env-151 | scaffold31110_2_MH0019          | + | 232   | 280   | RNA → hypo → rpsD (PRK05327)Ribosomal_S4 (pfam00163) →                                                                                               |
| env-152 | scaffold5909_2_O2.UC-14         | + | 57    | 105   | RNA → RpsD (COG0522)rpsD (PRK05327) →                                                                                                                |
| env-153 | BABB01007995.1                  | + | 205   | 253   | RNA → RpsD (COG0522)rpsD (PRK05327) →                                                                                                                |
| env-154 | contig19424                     | - | 1081  | 1033  | RNA → RpsD (COG0522)rpsD (PRK05327) → PRK05182 (PRK05182)RNA_pol.L (pfam01193) → PRK05182 (PRK05182)RNA_pol.L (pfam01193) →                          |
| env-155 | scaffold56457_1_MH0055          | + | 255   | 303   | RNA → RpsD (COG0522)rpsD (PRK05327) →                                                                                                                |
| env-156 | NLM015.scaffold12871.4          | + | 134   | 182   | RNA → RpsD (COG0522)rpsD (PRK05327) → PRK05182 (PRK05182)RNA_pol.L (pfam01193) →                                                                     |
| env-157 | scaffold93277_1_MH0053          | + | 467   | 505   | RNA → hypo →                                                                                                                                         |
| env-158 | scaffold17281_3_MH0030          | + | 410   | 458   | RNA → RpsD (COG0522)rpsD (PRK05327) → RpoA (COG0202)PRK05182 (PRK05182) → RplQ (COG0203)rplQ (PRK05591) →                                            |
| env-159 | scaffold738_1_V1.CD-6           | - | 143   | 95    | RNA → rpsD (PRK05327)Ribosomal_S4 (pfam00163) →                                                                                                      |
| env-160 | scaffold26767_2_MH0040          | + | 57    | 105   | RNA → RpsD (COG0522)rpsD (PRK05327) →                                                                                                                |
| env-161 | SRS019968_Baylor.scaffold.6283  | + | 260   | 308   | RNA → RpsD (COG0522)rpsD (PRK05327) →                                                                                                                |
| env-162 | SRS045645_Baylor.scaffold.14899 | + | 400   | 448   | RNA → RpsD (COG0522)rpsD (PRK05327) →                                                                                                                |
| env-163 | scaffold4241_1_MH0044           | - | 389   | 341   | RNA → RpsD (COG0522)rpsD (PRK05327) →                                                                                                                |
| env-164 | SRS051882_Baylor.scaffold.18491 | - | 625   | 577   | RNA → RpsD (COG0522)rpsD (PRK05327) →                                                                                                                |
| env-165 | scaffold33930_1_O2.UC-18        | - | 952   | 904   | RNA → RpsD (COG0522)rpsD (PRK05327) → PRK05182 (PRK05182)RNA_pol.L (pfam01193) →                                                                     |
| env-166 | BAAZ01001952.1                  | + | 529   | 577   | RNA → RpsD (COG0522)rpsD (PRK05327) → RNAP_alpha_NTD (cd06928)PRK05182 (PRK05182) →                                                                  |
| env-167 | SRS024435.LANL.scaffold.22712   | + | 73    | 121   | RNA → hypo → RpsD (COG0522)rpsD (PRK05327) →                                                                                                         |
| env-168 | SRS064557.LANL.scaffold.25854   | - | 129   | 81    | RNA →                                                                                                                                                |
| env-169 | SRS015782.WUGC.scaffold.11293   | + | 369   | 417   | RNA → RpsD (COG0522)rpsD (PRK05327) →                                                                                                                |
| env-170 | 4448814.3_Contig42594           | - | 675   | 627   | RNA → S4 (smart00363)RpsD (COG0522) →                                                                                                                |
| env-171 | DOM019.scaffold22337_4          | - | 435   | 387   | RNA → S4 (smart00363)RpsD (COG0522) →                                                                                                                |
| env-172 | BABD01010849.1                  | - | 1356  | 1308  | RNA → RpsD (COG0522)rpsD (PRK05327) → RNAP_alpha_NTD (cd06928)PRK05182 (PRK05182) →                                                                  |
| env-173 | 4491416.3_NODE.237              | - | 10253 | 10205 | RNA → RpsD (COG0522)rpsD (PRK05327) → RpoA (COG0202)PRK05182 (PRK05182) → RplQ (COG0203)rplQ (PRK05591) →                                            |
| env-174 | SRS020869_Baylor.scaffold.2934  | - | 190   | 142   | RNA → rpsD (PRK05327)Ribosomal_S4 (pfam00163) →                                                                                                      |
| env-175 | 4491421.3_NODE.99843            | + | 4017  | 4065  | RNA → RpsD (COG0522)rpsD (PRK05327) → RpoA (COG0202)PRK05182 (PRK05182) → RplQ (COG0203)rplQ (PRK05591) → rplQ (PRK05591)Ribosomal_L17 (pfam01196) → |
| env-176 | JGI994J12354_10027568           | + | 2149  | 2191  | RNA → RpsD (COG0522)rpsD (PRK05327) → RNAP_alpha_NTD (cd06928)PRK05182 (PRK05182) →                                                                  |
| env-177 | JGI24707J26582_10000222         | - | 2326  | 2281  | RNA → RpsD (COG0522)rpsD (PRK05327) → RpoA (COG0202)PRK05182 (PRK05182) → RplQ (COG0203)rplQ (PRK05591) →                                            |
| env-178 | BAAZ01024853.1                  | - | 919   | 881   | RNA → RpsD (COG0522)rpsD (PRK05327) → PRK05182 (PRK05182)RNA_pol.L (pfam01193) →                                                                     |
| env-179 | AUXO015025041.1                 | - | 398   | 345   | RNA → rpsD (PRK05327)Ribosomal_S4 (pfam00163) →                                                                                                      |
| env-180 | AUXO016702402.1                 | + | 524   | 595   | RNA → rpsD (PRK05327)Ribosomal_S4 (pfam00163) →                                                                                                      |
| env-181 | NLM006.scaffold52536_3          | + | 16553 | 16592 | RNA → RpsD (COG0522)rpsD (PRK05327) → RpoA (COG0202)PRK05182 (PRK05182) → RplQ (COG0203)rplQ (PRK05591) →                                            |
| env-182 | DLM007.scaffold5141_17          | + | 197   | 236   | RNA → RpsD (COG0522)rpsD (PRK05327) →                                                                                                                |
| env-183 | scaffold27115_3_MH0036          | + | 146   | 185   | RNA → RpsD (COG0522)rpsD (PRK05327) → RpoA (COG0202)PRK05182 (PRK05182) → rplQ (PRK05591)Ribosomal_L17 (pfam01196) →                                 |
| env-184 | scaffold335_4_MH0020            | - | 659   | 620   | RNA → RpsD (COG0522)rpsD (PRK05327) →                                                                                                                |



|         |                               |   |        |        |                                                                                                                                                                |
|---------|-------------------------------|---|--------|--------|----------------------------------------------------------------------------------------------------------------------------------------------------------------|
| env-185 | scaffold9913.1_MH0050         | - | 682    | 643    | RNA → RpsD (COG0522)rpsD (PRK05327) →                                                                                                                          |
| Pxy-1-1 | NZ_GL883867.1                 | - | 21352  | 21313  | RNA → RpsD (COG0522)rpsD (PRK05327) → RpoA (COG0202)PRK05182 (PRK05182) →<br>RplQ (COG0203)rplQ (PRK05591) → rplQ (PRK05591)Ribosomal.L17 (pfam01196) → hypo → |
| env-186 | SRS048164_WUGC_scaffold_34643 | + | 433    | 472    | RNA → RpsD (COG0522)rpsD (PRK05327) →                                                                                                                          |
| env-187 | scaffold10151.5_MH0073        | - | 692    | 653    | RNA → RpsD (COG0522)rpsD (PRK05327) →                                                                                                                          |
| env-188 | IMNBL1.c0003450               | + | 7491   | 7530   | RNA → RpsD (COG0522)rpsD (PRK05327) →<br>RNAP_alpha_NTD (cd06928)PRK05182 (PRK05182)RNA_poLA_CTD (pfam03118) →<br>RplQ (COG0203)rplQ (PRK05591) →              |
| env-189 | SRS011529_WUGC_scaffold_6343  | - | 1690   | 1641   | RNA → RpsD (COG0522)rpsD (PRK05327) →<br>RNAP_alpha_NTD (cd06928)PRK05182 (PRK05182)RNA_poLA_CTD (pfam03118) →                                                 |
| env-190 | scaffold39757.1_MH0036        | - | 40     | 1      | RNA →                                                                                                                                                          |
| env-191 | scaffold56046.2_MH0046        | - | 982    | 933    | RNA → RpsD (COG0522)rpsD (PRK05327) → PRK05182 (PRK05182)RNA_poL (pfam01193) →                                                                                 |
| env-192 | AUXO013662250.1               | - | 353    | 304    | RNA → rpsD (PRK05327)Ribosomal.S4 (pfam00163) →                                                                                                                |
| env-193 | AUXO011716848.1               | + | 267    | 316    | RNA → S4 (smart00363)RpsD (COG0522) →                                                                                                                          |
| env-194 | AUXO012267364.1               | + | 526    | 565    | RNA →                                                                                                                                                          |
| env-195 | AUXO014724871.1               | - | 701    | 652    | RNA → RpsD (COG0522)rpsD (PRK05327) →                                                                                                                          |
| env-196 | AUXO015059357.1               | + | 29     | 78     | RNA → RpsD (COG0522)rpsD (PRK05327) →                                                                                                                          |
| env-197 | AUXO018761249.1               | - | 194    | 146    | RNA → rpsD (PRK05327)Ribosomal.S4 (pfam00163) →                                                                                                                |
| env-198 | 2227339052                    | - | 167    | 127    | RNA → rpsD (PRK05327)Ribosomal.S4 (pfam00163) →                                                                                                                |
| env-199 | JGI994J12354.10199883         | - | 251    | 211    | RNA → rpsD (PRK05327)Ribosomal.S4 (pfam00163) →                                                                                                                |
| env-200 | 2227053765                    | + | 147    | 187    | RNA →                                                                                                                                                          |
| env-201 | JGI994J12354.10460523         | + | 203    | 243    | RNA → rpsD (PRK05327)Ribosomal.S4 (pfam00163) →                                                                                                                |
| env-202 | 2227095262                    | - | 330    | 290    | RNA → rpsD (PRK05327)Ribosomal.S4 (pfam00163) →                                                                                                                |
| env-203 | IMNBL1.c0184244               | - | 414    | 374    | RNA → S4 (smart00363)RpsD (COG0522) →                                                                                                                          |
| env-204 | JGI994J12354.10281577         | + | 401    | 441    | RNA → rpsD (PRK05327)Ribosomal.S4 (pfam00163) →                                                                                                                |
| env-205 | IMNBL1.c0088446               | - | 33     | 3      | RNA →                                                                                                                                                          |
| env-206 | IMNBL1.c0076852               | + | 129    | 169    | RNA → RpsD (COG0522)rpsD (PRK05327) → PRK05182 (PRK05182)RNA_poL (pfam01193) →                                                                                 |
| env-207 | JGI994J12354.10160833         | - | 704    | 664    | RNA → RpsD (COG0522)rpsD (PRK05327) →                                                                                                                          |
| env-208 | 2227437209                    | + | 431    | 471    | RNA → RpsD (COG0522)rpsD (PRK05327) →                                                                                                                          |
| env-209 | 2227588074                    | + | 10     | 50     | RNA → RpsD (COG0522)rpsD (PRK05327) →                                                                                                                          |
| env-210 | JGI996J12353.1011164          | - | 683    | 643    | RNA → hypo → RpsD (COG0522)rpsD (PRK05327) →                                                                                                                   |
| env-211 | JGI994J12354.10602131         | - | 192    | 152    | RNA → rpsD (PRK05327)Ribosomal.S4 (pfam00163) →                                                                                                                |
| env-212 | 2227213828                    | - | 194    | 154    | RNA → rpsD (PRK05327)Ribosomal.S4 (pfam00163) →                                                                                                                |
| env-213 | JGI994J12354.10069051         | + | 854    | 894    | RNA → RpsD (COG0522)rpsD (PRK05327) → RpoA (COG0202)PRK05182 (PRK05182) →                                                                                      |
| env-214 | 2227339122                    | + | 4240   | 4280   | RNA → RpsD (COG0522)rpsD (PRK05327) →<br>RNAP_alpha_NTD (cd06928)PRK05182 (PRK05182)RNA_poLA_CTD (pfam03118) →<br>RplQ (COG0203)rplQ (PRK05591) →              |
| env-215 | IMNBL1.c0070425               | + | 630    | 670    | RNA → RpsD (COG0522)rpsD (PRK05327) →                                                                                                                          |
| env-216 | JGI994J12354.10305054         | + | 142    | 182    | RNA → rpsD (PRK05327)Ribosomal.S4 (pfam00163) →                                                                                                                |
| env-217 | JGI994J12354.10567243         | + | 174    | 214    | RNA → rpsD (PRK05327)Ribosomal.S4 (pfam00163) →                                                                                                                |
| env-218 | IMNBL1.c0000677               | - | 14388  | 14348  | RNA → RpsD (COG0522)rpsD (PRK05327) →<br>RNAP_alpha_NTD (cd06928)PRK05182 (PRK05182)RNA_poLA_CTD (pfam03118) →<br>RplQ (COG0203)rplQ (PRK05591) →              |
| env-219 | AUXO014137175.1               | - | 93     | 54     | RNA → ← hypo                                                                                                                                                   |
| env-220 | RUMENNODE.1342001.1           | + | 2330   | 2377   | RNA → rpsD (PRK05327)Ribosomal.S4 (pfam00163) →                                                                                                                |
| env-221 | HCF14C.3.8265.1               | - | 4204   | 4157   | RNA → RpsD (COG0522)rpsD (PRK05327) → RpoA (COG0202)PRK05182 (PRK05182) →<br>RplQ (COG0203)rplQ (PRK05591) →                                                   |
| env-222 | SRS023604_C783111             | - | 1719   | 1672   | RNA → RpsD (COG0522)rpsD (PRK05327) → RpoA (COG0202)PRK05182 (PRK05182) →                                                                                      |
| env-223 | AUXO012249817.1               | - | 397    | 349    | RNA → rpsD (PRK05327)Ribosomal.S4 (pfam00163) →                                                                                                                |
| env-224 | 4491407.3_NODE.8402           | - | 3326   | 3285   | RNA → RpsD (COG0522)rpsD (PRK05327) →<br>RNAP_alpha_NTD (cd06928)PRK05182 (PRK05182)RNA_poLA_CTD (pfam03118) →<br>RplQ (COG0203)rplQ (PRK05591) →              |
| env-225 | JGI20225J20221.1000009        | + | 207606 | 207653 | RNA → RpsD (COG0522)rpsD (PRK05327) → RpoA (COG0202)PRK05182 (PRK05182) →<br>RplQ (COG0203)rplQ (PRK05591) →                                                   |



|         |                               |   |         |         |                                                                                                                                                                                        |
|---------|-------------------------------|---|---------|---------|----------------------------------------------------------------------------------------------------------------------------------------------------------------------------------------|
| env-226 | BMHB3a_c40323                 | + | 123     | 170     | RNA → <b>rpsD (PRK05327)</b> Ribosomal_S4 (pfam00163) →                                                                                                                                |
| env-227 | JGI26523J50269_1000101        | + | 49816   | 49858   | RNA → <b>RpsD (COG0522)</b> rpsD (PRK05327) →<br>RNAP_alpha_NTD (cd06928)PRK05182 (PRK05182)RNA_pol_A_CTD (pfam03118) →<br><b>RplQ (COG0203)</b> rplQ (PRK05591) →                     |
| env-228 | JGI24499J29688_1097403        | + | 252     | 294     | RNA → <b>RpsD (COG0522)</b> rpsD (PRK05327) →                                                                                                                                          |
| env-229 | JGI24707J26582_10042111       | - | 641     | 599     | RNA → <b>RpsD (COG0522)</b> rpsD (PRK05327) →                                                                                                                                          |
| env-230 | 2211024960                    | + | 90      | 132     | RNA →                                                                                                                                                                                  |
| env-231 | 3300000408_102220             | - | 1904    | 1862    | RNA → <b>RpsD (COG0522)</b> rpsD (PRK05327) →<br>RNAP_alpha_NTD (cd06928)PRK05182 (PRK05182)RNA_pol_A_CTD (pfam03118) →<br><b>rplQ (PRK05591)</b> Ribosomal_L17 (pfam01196) →          |
| env-232 | PBDCA2_contig35478            | - | 23100   | 23058   | RNA → <b>RpsD (COG0522)</b> rpsD (PRK05327) →<br>RNAP_alpha_NTD (cd06928)PRK05182 (PRK05182)RNA_pol_A_CTD (pfam03118) →<br>PLN02967 (PLN02967) <b>RplQ (COG0203)</b> rplQ (PRK05591) → |
| env-233 | 3300000032_0074524            | + | 1154    | 1196    | RNA → <b>RpsD (COG0522)</b> rpsD (PRK05327) →                                                                                                                                          |
| env-234 | ASA126_GJFDWOI01ADAYG         | + | 127     | 159     | RNA →                                                                                                                                                                                  |
| env-235 | ASA129_GJG7ZZE02HS6CS         | - | 131     | 89      | RNA → ←-hypo                                                                                                                                                                           |
| env-236 | JGI24707J26582_10313961       | - | 186     | 144     | RNA → <b>rpsD (PRK05327)</b> Ribosomal_S4 (pfam00163) →                                                                                                                                |
| env-237 | JGI25321J50212_10130561       | - | 85      | 43      | RNA →                                                                                                                                                                                  |
| env-238 | 3300000568_10484048           | - | 237     | 195     | RNA → <b>rpsD (PRK05327)</b> Ribosomal_S4 (pfam00163) →                                                                                                                                |
| env-239 | JGI26523J50269_1018190        | - | 360     | 318     | RNA → <b>rpsD (PRK05327)</b> Ribosomal_S4 (pfam00163) →                                                                                                                                |
| Pac-1-1 | NZ_KB905713.1                 | - | 5768    | 5726    | RNA → <b>RpsD (COG0522)</b> rpsD (PRK05327) →<br>RNAP_alpha_NTD (cd06928)PRK05182 (PRK05182)RNA_pol_A_CTD (pfam03118) → hypo →<br><b>RplQ (COG0203)</b> rplQ (PRK05591) →              |
| env-240 | 3300001580_10221456           | - | 676     | 634     | RNA → <b>RpsD (COG0522)</b> rpsD (PRK05327) →                                                                                                                                          |
| env-241 | 3300001592_10979244           | - | 128     | 86      | RNA → ←-hypo                                                                                                                                                                           |
| env-242 | 4444165.3.06214               | + | 723     | 765     | RNA → <b>RpsD (COG0522)</b> rpsD (PRK05327) → <b>RpoA (COG0202)</b> PRK05182 (PRK05182) →<br><b>PRK05182 (PRK05182)</b> RNA_pol_L (pfam01193) →                                        |
| env-243 | PRSSGFe2_Sequence0000000352   | - | 11315   | 11273   | RNA → <b>RpsD (COG0522)</b> rpsD (PRK05327) →<br>RNAP_alpha_NTD (cd06928)PRK05182 (PRK05182)RNA_pol_A_CTD (pfam03118) →<br><b>rplQ (PRK05591)</b> Ribosomal_L17 (pfam01196) →          |
| env-244 | BMHBC_1.1_newblercontig05403  | - | 204     | 162     | RNA → hypo →                                                                                                                                                                           |
| env-245 | JFJP01044180.1                | + | 7301    | 7343    | RNA → <b>RpsD (COG0522)</b> rpsD (PRK05327) → <b>RpoA (COG0202)</b> PRK05182 (PRK05182) →<br><b>RplQ (COG0203)</b> rplQ (PRK05591) →                                                   |
| Ppr-1-1 | NC_014734.1                   | + | 2990427 | 2990469 | RNA → <b>RpsD (COG0522)</b> rpsD (PRK05327) → <b>RpoA (COG0202)</b> PRK05182 (PRK05182) →<br><b>RplQ (COG0203)</b> rplQ (PRK05591) →                                                   |
| env-246 | SRS016095_WUGC_scaffold_14591 | + | 280     | 322     | RNA → <b>RpsD (COG0522)</b> rpsD (PRK05327) →                                                                                                                                          |
| env-247 | SRS014235_WUGC_scaffold_63059 | + | 873     | 915     | RNA → <b>RpsD (COG0522)</b> rpsD (PRK05327) →                                                                                                                                          |
| env-248 | JGI24728J21555_1099436        | - | 413     | 371     | RNA → hypo → <b>RpsD (COG0522)</b> rpsD (PRK05327) →                                                                                                                                   |
| env-249 | JGI24731J21663_1020569        | + | 1048    | 1090    | RNA → <b>RpsD (COG0522)</b> rpsD (PRK05327) →                                                                                                                                          |
| env-250 | AUXO012304620.1               | + | 104     | 149     | RNA → <b>rpsD (PRK05327)</b> Ribosomal_S4 (pfam00163) →                                                                                                                                |
| env-251 | scaffold9573_4_O2.UC-24       | - | 2883    | 2838    | RNA → <b>RpsD (COG0522)</b> rpsD (PRK05327) →<br>RNAP_alpha_NTD (cd06928)PRK05182 (PRK05182)RNA_pol_A_CTD (pfam03118) →<br><b>rplQ (PRK05591)</b> Ribosomal_L17 (pfam01196) →          |
| env-252 | scaffold28280_3_MH0054        | + | 981     | 1024    | RNA → <b>RpsD (COG0522)</b> rpsD (PRK05327) →                                                                                                                                          |
| env-253 | 4491423.3_NODE_100453         | + | 1380    | 1423    | RNA → <b>RpsD (COG0522)</b> rpsD (PRK05327) →                                                                                                                                          |
| env-254 | 2014748740                    | + | 450     | 493     | RNA → <b>rpsD (PRK05327)</b> Ribosomal_S4 (pfam00163) →                                                                                                                                |
| env-255 | PRSSGFe2_Sequence0000029464   | - | 952     | 909     | RNA → <b>RpsD (COG0522)</b> rpsD (PRK05327) → <b>PRK05182 (PRK05182)</b> RNA_pol_L (pfam01193) →                                                                                       |
| env-256 | JGI20225J20221_1000111        | - | 93620   | 93577   | RNA → <b>RpsD (COG0522)</b> rpsD (PRK05327) → <b>RpoA (COG0202)</b> PRK05182 (PRK05182) →<br><b>RplQ (COG0203)</b> rplQ (PRK05591) →                                                   |
| env-257 | BMHBC_193261                  | - | 2611    | 2568    | RNA → <b>RpsD (COG0522)</b> rpsD (PRK05327) → <b>RpoA (COG0202)</b> PRK05182 (PRK05182) →<br><b>rplQ (PRK05591)</b> Ribosomal_L17 (pfam01196) →                                        |
| env-258 | 2210576792                    | + | 262     | 295     | RNA →                                                                                                                                                                                  |
| env-259 | JGI24500J29687_10051329       | + | 16282   | 16325   | RNA → <b>RpsD (COG0522)</b> rpsD (PRK05327) →                                                                                                                                          |

|         |                                   |   |        |        |                                                                                                                                                                                 |
|---------|-----------------------------------|---|--------|--------|---------------------------------------------------------------------------------------------------------------------------------------------------------------------------------|
| Dga-1-1 | NZ_GL891985.1                     | - | 188070 | 188027 | RNA → RpsD (COG0522)rpsD (PRK05327) →<br>RNAP_alpha_NTD (cd06928)PRK05182 (PRK05182)RNA_poLA_CTD (pfam03118) →<br>RplQ (COG0203)rplQ (PRK05591) →                               |
| env-260 | 2227035932                        | + | 1370   | 1413   | RNA → RpsD (COG0522)rpsD (PRK05327) →<br>RNAP_alpha_NTD (cd06928)PRK05182 (PRK05182)RNA_poLA_CTD (pfam03118) →<br>RplQ (COG0203)rplQ (PRK05591) →                               |
| Psp-4-1 | NZ_JOMI01000002.1                 | + | 192990 | 193033 | RNA → RpsD (COG0522)rpsD (PRK05327) →<br>RNAP_alpha_NTD (cd06928)PRK05182 (PRK05182)RNA_poLA_CTD (pfam03118) →<br>RplQ (COG0203)rplQ (PRK05591) →                               |
| env-261 | SRS019267_WUGC_scaffold_20085     | + | 866    | 910    | RNA → RpsD (COG0522)rpsD (PRK05327) → RpoA (COG0202)PRK05182 (PRK05182) →<br>rplQ (PRK05591)Ribosomal_L17 (pfam01196) →                                                         |
| env-262 | DOM012_scaffold34729_1            | - | 2272   | 2228   | RNA → RpsD (COG0522)rpsD (PRK05327) → RpoA (COG0202)PRK05182 (PRK05182) →<br>rplQ (PRK05591)Ribosomal_L17 (pfam01196) →                                                         |
| env-263 | Subgingival_plaque_LANL_C11140467 | - | 365    | 321    | RNA → rpsD (PRK05327)Ribosomal_S4 (pfam00163) →                                                                                                                                 |
| env-264 | SRS015650_WUGC_scaffold_24783     | - | 465    | 421    | RNA → RpsD (COG0522)rpsD (PRK05327) →                                                                                                                                           |
| env-265 | AUXO013584032.1                   | + | 2699   | 2747   | RNA → RpsD (COG0522)rpsD (PRK05327) →<br>RNAP_alpha_NTD (cd06928)PRK05182 (PRK05182)RNA_poLA_CTD (pfam03118) →<br>rplQ (PRK05591)Ribosomal_L17 (pfam01196) →                    |
| env-266 | AUXO015681238.1                   | - | 390    | 342    | RNA → RpsD (COG0522)rpsD (PRK05327) →                                                                                                                                           |
| env-267 | AUXO016113898.1                   | - | 81     | 43     | RNA →                                                                                                                                                                           |
| env-268 | AUXO017288013.1                   | + | 160    | 208    | RNA → RpsD (COG0522)rpsD (PRK05327) → PRK05182 (PRK05182)RNA_pol_L (pfam01193) →                                                                                                |
| env-269 | HCF14C_3.8874_1                   | + | 1171   | 1219   | RNA → RpsD (COG0522)rpsD (PRK05327) →                                                                                                                                           |
| env-270 | AUXO013556098.1                   | - | 428    | 380    | RNA → RpsD (COG0522)rpsD (PRK05327) →                                                                                                                                           |
| env-271 | AUXO016146758.1                   | - | 533    | 485    | RNA → RpsD (COG0522)rpsD (PRK05327) →                                                                                                                                           |
| env-272 | BMHB3a_c152975                    | + | 10118  | 10161  | RNA → RpsD (COG0522)rpsD (PRK05327) → RpoA (COG0202)PRK05182 (PRK05182) →<br>RplQ (COG0203)rplQ (PRK05591) →                                                                    |
| env-273 | MA40A_contig27223                 | - | 222    | 179    | RNA → rpsD (PRK05327)Ribosomal_S4 (pfam00163) →                                                                                                                                 |
| env-274 | HCE12Call500_c0170529             | - | 10250  | 10193  | RNA → RpsD (COG0522)rpsD (PRK05327) →<br>RNAP_alpha_NTD (cd06928)PRK05182 (PRK05182)RNA_poLA_CTD (pfam03118) →<br>rplQ (PRK05591)PRK13108 (PRK13108)Ribosomal_L17 (pfam01196) → |
| env-275 | HCF12C_392227                     | + | 332    | 389    | RNA → RpsD (COG0522)rpsD (PRK05327) → hypo →                                                                                                                                    |
| env-276 | AUXO017050186.1                   | - | 255    | 205    | RNA → rpsD (PRK05327)Ribosomal_S4 (pfam00163) →                                                                                                                                 |
| env-277 | HCE12Call500_c0119666             | - | 1945   | 1895   | RNA → RpsD (COG0522)rpsD (PRK05327) → RpoA (COG0202)PRK05182 (PRK05182) →<br>rplQ (PRK05591)Ribosomal_L17 (pfam01196) →                                                         |
| env-278 | DLM004_scaffold13460_1            | + | 661    | 692    | RNA →                                                                                                                                                                           |
| env-279 | DOF009_scaffold34853_1            | + | 760    | 801    | RNA → RpsD (COG0522)rpsD (PRK05327) →                                                                                                                                           |
| env-280 | SRS011239_Baylor_scaffold_2110    | + | 507    | 538    | RNA →                                                                                                                                                                           |
| env-281 | SRS016095_WUGC_scaffold_12148     | - | 67     | 36     | RNA →                                                                                                                                                                           |
| env-282 | SRS064276_LANL_scaffold_7093      | + | 4193   | 4234   | RNA → RNAP_alpha_NTD (cd06928)RpsD (COG0522)PRK05182 (PRK05182)rpsD (PRK05327) →                                                                                                |
| env-283 | NLM015_scaffold155_4_1            | + | 381    | 422    | RNA → RpsD (COG0522)rpsD (PRK05327) →                                                                                                                                           |
| env-284 | SRS013687_Baylor_scaffold_7394    | + | 426    | 457    | RNA →                                                                                                                                                                           |
| env-285 | SRS049164_WUGC_scaffold_32178     | - | 432    | 394    | RNA → S4 (smart00363)RpsD (COG0522) →                                                                                                                                           |
| env-286 | BAAU01005463.1                    | - | 1319   | 1278   | RNA → RpsD (COG0522)rpsD (PRK05327) → RNAP_alpha_NTD (cd06928)PRK05182 (PRK05182) →                                                                                             |
| env-287 | DLF004_scaffold26868_1            | + | 661    | 692    | RNA →                                                                                                                                                                           |
| env-288 | 4491423_3_NODE_37638              | - | 96     | 55     | RNA →                                                                                                                                                                           |
| env-289 | NLM017_scaffold62_7               | - | 557    | 516    | RNA → RpsD (COG0522)rpsD (PRK05327) →                                                                                                                                           |
| env-290 | SRS014235_WUGC_scaffold_35424     | + | 572    | 603    | RNA →                                                                                                                                                                           |
| env-291 | SRS022137_WUGC_scaffold_15988     | - | 582    | 541    | RNA → RpsD (COG0522)rpsD (PRK05327) →                                                                                                                                           |
| env-292 | BABD01000634.1                    | - | 4603   | 4562   | RNA → RpsD (COG0522)rpsD (PRK05327) → RpoA (COG0202)PRK05182 (PRK05182) →<br>RplQ (COG0203)rplQ (PRK05591) →                                                                    |
| env-293 | NOM029_scaffold258_6              | - | 188    | 147    | RNA → rpsD (PRK05327)Ribosomal_S4 (pfam00163) →                                                                                                                                 |
| env-294 | SRS019582_WUGC_scaffold_26735     | - | 412    | 371    | RNA → S4 (smart00363)RpsD (COG0522) →                                                                                                                                           |
| env-295 | AJWZ01010988.1                    | - | 301    | 260    | RNA → rpsD (PRK05327)Ribosomal_S4 (pfam00163) →                                                                                                                                 |
| env-296 | pre-rum103-03185                  | + | 251    | 292    | RNA → RpsD (COG0522)rpsD (PRK05327) → PRK05182 (PRK05182)RNA_pol_L (pfam01193) →                                                                                                |

|         |                               |   |        |        |                                                                                                                                                          |
|---------|-------------------------------|---|--------|--------|----------------------------------------------------------------------------------------------------------------------------------------------------------|
| env-297 | longitudinal_403_1247         | - | 4435   | 4394   | RNA → RpsD (COG0522)rpsD (PRK05327) → RpoA (COG0202)PRK05182 (PRK05182) → RplQ (COG0203)rplQ (PRK05591) →                                                |
| env-298 | NOF010_scaffold29793_5        | - | 3201   | 3160   | RNA → RpsD (COG0522)rpsD (PRK05327) → RpoA (COG0202)PRK05182 (PRK05182) → RplQ (COG0203)rplQ (PRK05591) →                                                |
| env-299 | 4491406.3_NODE_31370          | - | 670    | 629    | RNA → RpsD (COG0522)rpsD (PRK05327) →                                                                                                                    |
| Dsp-2-1 | NZ_CVRU01000083.1             | + | 63519  | 63561  | RNA → RpsD (COG0522)rpsD (PRK05327) → RNAP_alpha_NTD (cd06928)PRK05182 (PRK05182)RNA_poL_A_CTD (pfam03118) → RplQ (COG0203)rplQ (PRK05591) →             |
| env-300 | IMNBL1_c0075309               | - | 465    | 423    | RNA → RpsD (COG0522)rpsD (PRK05327) →                                                                                                                    |
| env-301 | IMNBL1_c0368275               | - | 321    | 279    | RNA → rpsD (PRK05327)Ribosomal_S4 (pfam00163) →                                                                                                          |
| env-302 | JGI994J12354_10022051         | + | 3246   | 3288   | RNA → RpsD (COG0522)rpsD (PRK05327) →                                                                                                                    |
| env-303 | 2227309966                    | + | 229    | 271    | RNA → RpsD (COG0522)rpsD (PRK05327) → PRK05182 (PRK05182)RNA_poL (pfam01193) →                                                                           |
| env-304 | IMNBL1_c0230034               | + | 279    | 321    | RNA → rpsD (PRK05327)Ribosomal_S4 (pfam00163) →                                                                                                          |
| env-305 | IMNBL1_c0105304               | - | 213    | 171    | RNA → rpsD (PRK05327)Ribosomal_S4 (pfam00163) →                                                                                                          |
| Dca-1-1 | NZ_AUFL01000019.1             | + | 53200  | 53242  | RNA → RpsD (COG0522)rpsD (PRK05327) → RNAP_alpha_NTD (cd06928)PRK05182 (PRK05182)RNA_poL_A_CTD (pfam03118) → RplQ (COG0203)rplQ (PRK05591) →             |
| env-306 | 2210995755                    | - | 175    | 133    | RNA → rpsD (PRK05327)Ribosomal_S4 (pfam00163) →                                                                                                          |
| env-307 | JGI24728J21555_1006805        | - | 154    | 112    | RNA →                                                                                                                                                    |
| Bpy-2-1 | NZ_BAIU01000011.1             | - | 29809  | 29767  | RNA → RpsD (COG0522)rpsD (PRK05327) → RpoA (COG0202)PRK05182 (PRK05182) → RplQ (COG0203)rplQ (PRK05591) →                                                |
| env-308 | pre-rum103-00894              | - | 9641   | 9599   | RNA → RpsD (COG0522)rpsD (PRK05327) → RpoA (COG0202)PRK05182 (PRK05182) → RplQ (COG0203)rplQ (PRK05591) →                                                |
| Bpy-1-1 | NZ_KE993121.1                 | + | 42744  | 42786  | RNA → RpsD (COG0522)rpsD (PRK05327) → RpoA (COG0202)PRK05182 (PRK05182) → RplQ (COG0203)rplQ (PRK05591) → rplQ (PRK05591)Ribosomal_L17 (pfam01196) →     |
| env-309 | IMNBL1_c0157636               | + | 159    | 202    | RNA → RpsD (COG0522)rpsD (PRK05327) →                                                                                                                    |
| env-310 | 4491406.3_NODE_15769          | + | 177    | 209    | RNA →                                                                                                                                                    |
| env-311 | DLM010_scaffold16098_1        | + | 260    | 302    | RNA → RpsD (COG0522)rpsD (PRK05327) →                                                                                                                    |
| env-312 | 4491419.3_NODE_2960           | + | 462    | 504    | RNA → RpsD (COG0522)rpsD (PRK05327) → RpoA (COG0202)PRK05182 (PRK05182) → RplQ (COG0203)rplQ (PRK05591) →                                                |
| env-313 | DOM010_scaffold7295_1         | - | 660    | 618    | RNA → RpsD (COG0522)rpsD (PRK05327) →                                                                                                                    |
| env-314 | contig107354                  | + | 383    | 425    | RNA → rpsD (PRK05327)Ribosomal_S4 (pfam00163) →                                                                                                          |
| env-315 | NOF012_scaffold53092_1        | - | 107    | 65     | RNA →                                                                                                                                                    |
| env-316 | 4491485.3_NODE_4702           | - | 97     | 55     | RNA →                                                                                                                                                    |
| env-317 | 4491410.3_NODE_989            | - | 129    | 87     | RNA →                                                                                                                                                    |
| env-318 | 4444165.3.13720               | + | 60     | 102    | RNA → rpsD (PRK05327)Ribosomal_S4 (pfam00163) → S4 (smart00363)S4 (cd00165) →                                                                            |
| Bst-1-1 | NZ_BAKL01000061.1             | - | 5724   | 5682   | RNA → RpsD (COG0522)rpsD (PRK05327) → RpoA (COG0202)PRK05182 (PRK05182) → RplQ (COG0203)rplQ (PRK05591) →                                                |
| env-319 | 4491423.3_NODE_71282          | - | 97     | 55     | RNA → hypo →                                                                                                                                             |
| Bti-1-1 | NZ_CBVI01000016.1             | - | 5424   | 5382   | RNA → RpsD (COG0522)rpsD (PRK05327) → RpoA (COG0202)PRK05182 (PRK05182) → RplQ (COG0203)rplQ (PRK05591) →                                                |
| env-320 | 4491408.3_NODE_13301          | + | 9879   | 9921   | RNA → RpsD (COG0522)rpsD (PRK05327) → PRK05182 (PRK05182)RNA_poL_A_bac (pfam01000) → RpoA (COG0202)PRK05182 (PRK05182) → RplQ (COG0203)rplQ (PRK05591) → |
| env-321 | 4491420.3_NODE_10528          | + | 459    | 491    | RNA →                                                                                                                                                    |
| env-322 | 4491490.3_NODE_12841          | - | 663    | 621    | RNA → RpsD (COG0522)rpsD (PRK05327) →                                                                                                                    |
| env-323 | NLM007_scaffold12180_2        | - | 617    | 575    | RNA → RpsD (COG0522)rpsD (PRK05327) →                                                                                                                    |
| Bac-1-1 | NZ_CDP010000609.1             | - | 2777   | 2735   | RNA → RpsD (COG0522)rpsD (PRK05327) → RpoA (COG0202)PRK05182 (PRK05182) → RplQ (COG0203)rplQ (PRK05591) →                                                |
| env-324 | BABA01006018.1                | - | 202    | 160    | RNA → rpsD (PRK05327)Ribosomal_S4 (pfam00163) →                                                                                                          |
| env-325 | NLF013_scaffold515_5          | - | 614    | 572    | RNA → RpsD (COG0522)rpsD (PRK05327) →                                                                                                                    |
| Bol-1-1 | NZ_JH992946.1                 | + | 318016 | 318058 | RNA → RpsD (COG0522)rpsD (PRK05327) → RpoA (COG0202)PRK05182 (PRK05182) → RplQ (COG0203)rplQ (PRK05591) →                                                |
| env-326 | 08_07_GOS_DNA_scaffold96420_2 | - | 86     | 48     | RNA →                                                                                                                                                    |
| env-327 | BMHBC_1.1_newblercontig337321 | + | 91     | 124    | RNA →                                                                                                                                                    |
| env-328 | DLM003_C759402_1              | - | 450    | 412    | RNA → S4 (smart00363)RpsD (COG0522) →                                                                                                                    |

|         |                              |   |        |        |                                                                                                                                                                                                                    |
|---------|------------------------------|---|--------|--------|--------------------------------------------------------------------------------------------------------------------------------------------------------------------------------------------------------------------|
| env-329 | SRS022137_WUGC_scaffold_2662 | - | 466    | 423    | RNA→ rpsD (PRK05327)Ribosomal_S4 (pfam00163)→                                                                                                                                                                      |
| env-330 | NOF008_scaffold26002_3       | + | 1309   | 1342   | RNA→                                                                                                                                                                                                               |
| env-331 | BABA01023720.1               | + | 559    | 602    | RNA→ hypo→                                                                                                                                                                                                         |
| env-332 | 4491402.3_NODE.2368          | - | 33517  | 33474  | RNA→ RpsD (COG0522)rpsD (PRK05327)→ RpoA (COG0202)PRK05182 (PRK05182)→<br>RplQ (COG0203)rplQ (PRK05591)→                                                                                                           |
| env-333 | longitudinal_29_3            | + | 29258  | 29301  | RNA→ RpsD (COG0522)rpsD (PRK05327)→ RpoA (COG0202)PRK05182 (PRK05182)→<br>RplQ (COG0203)rplQ (PRK05591)→                                                                                                           |
| env-334 | 4491406.3_NODE.26822         | + | 457    | 490    | RNA→                                                                                                                                                                                                               |
| Bfa-1-1 | NZ_BAKK01000025.1            | - | 22207  | 22164  | RNA→ RpsD (COG0522)rpsD (PRK05327)→ hypo→ hypo→ RplQ (COG0203)rplQ (PRK05591)→                                                                                                                                     |
| env-335 | NOM012_scaffold23_1          | - | 506    | 463    | RNA→ RpsD (COG0522)rpsD (PRK05327)→                                                                                                                                                                                |
| env-336 | GO4KUYH01EWM5T               | - | 370    | 327    | RNA→ rpsD (PRK05327)Ribosomal_S4 (pfam00163)→                                                                                                                                                                      |
| Bre-1-1 | NZ_BAIV01000005.1            | + | 187594 | 187637 | RNA→ RpsD (COG0522)rpsD (PRK05327)→ RpoA (COG0202)PRK05182 (PRK05182)→<br>RplQ (COG0203)rplQ (PRK05591)→                                                                                                           |
| env-337 | 4491408.3_NODE.8793          | - | 1690   | 1647   | RNA→ RpoA (COG0202)RpsD (COG0522)PRK05182 (PRK05182)rpsD (PRK05327)→                                                                                                                                               |
| Bno-1-1 | NZ_JH724317.1                | - | 84405  | 84362  | RNA→ RpsD (COG0522)rpsD (PRK05327)→ RpoA (COG0202)PRK05182 (PRK05182)→<br>RplQ (COG0203)rplQ (PRK05591)→                                                                                                           |
| env-338 | 2205287234                   | - | 44     | 11     | RNA→ hypo→                                                                                                                                                                                                         |
| Bno-2-1 | NZ_BAJA01000009.1            | + | 40118  | 40161  | RNA→ RpsD (COG0522)rpsD (PRK05327)→ RpoA (COG0202)PRK05182 (PRK05182)→<br>RplQ (COG0203)rplQ (PRK05591)→                                                                                                           |
| env-339 | NOF007_scaffold44_16         | - | 1160   | 1117   | RNA→ RpsD (COG0522)rpsD (PRK05327)→ RNAP_alpha_NTD (cd06928)PRK05182 (PRK05182)→                                                                                                                                   |
| env-340 | 4491479.3_NODE.1257          | - | 110    | 67     | RNA→                                                                                                                                                                                                               |
| env-341 | DLM020_scaffold13017_1       | + | 262    | 305    | RNA→ ←hypo                                                                                                                                                                                                         |
| env-342 | DLF001_scaffold15389_1       | + | 209    | 252    | RNA→ RpsD (COG0522)rpsD (PRK05327)→ PRK05182 (PRK05182)RNA_pol.L (pfam01193)→                                                                                                                                      |
| env-343 | BAA01022580.1                | - | 570    | 527    | RNA→ RpsD (COG0522)rpsD (PRK05327)→                                                                                                                                                                                |
| env-344 | NLM003_scaffold34637_1       | + | 211    | 254    | RNA→ RpsD (COG0522)rpsD (PRK05327)→                                                                                                                                                                                |
| env-345 | DLM001_scaffold23897_1       | + | 340    | 383    | RNA→ ←hypo                                                                                                                                                                                                         |
| Bne-1-1 | NZ_HG726019.1                | + | 504025 | 504068 | RNA→ RpsD (COG0522)rpsD (PRK05327)→ RpoA (COG0202)PRK05182 (PRK05182)→<br>RplQ (COG0203)rplQ (PRK05591)→                                                                                                           |
| env-346 | 4491421.3_NODE.13085         | + | 481    | 519    | RNA→ hypo→                                                                                                                                                                                                         |
| env-347 | 4448820.3_Contig.2741        | - | 878    | 840    | RNA→ rpsD (PRK05327)→ S4 (smart00363)RpsD (COG0522)→                                                                                                                                                               |
| env-348 | DOF009_scaffold33995_5       | + | 427    | 465    | RNA→ RpsD (COG0522)rpsD (PRK05327)→                                                                                                                                                                                |
| env-349 | 4491404.3_NODE.40545         | + | 40773  | 40812  | RNA→ RpsD (COG0522)rpsD (PRK05327)→ RpoA (COG0202)PRK05182 (PRK05182)→<br>RplQ (COG0203)rplQ (PRK05591)→                                                                                                           |
| env-350 | NOM026_scaffold21137_8       | + | 135    | 174    | RNA→ RpsD (COG0522)rpsD (PRK05327)→                                                                                                                                                                                |
| env-351 | CAM_READ_0099620383          | + | 156    | 195    | RNA→ rpsD (PRK05327)Ribosomal_S4 (pfam00163)→                                                                                                                                                                      |
| env-352 | NOM020_scaffold32164_1       | - | 530    | 491    | RNA→ RpsD (COG0522)rpsD (PRK05327)→                                                                                                                                                                                |
| env-353 | CAM_READ_0099614309          | - | 253    | 214    | RNA→ rpsD (PRK05327)Ribosomal_S4 (pfam00163)→                                                                                                                                                                      |
| env-354 | CAM_READ_0100028819          | + | 179    | 218    | RNA→ rpsD (PRK05327)Ribosomal_S4 (pfam00163)→                                                                                                                                                                      |
| Bba-2-1 | NZ_KB894657.1                | + | 44135  | 44174  | RNA→ RpsD (COG0522)rpsD (PRK05327)→ RpsD (COG0522)rpsD (PRK05327)→<br>RpoA (COG0202)PRK05182 (PRK05182)→ RplQ (COG0203)rplQ (PRK05591)rpsP (PRK14521)→<br>rplQ (PRK05591)rpsP (PRK14521)Ribosomal_L17 (pfam01196)→ |
| env-355 | CAM_READ_0100328893          | - | 402    | 362    | RNA→ rpsD (PRK05327)Ribosomal_S4 (pfam00163)→                                                                                                                                                                      |
| env-356 | 4448808.3_Contig2785         | - | 1614   | 1574   | RNA→ S4 (smart00363)RpsD (COG0522)→                                                                                                                                                                                |
| env-357 | 4448807.3_Contig36355        | + | 56     | 95     | RNA→ rpsD (PRK05327)Ribosomal_S4 (pfam00163)→ S4 (smart00363)RpsD (COG0522)→                                                                                                                                       |
| env-358 | CAM_READ_0100031775          | - | 293    | 253    | RNA→ rpsD (PRK05327)Ribosomal_S4 (pfam00163)→                                                                                                                                                                      |
| env-359 | 4448817.3_Contig4536         | - | 2122   | 2083   | RNA→ rpsD (PRK05327)Ribosomal_S4 (pfam00163)→ S4 (smart00363)RpsD (COG0522)→<br>RpoA (COG0202)PRK05182 (PRK05182)→ RNAP_alpha_NTD (cd06928)rpoA (TIGR02027)→                                                       |
| env-360 | DLF003_scaffold27229_5       | - | 2090   | 2051   | RNA→ RpsD (COG0522)rpsD (PRK05327)→ RpoA (COG0202)PRK05182 (PRK05182)→<br>RplQ (COG0203)rplQ (PRK05591)→                                                                                                           |
| env-361 | NLM032_scaffold69263_2       | - | 652    | 613    | RNA→ RpsD (COG0522)rpsD (PRK05327)→                                                                                                                                                                                |
| env-362 | CAM_READ_0099610915          | - | 85     | 46     | RNA→                                                                                                                                                                                                               |
| env-363 | NLM015_scaffold45_1          | + | 4595   | 4634   | RNA→ RpsD (COG0522)rpsD (PRK05327)→ RpoA (COG0202)PRK05182 (PRK05182)→<br>RplQ (COG0203)rplQ (PRK05591)→                                                                                                           |
| env-364 | CAM_READ_0099599333          | + | 212    | 241    | RNA→                                                                                                                                                                                                               |
| env-365 | CAM_READ_0099868351          | - | 223    | 184    | RNA→ rpsD (PRK05327)Ribosomal_S4 (pfam00163)→                                                                                                                                                                      |



|         |                                     |   |         |         |                                                                                                                                                      |
|---------|-------------------------------------|---|---------|---------|------------------------------------------------------------------------------------------------------------------------------------------------------|
| env-366 | 4448815.3.Contig20136               | + | 237     | 276     | RNA→ REC (smart00448)REC (cd00156)→                                                                                                                  |
| env-367 | 4448815.3.Contig4225                | + | 1077    | 1117    | RNA→ rpsD (PRK05327)Ribosomal_S4 (pfam00163)→ S4 (smart00363)RpsD (COG0522)→                                                                         |
| env-368 | CAM_READ_0100032315                 | - | 355     | 315     | RNA→ rpsD (PRK05327)Ribosomal_S4 (pfam00163)→                                                                                                        |
| env-369 | CAM_READ_0099824453                 | - | 464     | 423     | RNA→ RpsD (COG0522)rpsD (PRK05327)→                                                                                                                  |
| env-370 | 4448811.3.Contig24646               | + | 402     | 441     | RNA→ rpsD (PRK05327)Ribosomal_S4 (pfam00163)→                                                                                                        |
| env-371 | 4448816.3.Contig535                 | + | 7083    | 7122    | RNA→ PRK05309 (PRK05309)RpsK (COG0100)→                                                                                                              |
| env-372 | 4491477.3.NODE_13450                | + | 289     | 328     | RNA→                                                                                                                                                 |
| env-373 | BABD01000252.1                      | + | 1870    | 1909    | RNA→ RpsD (COG0522)rpsD (PRK05327)→ RpoA (COG0202)PRK05182 (PRK05182)→<br>RplQ (COG0203)rplQ (PRK05591)→                                             |
| env-374 | BAAY01002401.1                      | - | 744     | 705     | RNA→ RpsD (COG0522)rpsD (PRK05327)→                                                                                                                  |
| env-375 | 4448812.3.Contig31152               | + | 433     | 472     | RNA→ rpsD (PRK05327)Ribosomal_S4 (pfam00163)→                                                                                                        |
| env-376 | DOM014.scaffold10613_2              | + | 79      | 118     | RNA→ RpsD (COG0522)rpsD (PRK05327)→                                                                                                                  |
| env-377 | longitudinal_9_1858                 | - | 1614    | 1575    | RNA→ RpsD (COG0522)rpsD (PRK05327)→                                                                                                                  |
| Bma-1-1 | NZ_KE159493.1                       | + | 945671  | 945710  | RNA→ RpsD (COG0522)rpsD (PRK05327)→ RpoA (COG0202)PRK05182 (PRK05182)→<br>RplQ (COG0203)rplQ (PRK05591)→                                             |
| env-378 | SRS011586_WUGC_scaffold_3940        | + | 681     | 720     | RNA→                                                                                                                                                 |
| env-379 | contig03653                         | - | 603     | 564     | RNA→ rpsD (PRK05327)Ribosomal_S4 (pfam00163)→                                                                                                        |
| env-380 | AMCI01000278.1                      | - | 2219    | 2180    | RNA→ RpsD (COG0522)rpsD (PRK05327)→ RpoA (COG0202)PRK05182 (PRK05182)→<br>RplQ (COG0203)rplQ (PRK05591)→ hypo→                                       |
| env-381 | NLF011_scaffold2976_3               | - | 407     | 368     | RNA→ RpsD (COG0522)rpsD (PRK05327)→                                                                                                                  |
| env-382 | SRS018656_C1624822                  | - | 39      | 10      | RNA→                                                                                                                                                 |
| env-383 | 4444165.3.59663                     | - | 347     | 308     | RNA→ rpsD (PRK05327)Ribosomal_S4 (pfam00163)→                                                                                                        |
| Bsa-1-1 | NC_015164.1                         | - | 2309295 | 2309256 | RNA→ RpsD (COG0522)rpsD (PRK05327)→ RpoA (COG0202)PRK05182 (PRK05182)→<br>RplQ (COG0203)rplQ (PRK05591)PRK10905 (PRK10905)→                          |
| env-384 | 4491421.3.NODE_98220                | - | 2451    | 2411    | RNA→ RpsD (COG0522)rpsD (PRK05327)→ RpoA (COG0202)PRK05182 (PRK05182)→<br>RplQ (COG0203)rplQ (PRK05591)→                                             |
| env-385 | 4491405.3.NODE_15725                | - | 729     | 690     | RNA→ RpsD (COG0522)rpsD (PRK05327)→                                                                                                                  |
| env-386 | 4491405.3.NODE_3691                 | - | 706     | 667     | RNA→ RpsD (COG0522)rpsD (PRK05327)→                                                                                                                  |
| Bfi-1-1 | NZ_GG688317.1                       | + | 227372  | 227415  | RNA→ RpsD (COG0522)rpsD (PRK05327)→ RpoA (COG0202)PRK05182 (PRK05182)→<br>RplQ (COG0203)rplQ (PRK05591)→                                             |
| env-387 | DOF008_scaffold9719_2               | + | 318     | 361     | RNA→ rpsD (PRK05327)Ribosomal_S4 (pfam00163)→                                                                                                        |
| env-388 | longitudinal_208_91                 | + | 6255    | 6298    | RNA→ hypo→ RpsD (COG0522)rpsD (PRK05327)→ RpoA (COG0202)PRK05182 (PRK05182)→<br>RplQ (COG0203)rplQ (PRK05591)→                                       |
| env-389 | SRS022713_LANL_scaffold_2857        | - | 541     | 498     | RNA→ RpsD (COG0522)rpsD (PRK05327)→                                                                                                                  |
| env-390 | DLM011_scaffold1111_2               | + | 788     | 821     | RNA→                                                                                                                                                 |
| env-391 | SRS023346_LANL_scaffold_1997        | + | 289     | 322     | RNA→                                                                                                                                                 |
| env-392 | scaffold5201_4_MH0074               | - | 616     | 573     | RNA→ RpsD (COG0522)rpsD (PRK05327)→                                                                                                                  |
| env-393 | 4491407.3.NODE_11023                | - | 669     | 626     | RNA→ RpsD (COG0522)rpsD (PRK05327)→                                                                                                                  |
| env-394 | UnmappedStool_Broad_scaffold_100816 | + | 284     | 318     | RNA→                                                                                                                                                 |
| env-395 | SRS015264_WUGC_scaffold_68015       | - | 1367    | 1323    | RNA→ RpsD (COG0522)rpsD (PRK05327)→ RNAP_alpha_NTD (cd06928)PRK05182 (PRK05182)→                                                                     |
| env-396 | SRS011586_C3383160                  | + | 59      | 103     | RNA→ RpsD (COG0522)rpsD (PRK05327)→                                                                                                                  |
| env-397 | DLM001_scaffold28826_29             | + | 13800   | 13834   | RNA→                                                                                                                                                 |
| env-398 | SRS013476_C2866296                  | - | 270     | 226     | RNA→ rpsD (PRK05327)Ribosomal_S4 (pfam00163)→                                                                                                        |
| Bhe-1-1 | NC_014933.1                         | + | 1368692 | 1368731 | RNA→ hypo→ RpsD (COG0522)rpsD (PRK05327)→ RpoA (COG0202)PRK05182 (PRK05182)→<br>RplQ (COG0203)rplQ (PRK05591)→                                       |
| env-399 | 4491411.3.NODE_7528                 | + | 1171    | 1210    | RNA→ RpsD (COG0522)rpsD (PRK05327)→ RpoA (COG0202)PRK05182 (PRK05182)→<br>RplQ (COG0203)rplQ (PRK05591)→                                             |
| Bfi-1-1 | NZ_GL882630.1                       | + | 110961  | 111000  | RNA→ RpsD (COG0522)rpsD (PRK05327)→<br>RNAP_alpha_NTD (cd06928)PRK05182 (PRK05182)RNA_poL_A_CTD (pfam03118)→<br>RplQ (COG0203)rplQ (PRK05591)→ hypo→ |
| env-400 | IMNBL1.c0000119                     | + | 20286   | 20326   | RNA→ RpsD (COG0522)rpsD (PRK05327)→ RpoA (COG0202)PRK05182 (PRK05182)→<br>RplQ (COG0203)rplQ (PRK05591)→                                             |
| env-401 | 2226960311                          | - | 510     | 470     | RNA→ RpsD (COG0522)rpsD (PRK05327)→                                                                                                                  |
| env-402 | JGI26534J51046_1128446              | - | 112     | 72      | RNA→ ← hypo                                                                                                                                          |
| env-403 | JGI994J12354_10651307               | - | 257     | 217     | RNA→ rpsD (PRK05327)Ribosomal_S4 (pfam00163)→                                                                                                        |

|         |                                |   |         |         |                                                                                                                                                                                     |
|---------|--------------------------------|---|---------|---------|-------------------------------------------------------------------------------------------------------------------------------------------------------------------------------------|
| env-404 | 2227529292                     | + | 543     | 583     | RNA → ←-hypo                                                                                                                                                                        |
| env-405 | JGI994J12354_10765493          | + | 91      | 133     | RNA → rpsD (PRK05327)Ribosomal_S4 (pfam00163) →                                                                                                                                     |
| env-406 | IMNBL1_c0050277                | - | 364     | 322     | RNA → rpsD (PRK05327)Ribosomal_S4 (pfam00163) →                                                                                                                                     |
| Bpa-1-1 | NZ_BAJR01000002.1              | + | 224743  | 224783  | RNA → RpsD (COG0522)rpsD (PRK05327) → RpoA (COG0202)PRK05182 (PRK05182) →<br>RplQ (COG0203)rplQ (PRK05591) →                                                                        |
| env-407 | BABD01002563.1                 | + | 2434    | 2474    | RNA → rpsD (PRK05327)Ribosomal_S4 (pfam00163) →                                                                                                                                     |
| env-408 | 4491404.3_NODE_23173           | - | 1622    | 1582    | RNA → RpsD (COG0522)rpsD (PRK05327) → RpoA (COG0202)PRK05182 (PRK05182) →                                                                                                           |
| Bba-1-1 | NZ_AUTU01000007.1              | + | 71664   | 71704   | RNA → RpsD (COG0522)rpsD (PRK05327) → RpoA (COG0202)PRK05182 (PRK05182) →<br>RplQ (COG0203)rplQ (PRK05591) →                                                                        |
| env-409 | AUXO016092034.1                | - | 828     | 788     | RNA → RpsD (COG0522)rpsD (PRK05327) → PRK05182 (PRK05182)RNA_pol_L (pfam01193) →                                                                                                    |
| env-410 | DLM007_scaffold43740.1         | + | 868     | 908     | RNA → RpsD (COG0522)rpsD (PRK05327) → PRK05182 (PRK05182)RNA_pol_L (pfam01193) →                                                                                                    |
| env-411 | BMHB3a_c153300                 | + | 16662   | 16702   | RNA → RpsD (COG0522)rpsD (PRK05327) → RpoA (COG0202)PRK05182 (PRK05182) →<br>RplQ (COG0203)rplQ (PRK05591) →                                                                        |
| env-412 | JGI24728J21555_1016111         | - | 1883    | 1843    | RNA → RpsD (COG0522)rpsD (PRK05327) → RpoA (COG0202)PRK05182 (PRK05182) →<br>rplQ (PRK05591)Ribosomal_L17 (pfam01196) →                                                             |
| env-413 | BMHBC_922                      | + | 4020    | 4060    | RNA → RpsD (COG0522)rpsD (PRK05327) → RpoA (COG0202)PRK05182 (PRK05182) →<br>RplQ (COG0203)rplQ (PRK05591) →                                                                        |
| env-414 | HCF12C_147729                  | + | 276     | 306     | RNA →                                                                                                                                                                               |
| Bpr-1-1 | NZ_AQWS01000016.1              | + | 67128   | 67168   | RNA → RpsD (COG0522)rpsD (PRK05327) → RpoA (COG0202)PRK05182 (PRK05182) →<br>RplQ (COG0203)rplQ (PRK05591) →                                                                        |
| Bco-1-1 | NZ_CM001167.1                  | - | 250156  | 250116  | RNA → RpsD (COG0522)rpsD (PRK05327) → RpsD (COG0522)rpsD (PRK05327) →<br>RpoA (COG0202)PRK05182 (PRK05182) → RpoA (COG0202)PRK05182 (PRK05182) →<br>RplQ (COG0203)rplQ (PRK05591) → |
| env-415 | JGI26523J50269_1004409         | + | 2776    | 2819    | RNA → RpsD (COG0522)rpsD (PRK05327) → RNAP_alpha_NTD (cd06928)PRK05182 (PRK05182) →                                                                                                 |
| env-416 | 3300000408_102680              | + | 393     | 436     | RNA → RpsD (COG0522)rpsD (PRK05327) →<br>RNAP_alpha_NTD (cd06928)PRK05182 (PRK05182)RNA_pol_A_CTD (pfam03118) →                                                                     |
| env-417 | scaffold27906_1_MH0037         | - | 715     | 672     | RNA → rpsD (PRK05327)Ribosomal_S4 (pfam00163) → RpsD (COG0522)rpsD (PRK05327) →                                                                                                     |
| Bvi-1-1 | NZ_CP007034.1                  | + | 1999562 | 1999605 | RNA → RpsD (COG0522)rpsD (PRK05327) →<br>RNAP_alpha_NTD (cd06928)PRK05182 (PRK05182)RNA_pol_A_CTD (pfam03118) →<br>RplQ (COG0203)rplQ (PRK05591) →                                  |
| env-418 | scaffold5855_4_MH0006          | - | 1933    | 1890    | RNA → RpsD (COG0522)rpsD (PRK05327) →<br>RNAP_alpha_NTD (cd06928)PRK05182 (PRK05182)RNA_pol_A_CTD (pfam03118) →<br>rplQ (PRK05591)Ribosomal_L17 (pfam01196) →                       |
| env-419 | 4491415.3_NODE_16450           | + | 1929    | 1972    | RNA → RpsD (COG0522)rpsD (PRK05327) → RpoA (COG0202)PRK05182 (PRK05182) →                                                                                                           |
| env-420 | scaffold13158_6_MH0012         | + | 400     | 443     | RNA → RpsD (COG0522)rpsD (PRK05327) →<br>RNAP_alpha_NTD (cd06928)PRK05182 (PRK05182)RNA_pol_A_CTD (pfam03118) →<br>rplQ (PRK05591)Ribosomal_L17 (pfam01196) →                       |
| env-421 | BMHB3a_c149458                 | - | 1857    | 1814    | RNA → RpsD (COG0522)rpsD (PRK05327) →<br>RNAP_alpha_NTD (cd06928)PRK05182 (PRK05182)RNA_pol_A_CTD (pfam03118) →<br>rplQ (PRK05591)Ribosomal_L17 (pfam01196) →                       |
| env-422 | RUMENNODE_488125_148000        | - | 776     | 733     | RNA → RpsD (COG0522)rpsD (PRK05327) → PRK05182 (PRK05182) →                                                                                                                         |
| env-423 | scaffold8032_1_MH0020          | - | 100     | 57      | RNA →                                                                                                                                                                               |
| env-424 | UnmappedStool_Broad_C251130659 | - | 263     | 220     | RNA → rpsD (PRK05327)Ribosomal_S4 (pfam00163) →                                                                                                                                     |
| env-425 | HCE12Call500_c0131960          | + | 95      | 141     | RNA → RpsD (COG0522)rpsD (PRK05327) →<br>RNAP_alpha_NTD (cd06928)PRK05182 (PRK05182)RNA_pol_A_CTD (pfam03118) →<br>rplQ (PRK05591)Ribosomal_L17 (pfam01196) →                       |
| env-426 | 2013403773                     | + | 632     | 678     | RNA → ←-hypo                                                                                                                                                                        |
| env-427 | JGI20163J15578_10124444        | - | 233     | 192     | RNA → rpsD (PRK05327)Ribosomal_S4 (pfam00163) →                                                                                                                                     |
| env-428 | JGI20163J15578_10757792        | - | 551     | 510     | RNA → RpsD (COG0522)rpsD (PRK05327) →                                                                                                                                               |
| env-429 | Incwf_1000509                  | - | 63510   | 63469   | RNA → RpsD (COG0522)rpsD (PRK05327) →<br>RNAP_alpha_NTD (cd06928)PRK05182 (PRK05182)RNA_pol_A_CTD (pfam03118) →<br>RplQ (COG0203)rplQ (PRK05591) →                                  |
| env-430 | IMNBL1_c0128642                | - | 512     | 471     | RNA → RpsD (COG0522)rpsD (PRK05327) →                                                                                                                                               |
| env-431 | 2227561212                     | - | 532     | 491     | RNA → RpsD (COG0522)rpsD (PRK05327) →                                                                                                                                               |
| env-432 | 2227599765                     | - | 41      | 10      | RNA →                                                                                                                                                                               |

|         |                                  |   |        |        |                                                                                                                                                      |
|---------|----------------------------------|---|--------|--------|------------------------------------------------------------------------------------------------------------------------------------------------------|
| Dsp-1-1 | NZ_CVRP01000013.1                | - | 125218 | 125177 | RNA → RpsD (COG0522)rpsD (PRK05327) → RNAP_alpha_NTD (cd06928)PRK05182 (PRK05182)RNA_polA_CTD (pfam03118) → RplQ (COG0203)rplQ (PRK05591) →          |
| env-433 | 2210517547                       | - | 191    | 150    | RNA → rpsD (PRK05327)Ribosomal_S4 (pfam00163) →                                                                                                      |
| env-434 | JGI26523J50269_1102284           | - | 319    | 278    | RNA → rpsD (PRK05327)Ribosomal_S4 (pfam00163) →                                                                                                      |
| Bga-1-1 | NZ_KB894134.1                    | - | 31988  | 31948  | RNA → RpsD (COG0522)rpsD (PRK05327) → RpoA (COG0202)PRK05182 (PRK05182) → RplQ (COG0203)rplQ (PRK05591) → rplQ (PRK05591)Ribosomal_L17 (pfam01196) → |
| env-435 | NLF006_scaffold28489_1           | + | 1163   | 1203   | RNA →                                                                                                                                                |
| env-436 | BABD01000996.1                   | + | 324    | 364    | RNA → rpsD (PRK05327)Ribosomal_S4 (pfam00163) → S4 (smart00363)RpsD (COG0522) → RpoA (COG0202)PRK05182 (PRK05182) → RplQ (COG0203)rplQ (PRK05591) →  |
| env-437 | CAM_READ_0099683363              | + | 274    | 314    | RNA → rpsD (PRK05327)Ribosomal_S4 (pfam00163) →                                                                                                      |
| env-438 | CAM_READ_0100181161              | + | 263    | 303    | RNA →                                                                                                                                                |
| env-439 | CAM_READ_0100124625              | + | 293    | 334    | RNA →                                                                                                                                                |
| env-440 | CAM_READ_0099376081              | + | 46     | 86     | RNA → rpsD (PRK05327)Ribosomal_S4 (pfam00163) → S4 (smart00363)S4 (pfam01479) →                                                                      |
| env-441 | CAM_READ_0099881367              | + | 377    | 407    | RNA →                                                                                                                                                |
| env-442 | 4448820.3_Contig_2096            | + | 70     | 110    | RNA → rpsD (PRK05327)Ribosomal_S4 (pfam00163) → S4 (smart00363)RpsD (COG0522) →                                                                      |
| env-443 | 4491406.3_NODE_1651              | - | 106    | 66     | RNA →                                                                                                                                                |
| env-444 | SRS057478_LANL_scaffold_3450     | + | 67     | 107    | RNA → ← hypo                                                                                                                                         |
| env-445 | BABB01003051.1                   | + | 162    | 202    | RNA → RpsD (COG0522)rpsD (PRK05327) → RNAP_alpha_NTD (cd06928)PRK05182 (PRK05182) →                                                                  |
| env-446 | BAA01002159.1                    | + | 2011   | 2051   | RNA → RpsD (COG0522)rpsD (PRK05327) → hypo →                                                                                                         |
| env-447 | 4448808.3_Contig27637            | - | 313    | 273    | RNA →                                                                                                                                                |
| env-448 | DOM001_scaffold38696_1           | - | 521    | 481    | RNA → RpsD (COG0522)rpsD (PRK05327) →                                                                                                                |
| env-449 | NOM016_scaffold2065_1            | + | 772    | 812    | RNA → RpsD (COG0522)rpsD (PRK05327) →                                                                                                                |
| env-450 | SRS023176_Baylor_scaffold_1186   | - | 45     | 15     | RNA →                                                                                                                                                |
| env-451 | 4448815.3_Contig37632            | - | 426    | 386    | RNA → S4 (smart00363)RpsD (COG0522) →                                                                                                                |
| env-452 | 4491401.3_NODE_53198             | + | 747    | 787    | RNA → RpsD (COG0522)rpsD (PRK05327) →                                                                                                                |
| env-453 | 4491419.3_NODE_6796              | - | 720    | 680    | RNA → RpsD (COG0522)rpsD (PRK05327) →                                                                                                                |
| env-454 | DLF004_scaffold28173_1           | + | 663    | 703    | RNA → RpsD (COG0522)rpsD (PRK05327) →                                                                                                                |
| env-455 | NOM012_scaffold42779_1           | - | 646    | 606    | RNA → RpsD (COG0522)rpsD (PRK05327) →                                                                                                                |
| env-456 | NOM020_scaffold27835_3           | - | 612    | 572    | RNA → RpsD (COG0522)rpsD (PRK05327) →                                                                                                                |
| env-457 | 4448814.3_Contig417              | - | 3940   | 3900   | RNA → RpsD (COG0522)rpsD (PRK05327) → RpoA (COG0202)PRK05182 (PRK05182) → RplQ (COG0203)rplQ (PRK05591) → hypo →                                     |
| env-458 | NOM015_scaffold155_1             | + | 161    | 201    | RNA → RpsD (COG0522)rpsD (PRK05327) →                                                                                                                |
| env-459 | SRS015960_WUGC_scaffold_3709     | - | 45     | 15     | RNA →                                                                                                                                                |
| env-460 | SRS049900_LANL_scaffold_2992     | - | 369    | 329    | RNA → rpsD (PRK05327)Ribosomal_S4 (pfam00163) →                                                                                                      |
| env-461 | 4448813.3_Contig19274            | - | 59     | 29     | RNA →                                                                                                                                                |
| env-462 | SRS018665_C3523114               | + | 23     | 70     | RNA → rpsD (PRK05327)Ribosomal_S4 (pfam00163) →                                                                                                      |
| env-463 | SRS019128_C4417707               | - | 737    | 690    | RNA → RpsD (COG0522)rpsD (PRK05327) →                                                                                                                |
| env-464 | SRS022536_LANL_scaffold_112290   | + | 4797   | 4844   | RNA → S4 (smart00363)RpsD (COG0522) → PRK05182 (PRK05182)RNA_pol_L (pfam01193) →                                                                     |
| env-465 | SRS016575_Baylor_scaffold_36465  | - | 658    | 611    | RNA → RpsD (COG0522)rpsD (PRK05327) →                                                                                                                |
| env-466 | SRS050628_C1820033               | + | 47     | 94     | RNA → rpsD (PRK05327)Ribosomal_S4 (pfam00163) →                                                                                                      |
| env-467 | SRS052876_LANL_scaffold_11771    | + | 2902   | 2949   | RNA → RpsD (COG0522)rpsD (PRK05327) → RNAP_alpha_NTD (cd06928)PRK05182 (PRK05182) →                                                                  |
| env-468 | SRS063603_LANL_scaffold_98718    | - | 50     | 13     | RNA →                                                                                                                                                |
| env-469 | SRS017227_Baylor_scaffold_160228 | + | 643    | 690    | RNA → rpsD (PRK05327)Ribosomal_S4 (pfam00163) →                                                                                                      |
| env-470 | SRS018394_Baylor_scaffold_73299  | + | 6083   | 6130   | RNA → rpsD (PRK05327)Ribosomal_S4 (pfam00163) →                                                                                                      |
| env-471 | SRS021496_Baylor_scaffold_84955  | - | 737    | 690    | RNA → RpsD (COG0522)rpsD (PRK05327) →                                                                                                                |
| env-472 | SRS023595_Baylor_scaffold_87344  | - | 329    | 282    | RNA → rpsD (PRK05327)Ribosomal_S4 (pfam00163) →                                                                                                      |
| env-473 | SRS024289_LANL_scaffold_49264    | + | 21972  | 22019  | RNA → RpsD (COG0522)rpsD (PRK05327) → RNAP_alpha_NTD (cd06928)PRK05182 (PRK05182)RNA_polA_CTD (pfam03118) → RplQ (COG0203)rplQ (PRK05591) →          |
| env-474 | SRS052604_C1840067               | + | 1153   | 1200   | RNA → RpsD (COG0522)rpsD (PRK05327) → RNAP_alpha_NTD (cd06928)PRK05182 (PRK05182)RNA_polA_CTD (pfam03118) → RplQ (COG0203)rplQ (PRK05591) →          |
| env-475 | SRS058808_C2801786               | + | 507    | 554    | RNA →                                                                                                                                                |

|         |                                    |   |      |      |                                                                                                                                                                   |
|---------|------------------------------------|---|------|------|-------------------------------------------------------------------------------------------------------------------------------------------------------------------|
| env-476 | SRS065099_C2629417                 | - | 284  | 237  | RNA → RpsD (PRK05327) Ribosomal_S4 (pfam00163) →                                                                                                                  |
| env-477 | Buccal_mucosa_LANL_scaffold_111229 | - | 710  | 663  | RNA → RpsD (COG0522) rpsD (PRK05327) →                                                                                                                            |
| env-478 | SRS013705_Baylor_scaffold_103305   | - | 435  | 388  | RNA → RpsD (COG0522) rpsD (PRK05327) →                                                                                                                            |
| env-479 | SRS018443_C3874981                 | + | 304  | 351  | RNA → RpsD (COG0522) rpsD (PRK05327) → RpoA (COG0202) PRK05182 (PRK05182) →                                                                                       |
| env-480 | SRS017304_Baylor_scaffold_31533    | + | 6469 | 6516 | RNA → RpsD (COG0522) rpsD (PRK05327) →<br>RNAP_alpha_NTD (cd06928) PRK05182 (PRK05182) RNA_pol_A_CTD (pfam03118) →<br>RplQ (COG0203) rplQ (PRK05591) →            |
| env-481 | SRS013252_Baylor_scaffold_26940    | + | 960  | 1007 | RNA → RpsD (COG0522) rpsD (PRK05327) →                                                                                                                            |
| env-482 | SRS019028_WUGC_scaffold_45751      | - | 423  | 376  | RNA → RpsD (COG0522) rpsD (PRK05327) →                                                                                                                            |
| env-483 | SRS012279_Baylor_scaffold_66400    | - | 3211 | 3164 | RNA → RpsD (COG0522) rpsD (PRK05327) →<br>RNAP_alpha_NTD (cd06928) PRK05182 (PRK05182) RNA_pol_A_CTD (pfam03118) →<br>RplQ (COG0203) rplQ (PRK05591) →            |
| env-484 | SRS015893_C2389359                 | - | 740  | 693  | RNA → RpsD (COG0522) rpsD (PRK05327) →                                                                                                                            |
| env-485 | SRS049268_C4370284                 | + | 2539 | 2576 | RNA →                                                                                                                                                             |
| env-486 | SRS051930_C3081289                 | - | 76   | 39   | RNA →                                                                                                                                                             |
| env-487 | SRS055378_LANL_scaffold_88414      | - | 2987 | 2940 | RNA → RpsD (COG0522) rpsD (PRK05327) →<br>RNAP_alpha_NTD (cd06928) PRK05182 (PRK05182) RNA_pol_A_CTD (pfam03118) →<br>RplQ (COG0203) rplQ (PRK05591) →            |
| env-488 | SRS016360_C2594021                 | - | 74   | 37   | RNA → ← hypo                                                                                                                                                      |
| env-489 | SRS017511_Baylor_scaffold_44051    | - | 4149 | 4102 | RNA → RpsD (COG0522) rpsD (PRK05327) →<br>RNAP_alpha_NTD (cd06928) PRK05182 (PRK05182) RNA_pol_A_CTD (pfam03118) →<br>RplQ (COG0203) rplQ (PRK05591) →            |
| env-490 | SRS018739_WUGC_scaffold_35509      | + | 66   | 113  | RNA → RpsD (COG0522) rpsD (PRK05327) →                                                                                                                            |
| env-491 | SRS022143_WUGC_scaffold_58148      | + | 62   | 109  | RNA → RpsD (COG0522) rpsD (PRK05327) →<br>RNAP_alpha_NTD (cd06928) PRK05182 (PRK05182) RNA_pol_A_CTD (pfam03118) →<br>rplQ (PRK05591) Ribosomal_L17 (pfam01196) → |
| env-492 | SRS024087_LANL_scaffold_25676      | + | 1061 | 1108 | RNA → RpsD (COG0522) rpsD (PRK05327) →<br>RNAP_alpha_NTD (cd06928) PRK05182 (PRK05182) RNA_pol_A_CTD (pfam03118) →<br>RplQ (COG0203) rplQ (PRK05591) →            |
| env-493 | SRS047113_C5300540                 | - | 121  | 74   | RNA →                                                                                                                                                             |
| env-494 | SRS055450_LANL_scaffold_68076      | + | 1281 | 1328 | RNA → RpsD (COG0522) rpsD (PRK05327) →<br>RNAP_alpha_NTD (cd06928) PRK05182 (PRK05182) RNA_pol_A_CTD (pfam03118) →<br>RplQ (COG0203) rplQ (PRK05591) →            |
| env-495 | SRS013723_Baylor_scaffold_78094    | + | 134  | 181  | RNA → RpsD (COG0522) rpsD (PRK05327) →                                                                                                                            |
| env-496 | SRS015574_WUGC_scaffold_47042      | + | 110  | 157  | RNA → RpsD (COG0522) rpsD (PRK05327) → PRK05182 (PRK05182) RNA_pol_L (pfam01193) →                                                                                |
| env-497 | SRS013533_C5397762                 | + | 347  | 394  | RNA →                                                                                                                                                             |
| env-498 | SRS013170_C3989364                 | + | 202  | 245  | RNA →                                                                                                                                                             |
| env-499 | SRS015215_C2525062                 | - | 60   | 23   | RNA →                                                                                                                                                             |
| env-500 | SRS015762_C3609878                 | + | 796  | 843  | RNA →                                                                                                                                                             |
| env-501 | SRS015434_C5621575                 | + | 192  | 237  | RNA →                                                                                                                                                             |
| env-502 | SRS013170_Baylor_scaffold_120567   | + | 426  | 471  | RNA →                                                                                                                                                             |
| env-503 | SRS023595_C7159178                 | + | 773  | 808  | RNA →                                                                                                                                                             |
| env-504 | scaffold11811_2_MH0082             | + | 201  | 253  | RNA → RpsD (COG0522) rpsD (PRK05327) →                                                                                                                            |
| env-505 | 08_07_XOS_DNA_scaffold14885_1      | - | 241  | 196  | RNA → RpsD (PRK05327) Ribosomal_S4 (pfam00163) →                                                                                                                  |
| env-506 | SRS022071_C2972092                 | + | 67   | 112  | RNA → RpsD (COG0522) rpsD (PRK05327) →                                                                                                                            |
| env-507 | 08_19_CONTROL_DNA_scaffold3842_6   | - | 647  | 602  | RNA → RpsD (COG0522) rpsD (PRK05327) →                                                                                                                            |
| env-508 | 07_22_CONTROL_DNA_scaffold5573_1   | + | 364  | 409  | RNA → RpsD (COG0522) rpsD (PRK05327) →                                                                                                                            |
| env-509 | 07_22_CONTROL_DNA_scaffold54317_1  | + | 232  | 277  | RNA → RpsD (COG0522) rpsD (PRK05327) →<br>RNAP_alpha_NTD (cd06928) PRK05182 (PRK05182) RNA_pol_A_CTD (pfam03118) →<br>rplQ (PRK05591) Ribosomal_L17 (pfam01196) → |
| env-510 | 07_22_INULIN_DNA_scaffold23708_1   | + | 190  | 235  | RNA → RpsD (COG0522) rpsD (PRK05327) →                                                                                                                            |
| env-511 | scaffold11208_4_MH0083             | + | 4936 | 4981 | RNA → RpsD (COG0522) rpsD (PRK05327) → RpoA (COG0202) PRK05182 (PRK05182) →<br>RplQ (COG0203) rplQ (PRK05591) →                                                   |
| env-512 | 07_22_INULIN_DNA_scaffold131_3     | - | 1214 | 1169 | RNA → RpsD (COG0522) rpsD (PRK05327) → RNAP_alpha_NTD (cd06928) PRK05182 (PRK05182) →                                                                             |
| env-513 | scaffold80135_1_MH0077             | - | 1023 | 978  | RNA → RpsD (COG0522) rpsD (PRK05327) → PRK05182 (PRK05182) RNA_pol_L (pfam01193) →                                                                                |



|         |                                    |   |       |       |      |                                                                                                                                           |
|---------|------------------------------------|---|-------|-------|------|-------------------------------------------------------------------------------------------------------------------------------------------|
| env-514 | O8_19_POLYDEXT_DNA_scaffold5982_10 | + | 115   | 160   | RNA→ | RpsD (COG0522)rpsD (PRK05327)→                                                                                                            |
| env-515 | mgutOb2_U_BM_aaa76b05_b1           | - | 766   | 721   | RNA→ | RpsD (COG0522)rpsD (PRK05327)→                                                                                                            |
| env-516 | SRS022137_WUGC_scaffold_28771      | + | 14373 | 14420 | RNA→ | RpsD (COG0522)rpsD (PRK05327)→<br>RNAP_alpha_NTD (cd06928)PRK05182 (PRK05182)RNA_pol_A_CTD (pfam03118)→<br>RplQ (COG0203)rplQ (PRK05591)→ |
| env-517 | UnmappedStool_Broad_C251091185     | - | 208   | 165   | RNA→ | rpsD (PRK05327)Ribosomal_S4 (pfam00163)→                                                                                                  |

### 14.3 Conserved domains

Conserved domains found in protein-coding genes listed in Section 14.2 are shown below, with the first sentence in their description from the Conserved Domain Database (if any). Conserved domains associated with more than one S4-

**cd00156** (1) Signal receiver domain; originally thought to be unique to bacteria (CheY, OmpR, NtrC, and PhoB), now recently identified in eukaryotes ETR1 *Arabidopsis thaliana*; this domain receives the signal from the sensor partner in a two-component systems; contains a phosphoacceptor site that is phosphorylated by histidine kinase homologs; usually found N-terminal to a DNA binding effector domain; forms homodimers

**cd00165** (1) S4/Hsp/ tRNA synthetase RNA-binding domain; The domain surface is populated by conserved, charged residues that define a likely RNA-binding site; Found in stress proteins, ribosomal proteins and tRNA synthetases; This may imply a hitherto unrecognized functional similarity between these three protein classes.

**cd06928** (96) N-terminal domain of the Alpha subunit of Bacterial RNA polymerase.

**COG0100** (2) Ribosomal protein S11 [Translation, ribosomal structure and biogenesis]

**COG0202** (94) DNA-directed RNA polymerase, alpha subunit/40 kD subunit [Transcription]

**COG0203** (132) Ribosomal protein L17 [Translation, ribosomal structure and biogenesis]

**COG0522** (341) Ribosomal protein S4 or related protein [Translation, ribosomal structure and biogenesis]

**COG4185** (1) Predicted ABC-type ATPase [General function prediction only]

**pfam00163** (100) Ribosomal protein S4/S9 N-terminal domain.

**pfam01000** (1) RNA polymerase Rpb3/RpoA insert domain.

Bacteroidia RNA are assigned a color, while others are shown in gray. The number in parentheses after the colored domain name is the number of occurrences in Section 14.2.

**pfam01193** (26) RNA polymerase Rpb3/Rpb11 dimerisation domain.

**pfam01196** (33) Ribosomal protein L17.

**pfam01479** (1) S4 domain.

**pfam03118** (79) Bacterial RNA polymerase, alpha chain C terminal domain.

**pfam07877** (1) Protein of unknown function (DUF1661).

**PLN02967** (1) kinase

**PRK05182** (218) DNA-directed RNA polymerase subunit alpha; Provisional

**PRK05309** (2) 30S ribosomal protein S11; Validated

**PRK05327** (423) 30S ribosomal protein S4; Validated

**PRK05591** (165) 50S ribosomal protein L17; Validated

**PRK10905** (1) cell division protein DamX; Validated

**PRK13108** (1) prolipoprotein diacylglycerol transferase; Reviewed

**PRK14521** (2) 30S ribosomal protein S16; Provisional

**smart00363** (21) S4 RNA-binding domain.

**smart00382** (1) ATPases associated with a variety of cellular activities.

**smart00448** (1) cheY-homologous receiver domain.

**TIGR02027** (1) DNA-directed RNA polymerase, alpha subunit, bacterial and chloroplast-type. [Transcription, DNA-dependent RNA polymerase]

### 14.4 Multiple-sequence alignment

Each S4-Bacteroidia RNA is denoted by an abbreviation (like “Eco-1-1”) that refers to a taxonomy given in Section 14.1. The alignment may include sequences containing the RNA motif, as well as flanking sequence. The S4-Bacteroidia RNA itself is denoted by the line underneath marked 5’ and 3’ on either end. Nucleotides in flanking sequences (i.e., not part of the motif) are written in gray letters. Stems of predicted rho-independent transcription terminators, if any, are shaded yellow. (Note: terminator predictions have not been analyzed manually, and many are likely to be false positives. Terminator predictions are those of the RNI software.) Nucleotides predicted to function (as DNA) as transcription-factor binding sites, if any, are shaded in green. (But note: these predictions are manually an-

notated, so they might be under-predicted.) Annotated start codons, if any, are shaded green. (Note: start codons are frequently misannotated, especially in environmental samples.) Nucleotides proposed to basepair as part of the consensus structure are shaded in color when they comprise Watson-Crick or G-U pairs. Otherwise they are shaded gray. Conserved stems are also indicated at the bottom of the alignment by angle brackets, where matching < and > denote base-paired columns. Below these angle brackets, the symbol “2” denotes base pairs exhibiting covariation according to the statistically well-founded R-scape method. “1” denotes base pairs exhibiting covariation according to R2R’s simplistic method. “0” denotes base pairs that are not observed to mutate and “?” denotes base pairs that



























```

env-242 AAAUUUUAAAAGAA . . . . . AUG
env-243 UUUAAAACAA . . . . . AUG
env-244 AACGCAUAAUAAAUAAAUAUAAAUA . . . . . AUG
env-245 AACACAUAAACAAUUUUAAUAAA . . . . . AUG
Ppr-1-1 AACACAUAAAUAAUUUUAAUAAAUA . . . . . AUG
env-246 AUUAAAUAUUUAGAA . . . . . AUG
env-247 UAAAAAAAUAUAGAA . . . . . AUG
env-248 AACAAUAGAAAA . . . . . AUG
env-249 AACAAUAGAAAA . . . . . AUG
env-250 CUUUAAAACGAAUUACCAA . . . . . AUG
env-251 UUUAAAUAUUUAGAA . . . . . AUG
env-252 UUUAAAUCUACUAAA . . . . . AUG
env-253 UUUAAAUCUACUAAA . . . . . AUG
env-254 UUUAAAA . . . . . AUG
env-255 AUAAUCACAAAA . AUUUUAAAUA . . . . . AUG
env-256 AUAAUCACAAAAACUUUGAAAAU . . . . . AUG
env-257 AUAAUCACAAAAACUUUGAAAAU . . . . . AUG
env-258 . . . . . AUG
env-259 UAAUUUGUAAAA . . . . . AUG
Dga-1-1 AGAAAAGAA . . . . . AUG
env-260 AGAAAAGAA . . . . . AUG
Psp-4-1 AGAAAAGAA . . . . . AUG
env-261 AUUUUUAAAAGUAUUAGAA . . . . . AUG
env-262 UUUUUAAAAGAAUUAGAA . . . . . AUG
env-263 AAAUUAAAAGAAUAAA . . . . . AUG
env-264 AAAUUAAAAGAAUAAA . . . . . AUG
env-265 AUUUUUUAAAA . . . . . AUG
env-266 UAAUUUAGAAAA . . . . . AUG
env-267 UAAUUUAGAAAA . . . . . AUG
env-268 AUUUUUUUAAAAGAAAGACU . . . . . AUG
env-269 AUUUAAUUUUUUAAAAGAAAA . . . . . AUG
env-270 UUUAAUUUAGAAAA . . . . . AUG
env-271 UUUAAUUUAGAAAA . . . . . AUG
env-272 AUUUAAAAGAAA . . . . . AUG
env-273 AUUUAAAAGAAA . . . . . AUG
env-274 UUUAAUUCAUUUUUUUAGAUUAAA . . . . . AUG
env-275 UUUAAUUCAUUUUUUUAGAUUAAA . . . . . AUG
env-276 AAUUUUUCAAUUCAAA . . . . . AUG
env-277 CUUUCAUUUUUAAAAGACU . . . . . AUG
env-278 AAAAUUUUAAAAGA . . . . . AUG
env-279 AAAAUUUUAAAAGA . . . . . AUG
env-280 AAAUA . . . . . AUG
env-281 AAAUA . . . . . AUG
env-282 AAAAUUUUAAAAGA . . . . . AUG
env-283 AAAAUUUUAAAAGA . . . . . AUG
env-284 AAAUA . . . . . AUG
env-285 . . . . . AUG
env-286 AAAAUUUUAAAAGA . . . . . AUG
env-287 AAAAUUUUAAAAGA . . . . . AUG
env-288 . . . . . AUG
env-289 AAAAUUUUAAAAGA . . . . . AUG
env-290 AAAUA . . . . . AUG
env-291 AAAAUUUUAAAAGA . . . . . AUG
env-292 AAAAUUUUAAAAGA . . . . . AUG
env-293 AAAAUUUUAAAAGA . . . . . AUG
env-294 AAAAUUUUAAAAGA . . . . . AUG
env-295 AAUUUUUAAAAGA . . . . . AUG
env-296 AAUUUUUAAAAGA . . . . . AUG
env-297 AAUUUUUAAAAGA . . . . . AUG
env-298 AAUUUUUAAAAGA . . . . . AUG
env-299 AAUUUUUAAAAGA . . . . . AUG
Dsp-2-1 UUUAAAAA . . . . . AUG
env-300 AAUUUUUUAAAAGAAA . . . . . AUG
env-301 AAUUUUUAAAACA . . . . . AUG
env-302 AAAUUUUUAAAACA . . . . . AUG
env-303 AAAUUUUUAAAACA . . . . . AUG
env-304 AAAUUUUUAAAACA . . . . . AUG
env-305 AUAAAAA . . . . . AUG
Dca-1-1 UUUAAAAA . . . . . AUG
env-306 UAAUAAAAAUAAUA . . . . . AUG
env-307 UAAUAAAAAUAAUA . . . . . AUG
Bpy-2-1 AAUUUUUAAAAGAA . . . . . AUG
env-308 AAUUUUUAAAAGAA . . . . . AUG
Bpy-1-1 AAUUUUUAAAAGAA . . . . . AUG
env-309 AAUAAUAGAAAAAA . . . . . AUG
env-310 AUUUUUAAA . . . . . AUG
env-311 AAUUUUUAAAAGAA . . . . . AUG
env-312 AAUUUUUAAAAGAA . . . . . AUG
env-313 AAUUUUUAAAAGAA . . . . . AUG
env-314 AAUUUUUAAAAGAA . . . . . AUG
env-315 AAAUUUUUAAAAGAA . . . . . AUG
env-316 AAUUUUUAAAAGAA . . . . . AUG
env-317 AAAUUUUUAAAAGAA . . . . . AUG
env-318 AAUUUUUAAAAGAA . . . . . AUG

```

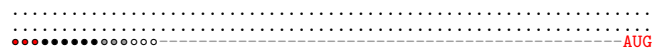









|                    |          |               |                |                  |                   |                                                     |
|--------------------|----------|---------------|----------------|------------------|-------------------|-----------------------------------------------------|
| Rbi-1-1            | Bacteria | Bacteroidetes | Flavobacteria  | Flavobacteriales | Flavobacteriaceae | <i>Robiginitalea biformata</i> HTCC2501             |
| Fba-3-1            | Bacteria | Bacteroidetes | Flavobacteria  | Flavobacteriales | bacterium         | HTCC2170                                            |
| Ale-1-1            | Bacteria | Bacteroidetes | Flavobacteriia | Flavobacteriales | Flavobacteriaceae | <i>Algibacter lectus</i>                            |
| Aat-1-1            | Bacteria | Bacteroidetes | Flavobacteriia | Flavobacteriales | Flavobacteriaceae | <i>Aquimarina atlantica</i>                         |
| Ace-1-1            | Bacteria | Bacteroidetes | Flavobacteriia | Flavobacteriales | Flavobacteriaceae | <i>Arenibacter certesii</i> DSM 19833               |
| Ala-1-1            | Bacteria | Bacteroidetes | Flavobacteriia | Flavobacteriales | Flavobacteriaceae | <i>Arenibacter latericius</i> DSM 15913             |
| Cca-1-1            | Bacteria | Bacteroidetes | Flavobacteriia | Flavobacteriales | Flavobacteriaceae | <i>Capnocytophaga canimorsus</i>                    |
| Cca-2-1            | Bacteria | Bacteroidetes | Flavobacteriia | Flavobacteriales | Flavobacteriaceae | <i>Capnocytophaga canis</i>                         |
| Ccy-1-1            | Bacteria | Bacteroidetes | Flavobacteriia | Flavobacteriales | Flavobacteriaceae | <i>Capnocytophaga cynodegmi</i>                     |
| Csp-1-1            | Bacteria | Bacteroidetes | Flavobacteriia | Flavobacteriales | Flavobacteriaceae | <i>Capnocytophaga sp. oral taxon 335 str.</i> F0486 |
| Csp-2-1            | Bacteria | Bacteroidetes | Flavobacteriia | Flavobacteriales | Flavobacteriaceae | <i>Capnocytophaga sp. oral taxon 863 str.</i> F0517 |
| Cal-1-1            | Bacteria | Bacteroidetes | Flavobacteriia | Flavobacteriales | Flavobacteriaceae | <i>Cellulophaga algicola</i> DSM 14237              |
| Cba-1-1            | Bacteria | Bacteroidetes | Flavobacteriia | Flavobacteriales | Flavobacteriaceae | <i>Cellulophaga baltica</i> NN016038                |
| Cly-1-1            | Bacteria | Bacteroidetes | Flavobacteriia | Flavobacteriales | Flavobacteriaceae | <i>Cellulophaga lytica</i> DSM 7489                 |
| Csp-3-1            | Bacteria | Bacteroidetes | Flavobacteriia | Flavobacteriales | Flavobacteriaceae | <i>Cellulophaga sp. Hel.I.12</i>                    |
| Ddo-1-1            | Bacteria | Bacteroidetes | Flavobacteriia | Flavobacteriales | Flavobacteriaceae | <i>Dokdonia donghaensis</i> DSW-1                   |
| Dsp-1-1            | Bacteria | Bacteroidetes | Flavobacteriia | Flavobacteriales | Flavobacteriaceae | <i>Dokdonia sp. MED134</i>                          |
| Ead-1-1            | Bacteria | Bacteroidetes | Flavobacteriia | Flavobacteriales | Flavobacteriaceae | <i>Eudoraea adriatica</i> DSM 19308                 |
| Fic-1-1            | Bacteria | Bacteroidetes | Flavobacteriia | Flavobacteriales | Flavobacteriaceae | <i>Flaviramus ichthyoenteri</i> Th78                |
| Fba-4-1            | Bacteria | Bacteroidetes | Flavobacteriia | Flavobacteriales | Flavobacteriaceae | bacterium P7-3-5                                    |
| Fch-1-1            | Bacteria | Bacteroidetes | Flavobacteriia | Flavobacteriales | Flavobacteriaceae | <i>Flavobacterium chungangense</i> LMG 26729        |
| Fda-1-1            | Bacteria | Bacteroidetes | Flavobacteriia | Flavobacteriales | Flavobacteriaceae | <i>Flavobacterium daejeonense</i> DSM 17708         |
| Ffr-1-1            | Bacteria | Bacteroidetes | Flavobacteriia | Flavobacteriales | Flavobacteriaceae | <i>Flavobacterium frigidarium</i> DSM 17623         |
| Ffr-2-1            | Bacteria | Bacteroidetes | Flavobacteriia | Flavobacteriales | Flavobacteriaceae | <i>Flavobacterium frigidum</i> PS1                  |
| Fgi-1-1            | Bacteria | Bacteroidetes | Flavobacteriia | Flavobacteriales | Flavobacteriaceae | <i>Flavobacterium gilvum</i>                        |
| Fhy-1-1            | Bacteria | Bacteroidetes | Flavobacteriia | Flavobacteriales | Flavobacteriaceae | <i>Flavobacterium hydatis</i>                       |
| Fin-1-1            | Bacteria | Bacteroidetes | Flavobacteriia | Flavobacteriales | Flavobacteriaceae | <i>Flavobacterium indicum</i> GPTSA100-9            |
| Fps-1-1            | Bacteria | Bacteroidetes | Flavobacteriia | Flavobacteriales | Flavobacteriaceae | <i>Flavobacterium psychrophilum</i>                 |
| Fre-1-1            | Bacteria | Bacteroidetes | Flavobacteriia | Flavobacteriales | Flavobacteriaceae | <i>Flavobacterium reichenbachii</i>                 |
| Fsa-1-1            | Bacteria | Bacteroidetes | Flavobacteriia | Flavobacteriales | Flavobacteriaceae | <i>Flavobacterium sasangense</i> DSM 21067          |
| Fsp-1-1            | Bacteria | Bacteroidetes | Flavobacteriia | Flavobacteriales | Flavobacteriaceae | <i>Flavobacterium sp. ABG</i>                       |
| Fsp-2-1            | Bacteria | Bacteroidetes | Flavobacteriia | Flavobacteriales | Flavobacteriaceae | <i>Flavobacterium sp. ACAM 123</i>                  |
| Fsp-3-1            | Bacteria | Bacteroidetes | Flavobacteriia | Flavobacteriales | Flavobacteriaceae | <i>Flavobacterium sp. FI</i>                        |
| Fsp-4-1            | Bacteria | Bacteroidetes | Flavobacteriia | Flavobacteriales | Flavobacteriaceae | <i>Flavobacterium sp. JRM</i>                       |
| Fsp-5-1            | Bacteria | Bacteroidetes | Flavobacteriia | Flavobacteriales | Flavobacteriaceae | <i>Flavobacterium sp. KJJ</i>                       |
| Fsp-6-1            | Bacteria | Bacteroidetes | Flavobacteriia | Flavobacteriales | Flavobacteriaceae | <i>Flavobacterium sp. MEB061</i>                    |
| Fsu-1-1            | Bacteria | Bacteroidetes | Flavobacteriia | Flavobacteriales | Flavobacteriaceae | <i>Flavobacterium succinicans</i> LMG 10402         |
| Fte-1-1            | Bacteria | Bacteroidetes | Flavobacteriia | Flavobacteriales | Flavobacteriaceae | <i>Flavobacterium tegetincola</i> DSM 22377         |
| Fag-1-1            | Bacteria | Bacteroidetes | Flavobacteriia | Flavobacteriales | Flavobacteriaceae | <i>Formosa agariphila</i> KMM 3901                  |
| Gsa-1-1            | Bacteria | Bacteroidetes | Flavobacteriia | Flavobacteriales | Flavobacteriaceae | <i>Gaetbulibacter saemankumensis</i> DSM 17032      |
| Gme-1-1            | Bacteria | Bacteroidetes | Flavobacteriia | Flavobacteriales | Flavobacteriaceae | <i>Gehidibacter mesophilus</i> DSM 14095            |
| Gli-1-1            | Bacteria | Bacteroidetes | Flavobacteriia | Flavobacteriales | Flavobacteriaceae | <i>Gillisia limnaea</i> DSM 15749                   |
| Gsp-1-1            | Bacteria | Bacteroidetes | Flavobacteriia | Flavobacteriales | Flavobacteriaceae | <i>Gillisia sp. CAL575</i>                          |
| Gsp-2-1            | Bacteria | Bacteroidetes | Flavobacteriia | Flavobacteriales | Flavobacteriaceae | <i>Gillisia sp. CBA3202</i>                         |
| Gsp-3-1            | Bacteria | Bacteroidetes | Flavobacteriia | Flavobacteriales | Flavobacteriaceae | <i>Gillisia sp. Hel.I.29</i>                        |
| Gsp-4-1            | Bacteria | Bacteroidetes | Flavobacteriia | Flavobacteriales | Flavobacteriaceae | <i>Gillisia sp. JM1</i>                             |
| Gec-1-1            | Bacteria | Bacteroidetes | Flavobacteriia | Flavobacteriales | Flavobacteriaceae | <i>Gramella echinicola</i> DSM 19838                |
| Gpo-1-1            | Bacteria | Bacteroidetes | Flavobacteriia | Flavobacteriales | Flavobacteriaceae | <i>Gramella portivictoriae</i> DSM 23547            |
| Jpa-1-1            | Bacteria | Bacteroidetes | Flavobacteriia | Flavobacteriales | Flavobacteriaceae | <i>Jejuia pallidulitea</i>                          |
| Jma-1-1            | Bacteria | Bacteroidetes | Flavobacteriia | Flavobacteriales | Flavobacteriaceae | <i>Joostella marina</i> DSM 19592                   |
| Kje-1-1            | Bacteria | Bacteroidetes | Flavobacteriia | Flavobacteriales | Flavobacteriaceae | <i>Kordia jejudonensis</i>                          |
| Lsp-1-1            | Bacteria | Bacteroidetes | Flavobacteriia | Flavobacteriales | Flavobacteriaceae | <i>Lacinutrix sp. Hel.I.90</i>                      |
| Lsp-2-1            | Bacteria | Bacteroidetes | Flavobacteriia | Flavobacteriales | Flavobacteriaceae | <i>Leeuwenhoekella sp. Hel.I.48</i>                 |
| Man-1-1            | Bacteria | Bacteroidetes | Flavobacteriia | Flavobacteriales | Flavobacteriaceae | <i>Maribacter antarcticus</i> DSM 21422             |
| Mfo-1-1            | Bacteria | Bacteroidetes | Flavobacteriia | Flavobacteriales | Flavobacteriaceae | <i>Maribacter forsetii</i> DSM 18668                |
| Msp-1-1            | Bacteria | Bacteroidetes | Flavobacteriia | Flavobacteriales | Flavobacteriaceae | <i>Maribacter sp. Hel.I.7</i>                       |
| Mth-1-1            | Bacteria | Bacteroidetes | Flavobacteriia | Flavobacteriales | Flavobacteriaceae | <i>Maribacter thermophilus</i>                      |
| Mze-1-1            | Bacteria | Bacteroidetes | Flavobacteriia | Flavobacteriales | Flavobacteriaceae | <i>Mesoflavibacter zeaxanthinifaciens</i> DSM 18436 |
| Mze-2-1            | Bacteria | Bacteroidetes | Flavobacteriia | Flavobacteriales | Flavobacteriaceae | <i>Mesoflavibacter zeaxanthinifaciens</i> S86       |
| Mlu-1-1            | Bacteria | Bacteroidetes | Flavobacteriia | Flavobacteriales | Flavobacteriaceae | <i>Muricauda lutaonensis</i>                        |
| Mru-1-1            | Bacteria | Bacteroidetes | Flavobacteriia | Flavobacteriales | Flavobacteriaceae | <i>Muricauda ruestringensis</i> DSM 13258           |
| Msp-2-1            | Bacteria | Bacteroidetes | Flavobacteriia | Flavobacteriales | Flavobacteriaceae | <i>Muricauda sp. MAR.2010.75</i>                    |
| Nul-1-1 to Nul-1-4 | Bacteria | Bacteroidetes | Flavobacteriia | Flavobacteriales | Flavobacteriaceae | <i>Nonlabens ulvanivorans</i>                       |
| Oma-1-1            | Bacteria | Bacteroidetes | Flavobacteriia | Flavobacteriales | Flavobacteriaceae | <i>Olleya marilimosa</i> CAM030                     |
| Osp-1-1            | Bacteria | Bacteroidetes | Flavobacteriia | Flavobacteriales | Flavobacteriaceae | <i>Olleya sp. VCSA23</i>                            |



|                  |                       |               |                |                  |                   |                                                 |
|------------------|-----------------------|---------------|----------------|------------------|-------------------|-------------------------------------------------|
| Osp-2-1          | Bacteria              | Bacteroidetes | Flavobacteriia | Flavobacteriales | Flavobacteriaceae | <i>Olleya sp.</i> VCSM12                        |
| Psp-1-1          | Bacteria              | Bacteroidetes | Flavobacteriia | Flavobacteriales | Flavobacteriaceae | <i>Polaribacter sp.</i> Hel1_85                 |
| Psp-2-1          | Bacteria              | Bacteroidetes | Flavobacteriia | Flavobacteriales | Flavobacteriaceae | <i>Polaribacter sp.</i> Hel1_88                 |
| Psp-3-1          | Bacteria              | Bacteroidetes | Flavobacteriia | Flavobacteriales | Flavobacteriaceae | <i>Polaribacter sp.</i> MED152                  |
| Pgo-1-1          | Bacteria              | Bacteroidetes | Flavobacteriia | Flavobacteriales | Flavobacteriaceae | <i>Psychroflexus gondwanensis</i> ACAM 44       |
| Pto-1-1          | Bacteria              | Bacteroidetes | Flavobacteriia | Flavobacteriales | Flavobacteriaceae | <i>Psychroflexus torquis</i> ATCC 700755        |
| Ptr-1-1          | Bacteria              | Bacteroidetes | Flavobacteriia | Flavobacteriales | Flavobacteriaceae | <i>Psychroflexus tropicus</i> DSM 15496         |
| Pja-1-1          | Bacteria              | Bacteroidetes | Flavobacteriia | Flavobacteriales | Flavobacteriaceae | <i>Psychroserpens jangbogonensis</i>            |
| Pme-1-1          | Bacteria              | Bacteroidetes | Flavobacteriia | Flavobacteriales | Flavobacteriaceae | <i>Psychroserpens mesophilus</i>                |
| Ssp-1-1          | Bacteria              | Bacteroidetes | Flavobacteriia | Flavobacteriales | Flavobacteriaceae | <i>Salegentibacter sp.</i> Hel1.6               |
| Ssp-2-1          | Bacteria              | Bacteroidetes | Flavobacteriia | Flavobacteriales | Flavobacteriaceae | <i>Sediminibacter sp.</i> Hel1.10               |
| Sze-1-1          | Bacteria              | Bacteroidetes | Flavobacteriia | Flavobacteriales | Flavobacteriaceae | <i>Siansivirga zeaxanthinifaciens</i> CC-SAMT-1 |
| Tna-1-1          | Bacteria              | Bacteroidetes | Flavobacteriia | Flavobacteriales | Flavobacteriaceae | <i>Tamlana nanhaiensis</i>                      |
| Tov-1-1          | Bacteria              | Bacteroidetes | Flavobacteriia | Flavobacteriales | Flavobacteriaceae | <i>Tenacibaculum ovolyticum</i> DSM 18103       |
| Zga-1-1          | Bacteria              | Bacteroidetes | Flavobacteriia | Flavobacteriales | Flavobacteriaceae | <i>Zobellia galactanivorans</i>                 |
| Zul-1-1          | Bacteria              | Bacteroidetes | Flavobacteriia | Flavobacteriales | Flavobacteriaceae | <i>Zobellia uliginosa</i>                       |
| env-1 to env-841 | environmental samples |               |                |                  |                   |                                                 |

## 15.2 Gene contexts

Each S4-Flavobacteria RNA (indicated by “RNA→”) is listed. For each hit, the downstream genes predicted to reside in a regulated operon are listed. If the nearest downstream gene is encoding in the opposite strand (and therefore presumed to not be a part of a regulated operon), then that gene is still depicted. Some environmental sequences and some RefSeq entries lack gene annotations, and so no genes are available for such sequences. The direction of each gene is indicated with an arrow (→), and each predicted conserved domain in the gene is named. Conserved domains associated with more than one S4-Flavobacteria RNA are assigned a color; other domains are gray. Information about these conserved

domains is given in Section 15.3. The accession of the sequence containing each S4-Flavobacteria RNA is given in the column named “Seq. accession”. Accessions beginning with “NC.”, “NS.”, “NW.” or “NZ.” are contained in RefSeq. Other accession refer to environmental samples. Nucleotide coordinates are given for the 5′ and 3′ boundaries of each S4-Flavobacteria RNA. If the 5′ coordinate is greater than the 3′ coordinate, the RNA is present on the reverse-complement strand of the containing genomic DNA sequence. Each hit is denoted by an abbreviation (like “Eco-1-1”) that refers to a taxonomy given in Section 15.1.

| abbrev. | Seq. accession            |   | 5′ at | 3′ at | genes                                                                                                                                                             |
|---------|---------------------------|---|-------|-------|-------------------------------------------------------------------------------------------------------------------------------------------------------------------|
| env-1   | JCVLSCAF_1096627086414    | + | 372   | 420   | RNA→ RpsD (COG0522)rpsD (PRK05327)→ RNAP_alpha_NTD (cd06928)PRK05182 (PRK05182)→                                                                                  |
| env-2   | JCVLSCAF_1096626661165    | + | 1143  | 1191  | RNA→ RpsD (COG0522)rpsD (PRK05327)→                                                                                                                               |
| env-3   | TrichMG.c101151           | - | 3047  | 3010  | RNA→ RpsD (COG0522)rpsD (PRK05327)→ RpoA (COG0202)PRK05182 (PRK05182)→<br>RplQ (COG0203)rplQ (PRK05591)→ CPSase_sm_chain (smart01097)CPSase_sm_chain (pfam00988)→ |
| env-4   | KGLS1_ANT02_95m.c10350754 | + | 179   | 224   | RNA→ rpsD (PRK05327)Ribosomal_S4 (pfam00163)→                                                                                                                     |
| env-5   | CESE01138582.1            | + | 526   | 571   | RNA→ RpsD (COG0522)rpsD (PRK05327)→                                                                                                                               |
| env-6   | CESE01260814.1            | + | 526   | 571   | RNA→ RpsD (COG0522)rpsD (PRK05327)→                                                                                                                               |
| env-7   | JGI20154J14316_10002684   | + | 5028  | 5073  | RNA→ RpsD (COG0522)rpsD (PRK05327)→ RpoA (COG0202)PRK05182 (PRK05182)→<br>RplQ (COG0203)rplQ (PRK05591)→                                                          |
| env-8   | CENR01029873.1            | - | 14623 | 14578 | RNA→ RpsD (COG0522)rpsD (PRK05327)→ RpoA (COG0202)PRK05182 (PRK05182)→                                                                                            |
| env-9   | PML_READ_00292105         | - | 291   | 246   | RNA→ rpsD (PRK05327)Ribosomal_S4 (pfam00163)→                                                                                                                     |
| env-10  | CETR01015277.1            | - | 2393  | 2348  | RNA→ RpsD (COG0522)rpsD (PRK05327)→ RpoA (COG0202)PRK05182 (PRK05182)→<br>RplQ (COG0203)rplQ (PRK05591)→                                                          |
| env-11  | JGI24723J26617_10003273   | + | 8066  | 8111  | RNA→ RpsD (COG0522)rpsD (PRK05327)→ RpoA (COG0202)PRK05182 (PRK05182)→<br>RplQ (COG0203)rplQ (PRK05591)→                                                          |
| env-12  | DelMOSum2010.c10014645    | - | 2436  | 2391  | RNA→ RpsD (COG0522)rpsD (PRK05327)→ RpoA (COG0202)PRK05182 (PRK05182)→<br>RplQ (COG0203)rplQ (PRK05591)→                                                          |
| env-13  | 2236876010_0077995        | + | 182   | 227   | RNA→ rpsD (PRK05327)Ribosomal_S4 (pfam00163)→                                                                                                                     |
| env-14  | 2236876010_0613686        | + | 157   | 202   | RNA→ rpsD (PRK05327)Ribosomal_S4 (pfam00163)→ rpsD (PRK05327)→                                                                                                    |
| env-15  | DelMOSum2011.c10012933    | + | 1809  | 1854  | RNA→ RpsD (COG0522)rpsD (PRK05327)→ RpoA (COG0202)PRK05182 (PRK05182)→<br>RplQ (COG0203)rplQ (PRK05591)→                                                          |
| env-16  | 2236876010_0135624        | + | 280   | 325   | RNA→                                                                                                                                                              |

|         |                          |   |         |         |                                                                                                                                                                                                                             |
|---------|--------------------------|---|---------|---------|-----------------------------------------------------------------------------------------------------------------------------------------------------------------------------------------------------------------------------|
| env-17  | 2236876011_290389        | - | 127     | 82      | RNA → rpsD (PRK05327)Ribosomal_S4 (pfam00163) →                                                                                                                                                                             |
| env-18  | JGI20152J14361_10041961  | - | 729     | 684     | RNA → RpsD (COG0522)rpsD (PRK05327) →                                                                                                                                                                                       |
| env-19  | JGI20152J14361_10060010  | + | 800     | 845     | RNA →                                                                                                                                                                                                                       |
| env-20  | JGI20152J14361_10066480  | + | 773     | 818     | RNA →                                                                                                                                                                                                                       |
| env-21  | 2236876009_001520        | - | 435     | 389     | RNA → S4 (smart00363)RpsD (COG0522) →                                                                                                                                                                                       |
| env-22  | 2236876010_0329218       | - | 266     | 218     | RNA → rpsD (PRK05327)Ribosomal_S4 (pfam00163) →                                                                                                                                                                             |
| env-23  | P_1C_Liq_1_UnCty_1010446 | + | 1314    | 1348    | RNA →                                                                                                                                                                                                                       |
| env-24  | P_2C_Liq_1_UnCty_1056530 | + | 207     | 251     | RNA → RpsD (COG0522)rpsD (PRK05327) →                                                                                                                                                                                       |
| Nul-1-1 | NZ_BB MJ01000004.1       | - | 87420   | 87376   | RNA → RpsD (COG0522)rpsD (PRK05327) → hypo →<br>RNAP_alpha_NTD (cd06928)PRK05182 (PRK05182)RNA_pol_A_CTD (pfam03118) → hypo → hypo →<br>CarA (COG0505)PRK12564 (PRK12564) → hypo → hypo →                                   |
| Nul-1-2 | NZ_BB NT01000002.1       | - | 87529   | 87485   | RNA → RpsD (COG0522)rpsD (PRK05327) →<br>RNAP_alpha_NTD (cd06928)PRK05182 (PRK05182)RNA_pol_A_CTD (pfam03118) →<br>RplQ (COG0203)rplQ (PRK05591) → CarA (COG0505)PRK12564 (PRK12564) →<br>eno (PRK00077)enolase (cd03313) → |
| Nul-1-3 | NZ_BB MK01000003.1       | + | 230947  | 230991  | RNA → RpsD (COG0522)rpsD (PRK05327) →<br>RNAP_alpha_NTD (cd06928)PRK05182 (PRK05182)RNA_pol_A_CTD (pfam03118) →<br>RplQ (COG0203)rplQ (PRK05591) → CarA (COG0505)PRK12564 (PRK12564) → hypo → hypo →                        |
| Fba-1-1 | NZ_CH 672374.1           | - | 1074107 | 1074063 | RNA → RpsD (COG0522)rpsD (PRK05327) →<br>RNAP_alpha_NTD (cd06928)PRK05182 (PRK05182)RNA_pol_A_CTD (pfam03118) →<br>RplQ (COG0203)rplQ (PRK05591) → CarA (COG0505)PRK12564 (PRK12564) →<br>eno (PRK00077)enolase (cd03313) → |
| Nul-1-4 | NZ_BB MM01000006.1       | + | 108642  | 108686  | RNA → RpsD (COG0522)rpsD (PRK05327) →<br>RNAP_alpha_NTD (cd06928)PRK05182 (PRK05182)RNA_pol_A_CTD (pfam03118) →<br>RplQ (COG0203)rplQ (PRK05591) → hypo → hypo → eno (PRK00077)enolase (cd03313) →                          |
| env-25  | P_2C_Liq_1_UnCty_1000014 | - | 67042   | 66997   | RNA → RpsD (COG0522)rpsD (PRK05327) →<br>RNAP_alpha_NTD (cd06928)PRK05182 (PRK05182)RNA_pol_A_CTD (pfam03118) →<br>RplQ (COG0203)rplQ (PRK05591) → CarA (COG0505)PRK12564 (PRK12564) →<br>eno (PRK00077)enolase (cd03313) → |
| env-26  | 2210087396               | + | 206     | 248     | RNA → rpsD (PRK05327)Ribosomal_S4 (pfam00163) →                                                                                                                                                                             |
| env-27  | 2210711694               | + | 456     | 488     | RNA →                                                                                                                                                                                                                       |
| env-28  | CEVW01139398.1           | + | 983     | 1023    | RNA → RpsD (COG0522)rpsD (PRK05327) → PRK05182 (PRK05182)RNA_pol_L (pfam01193) →                                                                                                                                            |
| env-29  | JCVL_SCAF_1096628258595  | - | 518     | 478     | RNA → RpsD (COG0522)rpsD (PRK05327) →                                                                                                                                                                                       |
| env-30  | CERR01133960.1           | - | 144     | 104     | RNA → rps4 (CHL00113)rpsD (PRK05327)Ribosomal_S4 (pfam00163) →                                                                                                                                                              |
| env-31  | JCVL_READ_1101740017077  | + | 208     | 256     | RNA → RpsD (COG0522)rpsD (PRK05327) →                                                                                                                                                                                       |
| Ddo-1-1 | NZ_JSAQ01000001.1        | + | 2692094 | 2692135 | RNA → RpsD (COG0522)rpsD (PRK05327) →<br>RNAP_alpha_NTD (cd06928)PRK05182 (PRK05182)RNA_pol_A_CTD (pfam03118) →<br>RplQ (COG0203)rplQ (PRK05591) →                                                                          |
| Dsp-1-1 | NZ_CP 009301.1           | + | 2792470 | 2792511 | RNA → RpsD (COG0522)rpsD (PRK05327) →<br>RNAP_alpha_NTD (cd06928)PRK05182 (PRK05182)RNA_pol_A_CTD (pfam03118) →<br>RplQ (COG0203)rplQ (PRK05591) →                                                                          |
| env-32  | CEWG01194218.1           | + | 1094    | 1136    | RNA →                                                                                                                                                                                                                       |
| env-33  | JCVL_SCAF_1096626222411  | + | 324     | 368     | RNA → RpsD (COG0522)rpsD (PRK05327) →                                                                                                                                                                                       |
| env-34  | LPjun09P1210m_c1017679   | - | 357     | 314     | RNA → rpsD (PRK05327)Ribosomal_S4 (pfam00163) →                                                                                                                                                                             |
| env-35  | CESI01021004.1           | - | 629     | 586     | RNA → RpsD (COG0522)rpsD (PRK05327) →                                                                                                                                                                                       |
| env-36  | CERI01207796.1           | + | 53      | 96      | RNA → RpsD (COG0522)rpsD (PRK05327) →                                                                                                                                                                                       |
| env-37  | CERM01149072.1           | - | 47      | 14      | RNA →                                                                                                                                                                                                                       |
| env-38  | DelMOSum2010_c10216602   | + | 506     | 549     | RNA → rpsD (PRK05327) →                                                                                                                                                                                                     |
| env-39  | CESU01140860.1           | - | 526     | 483     | RNA → RpsD (COG0522)rpsD (PRK05327) →                                                                                                                                                                                       |
| env-40  | LPaug08P2610m_c1036481   | - | 442     | 399     | RNA → S4 (smart00363)RpsD (COG0522) →                                                                                                                                                                                       |
| env-41  | JGI20160J14292_10002802  | + | 11050   | 11093   | RNA → RpsD (COG0522)rpsD (PRK05327) → RpoA (COG0202)PRK05182 (PRK05182) →<br>RplQ (COG0203)rplQ (PRK05591) → CPSase_sm_chain (smart01097)CPSase_sm_chain (pfam00988) →                                                      |

|        |                           |   |       |       |                                                                                                                                                                                                                                                                           |
|--------|---------------------------|---|-------|-------|---------------------------------------------------------------------------------------------------------------------------------------------------------------------------------------------------------------------------------------------------------------------------|
| env-42 | CENJ01167914.1            | + | 816   | 859   | RNA → RpsD (COG0522)rpsD (PRK05327) → RpoA (COG0202)PRK05182 (PRK05182) → RplQ (COG0203)rplQ (PRK05591) → CarA (COG0505)PRK12564 (PRK12564) → eno (PRK00077)enolase (cd03313) → GH25_muramidase (cd00599)Glyco_25 (smart00641) → monomer_idh (TIGR00178)IDH (pfam03971) → |
| env-43 | CEWK01129157.1            | - | 675   | 632   | RNA → RpsD (COG0522)rpsD (PRK05327) →                                                                                                                                                                                                                                     |
| env-44 | CENG01098372.1            | + | 851   | 894   | RNA → RpsD (COG0522)rpsD (PRK05327) →                                                                                                                                                                                                                                     |
| env-45 | JCVL_SCAF_1101668543230   | - | 496   | 453   | RNA → S4 (smart00363)RpsD (COG0522) →                                                                                                                                                                                                                                     |
| env-46 | DelMOSum2010_c10000017    | - | 35841 | 35798 | RNA → RpsD (COG0522)rpsD (PRK05327) → RpoA (COG0202)PRK05182 (PRK05182) → RplQ (COG0203)rplQ (PRK05591) → CarA (COG0505)PRK12564 (PRK12564) → eno (PRK00077)enolase (cd03313) → GH25_muramidase (cd00599)Glyco_25 (smart00641) → monomer_idh (TIGR00178)IDH (pfam03971) → |
| env-47 | DelMOSum2010_c10109581    | - | 317   | 274   | RNA → rpsD (PRK05327)Ribosomal_S4 (pfam00163) →                                                                                                                                                                                                                           |
| env-48 | JCVL_SCAF_1096627396816   | - | 557   | 514   | RNA → RpsD (COG0522)rpsD (PRK05327) →                                                                                                                                                                                                                                     |
| env-49 | 2236876001_514958         | - | 290   | 247   | RNA → rpsD (PRK05327)Ribosomal_S4 (pfam00163) →                                                                                                                                                                                                                           |
| env-50 | SI34jun09_10m_1018348     | + | 1056  | 1099  | RNA → rpsD (PRK05327) →                                                                                                                                                                                                                                                   |
| env-51 | CESJ01081808.1            | - | 167   | 124   | RNA → rpsD (PRK05327)Ribosomal_S4 (pfam00163) →                                                                                                                                                                                                                           |
| env-52 | CESP01137938.1            | - | 184   | 141   | RNA → rpsD (PRK05327)Ribosomal_S4 (pfam00163) →                                                                                                                                                                                                                           |
| env-53 | CESQ01357094.1            | + | 349   | 392   | RNA → RpsD (COG0522)rpsD (PRK05327) →                                                                                                                                                                                                                                     |
| env-54 | CESU01004307.1            | + | 415   | 458   | RNA → RpsD (COG0522)rpsD (PRK05327) →                                                                                                                                                                                                                                     |
| env-55 | JCVL_SCAF_1096627372950   | + | 1399  | 1442  | RNA → RpsD (COG0522)rpsD (PRK05327) → PRK05182 (PRK05182)RNA_pol.L (pfam01193) →                                                                                                                                                                                          |
| env-56 | SR_TTP_S3_1005704         | + | 528   | 487   | RNA → RpsD (COG0522)rpsD (PRK05327) →                                                                                                                                                                                                                                     |
| env-57 | CENQ01142578.1            | + | 1112  | 1153  | RNA → RpsD (COG0522)rpsD (PRK05327) → PRK05182 (PRK05182)RNA_pol.L (pfam01193) →                                                                                                                                                                                          |
| env-58 | JCVL_SCAF_1096627751190   | + | 390   | 431   | RNA → RpsD (COG0522)rpsD (PRK05327) → RpoA (COG0202)PRK05182 (PRK05182) →                                                                                                                                                                                                 |
| env-59 | SI34jun09_10m_1026568     | + | 377   | 426   | RNA → RpsD (COG0522)rpsD (PRK05327) →                                                                                                                                                                                                                                     |
| env-60 | 2236876010_0420853        | - | 113   | 64    | RNA → ← hypO                                                                                                                                                                                                                                                              |
| env-61 | CERM01058458.1            | + | 47    | 8     | RNA →                                                                                                                                                                                                                                                                     |
| env-62 | CESF01120564.1            | + | 2547  | 2596  | RNA →                                                                                                                                                                                                                                                                     |
| env-63 | DelMOWin2010_c10006726    | - | 4916  | 4867  | RNA → RpsD (COG0522)rpsD (PRK05327) → RNAP_alpha_NTD (cd06928)PRK05182 (PRK05182)RNA_pol.A_CTD (pfam03118) → RplQ (COG0203)rplQ (PRK05591) →                                                                                                                              |
| env-64 | 2236876003_095850         | + | 200   | 249   | RNA → rpsD (PRK05327)Ribosomal_S4 (pfam00163) →                                                                                                                                                                                                                           |
| env-65 | JGI20151J14362_10198578   | - | 460   | 411   | RNA → RpsD (COG0522)rpsD (PRK05327) →                                                                                                                                                                                                                                     |
| env-66 | DelMOSum2011_c10006805    | + | 2258  | 2307  | RNA → RpsD (COG0522)rpsD (PRK05327) → RpoA (COG0202)PRK05182 (PRK05182) → RplQ (COG0203)rplQ (PRK05591) →                                                                                                                                                                 |
| env-67 | CERM01027048.1            | - | 54    | 15    | RNA →                                                                                                                                                                                                                                                                     |
| env-68 | SA_S1_NOR05_45m_c10094569 | - | 509   | 460   | RNA → RpsD (COG0522)rpsD (PRK05327) →                                                                                                                                                                                                                                     |
| env-69 | CESJ01125754.1            | - | 683   | 634   | RNA → RpsD (COG0522)rpsD (PRK05327) →                                                                                                                                                                                                                                     |
| env-70 | JCVL_SCAF_1096627289576   | + | 1243  | 1292  | RNA → S4 (smart00363)RpsD (COG0522) →                                                                                                                                                                                                                                     |
| env-71 | SI54feb11_120m_c1075046   | + | 205   | 254   | RNA →                                                                                                                                                                                                                                                                     |
| env-72 | DelMOSum2010_c10001162    | - | 9097  | 9048  | RNA → RpsD (COG0522)rpsD (PRK05327) → RNAP_alpha_NTD (cd06928)PRK05182 (PRK05182)RNA_pol.A_CTD (pfam03118) → RplQ (COG0203)rplQ (PRK05591) →                                                                                                                              |
| env-73 | LPaug09P1610m_c1010800    | - | 1174  | 1132  | RNA → RpsD (COG0522)rpsD (PRK05327) → RNAP_alpha_NTD (cd06928)PRK05182 (PRK05182) →                                                                                                                                                                                       |
| env-74 | JGI20157J14317_10009143   | + | 851   | 893   | RNA → RpsD (COG0522)rpsD (PRK05327) → RNAP_alpha_NTD (cd06928)PRK05182 (PRK05182)RNA_pol.A_CTD (pfam03118) → rplQ (PRK05591)Ribosomal_L17 (pfam01196) → CarA (COG0505)PRK12564 (PRK12564) → eno (PRK00077)enolase (cd03313) →                                             |
| env-75 | DelMOSum2010_c10023112    | + | 1855  | 1897  | RNA → RpsD (COG0522)rpsD (PRK05327) → RNAP_alpha_NTD (cd06928)PRK05182 (PRK05182)RNA_pol.A_CTD (pfam03118) →                                                                                                                                                              |
| env-76 | JGI20154J14316_10037599   | + | 554   | 596   | RNA → RpsD (COG0522)rpsD (PRK05327) → RNAP_alpha_NTD (cd06928)PRK05182 (PRK05182)RNA_pol.A_CTD (pfam03118) →                                                                                                                                                              |
| env-77 | LPaug09P1610m_c1025405    | + | 502   | 545   | RNA → rpsD (PRK05327)Ribosomal_S4 (pfam00163) →                                                                                                                                                                                                                           |

|         |                              |   |       |       |                                                                                                                                                                                                                                                                                 |
|---------|------------------------------|---|-------|-------|---------------------------------------------------------------------------------------------------------------------------------------------------------------------------------------------------------------------------------------------------------------------------------|
| env-78  | CESF01024170.1               | + | 3852  | 3895  | RNA → RpsD (COG0522)rpsD (PRK05327) →<br>RNAP_alpha_NTD (cd06928)PRK05182 (PRK05182)RNA_pol_A_CTD (pfam03118) →<br>RplQ (COG0203)rplQ (PRK05591) → CarA (COG0505)PRK12564 (PRK12564) →<br>eno (PRK00077)enolase (cd03313) → gltA (PRK05614)EcCS_like (cd06114) →                |
| env-79  | CESI01111408.1               | - | 294   | 251   | RNA → rpsD (PRK05327)Ribosomal_S4 (pfam00163) →                                                                                                                                                                                                                                 |
| env-80  | CEVX01268119.1               | - | 403   | 360   | RNA → RpsD (COG0522)rpsD (PRK05327) →                                                                                                                                                                                                                                           |
| env-81  | CEOP01127922.1               | - | 573   | 530   | RNA → RpsD (COG0522)rpsD (PRK05327) →                                                                                                                                                                                                                                           |
| env-82  | CENT01082708.1               | + | 1142  | 1185  | RNA → RpsD (COG0522)rpsD (PRK05327) → RNAP_alpha_NTD (cd06928)PRK05182 (PRK05182) →                                                                                                                                                                                             |
| env-83  | CERI01005517.1               | + | 12209 | 12252 | RNA → RpsD (COG0522)rpsD (PRK05327) →<br>RNAP_alpha_NTD (cd06928)PRK05182 (PRK05182)RNA_pol_A_CTD (pfam03118) →<br>RplQ (COG0203)rplQ (PRK05591) →<br>GATase1_CPSase (cd01744)PRK12564 (PRK12564)CPSase_sm_chain (pfam00988) →                                                  |
| env-84  | NCBI_BBAY_READ_1105731223526 | - | 451   | 408   | RNA → RpsD (COG0522)rpsD (PRK05327) →                                                                                                                                                                                                                                           |
| env-85  | JCVL_SCAF_1096626910973      | + | 1202  | 1246  | RNA → RpsD (COG0522)rpsD (PRK05327) →<br>RNAP_alpha_NTD (cd06928)PRK05182 (PRK05182)RNA_pol_A_CTD (pfam03118) →                                                                                                                                                                 |
| env-86  | CENJ01088625.1               | - | 632   | 588   | RNA → RpsD (COG0522)rpsD (PRK05327) →                                                                                                                                                                                                                                           |
| env-87  | JGI20151J14362_10002063      | + | 4119  | 4163  | RNA → RpsD (COG0522)rpsD (PRK05327) →<br>RNAP_alpha_NTD (cd06928)PRK05182 (PRK05182)RNA_pol_A_CTD (pfam03118) →<br>RplQ (COG0203)rplQ (PRK05591)rpsP (PRK14521) → CarA (COG0505)PRK12564 (PRK12564) →<br>eno (PRK00077)enolase (cd03313) → gltA (PRK05614)EcCS_like (cd06114) → |
| env-88  | JCVL_SCAF_1096627345251      | + | 852   | 896   | RNA → RpsD (COG0522)rpsD (PRK05327) →                                                                                                                                                                                                                                           |
| env-89  | CENU01250245.1               | - | 488   | 444   | RNA → RpsD (COG0522)rpsD (PRK05327) →                                                                                                                                                                                                                                           |
| env-90  | JCVL_SCAF_1101668117291      | + | 939   | 982   | RNA → RpsD (COG0522)rpsD (PRK05327) →                                                                                                                                                                                                                                           |
| env-91  | NCBI_READ_1112493636597      | - | 239   | 197   | RNA →                                                                                                                                                                                                                                                                           |
| env-92  | NCBI_READ_1112637788282      | + | 45    | 87    | RNA → RpsD (COG0522)rpsD (PRK05327) →                                                                                                                                                                                                                                           |
| env-93  | DelMOSum2011_c10065322       | + | 1218  | 1261  | RNA → rpsD (PRK05327)Ribosomal_S4 (pfam00163) →                                                                                                                                                                                                                                 |
| env-94  | DelMOSum2010_c10001866       | + | 12778 | 12821 | RNA → RpsD (COG0522)rpsD (PRK05327) →<br>RNAP_alpha_NTD (cd06928)PRK05182 (PRK05182)RNA_pol_A_CTD (pfam03118) →<br>RplQ (COG0203)rplQ (PRK05591) → CarA (COG0505)PRK12564 (PRK12564) →<br>eno (PRK00077)Enolase_N (pfam03952) →                                                 |
| env-95  | DelMOSum2010_c10000646       | - | 20267 | 20225 | RNA → RpsD (COG0522)rpsD (PRK05327) →<br>RNAP_alpha_NTD (cd06928)PRK05182 (PRK05182)RNA_pol_A_CTD (pfam03118) →<br>RplQ (COG0203)rplQ (PRK05591) → CarA (COG0505)PRK12564 (PRK12564) →<br>eno (PRK00077)enolase (cd03313) → gltA (PRK05614)EcCS_like (cd06114) →                |
| env-96  | CERI01138193.1               | + | 441   | 483   | RNA →                                                                                                                                                                                                                                                                           |
| env-97  | JGI20157J14317_10000863      | - | 19631 | 19589 | RNA → RpsD (COG0522)rpsD (PRK05327) →<br>RNAP_alpha_NTD (cd06928)PRK05182 (PRK05182)RNA_pol_A_CTD (pfam03118) →<br>RplQ (COG0203)rplQ (PRK05591) → CPSase_sm_chain (smart01097)CPSase_sm_chain (pfam00988) →                                                                    |
| env-98  | CETY01154757.1               | - | 449   | 405   | RNA → RpsD (COG0522)rpsD (PRK05327) →                                                                                                                                                                                                                                           |
| env-99  | JCVL_SCAF_1096627797848      | + | 643   | 687   | RNA → rpsD (PRK05327)Ribosomal_S4 (pfam00163) → S4 (smart00363)RpsD (COG0522) →<br>PRK05182 (PRK05182)RNA_pol_L (pfam01193) →                                                                                                                                                   |
| env-100 | CERI01106383.1               | - | 1156  | 1112  | RNA → RpsD (COG0522)rpsD (PRK05327) → RNAP_alpha_NTD (cd06928)PRK05182 (PRK05182) →                                                                                                                                                                                             |
| env-101 | JGI20156J14371_10258465      | - | 393   | 349   | RNA → RpsD (COG0522)rpsD (PRK05327) →                                                                                                                                                                                                                                           |
| env-102 | JGI20156J14371_10000849      | - | 14189 | 14147 | RNA → RpsD (COG0522)rpsD (PRK05327) →<br>RNAP_alpha_NTD (cd06928)PRK05182 (PRK05182)RNA_pol_A_CTD (pfam03118) →<br>RplQ (COG0203)rplQ (PRK05591) →                                                                                                                              |
| env-103 | JCVL_SCAF_1101668015840      | - | 1336  | 1289  | RNA → RpsD (COG0522)rpsD (PRK05327) → RNAP_alpha_NTD (cd06928)PRK05182 (PRK05182) →                                                                                                                                                                                             |
| env-104 | CESW01058310.1               | - | 375   | 328   | RNA → RpsD (COG0522)rpsD (PRK05327) →                                                                                                                                                                                                                                           |
| env-105 | CEQI01167214.1               | + | 466   | 513   | RNA → rpsD (PRK05327)Ribosomal_S4 (pfam00163) →                                                                                                                                                                                                                                 |
| env-106 | KGI_S2_ANT04_2345m_c1444089  | + | 66    | 115   | RNA → rpsD (PRK05327)Ribosomal_S4 (pfam00163) →                                                                                                                                                                                                                                 |
| env-107 | KGI_S1_ANT01_95m_c10042760   | - | 553   | 504   | RNA → RpsD (COG0522)rpsD (PRK05327) →                                                                                                                                                                                                                                           |
| env-108 | JGI24025J20009_10098185      | - | 82    | 33    | RNA →                                                                                                                                                                                                                                                                           |
| env-109 | SA_S1_NOR05_45m_c10522404    | - | 164   | 115   | RNA → rpsD (PRK05327)Ribosomal_S4 (pfam00163) →                                                                                                                                                                                                                                 |
| env-110 | SA_S2_NOR15_50m_c10034879    | + | 1070  | 1119  | RNA → RpsD (COG0522)rpsD (PRK05327) →                                                                                                                                                                                                                                           |



|         |                              |   |       |       |                                                                                                                                                                                                                                                         |
|---------|------------------------------|---|-------|-------|---------------------------------------------------------------------------------------------------------------------------------------------------------------------------------------------------------------------------------------------------------|
| env-111 | KGLS1_ANT01.95m.c10014341    | - | 2364  | 2315  | RNA → RpsD (COG0522)rpsD (PRK05327) → RpoA (COG0202)PRK05182 (PRK05182) → RplQ (COG0203)rplQ (PRK05591) →                                                                                                                                               |
| env-112 | SA_S1_NOR08.45m.c10025816    | - | 1459  | 1410  | RNA → RpsD (COG0522)rpsD (PRK05327) →                                                                                                                                                                                                                   |
| env-113 | JGI25923J51411.1187453       | - | 75    | 35    | RNA →                                                                                                                                                                                                                                                   |
| env-114 | LWFCAn_GLQU6AQ01D6DBV        | - | 91    | 51    | RNA →                                                                                                                                                                                                                                                   |
| env-115 | CEUH01136830.1               | + | 421   | 461   | RNA → RpsD (COG0522)rpsD (PRK05327) → PRK05182 (PRK05182)RNA_pol.L (pfam01193) →                                                                                                                                                                        |
| env-116 | JGI24768J34885.10100695      | - | 432   | 392   | RNA → S4 (smart00363)RpsD (COG0522) →                                                                                                                                                                                                                   |
| env-117 | JGI25924J51412.1020305       | - | 684   | 644   | RNA → RpsD (COG0522)rpsD (PRK05327) →                                                                                                                                                                                                                   |
| env-118 | CEPL01069899.1               | - | 397   | 357   | RNA → RpsD (COG0522)rpsD (PRK05327) →                                                                                                                                                                                                                   |
| env-119 | CEUU01249842.1               | + | 1479  | 1519  | RNA → S4 (smart00363)RpsD (COG0522) →                                                                                                                                                                                                                   |
| env-120 | JGI12421J11937.10021494      | + | 1953  | 1993  | RNA → S4 (smart00363)RpsD (COG0522) →                                                                                                                                                                                                                   |
| env-121 | JGI24768J34885.10000210      | + | 12918 | 12958 | RNA → RpsD (COG0522)rpsD (PRK05327) → RNAP_alpha_NTD (cd06928)PRK05182 (PRK05182)RNA_pol.A_CTD (pfam03118) → RplQ (COG0203)rplQ (PRK05591) →                                                                                                            |
| env-122 | JGI25914J50564.10010364      | - | 2244  | 2204  | RNA → RpsD (COG0522)rpsD (PRK05327) → RNAP_alpha_NTD (cd06928)PRK05182 (PRK05182)RNA_pol.A_CTD (pfam03118) → RplQ (COG0203)rplQ (PRK05591) →                                                                                                            |
| env-123 | JGI12421J11937.10125481      | - | 368   | 328   | RNA → rpsD (PRK05327)Ribosomal_S4 (pfam00163) →                                                                                                                                                                                                         |
| env-124 | JGI20156J14371.10002312      | + | 12798 | 12838 | RNA → RpsD (COG0522)rpsD (PRK05327) → RpoA (COG0202)PRK05182 (PRK05182) → RplQ (COG0203)rplQ (PRK05591) →                                                                                                                                               |
| env-125 | M3P_c10141944                | + | 153   | 193   | RNA → rpsD (PRK05327)Ribosomal_S4 (pfam00163) →                                                                                                                                                                                                         |
| env-126 | JGI25914J50564.10045055      | - | 818   | 778   | RNA → RpsD (COG0522)rpsD (PRK05327) → PRK05182 (PRK05182)RNA_pol.L (pfam01193) →                                                                                                                                                                        |
| env-127 | DelMOSum2010.c10006624       | - | 704   | 664   | RNA → RpsD (COG0522)rpsD (PRK05327) →                                                                                                                                                                                                                   |
| env-128 | JGI25920J50251.10092017      | - | 50    | 20    | RNA →                                                                                                                                                                                                                                                   |
| env-129 | DelMOSum2010.c10002074       | - | 11710 | 11668 | RNA → RpsD (COG0522)rpsD (PRK05327) → RpoA (COG0202)PRK05182 (PRK05182) → PLN02967 (PLN02967)RplQ (COG0203)rplQ (PRK05591) →                                                                                                                            |
| env-130 | CESA01021238.1               | - | 2261  | 2219  | RNA → RpsD (COG0522)rpsD (PRK05327) → RpoA (COG0202)PRK05182 (PRK05182) → RplQ (COG0203)rplQ (PRK05591) →                                                                                                                                               |
| env-131 | NCBI_BBAY_READ.1106105275911 | - | 208   | 155   | RNA →                                                                                                                                                                                                                                                   |
| env-132 | CENG01041113.1               | + | 3621  | 3663  | RNA →                                                                                                                                                                                                                                                   |
| env-133 | CESF01027428.1               | - | 816   | 774   | RNA → RpsD (COG0522)rpsD (PRK05327) → PRK05182 (PRK05182)RNA_pol.L (pfam01193) →                                                                                                                                                                        |
| env-134 | CEWG01153018.1               | + | 405   | 447   | RNA → RpsD (COG0522)rpsD (PRK05327) →                                                                                                                                                                                                                   |
| env-135 | CETE01270809.1               | - | 1047  | 1005  | RNA → RpsD (COG0522)rpsD (PRK05327) → rpoA (CHL00013)PRK05182 (PRK05182) →                                                                                                                                                                              |
| env-136 | CEUH01072115.1               | - | 421   | 379   | RNA → S4 (smart00363)RpsD (COG0522) →                                                                                                                                                                                                                   |
| env-137 | CESI01305241.1               | - | 2124  | 2082  | RNA → RpsD (COG0522)rpsD (PRK05327) → RpoA (COG0202)PRK05182 (PRK05182) → RplQ (COG0203)rplQ (PRK05591) →                                                                                                                                               |
| env-138 | JCVL_SCAF.1101668716688      | + | 592   | 634   | RNA → RpsD (COG0522)rpsD (PRK05327) →                                                                                                                                                                                                                   |
| env-139 | 2236876001.320422            | + | 288   | 342   | RNA →                                                                                                                                                                                                                                                   |
| env-140 | 2236876001.014240            | + | 85    | 44    | RNA →                                                                                                                                                                                                                                                   |
| env-141 | 2236876001.374803            | - | 19    | 60    | RNA → rpsD (PRK05327)Ribosomal_S4 (pfam00163) →                                                                                                                                                                                                         |
| env-142 | 2236876001.181177            | - | 254   | 213   | RNA → rpsD (PRK05327)Ribosomal_S4 (pfam00163) →                                                                                                                                                                                                         |
| env-143 | JGI20156J14371.10000248      | + | 11432 | 11480 | RNA → RpsD (COG0522)rpsD (PRK05327) → RpoA (COG0202)PRK05182 (PRK05182) → RplQ (COG0203)rplQ (PRK05591) →                                                                                                                                               |
| env-144 | JGI20154J14316.10020138      | - | 582   | 534   | RNA → RpsD (COG0522)rpsD (PRK05327) →                                                                                                                                                                                                                   |
| env-145 | JGI20157J14317.10238135      | - | 207   | 166   | RNA → rpsD (PRK05327)Ribosomal_S4 (pfam00163) →                                                                                                                                                                                                         |
| env-146 | ElkS_mat_MD6A.1006090        | + | 1597  | 1645  | RNA → RpsD (COG0522)rpsD (PRK05327) →                                                                                                                                                                                                                   |
| env-147 | DelMOSum2010.c10001012       | + | 14798 | 14841 | RNA → RpsD (COG0522)rpsD (PRK05327) → RNAP_alpha_NTD (cd06928)PRK05182 (PRK05182)RNA_pol.A_CTD (pfam03118) → RplQ (COG0203)rplQ (PRK05591) → GATaseL_CPSase (cd01744)PRK12564 (PRK12564)CPSase_sm_chain (pfam00988) → eno (PRK00077)enolase (cd03313) → |
| env-148 | JGI20159J14440.10208187      | - | 331   | 288   | RNA → rpsD (PRK05327)Ribosomal_S4 (pfam00163) →                                                                                                                                                                                                         |

|         |                           |   |        |        |                                                                                                                                                                                                                                                        |
|---------|---------------------------|---|--------|--------|--------------------------------------------------------------------------------------------------------------------------------------------------------------------------------------------------------------------------------------------------------|
| env-149 | JGI20160J14292_10003529   | - | 10322  | 10279  | RNA → RpsD (COG0522)rpsD (PRK05327) → RNAP_alpha_NTD (cd06928)PRK05182 (PRK05182)RNA_polA_CTD (pfam03118) → RplQ (COG0203)rplQ (PRK05591) → GATase1_CPSase (cd01744)PRK12564 (PRK12564)CPSase_sm_chain (pfam00988) → eno (PRK00077)enolase (cd03313) → |
| env-150 | JGI20156J14371_10005217   | - | 7554   | 7511   | RNA → RpsD (COG0522)rpsD (PRK05327) → RNAP_alpha_NTD (cd06928)PRK05182 (PRK05182)RNA_polA_CTD (pfam03118) → RplQ (COG0203)rplQ (PRK05591) → GATase1_CPSase (cd01744)PRK12564 (PRK12564)CPSase_sm_chain (pfam00988) → eno (PRK00077)enolase (cd03313) → |
| env-151 | JGI20160J14292_10000862   | - | 24569  | 24526  | RNA → RpsD (COG0522)rpsD (PRK05327) → RpoA (COG0202)PRK05182 (PRK05182) → RplQ (COG0203)rplQ (PRK05591) → CarA (COG0505)PRK12564 (PRK12564) → eno (PRK00077)enolase (cd03313) → gltA (PRK05614)EcCS_like (cd06114) →                                   |
| env-152 | JGI20152J14361_10001272   | + | 11027  | 11070  | RNA → RpsD (COG0522)rpsD (PRK05327) → PRK05182 (PRK05182)RNA_pol_L (pfam01193) →                                                                                                                                                                       |
| env-153 | 2236876001_447696         | - | 404    | 361    | RNA → S4 (smart00363)RpsD (COG0522) →                                                                                                                                                                                                                  |
| env-154 | NCBI_READ_1112533167397   | - | 766    | 723    | RNA → RpsD (COG0522)rpsD (PRK05327) →                                                                                                                                                                                                                  |
| env-155 | SI34jun09_10m_1127658     | + | 229    | 272    | RNA → ←-hypo                                                                                                                                                                                                                                           |
| env-156 | JGI20160J14292_10182352   | + | 404    | 447    | RNA → rpsD (PRK05327)Ribosomal_S4 (pfam00163) →                                                                                                                                                                                                        |
| env-157 | CESJ01259508.1            | - | 513    | 470    | RNA → RpsD (COG0522)rpsD (PRK05327) →                                                                                                                                                                                                                  |
| env-158 | 2236876001_073076         | + | 29     | 72     | RNA → rpsD (PRK05327)Ribosomal_S4 (pfam00163) →                                                                                                                                                                                                        |
| env-159 | JGI20154J14316_10148802   | + | 420    | 463    | RNA → rpsD (PRK05327)Ribosomal_S4 (pfam00163) →                                                                                                                                                                                                        |
| env-160 | SA_S1_NOR08_45m_c10566989 | + | 97     | 141    | RNA → rpsD (PRK05327)Ribosomal_S4 (pfam00163) →                                                                                                                                                                                                        |
| Lsp-2-1 | NZ_JHZY01000004.1         | - | 470876 | 470832 | RNA → RpsD (COG0522)rpsD (PRK05327) → RpoA (COG0202)PRK05182 (PRK05182) → RplQ (COG0203)rplQ (PRK05591) →                                                                                                                                              |
| env-161 | CEVO01222084.1            | + | 846    | 880    | RNA →                                                                                                                                                                                                                                                  |
| env-162 | CESL01055523.1            | + | 471    | 515    | RNA → RpsD (COG0522)rpsD (PRK05327) → RpoA (COG0202)PRK05182 (PRK05182) → RplQ (COG0203)rplQ (PRK05591) →                                                                                                                                              |
| env-163 | CEVJ01029531.1            | + | 846    | 890    | RNA → rpsD (PRK05327)Ribosomal_S4 (pfam00163) →                                                                                                                                                                                                        |
| env-164 | CETR01135856.1            | + | 845    | 889    | RNA → RpsD (COG0522)rpsD (PRK05327) → RpoA (COG0202)PRK05182 (PRK05182) → RplQ (COG0203)rplQ (PRK05591) →                                                                                                                                              |
| env-165 | CEOS01000692.1            | - | 8747   | 8703   | RNA → RpsD (COG0522)rpsD (PRK05327) → RpoA (COG0202)PRK05182 (PRK05182) → RplQ (COG0203)rplQ (PRK05591) → hypo → CarA (COG0505)PRK12564 (PRK12564) →                                                                                                   |
| env-166 | 2236876011_134002         | + | 294    | 326    | RNA →                                                                                                                                                                                                                                                  |
| env-167 | JGI20154J14316_10001276   | - | 5032   | 4990   | RNA → RpsD (COG0522)rpsD (PRK05327) → RNAP_alpha_NTD (cd06928)PRK05182 (PRK05182)RNA_polA_CTD (pfam03118) →                                                                                                                                            |
| env-168 | 2231695257                | - | 173    | 131    | RNA → rpsD (PRK05327)Ribosomal_S4 (pfam00163) →                                                                                                                                                                                                        |
| env-169 | JGI25910J50241_10205082   | - | 41     | 9      | RNA →                                                                                                                                                                                                                                                  |
| Fba-2-1 | NZ_AAAX01000001.1         | - | 580267 | 580223 | RNA → RpsD (COG0522)rpsD (PRK05327) → RpsD (COG0522)rpsD (PRK05327) → RpoA (COG0202)PRK05182 (PRK05182) → RpoA (COG0202)PRK05182 (PRK05182) → RplQ (COG0203)rplQ (PRK05591) → RplQ (COG0203)rplQ (PRK05591) →                                          |
| env-170 | M3P_c10252825             | + | 117    | 160    | RNA → rpsD (PRK05327)Ribosomal_S4 (pfam00163) →                                                                                                                                                                                                        |
| Fsa-1-1 | NZ_JMLU01000009.1         | - | 18897  | 18854  | RNA → RpsD (COG0522)rpsD (PRK05327) → RpoA (COG0202)PRK05182 (PRK05182) → RplQ (COG0203)rplQ (PRK05591) →                                                                                                                                              |
| env-171 | JGI25921J50272_10187943   | + | 186    | 229    | RNA → rpsD (PRK05327)Ribosomal_S4 (pfam00163) →                                                                                                                                                                                                        |
| env-172 | 3300000052_174905         | + | 114    | 157    | RNA →                                                                                                                                                                                                                                                  |
| env-173 | 3300001592_10384027       | + | 364    | 407    | RNA → rpsD (PRK05327)Ribosomal_S4 (pfam00163) →                                                                                                                                                                                                        |
| env-174 | TB_FS06_10DRAFT_1000051   | - | 30943  | 30900  | RNA → RpsD (COG0522)rpsD (PRK05327) → RNAP_alpha_NTD (cd06928)PRK05182 (PRK05182)RNA_polA_CTD (pfam03118) → RplQ (COG0203)rplQ (PRK05591) →                                                                                                            |
| env-175 | 3300001592_10325872       | + | 220    | 263    | RNA → rpsD (PRK05327)Ribosomal_S4 (pfam00163) →                                                                                                                                                                                                        |
| env-176 | CETR01093469.1            | + | 1000   | 1048   | RNA → RpsD (COG0522)rpsD (PRK05327) → RpoA (COG0202)PRK05182 (PRK05182) → RplQ (COG0203)rplQ (PRK05591) →                                                                                                                                              |
| env-177 | CEVJ01168016.1            | - | 208    | 160    | RNA → rpsD (PRK05327)Ribosomal_S4 (pfam00163) →                                                                                                                                                                                                        |
| env-178 | CETA01172228.1            | - | 195    | 151    | RNA → rpsD (PRK05327)Ribosomal_S4 (pfam00163) →                                                                                                                                                                                                        |
| env-179 | CEVI01047151.1            | + | 2582   | 2626   | RNA → RpsD (COG0522)rpsD (PRK05327) → RpoA (COG0202)PRK05182 (PRK05182) → RplQ (COG0203)rplQ (PRK05591) →                                                                                                                                              |

|         |                              |   |       |       |                                                                                                                                                                                                                                                                  |
|---------|------------------------------|---|-------|-------|------------------------------------------------------------------------------------------------------------------------------------------------------------------------------------------------------------------------------------------------------------------|
| env-180 | JGI24815J26687_1079477       | + | 331   | 375   | RNA → rpsD (PRK05327)Ribosomal_S4 (pfam00163) →                                                                                                                                                                                                                  |
| env-181 | CEUC01056669.1               | + | 895   | 939   | RNA → rpsD (PRK05327)Ribosomal_S4 (pfam00163) →                                                                                                                                                                                                                  |
| env-182 | CESR01033026.1               | + | 887   | 931   | RNA → RpsD (COG0522)rpsD (PRK05327) →                                                                                                                                                                                                                            |
| env-183 | CETO01024088.1               | - | 1009  | 965   | RNA → RpsD (COG0522)rpsD (PRK05327) → rpoA (CHL00013)PRK05182 (PRK05182) →                                                                                                                                                                                       |
| env-184 | CEUS01122815.1               | - | 657   | 613   | RNA → RpsD (COG0522)rpsD (PRK05327) →                                                                                                                                                                                                                            |
| env-185 | CEWR01047726.1               | - | 680   | 636   | RNA → RpsD (COG0522)rpsD (PRK05327) →                                                                                                                                                                                                                            |
| env-186 | CETS01039292.1               | - | 1863  | 1819  | RNA → RpsD (COG0522)rpsD (PRK05327) → RpoA (COG0202)PRK05182 (PRK05182) →<br>RplQ (COG0203)rplQ (PRK05591) →                                                                                                                                                     |
| env-187 | CEVM01006958.1               | - | 238   | 194   | RNA → rpsD (PRK05327)Ribosomal_S4 (pfam00163) →                                                                                                                                                                                                                  |
| env-188 | SI54feb11_120m_c1042447      | - | 137   | 93    | RNA → rpsD (PRK05327)Ribosomal_S4 (pfam00163) →                                                                                                                                                                                                                  |
| env-189 | NCBI_BBAY_READ_1106073052947 | - | 860   | 816   | RNA → RpsD (COG0522)rpsD (PRK05327) →                                                                                                                                                                                                                            |
| env-190 | CENT01023057.1               | - | 131   | 87    | RNA → rpsD (PRK05327)Ribosomal_S4 (pfam00163) →                                                                                                                                                                                                                  |
| env-191 | CEVG01299689.1               | + | 820   | 854   | RNA →                                                                                                                                                                                                                                                            |
| env-192 | JCVL_SCAF_1096627857065      | - | 1611  | 1567  | RNA → RpsD (COG0522)rpsD (PRK05327) →                                                                                                                                                                                                                            |
| env-193 | CERI01112825.1               | - | 699   | 655   | RNA → RpsD (COG0522)rpsD (PRK05327) →                                                                                                                                                                                                                            |
| env-194 | CEWG01256266.1               | - | 432   | 388   | RNA → RpsD (COG0522)rpsD (PRK05327) →                                                                                                                                                                                                                            |
| env-195 | CENG01111780.1               | + | 9651  | 9695  | RNA → RpsD (COG0522)rpsD (PRK05327) →                                                                                                                                                                                                                            |
| env-196 | CENG01073265.1               | + | 732   | 776   | RNA → RpsD (COG0522)rpsD (PRK05327) → RNAP_alpha_NTD (cd06928)PRK05182 (PRK05182) →                                                                                                                                                                              |
| env-197 | CETY01269978.1               | + | 203   | 247   | RNA → RpsD (COG0522)rpsD (PRK05327) →                                                                                                                                                                                                                            |
| env-198 | CEWG01042362.1               | + | 503   | 547   | RNA → rpsD (PRK05327)Ribosomal_S4 (pfam00163) →                                                                                                                                                                                                                  |
| env-199 | JCVL_SCAF_1096627052264      | - | 632   | 588   | RNA → RpsD (COG0522)rpsD (PRK05327) →                                                                                                                                                                                                                            |
| env-200 | CETK01070832.1               | + | 5009  | 5053  | RNA → RpsD (COG0522)rpsD (PRK05327) →<br>RNAP_alpha_NTD (cd06928)PRK05182 (PRK05182)RNA_pol_A_CTD (pfam03118) →<br>RplQ (COG0203)rplQ (PRK05591) → CarA (COG0505)PRK12564 (PRK12564) →<br>eno (PRK00077)enolase (cd03313) → gltA (PRK05614)EcCS_like (cd06114) → |
| env-201 | JCVL_SCAF_1101667257495      | - | 457   | 413   | RNA → RpsD (COG0522)rpsD (PRK05327) →                                                                                                                                                                                                                            |
| env-202 | JGI20157J14317_10000316      | - | 23037 | 22993 | RNA → RpsD (COG0522)rpsD (PRK05327) →<br>RNAP_alpha_NTD (cd06928)PRK05182 (PRK05182)RNA_pol_A_CTD (pfam03118) →<br>RplQ (COG0203)rplQ (PRK05591) → CarA (COG0505)PRK12564 (PRK12564) →<br>eno (PRK00077)enolase (cd03313) → gltA (PRK05614)EcCS_like (cd06114) → |
| env-203 | JGI20156J14371_10020545      | - | 289   | 239   | RNA → rpsD (PRK05327)Ribosomal_S4 (pfam00163) →                                                                                                                                                                                                                  |
| env-204 | JCVL_SCAF_1096626856226      | + | 1215  | 1265  | RNA → RpsD (COG0522)rpsD (PRK05327) → RpoA (COG0202)PRK05182 (PRK05182) →                                                                                                                                                                                        |
| env-205 | JGI20159J14440_10001069      | - | 2266  | 2216  | RNA → RpsD (COG0522)rpsD (PRK05327) →<br>RNAP_alpha_NTD (cd06928)PRK05182 (PRK05182)RNA_pol_A_CTD (pfam03118) →<br>RplQ (COG0203)rplQ (PRK05591) →                                                                                                               |
| env-206 | DelMOSum2010_c10144771       | + | 169   | 218   | RNA → RpsD (COG0522)rpsD (PRK05327) →                                                                                                                                                                                                                            |
| env-207 | SI48aug10_10m_c1005592       | - | 1044  | 995   | RNA → RpsD (COG0522)rpsD (PRK05327) → RpoA (COG0202)PRK05182 (PRK05182) →                                                                                                                                                                                        |
| env-208 | NCBI_BBAY_READ_1106073039522 | - | 543   | 494   | RNA → RpsD (COG0522)rpsD (PRK05327) →                                                                                                                                                                                                                            |
| env-209 | NCBI_READ_1112493604101      | + | 450   | 499   | RNA → RpsD (COG0522)rpsD (PRK05327) →                                                                                                                                                                                                                            |
| env-210 | DelMOSum2010_c10000401       | - | 31221 | 31172 | RNA → RpsD (COG0522)rpsD (PRK05327) →<br>RNAP_alpha_NTD (cd06928)PRK05182 (PRK05182)RNA_pol_A_CTD (pfam03118) →<br>RplQ (COG0203)rplQ (PRK05591)rne (PRK10811) → hypo →                                                                                          |
| env-211 | JGI20152J14361_10035130      | - | 700   | 651   | RNA → RpsD (COG0522)rpsD (PRK05327) →                                                                                                                                                                                                                            |
| env-212 | CEWO01191481.1               | + | 536   | 585   | RNA → RpsD (COG0522)rpsD (PRK05327) →                                                                                                                                                                                                                            |
| env-213 | JGI20154J14316_10392850      | - | 59    | 20    | RNA →                                                                                                                                                                                                                                                            |
| env-214 | JGI20160J14292_10012841      | - | 839   | 790   | RNA → RpsD (COG0522)rpsD (PRK05327) → PRK05182 (PRK05182)RNA_pol_L (pfam01193) →                                                                                                                                                                                 |
| Jpa-1-1 | NZ_BBNS01000014.1            | + | 75674 | 75722 | RNA → RpsD (COG0522)rpsD (PRK05327) → RpoA (COG0202)PRK05182 (PRK05182) →                                                                                                                                                                                        |
| env-215 | ElkS_mat_MD6A_1048345        | - | 175   | 127   | RNA → rpsD (PRK05327)Ribosomal_S4 (pfam00163) →                                                                                                                                                                                                                  |
| env-216 | ElkS_mat_MD6A_1011575        | - | 1844  | 1796  | RNA → RpsD (COG0522)rpsD (PRK05327) →                                                                                                                                                                                                                            |
| env-217 | ElkS_mat_MD6A_1054401        | - | 382   | 334   | RNA → RpsD (COG0522)rpsD (PRK05327) →                                                                                                                                                                                                                            |
| env-218 | JGI20160J14292_10190844      | + | 186   | 227   | RNA → S4 (smart00363)RpsD (COG0522) →                                                                                                                                                                                                                            |
| env-219 | JGI12547J11936_1003731       | + | 2052  | 2092  | RNA → RpsD (COG0522)rpsD (PRK05327) → RpoA (COG0202)PRK05182 (PRK05182) →<br>RplQ (COG0203)rplQ (PRK05591) →                                                                                                                                                     |
| env-220 | JGI12421J11937_10050354      | + | 1249  | 1289  | RNA → ←hypo                                                                                                                                                                                                                                                      |

|         |                                   |   |       |       |                                                                                                                                                    |
|---------|-----------------------------------|---|-------|-------|----------------------------------------------------------------------------------------------------------------------------------------------------|
| env-221 | Keratinized_gingiva_LANL_C5716438 | - | 329   | 287   | RNA → rpsD (PRK05327)Ribosomal_S4 (pfam00163) →                                                                                                    |
| env-222 | SRS017691_Baylor_scaffold_68      | + | 1241  | 1283  | RNA → RpsD (COG0522)rpsD (PRK05327) → RNAP_alpha_NTD (cd06928)PRK05182 (PRK05182) →                                                                |
| env-223 | SRS018443_Baylor_scaffold_6145    | + | 2897  | 2939  | RNA → rpsD (PRK05327)Ribosomal_S4 (pfam00163) →                                                                                                    |
| env-224 | Palatine_Tonsils_LANL_C6151646    | - | 152   | 110   | RNA → rpsD (PRK05327)Ribosomal_S4 (pfam00163) →                                                                                                    |
| env-225 | SRS012285_Baylor_scaffold_4163    | + | 558   | 600   | RNA → RpsD (COG0522)rpsD (PRK05327) →<br>RNAP_alpha_NTD (cd06928)PRK05182 (PRK05182)RNA_pol_A_CTD (pfam03118) →<br>RplQ (COG0203)rplQ (PRK05591) → |
| env-226 | SRS016331_WUGC_scaffold_136       | - | 738   | 696   | RNA → RpsD (COG0522)rpsD (PRK05327) →                                                                                                              |
| env-227 | SRS011343_Baylor_scaffold_55324   | - | 267   | 225   | RNA → rpsD (PRK05327)Ribosomal_S4 (pfam00163) →                                                                                                    |
| env-228 | SRS011255_Baylor_scaffold_65092   | + | 718   | 760   | RNA → RpsD (COG0522)rpsD (PRK05327) →                                                                                                              |
| env-229 | SRS022602_Baylor_scaffold_81026   | - | 257   | 216   | RNA → rpsD (PRK05327)Ribosomal_S4 (pfam00163) →                                                                                                    |
| env-230 | SRS047634_LANL_scaffold_130560    | + | 829   | 870   | RNA → RpsD (COG0522)rpsD (PRK05327) →                                                                                                              |
| env-231 | SRS052876_LANL_scaffold_39269     | + | 1190  | 1231  | RNA →                                                                                                                                              |
| env-232 | SRS013836_Baylor_scaffold_28602   | - | 487   | 446   | RNA → RpsD (COG0522)rpsD (PRK05327) →                                                                                                              |
| Csp-1-1 | NZ_AKFR01000015.1                 | - | 81600 | 81559 | RNA → RpsD (COG0522)rpsD (PRK05327) →                                                                                                              |
| env-233 | SRS014888_WUGC_scaffold_19943     | + | 291   | 332   | RNA → RpsD (COG0522)rpsD (PRK05327) →                                                                                                              |
| env-234 | SRS013723_Baylor_scaffold_19316   | + | 2562  | 2603  | RNA →                                                                                                                                              |
| env-235 | SRS017511_Baylor_scaffold_85167   | + | 438   | 479   | RNA →                                                                                                                                              |
| env-236 | SRS017209_C2451925                | - | 303   | 262   | RNA → rpsD (PRK05327)Ribosomal_S4 (pfam00163) →                                                                                                    |
| env-237 | Throat_LANL_scaffold_30529        | + | 70    | 111   | RNA → rpsD (PRK05327)Ribosomal_S4 (pfam00163) →                                                                                                    |
| env-238 | SRS014573_C3620607                | - | 364   | 323   | RNA → RpsD (COG0522)rpsD (PRK05327) →                                                                                                              |
| env-239 | SRS015989_WUGC_scaffold_3203      | + | 436   | 477   | RNA → rpsD (PRK05327)Ribosomal_S4 (pfam00163) →                                                                                                    |
| env-240 | SRS051244_LANL_scaffold_57202     | + | 436   | 477   | RNA →                                                                                                                                              |
| env-241 | SRS024381_LANL_scaffold_48261     | + | 437   | 478   | RNA → RpsD (COG0522)rpsD (PRK05327) →                                                                                                              |
| env-242 | SRS053630_LANL_scaffold_15954     | + | 1148  | 1189  | RNA → RpsD (COG0522)rpsD (PRK05327) →<br>RNAP_alpha_NTD (cd06928)PRK05182 (PRK05182)RNA_pol_A_CTD (pfam03118) →<br>RplQ (COG0203)rplQ (PRK05591) → |
| env-243 | Buccal_mucosa_LANL_scaffold_33054 | + | 15    | 56    | RNA → rpsD (PRK05327)Ribosomal_S4 (pfam00163) → RpsD (COG0522)rpsD (PRK05327) →<br>RNAP_alpha_NTD (cd06928)PRK05182 (PRK05182) →                   |
| env-244 | SRS022083_Baylor_scaffold_14787   | + | 71    | 112   | RNA → RpsD (COG0522)rpsD (PRK05327) →                                                                                                              |
| env-245 | SRS022536_LANL_scaffold_45737     | + | 394   | 435   | RNA →                                                                                                                                              |
| env-246 | SRS049318_LANL_scaffold_22062     | - | 640   | 599   | RNA → rpsD (PRK05327)Ribosomal_S4 (pfam00163) → S4 (smart00363)RpsD (COG0522) → rpsD (PRK05327) →                                                  |
| env-247 | SRS011343_Baylor_scaffold_68646   | + | 588   | 629   | RNA →                                                                                                                                              |
| env-248 | TDF_OR_ARG05_123m.c1010977        | - | 701   | 661   | RNA → RpsD (COG0522)rpsD (PRK05327) →                                                                                                              |
| env-249 | SA_S1_NOR08_45m.c10064607         | - | 790   | 750   | RNA → RpsD (COG0522)rpsD (PRK05327) → RNAP_alpha_NTD (cd06928)PRK05182 (PRK05182) →                                                                |
| env-250 | TDF_MC_ARG01_113m.c1000650        | + | 230   | 270   | RNA → RpsD (COG0522)rpsD (PRK05327) →<br>RNAP_alpha_NTD (cd06928)PRK05182 (PRK05182)RNA_pol_A_CTD (pfam03118) →<br>RplQ (COG0203)rplQ (PRK05591) → |
| env-251 | SA_S2_NOR13_50m.c1156445          | - | 121   | 81    | RNA → rpsD (PRK05327)Ribosomal_S4 (pfam00163) →                                                                                                    |
| env-252 | TDF_OR_ARG04_113m.c1025301        | + | 530   | 570   | RNA → rpsD (PRK05327)Ribosomal_S4 (pfam00163) →                                                                                                    |
| env-253 | JGI24723J26617_10208337           | - | 127   | 87    | RNA →                                                                                                                                              |
| env-254 | TDF_OR_ARG04_113m.c1103690        | - | 163   | 123   | RNA → rpsD (PRK05327)Ribosomal_S4 (pfam00163) →                                                                                                    |
| env-255 | BS_KBA_SWE12_21m.c10302711        | - | 190   | 150   | RNA → rpsD (PRK05327)Ribosomal_S4 (pfam00163) →                                                                                                    |
| env-256 | JGI24723J26617_10789467           | + | 66    | 106   | RNA → rpsD (PRK05327)Ribosomal_S4 (pfam00163) →                                                                                                    |
| env-257 | KGL_S2_ANT05_2345m.c1010433       | - | 779   | 739   | RNA → RpsD (COG0522)rpsD (PRK05327) → PRK05182 (PRK05182) →                                                                                        |
| env-258 | KGL_S1_ANT01_95m.c10010832        | + | 492   | 532   | RNA → rpsD (PRK05327)Ribosomal_S4 (pfam00163) →                                                                                                    |
| env-259 | SA_S2_NOR13_50m.c1000962          | + | 5215  | 5255  | RNA → RpsD (COG0522)rpsD (PRK05327) → rpoA (CHL00013)PRK05182 (PRK05182) →                                                                         |
| env-260 | KGL_S1_ANT01_95m.c10110441        | + | 179   | 219   | RNA → RpsD (COG0522)rpsD (PRK05327) →                                                                                                              |
| env-261 | KGL_S1_ANT01_95m.c10085982        | + | 480   | 520   | RNA → RpsD (COG0522)rpsD (PRK05327) →                                                                                                              |
| env-262 | TB_FS06_10DRAFT_1000211           | + | 18911 | 18956 | RNA → RpsD (COG0522)rpsD (PRK05327) → RpoA (COG0202)PRK05182 (PRK05182) →<br>RplQ (COG0203)rplQ (PRK05591) →                                       |
| env-263 | DelMOSum2010_c10125148            | - | 972   | 931   | RNA → RpsD (COG0522)rpsD (PRK05327) → PRK05182 (PRK05182)RNA_pol_L (pfam01193) →                                                                   |



|         |                           |   |         |         |                                                                                                                                                                                                                                                                                                                  |
|---------|---------------------------|---|---------|---------|------------------------------------------------------------------------------------------------------------------------------------------------------------------------------------------------------------------------------------------------------------------------------------------------------------------|
| env-264 | JGI20157J14317_10000116   | + | 22436   | 22477   | RNA → RpsD (COG0522)rpsD (PRK05327) →<br>RNAP_alpha_NTD (cd06928)PRK05182 (PRK05182)RNA_pol_A_CTD (pfam03118) →<br>RplQ (COG0203)rplQ (PRK05591) → CarA (COG0505)PRK12564 (PRK12564) →<br>eno (PRK00077)enolase (cd03313) →                                                                                      |
| env-265 | JGI20159J14440_10000121   | + | 30004   | 30045   | RNA → RpsD (COG0522)rpsD (PRK05327) →<br>RNAP_alpha_NTD (cd06928)PRK05182 (PRK05182)RNA_pol_A_CTD (pfam03118) →<br>RplQ (COG0203)rplQ (PRK05591) → CarA (COG0505)PRK12564 (PRK12564) →<br>eno (PRK00077)enolase (cd03313) →                                                                                      |
| env-266 | CESE01008383.1            | + | 79060   | 79101   | RNA → RpsD (COG0522)rpsD (PRK05327) →<br>RNAP_alpha_NTD (cd06928)PRK05182 (PRK05182)RNA_pol_A_CTD (pfam03118) →<br>RplQ (COG0203)rplQ (PRK05591) → CarA (COG0505)PRK12564 (PRK12564) →<br>eno (PRK00077)enolase (cd03313) →                                                                                      |
| env-267 | JGI20152J14361_10000300   | + | 3945    | 3986    | RNA → RpsD (COG0522)rpsD (PRK05327) →<br>RNAP_alpha_NTD (cd06928)PRK05182 (PRK05182)RNA_pol_A_CTD (pfam03118) →<br>RplQ (COG0203)rplQ (PRK05591) → CarA (COG0505)PRK12564 (PRK12564) →<br>eno (PRK00077)enolase (cd03313) →                                                                                      |
| env-268 | DelMOSum2011_c10467853    | + | 40      | 81      | RNA → rpsD (PRK05327)Ribosomal_S4 (pfam00163) →                                                                                                                                                                                                                                                                  |
| env-269 | JGI20156J14371_10000212   | - | 49678   | 49637   | RNA → RpsD (COG0522)rpsD (PRK05327) →<br>RNAP_alpha_NTD (cd06928)PRK05182 (PRK05182)RNA_pol_A_CTD (pfam03118) →<br>RplQ (COG0203)rplQ (PRK05591) → CarA (COG0505)PRK12564 (PRK12564) →<br>eno (PRK00077)enolase (cd03313) →                                                                                      |
| env-270 | CETE01228191.1            | - | 644     | 603     | RNA → RpsD (COG0522)rpsD (PRK05327) →                                                                                                                                                                                                                                                                            |
| env-271 | CEVG01151379.1            | + | 315     | 356     | RNA → RpsD (COG0522)rpsD (PRK05327) →                                                                                                                                                                                                                                                                            |
| env-272 | CENO01018210.1            | - | 657     | 616     | RNA → RpsD (COG0522)rpsD (PRK05327) →                                                                                                                                                                                                                                                                            |
| env-273 | JCVL_SCAF_1096627080427   | + | 1062    | 1103    | RNA → RpsD (COG0522)rpsD (PRK05327) → rpoA (CHL00013)PRK05182 (PRK05182) →                                                                                                                                                                                                                                       |
| env-274 | CEUH01222072.1            | + | 246     | 287     | RNA → RpsD (COG0522)rpsD (PRK05327) →                                                                                                                                                                                                                                                                            |
| env-275 | SA_S1_NOR08_45m_c10087543 | - | 795     | 753     | RNA → RpsD (COG0522)rpsD (PRK05327) → hypo →                                                                                                                                                                                                                                                                     |
| env-276 | JGI20156J14371_10002845   | + | 7598    | 7640    | RNA → RpsD (COG0522)rpsD (PRK05327) →<br>RNAP_alpha_NTD (cd06928)PRK05182 (PRK05182)RNA_pol_A_CTD (pfam03118) →<br>RplQ (COG0203)rplQ (PRK05591) →                                                                                                                                                               |
| env-277 | TB_GS09_5_10006339        | + | 7277    | 7320    | RNA → RpsD (COG0522)rpsD (PRK05327) →<br>RNAP_alpha_NTD (cd06928)PRK05182 (PRK05182)RNA_pol_A_CTD (pfam03118) →<br>RplQ (COG0203)rplQ (PRK05591) →                                                                                                                                                               |
| env-278 | TB_FS06_10DRAFT_1000970   | - | 7745    | 7703    | RNA → RpsD (COG0522)rpsD (PRK05327) →<br>RNAP_alpha_NTD (cd06928)PRK05182 (PRK05182)RNA_pol_A_CTD (pfam03118) →<br>RplQ (COG0203)rplQ (PRK05591) → hypo → AmyAc_arch_bac_AmyA (cd11313)treS_nterm (TIGR02456) →<br>TIGR00275 (TIGR00275)HI0933_like (pfam03486) → TIGR00275 (TIGR00275)HI0933_like (pfam03486) → |
| env-279 | wf2_AHAA19916_y1          | - | 435     | 392     | RNA → S4 (smart00363)RpsD (COG0522) →                                                                                                                                                                                                                                                                            |
| env-280 | JGI20152J14361_10000009   | - | 112324  | 112282  | RNA → RpsD (COG0522)rpsD (PRK05327) →                                                                                                                                                                                                                                                                            |
| env-281 | GSLSAAL_GFP0ZZ302IYKTC    | - | 96      | 54      | RNA → ←hypo                                                                                                                                                                                                                                                                                                      |
| env-282 | SL_9KL_010_SED_10016857   | + | 55      | 99      | RNA → RpsD (COG0522)rpsD (PRK05327) → RpoA (COG0202)PRK05182 (PRK05182) →<br>RplQ (COG0203)rplQ (PRK05591) →                                                                                                                                                                                                     |
| env-283 | P_1C_Liq_1_UnCty_1074733  | - | 40      | 6       | RNA →                                                                                                                                                                                                                                                                                                            |
| env-284 | JGI11876J14442_10000071   | - | 34341   | 34297   | RNA → RpsD (COG0522)rpsD (PRK05327) → RpoA (COG0202)PRK05182 (PRK05182) →<br>rplQ (PRK05591)Ribosomal_L17 (pfam01196) → CarA (COG0505)PRK12564 (PRK12564) →                                                                                                                                                      |
| Pgo-1-1 | NZ_APLF01000014.1         | - | 34253   | 34209   | RNA → RpsD (COG0522)rpsD (PRK05327) → RpoA (COG0202)PRK05182 (PRK05182) →<br>RplQ (COG0203)rplQ (PRK05591) → rplQ (PRK05591)Ribosomal_L17 (pfam01196) →<br>CarA (COG0505)PRK12564 (PRK12564) →                                                                                                                   |
| env-285 | P_2C_Liq_1_UnCty_1067107  | + | 546     | 578     | RNA →                                                                                                                                                                                                                                                                                                            |
| env-286 | ElkS_mat_CD2A_1181468     | + | 226     | 182     | RNA → rpsD (PRK05327)Ribosomal_S4 (pfam00163) →                                                                                                                                                                                                                                                                  |
| env-287 | P_1C_Liq_1_UnCty_1015490  | + | 448     | 492     | RNA → RpsD (COG0522)rpsD (PRK05327) →                                                                                                                                                                                                                                                                            |
| env-288 | JGI1221J11331_1000639     | + | 5910    | 5954    | RNA → RpsD (COG0522)rpsD (PRK05327) → RpoA (COG0202)PRK05182 (PRK05182) →<br>RplQ (COG0203)rplQ (PRK05591) → CPSase_sm_chain (smart01097)CPSase_sm_chain (pfam00988) →<br>PRK12564 (PRK12564)GATase (pfam00117) →                                                                                                |
| Pto-1-1 | NC_018721.1               | - | 1068584 | 1068540 | RNA → RpsD (COG0522)rpsD (PRK05327) → RpoA (COG0202)PRK05182 (PRK05182) →<br>RplQ (COG0203)rplQ (PRK05591) → CarA (COG0505)PRK12564 (PRK12564) →                                                                                                                                                                 |

|         |                            |   |         |         |                                                                                                                                                                                                                      |
|---------|----------------------------|---|---------|---------|----------------------------------------------------------------------------------------------------------------------------------------------------------------------------------------------------------------------|
| Ptr-1-1 | NZ_KB905346.1              | + | 104039  | 104083  | RNA → RpsD (COG0522)rpsD (PRK05327) → RpoA (COG0202)PRK05182 (PRK05182) → RplQ (COG0203)rplQ (PRK05591) → CarA (COG0505)PRK12564 (PRK12564) →                                                                        |
| env-289 | SA_S1_NOR05_45m_c10375136  | + | 157     | 201     | RNA → rpsD (PRK05327)Ribosomal_S4 (pfam00163) →                                                                                                                                                                      |
| env-290 | SA_S2_NOR15_50m_c10192611  | + | 393     | 437     | RNA → rpsD (PRK05327)Ribosomal_S4 (pfam00163) →                                                                                                                                                                      |
| env-291 | SA_S1_NOR05_45m_c10080223  | + | 427     | 471     | RNA → rpsD (PRK05327)Ribosomal_S4 (pfam00163) →                                                                                                                                                                      |
| env-292 | SL_9KL_010_SED_10000028    | - | 31849   | 31807   | RNA → RpsD (COG0522)rpsD (PRK05327) → RNAP_alpha_NTD (cd06928)PRK05182 (PRK05182)RNA_polA_CTD (pfam03118) → RplQ (COG0203)rplQ (PRK05591) → CarA (COG0505)PRK12564 (PRK12564) →                                      |
| env-293 | SL_7KL_010_BRINE_10000083  | + | 29384   | 29426   | RNA → RpsD (COG0522)rpsD (PRK05327) → RNAP_alpha_NTD (cd06928)PRK05182 (PRK05182)RNA_polA_CTD (pfam03118) → RplQ (COG0203)rplQ (PRK05591) →                                                                          |
| Rbi-1-1 | NC_013222.1                | + | 1475311 | 1475353 | GATaseI_CPSase (cd01744)PRK12564 (PRK12564)CPSase_sm_chain (pfam00988) → RNA → RpsD (COG0522)rpsD (PRK05327) → RNAP_alpha_NTD (cd06928)PRK05182 (PRK05182)RNA_polA_CTD (pfam03118) → RplQ (COG0203)rplQ (PRK05591) → |
| Gfo-1-1 | NC_008571.1                | - | 2932356 | 2932313 | RNA → RpsD (COG0522)rpsD (PRK05327) → RpoA (COG0202)PRK05182 (PRK05182) → RplQ (COG0203)rplQ (PRK05591) →                                                                                                            |
| Gpo-1-1 | NZ_KE383971.1              | + | 95062   | 95105   | RNA → RpsD (COG0522)rpsD (PRK05327) → RpoA (COG0202)PRK05182 (PRK05182) → RplQ (COG0203)rplQ (PRK05591) →                                                                                                            |
| Gec-1-1 | NZ_AUHG01000011.1          | + | 90775   | 90818   | RNA → RpsD (COG0522)rpsD (PRK05327) → RpoA (COG0202)PRK05182 (PRK05182) → RplQ (COG0203)rplQ (PRK05591) → hypo → CarA (COG0505)PRK12564 (PRK12564) →                                                                 |
| env-294 | CENZ01218708.1             | - | 288     | 245     | RNA → rpsD (PRK05327)Ribosomal_S4 (pfam00163) →                                                                                                                                                                      |
| env-295 | CESL01104349.1             | + | 2289    | 2332    | RNA → RpsD (COG0522)rpsD (PRK05327) → RpoA (COG0202)PRK05182 (PRK05182) →                                                                                                                                            |
| Fjo-1-1 | NC_009441.1                | - | 396087  | 396045  | RNA → RpsD (COG0522)rpsD (PRK05327) → RNAP_alpha_NTD (cd06928)PRK05182 (PRK05182)RNA_polA_CTD (pfam03118) → RplQ (COG0203)rplQ (PRK05591) →                                                                          |
| env-296 | KGI_S1_ANT02_95m_c10161500 | - | 420     | 371     | RNA → S4 (smart00363)RpsD (COG0522) →                                                                                                                                                                                |
| env-297 | JGI24023J19991_10010536    | + | 3459    | 3508    | RNA → RpsD (COG0522)rpsD (PRK05327) → RpoA (COG0202)PRK05182 (PRK05182) →                                                                                                                                            |
| env-298 | 2236876001_453531          | - | 209     | 161     | RNA → rpsD (PRK05327)Ribosomal_S4 (pfam00163) →                                                                                                                                                                      |
| env-299 | DelMOSum2010_c10108153     | - | 712     | 664     | RNA → RpsD (COG0522)rpsD (PRK05327) →                                                                                                                                                                                |
| env-300 | JGI20154J14316_10182624    | - | 93      | 45      | RNA →                                                                                                                                                                                                                |
| env-301 | JGI20154J14316_10239595    | - | 85      | 37      | RNA →                                                                                                                                                                                                                |
| env-302 | JGI20160J14292_10255730    | + | 444     | 482     | RNA →                                                                                                                                                                                                                |
| env-303 | CESI01041543.1             | + | 405     | 453     | RNA → rpsD (PRK05327)Ribosomal_S4 (pfam00163) →                                                                                                                                                                      |
| env-304 | DelMOSum2010_c10015854     | - | 4138    | 4090    | RNA → RpsD (COG0522)rpsD (PRK05327) → RNAP_alpha_NTD (cd06928)PRK05182 (PRK05182)RNA_polA_CTD (pfam03118) → RplQ (COG0203)rplQ (PRK05591) → CarA (COG0505)PRK12564 (PRK12564) →                                      |
| env-305 | JGI20154J14316_10192329    | - | 65      | 24      | RNA →                                                                                                                                                                                                                |
| env-306 | DelMOSum2010_c10003210     | + | 452     | 500     | RNA → RpsD (COG0522)rpsD (PRK05327) → RNAP_alpha_NTD (cd06928)PRK05182 (PRK05182)RNA_polA_CTD (pfam03118) → RplQ (COG0203)rplQ (PRK05591) →                                                                          |
| env-307 | DelMOSum2010_c10379381     | + | 340     | 378     | RNA →                                                                                                                                                                                                                |
| env-308 | DelMOSum2010_c10492344     | - | 94      | 46      | RNA →                                                                                                                                                                                                                |
| env-309 | JGI20154J14316_10188950    | - | 67      | 24      | RNA →                                                                                                                                                                                                                |
| env-310 | JGI20160J14292_10241200    | + | 448     | 486     | RNA →                                                                                                                                                                                                                |
| env-311 | JGI20153J14295_10182765    | + | 414     | 461     | RNA →                                                                                                                                                                                                                |
| env-312 | CESU01090380.1             | + | 400     | 448     | RNA → RpsD (COG0522)rpsD (PRK05327) → RNAP_alpha_NTD (cd06928)PRK05182 (PRK05182)RNA_polA_CTD (pfam03118) → RplQ (COG0203)rplQ (PRK05591) → CarA (COG0505)PRK12564 (PRK12564) →                                      |
| env-313 | JGI20154J14316_10183818    | - | 76      | 28      | RNA →                                                                                                                                                                                                                |
| env-314 | JGI20154J14316_10249246    | + | 339     | 386     | RNA →                                                                                                                                                                                                                |
| env-315 | DelMOSum2011_c10107659     | + | 808     | 856     | RNA →                                                                                                                                                                                                                |
| env-316 | KGI_S1_ANT02_95m_c10000070 | - | 9736    | 9688    | RNA → RpsD (COG0522)rpsD (PRK05327) → RpoA (COG0202)PRK05182 (PRK05182) → RplQ (COG0203)rplQ (PRK05591) → CarA (COG0505)PRK12564 (PRK12564) →                                                                        |
| env-317 | DelMOSum2011_c10000248     | - | 37631   | 37583   | RNA → RpsD (COG0522)rpsD (PRK05327) → RpoA (COG0202)PRK05182 (PRK05182) → RplQ (COG0203)rplQ (PRK05591) → hypo → CarA (COG0505)PRK12564 (PRK12564) →                                                                 |

|         |                                 |   |         |         |                                                                                                                                                                                                                                  |
|---------|---------------------------------|---|---------|---------|----------------------------------------------------------------------------------------------------------------------------------------------------------------------------------------------------------------------------------|
| env-318 | JGI20157J14317_10074550         | - | 1039    | 991     | RNA → RpsD (COG0522)rpsD (PRK05327) → PRK05182 (PRK05182)RNA_pol_L (pfam01193) →                                                                                                                                                 |
| env-319 | JGI20157J14317_10082923         | + | 461     | 509     | RNA → RpsD (COG0522)rpsD (PRK05327) →                                                                                                                                                                                            |
| Tna-1-1 | NZ_JTDDV01000011.1              | - | 67639   | 67591   | RNA → RpsD (COG0522)rpsD (PRK05327) → RpoA (COG0202)PRK05182 (PRK05182) → RplQ (COG0203)rplQ (PRK05591) → hypo → CarA (COG0505)PRK12564 (PRK12564) →                                                                             |
| env-320 | JGI12097J13213_1000640          | - | 3883    | 3835    | RNA → RpsD (COG0522)rpsD (PRK05327) → RpoA (COG0202)PRK05182 (PRK05182) → RplQ (COG0203)rplQ (PRK05591) → CarA (COG0505)PRK12564 (PRK12564) →                                                                                    |
| env-321 | NCBI_READ_1112290411083         | - | 940     | 901     | RNA → rpsD (PRK05327) →                                                                                                                                                                                                          |
| env-322 | SRS024087_LANL_scaffold_26415   | + | 693     | 733     | RNA → RpsD (COG0522)rpsD (PRK05327) → RNAP_alpha_NTD (cd06928)PRK05182 (PRK05182)RNA_pol_A_CTD (pfam03118) → RplQ (COG0203)rplQ (PRK05591) →                                                                                     |
| env-323 | SRS022602_Baylor_scaffold_55726 | - | 1590    | 1550    | RNA → RpsD (COG0522)rpsD (PRK05327) → RNAP_alpha_NTD (cd06928)PRK05182 (PRK05182)RNA_pol_A_CTD (pfam03118) →                                                                                                                     |
| env-324 | SRS011343_C2229337              | - | 665     | 625     | RNA → RpsD (COG0522)rpsD (PRK05327) →                                                                                                                                                                                            |
| env-325 | SRS064449_LANL_scaffold_29232   | - | 83      | 43      | RNA →                                                                                                                                                                                                                            |
| env-326 | KGL_S1_ANT01_95m_c10069223      | + | 445     | 488     | RNA → RpsD (COG0522)rpsD (PRK05327) →                                                                                                                                                                                            |
| env-327 | KGL_S1_ANT01_95m_c10437516      | + | 51      | 94      | RNA → rpsD (PRK05327)Ribosomal_S4 (pfam00163) →                                                                                                                                                                                  |
| env-328 | KGL_S1_ANT01_95m_c10191473      | - | 99      | 56      | RNA →                                                                                                                                                                                                                            |
| env-329 | KGL_S1_ANT02_95m_c10154153      | - | 555     | 512     | RNA → RpsD (COG0522)rpsD (PRK05327) →                                                                                                                                                                                            |
| env-330 | KGL_S1_ANT02_95m_c10018669      | - | 104     | 61      | RNA →                                                                                                                                                                                                                            |
| env-331 | JGI1221J11331_1000195           | - | 5494    | 5451    | RNA → RpsD (COG0522)rpsD (PRK05327) → RpoA (COG0202)PRK05182 (PRK05182) →                                                                                                                                                        |
| Gli-1-1 | NZ_JH594606.1                   | - | 1313497 | 1313454 | RNA → RpsD (COG0522)rpsD (PRK05327) → RpsD (COG0522)rpsD (PRK05327) → RNAP_alpha_NTD (cd06928)PRK05182 (PRK05182)RNA_pol_A_CTD (pfam03118) → RpoA (COG0202)PRK05182 (PRK05182) → RplQ (COG0203)rplQ (PRK05591)Mtc1 (pfam10310) → |
| env-332 | ElkS_mat_MD6A_1190446           | + | 69      | 109     | RplQ (COG0203)rplQ (PRK05591)Mtc1 (pfam10310) →                                                                                                                                                                                  |
| env-333 | JGI1221J11331_1000080           | + | 24062   | 24105   | RNA → rpsD (PRK05327)Ribosomal_S4 (pfam00163) →                                                                                                                                                                                  |
| Aat-1-1 | NZ_AQRA01000007.1               | + | 133451  | 133494  | RNA → RpsD (COG0522)rpsD (PRK05327) → RpoA (COG0202)PRK05182 (PRK05182) →                                                                                                                                                        |
| env-334 | JGI11876J14442_10876046         | - | 214     | 174     | RplQ (COG0203)rplQ (PRK05591) →                                                                                                                                                                                                  |
| Gsp-3-1 | NZ_JQLP01000005.1               | + | 613543  | 613586  | RNA → rpsD (PRK05327)Ribosomal_S4 (pfam00163) →                                                                                                                                                                                  |
| env-335 | KGL_S1_ANT01_95m_c10674661      | + | 62      | 105     | RNA → RpsD (COG0522)rpsD (PRK05327) → RpoA (COG0202)PRK05182 (PRK05182) →                                                                                                                                                        |
| env-336 | KGL_S1_ANT01_95m_c10076701      | + | 615     | 572     | RplQ (COG0203)rplQ (PRK05591) →                                                                                                                                                                                                  |
| env-337 | KGL_S1_ANT01_95m_c10067832      | - | 463     | 506     | RNA → RpsD (COG0522)rpsD (PRK05327) →                                                                                                                                                                                            |
| env-338 | KGL_S2_ANT04_2345m_c1337795     | - | 82      | 39      | RNA →                                                                                                                                                                                                                            |
| env-339 | KGL_S1_ANT02_95m_c10321982      | + | 98      | 141     | RNA → rpsD (PRK05327)Ribosomal_S4 (pfam00163) →                                                                                                                                                                                  |
| env-340 | KGL_S1_ANT02_95m_c10332312      | + | 96      | 139     | RNA → rpsD (PRK05327)Ribosomal_S4 (pfam00163) →                                                                                                                                                                                  |
| Gsp-4-1 | NZ_KE384219.1                   | - | 887176  | 887133  | RNA → RpsD (COG0522)rpsD (PRK05327) → RpoA (COG0202)PRK05182 (PRK05182) → RplQ (COG0203)rplQ (PRK05591) →                                                                                                                        |
| Gsp-2-1 | NZ_AJLT01000027.1               | - | 3532    | 3489    | RNA → RpsD (COG0522)rpsD (PRK05327) → RpsD (COG0522)rpsD (PRK05327) → RpoA (COG0202)PRK05182 (PRK05182) → RpoA (COG0202)PRK05182 (PRK05182) → RplQ (COG0203)rplQ (PRK05591) → RplQ (COG0203)rplQ (PRK05591) →                    |
| env-341 | ElkS_mat_MD6A_1172629           | + | 144     | 187     | RNA → rpsD (PRK05327)Ribosomal_S4 (pfam00163) →                                                                                                                                                                                  |
| env-342 | CEVI01208716.1                  | - | 665     | 622     | RNA → RpsD (COG0522)rpsD (PRK05327) →                                                                                                                                                                                            |
| Ssp-1-1 | NZ_JQNQ01000001.1               | + | 2652711 | 2652754 | RNA → RpsD (COG0522)rpsD (PRK05327) → RpoA (COG0202)PRK05182 (PRK05182) → RplQ (COG0203)rplQ (PRK05591) →                                                                                                                        |
| Kal-1-1 | NZ_DS544873.1                   | - | 2713104 | 2713064 | RNA → RpsD (COG0522)rpsD (PRK05327) → RpoA (COG0202)PRK05182 (PRK05182) → RplQ (COG0203)rplQ (PRK05591) →                                                                                                                        |
| Gsp-1-1 | NZ_APHJ01000040.1               | - | 65659   | 65616   | RNA → RpsD (COG0522)rpsD (PRK05327) → RpoA (COG0202)PRK05182 (PRK05182) → RplQ (COG0203)rplQ (PRK05591) →                                                                                                                        |
| env-343 | P_1C_Liq_3_UnCty_1004385        | - | 1057    | 1016    | RNA → RpsD (COG0522)rpsD (PRK05327) → PRK05182 (PRK05182)RNA_pol_L (pfam01193) →                                                                                                                                                 |
| env-344 | P_1C_Liq_1_UnCty_1000030        | - | 6951    | 6910    | RNA → RpsD (COG0522)rpsD (PRK05327) → RNAP_alpha_NTD (cd06928)PRK05182 (PRK05182)RNA_pol_A_CTD (pfam03118) → RplQ (COG0203)rplQ (PRK05591) → CarA (COG0505)PRK12564 (PRK12564) →                                                 |
| env-345 | JGI25913J50563_1051608          | + | 106     | 147     | RNA → RpsD (COG0522)rpsD (PRK05327) →                                                                                                                                                                                            |

|         |                          |   |        |        |                                                                                                                                                                   |
|---------|--------------------------|---|--------|--------|-------------------------------------------------------------------------------------------------------------------------------------------------------------------|
| env-346 | ABOG01001487.1           | - | 91     | 50     | RNA → hypo →                                                                                                                                                      |
| env-347 | 2204886463               | - | 72     | 31     | RNA →                                                                                                                                                             |
| env-348 | GSLAS_GLMUJHB02GRDZW     | - | 120    | 79     | RNA → rpsD (PRK05327)Ribosomal_S4 (pfam00163) →                                                                                                                   |
| env-349 | JGI24770J26754_10034354  | + | 1291   | 1332   | RNA → RpsD (COG0522)rpsD (PRK05327) → RNAP_alpha_NTD (cd06928)PRK05182 (PRK05182) →                                                                               |
| Fin-1-1 | NC_017025.1              | + | 672442 | 672483 | RNA → RpsD (COG0522)rpsD (PRK05327) →<br>RNAP_alpha_NTD (cd06928)PRK05182 (PRK05182)RNA_pol_A_CTD (pfam03118) →<br>RplQ (COG0203)rplQ (PRK05591) →                |
| env-350 | JGI25920J50251_10035976  | - | 1266   | 1225   | RNA → RpsD (COG0522)rpsD (PRK05327) → RNAP_alpha_NTD (cd06928)PRK05182 (PRK05182) →                                                                               |
| env-351 | P_2C_Liq_2_UnCty_1074319 | + | 58     | 98     | RNA → RpsD (COG0522)rpsD (PRK05327) →                                                                                                                             |
| env-352 | DelMOSum2010_c10001779   | - | 4923   | 4883   | RNA → RpsD (COG0522)rpsD (PRK05327) → RpoA (COG0202)PRK05182 (PRK05182) →<br>RplQ (COG0203)rplQ (PRK05591) → CarA (COG0505)PRK12564 (PRK12564) →                  |
| env-353 | DelMOWin2010_c10201283   | - | 365    | 325    | RNA → RpsD (COG0522)rpsD (PRK05327) →                                                                                                                             |
| env-354 | ABOE01005844.1           | - | 55     | 25     | RNA → ←hypo                                                                                                                                                       |
| env-355 | P_2C_Liq_1_UnCty_1005695 | - | 2283   | 2243   | RNA → RpsD (COG0522)rpsD (PRK05327) → RpoA (COG0202)PRK05182 (PRK05182) →<br>RplQ (COG0203)rplQ (PRK05591) →                                                      |
| env-356 | CENG01018837.1           | - | 3006   | 2965   | RNA → RpsD (COG0522)rpsD (PRK05327) →<br>RNAP_alpha_NTD (cd06928)PRK05182 (PRK05182)RNA_pol_A_CTD (pfam03118) →<br>RplQ (COG0203)rplQ (PRK05591) → hypo →         |
| env-357 | CENP01317983.1           | + | 486    | 527    | RNA → rpsD (PRK05327)Ribosomal_S4 (pfam00163) →                                                                                                                   |
| env-358 | CENW01033667.1           | + | 574    | 605    | RNA → hypo →                                                                                                                                                      |
| env-359 | CEOP01025191.1           | - | 597    | 556    | RNA → RpsD (COG0522)rpsD (PRK05327) →                                                                                                                             |
| env-360 | CEPL01236006.1           | - | 586    | 545    | RNA → RpsD (COG0522)rpsD (PRK05327) →                                                                                                                             |
| env-361 | CERK01003498.1           | - | 2219   | 2178   | RNA → RpsD (COG0522)rpsD (PRK05327) →<br>RNAP_alpha_NTD (cd06928)PRK05182 (PRK05182)RNA_pol_A_CTD (pfam03118) →<br>RplQ (COG0203)rplQ (PRK05591)rpsP (PRK14521) → |
| env-362 | CESZ01017440.1           | + | 239    | 280    | RNA → RpsD (COG0522)rpsD (PRK05327) →                                                                                                                             |
| env-363 | CETQ01116547.1           | + | 277    | 318    | RNA → RpsD (COG0522)rpsD (PRK05327) →                                                                                                                             |
| env-364 | CEUG01164120.1           | + | 218    | 259    | RNA → RpsD (COG0522)rpsD (PRK05327) →                                                                                                                             |
| env-365 | CEVL01101790.1           | + | 577    | 618    | RNA → rpsD (PRK05327)Ribosomal_S4 (pfam00163) →                                                                                                                   |
| env-366 | CEVU01164851.1           | - | 2198   | 2157   | RNA → RpsD (COG0522)rpsD (PRK05327) → RpoA (COG0202)PRK05182 (PRK05182) →<br>RplQ (COG0203)rplQ (PRK05591) →                                                      |
| env-367 | CEWG01182900.1           | + | 735    | 776    | RNA →                                                                                                                                                             |
| env-368 | CEWK01130899.1           | - | 556    | 515    | RNA → RpsD (COG0522)rpsD (PRK05327) →                                                                                                                             |
| env-369 | JCVL_SCAF_1101668693344  | - | 606    | 566    | RNA → RpsD (COG0522)rpsD (PRK05327) →                                                                                                                             |
| env-370 | JCVL_SCAF_1096626974148  | - | 920    | 879    | RNA → RpsD (COG0522)rpsD (PRK05327) → PRK05182 (PRK05182)RNA_pol_L (pfam01193) →                                                                                  |
| env-371 | CENQ01077134.1           | - | 192    | 151    | RNA → rpsD (PRK05327)Ribosomal_S4 (pfam00163) →                                                                                                                   |
| env-372 | CEOM01200204.1           | + | 808    | 849    | RNA → RpsD (COG0522)rpsD (PRK05327) → RpoA (COG0202)PRK05182 (PRK05182) →<br>RplQ (COG0203)rplQ (PRK05591) →                                                      |
| env-373 | CEQX01059206.1           | - | 38     | 7      | RNA →                                                                                                                                                             |
| env-374 | CESP01186676.1           | + | 437    | 478    | RNA →                                                                                                                                                             |
| env-375 | CEUA01031995.1           | + | 888    | 929    | RNA → RpsD (COG0522)rpsD (PRK05327) →<br>RNAP_alpha_NTD (cd06928)PRK05182 (PRK05182)RNA_pol_A_CTD (pfam03118) →<br>RplQ (COG0203)rplQ (PRK05591) →                |
| env-376 | CEVG01008164.1           | + | 288    | 329    | RNA → rpsD (PRK05327)Ribosomal_S4 (pfam00163) →                                                                                                                   |
| env-377 | CEVR01251554.1           | + | 296    | 337    | RNA → rpsD (PRK05327)Ribosomal_S4 (pfam00163) →                                                                                                                   |
| env-378 | CEVX01164589.1           | + | 416    | 457    | RNA → RpsD (COG0522)rpsD (PRK05327) →                                                                                                                             |
| env-379 | CEWO01084334.1           | + | 5393   | 5434   | RNA → RpsD (COG0522)rpsD (PRK05327) →<br>RNAP_alpha_NTD (cd06928)PRK05182 (PRK05182)RNA_pol_A_CTD (pfam03118) →<br>RplQ (COG0203)rplQ (PRK05591) →                |
| env-380 | CEOV01038829.1           | - | 255    | 212    | RNA → rpsD (PRK05327)Ribosomal_S4 (pfam00163) →                                                                                                                   |
| env-381 | CEQ01099035.1            | + | 406    | 449    | RNA → RpsD (COG0522)rpsD (PRK05327) → RpoA (COG0202)PRK05182 (PRK05182) →                                                                                         |
| env-382 | CEQ001051374.1           | + | 920    | 963    | RNA → RpsD (COG0522)rpsD (PRK05327) →                                                                                                                             |
| env-383 | CESQ01024469.1           | + | 341    | 384    | RNA → RpsD (COG0522)rpsD (PRK05327) → RNAP_alpha_NTD (cd06928)PRK05182 (PRK05182) →                                                                               |
| env-384 | CEUM01272025.1           | + | 217    | 260    | RNA → RpsD (COG0522)rpsD (PRK05327) →                                                                                                                             |



|         |                           |   |       |       |                                                                                                                                                                                                                                                                                                                                                                                        |
|---------|---------------------------|---|-------|-------|----------------------------------------------------------------------------------------------------------------------------------------------------------------------------------------------------------------------------------------------------------------------------------------------------------------------------------------------------------------------------------------|
| env-385 | JCVL_READ_1103770020066   | - | 619   | 576   | RNA → RpsD (COG0522)rpsD (PRK05327) →                                                                                                                                                                                                                                                                                                                                                  |
| env-386 | CESD01077857.1            | - | 283   | 240   | RNA → rpsD (PRK05327)Ribosomal_S4 (pfam00163) →                                                                                                                                                                                                                                                                                                                                        |
| env-387 | CETB01090522.1            | - | 501   | 458   | RNA → RpsD (COG0522)rpsD (PRK05327) →                                                                                                                                                                                                                                                                                                                                                  |
| env-388 | JCVL_READ_1103769862037   | - | 370   | 327   | RNA → rpsD (PRK05327)Ribosomal_S4 (pfam00163) →                                                                                                                                                                                                                                                                                                                                        |
| env-389 | JCVL_SCAF_1096627876296   | + | 547   | 588   | RNA → RpsD (COG0522)rpsD (PRK05327) → RpsD (COG0522)rpsD (PRK05327) →                                                                                                                                                                                                                                                                                                                  |
| env-390 | JCVL_SCAF_1101668435598   | + | 664   | 705   | RNA → rpsD (PRK05327)Ribosomal_S4 (pfam00163) →                                                                                                                                                                                                                                                                                                                                        |
| env-391 | JCVL_SCAF_1096627108452   | - | 156   | 115   | RNA →                                                                                                                                                                                                                                                                                                                                                                                  |
| env-392 | CENJ01155291.1            | - | 444   | 403   | RNA → RpsD (COG0522)rpsD (PRK05327) →                                                                                                                                                                                                                                                                                                                                                  |
| env-393 | CENT01170625.1            | - | 233   | 192   | RNA → rpsD (PRK05327)Ribosomal_S4 (pfam00163) →                                                                                                                                                                                                                                                                                                                                        |
| env-394 | CENY01156917.1            | + | 415   | 456   | RNA → RpsD (COG0522)rpsD (PRK05327) → PRK05182 (PRK05182) →                                                                                                                                                                                                                                                                                                                            |
| env-395 | CEPC01245844.1            | + | 902   | 933   | RNA → hypo →                                                                                                                                                                                                                                                                                                                                                                           |
| env-396 | CEQO01025468.1            | + | 291   | 332   | RNA → RpsD (COG0522)rpsD (PRK05327) →                                                                                                                                                                                                                                                                                                                                                  |
| env-397 | CESN01038593.1            | - | 2422  | 2381  | RNA → RpsD (COG0522)rpsD (PRK05327) → RpoA (COG0202)PRK05182 (PRK05182) →<br>RplQ (COG0203)rplQ (PRK05591) →                                                                                                                                                                                                                                                                           |
| env-398 | JCVL_SCAF_1096627965867   | + | 486   | 527   | RNA → S4 (smart00363)RpsD (COG0522) → PRK05182 (PRK05182)RNA_pol_L (pfam01193) →                                                                                                                                                                                                                                                                                                       |
| env-399 | CETY01194632.1            | + | 6186  | 6227  | RNA → RpsD (COG0522)rpsD (PRK05327) → PRK05182 (PRK05182)RNA_pol_L (pfam01193) →                                                                                                                                                                                                                                                                                                       |
| env-400 | CEVG01161451.1            | + | 1799  | 1840  | RNA → RpsD (COG0522)rpsD (PRK05327) → PRK05182 (PRK05182)RNA_pol_L (pfam01193) →                                                                                                                                                                                                                                                                                                       |
| env-401 | CEVP01363226.1            | + | 1728  | 1769  | RNA → rpsD (PRK05327)Ribosomal_S4 (pfam00163) →                                                                                                                                                                                                                                                                                                                                        |
| env-402 | CEVX01015396.1            | + | 5254  | 5295  | RNA → RpsD (COG0522)rpsD (PRK05327) →                                                                                                                                                                                                                                                                                                                                                  |
| env-403 | JCVL_SCAF_1096627738902   | - | 327   | 286   | RNA → rpsD (PRK05327)Ribosomal_S4 (pfam00163) →                                                                                                                                                                                                                                                                                                                                        |
| env-404 | JCVL_SCAF_1096627987680   | + | 87    | 128   | RNA → RpsD (COG0522)rpsD (PRK05327) → RpoA (COG0202)PRK05182 (PRK05182) →                                                                                                                                                                                                                                                                                                              |
| env-405 | JCVL_SCAF_1101668751912   | - | 811   | 770   | RNA → RpsD (COG0522)rpsD (PRK05327) →                                                                                                                                                                                                                                                                                                                                                  |
| env-406 | CENP01173649.1            | + | 17909 | 17950 | RNA → RpsD (COG0522)rpsD (PRK05327) →<br>RNAP_alpha_NTD (cd06928)PRK05182 (PRK05182)RNA_pol_A_CTD (pfam03118) →<br>RplQ (COG0203)rplQ (PRK05591) → hypo → CarA (COG0505)PRK12564 (PRK12564) →<br>eno (PRK00077)enolase (cd03313) → gltA (PRK05614)Citrate_synt (pfam00285) → DdaH (COG1834) →<br>Amidinotransf (pfam02274) → Arg_tRNA_synt_N (smart01016)Arg_tRNA_synt_N (pfam03485) → |
| env-407 | CENX01050295.1            | - | 973   | 932   | RNA → RpsD (COG0522)rpsD (PRK05327) → PRK05182 (PRK05182)RNA_pol_L (pfam01193) →                                                                                                                                                                                                                                                                                                       |
| env-408 | CEPW01055046.1            | + | 441   | 482   | RNA → RpsD (COG0522)rpsD (PRK05327) → RpoA (COG0202)PRK05182 (PRK05182) →<br>RplQ (COG0203)rplQ (PRK05591) →                                                                                                                                                                                                                                                                           |
| env-409 | CESF01181460.1            | - | 96    | 55    | RNA →                                                                                                                                                                                                                                                                                                                                                                                  |
| env-410 | CETY01166093.1            | + | 795   | 836   | RNA →                                                                                                                                                                                                                                                                                                                                                                                  |
| env-411 | CEUN01220636.1            | + | 306   | 347   | RNA → rpsD (PRK05327)Ribosomal_S4 (pfam00163) →                                                                                                                                                                                                                                                                                                                                        |
| env-412 | CEVP01121720.1            | - | 660   | 619   | RNA → RpsD (COG0522)rpsD (PRK05327) →                                                                                                                                                                                                                                                                                                                                                  |
| env-413 | CEVW01163295.1            | - | 43    | 12    | RNA →                                                                                                                                                                                                                                                                                                                                                                                  |
| env-414 | CEWH01074398.1            | + | 631   | 672   | RNA → RpsD (COG0522)rpsD (PRK05327) →                                                                                                                                                                                                                                                                                                                                                  |
| env-415 | 85126595                  | - | 708   | 665   | RNA → RpsD (COG0522)rpsD (PRK05327) →                                                                                                                                                                                                                                                                                                                                                  |
| env-416 | CEQM01038432.1            | - | 514   | 471   | RNA → RpsD (COG0522)rpsD (PRK05327) →                                                                                                                                                                                                                                                                                                                                                  |
| env-417 | CEQW01046056.1            | - | 288   | 245   | RNA → rpsD (PRK05327)Ribosomal_S4 (pfam00163) →                                                                                                                                                                                                                                                                                                                                        |
| env-418 | CESF01121287.1            | + | 799   | 842   | RNA →                                                                                                                                                                                                                                                                                                                                                                                  |
| env-419 | CEUF01015480.1            | + | 459   | 502   | RNA → rpsD (PRK05327)Ribosomal_S4 (pfam00163) →                                                                                                                                                                                                                                                                                                                                        |
| env-420 | CAM_READ_0234809867       | - | 478   | 435   | RNA → S4 (smart00363)RpsD (COG0522) →                                                                                                                                                                                                                                                                                                                                                  |
| env-421 | CENF01049817.1            | + | 70    | 113   | RNA → RpsD (COG0522)rpsD (PRK05327) →                                                                                                                                                                                                                                                                                                                                                  |
| env-422 | CESW01020303.1            | + | 802   | 845   | RNA → RpsD (COG0522)rpsD (PRK05327) →                                                                                                                                                                                                                                                                                                                                                  |
| env-423 | CEUH01049850.1            | + | 363   | 406   | RNA → rpsD (PRK05327)Ribosomal_S4 (pfam00163) →                                                                                                                                                                                                                                                                                                                                        |
| env-424 | JCVL_SCAF_1096627517448   | - | 1401  | 1360  | RNA → RpsD (COG0522)rpsD (PRK05327) →                                                                                                                                                                                                                                                                                                                                                  |
| env-425 | JCVL_SCAF_1101668741877   | - | 1146  | 1105  | RNA → RpsD (COG0522)rpsD (PRK05327) → RNAP_alpha_NTD (cd06928)PRK05182 (PRK05182) →                                                                                                                                                                                                                                                                                                    |
| env-426 | JGI20153J14295_10198722   | + | 211   | 255   | RNA → rpsD (PRK05327)Ribosomal_S4 (pfam00163) →                                                                                                                                                                                                                                                                                                                                        |
| env-427 | SA_S1_NOR05_45m_c10264163 | + | 183   | 227   | RNA → rpsD (PRK05327)Ribosomal_S4 (pfam00163) →                                                                                                                                                                                                                                                                                                                                        |
| env-428 | SI60aug11_100m_c1216415   | - | 37    | 5     | RNA →                                                                                                                                                                                                                                                                                                                                                                                  |
| env-429 | SI34jun09_10m_1002524     | - | 5240  | 5198  | RNA → RpsD (COG0522)rpsD (PRK05327) →                                                                                                                                                                                                                                                                                                                                                  |
| env-430 | JGI1221J11331_1019349     | - | 1294  | 1245  | RNA → RpsD (COG0522)rpsD (PRK05327) → RNAP_alpha_NTD (cd06928)PRK05182 (PRK05182) →                                                                                                                                                                                                                                                                                                    |
| env-431 | P_2C_Liq_1_UnCty_1022676  | + | 198   | 240   | RNA → RpsD (COG0522)rpsD (PRK05327) → RpoA (COG0202)PRK05182 (PRK05182) →                                                                                                                                                                                                                                                                                                              |

|         |                             |   |        |        |                                                                                                                                                                                                                                                               |
|---------|-----------------------------|---|--------|--------|---------------------------------------------------------------------------------------------------------------------------------------------------------------------------------------------------------------------------------------------------------------|
| env-432 | SA_S1_NOR08_45m.c10303734   | - | 256    | 213    | RNA → rpsD (PRK05327)Ribosomal_S4 (pfam00163) →                                                                                                                                                                                                               |
| env-433 | JGI24025J20009_10186048     | - | 381    | 339    | RNA → RpsD (COG0522)rpsD (PRK05327) →                                                                                                                                                                                                                         |
| env-434 | TDF_OR_ARG04_113m.c1035950  | - | 334    | 292    | RNA → rpsD (PRK05327)Ribosomal_S4 (pfam00163) →                                                                                                                                                                                                               |
| env-435 | TDF_MC_ARG02_113m.c1087976  | + | 171    | 213    | RNA → rpsD (PRK05327)Ribosomal_S4 (pfam00163) →                                                                                                                                                                                                               |
| env-436 | KGL_S1_ANT02_95m.c10052129  | + | 703    | 745    | RNA → RpsD (COG0522)rpsD (PRK05327) →                                                                                                                                                                                                                         |
| env-437 | P_2C_Liq_1_UnCty_1009183    | + | 649    | 691    | RNA → RpsD (COG0522)rpsD (PRK05327) →                                                                                                                                                                                                                         |
| env-438 | CESF01214207.1              | + | 538    | 580    | RNA → ←-hypo                                                                                                                                                                                                                                                  |
| env-439 | PML_READ_00354242           | + | 42     | 84     | RNA → rpsD (PRK05327)Ribosomal_S4 (pfam00163) →                                                                                                                                                                                                               |
| env-440 | KGL_S2_ANT04_2345m.c1245894 | - | 300    | 258    | RNA → rpsD (PRK05327)Ribosomal_S4 (pfam00163) →                                                                                                                                                                                                               |
| env-441 | KGL_S1_ANT02_95m.c10002151  | - | 4971   | 4929   | RNA → RpsD (COG0522)rpsD (PRK05327) →<br>RNAP_alpha_NTD (cd06928)PRK05182 (PRK05182)RNA_pol_A_CTD (pfam03118) →<br>RplQ (COG0203)rplQ (PRK05591) →                                                                                                            |
| env-442 | JGI24724J26744_10001772     | + | 14502  | 14544  | RNA → rpsD (PRK05327)Ribosomal_S4 (pfam00163) →                                                                                                                                                                                                               |
| env-443 | KGL_S1_ANT01_95m.c10016085  | - | 758    | 716    | RNA → RpsD (COG0522)rpsD (PRK05327) → hypo →                                                                                                                                                                                                                  |
| env-444 | KGL_S1_ANT03_95m.c1000649   | - | 2219   | 2177   | RNA → RpsD (COG0522)rpsD (PRK05327) →<br>RNAP_alpha_NTD (cd06928)PRK05182 (PRK05182)RNA_pol_A_CTD (pfam03118) →<br>RplQ (COG0203)rplQ (PRK05591) →                                                                                                            |
| env-445 | SI48aug10_10m.c1075429      | + | 155    | 197    | RNA →                                                                                                                                                                                                                                                         |
| env-446 | JGI20152J14361_10073408     | - | 103    | 61     | RNA → ←-hypo                                                                                                                                                                                                                                                  |
| env-447 | JGI24023J19991_10048106     | - | 1743   | 1701   | RNA → RpsD (COG0522)rpsD (PRK05327) →<br>RNAP_alpha_NTD (cd06928)PRK05182 (PRK05182)RNA_pol_A_CTD (pfam03118) →                                                                                                                                               |
| env-448 | SA_S1_NOR05_45m.c10501087   | + | 134    | 176    | RNA → rpsD (PRK05327)Ribosomal_S4 (pfam00163) →                                                                                                                                                                                                               |
| env-449 | KGL_S2_ANT05_2345m.c1026215 | - | 758    | 716    | RNA → RpsD (COG0522)rpsD (PRK05327) → hypo →                                                                                                                                                                                                                  |
| env-450 | JGI24025J20009_10005367     | - | 6255   | 6213   | RNA → RpsD (COG0522)rpsD (PRK05327) →<br>RNAP_alpha_NTD (cd06928)PRK05182 (PRK05182)RNA_pol_A_CTD (pfam03118) →<br>RplQ (COG0203)rplQ (PRK05591) → CarA (COG0505)PRK12564 (PRK12564) →                                                                        |
| Fba-3-1 | NC_014472.1                 | - | 807022 | 806980 | RNA → RpsD (COG0522)rpsD (PRK05327) →<br>RNAP_alpha_NTD (cd06928)PRK05182 (PRK05182)RNA_pol_A_CTD (pfam03118) →<br>RplQ (COG0203)rplQ (PRK05591) → CarA (COG0505)PRK12564 (PRK12564) →<br>eno (PRK00077)enolase (cd03313) → eno (PRK00077)enolase (cd03313) → |
| env-451 | SA_S1_NOR08_45m.c10423185   | + | 103    | 145    | RNA → rpsD (PRK05327)Ribosomal_S4 (pfam00163) →                                                                                                                                                                                                               |
| env-452 | SA_S1_NOR08_45m.c10214572   | + | 57     | 99     | RNA → RpsD (COG0522)rpsD (PRK05327) →                                                                                                                                                                                                                         |
| env-453 | JGI20156J14371_10031151     | + | 222    | 264    | RNA → RpsD (COG0522)rpsD (PRK05327) →                                                                                                                                                                                                                         |
| env-454 | NCBI_READ_1112777383475     | - | 732    | 690    | RNA → RpsD (COG0522)rpsD (PRK05327) →                                                                                                                                                                                                                         |
| env-455 | NCBI_READ_1112788432221     | - | 789    | 747    | RNA → RpsD (COG0522)rpsD (PRK05327) →                                                                                                                                                                                                                         |
| env-456 | NCBI_READ_1112494047845     | + | 599    | 641    | RNA → rpsD (PRK05327)Ribosomal_S4 (pfam00163) →                                                                                                                                                                                                               |
| env-457 | 2236876010_0236984          | - | 372    | 324    | RNA → RpsD (COG0522)rpsD (PRK05327) →                                                                                                                                                                                                                         |
| env-458 | JGI20160J14292_10208151     | + | 144    | 192    | RNA → RpsD (COG0522)rpsD (PRK05327) →                                                                                                                                                                                                                         |
| env-459 | JGI20155J14468_10404061     | - | 156    | 108    | RNA → rpsD (PRK05327)Ribosomal_S4 (pfam00163) →                                                                                                                                                                                                               |
| env-460 | SA_S1_NOR08_45m.c10274690   | + | 87     | 129    | RNA → RpsD (COG0522)rpsD (PRK05327) →                                                                                                                                                                                                                         |
| env-461 | 2236876010_0455091          | - | 371    | 329    | RNA → RpsD (COG0522)rpsD (PRK05327) →                                                                                                                                                                                                                         |
| env-462 | 2236876010_0562821          | - | 158    | 116    | RNA → rpsD (PRK05327)Ribosomal_S4 (pfam00163) →                                                                                                                                                                                                               |
| env-463 | DelMOWin2010_c10188673      | - | 373    | 331    | RNA → RpsD (COG0522)rpsD (PRK05327) →                                                                                                                                                                                                                         |
| env-464 | SA_S1_NOR02_45m.c1174201    | - | 144    | 102    | RNA → rpsD (PRK05327)Ribosomal_S4 (pfam00163) →                                                                                                                                                                                                               |
| env-465 | JCVL_SCAF_1096626910919     | - | 950    | 908    | RNA → RpsD (COG0522)rpsD (PRK05327) →                                                                                                                                                                                                                         |
| env-466 | DelMOSum2010_c10659421      | - | 71     | 29     | RNA →                                                                                                                                                                                                                                                         |
| env-467 | 2236876010_0311705          | + | 440    | 472    | RNA →                                                                                                                                                                                                                                                         |
| env-468 | 2236876010_0138022          | + | 324    | 366    | RNA →                                                                                                                                                                                                                                                         |
| env-469 | 2236876010_0157521          | + | 63     | 105    | RNA → rpsD (PRK05327)Ribosomal_S4 (pfam00163) →                                                                                                                                                                                                               |
| env-470 | SA_S1_NOR05_45m.c10203477   | + | 305    | 347    | RNA → ←-hypo                                                                                                                                                                                                                                                  |
| env-471 | JGI20157J14317_10005668     | - | 2515   | 2473   | RNA → RpsD (COG0522)rpsD (PRK05327) →                                                                                                                                                                                                                         |
| env-472 | CEWR01000864.1              | + | 572    | 614    | RNA → rpsD (PRK05327)Ribosomal_S4 (pfam00163) →                                                                                                                                                                                                               |
| env-473 | 2236876010_0363029          | + | 290    | 332    | RNA → rpsD (PRK05327)Ribosomal_S4 (pfam00163) →                                                                                                                                                                                                               |
| env-474 | 2236876010_0242303          | + | 265    | 307    | RNA →                                                                                                                                                                                                                                                         |

|         |                                 |   |         |         |                                                                                                                                                                                                                           |
|---------|---------------------------------|---|---------|---------|---------------------------------------------------------------------------------------------------------------------------------------------------------------------------------------------------------------------------|
| env-475 | 2236876010_0101955              | - | 172     | 130     | RNA → rpsD (PRK05327)Ribosomal_S4 (pfam00163) →                                                                                                                                                                           |
| env-476 | DelMOSum2011_c10001719          | - | 610     | 568     | RNA → RpsD (COG0522)rpsD (PRK05327) →                                                                                                                                                                                     |
| env-477 | SA_S1_NOR05_45m_c10530560       | - | 224     | 182     | RNA → rpsD (PRK05327)Ribosomal_S4 (pfam00163) →                                                                                                                                                                           |
| env-478 | DelMOSum2011_c10529643          | - | 209     | 167     | RNA → rpsD (PRK05327)Ribosomal_S4 (pfam00163) →                                                                                                                                                                           |
| env-479 | JGI20156J14371_10646125         | - | 87      | 45      | RNA →                                                                                                                                                                                                                     |
| Psp-1-1 | NZ_LJPSD01000002.1              | + | 1347599 | 1347641 | RNA → RpsD (COG0522)rpsD (PRK05327) →<br>RNAP_alpha_NTD (cd06928)PRK05182 (PRK05182)RNA_pol_A_CTD (pfam03118) →<br>RplQ (COG0203)rplQ (PRK05591) → hypo →                                                                 |
| env-480 | 2236876010_0517953              | - | 211     | 169     | RNA → hypo →                                                                                                                                                                                                              |
| env-481 | 2236876010_0238370              | - | 424     | 382     | RNA → rpsD (PRK05327)Ribosomal_S4 (pfam00163) → S4 (smart00363)RpsD (COG0522) →                                                                                                                                           |
| env-482 | 2236876010_0136465              | - | 50      | 18      | RNA → hypo →                                                                                                                                                                                                              |
| env-483 | SI60aug11_200m_c1106132         | - | 340     | 298     | RNA → rpsD (PRK05327)Ribosomal_S4 (pfam00163) →                                                                                                                                                                           |
| env-484 | CERM01023755.1                  | + | 1651    | 1693    | RNA → RpsD (COG0522)rpsD (PRK05327) → hypo →                                                                                                                                                                              |
| Tov-1-1 | NZ_AUMF01000009.1               | - | 79066   | 79024   | RNA → RpsD (COG0522)rpsD (PRK05327) → RpoA (COG0202)PRK05182 (PRK05182) →<br>RplQ (COG0203)rplQ (PRK05591) → CarA (COG0505)PRK12564 (PRK12564) →                                                                          |
| env-485 | 2236876010_0403020              | + | 10      | 52      | RNA → rpsD (PRK05327)Ribosomal_S4 (pfam00163) → hypo →                                                                                                                                                                    |
| env-486 | CEPZ01013735.1                  | - | 141998  | 141956  | RNA → RpsD (COG0522)rpsD (PRK05327) →<br>RNAP_alpha_NTD (cd06928)PRK05182 (PRK05182)RNA_pol_A_CTD (pfam03118) →<br>RplQ (COG0203)rplQ (PRK05591) → hypo → CarA (COG0505)PRK12564 (PRK12564) →                             |
| env-487 | KGI_S2_ANT04_2345m_c1133551     | - | 346     | 304     | RNA → rpsD (PRK05327)Ribosomal_S4 (pfam00163) →                                                                                                                                                                           |
| env-488 | SA_S1_NOR05_45m_c10020030       | + | 1304    | 1346    | RNA → RpsD (COG0522)rpsD (PRK05327) →                                                                                                                                                                                     |
| env-489 | JGI20152J14361_10000017         | + | 7046    | 7088    | RNA → RpsD (COG0522)rpsD (PRK05327) → RpoA (COG0202)PRK05182 (PRK05182) →<br>RplQ (COG0203)rplQ (PRK05591) → CarA (COG0505)PRK12564 (PRK12564) →                                                                          |
| env-490 | DelMOSum2011_c10004810          | - | 4239    | 4197    | RNA → RpsD (COG0522)rpsD (PRK05327) → RpoA (COG0202)PRK05182 (PRK05182) →<br>RplQ (COG0203)rplQ (PRK05591) → CarA (COG0505)PRK12564 (PRK12564) →                                                                          |
| env-491 | JGI20154J14316_10079454         | - | 235     | 193     | RNA → rpsD (PRK05327)Ribosomal_S4 (pfam00163) →                                                                                                                                                                           |
| Kje-1-1 | NZ_LBMG01000016.1               | - | 14572   | 14530   | RNA → RpsD (COG0522)rpsD (PRK05327) → RpoA (COG0202)PRK05182 (PRK05182) →<br>RplQ (COG0203)rplQ (PRK05591) →                                                                                                              |
| env-492 | KGI_S1_ANT01_95m_c10057790      | - | 1051    | 1009    | RNA → RpsD (COG0522)rpsD (PRK05327) → PRK05182 (PRK05182)RNA_pol_L (pfam01193) →                                                                                                                                          |
| env-493 | JGI20160J14292_10195876         | - | 317     | 275     | RNA → rpsD (PRK05327)Ribosomal_S4 (pfam00163) →                                                                                                                                                                           |
| Psp-2-1 | NZ_JHZZ01000001.1               | - | 237303  | 237261  | RNA → RpsD (COG0522)rpsD (PRK05327) →<br>RNAP_alpha_NTD (cd06928)PRK05182 (PRK05182)RNA_pol_A_CTD (pfam03118) →                                                                                                           |
| env-494 | JGI20154J14316_10123778         | + | 416     | 458     | RNA → rpsD (PRK05327)Ribosomal_S4 (pfam00163) →                                                                                                                                                                           |
| env-495 | JGI20157J14317_10556627         | + | 133     | 175     | RNA → rpsD (PRK05327)Ribosomal_S4 (pfam00163) →                                                                                                                                                                           |
| env-496 | 2236876010_0174516              | - | 142     | 100     | RNA →                                                                                                                                                                                                                     |
| env-497 | BS_KBA_SWE12_21m_c10001102      | + | 2457    | 2499    | RNA → RpsD (COG0522)rpsD (PRK05327) → RpoA (COG0202)PRK05182 (PRK05182) →<br>RplQ (COG0203)rplQ (PRK05591) → hypo → CarA (COG0505)PRK12564 (PRK12564) →                                                                   |
| env-498 | CESE01006475.1                  | - | 1107    | 1065    | RNA → RpsD (COG0522)rpsD (PRK05327) → RpoA (COG0202)PRK05182 (PRK05182) →                                                                                                                                                 |
| env-499 | wf3_Contig994                   | - | 742     | 700     | RNA → RpsD (COG0522)rpsD (PRK05327) →                                                                                                                                                                                     |
| env-500 | SA_S2_NOR13_50m_c1005577        | - | 652     | 610     | RNA → RpsD (COG0522)rpsD (PRK05327) →                                                                                                                                                                                     |
| env-501 | P_2C_Liq_1_UnCty_1273058        | - | 86      | 45      | RNA →                                                                                                                                                                                                                     |
| env-502 | P_2C_Liq_3_UnCty_100504         | + | 604     | 645     | RNA → RpsD (COG0522)rpsD (PRK05327) →<br>RNAP_alpha_NTD (cd06928)PRK05182 (PRK05182)RNA_pol_A_CTD (pfam03118) →<br>RplQ (COG0203)rplQ (PRK05591) → CarA (COG0505)PRK12564 (PRK12564) →                                    |
| env-503 | P_2C_Liq_3_UnCty_100665         | - | 8850    | 8809    | RNA → RpsD (COG0522)rpsD (PRK05327) →                                                                                                                                                                                     |
| env-504 | KGI_S1_ANT01_95m_c10123548      | + | 293     | 341     | RNA → RpsD (COG0522)rpsD (PRK05327) →                                                                                                                                                                                     |
| env-505 | JGI11876J14442_10581827         | + | 196     | 237     | RNA → rpsD (PRK05327)Ribosomal_S4 (pfam00163) →                                                                                                                                                                           |
| env-506 | JGI24023J19991_10009789         | - | 99      | 58      | RNA →                                                                                                                                                                                                                     |
| env-507 | JGI24023J19991_10077987         | + | 1088    | 1129    | RNA →                                                                                                                                                                                                                     |
| env-508 | JGI24023J19991_10260636         | - | 75      | 34      | RNA →                                                                                                                                                                                                                     |
| env-509 | JGI24723J26617_10023895         | - | 2577    | 2536    | RNA → RpsD (COG0522)rpsD (PRK05327) → RNAP_alpha_NTD (cd06928)PRK05182 (PRK05182) →<br>PRK05182 (PRK05182)RNA_pol_A_CTD (pfam03118) → RplQ (COG0203)rplQ (PRK05591) →<br>PRK12564 (PRK12564)CPSase_sm_chain (pfam00988) → |
| env-510 | JGI24723J26617_10679119         | - | 223     | 182     | RNA → rpsD (PRK05327)Ribosomal_S4 (pfam00163) →                                                                                                                                                                           |
| env-511 | SRS022602_Baylor_scaffold_12322 | + | 70      | 111     | RNA → RpsD (COG0522)rpsD (PRK05327) →                                                                                                                                                                                     |

|         |                               |   |         |         |                                                                                                                                                                                                                                                                                                                                                             |
|---------|-------------------------------|---|---------|---------|-------------------------------------------------------------------------------------------------------------------------------------------------------------------------------------------------------------------------------------------------------------------------------------------------------------------------------------------------------------|
| env-512 | ASA120_GJFD58A02GLQWA         | + | 249     | 290     | RNA → ←-hypo                                                                                                                                                                                                                                                                                                                                                |
| Mze-2-1 | NZ_AFOE01000041.1             | + | 7910    | 7951    | RNA → RpsD (COG0522)rpsD (PRK05327) → RpsD (COG0522)rpsD (PRK05327) → RNAP_alpha_NTD (cd06928)PRK05182 (PRK05182)RNA_pol_A_CTD (pfam03118) → RNAP_alpha_NTD (cd06928)PRK05182 (PRK05182)RNA_pol_A_CTD (pfam03118) → RplQ (COG0203)rplQ (PRK05591) → RplQ (COG0203)rplQ (PRK05591) → CarA (COG0505)PRK12564 (PRK12564) → CarA (COG0505)PRK12564 (PRK12564) → |
| Csp-2-1 | NZ_KE992086.1                 | + | 67634   | 67675   | RNA → RpsD (COG0522)rpsD (PRK05327) → RNAP_alpha_NTD (cd06928)PRK05182 (PRK05182)RNA_pol_A_CTD (pfam03118) → RplQ (COG0203)rplQ (PRK05591) →                                                                                                                                                                                                                |
| Man-1-1 | NZ_KK211214.1                 | + | 408244  | 408285  | RNA → RpsD (COG0522)rpsD (PRK05327) → RNAP_alpha_NTD (cd06928)PRK05182 (PRK05182)RNA_pol_A_CTD (pfam03118) → RplQ (COG0203)rplQ (PRK05591) → rplQ (PRK05591)Ribosomal_L17 (pfam01196) → CarA (COG0505)PRK12564 (PRK12564) →                                                                                                                                 |
| Msp-1-1 | NZ_JHZW01000002.1             | - | 322870  | 322829  | RNA → RpsD (COG0522)rpsD (PRK05327) → RNAP_alpha_NTD (cd06928)PRK05182 (PRK05182)RNA_pol_A_CTD (pfam03118) → RplQ (COG0203)rplQ (PRK05591) → CarA (COG0505)PRK12564 (PRK12564) →                                                                                                                                                                            |
| env-513 | CEVF01017747.1                | + | 20379   | 20420   | RNA → RpsD (COG0522)rpsD (PRK05327) → RNAP_alpha_NTD (cd06928)PRK05182 (PRK05182)RNA_pol_A_CTD (pfam03118) →                                                                                                                                                                                                                                                |
| env-514 | LAZR01000718.1                | + | 21183   | 21224   | RNA → RpsD (COG0522)rpsD (PRK05327) → RNAP_alpha_NTD (cd06928)PRK05182 (PRK05182)RNA_pol_A_CTD (pfam03118) → RplQ (COG0203)rplQ (PRK05591) →                                                                                                                                                                                                                |
| env-515 | JGI11876J14442_10577013       | - | 154     | 113     | RNA → rpsD (PRK05327)Ribosomal_S4 (pfam00163) →                                                                                                                                                                                                                                                                                                             |
| env-516 | JGI24023J19991_10007103       | - | 261     | 220     | RNA → rpsD (PRK05327)Ribosomal_S4 (pfam00163) →                                                                                                                                                                                                                                                                                                             |
| env-517 | JGI24023J19991_10074980       | - | 367     | 326     | RNA → RpsD (COG0522)rpsD (PRK05327) →                                                                                                                                                                                                                                                                                                                       |
| env-518 | JGI24023J19991_10226678       | - | 76      | 35      | RNA →                                                                                                                                                                                                                                                                                                                                                       |
| env-519 | JGI24723J26617_10030345       | + | 1847    | 1888    | RNA → RpsD (COG0522)rpsD (PRK05327) →                                                                                                                                                                                                                                                                                                                       |
| env-520 | JGI24723J26617_10764797       | + | 51      | 92      | RNA → rpsD (PRK05327)Ribosomal_S4 (pfam00163) →                                                                                                                                                                                                                                                                                                             |
| env-521 | SRS055378_LANL_scaffold_51092 | - | 215     | 174     | RNA → rpsD (PRK05327)Ribosomal_S4 (pfam00163) →                                                                                                                                                                                                                                                                                                             |
| Csp-3-1 | NZ_JUHB01000001.1             | - | 1541536 | 1541495 | RNA → RpsD (COG0522)rpsD (PRK05327) → RNAP_alpha_NTD (cd06928)PRK05182 (PRK05182)RNA_pol_A_CTD (pfam03118) → RplQ (COG0203)rplQ (PRK05591) → CarA (COG0505)PRK12564 (PRK12564) →                                                                                                                                                                            |
| Cba-1-1 | NZ_CP009887.1                 | - | 225786  | 225745  | RNA → RpsD (COG0522)rpsD (PRK05327) → RNAP_alpha_NTD (cd06928)PRK05182 (PRK05182)RNA_pol_A_CTD (pfam03118) → RplQ (COG0203)rplQ (PRK05591) → CarA (COG0505)PRK12564 (PRK12564) →                                                                                                                                                                            |
| Mlu-1-1 | NZ_CP011071.1                 | - | 769099  | 769058  | RNA → RpsD (COG0522)rpsD (PRK05327) → RNAP_alpha_NTD (cd06928)PRK05182 (PRK05182)RNA_pol_A_CTD (pfam03118) →                                                                                                                                                                                                                                                |
| Msp-2-1 | NZ_JQNJ01000001.1             | - | 660265  | 660224  | RNA → RpsD (COG0522)rpsD (PRK05327) → RNAP_alpha_NTD (cd06928)PRK05182 (PRK05182)RNA_pol_A_CTD (pfam03118) → RplQ (COG0203)rplQ (PRK05591) → CarA (COG0505)PRK12564 (PRK12564) →                                                                                                                                                                            |
| env-522 | KGL_S1_ANT01_95m_c10061602    | - | 1117    | 1069    | RNA → RpsD (COG0522)rpsD (PRK05327) → RpoA (COG0202)PRK05182 (PRK05182) →                                                                                                                                                                                                                                                                                   |
| env-523 | KGL_S1_ANT01_95m_c10514893    | + | 216     | 264     | RNA →                                                                                                                                                                                                                                                                                                                                                       |
| env-524 | SA_S2_NOR13_50m_c1195435      | + | 57      | 105     | RNA → rpsD (PRK05327)Ribosomal_S4 (pfam00163) →                                                                                                                                                                                                                                                                                                             |
| env-525 | SA_S1_NOR08_45m_c10507688     | + | 279     | 317     | RNA →                                                                                                                                                                                                                                                                                                                                                       |
| env-526 | SA_S1_NOR08_45m_c10126322     | + | 241     | 289     | RNA → RpsD (COG0522)rpsD (PRK05327) →                                                                                                                                                                                                                                                                                                                       |
| env-527 | KGL_S2_ANT04_2345m_c1034044   | + | 979     | 1027    | RNA → rpsD (PRK05327)Ribosomal_S4 (pfam00163) →                                                                                                                                                                                                                                                                                                             |
| env-528 | SA_S1_NOR02_45m_c1006351      | - | 213     | 165     | RNA → rpsD (PRK05327)Ribosomal_S4 (pfam00163) →                                                                                                                                                                                                                                                                                                             |
| env-529 | ElkS_mat_MD6A_1003011         | - | 1378    | 1330    | RNA → RpsD (COG0522)rpsD (PRK05327) → RNAP_alpha_NTD (cd06928)PRK05182 (PRK05182) →                                                                                                                                                                                                                                                                         |
| env-530 | CESG01186264.1                | + | 76      | 124     | RNA → RpsD (COG0522)rpsD (PRK05327) →                                                                                                                                                                                                                                                                                                                       |
| env-531 | JGI24023J19991_10302847       | + | 95      | 143     | RNA → rpsD (PRK05327)Ribosomal_S4 (pfam00163) →                                                                                                                                                                                                                                                                                                             |
| Ale-1-1 | NZ_BBNQ01000011.1             | - | 90098   | 90050   | RNA → RpsD (COG0522)rpsD (PRK05327) → RpoA (COG0202)PRK05182 (PRK05182) → RplQ (COG0203)rplQ (PRK05591) →                                                                                                                                                                                                                                                   |
| Fag-1-1 | NZ_HG315671.1                 | + | 689063  | 689111  | RNA → RpsD (COG0522)rpsD (PRK05327) → RpoA (COG0202)PRK05182 (PRK05182) → RplQ (COG0203)rplQ (PRK05591) →                                                                                                                                                                                                                                                   |
| Osp-1-1 | NZ_JADS01000010.1             | + | 109557  | 109605  | RNA → RpsD (COG0522)rpsD (PRK05327) → RpoA (COG0202)PRK05182 (PRK05182) → RplQ (COG0203)rplQ (PRK05591) → CarA (COG0505)PRK12564 (PRK12564) →                                                                                                                                                                                                               |
| env-532 | CENJ01244751.1                | - | 131     | 90      | RNA →                                                                                                                                                                                                                                                                                                                                                       |



|         |                                 |   |         |         |                                                                                                                                                                                               |
|---------|---------------------------------|---|---------|---------|-----------------------------------------------------------------------------------------------------------------------------------------------------------------------------------------------|
| env-533 | KGLS1_ANT01.95m_c10140035       | + | 608     | 646     | RNA→                                                                                                                                                                                          |
| env-534 | SA_S1_NOR08_45m_c10026887       | - | 62      | 24      | RNA→                                                                                                                                                                                          |
| env-535 | SA_S1_NOR08_45m_c10548832       | - | 224     | 176     | RNA→ rpsD (PRK05327)Ribosomal_S4 (pfam00163)→                                                                                                                                                 |
| env-536 | SA_S2_NOR15_50m_c10053365       | + | 1565    | 1613    | RNA→ ←-hypo                                                                                                                                                                                   |
| env-537 | JGI24024J18818_10001114         | + | 7715    | 7763    | RNA→ RpsD (COG0522)rpsD (PRK05327)→ RpoA (COG0202)PRK05182 (PRK05182)→<br>RplQ (COG0203)rplQ (PRK05591)→ PRK12564 (PRK12564)GATase (pfam00117)CPSase.sm_chain (pfam00988)→                    |
| env-538 | CEUD01129050.1                  | + | 159     | 207     | RNA→ rpsD (PRK05327)Ribosomal_S4 (pfam00163)→                                                                                                                                                 |
| env-539 | JGI24724J26744_10024136         | - | 2300    | 2252    | RNA→ RpsD (COG0522)rpsD (PRK05327)→ RpoA (COG0202)PRK05182 (PRK05182)→<br>RplQ (COG0203)rplQ (PRK05591)→                                                                                      |
| Fic-1-1 | NZ_KN525716.1                   | + | 2656682 | 2656730 | RNA→ RpsD (COG0522)rpsD (PRK05327)→<br>RNAP_alpha_NTD (cd06928)PRK05182 (PRK05182)RNA_polA_CTD (pfam03118)→<br>RplQ (COG0203)rplQ (PRK05591)→ CarA (COG0505)PRK12564 (PRK12564)→              |
| Mze-1-1 | NZ_AULQ01000008.1               | - | 44044   | 43996   | RNA→ RpsD (COG0522)rpsD (PRK05327)→<br>RNAP_alpha_NTD (cd06928)PRK05182 (PRK05182)RNA_polA_CTD (pfam03118)→<br>RplQ (COG0203)rplQ (PRK05591)→ CarA (COG0505)PRK12564 (PRK12564)→              |
| env-540 | KGLS1_ANT01.95m_c10270403       | + | 123     | 171     | RNA→ rpsD (PRK05327)Ribosomal_S4 (pfam00163)→                                                                                                                                                 |
| env-541 | DelMOSum2010_c10000497          | - | 33517   | 33469   | RNA→ RpsD (COG0522)rpsD (PRK05327)→<br>RNAP_alpha_NTD (cd06928)PRK05182 (PRK05182)RNA_polA_CTD (pfam03118)→<br>RplQ (COG0203)rplQ (PRK05591)→ CarA (COG0505)PRK12564 (PRK12564)→              |
| env-542 | KGLS1_ANT02.95m_c10388256       | - | 163     | 115     | RNA→ rpsD (PRK05327)Ribosomal_S4 (pfam00163)→                                                                                                                                                 |
| Oma-1-1 | NZ_JADR01000010.1               | + | 109053  | 109101  | RNA→ RpsD (COG0522)rpsD (PRK05327)→ RpoA (COG0202)PRK05182 (PRK05182)→<br>RplQ (COG0203)rplQ (PRK05591)→ hypo→ hypo→ CarA (COG0505)PRK12564 (PRK12564)→                                       |
| env-543 | wf3_Contig160                   | - | 193     | 152     | RNA→                                                                                                                                                                                          |
| env-544 | KGLS1_ANT01.95m_c10151354       | - | 449     | 408     | RNA→ RpsD (COG0522)rpsD (PRK05327)→                                                                                                                                                           |
| env-545 | SA_S1_NOR05_45m_c10248728       | - | 299     | 258     | RNA→ rpsD (PRK05327)Ribosomal_S4 (pfam00163)→                                                                                                                                                 |
| env-546 | SA_S1_NOR08_45m_c10038794       | + | 22      | 63      | RNA→ RpsD (COG0522)rpsD (PRK05327)→<br>RNAP_alpha_NTD (cd06928)PRK05182 (PRK05182)RNA_polA_CTD (pfam03118)→<br>RplQ (COG0203)rplQ (PRK05591)→                                                 |
| env-547 | SA_S1_NOR08_45m_c10391914       | + | 152     | 193     | RNA→ rpsD (PRK05327)Ribosomal_S4 (pfam00163)→                                                                                                                                                 |
| env-548 | JGI24724J26744_10233624         | - | 582     | 534     | RNA→ RpsD (COG0522)rpsD (PRK05327)→                                                                                                                                                           |
| env-549 | ElkS_mat_CD2A_1000229           | - | 2419    | 2378    | RNA→ RpsD (COG0522)rpsD (PRK05327)→<br>RNAP_alpha_NTD (cd06928)PRK05182 (PRK05182)RNA_polA_CTD (pfam03118)→<br>RplQ (COG0203)rplQ (PRK05591)→ PRK12564 (PRK12564)CPSase.sm_chain (pfam00988)→ |
| env-550 | KGLS1_ANT03.95m_c1144743        | - | 169     | 121     | RNA→ rpsD (PRK05327)Ribosomal_S4 (pfam00163)→                                                                                                                                                 |
| env-551 | CEOE01026498.1                  | + | 404     | 445     | RNA→ RpsD (COG0522)rpsD (PRK05327)→                                                                                                                                                           |
| env-552 | CEQG01271447.1                  | - | 1058    | 1017    | RNA→ RpsD (COG0522)rpsD (PRK05327)→ rpoA (CHL00013)PRK05182 (PRK05182)→                                                                                                                       |
| env-553 | CEVF01017472.1                  | - | 1828    | 1787    | RNA→ RpsD (COG0522)rpsD (PRK05327)→<br>RNAP_alpha_NTD (cd06928)PRK05182 (PRK05182)RNA_polA_CTD (pfam03118)→                                                                                   |
| env-554 | LAZR01000011.1                  | + | 276612  | 276653  | RNA→ RpsD (COG0522)rpsD (PRK05327)→<br>RNAP_alpha_NTD (cd06928)PRK05182 (PRK05182)RNA_polA_CTD (pfam03118)→<br>RplQ (COG0203)rplQ (PRK05591)→ CarA (COG0505)PRK12564 (PRK12564)→              |
| env-555 | ElkS_mat_CD6A_1038608           | + | 159     | 200     | RNA→ rpsD (PRK05327)Ribosomal_S4 (pfam00163)→                                                                                                                                                 |
| env-556 | JGI24023J19991_10001527         | + | 11806   | 11847   | RNA→ RpsD (COG0522)rpsD (PRK05327)→<br>RNAP_alpha_NTD (cd06928)PRK05182 (PRK05182)RNA_polA_CTD (pfam03118)→<br>RplQ (COG0203)rplQ (PRK05591)→                                                 |
| env-557 | JGI24023J19991_10073144         | - | 242     | 201     | RNA→ rpsD (PRK05327)Ribosomal_S4 (pfam00163)→                                                                                                                                                 |
| env-558 | JGI24023J19991_10182654         | - | 76      | 35      | RNA→                                                                                                                                                                                          |
| env-559 | JGI24723J26617_10000010         | - | 143173  | 143132  | RNA→ RpsD (COG0522)rpsD (PRK05327)→<br>RNAP_alpha_NTD (cd06928)PRK05182 (PRK05182)RNA_polA_CTD (pfam03118)→<br>RplQ (COG0203)rplQ (PRK05591)→                                                 |
| env-560 | JGI24723J26617_10310440         | + | 372     | 403     | RNA→                                                                                                                                                                                          |
| env-561 | SRS013705_Baylor_scaffold_46745 | - | 1715    | 1674    | RNA→ RpsD (COG0522)rpsD (PRK05327)→<br>RNAP_alpha_NTD (cd06928)PRK05182 (PRK05182)RNA_polA_CTD (pfam03118)→                                                                                   |
| env-562 | SRS014691_C2644950              | - | 228     | 187     | RNA→ rpsD (PRK05327)Ribosomal_S4 (pfam00163)→                                                                                                                                                 |

|         |                                        |   |         |         |                                                                                                                                                                                                                                                              |
|---------|----------------------------------------|---|---------|---------|--------------------------------------------------------------------------------------------------------------------------------------------------------------------------------------------------------------------------------------------------------------|
| Mth-1-1 | NZ_LDAS01000001.1                      | - | 2178073 | 2178032 | RNA → RpsD (COG0522)rpsD (PRK05327) → RNAP_alpha_NTD (cd06928)PRK05182 (PRK05182)RNA_polA_CTD (pfam03118) → RplQ (COG0203)rplQ (PRK05591) → CarA (COG0505)PRK12564 (PRK12564) →                                                                              |
| Ead-1-1 | NZ_KB907546.1                          | + | 154121  | 154162  | RNA → RpsD (COG0522)rpsD (PRK05327) → RNAP_alpha_NTD (cd06928)PRK05182 (PRK05182)RNA_polA_CTD (pfam03118) → RplQ (COG0203)rplQ (PRK05591) → rplQ (PRK05591)Ribosomal_L17 (pfam01196) → CarA (COG0505)PRK12564 (PRK12564) → eno (PRK00077)enolase (cd03313) → |
| Cal-1-1 | NC_014934.1                            | - | 701743  | 701702  | RNA → RpsD (COG0522)rpsD (PRK05327) → RNAP_alpha_NTD (cd06928)PRK05182 (PRK05182)RNA_polA_CTD (pfam03118) → RplQ (COG0203)rplQ (PRK05591) →                                                                                                                  |
| Zga-1-1 | NC_015844.1                            | + | 2988024 | 2988065 | RNA → RpsD (COG0522)rpsD (PRK05327) → RNAP_alpha_NTD (cd06928)PRK05182 (PRK05182)RNA_polA_CTD (pfam03118) → RplQ (COG0203)rplQ (PRK05591) → CarA (COG0505)PRK12564 (PRK12564) →                                                                              |
| Mfo-1-1 | NZ_JQLH01000001.1                      | + | 1025162 | 1025203 | RNA → RpsD (COG0522)rpsD (PRK05327) → RNAP_alpha_NTD (cd06928)PRK05182 (PRK05182)RNA_polA_CTD (pfam03118) → RplQ (COG0203)rplQ (PRK05591) → CarA (COG0505)PRK12564 (PRK12564) →                                                                              |
| env-563 | CEWJ01225499.1                         | - | 661     | 620     | RNA → RpsD (COG0522)rpsD (PRK05327) →                                                                                                                                                                                                                        |
| env-564 | JGI11876J14442.10085363                | - | 384     | 343     | RNA → RpsD (COG0522)rpsD (PRK05327) →                                                                                                                                                                                                                        |
| env-565 | JGI11876J14442.11014628                | - | 113     | 72      | RNA →                                                                                                                                                                                                                                                        |
| env-566 | JGI24023J19991.10047227                | - | 1363    | 1322    | RNA → RpsD (COG0522)rpsD (PRK05327) → RNAP_alpha_NTD (cd06928)PRK05182 (PRK05182) →                                                                                                                                                                          |
| env-567 | JGI24023J19991.10138758                | - | 690     | 649     | RNA → RpsD (COG0522)rpsD (PRK05327) →                                                                                                                                                                                                                        |
| env-568 | JGI24723J26617.10014588                | + | 1099    | 1140    | RNA → RpsD (COG0522)rpsD (PRK05327) → RpoA (COG0202)PRK05182 (PRK05182) → RplQ (COG0203)rplQ (PRK05591) →                                                                                                                                                    |
| env-569 | JGI24723J26617.10602636                | - | 242     | 201     | RNA → rpsD (PRK05327)Ribosomal_S4 (pfam00163) →                                                                                                                                                                                                              |
| env-570 | Subgingival_plaque.LANL_scaffold_16751 | - | 129     | 88      | RNA → rpsD (PRK05327)Ribosomal_S4 (pfam00163) →                                                                                                                                                                                                              |
| env-571 | ATED_F4WRAXD01DYY4F                    | + | 189     | 230     | RNA → rpsD (PRK05327)Ribosomal_S4 (pfam00163) →                                                                                                                                                                                                              |
| Mru-1-1 | NC_015945.1                            | - | 713998  | 713957  | RNA → RpsD (COG0522)rpsD (PRK05327) → RNAP_alpha_NTD (cd06928)PRK05182 (PRK05182)RNA_polA_CTD (pfam03118) → RplQ (COG0203)rplQ (PRK05591) → CarA (COG0505)PRK12564 (PRK12564) →                                                                              |
| Cly-1-1 | NC_015167.1                            | + | 2435971 | 2436012 | RNA → RpsD (COG0522)rpsD (PRK05327) → RNAP_alpha_NTD (cd06928)PRK05182 (PRK05182)RNA_polA_CTD (pfam03118) → RplQ (COG0203)rplQ (PRK05591) →                                                                                                                  |
| Zul-1-1 | NZ_JQMD01000002.1                      | + | 4824073 | 4824114 | RNA → RpsD (COG0522)rpsD (PRK05327) → RNAP_alpha_NTD (cd06928)PRK05182 (PRK05182)RNA_polA_CTD (pfam03118) → RplQ (COG0203)rplQ (PRK05591) → CarA (COG0505)PRK12564 (PRK12564) →                                                                              |
| env-572 | KGL_S1_ANT01.95m.c10057626             | - | 442     | 394     | RNA → RpsD (COG0522)rpsD (PRK05327) →                                                                                                                                                                                                                        |
| env-573 | KGL_S1_ANT01.95m.c10621365             | + | 226     | 264     | RNA →                                                                                                                                                                                                                                                        |
| env-574 | SA_S2_NOR13.50m.c1011088               | - | 1383    | 1335    | RNA → RpsD (COG0522)rpsD (PRK05327) → RNAP_alpha_NTD (cd06928)PRK05182 (PRK05182) →                                                                                                                                                                          |
| env-575 | SA_S1_NOR05.45m.c10208693              | + | 159     | 207     | RNA → rpsD (PRK05327)Ribosomal_S4 (pfam00163) →                                                                                                                                                                                                              |
| env-576 | SA_S1_NOR05.45m.c10289234              | + | 223     | 271     | RNA → rpsD (PRK05327)Ribosomal_S4 (pfam00163) →                                                                                                                                                                                                              |
| env-577 | KGL_S2_ANT04.2345m.c1009836            | + | 891     | 939     | RNA → RpsD (COG0522)rpsD (PRK05327) → RNAP_alpha_NTD (cd06928)PRK05182 (PRK05182)RNA_polA_CTD (pfam03118) → RplQ (COG0203)rplQ (PRK05591) →                                                                                                                  |
| env-578 | SA_S2_NOR15.50m.c10285015              | + | 159     | 207     | RNA → rpsD (PRK05327)Ribosomal_S4 (pfam00163) →                                                                                                                                                                                                              |
| env-579 | KGL_S1_ANT03.95m.c1055981              | - | 201     | 153     | RNA → rpsD (PRK05327)Ribosomal_S4 (pfam00163) →                                                                                                                                                                                                              |
| env-580 | JGI24024J18818.10780925                | + | 148     | 196     | RNA →                                                                                                                                                                                                                                                        |
| env-581 | CEUX01091020.1                         | + | 141     | 189     | RNA → RpsD (COG0522)rpsD (PRK05327) → RpoA (COG0202)PRK05182 (PRK05182) →                                                                                                                                                                                    |
| env-582 | KVRMV2.101047941                       | + | 60      | 108     | RNA → rpsD (PRK05327)Ribosomal_S4 (pfam00163) →                                                                                                                                                                                                              |
| Gsa-1-1 | NZ_KE384430.1                          | + | 1061256 | 1061304 | RNA → RpsD (COG0522)rpsD (PRK05327) → RpoA (COG0202)PRK05182 (PRK05182) → RplQ (COG0203)rplQ (PRK05591) → CarA (COG0505)PRK12564 (PRK12564) →                                                                                                                |
| Fba-4-1 | NZ_ALIH01000001.1                      | + | 391313  | 391361  | RNA → RpsD (COG0522)rpsD (PRK05327) → RpoA (COG0202)PRK05182 (PRK05182) → RplQ (COG0203)rplQ (PRK05591) → hypo → hypo → CarA (COG0505)PRK12564 (PRK12564) →                                                                                                  |
| Ssp-2-1 | NZ_JHZX01000001.1                      | - | 1257672 | 1257624 | RNA → RpsD (COG0522)rpsD (PRK05327) → RpoA (COG0202)PRK05182 (PRK05182) → RplQ (COG0203)rplQ (PRK05591) →                                                                                                                                                    |
| env-583 | KGL_S1_ANT01.95m.c10261611             | - | 344     | 296     | RNA → rpsD (PRK05327)Ribosomal_S4 (pfam00163) →                                                                                                                                                                                                              |

|         |                             |   |         |         |                                                                                                                                                                                              |
|---------|-----------------------------|---|---------|---------|----------------------------------------------------------------------------------------------------------------------------------------------------------------------------------------------|
| env-584 | SA_S1_NOR05_45m.c10000531   | + | 10203   | 10251   | RNA → ←-hypo                                                                                                                                                                                 |
| env-585 | SA_S1_NOR08_45m.c10128342   | - | 449     | 401     | RNA → RpsD (COG0522)rpsD (PRK05327) →                                                                                                                                                        |
| env-586 | KGI_S2_ANT04_2345m.c1022193 | + | 1360    | 1408    | RNA → rpsD (PRK05327)Ribosomal_S4 (pfam00163) →                                                                                                                                              |
| env-587 | KGI_S1_ANT02_95m.c10022183  | + | 483     | 531     | RNA → RpsD (COG0522)rpsD (PRK05327) → RpoA (COG0202)PRK05182 (PRK05182) →<br>RplQ (COG0203)rplQ (PRK05591) →                                                                                 |
| env-588 | CEQS01129325.1              | - | 418     | 370     | RNA → S4 (smart00363)RpsD (COG0522) →                                                                                                                                                        |
| env-589 | LGVF01581283.1              | - | 913     | 865     | RNA → RpsD (COG0522)rpsD (PRK05327) → PRK05182 (PRK05182)RNA_pol.L (pfam01193) →                                                                                                             |
| Lsp-1-1 | NZ_JYNQ01000001.1           | - | 1525387 | 1525339 | RNA → RpsD (COG0522)rpsD (PRK05327) → RpoA (COG0202)PRK05182 (PRK05182) →<br>RplQ (COG0203)rplQ (PRK05591) →                                                                                 |
| Sze-1-1 | NZ_CP007202.1               | - | 225594  | 225546  | RNA → RpsD (COG0522)rpsD (PRK05327) → RpoA (COG0202)PRK05182 (PRK05182) →<br>RplQ (COG0203)rplQ (PRK05591) → CarA (COG0505)PRK12564 (PRK12564) →                                             |
| Osp-2-1 | NZ_JADT01000008.1           | + | 109566  | 109614  | RNA → RpsD (COG0522)rpsD (PRK05327) → RpoA (COG0202)PRK05182 (PRK05182) →<br>RplQ (COG0203)rplQ (PRK05591) → CarA (COG0505)PRK12564 (PRK12564) →                                             |
| env-590 | SA_S1_NOR08_45m.c10544044   | + | 126     | 174     | RNA → rpsD (PRK05327)Ribosomal_S4 (pfam00163) →                                                                                                                                              |
| env-591 | KGI_S1_ANT02_95m.c10037840  | - | 206     | 165     | RNA → rpsD (PRK05327)Ribosomal_S4 (pfam00163) →                                                                                                                                              |
| env-592 | CESF01075296.1              | + | 14667   | 14715   | RNA → RpsD (COG0522)rpsD (PRK05327) → RpoA (COG0202)PRK05182 (PRK05182) →<br>RplQ (COG0203)rplQ (PRK05591) → hypo → hypo → CarA (COG0505)PRK12564 (PRK12564) →                               |
| env-593 | ACQI01007085.1              | - | 679     | 639     | RNA → RpsD (COG0522)rpsD (PRK05327) →                                                                                                                                                        |
| env-594 | TDF_OR_ARG05_123m.c1016145  | - | 527     | 486     | RNA → RpsD (COG0522)rpsD (PRK05327) →                                                                                                                                                        |
| env-595 | TDF_OR_ARG04_113m.c1149045  | - | 173     | 132     | RNA → rpsD (PRK05327)Ribosomal_S4 (pfam00163) →                                                                                                                                              |
| env-596 | SA_S1_NOR05_45m.c10029529   | + | 805     | 846     | RNA → RpsD (COG0522)rpsD (PRK05327) → hypo →                                                                                                                                                 |
| env-597 | SA_S1_NOR08_45m.c10216906   | - | 145     | 104     | RNA → rpsD (PRK05327)Ribosomal_S4 (pfam00163) →                                                                                                                                              |
| env-598 | KGI_S2_ANT04_2345m.c1307712 | - | 223     | 182     | RNA → rpsD (PRK05327)Ribosomal_S4 (pfam00163) →                                                                                                                                              |
| env-599 | KGI_S1_ANT02_95m.c10521979  | + | 127     | 168     | RNA → rpsD (PRK05327)Ribosomal_S4 (pfam00163) →                                                                                                                                              |
| env-600 | BS_KBA_SWE12_21m.c10766585  | - | 160     | 112     | RNA → rpsD (PRK05327)Ribosomal_S4 (pfam00163) →                                                                                                                                              |
| env-601 | CENV01048908.1              | + | 2405    | 2446    | RNA → RpsD (COG0522)rpsD (PRK05327) → PRK05182 (PRK05182)RNA_pol.L (pfam01193) →                                                                                                             |
| env-602 | CEOE01058112.1              | - | 502     | 461     | RNA → RpsD (COG0522)rpsD (PRK05327) →                                                                                                                                                        |
| env-603 | CERQ01210477.1              | - | 335     | 294     | RNA → rpsD (PRK05327)Ribosomal_S4 (pfam00163) →                                                                                                                                              |
| env-604 | JGI12210J13797_10891149     | + | 219     | 250     | RNA →                                                                                                                                                                                        |
| Psp-3-1 | NC_020830.1                 | + | 2776178 | 2776219 | RNA → RpsD (COG0522)rpsD (PRK05327) → RpoA (COG0202)PRK05182 (PRK05182) →<br>RplQ (COG0203)rplQ (PRK05591) →                                                                                 |
| env-605 | SA_S1_NOR05_45m.c10021376   | - | 1404    | 1356    | RNA → RpsD (COG0522)rpsD (PRK05327) → RNAP_alpha_NTD (cd06928)PRK05182 (PRK05182) →                                                                                                          |
| env-606 | JCVI_SCAF_1101668093316     | - | 1811    | 1770    | RNA → RpsD (COG0522)rpsD (PRK05327) → PRK05182 (PRK05182)RNA_pol.L (pfam01193) →<br>RpoA (COG0202)PRK05182 (PRK05182) →                                                                      |
| env-607 | JGI20152J14361_10000058     | + | 48115   | 48163   | RNA → RpsD (COG0522)rpsD (PRK05327) → RpoA (COG0202)PRK05182 (PRK05182) →<br>RplQ (COG0203)rplQ (PRK05591) →                                                                                 |
| env-608 | _GVICOHK01D9LRN             | + | 86      | 126     | RNA →                                                                                                                                                                                        |
| env-609 | LWAEaNiAF_GBUVFP102I049T    | - | 173     | 131     | RNA → rpsD (PRK05327)Ribosomal_S4 (pfam00163) →                                                                                                                                              |
| env-610 | JGI25909J50240_1174521      | + | 96      | 138     | RNA → rpsD (PRK05327)Ribosomal_S4 (pfam00163) →                                                                                                                                              |
| env-611 | M3P_c10616965               | + | 93      | 134     | RNA →                                                                                                                                                                                        |
| env-612 | 3300000052_007306           | + | 713     | 755     | RNA → RpsD (COG0522)rpsD (PRK05327) →<br>RNAP_alpha_NTD (cd06928)PRK05182 (PRK05182)RNA_pol.A_CTD (pfam03118) →<br>RplQ (COG0203)rplQ (PRK05591) →                                           |
| Fgi-1-1 | NZ_JNCP01000052.1           | + | 79268   | 79310   | RNA → RpsD (COG0522)rpsD (PRK05327) →<br>RNAP_alpha_NTD (cd06928)PRK05182 (PRK05182)RNA_pol.A_CTD (pfam03118) →<br>RplQ (COG0203)rplQ (PRK05591) →                                           |
| env-613 | JGI12272J11983_1656627      | - | 104     | 62      | RNA → ←-hypo                                                                                                                                                                                 |
| env-614 | KGI_S2_ANT04_2345m.c1000254 | - | 19083   | 19041   | RNA → RpsD (COG0522)rpsD (PRK05327) →<br>RNAP_alpha_NTD (cd06928)PRK05182 (PRK05182)RNA_pol.A_CTD (pfam03118) →<br>RplQ (COG0203)rplQ (PRK05591) →                                           |
| env-615 | JGI25908J49247_10003866     | + | 1771    | 1813    | RNA → rpsD (PRK05327)Ribosomal_S4 (pfam00163) → S4 (smart00363)RpsD (COG0522) →<br>RNAP_alpha_NTD (cd06928)PRK05182 (PRK05182)RNA_pol.A_CTD (pfam03118) →<br>RplQ (COG0203)rplQ (PRK05591) → |
| env-616 | JGI12421J11937_10089621     | - | 766     | 724     | RNA → RpsD (COG0522)rpsD (PRK05327) → hypo →                                                                                                                                                 |

|         |                            |   |        |        |                                                                                                                                                                                                                           |
|---------|----------------------------|---|--------|--------|---------------------------------------------------------------------------------------------------------------------------------------------------------------------------------------------------------------------------|
| env-617 | JGI25912J50252_10007817    | - | 2296   | 2254   | RNA → RpsD (COG0522)rpsD (PRK05327) →<br>RNAP_alpha_NTD (cd06928)PRK05182 (PRK05182)RNA_pol_A_CTD (pfam03118) →                                                                                                           |
| Fps-1-1 | NZ_JRWC01000005.1          | - | 680844 | 680802 | RNA → RpsD (COG0522)rpsD (PRK05327) → hypo → RplQ (COG0203)rplQ (PRK05591) →                                                                                                                                              |
| env-618 | ARMCC_Contig_363473        | + | 473    | 515    | RNA →                                                                                                                                                                                                                     |
| env-619 | JGI20153J14295_10238628    | + | 268    | 310    | RNA → ← hypo                                                                                                                                                                                                              |
| env-620 | JGI25907J50239_1282084     | + | 32     | 74     | RNA → rpsD (PRK05327)Ribosomal_S4 (pfam00163) →                                                                                                                                                                           |
| Ffr-1-1 | NZ_AUDO01000001.1          | - | 396813 | 396771 | RNA → RpsD (COG0522)rpsD (PRK05327) →<br>RNAP_alpha_NTD (cd06928)PRK05182 (PRK05182)RNA_pol_A_CTD (pfam03118) →<br>RplQ (COG0203)rplQ (PRK05591) →                                                                        |
| env-621 | KGLS1_ANT01_95m_c10061422  | + | 544    | 586    | RNA → RpsD (COG0522)rpsD (PRK05327) →                                                                                                                                                                                     |
| env-622 | JGI24770J26754_10196236    | + | 572    | 614    | RNA →                                                                                                                                                                                                                     |
| env-623 | JGI25909J50240_1035901     | - | 911    | 869    | RNA → rpsD (PRK05327)Ribosomal_S4 (pfam00163) → S4 (smart00363)RpsD (COG0522) →<br>PRK05182 (PRK05182)RNA_pol_L (pfam01193) →                                                                                             |
| env-624 | JGI25911J50253_10049044    | + | 118    | 160    | RNA → rpsD (PRK05327)Ribosomal_S4 (pfam00163) → RpsD (COG0522)rpsD (PRK05327) →<br>RNAP_alpha_NTD (cd06928)PRK05182 (PRK05182)RNA_pol_A_CTD (pfam03118) →                                                                 |
| env-625 | 3300000052_115516          | - | 282    | 240    | RNA → rpsD (PRK05327)Ribosomal_S4 (pfam00163) →                                                                                                                                                                           |
| Ffr-2-1 | NZ_AHKF01000008.1          | - | 69789  | 69747  | RNA → RpsD (COG0522)rpsD (PRK05327) → RpsD (COG0522)rpsD (PRK05327) →<br>RNAP_alpha_NTD (cd06928)PRK05182 (PRK05182)RNA_pol_A_CTD (pfam03118) →<br>RNAP_alpha_NTD (cd06928)PRK05182 (PRK05182)RNA_pol_A_CTD (pfam03118) → |
| env-626 | KGLS1_ANT01_95m_c10048862  | + | 770    | 812    | RNA → RpsD (COG0522)rpsD (PRK05327) →                                                                                                                                                                                     |
| env-627 | JGI24770J26754_10143512    | - | 394    | 352    | RNA → RpsD (COG0522)rpsD (PRK05327) →                                                                                                                                                                                     |
| env-628 | MRS1b_contig_1810326       | - | 411    | 369    | RNA → S4 (smart00363)RpsD (COG0522) →                                                                                                                                                                                     |
| Fsp-2-1 | NZ_AJXL01000028.1          | - | 8777   | 8735   | RNA → RpsD (COG0522)rpsD (PRK05327) →<br>RNAP_alpha_NTD (cd06928)PRK05182 (PRK05182)RNA_pol_A_CTD (pfam03118) →<br>RplQ (COG0203)rplQ (PRK05591) →                                                                        |
| env-629 | 3300001605_10110064        | + | 1045   | 1087   | RNA → RpsD (COG0522)rpsD (PRK05327) → PRK05182 (PRK05182)RNA_pol_L (pfam01193) →                                                                                                                                          |
| env-630 | JGI25910J50241_10439814    | - | 102    | 60     | RNA →                                                                                                                                                                                                                     |
| env-631 | MRS2a_Contig_10143         | + | 194    | 236    | RNA → RpsD (COG0522)rpsD (PRK05327) → rpoA (CHL00013)PRK05182 (PRK05182) →                                                                                                                                                |
| Fch-1-1 | NZ_JASY01000008.1          | - | 165622 | 165580 | RNA → RpsD (COG0522)rpsD (PRK05327) →<br>RNAP_alpha_NTD (cd06928)PRK05182 (PRK05182)RNA_pol_A_CTD (pfam03118) →<br>RplQ (COG0203)rplQ (PRK05591) →                                                                        |
| env-632 | M3P_c10026069              | + | 470    | 512    | RNA → RpsD (COG0522)rpsD (PRK05327) →                                                                                                                                                                                     |
| env-633 | Y607_1006252               | + | 157633 | 157675 | RNA → RpsD (COG0522)rpsD (PRK05327) →<br>RNAP_alpha_NTD (cd06928)PRK05182 (PRK05182)RNA_pol_A_CTD (pfam03118) →<br>rplQ (PRK05591)Ribosomal_L17 (pfam01196) →                                                             |
| env-634 | AglaG_GDN60OX02GVF13       | + | 112    | 154    | RNA → rpsD (PRK05327)Ribosomal_S4 (pfam00163) →                                                                                                                                                                           |
| Fsp-6-1 | NZ_JXQR01000040.1          | + | 224224 | 224266 | RNA → RpsD (COG0522)rpsD (PRK05327) →<br>RNAP_alpha_NTD (cd06928)PRK05182 (PRK05182)RNA_pol_A_CTD (pfam03118) →<br>RplQ (COG0203)rplQ (PRK05591) →                                                                        |
| env-635 | SA_S1_NOR08_45m_c10825333  | - | 194    | 152    | RNA → rpsD (PRK05327)Ribosomal_S4 (pfam00163) →                                                                                                                                                                           |
| env-636 | PBR_1001305                | - | 1487   | 1445   | RNA → RpsD (COG0522)rpsD (PRK05327) → RNAP_alpha_NTD (cd06928)PRK05182 (PRK05182) →                                                                                                                                       |
| env-637 | JGI25908J49247_10195454    | - | 436    | 394    | RNA → S4 (smart00363)RpsD (COG0522) →                                                                                                                                                                                     |
| env-638 | JGI25914J50564_10084240    | - | 445    | 403    | RNA → RpsD (COG0522)rpsD (PRK05327) →                                                                                                                                                                                     |
| Fte-1-1 | NZ_KE384384.1              | - | 340469 | 340427 | RNA → RpsD (COG0522)rpsD (PRK05327) →<br>RNAP_alpha_NTD (cd06928)PRK05182 (PRK05182)RNA_pol_A_CTD (pfam03118) →<br>RplQ (COG0203)rplQ (PRK05591) →                                                                        |
| env-639 | 3300000053_265566          | - | 115    | 73     | RNA →                                                                                                                                                                                                                     |
| env-640 | 3300000558_10106130        | + | 1517   | 1559   | RNA → rpsD (PRK05327)Ribosomal_S4 (pfam00163) →                                                                                                                                                                           |
| env-641 | JGI25912J50252_10474158    | + | 162    | 204    | RNA →                                                                                                                                                                                                                     |
| env-642 | LM15JUN2010E_c5792         | - | 283    | 241    | RNA → rpsD (PRK05327)Ribosomal_S4 (pfam00163) →                                                                                                                                                                           |
| env-643 | BS_KBA_SWE12_21m_c10390926 | - | 240    | 198    | RNA → rpsD (PRK05327)Ribosomal_S4 (pfam00163) →                                                                                                                                                                           |
| env-644 | KGLS1_ANT01_95m_c10748070  | - | 50     | 18     | RNA →                                                                                                                                                                                                                     |
| env-645 | BS_KBA_SWE21_205m_10011318 | + | 306    | 348    | RNA → RpsD (COG0522)rpsD (PRK05327) →<br>RNAP_alpha_NTD (cd06928)PRK05182 (PRK05182)RNA_pol_A_CTD (pfam03118) →<br>RplQ (COG0203)rplQ (PRK05591) →                                                                        |



|         |                            |   |         |         |                                                                                                                                                                                               |
|---------|----------------------------|---|---------|---------|-----------------------------------------------------------------------------------------------------------------------------------------------------------------------------------------------|
| env-646 | BS_KBA_SWE02.21m.10026740  | + | 218     | 260     | RNA → RpsD (COG0522)rpsD (PRK05327) →<br>RNAP_alpha_NTD (cd06928)PRK05182 (PRK05182)RNA_pol_A_CTD (pfam03118) →                                                                               |
| env-647 | BS_KBA_SWE12.21m.c10002755 | - | 5914    | 5872    | RNA → RpsD (COG0522)rpsD (PRK05327) →<br>RNAP_alpha_NTD (cd06928)PRK05182 (PRK05182)RNA_pol_A_CTD (pfam03118) →<br>RplQ (COG0203)rplQ (PRK05591) → hypo → CarA (COG0505)PRK12564 (PRK12564) → |
| env-648 | TB_FS06_10DRAFT_1022891    | - | 1909    | 1861    | RNA → RpsD (COG0522)rpsD (PRK05327) → RpoA (COG0202)PRK05182 (PRK05182) →<br>RplQ (COG0203)rplQ (PRK05591) →                                                                                  |
| env-649 | TB_FS08_3DRAFT_1007294     | + | 1041    | 1089    | RNA → RpsD (COG0522)rpsD (PRK05327) → RpoA (COG0202)PRK05182 (PRK05182) →<br>RplQ (COG0203)rplQ (PRK05591) →                                                                                  |
| env-650 | TB_FS06_10DRAFT_1003825    | - | 2918    | 2870    | RNA → RpsD (COG0522)rpsD (PRK05327) → RpoA (COG0202)PRK05182 (PRK05182) →<br>RplQ (COG0203)rplQ (PRK05591) →                                                                                  |
| env-651 | TB_PC08_3_1003356          | + | 8254    | 8302    | RNA → rpsD (PRK05327)Ribosomal_S4 (pfam00163) →                                                                                                                                               |
| env-652 | BS_KBA_SWE12.21m.c10074507 | - | 439     | 397     | RNA → RpsD (COG0522)rpsD (PRK05327) →                                                                                                                                                         |
| Fda-1-1 | NZ_AUDK01000020.1          | - | 17618   | 17576   | RNA → RpsD (COG0522)rpsD (PRK05327) →<br>RNAP_alpha_NTD (cd06928)PRK05182 (PRK05182)RNA_pol_A_CTD (pfam03118) →<br>RplQ (COG0203)rplQ (PRK05591) →                                            |
| env-653 | TB_FS08_3DRAFT_1037856     | - | 82      | 40      | RNA →                                                                                                                                                                                         |
| env-654 | JGI24770J26754_10248674    | - | 226     | 184     | RNA → rpsD (PRK05327)Ribosomal_S4 (pfam00163) →                                                                                                                                               |
| env-655 | JGI24770J26754_10101330    | - | 620     | 578     | RNA → RpsD (COG0522)rpsD (PRK05327) →                                                                                                                                                         |
| env-656 | JGI25908J49247_10434406    | - | 89      | 47      | RNA →                                                                                                                                                                                         |
| env-657 | M3P_c10614138              | + | 93      | 134     | RNA →                                                                                                                                                                                         |
| Fsp-1-1 | NZ_LEKS01000003.1          | - | 349739  | 349697  | RNA → RpsD (COG0522)rpsD (PRK05327) →<br>RNAP_alpha_NTD (cd06928)PRK05182 (PRK05182)RNA_pol_A_CTD (pfam03118) →<br>RplQ (COG0203)rplQ (PRK05591) →                                            |
| Fhy-1-1 | NZ_JPRM01000006.1          | - | 152624  | 152582  | RNA → RpsD (COG0522)rpsD (PRK05327) →<br>RNAP_alpha_NTD (cd06928)PRK05182 (PRK05182)RNA_pol_A_CTD (pfam03118) →<br>RplQ (COG0203)rplQ (PRK05591) →                                            |
| env-658 | TB_PC08_66_10110603        | + | 272     | 314     | RNA → RpsD (COG0522)rpsD (PRK05327) →                                                                                                                                                         |
| env-659 | TB_GS09_5_10159295         | + | 73      | 115     | RNA → RpsD (COG0522)rpsD (PRK05327) →                                                                                                                                                         |
| env-660 | PBR_1151212                | - | 8605    | 8563    | RNA → RpsD (COG0522)rpsD (PRK05327) →<br>RNAP_alpha_NTD (cd06928)PRK05182 (PRK05182)RNA_pol_A_CTD (pfam03118) →<br>rplQ (PRK05591)Ribosomal_L17 (pfam01196) →                                 |
| Fsu-1-1 | NZ_JATV01000008.1          | + | 149522  | 149564  | RNA → RpsD (COG0522)rpsD (PRK05327) →<br>RNAP_alpha_NTD (cd06928)PRK05182 (PRK05182)RNA_pol_A_CTD (pfam03118) →<br>RplQ (COG0203)rplQ (PRK05591) →                                            |
| Fre-1-1 | NZ_JPRL01000001.1          | - | 1417992 | 1417950 | RNA → RpsD (COG0522)rpsD (PRK05327) →<br>RNAP_alpha_NTD (cd06928)PRK05182 (PRK05182)RNA_pol_A_CTD (pfam03118) →<br>RplQ (COG0203)rplQ (PRK05591) →                                            |
| env-661 | TB_FS08_3DRAFT_1132580     | - | 307     | 265     | RNA → rpsD (PRK05327)Ribosomal_S4 (pfam00163) →                                                                                                                                               |
| env-662 | JGI24770J26754_10259849    | + | 431     | 473     | RNA → rpsD (PRK05327)Ribosomal_S4 (pfam00163) →                                                                                                                                               |
| env-663 | JGI24770J26754_10222341    | - | 478     | 436     | RNA → RpsD (COG0522)rpsD (PRK05327) →                                                                                                                                                         |
| Fsp-4-1 | NZ_JSJO01000007.1          | - | 99004   | 98962   | RNA → RpsD (COG0522)rpsD (PRK05327) →<br>RNAP_alpha_NTD (cd06928)PRK05182 (PRK05182)RNA_pol_A_CTD (pfam03118) →<br>RplQ (COG0203)rplQ (PRK05591) →                                            |
| env-664 | LM20APR2010E.c11148        | + | 62      | 104     | RNA → RpsD (COG0522)rpsD (PRK05327) →                                                                                                                                                         |
| Fsp-5-1 | NZ_JARP01000003.1          | + | 95196   | 95238   | RNA → RpsD (COG0522)rpsD (PRK05327) →<br>RNAP_alpha_NTD (cd06928)PRK05182 (PRK05182)RNA_pol_A_CTD (pfam03118) →<br>RplQ (COG0203)rplQ (PRK05591) →                                            |
| Fsp-3-1 | NZ_JQJY01000005.1          | - | 476639  | 476597  | RNA → RpsD (COG0522)rpsD (PRK05327) →<br>RNAP_alpha_NTD (cd06928)PRK05182 (PRK05182)RNA_pol_A_CTD (pfam03118) →<br>RplQ (COG0203)rplQ (PRK05591) →                                            |
| env-665 | TB_PC08_66_10000572        | + | 14643   | 14685   | RNA → RpsD (COG0522)rpsD (PRK05327) →<br>RNAP_alpha_NTD (cd06928)PRK05182 (PRK05182)RNA_pol_A_CTD (pfam03118) →<br>RplQ (COG0203)rplQ (PRK05591) → hypo → CarA (COG0505)PRK12564 (PRK12564) → |

|         |                                 |   |        |        |                                                                                                                                                                                                                       |
|---------|---------------------------------|---|--------|--------|-----------------------------------------------------------------------------------------------------------------------------------------------------------------------------------------------------------------------|
| env-666 | JGI12421J11937_10000073         | + | 8864   | 8906   | RNA → RpsD (COG0522)rpsD (PRK05327) →<br>RNAP_alpha_NTD (cd06928)PRK05182 (PRK05182)RNA_pol_A_CTD (pfam03118) →<br>RplQ (COG0203)rplQ (PRK05591) →                                                                    |
| env-667 | TB_GS09_5_10001765              | + | 16237  | 16284  | RNA → RpsD (COG0522)rpsD (PRK05327) → RpoA (COG0202)PRK05182 (PRK05182) →<br>RplQ (COG0203)rplQ (PRK05591) →                                                                                                          |
| env-668 | 2236876009_117224               | - | 159    | 111    | RNA → rpsD (PRK05327)Ribosomal_S4 (pfam00163) →                                                                                                                                                                       |
| env-669 | JGI20151J14362_10046846         | - | 1758   | 1710   | RNA → RpsD (COG0522)rpsD (PRK05327) → RpoA (COG0202)PRK05182 (PRK05182) →                                                                                                                                             |
| env-670 | JGI20160J14292_10098055         | - | 386    | 338    | RNA → RpsD (COG0522)rpsD (PRK05327) →                                                                                                                                                                                 |
| env-671 | KGL_S1_ANT01_95m.c10216591      | + | 168    | 209    | RNA → rpsD (PRK05327)Ribosomal_S4 (pfam00163) →                                                                                                                                                                       |
| Acc-1-1 | NZ_AUCB01000005.1               | - | 135671 | 135630 | RNA → RpsD (COG0522)rpsD (PRK05327) →<br>RNAP_alpha_NTD (cd06928)PRK05182 (PRK05182)RNA_pol_A_CTD (pfam03118) →<br>RplQ (COG0203)rplQ (PRK05591) →                                                                    |
| env-672 | CENR01072972.1                  | + | 678    | 719    | RNA → RpsD (COG0522)rpsD (PRK05327) →<br>RNAP_alpha_NTD (cd06928)PRK05182 (PRK05182)RNA_pol_A_CTD (pfam03118) →<br>RplQ (COG0203)rplQ (PRK05591) → PRK12564 (PRK12564)GATase (pfam00117)CPSase.sm.chain (pfam00988) → |
| Ala-1-1 | NZ_AUKX01000021.1               | + | 84226  | 84267  | RNA → RpsD (COG0522)rpsD (PRK05327) →<br>RNAP_alpha_NTD (cd06928)PRK05182 (PRK05182)RNA_pol_A_CTD (pfam03118) →<br>RplQ (COG0203)rplQ (PRK05591) →                                                                    |
| env-673 | JGI24025J20009_10444090         | + | 195    | 232    | RNA →                                                                                                                                                                                                                 |
| env-674 | JGI24724J26744_10000005         | + | 153007 | 153048 | RNA → RpsD (COG0522)rpsD (PRK05327) →<br>RNAP_alpha_NTD (cd06928)PRK05182 (PRK05182)RNA_pol_A_CTD (pfam03118) →<br>RplQ (COG0203)rplQ (PRK05591) → CarA (COG0505)PRK12564 (PRK12564) →                                |
| env-675 | NCBI_READ_1112308291129         | + | 600    | 641    | RNA →                                                                                                                                                                                                                 |
| env-676 | SA_S1_NOR05_45m.c10047360       | - | 956    | 915    | RNA → RpsD (COG0522)rpsD (PRK05327) → PRK05182 (PRK05182)RNA_pol_L (pfam01193) →                                                                                                                                      |
| env-677 | SRS011255_Baylor_scaffold_31377 | - | 4549   | 4508   | RNA → RpsD (COG0522)rpsD (PRK05327) →<br>RNAP_alpha_NTD (cd06928)PRK05182 (PRK05182)RNA_pol_A_CTD (pfam03118) →<br>rplQ (PRK05591)Ribosomal_L17 (pfam01196) →                                                         |
| env-678 | SRS014578_C2475820              | + | 446    | 487    | RNA →                                                                                                                                                                                                                 |
| env-679 | SRS023841_Baylor_scaffold_6234  | - | 80     | 39     | RNA →                                                                                                                                                                                                                 |
| env-680 | SRS011126_Baylor_scaffold_35350 | + | 407    | 448    | RNA →                                                                                                                                                                                                                 |
| env-681 | SRS023841_Baylor_scaffold_1278  | + | 2872   | 2913   | RNA → RpsD (COG0522)rpsD (PRK05327) →<br>RNAP_alpha_NTD (cd06928)PRK05182 (PRK05182)RNA_pol_A_CTD (pfam03118) →                                                                                                       |
| env-682 | KGI_S2_ANT04_2345m.c1182776     | + | 183    | 224    | RNA → rpsD (PRK05327)Ribosomal_S4 (pfam00163) →                                                                                                                                                                       |
| env-683 | SRS015064_WUGC_scaffold_6319    | - | 214    | 173    | RNA → rpsD (PRK05327)Ribosomal_S4 (pfam00163) →                                                                                                                                                                       |
| env-684 | SRS015899_WUGC_scaffold_15247   | + | 600    | 641    | RNA → rpsD (PRK05327)Ribosomal_S4 (pfam00163) →                                                                                                                                                                       |
| env-685 | SRS043755_WUGC_scaffold_16606   | - | 81     | 40     | RNA →                                                                                                                                                                                                                 |
| env-686 | SRS053917_LANL_scaffold_21451   | - | 613    | 572    | RNA → RpsD (COG0522)rpsD (PRK05327) →                                                                                                                                                                                 |
| env-687 | NCBI_READ_1112493645660         | - | 765    | 724    | RNA → RpsD (COG0522)rpsD (PRK05327) →                                                                                                                                                                                 |
| env-688 | JGI11881J13070_1024505          | - | 310    | 258    | RNA → rpsD (PRK05327)Ribosomal_S4 (pfam00163) →                                                                                                                                                                       |
| env-689 | NCBI_READ_1112493894880         | - | 314    | 273    | RNA → rpsD (PRK05327)Ribosomal_S4 (pfam00163) →                                                                                                                                                                       |
| env-690 | 2236876002_134331               | + | 288    | 329    | RNA →                                                                                                                                                                                                                 |
| env-691 | KGL_S1_ANT01_95m.c10003318      | + | 5674   | 5715   | RNA → RpsD (COG0522)rpsD (PRK05327) →<br>RNAP_alpha_NTD (cd06928)PRK05182 (PRK05182)RNA_pol_A_CTD (pfam03118) →<br>RplQ (COG0203)rplQ (PRK05591) →                                                                    |
| env-692 | TDF_OR_ARG04_113m.c1009262      | + | 1093   | 1134   | RNA → rpsD (PRK05327)Ribosomal_S4 (pfam00163) →                                                                                                                                                                       |
| env-693 | BS_KBA_SWE12_21m.c10441963      | - | 48     | 17     | RNA →                                                                                                                                                                                                                 |
| env-694 | SA_S1_NOR05_45m.c10029776       | + | 910    | 951    | RNA → RpsD (COG0522)rpsD (PRK05327) →                                                                                                                                                                                 |
| env-695 | SI60aug11_100m.c1001696         | + | 199    | 240    | RNA → RpsD (COG0522)rpsD (PRK05327) →<br>RNAP_alpha_NTD (cd06928)PRK05182 (PRK05182)RNA_pol_A_CTD (pfam03118) →<br>RplQ (COG0203)rplQ (PRK05591) →                                                                    |
| env-696 | BS_KBA_SWE02_21m.10007670       | - | 3008   | 2967   | RNA → RpsD (COG0522)rpsD (PRK05327) →<br>RNAP_alpha_NTD (cd06928)PRK05182 (PRK05182)RNA_pol_A_CTD (pfam03118) →<br>RplQ (COG0203)rplQ (PRK05591) →                                                                    |
| env-697 | CESL01223066.1                  | - | 581    | 540    | RNA → RpsD (COG0522)rpsD (PRK05327) →                                                                                                                                                                                 |

|         |                               |   |         |         |                                                                                                                                                                                                                                                                                                                                                                                                             |
|---------|-------------------------------|---|---------|---------|-------------------------------------------------------------------------------------------------------------------------------------------------------------------------------------------------------------------------------------------------------------------------------------------------------------------------------------------------------------------------------------------------------------|
| env-698 | TFO_HY__Contig_1415           | + | 14727   | 14768   | RNA → RpsD (COG0522)rpsD (PRK05327) →<br>RNAP_alpha_NTD (cd06928)PRK05182 (PRK05182)RNA_pol_A_CTD (pfam03118) →<br>RplQ (COG0203)rplQ (PRK05591) →                                                                                                                                                                                                                                                          |
| env-699 | 3300001605_10731583           | + | 414     | 455     | RNA →                                                                                                                                                                                                                                                                                                                                                                                                       |
| env-700 | KVWG.1.1.1_newblercontig19647 | + | 110     | 151     | RNA → rpsD (PRK05327)Ribosomal_S4 (pfam00163) →                                                                                                                                                                                                                                                                                                                                                             |
| env-701 | JCVL_SCAF_1101668559196       | - | 977     | 935     | RNA → RpsD (COG0522)rpsD (PRK05327) → PRK05182 (PRK05182)RNA_pol_L (pfam01193) →                                                                                                                                                                                                                                                                                                                            |
| env-702 | NCBI_READ_1112494091561       | + | 60      | 101     | RNA → RpsD (COG0522)rpsD (PRK05327) →                                                                                                                                                                                                                                                                                                                                                                       |
| env-703 | NCBI_READ_1112532275014       | - | 690     | 649     | RNA → RpsD (COG0522)rpsD (PRK05327) →                                                                                                                                                                                                                                                                                                                                                                       |
| env-704 | NCBI_READ_1112777438177       | - | 394     | 353     | RNA → RpsD (COG0522)rpsD (PRK05327) →                                                                                                                                                                                                                                                                                                                                                                       |
| env-705 | DelMOSum2011_c10076159        | + | 881     | 922     | RNA → rpsD (PRK05327)Ribosomal_S4 (pfam00163) →                                                                                                                                                                                                                                                                                                                                                             |
| env-706 | TDF_OR_ARG04_113m.c1015903    | - | 887     | 846     | RNA → RpsD (COG0522)rpsD (PRK05327) → PRK05182 (PRK05182)RNA_pol_L (pfam01193) →                                                                                                                                                                                                                                                                                                                            |
| env-707 | BS_KBA_SWE12_21m.c10362886    | + | 6       | 47      | RNA → rpsD (PRK05327)Ribosomal_S4 (pfam00163) →                                                                                                                                                                                                                                                                                                                                                             |
| env-708 | SA_S1_NOR05_45m.c10001294     | - | 776     | 735     | RNA → RpsD (COG0522)rpsD (PRK05327) → PRK05182 (PRK05182) →                                                                                                                                                                                                                                                                                                                                                 |
| env-709 | KGI_S1_ANT03_95m.c1044459     | - | 439     | 398     | RNA → RpsD (COG0522)rpsD (PRK05327) →                                                                                                                                                                                                                                                                                                                                                                       |
| env-710 | JGI20154J14316_10006580       | + | 6557    | 6598    | RNA → RpsD (COG0522)rpsD (PRK05327) →<br>RNAP_alpha_NTD (cd06928)PRK05182 (PRK05182)RNA_pol_A_CTD (pfam03118) →                                                                                                                                                                                                                                                                                             |
| env-711 | CESI01170757.1                | + | 255     | 296     | RNA → rpsD (PRK05327)Ribosomal_S4 (pfam00163) →                                                                                                                                                                                                                                                                                                                                                             |
| env-712 | 3300001592_11040489           | + | 52      | 93      | RNA → rpsD (PRK05327)Ribosomal_S4 (pfam00163) →                                                                                                                                                                                                                                                                                                                                                             |
| env-713 | JGI25321J39296_1043397        | + | 52      | 93      | RNA → RpsD (COG0522)rpsD (PRK05327) → PRK05182 (PRK05182)RNA_pol_L (pfam01193) →                                                                                                                                                                                                                                                                                                                            |
| Pir-1-1 | NZ_CH724148.1                 | - | 107482  | 107441  | RNA → RpsD (COG0522)rpsD (PRK05327) → RpoA (COG0202)PRK05182 (PRK05182) →<br>RplQ (COG0203)rplQ (PRK05591) →                                                                                                                                                                                                                                                                                                |
| env-714 | NCBI_READ_1112494062227       | - | 199     | 158     | RNA →                                                                                                                                                                                                                                                                                                                                                                                                       |
| env-715 | NCBI_READ_1112493702487       | - | 839     | 798     | RNA → RpsD (COG0522)rpsD (PRK05327) →                                                                                                                                                                                                                                                                                                                                                                       |
| env-716 | NCBI_READ_1112290461315       | + | 55      | 96      | RNA → RpsD (COG0522)rpsD (PRK05327) →                                                                                                                                                                                                                                                                                                                                                                       |
| env-717 | DelMOSum2010_c10003497        | + | 7046    | 7087    | RNA → RpsD (COG0522)rpsD (PRK05327) →                                                                                                                                                                                                                                                                                                                                                                       |
| env-718 | SA_S2_NOR13_50m.c1014240      | - | 48      | 17      | RNA →                                                                                                                                                                                                                                                                                                                                                                                                       |
| env-719 | BS_KBA_SWE12_21m.c10004498    | - | 3174    | 3133    | RNA → RpsD (COG0522)rpsD (PRK05327) →<br>RNAP_alpha_NTD (cd06928)PRK05182 (PRK05182)RNA_pol_A_CTD (pfam03118) →<br>RplQ (COG0203)rplQ (PRK05591) →                                                                                                                                                                                                                                                          |
| env-720 | BS_KBA_SWE12_21m.c10128822    | - | 291     | 250     | RNA → rpsD (PRK05327)Ribosomal_S4 (pfam00163) →                                                                                                                                                                                                                                                                                                                                                             |
| env-721 | SA_S1_NOR08_45m.c10718266     | + | 33      | 74      | RNA → rpsD (PRK05327)Ribosomal_S4 (pfam00163) →                                                                                                                                                                                                                                                                                                                                                             |
| env-722 | JGI20154J14316_10014338       | - | 4356    | 4315    | RNA → RpsD (COG0522)rpsD (PRK05327) →                                                                                                                                                                                                                                                                                                                                                                       |
| env-723 | BS_KBA_SWE02_21m_10461828     | + | 81      | 122     | RNA → rpsD (PRK05327)Ribosomal_S4 (pfam00163) →                                                                                                                                                                                                                                                                                                                                                             |
| env-724 | CESU01046469.1                | + | 91      | 132     | RNA → RpsD (COG0522)rpsD (PRK05327) → PRK05182 (PRK05182)RNA_pol_L (pfam01193) →                                                                                                                                                                                                                                                                                                                            |
| env-725 | 3300001580_10549671           | + | 137     | 178     | RNA → rpsD (PRK05327)Ribosomal_S4 (pfam00163) →                                                                                                                                                                                                                                                                                                                                                             |
| env-726 | JGI24724J26744_10022788       | - | 166     | 125     | RNA → rpsD (PRK05327)Ribosomal_S4 (pfam00163) →                                                                                                                                                                                                                                                                                                                                                             |
| Jma-1-1 | NZ_JH651379.1                 | - | 2626446 | 2626405 | RNA → RpsD (COG0522)rpsD (PRK05327) → RpsD (COG0522)rpsD (PRK05327) →<br>RNAP_alpha_NTD (cd06928)PRK05182 (PRK05182)RNA_pol_A_CTD (pfam03118) →<br>RpoA (COG0202)PRK05182 (PRK05182) → RplQ (COG0203)rplQ (PRK05591) →<br>RplQ (COG0203)rplQ (PRK05591) → CarA (COG0505)PRK12564 (PRK12564) →<br>CarA (COG0505)PRK12564 (PRK12564) → eno (PRK00077)enolase (cd03313) →<br>eno (PRK00077)enolase (cd03313) → |
| env-727 | NCBI_READ_1112493915188       | - | 912     | 874     | RNA → hypo →                                                                                                                                                                                                                                                                                                                                                                                                |
| env-728 | NCBI_READ_1112290401224       | + | 25      | 66      | RNA → RpsD (COG0522)rpsD (PRK05327) →                                                                                                                                                                                                                                                                                                                                                                       |
| env-729 | NCBI_READ_1112493792322       | + | 649     | 690     | RNA →                                                                                                                                                                                                                                                                                                                                                                                                       |
| env-730 | AMQJ01014928.1                | + | 561     | 602     | RNA → rpsD (PRK05327)Ribosomal_S4 (pfam00163) →                                                                                                                                                                                                                                                                                                                                                             |
| env-731 | SA_S2_NOR13_50m.c1000098      | + | 13594   | 13635   | RNA → RpsD (COG0522)rpsD (PRK05327) →                                                                                                                                                                                                                                                                                                                                                                       |
| env-732 | BS_KBA_SWE12_21m.c10395815    | - | 39      | 8       | RNA →                                                                                                                                                                                                                                                                                                                                                                                                       |
| env-733 | BS_KBA_SWE12_21m.c10510804    | + | 111     | 152     | RNA → rpsD (PRK05327)Ribosomal_S4 (pfam00163) →                                                                                                                                                                                                                                                                                                                                                             |
| env-734 | SA_S2_NOR15_50m.c10003768     | - | 582     | 541     | RNA → RpsD (COG0522)rpsD (PRK05327) →                                                                                                                                                                                                                                                                                                                                                                       |
| env-735 | SI34jun09_10m_1017310         | + | 995     | 1036    | RNA → rpsD (PRK05327)Ribosomal_S4 (pfam00163) →                                                                                                                                                                                                                                                                                                                                                             |
| env-736 | CEQS01147054.1                | - | 337     | 296     | RNA → rpsD (PRK05327)Ribosomal_S4 (pfam00163) →                                                                                                                                                                                                                                                                                                                                                             |

|         |                            |   |       |       |                                                                                                                                                                                                                                            |
|---------|----------------------------|---|-------|-------|--------------------------------------------------------------------------------------------------------------------------------------------------------------------------------------------------------------------------------------------|
| env-737 | 3300000558_10037104        | - | 1932  | 1891  | RNA → RpsD (COG0522)rpsD (PRK05327) → RNAP_alpha_NTD (cd06928)PRK05182 (PRK05182)RNA_pol_A_CTD (pfam03118) → rplQ (PRK05591)Ribosomal_L17 (pfam01196) →                                                                                    |
| env-738 | JGI24025J20009_10008494    | + | 2996  | 3037  | RNA → RpsD (COG0522)rpsD (PRK05327) → RNAP_alpha_NTD (cd06928)PRK05182 (PRK05182)RNA_pol_A_CTD (pfam03118) → RpoA (COG0202)PRK05182 (PRK05182) → RplQ (COG0203)rplQ (PRK05591) → CPSase_sm_chain (smart01097)CPSase_sm_chain (pfam00988) → |
| env-739 | JGI25321J50212_10028228    | + | 778   | 819   | RNA → RpsD (COG0522)rpsD (PRK05327) → RNAP_alpha_NTD (cd06928)PRK05182 (PRK05182) →                                                                                                                                                        |
| env-740 | NCBI_READ_1112493671175    | - | 717   | 758   | RNA →                                                                                                                                                                                                                                      |
| env-741 | NCBI_READ_1112493447629    | - | 601   | 560   | RNA → RpsD (COG0522)rpsD (PRK05327) →                                                                                                                                                                                                      |
| env-742 | SA_S1_NOR08_45m_c10473502  | + | 160   | 200   | RNA → rpsD (PRK05327)Ribosomal_S4 (pfam00163) →                                                                                                                                                                                            |
| env-743 | SA_S2_NOR15_50m_c10652927  | - | 82    | 42    | RNA →                                                                                                                                                                                                                                      |
| env-744 | SA_S1_NOR05_45m_c10011813  | + | 2157  | 2197  | RNA → RpsD (COG0522)rpsD (PRK05327) →                                                                                                                                                                                                      |
| env-745 | TB_PC08_66_10003287        | - | 3261  | 3221  | RNA → RpsD (COG0522)rpsD (PRK05327) → RNAP_alpha_NTD (cd06928)PRK05182 (PRK05182)RNA_pol_A_CTD (pfam03118) → RplQ (COG0203)rplQ (PRK05591) →                                                                                               |
| env-746 | LGVC01026408.1             | - | 246   | 206   | RNA → rpsD (PRK05327)Ribosomal_S4 (pfam00163) →                                                                                                                                                                                            |
| env-747 | LGVF01085840.1             | + | 3439  | 3479  | RNA → RpsD (COG0522)rpsD (PRK05327) → RNAP_alpha_NTD (cd06928)PRK05182 (PRK05182) →                                                                                                                                                        |
| env-748 | JGI24023J19991_10058338    | + | 371   | 411   | RNA → RpsD (COG0522)rpsD (PRK05327) → RNAP_alpha_NTD (cd06928)PRK05182 (PRK05182) →                                                                                                                                                        |
| Cca-2-1 | NZ_CDO101000154.1          | + | 49748 | 49788 | RNA → RpsD (COG0522)rpsD (PRK05327) → RNAP_alpha_NTD (cd06928)PRK05182 (PRK05182)RNA_pol_A_CTD (pfam03118) → RplQ (COG0203)rplQ (PRK05591) →                                                                                               |
| env-749 | TDF_OR_ARG04_113m_c1311978 | + | 76    | 116   | RNA → rpsD (PRK05327)Ribosomal_S4 (pfam00163) →                                                                                                                                                                                            |
| env-750 | SA_S1_NOR08_45m_c10021922  | - | 775   | 735   | RNA → RpsD (COG0522)rpsD (PRK05327) → PRK05182 (PRK05182) →                                                                                                                                                                                |
| env-751 | SA_S2_NOR15_50m_c10674918  | + | 250   | 284   | RNA →                                                                                                                                                                                                                                      |
| env-752 | JGI24024J18818_10005433    | - | 2993  | 2953  | RNA → RpsD (COG0522)rpsD (PRK05327) → RNAP_alpha_NTD (cd06928)PRK05182 (PRK05182)RNA_pol_A_CTD (pfam03118) →                                                                                                                               |
| env-753 | LGVD01055874.1             | + | 4328  | 4368  | RNA → RpsD (COG0522)rpsD (PRK05327) → RNAP_alpha_NTD (cd06928)PRK05182 (PRK05182)RNA_pol_A_CTD (pfam03118) →                                                                                                                               |
| env-754 | JGI26437J51864_10085571    | + | 322   | 362   | RNA → RpsD (COG0522)rpsD (PRK05327) →                                                                                                                                                                                                      |
| env-755 | BS_KBA_SWE12_21m_c10012235 | - | 428   | 388   | RNA → S4 (smart00363)RpsD (COG0522) →                                                                                                                                                                                                      |
| env-756 | BS_KBA_SWE12_21m_c10357750 | + | 138   | 178   | RNA → rpsD (PRK05327)Ribosomal_S4 (pfam00163) →                                                                                                                                                                                            |
| env-757 | SA_S1_NOR08_45m_c10216310  | + | 259   | 299   | RNA → rpsD (PRK05327)Ribosomal_S4 (pfam00163) →                                                                                                                                                                                            |
| env-758 | TDF_MC_ARG02_113m_c1073765 | + | 140   | 180   | RNA → rpsD (PRK05327)Ribosomal_S4 (pfam00163) →                                                                                                                                                                                            |
| env-759 | KGLS1_ANT01_95m_c10034647  | + | 846   | 886   | RNA → RpsD (COG0522)rpsD (PRK05327) → RpoA (COG0202)PRK05182 (PRK05182) →                                                                                                                                                                  |
| env-760 | JGI24024J18818_10127678    | - | 133   | 93    | RNA → rpsD (PRK05327)Ribosomal_S4 (pfam00163) →                                                                                                                                                                                            |
| env-761 | LGVD01081681.1             | - | 710   | 670   | RNA → rpsD (PRK05327)Ribosomal_S4 (pfam00163) → RpsD (COG0522)rpsD (PRK05327) →                                                                                                                                                            |
| env-762 | JGI24023J19991_10002979    | - | 2498  | 2458  | RNA → RpsD (COG0522)rpsD (PRK05327) → RNAP_alpha_NTD (cd06928)PRK05182 (PRK05182)RNA_pol_A_CTD (pfam03118) → RplQ (COG0203)rplQ (PRK05591) →                                                                                               |
| Ccy-1-1 | NZ_CDOF01000060.1          | - | 6612  | 6572  | RNA → RpsD (COG0522)rpsD (PRK05327) → RNAP_alpha_NTD (cd06928)PRK05182 (PRK05182)RNA_pol_A_CTD (pfam03118) → RplQ (COG0203)rplQ (PRK05591) →                                                                                               |
| Cca-1-1 | NZ_CDOE01000064.1          | + | 15288 | 15328 | RNA → RpsD (COG0522)rpsD (PRK05327) → RNAP_alpha_NTD (cd06928)PRK05182 (PRK05182)RNA_pol_A_CTD (pfam03118) → RplQ (COG0203)rplQ (PRK05591) → CarA (COG0505)PRK12564 (PRK12564) → Methyltransf_23 (pfam13489) →                             |
| env-763 | TDF_MC_ARG01_113m_c1021061 | + | 112   | 152   | RNA → S4 (smart00363)RpsD (COG0522) →                                                                                                                                                                                                      |
| env-764 | SA_S2_NOR15_50m_c10115366  | - | 840   | 800   | RNA → RpsD (COG0522)rpsD (PRK05327) → PRK05182 (PRK05182)RNA_pol_L (pfam01193) →                                                                                                                                                           |
| env-765 | SA_S2_NOR13_50m_c1004409   | + | 1238  | 1278  | RNA → RpsD (COG0522)rpsD (PRK05327) →                                                                                                                                                                                                      |
| env-766 | JGI24024J18818_10558133    | - | 216   | 176   | RNA → rpsD (PRK05327)Ribosomal_S4 (pfam00163) →                                                                                                                                                                                            |
| env-767 | LGVF01258235.1             | + | 471   | 511   | RNA → RpsD (COG0522)rpsD (PRK05327) →                                                                                                                                                                                                      |
| env-768 | TDF_MC_ARG01_113m_c1001894 | - | 1149  | 1109  | RNA → RpsD (COG0522)rpsD (PRK05327) → RNAP_alpha_NTD (cd06928)PRK05182 (PRK05182) →                                                                                                                                                        |
| Pja-1-1 | NZ_JSWG01000012.1          | - | 78120 | 78072 | RNA → RpsD (COG0522)rpsD (PRK05327) → RpoA (COG0202)PRK05182 (PRK05182) → RplQ (COG0203)rplQ (PRK05591) → CarA (COG0505)PRK12564 (PRK12564) →                                                                                              |



|         |                             |   |        |        |                                                                                                                                                                                                                                                         |
|---------|-----------------------------|---|--------|--------|---------------------------------------------------------------------------------------------------------------------------------------------------------------------------------------------------------------------------------------------------------|
| env-769 | BS_KBA_SWE12.21m.c10006531  | + | 2159   | 2207   | RNA → RpsD (COG0522)rpsD (PRK05327) → RpoA (COG0202)PRK05182 (PRK05182) → RplQ (COG0203)rplQ (PRK05591) →                                                                                                                                               |
| env-770 | BS_KBA_SWE02.21m.10206790   | + | 72     | 120    | RNA → RpsD (COG0522)rpsD (PRK05327) →                                                                                                                                                                                                                   |
| Gme-1-1 | NZ_AUHD01000007.1           | + | 277770 | 277818 | RNA → RpsD (COG0522)rpsD (PRK05327) → RpoA (COG0202)PRK05182 (PRK05182) →                                                                                                                                                                               |
| env-771 | BS_KBA_SWE12.21m.c10002655  | - | 2863   | 2815   | RNA → RpsD (COG0522)rpsD (PRK05327) → rpoA (CHL00013)PRK05182 (PRK05182) → RpoA (COG0202)PRK05182 (PRK05182) → RplQ (COG0203)rplQ (PRK05591) →                                                                                                          |
| Pme-1-1 | NZ_JXJP01000002.1           | + | 289435 | 289483 | RNA → RpsD (COG0522)rpsD (PRK05327) → RpoA (COG0202)PRK05182 (PRK05182) → RplQ (COG0203)rplQ (PRK05591) → CarA (COG0505)PRK12564 (PRK12564) →                                                                                                           |
| env-772 | TDF_OR_ARG04.113m.c1048254  | + | 325    | 373    | RNA → rpsD (PRK05327)Ribosomal_S4 (pfam00163) →                                                                                                                                                                                                         |
| env-773 | SA_S1_NOR08.45m.c10228226   | + | 189    | 237    | RNA → rpsD (PRK05327)Ribosomal_S4 (pfam00163) →                                                                                                                                                                                                         |
| env-774 | 3300001592.10000538         | - | 31145  | 31097  | RNA → RpsD (COG0522)rpsD (PRK05327) → PRK05182 (PRK05182)RNA_pol_L (pfam01193) →                                                                                                                                                                        |
| env-775 | BS_KBA_SWE21.205m.10078219  | + | 596    | 644    | RNA → rpsD (PRK05327)Ribosomal_S4 (pfam00163) →                                                                                                                                                                                                         |
| env-776 | KGI_S1_ANT02.95m.c10197724  | + | 147    | 195    | RNA → rpsD (PRK05327)Ribosomal_S4 (pfam00163) →                                                                                                                                                                                                         |
| env-777 | JGI24723J26617.10003269     | + | 213    | 261    | RNA → RpsD (COG0522)rpsD (PRK05327) → RpoA (COG0202)PRK05182 (PRK05182) → RplQ (COG0203)rplQ (PRK05591) → CarA (COG0505)PRK12564 (PRK12564) →                                                                                                           |
| env-778 | JGI24724J26744.10230191     | - | 344    | 296    | RNA → rpsD (PRK05327)Ribosomal_S4 (pfam00163) →                                                                                                                                                                                                         |
| env-779 | KGI_S2_ANT04.2345m.c1317179 | - | 230    | 182    | RNA → rpsD (PRK05327)Ribosomal_S4 (pfam00163) →                                                                                                                                                                                                         |
| env-780 | JCVL_SCAF_1096628386002     | - | 1571   | 1525   | RNA → RpsD (COG0522)rpsD (PRK05327) →                                                                                                                                                                                                                   |
| env-781 | LPaug08P2610m.c1098718      | + | 109    | 157    | RNA → rpsD (PRK05327)Ribosomal_S4 (pfam00163) →                                                                                                                                                                                                         |
| env-782 | DelMOSum2010.c10000647      | - | 14055  | 14007  | RNA → RpsD (COG0522)rpsD (PRK05327) → RNAP_alpha_NTD (cd06928)PRK05182 (PRK05182)RNA_pol_A_CTD (pfam03118) → RplQ (COG0203)rplQ (PRK05591) → CarA (COG0505)PRK12564 (PRK12564) → eno (PRK00077)enolase (cd03313) → gltA (PRK05614)EcCS_like (cd06114) → |
| env-783 | KGI_S1_ANT01.95m.c10031960  | + | 223    | 266    | RNA → RpsD (COG0522)rpsD (PRK05327) → RNAP_alpha_NTD (cd06928)PRK05182 (PRK05182)RNA_pol_A_CTD (pfam03118) → RplQ (COG0203)rplQ (PRK05591) →                                                                                                            |
| env-784 | 2236876010.0182615          | - | 474    | 428    | RNA → rpsD (PRK05327)Ribosomal_S4 (pfam00163) → S4 (smart00363)RpsD (COG0522) →                                                                                                                                                                         |
| env-785 | JCVL_SCAF_1096626851900     | + | 1510   | 1551   | RNA → RpsD (COG0522)rpsD (PRK05327) →                                                                                                                                                                                                                   |
| env-786 | JGI20156J14371.10002853     | - | 815    | 774    | RNA → RpsD (COG0522)rpsD (PRK05327) → PRK05182 (PRK05182)RNA_pol_L (pfam01193) →                                                                                                                                                                        |
| env-787 | JCVL_SCAF_1096627961966     | + | 1328   | 1370   | RNA → RpsD (COG0522)rpsD (PRK05327) →                                                                                                                                                                                                                   |
| env-788 | JCVL_READ_1103242618048     | - | 562    | 520    | RNA → RpsD (COG0522)rpsD (PRK05327) →                                                                                                                                                                                                                   |
| env-789 | CEWO01110425.1              | + | 727    | 768    | RNA → RpsD (COG0522)rpsD (PRK05327) →                                                                                                                                                                                                                   |
| env-790 | CESJ01017871.1              | + | 773    | 804    | RNA →                                                                                                                                                                                                                                                   |
| env-791 | CESU01012824.1              | + | 1083   | 1124   | RNA → RpsD (COG0522)rpsD (PRK05327) →                                                                                                                                                                                                                   |
| env-792 | CESE01007018.1              | - | 3023   | 2982   | RNA → RpsD (COG0522)rpsD (PRK05327) → RpoA (COG0202)PRK05182 (PRK05182) → RplQ (COG0203)rplQ (PRK05591) → CPSase_sm_chain (smart01097)CPSase_sm_chain (pfam00988) →                                                                                     |
| env-793 | CESF01014444.1              | + | 686    | 717    | RNA →                                                                                                                                                                                                                                                   |
| env-794 | LPjun09P1210m.c1061424      | - | 156    | 115    | RNA → rpsD (PRK05327)Ribosomal_S4 (pfam00163) →                                                                                                                                                                                                         |
| env-795 | SI34jun09.10m.1065651       | + | 164    | 205    | RNA → rpsD (PRK05327)Ribosomal_S4 (pfam00163) →                                                                                                                                                                                                         |
| env-796 | DelMOSum2010.c10031049      | + | 744    | 785    | RNA → RpsD (COG0522)rpsD (PRK05327) → RNAP_alpha_NTD (cd06928)PRK05182 (PRK05182)RNA_pol_A_CTD (pfam03118) → RplQ (COG0203)rplQ (PRK05591) →                                                                                                            |
| env-797 | JGI20152J14361.10004992     | + | 6162   | 6203   | RNA → RpsD (COG0522)rpsD (PRK05327) → RpoA (COG0202)PRK05182 (PRK05182) →                                                                                                                                                                               |
| env-798 | JCVL_SCAF_1096626908974     | - | 951    | 910    | RNA → RpsD (COG0522)rpsD (PRK05327) → PRK05182 (PRK05182)RNA_pol_L (pfam01193) →                                                                                                                                                                        |
| env-799 | 2236876010.0124125          | + | 466    | 497    | RNA →                                                                                                                                                                                                                                                   |
| env-800 | JCVL_SCAF_1096627300879     | - | 885    | 844    | RNA → RpsD (COG0522)rpsD (PRK05327) → PRK05182 (PRK05182)RNA_pol_L (pfam01193) →                                                                                                                                                                        |
| env-801 | DelMOWin2010.c10056093      | - | 56     | 21     | RNA →                                                                                                                                                                                                                                                   |
| env-802 | DelMOSum2010.c10171752      | + | 62     | 103    | RNA → RpsD (COG0522)rpsD (PRK05327) →                                                                                                                                                                                                                   |
| env-803 | DelMOSum2011.c10049863      | - | 1275   | 1234   | RNA → RpsD (COG0522)rpsD (PRK05327) → RNAP_alpha_NTD (cd06928)PRK05182 (PRK05182) →                                                                                                                                                                     |
| env-804 | SI47jul10.100m.c1000543     | - | 1464   | 1423   | RNA → RpsD (COG0522)rpsD (PRK05327) → RNAP_alpha_NTD (cd06928)PRK05182 (PRK05182) →                                                                                                                                                                     |
| env-805 | SI36aug09.120m.1267228      | + | 135    | 176    | RNA → rpsD (PRK05327)Ribosomal_S4 (pfam00163) →                                                                                                                                                                                                         |
| env-806 | JGI20156J14371.10141859     | + | 313    | 354    | RNA → RpsD (COG0522)rpsD (PRK05327) →                                                                                                                                                                                                                   |
| env-807 | CENT01045813.1              | - | 316    | 275    | RNA → rpsD (PRK05327)Ribosomal_S4 (pfam00163) →                                                                                                                                                                                                         |
| env-808 | CESI01020841.1              | + | 455    | 496    | RNA → RpsD (COG0522)rpsD (PRK05327) →                                                                                                                                                                                                                   |

|         |                          |   |       |       |                                                                                                                                                                                                                                                                                            |
|---------|--------------------------|---|-------|-------|--------------------------------------------------------------------------------------------------------------------------------------------------------------------------------------------------------------------------------------------------------------------------------------------|
| env-809 | CERW01035365.1           | + | 573   | 614   | RNA → RpsD (COG0522)rpsD (PRK05327) →                                                                                                                                                                                                                                                      |
| env-810 | CESE01023512.1           | - | 2167  | 2126  | RNA → RpsD (COG0522)rpsD (PRK05327) →<br>RNAP_alpha_NTD (cd06928)PRK05182 (PRK05182)RNA_pol_A_CTD (pfam03118) →<br>RplQ (COG0203)rplQ (PRK05591) →                                                                                                                                         |
| env-811 | CESI01115170.1           | + | 394   | 435   | RNA → rpsD (PRK05327)Ribosomal_S4 (pfam00163) →                                                                                                                                                                                                                                            |
| env-812 | CESM01447978.1           | - | 644   | 603   | RNA → RpsD (COG0522)rpsD (PRK05327) →                                                                                                                                                                                                                                                      |
| env-813 | CESI01285347.1           | - | 647   | 606   | RNA → RpsD (COG0522)rpsD (PRK05327) →                                                                                                                                                                                                                                                      |
| env-814 | CESJ01035100.1           | + | 13520 | 13561 | RNA → RpsD (COG0522)rpsD (PRK05327) → RpoA (COG0202)PRK05182 (PRK05182) →<br>RplQ (COG0203)rplQ (PRK05591) → CarA (COG0505)PRK12564 (PRK12564) →<br>eno (PRK00077)Enolase_N (pfam03952) →                                                                                                  |
| env-815 | CESI01140995.1           | - | 648   | 607   | RNA → RpsD (COG0522)rpsD (PRK05327) →                                                                                                                                                                                                                                                      |
| env-816 | CESL01085606.1           | + | 7356  | 7397  | RNA → RpsD (COG0522)rpsD (PRK05327) →<br>RNAP_alpha_NTD (cd06928)PRK05182 (PRK05182)RNA_pol_A_CTD (pfam03118) →<br>RplQ (COG0203)rplQ (PRK05591) →                                                                                                                                         |
| env-817 | CETY01336660.1           | - | 667   | 626   | RNA → RpsD (COG0522)rpsD (PRK05327) →                                                                                                                                                                                                                                                      |
| env-818 | CERW01115847.1           | - | 343   | 302   | RNA → rpsD (PRK05327)Ribosomal_S4 (pfam00163) →                                                                                                                                                                                                                                            |
| env-819 | JCVL_SCAF_1096627085079  | + | 1100  | 1141  | RNA → RpsD (COG0522)rpsD (PRK05327) →                                                                                                                                                                                                                                                      |
| env-820 | 2236876007_0120103       | - | 371   | 330   | RNA → hypo →                                                                                                                                                                                                                                                                               |
| env-821 | DelMOWin2010_c10054074   | + | 28    | 69    | RNA → RpsD (COG0522)rpsD (PRK05327) →<br>RNAP_alpha_NTD (cd06928)PRK05182 (PRK05182)RNA_pol_A_CTD (pfam03118) →                                                                                                                                                                            |
| env-822 | 2236876010_0562604       | - | 92    | 51    | RNA → ←hypo                                                                                                                                                                                                                                                                                |
| env-823 | DelMOSum2010_c10187590   | - | 554   | 513   | RNA → RpsD (COG0522)rpsD (PRK05327) →                                                                                                                                                                                                                                                      |
| env-824 | CEOP01438579.1           | + | 571   | 612   | RNA → RpsD (COG0522)rpsD (PRK05327) →                                                                                                                                                                                                                                                      |
| env-825 | CESI01092574.1           | - | 661   | 620   | RNA → RpsD (COG0522)rpsD (PRK05327) →                                                                                                                                                                                                                                                      |
| env-826 | JCVL_SCAF_1096628391443  | + | 527   | 568   | RNA → rpsD (PRK05327)Ribosomal_S4 (pfam00163) → PRK05182 (PRK05182)RNA_pol_A_CTD (pfam03118) →<br>RplQ (COG0203)rplQ (PRK05591) →                                                                                                                                                          |
| env-827 | CEOK01218656.1           | + | 103   | 144   | RNA → RpsD (COG0522)rpsD (PRK05327) →                                                                                                                                                                                                                                                      |
| env-828 | CETE01044921.1           | - | 657   | 616   | RNA → RpsD (COG0522)rpsD (PRK05327) →                                                                                                                                                                                                                                                      |
| env-829 | CEUF01269544.1           | + | 331   | 372   | RNA → RpsD (COG0522)rpsD (PRK05327) → PRK05182 (PRK05182)RNA_pol_L (pfam01193) →                                                                                                                                                                                                           |
| env-830 | CENO01020607.1           | - | 670   | 629   | RNA → RpsD (COG0522)rpsD (PRK05327) →                                                                                                                                                                                                                                                      |
| env-831 | CEVH01290424.1           | - | 399   | 358   | RNA → S4 (smart00363)RpsD (COG0522) →                                                                                                                                                                                                                                                      |
| env-832 | CEWG01002875.1           | + | 131   | 172   | RNA → RpsD (COG0522)rpsD (PRK05327) → RNAP_alpha_NTD (cd06928)PRK05182 (PRK05182) →                                                                                                                                                                                                        |
| env-833 | CEPJ01070513.1           | + | 64    | 105   | RNA → RpsD (COG0522)rpsD (PRK05327) →                                                                                                                                                                                                                                                      |
| env-834 | 2236876001_043944        | - | 301   | 260   | RNA → rpsD (PRK05327)Ribosomal_S4 (pfam00163) →                                                                                                                                                                                                                                            |
| env-835 | SA_S2_NOR13_50m_c1052491 | - | 136   | 87    | RNA → rpsD (PRK05327)Ribosomal_S4 (pfam00163) →                                                                                                                                                                                                                                            |
| env-836 | LPaug09P1610m_c1023406   | + | 657   | 699   | RNA →                                                                                                                                                                                                                                                                                      |
| env-837 | CENJ01019829.1           | - | 355   | 313   | RNA → rpsD (PRK05327)Ribosomal_S4 (pfam00163) →                                                                                                                                                                                                                                            |
| env-838 | CESW01149347.1           | - | 2171  | 2129  | RNA → RpsD (COG0522)rpsD (PRK05327) → RpoA (COG0202)PRK05182 (PRK05182) →<br>RplQ (COG0203)rplQ (PRK05591) →                                                                                                                                                                               |
| env-839 | JCVL_SCAF_1096627389932  | + | 1334  | 1376  | RNA → RpsD (COG0522)rpsD (PRK05327) → RpoA (COG0202)PRK05182 (PRK05182) →<br>RplQ (COG0203)rplQ (PRK05591) → CarA (COG0505)PRK12564 (PRK12564) →<br>eno (PRK00077)enolase (cd03313) → gltA (PRK05614)EcCS_like (cd06114) →<br>DdaH (COG1834)arcA (TIGR01078) → Amidinotransf (pfam02274) → |
| env-840 | P_1C_Liq_3_UnCty_1071622 | + | 198   | 240   | RNA →                                                                                                                                                                                                                                                                                      |
| env-841 | P_2C_Liq_1_UnCty_1012564 | + | 496   | 538   | RNA → RpsD (COG0522)rpsD (PRK05327) →<br>RNAP_alpha_NTD (cd06928)PRK05182 (PRK05182)RNA_pol_A_CTD (pfam03118) →                                                                                                                                                                            |

### 15.3 Conserved domains

Conserved domains found in protein-coding genes listed in Section 15.2 are shown below, with the first sentence in their description from the Conserved Domain Database (if any). Conserved domains associated with more than one S4-

Flavobacteria RNA are assigned a color, while others are shown in gray. The number in parentheses after the colored domain name is the number of occurrences in Section 15.2.

- cd00599** (2) Endo-N-acetylmuramidases (muramidases) are lysozymes (also referred to as peptidoglycan hydrolases) that degrade bacterial cell walls by catalyzing the hydrolysis of 1,4-beta-linkages between N-acetylmuramic acid and N-acetyl-D-glucosamine residues.
- cd01744** (5) Small chain of the glutamine-dependent form of carbamoyl phosphate synthase, CPSase II.
- cd03313** (29) Enolase: Enolases are homodimeric enzymes that catalyse the reversible dehydration of 2-phospho-D-glycerate to phosphoenolpyruvate as part of the glycolytic and gluconeogenesis pathways.
- cd06114** (8) Escherichia coli (Ec) citrate synthase (CS) GltA-like.
- cd06928** (183) N-terminal domain of the Alpha subunit of Bacterial RNA polymerase.
- cd11313** (1) Alpha amylase catalytic domain found in archaeal and bacterial Alpha-amylases (also called 1,4-alpha-D-glucan-4-glucanohydrolase).
- CHL00013** (7) RNA polymerase alpha subunit
- CHL00113** (1) ribosomal protein S4; Reviewed
- COG0202** (115) DNA-directed RNA polymerase, alpha subunit/40 kD subunit [Transcription]
- COG0203** (224) Ribosomal protein L17 [Translation, ribosomal structure and biogenesis]
- COG0505** (80) Carbamoylphosphate synthase small subunit [Amino acid transport and metabolism, Nucleotide transport and metabolism]
- COG0522** (578) Ribosomal protein S4 or related protein [Translation, ribosomal structure and biogenesis]
- COG1834** (2) N-Dimethylarginine dimethylaminohydrolase [Amino acid transport and metabolism]
- pfam00117** (3) Glutamine amidotransferase class-I.
- pfam00163** (226) Ribosomal protein S4/S9 N-terminal domain.
- pfam00285** (1) Citrate synthase, C-terminal domain.
- pfam00988** (15) Carbamoyl-phosphate synthase small chain, CPSase domain.
- pfam01193** (34) RNA polymerase Rpb3/Rpb11 dimerisation domain.
- pfam01196** (9) Ribosomal protein L17.
- pfam02274** (2) Amidotransferase.
- pfam03118** (157) Bacterial RNA polymerase, alpha chain C terminal domain.
- pfam03485** (1) Arginyl tRNA synthetase N terminal domain.
- pfam03486** (2) HI0933-like protein.
- pfam03952** (2) Enolase, N-terminal domain.
- pfam03971** (2) Monomeric isocitrate dehydrogenase.
- pfam10310** (2) Maintenance of telomere capping protein 1.
- pfam13489** (1) Methyltransferase domain.
- PLN02967** (1) kinase
- PRK00077** (31) enolase; Provisional
- PRK05182** (345) DNA-directed RNA polymerase subunit alpha; Provisional
- PRK05327** (783) 30S ribosomal protein S4; Validated
- PRK05591** (233) 50S ribosomal protein L17; Validated
- PRK05614** (9) type II citrate synthase; Reviewed
- PRK10811** (1) ribonuclease E; Reviewed
- PRK12564** (90) carbamoyl phosphate synthase small subunit; Reviewed
- PRK14521** (2) 30S ribosomal protein S16; Provisional
- smart00363** (26) S4 RNA-binding domain.
- smart00621** (2) Glycosyl hydrolases family 25.
- smart01016** (1) Arginyl tRNA synthetase N terminal dom.
- smart01097** (6) Carbamoyl-phosphate synthase small chain, CPSase domain.
- TIGR00178** (2) isocitrate dehydrogenase, NADP-dependent, monomeric type. [Energy metabolism, TCA cycle]
- TIGR00275** (2) flavoprotein, HI0933 family. [Unknown function, Enzymes of unknown specificity]
- TIGR01078** (1) arginine deiminase. [Energy metabolism, Amino acids and amines]
- TIGR02456** (1) trehalose synthase. [Energy metabolism, Biosynthesis and degradation of polysaccharides]

## 15.4 Multiple-sequence alignment

Each S4-Flavobacteria RNA is denoted by an abbreviation (like “Eco-1-1”) that refers to a taxonomy given in Section 15.1. The alignment may include sequences containing the RNA motif, as well as flanking sequence. The S4-Flavobacteria RNA itself is denoted by the line underneath marked 5’ and 3’ on either end. Nucleotides in flanking sequences (i.e., not part of the motif) are written in **gray letters**. Stems of predicted rho-independent transcription terminators, if any, are shaded **yellow**. (Note: terminator predictions have not been analyzed manually, and many are likely to be false positives. Terminator predictions are those of the RNIE software.) Nucleotides predicted to function (as DNA) as transcription-factor binding sites, if any, are shaded in **green**. (But note: these predictions are manually annotated, so they might be under-predicted.) Annotated start codons, if any, are shaded **green**. (Note: start codons are frequently misannotated, especially in environmental samples.) Nucleotides proposed to basepair as part of the consensus structure are shaded in color when they comprise Watson-Crick or G-U

pairs. Otherwise they are shaded gray. Conserved stems are also indicated at the bottom of the alignment by angle brackets, where matching < and > denote base-paired columns. Below these angle brackets, the symbol “2” denotes base pairs exhibiting covariation according to the statistically well-founded R-scape method. “1” denotes base pairs exhibiting covariation according to R2R’s simplistic method. “0” denotes base pairs that are not observed to mutate and “?” denotes base pairs that have a significant frequency of non-canonical nucleotides for Watson-Crick or G-U pairs (> 5%). Below these base pair annotation is the consensus sequence: “R” = “A” or “G”, “Y” = “C” or “U”, **red nucleotides**: nucleotide identity conserved more than 97% of the time, **black nucleotides**: 90%, **gray nucleotides**: 75%, **red circle** (◉): nucleotide is present 97% of the time, **black circle** (◐): 90%, **gray circle** (◑): 75%, **white circle** (◒): 50%. All percentages of sequences just described (e.g. 97% conserved) assume that sequences have been weighted by the GSC algorithm implemented by the Infernal software package.



































|                  |                                                              |                                   |            |
|------------------|--------------------------------------------------------------|-----------------------------------|------------|
| Csp-2-1          | Bacteria Firmicutes Clostridia Clostridiales Lachnospiraceae | <i>Coproccoccus sp.</i>           | HPP0074    |
| Dfo-1-1          | Bacteria Firmicutes Clostridia Clostridiales Lachnospiraceae | <i>Dorea formicigenerans</i>      | 4_6_53AFAA |
| Dfo-2-1          | Bacteria Firmicutes Clostridia Clostridiales Lachnospiraceae | <i>Dorea formicigenerans</i>      | ATCC 27755 |
| Dlo-1-1          | Bacteria Firmicutes Clostridia Clostridiales Lachnospiraceae | <i>Dorea longicatena</i>          | AGR2136    |
| Dlo-2-1          | Bacteria Firmicutes Clostridia Clostridiales Lachnospiraceae | <i>Dorea longicatena</i>          | DSM 13814  |
| Dsp-1-1          | Bacteria Firmicutes Clostridia Clostridiales Lachnospiraceae | <i>Dorea sp.</i>                  | 5-2        |
| Dsp-2-1          | Bacteria Firmicutes Clostridia Clostridiales Lachnospiraceae | <i>Dorea sp.</i>                  | AGR2135    |
| Dsp-3-1          | Bacteria Firmicutes Clostridia Clostridiales Lachnospiraceae | <i>Dorea sp.</i>                  | D27        |
| Lba-1-1          | Bacteria Firmicutes Clostridia Clostridiales Lachnospiraceae | bacterium                         | 1_1_57FAA  |
| Lba-2-1          | Bacteria Firmicutes Clostridia Clostridiales Lachnospiraceae | bacterium                         | 2_1_46FAA  |
| Lba-3-1          | Bacteria Firmicutes Clostridia Clostridiales Lachnospiraceae | bacterium                         | 2_1_58FAA  |
| Lba-4-1          | Bacteria Firmicutes Clostridia Clostridiales Lachnospiraceae | bacterium                         | 3-2        |
| Lba-5-1          | Bacteria Firmicutes Clostridia Clostridiales Lachnospiraceae | bacterium                         | 3_1_46FAA  |
| Lba-6-1          | Bacteria Firmicutes Clostridia Clostridiales Lachnospiraceae | bacterium                         | 4_1_37FAA  |
| Lba-7-1          | Bacteria Firmicutes Clostridia Clostridiales Lachnospiraceae | bacterium                         | 5_1_57FAA  |
| Lba-8-1          | Bacteria Firmicutes Clostridia Clostridiales Lachnospiraceae | bacterium                         | 6_1_63FAA  |
| Lba-9-1          | Bacteria Firmicutes Clostridia Clostridiales Lachnospiraceae | bacterium                         | 8_1_57FAA  |
| Lba-10-1         | Bacteria Firmicutes Clostridia Clostridiales Lachnospiraceae | bacterium                         | 9_1_43BFAA |
| Lba-11-1         | Bacteria Firmicutes Clostridia Clostridiales Lachnospiraceae | bacterium                         | FE2018     |
| Rpe-1-1          | Bacteria Firmicutes Clostridia Clostridiales Lachnospiraceae | <i>Robinsoniella peoriensis</i>   |            |
| Rsp-1-1          | Bacteria Firmicutes Clostridia Clostridiales Lachnospiraceae | <i>Robinsoniella sp.</i>          | KNHs210    |
| Dma-1-1          | Bacteria Firmicutes Clostridia Clostridiales Ruminococcaceae | <i>Drancourtella massiliensis</i> |            |
| Rga-1-1          | Bacteria Firmicutes Clostridia Clostridiales Ruminococcaceae | <i>Ruminococcus gawvreauii</i>    | DSM 19829  |
| Rgn-3-1          | Bacteria Firmicutes Clostridia Clostridiales Ruminococcaceae | <i>Ruminococcus gnavus</i>        | ATCC 29149 |
| Rob-1-1          | Bacteria Firmicutes Clostridia Clostridiales Ruminococcaceae | <i>Ruminococcus obeum</i>         | ATCC 29174 |
| Rsp-2-1          | Bacteria Firmicutes Clostridia Clostridiales Ruminococcaceae | <i>Ruminococcus sp.</i>           | 5_1_39BFAA |
| Rsp-3-1          | Bacteria Firmicutes Clostridia Clostridiales Ruminococcaceae | <i>Ruminococcus sp.</i>           | JC304      |
| Rto-1-1          | Bacteria Firmicutes Clostridia Clostridiales Ruminococcaceae | <i>Ruminococcus torques</i>       | ATCC 27756 |
| env-1 to env-438 | environmental samples                                        |                                   |            |

## 16.2 Gene contexts

Each S4-Clostridia RNA (indicated by “RNA→”) is listed. For each hit, the downstream genes predicted to reside in a regulated operon are listed. If the nearest downstream gene is encoding in the opposite strand (and therefore presumed to not be a part of a regulated operon), then that gene is still depicted. Some environmental sequences and some RefSeq entries lack gene annotations, and so no genes are available for such sequences. The direction of each gene is indicated with an arrow (→), and each predicted conserved domain in the gene is named. Conserved domains associated with more than one S4-Clostridia RNA are assigned a color; other domains are gray. Information about these conserved domains is given

in Section 16.3. The accession of the sequence containing each S4-Clostridia RNA is given in the column named “Seq. accession”. Accessions beginning with “NC\_”, “NS\_”, “NW\_” or “NZ\_” are contained in RefSeq. Other accession refer to environmental samples. Nucleotide coordinates are given for the 5’ and 3’ boundaries of each S4-Clostridia RNA. If the 5’ coordinate is greater than the 3’ coordinate, the RNA is present on the reverse-complement strand of the containing genomic DNA sequence. Each hit is denoted by an abbreviation (like “Eco-1-1”) that refers to a taxonomy given in Section 16.1.

| abbrev. | Seq. accession                       | 5’ at | 3’ at | genes |                                                                                                                                             |
|---------|--------------------------------------|-------|-------|-------|---------------------------------------------------------------------------------------------------------------------------------------------|
| env-1   | AUXO015936627.1                      | +     | 257   | 309   | RNA→ RpsM (COG0099)rpsM (PRK05179)→                                                                                                         |
| env-2   | SRS016095_C2391063                   | +     | 242   | 301   | RNA→ rps13 (CHL00137)rpsM (PRK05179)uS13_bact (TIGR03631)→                                                                                  |
| env-3   | SRS052697_LANL_scaffold_5093         | +     | 388   | 447   | RNA→ rps13 (CHL00137)RpsM (COG0099)rpsM (PRK05179)uS13_bact (TIGR03631)→                                                                    |
| env-4   | scaffold46699_2_MH0044               | +     | 217   | 276   | RNA→ RpsM (COG0099)rpsM (PRK05179)→                                                                                                         |
| env-5   | scaffold83773_1_MH0059               | -     | 378   | 319   | RNA→ RpsM (COG0099)rpsM (PRK05179)→                                                                                                         |
| env-6   | NLF007_scaffold4057_7                | +     | 767   | 826   | RNA→ rps13 (CHL00137)rpsM (PRK05179)uS13_bact (TIGR03631)→                                                                                  |
| env-7   | scaffold201303_1_MH0006              | -     | 337   | 278   | RNA→ RpsM (COG0099)rpsM (PRK05179)→                                                                                                         |
| env-8   | scaffold3229_1_MH0038                | -     | 339   | 280   | RNA→ RpsM (COG0099)rpsM (PRK05179)→                                                                                                         |
| env-9   | UnmappedStool.Broad_scaffold_1083211 | +     | 240   | 299   | RNA→ RpsM (COG0099)rpsM (PRK05179)→                                                                                                         |
| env-10  | NOM007_scaffold46220_1               | +     | 19654 | 19713 | RNA→ RpsM (COG0099)rpsM (PRK05179)→ PRK05309 (PRK05309)RpsK (COG0100)→<br>RpsD (COG0522)rpsD (PRK05327)→ RpoA (COG0202)PRK05182 (PRK05182)→ |



|         |                                      |   |       |       |                                                                                                                                                                                               |
|---------|--------------------------------------|---|-------|-------|-----------------------------------------------------------------------------------------------------------------------------------------------------------------------------------------------|
| env-11  | SRS014923_C3228657                   | + | 242   | 301   | RNA → RpsM (COG0099)rpsM (PRK05179) →                                                                                                                                                         |
| env-12  | NLF009_scaffold14126_1               | - | 1235  | 1176  | RNA → RpsM (COG0099)rpsM (PRK05179) → PRK05309 (PRK05309)RpsK (COG0100) →<br>RpsD (COG0522)rpsD (PRK05327) →                                                                                  |
| env-13  | NOF014_scaffold21218_11              | + | 6928  | 6987  | RNA → RpsM (COG0099)rpsM (PRK05179) → PRK05309 (PRK05309)RpsK (COG0100) →<br>RpsD (COG0522)rpsD (PRK05327) → RpoA (COG0202)PRK05182 (PRK05182) →                                              |
| env-14  | SRS014459_C2557888                   | + | 432   | 491   | RNA → rps13 (CHL00137)rpsM (PRK05179)uS13_bact (TIGR03631) →                                                                                                                                  |
| env-15  | SRS017191_C1739427                   | + | 3572  | 3631  | RNA → rps13 (CHL00137)rpsM (PRK05179)uS13_bact (TIGR03631) →                                                                                                                                  |
| env-16  | SRS015065_WUGC_scaffold_29501        | - | 380   | 321   | RNA → RpsM (COG0099)rpsM (PRK05179) →                                                                                                                                                         |
| env-17  | 08_07_GOS_DNA_scaffold2232_4         | - | 501   | 447   | RNA → RpsM (COG0099)rpsM (PRK05179) →                                                                                                                                                         |
| env-18  | O8_19_POLYDEXT_DNA_scaffold1532_15   | + | 208   | 262   | RNA → RpsM (COG0099)rpsM (PRK05179) →                                                                                                                                                         |
| env-19  | JGI994J12354_10009703                | - | 3666  | 3612  | RNA → RpsM (COG0099)rpsM (PRK05179) →                                                                                                                                                         |
| Bsp-6-1 | NZ_KL370881.1                        | + | 27319 | 27373 | RNA → RpsM (COG0099)rpsM (PRK05179) → PRK05309 (PRK05309)RpsK (COG0100) →                                                                                                                     |
| env-20  | JGI20225J20221_1018968               | - | 1486  | 1434  | RNA → RpsM (COG0099)rpsM (PRK05179) → PRK05309 (PRK05309)RpsK (COG0100) →<br>RpsD (COG0522)rpsD (PRK05327) →                                                                                  |
| env-21  | AUX0017144234.1                      | + | 5176  | 5235  | RNA → RpsM (COG0099)rpsM (PRK05179) → PRK05309 (PRK05309)RpsK (COG0100) →                                                                                                                     |
| env-22  | AUX0010388311.1                      | + | 129   | 199   | RNA → ←-hypo                                                                                                                                                                                  |
| env-23  | AUX0013310740.1                      | - | 8305  | 8254  | RNA → RpsM (COG0099)rpsM (PRK05179) → PRK05309 (PRK05309)RpsK (COG0100) →<br>RpsD (COG0522)rpsD (PRK05327) → RpoA (COG0202)PRK05182 (PRK05182) →                                              |
| env-24  | 2227071526                           | - | 270   | 181   | RNA → rps13 (CHL00137)rpsM (PRK05179) →                                                                                                                                                       |
| env-25  | 2227624636                           | + | 10763 | 10852 | RNA → RpsM (COG0099)rpsM (PRK05179) → PRK05309 (PRK05309)RpsK (COG0100) →                                                                                                                     |
| env-26  | JGI996J12353_1001490                 | - | 756   | 667   | RNA → RpsM (COG0099)rpsM (PRK05179) → PRK05309 (PRK05309)RpsK (COG0100) →                                                                                                                     |
| env-27  | JGI994J12354_10000212                | + | 33654 | 33743 | RNA → RpsM (COG0099)rpsM (PRK05179) → PRK05309 (PRK05309)RpsK (COG0100) →<br>RpsD (COG0522)rpsD (PRK05327) → RpoA (COG0202)PRK05182 (PRK05182) →<br>rplQ (PRK05591)RibosomalL17 (pfam01196) → |
| env-28  | IMNBL1_c0003830                      | + | 98    | 187   | RNA → RpsM (COG0099)rpsM (PRK05179) → PRK05309 (PRK05309)RpsK (COG0100) →<br>RpsD (COG0522)rpsD (PRK05327) → RpoA (COG0202)PRK05182 (PRK05182) →<br>rplQ (PRK05591)RibosomalL17 (pfam01196) → |
| env-29  | 2226950468                           | - | 265   | 181   | RNA → rps13 (CHL00137)rpsM (PRK05179) →                                                                                                                                                       |
| env-30  | 2227073852                           | - | 2087  | 2000  | RNA → RpsM (COG0099)rpsM (PRK05179) → PRK05309 (PRK05309)RpsK (COG0100) →<br>RpsD (COG0522)rpsD (PRK05327) → RNAP_alpha_NTD (cd06928)PRK05182 (PRK05182) →                                    |
| env-31  | 2227078579                           | + | 1162  | 1249  | RNA → RpsM (COG0099)rpsM (PRK05179) → PRK05309 (PRK05309)RpsK (COG0100) →                                                                                                                     |
| env-32  | IMNBL1_c0000921                      | - | 22643 | 22556 | RNA → RpsM (COG0099)rpsM (PRK05179) → PRK05309 (PRK05309)RpsK (COG0100) →<br>RpsD (COG0522)rpsD (PRK05327) →                                                                                  |
| env-33  | 2227013722                           | + | 78    | 165   | RNA → RpsM (COG0099)rpsM (PRK05179) → PRK05309 (PRK05309)RpsK (COG0100) →<br>RpsD (COG0522)rpsD (PRK05327) →                                                                                  |
| env-34  | UnmappedStool_Broad_scaffold_1059721 | + | 666   | 716   | RNA →                                                                                                                                                                                         |
| env-35  | SRS014459_WUGC_scaffold_78018        | - | 406   | 356   | RNA → RpsM (COG0099)rpsM (PRK05179) →                                                                                                                                                         |
| env-36  | SRS015065_C2231612                   | - | 187   | 137   | RNA → hypo →                                                                                                                                                                                  |
| env-37  | AUX0016905584.1                      | + | 229   | 278   | RNA → rps13 (CHL00137)rpsM (PRK05179) →                                                                                                                                                       |
| env-38  | scaffold82255_1_V1.UC-14             | + | 430   | 480   | RNA →                                                                                                                                                                                         |
| env-39  | SRS014459_WUGC_scaffold_74344        | + | 465   | 518   | RNA →                                                                                                                                                                                         |
| env-40  | SRS015065_C2236339                   | - | 162   | 109   | RNA → hypo →                                                                                                                                                                                  |
| env-41  | SRS056259_LANL_scaffold_44254        | - | 151   | 97    | RNA → ←-hypo                                                                                                                                                                                  |
| env-42  | HCF12C_401724                        | + | 232   | 297   | RNA → hypo → RpsM (COG0099)rpsM (PRK05179) →                                                                                                                                                  |
| env-43  | longitudinal_220_106                 | + | 5954  | 6044  | RNA → RpsM (COG0099)rpsM (PRK05179) → PRK05309 (PRK05309)RpsK (COG0100) →                                                                                                                     |
| env-44  | longitudinal_221_153                 | + | 3442  | 3532  | RNA → RpsM (COG0099)rpsM (PRK05179) → PRK05309 (PRK05309)RpsK (COG0100) →                                                                                                                     |
| env-45  | AJWZ01010485.1                       | + | 81    | 143   | RNA → hypo →                                                                                                                                                                                  |
| env-46  | AUX0010018345.1                      | + | 2698  | 2750  | RNA → RpsM (COG0099)rpsM (PRK05179) → PRK05309 (PRK05309)RpsK (COG0100) →<br>RpsD (COG0522)rpsD (PRK05327) →                                                                                  |
| env-47  | AUX0016373287.1                      | - | 737   | 678   | RNA → RpsM (COG0099)rpsM (PRK05179) →                                                                                                                                                         |
| env-48  | AUX0016002689.1                      | - | 1204  | 1155  | RNA → RpsM (COG0099)rpsM (PRK05179) → PRK05309 (PRK05309)RpsK (COG0100) →<br>rpsD (PRK05327)Ribosomal_S4 (pfam00163) →                                                                        |
| env-49  | JGI2065J20421_1001636                | + | 4338  | 4413  | RNA → RpsM (COG0099)rpsM (PRK05179) → PRK05309 (PRK05309)RpsK (COG0100) →<br>RpsD (COG0522)rpsD (PRK05327) → RpoA (COG0202)PRK05182 (PRK05182) →<br>rplQ (PRK05591)RibosomalL17 (pfam01196) → |

|         |                                |   |         |         |                                                                                                                                                                                                               |
|---------|--------------------------------|---|---------|---------|---------------------------------------------------------------------------------------------------------------------------------------------------------------------------------------------------------------|
| env-50  | UnmappedStool_Broad_C250603932 | + | 179     | 253     | RNA →                                                                                                                                                                                                         |
| Dma-1-1 | NZ_CVPG01000005.1              | + | 471925  | 471999  | RNA → RpsM (COG0099)rpsM (PRK05179) → PRK05309 (PRK05309)RpsK (COG0100) → RpsD (COG0522)rpsD (PRK05327) → RpoA (COG0202)PRK05182 (PRK05182) →                                                                 |
| Cba-2-1 | NZ_BAIB02000003.1              | + | 231885  | 231959  | RNA → RpsM (COG0099)rpsM (PRK05179) → PRK05309 (PRK05309)RpsK (COG0100) → RpsD (COG0522)rpsD (PRK05327) → RpoA (COG0202)PRK05182 (PRK05182) →                                                                 |
| env-51  | 2227358603                     | - | 1575    | 1505    | RNA → RpsM (COG0099)rpsM (PRK05179) →                                                                                                                                                                         |
| Lba-2-1 | NZ_KE150017.1                  | - | 1725164 | 1725115 | RNA → RpsM (COG0099)rpsM (PRK05179) → PRK05309 (PRK05309)RpsK (COG0100) → RpsD (COG0522)rpsD (PRK05327) → RpoA (COG0202)PRK05182 (PRK05182) →                                                                 |
| [ce-1-1 | NZ_JHXY01000007.1              | - | 130151  | 130097  | RNA → RpsM (COG0099)rpsM (PRK05179) → PRK05309 (PRK05309)RpsK (COG0100) → RpsD (COG0522)rpsD (PRK05327) → RpoA (COG0202)PRK05182 (PRK05182) →                                                                 |
| Ece-1-1 | NZ_CM001487.1                  | + | 2588850 | 2588903 | RNA → RpsM (COG0099)rpsM (PRK05179) → RpsM (COG0099)rpsM (PRK05179) → PRK05309 (PRK05309)RpsK (COG0100) → PRK05309 (PRK05309)RpsK (COG0100) → RpsD (COG0522)rpsD (PRK05327) → RpsD (COG0522)rpsD (PRK05327) → |
| env-52  | longitudinal_411_28            | + | 45651   | 45704   | RNA → RpsM (COG0099)rpsM (PRK05179) → PRK05309 (PRK05309)RpsK (COG0100) → RpsD (COG0522)rpsD (PRK05327) → RpoA (COG0202)PRK05182 (PRK05182) →                                                                 |
| env-53  | JGI20163J15578_10027836        | - | 917     | 824     | RNA → hypo → RpsM (COG0099)rpsM (PRK05179) → PRK05309 (PRK05309)RpsK (COG0100) →                                                                                                                              |
| env-54  | scaffold18531_1.V1.CD-15       | + | 542     | 602     | RNA →                                                                                                                                                                                                         |
| env-55  | 4491403.3.NODE.1641            | + | 19531   | 19591   | RNA → RpsM (COG0099)rpsM (PRK05179) → PRK05309 (PRK05309)RpsK (COG0100) →                                                                                                                                     |
| env-56  | 4491482.3.NODE.7819            | - | 589     | 529     | RNA → RpsM (COG0099)rpsM (PRK05179) →                                                                                                                                                                         |
| env-57  | longitudinal_52_17             | - | 410211  | 410151  | RNA → RpsM (COG0099)rpsM (PRK05179) → PRK05309 (PRK05309)RpsK (COG0100) →                                                                                                                                     |
| env-58  | longitudinal_231_54            | - | 190275  | 190215  | RNA → RpsM (COG0099)rpsM (PRK05179) → PRK05309 (PRK05309)RpsK (COG0100) →                                                                                                                                     |
| env-59  | DOF012.scaffold14355_2         | + | 135     | 195     | RNA → RpsM (COG0099)rpsM (PRK05179) → PRK05309 (PRK05309)RpsK (COG0100) →                                                                                                                                     |
| env-60  | longitudinal_230_114           | - | 42745   | 42685   | RNA → RpsM (COG0099)rpsM (PRK05179) → PRK05309 (PRK05309)RpsK (COG0100) →                                                                                                                                     |
| env-61  | longitudinal_232_15            | - | 36662   | 36602   | RNA → RpsM (COG0099)rpsM (PRK05179) → PRK05309 (PRK05309)RpsK (COG0100) →                                                                                                                                     |
| env-62  | scaffold82035_1.MH0014         | - | 119     | 59      | RNA →                                                                                                                                                                                                         |
| env-63  | scaffold818_2.V1.CD-12         | + | 285     | 345     | RNA → RpsM (COG0099)rpsM (PRK05179) →                                                                                                                                                                         |
| env-64  | SRS075398_C2026444             | + | 301     | 361     | RNA → ←hypo                                                                                                                                                                                                   |
| env-65  | SRS012902_C526759              | + | 741     | 801     | RNA →                                                                                                                                                                                                         |
| env-66  | SRS023346_C1056305             | - | 107     | 47      | RNA → hypo →                                                                                                                                                                                                  |
| env-67  | BABA01009209.1                 | + | 367     | 427     | RNA → RpsM (COG0099)rpsM (PRK05179) → PRK05309 (PRK05309)RpsK (COG0100) →                                                                                                                                     |
| env-68  | scaffold33086_2.V1.CD-1        | - | 516     | 456     | RNA → RpsM (COG0099)rpsM (PRK05179) →                                                                                                                                                                         |
| env-69  | DLM009_scaffold11270_3         | + | 4628    | 4688    | RNA → RpsM (COG0099)rpsM (PRK05179) → PRK05309 (PRK05309)RpsK (COG0100) →                                                                                                                                     |
| env-70  | NLM017_scaffold20089_2         | + | 813     | 873     | RNA → RpsM (COG0099)rpsM (PRK05179) → PRK05309 (PRK05309)RpsK (COG0100) →                                                                                                                                     |
| env-71  | NLM027_scaffold10047_1         | - | 48785   | 48725   | RNA → RpsM (COG0099)rpsM (PRK05179) → PRK05309 (PRK05309)RpsK (COG0100) →                                                                                                                                     |
| env-72  | NLM028_scaffold839_7           | - | 1356    | 1296    | RNA → RpsM (COG0099)rpsM (PRK05179) → PRK05309 (PRK05309)RpsK (COG0100) →                                                                                                                                     |
| env-73  | NOF005_scaffold31692_1         | - | 1199    | 1139    | RNA → RpsM (COG0099)rpsM (PRK05179) → PRK05309 (PRK05309)RpsK (COG0100) →                                                                                                                                     |
| env-74  | NOM002_scaffold8624_11         | - | 5573    | 5513    | RNA → RpsM (COG0099)rpsM (PRK05179) → PRK05309 (PRK05309)RpsK (COG0100) →                                                                                                                                     |
| Rgn-3-1 | NZ_AAAYG02000020.1             | - | 118252  | 118192  | RNA → RpsM (COG0099)rpsM (PRK05179) → RpsM (COG0099)rpsM (PRK05179) → RpsM (COG0099)rpsM (PRK05179) → PRK05309 (PRK05309)RpsK (COG0100) → PRK05309 (PRK05309)RpsK (COG0100) →                                 |
| env-75  | SRS012273_Baylor_scaffold_747  | + | 3356    | 3416    | RNA → RpsM (COG0099)rpsM (PRK05179) →                                                                                                                                                                         |
| env-76  | DLM024_scaffold1675_1          | + | 19438   | 19498   | RNA → RpsM (COG0099)rpsM (PRK05179) → PRK05309 (PRK05309)RpsK (COG0100) →                                                                                                                                     |
| env-77  | DOM026_scaffold2679_6          | + | 580     | 640     | RNA → RpsM (COG0099)rpsM (PRK05179) →                                                                                                                                                                         |
| env-78  | SRS023176_C906831              | - | 179     | 119     | RNA → rps13 (CHL00137)rpsM (PRK05179) →                                                                                                                                                                       |
| env-79  | longitudinal_525_50            | + | 44720   | 44780   | RNA → RpsM (COG0099)rpsM (PRK05179) → PRK05309 (PRK05309)RpsK (COG0100) →                                                                                                                                     |
| Lba-3-1 | NZ_GL945339.1                  | - | 5397    | 5337    | RNA → RpsM (COG0099)rpsM (PRK05179) → PRK05309 (PRK05309)RpsK (COG0100) →                                                                                                                                     |
| Rgn-2-1 | NZ_KI669415.1                  | - | 296050  | 295990  | RNA → RpsM (COG0099)rpsM (PRK05179) → PRK05309 (PRK05309)RpsK (COG0100) →                                                                                                                                     |
| env-80  | NLM007_scaffold2834_4          | + | 3478    | 3538    | RNA → RpsM (COG0099)rpsM (PRK05179) →                                                                                                                                                                         |
| env-81  | SRS015578_WUGC_scaffold_47109  | - | 107     | 47      | RNA →                                                                                                                                                                                                         |
| Rgn-1-1 | NZ_JAGQ01000004.1              | + | 1161487 | 1161547 | RNA → RpsM (COG0099)rpsM (PRK05179) → PRK05309 (PRK05309)RpsK (COG0100) →                                                                                                                                     |
| env-82  | SRS057717_LANL_scaffold_8560   | + | 38      | 98      | RNA → RpsM (COG0099)rpsM (PRK05179) →                                                                                                                                                                         |
| env-83  | 4491488.3.NODE.4718            | - | 3548    | 3488    | RNA → RpsM (COG0099)rpsM (PRK05179) → PRK05309 (PRK05309)RpsK (COG0100) →                                                                                                                                     |

|          |                                 |   |        |        |                                                                                                                                                  |
|----------|---------------------------------|---|--------|--------|--------------------------------------------------------------------------------------------------------------------------------------------------|
| env-84   | NOM026_C930720.1                | + | 365    | 425    | RNA → RpsM (COG0099)rpsM (PRK05179) →                                                                                                            |
| env-85   | NOM027_scaffold1888.6           | + | 683    | 743    | RNA → RpsM (COG0099)rpsM (PRK05179) → PRK05309 (PRK05309)RpsK (COG0100) →                                                                        |
| env-86   | NOM028_scaffold2883.9           | + | 12792  | 12852  | RNA → RpsM (COG0099)rpsM (PRK05179) → PRK05309 (PRK05309)RpsK (COG0100) →                                                                        |
| env-87   | SRS017521_Baylor_scaffold.33616 | - | 298    | 238    | RNA → rps13 (CHL00137)rpsM (PRK05179) →                                                                                                          |
| env-88   | longitudinal_460_95             | + | 247645 | 247697 | RNA → RpsM (COG0099)rpsM (PRK05179) → PRK05309 (PRK05309)RpsK (COG0100) →                                                                        |
| env-89   | 4448814.3_Contig36431           | + | 203    | 262    | RNA → RpsM (COG0099)rpsM (PRK05179) →                                                                                                            |
| env-90   | JGI20163J15578_10056589         | + | 1720   | 1809   | RNA → RpsM (COG0099)rpsM (PRK05179) →                                                                                                            |
| env-91   | JGI20163J15578_10006853         | + | 4205   | 4343   | RNA → RpsM (COG0099)rpsM (PRK05179) →                                                                                                            |
| env-92   | HCF14C_2.1.1_newblercontig58175 | + | 339    | 418    | RNA →                                                                                                                                            |
| env-93   | AUXO011545607.1                 | - | 224    | 130    | RNA → ←-hypo                                                                                                                                     |
| env-94   | AUXO017992350.1                 | + | 172    | 224    | RNA → RpsM (COG0099)rpsM (PRK05179) → hypo →                                                                                                     |
| Lba-11-1 | NZ_JNKK01000010.1               | - | 51200  | 51148  | RNA → RpsM (COG0099)rpsM (PRK05179) → PRK05309 (PRK05309)RpsK (COG0100) →<br>RpsD (COG0522)rpsD (PRK05327) → RpoA (COG0202)PRK05182 (PRK05182) → |
| env-95   | AUXO011286893.1                 | + | 221    | 272    | RNA → RpsM (COG0099)rpsM (PRK05179) →                                                                                                            |
| env-96   | AUXO012939603.1                 | + | 907    | 958    | RNA →                                                                                                                                            |
| env-97   | longitudinal_461_56             | + | 109667 | 109723 | RNA → RpsM (COG0099)rpsM (PRK05179) → PRK05309 (PRK05309)RpsK (COG0100) →<br>RpsD (COG0522)rpsD (PRK05327) → RpoA (COG0202)PRK05182 (PRK05182) → |
| env-98   | longitudinal_462_123            | + | 109674 | 109730 | RNA → RpsM (COG0099)rpsM (PRK05179) → PRK05309 (PRK05309)RpsK (COG0100) →<br>RpsD (COG0522)rpsD (PRK05327) → RpoA (COG0202)PRK05182 (PRK05182) → |
| env-99   | longitudinal_463_7              | + | 109694 | 109750 | RNA → RpsM (COG0099)rpsM (PRK05179) → PRK05309 (PRK05309)RpsK (COG0100) →<br>RpsD (COG0522)rpsD (PRK05327) → RpoA (COG0202)PRK05182 (PRK05182) → |
| env-100  | longitudinal_522_3104           | + | 4325   | 4381   | RNA → RpsM (COG0099)rpsM (PRK05179) → PRK05309 (PRK05309)RpsK (COG0100) →<br>RpsD (COG0522)rpsD (PRK05327) →                                     |
| Dsp-3-1  | NZ_KQ236746.1                   | + | 368740 | 368792 | RNA → RpsM (COG0099)rpsM (PRK05179) → PRK05309 (PRK05309)RpsK (COG0100) →<br>RpsD (COG0522)rpsD (PRK05327) → RpoA (COG0202)PRK05182 (PRK05182) → |
| Dsp-1-1  | NZ_KE159794.1                   | - | 157768 | 157723 | RNA → RpsM (COG0099)rpsM (PRK05179) → PRK05309 (PRK05309)RpsK (COG0100) →<br>RpsD (COG0522)rpsD (PRK05327) → RpoA (COG0202)PRK05182 (PRK05182) → |
| env-101  | SRS011134_C4860384              | + | 270    | 323    | RNA →                                                                                                                                            |
| env-102  | SRS016095_C2345639              | - | 169    | 116    | RNA → rps13 (CHL00137)rpsM (PRK05179) →                                                                                                          |
| Dsp-2-1  | NZ_ATVU01000008.1               | + | 63049  | 63102  | RNA → RpsM (COG0099)rpsM (PRK05179) → PRK05309 (PRK05309)RpsK (COG0100) →<br>RpsD (COG0522)rpsD (PRK05327) → RpoA (COG0202)PRK05182 (PRK05182) → |
| env-103  | SRS018313_C7830548              | - | 121    | 68     | RNA →                                                                                                                                            |
| env-104  | SRS011271_C2920016              | + | 238    | 291    | RNA →                                                                                                                                            |
| env-105  | SRS015133_C3278084              | + | 230    | 283    | RNA →                                                                                                                                            |
| env-106  | longitudinal_66_246             | + | 13912  | 13965  | RNA → RpsM (COG0099)rpsM (PRK05179) → PRK05309 (PRK05309)RpsK (COG0100) →<br>RpsD (COG0522)rpsD (PRK05327) → RpoA (COG0202)PRK05182 (PRK05182) → |
| env-107  | longitudinal_67_37              | + | 13912  | 13965  | RNA → RpsM (COG0099)rpsM (PRK05179) → PRK05309 (PRK05309)RpsK (COG0100) →<br>RpsD (COG0522)rpsD (PRK05327) → RpoA (COG0202)PRK05182 (PRK05182) → |
| env-108  | longitudinal_111_61             | + | 12242  | 12295  | RNA → RpsM (COG0099)rpsM (PRK05179) → PRK05309 (PRK05309)RpsK (COG0100) →<br>RpsD (COG0522)rpsD (PRK05327) → RpoA (COG0202)PRK05182 (PRK05182) → |
| env-109  | longitudinal_112_225            | + | 13912  | 13965  | RNA → RpsM (COG0099)rpsM (PRK05179) → PRK05309 (PRK05309)RpsK (COG0100) →<br>RpsD (COG0522)rpsD (PRK05327) → RpoA (COG0202)PRK05182 (PRK05182) → |
| env-110  | longitudinal_187_175            | + | 41148  | 41201  | RNA → RpsM (COG0099)rpsM (PRK05179) → PRK05309 (PRK05309)RpsK (COG0100) →<br>RpsD (COG0522)rpsD (PRK05327) → RpoA (COG0202)PRK05182 (PRK05182) → |
| env-111  | longitudinal_295_1              | - | 30869  | 30816  | RNA → RpsM (COG0099)rpsM (PRK05179) → PRK05309 (PRK05309)RpsK (COG0100) →<br>RpsD (COG0522)rpsD (PRK05327) → RpoA (COG0202)PRK05182 (PRK05182) → |
| env-112  | longitudinal_296_203            | - | 16114  | 16061  | RNA → RpsM (COG0099)rpsM (PRK05179) → PRK05309 (PRK05309)RpsK (COG0100) →<br>RpsD (COG0522)rpsD (PRK05327) → RpoA (COG0202)PRK05182 (PRK05182) → |
| env-113  | longitudinal_297_58             | - | 30869  | 30816  | RNA → RpsM (COG0099)rpsM (PRK05179) → PRK05309 (PRK05309)RpsK (COG0100) →<br>RpsD (COG0522)rpsD (PRK05327) → RpoA (COG0202)PRK05182 (PRK05182) → |
| env-114  | longitudinal_298_248            | + | 4540   | 4593   | RNA → RpsM (COG0099)rpsM (PRK05179) → PRK05309 (PRK05309)RpsK (COG0100) →<br>RpsD (COG0522)rpsD (PRK05327) →                                     |
| env-115  | longitudinal_421_71             | + | 56051  | 56104  | RNA → RpsM (COG0099)rpsM (PRK05179) → PRK05309 (PRK05309)RpsK (COG0100) →<br>RpsD (COG0522)rpsD (PRK05327) → RpoA (COG0202)PRK05182 (PRK05182) → |



|         |                                 |   |        |        |                                                                                                                                                                                                                                                                                                                       |
|---------|---------------------------------|---|--------|--------|-----------------------------------------------------------------------------------------------------------------------------------------------------------------------------------------------------------------------------------------------------------------------------------------------------------------------|
| Dfo-2-1 | NZ_AAxA02000012.1               | - | 126306 | 126253 | RNA → RpsM (COG0099)rpsM (PRK05179) → RpsM (COG0099)rpsM (PRK05179) → RpsM (COG0099)rpsM (PRK05179) → PRK05309 (PRK05309)RpsK (COG0100) → PRK05309 (PRK05309)RpsK (COG0100) → RpsD (COG0522)rpsD (PRK05327) → RpsD (COG0522)rpsD (PRK05327) → RpoA (COG0202)PRK05182 (PRK05182) → RpoA (COG0202)PRK05182 (PRK05182) → |
| Dfo-1-1 | NZ_JH126494.1                   | - | 91730  | 91677  | RNA → RpsM (COG0099)rpsM (PRK05179) → PRK05309 (PRK05309)RpsK (COG0100) → RpsD (COG0522)rpsD (PRK05327) → RpoA (COG0202)PRK05182 (PRK05182) →                                                                                                                                                                         |
| env-116 | SRS015217_C2148859              | - | 111    | 58     | RNA → hypo →                                                                                                                                                                                                                                                                                                          |
| env-117 | SRS023914_C1983791              | - | 382    | 329    | RNA → RpsM (COG0099)rpsM (PRK05179) →                                                                                                                                                                                                                                                                                 |
| env-118 | DLM022_scaffold5029_5           | - | 1050   | 997    | RNA → RpsM (COG0099)rpsM (PRK05179) → PRK05309 (PRK05309)RpsK (COG0100) → hypo →                                                                                                                                                                                                                                      |
| env-119 | NOM001_scaffold35657_1          | + | 984    | 1035   | RNA → RpsM (COG0099)rpsM (PRK05179) →                                                                                                                                                                                                                                                                                 |
| env-120 | SRS015217_C2114294              | - | 125    | 74     | RNA → hypo →                                                                                                                                                                                                                                                                                                          |
| env-121 | SRS017521_Baylor_scaffold_12819 | - | 125    | 74     | RNA → hypo →                                                                                                                                                                                                                                                                                                          |
| env-122 | SRS064276_LANL_scaffold_58360   | + | 453    | 504    | RNA →                                                                                                                                                                                                                                                                                                                 |
| env-123 | 4491413.3_NODE.12466            | - | 145    | 94     | RNA → rps13 (CHL00137)rpsM (PRK05179) →                                                                                                                                                                                                                                                                               |
| env-124 | 4491421.3_NODE.115793           | + | 17730  | 17781  | RNA → RpsM (COG0099)rpsM (PRK05179) → PRK05309 (PRK05309)RpsK (COG0100) → RpsD (COG0522)rpsD (PRK05327) →                                                                                                                                                                                                             |
| env-125 | longitudinal_113_28             | - | 33326  | 33275  | RNA → RpsM (COG0099)rpsM (PRK05179) → PRK05309 (PRK05309)RpsK (COG0100) → RpsD (COG0522)rpsD (PRK05327) → RpoA (COG0202)PRK05182 (PRK05182) →                                                                                                                                                                         |
| env-126 | longitudinal_114_32             | - | 20351  | 20300  | RNA → RpsM (COG0099)rpsM (PRK05179) → PRK05309 (PRK05309)RpsK (COG0100) → RpsD (COG0522)rpsD (PRK05327) → RpoA (COG0202)PRK05182 (PRK05182) →                                                                                                                                                                         |
| Dlo-2-1 | NZ_DS264399.1                   | + | 39450  | 39501  | rplQ (PRK05591)Ribosomal_L17 (pfam01196) → RNA → RpsM (COG0099)rpsM (PRK05179) → PRK05309 (PRK05309)RpsK (COG0100) → RpsD (COG0522)rpsD (PRK05327) → RpoA (COG0202)PRK05182 (PRK05182) →                                                                                                                              |
| env-127 | AUXO014831574.1                 | - | 23382  | 23331  | RpoA (COG0202)PRK05182 (PRK05182) → rplQ (PRK05591)Ribosomal_L17 (pfam01196) → RNA → RpsM (COG0099)rpsM (PRK05179) → PRK05309 (PRK05309)RpsK (COG0100) → RpsD (COG0522)rpsD (PRK05327) → RpoA (COG0202)PRK05182 (PRK05182) →                                                                                          |
| env-128 | SRS015782_C3128808              | + | 194    | 245    | RNA →                                                                                                                                                                                                                                                                                                                 |
| env-129 | scaffold84298_1_MH0050          | - | 369    | 318    | RNA → RpsM (COG0099)rpsM (PRK05179) →                                                                                                                                                                                                                                                                                 |
| env-130 | longitudinal_299_23             | - | 26288  | 26235  | RNA → RpsM (COG0099)rpsM (PRK05179) → PRK05309 (PRK05309)RpsK (COG0100) → RpsD (COG0522)rpsD (PRK05327) → RpoA (COG0202)PRK05182 (PRK05182) →                                                                                                                                                                         |
| env-131 | longitudinal_300_84             | - | 26610  | 26557  | rplQ (PRK05591)Ribosomal_L17 (pfam01196) → RNA → RpsM (COG0099)rpsM (PRK05179) → PRK05309 (PRK05309)RpsK (COG0100) → RpsD (COG0522)rpsD (PRK05327) → RpoA (COG0202)PRK05182 (PRK05182) →                                                                                                                              |
| env-132 | longitudinal_301_116            | - | 26432  | 26379  | RNA → RpsM (COG0099)rpsM (PRK05179) → PRK05309 (PRK05309)RpsK (COG0100) → RpsD (COG0522)rpsD (PRK05327) → RpoA (COG0202)PRK05182 (PRK05182) →                                                                                                                                                                         |
| env-133 | longitudinal_302_50             | + | 53065  | 53118  | rplQ (PRK05591)Ribosomal_L17 (pfam01196) → RNA → RpsM (COG0099)rpsM (PRK05179) → PRK05309 (PRK05309)RpsK (COG0100) → RpsD (COG0522)rpsD (PRK05327) → RpoA (COG0202)PRK05182 (PRK05182) →                                                                                                                              |
| env-134 | longitudinal_346_79             | + | 20368  | 20421  | RNA → RpsM (COG0099)rpsM (PRK05179) → PRK05309 (PRK05309)RpsK (COG0100) → RpsD (COG0522)rpsD (PRK05327) → RpoA (COG0202)PRK05182 (PRK05182) →                                                                                                                                                                         |
| env-135 | longitudinal_347_101            | - | 54042  | 53989  | rplQ (PRK05591)Ribosomal_L17 (pfam01196) → RNA → RpsM (COG0099)rpsM (PRK05179) → PRK05309 (PRK05309)RpsK (COG0100) → RpsD (COG0522)rpsD (PRK05327) → RpoA (COG0202)PRK05182 (PRK05182) →                                                                                                                              |
| env-136 | SRS016095_WUGC_scaffold_24083   | - | 346    | 293    | RNA → RpsM (COG0099)rpsM (PRK05179) →                                                                                                                                                                                                                                                                                 |
| env-137 | NLM027_scaffold13626_3          | - | 4716   | 4663   | RNA → RpsM (COG0099)rpsM (PRK05179) → PRK05309 (PRK05309)RpsK (COG0100) → RpsD (COG0522)rpsD (PRK05327) → RpoA (COG0202)PRK05182 (PRK05182) →                                                                                                                                                                         |
| env-138 | NOM029_scaffold5480_12          | - | 185    | 132    | rplQ (PRK05591)Ribosomal_L17 (pfam01196) → RNA → rps13 (CHL00137)rpsM (PRK05179) →                                                                                                                                                                                                                                    |



|         |                                 |   |        |        |                                                                                                                                                                                                                                                                                |
|---------|---------------------------------|---|--------|--------|--------------------------------------------------------------------------------------------------------------------------------------------------------------------------------------------------------------------------------------------------------------------------------|
| env-139 | longitudinal_464_28             | + | 52346  | 52399  | RNA → RpsM (COG0099)rpsM (PRK05179) → PRK05309 (PRK05309)RpsK (COG0100) → RpsD (COG0522)rpsD (PRK05327) → RpoA (COG0202)PRK05182 (PRK05182) → rplQ (PRK05591)Ribosomal_L17 (pfam01196) →                                                                                       |
| Dlo-1-1 | NZ_KE384171.1                   | - | 39745  | 39692  | RNA → RpsM (COG0099)rpsM (PRK05179) → PRK05309 (PRK05309)RpsK (COG0100) → RpsD (COG0522)rpsD (PRK05327) → RpoA (COG0202)PRK05182 (PRK05182) → rplQ (PRK05591)Ribosomal_L17 (pfam01196) →                                                                                       |
| env-140 | DLM009_scaffold5025_5           | + | 13073  | 13126  | RNA → RpsM (COG0099)rpsM (PRK05179) → PRK05309 (PRK05309)RpsK (COG0100) → RpsD (COG0522)rpsD (PRK05327) → RpoA (COG0202)PRK05182 (PRK05182) → rplQ (PRK05591)Ribosomal_L17 (pfam01196) →                                                                                       |
| env-141 | longitudinal_134_7              | + | 68515  | 68568  | RNA → RpsM (COG0099)rpsM (PRK05179) → PRK05309 (PRK05309)RpsK (COG0100) → RpsD (COG0522)rpsD (PRK05327) → RpoA (COG0202)PRK05182 (PRK05182) → rplQ (PRK05591)Ribosomal_L17 (pfam01196) → hypo → GltD (COG0493)NuoF (COG1894)NADH_4Fe-4S (pfam10589)NAD_binding_8 (pfam13450) → |
| env-142 | longitudinal_135_8              | - | 31400  | 31347  | RNA → RpsM (COG0099)rpsM (PRK05179) → PRK05309 (PRK05309)RpsK (COG0100) → RpsD (COG0522)rpsD (PRK05327) → RpoA (COG0202)PRK05182 (PRK05182) → rplQ (PRK05591)Ribosomal_L17 (pfam01196) → hypo → GltD (COG0493)NuoF (COG1894)NADH_4Fe-4S (pfam10589)NAD_binding_8 (pfam13450) → |
| env-143 | longitudinal_188_28             | + | 68515  | 68568  | RNA → RpsM (COG0099)rpsM (PRK05179) → PRK05309 (PRK05309)RpsK (COG0100) → RpsD (COG0522)rpsD (PRK05327) → RpoA (COG0202)PRK05182 (PRK05182) → rplQ (PRK05591)Ribosomal_L17 (pfam01196) → hypo → GltD (COG0493)NuoF (COG1894)NADH_4Fe-4S (pfam10589)NAD_binding_8 (pfam13450) → |
| env-144 | longitudinal_189_5              | - | 31403  | 31350  | RNA → RpsM (COG0099)rpsM (PRK05179) → PRK05309 (PRK05309)RpsK (COG0100) → RpsD (COG0522)rpsD (PRK05327) → RpoA (COG0202)PRK05182 (PRK05182) → rplQ (PRK05591)Ribosomal_L17 (pfam01196) → hypo → GltD (COG0493)NuoF (COG1894)NADH_4Fe-4S (pfam10589)NAD_binding_8 (pfam13450) → |
| env-145 | longitudinal_190_130            | + | 68514  | 68567  | RNA → RpsM (COG0099)rpsM (PRK05179) → PRK05309 (PRK05309)RpsK (COG0100) → RpsD (COG0522)rpsD (PRK05327) → RpoA (COG0202)PRK05182 (PRK05182) → rplQ (PRK05591)Ribosomal_L17 (pfam01196) → hypo → GltD (COG0493)NuoF (COG1894)NADH_4Fe-4S (pfam10589)NAD_binding_8 (pfam13450) → |
| env-146 | longitudinal_465_52             | + | 52346  | 52399  | RNA → RpsM (COG0099)rpsM (PRK05179) → PRK05309 (PRK05309)RpsK (COG0100) → RpsD (COG0522)rpsD (PRK05327) → RpoA (COG0202)PRK05182 (PRK05182) → rplQ (PRK05591)Ribosomal_L17 (pfam01196) →                                                                                       |
| env-147 | longitudinal_466_3              | - | 31944  | 31891  | RNA → RpsM (COG0099)rpsM (PRK05179) → PRK05309 (PRK05309)RpsK (COG0100) → RpsD (COG0522)rpsD (PRK05327) → RpoA (COG0202)PRK05182 (PRK05182) → rplQ (PRK05591)Ribosomal_L17 (pfam01196) →                                                                                       |
| env-148 | longitudinal_467_77             | + | 52344  | 52397  | RNA → RpsM (COG0099)rpsM (PRK05179) → PRK05309 (PRK05309)RpsK (COG0100) → RpsD (COG0522)rpsD (PRK05327) → RpoA (COG0202)PRK05182 (PRK05182) → rplQ (PRK05591)Ribosomal_L17 (pfam01196) →                                                                                       |
| env-149 | longitudinal_414_23             | + | 90211  | 90261  | RNA → RpsM (COG0099)rpsM (PRK05179) → PRK05309 (PRK05309)RpsK (COG0100) → RpsD (COG0522)rpsD (PRK05327) → RpoA (COG0202)PRK05182 (PRK05182) →                                                                                                                                  |
| env-150 | SRS017191_Baylor_scaffold_17384 | - | 388    | 337    | RNA → RpsM (COG0099)rpsM (PRK05179) →                                                                                                                                                                                                                                          |
| env-151 | SRS015217_WUGC_scaffold_28345   | - | 149    | 98     | RNA →                                                                                                                                                                                                                                                                          |
| Chy-1-1 | NZ_GG657761.1                   | + | 327237 | 327288 | RNA → RpsM (COG0099)rpsM (PRK05179) → RpsM (COG0099)rpsM (PRK05179) → PRK05309 (PRK05309)RpsK (COG0100) → RpsD (COG0522)rpsD (PRK05327) → RpsD (COG0522)rpsD (PRK05327) → RpoA (COG0202)PRK05182 (PRK05182) →                                                                  |
| env-152 | SRS043411_C1566362              | - | 324    | 270    | RNA → hypo →                                                                                                                                                                                                                                                                   |
| env-153 | SRS016495_LANL_scaffold_8908    | - | 253    | 200    | RNA → rps13 (CHL00137)rpsM (PRK05179) →                                                                                                                                                                                                                                        |
| env-154 | SRS016517_C20253773             | - | 120    | 67     | RNA → hypo →                                                                                                                                                                                                                                                                   |
| Esp-1-1 | NZ_JPJE01000006.1               | + | 154152 | 154252 | RNA → RpsM (COG0099)rpsM (PRK05179) →                                                                                                                                                                                                                                          |
| env-155 | SRS023971_Baylor_scaffold_879   | - | 742    | 602    | RNA → RpsM (COG0099)rpsM (PRK05179) → rps11 (CHL00041)PRK05309 (PRK05309) →                                                                                                                                                                                                    |

|         |                                 |   |         |         |                                                                                                                                                      |
|---------|---------------------------------|---|---------|---------|------------------------------------------------------------------------------------------------------------------------------------------------------|
| env-156 | longitudinal_21_17              | - | 9462    | 9322    | RNA → RpsM (COG0099)rpsM (PRK05179) → PRK05309 (PRK05309)RpsK (COG0100) → RpsD (COG0522)rpsD (PRK05327) →                                            |
| env-157 | longitudinal_22_92              | - | 2112    | 1972    | RNA → RpsM (COG0099)rpsM (PRK05179) → PRK05309 (PRK05309)RpsK (COG0100) → RpsD (COG0522)rpsD (PRK05327) →                                            |
| env-158 | longitudinal_23_385             | - | 106549  | 106409  | RNA → RpsM (COG0099)rpsM (PRK05179) → PRK05309 (PRK05309)RpsK (COG0100) → RpsD (COG0522)rpsD (PRK05327) →                                            |
| env-159 | DLM016_scaffold59795_1          | - | 189     | 49      | RNA →                                                                                                                                                |
| env-160 | SRS048870_WUGC_scaffold_43350   | - | 502     | 362     | RNA → RpsM (COG0099)rpsM (PRK05179) →                                                                                                                |
| env-161 | NLM032_scaffold39271_3          | + | 153     | 293     | RNA → RpsM (COG0099)rpsM (PRK05179) → PRK05309 (PRK05309)RpsK (COG0100) → RpsD (COG0522)rpsD (PRK05327) →                                            |
| env-162 | SRS016095_WUGC_scaffold_16877   | - | 640     | 500     | RNA → RpsM (COG0099)rpsM (PRK05179) →                                                                                                                |
| env-163 | SRS049959_C3775241              | - | 206     | 66      | RNA → hypo →                                                                                                                                         |
| env-164 | scaffold9684_3_O2.UC-11         | + | 3170    | 3310    | RNA →                                                                                                                                                |
| env-165 | longitudinal_441_49             | + | 144537  | 144677  | RNA → RpsM (COG0099)rpsM (PRK05179) → PRK05309 (PRK05309)RpsK (COG0100) → RpsD (COG0522)rpsD (PRK05327) →                                            |
| env-166 | SRS018351_C2776780              | - | 763     | 623     | RNA → RpsM (COG0099)rpsM (PRK05179) → PRK05309 (PRK05309)RpsK (COG0100) →                                                                            |
| env-167 | SRS011586_WUGC_scaffold_26070   | - | 188     | 48      | RNA → hypo →                                                                                                                                         |
| env-168 | NOF014_scaffold14549_2          | + | 5949    | 6089    | RNA → RpsM (COG0099)rpsM (PRK05179) → PRK05309 (PRK05309)RpsK (COG0100) → RpsD (COG0522)rpsD (PRK05327) →                                            |
| env-169 | DOF008_scaffold13044_2          | - | 703     | 563     | RNA → RpsM (COG0099)rpsM (PRK05179) → rps11 (CHL00041)PRK05309 (PRK05309) →                                                                          |
| env-170 | NLM028_scaffold5808_6           | + | 527     | 667     | RNA → RpsM (COG0099)rpsM (PRK05179) → PRK05309 (PRK05309)RpsK (COG0100) → RpsD (COG0522)rpsD (PRK05327) →                                            |
| env-171 | DOF009_scaffold30020_7          | + | 1575    | 1715    | RNA → RpsM (COG0099)rpsM (PRK05179) → PRK05309 (PRK05309)RpsK (COG0100) → hypo →                                                                     |
| env-172 | DLM010_scaffold23309_2          | + | 360     | 500     | RNA → RpsM (COG0099)rpsM (PRK05179) →                                                                                                                |
| env-173 | DOM003_scaffold5836_26          | + | 3132    | 3272    | RNA → RpsM (COG0099)rpsM (PRK05179) → PRK05309 (PRK05309)RpsK (COG0100) →                                                                            |
| env-174 | NLM026_scaffold16599_9          | + | 5961    | 6101    | RNA → RpsM (COG0099)rpsM (PRK05179) → PRK05309 (PRK05309)RpsK (COG0100) → RpsD (COG0522)rpsD (PRK05327) →                                            |
| env-175 | DLM027_scaffold4257_3           | - | 2404    | 2264    | RNA → RpsM (COG0099)rpsM (PRK05179) → PRK05309 (PRK05309)RpsK (COG0100) → RpsD (COG0522)rpsD (PRK05327) →                                            |
| env-176 | SRS065504_LANL_scaffold_20275   | - | 380     | 240     | RNA → RpsM (COG0099)rpsM (PRK05179) →                                                                                                                |
| env-177 | NOF010_C660913_1                | + | 68      | 208     | RNA → RpsM (COG0099)rpsM (PRK05179) → PRK05309 (PRK05309)RpsK (COG0100) →                                                                            |
| env-178 | DLM022_scaffold4596_9           | - | 438     | 298     | RNA → RpsM (COG0099)rpsM (PRK05179) →                                                                                                                |
| Lba-4-1 | NZ_KE159795.1                   | - | 1371013 | 1370958 | RNA → RpsM (COG0099)rpsM (PRK05179) →                                                                                                                |
| env-179 | DLF012_scaffold283_24           | + | 205     | 261     | RNA → RpsM (COG0099)rpsM (PRK05179) → PRK05309 (PRK05309)RpsK (COG0100) → S4 (smart00363)RpsD (COG0522) →                                            |
| env-180 | longitudinal_337_87             | + | 40213   | 40269   | RNA → RpsM (COG0099)rpsM (PRK05179) → PRK05309 (PRK05309)RpsK (COG0100) → RpsD (COG0522)rpsD (PRK05327) → RpoA (COG0202)PRK05182 (PRK05182) →        |
| Csc-1-1 | NZ_DS499705.1                   | - | 60598   | 60542   | RNA → RpsM (COG0099)rpsM (PRK05179) → PRK05309 (PRK05309)RpsK (COG0100) → RpsD (COG0522)rpsD (PRK05327) → RpsD (COG0522)rpsD (PRK05327) →            |
| Cba-3-1 | NZ_BAII02000008.1               | + | 191914  | 191970  | RNA → RpsM (COG0099)rpsM (PRK05179) → PRK05309 (PRK05309)RpsK (COG0100) → RpsD (COG0522)rpsD (PRK05327) → RpoA (COG0202)PRK05182 (PRK05182) →        |
| [sc-1-1 | NZ_BAHS01000033.1               | + | 21391   | 21446   | RNA → RpsM (COG0099)rpsM (PRK05179) → PRK05309 (PRK05309)RpsK (COG0100) → hypo → RpsD (COG0522)rpsD (PRK05327) → RpoA (COG0202)PRK05182 (PRK05182) → |
| Lba-7-1 | NZ_GL945245.1                   | - | 61088   | 61032   | RNA → RpsM (COG0099)rpsM (PRK05179) → PRK05309 (PRK05309)RpsK (COG0100) → RpsD (COG0522)rpsD (PRK05327) → RpoA (COG0202)PRK05182 (PRK05182) →        |
| env-181 | DLF009_C396903.1                | + | 387     | 443     | RNA → rps13 (CHL00137)rpsM (PRK05179) →                                                                                                              |
| env-182 | AUXO014627591.1                 | + | 809     | 856     | RNA →                                                                                                                                                |
| env-183 | AUXO010674837.1                 | - | 397     | 351     | RNA → RpsM (COG0099)rpsM (PRK05179) →                                                                                                                |
| env-184 | 4448819.3.Contig14521           | + | 180     | 277     | RNA → rps13 (CHL00137)rpsM (PRK05179) →                                                                                                              |
| env-185 | scaffold93_3_V1.CD-12           | + | 256     | 353     | RNA → RpsM (COG0099)rpsM (PRK05179) →                                                                                                                |
| env-186 | SRS017521_Baylor_scaffold_37560 | + | 56      | 153     | RNA → RpsM (COG0099)rpsM (PRK05179) →                                                                                                                |
| env-187 | SRS024132_Baylor_scaffold_32332 | + | 1683    | 1780    | RNA →                                                                                                                                                |
| env-188 | SRS042284_C1690458              | - | 139     | 42      | RNA → hypo →                                                                                                                                         |
| env-189 | BABA01032099.1                  | + | 74      | 171     | RNA → RpsM (COG0099)rpsM (PRK05179) →                                                                                                                |

|         |                                     |   |         |         |                                                                               |
|---------|-------------------------------------|---|---------|---------|-------------------------------------------------------------------------------|
| env-190 | NOF005_scaffold49548_1              | + | 65      | 162     | RNA → RpsM (COG0099)rpsM (PRK05179) →                                         |
| env-191 | DLF006_scaffold33559_1              | + | 534     | 631     | RNA → ←-hypo                                                                  |
| env-192 | DLM012_scaffold29270_1              | + | 539     | 636     | RNA → RpsM (COG0099)rpsM (PRK05179) →                                         |
| env-193 | DLM022_scaffold333_4                | + | 12625   | 12722   | RNA → RpsM (COG0099)rpsM (PRK05179) →                                         |
| env-194 | scaffold43093_1.V1.CD-15            | - | 398     | 301     | RNA → RpsM (COG0099)rpsM (PRK05179) →                                         |
| env-195 | SRS057478_LANL_scaffold_2364        | + | 6630    | 6727    | RNA → RpsM (COG0099)rpsM (PRK05179) →                                         |
| env-196 | SRS014287_WUGC_scaffold_32769       | - | 803     | 706     | RNA → RpsM (COG0099)rpsM (PRK05179) →                                         |
| env-197 | SRS014459_WUGC_scaffold_353         | - | 704     | 607     | RNA → RpsM (COG0099)rpsM (PRK05179) →                                         |
| env-198 | SRS016495_LANL_scaffold_14198       | + | 1644    | 1741    | RNA → RpsM (COG0099)rpsM (PRK05179) →                                         |
| env-199 | SRS064276_LANL_scaffold_67145       | - | 653     | 556     | RNA → RpsM (COG0099)rpsM (PRK05179) →                                         |
| Lba-5-1 | NZ_GL890521.1                       | - | 320951  | 320854  | RNA → RpsM (COG0099)rpsM (PRK05179) →                                         |
| Lba-1-1 | NZ_GL945299.1                       | - | 118724  | 118627  | RNA → RpsM (COG0099)rpsM (PRK05179) →                                         |
| Lba-9-1 | NZ_GL622455.1                       | + | 76223   | 76320   | RNA → RpsM (COG0099)rpsM (PRK05179) →                                         |
| Rto-1-1 | NZ_DS264365.1                       | - | 22031   | 21934   | RNA → RpsM (COG0099)rpsM (PRK05179) →                                         |
| env-200 | UnmappedStool_Broad_scaffold_762794 | + | 200     | 297     | RNA → rps13 (CHL00137)rpsM (PRK05179) →                                       |
| env-201 | NLM031_scaffold9790_1               | + | 8440    | 8537    | RNA → ←-hypo                                                                  |
| env-202 | SRS012273_C3528184                  | - | 135     | 38      | RNA → hypo →                                                                  |
| env-203 | SRS014923_C3148149                  | - | 135     | 38      | RNA → hypo →                                                                  |
| env-204 | SRS015217_WUGC_scaffold_6745        | + | 283     | 380     | RNA →                                                                         |
| env-205 | SRS019397_WUGC_scaffold_29890       | - | 135     | 38      | RNA → hypo →                                                                  |
| env-206 | SRS019601_WUGC_scaffold_3920        | + | 4642    | 4739    | RNA → hypo →                                                                  |
| env-207 | SRS020869_C3206849                  | + | 287     | 384     | RNA →                                                                         |
| env-208 | SRS042628_C2611262                  | + | 367     | 464     | RNA → hypo →                                                                  |
| env-209 | SRS050422_C2650805                  | + | 284     | 381     | RNA →                                                                         |
| env-210 | SRS077730_LANL_scaffold_23057       | - | 135     | 38      | RNA → hypo →                                                                  |
| env-211 | SRS014613_C1466654                  | - | 148     | 51      | RNA → hypo →                                                                  |
| env-212 | SRS015065_WUGC_scaffold_7196        | + | 3193    | 3290    | RNA →                                                                         |
| env-213 | SRS015133_WUGC_scaffold_39311       | - | 153     | 56      | RNA →                                                                         |
| env-214 | SRS016989_C1459026                  | - | 153     | 56      | RNA → hypo →                                                                  |
| env-215 | SRS064645_C414785                   | + | 200     | 297     | RNA →                                                                         |
| env-216 | SRS058723_C6722821                  | + | 142     | 239     | RNA → RpsM (COG0099)rpsM (PRK05179) →                                         |
| env-217 | AUXO012083149.1                     | - | 437     | 384     | RNA → hypo → RpsM (COG0099)rpsM (PRK05179) →                                  |
| Rpe-1-1 | NZ_JTGN01000002.1                   | + | 415740  | 415795  | RNA → RpsM (COG0099)rpsM (PRK05179) → PRK05309 (PRK05309)RpsK (COG0100) →     |
| Rsp-1-1 | NZ_JMLZ01000002.1                   | + | 4582826 | 4582881 | RpsD (COG0522)rpsD (PRK05327) → RpoA (COG0202)PRK05182 (PRK05182) →           |
| env-218 | HCF12C_72825                        | - | 388     | 337     | RNA → RpsM (COG0099)rpsM (PRK05179) →                                         |
| env-219 | AUXO015776767.1                     | + | 78      | 133     | RNA → RpsM (COG0099)rpsM (PRK05179) →                                         |
| env-220 | AUXO011164680.1                     | - | 268     | 221     | RNA → rps13 (CHL00137)rpsM (PRK05179) →                                       |
| env-221 | SRS050925_LANL_scaffold_36095       | - | 324     | 265     | RNA → rps13 (CHL00137)rpsM (PRK05179) →                                       |
| env-222 | NOM009_scaffold13140_13             | - | 2089    | 2030    | RNA → RpsM (COG0099)rpsM (PRK05179) → PRK05309 (PRK05309)RpsK (COG0100) →     |
| env-223 | SRS023526_C3111217                  | + | 472     | 531     | RpsD (COG0522)rpsD (PRK05327) → RNAP_alpha_NTD (cd06928)PRK05182 (PRK05182) → |
| env-224 | SRS023583_C1297360                  | - | 201     | 142     | RNA →                                                                         |
| env-225 | SRS055982_C1612735                  | + | 1309    | 1368    | RNA →                                                                         |
| env-226 | SRS024075_LANL_scaffold_24329       | - | 214     | 155     | RNA →                                                                         |
| env-227 | SRS015578_WUGC_scaffold_35682       | - | 383     | 324     | RNA → RpsM (COG0099)rpsM (PRK05179) →                                         |
| env-228 | SRS016095_WUGC_scaffold_27178       | - | 399     | 340     | RNA → RpsM (COG0099)rpsM (PRK05179) →                                         |
| env-229 | scaffold6694_1_MH0045               | - | 199     | 140     | RNA → hypo →                                                                  |
| env-230 | scaffold51326_2_MH0086              | + | 2401    | 2460    | RNA → rps13 (CHL00137)rpsM (PRK05179) →                                       |
| env-231 | 4491423.3_NODE.156416               | + | 1556    | 1615    | RNA → rps13 (CHL00137)rpsM (PRK05179) →                                       |
| env-232 | SRS014459_WUGC_scaffold_16825       | + | 226     | 285     | RNA →                                                                         |
| env-233 | SRS015065_C2405519                  | + | 836     | 895     | RNA →                                                                         |

|          |                                      |   |        |        |                                                                                                                                                                                               |
|----------|--------------------------------------|---|--------|--------|-----------------------------------------------------------------------------------------------------------------------------------------------------------------------------------------------|
| env-234  | scaffold82058.3.MH0002               | + | 1327   | 1386   | RNA →                                                                                                                                                                                         |
| env-235  | scaffold49358.1.MH0011               | + | 406    | 465    | RNA → RpsM (COG0099)rpsM (PRK05179) →                                                                                                                                                         |
| env-236  | scaffold6610.2.V1.UC-6               | - | 583    | 524    | RNA → RpsM (COG0099)rpsM (PRK05179) →                                                                                                                                                         |
| env-237  | UnmappedStool_Broad_scaffold_708525  | + | 266    | 325    | RNA → RpsM (COG0099)rpsM (PRK05179) →                                                                                                                                                         |
| env-238  | SRS017521_C2601561                   | - | 183    | 124    | RNA →                                                                                                                                                                                         |
| env-239  | SRS020869_Baylor_scaffold_12378      | - | 384    | 325    | RNA → RpsM (COG0099)rpsM (PRK05179) →                                                                                                                                                         |
| env-240  | NOM013_scaffold46563_2               | - | 763    | 704    | RNA → RpsM (COG0099)rpsM (PRK05179) → PRK05309 (PRK05309)RpsK (COG0100) →                                                                                                                     |
| env-241  | AUXO011855295.1                      | + | 1265   | 1312   | RNA → RpsM (COG0099)rpsM (PRK05179) → hypo →                                                                                                                                                  |
| env-242  | SRS019601_C1835248                   | - | 186    | 135    | RNA → rpsM (PRK05179) →                                                                                                                                                                       |
| env-243  | DOF006_scaffold6616.2                | - | 320    | 269    | RNA → rps13 (CHL00137)rpsM (PRK05179) →                                                                                                                                                       |
| env-244  | SRS075398_C2013874                   | - | 190    | 139    | RNA → rpsM (PRK05179) →                                                                                                                                                                       |
| env-245  | UnmappedStool_Broad_scaffold_729622  | - | 165    | 114    | RNA → hypo →                                                                                                                                                                                  |
| env-246  | DLM024_scaffold288.2                 | - | 17086  | 17035  | RNA → RpsM (COG0099)rpsM (PRK05179) →                                                                                                                                                         |
| env-247  | DOM008_scaffold9546.10               | - | 10248  | 10197  | RNA → RpsM (COG0099)rpsM (PRK05179) →                                                                                                                                                         |
| env-248  | NLM023_scaffold268.5                 | + | 2617   | 2668   | RNA → RpsM (COG0099)rpsM (PRK05179) →                                                                                                                                                         |
| env-249  | NLM027_scaffold19174.2               | + | 3081   | 3132   | RNA → RpsM (COG0099)rpsM (PRK05179) →                                                                                                                                                         |
| env-250  | NOM002_scaffold15570.5               | + | 2668   | 2719   | RNA → RpsM (COG0099)rpsM (PRK05179) →                                                                                                                                                         |
| env-251  | SRS057717_LANL_scaffold_2277         | + | 5351   | 5402   | RNA → RpsM (COG0099)rpsM (PRK05179) →                                                                                                                                                         |
| Cne-1-1  | NZ_DS995339.4                        | + | 445348 | 445399 | RNA → RpsM (COG0099)rpsM (PRK05179) → RpsM (COG0099)rpsM (PRK05179) →                                                                                                                         |
| env-252  | scaffold35150.1.MH0047               | + | 861    | 913    | RNA → RpsM (COG0099)rpsM (PRK05179) →                                                                                                                                                         |
| env-253  | 4491482.3.NODE.6411                  | + | 1979   | 2031   | RNA → RpsM (COG0099)rpsM (PRK05179) →                                                                                                                                                         |
| env-254  | NLM027_scaffold9.3                   | + | 1877   | 1943   | RNA → RpsM (COG0099)rpsM (PRK05179) →                                                                                                                                                         |
| Lba-6-1  | NZ_GL872351.1                        | - | 15002  | 14936  | RNA → RpsM (COG0099)rpsM (PRK05179) → PRK05309 (PRK05309)RpsK (COG0100) →<br>RpsD (COG0522)rpsD (PRK05327) →                                                                                  |
| Csp-1-1  | NZ_KE150443.1                        | + | 296207 | 296273 | RNA → RpsM (COG0099)rpsM (PRK05179) → PRK05309 (PRK05309)RpsK (COG0100) →<br>RpsD (COG0522)rpsD (PRK05327) →                                                                                  |
| env-255  | CAM_READ_0099546121                  | + | 82     | 148    | RNA → RpsM (COG0099)rpsM (PRK05179) →                                                                                                                                                         |
| Lba-10-1 | NZ_GL890574.1                        | - | 15367  | 15301  | RNA → RpsM (COG0099)rpsM (PRK05179) → PRK05309 (PRK05309)RpsK (COG0100) →<br>RpsD (COG0522)rpsD (PRK05327) →                                                                                  |
| Csp-2-1  | NZ_KE150436.1                        | + | 369549 | 369615 | RNA → RpsM (COG0099)rpsM (PRK05179) → PRK05309 (PRK05309)RpsK (COG0100) →<br>RpsD (COG0522)rpsD (PRK05327) →                                                                                  |
| env-256  | longitudinal_520_20                  | - | 15080  | 15014  | RNA → RpsM (COG0099)rpsM (PRK05179) → PRK05309 (PRK05309)RpsK (COG0100) →<br>RpsD (COG0522)rpsD (PRK05327) →                                                                                  |
| env-257  | longitudinal_521_5                   | - | 15036  | 14970  | RNA → RpsM (COG0099)rpsM (PRK05179) → PRK05309 (PRK05309)RpsK (COG0100) →<br>RpsD (COG0522)rpsD (PRK05327) →                                                                                  |
| env-258  | SRS023176_C915644                    | + | 1011   | 1077   | RNA → rps13 (CHL00137)rpsM (PRK05179) →                                                                                                                                                       |
| env-259  | DOF006_scaffold3143.2                | - | 554    | 488    | RNA → RpsM (COG0099)rpsM (PRK05179) →                                                                                                                                                         |
| env-260  | AUXO015662166.1                      | - | 135    | 84     | RNA → ←hypo                                                                                                                                                                                   |
| env-261  | AUXO010716198.1                      | - | 157    | 108    | RNA → hypo →                                                                                                                                                                                  |
| env-262  | UnmappedStool_Broad_scaffold_1072535 | - | 139    | 50     | RNA → hypo →                                                                                                                                                                                  |
| env-263  | longitudinal_415_5                   | - | 192317 | 192267 | RNA → RpsM (COG0099)rpsM (PRK05179) → PRK05309 (PRK05309)RpsK (COG0100) →<br>RpsD (COG0522)rpsD (PRK05327) → RpoA (COG0202)PRK05182 (PRK05182) →<br>rplQ (PRK05591)RibosomalL17 (pfam01196) → |
| Bfo-1-1  | NZ_ACCL02000023.1                    | - | 56498  | 56409  | RNA → hypo → hypo → RpsM (COG0099)rpsM (PRK05179) → RpsM (COG0099)rpsM (PRK05179) →<br>PRK05309 (PRK05309)RpsK (COG0100) → PRK05309 (PRK05309)RpsK (COG0100) →                                |
| Bpr-1-1  | NZ_JP_JF01000101.1                   | - | 10439  | 10368  | RNA → RpsM (COG0099)rpsM (PRK05179) → PRK05309 (PRK05309)RpsK (COG0100) →<br>RpsD (COG0522)rpsD (PRK05327) → RpoA (COG0202)PRK05182 (PRK05182) →<br>rplQ (PRK05591)RibosomalL17 (pfam01196) → |
| Cba-1-1  | NZ_BAHT02000178.1                    | - | 3508   | 3437   | RNA → RpsM (COG0099)rpsM (PRK05179) → PRK05309 (PRK05309)RpsK (COG0100) →<br>RpsD (COG0522)rpsD (PRK05327) → RpoA (COG0202)PRK05182 (PRK05182) →<br>rplQ (PRK05591)RibosomalL17 (pfam01196) → |
| env-264  | AUXO012679497.1                      | + | 121    | 180    | RNA →                                                                                                                                                                                         |
| env-265  | AUXO010229542.1                      | - | 194    | 137    | RNA →                                                                                                                                                                                         |
| env-266  | AUXO015380717.1                      | - | 461    | 400    | RNA → RpsM (COG0099)rpsM (PRK05179) →                                                                                                                                                         |



|         |                                |   |        |        |                                                                                                                                                                                                                                                                       |
|---------|--------------------------------|---|--------|--------|-----------------------------------------------------------------------------------------------------------------------------------------------------------------------------------------------------------------------------------------------------------------------|
| env-267 | scaffold5991.3_MH0071          | + | 105    | 161    | RNA → RpsM (COG0099)rpsM (PRK05179) →                                                                                                                                                                                                                                 |
| env-268 | scaffold2528.1.V1.UC-13        | - | 739    | 683    | RNA → RpsM (COG0099)rpsM (PRK05179) → PRK05309 (PRK05309)RpsK (COG0100) →                                                                                                                                                                                             |
| env-269 | ADJT01013136.1                 | + | 1342   | 1398   | RNA → RpsM (COG0099)rpsM (PRK05179) →                                                                                                                                                                                                                                 |
| env-270 | SRS054590.LANL_scaffold_5907   | - | 732    | 676    | RNA → RpsM (COG0099)rpsM (PRK05179) → PRK05309 (PRK05309)RpsK (COG0100) →                                                                                                                                                                                             |
| Rob-1-1 | NZ_DS264342.1                  | + | 2400   | 2456   | RNA → RpsM (COG0099)rpsM (PRK05179) → RpsM (COG0099)rpsM (PRK05179) →<br>PRK05309 (PRK05309)RpsK (COG0100) → RpsD (COG0522)rpsD (PRK05327) →<br>RpoA (COG0202)PRK05182 (PRK05182) → RpoA (COG0202)PRK05182 (PRK05182) →<br>rplQ (PRK05591)Ribosomal_L17 (pfam01196) → |
| env-271 | NOM005_scaffold4156.9          | - | 399    | 343    | RNA → RpsM (COG0099)rpsM (PRK05179) →                                                                                                                                                                                                                                 |
| env-272 | BAAX01036074.1                 | + | 131    | 187    | RNA → RpsM (COG0099)rpsM (PRK05179) → PRK05309 (PRK05309)RpsK (COG0100) → hypo →                                                                                                                                                                                      |
| env-273 | longitudinal_278_81            | - | 19214  | 19157  | RNA → RpsM (COG0099)rpsM (PRK05179) →                                                                                                                                                                                                                                 |
| env-274 | longitudinal_409_317           | - | 113247 | 113190 | RNA → RpsM (COG0099)rpsM (PRK05179) →                                                                                                                                                                                                                                 |
| env-275 | NLM027_scaffold38083.1         | - | 974    | 918    | RNA → RpsM (COG0099)rpsM (PRK05179) → PRK05309 (PRK05309)RpsK (COG0100) →                                                                                                                                                                                             |
| env-276 | AJWZ01005537.1                 | + | 83     | 139    | RNA → RpsM (COG0099)rpsM (PRK05179) →                                                                                                                                                                                                                                 |
| env-277 | scaffold14428.2.V1.CD-12       | - | 284    | 228    | RNA → rps13 (CHL00137)rpsM (PRK05179) →                                                                                                                                                                                                                               |
| env-278 | scaffold2111.3.O2.UC-18        | + | 4475   | 4531   | RNA → RpsM (COG0099)rpsM (PRK05179) → PRK05309 (PRK05309)RpsK (COG0100) →<br>S4 (smart00363)RpsD (COG0522) →                                                                                                                                                          |
| env-279 | 4448820.3.Contig_54992         | - | 235    | 179    | RNA → rps13 (CHL00137)rpsM (PRK05179) →                                                                                                                                                                                                                               |
| env-280 | SRS018351.C2808969             | + | 3733   | 3789   | RNA →                                                                                                                                                                                                                                                                 |
| env-281 | longitudinal_309_72            | + | 12520  | 12576  | RNA → hypo → RpsM (COG0099)rpsM (PRK05179) → PRK05309 (PRK05309)RpsK (COG0100) →<br>RpsD (COG0522)rpsD (PRK05327) → RpoA (COG0202)PRK05182 (PRK05182) →<br>rplQ (PRK05591)Ribosomal_L17 (pfam01196) →                                                                 |
| env-282 | longitudinal_205_113           | + | 60575  | 60631  | RNA → hypo → RpsM (COG0099)rpsM (PRK05179) → PRK05309 (PRK05309)RpsK (COG0100) →<br>RpsD (COG0522)rpsD (PRK05327) → RpoA (COG0202)PRK05182 (PRK05182) →<br>rplQ (PRK05591)Ribosomal_L17 (pfam01196) →                                                                 |
| Bsp-1-1 | NZ_KE993318.1                  | + | 57041  | 57097  | RNA → RpsM (COG0099)rpsM (PRK05179) → PRK05309 (PRK05309)RpsK (COG0100) →<br>RpsD (COG0522)rpsD (PRK05327) → RpoA (COG0202)PRK05182 (PRK05182) →<br>rplQ (PRK05591)Ribosomal_L17 (pfam01196) → rplQ (PRK05591)Ribosomal_L17 (pfam01196) → hypo →                      |
| env-283 | NOM009_scaffold24969_6         | + | 1081   | 1137   | RNA → RpsM (COG0099)rpsM (PRK05179) →                                                                                                                                                                                                                                 |
| env-284 | DOF008_scaffold7612.1          | + | 695    | 751    | RNA → RpsM (COG0099)rpsM (PRK05179) → PRK05309 (PRK05309)RpsK (COG0100) →                                                                                                                                                                                             |
| env-285 | NLM027_scaffold2056_4          | + | 1652   | 1708   | RNA → RpsM (COG0099)rpsM (PRK05179) → PRK05309 (PRK05309)RpsK (COG0100) →<br>RpsD (COG0522)rpsD (PRK05327) → RpoA (COG0202)PRK05182 (PRK05182) →<br>rplQ (PRK05591)Ribosomal_L17 (pfam01196) →                                                                        |
| env-286 | NOM005_scaffold35543.1         | - | 16967  | 16911  | RNA → RpsM (COG0099)rpsM (PRK05179) → PRK05309 (PRK05309)RpsK (COG0100) →<br>RpsD (COG0522)rpsD (PRK05327) → RpoA (COG0202)PRK05182 (PRK05182) →<br>rplQ (PRK05591)Ribosomal_L17 (pfam01196) →                                                                        |
| env-287 | SRS043411.C1591614             | + | 354    | 410    | RNA → RpsM (COG0099)rpsM (PRK05179) →                                                                                                                                                                                                                                 |
| env-288 | ADJT01013276.1                 | - | 15776  | 15720  | RNA → RpsM (COG0099)rpsM (PRK05179) → PRK05309 (PRK05309)RpsK (COG0100) →<br>RpsD (COG0522)rpsD (PRK05327) → RpoA (COG0202)PRK05182 (PRK05182) →<br>rplQ (PRK05591)Ribosomal_L17 (pfam01196) →                                                                        |
| env-289 | DLM012_scaffold20960.1         | + | 3763   | 3819   | RNA → RpsM (COG0099)rpsM (PRK05179) →                                                                                                                                                                                                                                 |
| env-290 | NOM002.C380510.1               | - | 222    | 166    | RNA → hypo →                                                                                                                                                                                                                                                          |
| env-291 | NOM027_scaffold11759.1         | + | 1905   | 1961   | RNA → RpsM (COG0099)rpsM (PRK05179) →                                                                                                                                                                                                                                 |
| env-292 | NLM007_scaffold12767_10        | + | 9772   | 9828   | RNA → RpsM (COG0099)rpsM (PRK05179) →                                                                                                                                                                                                                                 |
| env-293 | SRS018351.C2796305             | + | 1883   | 1939   | RNA →                                                                                                                                                                                                                                                                 |
| env-294 | SRS050752.C2652917             | - | 205    | 149    | RNA → hypo →                                                                                                                                                                                                                                                          |
| env-295 | SRS017521.Baylor_scaffold_5298 | - | 324    | 268    | RNA → rps13 (CHL00137)rpsM (PRK05179) →                                                                                                                                                                                                                               |
| env-296 | DLF012_scaffold19007.1         | - | 35604  | 35548  | RNA → RpsM (COG0099)rpsM (PRK05179) →                                                                                                                                                                                                                                 |
| env-297 | NLM028_scaffold1532.6          | - | 9451   | 9395   | RNA → RpsM (COG0099)rpsM (PRK05179) →                                                                                                                                                                                                                                 |
| env-298 | DOM018_scaffold5452.9          | - | 1253   | 1197   | RNA → RpsM (COG0099)rpsM (PRK05179) →                                                                                                                                                                                                                                 |
| env-299 | NLM002_scaffold3727_2          | - | 562    | 506    | RNA → RpsM (COG0099)rpsM (PRK05179) →                                                                                                                                                                                                                                 |
| env-300 | NLM032_scaffold28_2            | - | 5783   | 5727   | RNA → RpsM (COG0099)rpsM (PRK05179) →                                                                                                                                                                                                                                 |
| env-301 | NOM017_scaffold25928_6         | - | 5948   | 5892   | RNA → RpsM (COG0099)rpsM (PRK05179) →                                                                                                                                                                                                                                 |
| env-302 | ADJS01016621.1                 | - | 17385  | 17329  | RNA → RpsM (COG0099)rpsM (PRK05179) →                                                                                                                                                                                                                                 |

|         |                               |   |         |         |                                                                                                                                                                                                |
|---------|-------------------------------|---|---------|---------|------------------------------------------------------------------------------------------------------------------------------------------------------------------------------------------------|
| env-303 | SRS014313_C2608362            | + | 174     | 230     | RNA →                                                                                                                                                                                          |
| env-304 | SRS018817_C1977109            | + | 122     | 178     | RNA → rps13 (CHL00137)rpsM (PRK05179) →                                                                                                                                                        |
| env-305 | SRS055982_C1571339            | - | 222     | 166     | RNA →                                                                                                                                                                                          |
| Bwe-2-1 | NZ_AXVN01000046.1             | - | 11240   | 11184   | RNA → RpsM (COG0099)rpsM (PRK05179) →                                                                                                                                                          |
| env-306 | SRS018656_C1701680            | + | 38      | 94      | RNA → RpsM (COG0099)rpsM (PRK05179) →                                                                                                                                                          |
| env-307 | scaffold21840_1_V1.UC-7       | + | 171     | 227     | RNA → RpsM (COG0099)rpsM (PRK05179) →                                                                                                                                                          |
| env-308 | SRS018313_C7804088            | + | 115     | 171     | RNA →                                                                                                                                                                                          |
| env-309 | DLM023_scaffold15800_4        | + | 58      | 114     | RNA → RpsM (COG0099)rpsM (PRK05179) →                                                                                                                                                          |
| env-310 | NLF008_scaffold4177_4         | - | 264     | 208     | RNA → rps13 (CHL00137)rpsM (PRK05179) →                                                                                                                                                        |
| env-311 | NLM031_scaffold8043_12        | - | 1012    | 956     | RNA → RpsM (COG0099)rpsM (PRK05179) →                                                                                                                                                          |
| env-312 | NOM009_scaffold9194_1         | - | 1168    | 1112    | RNA → RpsM (COG0099)rpsM (PRK05179) →                                                                                                                                                          |
| env-313 | NOM005_scaffold12219_1        | - | 576     | 520     | RNA → RpsM (COG0099)rpsM (PRK05179) →                                                                                                                                                          |
| env-314 | NOM026_scaffold20027_3        | - | 755     | 699     | RNA → RpsM (COG0099)rpsM (PRK05179) →                                                                                                                                                          |
| env-315 | ADJT01012175.1                | - | 11015   | 10959   | RNA → RpsM (COG0099)rpsM (PRK05179) →                                                                                                                                                          |
| env-316 | SRS050422_LANL_scaffold_5427  | + | 241     | 297     | RNA → RpsM (COG0099)rpsM (PRK05179) →                                                                                                                                                          |
| env-317 | SRS015782_C3373209            | + | 501     | 557     | RNA →                                                                                                                                                                                          |
| env-318 | SRS049712_C15436136           | + | 274     | 330     | RNA →                                                                                                                                                                                          |
| Bwe-1-1 | NZ_AUJF01000003.1             | + | 23323   | 23379   | RNA → RpsM (COG0099)rpsM (PRK05179) →                                                                                                                                                          |
| env-319 | NLM017_scaffold23522_6        | + | 25      | 81      | RNA → RpsM (COG0099)rpsM (PRK05179) →                                                                                                                                                          |
| env-320 | DOF008_scaffold4797_1         | - | 4686    | 4630    | RNA → RpsM (COG0099)rpsM (PRK05179) →                                                                                                                                                          |
| env-321 | scaffold37948_1_O2.UC-19      | - | 326     | 270     | RNA → rps13 (CHL00137)rpsM (PRK05179) →                                                                                                                                                        |
| env-322 | SRS058770_C1599846            | - | 411     | 355     | RNA → RpsM (COG0099)rpsM (PRK05179) →                                                                                                                                                          |
| env-323 | DOF010_scaffold104_3          | - | 22883   | 22827   | RNA → RpsM (COG0099)rpsM (PRK05179) →                                                                                                                                                          |
| Rsp-2-1 | NZ_ACII02000003.1             | - | 3053178 | 3053122 | RNA → RpsM (COG0099)rpsM (PRK05179) →                                                                                                                                                          |
| env-324 | SRS016495_C1820935            | - | 194     | 138     | RNA → hypo →                                                                                                                                                                                   |
| env-325 | NOM028_scaffold3211_4         | - | 15906   | 15850   | RNA → RpsM (COG0099)rpsM (PRK05179) →                                                                                                                                                          |
| env-326 | scaffold437_1_V1.CD-11        | - | 717     | 661     | RNA → RpsM (COG0099)rpsM (PRK05179) →                                                                                                                                                          |
| env-327 | CAM_READ_0099454135           | + | 66      | 121     | RNA → ←hypo                                                                                                                                                                                    |
| env-328 | SRS014923_WUGC_scaffold_34760 | + | 156     | 211     | RNA → rps13 (CHL00137)rpsM (PRK05179) →                                                                                                                                                        |
| env-329 | longitudinal_439_8            | + | 13623   | 13679   | RNA → RpsM (COG0099)rpsM (PRK05179) → PRK05309 (PRK05309)RpsK (COG0100) →<br>RpsD (COG0522)rpsD (PRK05327) → RpoA (COG0202)PRK05182 (PRK05182) →                                               |
| env-330 | longitudinal_440_169          | - | 13322   | 13266   | RNA → RpsM (COG0099)rpsM (PRK05179) → PRK05309 (PRK05309)RpsK (COG0100) →<br>RpsD (COG0522)rpsD (PRK05327) → RpoA (COG0202)PRK05182 (PRK05182) →                                               |
| env-331 | NLM008_scaffold23270_1        | - | 432     | 376     | RNA → RpsM (COG0099)rpsM (PRK05179) →                                                                                                                                                          |
| env-332 | NLM027_scaffold39514_1        | - | 666     | 610     | RNA → RpsM (COG0099)rpsM (PRK05179) → hypo →                                                                                                                                                   |
| env-333 | longitudinal_20_244           | - | 8699    | 8643    | RNA → RpsM (COG0099)rpsM (PRK05179) → PRK05309 (PRK05309)RpsK (COG0100) →<br>RpsD (COG0522)rpsD (PRK05327) → RpoA (COG0202)PRK05182 (PRK05182) →                                               |
| env-334 | longitudinal_53_558           | + | 42312   | 42368   | RNA → RpsM (COG0099)rpsM (PRK05179) → PRK05309 (PRK05309)RpsK (COG0100) →<br>RpsD (COG0522)rpsD (PRK05327) → RpoA (COG0202)PRK05182 (PRK05182) →                                               |
| env-335 | ADJT01008964.1                | + | 1183    | 1239    | RNA → RpsM (COG0099)rpsM (PRK05179) →                                                                                                                                                          |
| env-336 | SRS015217_WUGC_scaffold_18288 | + | 246     | 302     | RNA → RpsM (COG0099)rpsM (PRK05179) →                                                                                                                                                          |
| env-337 | 4491417.3_NODE_73162          | - | 21524   | 21468   | RNA → RpsM (COG0099)rpsM (PRK05179) → PRK05309 (PRK05309)RpsK (COG0100) →<br>RpsD (COG0522)rpsD (PRK05327) → PRK05182 (PRK05182)RNA_polLL (pfam01193) →<br>RpoA (COG0202)PRK05182 (PRK05182) → |
| env-338 | DOM026_scaffold12352_13       | - | 3568    | 3512    | RNA → RpsM (COG0099)rpsM (PRK05179) → PRK05309 (PRK05309)RpsK (COG0100) →<br>RpsD (COG0522)rpsD (PRK05327) → RpoA (COG0202)PRK05182 (PRK05182) →                                               |
| env-339 | longitudinal_122_170          | + | 39841   | 39897   | RNA → RpsM (COG0099)rpsM (PRK05179) → PRK05309 (PRK05309)RpsK (COG0100) →<br>RpsD (COG0522)rpsD (PRK05327) → RpoA (COG0202)PRK05182 (PRK05182) →                                               |
| env-340 | SRS014235_C3388785            | + | 157     | 213     | RNA → RpsM (COG0099)rpsM (PRK05179) →                                                                                                                                                          |
| env-341 | SRS014923_WUGC_scaffold_42123 | + | 33      | 89      | RNA → RpsM (COG0099)rpsM (PRK05179) →                                                                                                                                                          |
| env-342 | scaffold34343_3_MH0002        | + | 128     | 184     | RNA → RpsM (COG0099)rpsM (PRK05179) →                                                                                                                                                          |
| Bsc-1-1 | NZ_JNKJ01000057.1             | + | 1161    | 1217    | RNA → RpsM (COG0099)rpsM (PRK05179) → PRK05309 (PRK05309)RpsK (COG0100) →<br>RpsD (COG0522)rpsD (PRK05327) → RpoA (COG0202)PRK05182 (PRK05182) →                                               |

|         |                               |   |         |         |                                                                                                                                                                                                                                                                         |
|---------|-------------------------------|---|---------|---------|-------------------------------------------------------------------------------------------------------------------------------------------------------------------------------------------------------------------------------------------------------------------------|
| Rsp-3-1 | NZ_HE978651.1                 | - | 2529298 | 2529242 | RNA → RpsM (COG0099)rpsM (PRK05179) → PRK05309 (PRK05309)RpsK (COG0100) → RpsD (COG0522)rpsD (PRK05327) → RpoA (COG0202)PRK05182 (PRK05182) →                                                                                                                           |
| env-343 | AUXO012074612.1               | + | 242     | 300     | RNA → RpsM (COG0099)rpsM (PRK05179) → PRK05309 (PRK05309) →                                                                                                                                                                                                             |
| env-344 | DLM009_scaffold871.6          | - | 3189    | 3114    | RNA → RpsM (COG0099)rpsM (PRK05179) → PRK05309 (PRK05309)RpsK (COG0100) → RpsD (COG0522)rpsD (PRK05327) → RpoA (COG0202)PRK05182 (PRK05182) →                                                                                                                           |
| env-345 | NLM027_scaffold5861.18        | - | 15285   | 15210   | rplQ (PRK05591)Ribosomal_L17 (pfam01196) → RNA → RpsM (COG0099)rpsM (PRK05179) → PRK05309 (PRK05309)RpsK (COG0100) → RpsD (COG0522)rpsD (PRK05327) → RpoA (COG0202)PRK05182 (PRK05182) → rplQ (PRK05591)Ribosomal_L17 (pfam01196) → PRK13337 (PRK13337)LCB5 (COG1597) → |
| env-346 | CAM_READ_0099493925           | + | 211     | 286     | MntP (COG1971)spore_YtaF (TIGR02840) → RNA → rps13 (CHL00137)rpsM (PRK05179) →                                                                                                                                                                                          |
| env-347 | 4444164.3.49013               | + | 211     | 286     | RNA → rps13 (CHL00137)rpsM (PRK05179) →                                                                                                                                                                                                                                 |
| env-348 | scaffold12778.1.V1.CD-12      | + | 467     | 542     | RNA →                                                                                                                                                                                                                                                                   |
| env-349 | SRS018313_C7798604            | + | 179     | 254     | RNA →                                                                                                                                                                                                                                                                   |
| env-350 | DLF012_scaffold123.4          | + | 22132   | 22207   | RNA → RpsM (COG0099)rpsM (PRK05179) → PRK05309 (PRK05309)RpsK (COG0100) → RpsD (COG0522)rpsD (PRK05327) → RpoA (COG0202)PRK05182 (PRK05182) → rplQ (PRK05591)Ribosomal_L17 (pfam01196) → PRK13337 (PRK13337)LCB5 (COG1597) → MntP (COG1971)spore_YtaF (TIGR02840) →     |
| Lba-8-1 | NZ_GL890549.1                 | - | 179387  | 179312  | RNA → RpsM (COG0099)rpsM (PRK05179) → PRK05309 (PRK05309)RpsK (COG0100) → RpsD (COG0522)rpsD (PRK05327) → RpoA (COG0202)PRK05182 (PRK05182) → rplQ (PRK05591)Ribosomal_L17 (pfam01196) → PRK13337 (PRK13337)LCB5 (COG1597) → MntP (COG1971)spore_YtaF (TIGR02840) →     |
| Bha-1-1 | NZ_GG698590.1                 | - | 537224  | 537149  | RNA → RpsM (COG0099)rpsM (PRK05179) → PRK05309 (PRK05309)RpsK (COG0100) → RpsD (COG0522)rpsD (PRK05327) → RpoA (COG0202)PRK05182 (PRK05182) → rplQ (PRK05591)Ribosomal_L17 (pfam01196) → PRK13337 (PRK13337)LCB5 (COG1597) → MntP (COG1971)spore_YtaF (TIGR02840) →     |
| env-351 | CAM_READ_0100338075           | + | 116     | 191     | RNA → rps13 (CHL00137)rpsM (PRK05179) →                                                                                                                                                                                                                                 |
| env-352 | 4448819.3.Contig30791         | + | 5       | 75      | RNA → rpsM (PRK05179) →                                                                                                                                                                                                                                                 |
| env-353 | longitudinal_51_247           | - | 34515   | 34458   | RNA → hypo → RpsM (COG0099)rpsM (PRK05179) →                                                                                                                                                                                                                            |
| Rga-1-1 | NZ_AUDP01000014.1             | - | 27539   | 27482   | RNA → RpsM (COG0099)rpsM (PRK05179) →                                                                                                                                                                                                                                   |
| env-354 | AUXO015947882.1               | - | 158     | 103     | RNA → rps13 (CHL00137)rpsM (PRK05179) →                                                                                                                                                                                                                                 |
| env-355 | JGI994J12354_10010207         | + | 5480    | 5533    | RNA → RpsM (COG0099)rpsM (PRK05179) →                                                                                                                                                                                                                                   |
| env-356 | IMNBL1.c0108913               | - | 287     | 234     | RNA → rps13 (CHL00137)rpsM (PRK05179) →                                                                                                                                                                                                                                 |
| env-357 | JGI994J12354_10000026         | + | 7090    | 7145    | RNA → RpsM (COG0099)rpsM (PRK05179) →                                                                                                                                                                                                                                   |
| env-358 | 2227591299                    | - | 3740    | 3685    | RNA → RpsM (COG0099)rpsM (PRK05179) →                                                                                                                                                                                                                                   |
| env-359 | IMNBL1.c0000019               | + | 10768   | 10823   | RNA → RpsM (COG0099)rpsM (PRK05179) →                                                                                                                                                                                                                                   |
| env-360 | JGI994J12354_10094008         | + | 12      | 69      | RNA → ←hypo                                                                                                                                                                                                                                                             |
| env-361 | IMNBL1.c0036661               | + | 988     | 1043    | RNA → RpsM (COG0099)rpsM (PRK05179) → PRK05309 (PRK05309)RpsK (COG0100) →                                                                                                                                                                                               |
| env-362 | JGI994J12354_10002700         | - | 15440   | 15385   | RNA → ←hypo                                                                                                                                                                                                                                                             |
| env-363 | IMNBL1.c0023149               | + | 2251    | 2307    | RNA →                                                                                                                                                                                                                                                                   |
| env-364 | 2227528282                    | + | 222     | 278     | RNA → RpsM (COG0099)rpsM (PRK05179) →                                                                                                                                                                                                                                   |
| env-365 | JGI994J12354_10567539         | - | 328     | 272     | RNA → hypo → rps13 (CHL00137)rpsM (PRK05179) →                                                                                                                                                                                                                          |
| env-366 | 2227243856                    | + | 905     | 961     | RNA → RpsM (COG0099)rpsM (PRK05179) →                                                                                                                                                                                                                                   |
| env-367 | scaffold568.3_MH0038          | - | 330     | 279     | RNA → RpsM (COG0099)rpsM (PRK05179) →                                                                                                                                                                                                                                   |
| env-368 | scaffold119982.1_MH0056       | - | 332     | 281     | RNA → RpsM (COG0099)rpsM (PRK05179) →                                                                                                                                                                                                                                   |
| env-369 | scaffold11215.5_MH0063        | + | 300     | 351     | RNA → RpsM (COG0099)rpsM (PRK05179) →                                                                                                                                                                                                                                   |
| env-370 | scaffold3544.6_MH0074         | + | 523     | 574     | RNA → RpsM (COG0099)rpsM (PRK05179) →                                                                                                                                                                                                                                   |
| env-371 | scaffold17454.3_O2.UC-22      | + | 3387    | 3438    | RNA → rps13 (CHL00137)rpsM (PRK05179) →                                                                                                                                                                                                                                 |
| env-372 | scaffold71124.1.V1.CD-8       | - | 108     | 57      | RNA →                                                                                                                                                                                                                                                                   |
| env-373 | scaffold75223.1.V1.UC-9       | - | 362     | 311     | RNA → RpsM (COG0099)rpsM (PRK05179) →                                                                                                                                                                                                                                   |
| env-374 | 4491417.3.NODE.67088          | - | 675     | 624     | RNA → RpsM (COG0099)rpsM (PRK05179) →                                                                                                                                                                                                                                   |
| env-375 | DLM027_scaffold24464.1        | - | 728     | 677     | RNA → RpsM (COG0099)rpsM (PRK05179) → PRK05309 (PRK05309)RpsK (COG0100) →                                                                                                                                                                                               |
| env-376 | SRS016095_WUGC_scaffold.30576 | + | 143     | 194     | RNA → RpsM (COG0099)rpsM (PRK05179) →                                                                                                                                                                                                                                   |
| env-377 | SRS012273_C3777396            | + | 2744    | 2795    | RNA →                                                                                                                                                                                                                                                                   |



|         |                                |   |       |       |                                                                                                                                                                                               |
|---------|--------------------------------|---|-------|-------|-----------------------------------------------------------------------------------------------------------------------------------------------------------------------------------------------|
| env-378 | SRS014313_C2660173             | + | 568   | 619   | RNA →                                                                                                                                                                                         |
| env-379 | SRS014979_C2995935             | + | 209   | 260   | RNA →                                                                                                                                                                                         |
| env-380 | SRS015217_C2217440             | + | 360   | 411   | RNA →                                                                                                                                                                                         |
| env-381 | SRS017433_C1676010             | - | 110   | 59    | RNA → hypo →                                                                                                                                                                                  |
| env-382 | SRS051882_C2517682             | - | 110   | 59    | RNA →                                                                                                                                                                                         |
| env-383 | SRS018817_C2062093             | + | 582   | 633   | RNA →                                                                                                                                                                                         |
| env-384 | SRS050422_LANL_scaffold.21144  | - | 743   | 692   | RNA → RpsM (COG0099)rpsM (PRK05179) → PRK05309 (PRK05309)RpsK (COG0100) →                                                                                                                     |
| env-385 | scaffold1165_1.V1.CD-4         | - | 107   | 56    | RNA →                                                                                                                                                                                         |
| env-386 | DLM009_scaffold18031_8         | + | 36254 | 36305 | RNA → RpsM (COG0099)rpsM (PRK05179) → PRK05309 (PRK05309)RpsK (COG0100) →<br>RpsD (COG0522)rpsD (PRK05327) → RpoA (COG0202)PRK05182 (PRK05182) →                                              |
| env-387 | DLM028_scaffold14333_2         | - | 459   | 408   | RNA → RpsM (COG0099)rpsM (PRK05179) →                                                                                                                                                         |
| env-388 | NLM027_scaffold1108_2          | - | 1341  | 1290  | RNA → RpsM (COG0099)rpsM (PRK05179) → PRK05309 (PRK05309)RpsK (COG0100) →<br>S4 (smart00363)RpsD (COG0522) →                                                                                  |
| env-389 | SRS015782_C3477872             | + | 2144  | 2195  | RNA →                                                                                                                                                                                         |
| env-390 | DOM013_scaffold7638_5          | + | 299   | 350   | RNA → RpsM (COG0099)rpsM (PRK05179) → PRK05309 (PRK05309)RpsK (COG0100) →<br>RpsD (COG0522)rpsD (PRK05327) → RpoA (COG0202)PRK05182 (PRK05182)RNA_polL (pfam01193) →                          |
| env-391 | scaffold52941_2.MH0011         | - | 294   | 243   | RNA → rps13 (CHL00137)rpsM (PRK05179) →                                                                                                                                                       |
| env-392 | scaffold841_6.MH0037           | + | 2857  | 2908  | RNA →                                                                                                                                                                                         |
| env-393 | scaffold93665_1.MH0043         | - | 356   | 305   | RNA → RpsM (COG0099)rpsM (PRK05179) →                                                                                                                                                         |
| env-394 | scaffold44089_3.MH0060         | + | 396   | 447   | RNA → RpsM (COG0099)rpsM (PRK05179) →                                                                                                                                                         |
| env-395 | scaffold9918_1.MH0068          | - | 106   | 55    | RNA →                                                                                                                                                                                         |
| env-396 | scaffold61996_1.MH0082         | - | 326   | 275   | RNA → RpsM (COG0099)rpsM (PRK05179) →                                                                                                                                                         |
| env-397 | scaffold49998_1.V1.CD-14       | - | 295   | 244   | RNA → rps13 (CHL00137)rpsM (PRK05179) →                                                                                                                                                       |
| env-398 | scaffold12031_1.V1.UC-15       | - | 266   | 215   | RNA → rps13 (CHL00137)rpsM (PRK05179) →                                                                                                                                                       |
| env-399 | 4491410.3.NODE.7014            | + | 1319  | 1370  | RNA → RpsM (COG0099)rpsM (PRK05179) → PRK05309 (PRK05309)RpsK (COG0100) →<br>RpsD (COG0522)rpsD (PRK05327) → RpoA (COG0202)PRK05182 (PRK05182) →                                              |
| env-400 | 4491413.3.NODE.68514           | - | 12266 | 12215 | RNA → RpsM (COG0099)rpsM (PRK05179) → PRK05309 (PRK05309)RpsK (COG0100) →                                                                                                                     |
| env-401 | DOF008_scaffold23304_2         | - | 4645  | 4594  | RNA → RpsM (COG0099)rpsM (PRK05179) → PRK05309 (PRK05309)RpsK (COG0100) →<br>RpsD (COG0522)rpsD (PRK05327) → RpoA (COG0202)PRK05182 (PRK05182) →                                              |
| env-402 | DOM018_scaffold30267_2         | - | 9330  | 9279  | RNA → RpsM (COG0099)rpsM (PRK05179) → PRK05309 (PRK05309)RpsK (COG0100) →<br>RpsD (COG0522)rpsD (PRK05327) → RpoA (COG0202)PRK05182 (PRK05182) →                                              |
| env-403 | NLM032_scaffold1492_2          | - | 4705  | 4654  | RNA → RpsM (COG0099)rpsM (PRK05179) → PRK05309 (PRK05309)RpsK (COG0100) →<br>RpsD (COG0522)rpsD (PRK05327) → RpoA (COG0202)PRK05182 (PRK05182) →                                              |
| env-404 | ADJS01016619.1                 | + | 2886  | 2937  | RNA → RpsM (COG0099)rpsM (PRK05179) → PRK05309 (PRK05309)RpsK (COG0100) →<br>RpsD (COG0522)rpsD (PRK05327) → RpoA (COG0202)PRK05182 (PRK05182) →<br>rplQ (PRK05591)RibosomalL17 (pfam01196) → |
| env-405 | DLF014_scaffold5097_1          | - | 28650 | 28599 | RNA → RpsM (COG0099)rpsM (PRK05179) →                                                                                                                                                         |
| env-406 | DLM016_scaffold2418_6          | - | 2957  | 2906  | RNA → RpsM (COG0099)rpsM (PRK05179) → PRK05309 (PRK05309)RpsK (COG0100) →<br>RpsD (COG0522)rpsD (PRK05327) → RpoA (COG0202)PRK05182 (PRK05182) →                                              |
| env-407 | DOM026_scaffold10557_10        | + | 15236 | 15287 | RNA → RpsM (COG0099)rpsM (PRK05179) → PRK05309 (PRK05309)RpsK (COG0100) →<br>RpsD (COG0522)rpsD (PRK05327) → RpoA (COG0202)PRK05182 (PRK05182) →                                              |
| env-408 | NOF012_scaffold6209_1          | + | 350   | 401   | RNA → rps13 (CHL00137)rpsM (PRK05179) →                                                                                                                                                       |
| env-409 | SRS014235_WUGC_scaffold.106228 | - | 130   | 79    | RNA →                                                                                                                                                                                         |
| env-410 | SRS022071_C2808073             | - | 121   | 70    | RNA → hypo →                                                                                                                                                                                  |
| env-411 | SRS064276_LANL_scaffold.18813  | - | 435   | 384   | RNA → RpsM (COG0099)rpsM (PRK05179) →                                                                                                                                                         |
| env-412 | 4491401.3.NODE.45574           | + | 56    | 107   | RNA → rps13 (CHL00137)rpsM (PRK05179) → RpsM (COG0099)rpsM (PRK05179) →<br>PRK05309 (PRK05309)RpsK (COG0100) →                                                                                |
| env-413 | DLM018_scaffold30918_1         | + | 2     | 53    | RNA → RpsM (COG0099)rpsM (PRK05179) → PRK05309 (PRK05309)RpsK (COG0100) →                                                                                                                     |
| env-414 | DOF003_scaffold5613_4          | + | 314   | 365   | RNA → RpsM (COG0099)rpsM (PRK05179) → PRK05309 (PRK05309)RpsK (COG0100) → hypo →                                                                                                              |
| env-415 | DOF012_scaffold4673_1          | + | 384   | 435   | RNA → RpsM (COG0099)rpsM (PRK05179) → PRK05309 (PRK05309)RpsK (COG0100) →<br>RpsD (COG0522)rpsD (PRK05327) → RpoA (COG0202)PRK05182 (PRK05182) →                                              |
| env-416 | NOF002_scaffold2669_5          | - | 615   | 564   | RNA → RpsM (COG0099)rpsM (PRK05179) → PRK05309 (PRK05309)RpsK (COG0100) →                                                                                                                     |
| env-417 | NOM009_scaffold2007_2          | - | 2031  | 1980  | RNA → RpsM (COG0099)rpsM (PRK05179) → PRK05309 (PRK05309)RpsK (COG0100) →<br>RpsD (COG0522)rpsD (PRK05327) → RNAP_alpha_NTD (cd06928)PRK05182 (PRK05182) →                                    |
| env-418 | NOM001_scaffold9282_1          | - | 151   | 100   | RNA → rps13 (CHL00137)rpsM (PRK05179) →                                                                                                                                                       |



|         |                                     |   |        |        |     |                                                                                                                                                                                      |
|---------|-------------------------------------|---|--------|--------|-----|--------------------------------------------------------------------------------------------------------------------------------------------------------------------------------------|
| env-419 | SRS052697_LANL_scaffold_51469       | + | 80     | 131    | RNA | →                                                                                                                                                                                    |
| env-420 | scaffold85473_2_MH0025              | + | 479    | 530    | RNA | →                                                                                                                                                                                    |
| env-421 | scaffold52584_3_MH0045              | + | 1009   | 1060   | RNA | →                                                                                                                                                                                    |
| env-422 | scaffold37252_4_MH0062              | + | 528    | 579    | RNA | →                                                                                                                                                                                    |
| env-423 | scaffold96444_3_MH0069              | + | 741    | 792    | RNA | →                                                                                                                                                                                    |
| env-424 | scaffold2364_1_MH0071               | - | 108    | 57     | RNA | →                                                                                                                                                                                    |
| env-425 | scaffold88060_1_MH0083              | - | 108    | 57     | RNA | →                                                                                                                                                                                    |
| env-426 | scaffold91363_1_V1.UC-10            | + | 544    | 595    | RNA | →                                                                                                                                                                                    |
| env-427 | scaffold83915_1_V1.UC-8             | - | 108    | 57     | RNA | → hypo                                                                                                                                                                               |
| env-428 | SRS020233_C3818898                  | + | 153    | 205    | RNA | →                                                                                                                                                                                    |
| env-429 | SRS024132_C3632946                  | - | 167    | 115    | RNA | → hypo                                                                                                                                                                               |
| env-430 | SRS050422_LANL_scaffold_88482       | + | 593    | 645    | RNA | →                                                                                                                                                                                    |
| env-431 | SRS064276_C2411397                  | - | 185    | 133    | RNA | → hypo                                                                                                                                                                               |
| env-432 | UnmappedStool_Broad_scaffold_502667 | - | 347    | 295    | RNA | → rps13 (CHL00137)rpsM (PRK05179)→                                                                                                                                                   |
| env-433 | AUXO010373404.1                     | + | 958    | 1008   | RNA | → rps13 (CHL00137)rpsM (PRK05179)→                                                                                                                                                   |
| env-434 | UnmappedStool_Broad_C251835313      | + | 227    | 284    | RNA | →                                                                                                                                                                                    |
| Bhy-1-1 | NZ_GG657686.1                       | + | 284181 | 284238 | RNA | → RpsM (COG0099)rpsM (PRK05179)→                                                                                                                                                     |
| env-435 | AUXO015141686.1                     | - | 737    | 687    | RNA | → ←hypo                                                                                                                                                                              |
| env-436 | AUXO012457309.1                     | + | 505    | 561    | RNA | → RpsM (COG0099)rpsM (PRK05179)→ PRK05309 (PRK05309)RpsK (COG0100)→                                                                                                                  |
| env-437 | AUXO017593349.1                     | - | 353    | 299    | RNA | → RpsM (COG0099)rpsM (PRK05179)→                                                                                                                                                     |
| env-438 | AUXO011871861.1                     | + | 122    | 174    | RNA | → rps13 (CHL00137)rpsM (PRK05179)→                                                                                                                                                   |
| Bsp-7-1 | NZ_AUIX01000015.1                   | + | 102241 | 102293 | RNA | → RpsM (COG0099)rpsM (PRK05179)→ PRK05309 (PRK05309)RpsK (COG0100)→                                                                                                                  |
| Bsp-9-1 | NZ_AUJO01000032.1                   | + | 17808  | 17860  | RNA | → RpsM (COG0099)rpsM (PRK05179)→ PRK05309 (PRK05309)RpsK (COG0100)→                                                                                                                  |
| Bsp-5-1 | NZ_KE384159.1                       | - | 74816  | 74764  | RNA | → RpsM (COG0099)rpsM (PRK05179)→ PRK05309 (PRK05309)RpsK (COG0100)→                                                                                                                  |
| Bsp-4-1 | NZ_KE384144.1                       | + | 253197 | 253249 | RNA | → RpsM (COG0099)rpsM (PRK05179)→ PRK05309 (PRK05309)RpsK (COG0100)→                                                                                                                  |
| Bsp-2-1 | NZ_ATVV01000009.1                   | - | 41473  | 41421  | RNA | → RpsM (COG0099)rpsM (PRK05179)→ PRK05309 (PRK05309)RpsK (COG0100)→                                                                                                                  |
| Bsp-8-1 | NZ_KE384200.1                       | + | 31158  | 31210  | RNA | → RpsM (COG0099)rpsM (PRK05179)→ PRK05309 (PRK05309)RpsK (COG0100)→                                                                                                                  |
| Bsp-3-1 | NZ_JNLQ01000002.1                   | + | 492386 | 492438 | RNA | → RpsM (COG0099)rpsM (PRK05179)→ PRK05309 (PRK05309)RpsK (COG0100)→                                                                                                                  |
| Bpr-2-1 | NZ_KB892647.1                       | + | 780    | 851    | RNA | → RpsM (COG0099)rpsM (PRK05179)→ PRK05309 (PRK05309)RpsK (COG0100)→<br>RpsD (COG0522)rpsD (PRK05327)→ RpoA (COG0202)PRK05182 (PRK05182)→<br>rplQ (PRK05591)RibosomalL17 (pfam01196)→ |

## 16.3 Conserved domains

Conserved domains found in protein-coding genes listed in Section 16.2 are shown below, with the first sentence in their description from the Conserved Domain Database (if any). Conserved domains associated with more than one S4-

**cd00207** (5) 2Fe-2S iron-sulfur cluster binding domain.  
**cd06928** (3) N-terminal domain of the Alpha subunit of Bacterial RNA polymerase.  
**CHL00041** (2) ribosomal protein S11  
**CHL00137** (46) ribosomal protein S13; Validated  
**COG0099** (345) Ribosomal protein S13 [Translation, ribosomal structure and biogenesis]  
**COG0100** (189) Ribosomal protein S11 [Translation, ribosomal structure and biogenesis]  
**COG0202** (99) DNA-directed RNA polymerase, alpha subunit/40 kD subunit [Transcription]  
**COG0493** (5) NADPH-dependent glutamate synthase beta chain or related oxidoreductase [Amino acid transport and metabolism, General function prediction only]  
**COG0522** (132) Ribosomal protein S4 or related protein [Translation, ribosomal structure and biogenesis]

Clostridia RNA are assigned a color, while others are shown in gray. The number in parentheses after the colored domain name is the number of occurrences in Section 16.2.

**COG1576** (5) NAD-dependent dihydropyrimidine dehydrogenase, PreA subunit [Nucleotide transport and metabolism]  
**COG1597** (4) Diacylglycerol kinase family enzyme [Lipid transport and metabolism, General function prediction only]  
**COG1891** (5) NADH:ubiquinone oxidoreductase, NADH-binding 51 kD subunit (chain F) [Energy production and conversion]  
**COG1971** (4) Putative Mn2+ efflux pump MntP [Inorganic ion transport and metabolism]  
**pfam00163** (1) Ribosomal protein S4/S9 N-terminal domain.  
**pfam01193** (2) RNA polymerase Rpb3/Rpb11 dimerisation domain.  
**pfam01196** (44) Ribosomal protein L17.  
**pfam02256** (5) Iron hydrogenase small subunit.







































env-77  
 env-78  
 env-79  
 env-80  
 env-81  
 Rgn-1-1  
 env-82  
 env-83  
 env-87  
 env-88  
 env-89  
 env-90  
 env-91  
 env-92  
 env-93  
 env-94  
 Lba-11-1  
 env-95  
 env-96  
 env-97  
 Dsp-3-1  
 Dsp-1-1  
 env-101  
 env-102  
 Dsp-2-1  
 env-103  
 env-106  
 env-116  
 env-117  
 env-118  
 env-119  
 env-120  
 env-123  
 env-124  
 env-127  
 env-128  
 env-129  
 env-130  
 env-136  
 env-137  
 env-138  
 env-139  
 Dlo-1-1  
 env-140  
 env-149  
 env-150  
 env-151  
 Chy-1-1  
 env-152  
 env-153  
 env-154  
 Esp-1-1  
 env-155  
 env-156  
 env-159  
 env-160  
 env-161  
 env-162  
 env-163  
 env-164  
 env-165  
 env-167  
 env-168  
 env-169  
 env-170  
 env-171  
 env-172  
 env-175  
 env-176  
 env-177  
 env-178  
 Lba-4-1  
 env-179  
 Cba-3-1  
 [sc-1-1  
 Lba-7-1  
 env-181  
 env-182  
 env-183  
 env-184  
 env-185  
 env-186  
 env-187  
 env-188

.....U.....AC  
 .....U.....AC

CCUGCGUAAAGACAGAUUGGAAAGAUUAUAGGGCGAAAGCCCGCAUCGAGA.....

GCAGAAUUCGAGGACGAAAUAGGGCGCCAGCCCAUCAUCGAGCCGAGCAAAGCGGAGGCGAGAUGUGCAUUUCGA.....

UUGUGAAGACUUUAUAGGGCGAUAGCCCGCAGCGAGAUGGAGCAAAGCGGAAUCGAGCUGGCACGGCGUACCCUUCGAAAGGACACGGCAAAGCCGGCAAAGAUAAAGCGAAGCGAAAUCAAGCCGGCACAGCGUUCGCGCCGAAAAGACGGCGCAAAGCCGGCAGGACA.....AG  
 GAUGAAUGUCAAGAUUAUAGGGCGAAGCCCGACAACGAGAUAAAGCGAUAAGCGAAAUUCGAGUUGCUUUUC.....



```

env-294 .....UUCG
env-295 .....UUCG
env-296 .....UUCG
env-298 .....UUCG
env-299 .....UUCG
env-300 .....UUCG
env-301 .....UUCG
env-302 .....UUCG
env-303 .....UUCG
env-304 .....UUCG
env-305 .....UUCG
Bwe-2-1 .....UUCG
env-306 .....UUCG
env-307 .....UUCG
env-308 .....UUCG
env-309 .....UUCG
env-310 .....UUCG
env-311 .....UUCG
env-313 .....UUCG
env-314 .....UUCG
env-315 .....UUCG
env-317 .....UUCG
env-318 .....UUCG
Bwe-1-1 .....UUCG
env-319 .....UUCG
env-320 .....UUCG
env-321 .....UUCG
env-322 .....UUCG
env-323 .....UUUG
env-324 .....UUUG
env-325 .....UUUG
env-326 .....UUUG
env-327 .....UUCG
env-328 .....
env-329 .....
env-331 .....A
env-332 .....A
env-335 .....A
env-336 .....A
env-337 .....A
env-338 .....A
env-339 .....A
env-340 .....A
env-341 .....A
env-342 .....A
Bsc-1-1 .....
Rsp-3-1 .....
env-343 .....
env-344 .....
env-346 .....
env-348 .....
env-349 .....
env-350 .....
env-351 .....
env-352 .....
env-353 .....
Rga-1-1 .....
env-354 .....
env-355 .....UCCU
env-356 .....UCCU
env-357 .....
env-358 .....
env-359 .....
env-360 .....
env-361 .....GUGC
env-362 .....GUGC
env-363 .....
env-364 .....
env-365 .....
env-366 .....
env-367 .....
env-368 .....
env-369 .....
env-370 .....
env-371 .....
env-372 .....
env-373 .....
env-374 .....
env-375 .....
env-377 .....
env-383 .....
env-384 .....
env-385 .....
env-386 .....

```









Bpr-1-1  
Cba-1-1  
env-264  
env-265  
env-266  
env-267  
env-268  
env-271  
env-272  
env-273  
env-275  
env-276  
env-277  
env-278  
env-279  
env-280  
env-281  
env-282  
Bsp-1-1  
env-283  
env-284  
env-285  
env-286  
env-287  
env-288  
env-289  
env-290  
env-291  
env-292  
env-293  
env-294  
env-295  
env-296  
env-298  
env-299  
env-300  
env-301  
env-302  
env-303  
env-304  
env-305  
Bwe-2-1  
env-306  
env-307  
env-308  
env-309  
env-310  
env-311  
env-313  
env-314  
env-315  
env-317  
env-318  
Bwe-1-1  
env-319  
env-320  
env-321  
env-322  
env-323  
env-324  
env-325  
env-326  
env-327  
env-328  
env-329  
env-331  
env-332  
env-335  
env-336  
env-337  
env-338  
env-339  
env-340  
env-341  
env-342  
Bsc-1-1  
Rsp-3-1  
env-343  
env-344  
env-346  
env-348  
env-349  
env-350  
env-351

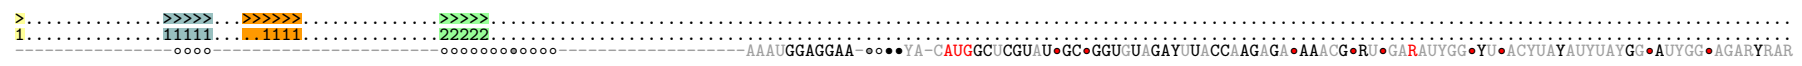

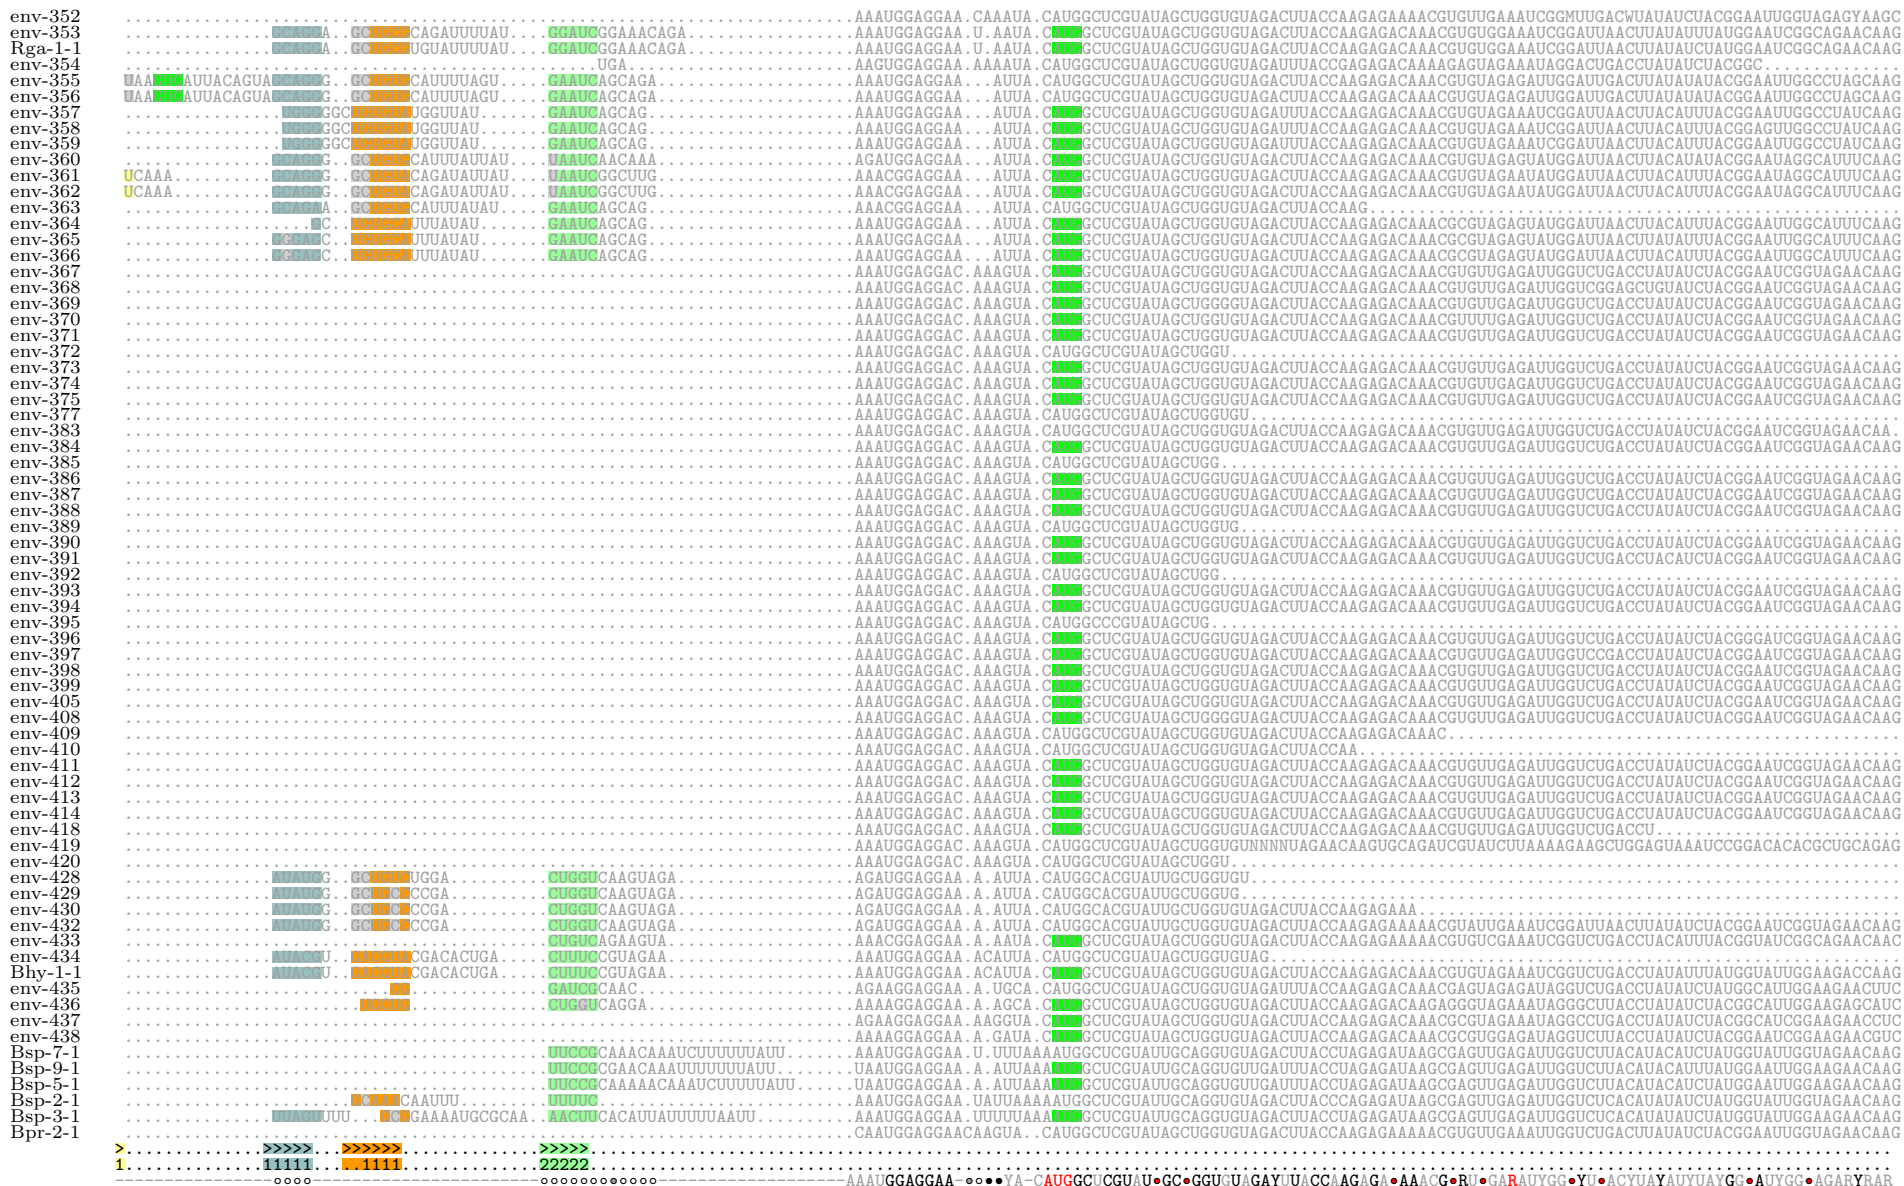

alignment positions 901 ··· 1080

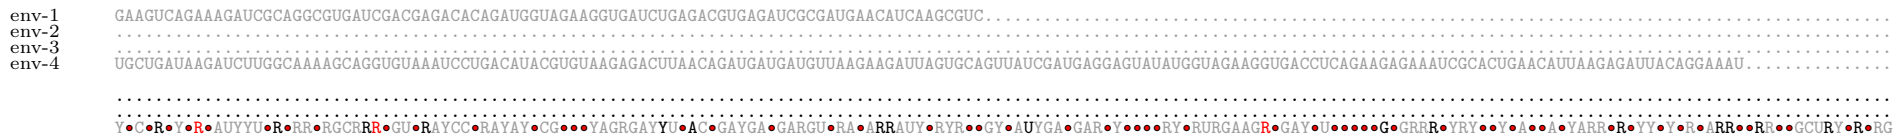













```

env-428 .....
env-429 .....
env-430 .....
env-432 CGCUACCCGUAUUCUGGAAGCAGCUAAUUGAUAUCCGAACACCCGUGUAGAGAUUACCGGACGAAGUAAAAAGAAUACAGUGCUGUAUUCGAUGAGACUCAGACUGUAG
env-433 UUCCAACAAGA .....
env-434 .....
Bhy-1-1 UGCAACUCGGCAUCUCGGCUGAUGCGAAAUAUUCUGGACACUCUGUUAAGAGAUUUGACAGCAGAAAGUAAAACAGAAUCCGUAAGUGAUGAGAGACUUAUGUAGGUGGAGGUGAUCUGAGAAGAGAUUCGUCUGAAUAUCAAGAGACUUCAGGAGAUUGGUGCUACAGAGG
env-435 UUCCAAUCGUAUUCUUGCGCAGGCCGGCGUUAACCCGGUAUCCCGUGUCAGAGAUUCAGACCGUAAGAGACGAGGUAAGAAUCCGUGGUAUCGAAAGAGACCCAGGUCUGAAGGUGAUCUGAGACGUGAAGUUGCUAUGAACAUCAACCGUCUUCAGGAGAUCCGUGCUACCGCGG
env-436 UUCCAAUCGUAUUCUUGCGCAGGCCGGCGUUAUUCGGUAUACACGUGUGAGAGAUUCAGAGAAAGUAAAACCCGGAGUAUUCGACGAGACUCAGACCGUAAGAGGUGAUCUGAGACGUCAGGUUGCAUGGAUCAAACGUCUUCAGGAGAUCCGUGCUAUCGUGG
env-437 UUCCAAACCGUAUUCUGGUGACGCGAGGUGUAGCCGAUAUACACGCGUUCGUGAUUCUACGGACGACGAAGUAAAAGAAUCCGUUCGUGAUCGAAAGAGACACAGGUUGAAGGUGAUCUUCGAGACAGCCGUAUGGAUCAAACCGUCUUCAGGAGAUCCGUGCUACCGCGG
env-438 UUCCAAACCGUAUUCUGGUGAUCGCGGAGUAGAUCCCAUUCACCGGUGUCGUGAUUCUUAUGAAGA .....
Bsp-7-1 CUCAAACAAAUAUCUUGCUGCUGCAAAUUAUACCCGGACACACGUGUUCGUGAUUCUACAGAUAGAGGUUAAAGAAUUCGUGAUAUCGUAACGUAUUGACGUAAGGUGAUCUUAAGAGAGAUUCGUAUGAACAUCAACCGUCUUCAGAAAUCGGAUGCUACAGAGG
Bsp-9-1 CUCAAACAAAUAUCUUGAGGUCGCAAAAGUAAAACCCGGACACACGUGUUCGUGAUUCUACAGAUAGAGUAAAGAAUUCGUAUUGAAGUAGAGGUGAUCUUAAGAGAGAAAUCGUAUGAACAUCAACCGUCUUCAGAGAUCCGUGCUACAGAGG
Bsp-5-1 CUCAAACAAAUAUCUUGAGGUUUCAAAAGUAAAACCCGGACACACGUGUUCGUGAUUCUACAGAUAGAGUAAAGAAUUCGAGAUUUCGUAAGGUAUUGAAGUAGAGGUGAUCUUAAGAGAGAAAUCGUAUGAACAUCAACCGUCUUCAGAGAUCCGUGCUACAGAGG
Bsp-2-1 CUCAAACAAAUAUCUUGCUGCUGCAAAUUAUUCGGACACACGUGUUCGUGAUUCUACAGAUAGAGUAAAGAAUUCGUGAUAUUCGUAUUGACGUAAGGUGAUCUUAAGAGAGAAAUCGUAUGAACAUCAACCGUCUUCAGAAAUCGGAUGCUACAGAGG
Bsp-3-1 CUCAAUAAGAUUCUUGCUGCUGCAAAUUAUUCGGACACACGUGUUCGUAUUCUACAGAUAGAGUAAAGAAUUCGUGAUAUUCGUAUUGACUAGACGUAAGGUGAUCUUAAGAGAGAAAUCGUAUGAACAUCAACCGUCUUCAGAAAUCGGAUGCUACAGAGG
Bpr-2-1 CGCUGACCGUAUCUUAAGUAGAGGCGAGGUAUAAACCCGGACACUCGCGCAGGGAAUUGACUGACGAAGAAUAGGAAAAUCCGUAUGCAUCGUAAGGUGAUCUGAGAAGAGAAAUCGUCUGAACAUCAAGAGAUUACAGGAAUCCGGAUGCUACAG

```

Y•C•R•Y•R•AUYYU•R•RR•RGCR•RR•GU•RAYCC•RAYAY•CG•••YAGRGAYU•Y•AC•GAYGA•GARGU•RA•ARRAU•RYR••GY•AUTGA•GAR•Y••••RY•RURGA•GR•GAY•U•••••G•GRRR•YRY••Y•A••YARR•R•YT•Y•R•ARR••RR••GCUR•Y•R•RG

alignment positions 1081...1117

```

env-1 .....
env-2 .....
env-3 .....
env-4 .....
env-5 .....
env-6 .....
env-7 .....
env-8 .....
env-9 .....
env-10 UAUCCGUCAUAGAAAAGGGUUCUCCUGUUCGUGGUCAG
env-11 UAUCCGUCAUAGAAAAGGGUUCUCCUGUUCGUGGUCAG
env-12 UAUCCGUCAUAGAAAAGGGUUCUCCUGUUCGUGGUCAG
env-13 UAUCCGUCAUAGAAAAGGGUUCUCCUGUUCGUGGUCAG
env-14 .....
env-16 AAUCCGUCACAGAAAAGGACUUCGUGUUCGCGGUCAG
env-17 AAUCCGUCACAGAAAAGGACUUCGUGUUCGCGGUCAG
env-18 AAUUCGUCAUAGAAAAGGACUUCGAGUUCGUGGUCAG
Bsp-6-1 UAUUCGUCAUAGAAAGAGCCUUCUGUUCGUGGUCAG
env-20 CAUUCGUCACAGAAAAGGACUUCGUGUUCGCGGUCAG
env-21 UGUUCGCCACAGAAAGGACUUCUGUUCGUGGACAG
env-22 UAUCCGUCACAGAAAAGGACUUCUGUUCGCGGACAG
env-23 UAUCCGUCACAGAAAAGGACUUCUGUUCGCGGACAG
env-24 UAUCCGUCAUAGAAAAGGACUUCAGUUCGUGGUCAA
env-25 UAUCCGUCAUAGAAAAGGACUUCAGUUCGUGGUCAA
env-28 UAUCCGUCAUAGAAAAGGACUUCGAGUUCGUGGUCAA
env-29 UAUCCGUCAUAGAAAAGGACUUCUGUUCGUGGUCAG
env-30 UAUCCGUCAUAGAAAAGGACUUCUGUUCGUGGUCAG
env-32 UAUCCGUCAUAGAAAAGGACUUCUGUUCGUGGUCAG
env-33 UAUCCGUCAUAGAAAAGGACUUCUGUUCGUGGUCAG
env-34 .....
env-35 .....
env-36 .....
env-37 .....
env-38 .....
env-39 .....
env-41 .....
env-42 .....
env-43 AAUCCGCCACAGAAAAGGCUUCGUGUGCGCGGCCAA
env-45 UUCGGGCAAAUUAUAAAACGGGUGUCUUUAUCAGACU
env-46 ACAGUUGCCAUAAGAAAGAAUAAUAAAGCAUUAUAA
env-47 AUGUCCGCAAGAUACAGCACCGUUAUCGAGGAGACCAU
env-48 AGGCAUCCGUCACAGAAAGGCUUCGUGUUCGCGGA
env-49 UGUCCGCCACAGAAAAGGACUUCUGUUCGCGGUCAG
env-50 AAUCCGUCAUAGAAAAGGACUUCGUGUUCGUGGACAG
Dma-1-1 GAUUCGUCAUAGAAAAGGACUUCUGUUCGCGGUCAG
env-51 UAUCCGCCACAGAAAGGACUUCGUGUUCGUGGACAG
Lba-2-1 UGGCAAAACGUCACAGAGUAGGACUUCUGUUCGUGGA
[ce-1-1 UGGCAAAACGUCACAGAGUAGGACUUCUGUUCGUGGA
Ece-1-1 AAUCCGUCAUAGAAAAGGACUUCUGUUCGUGGUCAG
env-52 GAUCCGUCAUAGAAAGGAAUUCGUGUUCGUGGUCAA
env-53 GAUCCGUCAUAGAAAGGAAUUCGUGUUCGUGGUCAA
env-54 AAUCCGUCACAGAAAAGGACUUCGUGUUCGUGGUCAG
env-55 AAUCCGUCACAGAAAAGGACUUCGUGUUCGUGGUCAG
env-59 AAUCCGUCACAGAAAAGGACUUCGUGUUCGUGGUCAG
env-60 AAUCCGUCACAGAAAAGGACUUCGUGUUCGUGGUCAG
env-62 .....
env-63 .....

```

R•Y•RYCAY•R•ARARG•••CY•RU•CRYRG•YRR

env-64 .....  
 env-66 .....  
 env-67 AAUCCGUCACAGAAAAGGACUUCGGUACGUGGUCAG  
 env-68 AAUCCGUCACAGAAAAGGACUUCGGUACGUGGUCAG  
 env-75 AA  
 env-76 AAUCCGUCACAGAAAAGGACUUCGGUACGUGGUCAG  
 env-77 AAUCCGUCACAGAAAAGGACUUCGGUACGUGGUCAG  
 env-78 .....  
 env-79 AAUCCGUCACAGAAAAGGACUUCGGUACGUGGUCAG  
 env-80 .....  
 env-81 .....  
 Rgn-1-1 AAUCCGUCACAGAAAAGGACUUCGGUACGUGGUCAG  
 env-82 AAUCCGUCACAGAAAAGGACUUCGGUACGUGGUCAG  
 env-83 AAUCCGUCACAGAAAAGGACUUCGGUACGUGGUCAG  
 env-87 .....  
 env-88 UAUCCGUCAUAGAAAAGGACUUCGGUUCGUGGUCAG  
 env-89 GUAUCCGUCAUAGAAAAGGACUUCGGUUCGUGGACA  
 env-90 AAUCCGUCAUAGAAAGGAAUUCGGUUCGUGGUCAA  
 env-91 GAUCCGUCAUAGAAAGGAAUUCGGUUCGUGGUCAA  
 env-92 .....  
 env-93 .....  
 env-94 CAAGAAGAAAUAUAAUUUAUAAAGUAGAAAAGGUG  
 Lba-11-1 CAAGAAGAAAUAUAAUUUAUAAAGAAAAGGUGAAA  
 env-95 AGGUAUCCGUCACAGAAAGGACUUCGGUCCCGGGA  
 env-96 .....  
 env-97 AAUCCGUCACAGAAAAGGACUUCGGUUCGUGGUCAG  
 Dsp-3-1 ACAGAUGAAGACGUUAAAGAAAACAGUCUGUAAUUG  
 Dsp-1-1 UAUCCGUCACAGAAAAGGACUUCGGUCCCGGUCAG  
 env-101 .....  
 env-102 .....  
 Dsp-2-1 AAUCCGUCACAGAAAAGGACUUCGGUUCGUGGUCAG  
 env-103 .....  
 env-106 AAUCCGUCACAGAAAAGGACUUCGGUUCGUGGUCAG  
 env-116 .....  
 env-117 AAUCCGUCACAGAAAAGGACUUCGG .....  
 env-118 AAUCCGUCACAGAAAAGGACUUCGGUUCGUGGUCAG  
 env-119 AAUCCGUCACAGAAAAGGACUUCAGUUC .....  
 env-120 .....  
 env-123 .....  
 env-124 AAUCCGUCACAGAAAAGGACUUCAGUUCGUGGUCAG  
 env-127 AAUCCGUCAUAGAAAAGGACUUCAGUUCGUGGUCAG  
 env-128 .....  
 env-129 AAUCCGUCACAGAAA .....  
 env-130 AAUCCGUCACAGAAAAGGACUUCGGUUCGUGGUCAG  
 env-136 .....  
 env-137 AAUCCGUCACAGAAAGGACUUCGGUACGUGGUCAG  
 env-138 .....  
 env-139 AAUCCGUCACAGAAAAGGACUUCGGUUCGUGGUCAG  
 Dlo-1-1 AAUCCGUCACAGAAAAGGACUUCGGUUCGUGGUCAG  
 env-140 AAUCCGUCACAGAAAAGGACUUCGGUUCGUGGUCAG  
 env-149 UAUCCGUCACAGAAAAGGACUUCGGUUCGUGGUCAG  
 env-150 .....  
 env-151 .....  
 Chy-1-1 UAUCCGUCACAGAAAAGGACUUCGGUCCCGGUCAG  
 env-152 .....  
 env-153 .....  
 env-154 .....  
 Esp-1-1 UAUCCGUCACAGAAAAGGACUUCGGUUCGUGGACAG  
 env-155 AAUCCGUCACAGAAAAGGACUUCGGUACGUGGACAG  
 env-156 AAUCCGUCAUAGAAAAGGACUUCAGUACGUGGACAG  
 env-159 .....  
 env-160 AAUCCGUCAUAGAAAAGGACUUCAGUACGUGGACAG  
 env-161 AAUCCGUCACAGAAAAGGACUUCGGUACGUGGACAG  
 env-162 AAUCCGUCAUAGAAAAGGACUUCGGUACGUGGACAG  
 env-163 .....  
 env-164 .....  
 env-165 AAUCCGUCAUAGAAAAGGACUUCGGUACGUGGACAG  
 env-167 .....  
 env-168 AAUCCGUCAUAGAAAAGGACUUCGGUACGUGGACAG  
 env-169 AAUCCGUCAUAGAAAAGGACUUCAGUACGUGGACAG  
 env-170 AAUCCGUCAUAGAAAAGGACUUCGGUACGUGGACAG  
 env-171 AAUCCGUCACAGAAAAGGACUUCGGUACGUGGACAG  
 env-172 AAUCCGUCAUAGAAAAGGACUUCGGUACGUGGACAG  
 env-175 AAUCCGUCACAGAAAAGGACUUCGGUACGUGGACAG  
 env-176 .....  
 env-177 AAUCCGUCAUAGAAAAGGACUUCGGUACGUGGACAG  
 env-178 .....  
 Lba-4-1 AAUCCGUCACAGAAAAGGCCUUCGGUUCGCGGUCAA  
 env-179 AAUCCGUCACAGAAAAGGACUUCGGUUCGUGGUCAG  
 Cba-3-1 AAUCCGUCACAGAAAAGGACUUCGGUUCGUGGUCAG  
 [sc-1-1 AAUCCGUCACAGAAAAGGACUUCGGUUCGUGGUCAG  
 Lba-7-1 AAUCCGUCACAGAAAAGGACUUCGGUUCGUGGUCAG  
 env-181 .....  
 env-182 .....

.....  
 R•Y•RYCAY•R•RARGR•••CY•RU•CRYRG•YRR

env-183 AGGCAUCCGUCACAG.....  
 env-184 .....  
 env-185 .....  
 env-186 AAUCCGUCAUAGAAAAGGACUUCGGUGCGGGUCAG  
 env-187 .....  
 env-188 .....  
 env-189 AAUCCGUCAUAGAAAAGGACUUCGGUGCGGGUCAG  
 env-190 AAUCCGUCAUAGAAAAGGACUUCGGUGCGGGUCAG  
 env-191 .....  
 env-192 AAUCCGUCAUAGAAAAGGACUUCGGUGCGGGUCAG  
 env-194 .....  
 env-195 AAUCCGUCAUAGAAAAGGACUUCGGUGCGGGUCAG  
 env-200 .....  
 env-201 .....  
 env-202 .....  
 env-211 .....  
 env-212 .....  
 env-216 AAUCC.....  
 env-217 AGGCAUCCGUCACAGAAAGAGGCCUUCGGUUCGCGG.  
 Rpe-1-1 AAUCCGUCAUAGAAAAGGACUUCGGUUCGUGGACAG  
 Rsp-1-1 AAUCCGUCAUAGAAAAGGACUUCGGUUCGUGGACAG  
 env-218 CCGCAUCCGCCACAGAAAGGGCC.....  
 env-219 UAUCCGUCACUGUAAAAGGACUUCGGUUCGCGGACAG  
 env-220 .....  
 env-221 .....  
 env-222 AAUCCGUCACAGAAAAGGUCUUCGGUUCGUGGUCAG  
 env-223 .....  
 env-226 .....  
 env-227 .....  
 env-228 .....  
 env-229 .....  
 env-230 .....  
 env-231 .....  
 env-232 .....  
 env-234 .....  
 env-235 .....  
 env-236 AAUCCGUCACAGAAAAGGUCUUCGGUUCGUGGUCAG  
 env-237 AGCAGGAAAUUGCAAAGCAGAUCAAGUUAACUAUAGA  
 env-238 .....  
 env-239 AAUCCGUCACAGAAAAGGUCUUCGGUUCGUGGUCAG  
 env-240 AGGCAUCCGUCACAGAAAAGGACUUCGGUUCGCGGA  
 env-241 .....  
 env-242 .....  
 env-243 .....  
 env-244 .....  
 env-245 .....  
 env-246 UAUCCGUCAUAGAAAAGGACUUCGUGUUCGUGGUCAG  
 env-252 UAUCCGUCAUAGAAAAGGACUUCGUGUUCGUGGUCAG  
 env-254 AAUCCGUCACAGAAAGGACUUCGGUACGUGGUCAG  
 Lba-6-1 AAUCCGUCACAGAAAGGACUUCGGUACGUGGUCAG  
 env-255 .....  
 Lba-10-1 AAUCCGUCACAGAAAGGACUUCGGUACGUGGUCAG  
 env-256 AAUCCGUCACAGAAAGGACUUCGGUACGUGGUCAG  
 env-258 .....  
 env-259 AAUCCGUCACAGAAAGGACUUCGGUACGUGGUCAG  
 env-260 .....  
 env-261 .....  
 env-262 .....  
 env-263 UAUCCGUCACAGAAAAGGCCUUCGGUUCGUGGUCAG  
 Bfo-1-1 UAUCCGCCAUCGUAAAAGGGCUUCGGUUCGUGGUCAG  
 Bpr-1-1 AGGAAUCCGCCACAGAAAAGGACUUCGGUUCGCGGA  
 Cba-1-1 AGGAAUCCGCCACAGAAAAGGACUUCGGUUCGUGGA  
 env-264 .....  
 env-265 .....  
 env-266 UAUCCGUCACUGUAAAAGGACUUCGGU.....  
 env-267 UAUCCGUCACUGUAAAAGGACUUCGGUUCGUGGCCAG  
 env-268 UAUCCGUCACUGUAAAAGGACUUCGGUUCGUGGCCAG  
 env-271 .....  
 env-272 UAUCCGUCACUGUAAAAGGACUUCGGUUCGUGGCCAG  
 env-273 UAUCCGUCACUGUAAAAGGACUUCGGUUCGUGGCCAG  
 env-275 UAUCCGUCACUGUAAAAGGACUUCGGUUCGUGGCCAG  
 env-276 UAUCCGU.....  
 env-277 .....  
 env-278 AAUCCGUCACUGUAAAAGGACUUCGGUUCGUGGUCAG  
 env-279 .....  
 env-280 .....  
 env-281 UAUCCGUCACUGUAAAAGGACUCCGGUUCGUGGUCAG  
 env-282 UAUCCGUCACUGUAAAAGGACUCCGGUUCGUGGUCAG  
 Bsp-1-1 UAUCCGUCACUGUAAAAGGACUCCGGUUCGUGGUCAG  
 env-283 .....  
 env-284 UAUCCGUCACUGUAAAAGGACUCCGGUUCGUGGUCAG  
 env-285 UAUCCGUCACUGUAAAAGGACUCCGGUUCGUGGUCAG  
 env-286 UAUCCGUCACUGUAAAAGGACUCCGGUUCGUGGUCAG  
 env-287 UAUCCGUCACUGUAAAAGGACUUCGGUUCGUGGUCAG

.....  
 ●R●Y●RYCAY●R●ARAGR●●●CY●RU●CRYR●YRR

env-288 UAUCCGUAUCGUAAAAGGACUCCGGUUCGUGGUCAG  
 env-289 UAUCCGUAUCGUAAAAGGACUCCGGUUCGUGGUCAG  
 env-290 .....  
 env-291 UAUCCGUAUCGUAAAAGGACUCCGGUUCGUGGUCAG  
 env-292 UAUCCGUAUCGUAAAAGGACUCCGGUUCGUGGUCAG  
 env-293 .....  
 env-294 .....  
 env-295 .....  
 env-296 UAUCCGUAUCGUAAAAGGACUCCGGUUCGUGGUCAG  
 env-298 UAUCCGUAUCGUAAAAGGACUCCGGUUCGUGGUCAG  
 env-299 UAUCCGUAUCGUAAAAGGACUCCGGUUCGUGGUCAG  
 env-300 UAUCCGUAUCGUAAAAGGACUCCGGUUCGUGGUCAG  
 env-301 UAUCCGUAUCGUAAAAGGACUCCGGUUCGUGGUCAG  
 env-302 UAUCCGUAUCGUAAAAGGACUCCGGUUCGUGGUCAG  
 env-303 .....  
 env-304 .....  
 env-305 .....  
 Bwe-2-1 UAUCCGUAUCGUAAAAGGACUCCGGUUCGUGGUCAG  
 env-306 UAUCCGUAUCGUAAAAGGACUCCGGUUCGUGGUCAG  
 env-307 .....  
 env-308 .....  
 env-309 UAUCCGUAUCGUAAAAGGACUCCGGUUCGUGGUCAG  
 env-310 .....  
 env-311 UAUCCGUAUCGUAAAAGGACUCCGGUUCGUGGUCAG  
 env-313 UAUCCGUAUCGUAAAAGGACUCCGGUUCGUGGUCAG  
 env-314 UAUCCGUAUCGUAAAAGGACUCCGGUUCGUGGUCAG  
 env-315 UAUCCGUAUCGUAAAAGGACUCCGGUUCGUGGUCAG  
 env-317 .....  
 env-318 .....  
 Bwe-1-1 UAUCCGUAUCGUAAAAGGACUCCGGUUCGUGGUCAG  
 env-319 UAUCCGUAUCGUAAAAGGACUCCGGUUCGUGGUCAG  
 env-320 UAUCCGUAUCGUAAAAGGACUCCGGUUCGUGGUCAG  
 env-321 .....  
 env-322 .....  
 env-323 UAUCCGUAUCGUAAAAGGACUCCGGUUCGUGGUCAG  
 env-324 .....  
 env-325 UAUCCGUAUCGUAAAAGGACUCCGGUUCGUGGUCAG  
 env-326 UAUCCGUAUCGUAAAAGGACUCCGGUUCGUGGUCAG  
 env-327 .....  
 env-328 .....  
 env-329 AAUCCGUAUCGUAAAAGGACUCCGGUUCGUGGUCAG  
 env-331 .....  
 env-332 AAUCCGUAUCGUAAAAGGACUCCGGUUCGUGGUCAG  
 env-335 .....  
 env-336 .....  
 env-337 AAUCCGUAUCGUAAAAGGACUCCGGUUCGUGGUCAG  
 env-338 AAUCCGUAUCGUAAAAGGACUCCGGUUCGUGGUCAG  
 env-339 AAUCCGUAUCGAAAAGGACUCCGGUUCGUGGUCAG  
 env-340 .....  
 env-341 .....  
 env-342 .....  
 Bsc-1-1 UAUCCGUAUCGUAAAAGGACUCCGGUUCGUGGUCAG  
 Rsp-3-1 UAUCCGUAUCGUAAAAGGACUCCGGUUCGUGGUCAG  
 env-343 UAUCCGUAUAGAAAAGGACUCCGGUUCGUGGUCAG  
 env-344 AGGUAUCCGUAUCGUAAAAGGACUCCGUUCGUGGU  
 env-346 .....  
 env-348 .....  
 env-349 .....  
 env-350 AGGUAUCCGUAUCGUAAAAGGACUCCGUUCGUGGU  
 env-351 .....  
 env-352 CAGAGGAAUCCGUAUCGUAAAAGGACUCCGUUCGUGU  
 env-353 AAUUCGUAUAGAAAAGGACUCCGUUCGUGGGCAG  
 Rga-1-1 UAUUCGUAUAGAAAAGGACUCCGUUCGUGGGACAG  
 env-354 .....  
 env-355 AAUUCGUAUAGAAAAGGACUCCGUUCGUGGGACAA  
 env-356 .....  
 env-357 AAUUCGUAUAGAAAAGGACUCCGUUCGUGGGUCAA  
 env-358 AAUUCGUAUAGAAAAGGACUCCGUUCGUGGGUCAA  
 env-359 AAUUCGUAUAGAAAAGGACUCCGUUCGUGGGUCAA  
 env-360 AAUUCGUAUAGAAAAGGACUCCGUUCGUGGGUCAA  
 env-361 AAUUCGUAUAGAAAAGGACUCCGUUCGUGGGUCAA  
 env-362 AAUUCGUAUAGAAAAGGACUCCGUUCGUGGGUCAA  
 env-363 .....  
 env-364 AAUCC .....  
 env-365 .....  
 env-366 AAUCC .....  
 env-367 .....  
 env-368 .....  
 env-369 .....  
 env-370 .....  
 env-371 .....  
 env-372 .....  
 env-373 UAUCCG .....  
 env-374 NNGUCAGGUUGAGAAAAGGAGAUCCUUGUAGAGAAAUC

.....  
 •R•Y•RYCAY•R•ARARGR•••CY•RU•CRYRG•YRR



```

env-375 UAUCCGUCaucguAAAGGCCUUCGGUUCGUGGUCAG
env-377 .....
env-383 GGUCCUAAGGAAACUGUUGCAAUAAGAAGAAUAAU
env-384 .....
env-385 UAUCCGUCaucguAAAGGCCUUCGGUUCGUGGUCAG
env-386 GAUCCGUCaucguAAAGGCCUUCGGUUCGUGGUCAG
env-387 UAUCCGUCaucguAAAGGCCUUCGGUUCGUGGUCAG
env-388 UAUCCGUCaucguAAAGGCCUUCGGUUCGUGGUCAG
env-389 .....
env-390 UAUCCGUCaucguAAAGGCCUUCGGUUCGUGGUCAG
env-391 .....
env-392 .....
env-393 .....
env-394 .....
env-395 .....
env-396 .....
env-397 .....
env-398 .....
env-399 UAUCCGUCaucguAAAGGCCUUCGGUUCGUGGUCAG
env-405 UAUCCGUCaucguAAAGGCCUUCGGUUCGUGGUCAG
env-408 .....
env-409 .....
env-410 .....
env-411 GAACUGUUGCAAUAAGAAGAAUAUUUAACCAGUA
env-412 GAGAUUCUCGUAAGAAAUCGCUAUGAACAUCAAACG
env-413 UAUCCGUCaucguAAAGGCCUUCGGUUCGUGGUCAG
env-414 UAUCCGUCaucguAAAGGCCUUCGGUUCGUGGUCAG
env-418 .....
env-419 .....
env-420 .....
env-428 .....
env-429 .....
env-430 .....
env-432 .....
env-433 .....
env-434 .....
Bhy-1-1 UAUCCGUCaucguAAAGGCCUUCGGUUCGUGGUCAG
env-435 UAUCCGUCaucguAAAGGCCUUCGGUUCGUGGUCAG
env-436 AAUCCGUCaucguAAAGGCCUUCGGUUCGUGGUCAG
env-437 CAU.....
env-438 .....
Bsp-7-1 AAUCCGUCacagaAGAGGACUUCUGUUCGUGGUCAG
Bsp-9-1 AAUUCGUCacagaAGAGGACUUCUGUUCGUGGUCAG
Bsp-5-1 AAUCCGUCacagaAGAGGACUUCUGUUCGUGGUCAG
Bsp-2-1 UAUCCGUCacagaAGAGGACUUCUGUUCGUGGUCAG
Bsp-3-1 UAUUCGUCacagaAGAGGACUUCUGUUCGUGGUCAG
Bpr-2-1 AGGAAUCCGUCacagaAGAGGACUUCGGUUCGUGGA
.....
R•Y•RYCAY•R•ARARGR•••CY•RU•CRYRG•YRR

```

## 17 S4-Fusobacteriales

### 17.1 Taxa

The taxonomy of each organism containing a putative S4-Fusobacteriales RNA is listed, with abbreviations identifying each hit (e.g., “Eco-1-1” and “Eco-1-2” might hypothetically represent two distinct RNAs in *E. coli*). The abbreviations will be used to identify each individual S4-Fusobacteriales RNA in Sections 17.2 and 17.4:

| abbrev. of hits | taxonomy of species                                                                                   |
|-----------------|-------------------------------------------------------------------------------------------------------|
| Cso-1-1         | Bacteria Fusobacteria Fusobacteriales Fusobacteriaceae <i>Cetobacterium somerae</i> ATCC BAA-474      |
| Csp-1-1         | Bacteria Fusobacteria Fusobacteriales Fusobacteriaceae <i>Cetobacterium</i> sp. ZOR0034               |
| Csp-2-1         | Bacteria Fusobacteria Fusobacteriales Fusobacteriaceae <i>Cetobacterium</i> sp. ZWU0022               |
| Fgo-1-1         | Bacteria Fusobacteria Fusobacteriales Fusobacteriaceae <i>Fusobacterium gonidiaformans</i> ATCC 25563 |
| Fhw-1-1         | Bacteria Fusobacteria Fusobacteriales Fusobacteriaceae <i>Fusobacterium hwasookii</i> ChDC F145       |
| Fhw-2-1         | Bacteria Fusobacteria Fusobacteriales Fusobacteriaceae <i>Fusobacterium hwasookii</i> ChDC F174       |
| Fhw-3-1         | Bacteria Fusobacteria Fusobacteriales Fusobacteriaceae <i>Fusobacterium hwasookii</i> ChDC F206       |
| Fhw-4-1         | Bacteria Fusobacteria Fusobacteriales Fusobacteriaceae <i>Fusobacterium hwasookii</i> ChDC F300       |
| Fmo-1-1         | Bacteria Fusobacteria Fusobacteriales Fusobacteriaceae <i>Fusobacterium mortiferum</i> ATCC 9817      |
| Fne-1-1         | Bacteria Fusobacteria Fusobacteriales Fusobacteriaceae <i>Fusobacterium necrophorum</i> BFTR-1        |

|          |          |              |                 |                  |                                                                        |
|----------|----------|--------------|-----------------|------------------|------------------------------------------------------------------------|
| Fne-2-1  | Bacteria | Fusobacteria | Fusobacteriales | Fusobacteriaceae | <i>Fusobacterium necrophorum</i> BFTR-2                                |
| Fne-3-1  | Bacteria | Fusobacteria | Fusobacteriales | Fusobacteriaceae | <i>Fusobacterium necrophorum</i> BL                                    |
| Fne-4-1  | Bacteria | Fusobacteria | Fusobacteriales | Fusobacteriaceae | <i>Fusobacterium necrophorum</i> D12                                   |
| Fne-5-1  | Bacteria | Fusobacteria | Fusobacteriales | Fusobacteriaceae | <i>Fusobacterium necrophorum</i> DAB                                   |
| Fne-6-1  | Bacteria | Fusobacteria | Fusobacteriales | Fusobacteriaceae | <i>Fusobacterium necrophorum</i> DJ-1                                  |
| Fne-7-1  | Bacteria | Fusobacteria | Fusobacteriales | Fusobacteriaceae | <i>Fusobacterium necrophorum</i> DJ-2                                  |
| Fne-8-1  | Bacteria | Fusobacteria | Fusobacteriales | Fusobacteriaceae | <i>Fusobacterium necrophorum</i> HUN048                                |
| Fne-9-1  | Bacteria | Fusobacteria | Fusobacteriales | Fusobacteriaceae | <i>Fusobacterium necrophorum</i> subsp. <i>funduliforme</i> ATCC 51357 |
| Fne-10-1 | Bacteria | Fusobacteria | Fusobacteriales | Fusobacteriaceae | <i>Fusobacterium necrophorum</i> subsp. <i>funduliforme</i> B35        |
| Fne-11-1 | Bacteria | Fusobacteria | Fusobacteriales | Fusobacteriaceae | <i>Fusobacterium necrophorum</i> subsp. <i>funduliforme</i> Fnf 1007   |
| Fnu-1-1  | Bacteria | Fusobacteria | Fusobacteriales | Fusobacteriaceae | <i>Fusobacterium nucleatum</i> 13.3C                                   |
| Fnu-2-1  | Bacteria | Fusobacteria | Fusobacteriales | Fusobacteriaceae | <i>Fusobacterium nucleatum</i> CC53                                    |
| Fnu-9-1  | Bacteria | Fusobacteria | Fusobacteriales | Fusobacteriaceae | <i>Fusobacterium nucleatum</i> ChDC F128                               |
| Fnu-3-1  | Bacteria | Fusobacteria | Fusobacteriales | Fusobacteriaceae | <i>Fusobacterium nucleatum</i> CTI-1                                   |
| Fnu-4-1  | Bacteria | Fusobacteria | Fusobacteriales | Fusobacteriaceae | <i>Fusobacterium nucleatum</i> CTI-2                                   |
| Fnu-5-1  | Bacteria | Fusobacteria | Fusobacteriales | Fusobacteriaceae | <i>Fusobacterium nucleatum</i> CTI-3                                   |
| Fnu-6-1  | Bacteria | Fusobacteria | Fusobacteriales | Fusobacteriaceae | <i>Fusobacterium nucleatum</i> CTI-5                                   |
| Fnu-7-1  | Bacteria | Fusobacteria | Fusobacteriales | Fusobacteriaceae | <i>Fusobacterium nucleatum</i> CTI-6                                   |
| Fnu-8-1  | Bacteria | Fusobacteria | Fusobacteriales | Fusobacteriaceae | <i>Fusobacterium nucleatum</i> CTI-7                                   |
| Fnu-11-1 | Bacteria | Fusobacteria | Fusobacteriales | Fusobacteriaceae | <i>Fusobacterium nucleatum</i> subsp. <i>animalis</i> 11.3.2           |
| Fnu-12-1 | Bacteria | Fusobacteria | Fusobacteriales | Fusobacteriaceae | <i>Fusobacterium nucleatum</i> subsp. <i>animalis</i> 21.1A            |
| Fnu-13-1 | Bacteria | Fusobacteria | Fusobacteriales | Fusobacteriaceae | <i>Fusobacterium nucleatum</i> subsp. <i>animalis</i> 3.1.33           |
| Fnu-14-1 | Bacteria | Fusobacteria | Fusobacteriales | Fusobacteriaceae | <i>Fusobacterium nucleatum</i> subsp. <i>animalis</i> 4.8              |
| Fnu-15-1 | Bacteria | Fusobacteria | Fusobacteriales | Fusobacteriaceae | <i>Fusobacterium nucleatum</i> subsp. <i>animalis</i> 7.1              |
| Fnu-16-1 | Bacteria | Fusobacteria | Fusobacteriales | Fusobacteriaceae | <i>Fusobacterium nucleatum</i> subsp. <i>animalis</i> ChDC F324        |
| Fnu-17-1 | Bacteria | Fusobacteria | Fusobacteriales | Fusobacteriaceae | <i>Fusobacterium nucleatum</i> subsp. <i>animalis</i> F0419            |
| Fnu-18-1 | Bacteria | Fusobacteria | Fusobacteriales | Fusobacteriaceae | <i>Fusobacterium nucleatum</i> subsp. <i>fusiforme</i> ATCC 51190      |
| Fnu-19-1 | Bacteria | Fusobacteria | Fusobacteriales | Fusobacteriaceae | <i>Fusobacterium nucleatum</i> subsp. <i>nucleatum</i> ATCC 23726      |
| Fnu-20-1 | Bacteria | Fusobacteria | Fusobacteriales | Fusobacteriaceae | <i>Fusobacterium nucleatum</i> subsp. <i>nucleatum</i> ATCC 25586      |
| Fnu-21-1 | Bacteria | Fusobacteria | Fusobacteriales | Fusobacteriaceae | <i>Fusobacterium nucleatum</i> subsp. <i>nucleatum</i> ChDC F316       |
| Fnu-22-1 | Bacteria | Fusobacteria | Fusobacteriales | Fusobacteriaceae | <i>Fusobacterium nucleatum</i> subsp. <i>polymorphum</i> ATCC 10953    |
| Fnu-23-1 | Bacteria | Fusobacteria | Fusobacteriales | Fusobacteriaceae | <i>Fusobacterium nucleatum</i> subsp. <i>polymorphum</i> F0401         |
| Fnu-24-1 | Bacteria | Fusobacteria | Fusobacteriales | Fusobacteriaceae | <i>Fusobacterium nucleatum</i> subsp. <i>vincentii</i> 3.1.27          |
| Fnu-25-1 | Bacteria | Fusobacteria | Fusobacteriales | Fusobacteriaceae | <i>Fusobacterium nucleatum</i> subsp. <i>vincentii</i> 3.1.36A2        |
| Fnu-26-1 | Bacteria | Fusobacteria | Fusobacteriales | Fusobacteriaceae | <i>Fusobacterium nucleatum</i> subsp. <i>vincentii</i> 4.1.13          |
| Fnu-27-1 | Bacteria | Fusobacteria | Fusobacteriales | Fusobacteriaceae | <i>Fusobacterium nucleatum</i> subsp. <i>vincentii</i> ATCC 49256      |
| Fnu-28-1 | Bacteria | Fusobacteria | Fusobacteriales | Fusobacteriaceae | <i>Fusobacterium nucleatum</i> subsp. <i>vincentii</i> ChDC F8         |
| Fnu-10-1 | Bacteria | Fusobacteria | Fusobacteriales | Fusobacteriaceae | <i>Fusobacterium nucleatum</i> W1481                                   |
| Fpe-1-1  | Bacteria | Fusobacteria | Fusobacteriales | Fusobacteriaceae | <i>Fusobacterium perfoetens</i> ATCC 29250                             |
| Fpe-2-1  | Bacteria | Fusobacteria | Fusobacteriales | Fusobacteriaceae | <i>Fusobacterium periodonticum</i> 2.1.31                              |
| Fpe-3-1  | Bacteria | Fusobacteria | Fusobacteriales | Fusobacteriaceae | <i>Fusobacterium periodonticum</i> ATCC 33693                          |
| Fpe-4-1  | Bacteria | Fusobacteria | Fusobacteriales | Fusobacteriaceae | <i>Fusobacterium periodonticum</i> D10                                 |
| Fru-1-1  | Bacteria | Fusobacteria | Fusobacteriales | Fusobacteriaceae | <i>Fusobacterium russii</i> ATCC 25533                                 |
| Fsp-1-1  | Bacteria | Fusobacteria | Fusobacteriales | Fusobacteriaceae | <i>Fusobacterium</i> sp. 1.1.41FAA                                     |
| Fsp-2-1  | Bacteria | Fusobacteria | Fusobacteriales | Fusobacteriaceae | <i>Fusobacterium</i> sp. 3.1.5R                                        |
| Fsp-3-1  | Bacteria | Fusobacteria | Fusobacteriales | Fusobacteriaceae | <i>Fusobacterium</i> sp. CM1                                           |
| Fsp-4-1  | Bacteria | Fusobacteria | Fusobacteriales | Fusobacteriaceae | <i>Fusobacterium</i> sp. CM21                                          |
| Fsp-5-1  | Bacteria | Fusobacteria | Fusobacteriales | Fusobacteriaceae | <i>Fusobacterium</i> sp. CM22                                          |
| Fsp-6-1  | Bacteria | Fusobacteria | Fusobacteriales | Fusobacteriaceae | <i>Fusobacterium</i> sp. OBRC1                                         |
| Fsp-7-1  | Bacteria | Fusobacteria | Fusobacteriales | Fusobacteriaceae | <i>Fusobacterium</i> sp. oral taxon 370 str. F0437                     |
| Ful-1-1  | Bacteria | Fusobacteria | Fusobacteriales | Fusobacteriaceae | <i>Fusobacterium ulcerans</i> 12-1B                                    |
| Ful-2-1  | Bacteria | Fusobacteria | Fusobacteriales | Fusobacteriaceae | <i>Fusobacterium ulcerans</i> ATCC 49185                               |
| Fva-1-1  | Bacteria | Fusobacteria | Fusobacteriales | Fusobacteriaceae | <i>Fusobacterium varium</i> ATCC 27725                                 |
| Ipo-1-1  | Bacteria | Fusobacteria | Fusobacteriales | Fusobacteriaceae | <i>Ilyobacter polytropus</i> DSM 2926                                  |
| Lbu-1-1  | Bacteria | Fusobacteria | Fusobacteriales | Fusobacteriaceae | <i>Leptotrichia buccalis</i> DSM 1135                                  |
| Lgo-1-1  | Bacteria | Fusobacteria | Fusobacteriales | Fusobacteriaceae | <i>Leptotrichia goodfellowii</i> F0264                                 |
| Pat-1-1  | Bacteria | Fusobacteria | Fusobacteriales | Fusobacteriaceae | <i>Psychrilyobacter atlanticus</i> DSM 19335                           |
| Ste-1-1  | Bacteria | Fusobacteria | Fusobacteriales | Fusobacteriaceae | <i>Sebaldella termitidis</i> ATCC 33386                                |
| Smo-1-1  | Bacteria | Fusobacteria | Fusobacteriales | Fusobacteriaceae | <i>Streptobacillus moniliformis</i> DSM 12112                          |
| Lgo-2-1  | Bacteria | Fusobacteria | Fusobacteriales | Leptotrichiaceae | <i>Leptotrichia goodfellowii</i> DSM 19756                             |
| Lsh-1-1  | Bacteria | Fusobacteria | Fusobacteriales | Leptotrichiaceae | <i>Leptotrichia shahii</i> DSM 19757                                   |
| Lsp-1-1  | Bacteria | Fusobacteria | Fusobacteriales | Leptotrichiaceae | <i>Leptotrichia</i> sp. oral taxon 212                                 |
| Lsp-2-1  | Bacteria | Fusobacteria | Fusobacteriales | Leptotrichiaceae | <i>Leptotrichia</i> sp. oral taxon 215 str. W9775                      |
| Lsp-3-1  | Bacteria | Fusobacteria | Fusobacteriales | Leptotrichiaceae | <i>Leptotrichia</i> sp. oral taxon 225 str. F0581                      |
| Lsp-4-1  | Bacteria | Fusobacteria | Fusobacteriales | Leptotrichiaceae | <i>Leptotrichia</i> sp. oral taxon 879 str. F0557                      |

|                  |                                                                                                 |
|------------------|-------------------------------------------------------------------------------------------------|
| Ltr-1-1          | Bacteria Fusobacteria Fusobacteriales Leptotrichiaceae <i>Leptotrichia trevisanii</i> DSM 22070 |
| Lwa-1-1          | Bacteria Fusobacteria Fusobacteriales Leptotrichiaceae <i>Leptotrichia wadei</i> DSM 19758      |
| Lwa-2-1          | Bacteria Fusobacteria Fusobacteriales Leptotrichiaceae <i>Leptotrichia wadei</i> F0279          |
| Sam-1-1          | Bacteria Fusobacteria Fusobacteriales Leptotrichiaceae <i>Sneathia amnii</i>                    |
| env-1 to env-482 | environmental samples                                                                           |

## 17.2 Gene contexts

Each S4-Fusobacteriales RNA (indicated by “RNA→”) is listed. For each hit, the downstream genes predicted to reside in a regulated operon are listed. If the nearest downstream gene is encoding in the opposite strand (and therefore presumed to not be a part of a regulated operon), then that gene is still depicted. Some environmental sequences and some RefSeq entries lack gene annotations, and so no genes are available for such sequences. The direction of each gene is indicated with an arrow (→), and each predicted conserved domain in the gene is named. Conserved domains associated with more than one S4-Fusobacteriales RNA are assigned a color; other domains are gray. Information about these con-

served domains is given in Section 17.3. The accession of the sequence containing each S4-Fusobacteriales RNA is given in the column named “Seq. accession”. Accessions beginning with “NC\_”, “NS\_”, “NW\_” or “NZ\_” are contained in RefSeq. Other accession refer to environmental samples. Nucleotide coordinates are given for the 5′ and 3′ boundaries of each S4-Fusobacteriales RNA. If the 5′ coordinate is greater than the 3′ coordinate, the RNA is present on the reverse-complement strand of the containing genomic DNA sequence. Each hit is denoted by an abbreviation (like “Eco-1-1”) that refers to a taxonomy given in Section 17.1.

| abbrev. | Seq. accession                |   | 5′ at | 3′ at | genes                                                                                                                                                                                    |
|---------|-------------------------------|---|-------|-------|------------------------------------------------------------------------------------------------------------------------------------------------------------------------------------------|
| env-1   | 4448820.3.Contig_4724         | - | 1508  | 1444  | RNA→ RpsM (COG0099)rpsM (PRK05179)→                                                                                                                                                      |
| env-2   | 4444165.3.02425               | - | 1233  | 1174  | RNA→ RpsM (COG0099)rpsM (PRK05179)→ PRK05309 (PRK05309)RpsK (COG0100)→<br>PRK05309 (PRK05309)RpsK (COG0100)→ rpsD (PRK05327)Ribosomal_S4 (pfam00163)→                                    |
| env-3   | 4448815.3.Contig29902         | - | 527   | 468   | RNA→ RpsM (COG0099)rpsM (PRK05179)→                                                                                                                                                      |
| env-4   | SRS064449.LANL_scaffold_2211  | + | 364   | 426   | RNA→ RpsM (COG0099)rpsM (PRK05179)→ PRK05309 (PRK05309)RpsK (COG0100)→                                                                                                                   |
| env-5   | SRS043239.WUGC_scaffold_38909 | - | 221   | 159   | RNA→ rps13 (CHL00137)rpsM (PRK05179)→                                                                                                                                                    |
| env-6   | SRS024318.LANL_scaffold_10757 | - | 103   | 41    | RNA→                                                                                                                                                                                     |
| env-7   | LWFCAn_GLO1YSU01C2O9I         | + | 165   | 222   | RNA→ RpsM (COG0099)rpsM (PRK05179)→                                                                                                                                                      |
| env-8   | SRS019124.C1397861            | + | 326   | 392   | RNA→ RpsM (COG0099)rpsM (PRK05179)→ PRK05309 (PRK05309)RpsK (COG0100)→                                                                                                                   |
| env-9   | SRS019125.WUGC_scaffold_10350 | + | 92    | 158   | RNA→ RpsM (COG0099)rpsM (PRK05179)→ PRK05309 (PRK05309)RpsK (COG0100)→<br>RpsD (COG0522)rpsD (PRK05327)→ RpoA (COG0202)PRK05182 (PRK05182)→<br>rplQ (PRK05591)Ribosomal_L17 (pfam01196)→ |
| env-10  | SRS013506.C1110483            | - | 685   | 618   | RNA→ RpsM (COG0099)rpsM (PRK05179)→ PRK05309 (PRK05309)RpsK (COG0100)→                                                                                                                   |
| env-11  | CAM_READ_0099908967           | - | 481   | 418   | RNA→ RpsM (COG0099)rpsM (PRK05179)→                                                                                                                                                      |
| env-12  | CAM_READ_0100166989           | + | 129   | 189   | RNA→ RpsM (COG0099)rpsM (PRK05179)→                                                                                                                                                      |
| env-13  | CAM_READ_0099986119           | - | 478   | 417   | RNA→ RpsM (COG0099)rpsM (PRK05179)→                                                                                                                                                      |
| env-14  | CAM_READ_0099775883           | - | 476   | 416   | RNA→ RpsM (COG0099)rpsM (PRK05179)→                                                                                                                                                      |
| env-15  | CAM_READ_0099873361           | - | 474   | 414   | RNA→ RpsM (COG0099)uS13_bact (TIGR03631)→                                                                                                                                                |
| env-16  | CAM_READ_0100181569           | + | 35    | 95    | RNA→                                                                                                                                                                                     |
| env-17  | 4444165.3.00747               | - | 3020  | 2960  | RNA→ RpsM (COG0099)rpsM (PRK05179)→ PRK05309 (PRK05309)RpsK (COG0100)→ rpsD (PRK05327)→<br>S4 (smart00363)RpsD (COG0522)→                                                                |
| env-18  | CAM_READ_0100128399           | - | 372   | 312   | RNA→ RpsM (COG0099)rpsM (PRK05179)→                                                                                                                                                      |
| env-19  | CAM_READ_0100169721           | + | 35    | 95    | RNA→ RpsM (COG0099)rpsM (PRK05179)→                                                                                                                                                      |
| env-20  | 4444164.3.01074               | + | 805   | 865   | RNA→ RpsM (COG0099)rpsM (PRK05179)→ PRK05309 (PRK05309)RpsK (COG0100)→<br>RpsD (COG0522)rpsD (PRK05327)→ PRK05182 (PRK05182)RNA_pol_L (pfam01193)→                                       |
| Fpe-1-1 | NZ_JHXW01000013.1             | + | 27498 | 27558 | RNA→ RpsM (COG0099)rpsM (PRK05179)→ PRK05309 (PRK05309)RpsK (COG0100)→<br>RpsD (COG0522)rpsD (PRK05327)→ RpoA (COG0202)PRK05182 (PRK05182)→<br>RplQ (COG0203)rplQ (PRK05591)→ hypo→      |
| env-21  | CAM_READ_0099877645           | + | 39    | 98    | RNA→ RpsM (COG0099)rpsM (PRK05179)→                                                                                                                                                      |
| env-22  | 4444164.3.00319               | + | 39    | 98    | RNA→ RpsM (COG0099)rpsM (PRK05179)→                                                                                                                                                      |
| env-23  | 4444164.3.51166               | + | 542   | 602   | RNA→ RpsM (COG0099)rpsM (PRK05179)→                                                                                                                                                      |

|         |                                   |   |         |         |                                                                                                                                                                                                                                                                                                                                                   |
|---------|-----------------------------------|---|---------|---------|---------------------------------------------------------------------------------------------------------------------------------------------------------------------------------------------------------------------------------------------------------------------------------------------------------------------------------------------------|
| env-24  | CAM_READ_0099837051               | - | 423     | 363     | RNA → RpsM (COG0099)rpsM (PRK05179) →                                                                                                                                                                                                                                                                                                             |
| env-25  | SRS023604_Baylor_scaffold_1939    | + | 279     | 366     | RNA → RpsM (COG0099)rpsM (PRK05179) → PRK05309 (PRK05309)RpsK (COG0100) →                                                                                                                                                                                                                                                                         |
| env-26  | SRS011111_C480900                 | + | 8       | 95      | RNA → RpsM (COG0099)rpsM (PRK05179) →                                                                                                                                                                                                                                                                                                             |
| env-27  | SRS023604_Baylor_scaffold_1904    | + | 280     | 370     | RNA → RpsM (COG0099)rpsM (PRK05179) → PRK05309 (PRK05309)RpsK (COG0100) →<br>RpsD (COG0522)rpsD (PRK05327) → RpoA (COG0202)PRK05182 (PRK05182) →<br>RplQ (COG0203)rplQ (PRK05591) →                                                                                                                                                               |
| env-28  | SRS017497_Baylor_scaffold_808     | + | 42316   | 42406   | RNA → RpsM (COG0099)rpsM (PRK05179) → PRK05309 (PRK05309)RpsK (COG0100) →<br>RpsD (COG0522)rpsD (PRK05327) → RpoA (COG0202)PRK05182 (PRK05182) →<br>RplQ (COG0203)rplQ (PRK05591) → Acetyltransf_1 (pfam00583)Acetyltransf_7 (pfam13508) →                                                                                                        |
| Sam-1-1 | NZ_CP011280.1                     | + | 495384  | 495474  | RNA → RpsM (COG0099)rpsM (PRK05179) → PRK05309 (PRK05309)RpsK (COG0100) →<br>RpsD (COG0522)rpsD (PRK05327) → RpoA (COG0202)PRK05182 (PRK05182) →<br>RplQ (COG0203)rplQ (PRK05591) → Acetyltransf_1 (pfam00583)Acetyltransf_7 (pfam13508) →                                                                                                        |
| env-29  | SRS011111_Baylor_scaffold_6158    | + | 13925   | 14015   | RNA → RpsM (COG0099)rpsM (PRK05179) → PRK05309 (PRK05309)RpsK (COG0100) →<br>RpsD (COG0522)rpsD (PRK05327) → RpoA (COG0202)PRK05182 (PRK05182) →<br>RplQ (COG0203)rplQ (PRK05591) → Acetyltransf_1 (pfam00583)Acetyltransf_7 (pfam13508) →<br>PRK00326 (PRK00326)MraZ_N (cd16320)MraZ_C (cd16321) → RmsH (COG0275)PRK00050 (PRK00050) →<br>hypo → |
| Ste-1-1 | NC_013517.1                       | - | 4215417 | 4215353 | RNA → RpsM (COG0099)rpsM (PRK05179) → PRK05309 (PRK05309)RpsK (COG0100) →<br>RpsD (COG0522)rpsD (PRK05327) → RpoA (COG0202)PRK05182 (PRK05182) →<br>RplQ (COG0203)rplQ (PRK05591) →                                                                                                                                                               |
| Smo-1-1 | NC_013515.1                       | + | 399617  | 399698  | RNA → RpsM (COG0099)rpsM (PRK05179) → PRK05309 (PRK05309)RpsK (COG0100) →<br>RpsD (COG0522)rpsD (PRK05327) → RpoA (COG0202)PRK05182 (PRK05182) →<br>RplQ (COG0203)rplQ (PRK05591) → hypo → hypo → hypo → hypo →                                                                                                                                   |
| env-30  | SRS016319_C3906942                | - | 367     | 278     | RNA → RpsM (COG0099)rpsM (PRK05179) →                                                                                                                                                                                                                                                                                                             |
| env-31  | SRS049389_C4596854                | + | 103     | 192     | RNA → RpsM (COG0099)rpsM (PRK05179) →                                                                                                                                                                                                                                                                                                             |
| env-32  | SRS015762_C3360097                | + | 103     | 192     | RNA → rps13 (CHL00137)rpsM (PRK05179) →                                                                                                                                                                                                                                                                                                           |
| env-33  | SRS016225_C2898664                | - | 373     | 284     | RNA → RpsM (COG0099)rpsM (PRK05179) →                                                                                                                                                                                                                                                                                                             |
| env-34  | SRS017120_Baylor_scaffold_77919   | + | 569     | 658     | RNA → RpsM (COG0099)rpsM (PRK05179) →                                                                                                                                                                                                                                                                                                             |
| env-35  | SRS019219_WUGC_scaffold_70719     | - | 373     | 284     | RNA → RpsM (COG0099)rpsM (PRK05179) →                                                                                                                                                                                                                                                                                                             |
| env-36  | SRS023352_LANL_scaffold_52359     | + | 475     | 564     | RNA →                                                                                                                                                                                                                                                                                                                                             |
| env-37  | SRS016569_C2417077                | - | 376     | 287     | RNA → RpsM (COG0099)rpsM (PRK05179) →                                                                                                                                                                                                                                                                                                             |
| env-38  | SRS019026_C1965129                | + | 158     | 247     | RNA → RpsM (COG0099)rpsM (PRK05179) → PRK05309 (PRK05309)RpsK (COG0100) →                                                                                                                                                                                                                                                                         |
| env-39  | SRS019027_C1950830                | + | 158     | 247     | RNA → RpsM (COG0099)rpsM (PRK05179) →                                                                                                                                                                                                                                                                                                             |
| env-40  | SRS019028_WUGC_scaffold_55374     | - | 365     | 276     | RNA → RpsM (COG0099)rpsM (PRK05179) →                                                                                                                                                                                                                                                                                                             |
| env-41  | SRS017076_C2662400                | + | 122     | 211     | RNA → RpsM (COG0099)rpsM (PRK05179) →                                                                                                                                                                                                                                                                                                             |
| env-42  | SRS014271_WUGC_scaffold_3488      | - | 457     | 368     | RNA → RpsM (COG0099)rpsM (PRK05179) →                                                                                                                                                                                                                                                                                                             |
| env-43  | SRS014470_WUGC_scaffold_45929     | - | 373     | 284     | RNA → RpsM (COG0099)rpsM (PRK05179) →                                                                                                                                                                                                                                                                                                             |
| env-44  | SRS014573_WUGC_scaffold_53471     | - | 376     | 287     | RNA → RpsM (COG0099)rpsM (PRK05179) →                                                                                                                                                                                                                                                                                                             |
| env-45  | SRS015057_WUGC_scaffold_36508     | - | 376     | 287     | RNA → RpsM (COG0099)rpsM (PRK05179) →                                                                                                                                                                                                                                                                                                             |
| env-46  | SRS019607_WUGC_scaffold_48886     | - | 645     | 556     | RNA → RpsM (COG0099)rpsM (PRK05179) → PRK05309 (PRK05309)RpsK (COG0100) →                                                                                                                                                                                                                                                                         |
| env-47  | SRS021496_Baylor_scaffold_82145   | + | 106     | 195     | RNA → RpsM (COG0099)rpsM (PRK05179) →                                                                                                                                                                                                                                                                                                             |
| env-48  | SRS044373_WUGC_scaffold_7895      | + | 106     | 195     | RNA → RpsM (COG0099)rpsM (PRK05179) →                                                                                                                                                                                                                                                                                                             |
| env-49  | SRS047219_WUGC_scaffold_21972     | + | 933     | 1022    | RNA → RpsM (COG0099)rpsM (PRK05179) →                                                                                                                                                                                                                                                                                                             |
| env-50  | SRS047824_WUGC_scaffold_46958     | - | 645     | 556     | RNA → RpsM (COG0099)rpsM (PRK05179) → PRK05309 (PRK05309)RpsK (COG0100) →                                                                                                                                                                                                                                                                         |
| env-51  | SRS057791_LANL_scaffold_64973     | + | 798     | 887     | RNA → rps13 (CHL00137)rpsM (PRK05179) →                                                                                                                                                                                                                                                                                                           |
| env-52  | Buccal_mucosa_LANL_scaffold_69102 | + | 103     | 192     | RNA → RpsM (COG0099)rpsM (PRK05179) →                                                                                                                                                                                                                                                                                                             |
| env-53  | SRS013705_Baylor_scaffold_48015   | - | 839     | 750     | RNA → RpsM (COG0099)rpsM (PRK05179) → PRK05309 (PRK05309)RpsK (COG0100) →                                                                                                                                                                                                                                                                         |
| env-54  | SRS015038_WUGC_scaffold_27606     | - | 597     | 508     | RNA → RpsM (COG0099)rpsM (PRK05179) →                                                                                                                                                                                                                                                                                                             |
| env-55  | SRS015272_WUGC_scaffold_163       | + | 206     | 295     | RNA → rps13 (CHL00137)rpsM (PRK05179) →                                                                                                                                                                                                                                                                                                           |
| env-56  | SRS018357_C3855302                | - | 376     | 287     | RNA → RpsM (COG0099)rpsM (PRK05179) →                                                                                                                                                                                                                                                                                                             |
| env-57  | SRS019894_WUGC_scaffold_51429     | + | 155     | 244     | RNA → rps13 (CHL00137)rpsM (PRK05179) →                                                                                                                                                                                                                                                                                                           |
| env-58  | SRS024081_LANL_scaffold_63456     | - | 645     | 556     | RNA → RpsM (COG0099)rpsM (PRK05179) → PRK05309 (PRK05309)RpsK (COG0100) →                                                                                                                                                                                                                                                                         |



|         |                                 |   |       |       |                                                                                                                                                                               |
|---------|---------------------------------|---|-------|-------|-------------------------------------------------------------------------------------------------------------------------------------------------------------------------------|
| env-59  | SRS053854.LANL_scaffold_54237   | - | 11790 | 11701 | RNA → RpsM (COG0099)rpsM (PRK05179) → PRK05309 (PRK05309)RpsK (COG0100) → RpsD (COG0522)rpsD (PRK05327) → RpoA (COG0202)PRK05182 (PRK05182) → RplQ (COG0203)rplQ (PRK05591) → |
| env-60  | SRS057539.LANL_scaffold_53408   | - | 376   | 287   | RNA → RpsM (COG0099)rpsM (PRK05179) →                                                                                                                                         |
| env-61  | SRS064774.LANL_scaffold_7571    | - | 671   | 582   | RNA → RpsM (COG0099)rpsM (PRK05179) → hypo → rps11 (CHL00041)PRK05309 (PRK05309) →                                                                                            |
| env-62  | SRS015899.WUGC_scaffold_4042    | - | 330   | 246   | RNA → RpsM (COG0099)rpsM (PRK05179) →                                                                                                                                         |
| env-63  | SRS018975_C1798714              | - | 194   | 110   | RNA → RpsM (COG0099)rpsM (PRK05179) →                                                                                                                                         |
| env-64  | SRS064449.LANL_scaffold_25989   | - | 365   | 281   | RNA → RpsM (COG0099)rpsM (PRK05179) →                                                                                                                                         |
| env-65  | SRS019389_C2168600              | - | 376   | 311   | RNA → RpsM (COG0099)rpsM (PRK05179) →                                                                                                                                         |
| env-66  | SRS017808.Baylor_scaffold_37000 | + | 6883  | 6949  | RNA →                                                                                                                                                                         |
| env-67  | SRS022530.LANL_scaffold_52023   | + | 955   | 1052  | RNA → RpsM (COG0099)rpsM (PRK05179) → PRK05309 (PRK05309)RpsK (COG0100) →                                                                                                     |
| env-68  | SRS013164.Baylor_scaffold_58877 | + | 45    | 110   | RNA → RpsM (COG0099)rpsM (PRK05179) → PRK05309 (PRK05309)RpsK (COG0100) → RpsD (COG0522)rpsD (PRK05327) → RpoA (COG0202)PRK05182 (PRK05182) → RplQ (COG0203)rplQ (PRK05591) → |
| env-69  | SRS017209.Baylor_scaffold_57193 | - | 372   | 307   | RNA → RpsM (COG0099)rpsM (PRK05179) →                                                                                                                                         |
| env-70  | SRS053603.LANL_scaffold_21307   | - | 669   | 604   | RNA → RpsM (COG0099)rpsM (PRK05179) → PRK05309 (PRK05309)RpsK (COG0100) →                                                                                                     |
| env-71  | SRS019607.WUGC_scaffold_56406   | - | 626   | 561   | RNA → RpsM (COG0099)rpsM (PRK05179) → PRK05309 (PRK05309)RpsK (COG0100) →                                                                                                     |
| env-72  | SRS013502_C2176709              | - | 644   | 579   | RNA → RpsM (COG0099)rpsM (PRK05179) → PRK05309 (PRK05309)RpsK (COG0100) →                                                                                                     |
| env-73  | SRS013705.Baylor_scaffold_95676 | + | 104   | 169   | RNA → RpsM (COG0099)rpsM (PRK05179) → PRK05309 (PRK05309)RpsK (COG0100) →                                                                                                     |
| env-74  | SRS014684_C3315306              | + | 4413  | 4478  | RNA → RpsM (COG0099)rpsM (PRK05179) → PRK05309 (PRK05309)RpsK (COG0100) →                                                                                                     |
| env-75  | SRS015209.WUGC_scaffold_55827   | - | 1494  | 1429  | RNA → RpsM (COG0099)rpsM (PRK05179) → PRK05309 (PRK05309)RpsK (COG0100) → RpsD (COG0522)rpsD (PRK05327) →                                                                     |
| env-76  | SRS015434.WUGC_scaffold_26309   | - | 522   | 457   | RNA → rps11 (CHL00041)PRK05309 (PRK05309)RpsM (COG0099)rpsM (PRK05179) →                                                                                                      |
| env-77  | SRS015762.WUGC_scaffold_32980   | - | 477   | 412   | RNA → RpsM (COG0099)rpsM (PRK05179) →                                                                                                                                         |
| env-78  | SRS015893.WUGC_scaffold_40459   | + | 3690  | 3755  | RNA → RpsM (COG0099)rpsM (PRK05179) →                                                                                                                                         |
| env-79  | SRS015941_C3324156              | - | 210   | 145   | RNA → rps13 (CHL00137)rpsM (PRK05179) →                                                                                                                                       |
| env-80  | SRS016002_C2598934              | + | 157   | 222   | RNA → RpsM (COG0099)rpsM (PRK05179) → PRK05309 (PRK05309)RpsK (COG0100) →                                                                                                     |
| env-81  | SRS016037_C2049273              | + | 483   | 548   | RNA → RpsM (COG0099)rpsM (PRK05179) → PRK05309 (PRK05309)RpsK (COG0100) → RpsD (COG0522)rpsD (PRK05327) → PRK05182 (PRK05182)RNA_pol_L (pfam01193) →                          |
| env-82  | SRS016319.WUGC_scaffold_50629   | + | 485   | 550   | RNA → RpsM (COG0099)rpsM (PRK05179) →                                                                                                                                         |
| env-83  | SRS016569_C2462808              | - | 626   | 561   | RNA → RpsM (COG0099)rpsM (PRK05179) → PRK05309 (PRK05309)RpsK (COG0100) →                                                                                                     |
| env-84  | SRS018300.Baylor_scaffold_20150 | - | 420   | 355   | RNA → RpsM (COG0099)rpsM (PRK05179) →                                                                                                                                         |
| env-85  | SRS018357_C3909917              | + | 104   | 169   | RNA → RpsM (COG0099)rpsM (PRK05179) → PRK05309 (PRK05309)RpsK (COG0100) →                                                                                                     |
| env-86  | SRS019026_C1948435              | + | 142   | 207   | RNA → RpsM (COG0099)rpsM (PRK05179) →                                                                                                                                         |
| env-87  | SRS019027.WUGC_scaffold_19534   | + | 142   | 207   | RNA → RpsM (COG0099)rpsM (PRK05179) →                                                                                                                                         |
| env-88  | SRS019045.WUGC_scaffold_56945   | - | 150   | 85    | RNA →                                                                                                                                                                         |
| env-89  | SRS019122_C5915383              | + | 2424  | 2489  | RNA →                                                                                                                                                                         |
| env-90  | SRS019126_C2215224              | + | 4877  | 4942  | RNA → RpsM (COG0099)rpsM (PRK05179) → PRK05309 (PRK05309)RpsK (COG0100) →                                                                                                     |
| env-91  | SRS019127_C1662274              | + | 888   | 953   | RNA → RpsM (COG0099)rpsM (PRK05179) → PRK05309 (PRK05309)RpsK (COG0100) →                                                                                                     |
| env-92  | SRS019219_C2851913              | + | 104   | 169   | RNA → RpsM (COG0099)rpsM (PRK05179) →                                                                                                                                         |
| env-93  | SRS021496.Baylor_scaffold_36018 | - | 782   | 717   | RNA → RpsM (COG0099)rpsM (PRK05179) → PRK05309 (PRK05309)RpsK (COG0100) →                                                                                                     |
| env-94  | SRS022719.LANL_scaffold_70435   | + | 875   | 940   | RNA → RpsM (COG0099)rpsM (PRK05179) → PRK05309 (PRK05309)RpsK (COG0100) →                                                                                                     |
| env-95  | SRS023617.Baylor_scaffold_50101 | + | 369   | 434   | RNA → RpsM (COG0099)rpsM (PRK05179) → PRK05309 (PRK05309)RpsK (COG0100) → RpsD (COG0522)rpsD (PRK05327) → RpoA (COG0202)PRK05182 (PRK05182) → RplQ (COG0203)rplQ (PRK05591) → |
| env-96  | SRS024138_C2767007              | + | 4689  | 4754  | RNA → RpsM (COG0099)rpsM (PRK05179) → PRK05309 (PRK05309)RpsK (COG0100) →                                                                                                     |
| env-97  | SRS024580.LANL_scaffold_8234    | - | 788   | 723   | RNA → RpsM (COG0099)rpsM (PRK05179) → PRK05309 (PRK05309)RpsK (COG0100) →                                                                                                     |
| env-98  | SRS045127.LANL_scaffold_37515   | - | 578   | 513   | RNA → RpsM (COG0099)rpsM (PRK05179) →                                                                                                                                         |
| env-99  | SRS049389.WUGC_scaffold_31108   | + | 747   | 812   | RNA → RpsM (COG0099)rpsM (PRK05179) → PRK05309 (PRK05309)RpsK (COG0100) →                                                                                                     |
| env-100 | SRS052227_C2920811              | + | 623   | 688   | RNA → RpsM (COG0099)rpsM (PRK05179) → PRK05309 (PRK05309)RpsK (COG0100) →                                                                                                     |
| env-101 | SRS055426_C3273637              | - | 680   | 615   | RNA → RpsM (COG0099)rpsM (PRK05179) → PRK05309 (PRK05309)RpsK (COG0100) →                                                                                                     |
| env-102 | SRS056622.LANL_scaffold_41405   | + | 1617  | 1682  | RNA → RpsM (COG0099)rpsM (PRK05179) → PRK05309 (PRK05309)RpsK (COG0100) →                                                                                                     |
| env-103 | SRS057205.LANL_scaffold_37743   | - | 1126  | 1061  | RNA → RpsM (COG0099)rpsM (PRK05179) → PRK05309 (PRK05309)RpsK (COG0100) → rpsD (PRK05327)Ribosomal_S4 (pfam00163) →                                                           |

|         |                                 |   |         |         |                                                                                                                                                                                                                                                                                                                                                                   |
|---------|---------------------------------|---|---------|---------|-------------------------------------------------------------------------------------------------------------------------------------------------------------------------------------------------------------------------------------------------------------------------------------------------------------------------------------------------------------------|
| env-104 | SRS058336.LANL_scaffold_63124   | + | 2680    | 2745    | RNA → RpsM (COG0099)rpsM (PRK05179) →                                                                                                                                                                                                                                                                                                                             |
| env-105 | SRS062544.C2743506              | - | 183     | 118     | RNA → RpsM (COG0099)rpsM (PRK05179) →                                                                                                                                                                                                                                                                                                                             |
| env-106 | SRS064423.LANL_scaffold_46316   | + | 11043   | 11108   | RNA → RpsM (COG0099)rpsM (PRK05179) → PRK05309 (PRK05309)RpsK (COG0100) →                                                                                                                                                                                                                                                                                         |
| env-107 | SRS065278.LANL_scaffold_19746   | + | 11609   | 11674   | RNA → RpsM (COG0099)rpsM (PRK05179) →                                                                                                                                                                                                                                                                                                                             |
| env-108 | SRS053917.LANL_scaffold_32361   | + | 1392    | 1457    | RNA →                                                                                                                                                                                                                                                                                                                                                             |
| env-109 | SRS020334.C2558817              | + | 142     | 207     | RNA → rps13 (CHL00137)rpsM (PRK05179) →                                                                                                                                                                                                                                                                                                                           |
| env-110 | SRS021477.Baylor_scaffold_19050 | - | 755     | 690     | RNA → RpsM (COG0099)rpsM (PRK05179) → PRK05309 (PRK05309)RpsK (COG0100) →                                                                                                                                                                                                                                                                                         |
| env-111 | SRS022725.LANL_scaffold_49014   | + | 367     | 432     | RNA → RpsM (COG0099)rpsM (PRK05179) →                                                                                                                                                                                                                                                                                                                             |
| env-112 | SRS044662.LANL_scaffold_17885   | + | 1141    | 1206    | RNA → RpsM (COG0099)rpsM (PRK05179) → PRK05309 (PRK05309)RpsK (COG0100) →<br>RpsD (COG0522)rpsD (PRK05327) → RNAP_alpha_NTD (cd06928)PRK05182 (PRK05182) →                                                                                                                                                                                                        |
| env-113 | SRS050669.LANL_scaffold_31912   | + | 237     | 302     | RNA → RpsM (COG0099)rpsM (PRK05179) → PRK05309 (PRK05309)RpsK (COG0100) → rpsD (PRK05327) →<br>S4 (smart00363)RpsD (COG0522) → RpoA (COG0202)PRK05182 (PRK05182) →                                                                                                                                                                                                |
| env-114 | SRS063603.LANL_scaffold_21218   | + | 1447    | 1512    | RNA → RpsM (COG0099)rpsM (PRK05179) →                                                                                                                                                                                                                                                                                                                             |
| env-115 | SRS065310.LANL_scaffold_6764    | + | 673     | 738     | RNA → RpsM (COG0099)rpsM (PRK05179) → PRK05309 (PRK05309)RpsK (COG0100) →                                                                                                                                                                                                                                                                                         |
| env-116 | SRS011306.Baylor_scaffold_86858 | + | 43      | 108     | RNA → RpsM (COG0099)rpsM (PRK05179) → PRK05309 (PRK05309)RpsK (COG0100) →<br>RpsD (COG0522)rpsD (PRK05327) → RpoA (COG0202)PRK05182 (PRK05182) →<br>RplQ (COG0203)rplQ (PRK05591) →                                                                                                                                                                               |
| env-117 | SRS018145.Baylor_scaffold_24537 | - | 588     | 523     | RNA → RpsM (COG0099)rpsM (PRK05179) →                                                                                                                                                                                                                                                                                                                             |
| env-118 | SRS023926.C2758757              | + | 68      | 133     | RNA → RpsM (COG0099)rpsM (PRK05179) → PRK05309 (PRK05309)RpsK (COG0100) →                                                                                                                                                                                                                                                                                         |
| env-119 | SRS024015.C2994174              | + | 50      | 115     | RNA → RpsM (COG0099)uS13_bact (TIGR03631) →                                                                                                                                                                                                                                                                                                                       |
| env-120 | SRS023964.Baylor_scaffold_21763 | - | 794     | 729     | RNA → RpsM (COG0099)rpsM (PRK05179) → PRK05309 (PRK05309)RpsK (COG0100) →                                                                                                                                                                                                                                                                                         |
| Lgo-2-1 | NZ_KI911785.1                   | - | 2023857 | 2023791 | RNA → RpsM (COG0099)rpsM (PRK05179) → PRK05309 (PRK05309)RpsK (COG0100) →<br>RpsD (COG0522)rpsD (PRK05327) → RpoA (COG0202)PRK05182 (PRK05182) →<br>RplQ (COG0203)rplQ (PRK05591) →                                                                                                                                                                               |
| Lgo-1-1 | NZ_ADAD01000134.1               | + | 34253   | 34319   | RNA → RpsM (COG0099)rpsM (PRK05179) → RpsM (COG0099)rpsM (PRK05179) →<br>PRK05309 (PRK05309)RpsK (COG0100) → PRK05309 (PRK05309)RpsK (COG0100) →<br>RpsD (COG0522)rpsD (PRK05327) → RpsD (COG0522)rpsD (PRK05327) →<br>RpoA (COG0202)PRK05182 (PRK05182) → RpoA (COG0202)PRK05182 (PRK05182) →<br>RplQ (COG0203)rplQ (PRK05591) → RplQ (COG0203)rplQ (PRK05591) → |
| env-121 | SRS016043.C2119167              | + | 74      | 140     | RNA → RpsM (COG0099)rpsM (PRK05179) →                                                                                                                                                                                                                                                                                                                             |
| env-122 | SRS016575.Baylor_scaffold_23962 | - | 369     | 303     | RNA → RpsM (COG0099)rpsM (PRK05179) →                                                                                                                                                                                                                                                                                                                             |
| env-123 | SRS017445.Baylor_scaffold_6239  | - | 2604    | 2538    | RNA → RpsM (COG0099)rpsM (PRK05179) → PRK05309 (PRK05309)RpsK (COG0100) →<br>RpsD (COG0522)rpsD (PRK05327) → RpoA (COG0202)PRK05182 (PRK05182) →                                                                                                                                                                                                                  |
| env-124 | SRS019073.C2416263              | - | 249     | 183     | RNA → RpsM (COG0099)rpsM (PRK05179) →                                                                                                                                                                                                                                                                                                                             |
| env-125 | SRS063932.C3692410              | + | 186     | 252     | RNA → RpsM (COG0099)rpsM (PRK05179) →                                                                                                                                                                                                                                                                                                                             |
| env-126 | SRS022536.C4389246              | - | 210     | 144     | RNA → RpsM (COG0099)rpsM (PRK05179) →                                                                                                                                                                                                                                                                                                                             |
| env-127 | SRS015057.WUGC_scaffold_17812   | - | 437     | 374     | RNA → RpsM (COG0099)rpsM (PRK05179) →                                                                                                                                                                                                                                                                                                                             |
| env-128 | SRS022143.WUGC_scaffold_54212   | - | 269     | 206     | RNA → RpsM (COG0099)rpsM (PRK05179) →                                                                                                                                                                                                                                                                                                                             |
| env-129 | SRS023352.LANL_scaffold_3112    | - | 145     | 82      | RNA → hyp0 →                                                                                                                                                                                                                                                                                                                                                      |
| env-130 | SRS045715.LANL_scaffold_13578   | - | 494     | 431     | RNA → RpsM (COG0099)rpsM (PRK05179) →                                                                                                                                                                                                                                                                                                                             |
| env-131 | SRS019894.C3767991              | - | 146     | 38      | RNA → hyp0 →                                                                                                                                                                                                                                                                                                                                                      |
| env-132 | SRS017076.Baylor_scaffold_22004 | - | 540     | 432     | RNA → RpsM (COG0099)rpsM (PRK05179) →                                                                                                                                                                                                                                                                                                                             |
| env-133 | SRS011140.Baylor_scaffold_53017 | + | 666     | 774     | RNA → RpsM (COG0099)rpsM (PRK05179) →                                                                                                                                                                                                                                                                                                                             |
| env-134 | SRS017080.C1183285              | + | 157     | 265     | RNA → RpsM (COG0099)rpsM (PRK05179) →                                                                                                                                                                                                                                                                                                                             |
| env-135 | SRS022530.LANL_scaffold_23336   | + | 1435    | 1543    | RNA → RpsM (COG0099)rpsM (PRK05179) → PRK05309 (PRK05309)RpsK (COG0100) →                                                                                                                                                                                                                                                                                         |
| env-136 | SRS023352.LANL_scaffold_46408   | - | 540     | 432     | RNA → RpsM (COG0099)rpsM (PRK05179) →                                                                                                                                                                                                                                                                                                                             |
| env-137 | SRS047210.WUGC_scaffold_54471   | - | 631     | 523     | RNA → RpsM (COG0099)rpsM (PRK05179) → PRK05309 (PRK05309)RpsK (COG0100) →                                                                                                                                                                                                                                                                                         |
| env-138 | SRS056323.C2531100              | + | 190     | 298     | RNA → RpsM (COG0099)rpsM (PRK05179) →                                                                                                                                                                                                                                                                                                                             |
| env-139 | SRS064774.LANL_scaffold_45162   | - | 363     | 255     | RNA → RpsM (COG0099)rpsM (PRK05179) →                                                                                                                                                                                                                                                                                                                             |
| env-140 | SRS017808.C3851216              | - | 631     | 523     | RNA → RpsM (COG0099)rpsM (PRK05179) → PRK05309 (PRK05309)RpsK (COG0100) →                                                                                                                                                                                                                                                                                         |
| env-141 | SRS016740.Baylor_scaffold_63596 | - | 601     | 493     | RNA → RpsM (COG0099)rpsM (PRK05179) → PRK05309 (PRK05309)RpsK (COG0100) →                                                                                                                                                                                                                                                                                         |
| env-142 | SRS017209.Baylor_scaffold_58872 | - | 631     | 566     | RNA → RpsM (COG0099)rpsM (PRK05179) → PRK05309 (PRK05309)RpsK (COG0100) →                                                                                                                                                                                                                                                                                         |
| env-143 | SRS015209.WUGC_scaffold_55797   | + | 3195    | 3260    | RNA → RpsM (COG0099)rpsM (PRK05179) → PRK05309 (PRK05309)RpsK (COG0100) →<br>RpsD (COG0522)rpsD (PRK05327) → RpoA (COG0202)PRK05182 (PRK05182) →                                                                                                                                                                                                                  |

|         |                                 |   |       |       |                                                                                                                                                                                     |
|---------|---------------------------------|---|-------|-------|-------------------------------------------------------------------------------------------------------------------------------------------------------------------------------------|
| env-144 | SRS015272_C3450279              | - | 233   | 168   | RNA → RpsM (COG0099)rpsM (PRK05179) →                                                                                                                                               |
| env-145 | SRS017120_Baylor_scaffold_63857 | + | 413   | 478   | RNA → RpsM (COG0099)rpsM (PRK05179) →                                                                                                                                               |
| env-146 | SRS018300_Baylor_scaffold_29179 | - | 540   | 475   | RNA → RpsM (COG0099)rpsM (PRK05179) →                                                                                                                                               |
| env-147 | SRS018591_WUGC_scaffold_4237    | + | 157   | 222   | RNA → RpsM (COG0099)rpsM (PRK05179) → PRK05309 (PRK05309)RpsK (COG0100) →<br>RpsD (COG0522)rpsD (PRK05327) → RpoA (COG0202)PRK05182 (PRK05182) →<br>RplQ (COG0203)rplQ (PRK05591) → |
| env-148 | SRS044486_C2170011              | - | 316   | 251   | RNA → RpsM (COG0099)rpsM (PRK05179) →                                                                                                                                               |
| env-149 | SRS047824_WUGC_scaffold_43077   | + | 137   | 202   | RNA → RpsM (COG0099)rpsM (PRK05179) → PRK05309 (PRK05309)RpsK (COG0100) →                                                                                                           |
| env-150 | SRS053603_LANL_scaffold_76618   | - | 120   | 55    | RNA →                                                                                                                                                                               |
| env-151 | SRS056622_LANL_scaffold_51943   | - | 691   | 626   | RNA → RpsM (COG0099)rpsM (PRK05179) → PRK05309 (PRK05309)RpsK (COG0100) →                                                                                                           |
| env-152 | SRS064329_LANL_scaffold_26192   | - | 540   | 475   | RNA → RpsM (COG0099)rpsM (PRK05179) →                                                                                                                                               |
| env-153 | SRS024081_LANL_scaffold_6310    | - | 649   | 584   | RNA → RpsM (COG0099)rpsM (PRK05179) → PRK05309 (PRK05309)RpsK (COG0100) →                                                                                                           |
| env-154 | SRS016086_C2470362              | + | 190   | 255   | RNA → RpsM (COG0099)rpsM (PRK05179) →                                                                                                                                               |
| env-155 | SRS018739_WUGC_scaffold_22546   | + | 1090  | 1155  | RNA → RpsM (COG0099)rpsM (PRK05179) → PRK05309 (PRK05309)RpsK (COG0100) →                                                                                                           |
| env-156 | SRS018791_C2157240              | - | 181   | 116   | RNA → RpsM (COG0099)rpsM (PRK05179) →                                                                                                                                               |
| env-157 | SRS020220_Baylor_scaffold_722   | - | 146   | 81    | RNA → hypo →                                                                                                                                                                        |
| env-158 | SRS051791_C1815930              | - | 691   | 626   | RNA → RpsM (COG0099)rpsM (PRK05179) → PRK05309 (PRK05309)RpsK (COG0100) →                                                                                                           |
| env-159 | SRS013705_Baylor_scaffold_86091 | - | 631   | 566   | RNA → RpsM (COG0099)rpsM (PRK05179) → PRK05309 (PRK05309)RpsK (COG0100) →                                                                                                           |
| env-160 | SRS014271_WUGC_scaffold_1617    | + | 128   | 193   | RNA → RpsM (COG0099)rpsM (PRK05179) →                                                                                                                                               |
| env-161 | SRS023926_Baylor_scaffold_56329 | + | 157   | 222   | RNA → RpsM (COG0099)rpsM (PRK05179) → PRK05309 (PRK05309)RpsK (COG0100) →<br>RpsD (COG0522)rpsD (PRK05327) → RpoA (COG0202)PRK05182 (PRK05182) →<br>RplQ (COG0203)rplQ (PRK05591) → |
| env-162 | SRS047219_WUGC_scaffold_31331   | - | 478   | 413   | RNA → RpsM (COG0099)rpsM (PRK05179) →                                                                                                                                               |
| env-163 | SRS065335_LANL_scaffold_24633   | + | 231   | 296   | RNA → RpsM (COG0099)rpsM (PRK05179) →                                                                                                                                               |
| env-164 | SRS019219_WUGC_scaffold_52621   | - | 783   | 718   | RNA → RpsM (COG0099)rpsM (PRK05179) → PRK05309 (PRK05309)RpsK (COG0100) →                                                                                                           |
| env-165 | SRS015893_WUGC_scaffold_14977   | + | 11585 | 11650 | RNA → RpsM (COG0099)rpsM (PRK05179) → PRK05309 (PRK05309)RpsK (COG0100) →                                                                                                           |
| env-166 | SRS024138_Baylor_scaffold_8471  | + | 1547  | 1612  | RNA → RpsM (COG0099)rpsM (PRK05179) → PRK05309 (PRK05309)RpsK (COG0100) →<br>RpsD (COG0522)rpsD (PRK05327) → RpoA (COG0202)PRK05182 (PRK05182) →<br>RplQ (COG0203)rplQ (PRK05591) → |
| env-167 | SRS065278_LANL_scaffold_50816   | - | 540   | 475   | RNA → RpsM (COG0099)rpsM (PRK05179) →                                                                                                                                               |
| env-168 | SRS019607_C2720344              | + | 602   | 667   | RNA → RpsM (COG0099)rpsM (PRK05179) →                                                                                                                                               |
| env-169 | SRS064423_LANL_scaffold_7006    | - | 793   | 728   | RNA → RpsM (COG0099)rpsM (PRK05179) → PRK05309 (PRK05309)RpsK (COG0100) →                                                                                                           |
| env-170 | SRS050628_C1893763              | + | 408   | 473   | RNA → RpsM (COG0099)rpsM (PRK05179) →                                                                                                                                               |
| env-171 | SRS015278_WUGC_scaffold_6421    | + | 97    | 162   | RNA → RpsM (COG0099)rpsM (PRK05179) →                                                                                                                                               |
| env-172 | SRS024144_LANL_scaffold_20370   | - | 551   | 486   | RNA → RpsM (COG0099)rpsM (PRK05179) →                                                                                                                                               |
| env-173 | SRS055450_LANL_scaffold_40160   | - | 148   | 83    | RNA → hypo →                                                                                                                                                                        |
| Lwa-1-1 | NZ_KB891061.1                   | + | 14728 | 14793 | RNA → RpsM (COG0099)rpsM (PRK05179) → PRK05309 (PRK05309)RpsK (COG0100) →<br>RpsD (COG0522)rpsD (PRK05327) → RpoA (COG0202)PRK05182 (PRK05182) →<br>RplQ (COG0203)rplQ (PRK05591) → |
| Lwa-2-1 | NZ_KI271401.1                   | - | 87815 | 87750 | RNA → RpsM (COG0099)rpsM (PRK05179) → PRK05309 (PRK05309)RpsK (COG0100) →<br>RpsD (COG0522)rpsD (PRK05327) → RpoA (COG0202)PRK05182 (PRK05182) →<br>RplQ (COG0203)rplQ (PRK05591) → |
| env-174 | SRS022083_Baylor_scaffold_19178 | - | 217   | 152   | RNA → RpsM (COG0099)rpsM (PRK05179) →                                                                                                                                               |
| env-175 | SRS014690_C1889275              | - | 403   | 338   | RNA → RpsM (COG0099)uS13_bact (TIGR03631) →                                                                                                                                         |
| env-176 | SRS017445_C3034105              | + | 35    | 100   | RNA → RpsM (COG0099)rpsM (PRK05179) →                                                                                                                                               |
| env-177 | SRS047113_LANL_scaffold_39994   | + | 35    | 100   | RNA → RpsM (COG0099)rpsM (PRK05179) →                                                                                                                                               |
| env-178 | SRS022536_LANL_scaffold_18564   | - | 468   | 403   | RNA → RpsM (COG0099)rpsM (PRK05179) →                                                                                                                                               |
| env-179 | SRS013723_Baylor_scaffold_46255 | + | 46    | 111   | RNA → RpsM (COG0099)uS13_bact (TIGR03631) →                                                                                                                                         |
| env-180 | SRS016360_Baylor_scaffold_58948 | - | 577   | 512   | RNA → RpsM (COG0099)rpsM (PRK05179) →                                                                                                                                               |
| env-181 | SRS014476_C3328552              | + | 91    | 156   | RNA → RpsM (COG0099)rpsM (PRK05179) →                                                                                                                                               |
| env-182 | SRS015470_C3307239              | + | 122   | 187   | RNA → RpsM (COG0099)rpsM (PRK05179) →                                                                                                                                               |
| env-183 | SRS047265_C1024260              | + | 85    | 150   | RNA → RpsM (COG0099)rpsM (PRK05179) →                                                                                                                                               |
| env-184 | SRS065310_LANL_scaffold_16461   | + | 1324  | 1389  | RNA → RpsM (COG0099)rpsM (PRK05179) →                                                                                                                                               |
| env-185 | SRS053917_LANL_scaffold_85561   | + | 405   | 470   | RNA → RpsM (COG0099)rpsM (PRK05179) →                                                                                                                                               |



|         |                                 |   |         |         |                                                                                                                                                                                                                                                         |
|---------|---------------------------------|---|---------|---------|---------------------------------------------------------------------------------------------------------------------------------------------------------------------------------------------------------------------------------------------------------|
| env-186 | SRS011343_Baylor_scaffold_32578 | - | 1439    | 1374    | RNA → RpsM (COG0099)rpsM (PRK05179) → PRK05309 (PRK05309)RpsK (COG0100) → RpsD (COG0522)rpsD (PRK05327) →                                                                                                                                               |
| Lsp-3-1 | NZ_KI272907.1                   | - | 14521   | 14456   | RNA → RpsM (COG0099)rpsM (PRK05179) → PRK05309 (PRK05309)RpsK (COG0100) → RpsD (COG0522)rpsD (PRK05327) → RpoA (COG0202)PRK05182 (PRK05182) → RplQ (COG0203)rplQ (PRK05591) →                                                                           |
| env-187 | SRS014578_WUGC_scaffold_46133   | + | 84      | 149     | RNA → hypo → RpsM (COG0099)rpsM (PRK05179) →                                                                                                                                                                                                            |
| env-188 | SRS021477_Baylor_scaffold_2106  | - | 788     | 723     | RNA → RpsM (COG0099)rpsM (PRK05179) → PRK05309 (PRK05309)RpsK (COG0100) →                                                                                                                                                                               |
| env-189 | SRS015044_WUGC_scaffold_24016   | + | 23      | 88      | RNA → RpsM (COG0099)rpsM (PRK05179) →                                                                                                                                                                                                                   |
| env-190 | SRS063603_LANL_scaffold_95971   | - | 467     | 402     | RNA → RpsM (COG0099)rpsM (PRK05179) →                                                                                                                                                                                                                   |
| env-191 | SRS055378_LANL_scaffold_65216   | + | 150     | 215     | RNA → RpsM (COG0099)rpsM (PRK05179) →                                                                                                                                                                                                                   |
| env-192 | SRS052604_C1779911              | - | 369     | 304     | RNA → RpsM (COG0099)rpsM (PRK05179) →                                                                                                                                                                                                                   |
| Lsp-4-1 | NZ_KI271324.1                   | + | 15601   | 15666   | RNA → RpsM (COG0099)rpsM (PRK05179) → PRK05309 (PRK05309)RpsK (COG0100) → RpsD (COG0522)rpsD (PRK05327) → RpoA (COG0202)PRK05182 (PRK05182) → RplQ (COG0203)rplQ (PRK05591) →                                                                           |
| env-193 | SRS016200_WUGC_scaffold_19120   | - | 324     | 259     | RNA → RpsM (COG0099)rpsM (PRK05179) →                                                                                                                                                                                                                   |
| env-194 | SRS049318_LANL_scaffold_31958   | - | 260     | 195     | RNA → RpsM (COG0099)rpsM (PRK05179) →                                                                                                                                                                                                                   |
| env-195 | SRS024447_LANL_scaffold_24021   | + | 353     | 418     | RNA → RpsM (COG0099)rpsM (PRK05179) → PRK05309 (PRK05309)RpsK (COG0100) →                                                                                                                                                                               |
| Ltr-1-1 | NZ_AXVL01000009.1               | - | 21488   | 21423   | RNA → RpsM (COG0099)rpsM (PRK05179) → PRK05309 (PRK05309)RpsK (COG0100) → RpsD (COG0522)rpsD (PRK05327) → RpoA (COG0202)PRK05182 (PRK05182) → RplQ (COG0203)rplQ (PRK05591) →                                                                           |
| Lsh-1-1 | NZ_KB890273.1                   | - | 105178  | 105113  | RNA → RpsM (COG0099)rpsM (PRK05179) → PRK05309 (PRK05309)RpsK (COG0100) → RpsD (COG0522)rpsD (PRK05327) → RpoA (COG0202)PRK05182 (PRK05182) → RplQ (COG0203)rplQ (PRK05591) →                                                                           |
| Lbu-1-1 | NC_013192.1                     | + | 2131217 | 2131282 | RNA → RpsM (COG0099)rpsM (PRK05179) → PRK05309 (PRK05309)RpsK (COG0100) → RpsD (COG0522)rpsD (PRK05327) → RpoA (COG0202)PRK05182 (PRK05182) → RplQ (COG0203)rplQ (PRK05591) → hypo → hypo → Aes (COG0657) →                                             |
| env-196 | SRS018591_WUGC_scaffold_43849   | + | 45065   | 45132   | HAMP (smart00304)HATPase_c (smart00387)HisKA (smart00388)BaeS (COG0642) → RNA → RpsM (COG0099)rpsM (PRK05179) → PRK05309 (PRK05309)RpsK (COG0100) → RpsD (COG0522)rpsD (PRK05327) → RpoA (COG0202)PRK05182 (PRK05182) → RplQ (COG0203)rplQ (PRK05591) → |
| env-197 | SRS063999_LANL_scaffold_22653   | - | 339     | 274     | RNA → RpsM (COG0099)rpsM (PRK05179) →                                                                                                                                                                                                                   |
| env-198 | SRS075404_LANL_scaffold_62603   | - | 150     | 85      | RNA → hypo →                                                                                                                                                                                                                                            |
| env-199 | SRS014573_WUGC_scaffold_24913   | + | 104     | 169     | RNA → RpsM (COG0099)rpsM (PRK05179) → PRK05309 (PRK05309)RpsK (COG0100) →                                                                                                                                                                               |
| env-200 | SRS017120_C2908388              | + | 19      | 84      | RNA → RpsM (COG0099)rpsM (PRK05179) →                                                                                                                                                                                                                   |
| env-201 | SRS017533_C4103099              | - | 869     | 804     | RNA → RpsM (COG0099)rpsM (PRK05179) → PRK05309 (PRK05309)RpsK (COG0100) →                                                                                                                                                                               |
| env-202 | SRS018439_Baylor_scaffold_46100 | + | 34      | 99      | RNA → RpsM (COG0099)rpsM (PRK05179) → PRK05309 (PRK05309)RpsK (COG0100) → RpsD (COG0522)rpsD (PRK05327) →                                                                                                                                               |
| env-203 | SRS018739_C3600550              | + | 123     | 188     | RNA → RpsM (COG0099)rpsM (PRK05179) →                                                                                                                                                                                                                   |
| env-204 | SRS019327_WUGC_scaffold_19629   | - | 1708    | 1643    | RNA → RpsM (COG0099)rpsM (PRK05179) → PRK05309 (PRK05309)RpsK (COG0100) → RpsD (COG0522)rpsD (PRK05327) → PRK05182 (PRK05182)RNA_pol_L (pfam01193) →                                                                                                    |
| env-205 | SRS022077_Baylor_scaffold_16023 | - | 575     | 510     | RNA → RpsM (COG0099)rpsM (PRK05179) →                                                                                                                                                                                                                   |
| env-206 | SRS024081_LANL_scaffold_33076   | + | 104     | 169     | RNA → RpsM (COG0099)rpsM (PRK05179) →                                                                                                                                                                                                                   |
| env-207 | SRS042131_WUGC_scaffold_3782    | + | 14639   | 14704   | RNA → RpsM (COG0099)rpsM (PRK05179) → PRK05309 (PRK05309)RpsK (COG0100) → RpsD (COG0522)rpsD (PRK05327) → RpoA (COG0202)PRK05182 (PRK05182) → RplQ (COG0203)rplQ (PRK05591) →                                                                           |
| env-208 | SRS042643_WUGC_scaffold_36196   | + | 924     | 989     | RNA → RpsM (COG0099)rpsM (PRK05179) →                                                                                                                                                                                                                   |
| env-209 | SRS042910_C5617440              | + | 723     | 788     | RNA → RpsM (COG0099)rpsM (PRK05179) → PRK05309 (PRK05309)RpsK (COG0100) →                                                                                                                                                                               |
| env-210 | SRS043663_LANL_scaffold_40516   | - | 4450    | 4385    | RNA → RpsM (COG0099)rpsM (PRK05179) → PRK05309 (PRK05309)RpsK (COG0100) → RpsD (COG0522)rpsD (PRK05327) → RpoA (COG0202)PRK05182 (PRK05182) → RplQ (COG0203)rplQ (PRK05591) →                                                                           |
| env-211 | SRS044373_WUGC_scaffold_60101   | - | 526     | 461     | RNA → RpsM (COG0099)rpsM (PRK05179) →                                                                                                                                                                                                                   |
| env-212 | SRS049268_LANL_scaffold_41923   | - | 669     | 604     | RNA → RpsM (COG0099)rpsM (PRK05179) → PRK05309 (PRK05309)RpsK (COG0100) →                                                                                                                                                                               |
| env-213 | SRS057022_LANL_scaffold_28937   | + | 206     | 271     | RNA → RpsM (COG0099)rpsM (PRK05179) →                                                                                                                                                                                                                   |
| env-214 | SRS057539_LANL_scaffold_29275   | + | 3873    | 3938    | RNA → RpsM (COG0099)rpsM (PRK05179) →                                                                                                                                                                                                                   |
| env-215 | SRS063193_LANL_scaffold_60270   | - | 626     | 561     | RNA → RpsM (COG0099)rpsM (PRK05179) → PRK05309 (PRK05309)RpsK (COG0100) →                                                                                                                                                                               |



|         |                                 |   |        |        |                                                                                                                                                                                     |
|---------|---------------------------------|---|--------|--------|-------------------------------------------------------------------------------------------------------------------------------------------------------------------------------------|
| env-216 | SRS064774_C2799284              | + | 104    | 169    | RNA → RpsM (COG0099)rpsM (PRK05179) →                                                                                                                                               |
| env-217 | SRS077736_C1759087              | - | 289    | 224    | RNA → RpsM (COG0099)rpsM (PRK05179) →                                                                                                                                               |
| Lsp-2-1 | NZ_KI272826.1                   | + | 100033 | 100098 | RNA → RpsM (COG0099)rpsM (PRK05179) → PRK05309 (PRK05309)RpsK (COG0100) →<br>RpsD (COG0522)rpsD (PRK05327) → RpoA (COG0202)PRK05182 (PRK05182) →<br>RplQ (COG0203)rplQ (PRK05591) → |
| env-218 | SRS023835_C3783904              | - | 527    | 462    | RNA → RpsM (COG0099)rpsM (PRK05179) →                                                                                                                                               |
| env-219 | SRS055378_LANL_scaffold_20064   | - | 467    | 401    | RNA → RpsM (COG0099)rpsM (PRK05179) →                                                                                                                                               |
| env-220 | SRS016043_WUGC_scaffold_6899    | + | 458    | 524    | RNA → RpsM (COG0099)rpsM (PRK05179) →                                                                                                                                               |
| env-221 | SRS019591_WUGC_scaffold_33061   | - | 2209   | 2143   | RNA → RpsM (COG0099)rpsM (PRK05179) → PRK05309 (PRK05309)RpsK (COG0100) →<br>RpsD (COG0522)rpsD (PRK05327) → RNAP_alpha_NTD (cd06928)PRK05182 (PRK05182) →                          |
| env-222 | SRS013170_Baylor_scaffold_84939 | - | 535    | 469    | RNA → RpsM (COG0099)rpsM (PRK05179) →                                                                                                                                               |
| env-223 | SRS017139_Baylor_scaffold_75273 | - | 382    | 316    | RNA → RpsM (COG0099)rpsM (PRK05179) →                                                                                                                                               |
| env-224 | SRS023938_Baylor_scaffold_26910 | - | 1104   | 1038   | RNA → RpsM (COG0099)rpsM (PRK05179) → PRK05309 (PRK05309)RpsK (COG0100) →<br>rpsD (PRK05327)Ribosomal_S4 (pfam00163) →                                                              |
| env-225 | SRS051930_C3131142              | - | 369    | 303    | RNA → RpsM (COG0099)rpsM (PRK05179) →                                                                                                                                               |
| env-226 | SRS023841_Baylor_scaffold_19242 | + | 7063   | 7129   | RNA → RpsM (COG0099)rpsM (PRK05179) → PRK05309 (PRK05309)RpsK (COG0100) →<br>rpsD (PRK05327)Ribosomal_S4 (pfam00163) →                                                              |
| env-227 | SRS011098_Baylor_scaffold_14455 | + | 724    | 790    | RNA → RpsM (COG0099)rpsM (PRK05179) → PRK05309 (PRK05309)RpsK (COG0100) →<br>RpsD (COG0522)rpsD (PRK05327) → RpoA (COG0202)PRK05182 (PRK05182) →<br>RplQ (COG0203)rplQ (PRK05591) → |
| env-228 | SRS012285_Baylor_scaffold_13798 | + | 101    | 167    | RNA → RpsM (COG0099)rpsM (PRK05179) →                                                                                                                                               |
| env-229 | SRS013533_PGA_scaffold_82441    | - | 660    | 594    | RNA → RpsM (COG0099)rpsM (PRK05179) → RpsM (COG0099)rpsM (PRK05179) →                                                                                                               |
| env-230 | SRS014578_WUGC_scaffold_68326   | - | 305    | 239    | RNA → RpsM (COG0099)rpsM (PRK05179) →                                                                                                                                               |
| env-231 | SRS015470_C3336101              | - | 669    | 603    | RNA → RpsM (COG0099)rpsM (PRK05179) → PRK05309 (PRK05309)RpsK (COG0100) →                                                                                                           |
| env-232 | SRS016575_C3616229              | - | 112    | 46     | RNA → hypo →                                                                                                                                                                        |
| env-233 | SRS017511_C3312624              | - | 195    | 129    | RNA → RpsM (COG0099)rpsM (PRK05179) →                                                                                                                                               |
| env-234 | SRS018394_Baylor_scaffold_45763 | + | 120    | 186    | RNA → RpsM (COG0099)rpsM (PRK05179) →                                                                                                                                               |
| env-235 | SRS018665_WUGC_scaffold_479     | - | 1029   | 963    | RNA → RpsM (COG0099)rpsM (PRK05179) → PRK05309 (PRK05309)RpsK (COG0100) → rpsD (PRK05327) →                                                                                         |
| env-236 | SRS018975_C1710475              | - | 195    | 129    | RNA → RpsM (COG0099)rpsM (PRK05179) →                                                                                                                                               |
| env-237 | SRS022149_LANL_scaffold_16029   | - | 599    | 533    | RNA → RpsM (COG0099)rpsM (PRK05179) →                                                                                                                                               |
| env-238 | SRS024649_C3588658              | - | 373    | 307    | RNA → RpsM (COG0099)rpsM (PRK05179) →                                                                                                                                               |
| env-239 | SRS045197_C3310867              | + | 117    | 183    | RNA → RpsM (COG0099)rpsM (PRK05179) →                                                                                                                                               |
| env-240 | SRS051378_C1836081              | + | 393    | 459    | RNA → RpsM (COG0099)rpsM (PRK05179) →                                                                                                                                               |
| env-241 | SRS052604_C1775703              | - | 372    | 306    | RNA → RpsM (COG0099)rpsM (PRK05179) →                                                                                                                                               |
| env-242 | SRS055450_C2060497              | + | 104    | 170    | RNA → RpsM (COG0099)rpsM (PRK05179) →                                                                                                                                               |
| env-243 | SRS075410_LANL_scaffold_38102   | - | 535    | 469    | RNA → RpsM (COG0099)rpsM (PRK05179) →                                                                                                                                               |
| env-244 | SRS014476_C3276433              | - | 262    | 196    | RNA → RpsM (COG0099)rpsM (PRK05179) →                                                                                                                                               |
| env-245 | SRS015215_WUGC_scaffold_30194   | - | 2281   | 2215   | RNA → RpsM (COG0099)rpsM (PRK05179) → PRK05309 (PRK05309)RpsK (COG0100) →<br>RpsD (COG0522)rpsD (PRK05327) → RNAP_alpha_NTD (cd06928)PRK05182 (PRK05182) →                          |
| env-246 | SRS015899_C1863770              | - | 113    | 47     | RNA → hypo →                                                                                                                                                                        |
| env-247 | SRS019073_C2423699              | + | 117    | 183    | RNA → RpsM (COG0099)rpsM (PRK05179) →                                                                                                                                               |
| env-248 | SRS019077_C2628206              | + | 123    | 189    | RNA → RpsM (COG0099)rpsM (PRK05179) →                                                                                                                                               |
| env-249 | SRS020226_Baylor_scaffold_50340 | - | 366    | 300    | RNA → RpsM (COG0099)rpsM (PRK05179) →                                                                                                                                               |
| env-250 | SRS024087_LANL_scaffold_39994   | + | 1637   | 1703   | RNA → RpsM (COG0099)rpsM (PRK05179) →                                                                                                                                               |
| env-251 | SRS024381_LANL_scaffold_49494   | + | 578    | 644    | RNA → RpsM (COG0099)rpsM (PRK05179) → PRK05309 (PRK05309)RpsK (COG0100) →                                                                                                           |
| env-252 | SRS047113_LANL_scaffold_2260    | + | 101    | 167    | RNA → RpsM (COG0099)rpsM (PRK05179) →                                                                                                                                               |
| env-253 | SRS051244_LANL_scaffold_43648   | - | 535    | 469    | RNA → RpsM (COG0099)rpsM (PRK05179) →                                                                                                                                               |
| env-254 | SRS051941_LANL_scaffold_55544   | - | 535    | 469    | RNA → RpsM (COG0099)rpsM (PRK05179) →                                                                                                                                               |
| Lsp-1-1 | NZ_CP012410.1                   | + | 259790 | 259856 | RNA → RpsM (COG0099)rpsM (PRK05179) → PRK05309 (PRK05309)RpsK (COG0100) →<br>RpsD (COG0522)rpsD (PRK05327) → RpoA (COG0202)PRK05182 (PRK05182) →<br>RplQ (COG0203)rplQ (PRK05591) → |
| env-255 | SRS013723_Baylor_scaffold_66969 | + | 1803   | 1869   | RNA → RpsM (COG0099)rpsM (PRK05179) → PRK05309 (PRK05309)RpsK (COG0100) →                                                                                                           |

|         |                          |   |         |         |                                                                                                                                                                                                                  |
|---------|--------------------------|---|---------|---------|------------------------------------------------------------------------------------------------------------------------------------------------------------------------------------------------------------------|
| env-256 | JGI24712J26585_10001668  | + | 13781   | 13845   | RNA → RpsM (COG0099)rpsM (PRK05179) → PRK05309 (PRK05309)RpsK (COG0100) → RpsD (COG0522)rpsD (PRK05327) → RpoA (COG0202)PRK05182 (PRK05182) → RplQ (COG0203)rplQ (PRK05591) →                                    |
| env-257 | JGI24711J26586_10001349  | + | 13781   | 13845   | RNA → RpsM (COG0099)rpsM (PRK05179) → PRK05309 (PRK05309)RpsK (COG0100) → RpsD (COG0522)rpsD (PRK05327) → RpoA (COG0202)PRK05182 (PRK05182) → RplQ (COG0203)rplQ (PRK05591) →                                    |
| env-258 | JGI24502J29692_10003819  | + | 16692   | 16756   | RNA → RpsM (COG0099)rpsM (PRK05179) → PRK05309 (PRK05309)RpsK (COG0100) → RpsD (COG0522)rpsD (PRK05327) → RpoA (COG0202)PRK05182 (PRK05182) → RplQ (COG0203)rplQ (PRK05591) →                                    |
| env-259 | JGI24503J29689_10006856  | + | 15447   | 15511   | RNA → RpsM (COG0099)rpsM (PRK05179) → PRK05309 (PRK05309)RpsK (COG0100) → RpsD (COG0522)rpsD (PRK05327) → RNAP_alpha_NTD (cd06928)PRK05182 (PRK05182)RNA_pol_A_CTD (pfam03118) → RplQ (COG0203)rplQ (PRK05591) → |
| Cso-1-1 | NZ_KI518192.1            | + | 13030   | 13084   | RNA → RpsM (COG0099)rpsM (PRK05179) → PRK05309 (PRK05309)RpsK (COG0100) → RpsD (COG0522)rpsD (PRK05327) → RpoA (COG0202)PRK05182 (PRK05182) → RplQ (COG0203)rplQ (PRK05591) →                                    |
| Csp-2-1 | NZ_JRJJZ01000165.1       | + | 13067   | 13121   | RNA → RpsM (COG0099)rpsM (PRK05179) → PRK05309 (PRK05309)RpsK (COG0100) → RpsD (COG0522)rpsD (PRK05327) → RpoA (COG0202)PRK05182 (PRK05182) → RplQ (COG0203)rplQ (PRK05591) →                                    |
| Csp-1-1 | NZ_JTLI01000001.1        | + | 13083   | 13137   | RNA → RpsM (COG0099)rpsM (PRK05179) → PRK05309 (PRK05309)RpsK (COG0100) → RpsD (COG0522)rpsD (PRK05327) → RpoA (COG0202)PRK05182 (PRK05182) → RplQ (COG0203)rplQ (PRK05591) →                                    |
| env-260 | JGI994J12354_10000051    | - | 8355    | 8297    | RNA → RpsM (COG0099)rpsM (PRK05179) → PRK05309 (PRK05309)RpsK (COG0100) → RpsD (COG0522)rpsD (PRK05327) → RpoA (COG0202)PRK05182 (PRK05182) → RplQ (COG0203)rplQ (PRK05591) →                                    |
| env-261 | 2227390564               | - | 241     | 183     | RNA → RpsM (COG0099)rpsM (PRK05179) →                                                                                                                                                                            |
| env-262 | IMNBL1_c0066592          | + | 328     | 386     | RNA → RpsM (COG0099)rpsM (PRK05179) → rps11 (CHL00041)PRK05309 (PRK05309) →                                                                                                                                      |
| env-263 | BMHBC_159667             | + | 548     | 606     | RNA → RpsM (COG0099)rpsM (PRK05179) → PRK05309 (PRK05309)RpsK (COG0100) → RpsD (COG0522)rpsD (PRK05327) → RNAP_alpha_NTD (cd06928)PRK05182 (PRK05182) →                                                          |
| Ipo-1-1 | NC_014632.1              | - | 1917483 | 1917425 | RNA → RpsM (COG0099)rpsM (PRK05179) → PRK05309 (PRK05309)RpsK (COG0100) → RpsD (COG0522)rpsD (PRK05327) → RpoA (COG0202)PRK05182 (PRK05182) → RplQ (COG0203)rplQ (PRK05591) →                                    |
| env-264 | contig93332              | + | 673     | 734     | RNA → RpsM (COG0099)rpsM (PRK05179) →                                                                                                                                                                            |
| env-265 | scaffold18717_1.V1.CD-11 | + | 1496    | 1557    | RNA → RpsM (COG0099)rpsM (PRK05179) →                                                                                                                                                                            |
| env-266 | DLF004_scaffold35352.1   | + | 13177   | 13238   | RNA → RpsM (COG0099)rpsM (PRK05179) → PRK05309 (PRK05309)RpsK (COG0100) → RpsD (COG0522)rpsD (PRK05327) → RpoA (COG0202)PRK05182 (PRK05182) → RplQ (COG0203)rplQ (PRK05591) →                                    |
| env-267 | DLM010_scaffold45172_1   | - | 4988    | 4927    | RNA → RpsM (COG0099)rpsM (PRK05179) → PRK05309 (PRK05309)RpsK (COG0100) → RpsD (COG0522)rpsD (PRK05327) → RpoA (COG0202)PRK05182 (PRK05182) → RplQ (COG0203)rplQ (PRK05591) →                                    |
| env-268 | DLM014_scaffold52950_1   | + | 13617   | 13678   | RNA → RpsM (COG0099)rpsM (PRK05179) → PRK05309 (PRK05309)RpsK (COG0100) → RpsD (COG0522)rpsD (PRK05327) → RpoA (COG0202)PRK05182 (PRK05182) → RplQ (COG0203)rplQ (PRK05591) →                                    |
| env-269 | DOM010_scaffold24129_1   | + | 9239    | 9300    | RNA → RpsM (COG0099)rpsM (PRK05179) → PRK05309 (PRK05309)RpsK (COG0100) → RpsD (COG0522)rpsD (PRK05327) → RpoA (COG0202)PRK05182 (PRK05182) → RplQ (COG0203)rplQ (PRK05591) →                                    |
| env-270 | DOM016_scaffold37026_2   | - | 10720   | 10659   | RNA → RpsM (COG0099)rpsM (PRK05179) → PRK05309 (PRK05309)RpsK (COG0100) → RpsD (COG0522)rpsD (PRK05327) → RpoA (COG0202)PRK05182 (PRK05182) → RplQ (COG0203)rplQ (PRK05591) →                                    |
| env-271 | DOM017_scaffold7272_3    | - | 2891    | 2830    | RNA → RpsM (COG0099)rpsM (PRK05179) → PRK05309 (PRK05309)RpsK (COG0100) → RpsD (COG0522)rpsD (PRK05327) → RpoA (COG0202)PRK05182 (PRK05182) → rplQ (PRK05591)Ribosomal_L17 (pfam01196) →                         |
| env-272 | NLF014_scaffold15038_1   | + | 529     | 590     | RNA → RpsM (COG0099)rpsM (PRK05179) →                                                                                                                                                                            |
| env-273 | NLF015_scaffold34189_4   | - | 5098    | 5037    | RNA → RpsM (COG0099)rpsM (PRK05179) → PRK05309 (PRK05309)RpsK (COG0100) → RpsD (COG0522)rpsD (PRK05327) → RpoA (COG0202)PRK05182 (PRK05182) → RplQ (COG0203)rplQ (PRK05591) →                                    |
| env-274 | NLM006_scaffold51268_3   | - | 727     | 666     | RNA → RpsM (COG0099)rpsM (PRK05179) → rps11 (CHL00041)PRK05309 (PRK05309) →                                                                                                                                      |

|         |                                |   |        |        |                                                                                                                                                                               |
|---------|--------------------------------|---|--------|--------|-------------------------------------------------------------------------------------------------------------------------------------------------------------------------------|
| env-275 | NOM026_scaffold3_1             | - | 17438  | 17377  | RNA → RpsM (COG0099)rpsM (PRK05179) → PRK05309 (PRK05309)RpsK (COG0100) → RpsD (COG0522)rpsD (PRK05327) → RpoA (COG0202)PRK05182 (PRK05182) → RplQ (COG0203)rplQ (PRK05591) → |
| env-276 | SRS017433_C1836359             | - | 3003   | 2942   | RNA → RpsM (COG0099)rpsM (PRK05179) → PRK05309 (PRK05309)RpsK (COG0100) → RpsD (COG0522)rpsD (PRK05327) → RpoA (COG0202)PRK05182 (PRK05182) → RplQ (COG0203)rplQ (PRK05591) → |
| env-277 | SRS023176_C936722              | - | 3456   | 3395   | RNA → RpsM (COG0099)rpsM (PRK05179) → PRK05309 (PRK05309)RpsK (COG0100) → RpsD (COG0522)rpsD (PRK05327) → RpoA (COG0202)PRK05182 (PRK05182) → RplQ (COG0203)rplQ (PRK05591) → |
| Fmo-1-1 | NZ_GL987993.1                  | + | 62917  | 62978  | RNA → RpsM (COG0099)rpsM (PRK05179) → PRK05309 (PRK05309)RpsK (COG0100) → RpsD (COG0522)rpsD (PRK05327) → RpoA (COG0202)PRK05182 (PRK05182) → RplQ (COG0203)rplQ (PRK05591) → |
| env-278 | NLM024_scaffold20695_1         | - | 5661   | 5600   | RNA → RpsM (COG0099)rpsM (PRK05179) → PRK05309 (PRK05309)RpsK (COG0100) → RpsD (COG0522)rpsD (PRK05327) → RpoA (COG0202)PRK05182 (PRK05182) → RplQ (COG0203)rplQ (PRK05591) → |
| env-279 | NLM023_scaffold45840_1         | - | 36496  | 36435  | RNA → RpsM (COG0099)rpsM (PRK05179) → PRK05309 (PRK05309)RpsK (COG0100) → RpsD (COG0522)rpsD (PRK05327) → RpoA (COG0202)PRK05182 (PRK05182) → RplQ (COG0203)rplQ (PRK05591) → |
| env-280 | DOM005_scaffold13463_2         | - | 25370  | 25308  | RNA → RpsM (COG0099)rpsM (PRK05179) → PRK05309 (PRK05309)RpsK (COG0100) → RpsD (COG0522)rpsD (PRK05327) → RpoA (COG0202)PRK05182 (PRK05182) → RplQ (COG0203)rplQ (PRK05591) → |
| env-281 | DOM010_scaffold83_2            | + | 2172   | 2233   | RNA → RpsM (COG0099)rpsM (PRK05179) → PRK05309 (PRK05309)RpsK (COG0100) → RpsD (COG0522)rpsD (PRK05327) → RpoA (COG0202)PRK05182 (PRK05182) → RplQ (COG0203)rplQ (PRK05591) → |
| env-282 | 4448815.3_Contig41831          | + | 346    | 407    | RNA →                                                                                                                                                                         |
| env-283 | DOM023_scaffold22784_3         | - | 323    | 262    | RNA → RpsM (COG0099)rpsM (PRK05179) →                                                                                                                                         |
| env-284 | NLM027_scaffold31130_3         | - | 5574   | 5513   | RNA → RpsM (COG0099)rpsM (PRK05179) → PRK05309 (PRK05309)RpsK (COG0100) → RpsD (COG0522)rpsD (PRK05327) → RpoA (COG0202)PRK05182 (PRK05182) → RplQ (COG0203)rplQ (PRK05591) → |
| env-285 | NOM022_scaffold9197_2          | - | 8382   | 8321   | RNA → RpsM (COG0099)rpsM (PRK05179) → PRK05309 (PRK05309)RpsK (COG0100) → RpsD (COG0522)rpsD (PRK05327) → RpoA (COG0202)PRK05182 (PRK05182) → RplQ (COG0203)rplQ (PRK05591) → |
| env-286 | NOM023_scaffold2804_1          | + | 2069   | 2130   | RNA → RpsM (COG0099)rpsM (PRK05179) → PRK05309 (PRK05309)RpsK (COG0100) → RpsD (COG0522)rpsD (PRK05327) → RpoA (COG0202)PRK05182 (PRK05182) → RplQ (COG0203)rplQ (PRK05591) → |
| env-287 | 4444165.3.11744                | + | 3036   | 3097   | RNA → RpsM (COG0099)rpsM (PRK05179) → PRK05309 (PRK05309)RpsK (COG0100) →                                                                                                     |
| env-288 | NOF009_scaffold43353_2         | - | 13425  | 13364  | RNA → RpsM (COG0099)rpsM (PRK05179) → PRK05309 (PRK05309)RpsK (COG0100) → RpsD (COG0522)rpsD (PRK05327) → RpoA (COG0202)PRK05182 (PRK05182) → RplQ (COG0203)rplQ (PRK05591) → |
| env-289 | NLM017_scaffold13921_5         | - | 472    | 411    | RNA → RpsM (COG0099)rpsM (PRK05179) →                                                                                                                                         |
| env-290 | NOM004_scaffold18127_3         | + | 1020   | 1081   | RNA → RpsM (COG0099)rpsM (PRK05179) → PRK05309 (PRK05309)RpsK (COG0100) → RpsD (COG0522)rpsD (PRK05327) → RpoA (COG0202)PRK05182 (PRK05182) → RplQ (COG0203)rplQ (PRK05591) → |
| env-291 | UnmappedStool_Broad_C252318921 | - | 272    | 211    | RNA → rps13 (CHL00137)rpsM (PRK05179) →                                                                                                                                       |
| env-292 | DLF008_C336303_1               | + | 18232  | 18293  | RNA → RpsM (COG0099)rpsM (PRK05179) → PRK05309 (PRK05309)RpsK (COG0100) → RpsD (COG0522)rpsD (PRK05327) → RpoA (COG0202)PRK05182 (PRK05182) → RplQ (COG0203)rplQ (PRK05591) → |
| env-293 | DOF006_scaffold7307_3          | - | 10364  | 10303  | RNA → RpsM (COG0099)rpsM (PRK05179) → PRK05309 (PRK05309)RpsK (COG0100) → RpsD (COG0522)rpsD (PRK05327) → RpoA (COG0202)PRK05182 (PRK05182) → RplQ (COG0203)rplQ (PRK05591) → |
| env-294 | DOM005_scaffold6985_2          | + | 829    | 890    | RNA → RpsM (COG0099)uS13_bact (TIGR03631) →                                                                                                                                   |
| Ful-2-1 | NZ_JH815234.1                  | + | 58593  | 58654  | RNA → RpsM (COG0099)rpsM (PRK05179) → PRK05309 (PRK05309)RpsK (COG0100) → RpsD (COG0522)rpsD (PRK05327) → RpoA (COG0202)PRK05182 (PRK05182) → RplQ (COG0203)rplQ (PRK05591) → |
| Ful-1-1 | NZ_KE161010.1                  | + | 184763 | 184824 | RNA → RpsM (COG0099)rpsM (PRK05179) → PRK05309 (PRK05309)RpsK (COG0100) → RpsD (COG0522)rpsD (PRK05327) → RpoA (COG0202)PRK05182 (PRK05182) → RplQ (COG0203)rplQ (PRK05591) → |



|          |                                 |   |       |       |                                                                                                                                                                                                                                                                                                                                                       |
|----------|---------------------------------|---|-------|-------|-------------------------------------------------------------------------------------------------------------------------------------------------------------------------------------------------------------------------------------------------------------------------------------------------------------------------------------------------------|
| env-295  | 4491479.3_NODE.279              | + | 17428 | 17489 | RNA → RpsM (COG0099)rpsM (PRK05179) → PRK05309 (PRK05309)RpsK (COG0100) → RpsD (COG0522)rpsD (PRK05327) → RpoA (COG0202)PRK05182 (PRK05182) → RplQ (COG0203)rplQ (PRK05591) →                                                                                                                                                                         |
| env-296  | NOF002_scaffold13914.10         | - | 446   | 385   | RNA → RpsM (COG0099)rpsM (PRK05179) →                                                                                                                                                                                                                                                                                                                 |
| Fva-1-1  | NZ_GL987999.1                   | + | 52065 | 52126 | RNA → RpsM (COG0099)rpsM (PRK05179) → PRK05309 (PRK05309)RpsK (COG0100) → RpsD (COG0522)rpsD (PRK05327) → RpoA (COG0202)PRK05182 (PRK05182) → RplQ (COG0203)rplQ (PRK05591) →                                                                                                                                                                         |
| env-297  | scaffold80362_1_V1.UC-17        | + | 2137  | 2199  | RNA → RpsM (COG0099)rpsM (PRK05179) → PRK05309 (PRK05309)RpsK (COG0100) → RpsD (COG0522)rpsD (PRK05327) → RpoA (COG0202)PRK05182 (PRK05182) → RplQ (COG0203)rplQ (PRK05591) →                                                                                                                                                                         |
| Fsp-2-1  | NZ_GG657975.1                   | - | 48581 | 48519 | RNA → RpsM (COG0099)rpsM (PRK05179) → RpsM (COG0099)rpsM (PRK05179) → PRK05309 (PRK05309)RpsK (COG0100) → PRK05309 (PRK05309)RpsK (COG0100) → RpsD (COG0522)rpsD (PRK05327) → RpsD (COG0522)rpsD (PRK05327) → RpoA (COG0202)PRK05182 (PRK05182) → RpoA (COG0202)PRK05182 (PRK05182) → RplQ (COG0203)rplQ (PRK05591) → RplQ (COG0203)rplQ (PRK05591) → |
| Fgo-1-1  | NZ_KQ235756.1                   | + | 86258 | 86320 | RNA → RpsM (COG0099)rpsM (PRK05179) → PRK05309 (PRK05309)RpsK (COG0100) → RpsD (COG0522)rpsD (PRK05327) → RpoA (COG0202)PRK05182 (PRK05182) → RplQ (COG0203)rplQ (PRK05591) →                                                                                                                                                                         |
| Fne-5-1  | NZ_JAAF01000042.1               | + | 1430  | 1492  | RNA → RpsM (COG0099)rpsM (PRK05179) → PRK05309 (PRK05309)RpsK (COG0100) → RpsD (COG0522)rpsD (PRK05327) → RpoA (COG0202)PRK05182 (PRK05182) → RplQ (COG0203)rplQ (PRK05591) →                                                                                                                                                                         |
| Fne-3-1  | NZ_JAAC01000019.1               | + | 1569  | 1631  | RNA → RpsM (COG0099)rpsM (PRK05179) → PRK05309 (PRK05309)RpsK (COG0100) → RpsD (COG0522)rpsD (PRK05327) → RpoA (COG0202)PRK05182 (PRK05182) → RplQ (COG0203)rplQ (PRK05591) →                                                                                                                                                                         |
| Fne-10-1 | NZ_AOJP01000008.1               | - | 52376 | 52314 | RNA → RpsM (COG0099)rpsM (PRK05179) → PRK05309 (PRK05309)RpsK (COG0100) → RpsD (COG0522)rpsD (PRK05327) → RpoA (COG0202)PRK05182 (PRK05182) → RplQ (COG0203)rplQ (PRK05591) →                                                                                                                                                                         |
| Fne-9-1  | NZ_AJSY01000009.1               | + | 2132  | 2194  | RNA → RpsM (COG0099)rpsM (PRK05179) → PRK05309 (PRK05309)RpsK (COG0100) → RpsD (COG0522)rpsD (PRK05327) → RpoA (COG0202)PRK05182 (PRK05182) → RplQ (COG0203)rplQ (PRK05591) →                                                                                                                                                                         |
| Fne-1-1  | NZ_JAAE01000021.1               | - | 16569 | 16507 | RNA → RpsM (COG0099)rpsM (PRK05179) → PRK05309 (PRK05309)RpsK (COG0100) → RpsD (COG0522)rpsD (PRK05327) → RpoA (COG0202)PRK05182 (PRK05182) → RplQ (COG0203)rplQ (PRK05591) →                                                                                                                                                                         |
| Fne-7-1  | NZ_JAAH01000082.1               | - | 16650 | 16588 | RNA → RpsM (COG0099)rpsM (PRK05179) → PRK05309 (PRK05309)RpsK (COG0100) → RpsD (COG0522)rpsD (PRK05327) → RpoA (COG0202)PRK05182 (PRK05182) → RplQ (COG0203)rplQ (PRK05591) →                                                                                                                                                                         |
| Fne-2-1  | NZ_JAAG01000077.1               | - | 16625 | 16563 | RNA → RpsM (COG0099)rpsM (PRK05179) → PRK05309 (PRK05309)RpsK (COG0100) → RpsD (COG0522)rpsD (PRK05327) → RpoA (COG0202)PRK05182 (PRK05182) → RplQ (COG0203)rplQ (PRK05591) →                                                                                                                                                                         |
| Fne-6-1  | NZ_JAAD01000236.1               | + | 1428  | 1490  | RNA → RpsM (COG0099)rpsM (PRK05179) → PRK05309 (PRK05309)RpsK (COG0100) → RpsD (COG0522)rpsD (PRK05327) → RpoA (COG0202)PRK05182 (PRK05182) → RplQ (COG0203)rplQ (PRK05591) →                                                                                                                                                                         |
| Fne-4-1  | NZ_GL988017.1                   | + | 49167 | 49229 | RNA → RpsM (COG0099)rpsM (PRK05179) → PRK05309 (PRK05309)RpsK (COG0100) → RpsD (COG0522)rpsD (PRK05327) → RpoA (COG0202)PRK05182 (PRK05182) → RplQ (COG0203)rplQ (PRK05591) →                                                                                                                                                                         |
| Fne-11-1 | NZ_ALKK01000035.1               | - | 50617 | 50555 | RNA → RpsM (COG0099)rpsM (PRK05179) → PRK05309 (PRK05309)RpsK (COG0100) → RpsD (COG0522)rpsD (PRK05327) → RpoA (COG0202)PRK05182 (PRK05182) → RplQ (COG0203)rplQ (PRK05591) →                                                                                                                                                                         |
| Fne-8-1  | NZ_JHWT01000020.1               | - | 51252 | 51190 | RNA → RpsM (COG0099)rpsM (PRK05179) → PRK05309 (PRK05309)RpsK (COG0100) → RpsD (COG0522)rpsD (PRK05327) → RpoA (COG0202)PRK05182 (PRK05182) → RplQ (COG0203)rplQ (PRK05591) →                                                                                                                                                                         |
| env-298  | SRS043422_LANL_scaffold.508     | - | 307   | 245   | RNA → RpsM (COG0099)rpsM (PRK05179) →                                                                                                                                                                                                                                                                                                                 |
| env-299  | SRS065099_LANL_scaffold.56436   | + | 892   | 954   | RNA → RpsM (COG0099)rpsM (PRK05179) → rps11 (CHL00041)PRK05309 (PRK05309) →                                                                                                                                                                                                                                                                           |
| env-300  | SRS016360_Baylor_scaffold.43492 | + | 448   | 510   | RNA → RpsM (COG0099)rpsM (PRK05179) → PRK05309 (PRK05309)RpsK (COG0100) → RpsD (COG0522)rpsD (PRK05327) → RpoA (COG0202)rpoA (TIGR02027) →                                                                                                                                                                                                            |
| env-301  | SRS021960_Baylor_scaffold.29549 | - | 372   | 310   | RNA → RpsM (COG0099)rpsM (PRK05179) →                                                                                                                                                                                                                                                                                                                 |
| env-302  | SRS052876_LANL_scaffold.1775    | + | 450   | 512   | RNA → rps13 (CHL00137)rpsM (PRK05179) →                                                                                                                                                                                                                                                                                                               |



|          |                                 |   |         |         |                                                                                                                                                                                                             |
|----------|---------------------------------|---|---------|---------|-------------------------------------------------------------------------------------------------------------------------------------------------------------------------------------------------------------|
| env-303  | SRS015985_WUGC_scaffold_11687   | - | 350     | 288     | RNA → RpsM (COG0099)rpsM (PRK05179) →                                                                                                                                                                       |
| env-304  | SRS020340_Baylor_scaffold_22156 | - | 1355    | 1293    | RNA → RpsM (COG0099)rpsM (PRK05179) → PRK05309 (PRK05309)RpsK (COG0100) → S4 (smart00363)RpsD (COG0522) →                                                                                                   |
| env-305  | SRS017025_C1636822              | + | 100     | 162     | RNA → RpsM (COG0099)rpsM (PRK05179) →                                                                                                                                                                       |
| env-306  | SRS013170_Baylor_scaffold_81941 | + | 481     | 543     | RNA → RpsM (COG0099)rpsM (PRK05179) →                                                                                                                                                                       |
| env-307  | SRS017445_Baylor_scaffold_8312  | + | 454     | 516     | RNA → RpsM (COG0099)rpsM (PRK05179) → rps11 (CHI00041)PRK05309 (PRK05309) → PRK05309 (PRK05309)RpsK (COG0100) → RpsD (COG0522)rpsD (PRK05327) → PRK05182 (PRK05182)RNA_pol_L (pfam01193) →                  |
| env-308  | SRS019073_WUGC_scaffold_286     | + | 20      | 82      | RNA → RpsM (COG0099)rpsM (PRK05179) →                                                                                                                                                                       |
| env-309  | SRS020226_Baylor_scaffold_20989 | + | 451     | 513     | RNA → RpsM (COG0099)rpsM (PRK05179) →                                                                                                                                                                       |
| env-310  | SRS047265_C1093350              | + | 348     | 410     | RNA → RpsM (COG0099)rpsM (PRK05179) → PRK05309 (PRK05309)RpsK (COG0100) → rpsD (PRK05327) →                                                                                                                 |
| Fhw-4-1  | NZ_ATKG01000094.1               | - | 9304    | 9242    | RNA → RpsM (COG0099)rpsM (PRK05179) → PRK05309 (PRK05309)RpsK (COG0100) → RpsD (COG0522)rpsD (PRK05327) → RpoA (COG0202)rpoA (TIGR02027) → RpoA (COG0202)rpoA (TIGR02027) → RplQ (COG0203)rplQ (PRK05591) → |
| Fhw-1-1  | NZ_ATKE01000061.1               | - | 12226   | 12164   | RNA → RpsM (COG0099)rpsM (PRK05179) → PRK05309 (PRK05309)RpsK (COG0100) → RpsD (COG0522)rpsD (PRK05327) → RpoA (COG0202)rpoA (TIGR02027) → RpoA (COG0202)rpoA (TIGR02027) → RplQ (COG0203)rplQ (PRK05591) → |
| Fhw-3-1  | NZ_ATKH01000028.1               | - | 9304    | 9242    | RNA → RpsM (COG0099)rpsM (PRK05179) → PRK05309 (PRK05309)RpsK (COG0100) → RpsD (COG0522)rpsD (PRK05327) → RpoA (COG0202)rpoA (TIGR02027) → RpoA (COG0202)rpoA (TIGR02027) → RplQ (COG0203)rplQ (PRK05591) → |
| Fhw-2-1  | NZ_ATKF01000105.1               | - | 24308   | 24246   | RNA → RpsM (COG0099)rpsM (PRK05179) → PRK05309 (PRK05309)RpsK (COG0100) → RpsD (COG0522)rpsD (PRK05327) → RpoA (COG0202)rpoA (TIGR02027) → RpoA (COG0202)rpoA (TIGR02027) → RplQ (COG0203)rplQ (PRK05591) → |
| Fsp-6-1  | NZ_JANA01000050.1               | + | 15841   | 15903   | RNA → RpsM (COG0099)rpsM (PRK05179) → PRK05309 (PRK05309)RpsK (COG0100) → RpsD (COG0522)rpsD (PRK05327) → RpoA (COG0202)rpoA (TIGR02027) → RpoA (COG0202)rpoA (TIGR02027) → RplQ (COG0203)rplQ (PRK05591) → |
| env-311  | SRS018157_Baylor_scaffold_655   | + | 18      | 80      | RNA → RpsM (COG0099)rpsM (PRK05179) →                                                                                                                                                                       |
| env-312  | SRS057022_C1993424              | - | 642     | 580     | RNA → RpsM (COG0099)rpsM (PRK05179) → PRK05309 (PRK05309)RpsK (COG0100)rps11p (PRK09607)arch_S11P (TIGR03628)uS11_bact (TIGR03632)Ribosomal                                                                 |
| Fnu-9-1  | NZ_ALVD01000005.1               | + | 72312   | 72374   | RNA → RpsM (COG0099)rpsM (PRK05179) → PRK05309 (PRK05309)RpsK (COG0100) → RpsD (COG0522)rpsD (PRK05327) → RpoA (COG0202)rpoA (TIGR02027) → RpoA (COG0202)rpoA (TIGR02027) → RplQ (COG0203)rplQ (PRK05591) → |
| env-313  | SRS015470_WUGC_scaffold_62148   | - | 625     | 563     | RNA → RpsM (COG0099)rpsM (PRK05179) → PRK05309 (PRK05309) →                                                                                                                                                 |
| env-314  | SRS063351_C704759               | - | 376     | 314     | RNA → RpsM (COG0099)rpsM (PRK05179) →                                                                                                                                                                       |
| Fnu-3-1  | NZ_KI1518461.1                  | - | 1355250 | 1355188 | RNA → RpsM (COG0099)rpsM (PRK05179) → PRK05309 (PRK05309)RpsK (COG0100) → RpsD (COG0522)rpsD (PRK05327) → RpoA (COG0202)rpoA (TIGR02027) → RplQ (COG0203)rplQ (PRK05591) →                                  |
| Fnu-16-1 | NZ_ATKD01000080.1               | - | 9661    | 9599    | RNA → RpsM (COG0099)rpsM (PRK05179) → PRK05309 (PRK05309)RpsK (COG0100) → RpsD (COG0522)rpsD (PRK05327) → RpoA (COG0202)rpoA (TIGR02027) → RplQ (COG0203)rplQ (PRK05591) →                                  |
| Fsp-3-1  | NZ_JANB01000001.1               | + | 5756    | 5818    | RNA → RpsM (COG0099)rpsM (PRK05179) → PRK05309 (PRK05309)RpsK (COG0100) → RpsD (COG0522)rpsD (PRK05327) → RpoA (COG0202)rpoA (TIGR02027) → RplQ (COG0203)rplQ (PRK05591) →                                  |
| Fnu-10-1 | NZ_AXUR01000028.1               | - | 25993   | 25931   | RNA → RpsM (COG0099)rpsM (PRK05179) → PRK05309 (PRK05309)RpsK (COG0100) → RpsD (COG0522)rpsD (PRK05327) → RpoA (COG0202)rpoA (TIGR02027) → RplQ (COG0203)rplQ (PRK05591) →                                  |
| env-315  | SRS051930_LANL_scaffold_6191    | + | 3750    | 3812    | RNA → RpsM (COG0099)rpsM (PRK05179) → PRK05309 (PRK05309)RpsK (COG0100) → S4 (smart00363)RpsD (COG0522) → RpoA (COG0202)rpoA (TIGR02027) →                                                                  |
| env-316  | SRS016541_C1528741              | + | 21      | 83      | RNA → RpsM (COG0099)rpsM (PRK05179) →                                                                                                                                                                       |
| env-317  | SRS011126_Baylor_scaffold_58649 | - | 598     | 536     | RNA → RpsM (COG0099)rpsM (PRK05179) →                                                                                                                                                                       |
| env-318  | SRS050628_C1835320              | - | 390     | 328     | RNA → RpsM (COG0099)rpsM (PRK05179) →                                                                                                                                                                       |
| env-319  | SRS012285_Baylor_scaffold_1782  | + | 425     | 487     | RNA → RpsM (COG0099)rpsM (PRK05179) →                                                                                                                                                                       |
| env-320  | SRS017691_Baylor_scaffold_50060 | + | 518     | 580     | RNA → RpsM (COG0099)rpsM (PRK05179) →                                                                                                                                                                       |
| env-321  | SRS018443_C3801805              | + | 470     | 532     | RNA →                                                                                                                                                                                                       |
| env-322  | SRS014578_WUGC_scaffold_7353    | - | 722     | 660     | RNA → RpsM (COG0099)rpsM (PRK05179) → PRK05309 (PRK05309)RpsK (COG0100) →                                                                                                                                   |
| env-323  | SRS014690_C1866550              | - | 347     | 285     | RNA → RpsM (COG0099)rpsM (PRK05179) →                                                                                                                                                                       |

|          |                                 |   |         |         |                                                                                                                                                                                                                                                                                                                                                 |
|----------|---------------------------------|---|---------|---------|-------------------------------------------------------------------------------------------------------------------------------------------------------------------------------------------------------------------------------------------------------------------------------------------------------------------------------------------------|
| env-324  | SRS015278.WUGC_scaffold_42089   | + | 2204    | 2266    | RNA → RpsM (COG0099)rpsM (PRK05179) → PRK05309 (PRK05309)RpsK (COG0100) → RpsD (COG0522)rpsD (PRK05327) → RpoA (COG0202)rpoA (TIGR02027) → RplQ (COG0203)rplQ (PRK05591) →                                                                                                                                                                      |
| env-325  | SRS015989.C2166928              | + | 538     | 600     | RNA → RpsM (COG0099)rpsM (PRK05179) → PRK05309 (PRK05309)RpsK (COG0100) →                                                                                                                                                                                                                                                                       |
| env-326  | SRS016043.WUGC_scaffold_19941   | - | 541     | 479     | RNA → RpsM (COG0099)rpsM (PRK05179) →                                                                                                                                                                                                                                                                                                           |
| env-327  | SRS023358.C3483802              | - | 630     | 568     | RNA → RpsM (COG0099)rpsM (PRK05179) → PRK05309 (PRK05309) →                                                                                                                                                                                                                                                                                     |
| env-328  | SRS023938.Baylor_scaffold_16323 | + | 244     | 306     | RNA → RpsM (COG0099)rpsM (PRK05179) → rps11 (CHL00041)PRK05309 (PRK05309) →                                                                                                                                                                                                                                                                     |
| env-329  | SRS024021.C2019934              | - | 499     | 437     | RNA → RpsM (COG0099)rpsM (PRK05179) →                                                                                                                                                                                                                                                                                                           |
| env-330  | SRS024381.LANL_scaffold_17523   | + | 558     | 620     | RNA → RpsM (COG0099)rpsM (PRK05179) → rps11 (CHL00041)PRK05309 (PRK05309) →                                                                                                                                                                                                                                                                     |
| env-331  | SRS051378.C1822879              | + | 210     | 272     | RNA → RpsM (COG0099)rpsM (PRK05179) →                                                                                                                                                                                                                                                                                                           |
| env-332  | SRS052604.C1807758              | + | 212     | 274     | RNA → RpsM (COG0099)rpsM (PRK05179) →                                                                                                                                                                                                                                                                                                           |
| env-333  | SRS056892.C1486315              | + | 188     | 250     | RNA → RpsM (COG0099)rpsM (PRK05179) →                                                                                                                                                                                                                                                                                                           |
| env-334  | SRS058808.LANL_scaffold_23314   | + | 321     | 383     | RNA → RpsM (COG0099)rpsM (PRK05179) →                                                                                                                                                                                                                                                                                                           |
| Fnu-1-1  | NZ_KI965381.1                   | - | 1470032 | 1469970 | RNA → RpsM (COG0099)rpsM (PRK05179) → PRK05309 (PRK05309)RpsK (COG0100) → RpsD (COG0522)rpsD (PRK05327) → RpoA (COG0202)rpoA (TIGR02027) → RpoA (COG0202)rpoA (TIGR02027) → RplQ (COG0203)rplQ (PRK05591) →                                                                                                                                     |
| Fnu-7-1  | NZ_AXNV01000011.1               | + | 20769   | 20831   | RNA → RpsM (COG0099)rpsM (PRK05179) → PRK05309 (PRK05309)RpsK (COG0100) → RpsD (COG0522)rpsD (PRK05327) → RpoA (COG0202)rpoA (TIGR02027) → RpoA (COG0202)rpoA (TIGR02027) → RplQ (COG0203)rplQ (PRK05591) →                                                                                                                                     |
| Fsp-5-1  | NZ_JAQC01000039.1               | + | 6874    | 6936    | RNA → RpsM (COG0099)rpsM (PRK05179) → PRK05309 (PRK05309)RpsK (COG0100) → RpsD (COG0522)rpsD (PRK05327) → RpoA (COG0202)rpoA (TIGR02027) → RpoA (COG0202)rpoA (TIGR02027) → RplQ (COG0203)rplQ (PRK05591) →                                                                                                                                     |
| env-335  | SRS055378.LANL_scaffold_3069    | + | 20      | 84      | RNA → RpsM (COG0099)rpsM (PRK05179) → PRK05309 (PRK05309)RpsK (COG0100) →                                                                                                                                                                                                                                                                       |
| env-336  | SRS014476.C3341139              | + | 43      | 105     | RNA → RpsM (COG0099)rpsM (PRK05179) →                                                                                                                                                                                                                                                                                                           |
| Fnu-22-1 | NZ_CM000440.1                   | + | 860522  | 860584  | RNA → RpsM (COG0099)rpsM (PRK05179) → RpsM (COG0099)rpsM (PRK05179) → PRK05309 (PRK05309)RpsK (COG0100) → PRK05309 (PRK05309)RpsK (COG0100) → RpsD (COG0522)rpsD (PRK05327) → RpsD (COG0522)rpsD (PRK05327) → RpoA (COG0202)rpoA (TIGR02027) → RpoA (COG0202)rpoA (TIGR02027) → RplQ (COG0203)rplQ (PRK05591) → RplQ (COG0203)rplQ (PRK05591) → |
| env-337  | SRS064329.LANL_scaffold_32934   | + | 20      | 82      | RNA → RpsM (COG0099)rpsM (PRK05179) → PRK05309 (PRK05309)RpsK (COG0100)rpsD (PRK05327)Ribosomal_S4 (pfam00163) →                                                                                                                                                                                                                                |
| env-338  | Throat_LANL_C5780661            | - | 163     | 101     | RNA →                                                                                                                                                                                                                                                                                                                                           |
| env-339  | SRS014684.WUGC_scaffold_2752    | + | 1181    | 1243    | RNA → RpsM (COG0099)rpsM (PRK05179) → PRK05309 (PRK05309)RpsK (COG0100) → RpsD (COG0522)rpsD (PRK05327) → RpoA (COG0202)rpoA (TIGR02027) → rplQ (PRK05591)Ribosomal_L17 (pfam01196) →                                                                                                                                                           |
| env-340  | SRS018591.C1305506              | - | 1175    | 1113    | RNA → RpsM (COG0099)rpsM (PRK05179) → PRK05309 (PRK05309)RpsK (COG0100) → rpsD (PRK05327)Ribosomal_S4 (pfam00163) →                                                                                                                                                                                                                             |
| env-341  | SRS019022.WUGC_scaffold_38441   | - | 3789    | 3727    | RNA → RpsM (COG0099)rpsM (PRK05179) → PRK05309 (PRK05309)RpsK (COG0100) → RpsD (COG0522)rpsD (PRK05327) → RpoA (COG0202)rpoA (TIGR02027) → RplQ (COG0203)rplQ (PRK05591) →                                                                                                                                                                      |
| env-342  | SRS019045.WUGC_scaffold_36434   | - | 9682    | 9620    | RNA → RpsM (COG0099)rpsM (PRK05179) → PRK05309 (PRK05309)RpsK (COG0100) → RpsD (COG0522)rpsD (PRK05327) → RpoA (COG0202)rpoA (TIGR02027) → RplQ (COG0203)rplQ (PRK05591) →                                                                                                                                                                      |
| env-343  | SRS019219.WUGC_scaffold_39593   | - | 1300    | 1238    | RNA → RpsM (COG0099)rpsM (PRK05179) → PRK05309 (PRK05309)RpsK (COG0100) → RpsD (COG0522)rpsD (PRK05327) →                                                                                                                                                                                                                                       |
| env-344  | SRS019389.C2241031              | - | 648     | 586     | RNA → RpsM (COG0099)rpsM (PRK05179) → PRK05309 (PRK05309)RpsK (COG0100) →                                                                                                                                                                                                                                                                       |
| env-345  | SRS020220.C3612140              | - | 287     | 225     | RNA → RpsM (COG0099)rpsM (PRK05179) →                                                                                                                                                                                                                                                                                                           |
| env-346  | SRS051791.LANL_scaffold_1205    | - | 1302    | 1240    | RNA → RpsM (COG0099)rpsM (PRK05179) → PRK05309 (PRK05309)RpsK (COG0100) → RpsD (COG0522)rpsD (PRK05327) →                                                                                                                                                                                                                                       |
| env-347  | SRS053603.C3303360              | + | 458     | 520     | RNA → RpsM (COG0099)rpsM (PRK05179) → PRK05309 (PRK05309)RpsK (COG0100) →                                                                                                                                                                                                                                                                       |
| env-348  | SRS054687.C3486456              | - | 734     | 672     | RNA → RpsM (COG0099)rpsM (PRK05179) → PRK05309 (PRK05309)RpsK (COG0100) →                                                                                                                                                                                                                                                                       |
| env-349  | SRS065335.LANL_scaffold_29301   | - | 3749    | 3687    | RNA → RpsM (COG0099)rpsM (PRK05179) → PRK05309 (PRK05309)RpsK (COG0100) → RpsD (COG0522)rpsD (PRK05327) → RpoA (COG0202)rpoA (TIGR02027) → RplQ (COG0203)rplQ (PRK05591) →                                                                                                                                                                      |

|         |                                 |   |       |       |                                                                                                                                                                                                             |
|---------|---------------------------------|---|-------|-------|-------------------------------------------------------------------------------------------------------------------------------------------------------------------------------------------------------------|
| env-350 | SRS017120_Baylor_scaffold.81370 | + | 457   | 519   | RNA → RpsM (COG0099)rpsM (PRK05179) → PRK05309 (PRK05309)RpsK (COG0100) → RpsD (COG0522)rpsD (PRK05327) → RNAP_alpha_NTD (cd06928)PRK05182 (PRK05182) →                                                     |
| env-351 | SRS014692_WUGC_scaffold.12525   | - | 1378  | 1316  | RNA → RpsM (COG0099)rpsM (PRK05179) → PRK05309 (PRK05309)RpsK (COG0100) → S4 (smart00363)RpsD (COG0522) →                                                                                                   |
| env-352 | SRS047824_WUGC_scaffold.34774   | - | 578   | 516   | RNA → RpsM (COG0099)rpsM (PRK05179) →                                                                                                                                                                       |
| env-353 | SRS023930_C2177563              | - | 496   | 434   | RNA → RpsM (COG0099)rpsM (PRK05179) →                                                                                                                                                                       |
| env-354 | SRS018665_WUGC_scaffold.5673    | - | 903   | 841   | RNA → RpsM (COG0099)rpsM (PRK05179) → PRK05309 (PRK05309)RpsK (COG0100) →                                                                                                                                   |
| env-355 | SRS018975_WUGC_scaffold.48555   | - | 578   | 516   | RNA → RpsM (COG0099)rpsM (PRK05179) →                                                                                                                                                                       |
| env-356 | SRS020858_C751293               | - | 163   | 101   | RNA → hypo →                                                                                                                                                                                                |
| env-357 | SRS023987_C1155340              | - | 165   | 103   | RNA → hypo →                                                                                                                                                                                                |
| env-358 | SRS052668_LANL_scaffold.2440    | + | 371   | 433   | RNA → RpsM (COG0099)rpsM (PRK05179) →                                                                                                                                                                       |
| env-359 | SRS011086_C2705778              | + | 490   | 552   | RNA →                                                                                                                                                                                                       |
| env-360 | SRS018971_C747146               | + | 209   | 271   | RNA →                                                                                                                                                                                                       |
| env-361 | SRS019128_WUGC_scaffold.1597    | - | 240   | 178   | RNA → rps13 (CHL00137)rpsM (PRK05179) →                                                                                                                                                                     |
| env-362 | SRS023595_Baylor_scaffold.12376 | + | 20    | 82    | RNA → RpsM (COG0099)rpsM (PRK05179) → PRK05309 (PRK05309)RpsK (COG0100) → rpsD (PRK05327)Ribosomal_S4 (pfam00163) →                                                                                         |
| Fsp-7-1 | NZ_JH378968.1                   | - | 23656 | 23594 | RNA → RpsM (COG0099)rpsM (PRK05179) → PRK05309 (PRK05309)RpsK (COG0100) → RpsD (COG0522)rpsD (PRK05327) → RpoA (COG0202)rpoA (TIGR02027) → RpoA (COG0202)rpoA (TIGR02027) → RplQ (COG0203)rplQ (PRK05591) → |
| env-363 | SRS016740_Baylor_scaffold.31792 | - | 2409  | 2347  | RNA → RpsM (COG0099)rpsM (PRK05179) → PRK05309 (PRK05309)RpsK (COG0100) → RpsD (COG0522)rpsD (PRK05327) → RNAP_alpha_NTD (cd06928)PRK05182 (PRK05182) →                                                     |
| env-364 | SRS055495_C1108972              | - | 120   | 58    | RNA →                                                                                                                                                                                                       |
| env-365 | SRS062878_LANL_scaffold.63865   | + | 495   | 557   | RNA → RpsM (COG0099)rpsM (PRK05179) →                                                                                                                                                                       |
| env-366 | SRS075404_LANL_scaffold.14797   | + | 890   | 828   | RNA → RpsM (COG0099)rpsM (PRK05179) →                                                                                                                                                                       |
| env-367 | SRS011140_Baylor_scaffold.51504 | + | 350   | 412   | RNA → RpsM (COG0099)rpsM (PRK05179) → PRK05309 (PRK05309)RpsK (COG0100) →                                                                                                                                   |
| env-368 | SRS011243_Baylor_scaffold.10689 | - | 3419  | 3357  | RNA → RpsM (COG0099)rpsM (PRK05179) → PRK05309 (PRK05309)RpsK (COG0100) → RpsD (COG0522)rpsD (PRK05327) → RpoA (COG0202)rpoA (TIGR02027) → RplQ (COG0203)rplQ (PRK05591) →                                  |
| env-369 | SRS011247_C1351757              | + | 468   | 530   | RNA →                                                                                                                                                                                                       |
| env-370 | SRS011306_Baylor_scaffold.3104  | - | 3003  | 2941  | RNA → RpsM (COG0099)rpsM (PRK05179) → PRK05309 (PRK05309)RpsK (COG0100) → RpsD (COG0522)rpsD (PRK05327) → RpoA (COG0202)rpoA (TIGR02027) → RplQ (COG0203)rplQ (PRK05591) →                                  |
| env-371 | SRS013164_Baylor_scaffold.46971 | - | 920   | 858   | RNA → RpsM (COG0099)rpsM (PRK05179) → PRK05309 (PRK05309)RpsK (COG0100) →                                                                                                                                   |
| env-372 | SRS013502_C2191535              | - | 163   | 101   | RNA →                                                                                                                                                                                                       |
| env-373 | SRS013705_Baylor_scaffold.64513 | + | 487   | 549   | RNA → RpsM (COG0099)rpsM (PRK05179) → PRK05309 (PRK05309)RpsK (COG0100) →                                                                                                                                   |
| env-374 | SRS013818_Baylor_scaffold.41472 | + | 473   | 535   | RNA → RpsM (COG0099)rpsM (PRK05179) → PRK05309 (PRK05309)RpsK (COG0100) → RpsD (COG0522)rpsD (PRK05327) → RpoA (COG0202)PRK05182 (PRK05182) →                                                               |
| env-375 | SRS013879_WUGC_scaffold.41089   | - | 934   | 872   | RNA → RpsM (COG0099)rpsM (PRK05179) → PRK05309 (PRK05309)RpsK (COG0100) →                                                                                                                                   |
| env-376 | SRS013945_WUGC_scaffold.13633   | - | 525   | 463   | RNA → RpsM (COG0099)rpsM (PRK05179) →                                                                                                                                                                       |
| env-377 | SRS013947_WUGC_scaffold.13273   | - | 7521  | 7459  | RNA → RpsM (COG0099)rpsM (PRK05179) → PRK05309 (PRK05309)RpsK (COG0100) → RpsD (COG0522)rpsD (PRK05327) → RpoA (COG0202)rpoA (TIGR02027) → RplQ (COG0203)rplQ (PRK05591) →                                  |
| env-378 | SRS013948_C1529892              | + | 458   | 520   | RNA → RpsM (COG0099)rpsM (PRK05179) → PRK05309 (PRK05309)RpsK (COG0100) →                                                                                                                                   |
| env-379 | SRS014124_WUGC_scaffold.58834   | - | 1359  | 1297  | RNA → RpsM (COG0099)rpsM (PRK05179) → PRK05309 (PRK05309)RpsK (COG0100) → S4 (smart00363)RpsD (COG0522) →                                                                                                   |
| env-380 | SRS014271_WUGC_scaffold.4413    | + | 497   | 559   | RNA → RpsM (COG0099)rpsM (PRK05179) → PRK05309 (PRK05309)RpsK (COG0100) → RpsD (COG0522)rpsD (PRK05327) → hypo →                                                                                            |
| env-381 | SRS014470_WUGC_scaffold.38766   | - | 2083  | 2021  | RNA → RpsM (COG0099)rpsM (PRK05179) → PRK05309 (PRK05309)RpsK (COG0100) → RpsD (COG0522)rpsD (PRK05327) → RNAP_alpha_NTD (cd06928)PRK05182 (PRK05182) →                                                     |
| env-382 | SRS014573_WUGC_scaffold.16390   | - | 844   | 782   | RNA → RpsM (COG0099)rpsM (PRK05179) → PRK05309 (PRK05309)RpsK (COG0100) → PRK05309 (PRK05309)RpsK (COG0100) →                                                                                               |
| env-383 | SRS014689_WUGC_scaffold.25280   | + | 2043  | 2105  | RNA → RpsM (COG0099)rpsM (PRK05179) → PRK05309 (PRK05309)RpsK (COG0100) → RpsD (COG0522)rpsD (PRK05327) → RpoA (COG0202)rpoA (TIGR02027) → RplQ (COG0203)rplQ (PRK05591) →                                  |



|         |                                 |   |      |      |                                                                                                                                                                                                      |
|---------|---------------------------------|---|------|------|------------------------------------------------------------------------------------------------------------------------------------------------------------------------------------------------------|
| env-384 | SRS014888_WUGC_scaffold_2290    | + | 801  | 863  | RNA → RpsM (COG0099)rpsM (PRK05179) → PRK05309 (PRK05309)RpsK (COG0100) → RpsD (COG0522)rpsD (PRK05327) → RpoA (COG0202)rpoA (TIGR02027) → RplQ (COG0203)rplQ (PRK05591) →                           |
| env-385 | SRS015057_WUGC_scaffold_68354   | - | 734  | 672  | RNA → RpsM (COG0099)rpsM (PRK05179) → PRK05309 (PRK05309)RpsK (COG0100) →                                                                                                                            |
| env-386 | SRS015154_C747837               | + | 666  | 728  | RNA → RpsM (COG0099)rpsM (PRK05179) →                                                                                                                                                                |
| env-387 | SRS015644_WUGC_scaffold_11157   | + | 577  | 639  | RNA → RpsM (COG0099)rpsM (PRK05179) → PRK05309 (PRK05309)RpsK (COG0100) → RpsD (COG0522)rpsD (PRK05327) → hypo →                                                                                     |
| env-388 | SRS015745_C1206036              | - | 637  | 575  | RNA → RpsM (COG0099)rpsM (PRK05179) →                                                                                                                                                                |
| env-389 | SRS015762_C3450973              | - | 163  | 101  | RNA → hypo →                                                                                                                                                                                         |
| env-390 | SRS015797_WUGC_scaffold_30177   | - | 734  | 672  | RNA → RpsM (COG0099)rpsM (PRK05179) → PRK05309 (PRK05309)RpsK (COG0100) →                                                                                                                            |
| env-391 | SRS015893_WUGC_scaffold_5057    | + | 854  | 916  | RNA → RpsM (COG0099)rpsM (PRK05179) → PRK05309 (PRK05309)RpsK (COG0100) → RpsD (COG0522)rpsD (PRK05327) → RpoA (COG0202)rpoA (TIGR02027) → RplQ (COG0203)rplQ (PRK05591) →                           |
| env-392 | SRS015941_WUGC_scaffold_78015   | - | 1690 | 1628 | RNA → RpsM (COG0099)rpsM (PRK05179) → PRK05309 (PRK05309)RpsK (COG0100) → RpsD (COG0522)rpsD (PRK05327) → hypo →                                                                                     |
| env-393 | SRS016002_WUGC_scaffold_50772   | - | 2403 | 2341 | RNA → RpsM (COG0099)rpsM (PRK05179) → PRK05309 (PRK05309)RpsK (COG0100) → RpsD (COG0522)rpsD (PRK05327) → RNAP_alpha_NTD (cd06928)PRK05182 (PRK05182) →                                              |
| env-394 | SRS016037_WUGC_scaffold_2228    | - | 3491 | 3429 | RNA → RpsM (COG0099)rpsM (PRK05179) → PRK05309 (PRK05309)RpsK (COG0100) → RpsD (COG0522)rpsD (PRK05327) → RNAP_alpha_NTD (cd06928)PRK05182 (PRK05182) → RNA_pol_A_CTD (pfam03118)HHH_5 (pfam14520) → |
| env-395 | SRS016086_C2496538              | - | 737  | 675  | RNA → RpsM (COG0099)rpsM (PRK05179) → PRK05309 (PRK05309)RpsK (COG0100) →                                                                                                                            |
| env-396 | SRS016225_WUGC_scaffold_27311   | - | 2971 | 2909 | RNA → RpsM (COG0099)rpsM (PRK05179) → PRK05309 (PRK05309)RpsK (COG0100) → RpsD (COG0522)rpsD (PRK05327) → RpoA (COG0202)rpoA (TIGR02027) → RplQ (COG0203)rplQ (PRK05591) →                           |
| env-397 | SRS016319_WUGC_scaffold_10490   | + | 864  | 926  | RNA → RpsM (COG0099)rpsM (PRK05179) → PRK05309 (PRK05309)RpsK (COG0100) → RpsD (COG0522)rpsD (PRK05327) → RNAP_alpha_NTD (cd06928)PRK05182 (PRK05182) →                                              |
| env-398 | SRS016569_Baylor_scaffold_43023 | - | 332  | 270  | RNA → RpsM (COG0099)rpsM (PRK05179) →                                                                                                                                                                |
| env-399 | SRS017209_Baylor_scaffold_12537 | + | 765  | 827  | RNA → RpsM (COG0099)rpsM (PRK05179) → PRK05309 (PRK05309)RpsK (COG0100) → RpsD (COG0522)rpsD (PRK05327) → RNAP_alpha_NTD (cd06928)PRK05182 (PRK05182) →                                              |
| env-400 | SRS017215_Baylor_scaffold_8618  | + | 162  | 224  | RNA → RpsM (COG0099)rpsM (PRK05179) →                                                                                                                                                                |
| env-401 | SRS017439_Baylor_scaffold_16569 | - | 2843 | 2781 | RNA → RpsM (COG0099)rpsM (PRK05179) → PRK05309 (PRK05309)RpsK (COG0100) → RpsD (COG0522)rpsD (PRK05327) → RpoA (COG0202)rpoA (TIGR02027) → RplQ (PRK05591)Ribosomal_L17 (pfam01196) →                |
| env-402 | SRS017533_Baylor_scaffold_4653  | + | 366  | 428  | RNA → RpsM (COG0099)rpsM (PRK05179) →                                                                                                                                                                |
| env-403 | SRS017808_Baylor_scaffold_22336 | - | 2749 | 2687 | RNA → RpsM (COG0099)rpsM (PRK05179) → PRK05309 (PRK05309)RpsK (COG0100) → RpsD (COG0522)rpsD (PRK05327) → RpoA (COG0202)rpoA (TIGR02027) → RplQ (PRK05591)Ribosomal_L17 (pfam01196) →                |
| env-404 | SRS018149_Baylor_scaffold_14890 | + | 287  | 349  | RNA → RpsM (COG0099)rpsM (PRK05179) →                                                                                                                                                                |
| env-405 | SRS018357_Baylor_scaffold_12839 | + | 1146 | 1208 | RNA → RpsM (COG0099)rpsM (PRK05179) → PRK05309 (PRK05309)RpsK (COG0100) →                                                                                                                            |
| env-406 | SRS018739_WUGC_scaffold_20843   | + | 819  | 881  | RNA → RpsM (COG0099)rpsM (PRK05179) → PRK05309 (PRK05309)RpsK (COG0100) → S4 (smart00363)RpsD (COG0522) →                                                                                            |
| env-407 | SRS018969_C2947476              | - | 741  | 679  | RNA → RpsM (COG0099)rpsM (PRK05179) → PRK05309 (PRK05309)RpsK (COG0100) →                                                                                                                            |
| env-408 | SRS019026_WUGC_scaffold_24792   | - | 723  | 661  | RNA → RpsM (COG0099)rpsM (PRK05179) → PRK05309 (PRK05309)RpsK (COG0100) →                                                                                                                            |
| env-409 | SRS019122_WUGC_scaffold_7425    | - | 151  | 89   | RNA → hypo →                                                                                                                                                                                         |
| env-410 | SRS019126_WUGC_scaffold_31303   | + | 1131 | 1193 | RNA → RpsM (COG0099)rpsM (PRK05179) →                                                                                                                                                                |
| env-411 | SRS019127_WUGC_scaffold_14132   | + | 458  | 520  | RNA → RpsM (COG0099)rpsM (PRK05179) → PRK05309 (PRK05309)RpsK (COG0100) → RpsD (COG0522)rpsD (PRK05327) → hypo →                                                                                     |
| env-412 | SRS019327_WUGC_scaffold_41934   | + | 485  | 547  | RNA → RpsM (COG0099)rpsM (PRK05179) → PRK05309 (PRK05309)RpsK (COG0100) → RpsD (COG0522)rpsD (PRK05327) → RpoA (COG0202)rpoA (TIGR02027) → RplQ (PRK05591)Ribosomal_L17 (pfam01196) →                |
| env-413 | SRS019587_C1052430              | + | 490  | 552  | RNA → RpsM (COG0099)rpsM (PRK05179) →                                                                                                                                                                |
| env-414 | SRS019607_WUGC_scaffold_24021   | - | 1359 | 1297 | RNA → RpsM (COG0099)rpsM (PRK05179) → PRK05309 (PRK05309)RpsK (COG0100) → S4 (smart00363)RpsD (COG0522) →                                                                                            |
| env-415 | SRS019894_C3929909              | + | 2203 | 2265 | RNA → RpsM (COG0099)rpsM (PRK05179) → PRK05309 (PRK05309)RpsK (COG0100) →                                                                                                                            |
| env-416 | SRS019974_Baylor_scaffold_593   | - | 1777 | 1715 | RNA → RpsM (COG0099)rpsM (PRK05179) → PRK05309 (PRK05309)RpsK (COG0100) → RpsD (COG0522)rpsD (PRK05327) → PRK05182 (PRK05182)RNA_pol_L (pfam01193) →                                                 |



|         |                                 |   |       |       |                                                                                                                                                                            |
|---------|---------------------------------|---|-------|-------|----------------------------------------------------------------------------------------------------------------------------------------------------------------------------|
| env-417 | SRS020856_Baylor_scaffold_33762 | - | 2739  | 2677  | RNA → RpsM (COG0099)rpsM (PRK05179) → PRK05309 (PRK05309)RpsK (COG0100) → RpsD (COG0522)rpsD (PRK05327) → RpoA (COG0202)rpoA (TIGR02027) → RplQ (COG0203)rplQ (PRK05591) → |
| env-418 | SRS021496_Baylor_scaffold_62694 | - | 926   | 864   | RNA → RpsM (COG0099)rpsM (PRK05179) → PRK05309 (PRK05309)RpsK (COG0100) →                                                                                                  |
| env-419 | SRS021954_C3037904              | - | 734   | 672   | RNA → RpsM (COG0099)rpsM (PRK05179) → PRK05309 (PRK05309)RpsK (COG0100) →                                                                                                  |
| env-420 | SRS022143_WUGC_scaffold_83705   | - | 996   | 934   | RNA → RpsM (COG0099)rpsM (PRK05179) → PRK05309 (PRK05309)RpsK (COG0100) →                                                                                                  |
| env-421 | SRS022530_LANL_scaffold_49521   | - | 926   | 864   | RNA → RpsM (COG0099)rpsM (PRK05179) → PRK05309 (PRK05309)RpsK (COG0100) →                                                                                                  |
| env-422 | SRS022621_Baylor_scaffold_80815 | + | 486   | 548   | RNA → RpsM (COG0099)rpsM (PRK05179) → PRK05309 (PRK05309)RpsK (COG0100) →                                                                                                  |
| env-423 | SRS023352_LANL_scaffold_56800   | - | 3748  | 3686  | RNA → RpsM (COG0099)rpsM (PRK05179) → PRK05309 (PRK05309)RpsK (COG0100) → RpsD (COG0522)rpsD (PRK05327) → RpoA (COG0202)rpoA (TIGR02027) → RplQ (COG0203)rplQ (PRK05591) → |
| env-424 | SRS023835_Baylor_scaffold_7147  | + | 1830  | 1892  | RNA → RpsM (COG0099)rpsM (PRK05179) → PRK05309 (PRK05309)RpsK (COG0100) →                                                                                                  |
| env-425 | SRS023926_Baylor_scaffold_58416 | + | 523   | 585   | RNA →                                                                                                                                                                      |
| env-426 | SRS023958_Baylor_scaffold_28668 | + | 1028  | 1090  | RNA → RpsM (COG0099)rpsM (PRK05179) → PRK05309 (PRK05309)RpsK (COG0100) → RpsD (COG0522)rpsD (PRK05327) → RpoA (COG0202)rpoA (TIGR02027) → RplQ (COG0203)rplQ (PRK05591) → |
| env-427 | SRS024015_Baylor_scaffold_50485 | + | 758   | 820   | RNA → RpsM (COG0099)rpsM (PRK05179) → PRK05309 (PRK05309)RpsK (COG0100) →                                                                                                  |
| env-428 | SRS024138_Baylor_scaffold_11348 | + | 624   | 686   | RNA → RpsM (COG0099)rpsM (PRK05179) → PRK05309 (PRK05309)RpsK (COG0100) → rpsD (PRK05327)Ribosomal_S4 (pfam00163) →                                                        |
| env-429 | SRS024277_LANL_scaffold_17092   | - | 1783  | 1721  | RNA → RpsM (COG0099)rpsM (PRK05179) → PRK05309 (PRK05309)RpsK (COG0100) → RpsD (COG0522)rpsD (PRK05327) → PRK05182 (PRK05182)RNA_pol_L (pfam01193) →                       |
| env-430 | SRS024375_LANL_scaffold_43939   | + | 472   | 534   | RNA → RpsM (COG0099)rpsM (PRK05179) → PRK05309 (PRK05309)RpsK (COG0100) → RpsD (COG0522)rpsD (PRK05327) → RpoA (COG0202)rpoA (TIGR02027) → RplQ (COG0203)rplQ (PRK05591) → |
| env-431 | SRS024441_LANL_scaffold_45032   | + | 350   | 412   | RNA → RpsM (COG0099)rpsM (PRK05179) → PRK05309 (PRK05309)RpsK (COG0100) →                                                                                                  |
| env-432 | SRS042131_WUGC_scaffold_44855   | - | 11940 | 11878 | RNA → RpsM (COG0099)rpsM (PRK05179) → PRK05309 (PRK05309)RpsK (COG0100) → RpsD (COG0522)rpsD (PRK05327) → RpoA (COG0202)rpoA (TIGR02027) → RplQ (COG0203)rplQ (PRK05591) → |
| env-433 | SRS042910_WUGC_scaffold_4026    | - | 142   | 80    | RNA →                                                                                                                                                                      |
| env-434 | SRS043663_LANL_scaffold_25082   | + | 1266  | 1328  | RNA → RpsM (COG0099)rpsM (PRK05179) → PRK05309 (PRK05309)RpsK (COG0100) → RpsD (COG0522)rpsD (PRK05327) →                                                                  |
| env-435 | SRS044373_C2894119              | - | 163   | 101   | RNA →                                                                                                                                                                      |
| env-436 | SRS044662_LANL_scaffold_30324   | + | 1063  | 1125  | RNA → RpsM (COG0099)rpsM (PRK05179) → PRK05309 (PRK05309)RpsK (COG0100) → RpsD (COG0522)rpsD (PRK05327) → RNAP_alpha_NTD (cd06928)PRK05182 (PRK05182) →                    |
| env-437 | SRS045127_LANL_scaffold_33107   | - | 934   | 872   | RNA → RpsM (COG0099)rpsM (PRK05179) → PRK05309 (PRK05309)RpsK (COG0100) →                                                                                                  |
| env-438 | SRS045978_C998448               | + | 162   | 224   | RNA → RpsM (COG0099)rpsM (PRK05179) →                                                                                                                                      |
| env-439 | SRS047210_WUGC_scaffold_50675   | + | 485   | 547   | RNA → RpsM (COG0099)rpsM (PRK05179) → PRK05309 (PRK05309)RpsK (COG0100) → RpsD (COG0522)rpsD (PRK05327) → RpoA (COG0202)rpoA (TIGR02027) → RplQ (COG0203)rplQ (PRK05591) → |
| env-440 | SRS047219_C2250559              | + | 513   | 575   | RNA →                                                                                                                                                                      |
| env-441 | SRS048411_C6948333              | - | 287   | 225   | RNA → RpsM (COG0099)rpsM (PRK05179) →                                                                                                                                      |
| env-442 | SRS048791_LANL_scaffold_14386   | - | 1359  | 1297  | RNA → RpsM (COG0099)rpsM (PRK05179) → PRK05309 (PRK05309)RpsK (COG0100) → S4 (smart00363)RpsD (COG0522) →                                                                  |
| env-443 | SRS049147_LANL_scaffold_32903   | + | 345   | 407   | RNA → RpsM (COG0099)rpsM (PRK05179) → PRK05309 (PRK05309)RpsK (COG0100) →                                                                                                  |
| env-444 | SRS049389_C4447558              | - | 165   | 103   | RNA → hyp0 →                                                                                                                                                               |
| env-445 | SRS050029_C712147               | - | 1341  | 1279  | RNA → RpsM (COG0099)rpsM (PRK05179) → PRK05309 (PRK05309)RpsK (COG0100) → S4 (smart00363)RpsD (COG0522) →                                                                  |
| env-446 | SRS052227_LANL_scaffold_45775   | + | 496   | 558   | RNA → RpsM (COG0099)rpsM (PRK05179) → PRK05309 (PRK05309)RpsK (COG0100) → S4 (smart00363)RpsD (COG0522) →                                                                  |
| env-447 | SRS052874_LANL_scaffold_15177   | - | 214   | 152   | RNA → rps13 (CHL00137)rpsM (PRK05179) →                                                                                                                                    |
| env-448 | SRS053854_LANL_scaffold_52950   | - | 165   | 103   | RNA →                                                                                                                                                                      |
| env-449 | SRS054569_C1459708              | + | 270   | 332   | RNA →                                                                                                                                                                      |
| env-450 | SRS055426_LANL_scaffold_39788   | - | 367   | 305   | RNA → RpsM (COG0099)rpsM (PRK05179) →                                                                                                                                      |
| env-451 | SRS056323_C2439953              | - | 144   | 82    | RNA → hyp0 →                                                                                                                                                               |
| env-452 | SRS057205_LANL_scaffold_18775   | - | 538   | 476   | RNA → RpsM (COG0099)rpsM (PRK05179) → PRK05309 (PRK05309)RpsK (COG0100) →                                                                                                  |

|          |                               |   |         |         |                                                                                                                                                                                                                                                                                                                                                                                                 |
|----------|-------------------------------|---|---------|---------|-------------------------------------------------------------------------------------------------------------------------------------------------------------------------------------------------------------------------------------------------------------------------------------------------------------------------------------------------------------------------------------------------|
| env-453  | SRS057355_LANL_scaffold_42476 | + | 233     | 295     | RNA → RpsM (COG0099)rpsM (PRK05179) →                                                                                                                                                                                                                                                                                                                                                           |
| env-454  | SRS057692_LANL_scaffold_15429 | - | 850     | 788     | RNA → RpsM (COG0099)rpsM (PRK05179) → PRK05309 (PRK05309)RpsK (COG0100) →                                                                                                                                                                                                                                                                                                                       |
| env-455  | SRS057791_C3662634            | + | 525     | 587     | RNA → RpsM (COG0099)rpsM (PRK05179) → PRK05309 (PRK05309)RpsK (COG0100) →                                                                                                                                                                                                                                                                                                                       |
| env-456  | SRS058336_LANL_scaffold_23007 | + | 495     | 557     | RNA → RpsM (COG0099)rpsM (PRK05179) → PRK05309 (PRK05309)RpsK (COG0100) →<br>RpsD (COG0522)rpsD (PRK05327) → RpoA (COG0202)rpoA (TIGR02027) →<br>RplQ (COG0203)rplQ (PRK05591) →                                                                                                                                                                                                                |
| env-457  | SRS062544_LANL_scaffold_18883 | + | 811     | 873     | RNA → RpsM (COG0099)rpsM (PRK05179) → PRK05309 (PRK05309)RpsK (COG0100) →<br>RpsD (COG0522)rpsD (PRK05327) → RNAP_alpha_NTD (cd06928)PRK05182 (PRK05182) →                                                                                                                                                                                                                                      |
| env-458  | SRS063193_LANL_scaffold_13819 | + | 549     | 611     | RNA → RpsM (COG0099)rpsM (PRK05179) → PRK05309 (PRK05309)RpsK (COG0100) →<br>RpsD (COG0522)rpsD (PRK05327) → RpoA (COG0202)rpoA (TIGR02027) →<br>RplQ (COG0203)rplQ (PRK05591) →                                                                                                                                                                                                                |
| env-459  | SRS063288_LANL_scaffold_60004 | - | 1777    | 1715    | RNA → RpsM (COG0099)rpsM (PRK05179) → PRK05309 (PRK05309)RpsK (COG0100) →<br>RpsD (COG0522)rpsD (PRK05327) → PRK05182 (PRK05182)RNA_pol_L (pfam01193) →                                                                                                                                                                                                                                         |
| env-460  | SRS064423_LANL_scaffold_34417 | + | 577     | 639     | RNA → RpsM (COG0099)rpsM (PRK05179) → PRK05309 (PRK05309)RpsK (COG0100) →                                                                                                                                                                                                                                                                                                                       |
| env-461  | SRS064774_LANL_scaffold_4377  | + | 577     | 639     | RNA → RpsM (COG0099)rpsM (PRK05179) → PRK05309 (PRK05309)RpsK (COG0100) →<br>RpsD (COG0522)rpsD (PRK05327) → RpoA (COG0202)rpoA (TIGR02027) →<br>rplQ (PRK05591)Ribosomal_L17 (pfam01196) →                                                                                                                                                                                                     |
| env-462  | SRS065278_LANL_scaffold_17949 | - | 734     | 672     | RNA → RpsM (COG0099)rpsM (PRK05179) → PRK05309 (PRK05309)RpsK (COG0100) →                                                                                                                                                                                                                                                                                                                       |
| env-463  | SRS077736_LANL_scaffold_5525  | + | 6802    | 6864    | RNA → RpsM (COG0099)rpsM (PRK05179) → PRK05309 (PRK05309)RpsK (COG0100) →<br>RpsD (COG0522)rpsD (PRK05327) → RpoA (COG0202)rpoA (TIGR02027) →<br>RplQ (COG0203)rplQ (PRK05591) →                                                                                                                                                                                                                |
| Fsp-1-1  | NZ_GG770381.1                 | + | 968393  | 968455  | RNA → RpsM (COG0099)rpsM (PRK05179) → RpsM (COG0099)rpsM (PRK05179) →<br>PRK05309 (PRK05309)RpsK (COG0100) → PRK05309 (PRK05309)RpsK (COG0100) →<br>RpsD (COG0522)rpsD (PRK05327) → RpsD (COG0522)rpsD (PRK05327) →<br>RpoA (COG0202)rpoA (TIGR02027) → RpoA (COG0202)rpoA (TIGR02027) →<br>RpoA (COG0202)rpoA (TIGR02027) → RplQ (COG0203)rplQ (PRK05591) →<br>RplQ (COG0203)rplQ (PRK05591) → |
| Fpe-4-1  | NZ_JH815417.1                 | - | 11807   | 11745   | RNA → RpsM (COG0099)rpsM (PRK05179) → PRK05309 (PRK05309)RpsK (COG0100) →<br>RpsD (COG0522)rpsD (PRK05327) → RpoA (COG0202)rpoA (TIGR02027) →<br>RplQ (COG0203)rplQ (PRK05591) →                                                                                                                                                                                                                |
| Fpe-2-1  | NZ_KN173677.1                 | - | 26799   | 26737   | RNA → RpsM (COG0099)rpsM (PRK05179) → PRK05309 (PRK05309)RpsK (COG0100) →<br>RpsD (COG0522)rpsD (PRK05327) → RpoA (COG0202)rpoA (TIGR02027) →<br>RplQ (COG0203)rplQ (PRK05591) →                                                                                                                                                                                                                |
| Fpe-3-1  | NZ_GG665896.1                 | - | 54181   | 54119   | RNA → RpsM (COG0099)rpsM (PRK05179) → PRK05309 (PRK05309)RpsK (COG0100) →<br>RpsD (COG0522)rpsD (PRK05327) → RpoA (COG0202)rpoA (TIGR02027) →<br>RpoA (COG0202)rpoA (TIGR02027) → RplQ (COG0203)rplQ (PRK05591) →<br>RplQ (COG0203)rplQ (PRK05591) →                                                                                                                                            |
| Fnu-13-1 | NZ_KI391961.1                 | - | 1115280 | 1115218 | RNA → RpsM (COG0099)rpsM (PRK05179) → PRK05309 (PRK05309)RpsK (COG0100) →<br>RpsD (COG0522)rpsD (PRK05327) → RpoA (COG0202)rpoA (TIGR02027) →<br>RplQ (COG0203)rplQ (PRK05591) →                                                                                                                                                                                                                |
| env-464  | SRS014107_C1350717            | - | 463     | 401     | RNA → RpsM (COG0099)rpsM (PRK05179) →                                                                                                                                                                                                                                                                                                                                                           |
| Fnu-20-1 | NC_003454.1                   | - | 1944307 | 1944245 | RNA → RpsM (COG0099)rpsM (PRK05179) → PRK05309 (PRK05309)RpsK (COG0100) →<br>RpsD (COG0522)rpsD (PRK05327) → RpoA (COG0202)rpoA (TIGR02027) →<br>RplQ (COG0203)rplQ (PRK05591) →                                                                                                                                                                                                                |
| Fnu-19-1 | NZ_ADVK01000050.1             | + | 10509   | 10571   | RNA → RpsM (COG0099)rpsM (PRK05179) → RpsM (COG0099)rpsM (PRK05179) →<br>PRK05309 (PRK05309)RpsK (COG0100) → PRK05309 (PRK05309)RpsK (COG0100) →<br>RpsD (COG0522)rpsD (PRK05327) → RpsD (COG0522)rpsD (PRK05327) →<br>RpoA (COG0202)rpoA (TIGR02027) → RpoA (COG0202)rpoA (TIGR02027) →<br>RpoA (COG0202)rpoA (TIGR02027) → RplQ (COG0203)rplQ (PRK05591) →<br>RplQ (COG0203)rplQ (PRK05591) → |
| Fnu-4-1  | NZ_KI518439.1                 | - | 69791   | 69729   | RNA → RpsM (COG0099)rpsM (PRK05179) → PRK05309 (PRK05309)RpsK (COG0100) →<br>RpsD (COG0522)rpsD (PRK05327) → RpoA (COG0202)rpoA (TIGR02027) →<br>RpoA (COG0202)rpoA (TIGR02027) → RplQ (COG0203)rplQ (PRK05591) →                                                                                                                                                                               |
| Fnu-21-1 | NZ_ATKC01000049.1             | + | 44411   | 44473   | RNA → RpsM (COG0099)rpsM (PRK05179) → PRK05309 (PRK05309)RpsK (COG0100) →<br>RpsD (COG0522)rpsD (PRK05327) → RpoA (COG0202)rpoA (TIGR02027) →<br>RpoA (COG0202)rpoA (TIGR02027) → RplQ (COG0203)rplQ (PRK05591) →                                                                                                                                                                               |
| env-465  | SRS023538_C1261540            | + | 17      | 79      | RNA → RpsM (COG0099)rpsM (PRK05179) →                                                                                                                                                                                                                                                                                                                                                           |

|          |                                 |   |         |         |                                                                                                                                                                      |
|----------|---------------------------------|---|---------|---------|----------------------------------------------------------------------------------------------------------------------------------------------------------------------|
| env-466  | SRS024355_LANL_scaffold_106543  | + | 483     | 545     | RNA→                                                                                                                                                                 |
| env-467  | SRS014477_C1639124              | - | 1216    | 1154    | RNA→ RpsM (COG0099)rpsM (PRK05179)→ PRK05309 (PRK05309)RpsK (COG0100)→ rpsD (PRK05327)Ribosomal_S4 (pfam00163)→                                                      |
| env-468  | SRS015062_WUGC_scaffold_604     | + | 27      | 89      | RNA→ RpsM (COG0099)rpsM (PRK05179)→ PRK05309 (PRK05309)RpsK (COG0100)→ RpsD (COG0522)rpsD (PRK05327)→ RpoA (COG0202)rpoA (TIGR02027)→                                |
| Fnu-27-1 | NZ_AABF02000152.1               | - | 665     | 603     | RNA→ RpsM (COG0099)rpsM (PRK05179)→ RpsM (COG0099)rpsM (PRK05179)→                                                                                                   |
| Fnu-18-1 | NZ_AKXI01000109.1               | - | 659     | 597     | RNA→ RpsM (COG0099)rpsM (PRK05179)→ PRK05309 (PRK05309)RpsK (COG0100)→ PRK05309 (PRK05309)RpsK (COG0100)→                                                            |
| Fnu-8-1  | NZ_KI518350.1                   | - | 29268   | 29206   | RNA→ RpsM (COG0099)rpsM (PRK05179)→ PRK05309 (PRK05309)RpsK (COG0100)→ RpsD (COG0522)rpsD (PRK05327)→ RpoA (COG0202)rpoA (TIGR02027)→ RplQ (COG0203)rplQ (PRK05591)→ |
| Fsp-4-1  | NZ_AZYU01000357.1               | + | 163603  | 163665  | RNA→ RpsM (COG0099)rpsM (PRK05179)→ PRK05309 (PRK05309)RpsK (COG0100)→ RpsD (COG0522)rpsD (PRK05327)→ RpoA (COG0202)rpoA (TIGR02027)→ RplQ (COG0203)rplQ (PRK05591)→ |
| Fnu-14-1 | NC_021281.1                     | + | 757767  | 757829  | RNA→ RpsM (COG0099)rpsM (PRK05179)→ PRK05309 (PRK05309)RpsK (COG0100)→ RpsD (COG0522)rpsD (PRK05327)→ RpoA (COG0202)rpoA (TIGR02027)→                                |
| Fnu-11-1 | NZ_GL945391.1                   | - | 1036500 | 1036438 | RNA→ RpsM (COG0099)rpsM (PRK05179)→ PRK05309 (PRK05309)RpsK (COG0100)→ RpsD (COG0522)rpsD (PRK05327)→ RpoA (COG0202)rpoA (TIGR02027)→ RplQ (COG0203)rplQ (PRK05591)→ |
| Fnu-17-1 | NZ_JH594451.1                   | - | 821484  | 821422  | RNA→ RpsM (COG0099)rpsM (PRK05179)→ PRK05309 (PRK05309)RpsK (COG0100)→ RpsD (COG0522)rpsD (PRK05327)→ RpoA (COG0202)rpoA (TIGR02027)→                                |
| Fnu-5-1  | NZ_KI518408.1                   | - | 1034316 | 1034254 | RNA→ RpsM (COG0099)rpsM (PRK05179)→ PRK05309 (PRK05309)RpsK (COG0100)→ RpsD (COG0522)rpsD (PRK05327)→ RpoA (COG0202)rpoA (TIGR02027)→                                |
| Fnu-6-1  | NZ_KI518379.1                   | - | 4358    | 4296    | RNA→ RpsM (COG0099)rpsM (PRK05179)→ PRK05309 (PRK05309)RpsK (COG0100)→ RpsD (COG0522)rpsD (PRK05327)→ RpoA (COG0202)rpoA (TIGR02027)→                                |
| Fnu-15-1 | NZ_CP007062.1                   | - | 1460036 | 1459974 | RNA→ RpsM (COG0099)rpsM (PRK05179)→ PRK05309 (PRK05309)RpsK (COG0100)→ RpsD (COG0522)rpsD (PRK05327)→ RpoA (COG0202)rpoA (TIGR02027)→                                |
| Fnu-12-1 | NZ_CM002368.1                   | - | 1637804 | 1637742 | RNA→ RpsM (COG0099)rpsM (PRK05179)→ PRK05309 (PRK05309)RpsK (COG0100)→ RpsD (COG0522)rpsD (PRK05327)→ RpoA (COG0202)rpoA (TIGR02027)→                                |
| Fnu-23-1 | NZ_ADDB02000001.1               | - | 1457971 | 1457909 | RNA→ RpsM (COG0099)rpsM (PRK05179)→ PRK05309 (PRK05309)RpsK (COG0100)→ RpsD (COG0522)rpsD (PRK05327)→ RpoA (COG0202)rpoA (TIGR02027)→                                |
| env-469  | SRS011255_Baylor_scaffold_49939 | - | 316     | 254     | RNA→ RpsM (COG0099)rpsM (PRK05179)→                                                                                                                                  |
| env-470  | SRS017304_C1979295              | - | 442     | 380     | RNA→ RpsM (COG0099)rpsM (PRK05179)→                                                                                                                                  |
| env-471  | SRS024289_LANL_scaffold_19647   | - | 348     | 286     | RNA→ RpsM (COG0099)rpsM (PRK05179)→                                                                                                                                  |
| env-472  | SRS017076_C2692026              | + | 484     | 546     | RNA→ RpsM (COG0099)rpsM (PRK05179)→                                                                                                                                  |
| env-473  | SRS015061_WUGC_scaffold_2363    | + | 922     | 984     | RNA→                                                                                                                                                                 |
| env-474  | SRS063603_LANL_scaffold_101633  | + | 89      | 151     | RNA→ RpsM (COG0099)rpsM (PRK05179)→ rps11 (CHL00041)PRK05309 (PRK05309)→                                                                                             |
| Fnu-25-1 | NC_022196.1                     | - | 1518281 | 1518219 | RNA→ RpsM (COG0099)rpsM (PRK05179)→ PRK05309 (PRK05309)RpsK (COG0100)→ RpsD (COG0522)rpsD (PRK05327)→ RpoA (COG0202)rpoA (TIGR02027)→                                |
| Fnu-24-1 | NZ_CP007064.1                   | + | 716475  | 716537  | RplQ (COG0203)rplQ (PRK05591)→ RNA→ RpsM (COG0099)rpsM (PRK05179)→ PRK05309 (PRK05309)RpsK (COG0100)→ RpsD (COG0522)rpsD (PRK05327)→ RpoA (COG0202)rpoA (TIGR02027)→ |
| Fnu-26-1 | NZ_KQ235737.1                   | + | 623579  | 623641  | RplQ (COG0203)rplQ (PRK05591)→ RNA→ RpsM (COG0099)rpsM (PRK05179)→ PRK05309 (PRK05309)RpsK (COG0100)→ RpsD (COG0522)rpsD (PRK05327)→ RpoA (COG0202)rpoA (TIGR02027)→ |
| Fnu-2-1  | NZ_AOUL01000031.1               | + | 497     | 559     | RplQ (COG0203)rplQ (PRK05591)→ RNA→ RpsM (COG0099)rpsM (PRK05179)→ PRK05309 (PRK05309)RpsK (COG0100)→ RpsD (COG0522)rpsD (PRK05327)→ RpoA (COG0202)rpoA (TIGR02027)→ |
|          |                                 |   |         |         | RplQ (COG0203)rplQ (PRK05591)→                                                                                                                                       |



|          |                               |   |       |       |                                                                                                                                                                                                               |
|----------|-------------------------------|---|-------|-------|---------------------------------------------------------------------------------------------------------------------------------------------------------------------------------------------------------------|
| Fnu-28-1 | NZ_ATKB01000107.1             | + | 34703 | 34765 | RNA → RpsM (COG0099)rpsM (PRK05179) → PRK05309 (PRK05309)RpsK (COG0100) → RpsD (COG0522)rpsD (PRK05327) → RpoA (COG0202)rpoA (TIGR02027) → RplQ (COG0203)rplQ (PRK05591) →                                    |
| env-475  | SRS013946_WUGC_scaffold_10067 | - | 3701  | 3639  | RNA → RpsM (COG0099)rpsM (PRK05179) → RpsM (COG0099)rpsM (PRK05179) → PRK05309 (PRK05309)RpsK (COG0100) → RpsD (COG0522)rpsD (PRK05327) → RpoA (COG0202)PRK05182 (PRK05182) → RplQ (COG0203)rplQ (PRK05591) → |
| env-476  | SRS014473_C1106123            | - | 312   | 250   | RNA → RpsM (COG0099)rpsM (PRK05179) →                                                                                                                                                                         |
| Fru-1-1  | NZ_KB906917.1                 | + | 50468 | 50530 | RNA → RpsM (COG0099)rpsM (PRK05179) → PRK05309 (PRK05309)RpsK (COG0100) → RpsD (COG0522)rpsD (PRK05327) → RpoA (COG0202)PRK05182 (PRK05182) → RplQ (COG0203)rplQ (PRK05591) →                                 |
| Pat-1-1  | NZ_AUFS01000005.1             | + | 43017 | 43092 | RNA → RpsM (COG0099)rpsM (PRK05179) → PRK05309 (PRK05309)RpsK (COG0100) → RpsD (COG0522)rpsD (PRK05327) → RpoA (COG0202)PRK05182 (PRK05182) → RplQ (COG0203)rplQ (PRK05591) →                                 |
| env-477  | ASRL01000232.1                | + | 4597  | 4673  | RNA → RpsM (COG0099)rpsM (PRK05179) → PRK05309 (PRK05309)RpsK (COG0100) → RpsD (COG0522)rpsD (PRK05327) → RpoA (COG0202)PRK05182 (PRK05182) → RplQ (COG0203)rplQ (PRK05591) →                                 |
| env-478  | ASRO01002109.1                | - | 745   | 669   | RNA → RpsM (COG0099)rpsM (PRK05179) → rps11 (CHL00041)PRK05309 (PRK05309) →                                                                                                                                   |
| env-479  | ASRP01009088.1                | - | 232   | 156   | RNA → RpsM (COG0099)rpsM (PRK05179) →                                                                                                                                                                         |
| env-480  | AYRG01000382.1                | - | 2353  | 2277  | RNA → RpsM (COG0099)rpsM (PRK05179) → PRK05309 (PRK05309)RpsK (COG0100) → RpsD (COG0522)rpsD (PRK05327) → RNAP_alpha_NTD (cd06928)PRK05182 (PRK05182) →                                                       |
| env-481  | ASRM01008875.1                | - | 376   | 300   | RNA → RpsM (COG0099)rpsM (PRK05179) →                                                                                                                                                                         |
| env-482  | KGL_S1_ANT01.95m.c10046776    | + | 726   | 802   | RNA → RpsM (COG0099)rpsM (PRK05179) → rps11 (CHL00041)PRK05309 (PRK05309) →                                                                                                                                   |

### 17.3 Conserved domains

Conserved domains found in protein-coding genes listed in Section 17.2 are shown below, with the first sentence in their description from the Conserved Domain Database (if any). Conserved domains associated with more than one S4-

Fusobacteriales RNA are assigned a color, while others are shown in gray. The number in parentheses after the colored domain name is the number of occurrences in Section 17.2.

**cd06928** (15) N-terminal domain of the Alpha subunit of Bacterial RNA polymerase.  
**cd16320** (1) N-terminal subdomain of transcriptional regulator MraZ.  
**cd16321** (1) C-terminal subdomain of transcriptional regulator MraZ.  
**CHL00041** (11) ribosomal protein S11  
**CHL00137** (11) ribosomal protein S13; Validated  
**COG0099** (522) Ribosomal protein S13 [Translation, ribosomal structure and biogenesis]  
**COG0100** (308) Ribosomal protein S11 [Translation, ribosomal structure and biogenesis]  
**COG0202** (175) DNA-directed RNA polymerase, alpha subunit/40 kD subunit [Transcription]  
**COG0203** (145) Ribosomal protein L17 [Translation, ribosomal structure and biogenesis]  
**COG0275** (1) 16S rRNA C1402 N4-methylase RsmH [Translation, ribosomal structure and biogenesis]  
**COG0522** (199) Ribosomal protein S4 or related protein [Translation, ribosomal structure and biogenesis]  
**COG0642** (1) Signal transduction histidine kinase [Signal transduction mechanisms]  
**COG0657** (1) Acetyl esterase/lipase [Lipid transport and metabolism]  
**pfam00163** (9) Ribosomal protein S4/S9 N-terminal domain.  
**pfam00411** (1) Ribosomal protein S11.  
**pfam00583** (3) Acetyltransferase (GNAT) family.  
**pfam01193** (7) RNA polymerase Rpb3/Rpb11 dimerisation domain.  
**pfam01196** (7) Ribosomal protein L17.  
**pfam03118** (2) Bacterial RNA polymerase, alpha chain C terminal domain.  
**pfam13508** (3) Acetyltransferase (GNAT) domain.  
**pfam14520** (1) Helix-hairpin-helix domain.

**PRK00050** (1) 16S rRNA m(4)C1402 methyltransferase; Provisional  
**PRK00326** (1) cell division protein MraZ; Reviewed  
**PRK05179** (528) 30S ribosomal protein S13; Validated  
**PRK05182** (110) DNA-directed RNA polymerase subunit alpha; Provisional  
**PRK05309** (321) 30S ribosomal protein S11; Validated  
**PRK05327** (201) 30S ribosomal protein S4; Validated  
**PRK05591** (152) 50S ribosomal protein L17; Validated  
**PRK09607** (1) 30S ribosomal protein S11P; Reviewed  
**smart00304** (1) HAMP (Histidine kinases, Adenylyl cyclases, Methyl binding proteins, Phosphatases) domain.  
**smart00363** (11) S4 RNA-binding domain.  
**smart00387** (1) Histidine kinase-like ATPases.  
**smart00388** (1) His Kinase A (phosphoacceptor) domain.  
**TIGR02027** (87) DNA-directed RNA polymerase, alpha subunit, bacterial and chloroplast-type. [Transcription, DNA-dependent RNA polymerase]  
**TIGR03628** (1) ribosomal protein uS11P, archaeal form. [Protein synthesis, Ribosomal proteins: synthesis and modification]  
**TIGR03631** (5) ribosomal protein uS13, bacterial form. [Protein synthesis, Ribosomal proteins: synthesis and modification]  
**TIGR03632** (1) ribosomal protein uS11, bacterial form. [Protein synthesis, Ribosomal proteins: synthesis and modification]

















| abbrev. | Seq. accession          |   | 5' at   | 3' at   | genes                                                                                                                                                               |
|---------|-------------------------|---|---------|---------|---------------------------------------------------------------------------------------------------------------------------------------------------------------------|
| env-1   | F3OLC3J01EL6Z5          | - | 180     | 92      | RNA → hypo →                                                                                                                                                        |
| env-2   | F3OLC3J02I9N18          | + | 405     | 486     | RNA → hypo →                                                                                                                                                        |
| env-3   | F3OLC3J01B4FHU          | - | 100     | 16      | RNA → ← hypo                                                                                                                                                        |
| Cli-1-1 | NC_010803.1             | + | 167079  | 167163  | RNA → rpsF (PRK00453) bS6 (cd00473) → ssb (TIGR00621) SSB (pfam00436) →<br>rpsR (PRK00391) Ribosomal_S18 (pfam01084) → RplI (COG0359) rplI (PRK00137) →             |
| env-4   | F3OLC3J01AOTFF          | + | 81      | 168     | RNA → hypo → hypo →                                                                                                                                                 |
| env-5   | F3OLC3J01ER1WJ          | + | 100     | 184     | RNA → rpsF (PRK00453) Ribosomal_S6 (pfam01250) →                                                                                                                    |
| env-6   | F3OLC3J02FQPPB          | + | 240     | 324     | RNA → hypo →                                                                                                                                                        |
| env-7   | F3OLC3J02HKSSD          | + | 197     | 281     | RNA → hypo →                                                                                                                                                        |
| env-8   | F3OLC3J01EFF4C          | + | 240     | 324     | RNA →                                                                                                                                                               |
| env-9   | TB_FS08_3DRAFT_1000662  | - | 15648   | 15564   | RNA → rpsF (PRK00453) Ribosomal_S6 (pfam01250) → ssb (TIGR00621) SSB (pfam00436) →<br>rpsR (PRK00391) Ribosomal_S18 (pfam01084) → RplI (COG0359) rplI (PRK00137) →  |
| env-10  | F3OLC3J01EZCCM          | + | 89      | 173     | RNA → rpsF (PRK00453) Ribosomal_S6 (pfam01250) →                                                                                                                    |
| env-11  | F3OLC3J01BGKJE          | + | 100     | 184     | RNA → rpsF (PRK00453) Ribosomal_S6 (pfam01250) →                                                                                                                    |
| env-12  | F3OLC3J01BIBU0          | - | 124     | 40      | RNA → hypo →                                                                                                                                                        |
| env-13  | F3OLC3J01B90M6          | + | 80      | 164     | RNA → rpsF (PRK00453) Ribosomal_S6 (pfam01250) →                                                                                                                    |
| env-14  | F3OLC3J01CB09B          | + | 308     | 390     | RNA → hypo →                                                                                                                                                        |
| Cch-1-1 | NC_007514.1             | + | 109831  | 109904  | RNA → rpsF (PRK00453) Ribosomal_S6 (pfam01250) → ssb (TIGR00621) SSB (pfam00436) →<br>rpsR (PRK00391) Ribosomal_S18 (pfam01084) → RplI (COG0359) rplI (PRK00137) →  |
| Cph-1-1 | NC_010831.1             | + | 160217  | 160291  | RNA → rpsF (PRK00453) bS6 (cd00473) → ssb (TIGR00621) SSB (pfam00436) →<br>rpsR (PRK00391) Ribosomal_S18 (pfam01084) → RplI (COG0359) rplI (PRK00137) →             |
| env-15  | M750CN_1000441          | - | 2463    | 2386    | RNA → rpsF (PRK00453) bS6 (cd00473) → ssb (TIGR00621) SSB (pfam00436) →<br>rpsR (PRK00391) Ribosomal_S18 (pfam01084) → RplI (COG0359) rplI (PRK00137) →             |
| env-16  | M740_1006987            | - | 2342    | 2265    | RNA → rpsF (PRK00453) bS6 (cd00473) → ssb (TIGR00621) SSB (pfam00436) →<br>rpsR (PRK00391) Ribosomal_S18 (pfam01084) → RplI (COG0359) rplI (PRK00137) →             |
| Pae-1-1 | NC_011059.1             | + | 168156  | 168233  | RNA → rpsF (PRK00453) bS6 (cd00473) → ssb (TIGR00621) SSB (pfam00436) →<br>rpsR (PRK00391) Ribosomal_S18 (pfam01084) → RplI (COG0359) rplI (PRK00137) →             |
| env-17  | M590M2_1034735          | - | 176     | 99      | RNA → hypo →                                                                                                                                                        |
| env-18  | M590M1_1003288          | + | 1442    | 1517    | RNA → rpsF (PRK00453) bS6 (cd00473) → ssb (TIGR00621) SSB (pfam00436) →<br>rpsR (PRK00391) Ribosomal_S18 (pfam01084) → RplI (COG0359) rplI (PRK00137) →             |
| env-19  | M590M2_1009672          | - | 1755    | 1680    | RNA → rpsF (PRK00453) bS6 (cd00473) → ssb (TIGR00621) SSB (pfam00436) →<br>rpsR (PRK00391) Ribosomal_S18 (pfam01084) → RplI (COG0359) rplI (PRK00137) →             |
| env-20  | GooDraft_1000020        | - | 11816   | 11741   | RNA → rpsF (PRK00453) bS6 (cd00473) → ssb (TIGR00621) SSB (pfam00436) →<br>rpsR (PRK00391) Ribosomal_S18 (pfam01084) → RplI (COG0359) rplI (PRK00137) →             |
| env-21  | M740_1012895            | - | 3033    | 2959    | RNA → rpsF (PRK00453) bS6 (cd00473) → ssb (TIGR00621) SSB (pfam00436) →<br>rpsR (PRK00391) Ribosomal_S18 (pfam01084) → RplI (COG0359) rplI (PRK00137) →             |
| env-22  | M750CN_1002294          | + | 1537    | 1611    | RNA → rpsF (PRK00453) bS6 (cd00473) → ssb (TIGR00621) SSB (pfam00436) →<br>rpsR (PRK00391) Ribosomal_S18 (pfam01084) → RplI (COG0359) rplI (PRK00137) →             |
| Cpa-1-1 | NC_011027.1             | + | 129607  | 129681  | RNA → rpsF (PRK00453) bS6 (cd00473) → ssb (TIGR00621) SSB (pfam00436) →<br>rpsR (PRK00391) Ribosomal_S18 (pfam01084) → RplI (COG0359) rplI (PRK00137) →             |
| env-23  | M590M1_1000641          | - | 1709    | 1635    | RNA → rpsF (PRK00453) bS6 (cd00473) → ssb (TIGR00621) SSB (pfam00436) →<br>rpsR (PRK00391) Ribosomal_S18 (pfam01084) → RplI (COG0359) rplI (PRK00137) →             |
| env-24  | M590M2_1003423          | - | 1681    | 1607    | RNA → rpsF (PRK00453) bS6 (cd00473) → ssb (TIGR00621) SSB (pfam00436) →<br>rpsR (PRK00391) Ribosomal_S18 (pfam01084) → RplI (PRK00137) Ribosomal_L9_N (pfam01281) → |
| Cte-1-1 | NC_002932.3             | - | 2020240 | 2020165 | RNA → rpsF (PRK00453) bS6 (cd00473) → ssb (TIGR00621) SSB (pfam00436) →                                                                                             |
| Cph-2-1 | NC_008639.1             | - | 2877490 | 2877409 | RNA → rpsF (PRK00453) bS6 (cd00473) → ssb (TIGR00621) SSB (pfam00436) →<br>rpsR (PRK00391) Ribosomal_S18 (pfam01084) → RplI (COG0359) rplI (PRK00137) →             |
| env-25  | NCBI_READ_1113216244664 | - | 966     | 897     | RNA → rpsF (PRK00453) Ribosomal_S6 (pfam01250) → SSB_OBF (cd04496) ssb (TIGR00621) →                                                                                |
| env-26  | NCBI_READ_1113298190517 | - | 98      | 23      | RNA →                                                                                                                                                               |
| env-27  | NCBI_READ_1113316091948 | + | 650     | 726     | RNA →                                                                                                                                                               |
| env-28  | NCBI_READ_1113316246897 | + | 712     | 788     | RNA →                                                                                                                                                               |
| env-29  | NCBI_READ_1112280131988 | + | 738     | 813     | RNA → heptsyl_trn_II (TIGR02195) GT1_LPS_heptsyltransferase (cd03789) →                                                                                             |
| env-30  | NCBI_READ_1113316182926 | + | 890     | 964     | RNA →                                                                                                                                                               |
| env-31  | NCBI_READ_1112280190525 | + | 291     | 367     | RNA → rpsF (PRK00453) bS6 (cd00473) →                                                                                                                               |
| env-32  | NCBI_READ_1113235400465 | - | 346     | 270     | RNA → rpsF (PRK00453) Ribosomal_S6 (pfam01250) →                                                                                                                    |

|         |                         |   |        |        |                                                                                                                                                                                                                                                                                                      |
|---------|-------------------------|---|--------|--------|------------------------------------------------------------------------------------------------------------------------------------------------------------------------------------------------------------------------------------------------------------------------------------------------------|
| env-33  | NCBI_READ_1112280138898 | - | 302    | 226    | RNA → rpsF (PRK00453)Ribosomal_S6 (pfam01250) →                                                                                                                                                                                                                                                      |
| env-34  | NCBI_READ_1113315684505 | - | 349    | 273    | RNA → rpsF (PRK00453)Ribosomal_S6 (pfam01250) →                                                                                                                                                                                                                                                      |
| env-35  | NCBI_READ_1112280178452 | - | 455    | 379    | RNA → rpsF (PRK00453)bS6 (cd00473) →                                                                                                                                                                                                                                                                 |
| env-36  | NCBI_READ_1113298125219 | - | 372    | 296    | RNA → rpsF (PRK00453)Ribosomal_S6 (pfam01250) →                                                                                                                                                                                                                                                      |
| env-37  | NCBI_READ_1113316249537 | + | 181    | 257    | RNA → rpsF (PRK00453)bS6 (cd00473) →                                                                                                                                                                                                                                                                 |
| env-38  | NCBI_READ_1113316395352 | - | 471    | 395    | RNA → rpsF (PRK00453)bS6 (cd00473) →                                                                                                                                                                                                                                                                 |
| env-39  | NCBI_READ_1113308556153 | - | 520    | 444    | RNA → rpsF (PRK00453)bS6 (cd00473) →                                                                                                                                                                                                                                                                 |
| env-40  | NCBI_READ_1113316249529 | - | 226    | 150    | RNA → rpsF (PRK00453) →                                                                                                                                                                                                                                                                              |
| env-41  | NCBI_READ_1113215706340 | + | 274    | 350    | RNA → rpsF (PRK00453)Ribosomal_S6 (pfam01250) →                                                                                                                                                                                                                                                      |
| env-42  | NCBI_READ_1113315555704 | - | 506    | 430    | RNA → rpsF (PRK00453)bS6 (cd00473) →                                                                                                                                                                                                                                                                 |
| env-43  | NCBI_READ_1113316238233 | - | 471    | 395    | RNA → rpsF (PRK00453)bS6 (cd00473) →                                                                                                                                                                                                                                                                 |
| env-44  | NCBI_READ_1113216208246 | - | 506    | 430    | RNA → rpsF (PRK00453)bS6 (cd00473) →                                                                                                                                                                                                                                                                 |
| env-45  | NCBI_READ_1113316081654 | - | 811    | 735    | RNA → rpsF (PRK00453)bS6 (cd00473) → SSB_OBF (cd04496)ssb (TIGR00621) →                                                                                                                                                                                                                              |
| env-46  | NCBI_READ_1113021287689 | - | 859    | 784    | RNA → rpsF (PRK00453)bS6 (cd00473) →                                                                                                                                                                                                                                                                 |
| env-47  | NCBI_READ_1113289126331 | - | 828    | 752    | RNA → rpsF (PRK00453)bS6 (cd00473) → Ssb (COG0629)ssb (TIGR00621) →                                                                                                                                                                                                                                  |
| env-48  | NCBI_READ_1113215581360 | - | 190    | 114    | RNA →                                                                                                                                                                                                                                                                                                |
| env-49  | NCBI_READ_1113235389909 | - | 644    | 568    | RNA → rpsF (PRK00453)bS6 (cd00473) →                                                                                                                                                                                                                                                                 |
| Cph-3-1 | NC_009337.1             | + | 202059 | 202135 | RNA → rpsF (PRK00453)Ribosomal_S6 (pfam01250) → SSB_OBF (cd04496)ssb (TIGR00621) →<br>rpsR (PRK00391)Ribosomal_S18 (pfam01084) → RplI (COG0359)rplI (PRK00137) →                                                                                                                                     |
| env-50  | NCBI_READ_1112308883715 | - | 917    | 846    | RNA → rpsF (PRK00453)bS6 (cd00473) → SSB_OBF (cd04496)ssb (TIGR00621) →                                                                                                                                                                                                                              |
| env-51  | NCBI_READ_1112280218812 | - | 990    | 917    | RNA → rpsF (PRK00453)Ribosomal_S6 (pfam01250) → SSB_OBF (cd04496)ssb (TIGR00621) →                                                                                                                                                                                                                   |
| env-52  | NCBI_READ_1113316170875 | - | 893    | 819    | RNA → rpsF (PRK00453)bS6 (cd00473) →                                                                                                                                                                                                                                                                 |
| env-53  | TB_FS08.3DRAFT_1000257  | + | 16727  | 16803  | RNA → rpsF (PRK00453)bS6 (cd00473) → ssb (TIGR00621)SSB (pfam00436) →<br>rpsR (PRK00391)Ribosomal_S18 (pfam01084) → RplI (COG0359)rplI (PRK00137) →                                                                                                                                                  |
| Cfe-1-1 | NZ_AA01000042.1         | - | 4661   | 4585   | RNA → rpsF (PRK00453)bS6 (cd00473) → rpsF (PRK00453)bS6 (cd00473) → ssb (TIGR00621)SSB (pfam00436) →<br>ssb (TIGR00621)SSB (pfam00436) → rpsR (PRK00391)Ribosomal_S18 (pfam01084) →<br>rpsR (PRK00391)Ribosomal_S18 (pfam01084) → RplI (COG0359)rplI (PRK00137) →<br>RplI (COG0359)rplI (PRK00137) → |
| Pph-1-1 | NC_011060.1             | + | 122430 | 122507 | RNA → rpsF (PRK00453)bS6 (cd00473) → ssb (TIGR00621)SSB (pfam00436) →<br>rpsR (PRK00391)Ribosomal_S18 (pfam01084) → RplI (COG0359)rplI (PRK00137) →                                                                                                                                                  |
| env-54  | TB03JUN2009H_c1         | + | 2274   | 2351   | RNA → rpsF (PRK00453)bS6 (cd00473) → ssb (TIGR00621)SSB (pfam00436) →<br>rpsR (PRK00391)Ribosomal_S18 (pfam01084) → RplI (COG0359)rplI (PRK00137) →                                                                                                                                                  |
| env-55  | TB18AUG2009E_c1         | + | 2274   | 2351   | RNA → rpsF (PRK00453)bS6 (cd00473) → ssb (TIGR00621)SSB (pfam00436) →<br>rpsR (PRK00391)Ribosomal_S18 (pfam01084) → RplI (COG0359)rplI (PRK00137) →                                                                                                                                                  |
| env-56  | TB18AUG2009H_c2         | + | 2274   | 2351   | RNA → rpsF (PRK00453)bS6 (cd00473) → ssb (TIGR00621)SSB (pfam00436) →<br>rpsR (PRK00391)Ribosomal_S18 (pfam01084) → RplI (COG0359)rplI (PRK00137) →                                                                                                                                                  |
| Clu-1-1 | NC_007512.1             | + | 128893 | 128969 | RNA → rpsF (PRK00453)Ribosomal_S6 (pfam01250) → ssb (TIGR00621)SSB (pfam00436) →<br>rpsR (PRK00391)Ribosomal_S18 (pfam01084) → RplI (COG0359)rplI (PRK00137) →                                                                                                                                       |

### 18.3 Conserved domains

Conserved domains found in protein-coding genes listed in Section 18.2 are shown below, with the first sentence in their description from the Conserved Domain Database (if any). Conserved domains associated with more than one S6-S18-

**cd00473** (36) Bacterial ribosomal protein S6.

**cd03789** (1) Lipopolysaccharide heptosyltransferase is involved in the biosynthesis of lipooligosaccharide (LOS).

**cd04496** (5) SSB\_OBF: A subfamily of OB folds similar to the OB fold of ssDNA-binding protein (SSB).

**COG0359** (24) Ribosomal protein L9 [Translation, ribosomal structure and biogenesis]

Chlorobi RNA are assigned a color, while others are shown in gray. The number in parentheses after the colored domain name is the number of occurrences in Section 18.2.

**COG0629** (1) Single-stranded DNA-binding protein [Replication, recombination and repair]

**pfam00436** (25) Single-strand binding protein family.

**pfam01084** (25) Ribosomal protein S18.

**pfam01250** (15) Ribosomal protein S6.

**pfam01281** (1) Ribosomal protein L9, N-terminal domain.

**PRK00137** (25) 50S ribosomal protein L9; Reviewed







The taxonomy of each organism containing a putative S10-Clostridia RNA is listed, with abbreviations identifying each hit (e.g., “Eco-1-1” and “Eco-1-2” might hypothetically represent two distinct RNAs in *E. coli*). The abbreviations will be used to identify each individual S10-Clostridia RNA in Sections 19.2 and 19.4.

| abbrev. of hits | taxonomy of species                                                                                       |
|-----------------|-----------------------------------------------------------------------------------------------------------|
| Bhy-1-1         | Bacteria Firmicutes Clostridia Clostridiales <i>Blautia hydrogenotrophica</i> DSM 10507 (Ruminococcus)    |
| Cba-1-1         | Bacteria Firmicutes Clostridia Clostridiales <i>Clostridiaceae bacterium</i> MS3                          |
| Cbo-1-1         | Bacteria Firmicutes Clostridia Clostridiales Clostridiaceae <i>Clostridium bolteae</i> 90A5               |
| Cbo-2-1         | Bacteria Firmicutes Clostridia Clostridiales Clostridiaceae <i>Clostridium bolteae</i> 90A9               |
| Cbo-3-1         | Bacteria Firmicutes Clostridia Clostridiales Clostridiaceae <i>Clostridium bolteae</i> 90B3               |
| Cbo-4-1         | Bacteria Firmicutes Clostridia Clostridiales Clostridiaceae <i>Clostridium bolteae</i> 90B7               |
| Cbo-5-1         | Bacteria Firmicutes Clostridia Clostridiales Clostridiaceae <i>Clostridium bolteae</i> 90B8               |
| Cbo-6-1         | Bacteria Firmicutes Clostridia Clostridiales Clostridiaceae <i>Clostridium bolteae</i> ATCC BAA-613       |
| Cci-1-1         | Bacteria Firmicutes Clostridia Clostridiales Clostridiaceae <i>Clostridium citroniae</i> WAL-17108        |
| Ccl-1-1         | Bacteria Firmicutes Clostridia Clostridiales Clostridiaceae <i>Clostridium clostridioforme</i> 2_1_49FAA  |
| Ccl-2-1         | Bacteria Firmicutes Clostridia Clostridiales Clostridiaceae <i>Clostridium clostridioforme</i> 90A1       |
| Ccl-3-1         | Bacteria Firmicutes Clostridia Clostridiales Clostridiaceae <i>Clostridium clostridioforme</i> 90A3       |
| Ccl-4-1         | Bacteria Firmicutes Clostridia Clostridiales Clostridiaceae <i>Clostridium clostridioforme</i> 90A4       |
| Ccl-5-1         | Bacteria Firmicutes Clostridia Clostridiales Clostridiaceae <i>Clostridium clostridioforme</i> 90A6       |
| Ccl-6-1         | Bacteria Firmicutes Clostridia Clostridiales Clostridiaceae <i>Clostridium clostridioforme</i> 90A7       |
| Ccl-7-1         | Bacteria Firmicutes Clostridia Clostridiales Clostridiaceae <i>Clostridium clostridioforme</i> 90A8       |
| Ccl-8-1         | Bacteria Firmicutes Clostridia Clostridiales Clostridiaceae <i>Clostridium clostridioforme</i> 90B1       |
| Ccl-9-1         | Bacteria Firmicutes Clostridia Clostridiales Clostridiaceae <i>Clostridium clostridioforme</i> CM201      |
| Cha-1-1         | Bacteria Firmicutes Clostridia Clostridiales Clostridiaceae <i>Clostridium hathewayi</i> 12489931         |
| Cha-2-1         | Bacteria Firmicutes Clostridia Clostridiales Clostridiaceae <i>Clostridium hathewayi</i> WAL-18680        |
| Cne-1-1         | Bacteria Firmicutes Clostridia Clostridiales Clostridiaceae <i>Clostridium nexile</i> DSM 1787            |
| Cph-1-1         | Bacteria Firmicutes Clostridia Clostridiales Clostridiaceae <i>Clostridium phytofermentans</i> ISDg       |
| Csa-1-1         | Bacteria Firmicutes Clostridia Clostridiales Clostridiaceae <i>Clostridium saccharolyticum</i> WMI        |
| Csc-1-1         | Bacteria Firmicutes Clostridia Clostridiales Clostridiaceae <i>Clostridium scindens</i> ATCC 35704        |
| Csp-1-1         | Bacteria Firmicutes Clostridia Clostridiales Clostridiaceae <i>Clostridium</i> sp. 7_3_54FAA              |
| Csp-2-1         | Bacteria Firmicutes Clostridia Clostridiales Clostridiaceae <i>Clostridium</i> sp. ASF356                 |
| Csp-3-1         | Bacteria Firmicutes Clostridia Clostridiales Clostridiaceae <i>Clostridium</i> sp. ASF502                 |
| Csp-4-1         | Bacteria Firmicutes Clostridia Clostridiales Clostridiaceae <i>Clostridium</i> sp. D5                     |
| Csp-5-1         | Bacteria Firmicutes Clostridia Clostridiales Clostridiaceae <i>Clostridium</i> sp. FS41                   |
| Csp-6-1         | Bacteria Firmicutes Clostridia Clostridiales Clostridiaceae <i>Clostridium</i> sp. L2-50                  |
| Csp-7-1         | Bacteria Firmicutes Clostridia Clostridiales Clostridiaceae <i>Clostridium</i> sp. M62/1                  |
| Csy-1-1         | Bacteria Firmicutes Clostridia Clostridiales Clostridiaceae <i>Clostridium symbiosum</i> ATCC 14940       |
| Csy-2-1         | Bacteria Firmicutes Clostridia Clostridiales Clostridiaceae <i>Clostridium symbiosum</i> WAL-14163        |
| Csy-3-1         | Bacteria Firmicutes Clostridia Clostridiales Clostridiaceae <i>Clostridium symbiosum</i> WAL-14673        |
| Hha-1-1         | Bacteria Firmicutes Clostridia Clostridiales Clostridiaceae <i>Hungatella hathewayi</i> VE202-04          |
| Hha-2-1         | Bacteria Firmicutes Clostridia Clostridiales Clostridiaceae <i>Hungatella hathewayi</i> VE202-11          |
| Cba-2-1         | Bacteria Firmicutes Clostridia <i>Clostridiales bacterium</i> 1_7_47FAA                                   |
| Cba-3-1         | Bacteria Firmicutes Clostridia <i>Clostridiales bacterium</i> OBRC5-5                                     |
| Cba-4-1         | Bacteria Firmicutes Clostridia <i>Clostridiales bacterium</i> VE202-07                                    |
| Cba-5-1         | Bacteria Firmicutes Clostridia <i>Clostridiales bacterium</i> VE202-16                                    |
| Cba-6-1         | Bacteria Firmicutes Clostridia <i>Clostridiales bacterium</i> VE202-26                                    |
| Cba-7-1         | Bacteria Firmicutes Clostridia <i>Clostridiales bacterium</i> VE202-28                                    |
| Cba-8-1         | Bacteria Firmicutes Clostridia <i>Clostridiales bacterium</i> VE202-29                                    |
| Ece-1-1         | Bacteria Firmicutes Clostridia Clostridiales Eubacteriaceae <i>Eubacterium cellulosolvens</i> 6           |
| Eha-1-1         | Bacteria Firmicutes Clostridia Clostridiales Eubacteriaceae <i>Eubacterium hallii</i> DSM 3353            |
| Ere-1-1         | Bacteria Firmicutes Clostridia Clostridiales Eubacteriaceae <i>Eubacterium rectale</i> ATCC 33656         |
| Esp-1-1         | Bacteria Firmicutes Clostridia Clostridiales Eubacteriaceae <i>Eubacterium</i> sp. 14-2                   |
| [bo-1-1         | Bacteria Firmicutes Clostridia Clostridiales Lachnospiraceae [Clostridium] bolteae WAL-14578              |
| [ci-1-1         | Bacteria Firmicutes Clostridia Clostridiales Lachnospiraceae [Clostridium] citroniae WAL-19142            |
| [cl-1-1         | Bacteria Firmicutes Clostridia Clostridiales Lachnospiraceae [Clostridium] clostridioforme WAL-7855       |
| [sc-1-1         | Bacteria Firmicutes Clostridia Clostridiales Lachnospiraceae [Clostridium] scindens VE202-05              |
| Rgn-1-1         | Bacteria Firmicutes Clostridia Clostridiales Lachnospiraceae <i>Blautia Ruminococcus gnavus</i> AGR2154   |
| Rgn-2-1         | Bacteria Firmicutes Clostridia Clostridiales Lachnospiraceae <i>Blautia Ruminococcus gnavus</i> CC55.001C |
| Bfo-1-1         | Bacteria Firmicutes Clostridia Clostridiales Lachnospiraceae <i>Bryantella formatexigens</i> DSM 14469    |
| Bcr-1-1         | Bacteria Firmicutes Clostridia Clostridiales Lachnospiraceae <i>Butyrivibrio crossotus</i> DSM 2876       |
| Bfi-1-1         | Bacteria Firmicutes Clostridia Clostridiales Lachnospiraceae <i>Butyrivibrio fibrisolvens</i> AB2020      |
| Bfi-2-1         | Bacteria Firmicutes Clostridia Clostridiales Lachnospiraceae <i>Butyrivibrio fibrisolvens</i> FE2007      |
| Bfi-3-1         | Bacteria Firmicutes Clostridia Clostridiales Lachnospiraceae <i>Butyrivibrio fibrisolvens</i> ND3005      |
| Bfi-4-1         | Bacteria Firmicutes Clostridia Clostridiales Lachnospiraceae <i>Butyrivibrio fibrisolvens</i> WTE3004     |

|                   |                                                                    |                                                          |
|-------------------|--------------------------------------------------------------------|----------------------------------------------------------|
| Bsp-1-1           | Bacteria Firmicutes Clostridia Clostridiales Lachnospiraceae       | <i>Butyrivibrio sp.</i> AD3002                           |
| Bsp-2-1           | Bacteria Firmicutes Clostridia Clostridiales Lachnospiraceae       | <i>Butyrivibrio sp.</i> AE2015                           |
| Bsp-3-1           | Bacteria Firmicutes Clostridia Clostridiales Lachnospiraceae       | <i>Butyrivibrio sp.</i> AE3009                           |
| Bsp-4-1           | Bacteria Firmicutes Clostridia Clostridiales Lachnospiraceae       | <i>Butyrivibrio sp.</i> FCS006                           |
| Bsp-5-1           | Bacteria Firmicutes Clostridia Clostridiales Lachnospiraceae       | <i>Butyrivibrio sp.</i> LB2008                           |
| Bsp-6-1           | Bacteria Firmicutes Clostridia Clostridiales Lachnospiraceae       | <i>Butyrivibrio sp.</i> MC2021                           |
| Bsp-7-1           | Bacteria Firmicutes Clostridia Clostridiales Lachnospiraceae       | <i>Butyrivibrio sp.</i> NC2007                           |
| Bsp-8-1           | Bacteria Firmicutes Clostridia Clostridiales Lachnospiraceae       | <i>Butyrivibrio sp.</i> VCB2001                          |
| Bsp-9-1           | Bacteria Firmicutes Clostridia Clostridiales Lachnospiraceae       | <i>Butyrivibrio sp.</i> WCD2001                          |
| Bsp-10-1          | Bacteria Firmicutes Clostridia Clostridiales Lachnospiraceae       | <i>Butyrivibrio sp.</i> XPD2006                          |
| Cmo-1-1           | Bacteria Firmicutes Clostridia Clostridiales Lachnospiraceae       | <i>Catonella morbi</i> ATCC 51271                        |
| Cle-1-1           | Bacteria Firmicutes Clostridia Clostridiales Lachnospiraceae       | Cellulosilyticum <i>Clostridium lentocellum</i> DSM 5427 |
| Cco-1-1           | Bacteria Firmicutes Clostridia Clostridiales Lachnospiraceae       | <i>Coprococcus comes</i> ATCC 27758                      |
| Ceu-1-1           | Bacteria Firmicutes Clostridia Clostridiales Lachnospiraceae       | <i>Coprococcus eutactus</i> ATCC 27759                   |
| Csp-8-1           | Bacteria Firmicutes Clostridia Clostridiales Lachnospiraceae       | <i>Coprococcus sp.</i> HPP0048                           |
| Csp-9-1           | Bacteria Firmicutes Clostridia Clostridiales Lachnospiraceae       | <i>Coprococcus sp.</i> HPP0074                           |
| Dfo-1-1           | Bacteria Firmicutes Clostridia Clostridiales Lachnospiraceae       | <i>Dorea formicigenerans</i> 4_6_53AFAA                  |
| Dfo-2-1           | Bacteria Firmicutes Clostridia Clostridiales Lachnospiraceae       | <i>Dorea formicigenerans</i> ATCC 27755                  |
| Dlo-1-1           | Bacteria Firmicutes Clostridia Clostridiales Lachnospiraceae       | <i>Dorea longicatena</i> AGR2136                         |
| Dlo-2-1           | Bacteria Firmicutes Clostridia Clostridiales Lachnospiraceae       | <i>Dorea longicatena</i> DSM 13814                       |
| Dsp-1-1           | Bacteria Firmicutes Clostridia Clostridiales Lachnospiraceae       | <i>Dorea sp.</i> 5-2                                     |
| Jig-1-1           | Bacteria Firmicutes Clostridia Clostridiales Lachnospiraceae       | <i>Johnsonella ignava</i> ATCC 51276                     |
| Lsp-1-1           | Bacteria Firmicutes Clostridia Clostridiales Lachnospiraceae       | <i>Lachnoanaerobaculum sp.</i> MSX33                     |
| Lbo-1-1           | Bacteria Firmicutes Clostridia Clostridiales Lachnospiraceae       | <i>Lachnobacterium bovis</i>                             |
| Lbo-2-1           | Bacteria Firmicutes Clostridia Clostridiales Lachnospiraceae       | <i>Lachnobacterium bovis</i> C6A12                       |
| Lbo-3-1           | Bacteria Firmicutes Clostridia Clostridiales Lachnospiraceae       | <i>Lachnobacterium bovis</i> NK4B19                      |
| Lba-1-1           | Bacteria Firmicutes Clostridia Clostridiales Lachnospiraceae       | <i>bacterium</i> 1-1.57FAA                               |
| Lba-2-1           | Bacteria Firmicutes Clostridia Clostridiales Lachnospiraceae       | <i>bacterium</i> 1-4.56FAA                               |
| Lba-3-1           | Bacteria Firmicutes Clostridia Clostridiales Lachnospiraceae       | <i>bacterium</i> 2-1.46FAA                               |
| Lba-4-1           | Bacteria Firmicutes Clostridia Clostridiales Lachnospiraceae       | <i>bacterium</i> 2-1.58FAA                               |
| Lba-5-1           | Bacteria Firmicutes Clostridia Clostridiales Lachnospiraceae       | <i>bacterium</i> 3-1                                     |
| Lba-6-1           | Bacteria Firmicutes Clostridia Clostridiales Lachnospiraceae       | <i>bacterium</i> 3-2                                     |
| Lba-7-1           | Bacteria Firmicutes Clostridia Clostridiales Lachnospiraceae       | <i>bacterium</i> 3-1.46FAA                               |
| Lba-8-1           | Bacteria Firmicutes Clostridia Clostridiales Lachnospiraceae       | <i>bacterium</i> 3-1.57FAA_CT1                           |
| Lba-9-1           | Bacteria Firmicutes Clostridia Clostridiales Lachnospiraceae       | <i>bacterium</i> 4-1.37FAA                               |
| Lba-10-1          | Bacteria Firmicutes Clostridia Clostridiales Lachnospiraceae       | <i>bacterium</i> 5-1.57FAA                               |
| Lba-11-1          | Bacteria Firmicutes Clostridia Clostridiales Lachnospiraceae       | <i>bacterium</i> 8-1.57FAA                               |
| Lba-12-1          | Bacteria Firmicutes Clostridia Clostridiales Lachnospiraceae       | <i>bacterium</i> 9-1.43BFAA                              |
| Lba-13-1          | Bacteria Firmicutes Clostridia Clostridiales Lachnospiraceae       | <i>bacterium</i> A2                                      |
| Lba-14-1          | Bacteria Firmicutes Clostridia Clostridiales Lachnospiraceae       | <i>bacterium</i> A4                                      |
| Lba-15-1          | Bacteria Firmicutes Clostridia Clostridiales Lachnospiraceae       | <i>bacterium</i> ICM7                                    |
| Lba-16-1          | Bacteria Firmicutes Clostridia Clostridiales Lachnospiraceae       | <i>bacterium</i> M18-1                                   |
| Lba-17-1          | Bacteria Firmicutes Clostridia Clostridiales Lachnospiraceae       | <i>bacterium</i> NC2008                                  |
| Lba-18-1          | Bacteria Firmicutes Clostridia Clostridiales Lachnospiraceae       | <i>bacterium</i> NK4A136                                 |
| Lba-19-1          | Bacteria Firmicutes Clostridia Clostridiales Lachnospiraceae       | <i>bacterium</i> NK4A179                                 |
| Lba-22-1          | Bacteria Firmicutes Clostridia Clostridiales Lachnospiraceae       | <i>bacterium oral taxon</i> 082 str. F0431               |
| Lba-20-1          | Bacteria Firmicutes Clostridia Clostridiales Lachnospiraceae       | <i>bacterium</i> VE202-12                                |
| Lba-21-1          | Bacteria Firmicutes Clostridia Clostridiales Lachnospiraceae       | <i>bacterium</i> VE202-23                                |
| Lor-1-1           | Bacteria Firmicutes Clostridia Clostridiales Lachnospiraceae       | <i>oral taxon</i> 107 str. F0167                         |
| Rho-1-1           | Bacteria Firmicutes Clostridia Clostridiales Lachnospiraceae       | <i>Roseburia hominis</i> A2-183                          |
| Rin-1-1           | Bacteria Firmicutes Clostridia Clostridiales Lachnospiraceae       | <i>Roseburia intestinalis</i> L1-82                      |
| Rin-2-1           | Bacteria Firmicutes Clostridia Clostridiales Lachnospiraceae       | <i>Roseburia inulinivorans</i> DSM 16841                 |
| Slo-1-1           | Bacteria Firmicutes Clostridia Clostridiales Lachnospiraceae       | <i>Stomatobaculum longum</i>                             |
| Pba-1-1           | Bacteria Firmicutes Clostridia Clostridiales Peptostreptococcaceae | <i>bacterium oral taxon</i> 113 str. W5053               |
| Rfl-1-1           | Bacteria Firmicutes Clostridia Clostridiales Ruminococcaceae       | <i>Ruminococcus flavefaciens</i> FD-1                    |
| Rgn-3-1           | Bacteria Firmicutes Clostridia Clostridiales Ruminococcaceae       | <i>Ruminococcus gnavus</i> ATCC 29149                    |
| Rla-1-1           | Bacteria Firmicutes Clostridia Clostridiales Ruminococcaceae       | <i>Ruminococcus lactaris</i> CC59.002D                   |
| Rsp-1-1           | Bacteria Firmicutes Clostridia Clostridiales Ruminococcaceae       | <i>Ruminococcus sp.</i> JC304                            |
| Rto-1-1           | Bacteria Firmicutes Clostridia Clostridiales Ruminococcaceae       | <i>Ruminococcus torques</i> ATCC 27756                   |
| env-1 to env-1176 | environmental samples                                              |                                                          |

## 19.2 Gene contexts



Each S10-Clostridia RNA (indicated by “RNA→”) is listed. For each hit, the downstream genes predicted to reside in a regulated operon are listed. If the nearest downstream gene is encoding in the opposite strand (and therefore presumed to not be a part of a regulated operon), then that gene is still depicted. Some environmental sequences and some RefSeq entries lack gene annotations, and so no genes are available for such sequences. The direction of each gene is indicated with an arrow (→), and each predicted conserved domain in the gene is named. Conserved domains associated with more than one S10-Clostridia RNA are assigned a color; other domains are gray. Information about these conserved domains is given in

Section 19.3. The accession of the sequence containing each S10-Clostridia RNA is given in the column named “Seq. accession”. Accessions beginning with “NC\_”, “NS\_”, “NW\_” or “NZ\_” are contained in RefSeq. Other accession refer to environmental samples. Nucleotide coordinates are given for the 5′ and 3′ boundaries of each S10-Clostridia RNA. If the 5′ coordinate is greater than the 3′ coordinate, the RNA is present on the reverse-complement strand of the containing genomic DNA sequence. Each hit is denoted by an abbreviation (like “Eco-1-1”) that refers to a taxonomy given in Section 19.1.

| abbrev. | Seq. accession                  |   | 5′ at | 3′ at | genes                                                                         |
|---------|---------------------------------|---|-------|-------|-------------------------------------------------------------------------------|
| env-1   | 2226990398                      | - | 1238  | 1158  | RNA→ rpsJ (PRK00596)RpsJ (COG0051)→                                           |
| env-2   | IMNBL1_c0000333                 | - | 31361 | 31281 | RNA→ rpsJ (PRK00596)RpsJ (COG0051)→                                           |
| env-3   | JGI994J12354_10007324           | + | 4642  | 4722  | RNA→ rpsJ (PRK00596)RpsJ (COG0051)→                                           |
| env-4   | 2227142228                      | - | 1210  | 1130  | RNA→ rpsJ (PRK00596)RpsJ (COG0051)→                                           |
| env-5   | 2226961550                      | - | 118   | 38    | RNA→ ←-hypo                                                                   |
| env-6   | 4491409.3_NODE.35665            | - | 1609  | 1535  | RNA→ rpsJ (PRK00596)RpsJ (COG0051)→                                           |
| env-7   | DLF009_scaffold18474.3          | + | 2148  | 2217  | RNA→ rpsJ (PRK00596)RpsJ (COG0051)→                                           |
| env-8   | NOF011_scaffold7296.4           | - | 966   | 897   | RNA→ rpsJ (PRK00596)RpsJ (COG0051)→                                           |
| env-9   | scaffold16313_1_O2.UC-19        | + | 689   | 758   | RNA→                                                                          |
| env-10  | SRS013687_Baylor_scaffold.43281 | + | 185   | 253   | RNA→ rpsJ (PRK00596)RpsJ (COG0051)→                                           |
| env-11  | SRS024625_C2443234              | - | 144   | 76    | RNA→                                                                          |
| env-12  | AUX0018559537.1                 | - | 326   | 258   | RNA→ rpsJ (PRK00596)RpsJ (COG0051)→                                           |
| env-13  | SRS011302_Baylor_scaffold.3477  | + | 2312  | 2380  | RNA→ rpsJ (PRK00596)Ribosomal_S10 (pfam00338)→                                |
| env-14  | 4491406.3_NODE.8170             | - | 1590  | 1522  | RNA→ rpsJ (PRK00596)RpsJ (COG0051)→                                           |
| env-15  | 4491409.3_NODE.14115            | + | 1704  | 1772  | RNA→ rpsJ (PRK00596)RpsJ (COG0051)→                                           |
| env-16  | 2013434593                      | + | 25    | 93    | RNA→                                                                          |
| env-17  | scaffold41095_3_MH0053          | + | 367   | 435   | RNA→                                                                          |
| env-18  | SRS052697_LANL_scaffold.57795   | - | 276   | 208   | RNA→ hypo→                                                                    |
| env-19  | 4491407.3_NODE.19021            | + | 122   | 190   | RNA→ rpsJ (PRK00596)Ribosomal_S10 (pfam00338)→ RplC (COG0087)rplC (PRK00001)→ |
| env-20  | scaffold4401_13_MH0057          | + | 404   | 472   | RNA→ rpsJ (PRK00596)Ribosomal_S10 (pfam00338)→                                |
| env-21  | 4491401.3_NODE.82882            | - | 1562  | 1494  | RNA→ rpsJ (PRK00596)RpsJ (COG0051)→                                           |
| env-22  | 4491487.3_NODE.33289            | - | 2671  | 2603  | RNA→ rpsJ (PRK00596)RpsJ (COG0051)→                                           |
| env-23  | scaffold21085_1_MH0037          | - | 150   | 82    | RNA→                                                                          |
| env-24  | SRS011061_C4645920              | + | 238   | 306   | RNA→                                                                          |
| env-25  | DLM001_scaffold9250.9           | + | 1391  | 1459  | RNA→ rpsJ (PRK00596)RpsJ (COG0051)→                                           |
| env-26  | NLM031_scaffold272.21           | - | 6329  | 6261  | RNA→ rpsJ (PRK00596)RpsJ (COG0051)→                                           |
| env-27  | SRS013521_LANL_scaffold.2326    | - | 159   | 91    | RNA→                                                                          |
| env-28  | DOM019_scaffold38828.2          | + | 759   | 827   | RNA→ hypo→ rpsJ (PRK00596)Ribosomal_S10 (pfam00338)→                          |
| env-29  | SRS015663_WUGC_scaffold.1713    | - | 288   | 220   | RNA→ rpsJ (PRK00596)→                                                         |
| env-30  | scaffold25433_1_O2.UC-19        | - | 264   | 196   | RNA→ hypo→                                                                    |
| env-31  | SRS016095_WUGC_scaffold.35063   | - | 1318  | 1250  | RNA→ rpsJ (PRK00596)RpsJ (COG0051)→                                           |
| env-32  | SRS017191_C1692823              | + | 852   | 920   | RNA→ hypo→                                                                    |
| env-33  | SRS017821_Baylor_scaffold.18138 | + | 237   | 169   | RNA→                                                                          |
| env-34  | SRS019030_Baylor_scaffold.35826 | - | 460   | 392   | RNA→ rpsJ (PRK00596)RpsJ (COG0051)→                                           |
| env-35  | SRS019161_WUGC_scaffold.56262   | + | 245   | 313   | RNA→ hypo→ rpsJ (PRK00596)Ribosomal_S10 (pfam00338)→                          |
| env-36  | SRS022609_Baylor_scaffold.55492 | + | 119   | 187   | RNA→ hypo→ rpsJ (PRK00596)RpsJ (COG0051)→                                     |
| env-37  | SRS049712_C15422763             | - | 95    | 27    | RNA→ hypo→                                                                    |
| env-38  | SRS050422_LANL_scaffold.77388   | - | 273   | 205   | RNA→ hypo→                                                                    |
| env-39  | SRS051031_LANL_scaffold.19825   | + | 1380  | 1448  | RNA→ rpsJ (PRK00596)RpsJ (COG0051)→                                           |

|        |                                 |   |       |       |                                                                                                                                                                                                                                                                                                                                                                                                                                                                                                                                                                                                                                                                                                                                                                                                                                                                                                                                                                                                                                                                                                                                                                                                                                       |
|--------|---------------------------------|---|-------|-------|---------------------------------------------------------------------------------------------------------------------------------------------------------------------------------------------------------------------------------------------------------------------------------------------------------------------------------------------------------------------------------------------------------------------------------------------------------------------------------------------------------------------------------------------------------------------------------------------------------------------------------------------------------------------------------------------------------------------------------------------------------------------------------------------------------------------------------------------------------------------------------------------------------------------------------------------------------------------------------------------------------------------------------------------------------------------------------------------------------------------------------------------------------------------------------------------------------------------------------------|
| env-40 | SRS055982_C1608927              | + | 905   | 973   | RNA → rpsJ (PRK00596)RpsJ (COG0051) →                                                                                                                                                                                                                                                                                                                                                                                                                                                                                                                                                                                                                                                                                                                                                                                                                                                                                                                                                                                                                                                                                                                                                                                                 |
| env-41 | SRS056259_LANL_scaffold_34991   | - | 207   | 139   | RNA →                                                                                                                                                                                                                                                                                                                                                                                                                                                                                                                                                                                                                                                                                                                                                                                                                                                                                                                                                                                                                                                                                                                                                                                                                                 |
| env-42 | SRS065504_LANL_scaffold_12366   | - | 375   | 307   | RNA → rpsJ (PRK00596)Ribosomal_S10 (pfam00338) →                                                                                                                                                                                                                                                                                                                                                                                                                                                                                                                                                                                                                                                                                                                                                                                                                                                                                                                                                                                                                                                                                                                                                                                      |
| env-43 | 4491417.3_NODE_11963            | - | 1588  | 1520  | RNA → rpsJ (PRK00596)RpsJ (COG0051) →                                                                                                                                                                                                                                                                                                                                                                                                                                                                                                                                                                                                                                                                                                                                                                                                                                                                                                                                                                                                                                                                                                                                                                                                 |
| env-44 | SRS048870_WUGC_scaffold_9375    | - | 159   | 91    | RNA →                                                                                                                                                                                                                                                                                                                                                                                                                                                                                                                                                                                                                                                                                                                                                                                                                                                                                                                                                                                                                                                                                                                                                                                                                                 |
| env-45 | SRS049959_WUGC_scaffold_6371    | - | 438   | 370   | RNA → rpsJ (PRK00596)Ribosomal_S10 (pfam00338) →                                                                                                                                                                                                                                                                                                                                                                                                                                                                                                                                                                                                                                                                                                                                                                                                                                                                                                                                                                                                                                                                                                                                                                                      |
| env-46 | 4491477.3_NODE_36868            | + | 368   | 436   | RNA →                                                                                                                                                                                                                                                                                                                                                                                                                                                                                                                                                                                                                                                                                                                                                                                                                                                                                                                                                                                                                                                                                                                                                                                                                                 |
| env-47 | DLF013_scaffold3458_3           | + | 3322  | 3390  | RNA → hypo → rpsJ (PRK00596)RpsJ (COG0051) →                                                                                                                                                                                                                                                                                                                                                                                                                                                                                                                                                                                                                                                                                                                                                                                                                                                                                                                                                                                                                                                                                                                                                                                          |
| env-48 | SRS049712_C15557807             | + | 731   | 810   | RNA → rpsJ (PRK00596)Ribosomal_S10 (pfam00338) →                                                                                                                                                                                                                                                                                                                                                                                                                                                                                                                                                                                                                                                                                                                                                                                                                                                                                                                                                                                                                                                                                                                                                                                      |
| env-49 | scaffold7779_5_O2_UC-12         | - | 667   | 588   | RNA → rpsJ (PRK00596)RpsJ (COG0051) →                                                                                                                                                                                                                                                                                                                                                                                                                                                                                                                                                                                                                                                                                                                                                                                                                                                                                                                                                                                                                                                                                                                                                                                                 |
| env-50 | scaffold8248_1_O2_UC-13         | + | 480   | 559   | RNA → rpsJ (PRK00596)RpsJ (COG0051) → RplC (COG0087)rplC (PRK00001) →                                                                                                                                                                                                                                                                                                                                                                                                                                                                                                                                                                                                                                                                                                                                                                                                                                                                                                                                                                                                                                                                                                                                                                 |
| env-51 | scaffold6367_32_V1_CD-4         | + | 1972  | 2051  | rplD (PRK05319)Ribosomal_L4 (pfam00573) → rplW (PRK05738)Ribosomal_L23 (pfam00276) →<br>RNA → rpsJ (PRK00596)RpsJ (COG0051) → RplC (COG0087)rplC (PRK00001) →<br>rplD (PRK05319)Ribosomal_L4 (pfam00573) → rplW (PRK05738)Ribosomal_L23 (pfam00276) →                                                                                                                                                                                                                                                                                                                                                                                                                                                                                                                                                                                                                                                                                                                                                                                                                                                                                                                                                                                 |
| env-52 | SRS049959_WUGC_scaffold_42217   | + | 15227 | 15306 | RNA → rpsJ (PRK00596)RpsJ (COG0051) → RplC (COG0087)rplC (PRK00001) →                                                                                                                                                                                                                                                                                                                                                                                                                                                                                                                                                                                                                                                                                                                                                                                                                                                                                                                                                                                                                                                                                                                                                                 |
| env-53 | SRS063040_Baylor_scaffold_53437 | - | 465   | 386   | RNA → rpsJ (PRK00596)Ribosomal_S10 (pfam00338) →                                                                                                                                                                                                                                                                                                                                                                                                                                                                                                                                                                                                                                                                                                                                                                                                                                                                                                                                                                                                                                                                                                                                                                                      |
| env-54 | DOM014_scaffold41515_2          | - | 624   | 545   | RNA → rpsJ (PRK00596)RpsJ (COG0051) →                                                                                                                                                                                                                                                                                                                                                                                                                                                                                                                                                                                                                                                                                                                                                                                                                                                                                                                                                                                                                                                                                                                                                                                                 |
| env-55 | NLF007_scaffold12381_15         | + | 444   | 523   | RNA → rpsJ (PRK00596)RpsJ (COG0051) → RplC (COG0087)rplC (PRK00001) →                                                                                                                                                                                                                                                                                                                                                                                                                                                                                                                                                                                                                                                                                                                                                                                                                                                                                                                                                                                                                                                                                                                                                                 |
| env-56 | NLM025_scaffold9675_4           | - | 702   | 623   | RplD (COG0088)rplD (PRK05319) →<br>RNA → rpsJ (PRK00596)RpsJ (COG0051) →                                                                                                                                                                                                                                                                                                                                                                                                                                                                                                                                                                                                                                                                                                                                                                                                                                                                                                                                                                                                                                                                                                                                                              |
| env-57 | NOM018_scaffold2595_2           | + | 22357 | 22436 | RNA → rpsJ (PRK00596)RpsJ (COG0051) → RplC (COG0087)rplC (PRK00001) →<br>rplD (PRK05319)Ribosomal_L4 (pfam00573) → rplW (PRK05738)Ribosomal_L23 (pfam00276) →<br>RplB (COG0090)rplB (PRK09374) → rpsS (PRK00357)Ribosomal_S19 (pfam00203) →<br>rplV (PRK00565)Ribosomal_L22 (pfam00237) → RpsC (COG0092)rpsC (PRK00310) →<br>rplI6 (CHL00044)rplP (PRK09203) → PRK00306 (PRK00306)Ribosomal_L29 (pfam00831) →<br>rpsQ (PRK05610)Ribosomal_S17 (pfam00366) → rplN (PRK05483)Ribosomal_L14 (pfam00238) →<br>RplX (COG0198)rplX (PRK00004) →                                                                                                                                                                                                                                                                                                                                                                                                                                                                                                                                                                                                                                                                                             |
| env-58 | SRS015217_WUGC_scaffold_16052   | - | 586   | 507   | RNA → rpsJ (PRK00596)RpsJ (COG0051) →                                                                                                                                                                                                                                                                                                                                                                                                                                                                                                                                                                                                                                                                                                                                                                                                                                                                                                                                                                                                                                                                                                                                                                                                 |
| env-59 | DOM015_scaffold18234_5          | + | 4775  | 4854  | RNA → rpsJ (PRK00596)RpsJ (COG0051) → RplC (COG0087)rplC (PRK00001) →<br>rplD (PRK05319)Ribosomal_L4 (pfam00573) → rplW (PRK05738)Ribosomal_L23 (pfam00276) →<br>RplB (COG0090)rplB (PRK09374) → rpsS (PRK00357)Ribosomal_S19 (pfam00203) →<br>rplV (PRK00565)Ribosomal_L22 (pfam00237) → RpsC (COG0092)rpsC (PRK00310) →<br>rplI6 (CHL00044)rplP (PRK09203) → PRK00306 (PRK00306)Ribosomal_L29 (pfam00831) →<br>rpsQ (PRK05610)Ribosomal_S17 (pfam00366) → rplN (PRK05483)Ribosomal_L14 (pfam00238) →<br>RplX (COG0198)rplX (PRK00004) → rplE (PRK00010)RplE (COG0094) → rpsN (PRK08061)RpsN (COG0199) →<br>rpsH (PRK00136)Ribosomal_S8 (pfam00410) → RplF (COG0097)rplF (PRK05498) →<br>rplR (PRK05593)Ribosomal_L18p (pfam00861) → RpsE (COG0098)rpsE (PRK00550) →<br>Ribosomal_L30 (cd01658)rpmD (PRK05611) → RplO (COG0200)rplO (PRK05592) →<br>SecY (COG0201)secY (PRK09204) → adk (PRK00279)ADK (pfam00406) →<br>PRK05716 (PRK05716)MetAPI (cd01086) → infA (PRK00276)SLIF1 (cd04451) →<br>rpmJ (PRK00465)Ribosomal_L36 (pfam00444) → RpsM (COG0099)rpsM (PRK05179) →<br>PRK05309 (PRK05309)RpsK (COG0100) → RpsD (COG0522)rpsD (PRK05327) →<br>RpoA (COG0202)PRK05182 (PRK05182) → rplQ (PRK05591)Ribosomal_L17 (pfam01196) → |
| env-60 | NOM029_scaffold14304_23         | - | 471   | 392   | RNA → rpsJ (PRK00596)Ribosomal_S10 (pfam00338) →                                                                                                                                                                                                                                                                                                                                                                                                                                                                                                                                                                                                                                                                                                                                                                                                                                                                                                                                                                                                                                                                                                                                                                                      |
| env-61 | scaffold9930_2_MH0009           | - | 424   | 345   | RNA → rpsJ (PRK00596)Ribosomal_S10 (pfam00338) →                                                                                                                                                                                                                                                                                                                                                                                                                                                                                                                                                                                                                                                                                                                                                                                                                                                                                                                                                                                                                                                                                                                                                                                      |
| env-62 | scaffold24332_11_MH0045         | - | 2664  | 2585  | RNA → rpsJ (PRK00596)RpsJ (COG0051) → RplC (COG0087)rplC (PRK00001) →                                                                                                                                                                                                                                                                                                                                                                                                                                                                                                                                                                                                                                                                                                                                                                                                                                                                                                                                                                                                                                                                                                                                                                 |
| env-63 | scaffold16949_1_MH0048          | + | 212   | 291   | rplD (PRK05319)Ribosomal_L4 (pfam00573) → rplW (PRK05738)Ribosomal_L23 (pfam00276) →<br>RNA → rpsJ (PRK00596)RpsJ (COG0051) → RplC (COG0087)rplC (PRK00001) →                                                                                                                                                                                                                                                                                                                                                                                                                                                                                                                                                                                                                                                                                                                                                                                                                                                                                                                                                                                                                                                                         |
| env-64 | 4491484.3_NODE_8515             | - | 3592  | 3513  | rplD (PRK05319)Ribosomal_L4 (pfam00573) → rplW (PRK05738)Ribosomal_L23 (pfam00276) →<br>RNA → rpsJ (PRK00596)RpsJ (COG0051) → RplC (COG0087)rplC (PRK00001) →<br>rplB (PRK09374)Ribosomal_L2 (pfam00181) → rplB (PRK09374)Ribosomal_L2_C (pfam03947) →<br>rpsS (PRK00357)Ribosomal_S19 (pfam00203) →                                                                                                                                                                                                                                                                                                                                                                                                                                                                                                                                                                                                                                                                                                                                                                                                                                                                                                                                  |

|        |                                 |   |        |        |                                                                                                                                                                                                                                                                                                                                                                                                                                                                                                                                                                                                                                                                                                                                                                                                                                                                                          |
|--------|---------------------------------|---|--------|--------|------------------------------------------------------------------------------------------------------------------------------------------------------------------------------------------------------------------------------------------------------------------------------------------------------------------------------------------------------------------------------------------------------------------------------------------------------------------------------------------------------------------------------------------------------------------------------------------------------------------------------------------------------------------------------------------------------------------------------------------------------------------------------------------------------------------------------------------------------------------------------------------|
| env-65 | NLM026_scaffold29289_1          | + | 154    | 233    | RNA → rpsJ (PRK00596)RpsJ (COG0051) → RplC (COG0087)rplC (PRK00001) → rplD (PRK05319)Ribosomal_L4 (pfam00573) → rplW (PRK05738)Ribosomal_L23 (pfam00276) → RplB (COG0090)rplB (PRK09374) → rpsS (PRK00357)Ribosomal_S19 (pfam00203) → rplV (PRK00565)Ribosomal_L22 (pfam00237) → RpsC (COG0092)rpsC (PRK00310) → rpl16 (CHL00044)rplP (PRK09203) → PRK00306 (PRK00306)Ribosomal_L29 (pfam00831) → rpsQ (PRK05610)Ribosomal_S17 (pfam00366) → rplN (PRK05483)Ribosomal_L14 (pfam00238) → RplX (COG0198)rplX (PRK00004) → rplE (PRK00010)RplE (COG0094) → rpsN (PRK08061)RpsN (COG0199) → rpsH (PRK00136)Ribosomal_S8 (pfam00410) → RplF (COG0097)rplF (PRK05498) → rplR (PRK05593)Ribosomal_L18p (pfam00861) → RpsE (COG0098)rpsE (PRK00550) → Ribosomal_L30 (cd01658)rpmD (PRK05611) → RplO (COG0200)rplO (PRK05592) → SecY (COG0201)secY (PRK09204) → ADK (cd01428)AAA_17 (pfam13207) → |
| env-66 | NLM031_scaffold32591_5          | - | 104111 | 104032 | RNA → rpsJ (PRK00596)RpsJ (COG0051) → RplC (COG0087)rplC (PRK00001) → rplD (PRK05319)Ribosomal_L4 (pfam00573) → rplW (PRK05738)Ribosomal_L23 (pfam00276) → RplB (COG0090)rplB (PRK09374) → rpsS (PRK00357)Ribosomal_S19 (pfam00203) → rplV (PRK00565)Ribosomal_L22 (pfam00237) → RpsC (COG0092)rpsC (PRK00310) → rpl16 (CHL00044)rplP (PRK09203) → PRK00306 (PRK00306)Ribosomal_L29 (pfam00831) → rpsQ (PRK05610)Ribosomal_S17 (pfam00366) → rplN (PRK05483)Ribosomal_L14 (pfam00238) → RplX (COG0198)rplX (PRK00004) → rplE (PRK00010)RplE (COG0094) → rpsN (PRK08061)RpsN (COG0199) → rpsH (PRK00136)Ribosomal_S8 (pfam00410) → RplF (COG0097)rplF (PRK05498) → rplR (PRK05593)Ribosomal_L18p (pfam00861) → RpsE (COG0098)rpsE (PRK00550) → Ribosomal_L30 (cd01658)rpmD (PRK05611) → RplO (COG0200)rplO (PRK05592) → SecY (COG0201)secY (PRK09204) →                                   |
| env-67 | NOM019_scaffold27930_10         | + | 83526  | 83605  | RNA → rpsJ (PRK00596)RpsJ (COG0051) → RplC (COG0087)rplC (PRK00001) → rplD (PRK05319)Ribosomal_L4 (pfam00573) → rplW (PRK05738)Ribosomal_L23 (pfam00276) → RplB (COG0090)rplB (PRK09374) → rpsS (PRK00357)RpsS (COG0185) →                                                                                                                                                                                                                                                                                                                                                                                                                                                                                                                                                                                                                                                               |
| env-68 | SRS011302_Baylor_scaffold_21352 | - | 474    | 395    | RNA → rpsJ (PRK00596)Ribosomal_S10 (pfam00338) →                                                                                                                                                                                                                                                                                                                                                                                                                                                                                                                                                                                                                                                                                                                                                                                                                                         |
| env-69 | SRS012273_Baylor_scaffold_14966 | - | 16160  | 16081  | RNA → rpsJ (PRK00596)RpsJ (COG0051) → RplC (COG0087)rplC (PRK00001) → rplD (PRK05319)Ribosomal_L4 (pfam00573) → rplW (PRK05738)Ribosomal_L23 (pfam00276) → RplB (COG0090)rplB (PRK09374) → rpsS (PRK00357)Ribosomal_S19 (pfam00203) → rplV (PRK00565)Ribosomal_L22 (pfam00237) → RpsC (COG0092)rpsC (PRK00310) → rpl16 (CHL00044)rplP (PRK09203) → PRK00306 (PRK00306)Ribosomal_L29 (pfam00831) → rpsQ (PRK05610)Ribosomal_S17 (pfam00366) → rplN (PRK05483)Ribosomal_L14 (pfam00238) → RplX (COG0198)rplX (PRK00004) → rplE (PRK00010)RplE (COG0094) → rpsN (PRK08061)RpsN (COG0199) → rpsH (PRK00136)Ribosomal_S8 (pfam00410) → RplF (COG0097)rplF (PRK05498) → rplR (PRK05593)Ribosomal_L18p (pfam00861) → RpsE (COG0098)rpsE (PRK00550) → Ribosomal_L30 (cd01658)rpmD (PRK05611) → RplO (COG0200)rplO (PRK05592) → SecY (COG0201)secY (PRK09204) →                                   |
| env-70 | SRS015133_WUGC_scaffold_36610   | - | 2755   | 2676   | RNA → rpsJ (PRK00596)RpsJ (COG0051) → RplC (COG0087)rplC (PRK00001) → rplD (PRK05319)Ribosomal_L4 (pfam00573) → rplW (PRK05738)Ribosomal_L23 (pfam00276) → rplB (PRK09374)Ribosomal_L2 (pfam00181) →                                                                                                                                                                                                                                                                                                                                                                                                                                                                                                                                                                                                                                                                                     |
| env-71 | SRS048870_WUGC_scaffold_45340   | - | 5622   | 5543   | RNA → rpsJ (PRK00596)RpsJ (COG0051) → RplC (COG0087)rplC (PRK00001) → rplD (PRK05319)Ribosomal_L4 (pfam00573) → rplW (PRK05738)Ribosomal_L23 (pfam00276) → RplB (COG0090)rplB (PRK09374) → rpsS (PRK00357)Ribosomal_S19 (pfam00203) → rplV (PRK00565)Ribosomal_L22 (pfam00237) → RpsC (COG0092)rpsC (PRK00310) → rpl16 (CHL00044)rplP (PRK09203) → PRK00306 (PRK00306)Ribosomal_L29 (pfam00831) → rpsQ (PRK05610)Ribosomal_S17 (pfam00366) → rplN (PRK05483)Ribosomal_L14 (pfam00238) →                                                                                                                                                                                                                                                                                                                                                                                                  |
| env-72 | SRS051031_LANL_scaffold_20990   | - | 7045   | 6966   | RNA → rpsJ (PRK00596)RpsJ (COG0051) → RplC (COG0087)rplC (PRK00001) → rplD (PRK05319)Ribosomal_L4 (pfam00573) → rplW (PRK05738)Ribosomal_L23 (pfam00276) → RplB (COG0090)rplB (PRK09374) → rpsS (PRK00357)Ribosomal_S19 (pfam00203) → rplV (PRK00565)Ribosomal_L22 (pfam00237) → RpsC (COG0092)rpsC (PRK00310) → rpl16 (CHL00044)rplP (PRK09203) → PRK00306 (PRK00306)Ribosomal_L29 (pfam00831) → rpsQ (PRK05610)Ribosomal_S17 (pfam00366) → rplN (PRK05483)Ribosomal_L14 (pfam00238) → RplX (COG0198)rplX (PRK00004) → rplE (PRK00010)RplE (COG0094) → rpsN (PRK08061)RpsN (COG0199) →                                                                                                                                                                                                                                                                                                  |

|        |                               |   |       |       |                                                                                                                                                                                                                                                                                                                                                                                                                                                                                                                                                                                                                                                                                                                                                                                                                                                                                                                                                                                                                                                                               |
|--------|-------------------------------|---|-------|-------|-------------------------------------------------------------------------------------------------------------------------------------------------------------------------------------------------------------------------------------------------------------------------------------------------------------------------------------------------------------------------------------------------------------------------------------------------------------------------------------------------------------------------------------------------------------------------------------------------------------------------------------------------------------------------------------------------------------------------------------------------------------------------------------------------------------------------------------------------------------------------------------------------------------------------------------------------------------------------------------------------------------------------------------------------------------------------------|
| env-73 | SRS063985.LANL_scaffold_52558 | + | 6006  | 6085  | RNA → rpsJ (PRK00596)RpsJ (COG0051) → RplC (COG0087)rplC (PRK00001) → rplD (PRK05319)Ribosomal_L4 (pfam00573) → rplW (PRK05738)Ribosomal_L23 (pfam00276) → RplB (COG0090)rplB (PRK09374) → rpsS (PRK00357)Ribosomal_S19 (pfam00203) → rplV (PRK00565)Ribosomal_L22 (pfam00237) →                                                                                                                                                                                                                                                                                                                                                                                                                                                                                                                                                                                                                                                                                                                                                                                              |
| env-74 | SRS064276.LANL_scaffold_65717 | + | 3203  | 3282  | RNA → rpsJ (PRK00596)RpsJ (COG0051) → RplC (COG0087)rplC (PRK00001) → rplD (PRK05319)Ribosomal_L4 (pfam00573) → rplW (PRK05738)Ribosomal_L23 (pfam00276) → RplB (COG0090)rplB (PRK09374) →                                                                                                                                                                                                                                                                                                                                                                                                                                                                                                                                                                                                                                                                                                                                                                                                                                                                                    |
| env-75 | SRS065504.LANL_scaffold_36299 | + | 111   | 190   | RNA → rpsJ (PRK00596)RpsJ (COG0051) → rpl3 (CHL00143)rplC (PRK00001) →                                                                                                                                                                                                                                                                                                                                                                                                                                                                                                                                                                                                                                                                                                                                                                                                                                                                                                                                                                                                        |
| env-76 | NLM016_scaffold9518_14        | - | 10030 | 9953  | RNA → rpsJ (PRK00596)RpsJ (COG0051) → RplC (COG0087)rplC (PRK00001) → rplD (PRK05319)Ribosomal_L4 (pfam00573) → rplW (PRK05738)Ribosomal_L23 (pfam00276) → RplB (COG0090)rplB (PRK09374) → rpsS (PRK00357)Ribosomal_S19 (pfam00203) → rplV (PRK00565)Ribosomal_L22 (pfam00237) → RpsC (COG0092)rpsC (PRK00310) → rpl16 (CHL00044)rplP (PRK09203) → PRK00306 (PRK00306)Ribosomal_L29 (pfam00831) → rpsQ (PRK05610)Ribosomal_S17 (pfam00366) → rplN (PRK05483)Ribosomal_L14 (pfam00238) → RplX (COG0198)rplX (PRK00004) → rplE (PRK00010)RplE (COG0094) → rpsN (PRK08061)RpsN (COG0199) → rpsH (PRK00136)Ribosomal_S8 (pfam00410) → RplF (COG0097)rplF (PRK05498) → rplR (PRK05593)Ribosomal_L18p (pfam00861) → RpsE (COG0098)rpsE (PRK00550) → Ribosomal_L30 (cd01658)rpmD (PRK05611) → RplO (COG0200)rplO (PRK05592) → SecY (COG0201)secY (PRK09204) →                                                                                                                                                                                                                        |
| env-77 | scaffold5973.1.MH0070         | + | 109   | 186   | RNA → rpsJ (PRK00596)RpsJ (COG0051) → RplC (COG0087)rplC (PRK00001) →                                                                                                                                                                                                                                                                                                                                                                                                                                                                                                                                                                                                                                                                                                                                                                                                                                                                                                                                                                                                         |
| env-78 | DLF010_scaffold363_8          | - | 13570 | 13493 | RNA → rpsJ (PRK00596)RpsJ (COG0051) → RplC (COG0087)rplC (PRK00001) → rplD (PRK05319)Ribosomal_L4 (pfam00573) → rplW (PRK05738)Ribosomal_L23 (pfam00276) → RplB (COG0090)rplB (PRK09374) → rpsS (PRK00357)Ribosomal_S19 (pfam00203) → rplV (PRK00565)Ribosomal_L22 (pfam00237) → RpsC (COG0092)rpsC (PRK00310) → rpl16 (CHL00044)rplP (PRK09203) → PRK00306 (PRK00306)Ribosomal_L29 (pfam00831) → rpsQ (PRK05610)Ribosomal_S17 (pfam00366) → rplN (PRK05483)Ribosomal_L14 (pfam00238) → RplX (COG0198)rplX (PRK00004) → rplE (PRK00010)RplE (COG0094) → rpsN (PRK08061)RpsN (COG0199) → rpsH (PRK00136)Ribosomal_S8 (pfam00410) → RplF (COG0097)rplF (PRK05498) → rplR (PRK05593)Ribosomal_L18p (pfam00861) → RpsE (COG0098)rpsE (PRK00550) → Ribosomal_L30 (cd01658)rpmD (PRK05611) → RplO (COG0200)rplO (PRK05592) → SecY (COG0201)secY (PRK09204) →                                                                                                                                                                                                                        |
| env-79 | NOF005_scaffold4009_2         | + | 389   | 466   | RNA → rpsJ (PRK00596)RpsJ (COG0051) → RplC (COG0087)rplC (PRK00001) → rplD (PRK05319)Ribosomal_L4 (pfam00573) → rplW (PRK05738)Ribosomal_L23 (pfam00276) → RplB (COG0090)rplB (PRK09374) →                                                                                                                                                                                                                                                                                                                                                                                                                                                                                                                                                                                                                                                                                                                                                                                                                                                                                    |
| env-80 | 4491414.3.NODE_8789           | + | 2679  | 2756  | RNA → rpsJ (PRK00596)RpsJ (COG0051) → RplC (COG0087)rplC (PRK00001) → rplD (PRK05319)Ribosomal_L4 (pfam00573) → rplW (PRK05738)Ribosomal_L23 (pfam00276) → RplB (COG0090)rplB (PRK09374) → rpsS (PRK00357)Ribosomal_S19 (pfam00203) → rplV (PRK00565)Ribosomal_L22 (pfam00237) → RpsC (COG0092)rpsC (PRK00310) → rpl16 (CHL00044)rplP (PRK09203) → PRK00306 (PRK00306)Ribosomal_L29 (pfam00831) → rpsQ (PRK05610)Ribosomal_S17 (pfam00366) → rplN (PRK05483)Ribosomal_L14 (pfam00238) → RplX (COG0198)rplX (PRK00004) → rplE (PRK00010)RplE (COG0094) → rpsN (PRK08061)RpsN (COG0199) → rpsH (PRK00136)Ribosomal_S8 (pfam00410) → RplF (COG0097)rplF (PRK05498) → rplR (PRK05593)Ribosomal_L18p (pfam00861) → RpsE (COG0098)rpsE (PRK00550) → Ribosomal_L30 (cd01658)rpmD (PRK05611) → RplO (COG0200)rplO (PRK05592) → SecY (COG0201)secY (PRK09204) → adk (PRK00279)ADK (pfam00406) → PRK05716 (PRK05716)MetAP1 (cd01086) → infA (PRK00276)S1_IF1 (cd04451) → rpmJ (PRK00465)Ribosomal_L36 (pfam00444) → RpsM (COG0099)rpsM (PRK05179) → PRK05309 (PRK05309)RpsK (COG0100) → |



|         |                                      |   |       |       |                                                                                                                                                                                                                                                                                                                                                                                                                                                                                                                                                                                                                                                                                                                                                                                                                                                                                                                                                                                                                                                                                             |
|---------|--------------------------------------|---|-------|-------|---------------------------------------------------------------------------------------------------------------------------------------------------------------------------------------------------------------------------------------------------------------------------------------------------------------------------------------------------------------------------------------------------------------------------------------------------------------------------------------------------------------------------------------------------------------------------------------------------------------------------------------------------------------------------------------------------------------------------------------------------------------------------------------------------------------------------------------------------------------------------------------------------------------------------------------------------------------------------------------------------------------------------------------------------------------------------------------------|
| env-81  | DOM017_scaffold3301_19               | + | 250   | 327   | <p>RNA → rpsJ (PRK00596)RpsJ (COG0051) → RplC (COG0087)rplC (PRK00001) → rplD (PRK05319)Ribosomal_L4 (pfam00573) → rplW (PRK05738)Ribosomal_L23 (pfam00276) → RplB (COG0090)rplB (PRK09374) → rpsS (PRK00357)Ribosomal_S19 (pfam00203) → rplV (PRK00565)Ribosomal_L22 (pfam00237) → RpsC (COG0092)rpsC (PRK00310) → rpl16 (CHL00044)rplP (PRK09203) → PRK00306 (PRK00306)Ribosomal_L29 (pfam00831) → rpsQ (PRK05610)Ribosomal_S17 (pfam00366) → rplN (PRK05483)Ribosomal_L14 (pfam00238) → RplX (COG0198)rplX (PRK00004) → rplE (PRK00010)RplE (COG0094) → rpsN (PRK08061)RpsN (COG0199) → rpsH (PRK00136)Ribosomal_S8 (pfam00410) → RplF (COG0097)rplF (PRK05498) → rplR (PRK05593)Ribosomal_L18p (pfam00861) → RpsE (COG0098)rpsE (PRK00550) → Ribosomal_L30 (cd01658)rpmD (PRK05611) → RplO (COG0200)rplO (PRK05592) → SecY (COG0201)secY (PRK09204) → adk (PRK00279)ADK (pfam00406) → PRK05716 (PRK05716)MetAP1 (cd01086) → infA (PRK00276)S1_IF1 (cd04451) → rpmJ (PRK00465)Ribosomal_L36 (pfam00444) → RpsM (COG0099)rpsM (PRK05179) → PRK05309 (PRK05309)RpsK (COG0100) → hypo →</p> |
| env-82  | scaffold7442_2_MH0060                | + | 810   | 887   | <p>RNA → rpsJ (PRK00596)Ribosomal_S10 (pfam00338) →</p>                                                                                                                                                                                                                                                                                                                                                                                                                                                                                                                                                                                                                                                                                                                                                                                                                                                                                                                                                                                                                                     |
| env-83  | DLM001_scaffold58196_1               | - | 43327 | 43250 | <p>RNA → rpsJ (PRK00596)RpsJ (COG0051) → RplC (COG0087)rplC (PRK00001) → rplD (PRK05319)Ribosomal_L4 (pfam00573) → rplW (PRK05738)Ribosomal_L23 (pfam00276) → RplB (COG0090)rplB (PRK09374) → rpsS (PRK00357)Ribosomal_S19 (pfam00203) → rplV (PRK00565)Ribosomal_L22 (pfam00237) → RpsC (COG0092)rpsC (PRK00310) → rpl16 (CHL00044)rplP (PRK09203) → PRK00306 (PRK00306)Ribosomal_L29 (pfam00831) → rpsQ (PRK05610)Ribosomal_S17 (pfam00366) → rplN (PRK05483)Ribosomal_L14 (pfam00238) → RplX (COG0198)rplX (PRK00004) → rplE (PRK00010)RplE (COG0094) → rpsN (PRK08061)RpsN (COG0199) → rpsH (PRK00136)Ribosomal_S8 (pfam00410) → RplF (COG0097)rplF (PRK05498) → rplR (PRK05593)Ribosomal_L18p (pfam00861) → RpsE (COG0098)rpsE (PRK00550) → Ribosomal_L30 (cd01658)rpmD (PRK05611) → RplO (COG0200)rplO (PRK05592) → SecY (COG0201)secY (PRK09204) →</p>                                                                                                                                                                                                                               |
| env-84  | NLM015_scaffold954.6                 | + | 5548  | 5625  | <p>RNA → rpsJ (PRK00596)RpsJ (COG0051) →</p>                                                                                                                                                                                                                                                                                                                                                                                                                                                                                                                                                                                                                                                                                                                                                                                                                                                                                                                                                                                                                                                |
| env-85  | 4491401.3_NODE_15713                 | + | 3028  | 3095  | <p>RNA → rpsJ (PRK00596)RpsJ (COG0051) →</p>                                                                                                                                                                                                                                                                                                                                                                                                                                                                                                                                                                                                                                                                                                                                                                                                                                                                                                                                                                                                                                                |
| env-86  | SRS024435_LANL_scaffold_25731        | - | 322   | 255   | <p>RNA → rpsJ (PRK00596)RpsJ (COG0051) →</p>                                                                                                                                                                                                                                                                                                                                                                                                                                                                                                                                                                                                                                                                                                                                                                                                                                                                                                                                                                                                                                                |
| env-87  | 4491482.3_NODE_33602                 | + | 1071  | 1138  | <p>RNA → rpsJ (PRK00596)RpsJ (COG0051) →</p>                                                                                                                                                                                                                                                                                                                                                                                                                                                                                                                                                                                                                                                                                                                                                                                                                                                                                                                                                                                                                                                |
| env-88  | UnmappedStool_Broad_scaffold_1102440 | + | 454   | 521   | <p>RNA →</p>                                                                                                                                                                                                                                                                                                                                                                                                                                                                                                                                                                                                                                                                                                                                                                                                                                                                                                                                                                                                                                                                                |
| env-89  | SRS050925_C2029917                   | - | 176   | 109   | <p>RNA →</p>                                                                                                                                                                                                                                                                                                                                                                                                                                                                                                                                                                                                                                                                                                                                                                                                                                                                                                                                                                                                                                                                                |
| Pba-1-1 | NZ_KI259856.1                        | - | 47470 | 47393 | <p>RNA → hypo → rpsJ (PRK00596)RpsJ (COG0051) → RplC (COG0087)rplC (PRK00001) → rplD (PRK05319)Ribosomal_L4 (pfam00573) → rplW (PRK05738)Ribosomal_L23 (pfam00276) → RplB (COG0090)rplB (PRK09374) → rps19 (CHL00050)rpsS (PRK00357) → rplV (PRK00565)Ribosomal_L22 (pfam00237) → RpsC (COG0092)rpsC (PRK00310) → rpl16 (CHL00044)rplP (PRK09203) → rpl16 (CHL00044)rplP (PRK09203) → PRK00306 (PRK00306)Ribosomal_L29 (pfam00831) → rpsQ (PRK05610)Ribosomal_S17 (pfam00366) → rplN (PRK05483)Ribosomal_L14 (pfam00238) → RplX (COG0198)rplX (PRK00004) → rplE (PRK00010)RplE (COG0094) → rplE (PRK00010)RplE (COG0094) → rpsN (PRK08061)RpsN (COG0199) → rpsH (PRK00136)Ribosomal_S8 (pfam00410) → RplF (COG0097)rplF (PRK05498) → rplR (PRK05593)Ribosomal_L18p (pfam00861) → RpsE (COG0098)rpsE (PRK00550) → Ribosomal_L30 (cd01658)rpmD (PRK05611) → rplO (PRK05592)Ribosomal_L27A (pfam00828) → SecY (COG0201)secY (PRK09204) →</p>                                                                                                                                                   |
| env-90  | ADJS01004188.1                       | - | 54515 | 54436 | <p>RNA → rpsJ (PRK00596)RpsJ (COG0051) → RplC (COG0087)rplC (PRK00001) → rplD (PRK05319)Ribosomal_L4 (pfam00573) → rplW (PRK05738)Ribosomal_L23 (pfam00276) → RplB (COG0090)rplB (PRK09374) → rpsS (PRK00357)Ribosomal_S19 (pfam00203) → rplV (PRK00565)Ribosomal_L22 (pfam00237) → RpsC (COG0092)rpsC (PRK00310) → rpl16 (CHL00044)rplP (PRK09203) → PRK00306 (PRK00306)Ribosomal_L29 (pfam00831) → rpsQ (PRK05610)Ribosomal_S17 (pfam00366) → rplN (PRK05483)Ribosomal_L14 (pfam00238) → RplX (COG0198)rplX (PRK00004) → rplE (PRK00010)RplE (COG0094) → rpsN (PRK08061)RpsN (COG0199) → rpsH (PRK00136)Ribosomal_S8 (pfam00410) → RplF (COG0097)rplF (PRK05498) → rplR (PRK05593)Ribosomal_L18p (pfam00861) → RpsE (COG0098)rpsE (PRK00550) → Ribosomal_L30 (cd01658)rpmD (PRK05611) → RplO (COG0200)rplO (PRK05592) → SecY (COG0201)secY (PRK09204) →</p>                                                                                                                                                                                                                               |

|         |                                |   |       |       |                                                                                                                                                                                                                                                                                                                                                                                                                                                                                                                                              |
|---------|--------------------------------|---|-------|-------|----------------------------------------------------------------------------------------------------------------------------------------------------------------------------------------------------------------------------------------------------------------------------------------------------------------------------------------------------------------------------------------------------------------------------------------------------------------------------------------------------------------------------------------------|
| env-91  | scaffold34758_2_V1.CD-9        | - | 3281  | 3202  | RNA → rpsJ (PRK00596)RpsJ (COG0051) → RplC (COG0087)rplC (PRK00001) → rplD (PRK05319)Ribosomal_L4 (pfam00573) → rplW (PRK05738)Ribosomal_L23 (pfam00276) → RplB (COG0090)rplB (PRK09374) → rpsS (PRK00357)Ribosomal_S19 (pfam00203) →                                                                                                                                                                                                                                                                                                        |
| env-92  | SRS017103_C2723434             | + | 281   | 357   | RNA → rpsJ (PRK00596)RpsJ (COG0051) → RplC (COG0087)rplC (PRK00001) → rplD (PRK05319)Ribosomal_L4 (pfam00573) → rplW (PRK05738)Ribosomal_L23 (pfam00276) → RplB (COG0090)rplB (PRK09374) →                                                                                                                                                                                                                                                                                                                                                   |
| env-93  | SRS024331_LANL_scaffold_32721  | - | 2639  | 2563  | RNA → rpsJ (PRK00596)RpsJ (COG0051) → RplC (COG0087)rplC (PRK00001) → rplD (PRK05319)Ribosomal_L4 (pfam00573) → rplW (PRK05738)Ribosomal_L23 (pfam00276) →                                                                                                                                                                                                                                                                                                                                                                                   |
| env-94  | scaffold19892_1_MH0040         | + | 1899  | 1975  | RNA → rpsJ (PRK00596)RpsJ (COG0051) → RplC (COG0087)rplC (PRK00001) → rplD (PRK05319)Ribosomal_L4 (pfam00573) → rplW (PRK05738)Ribosomal_L23 (pfam00276) → RplB (PRK09374)Ribosomal_L2 (pfam00181) →                                                                                                                                                                                                                                                                                                                                         |
| env-95  | scaffold1228_27_MH0072         | - | 10164 | 10088 | RNA → rpsJ (PRK00596)RpsJ (COG0051) → RplC (COG0087)rplC (PRK00001) → rplD (PRK05319)Ribosomal_L4 (pfam00573) → rplW (PRK05738)Ribosomal_L23 (pfam00276) → RplB (COG0090)rplB (PRK09374) → rpsS (PRK00357)RpsS (COG0185) → rplV (PRK00565)Ribosomal_L22 (pfam00237) → RpsC (COG0092)rpsC (PRK00310) → rpl16 (CHL00044)rplP (PRK09203) → PRK00306 (PRK00306)Ribosomal_L29 (pfam00831) → rpsQ (PRK05610)Ribosomal_S17 (pfam00366) → rplN (PRK05483)Ribosomal_L14 (pfam00238) → RplX (COG0198)rplX (PRK00004) → rplE (PRK00010)RplE (COG0094) → |
| env-96  | scaffold14350_6_MH0053         | - | 1036  | 960   | RNA → rpsJ (PRK00596)RpsJ (COG0051) → RplC (COG0087)rplC (PRK00001) →                                                                                                                                                                                                                                                                                                                                                                                                                                                                        |
| env-97  | scaffold60961_3_MH0030         | - | 1485  | 1409  | RNA → rpsJ (PRK00596)RpsJ (COG0051) →                                                                                                                                                                                                                                                                                                                                                                                                                                                                                                        |
| env-98  | scaffold51359_1_O2.UC-24       | - | 257   | 181   | RNA →                                                                                                                                                                                                                                                                                                                                                                                                                                                                                                                                        |
| env-99  | SRS016335_C5109370             | - | 393   | 317   | RNA → rpsJ (PRK00596)Ribosomal_S10 (pfam00338) →                                                                                                                                                                                                                                                                                                                                                                                                                                                                                             |
| env-100 | SRS018817_C2118834             | + | 952   | 1028  | RNA → rpsJ (PRK00596)RpsJ (COG0051) → rpl3 (CHL00143)rplC (PRK00001) →                                                                                                                                                                                                                                                                                                                                                                                                                                                                       |
| env-101 | SRS050752_LANL_scaffold_50853  | - | 2468  | 2392  | RNA → rpsJ (PRK00596)RpsJ (COG0051) → RplC (COG0087)rplC (PRK00001) → rplD (PRK05319)Ribosomal_L4 (pfam00573) → rplW (PRK05738)Ribosomal_L23 (pfam00276) → RplB (COG0090)rplB (PRK09374) →                                                                                                                                                                                                                                                                                                                                                   |
| env-102 | 4491405.3_NODE_1553            | - | 26834 | 26758 | RNA → rpsJ (PRK00596)RpsJ (COG0051) →                                                                                                                                                                                                                                                                                                                                                                                                                                                                                                        |
| env-103 | DLM022_scaffold43434_1         | + | 1026  | 1102  | RNA → rpsJ (PRK00596)RpsJ (COG0051) →                                                                                                                                                                                                                                                                                                                                                                                                                                                                                                        |
| env-104 | NLM021_scaffold24247_3         | - | 25270 | 25194 | RNA → rpsJ (PRK00596)RpsJ (COG0051) →                                                                                                                                                                                                                                                                                                                                                                                                                                                                                                        |
| env-105 | SRS014235_WUGC_scaffold_122205 | - | 2336  | 2260  | RNA → rpsJ (PRK00596)RpsJ (COG0051) →                                                                                                                                                                                                                                                                                                                                                                                                                                                                                                        |
| env-106 | SRS019601_C2046325             | - | 1588  | 1512  | RNA → rpsJ (PRK00596)RpsJ (COG0051) →                                                                                                                                                                                                                                                                                                                                                                                                                                                                                                        |
| env-107 | DLF006_scaffold12563_13        | - | 870   | 794   | RNA → rpsJ (PRK00596)RpsJ (COG0051) →                                                                                                                                                                                                                                                                                                                                                                                                                                                                                                        |
| env-108 | SRS024435_C3230964             | - | 2635  | 2559  | RNA → rpsJ (PRK00596)RpsJ (COG0051) →                                                                                                                                                                                                                                                                                                                                                                                                                                                                                                        |
| env-109 | SRS017701_C1702668             | + | 150   | 226   | RNA →                                                                                                                                                                                                                                                                                                                                                                                                                                                                                                                                        |
| env-110 | scaffold12346_3_MH0031         | - | 1221  | 1145  | RNA → rpsJ (PRK00596)RpsJ (COG0051) →                                                                                                                                                                                                                                                                                                                                                                                                                                                                                                        |
| env-111 | DLM019_scaffold63082_2         | - | 34456 | 34380 | RNA → rpsJ (PRK00596)RpsJ (COG0051) →                                                                                                                                                                                                                                                                                                                                                                                                                                                                                                        |
| env-112 | scaffold8414_7_V1.CD-8         | - | 2764  | 2688  | RNA → rpsJ (PRK00596)RpsJ (COG0051) →                                                                                                                                                                                                                                                                                                                                                                                                                                                                                                        |
| env-113 | 4491409.3_NODE_23640           | + | 28884 | 28960 | RNA → rpsJ (PRK00596)RpsJ (COG0051) →                                                                                                                                                                                                                                                                                                                                                                                                                                                                                                        |
| env-114 | scaffold6976_8_MH0016          | + | 328   | 403   | RNA → rpsJ (PRK00596)RpsJ (COG0051) → RplC (COG0087)rplC (PRK00001) → rplD (PRK05319)Ribosomal_L4 (pfam00573) → rplW (PRK05738)Ribosomal_L23 (pfam00276) → RplB (COG0090)rplB (PRK09374) →                                                                                                                                                                                                                                                                                                                                                   |
| env-115 | scaffold81869_1_MH0033         | - | 212   | 137   | RNA →                                                                                                                                                                                                                                                                                                                                                                                                                                                                                                                                        |
| env-116 | 4491405.3_NODE_19252           | + | 230   | 305   | RNA → rpsJ (PRK00596)Ribosomal_S10 (pfam00338) →                                                                                                                                                                                                                                                                                                                                                                                                                                                                                             |

|         |                                 |   |       |       |                                                                                                                                                                                                                                                                                                                                                                                                                                                                                                                                                                                                                                                                                                                                                                                                                                                                                                                                                                                                                                                                                                                                                                                                                    |
|---------|---------------------------------|---|-------|-------|--------------------------------------------------------------------------------------------------------------------------------------------------------------------------------------------------------------------------------------------------------------------------------------------------------------------------------------------------------------------------------------------------------------------------------------------------------------------------------------------------------------------------------------------------------------------------------------------------------------------------------------------------------------------------------------------------------------------------------------------------------------------------------------------------------------------------------------------------------------------------------------------------------------------------------------------------------------------------------------------------------------------------------------------------------------------------------------------------------------------------------------------------------------------------------------------------------------------|
| env-117 | 4491410.3_NODE.2064             | + | 423   | 498   | RNA → rpsJ (PRK00596)RpsJ (COG0051) → RplC (COG0087)rplC (PRK00001) → rplD (PRK05319)Ribosomal_L4 (pfam00573) → rplW (PRK05738)Ribosomal_L23 (pfam00276) → RplB (COG0090)rplB (PRK09374) → rpsS (PRK00357)Ribosomal_S19 (pfam00203) → rplV (PRK00565)Ribosomal_L22 (pfam00237) → RpsC (COG0092)rpsC (PRK00310) → rpl16 (CHL00044)rplP (PRK09203) → PRK00306 (PRK00306)Ribosomal_L29 (pfam00831) → rpsQ (PRK05610)Ribosomal_S17 (pfam00366) → rplN (PRK05483)Ribosomal_L14 (pfam00238) → RplX (COG0198)rplX (PRK00004) → rplE (PRK00010)RplE (COG0094) → rpsN (PRK08061)RpsN (COG0199) → rpsH (PRK00136)Ribosomal_S8 (pfam00410) → RplF (COG0097)rplF (PRK05498) → rplR (PRK05593)Ribosomal_L18p (pfam00861) → RpsE (COG0098)rpsE (PRK00550) → Ribosomal_L30 (cd01658)rpmD (PRK05611) → RplO (COG0200)rplO (PRK05592) → SecY (COG0201)secY (PRK09204) → adk (PRK00279)ADK (pfam00406) → PRK05716 (PRK05716)MetAP1 (cd01086) → KOW_RPL14 (cd06088) → infA (PRK00276)S1_IF1 (cd04451) → rpmJ (PRK00465)Ribosomal_L36 (pfam00444) → RpsM (COG0099)rpsM (PRK05179) → PRK05309 (PRK05309)RpsK (COG0100) → RpsD (COG0522)rpsD (PRK05327) → RpoA (COG0202)PRK05182 (PRK05182) → rplQ (PRK05591)Ribosomal_L17 (pfam01196) → |
| env-118 | 4491412.3_NODE.68334            | + | 16503 | 16578 | RNA → rpsJ (PRK00596)RpsJ (COG0051) → RplC (COG0087)rplC (PRK00001) → rplD (PRK05319)Ribosomal_L4 (pfam00573) → rplW (PRK05738)Ribosomal_L23 (pfam00276) →                                                                                                                                                                                                                                                                                                                                                                                                                                                                                                                                                                                                                                                                                                                                                                                                                                                                                                                                                                                                                                                         |
| env-119 | NOF004_scaffold6915_3           | - | 18884 | 18809 | RNA → rpsJ (PRK00596)RpsJ (COG0051) → RplC (COG0087)rplC (PRK00001) → rplD (PRK05319)Ribosomal_L4 (pfam00573) → rplW (PRK05738)Ribosomal_L23 (pfam00276) → RplB (COG0090)rplB (PRK09374) → rpsS (PRK00357)Ribosomal_S19 (pfam00203) → rplV (PRK00565)Ribosomal_L22 (pfam00237) → RpsC (COG0092)rpsC (PRK00310) → rpl16 (CHL00044)rplP (PRK09203) → PRK00306 (PRK00306)Ribosomal_L29 (pfam00831) → rpsQ (PRK05610)Ribosomal_S17 (pfam00366) → rplN (PRK05483)Ribosomal_L14 (pfam00238) → RplX (COG0198)rplX (PRK00004) → rplE (PRK00010)RplE (COG0094) → rpsN (PRK08061)RpsN (COG0199) → rpsH (PRK00136)Ribosomal_S8 (pfam00410) → RplF (COG0097)rplF (PRK05498) → rplR (PRK05593)Ribosomal_L18p (pfam00861) → RpsE (COG0098)rpsE (PRK00550) → Ribosomal_L30 (cd01658)rpmD (PRK05611) → RplO (COG0200)rplO (PRK05592) → SecY (COG0201)secY (PRK09204) →                                                                                                                                                                                                                                                                                                                                                             |
| env-120 | SRS052697_LANL_scaffold_30806   | + | 25704 | 25779 | RNA → rpsJ (PRK00596)Ribosomal_S10 (pfam00338) →                                                                                                                                                                                                                                                                                                                                                                                                                                                                                                                                                                                                                                                                                                                                                                                                                                                                                                                                                                                                                                                                                                                                                                   |
| env-121 | SRS024435_C2906239              | - | 134   | 59    | RNA → hypo →                                                                                                                                                                                                                                                                                                                                                                                                                                                                                                                                                                                                                                                                                                                                                                                                                                                                                                                                                                                                                                                                                                                                                                                                       |
| env-122 | SRS047014_WUGC_scaffold_72164   | - | 438   | 365   | RNA → rpsJ (PRK00596)Ribosomal_S10 (pfam00338) →                                                                                                                                                                                                                                                                                                                                                                                                                                                                                                                                                                                                                                                                                                                                                                                                                                                                                                                                                                                                                                                                                                                                                                   |
| env-123 | scaffold29511_2_MH0002          | - | 2951  | 2878  | RNA → rpsJ (PRK00596)RpsJ (COG0051) → RplC (COG0087)rplC (PRK00001) → rplD (PRK05319)Ribosomal_L4 (pfam00573) → rplW (PRK05738)Ribosomal_L23 (pfam00276) → RplB (COG0090)rplB (PRK09374) →                                                                                                                                                                                                                                                                                                                                                                                                                                                                                                                                                                                                                                                                                                                                                                                                                                                                                                                                                                                                                         |
| env-124 | scaffold7276_3_MH0061           | - | 2984  | 2911  | RNA → rpsJ (PRK00596)RpsJ (COG0051) → RplC (COG0087)rplC (PRK00001) → rplD (PRK05319)Ribosomal_L4 (pfam00573) → rplW (PRK05738)Ribosomal_L23 (pfam00276) → RplB (COG0090)rplB (PRK09374) →                                                                                                                                                                                                                                                                                                                                                                                                                                                                                                                                                                                                                                                                                                                                                                                                                                                                                                                                                                                                                         |
| env-125 | scaffold78335_2_V1.UC-9         | + | 5667  | 5740  | RNA → rpsJ (PRK00596)Ribosomal_S10 (pfam00338) →                                                                                                                                                                                                                                                                                                                                                                                                                                                                                                                                                                                                                                                                                                                                                                                                                                                                                                                                                                                                                                                                                                                                                                   |
| env-126 | SRS022524_Baylor_scaffold_45135 | + | 2738  | 2811  | RNA → rpsJ (PRK00596)RpsJ (COG0051) → RplC (COG0087)rplC (PRK00001) → rplD (PRK05319)Ribosomal_L4 (pfam00573) → rplW (PRK05738)Ribosomal_L23 (pfam00276) → RplB (COG0090)rplB (PRK09374) →                                                                                                                                                                                                                                                                                                                                                                                                                                                                                                                                                                                                                                                                                                                                                                                                                                                                                                                                                                                                                         |
| env-127 | SRS063040_Baylor_scaffold_52905 | - | 1532  | 1459  | RNA → rpsJ (PRK00596)RpsJ (COG0051) → RplC (COG0087)rplC (PRK00001) → rplD (PRK05319)Ribosomal_L4 (pfam00573) →                                                                                                                                                                                                                                                                                                                                                                                                                                                                                                                                                                                                                                                                                                                                                                                                                                                                                                                                                                                                                                                                                                    |
| env-128 | 4491421.3_NODE.12916            | + | 171   | 244   | RNA → rpsJ (PRK00596)RpsJ (COG0051) →                                                                                                                                                                                                                                                                                                                                                                                                                                                                                                                                                                                                                                                                                                                                                                                                                                                                                                                                                                                                                                                                                                                                                                              |
| Rfl-1-1 | NZ_ACOK01000089.1               | - | 23727 | 23654 | RNA → rpsJ (PRK00596)RpsJ (COG0051) → rpsJ (PRK00596)RpsJ (COG0051) →                                                                                                                                                                                                                                                                                                                                                                                                                                                                                                                                                                                                                                                                                                                                                                                                                                                                                                                                                                                                                                                                                                                                              |
| env-129 | AUXO012404992.1                 | + | 861   | 934   | RNA →                                                                                                                                                                                                                                                                                                                                                                                                                                                                                                                                                                                                                                                                                                                                                                                                                                                                                                                                                                                                                                                                                                                                                                                                              |
| env-130 | scaffold4266_1_O2.UC-20         | - | 2230  | 2134  | RNA → rpsJ (PRK00596)RpsJ (COG0051) →                                                                                                                                                                                                                                                                                                                                                                                                                                                                                                                                                                                                                                                                                                                                                                                                                                                                                                                                                                                                                                                                                                                                                                              |
| env-131 | SRS011306_Baylor_scaffold_82937 | - | 355   | 251   | RNA → rpsJ (PRK00596)RpsJ (COG0051) →                                                                                                                                                                                                                                                                                                                                                                                                                                                                                                                                                                                                                                                                                                                                                                                                                                                                                                                                                                                                                                                                                                                                                                              |
| env-132 | SRS050244_C4490640              | + | 496   | 600   | RNA →                                                                                                                                                                                                                                                                                                                                                                                                                                                                                                                                                                                                                                                                                                                                                                                                                                                                                                                                                                                                                                                                                                                                                                                                              |
| env-133 | Throat_LANL_C5678524            | + | 67    | 171   | RNA → hypo →                                                                                                                                                                                                                                                                                                                                                                                                                                                                                                                                                                                                                                                                                                                                                                                                                                                                                                                                                                                                                                                                                                                                                                                                       |
| env-134 | SRS022530_LANL_scaffold_32319   | - | 61485 | 61381 | RNA → rpsJ (PRK00596)RpsJ (COG0051) →                                                                                                                                                                                                                                                                                                                                                                                                                                                                                                                                                                                                                                                                                                                                                                                                                                                                                                                                                                                                                                                                                                                                                                              |
| env-135 | SRS023617_C3177372              | + | 418   | 522   | RNA → rpsJ (PRK00596)RpsJ (COG0051) →                                                                                                                                                                                                                                                                                                                                                                                                                                                                                                                                                                                                                                                                                                                                                                                                                                                                                                                                                                                                                                                                                                                                                                              |
| env-136 | SRS024015_Baylor_scaffold_39044 | + | 136   | 240   | RNA → rpsJ (PRK00596)RpsJ (COG0051) →                                                                                                                                                                                                                                                                                                                                                                                                                                                                                                                                                                                                                                                                                                                                                                                                                                                                                                                                                                                                                                                                                                                                                                              |
| env-137 | SRS063288_LANL_scaffold_41293   | - | 688   | 584   | RNA → rpsJ (PRK00596)RpsJ (COG0051) →                                                                                                                                                                                                                                                                                                                                                                                                                                                                                                                                                                                                                                                                                                                                                                                                                                                                                                                                                                                                                                                                                                                                                                              |
| env-138 | SRS048791_C3235272              | + | 564   | 668   | RNA →                                                                                                                                                                                                                                                                                                                                                                                                                                                                                                                                                                                                                                                                                                                                                                                                                                                                                                                                                                                                                                                                                                                                                                                                              |

|         |                                  |   |         |         |                                                                                                                                                                                                                                                                                                                                                                                                                                                                                                                                                                                |
|---------|----------------------------------|---|---------|---------|--------------------------------------------------------------------------------------------------------------------------------------------------------------------------------------------------------------------------------------------------------------------------------------------------------------------------------------------------------------------------------------------------------------------------------------------------------------------------------------------------------------------------------------------------------------------------------|
| env-139 | SRS015057_C3265888               | + | 116     | 220     | RNA→                                                                                                                                                                                                                                                                                                                                                                                                                                                                                                                                                                           |
| env-140 | SRS055426_C3279481               | + | 716     | 820     | RNA→                                                                                                                                                                                                                                                                                                                                                                                                                                                                                                                                                                           |
| env-141 | SRS023557_C1764443               | + | 1478    | 1582    | RNA→ rpsJ (PRK00596)RpsJ (COG0051)→                                                                                                                                                                                                                                                                                                                                                                                                                                                                                                                                            |
| env-142 | SRS014888_C3060382               | + | 418     | 522     | RNA→                                                                                                                                                                                                                                                                                                                                                                                                                                                                                                                                                                           |
| env-143 | SRS024580_LANL_scaffold_44876    | - | 1561    | 1457    | RNA→ rpsJ (PRK00596)RpsJ (COG0051)→                                                                                                                                                                                                                                                                                                                                                                                                                                                                                                                                            |
| env-144 | SRS014124_C2621890               | - | 1301    | 1197    | RNA→ rpsJ (PRK00596)RpsJ (COG0051)→                                                                                                                                                                                                                                                                                                                                                                                                                                                                                                                                            |
| env-145 | SRS015893_WUGC_scaffold_31047    | + | 1959    | 2063    | RNA→ rpsJ (PRK00596)Ribosomal_S10 (pfam00338)→                                                                                                                                                                                                                                                                                                                                                                                                                                                                                                                                 |
| env-146 | SRS018591_WUGC_scaffold_38862    | - | 55571   | 55467   | RNA→ rpsJ (PRK00596)RpsJ (COG0051)→                                                                                                                                                                                                                                                                                                                                                                                                                                                                                                                                            |
| env-147 | SRS051791_LANL_scaffold_46426    | - | 75884   | 75780   | RNA→ rpsJ (PRK00596)RpsJ (COG0051)→                                                                                                                                                                                                                                                                                                                                                                                                                                                                                                                                            |
| env-148 | SRS011140_Baylor_scaffold_51353  | + | 94      | 198     | RNA→ rpsJ (PRK00596)RpsJ (COG0051)→                                                                                                                                                                                                                                                                                                                                                                                                                                                                                                                                            |
| env-149 | SRS012279_Baylor_scaffold_56090  | + | 690     | 794     | RNA→                                                                                                                                                                                                                                                                                                                                                                                                                                                                                                                                                                           |
| env-150 | SRS014271_C2921876               | - | 218     | 114     | RNA→                                                                                                                                                                                                                                                                                                                                                                                                                                                                                                                                                                           |
| env-151 | SRS014684_WUGC_scaffold_40865    | + | 1287    | 1391    | RNA→ rpsJ (PRK00596)RpsJ (COG0051)→                                                                                                                                                                                                                                                                                                                                                                                                                                                                                                                                            |
| env-152 | SRS014689_WUGC_scaffold_1936     | - | 994     | 890     | RNA→ rpsJ (PRK00596)RpsJ (COG0051)→                                                                                                                                                                                                                                                                                                                                                                                                                                                                                                                                            |
| env-153 | SRS019027_C1823783               | - | 185     | 81      | RNA→ hypo→                                                                                                                                                                                                                                                                                                                                                                                                                                                                                                                                                                     |
| env-154 | SRS024081_C2636285               | - | 218     | 114     | RNA→                                                                                                                                                                                                                                                                                                                                                                                                                                                                                                                                                                           |
| env-155 | SRS042910_C5605950               | + | 684     | 788     | RNA→                                                                                                                                                                                                                                                                                                                                                                                                                                                                                                                                                                           |
| env-156 | SRS062544_LANL_scaffold_74780    | + | 5551    | 5655    | RNA→                                                                                                                                                                                                                                                                                                                                                                                                                                                                                                                                                                           |
| env-157 | SRS064423_LANL_scaffold_33619    | + | 10606   | 10710   | RNA→ rpsJ (PRK00596)RpsJ (COG0051)→                                                                                                                                                                                                                                                                                                                                                                                                                                                                                                                                            |
| env-158 | SRS019122_C5850384               | + | 204     | 308     | RNA→ rpsJ (PRK00596)Ribosomal_S10 (pfam00338)→                                                                                                                                                                                                                                                                                                                                                                                                                                                                                                                                 |
| env-159 | SRS065278_LANL_scaffold_1918     | + | 684     | 788     | RNA→ rpsJ (PRK00596)RpsJ (COG0051)→                                                                                                                                                                                                                                                                                                                                                                                                                                                                                                                                            |
| env-160 | SRS014692_C1424509               | + | 220     | 324     | RNA→                                                                                                                                                                                                                                                                                                                                                                                                                                                                                                                                                                           |
| env-161 | SRS017713_C3272311               | + | 140     | 245     | RNA→                                                                                                                                                                                                                                                                                                                                                                                                                                                                                                                                                                           |
| Cmo-1-1 | NZ_KI535366.1                    | - | 700966  | 700861  | RNA→ rpsJ (PRK00596)RpsJ (COG0051)→                                                                                                                                                                                                                                                                                                                                                                                                                                                                                                                                            |
| env-162 | SRS022725_C5792968               | - | 517     | 412     | RNA→ rpsJ (PRK00596)RpsJ (COG0051)→                                                                                                                                                                                                                                                                                                                                                                                                                                                                                                                                            |
| env-163 | SRS022602_Baylor_scaffold_110235 | + | 21      | 126     | RNA→ rpsJ (PRK00596)RpsJ (COG0051)→                                                                                                                                                                                                                                                                                                                                                                                                                                                                                                                                            |
| Ece-1-1 | NZ_CM001487.1                    | + | 2574980 | 2575059 | RNA→ rpsJ (PRK00596)RpsJ (COG0051)→ rpsJ (PRK00596)RpsJ (COG0051)→                                                                                                                                                                                                                                                                                                                                                                                                                                                                                                             |
| env-164 | AUX0017143398.1                  | + | 3141    | 3243    | RNA→ rpsJ (PRK00596)RpsJ (COG0051)→                                                                                                                                                                                                                                                                                                                                                                                                                                                                                                                                            |
| Bfi-3-1 | NZ_ATVY01000026.1                | - | 26672   | 26570   | RNA→ rpsJ (PRK00596)RpsJ (COG0051)→                                                                                                                                                                                                                                                                                                                                                                                                                                                                                                                                            |
| Bfi-4-1 | NZ_AUJV01000009.1                | + | 23517   | 23619   | RNA→ rpsJ (PRK00596)RpsJ (COG0051)→                                                                                                                                                                                                                                                                                                                                                                                                                                                                                                                                            |
| Bfi-1-1 | NZ_ATVZ01000006.1                | - | 67223   | 67121   | RNA→ rpsJ (PRK00596)RpsJ (COG0051)→                                                                                                                                                                                                                                                                                                                                                                                                                                                                                                                                            |
| Bfi-2-1 | NZ_AUJW01000021.1                | - | 71753   | 71651   | RNA→ rpsJ (PRK00596)RpsJ (COG0051)→                                                                                                                                                                                                                                                                                                                                                                                                                                                                                                                                            |
| env-165 | SRS013252_Baylor_scaffold_21948  | - | 7197    | 7095    | RNA→ rpsJ (PRK00596)RpsJ (COG0051)→ RplC (COG0087)rplC (PRK00001)→<br>rplD (PRK05319)Ribosomal_L4 (pfam00573)→ rplW (PRK05738)Ribosomal_L23 (pfam00276)→<br>RplB (COG0090)rplB (PRK09374)→ rpsS (PRK00357)RpsS (COG0185)→<br>rplV (PRK00565)Ribosomal_L22 (pfam00237)→ RpsC (COG0092)rpsC (PRK00310)→<br>rpl16 (CHL00044)rplP (PRK09203)→ PRK00306 (PRK00306)Ribosomal_L29 (pfam00831)→<br>rpsQ (PRK05610)Ribosomal_S17 (pfam00366)→ rplN (PRK05483)Ribosomal_L14 (pfam00238)→<br>RplX (COG0198)rplX (PRK00004)→ rplE (PRK00010)RplE (COG0094)→ rpsN (PRK08061)RpsN (COG0199)→ |
| env-166 | SRS011126_C4671534               | - | 242     | 140     | RNA→                                                                                                                                                                                                                                                                                                                                                                                                                                                                                                                                                                           |
| env-167 | SRS013533_C5425190               | + | 425     | 527     | RNA→                                                                                                                                                                                                                                                                                                                                                                                                                                                                                                                                                                           |
| env-168 | SRS045197_C3557001               | + | 691     | 793     | RNA→                                                                                                                                                                                                                                                                                                                                                                                                                                                                                                                                                                           |
| env-169 | SRS049318_LANL_scaffold_176197   | + | 2049    | 2151    | RNA→ rpsJ (PRK00596)RpsJ (COG0051)→ RplC (COG0087)rplC (PRK00001)→<br>rplD (PRK05319)Ribosomal_L4 (pfam00573)→ rplW (PRK05738)Ribosomal_L23 (pfam00276)→<br>rplB (PRK09374)Ribosomal_L2 (pfam00181)→                                                                                                                                                                                                                                                                                                                                                                           |
| env-170 | SRS013170_Baylor_scaffold_134367 | - | 1061    | 959     | RNA→ rpsJ (PRK00596)RpsJ (COG0051)→ RplC (COG0087)rplC (PRK00001)→                                                                                                                                                                                                                                                                                                                                                                                                                                                                                                             |
| env-171 | SRS011152_C4188878               | - | 220     | 118     | RNA→ hypo→                                                                                                                                                                                                                                                                                                                                                                                                                                                                                                                                                                     |
| env-172 | SRS022602_Baylor_scaffold_37959  | - | 16760   | 16658   | RNA→ rpsJ (PRK00596)RpsJ (COG0051)→ RplC (COG0087)rplC (PRK00001)→<br>rplD (PRK05319)Ribosomal_L4 (pfam00573)→ rplW (PRK05738)Ribosomal_L23 (pfam00276)→<br>RplB (COG0090)rplB (PRK09374)→ rpsS (PRK00357)RpsS (COG0185)→<br>rplV (PRK00565)Ribosomal_L22 (pfam00237)→ RpsC (COG0092)rpsC (PRK00310)→<br>rpl16 (CHL00044)rplP (PRK09203)→ PRK00306 (PRK00306)Ribosomal_L29 (pfam00831)→<br>rpsQ (PRK05610)Ribosomal_S17 (pfam00366)→ rplN (PRK05483)Ribosomal_L14 (pfam00238)→<br>RplX (COG0198)rplX (PRK00004)→ rplE (PRK00010)RplE (COG0094)→ rpsN (PRK08061)RpsN (COG0199)→ |



|          |                                     |   |        |        |                                                                                                                                                                                                                                                                                           |
|----------|-------------------------------------|---|--------|--------|-------------------------------------------------------------------------------------------------------------------------------------------------------------------------------------------------------------------------------------------------------------------------------------------|
| env-173  | DLM028_scaffold27170_5              | - | 1772   | 1666   | RNA → rpsJ (PRK00596)RpsJ (COG0051) →                                                                                                                                                                                                                                                     |
| env-174  | DLF010_scaffold24_15                | - | 1235   | 1129   | RNA → rpsJ (PRK00596)RpsJ (COG0051) →                                                                                                                                                                                                                                                     |
| env-175  | scaffold958_4_MH0086                | - | 199    | 94     | RNA →                                                                                                                                                                                                                                                                                     |
| env-176  | UnmappedStool_Broad_scaffold_346780 | + | 64     | 169    | RNA → ← hypō                                                                                                                                                                                                                                                                              |
| env-177  | scaffold29314_3_MH0080              | - | 202    | 97     | RNA →                                                                                                                                                                                                                                                                                     |
| env-178  | 4491414_3_NODE_953                  | - | 28628  | 28523  | RNA → rpsJ (PRK00596)RpsJ (COG0051) →                                                                                                                                                                                                                                                     |
| env-179  | scaffold20541_3_MH0083              | - | 207    | 102    | RNA →                                                                                                                                                                                                                                                                                     |
| env-180  | SRS011061_C4862922                  | - | 895    | 792    | RNA → rpsJ (PRK00596)RpsJ (COG0051) → RplC (COG0087)rplC (PRK00001) →                                                                                                                                                                                                                     |
| env-181  | SRS016989_C1563263                  | - | 492    | 389    | RNA → rpsJ (PRK00596)RpsJ (COG0051) →                                                                                                                                                                                                                                                     |
| env-182  | SRS019267_C3574650                  | + | 121    | 224    | RNA → rpsJ (PRK00596)RpsJ (COG0051) →                                                                                                                                                                                                                                                     |
| env-183  | scaffold1958_7_MH0014               | - | 1410   | 1307   | RNA → rpsJ (PRK00596)RpsJ (COG0051) →                                                                                                                                                                                                                                                     |
| env-184  | scaffold37912_1_V1_CD-4             | + | 65     | 168    | RNA → rpsJ (PRK00596)RpsJ (COG0051) →                                                                                                                                                                                                                                                     |
| env-185  | scaffold70413_1_MH0035              | - | 229    | 126    | RNA →                                                                                                                                                                                                                                                                                     |
| env-186  | NLM021_scaffold9243_17              | + | 2752   | 2855   | RNA → rpsJ (PRK00596)RpsJ (COG0051) →                                                                                                                                                                                                                                                     |
| env-187  | NLM031_scaffold29725_6              | + | 96     | 199    | RNA → rpsJ (PRK00596)Ribosomal_S10 (pfam00338) →                                                                                                                                                                                                                                          |
| env-188  | SRS052697_LANL_scaffold_50890       | + | 162    | 265    | RNA → rpsJ (PRK00596)RpsJ (COG0051) → RplC (COG0087)rplC (PRK00001) →<br>RplD (COG0088)rplD (PRK05319) →                                                                                                                                                                                  |
| env-189  | scaffold33193_1_V1_UC-14            | + | 65     | 168    | RNA → rpsJ (PRK00596)RpsJ (COG0051) →                                                                                                                                                                                                                                                     |
| env-190  | 4491490_3_NODE_5470                 | + | 114    | 217    | RNA → rpsJ (PRK00596)RpsJ (COG0051) →                                                                                                                                                                                                                                                     |
| env-191  | 4491412_3_NODE_89684                | + | 7189   | 7292   | RNA → rpsJ (PRK00596)RpsJ (COG0051) →                                                                                                                                                                                                                                                     |
| env-192  | NLF005_scaffold9646_4               | - | 866    | 763    | RNA → rpsJ (PRK00596)RpsJ (COG0051) →                                                                                                                                                                                                                                                     |
| env-193  | scaffold8051_7_MH0055               | - | 726    | 623    | RNA → rpsJ (PRK00596)RpsJ (COG0051) →                                                                                                                                                                                                                                                     |
| env-194  | NOF008_scaffold890_10               | - | 417    | 314    | RNA → rpsJ (PRK00596)Ribosomal_S10 (pfam00338) →                                                                                                                                                                                                                                          |
| env-195  | scaffold31333_4_MH0028              | - | 751    | 648    | RNA → rpsJ (PRK00596)RpsJ (COG0051) →                                                                                                                                                                                                                                                     |
| env-196  | scaffold6771_3_MH0033               | - | 1483   | 1380   | RNA → rpsJ (PRK00596)RpsJ (COG0051) →                                                                                                                                                                                                                                                     |
| env-197  | scaffold30659_3_V1_UC-10            | + | 703    | 806    | RNA → rpsJ (PRK00596)Ribosomal_S10 (pfam00338) →                                                                                                                                                                                                                                          |
| env-198  | 4491487_3_NODE_19593                | + | 2229   | 2332   | RNA → rpsJ (PRK00596)RpsJ (COG0051) →                                                                                                                                                                                                                                                     |
| env-199  | SRS011239_C2472698                  | + | 137    | 240    | RNA →                                                                                                                                                                                                                                                                                     |
| env-200  | SRS013687_Baylor_scaffold_53562     | + | 167    | 270    | RNA → rpsJ (PRK00596)RpsJ (COG0051) → RplC (COG0087)rplC (PRK00001) →<br>rplD (PRK05319)Ribosomal_L4 (pfam00573) →                                                                                                                                                                        |
| env-201  | SRS014979_WUGC_scaffold_29225       | - | 1526   | 1423   | RNA → rpsJ (PRK00596)RpsJ (COG0051) → RplC (COG0087)rplC (PRK00001) →<br>RplD (COG0088)rplD (PRK05319) →                                                                                                                                                                                  |
| env-202  | SRS015133_WUGC_scaffold_33347       | - | 754    | 651    | RNA → rpsJ (PRK00596)RpsJ (COG0051) → rplC (PRK00001) →                                                                                                                                                                                                                                   |
| env-203  | SRS015854_WUGC_scaffold_34494       | - | 1175   | 1072   | RNA → rpsJ (PRK00596)RpsJ (COG0051) → RplC (COG0087)rplC (PRK00001) →                                                                                                                                                                                                                     |
| env-204  | SRS021948_C2578511                  | + | 115    | 218    | RNA →                                                                                                                                                                                                                                                                                     |
| env-205  | SRS051031_LANL_scaffold_55309       | + | 2873   | 2976   | RNA → rpsJ (PRK00596)RpsJ (COG0051) →                                                                                                                                                                                                                                                     |
| env-206  | SRS063985_LANL_scaffold_39954       | - | 2666   | 2563   | RNA → rpsJ (PRK00596)RpsJ (COG0051) → RplC (COG0087)rplC (PRK00001) →<br>RplD (COG0088)rplD (PRK05319) → rplD (PRK05319)Ribosomal_L4 (pfam00573) →<br>rplW (PRK05738)Ribosomal_L23 (pfam00276) → rplB (PRK09374)Ribosomal_L2 (pfam0181) →                                                 |
| env-207  | SRS065504_LANL_scaffold_46409       | - | 492    | 389    | RNA → rpsJ (PRK00596)RpsJ (COG0051) →                                                                                                                                                                                                                                                     |
| env-208  | SRS014613_WUGC_scaffold_17595       | - | 3925   | 3822   | RNA → rpsJ (PRK00596)RpsJ (COG0051) → RplC (COG0087)rplC (PRK00001) →<br>rplD (PRK05319)Ribosomal_L4 (pfam00573) → rplW (PRK05738)Ribosomal_L23 (pfam00276) →<br>RplB (COG0090)rplB (PRK09374) → rpsS (PRK00357)Ribosomal_S19 (pfam00203) →<br>rplV (PRK00565)Ribosomal_L22 (pfam00237) → |
| env-209  | SRS019161_WUGC_scaffold_54925       | + | 161    | 264    | RNA → rpsJ (PRK00596)RpsJ (COG0051) → RplC (COG0087)rplC (PRK00001) →                                                                                                                                                                                                                     |
| env-210  | SRS053335_C2500585                  | - | 1526   | 1423   | RNA → rpsJ (PRK00596)RpsJ (COG0051) → RplC (COG0087)rplC (PRK00001) →<br>RplD (COG0088)rplD (PRK05319) →                                                                                                                                                                                  |
| env-211  | SRS064276_LANL_scaffold_32780       | - | 2864   | 2761   | RNA → rpsJ (PRK00596)RpsJ (COG0051) → RplC (COG0087)rplC (PRK00001) →<br>rplD (PRK05319)Ribosomal_L4 (pfam00573) → rplW (PRK05738)Ribosomal_L23 (pfam00276) →<br>RplB (COG0090)rplB (PRK09374) →                                                                                          |
| Lba-19-1 | NZ_ATWC01000002.1                   | - | 171387 | 171260 | RNA → rpsJ (PRK00596)RpsJ (COG0051) →                                                                                                                                                                                                                                                     |
| Lba-17-1 | NZ_JHWS01000005.1                   | + | 279183 | 279268 | RNA → rpsJ (PRK00596)RpsJ (COG0051) →                                                                                                                                                                                                                                                     |
| env-212  | AUXO018772739.1                     | - | 475    | 390    | RNA → rpsJ (PRK00596)RpsJ (COG0051) →                                                                                                                                                                                                                                                     |
| Lba-18-1 | NZ_ATVW01000015.1                   | + | 20018  | 20103  | RNA → rpsJ (PRK00596)RpsJ (COG0051) →                                                                                                                                                                                                                                                     |

|         |                                 |   |        |        |                                                                                                                                                                                                                                                                                                                                                                                                                                                                                                                                                                                                                                                                                                                                                                     |
|---------|---------------------------------|---|--------|--------|---------------------------------------------------------------------------------------------------------------------------------------------------------------------------------------------------------------------------------------------------------------------------------------------------------------------------------------------------------------------------------------------------------------------------------------------------------------------------------------------------------------------------------------------------------------------------------------------------------------------------------------------------------------------------------------------------------------------------------------------------------------------|
| env-213 | 08_07_XOS_DNA_scaffold44549.1   | - | 5717   | 5619   | RNA → rpsJ (PRK00596)RpsJ (COG0051) →                                                                                                                                                                                                                                                                                                                                                                                                                                                                                                                                                                                                                                                                                                                               |
| env-214 | SRS011529_WUGC_scaffold_31649   | + | 2893   | 2977   | RNA →                                                                                                                                                                                                                                                                                                                                                                                                                                                                                                                                                                                                                                                                                                                                                               |
| env-215 | scaffold20711_4_V1.CD-13        | - | 153    | 69     | RNA →                                                                                                                                                                                                                                                                                                                                                                                                                                                                                                                                                                                                                                                                                                                                                               |
| env-216 | scaffold537_5_V1.UC-14          | + | 2694   | 2778   | RNA → rpsJ (PRK00596)RpsJ (COG0051) →                                                                                                                                                                                                                                                                                                                                                                                                                                                                                                                                                                                                                                                                                                                               |
| env-217 | 4491423.3_NODE_119558           | - | 2026   | 1942   | RNA → rpsJ (PRK00596)Ribosomal_S10 (pfam00338) →                                                                                                                                                                                                                                                                                                                                                                                                                                                                                                                                                                                                                                                                                                                    |
| env-218 | SRS019582_WUGC_scaffold_26056   | - | 3718   | 3634   | RNA → RplC (COG0087)rplC (PRK00001) → rplD (PRK05319)Ribosomal_L4 (pfam00573) →<br>rplW (PRK05738)Ribosomal_L23 (pfam00276) → RplB (COG0090)rplB (PRK09374) →<br>rpsS (PRK00357)RpsS (COG0185) → rplV (PRK00565)Ribosomal_L22 (pfam00237) →                                                                                                                                                                                                                                                                                                                                                                                                                                                                                                                         |
| env-219 | scaffold4496.1_MH0063           | + | 3017   | 3101   | RNA → rpsJ (PRK00596)Ribosomal_S10 (pfam00338) →                                                                                                                                                                                                                                                                                                                                                                                                                                                                                                                                                                                                                                                                                                                    |
| env-220 | scaffold10033_5_MH0081          | - | 153    | 69     | RNA →                                                                                                                                                                                                                                                                                                                                                                                                                                                                                                                                                                                                                                                                                                                                                               |
| env-221 | NLF007_scaffold23667_30         | - | 6135   | 6051   | RNA → rpsJ (PRK00596)RpsJ (COG0051) →                                                                                                                                                                                                                                                                                                                                                                                                                                                                                                                                                                                                                                                                                                                               |
| env-222 | NLM021_scaffold31892_2          | + | 6861   | 6945   | RNA → rpsJ (PRK00596)RpsJ (COG0051) →                                                                                                                                                                                                                                                                                                                                                                                                                                                                                                                                                                                                                                                                                                                               |
| env-223 | NLF013_scaffold4173_33          | - | 4292   | 4208   | RNA → rpsJ (PRK00596)RpsJ (COG0051) →                                                                                                                                                                                                                                                                                                                                                                                                                                                                                                                                                                                                                                                                                                                               |
| env-224 | SRS020328_Baylor_scaffold_12580 | - | 6998   | 6914   | RNA → rpsJ (PRK00596)RpsJ (COG0051) →                                                                                                                                                                                                                                                                                                                                                                                                                                                                                                                                                                                                                                                                                                                               |
| env-225 | scaffold27081_10_MH0017         | + | 123    | 207    | RNA → rpsJ (PRK00596)RpsJ (COG0051) →                                                                                                                                                                                                                                                                                                                                                                                                                                                                                                                                                                                                                                                                                                                               |
| env-226 | scaffold2277_2_MH0077           | - | 340    | 256    | RNA → rpsJ (PRK00596)Ribosomal_S10 (pfam00338) →                                                                                                                                                                                                                                                                                                                                                                                                                                                                                                                                                                                                                                                                                                                    |
| env-227 | DOM012_scaffold9226_17          | - | 1293   | 1209   | RNA → rpsJ (PRK00596)RpsJ (COG0051) →                                                                                                                                                                                                                                                                                                                                                                                                                                                                                                                                                                                                                                                                                                                               |
| env-228 | SRS015217_WUGC_scaffold_10150   | + | 19846  | 19930  | RNA → rpsJ (PRK00596)RpsJ (COG0051) →                                                                                                                                                                                                                                                                                                                                                                                                                                                                                                                                                                                                                                                                                                                               |
| Csp-6-1 | NZ_DS480326.1                   | - | 124987 | 124903 | RNA → rpsJ (PRK00596)RpsJ (COG0051) →                                                                                                                                                                                                                                                                                                                                                                                                                                                                                                                                                                                                                                                                                                                               |
| env-229 | 4491421.3_NODE_4750             | + | 252    | 336    | RNA → rpsJ (PRK00596)RpsJ (COG0051) →                                                                                                                                                                                                                                                                                                                                                                                                                                                                                                                                                                                                                                                                                                                               |
| env-230 | 4491477.3_NODE_51506            | + | 30052  | 30136  | RNA → rpsJ (PRK00596)RpsJ (COG0051) →                                                                                                                                                                                                                                                                                                                                                                                                                                                                                                                                                                                                                                                                                                                               |
| env-231 | 4491487.3_NODE_4692             | + | 19908  | 19992  | RNA → rpsJ (PRK00596)Ribosomal_S10 (pfam00338) →                                                                                                                                                                                                                                                                                                                                                                                                                                                                                                                                                                                                                                                                                                                    |
| env-232 | SRS013951_WUGC_scaffold_4945    | - | 9240   | 9156   | RNA → rpsJ (PRK00596)RpsJ (COG0051) →                                                                                                                                                                                                                                                                                                                                                                                                                                                                                                                                                                                                                                                                                                                               |
| env-233 | SRS019161_WUGC_scaffold_49940   | - | 431    | 347    | RNA → rpsJ (PRK00596)RpsJ (COG0051) →                                                                                                                                                                                                                                                                                                                                                                                                                                                                                                                                                                                                                                                                                                                               |
| env-234 | scaffold7691.3_MH0009           | + | 6985   | 7069   | RNA →                                                                                                                                                                                                                                                                                                                                                                                                                                                                                                                                                                                                                                                                                                                                                               |
| env-235 | scaffold13176_2_O2.UC-16        | - | 193    | 109    | RNA →                                                                                                                                                                                                                                                                                                                                                                                                                                                                                                                                                                                                                                                                                                                                                               |
| env-236 | DLM018_scaffold17866_11         | - | 6083   | 5999   | RNA → rpsJ (PRK00596)RpsJ (COG0051) →                                                                                                                                                                                                                                                                                                                                                                                                                                                                                                                                                                                                                                                                                                                               |
| env-237 | DLF010_scaffold22271_21         | - | 10166  | 10082  | RNA → rpsJ (PRK00596)RpsJ (COG0051) →                                                                                                                                                                                                                                                                                                                                                                                                                                                                                                                                                                                                                                                                                                                               |
| env-238 | NOM012_scaffold41665_2          | + | 16835  | 16919  | RNA → rpsJ (PRK00596)RpsJ (COG0051) →                                                                                                                                                                                                                                                                                                                                                                                                                                                                                                                                                                                                                                                                                                                               |
| env-239 | NOM016_scaffold4013_10          | + | 667    | 751    | RNA → rpsJ (PRK00596)Ribosomal_S10 (pfam00338) →                                                                                                                                                                                                                                                                                                                                                                                                                                                                                                                                                                                                                                                                                                                    |
| env-240 | NOM017_scaffold8338_6           | - | 739    | 655    | RNA → rpsJ (PRK00596)RpsJ (COG0051) →                                                                                                                                                                                                                                                                                                                                                                                                                                                                                                                                                                                                                                                                                                                               |
| env-241 | SRS023914_Baylor_scaffold_6440  | + | 34973  | 35057  | RNA → rpsJ (PRK00596)RpsJ (COG0051) →                                                                                                                                                                                                                                                                                                                                                                                                                                                                                                                                                                                                                                                                                                                               |
| env-242 | ASRL01000150.1                  | - | 7972   | 7887   | RNA → rpsJ (PRK00596)RpsJ (COG0051) → RplC (COG0087)rplC (PRK00001) →<br>rplD (PRK05319)Ribosomal_L4 (pfam00573) → rplW (PRK05738)Ribosomal_L23 (pfam00276) →<br>RplB (COG0090)rplB (PRK09374) → rpsS (PRK00357)RpsS (COG0185) →<br>rplV (PRK00565)Ribosomal_L22 (pfam00237) → RpsC (COG0092)rpsC (PRK00310) →<br>rpl16 (CHL00044)rplP (PRK09203) → PRK00306 (PRK00306)Ribosomal_L29 (pfam00831) →<br>rpsQ (PRK05610)Ribosomal_S17 (pfam00366) → rplN (PRK05483)Ribosomal_L14 (pfam00238) →<br>rplX (PRK00004)KOW_RPL26 (cd06089) → rplE (PRK00010)RplE (COG0094) →<br>rpsN (PRK08061)RpsN (COG0199) → rpsH (PRK00136)Ribosomal_S8 (pfam00410) →<br>rpl6 (CHL00140)rplF (PRK05498) →                                                                                |
| env-243 | ASRM01003264.1                  | - | 570    | 485    | RNA → rpsJ (PRK00596)RpsJ (COG0051) →                                                                                                                                                                                                                                                                                                                                                                                                                                                                                                                                                                                                                                                                                                                               |
| env-244 | ASRK01000096.1                  | + | 8848   | 8933   | RNA → rpsJ (PRK00596)RpsJ (COG0051) → RplC (COG0087)rplC (PRK00001) →<br>rplD (PRK05319)Ribosomal_L4 (pfam00573) → rplW (PRK05738)Ribosomal_L23 (pfam00276) →<br>RplB (COG0090)rplB (PRK09374) → rpsS (PRK00357)RpsS (COG0185) →<br>rplV (PRK00565)Ribosomal_L22 (pfam00237) → RpsC (COG0092)rpsC (PRK00310) →<br>rpl16 (CHL00044)rplP (PRK09203) → PRK00306 (PRK00306)Ribosomal_L29 (pfam00831) →<br>rpsQ (PRK05610)Ribosomal_S17 (pfam00366) → rplN (PRK05483)Ribosomal_L14 (pfam00238) →<br>rplX (PRK00004)KOW_RPL26 (cd06089) → rplE (PRK00010)RplE (COG0094) →<br>rpsN (PRK08061)RpsN (COG0199) → rpsH (PRK00136)Ribosomal_S8 (pfam00410) →<br>rpl6 (CHL00140)rplF (PRK05498) → rplR (PRK05593)Ribosomal_L18p (pfam00861) →<br>RpsE (COG0098)rpsE (PRK00550) → |
| env-245 | ASRN01000847.1                  | - | 99     | 14     | RNA →                                                                                                                                                                                                                                                                                                                                                                                                                                                                                                                                                                                                                                                                                                                                                               |
| env-246 | ASRP01009196.1                  | - | 99     | 14     | RNA →                                                                                                                                                                                                                                                                                                                                                                                                                                                                                                                                                                                                                                                                                                                                                               |

|         |                                 |   |       |       |                                                                                                                            |
|---------|---------------------------------|---|-------|-------|----------------------------------------------------------------------------------------------------------------------------|
| env-247 | NLF011_scaffold23581_7          | - | 12837 | 12749 | RNA → rpsJ (PRK00596)RpsJ (COG0051) →                                                                                      |
| env-248 | NLM010_scaffold2128_3           | + | 5986  | 6074  | RNA → rpsJ (PRK00596)RpsJ (COG0051) →                                                                                      |
| env-249 | scaffold18342_7.V1.UC-21        | - | 2390  | 2302  | RNA → rpsJ (PRK00596)RpsJ (COG0051) →                                                                                      |
| env-250 | NLM029_scaffold31899_2          | + | 10319 | 10407 | RNA → rpsJ (PRK00596)RpsJ (COG0051) →                                                                                      |
| env-251 | SRS011271_WUGC_scaffold_26754   | + | 5636  | 5724  | RNA → rpsJ (PRK00596)RpsJ (COG0051) →                                                                                      |
| env-252 | scaffold20388_1.O2.UC-13        | + | 2191  | 2279  | RNA →                                                                                                                      |
| env-253 | SRS014613_WUGC_scaffold_26039   | - | 294   | 206   | RNA →                                                                                                                      |
| env-254 | SRS016095_WUGC_scaffold_35198   | - | 490   | 402   | RNA → rpsJ (PRK00596)Ribosomal_S10 (pfam00338) →                                                                           |
| env-255 | SRS054956_LANL_scaffold_18901   | - | 202   | 114   | RNA →                                                                                                                      |
| env-256 | SRS064276_LANL_scaffold_57665   | - | 294   | 206   | RNA → hypo →                                                                                                               |
| env-257 | DLM028_scaffold41246_2          | + | 204   | 292   | RNA → rpsJ (PRK00596)RpsJ (COG0051) →                                                                                      |
| env-258 | DOF004_scaffold21058_13         | + | 2014  | 2102  | RNA → rpsJ (PRK00596)RpsJ (COG0051) →                                                                                      |
| env-259 | NOF008_scaffold41486_5          | + | 1075  | 1163  | RNA → rpsJ (PRK00596)RpsJ (COG0051) →                                                                                      |
| env-260 | NOF012_scaffold7935_4           | + | 3601  | 3689  | RNA → rpsJ (PRK00596)RpsJ (COG0051) →                                                                                      |
| env-261 | NOM007_scaffold1962_10          | + | 1752  | 1840  | RNA → rpsJ (PRK00596)Ribosomal_S10 (pfam00338) →                                                                           |
| env-262 | NOF013_scaffold28708_1          | + | 3005  | 3093  | RNA → rpsJ (PRK00596)RpsJ (COG0051) →                                                                                      |
| env-263 | NOM010_scaffold39587_3          | - | 29192 | 29104 | RNA → rpsJ (PRK00596)RpsJ (COG0051) →                                                                                      |
| env-264 | SRS051031_LANL_scaffold_52982   | + | 5566  | 5654  | RNA → rpsJ (PRK00596)RpsJ (COG0051) →                                                                                      |
| env-265 | scaffold4680_1.V1.CD-14         | - | 1154  | 1066  | RNA → rpsJ (PRK00596)RpsJ (COG0051) →                                                                                      |
| env-266 | scaffold16707_1.MH0043          | - | 163   | 82    | RNA →                                                                                                                      |
| env-267 | scaffold992_1.V1.CD-12          | + | 593   | 674   | RNA →                                                                                                                      |
| env-268 | scaffold8291_2.V1.CD-3          | + | 6188  | 6269  | RNA →                                                                                                                      |
| env-269 | scaffold15225_3.V1.UC-14        | + | 341   | 422   | RNA →                                                                                                                      |
| env-270 | SRS022524_Baylor_scaffold_28649 | - | 181   | 100   | RNA →                                                                                                                      |
| env-271 | SRS014287_WUGC_scaffold_7770    | + | 492   | 573   | RNA →                                                                                                                      |
| env-272 | SRS015065_WUGC_scaffold_7960    | - | 167   | 86    | RNA →                                                                                                                      |
| env-273 | SRS015264_WUGC_scaffold_19803   | + | 17439 | 17520 | RNA → rpsJ (PRK00596)Ribosomal_S10 (pfam00338) →                                                                           |
| env-274 | SRS017701_Baylor_scaffold_14318 | + | 838   | 919   | RNA → rpsJ (PRK00596)RpsJ (COG0051) →                                                                                      |
| env-275 | SRS019968_Baylor_scaffold_7511  | - | 182   | 101   | RNA →                                                                                                                      |
| env-276 | SRS048870_WUGC_scaffold_19339   | - | 180   | 99    | RNA →                                                                                                                      |
| env-277 | SRS052697_LANL_scaffold_12986   | - | 165   | 84    | RNA →                                                                                                                      |
| env-278 | SRS056519_LANL_scaffold_13514   | - | 181   | 100   | RNA →                                                                                                                      |
| env-279 | SRS062427_LANL_scaffold_6177    | - | 181   | 100   | RNA →                                                                                                                      |
| env-280 | scaffold9779_1.MH0068           | - | 164   | 83    | RNA →                                                                                                                      |
| env-281 | scaffold17921_1.MH0044          | - | 167   | 86    | RNA →                                                                                                                      |
| env-282 | 4491413_3.NODE.441              | - | 240   | 159   | RNA →                                                                                                                      |
| env-283 | scaffold2177_1.V1.CD-9          | + | 18517 | 18598 | RNA → rpsJ (PRK00596)RpsJ (COG0051) →                                                                                      |
| env-284 | DLM018_scaffold20549_34         | - | 471   | 390   | RNA → rpsJ (PRK00596)RpsJ (COG0051) →                                                                                      |
| env-285 | NLF001_scaffold2_2              | - | 42911 | 42830 | RNA → rpsJ (PRK00596)RpsJ (COG0051) →                                                                                      |
| env-286 | NOF005_scaffold12064_3          | + | 6160  | 6241  | RNA → rpsJ (PRK00596)RpsJ (COG0051) →                                                                                      |
| env-287 | NOM015_scaffold4921_10          | + | 5913  | 5994  | RNA → rpsJ (PRK00596)RpsJ (COG0051) →                                                                                      |
| env-288 | DOM026_scaffold32809_1          | + | 1451  | 1532  | RNA → rpsJ (PRK00596)RpsJ (COG0051) →                                                                                      |
| env-289 | NLM029_scaffold10880_16         | + | 1008  | 1089  | RNA → rpsJ (PRK00596)RpsJ (COG0051) →                                                                                      |
| env-290 | SRS011271_WUGC_scaffold_252     | - | 2128  | 2047  | RNA → rplC (COG0087)rplC (PRK00001) →<br>rplD (PRK05319)rplW (PRK05738)Ribosomal.L23 (pfam00276)Ribosomal.L4 (pfam00573) → |
| env-291 | scaffold20849_1.MH0039          | - | 167   | 86    | RNA →                                                                                                                      |
| env-292 | scaffold13214_3.MH0063          | + | 341   | 422   | RNA →                                                                                                                      |
| env-293 | scaffold22108_1.V1.CD-8         | - | 167   | 86    | RNA →                                                                                                                      |
| env-294 | SRS015217_WUGC_scaffold_8594    | - | 165   | 84    | RNA →                                                                                                                      |
| env-295 | SRS019601_WUGC_scaffold_8958    | - | 167   | 86    | RNA →                                                                                                                      |
| env-296 | SRS019685_WUGC_scaffold_21426   | - | 181   | 100   | RNA →                                                                                                                      |
| env-297 | SRS042628_WUGC_scaffold_8232    | + | 494   | 575   | RNA →                                                                                                                      |

|         |                                |   |        |        |                                                      |
|---------|--------------------------------|---|--------|--------|------------------------------------------------------|
| env-298 | SRS043701_LANL_scaffold.11145  | - | 181    | 100    | RNA→                                                 |
| env-299 | SRS053335_LANL_scaffold.10264  | - | 181    | 100    | RNA→ hypo→                                           |
| env-300 | scaffold3402.4_MH0042          | + | 4470   | 4551   | RNA→                                                 |
| env-301 | scaffold5536.2_MH0066          | - | 142    | 61     | RNA→                                                 |
| env-302 | SRS017247_C943587              | - | 122    | 41     | RNA→ hypo→                                           |
| env-303 | SRS023526_Baylor_scaffold.5213 | - | 167    | 86     | RNA→                                                 |
| env-304 | SRS043411_WUGC_scaffold.5719   | - | 1184   | 1103   | RNA→ rpsJ (PRK00596)Ribosomal_S10 (pfam00338)→ hypo→ |
| env-305 | SRS058723_Baylor_scaffold.3070 | - | 335    | 254    | RNA→ rpsJ (PRK00596)Ribosomal_S10 (pfam00338)→       |
| env-306 | BABB01001370.1                 | - | 4795   | 4714   | RNA→ rpsJ (PRK00596)RpsJ (COG0051)→                  |
| env-307 | scaffold23001.1_MH0033         | - | 167    | 86     | RNA→                                                 |
| env-308 | SRS049164_WUGC_scaffold.27429  | - | 180    | 99     | RNA→                                                 |
| env-309 | DLM023_scaffold28443.2         | - | 4447   | 4366   | RNA→ rpsJ (PRK00596)RpsJ (COG0051)→                  |
| env-310 | NLF007_scaffold22991.5         | - | 331    | 250    | RNA→ rpsJ (PRK00596)Ribosomal_S10 (pfam00338)→       |
| env-311 | NOM001_scaffold36725.1         | - | 25726  | 25645  | RNA→ rpsJ (PRK00596)RpsJ (COG0051)→                  |
| env-312 | ADJS01009405.1                 | + | 3228   | 3309   | RNA→ rpsJ (PRK00596)RpsJ (COG0051)→                  |
| env-313 | SRS015854_WUGC_scaffold.8959   | - | 679    | 598    | RNA→ RplC (COG0087)rplC (PRK00001)→                  |
| env-314 | SRS024075_LANL_scaffold.4405   | + | 2401   | 2482   | RNA→ rpsJ (PRK00596)RpsJ (COG0051)→                  |
| env-315 | SRS063040_Baylor_scaffold.7602 | - | 1030   | 949    | RNA→ RplC (COG0087)rplC (PRK00001)→                  |
| env-316 | scaffold4160.1_MH0021          | - | 165    | 84     | RNA→                                                 |
| env-317 | scaffold8722.1_MH0027          | - | 177    | 96     | RNA→                                                 |
| env-318 | scaffold17060.5_MH0028         | + | 6414   | 6495   | RNA→                                                 |
| env-319 | scaffold8943.6_MH0053          | + | 593    | 674    | RNA→                                                 |
| env-320 | scaffold51963.3_MH0057         | + | 6208   | 6289   | RNA→                                                 |
| env-321 | scaffold8695.1_MH0084          | - | 165    | 84     | RNA→                                                 |
| env-322 | scaffold6602.1_O2.UC-14        | - | 165    | 84     | RNA→                                                 |
| env-323 | scaffold5800.2_O2.UC-16        | + | 6220   | 6301   | RNA→                                                 |
| env-324 | scaffold14590.1_V1.CD-4        | - | 163    | 82     | RNA→                                                 |
| env-325 | scaffold3608.3_V1.UC-7         | + | 6221   | 6302   | RNA→                                                 |
| env-326 | SRS015190_WUGC_scaffold.6257   | - | 167    | 86     | RNA→                                                 |
| env-327 | SRS015782_WUGC_scaffold.7626   | - | 167    | 86     | RNA→                                                 |
| env-328 | SRS042284_WUGC_scaffold.5200   | - | 167    | 86     | RNA→ hypo→                                           |
| env-329 | SRS047044_WUGC_scaffold.9146   | - | 181    | 100    | RNA→ hypo→                                           |
| env-330 | SRS053398_LANL_scaffold.13945  | + | 18555  | 18636  | RNA→ rpsJ (PRK00596)Ribosomal_S10 (pfam00338)→       |
| env-331 | scaffold18582.3_MH0040         | - | 322    | 241    | RNA→ rpsJ (PRK00596)RpsJ (COG0051)→                  |
| env-332 | scaffold13759.1_MH0046         | - | 162    | 81     | RNA→                                                 |
| env-333 | scaffold16705.1_O2.UC-22       | - | 165    | 84     | RNA→                                                 |
| env-334 | 4491401.3_NODE.53304           | + | 618    | 699    | RNA→ rpsJ (PRK00596)Ribosomal_S10 (pfam00338)→       |
| env-335 | 4491417.3_NODE.3394            | + | 16865  | 16946  | RNA→ rpsJ (PRK00596)RpsJ (COG0051)→                  |
| env-336 | DLF005_scaffold17120.4         | - | 40417  | 40336  | RNA→ rpsJ (PRK00596)RpsJ (COG0051)→                  |
| env-337 | DLM008_scaffold2771.2          | + | 6173   | 6254   | RNA→ rpsJ (PRK00596)RpsJ (COG0051)→                  |
| env-338 | DOF003_scaffold17942.4         | + | 360    | 441    | RNA→ rpsJ (PRK00596)RpsJ (COG0051)→                  |
| env-339 | NLM004_scaffold3966.5          | + | 12804  | 12885  | RNA→ rpsJ (PRK00596)RpsJ (COG0051)→                  |
| env-340 | NOM005_scaffold3277.7          | - | 7989   | 7908   | RNA→ rpsJ (PRK00596)RpsJ (COG0051)→                  |
| env-341 | 4491409.3_NODE.22629           | - | 14580  | 14499  | RNA→ rpsJ (PRK00596)RpsJ (COG0051)→                  |
| env-342 | 4491420.3_NODE.5117            | + | 55138  | 55219  | RNA→ rpsJ (PRK00596)RpsJ (COG0051)→                  |
| env-343 | DOM017_scaffold32436.1         | - | 804    | 723    | RNA→ rpsJ (PRK00596)RpsJ (COG0051)→                  |
| env-344 | NLF006_scaffold12057.2         | - | 969    | 888    | RNA→ rpsJ (PRK00596)RpsJ (COG0051)→                  |
| env-345 | NLM006_scaffold7171.11         | - | 3023   | 2942   | RNA→ rpsJ (PRK00596)RpsJ (COG0051)→                  |
| env-346 | SRS014683_WUGC_scaffold.18380  | + | 33     | 114    | RNA→ rpsJ (PRK00596)RpsJ (COG0051)→                  |
| Ere-1-1 | NC_012781.1                    | + | 383105 | 383186 | RNA→ rpsJ (PRK00596)RpsJ (COG0051)→                  |
| env-347 | SRS015578_WUGC_scaffold.8463   | - | 165    | 84     | RNA→                                                 |
| env-348 | SRS019161_WUGC_scaffold.21627  | - | 180    | 99     | RNA→ hypo→                                           |



|         |                                  |   |        |        |      |                                                                                                                                                                                                                                                                                                                                                                                                                                                                                                                                                                                            |
|---------|----------------------------------|---|--------|--------|------|--------------------------------------------------------------------------------------------------------------------------------------------------------------------------------------------------------------------------------------------------------------------------------------------------------------------------------------------------------------------------------------------------------------------------------------------------------------------------------------------------------------------------------------------------------------------------------------------|
| env-349 | SRS024132_Baylor_scaffold_5045   | - | 165    | 84     | RNA→ |                                                                                                                                                                                                                                                                                                                                                                                                                                                                                                                                                                                            |
| env-350 | SRS048164_WUGC_scaffold_7310     | + | 1960   | 2041   | RNA→ | rpsJ (PRK00596)RpsJ (COG0051)→                                                                                                                                                                                                                                                                                                                                                                                                                                                                                                                                                             |
| env-351 | SRS078176_LANL_scaffold_9297     | - | 182    | 101    | RNA→ |                                                                                                                                                                                                                                                                                                                                                                                                                                                                                                                                                                                            |
| env-352 | scaffold19886_8.MH0004           | + | 1468   | 1549   | RNA→ |                                                                                                                                                                                                                                                                                                                                                                                                                                                                                                                                                                                            |
| env-353 | 4491414.3_NODE_10232             | + | 18886  | 18967  | RNA→ | rpsJ (PRK00596)RpsJ (COG0051)→                                                                                                                                                                                                                                                                                                                                                                                                                                                                                                                                                             |
| env-354 | DLM002_scaffold19292_4           | - | 1385   | 1304   | RNA→ | rpsJ (PRK00596)RpsJ (COG0051)→                                                                                                                                                                                                                                                                                                                                                                                                                                                                                                                                                             |
| env-355 | DOM013_scaffold53913_3           | - | 42788  | 42707  | RNA→ | rpsJ (PRK00596)RpsJ (COG0051)→                                                                                                                                                                                                                                                                                                                                                                                                                                                                                                                                                             |
| env-356 | NLM010_scaffold33432_2           | + | 26633  | 26714  | RNA→ | rpsJ (PRK00596)RpsJ (COG0051)→                                                                                                                                                                                                                                                                                                                                                                                                                                                                                                                                                             |
| env-357 | NLM032_scaffold5645_33           | - | 3767   | 3686   | RNA→ | rpsJ (PRK00596)RpsJ (COG0051)→                                                                                                                                                                                                                                                                                                                                                                                                                                                                                                                                                             |
| env-358 | NOM009_scaffold4493_3            | - | 42879  | 42798  | RNA→ | rpsJ (PRK00596)RpsJ (COG0051)→                                                                                                                                                                                                                                                                                                                                                                                                                                                                                                                                                             |
| env-359 | NLM022_scaffold12984_2           | + | 6167   | 6248   | RNA→ | rpsJ (PRK00596)RpsJ (COG0051)→                                                                                                                                                                                                                                                                                                                                                                                                                                                                                                                                                             |
| env-360 | NOM018_scaffold8271_1            | + | 75     | 156    | RNA→ | rpsJ (PRK00596)RpsJ (COG0051)→                                                                                                                                                                                                                                                                                                                                                                                                                                                                                                                                                             |
| env-361 | SRS014459_WUGC_scaffold_14109    | + | 10605  | 10686  | RNA→ | rpsJ (PRK00596)RpsJ (COG0051)→                                                                                                                                                                                                                                                                                                                                                                                                                                                                                                                                                             |
| env-362 | SRS019030_Baylor_scaffold_218    | + | 268    | 349    | RNA→ | rpsJ (PRK00596)RpsJ (COG0051)→                                                                                                                                                                                                                                                                                                                                                                                                                                                                                                                                                             |
| env-363 | SRS054956_LANL_scaffold_7970     | - | 167    | 86     | RNA→ |                                                                                                                                                                                                                                                                                                                                                                                                                                                                                                                                                                                            |
| env-364 | BABG01016216.1                   | - | 115    | 34     | RNA→ |                                                                                                                                                                                                                                                                                                                                                                                                                                                                                                                                                                                            |
| env-365 | scaffold3598_2.MH0037            | + | 1682   | 1763   | RNA→ | rpsJ (PRK00596)Ribosomal_S10 (pfam00338)→                                                                                                                                                                                                                                                                                                                                                                                                                                                                                                                                                  |
| env-366 | DLM027_scaffold716_3             | - | 3549   | 3468   | RNA→ | rpsJ (PRK00596)RpsJ (COG0051)→                                                                                                                                                                                                                                                                                                                                                                                                                                                                                                                                                             |
| env-367 | NOF010_scaffold33104_25          | - | 4436   | 4355   | RNA→ | rpsJ (PRK00596)RpsJ (COG0051)→                                                                                                                                                                                                                                                                                                                                                                                                                                                                                                                                                             |
| env-368 | DLM028_scaffold6833_1            | - | 574    | 493    | RNA→ | rpsJ (PRK00596)RpsJ (COG0051)→                                                                                                                                                                                                                                                                                                                                                                                                                                                                                                                                                             |
| env-369 | NLF011_scaffold1666_1            | - | 295    | 214    | RNA→ | rpsJ (PRK00596)RpsJ (COG0051)→                                                                                                                                                                                                                                                                                                                                                                                                                                                                                                                                                             |
| env-370 | NLM008_scaffold17066_1           | - | 5551   | 5470   | RNA→ | rpsJ (PRK00596)RpsJ (COG0051)→                                                                                                                                                                                                                                                                                                                                                                                                                                                                                                                                                             |
| env-371 | NLM028_scaffold4257_4            | - | 40205  | 40124  | RNA→ | rpsJ (PRK00596)RpsJ (COG0051)→                                                                                                                                                                                                                                                                                                                                                                                                                                                                                                                                                             |
| env-372 | DLF003_scaffold1033_10           | + | 1103   | 1184   | RNA→ | rpsJ (PRK00596)Ribosomal_S10 (pfam00338)→                                                                                                                                                                                                                                                                                                                                                                                                                                                                                                                                                  |
| env-373 | DLM006_scaffold1766_11           | + | 1075   | 1156   | RNA→ | rpsJ (PRK00596)RpsJ (COG0051)→                                                                                                                                                                                                                                                                                                                                                                                                                                                                                                                                                             |
| env-374 | NLM021_scaffold5173_1            | - | 5388   | 5307   | RNA→ | rpsJ (PRK00596)RpsJ (COG0051)→                                                                                                                                                                                                                                                                                                                                                                                                                                                                                                                                                             |
| env-375 | scaffold16666_5_V1.CD-11         | - | 140    | 59     | RNA→ |                                                                                                                                                                                                                                                                                                                                                                                                                                                                                                                                                                                            |
| env-376 | RUMENNODE.1856948.1              | + | 5532   | 5635   | RNA→ | rpsJ (PRK00596)RpsJ (COG0051)→                                                                                                                                                                                                                                                                                                                                                                                                                                                                                                                                                             |
| Bsp-5-1 | NZ_KK211308.1                    | - | 207215 | 207112 | RNA→ | rpsJ (PRK00596)RpsJ (COG0051)→                                                                                                                                                                                                                                                                                                                                                                                                                                                                                                                                                             |
| env-377 | SRS017227_Baylor_scaffold_139101 | - | 221    | 145    | RNA→ |                                                                                                                                                                                                                                                                                                                                                                                                                                                                                                                                                                                            |
| env-378 | SRS042984_LANL_scaffold_21113    | + | 2212   | 2288   | RNA→ |                                                                                                                                                                                                                                                                                                                                                                                                                                                                                                                                                                                            |
| env-379 | SRS018443_Baylor_scaffold_52281  | - | 249    | 173    | RNA→ |                                                                                                                                                                                                                                                                                                                                                                                                                                                                                                                                                                                            |
| env-380 | SRS018157_C4833961               | - | 217    | 141    | RNA→ |                                                                                                                                                                                                                                                                                                                                                                                                                                                                                                                                                                                            |
| env-381 | SRS053917_LANL_scaffold_98590    | + | 169    | 245    | RNA→ | rpsJ (PRK00596)RpsJ (COG0051)→ RplC (COG0087)rplC (PRK00001)→                                                                                                                                                                                                                                                                                                                                                                                                                                                                                                                              |
| env-382 | SRS017139_Baylor_scaffold_54237  | + | 946    | 1022   | RNA→ | rpsJ (PRK00596)RpsJ (COG0051)→                                                                                                                                                                                                                                                                                                                                                                                                                                                                                                                                                             |
| env-383 | SRS024355_LANL_scaffold_90040    | + | 571    | 647    | RNA→ | rpsJ (PRK00596)RpsJ (COG0051)→                                                                                                                                                                                                                                                                                                                                                                                                                                                                                                                                                             |
| env-384 | SRS018394_Baylor_scaffold_71324  | + | 824    | 900    | RNA→ | rpsJ (PRK00596)RpsJ (COG0051)→ RplC (COG0087)rplC (PRK00001)→<br>rplD (PRK05319)Ribosomal_L4 (pfam00573)→                                                                                                                                                                                                                                                                                                                                                                                                                                                                                  |
| Lor-1-1 | NZ_GL890598.1                    | + | 12752  | 12828  | RNA→ | rpsJ (PRK00596)RpsJ (COG0051)→ RplC (COG0087)rplC (PRK00001)→<br>rplD (PRK05319)Ribosomal_L4 (pfam00573)→ rplW (PRK05738)Ribosomal_L23 (pfam00276)→<br>RplB (COG0090)rplB (PRK09374)→ rpsS (PRK00357)RpsS (COG0185)→<br>rplV (PRK00565)Ribosomal_L22 (pfam00237)→ RpsC (COG0092)rpsC (PRK00310)→<br>rpl16 (CHL00044)rplP (PRK09203)→ PRK00306 (PRK00306)Ribosomal_L29 (pfam00831)→<br>rpsQ (PRK05610)Ribosomal_S17 (pfam00366)→ rplN (PRK05483)Ribosomal_L14 (pfam00238)→<br>RplX (COG0198)rplX (PRK00004)→ rplE (PRK00010)RplE (COG0094)→ rpsN (PRK08061)RpsN (COG0199)→<br>hypo→<br>RNA→ |
| env-385 | SRS014690_C1764201               | - | 155    | 79     | RNA→ |                                                                                                                                                                                                                                                                                                                                                                                                                                                                                                                                                                                            |
| env-386 | SRS047634_LANL_scaffold_48885    | + | 6495   | 6571   | RNA→ | rpsJ (PRK00596)RpsJ (COG0051)→ RplC (COG0087)rplC (PRK00001)→<br>rplD (PRK05319)Ribosomal_L4 (pfam00573)→ rplW (PRK05738)Ribosomal_L23 (pfam00276)→<br>RplB (COG0090)rplB (PRK09374)→ rpsS (PRK00357)RpsS (COG0185)→<br>rplV (PRK00565)Ribosomal_L22 (pfam00237)→ RpsC (COG0092)rpsC (PRK00310)→<br>rpl16 (CHL00044)rplP (PRK09203)→ PRK00306 (PRK00306)Ribosomal_L29 (pfam00831)→<br>rpsQ (PRK05610)Ribosomal_S17 (pfam00366)→ rplN (PRK05483)Ribosomal_L14 (pfam00238)→<br>RplX (COG0198)rplX (PRK00004)→ rplE (PRK00010)RplE (COG0094)→ rpsN (PRK08061)RpsN (COG0199)→                  |

|          |                               |   |        |        |                                                                                                                                                                                                                                                                                                                                                                                                                                                                                                                                                                                                                                                                                                                                                                                                                                                                                                                                                                                                                                                                                                                                                                                                                                         |
|----------|-------------------------------|---|--------|--------|-----------------------------------------------------------------------------------------------------------------------------------------------------------------------------------------------------------------------------------------------------------------------------------------------------------------------------------------------------------------------------------------------------------------------------------------------------------------------------------------------------------------------------------------------------------------------------------------------------------------------------------------------------------------------------------------------------------------------------------------------------------------------------------------------------------------------------------------------------------------------------------------------------------------------------------------------------------------------------------------------------------------------------------------------------------------------------------------------------------------------------------------------------------------------------------------------------------------------------------------|
| env-387  | SRS017304_C2019822            | + | 4855   | 4931   | RNA → rpsJ (PRK00596)RpsJ (COG0051) → RplC (COG0087)rplC (PRK00001) → rplD (PRK05319)Ribosomal_L4 (pfam00573) → rplW (PRK05738)Ribosomal_L23 (pfam00276) → RplB (COG0090)rplB (PRK09374) → rpsS (PRK00357)RpsS (COG0185) → rplV (PRK00565)Ribosomal_L22 (pfam00237) → RpsC (COG0092)rpsC (PRK00310) → rpl16 (CHL00044)rplP (PRK09203) → PRK00306 (PRK00306)Ribosomal_L29 (pfam00831) → rpsQ (PRK05610)Ribosomal_S17 (pfam00366) → rplN (PRK05483)Ribosomal_L14 (pfam00238) → RplX (COG0198)rplX (PRK00004) → rplE (PRK00010)RplE (COG0094) → rpsN (PRK08061)RpsN (COG0199) → rpsH (PRK00136)Ribosomal_S8 (pfam00410) →                                                                                                                                                                                                                                                                                                                                                                                                                                                                                                                                                                                                                  |
| env-388  | SRS047824_WUGC_scaffold_310   | + | 15740  | 15815  | RNA →                                                                                                                                                                                                                                                                                                                                                                                                                                                                                                                                                                                                                                                                                                                                                                                                                                                                                                                                                                                                                                                                                                                                                                                                                                   |
| Lba-15-1 | NZ_ALJL01000022.1             | + | 187340 | 187415 | RNA → rpsJ (PRK00596)RpsJ (COG0051) → rpsJ (PRK00596)RpsJ (COG0051) → RplC (COG0087)rplC (PRK00001) → RplC (COG0087)rplC (PRK00001) → rplD (PRK05319)Ribosomal_L4 (pfam00573) → rplD (PRK05319)Ribosomal_L4 (pfam00573) → rplW (PRK05738)Ribosomal_L23 (pfam00276) → rplW (PRK05738)Ribosomal_L23 (pfam00276) → RplB (COG0090)rplB (PRK09374) → RplB (COG0090)rplB (PRK09374) → rpsS (PRK00357)RpsS (COG0185) → rpsS (PRK00357)RpsS (COG0185) → rplV (PRK00565)Ribosomal_L22 (pfam00237) → rplV (PRK00565)Ribosomal_L22 (pfam00237) → RpsC (COG0092)rpsC (PRK00310) → RpsC (COG0092)rpsC (PRK00310) → rpl16 (CHL00044)rplP (PRK09203) → rpl16 (CHL00044)rplP (PRK09203) → PRK00306 (PRK00306)Ribosomal_L29 (pfam00831) → PRK00306 (PRK00306)Ribosomal_L29 (pfam00831) → rpsQ (PRK05610)Ribosomal_S17 (pfam00366) → rpsQ (PRK05610)Ribosomal_S17 (pfam00366) → rplN (PRK05483)Ribosomal_L14 (pfam00238) → rplN (PRK05483)Ribosomal_L14 (pfam00238) → RplX (COG0198)rplX (PRK00004) → RplX (COG0198)rplX (PRK00004) → rplE (PRK00010)RplE (COG0094) → rplE (PRK00010)RplE (COG0094) → rpsN (PRK08061)RpsN (COG0199) → rpsN (PRK08061)RpsN (COG0199) → rpsH (PRK00136)Ribosomal_S8 (pfam00410) → rpsH (PRK00136)Ribosomal_S8 (pfam00410) → |
| env-389  | SRS063288_C2574221            | + | 262    | 337    | RNA → rpsJ (PRK00596)RpsJ (COG0051) →                                                                                                                                                                                                                                                                                                                                                                                                                                                                                                                                                                                                                                                                                                                                                                                                                                                                                                                                                                                                                                                                                                                                                                                                   |
| env-390  | SRS013879_C2821049            | - | 196    | 121    | RNA →                                                                                                                                                                                                                                                                                                                                                                                                                                                                                                                                                                                                                                                                                                                                                                                                                                                                                                                                                                                                                                                                                                                                                                                                                                   |
| env-391  | SRS022530_LANL_scaffold_1983  | - | 1053   | 978    | RNA → rpsJ (PRK00596)RpsJ (COG0051) → RplC (COG0087)rplC (PRK00001) →                                                                                                                                                                                                                                                                                                                                                                                                                                                                                                                                                                                                                                                                                                                                                                                                                                                                                                                                                                                                                                                                                                                                                                   |
| env-392  | SRS024381_LANL_scaffold_11259 | + | 59     | 134    | RNA → hypo → rpsJ (PRK00596)RpsJ (COG0051) →                                                                                                                                                                                                                                                                                                                                                                                                                                                                                                                                                                                                                                                                                                                                                                                                                                                                                                                                                                                                                                                                                                                                                                                            |
| env-393  | SRS055426_C3279857            | + | 722    | 797    | RNA →                                                                                                                                                                                                                                                                                                                                                                                                                                                                                                                                                                                                                                                                                                                                                                                                                                                                                                                                                                                                                                                                                                                                                                                                                                   |
| env-394  | SRS063193_LANL_scaffold_16021 | + | 86     | 161    | RNA →                                                                                                                                                                                                                                                                                                                                                                                                                                                                                                                                                                                                                                                                                                                                                                                                                                                                                                                                                                                                                                                                                                                                                                                                                                   |
| env-395  | SRS013502_C2153529            | + | 97     | 172    | RNA → rpsJ (PRK00596)RpsJ (COG0051) →                                                                                                                                                                                                                                                                                                                                                                                                                                                                                                                                                                                                                                                                                                                                                                                                                                                                                                                                                                                                                                                                                                                                                                                                   |
| env-396  | SRS018969_WUGC_scaffold_55533 | + | 372    | 447    | RNA →                                                                                                                                                                                                                                                                                                                                                                                                                                                                                                                                                                                                                                                                                                                                                                                                                                                                                                                                                                                                                                                                                                                                                                                                                                   |
| env-397  | SRS023352_LANL_scaffold_14387 | - | 2374   | 2299   | RNA → rpsJ (PRK00596)RpsJ (COG0051) → RplC (COG0087)rplC (PRK00001) → rplD (PRK05319)Ribosomal_L4 (pfam00573) → rplW (PRK05738)Ribosomal_L23 (pfam00276) → RplB (COG0090)rplB (PRK09374) →                                                                                                                                                                                                                                                                                                                                                                                                                                                                                                                                                                                                                                                                                                                                                                                                                                                                                                                                                                                                                                              |
| env-398  | SRS024580_C3068412            | - | 734    | 659    | RNA → rpsJ (PRK00596)RpsJ (COG0051) → rpl3 (CHL00143)rplC (PRK00001) →                                                                                                                                                                                                                                                                                                                                                                                                                                                                                                                                                                                                                                                                                                                                                                                                                                                                                                                                                                                                                                                                                                                                                                  |
| env-399  | SRS057692_LANL_scaffold_52939 | - | 1542   | 1467   | RNA → rpsJ (PRK00596)RpsJ (COG0051) → RplC (COG0087)rplC (PRK00001) → rplD (PRK05319)Ribosomal_L4 (pfam00573) →                                                                                                                                                                                                                                                                                                                                                                                                                                                                                                                                                                                                                                                                                                                                                                                                                                                                                                                                                                                                                                                                                                                         |
| env-400  | SRS013164_C2331459            | - | 765    | 690    | RNA → rpsJ (PRK00596)RpsJ (COG0051) → rpl3 (CHL00143)rplC (PRK00001) →                                                                                                                                                                                                                                                                                                                                                                                                                                                                                                                                                                                                                                                                                                                                                                                                                                                                                                                                                                                                                                                                                                                                                                  |
| env-401  | SRS018357_C3826668            | + | 11     | 86     | RNA → hypo → rpsJ (PRK00596)RpsJ (COG0051) →                                                                                                                                                                                                                                                                                                                                                                                                                                                                                                                                                                                                                                                                                                                                                                                                                                                                                                                                                                                                                                                                                                                                                                                            |
| Lsp-1-1  | NZ_AZXX01000062.1             | - | 191602 | 191527 | RNA → rpsJ (PRK00596)RpsJ (COG0051) → RplC (COG0087)rplC (PRK00001) → rplD (PRK05319)Ribosomal_L4 (pfam00573) → rplW (PRK05738)Ribosomal_L23 (pfam00276) → RplB (COG0090)rplB (PRK09374) → rpsS (PRK00357)RpsS (COG0185) → rplV (PRK00565)Ribosomal_L22 (pfam00237) → RpsC (COG0092)rpsC (PRK00310) → rpl16 (CHL00044)rplP (PRK09203) → PRK00306 (PRK00306)Ribosomal_L29 (pfam00831) → rpsQ (PRK05610)Ribosomal_S17 (pfam00366) → rplN (PRK05483)Ribosomal_L14 (pfam00238) → RplX (COG0198)rplX (PRK00004) → rplE (PRK00010)RplE (COG0094) → rpsN (PRK08061)RpsN (COG0199) →                                                                                                                                                                                                                                                                                                                                                                                                                                                                                                                                                                                                                                                            |
| env-402  | SRS019026_C1857454            | + | 146    | 221    | RNA →                                                                                                                                                                                                                                                                                                                                                                                                                                                                                                                                                                                                                                                                                                                                                                                                                                                                                                                                                                                                                                                                                                                                                                                                                                   |
| env-403  | SRS024277_C2778072            | - | 387    | 312    | RNA → rpsJ (PRK00596)Ribosomal_S10 (pfam00338) →                                                                                                                                                                                                                                                                                                                                                                                                                                                                                                                                                                                                                                                                                                                                                                                                                                                                                                                                                                                                                                                                                                                                                                                        |
| env-404  | SRS050628_LANL_scaffold_2158  | - | 310    | 235    | RNA → hypo → rpsJ (PRK00596)Ribosomal_S10 (pfam00338) →                                                                                                                                                                                                                                                                                                                                                                                                                                                                                                                                                                                                                                                                                                                                                                                                                                                                                                                                                                                                                                                                                                                                                                                 |
| env-405  | SRS057539_LANL_scaffold_17399 | + | 419    | 494    | RNA → rpsJ (PRK00596)RpsJ (COG0051) →                                                                                                                                                                                                                                                                                                                                                                                                                                                                                                                                                                                                                                                                                                                                                                                                                                                                                                                                                                                                                                                                                                                                                                                                   |
| env-406  | SRS013234_C2990282            | - | 236    | 161    | RNA →                                                                                                                                                                                                                                                                                                                                                                                                                                                                                                                                                                                                                                                                                                                                                                                                                                                                                                                                                                                                                                                                                                                                                                                                                                   |

|          |                                 |   |         |         |                                                                                                                                                                                                                                                                                                                                                                                                                                                                                                                                                                                                                                                                             |
|----------|---------------------------------|---|---------|---------|-----------------------------------------------------------------------------------------------------------------------------------------------------------------------------------------------------------------------------------------------------------------------------------------------------------------------------------------------------------------------------------------------------------------------------------------------------------------------------------------------------------------------------------------------------------------------------------------------------------------------------------------------------------------------------|
| Lba-22-1 | NZ_JH591133.1                   | + | 12060   | 12135   | RNA → rpsJ (PRK00596)RpsJ (COG0051) → RplC (COG0087)rplC (PRK00001) → hypo → hypo → rplD (PRK05319)Ribosomal_L4 (pfam00573) → rplD (PRK05319)Ribosomal_L4 (pfam00573) → rplW (PRK05738)Ribosomal_L23 (pfam00276) → RplB (COG0090)rplB (PRK09374) → rpsS (PRK00357)RpsS (COG0185) → rplV (PRK00565)Ribosomal_L22 (pfam00237) → RpsC (COG0092)rpsC (PRK00310) → rpl16 (CHL00044)rplP (PRK09203) → PRK00306 (PRK00306)Ribosomal_L29 (pfam00831) → rpsQ (PRK05610)Ribosomal_S17 (pfam00366) → rplN (PRK05483)Ribosomal_L14 (pfam00238) → RplX (COG0198)rplX (PRK00004) → rplE (PRK00010)RplE (COG0094) → rpsN (PRK08061)RpsN (COG0199) → rpsN (PRK08061)RpsN (COG0199) → hypo → |
| env-407  | SRS015893_C2284730              | + | 70      | 145     | RNA → rpsJ (PRK00596)RpsJ (COG0051) →                                                                                                                                                                                                                                                                                                                                                                                                                                                                                                                                                                                                                                       |
| env-408  | SRS020856_C2635639              | + | 618     | 693     | RNA → rpsJ (PRK00596)RpsJ (COG0051) → RplC (COG0087)rplC (PRK00001) →                                                                                                                                                                                                                                                                                                                                                                                                                                                                                                                                                                                                       |
| env-409  | SRS024318_LANL_scaffold_69413   | + | 130     | 205     | RNA →                                                                                                                                                                                                                                                                                                                                                                                                                                                                                                                                                                                                                                                                       |
| env-410  | SRS053603_LANL_scaffold_68274   | + | 71      | 146     | RNA → rpsJ (PRK00596)RpsJ (COG0051) → RplC (COG0087)rplC (PRK00001) → rplD (PRK05319)Ribosomal_L4 (pfam00573) → rplW (PRK05738)Ribosomal_L23 (pfam00276) → RplB (COG0090)rplB (PRK09374) →                                                                                                                                                                                                                                                                                                                                                                                                                                                                                  |
| Cba-3-1  | NZ_JH815185.1                   | - | 1384295 | 1384220 | RNA → rpsJ (PRK00596)RpsJ (COG0051) → RplC (COG0087)rplC (PRK00001) → rplD (PRK05319)Ribosomal_L4 (pfam00573) → rplW (PRK05738)Ribosomal_L23 (pfam00276) → RplB (COG0090)rplB (PRK09374) → rpsS (PRK00357)RpsS (COG0185) → rplV (PRK00565)Ribosomal_L22 (pfam00237) → RpsC (COG0092)rpsC (PRK00310) → rpl16 (CHL00044)rplP (PRK09203) → PRK00306 (PRK00306)Ribosomal_L29 (pfam00831) → rpsQ (PRK05610)Ribosomal_S17 (pfam00366) → rplN (PRK05483)Ribosomal_L14 (pfam00238) → RplX (COG0198)rplX (PRK00004) → rplE (PRK00010)RplE (COG0094) → rpsN (PRK08061)RpsN (COG0199) →                                                                                                |
| env-411  | SRS014684_C3308960              | - | 1490    | 1415    | RNA → rpsJ (PRK00596)RpsJ (COG0051) → RplC (COG0087)rplC (PRK00001) → RplD (COG0088)rplD (PRK05319) →                                                                                                                                                                                                                                                                                                                                                                                                                                                                                                                                                                       |
| env-412  | SRS019027_C1949428              | + | 180     | 255     | RNA → rpsJ (PRK00596)RpsJ (COG0051) →                                                                                                                                                                                                                                                                                                                                                                                                                                                                                                                                                                                                                                       |
| env-413  | SRS019045_C2675630              | + | 109     | 184     | RNA → rpsJ (PRK00596)RpsJ (COG0051) →                                                                                                                                                                                                                                                                                                                                                                                                                                                                                                                                                                                                                                       |
| env-414  | SRS014573_WUGC_scaffold_30532   | - | 229     | 140     | RNA → hypo →                                                                                                                                                                                                                                                                                                                                                                                                                                                                                                                                                                                                                                                                |
| env-415  | SRS019071_C5206406              | + | 1242    | 1331    | RNA →                                                                                                                                                                                                                                                                                                                                                                                                                                                                                                                                                                                                                                                                       |
| env-416  | SRS018300_Baylor_scaffold_8057  | - | 2973    | 2884    | RNA → rpsJ (PRK00596)RpsJ (COG0051) → RplC (COG0087)rplC (PRK00001) → rplD (PRK05319)Ribosomal_L4 (pfam00573) → rplW (PRK05738)Ribosomal_L23 (pfam00276) → RplB (COG0090)rplB (PRK09374) →                                                                                                                                                                                                                                                                                                                                                                                                                                                                                  |
| env-417  | SRS016225_C2883210              | + | 201     | 290     | RNA →                                                                                                                                                                                                                                                                                                                                                                                                                                                                                                                                                                                                                                                                       |
| env-418  | SRS021496_C2575557              | - | 99      | 10      | RNA → hypo →                                                                                                                                                                                                                                                                                                                                                                                                                                                                                                                                                                                                                                                                |
| env-419  | SRS024441_C2869459              | - | 99      | 10      | RNA → hypo →                                                                                                                                                                                                                                                                                                                                                                                                                                                                                                                                                                                                                                                                |
| env-420  | SRS012279_Baylor_scaffold_34972 | - | 551     | 462     | RNA → rpsJ (PRK00596)RpsJ (COG0051) →                                                                                                                                                                                                                                                                                                                                                                                                                                                                                                                                                                                                                                       |
| env-421  | SRS015762_C3488345              | - | 99      | 10      | RNA →                                                                                                                                                                                                                                                                                                                                                                                                                                                                                                                                                                                                                                                                       |
| env-422  | SRS017209_Baylor_scaffold_18507 | - | 18184   | 18095   | RNA → rpsJ (PRK00596)RpsJ (COG0051) → RplC (COG0087)rplC (PRK00001) → rplD (PRK05319)Ribosomal_L4 (pfam00573) → rplW (PRK05738)Ribosomal_L23 (pfam00276) → RplB (COG0090)rplB (PRK09374) → rpsS (PRK00357)RpsS (COG0185) → rplV (PRK00565)Ribosomal_L22 (pfam00237) → RpsC (COG0092)rpsC (PRK00310) → rpl16 (CHL00044)rplP (PRK09203) →                                                                                                                                                                                                                                                                                                                                     |
| env-423  | SRS022077_C2576020              | + | 2624    | 2713    | RNA →                                                                                                                                                                                                                                                                                                                                                                                                                                                                                                                                                                                                                                                                       |
| env-424  | SRS050669_LANL_scaffold_22401   | + | 2618    | 2707    | RNA → rpsJ (PRK00596)RpsJ (COG0051) → RplC (COG0087)rplC (PRK00001) → rplD (PRK05319)Ribosomal_L4 (pfam00573) → rplW (PRK05738)Ribosomal_L23 (pfam00276) → RplB (COG0090)rplB (PRK09374) →                                                                                                                                                                                                                                                                                                                                                                                                                                                                                  |
| env-425  | SRS057205_C3496056              | - | 99      | 10      | RNA →                                                                                                                                                                                                                                                                                                                                                                                                                                                                                                                                                                                                                                                                       |
| env-426  | SRS057692_LANL_scaffold_28820   | - | 18094   | 18005   | RNA → rpsJ (PRK00596)RpsJ (COG0051) → RplC (COG0087)rplC (PRK00001) → rplD (PRK05319)Ribosomal_L4 (pfam00573) → rplW (PRK05738)Ribosomal_L23 (pfam00276) → RplB (COG0090)rplB (PRK09374) → rpsS (PRK00357)RpsS (COG0185) → rplV (PRK00565)Ribosomal_L22 (pfam00237) → RpsC (COG0092)rpsC (PRK00310) → rpl16 (CHL00044)rplP (PRK09203) →                                                                                                                                                                                                                                                                                                                                     |
| env-427  | SRS015797_C2672144              | + | 11515   | 11604   | RNA →                                                                                                                                                                                                                                                                                                                                                                                                                                                                                                                                                                                                                                                                       |
| env-428  | SRS014683_WUGC_scaffold_48805   | + | 91      | 186     | RNA → rpsJ (PRK00596)RpsJ (COG0051) →                                                                                                                                                                                                                                                                                                                                                                                                                                                                                                                                                                                                                                       |
| env-429  | scaffold12439_3_MH0067          | - | 209     | 114     | RNA →                                                                                                                                                                                                                                                                                                                                                                                                                                                                                                                                                                                                                                                                       |
| env-430  | NLM032_scaffold38249_2          | - | 401     | 306     | RNA → rpsJ (PRK00596)Ribosomal_S10 (pfam00338) →                                                                                                                                                                                                                                                                                                                                                                                                                                                                                                                                                                                                                            |

|         |                                     |   |       |       |                                                  |
|---------|-------------------------------------|---|-------|-------|--------------------------------------------------|
| env-431 | 4491413.3_NODE.14619                | - | 17813 | 17718 | RNA → rpsJ (PRK00596)RpsJ (COG0051) →            |
| env-432 | SRS011271.C2970480                  | + | 148   | 243   | RNA →                                            |
| env-433 | SRS023526_Baylor_scaffold.8422      | - | 1165  | 1070  | RNA → rpsJ (PRK00596)RpsJ (COG0051) →            |
| env-434 | 4491406.3_NODE.11036                | - | 1072  | 977   | RNA → rpsJ (PRK00596)RpsJ (COG0051) →            |
| env-435 | scaffold7196.1_MH0055               | - | 1151  | 1056  | RNA → rpsJ (PRK00596)RpsJ (COG0051) →            |
| env-436 | scaffold9574.3_MH0014               | - | 209   | 114   | RNA → hypo →                                     |
| env-437 | scaffold46288.2_MH0086              | + | 2014  | 2109  | RNA →                                            |
| env-438 | SRS011302.C3223053                  | + | 118   | 213   | RNA →                                            |
| env-439 | SRS014459_WUGC_scaffold.42270       | - | 1165  | 1070  | RNA → rpsJ (PRK00596)RpsJ (COG0051) →            |
| env-440 | SRS015133.C3303308                  | - | 273   | 178   | RNA →                                            |
| env-441 | SRS015578_WUGC_scaffold.16888       | - | 1170  | 1075  | RNA → rpsJ (PRK00596)RpsJ (COG0051) →            |
| env-442 | SRS015663.C2978496                  | - | 273   | 178   | RNA →                                            |
| env-443 | SRS015782.C3242805                  | - | 273   | 178   | RNA → hypo →                                     |
| env-444 | SRS016018.C1196800                  | - | 273   | 178   | RNA → hypo →                                     |
| env-445 | SRS017103.C2464388                  | - | 273   | 178   | RNA →                                            |
| env-446 | SRS018817.C1930195                  | + | 96    | 191   | RNA →                                            |
| env-447 | SRS019968.C1951730                  | - | 273   | 178   | RNA →                                            |
| env-448 | SRS042628_WUGC_scaffold.32234       | + | 9421  | 9516  | RNA → rpsJ (PRK00596)RpsJ (COG0051) →            |
| env-449 | SRS048164_WUGC_scaffold.13083       | - | 3276  | 3181  | RNA → rpsJ (PRK00596)RpsJ (COG0051) →            |
| env-450 | SRS050925_LANL_scaffold.67534       | + | 108   | 203   | RNA → rpsJ (PRK00596)RpsJ (COG0051) →            |
| env-451 | SRS051031.C2444620                  | + | 152   | 247   | RNA →                                            |
| env-452 | SRS053335_LANL_scaffold.29138       | - | 760   | 665   | RNA → rpsJ (PRK00596)RpsJ (COG0051) →            |
| env-453 | SRS056259_LANL_scaffold.47056       | - | 1427  | 1332  | RNA → rpsJ (PRK00596)RpsJ (COG0051) →            |
| env-454 | scaffold31147.1_MH0058              | - | 109   | 14    | RNA →                                            |
| env-455 | SRS015190_WUGC_scaffold.27972       | - | 760   | 665   | RNA → rpsJ (PRK00596)RpsJ (COG0051) →            |
| env-456 | DLM028_scaffold21444.3              | + | 2563  | 2658  | RNA → rpsJ (PRK00596)RpsJ (COG0051) →            |
| env-457 | scaffold5136.1_MH0064               | + | 124   | 219   | RNA → rpsJ (PRK00596)RpsJ (COG0051) →            |
| env-458 | SRS045004_LANL_scaffold.32382       | - | 760   | 665   | RNA → rpsJ (PRK00596)RpsJ (COG0051) →            |
| env-459 | UnmappedStool_Broad_scaffold.717639 | + | 562   | 657   | RNA →                                            |
| env-460 | SRS011586.C3298925                  | - | 179   | 84    | RNA →                                            |
| env-461 | SRS019685.C8263105                  | - | 253   | 158   | RNA →                                            |
| env-462 | SRS020233.C4054417                  | + | 326   | 421   | RNA →                                            |
| env-463 | SRS049712.C15431011                 | - | 273   | 178   | RNA → hypo →                                     |
| env-464 | SRS017521.C2498973                  | - | 169   | 74    | RNA → hypo →                                     |
| env-465 | SRS019910_WUGC_scaffold.74754       | + | 108   | 203   | RNA → rpsJ (PRK00596)RpsJ (COG0051) →            |
| env-466 | SRS053398_LANL_scaffold.39694       | + | 2463  | 2558  | RNA → rpsJ (PRK00596)RpsJ (COG0051) →            |
| env-467 | 4491410.3_NODE.67969                | + | 66    | 161   | RNA → rpsJ (PRK00596)Ribosomal_S10 (pfam00338) → |
| env-468 | ADJS01016428.1                      | + | 3391  | 3486  | RNA →                                            |
| env-469 | SRS016954.C2721358                  | - | 273   | 178   | RNA → hypo →                                     |
| env-470 | scaffold47201.1.O2.UC-22            | - | 1074  | 979   | RNA → rpsJ (PRK00596)RpsJ (COG0051) →            |
| env-471 | scaffold32854.6.V1.UC-21            | + | 2000  | 2095  | RNA → rpsJ (PRK00596)RpsJ (COG0051) →            |
| env-472 | NLM026_scaffold284.3                | - | 861   | 766   | RNA → rpsJ (PRK00596)RpsJ (COG0051) →            |
| env-473 | scaffold3368.2_MH0011               | - | 209   | 114   | RNA →                                            |
| env-474 | scaffold23333.3_MH0069              | - | 209   | 114   | RNA →                                            |
| env-475 | scaffold52193.1_MH0075              | - | 232   | 137   | RNA →                                            |
| env-476 | scaffold40929.1.V1.UC-15            | - | 231   | 136   | RNA →                                            |
| env-477 | scaffold25089.3.V1.UC-18            | + | 908   | 1003  | RNA →                                            |
| env-478 | SRS016335.C5051729                  | - | 108   | 13    | RNA →                                            |
| env-479 | SRS052697_LANL_scaffold.44674       | + | 797   | 892   | RNA →                                            |
| env-480 | SRS058770.C1525436                  | - | 131   | 36    | RNA →                                            |
| env-481 | SRS065504.C3209247                  | - | 273   | 178   | RNA →                                            |
| env-482 | SRS019582_WUGC_scaffold.83695       | + | 77    | 172   | RNA → rpsJ (PRK00596)RpsJ (COG0051) →            |



|         |                                    |   |        |        |                                                                                 |
|---------|------------------------------------|---|--------|--------|---------------------------------------------------------------------------------|
| env-483 | SRS043411_WUGC_scaffold_47208      | + | 82     | 177    | RNA → rpsJ (PRK00596)RpsJ (COG0051) →                                           |
| env-484 | scaffold74289_5_MH0035             | + | 677    | 772    | RNA →                                                                           |
| env-485 | DLM007_scaffold38_46               | + | 2742   | 2837   | RNA → rpsJ (PRK00596)RpsJ (COG0051) →                                           |
| env-486 | SRS016095_C2550551                 | - | 273    | 178    | RNA →                                                                           |
| env-487 | scaffold16164_3_MH0028             | + | 501    | 596    | RNA → rpsJ (PRK00596)Ribosomal_S10 (pfam00338) →                                |
| env-488 | scaffold14432_2_MH0039             | - | 208    | 113    | RNA →                                                                           |
| env-489 | scaffold7811_8_MH0072              | + | 11840  | 11919  | RNA → rpsJ (PRK00596)RpsJ (COG0051) →                                           |
| env-490 | NLF001_scaffold1614_22             | + | 1732   | 1811   | RNA → rpsJ (PRK00596)RpsJ (COG0051) →                                           |
| env-491 | NLM023_scaffold1764_27             | - | 4212   | 4133   | RNA → rpsJ (PRK00596)RpsJ (COG0051) →                                           |
| env-492 | NOM009_scaffold20333_9             | + | 194    | 273    | RNA → rpsJ (PRK00596)RpsJ (COG0051) →                                           |
| env-493 | SRS015578_WUGC_scaffold_19979      | - | 174    | 95     | RNA →                                                                           |
| env-494 | DLF007_scaffold11184_3             | + | 706    | 785    | RNA → rpsJ (PRK00596)RpsJ (COG0051) →                                           |
| env-495 | DOM013_C728173_1                   | + | 213    | 292    | RNA → rpsJ (PRK00596)RpsJ (COG0051) →                                           |
| env-496 | SRS016335_WUGC_scaffold_19721      | - | 664    | 585    | RNA → rpsJ (PRK00596)RpsJ (COG0051) →                                           |
| env-497 | DOM010_scaffold44278_1             | + | 145859 | 145938 | RNA → rpsJ (PRK00596)RpsJ (COG0051) →                                           |
| env-498 | NLF005_scaffold29876_2             | - | 619    | 540    | RNA → rpsJ (PRK00596)RpsJ (COG0051) →                                           |
| env-499 | SRS063040_Baylor_scaffold_18425    | - | 174    | 95     | RNA → hypo →                                                                    |
| env-500 | DOF013_scaffold497_1               | - | 750    | 671    | RNA → rpsJ (PRK00596)RpsJ (COG0051) →                                           |
| env-501 | NOM026_scaffold9794_3              | + | 191    | 270    | RNA → rpsJ (PRK00596)RpsJ (COG0051) →                                           |
| env-502 | UnmappedStool_Broad_scaffold_88209 | - | 174    | 95     | RNA →                                                                           |
| env-503 | DOF004_scaffold20309_1             | - | 817    | 738    | RNA → rpsJ (PRK00596)RpsJ (COG0051) →                                           |
| env-504 | DOM015_scaffold13120_2             | + | 30031  | 30110  | RNA → rpsJ (PRK00596)RpsJ (COG0051) →                                           |
| env-505 | DOM016_scaffold32429_1             | - | 806    | 727    | RNA → rpsJ (PRK00596)RpsJ (COG0051) →                                           |
| env-506 | NLF012_scaffold128_1               | - | 817    | 738    | RNA → rpsJ (PRK00596)RpsJ (COG0051) →                                           |
| env-507 | NLM007_scaffold9577_1              | + | 38620  | 38699  | RNA → rpsJ (PRK00596)RpsJ (COG0051) →                                           |
| env-508 | NLM022_scaffold16572_1             | + | 39462  | 39541  | RNA → rpsJ (PRK00596)RpsJ (COG0051) →                                           |
| env-509 | NOM004_scaffold7882_14             | + | 3208   | 3287   | RNA → rpsJ (PRK00596)RpsJ (COG0051) →                                           |
| env-510 | NOM014_scaffold27246_1             | - | 435    | 356    | RNA → rpsJ (PRK00596)RpsJ (COG0051) →                                           |
| env-511 | NOM020_scaffold37871_1             | - | 399    | 320    | RNA → rpsJ (PRK00596)Ribosomal_S10 (pfam00338) →                                |
| env-512 | scaffold1071_13_V1_UC-21           | - | 1569   | 1489   | RNA → RplC (COG0087)rplC (PRK00001) → rplD (PRK05319)Ribosomal_L4 (pfam00573) → |
| env-513 | scaffold63164_1_MH0035             | - | 406    | 326    | RNA → rpsJ (PRK00596)Ribosomal_S10 (pfam00338) →                                |
| env-514 | scaffold6429_5_MH0064              | - | 1119   | 1039   | RNA → RplC (COG0087)rplC (PRK00001) →                                           |
| env-515 | scaffold4634_3_V1_UC-17            | - | 1536   | 1456   | RNA → RplC (COG0087)rplC (PRK00001) → RplD (COG0088)rplD (PRK05319) →           |
| env-516 | SRS014235_WUGC_scaffold_50709      | + | 24455  | 24535  | RNA → rpsJ (PRK00596)RpsJ (COG0051) →                                           |
| env-517 | scaffold16691_6_MH0060             | - | 1548   | 1468   | RNA → RplC (COG0087)rplC (PRK00001) → RplD (COG0088)rplD (PRK05319) →           |
| env-518 | scaffold10811_1_MH0002             | - | 1137   | 1057   | RNA → RplC (COG0087)rplC (PRK00001) →                                           |
| env-519 | scaffold66919_2_MH0012             | + | 21859  | 21939  | RNA → rpsJ (PRK00596)Ribosomal_S10 (pfam00338) →                                |
| env-520 | scaffold3200_2_MH0026              | + | 11311  | 11391  | RNA → rpsJ (PRK00596)Ribosomal_S10 (pfam00338) →                                |
| env-521 | scaffold3869_3_MH0028              | - | 1569   | 1489   | RNA → RplC (COG0087)rplC (PRK00001) → rplD (PRK05319)Ribosomal_L4 (pfam00573) → |
| env-522 | scaffold64021_1_MH0050             | - | 1005   | 925    | RNA → rpsJ (PRK00596)RpsJ (COG0051) →                                           |
| env-523 | scaffold41845_1_MH0051             | - | 684    | 604    | RNA → rpsJ (PRK00596)RpsJ (COG0051) →                                           |
| env-524 | scaffold25986_1_MH0083             | + | 7731   | 7811   | RNA →                                                                           |
| env-525 | scaffold4557_5_O2_UC-24            | - | 329    | 249    | RNA → rpsJ (PRK00596)RpsJ (COG0051) →                                           |
| env-526 | 4491414_3_NODE_889                 | - | 1611   | 1531   | RNA → rpsJ (PRK00596)RpsJ (COG0051) →                                           |
| env-527 | 4491423_3_NODE_15108               | + | 887    | 967    | RNA → rpsJ (PRK00596)Ribosomal_S10 (pfam00338) →                                |
| env-528 | 4491484_3_NODE_8519                | + | 26186  | 26266  | RNA → rpsJ (PRK00596)RpsJ (COG0051) →                                           |
| env-529 | 4491487_3_NODE_1076                | - | 407    | 327    | RNA → rpsJ (PRK00596)Ribosomal_S10 (pfam00338) →                                |
| env-530 | DLF003_scaffold10360_5             | + | 291    | 371    | RNA →                                                                           |
| env-531 | DLF005_C790551_1                   | - | 263    | 183    | RNA →                                                                           |
| env-532 | DLM028_scaffold47970_1             | + | 28193  | 28273  | RNA → rpsJ (PRK00596)RpsJ (COG0051) →                                           |
| env-533 | NLF006_scaffold8323_3              | - | 902    | 822    | RNA → rpsJ (PRK00596)RpsJ (COG0051) →                                           |
| env-534 | NLF007_scaffold181_2               | - | 911    | 831    | RNA → rpsJ (PRK00596)RpsJ (COG0051) →                                           |

|          |                                 |   |         |         |                                                                                                                                                               |
|----------|---------------------------------|---|---------|---------|---------------------------------------------------------------------------------------------------------------------------------------------------------------|
| env-535  | NLF011_scaffold2872_3           | + | 6086    | 6166    | RNA → rpsJ (PRK00596)RpsJ (COG0051) →                                                                                                                         |
| env-536  | NLF013_scaffold25874_1          | + | 29048   | 29128   | RNA → rpsJ (PRK00596)RpsJ (COG0051) →                                                                                                                         |
| env-537  | NLM001_scaffold144_5            | - | 903     | 823     | RNA → rpsJ (PRK00596)RpsJ (COG0051) →                                                                                                                         |
| env-538  | NLM004_scaffold47788_3          | - | 900     | 820     | RNA → rpsJ (PRK00596)RpsJ (COG0051) →                                                                                                                         |
| env-539  | NLM025_scaffold70_10            | - | 912     | 832     | RNA → rpsJ (PRK00596)RpsJ (COG0051) →                                                                                                                         |
| env-540  | NLM029_scaffold41578_1          | + | 28952   | 29032   | RNA → rpsJ (PRK00596)RpsJ (COG0051) →                                                                                                                         |
| env-541  | NOF004_scaffold164_8            | - | 869     | 789     | RNA → rpsJ (PRK00596)RpsJ (COG0051) →                                                                                                                         |
| env-542  | NOF014_scaffold249_4            | - | 49901   | 49821   | RNA → rpsJ (PRK00596)RpsJ (COG0051) →                                                                                                                         |
| env-543  | NOM010_scaffold40130_2          | + | 24785   | 24865   | RNA → rpsJ (PRK00596)RpsJ (COG0051) →                                                                                                                         |
| env-544  | NOM013_scaffold112_2            | - | 911     | 831     | RNA → rpsJ (PRK00596)RpsJ (COG0051) →                                                                                                                         |
| env-545  | NOM019_scaffold39671_3          | + | 26855   | 26935   | RNA → rpsJ (PRK00596)RpsJ (COG0051) →                                                                                                                         |
| env-546  | SRS011271_WUGC_scaffold_4629    | - | 677     | 597     | RNA → rpsJ (PRK00596)RpsJ (COG0051) →                                                                                                                         |
| env-547  | SRS013521_C1519763              | + | 436     | 516     | RNA →                                                                                                                                                         |
| env-548  | SRS014459_WUGC_scaffold_70819   | + | 921     | 1001    | RNA → rpsJ (PRK00596)RpsJ (COG0051) →                                                                                                                         |
| env-549  | SRS015065_WUGC_scaffold_12019   | - | 3797    | 3717    | RNA → rpsJ (PRK00596)RpsJ (COG0051) →                                                                                                                         |
| env-550  | SRS015782_WUGC_scaffold_23904   | - | 233     | 153     | RNA →                                                                                                                                                         |
| env-551  | SRS017307_Baylor_scaffold_21108 | + | 4913    | 4993    | RNA → rpsJ (PRK00596)RpsJ (COG0051) →                                                                                                                         |
| env-552  | SRS019582_WUGC_scaffold_43199   | - | 686     | 606     | RNA → rpsJ (PRK00596)RpsJ (COG0051) →                                                                                                                         |
| env-553  | SRS019685_WUGC_scaffold_38431   | - | 441     | 361     | RNA → rpsJ (PRK00596)RpsJ (COG0051) →                                                                                                                         |
| env-554  | SRS024132_Baylor_scaffold_10696 | - | 378     | 298     | RNA → rpsJ (PRK00596)Ribosomal_S10 (pfam00338) →                                                                                                              |
| env-555  | SRS051031_LANL_scaffold_22555   | + | 19118   | 19198   | RNA → rpsJ (PRK00596)RpsJ (COG0051) →                                                                                                                         |
| env-556  | SRS011239_C2445216              | + | 87      | 167     | RNA → hypo →                                                                                                                                                  |
| env-557  | scaffold46369_1_MH0040          | + | 9444    | 9524    | RNA → RplC (COG0087)rplC (PRK00001) →                                                                                                                         |
| env-558  | scaffold1151_7_O2.UC-14         | + | 3292    | 3372    | RNA → rpsJ (PRK00596)RpsJ (COG0051) →                                                                                                                         |
| env-559  | NLM010_scaffold13542_1          | + | 29117   | 29197   | RNA → rpsJ (PRK00596)RpsJ (COG0051) →                                                                                                                         |
| env-560  | SRS016335_C5035038              | + | 205     | 285     | RNA →                                                                                                                                                         |
| env-561  | scaffold5557_2_MH0036           | + | 17078   | 17158   | RNA → rpsJ (PRK00596)Ribosomal_S10 (pfam00338) →                                                                                                              |
| env-562  | JGI994J12354_10001975           | + | 15910   | 16006   | RNA → rpsJ (PRK00596)RpsJ (COG0051) → RplC (COG0087)rplC (PRK00001) →<br>rplD (PRK05319)Ribosomal_L4 (pfam00573) → rplW (PRK05738)Ribosomal_L23 (pfam00276) → |
| env-563  | 2227187752                      | - | 1209    | 1113    | RNA → rpsJ (PRK00596)RpsJ (COG0051) → RplC (COG0087)rplC (PRK00001) →                                                                                         |
| env-564  | JGI994J12354_10004218           | - | 3107    | 3011    | RNA → rpsJ (PRK00596)RpsJ (COG0051) → RplC (COG0087)rplC (PRK00001) →<br>rplD (PRK05319)Ribosomal_L4 (pfam00573) → rplW (PRK05738)Ribosomal_L23 (pfam00276) → |
| env-565  | 2227464663                      | - | 1219    | 1123    | RNA → rpsJ (PRK00596)RpsJ (COG0051) → RplC (COG0087)rplC (PRK00001) →                                                                                         |
| Bsp-4-1  | NZ_KE384203.1                   | - | 447202  | 447101  | RNA → rpsJ (PRK00596)RpsJ (COG0051) →                                                                                                                         |
| Bsp-7-1  | NZ_ATWY01000018.1               | - | 18605   | 18504   | RNA → rpsJ (PRK00596)RpsJ (COG0051) →                                                                                                                         |
| Bsp-8-1  | NZ_AUIZ01000002.1               | - | 353991  | 353890  | RNA → rpsJ (PRK00596)RpsJ (COG0051) →                                                                                                                         |
| Bsp-10-1 | NZ_ATVT01000003.1               | + | 3764    | 3865    | RNA → rpsJ (PRK00596)RpsJ (COG0051) →                                                                                                                         |
| env-566  | RUMENNODE_3010558_1             | + | 335     | 436     | RNA → rpsJ (PRK00596)RpsJ (COG0051) →                                                                                                                         |
| Bsp-2-1  | NZ_ATVR01000004.1               | + | 28829   | 28932   | RNA → rpsJ (PRK00596)RpsJ (COG0051) →                                                                                                                         |
| Bsp-3-1  | NZ_ATVS01000010.1               | + | 72924   | 73025   | RNA → rpsJ (PRK00596)RpsJ (COG0051) →                                                                                                                         |
| Bsp-6-1  | NZ_JHXX01000001.1               | - | 1304332 | 1304231 | RNA → rpsJ (PRK00596)RpsJ (COG0051) →                                                                                                                         |
| env-567  | 4491415_3_NODE_18881            | + | 4525    | 4614    | RNA → rpsJ (PRK00596)RpsJ (COG0051) →                                                                                                                         |
| env-568  | scaffold6327_2_MH0061           | + | 8496    | 8585    | RNA → rpsJ (PRK00596)Ribosomal_S10 (pfam00338) →                                                                                                              |
| env-569  | NLF011_scaffold13765_1          | + | 307     | 396     | RNA → rpsJ (PRK00596)RpsJ (COG0051) →                                                                                                                         |
| env-570  | scaffold3636_3_O2.UC-1          | + | 564     | 653     | RNA → rpsJ (PRK00596)Ribosomal_S10 (pfam00338) →                                                                                                              |
| env-571  | 4491409_3_NODE_31461            | - | 26153   | 26064   | RNA → rpsJ (PRK00596)RpsJ (COG0051) →                                                                                                                         |
| env-572  | 4491413_3_NODE_8050             | - | 15619   | 15530   | RNA → rpsJ (PRK00596)RpsJ (COG0051) →                                                                                                                         |
| env-573  | 4491477_3_NODE_7209             | + | 2699    | 2788    | RNA → rpsJ (PRK00596)RpsJ (COG0051) →                                                                                                                         |
| env-574  | NLM026_scaffold55560_5          | + | 459     | 548     | RNA → rpsJ (PRK00596)RpsJ (COG0051) →                                                                                                                         |
| env-575  | NOF004_scaffold311_1            | - | 5383    | 5294    | RNA → rpsJ (PRK00596)RpsJ (COG0051) →                                                                                                                         |
| env-576  | SRS014459_WUGC_scaffold_12493   | + | 297     | 386     | RNA → rpsJ (PRK00596)RpsJ (COG0051) →                                                                                                                         |
| env-577  | SRS017307_Baylor_scaffold_11892 | - | 793     | 704     | RNA → rpsJ (PRK00596)RpsJ (COG0051) → rplC (PRK00001) →                                                                                                       |
| env-578  | DLF004_scaffold35964_6          | - | 21511   | 21422   | RNA → rpsJ (PRK00596)RpsJ (COG0051) →                                                                                                                         |

|         |                                 |   |       |       |                                                                                                                                                                                                                                                                                                                                                                                                                                                                                                                                                                                                                                                                                       |
|---------|---------------------------------|---|-------|-------|---------------------------------------------------------------------------------------------------------------------------------------------------------------------------------------------------------------------------------------------------------------------------------------------------------------------------------------------------------------------------------------------------------------------------------------------------------------------------------------------------------------------------------------------------------------------------------------------------------------------------------------------------------------------------------------|
| env-579 | DLF010_scaffold23_3             | - | 21633 | 21544 | RNA → rpsJ (PRK00596)RpsJ (COG0051) →                                                                                                                                                                                                                                                                                                                                                                                                                                                                                                                                                                                                                                                 |
| env-580 | DLM028_scaffold54551_3          | + | 250   | 339   | RNA → rpsJ (PRK00596)RpsJ (COG0051) →                                                                                                                                                                                                                                                                                                                                                                                                                                                                                                                                                                                                                                                 |
| env-581 | DLM014_scaffold42817_10         | + | 4633  | 4722  | RNA → rpsJ (PRK00596)RpsJ (COG0051) →                                                                                                                                                                                                                                                                                                                                                                                                                                                                                                                                                                                                                                                 |
| env-582 | DOM015_scaffold8595_1           | + | 338   | 427   | RNA → rpsJ (PRK00596)RpsJ (COG0051) →                                                                                                                                                                                                                                                                                                                                                                                                                                                                                                                                                                                                                                                 |
| env-583 | NLF002_scaffold9596_6           | + | 236   | 325   | RNA → rpsJ (PRK00596)RpsJ (COG0051) →                                                                                                                                                                                                                                                                                                                                                                                                                                                                                                                                                                                                                                                 |
| env-584 | NLF007_scaffold40019_1          | + | 4162  | 4251  | RNA → rpsJ (PRK00596)RpsJ (COG0051) →                                                                                                                                                                                                                                                                                                                                                                                                                                                                                                                                                                                                                                                 |
| env-585 | SRS011405_WUGC_scaffold_20040   | - | 262   | 173   | RNA →                                                                                                                                                                                                                                                                                                                                                                                                                                                                                                                                                                                                                                                                                 |
| env-586 | SRS013951_WUGC_scaffold_50787   | - | 472   | 383   | RNA → rpsJ (PRK00596)RpsJ (COG0051) →                                                                                                                                                                                                                                                                                                                                                                                                                                                                                                                                                                                                                                                 |
| env-587 | SRS023914_Baylor_scaffold_17099 | + | 141   | 230   | RNA → rpsJ (PRK00596)RpsJ (COG0051) →                                                                                                                                                                                                                                                                                                                                                                                                                                                                                                                                                                                                                                                 |
| env-588 | NLM015_scaffold23209_1          | + | 303   | 392   | RNA → rpsJ (PRK00596)RpsJ (COG0051) →                                                                                                                                                                                                                                                                                                                                                                                                                                                                                                                                                                                                                                                 |
| env-589 | scaffold17594_1_MH0026          | - | 1172  | 1083  | RNA → rpsJ (PRK00596)RpsJ (COG0051) →                                                                                                                                                                                                                                                                                                                                                                                                                                                                                                                                                                                                                                                 |
| env-590 | scaffold24884_1_O2.UC-17        | + | 242   | 331   | RNA → rpsJ (PRK00596)RpsJ (COG0051) →                                                                                                                                                                                                                                                                                                                                                                                                                                                                                                                                                                                                                                                 |
| env-591 | 4491404.3_NODE_83831            | + | 1313  | 1402  | RNA → hypo →                                                                                                                                                                                                                                                                                                                                                                                                                                                                                                                                                                                                                                                                          |
| env-592 | 4491421.3_NODE_88475            | - | 10256 | 10167 | RNA → rpsJ (PRK00596)RpsJ (COG0051) →                                                                                                                                                                                                                                                                                                                                                                                                                                                                                                                                                                                                                                                 |
| env-593 | 4491484.3_NODE_135              | + | 301   | 390   | RNA → rpsJ (PRK00596)RpsJ (COG0051) →                                                                                                                                                                                                                                                                                                                                                                                                                                                                                                                                                                                                                                                 |
| env-594 | DLF006_scaffold44611_3          | - | 3121  | 3032  | RNA → rpsJ (PRK00596)RpsJ (COG0051) →                                                                                                                                                                                                                                                                                                                                                                                                                                                                                                                                                                                                                                                 |
| env-595 | DLM005_scaffold21393_11         | - | 3900  | 3811  | RNA → rpsJ (PRK00596)RpsJ (COG0051) →                                                                                                                                                                                                                                                                                                                                                                                                                                                                                                                                                                                                                                                 |
| env-596 | DLM023_scaffold10572_11         | - | 2355  | 2266  | RNA → rpsJ (PRK00596)RpsJ (COG0051) →                                                                                                                                                                                                                                                                                                                                                                                                                                                                                                                                                                                                                                                 |
| env-597 | DOM017_scaffold16014_2          | + | 273   | 362   | RNA → rpsJ (PRK00596)RpsJ (COG0051) →                                                                                                                                                                                                                                                                                                                                                                                                                                                                                                                                                                                                                                                 |
| env-598 | NLF005_scaffold12_6             | + | 428   | 517   | RNA → rpsJ (PRK00596)RpsJ (COG0051) →                                                                                                                                                                                                                                                                                                                                                                                                                                                                                                                                                                                                                                                 |
| env-599 | NLM004_scaffold4711_1           | + | 328   | 417   | RNA → rpsJ (PRK00596)RpsJ (COG0051) →                                                                                                                                                                                                                                                                                                                                                                                                                                                                                                                                                                                                                                                 |
| env-600 | SRS013687_Baylor_scaffold_4489  | - | 566   | 477   | RNA → rpsJ (PRK00596)RpsJ (COG0051) →                                                                                                                                                                                                                                                                                                                                                                                                                                                                                                                                                                                                                                                 |
| env-601 | SRS015663_WUGC_scaffold_32361   | - | 261   | 172   | RNA →                                                                                                                                                                                                                                                                                                                                                                                                                                                                                                                                                                                                                                                                                 |
| env-602 | NOM001_scaffold9206_1           | + | 179   | 268   | RNA → rpsJ (PRK00596)Ribosomal_S10 (pfam00338) →                                                                                                                                                                                                                                                                                                                                                                                                                                                                                                                                                                                                                                      |
| env-603 | MA55A_contig00037               | + | 31742 | 31825 | RNA → rpsJ (PRK00596)RpsJ (COG0051) →                                                                                                                                                                                                                                                                                                                                                                                                                                                                                                                                                                                                                                                 |
| env-604 | SRS015038_C1830604              | - | 183   | 101   | RNA → hypo →                                                                                                                                                                                                                                                                                                                                                                                                                                                                                                                                                                                                                                                                          |
| env-605 | SRS024318_LANL_scaffold_48420   | - | 9783  | 9701  | RNA → rpsJ (PRK00596)RpsJ (COG0051) → RplC (COG0087)rplC (PRK00001) →<br>rplD (PRK05319)Ribosomal_L4 (pfam00573) → rplW (PRK05738)Ribosomal_L23 (pfam00276) →<br>RplB (COG0090)rplB (PRK09374) → rpsS (PRK00357)RpsS (COG0185) →<br>rplV (PRK00565)Ribosomal_L22 (pfam00237) → RpsC (COG0092)rpsC (PRK00310) →<br>rpl16 (CHL00044)rplP (PRK09203) → PRK00306 (PRK00306)Ribosomal_L29 (pfam00831) →<br>rpsQ (PRK05610)Ribosomal_S17 (pfam00366) → rplN (PRK05483)Ribosomal_L14 (pfam00238) →<br>RplX (COG0198)rplX (PRK00004) → rplE (PRK00010)RplE (COG0094) → rpsN (PRK08061)RpsN (COG0199) →<br>rpsH (PRK00136)Ribosomal_S8 (pfam00410) → rplF (PRK05498)Ribosomal_L6 (pfam00347) → |
| env-606 | SRS019389_C2174016              | + | 64    | 146   | RNA → rpsJ (PRK00596)Ribosomal_S10 (pfam00338) →                                                                                                                                                                                                                                                                                                                                                                                                                                                                                                                                                                                                                                      |
| env-607 | SRS021496_Baylor_scaffold_61403 | - | 25384 | 25302 | RNA → rpsJ (PRK00596)RpsJ (COG0051) → RplC (COG0087)rplC (PRK00001) →<br>rplD (PRK05319)Ribosomal_L4 (pfam00573) → rplW (PRK05738)Ribosomal_L23 (pfam00276) →<br>RplB (COG0090)rplB (PRK09374) → rpsS (PRK00357)RpsS (COG0185) →<br>rplV (PRK00565)Ribosomal_L22 (pfam00237) → RpsC (COG0092)rpsC (PRK00310) →<br>rpl16 (CHL00044)rplP (PRK09203) → PRK00306 (PRK00306)Ribosomal_L29 (pfam00831) →<br>rpsQ (PRK05610)Ribosomal_S17 (pfam00366) → rplN (PRK05483)Ribosomal_L14 (pfam00238) →<br>RplX (COG0198)rplX (PRK00004) → rplE (PRK00010)RplE (COG0094) → rpsN (PRK08061)RpsN (COG0199) →<br>rpsH (PRK00136)Ribosomal_S8 (pfam00410) → rpl6 (CHL00140)rplF (PRK05498) →          |
| env-608 | SRS013705_Baylor_scaffold_10956 | - | 13141 | 13059 | RNA → rpsJ (PRK00596)RpsJ (COG0051) → RplC (COG0087)rplC (PRK00001) →<br>rplD (PRK05319)Ribosomal_L4 (pfam00573) → rplW (PRK05738)Ribosomal_L23 (pfam00276) →<br>RplB (COG0090)rplB (PRK09374) → rpsS (PRK00357)RpsS (COG0185) →<br>rplV (PRK00565)Ribosomal_L22 (pfam00237) → RpsC (COG0092)rpsC (PRK00310) →<br>rpl16 (CHL00044)rplP (PRK09203) → PRK00306 (PRK00306)Ribosomal_L29 (pfam00831) →<br>rpsQ (PRK05610)Ribosomal_S17 (pfam00366) → rplN (PRK05483)Ribosomal_L14 (pfam00238) →<br>RplX (COG0198)rplX (PRK00004) → rplE (PRK00010)RplE (COG0094) → rpsN (PRK08061)RpsN (COG0199) →<br>rpsH (PRK00136)Ribosomal_S8 (pfam00410) → rpl6 (CHL00140)rplF (PRK05498) →          |
| env-609 | SRS023926_Baylor_scaffold_57257 | - | 419   | 337   | RNA → rpsJ (PRK00596)RpsJ (COG0051) →                                                                                                                                                                                                                                                                                                                                                                                                                                                                                                                                                                                                                                                 |

|         |                                 |   |       |       |                                                                                                                                                                                                                                                                                                                                                                                                                                                                                                                                                                                                                                                         |
|---------|---------------------------------|---|-------|-------|---------------------------------------------------------------------------------------------------------------------------------------------------------------------------------------------------------------------------------------------------------------------------------------------------------------------------------------------------------------------------------------------------------------------------------------------------------------------------------------------------------------------------------------------------------------------------------------------------------------------------------------------------------|
| env-610 | SRS024081.LANL_scaffold_55960   | - | 2978  | 2896  | RNA → rpsJ (PRK00596)RpsJ (COG0051) → RplC (COG0087)rplC (PRK00001) → rplD (PRK05319)Ribosomal_L4 (pfam00573) → rplW (PRK05738)Ribosomal_L23 (pfam00276) → RplB (COG0090)rplB (PRK09374) →                                                                                                                                                                                                                                                                                                                                                                                                                                                              |
| env-611 | SRS024355.C4308570              | - | 2975  | 2893  | RNA → rpsJ (PRK00596)RpsJ (COG0051) → RplC (COG0087)rplC (PRK00001) → rplD (PRK05319)Ribosomal_L4 (pfam00573) → rplW (PRK05738)Ribosomal_L23 (pfam00276) → RplB (COG0090)rplB (PRK09374) →                                                                                                                                                                                                                                                                                                                                                                                                                                                              |
| env-612 | SRS051791.LANL_scaffold_39766   | - | 72601 | 72519 | RNA → rpsJ (PRK00596)RpsJ (COG0051) → RplC (COG0087)rplC (PRK00001) → rplD (PRK05319)Ribosomal_L4 (pfam00573) → rplW (PRK05738)Ribosomal_L23 (pfam00276) → RplB (COG0090)rplB (PRK09374) → rpsS (PRK00357)RpsS (COG0185) → rplV (PRK00565)Ribosomal_L22 (pfam00237) → RpsC (COG0092)rpsC (PRK00310) → rpl16 (CHL00044)rplP (PRK09203) → PRK00306 (PRK00306)Ribosomal_L29 (pfam00831) → rpsQ (PRK05610)Ribosomal_S17 (pfam00366) → rplN (PRK05483)Ribosomal_L14 (pfam00238) → RplX (COG0198)rplX (PRK00004) → rplE (PRK00010)RplE (COG0094) → rpsN (PRK08061)RpsN (COG0199) → rpsH (PRK00136)Ribosomal_S8 (pfam00410) → rpl6 (CHL00140)rplF (PRK05498) → |
| env-613 | SRS064774.LANL_scaffold_50591   | - | 419   | 337   | RNA → rpsJ (PRK00596)RpsJ (COG0051) →                                                                                                                                                                                                                                                                                                                                                                                                                                                                                                                                                                                                                   |
| env-614 | SRS057539.LANL_scaffold_48920   | - | 2989  | 2907  | RNA → rpsJ (PRK00596)RpsJ (COG0051) → RplC (COG0087)rplC (PRK00001) → rplD (PRK05319)Ribosomal_L4 (pfam00573) → rplW (PRK05738)Ribosomal_L23 (pfam00276) → RplB (COG0090)rplB (PRK09374) →                                                                                                                                                                                                                                                                                                                                                                                                                                                              |
| env-615 | Buccal_mucosa_LANL.C64980361    | + | 214   | 296   | RNA →                                                                                                                                                                                                                                                                                                                                                                                                                                                                                                                                                                                                                                                   |
| env-616 | SRS014573.WUGC_scaffold_39733   | - | 183   | 101   | RNA →                                                                                                                                                                                                                                                                                                                                                                                                                                                                                                                                                                                                                                                   |
| env-617 | SRS015272.WUGC_scaffold_20985   | - | 183   | 101   | RNA →                                                                                                                                                                                                                                                                                                                                                                                                                                                                                                                                                                                                                                                   |
| env-618 | SRS019219.C2770408              | + | 150   | 232   | RNA →                                                                                                                                                                                                                                                                                                                                                                                                                                                                                                                                                                                                                                                   |
| env-619 | SRS042131.C2238632              | - | 183   | 101   | RNA →                                                                                                                                                                                                                                                                                                                                                                                                                                                                                                                                                                                                                                                   |
| env-620 | SRS047210.C3290105              | - | 183   | 101   | RNA →                                                                                                                                                                                                                                                                                                                                                                                                                                                                                                                                                                                                                                                   |
| env-621 | SRS050244.C4357047              | + | 214   | 296   | RNA →                                                                                                                                                                                                                                                                                                                                                                                                                                                                                                                                                                                                                                                   |
| env-622 | SRS063193.C2703828              | + | 165   | 247   | RNA →                                                                                                                                                                                                                                                                                                                                                                                                                                                                                                                                                                                                                                                   |
| env-623 | SRS064329.C2690719              | + | 645   | 727   | RNA →                                                                                                                                                                                                                                                                                                                                                                                                                                                                                                                                                                                                                                                   |
| env-624 | SRS019607.C2625282              | - | 183   | 101   | RNA → hypo →                                                                                                                                                                                                                                                                                                                                                                                                                                                                                                                                                                                                                                            |
| env-625 | SRS022143.WUGC_scaffold_66638   | + | 646   | 728   | RNA → rpsJ (PRK00596)RpsJ (COG0051) → RplC (COG0087)rplC (PRK00001) →                                                                                                                                                                                                                                                                                                                                                                                                                                                                                                                                                                                   |
| env-626 | Palatine_Tonsils_LANL.C6217726  | - | 183   | 101   | RNA →                                                                                                                                                                                                                                                                                                                                                                                                                                                                                                                                                                                                                                                   |
| env-627 | SRS011140.C5100171              | + | 457   | 539   | RNA →                                                                                                                                                                                                                                                                                                                                                                                                                                                                                                                                                                                                                                                   |
| env-628 | SRS014470.C3659642              | + | 443   | 525   | RNA →                                                                                                                                                                                                                                                                                                                                                                                                                                                                                                                                                                                                                                                   |
| env-629 | SRS017120.Baylor_scaffold_61418 | - | 5322  | 5240  | RNA → rpsJ (PRK00596)RpsJ (COG0051) → RplC (COG0087)rplC (PRK00001) → rplD (PRK05319)Ribosomal_L4 (pfam00573) → rplW (PRK05738)Ribosomal_L23 (pfam00276) → RplB (COG0090)rplB (PRK09374) → rpsS (PRK00357)RpsS (COG0185) → rplV (PRK00565)Ribosomal_L22 (pfam00237) → RpsC (COG0092)rpsC (PRK00310) → rpl16 (CHL00044)rplP (PRK09203) → PRK00306 (PRK00306)Ribosomal_L29 (pfam00831) → rpsQ (PRK05610)Ribosomal_S17 (pfam00366) →                                                                                                                                                                                                                       |
| env-630 | SRS018357.C3905527              | + | 512   | 594   | RNA →                                                                                                                                                                                                                                                                                                                                                                                                                                                                                                                                                                                                                                                   |
| env-631 | SRS053854.LANL_scaffold_37572   | + | 22349 | 22431 | RNA → rpsJ (PRK00596)RpsJ (COG0051) → RplC (COG0087)rplC (PRK00001) → rplD (PRK05319)Ribosomal_L4 (pfam00573) → rplW (PRK05738)Ribosomal_L23 (pfam00276) → RplB (COG0090)rplB (PRK09374) → rpsS (PRK00357)RpsS (COG0185) → rplV (PRK00565)Ribosomal_L22 (pfam00237) → RpsC (COG0092)rpsC (PRK00310) → rpl16 (CHL00044)rplP (PRK09203) → PRK00306 (PRK00306)Ribosomal_L29 (pfam00831) → rpsQ (PRK05610)Ribosomal_S17 (pfam00366) → rplN (PRK05483)Ribosomal_L14 (pfam00238) → RplX (COG0198)rplX (PRK00004) → rplE (PRK00010)RplE (COG0094) → rpsN (PRK08061)RpsN (COG0199) → rpsH (PRK00136)Ribosomal_S8 (pfam00410) → rpl6 (CHL00140)rplF (PRK05498) → |
| env-632 | SRS013836.Baylor_scaffold_6533  | + | 97    | 179   | RNA → rpsJ (PRK00596)RpsJ (COG0051) → RplC (COG0087)rplC (PRK00001) → rplD (PRK05319)Ribosomal_L4 (pfam00573) → rplW (PRK05738)Ribosomal_L23 (pfam00276) → RplB (COG0090)rplB (PRK09374) → rpsS (PRK00357)RpsS (COG0185) →                                                                                                                                                                                                                                                                                                                                                                                                                              |
| env-633 | SRS016319.WUGC_scaffold_11309   | - | 183   | 101   | RNA → hypo →                                                                                                                                                                                                                                                                                                                                                                                                                                                                                                                                                                                                                                            |
| env-634 | SRS019974.Baylor_scaffold_45226 | - | 1407  | 1325  | RNA → rpsJ (PRK00596)RpsJ (COG0051) → RplC (COG0087)rplC (PRK00001) → RplD (COG0088)rplD (PRK05319) →                                                                                                                                                                                                                                                                                                                                                                                                                                                                                                                                                   |



|         |                                 |   |        |        |                                                                                                                                                                                                                                                                                                                                                                                                                                                                                                                                                                                                                                                                  |
|---------|---------------------------------|---|--------|--------|------------------------------------------------------------------------------------------------------------------------------------------------------------------------------------------------------------------------------------------------------------------------------------------------------------------------------------------------------------------------------------------------------------------------------------------------------------------------------------------------------------------------------------------------------------------------------------------------------------------------------------------------------------------|
| env-635 | SRS023352.LANL_scaffold_27433   | + | 419    | 501    | RNA → rpsJ (PRK00596)RpsJ (COG0051) → RplC (COG0087)rplC (PRK00001) → rplD (PRK05319)Ribosomal_L4 (pfam00573) → rplW (PRK05738)Ribosomal_L23 (pfam00276) → RplB (COG0090)rplB (PRK09374) → rpsS (PRK00357)RpsS (COG0185) → rplV (PRK00565)Ribosomal_L22 (pfam00237) → RpsC (COG0092)rpsC (PRK00310) → rpl16 (CHL00044)rplP (PRK09203) → PRK00306 (PRK00306)Ribosomal_L29 (pfam00831) → rpsQ (PRK05610)Ribosomal_S17 (pfam00366) → rplN (PRK05483)Ribosomal_L14 (pfam00238) → RplX (COG0198)rplX (PRK00004) → rplE (PRK00010)RplE (COG0094) → rpsN (PRK08061)RpsN (COG0199) → rpsH (PRK00136)Ribosomal_S8 (pfam00410) → rpl6 (CHL00140)rplF (PRK05498) →          |
| env-636 | SRS024447.LANL_scaffold_44990   | - | 725    | 643    | RNA → rpsJ (PRK00596)RpsJ (COG0051) → rpl3 (CHL00143)rplC (PRK00001) →                                                                                                                                                                                                                                                                                                                                                                                                                                                                                                                                                                                           |
| env-637 | SRS014271.WUGC_scaffold_40283   | - | 1462   | 1380   | RNA → rpsJ (PRK00596)RpsJ (COG0051) → RplC (COG0087)rplC (PRK00001) → RplD (COG0088)rplD (PRK05319) →                                                                                                                                                                                                                                                                                                                                                                                                                                                                                                                                                            |
| env-638 | SRS044486.C2103388              | - | 215    | 133    | RNA → hypo →                                                                                                                                                                                                                                                                                                                                                                                                                                                                                                                                                                                                                                                     |
| env-639 | SRS062544.LANL_scaffold_1604    | - | 9172   | 9090   | RNA → rpsJ (PRK00596)RpsJ (COG0051) → RplC (COG0087)rplC (PRK00001) → rplD (PRK05319)Ribosomal_L4 (pfam00573) → rplW (PRK05738)Ribosomal_L23 (pfam00276) → RplB (COG0090)rplB (PRK09374) → rpsS (PRK00357)RpsS (COG0185) → rplV (PRK00565)Ribosomal_L22 (pfam00237) → RpsC (COG0092)rpsC (PRK00310) → rpl16 (CHL00044)rplP (PRK09203) → PRK00306 (PRK00306)Ribosomal_L29 (pfam00831) → rpsQ (PRK05610)Ribosomal_S17 (pfam00366) → rplN (PRK05483)Ribosomal_L14 (pfam00238) → RplX (COG0198)rplX (PRK00004) → rplE (PRK00010)RplE (COG0094) → rpsN (PRK08061)RpsN (COG0199) → rpsH (PRK00136)Ribosomal_S8 (pfam00410) → rpl6 (CHL00140)rplF (PRK05498) →          |
| env-640 | SRS016740.Baylor_scaffold_57697 | - | 4537   | 4455   | RNA → rpsJ (PRK00596)RpsJ (COG0051) → RplC (COG0087)rplC (PRK00001) → rplD (PRK05319)Ribosomal_L4 (pfam00573) → rplW (PRK05738)Ribosomal_L23 (pfam00276) → RplB (COG0090)rplB (PRK09374) → rpsS (PRK00357)RpsS (COG0185) → rplV (PRK00565)Ribosomal_L22 (pfam00237) → RpsC (COG0092)rpsC (PRK00310) →                                                                                                                                                                                                                                                                                                                                                            |
| env-641 | SRS015941.WUGC_scaffold_60199   | + | 239    | 321    | RNA → rpsJ (PRK00596)RpsJ (COG0051) → RplC (COG0087)rplC (PRK00001) → rplD (PRK05319)Ribosomal_L4 (pfam00573) → rplW (PRK05738)Ribosomal_L23 (pfam00276) → RplB (COG0090)rplB (PRK09374) → rpsS (PRK00357)RpsS (COG0185) → rplV (PRK00565)Ribosomal_L22 (pfam00237) → RpsC (COG0092)rpsC (PRK00310) → rpl16 (CHL00044)rplP (PRK09203) → PRK00306 (PRK00306)Ribosomal_L29 (pfam00831) → rpsQ (PRK05610)Ribosomal_S17 (pfam00366) → rplN (PRK05483)Ribosomal_L14 (pfam00238) → RplX (COG0198)rplX (PRK00004) → rplE (PRK00010)RplE (COG0094) → rpsN (PRK08061)RpsN (COG0199) → rpsH (PRK00136)Ribosomal_S8 (pfam00410) → rplF (PRK05498)Ribosomal_L6 (pfam00347) → |
| env-642 | SRS020220.Baylor_scaffold_40425 | - | 4359   | 4277   | RNA → rpsJ (PRK00596)RpsJ (COG0051) → RplC (COG0087)rplC (PRK00001) → rplD (PRK05319)Ribosomal_L4 (pfam00573) → rplW (PRK05738)Ribosomal_L23 (pfam00276) → RplB (COG0090)rplB (PRK09374) → rpsS (PRK00357)RpsS (COG0185) → rplV (PRK00565)Ribosomal_L22 (pfam00237) → RpsC (COG0092)rpsC (PRK00310) →                                                                                                                                                                                                                                                                                                                                                            |
| env-643 | SRS047219.WUGC_scaffold_10994   | - | 4404   | 4322   | RNA → rpsJ (PRK00596)RpsJ (COG0051) → RplC (COG0087)rplC (PRK00001) → rplD (PRK05319)Ribosomal_L4 (pfam00573) → rplW (PRK05738)Ribosomal_L23 (pfam00276) → RplB (COG0090)rplB (PRK09374) → rpsS (PRK00357)RpsS (COG0185) → rplV (PRK00565)Ribosomal_L22 (pfam00237) → RpsC (COG0092)rpsC (PRK00310) →                                                                                                                                                                                                                                                                                                                                                            |
| env-644 | SRS017076.Baylor_scaffold_27856 | + | 239    | 321    | RNA → rpsJ (PRK00596)RpsJ (COG0051) → RplC (COG0087)rplC (PRK00001) → rplD (PRK05319)Ribosomal_L4 (pfam00573) → rplW (PRK05738)Ribosomal_L23 (pfam00276) → RplB (COG0090)rplB (PRK09374) → rpsS (PRK00357)RpsS (COG0185) → hypo →                                                                                                                                                                                                                                                                                                                                                                                                                                |
| env-645 | SRS017080.C1208674              | + | 239    | 321    | RNA → rpsJ (PRK00596)RpsJ (COG0051) →                                                                                                                                                                                                                                                                                                                                                                                                                                                                                                                                                                                                                            |
| Jig-1-1 | NZ_JH378829.1                   | - | 294163 | 294077 | RNA → rpsJ (PRK00596)RpsJ (COG0051) → RplC (COG0087)rplC (PRK00001) → rplD (PRK05319)Ribosomal_L4 (pfam00573) → rplW (PRK05738)Ribosomal_L23 (pfam00276) →                                                                                                                                                                                                                                                                                                                                                                                                                                                                                                       |
| env-646 | DLF013_scaffold30742.5          | + | 295    | 384    | RNA → rpsJ (PRK00596)Ribosomal_S10 (pfam00338) →                                                                                                                                                                                                                                                                                                                                                                                                                                                                                                                                                                                                                 |
| env-647 | ADJS01008642.1                  | - | 6451   | 6362   | RNA → rpsJ (PRK00596)RpsJ (COG0051) →                                                                                                                                                                                                                                                                                                                                                                                                                                                                                                                                                                                                                            |
| Eha-1-1 | NZ_ACEP0100080.1                | + | 41279  | 41368  | RNA → rpsJ (PRK00596)RpsJ (COG0051) → rpsJ (PRK00596)RpsJ (COG0051) →                                                                                                                                                                                                                                                                                                                                                                                                                                                                                                                                                                                            |
| env-648 | SRS017521.Baylor_scaffold_8153  | - | 190    | 101    | RNA → hypo →                                                                                                                                                                                                                                                                                                                                                                                                                                                                                                                                                                                                                                                     |
| env-649 | DLM013_scaffold7335.7           | - | 2319   | 2230   | RNA → rpsJ (PRK00596)RpsJ (COG0051) →                                                                                                                                                                                                                                                                                                                                                                                                                                                                                                                                                                                                                            |
| env-650 | scaffold2225.2_MH0044           | - | 1084   | 1004   | RNA → rpsJ (PRK00596)RpsJ (COG0051) →                                                                                                                                                                                                                                                                                                                                                                                                                                                                                                                                                                                                                            |
| env-651 | NLM026_scaffold21820.1          | + | 21714  | 21794  | RNA → rpsJ (PRK00596)RpsJ (COG0051) →                                                                                                                                                                                                                                                                                                                                                                                                                                                                                                                                                                                                                            |
| env-652 | NOF008_scaffold24903.1          | + | 21716  | 21796  | RNA → rpsJ (PRK00596)RpsJ (COG0051) →                                                                                                                                                                                                                                                                                                                                                                                                                                                                                                                                                                                                                            |
| env-653 | DLF003_scaffold30405.2          | + | 3989   | 4069   | RNA → rpsJ (PRK00596)RpsJ (COG0051) →                                                                                                                                                                                                                                                                                                                                                                                                                                                                                                                                                                                                                            |

|          |                                     |   |       |       |                                                                                                                                                                                                                                                                                                                                                                                                                                                                                                                                                                                                |
|----------|-------------------------------------|---|-------|-------|------------------------------------------------------------------------------------------------------------------------------------------------------------------------------------------------------------------------------------------------------------------------------------------------------------------------------------------------------------------------------------------------------------------------------------------------------------------------------------------------------------------------------------------------------------------------------------------------|
| env-654  | SRS022609_Baylor_scaffold_47809     | + | 2933  | 3028  | RNA → rpsJ (PRK00596)Ribosomal_S10 (pfam00338) →                                                                                                                                                                                                                                                                                                                                                                                                                                                                                                                                               |
| env-655  | scaffold48720_1_MH0045              | - | 185   | 90    | RNA →                                                                                                                                                                                                                                                                                                                                                                                                                                                                                                                                                                                          |
| env-656  | DLM014_scaffold11994_1              | - | 368   | 273   | RNA → rpsJ (PRK00596)Ribosomal_S10 (pfam00338) →                                                                                                                                                                                                                                                                                                                                                                                                                                                                                                                                               |
| env-657  | SRS052697_LANL_scaffold_39196       | - | 189   | 94    | RNA →                                                                                                                                                                                                                                                                                                                                                                                                                                                                                                                                                                                          |
| env-658  | DLF005_scaffold27951_2              | - | 1013  | 918   | RNA → rpsJ (PRK00596)RpsJ (COG0051) →                                                                                                                                                                                                                                                                                                                                                                                                                                                                                                                                                          |
| env-659  | DOM024_scaffold33725_3              | + | 258   | 353   | RNA → rpsJ (PRK00596)RpsJ (COG0051) →                                                                                                                                                                                                                                                                                                                                                                                                                                                                                                                                                          |
| env-660  | NLF013_scaffold5635_8               | + | 41902 | 41997 | RNA → rpsJ (PRK00596)RpsJ (COG0051) →                                                                                                                                                                                                                                                                                                                                                                                                                                                                                                                                                          |
| env-661  | NLM029_scaffold14839_9              | + | 4602  | 4697  | RNA → rpsJ (PRK00596)RpsJ (COG0051) →                                                                                                                                                                                                                                                                                                                                                                                                                                                                                                                                                          |
| env-662  | NOM005_scaffold28840_1              | - | 381   | 286   | RNA → rpsJ (PRK00596)Ribosomal_S10 (pfam00338) →                                                                                                                                                                                                                                                                                                                                                                                                                                                                                                                                               |
| env-663  | SRS063985_LANL_scaffold_18654       | - | 187   | 92    | RNA →                                                                                                                                                                                                                                                                                                                                                                                                                                                                                                                                                                                          |
| env-664  | scaffold9404_4_V1.CD-11             | + | 127   | 222   | RNA → rpsJ (PRK00596)Ribosomal_S10 (pfam00338) →                                                                                                                                                                                                                                                                                                                                                                                                                                                                                                                                               |
| env-665  | scaffold53060_1_V1.UC-6             | - | 185   | 90    | RNA →                                                                                                                                                                                                                                                                                                                                                                                                                                                                                                                                                                                          |
| env-666  | NOF008_scaffold7151_1               | - | 255   | 160   | RNA →                                                                                                                                                                                                                                                                                                                                                                                                                                                                                                                                                                                          |
| env-667  | SRS015578_WUGC_scaffold_23407       | - | 187   | 92    | RNA →                                                                                                                                                                                                                                                                                                                                                                                                                                                                                                                                                                                          |
| env-668  | NLF005_scaffold32939_3              | - | 346   | 251   | RNA → rpsJ (PRK00596)Ribosomal_S10 (pfam00338) →                                                                                                                                                                                                                                                                                                                                                                                                                                                                                                                                               |
| Lba-14-1 | NZ_KE159563.1                       | - | 23368 | 23278 | RNA → rpsJ (PRK00596)RpsJ (COG0051) → RplC (COG0087)rplC (PRK00001) →<br>rplD (PRK05319)Ribosomal_L4 (pfam00573) → rplW (PRK05738)Ribosomal_L23 (pfam00276) →<br>RplB (COG0090)rplB (PRK09374) → rpsS (PRK00357)RpsS (COG0185) →<br>rplV (PRK00565)Ribosomal_L22 (pfam00237) → RpsC (COG0092)rpsC (PRK00310) →<br>rpl16 (CHL00044)rplP (PRK09203) → PRK00306 (PRK00306)Ribosomal_L29 (pfam00831) →<br>rpsQ (PRK05610)Ribosomal_S17 (pfam00366) → rplN (PRK05483)Ribosomal_L14 (pfam00238) →<br>RplX (COG0198)rplX (PRK00004) → rplE (PRK00010)RplE (COG0094) → rpsN (PRK08061)RpsN (COG0199) → |
| Bsp-1-1  | NZ_ATVV01000009.1                   | - | 54629 | 54531 | RNA → rpsJ (PRK00596)RpsJ (COG0051) →                                                                                                                                                                                                                                                                                                                                                                                                                                                                                                                                                          |
| Bsp-9-1  | NZ_KE384200.1                       | + | 18003 | 18101 | RNA → rpsJ (PRK00596)RpsJ (COG0051) →                                                                                                                                                                                                                                                                                                                                                                                                                                                                                                                                                          |
| env-669  | DLM009_scaffold18031_8              | + | 20467 | 20550 | RNA → rpsJ (PRK00596)RpsJ (COG0051) →                                                                                                                                                                                                                                                                                                                                                                                                                                                                                                                                                          |
| env-670  | NOM005_scaffold39343_1              | - | 364   | 281   | RNA → rpsJ (PRK00596)Ribosomal_S10 (pfam00338) →                                                                                                                                                                                                                                                                                                                                                                                                                                                                                                                                               |
| env-671  | 4491417.3_NODE_55002                | - | 8825  | 8742  | RNA → rpsJ (PRK00596)RpsJ (COG0051) →                                                                                                                                                                                                                                                                                                                                                                                                                                                                                                                                                          |
| env-672  | 4491410.3_NODE_36037                | - | 7413  | 7330  | RNA → rpsJ (PRK00596)RpsJ (COG0051) →                                                                                                                                                                                                                                                                                                                                                                                                                                                                                                                                                          |
| env-673  | DLF014_scaffold5097_1               | - | 44435 | 44352 | RNA → rpsJ (PRK00596)RpsJ (COG0051) →                                                                                                                                                                                                                                                                                                                                                                                                                                                                                                                                                          |
| env-674  | DLM016_scaffold2775_3               | + | 1842  | 1925  | RNA → rpsJ (PRK00596)RpsJ (COG0051) →                                                                                                                                                                                                                                                                                                                                                                                                                                                                                                                                                          |
| env-675  | DLM018_scaffold25796_1              | + | 353   | 436   | RNA → rpsJ (PRK00596)Ribosomal_S10 (pfam00338) →                                                                                                                                                                                                                                                                                                                                                                                                                                                                                                                                               |
| env-676  | DOF008_scaffold2592_2               | - | 581   | 498   | RNA → rpsJ (PRK00596)RpsJ (COG0051) →                                                                                                                                                                                                                                                                                                                                                                                                                                                                                                                                                          |
| env-677  | DOF012_scaffold5047_1               | - | 2352  | 2269  | RNA → rpsJ (PRK00596)RpsJ (COG0051) →                                                                                                                                                                                                                                                                                                                                                                                                                                                                                                                                                          |
| env-678  | DOM013_scaffold30571_6              | - | 470   | 387   | RNA → rpsJ (PRK00596)RpsJ (COG0051) →                                                                                                                                                                                                                                                                                                                                                                                                                                                                                                                                                          |
| env-679  | DOM026_scaffold10557_9              | + | 388   | 471   | RNA → rpsJ (PRK00596)RpsJ (COG0051) →                                                                                                                                                                                                                                                                                                                                                                                                                                                                                                                                                          |
| env-680  | NLM032_scaffold1492_2               | - | 20482 | 20399 | RNA → rpsJ (PRK00596)RpsJ (COG0051) →                                                                                                                                                                                                                                                                                                                                                                                                                                                                                                                                                          |
| env-681  | DOM018_scaffold445_3                | + | 1261  | 1344  | RNA → rpsJ (PRK00596)RpsJ (COG0051) →                                                                                                                                                                                                                                                                                                                                                                                                                                                                                                                                                          |
| env-682  | NOM009_scaffold4295_7               | + | 387   | 470   | RNA → rpsJ (PRK00596)RpsJ (COG0051) →                                                                                                                                                                                                                                                                                                                                                                                                                                                                                                                                                          |
| env-683  | 4491413.3_NODE_68514                | - | 29126 | 29043 | RNA → rpsJ (PRK00596)RpsJ (COG0051) →                                                                                                                                                                                                                                                                                                                                                                                                                                                                                                                                                          |
| env-684  | scaffold18238_14_MH0043             | + | 1123  | 1206  | RNA →                                                                                                                                                                                                                                                                                                                                                                                                                                                                                                                                                                                          |
| env-685  | UnmappedStool_Broad_scaffold_262642 | - | 940   | 857   | RNA → ←-hypo                                                                                                                                                                                                                                                                                                                                                                                                                                                                                                                                                                                   |
| env-686  | DOF008_scaffold62_1                 | - | 1739  | 1645  | RNA → rpsJ (PRK00596)RpsJ (COG0051) → RplC (COG0087)rplC (PRK00001) →<br>rplD (PRK05319)Ribosomal_L4 (pfam00573) →                                                                                                                                                                                                                                                                                                                                                                                                                                                                             |
| env-687  | DLM027_scaffold22199_1              | - | 5689  | 5595  | RNA → rpsJ (PRK00596)RpsJ (COG0051) → RplC (COG0087)rplC (PRK00001) →<br>rplD (PRK05319)Ribosomal_L4 (pfam00573) → rplW (PRK05738)Ribosomal_L23 (pfam00276) →<br>RplB (COG0090)rplB (PRK09374) → rpsS (PRK00357)Ribosomal_S19 (pfam00203) →<br>rplV (PRK00565)Ribosomal_L22 (pfam00237) → RpsC (COG0092)rpsC (PRK00310) →<br>rpl16 (CHL00044)rplP (PRK09203) → PRK00306 (PRK00306)Ribosomal_L29 (pfam00831) →<br>rpsQ (PRK05610)Ribosomal_S17 (pfam00366) → rplN (PRK05483)Ribosomal_L14 (pfam00238) →                                                                                         |

|         |                               |   |        |        |                                                                                                                                                                                                                                                                                                                                                                                                                                                                                                                                                                                                                        |
|---------|-------------------------------|---|--------|--------|------------------------------------------------------------------------------------------------------------------------------------------------------------------------------------------------------------------------------------------------------------------------------------------------------------------------------------------------------------------------------------------------------------------------------------------------------------------------------------------------------------------------------------------------------------------------------------------------------------------------|
| env-688 | NLM026_scaffold16599_8        | + | 3734   | 3828   | RNA → rpsJ (PRK00596)RpsJ (COG0051) → RplC (COG0087)rplC (PRK00001) → rplD (PRK05319)Ribosomal_L4 (pfam00573) → rplW (PRK05738)Ribosomal_L23 (pfam00276) → RplB (COG0090)rplB (PRK09374) → rpsS (PRK00357)RpsS (COG0185) → rplV (PRK00565)Ribosomal_L22 (pfam00237) → RpsC (COG0092)rpsC (PRK00310) → rpl16 (CHL00044)rplP (PRK09203) → PRK00306 (PRK00306)Ribosomal_L29 (pfam00831) → rpsQ (PRK05610)Ribosomal_S17 (pfam00366) → rplN (PRK05483)Ribosomal_L14 (pfam00238) → RplX (COG0198)rplX (PRK00004) → rplE (PRK00010)RplE (COG0094) →                                                                           |
| env-689 | NLM028_scaffold65_1           | - | 197    | 103    | RNA →                                                                                                                                                                                                                                                                                                                                                                                                                                                                                                                                                                                                                  |
| env-690 | NOF010_scaffold14875_3        | - | 4414   | 4320   | RNA → rpsJ (PRK00596)RpsJ (COG0051) → RplC (COG0087)rplC (PRK00001) → rplD (PRK05319)Ribosomal_L4 (pfam00573) → rplW (PRK05738)Ribosomal_L23 (pfam00276) → RplB (COG0090)rplB (PRK09374) → rpsS (PRK00357)RpsS (COG0185) → rplV (PRK00565)Ribosomal_L22 (pfam00237) → RpsC (COG0092)rpsC (PRK00310) →                                                                                                                                                                                                                                                                                                                  |
| env-691 | SRS019161_WUGC_scaffold_28654 | - | 219    | 125    | RNA →                                                                                                                                                                                                                                                                                                                                                                                                                                                                                                                                                                                                                  |
| env-692 | DOM003_scaffold5836_16        | + | 259    | 353    | RNA → rpsJ (PRK00596)RpsJ (COG0051) →                                                                                                                                                                                                                                                                                                                                                                                                                                                                                                                                                                                  |
| env-693 | NOM001_scaffold34192_1        | - | 968    | 874    | RNA → rpsJ (PRK00596)RpsJ (COG0051) → RplC (COG0087)rplC (PRK00001) →                                                                                                                                                                                                                                                                                                                                                                                                                                                                                                                                                  |
| env-694 | longitudinal_441_49           | + | 131726 | 131820 | RNA → rpsJ (PRK00596)RpsJ (COG0051) → RplC (COG0087)rplC (PRK00001) → rplD (PRK05319)Ribosomal_L4 (pfam00573) → rplW (PRK05738)Ribosomal_L23 (pfam00276) → RplB (COG0090)rplB (PRK09374) → rpsS (PRK00357)RpsS (COG0185) → rplV (PRK00565)Ribosomal_L22 (pfam00237) → RpsC (COG0092)rpsC (PRK00310) → rpl16 (CHL00044)rplP (PRK09203) → PRK00306 (PRK00306)Ribosomal_L29 (pfam00831) → rpsQ (PRK05610)Ribosomal_S17 (pfam00366) → rplN (PRK05483)Ribosomal_L14 (pfam00238) → RplX (COG0198)rplX (PRK00004) → rplE (PRK00010)RplE (COG0094) → rpsN (PRK08061)RpsN (COG0199) → rpsH (PRK00136)Ribosomal_S8 (pfam00410) → |
| env-695 | DOF009_scaffold11200_9        | + | 419    | 513    | RNA → rpsJ (PRK00596)RpsJ (COG0051) →                                                                                                                                                                                                                                                                                                                                                                                                                                                                                                                                                                                  |
| env-696 | longitudinal_21_17            | - | 22273  | 22179  | RNA → rpsJ (PRK00596)RpsJ (COG0051) → RplC (COG0087)rplC (PRK00001) → rplD (PRK05319)Ribosomal_L4 (pfam00573) → rplW (PRK05738)Ribosomal_L23 (pfam00276) → RplB (COG0090)rplB (PRK09374) → rpsS (PRK00357)RpsS (COG0185) → rplV (PRK00565)Ribosomal_L22 (pfam00237) → RpsC (COG0092)rpsC (PRK00310) → rpl16 (CHL00044)rplP (PRK09203) → PRK00306 (PRK00306)Ribosomal_L29 (pfam00831) → rpsQ (PRK05610)Ribosomal_S17 (pfam00366) → rplN (PRK05483)Ribosomal_L14 (pfam00238) → RplX (COG0198)rplX (PRK00004) → rplE (PRK00010)RplE (COG0094) → rpsN (PRK08061)RpsN (COG0199) → rpsH (PRK00136)Ribosomal_S8 (pfam00410) → |
| env-697 | longitudinal_22_137           | - | 2800   | 2706   | RNA → rpsJ (PRK00596)RpsJ (COG0051) → RplC (COG0087)rplC (PRK00001) → rplD (PRK05319)Ribosomal_L4 (pfam00573) → rplW (PRK05738)Ribosomal_L23 (pfam00276) → RplB (PRK09374)Ribosomal_L2 (pfam00181) →                                                                                                                                                                                                                                                                                                                                                                                                                   |
| env-698 | longitudinal_23_385           | - | 119360 | 119266 | RNA → rpsJ (PRK00596)RpsJ (COG0051) → RplC (COG0087)rplC (PRK00001) → rplD (PRK05319)Ribosomal_L4 (pfam00573) → rplW (PRK05738)Ribosomal_L23 (pfam00276) → RplB (COG0090)rplB (PRK09374) → rpsS (PRK00357)RpsS (COG0185) → rplV (PRK00565)Ribosomal_L22 (pfam00237) → RpsC (COG0092)rpsC (PRK00310) → rpl16 (CHL00044)rplP (PRK09203) → PRK00306 (PRK00306)Ribosomal_L29 (pfam00831) → rpsQ (PRK05610)Ribosomal_S17 (pfam00366) → rplN (PRK05483)Ribosomal_L14 (pfam00238) → RplX (COG0198)rplX (PRK00004) → rplE (PRK00010)RplE (COG0094) → rpsN (PRK08061)RpsN (COG0199) → rpsH (PRK00136)Ribosomal_S8 (pfam00410) → |
| env-699 | NOF014_scaffold54976_9        | + | 413    | 507    | RNA → rpsJ (PRK00596)RpsJ (COG0051) → RplC (COG0087)rplC (PRK00001) → rplD (PRK05319)Ribosomal_L4 (pfam00573) → rplW (PRK05738)Ribosomal_L23 (pfam00276) → RplB (COG0090)rplB (PRK09374) → rpsS (PRK00357)RpsS (COG0185) → rplV (PRK00565)Ribosomal_L22 (pfam00237) → RpsC (COG0092)rpsC (PRK00310) → rpl16 (CHL00044)rplP (PRK09203) →                                                                                                                                                                                                                                                                                |
| env-700 | scaffold46017_3_MH0080        | - | 728    | 647    | RNA → rpsJ (PRK00596)RpsJ (COG0051) →                                                                                                                                                                                                                                                                                                                                                                                                                                                                                                                                                                                  |
| env-701 | scaffold248_6_O2_UC-4         | + | 3853   | 3934   | RNA → rpsJ (PRK00596)Ribosomal_S10 (pfam00338) →                                                                                                                                                                                                                                                                                                                                                                                                                                                                                                                                                                       |
| env-702 | SRS014923_C3294507            | - | 94     | 13     | RNA →                                                                                                                                                                                                                                                                                                                                                                                                                                                                                                                                                                                                                  |
| env-703 | SRS015854_WUGC_scaffold_39634 | - | 93     | 12     | RNA →                                                                                                                                                                                                                                                                                                                                                                                                                                                                                                                                                                                                                  |
| env-704 | SRS050925_LANL_scaffold_33465 | + | 1412   | 1493   | RNA → rpsJ (PRK00596)RpsJ (COG0051) →                                                                                                                                                                                                                                                                                                                                                                                                                                                                                                                                                                                  |
| Ceu-1-1 | NZ_DS483526.1                 | + | 154917 | 154998 | RNA → rpsJ (PRK00596)RpsJ (COG0051) →                                                                                                                                                                                                                                                                                                                                                                                                                                                                                                                                                                                  |
| env-705 | scaffold4547_6_MH0003         | + | 12959  | 13044  | RNA → rpsJ (PRK00596)RpsJ (COG0051) →                                                                                                                                                                                                                                                                                                                                                                                                                                                                                                                                                                                  |



|         |                                 |   |         |         |                                                                                                                                                                                                                                                                                                                                                                                                                                                                                                                                                                                                                                           |
|---------|---------------------------------|---|---------|---------|-------------------------------------------------------------------------------------------------------------------------------------------------------------------------------------------------------------------------------------------------------------------------------------------------------------------------------------------------------------------------------------------------------------------------------------------------------------------------------------------------------------------------------------------------------------------------------------------------------------------------------------------|
| env-706 | scaffold24806_1_MH0065          | - | 95      | 10      | RNA →                                                                                                                                                                                                                                                                                                                                                                                                                                                                                                                                                                                                                                     |
| env-707 | scaffold15202_12_MH0075         | + | 1002    | 1087    | RNA → rpsJ (PRK00596)Ribosomal_S10 (pfam00338) →                                                                                                                                                                                                                                                                                                                                                                                                                                                                                                                                                                                          |
| env-708 | NLM004_scaffold50332_5          | + | 702     | 787     | RNA → rpsJ (PRK00596)RpsJ (COG0051) →                                                                                                                                                                                                                                                                                                                                                                                                                                                                                                                                                                                                     |
| env-709 | scaffold7483_10_MH0050          | + | 16390   | 16475   | RNA → rpsJ (PRK00596)RpsJ (COG0051) →                                                                                                                                                                                                                                                                                                                                                                                                                                                                                                                                                                                                     |
| env-710 | scaffold3174_3_MH0086           | - | 410     | 325     | RNA → rpsJ (PRK00596)Ribosomal_S10 (pfam00338) →                                                                                                                                                                                                                                                                                                                                                                                                                                                                                                                                                                                          |
| env-711 | SRS052697_C3345764              | - | 98      | 13      | RNA →                                                                                                                                                                                                                                                                                                                                                                                                                                                                                                                                                                                                                                     |
| env-712 | scaffold516_22_MH0034           | + | 1362    | 1447    | RNA → rpsJ (PRK00596)RpsJ (COG0051) →                                                                                                                                                                                                                                                                                                                                                                                                                                                                                                                                                                                                     |
| env-713 | scaffold16883_4_MH0015          | - | 338     | 253     | RNA → rpsJ (PRK00596)Ribosomal_S10 (pfam00338) →                                                                                                                                                                                                                                                                                                                                                                                                                                                                                                                                                                                          |
| env-714 | scaffold3437_5_MH0042           | + | 12155   | 12240   | RNA →                                                                                                                                                                                                                                                                                                                                                                                                                                                                                                                                                                                                                                     |
| env-715 | scaffold32152_1_MH0052          | + | 799     | 884     | RNA → hypo →                                                                                                                                                                                                                                                                                                                                                                                                                                                                                                                                                                                                                              |
| env-716 | scaffold22830_6_MH0070          | + | 761     | 846     | RNA → rpsJ (PRK00596)RpsJ (COG0051) →                                                                                                                                                                                                                                                                                                                                                                                                                                                                                                                                                                                                     |
| env-717 | scaffold48922_1_V1_CD-8         | - | 2029    | 1944    | RNA → rpsJ (PRK00596)RpsJ (COG0051) →                                                                                                                                                                                                                                                                                                                                                                                                                                                                                                                                                                                                     |
| env-718 | 4491403.3_NODE_590              | - | 17129   | 17044   | RNA → rpsJ (PRK00596)RpsJ (COG0051) →                                                                                                                                                                                                                                                                                                                                                                                                                                                                                                                                                                                                     |
| env-719 | SRS049164_C2339078              | + | 236     | 321     | RNA → hypo →                                                                                                                                                                                                                                                                                                                                                                                                                                                                                                                                                                                                                              |
| env-720 | NOM013_scaffold4188_8           | + | 111     | 196     | RNA → rpsJ (PRK00596)RpsJ (COG0051) →                                                                                                                                                                                                                                                                                                                                                                                                                                                                                                                                                                                                     |
| env-721 | SRS012273_Baylor_scaffold_27311 | - | 447     | 362     | RNA → rpsJ (PRK00596)RpsJ (COG0051) →                                                                                                                                                                                                                                                                                                                                                                                                                                                                                                                                                                                                     |
| env-722 | SRS014459_WUGC_scaffold_9463    | - | 179     | 94      | RNA →                                                                                                                                                                                                                                                                                                                                                                                                                                                                                                                                                                                                                                     |
| env-723 | SRS015065_WUGC_scaffold_19845   | - | 225     | 140     | RNA →                                                                                                                                                                                                                                                                                                                                                                                                                                                                                                                                                                                                                                     |
| env-724 | SRS047014_WUGC_scaffold_16737   | + | 1370    | 1455    | RNA →                                                                                                                                                                                                                                                                                                                                                                                                                                                                                                                                                                                                                                     |
| env-725 | SRS063040_Baylor_scaffold_3708  | - | 1563    | 1478    | RNA → rpsJ (PRK00596)RpsJ (COG0051) →                                                                                                                                                                                                                                                                                                                                                                                                                                                                                                                                                                                                     |
| env-726 | scaffold19191_4_V1_UC-19        | - | 1168    | 1083    | RNA → rpsJ (PRK00596)RpsJ (COG0051) →                                                                                                                                                                                                                                                                                                                                                                                                                                                                                                                                                                                                     |
| env-727 | SRS017103_C2720120              | + | 2366    | 2451    | RNA →                                                                                                                                                                                                                                                                                                                                                                                                                                                                                                                                                                                                                                     |
| env-728 | SRS024331_LANL_scaffold_46092   | - | 97      | 12      | RNA →                                                                                                                                                                                                                                                                                                                                                                                                                                                                                                                                                                                                                                     |
| env-729 | scaffold4163_12_MH0063          | + | 2063    | 2148    | RNA → rpsJ (PRK00596)RpsJ (COG0051) →                                                                                                                                                                                                                                                                                                                                                                                                                                                                                                                                                                                                     |
| env-730 | DLM002_scaffold32671_L6         | + | 53527   | 53612   | RNA → rpsJ (PRK00596)RpsJ (COG0051) →                                                                                                                                                                                                                                                                                                                                                                                                                                                                                                                                                                                                     |
| env-731 | scaffold492_4_MH0046            | + | 3087    | 3172    | RNA → rpsJ (PRK00596)RpsJ (COG0051) →                                                                                                                                                                                                                                                                                                                                                                                                                                                                                                                                                                                                     |
| Rsp-1-1 | NZ_HE978651.1                   | - | 2542550 | 2542467 | RNA → rpsJ (PRK00596)RpsJ (COG0051) → RplC (COG0087)rplC (PRK00001) →<br>rplD (PRK05319)Ribosomal_L4 (pfam00573) → rplW (PRK05738)Ribosomal_L23 (pfam00276) →<br>RplB (COG0090)rplB (PRK09374) → rpsS (PRK00357)Ribosomal_S19 (pfam00203) →<br>rplV (PRK00565)Ribosomal_L22 (pfam00237) → RpsC (COG0092)rpsC (PRK00310) →<br>rpl16 (CHL00044)rplP (PRK09203) → PRK00306 (PRK00306)Ribosomal_L29 (pfam00831) →<br>rpsQ (PRK05610)Ribosomal_S17 (pfam00366) → rplN (PRK05483)Ribosomal_L14 (pfam00238) →<br>RplX (COG0198)rplX (PRK00004) → rplE (PRK00010)RplE (COG0094) → rpsN (PRK08061)RpsN (COG0199) →<br>RNA → GTP_HydF (TIGR03918) → |
| env-732 | 4491479.3_NODE_8774             | + | 192531  | 192622  | RNA →                                                                                                                                                                                                                                                                                                                                                                                                                                                                                                                                                                                                                                     |
| Rgn-1-1 | NZ_JAGQ01000004.1               | + | 1148637 | 1148728 | RNA → rpsJ (PRK00596)RpsJ (COG0051) →                                                                                                                                                                                                                                                                                                                                                                                                                                                                                                                                                                                                     |
| env-733 | ADJT01004649.1                  | + | 81      | 172     | RNA → rpsJ (PRK00596)RpsJ (COG0051) →                                                                                                                                                                                                                                                                                                                                                                                                                                                                                                                                                                                                     |
| env-734 | DLM009_scaffold11270_2          | + | 1293    | 1384    | RNA → rpsJ (PRK00596)RpsJ (COG0051) →                                                                                                                                                                                                                                                                                                                                                                                                                                                                                                                                                                                                     |
| env-735 | DOF012_scaffold7759_1           | + | 2947    | 3038    | RNA → rpsJ (PRK00596)RpsJ (COG0051) →                                                                                                                                                                                                                                                                                                                                                                                                                                                                                                                                                                                                     |
| env-736 | longitudinal_230_114            | - | 55598   | 55507   | RNA → rpsJ (PRK00596)RpsJ (COG0051) →                                                                                                                                                                                                                                                                                                                                                                                                                                                                                                                                                                                                     |
| env-737 | longitudinal_231_54             | - | 203125  | 203034  | RNA → rpsJ (PRK00596)RpsJ (COG0051) →                                                                                                                                                                                                                                                                                                                                                                                                                                                                                                                                                                                                     |
| env-738 | longitudinal_232_15             | - | 49512   | 49421   | RNA → rpsJ (PRK00596)RpsJ (COG0051) →                                                                                                                                                                                                                                                                                                                                                                                                                                                                                                                                                                                                     |
| env-739 | 4491482.3_NODE_3522             | + | 6776    | 6867    | RNA →                                                                                                                                                                                                                                                                                                                                                                                                                                                                                                                                                                                                                                     |
| env-740 | NOM002_scaffold8624_14          | - | 161     | 70      | RNA →                                                                                                                                                                                                                                                                                                                                                                                                                                                                                                                                                                                                                                     |
| env-741 | SRS042284_WUGC_scaffold_18018   | - | 166     | 75      | RNA → hypo →                                                                                                                                                                                                                                                                                                                                                                                                                                                                                                                                                                                                                              |
| env-742 | NOM026_scaffold565_8            | + | 1020    | 1111    | RNA → rpsJ (PRK00596)RpsJ (COG0051) →                                                                                                                                                                                                                                                                                                                                                                                                                                                                                                                                                                                                     |
| env-743 | longitudinal_525_50             | + | 31964   | 32055   | RNA → rpsJ (PRK00596)RpsJ (COG0051) →                                                                                                                                                                                                                                                                                                                                                                                                                                                                                                                                                                                                     |
| Rgn-2-1 | NZ_KI669415.1                   | - | 308806  | 308715  | RNA → rpsJ (PRK00596)RpsJ (COG0051) →                                                                                                                                                                                                                                                                                                                                                                                                                                                                                                                                                                                                     |
| Lba-4-1 | NZ_GL945339.1                   | - | 18152   | 18061   | RNA → rpsJ (PRK00596)RpsJ (COG0051) →                                                                                                                                                                                                                                                                                                                                                                                                                                                                                                                                                                                                     |
| env-744 | 4491488.3_NODE_2135             | - | 11126   | 11035   | RNA → rpsJ (PRK00596)RpsJ (COG0051) →                                                                                                                                                                                                                                                                                                                                                                                                                                                                                                                                                                                                     |
| env-745 | DLM024_scaffold1675_1           | + | 6682    | 6773    | RNA → rpsJ (PRK00596)RpsJ (COG0051) →                                                                                                                                                                                                                                                                                                                                                                                                                                                                                                                                                                                                     |
| env-746 | DOM016_scaffold28471_1          | - | 579     | 488     | RNA → rpsJ (PRK00596)RpsJ (COG0051) →                                                                                                                                                                                                                                                                                                                                                                                                                                                                                                                                                                                                     |
| env-747 | NLM007_scaffold2834_3           | + | 4947    | 5038    | RNA → rpsJ (PRK00596)RpsJ (COG0051) →                                                                                                                                                                                                                                                                                                                                                                                                                                                                                                                                                                                                     |
| env-748 | NLM027_scaffold10047_1          | - | 61541   | 61450   | RNA → rpsJ (PRK00596)RpsJ (COG0051) →                                                                                                                                                                                                                                                                                                                                                                                                                                                                                                                                                                                                     |





|         |                                     |   |        |        |                                                                                                                                                                                                                                                                                                                                                                                                                                                                                                                                                                                                                        |
|---------|-------------------------------------|---|--------|--------|------------------------------------------------------------------------------------------------------------------------------------------------------------------------------------------------------------------------------------------------------------------------------------------------------------------------------------------------------------------------------------------------------------------------------------------------------------------------------------------------------------------------------------------------------------------------------------------------------------------------|
| Dsp-1-1 | NZ_KE159794.1                       | - | 173058 | 172976 | RNA → rpsJ (PRK00596)RpsJ (COG0051) → RplC (COG0087)rplC (PRK00001) → rplD (PRK05319)Ribosomal_L4 (pfam00573) → rplW (PRK05738)Ribosomal_L23 (pfam00276) → RplB (COG0090)rplB (PRK09374) → rpsS (PRK00357)RpsS (COG0185) → rplV (PRK00565)Ribosomal_L22 (pfam00237) → RpsC (COG0092)rpsC (PRK00310) → rpl16 (CHL00044)rplP (PRK09203) → PRK00306 (PRK00306)Ribosomal_L29 (pfam00831) → rpsQ (PRK05610)Ribosomal_S17 (pfam00366) → rplN (PRK05483)Ribosomal_L14 (pfam00238) → RplX (COG0198)rplX (PRK00004) → rplE (PRK00010)RplE (COG0094) → rpsN (PRK08061)RpsN (COG0199) →                                           |
| env-765 | scaffold8116.4_MH0058               | + | 475    | 558    | RNA →                                                                                                                                                                                                                                                                                                                                                                                                                                                                                                                                                                                                                  |
| env-766 | UnmappedStool_Broad_scaffold_811588 | + | 1503   | 1586   | RNA →                                                                                                                                                                                                                                                                                                                                                                                                                                                                                                                                                                                                                  |
| env-767 | NOM005_scaffold16235_2              | + | 536    | 619    | RNA → rpsJ (PRK00596)RpsJ (COG0051) →                                                                                                                                                                                                                                                                                                                                                                                                                                                                                                                                                                                  |
| env-768 | scaffold879.1_MH0020                | - | 181    | 98     | RNA →                                                                                                                                                                                                                                                                                                                                                                                                                                                                                                                                                                                                                  |
| env-769 | DOF003_scaffold12608_5              | - | 851    | 768    | RNA → rpsJ (PRK00596)RpsJ (COG0051) →                                                                                                                                                                                                                                                                                                                                                                                                                                                                                                                                                                                  |
| env-770 | DLF014_scaffold3019.1               | + | 38181  | 38264  | RNA → rpsJ (PRK00596)RpsJ (COG0051) →                                                                                                                                                                                                                                                                                                                                                                                                                                                                                                                                                                                  |
| env-771 | DLM004_scaffold2544.24              | + | 1613   | 1696   | RNA → rpsJ (PRK00596)RpsJ (COG0051) →                                                                                                                                                                                                                                                                                                                                                                                                                                                                                                                                                                                  |
| env-772 | NLM002_scaffold11552_20             | - | 6524   | 6441   | RNA → rpsJ (PRK00596)RpsJ (COG0051) →                                                                                                                                                                                                                                                                                                                                                                                                                                                                                                                                                                                  |
| env-773 | NLM007_scaffold8527_7               | + | 212    | 295    | RNA → rpsJ (PRK00596)RpsJ (COG0051) →                                                                                                                                                                                                                                                                                                                                                                                                                                                                                                                                                                                  |
| env-774 | NOM009_scaffold43909.1              | + | 265    | 348    | RNA → rpsJ (PRK00596)RpsJ (COG0051) →                                                                                                                                                                                                                                                                                                                                                                                                                                                                                                                                                                                  |
| env-775 | NOM028_scaffold32438.1              | - | 438    | 355    | RNA → rpsJ (PRK00596)RpsJ (COG0051) →                                                                                                                                                                                                                                                                                                                                                                                                                                                                                                                                                                                  |
| env-776 | SRS019397_WUGC_scaffold.4193        | - | 413    | 330    | RNA → rpsJ (PRK00596)Ribosomal_S10 (pfam00338) →                                                                                                                                                                                                                                                                                                                                                                                                                                                                                                                                                                       |
| env-777 | DOM010_scaffold1445.8               | + | 1478   | 1561   | RNA → rpsJ (PRK00596)RpsJ (COG0051) →                                                                                                                                                                                                                                                                                                                                                                                                                                                                                                                                                                                  |
| env-778 | longitudinal_13_538                 | - | 50782  | 50698  | RNA → rpsJ (PRK00596)RpsJ (COG0051) → RplC (COG0087)rplC (PRK00001) → rplD (PRK05319)Ribosomal_L4 (pfam00573) → rplW (PRK05738)Ribosomal_L23 (pfam00276) → RplB (COG0090)rplB (PRK09374) → rpsS (PRK00357)RpsS (COG0185) → rplV (PRK00565)Ribosomal_L22 (pfam00237) → RpsC (COG0092)rpsC (PRK00310) → rpl16 (CHL00044)rplP (PRK09203) → PRK00306 (PRK00306)Ribosomal_L29 (pfam00831) → rpsQ (PRK05610)Ribosomal_S17 (pfam00366) → rplN (PRK05483)Ribosomal_L14 (pfam00238) → RplX (COG0198)rplX (PRK00004) → rplE (PRK00010)RplE (COG0094) → rpsN (PRK08061)RpsN (COG0199) → rpsH (PRK00136)Ribosomal_S8 (pfam00410) → |
| env-779 | longitudinal_14_60                  | - | 50782  | 50698  | RNA → rpsJ (PRK00596)RpsJ (COG0051) → RplC (COG0087)rplC (PRK00001) → rplD (PRK05319)Ribosomal_L4 (pfam00573) → rplW (PRK05738)Ribosomal_L23 (pfam00276) → RplB (COG0090)rplB (PRK09374) → rpsS (PRK00357)RpsS (COG0185) → rplV (PRK00565)Ribosomal_L22 (pfam00237) → RpsC (COG0092)rpsC (PRK00310) → rpl16 (CHL00044)rplP (PRK09203) → PRK00306 (PRK00306)Ribosomal_L29 (pfam00831) → rpsQ (PRK05610)Ribosomal_S17 (pfam00366) → rplN (PRK05483)Ribosomal_L14 (pfam00238) → RplX (COG0198)rplX (PRK00004) → rplE (PRK00010)RplE (COG0094) → rpsN (PRK08061)RpsN (COG0199) →                                           |
| env-780 | longitudinal_15_97                  | - | 50782  | 50698  | RNA → rpsJ (PRK00596)RpsJ (COG0051) → RplC (COG0087)rplC (PRK00001) → rplD (PRK05319)Ribosomal_L4 (pfam00573) → rplW (PRK05738)Ribosomal_L23 (pfam00276) → RplB (COG0090)rplB (PRK09374) → rpsS (PRK00357)RpsS (COG0185) → rplV (PRK00565)Ribosomal_L22 (pfam00237) → RpsC (COG0092)rpsC (PRK00310) → rpl16 (CHL00044)rplP (PRK09203) → PRK00306 (PRK00306)Ribosomal_L29 (pfam00831) → rpsQ (PRK05610)Ribosomal_S17 (pfam00366) → rplN (PRK05483)Ribosomal_L14 (pfam00238) → RplX (COG0198)rplX (PRK00004) → rplE (PRK00010)RplE (COG0094) → rpsN (PRK08061)RpsN (COG0199) → rpsH (PRK00136)Ribosomal_S8 (pfam00410) → |
| env-781 | longitudinal_40_24                  | - | 50781  | 50697  | RNA → rpsJ (PRK00596)RpsJ (COG0051) → RplC (COG0087)rplC (PRK00001) → rplD (PRK05319)Ribosomal_L4 (pfam00573) → rplW (PRK05738)Ribosomal_L23 (pfam00276) → RplB (COG0090)rplB (PRK09374) → rpsS (PRK00357)RpsS (COG0185) → rplV (PRK00565)Ribosomal_L22 (pfam00237) → RpsC (COG0092)rpsC (PRK00310) → rpl16 (CHL00044)rplP (PRK09203) → PRK00306 (PRK00306)Ribosomal_L29 (pfam00831) → rpsQ (PRK05610)Ribosomal_S17 (pfam00366) → rplN (PRK05483)Ribosomal_L14 (pfam00238) → RplX (COG0198)rplX (PRK00004) → rplE (PRK00010)RplE (COG0094) → rpsN (PRK08061)RpsN (COG0199) → rpsH (PRK00136)Ribosomal_S8 (pfam00410) → |









|         |                         |   |       |       |                                                                                                                                                                                                                                                                                                                                                                                                                                                                                                                                                                                                                                               |
|---------|-------------------------|---|-------|-------|-----------------------------------------------------------------------------------------------------------------------------------------------------------------------------------------------------------------------------------------------------------------------------------------------------------------------------------------------------------------------------------------------------------------------------------------------------------------------------------------------------------------------------------------------------------------------------------------------------------------------------------------------|
| env-796 | longitudinal_105_72     | + | 82106 | 82190 | RNA → rpsJ (PRK00596)RpsJ (COG0051) → RplC (COG0087)rplC (PRK00001) →<br>rplD (PRK05319)Ribosomal_L4 (pfam00573) → rplW (PRK05738)Ribosomal_L23 (pfam00276) →<br>RplB (COG0090)rplB (PRK09374) → rpsS (PRK00357)RpsS (COG0185) →<br>rplV (PRK00565)Ribosomal_L22 (pfam00237) → RpsC (COG0092)rpsC (PRK00310) →<br>rpl16 (CHL00044)rplP (PRK09203) → PRK00306 (PRK00306)Ribosomal_L29 (pfam00831) →<br>rpsQ (PRK05610)Ribosomal_S17 (pfam00366) → rplN (PRK05483)Ribosomal_L14 (pfam00238) →<br>RplX (COG0198)rplX (PRK00004) → rplE (PRK00010)RplE (COG0094) → rpsN (PRK08061)RpsN (COG0199) →<br>rpsH (PRK00136)Ribosomal_S8 (pfam00410) →   |
| env-797 | longitudinal_106_357    | - | 50784 | 50700 | RNA → rpsJ (PRK00596)RpsJ (COG0051) → RplC (COG0087)rplC (PRK00001) →<br>rplD (PRK05319)Ribosomal_L4 (pfam00573) → rplW (PRK05738)Ribosomal_L23 (pfam00276) →<br>RplB (COG0090)rplB (PRK09374) → rps19 (CHL00050)rpsS (PRK00357) →<br>rplV (PRK00565)Ribosomal_L22 (pfam00237) → RpsC (COG0092)rpsC (PRK00310) →<br>rpl16 (CHL00044)rplP (PRK09203) → PRK00306 (PRK00306)Ribosomal_L29 (pfam00831) →<br>rpsQ (PRK05610)Ribosomal_S17 (pfam00366) → rplN (PRK05483)Ribosomal_L14 (pfam00238) →<br>RplX (COG0198)rplX (PRK00004) → rplE (PRK00010)RplE (COG0094) → rpsN (PRK08061)RpsN (COG0199) →<br>rpsH (PRK00136)Ribosomal_S8 (pfam00410) → |
| env-798 | longitudinal_107_17     | + | 13248 | 13332 | RNA → rpsJ (PRK00596)RpsJ (COG0051) → RplC (COG0087)rplC (PRK00001) →<br>rplD (PRK05319)Ribosomal_L4 (pfam00573) → rplW (PRK05738)Ribosomal_L23 (pfam00276) →<br>RplB (COG0090)rplB (PRK09374) → rpsS (PRK00357)RpsS (COG0185) →<br>rplV (PRK00565)Ribosomal_L22 (pfam00237) → RpsC (COG0092)rpsC (PRK00310) →<br>rpl16 (CHL00044)rplP (PRK09203) → PRK00306 (PRK00306)Ribosomal_L29 (pfam00831) →<br>rpsQ (PRK05610)Ribosomal_S17 (pfam00366) → rplN (PRK05483)Ribosomal_L14 (pfam00238) →<br>RplX (COG0198)rplX (PRK00004) → rplE (PRK00010)RplE (COG0094) → rpsN (PRK08061)RpsN (COG0199) →<br>rpsH (PRK00136)Ribosomal_S8 (pfam00410) →   |
| env-799 | longitudinal_108_5      | + | 13247 | 13331 | RNA → rpsJ (PRK00596)RpsJ (COG0051) → RplC (COG0087)rplC (PRK00001) →<br>rplD (PRK05319)Ribosomal_L4 (pfam00573) → rplW (PRK05738)Ribosomal_L23 (pfam00276) →<br>RplB (COG0090)rplB (PRK09374) → rpsS (PRK00357)RpsS (COG0185) →<br>rplV (PRK00565)Ribosomal_L22 (pfam00237) → RpsC (COG0092)rpsC (PRK00310) →<br>rpl16 (CHL00044)rplP (PRK09203) → PRK00306 (PRK00306)Ribosomal_L29 (pfam00831) →<br>rpsQ (PRK05610)Ribosomal_S17 (pfam00366) → rplN (PRK05483)Ribosomal_L14 (pfam00238) →<br>RplX (COG0198)rplX (PRK00004) → rplE (PRK00010)RplE (COG0094) → rpsN (PRK08061)RpsN (COG0199) →<br>rpsH (PRK00136)Ribosomal_S8 (pfam00410) →   |
| env-800 | longitudinal_109_7      | + | 13246 | 13330 | RNA → rpsJ (PRK00596)RpsJ (COG0051) → RplC (COG0087)rplC (PRK00001) →<br>rplD (PRK05319)Ribosomal_L4 (pfam00573) → rplW (PRK05738)Ribosomal_L23 (pfam00276) →<br>RplB (COG0090)rplB (PRK09374) → rpsS (PRK00357)RpsS (COG0185) →<br>rplV (PRK00565)Ribosomal_L22 (pfam00237) → RpsC (COG0092)rpsC (PRK00310) →<br>rpl16 (CHL00044)rplP (PRK09203) → PRK00306 (PRK00306)Ribosomal_L29 (pfam00831) →<br>rpsQ (PRK05610)Ribosomal_S17 (pfam00366) → rplN (PRK05483)Ribosomal_L14 (pfam00238) →<br>RplX (COG0198)rplX (PRK00004) → rplE (PRK00010)RplE (COG0094) → rpsN (PRK08061)RpsN (COG0199) →<br>rpsH (PRK00136)Ribosomal_S8 (pfam00410) →   |
| env-801 | longitudinal_110_299    | + | 82113 | 82197 | RNA → rpsJ (PRK00596)RpsJ (COG0051) → RplC (COG0087)rplC (PRK00001) →<br>rplD (PRK05319)Ribosomal_L4 (pfam00573) → rplW (PRK05738)Ribosomal_L23 (pfam00276) →<br>RplB (COG0090)rplB (PRK09374) → rpsS (PRK00357)RpsS (COG0185) →<br>rplV (PRK00565)Ribosomal_L22 (pfam00237) → RpsC (COG0092)rpsC (PRK00310) →<br>rpl16 (CHL00044)rplP (PRK09203) → PRK00306 (PRK00306)Ribosomal_L29 (pfam00831) →<br>rpsQ (PRK05610)Ribosomal_S17 (pfam00366) → rplN (PRK05483)Ribosomal_L14 (pfam00238) →<br>RplX (COG0198)rplX (PRK00004) → rplE (PRK00010)RplE (COG0094) → rpsN (PRK08061)RpsN (COG0199) →<br>rpsH (PRK00136)Ribosomal_S8 (pfam00410) →   |
| env-802 | NOF005_scaffold1985_8   | + | 1796  | 1880  | RNA → rpsJ (PRK00596)RpsJ (COG0051) → RplC (COG0087)rplC (PRK00001) →<br>rplD (PRK05319)Ribosomal_L4 (pfam00573) → rplW (PRK05738)Ribosomal_L23 (pfam00276) →                                                                                                                                                                                                                                                                                                                                                                                                                                                                                 |
| env-803 | NLM031_scaffold14783_14 | - | 386   | 302   | RNA → rpsJ (PRK00596)Ribosomal_S10 (pfam00338) →                                                                                                                                                                                                                                                                                                                                                                                                                                                                                                                                                                                              |
| env-804 | NOM009_scaffold30082_1  | - | 211   | 127   | RNA →                                                                                                                                                                                                                                                                                                                                                                                                                                                                                                                                                                                                                                         |
| env-805 | NOM026_scaffold8944_8   | + | 436   | 520   | RNA →                                                                                                                                                                                                                                                                                                                                                                                                                                                                                                                                                                                                                                         |

|         |                      |   |        |        |                                                                                                                                                                                                                                                                                                                                                                                                                                                                                                                                                                                                                                                                                                                                                   |
|---------|----------------------|---|--------|--------|---------------------------------------------------------------------------------------------------------------------------------------------------------------------------------------------------------------------------------------------------------------------------------------------------------------------------------------------------------------------------------------------------------------------------------------------------------------------------------------------------------------------------------------------------------------------------------------------------------------------------------------------------------------------------------------------------------------------------------------------------|
| Cco-1-1 | NZ_GG662012.1        | + | 43704  | 43788  | <p>RNA → rpsJ (PRK00596)RpsJ (COG0051) → RplC (COG0087)rplC (PRK00001) →<br/> rplD (PRK05319)Ribosomal_L4 (pfam00573) → rplW (PRK05738)Ribosomal_L23 (pfam00276) →<br/> RplB (COG0090)rplB (PRK09374) → rpsS (PRK00357)RpsS (COG0185) →<br/> rplV (PRK00565)Ribosomal_L22 (pfam00237) → RpsC (COG0092)rpsC (PRK00310) →<br/> rpl16 (CHL00044)rplP (PRK09203) → PRK00306 (PRK00306)Ribosomal_L29 (pfam00831) → hypo →<br/> rpsQ (PRK05610)Ribosomal_S17 (pfam00366) → rpsQ (PRK05610)Ribosomal_S17 (pfam00366) →<br/> rplN (PRK05483)Ribosomal_L14 (pfam00238) → hypo → hypo → RplX (COG0198)ribosomal_L24 (pfam17136) →<br/> rplE (PRK00010)RplE (COG0094) → rpsN (PRK08061)RpsN (COG0199) →<br/> rpsH (PRK00136)Ribosomal_S8 (pfam00410) →</p>   |
| env-806 | longitudinal_291_432 | - | 4369   | 4285   | <p>RNA → rpsJ (PRK00596)RpsJ (COG0051) → RplC (COG0087)rplC (PRK00001) →<br/> rplD (PRK05319)Ribosomal_L4 (pfam00573) → rplW (PRK05738)Ribosomal_L23 (pfam00276) →<br/> RplB (COG0090)rplB (PRK09374) → rpsS (PRK00357)RpsS (COG0185) →<br/> rplV (PRK00565)Ribosomal_L22 (pfam00237) → RpsC (COG0092)rpsC (PRK00310) →</p>                                                                                                                                                                                                                                                                                                                                                                                                                       |
| env-807 | longitudinal_292_65  | - | 59834  | 59750  | <p>RNA → rpsJ (PRK00596)RpsJ (COG0051) → RplC (COG0087)rplC (PRK00001) →<br/> rplD (PRK05319)Ribosomal_L4 (pfam00573) → rplW (PRK05738)Ribosomal_L23 (pfam00276) →<br/> RplB (COG0090)rplB (PRK09374) → rpsS (PRK00357)RpsS (COG0185) →<br/> rplV (PRK00565)Ribosomal_L22 (pfam00237) → RpsC (COG0092)rpsC (PRK00310) →<br/> rpl16 (CHL00044)rplP (PRK09203) → PRK00306 (PRK00306)Ribosomal_L29 (pfam00831) →<br/> rpsQ (PRK05610)Ribosomal_S17 (pfam00366) → rplN (PRK05483)Ribosomal_L14 (pfam00238) →<br/> RplX (COG0198)rplX (PRK00004) → rplE (PRK00010)RplE (COG0094) → rpsN (PRK08061)RpsN (COG0199) →<br/> rpsH (PRK00136)Ribosomal_S8 (pfam00410) →</p>                                                                                  |
| env-808 | longitudinal_293_123 | + | 13738  | 13822  | <p>RNA → rpsJ (PRK00596)RpsJ (COG0051) → RplC (COG0087)rplC (PRK00001) →<br/> rplD (PRK05319)Ribosomal_L4 (pfam00573) → rplW (PRK05738)Ribosomal_L23 (pfam00276) →<br/> RplB (COG0090)rplB (PRK09374) → rpsS (PRK00357)RpsS (COG0185) →<br/> rplV (PRK00565)Ribosomal_L22 (pfam00237) → RpsC (COG0092)rpsC (PRK00310) →<br/> rpl16 (CHL00044)rplP (PRK09203) → PRK00306 (PRK00306)Ribosomal_L29 (pfam00831) →<br/> rpsQ (PRK05610)Ribosomal_S17 (pfam00366) → rplN (PRK05483)Ribosomal_L14 (pfam00238) →<br/> RplX (COG0198)rplX (PRK00004) → rplE (PRK00010)RplE (COG0094) → rpsN (PRK08061)RpsN (COG0199) →<br/> rpsH (PRK00136)Ribosomal_S8 (pfam00410) →</p>                                                                                  |
| env-809 | longitudinal_294_16  | - | 140925 | 140841 | <p>RNA → rpsJ (PRK00596)RpsJ (COG0051) → RplC (COG0087)rplC (PRK00001) →<br/> rplD (PRK05319)Ribosomal_L4 (pfam00573) → rplW (PRK05738)Ribosomal_L23 (pfam00276) →<br/> RplB (COG0090)rplB (PRK09374) → rpsS (PRK00357)RpsS (COG0185) →<br/> rplV (PRK00565)Ribosomal_L22 (pfam00237) → RpsC (COG0092)rpsC (PRK00310) →<br/> rpl16 (CHL00044)rplP (PRK09203) → PRK00306 (PRK00306)Ribosomal_L29 (pfam00831) →<br/> rpsQ (PRK05610)Ribosomal_S17 (pfam00366) → rplN (PRK05483)Ribosomal_L14 (pfam00238) →<br/> RplX (COG0198)rplX (PRK00004) → rplE (PRK00010)RplE (COG0094) → rpsN (PRK08061)RpsN (COG0199) →<br/> rpsH (PRK00136)Ribosomal_S8 (pfam00410) →</p>                                                                                  |
| env-810 | longitudinal_344_234 | + | 686    | 770    | <p>RNA → rpsJ (PRK00596)RpsJ (COG0051) → RplC (COG0087)rplC (PRK00001) →<br/> rplD (PRK05319)Ribosomal_L4 (pfam00573) → rplW (PRK05738)Ribosomal_L23 (pfam00276) →<br/> RplB (COG0090)rplB (PRK09374) → RplB (COG0090)rplB (PRK09374) →<br/> rplB (PRK09374)Ribosomal_L2_C (pfam03947) → rpsS (PRK00357)RpsS (COG0185) →<br/> rplV (PRK00565)Ribosomal_L22 (pfam00237) → RpsC (COG0092)rpsC (PRK00310) →<br/> rpl16 (CHL00044)rplP (PRK09203) → PRK00306 (PRK00306)Ribosomal_L29 (pfam00831) →<br/> rpsQ (PRK05610)Ribosomal_S17 (pfam00366) → rplN (PRK05483)Ribosomal_L14 (pfam00238) →<br/> RplX (COG0198)rplX (PRK00004) → rplE (PRK00010)RplE (COG0094) → rpsN (PRK08061)RpsN (COG0199) →<br/> rpsH (PRK00136)Ribosomal_S8 (pfam00410) →</p> |
| env-811 | longitudinal_345_116 | - | 4378   | 4294   | <p>RNA → rpsJ (PRK00596)RpsJ (COG0051) → RplC (COG0087)rplC (PRK00001) →<br/> rplD (PRK05319)Ribosomal_L4 (pfam00573) → rplW (PRK05738)Ribosomal_L23 (pfam00276) →<br/> RplB (COG0090)rplB (PRK09374) → rpsS (PRK00357)RpsS (COG0185) →<br/> rplV (PRK00565)Ribosomal_L22 (pfam00237) → RpsC (COG0092)rpsC (PRK00310) →</p>                                                                                                                                                                                                                                                                                                                                                                                                                       |

|         |                      |   |        |        |                                                                                                                                                                                                                                                                                                                                                                                                                                                                                                                                                                                                                                                                   |
|---------|----------------------|---|--------|--------|-------------------------------------------------------------------------------------------------------------------------------------------------------------------------------------------------------------------------------------------------------------------------------------------------------------------------------------------------------------------------------------------------------------------------------------------------------------------------------------------------------------------------------------------------------------------------------------------------------------------------------------------------------------------|
| env-812 | longitudinal_133_22  | + | 48325  | 48409  | RNA → rpsJ (PRK00596)RpsJ (COG0051) → RplC (COG0087)rplC (PRK00001) → rplD (PRK05319)Ribosomal_L4 (pfam00573) → rplW (PRK05738)Ribosomal_L23 (pfam00276) → RplB (COG0090)rplB (PRK09374) → rpsS (PRK00357)RpsS (COG0185) → rplV (PRK00565)Ribosomal_L22 (pfam00237) → RpsC (COG0092)rpsC (PRK00310) → rpl16 (CHL00044)rplP (PRK09203) → PRK00306 (PRK00306)Ribosomal_L29 (pfam00831) → rpsQ (PRK05610)Ribosomal_S17 (pfam00366) → rplN (PRK05483)Ribosomal_L14 (pfam00238) → RplX (COG0198)rplX (PRK00004) → rplE (PRK00010)RplE (COG0094) → rpsN (PRK08061)RpsN (COG0199) → rpsH (PRK00136)Ribosomal_S8 (pfam00410) →                                            |
| env-813 | longitudinal_186_6   | + | 48325  | 48409  | RNA → rpsJ (PRK00596)RpsJ (COG0051) → RplC (COG0087)rplC (PRK00001) → rplD (PRK05319)Ribosomal_L4 (pfam00573) → rplW (PRK05738)Ribosomal_L23 (pfam00276) → RplB (COG0090)rplB (PRK09374) → rpsS (PRK00357)RpsS (COG0185) → rplV (PRK00565)Ribosomal_L22 (pfam00237) → rplV (PRK00565)Ribosomal_L22 (pfam00237) → RpsC (COG0092)rpsC (PRK00310) → rpl16 (CHL00044)rplP (PRK09203) → PRK00306 (PRK00306)Ribosomal_L29 (pfam00831) → rpsQ (PRK05610)Ribosomal_S17 (pfam00366) → rplN (PRK05483)Ribosomal_L14 (pfam00238) → RplX (COG0198)rplX (PRK00004) → rplE (PRK00010)RplE (COG0094) → rpsN (PRK08061)RpsN (COG0199) → rpsH (PRK00136)Ribosomal_S8 (pfam00410) → |
| env-814 | longitudinal_295_1   | - | 44521  | 44440  | RNA → rpsJ (PRK00596)RpsJ (COG0051) → RplC (COG0087)rplC (PRK00001) → rplD (PRK05319)Ribosomal_L4 (pfam00573) → rplW (PRK05738)Ribosomal_L23 (pfam00276) → RplB (COG0090)rplB (PRK09374) → rpsS (PRK00357)RpsS (COG0185) → rplV (PRK00565)Ribosomal_L22 (pfam00237) → RpsC (COG0092)rpsC (PRK00310) → rpl16 (CHL00044)rplP (PRK09203) → PRK00306 (PRK00306)Ribosomal_L29 (pfam00831) → rpsQ (PRK05610)Ribosomal_S17 (pfam00366) → rplN (PRK05483)Ribosomal_L14 (pfam00238) → RplX (COG0198)rplX (PRK00004) → rplE (PRK00010)RplE (COG0094) → rpsN (PRK08061)RpsN (COG0199) → rpsH (PRK00136)Ribosomal_S8 (pfam00410) →                                            |
| env-815 | longitudinal_296_205 | - | 4377   | 4296   | RNA → rpsJ (PRK00596)RpsJ (COG0051) → RplC (COG0087)rplC (PRK00001) → rplD (PRK05319)Ribosomal_L4 (pfam00573) → rplW (PRK05738)Ribosomal_L23 (pfam00276) → RplB (COG0090)rplB (PRK09374) → rpsS (PRK00357)RpsS (COG0185) → rplV (PRK00565)Ribosomal_L22 (pfam00237) → KH (smart00322)RpsC (COG0092) → rpl16 (CHL00044)rplP (PRK09203) → PRK00306 (PRK00306)Ribosomal_L29 (pfam00831) → rpsQ (PRK05610)Ribosomal_S17 (pfam00366) → rplN (PRK05483)Ribosomal_L14 (pfam00238) → RplX (COG0198)rplX (PRK00004) → rplE (PRK00010)RplE (COG0094) → rpsN (PRK08061)RpsN (COG0199) →                                                                                      |
| env-816 | longitudinal_297_58  | - | 44521  | 44440  | RNA → rpsJ (PRK00596)RpsJ (COG0051) → RplC (COG0087)rplC (PRK00001) → rplD (PRK05319)Ribosomal_L4 (pfam00573) → rplW (PRK05738)Ribosomal_L23 (pfam00276) → RplB (COG0090)rplB (PRK09374) → rpsS (PRK00357)RpsS (COG0185) → rplV (PRK00565)Ribosomal_L22 (pfam00237) → RpsC (COG0092)rpsC (PRK00310) → rpl16 (CHL00044)rplP (PRK09203) → PRK00306 (PRK00306)Ribosomal_L29 (pfam00831) → rpsQ (PRK05610)Ribosomal_S17 (pfam00366) → rplN (PRK05483)Ribosomal_L14 (pfam00238) → RplX (COG0198)rplX (PRK00004) → rplE (PRK00010)RplE (COG0094) → rpsN (PRK08061)RpsN (COG0199) →                                                                                      |
| env-817 | longitudinal_298_873 | + | 4316   | 4397   | RNA → rpsJ (PRK00596)RpsJ (COG0051) → RplC (COG0087)rplC (PRK00001) → rplD (PRK05319)Ribosomal_L4 (pfam00573) → rplW (PRK05738)Ribosomal_L23 (pfam00276) → RplB (COG0090)rplB (PRK09374) →                                                                                                                                                                                                                                                                                                                                                                                                                                                                        |
| Dfo-2-1 | NZ_AAAXA02000012.1   | - | 139959 | 139878 | RNA → rpsJ (PRK00596)RpsJ (COG0051) → rpsJ (PRK00596)RpsJ (COG0051) → RplC (COG0087)rplC (PRK00001) → RplC (COG0087)rplC (PRK00001) → rplD (PRK05319)Ribosomal_L4 (pfam00573) → rplD (PRK05319)Ribosomal_L4 (pfam00573) → rplW (PRK05738)Ribosomal_L23 (pfam00276) → rplW (PRK05738)Ribosomal_L23 (pfam00276) →                                                                                                                                                                                                                                                                                                                                                   |
| Dfo-1-1 | NZ_JH126494.1        | - | 105382 | 105301 | RNA → rpsJ (PRK00596)RpsJ (COG0051) → RplC (COG0087)rplC (PRK00001) → rplD (PRK05319)Ribosomal_L4 (pfam00573) → rplW (PRK05738)Ribosomal_L23 (pfam00276) → RplB (COG0090)rplB (PRK09374) → rpsS (PRK00357)RpsS (COG0185) → rplV (PRK00565)Ribosomal_L22 (pfam00237) → RpsC (COG0092)rpsC (PRK00310) → rpl16 (CHL00044)rplP (PRK09203) → PRK00306 (PRK00306)Ribosomal_L29 (pfam00831) → rpsQ (PRK05610)Ribosomal_S17 (pfam00366) → rplN (PRK05483)Ribosomal_L14 (pfam00238) → RplX (COG0198)rplX (PRK00004) → rplE (PRK00010)RplE (COG0094) → rpsN (PRK08061)RpsN (COG0199) →                                                                                      |
| env-818 | longitudinal_421_71  | + | 42399  | 42480  | RNA → rpsJ (PRK00596)RpsJ (COG0051) → RplC (COG0087)rplC (PRK00001) → rplD (PRK05319)Ribosomal_L4 (pfam00573) → rplW (PRK05738)Ribosomal_L23 (pfam00276) → RplB (COG0090)rplB (PRK09374) → rpsS (PRK00357)RpsS (COG0185) → rplV (PRK00565)Ribosomal_L22 (pfam00237) → RpsC (COG0092)rpsC (PRK00310) → rpl16 (CHL00044)rplP (PRK09203) → PRK00306 (PRK00306)Ribosomal_L29 (pfam00831) → rpsQ (PRK05610)Ribosomal_S17 (pfam00366) → rplN (PRK05483)Ribosomal_L14 (pfam00238) → RplX (COG0198)rplX (PRK00004) → rplE (PRK00010)RplE (COG0094) → rpsN (PRK08061)RpsN (COG0199) →                                                                                      |



|          |                                 |   |         |         |                                                                                                                                                                                                                                                                                                                                                                                                                                                                                                                                                                              |
|----------|---------------------------------|---|---------|---------|------------------------------------------------------------------------------------------------------------------------------------------------------------------------------------------------------------------------------------------------------------------------------------------------------------------------------------------------------------------------------------------------------------------------------------------------------------------------------------------------------------------------------------------------------------------------------|
| env-819  | longitudinal_187_175            | + | 27495   | 27576   | RNA → rpsJ (PRK00596)RpsJ (COG0051) → RplC (COG0087)rplC (PRK00001) → rplD (PRK05319)Ribosomal_L4 (pfam00573) → rplW (PRK05738)Ribosomal_L23 (pfam00276) → RplB (COG0090)rplB (PRK09374) → rpsS (PRK00357)RpsS (COG0185) → rplV (PRK00565)Ribosomal_L22 (pfam00237) → RpsC (COG0092)rpsC (PRK00310) → rpl16 (CHL00044)rplP (PRK09203) → PRK00306 (PRK00306)Ribosomal_L29 (pfam00831) → rpsQ (PRK05610)Ribosomal_S17 (pfam00366) → rplN (PRK05483)Ribosomal_L14 (pfam00238) → RplX (COG0198)rplX (PRK00004) → rplE (PRK00010)RplE (COG0094) → rpsN (PRK08061)RpsN (COG0199) → |
| env-820  | longitudinal_519_34             | + | 75799   | 75884   | RNA → rpsJ (PRK00596)RpsJ (COG0051) →                                                                                                                                                                                                                                                                                                                                                                                                                                                                                                                                        |
| Cbo-6-1  | NZ_DS480701.1                   | - | 29789   | 29704   | RNA → rpsJ (PRK00596)RpsJ (COG0051) →                                                                                                                                                                                                                                                                                                                                                                                                                                                                                                                                        |
| Cbo-1-1  | NZ_KB851188.1                   | + | 671984  | 672069  | RNA → rpsJ (PRK00596)RpsJ (COG0051) →                                                                                                                                                                                                                                                                                                                                                                                                                                                                                                                                        |
| Cbo-5-1  | NZ_KB851140.1                   | - | 31903   | 31818   | RNA → rpsJ (PRK00596)RpsJ (COG0051) →                                                                                                                                                                                                                                                                                                                                                                                                                                                                                                                                        |
| Cbo-4-1  | NZ_KB851170.1                   | - | 436154  | 436069  | RNA → rpsJ (PRK00596)RpsJ (COG0051) →                                                                                                                                                                                                                                                                                                                                                                                                                                                                                                                                        |
| [bo-1-1  | NZ_KQ235847.1                   | + | 638432  | 638517  | RNA → rpsJ (PRK00596)RpsJ (COG0051) →                                                                                                                                                                                                                                                                                                                                                                                                                                                                                                                                        |
| [ci-1-1  | NZ_KQ235875.1                   | - | 58399   | 58314   | RNA → rpsJ (PRK00596)RpsJ (COG0051) →                                                                                                                                                                                                                                                                                                                                                                                                                                                                                                                                        |
| Csp-5-1  | NZ_JYHN01000073.1               | + | 12472   | 12557   | RNA → rpsJ (PRK00596)RpsJ (COG0051) →                                                                                                                                                                                                                                                                                                                                                                                                                                                                                                                                        |
| Cci-1-1  | NZ_JH376430.1                   | - | 58181   | 58096   | RNA → rpsJ (PRK00596)RpsJ (COG0051) →                                                                                                                                                                                                                                                                                                                                                                                                                                                                                                                                        |
| env-821  | DOM008_scaffold5856_4           | - | 1719    | 1634    | RNA → rpsJ (PRK00596)RpsJ (COG0051) →                                                                                                                                                                                                                                                                                                                                                                                                                                                                                                                                        |
| env-822  | DLM024_scaffold3474_1           | + | 221     | 306     | RNA → rpsJ (PRK00596)RpsJ (COG0051) →                                                                                                                                                                                                                                                                                                                                                                                                                                                                                                                                        |
| env-823  | DOM022_scaffold7182_3           | - | 11175   | 11090   | RNA → rpsJ (PRK00596)RpsJ (COG0051) →                                                                                                                                                                                                                                                                                                                                                                                                                                                                                                                                        |
| Cbo-2-1  | NZ_KB851182.1                   | - | 3727490 | 3727405 | RNA → rpsJ (PRK00596)RpsJ (COG0051) →                                                                                                                                                                                                                                                                                                                                                                                                                                                                                                                                        |
| Cbo-3-1  | NZ_KB851179.1                   | - | 40006   | 39921   | RNA → rpsJ (PRK00596)RpsJ (COG0051) →                                                                                                                                                                                                                                                                                                                                                                                                                                                                                                                                        |
| Cba-4-1  | NZ_BAHU02000028.1               | + | 24715   | 24800   | RNA → rpsJ (PRK00596)RpsJ (COG0051) →                                                                                                                                                                                                                                                                                                                                                                                                                                                                                                                                        |
| Cba-7-1  | NZ_BAIK02000095.1               | - | 31314   | 31229   | RNA → rpsJ (PRK00596)RpsJ (COG0051) →                                                                                                                                                                                                                                                                                                                                                                                                                                                                                                                                        |
| env-824  | DLF007_scaffold1906_9           | - | 8119    | 8034    | RNA → rpsJ (PRK00596)RpsJ (COG0051) →                                                                                                                                                                                                                                                                                                                                                                                                                                                                                                                                        |
| env-825  | DOM005_scaffold2526_23          | + | 748     | 833     | RNA → rpsJ (PRK00596)RpsJ (COG0051) →                                                                                                                                                                                                                                                                                                                                                                                                                                                                                                                                        |
| Cba-2-1  | NZ_DS990264.1                   | + | 173299  | 173384  | RNA → rpsJ (PRK00596)RpsJ (COG0051) → rpsJ (PRK00596)RpsJ (COG0051) →                                                                                                                                                                                                                                                                                                                                                                                                                                                                                                        |
| env-826  | DOF010_scaffold27370_9          | - | 556     | 471     | RNA → rpsJ (PRK00596)RpsJ (COG0051) →                                                                                                                                                                                                                                                                                                                                                                                                                                                                                                                                        |
| Ccl-6-1  | NZ_KB851048.1                   | - | 152029  | 151944  | RNA → rpsJ (PRK00596)RpsJ (COG0051) →                                                                                                                                                                                                                                                                                                                                                                                                                                                                                                                                        |
| env-827  | BABA01014305.1                  | - | 333     | 248     | RNA →                                                                                                                                                                                                                                                                                                                                                                                                                                                                                                                                                                        |
| Ccl-3-1  | NZ_KB851058.1                   | - | 172004  | 171919  | RNA → hypo → rpsJ (PRK00596)RpsJ (COG0051) →                                                                                                                                                                                                                                                                                                                                                                                                                                                                                                                                 |
| Ccl-9-1  | NZ_KB850936.1                   | + | 2207674 | 2207759 | RNA → hypo → rpsJ (PRK00596)RpsJ (COG0051) →                                                                                                                                                                                                                                                                                                                                                                                                                                                                                                                                 |
| Ccl-4-1  | NZ_KB851076.1                   | + | 62132   | 62217   | RNA → hypo → rpsJ (PRK00596)RpsJ (COG0051) →                                                                                                                                                                                                                                                                                                                                                                                                                                                                                                                                 |
| Ccl-8-1  | NZ_KB850966.1                   | + | 1570893 | 1570978 | RNA → hypo → rpsJ (PRK00596)RpsJ (COG0051) →                                                                                                                                                                                                                                                                                                                                                                                                                                                                                                                                 |
| Ccl-5-1  | NZ_KB851039.1                   | + | 308067  | 308152  | RNA → hypo → rpsJ (PRK00596)RpsJ (COG0051) →                                                                                                                                                                                                                                                                                                                                                                                                                                                                                                                                 |
| Ccl-2-1  | NZ_KB851121.1                   | - | 453818  | 453733  | RNA → hypo → rpsJ (PRK00596)RpsJ (COG0051) →                                                                                                                                                                                                                                                                                                                                                                                                                                                                                                                                 |
| Ccl-7-1  | NZ_KB850990.1                   | - | 33581   | 33496   | RNA → hypo → rpsJ (PRK00596)RpsJ (COG0051) →                                                                                                                                                                                                                                                                                                                                                                                                                                                                                                                                 |
| [cl-1-1  | NZ_KQ235916.1                   | - | 65391   | 65306   | RNA → hypo → rpsJ (PRK00596)RpsJ (COG0051) →                                                                                                                                                                                                                                                                                                                                                                                                                                                                                                                                 |
| Ccl-1-1  | NZ_JH376872.1                   | + | 684262  | 684347  | RNA → hypo → rpsJ (PRK00596)RpsJ (COG0051) →                                                                                                                                                                                                                                                                                                                                                                                                                                                                                                                                 |
| Lba-16-1 | NZ_KE159611.1                   | - | 333481  | 333384  | RNA → rpsJ (PRK00596)RpsJ (COG0051) →                                                                                                                                                                                                                                                                                                                                                                                                                                                                                                                                        |
| Csp-3-1  | NZ_KB822452.1                   | + | 182613  | 182710  | RNA → rpsJ (PRK00596)RpsJ (COG0051) →                                                                                                                                                                                                                                                                                                                                                                                                                                                                                                                                        |
| env-828  | 4491488.3_NODE_13653            | - | 1210    | 1116    | RNA → rpsJ (PRK00596)RpsJ (COG0051) → RplC (COG0087)rplC (PRK00001) →                                                                                                                                                                                                                                                                                                                                                                                                                                                                                                        |
| env-829  | DLM023_scaffold19875_8          | + | 194     | 288     | RNA → rpsJ (PRK00596)RpsJ (COG0051) → RplC (COG0087)rplC (PRK00001) →                                                                                                                                                                                                                                                                                                                                                                                                                                                                                                        |
| env-830  | NOF007_scaffold11968_1          | + | 314     | 408     | RNA → hypo →                                                                                                                                                                                                                                                                                                                                                                                                                                                                                                                                                                 |
| env-831  | SRS017521_Baylor_scaffold_53704 | - | 166     | 72      | RNA →                                                                                                                                                                                                                                                                                                                                                                                                                                                                                                                                                                        |
| env-832  | NLM015_scaffold7043_13          | + | 1676    | 1770    | RNA → hypo →                                                                                                                                                                                                                                                                                                                                                                                                                                                                                                                                                                 |
| env-833  | 4491420.3_NODE_1923             | - | 275     | 181     | RNA →                                                                                                                                                                                                                                                                                                                                                                                                                                                                                                                                                                        |
| env-834  | DOM022_scaffold13753_3          | - | 1709    | 1615    | RNA → rpsJ (PRK00596)RpsJ (COG0051) → RplC (COG0087)rplC (PRK00001) → rplD (PRK05319)Ribosomal_L4 (pfam00573) →                                                                                                                                                                                                                                                                                                                                                                                                                                                              |
| env-835  | NLM006_scaffold4964_7           | + | 3718    | 3812    | RNA → rpsJ (PRK00596)RpsJ (COG0051) → RplC (COG0087)rplC (PRK00001) → rplD (PRK05319)Ribosomal_L4 (pfam00573) → rplW (PRK05738)Ribosomal_L23 (pfam00276) → RplB (COG0090)rplB (PRK09374) →                                                                                                                                                                                                                                                                                                                                                                                   |
| env-836  | NLM031_scaffold4829_11          | + | 921     | 1015    | RNA → rpsJ (PRK00596)RpsJ (COG0051) → RplC (COG0087)rplC (PRK00001) → RplD (COG0088)rplD (PRK05319) →                                                                                                                                                                                                                                                                                                                                                                                                                                                                        |



|          |                                     |   |         |         |                                                                                                                                                                                                                                                                                                                                                                                                                                                                                                                                                                                                                                                                                          |
|----------|-------------------------------------|---|---------|---------|------------------------------------------------------------------------------------------------------------------------------------------------------------------------------------------------------------------------------------------------------------------------------------------------------------------------------------------------------------------------------------------------------------------------------------------------------------------------------------------------------------------------------------------------------------------------------------------------------------------------------------------------------------------------------------------|
| Rto-1-1  | NZ_DS264365.1                       | - | 34936   | 34842   | RNA → hypo →                                                                                                                                                                                                                                                                                                                                                                                                                                                                                                                                                                                                                                                                             |
| env-837  | 4491479.3_NODE_8774                 | + | 203259  | 203353  | RNA → rpsJ (PRK00596)RpsJ (COG0051) → RplC (COG0087)rplC (PRK00001) →<br>rplD (PRK05319)Ribosomal_L4 (pfam00573) → rplW (PRK05738)Ribosomal_L23 (pfam00276) →<br>RplB (COG0090)rplB (PRK09374) → rpsS (PRK00357)RpsS (COG0185) →<br>rplV (PRK00565)Ribosomal_L22 (pfam00237) → rpsC (PRK00310)30S_S3_KH (cd02412) →                                                                                                                                                                                                                                                                                                                                                                      |
| env-838  | SRS022713_LANL_scaffold_9359        | - | 1239    | 1145    | RNA → rpsJ (PRK00596)Ribosomal_S10 (pfam00338) →                                                                                                                                                                                                                                                                                                                                                                                                                                                                                                                                                                                                                                         |
| env-839  | DLM021_scaffold9512.3               | + | 55      | 149     | RNA → rpsJ (PRK00596)RpsJ (COG0051) →                                                                                                                                                                                                                                                                                                                                                                                                                                                                                                                                                                                                                                                    |
| env-840  | SRS014923_WUGC_scaffold_52186       | + | 3683    | 3777    | RNA →                                                                                                                                                                                                                                                                                                                                                                                                                                                                                                                                                                                                                                                                                    |
| Lba-1-1  | NZ_GL945299.1                       | - | 131629  | 131535  | RNA → rpsJ (PRK00596)RpsJ (COG0051) → RplC (COG0087)rplC (PRK00001) →<br>rplD (PRK05319)Ribosomal_L4 (pfam00573) → rplW (PRK05738)Ribosomal_L23 (pfam00276) →<br>RplB (COG0090)rplB (PRK09374) → rpsS (PRK00357)RpsS (COG0185) →<br>rplV (PRK00565)Ribosomal_L22 (pfam00237) → RpsC (COG0092)rpsC (PRK00310) →<br>rpl16 (CHL00044)rplP (PRK09203) → PRK00306 (PRK00306)Ribosomal_L29 (pfam00831) →<br>rpsQ (PRK05610)Ribosomal_S17 (pfam00366) → rplN (PRK05483)Ribosomal_L14 (pfam00238) →<br>RplX (COG0198)rplX (PRK00004) → rplE (PRK00010)RplE (COG0094) → rpsN (PRK08061)RpsN (COG0199) →                                                                                           |
| Lba-11-1 | NZ_GL622455.1                       | + | 63318   | 63412   | rpsH (PRK00136)Ribosomal_S8 (pfam00410) →<br>RNA → rpsJ (PRK00596)RpsJ (COG0051) → RplC (COG0087)rplC (PRK00001) →<br>rplD (PRK05319)Ribosomal_L4 (pfam00573) → rplW (PRK05738)Ribosomal_L23 (pfam00276) →<br>RplB (COG0090)rplB (PRK09374) → rpsS (PRK00357)RpsS (COG0185) →<br>rplV (PRK00565)Ribosomal_L22 (pfam00237) → RpsC (COG0092)rpsC (PRK00310) →<br>rpl16 (CHL00044)rplP (PRK09203) → PRK00306 (PRK00306)Ribosomal_L29 (pfam00831) →<br>rpsQ (PRK05610)Ribosomal_S17 (pfam00366) → rplN (PRK05483)Ribosomal_L14 (pfam00238) →<br>RplX (COG0198)rplX (PRK00004) → rplE (PRK00010)RplE (COG0094) → rpsN (PRK08061)RpsN (COG0199) →<br>rpsH (PRK00136)Ribosomal_S8 (pfam00410) → |
| env-841  | DOM008_scaffold11099.2              | + | 379     | 473     | RNA → rpsJ (PRK00596)RpsJ (COG0051) →                                                                                                                                                                                                                                                                                                                                                                                                                                                                                                                                                                                                                                                    |
| Lba-7-1  | NZ_GL890521.1                       | - | 333856  | 333762  | RNA → rpsJ (PRK00596)RpsJ (COG0051) → RplC (COG0087)rplC (PRK00001) →<br>rplD (PRK05319)Ribosomal_L4 (pfam00573) → rplW (PRK05738)Ribosomal_L23 (pfam00276) →<br>RplB (COG0090)rplB (PRK09374) → rpsS (PRK00357)RpsS (COG0185) →<br>rplV (PRK00565)Ribosomal_L22 (pfam00237) → RpsC (COG0092)rpsC (PRK00310) →<br>rpl16 (CHL00044)rplP (PRK09203) → PRK00306 (PRK00306)Ribosomal_L29 (pfam00831) →<br>rpsQ (PRK05610)Ribosomal_S17 (pfam00366) → rplN (PRK05483)Ribosomal_L14 (pfam00238) →<br>RplX (COG0198)rplX (PRK00004) → rplE (PRK00010)RplE (COG0094) → rpsN (PRK08061)RpsN (COG0199) →<br>rpsH (PRK00136)Ribosomal_S8 (pfam00410) →                                              |
| env-842  | 4448814.3_Contig31048               | + | 343     | 437     | RNA → hypo →                                                                                                                                                                                                                                                                                                                                                                                                                                                                                                                                                                                                                                                                             |
| env-843  | DLF009_scaffold139_11               | - | 490     | 383     | RNA → rpsJ (PRK00596)RpsJ (COG0051) →                                                                                                                                                                                                                                                                                                                                                                                                                                                                                                                                                                                                                                                    |
| env-844  | UnmappedStool_Broad_scaffold_696739 | - | 332     | 252     | RNA → hypo →                                                                                                                                                                                                                                                                                                                                                                                                                                                                                                                                                                                                                                                                             |
| env-845  | 4491413.3_NODE_28238                | - | 28876   | 28796   | RNA → rpsJ (PRK00596)RpsJ (COG0051) →                                                                                                                                                                                                                                                                                                                                                                                                                                                                                                                                                                                                                                                    |
| env-846  | 4491423.3_NODE_19525                | - | 4056    | 3976    | RNA → rpsJ (PRK00596)RpsJ (COG0051) →                                                                                                                                                                                                                                                                                                                                                                                                                                                                                                                                                                                                                                                    |
| env-847  | SRS052697_LANL_scaffold_18998       | - | 390     | 310     | RNA → rpsJ (PRK00596)Ribosomal_S10 (pfam00338) →                                                                                                                                                                                                                                                                                                                                                                                                                                                                                                                                                                                                                                         |
| env-848  | NLF013_scaffold9702_5               | - | 1227    | 1147    | RNA → rpsJ (PRK00596)RpsJ (COG0051) →                                                                                                                                                                                                                                                                                                                                                                                                                                                                                                                                                                                                                                                    |
| env-849  | NLF009_scaffold47128_2              | + | 415     | 495     | RNA →                                                                                                                                                                                                                                                                                                                                                                                                                                                                                                                                                                                                                                                                                    |
| env-850  | scaffold72408_1_MH0058              | - | 228     | 148     | RNA → hypo →                                                                                                                                                                                                                                                                                                                                                                                                                                                                                                                                                                                                                                                                             |
| env-851  | scaffold14894_1_MH0014              | - | 249     | 168     | RNA →                                                                                                                                                                                                                                                                                                                                                                                                                                                                                                                                                                                                                                                                                    |
| env-852  | SRS015217_WUGC_scaffold_12868       | + | 2064    | 2145    | RNA →                                                                                                                                                                                                                                                                                                                                                                                                                                                                                                                                                                                                                                                                                    |
| env-853  | DLM008_scaffold14278_10             | - | 4516    | 4435    | RNA → rpsJ (PRK00596)RpsJ (COG0051) →                                                                                                                                                                                                                                                                                                                                                                                                                                                                                                                                                                                                                                                    |
| env-854  | UnmappedStool_Broad_scaffold_412435 | - | 349     | 268     | RNA → rpsJ (PRK00596)RpsJ (COG0051) →                                                                                                                                                                                                                                                                                                                                                                                                                                                                                                                                                                                                                                                    |
| env-855  | DOM019_C726307_1                    | - | 271     | 190     | RNA →                                                                                                                                                                                                                                                                                                                                                                                                                                                                                                                                                                                                                                                                                    |
| env-856  | 4491417.3_NODE_36334                | + | 887     | 968     | RNA →                                                                                                                                                                                                                                                                                                                                                                                                                                                                                                                                                                                                                                                                                    |
| env-857  | DLM028_scaffold37057_1_2            | - | 716     | 635     | RNA → rpsJ (PRK00596)RpsJ (COG0051) →                                                                                                                                                                                                                                                                                                                                                                                                                                                                                                                                                                                                                                                    |
| env-858  | NLM031_scaffold55673_5              | + | 29666   | 29747   | RNA → rpsJ (PRK00596)RpsJ (COG0051) →                                                                                                                                                                                                                                                                                                                                                                                                                                                                                                                                                                                                                                                    |
| env-859  | NOF013_scaffold6414_30              | + | 2033    | 2114    | RNA → rpsJ (PRK00596)RpsJ (COG0051) →                                                                                                                                                                                                                                                                                                                                                                                                                                                                                                                                                                                                                                                    |
| env-860  | longitudinal_438_77                 | - | 42376   | 42295   | RNA → rpsJ (PRK00596)RpsJ (COG0051) →                                                                                                                                                                                                                                                                                                                                                                                                                                                                                                                                                                                                                                                    |
| Rho-1-1  | NC_015977.1                         | - | 3143074 | 3142993 | RNA → rpsJ (PRK00596)RpsJ (COG0051) →                                                                                                                                                                                                                                                                                                                                                                                                                                                                                                                                                                                                                                                    |
| env-861  | NLM026_scaffold36927_9              | - | 437     | 356     | RNA → rpsJ (PRK00596)Ribosomal_S10 (pfam00338) →                                                                                                                                                                                                                                                                                                                                                                                                                                                                                                                                                                                                                                         |

|         |                               |   |        |        |                                                                     |
|---------|-------------------------------|---|--------|--------|---------------------------------------------------------------------|
| env-862 | SRS049164.WUGC_scaffold_63181 | - | 252    | 171    | RNA → ←-hypo                                                        |
| env-863 | DLF012_scaffold4039_3         | + | 4877   | 4957   | RNA → rpsJ (PRK00596)RpsJ (COG0051)→                                |
| env-864 | SRS050422.LANL_scaffold_15527 | - | 181    | 101    | RNA →                                                               |
| env-865 | 4491485.3.NODE.8452           | - | 8128   | 8047   | RNA → hypo→ rpsJ (PRK00596)RpsJ (COG0051)→                          |
| env-866 | DOM010_scaffold114_1          | + | 76895  | 76976  | RNA → hypo→ rpsJ (PRK00596)RpsJ (COG0051)→                          |
| env-867 | NLF010_scaffold280_62         | + | 221    | 302    | RNA → rpsJ (PRK00596)RpsJ (COG0051)→                                |
| env-868 | scaffold6333_2.O2.UC-11       | + | 2568   | 2649   | RNA → rpsJ (PRK00596)Ribosomal.S10 (pfam00338)→                     |
| env-869 | SRS014923.WUGC_scaffold_21701 | - | 206    | 125    | RNA →                                                               |
| env-870 | SRS048164.WUGC_scaffold_6926  | - | 364    | 283    | RNA → rpsJ (PRK00596)Ribosomal.S10 (pfam00338)→                     |
| env-871 | SRS053398.LANL_scaffold_19345 | - | 207    | 126    | RNA → hypo→                                                         |
| env-872 | SRS024331.LANL_scaffold_6342  | - | 361    | 280    | RNA → rpsJ (PRK00596)Ribosomal.S10 (pfam00338)→                     |
| env-873 | SRS042628.WUGC_scaffold_13655 | - | 207    | 126    | RNA →                                                               |
| env-874 | 4491413.3.NODE_36320          | + | 36281  | 36362  | RNA → hypo→ rpsJ (PRK00596)RpsJ (COG0051)→                          |
| env-875 | SRS049164.WUGC_scaffold_48687 | + | 416    | 497    | RNA → hypo→                                                         |
| env-876 | SRS047014.WUGC_scaffold_33266 | - | 207    | 126    | RNA →                                                               |
| env-877 | DOF014_scaffold33897_7        | + | 141    | 222    | RNA → rpsJ (PRK00596)Ribosomal.S10 (pfam00338)→                     |
| env-878 | DOM024_scaffold8082_9         | + | 242    | 323    | RNA → rpsJ (PRK00596)RpsJ (COG0051)→                                |
| env-879 | SRS058770.LANL_scaffold_8927  | - | 361    | 280    | RNA → rpsJ (PRK00596)Ribosomal.S10 (pfam00338)→                     |
| env-880 | 4491403.3.NODE_43191          | - | 1209   | 1128   | RNA → rpsJ (PRK00596)Ribosomal.S10 (pfam00338)→                     |
| env-881 | 4491404.3.NODE_39204          | + | 16     | 97     | RNA → rpsJ (PRK00596)RpsJ (COG0051)→                                |
| env-882 | DLM015_scaffold18244_10       | + | 1214   | 1295   | RNA → hypo→ rpsJ (PRK00596)RpsJ (COG0051)→                          |
| env-883 | DLM021_scaffold23002_4        | - | 9326   | 9245   | RNA → hypo→ rpsJ (PRK00596)RpsJ (COG0051)→                          |
| env-884 | DOF011_scaffold5789_15        | + | 252    | 333    | RNA → rpsJ (PRK00596)Ribosomal.S10 (pfam00338)→                     |
| env-885 | DOM021_scaffold13341_7        | + | 164    | 245    | RNA → rpsJ (PRK00596)RpsJ (COG0051)→                                |
| env-886 | NLM008_scaffold17065_3        | - | 3947   | 3866   | RNA → hypo→ rpsJ (PRK00596)RpsJ (COG0051)→                          |
| env-887 | NLM009_scaffold5386_5         | + | 2122   | 2203   | RNA → hypo→ rpsJ (PRK00596)RpsJ (COG0051)→                          |
| env-888 | NLM021_scaffold13120_8        | + | 3360   | 3441   | RNA → hypo→ rpsJ (PRK00596)RpsJ (COG0051)→                          |
| env-889 | NOM020_scaffold2140_8         | - | 6244   | 6163   | RNA → hypo→ rpsJ (PRK00596)RpsJ (COG0051)→                          |
| env-890 | NOM025_scaffold13467_1        | - | 49759  | 49678  | RNA → hypo→ rpsJ (PRK00596)RpsJ (COG0051)→                          |
| env-891 | NOM029_scaffold63_2           | - | 3400   | 3319   | RNA → hypo→ rpsJ (PRK00596)RpsJ (COG0051)→                          |
| env-892 | 4491419.3.NODE_20619          | + | 4027   | 4108   | RNA → hypo→ rpsJ (PRK00596)RpsJ (COG0051)→                          |
| env-893 | DLM028_scaffold2088_3         | - | 11513  | 11432  | RNA → hypo→ rpsJ (PRK00596)RpsJ (COG0051)→                          |
| env-894 | NLM004_scaffold4826_13        | + | 1805   | 1886   | RNA → hypo→ rpsJ (PRK00596)RpsJ (COG0051)→                          |
| env-895 | NLM032_scaffold6862_1         | + | 3653   | 3734   | RNA → hypo→ rpsJ (PRK00596)RpsJ (COG0051)→                          |
| env-896 | NOF006_scaffold7748_15        | + | 408    | 489    | RNA → hypo→ rpsJ (PRK00596)RpsJ (COG0051)→                          |
| env-897 | NOF007_scaffold4503_1         | + | 37612  | 37693  | RNA → hypo→ rpsJ (PRK00596)RpsJ (COG0051)→                          |
| env-898 | DOM022_scaffold52_3           | - | 38941  | 38860  | RNA → hypo→ rpsJ (PRK00596)RpsJ (COG0051)→                          |
| env-899 | NOM002_scaffold8686_2         | + | 209    | 290    | RNA → rpsJ (PRK00596)RpsJ (COG0051)→                                |
| env-900 | SRS015264.WUGC_scaffold_25881 | - | 207    | 126    | RNA →                                                               |
| env-901 | scaffold2311_1.V1.UC-21       | - | 204    | 123    | RNA →                                                               |
| env-902 | 4491420.3.NODE_8720           | + | 93     | 174    | RNA →                                                               |
| env-903 | DLM020_scaffold4730_1         | - | 107388 | 107307 | RNA → hypo→ rpsJ (PRK00596)RpsJ (COG0051)→                          |
| env-904 | DOM018_scaffold13457_5        | - | 1831   | 1750   | RNA → rpsJ (PRK00596)RpsJ (COG0051)→                                |
| env-905 | NOM007_scaffold35894_2        | - | 1318   | 1237   | RNA → hypo→ rpsJ (PRK00596)RpsJ (COG0051)→                          |
| env-906 | NOM022_scaffold18782_6        | + | 4188   | 4269   | RNA → hypo→ rpsJ (PRK00596)RpsJ (COG0051)→                          |
| Rin-2-1 | NZ_ACFY01000086.1             | + | 87520  | 87601  | RNA → rpsJ (PRK00596)RpsJ (COG0051)→ rpsJ (PRK00596)RpsJ (COG0051)→ |
| env-907 | scaffold2088_3.MH0067         | + | 748    | 829    | RNA → rpsJ (PRK00596)Ribosomal.S10 (pfam00338)→                     |
| env-908 | scaffold3368_5.V1.UC-7        | - | 182    | 101    | RNA →                                                               |
| env-909 | DLM002_scaffold8503_15        | + | 532    | 613    | RNA → hypo→ rpsJ (PRK00596)RpsJ (COG0051)→                          |
| env-910 | DOM017_scaffold4879_3         | + | 2589   | 2670   | RNA → hypo→ rpsJ (PRK00596)RpsJ (COG0051)→                          |
| env-911 | NOM014_scaffold11459_3        | - | 4961   | 4880   | RNA → hypo→ rpsJ (PRK00596)RpsJ (COG0051)→                          |
| env-912 | SRS064276.LANL_scaffold_12898 | - | 359    | 278    | RNA → rpsJ (PRK00596)Ribosomal.S10 (pfam00338)→                     |

|          |                         |   |        |        |                                                                                                                                                                                                                                                                                                                                                                                                                                                                                                                                                                                                                                                                                                                                                                                                                                                                                                                         |
|----------|-------------------------|---|--------|--------|-------------------------------------------------------------------------------------------------------------------------------------------------------------------------------------------------------------------------------------------------------------------------------------------------------------------------------------------------------------------------------------------------------------------------------------------------------------------------------------------------------------------------------------------------------------------------------------------------------------------------------------------------------------------------------------------------------------------------------------------------------------------------------------------------------------------------------------------------------------------------------------------------------------------------|
| env-913  | NLF013_scaffold11235_2  | + | 33240  | 33321  | RNA → rpsJ (PRK00596)RpsJ (COG0051) →                                                                                                                                                                                                                                                                                                                                                                                                                                                                                                                                                                                                                                                                                                                                                                                                                                                                                   |
| env-914  | NOM026_scaffold13266_5  | - | 2455   | 2374   | RNA → rpsJ (PRK00596)RpsJ (COG0051) →                                                                                                                                                                                                                                                                                                                                                                                                                                                                                                                                                                                                                                                                                                                                                                                                                                                                                   |
| env-915  | NOM018_C815838_1        | - | 251    | 170    | RNA →                                                                                                                                                                                                                                                                                                                                                                                                                                                                                                                                                                                                                                                                                                                                                                                                                                                                                                                   |
| env-916  | NLF002_scaffold7830_8   | + | 14588  | 14669  | RNA → rpsJ (PRK00596)RpsJ (COG0051) →                                                                                                                                                                                                                                                                                                                                                                                                                                                                                                                                                                                                                                                                                                                                                                                                                                                                                   |
| env-917  | NOF014_scaffold631_2    | - | 1554   | 1473   | RNA → rpsJ (PRK00596)RpsJ (COG0051) →                                                                                                                                                                                                                                                                                                                                                                                                                                                                                                                                                                                                                                                                                                                                                                                                                                                                                   |
| env-918  | longitudinal_461_56     | + | 96014  | 96096  | RNA → rpsJ (PRK00596)RpsJ (COG0051) →                                                                                                                                                                                                                                                                                                                                                                                                                                                                                                                                                                                                                                                                                                                                                                                                                                                                                   |
| env-919  | longitudinal_462_123    | + | 96021  | 96103  | RNA → rpsJ (PRK00596)RpsJ (COG0051) →                                                                                                                                                                                                                                                                                                                                                                                                                                                                                                                                                                                                                                                                                                                                                                                                                                                                                   |
| env-920  | longitudinal_463_7      | + | 96041  | 96123  | RNA → rpsJ (PRK00596)RpsJ (COG0051) →                                                                                                                                                                                                                                                                                                                                                                                                                                                                                                                                                                                                                                                                                                                                                                                                                                                                                   |
| Lba-10-1 | NZ_GL945245.1           | - | 74466  | 74384  | RNA → rpsJ (PRK00596)RpsJ (COG0051) → RplC (COG0087)rplC (PRK00001) →<br>rplD (PRK05319)Ribosomal_L4 (pfam00573) → rplW (PRK05738)Ribosomal_L23 (pfam00276) →<br>RplB (COG0090)rplB (PRK09374) → rpsS (PRK00357)RpsS (COG0185) →<br>rplV (PRK00565)Ribosomal_L22 (pfam00237) → RpsC (COG0092)rpsC (PRK00310) →<br>rpl16 (CHL00044)rplP (PRK09203) → PRK00306 (PRK00306)Ribosomal_L29 (pfam00831) →<br>rpsQ (PRK05610)Ribosomal_S17 (pfam00366) → rplN (PRK05483)Ribosomal_L14 (pfam00238) →<br>RplX (COG0198)rplX (PRK00004) → rplE (PRK00010)RplE (COG0094) → rpsN (PRK08061)RpsN (COG0199) →<br>rpsH (PRK00136)Ribosomal_S8 (pfam00410) → rpl6 (CHL00140)rplF (PRK05498) →<br>rplR (PRK05593)Ribosomal_L18p (pfam00861) → RpsE (COG0098)rpsE (PRK00550) →<br>Ribosomal_L30 (cd01658)rpmD (PRK05611) → RplO (COG0200)rplO (PRK05592) →<br>SecY (COG0201)secY (PRK09204) →                                              |
| [sc-1-1  | NZ_BAHS01000033.1       | + | 7765   | 7847   | RNA → rpsJ (PRK00596)RpsJ (COG0051) →                                                                                                                                                                                                                                                                                                                                                                                                                                                                                                                                                                                                                                                                                                                                                                                                                                                                                   |
| env-921  | DLF012_scaffold283_15   | + | 2596   | 2678   | RNA → rpsJ (PRK00596)RpsJ (COG0051) →                                                                                                                                                                                                                                                                                                                                                                                                                                                                                                                                                                                                                                                                                                                                                                                                                                                                                   |
| env-922  | longitudinal_337_87     | + | 26835  | 26917  | RNA → rpsJ (PRK00596)RpsJ (COG0051) → RplC (COG0087)rplC (PRK00001) →<br>rplD (PRK05319)Ribosomal_L4 (pfam00573) → rplW (PRK05738)Ribosomal_L23 (pfam00276) →<br>RplB (COG0090)rplB (PRK09374) → rpsS (PRK00357)RpsS (COG0185) →<br>rplV (PRK00565)Ribosomal_L22 (pfam00237) → RpsC (COG0092)rpsC (PRK00310) →<br>rpl16 (CHL00044)rplP (PRK09203) → PRK00306 (PRK00306)Ribosomal_L29 (pfam00831) →<br>rpsQ (PRK05610)Ribosomal_S17 (pfam00366) → rplN (PRK05483)Ribosomal_L14 (pfam00238) →<br>RplX (COG0198)rplX (PRK00004) → rplE (PRK00010)RplE (COG0094) → rpsN (PRK08061)RpsN (COG0199) →<br>rpsH (PRK00136)Ribosomal_S8 (pfam00410) → rpl6 (CHL00140)rplF (PRK05498) →<br>rplR (PRK05593)Ribosomal_L18p (pfam00861) → RpsE (COG0098)rpsE (PRK00550) →<br>Ribosomal_L30 (cd01658)rpmD (PRK05611) → RplO (COG0200)rplO (PRK05592) →<br>SecY (COG0201)secY (PRK09204) →                                              |
| env-923  | longitudinal_522_1406   | + | 359    | 441    | RNA → rpsJ (PRK00596)RpsJ (COG0051) →                                                                                                                                                                                                                                                                                                                                                                                                                                                                                                                                                                                                                                                                                                                                                                                                                                                                                   |
| Csc-1-1  | NZ_DS499705.1           | - | 73976  | 73894  | RNA → rpsJ (PRK00596)RpsJ (COG0051) → RplC (COG0087)rplC (PRK00001) →<br>rplD (PRK05319)Ribosomal_L4 (pfam00573) → rplW (PRK05738)Ribosomal_L23 (pfam00276) →<br>RplB (COG0090)rplB (PRK09374) → rpsS (PRK00357)RpsS (COG0185) →<br>rplV (PRK00565)Ribosomal_L22 (pfam00237) → RpsC (COG0092)rpsC (PRK00310) →<br>rpl16 (CHL00044)rplP (PRK09203) → PRK00306 (PRK00306)Ribosomal_L29 (pfam00831) →<br>rpsQ (PRK05610)Ribosomal_S17 (pfam00366) → rplN (PRK05483)Ribosomal_L14 (pfam00238) →<br>RplX (COG0198)rplX (PRK00004) → rplE (PRK00010)RplE (COG0094) → rpsN (PRK08061)RpsN (COG0199) →<br>rpsH (PRK00136)Ribosomal_S8 (pfam00410) → rpl6 (CHL00140)rplF (PRK05498) →<br>rplR (PRK05593)Ribosomal_L18p (pfam00861) → rplR (PRK05593)Ribosomal_L18_L5e (cd00432) →<br>RpsE (COG0098)rpsE (PRK00550) → Ribosomal_L30 (cd01658)rpmD (PRK05611) →<br>RplO (COG0200)rplO (PRK05592) → SecY (COG0201)secY (PRK09204) → |
| Cba-6-1  | NZ_BAII02000008.1       | + | 178284 | 178366 | RNA → rpsJ (PRK00596)RpsJ (COG0051) →                                                                                                                                                                                                                                                                                                                                                                                                                                                                                                                                                                                                                                                                                                                                                                                                                                                                                   |
| Bhy-1-1  | NZ_GG657686.1           | + | 266696 | 266777 | RNA → rpsJ (PRK00596)RpsJ (COG0051) → rpsJ (PRK00596)RpsJ (COG0051) →<br>RplC (COG0087)rplC (PRK00001) → rplD (PRK05319)Ribosomal_L4 (pfam00573) →<br>rplW (PRK05738)Ribosomal_L23 (pfam00276) →                                                                                                                                                                                                                                                                                                                                                                                                                                                                                                                                                                                                                                                                                                                        |
| env-924  | 4491487.3.NODE_119164   | + | 6041   | 6130   | RNA → rpsJ (PRK00596)RpsJ (COG0051) →                                                                                                                                                                                                                                                                                                                                                                                                                                                                                                                                                                                                                                                                                                                                                                                                                                                                                   |
| env-925  | NOM010_scaffold888_13   | - | 262    | 173    | RNA →                                                                                                                                                                                                                                                                                                                                                                                                                                                                                                                                                                                                                                                                                                                                                                                                                                                                                                                   |
| env-926  | NLF007_scaffold25078_17 | - | 2019   | 1930   | RNA → rpsJ (PRK00596)RpsJ (COG0051) →                                                                                                                                                                                                                                                                                                                                                                                                                                                                                                                                                                                                                                                                                                                                                                                                                                                                                   |
| env-927  | NLM021_scaffold5854_5   | + | 3094   | 3183   | RNA → rpsJ (PRK00596)RpsJ (COG0051) →                                                                                                                                                                                                                                                                                                                                                                                                                                                                                                                                                                                                                                                                                                                                                                                                                                                                                   |
| Bcr-1-1  | NZ_GG663523.1           | - | 84988  | 84909  | RNA → rpsJ (PRK00596)RpsJ (COG0051) → rpsJ (PRK00596)RpsJ (COG0051) →                                                                                                                                                                                                                                                                                                                                                                                                                                                                                                                                                                                                                                                                                                                                                                                                                                                   |
| env-928  | 4491405.3.NODE_49       | + | 11944  | 12023  | RNA → rpsJ (PRK00596)RpsJ (COG0051) →                                                                                                                                                                                                                                                                                                                                                                                                                                                                                                                                                                                                                                                                                                                                                                                                                                                                                   |

|         |                                 |   |        |        |                                                                                                                                                            |
|---------|---------------------------------|---|--------|--------|------------------------------------------------------------------------------------------------------------------------------------------------------------|
| env-929 | SRS019582.WUGC_scaffold_37983   | + | 23645  | 23724  | RNA → rpsJ (PRK00596)RpsJ (COG0051) → RplC (COG0087)rplC (PRK00001) → rplD (PRK05319)Ribosomal_L4 (pfam00573) → rplW (PRK05738)Ribosomal_L23 (pfam00276) → |
| env-930 | 4491410.3.NODE_58360            | + | 14037  | 14116  | RNA → rpsJ (PRK00596)RpsJ (COG0051) →                                                                                                                      |
| env-931 | 4491484.3.NODE_3245             | - | 8920   | 8841   | RNA → rpsJ (PRK00596)RpsJ (COG0051) →                                                                                                                      |
| env-932 | scaffold20211_2.MH0025          | - | 397    | 318    | RNA → rpsJ (PRK00596)Ribosomal_S10 (pfam00338) →                                                                                                           |
| env-933 | 4491414.3.NODE_1471             | - | 1688   | 1609   | RNA → rpsJ (PRK00596)RpsJ (COG0051) →                                                                                                                      |
| env-934 | NLM022_scaffold29854_2          | + | 26081  | 26161  | RNA →                                                                                                                                                      |
| env-935 | 4491402.3.NODE_2732             | - | 220150 | 220070 | RNA → rpsJ (PRK00596)RpsJ (COG0051) →                                                                                                                      |
| env-936 | 4491419.3.NODE_5150             | - | 3952   | 3872   | RNA → rpsJ (PRK00596)RpsJ (COG0051) →                                                                                                                      |
| env-937 | NLM010_scaffold20898_13         | - | 1810   | 1730   | RNA → rpsJ (PRK00596)RpsJ (COG0051) →                                                                                                                      |
| env-938 | SRS013158_Baylor_scaffold.11109 | - | 287    | 207    | RNA → hypo →                                                                                                                                               |
| env-939 | SRS015264.WUGC_scaffold_37105   | + | 430    | 510    | RNA → rpsJ (PRK00596)RpsJ (COG0051) →                                                                                                                      |
| env-940 | NLM004_scaffold7074_5           | + | 549    | 629    | RNA → rpsJ (PRK00596)RpsJ (COG0051) →                                                                                                                      |
| env-941 | SRS043701.LANL_scaffold_8835    | + | 329    | 409    | RNA → rpsJ (PRK00596)RpsJ (COG0051) →                                                                                                                      |
| env-942 | scaffold16680_3.MH0011          | + | 648    | 728    | RNA → hypo →                                                                                                                                               |
| env-943 | NLF005_scaffold18267_1          | + | 154    | 234    | RNA → rpsJ (PRK00596)RpsJ (COG0051) →                                                                                                                      |
| env-944 | NOM009_scaffold7774_6           | - | 20905  | 20825  | RNA → rpsJ (PRK00596)RpsJ (COG0051) →                                                                                                                      |
| env-945 | DOM003_scaffold19611_1          | + | 136    | 216    | RNA → rpsJ (PRK00596)RpsJ (COG0051) →                                                                                                                      |
| env-946 | NLF013_scaffold11475_6          | + | 661    | 741    | RNA →                                                                                                                                                      |
| env-947 | SRS015960.WUGC_scaffold_7480    | + | 329    | 409    | RNA →                                                                                                                                                      |
| env-948 | SRS056519.LANL_scaffold_9865    | - | 288    | 208    | RNA →                                                                                                                                                      |
| env-949 | NOM002_scaffold7458_1           | + | 147    | 227    | RNA → rpsJ (PRK00596)RpsJ (COG0051) →                                                                                                                      |
| env-950 | SRS022137.WUGC_scaffold_40873   | - | 287    | 207    | RNA → hypo →                                                                                                                                               |
| Rin-1-1 | NZ_GG692728.1                   | - | 64665  | 64585  | RNA → rpsJ (PRK00596)RpsJ (COG0051) → rpsJ (PRK00596)RpsJ (COG0051) →                                                                                      |
| env-951 | 4491485.3.NODE_16391            | + | 24197  | 24277  | RNA → rpsJ (PRK00596)RpsJ (COG0051) →                                                                                                                      |
| env-952 | SRS019397.WUGC_scaffold_6745    | + | 328    | 408    | RNA → rpsJ (PRK00596)RpsJ (COG0051) →                                                                                                                      |
| env-953 | NOF005_scaffold5963_8           | - | 1692   | 1612   | RNA → rpsJ (PRK00596)RpsJ (COG0051) →                                                                                                                      |
| env-954 | SRS043411.WUGC_scaffold_12982   | - | 288    | 208    | RNA → hypo →                                                                                                                                               |
| env-955 | 4491421.3.NODE_11491            | + | 13278  | 13358  | RNA → rpsJ (PRK00596)RpsJ (COG0051) →                                                                                                                      |
| env-956 | NOM022_scaffold14723_28         | - | 3683   | 3603   | RNA → rpsJ (PRK00596)RpsJ (COG0051) →                                                                                                                      |
| env-957 | NOM027_scaffold11125_1          | - | 446    | 366    | RNA → rpsJ (PRK00596)Ribosomal_S10 (pfam00338) →                                                                                                           |
| env-958 | SRS014287.WUGC_scaffold_12600   | - | 819    | 739    | RNA → rpsJ (PRK00596)RpsJ (COG0051) →                                                                                                                      |
| env-959 | NOM002_scaffold929_13           | + | 1149   | 1229   | RNA → ← hypo                                                                                                                                               |
| env-960 | RUMENNODE_4338772_1             | - | 19974  | 19892  | RNA → rpsJ (PRK00596)RpsJ (COG0051) → RplC (COG0087)rplC (PRK00001) → RplD (COG0088)rplD (PRK05319) → rplD (PRK05319)Ribosomal_L4 (pfam00573) →            |
| env-961 | RUMENNODE_2488056_1             | - | 20859  | 20777  | RNA → rpsJ (PRK00596)RpsJ (COG0051) → RplC (COG0087)rplC (PRK00001) → rplD (PRK05319)Ribosomal_L4 (pfam00573) →                                            |
| env-962 | SRS014923.WUGC_scaffold_57720   | - | 163    | 82     | RNA →                                                                                                                                                      |
| env-963 | scaffold7909_1.MH0081           | - | 174    | 93     | RNA →                                                                                                                                                      |
| env-964 | 4491408.3.NODE_8011             | - | 1352   | 1271   | RNA → rpsJ (PRK00596)RpsJ (COG0051) → RplC (COG0087)rplC (PRK00001) → RplC (COG0087)rplC (PRK00001) →                                                      |
| env-965 | IMNBL1_c0000852                 | + | 20500  | 20581  | RNA → rpsJ (PRK00596)RpsJ (COG0051) →                                                                                                                      |
| env-966 | JGI994J12354_10001434           | - | 3364   | 3283   | RNA → rpsJ (PRK00596)RpsJ (COG0051) →                                                                                                                      |
| env-967 | 2227244666                      | + | 3836   | 3917   | RNA → rpsJ (PRK00596)RpsJ (COG0051) →                                                                                                                      |
| env-968 | BABG01010268.1                  | - | 446    | 363    | RNA → rpsJ (PRK00596)RpsJ (COG0051) →                                                                                                                      |
| env-969 | scaffold33008_3.MH0030          | + | 784    | 867    | RNA →                                                                                                                                                      |
| env-970 | scaffold7906_1.V1.CD-1          | - | 885    | 802    | RNA → rpsJ (PRK00596)RpsJ (COG0051) →                                                                                                                      |
| env-971 | DLM023_scaffold1754_17          | - | 606    | 523    | RNA → rpsJ (PRK00596)RpsJ (COG0051) →                                                                                                                      |
| env-972 | 4491421.3.NODE_79900            | + | 381    | 464    | RNA →                                                                                                                                                      |
| env-973 | scaffold17933_1.MH0058          | - | 182    | 99     | RNA →                                                                                                                                                      |
| env-974 | scaffold9942_8.MH0073           | + | 2179   | 2262   | RNA →                                                                                                                                                      |
| env-975 | scaffold7106_1.MH0074           | - | 181    | 98     | RNA →                                                                                                                                                      |
| env-976 | scaffold6425_1.V1.UC-7          | - | 182    | 99     | RNA →                                                                                                                                                      |



|         |                              |   |         |         |                                                                                                                                                                                                                                                                                                                                                                                                                                                                                                                                                                                                |
|---------|------------------------------|---|---------|---------|------------------------------------------------------------------------------------------------------------------------------------------------------------------------------------------------------------------------------------------------------------------------------------------------------------------------------------------------------------------------------------------------------------------------------------------------------------------------------------------------------------------------------------------------------------------------------------------------|
| env-977 | DOF003_scaffold16512.6       | + | 311     | 394     | RNA → rpsJ (PRK00596)RpsJ (COG0051) →                                                                                                                                                                                                                                                                                                                                                                                                                                                                                                                                                          |
| env-978 | DOM016_scaffold3915.5        | + | 242     | 325     | RNA → rpsJ (PRK00596)Ribosomal_S10 (pfam00338) →                                                                                                                                                                                                                                                                                                                                                                                                                                                                                                                                               |
| env-979 | NOM002_scaffold75.3          | + | 434     | 517     | RNA → rpsJ (PRK00596)RpsJ (COG0051) →                                                                                                                                                                                                                                                                                                                                                                                                                                                                                                                                                          |
| Lba-3-1 | NZ_KE150017.1                | - | 1738715 | 1738634 | RNA → rpsJ (PRK00596)RpsJ (COG0051) → RplC (COG0087)rplC (PRK00001) →<br>rplD (PRK05319)Ribosomal_L4 (pfam00573) → rplW (PRK05738)Ribosomal_L23 (pfam00276) →<br>RplB (COG0090)rplB (PRK09374) → rpsS (PRK00357)RpsS (COG0185) →<br>rplV (PRK00565)Ribosomal_L22 (pfam00237) → RpsC (COG0092)rpsC (PRK00310) →<br>rpl16 (CHL00044)rplP (PRK09203) → PRK00306 (PRK00306)Ribosomal_L29 (pfam00831) →<br>rpsQ (PRK05610)Ribosomal_S17 (pfam00366) → rplN (PRK05483)Ribosomal_L14 (pfam00238) →<br>RplX (COG0198)rplX (PRK00004) → rplE (PRK00010)RplE (COG0094) → rpsN (PRK08061)RpsN (COG0199) → |
| env-980 | SRS057717_LANL_scaffold.6546 | - | 2301    | 2220    | RNA → rpsJ (PRK00596)RpsJ (COG0051) →                                                                                                                                                                                                                                                                                                                                                                                                                                                                                                                                                          |
| env-981 | 4491482.3_NODE.12049         | - | 97      | 16      | RNA →                                                                                                                                                                                                                                                                                                                                                                                                                                                                                                                                                                                          |
| env-982 | NLM027_scaffold19893.2       | - | 681     | 600     | RNA → rpsJ (PRK00596)RpsJ (COG0051) →                                                                                                                                                                                                                                                                                                                                                                                                                                                                                                                                                          |
| Cne-1-1 | NZ_DS995339.4                | + | 431934  | 432015  | RNA → rpsJ (PRK00596)RpsJ (COG0051) → RplC (COG0087)rplC (PRK00001) →<br>rplD (PRK05319)Ribosomal_L4 (pfam00573) → rplW (PRK05738)Ribosomal_L23 (pfam00276) →<br>RplB (COG0090)rplB (PRK09374) → rpsS (PRK00357)RpsS (COG0185) →<br>rplV (PRK00565)Ribosomal_L22 (pfam00237) → RpsC (COG0092)rpsC (PRK00310) →<br>rpl16 (CHL00044)rplP (PRK09203) → PRK00306 (PRK00306)Ribosomal_L29 (pfam00831) →<br>rpsQ (PRK05610)Ribosomal_S17 (pfam00366) → rplN (PRK05483)Ribosomal_L14 (pfam00238) →<br>RplX (COG0198)rplX (PRK00004) → rplE (PRK00010)RplE (COG0094) → rpsN (PRK08061)RpsN (COG0199) → |
| env-983 | DOM008_scaffold9546.12       | - | 4435    | 4354    | RNA → rpsJ (PRK00596)RpsJ (COG0051) → RplC (COG0087)rplC (PRK00001) →<br>rplD (PRK05319)Ribosomal_L4 (pfam00573) → rplW (PRK05738)Ribosomal_L23 (pfam00276) →<br>RplB (COG0090)rplB (PRK09374) → rpsS (PRK00357)RpsS (COG0185) →<br>rplV (PRK00565)Ribosomal_L22 (pfam00237) → RpsC (COG0092)rpsC (PRK00310) →                                                                                                                                                                                                                                                                                 |
| env-984 | DOF006_scaffold10319.1       | - | 1987    | 1906    | RNA → rpsJ (PRK00596)RpsJ (COG0051) → RplC (COG0087)rplC (PRK00001) →<br>rplD (PRK05319)Ribosomal_L4 (pfam00573) →                                                                                                                                                                                                                                                                                                                                                                                                                                                                             |
| env-985 | DOF006_scaffold1788.9        | + | 437     | 518     | RNA → rpsJ (PRK00596)RpsJ (COG0051) → RplC (COG0087)rplC (PRK00001) →                                                                                                                                                                                                                                                                                                                                                                                                                                                                                                                          |
| Csp-8-1 | NZ_KE150443.1                | + | 282818  | 282899  | RNA → rpsJ (PRK00596)RpsJ (COG0051) → RplC (COG0087)rplC (PRK00001) →<br>rplD (PRK05319)Ribosomal_L4 (pfam00573) → rplW (PRK05738)Ribosomal_L23 (pfam00276) →<br>RplB (COG0090)rplB (PRK09374) → rpsS (PRK00357)RpsS (COG0185) →<br>rplV (PRK00565)Ribosomal_L22 (pfam00237) → RpsC (COG0092)rpsC (PRK00310) →<br>rpl16 (CHL00044)rplP (PRK09203) → PRK00306 (PRK00306)Ribosomal_L29 (pfam00831) →<br>rpsQ (PRK05610)Ribosomal_S17 (pfam00366) → rplN (PRK05483)Ribosomal_L14 (pfam00238) →<br>RplX (COG0198)rplX (PRK00004) → rplE (PRK00010)RplE (COG0094) → rpsN (PRK08061)RpsN (COG0199) → |
| env-986 | DLF012_scaffold17148.1       | - | 413     | 332     | RNA → rpsJ (PRK00596)RpsJ (COG0051) →                                                                                                                                                                                                                                                                                                                                                                                                                                                                                                                                                          |
| Csp-9-1 | NZ_KE150436.1                | + | 356160  | 356241  | RNA → rpsJ (PRK00596)RpsJ (COG0051) → RplC (COG0087)rplC (PRK00001) →<br>rplD (PRK05319)Ribosomal_L4 (pfam00573) → rplW (PRK05738)Ribosomal_L23 (pfam00276) →<br>RplB (COG0090)rplB (PRK09374) → rpsS (PRK00357)RpsS (COG0185) →<br>rplV (PRK00565)Ribosomal_L22 (pfam00237) → RpsC (COG0092)rpsC (PRK00310) →<br>rpl16 (CHL00044)rplP (PRK09203) → PRK00306 (PRK00306)Ribosomal_L29 (pfam00831) →<br>rpsQ (PRK05610)Ribosomal_S17 (pfam00366) → rplN (PRK05483)Ribosomal_L14 (pfam00238) →<br>RplX (COG0198)rplX (PRK00004) → rplE (PRK00010)RplE (COG0094) → rpsN (PRK08061)RpsN (COG0199) → |
| env-987 | NLM027_scaffold221.5         | + | 1755    | 1836    | RNA → rpsJ (PRK00596)RpsJ (COG0051) → RplC (COG0087)rplC (PRK00001) →<br>rplD (PRK05319)Ribosomal_L4 (pfam00573) → rplW (PRK05738)Ribosomal_L23 (pfam00276) →<br>RplB (COG0090)rplB (PRK09374) →                                                                                                                                                                                                                                                                                                                                                                                               |
| env-988 | NOM028_scaffold23473.1       | - | 499     | 418     | RNA → rpsJ (PRK00596)RpsJ (COG0051) →                                                                                                                                                                                                                                                                                                                                                                                                                                                                                                                                                          |
| env-989 | longitudinal_520_20          | - | 28469   | 28388   | RNA → rpsJ (PRK00596)RpsJ (COG0051) → RplC (COG0087)rplC (PRK00001) →<br>rplD (PRK05319)Ribosomal_L4 (pfam00573) → rplW (PRK05738)Ribosomal_L23 (pfam00276) →<br>RplB (COG0090)rplB (PRK09374) → rpsS (PRK00357)RpsS (COG0185) →<br>rplV (PRK00565)Ribosomal_L22 (pfam00237) → RpsC (COG0092)rpsC (PRK00310) →<br>rpl16 (CHL00044)rplP (PRK09203) → PRK00306 (PRK00306)Ribosomal_L29 (pfam00831) →<br>rpsQ (PRK05610)Ribosomal_S17 (pfam00366) → rplN (PRK05483)Ribosomal_L14 (pfam00238) →<br>RplX (COG0198)rplX (PRK00004) → rplE (PRK00010)RplE (COG0094) → rpsN (PRK08061)RpsN (COG0199) → |

|          |                               |   |       |       |                                                                                                                                                                                                                                                                                                                                                                                                                                                                                                                                                                                                                        |
|----------|-------------------------------|---|-------|-------|------------------------------------------------------------------------------------------------------------------------------------------------------------------------------------------------------------------------------------------------------------------------------------------------------------------------------------------------------------------------------------------------------------------------------------------------------------------------------------------------------------------------------------------------------------------------------------------------------------------------|
| env-990  | longitudinal_521_5            | - | 28425 | 28344 | RNA → rpsJ (PRK00596)RpsJ (COG0051) → RplC (COG0087)rplC (PRK00001) → rplD (PRK05319)Ribosomal_L4 (pfam00573) → rplW (PRK05738)Ribosomal_L23 (pfam00276) → RplB (COG0090)rplB (PRK09374) → rpsS (PRK00357)RpsS (COG0185) → rplV (PRK00565)Ribosomal_L22 (pfam00237) → RpsC (COG0092)rpsC (PRK00310) → rpl16 (CHL00044)rplP (PRK09203) → PRK00306 (PRK00306)Ribosomal_L29 (pfam00831) → rpsQ (PRK05610)Ribosomal_S17 (pfam00366) → rplN (PRK05483)Ribosomal_L14 (pfam00238) → RplX (COG0198)rplX (PRK00004) → rplE (PRK00010)RplE (COG0094) → rpsN (PRK08061)RpsN (COG0199) →                                           |
| Lba-9-1  | NZ_GL872351.1                 | - | 28391 | 28310 | RNA → rpsJ (PRK00596)RpsJ (COG0051) → RplC (COG0087)rplC (PRK00001) → rplD (PRK05319)Ribosomal_L4 (pfam00573) → rplW (PRK05738)Ribosomal_L23 (pfam00276) → RplB (COG0090)rplB (PRK09374) → rpsS (PRK00357)RpsS (COG0185) → rplV (PRK00565)Ribosomal_L22 (pfam00237) → RpsC (COG0092)rpsC (PRK00310) → rpl16 (CHL00044)rplP (PRK09203) → PRK00306 (PRK00306)Ribosomal_L29 (pfam00831) → rpsQ (PRK05610)Ribosomal_S17 (pfam00366) → rplN (PRK05483)Ribosomal_L14 (pfam00238) → RplX (COG0198)rplX (PRK00004) → rplE (PRK00010)RplE (COG0094) → rpsN (PRK08061)RpsN (COG0199) →                                           |
| Lba-12-1 | NZ_GL890574.1                 | - | 28756 | 28675 | RNA → rpsJ (PRK00596)RpsJ (COG0051) → RplC (COG0087)rplC (PRK00001) → rplD (PRK05319)Ribosomal_L4 (pfam00573) → rplW (PRK05738)Ribosomal_L23 (pfam00276) → RplB (COG0090)rplB (PRK09374) → rpsS (PRK00357)RpsS (COG0185) → rplV (PRK00565)Ribosomal_L22 (pfam00237) → RpsC (COG0092)rpsC (PRK00310) → rpl16 (CHL00044)rplP (PRK09203) → PRK00306 (PRK00306)Ribosomal_L29 (pfam00831) → rpsQ (PRK05610)Ribosomal_S17 (pfam00366) → rplN (PRK05483)Ribosomal_L14 (pfam00238) → RplX (COG0198)rplX (PRK00004) → rplE (PRK00010)RplE (COG0094) → rpsN (PRK08061)RpsN (COG0199) →                                           |
| env-991  | longitudinal_114_32           | - | 33692 | 33610 | RNA → rpsJ (PRK00596)RpsJ (COG0051) → RplC (COG0087)rplC (PRK00001) → rplD (PRK05319)Ribosomal_L4 (pfam00573) → rplW (PRK05738)Ribosomal_L23 (pfam00276) → RplB (COG0090)rplB (PRK09374) → rpsS (PRK00357)RpsS (COG0185) → rplV (PRK00565)Ribosomal_L22 (pfam00237) → RpsC (COG0092)rpsC (PRK00310) → rpl16 (CHL00044)rplP (PRK09203) → PRK00306 (PRK00306)Ribosomal_L29 (pfam00831) → rpsQ (PRK05610)Ribosomal_S17 (pfam00366) → rplN (PRK05483)Ribosomal_L14 (pfam00238) → RplX (COG0198)rplX (PRK00004) → rplE (PRK00010)RplE (COG0094) → rpsN (PRK08061)RpsN (COG0199) →                                           |
| env-992  | longitudinal_113_28           | - | 46667 | 46585 | rpsH (PRK00136)Ribosomal_S8 (pfam00410) → RNA → rpsJ (PRK00596)RpsJ (COG0051) → RplC (COG0087)rplC (PRK00001) → rplD (PRK05319)Ribosomal_L4 (pfam00573) → rplW (PRK05738)Ribosomal_L23 (pfam00276) → RplB (COG0090)rplB (PRK09374) → rpsS (PRK00357)RpsS (COG0185) → rplV (PRK00565)Ribosomal_L22 (pfam00237) → RpsC (COG0092)rpsC (PRK00310) → rpl16 (CHL00044)rplP (PRK09203) → PRK00306 (PRK00306)Ribosomal_L29 (pfam00831) → rpsQ (PRK05610)Ribosomal_S17 (pfam00366) → rplN (PRK05483)Ribosomal_L14 (pfam00238) → RplX (COG0198)rplX (PRK00004) → rplE (PRK00010)RplE (COG0094) → rpsN (PRK08061)RpsN (COG0199) → |
| env-993  | SRS015782_WUGC_scaffold_40849 | + | 1056  | 1138  | RNA → rpsH (PRK00136)Ribosomal_S8 (pfam00410) →                                                                                                                                                                                                                                                                                                                                                                                                                                                                                                                                                                        |
| Dlo-2-1  | NZ_DS264399.1                 | + | 26108 | 26190 | RNA → rpsJ (PRK00596)RpsJ (COG0051) → RplC (COG0087)rplC (PRK00001) → rplD (PRK05319)Ribosomal_L4 (pfam00573) → rplW (PRK05738)Ribosomal_L23 (pfam00276) → RplB (COG0090)rplB (PRK09374) → rpsS (PRK00357)RpsS (COG0185) → rplV (PRK00565)Ribosomal_L22 (pfam00237) → RpsC (COG0092)rpsC (PRK00310) → rpl16 (CHL00044)rplP (PRK09203) → PRK00306 (PRK00306)Ribosomal_L29 (pfam00831) → rpsQ (PRK05610)Ribosomal_S17 (pfam00366) → rplN (PRK05483)Ribosomal_L14 (pfam00238) → RplX (COG0198)rplX (PRK00004) → rplE (PRK00010)RplE (COG0094) → rpsN (PRK08061)RpsN (COG0199) →                                           |
| env-994  | NOM009_scaffold172_2          | + | 629   | 711   | RNA → rpsJ (PRK00596)RpsJ (COG0051) → RplC (COG0087)rplC (PRK00001) →                                                                                                                                                                                                                                                                                                                                                                                                                                                                                                                                                  |
| env-995  | 4491421.3_NODE_115793         | + | 3592  | 3674  | RNA → rpsJ (PRK00596)RpsJ (COG0051) → RplC (COG0087)rplC (PRK00001) → rplD (PRK05319)Ribosomal_L4 (pfam00573) → rplW (PRK05738)Ribosomal_L23 (pfam00276) → RplB (COG0090)rplB (PRK09374) → rpl2 (CHL00052)rplB (PRK09374) → rpsS (PRK00357)RpsS (COG0185) → rplV (PRK00565)Ribosomal_L22 (pfam00237) → RpsC (PRK00310)30S_S3_KH (cd02412) →                                                                                                                                                                                                                                                                            |
| env-996  | 4491417.3_NODE_2013           | - | 1426  | 1344  | RNA → rpsJ (PRK00596)RpsJ (COG0051) → RplC (COG0087)rplC (PRK00001) → RplD (COG0088)rplD (PRK05319) →                                                                                                                                                                                                                                                                                                                                                                                                                                                                                                                  |

|          |                       |   |       |       |                                                                                                                                                                                                                                                                                                                                                                                                                                                                                                                                                                                                                        |
|----------|-----------------------|---|-------|-------|------------------------------------------------------------------------------------------------------------------------------------------------------------------------------------------------------------------------------------------------------------------------------------------------------------------------------------------------------------------------------------------------------------------------------------------------------------------------------------------------------------------------------------------------------------------------------------------------------------------------|
| env-997  | longitudinal_68_67    | + | 35973 | 36055 | RNA → rpsJ (PRK00596)RpsJ (COG0051) → RplC (COG0087)rplC (PRK00001) → rplD (PRK05319)Ribosomal_L4 (pfam00573) → rplW (PRK05738)Ribosomal_L23 (pfam00276) → RplB (COG0090)rplB (PRK09374) → rpsS (PRK00357)RpsS (COG0185) → rplV (PRK00565)Ribosomal_L22 (pfam00237) → RpsC (COG0092)rpsC (PRK00310) → rpl16 (CHL00044)rplP (PRK09203) → PRK00306 (PRK00306)Ribosomal_L29 (pfam00831) → rpsQ (PRK05610)Ribosomal_S17 (pfam00366) → rplN (PRK05483)Ribosomal_L14 (pfam00238) → RplX (COG0198)rplX (PRK00004) → rplE (PRK00010)RplE (COG0094) → rpsN (PRK08061)RpsN (COG0199) → rpsH (PRK00136)Ribosomal_S8 (pfam00410) → |
| env-998  | longitudinal_299_23   | - | 39606 | 39524 | RNA → rpsJ (PRK00596)RpsJ (COG0051) → RplC (COG0087)rplC (PRK00001) → rplD (PRK05319)Ribosomal_L4 (pfam00573) → rplW (PRK05738)Ribosomal_L23 (pfam00276) → RplB (COG0090)rplB (PRK09374) → rpsS (PRK00357)RpsS (COG0185) → rplV (PRK00565)Ribosomal_L22 (pfam00237) → RpsC (COG0092)rpsC (PRK00310) →                                                                                                                                                                                                                                                                                                                  |
| env-999  | longitudinal_300_84   | - | 39927 | 39845 | RNA → rpsJ (PRK00596)RpsJ (COG0051) → RplC (COG0087)rplC (PRK00001) → rplD (PRK05319)Ribosomal_L4 (pfam00573) → rplW (PRK05738)Ribosomal_L23 (pfam00276) → RplB (COG0090)rplB (PRK09374) → rpsS (PRK00357)RpsS (COG0185) → rplV (PRK00565)Ribosomal_L22 (pfam00237) → RpsC (COG0092)rpsC (PRK00310) → rpl16 (CHL00044)rplP (PRK09203) → PRK00306 (PRK00306)Ribosomal_L29 (pfam00831) → rpsQ (PRK05610)Ribosomal_S17 (pfam00366) → rplN (PRK05483)Ribosomal_L14 (pfam00238) → RplX (COG0198)rplX (PRK00004) → rplE (PRK00010)RplE (COG0094) → rpsN (PRK08061)RpsN (COG0199) → rpsH (PRK00136)Ribosomal_S8 (pfam00410) → |
| env-1000 | longitudinal_301_117  | - | 4335  | 4253  | RNA → rpsJ (PRK00596)RpsJ (COG0051) → RplC (COG0087)rplC (PRK00001) → rplD (PRK05319)Ribosomal_L4 (pfam00573) → rplW (PRK05738)Ribosomal_L23 (pfam00276) → RplB (COG0090)rplB (PRK09374) → rpsS (PRK00357)RpsS (COG0185) → rplV (PRK00565)Ribosomal_L22 (pfam00237) → KH (smart00322)RpsC (COG0092) →                                                                                                                                                                                                                                                                                                                  |
| env-1001 | longitudinal_302_50   | + | 39748 | 39830 | RNA → rpsJ (PRK00596)RpsJ (COG0051) → RplC (COG0087)rplC (PRK00001) → rplD (PRK05319)Ribosomal_L4 (pfam00573) → rplW (PRK05738)Ribosomal_L23 (pfam00276) → RplB (COG0090)rplB (PRK09374) → rpsS (PRK00357)RpsS (COG0185) → rplV (PRK00565)Ribosomal_L22 (pfam00237) → RpsC (COG0092)rpsC (PRK00310) → rpl16 (CHL00044)rplP (PRK09203) → PRK00306 (PRK00306)Ribosomal_L29 (pfam00831) → rpsQ (PRK05610)Ribosomal_S17 (pfam00366) → rplN (PRK05483)Ribosomal_L14 (pfam00238) → RplX (COG0198)rplX (PRK00004) → rplE (PRK00010)RplE (COG0094) → rpsN (PRK08061)RpsN (COG0199) → rpsH (PRK00136)Ribosomal_S8 (pfam00410) → |
| env-1002 | longitudinal_346_79   | + | 7051  | 7133  | RNA → rpsJ (PRK00596)RpsJ (COG0051) → RplC (COG0087)rplC (PRK00001) → rplD (PRK05319)Ribosomal_L4 (pfam00573) → rplW (PRK05738)Ribosomal_L23 (pfam00276) → RplB (COG0090)rplB (PRK09374) → rpsS (PRK00357)RpsS (COG0185) → rplV (PRK00565)Ribosomal_L22 (pfam00237) → RpsC (COG0092)rpsC (PRK00310) → rpl16 (CHL00044)rplP (PRK09203) → PRK00306 (PRK00306)Ribosomal_L29 (pfam00831) → rpsQ (PRK05610)Ribosomal_S17 (pfam00366) → rplN (PRK05483)Ribosomal_L14 (pfam00238) → RplX (COG0198)rplX (PRK00004) → rplE (PRK00010)RplE (COG0094) → rpsN (PRK08061)RpsN (COG0199) → rpsH (PRK00136)Ribosomal_S8 (pfam00410) → |
| env-1003 | longitudinal_347_101  | - | 67359 | 67277 | RNA → rpsJ (PRK00596)RpsJ (COG0051) → RplC (COG0087)rplC (PRK00001) → rplD (PRK05319)Ribosomal_L4 (pfam00573) → rplW (PRK05738)Ribosomal_L23 (pfam00276) → RplB (COG0090)rplB (PRK09374) → rpsS (PRK00357)RpsS (COG0185) → rplV (PRK00565)Ribosomal_L22 (pfam00237) → RpsC (COG0092)rpsC (PRK00310) → rpl16 (CHL00044)rplP (PRK09203) → PRK00306 (PRK00306)Ribosomal_L29 (pfam00831) → rpsQ (PRK05610)Ribosomal_S17 (pfam00366) → rplN (PRK05483)Ribosomal_L14 (pfam00238) → RplX (COG0198)rplX (PRK00004) → rplE (PRK00010)RplE (COG0094) → rpsN (PRK08061)RpsN (COG0199) → rpsH (PRK00136)Ribosomal_S8 (pfam00410) → |
| env-1004 | AUXO010955118.1       | + | 38874 | 38956 | RNA →                                                                                                                                                                                                                                                                                                                                                                                                                                                                                                                                                                                                                  |
| env-1005 | ADJS01006814.1        | + | 10307 | 10389 | RNA → rpsJ (PRK00596)RpsJ (COG0051) → RplC (COG0087)rplC (PRK00001) → rplD (PRK05319)Ribosomal_L4 (pfam00573) → rplW (PRK05738)Ribosomal_L23 (pfam00276) → RplB (COG0090)rplB (PRK09374) →                                                                                                                                                                                                                                                                                                                                                                                                                             |
| env-1006 | NOM029_scaffold8422.1 | - | 172   | 90    | RNA → hypo →                                                                                                                                                                                                                                                                                                                                                                                                                                                                                                                                                                                                           |



|          |                        |   |       |       |                                                                                                                                                                                                                                                                                                                                                                                                                                                                                                                                                                                                                        |
|----------|------------------------|---|-------|-------|------------------------------------------------------------------------------------------------------------------------------------------------------------------------------------------------------------------------------------------------------------------------------------------------------------------------------------------------------------------------------------------------------------------------------------------------------------------------------------------------------------------------------------------------------------------------------------------------------------------------|
| env-1007 | NLM027_scaffold13626_5 | - | 7795  | 7713  | RNA → rpsJ (PRK00596)RpsJ (COG0051) → RplC (COG0087)rplC (PRK00001) → rplD (PRK05319)Ribosomal_L4 (pfam00573) → rplW (PRK05738)Ribosomal_L23 (pfam00276) → RplB (COG0090)rplB (PRK09374) → rpsS (PRK00357)RpsS (COG0185) → rplV (PRK00565)Ribosomal_L22 (pfam00237) → RpsC (COG0092)rpsC (PRK00310) → rpl16 (CHL00044)rplP (PRK09203) → PRK00306 (PRK00306)Ribosomal_L29 (pfam00831) → rpsQ (PRK05610)Ribosomal_S17 (pfam00366) → rplN (PRK05483)Ribosomal_L14 (pfam00238) → RplX (COG0198)rplX (PRK00004) → rplE (PRK00010)RplE (COG0094) → rpsN (PRK08061)RpsN (COG0199) → rpsH (PRK00136)Ribosomal_S8 (pfam00410) → |
| env-1008 | DLF013_scaffold33304_1 | - | 365   | 283   | RNA → rpsJ (PRK00596)Ribosomal_S10 (pfam00338) →                                                                                                                                                                                                                                                                                                                                                                                                                                                                                                                                                                       |
| env-1009 | DLM009_scaffold5025_4  | + | 9759  | 9841  | RNA → hypo →                                                                                                                                                                                                                                                                                                                                                                                                                                                                                                                                                                                                           |
| env-1010 | longitudinal_134_7     | + | 55196 | 55278 | RNA → rpsJ (PRK00596)RpsJ (COG0051) → RplC (COG0087)rplC (PRK00001) → rplD (PRK05319)Ribosomal_L4 (pfam00573) → rplW (PRK05738)Ribosomal_L23 (pfam00276) → RplB (COG0090)rplB (PRK09374) → rpsS (PRK00357)RpsS (COG0185) → rplV (PRK00565)Ribosomal_L22 (pfam00237) → RpsC (COG0092)rpsC (PRK00310) → rpl16 (CHL00044)rplP (PRK09203) → PRK00306 (PRK00306)Ribosomal_L29 (pfam00831) → rpsQ (PRK05610)Ribosomal_S17 (pfam00366) → rplN (PRK05483)Ribosomal_L14 (pfam00238) → RplX (COG0198)rplX (PRK00004) → rplE (PRK00010)RplE (COG0094) → rpsN (PRK08061)RpsN (COG0199) → rpsH (PRK00136)Ribosomal_S8 (pfam00410) → |
| env-1011 | longitudinal_135_8     | - | 44719 | 44637 | RNA → rpsJ (PRK00596)RpsJ (COG0051) → RplC (COG0087)rplC (PRK00001) → rplD (PRK05319)Ribosomal_L4 (pfam00573) → rplW (PRK05738)Ribosomal_L23 (pfam00276) → RplB (COG0090)rplB (PRK09374) → rpsS (PRK00357)RpsS (COG0185) → rplV (PRK00565)Ribosomal_L22 (pfam00237) → RpsC (COG0092)rpsC (PRK00310) → rpl16 (CHL00044)rplP (PRK09203) → PRK00306 (PRK00306)Ribosomal_L29 (pfam00831) → rpsQ (PRK05610)Ribosomal_S17 (pfam00366) → rplN (PRK05483)Ribosomal_L14 (pfam00238) → RplX (COG0198)rplX (PRK00004) → rplE (PRK00010)RplE (COG0094) → rpsN (PRK08061)RpsN (COG0199) → rpsH (PRK00136)Ribosomal_S8 (pfam00410) → |
| env-1012 | longitudinal_188_28    | + | 55196 | 55278 | RNA → rpsJ (PRK00596)RpsJ (COG0051) → RplC (COG0087)rplC (PRK00001) → rplD (PRK05319)Ribosomal_L4 (pfam00573) → rplW (PRK05738)Ribosomal_L23 (pfam00276) → RplB (COG0090)rplB (PRK09374) → rpsS (PRK00357)RpsS (COG0185) → rplV (PRK00565)Ribosomal_L22 (pfam00237) → RpsC (COG0092)rpsC (PRK00310) → rpl16 (CHL00044)rplP (PRK09203) → PRK00306 (PRK00306)Ribosomal_L29 (pfam00831) → rpsQ (PRK05610)Ribosomal_S17 (pfam00366) → rplN (PRK05483)Ribosomal_L14 (pfam00238) → RplX (COG0198)rplX (PRK00004) → rplE (PRK00010)RplE (COG0094) → rpsN (PRK08061)RpsN (COG0199) → rpsH (PRK00136)Ribosomal_S8 (pfam00410) → |
| env-1013 | longitudinal_189_5     | - | 44722 | 44640 | RNA → rpsJ (PRK00596)RpsJ (COG0051) → RplC (COG0087)rplC (PRK00001) → rplD (PRK05319)Ribosomal_L4 (pfam00573) → rplW (PRK05738)Ribosomal_L23 (pfam00276) → RplB (COG0090)rplB (PRK09374) → rpsS (PRK00357)RpsS (COG0185) → rplV (PRK00565)Ribosomal_L22 (pfam00237) → RpsC (COG0092)rpsC (PRK00310) → rpl16 (CHL00044)rplP (PRK09203) → PRK00306 (PRK00306)Ribosomal_L29 (pfam00831) → rpsQ (PRK05610)Ribosomal_S17 (pfam00366) → rplN (PRK05483)Ribosomal_L14 (pfam00238) → RplX (COG0198)rplX (PRK00004) → rplE (PRK00010)RplE (COG0094) → rpsN (PRK08061)RpsN (COG0199) → rpsH (PRK00136)Ribosomal_S8 (pfam00410) → |
| env-1014 | longitudinal_190_130   | + | 55195 | 55277 | RNA → rpsJ (PRK00596)RpsJ (COG0051) → RplC (COG0087)rplC (PRK00001) → rplD (PRK05319)Ribosomal_L4 (pfam00573) → rplW (PRK05738)Ribosomal_L23 (pfam00276) → RplB (COG0090)rplB (PRK09374) → rpsS (PRK00357)RpsS (COG0185) → rplV (PRK00565)Ribosomal_L22 (pfam00237) → RpsC (COG0092)rpsC (PRK00310) → rpl16 (CHL00044)rplP (PRK09203) → PRK00306 (PRK00306)Ribosomal_L29 (pfam00831) → rpsQ (PRK05610)Ribosomal_S17 (pfam00366) → rplN (PRK05483)Ribosomal_L14 (pfam00238) → RplX (COG0198)rplX (PRK00004) → rplE (PRK00010)RplE (COG0094) → rpsN (PRK08061)RpsN (COG0199) → rpsH (PRK00136)Ribosomal_S8 (pfam00410) → |



|          |                                    |   |        |        |                                                                                                                                                                                                                                                                                                                                                                                                                                                                                                                                                                                                                                                               |
|----------|------------------------------------|---|--------|--------|---------------------------------------------------------------------------------------------------------------------------------------------------------------------------------------------------------------------------------------------------------------------------------------------------------------------------------------------------------------------------------------------------------------------------------------------------------------------------------------------------------------------------------------------------------------------------------------------------------------------------------------------------------------|
| env-1015 | longitudinal_465_52                | + | 39026  | 39108  | RNA → rpsJ (PRK00596)RpsJ (COG0051) → RplC (COG0087)rplC (PRK00001) → rplD (PRK05319)Ribosomal_L4 (pfam00573) → rplW (PRK05738)Ribosomal_L23 (pfam00276) → RplB (COG0090)rplB (PRK09374) → rpsS (PRK00357)RpsS (COG0185) → rplV (PRK00565)Ribosomal_L22 (pfam00237) → RpsC (COG0092)rpsC (PRK00310) → rpl16 (CHL00044)rplP (PRK09203) → PRK00306 (PRK00306)Ribosomal_L29 (pfam00831) → rpsQ (PRK05610)Ribosomal_S17 (pfam00366) → rplN (PRK05483)Ribosomal_L14 (pfam00238) → RplX (COG0198)rplX (PRK00004) → rplE (PRK00010)RplE (COG0094) → rpsN (PRK08061)RpsN (COG0199) → rpsH (PRK00136)Ribosomal_S8 (pfam00410) →                                        |
| env-1016 | longitudinal_466_3                 | - | 45264  | 45182  | RNA → rpsJ (PRK00596)RpsJ (COG0051) → RplC (COG0087)rplC (PRK00001) → hypo → RplC (COG0087)rplC (PRK00001) → rplD (PRK05319)Ribosomal_L4 (pfam00573) → rplW (PRK05738)Ribosomal_L23 (pfam00276) → RplB (COG0090)rplB (PRK09374) → rpsS (PRK00357)RpsS (COG0185) → rplV (PRK00565)Ribosomal_L22 (pfam00237) → RpsC (COG0092)rpsC (PRK00310) → rpl16 (CHL00044)rplP (PRK09203) → PRK00306 (PRK00306)Ribosomal_L29 (pfam00831) → rpsQ (PRK05610)Ribosomal_S17 (pfam00366) → rplN (PRK05483)Ribosomal_L14 (pfam00238) → RplX (COG0198)rplX (PRK00004) → rplE (PRK00010)RplE (COG0094) → rpsN (PRK08061)RpsN (COG0199) → rpsH (PRK00136)Ribosomal_S8 (pfam00410) → |
| env-1017 | longitudinal_467_77                | + | 39024  | 39106  | RNA → rpsJ (PRK00596)RpsJ (COG0051) → RplC (COG0087)rplC (PRK00001) → rplD (PRK05319)Ribosomal_L4 (pfam00573) → rplW (PRK05738)Ribosomal_L23 (pfam00276) → RplB (COG0090)rplB (PRK09374) → rpsS (PRK00357)RpsS (COG0185) → rplV (PRK00565)Ribosomal_L22 (pfam00237) → RpsC (COG0092)rpsC (PRK00310) → rpl16 (CHL00044)rplP (PRK09203) → PRK00306 (PRK00306)Ribosomal_L29 (pfam00831) → rpsQ (PRK05610)Ribosomal_S17 (pfam00366) → rplN (PRK05483)Ribosomal_L14 (pfam00238) → RplX (COG0198)rplX (PRK00004) → rplE (PRK00010)RplE (COG0094) → rpsN (PRK08061)RpsN (COG0199) → rpsH (PRK00136)Ribosomal_S8 (pfam00410) →                                        |
| env-1018 | DLM012_scaffold1652_10             | + | 412    | 494    | RNA → rpsJ (PRK00596)RpsJ (COG0051) → RplC (COG0087)rplC (PRK00001) →                                                                                                                                                                                                                                                                                                                                                                                                                                                                                                                                                                                         |
| env-1019 | longitudinal_464_28                | + | 39026  | 39108  | RNA → rpsJ (PRK00596)RpsJ (COG0051) → RplC (COG0087)rplC (PRK00001) → rplD (PRK05319)Ribosomal_L4 (pfam00573) → rplW (PRK05738)Ribosomal_L23 (pfam00276) → RplB (COG0090)rplB (PRK09374) → rpsS (PRK00357)RpsS (COG0185) → rplV (PRK00565)Ribosomal_L22 (pfam00237) → RpsC (COG0092)rpsC (PRK00310) → rpl16 (CHL00044)rplP (PRK09203) → PRK00306 (PRK00306)Ribosomal_L29 (pfam00831) → rpsQ (PRK05610)Ribosomal_S17 (pfam00366) → rplN (PRK05483)Ribosomal_L14 (pfam00238) → RplX (COG0198)rplX (PRK00004) → rplE (PRK00010)RplE (COG0094) → rpsN (PRK08061)RpsN (COG0199) → rpsH (PRK00136)Ribosomal_S8 (pfam00410) →                                        |
| Dlo-1-1  | NZ_KE384171.1                      | - | 53064  | 52982  | RNA → rpsJ (PRK00596)RpsJ (COG0051) → RplC (COG0087)rplC (PRK00001) → rplD (PRK05319)Ribosomal_L4 (pfam00573) → rplW (PRK05738)Ribosomal_L23 (pfam00276) → RplB (COG0090)rplB (PRK09374) → rpsS (PRK00357)RpsS (COG0185) → rplV (PRK00565)Ribosomal_L22 (pfam00237) → RpsC (COG0092)rpsC (PRK00310) → rpl16 (CHL00044)rplP (PRK09203) → PRK00306 (PRK00306)Ribosomal_L29 (pfam00831) → rpsQ (PRK05610)Ribosomal_S17 (pfam00366) → rplN (PRK05483)Ribosomal_L14 (pfam00238) → RplX (COG0198)rplX (PRK00004) → rplE (PRK00010)RplE (COG0094) → rpsN (PRK08061)RpsN (COG0199) → rpsH (PRK00136)Ribosomal_S8 (pfam00410) →                                        |
| env-1020 | DLM008_scaffold98_16               | - | 4788   | 4708   | RNA → rpsJ (PRK00596)RpsJ (COG0051) →                                                                                                                                                                                                                                                                                                                                                                                                                                                                                                                                                                                                                         |
| env-1021 | 4491403.3_NODE_90116               | - | 1091   | 1011   | RNA → rpsJ (PRK00596)RpsJ (COG0051) →                                                                                                                                                                                                                                                                                                                                                                                                                                                                                                                                                                                                                         |
| env-1022 | 4491482.3_NODE_33763               | + | 29992  | 30072  | RNA → rpsJ (PRK00596)RpsJ (COG0051) →                                                                                                                                                                                                                                                                                                                                                                                                                                                                                                                                                                                                                         |
| Lba-2-1  | NZ_GL945165.1                      | - | 181718 | 181624 | RNA → hypo → rpsJ (PRK00596)RpsJ (COG0051) →                                                                                                                                                                                                                                                                                                                                                                                                                                                                                                                                                                                                                  |
| env-1023 | NLF005_scaffold8054_23             | - | 240    | 156    | RNA →                                                                                                                                                                                                                                                                                                                                                                                                                                                                                                                                                                                                                                                         |
| env-1024 | scaffold48677_1_MH0016             | - | 226    | 142    | RNA → hypo →                                                                                                                                                                                                                                                                                                                                                                                                                                                                                                                                                                                                                                                  |
| env-1025 | SRS052697_LANL_scaffold_40762      | - | 228    | 144    | RNA →                                                                                                                                                                                                                                                                                                                                                                                                                                                                                                                                                                                                                                                         |
| env-1026 | NOF014_scaffold21218.7             | + | 6081   | 6165   | RNA → rpsJ (PRK00596)RpsJ (COG0051) → RplC (COG0087)rplC (PRK00001) → RplD (COG0088)rplD (PRK05319) →                                                                                                                                                                                                                                                                                                                                                                                                                                                                                                                                                         |
| env-1027 | UnmappedStool_Broad_scaffold_56426 | + | 442    | 526    | RNA → rpsJ (PRK00596)RpsJ (COG0051) → rpl3 (CHL00143)rplC (PRK00001) →                                                                                                                                                                                                                                                                                                                                                                                                                                                                                                                                                                                        |

|          |                                 |   |        |        |                                                                                                                                                                                                                                                                                                                                                                                                                                                                                                                                                                              |
|----------|---------------------------------|---|--------|--------|------------------------------------------------------------------------------------------------------------------------------------------------------------------------------------------------------------------------------------------------------------------------------------------------------------------------------------------------------------------------------------------------------------------------------------------------------------------------------------------------------------------------------------------------------------------------------|
| env-1028 | NOM007_scaffold46220_1          | + | 6092   | 6176   | RNA → rpsJ (PRK00596)RpsJ (COG0051) → RplC (COG0087)rplC (PRK00001) → rplD (PRK05319)Ribosomal_L4 (pfam00573) → rplW (PRK05738)Ribosomal_L23 (pfam00276) → RplB (COG0090)rplB (PRK09374) → rpsS (PRK00357)RpsS (COG0185) → rplV (PRK00565)Ribosomal_L22 (pfam00237) → RpsC (COG0092)rpsC (PRK00310) → rpl16 (CHL00044)rplP (PRK09203) → PRK00306 (PRK00306)Ribosomal_L29 (pfam00831) → rpsQ (PRK05610)Ribosomal_L17 (pfam00366) → rplN (PRK05483)Ribosomal_L14 (pfam00238) → RplX (COG0198)rplX (PRK00004) → rplE (PRK00010)RplE (COG0094) → rpsN (PRK08061)RpsN (COG0199) → |
| env-1029 | SRS015065_WUGC_scaffold_21436   | - | 228    | 144    | RNA →                                                                                                                                                                                                                                                                                                                                                                                                                                                                                                                                                                        |
| env-1030 | scaffold8950_1_MH0020           | - | 182    | 100    | RNA →                                                                                                                                                                                                                                                                                                                                                                                                                                                                                                                                                                        |
| env-1031 | scaffold13706_1_MH0082          | - | 182    | 100    | RNA →                                                                                                                                                                                                                                                                                                                                                                                                                                                                                                                                                                        |
| env-1032 | NLM023_scaffold21939_3          | + | 42     | 124    | RNA → rpsJ (PRK00596)RpsJ (COG0051) →                                                                                                                                                                                                                                                                                                                                                                                                                                                                                                                                        |
| env-1033 | NOF005_scaffold41945_3          | - | 3030   | 2948   | RNA → rpsJ (PRK00596)RpsJ (COG0051) →                                                                                                                                                                                                                                                                                                                                                                                                                                                                                                                                        |
| env-1034 | scaffold14387_1_O2.UC-20        | - | 183    | 101    | RNA →                                                                                                                                                                                                                                                                                                                                                                                                                                                                                                                                                                        |
| env-1035 | NLM005_scaffold29532_3          | - | 939    | 859    | RNA → rpsJ (PRK00596)RpsJ (COG0051) →                                                                                                                                                                                                                                                                                                                                                                                                                                                                                                                                        |
| env-1036 | SRS014979_WUGC_scaffold_17094   | - | 219    | 139    | RNA →                                                                                                                                                                                                                                                                                                                                                                                                                                                                                                                                                                        |
| env-1037 | SRS015854_WUGC_scaffold_21352   | - | 218    | 138    | RNA → hypo →                                                                                                                                                                                                                                                                                                                                                                                                                                                                                                                                                                 |
| env-1038 | scaffold11729_1_MH0046          | - | 176    | 96     | RNA →                                                                                                                                                                                                                                                                                                                                                                                                                                                                                                                                                                        |
| env-1039 | 4491404.3_NODE_80547            | + | 4100   | 4180   | RNA → rpsJ (PRK00596)RpsJ (COG0051) →                                                                                                                                                                                                                                                                                                                                                                                                                                                                                                                                        |
| env-1040 | NLF012_scaffold34222_1          | + | 9882   | 9962   | RNA → rpsJ (PRK00596)RpsJ (COG0051) →                                                                                                                                                                                                                                                                                                                                                                                                                                                                                                                                        |
| env-1041 | SRS014613_WUGC_scaffold_19279   | - | 219    | 139    | RNA →                                                                                                                                                                                                                                                                                                                                                                                                                                                                                                                                                                        |
| env-1042 | SRS015663_WUGC_scaffold_14486   | - | 205    | 125    | RNA →                                                                                                                                                                                                                                                                                                                                                                                                                                                                                                                                                                        |
| env-1043 | scaffold3356_1_MH0020           | - | 178    | 98     | RNA →                                                                                                                                                                                                                                                                                                                                                                                                                                                                                                                                                                        |
| env-1044 | scaffold41365_1_MH0048          | - | 215    | 135    | RNA → hypo →                                                                                                                                                                                                                                                                                                                                                                                                                                                                                                                                                                 |
| env-1045 | DOM018_scaffold286_1            | - | 8103   | 8023   | RNA → rpsJ (PRK00596)RpsJ (COG0051) →                                                                                                                                                                                                                                                                                                                                                                                                                                                                                                                                        |
| env-1046 | scaffold5676_2_MH0030           | + | 2969   | 3049   | RNA →                                                                                                                                                                                                                                                                                                                                                                                                                                                                                                                                                                        |
| env-1047 | NOM018_scaffold537_4            | + | 242    | 322    | RNA →                                                                                                                                                                                                                                                                                                                                                                                                                                                                                                                                                                        |
| env-1048 | ADJS01018011.1                  | - | 102    | 22     | RNA →                                                                                                                                                                                                                                                                                                                                                                                                                                                                                                                                                                        |
| env-1049 | SRS012273_Baylor_scaffold_16633 | - | 217    | 137    | RNA →                                                                                                                                                                                                                                                                                                                                                                                                                                                                                                                                                                        |
| env-1050 | SRS051031_LANL_scaffold_29286   | - | 205    | 125    | RNA →                                                                                                                                                                                                                                                                                                                                                                                                                                                                                                                                                                        |
| env-1051 | SRS052027_LANL_scaffold_5017    | - | 180    | 100    | RNA →                                                                                                                                                                                                                                                                                                                                                                                                                                                                                                                                                                        |
| env-1052 | SRS015578_WUGC_scaffold_20977   | - | 205    | 125    | RNA →                                                                                                                                                                                                                                                                                                                                                                                                                                                                                                                                                                        |
| env-1053 | SRS058723_Baylor_scaffold_8787  | - | 220    | 140    | RNA →                                                                                                                                                                                                                                                                                                                                                                                                                                                                                                                                                                        |
| env-1054 | scaffold5589_1_V1.CD-15         | - | 176    | 96     | RNA →                                                                                                                                                                                                                                                                                                                                                                                                                                                                                                                                                                        |
| env-1055 | DLF006_scaffold6164_6           | - | 332    | 252    | RNA → rpsJ (PRK00596)RpsJ (COG0051) →                                                                                                                                                                                                                                                                                                                                                                                                                                                                                                                                        |
| env-1056 | SRS011271_WUGC_scaffold_13792   | - | 203    | 123    | RNA →                                                                                                                                                                                                                                                                                                                                                                                                                                                                                                                                                                        |
| env-1057 | SRS015133_WUGC_scaffold_22071   | - | 217    | 137    | RNA →                                                                                                                                                                                                                                                                                                                                                                                                                                                                                                                                                                        |
| env-1058 | SRS050925_LANL_scaffold_18487   | - | 178    | 98     | RNA →                                                                                                                                                                                                                                                                                                                                                                                                                                                                                                                                                                        |
| env-1059 | 4491423.3_NODE_31871            | + | 887    | 967    | RNA → rpsJ (PRK00596)RpsJ (COG0051) →                                                                                                                                                                                                                                                                                                                                                                                                                                                                                                                                        |
| env-1060 | DLM007_scaffold22614_6          | + | 347    | 427    | RNA → rpsJ (PRK00596)RpsJ (COG0051) →                                                                                                                                                                                                                                                                                                                                                                                                                                                                                                                                        |
| env-1061 | DLM013_scaffold20638_2          | - | 589    | 509    | RNA → rpsJ (PRK00596)RpsJ (COG0051) →                                                                                                                                                                                                                                                                                                                                                                                                                                                                                                                                        |
| env-1062 | DOM026_scaffold2783_5           | - | 1389   | 1309   | RNA → rpsJ (PRK00596)RpsJ (COG0051) →                                                                                                                                                                                                                                                                                                                                                                                                                                                                                                                                        |
| env-1063 | NLM029_scaffold10879_6          | + | 10181  | 10261  | RNA → rpsJ (PRK00596)RpsJ (COG0051) →                                                                                                                                                                                                                                                                                                                                                                                                                                                                                                                                        |
| env-1064 | NOM029_scaffold77_3             | - | 6632   | 6552   | RNA → rpsJ (PRK00596)RpsJ (COG0051) →                                                                                                                                                                                                                                                                                                                                                                                                                                                                                                                                        |
| Cha-1-1  | NZ_KB850952.1                   | - | 266489 | 266409 | RNA → rpsJ (PRK00596)RpsJ (COG0051) →                                                                                                                                                                                                                                                                                                                                                                                                                                                                                                                                        |
| env-1065 | BABF01000827.1                  | + | 5585   | 5665   | RNA → rpsJ (PRK00596)RpsJ (COG0051) →                                                                                                                                                                                                                                                                                                                                                                                                                                                                                                                                        |
| Hha-2-1  | NZ_BAHY01000041.1               | + | 46269  | 46349  | RNA → rpsJ (PRK00596)RpsJ (COG0051) →                                                                                                                                                                                                                                                                                                                                                                                                                                                                                                                                        |
| Hha-1-1  | NZ_BAHR02000176.1               | + | 17953  | 18033  | RNA → rpsJ (PRK00596)RpsJ (COG0051) →                                                                                                                                                                                                                                                                                                                                                                                                                                                                                                                                        |
| env-1066 | DLM024_scaffold447_12           | - | 10332  | 10252  | RNA → rpsJ (PRK00596)RpsJ (COG0051) →                                                                                                                                                                                                                                                                                                                                                                                                                                                                                                                                        |
| Cba-1-1  | NZ_CCYG01000030.1               | - | 17670  | 17589  | RNA → rpsJ (PRK00596)RpsJ (COG0051) →                                                                                                                                                                                                                                                                                                                                                                                                                                                                                                                                        |
| Cba-8-1  | NZ_BAIL02000037.1               | + | 5849   | 5930   | RNA → rpsJ (PRK00596)RpsJ (COG0051) →                                                                                                                                                                                                                                                                                                                                                                                                                                                                                                                                        |
| env-1067 | DLM003_scaffold37465_3          | - | 449    | 368    | RNA → rpsJ (PRK00596)Ribosomal_S10 (pfam00338) →                                                                                                                                                                                                                                                                                                                                                                                                                                                                                                                             |
| Lba-21-1 | NZ_BAIG01000037.1               | - | 23850  | 23769  | RNA → rpsJ (PRK00596)RpsJ (COG0051) →                                                                                                                                                                                                                                                                                                                                                                                                                                                                                                                                        |
| Lba-20-1 | NZ_BAHZ01000017.1               | + | 31717  | 31798  | RNA → rpsJ (PRK00596)RpsJ (COG0051) →                                                                                                                                                                                                                                                                                                                                                                                                                                                                                                                                        |

|          |                                 |   |         |         |                                                                                                                                                                                                  |
|----------|---------------------------------|---|---------|---------|--------------------------------------------------------------------------------------------------------------------------------------------------------------------------------------------------|
| Lba-8-1  | NZ_KE150406.1                   | - | 356926  | 356845  | RNA → rpsJ (PRK00596)RpsJ (COG0051) →                                                                                                                                                            |
| env-1068 | DLM022_scaffold65033.2          | - | 21810   | 21729   | RNA → rpsJ (PRK00596)RpsJ (COG0051) →                                                                                                                                                            |
| Lba-13-1 | NZ_KE159636.1                   | + | 315368  | 315449  | RNA → rpsJ (PRK00596)RpsJ (COG0051) →                                                                                                                                                            |
| Csp-7-1  | NZ_GG730310.1                   | - | 511953  | 511870  | RNA → rpsJ (PRK00596)RpsJ (COG0051) →                                                                                                                                                            |
| env-1069 | NOM014_scaffold12257_6          | + | 214     | 297     | RNA → rpsJ (PRK00596)RpsJ (COG0051) →                                                                                                                                                            |
| env-1070 | 4448815.3_Contig39759           | - | 335     | 252     | RNA → ←-hypo                                                                                                                                                                                     |
| env-1071 | NOM004_scaffold1071_29          | + | 1697    | 1780    | RNA → rpsJ (PRK00596)RpsJ (COG0051) →                                                                                                                                                            |
| env-1072 | 4448817.3_Contig41879           | + | 547     | 630     | RNA →                                                                                                                                                                                            |
| Esp-1-1  | NZ_KE159567.1                   | + | 201686  | 201769  | RNA → rpsJ (PRK00596)RpsJ (COG0051) →                                                                                                                                                            |
| env-1073 | SRS014459_WUGC_scaffold_29318   | - | 183     | 101     | RNA →                                                                                                                                                                                            |
| env-1074 | scaffold8733.1_MH0068           | - | 181     | 99      | RNA →                                                                                                                                                                                            |
| env-1075 | 4448812.3_Contig6350            | + | 105     | 187     | RNA → rpsJ (PRK00596)Ribosomal_S10 (pfam00338) →                                                                                                                                                 |
| Csa-1-1  | NC_014376.1                     | - | 4065824 | 4065743 | RNA → rpsJ (PRK00596)RpsJ (COG0051) →                                                                                                                                                            |
| env-1076 | 4491413.3_NODE_8993             | - | 365     | 282     | RNA →                                                                                                                                                                                            |
| env-1077 | 4491487.3_NODE_55596            | - | 1190    | 1107    | RNA → rpsJ (PRK00596)RpsJ (COG0051) →                                                                                                                                                            |
| env-1078 | DLF014_scaffold222_7            | + | 23771   | 23854   | RNA → rpsJ (PRK00596)RpsJ (COG0051) →                                                                                                                                                            |
| env-1079 | NOF002_scaffold1633_2           | - | 30591   | 30508   | RNA → rpsJ (PRK00596)RpsJ (COG0051) →                                                                                                                                                            |
| env-1080 | NOM002_scaffold7212_2           | - | 50398   | 50315   | RNA → rpsJ (PRK00596)RpsJ (COG0051) →                                                                                                                                                            |
| env-1081 | NOM016_scaffold10985_7          | + | 832     | 915     | RNA →                                                                                                                                                                                            |
| env-1082 | SRS049164_WUGC_scaffold_55041   | - | 222     | 139     | RNA →                                                                                                                                                                                            |
| env-1083 | DOM012_scaffold51_17            | - | 3319    | 3236    | RNA → rpsJ (PRK00596)RpsJ (COG0051) →                                                                                                                                                            |
| env-1084 | DLM002_scaffold16134_2.1        | - | 304     | 221     | RNA →                                                                                                                                                                                            |
| env-1085 | NOM017_scaffold25392_1          | + | 61      | 144     | RNA → rpsJ (PRK00596)RpsJ (COG0051) →                                                                                                                                                            |
| env-1086 | BABD01036607.1                  | - | 431     | 348     | RNA → rpsJ (PRK00596)Ribosomal_S10 (pfam00338) →                                                                                                                                                 |
| Cha-2-1  | NZ_JH379029.1                   | - | 49852   | 49771   | RNA → rpsJ (PRK00596)RpsJ (COG0051) →                                                                                                                                                            |
| Lba-5-1  | NZ_KE159571.1                   | + | 661657  | 661740  | RNA → rpsJ (PRK00596)RpsJ (COG0051) →                                                                                                                                                            |
| Csp-1-1  | NZ_JH376516.1                   | - | 458908  | 458824  | RNA → rpsJ (PRK00596)RpsJ (COG0051) →                                                                                                                                                            |
| env-1087 | DLM024_scaffold3420_12          | - | 30123   | 30039   | RNA → rpsJ (PRK00596)RpsJ (COG0051) →                                                                                                                                                            |
| Csy-3-1  | NZ_GL834357.1                   | + | 437513  | 437597  | RNA → rpsJ (PRK00596)RpsJ (COG0051) →                                                                                                                                                            |
| Csy-2-1  | NZ_GL834305.1                   | - | 526475  | 526391  | RNA → rpsJ (PRK00596)RpsJ (COG0051) →                                                                                                                                                            |
| Csy-1-1  | NZ_KE992799.1                   | + | 25413   | 25497   | RNA → rpsJ (PRK00596)RpsJ (COG0051) →                                                                                                                                                            |
| Cba-5-1  | NZ_BAID02000107.1               | - | 26962   | 26878   | RNA → rpsJ (PRK00596)RpsJ (COG0051) →                                                                                                                                                            |
| env-1088 | RUMENNODE.4202514.70000         | - | 73558   | 73476   | RNA → rpsJ (PRK00596)RpsJ (COG0051) → RplC (COG0087)rplC (PRK00001) →<br>rplD (PRK05319)Ribosomal_L4 (pfam00573) → rplW (PRK05738)Ribosomal_L23 (pfam00276) →                                    |
| env-1089 | SRS013818_Baylor_scaffold_51548 | + | 1200    | 1282    | RNA → rpsJ (PRK00596)RpsJ (COG0051) → rpl3 (CHL00143)rplC (PRK00001) →                                                                                                                           |
| env-1090 | SRS024580_C3065196              | + | 214     | 296     | RNA → rpsJ (PRK00596)RpsJ (COG0051) → rpl3 (CHL00143)rplC (PRK00001) →                                                                                                                           |
| env-1091 | SRS049389_WUGC_scaffold_44677   | + | 1748    | 1830    | RNA → rpsJ (PRK00596)RpsJ (COG0051) → RplC (COG0087)rplC (PRK00001) →<br>rplD (PRK05319)Ribosomal_L4 (pfam00573) → rplW (PRK05738)Ribosomal_L23 (pfam00276) →<br>RplB (COG0090)rplB (PRK09374) → |
| env-1092 | SRS051791_LANL_scaffold_6364    | - | 2179    | 2097    | RNA → rpsJ (PRK00596)RpsJ (COG0051) → RplC (COG0087)rplC (PRK00001) →<br>rplD (PRK05319)Ribosomal_L4 (pfam00573) → rplW (PRK05738)Ribosomal_L23 (pfam00276) →                                    |
| env-1093 | SRS014689_WUGC_scaffold_23083   | + | 95      | 177     | RNA → rpsJ (PRK00596)RpsJ (COG0051) → RplC (COG0087)rplC (PRK00001) →                                                                                                                            |
| env-1094 | SRS015434_C5946977              | + | 1744    | 1826    | RNA →                                                                                                                                                                                            |
| env-1095 | SRS016342_Baylor_scaffold_32993 | + | 182     | 264     | RNA →                                                                                                                                                                                            |

|          |                                      |   |        |        |                                                                                                                                                                                                                                                                                                                                                                                                                                                                                                                                                                                                                                                                                                                                                                                                                                                                                         |
|----------|--------------------------------------|---|--------|--------|-----------------------------------------------------------------------------------------------------------------------------------------------------------------------------------------------------------------------------------------------------------------------------------------------------------------------------------------------------------------------------------------------------------------------------------------------------------------------------------------------------------------------------------------------------------------------------------------------------------------------------------------------------------------------------------------------------------------------------------------------------------------------------------------------------------------------------------------------------------------------------------------|
| env-1096 | SRS019022.WUGC_scaffold_7226         | - | 36273  | 36191  | RNA → rpsJ (PRK00596)RpsJ (COG0051) → RplC (COG0087)rplC (PRK00001) → rplD (PRK05319)Ribosomal_L4 (pfam00573) → rplW (PRK05738)Ribosomal_L23 (pfam00276) → RplB (COG0090)rplB (PRK09374) → rpsS (PRK00357)RpsS (COG0185) → rplV (PRK00565)Ribosomal_L22 (pfam00237) → RpsC (COG0092)rpsC (PRK00310) → rpl16 (CHL00044)rplP (PRK09203) → PRK00306 (PRK00306)Ribosomal_L29 (pfam00831) → rpsQ (PRK05610)Ribosomal_S17 (pfam00366) → rplN (PRK05483)Ribosomal_L14 (pfam00238) → RplX (COG0198)rplX (PRK00004) → rplE (PRK00010)RplE (COG0094) → rpsN (PRK08061)RpsN (COG0199) → rpsH (PRK00136)Ribosomal_S8 (pfam00410) → RplF (COG0097)rplF (PRK05498) → rplR (PRK05593)Ribosomal_L18p (pfam00861) → RpsE (COG0098)rpsE (PRK00550) → Ribosomal_L30 (cd01658)rpmD (PRK05611) → rplO (PRK05592)Ribosomal_L27A (pfam00828) → SecY (COG0201)secY (PRK09204) →                                 |
| env-1097 | SRS019894.C3850908                   | - | 182    | 100    | RNA →                                                                                                                                                                                                                                                                                                                                                                                                                                                                                                                                                                                                                                                                                                                                                                                                                                                                                   |
| env-1098 | SRS064774.C2746908                   | - | 188    | 106    | RNA →                                                                                                                                                                                                                                                                                                                                                                                                                                                                                                                                                                                                                                                                                                                                                                                                                                                                                   |
| env-1099 | SRS022719.LANL_scaffold_10343        | + | 154    | 236    | RNA → rpsJ (PRK00596)Ribosomal_S10 (pfam00338) →                                                                                                                                                                                                                                                                                                                                                                                                                                                                                                                                                                                                                                                                                                                                                                                                                                        |
| env-1100 | SRS057692.C2605374                   | - | 221    | 139    | RNA → hypo →                                                                                                                                                                                                                                                                                                                                                                                                                                                                                                                                                                                                                                                                                                                                                                                                                                                                            |
| Slo-1-1  | NZ_JH590862.1                        | - | 265923 | 265841 | RNA → rpsJ (PRK00596)RpsJ (COG0051) → RplC (COG0087)rplC (PRK00001) → rplD (PRK05319)Ribosomal_L4 (pfam00573) → rplW (PRK05738)Ribosomal_L23 (pfam00276) → RplB (COG0090)rplB (PRK09374) → rpsS (PRK00357)RpsS (COG0185) → rplV (PRK00565)Ribosomal_L22 (pfam00237) → RpsC (COG0092)rpsC (PRK00310) → rpl16 (CHL00044)rplP (PRK09203) → PRK00306 (PRK00306)Ribosomal_L29 (pfam00831) → rpsQ (PRK05610)Ribosomal_S17 (pfam00366) → rplN (PRK05483)Ribosomal_L14 (pfam00238) → RplX (COG0198)rplX (PRK00004) → rplE (PRK00010)RplE (COG0094) → rplE (PRK00010)RplE (COG0094) → rpsN (PRK08061)RpsN (COG0199) → rpsH (PRK00136)Ribosomal_S8 (pfam00410) → RplF (COG0097)rplF (PRK05498) → rplR (PRK05593)Ribosomal_L18p (pfam00861) → RpsE (COG0098)rpsE (PRK00550) → Ribosomal_L30 (cd01658)rpmD (PRK05611) → rplO (PRK05592)Ribosomal_L27A (pfam00828) → SecY (COG0201)secY (PRK09204) → |
| env-1101 | SRS018443.C3867499                   | + | 1133   | 1215   | RNA → hypo →                                                                                                                                                                                                                                                                                                                                                                                                                                                                                                                                                                                                                                                                                                                                                                                                                                                                            |
| env-1102 | SRS013879.C2852050                   | - | 221    | 139    | RNA →                                                                                                                                                                                                                                                                                                                                                                                                                                                                                                                                                                                                                                                                                                                                                                                                                                                                                   |
| env-1103 | SRS015644.WUGC_scaffold_48522        | - | 920    | 838    | RNA → rpsJ (PRK00596)RpsJ (COG0051) → rpl3 (CHL00143)rplC (PRK00001) →                                                                                                                                                                                                                                                                                                                                                                                                                                                                                                                                                                                                                                                                                                                                                                                                                  |
| env-1104 | SRS019219.WUGC_scaffold_28960        | - | 350    | 268    | RNA → rpsJ (PRK00596)Ribosomal_S10 (pfam00338) →                                                                                                                                                                                                                                                                                                                                                                                                                                                                                                                                                                                                                                                                                                                                                                                                                                        |
| env-1105 | SRS019974.C3184997                   | + | 119    | 201    | RNA →                                                                                                                                                                                                                                                                                                                                                                                                                                                                                                                                                                                                                                                                                                                                                                                                                                                                                   |
| env-1106 | SRS053854.LANL_scaffold_31660        | + | 1073   | 1155   | RNA → rpsJ (PRK00596)RpsJ (COG0051) → RplC (COG0087)rplC (PRK00001) → rplD (PRK05319)Ribosomal_L4 (pfam00573) → rplW (PRK05738)Ribosomal_L23 (pfam00276) →                                                                                                                                                                                                                                                                                                                                                                                                                                                                                                                                                                                                                                                                                                                              |
| env-1107 | Palatine_Tonsils.LANL_scaffold_37420 | + | 240    | 322    | RNA →                                                                                                                                                                                                                                                                                                                                                                                                                                                                                                                                                                                                                                                                                                                                                                                                                                                                                   |
| env-1108 | SRS016740.Baylor_scaffold_70786      | + | 1203   | 1285   | RNA → rpsJ (PRK00596)RpsJ (COG0051) → RplC (COG0087)rplC (PRK00001) → rplD (PRK05319)Ribosomal_L4 (pfam00573) → rplW (PRK05738)Ribosomal_L23 (pfam00276) → RplB (COG0090)rplB (PRK09374) →                                                                                                                                                                                                                                                                                                                                                                                                                                                                                                                                                                                                                                                                                              |
| env-1109 | SRS011306.Baylor_scaffold_89066      | + | 1041   | 1123   | RNA → rpsJ (PRK00596)RpsJ (COG0051) → RplC (COG0087)rplC (PRK00001) → rplD (PRK05319)Ribosomal_L4 (pfam00573) → rplW (PRK05738)Ribosomal_L23 (pfam00276) → RplB (COG0090)rplB (PRK09374) →                                                                                                                                                                                                                                                                                                                                                                                                                                                                                                                                                                                                                                                                                              |
| env-1110 | SRS015209.WUGC_scaffold_4051         | - | 58388  | 58306  | RNA → rpsJ (PRK00596)RpsJ (COG0051) → RplC (COG0087)rplC (PRK00001) → rplD (PRK05319)Ribosomal_L4 (pfam00573) → rplW (PRK05738)Ribosomal_L23 (pfam00276) → RplB (COG0090)rplB (PRK09374) → rpsS (PRK00357)RpsS (COG0185) → rplV (PRK00565)Ribosomal_L22 (pfam00237) → RpsC (COG0092)rpsC (PRK00310) → rpl16 (CHL00044)rplP (PRK09203) → PRK00306 (PRK00306)Ribosomal_L29 (pfam00831) → rpsQ (PRK05610)Ribosomal_S17 (pfam00366) → rplN (PRK05483)Ribosomal_L14 (pfam00238) → RplX (COG0198)rplX (PRK00004) → rplE (PRK00010)RplE (COG0094) → rpsN (PRK08061)RpsN (COG0199) → rpsH (PRK00136)Ribosomal_S8 (pfam00410) → RplF (COG0097)rplF (PRK05498) → rplR (PRK05593)Ribosomal_L18p (pfam00861) → RpsE (COG0098)rpsE (PRK00550) → Ribosomal_L30 (cd01658)rpmD (PRK05611) → rplO (PRK05592)Ribosomal_L27A (pfam00828) → SecY (COG0201)secY (PRK09204) →                                 |



|          |                                 |   |       |       |                                                                                                                                                                                                                                                                                                                                                                                                                                                                                                                                                                                                                                                                                                                                                                                                                                                                                                                             |
|----------|---------------------------------|---|-------|-------|-----------------------------------------------------------------------------------------------------------------------------------------------------------------------------------------------------------------------------------------------------------------------------------------------------------------------------------------------------------------------------------------------------------------------------------------------------------------------------------------------------------------------------------------------------------------------------------------------------------------------------------------------------------------------------------------------------------------------------------------------------------------------------------------------------------------------------------------------------------------------------------------------------------------------------|
| env-1111 | SRS016037_WUGC_scaffold_42187   | + | 1374  | 1456  | RNA → rpsJ (PRK00596)RpsJ (COG0051) → RplC (COG0087)rplC (PRK00001) → rplD (PRK05319)Ribosomal_L4 (pfam00573) → rplW (PRK05738)Ribosomal_L23 (pfam00276) → RplB (COG0090)rplB (PRK09374) → rpsS (PRK00357)RpsS (COG0185) → rplV (PRK00565)Ribosomal_L22 (pfam00237) → RpsC (COG0092)rpsC (PRK00310) → rpl16 (CHL00044)rplP (PRK09203) → PRK00306 (PRK00306)Ribosomal_L29 (pfam00831) → rpsQ (PRK05610)Ribosomal_S17 (pfam00366) → rplN (PRK05483)Ribosomal_L14 (pfam00238) → RplX (COG0198)rplX (PRK00004) → rplE (PRK00010)RplE (COG0094) → rpsN (PRK08061)RpsN (COG0199) → rpsH (PRK00136)Ribosomal_S8 (pfam00410) → RplF (COG0097)rplF (PRK05498) → rplR (PRK05593)Ribosomal_L18p (pfam00861) → RpsE (COG0098)rpsE (PRK00550) → Ribosomal_L30 (cd01658)rpmD (PRK05611) → rplO (PRK05592)Ribosomal_L27A (pfam00828) → SecY (COG0201)secY (PRK09204) → adk (PRK00279)ADK (cd01428) → PRK05716 (PRK05716)MetAP1 (cd01086) → |
| env-1112 | SRS019127_C1647535              | - | 881   | 799   | RNA → rpsJ (PRK00596)RpsJ (COG0051) → rpl3 (CHL00143)rplC (PRK00001) →                                                                                                                                                                                                                                                                                                                                                                                                                                                                                                                                                                                                                                                                                                                                                                                                                                                      |
| env-1113 | SRS021496_Baylor_scaffold_1948  | - | 18954 | 18872 | RNA → rpsJ (PRK00596)RpsJ (COG0051) → RplC (COG0087)rplC (PRK00001) → rplD (PRK05319)Ribosomal_L4 (pfam00573) → rplW (PRK05738)Ribosomal_L23 (pfam00276) → RplB (COG0090)rplB (PRK09374) → rpsS (PRK00357)RpsS (COG0185) → rplV (PRK00565)Ribosomal_L22 (pfam00237) → RpsC (COG0092)rpsC (PRK00310) → rpl16 (CHL00044)rplP (PRK09203) → PRK00306 (PRK00306)Ribosomal_L29 (pfam00831) → rpsQ (PRK05610)Ribosomal_S17 (pfam00366) → rplN (PRK05483)Ribosomal_L14 (pfam00238) → RplX (COG0198)rplX (PRK00004) → rplE (PRK00010)RplE (COG0094) → rpsN (PRK08061)RpsN (COG0199) → rpsH (PRK00136)Ribosomal_S8 (pfam00410) → RplF (COG0097)rplF (PRK05498) → rplR (PRK05593)Ribosomal_L18p (pfam00861) → RpsE (COG0098)rpsE (PRK00550) → Ribosomal_L30 (cd01658)rpmD (PRK05611) → rplO (PRK05592)Ribosomal_L27A (pfam00828) → SecY (COG0201)secY (PRK09204) →                                                                     |
| env-1114 | SRS056622_LANL_scaffold_50730   | - | 38763 | 38681 | RNA → rpsJ (PRK00596)RpsJ (COG0051) → RplC (COG0087)rplC (PRK00001) → rplD (PRK05319)Ribosomal_L4 (pfam00573) → rplW (PRK05738)Ribosomal_L23 (pfam00276) → RplB (COG0090)rplB (PRK09374) → rpsS (PRK00357)RpsS (COG0185) → rplV (PRK00565)Ribosomal_L22 (pfam00237) → RpsC (COG0092)rpsC (PRK00310) → rpl16 (CHL00044)rplP (PRK09203) → PRK00306 (PRK00306)Ribosomal_L29 (pfam00831) → rpsQ (PRK05610)Ribosomal_S17 (pfam00366) → rplN (PRK05483)Ribosomal_L14 (pfam00238) → RplX (COG0198)rplX (PRK00004) → rplE (PRK00010)RplE (COG0094) → rpsN (PRK08061)RpsN (COG0199) → rpsH (PRK00136)Ribosomal_S8 (pfam00410) → RplF (COG0097)rplF (PRK05498) → rplR (PRK05593)Ribosomal_L18p (pfam00861) → RpsE (COG0098)rpsE (PRK00550) → Ribosomal_L30 (cd01658)rpmD (PRK05611) → rplO (PRK05592)Ribosomal_L27A (pfam00828) → SecY (COG0201)secY (PRK09204) →                                                                     |
| env-1115 | SRS012279_Baylor_scaffold_39424 | + | 2148  | 2230  | RNA →                                                                                                                                                                                                                                                                                                                                                                                                                                                                                                                                                                                                                                                                                                                                                                                                                                                                                                                       |
| env-1116 | SRS022077_C2487593              | + | 355   | 437   | RNA →                                                                                                                                                                                                                                                                                                                                                                                                                                                                                                                                                                                                                                                                                                                                                                                                                                                                                                                       |
| env-1117 | SRS044662_C1603794              | - | 231   | 149   | RNA → hypo →                                                                                                                                                                                                                                                                                                                                                                                                                                                                                                                                                                                                                                                                                                                                                                                                                                                                                                                |
| env-1118 | SRS014124_C2616663              | - | 366   | 284   | RNA → rpsJ (PRK00596)Ribosomal_S10 (pfam00338) →                                                                                                                                                                                                                                                                                                                                                                                                                                                                                                                                                                                                                                                                                                                                                                                                                                                                            |
| env-1119 | SRS019045_WUGC_scaffold_27984   | - | 12270 | 12188 | RNA → rpsJ (PRK00596)RpsJ (COG0051) → RplC (COG0087)rplC (PRK00001) → rplD (PRK05319)Ribosomal_L4 (pfam00573) → rplW (PRK05738)Ribosomal_L23 (pfam00276) → RplB (COG0090)rplB (PRK09374) → rpsS (PRK00357)RpsS (COG0185) → rplV (PRK00565)Ribosomal_L22 (pfam00237) → RpsC (COG0092)rpsC (PRK00310) → rpl16 (CHL00044)rplP (PRK09203) → PRK00306 (PRK00306)Ribosomal_L29 (pfam00831) → rpsQ (PRK05610)Ribosomal_S17 (pfam00366) → rplN (PRK05483)Ribosomal_L14 (pfam00238) → RplX (COG0198)rplX (PRK00004) → rplE (PRK00010)RplE (COG0094) → rpsN (PRK08061)RpsN (COG0199) → rpsH (PRK00136)Ribosomal_S8 (pfam00410) → RplF (COG0097)rplF (PRK05498) → rplR (PRK05593)Ribosomal_L18p (pfam00861) → RpsE (COG0098)rpsE (PRK00550) → Ribosomal_L30 (cd01658)rpmD (PRK05611) → rplO (PRK05592)Ribosomal_L27A (pfam00828) → SecY (COG0201)secY (PRK09204) →                                                                     |
| env-1120 | SRS022621_Baylor_scaffold_71993 | - | 649   | 567   | RNA → rpsJ (PRK00596)RpsJ (COG0051) →                                                                                                                                                                                                                                                                                                                                                                                                                                                                                                                                                                                                                                                                                                                                                                                                                                                                                       |
| env-1121 | SRS023617_Baylor_scaffold_75006 | + | 4288  | 4370  | RNA → rpsJ (PRK00596)RpsJ (COG0051) → RplC (COG0087)rplC (PRK00001) → rplD (PRK05319)Ribosomal_L4 (pfam00573) → rplW (PRK05738)Ribosomal_L23 (pfam00276) → RplB (COG0090)rplB (PRK09374) →                                                                                                                                                                                                                                                                                                                                                                                                                                                                                                                                                                                                                                                                                                                                  |
| env-1122 | SRS055426_LANL_scaffold_56046   | + | 434   | 516   | RNA → rpsJ (PRK00596)RpsJ (COG0051) → RplC (COG0087)rplC (PRK00001) → rplD (PRK05319)Ribosomal_L4 (pfam00573) → rplW (PRK05738)Ribosomal_L23 (pfam00276) →                                                                                                                                                                                                                                                                                                                                                                                                                                                                                                                                                                                                                                                                                                                                                                  |

|          |                                  |   |        |        |                                                                                                                                                                                                                                                                                                                                                                                                                                                                                                                                                                                                                                                                                                                                                                                                                                                         |
|----------|----------------------------------|---|--------|--------|---------------------------------------------------------------------------------------------------------------------------------------------------------------------------------------------------------------------------------------------------------------------------------------------------------------------------------------------------------------------------------------------------------------------------------------------------------------------------------------------------------------------------------------------------------------------------------------------------------------------------------------------------------------------------------------------------------------------------------------------------------------------------------------------------------------------------------------------------------|
| env-1123 | SRS015038_WUGC_scaffold_27865    | - | 2521   | 2439   | RNA → rpsJ (PRK00596)RpsJ (COG0051) → RplC (COG0087)rplC (PRK00001) → rplD (PRK05319)Ribosomal_L4 (pfam00573) → rplW (PRK05738)Ribosomal_L23 (pfam00276) → RplB (COG0090)rplB (PRK09374) →                                                                                                                                                                                                                                                                                                                                                                                                                                                                                                                                                                                                                                                              |
| env-1124 | Buccal_mucosa_LANL_scaffold_1634 | + | 150    | 232    | RNA → rpsJ (PRK00596)RpsJ (COG0051) →                                                                                                                                                                                                                                                                                                                                                                                                                                                                                                                                                                                                                                                                                                                                                                                                                   |
| env-1125 | SRS014888_C3099341               | - | 199    | 117    | RNA →                                                                                                                                                                                                                                                                                                                                                                                                                                                                                                                                                                                                                                                                                                                                                                                                                                                   |
| env-1126 | SRS015762_WUGC_scaffold_42481    | + | 1202   | 1284   | RNA →                                                                                                                                                                                                                                                                                                                                                                                                                                                                                                                                                                                                                                                                                                                                                                                                                                                   |
| env-1127 | SRS015797_C2554923               | + | 273    | 355    | RNA →                                                                                                                                                                                                                                                                                                                                                                                                                                                                                                                                                                                                                                                                                                                                                                                                                                                   |
| env-1128 | SRS016569_C2502716               | + | 1756   | 1838   | RNA →                                                                                                                                                                                                                                                                                                                                                                                                                                                                                                                                                                                                                                                                                                                                                                                                                                                   |
| env-1129 | SRS017808_C3738277               | + | 135    | 217    | RNA →                                                                                                                                                                                                                                                                                                                                                                                                                                                                                                                                                                                                                                                                                                                                                                                                                                                   |
| env-1130 | SRS018300_Baylor_scaffold_24096  | + | 192    | 274    | RNA →                                                                                                                                                                                                                                                                                                                                                                                                                                                                                                                                                                                                                                                                                                                                                                                                                                                   |
| env-1131 | SRS018439_C2357059               | + | 501    | 583    | RNA →                                                                                                                                                                                                                                                                                                                                                                                                                                                                                                                                                                                                                                                                                                                                                                                                                                                   |
| env-1132 | SRS018739_C3682509               | + | 1199   | 1281   | RNA →                                                                                                                                                                                                                                                                                                                                                                                                                                                                                                                                                                                                                                                                                                                                                                                                                                                   |
| env-1133 | SRS019122_C5774298               | - | 198    | 116    | RNA → ←-hypo                                                                                                                                                                                                                                                                                                                                                                                                                                                                                                                                                                                                                                                                                                                                                                                                                                            |
| env-1134 | SRS019126_C2113536               | - | 241    | 159    | RNA →                                                                                                                                                                                                                                                                                                                                                                                                                                                                                                                                                                                                                                                                                                                                                                                                                                                   |
| env-1135 | SRS019327_WUGC_scaffold_22335    | - | 366    | 284    | RNA → rpsJ (PRK00596)Ribosomal_S10 (pfam00338) →                                                                                                                                                                                                                                                                                                                                                                                                                                                                                                                                                                                                                                                                                                                                                                                                        |
| env-1136 | SRS020856_C2575490               | + | 380    | 462    | RNA →                                                                                                                                                                                                                                                                                                                                                                                                                                                                                                                                                                                                                                                                                                                                                                                                                                                   |
| env-1137 | SRS022530_C2080540               | + | 216    | 298    | RNA →                                                                                                                                                                                                                                                                                                                                                                                                                                                                                                                                                                                                                                                                                                                                                                                                                                                   |
| env-1138 | SRS023926_Baylor_scaffold_581    | - | 11958  | 11876  | RNA → rpsJ (PRK00596)RpsJ (COG0051) → RplC (COG0087)rplC (PRK00001) → rplD (PRK05319)Ribosomal_L4 (pfam00573) → rplW (PRK05738)Ribosomal_L23 (pfam00276) → RplB (COG0090)rplB (PRK09374) → rpsS (PRK00357)RpsS (COG0185) → rplV (PRK00565)Ribosomal_L22 (pfam00237) → RpsC (COG0092)rpsC (PRK00310) → rpl16 (CHL00044)rplP (PRK09203) → PRK00306 (PRK00306)Ribosomal_L29 (pfam00831) → rpsQ (PRK05610)Ribosomal_L17 (pfam00366) → rplN (PRK05483)Ribosomal_L14 (pfam00238) → RplX (COG0198)rplX (PRK00004) → rplE (PRK00010)RplE (COG0094) → rpsN (PRK08061)RpsN (COG0199) → rpsH (PRK00136)Ribosomal_S8 (pfam00410) → RplF (COG0097)rplF (PRK05498) → rplR (PRK05593)Ribosomal_L18p (pfam00861) → RpsE (COG0098)rpsE (PRK00550) → Ribosomal_L30 (cd01658)rpmD (PRK05611) → rplO (PRK05592)Ribosomal_L27A (pfam00828) → SecY (COG0201)secY (PRK09204) → |
| env-1139 | SRS024081_C2509738               | + | 250    | 332    | RNA →                                                                                                                                                                                                                                                                                                                                                                                                                                                                                                                                                                                                                                                                                                                                                                                                                                                   |
| env-1140 | SRS024138_C2606537               | + | 134    | 216    | RNA →                                                                                                                                                                                                                                                                                                                                                                                                                                                                                                                                                                                                                                                                                                                                                                                                                                                   |
| env-1141 | SRS024441_LANL_scaffold_49596    | + | 1744   | 1826   | RNA →                                                                                                                                                                                                                                                                                                                                                                                                                                                                                                                                                                                                                                                                                                                                                                                                                                                   |
| env-1142 | SRS050244_LANL_scaffold_51697    | - | 366    | 284    | RNA → rpsJ (PRK00596)Ribosomal_S10 (pfam00338) →                                                                                                                                                                                                                                                                                                                                                                                                                                                                                                                                                                                                                                                                                                                                                                                                        |
| env-1143 | SRS053603_LANL_scaffold_24802    | + | 1364   | 1446   | RNA →                                                                                                                                                                                                                                                                                                                                                                                                                                                                                                                                                                                                                                                                                                                                                                                                                                                   |
| env-1144 | SRS057355_C2349863               | + | 1129   | 1211   | RNA →                                                                                                                                                                                                                                                                                                                                                                                                                                                                                                                                                                                                                                                                                                                                                                                                                                                   |
| env-1145 | SRS017439_C3682793               | - | 198    | 116    | RNA → hypo →                                                                                                                                                                                                                                                                                                                                                                                                                                                                                                                                                                                                                                                                                                                                                                                                                                            |
| env-1146 | SRS013705_Baylor_scaffold_81679  | - | 1216   | 1134   | RNA → rpsJ (PRK00596)RpsJ (COG0051) → RplC (COG0087)rplC (PRK00001) →                                                                                                                                                                                                                                                                                                                                                                                                                                                                                                                                                                                                                                                                                                                                                                                   |
| env-1147 | SRS020220_C3614164               | + | 875    | 957    | RNA →                                                                                                                                                                                                                                                                                                                                                                                                                                                                                                                                                                                                                                                                                                                                                                                                                                                   |
| env-1148 | SRS050669_LANL_scaffold_67916    | - | 1577   | 1495   | RNA → rpsJ (PRK00596)RpsJ (COG0051) → RplC (COG0087)rplC (PRK00001) → rplD (PRK05319)Ribosomal_L4 (pfam00573) →                                                                                                                                                                                                                                                                                                                                                                                                                                                                                                                                                                                                                                                                                                                                         |
| env-1149 | SRS058336_LANL_scaffold_62543    | + | 1752   | 1834   | RNA →                                                                                                                                                                                                                                                                                                                                                                                                                                                                                                                                                                                                                                                                                                                                                                                                                                                   |
| env-1150 | SRS011086_WUGC_scaffold_38837    | + | 190    | 272    | RNA → rpsJ (PRK00596)RpsJ (COG0051) → rpl3 (CHL00143)rplC (PRK00001) →                                                                                                                                                                                                                                                                                                                                                                                                                                                                                                                                                                                                                                                                                                                                                                                  |
| env-1151 | SRS011140_C5153003               | + | 1201   | 1283   | RNA →                                                                                                                                                                                                                                                                                                                                                                                                                                                                                                                                                                                                                                                                                                                                                                                                                                                   |
| env-1152 | SRS057539_C2728969               | + | 1202   | 1284   | RNA →                                                                                                                                                                                                                                                                                                                                                                                                                                                                                                                                                                                                                                                                                                                                                                                                                                                   |
| env-1153 | SRS063288_C2538166               | - | 197    | 115    | RNA →                                                                                                                                                                                                                                                                                                                                                                                                                                                                                                                                                                                                                                                                                                                                                                                                                                                   |
| env-1154 | SRS015395_C2397760               | + | 1066   | 1148   | RNA →                                                                                                                                                                                                                                                                                                                                                                                                                                                                                                                                                                                                                                                                                                                                                                                                                                                   |
| env-1155 | SRS016002_WUGC_scaffold_44691    | - | 188    | 106    | RNA →                                                                                                                                                                                                                                                                                                                                                                                                                                                                                                                                                                                                                                                                                                                                                                                                                                                   |
| env-1156 | SRS019607_C2614074               | - | 188    | 106    | RNA →                                                                                                                                                                                                                                                                                                                                                                                                                                                                                                                                                                                                                                                                                                                                                                                                                                                   |
| env-1157 | SRS022536_LANL_scaffold_76935    | + | 51     | 133    | RNA → rpsJ (PRK00596)Ribosomal_S10 (pfam00338) →                                                                                                                                                                                                                                                                                                                                                                                                                                                                                                                                                                                                                                                                                                                                                                                                        |
| env-1158 | SRS057791_LANL_scaffold_81273    | - | 188    | 106    | RNA →                                                                                                                                                                                                                                                                                                                                                                                                                                                                                                                                                                                                                                                                                                                                                                                                                                                   |
| env-1159 | SRS043239_WUGC_scaffold_35420    | + | 57     | 139    | RNA → rpsJ (PRK00596)Ribosomal_S10 (pfam00338) →                                                                                                                                                                                                                                                                                                                                                                                                                                                                                                                                                                                                                                                                                                                                                                                                        |
| Csp-2-1  | NZ_KB822565.1                    | - | 883766 | 883673 | RNA → rpsJ (PRK00596)RpsJ (COG0051) →                                                                                                                                                                                                                                                                                                                                                                                                                                                                                                                                                                                                                                                                                                                                                                                                                   |
| env-1160 | DLM023_scaffold38722_2           | + | 555    | 632    | RNA → rpsJ (PRK00596)RpsJ (COG0051) →                                                                                                                                                                                                                                                                                                                                                                                                                                                                                                                                                                                                                                                                                                                                                                                                                   |
| env-1161 | NOM002_scaffold32230_2           | - | 52228  | 52151  | RNA → rpsJ (PRK00596)RpsJ (COG0051) →                                                                                                                                                                                                                                                                                                                                                                                                                                                                                                                                                                                                                                                                                                                                                                                                                   |

|          |                               |   |         |         |                                                                                                                                                                                                                                                                                                                                                                                                                                                                                                                                                                                                                                                                                                                                                                                                                                                                                            |
|----------|-------------------------------|---|---------|---------|--------------------------------------------------------------------------------------------------------------------------------------------------------------------------------------------------------------------------------------------------------------------------------------------------------------------------------------------------------------------------------------------------------------------------------------------------------------------------------------------------------------------------------------------------------------------------------------------------------------------------------------------------------------------------------------------------------------------------------------------------------------------------------------------------------------------------------------------------------------------------------------------|
| env-1162 | DLF014_scaffold7481_2         | - | 97485   | 97408   | RNA → rpsJ (PRK00596)RpsJ (COG0051) →                                                                                                                                                                                                                                                                                                                                                                                                                                                                                                                                                                                                                                                                                                                                                                                                                                                      |
| env-1163 | scaffold1445_7_MH0020         | - | 5388    | 5311    | RNA → rpsJ (PRK00596)RpsJ (COG0051) →                                                                                                                                                                                                                                                                                                                                                                                                                                                                                                                                                                                                                                                                                                                                                                                                                                                      |
| env-1164 | C6522713_1_V1.UC-10           | - | 407     | 330     | RNA → rpsJ (PRK00596)RpsJ (COG0051) →                                                                                                                                                                                                                                                                                                                                                                                                                                                                                                                                                                                                                                                                                                                                                                                                                                                      |
| env-1165 | SRS024331_C2252267            | - | 502     | 425     | RNA → rpsJ (PRK00596)RpsJ (COG0051) →                                                                                                                                                                                                                                                                                                                                                                                                                                                                                                                                                                                                                                                                                                                                                                                                                                                      |
| env-1166 | scaffold50700_6_MH0006        | + | 13941   | 14018   | RNA → rpsJ (PRK00596)RpsJ (COG0051) →                                                                                                                                                                                                                                                                                                                                                                                                                                                                                                                                                                                                                                                                                                                                                                                                                                                      |
| env-1167 | JGI994J12354_10000791         | + | 2007    | 2104    | RNA → rpsJ (PRK00596)RpsJ (COG0051) → RplC (COG0087)rplC (PRK00001) →<br>rplD (PRK05319)Ribosomal_L4 (pfam00573) → rplW (PRK05738)Ribosomal_L23 (pfam00276) →<br>RplB (COG0090)rplB (PRK09374) → rpsS (PRK00357)RpsS (COG0185) →<br>rplV (PRK00565)Ribosomal_L22 (pfam00237) → RpsC (COG0092)rpsC (PRK00310) →<br>rpl16 (CHL00044)rplP (PRK09203) → PRK00306 (PRK00306)Ribosomal_L29 (pfam00831) →<br>rpsQ (PRK05610)Ribosomal_S17 (pfam00366) → rplN (PRK05483)Ribosomal_L14 (pfam00238) →                                                                                                                                                                                                                                                                                                                                                                                                |
| env-1168 | IMNBL1_c0000388               | + | 10662   | 10755   | RNA → rpsJ (PRK00596)RpsJ (COG0051) → RplC (COG0087)rplC (PRK00001) →<br>rplD (PRK05319)Ribosomal_L4 (pfam00573) → rplW (PRK05738)Ribosomal_L23 (pfam00276) →<br>RplB (COG0090)rplB (PRK09374) → rpsS (PRK00357)RpsS (COG0185) →<br>rplV (PRK00565)Ribosomal_L22 (pfam00237) → RpsC (COG0092)rpsC (PRK00310) →<br>rpl16 (CHL00044)rplP (PRK09203) → PRK00306 (PRK00306)Ribosomal_L29 (pfam00831) →<br>rpsQ (PRK05610)Ribosomal_S17 (pfam00366) → rplN (PRK05483)Ribosomal_L14 (pfam00238) →                                                                                                                                                                                                                                                                                                                                                                                                |
| env-1169 | JGI994J12354_10000720         | - | 21163   | 21067   | RNA → rpsJ (PRK00596)RpsJ (COG0051) →                                                                                                                                                                                                                                                                                                                                                                                                                                                                                                                                                                                                                                                                                                                                                                                                                                                      |
| env-1170 | 2227476835                    | - | 442     | 346     | RNA → rpsJ (PRK00596)RpsJ (COG0051) →                                                                                                                                                                                                                                                                                                                                                                                                                                                                                                                                                                                                                                                                                                                                                                                                                                                      |
| env-1171 | IMNBL1_c0000272               | + | 15388   | 15484   | RNA → rpsJ (PRK00596)RpsJ (COG0051) →                                                                                                                                                                                                                                                                                                                                                                                                                                                                                                                                                                                                                                                                                                                                                                                                                                                      |
| env-1172 | SRS014459_WUGC_scaffold_61552 | - | 3023    | 2929    | RNA → rpsJ (PRK00596)RpsJ (COG0051) →                                                                                                                                                                                                                                                                                                                                                                                                                                                                                                                                                                                                                                                                                                                                                                                                                                                      |
| env-1173 | scaffold26742_2_MH0080        | - | 219     | 125     | RNA →                                                                                                                                                                                                                                                                                                                                                                                                                                                                                                                                                                                                                                                                                                                                                                                                                                                                                      |
| env-1174 | DLM023_scaffold12761_3        | + | 988     | 1082    | RNA →                                                                                                                                                                                                                                                                                                                                                                                                                                                                                                                                                                                                                                                                                                                                                                                                                                                                                      |
| env-1175 | SRS015217_WUGC_scaffold_38672 | - | 2002    | 1908    | RNA → rpsJ (PRK00596)RpsJ (COG0051) →                                                                                                                                                                                                                                                                                                                                                                                                                                                                                                                                                                                                                                                                                                                                                                                                                                                      |
| env-1176 | SRS015264_WUGC_scaffold_39672 | - | 16092   | 15998   | RNA → rpsJ (PRK00596)RpsJ (COG0051) →                                                                                                                                                                                                                                                                                                                                                                                                                                                                                                                                                                                                                                                                                                                                                                                                                                                      |
| Cle-1-1  | NC_015275.1                   | - | 3861759 | 3861678 | RNA → rpsJ (PRK00596)RpsJ (COG0051) → RplC (COG0087)rplC (PRK00001) →<br>rplD (PRK05319)Ribosomal_L4 (pfam00573) → rplW (PRK05738)Ribosomal_L23 (pfam00276) →<br>RplB (COG0090)rplB (PRK09374) → rpsS (PRK00357)Ribosomal_S19 (pfam00203) →<br>rplV (PRK00565)Ribosomal_L22 (pfam00237) → RpsC (COG0092)rpsC (PRK00310) →<br>rpl16 (CHL00044)rplP (PRK09203) → PRK00306 (PRK00306)Ribosomal_L29 (pfam00831) →<br>RpsQ (COG0186)rpsQ (PRK05610) → rplN (PRK05483)Ribosomal_L14 (pfam00238) →<br>rplX (PRK00004)KOW_RPL26 (cd06089) → rplE (PRK00010)RplE (COG0094) →<br>rpsN (PRK08061)RpsN (COG0199) → rpsH (PRK00136)Ribosomal_S8 (pfam00410) →<br>RplF (COG0097)rplF (PRK05498) → rplR (PRK05593)Ribosomal_L18p (pfam00861) →<br>RpsE (COG0098)rpsE (PRK00550) → Ribosomal_L30 (cd01658)rpmD (PRK05611) →<br>rplO (PRK05592)Ribosomal_L27A (pfam00828) → SecY (COG0201)secY (PRK09204) → |

### 19.3 Conserved domains

Conserved domains found in protein-coding genes listed in Section 19.2 are shown below, with the first sentence in their description from the Conserved Domain Database (if any). Conserved domains associated with more than one S10-

- cd00432** (1) Ribosomal L18/L5e: L18 (L5e) is a ribosomal protein found in the central protuberance (CP) of the large subunit.  
**cd01086** (5) Methionine Aminopeptidase 1.  
**cd01428** (2) Adenylate kinase (ADK) catalyzes the reversible phosphoryl transfer from adenosine triphosphates (ATP) to adenosine monophosphates (AMP) and to yield adenosine diphosphates (ADP).  
**cd01658** (25) Ribosomal protein L30, which is found in eukaryotes and prokaryotes but not in

Clostridia RNA are assigned a color, while others are shown in gray. The number in parentheses after the colored domain name is the number of occurrences in Section 19.2.

- archaea, is one of the smallest ribosomal proteins with a molecular mass of about 7kDa.  
**cd02412** (2) K homology RNA-binding (KH) domain of the prokaryotic 30S small ribosomal subunit protein S3.  
**cd04451** (4) S1\_IF1: Translation Initiation Factor IF1, S1-like RNA-binding domain.  
**cd06088** (1) KOW motif of Ribosomal Protein L14.  
**cd06089** (3) KOW motif of Ribosomal Protein L26.  
**CHL00022** (135) ribosomal protein L16  
**CHL00050** (2) ribosomal protein S19

- CHL00052** (1) ribosomal protein L2  
**CHL00140** (11) ribosomal protein L6; Validated  
**CHL00143** (11) ribosomal protein L3; Validated  
**COG0051** (841) Ribosomal protein S10 [Translation, ribosomal structure and biogenesis]  
**COG0087** (263) Ribosomal protein L3 [Translation, ribosomal structure and biogenesis]  
**COG0088** (14) Ribosomal protein L4 [Translation, ribosomal structure and biogenesis]  
**COG0090** (179) Ribosomal protein L2 [Translation, ribosomal structure and biogenesis]  
**COG0092** (144) Ribosomal protein S3 [Translation, ribosomal structure and biogenesis]  
**COG0094** (127) Ribosomal protein L5 [Translation, ribosomal structure and biogenesis]  
**COG0097** (22) Ribosomal protein L6P/L9E [Translation, ribosomal structure and biogenesis]  
**COG0098** (26) Ribosomal protein S5 [Translation, ribosomal structure and biogenesis]  
**COG0099** (4) Ribosomal protein S13 [Translation, ribosomal structure and biogenesis]  
**COG0100** (4) Ribosomal protein S11 [Translation, ribosomal structure and biogenesis]  
**COG0185** (128) Ribosomal protein S19 [Translation, ribosomal structure and biogenesis]  
**COG0186** (1) Ribosomal protein S17 [Translation, ribosomal structure and biogenesis]  
**COG0198** (123) Ribosomal protein L24 [Translation, ribosomal structure and biogenesis]  
**COG0199** (124) Ribosomal protein S14 [Translation, ribosomal structure and biogenesis]  
**COG0200** (15) Ribosomal protein L15 [Translation, ribosomal structure and biogenesis]  
**COG0201** (25) Preprotein translocase subunit SecY [Intracellular trafficking, secretion, and vesicular transport]  
**COG0202** (2) DNA-directed RNA polymerase, alpha subunit/40 kD subunit [Transcription]  
**COG0522** (2) Ribosomal protein S4 or related protein [Translation, ribosomal structure and biogenesis]  
**pfam00181** (6) Ribosomal Proteins L2, RNA binding domain.  
**pfam00203** (24) Ribosomal protein S19.  
**pfam00237** (150) Ribosomal protein L22p/L17e.  
**pfam00238** (130) Ribosomal protein L14p/L23e.  
**pfam00276** (209) Ribosomal protein L23.  
**pfam00338** (95) Ribosomal protein S10p/S20e.  
**pfam00347** (2) Ribosomal protein L6.  
**pfam00366** (132) Ribosomal protein S17.  
**pfam00406** (4) Adenylate kinase.  
**pfam00410** (96) Ribosomal protein S8.  
**pfam00444** (4) Ribosomal protein L36.  
**pfam00573** (222) Ribosomal protein L4/L1 family.  
**pfam00828** (10) Ribosomal proteins 50S-L15, 50S-L18e, 60S-L27A.  
**pfam00831** (131) Ribosomal L29 protein.  
**pfam00861** (26) Ribosomal L18 of archaea, bacteria, mitoch.  
**pfam01196** (2) Ribosomal protein L17.  
**pfam03947** (2) Ribosomal Proteins L2, C-terminal domain.  
**pfam13207** (1) AAA domain.  
**pfam17136** (1) Ribosomal proteins 50S L24/mitochondrial 39S L24.  
**PRK00001** (276) 50S ribosomal protein L3; Validated  
**PRK00004** (125) 50S ribosomal protein L24; Reviewed  
**PRK00010** (127) 50S ribosomal protein L5; Validated  
**PRK00136** (96) 30S ribosomal protein S8; Validated  
**PRK00276** (4) translation initiation factor IF-1; Validated  
**PRK00279** (5) adenylate kinase; Reviewed  
**PRK00306** (131) 50S ribosomal protein L29; Reviewed  
**PRK00310** (144) 30S ribosomal protein S3; Reviewed  
**PRK00357** (154) 30S ribosomal protein S19; Reviewed  
**PRK00765** (4) 50S ribosomal protein L36; Reviewed  
**PRK00550** (26) 30S ribosomal protein S5; Validated  
**PRK00565** (150) 50S ribosomal protein L22; Reviewed  
**PRK00596** (937) 30S ribosomal protein S10; Reviewed  
**PRK05179** (4) 30S ribosomal protein S13; Validated  
**PRK05182** (2) DNA-directed RNA polymerase subunit alpha; Provisional  
**PRK05309** (4) 30S ribosomal protein S11; Validated  
**PRK05319** (236) 50S ribosomal protein L4; Provisional  
**PRK05327** (2) 30S ribosomal protein S4; Validated  
**PRK05483** (130) 50S ribosomal protein L14; Validated  
**PRK05498** (35) 50S ribosomal protein L6; Validated  
**PRK05591** (2) 50S ribosomal protein L17; Validated  
**PRK05592** (25) 50S ribosomal protein L15; Reviewed  
**PRK05593** (27) 50S ribosomal protein L18; Reviewed  
**PRK05610** (133) 30S ribosomal protein S17; Reviewed  
**PRK05611** (25) 50S ribosomal protein L30; Reviewed  
**PRK05716** (5) methionine aminopeptidase; Validated  
**PRK05738** (209) 50S ribosomal protein L23; Reviewed  
**PRK08061** (124) 30S ribosomal protein S14; Reviewed  
**PRK09203** (135) 50S ribosomal protein L16; Reviewed  
**PRK09204** (25) preprotein translocase subunit SecY; Reviewed  
**PRK09374** (188) 50S ribosomal protein L2; Validated  
**smart00322** (2) K homology RNA-binding domain.  
**TIGR03918** (1) [FeFe] hydrogenase H-cluster maturation GTPase HydF. [FeFe] hydrogenase H-cluster maturation GTPase HydF. This model describes the family of the [Fe] hydrogenase maturation protein HypF as characterized in *Chlamydomonas reinhardtii* and found, in an operon with radical SAM proteins HydE and HydG, in numerous bacteria. It has GTPase activity, can bind an 4Fe-4S cluster, and is essential for hydrogenase activity. [Protein fate, Protein modification and repair]

## 19.4 Multiple-sequence alignment

Each S10-Clostridia RNA is denoted by an abbreviation (like “Eco-1-1”) that refers to a taxonomy given in Section 19.1. The alignment may include sequences containing the RNA motif, as well as flanking sequence. The S10-Clostridia RNA itself is denoted by the line underneath marked 5' and 3' on either end. Nucleotides in flanking sequences (i.e., not part of the motif) are written in gray letters. Stems

of predicted rho-independent transcription terminators, if any, are shaded yellow. (Note: terminator predictions have not been analyzed manually, and many are likely to be false positives. Terminator predictions are those of the RNIE software.) Nucleotides predicted to function (as DNA) as transcription-factor binding sites, if any, are shaded in green. (But note: these predictions are manually an-



notated, so they might be under-predicted.) Annotated start codons, if any, are shaded **green**. (Note: start codons are frequently misannotated, especially in environmental samples.) Nucleotides proposed to basepair as part of the consensus structure are shaded in color when they comprise Watson-Crick or G-U pairs. Otherwise they are shaded gray. Conserved stems are also indicated at the bottom of the alignment by angle brackets, where matching < and > denote base-paired columns. Below these angle brackets, the symbol “2” denotes base pairs exhibiting covariation according to the statistically well-founded R-scape method. “1” denotes base pairs exhibiting covariation according to R2R’s simplistic method. “0”

denotes base pairs that are not observed to mutate and “?” denotes base pairs that have a significant frequency of non-canonical nucleotides for Watson-Crick or G-U pairs (> 5%). Below these base pair annotation is the consensus sequence: “R” = “A” or “G”, “Y” = “C” or “U”, **red nucleotides**: nucleotide identity conserved more than 97% of the time, black nucleotides: 90%, gray nucleotides: 75%, red circle (◐): nucleotide is present 97% of the time, black circle (◑): 90%, gray circle (◒): 75%, white circle (◓): 50%. All percentages of sequences just described (e.g. 97% conserved) assume that sequences have been weighted by the GSC algorithm implemented by the Infernal software package.

Duplicate sequences: the following putative homologs are not shown in the alignment because their sequences are identical to a homolog already shown: Bfi-3-1, Bfi-4-1, Bsp-8-1, Cba-4-1, Cba-5-1, Cbo-1-1, Cbo-3-1, Cbo-4-1, Cbo-5-1, Cbo-6-1, Cci-1-1, Ccl-2-1, Ccl-4-1, Ccl-5-1, Ccl-7-1, Ccl-8-1, Ccl-9-1, Ceu-1-1, Cne-1-1, Csp-6-1, Csy-1-1, Csy-2-1, Csy-3-1, Ere-1-1, Hha-1-1, Hha-2-1, Lba-1-1, Lba-11-1, Lba-12-1, Lba-18-1, Lba-21-1, Lba-22-1, Lba-9-1, Lbo-1-1, Lbo-2-1, Lsp-1-1, Rgn-2-1, Rgn-3-1, Rho-1-1, Rla-1-1, Rto-1-1, [bo-1-1, [cl-1-1, env-100, env-1000, env-1001, env-1002, env-1003, env-1004, env-1005, env-101, env-1010, env-1011, env-1012, env-1013, env-1014, env-1015, env-1016, env-1017, env-1025, env-103, env-1031, env-104, env-1047, env-1048, env-1049, env-105, env-1050, env-1051, env-106, env-1060, env-1061, env-1062, env-1063, env-1064, env-1079, env-108, env-1080, env-1090, env-1091, env-1092, env-1098, env-1109, env-1110, env-1111, env-1112, env-1113, env-1114, env-1116, env-1117, env-1119, env-1120, env-1121, env-1122, env-1125, env-1126, env-1127, env-1128, env-1129, env-1130, env-1131, env-1132, env-1133, env-1134, env-1135, env-1136, env-1137, env-1138, env-1139, env-1140, env-1141, env-1142, env-1143, env-1144, env-115, env-1152, env-1153, env-116, env-1161, env-1164, env-1165, env-117, env-118, env-119, env-120, env-124, env-125, env-126, env-127, env-135, env-136, env-137, env-145, env-146, env-147, env-149, env-150, env-151, env-152, env-153, env-154, env-155, env-156, env-157, env-167, env-168, env-169, env-181, env-182, env-187, env-196, env-197, env-198, env-199, env-2, env-200, env-201, env-202, env-203, env-204, env-205, env-206, env-207, env-209, env-210, env-211, env-221, env-222, env-226, env-227, env-228, env-230, env-232, env-233, env-238, env-239, env-24, env-240, env-241, env-243, env-245, env-246, env-253, env-254, env-255, env-256, env-258, env-260, env-261, env-263, env-267, env-268, env-269, env-270, env-271, env-272, env-273, env-274, env-275, env-276, env-277, env-278, env-279, env-285, env-286, env-287, env-292, env-293, env-294, env-295, env-296, env-297, env-298, env-299, env-3, env-301, env-302, env-31, env-318, env-319, env-32, env-320, env-321, env-322, env-323, env-324, env-325, env-326, env-327, env-328, env-329, env-33, env-330, env-337, env-34, env-342, env-343, env-344, env-345, env-346, env-35, env-356, env-357, env-358, env-36, env-367, env-369, env-37, env-370, env-371, env-378, env-38, env-383, env-39, env-40, env-401, env-41, env-412, env-413, env-418, env-419, env-42, env-421, env-422, env-423, env-424, env-425, env-437, env-438, env-439, env-44, env-440, env-441, env-442, env-443, env-444, env-445, env-446, env-447, env-448, env-449, env-450, env-451, env-452, env-453, env-458, env-461, env-462, env-463, env-474, env-475, env-476, env-477, env-478, env-479, env-480, env-481, env-490, env-491, env-492, env-493, env-50, env-504, env-505, env-506, env-507, env-508, env-509, env-51, env-510, env-511, env-519, env-52, env-520, env-521, env-522, env-523, env-524, env-525, env-526, env-527, env-528, env-529, env-53, env-530, env-531, env-532, env-533, env-534, env-535, env-536, env-537, env-538, env-539, env-540, env-541, env-542, env-543, env-544, env-545, env-546, env-547, env-548, env-549, env-550, env-551, env-552, env-553, env-554, env-555, env-56, env-569, env-572, env-574, env-575, env-576, env-577, env-580, env-605, env-609, env-610, env-611, env-612, env-613, env-616, env-617, env-618, env-619, env-62, env-620, env-621, env-622, env-627, env-628, env-629, env-63, env-630, env-631, env-636, env-638, env-64, env-645, env-65, env-651, env-652, env-659, env-66, env-660, env-661, env-665, env-666, env-67, env-670, env-673, env-674, env-675, env-676, env-677, env-678, env-679, env-68, env-680, env-682, env-688, env-689, env-69, env-690, env-693, env-697, env-698, env-70, env-701, env-702, env-703, env-704, env-706, env-707, env-71, env-714, env-715, env-716, env-717, env-718, env-719, env-72, env-720, env-721, env-722, env-723, env-724, env-725, env-728, env-73, env-736, env-737, env-738, env-74, env-740, env-741, env-743, env-745, env-746, env-747, env-748, env-75, env-750, env-757, env-761, env-766, env-771, env-772, env-773, env-774, env-775, env-776, env-779, env-780, env-781, env-782, env-783, env-784, env-785, env-786, env-787, env-788, env-789, env-79, env-790, env-791, env-792, env-793, env-794, env-795, env-796, env-797, env-798, env-799, env-800, env-801, env-804, env-805, env-807, env-808, env-809, env-810, env-811, env-813, env-815, env-816, env-817, env-825, env-834, env-835, env-836, env-84, env-846, env-847, env-852, env-857, env-858, env-859, env-860, env-869, env-870, env-871, env-873, env-876, env-881, env-882, env-883, env-884, env-885, env-886, env-887, env-888, env-889, env-890, env-891, env-894, env-895, env-896, env-897, env-905, env-908, env-909, env-910, env-911, env-912, env-917, env-919, env-920, env-922, env-925, env-927, env-929, env-93, env-931, env-936, env-937, env-938, env-939, env-941, env-947, env-948, env-952, env-956, env-957, env-958, env-966, env-969, env-974, env-975, env-976, env-977, env-978, env-979, env-98, env-982, env-988, env-989, env-990, env-997, env-998, env-999















































































env-184 UGAUUGAUACUGUAAAAGAAAACGGGAGCAAAGGUGAGUGGGCCUGGCCAUUCCUAC  
env-185  
env-186 UGAUUGAUACUGUAAAAGAAAACGGGAGCAAAGGUGAGUGGGCCUGGCCAUUCCUAC  
env-188 UGAUUGAUACUGUAAAAGAAAACGGGAGCAAAGGUGAGUGGGCCUGGCCAUUCCUAC  
env-189 UGAUUGAUACUGUAAAAGAAAACGGGAGCAAAGGUGAGUGGGCCUGGCCAUUCCUAC  
env-190 UGAUUGAUACUGUAAAAGAAAACGGGAGCAAAGGUGAGUGGGCCUGGCCAUUCCUAC  
env-191 AAAAGUCAGAAAAGAGAAUUAUCCUGAAGGCAUACGAUANNNNNNNNNNNNNNNN  
env-192 UGAUUGAUACUGUAAAAGAAAACGGGAGCAAAGGUGAGUGGGCCUGGCCAUUCCUAC  
env-193 UGAUUGAUACUGUAAAAGAAAACGGGAGCAAAGGUGAGUGGGCCUGGCCAUUCCUAC  
env-194 UGAUUGAUACUGUAAAAGAAAACGGGAGCAAAGGUGAGUGGGCCUGGCCAUUCCUAC  
env-195  
env-208 UGAUUGAUACUGUAAAAGAAAACGGGAGCAAAGGUGAGUGGGCCUGGCCAUUCCUAC  
Lba-19-1 UUAAGAAGAACGGUGGAGCAGUAAGCGGUCCGUUCCUUCUCAAAGAGGGAAGU  
Lba-17-1 AAGAUGGUGGAGAGACAUCUGGUCCAGUACCUUCCAAAGAAAGGAAGUAGUUA  
env-212 AAGAUGGUGGAGAGACAUCUGGUCCAGUACCUUCCAAAGAAAGGAAGUAGUUA  
env-213 GGAGACAAGCGGUCCGUUCCUUCUCAAAGAAAGGAAGUUGUACGAUCCUGCGU  
env-214  
env-215  
env-216 GACCGGUUCCAAUGCCUACAAAGGUGAGAAAGAUUACA AUCCUCAGAGCUGUUAUAA  
env-217 GACCGNNNNNNNNNNNNNNNNNNNNNNNNNNNNNNNNNNNNNNNNNNNNNNNNNNNN  
env-218 GACCGNNNNNNNNNNNNNNNNNNNGAACUCAUAGAGAUUUAUCGAGCUAAUUGCACCAA  
env-219 GACCGGUUCCAAUGCCUACAAAGGUGAGAAAGAUACA AUCCUCAGAGCUGUUAUAA  
env-220  
env-223 GACCGGUUCCAAUGCCUACAAAGGUGAGAAAGAUACA AUCCUCAGAGCUGUUAUAA  
env-224 GACCGGUUCCAAUGCCUACAAAGGUGAGAAAGAUACA AUCCUCAGAGCUGUUAUAA  
env-225 GACCG  
env-229 GACCGGUUCCAAUGCCUACAAAGGUGAGAAAGAUACA AUCCUCAGAGCUGUUAUAA  
env-231 GACCGGUUCCAAUGCCUACAAAGGUGAGAAAGAUACA AUCCUCAGAGCUGUUAUAA  
env-234  
env-235  
env-236 GACCGGUUCCAAUGCCUACAAAGGUGAGAAAGAUACA AUCCUCAGAGCUGUUAUAA  
env-237 GACCGGUUCCAAUGCCUACA  
env-242 AGAAAUUGUAACA AUUCUAGAGCAUAACAUAAGUACAAGA AUCCUCAGAGCAAUUC  
env-244  
env-247 CACA AUUCAGAUCAUGCAGCUGUAAA AUUUAUGAUACGGUAAAGAAAGACAGGAG  
env-248 CACA AUUCAGAUCAUGCAGCUGUAAA AUUUAUGAUACGGUAAAGAAAGACAGGAG  
env-249 CACA AUUCAGAUCAUGCAGCUGUAAA AUUUAUGAUACGGUAAAGAAAGACAGGAG  
env-250 CACA AUUCAGAUCAUGCAGCUGUAAA AUUUAUGAUACGGUAAAGAAAGACAGGAG  
env-251 CACA AUUCAGAUCAUGCAGCUGUAAA AUUUAUGAUACGGUAAAGAAAGACAGGAG  
env-252  
env-257 CACA AUUCAGAUCAUGCAGCUGUAAA AUUUAUGAUACGGUAAAGAAAGACAGGAG  
env-259 CACA AUUCAGAUCAUGCAGCUGUAAA AUUUAUGAUACGGUAAAGAAAGACAGGAG  
env-262 CACA AUUCAGAUCAUGCAGCUGUAAA AUUUAUGAUACGGUAAAGAAAGACAGGAG  
env-264 CACA AUUCAGAUCAUGCAGCUGUAAA AUUUAUGAUACGGUAAAGAAAGACAGGAG  
env-265 CACA AUUCAGAUCAUGCAGCUGUAAA AUUUAUGAUACGGUAAAGAAAGACAGGAG  
env-266  
env-280  
env-281  
env-282  
env-283  
env-284 CGGU ACCU CUCC AA CA AAG AAG GA AGU UACA AUUCU UAGAGCU ACUCACA AGUA  
env-288 CGGU ACCU CUCC AA CA AAG AAG GA AGU UACA AUUCU UAGAGCU ACUCACA AGUA  
env-289 CGGU ACCU CUCC AA CA AAG AAG GA AGU UACA AUUCU UAGAGCU ACUCACA AGGA  
env-290 CAUUGAU AUCAAAU GAAGCAGAAAUAAGCUUACA AUUAUUGAU AUUCCCGAA  
env-291  
env-300  
env-303 CGGU ACCU CUCC AA CA AAG AAG GA AGU UACA AUUCU UAGAGCU ACUCACA AGUA  
env-304 CGG  
env-305 CGGU ACCU CUCC AA CA AAG AAG GA AGU UACA AUUCU UAGAGCU ACUCACA AGUA  
env-306  
env-307  
env-308  
env-309 CGGU ACCU CUCC AA CA AAG AAG GA AGU UACA AUUCU UAGAGCU ACUCACA AGUA  
env-310  
env-311 CGGU ACCU CUCC AA CA AAG AAG GA AGU UACA AUUCU UAGAGCU ACUCACA AGUA  
env-312 CGGU ACCU CUCC AA CA AAG AAG GA AGU UACA AUUCU UAGAGCU ACUCACA AGUA  
env-313 GAUAU CAAA UGAAGCAGAAAUAAGCUUACA CAUUA AUUAUUAUCCCGAAUGGU  
env-314 UA CAAGGAUUCUGGAA CAGUUCGAGCAGAA CUCUA AAGAGACUUAUCGAUAUCA  
env-315 AGAAUCUCA AAGAGACUUAUCGUAUCAUCAUCCAACACAGAAAGACACAGAGUCU  
env-316  
env-317  
env-331  
env-332  
env-333  
env-334 CGGU ACCU CUCC AA CA AAG AAG GA AGU UANNNNNNNNNNNNNNNNNNNNNNNNNN  
env-335 CGGU ACCU CUCC AA CA AAG AAG GA AGU UACA AUUCU UAGAGCU ACUCACA AGUA  
env-336 CGGU ACCU CUCC AA CA AAG AAG GA AGU UACA AUUCU UAGAGCU ACUCACA AGUA  
env-338 CGGU ACCU CUCC AA CA AAG AAG GA AGU UACA AUUCU UAGAGCU ACUCACA AGUA  
env-339 CGGU ACCU CUCC AA CA AAG AAG GA AGU UACA AUUCU UAGAGCU ACUCACA AGUA  
env-340 CGGU ACCU CUCC AA CA AAG AAG GA AGU UACA AUUCU UAGAGCU ACUCACA AGUA  
env-341 CGGU ACCU CUCC AA CA AAG AAG GA AGU UACA AUUCU UAGAGCU ACUCACA AGUA  
env-347  
env-348  
env-349

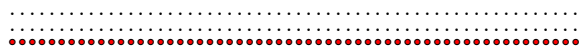

env-350 .....  
env-351 .....  
env-352 .....  
env-353 CGGUACCUCUCCAAACAAGAAGGAAGUAGUUACAAUUCUUAGAGCUACUCACAAGUA  
env-354 CGGUACCUCUCCAAACAAGAAGGAAGUAGUUACAAUUCUUAGAGCUACUCACAAGUA  
env-355 CGGUACCUCUCCAAACAAGAAGGAAGUAGUUACAAUUCUUAGAGCUACUCACAAGUA  
env-359 CGGUACCUCUCCGACAAGAAGGAAGUAGUUACAAUUCUUAGAGCUACUCACAAGUA  
env-360 CGGUACCUCUCCAAACAAGAAGGAAGUAGUUACAAUUCUUAGAGCUACUCACAAGUA  
env-361 CGGUACCUCUCCAAACAAGAAGGAAGUAGUUACAAUUCUUAGAGCUACUCACAAGUA  
env-362 AAGUACAAGGAUUCUGUGAACAGUUCGAGCAGAGAACUCAUAGAGACUUAUCGAUA  
env-363 .....  
env-364 .....  
env-365 CGGUACCUCUCCAAACAAGA . . . . .  
env-366 CGGUACCUCUCCAAACAAGAAGGAAGUAGUUACAAUUCUUAGAGCUACUCACAAGUA  
env-368 .....  
env-372 CGGUACCUCUCCAAACAAGAAGGAAGUAGUUAC . . . . .  
env-373 CGGUACCUCUCCAAACAAGAAGGAAGUAGUUACAAUUCUUAGAGCUACUCACAAGUA  
env-374 CGGUACCUCUCCAAACAAGAAGGAAGUAGUUACAAUUCUUAGAGCUACUCACAAGUA  
env-375 .....  
env-376 GUC AAGAAGAACGGAUUCACAGGUUAGCGGACCGGUACCCCUUCUACUAAGAAGGAAG  
Bsp-5-1 GUC AAGAAGAACGGAUUCACAGGUUAGCGGACCGGUACCCCUUCUACUAAGAAGGAAG  
env-377 .....  
env-379 .....  
env-380 .....  
env-381 CUACCAACAAGAAGGAAGUGGUUACUAUCCUUAGAGCUGUACAUAAAGUACAAAGACU  
env-382 ACUACCGACAAGAAGGAAGUGGUUACUAUCCUUAGAGCUGUACAUAAAGUACAAAGAC  
env-384 CUACCAACAAGAAGGAAGUGGUUACUAUCCUUAGAGCUGUACAUAAAGUACAAAGACU  
Lor-1-1 CUACCAACAAGAAGGAAGUGGUUACUAUCCUUAGAGCUGUACAUAAAGUACAAAGACU  
env-385 .....  
env-386 CUACCAACAAGAAGGAAGUGGUUACUAUCCUUAGAGCUGUACAUAAAGUACAAAGACU  
env-387 ACUACCGACAAGAAGGAAGUGGUUACUAUCCUUAGAGCUGUACAUAAAGUACAAAGAC  
env-388 .....  
Lba-15-1 ACUACCAACAAGAAGGAAGUGGUUACUAUCCUUAGAGCUGUACAUAAAGUACAAAGAC  
env-389 ACUACCAACAAGAAGGAAGUGGUUACUAUCCUUAGAGCUGUACAUAAAGUACAAAGAC  
env-390 .....  
env-391 ACUACCAACAAGAAGGAAGUGGUUACUAUCCUUAGAGCUGUACAUAAAGUACAAAGAC  
env-392 .....  
env-393 .....  
env-394 .....  
env-395 ACUACCAACAAGAAGGAAGUGGUUACUAUCCUUAGAGCUGUACAUAAAGUACAAAGAC  
env-396 .....  
env-397 ACUACCAACAAGAAGGAAGUGGUUACUAUCCUUAGAGCUGUACAUAAAGUACAAAGAC  
env-398 ACUACCAACAAGAAGGAAGUGGUUACUAUCCUUAGAGCUGUACAUAAAGUACAAAGAC  
env-399 ACUACCAACAAGAAGGAAGUGGUUACUAUCCUUAGAGCUGUACAUAAAGUACAAAGAC  
env-400 ACUACCAACAAGAAGGAAGUGGUUACUAUCCUUAGAGCUGUACAUAAAGUACAAAGAC  
env-402 .....  
env-403 ACUACCAACAAGAAGGAAGUGGUUACUAUCCUUAGAGCUGUACAUAAAGUACAAAGAC  
env-404 .....  
env-405 ACUACCAACAAGAAGGAAGUGGUUACUAUCCUUAGAGCUGUACAUAAAGUACAAAGAC  
env-406 .....  
env-407 ACUACCAACAAGAAGGAAGUGGUUACUAUCCUUAGAGCUGUACAUAAAGUACAAAGAC  
env-408 ACUACCAACAAGAAGGAAGUGGUUACUAUCCUUAGAGCUGUACAUAAAGUACAAAGAC  
env-409 .....  
env-410 ACUACCAACAAGAAGGAAGUGGUUACUAUCCUUAGAGCUGUACAUAAAGUACAAAGAC  
Cha-3-1 ACUACCAACAAGAAGGAAGUGGUUACUAUCCUUAGAGCUGUACAUAAAGUACAAAGAC  
env-411 CUACCAACAAGAAGGAAGUGGUUACUAUCCUUAGAGCUGUACAUAAAGUACAAAGACU  
env-414 .....  
env-415 .....  
env-416 CCUGUGCGCUGCCUACCAAGAAAAGGAGUAGUUACAAUACUCGUGCAGUUCACAAAU  
env-417 .....  
env-420 .....  
env-426 CCUGUGCGCUGCCUACUAAAGAAAAGGAGUAGUUACAAUACUCGUGCAGUUCACAAAU  
env-427 .....  
env-428 AUCGAAAACAGUCAAGAAAAAUGGAGCACAGGUGAGCGGACCGGUACCGCUUCCACUA  
env-429 .....  
env-430 AUCGAAAACAGUCAAGAAAAAUGGAGCACAGGUGAGCGGACCGGUACCGCUUCCUA . . .  
env-431 AUCGAAAACAGUCAAGAAAAAUGGAGCACAGGUGAGCGGACCGGUACCGCUUCCACUA  
env-432 .....  
env-433 AUCGAAAACAGUCAAGAAAAAUGGAGCACAGGUGAGCGGACCGGUACCGCUUCCACUA  
env-434 NNNNNNNNNNNNNNNNNNNNNNNNNNNNNNNNNNNNNNNNNNNNNNNNNNNNNNNNNNN  
env-435 AUCGAAAACAGUCAAGAAAAAUGGAGCACAGGUGAGCGGACCGGUACCGCUUCCACUA  
env-436 .....  
env-454 AUCGAAAACAGUCAAGAAAAAUGGAGCACAGGUGAGCGGACCGGUACCGCUUCCACUA  
env-455 AUCGAAAACAGUCAAGAAAAAUGGAGCACAGGUGAGCGGACCGGUACCGCUUCCACUA  
env-456 AUCGAAAACAGUCAAGAAAAAUGGAGCACAGGUGAGCGGACCGGUACCGCUUCCACUA  
env-457 AUCGAAAACAGUCAAGAAAAAUGGAGCACAGGUGAGCGGACCGGUACCGCUUCCACUA  
env-459 .....  
env-460 .....  
env-464 .....  
env-465 AUCGAAAACAGUCAAGAAAAAUGGAGCACAGGUGAGCGGACCGGUACCGCUUCCACUA  
env-466 AUCGAAAACAGUCAAGAAAAAUGGAGCACAGGUGAGCGGACCGGUACCGCUUCCACUA  
env-467 UCAGGUUAUGAGGAUUAACUGAAAGCUUACGAUCAUACGUUAGUUGAUGCGUCUGCG  
env-468 .....  
env-469 .....







env-625 CAUAAGUAUAAAGGACUCUCGUGAGCAGUUCGAGCAGAGAACACAUAAAGAGAUUGAUUG  
env-626 ACCAGUUCCACUCCAACAAAGAAAGGAAUGUAACAACUUGAGAGCGGUUCAUAAG  
env-632 AAGUAUAAAGGACUCUCGUGAGCAGUUCGAGCAGAGAACACAUAAAGAGAUUGAUUGAUG  
env-633 ACCAGUUCCACUCCAACAAAGAAAGGAAUGUAACAACUUGAGAGCGGUUCAUAAG  
env-634 CAUAAGUAUAAAGGACUCUCGUGAGCAGUUCGAGCAGAGAACACAUAAAGAGAUUGAUUGAUG  
env-635 ACCAGUUCCACUCCAACAAAGAAAGGAAUGUAACAACUUGAGAGCGGUUCAUAAG  
env-637 CAUAAGUAUAAAGGACUCUCGUGAGCAGUUCGAGCAGAGAACACAUAAAGAGAUUGAUUG  
env-639 ACCAGUUCCACUCCAACAAAGAAAGGAAUGUAACAACUUGAGAGCGGUUCAUAAG  
env-640 ACUCUCGUGAGCAGUUCGAGCAGAGAACACAUAAAGAGAUUGAUUGUUGUUGACC  
env-641 CAUAAGUAUAAAGGACUCUCGUGAGCAGUUCGAGCAGAGAACACAUAAAGAGAUUGAUUG  
env-642 UAAGGACUCUCGUGAGCAGUUCGAGCAGAGAACACAUAAAGAGAUUGAUUGUUGUU  
env-643 ACCAGUUCCACUCCAACAAAGAAAGGAAUGUAACAACUUGAGAGCGGUUCAUAAG  
env-644 GGUGCCGUCUACUAAAAGGAAUGGUUAACUUAUAGAGCGGUUCAUAAGUAC  
Jig-1-1 AGUACCGAUGCCAAACUAGAAAGAGGUAGUUAACAACUUAUAGAGCGGUUCAAAAUAAC  
env-646 AGUACCGAUGCCAAACUAGAAAGAGGUAGUUAACAACUUAUAGAGCGGUUCAAAAUAAC  
env-647 AGUACCGAUGCCAAACUAGAAAGAGGUAGUUAACAACUUAUAGAGCGGUUCAAAAUAAC  
Eha-1-1 AGUACCGAUGCCAAACUAGAAAGAGGUAGUUAACAACUUAUAGAGCGGUUCAAAAUAAC  
env-648 AGUACCGAUGCCAAACUAGAAAGAGGUAGUUAACAACUUAUAGAGCGGUUCAAAAUAAC  
env-649 GACCAGUCCAAAGCCAAACAAAGUAGAAAGGUGACAACUUAUAGAGCGGUUCAAAAUAAC  
env-650 GACCAGUCCAAAGCCAAACAAAGUAGAAAGGUGACAACUUAUAGAGCGGUUCAAAAUAAC  
env-653 UGAGUGGUCGGUACCCU . . . . .  
env-654 UGAGUGGUCGGUACCCU . . . . .  
env-655 UGAGUGGUCGGUACCCU . . . . .  
env-656 UGAGUGGUCGGUACCCU . . . . .  
env-657 UGAGUGGUCGGUACCCU . . . . .  
env-658 UGAGUGGUCGGUACCCU . . . . .  
env-662 AGUGGUCGGUACCCU . . . . .  
env-663 . . . . .  
env-664 . . . . .  
env-667 . . . . .  
env-668 . . . . .  
Lba-14-1 GGUUGAUGCAUCUGCCAAAAAAUAUUGAAACAGUUAAGAAAAUGGAUCACAGGUG  
Bsp-1-1 AGAAACGGAUUCUACAGGUUAGCGGACCUGUACCGCUUCCUAUAAGAAGGAAGUAGUUC  
Bsp-9-1 AGAAACGGAUUCUACAGGUUAGCGGACCUGUACCGCUUCCGUAUAAGAAGGAAGUAGUUC  
env-669 GUACCGCUUCCAACGAAAGAGAGGUAGUA . . . . .  
env-671 GUACCGCUUCCAACGAAAGAGAGGUAGUAACAACUUAUAGAGCGGUUCAAAAGUAACA  
env-672 GUACCGCUUCCAACGAAAGAG . . . . .  
env-681 GUACCGCUUCCAACGAAAGAGAGGUAGUAACAACUUAUAGAGCGGUUCAAAAGUAACA  
env-683 GUACCGCUUCCAACGAAAGAGAGGUAGUAACAACUUAUAGAGCGGUUCAAAAGUAACA  
env-684 . . . . .  
env-685 NNNNNNNNNNNNNNNNNNNNNNNNNNNNNNNNNNNNNNNNNNNNNNNNNNNNNNNNNNNNN  
env-686 AAAGAACGGGUCACAGGUGAGUGGACCGGUACCAUCCGACUAAGAAGGAAGUUGUA  
env-687 . . . . .  
env-691 AAAGAACGGGUCACAGGUGAGUGGACCGGUACCAUCCGACUAAGAAGGAAGUUGUA  
env-692 AAAGAACGGGUCACAGGUGAGUGGACCGGUACCAUCCGACUAAGAAGGAAGUUGUA  
env-694 AAAGAACGGGUCACAGGUGAGUGGACCGGUACCAUCCGACUAAGAAGGAAGUUGUA  
env-695 AAAGAACGGGUCACAGGUGAGUGGACCGGUACCAUCCGACUAAGAAGGAAGUUGUA  
env-696 AAAGAACGGGUCACAGGUGAGUGGACCGGUACCAUCCGACUAAGAAGGAAGUUGUA  
env-699 AAAGAACGGGUCACAGGUGAGUGGACCGGUACCAUCCGACUAAGAAGGAAGUUGUA  
env-700 . . . . .  
env-705 CCGGACCAGUCCAAUGCCUACUAAGAUAUGAGAAGAUACAACUUAUAGAGCAGUUA  
env-708 CCGGACCAGUCCAAUGCCUACUAAGAUAUGAGAAGAUACAACUUAUAGAGCAGUUA  
env-709 CCGGACCAGUCCAAUGCCUACUAAGAUAUGAGAAGAUACAACUUAUAGAGCAGUUA  
env-710 CCGGACCAGUCCAAUGCCUACUAAGAUAUGAGAAGAUACAACUUAUAGAGCAGUUA  
env-711 . . . . .  
env-712 . . . . .  
env-713 . . . . .  
env-726 CCGGACCAGUCCAAUGCCUACUAAGAUAUGAGAAGAUACAACUUAUAGAGCAGUUA  
env-727 . . . . .  
env-729 CCGGACCAGUCCAAUGCCUACUAAGAUAUGAGAAGAUACAACUUAUAGAGCAGUUA  
env-730 CCGGACCAGUCCAAUGCCUACUAAGAUAUGAGAAGAUACAACUUAUAGAGCAGUUA  
env-731 CCGGACCAGUCCAAUGCCUACUAAGAUAUGAGAAGAUACAACUUAUAGAGCAGUUA  
Rsp-1-1 UUCCAUCUCCUACAAGAAGAGAGGUUGUUAACAACUUAUAGAGCGGUUCAAAAUAACA  
env-732 UGCGCCACUGAUCAGAAAACUAACUAGCAGAAUACGGAUACGGAUACCGGUUCAUUA  
Rgn-1-1 GCACAGGUAAGCGGCGCGGUACCAUCCAAACUAAGAAGGAAGUUGUUAACAUCUUA  
env-733 CACAGGUAAGCGGACCGGUACCAUCCAAACUAAGAAGGAAGUUGUUAACAUCUUA  
env-734 CACAGGUAAGCGGACCGGUACCAUCCAAACUAAGAAGGAAGUUGUUAACAUCUUA  
env-735 GCACAGGUAAGCGGACCGGUACCAUCCAAACUAAGAAGGAAGUUGUUAACAUCUUA  
env-739 GCACAGGUAAGCGGACCGGUACCAUCCAAACUAAGAAGGAAGUUGUUAACAUCUUA  
Lba-4-1 GCACAGGUAAGCGGACCGGUACCAUCCAAACUAAGAAGGAAGUUGUUAACAUCUUA  
env-744 GCACAGGUAAGCGGACCGGUACCAUCCAAACUAAGAAGGAAGUUGUUAACAUCUUA  
env-749 CACAUUGAAAAGCAUUGAUCACAGUUGGUUGAUGCAUCUGCUAAGAAAAUCAUCGAA  
env-751 UGGAUCACAGGUGAGCGGACAGUGCCGUUACCAACAAAAAGGAAGUUAACCAAU  
Cph-1-1 AUUUAAUCGAUGCAUCUGCAGGAAAAAUUCGAAAACUGUAAAAGAGCAGGAUCGAA  
Bfo-1-1 GCCCCUCCGACAAAAGAAAGAAAGUUAUCCAUUCUCCGUGCUGUACAAAGUACAAA  
env-752 CAUCGAGACUGUAAAAGAAAGCGGAUCACAGGUAAGCGGUUCCGUACCCUUCUUA  
env-753 . . . . .  
Lbo-3-1 GUACCCUUCACAAAAGAAAGAAAGUUGUUAACUUAUAGAGCGGUUCAAAAUA  
env-754 UUCGUGGCAACUAAGAAGAAAUUGUUAACAACUUAUAGAGCGGUUCAAAAUA  
env-755 UUCGUGGCAACUAAGAAGAAAUUGUUAACAACUUAUAGAGCGGUUCAAAAUA  
Csp-4-1 CAAGUGAGUGGACCAUGCCAUCCAAACUAAGAAGGAAGUUAACAACUUAUAGAG  
env-756 CAAGAAGAAUGGAGCUCAGGUAAGCGGACCGGUACCCUUCUUAAGAAAGGA  
env-758 GGUCACAGGUGAGUGGACCGGUACCAUCCGACUAAGAAGGAAGUUAACAACUUA



env-759 UACCACUACCAACGAAAAAGAGGUAGUUACAAUUCUUAGAGCGGUACACAAAGUACAA  
env-760 UACCACUACCAACGAAAAAGAGGUAGUUACAAUUCUUAGAGCGGUACACAAAGUACAA  
env-762 CCACUUCACAAUAGAAAGAGGUAGUUACAAUUCUUAGAGCGGUACAAAGUACAAAG  
env-763 UAAGUGGACCGGUACCCUUCUACUAAAGAAAGUUGUACAAUUCUUGCGGCGU  
env-764 GAAGUUGUACAAUUCUUAGAGCGGUACAAUUAUAAAGAUUCAGAGCAGAGUUUG  
Lba-6-1 CGAAAACUGUUAAAGAAAGUAGUACAAAGGUGAGCGGACCGGUACCGCUCCGACUAA  
Dsp-1-1  
env-765 CCAGUGCCGUUACCAACUAAAGAAAGAGGUUGUACAAUUCUGCGUGCGGUUCAAAAGU  
env-767  
env-768 CCAGUGCCGUUACCAACUAAAGAAAGAGGUUGUACAAUUCUGCGUGCGGUUCAAAAGU  
env-769  
env-770 CCAGUGCCGUUACCAACUAAAGAAAGAGGUUGUACAAUUCUGCGUGCGGUUCAAAAGU  
env-777 GACCGGUGCCGUUACCAACUAAAGAAAGAGGUUGUACCAUUCUGCGUGCGGUUCAUAA  
env-778 GUACCGCUCCGACAAAGAAAGAGGUUGUACAAUUCUUAGAGCGGUUCAAAUUAACA  
env-802 GUACCGCUCCGACAAAGAAAGAGGUUGUACAAUUCUUAGAGCGGUUCAAAUUAACA  
env-803  
Cco-1-1 GUACCGCUCCGACAAAGAAAGAGGUUGUACAAUUCUUAGAGCGGUUCAAAUUAACA  
env-806 GUACCGCUCCGACAAAGAAAGAGGUUGUACAAUUCUUAGAGCGGUUCAAAUUAACA  
env-812 GUACCGCUCCGACAAAGAAAGAGGUUGUACAAUUCUUAGAGCGGUUCAAAUUAACA  
env-814 ACAGGUGAGCGGACCGGUUCCAUUCUACUAAAGAAAGAGGUUGUACAAUUCUUAAAG  
Dfo-2-1 ACAGGUGAGCGGACCGGUUCCAUUCUACUAAAGAAAGAGGUUGUACAAUUCUUAAAG  
Dfo-1-1 ACAGGUGAGCGGACCGGUUCCAUUCUACUAAAGAAAGAGGUUGUACAAUUCUUAAAG  
env-818 ACAGGUGAGCGGACCGGUUCCAUUCUACUAAAGAAAGAGGUUGUACAAUUCUUAAAG  
env-819 ACAGGUGAGCGGACCGGUUCCAUUCUACUAAAGAAAGAGGUUGUACAAUUCUUAAAG  
env-820 GACCGGUGCCGUUACCAACCAAGAAAGAGGUAGUAAACUUCUGCGUGCGGUUCAUAA  
[ci-1-1 ACCGGUACCGUUACCAACCAAGAAAGAGGUAGUAAACUUCUGCGUGCGUUCUAAAG  
Csp-5-1 ACCGGUACCGUUACCAACCAAGAAAGAGGUAGUAAACUUCUGCGUGCGUUCUAAAG  
env-821 GGACCGGUGCCGUUACCAACCAAGAAAGAGGUAGUAAACUUCUGCGUGCGGUUCAUAA  
env-822 GACCGGUGCCGUUACCAACCAAGAAAGAGGUAGUAAACUUCUGCGUGCGGUUCAUAA  
env-823 GACCGGUGCCGUUACCAACCAAGAAAGAGGUAGUAAACUUCUGCGUGCGGUUCAUAA  
Cbo-2-1 GACCGGUGCCGUUACCAACCAAGAAAGAGGUAGUAAACUUCUGCGUGCGGUUCAUAA  
Cba-7-1 ACCGGUGCCGUUACCAACCAAGAAAGAGGUAGUAAACUUCUGCGUGCGUUCUAAAG  
env-824 GACCGGUGCCGUUACCAACCAAGAAAGAGGUAGUAAACUUCUGCGUGCGGUUCAUAA  
Cba-2-1 ACCGGUGCCGUUACCAACCAAGAAAGAGGUAGUAAACUUCUGCGUGCGUUCUAAAG  
env-826 GACCGGUGCCGUUACCAACCAAGAAAGAGGUAGUAAACUUCUGCGUGCGGUUCAUAA  
Ccl-6-1 GACCGGUGCCGUUACCAACCAAGAAAGAGGUAGUAAACUUCUGCGUGCGGUUCAUAA  
env-827  
Ccl-3-1 GACCGGUGCCGUUACCAACCAAGAAAGAGGUAGUAAACUUCUGCGUGCGGUUCAUAA  
Ccl-1-1 GACCGGUGCCGUUACCAACCAAGAAAGAGGUAGUAAACUUCUGCGUGCGGUUCAUAA  
Lba-16-1 CAGGUGAGCGGUCGGUACCAUUCGACCAAGAAAGAGGUAGUAAACUUCUAGAGCGGG  
Csp-3-1 CAGGUGAGCGGUCGGUACCAUUCGACCAAGAAAGAGGUAGUAAACUUCUAGAGCGGG  
env-828 UCACAGGUGAGCGGACCGGUGCCGUCGGCACAAGAAAGAGGUAGUAAACUUCUUA  
env-829 CAGGUGAGCGGACCGGUGCCGUCGGCACAAGAAAGAGGUAGUAAACUUCUAGAG  
env-830  
env-831  
env-832  
env-833  
env-837 NNNNNNNNNNNNNNGUAUGAUCACAGCUCGUUGAUGCAUCCGCAAAAGAAAUCAU  
env-838 CAGGUGAGCGGACCGGUGCCGUCGGCACAAGAAAGAGGUAGUAAACUUCUAGAG  
env-839 UGUACCUUCUCCAAACAAAGAAAGAGGUAGUAAACUUCUAGAGCUGUACACAAGUAC  
env-840  
env-841 ACAGGUGAGCGGACCGGUGCCGUCGGCACAAGAAAGAGGUAGUAAACUUCUUA  
Lba-7-1 CAGGUGAGCGGACCGGUGCCGUCGGCACAAGAAAGAGGUAGUAAACUUCUAGAG  
env-842 CAGGUGAGCGG  
env-843 CGGUGCCGUUACCAACCAAGAAAGAGGUAGUAAACUUCUAGAGCAGUUCACAAGUA  
env-844 C  
env-845 GAAGAUAUCGAGAGUGCUAAGAAAGACAGGGGUCAGGUGAGCGGACCGGUACCUUCU  
env-848 GAAGAUAUCGAGAGUGCUAAGAAAGACAGGGGUCAGGUGAGCGGACCGGUACCUUCU  
env-849  
env-850  
env-851  
env-853 AUCGAAAACUGUAAAGAAAGAACGGUACACAGGUGAGCGGACCGGUACCUUCUCCAA  
env-854 AUCGAAAACUGUAAAGAA  
env-855  
env-856  
env-861 AUCGAAAACUGUAAAGAAAGAACGGUACACAGGUGAGCGGACCGGUACCUUCUCCAA  
env-862  
env-863 UACCACUUCCCAUAAGAAAGAGUAGUAAACUUCUAGAGCGGUUCAAAUUAACA  
env-864  
env-865 GAAAAACGGUACACAGGUGAGCGGACCGGUACCAUUCUCCAAUAAAGAGAAAGUUGUU  
env-866 GAAAAACGGUACACAGGUGAGCGGACCGGUACCAUUCUCCAAUAAAGAGAAAGUUGUU  
env-867 GAAAAACGGUACACAGGUGAGCGGACCGGUACCAUUCUCCAAUAAAGAGAAAGUUGUU  
env-868  
env-872 GAAAAACGGUACACAGGUGAGCGGACCGGUACCAUUCUCCAAUAAAGAGAAAGUUGUU  
env-874  
env-875  
env-877 GAAAGAACGGUACACAGGUGAGCGGACCGGUACCUUCUCCAAUAAAGAAAGUAGUU  
env-878 GAAAAACGGUACACAGGUGAGCGGACCGGUACCAUUCUCCAAUAAAGAGAAAGUUGUU  
env-879 GAAAAACGGUACACAGGUGAGCGGACCGG  
env-880 GAAAAACGGUACACAGGUGAGCGGACCGGUACCAUUCUCCAAUAAAGAGAAAGUUGUU  
env-892 GAAAAACGGUACACAGGUGAGCGGACCGGUACCAUUCUCCAAUAAAGAGAAAGUUGUU  
env-893 GAAAAACGGUACACAGGUGAGCGGACCGGUACCAUUCUCCAAUAAAGAGAAAGUUGUU  
env-898 GAAAAACGGUACACAGGUGAGCGGACCGGUACCAUUCUCCAAUAAAGAGAAAGUUGUU  
env-899 GAAAAACGGUACACAGGUGAGCGGACCGGUACCAUUCUCCAAUAAAGAGAAAGUUGUU

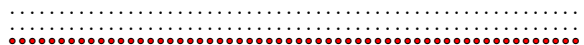



env-1024 .....  
 env-1026 AAAAAAAAAUCGAAACAGUAAAGAAAAAGGUUUCACAGGUGAGUGGACCGGUACCCUCU  
 env-1027 AAAAAAAAAUCGAAACAGUAAAGAAAAAGGUUUCACAGGUGAGUGGACCGGUACCCUCU  
 env-1028 AAAAAAAAAUCGAAACAGUAAAGAAAAAGGUUUCACAGGUGAGUGGACCGGUACCCUCU  
 env-1029 .....  
 env-1030 UCCGGUUCGCGUGCCGACAAAGAAAGAGGUUUAACAACUUUAAGAGCUGUUAUAAG  
 env-1032 UCCGGUUCGCGUGCCGACAAAGAAAGAGGUUUAACAACUUUAAGAGCUGUUAUAAG  
 env-1033 UCCGGUUCGCGUGCCGACAAAGAAAGAGGUUUAACAACUUUAAGAGCUGUUAUAAG  
 env-1034 GAGACUGUAAAAGAAACCGGAUCACAGGUGAGCGGACCGGUACCCUUCUUAUAAGA  
 env-1035 .....  
 env-1036 .....  
 env-1037 .....  
 env-1038 .....  
 env-1039 CGAGACUGUAAAAGAAACCGGAUCACAGGUGAGCGGACCGGUACCCUUCUUAUAAG  
 env-1040 CGAGACUGUAAAAGAAACCGGAUCACAGGUGAGCGGACCGGUACCCUUCUUAUAAG  
 env-1041 .....  
 env-1042 .....  
 env-1043 .....  
 env-1044 CGAGACUGUAAAAGAAACCGGAUCACAGGUGAGCGGACCGGUACCCUUCUUAUAAG  
 env-1045 .....  
 env-1046 .....  
 env-1052 .....  
 env-1053 .....  
 env-1054 .....  
 env-1055 C.....  
 env-1056 .....  
 env-1057 .....  
 env-1058 .....  
 env-1059 CGAGACUGUAAAAGAAACCGGAUCACAGGUGAGCGGACCGGUACCCUUCUUAUAAG  
 Cha-1-1 CGGUGCCGUUACCAACGAAGAAAGAGGUGUAACUUAUUUACGUGCAGUUCACAAGUA  
 env-1065 CGGUGCCGUUACCAACGAAGAAAGAGGUGUAACUUAUUUACGUGCAGUUCACAAGUA  
 env-1066 CGGUGCCGUUACCAACGAAGAAAGAGGUGUAACUUAUUUACGUGCAGUUCACAAGUA  
 Cba-1-1 CUGCCAAGAAAAUCAUCGAAACAGUUAAAGAAACCGGACACAGGUGAGCGGACCGGU  
 Cba-8-1 CUGCCAAGAAAAUCAUCGAAACAGUUAAAGAAACCGGACACAGGUGAGCGGACCGGU  
 env-1067 CUGCCAAGAAAAUCAUCGAAACAGUUAAAGAAACCGGACACAGGUGAGCGGACCGGU  
 Lba-20-1 CUGCCAAGAAAAUCAUCGAAACAGUUAAAGAAACCGGACACAGGUGAGCGGACCGGU  
 Lba-8-1 CUGCCAAGAAAAUCAUCGAAACAGUUAAAGAAACCGGACACAGGUGAGCGGACCGGU  
 env-1068 CUGCCAAGAAAAUCAUCGAAACAGUUAAAGAAACCGGACACAGGUGAGCGGACCGGU  
 Lba-13-1 ACUCCCAACCAAGGAAAGUAGUACAACUUUAAGGACAGUCCAAAGUAUAAGGAC  
 Csp-7-1 GUACCGUUAACCAACAAAGAAAGAGGUUUAACAACUUUAAGAGCUGUUAUAAGUAACA  
 env-1069 UGCCGUUACCAACUAAAGAAAGAGGUUUAACAACUUUAAGAGCUGUUAUAAGUAACA  
 env-1070 G.....  
 env-1071 UGCCGUUACCAACUAAAGAAAGAGGUUUAACAACUUUAAGAGCUGUUAUAAGUAACA  
 env-1072 .....  
 Esp-1-1 CCCCUCACCACCAACCGGAAGUAGUAACCAUUUUGAGAGCGGUUACAAAUAACAAG  
 env-1073 .....  
 env-1074 .....  
 env-1075 GGUUCCGUGCCGACCAAGAAAGAGGUUUAACGAUCUUUAAGAGCUGUUAUAAGUAC  
 Csa-1-1 GUGCCGUUACCAACCAAGAAAGGAGGUGUAACCAUCUUUAAGGCGGUUACAAAGUACA  
 env-1076 CUUUUUUUUAGGCAAGUCAAGUUAUAGAGA  
 env-1077 UGAUCAGUCAGCUAAGAAAAUUUUCGAGACUGUUUAAGAAAGACAGGAUCUCAGGUGAGU  
 env-1078 CGAGACUGUAAAAGAAACCGGAUCACAGGUGAGCGGACCGGUACCCUUCUUAUAAG  
 env-1081 .....  
 env-1082 .....  
 env-1083 CGAGACUGUAAAAGAAACCGGAUCACAGGUGAGCGGACCGGUACCCUUCUUAUAAG  
 env-1084 .....  
 env-1085 CGAGACUGUAAAAGAAACCGGAUCACAGGUGAGCGGACCGGUACCCUUCUUAUAAG  
 env-1086 CGAGACUGUAAAAGAAACCGGAUCACAGGUGAGCGGACCGGUACCCUUCUUAUAAG  
 Cha-2-1 GUUCCGUUACCAACCAAGAAAGGAGUAGUUUAACUUAUUAAGGACAGUUCACAAGUACA  
 Lba-5-1 CUUCCCAACCAAGAAAGGAGUUAACAACUUUUCGUGCAGUUCACAAUAUAAGGAUU  
 Csp-1-1 GUGCCGUUACCGACAAAGAAAGGAGUAGUUAACAACUUUUAAGGCGUUAUAAGUACA  
 env-1087 GUGCCGUUACCGACAAAGAAAGGAGUAGUUAACAACUUUUAAGGCGUUAUAAGUACA  
 env-1088 GGUUCCGUGUCCUUAUAAGAAAGGAGUAGUUAACAACUUUUAAGGCGUUAUAAGUAC  
 env-1089 CGGUCCGUAUCCGUGCCGACCAAGAAAGGAGUAGUUAACAACUUUCCGUGCGGUUAC  
 env-1093 CCGAACCAAGAAAGAGGUAGUUAACAACUUUCCGUGCGGUUACCAAGUUAAGGACAGCC  
 env-1094 .....  
 env-1095 .....  
 env-1096 CGGUCCGUAUCCGUGCCGACCAAGAAAGGAGUUAACAACUUUCCGUGCGGUUAC  
 env-1097 .....  
 env-1099 CGGUUUAACAAGUUAAGGACAGCCGUGAGCAGUUCGACGAGAAACGUAUAAGAGAC  
 env-1100 .....  
 Slo-1-1 CGGUCCGUAUCCGUGCCGACCAAGAAAGGAGUAGUUAACAACUUUCCGUGCGGUUAC  
 env-1101 .....  
 env-1102 .....  
 env-1103 CCGGUCCGUAUCCGUGCCGACCAAGAAAGGAGUAGUUAACAACUUUCCGUGCGGUUAC  
 env-1104 CGAGCAGAGAACUCACA.....  
 env-1105 .....  
 env-1106 GGCCCGAUUCCGUGCCGACCAAGAAAGGAGUAGUUAACAACUUUCCGUGCGGUUAC  
 env-1107 .....  
 env-1108 CCGGUCCGUAUCCGUGCCGACCAAGAAAGGAGUAGUUAACAACUUUCCGUGCGGUUAC  
 env-1115 .....  
 env-1118 CGGUCCGUAUCCGUGCCGACCAAGAAAGGAGUAGUUAACAACUUUCCGUGCGGUUAC  
 env-1123 GGCCCGAUUCCGUGCCGACCAAGAAAGGAGUAGUUAACAACUUUCCGUGCGGUUAC  
 env-1124 .....  
 .....  
 .....  
 .....





|         |         |               |              |                 |                  |                                                   |
|---------|---------|---------------|--------------|-----------------|------------------|---------------------------------------------------|
| Hde-1-1 | Archaea | Euryarchaeota | Halobacteria | Halobacteriales | Halobacteriaceae | <i>Haloferax denitrificans</i> ATCC 35960         |
| Hel-1-1 | Archaea | Euryarchaeota | Halobacteria | Halobacteriales | Halobacteriaceae | <i>Haloferax elongans</i> ATCC BAA-1513           |
| Hgi-1-1 | Archaea | Euryarchaeota | Halobacteria | Halobacteriales | Halobacteriaceae | <i>Haloferax gibbonsii</i> ATCC 33959             |
| Hla-2-1 | Archaea | Euryarchaeota | Halobacteria | Halobacteriales | Halobacteriaceae | <i>Haloferax larsenii</i> JCM 13917               |
| Hme-1-1 | Archaea | Euryarchaeota | Halobacteria | Halobacteriales | Halobacteriaceae | <i>Haloferax mediterranei</i> ATCC 33500          |
| Hmu-1-1 | Archaea | Euryarchaeota | Halobacteria | Halobacteriales | Halobacteriaceae | <i>Haloferax mucosum</i> ATCC BAA-1512            |
| Hpr-1-1 | Archaea | Euryarchaeota | Halobacteria | Halobacteriales | Halobacteriaceae | <i>Haloferax prahovense</i> DSM 18310             |
| Hsp-2-1 | Archaea | Euryarchaeota | Halobacteria | Halobacteriales | Halobacteriaceae | <i>Haloferax sp.</i> ATCC BAA-646                 |
| Hsu-2-1 | Archaea | Euryarchaeota | Halobacteria | Halobacteriales | Halobacteriaceae | <i>Haloferax sulfurifontis</i> ATCC BAA-897       |
| Hvo-1-1 | Archaea | Euryarchaeota | Halobacteria | Halobacteriales | Halobacteriaceae | <i>Haloferax volcanii</i> DS2                     |
| Hbo-1-1 | Archaea | Euryarchaeota | Halobacteria | Halobacteriales | Halobacteriaceae | <i>Halogeometricum borinquense</i> DSM 11551      |
| Hsa-5-1 | Archaea | Euryarchaeota | Halobacteria | Halobacteriales | Halobacteriaceae | <i>Halogramum salarium</i> B-1                    |
| Hka-1-1 | Archaea | Euryarchaeota | Halobacteria | Halobacteriales | Halobacteriaceae | <i>Halomicrobium katesii</i> DSM 19301            |
| Hmu-2-1 | Archaea | Euryarchaeota | Halobacteria | Halobacteriales | Halobacteriaceae | <i>Halomicrobium mukohataei</i> DSM 12286         |
| Hxa-1-1 | Archaea | Euryarchaeota | Halobacteria | Halobacteriales | Halobacteriaceae | <i>Halopiger xanaduensis</i> SH-6                 |
| Hti-1-1 | Archaea | Euryarchaeota | Halobacteria | Halobacteriales | Halobacteriaceae | <i>Halorhabdus tiamatea</i> SARL4B                |
| Hut-1-1 | Archaea | Euryarchaeota | Halobacteria | Halobacteriales | Halobacteriaceae | <i>Halorhabdus utahensis</i> DSM 12940            |
| Hai-1-1 | Archaea | Euryarchaeota | Halobacteria | Halobacteriales | Halobacteriaceae | <i>Halorubrum ailingense</i> JCM 13560            |
| Har-2-1 | Archaea | Euryarchaeota | Halobacteria | Halobacteriales | Halobacteriaceae | <i>Halorubrum arcis</i> JCM 13916                 |
| Hca-2-1 | Archaea | Euryarchaeota | Halobacteria | Halobacteriales | Halobacteriaceae | <i>Halorubrum californiense</i> DSM 19288         |
| Hco-1-1 | Archaea | Euryarchaeota | Halobacteria | Halobacteriales | Halobacteriaceae | <i>Halorubrum coriense</i> DSM 10284              |
| Hdi-1-1 | Archaea | Euryarchaeota | Halobacteria | Halobacteriales | Halobacteriaceae | <i>Halorubrum distributum</i> JCM 10118           |
| Hho-1-1 | Archaea | Euryarchaeota | Halobacteria | Halobacteriales | Halobacteriaceae | <i>Halorubrum hochstenium</i> ATCC 700873         |
| Hko-1-1 | Archaea | Euryarchaeota | Halobacteria | Halobacteriales | Halobacteriaceae | <i>Halorubrum kocurii</i> JCM 14978               |
| Hli-1-1 | Archaea | Euryarchaeota | Halobacteria | Halobacteriales | Halobacteriaceae | <i>Halorubrum lipolyticum</i> DSM 21995           |
| Hli-2-1 | Archaea | Euryarchaeota | Halobacteria | Halobacteriales | Halobacteriaceae | <i>Halorubrum litoreum</i> JCM 13561              |
| Hsa-6-1 | Archaea | Euryarchaeota | Halobacteria | Halobacteriales | Halobacteriaceae | <i>Halorubrum saccharovororum</i> DSM 1137        |
| Hsp-3-1 | Archaea | Euryarchaeota | Halobacteria | Halobacteriales | Halobacteriaceae | <i>Halorubrum sp.</i> T3                          |
| Hte-1-1 | Archaea | Euryarchaeota | Halobacteria | Halobacteriales | Halobacteriaceae | <i>Halorubrum tebenquichense</i> DSM 14210        |
| Hpa-2-1 | Archaea | Euryarchaeota | Halobacteria | Halobacteriales | Halobacteriaceae | <i>Halosarcina pallida</i> JCM 14848              |
| Hca-3-1 | Archaea | Euryarchaeota | Halobacteria | Halobacteriales | Halobacteriaceae | <i>Halosimplex carlsbadense</i> 2-9-1             |
| Hli-3-1 | Archaea | Euryarchaeota | Halobacteria | Halobacteriales | Halobacteriaceae | <i>Haloterrigena limicola</i> JCM 13563           |
| Hsa-7-1 | Archaea | Euryarchaeota | Halobacteria | Halobacteriales | Halobacteriaceae | <i>Haloterrigena salina</i> JCM 13891             |
| Hth-2-1 | Archaea | Euryarchaeota | Halobacteria | Halobacteriales | Halobacteriaceae | <i>Haloterrigena thermotolerans</i> DSM 11522     |
| Htu-1-1 | Archaea | Euryarchaeota | Halobacteria | Halobacteriales | Halobacteriaceae | <i>Haloterrigena turkmenica</i> DSM 5511          |
| Has-1-1 | Archaea | Euryarchaeota | Halobacteria | Halobacteriales | Halobacteriaceae | <i>Halovivax asiaticus</i> JCM 14624              |
| Nae-1-1 | Archaea | Euryarchaeota | Halobacteria | Halobacteriales | Halobacteriaceae | <i>Natrialba aegyptia</i> DSM 13077               |
| Nas-1-1 | Archaea | Euryarchaeota | Halobacteria | Halobacteriales | Halobacteriaceae | <i>Natrialba asiatica</i> DSM 12278               |
| Nch-1-1 | Archaea | Euryarchaeota | Halobacteria | Halobacteriales | Halobacteriaceae | <i>Natrialba chahannaoensis</i> JCM 10990         |
| Nhu-1-1 | Archaea | Euryarchaeota | Halobacteria | Halobacteriales | Halobacteriaceae | <i>Natrialba hulunbeirensis</i> JCM 10989         |
| Nma-1-1 | Archaea | Euryarchaeota | Halobacteria | Halobacteriales | Halobacteriaceae | <i>Natrialba magadii</i> ATCC 43099               |
| Nta-1-1 | Archaea | Euryarchaeota | Halobacteria | Halobacteriales | Halobacteriaceae | <i>Natrialba taiwanensis</i> DSM 12281            |
| Nga-1-1 | Archaea | Euryarchaeota | Halobacteria | Halobacteriales | Halobacteriaceae | <i>Natrinema gari</i> JCM 14663                   |
| Npa-1-1 | Archaea | Euryarchaeota | Halobacteria | Halobacteriales | Halobacteriaceae | <i>Natrinema pallidum</i> DSM 3751                |
| Npe-1-1 | Archaea | Euryarchaeota | Halobacteria | Halobacteriales | Halobacteriaceae | <i>Natrinema pellirubrum</i> DSM 15624            |
| Nve-1-1 | Archaea | Euryarchaeota | Halobacteria | Halobacteriales | Halobacteriaceae | <i>Natrinema versiforme</i> JCM 10478             |
| Ngr-1-1 | Archaea | Euryarchaeota | Halobacteria | Halobacteriales | Halobacteriaceae | <i>Natronobacterium gregoryi</i> SP2              |
| Nam-1-1 | Archaea | Euryarchaeota | Halobacteria | Halobacteriales | Halobacteriaceae | <i>Natronococcus amylolyticus</i> DSM 10524       |
| Nje-1-1 | Archaea | Euryarchaeota | Halobacteria | Halobacteriales | Halobacteriaceae | <i>Natronococcus jeotgali</i> DSM 18795           |
| Noc-1-1 | Archaea | Euryarchaeota | Halobacteria | Halobacteriales | Halobacteriaceae | <i>Natronococcus occultus</i> SP4                 |
| Nin-1-1 | Archaea | Euryarchaeota | Halobacteria | Halobacteriales | Halobacteriaceae | <i>Natronolimnobius innermongolicus</i> JCM 12255 |
| Nmo-1-1 | Archaea | Euryarchaeota | Halobacteria | Halobacteriales | Halobacteriaceae | <i>Natronomonas mooolapensis</i> 8.8.11           |
| Nph-1-1 | Archaea | Euryarchaeota | Halobacteria | Halobacteriales | Halobacteriaceae | <i>Natronomonas pharaonis</i> DSM 2160            |
| Nba-1-1 | Archaea | Euryarchaeota | Halobacteria | Halobacteriales | Halobacteriaceae | <i>Natronorubrum bangense</i> JCM 10635           |
| Nsu-1-1 | Archaea | Euryarchaeota | Halobacteria | Halobacteriales | Halobacteriaceae | <i>Natronorubrum sulfidifaciens</i> JCM 14089     |
| Nti-1-1 | Archaea | Euryarchaeota | Halobacteria | Halobacteriales | Halobacteriaceae | <i>Natronorubrum tibetense</i> GA33               |
| Ssp-1-1 | Archaea | Euryarchaeota | Halobacteria | Halobacteriales | Halobacteriaceae | <i>Salinarchaeum sp.</i> Harcht-Bsk1              |
| Hag-1-1 | Archaea | Euryarchaeota | Halobacteria | Halobacteriales | Halococcaceae    | <i>Halococcus agarilyticus</i>                    |
| Hse-1-1 | Archaea | Euryarchaeota | Halobacteria | Halobacteriales | Halococcaceae    | <i>Halococcus sediminicola</i>                    |
| Hru-1-1 | Archaea | Euryarchaeota | Halobacteria | Haloferacales   | Haloferacaceae   | <i>Halobellus rufus</i>                           |
| Hal-1-1 | Archaea | Euryarchaeota | Halobacteria | Haloferacales   | Haloferacaceae   | <i>Haloferax alexandrinus</i>                     |
| Hgi-2-1 | Archaea | Euryarchaeota | Halobacteria | Haloferacales   | Haloferacaceae   | <i>Haloferax gibbonsii</i>                        |
| Hsp-4-1 | Archaea | Euryarchaeota | Halobacteria | Haloferacales   | Haloferacaceae   | <i>Haloferax sp.</i> ATB1                         |
| Hna-1-1 | Archaea | Euryarchaeota | Halobacteria | Haloferacales   | Haloferacaceae   | <i>Haloplanus natans</i> DSM 17983                |
| Hru-2-1 | Archaea | Euryarchaeota | Halobacteria | Haloferacales   | Halorubraceae    | <i>Halolamina rubra</i>                           |

|                  |         |               |              |               |               |                                      |
|------------------|---------|---------------|--------------|---------------|---------------|--------------------------------------|
| Hha-2-1          | Archaea | Euryarchaeota | Halobacteria | Haloferacales | Halorubraceae | <i>Halorubrum halophilum</i>         |
| Hsa-8-1          | Archaea | Euryarchaeota | Halobacteria | Haloferacales | Halorubraceae | <i>Halorubrum saccharovororum</i>    |
| Hsp-5-1          | Archaea | Euryarchaeota | Halobacteria | Haloferacales | Halorubraceae | <i>Halorubrum sp.</i> BV1            |
| Hdj-1-1          | Archaea | Euryarchaeota | Halobacteria | Natrialbales  | Natrialbaceae | <i>Halopiger djelfmassiliensis</i>   |
| Hgo-1-1          | Archaea | Euryarchaeota | Halobacteria | Natrialbales  | Natrialbaceae | <i>Halopiger goleimassiliensis</i>   |
| Hsa-9-1          | Archaea | Euryarchaeota | Halobacteria | Natrialbales  | Natrialbaceae | <i>Halopiger salifodinae</i>         |
| Hla-3-1          | Archaea | Euryarchaeota | Halobacteria | Natrialbales  | Natrialbaceae | <i>Halostagnicola larsenii</i> XH-48 |
| Hsp-6-1          | Archaea | Euryarchaeota | Halobacteria | Natrialbales  | Natrialbaceae | <i>Halostagnicola sp.</i> A56        |
| Hje-2-1          | Archaea | Euryarchaeota | Halobacteria | Natrialbales  | Natrialbaceae | <i>Haloterrigena jeotgali</i> A29    |
| Nal-1-1          | Archaea | Euryarchaeota | Halobacteria | Natrialbales  | Natrialbaceae | <i>Natrinema altunense</i>           |
| Nsp-1-1          | Archaea | Euryarchaeota | Halobacteria | Natrialbales  | Natrialbaceae | <i>Natrinema sp.</i> J7-1            |
| env-1 to env-185 |         |               |              |               |               | environmental samples                |

## 20.2 Gene contexts

Each S15-Halobacteria RNA (indicated by “RNA→”) is listed. For each hit, the downstream genes predicted to reside in a regulated operon are listed. If the nearest downstream gene is encoding in the opposite strand (and therefore presumed to not be a part of a regulated operon), then that gene is still depicted. Some environmental sequences and some RefSeq entries lack gene annotations, and so no genes are available for such sequences. The direction of each gene is indicated with an arrow (→), and each predicted conserved domain in the gene is named. Conserved domains associated with more than one S15-Halobacteria RNA are assigned a color; other domains are gray. Information about these conserved

domains is given in Section 20.3. The accession of the sequence containing each S15-Halobacteria RNA is given in the column named “Seq. accession”. Accessions beginning with “NC\_”, “NS\_”, “NW\_” or “NZ\_” are contained in RefSeq. Other accession refer to environmental samples. Nucleotide coordinates are given for the 5′ and 3′ boundaries of each S15-Halobacteria RNA. If the 5′ coordinate is greater than the 3′ coordinate, the RNA is present on the reverse-complement strand of the containing genomic DNA sequence. Each hit is denoted by an abbreviation (like “Eco-1-1”) that refers to a taxonomy given in Section 20.1.

| abbrev. | Seq. accession           |   | 5′ at  | 3′ at  | genes                                                                                                                                                  |
|---------|--------------------------|---|--------|--------|--------------------------------------------------------------------------------------------------------------------------------------------------------|
| env-1   | CETH01443816.1           | - | 36475  | 36410  | RNA→ <b>rps15p (PRK08561)</b> Ribosomal_S15 (pfam00312)→ <b>PRK14888 (PRK14888)</b> →<br><b>RPS3A (COG1890)PRK04057 (PRK04057)</b> →                   |
| env-2   | CEWR01249401.1           | - | 634    | 569    | RNA→ <b>rps15p (PRK08561)</b> Ribosomal_S15 (pfam00312)→                                                                                               |
| env-3   | CESY01224593.1           | + | 483    | 548    | RNA→                                                                                                                                                   |
| env-4   | CEQN01077410.1           | - | 89     | 24     | RNA→                                                                                                                                                   |
| env-5   | CEUZ01094134.1           | + | 294    | 359    | RNA→ <b>Ribosomal_S15 (pfam00312)</b> Ribosomal_S13_N (pfam08069)→                                                                                     |
| env-6   | CEVQ01090649.1           | - | 366    | 301    | RNA→ <b>Ribosomal_S13_N (pfam08069)</b> →                                                                                                              |
| env-7   | JXWU01104845.1           | + | 1      | 97     | RNA→ <b>S15_NS1_EPRS_RNA-bind (cd00677)</b> Ribosomal_S13_N (pfam08069)→                                                                               |
| Hut-1-1 | NC_013158.1              | - | 714527 | 714434 | RNA→ <b>rps15p (PRK08561)</b> Ribosomal_S15p_S13e (cd00353)→ <b>hypo</b> → <b>PRK14888 (PRK14888)</b> →<br><b>RPS3A (COG1890)PRK04057 (PRK04057)</b> → |
| env-8   | JXWS01091643.1           | - | 837    | 774    | RNA→ <b>rps15p (PRK08561)</b> Ribosomal_S15 (pfam00312)→ <b>PRK07409 (PRK07409)</b> →                                                                  |
| env-9   | GQKUMWE02J03Y4           | - | 278    | 180    | RNA→ <b>rps15p (PRK08561)</b> →                                                                                                                        |
| Hti-1-1 | NZ_AFNTO2000006.1        | - | 58722  | 58627  | RNA→ <b>RpsO (COG0184)</b> rps15p (PRK08561)→ <b>hypo</b> → <b>PRK14888 (PRK14888)</b> →<br><b>RPS3A (COG1890)PRK04057 (PRK04057)</b> →                |
| env-10  | GSLNARP_contig10642      | + | 226    | 286    | RNA→ <b>rps15p (PRK08561)</b> Ribosomal_S15p_S13e (cd00353)→ <b>PHA03247 (PHA03247)</b> →                                                              |
| env-11  | GSLNARP_GFPJP1N02I2Z83   | - | 234    | 174    | RNA→ <b>rps15p (PRK08561)</b> →                                                                                                                        |
| env-12  | SS_3KL_010_SOIL_10126881 | - | 211    | 126    | RNA→ ← <b>hypo</b>                                                                                                                                     |
| env-13  | 2140918017-39245         | - | 377    | 279    | RNA→ <b>Ribosomal_S13_N (pfam08069)</b> →                                                                                                              |
| env-14  | GSLNAS_contig01475       | - | 166    | 104    | RNA→ <b>rps15p (PRK08561)</b> →                                                                                                                        |
| env-15  | APHM01016997.1           | + | 513    | 574    | RNA→ <b>RpsO (COG0184)</b> rps15p (PRK08561)→ <b>hypo</b> →                                                                                            |
| Hac-1-1 | NZ_BATA01000023.1        | + | 18137  | 18202  | RNA→ <b>RpsO (COG0184)</b> rps15p (PRK08561)→ <b>hypo</b> → <b>Pcc1 (COG2892)PRK14888 (PRK14888)</b> →<br><b>RPS3A (COG1890)PRK04057 (PRK04057)</b> →  |
| env-16  | GSLNARP_contig03059      | + | 263    | 328    | RNA→ <b>rps15p (PRK08561)</b> →                                                                                                                        |
| Hsa-5-1 | NZ_ALJD01000003.1        | - | 168876 | 168813 | RNA→ ← <b>hypo</b>                                                                                                                                     |
| env-17  | P_A23_Liq_1_Fmt_1021563  | + | 164    | 234    | RNA→ <b>hypo</b> →                                                                                                                                     |

|         |                           |   |        |        |                                                                                                                                               |
|---------|---------------------------|---|--------|--------|-----------------------------------------------------------------------------------------------------------------------------------------------|
| env-18  | P_A23_Liq_3_Fmt_1005281   | - | 131    | 61     | RNA→                                                                                                                                          |
| env-19  | P_1C_Liq_3_UnCty_1085606  | - | 92     | 22     | RNA→ ←hypo                                                                                                                                    |
| env-20  | P_1C_Sed_2_UnCty_1004024  | + | 2712   | 2782   | RNA→ rps15p (PRK08561)Ribosomal_S15p_S13e (cd00353)→ hypo→                                                                                    |
| Har-2-1 | NZ_AOJ01000049.1          | - | 118618 | 118548 | RNA→ rps15p (PRK08561)Ribosomal_S15p_S13e (cd00353)→ hypo→ PRK14888 (PRK14888)→<br>RPS3A (COG1890)PRK04057 (PRK04057)→                        |
| Hsp-3-1 | NZ_JH815329.1             | + | 386490 | 386560 | RNA→ rps15p (PRK08561)Ribosomal_S15p_S13e (cd00353)→ hypo→ PRK14888 (PRK14888)→<br>RPS3A (COG1890)PRK04057 (PRK04057)→                        |
| env-21  | P_1C_Liq_1_UnCty_1154732  | + | 171    | 241    | RNA→                                                                                                                                          |
| env-22  | P_1C_Liq_1_UnCty_1093462  | + | 241    | 311    | RNA→ ←hypo                                                                                                                                    |
| env-23  | P_A23_Liq_1_Fmt_1001349   | + | 3246   | 3316   | RNA→ rps15p (PRK08561)Ribosomal_S15p_S13e (cd00353)→                                                                                          |
| Hdi-1-1 | NZ_AOJN01000047.1         | + | 134657 | 134727 | RNA→ rps15p (PRK08561)Ribosomal_S15p_S13e (cd00353)→ hypo→ PRK14888 (PRK14888)→<br>RPS3A (COG1890)PRK04057 (PRK04057)→                        |
| Hli-2-1 | NZ_AOJF01000030.1         | - | 133338 | 133268 | RNA→ rps15p (PRK08561)Ribosomal_S15p_S13e (cd00353)→ PRK13800 (PRK13800)→<br>PRK14888 (PRK14888)→ RPS3A (COG1890)PRK04057 (PRK04057)→         |
| Hsa-8-1 | NZ_JNFH02000131.1         | + | 4096   | 4166   | RNA→ rps15p (PRK08561)Ribosomal_S15p_S13e (cd00353)→                                                                                          |
| env-24  | P_1C_Liq_1_UnCty_1068401  | - | 82     | 12     | RNA→ ←hypo                                                                                                                                    |
| Hha-2-1 | NZ_BBJP01000023.1         | + | 160344 | 160414 | RNA→ rps15p (PRK08561)Ribosomal_S15p_S13e (cd00353)→                                                                                          |
| Hko-1-1 | NZ_AOJH01000076.1         | + | 51508  | 51578  | RNA→ rps15p (PRK08561)Ribosomal_S15p_S13e (cd00353)→                                                                                          |
| env-25  | SL_6KL_011_BRINE_1017551  | + | 2402   | 2473   | RNA→ ←hypo                                                                                                                                    |
| env-26  | ADL20m3uS_contig00641     | - | 3847   | 3777   | RNA→ rps15p (PRK08561)Ribosomal_S15p_S13e (cd00353)→                                                                                          |
| env-27  | SL_6KL_011_BRINE_1076960  | - | 86     | 16     | RNA→                                                                                                                                          |
| env-28  | SL_6KL_011_BRINE_1017271  | + | 2449   | 2519   | RNA→ ←hypo                                                                                                                                    |
| env-29  | SL_6KL_011_BRINE_1090146  | - | 309    | 239    | RNA→ rps15p (PRK08561)→                                                                                                                       |
| env-30  | SL_6KL_011_BRINE_1023965  | - | 103    | 33     | RNA→ ←cad (TIGR00779)CadD (COG4300)                                                                                                           |
| env-31  | SL_6KL_011_BRINE_1037136  | - | 103    | 33     | RNA→                                                                                                                                          |
| env-32  | SL_6KL_011_BRINE_1181093  | - | 313    | 245    | RNA→ ←hypo                                                                                                                                    |
| env-33  | SL_6KL_011_BRINE_1011159  | - | 349    | 278    | RNA→ rps15p (PRK08561)→                                                                                                                       |
| env-34  | SL_5KL_010_SED_10000937   | + | 4177   | 4247   | RNA→ rps15p (PRK08561)Ribosomal_S15p_S13e (cd00353)→ hypo→ PRK14888 (PRK14888)→<br>PRK04057 (PRK04057)Ribosomal_S3Ae (pfam01015)→             |
| env-35  | SL_6KL_011_BRINE_1004176  | - | 2444   | 2374   | RNA→ rps15p (PRK08561)Ribosomal_S15p_S13e (cd00353)→ hypo→ PRK14888 (PRK14888)→                                                               |
| env-36  | SL_5KL_010_BRINE_10006748 | - | 203    | 133    | RNA→                                                                                                                                          |
| env-37  | SL_5KL_010_BRINE_10374007 | + | 150    | 220    | RNA→ ←hypo                                                                                                                                    |
| env-38  | SL_4KL_010_BRINE_10048044 | - | 170    | 100    | RNA→                                                                                                                                          |
| env-39  | P_1C_Liq_3_UnCty_1004643  | + | 1043   | 1114   | RNA→                                                                                                                                          |
| env-40  | P_1C_Liq_1_UnCty_1024121  | - | 147    | 77     | RNA→                                                                                                                                          |
| env-41  | JXWS01080544.1            | - | 204    | 134    | RNA→                                                                                                                                          |
| Hsp-5-1 | NZ_KN050825.1             | + | 8179   | 8249   | RNA→ rps15p (PRK08561)Ribosomal_S15p_S13e (cd00353)→ hypo→ PRK14888 (PRK14888)→<br>RPS3A (COG1890)PRK04057 (PRK04057)→                        |
| Hca-2-1 | NZ_AOJK01000009.1         | - | 96124  | 96054  | RNA→ rps15p (PRK08561)Ribosomal_S15p_S13e (cd00353)→ hypo→ PRK14888 (PRK14888)→<br>RPS3A (COG1890)PRK04057 (PRK04057)→                        |
| Hli-1-1 | NZ_AOJG01000013.1         | - | 3341   | 3271   | RNA→ rps15p (PRK08561)Ribosomal_S15p_S13e (cd00353)→                                                                                          |
| Hte-1-1 | NZ_AOJD01000053.1         | - | 79083  | 79012  | RNA→ rps15p (PRK08561)Ribosomal_S15p_S13e (cd00353)→ hypo→ PRK14888 (PRK14888)→<br>RPS3A (COG1890)PRK04057 (PRK04057)→                        |
| Hho-1-1 | NZ_AOJO01000016.1         | - | 18126  | 18055  | RNA→ rps15p (PRK08561)Ribosomal_S15p_S13e (cd00353)→ hypo→ PRK14888 (PRK14888)→<br>RPS3A (COG1890)PRK04057 (PRK04057)→                        |
| Hsa-6-1 | NZ_AOJE01000062.1         | + | 16777  | 16847  | RNA→ rps15p (PRK08561)Ribosomal_S15p_S13e (cd00353)→ hypo→ hypo→ PRK14888 (PRK14888)→<br>RPS3A (COG1890)PRK04057 (PRK04057)→                  |
| Hco-1-1 | NZ_AOJL01000060.1         | + | 22697  | 22767  | RNA→ rps15p (PRK08561)Ribosomal_S15p_S13e (cd00353)→ A-tRNA_syn_arch (TIGR03683)→<br>PRK14888 (PRK14888)→ RPS3A (COG1890)PRK04057 (PRK04057)→ |
| Hai-1-1 | NZ_AOJI01000013.1         | + | 26726  | 26797  | RNA→ rps15p (PRK08561)Ribosomal_S15p_S13e (cd00353)→ hypo→ PRK14888 (PRK14888)→<br>RPS3A (COG1890)PRK04057 (PRK04057)→                        |
| env-42  | P_1C_Sed_2_UnCty_1023573  | + | 227    | 298    | RNA→ rps15p (PRK08561)Ribosomal_S15p_S13e (cd00353)→ hypo→                                                                                    |
| env-43  | GSLNARP_contig15969       | - | 992    | 921    | RNA→ rps15p (PRK08561)Ribosomal_S15p_S13e (cd00353)→ hypo→                                                                                    |
| env-44  | SL_6KL_011_BRINE_1115284  | + | 186    | 256    | RNA→ rps15p (PRK08561)→                                                                                                                       |
| env-45  | SL_6KL_011_BRINE_1080748  | + | 491    | 561    | RNA→ hypo→                                                                                                                                    |



|         |                             |   |         |         |                                                                                                                                                                                                                                                             |
|---------|-----------------------------|---|---------|---------|-------------------------------------------------------------------------------------------------------------------------------------------------------------------------------------------------------------------------------------------------------------|
| env-46  | GSLNARP_GFPJP1N02H805S      | - | 330     | 265     | RNA → Ribosomal_S13_N (pfam08069) →                                                                                                                                                                                                                         |
| Hpa-1-1 | NZ_AEMG01000012.1           | + | 19787   | 19853   | RNA → rps15p (PRK08561)Ribosomal_S15p_S13e (cd00353) →<br>rps15p (PRK08561)Ribosomal_S15p_S13e (cd00353) → hypo → hypo → PRK14888 (PRK14888) →<br>PRK14888 (PRK14888) → RPS3A (COG1890)PRK04057 (PRK04057) →<br>RPS3A (COG1890)PRK04057 (PRK04057) → hypo → |
| Hci-1-1 | NZ_JDTH01000002.1           | - | 369624  | 369515  | RNA → RpsO (COG0184)rps15p (PRK08561) → hypo → PRK14888 (PRK14888) →<br>RPS3A (COG1890)PRK04057 (PRK04057) →                                                                                                                                                |
| env-47  | P_1C_Sed_2_UnCty_1119332    | - | 170     | 102     | RNA →                                                                                                                                                                                                                                                       |
| env-48  | GSLSAAL.contig12508         | - | 55982   | 55920   | RNA → rps15p (PRK08561)Ribosomal_S15p_S13e (cd00353) → hypo → PRK14888 (PRK14888) →<br>RPS3A (COG1890)PRK04057 (PRK04057) →                                                                                                                                 |
| env-49  | ABOG01057646.1              | - | 101     | 46      | RNA → ←hypo                                                                                                                                                                                                                                                 |
| env-50  | ABOG01040231.1              | + | 23      | 85      | RNA → hypo →                                                                                                                                                                                                                                                |
| env-51  | PR_CR_10_Liq_1.inCR_1012431 | + | 1250    | 1312    | RNA → rps15p (PRK08561)Ribosomal_S15 (pfam00312) → hypo →                                                                                                                                                                                                   |
| env-52  | GSLSAAL.contig09376         | + | 9954    | 10016   | RNA → rps15p (PRK08561)S15_NS1_EPRS_RNA-bind (cd00677) → hypo → PRK14888 (PRK14888) →<br>PRK04057 (PRK04057)Ribosomal_S3Ae (pfam01015) →                                                                                                                    |
| env-53  | GSLSAAL.contig12665         | - | 1260    | 1198    | RNA → rps15p (PRK08561)Ribosomal_S15p_S13e (cd00353) → hypo →                                                                                                                                                                                               |
| env-54  | GSLSAAL.contig00663         | - | 9050    | 8988    | RNA → rps15p (PRK08561)Ribosomal_S15p_S13e (cd00353) → hypo → PRK14888 (PRK14888) →<br>PRK04057 (PRK04057)Ribosomal_S3Ae (pfam01015) →                                                                                                                      |
| env-55  | GSLSAAL.contig05944         | + | 161     | 223     | RNA → rps15p (PRK08561)Ribosomal_S15 (pfam00312) → hypo → PRK14888 (PRK14888) →<br>PRK04057 (PRK04057)Ribosomal_S3Ae (pfam01015) →                                                                                                                          |
| env-56  | PR_CR_10_Liq_1.inCR_1198478 | + | 83      | 145     | RNA → rps15p (PRK08561)Ribosomal_S13_N (pfam08069) →                                                                                                                                                                                                        |
| env-57  | GSLSAAL.contig11173         | - | 1195    | 1133    | RNA → rps15p (PRK08561)Ribosomal_S15p_S13e (cd00353) → hypo →                                                                                                                                                                                               |
| env-58  | GSLSAAL.contig11466         | + | 1789    | 1851    | RNA → Ribosomal_S13_N (pfam08069) →                                                                                                                                                                                                                         |
| Hla-2-1 | NZ_AOL101000007.1           | - | 53069   | 53009   | RNA → rps15p (PRK08561)Ribosomal_S15p_S13e (cd00353) → PRK13800 (PRK13800) →<br>PRK14888 (PRK14888) → PRK04057 (PRK04057)Ribosomal_S3Ae (pfam01015) →                                                                                                       |
| Hsp-4-1 | NZ_JPES01000120.1           | + | 18134   | 18194   | RNA → rps15p (PRK08561)Ribosomal_S15p_S13e (cd00353) → hypo → hypo →                                                                                                                                                                                        |
| Hsp-2-1 | NZ_AOLD01000018.1           | + | 222134  | 222194  | RNA → rps15p (PRK08561)Ribosomal_S15p_S13e (cd00353) → hypo → PRK14888 (PRK14888) → hypo → hypo →<br>PRK04057 (PRK04057)Ribosomal_S3Ae (pfam01015) → RPS3A (COG1890)PRK04057 (PRK04057) →                                                                   |
| Hme-1-1 | NZ_AOLO01000006.1           | + | 119016  | 119079  | RNA → rps15p (PRK08561)Ribosomal_S15p_S13e (cd00353) → hypo →<br>Sema_3G (cd11255)PRK14888 (PRK14888) → PRK04057 (PRK04057)Ribosomal_S3Ae (pfam01015) →                                                                                                     |
| Hel-1-1 | NZ_AOLK01000015.1           | - | 258454  | 258394  | RNA → rps15p (PRK08561)Ribosomal_S15p_S13e (cd00353) → PRK13800 (PRK13800) →<br>PRK14888 (PRK14888) → PRK04057 (PRK04057)Ribosomal_S3Ae (pfam01015) →                                                                                                       |
| Hvo-1-1 | NZ_AOHU01000091.1           | + | 222642  | 222702  | RNA → rps15p (PRK08561)Ribosomal_S15p_S13e (cd00353) → hypo → PRK14888 (PRK14888) → hypo → hypo →<br>PRK04057 (PRK04057)Ribosomal_S3Ae (pfam01015) →                                                                                                        |
| Hsu-2-1 | NZ_AOLM01000003.1           | - | 127653  | 127593  | RNA → rps15p (PRK08561)Ribosomal_S15p_S13e (cd00353) → hypo → PRK14888 (PRK14888) →<br>PRK04057 (PRK04057)Ribosomal_S3Ae (pfam01015) →                                                                                                                      |
| Hde-1-1 | NZ_AOLP01000019.1           | + | 71205   | 71265   | RNA → rps15p (PRK08561)Ribosomal_S15p_S13e (cd00353) → hypo → PRK14888 (PRK14888) →<br>PRK04057 (PRK04057)Ribosomal_S3Ae (pfam01015) →                                                                                                                      |
| Hpr-1-1 | NZ_AOLG01000012.1           | - | 2307    | 2247    | RNA → rps15p (PRK08561)Ribosomal_S15p_S13e (cd00353) → hypo → PRK14888 (PRK14888) → hypo →<br>PRK04057 (PRK04057)Ribosomal_S3Ae (pfam01015) →                                                                                                               |
| Hgi-1-1 | NZ_AOLJ01000025.1           | + | 12076   | 12136   | RNA → rps15p (PRK08561)Ribosomal_S15p_S13e (cd00353) → hypo → PRK14888 (PRK14888) →<br>PRK04057 (PRK04057)Ribosomal_S3Ae (pfam01015) →                                                                                                                      |
| Hal-1-1 | NZ_LK053000.1               | - | 2441666 | 2441606 | RNA → rps15p (PRK08561)Ribosomal_S15p_S13e (cd00353) → hypo → PRK14888 (PRK14888) →<br>PRK04057 (PRK04057)Ribosomal_S3Ae (pfam01015) →                                                                                                                      |
| Hgi-2-1 | NZ_CP011947.1               | - | 1061334 | 1061274 | RNA → rps15p (PRK08561)Ribosomal_S15p_S13e (cd00353) → hypo → PRK14888 (PRK14888) →<br>PRK04057 (PRK04057)Ribosomal_S3Ae (pfam01015) →                                                                                                                      |
| Hmu-1-1 | NZ_AOLN01000018.1           | + | 214475  | 214538  | RNA → rps15p (PRK08561)Ribosomal_S15p_S13e (cd00353) → hypo → PRK14888 (PRK14888) →<br>PRK04057 (PRK04057)Ribosomal_S3Ae (pfam01015) →                                                                                                                      |
| env-59  | JXWS01117778.1              | - | 479     | 415     | RNA → Ribosomal_S15 (pfam00312)Ribosomal_S13_N (pfam08069) →                                                                                                                                                                                                |
| env-60  | SL_4KL_010_BRINE_10436734   | - | 180     | 109     | RNA →                                                                                                                                                                                                                                                       |
| env-61  | SL_4KL_010_BRINE_10606398   | - | 98      | 13      | RNA → ←hypo                                                                                                                                                                                                                                                 |
| env-62  | GSLNAS_F7I09SK02FQQIZ       | - | 461     | 396     | RNA → Ribosomal_S13_N (pfam08069) →                                                                                                                                                                                                                         |
| env-63  | SS_3KL_010_SOIL_10006438    | - | 147     | 81      | RNA →                                                                                                                                                                                                                                                       |
| env-64  | SS_3KL_010_SOIL_10046089    | - | 149     | 81      | RNA → ←hypo                                                                                                                                                                                                                                                 |
| Has-1-1 | NZ_AOIQ01000008.1           | + | 125599  | 125690  | RNA → hypo → rps15p (PRK08561) → hypo → rps15p (PRK08561)Ribosomal_S15p_S13e (cd00353) → hypo →<br>PRK14888 (PRK14888) → RPS3A (COG1890)PRK04057 (PRK04057) →                                                                                               |

|         |                           |   |         |         |                                                                                                                                                                             |
|---------|---------------------------|---|---------|---------|-----------------------------------------------------------------------------------------------------------------------------------------------------------------------------|
| env-65  | JXWU01059374.1            | + | 232     | 306     | RNA →                                                                                                                                                                       |
| h3A-1-1 | NZ_KK033115.1             | - | 376523  | 376455  | RNA → RpsO (COG0184)rps15p (PRK08561) → hypo → PRK14888 (PRK14888) →<br>PRK04057 (PRK04057)Ribosomal_S3Ae (pfam01015) → RNAP_L (cd06927)PRK01146 (PRK01146) →               |
| env-66  | ADL20m3uS_contig11732     | + | 2953    | 3015    | RNA → rps15p (PRK08561)Ribosomal_S15p_S13e (cd00353) → hypo → PRK14888 (PRK14888) →<br>RPS3A (COG1890)PRK04057 (PRK04057) →                                                 |
| env-67  | GSLNARP_contig20163       | + | 786     | 851     | RNA → rps15p (PRK08561)Ribosomal_S15p_S13e (cd00353) → hypo →                                                                                                               |
| Hka-1-1 | NZ_KB905379.1             | + | 563781  | 563847  | RNA → rps15p (PRK08561)Ribosomal_S15p_S13e (cd00353) → hypo → PRK14888 (PRK14888) →<br>RPS3A (COG1890)PRK04057 (PRK04057) → PRK04057 (PRK04057)Ribosomal_S3Ae (pfam01015) → |
| Hmu-2-1 | NC_013202.1               | - | 2042594 | 2042528 | RNA → rps15p (PRK08561)Ribosomal_S15p_S13e (cd00353) → hypo → PRK14888 (PRK14888) →<br>PRK04057 (PRK04057)Ribosomal_S3Ae (pfam01015) →                                      |
| env-68  | P_A23_Liq_1_Fmt_1018204   | - | 215     | 150     | RNA →                                                                                                                                                                       |
| Ham-1-1 | NZ_AOLW01000050.1         | - | 65561   | 65496   | RNA → RpsO (COG0184)rps15p (PRK08561) → hypo → PRK14888 (PRK14888) →<br>PRK04057 (PRK04057)Ribosomal_S3Ae (pfam01015) →                                                     |
| Hva-1-1 | NZ_AOLQ01000067.1         | - | 102654  | 102589  | RNA → rps15p (PRK08561)Ribosomal_S15p_S13e (cd00353) → hypo → PRK14888 (PRK14888) →<br>PRK04057 (PRK04057)Ribosomal_S3Ae (pfam01015) →                                      |
| Hja-1-1 | NZ_AOLY01000009.1         | - | 228112  | 228047  | RNA → RpsO (COG0184)rps15p (PRK08561) → hypo → PRK14888 (PRK14888) →<br>PRK04057 (PRK04057)Ribosomal_S3Ae (pfam01015) →                                                     |
| Hma-1-1 | NC_006396.1               | + | 1271347 | 1271412 | RNA → RpsO (COG0184)rps15p (PRK08561) → hypo → PRK14888 (PRK14888) →<br>RPS3A (COG1890)PRK04057 (PRK04057) →                                                                |
| Hsa-2-1 | NZ_JXAO01000006.1         | + | 33018   | 33083   | RNA → RpsO (COG0184)rps15p (PRK08561) → hypo → PRK14888 (PRK14888) →<br>PRK04057 (PRK04057)Ribosomal_S3Ae (pfam01015) →                                                     |
| Hca-1-1 | NZ_AOLS01000008.1         | + | 111762  | 111827  | RNA → RpsO (COG0184)rps15p (PRK08561) → hypo → hypo →                                                                                                                       |
| Hsi-1-1 | NZ_AOLR01000002.1         | + | 110713  | 110778  | RNA → RpsO (COG0184)rps15p (PRK08561) → hypo → PRK14888 (PRK14888) →<br>RPS3A (COG1890)PRK04057 (PRK04057) →                                                                |
| Har-1-1 | NZ_AOLX01000027.1         | - | 130959  | 130894  | RNA → RpsO (COG0184)rps15p (PRK08561) → hypo → PRK14888 (PRK14888) →<br>PRK04057 (PRK04057)Ribosomal_S3Ae (pfam01015) →                                                     |
| env-69  | P_1C_Sed_2_UnCty_1113621  | + | 256     | 321     | RNA →                                                                                                                                                                       |
| env-70  | ADL5mRS1u_GM034OG01ABXFC  | - | 278     | 212     | RNA → rps15p (PRK08561) →                                                                                                                                                   |
| env-71  | APHM01021510.1            | + | 41573   | 41636   | RNA → rps15p (PRK08561)Ribosomal_S15p_S13e (cd00353) →                                                                                                                      |
| env-72  | P_A23_Liq_2_Fmt_1000692   | - | 6203    | 6140    | RNA → rps15p (PRK08561)Ribosomal_S15p_S13e (cd00353) →                                                                                                                      |
| env-73  | P_A23_Liq_1_Fmt_1001408   | + | 1210    | 1273    | RNA → rps15p (PRK08561)Ribosomal_S15p_S13e (cd00353) →                                                                                                                      |
| env-74  | GSLNARP_contig28817       | - | 4621    | 4558    | RNA → rps15p (PRK08561)Ribosomal_S15p_S13e (cd00353) → hypo → PRK14888 (PRK14888) →<br>PRK04057 (PRK04057)Ribosomal_S3Ae (pfam01015) →                                      |
| env-75  | APHM01021421.1            | - | 191186  | 191123  | RNA → rps15p (PRK08561)Ribosomal_S15p_S13e (cd00353) →                                                                                                                      |
| env-76  | SL_4KL_010_BRINE_10225816 | - | 172     | 88      | RNA → ←hypo                                                                                                                                                                 |
| Hca-3-1 | NZ_AOIU01000035.1         | + | 133178  | 133243  | RNA → RpsO (COG0184)rps15p (PRK08561) → hypo → PRK14888 (PRK14888) →<br>RPS3A (COG1890)PRK04057 (PRK04057) →                                                                |
| env-77  | SL_5KL_010_BRINE_10001052 | + | 13389   | 13455   | RNA →                                                                                                                                                                       |
| env-78  | SL_4KL_010_BRINE_10019393 | - | 210     | 144     | RNA →                                                                                                                                                                       |
| env-79  | SL_6KL_011_BRINE_1125381  | + | 228     | 294     | RNA → ←hypo                                                                                                                                                                 |
| env-80  | SL_4KL_010_BRINE_10007098 | - | 1494    | 1429    | RNA → ←hypo                                                                                                                                                                 |
| env-81  | SL_4KL_010_BRINE_10047307 | + | 2075    | 2140    | RNA →                                                                                                                                                                       |
| Hsa-1-1 | NZ_BBMO01000001.1         | + | 1186894 | 1186960 | RNA → RpsO (COG0184)rps15p (PRK08561) → hypo → PRK14888 (PRK14888) →<br>RPS3A (COG1890)PRK04057 (PRK04057) →                                                                |
| env-82  | GSLNARP_GFPJP1N02JIM46    | + | 6       | 71      | RNA → rps15p (PRK08561) →                                                                                                                                                   |
| env-83  | SL_4KL_010_BRINE_10142426 | - | 703     | 638     | RNA → rps15p (PRK08561)Ribosomal_S15p_S13e (cd00353) →                                                                                                                      |
| env-84  | GSLNAS_F7I09SK02IMHTW     | - | 401     | 336     | RNA → Ribosomal_S13_N (pfam08069) →                                                                                                                                         |
| env-85  | SL_4KL_010_BRINE_10262119 | + | 294     | 359     | RNA → hypo →                                                                                                                                                                |
| env-86  | SL_4KL_010_BRINE_10060909 | + | 1536    | 1601    | RNA → ←hypo                                                                                                                                                                 |
| env-87  | SL_6KL_011_BRINE_1008478  | - | 2259    | 2195    | RNA → ←MarR (COG1846)HTH_27 (pfam13463)                                                                                                                                     |
| env-88  | APHM01021551.1            | + | 1361    | 1425    | RNA → RpsO (COG0184)rps15p (PRK08561) → hypo → PRK14888 (PRK14888) →<br>RPS3A (COG1890)PRK04057 (PRK04057) →                                                                |
| env-89  | GSLSAALGFP0ZZ301BID9D     | - | 389     | 325     | RNA → Ribosomal_S13_N (pfam08069) →                                                                                                                                         |
| env-90  | GSLNAS_F7I09SK02H8PXO     | + | 23      | 89      | RNA → Ribosomal_S13_N (pfam08069) →                                                                                                                                         |
| env-91  | GSLNAS_F7I09SK02JLDI6     | - | 289     | 223     | RNA → rps15p (PRK08561) →                                                                                                                                                   |

|         |                           |   |       |       |                                                                                                                                                            |
|---------|---------------------------|---|-------|-------|------------------------------------------------------------------------------------------------------------------------------------------------------------|
| env-92  | SL_6KL_011_BRINE_1005455  | - | 398   | 338   | RNA → Ribosomal_S13_N (pfam08069) →                                                                                                                        |
| env-93  | SL_5KL_010_BRINE_10006403 | - | 4853  | 4793  | RNA → rps15p (PRK08561)Ribosomal_S15p_S13e (cd00353) → hypo → PRK14888 (PRK14888) → RPS3A (COG1890)PRK04057 (PRK04057) →                                   |
| env-94  | GRCP39E01BOGZV            | - | 496   | 438   | RNA → Ribosomal_S13_N (pfam08069) →                                                                                                                        |
| env-95  | P_A23_Liq_1_Fmt_1014328   | - | 338   | 279   | RNA → Ribosomal_S13_N (pfam08069) →                                                                                                                        |
| env-96  | APHM01010841.1            | - | 1489  | 1430  | RNA → rps15p (PRK08561)Ribosomal_S15p_S13e (cd00353) → hypo →                                                                                              |
| env-97  | P_A23_Liq_3_Fmt_1003525   | + | 2170  | 2229  | RNA → Ribosomal_S13_N (pfam08069) →                                                                                                                        |
| env-98  | APHM01021204.1            | - | 7840  | 7781  | RNA → rps15p (PRK08561)Ribosomal_S15p_S13e (cd00353) → A-tRNA_syn_arch (TIGR03683) → PRK14888 (PRK14888) → PRK04057 (PRK04057)Ribosomal_S3Ae (pfam01015) → |
| env-99  | P_A23_Liq_1_Fmt_1003446   | + | 2004  | 2063  | RNA → ←hypo                                                                                                                                                |
| env-100 | ADL20m3uS_contig11784     | + | 13949 | 14008 | RNA → Ribosomal_S15 (pfam00312)Ribosomal_S13_N (pfam08069) →                                                                                               |
| env-101 | ADL20m3uS_contig11574     | - | 35601 | 35542 | RNA → rps15p (PRK08561)Ribosomal_S15p_S13e (cd00353) → hypo → PRK14888 (PRK14888) → RPS3A (COG1890)PRK04057 (PRK04057) →                                   |
| env-102 | SL_4KL_010_BRINE_10059133 | - | 223   | 164   | RNA →                                                                                                                                                      |
| env-103 | SL_6KL_011_BRINE_1000187  | + | 3664  | 3723  | RNA → rps15p (PRK08561)Ribosomal_S15p_S13e (cd00353) → hypo → PRK14888 (PRK14888) → PRK04057 (PRK04057)Ribosomal_S3Ae (pfam01015) →                        |
| env-104 | ADL5mRS1u_GM034OG02GJ0EH  | - | 169   | 110   | RNA → hypo →                                                                                                                                               |
| env-105 | P_1C_Sed_2_UnCty_1025083  | + | 307   | 366   | RNA → rps15p (PRK08561)Ribosomal_S15 (pfam00312) → hypo →                                                                                                  |
| env-106 | SL_4KL_010_BRINE_10300408 | + | 236   | 296   | RNA → ←hypo                                                                                                                                                |
| env-107 | SL_4KL_010_BRINE_10350117 | + | 300   | 360   | RNA →                                                                                                                                                      |
| env-108 | SL_4KL_010_BRINE_10637802 | - | 76    | 16    | RNA →                                                                                                                                                      |
| env-109 | SL_4KL_010_BRINE_10714498 | + | 107   | 167   | RNA → ←hypo                                                                                                                                                |
| env-110 | SL_5KL_010_BRINE_10197968 | + | 189   | 249   | RNA → ←hypo                                                                                                                                                |
| env-111 | SL_4KL_010_BRINE_10023425 | + | 3324  | 3384  | RNA → ←hypo                                                                                                                                                |
| env-112 | SL_4KL_010_BRINE_10204576 | + | 115   | 175   | RNA → rps15p (PRK08561) →                                                                                                                                  |
| env-113 | SL_5KL_010_SED_10041201   | - | 980   | 920   | RNA → rps15p (PRK08561)Ribosomal_S15p_S13e (cd00353) → hypo →                                                                                              |
| env-114 | SL_6KL_011_BRINE_1114368  | + | 262   | 322   | RNA → ←hypo                                                                                                                                                |
| env-115 | SL_4KL_010_BRINE_10020685 | - | 82    | 22    | RNA →                                                                                                                                                      |
| env-116 | SL_6KL_011_BRINE_1011655  | - | 284   | 224   | RNA → rps15p (PRK08561) →                                                                                                                                  |
| env-117 | SL_5KL_010_BRINE_10209515 | + | 284   | 344   | RNA →                                                                                                                                                      |
| env-118 | SL_6KL_011_BRINE_1001544  | - | 2246  | 2186  | RNA → rps15p (PRK08561)Ribosomal_S15p_S13e (cd00353) → alaS (PRK13902) → PRK14888 (PRK14888) → RPS3A (COG1890)PRK04057 (PRK04057) →                        |
| env-119 | SL_6KL_011_BRINE_1024707  | - | 74    | 14    | RNA →                                                                                                                                                      |
| env-120 | SL_5KL_010_BRINE_10059954 | + | 1069  | 1129  | RNA → ←hypo                                                                                                                                                |
| env-121 | SL_4KL_010_BRINE_10154812 | - | 369   | 309   | RNA → Ribosomal_S13_N (pfam08069) →                                                                                                                        |
| env-122 | SL_4KL_010_BRINE_10414697 | + | 252   | 312   | RNA →                                                                                                                                                      |
| env-123 | SL_5KL_010_BRINE_10109794 | - | 494   | 434   | RNA → Ribosomal_S13_N (pfam08069) →                                                                                                                        |
| env-124 | SL_5KL_010_BRINE_10069484 | - | 177   | 117   | RNA → ←hypo                                                                                                                                                |
| env-125 | SL_4KL_010_BRINE_10162859 | - | 206   | 146   | RNA → ←hypo                                                                                                                                                |
| env-126 | SL_4KL_010_BRINE_10275765 | - | 177   | 117   | RNA → ←hypo                                                                                                                                                |
| env-127 | GSLSAAL_GFP0ZZ301EKX2T    | - | 305   | 245   | RNA → Ribosomal_S13_N (pfam08069) →                                                                                                                        |
| env-128 | SL_4KL_010_BRINE_10097307 | - | 214   | 154   | RNA → ←hypo                                                                                                                                                |
| env-129 | SL_4KL_010_BRINE_10048125 | + | 2101  | 2161  | RNA →                                                                                                                                                      |
| env-130 | SL_4KL_010_BRINE_10328064 | + | 187   | 247   | RNA →                                                                                                                                                      |
| env-131 | SL_6KL_011_BRINE_1018831  | - | 500   | 440   | RNA → Ribosomal_S13_N (pfam08069) →                                                                                                                        |
| env-132 | SL_4KL_010_BRINE_10013651 | - | 210   | 150   | RNA → ←hypo                                                                                                                                                |
| env-133 | P_A23_Liq_1_Fmt_1006894   | - | 1048  | 989   | RNA → rps15p (PRK08561)Ribosomal_S15p_S13e (cd00353) → hypo →                                                                                              |
| env-134 | P_1C_Liq_3_UnCty_1011064  | + | 95    | 154   | RNA → rps15p (PRK08561)Ribosomal_S15p_S13e (cd00353) →                                                                                                     |
| env-135 | P_A23_Liq_2_Fmt_1004041   | - | 190   | 131   | RNA →                                                                                                                                                      |
| env-136 | APHM01021593.1            | + | 13468 | 13527 | RNA → rps15p (PRK08561)Ribosomal_S15p_S13e (cd00353) → hypo →                                                                                              |
| env-137 | P_A23_Liq_1_Fmt_1011742   | + | 225   | 284   | RNA → rps15p (PRK08561)Ribosomal_S15 (pfam00312) →                                                                                                         |
| env-138 | P_A23_Liq_3_Fmt_1033915   | - | 244   | 185   | RNA → rps15p (PRK08561) →                                                                                                                                  |
| env-139 | SL_5KL_010_BRINE_10002441 | - | 7903  | 7844  | RNA → rps15p (PRK08561)Ribosomal_S15 (pfam00312) → hypo → PRK14888 (PRK14888) → RPS3A (COG1890)PRK04057 (PRK04057) →                                       |

|         |                           |   |         |         |                                                                                                                                        |
|---------|---------------------------|---|---------|---------|----------------------------------------------------------------------------------------------------------------------------------------|
| env-140 | P_A23_Liq_1_Fmt_1003155   | - | 239     | 180     | RNA → ←-hypo                                                                                                                           |
| CHA-1-1 | NZ_ASGZ01000049.1         | + | 3617    | 3683    | RNA → rps15p (PRK08561)Ribosomal_S15p_S13e (cd00353) → PRK13800 (PRK13800)PBP2_HisK (cd13704) →                                        |
| env-141 | SL_4KL_010_BRINE_10085604 | - | 150     | 84      | RNA →                                                                                                                                  |
| env-142 | SL_6KL_011_BRINE_1044936  | - | 158     | 90      | RNA → ←-hypo                                                                                                                           |
| Nsu-1-1 | NZ_AOHX01000042.1         | - | 103712  | 103642  | RNA → RpsO (COG0184)rps15p (PRK08561) → PRK13800 (PRK13800) → PRK14888 (PRK14888) →<br>RPS3A (COG1890)PRK04057 (PRK04057) →            |
| Hla-1-1 | NZ_AGFZ01000124.1         | + | 17222   | 17292   | RNA → RpsO (COG0184)rps15p (PRK08561) → RpsO (COG0184)rps15p (PRK08561) → hypo → hypo →                                                |
| env-143 | SL_5KL_010_BRINE_10055562 | - | 160     | 95      | RNA → ←-hypo                                                                                                                           |
| env-144 | SL_5KL_010_BRINE_10106739 | + | 525     | 590     | RNA →                                                                                                                                  |
| env-145 | SL_5KL_010_BRINE_10001172 | + | 12650   | 12715   | RNA →                                                                                                                                  |
| Hxa-1-1 | NC_015666.1               | + | 2172566 | 2172639 | RNA → RpsO (COG0184)rps15p (PRK08561) → hypo → PRK14888 (PRK14888) →<br>PRK04057 (PRK04057)Ribosomal_S3Ae (pfam01015) →                |
| env-146 | SL_6KL_011_BRINE_1235537  | - | 113     | 48      | RNA →                                                                                                                                  |
| env-147 | SL_4KL_010_BRINE_10453247 | - | 143     | 76      | RNA → ←-hypo                                                                                                                           |
| Ngr-1-1 | NZ_AOIC01000118.1         | + | 22540   | 22604   | RNA → RpsO (COG0184)rps15p (PRK08561) → hypo → PRK14888 (PRK14888) →<br>RPS3A (COG1890)PRK04057 (PRK04057) →                           |
| env-148 | SL_5KL_010_BRINE_10000150 | + | 26232   | 26305   | RNA → rps15p (PRK08561)Ribosomal_S15p_S13e (cd00353) → hypo → PRK14888 (PRK14888) →<br>RPS3A (COG1890)PRK04057 (PRK04057) →            |
| env-149 | SL_8KL_010_SED_10418808   | - | 198     | 125     | RNA → rps15p (PRK08561) →                                                                                                              |
| env-150 | SL_5KL_010_BRINE_10011173 | - | 233     | 168     | RNA → hypo →                                                                                                                           |
| env-151 | SL_4KL_010_BRINE_10233198 | - | 160     | 95      | RNA → ←-hypo                                                                                                                           |
| Hdj-1-1 | NZ_HG315685.1             | - | 946456  | 946386  | RNA → RpsO (COG0184)rps15p (PRK08561) → hypo → PRK14888 (PRK14888) →<br>RPS3A (COG1890)PRK04057 (PRK04057) →                           |
| env-152 | ADL20m3uS_GLR497S01CYFB9  | - | 217     | 152     | RNA → hypo →                                                                                                                           |
| env-153 | 2140918017-18446          | - | 216     | 151     | RNA →                                                                                                                                  |
| env-154 | SL_8KL_010_SED_10420993   | + | 127     | 192     | RNA → ←-hypo                                                                                                                           |
| env-155 | SL_4KL_010_BRINE_10209625 | - | 174     | 109     | RNA →                                                                                                                                  |
| env-156 | SL_4KL_010_BRINE_10009987 | - | 1525    | 1460    | RNA → rps15p (PRK08561)Ribosomal_S15p_S13e (cd00353) → RecJ (COG0608) →                                                                |
| env-157 | SL_6KL_011_BRINE_1000505  | - | 8160    | 8095    | RNA → rps15p (PRK08561)Ribosomal_S15p_S13e (cd00353) → hypo → PRK14888 (PRK14888) →<br>RPS3A (COG1890)PRK04057 (PRK04057) →            |
| env-158 | SL_6KL_011_BRINE_1064947  | + | 350     | 413     | RNA → Ribosomal_S13_N (pfam08069) →                                                                                                    |
| env-159 | SL_5KL_010_BRINE_10001414 | + | 3775    | 3841    | RNA → RpsO (COG0184)rps15p (PRK08561) → hypo → PRK14888 (PRK14888) →<br>RPS3A (COG1890)PRK04057 (PRK04057) →                           |
| env-160 | SL_4KL_010_BRINE_10410649 | + | 75      | 141     | RNA → rps15p (PRK08561) →                                                                                                              |
| Hgo-1-1 | NZ_HG315690.1             | + | 210551  | 210620  | RNA → RpsO (COG0184)rps15p (PRK08561) → minC (PRK00030) → PRK14888 (PRK14888) →<br>RPS3A (COG1890)PRK04057 (PRK04057) →                |
| Npa-1-1 | NZ_AOII01000045.1         | + | 2929    | 2999    | RNA → rps15p (PRK08561)Ribosomal_S15p_S13e (cd00353) → hypo → PRK14888 (PRK14888) →<br>RPS3A (COG1890)PRK04057 (PRK04057) →            |
| Nga-1-1 | NZ_AOIJ01000082.1         | + | 8646    | 8716    | RNA → rps15p (PRK08561)Ribosomal_S15p_S13e (cd00353) → hypo → PRK14888 (PRK14888) →<br>RPS3A (COG1890)PRK04057 (PRK04057) →            |
| Nsp-1-1 | NZ_AJVG01000015.1         | + | 33476   | 33546   | RNA → rps15p (PRK08561)Ribosomal_S15p_S13e (cd00353) → hypo → PRK14888 (PRK14888) →<br>RPS3A (COG1890)PRK04057 (PRK04057) →            |
| Nal-1-1 | NZ_JNCS01000002.1         | - | 209831  | 209761  | RNA → rps15p (PRK08561)Ribosomal_S15p_S13e (cd00353) → hypo → PRK14888 (PRK14888) →<br>RPS3A (COG1890)PRK04057 (PRK04057) →            |
| env-161 | ADL20m3uS_GLR497S01D4APN  | + | 16      | 86      | RNA → Ribosomal_S13_N (pfam08069) →                                                                                                    |
| Hli-3-1 | NZ_AOIT01000016.1         | + | 177551  | 177622  | RNA → RpsO (COG0184)rps15p (PRK08561) → hypo → PRK14888 (PRK14888) →<br>RPS3A (COG1890)PRK04057 (PRK04057) →                           |
| Nve-1-1 | NZ_AOID01000012.1         | - | 23261   | 23191   | RNA → rps15p (PRK08561)Ribosomal_S15p_S13e (cd00353) → hypo → PRK14888 (PRK14888) →<br>RPS3A (COG1890)PRK04057 (PRK04057) →            |
| Npe-1-1 | NZ_AOIE01000076.1         | + | 117112  | 117182  | RNA → RpsO (COG0184)rps15p (PRK08561) → hypo → PRK14888 (PRK14888) →<br>RPS3A (COG1890)PRK04057 (PRK04057) →                           |
| Hje-2-1 | NZ_JDTG01000005.1         | + | 36819   | 36889   | RNA → RpsO (COG0184)rps15p (PRK08561) → hypo → PRK14888 (PRK14888) →<br>RPS3A (COG1890)PRK04057 (PRK04057) →                           |
| Hth-2-1 | NZ_AOIR01000045.1         | + | 2606    | 2676    | RNA → RpsO (COG0184)rps15p (PRK08561) → hypo → hypo →                                                                                  |
| Nje-1-1 | NZ_AOIA01000160.1         | + | 12251   | 12321   | RNA → rps15p (PRK08561)Ribosomal_S15p_S13e (cd00353) → hypo → PRK14888 (PRK14888) →<br>PRK04057 (PRK04057)Ribosomal_S3Ae (pfam01015) → |



|         |                           |   |         |         |                                                                                                                                                                                                 |
|---------|---------------------------|---|---------|---------|-------------------------------------------------------------------------------------------------------------------------------------------------------------------------------------------------|
| env-162 | SS_3KL_010_SOIL_10055065  | + | 1009    | 1078    | RNA → ←-hypo                                                                                                                                                                                    |
| Noc-1-1 | NC_019974.1               | - | 817241  | 817172  | RNA → rps15p (PRK08561)Ribosomal_S15p_S13e (cd00353) → hypo → PRK14888 (PRK14888) → RPS3A (COG1890)PRK04057 (PRK04057) →                                                                        |
| Nam-1-1 | NZ_AOIB01000013.1         | + | 141311  | 141380  | RNA → rps15p (PRK08561)Ribosomal_S15p_S13e (cd00353) → PRK13029 (PRK13029) → PRK14888 (PRK14888) → RPS3A (COG1890)PRK04057 (PRK04057) →                                                         |
| Nhu-1-1 | NZ_AOIM01000039.1         | - | 10511   | 10445   | RNA → RpsO (COG0184)rps15p (PRK08561) → hypo → PRK14888 (PRK14888) → RPS3A (COG1890)PRK04057 (PRK04057) →                                                                                       |
| Nma-1-1 | NZ_AOHS01000030.1         | - | 82382   | 82316   | RNA → RpsO (COG0184)rps15p (PRK08561) →                                                                                                                                                         |
| Nta-1-1 | NZ_AOIL01000028.1         | + | 66155   | 66221   | RNA → RpsO (COG0184)rps15p (PRK08561) → hypo → PRK14888 (PRK14888) → RPS3A (COG1890)PRK04057 (PRK04057) →                                                                                       |
| Nas-1-1 | NZ_AOIO01000033.1         | - | 16936   | 16870   | RNA → RpsO (COG0184)rps15p (PRK08561) → hypo → PRK14888 (PRK14888) → RPS3A (COG1890)PRK04057 (PRK04057) →                                                                                       |
| Nch-1-1 | NZ_AOIN01000092.1         | + | 72402   | 72468   | RNA → RpsO (COG0184)rps15p (PRK08561) →                                                                                                                                                         |
| Nae-1-1 | NZ_AOIP01000015.1         | - | 106319  | 106249  | RNA → RpsO (COG0184)rps15p (PRK08561) → hypo → PRK14888 (PRK14888) → RPS3A (COG1890)PRK04057 (PRK04057) →                                                                                       |
| Nba-1-1 | NZ_AOHY01000002.1         | - | 121091  | 121021  | RNA → RpsO (COG0184)rps15p (PRK08561) → PRK13800 (PRK13800) → PRK14888 (PRK14888) → PRK04057 (PRK04057)Ribosomal_S3Ae (pfam01015) →                                                             |
| Nin-1-1 | NZ_AOHZ01000012.1         | + | 7343    | 7413    | RNA → RpsO (COG0184)rps15p (PRK08561) → hypo → PRK14888 (PRK14888) → PRK04057 (PRK04057)Ribosomal_S3Ae (pfam01015) →                                                                            |
| Hni-1-1 | NZ_AOMA01000110.1         | + | 847     | 917     | RNA → RpsO (COG0184)rps15p (PRK08561) → hypo → hypo →                                                                                                                                           |
| Hsa-7-1 | NZ_AOIS01000067.1         | - | 104689  | 104619  | RNA → RpsO (COG0184)rps15p (PRK08561) → hypo → PRK14888 (PRK14888) → PRK04057 (PRK04057)Ribosomal_S3Ae (pfam01015) →                                                                            |
| Htu-1-1 | NC_013743.1               | - | 1454550 | 1454480 | RNA → RpsO (COG0184)rps15p (PRK08561) → hypo → PRK14888 (PRK14888) → PRK04057 (PRK04057)Ribosomal_S3Ae (pfam01015) →                                                                            |
| Hsa-9-1 | NZ_JROF01000003.1         | + | 151229  | 151299  | RNA → RpsO (COG0184)rps15p (PRK08561) → hypo → PRK14888 (PRK14888) → RPS3A (COG1890)PRK04057 (PRK04057) →                                                                                       |
| Nti-1-1 | NZ_AOHW01000044.1         | + | 85110   | 85180   | RNA → rps15p (PRK08561)Ribosomal_S15p_S13e (cd00353) → hypo → hypo → hypo → hypo → hypo → PRK14888 (PRK14888) → RPS3A (COG1890)PRK04057 (PRK04057) →                                            |
| env-163 | SL_5KL_010_BRINE_10001436 | + | 10905   | 10968   | RNA → rps15p (PRK08561)Ribosomal_S15p_S13e (cd00353) → hypo →                                                                                                                                   |
| env-164 | GSLNARP_GFPJP1N02G46KO    | + | 349     | 411     | RNA → hypo →                                                                                                                                                                                    |
| env-165 | GSLNARP_GFPJP1N02HKHM0    | + | 321     | 383     | RNA → ←-hypo                                                                                                                                                                                    |
| env-166 | GSLNARP_GFPJP1N02HIBH2    | + | 301     | 362     | RNA → hypo →                                                                                                                                                                                    |
| Hpa-2-1 | NZ_AOIV01000045.1         | + | 239288  | 239352  | RNA → rps15p (PRK08561)Ribosomal_S15p_S13e (cd00353) → hypo → PRK14888 (PRK14888) → PRK04057 (PRK04057)Ribosomal_S3Ae (pfam01015) →                                                             |
| Hru-1-1 | NZ_BBJO01000031.1         | + | 112826  | 112888  | RNA → rps15p (PRK08561)Ribosomal_S15p_S13e (cd00353) → hypo → hypo →                                                                                                                            |
| Hbo-1-1 | NZ_AOHT01000051.1         | - | 203113  | 203048  | RNA → RpsO (COG0184)rps15p (PRK08561) → hypo → PRK14888 (PRK14888) → PRK04057 (PRK04057)Ribosomal_S3Ae (pfam01015) →                                                                            |
| Ssp-1-1 | NC_021313.1               | - | 2955315 | 2955225 | RNA → rps15p (PRK08561)Ribosomal_S15p_S13e (cd00353) → hypo → hypo → PRK14888 (PRK14888) → RPS3A (COG1890)PRK04057 (PRK04057) → DUF2127 (pfam09900) →                                           |
| Hje-1-1 | NZ_AXZD01000009.1         | - | 4784    | 4656    | RNA → rps15p (PRK08561)Ribosomal_S15p_S13e (cd00353) → hypo → PRK14888 (PRK14888) → PRK04057 (PRK04057)Ribosomal_S3Ae (pfam01015) →                                                             |
| env-167 | P_1C_Sed_2_UnCty_1161793  | + | 207     | 266     | RNA → hypo →                                                                                                                                                                                    |
| env-168 | P_1C_Sed_2_UnCty_1391468  | + | 115     | 172     | RNA → hypo →                                                                                                                                                                                    |
| Hna-1-1 | NZ_KE386573.1             | + | 1370676 | 1370733 | RNA → rps15p (PRK08561)Ribosomal_S15p_S13e (cd00353) → hypo → PRK14888 (PRK14888) → RPS3A (COG1890)PRK04057 (PRK04057) → HATPase_c (smart00387)BaeS (COG0642)PAS (pfam00989)PAS_9 (pfam13426) → |
| env-169 | GSLNARP_GFPJP1N02I1Q94    | - | 238     | 180     | RNA → rps15p (PRK08561) →                                                                                                                                                                       |
| env-170 | SL_6KL_011_BRINE_1044879  | + | 455     | 520     | RNA → rps15p (PRK08561)Ribosomal_S15p_S13e (cd00353) → hypo →                                                                                                                                   |
| env-171 | SL_4KL_010_BRINE_10071208 | + | 486     | 551     | RNA → rps15p (PRK08561)Ribosomal_S15p_S13e (cd00353) → hypo →                                                                                                                                   |
| Nph-1-1 | NC_007426.1               | + | 1546623 | 1546688 | RNA → rps15p (PRK08561)Ribosomal_S15p_S13e (cd00353) → hypo → PRK14888 (PRK14888) → RPS3A (COG1890)PRK04057 (PRK04057) →                                                                        |
| Nmo-1-1 | NC_020388.1               | + | 1095664 | 1095729 | RNA → rps15p (PRK08561)Ribosomal_S15p_S13e (cd00353) → hypo → PRK14888 (PRK14888) → RPS3A (COG1890)PRK04057 (PRK04057) →                                                                        |
| env-172 | GSLNARP_contig01185       | + | 384     | 449     | RNA → Ribosomal_S13_N (pfam08069) →                                                                                                                                                             |
| env-173 | SL_6KL_011_BRINE_1143269  | + | 264     | 329     | RNA →                                                                                                                                                                                           |
| env-174 | SL_4KL_010_BRINE_10124144 | - | 762     | 697     | RNA → rps15p (PRK08561)Ribosomal_S15p_S13e (cd00353) → hypo →                                                                                                                                   |

|         |                           |   |         |         |                                                                                                                                                                                                                                       |
|---------|---------------------------|---|---------|---------|---------------------------------------------------------------------------------------------------------------------------------------------------------------------------------------------------------------------------------------|
| env-175 | SL_6KL_011_BRINE_1002809  | + | 7175    | 7240    | RNA → Ribosomal_S13_N (pfam08069) → rps15p (PRK08561) Ribosomal_S15 (pfam00312) → hypo →                                                                                                                                              |
| env-176 | SL_4KL_010_BRINE_10155541 | + | 78      | 143     | RNA → ← hypo                                                                                                                                                                                                                          |
| env-177 | SL_4KL_010_BRINE_10020079 | + | 3724    | 3789    | RNA →                                                                                                                                                                                                                                 |
| env-178 | SL_4KL_010_BRINE_10196029 | + | 155     | 220     | RNA → Ribosomal_S13_N (pfam08069) →                                                                                                                                                                                                   |
| Hsp-6-1 | NZ_JMIP02000018.1         | + | 49610   | 49681   | RNA → rps15p (PRK08561) Ribosomal_S15p_S13e (cd00353) → hypo → PRK14888 (PRK14888) → RPS3A (COG1890) PRK04057 (PRK04057) →                                                                                                            |
| Hla-3-1 | NZ_CP007055.1             | + | 931368  | 931439  | RNA → RpsO (COG0184) rps15p (PRK08561) → hypo → PRK14888 (PRK14888) → RPS3A (COG1890) PRK04057 (PRK04057) →                                                                                                                           |
| env-179 | P_A23_Liq_1_Fmt_1002256   | - | 2002    | 1926    | RNA → RpsO (COG0184) rps15p (PRK08561) → hypo → hypo →                                                                                                                                                                                |
| env-180 | JXWS01021119.1            | - | 732     | 656     | RNA → RpsO (COG0184) rps15p (PRK08561) →                                                                                                                                                                                              |
| env-181 | APHM01021963.1            | - | 6541    | 6476    | RNA → rps15p (PRK08561) Ribosomal_S15p_S13e (cd00353) →                                                                                                                                                                               |
| env-182 | GSLNARP_contig29640       | + | 334     | 399     | RNA → rps15p (PRK08561) Ribosomal_S15p_S13e (cd00353) → hypo →                                                                                                                                                                        |
| env-183 | GSLNARP_contig29701       | + | 717     | 782     | RNA → rps15p (PRK08561) Ribosomal_S15p_S13e (cd00353) → hypo →                                                                                                                                                                        |
| Hsu-1-1 | NZ_CP008874.1             | + | 1124695 | 1124758 | RNA → rps15p (PRK08561) Ribosomal_S15p_S13e (cd00353) → hypo → PRK14888 (PRK14888) → RPS3A (COG1890) PRK04057 (PRK04057) → archae_ser_T (TIGR04217) CDP-OH_P_transf (pfam01066) → HEAT (COG1413) prfB (PRK00578) HEAT_2 (pfam13646) → |
| Hha-1-1 | NZ_A_JRK01000105.1        | - | 627     | 565     | RNA → rps15p (PRK08561) Ribosomal_S15 (pfam00312) → rps15p (PRK08561) Ribosomal_S15 (pfam00312) →                                                                                                                                     |
| Hru-2-1 | NZ_BB_JN01000039.1        | - | 65806   | 65742   | RNA → rps15p (PRK08561) Ribosomal_S15p_S13e (cd00353) → hypo →                                                                                                                                                                        |
| env-184 | 2140918017-23842          | + | 118     | 178     | RNA → rps15p (PRK08561) →                                                                                                                                                                                                             |
| Hsa-4-1 | NZ_AOME01000070.1         | + | 267801  | 267861  | RNA → rps15p (PRK08561) Ribosomal_S15 (pfam00312) → hypo → PRK14888 (PRK14888) → RPS3A (COG1890) PRK04057 (PRK04057) →                                                                                                                |
| Hag-1-1 | NZ_BAFM01000018.1         | - | 8492    | 8432    | RNA → rps15p (PRK08561) Ribosomal_S15p_S13e (cd00353) → hypo → PRK14888 (PRK14888) → RPS3A (COG1890) PRK04057 (PRK04057) →                                                                                                            |
| Hsa-3-1 | NZ_AOMD01000016.1         | + | 129258  | 129318  | RNA → rps15p (PRK08561) Ribosomal_S15p_S13e (cd00353) → hypo → PRK14888 (PRK14888) → RPS3A (COG1890) PRK04057 (PRK04057) →                                                                                                            |
| Hse-1-1 | NZ_BBMP01000004.1         | + | 37396   | 37456   | RNA → rps15p (PRK08561) Ribosomal_S15 (pfam00312) → hypo → PRK14888 (PRK14888) → RPS3A (COG1890) PRK04057 (PRK04057) →                                                                                                                |
| Hth-1-1 | NZ_AOMF01000159.1         | - | 66211   | 66151   | RNA → rps15p (PRK08561) Ribosomal_S15 (pfam00312) → hypo → PRK14888 (PRK14888) → RPS3A (COG1890) PRK04057 (PRK04057) →                                                                                                                |
| Hmo-1-1 | NZ_AOMC01000070.1         | + | 55554   | 55614   | RNA → rps15p (PRK08561) Ribosomal_S15p_S13e (cd00353) → hypo → PRK14888 (PRK14888) → RPS3A (COG1890) PRK04057 (PRK04057) →                                                                                                            |
| env-185 | APHM01010805.1            | + | 863     | 937     | RNA → Ribosomal_S15 (pfam00312) Ribosomal_S13_N (pfam08069) →                                                                                                                                                                         |
| Hsp-1-1 | NC_002607.1               | - | 593897  | 593832  | RNA → RpsO (COG0184) rps15p (PRK08561) → hypo → PRK14888 (PRK14888) → PRK14888 (PRK14888) → RPS3A (COG1890) PRK04057 (PRK04057) →                                                                                                     |

## 20.3 Conserved domains

Conserved domains found in protein-coding genes listed in Section 20.2 are shown below, with the first sentence in their description from the Conserved Domain Database (if any). Conserved domains associated with more than one S15-

**cd00353** (98) Ribosomal protein S15 (prokaryotic)\_S13 (eukaryotic) binds the central domain of 16S rRNA and is required for assembly of the small ribosomal subunit and for intersubunit association, thus representing a key element in the assembly of the whole ribosome.  
**cd00677** (2) S15/NS1/EPRS\_RNA-binding domain.  
**cd06927** (1) L subunit of Archaeal RNA polymerase.  
**cd11255** (1) The Sema domain, a protein interacting module, of semaphorin 3G (Sema3G).  
**cd13704** (1) The periplasmic sensor domain of histidine kinase receptors; the type 2 periplasmic binding fold protein.  
**COG0184** (44) Ribosomal protein S15P/S13E [Translation, ribosomal structure and biogenesis]  
**COG0608** (1) Single-stranded DNA-specific exonuclease, DHH superfamily, may be involved in

Halobacteria RNA are assigned a color, while others are shown in gray. The number in parentheses after the colored domain name is the number of occurrences in Section 20.2.

archaeal DNA replication initiation [Replication, recombination and repair]  
**COG0642** (1) Signal transduction histidine kinase [Signal transduction mechanisms]  
**COG1413** (1) HEAT repeat [General function prediction only]  
**COG1846** (1) DNA-binding transcriptional regulator, MarR family [Transcription]  
**COG1890** (69) Ribosomal protein S3AE [Translation, ribosomal structure and biogenesis]  
**COG2892** (1) tRNA threonylcarbamoyladenine modification (KEOPS) complex, Pcc1 subunit [Translation, ribosomal structure and biogenesis]  
**COG4300** (1) Cadmium resistance protein CadD, predicted permease [Inorganic ion transport and metabolism]  
**pfam00312** (18) Ribosomal protein S15.



env-17 AAACCCUCUCGUCAGCUCGCGGGGGGUCACACGAACACGCUUAUCAACACGACCGGACCGGUUCGACGGGAACACGACAGUCGAGAUCCGACGC . . . . . CUCU . . . . .

env-18 AAACCCUCUCGUCAGCUCGCGGGGGGUCACACGAACACGCUUAUCAACACGACCGGACCGGUUCGACGGGAACACGACAGUCGAGAUCCGACGC . . . . . CUCU . . . . .

env-19 CGGGCGGGUUCUCGCGGGGGGUCACACGAACACGCUUAUCAACACGACCGGACCGGUUCGACGGGAACACGACAGUCGAGAUCCGACGC . . . . . CUCU . . . . .

env-20 GCGUUCGCGGAGAGGAGUCGCGCCACGCGGGGACAAAGAACACGCUUAUCAACACGACCGGACCGGUUCGACGGGAACACGACAGUCGAGAUCCGACGC . . . . . CUCU . . . . .

Har-2-1 CGGAAGCGAGGAGCGCUCGCGGGGUCACACGAACACGCUUAUCAACACGACCGGACCGGUUCGACGGGAACACGACAGUCGAGAUCCGACGC . . . . . CUCU . . . . .

Hsp-3-1 AGAGCGUGGAAAGCGCGCGCCACUCGCGCCCAAGAACACGCUUAUCAACACGACCGGACCGGUUCGACGGGAACACGACAGUCGAGAUCCGACGC . . . . . CUCU . . . . .

env-21 GCGUCGCGGAGCGGUCGCGGGGUCACACGAACACGCUUAUCAACACGACCGGACCGGUUCGACGGGAACACGACAGUCGAGAUCCGACGC . . . . . CUCU . . . . .

env-22 UGUGUGCGCGGAAACGGGCGCGGUCGCGGACGACAAAGAACACCCUUAAGAACCCCGGACCGGACCGGUUCGACGGGAACACGACAGUCGAGAUCCGACGC . . . . . CUCU . . . . .

env-23 GCGUUCGCGGACGGAUAUCGCGGUCGCGGACAAAGAACACGCUUAUCAACACGACCGGACCGGUUCGACGGGAACACGACAGUCGAGAUCCGACGC . . . . . CUCU . . . . .

Hdi-1-1 CCGAAGCGAGGAGCGCUCGCGGGCUCGCGACCAAGAACACGCUUAUCAACACGACCGGACCGGUUCGACGGGAACACGACAGUCGAGAUCCGACGC . . . . . CUCU . . . . .

Hli-2-1 CCGAAGCGGAGGAGCGCUCGCGGGCUCGCGACCAAGAACACGCUUAUCAACACGACCGGACCGGUUCGACGGGAACACGACAGUCGAGAUCCGACGC . . . . . CUCU . . . . .

Hsa-8-1 CUCUCAUUGUCCGACUCGCGGAGCGGACGACAAAGAACACGCUUAUCAACACGACCGGACCGGUUCGACGGGAACACGACAGUCGAGAUCCGACGC . . . . . CUCU . . . . .

Hha-2-1 ACGCAAUCCACCGGAACCGGACCGGCGCACAAAGAACACGCUUAUCAACACGACCGGACCGGUUCGACGGGAACACGACAGUCGAGAUCCGACGC . . . . . CUCU . . . . .

Hba-2-1 CUCUAGAUUGUCCGACUCGCGGAGCGGACGACAAAGAACACGCUUAUCAACACGACCGGACCGGUUCGACGGGAACACGACAGUCGAGAUCCGACGC . . . . . CUCU . . . . .

env-25 CCGAUUCGCGGCGCGGUCGCGGCGGACAAAGAACACGCUUAUCAACACGACCGGACCGGUUCGACGGGAACACGACAGUCGAGAUCCGACGC . . . . . CUCU . . . . .

env-26 GCUACUUAAGUGAACAGCGGACGGGCGGACAAAGAACACGCUUAUCAACACGACCGGACCGGUUCGACGGGAACACGACAGUCGAGAUCCGACGC . . . . . CUCU . . . . .

env-27 UUCUCGUAUCUCGUAUCCAUCCGAGCGCCCAAGAACACGCUUAUCAACACGACCGGACCGGUUCGACGGGAACACGACAGUCGAGAUCCGACGC . . . . . CUCU . . . . .

env-28 GGAAGNAAACCGUUCGCGACCGCGGACGACAAAGAACACGCUUAUCAACACGACCGGACCGGUUCGACGGGAACACGACAGUCGAGAUCCGACGC . . . . . CUCU . . . . .

env-29 GUGUCAAGGCGAGUGUUCACCGGGGACGACAAAGAACACGCUUAUCAACACGACCGGACCGGUUCGACGGGAACACGACAGUCGAGAUCCGACGC . . . . . CUCU . . . . .

env-30 ACGGAAUCUGGCGGUCGCGGGCGUCGACUCCAAAGAACACCCUUAAGAGGAGCGGACCGGUUCGACGGGAACACGACAGUCGAGAUCCGACGC . . . . . CUCU . . . . .

env-31 UGUCGCGCGAUGAGUCCCGCGGACCAAGAACACGCUUAUCAACACGACCGGACCGGUUCGACGGGAACACGACAGUCGAGAUCCGACGC . . . . . CUCU . . . . .

env-32 GGAAGCAAAACCGUUCGCGACCGGACGACAAAGAACACGCUUAUCAACACGACCGGACCGGUUCGACGGGAACACGACAGUCGAGAUCCGACGC . . . . . CUCU . . . . .

env-33 GAGGCGCGGUCGCGGGGAGCGACCGGACGACAAAGAACACGCUUAUCAACACGACCGGACCGGUUCGACGGGAACACGACAGUCGAGAUCCGACGC . . . . . CUCU . . . . .

env-34 UAAUCACUCCCAAGUCCGGAUUCGCGGACGACAAAGAACACGCUUAUCAACACGACCGGACCGGUUCGACGGGAACACGACAGUCGAGAUCCGACGC . . . . . CUCU . . . . .

env-35 UAAUCACUCCCAAGUCCGGAUUCGCGGACGACAAAGAACACGCUUAUCAACACGACCGGACCGGUUCGACGGGAACACGACAGUCGAGAUCCGACGC . . . . . CUCU . . . . .

env-36 UAAUCACUCCCAAGUCCGGAUUCGCGGACGACAAAGAACACGCUUAUCAACACGACCGGACCGGUUCGACGGGAACACGACAGUCGAGAUCCGACGC . . . . . CUCU . . . . .

env-37 CGAGAGACCAAAUCCGCGGACGCGGACGACAAAGAACACGCUUAUCAACACGACCGGACCGGUUCGACGGGAACACGACAGUCGAGAUCCGACGC . . . . . CUCU . . . . .

env-38 ACUCUCGCGGCUUACACCGGCGGACGACAAAGAACACGCUUAUCAACACGACCGGACCGGUUCGACGGGAACACGACAGUCGAGAUCCGACGC . . . . . CUCU . . . . .

env-39 GGCCUUGGCGGUCGCGGACCGGACGACAAAGAACACGCUUAUCAACACGACCGGACCGGUUCGACGGGAACACGACAGUCGAGAUCCGACGC . . . . . CUCU . . . . .

env-40 GGUCUUAUGCCAGUCGCGGCGGACGACAAAGAACACGCUUAUCAACACGACCGGACCGGUUCGACGGGAACACGACAGUCGAGAUCCGACGC . . . . . CUCU . . . . .

env-41 GGUCUUCGCGGUCGCGGACCGGACGACAAAGAACACGCUUAUCAACACGACCGGACCGGUUCGACGGGAACACGACAGUCGAGAUCCGACGC . . . . . CUCU . . . . .

Hsp-5-1 CUAUUCUUCGUAUUCGCGGCGGACGACAAAGAACACGCUUAUCAACACGACCGGACCGGUUCGACGGGAACACGACAGUCGAGAUCCGACGC . . . . . CUCU . . . . .

Hca-2-1 GGGUCUCCCGGACGAGCGCGGCGGACGACAAAGAACACGCUUAUCAACACGACCGGACCGGUUCGACGGGAACACGACAGUCGAGAUCCGACGC . . . . . CUCU . . . . .

Hli-1-1 AGUUCUACCGCGCGGUCGCGGCGGACGACAAAGAACACGCUUAUCAACACGACCGGACCGGUUCGACGGGAACACGACAGUCGAGAUCCGACGC . . . . . CUCU . . . . .

Hte-1-1 ACCGAGGGGGGACGACCGGCGGUCGCGGACGACAAAGAACACGCUUAUCAACACGACCGGACCGGUUCGACGGGAACACGACAGUCGAGAUCCGACGC . . . . . CUCU . . . . .

Hho-1-1 GACCGAGGGGGGACGACCGGCGGUCGCGGACGACAAAGAACACGCUUAUCAACACGACCGGACCGGUUCGACGGGAACACGACAGUCGAGAUCCGACGC . . . . . CUCU . . . . .

Hsa-6-1 GUUCACCGCGCGGCGGCGGUCGCGGACGACAAAGAACACGCUUAUCAACACGACCGGACCGGUUCGACGGGAACACGACAGUCGAGAUCCGACGC . . . . . CUCU . . . . .

Hco-1-1 GCGUUCGCGGACGAGUCGCGGCGGACGACAAAGAACACGCUUAUCAACACGACCGGACCGGUUCGACGGGAACACGACAGUCGAGAUCCGACGC . . . . . CUCU . . . . .

Hai-1-1 GCGGUUCGCGGACGAGUCGCGGCGGACGACAAAGAACACGCUUAUCAACACGACCGGACCGGUUCGACGGGAACACGACAGUCGAGAUCCGACGC . . . . . CUCU . . . . .

env-42 GCGGCGGUCUCGCGGCGGCGGCGGACGACAAAGAACACGCUUAUCAACACGACCGGACCGGUUCGACGGGAACACGACAGUCGAGAUCCGACGC . . . . . CUCU . . . . .

env-43 ACCGACGAGACGACAAAGCGGCGGCGGACGACAAAGAACACGCUUAUCAACACGACCGGACCGGUUCGACGGGAACACGACAGUCGAGAUCCGACGC . . . . . CUCU . . . . .

env-44 GCGGAGAGUGAUCGCGGAGCGGCGGACGACAAAGAACACGCUUAUCAACACGACCGGACCGGUUCGACGGGAACACGACAGUCGAGAUCCGACGC . . . . . CUCU . . . . .

env-45 ACUGGGGUGGACGCGGUCGCGGCGGACGACAAAGAACACGCUUAUCAACACGACCGGACCGGUUCGACGGGAACACGACAGUCGAGAUCCGACGC . . . . . CUCU . . . . .

env-46 CGUUCUUAACUCCGCGGAGUCGCGGCGGACGACAAAGAACACGCUUAUCAACACGACCGGACCGGUUCGACGGGAACACGACAGUCGAGAUCCGACGC . . . . . CUCU . . . . .

Hpa-1-1 CUCUACUCCGCGGCGGCGGAAACCGUACGCGGAAACCGUUAUCAACACGACCGGACCGGUUCGACGGGAACACGACAGUCGAGAUCCGACGC . . . . . CUCU . . . . .

Hci-1-1 UGGGCGGUGGACGUGAGCGGCGGCGGACGACAAAGAACACGCUUAUCAACACGACCGGACCGGUUCGACGGGAACACGACAGUCGAGAUCCGACGC . . . . . CUCU . . . . .

env-47 ACCGACCGGUCGCGGCGGCGGACGACAAAGAACACGCUUAUCAACACGACCGGACCGGUUCGACGGGAACACGACAGUCGAGAUCCGACGC . . . . . CUCU . . . . .

env-48 AGCCGGUUAUAGCACUUCGACCGGUGGUAUGCCAAACCGUUAUCAACACGACCGGACCGGUUCGACGGGAACACGACAGUCGAGAUCCGACGC . . . . . CUCU . . . . .

env-49 . . . . . ACACAGCGCGGCGGAAUCGACAU . . . . . GUCGGC . . . . .

env-50 . . . . . ACACAGCGCGGCGGAAUCGACAU . . . . . GUCGGC . . . . .

env-51 . . . . . ACACAGCGCGGCGGAAUCGACAU . . . . . GUCGGC . . . . .

env-52 . . . . . ACACAGCGCGGCGGAAUCGACAU . . . . . GUCGGC . . . . .

env-53 . . . . . ACACAGCGCGGCGGAAUCGACAU . . . . . GUCGGC . . . . .

env-54 . . . . . ACACAGCGCGGCGGAAUCGACAU . . . . . GUCGGC . . . . .

env-55 . . . . . ACACAGCGCGGCGGAAUCGACAU . . . . . GUCGGC . . . . .

env-56 . . . . . ACACAGCGCGGCGGAAUCGACAU . . . . . GUCGGC . . . . .

env-57 . . . . . ACACAGCGCGGCGGAAUCGACAU . . . . . GUCGGC . . . . .

Hla-2-1 . . . . . ACACAGCGCGGCGGAAUCGACAU . . . . . GUCGGC . . . . .

Hsp-4-1 . . . . . ACACAGCGCGGCGGAAUCGACAU . . . . . GUCGGC . . . . .

Hsp-2-1 . . . . . ACACAGCGCGGCGGAAUCGACAU . . . . . GUCGGC . . . . .

Hme-1-1 . . . . . ACACAGCGCGGCGGAAUCGACAU . . . . . GUCGGC . . . . .

Hel-1-1 . . . . . ACACAGCGCGGCGGAAUCGACAU . . . . . GUCGGC . . . . .

Hvo-1-1 . . . . . ACACAGCGCGGCGGAAUCGACAU . . . . . GUCGGC . . . . .

Hsu-2-1 . . . . . ACACAGCGCGGCGGAAUCGACAU . . . . . GUCGGC . . . . .

Hde-1-1 . . . . . ACACAGCGCGGCGGAAUCGACAU . . . . . GUCGGC . . . . .

Hpr-1-1 . . . . . ACACAGCGCGGCGGAAUCGACAU . . . . . GUCGGC . . . . .

Hgi-1-1 . . . . . ACACAGCGCGGCGGAAUCGACAU . . . . . GUCGGC . . . . .

Hal-1-1 . . . . . ACACAGCGCGGCGGAAUCGACAU . . . . . GUCGGC . . . . .

Hgi-2-1 . . . . . ACACAGCGCGGCGGAAUCGACAU . . . . . GUCGGC . . . . .

Hmu-1-1 . . . . . ACACAGCGCGGCGGAAUCGACAU . . . . . GUCGGC . . . . .

env-59 . . . . . ACACAGCGCGGCGGAAUCGACAU . . . . . GUCGGC . . . . .

env-60 . . . . . ACACAGCGCGGCGGAAUCGACAU . . . . . GUCGGC . . . . .

env-61 . . . . . ACACAGCGCGGCGGAAUCGACAU . . . . . GUCGGC . . . . .

env-62 . . . . . ACACAGCGCGGCGGAAUCGACAU . . . . . GUCGGC . . . . .

env-63 . . . . . ACACAGCGCGGCGGAAUCGACAU . . . . . GUCGGC . . . . .

env-64 . . . . . ACACAGCGCGGCGGAAUCGACAU . . . . . GUCGGC . . . . .

Has-1-1 . . . . . ACACAGCGCGGCGGAAUCGACAU . . . . . GUCGGC . . . . .

env-65 . . . . . ACACAGCGCGGCGGAAUCGACAU . . . . . GUCGGC . . . . .

h3A-1-1 . . . . . ACACAGCGCGGCGGAAUCGACAU . . . . . GUCGGC . . . . .

env-66 . . . . . ACACAGCGCGGCGGAAUCGACAU . . . . . GUCGGC . . . . .

env-67 . . . . . ACACAGCGCGGCGGAAUCGACAU . . . . . GUCGGC . . . . .

















**abbrev. of hits taxonomy of species**

|                  |         |               |                 |                    |                       |                                              |
|------------------|---------|---------------|-----------------|--------------------|-----------------------|----------------------------------------------|
| CMe-1-1          | Archaea | Euryarchaeota | Methanomicrobia | Methanomicrobiales | Generaincertae sedis  | <i>Candidatus</i> Methanoregula boonei 6A8   |
| Mpa-1-1          | Archaea | Euryarchaeota | Methanomicrobia | Methanomicrobiales | Generaincertae sedis  | <i>Methanosphaerula palustris</i> E1-9c      |
| Mba-1-1          | Archaea | Euryarchaeota | Methanomicrobia | Methanomicrobiales | Methanocorpusculaceae | <i>Methanocorpusculum bavaricum</i> DSM 4179 |
| Mla-1-1          | Archaea | Euryarchaeota | Methanomicrobia | Methanomicrobiales | Methanocorpusculaceae | <i>Methanocorpusculum labreanum</i> Z        |
| Mbo-1-1          | Archaea | Euryarchaeota | Methanomicrobia | Methanomicrobiales | Methanomicrobiaceae   | <i>Methanoculleus bouyensis</i> MS2          |
| Mma-1-1          | Archaea | Euryarchaeota | Methanomicrobia | Methanomicrobiales | Methanomicrobiaceae   | <i>Methanoculleus marisnigri</i> JR1         |
| Mse-1-1          | Archaea | Euryarchaeota | Methanomicrobia | Methanomicrobiales | Methanomicrobiaceae   | <i>Methanoculleus sediminis</i>              |
| Msp-1-1          | Archaea | Euryarchaeota | Methanomicrobia | Methanomicrobiales | Methanomicrobiaceae   | <i>Methanoculleus</i> sp. MH98A              |
| Mli-1-1          | Archaea | Euryarchaeota | Methanomicrobia | Methanomicrobiales | Methanomicrobiaceae   | <i>Methanofollis liminatans</i> DSM 4140     |
| Mpa-2-1          | Archaea | Euryarchaeota | Methanomicrobia | Methanomicrobiales | Methanomicrobiaceae   | <i>Methanolacinia paynteri</i>               |
| Mmo-1-1          | Archaea | Euryarchaeota | Methanomicrobia | Methanomicrobiales | Methanomicrobiaceae   | <i>Methanomicrobium mobile</i> BP            |
| Mli-2-1          | Archaea | Euryarchaeota | Methanomicrobia | Methanomicrobiales | Methanomicrobiaceae   | <i>Methanoplanus limicola</i> DSM 2279       |
| Mpe-1-1          | Archaea | Euryarchaeota | Methanomicrobia | Methanomicrobiales | Methanomicrobiaceae   | <i>Methanoplanus petrolearius</i> DSM 11571  |
| Mta-1-1          | Archaea | Euryarchaeota | Methanomicrobia | Methanomicrobiales | Methanoregulaceae     | <i>Methanolinea tarda</i> NOBI-1             |
| Mfo-1-1          | Archaea | Euryarchaeota | Methanomicrobia | Methanomicrobiales | Methanoregulaceae     | <i>Methanoregula formicica</i> SMSF          |
| env-1 to env-179 |         |               |                 |                    |                       | environmental samples                        |

**21.2 Gene contexts**

Each S15-Methanobacteria RNA (indicated by “RNA→”) is listed. For each hit, the downstream genes predicted to reside in a regulated operon are listed. If the nearest downstream gene is encoding in the opposite strand (and therefore presumed to not be a part of a regulated operon), then that gene is still depicted. Some environmental sequences and some RefSeq entries lack gene annotations, and so no genes are available for such sequences. The direction of each gene is indicated with an arrow (→), and each predicted conserved domain in the gene is named. Conserved domains associated with more than one S15-Methanobacteria RNA are assigned a color; other domains are gray. Information about these conserved do-

mains is given in Section 21.3. The accession of the sequence containing each S15-Methanobacteria RNA is given in the column named “Seq. accession”. Accessions beginning with “NC\_”, “NS\_”, “NW\_” or “NZ\_” are contained in RefSeq. Other accession refer to environmental samples. Nucleotide coordinates are given for the 5′ and 3′ boundaries of each S15-Methanobacteria RNA. If the 5′ coordinate is greater than the 3′ coordinate, the RNA is present on the reverse-complement strand of the containing genomic DNA sequence. Each hit is denoted by an abbreviation (like “Eco-1-1”) that refers to a taxonomy given in Section 21.1.

| abbrev. | Seq. accession          | 5′ at | 3′ at   | genes   |                                                                                                                                                                                                                                                                                                 |
|---------|-------------------------|-------|---------|---------|-------------------------------------------------------------------------------------------------------------------------------------------------------------------------------------------------------------------------------------------------------------------------------------------------|
| env-1   | RUMENNODE_3956981.1     | -     | 89863   | 89776   | <b>RNA</b> → <b>rps15p (PRK08561)</b> Ribosomal_S15p_S13e (cd00353)→ <b>RecJ (COG0608)</b> recJ (TIGR00644)→                                                                                                                                                                                    |
| Mmo-1-1 | NZ_JOMF01000007.1       | -     | 133803  | 133716  | <b>RNA</b> → <b>rps15p (PRK08561)</b> Ribosomal_S15p_S13e (cd00353)→ <b>RecJ (COG0608)</b> recJ (TIGR00644)→<br><b>PRK14888 (PRK14888)</b> → <b>PRK04057 (PRK04057)</b> Ribosomal_S3Ae (pfam01015)→ <b>hypo</b> →                                                                               |
| env-2   | JGI24731J21663_1004595  | +     | 6197    | 6276    | <b>RNA</b> →                                                                                                                                                                                                                                                                                    |
| env-3   | JGI24731J21663_1017363  | -     | 1544    | 1465    | <b>RNA</b> → <b>rps15p (PRK08561)</b> Ribosomal_S15p_S13e (cd00353)→ <b>RecJ (COG0608)</b> recJ (TIGR00644)→                                                                                                                                                                                    |
| env-4   | JGI24732J26686_1057961  | -     | 395     | 316     | <b>RNA</b> → <b>Ribosomal_S13_N (pfam08069)</b> →                                                                                                                                                                                                                                               |
| env-5   | JGI24728J21555_1000004  | -     | 136779  | 136704  | <b>RNA</b> → ← <b>hypo</b>                                                                                                                                                                                                                                                                      |
| env-6   | 3300000558_11395505     | +     | 169     | 244     | <b>RNA</b> → <b>Ribosomal_S13_N (pfam08069)</b> →                                                                                                                                                                                                                                               |
| env-7   | JGI24729J20445_1005959  | -     | 2081    | 2005    | <b>RNA</b> → <b>RpsO (COG0184)</b> rps15p (PRK08561)→ <b>RecJ (COG0608)</b> recJ (TIGR00644)→ <b>PRK14888 (PRK14888)</b> →                                                                                                                                                                      |
| env-8   | SL_5KL_010_SED_10017420 | -     | 502     | 427     | <b>RNA</b> → <b>Ribosomal_S13_N (pfam08069)</b> →                                                                                                                                                                                                                                               |
| env-9   | SL_3KL_010_SED_11192733 | +     | 39      | 114     | <b>RNA</b> → <b>hypo</b> →                                                                                                                                                                                                                                                                      |
| env-10  | SL_3KL_010_SED_10014053 | -     | 606     | 533     | <b>RNA</b> → <b>RpsO (COG0184)</b> rps15p (PRK08561)→                                                                                                                                                                                                                                           |
| env-11  | SL_3KL_010_SED_10006919 | -     | 1903    | 1830    | <b>RNA</b> → <b>RpsO (COG0184)</b> rps15p (PRK08561)→ <b>RecJ (COG0608)</b> A-tRNA_syn_arch (TIGR03683)→                                                                                                                                                                                        |
| Mpa-1-1 | NC_011832.1             | -     | 2788986 | 2788870 | <b>RNA</b> → <b>rps15p (PRK08561)</b> Ribosomal_S15p_S13e (cd00353)→ <b>RecJ (COG0608)</b> recJ (TIGR00644)→<br><b>PhnD (COG3221)</b> <b>PRK14888 (PRK14888)</b> → <b>PRK00960 (PRK00960)</b> Gly_His_Pro_Ser_Thr_tRS_core (cd00670)→<br><b>PRK04057 (PRK04057)</b> Ribosomal_S3Ae (pfam01015)→ |
| env-12  | DHTCA2.GJDNVXK02I5RIS   | -     | 305     | 187     | <b>RNA</b> → <b>hypo</b> → <b>rps15p (PRK08561)</b> →                                                                                                                                                                                                                                           |
| env-13  | BDMC2_contig04064       | -     | 1051    | 974     | <b>RNA</b> → <b>RpsO (COG0184)</b> rps15p (PRK08561)→ <b>RecJ (COG0608)</b> recJ (TIGR00644)→ <b>hypo</b> →                                                                                                                                                                                     |
| env-14  | 2205091243              | +     | 132     | 214     | <b>RNA</b> →                                                                                                                                                                                                                                                                                    |
| env-15  | 2204637606              | +     | 116     | 198     | <b>RNA</b> → <b>rps15p (PRK08561)</b> →                                                                                                                                                                                                                                                         |
| env-16  | JGI20214J14112_1457962  | +     | 22      | 99      | <b>RNA</b> → <b>hypo</b> → <b>rps15p (PRK08561)</b> →                                                                                                                                                                                                                                           |

|         |                           |   |         |         |                                                                                                                                                                                                                                                                                                                                                                  |
|---------|---------------------------|---|---------|---------|------------------------------------------------------------------------------------------------------------------------------------------------------------------------------------------------------------------------------------------------------------------------------------------------------------------------------------------------------------------|
| env-17  | SakLake120mDRAFT_c0001602 | + | 6343    | 6421    | RNA → rps15p (PRK08561)Ribosomal_S15p_S13e (cd00353) → RecJ (COG0608)recJ (TIGR00644) → PRK14888 (PRK14888) → PRK00960 (PRK00960)Gly_His_Pro_Ser_Thr_tRS_core (cd00670) → PRK04057 (PRK04057)Ribosomal_S3Ae (pfam01015) →                                                                                                                                        |
| env-18  | JGI24729J20445_1013682    | - | 766     | 687     | RNA → RpsO (COG0184)rps15p (PRK08561) → RecJ (COG0608)recJ (TIGR00644) →                                                                                                                                                                                                                                                                                         |
| env-19  | JGI24730J26740_1000033    | + | 32652   | 32731   | RNA → RpsO (COG0184)rps15p (PRK08561) → RecJ (COG0608)recJ (TIGR00644) → PRK14888 (PRK14888) → PRK04057 (PRK04057)Ribosomal_S3Ae (pfam01015) →                                                                                                                                                                                                                   |
| env-20  | 3300000558_10042858       | - | 212     | 133     | RNA → ←-hypo                                                                                                                                                                                                                                                                                                                                                     |
| env-21  | 3300001592_10223493       | + | 286     | 365     | RNA → Ribosomal_S13_N (pfam08069) →                                                                                                                                                                                                                                                                                                                              |
| env-22  | 3300000032_0002816        | - | 6001    | 5922    | RNA → rps15p (PRK08561)Ribosomal_S15p_S13e (cd00353) → RecJ (COG0608)recJ (TIGR00644) → PRK14888 (PRK14888) → PRK00960 (PRK00960)Gly_His_Pro_Ser_Thr_tRS_core (cd00670) → PRK04057 (PRK04057)Ribosomal_S3Ae (pfam01015) → IPGM_like (cd16011)PhosphMutase (pfam10143) → hypo →                                                                                   |
| env-23  | M940CN_1015758            | - | 1243    | 1152    | RNA → rps15p (PRK08561)Ribosomal_S15p_S13e (cd00353) → RecJ (COG0608)recJ (TIGR00644) →                                                                                                                                                                                                                                                                          |
| Mpe-1-1 | NC_014507.1               | + | 2024969 | 2025060 | RNA → rps15p (PRK08561)Ribosomal_S15p_S13e (cd00353) → RecJ (COG0608)recJ (TIGR00644) → PRK14888 (PRK14888) → PRK04057 (PRK04057)Ribosomal_S3Ae (pfam01015) → hypo → hypo → BluB (TIGR02476)Nitroreductase (pfam00881) → PRK03922 (PRK03922)DUF555 (pfam04475) → ribokinase_group_A (cd01942)PTZ00247 (PTZ00247) → COG3356 (COG3356)DUF2070 (pfam09843) →        |
| Mpa-2-1 | NZ_KN360943.1             | + | 84264   | 84354   | RNA → rps15p (PRK08561)Ribosomal_S15p_S13e (cd00353) → RecJ (COG0608)recJ (TIGR00644) → PRK14888 (PRK14888) → PRK04057 (PRK04057)Ribosomal_S3Ae (pfam01015) → hypo → hypo → BluB (TIGR02476)Nitroreductase (pfam00881) → PRK03922 (PRK03922)DUF555 (pfam04475) → ribokinase_group_A (cd01942)D-ribokin_bact (TIGR02152) → COG3356 (COG3356)DUF2070 (pfam09843) → |
| env-24  | SakLake120mDRAFT_c0582226 | - | 239     | 158     | RNA → Ribosomal_S13_N (pfam08069) →                                                                                                                                                                                                                                                                                                                              |
| env-25  | 3300001567_10013045       | - | 512     | 429     | RNA → Ribosomal_S13_N (pfam08069) →                                                                                                                                                                                                                                                                                                                              |
| env-26  | BDMC2_GDQ3S3O02JCPBT_left | - | 164     | 85      | RNA →                                                                                                                                                                                                                                                                                                                                                            |
| env-27  | WSSedA1Ba3_1085468        | - | 477     | 405     | RNA → Ribosomal_S15 (pfam00312)Ribosomal_S13_N (pfam08069) →                                                                                                                                                                                                                                                                                                     |
| env-28  | JGI20214J14112_1152162    | + | 106     | 178     | RNA → Ribosomal_S13_N (pfam08069) →                                                                                                                                                                                                                                                                                                                              |
| env-29  | 3300001567_10002105       | + | 3402    | 3481    | RNA → RpsO (COG0184)rps15p (PRK08561) → RecJ (COG0608)recJ (TIGR00644) → PRK14888 (PRK14888) → PRK00960 (PRK00960)Gly_His_Pro_Ser_Thr_tRS_core (cd00670) → PRK04057 (PRK04057)Ribosomal_S3Ae (pfam01015) →                                                                                                                                                       |
| env-30  | JGI20214J14112_1280193    | + | 182     | 255     | RNA →                                                                                                                                                                                                                                                                                                                                                            |
| env-31  | WSSedB1B2_c063428         | - | 318     | 245     | RNA → Ribosomal_S13_N (pfam08069) →                                                                                                                                                                                                                                                                                                                              |
| env-32  | SL_5KL_010_SED_10000187   | + | 25577   | 25650   | RNA → rps15p (PRK08561)Ribosomal_S15p_S13e (cd00353) → RecJ (COG0608) → PRK14888 (PRK14888) → PRK04057 (PRK04057)Ribosomal_S3Ae (pfam01015) → apgM (TIGR00306)IPGM_like (cd16011) → COG4801 (COG4801)glmU (TIGR01173) → hypo →                                                                                                                                   |
| env-33  | JGI24713J26584_10001722   | - | 13168   | 13096   | RNA → hypo → rps15p (PRK08561)Ribosomal_S15p_S13e (cd00353) → RecJ (COG0608)recJ (TIGR00644)DHHA1 (pfam02272) → PRK14888 (PRK14888) → PRK04057 (PRK04057)Ribosomal_S3Ae (pfam01015) →                                                                                                                                                                            |
| env-34  | JGI24714J26587_10001783   | - | 13168   | 13096   | RNA → PRK11160 (PRK11160) → rps15p (PRK08561)Ribosomal_S15p_S13e (cd00353) → RecJ (COG0608)recJ (TIGR00644)DHHA1 (pfam02272) → PRK14888 (PRK14888) → PRK04057 (PRK04057)Ribosomal_S3Ae (pfam01015) →                                                                                                                                                             |
| env-35  | JGI24709J26583_10009162   | + | 2538    | 2609    | RNA → rps15p (PRK08561)Ribosomal_S15 (pfam00312) → RecJ (COG0608)recJ (TIGR00644) → PRK14888 (PRK14888) → PRK04057 (PRK04057)Ribosomal_S3Ae (pfam01015) →                                                                                                                                                                                                        |
| env-36  | JGI24707J26582_10010674   | - | 1854    | 1783    | RNA → rps15p (PRK08561)Ribosomal_S15p_S13e (cd00353) → RecJ (COG0608)recJ (TIGR00644) →                                                                                                                                                                                                                                                                          |
| env-37  | JGI24711J26586_10015339   | - | 2787    | 2716    | RNA → rps15p (PRK08561)Ribosomal_S15p_S13e (cd00353) → RecJ (COG0608)recJ (TIGR00644) → hypo → PRK14888 (PRK14888) → PRK04057 (PRK04057)Ribosomal_S3Ae (pfam01015) →                                                                                                                                                                                             |
| env-38  | JGI24710J26742_10008399   | + | 5929    | 6000    | RNA → rps15p (PRK08561)Ribosomal_S15p_S13e (cd00353) → RecJ (COG0608)recJ (TIGR00644) →                                                                                                                                                                                                                                                                          |
| env-39  | JGI24712J26585_10018987   | + | 1068    | 1139    | RNA → rps15p (PRK08561)Ribosomal_S15p_S13e (cd00353) → RecJ (COG0608)recJ (TIGR00644) → PRK14888 (PRK14888) → PRK04057 (PRK04057)Ribosomal_S3Ae (pfam01015) →                                                                                                                                                                                                    |
| env-40  | JGI24708J26588_10009965   | - | 2892    | 2821    | RNA → rps15p (PRK08561)Ribosomal_S15p_S13e (cd00353) → RecJ (COG0608)recJ (TIGR00644) → PRK14888 (PRK14888) → PRK04057 (PRK04057)Ribosomal_S3Ae (pfam01015) →                                                                                                                                                                                                    |
| env-41  | JGI24712J26585_10013199   | - | 199     | 130     | RNA →                                                                                                                                                                                                                                                                                                                                                            |
| env-42  | JGI24711J26586_10077988   | + | 748     | 817     | RNA → rps15p (PRK08561) →                                                                                                                                                                                                                                                                                                                                        |
| env-43  | JGI24710J26742_10001551   | - | 12821   | 12752   | RNA → rps15p (PRK08561)Ribosomal_S15p_S13e (cd00353) → RecJ (COG0608)recJ (TIGR00644) → PRK14888 (PRK14888) → PRK04057 (PRK04057)Ribosomal_S3Ae (pfam01015) →                                                                                                                                                                                                    |
| env-44  | JGI24709J26583_10004510   | + | 8218    | 8287    | RNA → rps15p (PRK08561)Ribosomal_S15p_S13e (cd00353) → RecJ (COG0608)recJ (TIGR00644) → PRK14888 (PRK14888) → PRK04057 (PRK04057)Ribosomal_S3Ae (pfam01015) →                                                                                                                                                                                                    |
| env-45  | JGI24711J26586_10013429   | + | 3611    | 3680    | RNA →                                                                                                                                                                                                                                                                                                                                                            |



|         |                         |   |        |        |                                                                                                                                                                                                                                                                                 |
|---------|-------------------------|---|--------|--------|---------------------------------------------------------------------------------------------------------------------------------------------------------------------------------------------------------------------------------------------------------------------------------|
| env-46  | JGI24712J26585_10007655 | + | 6829   | 6898   | RNA → rps15p (PRK08561)Ribosomal_S15p_S13e (cd00353) →                                                                                                                                                                                                                          |
| env-47  | JGI24712J26585_10045214 | - | 875    | 806    | RNA → rps15p (PRK08561)Ribosomal_S15 (pfam00312) → RecJ (COG0608) →                                                                                                                                                                                                             |
| env-48  | JGI24709J26583_10006535 | - | 7792   | 7723   | RNA → Ribosomal_S13_N (pfam08069) → RecJ (COG0608)recJ (TIGR00644) → PRK14888 (PRK14888) →<br>PRK04057 (PRK04057)Ribosomal_S3Ae (pfam01015) →                                                                                                                                   |
| env-49  | JGI24707J26582_10115681 | + | 545    | 614    | RNA → rps15p (PRK08561) →                                                                                                                                                                                                                                                       |
| env-50  | JGI24711J26586_10231301 | - | 163    | 94     | RNA →                                                                                                                                                                                                                                                                           |
| env-51  | JGI24710J26742_10017231 | - | 2099   | 2030   | RNA → rps15p (PRK08561)Ribosomal_S15p_S13e (cd00353) → RecJ (COG0608)recJ (TIGR00644) →<br>PRK14888 (PRK14888) →                                                                                                                                                                |
| env-52  | JGI24708J26588_10034739 | + | 663    | 732    | RNA → rps15p (PRK08561)Ribosomal_S15p_S13e (cd00353) → RecJ (COG0608)recJ (TIGR00644) →                                                                                                                                                                                         |
| env-53  | JGI24707J26582_10002665 | - | 12607  | 12538  | RNA → RpsO (COG0184)rps15p (PRK08561) → RecJ (COG0608) → PRK14888 (PRK14888) →<br>PRK04057 (PRK04057)Ribosomal_S3Ae (pfam01015) →                                                                                                                                               |
| env-54  | JGI24708J26588_10002365 | - | 13618  | 13549  | RNA → RpsO (COG0184)rps15p (PRK08561) → RecJ (COG0608) → PRK14888 (PRK14888) →<br>PRK04057 (PRK04057)Ribosomal_S3Ae (pfam01015) →                                                                                                                                               |
| env-55  | JGI24713J26584_10003246 | + | 742    | 811    | RNA → RpsO (COG0184)rps15p (PRK08561) → RecJ (COG0608) → PRK14888 (PRK14888) →<br>PRK04057 (PRK04057)Ribosomal_S3Ae (pfam01015) →                                                                                                                                               |
| env-56  | JGI24714J26587_10001431 | + | 3149   | 3218   | RNA → RpsO (COG0184)rps15p (PRK08561) → RecJ (COG0608) → PRK14888 (PRK14888) →<br>PRK04057 (PRK04057)Ribosomal_S3Ae (pfam01015) →                                                                                                                                               |
| env-57  | JGI24712J26585_10004187 | - | 10439  | 10370  | RNA → RpsO (COG0184)rps15p (PRK08561) → RecJ (COG0608) → PRK14888 (PRK14888) →<br>PRK04057 (PRK04057)Ribosomal_S3Ae (pfam01015) →                                                                                                                                               |
| env-58  | JGI24711J26586_10011349 | - | 3687   | 3618   | RNA → RpsO (COG0184)rps15p (PRK08561) → RecJ (COG0608) → PRK14888 (PRK14888) →<br>PRK04057 (PRK04057)Ribosomal_S3Ae (pfam01015) →                                                                                                                                               |
| env-59  | JGI24709J26583_10004141 | - | 10439  | 10370  | RNA → RpsO (COG0184)rps15p (PRK08561) → RecJ (COG0608) → PRK14888 (PRK14888) →<br>PRK04057 (PRK04057)Ribosomal_S3Ae (pfam01015) →                                                                                                                                               |
| env-60  | JGI24710J26742_10004693 | - | 10439  | 10370  | RNA → RpsO (COG0184)rps15p (PRK08561) → RecJ (COG0608) → PRK14888 (PRK14888) →<br>PRK04057 (PRK04057)Ribosomal_S3Ae (pfam01015) →                                                                                                                                               |
| Mbo-1-1 | NC_018227.2             | + | 355435 | 355504 | RNA → rps15p (PRK08561)Ribosomal_S15 (pfam00312) → RecJ (COG0608)recJ (TIGR00644) →<br>PRK14888 (PRK14888) → PRK04057 (PRK04057)Ribosomal_S3Ae (pfam01015) →                                                                                                                    |
| env-61  | JGI24712J26585_10064911 | + | 1269   | 1338   | RNA →                                                                                                                                                                                                                                                                           |
| env-62  | JGI24711J26586_10108516 | + | 580    | 649    | RNA →                                                                                                                                                                                                                                                                           |
| env-63  | JGI24709J26583_10179352 | - | 163    | 94     | RNA →                                                                                                                                                                                                                                                                           |
| env-64  | 3300000558_10029409     | + | 126    | 197    | RNA → rps15p (PRK08561)Ribosomal_S15p_S13e (cd00353) → RecJ (COG0608)recJ (TIGR00644) →                                                                                                                                                                                         |
| env-65  | 3300000568_10009510     | - | 2212   | 2141   | RNA → rps15p (PRK08561)Ribosomal_S15p_S13e (cd00353) → RecJ (COG0608)recJ (TIGR00644) →<br>PRK14888 (PRK14888) → PRK04057 (PRK04057)Ribosomal_S3Ae (pfam01015) →                                                                                                                |
| env-66  | 3300000032_0014754      | + | 78     | 149    | RNA → rps15p (PRK08561)Ribosomal_S15p_S13e (cd00353) → RecJ (COG0608)recJ (TIGR00644) →                                                                                                                                                                                         |
| env-67  | 3300000032_0066330      | + | 155    | 226    | RNA → Ribosomal_S13_N (pfam08069) →                                                                                                                                                                                                                                             |
| env-68  | 3300001592_10784659     | + | 44     | 115    | RNA → rps15p (PRK08561) →                                                                                                                                                                                                                                                       |
| env-69  | 3300000507_100903       | - | 1882   | 1811   | RNA → rps15p (PRK08561)Ribosomal_S15p_S13e (cd00353) → RecJ (COG0608)recJ (TIGR00644) → hypo →                                                                                                                                                                                  |
| Msp-1-1 | NZ_JMIO1000090.1        | + | 12381  | 12453  | RNA → hypo → hypo →                                                                                                                                                                                                                                                             |
| Mma-1-1 | NC_009051.1             | - | 416072 | 416000 | RNA → rps15p (PRK08561)Ribosomal_S15p_S13e (cd00353) → RecJ (COG0608)recJ (TIGR00644) → hypo →<br>PRK14888 (PRK14888) → PRK04057 (PRK04057)Ribosomal_S3Ae (pfam01015) → hypo →<br>apgM (TIGR00306)lPGM_like (cd16011) → lipid_A_lpxD (TIGR01853)Bactofilin (pfam04519) → hypo → |
| env-70  | JGI24712J26585_10323374 | - | 185    | 113    | RNA →                                                                                                                                                                                                                                                                           |
| Mse-1-1 | NZ_JXOJ01000001.1       | - | 229493 | 229421 | RNA → rps15p (PRK08561)Ribosomal_S15p_S13e (cd00353) → RecJ (COG0608)recJ (TIGR00644) →<br>PRK14888 (PRK14888) → PRK04057 (PRK04057)Ribosomal_S3Ae (pfam01015) → hypo →<br>ApgM (COG3635)apgM (TIGR00306) → lipid_A_lpxD (TIGR01853)Bactofilin (pfam04519) → hypo →             |
| env-71  | 3300000568_10009858     | - | 298    | 228    | RNA → Ribosomal_S13_N (pfam08069) →                                                                                                                                                                                                                                             |
| env-72  | 3300001567_10003374     | - | 12269  | 12199  | RNA → rps15p (PRK08561)Ribosomal_S15p_S13e (cd00353) → RecJ (COG0608)recJ (TIGR00644) →<br>PRK14888 (PRK14888) → PRK04057 (PRK04057)Ribosomal_S3Ae (pfam01015) →                                                                                                                |
| env-73  | 3300000032_0044310      | - | 13186  | 13116  | RNA → rps15p (PRK08561)Ribosomal_S15p_S13e (cd00353) → RecJ (COG0608)recJ (TIGR00644) →<br>PRK14888 (PRK14888) → PRK04057 (PRK04057)Ribosomal_S3Ae (pfam01015) →                                                                                                                |
| env-74  | 3300000558_11565244     | + | 1079   | 1149   | RNA → rps15p (PRK08561)Ribosomal_S15p_S13e (cd00353) → RecJ (COG0608) →                                                                                                                                                                                                         |
| env-75  | 3300001592_10006172     | - | 8474   | 8404   | RNA → rps15p (PRK08561)Ribosomal_S15p_S13e (cd00353) → RecJ (COG0608)recJ (TIGR00644) →<br>PRK14888 (PRK14888) → PRK04057 (PRK04057)Ribosomal_S3Ae (pfam01015) →                                                                                                                |
| env-76  | JGI26437J51864_10033120 | + | 500    | 575    | RNA → rps15p (PRK08561)Ribosomal_S15p_S13e (cd00353) →                                                                                                                                                                                                                          |

|         |                             |   |         |         |                                                                                                                                                                                                                                                                                               |
|---------|-----------------------------|---|---------|---------|-----------------------------------------------------------------------------------------------------------------------------------------------------------------------------------------------------------------------------------------------------------------------------------------------|
| env-77  | 3300001580_10010117         | - | 5601    | 5525    | RNA → RpsO (COG0184)rps15p (PRK08561) → RecJ (COG0608)recJ (TIGR00644) → PRK14888 (PRK14888) → PRK00960 (PRK00960)Gly_His_Pro_Ser_Thr.tRS_core (cd00670) → PRK04057 (PRK04057)Ribosomal_S3Ae (pfam01015) → apgM (TIGR00306)iPGM_like (cd16011) → hypo →                                       |
| env-78  | 2232139342                  | - | 237     | 160     | RNA → rps15p (PRK08561) →                                                                                                                                                                                                                                                                     |
| env-79  | 3300001592_10034324         | + | 2742    | 2834    | RNA → RpsO (COG0184)rps15p (PRK08561) →                                                                                                                                                                                                                                                       |
| env-80  | 2013874838                  | - | 1123    | 1033    | RNA → rps15p (PRK08561)Ribosomal_S15 (pfam00312) → RecJ (COG0608)recJ (TIGR00644) →                                                                                                                                                                                                           |
| env-81  | BMHB3a_c125774              | + | 423     | 513     | RNA → Ribosomal_S13_N (pfam08069) →                                                                                                                                                                                                                                                           |
| env-82  | JGI2065J20421_1144564       | + | 131     | 221     | RNA → hypo →                                                                                                                                                                                                                                                                                  |
| env-83  | JGI26339J46600_10075181     | - | 619     | 538     | RNA → rps15p (PRK08561)Ribosomal_S15 (pfam00312) →                                                                                                                                                                                                                                            |
| env-84  | JGI20225J20221_1000010      | + | 326457  | 326544  | RNA → rps15p (PRK08561)Ribosomal_S15 (pfam00312) → RecJ (COG0608)recJ (TIGR00644) → PRK14888 (PRK14888) → PRK04057 (PRK04057)Ribosomal_S3Ae (pfam01015) →                                                                                                                                     |
| env-85  | PRSSGFe2_Sequence0000002097 | + | 2324    | 2413    | RNA → rps15p (PRK08561)Ribosomal_S15 (pfam00312)Ribosomal_S13_N (pfam08069) → RecJ (COG0608)recJ (TIGR00644) → PRK14888 (PRK14888) → PRK04057 (PRK04057)Ribosomal_S3Ae (pfam01015) → apgM (TIGR00306)iPGM_like (cd16011) → PRK15319 (PRK15319)Bactofilin (pfam04519) → Hanta_G2 (pfam01561) → |
| env-86  | WSSedL1Cam_c0002            | + | 96851   | 96938   | RNA → rps15p (PRK08561)Ribosomal_S15 (pfam00312) → RecJ (COG0608)recJ (TIGR00644) → PRK14888 (PRK14888) → PRK04057 (PRK04057)Ribosomal_S3Ae (pfam01015) →                                                                                                                                     |
| CMe-1-1 | NC_009712.1                 | + | 2304410 | 2304492 | RNA → rps15p (PRK08561)Ribosomal_S15 (pfam00312) → RecJ (COG0608) → PRK14888 (PRK14888)7tmA_CXCR1.2 (cd15178) → PRK04057 (PRK04057)Ribosomal_S3Ae (pfam01015) →                                                                                                                               |
| env-87  | JGI24729J20445_1138040      | - | 236     | 148     | RNA → ←hypo                                                                                                                                                                                                                                                                                   |
| env-88  | JGI24730J26740_1000008      | + | 72470   | 72558   | RNA → rps15p (PRK08561)Ribosomal_S15 (pfam00312) → RecJ (COG0608)recJ (TIGR00644) → PRK14888 (PRK14888) → PRK04057 (PRK04057)Ribosomal_S3Ae (pfam01015) →                                                                                                                                     |
| Mli-1-1 | NZ_CM001555.1               | - | 2222769 | 2222698 | RNA → RpsO (COG0184)rps15p (PRK08561) → RpsO (COG0184)rps15p (PRK08561) → RecJ (COG0608) → RecJ (COG0608) → PRK14888 (PRK14888) → PRK14888 (PRK14888) → PRK04057 (PRK04057)Ribosomal_S3Ae (pfam01015) → PRK04057 (PRK04057)Ribosomal_S3Ae (pfam01015) →                                       |
| Mfo-1-1 | NC_019943.1                 | - | 469269  | 469194  | RNA → rps15p (PRK08561)Ribosomal_S15 (pfam00312) → RecJ (COG0608)recJ (TIGR00644) → PRK14888 (PRK14888) → PRK04057 (PRK04057)Ribosomal_S3Ae (pfam01015) →                                                                                                                                     |
| env-89  | 3300000558_10035676         | + | 11455   | 11529   | RNA → rps15p (PRK08561) →                                                                                                                                                                                                                                                                     |
| env-90  | 3300001605_10975353         | + | 94      | 168     | RNA → Ribosomal_S13_N (pfam08069) →                                                                                                                                                                                                                                                           |
| env-91  | JGI24730J26740_1005506      | - | 3828    | 3750    | RNA → RpsO (COG0184)rps15p (PRK08561) → RecJ (COG0608) → PRK14888 (PRK14888) → PRK04057 (PRK04057)Ribosomal_S3Ae (pfam01015) →                                                                                                                                                                |
| env-92  | JGI24729J20445_1023293      | + | 517     | 593     | RNA → rps15p (PRK08561)Ribosomal_S15p_S13e (cd00353) →                                                                                                                                                                                                                                        |
| env-93  | JGI24728J21555_1000106      | + | 20382   | 20458   | RNA → rps15p (PRK08561)Ribosomal_S15p_S13e (cd00353) → RecJ (COG0608)recJ (TIGR00644)DHHA1 (pfam02272) → PRK14888 (PRK14888) → PRK04057 (PRK04057)Ribosomal_S3Ae (pfam01015) →                                                                                                                |
| env-94  | JGI24732J26686_1000182      | - | 32050   | 31974   | RNA → rps15p (PRK08561)Ribosomal_S15p_S13e (cd00353) → RecJ (COG0608)recJ (TIGR00644)DHHA1 (pfam02272) → PRK14888 (PRK14888) → PRK04057 (PRK04057)Ribosomal_S3Ae (pfam01015) →                                                                                                                |
| env-95  | JGI24732J26686_1000319      | + | 14050   | 14126   | RNA → rps15p (PRK08561)Ribosomal_S15p_S13e (cd00353) → RecJ (COG0608)recJ (TIGR00644)DHHA1 (pfam02272) → PRK14888 (PRK14888) → PRK04057 (PRK04057)Ribosomal_S3Ae (pfam01015) →                                                                                                                |
| env-96  | JGI24728J21555_1038878      | + | 851     | 927     | RNA →                                                                                                                                                                                                                                                                                         |
| env-97  | JGI24730J26740_1222110      | - | 264     | 188     | RNA → rps15p (PRK08561) →                                                                                                                                                                                                                                                                     |
| env-98  | 3300001605_10027048         | - | 295     | 219     | RNA → Ribosomal_S13_N (pfam08069) →                                                                                                                                                                                                                                                           |
| env-99  | 3300000185_101747           | - | 1221    | 1145    | RNA → rps15p (PRK08561)Ribosomal_S15 (pfam00312) → RecJ (COG0608)recJ (TIGR00644) →                                                                                                                                                                                                           |
| env-100 | 3300000032_0027748          | - | 1766    | 1690    | RNA → rps15p (PRK08561)Ribosomal_S15 (pfam00312) → RecJ (COG0608)recJ (TIGR00644) →                                                                                                                                                                                                           |
| env-101 | 3300000558_11833810         | - | 1221    | 1145    | RNA → rps15p (PRK08561)Ribosomal_S15 (pfam00312) → RecJ (COG0608)recJ (TIGR00644) →                                                                                                                                                                                                           |
| env-102 | 3300000568_10087874         | + | 4955    | 5031    | RNA → rps15p (PRK08561)Ribosomal_S15 (pfam00312) → RecJ (COG0608)recJ (TIGR00644) →                                                                                                                                                                                                           |
| env-103 | 3300001580_10011015         | - | 3080    | 3002    | RNA → rps15p (PRK08561)Ribosomal_S15p_S13e (cd00353) → RecJ (COG0608)recJ (TIGR00644)DHHA1 (pfam02272) → PRK14888 (PRK14888) → PRK04057 (PRK04057)Ribosomal_S3Ae (pfam01015) →                                                                                                                |
| env-104 | LWFCAn_GLO1YSU01E41BP       | + | 16      | 91      | RNA → PRK04057 (PRK04057)Ribosomal_S3Ae (pfam01015) → MFS (cd06174)efflux_EmrB (TIGR00711) →                                                                                                                                                                                                  |
| env-105 | 3300001592_10847636         | + | 30      | 107     | RNA → rps15p (PRK08561) →                                                                                                                                                                                                                                                                     |
| env-106 | 3300001567_10049145         | - | 100     | 26      | RNA →                                                                                                                                                                                                                                                                                         |
| env-107 | JGI26437J51864_10417374     | + | 109     | 183     | RNA → hypo →                                                                                                                                                                                                                                                                                  |

|         |                           |   |       |       |                                                                                                                                                                                                                |
|---------|---------------------------|---|-------|-------|----------------------------------------------------------------------------------------------------------------------------------------------------------------------------------------------------------------|
| env-108 | JGI20214J14112_1001966    | + | 2925  | 3001  | RNA → rps15p (PRK08561)Ribosomal_S15 (pfam00312) →                                                                                                                                                             |
| env-109 | SakLake120mDRAFT_c0148215 | - | 531   | 456   | RNA → rps15p (PRK08561)Ribosomal_S15 (pfam00312) →                                                                                                                                                             |
| env-110 | JGI20214J14112_1066793    | - | 466   | 393   | RNA → Ribosomal_S13_N (pfam08069) →                                                                                                                                                                            |
| env-111 | 3300001567_10018396       | - | 99    | 26    | RNA → ←hypo                                                                                                                                                                                                    |
| env-112 | 3300000558_10022832       | - | 2400  | 2328  | RNA → rps15p (PRK08561)Ribosomal_S15p_S13e (cd00353) → RecJ (COG0608)recJ (TIGR00644) → PRK14888 (PRK14888) → PRK04057 (PRK04057)Ribosomal_S3Ae (pfam01015) →                                                  |
| env-113 | 3300001580_10015327       | + | 3751  | 3823  | RNA → rps15p (PRK08561)Ribosomal_S15p_S13e (cd00353) → RecJ (COG0608)recJ (TIGR00644) → PRK14888 (PRK14888) → PRK04057 (PRK04057)Ribosomal_S3Ae (pfam01015) →                                                  |
| env-114 | 3300001605_10381060       | - | 80    | 8     | RNA →                                                                                                                                                                                                          |
| env-115 | JGI24729J20445_1000035    | + | 33077 | 33154 | RNA → rps15p (PRK08561)Ribosomal_S15 (pfam00312) → RecJ (COG0608)recJ (TIGR00644) → PRK14888 (PRK14888) → PRK04057 (PRK04057)Ribosomal_S3Ae (pfam01015) →                                                      |
| env-116 | JGI24732J26686_1000038    | + | 17911 | 17988 | RNA → rps15p (PRK08561)Ribosomal_S15 (pfam00312) → RecJ (COG0608)recJ (TIGR00644) → PRK14888 (PRK14888) → PRK04057 (PRK04057)Ribosomal_S3Ae (pfam01015) →                                                      |
| env-117 | BDMC2_FXAG6RB01C8MB5      | - | 494   | 416   | RNA → Ribosomal_S13_N (pfam08069) →                                                                                                                                                                            |
| env-118 | JGI24729J20445_1010075    | + | 1466  | 1542  | RNA → rps15p (PRK08561)Ribosomal_S15 (pfam00312) → RecJ (COG0608) →                                                                                                                                            |
| env-119 | JGI24728J21555_1016609    | - | 489   | 413   | RNA → Ribosomal_S13_N (pfam08069) →                                                                                                                                                                            |
| env-120 | TB_GS10_10_10107963       | - | 629   | 548   | RNA → rps15p (PRK08561)Ribosomal_S15 (pfam00312) →                                                                                                                                                             |
| env-121 | TB_GS09_5_10262278        | - | 191   | 110   | RNA → hypo →                                                                                                                                                                                                   |
| env-122 | JGI26437J51864_10012658   | + | 109   | 188   | RNA → rps15p (PRK08561)Ribosomal_S15p_S13e (cd00353) → RecJ (COG0608)recJ (TIGR00644) →                                                                                                                        |
| env-123 | 3300000032_0017538        | + | 5307  | 5386  | RNA → rps15p (PRK08561)Ribosomal_S15p_S13e (cd00353) → RecJ (COG0608)recJ (TIGR00644) →                                                                                                                        |
| env-124 | WSSedA2C_c014251          | - | 708   | 630   | RNA → rps15p (PRK08561)Ribosomal_S15p_S13e (cd00353) → hypo →                                                                                                                                                  |
| env-125 | WSSedA1TJGI_c016288       | + | 290   | 368   | RNA → rps15p (PRK08561)Ribosomal_S15p_S13e (cd00353) → RecJ (COG0608)recJ (TIGR00644) →                                                                                                                        |
| env-126 | WSSedA1Ba2_1007239        | + | 706   | 784   | RNA → rps15p (PRK08561)Ribosomal_S15p_S13e (cd00353) → RecJ (COG0608) →                                                                                                                                        |
| env-127 | WSSedA2Ca3_1014251        | - | 708   | 630   | RNA → rps15p (PRK08561)Ribosomal_S15p_S13e (cd00353) → hypo →                                                                                                                                                  |
| env-128 | WSSedA1Ba3_1001463        | - | 6148  | 6070  | RNA → rps15p (PRK08561)Ribosomal_S15p_S13e (cd00353) → RecJ (COG0608)recJ (TIGR00644) → PRK14888 (PRK14888) → PRK04057 (PRK04057)Ribosomal_S3Ae (pfam01015) →                                                  |
| env-129 | WSSedB1B2_c008138         | + | 171   | 249   | RNA → rps15p (PRK08561)Ribosomal_S15p_S13e (cd00353) → RecJ (COG0608)recJ (TIGR00644) →                                                                                                                        |
| env-130 | WSSedB2T_c084959          | + | 143   | 221   | RNA → ←hypo                                                                                                                                                                                                    |
| env-131 | WSSedB2T_c089397          | - | 217   | 139   | RNA → ←hypo                                                                                                                                                                                                    |
| env-132 | JGI20213J14113_1035134    | + | 232   | 310   | RNA → Ribosomal_S13_N (pfam08069) →                                                                                                                                                                            |
| env-133 | JGI20214J14112_1021896    | - | 626   | 548   | RNA → rps15p (PRK08561)Ribosomal_S15p_S13e (cd00353) →                                                                                                                                                         |
| env-134 | JGI26437J51864_10213950   | + | 73    | 151   | RNA → Ribosomal_S13_N (pfam08069) →                                                                                                                                                                            |
| env-135 | WSSedA1Ba3_1000357        | - | 6727  | 6647  | RNA → rps15p (PRK08561)Ribosomal_S15p_S13e (cd00353) → RecJ (COG0608)recJ (TIGR00644) → PRK14888 (PRK14888) → PRK04057 (PRK04057)Ribosomal_S3Ae (pfam01015) →                                                  |
| env-136 | WSSedA1Ba3_1272904        | + | 141   | 221   | RNA → hypo →                                                                                                                                                                                                   |
| env-137 | WSSedA1Ba_1001070         | + | 2641  | 2721  | RNA → rps15p (PRK08561)Ribosomal_S15p_S13e (cd00353) → RecJ (COG0608)recJ (TIGR00644) → PRK14888 (PRK14888) → PRK04057 (PRK04057)Ribosomal_S3Ae (pfam01015) → hypo → PRK04024 (PRK04024) iPGM_like (cd16011) → |
| env-138 | WSSedA2C_c018532          | - | 789   | 709   | RNA → rps15p (PRK08561)Ribosomal_S15p_S13e (cd00353) → RecJ (COG0608)recJ (TIGR00644) →                                                                                                                        |
| env-139 | WSSedA1TJGI_c000079       | - | 10509 | 10429 | RNA → rps15p (PRK08561)Ribosomal_S15p_S13e (cd00353) → RecJ (COG0608)recJ (TIGR00644) → PRK14888 (PRK14888) → PRK04057 (PRK04057)Ribosomal_S3Ae (pfam01015) →                                                  |
| env-140 | WSSedB1B2_c003916         | + | 734   | 814   | RNA → rps15p (PRK08561)Ribosomal_S15p_S13e (cd00353) →                                                                                                                                                         |
| env-141 | WSSedB2T_c002759          | + | 1013  | 1093  | RNA → rps15p (PRK08561)Ribosomal_S15p_S13e (cd00353) → RecJ (COG0608) →                                                                                                                                        |
| env-142 | WSSedA1Ba2_1000860        | + | 4312  | 4392  | RNA → rps15p (PRK08561)Ribosomal_S15p_S13e (cd00353) → RecJ (COG0608)recJ (TIGR00644) →                                                                                                                        |
| env-143 | WSSedB2Ba_1002821         | - | 672   | 592   | RNA → rps15p (PRK08561)Ribosomal_S15p_S13e (cd00353) →                                                                                                                                                         |
| env-144 | WSSedB2Ca_1002616         | + | 792   | 872   | RNA → rps15p (PRK08561)Ribosomal_S15p_S13e (cd00353) →                                                                                                                                                         |
| env-145 | WSSedA2Ca3_1018532        | - | 789   | 709   | RNA → rps15p (PRK08561)Ribosomal_S15p_S13e (cd00353) → RecJ (COG0608)recJ (TIGR00644) →                                                                                                                        |
| env-146 | JGI20214J14112_1000149    | - | 1161  | 1081  | RNA → rps15p (PRK08561)Ribosomal_S15p_S13e (cd00353) → RecJ (COG0608)recJ (TIGR00644) →                                                                                                                        |
| env-147 | JGI20213J14113_1001057    | + | 1284  | 1364  | RNA → rps15p (PRK08561)Ribosomal_S15p_S13e (cd00353) → RecJ (COG0608)recJ (TIGR00644) → PRK14888 (PRK14888) → PRK04057 (PRK04057)Ribosomal_S3Ae (pfam01015) →                                                  |
| env-148 | WSSedA1Ba3_1006166        | + | 2461  | 2541  | RNA → rps15p (PRK08561)Ribosomal_S15p_S13e (cd00353) →                                                                                                                                                         |
| env-149 | WSSedA1TJGI_c233835       | + | 122   | 202   | RNA →                                                                                                                                                                                                          |
| env-150 | JGI26437J51864_10004063   | - | 209   | 129   | RNA → hypo →                                                                                                                                                                                                   |



|         |                         |   |         |         |                                                                                                                                                                                                                                                                                                                                                                                                                                                                                                                           |
|---------|-------------------------|---|---------|---------|---------------------------------------------------------------------------------------------------------------------------------------------------------------------------------------------------------------------------------------------------------------------------------------------------------------------------------------------------------------------------------------------------------------------------------------------------------------------------------------------------------------------------|
| env-151 | 3300001567_10000108     | - | 84134   | 84057   | RNA → hypo → rps15p (PRK08561)Ribosomal_S15p_S13e (cd00353) → RecJ (COG0608) → PRK14888 (PRK14888) → PRK04057 (PRK04057)Ribosomal_S3Ae (pfam01015) → PRK04057 (PRK04057)Ribosomal_S3Ae (pfam01015) →                                                                                                                                                                                                                                                                                                                      |
| env-152 | WSSedA1Ba3_1177753      | + | 108     | 186     | RNA → Ribosomal_S13_N (pfam08069) →                                                                                                                                                                                                                                                                                                                                                                                                                                                                                       |
| env-153 | WSSedA1Ba_1152331       | - | 288     | 210     | RNA → Ribosomal_S13_N (pfam08069) →                                                                                                                                                                                                                                                                                                                                                                                                                                                                                       |
| env-154 | B3_all.c.Cons177848     | - | 485     | 407     | RNA → rps15p (PRK08561) →                                                                                                                                                                                                                                                                                                                                                                                                                                                                                                 |
| env-155 | 3300000568_10530120     | + | 366     | 444     | RNA → hypo →                                                                                                                                                                                                                                                                                                                                                                                                                                                                                                              |
| env-156 | JGI24729J20445_1002298  | - | 5486    | 5409    | RNA → rps15p (PRK08561)Ribosomal_S15 (pfam00312) → RecJ (COG0608)recJ (TIGR00644) → PRK14888 (PRK14888) → PRK04057 (PRK04057)Ribosomal_S3Ae (pfam01015) →                                                                                                                                                                                                                                                                                                                                                                 |
| env-157 | JGI24729J20445_1020946  | - | 87      | 10      | RNA →                                                                                                                                                                                                                                                                                                                                                                                                                                                                                                                     |
| env-158 | JGI24732J26686_1097519  | - | 87      | 10      | RNA →                                                                                                                                                                                                                                                                                                                                                                                                                                                                                                                     |
| env-159 | JGI24732J26686_1003719  | - | 4772    | 4695    | RNA → rps15p (PRK08561)Ribosomal_S15 (pfam00312) → RecJ (COG0608)recJ (TIGR00644) → PRK14888 (PRK14888) → PRK04057 (PRK04057)Ribosomal_S3Ae (pfam01015) →                                                                                                                                                                                                                                                                                                                                                                 |
| env-160 | 3300001567_10000097     | + | 54256   | 54336   | RNA → rps15p (PRK08561)Ribosomal_S15p_S13e (cd00353) → RecJ (COG0608)recJ (TIGR00644) → PRK14888 (PRK14888) → PRK04057 (PRK04057)Ribosomal_S3Ae (pfam01015) →                                                                                                                                                                                                                                                                                                                                                             |
| env-161 | 3300000568_10641437     | - | 280     | 200     | RNA → rps15p (PRK08561) →                                                                                                                                                                                                                                                                                                                                                                                                                                                                                                 |
| env-162 | JGI20214J14112_1020774  | - | 594     | 514     | RNA → rps15p (PRK08561)Ribosomal_S15p_S13e (cd00353) →                                                                                                                                                                                                                                                                                                                                                                                                                                                                    |
| env-163 | 3300001580_10805722     | + | 98      | 181     | RNA → rps15p (PRK08561) →                                                                                                                                                                                                                                                                                                                                                                                                                                                                                                 |
| env-164 | taComm3_C4593           | - | 845     | 762     | RNA → RpsO (COG0184)rps15p (PRK08561) → RecJ (COG0608)recJ (TIGR00644) →                                                                                                                                                                                                                                                                                                                                                                                                                                                  |
| env-165 | 3300001592_10767277     | + | 24      | 111     | RNA → hypo → rps15p (PRK08561) →                                                                                                                                                                                                                                                                                                                                                                                                                                                                                          |
| env-166 | JGI12104J13512_1000881  | + | 4950    | 5036    | RNA → RpsO (COG0184)rps15p (PRK08561) → RecJ (COG0608)recJ (TIGR00644) → PRK14888 (PRK14888) →                                                                                                                                                                                                                                                                                                                                                                                                                            |
| env-167 | JGI11944J13513_1000579  | + | 5848    | 5934    | RNA → RpsO (COG0184)rps15p (PRK08561) → RecJ (COG0608)recJ (TIGR00644) → PRK14888 (PRK14888) →                                                                                                                                                                                                                                                                                                                                                                                                                            |
| env-168 | JGI12104J13512_1055609  | - | 126     | 41      | RNA →                                                                                                                                                                                                                                                                                                                                                                                                                                                                                                                     |
| env-169 | 3300000032_0028051      | - | 6644    | 6556    | RNA → RpsO (COG0184)rps15p (PRK08561) → RecJ (COG0608)recJ (TIGR00644) → PRK14888 (PRK14888) →                                                                                                                                                                                                                                                                                                                                                                                                                            |
| env-170 | 3300000558_10008220     | - | 2159    | 2071    | RNA → RpsO (COG0184)rps15p (PRK08561) → RecJ (COG0608)recJ (TIGR00644) → PRK14888 (PRK14888) →                                                                                                                                                                                                                                                                                                                                                                                                                            |
| env-171 | 3300000568_10642328     | + | 2264    | 2352    | hypo → RNA → RpsO (COG0184)rps15p (PRK08561) → RecJ (COG0608)recJ (TIGR00644) → PRK14888 (PRK14888) →                                                                                                                                                                                                                                                                                                                                                                                                                     |
| env-172 | 3300000568_10908886     | - | 124     | 36      | RNA →                                                                                                                                                                                                                                                                                                                                                                                                                                                                                                                     |
| env-173 | 3300001580_10001748     | + | 3910    | 3998    | RNA → RpsO (COG0184)rps15p (PRK08561) → RecJ (COG0608)recJ (TIGR00644) → PRK14888 (PRK14888) →                                                                                                                                                                                                                                                                                                                                                                                                                            |
| Mta-1-1 | NZ_AGIY02000001.1       | - | 138618  | 138536  | RNA → RpsO (COG0184)rps15p (PRK08561) → RecJ (COG0608)recJ (TIGR00644) → PRK14888 (PRK14888) → PRK04057 (PRK04057)Ribosomal_S3Ae (pfam01015) →                                                                                                                                                                                                                                                                                                                                                                            |
| env-174 | taComm3_C6165           | - | 76136   | 76054   | RNA → RpsO (COG0184)rps15p (PRK08561) → RecJ (COG0608)recJ (TIGR00644) → PRK14888 (PRK14888) →                                                                                                                                                                                                                                                                                                                                                                                                                            |
| env-175 | JGI12104J13512_1000508  | + | 4260    | 4342    | RNA → RpsO (COG0184)rps15p (PRK08561) → RecJ (COG0608)recJ (TIGR00644) → PRK14888 (PRK14888) → PRK04057 (PRK04057)Ribosomal_S3Ae (pfam01015) →                                                                                                                                                                                                                                                                                                                                                                            |
| env-176 | JGI11944J13513_1004555  | + | 4268    | 4350    | RNA → RpsO (COG0184)rps15p (PRK08561) → RecJ (COG0608)recJ (TIGR00644) → PRK14888 (PRK14888) → PRK04057 (PRK04057)Ribosomal_S3Ae (pfam01015) →                                                                                                                                                                                                                                                                                                                                                                            |
| Mli-2-1 | NZ_CM001436.1           | - | 2802614 | 2802534 | RNA → rps15p (PRK08561)Ribosomal_S15 (pfam00312) → rps15p (PRK08561)Ribosomal_S15 (pfam00312) → RecJ (COG0608)recJ (TIGR00644) → RecJ (COG0608)recJ (TIGR00644) → PRK14888 (PRK14888) → PRK14888 (PRK14888) → PRK04057 (PRK04057)Ribosomal_S3Ae (pfam01015) → PRK04057 (PRK04057)Ribosomal_S3Ae (pfam01015) → hypo → hypo → hypo → hypo → PRKI0765 (PRK10765)Nitroreductase (pfam00881) → PRKI0765 (PRK10765)Nitroreductase (pfam00881) → PRK03922 (PRK03922)DUF555 (pfam04475) → PRK03922 (PRK03922)DUF555 (pfam04475) → |
| Mba-1-1 | NZ_AUMX01000001.1       | + | 125785  | 125859  | ribokinase_group_A (cd01942)PTZ00247 (PTZ00247) → ribokinase_group_A (cd01942)PTZ00247 (PTZ00247) → RNA → rps15p (PRK08561)Ribosomal_S15p_S13e (cd00353) → RecJ (COG0608)recJ (TIGR00644) → PRK14888 (PRK14888) → PRK04057 (PRK04057)Ribosomal_S3Ae (pfam01015) →                                                                                                                                                                                                                                                         |
| Mla-1-1 | NC_008942.1             | - | 271642  | 271569  | RNA → rps15p (PRK08561)Ribosomal_S15p_S13e (cd00353) → RecJ (COG0608)recJ (TIGR00644) → PRK14888 (PRK14888) → PRK04057 (PRK04057)Ribosomal_S3Ae (pfam01015) →                                                                                                                                                                                                                                                                                                                                                             |
| env-177 | BDMC2_GGZN29857_b1      | - | 505     | 433     | RNA → Ribosomal_S15 (pfam00312)Ribosomal_S13_N (pfam08069) →                                                                                                                                                                                                                                                                                                                                                                                                                                                              |
| env-178 | BDMC2_FXAG6RB01AV6H8    | - | 77      | 5       | RNA →                                                                                                                                                                                                                                                                                                                                                                                                                                                                                                                     |
| env-179 | JGI20163J15578_11006719 | + | 71      | 153     | RNA → Ribosomal_S13_N (pfam08069) →                                                                                                                                                                                                                                                                                                                                                                                                                                                                                       |

## 21.3 Conserved domains



Conserved domains found in protein-coding genes listed in Section 21.2 are shown below, with the first sentence in their description from the Conserved Domain Database (if any). Conserved domains associated with more than one S15-

**cd00353** (67) Ribosomal protein S15 (prokaryotic)\_S13 (eukaryotic) binds the central domain of 16S rRNA and is required for assembly of the small ribosomal subunit and for intersubunit association, thus representing a key element in the assembly of the whole ribosome.

**cd00670** (5) Gly\_His\_Pro\_Ser\_Thr\_tRNA synthetase class II core domain.

**cd01942** (4) Ribokinase-like subgroup A.

**cd06174** (1) The Major Facilitator Superfamily (MFS) is a large and diverse group of secondary transporters that includes uniporters, symporters, and antiporters.

**cd15178** (1) CXC chemokine receptor types 1 and 2, member of the class A family of seven-transmembrane G protein-coupled receptors.

**cd16011** (6) uncharacterized subfamily of alkaline phosphatase, homologous to 2 3 bisphosphoglycerate independent phosphoglycerate mutase (iPGM) and bacterial phosphopentomutases.

**COG0184** (31) Ribosomal protein S15P/S13E [Translation, ribosomal structure and biogenesis]

**COG0608** (107) Single-stranded DNA-specific exonuclease, DHH superfamily, may be involved in archaeal DNA replication initiation [Replication, recombination and repair]

**COG3221** (1) ABC-type phosphate/phosphonate transport system, periplasmic component [Inorganic ion transport and metabolism]

**COG3356** (2) Predicted membrane-associated lipid hydrolase, neutral ceramidase superfamily [Lipid transport and metabolism]

**COG3635** (1) 2,3-bisphosphoglycerate-independent phosphoglycerate mutase, archeal type [Carbohydrate transport and metabolism]

**COG4801** (1) Predicted acyltransferase, contains DUF342 domain [General function prediction only]

**pfam00312** (27) Ribosomal protein S15.

**pfam00881** (4) Nitroreductase family.

**pfam01015** (68) Ribosomal S3Ae family.

**pfam01561** (1) Hantavirus glycoprotein G2.

**pfam02272** (6) DHHA1 domain.

**pfam04475** (4) Protein of unknown function (DUF555).

**pfam04519** (3) Polymer-forming cytoskeletal.

**pfam08069** (25) Ribosomal S13/S15 N-terminal domain.

**pfam09843** (2) Predicted membrane protein (DUF2070).

**pfam10143** (1) 2,3-bisphosphoglycerate-independent phosphoglycerate mutase. [2-phospho-D-glycerate + 2,3-diphosphoglycerate = 3-phospho-D-glycerate + 2,3-diphosphoglycerate]

**PRK00960** (5) seryl-tRNA synthetase; Provisional

## 21.4 Multiple-sequence alignment

Each S15-Methanobacteria RNA is denoted by an abbreviation (like “Eco-1-1”) that refers to a taxonomy given in Section 21.1. The alignment may include sequences containing the RNA motif, as well as flanking sequence. The S15-Methanobacteria RNA itself is denoted by the line underneath marked 5’ and 3’ on either end. Nucleotides in flanking sequences (i.e., not part of the motif)

Methanobacteria RNA are assigned a color, while others are shown in gray. The number in parentheses after the colored domain name is the number of occurrences in Section 21.2.

**PRK03922** (4) hypothetical protein; Provisional

**PRK04024** (1) cofactor-independent phosphoglycerate mutase; Provisional

**PRK04057** (68) 30S ribosomal protein S3Ae; Validated

**PRK08561** (137) 30S ribosomal protein S15P; Reviewed

**PRK10765** (2) nitroreductase A; Provisional

**PRK11160** (1) cysteine/glutathione ABC transporter membrane/ATP-binding component; Reviewed

**PRK14888** (76) KEOPS complex Pcc1-like subunit; Provisional

**PRK15319** (1) AIDA autotransporter-like protein ShdA; Provisional

**PTZ00247** (3) adenosine kinase; Provisional

**TCR00306** (5) phosphoglycerate mutase (2,3-diphosphoglycerate-independent), archaeal form. [Energy metabolism, Glycolysis/gluconeogenesis]

**TIGR00644** (87) single-stranded-DNA-specific exonuclease RecJ. [DNA metabolism, DNA replication, recombination, and repair]

**TIGR00711** (1) drug resistance transporter, EmrB/QacA subfamily. [Cellular processes, Toxin production and resistance, Transport and binding proteins, Other]

**TIGR01173** (1) UDP-N-acetylglucosamine diphosphorylase/glucosamine-1-phosphate N-acetyltransferase. [Cell envelope, Biosynthesis and degradation of murein sacculus and peptidoglycan, Cell envelope, Biosynthesis and degradation of surface polysaccharides and lipopolysaccharides, Central intermediary metabolism, Amino sugars]

**TIGR01853** (2) UDP-3-O-[3-hydroxymyristoyl] glucosamine N-acyltransferase LpxD. [3-hydroxymyristoyl] glucosamine N-acyltransferase LpxD. This model describes LpxD, an enzyme for the biosynthesis of lipid A, a component of lipopolysaccharide (LPS) in the outer membrane outer leaflet of most Gram-negative bacteria. Some differences are found between lipid A of different species. This protein represents the third step from UDP-N-acetyl-D-glucosamine. The group added at this step generally is 14:0(3-OH) (myristate) but may vary; in Aquifex it appears to be 16:0(3-OH) (palmitate). [Cell envelope, Biosynthesis and degradation of surface polysaccharides and lipopolysaccharides]

**TIGR02152** (1) ribokinase. [Energy metabolism, Sugars]

**TIGR02476** (2) 5,6-dimethylbenzimidazole synthase. [Biosynthesis of cofactors, prosthetic groups, and carriers, Heme, porphyrin, and cobalamin]

**TIGR03683** (1) alanyl-tRNA synthetase.

are written in gray letters. Stems of predicted rho-independent transcription terminators, if any, are shaded yellow. (Note: terminator predictions have not been analyzed manually, and many are likely to be false positives. Terminator predictions are those of the RNIE software.) Nucleotides predicted to function (as DNA) as transcription-factor binding sites, if any, are shaded in green. (But note: these

















env-12 .....  
 env-13 GGCGGAUCCUUGCAUCGGCGGG  
 env-14 .....  
 env-15 .....  
 env-16 .....  
 env-17 GCAACCGGAAAAUCAUAGGCC  
 env-18 AUCCUGGAAUCCAGGGGUGCA  
 env-20 .....  
 env-21 AGAUCAUCCGGGAUAACGGCCU  
 env-22 AGAUCAUCCGGGAUAACGGCCU  
 env-23 GAGUCCAAGCGUCAAAACUUGC  
 Mpe-1-1 UCUUAGAAAAGGAAGGAAUGUCA  
 Mpa-2-1 UCUUAGAAAAGGAAGGAAUGUCC  
 env-24 .....  
 env-25 GGACAGGUACGGAGUCCCGAU  
 env-26 .....  
 env-27 GAUCGUAAGGAAAAGGGACUG  
 env-28 .....  
 env-29 GAGAUCUAAAAAGAGCAGGGCA  
 env-30 .....  
 env-31 .....  
 env-32 GUGUCCCGACAUAACUCGCG  
 env-33 CGGAGAUCCUCCGCGAAAAAGG  
 env-34 CGGAGAUCCUCCGCGAAAAAGG  
 env-35 ACCAGAUCCUUCGCGAAAAUGA  
 env-36 ACCAGAUCCUUCGCGAAAAUGA  
 env-39 ACCAGAUCCUUCGCGAAAAUGA  
 env-40 ACCAGAUCCUUCGCGAAAAUGA  
 env-41 .....  
 env-42 .....  
 env-44 ACGAGAUCCUCCGCGAAAAAGG  
 env-45 .....  
 env-46 AACGAGAUCCUCCGCGAAAAAGG  
 env-47 AACGAGAUCCUCCGCGAGAAGG  
 env-48 AACGAGAUCCUCCGCGAGAAGG  
 env-49 .....  
 env-51 AACGAGAUCCUCCGCGAGAAGG  
 env-52 AACGAGAUCCUCCGCGAGAAGG  
 env-53 AAUCAGAUCCUUCGCGAGAACG  
 Mbo-1-1 AACGAGAUCCUCCGCGAGAAGG  
 env-61 .....  
 env-64 AACGGAGAUUCUCCGUGAGAAC  
 env-65 UAACGGAGAUUCUCCGUGAGAA  
 env-66 AACGGAGAUUCUCCGUGAGAAC  
 env-67 AACGGAGAUUCUCCGUGAGAAC  
 env-68 .....  
 env-69 AACGAAAUCUCCGCGAGAAGG  
 Msp-1-1 .....  
 Mma-1-1 GGCGAGAUCCUCCGCGAGAAGG  
 env-70 .....  
 Mse-1-1 AGCGAGAUCCUCCGCGAGAAGG  
 env-71 .....  
 env-72 AAACGAGAUCCUCCGCGAGAAG  
 env-73 AAACGAGAUCCUCCGCGAGAAG  
 env-76 AGAUACUCAAGGAGAAGGGCCU  
 env-77 CUGGAGGAGAACGGUCUGCAGU  
 env-78 .....  
 env-79 UCAUCAGGGAGAAAGGAUUGGA  
 env-80 GACAUCUAAAAGGAGAACAAAGG  
 env-81 ACAUCUAAAAGGAGAACAAAGG  
 env-82 .....  
 env-83 GACAUCUAAAAGGAGAACAAAGG  
 env-84 GACAUCUAAAAGGAGAACAAAGG  
 env-85 UAUCUAGUCCGAGAACAAAGC  
 env-86 CAUCUUGAAAAGGAAACCGGUC  
 CMe-1-1 AUCGGUGACAUCUUAACGGAGA  
 env-87 .....  
 env-88 GACAUCUAAAAGGAGAACAAAGG  
 Mli-1-1 AUCCUCAGCCAGAACGGGCUCG  
 Mfo-1-1 GGAUCGGGACCAUUCUCCGCGA  
 env-89 .....  
 env-90 .....  
 env-91 AGCGGAUCGGAACCAUCCUGAG  
 env-92 GCGGAUCGGACCAUCUACGG  
 env-96 .....  
 env-97 .....  
 env-98 .....  
 env-99 GGGACAUCUCCGAGAGCGAACAA  
 env-103 CGUAUCGGCGAUUCUAAAAG  
 env-104 .....  
 env-105 .....  
 env-106 .....  
 env-107 .....  
 env-108 GAUAUCUCCGGGAGAACAAAG

.....  
 .....  
 .....





|                    |          |               |                |                  |                           |                                                     |
|--------------------|----------|---------------|----------------|------------------|---------------------------|-----------------------------------------------------|
| Gfo-1-1            | Bacteria | Bacteroidetes | Flavobacteria  | Flavobacteriales | Flavobacteriaceae         | <i>Gramella forsetii</i> KT0803                     |
| Kal-1-1            | Bacteria | Bacteroidetes | Flavobacteria  | Flavobacteriales | Flavobacteriaceae         | <i>Kordia algicida</i> OT-1                         |
| Lbl-1-1            | Bacteria | Bacteroidetes | Flavobacteria  | Flavobacteriales | Flavobacteriaceae         | <i>Leeuwenhoekiella blandensis</i> MED217           |
| Pir-1-1            | Bacteria | Bacteroidetes | Flavobacteria  | Flavobacteriales | Flavobacteriaceae         | <i>Polaribacter irgensii</i> 23-P                   |
| Rbi-1-1            | Bacteria | Bacteroidetes | Flavobacteria  | Flavobacteriales | Flavobacteriaceae         | <i>Robiginitalea biformata</i> HTCC2501             |
| Zpr-1-1            | Bacteria | Bacteroidetes | Flavobacteria  | Flavobacteriales | Flavobacteriaceae         | <i>Zunongwangia profunda</i> SM-A87                 |
| Fba-5-1            | Bacteria | Bacteroidetes | Flavobacteria  | Flavobacteriales | <i>bacterium</i> ALC-1    |                                                     |
| Fba-6-1            | Bacteria | Bacteroidetes | Flavobacteria  | Flavobacteriales | <i>bacterium</i> HTCC2170 |                                                     |
| Cca-1-1            | Bacteria | Bacteroidetes | Flavobacteriia | Flavobacteriales | Crocinitomicaceae         | <i>Crocinitomix catalasitica</i> ATCC 23190         |
| Fta-1-1            | Bacteria | Bacteroidetes | Flavobacteriia | Flavobacteriales | Cryomorphaceae            | <i>Fluviicola taffensis</i> DSM 16823               |
| Aca-1-1            | Bacteria | Bacteroidetes | Flavobacteriia | Flavobacteriales | Flavobacteriaceae         | <i>Aequorivita capsosiphonis</i> DSM 23843          |
| Asu-1-1            | Bacteria | Bacteroidetes | Flavobacteriia | Flavobacteriales | Flavobacteriaceae         | <i>Aequorivita sublithicola</i> DSM 14238           |
| Avl-1-1            | Bacteria | Bacteroidetes | Flavobacteriia | Flavobacteriales | Flavobacteriaceae         | <i>Aequorivita vladivostokensis</i>                 |
| Ale-1-1 to Ale-1-2 | Bacteria | Bacteroidetes | Flavobacteriia | Flavobacteriales | Flavobacteriaceae         | <i>Algibacter lectus</i>                            |
| Ale-2-1            | Bacteria | Bacteroidetes | Flavobacteriia | Flavobacteriales | Flavobacteriaceae         | <i>Altibacter lentus</i>                            |
| Aag-1-1            | Bacteria | Bacteroidetes | Flavobacteriia | Flavobacteriales | Flavobacteriaceae         | <i>Aquimarina agarilytica</i> ZC1                   |
| Aat-1-1            | Bacteria | Bacteroidetes | Flavobacteriia | Flavobacteriales | Flavobacteriaceae         | <i>Aquimarina atlantica</i>                         |
| Ala-1-1            | Bacteria | Bacteroidetes | Flavobacteriia | Flavobacteriales | Flavobacteriaceae         | <i>Aquimarina latercula</i> DSM 2041                |
| Ama-1-1            | Bacteria | Bacteroidetes | Flavobacteriia | Flavobacteriales | Flavobacteriaceae         | <i>Aquimarina macrocephali</i> JAMB N27             |
| Ame-1-1            | Bacteria | Bacteroidetes | Flavobacteriia | Flavobacteriales | Flavobacteriaceae         | <i>Aquimarina megaterium</i> XH134                  |
| Amu-1-1            | Bacteria | Bacteroidetes | Flavobacteriia | Flavobacteriales | Flavobacteriaceae         | <i>Aquimarina muelleri</i> DSM 19832                |
| Apa-1-1            | Bacteria | Bacteroidetes | Flavobacteriia | Flavobacteriales | Flavobacteriaceae         | <i>Aquimarina pacifica</i>                          |
| Aal-1-1            | Bacteria | Bacteroidetes | Flavobacteriia | Flavobacteriales | Flavobacteriaceae         | <i>Arenibacter algicola</i>                         |
| Ace-1-1            | Bacteria | Bacteroidetes | Flavobacteriia | Flavobacteriales | Flavobacteriaceae         | <i>Arenibacter certesii</i> DSM 19833               |
| Ala-2-1            | Bacteria | Bacteroidetes | Flavobacteriia | Flavobacteriales | Flavobacteriaceae         | <i>Arenibacter latericius</i> DSM 15913             |
| Bzo-1-1            | Bacteria | Bacteroidetes | Flavobacteriia | Flavobacteriales | Flavobacteriaceae         | <i>Bergeyella zoohelcum</i> ATCC 43767              |
| Bzo-2-1            | Bacteria | Bacteroidetes | Flavobacteriia | Flavobacteriales | Flavobacteriaceae         | <i>Bergeyella zoohelcum</i> CCUG 30536              |
| Bar-1-1            | Bacteria | Bacteroidetes | Flavobacteriia | Flavobacteriales | Flavobacteriaceae         | <i>Bizionia argentinensis</i> JUB59                 |
| Cca-2-1 to Cca-2-3 | Bacteria | Bacteroidetes | Flavobacteriia | Flavobacteriales | Flavobacteriaceae         | <i>Capnocytophaga canimorsus</i>                    |
| Cca-3-1            | Bacteria | Bacteroidetes | Flavobacteriia | Flavobacteriales | Flavobacteriaceae         | <i>Capnocytophaga canimorsus</i> Cc5                |
| Cca-4-1 to Cca-4-3 | Bacteria | Bacteroidetes | Flavobacteriia | Flavobacteriales | Flavobacteriaceae         | <i>Capnocytophaga canis</i>                         |
| Ccy-1-1 to Ccy-1-3 | Bacteria | Bacteroidetes | Flavobacteriia | Flavobacteriales | Flavobacteriaceae         | <i>Capnocytophaga cynodegmi</i>                     |
| Ccy-2-1            | Bacteria | Bacteroidetes | Flavobacteriia | Flavobacteriales | Flavobacteriaceae         | <i>Capnocytophaga cynodegmi</i> DSM 19736           |
| Coc-2-1            | Bacteria | Bacteroidetes | Flavobacteriia | Flavobacteriales | Flavobacteriaceae         | <i>Capnocytophaga ochracea</i>                      |
| Coc-3-1            | Bacteria | Bacteroidetes | Flavobacteriia | Flavobacteriales | Flavobacteriaceae         | <i>Capnocytophaga ochracea</i> F0287                |
| Coc-4-1            | Bacteria | Bacteroidetes | Flavobacteriia | Flavobacteriales | Flavobacteriaceae         | <i>Capnocytophaga ochracea</i> str. Holt 25         |
| Csp-2-1            | Bacteria | Bacteroidetes | Flavobacteriia | Flavobacteriales | Flavobacteriaceae         | <i>Capnocytophaga</i> sp. oral taxon 324 str. F0483 |
| Csp-3-1            | Bacteria | Bacteroidetes | Flavobacteriia | Flavobacteriales | Flavobacteriaceae         | <i>Capnocytophaga</i> sp. oral taxon 326 str. F0382 |
| Csp-4-1            | Bacteria | Bacteroidetes | Flavobacteriia | Flavobacteriales | Flavobacteriaceae         | <i>Capnocytophaga</i> sp. oral taxon 329 str. F0087 |
| Csp-5-1            | Bacteria | Bacteroidetes | Flavobacteriia | Flavobacteriales | Flavobacteriaceae         | <i>Capnocytophaga</i> sp. oral taxon 332 str. F0381 |
| Csp-6-1            | Bacteria | Bacteroidetes | Flavobacteriia | Flavobacteriales | Flavobacteriaceae         | <i>Capnocytophaga</i> sp. oral taxon 335 str. F0486 |
| Csp-7-1            | Bacteria | Bacteroidetes | Flavobacteriia | Flavobacteriales | Flavobacteriaceae         | <i>Capnocytophaga</i> sp. oral taxon 336 str. F0502 |
| Csp-8-1            | Bacteria | Bacteroidetes | Flavobacteriia | Flavobacteriales | Flavobacteriaceae         | <i>Capnocytophaga</i> sp. oral taxon 338 str. F0234 |
| Csp-9-1            | Bacteria | Bacteroidetes | Flavobacteriia | Flavobacteriales | Flavobacteriaceae         | <i>Capnocytophaga</i> sp. oral taxon 380 str. F0488 |
| Csp-10-1           | Bacteria | Bacteroidetes | Flavobacteriia | Flavobacteriales | Flavobacteriaceae         | <i>Capnocytophaga</i> sp. oral taxon 412 str. F0487 |
| Cal-1-1            | Bacteria | Bacteroidetes | Flavobacteriia | Flavobacteriales | Flavobacteriaceae         | <i>Cellulophaga algicola</i> DSM 14237              |
| Cba-1-1            | Bacteria | Bacteroidetes | Flavobacteriia | Flavobacteriales | Flavobacteriaceae         | <i>Cellulophaga baltica</i> 13                      |
| Cba-2-1            | Bacteria | Bacteroidetes | Flavobacteriia | Flavobacteriales | Flavobacteriaceae         | <i>Cellulophaga baltica</i> 18                      |
| Cba-3-1            | Bacteria | Bacteroidetes | Flavobacteriia | Flavobacteriales | Flavobacteriaceae         | <i>Cellulophaga baltica</i> 4                       |
| Cba-4-1            | Bacteria | Bacteroidetes | Flavobacteriia | Flavobacteriales | Flavobacteriaceae         | <i>Cellulophaga baltica</i> NN016038                |
| Cge-1-1            | Bacteria | Bacteroidetes | Flavobacteriia | Flavobacteriales | Flavobacteriaceae         | <i>Cellulophaga geojensis</i> KL-A                  |
| Cly-1-1            | Bacteria | Bacteroidetes | Flavobacteriia | Flavobacteriales | Flavobacteriaceae         | <i>Cellulophaga lytica</i>                          |
| Cly-2-1            | Bacteria | Bacteroidetes | Flavobacteriia | Flavobacteriales | Flavobacteriaceae         | <i>Cellulophaga lytica</i> DSM 7489                 |
| Csp-11-1           | Bacteria | Bacteroidetes | Flavobacteriia | Flavobacteriales | Flavobacteriaceae         | <i>Cellulophaga</i> sp. E6(2014)                    |
| Csp-12-1           | Bacteria | Bacteroidetes | Flavobacteriia | Flavobacteriales | Flavobacteriaceae         | <i>Cellulophaga</i> sp. Hel.L.12                    |
| Can-1-1            | Bacteria | Bacteroidetes | Flavobacteriia | Flavobacteriales | Flavobacteriaceae         | <i>Chryseobacterium angstadtii</i>                  |
| Cca-5-1            | Bacteria | Bacteroidetes | Flavobacteriia | Flavobacteriales | Flavobacteriaceae         | <i>Chryseobacterium caeni</i> DSM 17710             |
| Cda-1-1            | Bacteria | Bacteroidetes | Flavobacteriia | Flavobacteriales | Flavobacteriaceae         | <i>Chryseobacterium daeguense</i> DSM 19388         |
| Cfo-1-1            | Bacteria | Bacteroidetes | Flavobacteriia | Flavobacteriales | Flavobacteriaceae         | <i>Chryseobacterium formosense</i>                  |
| Cga-1-1            | Bacteria | Bacteroidetes | Flavobacteriia | Flavobacteriales | Flavobacteriaceae         | <i>Chryseobacterium gallinarum</i>                  |
| Cgl-1-1            | Bacteria | Bacteroidetes | Flavobacteriia | Flavobacteriales | Flavobacteriaceae         | <i>Chryseobacterium gleum</i> ATCC 35910            |
| Cha-1-1            | Bacteria | Bacteroidetes | Flavobacteriia | Flavobacteriales | Flavobacteriaceae         | <i>Chryseobacterium haifense</i> DSM 19056          |
| Cha-2-1            | Bacteria | Bacteroidetes | Flavobacteriia | Flavobacteriales | Flavobacteriaceae         | <i>Chryseobacterium halperniae</i>                  |
| Chi-1-1            | Bacteria | Bacteroidetes | Flavobacteriia | Flavobacteriales | Flavobacteriaceae         | <i>Chryseobacterium hispalense</i> DSM 25574        |
| Cin-1-1            | Bacteria | Bacteroidetes | Flavobacteriia | Flavobacteriales | Flavobacteriaceae         | <i>Chryseobacterium indologenes</i>                 |

|                    |          |               |                |                  |                   |                                                               |
|--------------------|----------|---------------|----------------|------------------|-------------------|---------------------------------------------------------------|
| Cin-2-1            | Bacteria | Bacteroidetes | Flavobacteriia | Flavobacteriales | Flavobacteriaceae | <i>Chryseobacterium indologenes</i> NBRC 14944                |
| Cje-1-1            | Bacteria | Bacteroidetes | Flavobacteriia | Flavobacteriales | Flavobacteriaceae | <i>Chryseobacterium jeonii</i>                                |
| Cko-1-1            | Bacteria | Bacteroidetes | Flavobacteriia | Flavobacteriales | Flavobacteriaceae | <i>Chryseobacterium koreense</i> CCUG 49689                   |
| Clu-1-1            | Bacteria | Bacteroidetes | Flavobacteriia | Flavobacteriales | Flavobacteriaceae | <i>Chryseobacterium luteum</i>                                |
| Cor-1-1 to Cor-1-2 | Bacteria | Bacteroidetes | Flavobacteriia | Flavobacteriales | Flavobacteriaceae | <i>Chryseobacterium oranimense</i> G311                       |
| Cpi-1-1            | Bacteria | Bacteroidetes | Flavobacteriia | Flavobacteriales | Flavobacteriaceae | <i>Chryseobacterium piperi</i>                                |
| Cso-1-1            | Bacteria | Bacteroidetes | Flavobacteriia | Flavobacteriales | Flavobacteriaceae | <i>Chryseobacterium soli</i>                                  |
| Cso-2-1            | Bacteria | Bacteroidetes | Flavobacteriia | Flavobacteriales | Flavobacteriaceae | <i>Chryseobacterium solincola</i>                             |
| Csp-13-1           | Bacteria | Bacteroidetes | Flavobacteriia | Flavobacteriales | Flavobacteriaceae | <i>Chryseobacterium</i> sp. BLS98                             |
| Csp-14-1           | Bacteria | Bacteroidetes | Flavobacteriia | Flavobacteriales | Flavobacteriaceae | <i>Chryseobacterium</i> sp. CF365                             |
| Csp-15-1           | Bacteria | Bacteroidetes | Flavobacteriia | Flavobacteriales | Flavobacteriaceae | <i>Chryseobacterium</i> sp. FH1                               |
| Csp-16-1           | Bacteria | Bacteroidetes | Flavobacteriia | Flavobacteriales | Flavobacteriaceae | <i>Chryseobacterium</i> sp. FH2                               |
| Csp-17-1           | Bacteria | Bacteroidetes | Flavobacteriia | Flavobacteriales | Flavobacteriaceae | <i>Chryseobacterium</i> sp. JM1                               |
| Csp-18-1           | Bacteria | Bacteroidetes | Flavobacteriia | Flavobacteriales | Flavobacteriaceae | <i>Chryseobacterium</i> sp. OV259                             |
| Csp-19-1           | Bacteria | Bacteroidetes | Flavobacteriia | Flavobacteriales | Flavobacteriaceae | <i>Chryseobacterium</i> sp. OV705                             |
| Csp-20-1           | Bacteria | Bacteroidetes | Flavobacteriia | Flavobacteriales | Flavobacteriaceae | <i>Chryseobacterium</i> sp. OV715                             |
| Csp-21-1           | Bacteria | Bacteroidetes | Flavobacteriia | Flavobacteriales | Flavobacteriaceae | <i>Chryseobacterium</i> sp. P1-3                              |
| Csp-22-1           | Bacteria | Bacteroidetes | Flavobacteriia | Flavobacteriales | Flavobacteriaceae | <i>Chryseobacterium</i> sp. StRB126                           |
| Csp-23-1           | Bacteria | Bacteroidetes | Flavobacteriia | Flavobacteriales | Flavobacteriaceae | <i>Chryseobacterium</i> sp. UNC8MFCol                         |
| Csp-24-1           | Bacteria | Bacteroidetes | Flavobacteriia | Flavobacteriales | Flavobacteriaceae | <i>Chryseobacterium</i> sp. YR459                             |
| Csp-25-1           | Bacteria | Bacteroidetes | Flavobacteriia | Flavobacteriales | Flavobacteriaceae | <i>Chryseobacterium</i> sp. YR460                             |
| Csp-26-1           | Bacteria | Bacteroidetes | Flavobacteriia | Flavobacteriales | Flavobacteriaceae | <i>Chryseobacterium</i> sp. YR477                             |
| Csp-27-1           | Bacteria | Bacteroidetes | Flavobacteriia | Flavobacteriales | Flavobacteriaceae | <i>Chryseobacterium</i> sp. YR480                             |
| Csp-28-1           | Bacteria | Bacteroidetes | Flavobacteriia | Flavobacteriales | Flavobacteriaceae | <i>Chryseobacterium</i> sp. YR485                             |
| Csp-29-1           | Bacteria | Bacteroidetes | Flavobacteriia | Flavobacteriales | Flavobacteriaceae | <i>Chryseobacterium</i> sp. YR561                             |
| Cta-1-1            | Bacteria | Bacteroidetes | Flavobacteriia | Flavobacteriales | Flavobacteriaceae | <i>Chryseobacterium taiwanense</i>                            |
| Cte-1-1            | Bacteria | Bacteroidetes | Flavobacteriia | Flavobacteriales | Flavobacteriaceae | <i>Chryseobacterium tenax</i> DSM 16811                       |
| Cvr-1-1            | Bacteria | Bacteroidetes | Flavobacteriia | Flavobacteriales | Flavobacteriaceae | <i>Chryseobacterium vrystaatense</i>                          |
| Ddo-1-1            | Bacteria | Bacteroidetes | Flavobacteriia | Flavobacteriales | Flavobacteriaceae | <i>Dokdonia donghaensis</i> DSW-1                             |
| Dsp-1-1            | Bacteria | Bacteroidetes | Flavobacteriia | Flavobacteriales | Flavobacteriaceae | <i>Dokdonia</i> sp. MED134                                    |
| Dsp-2-1            | Bacteria | Bacteroidetes | Flavobacteriia | Flavobacteriales | Flavobacteriaceae | <i>Dokdonia</i> sp. PRO95                                     |
| Ean-1-1 to Ean-1-4 | Bacteria | Bacteroidetes | Flavobacteriia | Flavobacteriales | Flavobacteriaceae | <i>Elizabethkingia anophelis</i>                              |
| Ean-2-1            | Bacteria | Bacteroidetes | Flavobacteriia | Flavobacteriales | Flavobacteriaceae | <i>Elizabethkingia anophelis</i> Ag1                          |
| Ean-3-1            | Bacteria | Bacteroidetes | Flavobacteriia | Flavobacteriales | Flavobacteriaceae | <i>Elizabethkingia anophelis</i> FMS-007                      |
| Ean-4-1            | Bacteria | Bacteroidetes | Flavobacteriia | Flavobacteriales | Flavobacteriaceae | <i>Elizabethkingia anophelis</i> NUH1                         |
| Ean-5-1            | Bacteria | Bacteroidetes | Flavobacteriia | Flavobacteriales | Flavobacteriaceae | <i>Elizabethkingia anophelis</i> NUH11                        |
| Ean-6-1            | Bacteria | Bacteroidetes | Flavobacteriia | Flavobacteriales | Flavobacteriaceae | <i>Elizabethkingia anophelis</i> NUH4                         |
| Ean-7-1            | Bacteria | Bacteroidetes | Flavobacteriia | Flavobacteriales | Flavobacteriaceae | <i>Elizabethkingia anophelis</i> NUH6                         |
| Ean-8-1            | Bacteria | Bacteroidetes | Flavobacteriia | Flavobacteriales | Flavobacteriaceae | <i>Elizabethkingia anophelis</i> NUHP1                        |
| Ean-9-1            | Bacteria | Bacteroidetes | Flavobacteriia | Flavobacteriales | Flavobacteriaceae | <i>Elizabethkingia anophelis</i> NUHP2                        |
| Ean-10-1           | Bacteria | Bacteroidetes | Flavobacteriia | Flavobacteriales | Flavobacteriaceae | <i>Elizabethkingia anophelis</i> NUHP3                        |
| Ean-11-1           | Bacteria | Bacteroidetes | Flavobacteriia | Flavobacteriales | Flavobacteriaceae | <i>Elizabethkingia anophelis</i> PW2809                       |
| Ean-12-1           | Bacteria | Bacteroidetes | Flavobacteriia | Flavobacteriales | Flavobacteriaceae | <i>Elizabethkingia anophelis</i> R26                          |
| Eme-1-1            | Bacteria | Bacteroidetes | Flavobacteriia | Flavobacteriales | Flavobacteriaceae | <i>Elizabethkingia meningoseptica</i> 502                     |
| Eme-2-1 to Eme-2-2 | Bacteria | Bacteroidetes | Flavobacteriia | Flavobacteriales | Flavobacteriaceae | <i>Elizabethkingia meningoseptica</i> ATCC 13253 = NBRC 12535 |
| Emi-1-1            | Bacteria | Bacteroidetes | Flavobacteriia | Flavobacteriales | Flavobacteriaceae | <i>Elizabethkingia miricola</i>                               |
| Ebr-1-1            | Bacteria | Bacteroidetes | Flavobacteriia | Flavobacteriales | Flavobacteriaceae | <i>Empedobacter brevis</i> NBRC 14943 = ATCC 43319            |
| Efa-1-1            | Bacteria | Bacteroidetes | Flavobacteriia | Flavobacteriales | Flavobacteriaceae | <i>Empedobacter falsenii</i>                                  |
| Ead-1-1            | Bacteria | Bacteroidetes | Flavobacteriia | Flavobacteriales | Flavobacteriaceae | <i>Eudoraea adriatica</i> DSM 19308                           |
| Fic-1-1            | Bacteria | Bacteroidetes | Flavobacteriia | Flavobacteriales | Flavobacteriaceae | <i>Flaviramulus ichthyoenteri</i> Th78                        |
| Fba-7-1            | Bacteria | Bacteroidetes | Flavobacteriia | Flavobacteriales | Flavobacteriaceae | <i>Flavobacteriaceae bacterium</i> HQM9                       |
| Fba-8-1            | Bacteria | Bacteroidetes | Flavobacteriia | Flavobacteriales | Flavobacteriaceae | <i>Flavobacteriaceae bacterium</i> P7-3-5                     |
| Fba-9-1            | Bacteria | Bacteroidetes | Flavobacteriia | Flavobacteriales | Flavobacteriaceae | <i>Flavobacteriaceae bacterium</i> S85                        |
| Fan-1-1            | Bacteria | Bacteroidetes | Flavobacteriia | Flavobacteriales | Flavobacteriaceae | <i>Flavobacterium antarcticum</i> DSM 19726                   |
| Faq-1-1            | Bacteria | Bacteroidetes | Flavobacteriia | Flavobacteriales | Flavobacteriaceae | <i>Flavobacterium aquatile</i> LMG 4008 = ATCC 11947          |
| Fbe-1-1            | Bacteria | Bacteroidetes | Flavobacteriia | Flavobacteriales | Flavobacteriaceae | <i>Flavobacterium beibuense</i> F44-8                         |
| Fbr-1-1            | Bacteria | Bacteroidetes | Flavobacteriia | Flavobacteriales | Flavobacteriaceae | <i>Flavobacterium branchiophilum</i> FL-15                    |
| Fca-1-1 to Fca-1-2 | Bacteria | Bacteroidetes | Flavobacteriia | Flavobacteriales | Flavobacteriaceae | <i>Flavobacterium cauense</i> R2A-7                           |
| Fch-1-1            | Bacteria | Bacteroidetes | Flavobacteriia | Flavobacteriales | Flavobacteriaceae | <i>Flavobacterium chungangense</i> LMG 26729                  |
| Fco-1-1            | Bacteria | Bacteroidetes | Flavobacteriia | Flavobacteriales | Flavobacteriaceae | <i>Flavobacterium columnare</i> ATCC 49512                    |
| Fda-1-1            | Bacteria | Bacteroidetes | Flavobacteriia | Flavobacteriales | Flavobacteriaceae | <i>Flavobacterium daejeonense</i> DSM 17708                   |
| Fde-1-1            | Bacteria | Bacteroidetes | Flavobacteriia | Flavobacteriales | Flavobacteriaceae | <i>Flavobacterium denitrificans</i> DSM 15936                 |
| Fen-1-1 to Fen-1-2 | Bacteria | Bacteroidetes | Flavobacteriia | Flavobacteriales | Flavobacteriaceae | <i>Flavobacterium enshiense</i> DK69                          |
| Ffi-1-1            | Bacteria | Bacteroidetes | Flavobacteriia | Flavobacteriales | Flavobacteriaceae | <i>Flavobacterium filum</i> DSM 17961                         |
| Ffr-1-1            | Bacteria | Bacteroidetes | Flavobacteriia | Flavobacteriales | Flavobacteriaceae | <i>Flavobacterium frigidarium</i> DSM 17623                   |

|                     |          |               |                |                  |                   |                                                          |
|---------------------|----------|---------------|----------------|------------------|-------------------|----------------------------------------------------------|
| Ffr-2-1             | Bacteria | Bacteroidetes | Flavobacteriia | Flavobacteriales | Flavobacteriaceae | <i>Flavobacterium frigidis</i> PS1                       |
| Fge-1-1             | Bacteria | Bacteroidetes | Flavobacteriia | Flavobacteriales | Flavobacteriaceae | <i>Flavobacterium gelidilacus</i> DSM 15343              |
| Fgi-1-1             | Bacteria | Bacteroidetes | Flavobacteriia | Flavobacteriales | Flavobacteriaceae | <i>Flavobacterium gilvum</i>                             |
| Fhi-1-1             | Bacteria | Bacteroidetes | Flavobacteriia | Flavobacteriales | Flavobacteriaceae | <i>Flavobacterium hibernum</i>                           |
| Fhy-1-1             | Bacteria | Bacteroidetes | Flavobacteriia | Flavobacteriales | Flavobacteriaceae | <i>Flavobacterium hydatis</i>                            |
| Fin-1-1             | Bacteria | Bacteroidetes | Flavobacteriia | Flavobacteriales | Flavobacteriaceae | <i>Flavobacterium indicum</i> GPTSA100-9                 |
| Fli-1-1             | Bacteria | Bacteroidetes | Flavobacteriia | Flavobacteriales | Flavobacteriaceae | <i>Flavobacterium limnosediminis</i> JC2902              |
| Fps-1-1 to Fps-1-10 | Bacteria | Bacteroidetes | Flavobacteriia | Flavobacteriales | Flavobacteriaceae | <i>Flavobacterium psychrophilum</i>                      |
| Fps-2-1             | Bacteria | Bacteroidetes | Flavobacteriia | Flavobacteriales | Flavobacteriaceae | <i>Flavobacterium psychrophilum</i> FPG101               |
| Fps-3-1             | Bacteria | Bacteroidetes | Flavobacteriia | Flavobacteriales | Flavobacteriaceae | <i>Flavobacterium psychrophilum</i> FPG3                 |
| Fps-4-1             | Bacteria | Bacteroidetes | Flavobacteriia | Flavobacteriales | Flavobacteriaceae | <i>Flavobacterium psychrophilum</i> JIP02/86             |
| Fri-1-1             | Bacteria | Bacteroidetes | Flavobacteriia | Flavobacteriales | Flavobacteriaceae | <i>Flavobacterium rivuli</i> DSM 21788                   |
| Fri-2-1             | Bacteria | Bacteroidetes | Flavobacteriia | Flavobacteriales | Flavobacteriaceae | <i>Flavobacterium rivuli</i> WB 3.3-2 = DSM 21788        |
| Fsa-1-1             | Bacteria | Bacteroidetes | Flavobacteriia | Flavobacteriales | Flavobacteriaceae | <i>Flavobacterium saliperosum</i> S13                    |
| Fsa-2-1             | Bacteria | Bacteroidetes | Flavobacteriia | Flavobacteriales | Flavobacteriaceae | <i>Flavobacterium sasangense</i> DSM 21067               |
| Fse-1-1             | Bacteria | Bacteroidetes | Flavobacteriia | Flavobacteriales | Flavobacteriaceae | <i>Flavobacterium seoulense</i>                          |
| Fso-1-1             | Bacteria | Bacteroidetes | Flavobacteriia | Flavobacteriales | Flavobacteriaceae | <i>Flavobacterium soli</i> DSM 19725                     |
| Fsp-1-1             | Bacteria | Bacteroidetes | Flavobacteriia | Flavobacteriales | Flavobacteriaceae | <i>Flavobacterium</i> sp. 316                            |
| Fsp-2-1             | Bacteria | Bacteroidetes | Flavobacteriia | Flavobacteriales | Flavobacteriaceae | <i>Flavobacterium</i> sp. 83                             |
| Fsp-3-1             | Bacteria | Bacteroidetes | Flavobacteriia | Flavobacteriales | Flavobacteriaceae | <i>Flavobacterium</i> sp. ABG                            |
| Fsp-4-1             | Bacteria | Bacteroidetes | Flavobacteriia | Flavobacteriales | Flavobacteriaceae | <i>Flavobacterium</i> sp. ACAM 123                       |
| Fsp-5-1             | Bacteria | Bacteroidetes | Flavobacteriia | Flavobacteriales | Flavobacteriaceae | <i>Flavobacterium</i> sp. AED                            |
| Fsp-6-1             | Bacteria | Bacteroidetes | Flavobacteriia | Flavobacteriales | Flavobacteriaceae | <i>Flavobacterium</i> sp. CF136                          |
| Fsp-7-1             | Bacteria | Bacteroidetes | Flavobacteriia | Flavobacteriales | Flavobacteriaceae | <i>Flavobacterium</i> sp. F52                            |
| Fsp-8-1             | Bacteria | Bacteroidetes | Flavobacteriia | Flavobacteriales | Flavobacteriaceae | <i>Flavobacterium</i> sp. JRM                            |
| Fsp-9-1             | Bacteria | Bacteroidetes | Flavobacteriia | Flavobacteriales | Flavobacteriaceae | <i>Flavobacterium</i> sp. KJJ                            |
| Fsp-10-1            | Bacteria | Bacteroidetes | Flavobacteriia | Flavobacteriales | Flavobacteriaceae | <i>Flavobacterium</i> sp. KMS                            |
| Fsp-11-1            | Bacteria | Bacteroidetes | Flavobacteriia | Flavobacteriales | Flavobacteriaceae | <i>Flavobacterium</i> sp. MEB061                         |
| Fsp-12-1            | Bacteria | Bacteroidetes | Flavobacteriia | Flavobacteriales | Flavobacteriaceae | <i>Flavobacterium</i> sp. URHB0058                       |
| Fsp-13-1            | Bacteria | Bacteroidetes | Flavobacteriia | Flavobacteriales | Flavobacteriaceae | <i>Flavobacterium</i> sp. WG21                           |
| Fsu-1-1 to Fsu-1-2  | Bacteria | Bacteroidetes | Flavobacteriia | Flavobacteriales | Flavobacteriaceae | <i>Flavobacterium subsaxonicum</i> WB 4.1-42 = DSM 21790 |
| Fsu-2-1             | Bacteria | Bacteroidetes | Flavobacteriia | Flavobacteriales | Flavobacteriaceae | <i>Flavobacterium succinicans</i> LMG 10402              |
| Fsu-3-1 to Fsu-3-2  | Bacteria | Bacteroidetes | Flavobacteriia | Flavobacteriales | Flavobacteriaceae | <i>Flavobacterium suncheonense</i> GH29-5 = DSM 17707    |
| Fte-1-1             | Bacteria | Bacteroidetes | Flavobacteriia | Flavobacteriales | Flavobacteriaceae | <i>Flavobacterium tegetincola</i> DSM 22377              |
| Fag-1-1             | Bacteria | Bacteroidetes | Flavobacteriia | Flavobacteriales | Flavobacteriaceae | <i>Formosa agariphila</i> KMM 3901                       |
| Fsp-14-1            | Bacteria | Bacteroidetes | Flavobacteriia | Flavobacteriales | Flavobacteriaceae | <i>Formosa</i> sp. AK20                                  |
| Gsa-1-1             | Bacteria | Bacteroidetes | Flavobacteriia | Flavobacteriales | Flavobacteriaceae | <i>Gaetbulibacter saemankumensis</i> DSM 17032           |
| Gsp-1-1             | Bacteria | Bacteroidetes | Flavobacteriia | Flavobacteriales | Flavobacteriaceae | <i>Galbibacter</i> sp. ck-12-15                          |
| Gme-1-1             | Bacteria | Bacteroidetes | Flavobacteriia | Flavobacteriales | Flavobacteriaceae | <i>Gelidibacter mesophilus</i> DSM 14095                 |
| Gli-1-1             | Bacteria | Bacteroidetes | Flavobacteriia | Flavobacteriales | Flavobacteriaceae | <i>Gillisia limmaea</i> DSM 15749                        |
| Gsp-2-1             | Bacteria | Bacteroidetes | Flavobacteriia | Flavobacteriales | Flavobacteriaceae | <i>Gillisia</i> sp. CAL575                               |
| Gsp-3-1             | Bacteria | Bacteroidetes | Flavobacteriia | Flavobacteriales | Flavobacteriaceae | <i>Gillisia</i> sp. CBA3202                              |
| Gsp-4-1             | Bacteria | Bacteroidetes | Flavobacteriia | Flavobacteriales | Flavobacteriaceae | <i>Gillisia</i> sp. Hel.L.29                             |
| Gsp-5-1             | Bacteria | Bacteroidetes | Flavobacteriia | Flavobacteriales | Flavobacteriaceae | <i>Gillisia</i> sp. JM1                                  |
| Gec-1-1             | Bacteria | Bacteroidetes | Flavobacteriia | Flavobacteriales | Flavobacteriaceae | <i>Gramella echinicola</i> DSM 19838                     |
| Gpo-1-1             | Bacteria | Bacteroidetes | Flavobacteriia | Flavobacteriales | Flavobacteriaceae | <i>Gramella portivictoriae</i> DSM 23547                 |
| Iha-1-1             | Bacteria | Bacteroidetes | Flavobacteriia | Flavobacteriales | Flavobacteriaceae | <i>Imtechella halotolerans</i> K1                        |
| Jpa-1-1 to Jpa-1-3  | Bacteria | Bacteroidetes | Flavobacteriia | Flavobacteriales | Flavobacteriaceae | <i>Jejuia pallidulitea</i>                               |
| Jma-1-1             | Bacteria | Bacteroidetes | Flavobacteriia | Flavobacteriales | Flavobacteriaceae | <i>Joostella marina</i> DSM 19592                        |
| Kje-1-1             | Bacteria | Bacteroidetes | Flavobacteriia | Flavobacteriales | Flavobacteriaceae | <i>Kordia jejudonensis</i>                               |
| Kzh-1-1             | Bacteria | Bacteroidetes | Flavobacteriia | Flavobacteriales | Flavobacteriaceae | <i>Kordia zhangzhouensis</i>                             |
| Ksp-1-1             | Bacteria | Bacteroidetes | Flavobacteriia | Flavobacteriales | Flavobacteriaceae | <i>Krokinobacter</i> sp. 4H-3-7-5                        |
| Lja-1-1             | Bacteria | Bacteroidetes | Flavobacteriia | Flavobacteriales | Flavobacteriaceae | <i>Lacinutrix jangbogonensis</i>                         |
| Lsp-1-1             | Bacteria | Bacteroidetes | Flavobacteriia | Flavobacteriales | Flavobacteriaceae | <i>Lacinutrix</i> sp. 5H-3-7-4                           |
| Lsp-2-1             | Bacteria | Bacteroidetes | Flavobacteriia | Flavobacteriales | Flavobacteriaceae | <i>Lacinutrix</i> sp. Hel.L.90                           |
| Lsp-3-1             | Bacteria | Bacteroidetes | Flavobacteriia | Flavobacteriales | Flavobacteriaceae | <i>Leeuwenhoekella</i> sp. Hel.L.48                      |
| Lsp-4-1             | Bacteria | Bacteroidetes | Flavobacteriia | Flavobacteriales | Flavobacteriaceae | <i>Leeuwenhoekella</i> sp. MAR.2009.132                  |
| Myu-1-1             | Bacteria | Bacteroidetes | Flavobacteriia | Flavobacteriales | Flavobacteriaceae | <i>Mangrovimonas yunxiaonensis</i>                       |
| Man-1-1             | Bacteria | Bacteroidetes | Flavobacteriia | Flavobacteriales | Flavobacteriaceae | <i>Maribacter antarcticus</i> DSM 21422                  |
| Mfo-1-1             | Bacteria | Bacteroidetes | Flavobacteriia | Flavobacteriales | Flavobacteriaceae | <i>Maribacter forsetii</i> DSM 18668                     |
| Msp-1-1             | Bacteria | Bacteroidetes | Flavobacteriia | Flavobacteriales | Flavobacteriaceae | <i>Maribacter</i> sp. Hel.L.7                            |
| Mth-1-1             | Bacteria | Bacteroidetes | Flavobacteriia | Flavobacteriales | Flavobacteriaceae | <i>Maribacter thermophilus</i>                           |
| Mze-1-1             | Bacteria | Bacteroidetes | Flavobacteriia | Flavobacteriales | Flavobacteriaceae | <i>Mesoflavibacter zeaxanthinifaciens</i> DSM 18436      |
| Mze-2-1             | Bacteria | Bacteroidetes | Flavobacteriia | Flavobacteriales | Flavobacteriaceae | <i>Mesoflavibacter zeaxanthinifaciens</i> S86            |
| Mmo-1-1             | Bacteria | Bacteroidetes | Flavobacteriia | Flavobacteriales | Flavobacteriaceae | <i>Mesonnia mobilis</i> DSM 19841                        |



|                    |          |                |                     |                  |                   |                                                        |
|--------------------|----------|----------------|---------------------|------------------|-------------------|--------------------------------------------------------|
| Mru-1-1            | Bacteria | Bacteroidetes  | Flavobacteriia      | Flavobacteriales | Flavobacteriaceae | <i>Muricauda ruestringensis</i> DSM 13258              |
| Msp-2-1            | Bacteria | Bacteroidetes  | Flavobacteriia      | Flavobacteriales | Flavobacteriaceae | <i>Muricauda</i> sp. MAR_2010_75                       |
| M[0]-1-1           | Bacteria | Bacteroidetes  | Flavobacteriia      | Flavobacteriales | Flavobacteriaceae | <i>Myroides [odoratimimus]</i> CIP 103059              |
| Min-1-1            | Bacteria | Bacteroidetes  | Flavobacteriia      | Flavobacteriales | Flavobacteriaceae | <i>Myroides injenensis</i> M09-0166                    |
| Mod-1-1            | Bacteria | Bacteroidetes  | Flavobacteriia      | Flavobacteriales | Flavobacteriaceae | <i>Myroides odoratimimus</i>                           |
| Mod-2-1            | Bacteria | Bacteroidetes  | Flavobacteriia      | Flavobacteriales | Flavobacteriaceae | <i>Myroides odoratimimus</i> CCUG 10230                |
| Mod-3-1            | Bacteria | Bacteroidetes  | Flavobacteriia      | Flavobacteriales | Flavobacteriaceae | <i>Myroides odoratimimus</i> CCUG 12700                |
| Mod-4-1            | Bacteria | Bacteroidetes  | Flavobacteriia      | Flavobacteriales | Flavobacteriaceae | <i>Myroides odoratimimus</i> CCUG 12901                |
| Mod-5-1            | Bacteria | Bacteroidetes  | Flavobacteriia      | Flavobacteriales | Flavobacteriaceae | <i>Myroides odoratimimus</i> CCUG 3837                 |
| Mod-6-1            | Bacteria | Bacteroidetes  | Flavobacteriia      | Flavobacteriales | Flavobacteriaceae | <i>Myroides odoratimimus</i> CIP 101113                |
| Mod-7-1            | Bacteria | Bacteroidetes  | Flavobacteriia      | Flavobacteriales | Flavobacteriaceae | <i>Myroides odoratimimus</i> H1bi                      |
| Mod-8-1            | Bacteria | Bacteroidetes  | Flavobacteriia      | Flavobacteriales | Flavobacteriaceae | <i>Myroides odoratus</i> DSM 2801                      |
| Mpr-1-1            | Bacteria | Bacteroidetes  | Flavobacteriia      | Flavobacteriales | Flavobacteriaceae | <i>Myroides profundi</i>                               |
| Msp-3-1            | Bacteria | Bacteroidetes  | Flavobacteriia      | Flavobacteriales | Flavobacteriaceae | <i>Myroides</i> sp. A21                                |
| Nma-1-1            | Bacteria | Bacteroidetes  | Flavobacteriia      | Flavobacteriales | Flavobacteriaceae | <i>Nonlabens marinus</i> S1-08                         |
| Nul-1-1 to Nul-1-6 | Bacteria | Bacteroidetes  | Flavobacteriia      | Flavobacteriales | Flavobacteriaceae | <i>Nonlabens ulvanivorans</i>                          |
| Oma-1-1            | Bacteria | Bacteroidetes  | Flavobacteriia      | Flavobacteriales | Flavobacteriaceae | <i>Olleya marilimosa</i> CAM030                        |
| Osp-1-1            | Bacteria | Bacteroidetes  | Flavobacteriia      | Flavobacteriales | Flavobacteriaceae | <i>Olleya</i> sp. VCSA23                               |
| Osp-2-1            | Bacteria | Bacteroidetes  | Flavobacteriia      | Flavobacteriales | Flavobacteriaceae | <i>Olleya</i> sp. VCSM12                               |
| Orh-1-1            | Bacteria | Bacteroidetes  | Flavobacteriia      | Flavobacteriales | Flavobacteriaceae | <i>Ornithobacterium rhinotracheale</i> DSM 15997       |
| Orh-2-1            | Bacteria | Bacteroidetes  | Flavobacteriia      | Flavobacteriales | Flavobacteriaceae | <i>Ornithobacterium rhinotracheale</i> H06-030791      |
| Orh-3-1            | Bacteria | Bacteroidetes  | Flavobacteriia      | Flavobacteriales | Flavobacteriaceae | <i>Ornithobacterium rhinotracheale</i> ORT-UMN 88      |
| Psp-1-1            | Bacteria | Bacteroidetes  | Flavobacteriia      | Flavobacteriales | Flavobacteriaceae | <i>Polaribacter</i> sp. Hel1_33_49                     |
| Psp-2-1            | Bacteria | Bacteroidetes  | Flavobacteriia      | Flavobacteriales | Flavobacteriaceae | <i>Polaribacter</i> sp. Hel1_85                        |
| Psp-3-1            | Bacteria | Bacteroidetes  | Flavobacteriia      | Flavobacteriales | Flavobacteriaceae | <i>Polaribacter</i> sp. Hel1_L88                       |
| Psp-4-1            | Bacteria | Bacteroidetes  | Flavobacteriia      | Flavobacteriales | Flavobacteriaceae | <i>Polaribacter</i> sp. MED152                         |
| Pgo-1-1            | Bacteria | Bacteroidetes  | Flavobacteriia      | Flavobacteriales | Flavobacteriaceae | <i>Psychroflexus gondwanensis</i> ACAM 44              |
| Pto-1-1            | Bacteria | Bacteroidetes  | Flavobacteriia      | Flavobacteriales | Flavobacteriaceae | <i>Psychroflexus torquis</i> ATCC 700755               |
| Ptr-1-1            | Bacteria | Bacteroidetes  | Flavobacteriia      | Flavobacteriales | Flavobacteriaceae | <i>Psychroflexus tropicus</i> DSM 15496                |
| Pbu-1-1            | Bacteria | Bacteroidetes  | Flavobacteriia      | Flavobacteriales | Flavobacteriaceae | <i>Psychroserpens burtonensis</i> DSM 12212            |
| Pda-1-1            | Bacteria | Bacteroidetes  | Flavobacteriia      | Flavobacteriales | Flavobacteriaceae | <i>Psychroserpens damuponensis</i>                     |
| Pja-1-1            | Bacteria | Bacteroidetes  | Flavobacteriia      | Flavobacteriales | Flavobacteriaceae | <i>Psychroserpens jangbogonensis</i>                   |
| Pme-1-1            | Bacteria | Bacteroidetes  | Flavobacteriia      | Flavobacteriales | Flavobacteriaceae | <i>Psychroserpens mesophilus</i>                       |
| Psp-5-1            | Bacteria | Bacteroidetes  | Flavobacteriia      | Flavobacteriales | Flavobacteriaceae | <i>Psychroserpens</i> sp. Hel1_L66                     |
| Ran-1-1 to Ran-1-2 | Bacteria | Bacteroidetes  | Flavobacteriia      | Flavobacteriales | Flavobacteriaceae | <i>Riemerella anatipestifer</i>                        |
| Ran-2-1 to Ran-2-2 | Bacteria | Bacteroidetes  | Flavobacteriia      | Flavobacteriales | Flavobacteriaceae | <i>Riemerella anatipestifer</i> ATCC 11845 = DSM 15868 |
| Ran-3-1            | Bacteria | Bacteroidetes  | Flavobacteriia      | Flavobacteriales | Flavobacteriaceae | <i>Riemerella anatipestifer</i> RA-CH-2                |
| Ran-4-1            | Bacteria | Bacteroidetes  | Flavobacteriia      | Flavobacteriales | Flavobacteriaceae | <i>Riemerella anatipestifer</i> RA-GD                  |
| Ran-5-1            | Bacteria | Bacteroidetes  | Flavobacteriia      | Flavobacteriales | Flavobacteriaceae | <i>Riemerella anatipestifer</i> RA-SG                  |
| Ran-6-1            | Bacteria | Bacteroidetes  | Flavobacteriia      | Flavobacteriales | Flavobacteriaceae | <i>Riemerella anatipestifer</i> RA-YM                  |
| Ran-7-1            | Bacteria | Bacteroidetes  | Flavobacteriia      | Flavobacteriales | Flavobacteriaceae | <i>Riemerella anatipestifer</i> Yb2                    |
| Ssp-1-1            | Bacteria | Bacteroidetes  | Flavobacteriia      | Flavobacteriales | Flavobacteriaceae | <i>Salegentibacter</i> sp. Hel1_L6                     |
| Ste-1-1            | Bacteria | Bacteroidetes  | Flavobacteriia      | Flavobacteriales | Flavobacteriaceae | <i>Salinimicrobium terrae</i> DSM 17865                |
| Sxi-1-1            | Bacteria | Bacteroidetes  | Flavobacteriia      | Flavobacteriales | Flavobacteriaceae | <i>Salinimicrobium xinjiangense</i> DSM 19287          |
| Ssp-2-1            | Bacteria | Bacteroidetes  | Flavobacteriia      | Flavobacteriales | Flavobacteriaceae | <i>Sediminibacter</i> sp. Hel1_L10                     |
| Sze-1-1            | Bacteria | Bacteroidetes  | Flavobacteriia      | Flavobacteriales | Flavobacteriaceae | <i>Siansivirga zeaxanthimifaciens</i> CC-SAMT-1        |
| Tna-1-1            | Bacteria | Bacteroidetes  | Flavobacteriia      | Flavobacteriales | Flavobacteriaceae | <i>Tamlana nanhaiensis</i>                             |
| Tse-1-1            | Bacteria | Bacteroidetes  | Flavobacteriia      | Flavobacteriales | Flavobacteriaceae | <i>Tamlana sedimentorum</i>                            |
| Tma-1-1            | Bacteria | Bacteroidetes  | Flavobacteriia      | Flavobacteriales | Flavobacteriaceae | <i>Tenacibaculum maritimum</i> NCIMB 2154              |
| Tme-1-1            | Bacteria | Bacteroidetes  | Flavobacteriia      | Flavobacteriales | Flavobacteriaceae | <i>Tenacibaculum mesophilum</i>                        |
| Tov-1-1            | Bacteria | Bacteroidetes  | Flavobacteriia      | Flavobacteriales | Flavobacteriaceae | <i>Tenacibaculum ovolyticum</i> DSM 18103              |
| Tsp-1-1            | Bacteria | Bacteroidetes  | Flavobacteriia      | Flavobacteriales | Flavobacteriaceae | <i>Tenacibaculum</i> sp. 47A_GOM-205m                  |
| Wma-1-1            | Bacteria | Bacteroidetes  | Flavobacteriia      | Flavobacteriales | Flavobacteriaceae | <i>Weeksella massiliensis</i>                          |
| Wvi-1-1            | Bacteria | Bacteroidetes  | Flavobacteriia      | Flavobacteriales | Flavobacteriaceae | <i>Weeksella virosa</i> DSM 16922                      |
| Wps-1-1            | Bacteria | Bacteroidetes  | Flavobacteriia      | Flavobacteriales | Flavobacteriaceae | <i>Winogradskyella psychrotolerans</i> RS-3            |
| Wsp-1-1            | Bacteria | Bacteroidetes  | Flavobacteriia      | Flavobacteriales | Flavobacteriaceae | <i>Winogradskyella</i> sp. PG-2                        |
| Zam-1-1            | Bacteria | Bacteroidetes  | Flavobacteriia      | Flavobacteriales | Flavobacteriaceae | <i>Zhouia amylolytica</i> AD3                          |
| Zga-1-1            | Bacteria | Bacteroidetes  | Flavobacteriia      | Flavobacteriales | Flavobacteriaceae | <i>Zobellia galactanivorans</i>                        |
| Zul-1-1            | Bacteria | Bacteroidetes  | Flavobacteriia      | Flavobacteriales | Flavobacteriaceae | <i>Zobellia uliginosa</i>                              |
| Psp-6-1            | Bacteria | Proteobacteria | Gammaproteobacteria | Alteromonadales  | Psychromonadaceae | <i>Psychromonas</i> sp. SP041                          |
| env-1 to env-2152  |          |                |                     |                  |                   | environmental samples                                  |

## 22.2 Notes

Superscript numbers are used to annotate any S15-Flavobacteria RNA that has special characteristics (described below). These numeric annotations will be

<sup>1</sup> No UAnnUUUG is apparent in the 100 nucleotides upstream of this motif in-

## 22.3 Gene contexts

Each S15-Flavobacteria RNA (indicated by “RNA→”) is listed. For each hit, the downstream genes predicted to reside in a regulated operon are listed. If the nearest downstream gene is encoding in the opposite strand (and therefore presumed to not be a part of a regulated operon), then that gene is still depicted. Some environmental sequences and some RefSeq entries lack gene annotations, and so no genes are available for such sequences. The direction of each gene is indicated with an arrow (→), and each predicted conserved domain in the gene is named. Conserved domains associated with more than one S15-Flavobacteria RNA are assigned a color; other domains are gray. Information about these conserved

used in Sections 22.3 and 22.5. The meaning of the numbers are as follows.

stance.

domains is given in Section 22.4. The accession of the sequence containing each S15-Flavobacteria RNA is given in the column named “Seq. accession”. Accessions beginning with “NC\_”, “NS\_”, “NW\_” or “NZ\_” are contained in RefSeq. Other accession refer to environmental samples. Nucleotide coordinates are given for the 5′ and 3′ boundaries of each S15-Flavobacteria RNA. If the 5′ coordinate is greater than the 3′ coordinate, the RNA is present on the reverse-complement strand of the containing genomic DNA sequence. Each hit is denoted by an abbreviation (like “Eco-1-1”) that refers to a taxonomy given in Section 22.1. (Superscript numbers refer to annotations listed in Section 22.2)

| abbrev. | Seq. accession             |   | 5′ at   | 3′ at   | genes                                                                                                 |
|---------|----------------------------|---|---------|---------|-------------------------------------------------------------------------------------------------------|
| Pgo-1-1 | NZ_APLF01000002.1          | - | 80877   | 80813   | RNA→ rpsO (PRK05626)Ribosomal_S15 (pfam00312)→                                                        |
| env-1   | P_2C_Liq_1.UnCty_1066413   | - | 280     | 216     | RNA→ rpsO (PRK05626)Ribosomal_S15 (pfam00312)→                                                        |
| env-2   | SL_9KL_010_SED_10540992    | + | 126     | 190     | RNA→ rpsO (PRK05626)Ribosomal_S15 (pfam00312)→                                                        |
| env-3   | JGI11876J14442_10000003    | + | 205280  | 205344  | RNA→ rpsO (PRK05626)Ribosomal_S15 (pfam00312)→                                                        |
| Pto-1-1 | NC_018721.1                | + | 147626  | 147690  | RNA→ rpsO (PRK05626)Ribosomal_S15 (pfam00312)→                                                        |
| Ptr-1-1 | NZ_KB905343.1              | - | 600481  | 600417  | RNA→ rpsO (PRK05626)Ribosomal_S15 (pfam00312)→                                                        |
| env-4   | JGI1221J11331_1000106      | - | 12367   | 12303   | RNA→ rpsO (PRK05626)Ribosomal_S15 (pfam00312)→                                                        |
| env-5   | P_1C_Liq_1.UnCty_1089716   | - | 107     | 43      | RNA→                                                                                                  |
| env-6   | P_1C_Liq_3.UnCty_1064543   | - | 231     | 167     | RNA→ rpsO (PRK05626)Ribosomal_S15 (pfam00312)→                                                        |
| env-7   | P_1C_Liq_1.UnCty_1008265   | + | 1415    | 1479    | RNA→ rpsO (PRK05626)Ribosomal_S15 (pfam00312)→                                                        |
| env-8   | P_2C_Liq_1.UnCty_1170116   | + | 90      | 154     | RNA→ rpsO (PRK05626)Ribosomal_S15 (pfam00312)→                                                        |
| Mod-8-1 | NZ_CM001437.1              | - | 1513261 | 1513195 | RNA→ rpsO (PRK05626)Ribosomal_S15 (pfam00312)→ rpsO (PRK05626)Ribosomal_S15 (pfam00312)→              |
| M[o-1-1 | NZ_JH815539.1              | + | 176108  | 176174  | RNA→ rpsO (PRK05626)Ribosomal_S15 (pfam00312)→                                                        |
| env-9   | JGI20156J14371_10110659    | - | 680     | 612     | RNA→ rpsO (PRK05626)Ribosomal_S15 (pfam00312)→                                                        |
| env-10  | JGI20159J14440_10000064    | - | 3008    | 2940    | RNA→ rpsO (PRK05626)Ribosomal_S15 (pfam00312)→                                                        |
| env-11  | JGI20160J14292_10230840    | + | 25      | 93      | RNA→ rpsO (PRK05626)Ribosomal_S15 (pfam00312)→                                                        |
| env-12  | JGI20155J14468_10405117    | - | 344     | 276     | RNA→ rpsO (PRK05626)Ribosomal_S15 (pfam00312)→                                                        |
| env-13  | JGI20159J14440_10135058    | + | 106     | 174     | RNA→ rpsO (PRK05626)Ribosomal_S15 (pfam00312)→                                                        |
| env-14  | JGI20155J14468_10023041    | - | 280     | 212     | RNA→ rpsO (PRK05626)Ribosomal_S15 (pfam00312)→                                                        |
| env-15  | CAM_READ_0235006571        | - | 166     | 99      | RNA→ rpsO (PRK05626)RpsO (COG0184)→                                                                   |
| env-16  | 3300001592_10000361        | - | 46071   | 46015   | RNA→ rpsO (PRK05626)RpsO (COG0184)→                                                                   |
| env-17  | P_2C_Liq_1.UnCty_1027718   | + | 347     | 414     | RNA→ rpsO (PRK05626)Ribosomal_S15 (pfam00312)→                                                        |
| Fbr-1-1 | NC_016001.1                | - | 1162758 | 1162692 | RNA→ rpsO (PRK05626)Ribosomal_S15 (pfam00312)→                                                        |
| env-18  | JGI25922J50271_10000339    | - | 8516    | 8450    | RNA→ rpsO (PRK05626)Ribosomal_S15 (pfam00312)→                                                        |
| env-19  | JGI25921J50272_10046219    | - | 307     | 241     | RNA→ rpsO (PRK05626)Ribosomal_S15 (pfam00312)→                                                        |
| env-20  | soil_XZS65148_x1           | - | 304     | 236     | RNA→ rpsO (PRK05626)Ribosomal_S15 (pfam00312)→                                                        |
| env-21  | BS_KBA_SWE21_205m_10189866 | + | 318     | 376     | RNA→                                                                                                  |
| env-22  | CEUB01052019.1             | + | 160     | 227     | RNA→ rpsO (PRK05626)RpsO (COG0184)→                                                                   |
| env-23  | CEOP01451304.1             | + | 607     | 674     | RNA→ rpsO (PRK05626)RpsO (COG0184)→<br>PRK11824 (PRK11824)RNase_PH (pfam01138)RNase_PH_C (pfam03725)→ |

|         |                               |   |        |        |      |                                                                                     |
|---------|-------------------------------|---|--------|--------|------|-------------------------------------------------------------------------------------|
| env-24  | CETG01141171.1                | + | 474    | 541    | RNA→ | rpsO (PRK05626)Ribosomal_S15 (pfam00312)→                                           |
| env-25  | CETM01278025.1                | + | 477    | 544    | RNA→ |                                                                                     |
| Fba-9-1 | NZ_AFPK01000014.1             | + | 150749 | 150814 | RNA→ | rpsO (PRK05626)Ribosomal_S15 (pfam00312)→ rpsO (PRK05626)Ribosomal_S15 (pfam00312)→ |
| env-26  | CEOM01058151.1                | - | 607    | 540    | RNA→ | rpsO (PRK05626)Ribosomal_S15 (pfam00312)→                                           |
| env-27  | JGI25913J50563_1244176        | + | 71     | 137    | RNA→ | rpsO (PRK05626)Ribosomal_S15 (pfam00312)→                                           |
| env-28  | CETR01087310.1                | - | 18809  | 18745  | RNA→ | rpsO (PRK05626)Ribosomal_S15 (pfam00312)→                                           |
| env-29  | CEVJ01009927.1                | + | 44140  | 44204  | RNA→ | rpsO (PRK05626)Ribosomal_S15 (pfam00312)→                                           |
| env-30  | CEVK01027416.1                | - | 18585  | 18521  | RNA→ | rpsO (PRK05626)Ribosomal_S15 (pfam00312)→                                           |
| env-31  | CEVM01013066.1                | + | 53334  | 53398  | RNA→ | rpsO (PRK05626)Ribosomal_S15 (pfam00312)→                                           |
| env-32  | CEVO01125175.1                | + | 10666  | 10730  | RNA→ | rpsO (PRK05626)Ribosomal_S15 (pfam00312)→                                           |
| env-33  | CEVQ01101129.1                | + | 770    | 834    | RNA→ | rpsO (PRK05626)Ribosomal_S15 (pfam00312)→                                           |
| env-34  | JGI20154J14316_10054052       | - | 581    | 522    | RNA→ | rpsO (PRK05626)RpsO (COG0184)→                                                      |
| env-35  | JGI20157J14317_10003423       | - | 3710   | 3651   | RNA→ | rpsO (PRK05626)RpsO (COG0184)→                                                      |
| env-36  | DelMOSum2010_c10728123        | - | 223    | 164    | RNA→ | rpsO (PRK05626)Ribosomal_S15 (pfam00312)→                                           |
| env-37  | JCVL_SCAF_1096627992251       | + | 1032   | 1089   | RNA→ | rpsO (PRK05626)Ribosomal_S15 (pfam00312)→                                           |
| env-38  | 2236876001_130459             | + | 242    | 300    | RNA→ | rpsO (PRK05626)Ribosomal_S15 (pfam00312)→                                           |
| env-39  | DelMOSum2010_c10011046        | - | 5729   | 5669   | RNA→ | rpsO (PRK05626)RpsO (COG0184)→                                                      |
| env-40  | DelMOSum2011_c10604815        | - | 74     | 14     | RNA→ |                                                                                     |
| env-41  | DelMOSum2011_c10341564        | + | 308    | 368    | RNA→ |                                                                                     |
| env-42  | JGI24723J26617_10012210       | - | 2791   | 2732   | RNA→ | rpsO (PRK05626)RpsO (COG0184)→                                                      |
| env-43  | JGI25925J51416_10027951       | + | 789    | 854    | RNA→ | rpsO (PRK05626)Ribosomal_S15 (pfam00312)→                                           |
| Myu-1-1 | NZ_JPFK01000007.1             | - | 20817  | 20726  | RNA→ | rpsO (PRK05626)RpsO (COG0184)→ hypo→ hypo→                                          |
| env-44  | CERM01235517.1                | + | 1791   | 1859   | RNA→ |                                                                                     |
| env-45  | M3P_c10006697                 | - | 1022   | 954    | RNA→ | rpsO (PRK05626)Ribosomal_S15 (pfam00312)→                                           |
| env-46  | JGI25913J50563_1345866        | + | 57     | 125    | RNA→ | rpsO (PRK05626)Ribosomal_S15 (pfam00312)→                                           |
| env-47  | _GVICOHK01AKHQ1               | + | 147    | 215    | RNA→ |                                                                                     |
| env-48  | GXP7IEG01BCPE8                | + | 165    | 233    | RNA→ |                                                                                     |
| env-49  | TFO_HY_Contig_16695           | - | 374    | 310    | RNA→ | rpsO (PRK05626)Ribosomal_S15 (pfam00312)→                                           |
| env-50  | ATED1026_F5B15RW02JR6D3       | + | 134    | 198    | RNA→ | rpsO (PRK05626)Ribosomal_S15 (pfam00312)→                                           |
| env-51  | JGI20157J14317_10000285       | + | 5024   | 5082   | RNA→ | rpsO (PRK05626)RpsO (COG0184)→                                                      |
| env-52  | SA_S1_NOR08_45m.c10119203     | - | 441    | 384    | RNA→ | rpsO (PRK05626)Ribosomal_S15 (pfam00312)→                                           |
| env-53  | 20090826-Illumina_contig28958 | - | 458    | 392    | RNA→ | rpsO (PRK05626)RpsO (COG0184)→                                                      |
| Fsa-1-1 | NZ_AVFO01000002.1             | + | 264122 | 264190 | RNA→ | rpsO (PRK05626)Ribosomal_S15 (pfam00312)→                                           |
| Fca-1-1 | NZ_AVBIO1000015.1             | - | 13067  | 12999  | RNA→ | rpsO (PRK05626)Ribosomal_S15 (pfam00312)→                                           |
| Fca-1-2 | NZ_JRLU01000001.1             | - | 375317 | 375249 | RNA→ | rpsO (PRK05626)Ribosomal_S15 (pfam00312)→                                           |
| env-54  | CESA01099157.1                | + | 266    | 332    | RNA→ | rpsO (PRK05626)Ribosomal_S15 (pfam00312)→                                           |
| env-55  | CESN01196738.1                | + | 1485   | 1551   | RNA→ | rpsO (PRK05626)Ribosomal_S15 (pfam00312)→                                           |
| env-56  | CESP01155747.1                | + | 1403   | 1469   | RNA→ | rpsO (PRK05626)Ribosomal_S15 (pfam00312)→                                           |
| env-57  | CEVS01034257.1                | - | 7704   | 7638   | RNA→ | rpsO (PRK05626)Ribosomal_S15 (pfam00312)→                                           |
| env-58  | CEVU01127351.1                | + | 981    | 1047   | RNA→ | rpsO (PRK05626)Ribosomal_S15 (pfam00312)→                                           |
| env-59  | LBBO01003853.1                | + | 546    | 600    | RNA→ | rpsO (PRK05626)RpsO (COG0184)→                                                      |
| env-60  | JGI20157J14317_10520585       | - | 115    | 48     | RNA→ |                                                                                     |
| env-61  | JGI20152J14361_10102081       | + | 445    | 512    | RNA→ | hypo→                                                                               |
| env-62  | JGI20154J14316_10389205       | + | 184    | 251    | RNA→ |                                                                                     |
| env-63  | JGI20153J14295_10154293       | + | 431    | 498    | RNA→ | hypo→                                                                               |
| env-64  | JGI20153J14318_10154293       | + | 431    | 498    | RNA→ | hypo→                                                                               |
| env-65  | DelMOSum2010_c10048941        | - | 1015   | 948    | RNA→ | rpsO (PRK05626)Ribosomal_S15 (pfam00312)→                                           |
| env-66  | JGI20152J14361_10018736       | + | 1929   | 1996   | RNA→ | rpsO (PRK05626)Ribosomal_S15 (pfam00312)→                                           |
| env-67  | DelMOSum2011_c10028302        | - | 2345   | 2278   | RNA→ | rpsO (PRK05626)Ribosomal_S15 (pfam00312)→                                           |
| env-68  | JGI20152J14361_10074584       | - | 336    | 269    | RNA→ | rpsO (PRK05626)Ribosomal_S15 (pfam00312)→                                           |
| env-69  | JCVL_SCAF_1096626866200       | - | 228    | 161    | RNA→ | rpsO (PRK05626)Ribosomal_S15 (pfam00312)→                                           |
| env-70  | 2236876010_0476296            | + | 34     | 101    | RNA→ | rpsO (PRK05626)Ribosomal_S15 (pfam00312)→                                           |

|         |                           |   |        |        |      |                                                                                                                                                         |
|---------|---------------------------|---|--------|--------|------|---------------------------------------------------------------------------------------------------------------------------------------------------------|
| env-71  | DelMOSum2010.c10114672    | - | 927    | 860    | RNA→ | rpsO (PRK05626)Ribosomal_S15 (pfam00312)→                                                                                                               |
| env-72  | JGI20156J14371_10028011   | + | 1695   | 1762   | RNA→ | rpsO (PRK05626)Ribosomal_S15 (pfam00312)→                                                                                                               |
| env-73  | JGI20154J14316_10016589   | - | 2489   | 2422   | RNA→ | rpsO (PRK05626)Ribosomal_S15 (pfam00312)→                                                                                                               |
| env-74  | JGI20160J14292_10093798   | + | 200    | 267    | RNA→ | rpsO (PRK05626)Ribosomal_S15 (pfam00312)→                                                                                                               |
| env-75  | JGI20157J14317_10004874   | - | 1379   | 1312   | RNA→ | rpsO (PRK05626)Ribosomal_S15 (pfam00312)→                                                                                                               |
| env-76  | JGI20152J14361_10042016   | + | 1197   | 1264   | RNA→ |                                                                                                                                                         |
| env-77  | JGI20153J14295_10052012   | + | 1350   | 1417   | RNA→ |                                                                                                                                                         |
| env-78  | JGI20153J14318_10052012   | + | 1350   | 1417   | RNA→ |                                                                                                                                                         |
| env-79  | PML_READ_00443584         | - | 242    | 175    | RNA→ | rpsO (PRK05626)Ribosomal_S15 (pfam00312)→                                                                                                               |
| env-80  | PML_READ_00298684         | + | 75     | 143    | RNA→ |                                                                                                                                                         |
| env-81  | CESE01042213.1            | - | 314    | 247    | RNA→ | rpsO (PRK05626)Ribosomal_S15 (pfam00312)→                                                                                                               |
| env-82  | CESJ01033522.1            | + | 13583  | 13650  | RNA→ | rpsO (PRK05626)Ribosomal_S15 (pfam00312)→                                                                                                               |
| env-83  | CESJ01015177.1            | + | 5814   | 5881   | RNA→ | rpsO (PRK05626)Ribosomal_S15 (pfam00312)→                                                                                                               |
| env-84  | CESU01002158.1            | - | 2307   | 2240   | RNA→ | rpsO (PRK05626)Ribosomal_S15 (pfam00312)→                                                                                                               |
| env-85  | JGI20152J14361_10001968   | - | 123    | 56     | RNA→ |                                                                                                                                                         |
| env-86  | JGI20154J14316_10153966   | - | 465    | 398    | RNA→ | rpsO (PRK05626)Ribosomal_S15 (pfam00312)→                                                                                                               |
| env-87  | JGI20153J14295_10006772   | - | 4012   | 3945   | RNA→ | rpsO (PRK05626)Ribosomal_S15 (pfam00312)→                                                                                                               |
| env-88  | JGI20153J14318_10006772   | - | 4012   | 3945   | RNA→ | rpsO (PRK05626)Ribosomal_S15 (pfam00312)→                                                                                                               |
| env-89  | CERM01030429.1            | - | 985    | 918    | RNA→ | rpsO (PRK05626)Ribosomal_S15 (pfam00312)→                                                                                                               |
| env-90  | CESE01041678.1            | - | 313    | 247    | RNA→ | rpsO (PRK05626)Ribosomal_S15 (pfam00312)→                                                                                                               |
| env-91  | CEST01086311.1            | + | 5957   | 6023   | RNA→ | rpsO (PRK05626)Ribosomal_S15 (pfam00312)→                                                                                                               |
| env-92  | CEQA01115990.1            | + | 458    | 525    | RNA→ | rpsO (PRK05626)Ribosomal_S15 (pfam00312)→                                                                                                               |
| env-93  | TahiMoana_1000156         | - | 8657   | 8590   | RNA→ | rpsO (PRK05626)Ribosomal_S15 (pfam00312)→                                                                                                               |
| env-94  | JGI24723J26617_10000024   | - | 87111  | 87044  | RNA→ | rpsO (PRK05626)Ribosomal_S15 (pfam00312)→                                                                                                               |
| env-95  | CENR01073469.1            | - | 3738   | 3671   | RNA→ | rpsO (PRK05626)Ribosomal_S15 (pfam00312)→                                                                                                               |
| env-96  | CENX01105912.1            | - | 734    | 680    | RNA→ | rpsO (PRK05626)Ribosomal_S15 (pfam00312)→ PRK11824 (PRK11824)RNase_PH (pfam01138)→                                                                      |
| env-97  | CEOP01457717.1            | + | 2903   | 2957   | RNA→ | rpsO (PRK05626)Ribosomal_S15 (pfam00312)→ Pnp (COG1185)PRK11824 (PRK11824)→<br>RpoD (COG0568)sigma70-ECF (TIGR02937)→                                   |
| env-98  | CEOF01208035.1            | - | 315    | 261    | RNA→ | rpsO (PRK05626)Ribosomal_S15 (pfam00312)→                                                                                                               |
| env-99  | P_1C_Liq_1_UnCty_1000027  | - | 17086  | 17028  | RNA→ | rpsO (PRK05626)Ribosomal_S15 (pfam00312)→ Pnp (COG1185)PRK11824 (PRK11824)→<br>TonB (COG0810)tonB_Cterm (TIGR01352)→                                    |
| env-100 | P_2C_Liq_1_UnCty_1195289  | + | 93     | 151    | RNA→ | rpsO (PRK05626)Ribosomal_S15 (pfam00312)→                                                                                                               |
| env-101 | JCVL_SCAF_1101667010888   | + | 552    | 612    | RNA→ | rpsO (PRK05626)Ribosomal_S15 (pfam00312)→                                                                                                               |
| env-102 | CERI01036223.1            | - | 4293   | 4241   | RNA→ | rpsO (PRK05626)Ribosomal_S15 (pfam00312)→ Pnp (COG1185)PRK11824 (PRK11824)→<br>RpoD (COG0568)sigma70-ECF (TIGR02937)→ PRK05581 (PRK05581)RPE (cd00429)→ |
| env-103 | CENP01014601.1            | + | 918    | 969    | RNA→ | rpsO (PRK05626)Ribosomal_S15 (pfam00312)→                                                                                                               |
| env-104 | CENX01209556.1            | - | 1161   | 1110   | RNA→ | rpsO (PRK05626)Ribosomal_S15 (pfam00312)→<br>PRK11824 (PRK11824)RNase_PH (pfam01138)RNase_PH_C (pfam03725)→                                             |
| env-105 | CEOF01432258.1            | + | 505    | 556    | RNA→ | rpsO (PRK05626)Ribosomal_S15 (pfam00312)→<br>PRK11824 (PRK11824)RNase_PH (pfam01138)RNase_PH_C (pfam03725)→                                             |
| env-106 | CEOK01358130.1            | + | 1063   | 1114   | RNA→ | rpsO (PRK05626)Ribosomal_S15 (pfam00312)→                                                                                                               |
| env-107 | CETK01306832.1            | - | 576    | 524    | RNA→ | rpsO (PRK05626)Ribosomal_S15 (pfam00312)→ RNase_PH_PNPase_1 (cd11363)PRK11824 (PRK11824)→                                                               |
| env-108 | CESW01023746.1            | + | 683    | 736    | RNA→ | rpsO (PRK05626)Ribosomal_S15 (pfam00312)→ Pnp (COG1185)PRK11824 (PRK11824)→                                                                             |
| env-109 | CESP01265619.1            | + | 546    | 598    | RNA→ | rpsO (PRK05626)Ribosomal_S15 (pfam00312)→                                                                                                               |
| Min-1-1 | NZ_BAEX01000001.1         | + | 19959  | 20024  | RNA→ | rpsO (PRK05626)Ribosomal_S15 (pfam00312)→ rpsO (PRK05626)Ribosomal_S15 (pfam00312)→                                                                     |
| env-110 | CESJ01281228.1            | - | 803    | 743    | RNA→ | rpsO (PRK05626)Ribosomal_S15 (pfam00312)→ PRK11824 (PRK11824)RNase_PH (pfam01138)→                                                                      |
| env-111 | SA_S1_NOR05_45m.c10263701 | + | 212    | 278    | RNA→ | rpsO (PRK05626)RpsO (COG0184)→                                                                                                                          |
| env-112 | SA_S1_NOR08_45m.c10224370 | + | 426    | 492    | RNA→ |                                                                                                                                                         |
| env-113 | SA_S1_NOR05_45m.c10350149 | + | 212    | 278    | RNA→ |                                                                                                                                                         |
| env-114 | SA_S1_NOR08_45m.c10075071 | + | 209    | 275    | RNA→ | rpsO (PRK05626)Ribosomal_S15 (pfam00312)→                                                                                                               |
| env-115 | SA_S2_NOR15_50m.c10328732 | + | 371    | 437    | RNA→ |                                                                                                                                                         |
| env-116 | P_2C_Liq_1_UnCty_1015831  | + | 1190   | 1252   | RNA→ | rpsO (PRK05626)Ribosomal_S15 (pfam00312)→                                                                                                               |
| Nul-1-1 | NZ_BBMM01000004.1         | - | 180573 | 180485 | RNA→ | rpsO (PRK05626)Ribosomal_S15 (pfam00312)→ rpsO (PRK05626)Ribosomal_S15 (pfam00312)→                                                                     |



|         |                            |   |         |         |      |                                                                                     |
|---------|----------------------------|---|---------|---------|------|-------------------------------------------------------------------------------------|
| Nul-1-2 | NZ_BBNT01000011.1          | - | 28548   | 28460   | RNA→ | rpsO (PRK05626)Ribosomal_S15 (pfam00312)→                                           |
| Fba-1-1 | NZ_CH672374.1              | + | 1359719 | 1359807 | RNA→ | rpsO (PRK05626)Ribosomal_S15 (pfam00312)→ rpsO (PRK05626)Ribosomal_S15 (pfam00312)→ |
| Nul-1-3 | NZ_JPJI01000032.1          | - | 1047570 | 1047482 | RNA→ | rpsO (PRK05626)Ribosomal_S15 (pfam00312)→                                           |
| Nul-1-4 | NZ_BBMJ01000005.1          | - | 254727  | 254639  | RNA→ | rpsO (PRK05626)Ribosomal_S15 (pfam00312)→                                           |
| Nul-1-5 | NZ_BBMK01000001.1          | + | 51054   | 51142   | RNA→ | rpsO (PRK05626)Ribosomal_S15 (pfam00312)→ rpsO (PRK05626)Ribosomal_S15 (pfam00312)→ |
| Nul-1-6 | NZ_BBLG01000005.1          | - | 173187  | 173099  | RNA→ | rpsO (PRK05626)Ribosomal_S15 (pfam00312)→                                           |
| env-117 | P_2C_Liq_1_UnCty_1000001   | + | 20247   | 20338   | RNA→ | rpsO (PRK05626)Ribosomal_S15 (pfam00312)→                                           |
| env-118 | P_2C_Liq_2_UnCty_1019503   | + | 802     | 893     | RNA→ | rpsO (PRK05626)Ribosomal_S15 (pfam00312)→                                           |
| env-119 | CEOM01017949.1             | - | 2624    | 2561    | RNA→ | rpsO (PRK05626)Ribosomal_S15 (pfam00312)→ Pnp (COG1185)PRK11824 (PRK11824)→         |
| env-120 | CENX01076851.1             | - | 336     | 273     | RNA→ | rpsO (PRK05626)Ribosomal_S15 (pfam00312)→                                           |
| env-121 | CEOF01146199.1             | + | 578     | 641     | RNA→ | rpsO (PRK05626)Ribosomal_S15 (pfam00312)→ Pnp (COG1185)PRK11824 (PRK11824)→         |
| Fsu-1-1 | NZ_AUGP01000017.1          | + | 428051  | 428115  | RNA→ | rpsO (PRK05626)Ribosomal_S15 (pfam00312)→                                           |
| Fsu-1-2 | NZ_JRLY01000002.1          | - | 230583  | 230519  | RNA→ | rpsO (PRK05626)Ribosomal_S15 (pfam00312)→                                           |
| Gsp-1-1 | NZ_AMSG01000007.1          | + | 33255   | 33321   | RNA→ | rpsO (PRK05626)Ribosomal_S15 (pfam00312)→ rpsO (PRK05626)Ribosomal_S15 (pfam00312)→ |
| env-122 | JGI11876J14442_11183631    | + | 151     | 208     | RNA→ |                                                                                     |
| env-123 | JGI11876J14442_10280383    | - | 423     | 359     | RNA→ | rpsO (PRK05626)RpsO (COG0184)→                                                      |
| env-124 | CETRO1192788.1             | - | 196     | 132     | RNA→ | rpsO (PRK05626)Ribosomal_S15 (pfam00312)→                                           |
| env-125 | SI60aug11_200m.c1160499    | - | 131     | 66      | RNA→ | rpsO (PRK05626)→                                                                    |
| env-126 | 2236876001_545617          | + | 56      | 124     | RNA→ | rpsO (PRK05626)Ribosomal_S15 (pfam00312)→                                           |
| env-127 | 4491417.3_NODE.64483       | + | 5852    | 5910    | RNA→ | rpsO (PRK05626)Ribosomal_S15 (pfam00312)→                                           |
| env-128 | SRS052697_C3073829         | + | 11      | 69      | RNA→ | rpsO (PRK05626)Ribosomal_S15 (pfam00312)→                                           |
| env-129 | scaffold49704_5_MH0038     | + | 198     | 256     | RNA→ | rpsO (PRK05626)RpsO (COG0184)→                                                      |
| env-130 | SRS024435_C2966745         | + | 226     | 284     | RNA→ | rpsO (PRK05626)Ribosomal_S15 (pfam00312)→                                           |
| env-131 | KGL_S1_ANT01_95m.c10061386 | + | 974     | 1038    | RNA→ | rpsO (PRK05626)Ribosomal_S15 (pfam00312)→                                           |
| env-132 | KGL_S1_ANT02_95m.c10009452 | - | 2499    | 2435    | RNA→ | rpsO (PRK05626)Ribosomal_S15 (pfam00312)→                                           |
| env-133 | CESB01280198.1             | - | 828     | 770     | RNA→ | rpsO (PRK05626)Ribosomal_S15 (pfam00312)→ PRK11824 (PRK11824)RNase_PH (pfam01138)→  |
| env-134 | TB_GS09_5_10008900         | - | 6175    | 6110    | RNA→ | rpsO (PRK05626)Ribosomal_S15 (pfam00312)→                                           |
| env-135 | JGI20154J14316_10009605    | - | 4721    | 4654    | RNA→ | rpsO (PRK05626)Ribosomal_S15 (pfam00312)→                                           |
| env-136 | JGI20153J14295_10017197    | + | 805     | 872     | RNA→ | rpsO (PRK05626)Ribosomal_S15 (pfam00312)→                                           |
| env-137 | JGI20153J14318_10017197    | + | 805     | 872     | RNA→ | rpsO (PRK05626)Ribosomal_S15 (pfam00312)→                                           |
| env-138 | DelMOSum2010.c10000887     | - | 4525    | 4458    | RNA→ | rpsO (PRK05626)Ribosomal_S15 (pfam00312)→                                           |
| env-139 | DelMOSum2011.c10406029     | - | 342     | 275     | RNA→ | rpsO (PRK05626)Ribosomal_S15 (pfam00312)→                                           |
| env-140 | SI36aug09_100m.1134333     | - | 170     | 103     | RNA→ | rpsO (PRK05626)RpsO (COG0184)→                                                      |
| env-141 | JGI20154J14316_10002772    | + | 14364   | 14431   | RNA→ | rpsO (PRK05626)→                                                                    |
| env-142 | JGI20160J14292_10003420    | + | 11666   | 11733   | RNA→ | rpsO (PRK05626)Ribosomal_S15 (pfam00312)→                                           |
| env-143 | JGI20153J14295_10019149    | - | 130     | 63      | RNA→ | rpsO (PRK05626)→                                                                    |
| env-144 | JGI20153J14318_10019149    | - | 130     | 63      | RNA→ | rpsO (PRK05626)→                                                                    |
| env-145 | JGI20157J14317_10004310    | - | 467     | 400     | RNA→ | rpsO (PRK05626)Ribosomal_S15 (pfam00312)→                                           |
| env-146 | JGI20160J14292_10025459    | - | 466     | 400     | RNA→ | rpsO (PRK05626)Ribosomal_S15 (pfam00312)→                                           |
| env-147 | DelMOSum2011.c10000072     | + | 60905   | 60972   | RNA→ | rpsO (PRK05626)Ribosomal_S15 (pfam00312)→                                           |
| env-148 | JGI20160J14292_10243857    | + | 387     | 454     | RNA→ | hypo→                                                                               |
| env-149 | JGI20153J14295_10195907    | - | 246     | 179     | RNA→ | rpsO (PRK05626)Ribosomal_S15 (pfam00312)→                                           |
| env-150 | JGI20153J14318_10195907    | - | 246     | 179     | RNA→ | rpsO (PRK05626)Ribosomal_S15 (pfam00312)→                                           |
| env-151 | 2236876010_0615026         | - | 87      | 20      | RNA→ |                                                                                     |
| env-152 | JGI20154J14316_10005663    | + | 965     | 1032    | RNA→ | rpsO (PRK05626)Ribosomal_S15 (pfam00312)→                                           |
| env-153 | DelMOSum2010.c10007098     | - | 7581    | 7514    | RNA→ | rpsO (PRK05626)Ribosomal_S15 (pfam00312)→                                           |
| env-154 | SI34jun09_10m.1109894      | + | 227     | 294     | RNA→ | hypo→                                                                               |
| env-155 | DelMOSum2010.c10176236     | - | 322     | 255     | RNA→ | rpsO (PRK05626)Ribosomal_S15 (pfam00312)→                                           |
| env-156 | DelMOSum2010.c10534266     | + | 94      | 161     | RNA→ | rpsO (PRK05626)Ribosomal_S15 (pfam00312)→                                           |
| env-157 | DelMOSum2010.c10110255     | - | 223     | 156     | RNA→ | rpsO (PRK05626)Ribosomal_S15 (pfam00312)→                                           |
| env-158 | LPaug08P2610m.c1011541     | + | 445     | 512     | RNA→ | rpsO (PRK05626)Ribosomal_S15 (pfam00312)→                                           |
| env-159 | JGI20153J14295_10000898    | + | 23567   | 23634   | RNA→ | rpsO (PRK05626)Ribosomal_S15 (pfam00312)→                                           |

|         |                         |   |       |       |      |                                                                                                                                                         |
|---------|-------------------------|---|-------|-------|------|---------------------------------------------------------------------------------------------------------------------------------------------------------|
| env-160 | JGI20153J14318_10000898 | + | 23567 | 23634 | RNA→ | rpsO (PRK05626)Ribosomal_S15 (pfam00312)→                                                                                                               |
| env-161 | DelMOSum2011.c10006148  | + | 4842  | 4908  | RNA→ | rpsO (PRK05626)Ribosomal_S15 (pfam00312)→                                                                                                               |
| env-162 | JGI20154J14316_10039500 | + | 1690  | 1757  | RNA→ | rpsO (PRK05626)Ribosomal_S15 (pfam00312)→                                                                                                               |
| env-163 | JGI20157J14317_10001809 | + | 18612 | 18679 | RNA→ | rpsO (PRK05626)Ribosomal_S15 (pfam00312)→                                                                                                               |
| env-164 | JGI20157J14317_10230393 | - | 112   | 45    | RNA→ |                                                                                                                                                         |
| env-165 | CESU01027531.1          | - | 2628  | 2561  | RNA→ | rpsO (PRK05626)Ribosomal_S15 (pfam00312)→                                                                                                               |
| env-166 | AntarcticL_1233742      | + | 29    | 96    | RNA→ | rpsO (PRK05626)Ribosomal_S15 (pfam00312)→                                                                                                               |
| env-167 | JGI20154J14316_10002676 | - | 481   | 414   | RNA→ | rpsO (PRK05626)Ribosomal_S15 (pfam00312)→                                                                                                               |
| env-168 | JGI20153J14295_10002037 | - | 495   | 428   | RNA→ | rpsO (PRK05626)Ribosomal_S15 (pfam00312)→                                                                                                               |
| env-169 | JGI20153J14318_10002037 | - | 495   | 428   | RNA→ | rpsO (PRK05626)Ribosomal_S15 (pfam00312)→                                                                                                               |
| env-170 | JGI20157J14317_10482150 | - | 149   | 82    | RNA→ | rpsO (PRK05626)RpsO (COG0184)→                                                                                                                          |
| env-171 | DelMOSum2010.c10084194  | + | 926   | 993   | RNA→ | rpsO (PRK05626)Ribosomal_S15 (pfam00312)→                                                                                                               |
| env-172 | JGI20157J14317_10001466 | + | 8836  | 8903  | RNA→ | rpsO (PRK05626)Ribosomal_S15 (pfam00312)→                                                                                                               |
| env-173 | DelMOSum2010.c10625437  | + | 182   | 249   | RNA→ |                                                                                                                                                         |
| env-174 | CESI01018756.1          | - | 84    | 17    | RNA→ |                                                                                                                                                         |
| env-175 | CESU01045154.1          | - | 572   | 505   | RNA→ | rpsO (PRK05626)Ribosomal_S15 (pfam00312)→                                                                                                               |
| env-176 | JGI20154J14316_10053478 | - | 87    | 20    | RNA→ |                                                                                                                                                         |
| env-177 | JGI20154J14316_10077664 | + | 1096  | 1163  | RNA→ |                                                                                                                                                         |
| env-178 | JGI20157J14317_10014000 | + | 4902  | 4969  | RNA→ |                                                                                                                                                         |
| env-179 | JGI20157J14317_10311427 | + | 322   | 389   | RNA→ |                                                                                                                                                         |
| env-180 | DelMOSum2010.c10437430  | + | 283   | 350   | RNA→ | ←hypo                                                                                                                                                   |
| env-181 | JGI20156J14371_10063188 | - | 538   | 471   | RNA→ | rpsO (PRK05626)Ribosomal_S15 (pfam00312)→                                                                                                               |
| env-182 | JGI20160J14292_10007193 | + | 2729  | 2796  | RNA→ | rpsO (PRK05626)Ribosomal_S15 (pfam00312)→                                                                                                               |
| env-183 | JGI20153J14295_10004189 | + | 1692  | 1759  | RNA→ | rpsO (PRK05626)Ribosomal_S15 (pfam00312)→                                                                                                               |
| env-184 | JGI20153J14318_10004189 | + | 1692  | 1759  | RNA→ | rpsO (PRK05626)Ribosomal_S15 (pfam00312)→                                                                                                               |
| env-185 | DelMOSum2010.c10470294  | - | 79    | 12    | RNA→ | ←hypo                                                                                                                                                   |
| env-186 | DelMOSum2010.c10178987  | + | 509   | 576   | RNA→ | rpsO (PRK05626)Ribosomal_S15 (pfam00312)→                                                                                                               |
| env-187 | JGI20153J14295_10013902 | + | 4069  | 4136  | RNA→ |                                                                                                                                                         |
| env-188 | JGI20153J14318_10013902 | + | 4069  | 4136  | RNA→ |                                                                                                                                                         |
| env-189 | JGI20153J14295_10133651 | - | 491   | 425   | RNA→ | rpsO (PRK05626)Ribosomal_S15 (pfam00312)→                                                                                                               |
| env-190 | JGI20153J14318_10133651 | - | 491   | 425   | RNA→ | rpsO (PRK05626)Ribosomal_S15 (pfam00312)→                                                                                                               |
| env-191 | JGI20154J14316_10101586 | - | 128   | 62    | RNA→ |                                                                                                                                                         |
| env-192 | JGI20160J14292_10004452 | + | 816   | 882   | RNA→ | rpsO (PRK05626)Ribosomal_S15 (pfam00312)→                                                                                                               |
| env-193 | JGI20153J14295_10014690 | + | 3555  | 3621  | RNA→ | rpsO (PRK05626)Ribosomal_S15 (pfam00312)→                                                                                                               |
| env-194 | JGI20153J14318_10014690 | + | 3555  | 3621  | RNA→ | rpsO (PRK05626)Ribosomal_S15 (pfam00312)→                                                                                                               |
| env-195 | JGI20154J14316_10305977 | + | 282   | 348   | RNA→ |                                                                                                                                                         |
| env-196 | JGI20157J14317_10001080 | + | 26023 | 26090 | RNA→ | rpsO (PRK05626)→                                                                                                                                        |
| env-197 | DelMOSum2010.c10351914  | - | 182   | 115   | RNA→ | rpsO (PRK05626)Ribosomal_S15 (pfam00312)→                                                                                                               |
| env-198 | JGI20154J14316_10018926 | - | 1714  | 1647  | RNA→ | rpsO (PRK05626)Ribosomal_S15 (pfam00312)→                                                                                                               |
| env-199 | JGI20160J14292_10001541 | - | 464   | 397   | RNA→ | rpsO (PRK05626)Ribosomal_S15 (pfam00312)→                                                                                                               |
| env-200 | JGI20160J14292_10012905 | + | 4746  | 4813  | RNA→ | rpsO (PRK05626)Ribosomal_S15 (pfam00312)→                                                                                                               |
| env-201 | CESI01128275.1          | - | 83    | 16    | RNA→ |                                                                                                                                                         |
| env-202 | CESU01085162.1          | + | 222   | 289   | RNA→ | rpsO (PRK05626)Ribosomal_S15 (pfam00312)→                                                                                                               |
| env-203 | CENJ01024989.1          | - | 40023 | 39970 | RNA→ | rpsO (PRK05626)Ribosomal_S15 (pfam00312)→ Pnp (COG1185)PRK11824 (PRK11824)→<br>RpoD (COG0568)sigma70-ECF (TIGR02937)→ PRK05581 (PRK05581)RPE (cd00429)→ |
| env-204 | CEOK01177274.1          | - | 588   | 535   | RNA→ | rpsO (PRK05626)Ribosomal_S15 (pfam00312)→ RNase_PH_PNPase_I (cd11363)PRK11824 (PRK11824)→                                                               |
| env-205 | CEVN01281347.1          | + | 297   | 350   | RNA→ | rpsO (PRK05626)RpsO (COG0184)→                                                                                                                          |
| env-206 | CEVZ01405612.1          | - | 177   | 124   | RNA→ | rpsO (PRK05626)Ribosomal_S15 (pfam00312)→                                                                                                               |
| env-207 | CETH01159915.1          | - | 862   | 809   | RNA→ | rpsO (PRK05626)RpsO (COG0184)→ PRK11824 (PRK11824)RNase_PH (pfam01138)→                                                                                 |
| env-208 | CETM01029131.1          | + | 33254 | 33307 | RNA→ | rpsO (PRK05626)RpsO (COG0184)→ RNase_PH_PNPase_I (cd11363)PRK11824 (PRK11824)→                                                                          |
| env-209 | CEUL01222522.1          | + | 158   | 211   | RNA→ | rpsO (PRK05626)RpsO (COG0184)→                                                                                                                          |
| env-210 | CEVL01135957.1          | + | 141   | 194   | RNA→ | rpsO (PRK05626)RpsO (COG0184)→                                                                                                                          |

|         |                          |   |        |        |      |                                                       |
|---------|--------------------------|---|--------|--------|------|-------------------------------------------------------|
| env-211 | CETL01011955.1           | - | 471    | 418    | RNA→ | rpsO (PRK05626)Ribosomal_S15 (pfam00312)→ hypo→       |
| env-212 | CESZ01084417.1           | - | 85     | 17     | RNA→ |                                                       |
| env-213 | LGVF01484185.1           | + | 293    | 357    | RNA→ | rpsO (PRK05626)RpsO (COG0184)→                        |
| env-214 | LGOV01011148.1           | + | 10676  | 10740  | RNA→ | rpsO (PRK05626)RpsO (COG0184)→ hypo→                  |
| env-215 | LGVD01117462.1           | + | 298    | 362    | RNA→ | rpsO (PRK05626)RpsO (COG0184)→                        |
| env-216 | 3300001239.10037134      | + | 37     | 106    | RNA→ | rpsO (PRK05626)RpsO (COG0184)→                        |
| env-217 | 3300001605.10046264      | - | 862    | 793    | RNA→ | rpsO (PRK05626)RpsO (COG0184)→                        |
| env-218 | CESI01059016.1           | + | 1093   | 1152   | RNA→ |                                                       |
| env-219 | CESU01035381.1           | + | 515    | 574    | RNA→ |                                                       |
| env-220 | LWAnNN_GHFF8UE02IP5ZP    | - | 108    | 47     | RNA→ | hypo→                                                 |
| env-221 | JGI24768J34885.10063673  | - | 1068   | 1001   | RNA→ | rpsO (PRK05626)Ribosomal_S15 (pfam00312)→             |
| env-222 | JGI24768J34885.10402764  | - | 304    | 237    | RNA→ | rpsO (PRK05626)Ribosomal_S15p_S13e (cd00353)→         |
| Fli-1-1 | NZ_AVGG01000002.1        | + | 225714 | 225782 | RNA→ | rpsO (PRK05626)Ribosomal_S15 (pfam00312)→             |
| Gme-1-1 | NZ_AUHD01000001.1        | - | 60972  | 60906  | RNA→ | rpsO (PRK05626)Ribosomal_S15 (pfam00312)→ hypo→ hypo→ |
| env-223 | topACOD.F95O9CU01BVTXN   | - | 187    | 122    | RNA→ | rpsO (PRK05626)Ribosomal_S15 (pfam00312)→             |
| env-224 | JGI25914J50564.10243922  | + | 296    | 364    | RNA→ |                                                       |
| env-225 | JGI25930J51415.1071170   | + | 134    | 202    | RNA→ | rpsO (PRK05626)RpsO (COG0184)→                        |
| env-226 | JGI12421J11937.10355000  | + | 222    | 290    | RNA→ |                                                       |
| env-227 | JGI12421J11937.10090896  | + | 762    | 830    | RNA→ |                                                       |
| env-228 | JGI12421J11937.10098907  | + | 706    | 774    | RNA→ |                                                       |
| env-229 | JGI24768J34885.10985290  | + | 138    | 206    | RNA→ |                                                       |
| env-230 | JGI25910J50241.10014301  | - | 1797   | 1729   | RNA→ | rpsO (PRK05626)Ribosomal_S15 (pfam00312)→             |
| env-231 | JGI25920J50251.10021433  | + | 1008   | 1076   | RNA→ | rpsO (PRK05626)Ribosomal_S15 (pfam00312)→             |
| env-232 | JGI25911J50253.10009747  | + | 2185   | 2253   | RNA→ | rpsO (PRK05626)Ribosomal_S15 (pfam00312)→             |
| env-233 | JGI25912J50252.10017251  | + | 1608   | 1676   | RNA→ | rpsO (PRK05626)Ribosomal_S15 (pfam00312)→             |
| env-234 | JGI25919J51413.1008186   | + | 196    | 264    | RNA→ | rpsO (PRK05626)Ribosomal_S15 (pfam00312)→             |
| env-235 | JGI12421J11937.10068959  | - | 121    | 53     | RNA→ |                                                       |
| env-236 | JGI25914J50564.10005894  | + | 1142   | 1210   | RNA→ | rpsO (PRK05626)Ribosomal_S15 (pfam00312)→             |
| env-237 | JGI25925J51416.10005604  | + | 1735   | 1803   | RNA→ | rpsO (PRK05626)Ribosomal_S15 (pfam00312)→             |
| env-238 | JGI25910J50241.10558763  | - | 157    | 89     | RNA→ | hypo→                                                 |
| env-239 | CEVJ01089541.1           | + | 746    | 812    | RNA→ | rpsO (PRK05626)Ribosomal_S15 (pfam00312)→             |
| env-240 | CEVK01107692.1           | + | 697    | 763    | RNA→ | rpsO (PRK05626)Ribosomal_S15 (pfam00312)→             |
| env-241 | CEVM01127682.1           | - | 8640   | 8574   | RNA→ | rpsO (PRK05626)Ribosomal_S15 (pfam00312)→             |
| env-242 | CEVO01247303.1           | - | 757    | 691    | RNA→ | rpsO (PRK05626)Ribosomal_S15 (pfam00312)→             |
| env-243 | CEVQ01258568.1           | + | 523    | 589    | RNA→ | rpsO (PRK05626)RpsO (COG0184)→                        |
| env-244 | P.1C.Liq.3.UnCty_1003320 | - | 752    | 689    | RNA→ | rpsO (PRK05626)RpsO (COG0184)→                        |
| env-245 | P.1C.Liq.1.UnCty_1001124 | + | 88     | 151    | RNA→ | rpsO (PRK05626)RpsO (COG0184)→                        |
| env-246 | P.1C.Liq.2.UnCty_1013913 | - | 483    | 420    | RNA→ | rpsO (PRK05626)RpsO (COG0184)→                        |
| env-247 | P.1C.Liq.2.UnCty_1115639 | - | 112    | 49     | RNA→ |                                                       |
| env-248 | GSLASAS_GLMUJHB02IJCCC   | - | 69     | 6      | RNA→ |                                                       |
| env-249 | P.1C.Liq.1.UnCty_1006195 | - | 740    | 677    | RNA→ | rpsO (PRK05626)Ribosomal_S15 (pfam00312)→             |
| env-250 | P.2C.Liq.1.UnCty_1185669 | + | 181    | 244    | RNA→ | rpsO (PRK05626)RpsO (COG0184)→                        |
| env-251 | CEQG01151576.1           | - | 14001  | 13934  | RNA→ | rpsO (PRK05626)Ribosomal_S15 (pfam00312)→             |
| env-252 | CERQ01228901.1           | + | 560    | 627    | RNA→ | rpsO (PRK05626)Ribosomal_S15 (pfam00312)→             |
| env-253 | CETB01276978.1           | + | 270    | 337    | RNA→ | rpsO (PRK05626)Ribosomal_S15 (pfam00312)→             |
| env-254 | CETR01042174.1           | + | 13985  | 14052  | RNA→ | rpsO (PRK05626)Ribosomal_S15 (pfam00312)→             |
| env-255 | CEQS01121120.1           | - | 530    | 463    | RNA→ | rpsO (PRK05626)Ribosomal_S15 (pfam00312)→             |
| env-256 | CEVH01121698.1           | + | 336    | 403    | RNA→ | rpsO (PRK05626)Ribosomal_S15 (pfam00312)→             |
| env-257 | JCVL_SCAF_1096627482312  | + | 478    | 545    | RNA→ | rpsO (PRK05626)Ribosomal_S15 (pfam00312)→             |
| env-258 | CEQG01262115.1           | + | 449    | 514    | RNA→ | rpsO (PRK05626)Ribosomal_S15 (pfam00312)→             |
| env-259 | CEVM01147883.1           | + | 152    | 217    | RNA→ | rpsO (PRK05626)Ribosomal_S15 (pfam00312)→             |
| env-260 | CEVO01240128.1           | - | 371    | 306    | RNA→ | rpsO (PRK05626)Ribosomal_S15 (pfam00312)→             |

|         |                        |   |         |         |      |                                                                                                                                                         |
|---------|------------------------|---|---------|---------|------|---------------------------------------------------------------------------------------------------------------------------------------------------------|
| env-261 | CEVJ01132551.1         | + | 371     | 436     | RNA→ | rpsO (PRK05626)Ribosomal_S15 (pfam00312)→                                                                                                               |
| Nma-1-1 | NZ_AP014548.1          | - | 1343589 | 1343499 | RNA→ | rpsO (PRK05626)Ribosomal_S15 (pfam00312)→                                                                                                               |
| env-262 | topACOD_F95O9CU02GIL5N | - | 178     | 115     | RNA→ | rpsO (PRK05626)Ribosomal_S15 (pfam00312)→                                                                                                               |
| env-263 | CEVX01088623.1         | - | 401     | 336     | RNA→ | rpsO (PRK05626)Ribosomal_S15 (pfam00312)→                                                                                                               |
| env-264 | CENF01080549.1         | - | 982     | 917     | RNA→ | rpsO (PRK05626)Ribosomal_S15 (pfam00312)→<br>PRK11824 (PRK11824)RNase_PH (pfam01138)RNase_PH_C (pfam03725)→                                             |
| env-265 | CEVP01232759.1         | + | 45      | 110     | RNA→ | rpsO (PRK05626)Ribosomal_S15 (pfam00312)→ RNase_PH_PNPase_1 (cd11363)PRK11824 (PRK11824)→                                                               |
| env-266 | CEQE01251909.1         | + | 229     | 292     | RNA→ | rpsO (PRK05626)Ribosomal_S15 (pfam00312)→                                                                                                               |
| env-267 | CERQ01096008.1         | - | 324     | 261     | RNA→ | rpsO (PRK05626)Ribosomal_S15 (pfam00312)→                                                                                                               |
| env-268 | CEUY01328535.1         | + | 133     | 196     | RNA→ | rpsO (PRK05626)Ribosomal_S15 (pfam00312)→                                                                                                               |
| env-269 | JGI11881J13070_1009257 | - | 658     | 595     | RNA→ | rpsO (PRK05626)Ribosomal_S15 (pfam00312)→                                                                                                               |
| env-270 | JGI12148J13107_117495  | + | 102     | 165     | RNA→ | rpsO (PRK05626)Ribosomal_S15 (pfam00312)→                                                                                                               |
| env-271 | CETU01138396.1         | + | 53      | 116     | RNA→ | rpsO (PRK05626)Ribosomal_S15 (pfam00312)→                                                                                                               |
| env-272 | CEVI01059114.1         | - | 539     | 476     | RNA→ | rpsO (PRK05626)Ribosomal_S15 (pfam00312)→                                                                                                               |
| Mmo-1-1 | NZ_KE384013.1          | - | 343223  | 343160  | RNA→ | rpsO (PRK05626)Ribosomal_S15 (pfam00312)→                                                                                                               |
| env-273 | SRS016095_C2559685     | + | 1214    | 1274    | RNA→ | rpsO (PRK05626)Ribosomal_S15 (pfam00312)→                                                                                                               |
| env-274 | SRS019968_C2017240     | - | 402     | 342     | RNA→ | rpsO (PRK05626)Ribosomal_S15 (pfam00312)→                                                                                                               |
| env-275 | SRS064557_C1810798     | - | 387     | 327     | RNA→ | rpsO (PRK05626)Ribosomal_S15 (pfam00312)→                                                                                                               |
| env-276 | CENF01212627.1         | + | 1179    | 1247    | RNA→ | rpsO (PRK05626)RpsO (COG0184)→ hypo→                                                                                                                    |
| env-277 | CERG01152242.1         | + | 414     | 482     | RNA→ | rpsO (PRK05626)RpsO (COG0184)→                                                                                                                          |
| env-278 | CERR01009272.1         | - | 2063    | 1995    | RNA→ | rpsO (PRK05626)RpsO (COG0184)→ Pnp (COG1185)PRK11824 (PRK11824)→                                                                                        |
| env-279 | CERV01011610.1         | + | 2857    | 2925    | RNA→ | rpsO (PRK05626)RpsO (COG0184)→ PRK11824 (PRK11824)RNase_PH (pfam01138)→                                                                                 |
| env-280 | CETB01333319.1         | - | 576     | 508     | RNA→ | rpsO (PRK05626)RpsO (COG0184)→ RNase_PH_PNPase_1 (cd11363)PRK11824 (PRK11824)→                                                                          |
| env-281 | CERB01165146.1         | - | 781     | 714     | RNA→ | rpsO (PRK05626)RpsO (COG0184)→ PRK11824 (PRK11824)RNase_PH (pfam01138)→                                                                                 |
| env-282 | CEUN01041406.1         | + | 479     | 546     | RNA→ | rpsO (PRK05626)Ribosomal_S15 (pfam00312)→                                                                                                               |
| env-283 | CEUQ01052428.1         | + | 476     | 543     | RNA→ | rpsO (PRK05626)RpsO (COG0184)→ PRK11824 (PRK11824)RNase_PH (pfam01138)→                                                                                 |
| env-284 | CEVZ01245147.1         | + | 1848    | 1915    | RNA→ | rpsO (PRK05626)RpsO (COG0184)→                                                                                                                          |
| env-285 | CEVA01049874.1         | - | 671     | 604     | RNA→ | rpsO (PRK05626)RpsO (COG0184)→ PRK11824 (PRK11824)RNase_PH (pfam01138)→                                                                                 |
| env-286 | CENY01189203.1         | + | 413     | 480     | RNA→ |                                                                                                                                                         |
| env-287 | CEOQ01377130.1         | - | 582     | 515     | RNA→ | rpsO (PRK05626)RpsO (COG0184)→ PRK11824 (PRK11824)RNase_PH (pfam01138)→                                                                                 |
| env-288 | CETG01040803.1         | + | 479     | 546     | RNA→ | rpsO (PRK05626)Ribosomal_S15 (pfam00312)→                                                                                                               |
| env-289 | CEPK01084254.1         | - | 717     | 650     | RNA→ | rpsO (PRK05626)RpsO (COG0184)→ PRK11824 (PRK11824)RNase_PH (pfam01138)→                                                                                 |
| env-290 | CETB01107343.1         | - | 567     | 500     | RNA→ | rpsO (PRK05626)RpsO (COG0184)→ PRK11824 (PRK11824)RNase_PH (pfam01138)→                                                                                 |
| env-291 | CETM01027306.1         | - | 537     | 470     | RNA→ | rpsO (PRK05626)RpsO (COG0184)→ RNase_PH_PNPase_1 (cd11363)PRK11824 (PRK11824)→                                                                          |
| env-292 | CEUS01161241.1         | + | 657     | 724     | RNA→ | rpsO (PRK05626)RpsO (COG0184)→                                                                                                                          |
| env-293 | CEUZ01497389.1         | - | 394     | 327     | RNA→ | rpsO (PRK05626)RpsO (COG0184)→                                                                                                                          |
| env-294 | CETW01247773.1         | - | 486     | 419     | RNA→ | rpsO (PRK05626)RpsO (COG0184)→ hypo→                                                                                                                    |
| env-295 | CEUY01024920.1         | + | 693     | 760     | RNA→ | rpsO (PRK05626)RpsO (COG0184)→ PRK11824 (PRK11824)RNase_PH (pfam01138)→                                                                                 |
| env-296 | CEVN01169446.1         | - | 230     | 163     | RNA→ | rpsO (PRK05626)Ribosomal_S15 (pfam00312)→                                                                                                               |
| env-297 | CERB01253177.1         | - | 256     | 189     | RNA→ | rpsO (PRK05626)Ribosomal_S15 (pfam00312)→                                                                                                               |
| env-298 | CETP01182766.1         | + | 1115    | 1170    | RNA→ |                                                                                                                                                         |
| env-299 | CEUW01218718.1         | - | 377     | 322     | RNA→ | rpsO (PRK05626)Ribosomal_S15 (pfam00312)→                                                                                                               |
| env-300 | CEUF01031262.1         | - | 3989    | 3934    | RNA→ | rpsO (PRK05626)Ribosomal_S15 (pfam00312)→ Pnp (COG1185)PRK11824 (PRK11824)→<br>RpoD (COG0568)sigma70-ECF (TIGR02937)→ PRK05581 (PRK05581)RPE (cd00429)→ |
| env-301 | CEUG01214040.1         | - | 119     | 64      | RNA→ | hypo→                                                                                                                                                   |
| env-302 | CETK01110687.1         | - | 61390   | 61335   | RNA→ | rpsO (PRK05626)Ribosomal_S15 (pfam00312)→ Pnp (COG1185)PRK11824 (PRK11824)→<br>RpoD (COG0568)sigma70-ECF (TIGR02937)→ PRK05581 (PRK05581)RPE (cd00429)→ |
| env-303 | CETL01064018.1         | - | 538     | 483     | RNA→ | rpsO (PRK05626)Ribosomal_S15 (pfam00312)→ RNase_PH_PNPase_1 (cd11363)PRK11824 (PRK11824)→                                                               |
| env-304 | CESW01089027.1         | + | 96      | 152     | RNA→ | rpsO (PRK05626)Ribosomal_S15 (pfam00312)→ PRK11824 (PRK11824)RNase_PH (pfam01138)→                                                                      |
| env-305 | CAM_READ_0234091691    | - | 79      | 24      | RNA→ |                                                                                                                                                         |
| env-306 | CESZ01040152.1         | + | 353     | 408     | RNA→ | rpsO (PRK05626)RpsO (COG0184)→                                                                                                                          |
| env-307 | CESA01198900.1         | + | 376     | 431     | RNA→ | rpsO (PRK05626)RpsO (COG0184)→                                                                                                                          |
| env-308 | CEQS01074332.1         | - | 162559  | 162500  | RNA→ | rpsO (PRK05626)Ribosomal_S15 (pfam00312)→ Pnp (COG1185)PRK11824 (PRK11824)→                                                                             |



|         |                         |   |         |         |      |                                                                                                                                                         |
|---------|-------------------------|---|---------|---------|------|---------------------------------------------------------------------------------------------------------------------------------------------------------|
| Lsp-3-1 | NZ_JHZY01000002.1       | - | 172107  | 172041  | RNA→ | rpsO (PRK05626)Ribosomal_S15 (pfam00312)→                                                                                                               |
| env-309 | CEVM01090294.1          | - | 285     | 219     | RNA→ | rpsO (PRK05626)RpsO (COG0184)→                                                                                                                          |
| env-310 | CETA01052158.1          | + | 5065    | 5131    | RNA→ | rpsO (PRK05626)Ribosomal_S15 (pfam00312)→                                                                                                               |
| env-311 | CETB01058157.1          | + | 1085    | 1151    | RNA→ | rpsO (PRK05626)Ribosomal_S15 (pfam00312)→                                                                                                               |
| env-312 | CEVJ01090841.1          | - | 927     | 861     | RNA→ | rpsO (PRK05626)Ribosomal_S15 (pfam00312)→                                                                                                               |
| env-313 | CETU01159611.1          | - | 800     | 734     | RNA→ | rpsO (PRK05626)Ribosomal_S15 (pfam00312)→                                                                                                               |
| env-314 | CETT01019050.1          | + | 500     | 566     | RNA→ | rpsO (PRK05626)Ribosomal_S15 (pfam00312)→                                                                                                               |
| env-315 | CEVK01011741.1          | - | 496     | 430     | RNA→ | rpsO (PRK05626)Ribosomal_S15 (pfam00312)→                                                                                                               |
| env-316 | CERQ01230915.1          | - | 1011    | 945     | RNA→ | rpsO (PRK05626)Ribosomal_S15 (pfam00312)→                                                                                                               |
| env-317 | CEUY01464639.1          | - | 77      | 11      | RNA→ |                                                                                                                                                         |
| env-318 | CEPD01093744.1          | - | 461     | 395     | RNA→ | rpsO (PRK05626)Ribosomal_S15 (pfam00312)→                                                                                                               |
| env-319 | CERY01058984.1          | - | 449     | 383     | RNA→ | rpsO (PRK05626)Ribosomal_S15 (pfam00312)→                                                                                                               |
| env-320 | CEPZ01179059.1          | + | 369     | 435     | RNA→ | rpsO (PRK05626)Ribosomal_S15 (pfam00312)→                                                                                                               |
| env-321 | CERE01075129.1          | + | 1132    | 1198    | RNA→ | rpsO (PRK05626)Ribosomal_S15 (pfam00312)→                                                                                                               |
| env-322 | CESC01013190.1          | + | 80317   | 80383   | RNA→ | rpsO (PRK05626)Ribosomal_S15 (pfam00312)→                                                                                                               |
| env-323 | CEUN01016453.1          | + | 2805    | 2871    | RNA→ | rpsO (PRK05626)Ribosomal_S15 (pfam00312)→                                                                                                               |
| Lbl-1-1 | NZ_CH672395.1           | - | 1099698 | 1099632 | RNA→ | rpsO (PRK05626)Ribosomal_S15 (pfam00312)→                                                                                                               |
| env-324 | CETS01234391.1          | + | 379     | 445     | RNA→ | rpsO (PRK05626)Ribosomal_S15 (pfam00312)→                                                                                                               |
| env-325 | CEWI01015492.1          | - | 496     | 430     | RNA→ | rpsO (PRK05626)Ribosomal_S15 (pfam00312)→                                                                                                               |
| env-326 | CEOS01054411.1          | - | 238     | 172     | RNA→ | rpsO (PRK05626)Ribosomal_S15 (pfam00312)→                                                                                                               |
| Fri-1-1 | NZ_KB899968.1           | - | 97102   | 97037   | RNA→ | rpsO (PRK05626)Ribosomal_S15 (pfam00312)→                                                                                                               |
| Fri-2-1 | NZ_JRLX01000004.1       | + | 133005  | 133070  | RNA→ | rpsO (PRK05626)Ribosomal_S15 (pfam00312)→                                                                                                               |
| env-327 | JCVI_SCAF_1096626847824 | + | 1625    | 1679    | RNA→ | rpsO (PRK05626)Ribosomal_S15 (pfam00312)→                                                                                                               |
| env-328 | CETY01060541.1          | - | 800     | 747     | RNA→ | PRK11824 (PRK11824)RNase_PH (pfam01138)RNase_PH.C (pfam03725)→<br>rpsO (PRK05626)Ribosomal_S15 (pfam00312)→ PRK11824 (PRK11824)RNase_PH (pfam01138)→    |
| env-329 | CESE01249388.1          | + | 30      | 85      | RNA→ | rpsO (PRK05626)RpsO (COG0184)→ PRK11824 (PRK11824)RNase_PH (pfam01138)→                                                                                 |
| env-330 | CESJ01046981.1          | + | 6198    | 6253    | RNA→ | rpsO (PRK05626)RpsO (COG0184)→ PRK11824 (PRK11824)RNase_PH (pfam01138)→                                                                                 |
| env-331 | CEVF01245326.1          | + | 262     | 318     | RNA→ | rpsO (PRK05626)RpsO (COG0184)→                                                                                                                          |
| env-332 | JCVI_SCAF_1096628209080 | - | 1575    | 1519    | RNA→ | rpsO (PRK05626)RpsO (COG0184)→ PRK11824 (PRK11824)RNase_PH (pfam01138)→                                                                                 |
| env-333 | CEUA01276370.1          | - | 476     | 420     | RNA→ | rpsO (PRK05626)RpsO (COG0184)→ hypo→                                                                                                                    |
| env-334 | CESJ01065949.1          | - | 404     | 345     | RNA→ | rpsO (PRK05626)Ribosomal_S15 (pfam00312)→                                                                                                               |
| env-335 | GSLAS_GBFBV41Z02H1HZP   | + | 224     | 282     | RNA→ |                                                                                                                                                         |
| env-336 | GSLSAAL_GFP0ZZ301DBBHK  | - | 358     | 298     | RNA→ | rpsO (PRK05626)Ribosomal_S15 (pfam00312)→                                                                                                               |
| env-337 | JGI11876J14442_10048055 | + | 1753    | 1811    | RNA→ | rpsO (PRK05626)Ribosomal_S15 (pfam00312)→                                                                                                               |
| env-338 | JCVL_READ_1102140320562 | + | 586     | 640     | RNA→ | rpsO (PRK05626)Ribosomal_S15 (pfam00312)→                                                                                                               |
| env-339 | JCVL_READ_1108829504037 | + | 48      | 102     | RNA→ | rpsO (PRK05626)Ribosomal_S15 (pfam00312)→ PRK11824 (PRK11824)RNase_PH (pfam01138)→                                                                      |
| env-340 | JCVL_READ_1101733741174 | - | 276     | 222     | RNA→ |                                                                                                                                                         |
| env-341 | CEOO01040203.1          | + | 631     | 685     | RNA→ | rpsO (PRK05626)→                                                                                                                                        |
| env-342 | CEWA01031860.1          | + | 385     | 439     | RNA→ | rpsO (PRK05626)Ribosomal_S15 (pfam00312)→ Pnp (COG1185)PRK11824 (PRK11824)→                                                                             |
| env-343 | CEOV01172242.1          | + | 485     | 539     | RNA→ |                                                                                                                                                         |
| env-344 | CEUR01130058.1          | - | 88      | 34      | RNA→ |                                                                                                                                                         |
| env-345 | CETK01152287.1          | - | 721     | 667     | RNA→ | rpsO (PRK05626)Ribosomal_S15 (pfam00312)→ PRK11824 (PRK11824)RNase_PH (pfam01138)→                                                                      |
| env-346 | CEUG01240482.1          | - | 938     | 884     | RNA→ | rpsO (PRK05626)Ribosomal_S15 (pfam00312)→ PRK11824 (PRK11824)RNase_PH (pfam01138)→                                                                      |
| env-347 | CETE01019518.1          | - | 64087   | 64033   | RNA→ | rpsO (PRK05626)Ribosomal_S15 (pfam00312)→ Pnp (COG1185)PRK11824 (PRK11824)→<br>RpoD (COG0568)sigma70-ECF (TIGR02937)→ PRK05581 (PRK05581)RPE (cd00429)→ |
| env-348 | CETQ01056045.1          | - | 3058    | 3004    | RNA→ | rpsO (PRK05626)Ribosomal_S15 (pfam00312)→ Pnp (COG1185)PRK11824 (PRK11824)→<br>sigma70-ECF (TIGR02937)Sigma70_r1_2 (pfam00140)Sigma70_r2 (pfam04542)→   |
| env-349 | CEUH01289173.1          | - | 939     | 885     | RNA→ | rpsO (PRK05626)Ribosomal_S15 (pfam00312)→ PRK11824 (PRK11824)RNase_PH (pfam01138)→                                                                      |
| env-350 | CEWG01025700.1          | + | 54379   | 54433   | RNA→ | rpsO (PRK05626)Ribosomal_S15 (pfam00312)→ Pnp (COG1185)PRK11824 (PRK11824)→<br>RpoD (COG0568)sigma70-ECF (TIGR02937)→ PRK05581 (PRK05581)RPE (cd00429)→ |
| env-351 | CEWH01036275.1          | - | 2198    | 2144    | RNA→ | rpsO (PRK05626)Ribosomal_S15 (pfam00312)→ Pnp (COG1185)PRK11824 (PRK11824)→                                                                             |
| env-352 | CEVG01088667.1          | + | 633     | 687     | RNA→ | rpsO (PRK05626)→                                                                                                                                        |
| env-353 | CEWJ01239071.1          | - | 240     | 186     | RNA→ | rpsO (PRK05626)Ribosomal_S15 (pfam00312)→                                                                                                               |

|         |                           |   |         |         |      |                                                                                                                                                         |
|---------|---------------------------|---|---------|---------|------|---------------------------------------------------------------------------------------------------------------------------------------------------------|
| env-354 | CEVH01159213.1            | + | 181     | 235     | RNA→ | rpsO (PRK05626)Ribosomal_S15 (pfam00312)→ PRK11824 (PRK11824)RNase_PH (pfam01138)→                                                                      |
| env-355 | CEPT01275949.1            | - | 108     | 54      | RNA→ |                                                                                                                                                         |
| env-356 | CEUM01290778.1            | + | 535     | 589     | RNA→ | rpsO (PRK05626)Ribosomal_S15 (pfam00312)→ hypo→                                                                                                         |
| env-357 | PBR_1004362               | - | 413     | 348     | RNA→ | rpsO (PRK05626)Ribosomal_S15 (pfam00312)→                                                                                                               |
| Fta-1-1 | NC_015321.1               | + | 2727109 | 2727174 | RNA→ | rpsO (PRK05626)Ribosomal_S15 (pfam00312)→                                                                                                               |
| env-358 | KGLS1_ANT02_95m.c10279369 | - | 384     | 320     | RNA→ | rpsO (PRK05626)Ribosomal_S15 (pfam00312)→                                                                                                               |
| env-359 | P_1C_Liq_1_UnCty_1146961  | + | 178     | 240     | RNA→ |                                                                                                                                                         |
| env-360 | P_2C_Liq_1_UnCty_1109790  | - | 320     | 258     | RNA→ | rpsO (PRK05626)Ribosomal_S15 (pfam00312)→                                                                                                               |
| env-361 | SL_7KL_010_BRINE_10000173 | - | 3812    | 3748    | RNA→ | rpsO (PRK05626)Ribosomal_S15 (pfam00312)→                                                                                                               |
| env-362 | SL_9KL_010_SED_10000238   | + | 12358   | 12422   | RNA→ | rpsO (PRK05626)Ribosomal_S15 (pfam00312)→                                                                                                               |
| Mod-7-1 | NZ_AYMS01000053.1         | - | 7079    | 7009    | RNA→ | rpsO (PRK05626)Ribosomal_S15 (pfam00312)→                                                                                                               |
| Mod-6-1 | NZ_JH590839.1             | + | 306818  | 306888  | RNA→ | rpsO (PRK05626)Ribosomal_S15 (pfam00312)→                                                                                                               |
| Mod-5-1 | NZ_JH815537.1             | + | 340698  | 340768  | RNA→ | rpsO (PRK05626)Ribosomal_S15 (pfam00312)→                                                                                                               |
| Mod-2-1 | NZ_KE161017.1             | + | 300297  | 300367  | RNA→ | rpsO (PRK05626)Ribosomal_S15 (pfam00312)→                                                                                                               |
| Msp-3-1 | NZ_CP010327.1             | - | 814045  | 813975  | RNA→ | rpsO (PRK05626)Ribosomal_S15 (pfam00312)→                                                                                                               |
| Mod-3-1 | NZ_KE340321.1             | + | 302906  | 302976  | RNA→ | rpsO (PRK05626)Ribosomal_S15 (pfam00312)→                                                                                                               |
| Mpr-1-1 | NZ_CP010817.1             | - | 3674296 | 3674226 | RNA→ | rpsO (PRK05626)Ribosomal_S15 (pfam00312)→                                                                                                               |
| Mod-4-1 | NZ_JH590835.1             | - | 245456  | 245386  | RNA→ | rpsO (PRK05626)Ribosomal_S15 (pfam00312)→                                                                                                               |
| Mod-1-1 | NZ_JWJO01000006.1         | + | 753     | 821     | RNA→ | rpsO (PRK05626)Ribosomal_S15 (pfam00312)→                                                                                                               |
| Fin-1-1 | NC_017025.1               | + | 2426652 | 2426716 | RNA→ | rpsO (PRK05626)Ribosomal_S15 (pfam00312)→                                                                                                               |
| env-363 | JGI25910J50241_10022696   | + | 1815    | 1881    | RNA→ | rpsO (PRK05626)Ribosomal_S15 (pfam00312)→                                                                                                               |
| env-364 | JGI25910J50241_10032142   | - | 1405    | 1339    | RNA→ | rpsO (PRK05626)Ribosomal_S15 (pfam00312)→                                                                                                               |
| env-365 | JGI25911J50253_10054721   | + | 193     | 259     | RNA→ | rpsO (PRK05626)Ribosomal_S15 (pfam00312)→                                                                                                               |
| env-366 | JGI25908J49247_10520374   | + | 33      | 99      | RNA→ | rpsO (PRK05626)Ribosomal_S15 (pfam00312)→                                                                                                               |
| env-367 | JGI25920J50251_10045732   | + | 42      | 108     | RNA→ | rpsO (PRK05626)Ribosomal_S15 (pfam00312)→                                                                                                               |
| env-368 | JGI25910J50241_10027611   | - | 1889    | 1823    | RNA→ | rpsO (PRK05626)Ribosomal_S15 (pfam00312)→                                                                                                               |
| env-369 | P_1C_Liq_1_UnCty_1013506  | + | 698     | 774     | RNA→ | rpsO (PRK05626)RpsO (COG0184)→                                                                                                                          |
| env-370 | P_2C_Liq_1_UnCty_1023963  | + | 685     | 761     | RNA→ | rpsO (PRK05626)RpsO (COG0184)→ PRK11824 (PRK11824)RNase_PH (pfam01138)→                                                                                 |
| env-371 | P_2C_Liq_2_UnCty_1019436  | + | 188     | 264     | RNA→ | rpsO (PRK05626)RpsO (COG0184)→                                                                                                                          |
| env-372 | P_1C_Liq_2_UnCty_1015786  | - | 536     | 460     | RNA→ | PRK11824 (PRK11824)RNase_PH (pfam01138)RNase_PH_C (pfam03725)→<br>rpsO (PRK05626)RpsO (COG0184)→ RNase_PH_PNPase_1 (cd11363)PRK11824 (PRK11824)→        |
| env-373 | CENP01234479.1            | + | 54048   | 54107   | RNA→ | rpsO (PRK05626)Ribosomal_S15 (pfam00312)→ Pnp (COG1185)PRK11824 (PRK11824)→<br>RpoD (COG0568)sigma70-ECF (TIGR02937)→ PRK05581 (PRK05581)RPE (cd00429)→ |
| env-374 | CEOK01051128.1            | + | 11806   | 11865   | RNA→ | rpsO (PRK05626)Ribosomal_S15 (pfam00312)→ Pnp (COG1185)PRK11824 (PRK11824)→<br>RpoD (COG0568)sigma70-ECF (TIGR02937)→ PRK05581 (PRK05581)RPE (cd00429)→ |
| env-375 | CEOF01428303.1            | + | 1460    | 1519    | RNA→ |                                                                                                                                                         |
| env-376 | CERM01056288.1            | - | 643     | 576     | RNA→ | rpsO (PRK05626)RpsO (COG0184)→                                                                                                                          |
| env-377 | CERM01008643.1            | + | 3284    | 3351    | RNA→ | rpsO (PRK05626)RpsO (COG0184)→                                                                                                                          |
| env-378 | CEVX01053585.1            | + | 2992    | 3059    | RNA→ | rpsO (PRK05626)RpsO (COG0184)→                                                                                                                          |
| env-379 | CESF01002239.1            | - | 6290    | 6222    | RNA→ | rpsO (PRK05626)Ribosomal_S15 (pfam00312)→                                                                                                               |
| env-380 | CESO01109506.1            | - | 5554    | 5486    | RNA→ | rpsO (PRK05626)Ribosomal_S15 (pfam00312)→                                                                                                               |
| env-381 | CETY01366948.1            | + | 307     | 375     | RNA→ | rpsO (PRK05626)Ribosomal_S15 (pfam00312)→                                                                                                               |
| env-382 | CESM01460641.1            | + | 62      | 130     | RNA→ | rpsO (PRK05626)Ribosomal_S15 (pfam00312)→                                                                                                               |
| env-383 | CEVP01299765.1            | + | 326     | 394     | RNA→ | rpsO (PRK05626)Ribosomal_S15 (pfam00312)→                                                                                                               |
| env-384 | CEWG01217676.1            | + | 305     | 373     | RNA→ | rpsO (PRK05626)Ribosomal_S15 (pfam00312)→                                                                                                               |
| env-385 | CERK01085407.1            | + | 265     | 333     | RNA→ | rpsO (PRK05626)Ribosomal_S15 (pfam00312)→                                                                                                               |
| env-386 | CERW01016535.1            | + | 3627    | 3695    | RNA→ | rpsO (PRK05626)Ribosomal_S15 (pfam00312)→                                                                                                               |
| env-387 | CESA01134118.1            | + | 1636    | 1704    | RNA→ | rpsO (PRK05626)Ribosomal_S15 (pfam00312)→                                                                                                               |
| env-388 | CEVX01008274.1            | + | 4128    | 4196    | RNA→ | rpsO (PRK05626)Ribosomal_S15 (pfam00312)→                                                                                                               |
| env-389 | CERM01128748.1            | + | 189     | 257     | RNA→ | rpsO (PRK05626)Ribosomal_S15 (pfam00312)→                                                                                                               |
| env-390 | JCVL_SCAF_1096627802799   | + | 1198    | 1266    | RNA→ | rpsO (PRK05626)Ribosomal_S15 (pfam00312)→                                                                                                               |
| env-391 | CEOM01115757.1            | - | 1876    | 1808    | RNA→ | rpsO (PRK05626)Ribosomal_S15 (pfam00312)→                                                                                                               |
| env-392 | CEWK01131420.1            | + | 392     | 460     | RNA→ | rpsO (PRK05626)Ribosomal_S15 (pfam00312)→                                                                                                               |

|         |                              |   |         |         |      |                                                                                                                                                         |
|---------|------------------------------|---|---------|---------|------|---------------------------------------------------------------------------------------------------------------------------------------------------------|
| env-393 | CESW01060567.1               | - | 673     | 605     | RNA→ | rpsO (PRK05626)Ribosomal_S15 (pfam00312)→                                                                                                               |
| env-394 | CEOM01357113.1               | + | 580     | 648     | RNA→ | rpsO (PRK05626)Ribosomal_S15 (pfam00312)→                                                                                                               |
| env-395 | CESP01222974.1               | - | 266     | 198     | RNA→ | rpsO (PRK05626)Ribosomal_S15 (pfam00312)→                                                                                                               |
| env-396 | CEST01081216.1               | - | 179     | 120     | RNA→ | rpsO (PRK05626)Ribosomal_S15 (pfam00312)→                                                                                                               |
| env-397 | NCBL_READ_1112532322036      | + | 335     | 394     | RNA→ | rpsO (PRK05626)Ribosomal_S15 (pfam00312)→                                                                                                               |
| env-398 | NCBL_READ_111277362018       | + | 412     | 471     | RNA→ | rpsO (PRK05626)Ribosomal_S15 (pfam00312)→                                                                                                               |
| env-399 | NCBL_READ_1112533192499      | - | 730     | 671     | RNA→ | rpsO (PRK05626)Ribosomal_S15 (pfam00312)→ PRK11824 (PRK11824)RNase_PH (pfam01138)→                                                                      |
| env-400 | CESE01040916.1               | + | 2914    | 2973    | RNA→ | rpsO (PRK05626)Ribosomal_S15 (pfam00312)→                                                                                                               |
| env-401 | CESJ01014804.1               | - | 376     | 317     | RNA→ | rpsO (PRK05626)Ribosomal_S15 (pfam00312)→                                                                                                               |
| env-402 | CESN01055916.1               | - | 278     | 222     | RNA→ | rpsO (PRK05626)Ribosomal_S15 (pfam00312)→                                                                                                               |
| env-403 | CESP01147131.1               | - | 157     | 101     | RNA→ | rpsO (PRK05626)RpsO (COG0184)→                                                                                                                          |
| env-404 | CESW01247893.1               | + | 149     | 205     | RNA→ | rpsO (PRK05626)Ribosomal_S15 (pfam00312)→ PRK11824 (PRK11824)RNase_PH (pfam01138)→                                                                      |
| env-405 | CETY01067238.1               | - | 908     | 856     | RNA→ | rpsO (PRK05626)Ribosomal_S15 (pfam00312)→ PRK11824 (PRK11824)RNase_PH (pfam01138)→                                                                      |
| env-406 | CEOP01095216.1               | - | 241     | 189     | RNA→ | rpsO (PRK05626)Ribosomal_S15 (pfam00312)→                                                                                                               |
| env-407 | CEUR01327391.1               | + | 1009    | 1065    | RNA→ | rpsO (PRK05626)Ribosomal_S15 (pfam00312)→<br>PRK11824 (PRK11824)RNase_PH (pfam01138)RNase_PH_C (pfam03725)→                                             |
| env-408 | CEWJ01231416.1               | - | 68      | 12      | RNA→ |                                                                                                                                                         |
| env-409 | CAM_READ_0231777305          | + | 246     | 302     | RNA→ | hypo→                                                                                                                                                   |
| env-410 | CAM_READ_0233120627          | + | 246     | 302     | RNA→ |                                                                                                                                                         |
| env-411 | CEOK01184894.1               | - | 9274    | 9218    | RNA→ | rpsO (PRK05626)Ribosomal_S15 (pfam00312)→ Pnp (COG1185)PRK11824 (PRK11824)→<br>RpoD (COG0568)sigma70-ECF (TIGR02937)→ PRK05581 (PRK05581)RPE (cd00429)→ |
| env-412 | CESP01118836.1               | + | 165     | 221     | RNA→ | rpsO (PRK05626)Ribosomal_S15 (pfam00312)→                                                                                                               |
| env-413 | JCVL_SCAF_1096628396118      | + | 1238    | 1294    | RNA→ | rpsO (PRK05626)Ribosomal_S15 (pfam00312)→                                                                                                               |
| env-414 | CENP01152184.1               | - | 17026   | 16970   | RNA→ | rpsO (PRK05626)Ribosomal_S15 (pfam00312)→ Pnp (COG1185)PRK11824 (PRK11824)→<br>RpoD (COG0568)sigma70-ECF (TIGR02937)→ PRK05581 (PRK05581)RPE (cd00429)→ |
| env-415 | CESI01270948.1               | + | 837     | 890     | RNA→ |                                                                                                                                                         |
| env-416 | CESI01305757.1               | + | 1479    | 1532    | RNA→ | rpsO (PRK05626)Ribosomal_S15 (pfam00312)→<br>PRK11824 (PRK11824)RNase_PH (pfam01138)RNase_PH_C (pfam03725)→                                             |
| env-417 | CESU01062348.1               | + | 413     | 466     | RNA→ | rpsO (PRK05626)Ribosomal_S15 (pfam00312)→<br>PRK11824 (PRK11824)RNase_PH (pfam01138)RNase_PH_C (pfam03725)→                                             |
| env-418 | CESJ01175686.1               | - | 363     | 309     | RNA→ | rpsO (PRK05626)Ribosomal_S15 (pfam00312)→                                                                                                               |
| Fbe-1-1 | NZ_JRLV01000023.1            | - | 16228   | 16166   | RNA→ | rpsO (PRK05626)Ribosomal_S15 (pfam00312)→                                                                                                               |
| env-419 | CERZ01029826.1               | - | 671     | 607     | RNA→ | rpsO (PRK05626)Ribosomal_S15 (pfam00312)→                                                                                                               |
| Ksp-1-1 | NC_015496.1                  | + | 583327  | 583390  | RNA→ | rpsO (PRK05626)Ribosomal_S15 (pfam00312)→                                                                                                               |
| Dsp-2-1 | NZ_CM001837.1                | + | 492542  | 492605  | RNA→ | rpsO (PRK05626)Ribosomal_S15 (pfam00312)→                                                                                                               |
| Dsp-1-1 | NZ_CP009301.1                | + | 1271436 | 1271503 | RNA→ | rpsO (PRK05626)Ribosomal_S15 (pfam00312)→                                                                                                               |
| Ddo-1-1 | NZ_JSAQ01000001.1            | + | 1202154 | 1202221 | RNA→ | rpsO (PRK05626)Ribosomal_S15 (pfam00312)→                                                                                                               |
| Iha-1-1 | NZ_AJJU01000004.1            | + | 333125  | 333187  | RNA→ | rpsO (PRK05626)Ribosomal_S15 (pfam00312)→ rpsO (PRK05626)Ribosomal_S15 (pfam00312)→                                                                     |
| env-420 | CENJ01055151.1               | - | 1153    | 1089    | RNA→ | rpsO (PRK05626)Ribosomal_S15 (pfam00312)→ RNase_PH_PNPase_1 (cd11363)PRK11824 (PRK11824)→                                                               |
| env-421 | LPaug09P1610m_c1073129       | - | 145     | 81      | RNA→ | rpsO (PRK05626)RpsO (COG0184)→                                                                                                                          |
| env-422 | A09P0410a_Sequence0000045006 | + | 360     | 424     | RNA→ | rpsO (PRK05626)Ribosomal_S15 (pfam00312)→ RNase_PH_PNPase_1 (cd11363)PRK11824 (PRK11824)→                                                               |
| env-423 | CEOM01146924.1               | - | 65      | 1       | RNA→ |                                                                                                                                                         |
| env-424 | CENN01066147.1               | + | 1036    | 1100    | RNA→ | rpsO (PRK05626)Ribosomal_S15 (pfam00312)→ Pnp (COG1185)PRK11824 (PRK11824)→                                                                             |
| env-425 | CENU01000611.1               | - | 5201    | 5137    | RNA→ | rpsO (PRK05626)Ribosomal_S15 (pfam00312)→ Pnp (COG1185)PRK11824 (PRK11824)→                                                                             |
| env-426 | CEOK01054851.1               | - | 1174    | 1110    | RNA→ | rpsO (PRK05626)Ribosomal_S15 (pfam00312)→ RNase_PH_PNPase_1 (cd11363)PRK11824 (PRK11824)→                                                               |
| env-427 | CENP01019191.1               | + | 2058    | 2122    | RNA→ | rpsO (PRK05626)Ribosomal_S15 (pfam00312)→ Pnp (COG1185)PRK11824 (PRK11824)→                                                                             |
| env-428 | CENU01173310.1               | - | 367     | 303     | RNA→ | rpsO (PRK05626)Ribosomal_S15 (pfam00312)→                                                                                                               |
| env-429 | CESS01087722.1               | - | 2995    | 2931    | RNA→ | rpsO (PRK05626)Ribosomal_S15 (pfam00312)→ Pnp (COG1185)PRK11824 (PRK11824)→                                                                             |
| env-430 | JCVL_SCAF_1096627377572      | + | 2760    | 2824    | RNA→ | rpsO (PRK05626)Ribosomal_S15 (pfam00312)→                                                                                                               |
| env-431 | CEOK01021460.1               | - | 1198    | 1134    | RNA→ | rpsO (PRK05626)Ribosomal_S15 (pfam00312)→ RNase_PH_PNPase_1 (cd11363)PRK11824 (PRK11824)→                                                               |
| env-432 | CENJ01182900.1               | + | 248     | 312     | RNA→ | rpsO (PRK05626)Ribosomal_S15 (pfam00312)→                                                                                                               |
| env-433 | CENU01105541.1               | + | 758     | 822     | RNA→ |                                                                                                                                                         |
| env-434 | CEOM01022458.1               | - | 1511    | 1447    | RNA→ | rpsO (PRK05626)Ribosomal_S15 (pfam00312)→ Pnp (COG1185)PRK11824 (PRK11824)→                                                                             |



|         |                          |   |         |         |      |                                                                                                               |
|---------|--------------------------|---|---------|---------|------|---------------------------------------------------------------------------------------------------------------|
| env-435 | JCVL_SCAF_1096627389939  | + | 60590   | 60654   | RNA→ | rpsO (PRK05626)Ribosomal_S15 (pfam00312)→ Pnp (COG1185)PRK11824 (PRK11824)→                                   |
| env-436 | CENG01086864.1           | - | 453     | 389     | RNA→ | rpsO (PRK05626)Ribosomal_S15 (pfam00312)→                                                                     |
| env-437 | CENN01059376.1           | - | 230     | 166     | RNA→ | rpsO (PRK05626)Ribosomal_S15 (pfam00312)→                                                                     |
| env-438 | CESW01265115.1           | + | 247     | 311     | RNA→ | rpsO (PRK05626)Ribosomal_S15 (pfam00312)→ Pnp (COG1185)PRK11824 (PRK11824)→                                   |
| env-439 | CEOM01082955.1           | + | 4838    | 4902    | RNA→ | rpsO (PRK05626)Ribosomal_S15 (pfam00312)→ PRK11824 (PRK11824)RNase_PH (pfam01138)→                            |
| env-440 | CENP01061027.1           | + | 20726   | 20790   | RNA→ | rpsO (PRK05626)Ribosomal_S15 (pfam00312)→                                                                     |
| env-441 | CENU01097470.1           | - | 401     | 337     | RNA→ | rpsO (PRK05626)Ribosomal_S15 (pfam00312)→                                                                     |
| env-442 | CENX01202860.1           | - | 8088    | 8024    | RNA→ | rpsO (PRK05626)Ribosomal_S15 (pfam00312)→ Pnp (COG1185)PRK11824 (PRK11824)→                                   |
| env-443 | CEOF01213869.1           | + | 2775    | 2839    | RNA→ | rpsO (PRK05626)Ribosomal_S15 (pfam00312)→ Pnp (COG1185)PRK11824 (PRK11824)→                                   |
| env-444 | CEOK01043507.1           | + | 75      | 139     | RNA→ | rpsO (PRK05626)Ribosomal_S15 (pfam00312)→ RNase_PH_PNPase_1 (cd11363)PRK11824 (PRK11824)→                     |
| Kje-1-1 | NZ_LBMG01000021.1        | - | 84468   | 84404   | RNA→ | rpsO (PRK05626)Ribosomal_S15 (pfam00312)→                                                                     |
| Kal-1-1 | NZ_DS544873.1            | - | 4807475 | 4807411 | RNA→ | rpsO (PRK05626)Ribosomal_S15 (pfam00312)→                                                                     |
| Kzh-1-1 | NZ_LBMH01000003.1        | + | 156456  | 156520  | RNA→ | rpsO (PRK05626)Ribosomal_S15 (pfam00312)→                                                                     |
| env-445 | JCVL_SCAF_1096627449837  | + | 1096    | 1163    | RNA→ | rpsO (PRK05626)→                                                                                              |
| env-446 | CEQG01221456.1           | - | 120     | 62      | RNA→ | rpsO (PRK05626)→                                                                                              |
| env-447 | CEQY01168872.1           | + | 258     | 316     | RNA→ | rpsO (PRK05626)Ribosomal_S15 (pfam00312)→ PRK11824 (PRK11824)RNase_PH (pfam01138)→                            |
| env-448 | CERC01134264.1           | + | 7325    | 7383    | RNA→ | rpsO (PRK05626)Ribosomal_S15 (pfam00312)→ Pnp (COG1185)PRK11824 (PRK11824)→                                   |
| env-449 | P_2C_Liq_1_UnCty_1172006 | + | 238     | 295     | RNA→ | rpsO (PRK05626)Ribosomal_S15 (pfam00312)→                                                                     |
| env-450 | CEOO01008234.1           | + | 2508    | 2575    | RNA→ | rpsO (PRK05626)Ribosomal_S15 (pfam00312)→                                                                     |
| env-451 | CESA01225116.1           | + | 184     | 251     | RNA→ | rpsO (PRK05626)Ribosomal_S15 (pfam00312)→                                                                     |
| env-452 | CESZ01040124.1           | - | 244     | 177     | RNA→ | rpsO (PRK05626)Ribosomal_S15 (pfam00312)→                                                                     |
| env-453 | CESZ01039937.1           | - | 243     | 177     | RNA→ | rpsO (PRK05626)Ribosomal_S15 (pfam00312)→                                                                     |
| env-454 | CEOM01051750.1           | - | 464     | 397     | RNA→ | rpsO (PRK05626)Ribosomal_S15 (pfam00312)→                                                                     |
| env-455 | CEVU01350716.1           | - | 629     | 562     | RNA→ | rpsO (PRK05626)Ribosomal_S15 (pfam00312)→                                                                     |
| env-456 | P_2C_Liq_1_UnCty_1017278 | - | 872     | 816     | RNA→ | rpsO (PRK05626)Ribosomal_S15 (pfam00312)→ PRK11824 (PRK11824)RNase_PH (pfam01138)→                            |
| env-457 | P_2C_Liq_2_UnCty_1110420 | - | 101     | 45      | RNA→ | rpsO (PRK05626)Ribosomal_S15 (pfam00312)→                                                                     |
| env-458 | GQKUMWE01EWSJM           | + | 239     | 300     | RNA→ | ← hypo                                                                                                        |
| env-459 | CENT01012923.1           | - | 2675    | 2616    | RNA→ | rpsO (PRK05626)Ribosomal_S15 (pfam00312)→ Pnp (COG1185)PRK11824 (PRK11824)→                                   |
| env-460 | CERW01249250.1           | + | 463     | 522     | RNA→ | rpsO (PRK05626)Ribosomal_S15 (pfam00312)→ RNase_PH_PNPase_1 (cd11363)PRK11824 (PRK11824)→                     |
| env-461 | CEVS01053715.1           | - | 327     | 268     | RNA→ | rpsO (PRK05626)Ribosomal_S15 (pfam00312)→                                                                     |
| env-462 | CEOP01008691.1           | - | 1501    | 1441    | RNA→ | rpsO (PRK05626)Ribosomal_S15 (pfam00312)→ RNase_PH_PNPase_1 (cd11363)PRK11824 (PRK11824)→                     |
| env-463 | CEVP01023094.1           | + | 259     | 319     | RNA→ | rpsO (PRK05626)Ribosomal_S15 (pfam00312)→ RNase_PH_PNPase_1 (cd11363)PRK11824 (PRK11824)→                     |
| env-464 | JCVL_READ_1104230391553  | + | 800     | 860     | RNA→ | rpsO (PRK05626)RpsO (COG0184)→                                                                                |
| env-465 | JCVL_READ_1104230226763  | - | 664     | 604     | RNA→ | rpsO (PRK05626)Ribosomal_S15 (pfam00312)→ PRK11824 (PRK11824)RNase_PH (pfam01138)→                            |
| env-466 | CETQ01008005.1           | - | 1003    | 943     | RNA→ | rpsO (PRK05626)Ribosomal_S15 (pfam00312)→ PRK11824 (PRK11824)RNase_PH (pfam01138)RNase_PH_C (pfam03725)→      |
| env-467 | CESF01056087.1           | + | 108     | 168     | RNA→ | rpsO (PRK05626)Ribosomal_S15 (pfam00312)→ PRK11824 (PRK11824)RNase_PH (pfam01138)→                            |
| env-468 | CESO01047575.1           | - | 1806    | 1746    | RNA→ | rpsO (PRK05626)Ribosomal_S15 (pfam00312)→ Pnp (COG1185)PRK11824 (PRK11824)→                                   |
| env-469 | CEWG01134969.1           | + | 150     | 210     | RNA→ | rpsO (PRK05626)Ribosomal_S15 (pfam00312)→ PRK11824 (PRK11824)RNase_PH (pfam01138)→                            |
| env-470 | CESM01335079.1           | - | 449     | 389     | RNA→ | rpsO (PRK05626)Ribosomal_S15 (pfam00312)→                                                                     |
| env-471 | JGI25920J50251_10101252  | - | 633     | 565     | RNA→ | rpsO (PRK05626)RpsO (COG0184)→                                                                                |
| env-472 | 2236876001_042780        | - | 239     | 185     | RNA→ | rpsO (PRK05626)Ribosomal_S15 (pfam00312)→                                                                     |
| env-473 | SI34jun09_10m_1003614    | - | 2745    | 2691    | RNA→ | rpsO (PRK05626)RpsO (COG0184)→ Pnp (COG1185)PRK11824 (PRK11824)→ PRK09210 (PRK09210)Sigma70_r1_2 (pfam00140)→ |
| env-474 | 2236876001_503295        | + | 35      | 89      | RNA→ | rpsO (PRK05626)RpsO (COG0184)→                                                                                |
| env-475 | LAZR01010698.1           | - | 870     | 806     | RNA→ | rpsO (PRK05626)RpsO (COG0184)→                                                                                |
| env-476 | JGI20160J14292_10000017  | - | 161918  | 161862  | RNA→ | rpsO (PRK05626)Ribosomal_S15 (pfam00312)→                                                                     |
| env-477 | JGI20156J14371_10003440  | + | 5695    | 5749    | RNA→ | rpsO (PRK05626)Ribosomal_S15 (pfam00312)→                                                                     |
| env-478 | JGI20157J14317_10056873  | + | 532     | 586     | RNA→ | rpsO (PRK05626)Ribosomal_S15 (pfam00312)→                                                                     |
| env-479 | JGI20159J14440_10211892  | + | 222     | 276     | RNA→ | rpsO (PRK05626)Ribosomal_S15 (pfam00312)→                                                                     |
| env-480 | CESJ01009412.1           | - | 295     | 238     | RNA→ | rpsO (PRK05626)Ribosomal_S15 (pfam00312)→                                                                     |
| env-481 | DelMOSum2010.c10003273   | + | 6417    | 6474    | RNA→ | rpsO (PRK05626)Ribosomal_S15 (pfam00312)→                                                                     |
| env-482 | JGI20154J14316_10013644  | + | 4557    | 4614    | RNA→ | rpsO (PRK05626)RpsO (COG0184)→                                                                                |



|         |                          |   |        |        |                                                                |
|---------|--------------------------|---|--------|--------|----------------------------------------------------------------|
| env-483 | JGI20157J14317_10026517  | + | 2621   | 2678   | RNA→ rpsO (PRK05626)RpsO (COG0184)→                            |
| env-484 | JGI20153J14295_10010421  | - | 315    | 258    | RNA→ rpsO (PRK05626)Ribosomal_S15 (pfam00312)→                 |
| env-485 | JGI20153J14318_10010421  | - | 315    | 258    | RNA→ rpsO (PRK05626)Ribosomal_S15 (pfam00312)→                 |
| env-486 | 2236876001_158288        | - | 282    | 226    | RNA→ rpsO (PRK05626)Ribosomal_S15 (pfam00312)→                 |
| env-487 | JGI20152J14361_10115381  | + | 161    | 218    | RNA→ rpsO (PRK05626)Ribosomal_S15 (pfam00312)→                 |
| env-488 | JGI20160J14292_10003695  | - | 5908   | 5851   | RNA→ rpsO (PRK05626)Ribosomal_S15 (pfam00312)→                 |
| env-489 | CESI01136105.1           | - | 853    | 796    | RNA→ rpsO (PRK05626)Ribosomal_S15 (pfam00312)→                 |
| env-490 | DelMOSum2010_c10699725   | - | 59     | 2      | RNA→                                                           |
| env-491 | JGI20152J14361_10001110  | + | 2581   | 2638   | RNA→ rpsO (PRK05626)RpsO (COG0184)→                            |
| env-492 | JGI20156J14371_10001772  | + | 5804   | 5861   | RNA→ rpsO (PRK05626)RpsO (COG0184)→                            |
| env-493 | JGI20154J14316_10024766  | + | 2744   | 2801   | RNA→ rpsO (PRK05626)RpsO (COG0184)→                            |
| env-494 | JGI20160J14292_10090187  | - | 774    | 717    | RNA→ rpsO (PRK05626)RpsO (COG0184)→                            |
| env-495 | JGI20157J14317_10011759  | - | 3922   | 3865   | RNA→ rpsO (PRK05626)RpsO (COG0184)→                            |
| env-496 | JGI20153J14295_10003124  | + | 11087  | 11144  | RNA→ rpsO (PRK05626)Ribosomal_S15 (pfam00312)→                 |
| env-497 | JGI20153J14318_10003124  | + | 11087  | 11144  | RNA→ rpsO (PRK05626)Ribosomal_S15 (pfam00312)→                 |
| env-498 | JGI20153J14295_10020066  | - | 1717   | 1660   | RNA→ rpsO (PRK05626)RpsO (COG0184)→                            |
| env-499 | JGI20153J14318_10020066  | - | 1717   | 1660   | RNA→ rpsO (PRK05626)RpsO (COG0184)→                            |
| env-500 | JGI20159J14440_10267556  | + | 379    | 436    | RNA→ ←-hypo                                                    |
| env-501 | JGI20154J14316_10180509  | + | 119    | 176    | RNA→ rpsO (PRK05626)RpsO (COG0184)→                            |
| env-502 | CERI01279172.1           | + | 1860   | 1917   | RNA→ rpsO (PRK05626)Ribosomal_S15 (pfam00312)→                 |
| env-503 | CEGC01022181.1           | + | 362    | 426    | RNA→ rpsO (PRK05626)Ribosomal_S15 (pfam00312)→                 |
| env-504 | CEQG01070770.1           | - | 2992   | 2928   | RNA→ rpsO (PRK05626)Ribosomal_S15 (pfam00312)→                 |
| env-505 | CEQQ01079414.1           | + | 374    | 438    | RNA→ rpsO (PRK05626)Ribosomal_S15 (pfam00312)→                 |
| env-506 | CEPG01012475.1           | - | 616    | 548    | RNA→ rpsO (PRK05626)RpsO (COG0184)→                            |
| env-507 | P_1C_Liq_2_UnCty_1052240 | - | 318    | 260    | RNA→ rpsO (PRK05626)Ribosomal_S15 (pfam00312)→                 |
| env-508 | P_1C_Liq_1_UnCty_1125732 | - | 94     | 36     | RNA→                                                           |
| env-509 | P_2C_Liq_1_UnCty_1007508 | + | 1871   | 1929   | RNA→ rpsO (PRK05626)RpsO (COG0184)→                            |
| env-510 | P_2C_Liq_2_UnCty_1069522 | - | 283    | 225    | PRK11824 (PRK11824)RNase_PH (pfam01138)RNase_PH_C (pfam03725)→ |
| env-511 | ElkS_mat_MD6A_1029892    | - | 674    | 608    | RNA→ rpsO (PRK05626)RpsO (COG0184)→                            |
| env-512 | JGI11876J14442_10002542  | + | 13284  | 13350  | RNA→ rpsO (PRK05626)Ribosomal_S15 (pfam00312)→                 |
| Fhi-1-1 | NZ_JPRK01000005.1        | + | 251976 | 252039 | RNA→ rpsO (PRK05626)Ribosomal_S15 (pfam00312)→                 |
| Fsp-9-1 | NZ_JARP01000002.1        | - | 708129 | 708066 | RNA→ rpsO (PRK05626)Ribosomal_S15 (pfam00312)→                 |
| Asu-1-1 | NC_018013.1              | + | 528300 | 528368 | RNA→ rpsO (PRK05626)Ribosomal_S15 (pfam00312)→                 |
| Aca-1-1 | NZ_AUBG01000007.1        | - | 10769  | 10702  | RNA→ rpsO (PRK05626)Ribosomal_S15 (pfam00312)→                 |
| env-513 | JGI24723J26617_10077130  | - | 289    | 222    | RNA→ rpsO (PRK05626)Ribosomal_S15 (pfam00312)→                 |
| env-514 | JGI24723J26617_10048522  | + | 1324   | 1391   | RNA→ rpsO (PRK05626)Ribosomal_S15 (pfam00312)→                 |
| env-515 | CERO01082754.1           | + | 566    | 633    | RNA→ rpsO (PRK05626)Ribosomal_S15 (pfam00312)→                 |
| env-516 | CERP01000066.1           | - | 89558  | 89491  | RNA→ rpsO (PRK05626)Ribosomal_S15 (pfam00312)→                 |
| env-517 | CERU01094717.1           | + | 740    | 807    | RNA→ rpsO (PRK05626)Ribosomal_S15 (pfam00312)→                 |
| Avl-1-1 | NZ_JSVU01000005.1        | + | 248306 | 248373 | RNA→ rpsO (PRK05626)Ribosomal_S15 (pfam00312)→                 |
| env-518 | CERY01108911.1           | + | 730    | 797    | RNA→ rpsO (PRK05626)Ribosomal_S15 (pfam00312)→                 |
| env-519 | JGI24723J26617_10269373  | - | 259    | 192    | RNA→ rpsO (PRK05626)Ribosomal_S15 (pfam00312)→                 |
| env-520 | JGI24723J26617_10077183  | - | 289    | 222    | RNA→ rpsO (PRK05626)Ribosomal_S15 (pfam00312)→                 |
| env-521 | CEVN01317104.1           | + | 431    | 498    | RNA→ rpsO (PRK05626)Ribosomal_S15 (pfam00312)→                 |
| env-522 | JGI24723J26617_10004896  | + | 8365   | 8432   | RNA→ rpsO (PRK05626)Ribosomal_S15 (pfam00312)→                 |
| env-523 | CENR01030012.1           | + | 19705  | 19772  | RNA→ rpsO (PRK05626)Ribosomal_S15 (pfam00312)→                 |
| env-524 | CEOG01036059.1           | + | 11314  | 11381  | RNA→ rpsO (PRK05626)Ribosomal_S15 (pfam00312)→                 |
| env-525 | CERJ01077310.1           | + | 15535  | 15602  | RNA→ rpsO (PRK05626)Ribosomal_S15 (pfam00312)→                 |
| env-526 | CERN01056527.1           | + | 206606 | 206673 | RNA→ rpsO (PRK05626)Ribosomal_S15 (pfam00312)→                 |
| env-527 | CERO01015055.1           | - | 94     | 27     | RNA→                                                           |
| env-528 | CETB01099781.1           | - | 934    | 867    | RNA→ rpsO (PRK05626)Ribosomal_S15 (pfam00312)→                 |

|         |                            |   |         |         |      |                                                                                                                                                         |
|---------|----------------------------|---|---------|---------|------|---------------------------------------------------------------------------------------------------------------------------------------------------------|
| env-529 | CETRO1093448.1             | - | 3881    | 3814    | RNA→ | rpsO (PRK05626)Ribosomal_S15 (pfam00312)→                                                                                                               |
| env-530 | CEVM01236749.1             | - | 847     | 780     | RNA→ | rpsO (PRK05626)Ribosomal_S15 (pfam00312)→                                                                                                               |
| env-531 | CEVO01146838.1             | - | 280     | 213     | RNA→ | rpsO (PRK05626)Ribosomal_S15 (pfam00312)→                                                                                                               |
| env-532 | JGI24723J26617_10024902    | - | 107     | 40      | RNA→ |                                                                                                                                                         |
| env-533 | JGI24723J26617_10051817    | - | 111     | 44      | RNA→ |                                                                                                                                                         |
| env-534 | CENX01022829.1             | + | 1733    | 1788    | RNA→ | rpsO (PRK05626)Ribosomal_S15 (pfam00312)→ Pnp (COG1185)PRK11824 (PRK11824)→<br>sigma70-ECF (TIGR02937)Sigma70_r1_2 (pfam00140)Sigma70_r2 (pfam04542)→   |
| env-535 | CEOF01084231.1             | + | 2913    | 2968    | RNA→ | rpsO (PRK05626)Ribosomal_S15 (pfam00312)→ Pnp (COG1185)PRK11824 (PRK11824)→<br>RpoD (COG0568)sigma70-ECF (TIGR02937)→ PRK05581 (PRK05581)RPE (cd00429)→ |
| env-536 | CENP01067191.1             | - | 87      | 32      | RNA→ |                                                                                                                                                         |
| env-537 | CENG01112007.1             | + | 4191    | 4246    | RNA→ | rpsO (PRK05626)Ribosomal_S15 (pfam00312)→ Pnp (COG1185)PRK11824 (PRK11824)→                                                                             |
| env-538 | CENU01401332.1             | + | 472     | 527     | RNA→ | rpsO (PRK05626)Ribosomal_S15 (pfam00312)→<br>PRK11824 (PRK11824)RNase_PH (pfam01138)RNase_PH_C (pfam03725)→                                             |
| env-539 | CENJ01312050.1             | - | 97      | 42      | RNA→ |                                                                                                                                                         |
| env-540 | CENP01044677.1             | + | 77      | 132     | RNA→ | rpsO (PRK05626)Ribosomal_S15 (pfam00312)→ PRK11824 (PRK11824)RNase_PH (pfam01138)→                                                                      |
| Apa-1-1 | NZ_JACC01000030.1          | - | 38381   | 38316   | RNA→ | rpsO (PRK05626)RpsO (COG0184)→                                                                                                                          |
| Ama-1-1 | NZ_JACA01000052.1          | - | 55849   | 55785   | RNA→ | rpsO (PRK05626)Ribosomal_S15 (pfam00312)→                                                                                                               |
| Aat-1-1 | NZ_AQRA01000003.1          | - | 469802  | 469738  | RNA→ | rpsO (PRK05626)Ribosomal_S15 (pfam00312)→                                                                                                               |
| Ame-1-1 | NZ_JACB01000015.1          | + | 60959   | 61023   | RNA→ | rpsO (PRK05626)Ribosomal_S15 (pfam00312)→                                                                                                               |
| Ala-1-1 | NZ_KE387187.1              | + | 63041   | 63106   | RNA→ | rpsO (PRK05626)RpsO (COG0184)→                                                                                                                          |
| Amu-1-1 | NZ_AUML01000001.1          | - | 274510  | 274444  | RNA→ | rpsO (PRK05626)RpsO (COG0184)→                                                                                                                          |
| Fsu-3-1 | NZ_AUCZ01000003.1          | + | 320199  | 320263  | RNA→ | rpsO (PRK05626)Ribosomal_S15 (pfam00312)→                                                                                                               |
| Fsu-3-2 | NZ_JRLW01000014.1          | + | 90546   | 90610   | RNA→ | rpsO (PRK05626)Ribosomal_S15 (pfam00312)→                                                                                                               |
| Fen-1-1 | NZ_AVCS01000009.1          | - | 299934  | 299870  | RNA→ | rpsO (PRK05626)Ribosomal_S15 (pfam00312)→                                                                                                               |
| Fen-1-2 | NZ_JRLZ01000004.1          | + | 212529  | 212593  | RNA→ | rpsO (PRK05626)Ribosomal_S15 (pfam00312)→                                                                                                               |
| Fco-1-1 | NC_016510.2                | + | 875063  | 875127  | RNA→ | rpsO (PRK05626)Ribosomal_S15 (pfam00312)→                                                                                                               |
| env-541 | JGI24770J26754_10043964    | + | 1074    | 1138    | RNA→ | rpsO (PRK05626)Ribosomal_S15 (pfam00312)→                                                                                                               |
| env-542 | JGI25913J50563_1022430     | - | 297     | 233     | RNA→ | rpsO (PRK05626)Ribosomal_S15 (pfam00312)→                                                                                                               |
| env-543 | LWAEeNNiSIP_GDP3C2T02IBMEZ | - | 77      | 13      | RNA→ |                                                                                                                                                         |
| env-544 | LWAnNN.GDP3C2T02IBMEZ      | - | 77      | 13      | RNA→ |                                                                                                                                                         |
| env-545 | JGI25920J50251_10102258    | + | 416     | 480     | RNA→ | rpsO (PRK05626)Ribosomal_S15 (pfam00312)→                                                                                                               |
| env-546 | TDF_OR_ARG04_113m.c1238479 | - | 103     | 38      | RNA→ |                                                                                                                                                         |
| Fps-1-1 | NZ_CP010278.1              | + | 2255345 | 2255410 | RNA→ | rpsO (PRK05626)Ribosomal_S15 (pfam00312)→                                                                                                               |
| Fps-1-2 | NZ_CP010276.1              | + | 2300567 | 2300632 | RNA→ | rpsO (PRK05626)Ribosomal_S15 (pfam00312)→                                                                                                               |
| Fps-1-3 | NZ_CP010274.1              | + | 2298136 | 2298201 | RNA→ | rpsO (PRK05626)Ribosomal_S15 (pfam00312)→                                                                                                               |
| Jma-1-1 | NZ_JH651379.1              | - | 1502761 | 1502696 | RNA→ | rpsO (PRK05626)Ribosomal_S15 (pfam00312)→ rpsO (PRK05626)Ribosomal_S15 (pfam00312)→                                                                     |
| env-547 | KVRMV2_100016903           | - | 110     | 57      | RNA→ |                                                                                                                                                         |
| env-548 | CEQT01124934.1             | - | 606     | 550     | RNA→ | rpsO (PRK05626)Ribosomal_S15 (pfam00312)→ PRK11824 (PRK11824)RNase_PH (pfam01138)→                                                                      |
| env-549 | CEVG01326867.1             | + | 310     | 366     | RNA→ | rpsO (PRK05626)Ribosomal_S15 (pfam00312)→ PRK11824 (PRK11824)RNase_PH (pfam01138)→                                                                      |
| env-550 | CEQI01034781.1             | + | 143     | 199     | RNA→ | rpsO (PRK05626)Ribosomal_S15 (pfam00312)→ Pnp (COG1185)PRK11824 (PRK11824)→                                                                             |
| env-551 | P_2C_Liq_1_UnCty_1000352   | + | 10687   | 10752   | RNA→ | rpsO (PRK05626)Ribosomal_S15 (pfam00312)→                                                                                                               |
| env-552 | P_2C_Liq_2_UnCty_1001631   | - | 4100    | 4035    | RNA→ | rpsO (PRK05626)Ribosomal_S15 (pfam00312)→                                                                                                               |
| env-553 | P_2C_Liq_3_UnCty_100392    | + | 7024    | 7089    | RNA→ | rpsO (PRK05626)Ribosomal_S15 (pfam00312)→                                                                                                               |
| env-554 | JGI20153J14295_10009471    | - | 2396    | 2331    | RNA→ | rpsO (PRK05626)Ribosomal_S15 (pfam00312)→                                                                                                               |
| env-555 | JGI20153J14318_10009471    | - | 2396    | 2331    | RNA→ | rpsO (PRK05626)Ribosomal_S15 (pfam00312)→                                                                                                               |
| env-556 | JCVL_SCAF_1096626865111    | - | 109     | 44      | RNA→ |                                                                                                                                                         |
| env-557 | JGI20154J14316_10022771    | + | 940     | 1005    | RNA→ | rpsO (PRK05626)Ribosomal_S15 (pfam00312)→                                                                                                               |
| Ffi-1-1 | NZ_KE384381.1              | + | 65930   | 65995   | RNA→ | rpsO (PRK05626)Ribosomal_S15 (pfam00312)→                                                                                                               |
| env-558 | JGI24768J34885_10768442    | + | 60      | 125     | RNA→ | rpsO (PRK05626)Ribosomal_S15 (pfam00312)→                                                                                                               |
| env-559 | JGI20156J14371_10000091    | - | 48791   | 48726   | RNA→ | rpsO (PRK05626)Ribosomal_S15 (pfam00312)→                                                                                                               |
| env-560 | JGI20154J14316_10038808    | - | 884     | 819     | RNA→ | rpsO (PRK05626)Ribosomal_S15 (pfam00312)→                                                                                                               |
| env-561 | DelMOWin2010_c10012594     | - | 4166    | 4099    | RNA→ | rpsO (PRK05626)Ribosomal_S15 (pfam00312)→                                                                                                               |
| env-562 | SI48aug10_10m.c1029846     | + | 215     | 282     | RNA→ | rpsO (PRK05626)Ribosomal_S15 (pfam00312)→                                                                                                               |

|         |                         |   |      |      |      |                                                                                                                                                                                       |
|---------|-------------------------|---|------|------|------|---------------------------------------------------------------------------------------------------------------------------------------------------------------------------------------|
| env-563 | JGI20160J14292_10046285 | - | 129  | 62   | RNA→ |                                                                                                                                                                                       |
| env-564 | JGI20155J14468_10071765 | - | 979  | 912  | RNA→ | rpsO (PRK05626)Ribosomal_S15 (pfam00312)→                                                                                                                                             |
| env-565 | DelMOSum2010.c10029733  | - | 95   | 28   | RNA→ |                                                                                                                                                                                       |
| env-566 | JGI20160J14292_10025745 | + | 2542 | 2609 | RNA→ | rpsO (PRK05626)Ribosomal_S15 (pfam00312)→                                                                                                                                             |
| env-567 | JGI20153J14295_10164677 | - | 300  | 233  | RNA→ | rpsO (PRK05626)Ribosomal_S15 (pfam00312)→                                                                                                                                             |
| env-568 | JGI20153J14318_10164677 | - | 300  | 233  | RNA→ | rpsO (PRK05626)Ribosomal_S15 (pfam00312)→                                                                                                                                             |
| env-569 | JGI20151J14362_10106988 | + | 760  | 827  | RNA→ | rpsO (PRK05626)Ribosomal_S15 (pfam00312)→                                                                                                                                             |
| env-570 | JGI20155J14468_10226844 | - | 184  | 117  | RNA→ | rpsO (PRK05626)Ribosomal_S15 (pfam00312)→                                                                                                                                             |
| env-571 | JGI20156J14371_10017225 | + | 4008 | 4075 | RNA→ |                                                                                                                                                                                       |
| env-572 | JGI20157J14317_10097956 | - | 992  | 925  | RNA→ | rpsO (PRK05626)Ribosomal_S15 (pfam00312)→                                                                                                                                             |
| env-573 | JGI20159J14440_10001664 | - | 3899 | 3832 | RNA→ | rpsO (PRK05626)Ribosomal_S15 (pfam00312)→                                                                                                                                             |
| env-574 | JGI20151J14362_10553745 | + | 192  | 259  | RNA→ |                                                                                                                                                                                       |
| env-575 | JGI20156J14371_10055795 | - | 129  | 62   | RNA→ |                                                                                                                                                                                       |
| env-576 | JGI20156J14371_10169803 | + | 499  | 566  | RNA→ |                                                                                                                                                                                       |
| env-577 | JGI20157J14317_10131865 | + | 746  | 813  | RNA→ |                                                                                                                                                                                       |
| env-578 | 2236876007_0312397      | - | 171  | 104  | RNA→ | rpsO (PRK05626)Ribosomal_S15 (pfam00312)→                                                                                                                                             |
| env-579 | DelMOSum2010.c10010162  | + | 1748 | 1815 | RNA→ | rpsO (PRK05626)Ribosomal_S15 (pfam00312)→                                                                                                                                             |
| env-580 | LPaug09P1610m.c1025198  | - | 345  | 278  | RNA→ | rpsO (PRK05626)Ribosomal_S15 (pfam00312)→                                                                                                                                             |
| env-581 | JGI20152J14361_10068744 | + | 344  | 411  | RNA→ | rpsO (PRK05626)Ribosomal_S15 (pfam00312)→                                                                                                                                             |
| env-582 | JGI20151J14362_10030196 | + | 80   | 147  | RNA→ | rpsO (PRK05626)Ribosomal_S15 (pfam00312)→                                                                                                                                             |
| env-583 | JGI20156J14371_10081935 | - | 1117 | 1050 | RNA→ | rpsO (PRK05626)Ribosomal_S15 (pfam00312)→                                                                                                                                             |
| env-584 | JGI20160J14292_10175855 | + | 558  | 625  | RNA→ |                                                                                                                                                                                       |
| env-585 | JGI20157J14317_10317670 | + | 324  | 391  | RNA→ |                                                                                                                                                                                       |
| env-586 | JGI20155J14468_10022308 | + | 3140 | 3207 | RNA→ |                                                                                                                                                                                       |
| env-587 | JGI20155J14468_10502791 | - | 79   | 12   | RNA→ |                                                                                                                                                                                       |
| env-588 | JGI20158J14315_10014377 | - | 461  | 394  | RNA→ | rpsO (PRK05626)Ribosomal_S15 (pfam00312)→                                                                                                                                             |
| env-589 | JGI20158J14315_10054385 | + | 304  | 371  | RNA→ | rpsO (PRK05626)Ribosomal_S15 (pfam00312)→                                                                                                                                             |
| env-590 | LPjun09P1210m.c1021057  | - | 265  | 198  | RNA→ | rpsO (PRK05626)Ribosomal_S15 (pfam00312)→                                                                                                                                             |
| env-591 | CESF01026423.1          | - | 426  | 359  | RNA→ | rpsO (PRK05626)Ribosomal_S15 (pfam00312)→                                                                                                                                             |
| env-592 | LPaug08P2610m.c1011929  | - | 656  | 589  | RNA→ | rpsO (PRK05626)Ribosomal_S15 (pfam00312)→                                                                                                                                             |
| env-593 | JGI20152J14361_10054897 | + | 879  | 946  | RNA→ |                                                                                                                                                                                       |
| env-594 | JGI20153J14295_10031185 | + | 1241 | 1308 | RNA→ | rpsO (PRK05626)Ribosomal_S15 (pfam00312)→                                                                                                                                             |
| env-595 | JGI20153J14318_10031185 | + | 1241 | 1308 | RNA→ | rpsO (PRK05626)Ribosomal_S15 (pfam00312)→                                                                                                                                             |
| env-596 | JGI20156J14371_10287260 | + | 272  | 339  | RNA→ |                                                                                                                                                                                       |
| env-597 | JGI20160J14292_10262699 | - | 129  | 62   | RNA→ |                                                                                                                                                                                       |
| env-598 | JGI20154J14316_10027342 | - | 1569 | 1502 | RNA→ | rpsO (PRK05626)Ribosomal_S15 (pfam00312)→                                                                                                                                             |
| env-599 | JGI20157J14317_10012354 | + | 3736 | 3803 | RNA→ | rpsO (PRK05626)Ribosomal_S15 (pfam00312)→                                                                                                                                             |
| env-600 | JCVL_SCAF_1096626862538 | + | 155  | 222  | RNA→ | rpsO (PRK05626)Ribosomal_S15 (pfam00312)→                                                                                                                                             |
| env-601 | JGI20156J14371_10124702 | - | 670  | 604  | RNA→ | rpsO (PRK05626)Ribosomal_S15 (pfam00312)→ PRK11824 (PRK11824)RNase_PH (pfam01138)RNase_PH_C (pfam03725)→                                                                              |
| env-602 | CESO1123227.1           | - | 455  | 390  | RNA→ | rpsO (PRK05626)Ribosomal_S15 (pfam00312)→                                                                                                                                             |
| env-603 | CETY01169678.1          | - | 8265 | 8200 | RNA→ | rpsO (PRK05626)Ribosomal_S15 (pfam00312)→ Pnp (COG1185)PRK11824 (PRK11824)→ RpoD (COG0568)sigma70-ECF (TIGR02937)→ PRK05581 (PRK05581)RPE (cd00429)→ anmK (PRK09585)AnmK (pfam03702)→ |
| env-604 | Antartic2_1179192       | + | 146  | 211  | RNA→ | rpsO (PRK05626)Ribosomal_S15 (pfam00312)→                                                                                                                                             |
| env-605 | CEWO01136473.1          | + | 175  | 241  | RNA→ | rpsO (PRK05626)Ribosomal_S15 (pfam00312)→                                                                                                                                             |
| env-606 | NCBL_READ_1112493426512 | + | 347  | 411  | RNA→ | rpsO (PRK05626)Ribosomal_S15 (pfam00312)→                                                                                                                                             |
| env-607 | CESJ01083807.1          | - | 353  | 289  | RNA→ | rpsO (PRK05626)Ribosomal_S15 (pfam00312)→                                                                                                                                             |
| env-608 | LPaug08P2610m.c1089043  | + | 81   | 145  | RNA→ | rpsO (PRK05626)Ribosomal_S15 (pfam00312)→                                                                                                                                             |
| env-609 | JGI24816J26688_1216386  | + | 208  | 272  | RNA→ |                                                                                                                                                                                       |
| env-610 | JGI24817J26689_1164217  | + | 175  | 239  | RNA→ | rpsO (PRK05626)RpsO (COG0184)→                                                                                                                                                        |



|         |                                |   |       |       |                                                                                                                                                                                                                                    |
|---------|--------------------------------|---|-------|-------|------------------------------------------------------------------------------------------------------------------------------------------------------------------------------------------------------------------------------------|
| env-611 | CESL01010325.1                 | + | 5005  | 5069  | RNA→ rpsO (PRK05626)Ribosomal_S15 (pfam00312)→ Pnp (COG1185)PRK11824 (PRK11824)→ RpoD (COG0568)sigma70-ECF (TIGR02937)→ PRK05581 (PRK05581)RPE (cd00429)→ anmK (PRK09585)AnmK (pfam03702)→                                         |
| env-612 | CETA01075676.1                 | - | 752   | 688   | RNA→ rpsO (PRK05626)Ribosomal_S15 (pfam00312)→ PRK11824 (PRK11824)RNase_PH (pfam01138)→                                                                                                                                            |
| env-613 | SI47jul10_100m_c1098805        | - | 210   | 146   | RNA→ rpsO (PRK05626)Ribosomal_S15 (pfam00312)→                                                                                                                                                                                     |
| env-614 | CEQF01068126.1                 | + | 924   | 988   | RNA→ rpsO (PRK05626)Ribosomal_S15 (pfam00312)→ PRK11824 (PRK11824)RNase_PH (pfam01138)→                                                                                                                                            |
| env-615 | CERL01242589.1                 | + | 2074  | 2138  | RNA→ rpsO (PRK05626)Ribosomal_S15 (pfam00312)→                                                                                                                                                                                     |
| env-616 | JCVL_SCAF_1101667292350        | - | 651   | 587   | RNA→ rpsO (PRK05626)Ribosomal_S15 (pfam00312)→ PRK11824 (PRK11824)RNase_PH (pfam01138)→                                                                                                                                            |
| env-617 | CESM01026631.1                 | + | 383   | 447   | RNA→ rpsO (PRK05626)Ribosomal_S15 (pfam00312)→ PRK11824 (PRK11824)RNase_PH (pfam01138)RNase_PH_C (pfam03725)→                                                                                                                      |
| env-618 | CEUB01079894.1                 | - | 176   | 112   | RNA→ rpsO (PRK05626)Ribosomal_S15 (pfam00312)→                                                                                                                                                                                     |
| env-619 | CESU01087378.1                 | + | 261   | 325   | RNA→ rpsO (PRK05626)Ribosomal_S15 (pfam00312)→ PRK11824 (PRK11824)RNase_PH (pfam01138)RNase_PH_C (pfam03725)→                                                                                                                      |
| env-620 | CEVX01097219.1                 | + | 420   | 484   | RNA→ rpsO (PRK05626)Ribosomal_S15 (pfam00312)→ PRK11824 (PRK11824)RNase_PH (pfam01138)→                                                                                                                                            |
| env-621 | CEWO01070284.1                 | - | 70    | 6     | RNA→                                                                                                                                                                                                                               |
| env-622 | CEOP01011972.1                 | - | 955   | 891   | RNA→ rpsO (PRK05626)Ribosomal_S15 (pfam00312)→ PRK11824 (PRK11824)RNase_PH (pfam01138)→                                                                                                                                            |
| env-623 | CERW01092002.1                 | - | 678   | 614   | RNA→ rpsO (PRK05626)Ribosomal_S15 (pfam00312)→ PRK11824 (PRK11824)RNase_PH (pfam01138)→                                                                                                                                            |
| env-624 | JCVL_SCAF_1096626863907        | - | 2148  | 2084  | RNA→ rpsO (PRK05626)Ribosomal_S15 (pfam00312)→ Pnp (COG1185)PRK11824 (PRK11824)→                                                                                                                                                   |
| env-625 | DelMOSum2010.c10030564         | - | 2683  | 2619  | RNA→ rpsO (PRK05626)Ribosomal_S15 (pfam00312)→ Pnp (COG1185)PRK11824 (PRK11824)→                                                                                                                                                   |
| env-626 | JGI20156J14371_10004976        | - | 5364  | 5300  | RNA→ rpsO (PRK05626)Ribosomal_S15 (pfam00312)→ Pnp (COG1185)PRK11824 (PRK11824)→ RpoD (COG0568)sigma70-ECF (TIGR02937)bSCRAP40 (bSCRAP40)bSCRAP106 (bSCRAP106)→ PRK05581 (PRK05581)RPE (cd00429)→ anmK (PRK09585)AnmK (pfam03702)→ |
| env-627 | JGI20160J14292_10560358        | - | 67    | 3     | RNA→                                                                                                                                                                                                                               |
| env-628 | JGI20155J14468_10155867        | + | 228   | 292   | RNA→ rpsO (PRK05626)Ribosomal_S15 (pfam00312)→ RNase_PH_PNPase_1 (cd11363)PRK11824 (PRK11824)→                                                                                                                                     |
| env-629 | CERI01034968.1                 | - | 2137  | 2073  | RNA→ rpsO (PRK05626)Ribosomal_S15 (pfam00312)→ Pnp (COG1185)PRK11824 (PRK11824)→                                                                                                                                                   |
| env-630 | CERM01237716.1                 | + | 160   | 224   | RNA→ rpsO (PRK05626)Ribosomal_S15 (pfam00312)→ Pnp (COG1185)PRK11824 (PRK11824)→                                                                                                                                                   |
| env-631 | CESF01120804.1                 | - | 1011  | 947   | RNA→ rpsO (PRK05626)Ribosomal_S15 (pfam00312)→ PRK11824 (PRK11824)RNase_PH (pfam01138)RNase_PH_C (pfam03725)→                                                                                                                      |
| env-632 | CESO01082605.1                 | + | 3598  | 3662  | RNA→ rpsO (PRK05626)Ribosomal_S15 (pfam00312)→ PRK11824 (PRK11824)RNase_PH (pfam01138)→                                                                                                                                            |
| env-633 | CETY01057294.1                 | + | 812   | 876   | RNA→ rpsO (PRK05626)Ribosomal_S15 (pfam00312)→                                                                                                                                                                                     |
| env-634 | CEWO01335636.1                 | + | 832   | 896   | RNA→                                                                                                                                                                                                                               |
| env-635 | CESJ01039048.1                 | + | 2696  | 2760  | RNA→                                                                                                                                                                                                                               |
| env-636 | LPjun09P1210m_c1043297         | - | 263   | 199   | RNA→ rpsO (PRK05626)Ribosomal_S15 (pfam00312)→                                                                                                                                                                                     |
| env-637 | CENF01241446.1                 | - | 475   | 411   | RNA→ rpsO (PRK05626)Ribosomal_S15 (pfam00312)→ hypo→                                                                                                                                                                               |
| env-638 | LPaug09P1610m_c1079724         | - | 152   | 88    | RNA→ rpsO (PRK05626)RpsO (COG0184)→                                                                                                                                                                                                |
| env-639 | LPaug08P2610m_c1008313         | - | 509   | 445   | RNA→ rpsO (PRK05626)Ribosomal_S15 (pfam00312)→ RNase_PH_PNPase_1 (cd11363)PRK11824 (PRK11824)→                                                                                                                                     |
| env-640 | CESI01003936.1                 | - | 2614  | 2550  | RNA→ rpsO (PRK05626)Ribosomal_S15 (pfam00312)→ Pnp (COG1185)PRK11824 (PRK11824)→                                                                                                                                                   |
| env-641 | SI54feb11_100m_c1030638        | - | 504   | 440   | RNA→ rpsO (PRK05626)Ribosomal_S15 (pfam00312)→ RNase_PH_PNPase_1 (cd11363)PRK11824 (PRK11824)→                                                                                                                                     |
| env-642 | SI60aug11_100m_c1000018        | + | 42717 | 42781 | RNA→ rpsO (PRK05626)Ribosomal_S15 (pfam00312)→ Pnp (COG1185)PRK11824 (PRK11824)→ RpoD (COG0568)sigma70-ECF (TIGR02937)bSCRAP40 (bSCRAP40)bSCRAP106 (bSCRAP106)→ PRK05581 (PRK05581)RPE (cd00429)→ anmK (COG2377)anmK (PRK09585)→   |
| env-643 | SI47jul10_120m_c1021072        | - | 725   | 661   | RNA→ rpsO (PRK05626)Ribosomal_S15 (pfam00312)→ PRK11824 (PRK11824)RNase_PH (pfam01138)→                                                                                                                                            |
| env-644 | SI36aug09_120m_1000015         | + | 9032  | 9096  | RNA→ rpsO (PRK05626)Ribosomal_S15 (pfam00312)→ Pnp (COG1185)PRK11824 (PRK11824)→ RpoD (COG0568)sigma70-ECF (TIGR02937)bSCRAP40 (bSCRAP40)bSCRAP106 (bSCRAP106)→ PRK05581 (PRK05581)RPE (cd00429)→ anmK (PRK09585)AnmK (pfam03702)→ |
| env-645 | A09P04500a_Sequence0000024128  | - | 490   | 426   | RNA→ rpsO (PRK05626)Ribosomal_S15 (pfam00312)→ RNase_PH_PNPase_1 (cd11363)PRK11824 (PRK11824)→                                                                                                                                     |
| env-646 | J09P20500a_Sequence0000027602  | - | 643   | 579   | RNA→ rpsO (PRK05626)Ribosomal_S15 (pfam00312)→ PRK11824 (PRK11824)RNase_PH (pfam01138)→                                                                                                                                            |
| env-647 | F10SI03120a_Sequence0000002163 | + | 5397  | 5461  | RNA→ rpsO (PRK05626)Ribosomal_S15 (pfam00312)→                                                                                                                                                                                     |
| env-648 | SI39nov09_120m_c1156358        | + | 103   | 167   | RNA→ rpsO (PRK05626)Ribosomal_S15 (pfam00312)→                                                                                                                                                                                     |
| env-649 | SI60aug11_100m_c1008765        | + | 593   | 657   | RNA→ rpsO (PRK05626)Ribosomal_S15 (pfam00312)→ Pnp (COG1185)PRK11824 (PRK11824)→                                                                                                                                                   |
| env-650 | SI47jul10_100m_c1000490        | - | 5467  | 5403  | RNA→ rpsO (PRK05626)Ribosomal_S15 (pfam00312)→ Pnp (COG1185)PRK11824 (PRK11824)→ RpoD (COG0568)sigma70-ECF (TIGR02937)bSCRAP40 (bSCRAP40)bSCRAP106 (bSCRAP106)→ PRK05581 (PRK05581)RPE (cd00429)→ anmK (PRK09585)AnmK (pfam03702)→ |
| env-651 | SI39nov09_135m_c1093920        | + | 131   | 195   | RNA→ rpsO (PRK05626)Ribosomal_S15 (pfam00312)→                                                                                                                                                                                     |



|         |                                |   |       |       |                                                                                                                                                                                                                                    |
|---------|--------------------------------|---|-------|-------|------------------------------------------------------------------------------------------------------------------------------------------------------------------------------------------------------------------------------------|
| env-652 | SI60aug11_200m.c1241338        | + | 85    | 149   | RNA→ rpsO (PRK05626)RpsO (COG0184)→                                                                                                                                                                                                |
| env-653 | SI47jul10_135m.c1051027        | - | 459   | 395   | RNA→ rpsO (PRK05626)Ribosomal_S15 (pfam00312)→ hypo→                                                                                                                                                                               |
| env-654 | SI34jun09_120m.1000008         | - | 61442 | 61378 | RNA→ rpsO (PRK05626)Ribosomal_S15 (pfam00312)→ Pnp (COG1185)PRK11824 (PRK11824)→ RpoD (COG0568)sigma70-ECF (TIGR02937)bSCRAP40 (bSCRAP40)bSCRAP106 (bSCRAP106)→ PRK05581 (PRK05581)RPE (cd00429)→ anmK (PRK09585)AnmK (pfam03702)→ |
| env-655 | SI34jun09_135m.1000014         | - | 50759 | 50695 | RNA→ rpsO (PRK05626)Ribosomal_S15 (pfam00312)→ Pnp (COG1185)PRK11824 (PRK11824)→ RpoD (COG0568)sigma70-ECF (TIGR02937)bSCRAP40 (bSCRAP40)bSCRAP106 (bSCRAP106)→ PRK05581 (PRK05581)RPE (cd00429)→ anmK (PRK09585)AnmK (pfam03702)→ |
| env-656 | SI39nov09_100m.1072152         | - | 470   | 406   | RNA→ rpsO (PRK05626)Ribosomal_S15 (pfam00312)→ hypo→                                                                                                                                                                               |
| env-657 | SI36aug09_100m.1060339         | + | 326   | 390   | RNA→                                                                                                                                                                                                                               |
| env-658 | SI34jun09_100m.1011554         | - | 1665  | 1601  | RNA→ rpsO (PRK05626)Ribosomal_S15 (pfam00312)→ Pnp (COG1185)PRK11824 (PRK11824)→                                                                                                                                                   |
| env-659 | CEWR01151164.1                 | - | 180   | 116   | RNA→ rpsO (PRK05626)Ribosomal_S15 (pfam00312)→                                                                                                                                                                                     |
| env-660 | CESE01088802.1                 | - | 353   | 289   | RNA→ rpsO (PRK05626)Ribosomal_S15 (pfam00312)→                                                                                                                                                                                     |
| env-661 | CETV01112507.1                 | + | 2433  | 2497  | RNA→ rpsO (PRK05626)Ribosomal_S15 (pfam00312)→ Pnp (COG1185)PRK11824 (PRK11824)→ RpoD (COG0568)sigma70-ECF (TIGR02937)→ PRK05581 (PRK05581)RPE (cd00429)→ anmK (PRK09585)AnmK (pfam03702)→                                         |
| env-662 | A09P041000a_Sequence0000001821 | + | 883   | 947   | RNA→ rpsO (PRK05626)Ribosomal_S15 (pfam00312)→ PRK11824 (PRK11824)RNase_PH (pfam01138)→                                                                                                                                            |
| env-663 | CESM01243490.1                 | + | 238   | 303   | RNA→ rpsO (PRK05626)Ribosomal_S15 (pfam00312)→                                                                                                                                                                                     |
| env-664 | BS_KBA_SWE12_21m.c10000131     | + | 18308 | 18374 | RNA→ rpsO (PRK05626)Ribosomal_S15 (pfam00312)→                                                                                                                                                                                     |
| env-665 | BS_KBB_SWE26_205m.c1000040     | - | 13487 | 13421 | RNA→ rpsO (PRK05626)Ribosomal_S15 (pfam00312)→                                                                                                                                                                                     |
| env-666 | BS_KBA_SWE07_21m.c1009901      | - | 943   | 877   | RNA→ rpsO (PRK05626)Ribosomal_S15 (pfam00312)→                                                                                                                                                                                     |
| env-667 | BS_KBA_SWE21_205m.10000004     | + | 15225 | 15291 | RNA→ rpsO (PRK05626)Ribosomal_S15 (pfam00312)→                                                                                                                                                                                     |
| env-668 | BS_KBA_SWE02_21m.10000008      | + | 18316 | 18382 | RNA→ rpsO (PRK05626)Ribosomal_S15 (pfam00312)→                                                                                                                                                                                     |
| env-669 | KGL_S1_ANT02_95m.c10523594     | - | 194   | 129   | RNA→ rpsO (PRK05626)Ribosomal_S15 (pfam00312)→                                                                                                                                                                                     |
| env-670 | SA_S1_NOR08_45m.c10397994      | - | 292   | 227   | RNA→ rpsO (PRK05626)Ribosomal_S15 (pfam00312)→                                                                                                                                                                                     |
| env-671 | SA_S2_NOR15_50m.c10501265      | + | 214   | 279   | RNA→ rpsO (PRK05626)→                                                                                                                                                                                                              |
| env-672 | CEUH01124891.1                 | + | 289   | 346   | RNA→ rpsO (PRK05626)Ribosomal_S15 (pfam00312)→                                                                                                                                                                                     |
| env-673 | CESI01168467.1                 | - | 345   | 287   | RNA→ rpsO (PRK05626)Ribosomal_S15 (pfam00312)→                                                                                                                                                                                     |
| env-674 | CESU01168001.1                 | - | 537   | 479   | RNA→ rpsO (PRK05626)Ribosomal_S15 (pfam00312)→ RNase_PH_PNPase_1 (cd11363)PRK11824 (PRK11824)→                                                                                                                                     |
| env-675 | CESM01131397.1                 | - | 185   | 127   | RNA→ rpsO (PRK05626)Ribosomal_S15 (pfam00312)→                                                                                                                                                                                     |
| env-676 | CESZ01043879.1                 | - | 5070  | 5012  | RNA→ rpsO (PRK05626)Ribosomal_S15 (pfam00312)→ Pnp (COG1185)PRK11824 (PRK11824)→                                                                                                                                                   |
| env-677 | CENG01063226.1                 | - | 2602  | 2544  | RNA→ rpsO (PRK05626)Ribosomal_S15 (pfam00312)→ Pnp (COG1185)PRK11824 (PRK11824)→                                                                                                                                                   |
| env-678 | CESA01043993.1                 | + | 34    | 92    | RNA→ rpsO (PRK05626)Ribosomal_S15 (pfam00312)→ Pnp (COG1185)PRK11824 (PRK11824)→                                                                                                                                                   |
| env-679 | CEQX01317913.1                 | - | 490   | 432   | RNA→ rpsO (PRK05626)Ribosomal_S15 (pfam00312)→ PRK11824 (PRK11824)→                                                                                                                                                                |
| env-680 | CESQ01364581.1                 | + | 618   | 676   | RNA→ hypo→                                                                                                                                                                                                                         |
| env-681 | CETE01036010.1                 | - | 845   | 787   | RNA→ rpsO (PRK05626)Ribosomal_S15 (pfam00312)→ PRK11824 (PRK11824)RNase_PH (pfam01138)→                                                                                                                                            |
| env-682 | CETK01367368.1                 | + | 610   | 668   | RNA→ rpsO (PRK05626)Ribosomal_S15 (pfam00312)→ PRK11824 (PRK11824)RNase_PH (pfam01138)→                                                                                                                                            |
| env-683 | CETQ01203907.1                 | + | 444   | 502   | RNA→ rpsO (PRK05626)Ribosomal_S15 (pfam00312)→                                                                                                                                                                                     |
| env-684 | CEUH01124635.1                 | - | 299   | 241   | RNA→ rpsO (PRK05626)Ribosomal_S15 (pfam00312)→                                                                                                                                                                                     |
| env-685 | CEUW01071784.1                 | - | 737   | 679   | RNA→ rpsO (PRK05626)Ribosomal_S15 (pfam00312)→ PRK11824 (PRK11824)RNase_PH (pfam01138)→                                                                                                                                            |
| env-686 | CEWH01138841.1                 | - | 766   | 708   | RNA→ rpsO (PRK05626)Ribosomal_S15 (pfam00312)→ PRK11824 (PRK11824)RNase_PH (pfam01138)→                                                                                                                                            |
| env-687 | CEUK01251936.1                 | + | 511   | 569   | RNA→                                                                                                                                                                                                                               |
| env-688 | CEUU01042451.1                 | - | 497   | 439   | RNA→ rpsO (PRK05626)Ribosomal_S15 (pfam00312)→ RNase_PH_PNPase_1 (cd11363)PRK11824 (PRK11824)→                                                                                                                                     |
| env-689 | CEVF01030331.1                 | - | 845   | 787   | RNA→ rpsO (PRK05626)Ribosomal_S15 (pfam00312)→ PRK11824 (PRK11824)RNase_PH (pfam01138)→                                                                                                                                            |
| env-690 | CEWJ01102386.1                 | + | 420   | 478   | RNA→ rpsO (PRK05626)Ribosomal_S15 (pfam00312)→ PRK11824 (PRK11824)RNase_PH (pfam01138)→                                                                                                                                            |
| env-691 | JGI24820J26691_1081338         | - | 226   | 168   | RNA→ rpsO (PRK05626)Ribosomal_S15 (pfam00312)→                                                                                                                                                                                     |
| env-692 | JCVL_SCAF_1096627810395        | + | 221   | 279   | RNA→ rpsO (PRK05626)Ribosomal_S15 (pfam00312)→ PRK11824 (PRK11824)RNase_PH (pfam01138)→ PRK11824 (PRK11824)RNase_PH (pfam01138)RNase_PH_C (pfam03725)→                                                                             |
| env-693 | CESM01131398.1                 | + | 31    | 89    | RNA→ rpsO (PRK05626)Ribosomal_S15 (pfam00312)→ PRK11824 (PRK11824)RNase_PH (pfam01138)→                                                                                                                                            |
| env-694 | CERI01037614.1                 | + | 3582  | 3642  | RNA→ rpsO (PRK05626)Ribosomal_S15 (pfam00312)→ Pnp (COG1185)PRK11824 (PRK11824)→ RpoD (COG0568)sigma70-ECF (TIGR02937)→ PRK05581 (PRK05581)RPE (cd00429)→                                                                          |
| env-695 | CESF01030271.1                 | - | 5728  | 5668  | RNA→ rpsO (PRK05626)Ribosomal_S15 (pfam00312)→ Pnp (COG1185)PRK11824 (PRK11824)→ RpoD (COG0568)sigma70-ECF (TIGR02937)→ PRK05581 (PRK05581)RPE (cd00429)→                                                                          |
| env-696 | CESO01050962.1                 | - | 2098  | 2038  | RNA→ rpsO (PRK05626)Ribosomal_S15 (pfam00312)→ Pnp (COG1185)PRK11824 (PRK11824)→                                                                                                                                                   |

|         |                              |   |        |        |                                                                                                                                                                                                                                                                                                                                                                                    |
|---------|------------------------------|---|--------|--------|------------------------------------------------------------------------------------------------------------------------------------------------------------------------------------------------------------------------------------------------------------------------------------------------------------------------------------------------------------------------------------|
| env-697 | CETY01400875.1               | - | 635    | 575    | RNA → rpsO (PRK05626)Ribosomal_S15 (pfam00312) → PRK11824 (PRK11824)RNase_PH (pfam01138) →                                                                                                                                                                                                                                                                                         |
| env-698 | CEVX01285939.1               | + | 370    | 430    | RNA → rpsO (PRK05626)Ribosomal_S15 (pfam00312) →                                                                                                                                                                                                                                                                                                                                   |
| env-699 | CEOP01004610.1               | + | 2645   | 2705   | RNA → rpsO (PRK05626)Ribosomal_S15 (pfam00312) → Pnp (COG1185)PRK11824 (PRK11824) →                                                                                                                                                                                                                                                                                                |
| env-700 | JCVL_SCAF_1096626851857      | - | 1063   | 1003   | RNA → rpsO (PRK05626)Ribosomal_S15 (pfam00312) → RNase_PH_PNPase_1 (cd11363)PRK11824 (PRK11824) →                                                                                                                                                                                                                                                                                  |
| env-701 | CENT01185471.1               | - | 1093   | 1032   | RNA → rpsO (PRK05626)Ribosomal_S15 (pfam00312) → RNase_PH_PNPase_1 (cd11363)PRK11824 (PRK11824) →                                                                                                                                                                                                                                                                                  |
| env-702 | LPaug09P1610m.c1022285       | - | 558    | 498    | RNA → rpsO (PRK05626)Ribosomal_S15 (pfam00312) → RNase_PH_PNPase_1 (cd11363)PRK11824 (PRK11824) →                                                                                                                                                                                                                                                                                  |
| env-703 | CENG01117863.1               | + | 933    | 989    | RNA →                                                                                                                                                                                                                                                                                                                                                                              |
| env-704 | CENJ01221902.1               | - | 62     | 6      | RNA → ←-hypo                                                                                                                                                                                                                                                                                                                                                                       |
| env-705 | NCBI_BBAY_READ_1105609640893 | - | 179    | 122    | RNA →                                                                                                                                                                                                                                                                                                                                                                              |
| env-706 | CEOK01189823.1               | - | 83     | 26     | RNA →                                                                                                                                                                                                                                                                                                                                                                              |
| env-707 | JCVL_SCAF_1101668161477      | - | 498    | 441    | RNA → rpsO (PRK05626)Ribosomal_S15 (pfam00312) →                                                                                                                                                                                                                                                                                                                                   |
| env-708 | JGI20157J14317_10026495      | - | 1195   | 1138   | RNA → rpsO (PRK05626)Ribosomal_S15 (pfam00312) → RNase_PH_PNPase_1 (cd11363)PRK11824 (PRK11824) →                                                                                                                                                                                                                                                                                  |
| env-709 | HBC_scaff_10024157           | + | 21661  | 21709  | RNA → rpsO (PRK05626)Ribosomal_S15 (pfam00312) →                                                                                                                                                                                                                                                                                                                                   |
| env-710 | HBC_ctgs_1000293             | - | 1761   | 1713   | RNA → rpsO (PRK05626)Ribosomal_S15 (pfam00312) →                                                                                                                                                                                                                                                                                                                                   |
| env-711 | JGI24023J19991_10000252      | - | 22396  | 22343  | RNA → rpsO (PRK05626)Ribosomal_S15 (pfam00312) → Pnp (COG1185)PRK11824 (PRK11824) →                                                                                                                                                                                                                                                                                                |
| env-712 | CERI01113722.1               | - | 1102   | 1043   | RNA → rpsO (PRK05626)Ribosomal_S15 (pfam00312) → RNase_PH_PNPase_1 (cd11363)PRK11824 (PRK11824) →                                                                                                                                                                                                                                                                                  |
| Fba-2-1 | NZ_ABVV01000001.1            | - | 275587 | 275526 | RNA → rpsO (PRK05626)Ribosomal_S15 (pfam00312) → rpsO (PRK05626)Ribosomal_S15 (pfam00312) → hypo →<br>Pnp (COG1185)PRK11824 (PRK11824) → Pnp (COG1185)PRK11824 (PRK11824) →<br>RpoD (COG0568)sigma70-ECF (TIGR02937)bSCRAP40 (bSCRAP40)bSCRAP106 (bSCRAP106) →<br>RpoD (COG0568)sigma70-ECF (TIGR02937) → PRK05581 (PRK05581)RPE (cd00429) →<br>PRK05581 (PRK05581)RPE (cd00429) → |
| env-713 | DelMOSum2010.c10000077       | - | 70521  | 70460  | RNA → rpsO (PRK05626)Ribosomal_S15 (pfam00312) → Pnp (COG1185)PRK11824 (PRK11824) →<br>RpoD (COG0568)sigma70-ECF (TIGR02937)bSCRAP40 (bSCRAP40)bSCRAP106 (bSCRAP106) →<br>PRK05581 (PRK05581)RPE (cd00429) →                                                                                                                                                                       |
| env-714 | SI34jun09_10m_1001264        | - | 3237   | 3176   | RNA → rpsO (PRK05626)Ribosomal_S15 (pfam00312) → Pnp (COG1185)PRK11824 (PRK11824) →<br>RpoD (COG0568)sigma70-ECF (TIGR02937) →                                                                                                                                                                                                                                                     |
| env-715 | JGI20152J14361_10000391      | - | 11554  | 11493  | RNA → rpsO (PRK05626)Ribosomal_S15 (pfam00312) → Pnp (COG1185)PRK11824 (PRK11824) →<br>RpoD (COG0568)sigma70-ECF (TIGR02937)bSCRAP40 (bSCRAP40)bSCRAP106 (bSCRAP106) →<br>PRK05581 (PRK05581)RPE (cd00429) →                                                                                                                                                                       |
| env-716 | JGI20160J14292_10000039      | + | 19294  | 19355  | RNA → rpsO (PRK05626)Ribosomal_S15 (pfam00312) → Pnp (COG1185)PRK11824 (PRK11824) →<br>RpoD (COG0568)sigma70-ECF (TIGR02937)bSCRAP40 (bSCRAP40)bSCRAP106 (bSCRAP106) →<br>PRK05581 (PRK05581)RPE (cd00429) →                                                                                                                                                                       |
| env-717 | JGI20157J14317_10000232      | + | 16872  | 16933  | RNA → rpsO (PRK05626)Ribosomal_S15 (pfam00312) → Pnp (COG1185)PRK11824 (PRK11824) →<br>RpoD (COG0568)sigma70-ECF (TIGR02937)bSCRAP40 (bSCRAP40)bSCRAP106 (bSCRAP106) →<br>PRK05581 (PRK05581)RPE (cd00429) →                                                                                                                                                                       |
| env-718 | DelMOSum2011.c10015687       | - | 2741   | 2680   | RNA → rpsO (PRK05626)Ribosomal_S15 (pfam00312) → Pnp (COG1185)PRK11824 (PRK11824) →<br>PRK09210 (PRK09210)Sigma70_r1_2 (pfam00140) →                                                                                                                                                                                                                                               |
| env-719 | JGI20151J14362_10000070      | - | 48313  | 48252  | RNA → rpsO (PRK05626)Ribosomal_S15 (pfam00312) → Pnp (COG1185)PRK11824 (PRK11824) →<br>RpoD (COG0568)sigma70-ECF (TIGR02937)bSCRAP40 (bSCRAP40)bSCRAP106 (bSCRAP106) →<br>PRK05581 (PRK05581)RPE (cd00429) →                                                                                                                                                                       |
| env-720 | JGI20156J14371_10000130      | + | 17278  | 17339  | RNA → rpsO (PRK05626)Ribosomal_S15 (pfam00312) → Pnp (COG1185)PRK11824 (PRK11824) →<br>RpoD (COG0568)sigma70-ECF (TIGR02937)bSCRAP40 (bSCRAP40)bSCRAP106 (bSCRAP106) →<br>PRK05581 (PRK05581)RPE (cd00429) →                                                                                                                                                                       |
| env-721 | JGI20154J14316_10000543      | - | 13329  | 13268  | RNA → rpsO (PRK05626)Ribosomal_S15 (pfam00312) → Pnp (COG1185)PRK11824 (PRK11824) →<br>RpoD (COG0568)sigma70-ECF (TIGR02937)bSCRAP40 (bSCRAP40)bSCRAP106 (bSCRAP106) →<br>PRK05581 (PRK05581)RPE (cd00429) →                                                                                                                                                                       |
| env-722 | JGI20153J14295_10000212      | - | 48142  | 48081  | RNA → rpsO (PRK05626)Ribosomal_S15 (pfam00312) → Pnp (COG1185)PRK11824 (PRK11824) →<br>RpoD (COG0568)sigma70-ECF (TIGR02937)bSCRAP40 (bSCRAP40)bSCRAP106 (bSCRAP106) →<br>PRK05581 (PRK05581)RPE (cd00429) →                                                                                                                                                                       |
| env-723 | JGI20153J14318_10000212      | - | 48142  | 48081  | RNA → rpsO (PRK05626)Ribosomal_S15 (pfam00312) → Pnp (COG1185)PRK11824 (PRK11824) →<br>RpoD (COG0568)sigma70-ECF (TIGR02937)bSCRAP40 (bSCRAP40)bSCRAP106 (bSCRAP106) →<br>PRK05581 (PRK05581)RPE (cd00429) →                                                                                                                                                                       |
| env-724 | JGI20159J14440_10000191      | - | 27139  | 27078  | RNA → rpsO (PRK05626)Ribosomal_S15 (pfam00312) → Pnp (COG1185)PRK11824 (PRK11824) →<br>RpoD (COG0568)sigma70-ECF (TIGR02937)bSCRAP40 (bSCRAP40)bSCRAP106 (bSCRAP106) →<br>PRK05581 (PRK05581)RPE (cd00429) →                                                                                                                                                                       |

|         |                         |   |        |        |                                                                                                                                                                                                   |
|---------|-------------------------|---|--------|--------|---------------------------------------------------------------------------------------------------------------------------------------------------------------------------------------------------|
| env-725 | JGI20155J14468.10000002 | - | 197670 | 197609 | RNA→ rpsO (PRK05626)Ribosomal_S15 (pfam00312)→ Pnp (COG1185)PRK11824 (PRK11824)→ RpoD (COG0568)sigma70-ECF (TIGR02937)bSCRAP40 (bSCRAP40)bSCRAP106 (bSCRAP106)→ PRK05581 (PRK05581)RPE (cd00429)→ |
| env-726 | JGI20158J14315.10001443 | - | 14132  | 14071  | RNA→ rpsO (PRK05626)Ribosomal_S15 (pfam00312)→ Pnp (COG1185)PRK11824 (PRK11824)→ RpoD (COG0568)sigma70-ECF (TIGR02937)bSCRAP40 (bSCRAP40)bSCRAP106 (bSCRAP106)→ PRK05581 (PRK05581)RPE (cd00429)→ |
| env-727 | SI60aug11.100m.c1210894 | - | 111    | 50     | RNA→                                                                                                                                                                                              |
| env-728 | SI48aug10.10m.c1076796  | - | 113    | 52     | RNA→                                                                                                                                                                                              |
| env-729 | SI48aug10.100m.1053294  | - | 541    | 480    | RNA→ rpsO (PRK05626)Ribosomal_S15 (pfam00312)→ RNase_PH_PNPase_1 (cd11363)PRK11824 (PRK11824)→                                                                                                    |
| env-730 | JGI20152J14361.10285356 | + | 41     | 101    | RNA→ rpsO (PRK05626)Ribosomal_S15 (pfam00312)→                                                                                                                                                    |
| env-731 | JGI20151J14362.10001694 | + | 13999  | 14059  | RNA→ rpsO (PRK05626)Ribosomal_S15 (pfam00312)→ Pnp (COG1185)PRK11824 (PRK11824)→                                                                                                                  |
| env-732 | JGI20156J14371.10036665 | + | 758    | 818    | RNA→ rpsO (PRK05626)Ribosomal_S15 (pfam00312)→ Pnp (COG1185)PRK11824 (PRK11824)→                                                                                                                  |
| env-733 | JGI20159J14440.10045471 | + | 1257   | 1317   | RNA→ rpsO (PRK05626)Ribosomal_S15 (pfam00312)→                                                                                                                                                    |
| env-734 | JGI20160J14292.10275000 | + | 128    | 188    | RNA→ rpsO (PRK05626)Ribosomal_S15 (pfam00312)→                                                                                                                                                    |
| env-735 | JGI20155J14468.10035248 | + | 2056   | 2116   | RNA→ rpsO (PRK05626)Ribosomal_S15 (pfam00312)→                                                                                                                                                    |
| env-736 | JGI20158J14315.10222416 | + | 279    | 339    | RNA→ rpsO (PRK05626)Ribosomal_S15 (pfam00312)→                                                                                                                                                    |
| env-737 | CENJ01283541.1          | + | 787    | 847    | RNA→                                                                                                                                                                                              |
| env-738 | JCVL_SCAF_1096626899896 | + | 1250   | 1310   | RNA→                                                                                                                                                                                              |
| env-739 | CENG01040397.1          | - | 73     | 13     | RNA→                                                                                                                                                                                              |
| env-740 | CESI01023085.1          | - | 644    | 584    | RNA→ rpsO (PRK05626)Ribosomal_S15 (pfam00312)→ PRK11824 (PRK11824)RNase_PH (pfam01138)→                                                                                                           |
| env-741 | CETK01101931.1          | - | 10939  | 10891  | RNA→ rpsO (PRK05626)Ribosomal_S15 (pfam00312)→ Pnp (COG1185)PRK11824 (PRK11824)→ RpoD (COG0568)sigma70-ECF (TIGR02937)→ PRK05581 (PRK05581)RPE (cd00429)→                                         |
| env-742 | CEVG01048401.1          | - | 452    | 404    | RNA→ rpsO (PRK05626)Ribosomal_S15 (pfam00312)→                                                                                                                                                    |
| env-743 | CESS01088671.1          | + | 460    | 508    | RNA→ rpsO (PRK05626)RpsO (COG0184)→ PRK11824 (PRK11824)RNase_PH (pfam01138)RNase_PH_C (pfam03725)→                                                                                                |
| env-744 | CENP01025453.1          | + | 853    | 901    | RNA→                                                                                                                                                                                              |
| env-745 | CENU01400115.1          | + | 500    | 548    | RNA→ rpsO (PRK05626)RpsO (COG0184)→ PRK11824 (PRK11824)RNase_PH (pfam01138)→                                                                                                                      |
| env-746 | JCVL_SCAF_1096627284330 | - | 131    | 83     | RNA→                                                                                                                                                                                              |
| env-747 | CENN01195248.1          | + | 427    | 475    | RNA→ rpsO (PRK05626)RpsO (COG0184)→ Pnp (COG1185)PRK11824 (PRK11824)→ RpoD (COG0568)sigma70-ECF (TIGR02937)→                                                                                      |
| env-748 | CEWA01144527.1          | + | 171    | 219    | RNA→ rpsO (PRK05626)Ribosomal_S15 (pfam00312)→                                                                                                                                                    |
| env-749 | CEUH01264893.1          | - | 295    | 247    | RNA→ rpsO (PRK05626)Ribosomal_S15 (pfam00312)→                                                                                                                                                    |
| env-750 | CEWG01086055.1          | + | 2874   | 2922   | RNA→ rpsO (PRK05626)Ribosomal_S15 (pfam00312)→                                                                                                                                                    |
| env-751 | JCVL_SCAF_1101668541356 | - | 246    | 198    | RNA→ rpsO (PRK05626)Ribosomal_S15 (pfam00312)→                                                                                                                                                    |
| env-752 | CEUB01094603.1          | + | 343    | 391    | RNA→ rpsO (PRK05626)Ribosomal_S15 (pfam00312)→                                                                                                                                                    |
| env-753 | CENG01122428.1          | - | 281    | 233    | RNA→ rpsO (PRK05626)Ribosomal_S15 (pfam00312)→                                                                                                                                                    |
| env-754 | CENJ01278422.1          | + | 82     | 130    | RNA→ rpsO (PRK05626)Ribosomal_S15 (pfam00312)→ PRK11824 (PRK11824)RNase_PH (pfam01138)→                                                                                                           |
| env-755 | CEWH01115234.1          | - | 417    | 368    | RNA→ rpsO (PRK05626)Ribosomal_S15 (pfam00312)→                                                                                                                                                    |
| env-756 | CESF01312487.1          | + | 10933  | 10981  | RNA→ rpsO (PRK05626)Ribosomal_S15 (pfam00312)→ Pnp (COG1185)PRK11824 (PRK11824)→                                                                                                                  |
| env-757 | CESO01048748.1          | + | 2685   | 2733   | RNA→ rpsO (PRK05626)Ribosomal_S15 (pfam00312)→ Pnp (COG1185)PRK11824 (PRK11824)→ RpoD (COG0568)sigma70-ECF (TIGR02937)→ PRK05581 (PRK05581)RPE (cd00429)→                                         |
| env-758 | CEVG01111268.1          | - | 830    | 782    | RNA→ rpsO (PRK05626)Ribosomal_S15 (pfam00312)→ PRK11824 (PRK11824)RNase_PH (pfam01138)→                                                                                                           |
| env-759 | CENG01071379.1          | + | 1616   | 1664   | RNA→ rpsO (PRK05626)RpsO (COG0184)→ Pnp (COG1185)PRK11824 (PRK11824)→ RpoD (COG0568)sigma70-ECF (TIGR02937)→                                                                                      |
| env-760 | CENT01073065.1          | + | 574    | 622    | RNA→ rpsO (PRK05626)RpsO (COG0184)→ RNase_PH_PNPase_1 (cd11363)PRK11824 (PRK11824)→                                                                                                               |
| env-761 | CEQP01301392.1          | + | 997    | 1051   | RNA→ hypo→                                                                                                                                                                                        |
| env-762 | CETB01210491.1          | + | 254    | 308    | RNA→ rpsO (PRK05626)Ribosomal_S15 (pfam00312)→                                                                                                                                                    |
| env-763 | CESM01391969.1          | - | 199    | 145    | RNA→ rpsO (PRK05626)Ribosomal_S15 (pfam00312)→                                                                                                                                                    |
| env-764 | CEWG01210985.1          | - | 2290   | 2236   | RNA→ rpsO (PRK05626)Ribosomal_S15 (pfam00312)→ Pnp (COG1185)PRK11824 (PRK11824)→                                                                                                                  |
| env-765 | JCVL_SCAF_1096626961789 | - | 286    | 232    | RNA→ rpsO (PRK05626)Ribosomal_S15 (pfam00312)→                                                                                                                                                    |
| env-766 | CEUF01056559.1          | + | 193    | 247    | RNA→ rpsO (PRK05626)Ribosomal_S15 (pfam00312)→ PRK11824 (PRK11824)RNase_PH (pfam01138)RNase_PH_C (pfam03725)→                                                                                     |
| env-767 | CEOV01002341.1          | - | 270    | 216    | RNA→ rpsO (PRK05626)Ribosomal_S15 (pfam00312)→                                                                                                                                                    |
| env-768 | CEOW01267461.1          | + | 1775   | 1829   | RNA→ rpsO (PRK05626)Ribosomal_S15 (pfam00312)→                                                                                                                                                    |



|         |                             |   |        |        |                                                                                                                  |
|---------|-----------------------------|---|--------|--------|------------------------------------------------------------------------------------------------------------------|
| env-769 | CEPA01173849.1              | + | 414    | 468    | RNA→ hypo→                                                                                                       |
| env-770 | CEPT01173609.1              | + | 76     | 130    | RNA→ rpsO (PRK05626)Ribosomal_S15 (pfam00312)→                                                                   |
| env-771 | CEVG01159809.1              | - | 1097   | 1043   | RNA→ rpsO (PRK05626)Ribosomal_S15 (pfam00312)→<br>PRK11824 (PRK11824)RNase_PH (pfam01138)RNase_PH_C (pfam03725)→ |
| env-772 | CEWA01198601.1              | - | 261    | 207    | RNA→ rpsO (PRK05626)Ribosomal_S15 (pfam00312)→                                                                   |
| env-773 | CETK01338805.1              | + | 612    | 666    | RNA→ rpsO (PRK05626)Ribosomal_S15 (pfam00312)→                                                                   |
| env-774 | CEUH01280879.1              | + | 105    | 159    | RNA→ rpsO (PRK05626)Ribosomal_S15 (pfam00312)→ PRK11824 (PRK11824)RNase_PH (pfam01138)→                          |
| env-775 | CEVH01186256.1              | + | 1905   | 1959   | RNA→ rpsO (PRK05626)Ribosomal_S15 (pfam00312)→                                                                   |
| env-776 | CEWH01028013.1              | + | 91     | 145    | RNA→ rpsO (PRK05626)Ribosomal_S15 (pfam00312)→ Pnp (COG1185)PRK11824 (PRK11824)→                                 |
| env-777 | CENJ01092577.1              | - | 1007   | 952    | RNA→ rpsO (PRK05626)Ribosomal_S15 (pfam00312)→<br>PRK11824 (PRK11824)RNase_PH (pfam01138)RNase_PH_C (pfam03725)→ |
| env-778 | CEOK01031026.1              | + | 658    | 713    | RNA→ rpsO (PRK05626)Ribosomal_S15 (pfam00312)→                                                                   |
| env-779 | CEVU01050680.1              | - | 328    | 273    | RNA→ rpsO (PRK05626)Ribosomal_S15 (pfam00312)→                                                                   |
| env-780 | CEVP01013039.1              | + | 315    | 369    | RNA→ rpsO (PRK05626)Ribosomal_S15 (pfam00312)→ PRK11824 (PRK11824)RNase_PH (pfam01138)→                          |
| env-781 | CEQN01285656.1              | + | 461    | 515    | RNA→ rpsO (PRK05626)Ribosomal_S15 (pfam00312)→                                                                   |
| env-782 | CEQY01281147.1              | - | 162    | 108    | RNA→ rpsO (PRK05626)Ribosomal_S15 (pfam00312)→                                                                   |
| env-783 | CESB01256322.1              | - | 418    | 364    | RNA→ rpsO (PRK05626)Ribosomal_S15 (pfam00312)→                                                                   |
| env-784 | CENX01069896.1              | - | 443    | 388    | RNA→ rpsO (PRK05626)Ribosomal_S15 (pfam00312)→                                                                   |
| env-785 | CEOM01046697.1              | - | 328    | 273    | RNA→ rpsO (PRK05626)Ribosomal_S15 (pfam00312)→                                                                   |
| env-786 | CENP01062878.1              | + | 5461   | 5515   | RNA→ rpsO (PRK05626)Ribosomal_S15 (pfam00312)→ Pnp (COG1185)PRK11824 (PRK11824)→                                 |
| env-787 | CEOF01162626.1              | + | 613    | 667    | RNA→ rpsO (PRK05626)Ribosomal_S15 (pfam00312)→                                                                   |
| env-788 | CEOK01252908.1              | + | 73     | 127    | RNA→ rpsO (PRK05626)Ribosomal_S15 (pfam00312)→ RNase_PH_PNPase_1 (cd11363)PRK11824 (PRK11824)→                   |
| env-789 | SR_TTP_S3_1008655           | - | 875    | 808    | RNA→ rpsO (PRK05626)Ribosomal_S15 (pfam00312)→                                                                   |
| env-790 | SR_TP_S13sol_1003857        | + | 417    | 484    | RNA→ rpsO (PRK05626)Ribosomal_S15 (pfam00312)→                                                                   |
| env-791 | NCBL_READ_1112684383788     | - | 614    | 547    | RNA→ rpsO (PRK05626)Ribosomal_S15 (pfam00312)→                                                                   |
| env-792 | CEST01074805.1              | - | 430    | 363    | RNA→ rpsO (PRK05626)Ribosomal_S15 (pfam00312)→                                                                   |
| env-793 | CESU01086043.1              | - | 552    | 485    | RNA→ rpsO (PRK05626)Ribosomal_S15 (pfam00312)→                                                                   |
| env-794 | NCBL_READ_1112777362025     | + | 472    | 539    | RNA→ rpsO (PRK05626)Ribosomal_S15 (pfam00312)→                                                                   |
| env-795 | CESE01059308.1              | - | 72     | 5      | RNA→                                                                                                             |
| env-796 | NCBL_READ_1112684267655     | - | 819    | 752    | RNA→ hypo→                                                                                                       |
| env-797 | NCBL_READ_1112777442403     | - | 338    | 271    | RNA→ rpsO (PRK05626)Ribosomal_S15 (pfam00312)→                                                                   |
| env-798 | CESJ01108224.1              | - | 304    | 237    | RNA→ rpsO (PRK05626)Ribosomal_S15 (pfam00312)→                                                                   |
| env-799 | DelMOSum2010.c10152077      | + | 650    | 699    | RNA→ rpsO (PRK05626)Ribosomal_S15 (pfam00312)→                                                                   |
| Cca-4-1 | NZ_CDOL01000024.1           | - | 3056   | 3001   | RNA→ rpsO (PRK05626)RpsO (COG0184)→                                                                              |
| Cca-4-2 | NZ_CDOI01000148.1           | - | 32622  | 32567  | RNA→ rpsO (PRK05626)RpsO (COG0184)→                                                                              |
| Cca-4-3 | NZ_CDOH01000002.1           | + | 17823  | 17878  | RNA→ rpsO (PRK05626)RpsO (COG0184)→                                                                              |
| env-800 | JGI11876J14442_10315541     | - | 187    | 137    | RNA→ rpsO (PRK05626)Ribosomal_S15 (pfam00312)→                                                                   |
| env-801 | JCVL_SCAF_1101668147026     | + | 1128   | 1191   | RNA→ rpsO (PRK05626)Ribosomal_S15 (pfam00312)→                                                                   |
| env-802 | JCVL_SCAF_1101668641004     | - | 585    | 522    | RNA→ rpsO (PRK05626)RpsO (COG0184)→                                                                              |
| env-803 | KVRMV2_100003289            | + | 329    | 382    | RNA→ rpsO (PRK05626)RpsO (COG0184)→                                                                              |
| env-804 | KVRMV2_100403512            | + | 971    | 1024   | RNA→ rpsO (PRK05626)RpsO (COG0184)→                                                                              |
| env-805 | CERW01009190.1              | - | 617    | 563    | RNA→ rpsO (PRK05626)Ribosomal_S15 (pfam00312)→ PRK11824 (PRK11824)RNase_PH (pfam01138)→                          |
| env-806 | CERK01116695.1              | + | 478    | 532    | RNA→ rpsO (PRK05626)Ribosomal_S15 (pfam00312)→                                                                   |
| env-807 | NCBLBBAY_READ_1106105340888 | + | 777    | 830    | RNA→                                                                                                             |
| env-808 | CEVG01118472.1              | - | 579    | 526    | RNA→ rpsO (PRK05626)Ribosomal_S15 (pfam00312)→ RNase_PH_PNPase_1 (cd11363)PRK11824 (PRK11824)→                   |
| env-809 | CESM01310257.1              | - | 73     | 20     | RNA→                                                                                                             |
| Zga-1-1 | NC_015844.1                 | + | 930103 | 930167 | RNA→ rpsO (PRK05626)RpsO (COG0184)→                                                                              |
| env-810 | JGI26524J50256_1000051      | + | 47029  | 47095  | RNA→ rpsO (PRK05626)Ribosomal_S15 (pfam00312)→                                                                   |
| env-811 | JGI26523J50269_1000086      | - | 81858  | 81792  | RNA→ rpsO (PRK05626)Ribosomal_S15 (pfam00312)→                                                                   |
| env-812 | JGI26534J51046_1001036      | + | 19681  | 19747  | RNA→ rpsO (PRK05626)Ribosomal_S15 (pfam00312)→                                                                   |
| env-813 | JGI25911J50253_10156824     | - | 177    | 112    | RNA→                                                                                                             |
| env-814 | JGI25910J50241_10411963     | + | 60     | 125    | RNA→ rpsO (PRK05626)Ribosomal_S15 (pfam00312)→                                                                   |
| env-815 | JGI25912J50252_10064814     | - | 743    | 678    | RNA→ rpsO (PRK05626)Ribosomal_S15 (pfam00312)→                                                                   |



|         |                         |   |       |       |      |                                                                                                                                                                                                                                     |
|---------|-------------------------|---|-------|-------|------|-------------------------------------------------------------------------------------------------------------------------------------------------------------------------------------------------------------------------------------|
| env-816 | JGI25908J49247_10047059 | - | 348   | 283   | RNA→ | rpsO (PRK05626)Ribosomal_S15 (pfam00312)→                                                                                                                                                                                           |
| env-817 | JGI25914J50564_10007880 | + | 233   | 298   | RNA→ | rpsO (PRK05626)Ribosomal_S15 (pfam00312)→                                                                                                                                                                                           |
| env-818 | JGI25920J50251_10000314 | - | 11641 | 11576 | RNA→ | rpsO (PRK05626)Ribosomal_S15 (pfam00312)→                                                                                                                                                                                           |
| env-819 | JGI25920J50251_10070705 | - | 70    | 5     | RNA→ |                                                                                                                                                                                                                                     |
| env-820 | JGI25914J50564_10014061 | - | 82    | 17    | RNA→ |                                                                                                                                                                                                                                     |
| env-821 | JCVL_SCAF_1101668133290 | + | 581   | 646   | RNA→ | rpsO (PRK05626)Ribosomal_S15 (pfam00312)→<br>PRK11824 (PRK11824)RNase_PH (pfam01138)RNase_PH_C (pfam03725)→                                                                                                                         |
| env-822 | JGI25920J50251_10005537 | + | 3465  | 3530  | RNA→ | rpsO (PRK05626)Ribosomal_S15 (pfam00312)→                                                                                                                                                                                           |
| env-823 | JGI12421J11937_10023408 | + | 486   | 551   | RNA→ | rpsO (PRK05626)Ribosomal_S15 (pfam00312)→                                                                                                                                                                                           |
| env-824 | CEWG01134755.1          | - | 547   | 492   | RNA→ | rpsO (PRK05626)Ribosomal_S15 (pfam00312)→ PRK11824 (PRK11824)RNase_PH (pfam01138)→                                                                                                                                                  |
| env-825 | DelMOSum2011.c10066067  | + | 20    | 85    | RNA→ | rpsO (PRK05626)Ribosomal_S15 (pfam00312)→<br>PRK11824 (PRK11824)PNPase (pfam03726)RNase_PH (pfam01138)→                                                                                                                             |
| env-826 | CESJ01016598.1          | + | 4458  | 4522  | RNA→ | rpsO (PRK05626)Ribosomal_S15 (pfam00312)→ RNase_PH_PNPase_1 (cd11363)PRK11824 (PRK11824)→                                                                                                                                           |
| env-827 | CESI01019537.1          | - | 314   | 249   | RNA→ | rpsO (PRK05626)Ribosomal_S15 (pfam00312)→                                                                                                                                                                                           |
| env-828 | JCVL_SCAF_1096627403573 | - | 332   | 267   | RNA→ | rpsO (PRK05626)Ribosomal_S15 (pfam00312)→                                                                                                                                                                                           |
| env-829 | PML_READ_01087893       | - | 217   | 151   | RNA→ | rpsO (PRK05626)Ribosomal_S15 (pfam00312)→                                                                                                                                                                                           |
| env-830 | PML_READ_00236953       | + | 109   | 174   | RNA→ | rpsO (PRK05626)RpsO (COG0184)→                                                                                                                                                                                                      |
| env-831 | PML_READ_01045449       | - | 100   | 35    | RNA→ |                                                                                                                                                                                                                                     |
| env-832 | CESU01015641.1          | - | 388   | 323   | RNA→ | rpsO (PRK05626)Ribosomal_S15 (pfam00312)→                                                                                                                                                                                           |
| env-833 | LPaug08P2610m.c1025036  | - | 264   | 199   | RNA→ | rpsO (PRK05626)Ribosomal_S15 (pfam00312)→                                                                                                                                                                                           |
| env-834 | LPjun09P1210m.c1044378  | - | 232   | 167   | RNA→ | rpsO (PRK05626)Ribosomal_S15 (pfam00312)→                                                                                                                                                                                           |
| env-835 | DelMOSum2010.c10056809  | - | 1201  | 1136  | RNA→ | rpsO (PRK05626)RpsO (COG0184)→<br>PRK11824 (PRK11824)RNase_PH (pfam01138)RNase_PH_C (pfam03725)→                                                                                                                                    |
| env-836 | SI60aug11_200m.c1181697 | + | 116   | 180   | RNA→ | rpsO (PRK05626)Ribosomal_S15 (pfam00312)→                                                                                                                                                                                           |
| env-837 | SI36aug09_120m.1049180  | + | 473   | 537   | RNA→ | rpsO (PRK05626)Ribosomal_S15 (pfam00312)→                                                                                                                                                                                           |
| env-838 | SI47jul10_100m.c1026668 | - | 558   | 494   | RNA→ | rpsO (PRK05626)Ribosomal_S15 (pfam00312)→ RNase_PH_PNPase_1 (cd11363)PRK11824 (PRK11824)→                                                                                                                                           |
| env-839 | SI60aug11_100m.c1000082 | + | 8859  | 8923  | RNA→ | rpsO (PRK05626)Ribosomal_S15 (pfam00312)→ Pnp (COG1185)PRK11824 (PRK11824)→<br>RpoD (COG0568)sigma70-ECF (TIGR02937)bSCRAP40 (bSCRAP40)bSCRAP106 (bSCRAP106)→<br>PRK05581 (PRK05581)RPE (cd00429)→ anmK (PRK09585)AnmK (pfam03702)→ |
| env-840 | SI48aug10_10m.c1011319  | + | 396   | 460   | RNA→ | rpsO (PRK05626)Ribosomal_S15 (pfam00312)→                                                                                                                                                                                           |
| env-841 | SI34jun09_10m.1000012   | + | 25879 | 25943 | RNA→ | rpsO (PRK05626)Ribosomal_S15 (pfam00312)→ Pnp (COG1185)PRK11824 (PRK11824)→<br>RpoD (COG0568)sigma70-ECF (TIGR02937)bSCRAP40 (bSCRAP40)bSCRAP106 (bSCRAP106)→<br>PRK05581 (PRK05581)RPE (cd00429)→ anmK (PRK09585)AnmK (pfam03702)→ |
| env-842 | SI34jun09_120m.1001580  | - | 5416  | 5352  | RNA→ | rpsO (PRK05626)Ribosomal_S15 (pfam00312)→ Pnp (COG1185)PRK11824 (PRK11824)→<br>RpoD (COG0568)sigma70-ECF (TIGR02937)bSCRAP40 (bSCRAP40)bSCRAP106 (bSCRAP106)→<br>PRK05581 (PRK05581)RPE (cd00429)→ anmK (PRK09585)AnmK (pfam03702)→ |
| env-843 | SI34jun09_135m.1005514  | + | 3165  | 3229  | RNA→ | rpsO (PRK05626)Ribosomal_S15 (pfam00312)→ Pnp (COG1185)PRK11824 (PRK11824)→                                                                                                                                                         |
| env-844 | SI36aug09_100m.1014540  | - | 871   | 807   | RNA→ | rpsO (PRK05626)Ribosomal_S15 (pfam00312)→ PRK11824 (PRK11824)RNase_PH (pfam01138)→                                                                                                                                                  |
| env-845 | SI34jun09_100m.1000069  | - | 38756 | 38692 | RNA→ | rpsO (PRK05626)Ribosomal_S15 (pfam00312)→ Pnp (COG1185)PRK11824 (PRK11824)→<br>RpoD (COG0568)sigma70-ECF (TIGR02937)bSCRAP40 (bSCRAP40)bSCRAP106 (bSCRAP106)→<br>PRK05581 (PRK05581)RPE (cd00429)→ anmK (PRK09585)AnmK (pfam03702)→ |
| env-846 | SI48aug10_100m.1002881  | - | 383   | 319   | RNA→ | rpsO (PRK05626)Ribosomal_S15 (pfam00312)→                                                                                                                                                                                           |
| env-847 | DelMOSum2011.c10015265  | - | 605   | 540   | RNA→ | rpsO (PRK05626)Ribosomal_S15 (pfam00312)→ PRK11824 (PRK11824)RNase_PH (pfam01138)→                                                                                                                                                  |
| env-848 | JGI20157J14317_10011885 | - | 386   | 321   | RNA→ | rpsO (PRK05626)Ribosomal_S15 (pfam00312)→                                                                                                                                                                                           |
| env-849 | DelMOSum2010.c10060176  | - | 479   | 414   | RNA→ | rpsO (PRK05626)Ribosomal_S15 (pfam00312)→ hypo→                                                                                                                                                                                     |
| env-850 | SI34jun09_100m.1160428  | + | 29    | 94    | RNA→ | rpsO (PRK05626)Ribosomal_S15 (pfam00312)→                                                                                                                                                                                           |
| env-851 | JGI20156J14371_10000759 | + | 27598 | 27663 | RNA→ | rpsO (PRK05626)Ribosomal_S15 (pfam00312)→                                                                                                                                                                                           |
| env-852 | JGI20157J14317_10012691 | - | 388   | 323   | RNA→ | rpsO (PRK05626)Ribosomal_S15 (pfam00312)→                                                                                                                                                                                           |
| env-853 | JGI20155J14468_10000146 | - | 524   | 459   | RNA→ | rpsO (PRK05626)Ribosomal_S15 (pfam00312)→ RNase_PH_PNPase_1 (cd11363)PRK11824 (PRK11824)→                                                                                                                                           |
| env-854 | CESO01040974.1          | + | 1915  | 1980  | RNA→ |                                                                                                                                                                                                                                     |
| env-855 | CEWO01311710.1          | + | 677   | 742   | RNA→ |                                                                                                                                                                                                                                     |
| env-856 | 2236876009_219883       | - | 133   | 67    | RNA→ | rpsO (PRK05626)RpsO (COG0184)→                                                                                                                                                                                                      |
| env-857 | SI39nov09_10m.c1013699  | + | 177   | 242   | RNA→ | rpsO (PRK05626)Ribosomal_S15 (pfam00312)→ RNase_PH_PNPase_1 (cd11363)PRK11824 (PRK11824)→                                                                                                                                           |
| env-858 | SI48aug10_10m.c1001560  | - | 392   | 327   | RNA→ | rpsO (PRK05626)Ribosomal_S15 (pfam00312)→                                                                                                                                                                                           |

|         |                         |   |      |      |      |                                                                                                                                                                                                                                                                                            |
|---------|-------------------------|---|------|------|------|--------------------------------------------------------------------------------------------------------------------------------------------------------------------------------------------------------------------------------------------------------------------------------------------|
| env-859 | SI48aug10_100m_1003033  | + | 2938 | 3003 | RNA→ | rpsO (PRK05626)Ribosomal_S15 (pfam00312)→ Pnp (COG1185)PRK11824 (PRK11824)→                                                                                                                                                                                                                |
| env-860 | JGI20152J14361_10014083 | - | 305  | 240  | RNA→ | rpsO (PRK05626)Ribosomal_S15 (pfam00312)→                                                                                                                                                                                                                                                  |
| env-861 | JGI20160J14292_10040223 | + | 2051 | 2116 | RNA→ | rpsO (PRK05626)Ribosomal_S15 (pfam00312)→                                                                                                                                                                                                                                                  |
| env-862 | JGI20159J14440_10514398 | - | 304  | 239  | RNA→ | rpsO (PRK05626)Ribosomal_S15 (pfam00312)→                                                                                                                                                                                                                                                  |
| env-863 | CESF01137326.1          | + | 1896 | 1961 | RNA→ |                                                                                                                                                                                                                                                                                            |
| env-864 | CETY01149387.1          | - | 339  | 274  | RNA→ | rpsO (PRK05626)Ribosomal_S15 (pfam00312)→                                                                                                                                                                                                                                                  |
| env-865 | SI54feb11_100m_c1083680 | - | 282  | 217  | RNA→ | rpsO (PRK05626)RpsO (COG0184)→                                                                                                                                                                                                                                                             |
| env-866 | JGI20156J14371_10129797 | - | 113  | 48   | RNA→ |                                                                                                                                                                                                                                                                                            |
| env-867 | JGI20155J14468_10151635 | + | 628  | 693  | RNA→ |                                                                                                                                                                                                                                                                                            |
| env-868 | JGI20160J14292_10059861 | - | 181  | 116  | RNA→ | rpsO (PRK05626)Ribosomal_S15 (pfam00312)→                                                                                                                                                                                                                                                  |
| env-869 | JCVL_SCAF_1101668107239 | + | 814  | 879  | RNA→ | rpsO (PRK05626)Ribosomal_S15 (pfam00312)→                                                                                                                                                                                                                                                  |
| env-870 | JGI20154J14316_10048683 | - | 1152 | 1087 | RNA→ | rpsO (PRK05626)Ribosomal_S15 (pfam00312)→<br>PRK11824 (PRK11824)RNase_PH (pfam01138)RNase_PH_C (pfam03725)→                                                                                                                                                                                |
| env-871 | JGI20153J14295_10057124 | - | 943  | 878  | RNA→ | rpsO (PRK05626)Ribosomal_S15 (pfam00312)→ PRK11824 (PRK11824)RNase_PH (pfam01138)→                                                                                                                                                                                                         |
| env-872 | JGI20153J14318_10057124 | - | 943  | 878  | RNA→ | rpsO (PRK05626)Ribosomal_S15 (pfam00312)→ PRK11824 (PRK11824)RNase_PH (pfam01138)→                                                                                                                                                                                                         |
| env-873 | JGI20159J14440_10010099 | + | 2098 | 2163 | RNA→ | rpsO (PRK05626)Ribosomal_S15 (pfam00312)→ Pnp (COG1185)PRK11824 (PRK11824)→<br>sigma70-ECF (TIGR02937)Sigma70_r1_2 (pfam00140)Sigma70_r2 (pfam04542)→                                                                                                                                      |
| env-874 | JGI20158J14315_10004959 | - | 6347 | 6282 | RNA→ | rpsO (PRK05626)Ribosomal_S15 (pfam00312)→ PRK11824 (PRK11824)RNase_PH (pfam01138)→<br>S1 (smart00316)KH (smart00322)Pnp (COG1185)→<br>RpoD (COG0568)sigma70-ECF (TIGR02937)bSCRAP40 (bSCRAP40)bSCRAP106 (bSCRAP106)→<br>PRK05581 (PRK05581)RPE (cd00429)→ anmK (PRK09585)AnmK (pfam03702)→ |
| env-875 | CEOP01365269.1          | - | 98   | 33   | RNA→ |                                                                                                                                                                                                                                                                                            |
| env-876 | DelMOWin2010_c10528752  | + | 190  | 255  | RNA→ | rpsO (PRK05626)→                                                                                                                                                                                                                                                                           |
| env-877 | JGI20156J14371_10036705 | + | 2103 | 2168 | RNA→ | rpsO (PRK05626)Ribosomal_S15 (pfam00312)→                                                                                                                                                                                                                                                  |
| env-878 | JGI20160J14292_10049262 | - | 1686 | 1621 | RNA→ | rpsO (PRK05626)Ribosomal_S15 (pfam00312)→ PRK11824 (PRK11824)RNase_PH (pfam01138)→<br>PRK11824 (PRK11824)RNase_PH (pfam01138)→                                                                                                                                                             |
| env-879 | JGI20157J14317_10057593 | - | 704  | 639  | RNA→ | rpsO (PRK05626)Ribosomal_S15 (pfam00312)→ PRK11824 (PRK11824)RNase_PH (pfam01138)→                                                                                                                                                                                                         |
| env-880 | JGI20155J14468_10064733 | - | 1016 | 951  | RNA→ | rpsO (PRK05626)Ribosomal_S15 (pfam00312)→<br>PRK11824 (PRK11824)RNase_PH (pfam01138)RNase_PH_C (pfam03725)→                                                                                                                                                                                |
| env-881 | JGI20152J14361_10000414 | - | 3697 | 3632 | RNA→ | rpsO (PRK05626)Ribosomal_S15 (pfam00312)→ Pnp (COG1185)PRK11824 (PRK11824)→<br>RpoD (COG0568)sigma70-ECF (TIGR02937)bSCRAP40 (bSCRAP40)bSCRAP106 (bSCRAP106)→<br>PRK05581 (PRK05581)RPE (cd00429)→                                                                                         |
| env-882 | JGI20151J14362_10002476 | + | 4075 | 4140 | RNA→ | rpsO (PRK05626)Ribosomal_S15 (pfam00312)→ Pnp (COG1185)PRK11824 (PRK11824)→<br>RpoD (COG0568)sigma70-ECF (TIGR02937)bSCRAP40 (bSCRAP40)bSCRAP106 (bSCRAP106)→<br>PRK05581 (PRK05581)RPE (cd00429)→ anmK (PRK09585)AnmK (pfam03702)→                                                        |
| env-883 | 2236876001_196002       | - | 290  | 236  | RNA→ | rpsO (PRK05626)Ribosomal_S15 (pfam00312)→                                                                                                                                                                                                                                                  |
| env-884 | JGI20155J14468_10058899 | + | 1110 | 1164 | RNA→ | rpsO (PRK05626)Ribosomal_S15 (pfam00312)→                                                                                                                                                                                                                                                  |
| env-885 | JGI20158J14315_10054641 | - | 1345 | 1291 | RNA→ | rpsO (PRK05626)Ribosomal_S15 (pfam00312)→<br>PRK11824 (PRK11824)PNPase (pfam03726)RNase_PH (pfam01138)RNase_PH_C (pfam03725)→                                                                                                                                                              |
| env-886 | CENT01010038.1          | + | 1338 | 1392 | RNA→ | rpsO (PRK05626)Ribosomal_S15 (pfam00312)→                                                                                                                                                                                                                                                  |
| env-887 | CESF01070596.1          | + | 472  | 526  | RNA→ | rpsO (PRK05626)Ribosomal_S15 (pfam00312)→                                                                                                                                                                                                                                                  |
| env-888 | CESO01000708.1          | - | 1675 | 1621 | RNA→ | rpsO (PRK05626)Ribosomal_S15 (pfam00312)→ Pnp (COG1185)PRK11824 (PRK11824)→                                                                                                                                                                                                                |
| env-889 | CEVU01160017.1          | + | 113  | 167  | RNA→ | rpsO (PRK05626)Ribosomal_S15 (pfam00312)→ PRK11824 (PRK11824)RNase_PH (pfam01138)→                                                                                                                                                                                                         |
| env-890 | CEWO01095888.1          | - | 470  | 416  | RNA→ | rpsO (PRK05626)Ribosomal_S15 (pfam00312)→ hypo→                                                                                                                                                                                                                                            |
| env-891 | JCVL_SCAF_1096627428780 | - | 347  | 293  | RNA→ | rpsO (PRK05626)Ribosomal_S15 (pfam00312)→                                                                                                                                                                                                                                                  |
| env-892 | JCVL_SCAF_1096627340448 | - | 710  | 656  | RNA→ | rpsO (PRK05626)Ribosomal_S15 (pfam00312)→ PRK11824 (PRK11824)RNase_PH (pfam01138)→                                                                                                                                                                                                         |
| env-893 | CEWG01034068.1          | - | 8107 | 8053 | RNA→ | rpsO (PRK05626)Ribosomal_S15 (pfam00312)→ Pnp (COG1185)PRK11824 (PRK11824)→<br>RpoD (COG0568)sigma70-ECF (TIGR02937)→ PRK05581 (PRK05581)RPE (cd00429)→<br>AnmK (COG2377)anmK (PRK09585)→                                                                                                  |
| env-894 | DelMOWin2010_c10023670  | + | 1770 | 1824 | RNA→ | rpsO (PRK05626)Ribosomal_S15 (pfam00312)→<br>PRK11824 (PRK11824)PNPase (pfam03726)RNase_PH (pfam01138)RNase_PH_C (pfam03725)→                                                                                                                                                              |
| env-895 | CENF01414486.1          | + | 550  | 604  | RNA→ | rpsO (PRK05626)Ribosomal_S15 (pfam00312)→<br>PRK11824 (PRK11824)PNPase (pfam03726)RNase_PH (pfam01138)RNase_PH_C (pfam03725)→                                                                                                                                                              |
| env-896 | CEOP01028619.1          | - | 1417 | 1363 | RNA→ | rpsO (PRK05626)Ribosomal_S15 (pfam00312)→<br>PRK11824 (PRK11824)RNase_PH (pfam01138)RNase_PH_C (pfam03725)→                                                                                                                                                                                |

|         |                              |   |         |         |      |                                                                                                          |
|---------|------------------------------|---|---------|---------|------|----------------------------------------------------------------------------------------------------------|
| env-897 | CESM01030051.1               | - | 2678    | 2624    | RNA→ | rpsO (PRK05626)Ribosomal_S15 (pfam00312)→ Pnp (COG1185)PRK11824 (PRK11824)→                              |
| env-898 | CETY01071453.1               | - | 87      | 33      | RNA→ |                                                                                                          |
| env-899 | CEVX01269025.1               | - | 90      | 36      | RNA→ |                                                                                                          |
| env-900 | JCVL_SCAF_1096627909011      | + | 651     | 705     | RNA→ | PRK11824 (PRK11824)RNase_PH (pfam01138)RNase_PH_C (pfam03725)→                                           |
| env-901 | LPaug09P1610m_c1031693       | - | 129     | 73      | RNA→ | rpsO (PRK05626)→                                                                                         |
| env-902 | LPjun09P1210m_c1013475       | - | 432     | 376     | RNA→ | rpsO (PRK05626)Ribosomal_S15 (pfam00312)→                                                                |
| env-903 | DelMOSum2010.c10000068       | + | 18253   | 18310   | RNA→ | rpsO (PRK05626)Ribosomal_S15 (pfam00312)→                                                                |
| env-904 | A09P0410a_Sequence0000021066 | - | 462     | 405     | RNA→ | rpsO (PRK05626)Ribosomal_S15 (pfam00312)→                                                                |
| env-905 | JGI20157J14317_10344599      | - | 183     | 126     | RNA→ | rpsO (PRK05626)Ribosomal_S15 (pfam00312)→                                                                |
| env-906 | JGI25920J50251_10011692      | - | 2092    | 2026    | RNA→ | rpsO (PRK05626)Ribosomal_S15 (pfam00312)→                                                                |
| env-907 | JGI25911J50253_10208029      | - | 174     | 108     | RNA→ |                                                                                                          |
| env-908 | JGI25910J50241_10133287      | - | 519     | 453     | RNA→ | rpsO (PRK05626)Ribosomal_S15 (pfam00312)→ hypo→                                                          |
| Fge-1-1 | NZ_KE383905.1                | - | 172236  | 172170  | RNA→ | rpsO (PRK05626)Ribosomal_S15 (pfam00312)→                                                                |
| Ale-2-1 | NZ_KN050846.1                | - | 2805051 | 2804985 | RNA→ | rpsO (PRK05626)Ribosomal_S15 (pfam00312)→                                                                |
| env-909 | PBR_1019653                  | - | 5944    | 5878    | RNA→ | rpsO (PRK05626)Ribosomal_S15 (pfam00312)→                                                                |
| env-910 | JGI24723J26617_10002167      | - | 11651   | 11585   | RNA→ | rpsO (PRK05626)Ribosomal_S15 (pfam00312)→                                                                |
| env-911 | JCVL_SCAF_1101668691680      | + | 126     | 192     | RNA→ | rpsO (PRK05626)Ribosomal_S15 (pfam00312)→                                                                |
| env-912 | CEWG01179869.1               | + | 230     | 296     | RNA→ | rpsO (PRK05626)Ribosomal_S15 (pfam00312)→                                                                |
| env-913 | CETK01031226.1               | - | 238     | 171     | RNA→ | rpsO (PRK05626)Ribosomal_S15 (pfam00312)→                                                                |
| env-914 | CESF01019749.1               | - | 849     | 782     | RNA→ | rpsO (PRK05626)Ribosomal_S15 (pfam00312)→                                                                |
| env-915 | CESO01019946.1               | + | 842     | 909     | RNA→ | rpsO (PRK05626)Ribosomal_S15 (pfam00312)→                                                                |
| env-916 | CEUH01062216.1               | - | 338     | 272     | RNA→ | rpsO (PRK05626)Ribosomal_S15 (pfam00312)→                                                                |
| Man-1-1 | NZ_KK211215.1                | - | 65801   | 65738   | RNA→ | rpsO (PRK05626)RpsO (COG0184)→                                                                           |
| env-917 | JGI20156J14371_10007079      | - | 147     | 90      | RNA→ | rpsO (PRK05626)→                                                                                         |
| env-918 | JGI20160J14292_10016935      | - | 147     | 90      | RNA→ | rpsO (PRK05626)→                                                                                         |
| env-919 | CEVW01069772.1               | - | 669     | 612     | RNA→ | rpsO (PRK05626)Ribosomal_S15 (pfam00312)→ PRK11824 (PRK11824)RNase_PH (pfam01138)→                       |
| env-920 | JGI20156J14371_10415361      | + | 33      | 90      | RNA→ | rpsO (PRK05626)Ribosomal_S15 (pfam00312)→                                                                |
| env-921 | JGI20160J14292_10453555      | - | 300     | 243     | RNA→ | rpsO (PRK05626)Ribosomal_S15 (pfam00312)→                                                                |
| env-922 | JGI20155J14468_10000239      | - | 6353    | 6296    | RNA→ | rpsO (PRK05626)Ribosomal_S15 (pfam00312)→ Pnp (COG1185)PRK11824 (PRK11824)→                              |
| env-923 | DelMOSum2010.c10011135       | - | 3298    | 3241    | RNA→ | rpsO (PRK05626)Ribosomal_S15 (pfam00312)→ Pnp (COG1185)PRK11824 (PRK11824)→                              |
| env-924 | DelMOSum2010.c10190970       | + | 126     | 183     | RNA→ | rpsO (PRK05626)Ribosomal_S15 (pfam00312)→ RNase_PH_PNPase_I (cd11363)PRK11824 (PRK11824)→                |
| env-925 | JGI20156J14371_10100972      | + | 860     | 917     | RNA→ |                                                                                                          |
| env-926 | JGI20160J14292_10127509      | - | 69      | 12      | RNA→ |                                                                                                          |
| env-927 | JGI20159J14440_10000775      | - | 3153    | 3096    | RNA→ | rpsO (PRK05626)Ribosomal_S15 (pfam00312)→ Pnp (COG1185)PRK11824 (PRK11824)→                              |
| env-928 | CEUW01210784.1               | + | 690     | 747     | RNA→ |                                                                                                          |
| env-929 | CEUK01207791.1               | + | 22      | 79      | RNA→ | rpsO (PRK05626)Ribosomal_S15 (pfam00312)→ RNase_PH_PNPase_I (cd11363)PRK11824 (PRK11824)→                |
| env-930 | CEUU01245541.1               | - | 1236    | 1179    | RNA→ | rpsO (PRK05626)Ribosomal_S15 (pfam00312)→ RNase_PH_PNPase_I (cd11363)PRK11824 (PRK11824)→                |
| env-931 | CEVF01306501.1               | - | 4315    | 4258    | RNA→ | rpsO (PRK05626)Ribosomal_S15 (pfam00312)→ Pnp (COG1185)PRK11824 (PRK11824)→                              |
| env-932 | CEQD01093616.1               | + | 62      | 120     | RNA→ | rpsO (PRK05626)Ribosomal_S15 (pfam00312)→ PRK11824 (PRK11824)RNase_PH (pfam01138)RNase_PH_C (pfam03725)→ |
| env-933 | Y607_1006247                 | + | 254177  | 254245  | RNA→ | rpsO (PRK05626)RpsO (COG0184)→                                                                           |
| env-934 | 3300000558_11729233          | - | 567     | 500     | RNA→ | rpsO (PRK05626)RpsO (COG0184)→                                                                           |
| env-935 | 3300001605_10025997          | - | 1325    | 1258    | RNA→ | rpsO (PRK05626)RpsO (COG0184)→                                                                           |
| env-936 | AYRH01021120.1               | - | 183     | 121     | RNA→ | rpsO (PRK05626)Ribosomal_S15 (pfam00312)→                                                                |
| env-937 | CEWO01187126.1               | - | 947     | 880     | RNA→ | rpsO (PRK05626)Ribosomal_S15 (pfam00312)→                                                                |
| env-938 | CEVS01341770.1               | - | 695     | 640     | RNA→ | rpsO (PRK05626)Ribosomal_S15 (pfam00312)→ PRK11824 (PRK11824)RNase_PH (pfam01138)→                       |
| env-939 | CEVW01355221.1               | - | 618     | 563     | RNA→ | rpsO (PRK05626)Ribosomal_S15 (pfam00312)→ PRK11824 (PRK11824)RNase_PH (pfam01138)→                       |
| env-940 | CEQM01182343.1               | + | 515     | 570     | RNA→ |                                                                                                          |
| env-941 | CEQN01033481.1               | - | 720     | 665     | RNA→ | rpsO (PRK05626)Ribosomal_S15 (pfam00312)→ PRK11824 (PRK11824)RNase_PH (pfam01138)→                       |
| env-942 | CESQ01380936.1               | - | 103     | 48      | RNA→ |                                                                                                          |
| env-943 | CEVP01035867.1               | + | 331     | 386     | RNA→ | rpsO (PRK05626)Ribosomal_S15 (pfam00312)→ PRK11824 (PRK11824)RNase_PH (pfam01138)→                       |
| env-944 | CEQO01283396.1               | + | 1289    | 1344    | RNA→ | rpsO (PRK05626)Ribosomal_S15 (pfam00312)→                                                                |



|          |                                 |   |        |        |      |                                                                                     |
|----------|---------------------------------|---|--------|--------|------|-------------------------------------------------------------------------------------|
| env-945  | CERS01106140.1                  | + | 701    | 756    | RNA→ | rpsO (PRK05626)Ribosomal_S15 (pfam00312)→                                           |
| env-946  | CEUA01394830.1                  | + | 729    | 784    | RNA→ |                                                                                     |
| Tma-1-1  | NZ.BAUG01000053.1               | - | 3972   | 3908   | RNA→ | rpsO (PRK05626)Ribosomal_S15 (pfam00312)→                                           |
| env-947  | JGI25920J50251_10315894         | + | 94     | 151    | RNA→ | rpsO (PRK05626)Ribosomal_S15 (pfam00312)→                                           |
| Fsp-12-1 | NZ_AUEU01000012.1               | + | 243905 | 243971 | RNA→ | rpsO (PRK05626)Ribosomal_S15 (pfam00312)→                                           |
| Fde-1-1  | NZ_AUDL01000013.1               | - | 39996  | 39930  | RNA→ | rpsO (PRK05626)Ribosomal_S15 (pfam00312)→                                           |
| Fba-7-1  | NZ_AFPB01000144.1               | - | 4726   | 4662   | RNA→ | rpsO (PRK05626)RpsO (COG0184)→ rpsO (PRK05626)RpsO (COG0184)→                       |
| Ale-1-1  | NZ_BBNQ01000031.1               | - | 6559   | 6493   | RNA→ | rpsO (PRK05626)Ribosomal_S15 (pfam00312)→                                           |
| Ale-1-2  | NZ_BBNU01000036.1               | + | 8531   | 8597   | RNA→ | rpsO (PRK05626)Ribosomal_S15 (pfam00312)→                                           |
| Ffr-1-1  | NZ_AUDO01000008.1               | - | 223593 | 223528 | RNA→ | rpsO (PRK05626)Ribosomal_S15 (pfam00312)→                                           |
| env-948  | JGI25921J50272_10193124         | - | 177    | 111    | RNA→ | rpsO (PRK05626)RpsO (COG0184)→                                                      |
| Fsp-1-1  | NZ_JYGZ01000002.1               | - | 102653 | 102588 | RNA→ | rpsO (PRK05626)Ribosomal_S15 (pfam00312)→                                           |
| env-949  | 3300001592_10204136             | - | 110    | 44     | RNA→ |                                                                                     |
| env-950  | M3P_c10003408                   | - | 87     | 21     | RNA→ |                                                                                     |
| Fsa-2-1  | NZ_JMLU01000001.1               | + | 65197  | 65263  | RNA→ | rpsO (PRK05626)Ribosomal_S15 (pfam00312)→                                           |
| env-951  | 3300001605_10665184             | + | 444    | 510    | RNA→ |                                                                                     |
| env-952  | 3300001605_10033828             | + | 4228   | 4294   | RNA→ | rpsO (PRK05626)Ribosomal_S15 (pfam00312)→                                           |
| Fba-3-1  | NZ_AAAX01000002.1               | - | 363051 | 362985 | RNA→ | rpsO (PRK05626)Ribosomal_S15 (pfam00312)→ rpsO (PRK05626)Ribosomal_S15 (pfam00312)→ |
| env-953  | TB_FS06_10DRAFT_1000175         | - | 6311   | 6245   | RNA→ | rpsO (PRK05626)Ribosomal_S15 (pfam00312)→                                           |
| env-954  | 3300001605_10453220             | - | 110    | 44     | RNA→ |                                                                                     |
| env-955  | CESI01049345.1                  | + | 1523   | 1589   | RNA→ | rpsO (PRK05626)Ribosomal_S15 (pfam00312)→                                           |
| env-956  | CEST01010500.1                  | - | 551    | 485    | RNA→ | rpsO (PRK05626)Ribosomal_S15 (pfam00312)→                                           |
| env-957  | NCBI_READ_1112788336194         | + | 594    | 660    | RNA→ |                                                                                     |
| env-958  | JCVL_SCAF_1101667195802         | - | 126    | 70     | RNA→ | hypo→                                                                               |
| env-959  | SRS018157_Baylor_scaffold_12805 | + | 66     | 120    | RNA→ | rpsO (PRK05626)Ribosomal_S15 (pfam00312)→                                           |
| Csp-1-1  | NZ_ABZV01000001.1               | + | 56329  | 56384  | RNA→ | rpsO (PRK05626)Ribosomal_S15 (pfam00312)→ rpsO (PRK05626)Ribosomal_S15 (pfam00312)→ |
| env-960  | SRS024289_LANL_scaffold_56301   | + | 344    | 399    | RNA→ | rpsO (PRK05626)→                                                                    |
| env-961  | SRS051244_LANL_scaffold_25997   | + | 197    | 252    | RNA→ | rpsO (PRK05626)Ribosomal_S15 (pfam00312)→                                           |
| Csp-3-1  | NZ_KB291394.1                   | - | 29522  | 29467  | RNA→ | rpsO (PRK05626)Ribosomal_S15 (pfam00312)→                                           |
| env-962  | SRS021496_Baylor_scaffold_73949 | - | 2767   | 2712   | RNA→ | rpsO (PRK05626)Ribosomal_S15 (pfam00312)→                                           |
| env-963  | SRS022530_LANL_scaffold_20874   | - | 38233  | 38178  | RNA→ | rpsO (PRK05626)Ribosomal_S15 (pfam00312)→                                           |
| env-964  | SRS063288_LANL_scaffold_3750    | - | 772    | 717    | RNA→ | rpsO (PRK05626)Ribosomal_S15 (pfam00312)→                                           |
| env-965  | SRS011098_Baylor_scaffold_11988 | + | 19624  | 19680  | RNA→ | rpsO (PRK05626)Ribosomal_S15 (pfam00312)→                                           |
| env-966  | SRS023938_Baylor_scaffold_45086 | + | 428    | 483    | RNA→ |                                                                                     |
| env-967  | SRS014573_C3519028              | + | 210    | 265    | RNA→ | rpsO (PRK05626)→                                                                    |
| env-968  | SRS015434_C5951484              | + | 1370   | 1425   | RNA→ | rpsO (PRK05626)Ribosomal_S15 (pfam00312)→                                           |
| env-969  | SRS018439_Baylor_scaffold_4715  | + | 14608  | 14663  | RNA→ | rpsO (PRK05626)Ribosomal_S15 (pfam00312)→                                           |
| env-970  | SRS022719_C2913748              | - | 436    | 381    | RNA→ | rpsO (PRK05626)Ribosomal_S15 (pfam00312)→                                           |
| env-971  | SRS024441_LANL_scaffold_31186   | + | 18667  | 18722  | RNA→ | rpsO (PRK05626)Ribosomal_S15 (pfam00312)→                                           |
| env-972  | SRS015470_WUGC_scaffold_17737   | + | 950    | 1005   | RNA→ | rpsO (PRK05626)Ribosomal_S15 (pfam00312)→                                           |
| env-973  | SRS015947_WUGC_scaffold_20781   | - | 17604  | 17549  | RNA→ | rpsO (PRK05626)Ribosomal_S15 (pfam00312)→                                           |
| env-974  | SRS016092_WUGC_scaffold_7783    | - | 4221   | 4166   | RNA→ | rpsO (PRK05626)Ribosomal_S15 (pfam00312)→                                           |
| env-975  | SRS019591_WUGC_scaffold_41796   | + | 10308  | 10363  | RNA→ | rpsO (PRK05626)Ribosomal_S15 (pfam00312)→                                           |
| env-976  | SRS017814_C2664019              | - | 331    | 276    | RNA→ | rpsO (PRK05626)Ribosomal_S15 (pfam00312)→                                           |
| env-977  | SRS019029_C3201897              | + | 280    | 335    | RNA→ | rpsO (PRK05626)Ribosomal_S15 (pfam00312)→                                           |
| env-978  | SRS019077_C2652316              | + | 764    | 819    | RNA→ | rpsO (PRK05626)→                                                                    |
| env-979  | SRS051378_C1874895              | - | 114    | 59     | RNA→ | rpsO (PRK05626)→                                                                    |
| env-980  | SRS019127_WUGC_scaffold_15951   | - | 88     | 33     | RNA→ |                                                                                     |
| env-981  | SRS055450_LANL_scaffold_46997   | + | 520    | 575    | RNA→ |                                                                                     |
| env-982  | SRS019387_C1738776              | + | 554    | 609    | RNA→ |                                                                                     |
| env-983  | SRS020862_Baylor_scaffold_705   | + | 10311  | 10366  | RNA→ | rpsO (PRK05626)Ribosomal_S15 (pfam00312)→                                           |
| env-984  | SRS024021_Baylor_scaffold_18404 | + | 1381   | 1436   | RNA→ | rpsO (PRK05626)Ribosomal_S15 (pfam00312)→                                           |



|          |                                 |   |       |       |      |                                                                                                                                                                               |
|----------|---------------------------------|---|-------|-------|------|-------------------------------------------------------------------------------------------------------------------------------------------------------------------------------|
| env-985  | SRS047100.C2096794              | - | 1382  | 1327  | RNA→ | rpsO (PRK05626)Ribosomal_S15 (pfam00312)→                                                                                                                                     |
| env-986  | SRS050628.LANL_scaffold.20741   | + | 893   | 948   | RNA→ | rpsO (PRK05626)Ribosomal_S15 (pfam00312)→                                                                                                                                     |
| env-987  | SRS065310.LANL_scaffold.14848   | - | 379   | 324   | RNA→ | rpsO (PRK05626)Ribosomal_S15 (pfam00312)→                                                                                                                                     |
| env-988  | SRS063603.LANL_scaffold.3555    | - | 469   | 414   | RNA→ | rpsO (PRK05626)Ribosomal_S15 (pfam00312)→                                                                                                                                     |
| env-989  | SRS015540.C1142881              | + | 29    | 84    | RNA→ | rpsO (PRK05626)Ribosomal_S15 (pfam00312)→                                                                                                                                     |
| env-990  | SRS013879.WUGC_scaffold.44390   | - | 1424  | 1369  | RNA→ | rpsO (PRK05626)Ribosomal_S15 (pfam00312)→                                                                                                                                     |
| env-991  | SRS015797.WUGC_scaffold.12357   | - | 4177  | 4122  | RNA→ | rpsO (PRK05626)Ribosomal_S15 (pfam00312)→                                                                                                                                     |
| env-992  | SRS023926.Baylor_scaffold.18801 | - | 32149 | 32094 | RNA→ | rpsO (PRK05626)Ribosomal_S15 (pfam00312)→                                                                                                                                     |
| env-993  | SRS014888.C3106033              | - | 1913  | 1858  | RNA→ | rpsO (PRK05626)Ribosomal_S15 (pfam00312)→                                                                                                                                     |
| env-994  | SRS015440.WUGC_scaffold.28748   | + | 418   | 473   | RNA→ | rpsO (PRK05626)Ribosomal_S15 (pfam00312)→                                                                                                                                     |
| env-995  | SRS015899.WUGC_scaffold.18506   | + | 1223  | 1278  | RNA→ | rpsO (PRK05626)Ribosomal_S15 (pfam00312)→                                                                                                                                     |
| env-996  | SRS018145.Baylor_scaffold.48780 | - | 786   | 731   | RNA→ | rpsO (PRK05626)Ribosomal_S15 (pfam00312)→                                                                                                                                     |
| env-997  | SRS019225.WUGC_scaffold.29613   | + | 4319  | 4374  | RNA→ | rpsO (PRK05626)Ribosomal_S15 (pfam00312)→                                                                                                                                     |
| env-998  | SRS057692.LANL_scaffold.3535    | + | 4937  | 4992  | RNA→ | rpsO (PRK05626)Ribosomal_S15 (pfam00312)→                                                                                                                                     |
| env-999  | SRS016037.WUGC_scaffold.44207   | + | 7031  | 7086  | RNA→ | rpsO (PRK05626)Ribosomal_S15 (pfam00312)→                                                                                                                                     |
| env-1000 | SRS016225.C2977708              | + | 383   | 438   | RNA→ | rpsO (PRK05626)Ribosomal_S15 (pfam00312)→                                                                                                                                     |
| env-1001 | SRS017511.C3344598              | + | 142   | 197   | RNA→ | rpsO (PRK05626)Ribosomal_S15 (pfam00312)→                                                                                                                                     |
| env-1002 | SRS018573.WUGC_scaffold.30691   | + | 507   | 562   | RNA→ | rpsO (PRK05626)RpsO (COG0184)→                                                                                                                                                |
| env-1003 | SRS019073.WUGC_scaffold.15301   | - | 330   | 275   | RNA→ | rpsO (PRK05626)Ribosomal_S15 (pfam00312)→                                                                                                                                     |
| env-1004 | SRS019122.C5920199              | + | 1857  | 1912  | RNA→ | rpsO (PRK05626)Ribosomal_S15 (pfam00312)→                                                                                                                                     |
| env-1005 | SRS019333.C1243671              | + | 173   | 228   | RNA→ | rpsO (PRK05626)RpsO (COG0184)→                                                                                                                                                |
| env-1006 | SRS020340.C2878267              | + | 340   | 395   | RNA→ |                                                                                                                                                                               |
| env-1007 | SRS021477.Baylor_scaffold.40483 | + | 1827  | 1882  | RNA→ | rpsO (PRK05626)Ribosomal_S15 (pfam00312)→                                                                                                                                     |
| env-1008 | SRS024561.LANL_scaffold.37452   | + | 268   | 323   | RNA→ | rpsO (PRK05626)RpsO (COG0184)→                                                                                                                                                |
| env-1009 | SRS047265.WUGC_scaffold.19746   | - | 470   | 415   | RNA→ | rpsO (PRK05626)Ribosomal_S15 (pfam00312)→ hypo→                                                                                                                               |
| env-1010 | SRS055401.LANL_scaffold.34453   | + | 585   | 640   | RNA→ | rpsO (PRK05626)→                                                                                                                                                              |
| env-1011 | SRS053630.C928372               | - | 3451  | 3396  | RNA→ | rpsO (PRK05626)Ribosomal_S15 (pfam00312)→                                                                                                                                     |
| env-1012 | CEOK01091424.1                  | + | 379   | 434   | RNA→ | rpsO (PRK05626)Ribosomal_S15 (pfam00312)→                                                                                                                                     |
| env-1013 | CENG01166087.1                  | + | 243   | 298   | RNA→ | rpsO (PRK05626)Ribosomal_S15 (pfam00312)→                                                                                                                                     |
| env-1014 | CENJ01054220.1                  | + | 696   | 751   | RNA→ | rpsO (PRK05626)Ribosomal_S15 (pfam00312)→ PRK11824 (PRK11824)RNase_PH (pfam01138)→                                                                                            |
| env-1015 | CENX01011707.1                  | + | 917   | 972   | RNA→ | rpsO (PRK05626)Ribosomal_S15 (pfam00312)→                                                                                                                                     |
| env-1016 | CENP01029996.1                  | + | 133   | 188   | RNA→ | rpsO (PRK05626)Ribosomal_S15 (pfam00312)→ PRK11824 (PRK11824)RNase_PH (pfam01138)→                                                                                            |
| env-1017 | CETL01077499.1                  | + | 235   | 290   | RNA→ | rpsO (PRK05626)Ribosomal_S15 (pfam00312)→                                                                                                                                     |
| env-1018 | CESP01137952.1                  | + | 2063  | 2118  | RNA→ | PRK11824 (PRK11824)RNase_PH (pfam01138)RNase_PH_C (pfam03725)→<br>rpsO (PRK05626)Ribosomal_S15 (pfam00312)→<br>PRK11824 (PRK11824)RNase_PH (pfam01138)RNase_PH_C (pfam03725)→ |
| env-1019 | CENX01186301.1                  | - | 389   | 334   | RNA→ | rpsO (PRK05626)Ribosomal_S15 (pfam00312)→                                                                                                                                     |
| env-1020 | CEOF01186277.1                  | - | 389   | 334   | RNA→ | rpsO (PRK05626)Ribosomal_S15 (pfam00312)→                                                                                                                                     |
| env-1021 | CESW01208627.1                  | + | 457   | 513   | RNA→ | rpsO (PRK05626)Ribosomal_S15 (pfam00312)→                                                                                                                                     |
| env-1022 | CEQX01005238.1                  | - | 426   | 371   | RNA→ | rpsO (PRK05626)Ribosomal_S15 (pfam00312)→                                                                                                                                     |
| env-1023 | CEPU01014169.1                  | - | 422   | 367   | RNA→ | rpsO (PRK05626)Ribosomal_S15 (pfam00312)→                                                                                                                                     |
| env-1024 | CEVH01129166.1                  | - | 2144  | 2089  | RNA→ | rpsO (PRK05626)Ribosomal_S15 (pfam00312)→ Pnp (COG1185)PRK11824 (PRK11824)→                                                                                                   |
| env-1025 | CEOW01121765.1                  | - | 962   | 907   | RNA→ | rpsO (PRK05626)RpsO (COG0184)→<br>PRK11824 (PRK11824)RNase_PH (pfam01138)RNase_PH_C (pfam03725)→                                                                              |
| env-1026 | CEVX01126697.1                  | - | 281   | 226   | RNA→ | rpsO (PRK05626)Ribosomal_S15 (pfam00312)→                                                                                                                                     |
| env-1027 | CEVS01109929.1                  | - | 229   | 174   | RNA→ | rpsO (PRK05626)Ribosomal_S15 (pfam00312)→                                                                                                                                     |
| env-1028 | CEVH01173857.1                  | - | 230   | 174   | RNA→ | rpsO (PRK05626)Ribosomal_S15 (pfam00312)→                                                                                                                                     |
| env-1029 | CEUW01249740.1                  | - | 307   | 251   | RNA→ | rpsO (PRK05626)Ribosomal_S15 (pfam00312)→                                                                                                                                     |
| env-1030 | CEUM01264125.1                  | - | 71    | 15    | RNA→ |                                                                                                                                                                               |
| env-1031 | CEUV01191480.1                  | - | 71    | 15    | RNA→ |                                                                                                                                                                               |
| env-1032 | CEUU01248441.1                  | + | 1447  | 1503  | RNA→ | rpsO (PRK05626)Ribosomal_S15 (pfam00312)→                                                                                                                                     |
| env-1033 | CEVF01023934.1                  | + | 1550  | 1606  | RNA→ | rpsO (PRK05626)Ribosomal_S15 (pfam00312)→                                                                                                                                     |
| env-1034 | CETP01104982.1                  | + | 419   | 475   | RNA→ | rpsO (PRK05626)Ribosomal_S15 (pfam00312)→                                                                                                                                     |

|          |                         |   |       |       |                                                                                                                                                              |
|----------|-------------------------|---|-------|-------|--------------------------------------------------------------------------------------------------------------------------------------------------------------|
| env-1035 | CEWG01181614.1          | - | 71    | 15    | RNA→                                                                                                                                                         |
| env-1036 | CAM_READ_0233394955     | - | 381   | 324   | RNA→ ←-hypo                                                                                                                                                  |
| env-1037 | CETQ01034087.1          | - | 365   | 310   | RNA→ rpsO (PRK05626)Ribosomal_S15 (pfam00312)→                                                                                                               |
| env-1038 | JCVL_SCAF_1101668393340 | + | 580   | 636   | RNA→ rpsO (PRK05626)Ribosomal_S15 (pfam00312)→                                                                                                               |
| env-1039 | CEOX01118814.1          | + | 508   | 564   | RNA→                                                                                                                                                         |
| env-1040 | CEOV01159916.1          | + | 492   | 548   | RNA→                                                                                                                                                         |
| env-1041 | CEOK01026918.1          | - | 67    | 10    | RNA→                                                                                                                                                         |
| env-1042 | CENJ01059679.1          | + | 390   | 447   | RNA→ rpsO (PRK05626)Ribosomal_S15 (pfam00312)→ PRK11824 (PRK11824)RNase_PH (pfam01138)→                                                                      |
| env-1043 | CENP01107856.1          | - | 726   | 669   | RNA→ rpsO (PRK05626)Ribosomal_S15 (pfam00312)→ PRK11824 (PRK11824)RNase_PH (pfam01138)→                                                                      |
| env-1044 | JCVL_SCAF_1101668367367 | + | 220   | 278   | RNA→ rpsO (PRK05626)Ribosomal_S15 (pfam00312)→ PRK11824 (PRK11824)RNase_PH (pfam01138)→                                                                      |
| env-1045 | JCVL_READ_1103359209347 | + | 374   | 430   | RNA→ rpsO (PRK05626)Ribosomal_S15 (pfam00312)→ PRK11824 (PRK11824)RNase_PH (pfam01138)→                                                                      |
| env-1046 | CENJ01271348.1          | + | 690   | 746   | RNA→                                                                                                                                                         |
| env-1047 | CERR01108442.1          | - | 2061  | 2005  | RNA→ rpsO (PRK05626)Ribosomal_S15 (pfam00312)→ Pnp (COG1185)PRK11824 (PRK11824)→                                                                             |
| env-1048 | CEVW01297929.1          | - | 67    | 11    | RNA→                                                                                                                                                         |
| env-1049 | CERK01007231.1          | + | 11630 | 11686 | RNA→ rpsO (PRK05626)Ribosomal_S15 (pfam00312)→ Pnp (COG1185)PRK11824 (PRK11824)→<br>RpoD (COG0568)sigma70-ECF (TIGR02937)→ PRK05581 (PRK05581)RPE (cd00429)→ |
| env-1050 | CERW01018950.1          | + | 11301 | 11357 | RNA→ rpsO (PRK05626)Ribosomal_S15 (pfam00312)→ Pnp (COG1185)PRK11824 (PRK11824)→<br>RpoD (COG0568)sigma70-ECF (TIGR02937)→ PRK05581 (PRK05581)RPE (cd00429)→ |
| env-1051 | CERV01210325.1          | + | 688   | 744   | RNA→                                                                                                                                                         |
| env-1052 | CEWB01130717.1          | + | 504   | 560   | RNA→                                                                                                                                                         |
| env-1053 | CEVX01029906.1          | - | 1046  | 990   | RNA→ rpsO (PRK05626)Ribosomal_S15 (pfam00312)→ PRK11824 (PRK11824)RNase_PH (pfam01138)→                                                                      |
| env-1054 | CEWO01080375.1          | + | 31704 | 31760 | RNA→ rpsO (PRK05626)Ribosomal_S15 (pfam00312)→ Pnp (COG1185)PRK11824 (PRK11824)→<br>RpoD (COG0568)sigma70-ECF (TIGR02937)→ PRK05581 (PRK05581)RPE (cd00429)→ |
| env-1055 | CERG01075223.1          | - | 301   | 245   | RNA→ rpsO (PRK05626)Ribosomal_S15 (pfam00312)→                                                                                                               |
| env-1056 | JCVL_SCAF_1101668453793 | - | 755   | 699   | RNA→ rpsO (PRK05626)RpsO (COG0184)→ PRK11824 (PRK11824)RNase_PH (pfam01138)→                                                                                 |
| env-1057 | CETE01088223.1          | - | 254   | 198   | RNA→ rpsO (PRK05626)Ribosomal_S15 (pfam00312)→                                                                                                               |
| env-1058 | CEVG01324060.1          | + | 1087  | 1143  | RNA→                                                                                                                                                         |
| env-1059 | CEQX01186058.1          | - | 92    | 36    | RNA→                                                                                                                                                         |
| env-1060 | CETL01280057.1          | + | 711   | 767   | RNA→                                                                                                                                                         |
| env-1061 | CEOP01144955.1          | - | 414   | 358   | RNA→ rpsO (PRK05626)Ribosomal_S15 (pfam00312)→                                                                                                               |
| env-1062 | CEOM01088735.1          | - | 235   | 179   | RNA→ rpsO (PRK05626)Ribosomal_S15 (pfam00312)→                                                                                                               |
| env-1063 | CEOK01164348.1          | + | 1258  | 1314  | RNA→ rpsO (PRK05626)Ribosomal_S15 (pfam00312)→<br>PRK11824 (PRK11824)RNase_PH (pfam01138)RNase_PH.C (pfam03725)→                                             |
| env-1064 | CEOO01015551.1          | + | 104   | 160   | RNA→ rpsO (PRK05626)Ribosomal_S15 (pfam00312)→                                                                                                               |
| env-1065 | CEPW01148047.1          | - | 367   | 311   | RNA→ rpsO (PRK05626)Ribosomal_S15 (pfam00312)→                                                                                                               |
| env-1066 | CESQ01107160.1          | + | 179   | 235   | RNA→ rpsO (PRK05626)Ribosomal_S15 (pfam00312)→                                                                                                               |
| env-1067 | CEVP01076511.1          | + | 372   | 428   | RNA→ rpsO (PRK05626)Ribosomal_S15 (pfam00312)→                                                                                                               |
| env-1068 | CEWO01041439.1          | + | 478   | 534   | RNA→ rpsO (PRK05626)Ribosomal_S15 (pfam00312)→                                                                                                               |
| env-1069 | JCVL_SCAF_1101668473583 | - | 731   | 675   | RNA→ rpsO (PRK05626)Ribosomal_S15 (pfam00312)→ PRK11824 (PRK11824)RNase_PH (pfam01138)→                                                                      |
| env-1070 | CENF01040883.1          | + | 158   | 214   | RNA→ rpsO (PRK05626)Ribosomal_S15 (pfam00312)→                                                                                                               |
| env-1071 | CERK01009463.1          | - | 541   | 485   | RNA→ rpsO (PRK05626)Ribosomal_S15 (pfam00312)→ RNase_PH_PNPase_1 (cd11363)PRK11824 (PRK11824)→                                                               |
| env-1072 | CERR01043387.1          | + | 2545  | 2601  | RNA→ rpsO (PRK05626)Ribosomal_S15 (pfam00312)→                                                                                                               |
| env-1073 | CERV01074256.1          | - | 390   | 334   | RNA→ rpsO (PRK05626)Ribosomal_S15 (pfam00312)→                                                                                                               |
| env-1074 | CETI01126305.1          | - | 941   | 885   | RNA→ rpsO (PRK05626)Ribosomal_S15 (pfam00312)→ PRK11824 (PRK11824)RNase_PH (pfam01138)→                                                                      |
| env-1075 | CEUB01187863.1          | + | 575   | 631   | RNA→ rpsO (PRK05626)Ribosomal_S15 (pfam00312)→ Pnp (COG1185)PRK11824 (PRK11824)→                                                                             |
| env-1076 | CEVX01089166.1          | + | 423   | 479   | RNA→ rpsO (PRK05626)Ribosomal_S15 (pfam00312)→                                                                                                               |
| env-1077 | CEOM01102445.1          | - | 218   | 162   | RNA→ rpsO (PRK05626)Ribosomal_S15 (pfam00312)→                                                                                                               |
| env-1078 | CEOP01072639.1          | - | 187   | 131   | RNA→ rpsO (PRK05626)Ribosomal_S15 (pfam00312)→                                                                                                               |
| env-1079 | CESM01057045.1          | - | 387   | 331   | RNA→ rpsO (PRK05626)Ribosomal_S15 (pfam00312)→                                                                                                               |
| env-1080 | CETE01063798.1          | + | 198   | 254   | RNA→ rpsO (PRK05626)Ribosomal_S15 (pfam00312)→                                                                                                               |
| env-1081 | CEVX01052949.1          | + | 126   | 182   | RNA→ rpsO (PRK05626)Ribosomal_S15 (pfam00312)→                                                                                                               |
| env-1082 | JCVL_SCAF_1096627072953 | + | 895   | 951   | RNA→ rpsO (PRK05626)Ribosomal_S15 (pfam00312)→ PRK11824 (PRK11824)RNase_PH (pfam01138)→                                                                      |
| env-1083 | CENT01157003.1          | - | 481   | 425   | RNA→ rpsO (PRK05626)Ribosomal_S15 (pfam00312)→ hypo→                                                                                                         |

|          |                         |   |       |       |      |                                                                                                                                           |
|----------|-------------------------|---|-------|-------|------|-------------------------------------------------------------------------------------------------------------------------------------------|
| env-1084 | CEVU01001438.1          | - | 529   | 473   | RNA→ | rpsO (PRK05626)Ribosomal_S15 (pfam00312)→ RNase_PH_PNPase_1 (cd11363)PRK11824 (PRK11824)→                                                 |
| env-1085 | JCVI_READ_1103180834378 | - | 500   | 444   | RNA→ | rpsO (PRK05626)Ribosomal_S15 (pfam00312)→ hypo→                                                                                           |
| env-1086 | JCVI_READ_1108830074671 | - | 624   | 568   | RNA→ | rpsO (PRK05626)Ribosomal_S15 (pfam00312)→                                                                                                 |
| env-1087 | CEWG01092952.1          | - | 74    | 18    | RNA→ |                                                                                                                                           |
| env-1088 | CESW01098570.1          | - | 598   | 542   | RNA→ | rpsO (PRK05626)Ribosomal_S15 (pfam00312)→ PRK11824 (PRK11824)RNase_PH (pfam01138)→                                                        |
| env-1089 | CENG01044642.1          | - | 530   | 474   | RNA→ | rpsO (PRK05626)Ribosomal_S15 (pfam00312)→ RNase_PH_PNPase_1 (cd11363)PRK11824 (PRK11824)→                                                 |
| env-1090 | CEOM01078862.1          | + | 107   | 163   | RNA→ | rpsO (PRK05626)Ribosomal_S15 (pfam00312)→ RNase_PH_PNPase_1 (cd11363)PRK11824 (PRK11824)→                                                 |
| env-1091 | CEOY01062467.1          | + | 215   | 271   | RNA→ | rpsO (PRK05626)Ribosomal_S15 (pfam00312)→                                                                                                 |
| env-1092 | CEPU01224898.1          | - | 334   | 278   | RNA→ | rpsO (PRK05626)Ribosomal_S15 (pfam00312)→                                                                                                 |
| env-1093 | CESN01053220.1          | - | 69    | 13    | RNA→ |                                                                                                                                           |
| env-1094 | CETI01258919.1          | + | 443   | 499   | RNA→ |                                                                                                                                           |
| env-1095 | CEVZ01325749.1          | + | 257   | 313   | RNA→ | rpsO (PRK05626)Ribosomal_S15 (pfam00312)→                                                                                                 |
| env-1096 | CAM_READ_0233245559     | + | 268   | 324   | RNA→ | rpsO (PRK05626)Ribosomal_S15 (pfam00312)→                                                                                                 |
| env-1097 | JCVI_READ_1108830074672 | - | 627   | 571   | RNA→ | rpsO (PRK05626)Ribosomal_S15 (pfam00312)→ PRK11824 (PRK11824)RNase_PH (pfam01138)→                                                        |
| env-1098 | JCVI_SCAF_1096626319309 | + | 109   | 165   | RNA→ | rpsO (PRK05626)Ribosomal_S15 (pfam00312)→ PRK11824 (PRK11824)RNase_PH (pfam01138)→                                                        |
| env-1099 | 85126184                | + | 606   | 662   | RNA→ |                                                                                                                                           |
| env-1100 | JCVI_READ_1103180276409 | + | 606   | 662   | RNA→ |                                                                                                                                           |
| env-1101 | CENP01224387.1          | - | 579   | 523   | RNA→ | rpsO (PRK05626)Ribosomal_S15 (pfam00312)→ PRK11824 (PRK11824)RNase_PH (pfam01138)→                                                        |
| env-1102 | CEOO01058349.1          | + | 262   | 318   | RNA→ | rpsO (PRK05626)Ribosomal_S15 (pfam00312)→                                                                                                 |
| env-1103 | CEPL01104959.1          | + | 227   | 283   | RNA→ | rpsO (PRK05626)Ribosomal_S15 (pfam00312)→                                                                                                 |
| env-1104 | CEQN01113421.1          | - | 266   | 210   | RNA→ | rpsO (PRK05626)Ribosomal_S15 (pfam00312)→                                                                                                 |
| env-1105 | CESZ01006198.1          | + | 105   | 161   | RNA→ | rpsO (PRK05626)Ribosomal_S15 (pfam00312)→ PRK11824 (PRK11824)RNase_PH (pfam01138)→                                                        |
| env-1106 | CEVX01162813.1          | + | 10219 | 10275 | RNA→ | rpsO (PRK05626)Ribosomal_S15 (pfam00312)→ Pnp (COG1185)PRK11824 (PRK11824)→                                                               |
| env-1107 | CAM_READ_0234149989     | - | 230   | 174   | RNA→ |                                                                                                                                           |
| env-1108 | JCVI_READ_1108830083326 | - | 137   | 81    | RNA→ | rpsO (PRK05626)→                                                                                                                          |
| env-1109 | JCVI_READ_1108799804924 | + | 237   | 293   | RNA→ | rpsO (PRK05626)Ribosomal_S15 (pfam00312)→ PRK11824 (PRK11824)RNase_PH (pfam01138)→                                                        |
| env-1110 | CEWB01036815.1          | - | 340   | 283   | RNA→ | rpsO (PRK05626)Ribosomal_S15 (pfam00312)→                                                                                                 |
| env-1111 | JCVI_SCAF_1096628021305 | - | 1523  | 1467  | RNA→ | rpsO (PRK05626)Ribosomal_S15 (pfam00312)→ PRK11824 (PRK11824)RNase_PH (pfam01138)→                                                        |
| env-1112 | CESN01190334.1          | + | 896   | 952   | RNA→ | rpsO (PRK05626)Ribosomal_S15 (pfam00312)→ PRK11824 (PRK11824)RNase_PH (pfam01138)RNase_PH_C (pfam03725)→                                  |
| env-1113 | CETE01015087.1          | - | 366   | 310   | RNA→ | rpsO (PRK05626)Ribosomal_S15 (pfam00312)→                                                                                                 |
| env-1114 | CETK01092484.1          | + | 149   | 205   | RNA→ | rpsO (PRK05626)Ribosomal_S15 (pfam00312)→                                                                                                 |
| env-1115 | CETJ01158801.1          | - | 614   | 558   | RNA→ | rpsO (PRK05626)Ribosomal_S15 (pfam00312)→ PRK11824 (PRK11824)RNase_PH (pfam01138)→                                                        |
| env-1116 | CETO01171402.1          | - | 663   | 607   | RNA→ | rpsO (PRK05626)Ribosomal_S15 (pfam00312)→ PRK11824 (PRK11824)RNase_PH (pfam01138)→                                                        |
| env-1117 | CEUJ01011635.1          | - | 1182  | 1126  | RNA→ | rpsO (PRK05626)Ribosomal_S15 (pfam00312)→ PRK11824 (PRK11824)RNase_PH (pfam01138)RNase_PH_C (pfam03725)→                                  |
| env-1118 | CEUL01314205.1          | - | 583   | 527   | RNA→ | rpsO (PRK05626)Ribosomal_S15 (pfam00312)→ PRK11824 (PRK11824)RNase_PH (pfam01138)→                                                        |
| env-1119 | CEUQ01085079.1          | + | 281   | 337   | RNA→ | rpsO (PRK05626)Ribosomal_S15 (pfam00312)→                                                                                                 |
| env-1120 | JGI24820J26691_1000397  | + | 11685 | 11741 | RNA→ | rpsO (PRK05626)Ribosomal_S15 (pfam00312)→ PRK11824 (PRK11824)RNase_PH (pfam01138)RNase_PH_C (pfam03725)→                                  |
| env-1121 | CETT01075724.1          | - | 760   | 704   | RNA→ | rpsO (PRK05626)Ribosomal_S15 (pfam00312)→ PRK11824 (PRK11824)RNase_PH (pfam01138)→                                                        |
| env-1122 | CENX01010795.1          | + | 29698 | 29754 | RNA→ | rpsO (PRK05626)RpsO (COG0184)→ Pnp (COG1185)PRK11824 (PRK11824)→ RpoD (COG0568)sigma70-ECF (TIGR02937)→ PRK05581 (PRK05581)RPE (cd00429)→ |
| env-1123 | CEPT01054511.1          | + | 99    | 155   | RNA→ | rpsO (PRK05626)Ribosomal_S15 (pfam00312)→ PRK11824 (PRK11824)RNase_PH (pfam01138)→                                                        |
| env-1124 | CESW01141929.1          | - | 852   | 796   | RNA→ | rpsO (PRK05626)Ribosomal_S15 (pfam00312)→ PRK11824 (PRK11824)RNase_PH (pfam01138)→                                                        |
| env-1125 | CETG01325760.1          | - | 690   | 634   | RNA→ | rpsO (PRK05626)Ribosomal_S15 (pfam00312)→ PRK11824 (PRK11824)RNase_PH (pfam01138)→                                                        |
| env-1126 | CETM01138654.1          | + | 38    | 94    | RNA→ | rpsO (PRK05626)Ribosomal_S15 (pfam00312)→ PRK11824 (PRK11824)RNase_PH (pfam01138)→                                                        |
| env-1127 | CETS01042552.1          | + | 1863  | 1919  | RNA→ | rpsO (PRK05626)Ribosomal_S15 (pfam00312)→ PRK11824 (PRK11824)RNase_PH (pfam01138)→                                                        |
| env-1128 | CEOF01214230.1          | - | 326   | 270   | RNA→ | rpsO (PRK05626)RpsO (COG0184)→                                                                                                            |
| env-1129 | JGI25921J50272_10110947 | - | 112   | 45    | RNA→ | hypo→                                                                                                                                     |
| env-1130 | JGI25921J50272_10064100 | + | 59    | 126   | RNA→ | rpsO (PRK05626)Ribosomal_S15p_S13e (cd00353)→                                                                                             |
| env-1131 | JGI12547J11936_1016467  | - | 880   | 813   | RNA→ | rpsO (PRK05626)RpsO (COG0184)→                                                                                                            |
| env-1132 | JGI25912J50252_10000040 | + | 10957 | 11024 | RNA→ | rpsO (PRK05626)RpsO (COG0184)→                                                                                                            |



|          |                         |   |         |         |      |                                                                  |
|----------|-------------------------|---|---------|---------|------|------------------------------------------------------------------|
| env-1133 | JGI25925J51416_10000721 | - | 2637    | 2570    | RNA→ | rpsO (PRK05626)RpsO (COG0184)→                                   |
| env-1134 | JGI12421J11937_10092536 | - | 740     | 673     | RNA→ | rpsO (PRK05626)RpsO (COG0184)→                                   |
| env-1135 | JGI25910J50241_10000033 | + | 10957   | 11024   | RNA→ | rpsO (PRK05626)RpsO (COG0184)→                                   |
| env-1136 | JGI25911J50253_10000079 | - | 16190   | 16123   | RNA→ | rpsO (PRK05626)RpsO (COG0184)→                                   |
| env-1137 | JGI25914J50564_10211613 | - | 350     | 283     | RNA→ | rpsO (PRK05626)RpsO (COG0184)→                                   |
| env-1138 | M3P_c10368127           | - | 78      | 11      | RNA→ |                                                                  |
| env-1139 | JGI25921J50272_10001427 | - | 6248    | 6181    | RNA→ | rpsO (PRK05626)RpsO (COG0184)→ Pnp (COG1185)PRK11824 (PRK11824)→ |
| env-1140 | JGI25913J50563_1000060  | - | 14177   | 14110   | RNA→ | rpsO (PRK05626)Ribosomal_S15 (pfam00312)→                        |
| env-1141 | CEOK01126743.1          | + | 2956    | 3010    | RNA→ | rpsO (PRK05626)Ribosomal_S15 (pfam00312)→                        |
| env-1142 | CENJ01063439.1          | - | 3516    | 3462    | RNA→ | rpsO (PRK05626)Ribosomal_S15 (pfam00312)→                        |
| env-1143 | CENP01230084.1          | + | 4337    | 4391    | RNA→ | rpsO (PRK05626)Ribosomal_S15 (pfam00312)→                        |
| Lsp-4-1  | NZ_JPOL0100002.1        | - | 3091910 | 3091846 | RNA→ | rpsO (PRK05626)Ribosomal_S15 (pfam00312)→                        |
| Cca-5-1  | NZ_AUFK01000009.1       | - | 843585  | 843537  | RNA→ | rpsO (PRK05626)Ribosomal_S15 (pfam00312)→                        |
| env-1144 | SwRhRL2b_contig_307599  | - | 287     | 239     | RNA→ | rpsO (PRK05626)RpsO (COG0184)→                                   |
| Fan-1-1  | NZ_ATT01000001.1        | - | 367999  | 367938  | RNA→ | rpsO (PRK05626)Ribosomal_S15 (pfam00312)→                        |
| Fte-1-1  | NZ_AUDN01000008.1       | + | 180924  | 180985  | RNA→ | rpsO (PRK05626)Ribosomal_S15 (pfam00312)→                        |
| env-1145 | JGI24723J26617_10000025 | - | 95199   | 95137   | RNA→ | rpsO (PRK05626)Ribosomal_S15 (pfam00312)→                        |
| env-1146 | JGI1221J11331_1065710   | + | 185     | 247     | RNA→ | rpsO (PRK05626)Ribosomal_S15 (pfam00312)→                        |
| env-1147 | CEOS01027552.1          | + | 66892   | 66954   | RNA→ | rpsO (PRK05626)Ribosomal_S15 (pfam00312)→                        |
| env-1148 | CEOX01194702.1          | - | 519     | 457     | RNA→ | rpsO (PRK05626)Ribosomal_S15 (pfam00312)→                        |
| env-1149 | CESL01150597.1          | - | 869     | 807     | RNA→ | rpsO (PRK05626)Ribosomal_S15 (pfam00312)→                        |
| env-1150 | CETA01146872.1          | - | 546     | 484     | RNA→ | rpsO (PRK05626)Ribosomal_S15 (pfam00312)→                        |
| env-1151 | CETB01171796.1          | + | 30062   | 30124   | RNA→ | rpsO (PRK05626)Ribosomal_S15 (pfam00312)→                        |
| env-1152 | CETR01014521.1          | + | 66892   | 66954   | RNA→ | rpsO (PRK05626)Ribosomal_S15 (pfam00312)→                        |
| env-1153 | CETS01016621.1          | + | 66892   | 66954   | RNA→ | rpsO (PRK05626)Ribosomal_S15 (pfam00312)→                        |
| env-1154 | CETT01201410.1          | + | 158     | 220     | RNA→ | rpsO (PRK05626)Ribosomal_S15 (pfam00312)→                        |
| env-1155 | CEVJ01093656.1          | - | 1367    | 1305    | RNA→ | rpsO (PRK05626)Ribosomal_S15 (pfam00312)→                        |
| env-1156 | CEVK01102272.1          | - | 1022    | 960     | RNA→ | rpsO (PRK05626)Ribosomal_S15 (pfam00312)→                        |
| env-1157 | CEVQ01351872.1          | + | 781     | 843     | RNA→ | rpsO (PRK05626)Ribosomal_S15 (pfam00312)→                        |
| env-1158 | CEWI01263175.1          | + | 378     | 316     | RNA→ | rpsO (PRK05626)Ribosomal_S15 (pfam00312)→                        |
| env-1159 | CERQ01119226.1          | - | 71      | 9       | RNA→ |                                                                  |
| env-1160 | CEVI01194451.1          | - | 71      | 9       | RNA→ |                                                                  |
| env-1161 | CETG01242168.1          | + | 199     | 261     | RNA→ | rpsO (PRK05626)Ribosomal_S15 (pfam00312)→                        |
| env-1162 | JGI24025J20009_10171038 | + | 263     | 325     | RNA→ | rpsO (PRK05626)Ribosomal_S15 (pfam00312)→                        |
| env-1163 | JGI20152J14361_10000034 | - | 29790   | 29725   | RNA→ | rpsO (PRK05626)Ribosomal_S15 (pfam00312)→                        |
| env-1164 | JGI20156J14371_10001636 | - | 2827    | 2762    | RNA→ | rpsO (PRK05626)Ribosomal_S15 (pfam00312)→                        |
| env-1165 | JGI20153J14295_10056361 | - | 492     | 427     | RNA→ | rpsO (PRK05626)Ribosomal_S15 (pfam00312)→                        |
| env-1166 | JGI20153J14318_10056361 | - | 492     | 427     | RNA→ | rpsO (PRK05626)Ribosomal_S15 (pfam00312)→                        |
| env-1167 | DelMOSum2011.c10000619  | + | 21340   | 21404   | RNA→ | rpsO (PRK05626)Ribosomal_S15 (pfam00312)→                        |
| env-1168 | 2236876010_0099679      | - | 354     | 287     | RNA→ |                                                                  |
| env-1169 | 2236876001_018781       | - | 282     | 215     | RNA→ | hypo→                                                            |
| Psp-6-1  | NZ_CBRF010000389.1      | - | 277     | 212     | RNA→ | rpsO (PRK05626)Ribosomal_S15 (pfam00312)→                        |
| env-1170 | CESU01016827.1          | - | 658     | 593     | RNA→ | rpsO (PRK05626)Ribosomal_S15 (pfam00312)→                        |
| env-1171 | CESI01053671.1          | - | 1054    | 989     | RNA→ | rpsO (PRK05626)Ribosomal_S15 (pfam00312)→                        |
| env-1172 | NCBI_READ_1112493756060 | + | 800     | 866     | RNA→ |                                                                  |
| env-1173 | NCBI_READ_1112290405280 | - | 757     | 690     | RNA→ | rpsO (PRK05626)Ribosomal_S15 (pfam00312)→                        |
| env-1174 | 2236876010_0188177      | + | 202     | 268     | RNA→ | rpsO (PRK05626)RpsO (COG0184)→                                   |
| Tov-1-1  | NZ_AUMF01000013.1       | + | 158381  | 158445  | RNA→ | rpsO (PRK05626)Ribosomal_S15 (pfam00312)→                        |
| Pir-1-1  | NZ_CH724148.1           | + | 565143  | 565208  | RNA→ | rpsO (PRK05626)Ribosomal_S15 (pfam00312)→                        |
| env-1175 | NCBI_READ_1112290390846 | + | 257     | 324     | RNA→ | rpsO (PRK05626)Ribosomal_S15 (pfam00312)→                        |
| env-1176 | NCBI_READ_1112788434094 | + | 709     | 776     | RNA→ |                                                                  |
| env-1177 | NCBI_READ_1112777244532 | - | 379     | 312     | RNA→ | rpsO (PRK05626)Ribosomal_S15 (pfam00312)→                        |



|          |                           |   |         |         |      |                                                                                     |
|----------|---------------------------|---|---------|---------|------|-------------------------------------------------------------------------------------|
| env-1178 | NCBI_READ.1112637244083   | + | 363     | 430     | RNA→ | rpsO (PRK05626)Ribosomal_S15 (pfam00312)→                                           |
| env-1179 | NCBI_READ.1112637711645   | + | 430     | 497     | RNA→ | rpsO (PRK05626)Ribosomal_S15 (pfam00312)→                                           |
| env-1180 | CESE01018107.1            | + | 12288   | 12355   | RNA→ | rpsO (PRK05626)Ribosomal_S15 (pfam00312)→                                           |
| env-1181 | CEST01011319.1            | + | 1239    | 1306    | RNA→ |                                                                                     |
| env-1182 | NCBI_READ.1112788335987   | - | 294     | 227     | RNA→ | rpsO (PRK05626)Ribosomal_S15 (pfam00312)→                                           |
| env-1183 | wf3_AHA15724.y1           | - | 298     | 233     | RNA→ | rpsO (PRK05626)RpsO (COG0184)→                                                      |
| env-1184 | DelMOWin2010.c10256912    | + | 1       | 66      | RNA→ | rpsO (PRK05626)Ribosomal_S15 (pfam00312)→                                           |
| env-1185 | SI60aug11.100m.c1001628   | - | 875     | 810     | RNA→ | rpsO (PRK05626)Ribosomal_S15 (pfam00312)→                                           |
| env-1186 | JGI20152J14361.10009221   | - | 790     | 725     | RNA→ | rpsO (PRK05626)Ribosomal_S15 (pfam00312)→                                           |
| Psp-1-1  | NZ_JPDI01000001.1         | - | 301145  | 301080  | RNA→ | rpsO (PRK05626)Ribosomal_S15 (pfam00312)→                                           |
| env-1187 | JGI20160J14292.10015031   | + | 1484    | 1549    | RNA→ | rpsO (PRK05626)Ribosomal_S15 (pfam00312)→                                           |
| env-1188 | JGI20153J14295.10072278   | - | 131     | 66      | RNA→ |                                                                                     |
| env-1189 | JGI20153J14318.10072278   | - | 131     | 66      | RNA→ |                                                                                     |
| env-1190 | 2236876009.034639         | - | 316     | 251     | RNA→ | rpsO (PRK05626)Ribosomal_S15 (pfam00312)→ rpsO (PRK05626)Ribosomal_S15 (pfam00312)→ |
| env-1191 | SI60aug11.200m.c1030663   | - | 361     | 296     | RNA→ | rpsO (PRK05626)Ribosomal_S15 (pfam00312)→                                           |
| env-1192 | SI34jun09.10m.1045700     | + | 218     | 283     | RNA→ | rpsO (PRK05626)Ribosomal_S15 (pfam00312)→                                           |
| env-1193 | JGI20154J14316.10009990   | + | 1427    | 1492    | RNA→ | rpsO (PRK05626)Ribosomal_S15 (pfam00312)→                                           |
| env-1194 | JGI20153J14295.10000097   | - | 96      | 31      | RNA→ |                                                                                     |
| env-1195 | JGI20153J14318.10000097   | - | 96      | 31      | RNA→ |                                                                                     |
| env-1196 | DelMOSum2010.c10004701    | + | 2457    | 2522    | RNA→ | rpsO (PRK05626)Ribosomal_S15 (pfam00312)→                                           |
| env-1197 | NCBI_READ.1112532466838   | + | 411     | 476     | RNA→ | rpsO (PRK05626)Ribosomal_S15 (pfam00312)→                                           |
| env-1198 | JGI20154J14316.10069178   | + | 223     | 288     | RNA→ | rpsO (PRK05626)Ribosomal_S15 (pfam00312)→                                           |
| env-1199 | CEWR01072923.1            | + | 9501    | 9566    | RNA→ |                                                                                     |
| env-1200 | NCBI_READ.1112494129442   | - | 686     | 621     | RNA→ | rpsO (PRK05626)Ribosomal_S15 (pfam00312)→                                           |
| env-1201 | NCBI_READ.1112493965127   | - | 731     | 666     | RNA→ | rpsO (PRK05626)Ribosomal_S15 (pfam00312)→                                           |
| env-1202 | CEST01080561.1            | - | 520     | 455     | RNA→ | rpsO (PRK05626)Ribosomal_S15 (pfam00312)→                                           |
| env-1203 | CESI01299916.1            | - | 89      | 24      | RNA→ |                                                                                     |
| env-1204 | NCBI_READ.1112493618954   | - | 348     | 283     | RNA→ | rpsO (PRK05626)Ribosomal_S15 (pfam00312)→                                           |
| env-1205 | P_2C_Liq_3.UnCty_100110   | - | 10558   | 10493   | RNA→ | rpsO (PRK05626)Ribosomal_S15 (pfam00312)→                                           |
| env-1206 | P_2C_Liq_1.UnCty_1000155  | + | 17803   | 17868   | RNA→ | rpsO (PRK05626)Ribosomal_S15 (pfam00312)→                                           |
| env-1207 | P_2C_Liq_2.UnCty_10014517 | - | 424     | 359     | RNA→ | rpsO (PRK05626)Ribosomal_S15 (pfam00312)→                                           |
| Psp-3-1  | NZ_JHZZ01000001.1         | + | 843905  | 843970  | RNA→ | rpsO (PRK05626)Ribosomal_S15 (pfam00312)→ hypo→ Pnp (COG1185)PRK11824 (PRK11824)→   |
| env-1208 | DelMOSum2011.c10451001    | - | 187     | 122     | RNA→ | rpsO (PRK05626)Ribosomal_S15 (pfam00312)→                                           |
| env-1209 | JGI20156J14371.10087495   | + | 211     | 276     | RNA→ | rpsO (PRK05626)Ribosomal_S15 (pfam00312)→                                           |
| env-1210 | JGI20159J14440.10134887   | - | 66      | 1       | RNA→ |                                                                                     |
| env-1211 | JGI20152J14361.10000060   | + | 50242   | 50307   | RNA→ | rpsO (PRK05626)Ribosomal_S15 (pfam00312)→                                           |
| env-1212 | P_2C_Liq_1.UnCty_1001158  | - | 2910    | 2845    | RNA→ | rpsO (PRK05626)Ribosomal_S15 (pfam00312)→                                           |
| env-1213 | JGI20153J14295.10391622   | - | 175     | 109     | RNA→ | rpsO (PRK05626)RpsO (COG0184)→                                                      |
| env-1214 | JGI20153J14318.10391622   | - | 175     | 109     | RNA→ | rpsO (PRK05626)RpsO (COG0184)→                                                      |
| Psp-2-1  | NZ_JPDS01000003.1         | + | 146619  | 146684  | RNA→ | rpsO (PRK05626)Ribosomal_S15 (pfam00312)→                                           |
| Psp-4-1  | NC.020830.1               | - | 2479424 | 2479359 | RNA→ | rpsO (PRK05626)Ribosomal_S15 (pfam00312)→                                           |
| env-1215 | 2236876010.0335376        | + | 192     | 256     | RNA→ | hypo→                                                                               |
| env-1216 | JCVL_SCAF_1096627466044   | + | 161     | 226     | RNA→ | rpsO (PRK05626)Ribosomal_S15 (pfam00312)→                                           |
| env-1217 | 2236876010.0251574        | - | 232     | 167     | RNA→ | rpsO (PRK05626)Ribosomal_S15 (pfam00312)→                                           |
| env-1218 | 2236876010.0458838        | - | 157     | 92      | RNA→ | rpsO (PRK05626)RpsO (COG0184)→                                                      |
| env-1219 | 2236876010.0341471        | - | 321     | 256     | RNA→ | rpsO (PRK05626)Ribosomal_S15 (pfam00312)→                                           |
| env-1220 | DelMOSum2011.c10002449    | - | 3023    | 2958    | RNA→ | rpsO (PRK05626)Ribosomal_S15 (pfam00312)→                                           |
| env-1221 | CER101273154.1            | - | 366     | 301     | RNA→ | rpsO (PRK05626)Ribosomal_S15 (pfam00312)→                                           |
| env-1222 | SI34jun09.10m.1064123     | + | 231     | 296     | RNA→ | rpsO (PRK05626)Ribosomal_S15 (pfam00312)→                                           |
| env-1223 | JGI20151J14362.10003118   | + | 10963   | 11028   | RNA→ | rpsO (PRK05626)Ribosomal_S15 (pfam00312)→                                           |
| env-1224 | JGI20159J14440.10001807   | - | 6646    | 6581    | RNA→ | rpsO (PRK05626)Ribosomal_S15 (pfam00312)→                                           |
| env-1225 | JGI20158J14315.10040249   | - | 1575    | 1510    | RNA→ | rpsO (PRK05626)Ribosomal_S15 (pfam00312)→                                           |

|          |                         |   |       |       |      |                                                                                   |
|----------|-------------------------|---|-------|-------|------|-----------------------------------------------------------------------------------|
| env-1226 | JGI20154J14316_10029064 | - | 823   | 758   | RNA→ | rpsO (PRK05626)Ribosomal_S15 (pfam00312)→                                         |
| env-1227 | JGI20153J14295_10003610 | - | 825   | 760   | RNA→ | rpsO (PRK05626)Ribosomal_S15 (pfam00312)→                                         |
| env-1228 | JGI20153J14318_10003610 | - | 825   | 760   | RNA→ | rpsO (PRK05626)Ribosomal_S15 (pfam00312)→                                         |
| env-1229 | JGI20155J14468_10055793 | - | 1584  | 1519  | RNA→ | rpsO (PRK05626)Ribosomal_S15 (pfam00312)→                                         |
| env-1230 | 2236876010.0648566      | + | 166   | 232   | RNA→ | rpsO (PRK05626)→                                                                  |
| env-1231 | 2236876010.0594514      | + | 218   | 283   | RNA→ |                                                                                   |
| env-1232 | 2236876009_222657       | - | 142   | 77    | RNA→ | rpsO (PRK05626)→                                                                  |
| env-1233 | 2236876010.0518603      | - | 123   | 58    | RNA→ | hypo→                                                                             |
| env-1234 | 2236876010.0164712      | + | 288   | 353   | RNA→ |                                                                                   |
| env-1235 | 2236876010.0454774      | + | 51    | 116   | RNA→ | rpsO (PRK05626)RpsO (COG0184)→                                                    |
| env-1236 | DelMOWin2010_c10635086  | + | 50    | 115   | RNA→ | rpsO (PRK05626)Ribosomal_S15 (pfam00312)→                                         |
| env-1237 | JGI20152J14361_10030741 | - | 526   | 461   | RNA→ | rpsO (PRK05626)Ribosomal_S15 (pfam00312)→                                         |
| env-1238 | JGI20156J14371_10002279 | - | 527   | 462   | RNA→ | rpsO (PRK05626)Ribosomal_S15 (pfam00312)→                                         |
| env-1239 | JGI20160J14292_10001237 | - | 71    | 6     | RNA→ |                                                                                   |
| env-1240 | JGI20157J14317_10001850 | + | 18454 | 18519 | RNA→ | rpsO (PRK05626)Ribosomal_S15 (pfam00312)→                                         |
| env-1241 | 2236876010.0276371      | + | 118   | 182   | RNA→ |                                                                                   |
| env-1242 | JGI20154J14316_10081544 | - | 110   | 45    | RNA→ | hypo→                                                                             |
| env-1243 | JGI20153J14295_10059635 | - | 113   | 48    | RNA→ | hypo→                                                                             |
| env-1244 | JGI20153J14318_10059635 | - | 113   | 48    | RNA→ | hypo→                                                                             |
| env-1245 | PML_READ_00810429       | + | 39    | 104   | RNA→ | rpsO (PRK05626)RpsO (COG0184)→                                                    |
| env-1246 | PML_READ_00749665       | + | 164   | 229   | RNA→ | hypo→                                                                             |
| env-1247 | JGI20156J14371_10251340 | - | 138   | 74    | RNA→ |                                                                                   |
| env-1248 | JGI20152J14361_10042742 | + | 1189  | 1254  | RNA→ | hypo→                                                                             |
| env-1249 | JGI20160J14292_10013292 | + | 5005  | 5070  | RNA→ |                                                                                   |
| env-1250 | JGI20153J14295_10037233 | - | 1940  | 1875  | RNA→ | rpsO (PRK05626)Ribosomal_S15 (pfam00312)→                                         |
| env-1251 | JGI20153J14318_10037233 | - | 1940  | 1875  | RNA→ | rpsO (PRK05626)Ribosomal_S15 (pfam00312)→                                         |
| env-1252 | CESU01096896.1          | - | 500   | 435   | RNA→ | rpsO (PRK05626)Ribosomal_S15 (pfam00312)→                                         |
| env-1253 | PML_READ_00817042       | + | 104   | 169   | RNA→ | rpsO (PRK05626)Ribosomal_S15 (pfam00312)→                                         |
| env-1254 | DelMOSum2010_c10498216  | + | 248   | 313   | RNA→ |                                                                                   |
| env-1255 | SI34jun09_100m_1156551  | + | 262   | 327   | RNA→ |                                                                                   |
| env-1256 | JGI20154J14316_10022051 | + | 3363  | 3428  | RNA→ | hypo→                                                                             |
| env-1257 | JGI20153J14295_10059402 | - | 113   | 48    | RNA→ | hypo→                                                                             |
| env-1258 | JGI20153J14318_10059402 | - | 113   | 48    | RNA→ | hypo→                                                                             |
| env-1259 | JGI20152J14361_10005596 | + | 1194  | 1259  | RNA→ | rpsO (PRK05626)Ribosomal_S15 (pfam00312)→                                         |
| env-1260 | JGI20156J14371_10001740 | + | 17326 | 17391 | RNA→ | rpsO (PRK05626)Ribosomal_S15 (pfam00312)→ hypo→                                   |
| env-1261 | JGI20157J14317_10050291 | - | 461   | 396   | RNA→ | rpsO (PRK05626)Ribosomal_S15 (pfam00312)→ hypo→                                   |
| env-1262 | JGI20160J14292_10037220 | - | 1297  | 1232  | RNA→ | rpsO (PRK05626)Ribosomal_S15 (pfam00312)→                                         |
| env-1263 | JGI20151J14362_10001103 | - | 1600  | 1535  | RNA→ | rpsO (PRK05626)RpsO (COG0184)→ hypo→ Pnp (COG1185)PRK11824 (PRK11824)→            |
| env-1264 | SI34jun09_10m_1001615   | - | 5506  | 5441  | RNA→ | rpsO (PRK05626)Ribosomal_S15 (pfam00312)→ hypo→ Pnp (COG1185)PRK11824 (PRK11824)→ |
| env-1265 | SI34jun09_10m_1017464   | + | 625   | 690   | RNA→ | rpsO (PRK05626)Ribosomal_S15 (pfam00312)→                                         |
| env-1266 | SI34jun09_135m_1013108  | - | 2236  | 2171  | RNA→ | rpsO (PRK05626)Ribosomal_S15 (pfam00312)→                                         |
| env-1267 | SI34jun09_100m_1007927  | + | 444   | 509   | RNA→ | rpsO (PRK05626)Ribosomal_S15 (pfam00312)→                                         |
| env-1268 | SI48aug10_100m_1159875  | + | 93    | 158   | RNA→ | rpsO (PRK05626)Ribosomal_S15 (pfam00312)→                                         |
| env-1269 | JGI20154J14316_10014588 | - | 110   | 45    | RNA→ | hypo→                                                                             |
| env-1270 | CESF01290968.1          | - | 205   | 140   | RNA→ | rpsO (PRK05626)Ribosomal_S15 (pfam00312)→                                         |
| env-1271 | JCVL_SCAF_1096627401693 | - | 1341  | 1276  | RNA→ | rpsO (PRK05626)Ribosomal_S15 (pfam00312)→                                         |
| env-1272 | SI48aug10_10m_c1023266  | + | 218   | 283   | RNA→ | rpsO (PRK05626)Ribosomal_S15 (pfam00312)→                                         |
| env-1273 | SI34jun09_120m_1022537  | + | 54    | 119   | RNA→ | rpsO (PRK05626)Ribosomal_S15 (pfam00312)→                                         |
| env-1274 | JGI20156J14371_10172854 | + | 486   | 551   | RNA→ |                                                                                   |
| env-1275 | JGI20153J14295_10026978 | - | 113   | 48    | RNA→ | hypo→                                                                             |
| env-1276 | JGI20153J14318_10026978 | - | 113   | 48    | RNA→ | hypo→                                                                             |
| env-1277 | 2236876009_230751       | - | 266   | 201   | RNA→ | rpsO (PRK05626)Ribosomal_S15 (pfam00312)→                                         |

|          |                            |   |         |         |      |                                                                                     |
|----------|----------------------------|---|---------|---------|------|-------------------------------------------------------------------------------------|
| env-1278 | CESE01261489.1             | + | 340     | 405     | RNA→ | rpsO (PRK05626)Ribosomal_S15 (pfam00312)→                                           |
| env-1279 | CEST01084614.1             | - | 1635    | 1570    | RNA→ | rpsO (PRK05626)Ribosomal_S15 (pfam00312)→                                           |
| Ccy-1-1  | NZ_CDOF01000013.1          | - | 34423   | 34369   | RNA→ | rpsO (PRK05626)Ribosomal_S15 (pfam00312)→                                           |
| Ccy-1-2  | NZ_CDOG01000011.1          | - | 34424   | 34370   | RNA→ | rpsO (PRK05626)Ribosomal_S15 (pfam00312)→                                           |
| Ccy-2-1  | NZ_KB900704.1              | - | 181426  | 181372  | RNA→ | rpsO (PRK05626)Ribosomal_S15 (pfam00312)→                                           |
| Ccy-1-3  | NZ_CDOD01000067.1          | + | 17098   | 17152   | RNA→ | rpsO (PRK05626)Ribosomal_S15 (pfam00312)→                                           |
| Tme-1-1  | NZ_LDOD01000002.1          | + | 281523  | 281586  | RNA→ | rpsO (PRK05626)Ribosomal_S15 (pfam00312)→                                           |
| Tsp-1-1  | NZ_JADN01000008.1          | - | 275749  | 275686  | RNA→ | rpsO (PRK05626)RpsO (COG0184)→                                                      |
| env-1280 | JGI20154J14316_10212002    | + | 357     | 424     | RNA→ |                                                                                     |
| env-1281 | DelMOSum2011.c10031224     | + | 1515    | 1582    | RNA→ | rpsO (PRK05626)Ribosomal_S15 (pfam00312)→                                           |
| env-1282 | NCBI_READ_1112493817117    | + | 489     | 556     | RNA→ | rpsO (PRK05626)Ribosomal_S15 (pfam00312)→                                           |
| env-1283 | NCBI_READ_1112532339470    | - | 139     | 72      | RNA→ |                                                                                     |
| env-1284 | JGI20154J14316_10007880    | + | 7231    | 7298    | RNA→ |                                                                                     |
| env-1285 | JGI20153J14295_10044777    | - | 1598    | 1531    | RNA→ | rpsO (PRK05626)Ribosomal_S15 (pfam00312)→                                           |
| env-1286 | JGI20153J14318_10044777    | - | 1598    | 1531    | RNA→ | rpsO (PRK05626)Ribosomal_S15 (pfam00312)→                                           |
| env-1287 | NCBI_READ_1112493996523    | - | 766     | 699     | RNA→ | rpsO (PRK05626)Ribosomal_S15 (pfam00312)→                                           |
| env-1288 | NCBI_READ_1112493957189    | - | 592     | 525     | RNA→ | rpsO (PRK05626)Ribosomal_S15 (pfam00312)→                                           |
| env-1289 | NCBI_READ_1112494170669    | - | 517     | 450     | RNA→ | rpsO (PRK05626)Ribosomal_S15 (pfam00312)→                                           |
| env-1290 | CESE01136377.1             | + | 326     | 393     | RNA→ | rpsO (PRK05626)Ribosomal_S15 (pfam00312)→                                           |
| env-1291 | CEST01080931.1             | + | 326     | 393     | RNA→ | rpsO (PRK05626)Ribosomal_S15 (pfam00312)→                                           |
| env-1292 | CEWR01087712.1             | + | 3318    | 3385    | RNA→ | rpsO (PRK05626)Ribosomal_S15 (pfam00312)→                                           |
| env-1293 | NCBI_READ_1112493907442    | + | 499     | 566     | RNA→ | rpsO (PRK05626)Ribosomal_S15 (pfam00312)→                                           |
| env-1294 | NCBI_READ_1112494181464    | + | 794     | 861     | RNA→ |                                                                                     |
| env-1295 | DelMOSum2010.c10001171     | + | 1998    | 2065    | RNA→ | rpsO (PRK05626)Ribosomal_S15 (pfam00312)→                                           |
| env-1296 | JGI20154J14316_10023581    | - | 1717    | 1650    | RNA→ | rpsO (PRK05626)Ribosomal_S15 (pfam00312)→                                           |
| env-1297 | JGI20160J14292_10181928    | - | 501     | 434     | RNA→ | rpsO (PRK05626)Ribosomal_S15 (pfam00312)→                                           |
| env-1298 | JGI20157J14317_10011652    | + | 375     | 442     | RNA→ | rpsO (PRK05626)Ribosomal_S15 (pfam00312)→                                           |
| env-1299 | NCBI_READ_1112493510178    | + | 737     | 804     | RNA→ |                                                                                     |
| env-1300 | DelMOWin2010.c10091431     | - | 949     | 884     | RNA→ | rpsO (PRK05626)Ribosomal_S15 (pfam00312)→                                           |
| env-1301 | 2236876010.0513203         | + | 165     | 230     | RNA→ | rpsO (PRK05626)Ribosomal_S15 (pfam00312)→                                           |
| env-1302 | 2236876010.0390247         | + | 46      | 111     | RNA→ | rpsO (PRK05626)Ribosomal_S15 (pfam00312)→                                           |
| env-1303 | 2236876010.0377328         | + | 221     | 286     | RNA→ | ←-hypo                                                                              |
| env-1304 | CEPZ01057464.1             | + | 94811   | 94876   | RNA→ | rpsO (PRK05626)Ribosomal_S15 (pfam00312)→                                           |
| env-1305 | SA_S2_NOR15_50m.c10278819  | + | 84      | 148     | RNA→ | rpsO (PRK05626)Ribosomal_S15 (pfam00312)→                                           |
| env-1306 | SA_S1_NOR08_45m.c10000468  | + | 15998   | 16062   | RNA→ | rpsO (PRK05626)Ribosomal_S15 (pfam00312)→                                           |
| env-1307 | SA_S1_NOR05_45m.c10094816  | + | 548     | 612     | RNA→ | rpsO (PRK05626)→                                                                    |
| env-1308 | SA_S1_NOR08_45m.c10341122  | - | 105     | 42      | RNA→ |                                                                                     |
| env-1309 | SA_S1_NOR08_45m.c10492149  | + | 268     | 332     | RNA→ |                                                                                     |
| env-1310 | KGLS1_ANT02_95m.c10084079  | - | 684     | 620     | RNA→ | rpsO (PRK05626)RpsO (COG0184)→                                                      |
| env-1311 | KGLS2_ANT04_2345m.c1062656 | + | 34      | 98      | RNA→ | rpsO (PRK05626)RpsO (COG0184)→                                                      |
| Tna-1-1  | NZ_JTDV01000003.1          | - | 177687  | 177624  | RNA→ | rpsO (PRK05626)RpsO (COG0184)→                                                      |
| env-1312 | NCBI_READ_1112308404053    | - | 82      | 19      | RNA→ |                                                                                     |
| Cly-1-1  | NZ_CP009239.1              | + | 671680  | 671743  | RNA→ | rpsO (PRK05626)Ribosomal_S15 (pfam00312)→                                           |
| Cge-1-1  | NZ_ARZX01000025.1          | - | 10591   | 10528   | RNA→ | rpsO (PRK05626)Ribosomal_S15 (pfam00312)→                                           |
| Cly-2-1  | NC_015167.1                | + | 719362  | 719425  | RNA→ | rpsO (PRK05626)Ribosomal_S15 (pfam00312)→                                           |
| Sxi-1-1  | NZ_KE384055.1              | - | 51323   | 51260   | RNA→ | rpsO (PRK05626)Ribosomal_S15 (pfam00312)→                                           |
| Ste-1-1  | NZ_KE384221.1              | - | 180772  | 180709  | RNA→ | rpsO (PRK05626)Ribosomal_S15 (pfam00312)→                                           |
| Cal-1-1  | NC_014934.1                | - | 2557672 | 2557605 | RNA→ | rpsO (PRK05626)Ribosomal_S15 (pfam00312)→                                           |
| env-1313 | G312J29652_10037410        | + | 360     | 426     | RNA→ | rpsO (PRK05626)Ribosomal_S15 (pfam00312)→                                           |
| Mze-2-1  | NZ_AFOE01000038.1          | - | 92933   | 92869   | RNA→ | rpsO (PRK05626)Ribosomal_S15 (pfam00312)→ rpsO (PRK05626)Ribosomal_S15 (pfam00312)→ |
| env-1314 | BS_KBB_SWE26_205m.c1009634 | + | 1084    | 1151    | RNA→ | rpsO (PRK05626)Ribosomal_S15 (pfam00312)→                                           |
| env-1315 | BS_KBA_SWE21_205m_10014103 | + | 1629    | 1696    | RNA→ | rpsO (PRK05626)Ribosomal_S15 (pfam00312)→                                           |

|          |                            |   |         |         |      |                                                                                     |
|----------|----------------------------|---|---------|---------|------|-------------------------------------------------------------------------------------|
| env-1316 | BS_KBA_SWE12_21m.c10159732 | + | 214     | 281     | RNA→ | rpsO (PRK05626)Ribosomal_S15 (pfam00312)→                                           |
| env-1317 | JGI24770J26754_10000514    | + | 13589   | 13655   | RNA→ | rpsO (PRK05626)Ribosomal_S15 (pfam00312)→                                           |
| env-1318 | JGI24770J26754_10369233    | + | 63      | 130     | RNA→ | rpsO (PRK05626)RpsO (COG0184)→                                                      |
| Fgi-1-1  | NZ_JNCP01000044.1          | - | 44328   | 44263   | RNA→ | rpsO (PRK05626)Ribosomal_S15 (pfam00312)→                                           |
| Fsu-2-1  | NZ_JATV01000015.1          | + | 31818   | 31885   | RNA→ | rpsO (PRK05626)Ribosomal_S15 (pfam00312)→                                           |
| env-1319 | JGI24770J26754_10511844    | - | 322     | 256     | RNA→ | rpsO (PRK05626)Ribosomal_S15 (pfam00312)→                                           |
| env-1320 | BS_KBB_SWE26_205m.c1206028 | + | 132     | 198     | RNA→ | rpsO (PRK05626)Ribosomal_S15 (pfam00312)→                                           |
| env-1321 | BS_KBA_SWE12_21m.c10074375 | - | 497     | 431     | RNA→ | rpsO (PRK05626)Ribosomal_S15 (pfam00312)→                                           |
| env-1322 | BS_KBA_SWE21_205m.10062507 | - | 450     | 384     | RNA→ | rpsO (PRK05626)Ribosomal_S15 (pfam00312)→                                           |
| Fjo-1-1  | NC_009441.1                | - | 1659768 | 1659702 | RNA→ | rpsO (PRK05626)Ribosomal_S15 (pfam00312)→                                           |
| Fsp-7-1  | NZ_AKZQ01000027.1          | - | 119685  | 119618  | RNA→ | rpsO (PRK05626)Ribosomal_S15 (pfam00312)→ rpsO (PRK05626)Ribosomal_S15 (pfam00312)→ |
| Fsp-13-1 | NZ_AMYW01000001.1          | - | 340269  | 340204  | RNA→ | rpsO (PRK05626)Ribosomal_S15 (pfam00312)→                                           |
| Fsp-6-1  | NZ_AKJZ01000010.1          | - | 81893   | 81828   | RNA→ | rpsO (PRK05626)Ribosomal_S15 (pfam00312)→ rpsO (PRK05626)Ribosomal_S15 (pfam00312)→ |
| Fsp-8-1  | NZ_JSyo01000054.1          | + | 12825   | 12890   | RNA→ | rpsO (PRK05626)Ribosomal_S15 (pfam00312)→                                           |
| Fsp-10-1 | NZ_Jsyp01000001.1          | + | 564883  | 564948  | RNA→ | rpsO (PRK05626)Ribosomal_S15 (pfam00312)→                                           |
| Fhy-1-1  | NZ_JPRM01000021.1          | + | 90628   | 90693   | RNA→ | rpsO (PRK05626)Ribosomal_S15 (pfam00312)→                                           |
| env-1323 | ARWTCa.c258734             | + | 36      | 101     | RNA→ | rpsO (PRK05626)Ribosomal_S15 (pfam00312)→                                           |
| env-1324 | PBR_1164806                | - | 6336    | 6271    | RNA→ | rpsO (PRK05626)Ribosomal_S15 (pfam00312)→                                           |
| Fsp-11-1 | NZ_JXQR01000045.1          | - | 39476   | 39411   | RNA→ | rpsO (PRK05626)Ribosomal_S15 (pfam00312)→                                           |
| Fch-1-1  | NZ_JASY01000002.1          | - | 513988  | 513923  | RNA→ | rpsO (PRK05626)Ribosomal_S15 (pfam00312)→                                           |
| env-1325 | BS_KBA_SWE21_205m.10269192 | - | 314     | 250     | RNA→ | rpsO (PRK05626)Ribosomal_S15 (pfam00312)→                                           |
| env-1326 | BS_KBA_SWE21_205m.10250829 | + | 230     | 294     | RNA→ | rpsO (PRK05626)RpsO (COG0184)→                                                      |
| env-1327 | BS_KBA_SWE02_21m.10049645  | - | 190     | 126     | RNA→ | rpsO (PRK05626)Ribosomal_S15 (pfam00312)→                                           |
| env-1328 | BS_KBA_SWE12_21m.c10022633 | + | 520     | 584     | RNA→ | rpsO (PRK05626)Ribosomal_S15 (pfam00312)→                                           |
| env-1329 | BS_KBB_SWE26_205m.c1001111 | - | 783     | 719     | RNA→ | rpsO (PRK05626)Ribosomal_S15 (pfam00312)→                                           |
| env-1330 | JGI25914J50564_10000261    | - | 10238   | 10176   | RNA→ | rpsO (PRK05626)Ribosomal_S15 (pfam00312)→                                           |
| env-1331 | JGI25917J50250_10000514    | + | 5135    | 5197    | RNA→ | rpsO (PRK05626)Ribosomal_S15 (pfam00312)→                                           |
| env-1332 | TB_FS06_10DRAFT_1000014    | - | 38913   | 38850   | RNA→ | rpsO (PRK05626)RpsO (COG0184)→                                                      |
| env-1333 | TB_GS09_5_10013944         | + | 2931    | 2994    | RNA→ | rpsO (PRK05626)Ribosomal_S15 (pfam00312)→                                           |
| Gsp-4-1  | NZ_JQLP01000005.1          | - | 753960  | 753897  | RNA→ | rpsO (PRK05626)Ribosomal_S15 (pfam00312)→                                           |
| Gli-1-1  | NZ_JH594606.1              | + | 1080060 | 1080123 | RNA→ | rpsO (PRK05626)Ribosomal_S15 (pfam00312)→ rpsO (PRK05626)Ribosomal_S15 (pfam00312)→ |
| env-1334 | ACOFG987_F36MELC02HNE7Q    | - | 136     | 72      | RNA→ | rpsO (PRK05626)RpsO (COG0184)→                                                      |
| env-1335 | 3300001197_1006016         | - | 258     | 195     | RNA→ | rpsO (PRK05626)Ribosomal_S15 (pfam00312)→                                           |
| env-1336 | KGLS1_ANT02_95m.c10124631  | + | 34      | 97      | RNA→ | rpsO (PRK05626)Ribosomal_S15 (pfam00312)→                                           |
| env-1337 | KGLS1_ANT02_95m.c10029222  | + | 1799    | 1862    | RNA→ |                                                                                     |
| env-1338 | KGLS1_ANT01_95m.c10051775  | - | 89      | 26      | RNA→ |                                                                                     |
| env-1339 | KGLS1_ANT01_95m.c10120864  | + | 17      | 80      | RNA→ | rpsO (PRK05626)RpsO (COG0184)→                                                      |
| env-1340 | KGLS2_ANT04_2345m.c1012199 | + | 2487    | 2550    | RNA→ | ←-hypo                                                                              |
| env-1341 | KGLS1_ANT02_95m.c10492692  | - | 191     | 128     | RNA→ | rpsO (PRK05626)Ribosomal_S15 (pfam00312)→                                           |
| Gsp-5-1  | NZ_KE384218.1              | - | 925343  | 925280  | RNA→ | rpsO (PRK05626)RpsO (COG0184)→                                                      |
| env-1342 | KGLS1_ANT01_95m.c10008468  | - | 78      | 15      | RNA→ | ←-hypo                                                                              |
| env-1343 | KGLS1_ANT01_95m.c10008586  | - | 85      | 22      | RNA→ |                                                                                     |
| env-1344 | KGLS1_ANT01_95m.c10068748  | - | 92      | 29      | RNA→ |                                                                                     |
| env-1345 | KGLS2_ANT04_2345m.c1047821 | + | 810     | 873     | RNA→ |                                                                                     |
| env-1346 | KGLS2_ANT04_2345m.c1020564 | - | 89      | 26      | RNA→ |                                                                                     |
| Gsp-3-1  | NZ_AJLT01000036.1          | - | 4218    | 4155    | RNA→ | rpsO (PRK05626)Ribosomal_S15 (pfam00312)→ rpsO (PRK05626)Ribosomal_S15 (pfam00312)→ |
| Gsp-2-1  | NZ_APHJ01000020.1          | - | 9198    | 9135    | RNA→ | rpsO (PRK05626)RpsO (COG0184)→                                                      |
| env-1347 | KGLS1_ANT01_95m.c10037026  | - | 89      | 26      | RNA→ |                                                                                     |
| env-1348 | KGLS1_ANT02_95m.c10022116  | + | 2196    | 2259    | RNA→ |                                                                                     |
| env-1349 | JGI1221J11331_1000234      | - | 4346    | 4283    | RNA→ | rpsO (PRK05626)Ribosomal_S15 (pfam00312)→                                           |
| env-1350 | KGLS1_ANT01_95m.c10095535  | - | 799     | 736     | RNA→ | rpsO (PRK05626)Ribosomal_S15 (pfam00312)→                                           |
| Gec-1-1  | NZ_KE383973.1              | - | 8392    | 8330    | RNA→ | rpsO (PRK05626)Ribosomal_S15 (pfam00312)→                                           |



|          |                            |   |         |         |      |                                                                                   |
|----------|----------------------------|---|---------|---------|------|-----------------------------------------------------------------------------------|
| Gpo-1-1  | NZ_AUHF01000001.1          | - | 869907  | 869845  | RNA→ | rpsO (PRK05626)Ribosomal_S15 (pfam00312)→                                         |
| env-1351 | CESL01230473.1             | + | 117     | 179     | RNA→ | rpsO (PRK05626)Ribosomal_S15 (pfam00312)→                                         |
| env-1352 | CESF01213480.1             | + | 362     | 424     | RNA→ | rpsO (PRK05626)RpsO (COG0184)→                                                    |
| env-1353 | CETA01214501.1             | - | 215     | 153     | RNA→ | rpsO (PRK05626)Ribosomal_S15 (pfam00312)→                                         |
| Gfo-1-1  | NC_008571.1                | - | 445156  | 445094  | RNA→ | rpsO (PRK05626)Ribosomal_S15 (pfam00312)→ hypo→ Pnp (COG1185)PRK11824 (PRK11824)→ |
|          |                            |   |         |         |      | hypo→ hypo→ hypo→                                                                 |
| env-1354 | CEVK01150598.1             | + | 458     | 520     | RNA→ | rpsO (PRK05626)Ribosomal_S15 (pfam00312)→                                         |
| env-1355 | CEVO01219582.1             | + | 51      | 113     | RNA→ | rpsO (PRK05626)Ribosomal_S15 (pfam00312)→                                         |
| env-1356 | CETX01274527.1             | - | 892     | 830     | RNA→ | rpsO (PRK05626)Ribosomal_S15 (pfam00312)→                                         |
| env-1357 | CEUY01486981.1             | + | 1938    | 2000    | RNA→ | rpsO (PRK05626)Ribosomal_S15 (pfam00312)→                                         |
| env-1358 | CETR01013089.1             | - | 4212    | 4150    | RNA→ | rpsO (PRK05626)Ribosomal_S15 (pfam00312)→                                         |
| env-1359 | CETS01018170.1             | + | 146     | 208     | RNA→ | rpsO (PRK05626)Ribosomal_S15 (pfam00312)→                                         |
| env-1360 | CEOS01036999.1             | + | 5728    | 5790    | RNA→ | rpsO (PRK05626)Ribosomal_S15 (pfam00312)→                                         |
| env-1361 | CEPD01004855.1             | + | 10048   | 10110   | RNA→ | rpsO (PRK05626)Ribosomal_S15 (pfam00312)→                                         |
| env-1362 | CERQ01017587.1             | - | 4212    | 4150    | RNA→ | rpsO (PRK05626)Ribosomal_S15 (pfam00312)→                                         |
| env-1363 | CETA01098167.1             | - | 4212    | 4150    | RNA→ | rpsO (PRK05626)Ribosomal_S15 (pfam00312)→                                         |
| env-1364 | CETG01119913.1             | - | 4015    | 3953    | RNA→ | rpsO (PRK05626)Ribosomal_S15 (pfam00312)→                                         |
| env-1365 | CEUX01200289.1             | - | 611     | 549     | RNA→ | rpsO (PRK05626)Ribosomal_S15 (pfam00312)→                                         |
| env-1366 | CEVI01039718.1             | + | 2211    | 2273    | RNA→ | rpsO (PRK05626)Ribosomal_S15 (pfam00312)→                                         |
| Zpr-1-1  | NC_014041.1                | - | 1015479 | 1015417 | RNA→ | rpsO (PRK05626)Ribosomal_S15 (pfam00312)→                                         |
| env-1367 | CEOX01230633.1             | + | 1223    | 1285    | RNA→ | rpsO (PRK05626)Ribosomal_S15 (pfam00312)→                                         |
| env-1368 | CETU01337419.1             | - | 615     | 553     | RNA→ | rpsO (PRK05626)Ribosomal_S15 (pfam00312)→                                         |
| env-1369 | CEVM01259718.1             | + | 226     | 288     | RNA→ | rpsO (PRK05626)Ribosomal_S15 (pfam00312)→                                         |
| env-1370 | CETM01453121.1             | - | 2692    | 2630    | RNA→ | rpsO (PRK05626)Ribosomal_S15 (pfam00312)→                                         |
| env-1371 | CESL01138425.1             | - | 5314    | 5252    | RNA→ | rpsO (PRK05626)Ribosomal_S15 (pfam00312)→                                         |
| env-1372 | CEVA01504643.1             | - | 1690    | 1628    | RNA→ | rpsO (PRK05626)Ribosomal_S15 (pfam00312)→                                         |
| env-1373 | CETB01101212.1             | - | 4212    | 4150    | RNA→ | rpsO (PRK05626)Ribosomal_S15 (pfam00312)→                                         |
| env-1374 | CETO01054190.1             | - | 4212    | 4150    | RNA→ | rpsO (PRK05626)Ribosomal_S15 (pfam00312)→                                         |
| env-1375 | CETT01093762.1             | - | 4212    | 4150    | RNA→ | rpsO (PRK05626)Ribosomal_S15 (pfam00312)→                                         |
| env-1376 | CEVJ01161702.1             | + | 426     | 488     | RNA→ | rpsO (PRK05626)Ribosomal_S15 (pfam00312)→                                         |
| env-1377 | CEWI01262926.1             | - | 4015    | 3953    | RNA→ | rpsO (PRK05626)Ribosomal_S15 (pfam00312)→                                         |
| env-1378 | JGI1221J11331_1000144      | - | 6864    | 6801    | RNA→ | rpsO (PRK05626)Ribosomal_S15 (pfam00312)→                                         |
| env-1379 | CEVI01097594.1             | - | 909     | 846     | RNA→ | rpsO (PRK05626)Ribosomal_S15 (pfam00312)→                                         |
| env-1380 | CESF01293253.1             | - | 867     | 804     | RNA→ | rpsO (PRK05626)Ribosomal_S15 (pfam00312)→                                         |
| env-1381 | CEVA01269270.1             | - | 286     | 223     | RNA→ | rpsO (PRK05626)Ribosomal_S15 (pfam00312)→                                         |
| env-1382 | JGI11876J14442_10131815    | - | 547     | 484     | RNA→ | rpsO (PRK05626)Ribosomal_S15 (pfam00312)→                                         |
| env-1383 | ElkS_mat_MD6A_1190057      | - | 183     | 120     | RNA→ | rpsO (PRK05626)Ribosomal_S15 (pfam00312)→                                         |
| Ssp-1-1  | NZ_JQNQ01000001.1          | + | 899638  | 899701  | RNA→ | rpsO (PRK05626)Ribosomal_S15 (pfam00312)→                                         |
| Tse-1-1  | NZ_JTDW01000005.1          | + | 421254  | 421317  | RNA→ | rpsO (PRK05626)RpsO (COG0184)→                                                    |
| Lsp-2-1  | NZ_JYNQ01000001.1          | - | 2806058 | 2805994 | RNA→ | rpsO (PRK05626)Ribosomal_S15 (pfam00312)→                                         |
| Jpa-1-1  | NZ_BBNS01000015.1          | - | 28578   | 28513   | RNA→ | rpsO (PRK05626)RpsO (COG0184)→                                                    |
| Jpa-1-2  | NZ_BBNR01000016.1          | + | 55491   | 55556   | RNA→ | rpsO (PRK05626)RpsO (COG0184)→                                                    |
| Jpa-1-3  | NZ_BBNY01000095.1          | + | 87840   | 87905   | RNA→ | rpsO (PRK05626)RpsO (COG0184)→                                                    |
| Ssp-2-1  | NZ_JHZX01000001.1          | - | 2892930 | 2892865 | RNA→ | rpsO (PRK05626)Ribosomal_S15 (pfam00312)→                                         |
| env-1384 | JGI24023J19991_10003832    | + | 3258    | 3322    | RNA→ | rpsO (PRK05626)Ribosomal_S15 (pfam00312)→                                         |
| env-1385 | SA_S1_NOR08_45m.c10123497  | - | 596     | 531     | RNA→ | rpsO (PRK05626)Ribosomal_S15 (pfam00312)→                                         |
| env-1386 | SA_S1_NOR05_45m.c10247099  | + | 238     | 303     | RNA→ | rpsO (PRK05626)→                                                                  |
| env-1387 | KGLS2_ANT05_2345m.c1162791 | + | 181     | 246     | RNA→ | rpsO (PRK05626)Ribosomal_S15 (pfam00312)→                                         |
| env-1388 | KGLS1_ANT03_95m.c1210231   | - | 114     | 49      | RNA→ | hypo→                                                                             |
| env-1389 | KGLS1_ANT01_95m.c10052137  | - | 700     | 635     | RNA→ | rpsO (PRK05626)Ribosomal_S15 (pfam00312)→                                         |
| env-1390 | KGLS1_ANT02_95m.c10092914  | + | 320     | 385     | RNA→ | rpsO (PRK05626)Ribosomal_S15 (pfam00312)→                                         |
| env-1391 | SA_S2_NOR15_50m.c10267897  | + | 343     | 408     | RNA→ | rpsO (PRK05626)Ribosomal_S15 (pfam00312)→                                         |
| env-1392 | CEVA01348977.1             | - | 69      | 4       | RNA→ |                                                                                   |

|          |                            |   |         |         |      |                                                               |
|----------|----------------------------|---|---------|---------|------|---------------------------------------------------------------|
| env-1393 | CEQX01182899.1             | + | 35      | 100     | RNA→ | rpsO (PRK05626)RpsO (COG0184)→                                |
| env-1394 | CEUN01355620.1             | + | 760     | 825     | RNA→ |                                                               |
| env-1395 | CESF01312563.1             | - | 1354    | 1289    | RNA→ | rpsO (PRK05626)RpsO (COG0184)→                                |
| env-1396 | ElkS_mat_MD6A_1000645      | - | 997     | 932     | RNA→ | rpsO (PRK05626)Ribosomal_S15 (pfam00312)→                     |
| env-1397 | JGI11876J14442_10001894    | - | 4964    | 4899    | RNA→ | rpsO (PRK05626)Ribosomal_S15 (pfam00312)→                     |
| env-1398 | CGULGFPCP3IQ02HOG5X        | - | 70      | 5       | RNA→ |                                                               |
| env-1399 | CEVA01011410.1             | - | 380     | 315     | RNA→ | rpsO (PRK05626)RpsO (COG0184)→                                |
| env-1400 | CEQH01190568.1             | - | 69      | 4       | RNA→ |                                                               |
| env-1401 | CEUN01165117.1             | + | 490     | 555     | RNA→ | rpsO (PRK05626)RpsO (COG0184)→                                |
| env-1402 | CEUF01199729.1             | - | 259     | 194     | RNA→ | rpsO (PRK05626)RpsO (COG0184)→                                |
| env-1403 | JGI11876J14442_10807421    | - | 249     | 184     | RNA→ | rpsO (PRK05626)RpsO (COG0184)→                                |
| env-1404 | TDF_OR_ARG04_113m_c1142939 | + | 11      | 76      | RNA→ | rpsO (PRK05626)Ribosomal_S15 (pfam00312)→                     |
| env-1405 | KGLS1_ANT03_95m_c1006422   | + | 12      | 77      | RNA→ | rpsO (PRK05626)Ribosomal_S15 (pfam00312)→                     |
| env-1406 | KGLS1_ANT01_95m_c10028809  | - | 1106    | 1041    | RNA→ | rpsO (PRK05626)Ribosomal_S15 (pfam00312)→                     |
| env-1407 | KGLS1_ANT01_95m_c10013761  | + | 2777    | 2842    | RNA→ | rpsO (PRK05626)Ribosomal_S15 (pfam00312)→                     |
| env-1408 | KGLS2_ANT06_2345m_c1017384 | - | 817     | 752     | RNA→ | rpsO (PRK05626)Ribosomal_S15 (pfam00312)→                     |
| env-1409 | KGLS2_ANT04_2345m_c1018151 | - | 817     | 752     | RNA→ | rpsO (PRK05626)Ribosomal_S15 (pfam00312)→                     |
| env-1410 | KGLS1_ANT02_95m_c10015429  | - | 1648    | 1583    | RNA→ | rpsO (PRK05626)Ribosomal_S15 (pfam00312)→                     |
| env-1411 | SA_S1_NOR08_45m_c10818453  | + | 54      | 119     | RNA→ | rpsO (PRK05626)Ribosomal_S15 (pfam00312)→                     |
| Wsp-1-1  | NZ_AP014583.1              | - | 2199375 | 2199310 | RNA→ | rpsO (PRK05626)Ribosomal_S15 (pfam00312)→                     |
| env-1412 | KGLS1_ANT01_95m_c10108529  | + | 255     | 320     | RNA→ | rpsO (PRK05626)RpsO (COG0184)→                                |
| env-1413 | SA_S1_NOR05_45m_c10222323  | - | 117     | 52      | RNA→ |                                                               |
| env-1414 | KGLS1_ANT02_95m_c10018235  | + | 1331    | 1396    | RNA→ | rpsO (PRK05626)RpsO (COG0184)→                                |
| env-1415 | KGLS1_ANT01_95m_c10439590  | - | 216     | 151     | RNA→ | rpsO (PRK05626)Ribosomal_S15 (pfam00312)→                     |
| env-1416 | JGI24024J18818_10456388    | - | 203     | 138     | RNA→ | rpsO (PRK05626)Ribosomal_S15 (pfam00312)→                     |
| Bar-1-1  | NZ_AFXZ01000012.1          | + | 168728  | 168815  | RNA→ | rpsO (PRK05626)RpsO (COG0184)→ rpsO (PRK05626)RpsO (COG0184)→ |
| env-1417 | JGI24724J26744_10000170    | - | 8375    | 8311    | RNA→ | rpsO (PRK05626)RpsO (COG0184)→                                |
| env-1418 | CEWQ01060895.1             | - | 188     | 124     | RNA→ | rpsO (PRK05626)Ribosomal_S15 (pfam00312)→                     |
| env-1419 | CESO01252919.1             | + | 473     | 537     | RNA→ | rpsO (PRK05626)Ribosomal_S15 (pfam00312)→                     |
| env-1420 | JGI12097J13213_1000798     | - | 3534    | 3470    | RNA→ | rpsO (PRK05626)Ribosomal_S15 (pfam00312)→                     |
| Pme-1-1  | NZ_JXJP01000001.1          | - | 451220  | 451155  | RNA→ | rpsO (PRK05626)Ribosomal_S15 (pfam00312)→                     |
| env-1421 | CEWR01222457.1             | - | 577     | 512     | RNA→ | rpsO (PRK05626)Ribosomal_S15 (pfam00312)→                     |
| Psp-5-1  | NZ_JUGU01000001.1          | - | 3801057 | 3800992 | RNA→ | rpsO (PRK05626)Ribosomal_S15 (pfam00312)→                     |
| Pbu-1-1  | NZ_AUDE01000023.1          | - | 4567    | 4502    | RNA→ | rpsO (PRK05626)RpsO (COG0184)→                                |
| env-1422 | JGI24025J20009_10010090    | + | 1129    | 1194    | RNA→ | rpsO (PRK05626)Ribosomal_S15 (pfam00312)→                     |
| env-1423 | JGI24724J26744_10030194    | - | 1651    | 1586    | RNA→ | rpsO (PRK05626)Ribosomal_S15 (pfam00312)→                     |
| env-1424 | JGI24723J26617_10025495    | - | 1546    | 1481    | RNA→ | rpsO (PRK05626)Ribosomal_S15 (pfam00312)→                     |
| env-1425 | SA_S1_NOR08_45m_c10367044  | + | 199     | 264     | RNA→ | rpsO (PRK05626)Ribosomal_S15 (pfam00312)→                     |
| Pja-1-1  | NZ_JSWG01000009.1          | - | 755527  | 755462  | RNA→ | rpsO (PRK05626)Ribosomal_S15 (pfam00312)→                     |
| env-1426 | JGI24724J26744_10068913    | - | 1143    | 1078    | RNA→ | rpsO (PRK05626)Ribosomal_S15 (pfam00312)→                     |
| env-1427 | JGI24723J26617_10012390    | + | 378     | 443     | RNA→ | rpsO (PRK05626)Ribosomal_S15 (pfam00312)→                     |
| env-1428 | JGI24723J26617_10058375    | - | 123     | 58      | RNA→ |                                                               |
| env-1429 | JGI20151J14362_10049778    | + | 238     | 303     | RNA→ | rpsO (PRK05626)Ribosomal_S15 (pfam00312)→                     |
| env-1430 | JGI20156J14371_10001957    | - | 2149    | 2084    | RNA→ | rpsO (PRK05626)Ribosomal_S15 (pfam00312)→                     |
| env-1431 | JGI20158J14315_10011911    | + | 3564    | 3629    | RNA→ | rpsO (PRK05626)Ribosomal_S15 (pfam00312)→                     |
| env-1432 | CERM01194957.1             | + | 488     | 553     | RNA→ | rpsO (PRK05626)Ribosomal_S15 (pfam00312)→                     |
| env-1433 | 2236876011_209432          | + | 56      | 121     | RNA→ | rpsO (PRK05626)Ribosomal_S15 (pfam00312)→                     |
| env-1434 | JGI11876J14442_10001335    | - | 9660    | 9595    | RNA→ | rpsO (PRK05626)RpsO (COG0184)→ hypo→                          |
| env-1435 | ElkS_mat_MD6A_1062416      | + | 49      | 114     | RNA→ | rpsO (PRK05626)RpsO (COG0184)→                                |
| env-1436 | KGLS2_ANT04_2345m_c1011179 | - | 642     | 578     | RNA→ | rpsO (PRK05626)Ribosomal_S15 (pfam00312)→                     |
| Oma-1-1  | NZ_KI912443.1              | - | 246097  | 246033  | RNA→ | rpsO (PRK05626)Ribosomal_S15 (pfam00312)→                     |
| env-1437 | wf3_AHAI12229_x1           | - | 290     | 226     | RNA→ | rpsO (PRK05626)Ribosomal_S15 (pfam00312)→                     |

|          |                            |   |         |         |      |                                                                                     |
|----------|----------------------------|---|---------|---------|------|-------------------------------------------------------------------------------------|
| env-1438 | JGI24724J26744.10003514    | - | 4752    | 4688    | RNA→ | rpsO (PRK05626)Ribosomal_S15 (pfam00312)→                                           |
| env-1439 | CESF01013150.1             | - | 383089  | 383025  | RNA→ | rpsO (PRK05626)Ribosomal_S15 (pfam00312)→                                           |
| env-1440 | CES001127605.1             | - | 775     | 711     | RNA→ | rpsO (PRK05626)Ribosomal_S15 (pfam00312)→                                           |
| Sze-1-1  | NZ_CP007202.1              | - | 1742017 | 1741953 | RNA→ | rpsO (PRK05626)Ribosomal_S15 (pfam00312)→ hypo→ hypo→                               |
| Gsa-1-1  | NZ_AUDV01000006.1          | + | 383148  | 383212  | RNA→ | rpsO (PRK05626)RpsO (COG0184)→ hypo→ hypo→                                          |
| env-1441 | KGLS1_ANT01.95m.c10171289  | - | 192     | 128     | RNA→ | rpsO (PRK05626)Ribosomal_S15 (pfam00312)→                                           |
| env-1442 | ElkS.mat_MD6A.1000561      | - | 14496   | 14432   | RNA→ | rpsO (PRK05626)Ribosomal_S15 (pfam00312)→                                           |
| env-1443 | JGI11876J14442.10000603    | - | 26866   | 26802   | RNA→ | rpsO (PRK05626)Ribosomal_S15 (pfam00312)→                                           |
| Mze-1-1  | NZ_KE383820.1              | - | 249635  | 249571  | RNA→ | rpsO (PRK05626)Ribosomal_S15 (pfam00312)→                                           |
| env-1444 | CEUX01207121.1             | + | 1570    | 1634    | RNA→ | rpsO (PRK05626)Ribosomal_S15 (pfam00312)→                                           |
| env-1445 | KGLS2_ANT04.2345m.c1032766 | - | 578     | 514     | RNA→ | rpsO (PRK05626)Ribosomal_S15 (pfam00312)→                                           |
| env-1446 | KGLS1_ANT02.95m.c10040186  | + | 144     | 208     | RNA→ | rpsO (PRK05626)Ribosomal_S15 (pfam00312)→                                           |
| env-1447 | SA_S1_NOR02.45m.c1045496   | - | 449     | 385     | RNA→ | rpsO (PRK05626)Ribosomal_S15 (pfam00312)→                                           |
| env-1448 | SA_S2_NOR13.50m.c1120752   | + | 50      | 114     | RNA→ | rpsO (PRK05626)Ribosomal_S15 (pfam00312)→                                           |
| env-1449 | SA_S2_NOR13.50m.c1031479   | - | 458     | 394     | RNA→ | rpsO (PRK05626)Ribosomal_S15 (pfam00312)→                                           |
| env-1450 | SA_S1_NOR05.45m.c10015538  | + | 1854    | 1918    | RNA→ | rpsO (PRK05626)Ribosomal_S15 (pfam00312)→ hypo→                                     |
| env-1451 | SA_S1_NOR08.45m.c10002201  | - | 821     | 757     | RNA→ | rpsO (PRK05626)Ribosomal_S15 (pfam00312)→ hypo→                                     |
| env-1452 | SA_S2_NOR15.50m.c10001453  | + | 9897    | 9961    | RNA→ | rpsO (PRK05626)Ribosomal_S15 (pfam00312)→ hypo→                                     |
| env-1453 | SA_S2_NOR18.50m.c1054082   | + | 176     | 240     | RNA→ | rpsO (PRK05626)Ribosomal_S15 (pfam00312)→                                           |
| env-1454 | KGLS1_ANT02.95m.c10590781  | + | 23      | 87      | RNA→ | rpsO (PRK05626)Ribosomal_S15 (pfam00312)→                                           |
| env-1455 | wf3_AHAI10363.y1           | - | 203     | 139     | RNA→ | rpsO (PRK05626)→                                                                    |
| Wps-1-1  | NZ_ATMR01000007.1          | + | 31896   | 31960   | RNA→ | rpsO (PRK05626)Ribosomal_S15 (pfam00312)→                                           |
| env-1456 | wf1_AGZO11054.b2           | + | 348     | 412     | RNA→ | rpsO (PRK05626)RpsO (COG0184)→                                                      |
| env-1457 | JGI24723J26617.10002165    | + | 14707   | 14771   | RNA→ | rpsO (PRK05626)Ribosomal_S15 (pfam00312)→                                           |
| Osp-2-1  | NZ_JADT01000002.1          | + | 86800   | 86864   | RNA→ | rpsO (PRK05626)Ribosomal_S15 (pfam00312)→                                           |
| Osp-1-1  | NZ_JADS01000007.1          | + | 86864   | 86928   | RNA→ | rpsO (PRK05626)Ribosomal_S15 (pfam00312)→                                           |
| env-1458 | JGI24724J26744.10155390    | + | 492     | 556     | RNA→ | rpsO (PRK05626)Ribosomal_S15 (pfam00312)→                                           |
| env-1459 | JGI24723J26617.10081657    | + | 261     | 325     | RNA→ | rpsO (PRK05626)Ribosomal_S15 (pfam00312)→                                           |
| env-1460 | SA_S1_NOR08.45m.c10027555  | + | 957     | 1021    | RNA→ | rpsO (PRK05626)Ribosomal_S15 (pfam00312)→                                           |
| env-1461 | JGI24724J26744.10015488    | + | 1261    | 1325    | RNA→ | rpsO (PRK05626)Ribosomal_S15 (pfam00312)→                                           |
| env-1462 | JGI24723J26617.10001993    | + | 11787   | 11851   | RNA→ | rpsO (PRK05626)Ribosomal_S15 (pfam00312)→                                           |
| env-1463 | KGLS1_ANT02.95m.c10261135  | + | 309     | 373     | RNA→ | hypo→                                                                               |
| Lsp-1-1  | NC.015638.1                | + | 582743  | 582807  | RNA→ | rpsO (PRK05626)Ribosomal_S15 (pfam00312)→                                           |
| env-1464 | SA_S2_NOR15.50m.c10085505  | + | 209     | 273     | RNA→ | rpsO (PRK05626)Ribosomal_S15 (pfam00312)→                                           |
| env-1465 | KGLS1_ANT02.95m.c10028795  | + | 1129    | 1193    | RNA→ | rpsO (PRK05626)Ribosomal_S15 (pfam00312)→                                           |
| env-1466 | KGLS1_ANT01.95m.c10028466  | - | 325     | 261     | RNA→ | rpsO (PRK05626)Ribosomal_S15 (pfam00312)→                                           |
| env-1467 | KGLS2_ANT06.2345m.c1003951 | - | 969     | 905     | RNA→ | rpsO (PRK05626)RpsO (COG0184)→                                                      |
| env-1468 | KGLS2_ANT05.2345m.c1024722 | + | 428     | 492     | RNA→ | rpsO (PRK05626)Ribosomal_S15 (pfam00312)→ rpsO (PRK05626)Ribosomal_S15 (pfam00312)→ |
| env-1469 | KGLS2_ANT06.2345m.c1002277 | - | 564     | 500     | RNA→ | rpsO (PRK05626)Ribosomal_S15 (pfam00312)→                                           |
| env-1470 | KGLS1_ANT03.95m.c1005571   | + | 822     | 886     | RNA→ | rpsO (PRK05626)Ribosomal_S15 (pfam00312)→                                           |
| env-1471 | CEQG01149785.1             | - | 2866    | 2802    | RNA→ | rpsO (PRK05626)RpsO (COG0184)→                                                      |
| Fba-5-1  | NZ_ABHI01000002.1          | - | 642916  | 642852  | RNA→ | rpsO (PRK05626)Ribosomal_S15 (pfam00312)→ rpsO (PRK05626)Ribosomal_S15 (pfam00312)→ |
| Fic-1-1  | NZ_KN525716.1              | + | 1154245 | 1154309 | RNA→ | rpsO (PRK05626)Ribosomal_S15 (pfam00312)→ hypo→ hypo→                               |
| env-1472 | JGI24025J20009.10267879    | - | 111     | 47      | RNA→ | hypo→                                                                               |
| Lja-1-1  | NZ_JSWF01000036.1          | + | 51771   | 51835   | RNA→ | rpsO (PRK05626)Ribosomal_S15 (pfam00312)→                                           |
| env-1473 | JGI24025J20009.10053124    | - | 1206    | 1142    | RNA→ | rpsO (PRK05626)RpsO (COG0184)→                                                      |
| Fba-8-1  | NZ_ALIH01000008.1          | - | 90157   | 90221   | RNA→ | rpsO (PRK05626)RpsO (COG0184)→ hypo→ hypo→                                          |
| env-1474 | JGI24723J26617.10480515    | + | 213     | 149     | RNA→ | rpsO (PRK05626)Ribosomal_S15 (pfam00312)→                                           |
| env-1475 | JGI11876J14442.10711006    | - | 246     | 182     | RNA→ | rpsO (PRK05626)Ribosomal_S15 (pfam00312)→                                           |
| env-1476 | JGI24723J26617.10000349    | - | 8866    | 8802    | RNA→ | rpsO (PRK05626)Ribosomal_S15 (pfam00312)→                                           |
| env-1477 | SA_S1_NOR05.45m.c10059526  | - | 797     | 733     | RNA→ | rpsO (PRK05626)Ribosomal_S15 (pfam00312)→                                           |
| env-1478 | SA_S2_NOR15.50m.c10011596  | - | 1359    | 1295    | RNA→ | rpsO (PRK05626)Ribosomal_S15 (pfam00312)→                                           |



|          |                                |   |       |       |      |                                                 |
|----------|--------------------------------|---|-------|-------|------|-------------------------------------------------|
| env-1479 | SA_S1_NOR08.45m.c10057202      | + | 230   | 294   | RNA→ | rpsO (PRK05626)Ribosomal_S15 (pfam00312)→       |
| env-1480 | SA_S1_NOR08.45m.c10566095      | - | 249   | 185   | RNA→ | rpsO (PRK05626)Ribosomal_S15 (pfam00312)→       |
| env-1481 | SA_S2_NOR15.50m.c10000178      | + | 21761 | 21825 | RNA→ | rpsO (PRK05626)Ribosomal_S15 (pfam00312)→       |
| env-1482 | KGLS1_ANT03.95m.c1016120       | - | 66    | 2     | RNA→ |                                                 |
| env-1483 | CEUD01278901.1                 | + | 657   | 721   | RNA→ | rpsO (PRK05626)Ribosomal_S15 (pfam00312)→       |
| env-1484 | KGLS1_ANT01.95m.c10027578      | - | 798   | 734   | RNA→ | rpsO (PRK05626)Ribosomal_S15 (pfam00312)→       |
| env-1485 | SA_S1_NOR05.45m.c10358528      | + | 155   | 219   | RNA→ | rpsO (PRK05626)RpsO (COG0184)→                  |
| env-1486 | SA_S1_NOR08.45m.c10002212      | - | 620   | 556   | RNA→ | rpsO (PRK05626)Ribosomal_S15 (pfam00312)→       |
| env-1487 | SA_S2_NOR15.50m.c10549841      | - | 196   | 132   | RNA→ | rpsO (PRK05626)Ribosomal_S15 (pfam00312)→       |
| env-1488 | KGLS1_ANT02.95m.c10003746      | - | 2134  | 2070  | RNA→ | rpsO (PRK05626)Ribosomal_S15 (pfam00312)→       |
| env-1489 | SA_S1_NOR05.45m.c10195079      | + | 321   | 385   | RNA→ | hypo→                                           |
| env-1490 | SA_S1_NOR02.45m.c1140729       | + | 236   | 300   | RNA→ | ←hypo                                           |
| env-1491 | JGI20152J14361.10000356        | + | 14689 | 14753 | RNA→ | rpsO (PRK05626)Ribosomal_S15 (pfam00312)→       |
| env-1492 | JGI20154J14316.10013934        | - | 3274  | 3210  | RNA→ | rpsO (PRK05626)Ribosomal_S15 (pfam00312)→       |
| env-1493 | JGI20160J14292.10006817        | - | 6691  | 6627  | RNA→ | rpsO (PRK05626)Ribosomal_S15 (pfam00312)→       |
| env-1494 | JGI20153J14295.10001021        | + | 14651 | 14715 | RNA→ | rpsO (PRK05626)Ribosomal_S15 (pfam00312)→       |
| env-1495 | JGI20153J14318.10001021        | + | 14651 | 14715 | RNA→ | rpsO (PRK05626)Ribosomal_S15 (pfam00312)→       |
| env-1496 | A09P04.1300.Sequence0000005964 | - | 443   | 379   | RNA→ | rpsO (PRK05626)Ribosomal_S15 (pfam00312)→       |
| env-1497 | SA_S1_NOR05.45m.c10061437      | + | 558   | 622   | RNA→ | rpsO (PRK05626)Ribosomal_S15 (pfam00312)→       |
| env-1498 | SA_S2_NOR15.50m.c10172884      | - | 143   | 79    | RNA→ | rpsO (PRK05626)→                                |
| env-1499 | SA_S2_NOR18.50m.1220507        | - | 273   | 209   | RNA→ | rpsO (PRK05626)Ribosomal_S15 (pfam00312)→       |
| env-1500 | SA_S1_NOR08.45m.c10021859      | - | 176   | 112   | RNA→ | rpsO (PRK05626)Ribosomal_S15 (pfam00312)→       |
| env-1501 | SA_S2_NOR15.50m.c10038244      | - | 971   | 907   | RNA→ | rpsO (PRK05626)Ribosomal_S15 (pfam00312)→ hypo→ |
| env-1502 | SA_S1_NOR05.45m.c10068838      | + | 336   | 400   | RNA→ | rpsO (PRK05626)Ribosomal_S15 (pfam00312)→       |
| env-1503 | SA_S1_NOR08.45m.c10016610      | + | 2682  | 2746  | RNA→ | rpsO (PRK05626)Ribosomal_S15 (pfam00312)→ hypo→ |
| env-1504 | SA_S1_NOR08.45m.c10435309      | + | 269   | 333   | RNA→ |                                                 |
| env-1505 | SA_S1_NOR08.45m.c10144408      | - | 487   | 423   | RNA→ | rpsO (PRK05626)Ribosomal_S15 (pfam00312)→ hypo→ |
| env-1506 | KGLS2_ANT04.2345m.c1296240     | - | 281   | 217   | RNA→ | rpsO (PRK05626)Ribosomal_S15 (pfam00312)→       |
| Pda-1-1  | NZ_JXJO01000023.1              | + | 45518 | 45582 | RNA→ | rpsO (PRK05626)Ribosomal_S15 (pfam00312)→       |
| env-1507 | SA_S1_NOR08.45m.c10764472      | - | 134   | 71    | RNA→ | rpsO (PRK05626)RpsO (COG0184)→                  |
| env-1508 | BS_KBA_SWE12.21m.c10000055     | + | 27026 | 27089 | RNA→ | rpsO (PRK05626)RpsO (COG0184)→                  |
| env-1509 | BS_KBB_SWE26.205m.c1007908     | + | 294   | 357   | RNA→ | rpsO (PRK05626)RpsO (COG0184)→                  |
| env-1510 | BS_KBB_SWE26.205m.c1015589     | + | 493   | 556   | RNA→ | rpsO (PRK05626)RpsO (COG0184)→                  |
| env-1511 | BS_KBA_SWE07.21m.c1008693      | + | 159   | 222   | RNA→ | rpsO (PRK05626)RpsO (COG0184)→                  |
| env-1512 | BS_KBA_SWE21.205m.10000856     | + | 7869  | 7932  | RNA→ | rpsO (PRK05626)RpsO (COG0184)→                  |
| env-1513 | BS_KBA_SWE21.205m.10001614     | - | 7075  | 7012  | RNA→ | rpsO (PRK05626)RpsO (COG0184)→                  |
| env-1514 | BS_KBA_SWE02.21m.10000074      | + | 25016 | 25079 | RNA→ | rpsO (PRK05626)RpsO (COG0184)→                  |
| env-1515 | 3300001592.10093314            | - | 181   | 117   | RNA→ | rpsO (PRK05626)Ribosomal_S15 (pfam00312)→       |
| env-1516 | KVRMV2.100601001               | + | 114   | 178   | RNA→ | rpsO (PRK05626)RpsO (COG0184)→                  |
| env-1517 | CEOS01128007.1                 | - | 419   | 357   | RNA→ | rpsO (PRK05626)Ribosomal_S15 (pfam00312)→       |
| env-1518 | CERQ01221307.1                 | + | 319   | 381   | RNA→ | rpsO (PRK05626)Ribosomal_S15 (pfam00312)→       |
| env-1519 | BS_KBA_SWE21.205m.10160982     | - | 121   | 58    | RNA→ | hypo→                                           |
| env-1520 | BS_KBA_SWE02.21m.10189888      | - | 297   | 234   | RNA→ | rpsO (PRK05626)Ribosomal_S15 (pfam00312)→       |
| env-1521 | BS_KBA_SWE12.21m.c10156796     | + | 253   | 316   | RNA→ | rpsO (PRK05626)Ribosomal_S15 (pfam00312)→       |
| env-1522 | CEQZ01049836.1                 | - | 1155  | 1068  | RNA→ | rpsO (PRK05626)RpsO (COG0184)→                  |
| env-1523 | CERU01038294.1                 | - | 1201  | 1114  | RNA→ | rpsO (PRK05626)RpsO (COG0184)→                  |
| Fsp-14-1 | NZ_ANLA01000005.1              | - | 82448 | 82361 | RNA→ | rpsO (PRK05626)RpsO (COG0184)→                  |
| env-1524 | CERY01028704.1                 | - | 371   | 284   | RNA→ | rpsO (PRK05626)RpsO (COG0184)→                  |
| env-1525 | KGLS1_ANT01.95m.c10252634      | - | 205   | 141   | RNA→ | rpsO (PRK05626)Ribosomal_S15 (pfam00312)→       |
| env-1526 | KGLS1_ANT02.95m.c10380062      | - | 148   | 84    | RNA→ | rpsO (PRK05626)→                                |
| env-1527 | SA_S1_NOR08.45m.c10034326      | + | 179   | 243   | RNA→ | rpsO (PRK05626)Ribosomal_S15 (pfam00312)→       |
| env-1528 | TB_PC08.66.10134032            | + | 487   | 551   | RNA→ | rpsO (PRK05626)Ribosomal_S15 (pfam00312)→       |



|                       |                                  |   |         |         |      |                                                                                     |
|-----------------------|----------------------------------|---|---------|---------|------|-------------------------------------------------------------------------------------|
| env-1529              | BS_KBB_SWE26_205m.c1003922       | + | 1790    | 1854    | RNA→ | rpsO (PRK05626)RpsO (COG0184)→                                                      |
| env-1530              | BS_KBA_SWE12_21m.c10003244       | - | 3098    | 3034    | RNA→ | rpsO (PRK05626)RpsO (COG0184)→                                                      |
| env-1531              | BS_KBB_SWE26_205m.c1000422       | + | 8956    | 9020    | RNA→ | rpsO (PRK05626)RpsO (COG0184)→                                                      |
| env-1532              | BS_KBA_SWE21_205m_10001432       | + | 5368    | 5432    | RNA→ | rpsO (PRK05626)RpsO (COG0184)→                                                      |
| env-1533              | BS_KBA_SWE02_21m_10001031        | - | 1511    | 1447    | RNA→ | rpsO (PRK05626)RpsO (COG0184)→                                                      |
| Fag-1-1               | NZ_HG315671.1                    | - | 573237  | 573173  | RNA→ | rpsO (PRK05626)RpsO (COG0184)→                                                      |
| <sup>1</sup> env-1534 | KGLS1_ANT01_95m.c10197802        | + | 270     | 324     | RNA→ | rpsO (PRK05626)Ribosomal_S15 (pfam00312)→ rpsO (PRK05626)Ribosomal_S15 (pfam00312)→ |
| env-1535              | KGLS1_ANT01_95m.c10417003        | + | 73      | 137     | RNA→ | rpsO (PRK05626)Ribosomal_S15 (pfam00312)→                                           |
| env-1536              | KGLS1_ANT01_95m.c10197802        | + | 146     | 210     | RNA→ | rpsO (PRK05626)→ rpsO (PRK05626)→ rpsO (PRK05626)Ribosomal_S15 (pfam00312)→         |
| env-1537              | KGLS2_ANT04_2345m.c1079454       | - | 304     | 240     | RNA→ | rpsO (PRK05626)RpsO (COG0184)→                                                      |
| env-1538              | SA_S1_NOR05_45m.c10195650        | - | 251     | 186     | RNA→ | rpsO (PRK05626)Ribosomal_S15 (pfam00312)→                                           |
| env-1539              | SA_S2_NOR13_50m.c1186424         | + | 131     | 196     | RNA→ | rpsO (PRK05626)→                                                                    |
| env-1540              | SA_S1_NOR08_45m.c10053497        | - | 624     | 559     | RNA→ | rpsO (PRK05626)RpsO (COG0184)→                                                      |
| env-1541              | KGLS1_ANT02_95m.c10081391        | + | 477     | 542     | RNA→ | rpsO (PRK05626)RpsO (COG0184)→                                                      |
| env-1542              | KGLS1_ANT01_95m.c10127393        | - | 466     | 401     | RNA→ | rpsO (PRK05626)RpsO (COG0184)→                                                      |
| env-1543              | SA_S1_NOR05_45m.c10021755        | + | 211     | 276     | RNA→ | rpsO (PRK05626)RpsO (COG0184)→                                                      |
| env-1544              | SA_S2_NOR15_50m.c10037074        | - | 1773    | 1708    | RNA→ | rpsO (PRK05626)RpsO (COG0184)→                                                      |
| env-1545              | SA_S2_NOR18_50m_1058205          | + | 140     | 205     | RNA→ | rpsO (PRK05626)RpsO (COG0184)→                                                      |
| env-1546              | SA_S1_NOR02_45m.c1038615         | + | 422     | 487     | RNA→ | rpsO (PRK05626)→                                                                    |
| env-1547              | SA_S1_NOR05_45m.c10018119        | + | 1240    | 1305    | RNA→ | rpsO (PRK05626)RpsO (COG0184)→                                                      |
| env-1548              | JGI24024J18818_10009536          | - | 3130    | 3065    | RNA→ | rpsO (PRK05626)Ribosomal_S15 (pfam00312)→                                           |
| env-1549              | SA_S1_NOR08_45m.c10538363        | + | 246     | 311     | RNA→ | →                                                                                   |
| env-1550              | JGI24024J18818_10055265          | + | 859     | 923     | RNA→ | rpsO (PRK05626)Ribosomal_S15 (pfam00312)→                                           |
| env-1551              | JGI24023J19991_10458387          | - | 291     | 227     | RNA→ | rpsO (PRK05626)Ribosomal_S15 (pfam00312)→                                           |
| env-1552              | SA_S2_NOR15_50m.c10835355        | - | 217     | 153     | RNA→ | rpsO (PRK05626)Ribosomal_S15 (pfam00312)→                                           |
| env-1553              | SA_S1_NOR08_45m.c10167461        | - | 625     | 561     | RNA→ | rpsO (PRK05626)Ribosomal_S15 (pfam00312)→                                           |
| env-1554              | SA_S1_NOR08_45m.c10626463        | + | 221     | 285     | RNA→ | →                                                                                   |
| env-1555              | JGI11876J14442_10165063          | + | 433     | 498     | RNA→ | rpsO (PRK05626)Ribosomal_S15 (pfam00312)→                                           |
| env-1556              | ElkS_mat_MD6A_1051781            | - | 206     | 141     | RNA→ | rpsO (PRK05626)Ribosomal_S15 (pfam00312)→                                           |
| env-1557              | ElkS_mat_MD6A_1006443            | + | 2218    | 2283    | RNA→ | rpsO (PRK05626)Ribosomal_S15 (pfam00312)→                                           |
| env-1558              | JGI11876J14442_10009103          | - | 1440    | 1375    | RNA→ | rpsO (PRK05626)Ribosomal_S15 (pfam00312)→                                           |
| env-1559              | SA_S1_NOR02_45m.c1138063         | - | 201     | 137     | RNA→ | rpsO (PRK05626)Ribosomal_S15 (pfam00312)→                                           |
| env-1560              | SA_S1_NOR05_45m.c10066143        | + | 481     | 545     | RNA→ | rpsO (PRK05626)Ribosomal_S15 (pfam00312)→                                           |
| env-1561              | SRS043422_C2682413               | + | 1246    | 1291    | RNA→ | rpsO (PRK05626)Ribosomal_S15 (pfam00312)→                                           |
| env-1562              | SRS046686_C887109                | + | 19      | 64      | RNA→ | rpsO (PRK05626)Ribosomal_S15 (pfam00312)→                                           |
| env-1563              | Buccal_mucosa_LANL_scaffold_1631 | + | 636     | 681     | RNA→ | rpsO (PRK05626)Ribosomal_S15 (pfam00312)→                                           |
| env-1564              | SRS014687_C1256631               | - | 75      | 30      | RNA→ | →                                                                                   |
| env-1565              | SRS013506_C1077366               | + | 303     | 348     | RNA→ | →                                                                                   |
| env-1566              | TrichMG_c100003                  | - | 114945  | 114878  | RNA→ | rpsO (PRK05626)Ribosomal_S15 (pfam00312)→                                           |
| Zam-1-1               | NZ_AYXY01000022.1                | + | 24468   | 24536   | RNA→ | rpsO (PRK05626)Ribosomal_S15 (pfam00312)→                                           |
| env-1567              | JGI24770J26754_10002254          | - | 8613    | 8546    | RNA→ | rpsO (PRK05626)Ribosomal_S15 (pfam00312)→                                           |
| Ffr-2-1               | NZ_AHKF01000016.1                | - | 97801   | 97735   | RNA→ | rpsO (PRK05626)Ribosomal_S15 (pfam00312)→ rpsO (PRK05626)Ribosomal_S15 (pfam00312)→ |
| env-1568              | KGLS1_ANT01_95m.c10016611        | - | 1987    | 1921    | RNA→ | rpsO (PRK05626)Ribosomal_S15 (pfam00312)→                                           |
| env-1569              | KGLS2_ANT04_2345m.c1022905       | - | 1437    | 1371    | RNA→ | rpsO (PRK05626)Ribosomal_S15 (pfam00312)→                                           |
| env-1570              | KGLS1_ANT02_95m.c10016777        | - | 2633    | 2567    | RNA→ | rpsO (PRK05626)Ribosomal_S15 (pfam00312)→                                           |
| Fsp-2-1               | NZ_JQMS01000001.1                | - | 1756958 | 1756892 | RNA→ | rpsO (PRK05626)Ribosomal_S15 (pfam00312)→                                           |
| env-1571              | JGI24770J26754_10342540          | - | 429     | 363     | RNA→ | rpsO (PRK05626)Ribosomal_S15 (pfam00312)→                                           |
| env-1572              | KGLS1_ANT01_95m.c10332605        | - | 256     | 190     | RNA→ | rpsO (PRK05626)Ribosomal_S15 (pfam00312)→                                           |
| env-1573              | KGLS1_ANT01_95m.c10257100        | + | 199     | 265     | RNA→ | rpsO (PRK05626)Ribosomal_S15 (pfam00312)→                                           |
| env-1574              | KGLS1_ANT02_95m.c10031472        | + | 1706    | 1772    | RNA→ | →                                                                                   |
| env-1575              | KGLS1_ANT01_95m.c10019254        | - | 1136    | 1070    | RNA→ | rpsO (PRK05626)Ribosomal_S15 (pfam00312)→                                           |

|          |                            |   |         |         |      |                                                                                                  |
|----------|----------------------------|---|---------|---------|------|--------------------------------------------------------------------------------------------------|
| env-1576 | KGLS2_ANT06.2345m.c1022245 | - | 116     | 50      | RNA→ |                                                                                                  |
| Fsp-5-1  | NZ_JSYM01000001.1          | - | 1738792 | 1738726 | RNA→ | rpsO (PRK05626)Ribosomal_S15 (pfam00312)→                                                        |
| Fsp-3-1  | NZ_LEKS01000001.1          | - | 40307   | 40241   | RNA→ | rpsO (PRK05626)Ribosomal_S15 (pfam00312)→                                                        |
| env-1577 | KGLS2_ANT04.2345m.c1000215 | + | 4350    | 4416    | RNA→ | rpsO (PRK05626)Ribosomal_S15 (pfam00312)→                                                        |
| env-1578 | KGLS1_ANT02.95m.c10005510  | - | 1136    | 1070    | RNA→ | rpsO (PRK05626)Ribosomal_S15 (pfam00312)→                                                        |
| env-1579 | KGLS1_ANT01.95m.c10022295  | - | 134     | 68      | RNA→ | hypo→                                                                                            |
| Fsp-4-1  | NZ_AJXL010000050.1         | - | 10986   | 10920   | RNA→ | rpsO (PRK05626)Ribosomal_S15 (pfam00312)→                                                        |
| env-1580 | JGI26055J44792.1116768     | + | 87      | 134     | RNA→ | rpsO (PRK05626)Ribosomal_S15 (pfam00312)→                                                        |
| env-1581 | JGI25831J46370.119340      | - | 174     | 127     | RNA→ | rpsO (PRK05626)Ribosomal_S15 (pfam00312)→                                                        |
| Wma-1-1  | NZ_CCMH01000008.1          | - | 91520   | 91474   | RNA→ | rpsO (PRK05626)Ribosomal_S15 (pfam00312)→                                                        |
| Wvi-1-1  | NC_015144.1                | - | 1924258 | 1924211 | RNA→ | rpsO (PRK05626)Ribosomal_S15 (pfam00312)→                                                        |
| Orh-1-1  | NC_018016.1                | + | 365476  | 365528  | RNA→ | rpsO (PRK05626)Ribosomal_S15 (pfam00312)→                                                        |
| Orh-3-1  | NZ_CP006828.1              | + | 371699  | 371751  | RNA→ | rpsO (PRK05626)Ribosomal_S15 (pfam00312)→                                                        |
| Orh-2-1  | NZ_AXDE01000002.1          | + | 306778  | 306830  | RNA→ | rpsO (PRK05626)Ribosomal_S15 (pfam00312)→                                                        |
| env-1582 | 3300001197.1085176         | - | 1056    | 1010    | RNA→ | rpsO (PRK05626)Ribosomal_S15 (pfam00312)→                                                        |
| env-1583 | APMI01076955.1             | + | 2558    | 2605    | RNA→ | rpsO (PRK05626)Ribosomal_S15 (pfam00312)→                                                        |
| env-1584 | JGI25853J50183.17647       | - | 50      | 4       | RNA→ |                                                                                                  |
| env-1585 | 3300001592.10080689        | - | 473     | 427     | RNA→ | rpsO (PRK05626)Ribosomal_S15 (pfam00312)→                                                        |
| env-1586 | JGI26538J50259.1000062     | + | 73740   | 73786   | RNA→ | rpsO (PRK05626)Ribosomal_S15 (pfam00312)→                                                        |
| env-1587 | 3300001592.10000999        | + | 9714    | 9760    | RNA→ | rpsO (PRK05626)Ribosomal_S15 (pfam00312)→                                                        |
| env-1588 | 2210193624                 | + | 353     | 399     | RNA→ |                                                                                                  |
| Ebr-1-1  | NZ_KB908301.1              | + | 70085   | 70131   | RNA→ | rpsO (PRK05626)Ribosomal_S15 (pfam00312)→                                                        |
| env-1589 | JGI26051J44788.1005993     | + | 1041    | 1087    | RNA→ | rpsO (PRK05626)Ribosomal_S15 (pfam00312)→                                                        |
| env-1590 | JGI26053J44789.1004649     | + | 636     | 682     | RNA→ | rpsO (PRK05626)Ribosomal_S15 (pfam00312)→                                                        |
| env-1591 | JGI26055J44792.1013313     | - | 518     | 472     | RNA→ | rpsO (PRK05626)Ribosomal_S15 (pfam00312)→                                                        |
| env-1592 | JGI26057J44791.1000035     | + | 25918   | 25964   | RNA→ | rpsO (PRK05626)Ribosomal_S15 (pfam00312)→                                                        |
| env-1593 | JGI26054J46599.1000016     | - | 39347   | 39301   | RNA→ | rpsO (PRK05626)Ribosomal_S15 (pfam00312)→                                                        |
| env-1594 | JGI26052J44787.1039558     | + | 277     | 323     | RNA→ | rpsO (PRK05626)Ribosomal_S15 (pfam00312)→                                                        |
| Efa-1-1  | NZ_JSYQ01000009.1          | + | 118305  | 118351  | RNA→ | rpsO (PRK05626)Ribosomal_S15 (pfam00312)→                                                        |
| env-1595 | JGI26050J44790.1040856     | - | 81      | 35      | RNA→ | hypo→                                                                                            |
| Bzo-1-1  | NZ_JH932293.1              | - | 2055058 | 2055010 | RNA→ | rpsO (PRK05626)Ribosomal_S15 (pfam00312)→                                                        |
| Bzo-2-1  | NZ_JH932282.1              | + | 1022343 | 1022391 | RNA→ | rpsO (PRK05626)Ribosomal_S15 (pfam00312)→                                                        |
| env-1596 | CEVG01031283.1             | + | 424     | 489     | RNA→ | rpsO (PRK05626)RpsO (COG0184)→ PRK11824 (PRK11824)RNase_PH (pfam01138)→                          |
| env-1597 | CEWK01195648.1             | - | 283     | 218     | RNA→ | rpsO (PRK05626)RpsO (COG0184)→                                                                   |
| env-1598 | CEPJ01242679.1             | - | 79      | 14      | RNA→ |                                                                                                  |
| env-1599 | CEWH01147159.1             | + | 7783    | 7848    | RNA→ | rpsO (PRK05626)Ribosomal_S15 (pfam00312)→                                                        |
| env-1600 | JCVL_SCAF_1101667581186    | + | 571     | 636     | RNA→ | rpsO (PRK05626)Ribosomal_S15 (pfam00312)→                                                        |
| env-1601 | CEVH01171373.1             | + | 701     | 766     | RNA→ | rpsO (PRK05626)Ribosomal_S15 (pfam00312)→                                                        |
| env-1602 | CEUH01137174.1             | - | 914     | 849     | RNA→ | rpsO (PRK05626)RpsO (COG0184)→ PRK11824 (PRK11824)RNase_PH (pfam01138)→                          |
| env-1603 | CEVG01256217.1             | - | 217     | 152     | RNA→ | rpsO (PRK05626)Ribosomal_S15 (pfam00312)→                                                        |
| env-1604 | CEWK01191961.1             | + | 343     | 408     | RNA→ | rpsO (PRK05626)RpsO (COG0184)→                                                                   |
| env-1605 | CEVS01311665.1             | + | 167     | 232     | RNA→ | rpsO (PRK05626)RpsO (COG0184)→ RNase_PH_PNPase_1 (cd11363)PRK11824 (PRK11824)→                   |
| env-1606 | CEOM01011442.1             | - | 239     | 174     | RNA→ | rpsO (PRK05626)Ribosomal_S15 (pfam00312)→                                                        |
| env-1607 | JCVI_READ_1104230051515    | - | 1009    | 945     | RNA→ | rpsO (PRK05626)RpsO (COG0184)→<br>PRK11824 (PRK11824)RNase_PH (pfam01138)RNase_PH_C (pfam03725)→ |
| env-1608 | CENF01403979.1             | + | 590     | 654     | RNA→ | rpsO (PRK05626)RpsO (COG0184)→ PRK11824 (PRK11824)RNase_PH (pfam01138)→                          |
| env-1609 | CEOC01304602.1             | - | 743     | 678     | RNA→ | rpsO (PRK05626)Ribosomal_S15 (pfam00312)→ PRK11824 (PRK11824)RNase_PH (pfam01138)→               |
| env-1610 | CETE01250240.1             | - | 394     | 329     | RNA→ | rpsO (PRK05626)Ribosomal_S15 (pfam00312)→                                                        |
| env-1611 | CEUR01041503.1             | - | 281     | 216     | RNA→ | rpsO (PRK05626)Ribosomal_S15 (pfam00312)→                                                        |
| env-1612 | CEVG01012585.1             | - | 211     | 146     | RNA→ | rpsO (PRK05626)Ribosomal_S15 (pfam00312)→                                                        |
| env-1613 | CEWG01074623.1             | + | 1532    | 1597    | RNA→ | rpsO (PRK05626)Ribosomal_S15 (pfam00312)→                                                        |
| env-1614 | CENG01192212.1             | - | 188     | 123     | RNA→ | rpsO (PRK05626)Ribosomal_S15 (pfam00312)→                                                        |

|          |                                 |   |         |         |      |                                                                                                                                                     |
|----------|---------------------------------|---|---------|---------|------|-----------------------------------------------------------------------------------------------------------------------------------------------------|
| env-1615 | CENO01053689.1                  | + | 270     | 335     | RNA→ | rpsO (PRK05626)Ribosomal_S15 (pfam00312)→ RNase_PH_PNPase_1 (cd11363)PRK11824 (PRK11824)→                                                           |
| env-1616 | CEUM01074299.1                  | + | 1019    | 1084    | RNA→ |                                                                                                                                                     |
| env-1617 | CEUV01130266.1                  | - | 5263    | 5198    | RNA→ | rpsO (PRK05626)Ribosomal_S15 (pfam00312)→ Pnp (COG1185)PRK11824 (PRK11824)→<br>PLN02198 (PLN02198)Ggt (COG0405)→ PRK10115 (PRK10115)PtrB (COG1770)→ |
| env-1618 | CEVH01019235.1                  | - | 182     | 117     | RNA→ | rpsO (PRK05626)Ribosomal_S15 (pfam00312)→                                                                                                           |
| env-1619 | CEWH01078602.1                  | - | 279     | 214     | RNA→ | rpsO (PRK05626)Ribosomal_S15 (pfam00312)→                                                                                                           |
| env-1620 | JCVI_SCAF_1096627336466         | + | 264     | 329     | RNA→ | rpsO (PRK05626)Ribosomal_S15 (pfam00312)→                                                                                                           |
| env-1621 | JCVI_SCAF_1096628013630         | - | 1884    | 1819    | RNA→ | rpsO (PRK05626)RpsO (COG0184)→                                                                                                                      |
| env-1622 | sludgePhrap_Contig10770         | + | 80      | 144     | RNA→ | rpsO (PRK05626)RpsO (COG0184)→                                                                                                                      |
| env-1623 | JGI25920J50251_10058504         | + | 359     | 425     | RNA→ | rpsO (PRK05626)Ribosomal_S15 (pfam00312)→                                                                                                           |
| env-1624 | JGI25911J50253_10258121         | - | 271     | 205     | RNA→ | rpsO (PRK05626)Ribosomal_S15 (pfam00312)→                                                                                                           |
| env-1625 | JGI25910J50241_10053410         | - | 957     | 891     | RNA→ | rpsO (PRK05626)Ribosomal_S15 (pfam00312)→                                                                                                           |
| env-1626 | JGI25910J50241_10095017         | - | 415     | 349     | RNA→ | rpsO (PRK05626)Ribosomal_S15 (pfam00312)→                                                                                                           |
| env-1627 | JGI25910J50241_10069387         | + | 906     | 972     | RNA→ |                                                                                                                                                     |
| env-1628 | JGI12421J11937_10000034         | + | 36707   | 36773   | RNA→ | rpsO (PRK05626)Ribosomal_S15 (pfam00312)→                                                                                                           |
| env-1629 | LM20APR2010E_c396               | + | 1869    | 1935    | RNA→ | rpsO (PRK05626)Ribosomal_S15 (pfam00312)→                                                                                                           |
| env-1630 | TB_PC08.66_10060944             | - | 109     | 43      | RNA→ |                                                                                                                                                     |
| env-1631 | TB_GS09.5_10171935              | - | 305     | 239     | RNA→ | rpsO (PRK05626)Ribosomal_S15 (pfam00312)→                                                                                                           |
| env-1632 | TB_PC08.66_10061930             | + | 1206    | 1272    | RNA→ |                                                                                                                                                     |
| env-1633 | AglaG_GDN60OX02HZEN             | - | 102     | 35      | RNA→ |                                                                                                                                                     |
| env-1634 | JGI24770J26754_10074152         | + | 350     | 417     | RNA→ | rpsO (PRK05626)Ribosomal_S15 (pfam00312)→                                                                                                           |
| env-1635 | TB03JUN2009E_Contig_145064      | - | 74      | 7       | RNA→ |                                                                                                                                                     |
| Faq-1-1  | NZ_JRHH01000001.1               | - | 229487  | 229420  | RNA→ | rpsO (PRK05626)Ribosomal_S15 (pfam00312)→                                                                                                           |
| env-1636 | JFJP01044092.1                  | - | 4887    | 4820    | RNA→ | rpsO (PRK05626)Ribosomal_S15 (pfam00312)→                                                                                                           |
| env-1637 | JFJP01001225.1                  | + | 19883   | 19950   | RNA→ | rpsO (PRK05626)Ribosomal_S15 (pfam00312)→                                                                                                           |
| env-1638 | SRS045197_WUGC_scaffold_71844   | + | 1187    | 1244    | RNA→ | rpsO (PRK05626)Ribosomal_S15 (pfam00312)→                                                                                                           |
| env-1639 | SRS053584_LANL_scaffold_46820   | + | 1187    | 1244    | RNA→ | rpsO (PRK05626)Ribosomal_S15 (pfam00312)→                                                                                                           |
| env-1640 | SRS015803_WUGC_scaffold_1822    | - | 19092   | 19035   | RNA→ | rpsO (PRK05626)Ribosomal_S15 (pfam00312)→                                                                                                           |
| env-1641 | SRS018157_Baylor_scaffold_79748 | + | 2305    | 2362    | RNA→ | rpsO (PRK05626)Ribosomal_S15 (pfam00312)→                                                                                                           |
| env-1642 | SRS019077_WUGC_scaffold_63873   | - | 412     | 355     | RNA→ | rpsO (PRK05626)Ribosomal_S15 (pfam00312)→                                                                                                           |
| Csp-6-1  | NZ_AKFR01000034.1               | + | 60045   | 60102   | RNA→ | rpsO (PRK05626)Ribosomal_S15 (pfam00312)→                                                                                                           |
| env-1643 | SRS047113_C5238338              | - | 69      | 13      | RNA→ |                                                                                                                                                     |
| env-1644 | SRS024144_C1787925              | + | 808     | 864     | RNA→ |                                                                                                                                                     |
| env-1645 | SRS043772_WUGC_scaffold_9035    | + | 507     | 563     | RNA→ | rpsO (PRK05626)→                                                                                                                                    |
| Coc-2-1  | NZ_JVFB01000069.1               | - | 264032  | 263976  | RNA→ | rpsO (PRK05626)Ribosomal_S15 (pfam00312)→                                                                                                           |
| env-1646 | SRS014578_WUGC_scaffold_50948   | - | 289     | 233     | RNA→ |                                                                                                                                                     |
| Csp-9-1  | NZ_KB291210.1                   | + | 18472   | 18527   | RNA→ | rpsO (PRK05626)Ribosomal_S15 (pfam00312)→                                                                                                           |
| env-1647 | SRS011343_Baylor_scaffold_28900 | + | 921     | 976     | RNA→ |                                                                                                                                                     |
| env-1648 | SRS015215_WUGC_scaffold_40668   | - | 90      | 35      | RNA→ |                                                                                                                                                     |
| env-1649 | SRS024087_C3535890              | - | 68      | 13      | RNA→ |                                                                                                                                                     |
| env-1650 | SRS018337_Baylor_scaffold_6407  | + | 3       | 58      | RNA→ | rpsO (PRK05626)Ribosomal_S15 (pfam00312)→                                                                                                           |
| env-1651 | SRS055378_LANL_scaffold_11295   | - | 202     | 147     | RNA→ | rpsO (PRK05626)Ribosomal_S15 (pfam00312)→                                                                                                           |
| env-1652 | SRS011255_Baylor_scaffold_50639 | - | 90      | 35      | RNA→ |                                                                                                                                                     |
| env-1653 | SRS014476_WUGC_scaffold_37616   | - | 90      | 35      | RNA→ |                                                                                                                                                     |
| env-1654 | SRS016043_WUGC_scaffold_47910   | - | 90      | 35      | RNA→ |                                                                                                                                                     |
| env-1655 | SRS021960_Baylor_scaffold_21591 | + | 91      | 146     | RNA→ | rpsO (PRK05626)RpsO (COG0184)→                                                                                                                      |
| env-1656 | SRS013252_Baylor_scaffold_38320 | - | 68      | 13      | RNA→ |                                                                                                                                                     |
| env-1657 | SRS053917_LANL_scaffold_37634   | - | 1535    | 1481    | RNA→ | rpsO (PRK05626)Ribosomal_S15 (pfam00312)→                                                                                                           |
| Coc-3-1  | NZ_GL573160.1                   | + | 348550  | 348604  | RNA→ | rpsO (PRK05626)Ribosomal_S15 (pfam00312)→                                                                                                           |
| Coc-4-1  | NZ_AKFV01000036.1               | + | 171648  | 171702  | RNA→ | rpsO (PRK05626)Ribosomal_S15 (pfam00312)→                                                                                                           |
| Coc-1-1  | NC_013162.1                     | + | 2020418 | 2020473 | RNA→ | rpsO (PRK05626)Ribosomal_S15 (pfam00312)→                                                                                                           |
| Csp-7-1  | NZ_KE150489.1                   | - | 245846  | 245793  | RNA→ | rpsO (PRK05626)Ribosomal_S15 (pfam00312)→                                                                                                           |



|          |                                    |   |       |       |      |                                           |                                           |
|----------|------------------------------------|---|-------|-------|------|-------------------------------------------|-------------------------------------------|
| Csp-10-1 | NZ_AJZR01000054.1                  | + | 24577 | 24630 | RNA→ | rpsO (PRK05626)Ribosomal_S15 (pfam00312)→ | rpsO (PRK05626)Ribosomal_S15 (pfam00312)→ |
| Csp-2-1  | NZ_KB291539.1                      | + | 18156 | 18209 | RNA→ | rpsO (PRK05626)Ribosomal_S15 (pfam00312)→ |                                           |
| env-1658 | G312J29652_10291633                | + | 142   | 208   | RNA→ | rpsO (PRK05626)Ribosomal_S15 (pfam00312)→ |                                           |
| env-1659 | M3P_c10401073                      | - | 92    | 26    | RNA→ | hyp0→                                     |                                           |
| env-1660 | JGI25913J50563_1004702             | - | 1156  | 1090  | RNA→ | rpsO (PRK05626)Ribosomal_S15 (pfam00312)→ |                                           |
| env-1661 | 3300000052_045724                  | + | 487   | 553   | RNA→ | rpsO (PRK05626)Ribosomal_S15 (pfam00312)→ |                                           |
| env-1662 | JGI25913J50563_1032633             | + | 701   | 767   | RNA→ |                                           |                                           |
| env-1663 | JCVL_SCAF_1101668144518            | - | 828   | 762   | RNA→ | rpsO (PRK05626)Ribosomal_S15 (pfam00312)→ |                                           |
| env-1664 | SRS043422.LANL_scaffold_27461      | + | 70    | 126   | RNA→ | rpsO (PRK05626)Ribosomal_S15 (pfam00312)→ |                                           |
| env-1665 | SRS013533.PGA_scaffold_76303       | + | 331   | 387   | RNA→ | rpsO (PRK05626)Ribosomal_S15 (pfam00312)→ |                                           |
| env-1666 | SRS014888.C3093205                 | - | 468   | 412   | RNA→ | rpsO (PRK05626)Ribosomal_S15 (pfam00312)→ |                                           |
| env-1667 | SRS050669.LANL_scaffold_37527      | - | 1248  | 1192  | RNA→ | rpsO (PRK05626)Ribosomal_S15 (pfam00312)→ |                                           |
| env-1668 | SRS015063.C2120774                 | + | 197   | 253   | RNA→ | rpsO (PRK05626)Ribosomal_S15 (pfam00312)→ |                                           |
| env-1669 | SRS015762.WUGC_scaffold_51343      | - | 4350  | 4294  | RNA→ | rpsO (PRK05626)Ribosomal_S15 (pfam00312)→ |                                           |
| env-1670 | SRS019029.WUGC_scaffold_45090      | + | 1155  | 1211  | RNA→ | rpsO (PRK05626)Ribosomal_S15 (pfam00312)→ |                                           |
| env-1671 | SRS019122.C5910877                 | - | 652   | 596   | RNA→ | rpsO (PRK05626)Ribosomal_S15 (pfam00312)→ |                                           |
| env-1672 | SRS057205.LANL_scaffold_58800      | + | 12511 | 12567 | RNA→ | rpsO (PRK05626)Ribosomal_S15 (pfam00312)→ |                                           |
| env-1673 | SRS016092.C1171386                 | + | 397   | 453   | RNA→ | rpsO (PRK05626)Ribosomal_S15 (pfam00312)→ |                                           |
| env-1674 | SRS017227.Baylor_scaffold_110356   | - | 740   | 684   | RNA→ | rpsO (PRK05626)Ribosomal_S15 (pfam00312)→ |                                           |
| env-1675 | SRS019591.WUGC_scaffold_42767      | - | 4361  | 4305  | RNA→ | rpsO (PRK05626)Ribosomal_S15 (pfam00312)→ |                                           |
| env-1676 | SRS019027.C1985251                 | - | 2922  | 2866  | RNA→ | rpsO (PRK05626)Ribosomal_S15 (pfam00312)→ |                                           |
| Csp-4-1  | NZ_KN389985.1                      | - | 83839 | 83783 | RNA→ | rpsO (PRK05626)Ribosomal_S15 (pfam00312)→ |                                           |
| env-1677 | SRS019077.C2547620                 | - | 115   | 59    | RNA→ | rpsO (PRK05626)→                          |                                           |
| env-1678 | SRS063288.C2556324                 | + | 441   | 497   | RNA→ | rpsO (PRK05626)→                          |                                           |
| env-1679 | SRS019906.WUGC_scaffold_52431      | - | 674   | 618   | RNA→ | rpsO (PRK05626)Ribosomal_S15 (pfam00312)→ |                                           |
| env-1680 | SRS021960.C2067122                 | + | 215   | 271   | RNA→ |                                           |                                           |
| env-1681 | SRS023538.Baylor_scaffold_38631    | + | 1459  | 1515  | RNA→ | rpsO (PRK05626)Ribosomal_S15 (pfam00312)→ |                                           |
| env-1682 | SRS024289.C2070569                 | - | 115   | 59    | RNA→ | rpsO (PRK05626)→                          |                                           |
| env-1683 | SRS045715.C4722109                 | - | 89    | 33    | RNA→ |                                           |                                           |
| env-1684 | SRS050244.LANL_scaffold_99594      | + | 959   | 1015  | RNA→ | rpsO (PRK05626)Ribosomal_S15 (pfam00312)→ |                                           |
| env-1685 | SRS051378.C1779297                 | - | 115   | 59    | RNA→ | rpsO (PRK05626)→                          |                                           |
| env-1686 | SRS054653.C1990320                 | + | 34    | 90    | RNA→ | rpsO (PRK05626)Ribosomal_S15 (pfam00312)→ |                                           |
| env-1687 | SRS058336.C2081196                 | + | 224   | 280   | RNA→ | rpsO (PRK05626)Ribosomal_S15 (pfam00312)→ |                                           |
| env-1688 | Buccal_mucosa.LANL_scaffold_150368 | - | 636   | 580   | RNA→ | rpsO (PRK05626)Ribosomal_S15 (pfam00312)→ |                                           |
| env-1689 | SRS023930.C2191794                 | - | 1919  | 1863  | RNA→ | rpsO (PRK05626)Ribosomal_S15 (pfam00312)→ |                                           |
| env-1690 | SRS018975.WUGC_scaffold_37944      | + | 424   | 480   | RNA→ | rpsO (PRK05626)Ribosomal_S15 (pfam00312)→ |                                           |
| env-1691 | SRS012285.Baylor_scaffold_28847    | - | 817   | 761   | RNA→ | rpsO (PRK05626)Ribosomal_S15 (pfam00312)→ |                                           |
| env-1692 | SRS014473.C1058379                 | + | 108   | 164   | RNA→ | rpsO (PRK05626)RpsO (COG0184)→            |                                           |
| env-1693 | SRS015044.WUGC_scaffold_70508      | + | 49    | 105   | RNA→ | rpsO (PRK05626)Ribosomal_S15 (pfam00312)→ |                                           |
| env-1694 | SRS015434.C5932842                 | + | 276   | 332   | RNA→ | rpsO (PRK05626)Ribosomal_S15 (pfam00312)→ |                                           |
| env-1695 | SRS015899.WUGC_scaffold_29136      | + | 830   | 886   | RNA→ | rpsO (PRK05626)Ribosomal_S15 (pfam00312)→ |                                           |
| env-1696 | SRS016297.C532059                  | + | 45    | 101   | RNA→ | rpsO (PRK05626)Ribosomal_S15 (pfam00312)→ |                                           |
| env-1697 | SRS018300.Baylor_scaffold_13428    | + | 11276 | 11332 | RNA→ | rpsO (PRK05626)Ribosomal_S15 (pfam00312)→ |                                           |
| env-1698 | SRS019071.C5001202                 | + | 275   | 331   | RNA→ |                                           |                                           |
| env-1699 | SRS019225.WUGC_scaffold_37789      | + | 737   | 793   | RNA→ | rpsO (PRK05626)Ribosomal_S15 (pfam00312)→ |                                           |
| env-1700 | SRS021477.Baylor_scaffold_50396    | + | 770   | 826   | RNA→ | rpsO (PRK05626)→                          |                                           |
| env-1701 | SRS022725.LANL_scaffold_57376      | + | 10486 | 10542 | RNA→ | rpsO (PRK05626)Ribosomal_S15 (pfam00312)→ |                                           |
| env-1702 | SRS023595.Baylor_scaffold_65314    | - | 1031  | 975   | RNA→ | rpsO (PRK05626)Ribosomal_S15 (pfam00312)→ |                                           |
| env-1703 | SRS024355.LANL_scaffold_78151      | + | 324   | 380   | RNA→ | rpsO (PRK05626)Ribosomal_S15 (pfam00312)→ |                                           |
| env-1704 | SRS065099.LANL_scaffold_43567      | - | 1245  | 1189  | RNA→ | rpsO (PRK05626)Ribosomal_S15 (pfam00312)→ |                                           |
| env-1705 | SRS047634.LANL_scaffold_56906      | + | 930   | 986   | RNA→ | rpsO (PRK05626)Ribosomal_S15 (pfam00312)→ |                                           |
| env-1706 | SRS050628.C1885263                 | + | 48    | 104   | RNA→ | rpsO (PRK05626)Ribosomal_S15 (pfam00312)→ |                                           |



|          |                                  |   |         |         |      |                                           |                                          |
|----------|----------------------------------|---|---------|---------|------|-------------------------------------------|------------------------------------------|
| env-1707 | SRS051941.LANL_scaffold_40092    | - | 624     | 568     | RNA→ | rpsO (PRK05626)Ribosomal_S15 (pfam00312)→ | PRK11824 (PRK11824)RNase_PH (pfam01138)→ |
| env-1708 | SRS057022.C1966776               | - | 419     | 363     | RNA→ | rpsO (PRK05626)Ribosomal_S15 (pfam00312)→ |                                          |
| env-1709 | SRS020222.C1001786               | + | 45      | 101     | RNA→ | rpsO (PRK05626)Ribosomal_S15 (pfam00312)→ |                                          |
| env-1710 | SRS063215.LANL_scaffold_746      | + | 1746    | 1802    | RNA→ | rpsO (PRK05626)Ribosomal_S15 (pfam00312)→ |                                          |
| Cko-1-1  | NZ_LFNG01000006.1                | - | 73410   | 73364   | RNA→ | rpsO (PRK05626)Ribosomal_S15 (pfam00312)→ |                                          |
| env-1711 | SRS019128.WUGC_scaffold_40428    | - | 250     | 198     | RNA→ | rpsO (PRK05626)RpsO (COG0184)→            |                                          |
| env-1712 | SRS024561.LANL_scaffold_27863    | - | 246     | 194     | RNA→ | rpsO (PRK05626)RpsO (COG0184)→            |                                          |
| env-1713 | SRS063932.LANL_scaffold_85576    | - | 294     | 242     | RNA→ | rpsO (PRK05626)Ribosomal_S15 (pfam00312)→ |                                          |
| env-1714 | SRS011126.Baylor_scaffold_15902  | - | 467     | 415     | RNA→ | rpsO (PRK05626)Ribosomal_S15 (pfam00312)→ |                                          |
| env-1715 | SRS016360.Baylor_scaffold_10965  | + | 1870    | 1922    | RNA→ | rpsO (PRK05626)Ribosomal_S15 (pfam00312)→ |                                          |
| env-1716 | SRS017227.Baylor_scaffold_133947 | + | 2861    | 2913    | RNA→ | rpsO (PRK05626)Ribosomal_S15 (pfam00312)→ |                                          |
| env-1717 | SRS018665.WUGC_scaffold_9476     | - | 1439    | 1387    | RNA→ | rpsO (PRK05626)Ribosomal_S15 (pfam00312)→ |                                          |
| env-1718 | SRS024087.C3338429               | + | 348     | 400     | RNA→ |                                           |                                          |
| env-1719 | SRS063999.C3578431               | - | 65      | 13      | RNA→ |                                           |                                          |
| env-1720 | SRS052876.LANL_scaffold_43042    | - | 2813    | 2761    | RNA→ | rpsO (PRK05626)Ribosomal_S15 (pfam00312)→ |                                          |
| env-1721 | SRS063603.LANL_scaffold_104178   | + | 1536    | 1588    | RNA→ | rpsO (PRK05626)Ribosomal_S15 (pfam00312)→ |                                          |
| env-1722 | SRS015803.WUGC_scaffold_46814    | + | 633     | 685     | RNA→ | rpsO (PRK05626)Ribosomal_S15 (pfam00312)→ |                                          |
| Csp-5-1  | NZ_KB291273.1                    | + | 7305    | 7357    | RNA→ | rpsO (PRK05626)Ribosomal_S15 (pfam00312)→ |                                          |
| env-1723 | SRS047113.LANL_scaffold_40316    | - | 65      | 13      | RNA→ |                                           |                                          |
| env-1724 | BS_KBA_SWE02_21m_10002378        | - | 6637    | 6571    | RNA→ | rpsO (PRK05626)Ribosomal_S15 (pfam00312)→ |                                          |
| env-1725 | BS_KBA_SWE12_21m_c10257970       | - | 316     | 250     | RNA→ | rpsO (PRK05626)Ribosomal_S15 (pfam00312)→ |                                          |
| env-1726 | BS_KBA_SWE21_205m_10065151       | - | 791     | 725     | RNA→ | rpsO (PRK05626)Ribosomal_S15 (pfam00312)→ |                                          |
| env-1727 | BS_KBA_SWE07_21m_c1084691        | + | 116     | 182     | RNA→ | rpsO (PRK05626)Ribosomal_S15 (pfam00312)→ |                                          |
| Csp-8-1  | NZ_GL872413.1                    | + | 1146487 | 1146540 | RNA→ | rpsO (PRK05626)RpsO (COG0184)→            |                                          |
| env-1728 | SRS013950.C2010154               | + | 28      | 81      | RNA→ | rpsO (PRK05626)Ribosomal_S15 (pfam00312)→ |                                          |
| env-1729 | SRS024381.LANL_scaffold_23096    | - | 964     | 909     | RNA→ | rpsO (PRK05626)RpsO (COG0184)→            |                                          |
| env-1730 | SRS064329.C2708069               | + | 592     | 647     | RNA→ | rpsO (PRK05626)RpsO (COG0184)→            |                                          |
| env-1731 | SRS012279.C2755382               | + | 1578    | 1633    | RNA→ | rpsO (PRK05626)RpsO (COG0184)→            |                                          |
| env-1732 | SRS016319.C4022715               | - | 1914    | 1859    | RNA→ | rpsO (PRK05626)RpsO (COG0184)→            |                                          |
| env-1733 | SRS017209.Baylor_scaffold_62146  | + | 1830    | 1885    | RNA→ | rpsO (PRK05626)RpsO (COG0184)→            |                                          |
| env-1734 | SRS018300.Baylor_scaffold_54476  | - | 1573    | 1518    | RNA→ | rpsO (PRK05626)RpsO (COG0184)→            |                                          |
| env-1735 | SRS019122.C5923314               | - | 6524    | 6469    | RNA→ | rpsO (PRK05626)RpsO (COG0184)→            |                                          |
| env-1736 | SRS019127.C1675613               | + | 2142    | 2197    | RNA→ | rpsO (PRK05626)RpsO (COG0184)→            |                                          |
| env-1737 | SRS021496.Baylor_scaffold_73479  | - | 8230    | 8175    | RNA→ | rpsO (PRK05626)RpsO (COG0184)→            |                                          |
| env-1738 | SRS022077.Baylor_scaffold_57464  | + | 1502    | 1557    | RNA→ | rpsO (PRK05626)RpsO (COG0184)→            |                                          |
| env-1739 | SRS022530.LANL_scaffold_23647    | - | 9977    | 9922    | RNA→ | rpsO (PRK05626)RpsO (COG0184)→            |                                          |
| env-1740 | SRS024081.LANL_scaffold_27019    | - | 8253    | 8198    | RNA→ | rpsO (PRK05626)RpsO (COG0184)→            |                                          |
| env-1741 | SRS050244.LANL_scaffold_22625    | + | 4127    | 4182    | RNA→ | rpsO (PRK05626)RpsO (COG0184)→            |                                          |
| env-1742 | SRS050669.LANL_scaffold_21743    | - | 1678    | 1623    | RNA→ | rpsO (PRK05626)RpsO (COG0184)→            |                                          |
| env-1743 | SRS063288.C2588099               | - | 397     | 342     | RNA→ | rpsO (PRK05626)RpsO (COG0184)→            |                                          |
| env-1744 | SRS011126.Baylor_scaffold_9375   | + | 632     | 687     | RNA→ | rpsO (PRK05626)RpsO (COG0184)→            |                                          |
| env-1745 | SRS013533.PGA_scaffold_2853      | + | 34      | 89      | RNA→ | rpsO (PRK05626)RpsO (COG0184)→            |                                          |
| env-1746 | SRS015063.WUGC_scaffold_46448    | + | 1494    | 1549    | RNA→ |                                           |                                          |
| env-1747 | SRS018665.C3617939               | + | 376     | 431     | RNA→ |                                           |                                          |
| env-1748 | SRS018778.C1276842               | - | 1257    | 1202    | RNA→ | rpsO (PRK05626)RpsO (COG0184)→            |                                          |
| env-1749 | SRS019980.Baylor_scaffold_28622  | + | 2149    | 2204    | RNA→ | rpsO (PRK05626)RpsO (COG0184)→            |                                          |
| env-1750 | SRS020340.C2796995               | + | 244     | 299     | RNA→ |                                           |                                          |
| env-1751 | SRS043755.WUGC_scaffold_43382    | + | 2651    | 2706    | RNA→ |                                           |                                          |
| env-1752 | SRS023964.C2569817               | - | 445     | 390     | RNA→ | rpsO (PRK05626)RpsO (COG0184)→            |                                          |
| env-1753 | SRS049268.C4218766               | - | 234     | 179     | RNA→ | rpsO (PRK05626)Ribosomal_S15 (pfam00312)→ |                                          |
| env-1754 | SRS058336.C2129811               | - | 202     | 147     | RNA→ | rpsO (PRK05626)Ribosomal_S15 (pfam00312)→ |                                          |
| env-1755 | SRS063215.C2276132               | - | 206     | 151     | RNA→ | rpsO (PRK05626)Ribosomal_S15 (pfam00312)→ |                                          |

|          |                                 |   |        |        |      |                                           |                                |
|----------|---------------------------------|---|--------|--------|------|-------------------------------------------|--------------------------------|
| Cgi-1-1  | NZ_ACLQ01000019.1               | - | 321176 | 321120 | RNA→ | rpsO (PRK05626)RpsO (COG0184)→            | rpsO (PRK05626)RpsO (COG0184)→ |
| env-1756 | SRS053630.C926066               | + | 2157   | 2212   | RNA→ |                                           |                                |
| env-1757 | Tongue_dor_WUGL_scaffold_5146   | + | 1830   | 1885   | RNA→ |                                           |                                |
| env-1758 | SRS013705.C3757970              | + | 419    | 474    | RNA→ |                                           |                                |
| env-1759 | SRS014573.C3640759              | + | 448    | 503    | RNA→ |                                           |                                |
| env-1760 | SRS015762.WUGC_scaffold_51227   | - | 69     | 14     | RNA→ |                                           |                                |
| env-1761 | SRS016225.C2972871              | + | 722    | 777    | RNA→ |                                           |                                |
| env-1762 | SRS019071.WUGC_scaffold_32009   | + | 372    | 427    | RNA→ |                                           |                                |
| env-1763 | SRS042131.WUGC_scaffold_54007   | + | 6552   | 6607   | RNA→ |                                           |                                |
| env-1764 | SRS057205.C3544919              | + | 1708   | 1763   | RNA→ |                                           |                                |
| env-1765 | SRS012285.Baylor_scaffold_29593 | + | 360    | 415    | RNA→ |                                           |                                |
| env-1766 | SRS014888.C3089015              | - | 58     | 3      | RNA→ |                                           |                                |
| env-1767 | SRS018357.C3820809              | + | 107    | 162    | RNA→ | rpsO (PRK05626)Ribosomal_S15 (pfam00312)→ |                                |
| env-1768 | SRS018739.C3515427              | - | 340    | 285    | RNA→ | rpsO (PRK05626)RpsO (COG0184)→            |                                |
| env-1769 | SRS019327.C2770117              | + | 716    | 771    | RNA→ | rpsO (PRK05626)RpsO (COG0184)→            |                                |
| env-1770 | SRS020226.Baylor_scaffold_48761 | + | 121    | 176    | RNA→ | rpsO (PRK05626)RpsO (COG0184)→            |                                |
| env-1771 | SRS021477.Baylor_scaffold_53832 | - | 3224   | 3169   | RNA→ | rpsO (PRK05626)RpsO (COG0184)→            |                                |
| env-1772 | SRS024138.Baylor_scaffold_48685 | - | 5719   | 5664   | RNA→ | rpsO (PRK05626)RpsO (COG0184)→            |                                |
| env-1773 | SRS049389.C4680666              | + | 115    | 170    | RNA→ | rpsO (PRK05626)RpsO (COG0184)→            |                                |
| env-1774 | SRS062544.C3032576              | - | 2729   | 2674   | RNA→ | rpsO (PRK05626)RpsO (COG0184)→            |                                |
| env-1775 | SRS016541.Baylor_scaffold_10002 | - | 8245   | 8190   | RNA→ | rpsO (PRK05626)RpsO (COG0184)→            |                                |
| env-1776 | SRS011343.Baylor_scaffold_51832 | + | 619    | 674    | RNA→ | rpsO (PRK05626)RpsO (COG0184)→            |                                |
| env-1777 | SRS018573.WUGC_scaffold_37052   | - | 745    | 690    | RNA→ | rpsO (PRK05626)RpsO (COG0184)→            |                                |
| env-1778 | SRS055401.LANL_scaffold_16367   | - | 3521   | 3466   | RNA→ | rpsO (PRK05626)RpsO (COG0184)→            |                                |
| env-1779 | SRS018439.C2379934              | - | 315    | 259    | RNA→ | rpsO (PRK05626)Ribosomal_S15 (pfam00312)→ |                                |
| env-1780 | SRS011255.Baylor_scaffold_57867 | + | 143    | 199    | RNA→ | rpsO (PRK05626)RpsO (COG0184)→            |                                |
| env-1781 | SRS015755.WUGC_scaffold_31067   | + | 144    | 200    | RNA→ | rpsO (PRK05626)RpsO (COG0184)→            |                                |
| env-1782 | SRS017511.Baylor_scaffold_52784 | - | 1865   | 1809   | RNA→ | rpsO (PRK05626)RpsO (COG0184)→            |                                |
| env-1783 | SRS013949.C3427567              | - | 63     | 7      | RNA→ |                                           |                                |
| env-1784 | SRS047265.C1018884              | - | 63     | 7      | RNA→ |                                           |                                |
| env-1785 | SRS054430.C1991223              | - | 63     | 7      | RNA→ |                                           |                                |
| env-1786 | SRS015215.C2602102              | + | 1914   | 1970   | RNA→ | rpsO (PRK05626)RpsO (COG0184)→            |                                |
| env-1787 | SRS018157.Baylor_scaffold_17243 | + | 5326   | 5382   | RNA→ | rpsO (PRK05626)RpsO (COG0184)→            |                                |
| env-1788 | SRS018394.Baylor_scaffold_16582 | + | 207    | 263    | RNA→ | rpsO (PRK05626)RpsO (COG0184)→            |                                |
| env-1789 | SRS018975.WUGC_scaffold_27725   | - | 2246   | 2190   | RNA→ | rpsO (PRK05626)RpsO (COG0184)→            |                                |
| env-1790 | SRS023538.C1297948              | + | 625    | 681    | RNA→ | rpsO (PRK05626)RpsO (COG0184)→            |                                |
| env-1791 | SRS024021.Baylor_scaffold_35694 | - | 3813   | 3757   | RNA→ | rpsO (PRK05626)RpsO (COG0184)→            |                                |
| env-1792 | SRS051930.LANL_scaffold_30198   | - | 1945   | 1889   | RNA→ | rpsO (PRK05626)RpsO (COG0184)→            |                                |
| env-1793 | SRS053584.LANL_scaffold_27427   | + | 1111   | 1167   | RNA→ | rpsO (PRK05626)RpsO (COG0184)→            |                                |
| env-1794 | SRS064449.LANL_scaffold_54476   | - | 821    | 765    | RNA→ | rpsO (PRK05626)RpsO (COG0184)→            |                                |
| env-1795 | SRS015797.WUGC_scaffold_40800   | - | 3734   | 3678   | RNA→ | rpsO (PRK05626)RpsO (COG0184)→            |                                |
| env-1796 | SRS049268.LANL_scaffold_48367   | - | 1235   | 1179   | RNA→ | rpsO (PRK05626)RpsO (COG0184)→            |                                |
| env-1797 | SRS016575.Baylor_scaffold_62429 | - | 468    | 412    | RNA→ | rpsO (PRK05626)RpsO (COG0184)→            |                                |
| env-1798 | SRS021960.Baylor_scaffold_32080 | + | 1206   | 1262   | RNA→ | rpsO (PRK05626)RpsO (COG0184)→            |                                |
| env-1799 | SRS043018.WUGC_scaffold_17072   | - | 1686   | 1630   | RNA→ | rpsO (PRK05626)RpsO (COG0184)→            |                                |
| env-1800 | SRS052604.C1741226              | + | 192    | 248    | RNA→ | rpsO (PRK05626)Ribosomal_S15 (pfam00312)→ |                                |
| env-1801 | SRS075406.C835402               | + | 1492   | 1548   | RNA→ | rpsO (PRK05626)Ribosomal_S15 (pfam00312)→ |                                |
| env-1802 | SRS015044.C2954296              | - | 71     | 14     | RNA→ |                                           |                                |
| env-1803 | SRS017445.Baylor_scaffold_67615 | - | 71     | 14     | RNA→ |                                           |                                |
| env-1804 | SRS063999.LANL_scaffold_69744   | - | 714    | 657    | RNA→ | rpsO (PRK05626)RpsO (COG0184)→            |                                |
| env-1805 | SRS018443.C3761441              | + | 440    | 496    | RNA→ |                                           |                                |
| env-1806 | SRS023841.Baylor_scaffold_2255  | + | 17160  | 17216  | RNA→ |                                           |                                |

|          |                                   |   |       |       |      |                                                 |
|----------|-----------------------------------|---|-------|-------|------|-------------------------------------------------|
| env-1807 | SRS013723_Baylor_scaffold_96492   | + | 1691  | 1747  | RNA→ |                                                 |
| env-1808 | SRS015158_C2638461                | - | 70    | 14    | RNA→ |                                                 |
| env-1809 | SRS015899_C1864030                | - | 70    | 14    | RNA→ |                                                 |
| env-1810 | SRS015989_WUGC_scaffold_9962      | - | 70    | 14    | RNA→ |                                                 |
| env-1811 | SRS016331_C4186867                | + | 1034  | 1090  | RNA→ |                                                 |
| env-1812 | SRS017227_Baylor_scaffold_129048  | - | 70    | 14    | RNA→ |                                                 |
| env-1813 | SRS023938_Baylor_scaffold_54567   | - | 70    | 14    | RNA→ |                                                 |
| env-1814 | SRS043772_C1805334                | + | 959   | 1015  | RNA→ |                                                 |
| env-1815 | SRS047634_LANL_scaffold_135361    | + | 1682  | 1738  | RNA→ |                                                 |
| env-1816 | SRS051941_LANL_scaffold_63198     | - | 70    | 14    | RNA→ |                                                 |
| env-1817 | SRS055450_LANL_scaffold_60723     | + | 443   | 499   | RNA→ |                                                 |
| env-1818 | SRS011098_Baylor_scaffold_47355   | - | 447   | 391   | RNA→ | rpsO (PRK05626)RpsO (COG0184)→                  |
| env-1819 | SRS011152_Baylor_scaffold_56328   | - | 448   | 392   | RNA→ | rpsO (PRK05626)RpsO (COG0184)→                  |
| env-1820 | SRS017139_Baylor_scaffold_22700   | - | 713   | 657   | RNA→ | rpsO (PRK05626)RpsO (COG0184)→                  |
| env-1821 | SRS013252_Baylor_scaffold_570     | - | 3369  | 3313  | RNA→ | rpsO (PRK05626)RpsO (COG0184)→                  |
| env-1822 | SRS024561_LANL_scaffold_19776     | + | 521   | 577   | RNA→ | rpsO (PRK05626)RpsO (COG0184)→                  |
| env-1823 | SRS014894_WUGC_scaffold_44021     | + | 2091  | 2147  | RNA→ | rpsO (PRK05626)RpsO (COG0184)→                  |
| env-1824 | SRS015278_WUGC_scaffold_55991     | - | 313   | 257   | RNA→ | rpsO (PRK05626)Ribosomal_S15 (pfam00312)→       |
| env-1825 | SRS047113_LANL_scaffold_63026     | + | 134   | 190   | RNA→ | rpsO (PRK05626)Ribosomal_S15 (pfam00312)→       |
| env-1826 | SRS016043_WUGC_scaffold_15210     | + | 52    | 108   | RNA→ | rpsO (PRK05626)RpsO (COG0184)→                  |
| env-1827 | SRS017025_C1711249                | + | 439   | 495   | RNA→ | rpsO (PRK05626)Ribosomal_S15 (pfam00312)→       |
| env-1828 | SRS022725_LANL_scaffold_39329     | - | 181   | 125   | RNA→ | rpsO (PRK05626)Ribosomal_S15 (pfam00312)→       |
| env-1829 | SRS056622_C2506152                | - | 456   | 400   | RNA→ | rpsO (PRK05626)Ribosomal_S15 (pfam00312)→       |
| env-1830 | SRS014578_WUGC_scaffold_10366     | + | 9436  | 9493  | RNA→ | rpsO (PRK05626)RpsO (COG0184)→                  |
| env-1831 | SRS016200_C2197115                | + | 122   | 179   | RNA→ | rpsO (PRK05626)RpsO (COG0184)→                  |
| env-1832 | SRS019225_WUGC_scaffold_3776      | + | 18738 | 18795 | RNA→ | rpsO (PRK05626)RpsO (COG0184)→                  |
| env-1833 | SRS053917_LANL_scaffold_17810     | + | 480   | 536   | RNA→ | RNase_PH_PNPase_1 (cd11363)PRK11824 (PRK11824)→ |
| env-1834 | SRS014476_WUGC_scaffold_21840     | + | 108   | 161   | RNA→ | rpsO (PRK05626)Ribosomal_S15 (pfam00312)→       |
| env-1835 | SRS015278_WUGC_scaffold_27115     | - | 448   | 395   | RNA→ | rpsO (PRK05626)RpsO (COG0184)→                  |
| env-1836 | SRS019073_C2403742                | - | 61    | 8     | RNA→ |                                                 |
| env-1837 | SRS023938_C2280951                | + | 621   | 674   | RNA→ |                                                 |
| env-1838 | SRS042984_LANL_scaffold_33434     | - | 1845  | 1792  | RNA→ | rpsO (PRK05626)RpsO (COG0184)→                  |
| env-1839 | SRS045197_WUGC_scaffold_57665     | + | 563   | 616   | RNA→ | rpsO (PRK05626)Ribosomal_S15 (pfam00312)→       |
| env-1840 | SRS011126_Baylor_scaffold_28444   | - | 814   | 761   | RNA→ | rpsO (PRK05626)RpsO (COG0184)→                  |
| env-1841 | SRS013723_Baylor_scaffold_97854   | + | 595   | 648   | RNA→ | rpsO (PRK05626)RpsO (COG0184)→                  |
| env-1842 | SRS018157_Baylor_scaffold_39858   | + | 111   | 164   | RNA→ | rpsO (PRK05626)RpsO (COG0184)→                  |
| env-1843 | SRS022536_LANL_scaffold_17148     | + | 75494 | 75547 | RNA→ | rpsO (PRK05626)RpsO (COG0184)→                  |
| env-1844 | SRS049318_LANL_scaffold_66197     | - | 467   | 414   | RNA→ | rpsO (PRK05626)RpsO (COG0184)→                  |
| env-1845 | SRS065099_LANL_scaffold_25462     | - | 1601  | 1548  | RNA→ | rpsO (PRK05626)RpsO (COG0184)→                  |
| env-1846 | SRS011255_C2425047                | + | 575   | 628   | RNA→ |                                                 |
| env-1847 | SRS014578_WUGC_scaffold_64330     | + | 620   | 673   | RNA→ | rpsO (PRK05626)RpsO (COG0184)→                  |
| env-1848 | SRS015899_C1850213                | + | 925   | 978   | RNA→ |                                                 |
| env-1849 | SRS017445_C3104098                | - | 61    | 8     | RNA→ |                                                 |
| env-1850 | SRS019980_C2969016                | - | 61    | 8     | RNA→ |                                                 |
| env-1851 | SRS024144_C1802205                | + | 72    | 125   | RNA→ | rpsO (PRK05626)RpsO (COG0184)→                  |
| env-1852 | SRS043755_WUGC_scaffold_43461     | - | 467   | 414   | RNA→ | rpsO (PRK05626)RpsO (COG0184)→                  |
| env-1853 | SRS063932_LANL_scaffold_49231     | + | 1550  | 1603  | RNA→ | rpsO (PRK05626)Ribosomal_S15 (pfam00312)→       |
| env-1854 | Buccal_mucosa_LANL_scaffold_38424 | + | 493   | 546   | RNA→ | rpsO (PRK05626)Ribosomal_S15 (pfam00312)→       |
| env-1855 | SRS018665_WUGC_scaffold_60069     | - | 1584  | 1530  | RNA→ | rpsO (PRK05626)Ribosomal_S15 (pfam00312)→       |
| env-1856 | SRS015989_WUGC_scaffold_7147      | - | 469   | 415   | RNA→ | rpsO (PRK05626)Ribosomal_S15 (pfam00312)→       |
| env-1857 | SRS053917_LANL_scaffold_6591      | + | 5942  | 5996  | RNA→ | rpsO (PRK05626)Ribosomal_S15 (pfam00312)→       |
| env-1858 | SRS022725_LANL_scaffold_59028     | + | 5381  | 5435  | RNA→ | rpsO (PRK05626)Ribosomal_S15 (pfam00312)→       |



|          |                                   |   |         |         |      |                                                                                                                                                                           |
|----------|-----------------------------------|---|---------|---------|------|---------------------------------------------------------------------------------------------------------------------------------------------------------------------------|
| env-1859 | SRS015899.WUGC_scaffold_38801     | - | 470     | 416     | RNA→ | rpsO (PRK05626)Ribosomal_S15 (pfam00312)→                                                                                                                                 |
| env-1860 | SRS015158.WUGC_scaffold_8656      | - | 470     | 416     | RNA→ | rpsO (PRK05626)Ribosomal_S15 (pfam00312)→                                                                                                                                 |
| env-1861 | SRS043018.WUGC_scaffold_62457     | + | 332     | 386     | RNA→ | rpsO (PRK05626)Ribosomal_S15 (pfam00312)→                                                                                                                                 |
| env-1862 | SRS045197.WUGC_scaffold_57684     | - | 249     | 197     | RNA→ | rpsO (PRK05626)RpsO (COG0184)→                                                                                                                                            |
| env-1863 | SRS016360.Baylor_scaffold_47393   | + | 1132    | 1185    | RNA→ |                                                                                                                                                                           |
| env-1864 | SRS014477.C1535248                | - | 232     | 179     | RNA→ | rpsO (PRK05626)Ribosomal_S15 (pfam00312)→                                                                                                                                 |
| env-1865 | CEWR01254345.1                    | + | 688     | 738     | RNA→ | rpsO (PRK05626)Ribosomal_S15 (pfam00312)→                                                                                                                                 |
| Eme-2-1  | NZ_BARD01000020.1                 | + | 39213   | 39259   | RNA→ | rpsO (PRK05626)Ribosomal_S15 (pfam00312)→ rpsO (PRK05626)Ribosomal_S15 (pfam00312)→ hypo→                                                                                 |
| Eme-2-2  | NZ_ASAN01000003.1                 | + | 99334   | 99380   | RNA→ | rpsO (PRK05626)Ribosomal_S15 (pfam00312)→ hypo→ hypo→                                                                                                                     |
| Cca-1-1  | NZ_JHXV01000017.1                 | + | 23329   | 23378   | RNA→ | rpsO (PRK05626)Ribosomal_S15 (pfam00312)→                                                                                                                                 |
| Emi-1-1  | NZ_CP011059.1                     | + | 4046339 | 4046387 | RNA→ | rpsO (PRK05626)Ribosomal_S15 (pfam00312)→ SMC_prok_A (TIGR02169)DUF1003 (pfam06210)→                                                                                      |
| Cte-1-1  | NZ_AUAA01000028.1                 | + | 23283   | 23330   | RNA→ | rpsO (PRK05626)Ribosomal_S15 (pfam00312)→                                                                                                                                 |
| Csp-15-1 | NZ_JPLZ01000006.1                 | + | 1840    | 1887    | RNA→ | rpsO (PRK05626)Ribosomal_S15 (pfam00312)→                                                                                                                                 |
| Cha-2-1  | NZ_JPLY01000004.1                 | + | 813621  | 813669  | RNA→ | rpsO (PRK05626)Ribosomal_S15 (pfam00312)→                                                                                                                                 |
| Ean-3-1  | NZ_CP006576.1                     | - | 2427035 | 2426987 | RNA→ | rpsO (PRK05626)Ribosomal_S15 (pfam00312)→ SMC_prok_A (TIGR02169)DUF1003 (pfam06210)→                                                                                      |
| Ean-5-1  | NZ_ASYK01000015.1                 | + | 43042   | 43090   | RNA→ | rpsO (PRK05626)Ribosomal_S15 (pfam00312)→ SMC_prok_A (TIGR02169)DUF1003 (pfam06210)→                                                                                      |
| Ean-7-1  | NZ_ASYJ01000011.1                 | - | 311125  | 311077  | RNA→ | rpsO (PRK05626)Ribosomal_S15 (pfam00312)→ SMC_prok_A (TIGR02169)DUF1003 (pfam06210)→                                                                                      |
| Ean-1-1  | NZ_CCAC010000078.1                | - | 65873   | 65825   | RNA→ | rpsO (PRK05626)Ribosomal_S15 (pfam00312)→ SMC_prok_A (TIGR02169)DUF1003 (pfam06210)→                                                                                      |
| Ean-1-2  | NZ_CCAB010000101.1                | - | 104723  | 104675  | RNA→ | rpsO (PRK05626)Ribosomal_S15 (pfam00312)→ SMC_prok_A (TIGR02169)DUF1003 (pfam06210)→                                                                                      |
| Ean-1-3  | NZ_LFKT01000009.1                 | + | 119469  | 119517  | RNA→ | rpsO (PRK05626)Ribosomal_S15 (pfam00312)→ SMC_prok_A (TIGR02169)DUF1003 (pfam06210)→                                                                                      |
| Ean-11-1 | NZ_CBYE010000026.1                | + | 27074   | 27122   | RNA→ | rpsO (PRK05626)Ribosomal_S15 (pfam00312)→ SMC_prok_A (TIGR02169)DUF1003 (pfam06210)→                                                                                      |
| Ean-2-1  | NZ_AHHG01000045.1                 | - | 182436  | 182388  | RNA→ | rpsO (PRK05626)Ribosomal_S15 (pfam00312)→ rpsO (PRK05626)Ribosomal_S15 (pfam00312)→ SMC_prok_A (TIGR02169)DUF1003 (pfam06210)→ SMC_prok_A (TIGR02169)DUF1003 (pfam06210)→ |
| Ean-8-1  | NZ_CP007547.1                     | - | 3067040 | 3066992 | RNA→ | rpsO (PRK05626)Ribosomal_S15 (pfam00312)→ SMC_prok_A (TIGR02169)DUF1003 (pfam06210)→                                                                                      |
| Eme-1-1  | NZ_AVCQ01000015.1                 | - | 442021  | 441973  | RNA→ | rpsO (PRK05626)Ribosomal_S15 (pfam00312)→ rpsO (PRK05626)Ribosomal_S15 (pfam00312)→ SMC_prok_A (TIGR02169)DUF1003 (pfam06210)→                                            |
| Ean-6-1  | NZ_ASYI01000016.1                 | + | 45322   | 45370   | RNA→ | rpsO (PRK05626)Ribosomal_S15 (pfam00312)→ SMC_prok_A (TIGR02169)DUF1003 (pfam06210)→                                                                                      |
| Ean-10-1 | NZ_ASYG01000010.1                 | + | 159214  | 159262  | RNA→ | rpsO (PRK05626)Ribosomal_S15 (pfam00312)→ SMC_prok_A (TIGR02169)DUF1003 (pfam06210)→                                                                                      |
| Ean-9-1  | NZ_ASYF01000003.1                 | - | 448232  | 448184  | RNA→ | rpsO (PRK05626)Ribosomal_S15 (pfam00312)→ SMC_prok_A (TIGR02169)DUF1003 (pfam06210)→                                                                                      |
| Ean-4-1  | NZ_ASYH01000003.1                 | - | 448359  | 448311  | RNA→ | rpsO (PRK05626)Ribosomal_S15 (pfam00312)→ SMC_prok_A (TIGR02169)DUF1003 (pfam06210)→                                                                                      |
| Ean-1-4  | NZ_JNCG01000021.1                 | - | 185482  | 185434  | RNA→ | rpsO (PRK05626)Ribosomal_S15 (pfam00312)→ SMC_prok_A (TIGR02169)DUF1003 (pfam06210)→                                                                                      |
| Ean-12-1 | NZ_ANIW01000060.1                 | - | 190333  | 190285  | RNA→ | rpsO (PRK05626)Ribosomal_S15 (pfam00312)→ SMC_prok_A (TIGR02169)DUF1003 (pfam06210)→                                                                                      |
| Csp-18-1 | NZ_KN050755.1                     | - | 1438373 | 1438327 | RNA→ | rpsO (PRK05626)Ribosomal_S15 (pfam00312)→                                                                                                                                 |
| Cje-1-1  | NZ_JSYL01000004.1                 | + | 28177   | 28223   | RNA→ | rpsO (PRK05626)Ribosomal_S15 (pfam00312)→                                                                                                                                 |
| env-1866 | JGI26523J50269_1016856            | - | 1306    | 1260    | RNA→ | rpsO (PRK05626)Ribosomal_S15 (pfam00312)→                                                                                                                                 |
| env-1867 | JGI26527J51213_1032686            | - | 406     | 360     | RNA→ | rpsO (PRK05626)Ribosomal_S15 (pfam00312)→                                                                                                                                 |
| env-1868 | JGI26531J51214_10008686           | - | 2483    | 2437    | RNA→ | rpsO (PRK05626)Ribosomal_S15 (pfam00312)→                                                                                                                                 |
| Cha-1-1  | NZ_JASZ010000256.1                | + | 10759   | 10805   | RNA→ | rpsO (PRK05626)Ribosomal_S15 (pfam00312)→                                                                                                                                 |
| env-1869 | JGI26530J50255_1106976            | + | 312     | 358     | RNA→ | rpsO (PRK05626)Ribosomal_S15 (pfam00312)→                                                                                                                                 |
| env-1870 | topACOD_contig19283               | - | 304     | 259     | RNA→ | rpsO (PRK05626)Ribosomal_S15 (pfam00312)→                                                                                                                                 |
| Chi-1-1  | NZ_JARQ01000003.1                 | + | 453031  | 453077  | RNA→ | rpsO (PRK05626)Ribosomal_S15 (pfam00312)→                                                                                                                                 |
| env-1871 | 3300001197_1001501                | + | 9230    | 9275    | RNA→ | rpsO (PRK05626)Ribosomal_S15 (pfam00312)→                                                                                                                                 |
| Cso-2-1  | NZ_JSYK01000004.1                 | - | 52246   | 52199   | RNA→ | rpsO (PRK05626)Ribosomal_S15 (pfam00312)→                                                                                                                                 |
| Cda-1-1  | NZ_AUMT01000001.1                 | + | 62762   | 62807   | RNA→ | rpsO (PRK05626)Ribosomal_S15 (pfam00312)→                                                                                                                                 |
| Cpi-1-1  | NZ_JPRJ01000010.1                 | + | 67169   | 67214   | RNA→ | rpsO (PRK05626)Ribosomal_S15 (pfam00312)→                                                                                                                                 |
| env-1872 | 07_22_INULIN_DNA_scaffold18418_31 | - | 14224   | 14179   | RNA→ | rpsO (PRK05626)Ribosomal_S15 (pfam00312)→                                                                                                                                 |
| Fba-4-1  | NC_013062.1                       | - | 480533  | 480488  | RNA→ | rpsO (PRK05626)Ribosomal_S15 (pfam00312)→                                                                                                                                 |
| Cfo-1-1  | NZ_JPRP01000005.1                 | + | 14172   | 14217   | RNA→ | rpsO (PRK05626)Ribosomal_S15 (pfam00312)→                                                                                                                                 |
| env-1873 | APMI01051208.1                    | - | 1050    | 1005    | RNA→ | rpsO (PRK05626)Ribosomal_S15 (pfam00312)→                                                                                                                                 |
| Clu-1-1  | NZ_JPR01000006.1                  | - | 65330   | 65285   | RNA→ | rpsO (PRK05626)Ribosomal_S15 (pfam00312)→                                                                                                                                 |
| env-1874 | 2200753365                        | - | 6123    | 6078    | RNA→ | rpsO (PRK05626)Ribosomal_S15 (pfam00312)→                                                                                                                                 |
| Cta-1-1  | NZ_JWTA01000021.1                 | - | 33380   | 33335   | RNA→ | rpsO (PRK05626)Ribosomal_S15 (pfam00312)→                                                                                                                                 |



|          |                                 |   |         |         |                                                   |
|----------|---------------------------------|---|---------|---------|---------------------------------------------------|
| Csp-29-1 | NZ_JUGT01000011.1               | - | 37505   | 37460   | RNA → rpsO (PRK05626) Ribosomal_S15 (pfam00312) → |
| Csp-24-1 | NZ_JUGI01000017.1               | - | 175541  | 175496  | RNA → rpsO (PRK05626) Ribosomal_S15 (pfam00312) → |
| Csp-19-1 | NZ_JUHD01000005.1               | + | 223343  | 223388  | RNA → rpsO (PRK05626) Ribosomal_S15 (pfam00312) → |
| Cor-1-1  | NZ_CCAV010000003.1              | + | 217492  | 217537  | RNA → rpsO (PRK05626) Ribosomal_S15 (pfam00312) → |
| Cor-1-2  | NZ_CDHM01000003.1               | + | 217492  | 217537  | RNA → rpsO (PRK05626) Ribosomal_S15 (pfam00312) → |
| Csp-16-1 | NZ_LFNE01000002.1               | + | 313537  | 313582  | RNA → rpsO (PRK05626) Ribosomal_S15 (pfam00312) → |
| Can-1-1  | NZ_LFND01000006.1               | - | 295584  | 295539  | RNA → rpsO (PRK05626) Ribosomal_S15 (pfam00312) → |
| Cgl-1-1  | NZ_GL379781.1                   | - | 3418094 | 3418049 | RNA → rpsO (PRK05626) Ribosomal_S15 (pfam00312) → |
| Csp-26-1 | NZ_KN549099.1                   | - | 1525773 | 1525728 | RNA → rpsO (PRK05626) Ribosomal_S15 (pfam00312) → |
| Csp-23-1 | NZ_KI535291.1                   | + | 490120  | 490165  | RNA → rpsO (PRK05626) Ribosomal_S15 (pfam00312) → |
| Cin-2-1  | NZ_BAVL01000002.1               | + | 189412  | 189457  | RNA → rpsO (PRK05626) Ribosomal_S15 (pfam00312) → |
| Cso-1-1  | NZ_JPRH01000003.1               | + | 437436  | 437481  | RNA → rpsO (PRK05626) RpsO (COG0184) →            |
| Csp-17-1 | NZ_JPRN01000005.1               | - | 444957  | 444912  | RNA → rpsO (PRK05626) Ribosomal_S15 (pfam00312) → |
| Csp-20-1 | NZ_JUGX01000001.1               | - | 451596  | 451551  | RNA → rpsO (PRK05626) Ribosomal_S15 (pfam00312) → |
| env-1875 | JGI24741J21665_1003225          | + | 547     | 592     | RNA → rpsO (PRK05626) Ribosomal_S15 (pfam00312) → |
| env-1876 | SwRhRL2b_contig_2736501         | - | 126     | 81      | RNA → rpsO (PRK05626) RpsO (COG0184) →            |
| Csp-27-1 | NZ_JUGN01000014.1               | - | 542127  | 542082  | RNA → rpsO (PRK05626) Ribosomal_S15 (pfam00312) → |
| Csp-28-1 | NZ_JUGO01000011.1               | + | 158290  | 158335  | RNA → rpsO (PRK05626) Ribosomal_S15 (pfam00312) → |
| Cin-1-1  | NZ_LAZY010000038.1              | - | 61237   | 61192   | RNA → rpsO (PRK05626) Ribosomal_S15 (pfam00312) → |
| Csp-13-1 | NZ_LFNF01000003.1               | + | 556712  | 556757  | RNA → rpsO (PRK05626) Ribosomal_S15 (pfam00312) → |
| Csp-21-1 | NZ_JPEQ01000008.1               | - | 148879  | 148834  | RNA → rpsO (PRK05626) Ribosomal_S15 (pfam00312) → |
| Csp-25-1 | NZ_KN549083.1                   | + | 153277  | 153322  | RNA → rpsO (PRK05626) Ribosomal_S15 (pfam00312) → |
| Csp-22-1 | NZ_AP014624.1                   | + | 1694760 | 1694805 | RNA → rpsO (PRK05626) Ribosomal_S15 (pfam00312) → |
| Cga-1-1  | NZ_CP009928.1                   | + | 3037125 | 3037170 | RNA → rpsO (PRK05626) Ribosomal_S15 (pfam00312) → |
| Cvr-1-1  | NZ_JPRI01000002.1               | - | 96400   | 96355   | RNA → rpsO (PRK05626) Ribosomal_S15 (pfam00312) → |
| Csp-14-1 | NZ_JQJM01000004.1               | + | 231770  | 231815  | RNA → rpsO (PRK05626) Ribosomal_S15 (pfam00312) → |
| env-1877 | JGI24735J21928_10576231         | - | 306     | 261     | RNA → rpsO (PRK05626) Ribosomal_S15 (pfam00312) → |
| env-1878 | SRS050628.LANL_scaffold_18598   | + | 464     | 518     | RNA → rpsO (PRK05626) RpsO (COG0184) →            |
| env-1879 | SRS023595.C6923925              | - | 62      | 7       | RNA →                                             |
| env-1880 | JGI26529J51215_1088893          | - | 319     | 271     | RNA → rpsO (PRK05626) Ribosomal_S15 (pfam00312) → |
| env-1881 | JGI26530J50255_1057323          | - | 544     | 496     | RNA → rpsO (PRK05626) Ribosomal_S15 (pfam00312) → |
| env-1882 | JGI26527J51213_1015831          | - | 1014    | 966     | RNA → rpsO (PRK05626) Ribosomal_S15 (pfam00312) → |
| env-1883 | JGI25921J50272_10550746         | - | 155     | 89      | RNA →                                             |
| env-1884 | SRS011243.Baylor_scaffold_47946 | - | 2597    | 2550    | RNA → rpsO (PRK05626) Ribosomal_S15 (pfam00312) → |
| env-1885 | SRS013164.Baylor_scaffold_59591 | - | 4089    | 4042    | RNA → rpsO (PRK05626) Ribosomal_S15 (pfam00312) → |
| env-1886 | SRS014124.WUGC_scaffold_51556   | - | 1480    | 1433    | RNA → rpsO (PRK05626) Ribosomal_S15 (pfam00312) → |
| env-1887 | SRS018739.C3569612              | + | 103     | 150     | RNA → rpsO (PRK05626) Ribosomal_S15 (pfam00312) → |
| env-1888 | SRS019327.WUGC_scaffold_53864   | - | 2020    | 1973    | RNA → rpsO (PRK05626) Ribosomal_S15 (pfam00312) → |
| env-1889 | SRS022719.LANL_scaffold_27291   | + | 47554   | 47601   | RNA → rpsO (PRK05626) Ribosomal_S15 (pfam00312) → |
| env-1890 | SRS050669.LANL_scaffold_22387   | + | 10680   | 10727   | RNA → rpsO (PRK05626) Ribosomal_S15 (pfam00312) → |
| env-1891 | SRS077736.LANL_scaffold_38299   | + | 9035    | 9082    | RNA → rpsO (PRK05626) Ribosomal_S15 (pfam00312) → |
| env-1892 | SRS015060.C1545315              | + | 15      | 62      | RNA → rpsO (PRK05626) Ribosomal_S15 (pfam00312) → |
| env-1893 | SRS015434.C5634447              | - | 55      | 8       | RNA →                                             |
| env-1894 | SRS018300.Baylor_scaffold_41675 | + | 423     | 470     | RNA →                                             |
| env-1895 | SRS019071.C5124367              | + | 543     | 590     | RNA →                                             |
| env-1896 | SRS024441.C2974660              | + | 377     | 424     | RNA →                                             |
| env-1897 | SRS050244.LANL_scaffold_85939   | + | 1274    | 1321    | RNA →                                             |
| env-1898 | SRS015762.C3672449              | - | 55      | 8       | RNA →                                             |
| env-1899 | SRS054687.C3386725              | - | 55      | 8       | RNA →                                             |
| env-1900 | SRS015803.WUGC_scaffold_2285    | + | 78      | 125     | RNA → rpsO (PRK05626) Ribosomal_S15 (pfam00312) → |
| env-1901 | SRS016037.C2014584              | - | 305     | 258     | RNA → rpsO (PRK05626) Ribosomal_S15 (pfam00312) → |
| env-1902 | SRS016200.WUGC_scaffold_25492   | - | 60      | 13      | RNA →                                             |

|          |                                 |   |       |       |                                                   |
|----------|---------------------------------|---|-------|-------|---------------------------------------------------|
| env-1903 | SRS016569.C2492960              | + | 724   | 771   | RNA → rpsO (PRK05626) Ribosomal_S15 (pfam00312) → |
| env-1904 | SRS018357.Baylor_scaffold_29493 | - | 767   | 720   | RNA → rpsO (PRK05626) Ribosomal_S15 (pfam00312) → |
| env-1905 | SRS019045.C2658954              | + | 176   | 223   | RNA → rpsO (PRK05626) Ribosomal_S15 (pfam00312) → |
| env-1906 | SRS019587.C1053840              | - | 327   | 280   | RNA → rpsO (PRK05626) Ribosomal_S15 (pfam00312) → |
| env-1907 | SRS021496.Baylor_scaffold_63711 | + | 53    | 100   | RNA → rpsO (PRK05626) Ribosomal_S15 (pfam00312) → |
| env-1908 | SRS022149.C2781104              | + | 1     | 48    | RNA → rpsO (PRK05626) Ribosomal_S15 (pfam00312) → |
| env-1909 | SRS023557.C1767695              | - | 247   | 200   | RNA → rpsO (PRK05626) Ribosomal_S15 (pfam00312) → |
| env-1910 | SRS042910.C5602692              | - | 383   | 336   | RNA → rpsO (PRK05626) Ribosomal_S15 (pfam00312) → |
| env-1911 | SRS044373.C2907430              | - | 742   | 695   | RNA → rpsO (PRK05626) Ribosomal_S15 (pfam00312) → |
| env-1912 | SRS048791.C3091469              | - | 313   | 266   | RNA → rpsO (PRK05626) Ribosomal_S15 (pfam00312) → |
| env-1913 | SRS051244.LANL_scaffold_30757   | + | 464   | 511   | RNA → rpsO (PRK05626) Ribosomal_S15 (pfam00312) → |
| env-1914 | SRS055450.LANL_scaffold_72003   | - | 364   | 317   | RNA → rpsO (PRK05626) Ribosomal_S15 (pfam00312) → |
| env-1915 | SRS057692.LANL_scaffold_6218    | + | 21    | 68    | RNA → rpsO (PRK05626) Ribosomal_S15 (pfam00312) → |
| env-1916 | SRS058336.C2042484              | - | 153   | 106   | RNA → rpsO (PRK05626) Ribosomal_S15 (pfam00312) → |
| env-1917 | SRS064423.LANL_scaffold_57424   | + | 419   | 466   | RNA → rpsO (PRK05626) Ribosomal_S15 (pfam00312) → |
| env-1918 | SRS043422.C2694041              | - | 1486  | 1439  | RNA → rpsO (PRK05626) Ribosomal_S15 (pfam00312) → |
| env-1919 | SRS014473.C1126565              | + | 640   | 687   | RNA → rpsO (PRK05626) Ribosomal_S15 (pfam00312) → |
| env-1920 | SRS019125.C625732               | + | 7434  | 7481  | RNA → rpsO (PRK05626) Ribosomal_S15 (pfam00312) → |
| env-1921 | SRS064329.C2689539              | - | 427   | 380   | RNA → rpsO (PRK05626) Ribosomal_S15 (pfam00312) → |
| env-1922 | SRS012279.Baylor_scaffold_66478 | + | 7846  | 7893  | RNA → rpsO (PRK05626) Ribosomal_S15 (pfam00312) → |
| env-1923 | SRS022077.Baylor_scaffold_42750 | + | 9400  | 9447  | RNA → rpsO (PRK05626) Ribosomal_S15 (pfam00312) → |
| env-1924 | SRS013947.C1568635              | + | 15    | 62    | RNA → rpsO (PRK05626) Ribosomal_S15 (pfam00312) → |
| env-1925 | SRS014573.WUGC_scaffold_22664   | + | 73    | 120   | RNA → rpsO (PRK05626) Ribosomal_S15 (pfam00312) → |
| env-1926 | SRS015158.WUGC_scaffold_53335   | + | 495   | 542   | RNA → rpsO (PRK05626) Ribosomal_S15 (pfam00312) → |
| env-1927 | SRS015644.WUGC_scaffold_47575   | + | 224   | 271   | RNA → rpsO (PRK05626) Ribosomal_S15 (pfam00312) → |
| env-1928 | SRS015797.C2629919              | + | 42    | 89    | RNA → rpsO (PRK05626) Ribosomal_S15 (pfam00312) → |
| env-1929 | SRS016002.C2634626              | + | 834   | 881   | RNA → rpsO (PRK05626) Ribosomal_S15 (pfam00312) → |
| env-1930 | SRS016086.C2525590              | - | 620   | 573   | RNA → rpsO (PRK05626) Ribosomal_S15 (pfam00312) → |
| env-1931 | SRS016225.C3015844              | - | 61    | 14    | RNA →                                             |
| env-1932 | SRS024081.LANL_scaffold_72737   | + | 2277  | 2324  | RNA →                                             |
| env-1933 | SRS042131.C2167664              | + | 340   | 387   | RNA →                                             |
| env-1934 | SRS049147.C4008101              | + | 291   | 338   | RNA →                                             |
| env-1935 | SRS018145.Baylor_scaffold_19145 | - | 1405  | 1358  | RNA → rpsO (PRK05626) Ribosomal_S15 (pfam00312) → |
| env-1936 | SRS019027.C1962878              | - | 130   | 83    | RNA → rpsO (PRK05626) RpsO (COG0184) →            |
| env-1937 | SRS019122.C5834060              | + | 331   | 378   | RNA → rpsO (PRK05626) Ribosomal_S15 (pfam00312) → |
| env-1938 | SRS019591.WUGC_scaffold_17646   | - | 61    | 14    | RNA →                                             |
| env-1939 | SRS022083.C1886151              | - | 305   | 258   | RNA → rpsO (PRK05626) Ribosomal_S15 (pfam00312) → |
| env-1940 | SRS022530.LANL_scaffold_2248    | + | 50661 | 50708 | RNA → rpsO (PRK05626) Ribosomal_S15 (pfam00312) → |
| env-1941 | SRS024277.LANL_scaffold_38800   | - | 331   | 284   | RNA → rpsO (PRK05626) Ribosomal_S15 (pfam00312) → |
| env-1942 | SRS042984.LANL_scaffold_420     | + | 1488  | 1535  | RNA → rpsO (PRK05626) Ribosomal_S15 (pfam00312) → |
| env-1943 | SRS047824.C2273016              | - | 257   | 210   | RNA → rpsO (PRK05626) Ribosomal_S15 (pfam00312) → |
| env-1944 | SRS049389.WUGC_scaffold_29036   | + | 784   | 831   | RNA → rpsO (PRK05626) Ribosomal_S15 (pfam00312) → |
| env-1945 | SRS057539.LANL_scaffold_61878   | - | 651   | 604   | RNA → rpsO (PRK05626) Ribosomal_S15 (pfam00312) → |
| env-1946 | SRS057791.C3560696              | + | 282   | 329   | RNA → rpsO (PRK05626) Ribosomal_S15 (pfam00312) → |
| env-1947 | SRS063288.LANL_scaffold_13079   | + | 772   | 819   | RNA → rpsO (PRK05626) Ribosomal_S15 (pfam00312) → |
| env-1948 | SRS065278.C2443864              | + | 63    | 110   | RNA → rpsO (PRK05626) Ribosomal_S15 (pfam00312) → |
| env-1949 | Palatine.Tonsils.LANL.C6176060  | - | 63    | 16    | RNA →                                             |
| env-1950 | SRS045313.C1321695              | + | 55    | 102   | RNA → rpsO (PRK05626) Ribosomal_S15 (pfam00312) → |
| env-1951 | SRS018443.C3710842              | + | 364   | 411   | RNA →                                             |
| env-1952 | SRS023538.Baylor_scaffold_34561 | - | 542   | 495   | RNA → rpsO (PRK05626) Ribosomal_S15 (pfam00312) → |
| env-1953 | SRS051378.LANL_scaffold_19919   | + | 108   | 155   | RNA → rpsO (PRK05626) Ribosomal_S15 (pfam00312) → |
| env-1954 | SRS055401.LANL_scaffold_31063   | + | 824   | 871   | RNA →                                             |

|          |                                 |   |         |         |                                                   |
|----------|---------------------------------|---|---------|---------|---------------------------------------------------|
| env-1955 | SRS015985.WUGC_scaffold_29053   | - | 1071    | 1024    | RNA → rpsO (PRK05626) Ribosomal_S15 (pfam00312) → |
| env-1956 | SRS015989.WUGC_scaffold_321     | - | 1263    | 1216    | RNA → rpsO (PRK05626) Ribosomal_S15 (pfam00312) → |
| env-1957 | SRS011140.C5162271              | - | 1086    | 1039    | RNA → rpsO (PRK05626) Ribosomal_S15 (pfam00312) → |
| env-1958 | SRS011343.Baylor_scaffold_58822 | - | 579     | 532     | RNA → rpsO (PRK05626) Ribosomal_S15 (pfam00312) → |
| env-1959 | SRS013950.C2176163              | - | 1345    | 1298    | RNA → rpsO (PRK05626) Ribosomal_S15 (pfam00312) → |
| env-1960 | SRS019129.WUGC_scaffold_25059   | + | 248     | 295     | RNA → rpsO (PRK05626) Ribosomal_S15 (pfam00312) → |
| env-1961 | SRS014894.WUGC_scaffold_48888   | + | 400     | 447     | RNA →                                             |
| env-1962 | SRS015278.WUGC_scaffold_56393   | + | 212     | 259     | RNA → rpsO (PRK05626) Ribosomal_S15 (pfam00312) → |
| env-1963 | SRS015470.WUGC_scaffold_46669   | + | 449     | 496     | RNA → rpsO (PRK05626) Ribosomal_S15 (pfam00312) → |
| env-1964 | SRS016043.C2059938              | - | 61      | 14      | RNA →                                             |
| env-1965 | SRS016746.Baylor_scaffold_53508 | + | 20      | 67      | RNA → rpsO (PRK05626) Ribosomal_S15 (pfam00312) → |
| env-1966 | SRS017439.C3749384              | + | 21      | 68      | RNA → rpsO (PRK05626) Ribosomal_S15 (pfam00312) → |
| env-1967 | SRS017691.C5063285              | + | 292     | 339     | RNA →                                             |
| env-1968 | SRS018394.Baylor_scaffold_1898  | - | 472     | 425     | RNA → rpsO (PRK05626) Ribosomal_S15 (pfam00312) → |
| env-1969 | SRS019128.WUGC_scaffold_19415   | + | 88      | 135     | RNA → rpsO (PRK05626) Ribosomal_S15 (pfam00312) → |
| env-1970 | SRS019906.WUGC_scaffold_36213   | - | 53      | 6       | RNA →                                             |
| env-1971 | SRS022536.LANL_scaffold_43917   | - | 900     | 853     | RNA → rpsO (PRK05626) Ribosomal_S15 (pfam00312) → |
| env-1972 | SRS023595.C6958305              | + | 381     | 428     | RNA →                                             |
| env-1973 | SRS024021.Baylor_scaffold_13409 | - | 8309    | 8262    | RNA → rpsO (PRK05626) Ribosomal_S15 (pfam00312) → |
| env-1974 | SRS024447.LANL_scaffold_52352   | - | 305     | 258     | RNA → rpsO (PRK05626) Ribosomal_S15 (pfam00312) → |
| env-1975 | SRS047113.LANL_scaffold_72955   | + | 244     | 291     | RNA → rpsO (PRK05626) Ribosomal_S15 (pfam00312) → |
| env-1976 | SRS047634.LANL_scaffold_135861  | - | 561     | 514     | RNA → rpsO (PRK05626) Ribosomal_S15 (pfam00312) → |
| env-1977 | SRS053584.LANL_scaffold_40362   | - | 1914    | 1867    | RNA → rpsO (PRK05626) Ribosomal_S15 (pfam00312) → |
| env-1978 | SRS058808.LANL_scaffold_50592   | - | 215     | 168     | RNA → rpsO (PRK05626) Ribosomal_S15 (pfam00312) → |
| env-1979 | SRS063932.LANL_scaffold_80836   | + | 169     | 216     | RNA → rpsO (PRK05626) Ribosomal_S15 (pfam00312) → |
| env-1980 | SRS023930.C2188236              | - | 1153    | 1106    | RNA → rpsO (PRK05626) Ribosomal_S15 (pfam00312) → |
| env-1981 | SRS011126.Baylor_scaffold_69832 | - | 338     | 291     | RNA → rpsO (PRK05626) Ribosomal_S15 (pfam00312) → |
| env-1982 | SRS011152.Baylor_scaffold_54314 | - | 364     | 317     | RNA → rpsO (PRK05626) Ribosomal_S15 (pfam00312) → |
| env-1983 | SRS013252.C3586002              | - | 55      | 8       | RNA →                                             |
| env-1984 | SRS014578.WUGC_scaffold_33113   | - | 891     | 938     | RNA → rpsO (PRK05626) Ribosomal_S15 (pfam00312) → |
| env-1985 | SRS015215.C2492460              | - | 441     | 394     | RNA → rpsO (PRK05626) Ribosomal_S15 (pfam00312) → |
| env-1986 | SRS015440.C2591831              | + | 803     | 850     | RNA →                                             |
| env-1987 | SRS015574.WUGC_scaffold_74608   | + | 333     | 380     | RNA → rpsO (PRK05626) Ribosomal_S15 (pfam00312) → |
| env-1988 | SRS016331.C3952241              | + | 270     | 317     | RNA →                                             |
| env-1989 | SRS052876.LANL_scaffold_31436   | + | 425     | 472     | RNA →                                             |
| env-1990 | SRS017025.Baylor_scaffold_2897  | - | 844     | 797     | RNA → rpsO (PRK05626) Ribosomal_S15 (pfam00312) → |
| env-1991 | SRS017511.C3486220              | + | 49      | 96      | RNA → rpsO (PRK05626) Ribosomal_S15 (pfam00312) → |
| env-1992 | SRS017814.C2648955              | - | 305     | 258     | RNA → rpsO (PRK05626) Ribosomal_S15 (pfam00312) → |
| env-1993 | SRS018971.C748940               | - | 283     | 236     | RNA → rpsO (PRK05626) Ribosomal_S15 (pfam00312) → |
| env-1994 | SRS019387.C1725966              | - | 63      | 16      | RNA →                                             |
| env-1995 | SRS019980.Baylor_scaffold_58741 | + | 1292    | 1339    | RNA →                                             |
| env-1996 | SRS022725.LANL_scaffold_113781  | + | 1278    | 1325    | RNA → rpsO (PRK05626) Ribosomal_S15 (pfam00312) → |
| env-1997 | SRS023964.Baylor_scaffold_44464 | - | 2165    | 2118    | RNA → rpsO (PRK05626) Ribosomal_S15 (pfam00312) → |
| env-1998 | SRS024381.LANL_scaffold_36143   | - | 1503    | 1456    | RNA → rpsO (PRK05626) Ribosomal_S15 (pfam00312) → |
| env-1999 | SRS043755.WUGC_scaffold_39570   | + | 517     | 564     | RNA → rpsO (PRK05626) RpsO (COG0184) →            |
| env-2000 | SRS047265.C1087503              | - | 931     | 884     | RNA → rpsO (PRK05626) Ribosomal_S15 (pfam00312) → |
| env-2001 | SRS051930.C3123168              | + | 372     | 419     | RNA →                                             |
| env-2002 | SRS054430.LANL_scaffold_24266   | + | 1510    | 1557    | RNA →                                             |
| env-2003 | SRS063603.LANL_scaffold_97549   | - | 336     | 289     | RNA → rpsO (PRK05626) Ribosomal_S15 (pfam00312) → |
| env-2004 | SRS063999.LANL_scaffold_80667   | - | 1141    | 1094    | RNA → rpsO (PRK05626) Ribosomal_S15 (pfam00312) → |
| env-2005 | SRS016541.Baylor_scaffold_17430 | + | 71      | 118     | RNA → rpsO (PRK05626) Ribosomal_S15 (pfam00312) → |
| Ran-4-1  | NC_017569.1                     | - | 1632510 | 1632464 | RNA → rpsO (PRK05626) Ribosomal_S15 (pfam00312) → |

|          |                            |   |         |         |                                                   |
|----------|----------------------------|---|---------|---------|---------------------------------------------------|
| Ran-1-1  | NZ_CP007504.1              | + | 677153  | 677199  | RNA → rpsO (PRK05626) Ribosomal_S15 (pfam00312) → |
| Ran-1-2  | NZ_CP007503.1              | + | 665064  | 665110  | RNA → rpsO (PRK05626) Ribosomal_S15 (pfam00312) → |
| Ran-2-1  | NC_014738.1                | + | 675647  | 675693  | RNA → rpsO (PRK05626) Ribosomal_S15 (pfam00312) → |
| Ran-6-1  | NZ_AENH01000022.1          | + | 24212   | 24258   | RNA → rpsO (PRK05626) Ribosomal_S15 (pfam00312) → |
| Ran-5-1  | NZ_KB206037.1              | - | 211263  | 211217  | RNA → rpsO (PRK05626) Ribosomal_S15 (pfam00312) → |
| Ran-3-1  | NC_020125.1                | - | 1053939 | 1053893 | RNA → rpsO (PRK05626) Ribosomal_S15 (pfam00312) → |
| Ran-2-2  | NC_017045.1                | + | 837166  | 837212  | RNA → rpsO (PRK05626) Ribosomal_S15 (pfam00312) → |
| Ran-7-1  | NZ_CP007204.1              | + | 663670  | 663716  | RNA → rpsO (PRK05626) Ribosomal_S15 (pfam00312) → |
| Cca-2-1  | NZ_CDOE01000080.1          | - | 107055  | 107000  | RNA → rpsO (PRK05626) Ribosomal_S15 (pfam00312) → |
| Cca-2-2  | NZ_CDOK01000138.1          | + | 7933    | 7987    | RNA → rpsO (PRK05626) Ribosomal_S15 (pfam00312) → |
| Cca-2-3  | NZ_CDOJ01000102.1          | + | 7875    | 7929    | RNA → rpsO (PRK05626) Ribosomal_S15 (pfam00312) → |
| Cca-3-1  | NC_015846.1                | - | 2206651 | 2206597 | RNA → rpsO (PRK05626) Ribosomal_S15 (pfam00312) → |
| env-2006 | JGI12420J12819_1001506     | - | 9008    | 8962    | RNA → rpsO (PRK05626) Ribosomal_S15 (pfam00312) → |
| env-2007 | TFO_HY_Contig_14630        | - | 7035    | 6950    | RNA → rpsO (PRK05626) RpsO (COG0184) →            |
| Mru-1-1  | NC_015945.1                | - | 2244219 | 2244134 | RNA → rpsO (PRK05626) RpsO (COG0184) →            |
| env-2008 | JGI11876J14442_10002026    | + | 6244    | 6306    | RNA → rpsO (PRK05626) RpsO (COG0184) →            |
| env-2009 | ElkS_mat_CD2A_1000757      | - | 3779    | 3717    | RNA → rpsO (PRK05626) RpsO (COG0184) →            |
| env-2010 | CEOE01009065.1             | + | 2223    | 2285    | RNA →                                             |
| env-2011 | CEOE01041545.1             | + | 1214    | 1276    | RNA → rpsO (PRK05626) RpsO (COG0184) →            |
| env-2012 | CEQQ01164659.1             | - | 411     | 349     | RNA → rpsO (PRK05626) RpsO (COG0184) →            |
| env-2013 | CESC01055335.1             | + | 492     | 554     | RNA → rpsO (PRK05626) RpsO (COG0184) →            |
| env-2014 | CEVF01145327.1             | + | 1277    | 1339    | RNA → rpsO (PRK05626) Ribosomal_S15 (pfam00312) → |
| env-2015 | CEOS01127385.1             | + | 891     | 953     | RNA →                                             |
| env-2016 | CEQH01250475.1             | - | 233     | 171     | RNA → rpsO (PRK05626) Ribosomal_S15 (pfam00312) → |
| env-2017 | CETR01116473.1             | - | 448     | 386     | RNA → rpsO (PRK05626) RpsO (COG0184) →            |
| env-2018 | CEQG01236235.1             | - | 299     | 237     | RNA → rpsO (PRK05626) RpsO (COG0184) →            |
| Msp-2-1  | NZ_JQNJ01000001.1          | - | 2554372 | 2554309 | RNA → rpsO (PRK05626) RpsO (COG0184) →            |
| Cba-2-1  | NZ_CP009976.1              | - | 2003323 | 2003261 | RNA → rpsO (PRK05626) Ribosomal_S15 (pfam00312) → |
| Cba-3-1  | NZ_ATLG01000025.1          | + | 148886  | 148948  | RNA → rpsO (PRK05626) Ribosomal_S15 (pfam00312) → |
| Csp-11-1 | NZ_JQCT01000001.1          | + | 36796   | 36858   | RNA → rpsO (PRK05626) Ribosomal_S15 (pfam00312) → |
| Cba-4-1  | NZ_CP009887.1              | - | 1991741 | 1991679 | RNA → rpsO (PRK05626) Ribosomal_S15 (pfam00312) → |
| Cba-1-1  | NZ_ATLH01000029.1          | + | 35153   | 35215   | RNA → rpsO (PRK05626) Ribosomal_S15 (pfam00312) → |
| env-2019 | P_1C_Sed_3_UnCty_1112983   | + | 133     | 197     | RNA → rpsO (PRK05626) RpsO (COG0184) →            |
| env-2020 | SA_S1_NOR08_45m_c10098966  | - | 656     | 592     | RNA → rpsO (PRK05626) Ribosomal_S15 (pfam00312) → |
| Csp-12-1 | NZ_JUHB01000001.1          | - | 3425850 | 3425786 | RNA → rpsO (PRK05626) Ribosomal_S15 (pfam00312) → |
| Zul-1-1  | NZ_JQMD01000002.1          | + | 2791513 | 2791577 | RNA → rpsO (PRK05626) RpsO (COG0184) →            |
| env-2021 | CEQH01267320.1             | - | 701     | 637     | RNA → rpsO (PRK05626) Ribosomal_S15 (pfam00312) → |
| env-2022 | CEQR01110231.1             | + | 2717    | 2781    | RNA → rpsO (PRK05626) Ribosomal_S15 (pfam00312) → |
| env-2023 | CEQT01008943.1             | - | 946     | 882     | RNA → rpsO (PRK05626) Ribosomal_S15 (pfam00312) → |
| env-2024 | CERC01066844.1             | - | 30660   | 30596   | RNA → rpsO (PRK05626) Ribosomal_S15 (pfam00312) → |
| env-2025 | CERD01127367.1             | + | 35670   | 35734   | RNA → rpsO (PRK05626) Ribosomal_S15 (pfam00312) → |
| env-2026 | CERE01165140.1             | - | 692     | 628     | RNA → rpsO (PRK05626) Ribosomal_S15 (pfam00312) → |
| env-2027 | CERX01241151.1             | - | 248     | 184     | RNA → rpsO (PRK05626) Ribosomal_S15 (pfam00312) → |
| env-2028 | CENJ01132294.1             | - | 814     | 750     | RNA → rpsO (PRK05626) Ribosomal_S15 (pfam00312) → |
| env-2029 | JGI24723J26617_10000090    | - | 7488    | 7425    | RNA → rpsO (PRK05626) Ribosomal_S15 (pfam00312) → |
| Ace-1-1  | NZ_AUCB01000005.1          | + | 34830   | 34893   | RNA → rpsO (PRK05626) Ribosomal_S15 (pfam00312) → |
| Ala-2-1  | NZ_KE384290.1              | - | 34915   | 34852   | RNA → rpsO (PRK05626) Ribosomal_S15 (pfam00312) → |
| env-2030 | KGLS1_ANT01_95m_c10011027  | + | 4052    | 4115    | RNA → ←-hypo                                      |
| env-2031 | KGLS2_ANT06_2345m_c1000769 | - | 806     | 743     | RNA → rpsO (PRK05626) RpsO (COG0184) →            |
| env-2032 | SA_S1_NOR05_45m_c10101907  | - | 644     | 581     | RNA → rpsO (PRK05626) RpsO (COG0184) →            |
| env-2033 | SA_S2_NOR15_50m_c10610413  | + | 126     | 189     | RNA → rpsO (PRK05626) Ribosomal_S15 (pfam00312) → |
| env-2034 | KGLS2_ANT05_2345m_c1051480 | + | 342     | 405     | RNA → rpsO (PRK05626) RpsO (COG0184) →            |



|          |                               |   |         |         |                                                  |
|----------|-------------------------------|---|---------|---------|--------------------------------------------------|
| env-2035 | KGLS1_ANT02.95m.c10160552     | + | 8       | 71      | RNA → rpsO (PRK05626)RpsO (COG0184) →            |
| env-2036 | JGI24025J20009.10098606       | + | 246     | 309     | RNA → rpsO (PRK05626)RpsO (COG0184) →            |
| env-2037 | KGLS1_ANT01.95m.c10032764     | + | 1919    | 1982    | RNA → rpsO (PRK05626) →                          |
| env-2038 | KGLS1_ANT01.95m.c10238661     | - | 453     | 390     | RNA → rpsO (PRK05626)RpsO (COG0184) →            |
| env-2039 | TDF_OR_ARG04.113m.c1031286    | + | 374     | 437     | RNA → rpsO (PRK05626)Ribosomal_S15 (pfam00312) → |
| env-2040 | TDF_MC_ARG01.113m.c1031732    | - | 233     | 170     | RNA → rpsO (PRK05626)Ribosomal_S15 (pfam00312) → |
| env-2041 | SA.S1_NOR08.45m.c10338978     | + | 208     | 271     | RNA → rpsO (PRK05626)Ribosomal_S15 (pfam00312) → |
| env-2042 | TDF_MC_ARG02.113m.c1027467    | + | 202     | 265     | RNA → rpsO (PRK05626)Ribosomal_S15 (pfam00312) → |
| env-2043 | KGLS1_ANT03.95m.c1036695      | + | 376     | 439     | RNA → rpsO (PRK05626)Ribosomal_S15 (pfam00312) → |
| env-2044 | KGLS1_ANT02.95m.c10041159     | + | 904     | 967     | RNA → rpsO (PRK05626)RpsO (COG0184) →            |
| env-2045 | JGI24023J19991.10153635       | + | 471     | 534     | RNA → rpsO (PRK05626)Ribosomal_S15 (pfam00312) → |
| env-2046 | KGLS1_ANT01.95m.c10009658     | - | 886     | 823     | RNA → rpsO (PRK05626)RpsO (COG0184) →            |
| env-2047 | KGLS2_ANT04.2345m.c1021074    | + | 852     | 915     | RNA → rpsO (PRK05626)RpsO (COG0184) →            |
| env-2048 | KGLS1_ANT02.95m.c10001832     | + | 7430    | 7493    | RNA → rpsO (PRK05626)RpsO (COG0184) →            |
| env-2049 | P_2C_Liq.1.UnCty_1014332      | - | 1481    | 1417    | RNA → rpsO (PRK05626)RpsO (COG0184) →            |
| env-2050 | PML_READ.00802233             | + | 187     | 251     | RNA →                                            |
| env-2051 | DelMOSum2011.c10009803        | - | 282     | 218     | RNA → rpsO (PRK05626)Ribosomal_S15 (pfam00312) → |
| env-2052 | DelMOWin2010.c10595920        | + | 80      | 144     | RNA → rpsO (PRK05626)Ribosomal_S15 (pfam00312) → |
| env-2053 | P_2C_Liq.2.UnCty_1013023      | - | 1456    | 1392    | RNA → rpsO (PRK05626)RpsO (COG0184) →            |
| env-2054 | PML_READ.00935082             | + | 13      | 77      | RNA → rpsO (PRK05626)Ribosomal_S15 (pfam00312) → |
| env-2055 | DelMOSum2010.c10010410        | + | 322     | 386     | RNA → rpsO (PRK05626)RpsO (COG0184) →            |
| env-2056 | JGI20152J14361.10001126       | - | 5003    | 4939    | RNA → rpsO (PRK05626)RpsO (COG0184) →            |
| env-2057 | JGI20151J14362.10008756       | + | 270     | 334     | RNA → rpsO (PRK05626)RpsO (COG0184) →            |
| env-2058 | JGI20156J14371.10000639       | - | 17377   | 17313   | RNA → rpsO (PRK05626)RpsO (COG0184) →            |
| env-2059 | JGI20154J14316.10003245       | + | 8271    | 8335    | RNA → rpsO (PRK05626)RpsO (COG0184) →            |
| env-2060 | JGI20160J14292.10001354       | + | 13475   | 13539   | RNA → rpsO (PRK05626)RpsO (COG0184) →            |
| env-2061 | JGI20153J14295.10000494       | + | 27409   | 27473   | RNA → rpsO (PRK05626)RpsO (COG0184) →            |
| env-2062 | JGI20153J14318.10000494       | + | 27409   | 27473   | RNA → rpsO (PRK05626)RpsO (COG0184) →            |
| env-2063 | JGI20157J14317.10000832       | + | 24813   | 24877   | RNA → rpsO (PRK05626)RpsO (COG0184) →            |
| env-2064 | JGI20159J14440.10001145       | - | 5009    | 4945    | RNA → rpsO (PRK05626)RpsO (COG0184) →            |
| env-2065 | JGI20155J14468.10001234       | + | 14134   | 14198   | RNA → rpsO (PRK05626)RpsO (COG0184) →            |
| env-2066 | JGI20158J14315.10000172       | + | 28789   | 28853   | RNA → rpsO (PRK05626)RpsO (COG0184) →            |
| env-2067 | F10SI0310a.Sequence0000028922 | - | 721     | 657     | RNA → rpsO (PRK05626)RpsO (COG0184) →            |
| Ead-1-1  | NZ_KB907552.1                 | + | 40646   | 40709   | RNA → rpsO (PRK05626)RpsO (COG0184) →            |
| env-2068 | TDF_MC_ARG02.113m.c1042706    | + | 63      | 126     | RNA → rpsO (PRK05626)RpsO (COG0184) →            |
| env-2069 | TDF_OR_ARG04.113m.c1023153    | - | 698     | 635     | RNA → rpsO (PRK05626)RpsO (COG0184) →            |
| env-2070 | TDF_MC_ARG01.113m.c1008162    | - | 795     | 732     | RNA → rpsO (PRK05626)RpsO (COG0184) →            |
| env-2071 | JGI24024J18818.10072705       | + | 731     | 794     | RNA → rpsO (PRK05626)RpsO (COG0184) →            |
| env-2072 | TDF_OR_ARG05.123m.c1037339    | - | 340     | 277     | RNA → rpsO (PRK05626)RpsO (COG0184) →            |
| env-2073 | JGI24723J26617.10002068       | - | 2830    | 2767    | RNA → rpsO (PRK05626)Ribosomal_S15 (pfam00312) → |
| env-2074 | JGI24723J26617.10248799       | + | 233     | 296     | RNA → rpsO (PRK05626)Ribosomal_S15 (pfam00312) → |
| env-2075 | CENR01000826.1                | - | 4573    | 4510    | RNA → rpsO (PRK05626)Ribosomal_S15 (pfam00312) → |
| Aal-1-1  | NZ_JPOO01000001.1             | - | 1038671 | 1038608 | RNA → rpsO (PRK05626)Ribosomal_S15 (pfam00312) → |
| env-2076 | JGI24723J26617.10486333       | - | 145     | 82      | RNA → rpsO (PRK05626)RpsO (COG0184) →            |
| env-2077 | JGI24724J26744.10000006       | - | 23136   | 23073   | RNA → rpsO (PRK05626)Ribosomal_S15 (pfam00312) → |
| env-2078 | JGI24724J26744.10987649       | + | 71      | 135     | RNA → rpsO (PRK05626)Ribosomal_S15 (pfam00312) → |
| env-2079 | JGI24723J26617.10013201       | + | 2526    | 2590    | RNA → rpsO (PRK05626)Ribosomal_S15 (pfam00312) → |
| Fba-6-1  | NC.014472.1                   | + | 156641  | 156705  | RNA → rpsO (PRK05626)RpsO (COG0184) →            |
| env-2080 | JGI24723J26617.10539426       | - | 214     | 150     | RNA → rpsO (PRK05626)Ribosomal_S15 (pfam00312) → |
| env-2081 | JGI25321J50212.10002132       | + | 13149   | 13213   | RNA → rpsO (PRK05626)RpsO (COG0184) →            |
| env-2082 | JGI25321J39296.1282722        | + | 90      | 154     | RNA →                                            |
| env-2083 | KGLS1_ANT01.95m.c10067499     | + | 739     | 804     | RNA → rpsO (PRK05626)Ribosomal_S15 (pfam00312) → |

|          |                                |   |         |         |                                                                                               |
|----------|--------------------------------|---|---------|---------|-----------------------------------------------------------------------------------------------|
| env-2084 | KGLS2_ANT06.2345m.c1000581     | + | 4905    | 4970    | RNA → rpsO (PRK05626) Ribosomal_S15 (pfam00312) →                                             |
| Msp-1-1  | NZ_JHZW01000003.1              | + | 2014167 | 2014232 | RNA → rpsO (PRK05626) Ribosomal_S15 (pfam00312) →                                             |
| env-2085 | LAZR01000507.1                 | + | 2889    | 2954    | RNA → rpsO (PRK05626) RpsO (COG0184) →                                                        |
| env-2086 | JGI11876J14442.10355929        | - | 340     | 276     | RNA → rpsO (PRK05626) Ribosomal_S15 (pfam00312) →                                             |
| env-2087 | JGI11876J14442.10036760        | - | 2240    | 2176    | RNA → rpsO (PRK05626) Ribosomal_S15 (pfam00312) →                                             |
| env-2088 | ElkS_mat_CD6A.1068972          | - | 237     | 173     | RNA → rpsO (PRK05626) Ribosomal_S15 (pfam00312) →                                             |
| Mth-1-1  | NZ_LDAS01000001.1              | - | 4009227 | 4009163 | RNA → rpsO (PRK05626) Ribosomal_S15 (pfam00312) →                                             |
| env-2089 | CEVJ01146598.1                 | - | 214     | 150     | RNA → rpsO (PRK05626) Ribosomal_S15 (pfam00312) →                                             |
| env-2090 | CETA01166376.1                 | + | 440     | 504     | RNA →                                                                                         |
| env-2091 | CETS01181212.1                 | + | 283     | 347     | RNA → rpsO (PRK05626) Ribosomal_S15 (pfam00312) →                                             |
| env-2092 | CETB01163303.1                 | - | 1560    | 1496    | RNA → rpsO (PRK05626) Ribosomal_S15 (pfam00312) →                                             |
| env-2093 | CETR01268141.1                 | - | 1727    | 1663    | RNA → rpsO (PRK05626) Ribosomal_S15 (pfam00312) →                                             |
| env-2094 | CEV101056776.1                 | - | 475     | 411     | RNA → rpsO (PRK05626) Ribosomal_S15 (pfam00312) →                                             |
| env-2095 | CEVK01107237.1                 | - | 796     | 732     | RNA → rpsO (PRK05626) Ribosomal_S15 (pfam00312) →                                             |
| env-2096 | CEVM01115743.1                 | + | 2313    | 2377    | RNA → rpsO (PRK05626) Ribosomal_S15 (pfam00312) →                                             |
| env-2097 | CEVO01246946.1                 | - | 1295    | 1231    | RNA → rpsO (PRK05626) Ribosomal_S15 (pfam00312) →                                             |
| env-2098 | CEVQ01106901.1                 | + | 43110   | 43174   | RNA → rpsO (PRK05626) Ribosomal_S15 (pfam00312) →                                             |
| Rbi-1-1  | NC_013222.1                    | + | 3406822 | 3406886 | RNA → rpsO (PRK05626) RpsO (COG0184) →                                                        |
| Mfo-1-1  | NZ_JQLH01000001.1              | + | 3616475 | 3616539 | RNA → rpsO (PRK05626) Ribosomal_S15 (pfam00312) →                                             |
| env-2099 | SRS018149.C2886978             | - | 75      | 30      | RNA →                                                                                         |
| env-2100 | 3300000558.10272742            | + | 581     | 647     | RNA → rpsO (PRK05626) Ribosomal_S15 (pfam00312) →                                             |
| env-2101 | 3300001605.10046245            | + | 2444    | 2510    | RNA → rpsO (PRK05626) Ribosomal_S15 (pfam00312) →                                             |
| Fse-1-1  | NZ_JNCA01000025.1              | - | 40213   | 40146   | RNA → rpsO (PRK05626) Ribosomal_S15 (pfam00312) →                                             |
| Fda-1-1  | NZ_AUDK01000001.1              | + | 111173  | 111240  | RNA → rpsO (PRK05626) Ribosomal_S15 (pfam00312) →                                             |
| env-2102 | KGLS1_ANT02.95m.c10000014      | - | 20719   | 20655   | RNA → rpsO (PRK05626) Ribosomal_S15 (pfam00312) →                                             |
| env-2103 | CEQG01122965.1                 | + | 138     | 206     | RNA → rpsO (PRK05626) Ribosomal_S15 (pfam00312) →                                             |
| env-2104 | CEQP01291574.1                 | - | 688     | 620     | RNA → rpsO (PRK05626) Ribosomal_S15 (pfam00312) →                                             |
| env-2105 | PBR_1135713                    | - | 3768    | 3704    | RNA → rpsO (PRK05626) Ribosomal_S15 (pfam00312) → rpsO (PRK05626) Ribosomal_S15 (pfam00312) → |
| Fso-1-1  | NZ_AUGO01000002.1              | - | 155840  | 155776  | RNA → rpsO (PRK05626) Ribosomal_S15 (pfam00312) →                                             |
| env-2106 | PBDCA2_FISUTAU01D46T8          | + | 233     | 297     | RNA → rpsO (PRK05626) Ribosomal_S15 (pfam00312) →                                             |
| env-2107 | SwRhRL2b.contig_129529         | + | 1053    | 1118    | RNA →                                                                                         |
| env-2108 | SwRhRL2b.contig_2550456        | + | 642     | 706     | RNA → rpsO (PRK05626) Ribosomal_S15 (pfam00312) →                                             |
| env-2109 | JGI26527J51213.1149640         | + | 13      | 79      | RNA → rpsO (PRK05626) Ribosomal_S15 (pfam00312) →                                             |
| env-2110 | JGI26529J51215.1006318         | + | 1509    | 1575    | RNA → rpsO (PRK05626) Ribosomal_S15 (pfam00312) →                                             |
| Aag-1-1  | NZ_JH621247.1                  | - | 228487  | 228423  | RNA → rpsO (PRK05626) RpsO (COG0184) →                                                        |
| env-2111 | JGI24724J26744.10001654        | + | 4696    | 4763    | RNA → rpsO (PRK05626) Ribosomal_S15 (pfam00312) →                                             |
| env-2112 | JGI24723J26617.10011881        | - | 2756    | 2690    | RNA → rpsO (PRK05626) Ribosomal_S15 (pfam00312) →                                             |
| env-2113 | CEPR01003942.1                 | + | 62986   | 63052   | RNA → rpsO (PRK05626) Ribosomal_S15 (pfam00312) →                                             |
| env-2114 | CERJ01037600.1                 | - | 198     | 132     | RNA → rpsO (PRK05626) Ribosomal_S15 (pfam00312) →                                             |
| env-2115 | CETR01183773.1                 | + | 156     | 222     | RNA → rpsO (PRK05626) Ribosomal_S15 (pfam00312) →                                             |
| env-2116 | SI34jun09.100m.1197366         | + | 207     | 141     | RNA → rpsO (PRK05626) Ribosomal_S15 (pfam00312) →                                             |
| env-2117 | CERM01080683.1                 | + | 40389   | 40455   | RNA → rpsO (PRK05626) Ribosomal_S15 (pfam00312) →                                             |
| env-2118 | DelMOSum2010.c10000067         | + | 83929   | 83995   | RNA → rpsO (PRK05626) Ribosomal_S15 (pfam00312) →                                             |
| env-2119 | SI34jun09.10m.1052143          | - | 402     | 336     | RNA → rpsO (PRK05626) Ribosomal_S15 (pfam00312) →                                             |
| env-2120 | JGI20154J14316.10000666        | - | 10629   | 10563   | RNA → rpsO (PRK05626) Ribosomal_S15 (pfam00312) →                                             |
| env-2121 | DelMOSum2011.c10001660         | + | 6855    | 6921    | RNA → rpsO (PRK05626) Ribosomal_S15 (pfam00312) →                                             |
| env-2122 | A09P04.1300_Sequence0000000013 | + | 12503   | 12569   | RNA → rpsO (PRK05626) Ribosomal_S15 (pfam00312) →                                             |
| env-2123 | A09P04.1300_Sequence0000004592 | + | 1617    | 1683    | RNA → rpsO (PRK05626) Ribosomal_S15 (pfam00312) →                                             |
| env-2124 | CESJ01250408.1                 | + | 408     | 474     | RNA → rpsO (PRK05626) Ribosomal_S15 (pfam00312) →                                             |
| env-2125 | SI39nov09.120m.c1053170        | + | 111     | 177     | RNA → rpsO (PRK05626) Ribosomal_S15 (pfam00312) →                                             |
| env-2126 | CEWR01159061.1                 | - | 91      | 25      | RNA →                                                                                         |
| env-2127 | CESM01110142.1                 | + | 653     | 720     | RNA → rpsO (PRK05626) Ribosomal_S15 (pfam00312) →                                             |

|          |                           |   |         |         |     |   |                                          |   |
|----------|---------------------------|---|---------|---------|-----|---|------------------------------------------|---|
| env-2128 | SA_S1_NOR08_45m.c10035062 | + | 255     | 321     | RNA | → | rpsO (PRK05626)Ribosomal_S15 (pfam00312) | → |
| env-2129 | SA_S1_NOR08_45m.c10000452 | - | 838     | 771     | RNA | → | rpsO (PRK05626)Ribosomal_S15 (pfam00312) | → |
| env-2130 | SA_S2_NOR15_50m.c10000459 | - | 223     | 156     | RNA | → | rpsO (PRK05626)Ribosomal_S15 (pfam00312) | → |
| env-2131 | SA_S1_NOR05_45m.c10453048 | + | 105     | 172     | RNA | → | rpsO (PRK05626)Ribosomal_S15 (pfam00312) | → |
| env-2132 | 2236876010_0472988        | - | 323     | 256     | RNA | → |                                          |   |
| env-2133 | JGI20158J14315_10190251   | + | 302     | 369     | RNA | → | rpsO (PRK05626)Ribosomal_S15 (pfam00312) | → |
| env-2134 | SI34jun09_10m_1034686     | - | 415     | 348     | RNA | → | rpsO (PRK05626)Ribosomal_S15 (pfam00312) | → |
| env-2135 | JGI20155J14468_10136840   | - | 350     | 283     | RNA | → | rpsO (PRK05626)Ribosomal_S15 (pfam00312) | → |
| env-2136 | CESF01030834.1            | - | 322     | 255     | RNA | → | rpsO (PRK05626)Ribosomal_S15 (pfam00312) | → |
| env-2137 | DelMOWin2010.c10000940    | + | 13266   | 13333   | RNA | → | rpsO (PRK05626)Ribosomal_S15 (pfam00312) | → |
| env-2138 | 2236876010_0612317        | - | 99      | 31      | RNA | → |                                          |   |
| env-2139 | 2236876009_226267         | + | 99      | 166     | RNA | → | rpsO (PRK05626)Ribosomal_S15 (pfam00312) | → |
| env-2140 | JGI24723J26617_10002855   | + | 10915   | 10980   | RNA | → | rpsO (PRK05626)Ribosomal_S15 (pfam00312) | → |
| env-2141 | KVRMV2_105383168          | + | 103     | 169     | RNA | → |                                          |   |
| env-2142 | SA_S1_NOR08_45m.c10517261 | - | 204     | 138     | RNA | → | rpsO (PRK05626)Ribosomal_S15 (pfam00312) | → |
| env-2143 | JGI24724J26744_10022380   | - | 2421    | 2353    | RNA | → | rpsO (PRK05626)RpsO (COG0184)            | → |
| env-2144 | KVRMV2_100000644          | - | 1868    | 1802    | RNA | → | rpsO (PRK05626)Ribosomal_S15 (pfam00312) | → |
| env-2145 | 3300001605_10000882       | + | 723     | 789     | RNA | → | rpsO (PRK05626)Ribosomal_S15 (pfam00312) | → |
| env-2146 | 3300001605_10008345       | - | 347     | 281     | RNA | → | rpsO (PRK05626)Ribosomal_S15 (pfam00312) | → |
| env-2147 | 3300001605_10233542       | + | 724     | 790     | RNA | → | rpsO (PRK05626)Ribosomal_S15 (pfam00312) | → |
| env-2148 | 2210106066                | - | 148     | 89      | RNA | → | rpsO (PRK05626)RpsO (COG0184)            | → |
| env-2149 | 2157111858                | + | 47      | 106     | RNA | → |                                          |   |
| env-2150 | JGI25908J49247_10464678   | - | 201     | 146     | RNA | → | rpsO (PRK05626)Ribosomal_S15 (pfam00312) | → |
| env-2151 | JGI25911J50253_10473464   | + | 71      | 126     | RNA | → | rpsO (PRK05626)Ribosomal_S15 (pfam00312) | → |
| env-2152 | M3P_1084921               | - | 420     | 362     | RNA | → | rpsO (PRK05626)Ribosomal_S15 (pfam00312) | → |
| Fps-4-1  | NC_009613.3               | + | 1899222 | 1899287 | RNA | → | rpsO (PRK05626)Ribosomal_S15 (pfam00312) | → |
| Fps-1-4  | NZ_CP008878.1             | + | 2162665 | 2162730 | RNA | → | rpsO (PRK05626)Ribosomal_S15 (pfam00312) | → |
| Fps-1-5  | NZ_CP008883.1             | + | 2156137 | 2156202 | RNA | → | rpsO (PRK05626)Ribosomal_S15 (pfam00312) | → |
| Fps-1-6  | NZ_CP008881.1             | + | 2153198 | 2153263 | RNA | → | rpsO (PRK05626)Ribosomal_S15 (pfam00312) | → |
| Fps-1-7  | NZ_CP007627.1             | - | 849155  | 849090  | RNA | → | rpsO (PRK05626)Ribosomal_S15 (pfam00312) | → |
| Fps-2-1  | NZ_CP007206.1             | - | 797073  | 797008  | RNA | → | rpsO (PRK05626)Ribosomal_S15 (pfam00312) | → |
| Fps-3-1  | NZ_CP007207.1             | - | 1689453 | 1689388 | RNA | → | rpsO (PRK05626)Ribosomal_S15 (pfam00312) | → |
| Fps-1-8  | NZ_CP008902.1             | + | 2199599 | 2199664 | RNA | → | rpsO (PRK05626)Ribosomal_S15 (pfam00312) | → |
| Fps-1-9  | NZ_CP010275.1             | + | 2296737 | 2296802 | RNA | → | rpsO (PRK05626)Ribosomal_S15 (pfam00312) | → |
| Fps-1-10 | NZ_CP010277.1             | + | 2258520 | 2258585 | RNA | → | rpsO (PRK05626)Ribosomal_S15 (pfam00312) | → |

## 22.4 Conserved domains

Conserved domains found in protein-coding genes listed in Section 22.3 are shown below, with the first sentence in their description from the Conserved Domain Database (if any). Conserved domains associated with more than one S15-Flavobacteria RNA are assigned a color, while others are shown in gray. The symbols ‘d’ and ‘u’ (if any) to the left of the colored domain name indicate whether the domain occurs upstream or downstream of the RNA motif. Domains marked with lower-case ‘d’ occur (at least once) present downstream of some S15-Flavobacteria

RNA in the opposite orientation. Domains marked with capital ‘D’ occur downstream and in the same orientation (i.e., a potential *cis*-regulatory arrangement). Domains marked with a ‘u’ occur upstream of the RNA in either orientation. If the ‘d’/‘u’ symbols are missing, then the domain is downstream and in the same strand. (This mode is used for motifs predicted as *cis*-regulatory.) The number in parentheses after the colored domain name is the number of occurrences in Section 22.3.

- bSCRAP106** (26) Self-Cleaving Ribozyme Associated Protein number 106 (gi=2031276512 by jackhmmer)
- bSCRAP40** (26) Self-Cleaving Ribozyme Associated Protein number 40 (gi=10605909721 by jackhmmer)
- cd00353** (2) Ribosomal protein S15 (prokaryotic)\_S13 (eukaryotic) binds the central domain of 16S rRNA and is required for assembly of the small ribosomal subunit and for intersubunit association, thus representing a key element in the assembly of the whole ribosome.
- cd00429** (50) Ribulose-5-phosphate 3-epimerase (RPE).
- cd11363** (45) Polyribonucleotide nucleotidyltransferase, repeat 1.
- COG0184** (344) Ribosomal protein S15P/S13E [Translation, ribosomal structure and biogenesis]
- COG0405** (1) Gamma-glutamyltranspeptidase [Amino acid transport and metabolism]
- COG0568** (54) DNA-directed RNA polymerase, sigma subunit (sigma70/sigma32) [Transcription]
- COG0810** (1) Periplasmic protein TonB, links inner and outer membranes [Cell wall/membrane/envelope biogenesis]
- COG1185** (118) Polyribonucleotide nucleotidyltransferase (polynucleotide phosphorylase) [Translation, ribosomal structure and biogenesis]
- COG1770** (1) Protease II [Amino acid transport and metabolism]
- COG2377** (2) 1,6-Anhydro-N-acetylmuramate kinase [Cell wall/membrane/envelope biogenesis]
- pfam00140** (5) Sigma-70 factor, region 1.
- pfam00312** (1729) Ribosomal protein S15.
- pfam01138** (150) 3' exoribonuclease family, domain 1.
- pfam03702** (14) Anhydro-N-acetylmuramic acid kinase.
- pfam03725** (39) 3' exoribonuclease family, domain 2.
- pfam03726** (4) Polyribonucleotide nucleotidyltransferase, RNA binding domain.
- pfam04542** (3) Sigma-70 region 2.
- pfam06210** (18) Protein of unknown function (DUF1003).
- PLN02198** (1) glutathione gamma-glutamylcysteinytransferase
- PRK05581** (50) ribulose-phosphate 3-epimerase; Validated
- PRK05626** (2112) 30S ribosomal protein S15; Reviewed
- PRK09210** (2) RNA polymerase sigma factor RpoD; Validated
- PRK09585** (16) anhydro-N-acetylmuramic acid kinase; Reviewed
- PRK10115** (1) protease 2; Provisional
- PRK11824** (313) polynucleotide phosphorylase/polyadenylase; Provisional
- smart00316** (1) Ribosomal protein S1-like RNA-binding domain.
- smart00322** (1) K homology RNA-binding domain.
- TIGR01352** (1) TonB family C-terminal domain. [Transport and binding proteins, Cations and iron carrying compounds]
- TIGR02169** (18) chromosome segregation protein SMC, primarily archaeal type. [Cellular processes, Cell division, DNA metabolism, Chromosome-associated proteins]
- TIGR02937** (57) RNA polymerase sigma factor, sigma-70 family.

## 22.5 Multiple-sequence alignment

Each S15-Flavobacteria RNA is denoted by an abbreviation (like “Eco-1-1”) that refers to a taxonomy given in Section 22.1. (Superscript numbers refer to annotations listed in Section 22.2) The alignment may include sequences containing the RNA motif, as well as flanking sequence. The S15-Flavobacteria RNA itself is denoted by the line underneath marked 5' and 3' on either end. Nucleotides in flanking sequences (i.e., not part of the motif) are written in *gray letters*. Stems of predicted rho-independent transcription terminators, if any, are shaded **yellow**. (Note: terminator predictions have not been analyzed manually, and many are likely to be false positives. Terminator predictions are those of the RNIE software.) Nucleotides predicted to function (as DNA) as transcription-factor binding sites, if any, are shaded in **green**. (But note: these predictions are manually annotated, so they might be under-predicted.) Annotated start codons, if any, are shaded **green**. (Note: start codons are frequently misannotated, especially in environmental samples.) Nucleotides proposed to basepair as part of the consensus structure are shaded in color when they comprise Watson-Crick or G-U pairs. Oth-

erwise they are shaded gray. Conserved stems are also indicated at the bottom of the alignment by angle brackets, where matching < and > denote base-paired columns. Below these angle brackets, the symbol “2” denotes base pairs exhibiting covariation according to the statistically well-founded R-scape method. “1” denotes base pairs exhibiting covariation according to R2R’s simplistic method. “0” denotes base pairs that are not observed to mutate and “?” denotes base pairs that have a significant frequency of non-canonical nucleotides for Watson-Crick or G-U pairs (> 5%). Below these base pair annotation is the consensus sequence: “R” = “A” or “G”, “Y” = “C” or “U”, **red nucleotides**: nucleotide identity conserved more than 97% of the time, black nucleotides: 90%, **gray nucleotides**: 75%, red circle (◉): nucleotide is present 97% of the time, black circle (◐): 90%, gray circle (◑): 75%, white circle (◒): 50%. All percentages of sequences just described (e.g. 97% conserved) assume that sequences have been weighted by the GSC algorithm implemented by the Infernal software package.

Duplicate sequences: the following putative homologs are not shown in the alignment because their sequences are identical to a homolog already shown: Aal-1-1, Cba-1-1, Cba-3-1, Cca-2-3, Cca-3-1, Ccy-1-2, Ccy-2-1, Cin-2-1, Coc-4-1, Cor-1-2, Csp-4-1, Ean-1-1, Ean-1-2, Ean-1-4, Ean-10-1, Ean-11-1, Ean-12-1, Ean-2-1, Ean-4-1, Ean-5-1, Ean-6-1, Ean-7-1, Ean-8-1, Ean-9-1, Eme-1-1, Eme-2-2, Fca-1-2, Fen-1-2, Fps-1-10, Fps-1-2, Fps-1-3, Fps-1-4, Fps-1-5, Fps-1-6, Fps-1-7, Fps-1-8, Fps-1-9, Fps-2-1, Fps-3-1, Fri-2-1, Fsp-14-1, Fsu-1-2, Fsu-3-2, Jpa-1-2, Jpa-1-3, Lbl-1-1, M[o-1-1, Mod-2-1, Mod-5-1, Msp-3-1, Orh-2-1, Orh-3-1, Psp-1-1, Ran-1-1, Ran-1-2, Ran-2-2, Ran-3-1, Ran-5-1, Ran-6-1, Ran-7-1, Zpr-1-1, env-10, env-1000, env-1014, env-1020, env-1031, env-104, env-1043, env-105, env-1050, env-1052, env-1054,





































































































































env-409 AAUUUUCAAAA...  
 env-410 UUUUUCAAAA...  
 env-411 AAUUUUCAAAA...  
 env-412 AAUUUUCAAAA...  
 env-413 AAUUUUCAAAA...  
 env-414 AAUUUUCAAAA...  
 env-415 AAUUUUCAAAA...  
 env-416 AAUUUUCAAAA...  
 env-417 AAUUUUCAAAA...  
 env-418 AAUUUUCAAAA...  
 Fbe-1-1 AAUUUUCAAAA...  
 env-419 AAUUUUCAAAA...  
 Ksp-1-1 AAUUUUCAAAA...  
 Dsp-2-1 AAUUUUCAAAA...  
 Dsp-1-1 AAUUUUCAAAA...  
 Ddo-1-1 AAUUUUCAAAA...  
 Iha-1-1 AAUUUUCAAAA...  
 env-420 AAUUUUCAAAA...  
 env-421 AAUUUUCAAAA...  
 env-422 AAUUUUCAAAA...  
 env-423 AAUUUUCAAAA...  
 env-424 AAUUUUCAAAA...  
 env-427 AAUUUUCAAAA...  
 env-428 AAUUUUCAAAA...  
 env-429 AAUUUUCAAAA...  
 env-430 AAUUUUCAAAA...  
 env-431 AAUUUUCAAAA...  
 env-432 AAUUUUCAAAA...  
 env-433 AAUUUUCAAAA...  
 env-434 AAUUUUCAAAA...  
 env-435 AAUUUUCAAAA...  
 env-437 AAUUUUCAAAA...  
 env-438 AAUUUUCAAAA...  
 env-439 AAUUUUCAAAA...  
 env-440 AAUUUUCAAAA...  
 env-441 AAUUUUCAAAA...  
 env-442 AAUUUUCAAAA...  
 env-444 AAUUUUCAAAA...  
 Kje-1-1 AAUUUUCAAAA...  
 Kz1-1 AAUUUUCAAAA...  
 Khl-1-1 AAUUUUCAAAA...  
 env-445 AAUUUUCAAAA...  
 env-446 AAUUUUCAAAA...  
 env-447 AAUUUUCAAAA...  
 env-449 AAUUUUCAAAA...  
 env-450 AAUUUUCAAAA...  
 env-451 AAUUUUCAAAA...  
 env-452 AAUUUUCAAAA...  
 env-453 AAUUUUCAAAA...  
 env-454 AAUUUUCAAAA...  
 env-455 AAUUUUCAAAA...  
 env-456 AAUUUUCAAAA...  
 env-457 AAUUUUCAAAA...  
 env-458 AAUUUUCAAAA...  
 env-459 AAUUUUCAAAA...  
 env-460 AAUUUUCAAAA...  
 env-461 AAUUUUCAAAA...  
 env-462 AAUUUUCAAAA...  
 env-463 AAUUUUCAAAA...  
 env-464 AAUUUUCAAAA...  
 env-465 AAUUUUCAAAA...  
 env-466 AAUUUUCAAAA...  
 env-467 AAUUUUCAAAA...  
 env-469 AAUUUUCAAAA...  
 env-470 AAUUUUCAAAA...  
 env-471 AAUUUUCAAAA...  
 env-472 AAUUUUCAAAA...  
 env-473 AAUUUUCAAAA...  
 env-474 AAUUUUCAAAA...  
 env-475 AAUUUUCAAAA...  
 env-476 AAUUUUCAAAA...  
 env-477 AAUUUUCAAAA...  
 env-478 AAUUUUCAAAA...  
 env-479 AAUUUUCAAAA...  
 env-480 AAUUUUCAAAA...  
 env-481 AAUUUUCAAAA...  
 env-482 AAUUUUCAAAA...  
 env-484 AAUUUUCAAAA...  
 env-486 AAUUUUCAAAA...  
 env-487 AAUUUUCAAAA...  
 env-488 AAUUUUCAAAA...  
 env-489 AAUUUUCAAAA...  
 env-490 AAUUUUCAAAA...  
 env-491 AAUUUUCAAAA...

.....  
 .AUUYUR.RAR.ACG.RRR.R.R.R.R.RAYAC.GG.G.C.RC.GAAG.CAAUY.GC.YURUYAC.Y.Y.G.AUYRAY.YYUR.C.RA.CAYYUR.AAAR.AAYR.I.ARAU.Y.AYA.C.GAR.C.UC.YURGU.RYURGU.GG.AAR.G.RG.YY.YU.YU.GAYUYU.....





env-677 AUUUUCAAGAAACCGGAGGUUCUGAUCGAAACACGUGGUCGACAGAAGGCAAAAUUGCUUUUUAUACCUACGAAUACAGUCACCUAACGAAUACUUGAAAAAGAAUAGAUUUUGGUACAAAGAGCACUUCUUAUGGUAUUUUUAGGAAUUAUUGGACUACCUA  
env-678 AUUUUCAAGAAACCGGAGGUUCUGAUCGAAACACGUGGUCGACAGAAGGCGAUAUUGCUUUUUAUACCUACGAAUACAGUCACCUAACGAAUACUUGAAAAAGAAUAGAUUUUGGUACAAAGAGCACUUCUUAUGGUAUUUUUAGGAAUUAUUGGACUACCUA  
env-679 AUUUUCAAGAAACCGGAGGUUCGACAGAAUACGGGUCUACAGAAGGCGAUAUUGCUUUUUAUACCUACGAAUACAGUCACCUAACGAAUACUUGAAAAAGAAUAGAUUUUGGUACAAAGAGCACUUCUUAUGGUAUUUUUAGGAAUUAUUGGACUACCUA  
env-680 AUUUUCAAGAAACCGGAGGUUCGACAGAAUACGGGUCUACAGAAGGCGAUAUUGCUUUUUAUACCUACGAAUACAGUCACCUAACGAAUACUUGAAAAAGAAUAGAUUUUGGUACAAAGAGCACUUCUUAUGGUAUUUUUAGGAAUUAUUGGACUACCUA  
env-681 AUUUUCAAGAAACCGGAGGUUCGACAGAAACACCGGUCUACAGAAGGCGAUAUUGCUUUUUAUACCUACGAAUACAGUCACCUAACGAAUACUUGAAAAAGAAUAGAUUUUGGUACAAAGAGCACUUCUUAUGGUAUUUUUAGGAAUUAUUGGACUACCUA  
env-682 AUUUUCAAGAAACCGGAGGUUCGACAGAAACACCGGUCUACAGAAGGCGAUAUUGCUUUUUAUACCUACGAAUACAGUCACCUAACGAAUACUUGAAAAAGAAUAGAUUUUGGUACAAAGAGCACUUCUUAUGGUAUUUUUAGGAAUUAUUGGACUACCUA  
env-683 AUUUUCAAGAAACCGGAGGUUCGACAGAAACACCGGUCUACAGAAGGCGAUAUUGCUUUUUAUACCUACGAAUACAGUCACCUAACGAAUACUUGAAAAAGAAUAGAUUUUGGUACAAAGAGCACUUCUUAUGGUAUUUUUAGGAAUUAUUGGACUACCUA  
env-684 AUUUUCAAGAAACCGGAGGUUCGACAGAAACACCGGUCUACAGAAGGCGAUAUUGCUUUUUAUACCUACGAAUACAGUCACCUAACGAAUACUUGAAAAAGAAUAGAUUUUGGUACAAAGAGCACUUCUUAUGGUAUUUUUAGGAAUUAUUGGACUACCUA  
env-685 AUUUUCAAGAAACCGGAGGUUCGACAGAAACACCGGUCUACAGAAGGCGAUAUUGCUUUUUAUACCUACGAAUACAGUCACCUAACGAAUACUUGAAAAAGAAUAGAUUUUGGUACAAAGAGCACUUCUUAUGGUAUUUUUAGGAAUUAUUGGACUACCUA  
env-686 AUUUUCAAGAAACCGGAGGUUCGACAGAAACACCGGUCUACAGAAGGCGAUAUUGCUUUUUAUACCUACGAAUACAGUCACCUAACGAAUACUUGAAAAAGAAUAGAUUUUGGUACAAAGAGCACUUCUUAUGGUAUUUUUAGGAAUUAUUGGACUACCUA  
env-687 AUUUUCAAGAAACCGGAGG  
env-688 AUUUUCAAGAAACCGGAGGUUCGACAGAAACACCGGUCUACAGAAGGCGAUAUUGCUUUUUAUACCUACGAAUACAGUCACCUAACGAAUACUUGAAAAAGAAUAGAUUUUGGUACAAAGAGCACUUCUUAUGGUAUUUUUAGGAAUUAUUGGACUACCUA  
env-689 AUUUUCAAGAAACCGGAGGUUCGACAGAAACACCGGUCUACAGAAGGCGAUAUUGCUUUUUAUACCUACGAAUACAGUCACCUAACGAAUACUUGAAAAAGAAUAGAUUUUGGUACAAAGAGCACUUCUUAUGGUAUUUUUAGGAAUUAUUGGACUACCUA  
env-690 AUUUUCAAGAAACCGGAGGUUCGACAGAAACACCGGUCUACAGAAGGCGAUAUUGCUUUUUAUACCUACGAAUACAGUCACCUAACGAAUACUUGAAAAAGAAUAGAUUUUGGUACAAAGAGCACUUCUUAUGGUAUUUUUAGGAAUUAUUGGACUACCUA  
env-691 AUUUUCAAGAAACCGGAGGUUCGACAGAAACACCGGUCUACAGAAGGCGAUAUUGCUUUUUAUACCUACGAAUACAGUCACCUAACGAAUACUUGAAAAAGAAUAGAUUUUGGUACAAAGAGCACUUCUUAUGGUAUUUUUAGGAAUUAUUGGACUACCUA  
env-692 AUUUUCAAGAAACCGGAGGUUCGACAGAAACACCGGUCUACAGAAGGCGAUAUUGCUUUUUAUACCUACGAAUACAGUCACCUAACGAAUACUUGAAAAAGAAUAGAUUUUGGUACAAAGAGCACUUCUUAUGGUAUUUUUAGGAAUUAUUGGACUACCUA  
env-693 AUUUUCAAGAAACCGGAGGUUCGACAGAAACACCGGUCUACAGAAGGCGAUAUUGCUUUUUAUACCUACGAAUACAGUCACCUAACGAAUACUUGAAAAAGAAUAGAUUUUGGUACAAAGAGCACUUCUUAUGGUAUUUUUAGGAAUUAUUGGACUACCUA  
env-694 AUCUUUAAAAAUCAGUUAUUCAGAAAAACACUGGAUACACUGAAGGCAAAUUGGCUUUUUUACCCAGUUAUUCACACUUAUCAGAAACACCUUAAAACAAAACAGAAAGAUUUCACUACUGAAGGCUUACUAGUGGAAAGCGAAAGUCUUUCUGAUAUUUUA  
env-698 AUCUUUAAAAAUCAGUUAUUCAGAAAAACACUGGAUACACUGAAGGCAAAUUGGCUUUUUUACCCAGUUAUUCACACUUAUCAGAAACACCUUAAAACAAAACAGAAAGAUUUCACUACUGAAGGCUUACUAGUGGAAAGCGAAAGUCUUUCUGAUAUUUUA  
env-699 AUCUUUAAAAAUCAGUUAUUCAGAAAAACACUGGAUACACUGAAGGCAAAUUGGCUUUUUUACCCAGUUAUUCACACUUAUCAGAAACACCUUAAAACAAAACAGAAAGAUUUCACUACUGAAGGCUUACUAGUGGAAAGCGAAAGUCUUUCUGAUAUUUUA  
env-700 AUCUUUAAAAAUCAGUUAUUCAGAAAAACACUGGAUACACUGAAGGCAAAUUGGCUUUUUUACCCAGUUAUUCACACUUAUCAGAAACACCUUAAAACAAAACAGAAAGAUUUCACUACUGAAGGCUUACUAGUGGAAAGCGAAAGUCUUUCUGAUAUUUUA  
env-701 AUCUUUAAAAAUCAGUUAUUCAGAAAAACACUGGAUACACUGAAGGCAAAUUGGCUUUUUUACCCAGUUAUUCACACUUAUCAGAAACACCUUAAAACAAAACAGAAAGAUUUCACUACUGAAGGCUUACUAGUGGAAAGCGAAAGUCUUUCUGAUAUUUUA  
env-702 AUCUUUAAAAAUCAGUUAUUCAGAAAAACACUGGAUACACUGAAGGCAAAUUGGCUUUUUUACCCAGUUAUUCACACUUAUCAGAAACACCUUAAAACAAAACAGAAAGAUUUCACUACUGAAGGCUUACUAGUGGAAAGCGAAAGUCUUUCUGAUAUUUUA  
env-703  
env-704  
env-705  
env-706  
env-707  
env-708  
env-709  
env-711  
env-712  
env-713  
env-718  
env-727  
env-728  
env-729  
env-730  
env-731  
env-734  
env-735  
env-736  
env-737  
env-738  
env-739  
env-740  
env-741  
env-742  
env-743  
env-744  
env-745  
env-746  
env-747  
env-748  
env-749  
env-750  
env-751  
env-752  
env-753  
env-754  
env-755  
env-756  
env-758  
env-759  
env-760  
env-761  
env-762  
env-763  
env-764  
env-765  
env-766  
env-767  
env-768  
env-769  
env-770  
env-771  
env-772  
env-773  
env-774  
env-775  
env-776  
env-777  
env-778

.....  
A U U U Y R . R A R C . A G G . R R . . . R . R . . R A Y A C . G G . . G . C . R . G A . G . C . A A . U . Y . G C . Y U R U Y A C . Y . Y . G . A U Y R A Y C A Y Y U R . C . R A . C A Y Y U R A A A R . A A Y C . I A R G A U . Y A Y A . G A R . C . U C . Y U R G U . . . R Y U R G U . G G . A A R . G . R G . . . . . Y U . Y U . G A Y U A Y Y U . . . . .



































































































Each S16-Flavobacteria RNA (indicated by “RNA→”) is listed. For each hit, the downstream genes predicted to reside in a regulated operon are listed. If the nearest downstream gene is encoding in the opposite strand (and therefore presumed to not be a part of a regulated operon), then that gene is still depicted. Some environmental sequences and some RefSeq entries lack gene annotations, and so no genes are available for such sequences. The direction of each gene is indicated with an arrow (→), and each predicted conserved domain in the gene is named. Conserved domains associated with more than one S16-Flavobacteria RNA are assigned a color; other domains are gray. Information about these con-

served domains is given in Section 23.3. The accession of the sequence containing each S16-Flavobacteria RNA is given in the column named “Seq. accession”. Accessions beginning with “NC\_”, “NS\_”, “NW\_” or “NZ\_” are contained in RefSeq. Other accession refer to environmental samples. Nucleotide coordinates are given for the 5′ and 3′ boundaries of each S16-Flavobacteria RNA. If the 5′ coordinate is greater than the 3′ coordinate, the RNA is present on the reverse-complement strand of the containing genomic DNA sequence. Each hit is denoted by an abbreviation (like “Eco-1-1”) that refers to a taxonomy given in Section 23.1.

| abbrev. | Seq. accession             | 5′ at | 3′ at   | genes                                                                                                                                                                                                                                                                                               |
|---------|----------------------------|-------|---------|-----------------------------------------------------------------------------------------------------------------------------------------------------------------------------------------------------------------------------------------------------------------------------------------------------|
| env-1   | CESM01053608.1             | -     | 202     | 170 RNA→ rpsP (PRK14521)Ribosomal_S16 (pfam00886)→                                                                                                                                                                                                                                                  |
| Psp-1-1 | NZ_JHZ01000001.1           | -     | 457084  | 457051 RNA→ RpsP (COG0228)rpsP (PRK00040)→ rimM (PRK00122)PRC (pfam05239)→ hypo→ hypo→ hypo→                                                                                                                                                                                                        |
| env-2   | CESM01219967.1             | +     | 5701    | 5735 RNA→ RpsP (COG0228)S16 (TIGR00002)→                                                                                                                                                                                                                                                            |
| env-3   | JGI20154J14316.10001333    | -     | 21676   | 21642 RNA→ RpsP (COG0228)rpsP (PRK14521)→ RimM (COG0806)rimM (PRK00122)→                                                                                                                                                                                                                            |
| Cca-2-1 | NZ_CDOI01000172.1          | +     | 530     | 565 RNA→ RpsP (COG0228)rpsP (PRK14521)→ RimM (COG0806)rimM (PRK00122)→                                                                                                                                                                                                                              |
| env-4   | JCVL_SCAF_1096627433698    | +     | 434     | 468 RNA→ RpsP (COG0228)rpsP (PRK14521)→                                                                                                                                                                                                                                                             |
| env-5   | KVRMV2.103388609           | -     | 189     | 154 RNA→ rpsP (PRK14521)Ribosomal_S16 (pfam00886)→                                                                                                                                                                                                                                                  |
| env-6   | KVRMV2.102516834           | -     | 164     | 134 RNA→ rpsP (PRK14521)Ribosomal_S16 (pfam00886)→                                                                                                                                                                                                                                                  |
| env-7   | JGI25321J39296.1021846     | +     | 360     | 395 RNA→ rpsP (PRK14521)Ribosomal_S16 (pfam00886)→ rimM (PRK00122)RimM (pfam01782)→                                                                                                                                                                                                                 |
| env-8   | JGI12109J20283.11786692    | +     | 191     | 225 RNA→ RpsP (COG0228)rpsP (PRK00040)→                                                                                                                                                                                                                                                             |
| env-9   | KGLS1_ANT01.95m_c10031201  | +     | 1995    | 2031 RNA→ RpsP (COG0228)rpsP (PRK14521)→                                                                                                                                                                                                                                                            |
| Mth-1-1 | NZ_LDAS01000001.1          | -     | 2478880 | 2478844 RNA→ RpsP (COG0228)rpsP (PRK14521)→ RimM (COG0806)rimM (PRK00122)→                                                                                                                                                                                                                          |
| env-10  | TFO_HY_Contig_1945         | +     | 10420   | 10454 RNA→ RpsP (COG0228)rpsP (PRK14521)→ RimM (COG0806)rimM (PRK00122)→<br>PRK13759 (PRK13759)GALNS_like (cd16026)→<br>RNA→                                                                                                                                                                        |
| env-11  | 2236876002.175824          | +     | 203     | 238 RNA→ RpsP (COG0228)rpsP (PRK14521)→                                                                                                                                                                                                                                                             |
| env-12  | CETA01149051.1             | +     | 1248    | 1282 RNA→ rpsP (PRK14521)Ribosomal_S16 (pfam00886)→ RimM (COG0806)rimM (PRK00122)→<br>YjhB (COG1051)PRK05379 (PRK05379)→ PrsA (COG0462)ribP_PPkin (TIGR01251)→<br>PRK09198 (PRK09198)PBEF_like (cd01569)→ AdoMet_MTases (cd02440)Methyltransf_25 (pfam13649)→<br>PLN02526 (PLN02526)CaiA (COG1960)→ |
| env-13  | P_1C_Liq_3_UnCty_1040456   | +     | 269     | 303 RNA→                                                                                                                                                                                                                                                                                            |
| env-14  | CEGD01011474.1             | +     | 251     | 285 RNA→ RpsP (COG0228)TolA (COG3064)rpsP (PRK14521)→ rimM (PRK00122)RimM (pfam01782)→                                                                                                                                                                                                              |
| env-15  | CEVP01343318.1             | -     | 72      | 38 RNA→                                                                                                                                                                                                                                                                                             |
| env-16  | TDF_OR_ARG04.113m_c1016836 | -     | 288     | 254 RNA→ RpsP (COG0228)rpsP (PRK00040)→                                                                                                                                                                                                                                                             |
| env-17  | ElkS_mat_MD6A.1002363      | -     | 3313    | 3279 RNA→ RpsP (COG0228)rpsP (PRK00040)→ RimM (COG0806)rimM (PRK00122)→                                                                                                                                                                                                                             |
| env-18  | JGI24723J26617.10000107    | -     | 52649   | 52615 RNA→ RpsP (COG0228)rpsP (PRK14521)→                                                                                                                                                                                                                                                           |
| env-19  | P_2C_Liq_1_UnCty_1011637   | -     | 752     | 718 RNA→ rpsP (PRK00040)Ribosomal_S16 (pfam00886)→ RimM (pfam01782)→                                                                                                                                                                                                                                |
| env-20  | JGI11876J14442.10621969    | +     | 123     | 157 RNA→ rpsP (PRK14521)Ribosomal_S16 (pfam00886)→                                                                                                                                                                                                                                                  |
| env-21  | P_1C_Liq_1_UnCty_1063218   | -     | 143     | 109 RNA→ rpsP (PRK14521)Ribosomal_S16 (pfam00886)→                                                                                                                                                                                                                                                  |
| env-22  | ElkS_mat_CD2A.1075435      | -     | 84      | 50 RNA→ rpsP (PRK14521)→                                                                                                                                                                                                                                                                            |
| Pto-1-1 | NC_018721.1                | +     | 2465369 | 2465403 RNA→ RpsP (COG0228)S16 (TIGR00002)RR_TM4-6 (pfam06459)→ RimM (COG0806)rimM (PRK00122)→                                                                                                                                                                                                      |
| env-23  | JGI1221J11331.1000253      | -     | 14608   | 14574 RNA→ RpsP (COG0228)S16 (TIGR00002)→ RimM (COG0806)rimM (PRK00122)→                                                                                                                                                                                                                            |
| env-24  | LV_Brine.h2.0102.1093498   | +     | 2       | 36 RNA→ RpsP (COG0228)S16 (TIGR00002)→                                                                                                                                                                                                                                                              |
| env-25  | SL_9KL_010.SED.10009602    | +     | 426     | 460 RNA→ RpsP (COG0228)rpsP (PRK14521)→ RimM (COG0806)rimM (PRK00122)→                                                                                                                                                                                                                              |
| env-26  | KGLS1_ANT02.95m_c10124961  | +     | 605     | 639 RNA→                                                                                                                                                                                                                                                                                            |
| env-27  | LV_Brine.h2.0102.1076447   | +     | 206     | 240 RNA→ RpsP (COG0228)rpsP (PRK00040)→                                                                                                                                                                                                                                                             |
| env-28  | KGLS1_ANT02.95m_c10037012  | +     | 512     | 546 RNA→ RpsP (COG0228)rpsP (PRK14521)→ rimM (PRK00122)RimM (pfam01782)→                                                                                                                                                                                                                            |
| env-29  | CESN01195947.1             | -     | 1665    | 1631 RNA→ rpsP (PRK00040)Ribosomal_S16 (pfam00886)→ RimM (COG0806)rimM (PRK00122)→                                                                                                                                                                                                                  |
| env-30  | 3300001197_1087811         | +     | 340     | 374 RNA→                                                                                                                                                                                                                                                                                            |



|         |                               |   |        |        |                                                                                                                                                                                                                                 |
|---------|-------------------------------|---|--------|--------|---------------------------------------------------------------------------------------------------------------------------------------------------------------------------------------------------------------------------------|
| env-31  | JCVL_SCAF_1096628019256       | - | 205    | 171    | RNA → rpsP (PRK14521)Ribosomal_S16 (pfam00886) →                                                                                                                                                                                |
| Cca-1-1 | NZ_CDOE01000079.1             | + | 30020  | 30055  | RNA → RpsP (COG0228)rpsP (PRK14521) → rimM (PRK00122)RimM (pfam01782) →                                                                                                                                                         |
| env-32  | ElkS_mat_MD6A_1036189         | - | 417    | 383    | RNA → RpsP (COG0228)Pth2 (COG1990)rpsP (PRK00040) →                                                                                                                                                                             |
| env-33  | ElkS_mat_MD6A_1084536         | + | 371    | 406    | RNA →                                                                                                                                                                                                                           |
| env-34  | ElkS_mat_MD6A_1142320         | - | 275    | 241    | RNA → RpsP (COG0228)rpsP (PRK00040) →                                                                                                                                                                                           |
| env-35  | CEPZ01015035.1                | - | 63972  | 63938  | RNA → RpsP (COG0228)rpsP (PRK14521) → rimM (PRK00122)RimM (pfam01782) → hypo → hypo →                                                                                                                                           |
| Tsp-1-1 | NZ_JADN01000004.1             | - | 154893 | 154859 | RNA → RpsP (COG0228)rpsP (PRK14521) → rimM (PRK00122)PRC (pfam05239) →                                                                                                                                                          |
| Tme-1-1 | NZ_LDOD01000012.1             | - | 29532  | 29498  | RNA → RpsP (COG0228)rpsP (PRK14521) → rimM (PRK00122)RimM (pfam01782) →                                                                                                                                                         |
| env-36  | KVWG_1.1.1_newblercontig40966 | - | 246    | 212    | RNA →                                                                                                                                                                                                                           |
| env-37  | JGI20156J14371.10166570       | - | 50     | 15     | RNA →                                                                                                                                                                                                                           |
| env-38  | JGI20154J14316_10055217       | + | 1573   | 1608   | RNA → ←hypo                                                                                                                                                                                                                     |
| env-39  | JGI20153J14295_10043163       | - | 740    | 705    | RNA → RpsP (COG0228)rpsP (PRK14521) →                                                                                                                                                                                           |
| env-40  | 2236876009_178640             | + | 118    | 153    | RNA → rpsP (PRK14521)Ribosomal_S16 (pfam00886) → RpsP (COG0228)rpsP (PRK14521) →                                                                                                                                                |
| env-41  | SA_S1_NOR05_45m_c10081110     | - | 672    | 638    | RNA → RpsP (COG0228)rpsP (PRK14521) →                                                                                                                                                                                           |
| env-42  | CESF01293558.1                | + | 708    | 742    | RNA → RpsP (COG0228)rpsP (PRK14521) →                                                                                                                                                                                           |
| env-43  | CERM01139738.1                | - | 74     | 40     | RNA →                                                                                                                                                                                                                           |
| env-44  | CEOM01051344.1                | - | 585    | 551    | RNA → rpsP (PRK14521)Ribosomal_S16 (pfam00886) →                                                                                                                                                                                |
| env-45  | CESZ01096664.1                | - | 375    | 341    | RNA → rpsP (PRK00040)Ribosomal_S16 (pfam00886) →                                                                                                                                                                                |
| env-46  | CERK01075026.1                | + | 203    | 237    | RNA → RpsP (COG0228)rpsP (PRK00040) →                                                                                                                                                                                           |
| env-47  | CEWG01225384.1                | + | 660    | 694    | RNA → RpsP (COG0228)rpsP (PRK14521) → RimM (COG0806)rimM (PRK00122) →<br>AdoMet_MTases (cd02440)Methyltransf_25 (pfam13649) → PLN02526 (PLN02526)CaiA (COG1960) →<br>SGNH_hydrolase_like_1 (cd01832)Lipase_GDSL_2 (pfam13472) → |
| env-48  | CETK01073817.1                | + | 1419   | 1453   | RNA → RpsP (COG0228)S16 (TIGR00002) →                                                                                                                                                                                           |
| env-49  | CESO01307771.1                | + | 1268   | 1302   | RNA → rpsP (PRK14521) →                                                                                                                                                                                                         |
| env-50  | JCVL_SCAF_1101668667308       | + | 755    | 789    | RNA → rpsP (PRK00040)Ribosomal_S16 (pfam00886) →                                                                                                                                                                                |
| env-51  | JCVL_SCAF_1101667024969       | - | 694    | 660    | RNA → RpsP (COG0228)rpsP (PRK14521) →                                                                                                                                                                                           |
| env-52  | CEWO01363464.1                | + | 1092   | 1126   | RNA → RpsP (COG0228)S16 (TIGR00002) →                                                                                                                                                                                           |
| env-53  | JGI24723J26617_10000040       | - | 77894  | 77860  | RNA → RpsP (COG0228)rpsP (PRK14521) → RimM (COG0806)rimM (PRK00122) →                                                                                                                                                           |
| env-54  | KGLS1_ANT01.95m_c10031519     | + | 710    | 744    | RNA → RpsP (COG0228)rpsP (PRK14521) → RimM (COG0806)rimM (PRK00122) →                                                                                                                                                           |
| env-55  | KGLS2_ANT06_2345m_c1013054    | - | 98     | 64     | RNA → RpsP (COG0228)rpsP (PRK14521) →                                                                                                                                                                                           |
| env-56  | NCBI_READ_1112493730138       | + | 626    | 660    | RNA → rpsP (PRK14521)Ribosomal_S16 (pfam00886) →                                                                                                                                                                                |
| env-57  | CETX01019456.1                | - | 113    | 79     | RNA →                                                                                                                                                                                                                           |
| env-58  | CEOS01080067.1                | - | 1787   | 1753   | RNA → RpsP (COG0228)rpsP (PRK14521) → rimM (PRK00122)RimM (pfam01782)PRC (pfam05239) →                                                                                                                                          |
| env-59  | CEVA01364946.1                | + | 106    | 140    | RNA → rpsP (PRK14521)Ribosomal_S16 (pfam00886) →                                                                                                                                                                                |
| env-60  | JGI1221J11331_1019162         | + | 230    | 264    | RNA → rpsP (PRK14521)Ribosomal_S16 (pfam00886) →<br>rimM (PRK00122)RimM (pfam01782)PRC (pfam05239) →                                                                                                                            |
| Sxi-1-1 | NZ_AUIG01000033.1             | - | 1535   | 1501   | RNA → rpsP (PRK00040)Ribosomal_S16 (pfam00886) →<br>rimM (PRK00122)RimM (pfam01782)PRC (pfam05239) → hypo → hypo →                                                                                                              |
| env-61  | CENM01034188.1                | - | 902    | 868    | RNA → rpsP (PRK14521)Ribosomal_S16 (pfam00886) → rimM (PRK00122)RimM (pfam01782) →                                                                                                                                              |
| env-62  | CEOS01020083.1                | - | 32981  | 32947  | RNA → RpsP (COG0228)rpsP (PRK14521) → rimM (PRK00122)RimM (pfam01782) →<br>AdoMet_MTases (cd02440)Methyltransf_25 (pfam13649) → PLN02526 (PLN02526)CaiA (COG1960) →                                                             |
| env-63  | JGI20156J14371_10003640       | + | 2978   | 3012   | RNA → RpsP (COG0228)rpsP (PRK00040) → RimM (COG0806)rimM (PRK00122) →<br>AdoMet_MTases (cd02440)Methyltransf_25 (pfam13649) →                                                                                                   |
| env-64  | DelMOSum2010_c10016191        | + | 3980   | 4015   | RNA → RpsP (COG0228)rpsP (PRK00040) →                                                                                                                                                                                           |
| env-65  | KVRMV2_100000226              | + | 6455   | 6489   | RNA → RpsP (COG0228)rpsP (PRK00040) → RimM (COG0806)rimM (PRK00122) →                                                                                                                                                           |
| env-66  | JGI12037J13215_1008219        | + | 266    | 300    | RNA → RpsP (COG0228)rpsP (PRK14521) →                                                                                                                                                                                           |
| env-67  | CGUL_GFCP3IQ02IOEQO           | - | 70     | 36     | RNA →                                                                                                                                                                                                                           |
| env-68  | JGI20160J14292_10003172       | - | 10084  | 10050  | RNA → RpsP (COG0228)rpsP (PRK14521) → RimM (COG0806)rimM (PRK00122) →<br>AdoMet_MTases (cd02440)Methyltransf_25 (pfam13649) → PLN02526 (PLN02526)CaiA (COG1960) →<br>SGNH_hydrolase_like_1 (cd01832)Lipase_GDSL_2 (pfam13472) → |
| env-69  | 2236876010_0096165            | - | 74     | 40     | RNA → hypo →                                                                                                                                                                                                                    |
| env-70  | CETB01226394.1                | + | 29     | 63     | RNA → rpsP (PRK14521)Ribosomal_S16 (pfam00886) →                                                                                                                                                                                |
| env-71  | CENY01353123.1                | + | 2985   | 3019   | RNA → rpsP (PRK00040)Ribosomal_S16 (pfam00886) →                                                                                                                                                                                |
| env-72  | CEOQ01279817.1                | - | 551    | 517    | RNA → rpsP (PRK00040)Ribosomal_S16 (pfam00886) →                                                                                                                                                                                |

|         |                             |   |         |         |                                                                                                                                                                                                                                                                                                                                                                                                 |
|---------|-----------------------------|---|---------|---------|-------------------------------------------------------------------------------------------------------------------------------------------------------------------------------------------------------------------------------------------------------------------------------------------------------------------------------------------------------------------------------------------------|
| env-73  | CEUC01055477.1              | + | 3449    | 3483    | RNA → RpsP (COG0228)S16 (TIGR00002) →                                                                                                                                                                                                                                                                                                                                                           |
| env-74  | CEOP01159386.1              | + | 4003    | 4037    | RNA → rpsP (PRK14521)Ribosomal_S16 (pfam00886) →                                                                                                                                                                                                                                                                                                                                                |
| env-75  | 2236876007_0680529          | - | 113     | 79      | RNA →                                                                                                                                                                                                                                                                                                                                                                                           |
| env-76  | JCVL_SCAF_1101668515375     | - | 1138    | 1104    | RNA → rpsP (PRK14521)Ribosomal_S16 (pfam00886) →                                                                                                                                                                                                                                                                                                                                                |
| Gsp-3-1 | NZ_KE384218.1               | - | 412048  | 412014  | RNA → RpsP (COG0228)rpsP (PRK14521) → RimM (COG0806)rimM (PRK00122) →<br>AdoMet_MTases (cd02440)Methyltransf_25 (pfam13649) →<br>AdoMet_MTases (cd02440)Methyltransf_25 (pfam13649) → PLN02526 (PLN02526)CaiA (COG1960) →                                                                                                                                                                       |
| Gsp-1-1 | NZ_AJLT01000052.1           | + | 38402   | 38436   | RNA → RpsP (COG0228)rpsP (PRK14521) → RpsP (COG0228)rpsP (PRK14521) →<br>rimM (PRK00122)RimM (pfam01782) → rimM (PRK00122)RimM (pfam01782) →<br>AdoMet_MTases (cd02440)Methyltransf_25 (pfam13649) →<br>AdoMet_MTases (cd02440)Methyltransf_25 (pfam13649) →<br>AdoMet_MTases (cd02440)Methyltransf_25 (pfam13649) → PLN02526 (PLN02526)CaiA (COG1960) →<br>PLN02526 (PLN02526)CaiA (COG1960) → |
| env-77  | KGL_S1_ANT01_95m_c10008968  | - | 71      | 37      | RNA →                                                                                                                                                                                                                                                                                                                                                                                           |
| env-78  | JGI24724J26744_10116716     | + | 457     | 491     | RNA → RpsP (COG0228)rpsP (PRK00040) →                                                                                                                                                                                                                                                                                                                                                           |
| env-79  | CESN01042302.1              | + | 640     | 674     | RNA → ←-hypo                                                                                                                                                                                                                                                                                                                                                                                    |
| Lsp-1-1 | NC_015638.1                 | - | 1487340 | 1487306 | RNA → RpsP (COG0228)rpsP (PRK14521) → RpsP (COG0228)rpsP (PRK00040) →                                                                                                                                                                                                                                                                                                                           |
| env-80  | JGI24724J26744_10001441     | + | 16124   | 16158   | RNA → rpsP (PRK14521)Ribosomal_S16 (pfam00886) →                                                                                                                                                                                                                                                                                                                                                |
| Lsp-2-1 | NZ_JYNQ01000001.1           | - | 2613222 | 2613188 | RNA → RpsP (COG0228)rpsP (PRK00040) →                                                                                                                                                                                                                                                                                                                                                           |
| env-81  | AYRF01036350.1              | + | 43      | 77      | RNA → rpsP (PRK14521)Ribosomal_S16 (pfam00886) →                                                                                                                                                                                                                                                                                                                                                |
| env-82  | KGL_S2_ANT05_2345m_c1138509 | + | 19      | 53      | RNA → RpsP (COG0228)S16 (TIGR00002) →                                                                                                                                                                                                                                                                                                                                                           |
| env-83  | JGI24025J20009_10003996     | + | 740     | 774     | RNA → RpsP (COG0228)rpsP (PRK00040) →                                                                                                                                                                                                                                                                                                                                                           |
| env-84  | KGL_S1_ANT01_95m_c10219429  | - | 306     | 272     | RNA → RpsP (COG0228)S16 (TIGR00002) →                                                                                                                                                                                                                                                                                                                                                           |
| Gme-1-1 | NZ_KE383968.1               | + | 18032   | 18066   | RNA → RpsP (COG0228)rpsP (PRK00040) →                                                                                                                                                                                                                                                                                                                                                           |
| env-85  | DelMOSum2010_c10000289      | + | 5459    | 5493    | RNA → RpsP (COG0228)rpsP (PRK14521) → RimM (COG0806)rimM (PRK00122) →<br>AdoMet_MTases (cd02440)Methyltransf_25 (pfam13649) → PLN02526 (PLN02526)CaiA (COG1960) →<br>SGNH_hydrolase_like_1 (cd01832)Lipase_GDSL_2 (pfam13472) →                                                                                                                                                                 |
| env-86  | BS_KBA_SWE12_21m_c10003677  | - | 2677    | 2643    | RNA → RpsP (COG0228)rpsP (PRK14521) → rimM (PRK00122)RimM (pfam01782) →                                                                                                                                                                                                                                                                                                                         |
| env-87  | JGI20156J14371_10011188     | + | 1622    | 1657    | RNA → RpsP (COG0228)rpsP (PRK14521) → RimM (COG0806)rimM (PRK00122) →<br>AdoMet_MTases (cd02440)Methyltransf_25 (pfam13649) → PLN02526 (PLN02526)CaiA (COG1960) →                                                                                                                                                                                                                               |
| env-88  | 2236876011_215066           | - | 266     | 231     | RNA → RpsP (COG0228)rpsP (PRK00040) →                                                                                                                                                                                                                                                                                                                                                           |
| env-89  | SA_S1_NOR05_45m_c10049152   | + | 794     | 829     | RNA → RpsP (COG0228)rpsP (PRK00040) →                                                                                                                                                                                                                                                                                                                                                           |
| Tna-1-1 | NZ_JTDV01000002.1           | + | 21488   | 21524   | RNA → RpsP (COG0228)rpsP (PRK00040) →                                                                                                                                                                                                                                                                                                                                                           |
| Sze-1-1 | NZ_CP007202.1               | + | 440776  | 440811  | RNA → RpsP (COG0228)rpsP (PRK14521) →                                                                                                                                                                                                                                                                                                                                                           |
| env-90  | KGL_S1_ANT01_95m_c10132422  | - | 525     | 489     | RNA → RpsP (COG0228)rpsP (PRK14521) →                                                                                                                                                                                                                                                                                                                                                           |
| env-91  | JGI24723J26617_10166124     | + | 450     | 486     | RNA → rpsP (PRK14521)Ribosomal_S16 (pfam00886) →                                                                                                                                                                                                                                                                                                                                                |
| env-92  | JGI24025J20009_10047375     | + | 382     | 418     | RNA → RpsP (COG0228)S16 (TIGR00002) →                                                                                                                                                                                                                                                                                                                                                           |
| Ale-1-1 | NZ_BBNQ01000006.1           | + | 160473  | 160508  | RNA → RpsP (COG0228)rpsP (PRK14521) →                                                                                                                                                                                                                                                                                                                                                           |
| env-93  | KGL_S1_ANT01_95m_c10442974  | + | 162     | 197     | RNA → rpsP (PRK14521)Ribosomal_S16 (pfam00886) →                                                                                                                                                                                                                                                                                                                                                |
| env-94  | CESF01207615.1              | - | 398     | 364     | RNA → RpsP (COG0228)rpsP (PRK14521) →                                                                                                                                                                                                                                                                                                                                                           |
| env-95  | JCVL_SCAF_1096624993332     | - | 386     | 352     | RNA → RpsP (COG0228)rpsP (PRK14521) →                                                                                                                                                                                                                                                                                                                                                           |
| env-96  | 2236876009_175930           | - | 360     | 326     | RNA → RpsP (COG0228)rpsP (PRK00040) → rpsP (PRK14521) →                                                                                                                                                                                                                                                                                                                                         |
| env-97  | JGI24024J18818_10507174     | + | 229     | 264     | RNA → rpsP (PRK14521) →                                                                                                                                                                                                                                                                                                                                                                         |
| Gsp-2-1 | NZ_JQLP01000005.1           | - | 2435334 | 2435300 | RNA → RpsP (COG0228)rpsP (PRK14521) → rimM (PRK00122)RimM (pfam01782)PRC (pfam05239) →<br>AdoMet_MTases (cd02440)Methyltransf_25 (pfam13649) → PLN02526 (PLN02526)CaiA (COG1960) →                                                                                                                                                                                                              |
| env-98  | CEQH01183744.1              | + | 368     | 402     | RNA → rpsP (PRK14521)Ribosomal_S16 (pfam00886) →                                                                                                                                                                                                                                                                                                                                                |
| env-99  | KVRMV2_102741663            | - | 269     | 235     | RNA → RpsP (COG0228)rpsP (PRK00040) →                                                                                                                                                                                                                                                                                                                                                           |
| Wsp-1-1 | NZ_AP014583.1               | - | 1850820 | 1850786 | RNA → RpsP (COG0228)rpsP (PRK14521) → RimM (COG0806)rimM (PRK00122) →                                                                                                                                                                                                                                                                                                                           |
| env-100 | KVRMV2_100400240            | - | 91      | 57      | RNA →                                                                                                                                                                                                                                                                                                                                                                                           |
| Myu-1-1 | NZ_JPFK01000005.1           | - | 589182  | 589148  | RNA → RpsP (COG0228)rpsP (PRK14521) →                                                                                                                                                                                                                                                                                                                                                           |
| Kje-1-1 | NZ_LBMG01000002.1           | + | 77869   | 77903   | RNA → RpsP (COG0228)rpsP (PRK14521) → rimM (PRK00122)RimM (pfam01782) →<br>RibA (COG0807)ribA (PRK00393) →                                                                                                                                                                                                                                                                                      |
| env-101 | KGL_S1_ANT01_95m_c10001015  | - | 6200    | 6166    | RNA → RpsP (COG0228)rpsP (PRK14521) → rimM (PRK00122)RimM (pfam01782) →<br>AdoMet_MTases (cd02440)Methyltransf_25 (pfam13649) → PLN02526 (PLN02526)CaiA (COG1960) →                                                                                                                                                                                                                             |

|         |                                 |   |         |         |                                                                                              |
|---------|---------------------------------|---|---------|---------|----------------------------------------------------------------------------------------------|
| env-102 | KGL_S1_ANT01.95m.c10178456      | + | 378     | 412     | RNA → rpsP (PRK14521)Ribosomal_S16 (pfam00886) →                                             |
| env-103 | CERE01174386.1                  | - | 139     | 105     | RNA → rpsP (PRK14521)Ribosomal_S16 (pfam00886) →                                             |
| env-104 | 2236876002.225765               | - | 176     | 142     | RNA → rpsP (PRK14521)Ribosomal_S16 (pfam00886) →                                             |
| env-105 | KGL_S1_ANT01.95m.c10030431      | + | 734     | 768     | RNA → RpsP (COG0228)rpsP (PRK14521) →                                                        |
| env-106 | KGL_S1_ANT01.95m.c10007706      | - | 3233    | 3199    | RNA → RpsP (COG0228)rpsP (PRK14521) →                                                        |
| env-107 | JCVL_SCAF_1101668046809         | - | 546     | 512     | RNA → RpsP (COG0228)rpsP (PRK14521) →                                                        |
| env-108 | SA_S1_NOR08_45m.c10162553       | - | 124     | 90      | RNA → RpsP (COG0228)rpsP (PRK14521) →                                                        |
| Osp-1-1 | NZ_JADS01000027.1               | + | 8919    | 8953    | RNA → RpsP (COG0228)rpsP (PRK14521) → RimM (COG0806)rimM (PRK00122) →                        |
| env-109 | SRS013252_Baylor_scaffold.30766 | - | 6014    | 5979    | RNA → rpsP (PRK14521)Ribosomal_S16 (pfam00886) → RimM (COG0806)rimM (PRK00122) →             |
| env-110 | CESG01120888.1                  | - | 205     | 171     | RNA → rpsP (PRK14521)Ribosomal_S16 (pfam00886) →                                             |
| env-111 | SRS018439_Baylor_scaffold.43479 | - | 10552   | 10517   | RNA → RpsP (COG0228)rpsP (PRK14521) → rimM (PRK00122)PRC (pfam05239) →                       |
|         |                                 |   |         |         | Transket_pyr (smart00861)TktA2 (COG3958) → YicC (COG1561)PRK11820 (PRK11820) →               |
|         |                                 |   |         |         | Gmk (COG0194)gmk (PRK00300) → NMNAT (cd02165)nadD (PRK00071) →                               |
|         |                                 |   |         |         | LMWPC (smart00226)LMWPTP (cd16343) → RecR (COG0353)recR (PRK00076) →                         |
| env-112 | SRS015540_C1138365              | - | 527     | 492     | RNA → RpsP (COG0228)rpsP (PRK14521) →                                                        |
| Csp-1-1 | NZ_ABZV01000003.1               | - | 5407    | 5372    | RNA → RpsP (COG0228)rpsP (PRK14521) → RpsP (COG0228)rpsP (PRK14521) →                        |
|         |                                 |   |         |         | rimM (PRK00122)PRC (pfam05239) → rimM (PRK00122)PRC (pfam05239) →                            |
|         |                                 |   |         |         | Transket_pyr (smart00861)TktA2 (COG3958) → Transket_pyr (smart00861)TktA2 (COG3958) →        |
|         |                                 |   |         |         | YicC (COG1561)PRK11820 (PRK11820) → YicC (COG1561)PRK11820 (PRK11820) →                      |
|         |                                 |   |         |         | Gmk (COG0194)gmk (PRK00300) → Gmk (COG0194)gmk (PRK00300) → NMNAT (cd02165)nadD (PRK00071) → |
|         |                                 |   |         |         | NMNAT (cd02165)nadD (PRK00071) → LMWPC (smart00226)LMWPTP (cd16343) →                        |
|         |                                 |   |         |         | LMWPC (smart00226)LMWPTP (cd16343) → RecR (COG0353)recR (PRK00076) → hypo →                  |
| Kal-1-1 | NZ_DS544873.1                   | + | 2949885 | 2949919 | RNA → RpsP (COG0228)rpsP (PRK14521) → rimM (PRK00122)RimM (pfam01782) →                      |
|         |                                 |   |         |         | AdoMet_MTases (cd02440)Methyltransf_25 (pfam13649) →                                         |
| env-113 | KGL_S1_ANT01.95m.c10275683      | + | 114     | 148     | RNA → RpsP (COG0228)S16 (TIGR00002) →                                                        |
| env-114 | JGI12097J13213_1000099          | + | 9148    | 9182    | RNA → RpsP (COG0228)rpsP (PRK14521) → rimM (PRK00122)RimM (pfam01782) →                      |
|         |                                 |   |         |         | AdoMet_MTases (cd02440)Methyltransf_25 (pfam13649) → PLN02526 (PLN02526)CaiA (COG1960) →     |
| env-115 | KGL_S1_ANT01.95m.c10082430      | - | 337     | 303     | RNA → RpsP (COG0228)rpsP (PRK00040) →                                                        |
| env-116 | JGI24724J26744_10019130         | - | 1468    | 1434    | RNA → RpsP (COG0228)rpsP (PRK00040) → RimM (COG0806)rimM (PRK00122) →                        |
|         |                                 |   |         |         | AdoMet_MTases (cd02440)Methyltransf_25 (pfam13649) →                                         |
| env-117 | CEQG01049560.1                  | + | 282     | 316     | RNA → RpsP (COG0228)rpsP (PRK14521) →                                                        |
| env-118 | BS_KBA_SWE12.21m.c10365013      | - | 337     | 303     | RNA → RpsP (COG0228)rpsP (PRK00040) →                                                        |
| env-119 | BS_KBA_SWE12.21m.c10000423      | + | 6152    | 6186    | RNA → RpsP (COG0228)rpsP (PRK14521) → RimM (COG0806)rimM (PRK00122) →                        |
|         |                                 |   |         |         | AdoMet_MTases (cd02440)Methyltransf_25 (pfam13649) →                                         |
| env-120 | P_1C_Sed_3_UnCty_1160372        | + | 82      | 116     | RNA → rpsP (PRK14521)Ribosomal_S16 (pfam00886) →                                             |
| env-121 | SA_S1_NOR08_45m.c10086824       | + | 919     | 953     | RNA →                                                                                        |
| env-122 | KGL_S1_ANT01.95m.c10418974      | + | 254     | 288     | RNA →                                                                                        |
| env-123 | JCVL_SCAF_1096627435724         | + | 1230    | 1264    | RNA →                                                                                        |
| env-124 | CERM01151318.1                  | + | 572     | 606     | RNA →                                                                                        |
| env-125 | 2236876007_0117740              | - | 261     | 227     | RNA → RpsP (COG0228)rpsP (PRK00040) →                                                        |
| env-126 | wf3_AHAI4119_b1                 | - | 581     | 547     | RNA → RpsP (COG0228)rpsP (PRK14521) →                                                        |
| env-127 | CESF01282643.1                  | - | 99      | 65      | RNA →                                                                                        |
| Gpo-1-1 | NZ_AUHF01000007.1               | + | 179304  | 179338  | RNA → RpsP (COG0228)rpsP (PRK14521) → rimM (PRK00122)RimM (pfam01782) →                      |
| env-128 | CEOS01080028.1                  | + | 2877    | 2911    | RNA →                                                                                        |
| Jpa-1-1 | NZ_BBNS01000030.1               | - | 35262   | 35227   | RNA → RpsP (COG0228)rpsP (PRK14521) →                                                        |
| Gli-1-1 | NZ_JH594606.1                   | - | 2311466 | 2311432 | RNA → RpsP (COG0228)rpsP (PRK14521)APG6 (pfam04111) →                                        |
|         |                                 |   |         |         | RpsP (COG0228)rpsP (PRK14521)APG6 (pfam04111) → rimM (PRK00122)RimM (pfam01782) →            |
|         |                                 |   |         |         | rimM (PRK00122)RimM (pfam01782) → AdoMet_MTases (cd02440)Methyltransf_25 (pfam13649) →       |
|         |                                 |   |         |         | AdoMet_MTases (cd02440)Methyltransf_25 (pfam13649) →                                         |
|         |                                 |   |         |         | AdoMet_MTases (cd02440)Methyltransf_25 (pfam13649) →                                         |
| env-129 | 3300001197_1031695              | - | 46      | 12      | RNA → hypo →                                                                                 |
| env-130 | CEVX01047029.1                  | - | 9602    | 9568    | RNA → RpsP (COG0228)S16 (TIGR00002) → RimM (COG0806)rimM (PRK00122) →                        |
|         |                                 |   |         |         | AdoMet_MTases (cd02440)Methyltransf_25 (pfam13649) → PLN02526 (PLN02526)CaiA (COG1960) →     |
|         |                                 |   |         |         | SGNH_hydrolase_like_1 (cd01832)Lipase_GDSL_2 (pfam13472) →                                   |

## 23.3 Conserved domains

Conserved domains found in protein-coding genes listed in Section 23.2 are shown below, with the first sentence in their description from the Conserved Domain Database (if any). Conserved domains associated with more than one S16-

**cd01569** (1) pre-B-cell colony-enhancing factor (PBEF)-like.  
**cd01832** (4) Members of the SGNH-hydrolase superfamily, a diverse family of lipases and esterases.  
**cd02165** (3) Nicotinamide/nicotinate mononucleotide adenyltransferase.  
**cd02440** (23) S-adenosylmethionine-dependent methyltransferases (SAM or AdoMet-MTase), class I; AdoMet-MTases are enzymes that use S-adenosyl-L-methionine (SAM or AdoMet) as a substrate for methyltransfer, creating the product S-adenosyl-L-homocysteine (AdoHcy).  
**cd16026** (1) galactosamine-6-sulfatase; also known as N-acetylgalactosamine-6-sulfatase (GALNS).  
**cd16343** (3) Low molecular weight protein tyrosine phosphatase.  
**COG0194** (3) Guanylate kinase [Nucleotide transport and metabolism]  
**COG0228** (100) Ribosomal protein S16 [Translation, ribosomal structure and biogenesis]  
**COG0353** (2) Recombinational DNA repair protein RecR [Replication, recombination and repair]  
**COG0462** (1) Phosphoribosylpyrophosphate synthetase [Nucleotide transport and metabolism, Amino acid transport and metabolism]  
**COG0806** (25) Ribosomal 30S subunit maturation factor RimM, required for 16S rRNA processing [Translation, ribosomal structure and biogenesis]  
**COG0807** (1) GTP cyclohydrolase II [Coenzyme transport and metabolism]  
**COG1051** (1) ADP-ribose pyrophosphatase YjhB, NUDIX family [Nucleotide transport and metabolism]  
**COG1561** (3) Uncharacterized conserved protein YicC, UPF0701 family [Function unknown]  
**COG1960** (13) Acyl-CoA dehydrogenase related to the alkylation response protein AidB [Lipid transport and metabolism]  
**COG1990** (1) Peptidyl-tRNA hydrolase [Translation, ribosomal structure and biogenesis]  
**COG3064** (1) Membrane protein involved in colicin uptake [Cell wall/membrane/envelope biogenesis]

## 23.4 Multiple-sequence alignment

Each S16-Flavobacteria RNA is denoted by an abbreviation (like “Eco-1-1”) that refers to a taxonomy given in Section 23.1. The alignment may include sequences containing the RNA motif, as well as flanking sequence. The S16-Flavobacteria RNA itself is denoted by the line underneath marked 5' and 3' on either end. Nucleotides in flanking sequences (i.e., not part of the motif) are written in gray letters. Stems of predicted rho-independent transcription terminators, if any, are shaded yellow. (Note: terminator predictions have not been analyzed manually, and many are likely to be false positives. Terminator predictions are those of the RNE software.) Nucleotides predicted to function (as DNA) as transcription-

Flavobacteria RNA are assigned a color, while others are shown in gray. The number in parentheses after the colored domain name is the number of occurrences in Section 23.2.

**COG3958** (3) Transketolase, C-terminal subunit [Carbohydrate transport and metabolism]  
**pfam00886** (35) Ribosomal protein S16.  
**pfam01782** (23) RimM N-terminal domain.  
**pfam04111** (2) Autophagy protein Apg6.  
**pfam05239** (9) PRC-barrel domain.  
**pfam06459** (1) Ryanodine Receptor TM 4-6.  
**pfam13472** (4) GDSL-like Lipase/Acylhydrolase family.  
**pfam13649** (23) Methyltransferase domain.  
**PLN02526** (13) acyl-coenzyme A oxidase  
**PRK00040** (32) 30S ribosomal protein S16; Reviewed  
**PRK00071** (3) nicotinic acid mononucleotide adenyltransferase; Provisional  
**PRK00076** (2) recombination protein RecR; Reviewed  
**PRK00122** (52) 16S rRNA-processing protein RimM; Provisional  
**PRK00300** (3) guanylate kinase; Provisional  
**PRK00393** (1) GTP cyclohydrolase II; Reviewed  
**PRK05379** (1) bifunctional nicotinamide mononucleotide adenyltransferase/ADP-ribose pyrophosphatase; Provisional  
**PRK09198** (1) putative nicotinate phosphoribosyltransferase; Provisional  
**PRK11820** (3) hypothetical protein; Provisional  
**PRK13759** (1) arylsulfatase; Provisional  
**PRK14521** (95) 30S ribosomal protein S16; Provisional  
**smart00226** (3) Low molecular weight phosphatase family.  
**smart00861** (3) Transketolase, pyrimidine binding domain.  
**TIGR00002** (12) ribosomal protein S16. [Protein synthesis, Ribosomal proteins: synthesis and modification]  
**TIGR01251** (1) ribose-phosphate pyrophosphokinase. [Purines, pyrimidines, nucleosides, and nucleotides, Purine ribonucleotide biosynthesis]

factor binding sites, if any, are shaded in green. (But note: these predictions are manually annotated, so they might be under-predicted.) Annotated start codons, if any, are shaded green. (Note: start codons are frequently misannotated, especially in environmental samples.) Nucleotides proposed to basepair as part of the consensus structure are shaded in color when they comprise Watson-Crick or G-U pairs. Otherwise they are shaded gray. Conserved stems are also indicated at the bottom of the alignment by angle brackets, where matching < and > denote base-paired columns. Below these angle brackets, the symbol “2” denotes base pairs exhibiting covariation according to the statistically well-founded R-scape method.



“1” denotes base pairs exhibiting covariation according to R2R’s simplistic method. “0” denotes base pairs that are not observed to mutate and “?” denotes base pairs that have a significant frequency of non-canonical nucleotides for Watson-Crick or G-U pairs (> 5%). Below these base pair annotation is the consensus sequence: “R” = “A” or “G”, “Y” = “C” or “U”, **red nucleotides**: nucleotide identity con-

served more than 97% of the time, black nucleotides: 90%, gray nucleotides: 75%, red circle (●): nucleotide is present 97% of the time, black circle (●): 90%, gray circle (●): 75%, white circle (○): 50%. All percentages of sequences just described (e.g. 97% conserved) assume that sequences have been weighted by the GSC algorithm implemented by the Infernal software package.

alignment positions 1...47

```

env-1      UUAUUUACC..CGGGUCGAGUACCCAAAA..UAUUG.AAAUU..
Psp-1-1   UUAUUUACA..AAGGUCGAGAACCCUAAAA.AAUUA.AUAAAU
env-2      UUAUUUACC..UGGGUCGAGAACCCAAAA.UAUUGA.AAUU..
env-3      UUAUUUACC..GAGGUCGGGACCCUAAA.AAUUA.AAAU..
Cca-2-1   UUAUUUACU..GAGGUCGAGAACCCUAAAAAUUA.ACUUUU
env-4      UUAUUUACC..GGGUCGUGUACCCAAA.AUUUA.UAUACU
env-5      UUAUUUACC..AGGGUCGGGACCCUAAAUUUUA.UGUGAU
env-6      UUAUUUACA..AGGGUCGGGACCCU...AUA.AUA...AUG
env-7      UUAUUUACG..AGGGUCGGGACCCUCGAAAUUUA.UGUGAU.AUG
env-8      UUAUUUACA..AGGGUCGGGACCCUACA.AAUUA.UGUGAU
env-9      UUAUUUACC..GAGGUCGGGACCCUACAAAUUUA.UGUGAU
Mth-1-1   UUAUUUACC..GAGGUCGGGACCCUACAUAUUUA.UGUGAU
env-10     UUAUUUACC..AGGGUCGGGACCCUACA.AAUUA.UGUGAU
env-11     UUAUUUACCAAGGGUCGGGACCCUACA.AAUUA.UGUGAU.AUG
env-12     UUAUUUACA..GGGGUCGGGACCCGACA.AAUUA.UGUGAU
Cly-1-1   UUAUUUACA..GGGGUCGGGACCCUACAAAUUUA.UGUGAU.AUG
env-13     UUAUUUACU..GAGGUCGAGAACCCUAAA.AUUUA.UCUUAU.AUG
env-14     UUAUUUACC..GAGGUCGUGUACCCUAAA.AUUUA.ACAU..
env-15     UUAUUUAAC..UAGGUCGAGAACCCUAAA.AUUUA.UAAU..AUG
env-16     UUAUUUACU..UAGGUCGAGAACCCUAAA.AUUUA.ACAUU..
env-17     UUAUUUAUA..GGGUCGAGACCCGACA.AAUUA.UUAAU..
env-18     UUAUUUACC..AAGGUCGAGAACCCUAAA.AUUUA.ACA..
env-19     UUAUUUAUC..GGAGUCGAGAACCCUAAA.AUUUA.UUUU..
env-20     UUAUUUACG..GGAGUCGGGACCCUAAA.AUUUA.UUUUU..
env-21     UUAUUUACG..GGAGUCGGGACCCUAAA.AUUUA.UUUUUUAUG
env-22     UUAUUUACG..GGAGUCGGGACCCUAAA.AUUUA.UUUUU..AUG
Pto-1-1   UUAUUUACG..GGAGUCGAGAACCCUAAA.AUUUA.UUUUU..
env-23     UUAUUUACG..GGAGUCGAGAACCCUAAA.AUUUA.UUCUUU..
env-24     UUAUUUACG..GGAGUCGAGAACCCUAAA.AUUUA.UUUUU..
env-25     UUAUUUACG..GGAGUCGAGAACCCUAAA.AUUUA.UUUU..AUG
env-26     UUAUUUAUU..GAGGUCGAGAACCCUAAA.AUUUA.UUUU..AUG
env-27     UUAUUUAUU..GAGGUCGAGAACCCUGCA.AAUUA.UUUU..
env-28     UUAUUUAUU..GAGGUCGAGAACCCUAAA.AUUUA.UUUU..
env-29     UUAUUUACC..GGGUCGAGUACCCUACA.AAUUA.UACUU..
env-30     UUAUUUACA..GAGGUCGGGACCCUACA.AAUUA.UCAUU..AUG
env-31     UUAUUUACC..GGGUCGAGAACCCUAAA.AUUUA.UCGCU..AUG
Cca-1-1   UUAUUUACC..GAGGUCGAGAACCCUAAAAUUUA.UCGU..
env-32     UUAUUUACA..GGGUCGGGACCCCAUA.AAUUA.UUAAA..AUG
env-33     UUAUUUACG..GAGGUCGGGACCCUAAAUAUUUA.UCAUU..AUG
env-34     UUAUUUACC..GAGGUCGGGACCCUACU.AAUUA.UAGUUUU..
env-35     UUAUUUACC..AAGGUCGAGAACCCUAAA.AAUUA.AAUU..
Tsp-1-1   UUAUUUACC..AAGGUCGGGACCCUAAA.AAUUA.AAAU..
Tme-1-1   UUAUUUACC..AAGGUCGGGACCCUAAA.AAUUA.AAUU..
env-36     UUAUUUACC..UAGGUCGAGAACCCUAAA.AAUUA.AAAUU..AUG
env-37     UUAUUUACC..AAGGUCGAGAACCCUAAAAUUUA.AAGA..AUG
env-38     UUAUUUACC..AAGGUCGAGAACCCUAAAAUUUA.AAGA..AUG
env-39     UUAUUUACC..AAGGUCGAGAACCCUAAAAUUUA.AAAA..AUG
env-40     UUAUUUACC..AAGGUCGAGAACCCUAAAAUUUA.AAAA..AUG
env-41     UUAUUUACC..AAGGUCGAGAACCCUAAA.AAUUA.AACA..
env-42     UUAUUUACC..AAGGUCGAGAACCCUACA.AAUUA.UUUU..
env-43     UUAUUUACC..AAGGUCGAGAACCCUACA.AAUUA.UUUU..AUG
env-44     UUAUUUACC..AAGGUCGGGACCCUACA.AAUUA.UUUU..AUG
env-45     UUAUUUACA..AAGGUCGAGAACCCUACA.AAUUA.UUUU..
env-46     UUAUUUAUC..AAGGUCGAGAACCCUACA.AAUUA.UUUU..
env-47     UUAUUUAUA..AAGGUCGAGAACCCUACA.AAUUA.UUUU..
env-48     UUAUUUAUC..GAGUUCGUGUACCCUACA.AAUUA.UUUU..AUG
env-49     UUAUUUACC..GAGUUCGUGUACCCUACA.AAUUA.UUUU..AUG
env-50     UUAUUUACC..GAGUUCGUGUACCCUACA.AAUUA.UUUU..AUG
env-51     UUAUUUACG..GAGGUCGAGAACCCUAAA.AAUUA.UUAUU..AUG
env-52     UUAUUUACC..GAGGUCGAGAACCCUAAA.AAUUA.UUAUU..
env-53     UUAUUUAUA..GAGGUCGAGAACCCUAAA.AAUUA.UUUU..
env-54     UUAUUUACA..GAGGUCGAGAACCCUAAA.AAUUA.UUUU..
env-55     UUAUUUACA..GAGGUCGAGAACCCUAAA.AAUUA.UUUU..
env-56     UUAUUUACG..GAGGUCGAGAACCCUAAA.AAUUA.UUUUU..AUG
env-57     UUAUUUACA..GGGUCGGGACCCCAUA.AAUUA.UUUUU..AUG
env-58     UUAUUUAUA..GGGUCGGGACCCCAUA.AAUUA.UUUUU..
env-59     UUAUUUACC..GGGUCGGGACCCCAUA.AAUUA.UUUUU..
env-60     UUAUUUAUC..GGGUCGGGACCCCAUA.AAUUA.UUUUU..

```

```

<<<<<<...<<<<<...>>>>>>...>>>>>>.>.....
-102...22110...01122...201.....
5'UAUUUAY•RRGGUCGRG•ACCCYA•A•UUA•U•••••AUG

```
